# Supplementary material for: An Efficient Contact Model for the Simulation of Cargo Airdrop Extraction Phase
Source: Hindawi journal article supplement (doi:10.1155/2018/9895451), 2018-10-17
Supplement: f1 [file 9895451.f1.zip]

Archive with 31 entries (27 files):
- case1_stick_slip/contact_pts10.csv
- case1_stick_slip/contact_pts20.csv
- case1_stick_slip/contact_pts40.csv
- case1_stick_slip/extrcn_force.csv
- case1_stick_slip/motion_pts10.csv
- case1_stick_slip/motion_pts20.csv
- case1_stick_slip/motion_pts40.csv
- case2_ramp_drop/contact_pts20.csv
- case2_ramp_drop/contact_pts40.csv
- case2_ramp_drop/extrcn_force.csv
- case2_ramp_drop/motion_pts20.csv
- case2_ramp_drop/motion_pts40.csv
- case3_aircraft_coupling/m4000/
- case3_aircraft_coupling/m4000/df_aft.csv
- case3_aircraft_coupling/m4000/df_cargo.csv
- case3_aircraft_coupling/m4000/hist_contact.csv
- case3_aircraft_coupling/m4000_nocouple/
- case3_aircraft_coupling/m4000_nocouple/df_cargo.csv
- case3_aircraft_coupling/m4000_nocouple/hist_contact.csv
- case3_aircraft_coupling/m8000/
- case3_aircraft_coupling/m8000/df_aft.csv
- case3_aircraft_coupling/m8000/df_aft_append.csv
- case3_aircraft_coupling/m8000/df_cargo.csv
- case3_aircraft_coupling/m8000/hist_contact.csv
- case3_aircraft_coupling/m8000_nocouple/
- case3_aircraft_coupling/m8000_nocouple/df_cargo.csv
- case3_aircraft_coupling/m8000_nocouple/hist_contact.csv
- FEM_results/deg2_fd5000_fric_contact_forc.csv
- FEM_results/deg2_fd5000_fric_contact_forc_2.csv
- FEM_results/deg2_fd5000_fric_contact_forc_bw20Hz.csv
- FEM_results/deg2_fd5000_fric_motion.csv
