# Supplementary material for: An Efficient Contact Model for the Simulation of Cargo Airdrop Extraction Phase
Source: Hindawi journal article supplement (doi:10.1155/2018/9895451), 2018-10-17
Supplement: f1 [file 9895451.f1.zip › case1_stick_slip/contact_pts10.csv]

t(s)	cntcNrmForc(N)	cntcFricForc(N)	cntcPitchMoment(N/m)
0.00000000	0.00000000	0.00000000	0.00000000
0.00500000	2757.78368416	0.00000000	0.00000000
0.01000000	12558.93191540	0.00000000	0.00000000
0.01500000	13950.55586480	0.00000000	0.00000000
0.02000000	12856.41786794	0.00000000	0.00000000
0.02500000	11799.27321020	0.00000000	0.00000000
0.03000000	10947.09828687	0.00000000	0.00000000
0.03500000	10376.90498817	0.00000000	0.00000000
0.04000000	10063.47115228	0.00000000	0.00000000
0.04500000	9930.46783963	0.00000000	0.00000000
0.05000000	9900.13776532	0.00000000	0.00000000
0.05500000	9915.53634117	0.00000000	0.00000000
0.06000000	9943.74272631	0.00000000	0.00000000
0.06500000	9969.18591379	0.00000000	0.00000000
0.07000000	9986.80708199	0.00000000	0.00000000
0.07500000	9996.84956887	0.00000000	0.00000000
0.08000000	10001.40949312	0.00000000	0.00000000
0.08500000	10002.74660082	0.00000000	0.00000000
0.09000000	10002.50335240	0.00000000	0.00000000
0.09500000	10001.75221907	0.00000000	0.00000000
0.10000000	10001.01204920	0.00000000	0.00000000
0.10500000	10000.46664143	0.00000000	0.00000000
0.11000000	10000.14866069	0.00000000	0.00000000
0.11500000	9999.98681531	0.00000000	0.00000000
0.12000000	9999.93081714	0.00000000	0.00000000
0.12500000	9999.92810704	0.00000000	0.00000000
0.13000000	9999.94641499	0.00000000	0.00000075
0.13500000	9999.96959386	0.00000000	-0.00000186
0.14000000	9999.98482191	0.00000000	0.00000055
0.14500000	9999.99444915	0.00000000	0.00000408
0.15000000	10000.00017866	0.00000000	0.00001566
0.15500000	10000.00157937	0.00000000	0.00000311
0.16000000	10000.00116069	0.00000000	-0.00003754
0.16500000	10000.00241253	0.00000000	0.00002188
0.17000000	10000.00150798	0.00000000	0.00000959
0.17500000	10000.00106346	0.00000000	0.00000899
0.18000000	10000.00150976	0.00000000	0.00003398
0.18500000	10000.00007319	0.00000000	-0.00000239
0.19000000	10000.00006862	0.00000000	0.00000760
0.19500000	10000.00031525	0.00000000	0.00001112
0.20000000	9999.99988384	0.00000000	-0.00003654
0.20500000	9999.99945243	0.00000000	-0.00008420
0.21000000	9999.99949579	0.00000000	-0.00004682
0.21500000	9999.99958032	0.00000000	-0.00000206
0.22000000	9999.99956338	0.00000000	0.00001160
0.22500000	9999.99944776	0.00000000	-0.00000498
0.23000000	9999.99935177	0.00000000	-0.00001942
0.23500000	9999.99944501	0.00000000	-0.00001320
0.24000000	9999.99953825	0.00000000	-0.00000698
0.24500000	9999.99997360	0.00000000	0.00000619
0.25000000	10000.00056920	0.00000000	0.00002262
0.25500000	10000.00116480	0.00000000	0.00003905
0.26000000	10000.00176039	0.00000000	0.00005548
0.26500000	10000.00235599	0.00000000	0.00007191
0.27000000	10000.00295159	0.00000000	0.00008835
0.27500000	10000.00354718	0.00000000	0.00010478
0.28000000	10000.00414278	0.00000000	0.00012121
0.28500000	10000.00467308	0.00000000	0.00012322
0.29000000	10000.00515737	0.00000000	0.00011506
0.29500000	10000.00564165	0.00000000	0.00010691
0.30000000	10000.00612594	0.00000000	0.00009876
0.30500000	10000.00661022	0.00000000	0.00009060
0.31000000	10000.00709451	0.00000000	0.00008245
0.31500000	10000.00757879	0.00000000	0.00007429
0.32000000	10000.00806308	0.00000000	0.00006614
0.32500000	10000.00793206	0.00000000	0.00005689
0.33000000	10000.00716624	0.00000000	0.00004652
0.33500000	10000.00640043	0.00000000	0.00003614
0.34000000	10000.00563461	0.00000000	0.00002576
0.34500000	10000.00486879	0.00000000	0.00001538
0.35000000	10000.00410297	0.00000000	0.00000501
0.35500000	10000.00333715	0.00000000	-0.00000537
0.36000000	10000.00257133	0.00000000	-0.00001575
0.36500000	10000.00197516	0.00000000	-0.00002077
0.37000000	10000.00163604	0.00000000	-0.00001768
0.37500000	10000.00129692	0.00000000	-0.00001459
0.38000000	10000.00095779	0.00000000	-0.00001151
0.38500000	10000.00061867	0.00000000	-0.00000842
0.39000000	10000.00027955	0.00000000	-0.00000533
0.39500000	9999.99994042	0.00000000	-0.00000224
0.40000000	9999.99960130	0.00000000	0.00000085
0.40500000	9999.99932172	0.00000000	0.00000311
0.41000000	9999.99917898	0.00000000	0.00000347
0.41500000	9999.99903624	0.00000000	0.00000383
0.42000000	9999.99889350	0.00000000	0.00000419
0.42500000	9999.99875076	0.00000000	0.00000455
0.43000000	9999.99860802	0.00000000	0.00000491
0.43500000	9999.99846528	0.00000000	0.00000527
0.44000000	9999.99832254	0.00000000	0.00000563
0.44500000	9999.99817980	0.00000000	0.00000599
0.45000000	9999.99803706	0.00000000	0.00000635
0.45500000	9999.99789432	0.00000000	0.00000671
0.46000000	9999.99775158	0.00000000	0.00000707
0.46500000	9999.99760884	0.00000000	0.00000743
0.47000000	9999.99746610	0.00000000	0.00000779
0.47500000	9999.99732336	0.00000000	0.00000815
0.48000000	9999.99718062	0.00000000	0.00000851
0.48500000	9999.99703788	0.00000000	0.00000887
0.49000000	9999.99689514	0.00000000	0.00000923
0.49500000	9999.99675240	0.00000000	0.00000959
0.50000000	9999.99660966	0.00000000	0.00000995
0.50500000	9999.99646692	0.00000000	0.00001031
0.51000000	9999.99632418	0.00000000	0.00001067
0.51500000	9999.99619950	0.00000000	0.00001096
0.52000000	9999.99627973	0.00000000	0.00001051
0.52500000	9999.99635997	0.00000000	0.00001006
0.53000000	9999.99644020	0.00000000	0.00000961
0.53500000	9999.99652044	0.00000000	0.00000916
0.54000000	9999.99660067	0.00000000	0.00000871
0.54500000	9999.99668091	0.00000000	0.00000826
0.55000000	9999.99676114	0.00000000	0.00000781
0.55500000	9999.99684137	0.00000000	0.00000736
0.56000000	9999.99692161	0.00000000	0.00000691
0.56500000	9999.99700184	0.00000000	0.00000646
0.57000000	9999.99708208	0.00000000	0.00000601
0.57500000	9999.99716231	0.00000000	0.00000556
0.58000000	9999.99724255	0.00000000	0.00000511
0.58500000	9999.99732278	0.00000000	0.00000466
0.59000000	9999.99740301	0.00000000	0.00000421
0.59500000	9999.99748325	0.00000000	0.00000376
0.60000000	9999.99756348	0.00000000	0.00000331
0.60500000	9999.99764372	0.00000000	0.00000286
0.61000000	9999.99772395	0.00000000	0.00000241
0.61500000	9999.99780419	0.00000000	0.00000196
0.62000000	9999.99788442	0.00000000	0.00000151
0.62500000	9999.99796465	0.00000000	0.00000106
0.63000000	9999.99808496	0.00000000	0.00000057
0.63500000	9999.99821186	0.00000000	0.00000008
0.64000000	9999.99833876	0.00000000	-0.00000042
0.64500000	9999.99846566	0.00000000	-0.00000091
0.65000000	9999.99859256	0.00000000	-0.00000141
0.65500000	9999.99871946	0.00000000	-0.00000190
0.66000000	9999.99884636	0.00000000	-0.00000240
0.66500000	9999.99897326	0.00000000	-0.00000289
0.67000000	9999.99910016	0.00000000	-0.00000339
0.67500000	9999.99922706	0.00000000	-0.00000388
0.68000000	9999.99935396	0.00000000	-0.00000438
0.68500000	9999.99948086	0.00000000	-0.00000487
0.69000000	9999.99960776	0.00000000	-0.00000537
0.69500000	9999.99973466	0.00000000	-0.00000586
0.70000000	9999.99986156	0.00000000	-0.00000636
0.70500000	9999.99998846	0.00000000	-0.00000685
0.71000000	10000.00011536	0.00000000	-0.00000735
0.71500000	10000.00024226	0.00000000	-0.00000784
0.72000000	10000.00036916	0.00000000	-0.00000834
0.72500000	10000.00049606	0.00000000	-0.00000883
0.73000000	10000.00062296	0.00000000	-0.00000933
0.73500000	10000.00074986	0.00000000	-0.00000982
0.74000000	10000.00079149	0.00000000	-0.00000980
0.74500000	10000.00078440	0.00000000	-0.00000950
0.75000000	10000.00077731	0.00000000	-0.00000919
0.75500000	10000.00077022	0.00000000	-0.00000888
0.76000000	10000.00076313	0.00000000	-0.00000857
0.76500000	10000.00075604	0.00000000	-0.00000827
0.77000000	10000.00074895	0.00000000	-0.00000796
0.77500000	10000.00074186	0.00000000	-0.00000765
0.78000000	10000.00073478	0.00000000	-0.00000735
0.78500000	10000.00072769	0.00000000	-0.00000704
0.79000000	10000.00072060	0.00000000	-0.00000673
0.79500000	10000.00071351	0.00000000	-0.00000642
0.80000000	10000.00070642	0.00000000	-0.00000612
0.80500000	10000.00069933	0.00000000	-0.00000581
0.81000000	10000.00069224	0.00000000	-0.00000550
0.81500000	10000.00068515	0.00000000	-0.00000519
0.82000000	10000.00067806	0.00000000	-0.00000489
0.82500000	10000.00067097	0.00000000	-0.00000458
0.83000000	10000.00066388	0.00000000	-0.00000427
0.83500000	10000.00065679	0.00000000	-0.00000396
0.84000000	10000.00064971	0.00000000	-0.00000366
0.84500000	10000.00064262	0.00000000	-0.00000335
0.85000000	10000.00063553	0.00000000	-0.00000304
0.85500000	10000.00062844	0.00000000	-0.00000274
0.86000000	10000.00062135	0.00000000	-0.00000243
0.86500000	10000.00061426	0.00000000	-0.00000212
0.87000000	10000.00060717	0.00000000	-0.00000181
0.87500000	10000.00060008	0.00000000	-0.00000151
0.88000000	10000.00059299	0.00000000	-0.00000120
0.88500000	10000.00058590	0.00000000	-0.00000089
0.89000000	10000.00057881	0.00000000	-0.00000058
0.89500000	10000.00057172	0.00000000	-0.00000028
0.90000000	10000.00056464	0.00000000	0.00000003
0.90500000	10000.00055755	0.00000000	0.00000034
0.91000000	10000.00055046	0.00000000	0.00000065
0.91500000	10000.00054337	0.00000000	0.00000095
0.92000000	10000.00053628	0.00000000	0.00000126
0.92500000	10000.00052919	0.00000000	0.00000157
0.93000000	10000.00052210	0.00000000	0.00000188
0.93500000	10000.00051501	0.00000000	0.00000218
0.94000000	10000.00050792	0.00000000	0.00000249
0.94500000	10000.00050083	0.00000000	0.00000280
0.95000000	10000.00049374	0.00000000	0.00000310
0.95500000	10000.00048666	0.00000000	0.00000341
0.96000000	10000.00047957	0.00000000	0.00000372
0.96500000	10000.00047248	0.00000000	0.00000403
0.97000000	10000.00046539	0.00000000	0.00000433
0.97500000	10000.00045830	0.00000000	0.00000464
0.98000000	10000.00045121	0.00000000	0.00000495
0.98500000	10000.00044412	0.00000000	0.00000526
0.99000000	10000.00043703	0.00000000	0.00000556
0.99500000	10000.00042994	0.00000000	0.00000587
1.00000000	10000.00042285	0.00000000	0.00000618
1.00500000	10000.00041576	0.00000000	0.00000649
1.01000000	10000.00040867	0.00000000	0.00000679
1.01500000	10000.00040159	0.00000000	0.00000710
1.02000000	10000.00039450	0.00000000	0.00000741
1.02500000	10000.00038741	0.00000000	0.00000772
1.03000000	10000.00038032	0.00000000	0.00000802
1.03500000	10000.00037323	0.00000000	0.00000833
1.04000000	10000.00036614	0.00000000	0.00000864
1.04500000	10000.00035905	0.00000000	0.00000894
1.05000000	10000.00035196	0.00000000	0.00000925
1.05500000	10000.00034487	0.00000000	0.00000956
1.06000000	10000.00033778	0.00000000	0.00000987
1.06500000	10000.00033069	0.00000000	0.00001017
1.07000000	10000.00032360	0.00000000	0.00001048
1.07500000	10000.00031652	0.00000000	0.00001079
1.08000000	10000.00030943	0.00000000	0.00001110
1.08500000	10000.00030234	0.00000000	0.00001140
1.09000000	10000.00029525	0.00000000	0.00001171
1.09500000	10000.00028816	0.00000000	0.00001202
1.10000000	10000.00028107	0.00000000	0.00001233
1.10500000	10000.00027398	0.00000000	0.00001263
1.11000000	10000.00026689	0.00000000	0.00001294
1.11500000	10000.00025980	0.00000000	0.00001325
1.12000000	10000.00025271	0.00000000	0.00001356
1.12500000	10000.00024562	0.00000000	0.00001386
1.13000000	10000.00023854	0.00000000	0.00001417
1.13500000	10000.00023145	0.00000000	0.00001448
1.14000000	10000.00022436	0.00000000	0.00001478
1.14500000	10000.00021727	0.00000000	0.00001509
1.15000000	10000.00021018	0.00000000	0.00001540
1.15500000	10000.00020309	0.00000000	0.00001571
1.16000000	10000.00019600	0.00000000	0.00001601
1.16500000	10000.00018891	0.00000000	0.00001632
1.17000000	10000.00018182	0.00000000	0.00001663
1.17500000	10000.00017473	0.00000000	0.00001694
1.18000000	10000.00016764	0.00000000	0.00001724
1.18500000	10000.00016055	0.00000000	0.00001755
1.19000000	10000.00015347	0.00000000	0.00001786
1.19500000	10000.00014638	0.00000000	0.00001817
1.20000000	10000.00013929	0.00000000	0.00001847
1.20500000	10000.00013220	0.00000000	0.00001878
1.21000000	10000.00012511	0.00000000	0.00001909
1.21500000	10000.00011802	0.00000000	0.00001939
1.22000000	10000.00011093	0.00000000	0.00001970
1.22500000	10000.00010384	0.00000000	0.00002001
1.23000000	10000.00009675	0.00000000	0.00002032
1.23500000	10000.00008966	0.00000000	0.00002062
1.24000000	10000.00008257	0.00000000	0.00002093
1.24500000	10000.00008108	0.00000000	0.00002113
1.25000000	10000.00008119	0.00000000	0.00002130
1.25500000	10000.00008130	0.00000000	0.00002147
1.26000000	10000.00008141	0.00000000	0.00002164
1.26500000	10000.00008152	0.00000000	0.00002181
1.27000000	10000.00008163	0.00000000	0.00002197
1.27500000	10000.00008174	0.00000000	0.00002214
1.28000000	10000.00008185	0.00000000	0.00002231
1.28500000	10000.00008196	0.00000000	0.00002248
1.29000000	10000.00008207	0.00000000	0.00002265
1.29500000	10000.00008218	0.00000000	0.00002282
1.30000000	10000.00008228	0.00000000	0.00002299
1.30500000	10000.00008239	0.00000000	0.00002315
1.31000000	10000.00008250	0.00000000	0.00002332
1.31500000	10000.00008261	0.00000000	0.00002349
1.32000000	10000.00008272	0.00000000	0.00002366
1.32500000	10000.00008283	0.00000000	0.00002383
1.33000000	10000.00008294	0.00000000	0.00002400
1.33500000	10000.00008305	0.00000000	0.00002417
1.34000000	10000.00008316	0.00000000	0.00002433
1.34500000	10000.00008327	0.00000000	0.00002450
1.35000000	10000.00008338	0.00000000	0.00002467
1.35500000	10000.00008348	0.00000000	0.00002484
1.36000000	10000.00008359	0.00000000	0.00002501
1.36500000	10000.00008370	0.00000000	0.00002518
1.37000000	10000.00008381	0.00000000	0.00002534
1.37500000	10000.00008392	0.00000000	0.00002551
1.38000000	10000.00008403	0.00000000	0.00002568
1.38500000	10000.00008414	0.00000000	0.00002585
1.39000000	10000.00008425	0.00000000	0.00002602
1.39500000	10000.00008436	0.00000000	0.00002619
1.40000000	10000.00008447	0.00000000	0.00002636
1.40500000	10000.00008457	0.00000000	0.00002652
1.41000000	10000.00008468	0.00000000	0.00002669
1.41500000	10000.00008479	0.00000000	0.00002686
1.42000000	10000.00008490	0.00000000	0.00002703
1.42500000	10000.00008501	0.00000000	0.00002720
1.43000000	10000.00008512	0.00000000	0.00002737
1.43500000	10000.00008523	0.00000000	0.00002754
1.44000000	10000.00008534	0.00000000	0.00002770
1.44500000	10000.00008545	0.00000000	0.00002787
1.45000000	10000.00008556	0.00000000	0.00002804
1.45500000	10000.00008567	0.00000000	0.00002821
1.46000000	10000.00008577	0.00000000	0.00002838
1.46500000	10000.00008588	0.00000000	0.00002855
1.47000000	10000.00008599	0.00000000	0.00002872
1.47500000	10000.00008610	0.00000000	0.00002888
1.48000000	10000.00008621	0.00000000	0.00002905
1.48500000	10000.00008632	0.00000000	0.00002922
1.49000000	10000.00008643	0.00000000	0.00002939
1.49500000	10000.00008654	0.00000000	0.00002956
1.50000000	10000.00008665	0.00000000	0.00002973
1.50500000	10000.00008676	0.00000000	0.00002990
1.51000000	10000.00008687	0.00000000	0.00003006
1.51500000	10000.00008697	0.00000000	0.00003023
1.52000000	10000.00008708	0.00000000	0.00003040
1.52500000	10000.00008719	0.00000000	0.00003057
1.53000000	10000.00008730	0.00000000	0.00003074
1.53500000	10000.00008741	0.00000000	0.00003091
1.54000000	10000.00008752	0.00000000	0.00003108
1.54500000	10000.00008763	0.00000000	0.00003124
1.55000000	10000.00008774	0.00000000	0.00003141
1.55500000	10000.00008785	0.00000000	0.00003158
1.56000000	10000.00008796	0.00000000	0.00003175
1.56500000	10000.00008806	0.00000000	0.00003192
1.57000000	10000.00008817	0.00000000	0.00003209
1.57500000	10000.00008828	0.00000000	0.00003226
1.58000000	10000.00008839	0.00000000	0.00003242
1.58500000	10000.00008850	0.00000000	0.00003259
1.59000000	10000.00008861	0.00000000	0.00003276
1.59500000	10000.00008872	0.00000000	0.00003293
1.60000000	10000.00008883	0.00000000	0.00003310
1.60500000	10000.00008894	0.00000000	0.00003327
1.61000000	10000.00008905	0.00000000	0.00003344
1.61500000	10000.00008916	0.00000000	0.00003360
1.62000000	10000.00008926	0.00000000	0.00003377
1.62500000	10000.00008937	0.00000000	0.00003394
1.63000000	10000.00008948	0.00000000	0.00003411
1.63500000	10000.00008959	0.00000000	0.00003428
1.64000000	10000.00008970	0.00000000	0.00003445
1.64500000	10000.00008981	0.00000000	0.00003462
1.65000000	10000.00008992	0.00000000	0.00003478
1.65500000	10000.00009003	0.00000000	0.00003495
1.66000000	10000.00009014	0.00000000	0.00003512
1.66500000	10000.00009025	0.00000000	0.00003529
1.67000000	10000.00009036	0.00000000	0.00003546
1.67500000	10000.00009046	0.00000000	0.00003563
1.68000000	10000.00009057	0.00000000	0.00003580
1.68500000	10000.00009068	0.00000000	0.00003596
1.69000000	10000.00009079	0.00000000	0.00003613
1.69500000	10000.00009090	0.00000000	0.00003630
1.70000000	10000.00009101	0.00000000	0.00003647
1.70500000	10000.00009112	0.00000000	0.00003664
1.71000000	10000.00009123	0.00000000	0.00003681
1.71500000	10000.00009134	0.00000000	0.00003698
1.72000000	10000.00009145	0.00000000	0.00003714
1.72500000	10000.00009155	0.00000000	0.00003731
1.73000000	10000.00009166	0.00000000	0.00003748
1.73500000	10000.00009177	0.00000000	0.00003765
1.74000000	10000.00009188	0.00000000	0.00003782
1.74500000	10000.00009199	0.00000000	0.00003799
1.75000000	10000.00005302	0.00000000	0.00002866
1.75500000	10000.00001063	0.00000000	0.00001851
1.76000000	9999.99996824	0.00000000	0.00000836
1.76500000	9999.99992586	0.00000000	-0.00000179
1.77000000	9999.99997474	0.00000000	-0.00000200
1.77500000	10000.00002550	0.00000000	-0.00000200
1.78000000	10000.00007627	0.00000000	-0.00000200
1.78500000	10000.00012279	0.00000000	-0.00000199
1.79000000	10000.00006759	0.00000000	-0.00000174
1.79500000	10000.00001238	0.00000000	-0.00000148
1.80000000	9999.99995717	0.00000000	-0.00000123
1.80500000	9999.99990197	0.00000000	-0.00000097
1.81000000	9999.99984676	0.00000000	-0.00000072
1.81500000	9999.99979156	0.00000000	-0.00000047
1.82000000	9999.99973635	0.00000000	-0.00000021
1.82500000	9999.99970627	0.00000000	0.00000010
1.83000000	9999.99980767	0.00000000	0.00000074
1.83500000	9999.99990907	0.00000000	0.00000137
1.84000000	10000.00001048	0.00000000	0.00000201
1.84500000	10000.00011188	0.00000000	0.00000264
1.85000000	10000.00021328	0.00000000	0.00000327
1.85500000	10000.00031469	0.00000000	0.00000391
1.86000000	10000.00041609	0.00000000	0.00000454
1.86500000	10000.00045127	0.00000000	0.00000497
1.87000000	10000.00031702	0.00000000	0.00000485
1.87500000	10000.00018277	0.00000000	0.00000473
1.88000000	10000.00004851	0.00000000	0.00000461
1.88500000	9999.99991426	0.00000000	0.00000449
1.89000000	9999.99978001	0.00000000	0.00000437
1.89500000	9999.99964575	0.00000000	0.00000426
1.90000000	9999.99951150	0.00000000	0.00000414
1.90500000	9999.99937725	0.00000000	0.00000402
1.91000000	9999.99941279	0.00000000	-0.00000577
1.91500000	9999.99947850	0.00000000	-0.00001727
1.92000000	9999.99954420	0.00000000	-0.00002878
1.92500000	9999.99960990	0.00000000	-0.00004028
1.93000000	9999.99967560	0.00000000	-0.00005178
1.93500000	9999.99974130	0.00000000	-0.00006329
1.94000000	9999.99980701	0.00000000	-0.00007479
1.94500000	9999.99987271	0.00000000	-0.00008630
1.95000000	9999.99987537	0.00000000	-0.00008370
1.95500000	9999.99978998	0.00000000	-0.00006140
1.96000000	9999.99970459	0.00000000	-0.00003910
1.96500000	9999.99961919	0.00000000	-0.00001681
1.97000000	9999.99957598	0.00000000	-0.00000182
1.97500000	9999.99970004	0.00000000	-0.00001581
1.98000000	9999.99982409	0.00000000	-0.00002981
1.98500000	9999.99994814	0.00000000	-0.00004380
1.99000000	10000.00007219	0.00000000	-0.00005780
1.99500000	10000.00003038	0.00000000	0.00003762
2.00000000	10000.00001837	0.00000000	0.00001256
2.00500000	10000.00001034	0.00000000	0.00003901
2.01000000	10000.00000456	0.00000000	0.00018820
2.01500000	9999.99999989	0.00000000	0.00054151
2.02000000	9999.99999707	0.00000000	0.00107400
2.02500000	9999.99999439	0.00000000	0.00166578
2.03000000	9999.99999859	0.00000000	0.00220122
2.03500000	9999.99999930	0.00000000	0.00274802
2.04000000	9999.99999192	0.00000000	0.00333101
2.04500000	9999.99999846	3.17127818	0.30918878
2.05000000	9999.99998207	9.43363138	0.33823584
2.05500000	9999.99999262	10.79002377	0.05025456
2.06000000	10000.00002115	11.97095706	-0.08581403
2.06500000	10000.00004078	13.02550639	-0.12485887
2.07000000	10000.00003980	14.01937042	-0.11091809
2.07500000	10000.00002538	14.98293079	-0.07880305
2.08000000	10000.00000750	15.94693969	-0.04590729
2.08500000	9999.99999449	16.91809864	-0.02084719
2.09000000	9999.99998880	17.89934744	-0.00508409
2.09500000	9999.99998897	18.88926122	0.00311641
2.10000000	9999.99999294	19.88681469	0.00562832
2.10500000	9999.99999818	20.88709495	0.00538811
2.11000000	10000.00000235	21.88958053	0.00392857
2.11500000	10000.00000580	22.89240827	0.00245463
2.12000000	10000.00000700	23.89444870	0.00130061
2.12500000	10000.00000700	24.89610713	0.00049334
2.13000000	10000.00000686	25.89762757	0.00000404
2.13500000	10000.00000600	26.89865524	-0.00022005
2.14000000	10000.00000595	27.89955194	-0.00027364
2.14500000	10000.00000500	28.90013307	-0.00020611
2.15000000	10000.00000500	29.90087577	-0.00009298
2.15500000	10000.00000445	30.90154324	0.00000267
2.16000000	10000.00000400	31.90221318	0.00009066
2.16500000	10000.00000400	32.90290605	0.00015571
2.17000000	10000.00000400	33.90363345	0.00018829
2.17500000	10000.00000400	34.90439486	0.00018887
2.18000000	10000.00000400	35.90518987	0.00016539
2.18500000	10000.00000407	36.90599440	0.00013519
2.19000000	10000.00000523	37.90680112	0.00010499
2.19500000	10000.00000589	38.90759595	0.00007422
2.20000000	10000.00000558	39.90836754	0.00004236
2.20500000	10000.00000527	40.90913912	0.00001050
2.21000000	10000.00000479	41.90991611	-0.00001850
2.21500000	10000.00000322	42.91072710	-0.00002943
2.22000000	10000.00000166	43.91153810	-0.00004037
2.22500000	10000.00000010	44.91234910	-0.00005130
2.23000000	10000.00000000	45.91306736	-0.00003124
2.23500000	10000.00000000	46.91377928	-0.00000906
2.24000000	10000.00000000	47.91449120	0.00001312
2.24500000	10000.00000138	48.91525090	0.00003254
2.25000000	10000.00000325	49.91602784	0.00005098
2.25500000	10000.00000513	50.91680479	0.00006941
2.26000000	10000.00000690	51.91756981	0.00008898
2.26500000	10000.00000858	52.91832441	0.00010955
2.27000000	10000.00001026	53.91907901	0.00013013
2.27500000	10000.00001193	54.91983361	0.00015070
2.28000000	10000.00001361	55.92058821	0.00017127
2.28500000	10000.00001529	56.92134281	0.00019184
2.29000000	10000.00001697	57.92209741	0.00021242
2.29500000	10000.00001865	58.92285201	0.00023299
2.30000000	10000.00002033	59.92360661	0.00025356
2.30500000	10000.00002201	60.92436121	0.00027413
2.31000000	10000.00002369	61.92511581	0.00029471
2.31500000	10000.00002537	62.92587041	0.00031528
2.32000000	10000.00002705	63.92662502	0.00033585
2.32500000	10000.00002873	64.92737962	0.00035642
2.33000000	10000.00002935	65.92813912	0.00037076
2.33500000	10000.00002670	66.92891394	0.00036565
2.34000000	10000.00002404	67.92968875	0.00036054
2.34500000	10000.00002138	68.93046356	0.00035544
2.35000000	10000.00001872	69.93123837	0.00035033
2.35500000	10000.00001606	70.93201319	0.00034522
2.36000000	10000.00001340	71.93278800	0.00034011
2.36500000	10000.00001074	72.93356281	0.00033500
2.37000000	10000.00000808	73.93433762	0.00032990
2.37500000	10000.00000542	74.93511244	0.00032479
2.38000000	10000.00000276	75.93588725	0.00031968
2.38500000	10000.00000011	76.93666206	0.00031457
2.39000000	9999.99999745	77.93743687	0.00030946
2.39500000	9999.99999479	78.93821169	0.00030436
2.40000000	9999.99999213	79.93898650	0.00029925
2.40500000	9999.99999093	80.93978849	0.00028508
2.41000000	9999.99998982	81.94059186	0.00027046
2.41500000	9999.99998870	82.94139524	0.00025583
2.42000000	9999.99998758	83.94219861	0.00024121
2.42500000	9999.99998646	84.94300198	0.00022658
2.43000000	9999.99998534	85.94380535	0.00021196
2.43500000	9999.99998422	86.94460873	0.00019734
2.44000000	9999.99998310	87.94541210	0.00018271
2.44500000	9999.99998198	88.94621547	0.00016809
2.45000000	9999.99998086	89.94701884	0.00015346
2.45500000	9999.99997974	90.94782222	0.00013884
2.46000000	9999.99997862	91.94862559	0.00012421
2.46500000	9999.99997750	92.94942896	0.00010959
2.47000000	9999.99997638	93.95023234	0.00009496
2.47500000	9999.99997190	94.95102719	0.00008903
2.48000000	9999.99996570	95.95181768	0.00008756
2.48500000	9999.99995950	96.95260816	0.00008609
2.49000000	9999.99995330	97.95339865	0.00008462
2.49500000	9999.99994710	98.95418913	0.00008314
2.50000000	9999.99994090	99.95497962	0.00008167
2.50500000	9999.99993470	100.95577010	0.00008020
2.51000000	9999.99992850	101.95656059	0.00007873
2.51500000	9999.99992230	102.95735107	0.00007726
2.52000000	9999.99991610	103.95814156	0.00007579
2.52500000	9999.99990990	104.95893204	0.00007432
2.53000000	9999.99990370	105.95972253	0.00007285
2.53500000	9999.99989750	106.96051301	0.00007138
2.54000000	9999.99989130	107.96130350	0.00006991
2.54500000	9999.99988510	108.96209398	0.00006844
2.55000000	9999.99987890	109.96288447	0.00006696
2.55500000	9999.99987270	110.96367495	0.00006549
2.56000000	9999.99986650	111.96446544	0.00006402
2.56500000	9999.99986030	112.96525592	0.00006255
2.57000000	9999.99985410	113.96604641	0.00006108
2.57500000	9999.99984790	114.96683689	0.00005961
2.58000000	9999.99984170	115.96762738	0.00005814
2.58500000	9999.99983549	116.96841786	0.00005667
2.59000000	9999.99982929	117.96920835	0.00005520
2.59500000	9999.99982309	118.96999883	0.00005373
2.60000000	9999.99981689	119.97078932	0.00005226
2.60500000	9999.99981069	120.97157980	0.00005078
2.61000000	9999.99980449	121.97237029	0.00004931
2.61500000	9999.99979829	122.97316077	0.00004784
2.62000000	9999.99979209	123.97395126	0.00004637
2.62500000	9999.99978589	124.97474174	0.00004490
2.63000000	9999.99977969	125.97553222	0.00004343
2.63500000	9999.99977349	126.97632271	0.00004196
2.64000000	9999.99976729	127.97711319	0.00004049
2.64500000	9999.99976109	128.97790368	0.00003902
2.65000000	9999.99975489	129.97869416	0.00003755
2.65500000	9999.99974869	130.97948465	0.00003608
2.66000000	9999.99974249	131.98027513	0.00003460
2.66500000	9999.99973629	132.98106562	0.00003313
2.67000000	9999.99973009	133.98185610	0.00003166
2.67500000	9999.99972389	134.98264659	0.00003019
2.68000000	9999.99971769	135.98343707	0.00002872
2.68500000	9999.99971149	136.98422756	0.00002725
2.69000000	9999.99970529	137.98501804	0.00002578
2.69500000	9999.99969667	138.98581159	0.00002532
2.70000000	9999.99968533	139.98660859	0.00002600
2.70500000	9999.99967400	140.98740560	0.00002668
2.71000000	9999.99966266	141.98820260	0.00002736
2.71500000	9999.99965132	142.98899960	0.00002803
2.72000000	9999.99963999	143.98979660	0.00002871
2.72500000	9999.99962865	144.99059360	0.00002939
2.73000000	9999.99961731	145.99139061	0.00003007
2.73500000	9999.99960597	146.99218761	0.00003075
2.74000000	9999.99959464	147.99298461	0.00003143
2.74500000	9999.99958330	148.99378161	0.00003211
2.75000000	9999.99957196	149.99457861	0.00003279
2.75500000	9999.99956062	150.99537562	0.00003347
2.76000000	9999.99954929	151.99617262	0.00003414
2.76500000	9999.99953795	152.99696962	0.00003482
2.77000000	9999.99952661	153.99776662	0.00003550
2.77500000	9999.99951528	154.99856362	0.00003618
2.78000000	9999.99950394	155.99936063	0.00003686
2.78500000	9999.99949260	157.00015763	0.00003754
2.79000000	9999.99948126	158.00095463	0.00003822
2.79500000	9999.99946993	159.00175163	0.00003890
2.80000000	9999.99945859	160.00254863	0.00003958
2.80500000	9999.99944725	161.00334564	0.00004025
2.81000000	9999.99943591	162.00414264	0.00004093
2.81500000	9999.99942458	163.00493964	0.00004161
2.82000000	9999.99941324	164.00573664	0.00004229
2.82500000	9999.99940190	165.00653364	0.00004297
2.83000000	9999.99939057	166.00733065	0.00004365
2.83500000	9999.99937923	167.00812765	0.00004433
2.84000000	9999.99936789	168.00892465	0.00004501
2.84500000	9999.99935655	169.00972165	0.00004569
2.85000000	9999.99934522	170.01051866	0.00004636
2.85500000	9999.99933388	171.01131566	0.00004704
2.86000000	9999.99932254	172.01211266	0.00004772
2.86500000	9999.99931120	173.01290966	0.00004840
2.87000000	9999.99929987	174.01370666	0.00004908
2.87500000	9999.99928853	175.01450367	0.00004976
2.88000000	9999.99927719	176.01530067	0.00005044
2.88500000	9999.99926586	177.01609767	0.00005112
2.89000000	9999.99925452	178.01689467	0.00005180
2.89500000	9999.99924318	179.01769167	0.00005247
2.90000000	9999.99923184	180.01848868	0.00005315
2.90500000	9999.99922051	181.01928568	0.00005383
2.91000000	9999.99920917	182.02008268	0.00005451
2.91500000	9999.99920063	183.02088239	0.00005516
2.92000000	9999.99919932	184.02168908	0.00005575
2.92500000	9999.99919801	185.02249576	0.00005634
2.93000000	9999.99919670	186.02330245	0.00005693
2.93500000	9999.99919538	187.02410914	0.00005752
2.94000000	9999.99919407	188.02491583	0.00005811
2.94500000	9999.99919276	189.02572251	0.00005869
2.95000000	9999.99919145	190.02652920	0.00005928
2.95500000	9999.99919013	191.02733589	0.00005987
2.96000000	9999.99918882	192.02814258	0.00006046
2.96500000	9999.99918751	193.02894926	0.00006105
2.97000000	9999.99918620	194.02975595	0.00006164
2.97500000	9999.99918488	195.03056264	0.00006222
2.98000000	9999.99918357	196.03136932	0.00006281
2.98500000	9999.99918226	197.03217601	0.00006340
2.99000000	9999.99918095	198.03298270	0.00006399
2.99500000	9999.99917963	199.03378939	0.00006458
3.00000000	9999.99917832	200.03459607	0.00006517
3.00500000	9999.99917701	201.03540276	0.00006575
3.01000000	9999.99917570	202.03620945	0.00006634
3.01500000	9999.99917438	203.03701614	0.00006693
3.02000000	9999.99917307	204.03782282	0.00006752
3.02500000	9999.99917176	205.03862951	0.00006811
3.03000000	9999.99917045	206.03943620	0.00006870
3.03500000	9999.99916913	207.04024289	0.00006929
3.04000000	9999.99916782	208.04104957	0.00006987
3.04500000	9999.99916651	209.04185626	0.00007046
3.05000000	9999.99916520	210.04266295	0.00007105
3.05500000	9999.99916388	211.04346964	0.00007164
3.06000000	9999.99916257	212.04427632	0.00007223
3.06500000	9999.99916126	213.04508301	0.00007282
3.07000000	9999.99915995	214.04588970	0.00007340
3.07500000	9999.99915863	215.04669639	0.00007399
3.08000000	9999.99915732	216.04750307	0.00007458
3.08500000	9999.99915601	217.04830976	0.00007517
3.09000000	9999.99915470	218.04911645	0.00007576
3.09500000	9999.99915338	219.04992313	0.00007635
3.10000000	9999.99915207	220.05072982	0.00007693
3.10500000	9999.99915076	221.05153651	0.00007752
3.11000000	9999.99914945	222.05234320	0.00007811
3.11500000	9999.99914813	223.05314988	0.00007870
3.12000000	9999.99914682	224.05395657	0.00007929
3.12500000	9999.99914551	225.05476326	0.00007988
3.13000000	9999.99914420	226.05556995	0.00008046
3.13500000	9999.99912745	227.05637872	0.00008112
3.14000000	9999.99895237	228.05720888	0.00008249
3.14500000	9999.99877728	229.05803904	0.00008385
3.15000000	9999.99860220	230.05886920	0.00008522
3.15500000	9999.99842711	231.05969936	0.00008658
3.16000000	9999.99825203	232.06052952	0.00008795
3.16500000	9999.99807694	233.06135968	0.00008932
3.17000000	9999.99790186	234.06218984	0.00009068
3.17500000	9999.99772677	235.06302000	0.00009205
3.18000000	9999.99755169	236.06385016	0.00009341
3.18500000	9999.99737660	237.06468032	0.00009478
3.19000000	9999.99720152	238.06551048	0.00009614
3.19500000	9999.99702644	239.06634064	0.00009751
3.20000000	9999.99685135	240.06717080	0.00009888
3.20500000	9999.99667627	241.06800097	0.00010024
3.21000000	9999.99650118	242.06883113	0.00010161
3.21500000	9999.99632610	243.06966129	0.00010297
3.22000000	9999.99615101	244.07049145	0.00010434
3.22500000	9999.99597593	245.07132161	0.00010570
3.23000000	9999.99580084	246.07215177	0.00010707
3.23500000	9999.99562576	247.07298193	0.00010843
3.24000000	9999.99545067	248.07381209	0.00010980
3.24500000	9999.99527559	249.07464225	0.00011117
3.25000000	9999.99510050	250.07547241	0.00011253
3.25500000	9999.99492542	251.07630257	0.00011390
3.26000000	9999.99475033	252.07713273	0.00011526
3.26500000	9999.99457525	253.07796289	0.00011663
3.27000000	9999.99440016	254.07879305	0.00011799
3.27500000	9999.99422508	255.07962321	0.00011936
3.28000000	9999.99404999	256.08045337	0.00012073
3.28500000	9999.99387491	257.08128353	0.00012209
3.29000000	9999.99369982	258.08211369	0.00012346
3.29500000	9999.99352474	259.08294385	0.00012482
3.30000000	9999.99334965	260.08377401	0.00012619
3.30500000	9999.99317457	261.08460418	0.00012755
3.31000000	9999.99299948	262.08543434	0.00012892
3.31500000	9999.99282440	263.08626450	0.00013029
3.32000000	9999.99264932	264.08709466	0.00013165
3.32500000	9999.99247423	265.08792482	0.00013302
3.33000000	9999.99229915	266.08875498	0.00013438
3.33500000	9999.99212406	267.08958514	0.00013575
3.34000000	9999.99194898	268.09041530	0.00013711
3.34500000	9999.99177389	269.09124546	0.00013848
3.35000000	9999.99159881	270.09207562	0.00013985
3.35500000	9999.99142372	271.09290578	0.00014121
3.36000000	9999.99124864	272.09373594	0.00014258
3.36500000	9999.99107355	273.09456610	0.00014394
3.37000000	9999.99089847	274.09539626	0.00014531
3.37500000	9999.99072338	275.09622642	0.00014667
3.38000000	9999.99054830	276.09705658	0.00014804
3.38500000	9999.99037321	277.09788674	0.00014940
3.39000000	9999.99019813	278.09871690	0.00015077
3.39500000	9999.99002304	279.09954706	0.00015214
3.40000000	9999.98984796	280.10037722	0.00015350
3.40500000	9999.98967287	281.10120739	0.00015487
3.41000000	9999.98949779	282.10203755	0.00015623
3.41500000	9999.98932270	283.10286771	0.00015760
3.42000000	9999.98914762	284.10369787	0.00015896
3.42500000	9999.98897253	285.10452803	0.00016033
3.43000000	9999.98879745	286.10535819	0.00016170
3.43500000	9999.98862237	287.10618835	0.00016306
3.44000000	9999.98844728	288.10701851	0.00016443
3.44500000	9999.98827220	289.10784867	0.00016579
3.45000000	9999.98809711	290.10867883	0.00016716
3.45500000	9999.98792203	291.10950899	0.00016852
3.46000000	9999.98774694	292.11033915	0.00016989
3.46500000	9999.98757186	293.11116931	0.00017126
3.47000000	9999.98739677	294.11199947	0.00017262
3.47500000	9999.98722169	295.11282963	0.00017399
3.48000000	9999.98704660	296.11365979	0.00017535
3.48500000	9999.98687152	297.11448995	0.00017672
3.49000000	9999.98669643	298.11532011	0.00017808
3.49500000	9999.98652135	299.11615027	0.00017945
3.50000000	9999.98634626	300.11698043	0.00018082
3.50500000	9999.98617118	301.11781060	0.00018218
3.51000000	9999.98599609	302.11864076	0.00018355
3.51500000	9999.98582101	303.11947092	0.00018491
3.52000000	9999.98564592	304.12030108	0.00018628
3.52500000	9999.98547084	305.12113124	0.00018764
3.53000000	9999.98529575	306.12196140	0.00018901
3.53500000	9999.98512067	307.12279156	0.00019038
3.54000000	9999.98494558	308.12362172	0.00019174
3.54500000	9999.98477050	309.12445188	0.00019311
3.55000000	9999.98459542	310.12528204	0.00019447
3.55500000	9999.98442033	311.12611220	0.00019584
3.56000000	9999.98424525	312.12694236	0.00019720
3.56500000	9999.98407016	313.12777252	0.00019857
3.57000000	9999.98389508	314.12860268	0.00019993
3.57500000	9999.98371999	315.12943284	0.00020130
3.58000000	9999.98354491	316.13026300	0.00020267
3.58500000	9999.98336982	317.13109316	0.00020403
3.59000000	9999.98319474	318.13192332	0.00020540
3.59500000	9999.98301965	319.13275348	0.00020676
3.60000000	9999.98284457	320.13358364	0.00020813
3.60500000	9999.98266948	321.13441381	0.00020949
3.61000000	9999.98249440	322.13524397	0.00021086
3.61500000	9999.98231931	323.13607413	0.00021223
3.62000000	9999.98214423	324.13690429	0.00021359
3.62500000	9999.98196914	325.13773445	0.00021496
3.63000000	9999.98179406	326.13856461	0.00021632
3.63500000	9999.98161897	327.13939477	0.00021769
3.64000000	9999.98144389	328.14022493	0.00021905
3.64500000	9999.98126880	329.14105509	0.00022042
3.65000000	9999.98109372	330.14188525	0.00022179
3.65500000	9999.98091863	331.14271541	0.00022315
3.66000000	9999.98074355	332.14354557	0.00022452
3.66500000	9999.98056847	333.14437573	0.00022588
3.67000000	9999.98039338	334.14520589	0.00022725
3.67500000	9999.98021830	335.14603605	0.00022861
3.68000000	9999.98004321	336.14686621	0.00022998
3.68500000	9999.97986813	337.14769637	0.00023135
3.69000000	9999.97969304	338.14852653	0.00023271
3.69500000	9999.97951796	339.14935669	0.00023408
3.70000000	9999.97934287	340.15018685	0.00023544
3.70500000	9999.97916779	341.15101702	0.00023681
3.71000000	9999.97899270	342.15184718	0.00023817
3.71500000	9999.97881762	343.15267734	0.00023954
3.72000000	9999.97864253	344.15350750	0.00024091
3.72500000	9999.97846745	345.15433766	0.00024227
3.73000000	9999.97829236	346.15516782	0.00024364
3.73500000	9999.97811728	347.15599798	0.00024500
3.74000000	9999.97794219	348.15682814	0.00024637
3.74500000	9999.97776711	349.15765830	0.00024773
3.75000000	9999.97759202	350.15848846	0.00024910
3.75500000	9999.97741694	351.15931862	0.00025046
3.76000000	9999.97724185	352.16014878	0.00025183
3.76500000	9999.97706677	353.16097894	0.00025320
3.77000000	9999.97689168	354.16180910	0.00025456
3.77500000	9999.97671660	355.16263926	0.00025593
3.78000000	9999.97654152	356.16346942	0.00025729
3.78500000	9999.97636643	357.16429958	0.00025866
3.79000000	9999.97619135	358.16512974	0.00026002
3.79500000	9999.97601626	359.16595990	0.00026139
3.80000000	9999.97584118	360.16679006	0.00026276
3.80500000	9999.97566609	361.16762022	0.00026412
3.81000000	9999.97549101	362.16845039	0.00026549
3.81500000	9999.97531592	363.16928055	0.00026685
3.82000000	9999.97514084	364.17011071	0.00026822
3.82500000	9999.97496575	365.17094087	0.00026958
3.83000000	9999.97479067	366.17177103	0.00027095
3.83500000	9999.97461558	367.17260119	0.00027232
3.84000000	9999.97444050	368.17343135	0.00027368
3.84500000	9999.97426541	369.17426151	0.00027505
3.85000000	9999.97409033	370.17509167	0.00027641
3.85500000	9999.97391524	371.17592183	0.00027778
3.86000000	9999.97374016	372.17675199	0.00027914
3.86500000	9999.97356507	373.17758215	0.00028051
3.87000000	9999.97338999	374.17841231	0.00028188
3.87500000	9999.97321490	375.17924247	0.00028324
3.88000000	9999.97303982	376.18007263	0.00028461
3.88500000	9999.97286473	377.18090279	0.00028597
3.89000000	9999.97268965	378.18173295	0.00028734
3.89500000	9999.97251457	379.18256311	0.00028870
3.90000000	9999.97233948	380.18339327	0.00029007
3.90500000	9999.97216440	381.18422343	0.00029143
3.91000000	9999.97198931	382.18505360	0.00029280
3.91500000	9999.97181423	383.18588376	0.00029417
3.92000000	9999.97163914	384.18671392	0.00029553
3.92500000	9999.97146406	385.18754408	0.00029690
3.93000000	9999.97128897	386.18837424	0.00029826
3.93500000	9999.97111389	387.18920440	0.00029963
3.94000000	9999.97093880	388.19003456	0.00030099
3.94500000	9999.97076372	389.19086472	0.00030236
3.95000000	9999.97058863	390.19169488	0.00030373
3.95500000	9999.97041355	391.19252504	0.00030509
3.96000000	9999.97023846	392.19335520	0.00030646
3.96500000	9999.97006338	393.19418536	0.00030782
3.97000000	9999.96988829	394.19501552	0.00030919
3.97500000	9999.96971321	395.19584568	0.00031055
3.98000000	9999.96953812	396.19667584	0.00031192
3.98500000	9999.96936304	397.19750600	0.00031329
3.99000000	9999.96918795	398.19833616	0.00031465
3.99500000	9999.96901287	399.19916632	0.00031602
4.00000000	9999.96883778	400.19999648	0.00031738
4.00500000	9999.96866270	401.20082664	0.00031875
4.01000000	9999.96848762	402.20165681	0.00032011
4.01500000	9999.96831253	403.20248697	0.00032148
4.02000000	9999.96813745	404.20331713	0.00032285
4.02500000	9999.96796236	405.20414729	0.00032421
4.03000000	9999.96778728	406.20497745	0.00032558
4.03500000	9999.96761219	407.20580761	0.00032694
4.04000000	9999.96743711	408.20663777	0.00032831
4.04500000	9999.96726202	409.20746793	0.00032967
4.05000000	9999.96708694	410.20829809	0.00033104
4.05500000	9999.96691185	411.20912825	0.00033241
4.06000000	9999.96673677	412.20995841	0.00033377
4.06500000	9999.96656168	413.21078857	0.00033514
4.07000000	9999.96638660	414.21161873	0.00033650
4.07500000	9999.96621151	415.21244889	0.00033787
4.08000000	9999.96603643	416.21327905	0.00033923
4.08500000	9999.96586134	417.21410921	0.00034060
4.09000000	9999.96568626	418.21493937	0.00034196
4.09500000	9999.96551117	419.21576953	0.00034333
4.10000000	9999.96533609	420.21659969	0.00034470
4.10500000	9999.96516100	421.21742985	0.00034606
4.11000000	9999.96498592	422.21826002	0.00034743
4.11500000	9999.96481083	423.21909018	0.00034879
4.12000000	9999.96463575	424.21992034	0.00035016
4.12500000	9999.96446066	425.22075050	0.00035152
4.13000000	9999.96428558	426.22158066	0.00035289
4.13500000	9999.96411050	427.22241082	0.00035426
4.14000000	9999.96393541	428.22324098	0.00035562
4.14500000	9999.96376033	429.22407114	0.00035699
4.15000000	9999.96358524	430.22490130	0.00035835
4.15500000	9999.96341016	431.22573146	0.00035972
4.16000000	9999.96323507	432.22656162	0.00036108
4.16500000	9999.96305999	433.22739178	0.00036245
4.17000000	9999.96288490	434.22822194	0.00036382
4.17500000	9999.96270982	435.22905210	0.00036518
4.18000000	9999.96253473	436.22988226	0.00036655
4.18500000	9999.96235965	437.23071242	0.00036791
4.19000000	9999.96218456	438.23154258	0.00036928
4.19500000	9999.96200948	439.23237274	0.00037064
4.20000000	9999.96183439	440.23320290	0.00037201
4.20500000	9999.96165931	441.23403306	0.00037338
4.21000000	9999.96148422	442.23486323	0.00037474
4.21500000	9999.96130914	443.23569339	0.00037611
4.22000000	9999.96113405	444.23652355	0.00037747
4.22500000	9999.96095897	445.23735371	0.00037884
4.23000000	9999.96078388	446.23818387	0.00038020
4.23500000	9999.96060880	447.23901403	0.00038157
4.24000000	9999.96043371	448.23984419	0.00038294
4.24500000	9999.96025863	449.24067435	0.00038430
4.25000000	9999.96008355	450.24150451	0.00038567
4.25500000	9999.95990846	451.24233467	0.00038703
4.26000000	9999.95973338	452.24316483	0.00038840
4.26500000	9999.95955829	453.24399499	0.00038976
4.27000000	9999.95938321	454.24482515	0.00039113
4.27500000	9999.95920812	455.24565531	0.00039249
4.28000000	9999.95903304	456.24648547	0.00039386
4.28500000	9999.95885795	457.24731563	0.00039523
4.29000000	9999.95868287	458.24814579	0.00039659
4.29500000	9999.95850778	459.24897595	0.00039796
4.30000000	9999.95833270	460.24980611	0.00039932
4.30500000	9999.95815761	461.25063627	0.00040069
4.31000000	9999.95798253	462.25146644	0.00040205
4.31500000	9999.95780744	463.25229660	0.00040342
4.32000000	9999.95763236	464.25312676	0.00040479
4.32500000	9999.95745727	465.25395692	0.00040615
4.33000000	9999.95728219	466.25478708	0.00040752
4.33500000	9999.95710710	467.25561724	0.00040888
4.34000000	9999.95693202	468.25644740	0.00041025
4.34500000	9999.95675693	469.25727756	0.00041161
4.35000000	9999.95658185	470.25810772	0.00041298
4.35500000	9999.95640676	471.25893788	0.00041435
4.36000000	9999.95623168	472.25976804	0.00041571
4.36500000	9999.95605660	473.26059820	0.00041708
4.37000000	9999.95588151	474.26142836	0.00041844
4.37500000	9999.95570643	475.26225852	0.00041981
4.38000000	9999.95553134	476.26308868	0.00042117
4.38500000	9999.95535626	477.26391884	0.00042254
4.39000000	9999.95518117	478.26474900	0.00042391
4.39500000	9999.95500609	479.26557916	0.00042527
4.40000000	9999.95483100	480.26640932	0.00042664
4.40500000	9999.95465592	481.26723948	0.00042800
4.41000000	9999.95439963	482.26807540	0.00042977
4.41500000	9999.95392313	483.26892690	0.00043263
4.42000000	9999.95344664	484.26977841	0.00043548
4.42500000	9999.95297014	485.27062992	0.00043834
4.43000000	9999.95249364	486.27148143	0.00044120
4.43500000	9999.95201714	487.27233294	0.00044405
4.44000000	9999.95154064	488.27318445	0.00044691
4.44500000	9999.95106415	489.27403595	0.00044977
4.45000000	9999.95058765	490.27488746	0.00045263
4.45500000	9999.95011115	491.27573897	0.00045548
4.46000000	9999.94963465	492.27659048	0.00045834
4.46500000	9999.94915815	493.27744199	0.00046120
4.47000000	9999.94868166	494.27829350	0.00046405
4.47500000	9999.94820516	495.27914500	0.00046691
4.48000000	9999.94772866	496.27999651	0.00046977
4.48500000	9999.94725216	497.28084802	0.00047262
4.49000000	9999.94677567	498.28169953	0.00047548
4.49500000	9999.94629917	499.28255104	0.00047834
4.50000000	9999.94582267	500.28340255	0.00048119
4.50500000	9999.94534617	501.28425405	0.00048405
4.51000000	9999.94486967	502.28510556	0.00048691
4.51500000	9999.94439318	503.28595707	0.00048977
4.52000000	9999.94391668	504.28680858	0.00049262
4.52500000	9999.94344018	505.28766009	0.00049548
4.53000000	9999.94296368	506.28851160	0.00049834
4.53500000	9999.94248718	507.28936310	0.00050119
4.54000000	9999.94201069	508.29021461	0.00050405
4.54500000	9999.94153419	509.29106612	0.00050691
4.55000000	9999.94105769	510.29191763	0.00050976
4.55500000	9999.94058119	511.29276914	0.00051262
4.56000000	9999.94010469	512.29362064	0.00051548
4.56500000	9999.93962820	513.29447215	0.00051833
4.57000000	9999.93915170	514.29532366	0.00052119
4.57500000	9999.93867520	515.29617517	0.00052405
4.58000000	9999.93819870	516.29702668	0.00052691
4.58500000	9999.93772221	517.29787819	0.00052976
4.59000000	9999.93724571	518.29872969	0.00053262
4.59500000	9999.93676921	519.29958120	0.00053548
4.60000000	9999.93629271	520.30043271	0.00053833
4.60500000	9999.93581621	521.30128422	0.00054119
4.61000000	9999.93533972	522.30213573	0.00054405
4.61500000	9999.93486322	523.30298724	0.00054690
4.62000000	9999.93438672	524.30383874	0.00054976
4.62500000	9999.93391022	525.30469025	0.00055262
4.63000000	9999.93343372	526.30554176	0.00055547
4.63500000	9999.93295723	527.30639327	0.00055833
4.64000000	9999.93248073	528.30724478	0.00056119
4.64500000	9999.93200423	529.30809629	0.00056405
4.65000000	9999.93152773	530.30894779	0.00056690
4.65500000	9999.93105124	531.30979930	0.00056976
4.66000000	9999.93057474	532.31065081	0.00057262
4.66500000	9999.93009824	533.31150232	0.00057547
4.67000000	9999.92962174	534.31235383	0.00057833
4.67500000	9999.92914524	535.31320534	0.00058119
4.68000000	9999.92866875	536.31405684	0.00058404
4.68500000	9999.92819225	537.31490835	0.00058690
4.69000000	9999.92771575	538.31575986	0.00058976
4.69500000	9999.92723925	539.31661137	0.00059261
4.70000000	9999.92676275	540.31746288	0.00059547
4.70500000	9999.92628626	541.31831439	0.00059833
4.71000000	9999.92580976	542.31916589	0.00060119
4.71500000	9999.92533326	543.32001740	0.00060404
4.72000000	9999.92485676	544.32086891	0.00060690
4.72500000	9999.92438026	545.32172042	0.00060976
4.73000000	9999.92390377	546.32257193	0.00061261
4.73500000	9999.92342727	547.32342343	0.00061547
4.74000000	9999.92295077	548.32427494	0.00061833
4.74500000	9999.92247427	549.32512645	0.00062118
4.75000000	9999.92199778	550.32597796	0.00062404
4.75500000	9999.92152128	551.32682947	0.00062690
4.76000000	9999.92104478	552.32768098	0.00062975
4.76500000	9999.92056828	553.32853248	0.00063261
4.77000000	9999.92009178	554.32938399	0.00063547
4.77500000	9999.91961529	555.33023550	0.00063833
4.78000000	9999.91913879	556.33108701	0.00064118
4.78500000	9999.91866229	557.33193852	0.00064404
4.79000000	9999.91818579	558.33279003	0.00064690
4.79500000	9999.91770929	559.33364153	0.00064975
4.80000000	9999.91723280	560.33449304	0.00065261
4.80500000	9999.91675630	561.33534455	0.00065547
4.81000000	9999.91627980	562.33619606	0.00065832
4.81500000	9999.91580330	563.33704757	0.00066118
4.82000000	9999.91532681	564.33789908	0.00066404
4.82500000	9999.91485031	565.33875058	0.00066689
4.83000000	9999.91437381	566.33960209	0.00066975
4.83500000	9999.91389731	567.34045360	0.00067261
4.84000000	9999.91342081	568.34130511	0.00067547
4.84500000	9999.91294432	569.34215662	0.00067832
4.85000000	9999.91246782	570.34300813	0.00068118
4.85500000	9999.91199132	571.34385963	0.00068404
4.86000000	9999.91151482	572.34471114	0.00068689
4.86500000	9999.91103832	573.34556265	0.00068975
4.87000000	9999.91056183	574.34641416	0.00069261
4.87500000	9999.91008533	575.34726567	0.00069546
4.88000000	9999.90960883	576.34811717	0.00069832
4.88500000	9999.90913233	577.34896868	0.00070118
4.89000000	9999.90865583	578.34982019	0.00070403
4.89500000	9999.90817934	579.35067170	0.00070689
4.90000000	9999.90770284	580.35152321	0.00070975
4.90500000	9999.90722634	581.35237472	0.00071261
4.91000000	9999.90674984	582.35322622	0.00071546
4.91500000	9999.90627335	583.35407773	0.00071832
4.92000000	9999.90579685	584.35492924	0.00072118
4.92500000	9999.90532035	585.35578075	0.00072403
4.93000000	9999.90484385	586.35663226	0.00072689
4.93500000	9999.90436735	587.35748377	0.00072975
4.94000000	9999.90389086	588.35833527	0.00073260
4.94500000	9999.90341436	589.35918678	0.00073546
4.95000000	9999.90293786	590.36003829	0.00073832
4.95500000	9999.90246136	591.36088980	0.00074117
4.96000000	9999.90198486	592.36174131	0.00074403
4.96500000	9999.90150837	593.36259282	0.00074689
4.97000000	9999.90103187	594.36344432	0.00074975
4.97500000	9999.90055537	595.36429583	0.00075260
4.98000000	9999.90007887	596.36514734	0.00075546
4.98500000	9999.89960237	597.36599885	0.00075832
4.99000000	9999.89912588	598.36685036	0.00076117
4.99500000	9999.89864938	599.36770187	0.00076403
5.00000000	9999.89817288	600.36855337	0.00076689
5.00500000	9999.89769638	601.36940488	0.00076974
5.01000000	9999.89721989	602.37025639	0.00077260
5.01500000	9999.89674339	603.37110790	0.00077546
5.02000000	9999.89626689	604.37195941	0.00077831
5.02500000	9999.89579039	605.37281092	0.00078117
5.03000000	9999.89531389	606.37366242	0.00078403
5.03500000	9999.89483740	607.37451393	0.00078689
5.04000000	9999.89436090	608.37536544	0.00078974
5.04500000	9999.89388440	609.37621695	0.00079260
5.05000000	9999.89340790	610.37706846	0.00079546
5.05500000	9999.89293140	611.37791996	0.00079831
5.06000000	9999.89245491	612.37877147	0.00080117
5.06500000	9999.89197841	613.37962298	0.00080403
5.07000000	9999.89150191	614.38047449	0.00080688
5.07500000	9999.89102541	615.38132600	0.00080974
5.08000000	9999.89054892	616.38217751	0.00081260
5.08500000	9999.89007242	617.38302901	0.00081545
5.09000000	9999.88959592	618.38388052	0.00081831
5.09500000	9999.88911942	619.38473203	0.00082117
5.10000000	9999.88864292	620.38558354	0.00082403
5.10500000	9999.88816643	621.38643505	0.00082688
5.11000000	9999.88768993	622.38728656	0.00082974
5.11500000	9999.88721343	623.38813806	0.00083260
5.12000000	9999.88673693	624.38898957	0.00083545
5.12500000	9999.88626043	625.38984108	0.00083831
5.13000000	9999.88578394	626.39069259	0.00084117
5.13500000	9999.88530744	627.39154410	0.00084402
5.14000000	9999.88483094	628.39239561	0.00084688
5.14500000	9999.88435444	629.39324711	0.00084974
5.15000000	9999.88387794	630.39409862	0.00085259
5.15500000	9999.88340145	631.39495013	0.00085545
5.16000000	9999.88292495	632.39580164	0.00085831
5.16500000	9999.88244845	633.39665315	0.00086117
5.17000000	9999.88197195	634.39750466	0.00086402
5.17500000	9999.88149546	635.39835616	0.00086688
5.18000000	9999.88101896	636.39920767	0.00086974
5.18500000	9999.88054246	637.40005918	0.00087259
5.19000000	9999.88006596	638.40091069	0.00087545
5.19500000	9999.87958946	639.40176220	0.00087831
5.20000000	9999.87911297	640.40261371	0.00088116
5.20500000	9999.87863647	641.40346521	0.00088402
5.21000000	9999.87815997	642.40431672	0.00088688
5.21500000	9999.87768347	643.40516823	0.00088973
5.22000000	9999.87720697	644.40601974	0.00089259
5.22500000	9999.87673048	645.40687125	0.00089545
5.23000000	9999.87625398	646.40772275	0.00089831
5.23500000	9999.87577748	647.40857426	0.00090116
5.24000000	9999.87530098	648.40942577	0.00090402
5.24500000	9999.87482448	649.41027728	0.00090688
5.25000000	9999.87434799	650.41112879	0.00090973
5.25500000	9999.87387149	651.41198030	0.00091259
5.26000000	9999.87339499	652.41283180	0.00091545
5.26500000	9999.87291849	653.41368331	0.00091830
5.27000000	9999.87244200	654.41453482	0.00092116
5.27500000	9999.87196550	655.41538633	0.00092402
5.28000000	9999.87148900	656.41623784	0.00092687
5.28500000	9999.87101250	657.41708935	0.00092973
5.29000000	9999.87053600	658.41794085	0.00093259
5.29500000	9999.87005951	659.41879236	0.00093545
5.30000000	9999.86958301	660.41964387	0.00093830
5.30500000	9999.86910651	661.42049538	0.00094116
5.31000000	9999.86863001	662.42134689	0.00094402
5.31500000	9999.86815351	663.42219840	0.00094687
5.32000000	9999.86767702	664.42304990	0.00094973
5.32500000	9999.86720052	665.42390141	0.00095259
5.33000000	9999.86672402	666.42475292	0.00095544
5.33500000	9999.86624752	667.42560443	0.00095830
5.34000000	9999.86577103	668.42645594	0.00096116
5.34500000	9999.86529453	669.42730745	0.00096401
5.35000000	9999.86481803	670.42815895	0.00096687
5.35500000	9999.86434153	671.42901046	0.00096973
5.36000000	9999.86386503	672.42986197	0.00097259
5.36500000	9999.86338854	673.43071348	0.00097544
5.37000000	9999.86291204	674.43156499	0.00097830
5.37500000	9999.86243554	675.43241649	0.00098116
5.38000000	9999.86195904	676.43326800	0.00098401
5.38500000	9999.86148254	677.43411951	0.00098687
5.39000000	9999.86100605	678.43497102	0.00098973
5.39500000	9999.86052955	679.43582253	0.00099258
5.40000000	9999.86005305	680.43667404	0.00099544
5.40500000	9999.85957655	681.43752554	0.00099830
5.41000000	9999.85910005	682.43837705	0.00100115
5.41500000	9999.85862356	683.43922856	0.00100401
5.42000000	9999.85814706	684.44008007	0.00100687
5.42500000	9999.85767056	685.44093158	0.00100973
5.43000000	9999.85719406	686.44178309	0.00101258
5.43500000	9999.85671757	687.44263459	0.00101544
5.44000000	9999.85624107	688.44348610	0.00101830
5.44500000	9999.85576457	689.44433761	0.00102115
5.45000000	9999.85528807	690.44518912	0.00102401
5.45500000	9999.85481157	691.44604063	0.00102687
5.46000000	9999.85433508	692.44689214	0.00102972
5.46500000	9999.85385858	693.44774364	0.00103258
5.47000000	9999.85338208	694.44859515	0.00103544
5.47500000	9999.85290558	695.44944666	0.00103829
5.48000000	9999.85242908	696.45029817	0.00104115
5.48500000	9999.85195259	697.45114968	0.00104401
5.49000000	9999.85147609	698.45200119	0.00104687
5.49500000	9999.85099959	699.45285269	0.00104972
5.50000000	9999.85052309	700.45370420	0.00105258
5.50500000	9999.85004660	701.45455571	0.00105544
5.51000000	9999.84957010	702.45540722	0.00105829
5.51500000	9999.84909360	703.45625873	0.00106115
5.52000000	9999.84861710	704.45711024	0.00106401
5.52500000	9999.84814060	705.45796174	0.00106686
5.53000000	9999.84766411	706.45881325	0.00106972
5.53500000	9999.84718761	707.45966476	0.00107258
5.54000000	9999.84671111	708.46051627	0.00107543
5.54500000	9999.84623461	709.46136778	0.00107829
5.55000000	9999.84575811	710.46221928	0.00108115
5.55500000	9999.84528162	711.46307079	0.00108401
5.56000000	9999.84480512	712.46392230	0.00108686
5.56500000	9999.84432862	713.46477381	0.00108972
5.57000000	9999.84385212	714.46562532	0.00109258
5.57500000	9999.84337562	715.46647683	0.00109543
5.58000000	9999.84289913	716.46732833	0.00109829
5.58500000	9999.84242263	717.46817984	0.00110115
5.59000000	9999.84194613	718.46903135	0.00110400
5.59500000	9999.84146963	719.46988286	0.00110686
5.60000000	9999.84099314	720.47073437	0.00110972
5.60500000	9999.84051664	721.47158588	0.00111257
5.61000000	9999.84004014	722.47243738	0.00111543
5.61500000	9999.83956364	723.47328889	0.00111829
5.62000000	9999.83908714	724.47414040	0.00112115
5.62500000	9999.83861065	725.47499191	0.00112400
5.63000000	9999.83813415	726.47584342	0.00112686
5.63500000	9999.83765765	727.47669493	0.00112972
5.64000000	9999.83718115	728.47754643	0.00113257
5.64500000	9999.83670465	729.47839794	0.00113543
5.65000000	9999.83622816	730.47924945	0.00113829
5.65500000	9999.83575166	731.48010096	0.00114114
5.66000000	9999.83527516	732.48095247	0.00114400
5.66500000	9999.83479866	733.48180398	0.00114686
5.67000000	9999.83432216	734.48265548	0.00114971
5.67500000	9999.83384567	735.48350699	0.00115257
5.68000000	9999.83336917	736.48435850	0.00115543
5.68500000	9999.83304089	737.48523852	0.00115741
5.69000000	9999.83289390	738.48615343	0.00115831
5.69500000	9999.83274691	739.48706833	0.00115921
5.70000000	9999.83259993	740.48798323	0.00116011
5.70500000	9999.83245294	741.48889813	0.00116102
5.71000000	9999.83230595	742.48981304	0.00116192
5.71500000	9999.83215897	743.49072794	0.00116282
5.72000000	9999.83201198	744.49164284	0.00116372
5.72500000	9999.83186499	745.49255775	0.00116463
5.73000000	9999.83171801	746.49347265	0.00116553
5.73500000	9999.83157102	747.49438755	0.00116643
5.74000000	9999.83142403	748.49530245	0.00116733
5.74500000	9999.83127705	749.49621736	0.00116824
5.75000000	9999.83113006	750.49713226	0.00116914
5.75500000	9999.83098308	751.49804716	0.00117004
5.76000000	9999.83083609	752.49896207	0.00117094
5.76500000	9999.83068910	753.49987697	0.00117185
5.77000000	9999.83054212	754.50079187	0.00117275
5.77500000	9999.83039513	755.50170677	0.00117365
5.78000000	9999.83024814	756.50262168	0.00117456
5.78500000	9999.83010116	757.50353658	0.00117546
5.79000000	9999.82995417	758.50445148	0.00117636
5.79500000	9999.82980718	759.50536639	0.00117726
5.80000000	9999.82966020	760.50628129	0.00117817
5.80500000	9999.82951321	761.50719619	0.00117907
5.81000000	9999.82936622	762.50811110	0.00117997
5.81500000	9999.82921924	763.50902600	0.00118087
5.82000000	9999.82907225	764.50994090	0.00118178
5.82500000	9999.82892526	765.51085580	0.00118268
5.83000000	9999.82877828	766.51177071	0.00118358
5.83500000	9999.82863129	767.51268561	0.00118448
5.84000000	9999.82848431	768.51360051	0.00118539
5.84500000	9999.82833732	769.51451542	0.00118629
5.85000000	9999.82819033	770.51543032	0.00118719
5.85500000	9999.82804335	771.51634522	0.00118809
5.86000000	9999.82789636	772.51726012	0.00118900
5.86500000	9999.82774937	773.51817503	0.00118990
5.87000000	9999.82760239	774.51908993	0.00119080
5.87500000	9999.82745540	775.52000483	0.00119170
5.88000000	9999.82730841	776.52091974	0.00119261
5.88500000	9999.82716143	777.52183464	0.00119351
5.89000000	9999.82701444	778.52274954	0.00119441
5.89500000	9999.82686745	779.52366444	0.00119532
5.90000000	9999.82672047	780.52457935	0.00119622
5.90500000	9999.82657348	781.52549425	0.00119712
5.91000000	9999.82642650	782.52640915	0.00119802
5.91500000	9999.82627951	783.52732406	0.00119893
5.92000000	9999.82613252	784.52823896	0.00119983
5.92500000	9999.82598554	785.52915386	0.00120073
5.93000000	9999.82583855	786.53006876	0.00120163
5.93500000	9999.82569156	787.53098367	0.00120254
5.94000000	9999.82554458	788.53189857	0.00120344
5.94500000	9999.82539759	789.53281347	0.00120434
5.95000000	9999.82525060	790.53372838	0.00120524
5.95500000	9999.82510362	791.53464328	0.00120615
5.96000000	9999.82495663	792.53555818	0.00120705
5.96500000	9999.82480964	793.53647308	0.00120795
5.97000000	9999.82466266	794.53738799	0.00120885
5.97500000	9999.82451567	795.53830289	0.00120976
5.98000000	9999.82436868	796.53921779	0.00121066
5.98500000	9999.82422170	797.54013270	0.00121156
5.99000000	9999.82407471	798.54104760	0.00121246
5.99500000	9999.82392773	799.54196250	0.00121337
6.00000000	9999.82378074	800.54287740	0.00121427
6.00500000	9999.82363375	801.54379231	0.00121517
6.01000000	9999.82348677	802.54470721	0.00121607
6.01500000	9999.82333978	803.54562211	0.00121698
6.02000000	9999.82319279	804.54653702	0.00121788
6.02500000	9999.82304581	805.54745192	0.00121878
6.03000000	9999.82289882	806.54836682	0.00121969
6.03500000	9999.82275183	807.54928172	0.00122059
6.04000000	9999.82260485	808.55019663	0.00122149
6.04500000	9999.82245786	809.55111153	0.00122239
6.05000000	9999.82231087	810.55202643	0.00122330
6.05500000	9999.82216389	811.55294134	0.00122420
6.06000000	9999.82201690	812.55385624	0.00122510
6.06500000	9999.82186991	813.55477114	0.00122600
6.07000000	9999.82172293	814.55568604	0.00122691
6.07500000	9999.82157594	815.55660095	0.00122781
6.08000000	9999.82142896	816.55751585	0.00122871
6.08500000	9999.82128197	817.55843075	0.00122961
6.09000000	9999.82113498	818.55934566	0.00123052
6.09500000	9999.82098800	819.56026056	0.00123142
6.10000000	9999.82084101	820.56117546	0.00123232
6.10500000	9999.82069402	821.56209036	0.00123322
6.11000000	9999.82054704	822.56300527	0.00123413
6.11500000	9999.82040005	823.56392017	0.00123503
6.12000000	9999.82025306	824.56483507	0.00123593
6.12500000	9999.82010608	825.56574998	0.00123683
6.13000000	9999.81995909	826.56666488	0.00123774
6.13500000	9999.81981210	827.56757978	0.00123864
6.14000000	9999.81966512	828.56849468	0.00123954
6.14500000	9999.81951813	829.56940959	0.00124045
6.15000000	9999.81937115	830.57032449	0.00124135
6.15500000	9999.81922416	831.57123939	0.00124225
6.16000000	9999.81907717	832.57215430	0.00124315
6.16500000	9999.81893019	833.57306920	0.00124406
6.17000000	9999.81878320	834.57398410	0.00124496
6.17500000	9999.81863621	835.57489900	0.00124586
6.18000000	9999.81848923	836.57581391	0.00124676
6.18500000	9999.81834224	837.57672881	0.00124767
6.19000000	9999.81819525	838.57764371	0.00124857
6.19500000	9999.81804827	839.57855862	0.00124947
6.20000000	9999.81790128	840.57947352	0.00125037
6.20500000	9999.81775429	841.58038842	0.00125128
6.21000000	9999.81760731	842.58130332	0.00125218
6.21500000	9999.81746032	843.58221823	0.00125308
6.22000000	9999.81731333	844.58313313	0.00125398
6.22500000	9999.81716635	845.58404803	0.00125489
6.23000000	9999.81701936	846.58496294	0.00125579
6.23500000	9999.81687238	847.58587784	0.00125669
6.24000000	9999.81672539	848.58679274	0.00125759
6.24500000	9999.81657840	849.58770764	0.00125850
6.25000000	9999.81643142	850.58862255	0.00125940
6.25500000	9999.81628443	851.58953745	0.00126030
6.26000000	9999.81613744	852.59045235	0.00126120
6.26500000	9999.81599046	853.59136726	0.00126211
6.27000000	9999.81584347	854.59228216	0.00126301
6.27500000	9999.81569648	855.59319706	0.00126391
6.28000000	9999.81554950	856.59411196	0.00126482
6.28500000	9999.81540251	857.59502687	0.00126572
6.29000000	9999.81525552	858.59594177	0.00126662
6.29500000	9999.81510854	859.59685667	0.00126752
6.30000000	9999.81496155	860.59777158	0.00126843
6.30500000	9999.81481457	861.59868648	0.00126933
6.31000000	9999.81466758	862.59960138	0.00127023
6.31500000	9999.81452059	863.60051628	0.00127113
6.32000000	9999.81437361	864.60143119	0.00127204
6.32500000	9999.81422662	865.60234609	0.00127294
6.33000000	9999.81407963	866.60326099	0.00127384
6.33500000	9999.81393265	867.60417590	0.00127474
6.34000000	9999.81378566	868.60509080	0.00127565
6.34500000	9999.81363867	869.60600570	0.00127655
6.35000000	9999.81349169	870.60692060	0.00127745
6.35500000	9999.81334470	871.60783551	0.00127835
6.36000000	9999.81319771	872.60875041	0.00127926
6.36500000	9999.81305073	873.60966531	0.00128016
6.37000000	9999.81290374	874.61058022	0.00128106
6.37500000	9999.81275675	875.61149512	0.00128196
6.38000000	9999.81260977	876.61241002	0.00128287
6.38500000	9999.81246278	877.61332492	0.00128377
6.39000000	9999.81231580	878.61423983	0.00128467
6.39500000	9999.81216881	879.61515473	0.00128558
6.40000000	9999.81202182	880.61606963	0.00128648
6.40500000	9999.81187484	881.61698454	0.00128738
6.41000000	9999.81172785	882.61789944	0.00128828
6.41500000	9999.81158086	883.61881434	0.00128919
6.42000000	9999.81143388	884.61972924	0.00129009
6.42500000	9999.81128689	885.62064415	0.00129099
6.43000000	9999.81113990	886.62155905	0.00129189
6.43500000	9999.81099292	887.62247395	0.00129280
6.44000000	9999.81084593	888.62338886	0.00129370
6.44500000	9999.81069894	889.62430376	0.00129460
6.45000000	9999.81055196	890.62521866	0.00129550
6.45500000	9999.81040497	891.62613357	0.00129641
6.46000000	9999.81025799	892.62704847	0.00129731
6.46500000	9999.81011100	893.62796337	0.00129821
6.47000000	9999.80996401	894.62887827	0.00129911
6.47500000	9999.80981703	895.62979318	0.00130002
6.48000000	9999.80967004	896.63070808	0.00130092
6.48500000	9999.80952305	897.63162298	0.00130182
6.49000000	9999.80937607	898.63253789	0.00130272
6.49500000	9999.80922908	899.63345279	0.00130363
6.50000000	9999.80908209	900.63436769	0.00130453
6.50500000	9999.80893511	901.63528259	0.00130543
6.51000000	9999.80878812	902.63619750	0.00130633
6.51500000	9999.80864113	903.63711240	0.00130724
6.52000000	9999.80849415	904.63802730	0.00130814
6.52500000	9999.80834716	905.63894221	0.00130904
6.53000000	9999.80820017	906.63985711	0.00130995
6.53500000	9999.80805319	907.64077201	0.00131085
6.54000000	9999.80790620	908.64168691	0.00131175
6.54500000	9999.80775922	909.64260182	0.00131265
6.55000000	9999.80761223	910.64351672	0.00131356
6.55500000	9999.80746524	911.64443162	0.00131446
6.56000000	9999.80731826	912.64534653	0.00131536
6.56500000	9999.80717127	913.64626143	0.00131626
6.57000000	9999.80702428	914.64717633	0.00131717
6.57500000	9999.80687730	915.64809123	0.00131807
6.58000000	9999.80673031	916.64900614	0.00131897
6.58500000	9999.80658332	917.64992104	0.00131987
6.59000000	9999.80643634	918.65083594	0.00132078
6.59500000	9999.80628935	919.65175085	0.00132168
6.60000000	9999.80614236	920.65266575	0.00132258
6.60500000	9999.80599538	921.65358065	0.00132348
6.61000000	9999.80584839	922.65449555	0.00132439
6.61500000	9999.80570141	923.65541046	0.00132529
6.62000000	9999.80555442	924.65632536	0.00132619
6.62500000	9999.80540743	925.65724026	0.00132709
6.63000000	9999.80526045	926.65815517	0.00132800
6.63500000	9999.80511346	927.65907007	0.00132890
6.64000000	9999.80496647	928.65998497	0.00132980
6.64500000	9999.80481949	929.66089987	0.00133071
6.65000000	9999.80467250	930.66181478	0.00133161
6.65500000	9999.80452551	931.66272968	0.00133251
6.66000000	9999.80437853	932.66364458	0.00133341
6.66500000	9999.80423154	933.66455949	0.00133432
6.67000000	9999.80408455	934.66547439	0.00133522
6.67500000	9999.80393757	935.66638929	0.00133612
6.68000000	9999.80379058	936.66730419	0.00133702
6.68500000	9999.80364359	937.66821910	0.00133793
6.69000000	9999.80349661	938.66913400	0.00133883
6.69500000	9999.80334962	939.67004890	0.00133973
6.70000000	9999.80320264	940.67096381	0.00134063
6.70500000	9999.80305565	941.67187871	0.00134154
6.71000000	9999.80290866	942.67279361	0.00134244
6.71500000	9999.80276168	943.67370851	0.00134334
6.72000000	9999.80261469	944.67462342	0.00134424
6.72500000	9999.80246770	945.67553832	0.00134515
6.73000000	9999.80232072	946.67645322	0.00134605
6.73500000	9999.80217373	947.67736813	0.00134695
6.74000000	9999.80202674	948.67828303	0.00134785
6.74500000	9999.80187976	949.67919793	0.00134876
6.75000000	9999.80173277	950.68011283	0.00134966
6.75500000	9999.80158578	951.68102774	0.00135056
6.76000000	9999.80143880	952.68194264	0.00135146
6.76500000	9999.80129181	953.68285754	0.00135237
6.77000000	9999.80114482	954.68377245	0.00135327
6.77500000	9999.80099784	955.68468735	0.00135417
6.78000000	9999.80085085	956.68560225	0.00135508
6.78500000	9999.80070387	957.68651715	0.00135598
6.79000000	9999.80055688	958.68743206	0.00135688
6.79500000	9999.80040989	959.68834696	0.00135778
6.80000000	9999.80026291	960.68926186	0.00135869
6.80500000	9999.80011592	961.69017677	0.00135959
6.81000000	9999.79996893	962.69109167	0.00136049
6.81500000	9999.79982195	963.69200657	0.00136139
6.82000000	9999.79967496	964.69292147	0.00136230
6.82500000	9999.79952797	965.69383638	0.00136320
6.83000000	9999.79938099	966.69475128	0.00136410
6.83500000	9999.79923400	967.69566618	0.00136500
6.84000000	9999.79908701	968.69658109	0.00136591
6.84500000	9999.79894003	969.69749599	0.00136681
6.85000000	9999.79879304	970.69841089	0.00136771
6.85500000	9999.79864606	971.69932579	0.00136861
6.86000000	9999.79849907	972.70024070	0.00136952
6.86500000	9999.79835208	973.70115560	0.00137042
6.87000000	9999.79820510	974.70207050	0.00137132
6.87500000	9999.79805811	975.70298541	0.00137222
6.88000000	9999.79791112	976.70390031	0.00137313
6.88500000	9999.79776414	977.70481521	0.00137403
6.89000000	9999.79761715	978.70573011	0.00137493
6.89500000	9999.79747016	979.70664502	0.00137584
6.90000000	9999.79732318	980.70755992	0.00137674
6.90500000	9999.79717619	981.70847482	0.00137764
6.91000000	9999.79702920	982.70938973	0.00137854
6.91500000	9999.79688222	983.71030463	0.00137945
6.92000000	9999.79673523	984.71121953	0.00138035
6.92500000	9999.79658824	985.71213443	0.00138125
6.93000000	9999.79644126	986.71304934	0.00138215
6.93500000	9999.79629427	987.71396424	0.00138306
6.94000000	9999.79614729	988.71487914	0.00138396
6.94500000	9999.79600030	989.71579405	0.00138486
6.95000000	9999.79585331	990.71670895	0.00138576
6.95500000	9999.79570633	991.71762385	0.00138667
6.96000000	9999.82165603	992.72254274	0.00133969
6.96500000	9999.86290608	993.72980914	0.00126464
6.97000000	9999.90415613	994.73707555	0.00118958
6.97500000	9999.94540618	995.74434195	0.00111453
6.98000000	9999.98665624	996.75160836	0.00103948
6.98500000	9999.99936964	997.74544725	0.00018005
6.99000000	9999.99998597	998.74455668	0.00007017
6.99500000	9999.99996591	999.74685470	0.00020913
7.00000000	10000.00045837	999.86632415	-0.06215993
7.00500000	10000.00653032	981.38722868	-1.65355823
7.01000000	10000.30892168	600.01853524	-14.92853426
7.01500000	10000.00691763	600.00041459	1.28320899
7.02000000	9999.75710326	599.98542595	7.27790846
7.02500000	9999.72130776	599.98327860	7.81350116
7.03000000	9999.81627054	599.98897667	6.08797977
7.03500000	9999.94314252	599.99658820	3.90034765
7.04000000	10000.04113420	600.00246787	2.10521735
7.04500000	10000.09136467	600.00548171	0.92595891
7.05000000	10000.09981758	600.00598919	0.29344115
7.05500000	10000.08260659	600.00495616	0.03416358
7.06000000	10000.05491328	600.00329495	-0.01002587
7.06500000	10000.02762150	600.00165763	0.03905896
7.07000000	10000.00635665	600.00038136	0.11310433
7.07500000	9999.99215301	599.99952890	0.17727607
7.08000000	9999.98404490	599.99904280	0.22187088
7.08500000	9999.98039293	599.99882354	0.24585467
7.09000000	9999.97868858	599.99872097	0.25795242
7.09500000	9999.97794060	599.99867613	0.26139227
7.10000000	9999.97719446	599.99863195	0.26098679
7.10500000	9999.97606916	599.99856401	0.25929212
7.11000000	9999.97436860	599.99846191	0.25767402
7.11500000	9999.97215662	599.99832935	0.25671021
7.12000000	9999.96954940	599.99817322	0.25632928
7.12500000	9999.96661767	599.99799692	0.25670527
7.13000000	9999.96348314	599.99780896	0.25730333
7.13500000	9999.96022432	599.99761354	0.25793004
7.14000000	9999.95684330	599.99741033	0.25854580
7.14500000	9999.95331513	599.99719857	0.25918467
7.15000000	9999.94969330	599.99698132	0.25983210
7.15500000	9999.94591819	599.99675481	0.26047387
7.16000000	9999.94200083	599.99652018	0.26115221
7.16500000	9999.93798195	599.99627942	0.26184671
7.17000000	9999.93381450	599.99602932	0.26255252
7.17500000	9999.92947785	599.99576861	0.26321696
7.18000000	9999.92501278	599.99550031	0.26386565
7.18500000	9999.92035813	599.99522118	0.26450393
7.19000000	9999.91566208	599.99493956	0.26513806
7.19500000	9999.91068599	599.99464111	0.26574415
7.20000000	9999.90570990	599.99434267	0.26635024
7.20500000	9999.90042140	599.99402536	0.26698968
7.21000000	9999.89511789	599.99370714	0.26763072
7.21500000	9999.88955662	599.99337350	0.26830760
7.22000000	9999.88392249	599.99303551	0.26899463
7.22500000	9999.87807974	599.99268501	0.26968745
7.23000000	9999.87210080	599.99232636	0.27038407
7.23500000	9999.86580940	599.99194889	0.27108477
7.24000000	9999.85910416	599.99154649	0.27179088
7.24500000	9999.85239891	599.99114408	0.27249699
7.25000000	9999.84569367	599.99074168	0.27320310
7.25500000	9999.83767310	599.99026037	0.27390401
7.26000000	9999.82833088	599.98969975	0.27459969
7.26500000	9999.81898866	599.98913914	0.27529537
7.27000000	9999.80964644	599.98857852	0.27599105
7.27500000	9999.79977600	599.98798632	0.27668685
7.28000000	9999.78950283	599.98737003	0.27738275
7.28500000	9999.77922966	599.98675374	0.27807865
7.29000000	9999.76895649	599.98613745	0.27877455
7.29500000	9999.75937371	599.98556255	0.27948196
7.30000000	9999.75018639	599.98501134	0.28019595
7.30500000	9999.74099908	599.98446014	0.28090995
7.31000000	9999.73181177	599.98390894	0.28162394
7.31500000	9999.71810680	599.98308664	0.28246997
7.32000000	9999.70250601	599.98215059	0.28337139
7.32500000	9999.68690522	599.98121454	0.28427282
7.33000000	9999.67130443	599.98027848	0.28517425
7.33500000	9999.65570365	599.97934243	0.28607567
7.34000000	9999.64010286	599.97840637	0.28697710
7.34500000	9999.62106180	599.97726387	0.28774205
7.35000000	9999.59889811	599.97593398	0.28838313
7.35500000	9999.57673443	599.97460409	0.28902421
7.36000000	9999.55457074	599.97327419	0.28966529
7.36500000	9999.53240706	599.97194430	0.29030637
7.37000000	9999.51024338	599.97061441	0.29094745
7.37500000	9999.49062588	599.96943730	0.29173120
7.38000000	9999.47586391	599.96855154	0.29278703
7.38500000	9999.46110193	599.96766578	0.29384285
7.39000000	9999.44633996	599.96678002	0.29489868
7.39500000	9999.43157798	599.96589426	0.29595450
7.40000000	9999.41681601	599.96500850	0.29701033
7.40500000	9999.40239588	599.96414328	0.29805856
7.41000000	9999.38971829	599.96338279	0.29906807
7.41500000	9999.37704071	599.96262229	0.30007759
7.42000000	9999.36436313	599.96186180	0.30108710
7.42500000	9999.35168554	599.96110131	0.30209662
7.43000000	9999.33900796	599.96034081	0.30310613
7.43500000	9999.32633038	599.95958032	0.30411565
7.44000000	9999.31118064	599.95867131	0.30519982
7.44500000	9999.29599019	599.95775985	0.30628522
7.45000000	9999.28079974	599.95684839	0.30737062
7.45500000	9999.26560930	599.95593693	0.30845602
7.46000000	9999.25041885	599.95502547	0.30954143
7.46500000	9999.23522840	599.95411401	0.31062683
7.47000000	9999.34886646	599.96093234	0.31059525
7.47500000	10365.17035659	621.91022120	-608.76665774
7.48000000	9899.98981460	593.99938909	-58.49522126
7.48500000	9881.48935517	592.88936126	158.06872721
7.49000000	9976.57398406	598.59443936	197.60324632
7.49500000	10042.71187618	602.56271231	162.65536613
7.50000000	10056.94290964	603.41657436	108.53141347
7.50500000	10039.51177180	602.37070600	60.21854651
7.51000000	10014.29472107	600.85768285	25.96153951
7.51500000	9995.08660083	599.70519617	5.99957137
7.52000000	9985.31068768	599.11864132	-3.61367277
7.52500000	9983.78035703	599.02682120	-6.35633361
7.53000000	9986.68975499	599.20138539	-5.80112221
7.53500000	9991.15212327	599.46912776	-3.99260779
7.54000000	9995.21342518	599.71280544	-2.15329176
7.54500000	9998.11467225	599.88688048	-0.75659424
7.55000000	9999.69317878	599.98159106	0.07508029
7.55500000	10000.31286019	600.01877178	0.47684823
7.56000000	10000.33130032	600.01987804	0.59351077
7.56500000	10000.07943541	600.00476591	0.56548139
7.57000000	9999.76805634	599.98608330	0.48648396
7.57500000	9999.50336009	599.97020131	0.40669158
7.58000000	9999.32295653	599.95937769	0.34820510
7.58500000	9999.21494420	599.95289675	0.31273838
7.59000000	9999.16466642	599.94988001	0.29762812
7.59500000	9999.14316048	599.94858948	0.29383880
7.60000000	9999.13541840	599.94812470	0.29640281
7.60500000	9999.12974954	599.94778491	0.30096254
7.61000000	9999.11904206	599.94714243	0.30564142
7.61500000	9999.10248133	599.94614844	0.30923915
7.62000000	9999.08667704	599.94520110	0.31144364
7.62500000	9999.06547802	599.94392877	0.31306249
7.63000000	9999.04284840	599.94257090	0.31409232
7.63500000	9999.02369949	599.94142223	0.31495394
7.64000000	9999.00867179	599.94052050	0.31576994
7.64500000	9998.98793538	599.93927637	0.31656365
7.65000000	9998.96394755	599.93783708	0.31753088
7.65500000	9998.94004830	599.93640316	0.31864518
7.66000000	9998.91674173	599.93500487	0.31970844
7.66500000	9998.89391954	599.93363530	0.32079555
7.67000000	9998.87109551	599.93226566	0.32191663
7.67500000	9998.84782742	599.93086971	0.32307606
7.68000000	9998.82387563	599.92943279	0.32429071
7.68500000	9998.79974349	599.92798501	0.32553121
7.69000000	9998.77503199	599.92650233	0.32685477
7.69500000	9998.75017163	599.92501062	0.32819422
7.70000000	9998.72499582	599.92349977	0.32956734
7.70500000	9998.69965063	599.92197902	0.33095753
7.71000000	9998.67405537	599.92044365	0.33237291
7.71500000	9998.64721385	599.91883326	0.33389525
7.72000000	9998.61905953	599.91714386	0.33553026
7.72500000	9998.59090521	599.91545445	0.33716527
7.73000000	9998.56271840	599.91376311	0.33880275
7.73500000	9998.53194387	599.91191674	0.34063731
7.74000000	9998.50116935	599.91007038	0.34247187
7.74500000	9998.47039483	599.90822402	0.34430643
7.75000000	9998.44008438	599.90640537	0.34619596
7.75500000	9998.41017246	599.90461053	0.34813270
7.76000000	9998.38026053	599.90281569	0.35006944
7.76500000	9998.35035155	599.90102103	0.35202293
7.77000000	9998.32048596	599.89922907	0.35422302
7.77500000	9998.29062037	599.89743710	0.35642311
7.78000000	9998.26075478	599.89564514	0.35862320
7.78500000	9998.23049849	599.89382983	0.36060786
7.79000000	9998.19996980	599.89199826	0.36244232
7.79500000	9998.16944111	599.89016668	0.36427677
7.80000000	9998.14171820	599.88850344	0.36597713
7.80500000	9998.12969192	599.88778167	0.36704131
7.81000000	10547.23877565	632.83432665	-835.11532263
7.81500000	9936.81021892	596.20861284	-167.18790353
7.82000000	9869.79489702	592.18769354	121.20157288
7.82500000	9962.34839305	597.74090400	197.07576692
7.83000000	10038.22414372	602.29344886	176.28808888
7.83500000	10058.82034600	603.52922068	123.99232554
7.84000000	10043.00219653	602.58013178	72.37654734
7.84500000	10016.33689727	600.98021348	33.79329510
7.85000000	9995.13116593	599.70786962	10.01452364
7.85500000	9984.21207863	599.05272477	-1.93197742
7.86000000	9982.06405637	598.92384340	-6.07005808
7.86500000	9984.87870931	599.09272224	-6.09870949
7.87000000	9989.43727407	599.36623636	-4.43140655
7.87500000	9993.62203156	599.61732159	-2.51533058
7.88000000	9996.55732457	599.79343991	-1.00371401
7.88500000	9998.14973692	599.88898425	-0.05706954
7.89000000	9998.74924530	599.92495480	0.42268991
7.89500000	9998.75705533	599.92542306	0.59217614
7.90000000	9998.49707432	599.90982447	0.59220659
7.90500000	9998.18355016	599.89101278	0.52550402
7.91000000	9997.92136925	599.87528207	0.45120330
7.91500000	9997.74167303	599.86450041	0.39496152
7.92000000	9997.63188511	599.85791291	0.36098488
7.92500000	9997.56764531	599.85405905	0.34474192
7.93000000	9997.53017290	599.85181034	0.34060099
7.93500000	9997.50231414	599.85013886	0.34281886
7.94000000	9997.47523060	599.84851367	0.34753211
7.94500000	9997.44606923	599.84676411	0.35287893
7.95000000	9997.41194950	599.84471676	0.35732940
7.95500000	9997.37443746	599.84246617	0.36105021
7.96000000	9997.33559090	599.84013558	0.36444945
7.96500000	9997.29529348	599.83771794	0.36744789
7.97000000	9997.25421368	599.83525310	0.37035194
7.97500000	9997.21269326	599.83276167	0.37327636
7.98000000	9997.17072380	599.83024339	0.37628273
7.98500000	9997.12835265	599.82770127	0.37940016
7.99000000	9997.08548331	599.82512921	0.38241422
7.99500000	9997.04236813	599.82254233	0.38545424
8.00000000	9996.99876523	599.81992596	0.38874951
8.00500000	9996.95461485	599.81727674	0.39218748
8.01000000	9996.91005981	599.81460325	0.39573091
8.01500000	9996.86505440	599.81190339	0.39964169
8.02000000	9996.81949487	599.80916975	0.40350217
8.02500000	9996.77302672	599.80638154	0.40741543
8.03000000	9306.49790848	558.38987469	-350.22332042
8.03500000	10015.07198920	600.90431917	-296.11854509
8.04000000	9867.89794846	592.07387671	72.24587566
8.04500000	9945.45438208	596.72726329	190.46332007
8.05000000	10028.18591870	601.69115496	186.72566220
8.05500000	10057.72124328	603.46327491	138.78983048
8.06000000	10044.90439144	602.69426397	85.06380996
8.06500000	10018.00115551	601.08006925	42.30282548
8.07000000	9995.37576013	599.72254565	14.96958190
8.07500000	9982.96914940	598.97814865	0.18880182
8.08000000	9980.02112648	598.80126786	-5.61820543
8.08500000	9982.77820071	598.96669193	-6.29735408
8.09000000	9987.45729784	599.24743772	-4.85813395
8.09500000	9991.83146965	599.50988776	-2.90722271
8.10000000	9994.88100365	599.69286018	-1.28508645
8.10500000	9996.54251848	599.79255096	-0.21751863
8.11000000	9997.16336136	599.82980156	0.35587093
8.11500000	9997.15777327	599.82946674	0.58073803
8.12000000	9996.88066491	599.81284012	0.60928517
8.12500000	9996.55699823	599.79342011	0.55936993
8.13000000	9996.28780323	599.77726801	0.49215514
8.13500000	9996.09946446	599.76596782	0.43725336
8.14000000	9995.98013800	599.75880819	0.40306115
8.14500000	9995.90485414	599.75429082	0.38637643
8.15000000	9995.85325689	599.75119548	0.38241506
8.15500000	9995.80947786	599.74856835	0.38542792
8.16000000	9995.76493559	599.74589623	0.39156589
8.16500000	9995.71584888	599.74295075	0.39856919
8.17000000	9995.65810254	599.73948628	0.40568743
8.17500000	9995.59791408	599.73587455	0.41224870
8.18000000	9995.53392494	599.73203506	0.41848362
8.18500000	9995.48318450	599.72899068	0.42432244
8.19000000	9995.44333939	599.72660012	0.42977589
8.19500000	9995.38249886	599.72294982	0.43540355
8.20000000	9995.31894287	599.71913654	0.44139752
8.20500000	9297.51647633	557.85098850	-353.11240150
8.21000000	10016.47968874	600.98878139	-298.18671419
8.21500000	9876.31192687	592.57871592	71.33193319
8.22000000	9953.35238235	597.20114280	190.20238937
8.22500000	10031.81545700	601.90892749	187.29606577
8.23000000	10055.97132739	603.35827923	139.14979783
8.23500000	10040.67079233	602.44024787	85.19493121
8.24000000	10013.05501252	600.78330048	42.36639401
8.24500000	9990.88067965	599.45284097	14.60431507
8.25000000	9979.98200628	598.79892047	0.14161039
8.25500000	9978.12679952	598.68760779	-5.62457488
8.26000000	9981.54808920	598.89288516	-6.27681630
8.26500000	9986.48961235	599.18937706	-4.78794335
8.27000000	9990.79452873	599.44767194	-2.85370047
8.27500000	9993.69367505	599.62162066	-1.23452463
8.28000000	9995.11635968	599.70698151	-0.19338194
8.28500000	9995.56601990	599.73396154	0.36893201
8.29000000	9995.45085080	599.72705107	0.58709060
8.29500000	9995.12972469	599.70778320	0.62261152
8.30000000	9994.79601959	599.68776128	0.57916889
8.30500000	9994.53406299	599.67204347	0.51973054
8.31000000	9994.35189330	599.66111349	0.47115102
8.31500000	9994.23627041	599.65417601	0.44240341
8.32000000	9994.15682005	599.64940908	0.42981371
8.32500000	9994.09398030	599.64563897	0.42846204
8.33000000	9994.03494243	599.64209679	0.43401463
8.33500000	9993.97309758	599.63838592	0.44243162
8.34000000	9993.90661260	599.63439702	0.45213680
8.34500000	9993.83608853	599.63016543	0.46208252
8.35000000	9993.76249661	599.62575019	0.47191936
8.35500000	10404.57495062	624.27449673	-743.95605391
8.36000000	9922.24576801	595.33474587	-125.99384168
8.36500000	9903.20332447	594.19219920	134.77246046
8.37000000	9992.55838735	599.55350292	198.57000931
8.37500000	10047.78053512	602.86683240	172.86455861
8.38000000	10050.56409320	603.03384550	119.36833280
8.38500000	10026.25552854	601.57533162	68.07326064
8.39000000	9999.21023966	599.95261411	30.50270098
8.39500000	9982.04240520	598.92254398	8.08586702
8.40000000	9975.84655760	598.55079316	-2.83143118
8.40500000	9977.35195473	598.64111719	-6.21484713
8.41000000	9982.12047381	598.92722854	-5.82449138
8.41500000	9987.12907853	599.22774494	-4.02626396
8.42000000	9990.82149629	599.44928965	-2.16514296
8.42500000	9992.95739702	599.57744357	-0.76458322
8.43000000	9993.78980350	599.62738846	0.07447077
8.43500000	9993.85542077	599.63132542	0.48713977
8.44000000	9993.56379250	599.61382724	0.62542793
8.44500000	9993.19241770	599.59154521	0.63147344
8.45000000	9992.87465636	599.57247960	0.58522768
8.45500000	9992.64784014	599.55887033	0.53583526
8.46000000	9992.49290995	599.54957442	0.49996393
8.46500000	9992.39010258	599.54340604	0.48225026
8.47000000	9992.30938274	599.53856291	0.47797817
8.47500000	9992.23526421	599.53411550	0.48268081
8.48000000	9992.15775535	599.52946524	0.49312200
8.48500000	10439.36784833	626.36207093	-781.13801388
8.49000000	9934.30674233	596.05840503	-143.76326637
8.49500000	9908.09791157	594.48587470	128.24970815
8.50000000	9994.11922873	599.64715346	198.03390053
8.50500000	10047.32081300	602.83924870	175.04093134
8.51000000	10048.35532465	602.90131957	121.83277454
8.51500000	10022.89323548	601.37359386	70.05021081
8.52000000	9995.64707868	599.73882450	31.71827102
8.52500000	9978.67862258	598.72071709	8.49349939
8.53000000	9973.32299761	598.39937982	-2.61000650
8.53500000	9975.46588844	598.52795339	-6.14013646
8.54000000	9980.61062667	598.83663800	-5.82888348
8.54500000	9985.75078242	599.14504726	-4.05209624
8.55000000	9989.42153234	599.36529168	-2.18705291
8.55500000	9991.42017449	599.48521034	-0.78627428
8.56000000	9992.13746294	599.52824809	0.06945756
8.56500000	9992.09933208	599.52596004	0.49226719
8.57000000	9991.74512472	599.50470715	0.63988228
8.57500000	9991.34337165	599.48060226	0.65725998
8.58000000	9991.01478744	599.46088768	0.62057475
8.58500000	9990.78529652	599.44711749	0.57892270
8.59000000	9990.62931184	599.43775910	0.54924900
8.59500000	9990.51652627	599.43099135	0.53539259
8.60000000	9990.42344668	599.42540706	0.53399007
8.60500000	10058.18705170	603.49122274	-354.81933993
8.61000000	9897.50755741	593.85045343	46.80981878
8.61500000	9964.00809341	597.84048560	185.10307601
8.62000000	10034.34927274	602.06095614	191.30482437
8.62500000	10051.05589179	603.06335360	145.28851065
8.63000000	10030.90118447	601.85407119	90.46925143
8.63500000	10001.56307885	600.09378461	45.77999309
8.64000000	9980.30228800	598.81813710	16.47006605
8.64500000	9971.39919375	598.28395140	0.81774913
8.65000000	9971.90577616	598.31434652	-5.31647844
8.65500000	9976.81770006	598.60906169	-6.22607971
8.66000000	9982.42624719	598.94557490	-4.79916138
8.66500000	9986.75755786	599.20545337	-2.88261578
8.67000000	9989.29674320	599.35780435	-1.27078768
8.67500000	9990.30324938	599.41819483	-0.21347278
8.68000000	9990.39480433	599.42368857	0.37207973
8.68500000	9990.04594202	599.40275645	0.62028244
8.69000000	9989.60110665	599.37606666	0.68705141
8.69500000	9989.22037715	599.35322223	0.67331228
8.70000000	9988.94357245	599.33661399	0.63914964
8.70500000	9988.75482773	599.32528966	0.61042172
8.71000000	10280.13037545	616.80782242	-626.59096672
8.71500000	9919.27558376	595.15653460	-72.32602747
8.72000000	9936.16605605	596.16996340	151.75949913
8.72500000	10015.77614084	600.94656880	198.85694585
8.73000000	10049.87804997	602.99268330	166.45807786
8.73500000	10038.17226341	602.29033603	111.72493741
8.74000000	10008.32006267	600.49920340	61.58673010
8.74500000	9982.89970418	598.97398174	26.07199462
8.75000000	9970.14694731	598.20881713	5.53839564
8.75500000	9968.52673523	598.11160415	-3.70158226
8.76000000	9972.89229094	598.37353739	-6.21132673
8.76500000	9978.87671131	598.73260268	-5.43505179
8.77000000	9983.92131767	599.03527916	-3.58475186
8.77500000	9987.00287199	599.22017249	-1.81867205
8.78000000	9988.40835702	599.30450153	-0.54381150
8.78500000	9988.64358939	599.31861549	0.20151457
8.79000000	9988.32477717	599.29948644	0.56894142
8.79500000	9987.83657430	599.27019423	0.70288899
8.80000000	9987.39416975	599.24365039	0.72099793
8.80500000	9987.06234490	599.22374077	0.69995383
8.81000000	10144.08718119	608.64523116	-468.36656333
8.81500000	9911.65514656	594.69930910	-1.74788986
8.82000000	9960.10131724	597.60607889	173.07836619
8.82500000	10030.30453926	601.81827201	195.96152611
8.83000000	10049.36920105	602.96215253	155.46288961
8.83500000	10028.43332484	601.70599948	99.92321886
8.84000000	9997.49823113	599.84989389	52.56293754
8.84500000	9975.00904284	598.50054215	20.40312614
8.85000000	9965.89499992	597.95369959	2.68992065
8.85500000	9966.80823735	598.00849454	-4.78565847
8.86000000	9972.49351005	598.34961061	-6.20365598
8.86500000	9978.66587414	598.71995293	-5.02443411
8.87000000	9983.30714643	598.99842904	-3.12305135
8.87500000	9985.85337547	599.15120273	-1.46447213
8.88000000	9986.79174140	599.20750439	-0.32417303
8.88500000	9986.73584706	599.20415084	0.32080956
8.89000000	9986.27435420	599.17646104	0.63249726
8.89500000	9985.74067875	599.14444065	0.74498215
8.90000000	10472.63722780	628.35823360	-825.40187990
8.90500000	9961.43774344	597.68626416	-167.36015990
8.91000000	9931.76493863	595.90589642	118.92596408
8.91500000	10007.36547897	600.44192847	197.95044938
8.92000000	10047.55965441	602.85357897	178.22855843
8.92500000	10037.79834487	602.26790098	125.11285941
8.93000000	10006.92197209	600.41531819	72.27795656
8.93500000	9979.22278559	598.75336692	32.88213873
8.94000000	9964.89047876	597.89342917	9.06266008
8.94500000	9962.88894083	597.77333680	-2.35851869
8.95000000	9967.72866811	598.06371992	-6.00187263
8.95500000	9974.39389780	598.46363361	-5.68906592
8.96000000	9979.92636702	598.79558184	-3.94695661
8.96500000	9983.37058283	599.00223511	-2.11946124
8.97000000	9984.81704818	599.08902331	-0.74607818
8.97500000	9984.98628190	599.09917724	0.10176630
8.98000000	9984.55649738	599.07339005	0.55449840
8.98500000	9983.95811832	599.03748688	0.74850021
8.99000000	10056.17547953	603.37052877	-339.66249928
8.99500000	9923.20618718	595.39237155	52.09085819
9.00000000	9986.96956104	599.21817324	186.65655396
9.00500000	10041.41788528	602.48507341	191.18115712
9.01000000	10042.81827183	602.56909604	144.25182530
9.01500000	10013.95631408	600.83737883	89.01281406
9.02000000	9982.93987630	598.97639245	44.35400639
9.02500000	9964.47553539	597.86853220	15.57373292
9.03000000	9959.63239579	597.57794357	0.43400981
9.03500000	9963.50978763	597.81058712	-5.35592961
9.04000000	9970.45024771	598.22701447	-5.98145731
9.04500000	9976.75882595	598.60552991	-4.54302035
9.05000000	9980.81992631	598.84919552	-2.66960785
9.05500000	9982.74285378	598.96457124	-1.13572771
9.06000000	9983.15874396	598.98952485	-0.11225901
9.06500000	9982.76730119	598.96603764	0.46342767
9.07000000	10247.87876577	614.87272617	-594.01117955
9.07500000	9936.13186092	596.16791166	-58.55988222
9.08000000	9962.34388658	597.74063319	156.77011352
9.08500000	10029.20505045	601.75230284	199.12603042
9.09000000	10046.82440863	602.80946432	165.21572083
9.09500000	10023.16520021	601.38991207	109.67106564
9.10000000	9989.53023522	599.37181433	59.72426114
9.10500000	9965.66360778	597.93981679	24.65726368
9.11000000	9956.86748244	597.41204857	4.84522801
9.11500000	9958.92051539	597.53523066	-3.95336360
9.12000000	9965.82579545	597.94954785	-6.07597545
9.12500000	9972.87284948	598.37237120	-5.15652714
9.13000000	9977.87955568	598.67277308	-3.32962287
9.13500000	9980.52904226	598.83174265	-1.62632465
9.14000000	9981.26394617	598.87583686	-0.42617678
9.14500000	9980.99720285	598.85983201	0.31258341
9.15000000	10040.77658984	602.44659565	-306.24929641
9.15500000	9935.22196630	596.11331788	66.54856682
9.16000000	9999.83734713	599.99024065	189.76258011
9.16500000	10044.19744783	602.65184710	189.41983573
9.17000000	10037.12632593	602.22757917	141.15117803
9.17500000	10003.87969073	600.23278181	85.84602358
9.18000000	9972.80385833	598.36823116	42.05074170
9.18500000	9956.36479180	597.38188797	14.18100643
9.19000000	9953.94501673	597.23670124	-0.12875161
9.19500000	9959.57835847	597.57470132	-5.36204890
9.20000000	9967.35325002	598.04119468	-5.85233137
9.20500000	9973.74280018	598.42456824	-4.32535827
9.21000000	9977.64716756	598.65883033	-2.48362349
9.21500000	9979.20857752	598.75251490	-0.99864793
9.22000000	10567.78528830	634.06711711	-924.32990901
9.22500000	9998.35945395	599.90156767	-218.58144958
9.23000000	9947.68309590	596.86098592	100.86976467
9.23500000	10014.40122457	600.86407318	195.80839481
9.24000000	10046.23278512	602.77396724	183.22083010
9.24500000	10029.43197688	601.76591824	131.55788488
9.25000000	9993.83547135	599.63012840	77.45268262
9.25500000	9964.78757397	597.88725442	36.24609640
9.26000000	9951.53392317	597.09203507	10.85648584
9.26500000	9951.73429181	597.10405733	-1.56224405
9.27000000	9958.72322999	597.52339355	-5.69546988
9.27500000	9966.74218593	598.00453095	-5.57407984
9.28000000	9972.86778528	598.37206687	-3.95686721
9.28500000	9976.26038783	598.57562343	-2.16516100
9.29000000	9977.40261732	598.64415740	-0.77024443
9.29500000	10048.78384868	602.92703071	-314.34510176
9.30000000	9945.53163137	596.73189785	61.99805789
9.30500000	10006.57743479	600.39464592	189.28799318
9.31000000	10045.37488574	602.72249329	190.35999275
9.31500000	10032.62317537	601.95739073	142.14388710
9.32000000	9996.51275637	599.79076550	86.69800063
9.32500000	9964.70930635	597.88255855	42.49889874
9.33000000	9949.01853323	596.94111179	14.32679860
9.33500000	9948.23662417	596.89419761	0.17245145
9.34000000	9954.97759504	597.29865540	-5.23689268
9.34500000	9963.50592339	597.81035563	-5.74284203
9.35000000	9970.21291166	598.21277471	-4.25164085
9.35500000	9974.02916714	598.44175020	-2.43650447
9.36000000	10376.10488019	622.56629293	-740.18168354
9.36500000	9970.76004554	598.24560303	-128.46964353
9.37000000	9969.81171057	598.18870285	132.67813051
9.37500000	10030.67389798	601.84043403	199.46385822
9.38000000	10044.61369723	602.67682196	174.50687208
9.38500000	10016.41881293	600.98512919	120.03027024
9.39000000	9978.33542240	598.70012486	67.49243184
9.39500000	9952.63799275	597.15827929	29.70602653
9.40000000	9944.01742065	596.64104497	7.46623315
9.40500000	9947.60758321	596.85645543	-2.82656677
9.41000000	9956.23809298	597.37428572	-5.75716221
9.41500000	9964.53883216	597.87233004	-5.19909562
9.42000000	9970.19587922	598.21175260	-3.48240094
9.42500000	10454.54953718	627.27297223	-821.76014788
9.43000000	9986.89581145	599.21374855	-168.01655433
9.43500000	9968.89061360	598.13343679	118.69621285
9.44000000	10029.10562652	601.74633737	198.18585957
9.44500000	10045.09998174	602.70599928	178.78484989
9.45000000	10016.99107694	601.01946500	125.28940965
9.45500000	9977.61298507	598.65677939	71.91913645
9.46000000	9950.27400075	597.01644000	32.49712173
9.46500000	9940.79269412	596.44756162	8.95569300
9.47000000	9944.30660205	596.65839628	-2.15258152
9.47500000	9953.22076973	597.19324657	-5.64331665
9.48000000	9961.94014971	597.71640925	-5.25387372
9.48500000	9967.96535620	598.07792156	-3.60067805
9.49000000	10188.50761787	611.31045705	-520.84162196
9.49500000	9958.84178730	597.53050685	-27.32719827
9.50000000	9997.12245911	599.82734735	165.78485878
9.50500000	10043.09358817	602.58561497	197.93627395
9.51000000	10036.35308578	602.18118493	160.15840842
9.51500000	9998.22808589	599.89368495	103.96371609
9.52000000	9961.00411147	597.66024681	54.96191839
9.52500000	9940.77980014	596.44678808	21.72116667
9.53000000	9937.76009144	596.26560572	3.45159125
9.53500000	9944.89600140	596.69376028	-4.09380982
9.54000000	9954.68105178	597.28086286	-5.70385795
9.54500000	9962.65229205	597.75913771	-4.62512180
9.55000000	10302.95052169	618.17703134	-665.20682638
9.55500000	9972.16557029	598.32993458	-94.18932958
9.56000000	9988.79253935	599.32755239	143.96022467
9.56500000	10040.39345096	602.42360714	199.62416169
9.57000000	10040.08797016	602.40527813	170.03512984
9.57500000	10003.16032194	600.18961945	114.71135651
9.58000000	9963.11189700	597.78671355	63.28757966
9.58500000	9939.29909170	596.35794552	26.84224881
9.59000000	9934.07334967	596.04440071	6.05887808
9.59500000	9940.50461826	596.43027710	-3.16236613
9.60000000	9950.66581116	597.03994872	-5.62056239
9.60500000	9959.43034612	597.56582072	-4.87344817
9.61000000	10181.77525630	610.90651495	-516.21684504
9.61500000	9966.10757607	597.96645418	-26.92681611
9.62000000	10005.03190084	600.30191430	165.82019406
9.62500000	10045.79037973	602.74742299	197.75912378
9.63000000	10032.89936854	601.97396181	159.74058015
9.63500000	9991.03704211	599.46222234	103.49865782
9.64000000	9952.72740596	597.16364450	54.63499982
9.64500000	9933.20134261	595.99208040	21.55884530
9.65000000	9931.55063696	595.89303823	3.45946883
9.65500000	9939.91453860	596.39487252	-3.99009053
9.66000000	9950.43353030	597.02601148	-5.49883919
9.66500000	10490.78087557	629.44685244	-872.16678701
9.67000000	10006.51380800	600.39082851	-196.53191880
9.67500000	9982.62681479	598.95760872	107.19444544
9.68000000	10036.71352376	602.20281165	196.65677203
9.68500000	10043.72046708	602.62322823	180.86560658
9.69000000	10007.84606963	600.47076430	128.28838459
9.69500000	9963.86975169	597.83218497	74.35678194
9.70000000	9935.44566424	596.12673984	34.11206203
9.70500000	9927.13135298	595.62788097	9.84265912
9.71000000	9932.80143694	595.96808591	-1.63698322
9.71500000	9943.61957658	596.61717492	-5.26553041
9.72000000	10591.86635486	635.51198155	-972.95850111
9.72500000	10025.47804596	601.52868271	-246.30130133
9.73000000	9980.78466307	598.84707953	87.65448157
9.73500000	10034.81911429	602.08914663	193.14279423
9.74000000	10045.39403002	602.72364211	185.07117506
9.74500000	10009.98219626	600.59893165	134.21144573
9.75000000	9964.19878341	597.85192671	79.44301894
9.75500000	9933.51738555	596.01104316	37.52474183
9.76000000	9923.70357725	595.42221441	11.69636604
9.76500000	9929.00779289	595.74046788	-0.78343534
9.77000000	9940.07908570	596.40474555	-5.02751669
9.77500000	10397.18856510	623.83131371	-783.74637574
9.78000000	9994.86178059	599.69170644	-152.90261709
9.78500000	9995.02962294	599.70177732	122.51774287
9.79000000	10043.73528257	602.62411676	197.76015389
9.79500000	10039.95974422	602.39758446	176.32700670
9.80000000	9997.34104839	599.84046256	122.34893383
9.80500000	9952.19253867	597.13155254	69.35214770
9.81000000	9925.84580136	595.55074790	30.77771879
9.81500000	9920.55507580	595.23330436	8.24773014
9.82000000	9928.36136360	595.70168140	-2.02377068
9.82500000	9940.04637941	596.40278234	-5.13235564
9.83000000	10110.49734948	606.62984081	-416.84482781
9.83500000	9977.91134682	598.67468063	14.84344354
9.84000000	10025.98218541	601.55893077	176.56361127
9.84500000	10049.37976848	602.96278646	194.27310835
9.85000000	10019.32781316	601.15966881	150.97651753
9.85500000	9969.96958826	598.19817546	94.76318396
9.86000000	9932.36709603	595.94202608	48.13142937
9.86500000	9917.40855091	595.04451310	17.85396940
9.87000000	9920.36993931	595.22219604	2.03067357
9.87500000	9931.53626594	595.89217584	-4.15753258
9.88000000	10216.78070266	613.00684238	-578.62736392
9.88500000	9981.90646152	598.91438745	-58.32846034
9.89000000	10015.71726114	600.94303584	154.16303805
9.89500000	10050.01076833	603.00064616	197.51531803
9.90000000	10027.99569512	601.67974144	163.45807104
9.90500000	9978.14046728	598.68842805	107.60627379
9.91000000	9935.55978200	596.13358720	57.79950576
9.91500000	9915.35740424	594.92144430	23.60348096
9.92000000	9915.41862730	594.92511743	4.79694157
9.92500000	9925.96839437	595.55810365	-3.19330996
9.93000000	10205.93819127	612.35629161	-567.95990153
9.93500000	9982.95329253	598.97719763	-53.60185000
9.94000000	10019.19469598	601.15168161	155.48671939
9.94500000	10050.73090556	603.04385430	197.00400650
9.95000000	10025.60252526	601.53615180	162.44874904
9.95500000	9974.03152983	598.44189193	106.62435986
9.96000000	9931.18215525	595.87092914	57.07419485
9.96500000	9911.53260498	594.69195636	23.19351263
9.97000000	9912.32398754	594.73943901	4.61632679
9.97500000	9923.49120097	595.40947200	-3.18818541
9.98000000	10096.50060044	605.79003626	-400.41896620
9.98500000	9985.03460315	599.10207617	21.37911649
9.99000000	10034.11274279	602.04676465	176.77004860
[truncated: 1,001 more rows]
