# Supplementary material for: An Efficient Contact Model for the Simulation of Cargo Airdrop Extraction Phase
Source: Hindawi journal article supplement (doi:10.1155/2018/9895451), 2018-10-17
Supplement: f1 [file 9895451.f1.zip › case1_stick_slip/contact_pts20.csv]

t(s)	cntcNrmForc(N)	cntcFricForc(N)	cntcPitchMoment(N/m)
0.00000000	0.00000000	0.00000000	0.00000000
0.00500000	5037.14086683	0.00000000	0.00000000
0.01000000	15231.82714664	0.00000000	0.00000000
0.01500000	13233.10046566	0.00000000	0.00000000
0.02000000	10937.73108554	0.00000000	0.00000000
0.02500000	10290.63816794	0.00000000	0.00000000
0.03000000	10121.60994704	0.00000000	0.00000000
0.03500000	10064.33325470	0.00000000	0.00000000
0.04000000	10038.47806783	0.00000000	0.00000000
0.04500000	10024.10410635	0.00000000	0.00000000
0.05000000	10015.32078608	0.00000000	0.00000000
0.05500000	10009.78595002	0.00000000	0.00000000
0.06000000	10006.26212413	0.00000000	0.00000000
0.06500000	10004.01358015	0.00000000	0.00000000
0.07000000	10002.56103503	0.00000000	0.00000000
0.07500000	10001.63241534	0.00000000	0.00000000
0.08000000	10001.04898537	0.00000000	0.00000000
0.08500000	10000.66788155	0.00000000	0.00000000
0.09000000	10000.42897211	0.00000000	0.00000000
0.09500000	10000.27135622	0.00000000	0.00000000
0.10000000	10000.17636164	0.00000000	0.00000000
0.10500000	10000.11166681	0.00000000	0.00000000
0.11000000	10000.07081276	0.00000000	0.00000081
0.11500000	10000.04534351	0.00000000	-0.00000059
0.12000000	10000.02915504	0.00000000	0.00000242
0.12500000	10000.01869726	0.00000000	-0.00000698
0.13000000	10000.01200589	0.00000000	0.00003141
0.13500000	10000.00696872	0.00000000	0.00012792
0.14000000	10000.00388298	0.00000000	0.00002111
0.14500000	10000.00189516	0.00000000	-0.00000224
0.15000000	10000.00080158	0.00000000	0.00001448
0.15500000	10000.00074747	0.00000000	0.00001659
0.16000000	10000.00079822	0.00000000	-0.00000000
0.16500000	10000.00072100	0.00000000	-0.00001354
0.17000000	10000.00039774	0.00000000	-0.00001494
0.17500000	9999.99970773	0.00000000	0.00000869
0.18000000	9999.99900269	0.00000000	0.00003335
0.18500000	9999.99823855	0.00000000	0.00006864
0.19000000	9999.99741215	0.00000000	0.00011514
0.19500000	9999.99660544	0.00000000	0.00016038
0.20000000	9999.99722599	0.00000000	0.00011470
0.20500000	9999.99784655	0.00000000	0.00006901
0.21000000	9999.99872802	0.00000000	0.00003534
0.21500000	9999.99983177	0.00000000	0.00001189
0.22000000	10000.00084027	0.00000000	-0.00001374
0.22500000	10000.00051403	0.00000000	-0.00006994
0.23000000	10000.00018778	0.00000000	-0.00012613
0.23500000	10000.00006195	0.00000000	-0.00008882
0.24000000	10000.00007368	0.00000000	0.00001266
0.24500000	10000.00004621	0.00000000	0.00011443
0.25000000	9999.99973023	0.00000000	0.00021835
0.25500000	9999.99941426	0.00000000	0.00032227
0.26000000	9999.99909828	0.00000000	0.00042619
0.26500000	9999.99876330	0.00000000	0.00036080
0.27000000	9999.99841334	0.00000000	0.00016195
0.27500000	9999.99806338	0.00000000	-0.00003691
0.28000000	9999.99771342	0.00000000	-0.00023576
0.28500000	9999.99834532	0.00000000	-0.00014763
0.29000000	9999.99897839	0.00000000	-0.00005916
0.29500000	9999.99961147	0.00000000	0.00002931
0.30000000	9999.99991036	0.00000000	0.00007038
0.30500000	9999.99978116	0.00000000	0.00005072
0.31000000	9999.99965196	0.00000000	0.00003106
0.31500000	9999.99952276	0.00000000	0.00001140
0.32000000	9999.99967444	0.00000000	0.00000629
0.32500000	9999.99986515	0.00000000	0.00000320
0.33000000	10000.00005586	0.00000000	0.00000011
0.33500000	10000.00026598	0.00000000	-0.00000200
0.34000000	10000.00051782	0.00000000	-0.00000200
0.34500000	10000.00076966	0.00000000	-0.00000200
0.35000000	10000.00102149	0.00000000	-0.00000200
0.35500000	10000.00127333	0.00000000	-0.00000200
0.36000000	10000.00152517	0.00000000	-0.00000200
0.36500000	10000.00177700	0.00000000	-0.00000200
0.37000000	10000.00194892	0.00000000	0.00000158
0.37500000	10000.00195178	0.00000000	0.00001273
0.38000000	10000.00195463	0.00000000	0.00002387
0.38500000	10000.00195749	0.00000000	0.00003502
0.39000000	10000.00196035	0.00000000	0.00004617
0.39500000	10000.00196321	0.00000000	0.00005732
0.40000000	10000.00196607	0.00000000	0.00006847
0.40500000	10000.00184984	0.00000000	0.00006650
0.41000000	10000.00148538	0.00000000	0.00003720
0.41500000	10000.00112092	0.00000000	0.00000790
0.42000000	10000.00075645	0.00000000	-0.00002140
0.42500000	10000.00039199	0.00000000	-0.00005070
0.43000000	10000.00002753	0.00000000	-0.00008000
0.43500000	9999.99966306	0.00000000	-0.00010930
0.44000000	9999.99944165	0.00000000	-0.00011626
0.44500000	9999.99951382	0.00000000	-0.00007739
0.45000000	9999.99958600	0.00000000	-0.00003851
0.45500000	9999.99965818	0.00000000	0.00000036
0.46000000	9999.99973036	0.00000000	0.00003924
0.46500000	9999.99980254	0.00000000	0.00007812
0.47000000	9999.99987471	0.00000000	0.00011699
0.47500000	9999.99994559	0.00000000	0.00012387
0.48000000	10000.00001384	0.00000000	0.00006608
0.48500000	10000.00008209	0.00000000	0.00000829
0.49000000	10000.00015034	0.00000000	-0.00004950
0.49500000	10000.00021859	0.00000000	-0.00010729
0.50000000	10000.00028684	0.00000000	-0.00016508
0.50500000	10000.00035510	0.00000000	-0.00022287
0.51000000	10000.00042335	0.00000000	-0.00028066
0.51500000	10000.00049160	0.00000000	-0.00033845
0.52000000	10000.00055985	0.00000000	-0.00039624
0.52500000	10000.00062810	0.00000000	-0.00045403
0.53000000	10000.00069635	0.00000000	-0.00051182
0.53500000	10000.00076460	0.00000000	-0.00056961
0.54000000	10000.00083285	0.00000000	-0.00062740
0.54500000	10000.00090110	0.00000000	-0.00068519
0.55000000	10000.00096935	0.00000000	-0.00074298
0.55500000	10000.00094103	0.00000000	-0.00071527
0.56000000	10000.00089487	0.00000000	-0.00067175
0.56500000	10000.00084870	0.00000000	-0.00062823
0.57000000	10000.00080253	0.00000000	-0.00058471
0.57500000	10000.00075637	0.00000000	-0.00054119
0.58000000	10000.00071020	0.00000000	-0.00049767
0.58500000	10000.00066403	0.00000000	-0.00045415
0.59000000	10000.00061786	0.00000000	-0.00041063
0.59500000	10000.00057170	0.00000000	-0.00036711
0.60000000	10000.00052553	0.00000000	-0.00032359
0.60500000	10000.00047936	0.00000000	-0.00028007
0.61000000	10000.00043320	0.00000000	-0.00023655
0.61500000	10000.00038703	0.00000000	-0.00019303
0.62000000	10000.00034086	0.00000000	-0.00014951
0.62500000	10000.00029469	0.00000000	-0.00010599
0.63000000	10000.00026120	0.00000000	-0.00007657
0.63500000	10000.00025054	0.00000000	-0.00007257
0.64000000	10000.00023989	0.00000000	-0.00006856
0.64500000	10000.00022924	0.00000000	-0.00006456
0.65000000	10000.00021858	0.00000000	-0.00006056
0.65500000	10000.00020793	0.00000000	-0.00005655
0.66000000	10000.00019727	0.00000000	-0.00005255
0.66500000	10000.00018662	0.00000000	-0.00004855
0.67000000	10000.00017597	0.00000000	-0.00004454
0.67500000	10000.00016531	0.00000000	-0.00004054
0.68000000	10000.00015466	0.00000000	-0.00003654
0.68500000	10000.00014400	0.00000000	-0.00003253
0.69000000	10000.00013335	0.00000000	-0.00002853
0.69500000	10000.00012270	0.00000000	-0.00002453
0.70000000	10000.00011204	0.00000000	-0.00002052
0.70500000	10000.00010139	0.00000000	-0.00001652
0.71000000	10000.00009680	0.00000000	-0.00001665
0.71500000	10000.00009312	0.00000000	-0.00001739
0.72000000	10000.00008944	0.00000000	-0.00001813
0.72500000	10000.00008576	0.00000000	-0.00001887
0.73000000	10000.00008208	0.00000000	-0.00001962
0.73500000	10000.00007840	0.00000000	-0.00002036
0.74000000	10000.00007472	0.00000000	-0.00002110
0.74500000	10000.00007104	0.00000000	-0.00002184
0.75000000	10000.00006735	0.00000000	-0.00002259
0.75500000	10000.00006367	0.00000000	-0.00002333
0.76000000	10000.00005999	0.00000000	-0.00002407
0.76500000	10000.00005631	0.00000000	-0.00002481
0.77000000	10000.00005263	0.00000000	-0.00002556
0.77500000	10000.00004895	0.00000000	-0.00002630
0.78000000	10000.00004527	0.00000000	-0.00002704
0.78500000	10000.00004159	0.00000000	-0.00002778
0.79000000	10000.00003791	0.00000000	-0.00002853
0.79500000	10000.00003423	0.00000000	-0.00002927
0.80000000	10000.00003055	0.00000000	-0.00003001
0.80500000	10000.00002687	0.00000000	-0.00003075
0.81000000	10000.00002319	0.00000000	-0.00003150
0.81500000	10000.00001951	0.00000000	-0.00003224
0.82000000	10000.00001583	0.00000000	-0.00003298
0.82500000	10000.00001215	0.00000000	-0.00003372
0.83000000	10000.00000847	0.00000000	-0.00003447
0.83500000	10000.00000479	0.00000000	-0.00003521
0.84000000	10000.00000111	0.00000000	-0.00003595
0.84500000	9999.99999743	0.00000000	-0.00003669
0.85000000	9999.99999374	0.00000000	-0.00003744
0.85500000	9999.99999006	0.00000000	-0.00003818
0.86000000	9999.99998638	0.00000000	-0.00003892
0.86500000	9999.99998270	0.00000000	-0.00003967
0.87000000	9999.99997902	0.00000000	-0.00004041
0.87500000	9999.99997534	0.00000000	-0.00004115
0.88000000	9999.99997166	0.00000000	-0.00004189
0.88500000	9999.99996798	0.00000000	-0.00004264
0.89000000	9999.99996430	0.00000000	-0.00004338
0.89500000	9999.99996062	0.00000000	-0.00004412
0.90000000	9999.99995694	0.00000000	-0.00004486
0.90500000	9999.99995326	0.00000000	-0.00004561
0.91000000	9999.99994958	0.00000000	-0.00004635
0.91500000	9999.99994590	0.00000000	-0.00004709
0.92000000	9999.99994222	0.00000000	-0.00004783
0.92500000	9999.99993854	0.00000000	-0.00004858
0.93000000	9999.99993486	0.00000000	-0.00004932
0.93500000	9999.99993118	0.00000000	-0.00005006
0.94000000	9999.99992750	0.00000000	-0.00005080
0.94500000	9999.99992382	0.00000000	-0.00005155
0.95000000	9999.99992013	0.00000000	-0.00005229
0.95500000	9999.99991645	0.00000000	-0.00005303
0.96000000	9999.99991277	0.00000000	-0.00005377
0.96500000	9999.99990909	0.00000000	-0.00005452
0.97000000	9999.99990541	0.00000000	-0.00005526
0.97500000	9999.99990173	0.00000000	-0.00005600
0.98000000	9999.99989805	0.00000000	-0.00005674
0.98500000	9999.99989437	0.00000000	-0.00005749
0.99000000	9999.99989069	0.00000000	-0.00005823
0.99500000	9999.99988701	0.00000000	-0.00005897
1.00000000	9999.99988333	0.00000000	-0.00005971
1.00500000	9999.99987965	0.00000000	-0.00006046
1.01000000	9999.99987597	0.00000000	-0.00006120
1.01500000	9999.99987229	0.00000000	-0.00006194
1.02000000	9999.99986861	0.00000000	-0.00006268
1.02500000	9999.99986493	0.00000000	-0.00006343
1.03000000	9999.99986125	0.00000000	-0.00006417
1.03500000	9999.99985757	0.00000000	-0.00006491
1.04000000	9999.99985389	0.00000000	-0.00006565
1.04500000	9999.99985021	0.00000000	-0.00006640
1.05000000	9999.99984652	0.00000000	-0.00006714
1.05500000	9999.99984284	0.00000000	-0.00006788
1.06000000	9999.99983916	0.00000000	-0.00006862
1.06500000	9999.99983548	0.00000000	-0.00006937
1.07000000	9999.99983180	0.00000000	-0.00007011
1.07500000	9999.99982812	0.00000000	-0.00007085
1.08000000	9999.99982444	0.00000000	-0.00007160
1.08500000	9999.99982076	0.00000000	-0.00007234
1.09000000	9999.99981708	0.00000000	-0.00007308
1.09500000	9999.99981340	0.00000000	-0.00007382
1.10000000	9999.99980972	0.00000000	-0.00007457
1.10500000	9999.99980604	0.00000000	-0.00007531
1.11000000	9999.99980236	0.00000000	-0.00007605
1.11500000	9999.99979868	0.00000000	-0.00007679
1.12000000	9999.99979500	0.00000000	-0.00007754
1.12500000	9999.99979132	0.00000000	-0.00007828
1.13000000	9999.99978764	0.00000000	-0.00007902
1.13500000	9999.99978396	0.00000000	-0.00007976
1.14000000	9999.99978028	0.00000000	-0.00008051
1.14500000	9999.99977660	0.00000000	-0.00008125
1.15000000	9999.99977291	0.00000000	-0.00008199
1.15500000	9999.99976923	0.00000000	-0.00008273
1.16000000	9999.99976555	0.00000000	-0.00008348
1.16500000	9999.99976187	0.00000000	-0.00008422
1.17000000	9999.99975819	0.00000000	-0.00008496
1.17500000	9999.99975451	0.00000000	-0.00008570
1.18000000	9999.99975083	0.00000000	-0.00008645
1.18500000	9999.99974715	0.00000000	-0.00008719
1.19000000	9999.99974347	0.00000000	-0.00008793
1.19500000	9999.99973979	0.00000000	-0.00008867
1.20000000	9999.99973611	0.00000000	-0.00008942
1.20500000	9999.99973243	0.00000000	-0.00009016
1.21000000	9999.99972875	0.00000000	-0.00009090
1.21500000	9999.99972507	0.00000000	-0.00009164
1.22000000	9999.99972139	0.00000000	-0.00009239
1.22500000	9999.99971771	0.00000000	-0.00009313
1.23000000	9999.99971403	0.00000000	-0.00009387
1.23500000	9999.99971035	0.00000000	-0.00009461
1.24000000	9999.99970667	0.00000000	-0.00009536
1.24500000	9999.99970299	0.00000000	-0.00009610
1.25000000	9999.99969931	0.00000000	-0.00009684
1.25500000	9999.99969562	0.00000000	-0.00009758
1.26000000	9999.99969194	0.00000000	-0.00009833
1.26500000	9999.99968826	0.00000000	-0.00009907
1.27000000	9999.99968458	0.00000000	-0.00009981
1.27500000	9999.99968090	0.00000000	-0.00010055
1.28000000	9999.99967722	0.00000000	-0.00010130
1.28500000	9999.99967354	0.00000000	-0.00010204
1.29000000	9999.99966986	0.00000000	-0.00010278
1.29500000	9999.99966618	0.00000000	-0.00010352
1.30000000	9999.99966250	0.00000000	-0.00010427
1.30500000	9999.99965882	0.00000000	-0.00010501
1.31000000	9999.99965514	0.00000000	-0.00010575
1.31500000	9999.99965146	0.00000000	-0.00010650
1.32000000	9999.99964778	0.00000000	-0.00010724
1.32500000	9999.99964410	0.00000000	-0.00010798
1.33000000	9999.99964042	0.00000000	-0.00010872
1.33500000	9999.99963674	0.00000000	-0.00010947
1.34000000	9999.99963306	0.00000000	-0.00011021
1.34500000	9999.99962938	0.00000000	-0.00011095
1.35000000	9999.99962570	0.00000000	-0.00011169
1.35500000	9999.99962201	0.00000000	-0.00011244
1.36000000	9999.99961833	0.00000000	-0.00011318
1.36500000	9999.99961465	0.00000000	-0.00011392
1.37000000	9999.99961097	0.00000000	-0.00011466
1.37500000	9999.99960729	0.00000000	-0.00011541
1.38000000	9999.99960361	0.00000000	-0.00011615
1.38500000	9999.99959993	0.00000000	-0.00011689
1.39000000	9999.99959625	0.00000000	-0.00011763
1.39500000	9999.99959257	0.00000000	-0.00011838
1.40000000	9999.99958889	0.00000000	-0.00011912
1.40500000	9999.99958521	0.00000000	-0.00011986
1.41000000	9999.99958153	0.00000000	-0.00012060
1.41500000	9999.99957785	0.00000000	-0.00012135
1.42000000	9999.99957417	0.00000000	-0.00012209
1.42500000	9999.99957049	0.00000000	-0.00012283
1.43000000	9999.99956681	0.00000000	-0.00012357
1.43500000	9999.99956313	0.00000000	-0.00012432
1.44000000	9999.99955945	0.00000000	-0.00012506
1.44500000	9999.99955577	0.00000000	-0.00012580
1.45000000	9999.99955209	0.00000000	-0.00012654
1.45500000	9999.99954840	0.00000000	-0.00012729
1.46000000	9999.99954472	0.00000000	-0.00012803
1.46500000	9999.99954104	0.00000000	-0.00012877
1.47000000	9999.99953736	0.00000000	-0.00012951
1.47500000	9999.99953368	0.00000000	-0.00013026
1.48000000	9999.99953000	0.00000000	-0.00013100
1.48500000	9999.99954082	0.00000000	-0.00012677
1.49000000	9999.99955164	0.00000000	-0.00012253
1.49500000	9999.99956246	0.00000000	-0.00011830
1.50000000	9999.99957328	0.00000000	-0.00011406
1.50500000	9999.99958410	0.00000000	-0.00010982
1.51000000	9999.99959493	0.00000000	-0.00010559
1.51500000	9999.99960575	0.00000000	-0.00010135
1.52000000	9999.99961657	0.00000000	-0.00009712
1.52500000	9999.99962739	0.00000000	-0.00009288
1.53000000	9999.99963821	0.00000000	-0.00008864
1.53500000	9999.99964903	0.00000000	-0.00008441
1.54000000	9999.99965986	0.00000000	-0.00008017
1.54500000	9999.99967068	0.00000000	-0.00007594
1.55000000	9999.99968150	0.00000000	-0.00007170
1.55500000	9999.99969232	0.00000000	-0.00006747
1.56000000	9999.99970314	0.00000000	-0.00006323
1.56500000	9999.99971397	0.00000000	-0.00005899
1.57000000	9999.99972479	0.00000000	-0.00005476
1.57500000	9999.99973561	0.00000000	-0.00005052
1.58000000	9999.99974643	0.00000000	-0.00004629
1.58500000	9999.99975725	0.00000000	-0.00004205
1.59000000	9999.99976808	0.00000000	-0.00003781
1.59500000	9999.99977890	0.00000000	-0.00003358
1.60000000	9999.99978972	0.00000000	-0.00002934
1.60500000	9999.99980054	0.00000000	-0.00002511
1.61000000	9999.99981136	0.00000000	-0.00002087
1.61500000	9999.99982219	0.00000000	-0.00001664
1.62000000	9999.99983301	0.00000000	-0.00001240
1.62500000	9999.99984383	0.00000000	-0.00000816
1.63000000	9999.99985465	0.00000000	-0.00000393
1.63500000	9999.99986547	0.00000000	0.00000031
1.64000000	9999.99987630	0.00000000	0.00000454
1.64500000	9999.99988712	0.00000000	0.00000878
1.65000000	9999.99989794	0.00000000	0.00001301
1.65500000	9999.99990876	0.00000000	0.00001725
1.66000000	9999.99991958	0.00000000	0.00002149
1.66500000	9999.99993041	0.00000000	0.00002572
1.67000000	9999.99994123	0.00000000	0.00002996
1.67500000	9999.99994971	0.00000000	0.00003236
1.68000000	9999.99995221	0.00000000	0.00003009
1.68500000	9999.99995472	0.00000000	0.00002781
1.69000000	9999.99995722	0.00000000	0.00002554
1.69500000	9999.99995973	0.00000000	0.00002327
1.70000000	9999.99996223	0.00000000	0.00002100
1.70500000	9999.99996474	0.00000000	0.00001872
1.71000000	9999.99996724	0.00000000	0.00001645
1.71500000	9999.99996975	0.00000000	0.00001418
1.72000000	9999.99997225	0.00000000	0.00001190
1.72500000	9999.99997476	0.00000000	0.00000963
1.73000000	9999.99997726	0.00000000	0.00000736
1.73500000	9999.99997977	0.00000000	0.00000509
1.74000000	9999.99998228	0.00000000	0.00000281
1.74500000	9999.99998478	0.00000000	0.00000054
1.75000000	9999.99998729	0.00000000	-0.00000173
1.75500000	9999.99998979	0.00000000	-0.00000401
1.76000000	9999.99999230	0.00000000	-0.00000628
1.76500000	9999.99999480	0.00000000	-0.00000855
1.77000000	9999.99999731	0.00000000	-0.00001082
1.77500000	9999.99999981	0.00000000	-0.00001310
1.78000000	10000.00000232	0.00000000	-0.00001537
1.78500000	10000.00000482	0.00000000	-0.00001764
1.79000000	10000.00000733	0.00000000	-0.00001992
1.79500000	10000.00000983	0.00000000	-0.00002219
1.80000000	10000.00001234	0.00000000	-0.00002446
1.80500000	10000.00001484	0.00000000	-0.00002674
1.81000000	10000.00001735	0.00000000	-0.00002901
1.81500000	10000.00001985	0.00000000	-0.00003128
1.82000000	10000.00002236	0.00000000	-0.00003355
1.82500000	10000.00002487	0.00000000	-0.00003583
1.83000000	10000.00002737	0.00000000	-0.00003810
1.83500000	10000.00002988	0.00000000	-0.00004037
1.84000000	10000.00003238	0.00000000	-0.00004265
1.84500000	10000.00003489	0.00000000	-0.00004492
1.85000000	10000.00003739	0.00000000	-0.00004719
1.85500000	10000.00003990	0.00000000	-0.00004946
1.86000000	10000.00004240	0.00000000	-0.00005174
1.86500000	10000.00004491	0.00000000	-0.00005401
1.87000000	10000.00004431	0.00000000	-0.00005191
1.87500000	10000.00004131	0.00000000	-0.00004644
1.88000000	10000.00003832	0.00000000	-0.00004096
1.88500000	10000.00003532	0.00000000	-0.00003548
1.89000000	10000.00003233	0.00000000	-0.00003001
1.89500000	10000.00002933	0.00000000	-0.00002453
1.90000000	10000.00002633	0.00000000	-0.00001906
1.90500000	10000.00002334	0.00000000	-0.00001358
1.91000000	10000.00002034	0.00000000	-0.00000811
1.91500000	10000.00001735	0.00000000	-0.00000263
1.92000000	10000.00001435	0.00000000	0.00000284
1.92500000	10000.00001135	0.00000000	0.00000832
1.93000000	10000.00000836	0.00000000	0.00001380
1.93500000	10000.00000536	0.00000000	0.00001927
1.94000000	10000.00000236	0.00000000	0.00002475
1.94500000	9999.99999937	0.00000000	0.00003022
1.95000000	9999.99999637	0.00000000	0.00003570
1.95500000	9999.99999338	0.00000000	0.00004117
1.96000000	9999.99999038	0.00000000	0.00004665
1.96500000	9999.99998876	0.00000000	0.00004888
1.97000000	9999.99999248	0.00000000	0.00003855
1.97500000	9999.99999620	0.00000000	0.00002822
1.98000000	9999.99999992	0.00000000	0.00001788
1.98500000	10000.00000364	0.00000000	0.00000755
1.99000000	9999.99999803	0.00000000	-0.00000797
1.99500000	10000.00000084	0.00000000	0.00000264
2.00000000	9999.99995624	0.00000000	0.00001319
2.00500000	9999.99996348	0.00000000	0.00002829
2.01000000	9999.99994513	0.00000000	0.00018855
2.01500000	9999.99998240	0.00000000	0.00038996
2.02000000	9999.99997560	0.00000000	0.00081424
2.02500000	10000.00004034	0.00000000	0.00097029
2.03000000	10000.00003680	0.00000000	0.00127368
2.03500000	9999.99999955	0.00000000	0.00167180
2.04000000	10000.00001691	0.00000000	0.00199190
2.04500000	9999.99999877	3.18920380	0.30103930
2.05000000	9999.99998589	9.68099822	0.13100915
2.05500000	10000.00000355	10.91340640	-0.04000336
2.06000000	10000.00001466	11.95363987	-0.06165829
2.06500000	10000.00002062	12.94012295	-0.04954859
2.07000000	10000.00002208	13.92296432	-0.03448897
2.07500000	10000.00000399	14.91178408	-0.02178484
2.08000000	9999.99999954	15.90036721	-0.01420851
2.08500000	9999.99998078	16.89760262	-0.00841861
2.09000000	10000.00001223	17.89268568	-0.00527226
2.09500000	10000.00014489	18.89290890	-0.00323438
2.10000000	10000.00008927	19.89382178	-0.00205106
2.10500000	10000.00101505	20.88999854	-0.00139373
2.11000000	10000.00321371	21.88921720	-0.00080652
2.11500000	9999.99535737	22.89018629	-0.00013798
2.12000000	10000.00633677	23.88971665	-0.00068103
2.12500000	10000.01172040	24.89180284	-0.00066228
2.13000000	10000.01192526	25.89356537	-0.00053318
2.13500000	10000.00515111	26.89286434	-0.00021061
2.14000000	10000.00022494	27.89209216	-0.00000913
2.14500000	9999.99828241	28.89186771	0.00007530
2.15000000	9999.99936686	29.89257040	0.00009096
2.15500000	10000.00175530	30.89331878	-0.00000244
2.16000000	10000.00414375	31.89406716	-0.00009584
2.16500000	10000.00642319	32.89479766	-0.00023027
2.17000000	10000.00860487	33.89551212	-0.00040150
2.17500000	10000.01066833	34.89621414	-0.00056612
2.18000000	10000.00742653	35.89635823	-0.00043401
2.18500000	10000.00418473	36.89650232	-0.00030189
2.19000000	10000.00159982	37.89671793	-0.00016359
2.19500000	9999.99963008	38.89700052	-0.00001950
2.20000000	9999.99768824	39.89728595	0.00012341
2.20500000	9999.99825582	40.89782678	0.00016093
2.21000000	9999.99882339	41.89836761	0.00019845
2.21500000	9999.99957296	42.89888116	0.00015570
2.22000000	10000.00050050	43.89936802	0.00003447
2.22500000	10000.00142803	44.89985488	-0.00008676
2.23000000	10000.00235557	45.90034173	-0.00020800
2.23500000	10000.00256700	46.90084575	-0.00022901
2.24000000	10000.00266953	47.90135238	-0.00023478
2.24500000	10000.00277207	48.90185900	-0.00024056
2.25000000	10000.00271703	49.90236234	-0.00023576
2.25500000	10000.00213505	50.90285470	-0.00019562
2.26000000	10000.00155307	51.90334706	-0.00015549
2.26500000	10000.00097110	52.90383941	-0.00011535
2.27000000	10000.00055367	53.90430178	-0.00005893
2.27500000	10000.00024936	54.90474353	0.00000870
2.28000000	9999.99994506	55.90518528	0.00007632
2.28500000	9999.99964075	56.90562703	0.00014394
2.29000000	9999.99962123	57.90608568	0.00013713
2.29500000	9999.99961519	58.90654513	0.00012678
2.30000000	9999.99960915	59.90700457	0.00011644
2.30500000	9999.99960311	60.90746402	0.00010610
2.31000000	9999.99959707	61.90792346	0.00009576
2.31500000	9999.99959103	62.90838291	0.00008541
2.32000000	9999.99958499	63.90884236	0.00007507
2.32500000	9999.99957895	64.90930180	0.00006473
2.33000000	9999.99957291	65.90976125	0.00005439
2.33500000	9999.99956687	66.91022069	0.00004405
2.34000000	9999.99956205	67.91068155	0.00003387
2.34500000	9999.99959866	68.91119033	0.00002920
2.35000000	9999.99963527	69.91169911	0.00002453
2.35500000	9999.99967187	70.91220788	0.00001986
2.36000000	9999.99970848	71.91271666	0.00001520
2.36500000	9999.99974509	72.91322544	0.00001053
2.37000000	9999.99978170	73.91373421	0.00000586
2.37500000	9999.99981831	74.91424299	0.00000119
2.38000000	9999.99985492	75.91475177	-0.00000347
2.38500000	9999.99989153	76.91526054	-0.00000814
2.39000000	9999.99992814	77.91576932	-0.00001281
2.39500000	9999.99996082	78.91627862	-0.00001657
2.40000000	9999.99995908	79.91679253	-0.00001236
2.40500000	9999.99995734	80.91730643	-0.00000815
2.41000000	9999.99995561	81.91782033	-0.00000394
2.41500000	9999.99995387	82.91833423	0.00000027
2.42000000	9999.99995213	83.91884814	0.00000448
2.42500000	9999.99995039	84.91936204	0.00000869
2.43000000	9999.99994865	85.91987594	0.00001290
2.43500000	9999.99994691	86.92038984	0.00001711
2.44000000	9999.99994517	87.92090374	0.00002132
2.44500000	9999.99994343	88.92141765	0.00002553
2.45000000	9999.99994148	89.92192752	0.00002919
2.45500000	9999.99993852	90.92241855	0.00003026
2.46000000	9999.99993556	91.92290958	0.00003133
2.46500000	9999.99993260	92.92340061	0.00003241
2.47000000	9999.99992964	93.92389164	0.00003348
2.47500000	9999.99992668	94.92438267	0.00003455
2.48000000	9999.99992372	95.92487370	0.00003562
2.48500000	9999.99992075	96.92536473	0.00003670
2.49000000	9999.99991779	97.92585576	0.00003777
2.49500000	9999.99991483	98.92634679	0.00003884
2.50000000	9999.99991187	99.92683782	0.00003991
2.50500000	9999.99990891	100.92732885	0.00004098
2.51000000	9999.99990595	101.92781988	0.00004206
2.51500000	9999.99990299	102.92831091	0.00004313
2.52000000	9999.99990003	103.92880194	0.00004420
2.52500000	9999.99989707	104.92929297	0.00004527
2.53000000	9999.99989411	105.92978400	0.00004635
2.53500000	9999.99989115	106.93027503	0.00004742
2.54000000	9999.99988819	107.93076606	0.00004849
2.54500000	9999.99988523	108.93125709	0.00004956
2.55000000	9999.99988227	109.93174812	0.00005064
2.55500000	9999.99987931	110.93223915	0.00005171
2.56000000	9999.99987635	111.93273018	0.00005278
2.56500000	9999.99987339	112.93322120	0.00005385
2.57000000	9999.99987043	113.93371223	0.00005492
2.57500000	9999.99986746	114.93420326	0.00005600
2.58000000	9999.99986450	115.93469429	0.00005707
2.58500000	9999.99986154	116.93518532	0.00005814
2.59000000	9999.99985858	117.93567635	0.00005921
2.59500000	9999.99985562	118.93616738	0.00006029
2.60000000	9999.99985266	119.93665841	0.00006136
2.60500000	9999.99984970	120.93714944	0.00006243
2.61000000	9999.99984674	121.93764047	0.00006350
2.61500000	9999.99984378	122.93813150	0.00006458
2.62000000	9999.99984082	123.93862253	0.00006565
2.62500000	9999.99983786	124.93911356	0.00006672
2.63000000	9999.99983490	125.93960459	0.00006779
2.63500000	9999.99983194	126.94009562	0.00006886
2.64000000	9999.99982898	127.94058665	0.00006994
2.64500000	9999.99982602	128.94107768	0.00007101
2.65000000	9999.99982306	129.94156871	0.00007208
2.65500000	9999.99982010	130.94205974	0.00007315
2.66000000	9999.99981714	131.94255077	0.00007423
2.66500000	9999.99981208	132.94304461	0.00007506
2.67000000	9999.99980162	133.94354574	0.00007527
2.67500000	9999.99979115	134.94404687	0.00007548
2.68000000	9999.99978068	135.94454799	0.00007569
2.68500000	9999.99977022	136.94504912	0.00007590
2.69000000	9999.99975975	137.94555024	0.00007611
2.69500000	9999.99974928	138.94605137	0.00007632
2.70000000	9999.99973882	139.94655250	0.00007653
2.70500000	9999.99972835	140.94705362	0.00007674
2.71000000	9999.99971788	141.94755475	0.00007695
2.71500000	9999.99970742	142.94805587	0.00007716
2.72000000	9999.99969695	143.94855700	0.00007737
2.72500000	9999.99968648	144.94905812	0.00007758
2.73000000	9999.99967602	145.94955925	0.00007779
2.73500000	9999.99966555	146.95006038	0.00007800
2.74000000	9999.99965508	147.95056150	0.00007821
2.74500000	9999.99964461	148.95106263	0.00007842
2.75000000	9999.99963415	149.95156375	0.00007863
2.75500000	9999.99962368	150.95206488	0.00007883
2.76000000	9999.99961321	151.95256601	0.00007904
2.76500000	9999.99960275	152.95306713	0.00007925
2.77000000	9999.99959228	153.95356826	0.00007946
2.77500000	9999.99958181	154.95406938	0.00007967
2.78000000	9999.99957135	155.95457051	0.00007988
2.78500000	9999.99956088	156.95507164	0.00008009
2.79000000	9999.99955041	157.95557276	0.00008030
2.79500000	9999.99953995	158.95607389	0.00008051
2.80000000	9999.99952948	159.95657501	0.00008072
2.80500000	9999.99951901	160.95707614	0.00008093
2.81000000	9999.99950855	161.95757727	0.00008114
2.81500000	9999.99949808	162.95807839	0.00008135
2.82000000	9999.99948761	163.95857952	0.00008156
2.82500000	9999.99947715	164.95908064	0.00008177
2.83000000	9999.99946668	165.95958177	0.00008198
2.83500000	9999.99945621	166.96008290	0.00008219
2.84000000	9999.99944574	167.96058402	0.00008240
2.84500000	9999.99943528	168.96108515	0.00008261
2.85000000	9999.99942481	169.96158627	0.00008282
2.85500000	9999.99941434	170.96208740	0.00008303
2.86000000	9999.99940388	171.96258853	0.00008324
2.86500000	9999.99939341	172.96308965	0.00008345
2.87000000	9999.99938294	173.96359078	0.00008366
2.87500000	9999.99937248	174.96409190	0.00008387
2.88000000	9999.99936477	175.96459360	0.00008373
2.88500000	9999.99936156	176.96509621	0.00008303
2.89000000	9999.99935834	177.96559883	0.00008233
2.89500000	9999.99935512	178.96610144	0.00008164
2.90000000	9999.99935191	179.96660406	0.00008094
2.90500000	9999.99934869	180.96710667	0.00008024
2.91000000	9999.99934547	181.96760929	0.00007954
2.91500000	9999.99934225	182.96811191	0.00007884
2.92000000	9999.99933904	183.96861452	0.00007814
2.92500000	9999.99933582	184.96911714	0.00007744
2.93000000	9999.99933260	185.96961975	0.00007674
2.93500000	9999.99932939	186.97012237	0.00007604
2.94000000	9999.99932617	187.97062498	0.00007534
2.94500000	9999.99932295	188.97112760	0.00007464
2.95000000	9999.99931974	189.97163021	0.00007394
2.95500000	9999.99931652	190.97213283	0.00007324
2.96000000	9999.99931330	191.97263545	0.00007254
2.96500000	9999.99931009	192.97313806	0.00007184
2.97000000	9999.99930687	193.97364068	0.00007115
2.97500000	9999.99930365	194.97414329	0.00007045
2.98000000	9999.99930043	195.97464591	0.00006975
2.98500000	9999.99929722	196.97514852	0.00006905
2.99000000	9999.99929400	197.97565114	0.00006835
2.99500000	9999.99929078	198.97615375	0.00006765
3.00000000	9999.99928757	199.97665637	0.00006695
3.00500000	9999.99928435	200.97715899	0.00006625
3.01000000	9999.99928113	201.97766160	0.00006555
3.01500000	9999.99927792	202.97816422	0.00006485
3.02000000	9999.99927470	203.97866683	0.00006415
3.02500000	9999.99927148	204.97916945	0.00006345
3.03000000	9999.99926826	205.97967206	0.00006275
3.03500000	9999.99926505	206.98017468	0.00006205
3.04000000	9999.99926183	207.98067729	0.00006135
3.04500000	9999.99925861	208.98117991	0.00006066
3.05000000	9999.99925540	209.98168253	0.00005996
3.05500000	9999.99925218	210.98218514	0.00005926
3.06000000	9999.99924896	211.98268776	0.00005856
3.06500000	9999.99924575	212.98319037	0.00005786
3.07000000	9999.99924253	213.98369299	0.00005716
3.07500000	9999.99923931	214.98419560	0.00005646
3.08000000	9999.99923610	215.98469822	0.00005576
3.08500000	9999.99923288	216.98520083	0.00005506
3.09000000	9999.99922966	217.98570345	0.00005436
3.09500000	9999.99903913	218.98620973	0.00005527
3.10000000	9999.99864859	219.98671992	0.00005789
3.10500000	9999.99825804	220.98723011	0.00006050
3.11000000	9999.99786750	221.98774030	0.00006312
3.11500000	9999.99747695	222.98825050	0.00006574
3.12000000	9999.99708641	223.98876069	0.00006836
3.12500000	9999.99669586	224.98927088	0.00007098
3.13000000	9999.99630532	225.98978107	0.00007360
3.13500000	9999.99591477	226.99029126	0.00007622
3.14000000	9999.99552423	227.99080146	0.00007884
3.14500000	9999.99513368	228.99131165	0.00008145
3.15000000	9999.99474314	229.99182184	0.00008407
3.15500000	9999.99435259	230.99233203	0.00008669
3.16000000	9999.99396205	231.99284222	0.00008931
3.16500000	9999.99357150	232.99335242	0.00009193
3.17000000	9999.99318096	233.99386261	0.00009455
3.17500000	9999.99279041	234.99437280	0.00009717
3.18000000	9999.99239986	235.99488299	0.00009979
3.18500000	9999.99200932	236.99539318	0.00010241
3.19000000	9999.99161877	237.99590338	0.00010502
3.19500000	9999.99122823	238.99641357	0.00010764
3.20000000	9999.99083768	239.99692376	0.00011026
3.20500000	9999.99044714	240.99743395	0.00011288
3.21000000	9999.99005659	241.99794414	0.00011550
3.21500000	9999.98966605	242.99845434	0.00011812
3.22000000	9999.98927550	243.99896453	0.00012074
3.22500000	9999.98888496	244.99947472	0.00012336
3.23000000	9999.98849441	245.99998491	0.00012598
3.23500000	9999.98810387	247.00049510	0.00012859
3.24000000	9999.98771332	248.00100530	0.00013121
3.24500000	9999.98732278	249.00151549	0.00013383
3.25000000	9999.98693223	250.00202568	0.00013645
3.25500000	9999.98654169	251.00253587	0.00013907
3.26000000	9999.98615114	252.00304606	0.00014169
3.26500000	9999.98576060	253.00355625	0.00014431
3.27000000	9999.98537005	254.00406645	0.00014693
3.27500000	9999.98497951	255.00457664	0.00014954
3.28000000	9999.98458896	256.00508683	0.00015216
3.28500000	9999.98419842	257.00559702	0.00015478
3.29000000	9999.98380787	258.00610721	0.00015740
3.29500000	9999.98341733	259.00661741	0.00016002
3.30000000	9999.98302678	260.00712760	0.00016264
3.30500000	9999.98263624	261.00763779	0.00016526
3.31000000	9999.98224569	262.00814798	0.00016788
3.31500000	9999.98185515	263.00865817	0.00017050
3.32000000	9999.98146460	264.00916837	0.00017311
3.32500000	9999.98107406	265.00967856	0.00017573
3.33000000	9999.98068351	266.01018875	0.00017835
3.33500000	9999.98029297	267.01069894	0.00018097
3.34000000	9999.97990242	268.01120913	0.00018359
3.34500000	9999.97951187	269.01171933	0.00018621
3.35000000	9999.97912133	270.01222952	0.00018883
3.35500000	9999.97873078	271.01273971	0.00019145
3.36000000	9999.97834024	272.01324990	0.00019407
3.36500000	9999.97794969	273.01376009	0.00019668
3.37000000	9999.97755915	274.01427029	0.00019930
3.37500000	9999.97716860	275.01478048	0.00020192
3.38000000	9999.97677806	276.01529067	0.00020454
3.38500000	9999.97638751	277.01580086	0.00020716
3.39000000	9999.97599697	278.01631105	0.00020978
3.39500000	9999.97560642	279.01682125	0.00021240
3.40000000	9999.97521588	280.01733144	0.00021502
3.40500000	9999.97482533	281.01784163	0.00021763
3.41000000	9999.97443479	282.01835182	0.00022025
3.41500000	9999.97404424	283.01886201	0.00022287
3.42000000	9999.97365370	284.01937221	0.00022549
3.42500000	9999.97326315	285.01988240	0.00022811
3.43000000	9999.97287261	286.02039259	0.00023073
3.43500000	9999.97248206	287.02090278	0.00023335
3.44000000	9999.97209152	288.02141297	0.00023597
3.44500000	9999.97170097	289.02192316	0.00023859
3.45000000	9999.97131043	290.02243336	0.00024120
3.45500000	9999.97091988	291.02294355	0.00024382
3.46000000	9999.97052934	292.02345374	0.00024644
3.46500000	9999.97013879	293.02396393	0.00024906
3.47000000	9999.96974825	294.02447412	0.00025168
3.47500000	9999.96935770	295.02498432	0.00025430
3.48000000	9999.96896716	296.02549451	0.00025692
3.48500000	9999.96857661	297.02600470	0.00025954
3.49000000	9999.96818607	298.02651489	0.00026215
3.49500000	9999.96779552	299.02702508	0.00026477
3.50000000	9999.96740498	300.02753528	0.00026739
3.50500000	9999.96701443	301.02804547	0.00027001
3.51000000	9999.96662388	302.02855566	0.00027263
3.51500000	9999.96623334	303.02906585	0.00027525
3.52000000	9999.96584279	304.02957604	0.00027787
3.52500000	9999.96545225	305.03008624	0.00028049
3.53000000	9999.96506170	306.03059643	0.00028311
3.53500000	9999.96467116	307.03110662	0.00028572
3.54000000	9999.96428061	308.03161681	0.00028834
3.54500000	9999.96389007	309.03212700	0.00029096
3.55000000	9999.96349952	310.03263720	0.00029358
3.55500000	9999.96310898	311.03314739	0.00029620
3.56000000	9999.96271843	312.03365758	0.00029882
3.56500000	9999.96232789	313.03416777	0.00030144
3.57000000	9999.96193734	314.03467796	0.00030406
3.57500000	9999.96154680	315.03518816	0.00030668
3.58000000	9999.96115625	316.03569835	0.00030929
3.58500000	9999.96076571	317.03620854	0.00031191
3.59000000	9999.96037516	318.03671873	0.00031453
3.59500000	9999.95998462	319.03722892	0.00031715
3.60000000	9999.95959407	320.03773912	0.00031977
3.60500000	9999.95920353	321.03824931	0.00032239
3.61000000	9999.95881298	322.03875950	0.00032501
3.61500000	9999.95842244	323.03926969	0.00032763
3.62000000	9999.95803189	324.03977988	0.00033024
3.62500000	9999.95764135	325.04029007	0.00033286
3.63000000	9999.95725080	326.04080027	0.00033548
3.63500000	9999.95686026	327.04131046	0.00033810
3.64000000	9999.95646971	328.04182065	0.00034072
3.64500000	9999.95607917	329.04233084	0.00034334
3.65000000	9999.95568862	330.04284103	0.00034596
3.65500000	9999.95529808	331.04335123	0.00034858
3.66000000	9999.95490753	332.04386142	0.00035120
3.66500000	9999.95451699	333.04437161	0.00035381
3.67000000	9999.95412644	334.04488180	0.00035643
3.67500000	9999.95373589	335.04539199	0.00035905
3.68000000	9999.95334535	336.04590219	0.00036167
3.68500000	9999.95295480	337.04641238	0.00036429
3.69000000	9999.95256426	338.04692257	0.00036691
3.69500000	9999.95217371	339.04743276	0.00036953
3.70000000	9999.95178317	340.04794295	0.00037215
3.70500000	9999.95139262	341.04845315	0.00037477
3.71000000	9999.95100208	342.04896334	0.00037738
3.71500000	9999.95061153	343.04947353	0.00038000
3.72000000	9999.95022099	344.04998372	0.00038262
3.72500000	9999.94983044	345.05049391	0.00038524
3.73000000	9999.94943990	346.05100411	0.00038786
3.73500000	9999.94904935	347.05151430	0.00039048
3.74000000	9999.94865881	348.05202449	0.00039310
3.74500000	9999.94826826	349.05253468	0.00039572
3.75000000	9999.94787772	350.05304487	0.00039833
3.75500000	9999.94748717	351.05355507	0.00040095
3.76000000	9999.94709663	352.05406526	0.00040357
3.76500000	9999.94670608	353.05457545	0.00040619
3.77000000	9999.94631554	354.05508564	0.00040881
3.77500000	9999.94592499	355.05559583	0.00041143
3.78000000	9999.94553445	356.05610603	0.00041405
3.78500000	9999.94514390	357.05661622	0.00041667
3.79000000	9999.94475336	358.05712641	0.00041929
3.79500000	9999.94436281	359.05763660	0.00042190
3.80000000	9999.94397227	360.05814679	0.00042452
3.80500000	9999.94358172	361.05865698	0.00042714
3.81000000	9999.94319118	362.05916718	0.00042976
3.81500000	9999.94280063	363.05967737	0.00043238
3.82000000	9999.94241009	364.06018756	0.00043500
3.82500000	9999.94201954	365.06069775	0.00043762
3.83000000	9999.94162900	366.06120794	0.00044024
3.83500000	9999.94123845	367.06171814	0.00044286
3.84000000	9999.94084791	368.06222833	0.00044547
3.84500000	9999.94045736	369.06273852	0.00044809
3.85000000	9999.94006681	370.06324871	0.00045071
3.85500000	9999.93967627	371.06375890	0.00045333
3.86000000	9999.93928572	372.06426910	0.00045595
3.86500000	9999.93889518	373.06477929	0.00045857
3.87000000	9999.93850463	374.06528948	0.00046119
3.87500000	9999.93811409	375.06579967	0.00046381
3.88000000	9999.93772354	376.06630986	0.00046642
3.88500000	9999.93733300	377.06682006	0.00046904
3.89000000	9999.93694245	378.06733025	0.00047166
3.89500000	9999.93655191	379.06784044	0.00047428
3.90000000	9999.93616136	380.06835063	0.00047690
3.90500000	9999.93577082	381.06886082	0.00047952
3.91000000	9999.93538027	382.06937102	0.00048214
3.91500000	9999.93498973	383.06988121	0.00048476
3.92000000	9999.93459918	384.07039140	0.00048738
3.92500000	9999.93420864	385.07090159	0.00048999
3.93000000	9999.93381809	386.07141178	0.00049261
3.93500000	9999.93342755	387.07192198	0.00049523
3.94000000	9999.93303700	388.07243217	0.00049785
3.94500000	9999.93264646	389.07294236	0.00050047
3.95000000	9999.93225591	390.07345255	0.00050309
3.95500000	9999.93186537	391.07396274	0.00050571
3.96000000	9999.93147482	392.07447294	0.00050833
3.96500000	9999.93108428	393.07498313	0.00051094
3.97000000	9999.93069373	394.07549332	0.00051356
3.97500000	9999.93030319	395.07600351	0.00051618
3.98000000	9999.92991264	396.07651370	0.00051880
3.98500000	9999.92952210	397.07702389	0.00052142
3.99000000	9999.92913155	398.07753409	0.00052404
3.99500000	9999.92874101	399.07804428	0.00052666
4.00000000	9999.92835046	400.07855447	0.00052928
4.00500000	9999.92795992	401.07906466	0.00053190
4.01000000	9999.92756937	402.07957485	0.00053451
4.01500000	9999.92717882	403.08008505	0.00053713
4.02000000	9999.92678828	404.08059524	0.00053975
4.02500000	9999.92639773	405.08110543	0.00054237
4.03000000	9999.92600719	406.08161562	0.00054499
4.03500000	9999.92561664	407.08212581	0.00054761
4.04000000	9999.92522610	408.08263601	0.00055023
4.04500000	9999.92483555	409.08314620	0.00055285
4.05000000	9999.92444501	410.08365639	0.00055547
4.05500000	9999.92405446	411.08416658	0.00055808
4.06000000	9999.92366392	412.08467677	0.00056070
4.06500000	9999.92327337	413.08518697	0.00056332
4.07000000	9999.92288283	414.08569716	0.00056594
4.07500000	9999.92249228	415.08620735	0.00056856
4.08000000	9999.92210174	416.08671754	0.00057118
4.08500000	9999.92171119	417.08722773	0.00057380
4.09000000	9999.92132065	418.08773793	0.00057642
4.09500000	9999.92093010	419.08824812	0.00057903
4.10000000	9999.92053956	420.08875831	0.00058165
4.10500000	9999.92014901	421.08926850	0.00058427
4.11000000	9999.91975847	422.08977869	0.00058689
4.11500000	9999.91936792	423.09028889	0.00058951
4.12000000	9999.91897738	424.09079908	0.00059213
4.12500000	9999.91858683	425.09130927	0.00059475
4.13000000	9999.91819629	426.09181946	0.00059737
4.13500000	9999.91780574	427.09232965	0.00059999
4.14000000	9999.91741520	428.09283985	0.00060260
4.14500000	9999.91702465	429.09335004	0.00060522
4.15000000	9999.91663411	430.09386023	0.00060784
4.15500000	9999.91624356	431.09437042	0.00061046
4.16000000	9999.91585302	432.09488061	0.00061308
4.16500000	9999.91546247	433.09539080	0.00061570
4.17000000	9999.91507193	434.09590100	0.00061832
4.17500000	9999.91468138	435.09641119	0.00062094
4.18000000	9999.91429083	436.09692138	0.00062356
4.18500000	9999.91390029	437.09743157	0.00062617
4.19000000	9999.91350974	438.09794176	0.00062879
4.19500000	9999.91311920	439.09845196	0.00063141
4.20000000	9999.91272865	440.09896215	0.00063403
4.20500000	9999.91233811	441.09947234	0.00063665
4.21000000	9999.91194756	442.09998253	0.00063927
4.21500000	9999.91155702	443.10049272	0.00064189
4.22000000	9999.91116647	444.10100292	0.00064451
4.22500000	9999.91077593	445.10151311	0.00064712
4.23000000	9999.91038538	446.10202330	0.00064974
4.23500000	9999.90999484	447.10253349	0.00065236
4.24000000	9999.90960429	448.10304368	0.00065498
4.24500000	9999.90921375	449.10355388	0.00065760
4.25000000	9999.90882320	450.10406407	0.00066022
4.25500000	9999.90843266	451.10457426	0.00066284
4.26000000	9999.90804211	452.10508445	0.00066546
4.26500000	9999.90765157	453.10559464	0.00066808
4.27000000	9999.90726102	454.10610484	0.00067069
4.27500000	9999.90687048	455.10661503	0.00067331
4.28000000	9999.90647993	456.10712522	0.00067593
4.28500000	9999.90608939	457.10763541	0.00067855
4.29000000	9999.90569884	458.10814560	0.00068117
4.29500000	9999.90530830	459.10865580	0.00068379
4.30000000	9999.90491775	460.10916599	0.00068641
4.30500000	9999.90452721	461.10967618	0.00068903
4.31000000	9999.90413666	462.11018637	0.00069164
4.31500000	9999.90374612	463.11069656	0.00069426
4.32000000	9999.90335557	464.11120676	0.00069688
4.32500000	9999.90296503	465.11171695	0.00069950
4.33000000	9999.90257448	466.11222714	0.00070212
4.33500000	9999.90218394	467.11273733	0.00070474
4.34000000	9999.90179339	468.11324752	0.00070736
4.34500000	9999.90140284	469.11375771	0.00070998
4.35000000	9999.90101230	470.11426791	0.00071260
4.35500000	9999.90062175	471.11477810	0.00071521
4.36000000	9999.90023121	472.11528829	0.00071783
4.36500000	9999.89984066	473.11579848	0.00072045
4.37000000	9999.89945012	474.11630867	0.00072307
4.37500000	9999.89905957	475.11681887	0.00072569
4.38000000	9999.89866903	476.11732906	0.00072831
4.38500000	9999.89827848	477.11783925	0.00073093
4.39000000	9999.89788794	478.11834944	0.00073355
4.39500000	9999.89749739	479.11885963	0.00073617
4.40000000	9999.89710685	480.11936983	0.00073878
4.40500000	9999.89671630	481.11988002	0.00074140
4.41000000	9999.89632576	482.12039021	0.00074402
4.41500000	9999.89593521	483.12090040	0.00074664
4.42000000	9999.89554467	484.12141059	0.00074926
4.42500000	9999.89515412	485.12192079	0.00075188
4.43000000	9999.89476358	486.12243098	0.00075450
4.43500000	9999.89437303	487.12294117	0.00075712
4.44000000	9999.89398249	488.12345136	0.00075973
4.44500000	9999.89359194	489.12396155	0.00076235
4.45000000	9999.89320140	490.12447175	0.00076497
4.45500000	9999.89281085	491.12498194	0.00076759
4.46000000	9999.89242031	492.12549213	0.00077021
4.46500000	9999.89202976	493.12600232	0.00077283
4.47000000	9999.89163922	494.12651251	0.00077545
4.47500000	9999.89124867	495.12702271	0.00077807
4.48000000	9999.89085813	496.12753290	0.00078069
4.48500000	9999.89046758	497.12804309	0.00078330
4.49000000	9999.89007704	498.12855328	0.00078592
4.49500000	9999.88968649	499.12906347	0.00078854
4.50000000	9999.88929595	500.12957367	0.00079116
4.50500000	9999.88890540	501.13008386	0.00079378
4.51000000	9999.88851485	502.13059405	0.00079640
4.51500000	9999.88812431	503.13110424	0.00079902
4.52000000	9999.88773376	504.13161443	0.00080164
4.52500000	9999.88734322	505.13212462	0.00080426
4.53000000	9999.88695267	506.13263482	0.00080687
4.53500000	9999.88656213	507.13314501	0.00080949
4.54000000	9999.88617158	508.13365520	0.00081211
4.54500000	9999.88578104	509.13416539	0.00081473
4.55000000	9999.88539049	510.13467558	0.00081735
4.55500000	9999.88499995	511.13518578	0.00081997
4.56000000	9999.88460940	512.13569597	0.00082259
4.56500000	9999.88421886	513.13620616	0.00082521
4.57000000	9999.88382831	514.13671635	0.00082782
4.57500000	9999.88343777	515.13722654	0.00083044
4.58000000	9999.88304722	516.13773674	0.00083306
4.58500000	9999.88265668	517.13824693	0.00083568
4.59000000	9999.88226613	518.13875712	0.00083830
4.59500000	9999.88187559	519.13926731	0.00084092
4.60000000	9999.88148504	520.13977750	0.00084354
4.60500000	9999.88109450	521.14028770	0.00084616
4.61000000	9999.88070395	522.14079789	0.00084878
4.61500000	9999.88031341	523.14130808	0.00085139
4.62000000	9999.87992286	524.14181827	0.00085401
4.62500000	9999.87953232	525.14232846	0.00085663
4.63000000	9999.87914177	526.14283866	0.00085925
4.63500000	9999.87875123	527.14334885	0.00086187
4.64000000	9999.87836068	528.14385904	0.00086449
4.64500000	9999.87797014	529.14436923	0.00086711
4.65000000	9999.87757959	530.14487942	0.00086973
4.65500000	9999.87718905	531.14538962	0.00087235
4.66000000	9999.87679850	532.14589981	0.00087496
4.66500000	9999.87640796	533.14641000	0.00087758
4.67000000	9999.87601741	534.14692019	0.00088020
4.67500000	9999.87562687	535.14743038	0.00088282
4.68000000	9999.87523632	536.14794058	0.00088544
4.68500000	9999.87484577	537.14845077	0.00088806
4.69000000	9999.87445523	538.14896096	0.00089068
4.69500000	9999.87406468	539.14947115	0.00089330
4.70000000	9999.87367414	540.14998134	0.00089591
4.70500000	9999.87328359	541.15049153	0.00089853
4.71000000	9999.87289305	542.15100173	0.00090115
4.71500000	9999.87250250	543.15151192	0.00090377
4.72000000	9999.87211196	544.15202211	0.00090639
4.72500000	9999.87172141	545.15253230	0.00090901
4.73000000	9999.87133087	546.15304249	0.00091163
4.73500000	9999.87094032	547.15355269	0.00091425
4.74000000	9999.87054978	548.15406288	0.00091687
4.74500000	9999.87015923	549.15457307	0.00091948
4.75000000	9999.86976869	550.15508326	0.00092210
4.75500000	9999.86937814	551.15559345	0.00092472
4.76000000	9999.86898760	552.15610365	0.00092734
4.76500000	9999.86859705	553.15661384	0.00092996
4.77000000	9999.86820651	554.15712403	0.00093258
4.77500000	9999.86781596	555.15763422	0.00093520
4.78000000	9999.86742542	556.15814441	0.00093782
4.78500000	9999.86703487	557.15865461	0.00094043
4.79000000	9999.86664433	558.15916480	0.00094305
4.79500000	9999.86625378	559.15967499	0.00094567
4.80000000	9999.86586324	560.16018518	0.00094829
4.80500000	9999.86547269	561.16069537	0.00095091
4.81000000	9999.86508215	562.16120557	0.00095353
4.81500000	9999.86469160	563.16171576	0.00095615
4.82000000	9999.86430106	564.16222595	0.00095877
4.82500000	9999.86391051	565.16273614	0.00096139
4.83000000	9999.86351997	566.16324633	0.00096400
4.83500000	9999.86312942	567.16375653	0.00096662
4.84000000	9999.86273888	568.16426672	0.00096924
4.84500000	9999.86234833	569.16477691	0.00097186
4.85000000	9999.86195778	570.16528710	0.00097448
4.85500000	9999.86156724	571.16579729	0.00097710
4.86000000	9999.86117669	572.16630749	0.00097972
4.86500000	9999.86078615	573.16681768	0.00098234
4.87000000	9999.86039560	574.16732787	0.00098496
4.87500000	9999.86000506	575.16783806	0.00098757
4.88000000	9999.85961451	576.16834825	0.00099019
4.88500000	9999.85922397	577.16885844	0.00099281
4.89000000	9999.85883342	578.16936864	0.00099543
4.89500000	9999.85844288	579.16987883	0.00099805
4.90000000	9999.85805233	580.17038902	0.00100067
4.90500000	9999.85766179	581.17089921	0.00100329
4.91000000	9999.85727124	582.17140940	0.00100591
4.91500000	9999.85688070	583.17191960	0.00100852
4.92000000	9999.85649015	584.17242979	0.00101114
4.92500000	9999.85609961	585.17293998	0.00101376
4.93000000	9999.85570906	586.17345017	0.00101638
4.93500000	9999.85531852	587.17396036	0.00101900
4.94000000	9999.85492797	588.17447056	0.00102162
4.94500000	9999.85453743	589.17498075	0.00102424
4.95000000	9999.85414688	590.17549094	0.00102686
4.95500000	9999.85375634	591.17600113	0.00102948
4.96000000	9999.85336579	592.17651132	0.00103209
4.96500000	9999.85297525	593.17702152	0.00103471
4.97000000	9999.85258470	594.17753171	0.00103733
4.97500000	9999.85219416	595.17804190	0.00103995
4.98000000	9999.85180361	596.17855209	0.00104257
4.98500000	9999.85141307	597.17906228	0.00104519
4.99000000	9999.85102252	598.17957248	0.00104781
4.99500000	9999.85063198	599.18008267	0.00105043
5.00000000	9999.85024143	600.18059286	0.00105305
5.00500000	9999.84985089	601.18110305	0.00105566
5.01000000	9999.84946034	602.18161324	0.00105828
5.01500000	9999.84906979	603.18212344	0.00106090
5.02000000	9999.84867925	604.18263363	0.00106352
5.02500000	9999.84828870	605.18314382	0.00106614
5.03000000	9999.84789816	606.18365401	0.00106876
5.03500000	9999.84750761	607.18416420	0.00107138
5.04000000	9999.84711707	608.18467440	0.00107400
5.04500000	9999.84672652	609.18518459	0.00107661
5.05000000	9999.84633598	610.18569478	0.00107923
5.05500000	9999.84594543	611.18620497	0.00108185
5.06000000	9999.84555489	612.18671516	0.00108447
5.06500000	9999.84516434	613.18722535	0.00108709
5.07000000	9999.84477380	614.18773555	0.00108971
5.07500000	9999.84438325	615.18824574	0.00109233
5.08000000	9999.84399271	616.18875593	0.00109495
5.08500000	9999.84360216	617.18926612	0.00109757
5.09000000	9999.84321162	618.18977631	0.00110018
5.09500000	9999.84282107	619.19028651	0.00110280
5.10000000	9999.84243053	620.19079670	0.00110542
5.10500000	9999.84203998	621.19130689	0.00110804
5.11000000	9999.84164944	622.19181708	0.00111066
5.11500000	9999.84125889	623.19232727	0.00111328
5.12000000	9999.84086835	624.19283747	0.00111590
5.12500000	9999.84047780	625.19334766	0.00111852
5.13000000	9999.84008726	626.19385785	0.00112113
5.13500000	9999.83969671	627.19436804	0.00112375
5.14000000	9999.84041752	628.19497045	0.00111906
5.14500000	9999.84125365	629.19558243	0.00111361
5.15000000	9999.84208977	630.19619440	0.00110815
5.15500000	9999.84292589	631.19680638	0.00110270
5.16000000	9999.84376201	632.19741836	0.00109725
5.16500000	9999.84459813	633.19803033	0.00109179
5.17000000	9999.84543425	634.19864231	0.00108634
5.17500000	9999.84627037	635.19925429	0.00108089
5.18000000	9999.84710649	636.19986627	0.00107544
5.18500000	9999.84794261	637.20047824	0.00106998
5.19000000	9999.84877873	638.20109022	0.00106453
5.19500000	9999.84961485	639.20170220	0.00105908
5.20000000	9999.85045097	640.20231417	0.00105362
5.20500000	9999.85128709	641.20292615	0.00104817
5.21000000	9999.85212321	642.20353813	0.00104272
5.21500000	9999.85295933	643.20415010	0.00103726
5.22000000	9999.85379545	644.20476208	0.00103181
5.22500000	9999.85463157	645.20537406	0.00102636
5.23000000	9999.85546769	646.20598603	0.00102090
5.23500000	9999.85630381	647.20659801	0.00101545
5.24000000	9999.85713993	648.20720999	0.00101000
5.24500000	9999.85797605	649.20782196	0.00100455
5.25000000	9999.85881217	650.20843394	0.00099909
5.25500000	9999.85964829	651.20904592	0.00099364
5.26000000	9999.86048441	652.20965789	0.00098819
5.26500000	9999.86132053	653.21026987	0.00098273
5.27000000	9999.86215665	654.21088185	0.00097728
5.27500000	9999.86299277	655.21149382	0.00097183
5.28000000	9999.86382889	656.21210580	0.00096637
5.28500000	9999.86466501	657.21271778	0.00096092
5.29000000	9999.86550113	658.21332975	0.00095547
5.29500000	9999.86633725	659.21394173	0.00095001
5.30000000	9999.86717337	660.21455371	0.00094456
5.30500000	9999.86800949	661.21516568	0.00093911
5.31000000	9999.86884561	662.21577766	0.00093366
5.31500000	9999.86968173	663.21638964	0.00092820
5.32000000	9999.87051785	664.21700161	0.00092275
5.32500000	9999.87135397	665.21761359	0.00091730
5.33000000	9999.87219009	666.21822557	0.00091184
5.33500000	9999.87302621	667.21883754	0.00090639
5.34000000	9999.87386233	668.21944952	0.00090094
5.34500000	9999.87469845	669.22006150	0.00089548
5.35000000	9999.87553457	670.22067348	0.00089003
5.35500000	9999.87637070	671.22128545	0.00088458
5.36000000	9999.87720682	672.22189743	0.00087912
5.36500000	9999.87804294	673.22250941	0.00087367
5.37000000	9999.87887906	674.22312138	0.00086822
5.37500000	9999.87971518	675.22373336	0.00086277
5.38000000	9999.88055130	676.22434534	0.00085731
5.38500000	9999.88138742	677.22495731	0.00085186
5.39000000	9999.88222354	678.22556929	0.00084641
5.39500000	9999.88305966	679.22618127	0.00084095
5.40000000	9999.88389578	680.22679324	0.00083550
5.40500000	9999.88473190	681.22740522	0.00083005
5.41000000	9999.88556802	682.22801720	0.00082459
5.41500000	9999.88640414	683.22862917	0.00081914
5.42000000	9999.88724026	684.22924115	0.00081369
5.42500000	9999.88807638	685.22985313	0.00080823
5.43000000	9999.88891250	686.23046510	0.00080278
5.43500000	9999.88974862	687.23107708	0.00079733
5.44000000	9999.89058474	688.23168906	0.00079188
5.44500000	9999.89142086	689.23230103	0.00078642
5.45000000	9999.89225698	690.23291301	0.00078097
5.45500000	9999.89309310	691.23352499	0.00077552
5.46000000	9999.89392922	692.23413696	0.00077006
5.46500000	9999.89476534	693.23474894	0.00076461
5.47000000	9999.89560146	694.23536092	0.00075916
5.47500000	9999.89643758	695.23597289	0.00075370
5.48000000	9999.89727370	696.23658487	0.00074825
5.48500000	9999.89810982	697.23719685	0.00074280
5.49000000	9999.89894594	698.23780882	0.00073735
5.49500000	9999.89978206	699.23842080	0.00073189
5.50000000	9999.90061818	700.23903278	0.00072644
5.50500000	9999.90145430	701.23964476	0.00072099
5.51000000	9999.90229042	702.24025673	0.00071553
5.51500000	9999.90312654	703.24086871	0.00071008
5.52000000	9999.90396266	704.24148069	0.00070463
5.52500000	9999.90479878	705.24209266	0.00069917
5.53000000	9999.90563490	706.24270464	0.00069372
5.53500000	9999.90647102	707.24331662	0.00068827
5.54000000	9999.90730714	708.24392859	0.00068281
5.54500000	9999.90814326	709.24454057	0.00067736
5.55000000	9999.90897938	710.24515255	0.00067191
5.55500000	9999.90981550	711.24576452	0.00066646
5.56000000	9999.91065162	712.24637650	0.00066100
5.56500000	9999.91148775	713.24698848	0.00065555
5.57000000	9999.91232387	714.24760045	0.00065010
5.57500000	9999.91315999	715.24821243	0.00064464
5.58000000	9999.91399611	716.24882441	0.00063919
5.58500000	9999.91483223	717.24943638	0.00063374
5.59000000	9999.91566835	718.25004836	0.00062828
5.59500000	9999.91650447	719.25066034	0.00062283
5.60000000	9999.91734059	720.25127231	0.00061738
5.60500000	9999.91817671	721.25188429	0.00061192
5.61000000	9999.91901283	722.25249627	0.00060647
5.61500000	9999.91984895	723.25310824	0.00060102
5.62000000	9999.92068507	724.25372022	0.00059557
5.62500000	9999.92152119	725.25433220	0.00059011
5.63000000	9999.92235731	726.25494417	0.00058466
5.63500000	9999.92319343	727.25555615	0.00057921
5.64000000	9999.92402955	728.25616813	0.00057375
5.64500000	9999.92486567	729.25678010	0.00056830
5.65000000	9999.92576403	730.25742144	0.00056268
5.65500000	9999.92668188	731.25807197	0.00055700
5.66000000	9999.92759973	732.25872250	0.00055132
5.66500000	9999.92851758	733.25937303	0.00054564
5.67000000	9999.92943542	734.26002356	0.00053996
5.67500000	9999.93035327	735.26067409	0.00053428
5.68000000	9999.93127112	736.26132462	0.00052861
5.68500000	9999.93218897	737.26197515	0.00052293
5.69000000	9999.93310681	738.26262568	0.00051725
5.69500000	9999.93402466	739.26327621	0.00051157
5.70000000	9999.93494251	740.26392674	0.00050589
5.70500000	9999.93586036	741.26457727	0.00050021
5.71000000	9999.93677820	742.26522780	0.00049454
5.71500000	9999.93769605	743.26587833	0.00048886
5.72000000	9999.93861390	744.26652886	0.00048318
5.72500000	9999.93953175	745.26717939	0.00047750
5.73000000	9999.94044960	746.26782992	0.00047182
5.73500000	9999.94136744	747.26848045	0.00046615
5.74000000	9999.94228529	748.26913098	0.00046047
5.74500000	9999.94320314	749.26978151	0.00045479
5.75000000	9999.94412099	750.27043204	0.00044911
5.75500000	9999.94503883	751.27108257	0.00044343
5.76000000	9999.94595668	752.27173310	0.00043775
5.76500000	9999.94687453	753.27238363	0.00043208
5.77000000	9999.94779238	754.27303416	0.00042640
5.77500000	9999.94871022	755.27368469	0.00042072
5.78000000	9999.94962807	756.27433522	0.00041504
5.78500000	9999.95054592	757.27498575	0.00040936
5.79000000	9999.95146377	758.27563628	0.00040368
5.79500000	9999.95238162	759.27628681	0.00039801
5.80000000	9999.95329946	760.27693734	0.00039233
5.80500000	9999.95421731	761.27758787	0.00038665
5.81000000	9999.95513516	762.27823840	0.00038097
5.81500000	9999.95605301	763.27888893	0.00037529
5.82000000	9999.95697085	764.27953946	0.00036962
5.82500000	9999.95788870	765.28018999	0.00036394
5.83000000	9999.95880655	766.28084052	0.00035826
5.83500000	9999.95972440	767.28149105	0.00035258
5.84000000	9999.96064224	768.28214158	0.00034690
5.84500000	9999.96156009	769.28279211	0.00034122
5.85000000	9999.96247794	770.28344265	0.00033555
5.85500000	9999.96339579	771.28409318	0.00032987
5.86000000	9999.96431364	772.28474371	0.00032419
5.86500000	9999.96523148	773.28539424	0.00031851
5.87000000	9999.96614933	774.28604477	0.00031283
5.87500000	9999.96706718	775.28669530	0.00030715
5.88000000	9999.96798503	776.28734583	0.00030148
5.88500000	9999.96890287	777.28799636	0.00029580
5.89000000	9999.96982072	778.28864689	0.00029012
5.89500000	9999.97073857	779.28929742	0.00028444
5.90000000	9999.97165642	780.28994795	0.00027876
5.90500000	9999.97257426	781.29059848	0.00027309
5.91000000	9999.97349211	782.29124901	0.00026741
5.91500000	9999.97440996	783.29189954	0.00026173
5.92000000	9999.97532781	784.29255007	0.00025605
5.92500000	9999.97624565	785.29320060	0.00025037
5.93000000	9999.97716350	786.29385113	0.00024469
5.93500000	9999.97808135	787.29450166	0.00023902
5.94000000	9999.97899920	788.29515219	0.00023334
5.94500000	9999.97991705	789.29580272	0.00022766
5.95000000	9999.98083489	790.29645325	0.00022198
5.95500000	9999.98175274	791.29710378	0.00021630
5.96000000	9999.98267059	792.29775431	0.00021062
5.96500000	9999.98358844	793.29840484	0.00020495
5.97000000	9999.98450628	794.29905537	0.00019927
5.97500000	9999.98542413	795.29970590	0.00019359
5.98000000	9999.98634198	796.30035643	0.00018791
5.98500000	9999.98725983	797.30100696	0.00018223
5.99000000	9999.98817767	798.30165749	0.00017656
5.99500000	9999.98909552	799.30230802	0.00017088
6.00000000	9999.99001337	800.30295855	0.00016520
6.00500000	9999.99093122	801.30360908	0.00015952
6.01000000	9999.99184907	802.30425961	0.00015384
6.01500000	9999.99276691	803.30491014	0.00014816
6.02000000	9999.99368476	804.30556067	0.00014249
6.02500000	9999.99460261	805.30621120	0.00013681
6.03000000	9999.99552046	806.30686173	0.00013113
6.03500000	9999.99643830	807.30751226	0.00012545
6.04000000	9999.99735615	808.30816279	0.00011977
6.04500000	9999.99827400	809.30881332	0.00011409
6.05000000	9999.99919185	810.30946385	0.00010842
6.05500000	10000.00010969	811.31011438	0.00010274
6.06000000	10000.00102754	812.31076491	0.00009706
6.06500000	10000.00194539	813.31141544	0.00009138
6.07000000	10000.00286324	814.31206597	0.00008570
6.07500000	10000.00378109	815.31271650	0.00008003
6.08000000	10000.00469893	816.31336703	0.00007435
6.08500000	10000.00561678	817.31401756	0.00006867
6.09000000	10000.00653463	818.31466809	0.00006299
6.09500000	10000.00745248	819.31531862	0.00005731
6.10000000	10000.00837032	820.31596915	0.00005163
6.10500000	10000.00928817	821.31661968	0.00004596
6.11000000	10000.01020602	822.31727021	0.00004028
6.11500000	10000.01112387	823.31792074	0.00003460
6.12000000	10000.01204171	824.31857127	0.00002892
6.12500000	10000.01295956	825.31922180	0.00002324
6.13000000	10000.01387741	826.31987233	0.00001756
6.13500000	10000.01479526	827.32052286	0.00001189
6.14000000	10000.01571310	828.32117339	0.00000621
6.14500000	10000.01663095	829.32182392	0.00000053
6.15000000	10000.01754880	830.32247445	-0.00000515
6.15500000	10000.01846665	831.32312498	-0.00001083
6.16000000	10000.01862006	832.32372036	-0.00001225
6.16500000	10000.01829936	833.32428155	-0.00001104
6.17000000	10000.01797866	834.32484274	-0.00000982
6.17500000	10000.01765795	835.32540392	-0.00000861
6.18000000	10000.01733725	836.32596511	-0.00000739
6.18500000	10000.01701655	837.32652629	-0.00000618
6.19000000	10000.01669585	838.32708748	-0.00000497
6.19500000	10000.01637514	839.32764867	-0.00000375
6.20000000	10000.01605444	840.32820985	-0.00000254
6.20500000	10000.01573374	841.32877104	-0.00000133
6.21000000	10000.01541303	842.32933222	-0.00000011
6.21500000	10000.01509233	843.32989341	0.00000110
6.22000000	10000.01477163	844.33045460	0.00000232
6.22500000	10000.01445093	845.33101578	0.00000353
6.23000000	10000.01413022	846.33157697	0.00000474
6.23500000	10000.01380952	847.33213815	0.00000596
6.24000000	10000.01348882	848.33269934	0.00000717
6.24500000	10000.01316811	849.33326052	0.00000839
6.25000000	10000.01284741	850.33382171	0.00000960
6.25500000	10000.01252671	851.33438290	0.00001081
6.26000000	10000.01220601	852.33494408	0.00001203
6.26500000	10000.01188530	853.33550527	0.00001324
6.27000000	10000.01156460	854.33606645	0.00001446
6.27500000	10000.01124390	855.33662764	0.00001567
6.28000000	10000.01092319	856.33718883	0.00001688
6.28500000	10000.01060249	857.33775001	0.00001810
6.29000000	10000.01028179	858.33831120	0.00001931
6.29500000	10000.00996109	859.33887238	0.00002053
6.30000000	10000.00964038	860.33943357	0.00002174
6.30500000	10000.00931968	861.33999476	0.00002295
6.31000000	10000.00899898	862.34055594	0.00002417
6.31500000	10000.00867827	863.34111713	0.00002538
6.32000000	10000.00835757	864.34167831	0.00002660
6.32500000	10000.00803687	865.34223950	0.00002781
6.33000000	10000.00771617	866.34280069	0.00002902
6.33500000	10000.00739546	867.34336187	0.00003024
6.34000000	10000.00707476	868.34392306	0.00003145
6.34500000	10000.00675406	869.34448424	0.00003267
6.35000000	10000.00643335	870.34504543	0.00003388
6.35500000	10000.00611265	871.34560662	0.00003509
6.36000000	10000.00579195	872.34616780	0.00003631
6.36500000	10000.00547125	873.34672899	0.00003752
6.37000000	10000.00515054	874.34729017	0.00003874
6.37500000	10000.00482984	875.34785136	0.00003995
6.38000000	10000.00450914	876.34841254	0.00004116
6.38500000	10000.00418843	877.34897373	0.00004238
6.39000000	10000.00386773	878.34953492	0.00004359
6.39500000	10000.00354703	879.35009610	0.00004481
6.40000000	10000.00322633	880.35065729	0.00004602
6.40500000	10000.00290562	881.35121847	0.00004723
6.41000000	10000.00258492	882.35177966	0.00004845
6.41500000	10000.00226422	883.35234085	0.00004966
6.42000000	10000.00194351	884.35290203	0.00005088
6.42500000	10000.00162281	885.35346322	0.00005209
6.43000000	10000.00130211	886.35402440	0.00005330
6.43500000	10000.00098141	887.35458559	0.00005452
6.44000000	10000.00066070	888.35514678	0.00005573
6.44500000	10000.00034000	889.35570796	0.00005695
6.45000000	10000.00001930	890.35626915	0.00005816
6.45500000	9999.99969859	891.35683033	0.00005937
6.46000000	9999.99937789	892.35739152	0.00006059
6.46500000	9999.99905719	893.35795271	0.00006180
6.47000000	9999.99873649	894.35851389	0.00006302
6.47500000	9999.99841578	895.35907508	0.00006423
6.48000000	9999.99809508	896.35963626	0.00006544
6.48500000	9999.99777438	897.36019745	0.00006666
6.49000000	9999.99745367	898.36075864	0.00006787
6.49500000	9999.99713297	899.36131982	0.00006909
6.50000000	9999.99681227	900.36188101	0.00007030
6.50500000	9999.99649157	901.36244219	0.00007151
6.51000000	9999.99617086	902.36300338	0.00007273
6.51500000	9999.99585016	903.36356456	0.00007394
6.52000000	9999.99552946	904.36412575	0.00007515
6.52500000	9999.99520875	905.36468694	0.00007637
6.53000000	9999.99488805	906.36524812	0.00007758
6.53500000	9999.99456735	907.36580931	0.00007880
6.54000000	9999.99424665	908.36637049	0.00008001
6.54500000	9999.99392594	909.36693168	0.00008122
6.55000000	9999.99360524	910.36749287	0.00008244
6.55500000	9999.99328454	911.36805405	0.00008365
6.56000000	9999.99296383	912.36861524	0.00008487
6.56500000	9999.99264313	913.36917642	0.00008608
6.57000000	9999.99232243	914.36973761	0.00008729
6.57500000	9999.99200173	915.37029880	0.00008851
6.58000000	9999.99168102	916.37085998	0.00008972
6.58500000	9999.99136032	917.37142117	0.00009094
6.59000000	9999.99103962	918.37198235	0.00009215
6.59500000	9999.99071891	919.37254354	0.00009336
6.60000000	9999.99039821	920.37310473	0.00009458
6.60500000	9999.99007751	921.37366591	0.00009579
6.61000000	9999.98975681	922.37422710	0.00009701
6.61500000	9999.98943610	923.37478828	0.00009822
6.62000000	9999.98911540	924.37534947	0.00009943
6.62500000	9999.98879470	925.37591066	0.00010065
6.63000000	9999.98847399	926.37647184	0.00010186
6.63500000	9999.98815329	927.37703303	0.00010308
6.64000000	9999.98783259	928.37759421	0.00010429
6.64500000	9999.98751189	929.37815540	0.00010550
6.65000000	9999.98719118	930.37871658	0.00010672
6.65500000	9999.98687048	931.37927777	0.00010793
6.66000000	9999.98654978	932.37983896	0.00010915
6.66500000	9999.98622907	933.38040014	0.00011036
6.67000000	9999.98617840	934.38100744	0.00011135
6.67500000	9999.98642884	935.38166617	0.00011209
6.68000000	9999.98667927	936.38232489	0.00011283
6.68500000	9999.98692970	937.38298362	0.00011357
6.69000000	9999.98718013	938.38364234	0.00011431
6.69500000	9999.98743057	939.38430106	0.00011505
6.70000000	9999.98768100	940.38495979	0.00011579
6.70500000	9999.98793143	941.38561851	0.00011654
6.71000000	9999.98818186	942.38627723	0.00011728
6.71500000	9999.98843230	943.38693596	0.00011802
6.72000000	9999.98868273	944.38759468	0.00011876
6.72500000	9999.98893316	945.38825340	0.00011950
6.73000000	9999.98918359	946.38891213	0.00012024
6.73500000	9999.98943403	947.38957085	0.00012098
6.74000000	9999.98968446	948.39022957	0.00012172
6.74500000	9999.98993489	949.39088830	0.00012246
6.75000000	9999.99018532	950.39154702	0.00012320
6.75500000	9999.99043576	951.39220574	0.00012394
6.76000000	9999.99068619	952.39286447	0.00012468
6.76500000	9999.99093662	953.39352319	0.00012543
6.77000000	9999.99118705	954.39418192	0.00012617
6.77500000	9999.99143749	955.39484064	0.00012691
6.78000000	9999.99168792	956.39549936	0.00012765
6.78500000	9999.99193835	957.39615809	0.00012839
6.79000000	9999.99218879	958.39681681	0.00012913
6.79500000	9999.99243922	959.39747553	0.00012987
6.80000000	9999.99268965	960.39813426	0.00013061
6.80500000	9999.99294008	961.39879298	0.00013135
6.81000000	9999.99319052	962.39945170	0.00013209
6.81500000	9999.99344095	963.40011043	0.00013283
6.82000000	9999.99369138	964.40076915	0.00013357
6.82500000	9999.99394181	965.40142787	0.00013431
6.83000000	9999.99419225	966.40208660	0.00013506
6.83500000	9999.99444268	967.40274532	0.00013580
6.84000000	9999.99469311	968.40340405	0.00013654
6.84500000	9999.99494354	969.40406277	0.00013728
6.85000000	9999.99519398	970.40472149	0.00013802
6.85500000	9999.99544441	971.40538022	0.00013876
6.86000000	9999.99569484	972.40603894	0.00013950
6.86500000	9999.99594527	973.40669766	0.00014024
6.87000000	9999.99619571	974.40735639	0.00014098
6.87500000	9999.99644614	975.40801511	0.00014172
6.88000000	9999.99674736	976.40860675	0.00013531
6.88500000	9999.99707904	977.40915817	0.00012460
6.89000000	9999.99741072	978.40970960	0.00011390
6.89500000	9999.99774239	979.41026102	0.00010319
6.90000000	9999.99807407	980.41081245	0.00009249
6.90500000	9999.99840575	981.41136387	0.00008178
6.91000000	9999.99873742	982.41191530	0.00007107
6.91500000	9999.99906910	983.41246672	0.00006037
6.92000000	9999.99940078	984.41301814	0.00004966
6.92500000	9999.99973245	985.41356957	0.00003896
6.93000000	10000.00000872	986.41413631	0.00003044
6.93500000	10000.00000088	987.41478161	0.00003311
6.94000000	9999.99999304	988.41542691	0.00003579
6.94500000	9999.99998521	989.41607221	0.00003847
6.95000000	9999.99997737	990.41671751	0.00004114
6.95500000	9999.99996953	991.41736281	0.00004382
6.96000000	9999.99996169	992.41800811	0.00004650
6.96500000	9999.99995385	993.41865341	0.00004917
6.97000000	9999.99994602	994.41929871	0.00005185
6.97500000	9999.99993818	995.41994401	0.00005452
6.98000000	9999.99993034	996.42058931	0.00005720
6.98500000	9999.99994114	997.42114643	0.00005478
6.99000000	9999.99995987	998.42166600	0.00005019
6.99500000	9999.99997713	999.42220242	0.00004600
7.00000000	10000.00027763	999.98021578	-0.02926743
7.00500000	10000.00211425	997.46341109	-0.21086387
7.01000000	10000.36425800	600.02185567	-14.30544098
7.01500000	9999.92936415	599.99576191	2.51178935
7.02000000	9999.79113538	599.98746803	4.36877572
7.02500000	9999.85986974	599.99159206	3.46745075
7.03000000	9999.94533814	599.99672065	2.40479664
7.03500000	9999.99831414	599.99989912	1.61717797
7.04000000	10000.02269777	600.00136184	1.08795876
7.04500000	10000.02950267	600.00176986	0.74828512
7.05000000	10000.02776223	600.00166565	0.53339468
7.05500000	10000.02263860	600.00135803	0.39427467
7.06000000	10000.01681333	600.00100887	0.30791820
7.06500000	10000.01119831	600.00067153	0.25130582
7.07000000	10000.00633754	600.00038010	0.21753268
7.07500000	10000.00237223	600.00014216	0.19523599
7.08000000	9999.99878239	599.99992722	0.18104108
7.08500000	9999.99595720	599.99975778	0.17261845
7.09000000	9999.99347494	599.99960827	0.16753696
7.09500000	9999.99123922	599.99947434	0.16412485
7.10000000	9999.98929900	599.99935762	0.16225874
7.10500000	9999.98730149	599.99923772	0.16126528
7.11000000	9999.98485809	599.99909117	0.16075501
7.11500000	9999.98141972	599.99888492	0.16048671
7.12000000	9999.98124391	599.99887505	0.16053295
7.12500000	9999.97975609	599.99878502	0.16070795
7.13000000	9999.97771164	599.99866266	0.16095923
7.13500000	9999.97463297	599.99847839	0.16123495
7.14000000	9999.97538532	599.99852323	0.16169084
7.14500000	9999.97190063	599.99831403	0.16194928
7.15000000	9999.96942228	599.99816567	0.16230294
7.15500000	9999.96683118	599.99800988	0.16267881
7.16000000	9999.96305113	599.99778343	0.16303047
7.16500000	9999.96255684	599.99775368	0.16348210
7.17000000	9999.95974576	599.99758509	0.16385370
7.17500000	9999.95690381	599.99741446	0.16423797
7.18000000	9999.95383152	599.99723007	0.16463138
7.18500000	9999.94958933	599.99697575	0.16498632
7.19000000	9999.94580325	599.99674823	0.16528635
7.19500000	9999.94479589	599.99668772	0.16580880
7.20000000	9999.94207482	599.99652431	0.16623204
7.20500000	9999.93877896	599.99632712	0.16663580
7.21000000	9999.93484772	599.99609099	0.16701671
7.21500000	9999.93191511	599.99591474	0.16743600
7.22000000	9999.92864615	599.99571920	0.16785651
7.22500000	9999.92494988	599.99549742	0.16826594
7.23000000	9999.92118059	599.99527106	0.16867343
7.23500000	9999.91739146	599.99504351	0.16908957
7.24000000	9999.91337673	599.99480253	0.16950127
7.24500000	9999.90940604	599.99456479	0.16991797
7.25000000	9999.90543584	599.99432634	0.17034576
7.25500000	9999.90121204	599.99407269	0.17076489
7.26000000	9999.89689121	599.99381363	0.17118904
7.26500000	9999.89248527	599.99354924	0.17161525
7.27000000	9999.88799180	599.99327992	0.17204554
7.27500000	9999.88617259	599.99317004	0.17388357
7.28000000	9999.88266808	599.99296000	0.17501175
7.28500000	9999.87720991	599.99263236	0.17514842
7.29000000	9999.87155352	599.99229294	0.17519401
7.29500000	9999.86579820	599.99194772	0.17533195
7.30000000	9999.86391525	599.99183490	0.17725884
7.30500000	9999.85845359	599.99150705	0.17762629
7.31000000	9999.85220766	599.99113254	0.17764941
7.31500000	9999.84599514	599.99075973	0.17776409
7.32000000	9999.83975251	599.99038549	0.17798246
7.32500000	9999.83718451	599.99023117	0.17968352
7.33000000	9999.83134086	599.98988052	0.18016868
7.33500000	10040.83154506	602.44989287	-112.86873647
7.34000000	9986.26132161	599.17567938	42.26645068
7.34500000	9998.08582454	599.88514919	53.20546781
7.35000000	10002.96039941	600.17762395	39.97187532
7.35500000	10002.47208563	600.14832535	26.85117189
7.36000000	10000.91428305	600.05485695	17.40069751
7.36500000	9999.74701086	599.98482063	11.14503874
7.37000000	9999.15758153	599.94945472	7.15220362
7.37500000	9998.95906932	599.93754454	4.58703351
7.38000000	9998.98711802	599.93922722	2.99774093
7.38500000	9999.10088305	599.94605343	1.95621454
7.39000000	9999.24052422	599.95443188	1.30993476
7.39500000	9999.37032960	599.96221956	0.89962092
7.40000000	9999.47923359	599.96875422	0.63384557
7.40500000	9999.56207199	599.97372440	0.46869102
7.41000000	9999.62276167	599.97736572	0.36408331
7.41500000	9999.66500231	599.97989974	0.29813385
7.42000000	9999.69328757	599.98159769	0.25585924
7.42500000	9999.71064031	599.98263841	0.23014726
7.43000000	9999.72072580	599.98324369	0.21303831
7.43500000	9999.72461478	599.98347654	0.20213346
7.44000000	9999.72520643	599.98351246	0.19557418
7.44500000	9999.72345651	599.98340693	0.19142204
7.45000000	9999.71829627	599.98309755	0.18906634
7.45500000	9999.71081611	599.98264940	0.18782213
7.46000000	9999.70101319	599.98206099	0.18726889
7.46500000	9999.68964797	599.98137882	0.18701975
7.47000000	9999.67829972	599.98069784	0.18702153
7.47500000	9999.67092608	599.98025584	0.18708829
7.48000000	9999.65899256	599.97953962	0.18740618
7.48500000	9999.65097748	599.97905878	0.18779403
7.49000000	9999.64096302	599.97845780	0.18822506
7.49500000	9999.63792414	599.97827549	0.18865899
7.50000000	9999.63826364	599.97829597	0.18907970
7.50500000	9999.63190599	599.97791445	0.18945023
7.51000000	9999.61818473	599.97709080	0.18995471
7.51500000	9999.60327587	599.97619623	0.19059752
7.52000000	9999.58852289	599.97531141	0.19136334
7.52500000	9999.57610735	599.97456668	0.19202980
7.53000000	9999.56750226	599.97405030	0.19253427
7.53500000	9999.55864026	599.97351851	0.19305178
7.54000000	9999.54911432	599.97294688	0.19360294
7.54500000	9999.53926926	599.97235611	0.19415977
7.55000000	9999.52795049	599.97167698	0.19474277
7.55500000	9999.51707122	599.97102420	0.19531846
7.56000000	9999.52033116	599.97121946	0.20279552
7.56500000	9999.51326530	599.97079593	0.20674994
7.57000000	9999.50678743	599.97040740	0.20998843
7.57500000	9999.49586754	599.96975236	0.21158394
7.58000000	10245.99349725	614.75961000	-468.69181950
7.58500000	9987.53773867	599.25226454	-18.27031313
7.59000000	9993.12433286	599.58745961	52.97934811
7.59500000	10003.39246388	600.20354796	48.84037935
7.60000000	10004.20191323	600.25211456	34.59363566
7.60500000	10002.07519767	600.12451139	22.80254197
7.61000000	10000.14450160	600.00867011	14.70976381
7.61500000	9999.02245068	599.94134734	9.42462938
7.62000000	9998.54603169	599.91276151	6.04032176
7.62500000	9998.45630807	599.90737861	3.92307950
7.63000000	9998.53667503	599.91220065	2.55480696
7.63500000	9998.68164215	599.92089825	1.68864624
7.64000000	9998.83208444	599.92992537	1.14347697
7.64500000	9998.96009163	599.93760508	0.79880804
7.65000000	9999.06022477	599.94361375	0.57945008
7.65500000	9999.13243520	599.94794582	0.44186680
7.66000000	9999.18201777	599.95092085	0.35357201
7.66500000	9999.21331578	599.95279873	0.29825094
7.67000000	9999.23082562	599.95384926	0.26352936
7.67500000	9999.23954880	599.95437276	0.24116874
7.68000000	9999.23968014	599.95438094	0.22720401
7.68500000	9999.23442593	599.95406528	0.21891181
7.69000000	9999.22776013	599.95366535	0.21364640
7.69500000	9999.21765637	599.95305908	0.21070722
7.70000000	9999.20289928	599.95217401	0.20915695
7.70500000	9999.18963936	599.95137875	0.20841305
7.71000000	9999.17419757	599.95045146	0.20833169
7.71500000	9999.15540284	599.94932407	0.20861311
7.72000000	9999.13542832	599.94812581	0.20912141
7.72500000	9999.11489420	599.94689347	0.20981739
7.73000000	9999.09141358	599.94548473	0.21064681
7.73500000	9999.12699357	599.94761940	0.22916244
7.74000000	9999.12814988	599.94768919	0.23939635
7.74500000	10058.00090269	603.48005435	-211.25377281
7.75000000	9985.17674102	599.11060455	26.94266290
7.75500000	10000.20552872	600.01233141	54.69725796
7.76000000	10005.18037989	600.31082251	43.57690970
7.76500000	10003.47201375	600.20832068	29.77391770
7.77000000	10000.85571641	600.05134284	19.40883213
7.77500000	9999.07566747	599.94453960	12.47089889
7.78000000	9998.20008517	599.89200506	7.99451965
7.78500000	9997.91583850	599.87495042	5.14454248
7.79000000	9997.93446141	599.87606806	3.33994132
7.79500000	9998.07703889	599.88462226	2.19597700
7.80000000	9998.24863071	599.89491804	1.46857032
7.80500000	9998.40452961	599.90427140	1.00911593
7.81000000	9998.52929623	599.91175780	0.71801896
7.81500000	9998.62075580	599.91724510	0.53532547
7.82000000	9998.68409278	599.92104576	0.41668964
7.82500000	9998.72386642	599.92343223	0.34290138
7.83000000	9998.74608631	599.92476506	0.29640328
7.83500000	9998.75484432	599.92529072	0.26732176
7.84000000	9998.75449936	599.92526962	0.24855773
7.84500000	9998.74708214	599.92482464	0.23790828
7.85000000	9998.73547566	599.92412855	0.23148776
7.85500000	9998.72053505	599.92323243	0.22772630
7.86000000	9998.70310784	599.92218649	0.22585405
7.86500000	9998.68543745	599.92112672	0.22575793
7.87000000	9998.71667845	599.92300051	0.25439033
7.87500000	10026.88777837	601.61326692	-155.25696286
7.88000000	9988.18162419	599.29089775	35.92197867
7.88500000	10002.72591701	600.16355545	54.15637653
7.89000000	10005.50648083	600.33038873	41.79730971
7.89500000	10002.89419782	600.17365182	28.29502644
7.90000000	10000.07344066	600.00440648	18.40324351
7.90500000	9998.33182931	599.89990977	11.81836901
7.91000000	9997.54460732	599.85267656	7.58293456
7.91500000	9997.33360123	599.84001634	4.88622707
7.92000000	9997.40742634	599.84444581	3.19560661
7.92500000	9997.57933436	599.85475974	2.10509108
7.93000000	9997.76727362	599.86603636	1.41351855
7.93500000	9997.93122785	599.87587351	0.97696173
7.94000000	9998.05824714	599.88349496	0.70190848
7.94500000	9998.14888333	599.88893332	0.52539033
7.95000000	9998.20687465	599.89241231	0.41717200
7.95500000	9998.24290170	599.89457362	0.34645154
7.96000000	9998.25874023	599.89552431	0.30382493
7.96500000	9998.26170755	599.89570216	0.27652720
7.97000000	9998.25626178	599.89537567	0.26043180
7.97500000	9998.24234848	599.89454113	0.25035579
7.98000000	9998.27246569	599.89634803	0.27021963
7.98500000	10020.86799974	601.25207949	-145.48924423
7.99000000	9990.02181663	599.40130856	37.28002918
7.99500000	10003.92196458	600.23531787	54.00501765
8.00000000	10005.65371289	600.33922288	41.46708440
8.00500000	10002.49662768	600.14979729	28.03486798
8.01000000	9999.47583776	599.96855003	18.22218053
8.01500000	9997.70316709	599.86219000	11.72063286
8.02000000	9996.92890399	599.81573404	7.51365000
8.02500000	9996.75314807	599.80518845	4.84101483
8.03000000	9996.85781798	599.81146883	3.16011192
8.03500000	9997.05544656	599.82332678	2.08667655
8.04000000	9997.25882728	599.83552954	1.41530218
8.04500000	9997.43274370	599.84596509	0.97770017
8.05000000	9997.56316580	599.85379002	0.70526455
8.05500000	9997.65454144	599.85927276	0.53303443
8.06000000	9997.71187935	599.86271307	0.42438980
8.06500000	9997.74431260	599.86465854	0.35570538
8.07000000	9997.75667111	599.86540040	0.31350917
8.07500000	9997.75506270	599.86530337	0.28768106
8.08000000	10115.09284967	606.90557057	-336.00564975
8.08500000	9987.21508589	599.23290489	5.51427082
8.09000000	10001.51127119	600.09067629	54.58975724
8.09500000	10006.36381415	600.38182882	46.67202234
8.10000000	10003.51126254	600.21067533	32.48530629
8.10500000	9999.90803067	599.99448194	21.30952750
8.11000000	9997.58880900	599.85532872	13.72849954
8.11500000	9996.49853818	599.78991240	8.80687282
8.12000000	9996.17655832	599.77059332	5.67047761
8.12500000	9996.23490661	599.77409396	3.68551428
8.13000000	9996.43616756	599.78616987	2.42468275
8.13500000	9996.66105527	599.79966322	1.63003329
8.14000000	9996.85799248	599.81147961	1.12223859
8.14500000	9997.01037814	599.82062295	0.79827684
8.15000000	9997.11906093	599.82714366	0.59345894
8.15500000	9997.18658907	599.83119573	0.46734763
8.16000000	9997.22516520	599.83350959	0.38623861
8.16500000	9997.24079990	599.83444823	0.33701601
8.17000000	9999.17950883	599.95077037	-80.58262784
8.17500000	9996.00873502	599.76052410	46.24397071
8.18000000	10006.31099380	600.37865995	52.30521379
8.18500000	10005.05735276	600.30344124	38.63979421
8.19000000	10000.94828245	600.05689712	25.82078787
8.19500000	9997.85414279	599.87124848	16.72768300
8.20000000	9996.22980067	599.77378825	10.72887294
8.20500000	9995.64103302	599.73846223	6.90279486
8.21000000	9995.59396139	599.73563780	4.47099057
8.21500000	9995.77558883	599.74653494	2.92408160
8.22000000	9996.01882682	599.76112951	1.94836211
8.22500000	9996.24499299	599.77469952	1.32566429
8.23000000	9996.42599477	599.78555970	0.93042473
8.23500000	9996.55556441	599.79333382	0.68364139
8.24000000	9996.64014397	599.79840888	0.52690286
8.24500000	9996.69099844	599.80146004	0.42697432
8.25000000	9997.46583846	599.84795054	-72.75801688
8.25500000	9997.59360062	599.85561617	47.22216282
8.26000000	10006.85274857	600.41116470	52.03985924
8.26500000	10004.80104787	600.28806270	38.26288806
8.27000000	10000.36497203	600.02189874	25.53406245
8.27500000	9997.18361929	599.83101741	16.52961063
8.28000000	9995.57533088	599.73451981	10.61659596
8.28500000	9995.01443365	599.70086629	6.82300027
8.29000000	9995.00065134	599.70003906	4.41685984
8.29500000	9995.21254797	599.71275294	2.90128880
8.30000000	9995.47423406	599.72845410	1.94348035
8.30500000	9995.71020288	599.74261191	1.32211646
8.31000000	9995.89130898	599.75347826	0.93340859
8.31500000	9996.03224113	599.76193478	0.68748812
8.32000000	9594.96684595	575.69801064	-203.14321967
8.32500000	9991.00133679	599.46007987	-26.88105252
8.33000000	10001.69209912	600.10152591	52.29367487
8.33500000	10007.26826579	600.43609567	49.61131718
8.34000000	10003.60091292	600.21605502	35.37351071
8.34500000	9999.02868210	599.94172080	23.37589627
8.35000000	9996.10791047	599.76647456	15.09502775
8.35500000	9994.75770342	599.68546218	9.70462236
8.36000000	9994.35883727	599.66153058	6.23730535
8.36500000	9994.44016057	599.66640976	4.06246148
8.37000000	9994.69053494	599.68143179	2.66721395
8.37500000	9994.96686458	599.69801227	1.78904401
8.38000000	9995.20518216	599.71231072	1.23220148
8.38500000	9995.38574612	599.72314471	0.87734524
8.39000000	10119.19658012	607.15179471	-358.42400944
8.39500000	9990.85368833	599.45122096	1.39199786
8.40000000	10004.59961996	600.27597675	54.49510040
8.40500000	10007.07301204	600.42438078	47.25493999
8.41000000	10002.35495291	600.14129725	32.98934805
8.41500000	9997.79605496	599.86776356	21.65569999
8.42000000	9995.12917535	599.70775041	13.96575659
8.42500000	9993.98540511	599.63912426	8.96894318
8.43000000	9993.72763144	599.62365748	5.78599281
8.43500000	9993.87715545	599.63262911	3.76739002
8.44000000	9994.16017373	599.64961073	2.49099492
8.44500000	9994.44735312	599.66684104	1.68278265
8.45000000	9994.68448985	599.68106909	1.16607559
8.45500000	10119.30100070	607.15806018	-361.55484987
8.46000000	9991.53188850	599.49191347	1.14277007
8.46500000	10005.22375914	600.31342518	54.52524988
8.47000000	10007.12974580	600.42778462	47.37320620
8.47500000	10001.99295735	600.11957773	33.08439538
8.48000000	9997.23255159	599.83395299	21.73130385
8.48500000	9994.48433851	599.66906034	14.00456794
8.49000000	9993.33712271	599.60022716	9.00306981
8.49500000	9993.09883682	599.58593002	5.81365305
8.50000000	9993.26724376	599.59603486	3.77890777
8.50500000	9993.57164065	599.61429872	2.50507755
8.51000000	9993.87270628	599.63236246	1.68673097
8.51500000	9994.12128675	599.64727708	1.17116507
8.52000000	9995.28842548	599.71730580	-53.27673257
8.52500000	10002.30520891	600.13831236	49.76885718
8.53000000	10007.99085774	600.47945178	51.40831549
8.53500000	10003.40034566	600.20402080	37.32223702
8.54000000	9997.91656219	599.87499352	24.80154130
8.54500000	9994.47317096	599.66839032	16.04813082
8.55000000	9992.90204756	599.57412285	10.31596091
8.55500000	9992.46481717	599.54788902	6.64988222
8.56000000	9992.57199088	599.55431981	4.32494096
8.56500000	9992.87451660	599.57247056	2.83923569
8.57000000	9993.19897702	599.59193860	1.90682716
8.57500000	10118.05879425	607.08352775	-363.99399275
8.58000000	9992.97715892	599.57862932	0.79892566
8.58500000	10006.33249230	600.37994995	54.61658932
8.59000000	10007.09605088	600.42576282	47.53077750
8.59500000	10001.17241875	600.07034534	33.19917338
8.60000000	9996.02736692	599.76164165	21.80046285
8.60500000	9993.15972711	599.58958396	14.05148334
8.61000000	9992.01455380	599.52087312	9.04360178
8.61500000	9991.81153465	599.50869252	5.83421005
8.62000000	9992.02948704	599.52176959	3.80915280
8.62500000	9992.37093371	599.54225589	2.52954263
8.63000000	9592.26722123	575.53603310	-201.65725433
8.63500000	9993.59774275	599.61586455	-24.79752826
8.64000000	10005.35018391	600.32101133	52.99098427
8.64500000	10007.77670580	600.46660228	49.85851322
8.65000000	10001.79128237	600.10747704	35.47922025
8.65500000	9996.11458011	599.76687490	23.44371548
8.66000000	9992.81821676	599.56909320	15.13060947
8.66500000	9991.44374209	599.48662426	9.73309510
8.67000000	9991.14886932	599.46893174	6.28065097
8.67500000	9991.35068277	599.48104125	4.11586723
8.68000000	9991.69925350	599.50195520	2.71639680
8.68500000	10064.45854054	603.86751261	-266.67268387
8.69000000	9995.74131368	599.74447925	18.28856217
8.69500000	10008.14168545	600.48850110	55.39607916
8.70000000	10006.08656966	600.36519439	45.60510738
8.70500000	9999.31084003	599.95864999	31.39423451
8.71000000	9994.19940911	599.65196484	20.53743890
8.71500000	9991.54867115	599.49292039	13.22787962
8.72000000	9990.59240064	599.43554410	8.51347843
8.72500000	9990.52395090	599.43143744	5.51547153
8.73000000	9990.81552800	599.44893178	3.61009738
8.73500000	10174.79417134	610.48765018	-463.36525477
8.74000000	9994.30435808	599.65826138	-17.00826061
8.74500000	10006.75585475	600.40535161	53.78557939
8.75000000	10007.51965812	600.45117936	49.49440098
8.75500000	10000.63863099	600.03831795	35.02821893
8.76000000	9994.67892110	599.68073556	23.10191983
8.76500000	9991.36729648	599.48203738	14.91624512
8.77000000	9990.04748408	599.40284864	9.59831550
8.77500000	9989.82191451	599.38931514	6.20449749
8.78000000	9990.07786031	599.40467167	4.06767111
8.78500000	10114.97235105	606.89834111	-367.68833253
8.79000000	9995.22084062	599.71325031	0.52409985
8.79500000	10008.04802591	600.48288150	55.11614926
8.80000000	10006.72214127	600.40332853	47.99492216
8.80500000	9999.32891715	599.95973456	33.51071871
8.81000000	9993.51320099	599.61079191	22.02068560
8.81500000	9990.42351600	599.42541074	14.19134194
8.82000000	9989.28008980	599.35680514	9.13510782
8.82500000	9989.15994055	599.34959610	5.91409829
8.83000000	9989.46746176	599.36804734	3.87939646
8.83500000	10009.98063809	600.59883862	-122.69762252
8.84000000	10002.40908310	600.14454501	41.29861182
8.84500000	10009.16863154	600.55011755	54.54188558
8.85000000	10003.04172780	600.18250405	41.28113774
8.85500000	9995.68984028	599.74139040	27.76707895
8.86000000	9991.09590602	599.46575413	18.04245012
8.86500000	9989.01894302	599.34113642	11.61635203
8.87000000	9988.45324095	599.30719428	7.49370135
8.87500000	9988.60355258	599.31621307	4.87244807
8.88000000	10041.00035867	602.46002174	-217.95311233
8.88500000	9999.33017434	599.95981041	27.08272766
8.89000000	10009.44055184	600.56643328	55.92438863
8.89500000	10004.51154179	600.27069267	44.70439095
8.90000000	9996.56004565	599.79360319	30.53998236
8.90500000	9991.17810902	599.47068660	19.92633950
8.91000000	9988.60231551	599.31613916	12.84432383
8.91500000	9987.78931239	599.26735914	8.27493598
8.92000000	9987.85633916	599.27138040	5.37526860
8.92500000	10028.04973079	601.68298402	-184.43001495
8.93000000	10000.91967927	600.05518060	32.37289226
8.93500000	10009.58480858	600.57508872	55.83855491
8.94000000	10003.62595486	600.21755721	43.79591914
8.94500000	9995.49959644	599.72997563	29.76151711
8.95000000	9990.21981309	599.41318850	19.38316967
8.95500000	9987.78412417	599.26704758	12.49919997
8.96000000	9987.06745922	599.22404723	8.05863238
8.96500000	9987.18770777	599.23126241	5.22763566
8.97000000	9999.34145030	599.96048693	-66.90369702
8.97500000	10006.35310524	600.38118681	49.62089296
8.98000000	10008.46720283	600.50803239	53.18205203
8.98500000	10000.26869927	600.01612174	38.89610709
8.99000000	9992.70507297	599.56230460	25.89920343
8.99500000	9988.42513922	599.30550849	16.78537631
9.00000000	9986.67986620	599.20079187	10.81607603
9.00500000	9986.33717920	599.18023091	6.97725986
9.01000000	10042.10110733	602.52606683	-224.68082900
9.01500000	10000.46810449	600.02808644	26.20254977
9.02000000	10009.86337155	600.59180242	56.48225687
9.02500000	10003.68564986	600.22113900	45.27687705
9.03000000	9994.87662407	599.69259721	30.93306106
9.03500000	9989.12697376	599.34761813	20.20155439
9.04000000	9986.44042366	599.18642567	13.02553738
9.04500000	9985.64702296	599.13882142	8.40276754
9.05000000	10093.68803510	605.62128243	-339.28542224
9.05500000	9998.03390781	599.88203402	7.10752766
9.06000000	10009.80516765	600.58831007	56.46655272
9.06500000	10005.11024642	600.30661462	48.22353318
9.07000000	9995.79867258	599.74792049	33.51353702
9.07500000	9989.22011432	599.35320722	21.96111049
9.08000000	9986.01415840	599.16084958	14.17621394
9.08500000	9984.96296344	599.09777783	9.13675668
9.09000000	10084.14449088	605.04866950	-321.70165715
9.09500000	9998.72618641	599.92357131	10.37453567
9.10000000	10010.03988710	600.60239326	56.82316688
9.10500000	10004.58090016	600.27485422	47.99495025
9.11000000	9994.99277761	599.69956698	33.25763193
9.11500000	9988.38246372	599.30294793	21.77603466
9.12000000	9985.23488561	599.11409305	14.07955059
9.12500000	9984.21760479	599.05305614	9.06575488
9.13000000	10028.67956522	601.72077424	-191.99466730
9.13500000	10002.63957355	600.15837442	32.18752052
9.14000000	10009.96806647	600.59808405	56.88868858
9.14500000	10001.95950626	600.11757018	44.71852930
9.15000000	9992.51389477	599.55083396	30.38607158
9.15500000	9986.69522237	599.20171308	19.82084524
9.16000000	9984.11535044	599.04692109	12.79463827
9.16500000	9983.42885531	599.00573089	8.24184647
9.17000000	9998.44617955	599.90677055	-51.44032190
9.17500000	10008.49860352	600.50991656	52.25309632
9.18000000	10007.41304737	600.44478303	53.34809574
9.18500000	9997.23027433	599.83381613	38.59697557
9.19000000	9988.95288740	599.33717286	25.62366494
9.19500000	9984.54797761	599.07287851	16.58753846
9.20000000	9982.90329102	598.97419785	10.68866807
9.20500000	10027.82537066	601.66952198	-191.31943488
9.21000000	10003.32184308	600.19931092	32.93537523
9.21500000	10009.97125578	600.59827520	57.29971617
9.22000000	10001.12886378	600.06773138	44.99110286
9.22500000	9991.21406847	599.47284398	30.56765449
9.23000000	9985.19531299	599.11171911	19.92564061
9.23500000	9982.57740799	598.95464453	12.85451743
9.24000000	10088.32173369	605.29930363	-335.54309634
9.24500000	9999.68309645	599.98098588	8.94830040
9.25000000	10010.46295313	600.62777747	57.63206390
9.25500000	10003.47580514	600.20854826	48.91642843
9.26000000	9992.71642409	599.56298524	33.92112415
9.26500000	9985.55788727	599.13347308	22.23647672
9.27000000	9982.19934420	598.93196058	14.34841317
9.27500000	10123.81657506	607.42899465	-403.50726154
9.28000000	9998.85446086	599.93126742	-3.28013616
9.28500000	10010.45320726	600.62719250	57.28594098
9.29000000	10004.14225581	600.24853532	50.42754801
9.29500000	9992.96689082	599.57801373	35.29105840
9.30000000	9985.26863243	599.11611751	23.17719065
9.30500000	9981.60294732	598.89617704	14.97245115
9.31000000	10097.77313181	605.86638836	-357.76258006
9.31500000	9999.74769757	599.98486184	5.17659833
9.32000000	10010.66412349	600.63984755	58.08497989
9.32500000	10003.14467208	600.18867991	49.75057052
9.33000000	9991.76326237	599.50579581	34.58729511
9.33500000	9984.20732214	599.05243946	22.67795970
9.34000000	9980.70026010	598.84201589	14.64566862
9.34500000	10041.26549073	602.47592927	-232.56263536
9.35000000	10003.12136602	600.18728223	27.26555314
9.35500000	10010.22773284	600.61366366	58.52309413
9.36000000	10000.35026646	600.02101586	46.86375721
9.36500000	9989.23587508	599.35415293	32.01360493
9.37000000	9982.46739126	598.94804336	20.87732804
9.37500000	9979.57016117	598.77420936	13.48517971
9.38000000	10003.48372085	600.20902352	-93.95169387
9.38500000	10008.22473564	600.49348418	48.54894552
9.39000000	10007.76147287	600.46568842	56.43680722
9.39500000	9995.78436842	599.74706218	41.83433217
9.40000000	9985.77302425	599.14638173	27.97308467
9.40500000	9980.38828131	598.82329680	18.14361757
9.41000000	10101.57684972	606.09461091	-369.04983211
9.41500000	10000.18114279	600.01086849	4.20409307
9.42000000	10010.77434583	600.64646078	58.66027416
9.42500000	10002.21662442	600.13299729	50.51066156
9.43000000	9989.97553200	599.39853222	35.14288438
9.43500000	9981.99502516	598.91970110	23.05319732
9.44000000	9978.35093946	598.70105623	14.89584113
9.44500000	10001.91743781	600.11504673	-83.20670422
9.45000000	10008.97763376	600.53865788	50.47797285
9.45500000	10007.04025574	600.42241554	56.55489394
9.46000000	9994.23992457	599.65439530	41.58992052
9.46500000	9984.01697366	599.04101865	27.73842255
9.47000000	9978.68104382	598.72086225	17.99925040
9.47500000	10028.65944911	601.71956720	-201.94682371
9.48000000	10004.98291968	600.29897471	33.40753968
9.48500000	10009.68641739	600.58118541	59.37811019
9.49000000	9997.76679628	599.86600755	46.64469593
9.49500000	9985.93388114	599.15603282	31.70127062
9.50000000	9979.07006655	598.74420409	20.65139405
9.50500000	10074.50448716	604.47026895	-318.38568873
9.51000000	10001.81766378	600.10905976	14.17051372
9.51500000	10010.65516579	600.63931023	59.79902738
9.52000000	10000.06077784	600.00364651	49.98600714
9.52500000	9987.20716453	599.23242952	34.50577611
9.53000000	9979.27537899	598.75652275	22.60943761
9.53500000	10109.16447140	606.54986834	-388.26029152
9.54000000	10000.53434465	600.03206095	1.98286264
9.54500000	10010.95362444	600.65721719	59.73114453
9.55000000	10000.97867384	600.05871998	51.66006735
9.55500000	9987.58104261	599.25486272	35.98842000
9.56000000	9979.01613341	598.74096826	23.63366907
9.56500000	10106.03910709	606.36234604	-383.67383589
9.57000000	10000.79539552	600.04772372	3.09335853
9.57500000	10010.89128482	600.65347698	59.95319498
9.58000000	10000.47524829	600.02851497	51.75080721
9.58500000	9986.80824789	599.20849485	36.01158704
9.59000000	9978.17695249	598.69061730	23.64910592
9.59500000	10068.86232458	604.13173951	-309.24884911
9.60000000	10002.57418203	600.15445128	16.88449674
9.60500000	10010.47304975	600.62838281	60.65036569
9.61000000	9998.52448179	599.91146876	50.33191807
9.61500000	9984.95325132	599.09719528	34.66988178
9.62000000	9976.78689321	598.60721366	22.70605189
9.62500000	10025.78730617	601.54723815	-197.02151382
9.63000000	10006.05522849	600.36331373	35.59413776
9.63500000	10008.96482049	600.53788906	60.57033774
9.64000000	9995.08973646	599.70538395	47.36092238
9.64500000	9982.16957013	598.93017451	32.11111964
9.65000000	9974.99260708	598.49955608	20.95279521
9.65500000	10001.98271466	600.11896333	-86.19418917
9.66000000	10009.78363512	600.58701859	51.94340762
9.66500000	10005.46766460	600.32806000	58.32357900
9.67000000	9990.33537926	599.42012267	42.92343033
9.67500000	9978.82380340	598.72942801	28.63786638
9.68000000	10128.64005579	607.71840322	-428.79498333
9.68500000	10000.61696519	600.03701812	-4.03771364
9.69000000	10011.02836744	600.66170173	60.80891331
9.69500000	9999.61675322	599.97700564	53.40936978
9.70000000	9984.70178162	599.08210658	37.33672163
9.70500000	9975.27879991	598.51672762	24.54912146
9.71000000	10012.82978417	600.76978675	-151.13586400
9.71500000	10008.02539111	600.48152337	43.66472381
9.72000000	10007.34562152	600.44073724	60.67548829
9.72500000	9991.89098832	599.51345925	46.23863208
9.73000000	9978.92987693	598.73579280	31.14861011
9.73500000	10138.31564246	608.29893870	-448.05867676
9.74000000	10000.52135604	600.03128164	-6.69578311
9.74500000	10010.96850791	600.65811053	61.02497466
9.75000000	9999.11402996	599.94684155	54.16301016
9.75500000	9983.57619256	599.01457182	37.93786723
9.76000000	9973.75699632	598.42541957	24.94210898
9.76500000	10003.86071914	600.23164343	-101.71625703
9.77000000	10009.81213300	600.58872782	51.38566005
9.77500000	10005.05823596	600.30349410	59.87762028
9.78000000	9988.61054916	599.31663295	44.37919287
9.78500000	9976.08723895	598.56523434	29.65595078
9.79000000	10039.44978413	602.36698749	-243.81360793
9.79500000	10005.46497334	600.32789799	30.07781594
9.80000000	10008.94768024	600.53686107	62.58911325
9.80500000	9993.33716046	599.60022973	49.94867097
9.81000000	9978.63657713	598.71819481	34.06587915
9.81500000	10121.62992940	607.29779571	-421.79213728
9.82000000	10001.25250700	600.07515013	-0.78598451
9.82500000	10010.77538132	600.64652287	62.32150408
9.83000000	9997.25193591	599.83511609	54.31418336
9.83500000	9981.00246547	598.86014773	37.87188333
9.84000000	9971.06955028	598.26417292	24.89360489
9.84500000	9999.49063843	599.96943814	-34.49173668
9.85000000	10011.10243687	600.66614626	59.89322581
9.85500000	10000.07225446	600.00433486	57.38377230
9.86000000	9982.90506900	598.97430393	40.88902426
9.86500000	9971.56947390	598.29416861	27.02945656
9.87000000	9999.89101236	599.99346070	-62.25790865
9.87500000	10010.87779753	600.65266817	57.24809720
9.88000000	10001.74932834	600.10495938	59.29647630
9.88500000	9984.00794521	599.04047651	42.93585121
9.89000000	9971.71396662	598.30283793	28.51830799
9.89500000	10000.85929334	600.05155770	-77.01880341
9.90000000	10010.68346006	600.64100737	55.82957249
9.90500000	10002.33407438	600.14004421	60.26950984
9.91000000	9984.17683224	599.05060966	43.96409297
9.91500000	9971.32011513	598.27920723	29.24509022
9.92000000	10000.62530762	600.03751839	-74.08435903
9.92500000	10010.73855088	600.64431309	56.39128261
9.93000000	10001.80499158	600.10829948	60.36054521
9.93500000	9983.36086854	599.00165231	43.97732639
9.94000000	9970.43382020	598.22602902	29.25504062
9.94500000	9999.63869355	599.97832135	-54.78689254
9.95000000	10011.03611893	600.66216713	58.99289227
9.95500000	10000.16735014	600.01004086	59.65574763
9.96000000	9981.54245045	598.89254710	42.98785071
9.96500000	9968.93145308	598.13588725	28.47861858
9.97000000	9999.79732239	599.98783901	-24.87066229
9.97500000	10011.05254814	600.66315254	62.34038006
9.98000000	9997.30417953	599.83825101	57.98496201
9.98500000	9978.75219902	598.72513231	41.03267730
9.99000000	10102.82651085	606.16959096	-392.54180789
[truncated: 1,001 more rows]
