# Supplementary material for: An Efficient Contact Model for the Simulation of Cargo Airdrop Extraction Phase
Source: Hindawi journal article supplement (doi:10.1155/2018/9895451), 2018-10-17
Supplement: f1 [file 9895451.f1.zip › case1_stick_slip/contact_pts40.csv]

t(s)	cntcNrmForc(N)	cntcFricForc(N)	cntcPitchMoment(N/m)
0.00000000	0.00000000	0.00000000	0.00000000
0.00500000	8506.88072781	0.00000000	0.00000000
0.01000000	14864.44074614	0.00000000	0.00000000
0.01500000	11278.04936280	0.00000000	0.00000000
0.02000000	10274.60694193	0.00000000	0.00000000
0.02500000	10089.90635793	0.00000000	0.00000000
0.03000000	10043.87924377	0.00000000	0.00000000
0.03500000	10025.03821607	0.00000000	0.00000000
0.04000000	10014.95563636	0.00000000	0.00000000
0.04500000	10009.06997341	0.00000000	0.00000000
0.05000000	10005.54571181	0.00000000	0.00000000
0.05500000	10003.40861427	0.00000000	0.00000000
0.06000000	10002.08269046	0.00000000	0.00000000
0.06500000	10001.26494147	0.00000000	0.00000000
0.07000000	10000.78104089	0.00000000	0.00000000
0.07500000	10000.47428502	0.00000000	0.00000000
0.08000000	10000.29363189	0.00000000	0.00000000
0.08500000	10000.18209511	0.00000000	0.00000000
0.09000000	10000.09799431	0.00000000	-0.00000518
0.09500000	10000.05106972	0.00000000	-0.00001205
0.10000000	10000.03612063	0.00000000	-0.00002971
0.10500000	10000.03733450	0.00000000	0.00053040
0.11000000	10000.01681568	0.00000000	-0.00065001
0.11500000	10000.00934469	0.00000000	0.00036686
0.12000000	10000.00576049	0.00000000	-0.00021336
0.12500000	10000.00299745	0.00000000	0.00004179
0.13000000	10000.00295556	0.00000000	-0.00011029
0.13500000	9999.99816189	0.00000000	0.00074974
0.14000000	10000.00047279	0.00000000	0.00012097
0.14500000	10000.00045382	0.00000000	0.00002704
0.15000000	10000.00056559	0.00000000	0.00002366
0.15500000	10000.00068324	0.00000000	0.00002435
0.16000000	10000.00077632	0.00000000	0.00002239
0.16500000	10000.00040274	0.00000000	-0.00002990
0.17000000	10000.00002916	0.00000000	-0.00008219
0.17500000	10000.00006212	0.00000000	-0.00008696
0.18000000	10000.00253150	0.00000000	0.00019308
0.18500000	10000.00500089	0.00000000	0.00047311
0.19000000	10000.00431919	0.00000000	0.00040335
0.19500000	9999.99344784	0.00000000	-0.00079755
0.20000000	9999.98257650	0.00000000	-0.00199844
0.20500000	9999.97998543	0.00000000	-0.00226994
0.21000000	9999.99426682	0.00000000	-0.00064765
0.21500000	10000.00854821	0.00000000	0.00097464
0.22000000	10000.01411997	0.00000000	0.00160904
0.22500000	10000.00777219	0.00000000	0.00089146
0.23000000	10000.00142440	0.00000000	0.00017388
0.23500000	9999.99834755	0.00000000	-0.00017685
0.24000000	9999.99834863	0.00000000	-0.00018239
0.24500000	9999.99834971	0.00000000	-0.00018792
0.25000000	9999.99835078	0.00000000	-0.00019346
0.25500000	9999.99835186	0.00000000	-0.00019899
0.26000000	9999.99835294	0.00000000	-0.00020453
0.26500000	9999.99835661	0.00000000	-0.00020966
0.27000000	9999.99858524	0.00000000	-0.00017999
0.27500000	9999.99881388	0.00000000	-0.00015031
0.28000000	9999.99904251	0.00000000	-0.00012064
0.28500000	9999.99927115	0.00000000	-0.00009096
0.29000000	9999.99949978	0.00000000	-0.00006129
0.29500000	9999.99972842	0.00000000	-0.00003161
0.30000000	9999.99984662	0.00000000	-0.00001686
0.30500000	9999.99985768	0.00000000	-0.00001659
0.31000000	9999.99986874	0.00000000	-0.00001632
0.31500000	9999.99987980	0.00000000	-0.00001605
0.32000000	9999.99989087	0.00000000	-0.00001578
0.32500000	9999.99990193	0.00000000	-0.00001551
0.33000000	9999.99991299	0.00000000	-0.00001524
0.33500000	9999.99992405	0.00000000	-0.00001497
0.34000000	9999.99993512	0.00000000	-0.00001470
0.34500000	9999.99994618	0.00000000	-0.00001443
0.35000000	9999.99995724	0.00000000	-0.00001416
0.35500000	9999.99996830	0.00000000	-0.00001390
0.36000000	9999.99997936	0.00000000	-0.00001363
0.36500000	9999.99999043	0.00000000	-0.00001336
0.37000000	10000.00000149	0.00000000	-0.00001309
0.37500000	10000.00001255	0.00000000	-0.00001282
0.38000000	10000.00002361	0.00000000	-0.00001255
0.38500000	10000.00003468	0.00000000	-0.00001228
0.39000000	10000.00004574	0.00000000	-0.00001201
0.39500000	10000.00005680	0.00000000	-0.00001174
0.40000000	10000.00006786	0.00000000	-0.00001147
0.40500000	10000.00007893	0.00000000	-0.00001120
0.41000000	10000.00008999	0.00000000	-0.00001093
0.41500000	10000.00010105	0.00000000	-0.00001066
0.42000000	10000.00011211	0.00000000	-0.00001039
0.42500000	10000.00012318	0.00000000	-0.00001012
0.43000000	10000.00013424	0.00000000	-0.00000985
0.43500000	10000.00014530	0.00000000	-0.00000958
0.44000000	10000.00015636	0.00000000	-0.00000931
0.44500000	10000.00016743	0.00000000	-0.00000904
0.45000000	10000.00016049	0.00000000	-0.00001221
0.45500000	10000.00015058	0.00000000	-0.00001596
0.46000000	10000.00014066	0.00000000	-0.00001970
0.46500000	10000.00013075	0.00000000	-0.00002344
0.47000000	10000.00012083	0.00000000	-0.00002719
0.47500000	10000.00011092	0.00000000	-0.00003093
0.48000000	10000.00010100	0.00000000	-0.00003467
0.48500000	10000.00009108	0.00000000	-0.00003842
0.49000000	10000.00008117	0.00000000	-0.00004216
0.49500000	10000.00007125	0.00000000	-0.00004590
0.50000000	10000.00006134	0.00000000	-0.00004965
0.50500000	10000.00005142	0.00000000	-0.00005339
0.51000000	10000.00004151	0.00000000	-0.00005714
0.51500000	10000.00003159	0.00000000	-0.00006088
0.52000000	10000.00002167	0.00000000	-0.00006462
0.52500000	10000.00001176	0.00000000	-0.00006837
0.53000000	10000.00000184	0.00000000	-0.00007211
0.53500000	9999.99999193	0.00000000	-0.00007585
0.54000000	9999.99998201	0.00000000	-0.00007960
0.54500000	9999.99997210	0.00000000	-0.00008334
0.55000000	9999.99996218	0.00000000	-0.00008709
0.55500000	9999.99995226	0.00000000	-0.00009083
0.56000000	9999.99994235	0.00000000	-0.00009457
0.56500000	9999.99993243	0.00000000	-0.00009832
0.57000000	9999.99992252	0.00000000	-0.00010206
0.57500000	9999.99991260	0.00000000	-0.00010580
0.58000000	9999.99990268	0.00000000	-0.00010955
0.58500000	9999.99989277	0.00000000	-0.00011329
0.59000000	9999.99988285	0.00000000	-0.00011703
0.59500000	9999.99987515	0.00000000	-0.00011964
0.60000000	9999.99987589	0.00000000	-0.00011793
0.60500000	9999.99987663	0.00000000	-0.00011621
0.61000000	9999.99987737	0.00000000	-0.00011449
0.61500000	9999.99987810	0.00000000	-0.00011277
0.62000000	9999.99987884	0.00000000	-0.00011106
0.62500000	9999.99987958	0.00000000	-0.00010934
0.63000000	9999.99988032	0.00000000	-0.00010762
0.63500000	9999.99988105	0.00000000	-0.00010591
0.64000000	9999.99988179	0.00000000	-0.00010419
0.64500000	9999.99988253	0.00000000	-0.00010247
0.65000000	9999.99988327	0.00000000	-0.00010076
0.65500000	9999.99988401	0.00000000	-0.00009904
0.66000000	9999.99988474	0.00000000	-0.00009732
0.66500000	9999.99988548	0.00000000	-0.00009561
0.67000000	9999.99988622	0.00000000	-0.00009389
0.67500000	9999.99988696	0.00000000	-0.00009217
0.68000000	9999.99988769	0.00000000	-0.00009045
0.68500000	9999.99988843	0.00000000	-0.00008874
0.69000000	9999.99988917	0.00000000	-0.00008702
0.69500000	9999.99988991	0.00000000	-0.00008530
0.70000000	9999.99989064	0.00000000	-0.00008359
0.70500000	9999.99989138	0.00000000	-0.00008187
0.71000000	9999.99989212	0.00000000	-0.00008015
0.71500000	9999.99989286	0.00000000	-0.00007844
0.72000000	9999.99989360	0.00000000	-0.00007672
0.72500000	9999.99989433	0.00000000	-0.00007500
0.73000000	9999.99989507	0.00000000	-0.00007328
0.73500000	9999.99989581	0.00000000	-0.00007157
0.74000000	9999.99989655	0.00000000	-0.00006985
0.74500000	9999.99989728	0.00000000	-0.00006813
0.75000000	9999.99989802	0.00000000	-0.00006642
0.75500000	9999.99989876	0.00000000	-0.00006470
0.76000000	9999.99989950	0.00000000	-0.00006298
0.76500000	9999.99990023	0.00000000	-0.00006127
0.77000000	9999.99990097	0.00000000	-0.00005955
0.77500000	9999.99990171	0.00000000	-0.00005783
0.78000000	9999.99990245	0.00000000	-0.00005611
0.78500000	9999.99990318	0.00000000	-0.00005440
0.79000000	9999.99990392	0.00000000	-0.00005268
0.79500000	9999.99990466	0.00000000	-0.00005096
0.80000000	9999.99990540	0.00000000	-0.00004925
0.80500000	9999.99990614	0.00000000	-0.00004753
0.81000000	9999.99990687	0.00000000	-0.00004581
0.81500000	9999.99990761	0.00000000	-0.00004410
0.82000000	9999.99990835	0.00000000	-0.00004238
0.82500000	9999.99990909	0.00000000	-0.00004066
0.83000000	9999.99990982	0.00000000	-0.00003894
0.83500000	9999.99991056	0.00000000	-0.00003723
0.84000000	9999.99991130	0.00000000	-0.00003551
0.84500000	9999.99991204	0.00000000	-0.00003379
0.85000000	9999.99991277	0.00000000	-0.00003208
0.85500000	9999.99991351	0.00000000	-0.00003036
0.86000000	9999.99991425	0.00000000	-0.00002864
0.86500000	9999.99991499	0.00000000	-0.00002693
0.87000000	9999.99991572	0.00000000	-0.00002521
0.87500000	9999.99991646	0.00000000	-0.00002349
0.88000000	9999.99991720	0.00000000	-0.00002178
0.88500000	9999.99991794	0.00000000	-0.00002006
0.89000000	9999.99991868	0.00000000	-0.00001834
0.89500000	9999.99991941	0.00000000	-0.00001662
0.90000000	9999.99992015	0.00000000	-0.00001491
0.90500000	9999.99992089	0.00000000	-0.00001319
0.91000000	9999.99992163	0.00000000	-0.00001147
0.91500000	9999.99992236	0.00000000	-0.00000976
0.92000000	9999.99992310	0.00000000	-0.00000804
0.92500000	9999.99992384	0.00000000	-0.00000632
0.93000000	9999.99992458	0.00000000	-0.00000461
0.93500000	9999.99992531	0.00000000	-0.00000289
0.94000000	9999.99992605	0.00000000	-0.00000117
0.94500000	9999.99992679	0.00000000	0.00000055
0.95000000	9999.99992753	0.00000000	0.00000226
0.95500000	9999.99992827	0.00000000	0.00000398
0.96000000	9999.99992900	0.00000000	0.00000570
0.96500000	9999.99992974	0.00000000	0.00000741
0.97000000	9999.99993048	0.00000000	0.00000913
0.97500000	9999.99993122	0.00000000	0.00001085
0.98000000	9999.99993195	0.00000000	0.00001256
0.98500000	9999.99993269	0.00000000	0.00001428
0.99000000	9999.99993343	0.00000000	0.00001600
0.99500000	9999.99993417	0.00000000	0.00001772
1.00000000	9999.99993490	0.00000000	0.00001943
1.00500000	9999.99993564	0.00000000	0.00002115
1.01000000	9999.99993638	0.00000000	0.00002287
1.01500000	9999.99993712	0.00000000	0.00002458
1.02000000	9999.99993785	0.00000000	0.00002630
1.02500000	9999.99993859	0.00000000	0.00002802
1.03000000	9999.99993933	0.00000000	0.00002973
1.03500000	9999.99994007	0.00000000	0.00003145
1.04000000	9999.99994081	0.00000000	0.00003317
1.04500000	9999.99994154	0.00000000	0.00003488
1.05000000	9999.99994228	0.00000000	0.00003660
1.05500000	9999.99994302	0.00000000	0.00003832
1.06000000	9999.99994376	0.00000000	0.00004004
1.06500000	9999.99994449	0.00000000	0.00004175
1.07000000	9999.99994523	0.00000000	0.00004347
1.07500000	9999.99994597	0.00000000	0.00004519
1.08000000	9999.99994671	0.00000000	0.00004690
1.08500000	9999.99994744	0.00000000	0.00004862
1.09000000	9999.99994818	0.00000000	0.00005034
1.09500000	9999.99994892	0.00000000	0.00005205
1.10000000	9999.99994966	0.00000000	0.00005377
1.10500000	9999.99995040	0.00000000	0.00005549
1.11000000	9999.99995113	0.00000000	0.00005721
1.11500000	9999.99995187	0.00000000	0.00005892
1.12000000	9999.99995261	0.00000000	0.00006064
1.12500000	9999.99995335	0.00000000	0.00006236
1.13000000	9999.99995408	0.00000000	0.00006407
1.13500000	9999.99995482	0.00000000	0.00006579
1.14000000	9999.99995556	0.00000000	0.00006751
1.14500000	9999.99995630	0.00000000	0.00006922
1.15000000	9999.99995703	0.00000000	0.00007094
1.15500000	9999.99995777	0.00000000	0.00007266
1.16000000	9999.99995851	0.00000000	0.00007438
1.16500000	9999.99995925	0.00000000	0.00007609
1.17000000	9999.99995998	0.00000000	0.00007781
1.17500000	9999.99996072	0.00000000	0.00007953
1.18000000	9999.99996146	0.00000000	0.00008124
1.18500000	9999.99996220	0.00000000	0.00008296
1.19000000	9999.99996294	0.00000000	0.00008468
1.19500000	9999.99996367	0.00000000	0.00008639
1.20000000	9999.99996441	0.00000000	0.00008811
1.20500000	9999.99996515	0.00000000	0.00008983
1.21000000	9999.99996589	0.00000000	0.00009155
1.21500000	9999.99996662	0.00000000	0.00009326
1.22000000	9999.99996736	0.00000000	0.00009498
1.22500000	9999.99996810	0.00000000	0.00009670
1.23000000	9999.99996884	0.00000000	0.00009841
1.23500000	9999.99996957	0.00000000	0.00010013
1.24000000	9999.99997031	0.00000000	0.00010185
1.24500000	9999.99997105	0.00000000	0.00010356
1.25000000	9999.99997179	0.00000000	0.00010528
1.25500000	9999.99997253	0.00000000	0.00010700
1.26000000	9999.99997326	0.00000000	0.00010871
1.26500000	9999.99997400	0.00000000	0.00011043
1.27000000	9999.99997474	0.00000000	0.00011215
1.27500000	9999.99997548	0.00000000	0.00011387
1.28000000	9999.99997621	0.00000000	0.00011558
1.28500000	9999.99997695	0.00000000	0.00011730
1.29000000	9999.99997769	0.00000000	0.00011902
1.29500000	9999.99997843	0.00000000	0.00012073
1.30000000	9999.99997916	0.00000000	0.00012245
1.30500000	9999.99997990	0.00000000	0.00012417
1.31000000	9999.99998064	0.00000000	0.00012588
1.31500000	9999.99998138	0.00000000	0.00012760
1.32000000	9999.99998211	0.00000000	0.00012932
1.32500000	9999.99998285	0.00000000	0.00013104
1.33000000	9999.99998359	0.00000000	0.00013275
1.33500000	9999.99998433	0.00000000	0.00013447
1.34000000	9999.99998507	0.00000000	0.00013619
1.34500000	9999.99998580	0.00000000	0.00013790
1.35000000	9999.99998654	0.00000000	0.00013962
1.35500000	9999.99998728	0.00000000	0.00014134
1.36000000	9999.99998802	0.00000000	0.00014305
1.36500000	9999.99998875	0.00000000	0.00014477
1.37000000	9999.99998949	0.00000000	0.00014649
1.37500000	9999.99999023	0.00000000	0.00014821
1.38000000	9999.99999097	0.00000000	0.00014992
1.38500000	9999.99999170	0.00000000	0.00015164
1.39000000	9999.99999244	0.00000000	0.00015336
1.39500000	9999.99999318	0.00000000	0.00015507
1.40000000	9999.99999392	0.00000000	0.00015679
1.40500000	9999.99999465	0.00000000	0.00015851
1.41000000	9999.99999539	0.00000000	0.00016022
1.41500000	9999.99999613	0.00000000	0.00016194
1.42000000	9999.99999687	0.00000000	0.00016366
1.42500000	9999.99999761	0.00000000	0.00016538
1.43000000	9999.99999834	0.00000000	0.00016709
1.43500000	9999.99999908	0.00000000	0.00016881
1.44000000	9999.99999982	0.00000000	0.00017053
1.44500000	10000.00000056	0.00000000	0.00017224
1.45000000	10000.00000129	0.00000000	0.00017396
1.45500000	10000.00000203	0.00000000	0.00017568
1.46000000	10000.00000277	0.00000000	0.00017739
1.46500000	10000.00000351	0.00000000	0.00017911
1.47000000	10000.00000424	0.00000000	0.00018083
1.47500000	10000.00000498	0.00000000	0.00018254
1.48000000	10000.00000572	0.00000000	0.00018426
1.48500000	10000.00000646	0.00000000	0.00018598
1.49000000	10000.00000720	0.00000000	0.00018770
1.49500000	10000.00000793	0.00000000	0.00018941
1.50000000	10000.00000867	0.00000000	0.00019113
1.50500000	10000.00000941	0.00000000	0.00019285
1.51000000	10000.00001015	0.00000000	0.00019456
1.51500000	10000.00001088	0.00000000	0.00019628
1.52000000	10000.00001162	0.00000000	0.00019800
1.52500000	10000.00001236	0.00000000	0.00019971
1.53000000	10000.00001310	0.00000000	0.00020143
1.53500000	10000.00001383	0.00000000	0.00020315
1.54000000	10000.00001457	0.00000000	0.00020487
1.54500000	10000.00001531	0.00000000	0.00020658
1.55000000	10000.00001605	0.00000000	0.00020830
1.55500000	10000.00001678	0.00000000	0.00021002
1.56000000	10000.00001752	0.00000000	0.00021173
1.56500000	10000.00001826	0.00000000	0.00021345
1.57000000	10000.00001900	0.00000000	0.00021517
1.57500000	10000.00001974	0.00000000	0.00021688
1.58000000	10000.00002047	0.00000000	0.00021860
1.58500000	10000.00002121	0.00000000	0.00022032
1.59000000	10000.00002195	0.00000000	0.00022204
1.59500000	10000.00002269	0.00000000	0.00022375
1.60000000	10000.00002342	0.00000000	0.00022547
1.60500000	10000.00002416	0.00000000	0.00022719
1.61000000	10000.00002490	0.00000000	0.00022890
1.61500000	10000.00002564	0.00000000	0.00023062
1.62000000	10000.00002637	0.00000000	0.00023234
1.62500000	10000.00002711	0.00000000	0.00023405
1.63000000	10000.00002785	0.00000000	0.00023577
1.63500000	10000.00002859	0.00000000	0.00023749
1.64000000	10000.00002933	0.00000000	0.00023921
1.64500000	10000.00003006	0.00000000	0.00024092
1.65000000	10000.00003080	0.00000000	0.00024264
1.65500000	10000.00003154	0.00000000	0.00024436
1.66000000	10000.00003228	0.00000000	0.00024607
1.66500000	10000.00003301	0.00000000	0.00024779
1.67000000	10000.00003375	0.00000000	0.00024951
1.67500000	10000.00003449	0.00000000	0.00025122
1.68000000	10000.00003523	0.00000000	0.00025294
1.68500000	10000.00003596	0.00000000	0.00025466
1.69000000	10000.00003670	0.00000000	0.00025637
1.69500000	10000.00003744	0.00000000	0.00025809
1.70000000	10000.00003818	0.00000000	0.00025981
1.70500000	10000.00003891	0.00000000	0.00026153
1.71000000	10000.00003965	0.00000000	0.00026324
1.71500000	10000.00004039	0.00000000	0.00026496
1.72000000	10000.00004113	0.00000000	0.00026668
1.72500000	10000.00004187	0.00000000	0.00026839
1.73000000	10000.00004260	0.00000000	0.00027011
1.73500000	10000.00004334	0.00000000	0.00027183
1.74000000	10000.00004408	0.00000000	0.00027354
1.74500000	10000.00004482	0.00000000	0.00027526
1.75000000	10000.00004555	0.00000000	0.00027698
1.75500000	10000.00004629	0.00000000	0.00027870
1.76000000	10000.00004703	0.00000000	0.00028041
1.76500000	10000.00004777	0.00000000	0.00028213
1.77000000	10000.00004850	0.00000000	0.00028385
1.77500000	10000.00004764	0.00000000	0.00027850
1.78000000	10000.00004350	0.00000000	0.00025869
1.78500000	10000.00003937	0.00000000	0.00023889
1.79000000	10000.00003523	0.00000000	0.00021908
1.79500000	10000.00003109	0.00000000	0.00019927
1.80000000	10000.00002695	0.00000000	0.00017947
1.80500000	10000.00002282	0.00000000	0.00015966
1.81000000	10000.00001868	0.00000000	0.00013985
1.81500000	10000.00001454	0.00000000	0.00012005
1.82000000	10000.00001040	0.00000000	0.00010024
1.82500000	10000.00000627	0.00000000	0.00008043
1.83000000	10000.00000213	0.00000000	0.00006063
1.83500000	9999.99999799	0.00000000	0.00004082
1.84000000	9999.99999385	0.00000000	0.00002101
1.84500000	9999.99998971	0.00000000	0.00000121
1.85000000	9999.99999972	0.00000000	-0.00000621
1.85500000	10000.00001973	0.00000000	-0.00000485
1.86000000	10000.00003974	0.00000000	-0.00000349
1.86500000	10000.00005975	0.00000000	-0.00000214
1.87000000	10000.00007976	0.00000000	-0.00000078
1.87500000	10000.00009977	0.00000000	0.00000058
1.88000000	10000.00011978	0.00000000	0.00000193
1.88500000	10000.00013979	0.00000000	0.00000329
1.89000000	10000.00015980	0.00000000	0.00000465
1.89500000	10000.00017981	0.00000000	0.00000600
1.90000000	10000.00019982	0.00000000	0.00000736
1.90500000	10000.00021983	0.00000000	0.00000872
1.91000000	10000.00023984	0.00000000	0.00001007
1.91500000	10000.00025985	0.00000000	0.00001143
1.92000000	10000.00027986	0.00000000	0.00001279
1.92500000	10000.00018966	0.00000000	0.00001037
1.93000000	10000.00007896	0.00000000	0.00000725
1.93500000	9999.99996825	0.00000000	0.00000413
1.94000000	9999.99985755	0.00000000	0.00000101
1.94500000	9999.99974685	0.00000000	-0.00000211
1.95000000	9999.99963615	0.00000000	-0.00000523
1.95500000	9999.99952545	0.00000000	-0.00000835
1.96000000	9999.99948685	0.00000000	-0.00000878
1.96500000	9999.99952890	0.00000000	-0.00000621
1.97000000	9999.99957096	0.00000000	-0.00000363
1.97500000	9999.99961301	0.00000000	-0.00000105
1.98000000	9999.99965507	0.00000000	0.00000153
1.98500000	9999.99969712	0.00000000	0.00000410
1.99000000	9999.99973918	0.00000000	0.00000668
1.99500000	10000.00021090	0.00000000	-0.00000031
2.00000000	9999.99996601	0.00000000	0.00000000
2.00500000	9999.99997766	0.00000000	0.00003584
2.01000000	9999.99997629	0.00000000	0.00012143
2.01500000	9999.99998076	0.00000000	0.00033245
2.02000000	9999.99998650	0.00000000	0.00060289
2.02500000	9999.99999052	0.00000000	0.00073438
2.03000000	10000.00001287	0.00000000	0.00066311
2.03500000	10000.00001674	0.00000000	0.00085810
2.04000000	9999.99998789	0.00000000	0.00151153
2.04500000	9999.99999900	3.20273420	0.29505860
2.05000000	10000.00004564	9.78702652	0.04329175
2.05500000	10000.00003236	10.94409988	-0.05660194
2.06000000	10000.00001097	11.93952958	-0.04814177
2.06500000	9999.99996750	12.92038130	-0.03178596
2.07000000	10000.00002852	13.90625388	-0.01909299
2.07500000	9999.99967812	14.89622242	-0.01188285
2.08000000	9999.99981951	15.89246685	-0.00691747
2.08500000	10000.00832427	16.88845115	-0.00440755
2.09000000	9999.99813013	17.88727710	-0.00242153
2.09500000	10000.00093763	18.88659807	-0.00155234
2.10000000	10000.00006158	19.88620220	-0.00087475
2.10500000	9999.99867667	20.88585252	-0.00050337
2.11000000	9999.99798232	21.88577107	-0.00034040
2.11500000	9999.99843972	22.88600711	-0.00023217
2.12000000	10000.00038907	23.88656500	0.00000496
2.12500000	10000.00049409	24.88653077	-0.00009929
2.13000000	10000.00016970	25.88688892	-0.00008665
2.13500000	9999.99971517	26.88731202	-0.00003815
2.14000000	9999.99928160	27.88765222	0.00000514
2.14500000	9999.99884803	28.88799242	0.00004842
2.15000000	9999.99852076	29.88825669	0.00012326
2.15500000	9999.99824747	30.88848240	0.00021411
2.16000000	9999.99797418	31.88870812	0.00030497
2.16500000	9999.99869561	32.88895339	0.00028410
2.17000000	9999.99956883	33.88920166	0.00024618
2.17500000	10000.00036908	34.88945630	0.00020602
2.18000000	10000.00023171	35.88979293	0.00013697
2.18500000	10000.00009434	36.89012955	0.00006793
2.19000000	9999.99994228	37.89046704	0.00001063
2.19500000	9999.99975182	38.89080678	-0.00001599
2.20000000	9999.99956135	39.89114652	-0.00004262
2.20500000	9999.99937089	40.89148627	-0.00006924
2.21000000	9999.99918043	41.89182601	-0.00009587
2.21500000	9999.99898997	42.89216575	-0.00012249
2.22000000	9999.99879950	43.89250549	-0.00014912
2.22500000	9999.99860904	44.89284523	-0.00017574
2.23000000	9999.99841858	45.89318498	-0.00020237
2.23500000	9999.99822811	46.89352472	-0.00022899
2.24000000	9999.99810689	47.89385534	-0.00024637
2.24500000	9999.99819494	48.89415838	-0.00023580
2.25000000	9999.99828299	49.89446143	-0.00022523
2.25500000	9999.99837104	50.89476447	-0.00021466
2.26000000	9999.99845910	51.89506752	-0.00020409
2.26500000	9999.99854715	52.89537056	-0.00019352
2.27000000	9999.99863520	53.89567361	-0.00018295
2.27500000	9999.99872325	54.89597665	-0.00017238
2.28000000	9999.99881130	55.89627970	-0.00016181
2.28500000	9999.99889935	56.89658275	-0.00015124
2.29000000	9999.99899653	57.89687889	-0.00013979
2.29500000	9999.99912596	58.89715062	-0.00012523
2.30000000	9999.99925539	59.89742235	-0.00011067
2.30500000	9999.99938482	60.89769407	-0.00009612
2.31000000	9999.99951426	61.89796580	-0.00008156
2.31500000	9999.99964369	62.89823753	-0.00006700
2.32000000	9999.99977312	63.89850926	-0.00005244
2.32500000	9999.99990255	64.89878099	-0.00003788
2.33000000	10000.00003199	65.89905272	-0.00002332
2.33500000	10000.00016142	66.89932444	-0.00000876
2.34000000	10000.00025119	67.89960294	0.00000390
2.34500000	10000.00017404	68.89990990	0.00000861
2.35000000	10000.00009688	69.90021687	0.00001332
2.35500000	10000.00001973	70.90052383	0.00001803
2.36000000	9999.99994258	71.90083079	0.00002274
2.36500000	9999.99986543	72.90113776	0.00002745
2.37000000	9999.99978828	73.90144472	0.00003216
2.37500000	9999.99971113	74.90175169	0.00003687
2.38000000	9999.99963397	75.90205865	0.00004157
2.38500000	9999.99955682	76.90236561	0.00004628
2.39000000	9999.99947967	77.90267258	0.00005099
2.39500000	9999.99940252	78.90297954	0.00005570
2.40000000	9999.99932537	79.90328651	0.00006041
2.40500000	9999.99924822	80.90359347	0.00006512
2.41000000	9999.99917107	81.90390044	0.00006983
2.41500000	9999.99909391	82.90420740	0.00007454
2.42000000	9999.99901676	83.90451436	0.00007924
2.42500000	9999.99893961	84.90482133	0.00008395
2.43000000	9999.99886246	85.90512829	0.00008866
2.43500000	9999.99878531	86.90543526	0.00009337
2.44000000	9999.99870816	87.90574222	0.00009808
2.44500000	9999.99863100	88.90604918	0.00010279
2.45000000	9999.99855385	89.90635615	0.00010750
2.45500000	9999.99847670	90.90666311	0.00011221
2.46000000	9999.99839955	91.90697008	0.00011691
2.46500000	9999.99832240	92.90727704	0.00012162
2.47000000	9999.99824525	93.90758401	0.00012633
2.47500000	9999.99816810	94.90789097	0.00013104
2.48000000	9999.99809094	95.90819793	0.00013575
2.48500000	9999.99801379	96.90850490	0.00014046
2.49000000	9999.99793664	97.90881186	0.00014517
2.49500000	9999.99785949	98.90911883	0.00014988
2.50000000	9999.99778234	99.90942579	0.00015459
2.50500000	9999.99770519	100.90973275	0.00015929
2.51000000	9999.99762803	101.91003972	0.00016400
2.51500000	9999.99755088	102.91034668	0.00016871
2.52000000	9999.99747373	103.91065365	0.00017342
2.52500000	9999.99739658	104.91096061	0.00017813
2.53000000	9999.99731943	105.91126758	0.00018284
2.53500000	9999.99724228	106.91157454	0.00018755
2.54000000	9999.99716512	107.91188150	0.00019226
2.54500000	9999.99708797	108.91218847	0.00019696
2.55000000	9999.99710016	109.91250121	0.00019638
2.55500000	9999.99713754	110.91281559	0.00019430
2.56000000	9999.99717492	111.91312997	0.00019223
2.56500000	9999.99721230	112.91344435	0.00019015
2.57000000	9999.99724968	113.91375872	0.00018807
2.57500000	9999.99728706	114.91407310	0.00018600
2.58000000	9999.99732444	115.91438748	0.00018392
2.58500000	9999.99736182	116.91470186	0.00018184
2.59000000	9999.99739920	117.91501623	0.00017977
2.59500000	9999.99743658	118.91533061	0.00017769
2.60000000	9999.99747396	119.91564499	0.00017561
2.60500000	9999.99751134	120.91595937	0.00017354
2.61000000	9999.99754872	121.91627374	0.00017146
2.61500000	9999.99758610	122.91658812	0.00016938
2.62000000	9999.99762348	123.91690250	0.00016731
2.62500000	9999.99766086	124.91721688	0.00016523
2.63000000	9999.99769824	125.91753125	0.00016315
2.63500000	9999.99773562	126.91784563	0.00016108
2.64000000	9999.99777301	127.91816001	0.00015900
2.64500000	9999.99781039	128.91847439	0.00015692
2.65000000	9999.99784777	129.91878876	0.00015485
2.65500000	9999.99788515	130.91910314	0.00015277
2.66000000	9999.99792253	131.91941752	0.00015069
2.66500000	9999.99795991	132.91973190	0.00014862
2.67000000	9999.99799729	133.92004627	0.00014654
2.67500000	9999.99803467	134.92036065	0.00014446
2.68000000	9999.99807205	135.92067503	0.00014239
2.68500000	9999.99810943	136.92098941	0.00014031
2.69000000	9999.99814681	137.92130378	0.00013823
2.69500000	9999.99818419	138.92161816	0.00013616
2.70000000	9999.99822157	139.92193254	0.00013408
2.70500000	9999.99825895	140.92224692	0.00013200
2.71000000	9999.99829633	141.92256129	0.00012993
2.71500000	9999.99833371	142.92287567	0.00012785
2.72000000	9999.99837109	143.92319005	0.00012577
2.72500000	9999.99840847	144.92350443	0.00012370
2.73000000	9999.99844585	145.92381880	0.00012162
2.73500000	9999.99848323	146.92413318	0.00011954
2.74000000	9999.99852061	147.92444756	0.00011747
2.74500000	9999.99855800	148.92476194	0.00011539
2.75000000	9999.99859538	149.92507631	0.00011331
2.75500000	9999.99862463	150.92539214	0.00011126
2.76000000	9999.99863994	151.92571045	0.00010926
2.76500000	9999.99865525	152.92602877	0.00010725
2.77000000	9999.99867056	153.92634708	0.00010525
2.77500000	9999.99868587	154.92666539	0.00010325
2.78000000	9999.99870118	155.92698371	0.00010124
2.78500000	9999.99871649	156.92730202	0.00009924
2.79000000	9999.99873180	157.92762033	0.00009723
2.79500000	9999.99874711	158.92793865	0.00009523
2.80000000	9999.99876242	159.92825696	0.00009322
2.80500000	9999.99877773	160.92857527	0.00009122
2.81000000	9999.99879304	161.92889359	0.00008922
2.81500000	9999.99880835	162.92921190	0.00008721
2.82000000	9999.99882366	163.92953022	0.00008521
2.82500000	9999.99883897	164.92984853	0.00008320
2.83000000	9999.99885428	165.93016684	0.00008120
2.83500000	9999.99886959	166.93048516	0.00007919
2.84000000	9999.99888490	167.93080347	0.00007719
2.84500000	9999.99890021	168.93112178	0.00007519
2.85000000	9999.99891552	169.93144010	0.00007318
2.85500000	9999.99893083	170.93175841	0.00007118
2.86000000	9999.99894613	171.93207672	0.00006917
2.86500000	9999.99896144	172.93239504	0.00006717
2.87000000	9999.99897675	173.93271335	0.00006516
2.87500000	9999.99899206	174.93303166	0.00006316
2.88000000	9999.99900737	175.93334998	0.00006116
2.88500000	9999.99902268	176.93366829	0.00005915
2.89000000	9999.99903799	177.93398660	0.00005715
2.89500000	9999.99905330	178.93430492	0.00005514
2.90000000	9999.99906861	179.93462323	0.00005314
2.90500000	9999.99908392	180.93494155	0.00005113
2.91000000	9999.99909923	181.93525986	0.00004913
2.91500000	9999.99911454	182.93557817	0.00004713
2.92000000	9999.99912985	183.93589649	0.00004512
2.92500000	9999.99914516	184.93621480	0.00004312
2.93000000	9999.99916047	185.93653311	0.00004111
2.93500000	9999.99917578	186.93685143	0.00003911
2.94000000	9999.99919109	187.93716974	0.00003711
2.94500000	9999.99920640	188.93748805	0.00003510
2.95000000	9999.99922171	189.93780637	0.00003310
2.95500000	9999.99923702	190.93812468	0.00003109
2.96000000	9999.99925233	191.93844299	0.00002909
2.96500000	9999.99907104	192.93876259	0.00003050
2.97000000	9999.99888071	193.93908225	0.00003207
2.97500000	9999.99869037	194.93940191	0.00003363
2.98000000	9999.99850004	195.93972157	0.00003520
2.98500000	9999.99830971	196.94004123	0.00003677
2.99000000	9999.99811938	197.94036089	0.00003834
2.99500000	9999.99792904	198.94068055	0.00003991
3.00000000	9999.99773871	199.94100021	0.00004147
3.00500000	9999.99754838	200.94131987	0.00004304
3.01000000	9999.99735804	201.94163953	0.00004461
3.01500000	9999.99716771	202.94195919	0.00004618
3.02000000	9999.99697738	203.94227885	0.00004774
3.02500000	9999.99678704	204.94259851	0.00004931
3.03000000	9999.99659671	205.94291817	0.00005088
3.03500000	9999.99640638	206.94323783	0.00005245
3.04000000	9999.99621604	207.94355749	0.00005402
3.04500000	9999.99602571	208.94387715	0.00005558
3.05000000	9999.99583538	209.94419681	0.00005715
3.05500000	9999.99564504	210.94451647	0.00005872
3.06000000	9999.99545471	211.94483613	0.00006029
3.06500000	9999.99526438	212.94515579	0.00006186
3.07000000	9999.99507404	213.94547545	0.00006342
3.07500000	9999.99488371	214.94579511	0.00006499
3.08000000	9999.99469338	215.94611477	0.00006656
3.08500000	9999.99450304	216.94643443	0.00006813
3.09000000	9999.99431271	217.94675409	0.00006969
3.09500000	9999.99412238	218.94707375	0.00007126
3.10000000	9999.99393204	219.94739341	0.00007283
3.10500000	9999.99374171	220.94771307	0.00007440
3.11000000	9999.99355138	221.94803273	0.00007597
3.11500000	9999.99336104	222.94835239	0.00007753
3.12000000	9999.99317071	223.94867205	0.00007910
3.12500000	9999.99298038	224.94899171	0.00008067
3.13000000	9999.99279004	225.94931137	0.00008224
3.13500000	9999.99259971	226.94963103	0.00008380
3.14000000	9999.99240938	227.94995069	0.00008537
3.14500000	9999.99221904	228.95027034	0.00008694
3.15000000	9999.99202871	229.95059000	0.00008851
3.15500000	9999.99183838	230.95090966	0.00009008
3.16000000	9999.99164804	231.95122932	0.00009164
3.16500000	9999.99145771	232.95154898	0.00009321
3.17000000	9999.99126738	233.95186864	0.00009478
3.17500000	9999.99107704	234.95218830	0.00009635
3.18000000	9999.99088671	235.95250796	0.00009791
3.18500000	9999.99069638	236.95282762	0.00009948
3.19000000	9999.99050604	237.95314728	0.00010105
3.19500000	9999.99031571	238.95346694	0.00010262
3.20000000	9999.99012538	239.95378660	0.00010419
3.20500000	9999.98993504	240.95410626	0.00010575
3.21000000	9999.98974471	241.95442592	0.00010732
3.21500000	9999.98955438	242.95474558	0.00010889
3.22000000	9999.98936404	243.95506524	0.00011046
3.22500000	9999.98917371	244.95538490	0.00011203
3.23000000	9999.98898338	245.95570456	0.00011359
3.23500000	9999.98879304	246.95602422	0.00011516
3.24000000	9999.98860271	247.95634388	0.00011673
3.24500000	9999.98841238	248.95666354	0.00011830
3.25000000	9999.98822205	249.95698320	0.00011986
3.25500000	9999.98803171	250.95730286	0.00012143
3.26000000	9999.98784138	251.95762252	0.00012300
3.26500000	9999.98765105	252.95794218	0.00012457
3.27000000	9999.98746071	253.95826184	0.00012614
3.27500000	9999.98727038	254.95858150	0.00012770
3.28000000	9999.98708005	255.95890116	0.00012927
3.28500000	9999.98688971	256.95922082	0.00013084
3.29000000	9999.98669938	257.95954048	0.00013241
3.29500000	9999.98650905	258.95986014	0.00013397
3.30000000	9999.98631871	259.96017980	0.00013554
3.30500000	9999.98612838	260.96049946	0.00013711
3.31000000	9999.98593805	261.96081912	0.00013868
3.31500000	9999.98574771	262.96113878	0.00014025
3.32000000	9999.98555738	263.96145844	0.00014181
3.32500000	9999.98536705	264.96177810	0.00014338
3.33000000	9999.98517671	265.96209775	0.00014495
3.33500000	9999.98498638	266.96241741	0.00014652
3.34000000	9999.98479605	267.96273707	0.00014808
3.34500000	9999.98460571	268.96305673	0.00014965
3.35000000	9999.98441538	269.96337639	0.00015122
3.35500000	9999.98422505	270.96369605	0.00015279
3.36000000	9999.98403471	271.96401571	0.00015436
3.36500000	9999.98384438	272.96433537	0.00015592
3.37000000	9999.98365405	273.96465503	0.00015749
3.37500000	9999.98346371	274.96497469	0.00015906
3.38000000	9999.98327338	275.96529435	0.00016063
3.38500000	9999.98308305	276.96561401	0.00016220
3.39000000	9999.98289271	277.96593367	0.00016376
3.39500000	9999.98270238	278.96625333	0.00016533
3.40000000	9999.98251205	279.96657299	0.00016690
3.40500000	9999.98232171	280.96689265	0.00016847
3.41000000	9999.98213138	281.96721231	0.00017003
3.41500000	9999.98194105	282.96753197	0.00017160
3.42000000	9999.98175071	283.96785163	0.00017317
3.42500000	9999.98156038	284.96817129	0.00017474
3.43000000	9999.98137005	285.96849095	0.00017631
3.43500000	9999.98117971	286.96881061	0.00017787
3.44000000	9999.98098938	287.96913027	0.00017944
3.44500000	9999.98079905	288.96944993	0.00018101
3.45000000	9999.98060871	289.96976959	0.00018258
3.45500000	9999.98041838	290.97008925	0.00018414
3.46000000	9999.98022805	291.97040891	0.00018571
3.46500000	9999.98003771	292.97072857	0.00018728
3.47000000	9999.97984738	293.97104823	0.00018885
3.47500000	9999.97965705	294.97136789	0.00019042
3.48000000	9999.97946671	295.97168755	0.00019198
3.48500000	9999.97927638	296.97200721	0.00019355
3.49000000	9999.97908605	297.97232687	0.00019512
3.49500000	9999.97889571	298.97264653	0.00019669
3.50000000	9999.97870538	299.97296619	0.00019825
3.50500000	9999.97851505	300.97328585	0.00019982
3.51000000	9999.97832472	301.97360550	0.00020139
3.51500000	9999.97813438	302.97392516	0.00020296
3.52000000	9999.97794405	303.97424482	0.00020453
3.52500000	9999.97775372	304.97456448	0.00020609
3.53000000	9999.97756338	305.97488414	0.00020766
3.53500000	9999.97737305	306.97520380	0.00020923
3.54000000	9999.97718272	307.97552346	0.00021080
3.54500000	9999.97699238	308.97584312	0.00021237
3.55000000	9999.97680205	309.97616278	0.00021393
3.55500000	9999.97661172	310.97648244	0.00021550
3.56000000	9999.97642138	311.97680210	0.00021707
3.56500000	9999.97623105	312.97712176	0.00021864
3.57000000	9999.97604072	313.97744142	0.00022020
3.57500000	9999.97585038	314.97776108	0.00022177
3.58000000	9999.97566005	315.97808074	0.00022334
3.58500000	9999.97546972	316.97840040	0.00022491
3.59000000	9999.97527938	317.97872006	0.00022648
3.59500000	9999.97508905	318.97903972	0.00022804
3.60000000	9999.97489872	319.97935938	0.00022961
3.60500000	9999.97470838	320.97967904	0.00023118
3.61000000	9999.97451805	321.97999870	0.00023275
3.61500000	9999.97432772	322.98031836	0.00023431
3.62000000	9999.97413738	323.98063802	0.00023588
3.62500000	9999.97394705	324.98095768	0.00023745
3.63000000	9999.97375672	325.98127734	0.00023902
3.63500000	9999.97356638	326.98159700	0.00024059
3.64000000	9999.97337605	327.98191666	0.00024215
3.64500000	9999.97318572	328.98223632	0.00024372
3.65000000	9999.97299538	329.98255598	0.00024529
3.65500000	9999.97280505	330.98287564	0.00024686
3.66000000	9999.97261472	331.98319530	0.00024842
3.66500000	9999.97242438	332.98351496	0.00024999
3.67000000	9999.97223405	333.98383462	0.00025156
3.67500000	9999.97204372	334.98415428	0.00025313
3.68000000	9999.97185338	335.98447394	0.00025470
3.68500000	9999.97166305	336.98479360	0.00025626
3.69000000	9999.97147272	337.98511326	0.00025783
3.69500000	9999.97128238	338.98543291	0.00025940
3.70000000	9999.97109205	339.98575257	0.00026097
3.70500000	9999.97090172	340.98607223	0.00026254
3.71000000	9999.97071138	341.98639189	0.00026410
3.71500000	9999.97052105	342.98671155	0.00026567
3.72000000	9999.97033072	343.98703121	0.00026724
3.72500000	9999.97014038	344.98735087	0.00026881
3.73000000	9999.96995005	345.98767053	0.00027037
3.73500000	9999.96975972	346.98799019	0.00027194
3.74000000	9999.96956938	347.98830985	0.00027351
3.74500000	9999.96937905	348.98862951	0.00027508
3.75000000	9999.96918872	349.98894917	0.00027665
3.75500000	9999.96899838	350.98926883	0.00027821
3.76000000	9999.96880805	351.98958849	0.00027978
3.76500000	9999.96861772	352.98990815	0.00028135
3.77000000	9999.96842739	353.99022781	0.00028292
3.77500000	9999.96823705	354.99054747	0.00028448
3.78000000	9999.96804672	355.99086713	0.00028605
3.78500000	9999.96785639	356.99118679	0.00028762
3.79000000	9999.96766605	357.99150645	0.00028919
3.79500000	9999.96747572	358.99182611	0.00029076
3.80000000	9999.96728539	359.99214577	0.00029232
3.80500000	9999.96709505	360.99246543	0.00029389
3.81000000	9999.96690472	361.99278509	0.00029546
3.81500000	9999.96671439	362.99310475	0.00029703
3.82000000	9999.96652405	363.99342441	0.00029859
3.82500000	9999.96633372	364.99374407	0.00030016
3.83000000	9999.96614339	365.99406373	0.00030173
3.83500000	9999.96595305	366.99438339	0.00030330
3.84000000	9999.96576272	367.99470305	0.00030487
3.84500000	9999.96557239	368.99502271	0.00030643
3.85000000	9999.96538205	369.99534237	0.00030800
3.85500000	9999.96519172	370.99566203	0.00030957
3.86000000	9999.96500139	371.99598169	0.00031114
3.86500000	9999.96481105	372.99630135	0.00031271
3.87000000	9999.96462072	373.99662101	0.00031427
3.87500000	9999.96443039	374.99694066	0.00031584
3.88000000	9999.96424005	375.99726032	0.00031741
3.88500000	9999.96404972	376.99757998	0.00031898
3.89000000	9999.96385939	377.99789964	0.00032054
3.89500000	9999.96366905	378.99821930	0.00032211
3.90000000	9999.96347872	379.99853896	0.00032368
3.90500000	9999.96328839	380.99885862	0.00032525
3.91000000	9999.96309805	381.99917828	0.00032682
3.91500000	9999.96290772	382.99949794	0.00032838
3.92000000	9999.96271739	383.99981760	0.00032995
3.92500000	9999.96252705	385.00013726	0.00033152
3.93000000	9999.96233672	386.00045692	0.00033309
3.93500000	9999.96214639	387.00077658	0.00033465
3.94000000	9999.96195605	388.00109624	0.00033622
3.94500000	9999.96176572	389.00141590	0.00033779
3.95000000	9999.96157539	390.00173556	0.00033936
3.95500000	9999.96138505	391.00205522	0.00034093
3.96000000	9999.96119472	392.00237488	0.00034249
3.96500000	9999.96100439	393.00269454	0.00034406
3.97000000	9999.96081405	394.00301420	0.00034563
3.97500000	9999.96062372	395.00333386	0.00034720
3.98000000	9999.96043339	396.00365352	0.00034876
3.98500000	9999.96024305	397.00397318	0.00035033
3.99000000	9999.96005272	398.00429284	0.00035190
3.99500000	9999.95986239	399.00461250	0.00035347
4.00000000	9999.95967205	400.00493216	0.00035504
4.00500000	9999.95948172	401.00525182	0.00035660
4.01000000	9999.95929139	402.00557148	0.00035817
4.01500000	9999.95910105	403.00589114	0.00035974
4.02000000	9999.95891072	404.00621080	0.00036131
4.02500000	9999.95872039	405.00653046	0.00036288
4.03000000	9999.95853006	406.00685012	0.00036444
4.03500000	9999.95833972	407.00716978	0.00036601
4.04000000	9999.95814939	408.00748944	0.00036758
4.04500000	9999.95795906	409.00780910	0.00036915
4.05000000	9999.95776872	410.00812876	0.00037071
4.05500000	9999.95757839	411.00844842	0.00037228
4.06000000	9999.95738806	412.00876807	0.00037385
4.06500000	9999.95719772	413.00908773	0.00037542
4.07000000	9999.95700739	414.00940739	0.00037699
4.07500000	9999.95681706	415.00972705	0.00037855
4.08000000	9999.95662672	416.01004671	0.00038012
4.08500000	9999.95643639	417.01036637	0.00038169
4.09000000	9999.95624606	418.01068603	0.00038326
4.09500000	9999.95605572	419.01100569	0.00038482
4.10000000	9999.95586539	420.01132535	0.00038639
4.10500000	9999.95567506	421.01164501	0.00038796
4.11000000	9999.95548472	422.01196467	0.00038953
4.11500000	9999.95529439	423.01228433	0.00039110
4.12000000	9999.95510406	424.01260399	0.00039266
4.12500000	9999.95491372	425.01292365	0.00039423
4.13000000	9999.95472339	426.01324331	0.00039580
4.13500000	9999.95453306	427.01356297	0.00039737
4.14000000	9999.95434272	428.01388263	0.00039893
4.14500000	9999.95415239	429.01420229	0.00040050
4.15000000	9999.95396206	430.01452195	0.00040207
4.15500000	9999.95377172	431.01484161	0.00040364
4.16000000	9999.95358139	432.01516127	0.00040521
4.16500000	9999.95339106	433.01548093	0.00040677
4.17000000	9999.95320072	434.01580059	0.00040834
4.17500000	9999.95301039	435.01612025	0.00040991
4.18000000	9999.95282006	436.01643991	0.00041148
4.18500000	9999.95262972	437.01675957	0.00041305
4.19000000	9999.95243939	438.01707923	0.00041461
4.19500000	9999.95224906	439.01739889	0.00041618
4.20000000	9999.95205872	440.01771855	0.00041775
4.20500000	9999.95186839	441.01803821	0.00041932
4.21000000	9999.95167806	442.01835787	0.00042088
4.21500000	9999.95148772	443.01867753	0.00042245
4.22000000	9999.95129739	444.01899719	0.00042402
4.22500000	9999.95110706	445.01931685	0.00042559
4.23000000	9999.95091672	446.01963651	0.00042716
4.23500000	9999.95072639	447.01995617	0.00042872
4.24000000	9999.95053606	448.02027582	0.00043029
4.24500000	9999.95034572	449.02059548	0.00043186
4.25000000	9999.95015539	450.02091514	0.00043343
4.25500000	9999.94996506	451.02123480	0.00043499
4.26000000	9999.94977472	452.02155446	0.00043656
4.26500000	9999.94958439	453.02187412	0.00043813
4.27000000	9999.94939406	454.02219378	0.00043970
4.27500000	9999.94920372	455.02251344	0.00044127
4.28000000	9999.94901339	456.02283310	0.00044283
4.28500000	9999.94882306	457.02315276	0.00044440
4.29000000	9999.94863273	458.02347242	0.00044597
4.29500000	9999.94844239	459.02379208	0.00044754
4.30000000	9999.94825206	460.02411174	0.00044910
4.30500000	9999.94806173	461.02443140	0.00045067
4.31000000	9999.94787139	462.02475106	0.00045224
4.31500000	9999.94768106	463.02507072	0.00045381
4.32000000	9999.94749073	464.02539038	0.00045538
4.32500000	9999.94730039	465.02571004	0.00045694
4.33000000	9999.94711006	466.02602970	0.00045851
4.33500000	9999.94691973	467.02634936	0.00046008
4.34000000	9999.94658011	468.02666292	0.00046248
4.34500000	9999.94602833	469.02696780	0.00046608
4.35000000	9999.94547654	470.02727268	0.00046967
4.35500000	9999.94492475	471.02757756	0.00047326
4.36000000	9999.94437297	472.02788244	0.00047686
4.36500000	9999.94382118	473.02818732	0.00048045
4.37000000	9999.94326939	474.02849220	0.00048404
4.37500000	9999.94271761	475.02879709	0.00048763
4.38000000	9999.94216582	476.02910197	0.00049123
4.38500000	9999.94161403	477.02940685	0.00049482
4.39000000	9999.94106225	478.02971173	0.00049841
4.39500000	9999.94051046	479.03001661	0.00050201
4.40000000	9999.93995867	480.03032149	0.00050560
4.40500000	9999.93940689	481.03062637	0.00050919
4.41000000	9999.93885510	482.03093126	0.00051278
4.41500000	9999.93830332	483.03123614	0.00051638
4.42000000	9999.93775153	484.03154102	0.00051997
4.42500000	9999.93719974	485.03184590	0.00052356
4.43000000	9999.93664796	486.03215078	0.00052716
4.43500000	9999.93609617	487.03245566	0.00053075
4.44000000	9999.93554438	488.03276054	0.00053434
4.44500000	9999.93499260	489.03306543	0.00053793
4.45000000	9999.93444081	490.03337031	0.00054153
4.45500000	9999.93388902	491.03367519	0.00054512
4.46000000	9999.93333724	492.03398007	0.00054871
4.46500000	9999.93278545	493.03428495	0.00055231
4.47000000	9999.93223366	494.03458983	0.00055590
4.47500000	9999.93168188	495.03489471	0.00055949
4.48000000	9999.93113009	496.03519960	0.00056309
4.48500000	9999.93057831	497.03550448	0.00056668
4.49000000	9999.93002652	498.03580936	0.00057027
4.49500000	9999.92947473	499.03611424	0.00057386
4.50000000	9999.92892295	500.03641912	0.00057746
4.50500000	9999.92837116	501.03672400	0.00058105
4.51000000	9999.92781937	502.03702888	0.00058464
4.51500000	9999.92726759	503.03733377	0.00058824
4.52000000	9999.92671580	504.03763865	0.00059183
4.52500000	9999.92616401	505.03794353	0.00059542
4.53000000	9999.92561223	506.03824841	0.00059901
4.53500000	9999.92506044	507.03855329	0.00060261
4.54000000	9999.92450865	508.03885817	0.00060620
4.54500000	9999.92395687	509.03916305	0.00060979
4.55000000	9999.92340508	510.03946794	0.00061339
4.55500000	9999.92285330	511.03977282	0.00061698
4.56000000	9999.92230151	512.04007770	0.00062057
4.56500000	9999.92174972	513.04038258	0.00062416
4.57000000	9999.92119794	514.04068746	0.00062776
4.57500000	9999.92064615	515.04099234	0.00063135
4.58000000	9999.92009436	516.04129722	0.00063494
4.58500000	9999.91954258	517.04160211	0.00063854
4.59000000	9999.91899079	518.04190699	0.00064213
4.59500000	9999.91843900	519.04221187	0.00064572
4.60000000	9999.91788722	520.04251675	0.00064931
4.60500000	9999.91733543	521.04282163	0.00065291
4.61000000	9999.91678364	522.04312651	0.00065650
4.61500000	9999.91623186	523.04343139	0.00066009
4.62000000	9999.91568007	524.04373628	0.00066369
4.62500000	9999.91512829	525.04404116	0.00066728
4.63000000	9999.91457650	526.04434604	0.00067087
4.63500000	9999.91402471	527.04465092	0.00067447
4.64000000	9999.91347293	528.04495580	0.00067806
4.64500000	9999.91292114	529.04526068	0.00068165
4.65000000	9999.91236935	530.04556556	0.00068524
4.65500000	9999.91181757	531.04587045	0.00068884
4.66000000	9999.91126578	532.04617533	0.00069243
4.66500000	9999.91071399	533.04648021	0.00069602
4.67000000	9999.91016221	534.04678509	0.00069962
4.67500000	9999.90961042	535.04708997	0.00070321
4.68000000	9999.90905863	536.04739485	0.00070680
4.68500000	9999.90850685	537.04769973	0.00071039
4.69000000	9999.90795506	538.04800461	0.00071399
4.69500000	9999.90740328	539.04830950	0.00071758
4.70000000	9999.90685149	540.04861438	0.00072117
4.70500000	9999.90629970	541.04891926	0.00072477
4.71000000	9999.90574792	542.04922414	0.00072836
4.71500000	9999.90519613	543.04952902	0.00073195
4.72000000	9999.90464434	544.04983390	0.00073554
4.72500000	9999.90409256	545.05013878	0.00073914
4.73000000	9999.90354077	546.05044367	0.00074273
4.73500000	9999.90298898	547.05074855	0.00074632
4.74000000	9999.90243720	548.05105343	0.00074992
4.74500000	9999.90188541	549.05135831	0.00075351
4.75000000	9999.90133362	550.05166319	0.00075710
4.75500000	9999.90078184	551.05196807	0.00076069
4.76000000	9999.90023005	552.05227295	0.00076429
4.76500000	9999.89967827	553.05257784	0.00076788
4.77000000	9999.89912648	554.05288272	0.00077147
4.77500000	9999.89857469	555.05318760	0.00077507
4.78000000	9999.89802291	556.05349248	0.00077866
4.78500000	9999.89747112	557.05379736	0.00078225
4.79000000	9999.89691933	558.05410224	0.00078585
4.79500000	9999.89636755	559.05440712	0.00078944
4.80000000	9999.89581576	560.05471201	0.00079303
4.80500000	9999.89526397	561.05501689	0.00079662
4.81000000	9999.89471219	562.05532177	0.00080022
4.81500000	9999.89416040	563.05562665	0.00080381
4.82000000	9999.89360861	564.05593153	0.00080740
4.82500000	9999.89305683	565.05623641	0.00081100
4.83000000	9999.89250504	566.05654129	0.00081459
4.83500000	9999.89195326	567.05684618	0.00081818
4.84000000	9999.89140147	568.05715106	0.00082177
4.84500000	9999.89084968	569.05745594	0.00082537
4.85000000	9999.89029790	570.05776082	0.00082896
4.85500000	9999.88974611	571.05806570	0.00083255
4.86000000	9999.88919432	572.05837058	0.00083615
4.86500000	9999.88864254	573.05867546	0.00083974
4.87000000	9999.88809075	574.05898035	0.00084333
4.87500000	9999.88753896	575.05928523	0.00084692
4.88000000	9999.88698718	576.05959011	0.00085052
4.88500000	9999.88643539	577.05989499	0.00085411
4.89000000	9999.88588360	578.06019987	0.00085770
4.89500000	9999.88533182	579.06050475	0.00086130
4.90000000	9999.88478003	580.06080963	0.00086489
4.90500000	9999.88422825	581.06111452	0.00086848
4.91000000	9999.88367646	582.06141940	0.00087207
4.91500000	9999.88312467	583.06172428	0.00087567
4.92000000	9999.88257289	584.06202916	0.00087926
4.92500000	9999.88202110	585.06233404	0.00088285
4.93000000	9999.88146931	586.06263892	0.00088645
4.93500000	9999.88091753	587.06294380	0.00089004
4.94000000	9999.88036574	588.06324869	0.00089363
4.94500000	9999.87981395	589.06355357	0.00089723
4.95000000	9999.87926217	590.06385845	0.00090082
4.95500000	9999.87871038	591.06416333	0.00090441
4.96000000	9999.87815859	592.06446821	0.00090800
4.96500000	9999.87760681	593.06477309	0.00091160
4.97000000	9999.87705502	594.06507797	0.00091519
4.97500000	9999.87650323	595.06538286	0.00091878
4.98000000	9999.87595145	596.06568774	0.00092238
4.98500000	9999.87539966	597.06599262	0.00092597
4.99000000	9999.87484788	598.06629750	0.00092956
4.99500000	9999.87429609	599.06660238	0.00093315
5.00000000	9999.87374430	600.06690726	0.00093675
5.00500000	9999.87319252	601.06721214	0.00094034
5.01000000	9999.87264073	602.06751703	0.00094393
5.01500000	9999.87208894	603.06782191	0.00094753
5.02000000	9999.87153716	604.06812679	0.00095112
5.02500000	9999.87098537	605.06843167	0.00095471
5.03000000	9999.87043358	606.06873655	0.00095830
5.03500000	9999.86988180	607.06904143	0.00096190
5.04000000	9999.86933001	608.06934631	0.00096549
5.04500000	9999.86877822	609.06965120	0.00096908
5.05000000	9999.86822644	610.06995608	0.00097268
5.05500000	9999.86767465	611.07026096	0.00097627
5.06000000	9999.86712287	612.07056584	0.00097986
5.06500000	9999.86657108	613.07087072	0.00098345
5.07000000	9999.86601929	614.07117560	0.00098705
5.07500000	9999.86546751	615.07148048	0.00099064
5.08000000	9999.86491572	616.07178537	0.00099423
5.08500000	9999.86436393	617.07209025	0.00099783
5.09000000	9999.86381215	618.07239513	0.00100142
5.09500000	9999.86326036	619.07270001	0.00100501
5.10000000	9999.86270857	620.07300489	0.00100861
5.10500000	9999.86215679	621.07330977	0.00101220
5.11000000	9999.86160500	622.07361465	0.00101579
5.11500000	9999.86105321	623.07391953	0.00101938
5.12000000	9999.86050143	624.07422442	0.00102298
5.12500000	9999.85994964	625.07452930	0.00102657
5.13000000	9999.85939786	626.07483418	0.00103016
5.13500000	9999.85884607	627.07513906	0.00103376
5.14000000	9999.85829428	628.07544394	0.00103735
5.14500000	9999.85774250	629.07574882	0.00104094
5.15000000	9999.85719071	630.07605370	0.00104453
5.15500000	9999.85663892	631.07635859	0.00104813
5.16000000	9999.85608714	632.07666347	0.00105172
5.16500000	9999.85553535	633.07696835	0.00105531
5.17000000	9999.85498356	634.07727323	0.00105891
5.17500000	9999.85443178	635.07757811	0.00106250
5.18000000	9999.85387999	636.07788299	0.00106609
5.18500000	9999.85332820	637.07818787	0.00106968
5.19000000	9999.85277642	638.07849276	0.00107328
5.19500000	9999.85222463	639.07879764	0.00107687
5.20000000	9999.85167285	640.07910252	0.00108046
5.20500000	9999.85112106	641.07940740	0.00108406
5.21000000	9999.85056927	642.07971228	0.00108765
5.21500000	9999.85001749	643.08001716	0.00109124
5.22000000	9999.84946570	644.08032204	0.00109483
5.22500000	9999.84891391	645.08062693	0.00109843
5.23000000	9999.84836213	646.08093181	0.00110202
5.23500000	9999.84781034	647.08123669	0.00110561
5.24000000	9999.84725855	648.08154157	0.00110921
5.24500000	9999.84670677	649.08184645	0.00111280
5.25000000	9999.84615498	650.08215133	0.00111639
5.25500000	9999.84560319	651.08245621	0.00111999
5.26000000	9999.84505141	652.08276110	0.00112358
5.26500000	9999.84449962	653.08306598	0.00112717
5.27000000	9999.84394784	654.08337086	0.00113076
5.27500000	9999.84339605	655.08367574	0.00113436
5.28000000	9999.84284426	656.08398062	0.00113795
5.28500000	9999.84229248	657.08428550	0.00114154
5.29000000	9999.84174069	658.08459038	0.00114514
5.29500000	9999.84118890	659.08489527	0.00114873
5.30000000	9999.84063712	660.08520015	0.00115232
5.30500000	9999.84008533	661.08550503	0.00115591
5.31000000	9999.83953354	662.08580991	0.00115951
5.31500000	9999.83898176	663.08611479	0.00116310
5.32000000	9999.83842997	664.08641967	0.00116669
5.32500000	9999.83787818	665.08672455	0.00117029
5.33000000	9999.83732640	666.08702944	0.00117388
5.33500000	9999.83677461	667.08733432	0.00117747
5.34000000	9999.83622283	668.08763920	0.00118106
5.34500000	9999.83567104	669.08794408	0.00118466
5.35000000	9999.83511925	670.08824896	0.00118825
5.35500000	9999.83456747	671.08855384	0.00119184
5.36000000	9999.83401568	672.08885872	0.00119544
5.36500000	9999.83346389	673.08916361	0.00119903
5.37000000	9999.83291211	674.08946849	0.00120262
5.37500000	9999.83236032	675.08977337	0.00120621
5.38000000	9999.83180853	676.09007825	0.00120981
5.38500000	9999.83125675	677.09038313	0.00121340
5.39000000	9999.83070496	678.09068801	0.00121699
5.39500000	9999.83015317	679.09099289	0.00122059
5.40000000	9999.82960139	680.09129778	0.00122418
5.40500000	9999.82904960	681.09160266	0.00122777
5.41000000	9999.82849782	682.09190754	0.00123137
5.41500000	9999.82794603	683.09221242	0.00123496
5.42000000	9999.82739424	684.09251730	0.00123855
5.42500000	9999.82684246	685.09282218	0.00124214
5.43000000	9999.82629067	686.09312706	0.00124574
5.43500000	9999.82573888	687.09343195	0.00124933
5.44000000	9999.82518710	688.09373683	0.00125292
5.44500000	9999.82463531	689.09404171	0.00125652
5.45000000	9999.82408352	690.09434659	0.00126011
5.45500000	9999.82353174	691.09465147	0.00126370
5.46000000	9999.82297995	692.09495635	0.00126729
5.46500000	9999.82242816	693.09526123	0.00127089
5.47000000	9999.82187638	694.09556612	0.00127448
5.47500000	9999.82132459	695.09587100	0.00127807
5.48000000	9999.82077281	696.09617588	0.00128167
5.48500000	9999.82022102	697.09648076	0.00128526
5.49000000	9999.81966923	698.09678564	0.00128885
5.49500000	9999.81911745	699.09709052	0.00129244
5.50000000	9999.81856566	700.09739540	0.00129604
5.50500000	9999.81801387	701.09770029	0.00129963
5.51000000	9999.81746209	702.09800517	0.00130322
5.51500000	9999.81691030	703.09831005	0.00130682
5.52000000	9999.81635851	704.09861493	0.00131041
5.52500000	9999.81580673	705.09891981	0.00131400
5.53000000	9999.81525494	706.09922469	0.00131759
5.53500000	9999.81470315	707.09952957	0.00132119
5.54000000	9999.81415137	708.09983446	0.00132478
5.54500000	9999.81359958	709.10013934	0.00132837
5.55000000	9999.81304779	710.10044422	0.00133197
5.55500000	9999.81249601	711.10074910	0.00133556
5.56000000	9999.81194422	712.10105398	0.00133915
5.56500000	9999.81139244	713.10135886	0.00134275
5.57000000	9999.81084065	714.10166374	0.00134634
5.57500000	9999.81028886	715.10196862	0.00134993
5.58000000	9999.80973708	716.10227351	0.00135352
5.58500000	9999.80918529	717.10257839	0.00135712
5.59000000	9999.80863350	718.10288327	0.00136071
5.59500000	9999.80808172	719.10318815	0.00136430
5.60000000	9999.80752993	720.10349303	0.00136790
5.60500000	9999.80697814	721.10379791	0.00137149
5.61000000	9999.80642636	722.10410279	0.00137508
5.61500000	9999.80587457	723.10440768	0.00137867
5.62000000	9999.80532278	724.10471256	0.00138227
5.62500000	9999.80477100	725.10501744	0.00138586
5.63000000	9999.80421921	726.10532232	0.00138945
5.63500000	9999.80366743	727.10562720	0.00139305
5.64000000	9999.80311564	728.10593208	0.00139664
5.64500000	9999.80256385	729.10623696	0.00140023
5.65000000	9999.80201207	730.10654185	0.00140382
5.65500000	9999.80146028	731.10684673	0.00140742
5.66000000	9999.80090849	732.10715161	0.00141101
5.66500000	9999.80035671	733.10745649	0.00141460
5.67000000	9999.79980492	734.10776137	0.00141820
5.67500000	9999.79925313	735.10806625	0.00142179
5.68000000	9999.79870135	736.10837113	0.00142538
5.68500000	9999.79814956	737.10867602	0.00142897
5.69000000	9999.79759777	738.10898090	0.00143257
5.69500000	9999.79704599	739.10928578	0.00143616
5.70000000	9999.79649420	740.10959066	0.00143975
5.70500000	9999.79594242	741.10989554	0.00144335
5.71000000	9999.79539063	742.11020042	0.00144694
5.71500000	9999.79483884	743.11050530	0.00145053
5.72000000	9999.79698814	744.11102948	0.00143604
5.72500000	9999.79954177	745.11158647	0.00141883
5.73000000	9999.80209539	746.11214347	0.00140163
5.73500000	9999.80464902	747.11270046	0.00138443
5.74000000	9999.80720264	748.11325746	0.00136723
5.74500000	9999.80975627	749.11381445	0.00135003
5.75000000	9999.81230989	750.11437145	0.00133282
5.75500000	9999.81486352	751.11492845	0.00131562
5.76000000	9999.81741714	752.11548544	0.00129842
5.76500000	9999.81997077	753.11604244	0.00128122
5.77000000	9999.82252439	754.11659943	0.00126401
5.77500000	9999.82507802	755.11715643	0.00124681
5.78000000	9999.82763164	756.11771343	0.00122961
5.78500000	9999.83018527	757.11827042	0.00121241
5.79000000	9999.83273890	758.11882742	0.00119520
5.79500000	9999.83529252	759.11938441	0.00117800
5.80000000	9999.83784615	760.11994141	0.00116080
5.80500000	9999.84039977	761.12049841	0.00114360
5.81000000	9999.84295340	762.12105540	0.00112639
5.81500000	9999.84550702	763.12161240	0.00110919
5.82000000	9999.84806065	764.12216939	0.00109199
5.82500000	9999.85061427	765.12272639	0.00107479
5.83000000	9999.85316790	766.12328339	0.00105758
5.83500000	9999.85572152	767.12384038	0.00104038
5.84000000	9999.85827515	768.12439738	0.00102318
5.84500000	9999.86082877	769.12495437	0.00100598
5.85000000	9999.86338240	770.12551137	0.00098877
5.85500000	9999.86593602	771.12606837	0.00097157
5.86000000	9999.86848965	772.12662536	0.00095437
5.86500000	9999.87104327	773.12718236	0.00093717
5.87000000	9999.87359690	774.12773935	0.00091996
5.87500000	9999.87615052	775.12829635	0.00090276
5.88000000	9999.87870415	776.12885335	0.00088556
5.88500000	9999.88125777	777.12941034	0.00086836
5.89000000	9999.88381140	778.12996734	0.00085115
5.89500000	9999.88636502	779.13052433	0.00083395
5.90000000	9999.88891865	780.13108133	0.00081675
5.90500000	9999.89147227	781.13163833	0.00079955
5.91000000	9999.89402590	782.13219532	0.00078234
5.91500000	9999.89657952	783.13275232	0.00076514
5.92000000	9999.89913315	784.13330931	0.00074794
5.92500000	9999.90168677	785.13386631	0.00073074
5.93000000	9999.90424040	786.13442330	0.00071354
5.93500000	9999.90679402	787.13498030	0.00069633
5.94000000	9999.90934765	788.13553730	0.00067913
5.94500000	9999.91190127	789.13609429	0.00066193
5.95000000	9999.91445490	790.13665129	0.00064473
5.95500000	9999.91700852	791.13720828	0.00062752
5.96000000	9999.91956215	792.13776528	0.00061032
5.96500000	9999.92211578	793.13832228	0.00059312
5.97000000	9999.92466940	794.13887927	0.00057592
5.97500000	9999.92722303	795.13943627	0.00055871
5.98000000	9999.92977665	796.13999326	0.00054151
5.98500000	9999.93233028	797.14055026	0.00052431
5.99000000	9999.93488390	798.14110726	0.00050711
5.99500000	9999.93743753	799.14166425	0.00048990
6.00000000	9999.93999115	800.14222125	0.00047270
6.00500000	9999.94254478	801.14277824	0.00045550
6.01000000	9999.94509840	802.14333524	0.00043830
6.01500000	9999.94765203	803.14389224	0.00042109
6.02000000	9999.95020565	804.14444923	0.00040389
6.02500000	9999.95275928	805.14500623	0.00038669
6.03000000	9999.95531290	806.14556322	0.00036949
6.03500000	9999.95786653	807.14612022	0.00035228
6.04000000	9999.96042015	808.14667722	0.00033508
6.04500000	9999.96297378	809.14723421	0.00031788
6.05000000	9999.96552740	810.14779121	0.00030068
6.05500000	9999.96808103	811.14834820	0.00028347
6.06000000	9999.97063465	812.14890520	0.00026627
6.06500000	9999.97122462	813.14932492	0.00026184
6.07000000	9999.97178307	814.14974244	0.00025762
6.07500000	9999.97234151	815.15015995	0.00025339
6.08000000	9999.97289996	816.15057747	0.00024917
6.08500000	9999.97345841	817.15099499	0.00024494
6.09000000	9999.97401685	818.15141251	0.00024072
6.09500000	9999.97457530	819.15183002	0.00023650
6.10000000	9999.97513374	820.15224754	0.00023227
6.10500000	9999.97569219	821.15266506	0.00022805
6.11000000	9999.97625064	822.15308257	0.00022382
6.11500000	9999.97680908	823.15350009	0.00021960
6.12000000	9999.97736753	824.15391761	0.00021537
6.12500000	9999.97792597	825.15433513	0.00021115
6.13000000	9999.97848442	826.15475264	0.00020693
6.13500000	9999.97904287	827.15517016	0.00020270
6.14000000	9999.97960131	828.15558768	0.00019848
6.14500000	9999.98015976	829.15600519	0.00019425
6.15000000	9999.98071820	830.15642271	0.00019003
6.15500000	9999.98127665	831.15684023	0.00018580
6.16000000	9999.98183510	832.15725775	0.00018158
6.16500000	9999.98239354	833.15767526	0.00017735
6.17000000	9999.98295199	834.15809278	0.00017313
6.17500000	9999.98351043	835.15851030	0.00016891
6.18000000	9999.98406888	836.15892781	0.00016468
6.18500000	9999.98462733	837.15934533	0.00016046
6.19000000	9999.98518577	838.15976285	0.00015623
6.19500000	9999.98574422	839.16018037	0.00015201
6.20000000	9999.98630266	840.16059788	0.00014778
6.20500000	9999.98686111	841.16101540	0.00014356
6.21000000	9999.98741956	842.16143292	0.00013934
6.21500000	9999.98797800	843.16185043	0.00013511
6.22000000	9999.98853645	844.16226795	0.00013089
6.22500000	9999.98909489	845.16268547	0.00012666
6.23000000	9999.98965334	846.16310298	0.00012244
6.23500000	9999.99021179	847.16352050	0.00011821
6.24000000	9999.99077023	848.16393802	0.00011399
6.24500000	9999.99132868	849.16435554	0.00010976
6.25000000	9999.99188712	850.16477305	0.00010554
6.25500000	9999.99244557	851.16519057	0.00010132
6.26000000	9999.99300402	852.16560809	0.00009709
6.26500000	9999.99356246	853.16602560	0.00009287
6.27000000	9999.99412091	854.16644312	0.00008864
6.27500000	9999.99467935	855.16686064	0.00008442
6.28000000	9999.99523780	856.16727816	0.00008019
6.28500000	9999.99579625	857.16769567	0.00007597
6.29000000	9999.99635469	858.16811319	0.00007175
6.29500000	9999.99691314	859.16853071	0.00006752
6.30000000	9999.99747158	860.16894822	0.00006330
6.30500000	9999.99803003	861.16936574	0.00005907
6.31000000	9999.99858848	862.16978326	0.00005485
6.31500000	9999.99914692	863.17020078	0.00005062
6.32000000	9999.99970537	864.17061829	0.00004640
6.32500000	10000.00026381	865.17103581	0.00004217
6.33000000	10000.00082226	866.17145333	0.00003795
6.33500000	10000.00138071	867.17187084	0.00003373
6.34000000	10000.00193915	868.17228836	0.00002950
6.34500000	10000.00249760	869.17270588	0.00002528
6.35000000	10000.00305605	870.17312340	0.00002105
6.35500000	10000.00361449	871.17354091	0.00001683
6.36000000	10000.00417294	872.17395843	0.00001260
6.36500000	10000.00473138	873.17437595	0.00000838
6.37000000	10000.00528983	874.17479346	0.00000416
6.37500000	10000.00584828	875.17521098	-0.00000007
6.38000000	10000.00640672	876.17562850	-0.00000429
6.38500000	10000.00696517	877.17604602	-0.00000852
6.39000000	10000.00752361	878.17646353	-0.00001274
6.39500000	10000.00808206	879.17688105	-0.00001697
6.40000000	10000.00864051	880.17729857	-0.00002119
6.40500000	10000.00912462	881.17771005	-0.00002489
6.41000000	10000.00892772	882.17806630	-0.00002374
6.41500000	10000.00873081	883.17842254	-0.00002259
6.42000000	10000.00853391	884.17877878	-0.00002145
6.42500000	10000.00833700	885.17913502	-0.00002030
6.43000000	10000.00814010	886.17949126	-0.00001915
6.43500000	10000.00794319	887.17984750	-0.00001801
6.44000000	10000.00774629	888.18020375	-0.00001686
6.44500000	10000.00754938	889.18055999	-0.00001571
6.45000000	10000.00735247	890.18091623	-0.00001457
6.45500000	10000.00715557	891.18127247	-0.00001342
6.46000000	10000.00695866	892.18162871	-0.00001227
6.46500000	10000.00676176	893.18198496	-0.00001113
6.47000000	10000.00656485	894.18234120	-0.00000998
6.47500000	10000.00636795	895.18269744	-0.00000883
6.48000000	10000.00617104	896.18305368	-0.00000768
6.48500000	10000.00597413	897.18340992	-0.00000654
6.49000000	10000.00577723	898.18376616	-0.00000539
6.49500000	10000.00558032	899.18412241	-0.00000424
6.50000000	10000.00538342	900.18447865	-0.00000310
6.50500000	10000.00518651	901.18483489	-0.00000195
6.51000000	10000.00498961	902.18519113	-0.00000080
6.51500000	10000.00479270	903.18554737	0.00000034
6.52000000	10000.00459580	904.18590362	0.00000149
6.52500000	10000.00439889	905.18625986	0.00000264
6.53000000	10000.00420198	906.18661610	0.00000378
6.53500000	10000.00400508	907.18697234	0.00000493
6.54000000	10000.00380817	908.18732858	0.00000608
6.54500000	10000.00361127	909.18768482	0.00000722
6.55000000	10000.00341436	910.18804107	0.00000837
6.55500000	10000.00321746	911.18839731	0.00000952
6.56000000	10000.00302055	912.18875355	0.00001066
6.56500000	10000.00282365	913.18910979	0.00001181
6.57000000	10000.00262674	914.18946603	0.00001296
6.57500000	10000.00242983	915.18982227	0.00001410
6.58000000	10000.00223293	916.19017852	0.00001525
6.58500000	10000.00203602	917.19053476	0.00001640
6.59000000	10000.00183912	918.19089100	0.00001755
6.59500000	10000.00164221	919.19124724	0.00001869
6.60000000	10000.00144531	920.19160348	0.00001984
6.60500000	10000.00124840	921.19195973	0.00002099
6.61000000	10000.00105149	922.19231597	0.00002213
6.61500000	10000.00085459	923.19267221	0.00002328
6.62000000	10000.00065768	924.19302845	0.00002443
6.62500000	10000.00046078	925.19338469	0.00002557
6.63000000	10000.00026387	926.19374093	0.00002672
6.63500000	10000.00006697	927.19409718	0.00002787
6.64000000	9999.99987006	928.19445342	0.00002901
6.64500000	9999.99967316	929.19480966	0.00003016
6.65000000	9999.99947625	930.19516590	0.00003131
6.65500000	9999.99927934	931.19552214	0.00003245
6.66000000	9999.99908244	932.19587838	0.00003360
6.66500000	9999.99888553	933.19623463	0.00003475
6.67000000	9999.99868863	934.19659087	0.00003589
6.67500000	9999.99849172	935.19694711	0.00003704
6.68000000	9999.99829482	936.19730335	0.00003819
6.68500000	9999.99809791	937.19765959	0.00003934
6.69000000	9999.99790101	938.19801584	0.00004048
6.69500000	9999.99770410	939.19837208	0.00004163
6.70000000	9999.99750719	940.19872832	0.00004278
6.70500000	9999.99731029	941.19908456	0.00004392
6.71000000	9999.99711338	942.19944080	0.00004507
6.71500000	9999.99691648	943.19979704	0.00004622
6.72000000	9999.99671957	944.20015329	0.00004736
6.72500000	9999.99652267	945.20050953	0.00004851
6.73000000	9999.99632576	946.20086577	0.00004966
6.73500000	9999.99612885	947.20122201	0.00005080
6.74000000	9999.99593195	948.20157825	0.00005195
6.74500000	9999.99573504	949.20193450	0.00005310
6.75000000	9999.99559851	950.20230081	0.00005404
6.75500000	9999.99568558	951.20270444	0.00005421
6.76000000	9999.99577266	952.20310806	0.00005439
6.76500000	9999.99585973	953.20351169	0.00005456
6.77000000	9999.99594680	954.20391531	0.00005473
6.77500000	9999.99603387	955.20431894	0.00005491
6.78000000	9999.99612094	956.20472257	0.00005508
6.78500000	9999.99620801	957.20512619	0.00005526
6.79000000	9999.99629509	958.20552982	0.00005543
6.79500000	9999.99638216	959.20593344	0.00005560
6.80000000	9999.99646923	960.20633707	0.00005578
6.80500000	9999.99655630	961.20674069	0.00005595
6.81000000	9999.99664337	962.20714432	0.00005613
6.81500000	9999.99673045	963.20754795	0.00005630
6.82000000	9999.99681752	964.20795157	0.00005648
6.82500000	9999.99690459	965.20835520	0.00005665
6.83000000	9999.99699166	966.20875882	0.00005682
6.83500000	9999.99707873	967.20916245	0.00005700
6.84000000	9999.99716581	968.20956607	0.00005717
6.84500000	9999.99725288	969.20996970	0.00005735
6.85000000	9999.99733995	970.21037333	0.00005752
6.85500000	9999.99742702	971.21077695	0.00005770
6.86000000	9999.99751409	972.21118058	0.00005787
6.86500000	9999.99760117	973.21158420	0.00005804
6.87000000	9999.99768824	974.21198783	0.00005822
6.87500000	9999.99777531	975.21239145	0.00005839
6.88000000	9999.99786238	976.21279508	0.00005857
6.88500000	9999.99794945	977.21319871	0.00005874
6.89000000	9999.99803652	978.21360233	0.00005891
6.89500000	9999.99812360	979.21400596	0.00005909
6.90000000	9999.99821067	980.21440958	0.00005926
6.90500000	9999.99829774	981.21481321	0.00005944
6.91000000	9999.99838481	982.21521683	0.00005961
6.91500000	9999.99847188	983.21562046	0.00005979
6.92000000	9999.99855896	984.21602409	0.00005996
6.92500000	9999.99870273	985.21639646	0.00005696
6.93000000	9999.99886346	986.21675949	0.00005301
6.93500000	9999.99902419	987.21712253	0.00004906
6.94000000	9999.99918491	988.21748556	0.00004511
6.94500000	9999.99934564	989.21784859	0.00004117
6.95000000	9999.99950637	990.21821162	0.00003722
6.95500000	9999.99966710	991.21857466	0.00003327
6.96000000	9999.99982783	992.21893769	0.00002932
6.96500000	9999.99996492	993.21931324	0.00002622
6.97000000	9999.99997700	994.21975504	0.00002762
6.97500000	9999.99998900	995.22019608	0.00002900
6.98000000	9999.99998947	996.22052171	0.00002853
6.98500000	9999.99998993	997.22084733	0.00002807
6.99000000	9999.99998960	998.22125546	0.00002840
6.99500000	9999.99998914	999.22167774	0.00002886
7.00000000	9999.99967533	999.99773283	-0.01672105
7.00500000	9999.99670658	998.95026629	-0.09197880
7.01000000	9999.10764138	599.94645859	-18.78912291
7.01500000	10000.16923022	600.01015346	2.94005412
7.02000000	10000.35017659	600.02101045	3.55706109
7.02500000	10000.17298715	600.01037896	2.41692905
7.03000000	10000.05248318	600.00314894	1.53724598
7.03500000	9999.99974924	599.99998512	0.98033135
7.04000000	9999.98157314	599.99889452	0.63922742
7.04500000	9999.97812267	599.99868700	0.42854471
7.05000000	9999.97991282	599.99879486	0.29904663
7.05500000	9999.98356769	599.99901363	0.22236564
7.06000000	9999.98693060	599.99921582	0.17402323
7.06500000	9999.98932651	599.99935995	0.14339105
7.07000000	9999.99128266	599.99947702	0.12584407
7.07500000	9999.99278480	599.99956737	0.11587101
7.08000000	9999.99343271	599.99960604	0.10939220
7.08500000	9999.99354485	599.99961252	0.10514861
7.09000000	9999.99348946	599.99960902	0.10288287
7.09500000	9999.99323780	599.99959406	0.10177878
7.10000000	9999.99280183	599.99956811	0.10127228
7.10500000	9999.99210950	599.99952661	0.10090874
7.11000000	9999.99131397	599.99947862	0.10073248
7.11500000	9999.99065840	599.99943922	0.10093738
7.12000000	9999.98935092	599.99936076	0.10054661
7.12500000	9999.98844430	599.99930644	0.10094271
7.13000000	9999.98745123	599.99924675	0.10131988
7.13500000	9999.98630201	599.99917783	0.10155234
7.14000000	9999.98500981	599.99910089	0.10164241
7.14500000	9999.98371610	599.99902319	0.10184132
7.15000000	9999.98240964	599.99894472	0.10212330
7.15500000	9999.98109869	599.99886599	0.10243444
7.16000000	9999.97974100	599.99878456	0.10278004
7.16500000	9999.97835606	599.99870156	0.10314572
7.17000000	9999.97682243	599.99860962	0.10341235
7.17500000	9999.97515339	599.99850954	0.10358878
7.18000000	9999.97343108	599.99840613	0.10376285
7.18500000	9999.97163368	599.99829800	0.10393358
7.19000000	9999.96982256	599.99818914	0.10413382
7.19500000	9999.96798041	599.99807863	0.10440084
7.20000000	9999.96611480	599.99796668	0.10466916
7.20500000	9999.96415421	599.99784889	0.10494272
7.21000000	9999.96207759	599.99772438	0.10520936
7.21500000	9999.95981262	599.99758898	0.10546475
7.22000000	9999.95799460	599.99747941	0.10571063
7.22500000	9999.95587692	599.99735228	0.10597392
7.23000000	10003.08865628	600.18531934	-5.98669831
7.23500000	10003.10792981	600.18647543	23.87837360
7.24000000	10001.16398813	600.06983945	17.94648943
7.24500000	9999.53284113	599.97197043	11.43133785
7.25000000	9999.09630493	599.94577835	7.08358436
7.25500000	9999.18179684	599.95090812	4.38815745
7.26000000	9999.38666311	599.96319975	2.73064286
7.26500000	9999.56606742	599.97396425	1.70781672
7.27000000	9999.70528901	599.98231731	1.08733797
7.27500000	9999.78549692	599.98712982	0.70689772
7.28000000	9999.84454887	599.99067272	0.47484697
7.28500000	9999.88245293	599.99294695	0.33011781
7.29000000	9999.90259180	599.99415524	0.24409826
7.29500000	9999.91448740	599.99486950	0.19148617
7.30000000	9999.92074214	599.99524473	0.15975710
7.30500000	9999.92391019	599.99543478	0.14023236
7.31000000	9999.92357297	599.99541399	0.12867368
7.31500000	9999.92075793	599.99524564	0.12122833
7.32000000	9999.91685378	599.99501138	0.11692682
7.32500000	9999.91526402	599.99491584	0.11442510
7.33000000	9999.91686795	599.99501184	0.11320564
7.33500000	9999.91304664	599.99478285	0.11274765
7.34000000	9999.90950134	599.99457005	0.11222167
7.34500000	9999.90510471	599.99430584	0.11214945
7.35000000	9999.89953547	599.99397189	0.11221336
7.35500000	9999.89394518	599.99363697	0.11235603
7.36000000	9999.88822210	599.99329367	0.11255502
7.36500000	9999.88208032	599.99292484	0.11278605
7.37000000	9999.88548310	599.99312913	0.11296270
7.37500000	9999.88500433	599.99310027	0.11321585
7.38000000	9999.88113192	599.99286761	0.11353105
7.38500000	9999.87488057	599.99249274	0.11382029
7.39000000	9999.86965041	599.99217898	0.11414747
7.39500000	9999.86516218	599.99190961	0.11450221
7.40000000	9999.86007023	599.99160405	0.11484103
7.40500000	9999.85368588	599.99122103	0.11514576
7.41000000	9999.85175058	599.99110515	0.11539369
7.41500000	9998.32830099	599.89969803	-4.64777912
7.42000000	10003.50582822	600.21034978	23.94138437
7.42500000	10001.63858959	600.09831578	17.90024322
7.43000000	9999.81770694	599.98906262	11.38298405
7.43500000	9999.24350403	599.95461067	7.06006433
7.44000000	9999.23250585	599.95395064	4.37192094
7.44500000	9999.36810310	599.96208610	2.72143920
7.45000000	9999.50396752	599.97023784	1.70861187
7.45500000	9999.61123139	599.97667411	1.08903721
7.46000000	9999.68144276	599.98088669	0.71141828
7.46500000	9999.72753360	599.98365220	0.48016440
7.47000000	9999.75425494	599.98525511	0.34022446
7.47500000	9999.76942701	599.98616585	0.25276001
7.48000000	9999.77796243	599.98667793	0.20077245
7.48500000	9999.78068519	599.98684144	0.16901378
7.49000000	9999.78008273	599.98680523	0.14968241
7.49500000	9999.77813319	599.98668835	0.13773745
7.50000000	9999.77423787	599.98645403	0.13099615
7.50500000	9999.76951947	599.98617138	0.12691340
7.51000000	9999.76450515	599.98587035	0.12446938
7.51500000	9999.75845046	599.98550744	0.12313868
7.52000000	9999.75283378	599.98516995	0.12242764
7.52500000	9999.74674589	599.98480491	0.12219111
7.53000000	9999.74010580	599.98440670	0.12234097
7.53500000	9997.25438703	599.83526334	-7.12455453
7.54000000	10003.66159672	600.21969594	24.00510884
7.54500000	10001.82405559	600.10944358	18.13088948
7.55000000	9999.88350889	599.99301067	11.54835150
7.55500000	9999.22501734	599.95350085	7.15806563
7.56000000	9999.16610430	599.94996630	4.43626435
7.56500000	9999.27803486	599.95668235	2.76186997
7.57000000	9999.39805710	599.96388358	1.73566030
7.57500000	9999.49943145	599.96996583	1.11204326
7.58000000	9999.55034987	599.97302070	0.72725292
7.58500000	9999.59892555	599.97593534	0.48896287
7.59000000	9999.62714074	599.97762810	0.34695034
7.59500000	9999.63457050	599.97807387	0.26057287
7.60000000	9999.64016046	599.97840969	0.20789723
7.60500000	9999.64060256	599.97843579	0.17598088
7.61000000	9999.63889036	599.97833304	0.15651115
7.61500000	9999.63472415	599.97808298	0.14484580
7.62000000	9999.62613418	599.97756815	0.13771143
7.62500000	9999.62108763	599.97726536	0.13391144
7.63000000	9996.74665917	599.80479946	-12.70301667
7.63500000	10003.70215270	600.22212907	24.00945944
7.64000000	10001.99337360	600.11960272	18.53290986
7.64500000	9999.92666453	599.99560032	11.84641648
7.65000000	9999.17959044	599.95077512	7.34380055
7.65500000	9999.07855327	599.94471300	4.55186358
7.66000000	9999.16931574	599.95015921	2.83728425
7.66500000	9999.27782376	599.95666937	1.77973829
7.67000000	9999.37356327	599.96241348	1.14216370
7.67500000	9999.41784265	599.96507062	0.74800806
7.68000000	9999.46192056	599.96771534	0.50350132
7.68500000	9999.49079585	599.96944747	0.35807949
7.69000000	9999.49632741	599.96977999	0.26943138
7.69500000	9999.50020247	599.97001234	0.21552752
7.70000000	9999.49887520	599.96993205	0.18306622
7.70500000	9999.49559629	599.96973533	0.16306858
7.71000000	9998.08943617	599.88536634	-41.52356027
7.71500000	10003.22731725	600.19363888	23.17935799
7.72000000	10002.54694179	600.15281666	20.04533320
7.72500000	10000.16712220	600.01002740	13.00479651
7.73000000	9999.18532618	599.95111968	8.09939972
7.73500000	9998.98094392	599.93885658	5.01229984
7.74000000	9999.03530882	599.94211860	3.11263540
7.74500000	9999.13732342	599.94823941	1.95805125
7.75000000	9999.22571929	599.95354346	1.24586481
7.75500000	9999.28490776	599.95709446	0.81896104
7.76000000	9999.32995324	599.95979681	0.55046962
7.76500000	9999.33847935	599.96030845	0.38828791
7.77000000	9999.36301457	599.96178094	0.28904445
7.77500000	9999.35903649	599.96154207	0.22894915
7.78000000	10015.69078366	600.94144656	-116.94245311
7.78500000	10001.41226451	600.08473571	18.48750789
7.79000000	10003.31669178	600.19900137	22.13143937
7.79500000	10000.66368028	600.03982046	14.88216772
7.80000000	9999.27088001	599.95625274	9.30238108
7.80500000	9998.89787235	599.93387269	5.76706183
7.81000000	9998.89755855	599.93385318	3.57778056
7.81500000	9998.98479975	599.93908838	2.23641947
7.82000000	9999.07168536	599.94430087	1.42192250
7.82500000	9999.13509118	599.94810524	0.92182336
7.83000000	9999.17570774	599.95054259	0.61754738
7.83500000	9999.19928718	599.95195746	0.43127798
7.84000000	9999.20988291	599.95259296	0.31829672
7.84500000	10005.63958066	600.33837463	-84.89965895
7.85000000	10002.30404092	600.13824265	20.81147315
7.85500000	10003.03467192	600.18208018	21.46927143
7.86000000	10000.38275239	600.02296475	14.22741274
7.86500000	9999.10739554	599.94644402	8.87607990
7.87000000	9998.77683396	599.92661017	5.49729298
7.87500000	9998.78199975	599.92692025	3.41798475
7.88000000	9998.86622271	599.93197312	2.14101323
7.88500000	9998.94426296	599.93665562	1.36565604
7.89000000	9999.00021166	599.94001283	0.88948230
7.89500000	9999.03817526	599.94229071	0.59833147
7.90000000	9999.05662384	599.94339700	0.42174259
7.90500000	9997.80653348	599.86839247	-44.27548477
7.91000000	10003.33554854	600.20013263	23.17280548
7.91500000	10002.49210146	600.14952588	20.23773514
7.92000000	9999.97459118	599.99847564	13.15601979
7.92500000	9998.90178006	599.93410682	8.18847440
7.93000000	9998.64644837	599.91878710	5.06949042
7.93500000	9998.66662213	599.91999711	3.15057113
7.94000000	9998.74738787	599.92484314	1.98584389
7.94500000	9998.81750157	599.92904986	1.27196729
7.95000000	9998.86544432	599.93192641	0.83427460
7.95500000	9998.89869690	599.93392170	0.56631477
7.96000000	9997.15715376	599.82942929	-38.43753298
7.96500000	10003.49938841	600.20996355	23.50832016
7.97000000	10002.34045997	600.14042730	20.04102089
7.97500000	9999.82113930	599.98926822	12.98262175
7.98000000	9998.77054190	599.92623281	8.07606343
7.98500000	9998.52194742	599.91131724	4.99648517
7.99000000	9998.53892792	599.91233569	3.11463655
7.99500000	9998.61328377	599.91679695	1.95949398
8.00000000	9998.67923553	599.92075387	1.25601836
8.00500000	9998.72476248	599.92348571	0.82344986
8.01000000	10009.21882373	600.55312963	-102.04602219
8.01500000	10002.06226890	600.12373597	19.79850571
8.02000000	10003.07440059	600.18446367	22.00393330
8.02500000	10000.23871911	600.01432325	14.68444157
8.03000000	9998.82170276	599.92930231	9.17458744
8.03500000	9998.41938121	599.90516274	5.67926117
8.04000000	9998.38871886	599.90332276	3.53155632
8.04500000	9998.45263133	599.90715808	2.21773745
8.05000000	9998.51974306	599.91118489	1.41673522
8.05500000	9998.56881735	599.91412906	0.92535014
8.06000000	9996.61849255	599.79710925	-27.10054979
8.06500000	10003.73415837	600.22404966	24.04216574
8.07000000	10001.98068760	600.11884112	19.59662373
8.07500000	9999.49160099	599.96949595	12.61926006
8.08000000	9998.49009523	599.90940600	7.83914315
8.08500000	9998.25594988	599.89535711	4.86811770
8.09000000	9998.26672465	599.89600346	3.03424535
8.09500000	9998.33234214	599.89994061	1.93620886
8.10000000	9998.39163417	599.90349759	1.22623654
8.10500000	9998.83392239	599.93003506	-54.83921761
8.11000000	10003.23457902	600.19407494	22.93546052
8.11500000	10002.41169805	600.14470207	20.85149865
8.12000000	9999.67004224	599.98020228	13.62760315
8.12500000	9998.45276705	599.90716632	8.48112968
8.13000000	9998.13194519	599.88791667	5.25843188
8.13500000	9998.11674319	599.88700486	3.27475670
8.14000000	9998.17639395	599.89058380	2.06278123
8.14500000	9998.23359401	599.89401597	1.31873375
8.15000000	9996.91417255	599.81485012	-10.58036753
8.15500000	10003.88268367	600.23296096	24.49429532
8.16000000	10001.40855107	600.08451313	18.73566725
8.16500000	9999.05230917	599.94313851	11.94806506
8.17000000	9998.17267650	599.89036091	7.42684381
8.17500000	9997.97172796	599.87830358	4.61206100
8.18000000	9997.98513246	599.87910750	2.87804708
8.18500000	9998.04464236	599.88267828	1.83341680
8.19000000	10000.26612747	600.01596791	-64.19192625
8.19500000	10003.08971433	600.18538298	22.62882776
8.20000000	10002.39628441	600.14377723	21.29471892
8.20500000	9999.51837262	599.97110238	13.97142613
8.21000000	9998.21515733	599.89290919	8.70226525
8.21500000	9997.85458034	599.87127493	5.39120602
8.22000000	9997.82642372	599.86958537	3.37798388
8.22500000	9997.87194020	599.87231636	2.12647213
8.23000000	9999.61354473	599.97681252	-59.75377618
8.23500000	10003.20722562	600.19243313	22.99557766
8.24000000	10002.25353386	600.13521160	21.22816968
8.24500000	9999.35368441	599.96122093	13.88806622
8.25000000	9998.06498453	599.88389936	8.65118470
8.25500000	9997.71044155	599.86262626	5.36985022
8.26000000	9997.67699675	599.86061946	3.34751272
8.26500000	9997.72234159	599.86334080	2.11223589
8.27000000	9997.23896802	599.83433799	-7.68935503
8.27500000	10003.84078389	600.23044722	24.82302880
8.28000000	10001.04591968	600.06275503	18.76000168
8.28500000	9998.63855944	599.91831354	11.94731583
8.29000000	9997.74371323	599.86462236	7.42518139
8.29500000	9997.53099827	599.85185993	4.61333119
8.30000000	9997.53357313	599.85201465	2.88110608
8.30500000	10001.98439582	600.11906387	-74.71421146
8.31000000	10002.93518580	600.17611136	22.33043500
8.31500000	10002.30930986	600.13855867	21.86788649
8.32000000	9999.23625373	599.95417537	14.40025746
8.32500000	9997.83137042	599.86988259	8.98853099
8.33000000	9997.42670581	599.84560213	5.58845306
8.33500000	9997.36938471	599.84216333	3.47785725
8.34000000	10012.17658569	600.73059480	-117.64695332
8.34500000	10002.07345854	600.12440731	19.62867449
8.35000000	10002.71225263	600.16273485	22.96589029
8.35500000	9999.44458337	599.96667479	15.40985686
8.36000000	9997.80351455	599.86821100	9.64064597
8.36500000	9997.29548220	599.83772880	5.98027731
8.37000000	9997.21105622	599.83266291	3.72752431
8.37500000	10004.56013139	600.27360771	-87.54200645
8.38000000	10002.74063542	600.16443825	21.86588967
8.38500000	10002.30962916	600.13857795	22.39275150
8.39000000	9999.08661685	599.94519701	14.82740094
8.39500000	9997.57639411	599.85458400	9.26008986
8.40000000	9997.12302806	599.82738164	5.74309444
8.40500000	9997.05272897	599.82316375	3.58443561
8.41000000	9996.94946159	599.81696775	-23.58267741
8.41500000	10003.72140239	600.22328418	25.09066212
8.42000000	10001.09525685	600.06571584	20.12225495
8.42500000	9998.32014188	599.89920828	12.92955848
8.43000000	9997.21687258	599.83301234	8.04336841
8.43500000	9996.92284074	599.81537036	4.99319637
8.44000000	10025.02398895	601.50143896	-158.99104478
8.44500000	10001.31634692	600.07898084	16.77720792
8.45000000	10002.83796836	600.17027811	23.94351615
8.45500000	9999.33645720	599.96018744	16.33448736
8.46000000	9997.46436842	599.84786203	10.24748362
8.46500000	9996.86137810	599.81168286	6.37338916
8.47000000	9996.73371275	599.80402286	3.95510371
8.47500000	9998.07192143	599.88431540	-2.32840258
8.48000000	10003.59242853	600.21554559	25.45417025
8.48500000	10000.22136185	600.01328172	18.84337733
8.49000000	9997.73167739	599.86390041	11.97352225
8.49500000	9996.81598221	599.80895850	7.44143893
8.50000000	9996.58867403	599.79532073	4.62638869
8.50500000	9997.04636613	599.82278206	-18.47954677
8.51000000	10003.69600424	600.22176056	25.63485666
8.51500000	10000.65369412	600.03922197	20.13119493
8.52000000	9997.83145620	599.86988740	12.89829680
8.52500000	9996.73142043	599.80388542	8.02654892
8.53000000	9996.43348765	599.78600951	4.99138028
8.53500000	9997.09546444	599.82572782	-17.32036539
8.54000000	10003.65688417	600.21941314	25.74898070
8.54500000	10000.51686603	600.03101214	20.16929081
8.55000000	9997.67241188	599.86034462	12.91475955
8.55500000	9996.56393534	599.79383650	8.02316442
8.56000000	9996.26814567	599.77608867	4.98349093
8.56500000	9998.32523323	599.89951405	-1.03723482
8.57000000	10003.45582682	600.20734953	25.84079167
8.57500000	9999.82512238	599.98950758	19.01794944
8.58000000	9997.26632396	599.83597943	12.07545837
8.58500000	9996.32433768	599.77946018	7.49459817
8.59000000	10027.47021050	601.64821288	-167.69324962
8.59500000	10001.34042193	600.08042559	16.87991291
8.60000000	10002.54663275	600.15279807	24.65703629
8.60500000	9998.72680584	599.92360849	16.83351074
8.61000000	9996.71565822	599.80293960	10.56847546
8.61500000	9996.04915672	599.76294901	6.55767532
8.62000000	9997.56768186	599.85406065	-37.99214113
8.62500000	10003.52105993	600.21126347	25.61453739
8.63000000	10000.72912260	600.04374731	21.57232514
8.63500000	9997.49386572	599.84963211	13.94964542
8.64000000	9996.16353701	599.76981243	8.68387161
8.64500000	10034.42463883	602.06547832	-187.12280669
8.65000000	10001.05277111	600.06316644	15.60750684
8.65500000	10002.53521842	600.15211287	25.12651642
8.66000000	9998.57412153	599.91444690	17.28457731
8.66500000	9996.43827104	599.78629603	10.85567035
8.67000000	9995.72300134	599.74338051	6.73493083
8.67500000	9997.70347679	599.86220865	-9.33527856
8.68000000	10003.44529767	600.20671776	26.51919950
8.68500000	9999.68005375	599.98080277	20.12807314
8.69000000	9996.79801177	599.80788096	12.83281976
8.69500000	9995.71848211	599.74310928	8.00254174
8.70000000	9998.19453980	599.89167222	-44.85600215
8.70500000	10003.42789248	600.20567365	25.80553684
8.71000000	10000.55858992	600.03351547	22.19053266
8.71500000	9997.12032733	599.82721973	14.38741479
8.72000000	9995.69535573	599.74172154	8.96743901
8.72500000	10001.94486516	600.11669190	-75.27737584
8.73000000	10003.08925978	600.18535554	24.46030036
8.73500000	10001.04386303	600.06263210	23.39118165
8.74000000	9997.29782063	599.83786932	15.37090675
8.74500000	9995.63792192	599.73827564	9.59522680
8.75000000	10003.61241877	600.21674557	-84.71347203
8.75500000	10002.95104732	600.17706301	24.04097793
8.76000000	10001.09788787	600.06587333	23.78095806
8.76500000	9997.23780143	599.83426836	15.68596392
8.77000000	9995.49994533	599.72999713	9.79556687
8.77500000	10001.06468407	600.06388107	-68.87459397
8.78000000	10003.15148606	600.18908895	25.09054365
8.78500000	10000.72016410	600.04320987	23.40947926
8.79000000	9996.92579028	599.81554740	15.33519294
8.79500000	9995.27472569	599.71648379	9.56926610
8.80000000	9997.56479526	599.85388779	-35.98289112
8.80500000	10003.40217868	600.20413058	26.74281800
8.81000000	9999.91985677	599.99519158	22.27473091
8.81500000	9996.40308022	599.78418486	14.38375403
8.82000000	9994.97492523	599.69849561	8.95156097
8.82500000	9998.22376173	599.89342584	-4.16791405
8.83000000	10003.10971746	600.18658306	27.38477333
8.83500000	9998.75840888	599.92550421	20.38338865
8.84000000	9995.75998446	599.74559880	12.96019324
8.84500000	10031.61974274	601.89718443	-182.97770898
8.85000000	10001.36568688	600.08194146	17.40541186
8.85500000	10001.88100872	600.11286093	26.12577956
8.86000000	9997.40779258	599.84446801	17.88227897
8.86500000	9995.09661349	599.70579648	11.22688880
8.87000000	9998.40714373	599.90442819	-48.09442191
8.87500000	10003.30432180	600.19825930	26.77038350
8.88000000	9999.87706331	599.99262396	23.15749247
8.88500000	9996.08156862	599.76489413	15.03515216
8.89000000	9994.50177640	599.67010685	9.36844452
8.89500000	10000.01766333	600.00106011	9.97438814
8.90000000	10002.36492033	600.14189520	27.25745072
8.90500000	9997.65913978	599.85954822	19.24709719
8.91000000	9994.97055193	599.69823301	12.14899836
8.91500000	9998.54093213	599.91245608	-48.23555369
8.92000000	10003.27794812	600.19667705	27.12455811
8.92500000	9999.64287622	599.97857217	23.38716815
8.93000000	9995.75678010	599.74540697	15.17760424
8.93500000	10032.10364524	601.92621905	-186.08091209
8.94000000	10001.39482344	600.08368964	17.81037720
8.94500000	10001.58065215	600.09483924	26.71682542
8.95000000	9996.82819919	599.80969173	18.27079945
8.95500000	9994.41424169	599.66485449	11.48131182
8.96000000	9998.21126330	599.89267557	-5.71557750
8.96500000	10002.88177719	600.17290651	28.34079935
8.97000000	9998.06311982	599.88378734	21.19066914
8.97500000	9994.79839823	599.68790413	13.48773438
8.98000000	9998.38917503	599.90335043	-46.75474108
8.98500000	10003.21295816	600.19277763	27.63324623
8.99000000	9999.26733254	599.95603976	23.68915493
8.99500000	9995.25230684	599.71513813	15.36306971
9.00000000	10007.22271738	600.43336312	-103.35116098
9.00500000	10002.69654681	600.16179306	24.62742856
9.01000000	10000.27553218	600.01653228	25.60999000
9.01500000	9995.69590314	599.74175446	16.98358129
9.02000000	10024.36152282	601.46169122	-164.55810774
9.02500000	10001.81606018	600.10896367	20.32878565
9.03000000	10000.99487305	600.05969217	26.93182987
9.03500000	9996.05449455	599.76326949	18.25702999
9.04000000	10042.29050419	602.53743051	-214.17011713
9.04500000	10001.06659885	600.06399569	16.39817741
9.05000000	10001.40589880	600.08435396	27.72655854
9.05500000	9996.25164405	599.77509827	19.11374933
9.06000000	9771.95855243	586.31751343	-100.22476643
9.06500000	10000.73453647	600.04407230	14.45572937
9.07000000	10001.52262561	600.09135784	28.10537449
9.07500000	9996.26093880	599.77565606	19.53734621
9.08000000	10048.40011240	602.90400658	-229.73438454
9.08500000	10000.90072749	600.05404375	15.62671359
9.09000000	10001.36819644	600.08209155	28.16453777
9.09500000	9996.04570797	599.76274260	19.50481658
9.10000000	10033.40243476	602.00414573	-191.72124214
9.10500000	10001.45942252	600.08756533	18.80097024
9.11000000	10000.92607779	600.05556482	27.86810811
9.11500000	9995.62099149	599.73725989	19.03749000
9.12000000	10015.64256467	600.93855393	-137.18430333
9.12500000	10002.25865520	600.13551914	23.26692961
9.13000000	10000.16198388	600.00971930	27.11030380
9.13500000	9995.02522882	599.70151341	18.17439490
9.14000000	10002.60473125	600.15628375	-79.88141050
9.14500000	10002.91044970	600.17462721	27.31719822
9.15000000	9999.07838357	599.94470293	25.84162222
9.15500000	9994.29457153	599.65767455	16.95635470
9.16000000	9997.79699089	599.86781914	-31.75811246
9.16500000	10002.91217495	600.17473044	29.60772022
9.17000000	9997.72685661	599.86361173	24.03475561
9.17500000	9993.50674229	599.61040449	15.47197673
9.18000000	9999.01843691	599.94110593	1.57286620
9.18500000	10002.02357949	600.12141479	29.89140104
9.19000000	9996.21672725	599.77300363	21.77814938
9.19500000	10027.56695895	601.65401776	-176.54413245
9.20000000	10001.74876998	600.10492652	20.95088047
9.20500000	10000.27893684	600.01673628	28.31580852
9.21000000	9994.70028994	599.68201742	19.22472402
9.21500000	9999.42076679	599.96524614	-55.57449084
9.22000000	10002.92098862	600.17525909	29.19423685
9.22500000	9998.03012889	599.88180803	25.47149801
9.23000000	9993.31323485	599.59879404	16.55198963
9.23500000	9999.16976540	599.95018615	3.08243715
9.24000000	10001.78226312	600.10693612	30.33095246
9.24500000	9995.71498464	599.74289951	21.98170622
9.25000000	10010.34446552	600.62066827	-117.92473996
9.25500000	10002.52294238	600.15137678	25.95783673
9.26000000	9999.11299047	599.94677943	27.59914091
9.26500000	9993.66449248	599.61986953	18.34347076
9.27000000	9998.11851774	599.88711087	-10.27267271
9.27500000	10002.24594851	600.13475667	30.88456748
9.28000000	9996.11188993	599.76671329	23.38946924
9.28500000	10015.55748914	600.93344910	-138.43633365
9.29000000	10002.27370875	600.13642265	24.75012666
9.29500000	9999.23402770	599.95404150	28.30662392
9.30000000	9993.53089241	599.61185388	18.94579308
9.30500000	9998.33271485	599.89996333	-7.26338530
9.31000000	10002.03196652	600.12191767	31.18367441
9.31500000	9995.67917038	599.74075035	23.37052961
9.32000000	10006.77557385	600.40653430	-101.97279124
9.32500000	10002.62598167	600.15755891	27.65022253
9.33000000	9998.35325862	599.90119596	27.71424147
9.33500000	9992.81243029	599.56874567	18.30368405
9.34000000	9999.91295479	599.99477757	9.31593216
9.34500000	10000.98286657	600.05897198	30.92436620
9.35000000	9994.45136679	599.66708176	21.97920497
9.35500000	9998.27155341	599.89629318	-38.91563176
9.36000000	10002.59851203	600.15591097	31.16467058
9.36500000	9996.50365737	599.79021987	25.68431440
9.37000000	10016.46421822	600.98785305	-141.73389512
9.37500000	10002.26210647	600.13572640	25.55955662
9.38000000	9998.73043396	599.92382648	29.01411417
9.38500000	9992.69376544	599.56162609	19.41471170
9.39000000	9999.93591854	599.99615486	9.52044625
9.39500000	10000.76163788	600.04569832	31.37563048
9.40000000	9993.98653387	599.63919223	22.29160863
9.40500000	9997.96323908	599.87779414	-21.89818513
9.41000000	10002.17618121	600.13057117	32.06009790
9.41500000	9995.46098177	599.72765879	25.07995867
9.42000000	10001.76945467	600.10616753	-74.29324187
9.42500000	10002.65204391	600.15912267	30.28970152
9.43000000	9997.00243428	599.82014607	27.61318606
9.43500000	10019.26316991	601.15578985	-152.44044482
9.44000000	10002.12425111	600.12745531	25.36089329
9.44500000	9998.46710734	599.90802682	29.75480916
9.45000000	9992.08313953	599.52498840	19.94940311
9.45500000	10000.90156291	600.05409362	17.09721810
9.46000000	9999.74499492	599.98469952	31.36175498
9.46500000	9992.80218837	599.56813135	21.73345932
9.47000000	9999.45050851	599.96703084	5.52037018
9.47500000	10000.74361282	600.04461648	32.37562074
9.48000000	9993.50907052	599.61054396	23.33749584
9.48500000	9998.42183420	599.90531038	-8.57329654
9.49000000	10001.46975806	600.08818552	32.89708828
9.49500000	9994.12606035	599.64756365	24.70771754
9.50000000	9998.04618895	599.88277121	-22.99346120
9.50500000	10001.93123625	600.11587388	33.01240107
9.51000000	9994.64277586	599.67856609	25.83373090
9.51500000	9998.37268374	599.90236104	-36.27151412
9.52000000	10002.16798914	600.13007894	32.84737521
9.52500000	9995.02397273	599.70143844	26.69840214
9.53000000	9998.75292420	599.92517570	-45.52853295
9.53500000	10002.30605412	600.13836374	32.77275794
9.54000000	9995.21816371	599.71309026	27.29709880
9.54500000	9999.18943301	599.95136577	-50.49443830
9.55000000	10002.32280839	600.13936895	32.74067298
9.55500000	9995.24181915	599.71450915	27.63202192
9.56000000	9999.09185047	599.94551120	-49.47481667
9.56500000	10002.25833944	600.13550029	32.87948782
9.57000000	9995.07344652	599.70440722	27.70540361
9.57500000	9998.61877157	599.91712634	-42.92972241
9.58000000	10002.14918862	600.12895145	33.31328363
9.58500000	9994.71201121	599.68272082	27.52435707
9.59000000	9998.28959732	599.89737612	-32.62675262
9.59500000	10001.88391510	600.11303483	33.73565349
9.60000000	9994.17316101	599.65038949	27.08304085
9.60500000	9998.11765133	599.88705871	-18.93792558
9.61000000	10001.46864086	600.08811859	34.16892668
9.61500000	9993.45121549	599.60707272	26.38667930
9.62000000	9998.64690282	599.91881386	-4.88758796
9.62500000	10000.77444437	600.04646688	34.24737539
9.63000000	9992.59175053	599.55550499	25.44644518
9.63500000	9999.73836079	599.98430207	8.31352088
9.64000000	9999.79827230	599.98789659	33.97133184
9.64500000	9991.60082515	599.49604956	24.27185808
9.65000000	10000.98738283	600.05924251	19.00994180
9.65500000	9998.49741361	599.90984471	33.16434587
9.66000000	10021.93435428	601.31606089	-162.79528524
9.66500000	10001.98668126	600.11920109	27.16558325
9.67000000	9996.91538364	599.81492268	31.86895391
9.67500000	10003.88254140	600.23295270	-87.57174519
9.68000000	10002.26910695	600.13614618	32.33562818
9.68500000	9995.11823413	599.70709357	30.10823335
9.69000000	9998.33629120	599.90017718	-34.14786858
9.69500000	10001.61289206	600.09677341	34.78253961
9.70000000	9993.22248670	599.59334908	27.98243352
9.70500000	9999.06371764	599.94382321	0.53886993
9.71000000	10000.04570037	600.00274225	35.04717828
9.71500000	9991.30700001	599.47841983	25.60722106
9.72000000	10001.20777428	600.07246655	21.22480896
9.72500000	9997.77452176	599.86647084	33.65516152
9.73000000	10007.73605333	600.46416356	-108.41174087
9.73500000	10002.22781488	600.13366848	31.84805762
9.74000000	9995.13834700	599.70830087	31.21584687
9.74500000	9998.27154557	599.89629264	-29.96686542
9.75000000	10001.30959781	600.07857589	35.50377707
9.75500000	9992.44511114	599.54670670	28.19874533
9.76000000	9999.99654587	599.99979265	11.02778250
9.76500000	9998.87267797	599.93236079	35.13675134
9.77000000	10017.36900726	601.04214065	-147.73137463
9.77500000	10002.03399591	600.12203991	29.64133174
9.78000000	9995.64025314	599.73841501	32.56448021
9.78500000	9998.62549053	599.91752941	-37.42800651
9.79000000	10001.36821333	600.08209300	35.79027467
9.79500000	9992.29653711	599.53779205	28.93675902
9.80000000	10000.17881290	600.01072876	13.03985500
9.80500000	9998.44338594	599.90660344	35.48421789
9.81000000	10009.71131078	600.58267851	-117.04502711
9.81500000	10002.11835524	600.12710092	32.35340537
9.82000000	9994.55025153	599.67301481	32.16668369
9.82500000	9998.39094572	599.90345669	-14.15215630
9.83000000	10000.35762859	600.02145797	36.59403006
9.83500000	10040.86224967	602.45173478	-218.87151300
9.84000000	10001.52408076	600.09144524	25.21381859
9.84500000	9996.34868155	599.78092072	34.45129248
9.85000000	9999.08113802	599.94486807	-46.07317807
9.85500000	10001.36322514	600.08179305	36.29718630
9.86000000	9991.90360466	599.51421601	29.95383428
9.86500000	10000.60310587	600.03618652	17.14556414
9.87000000	9997.52308264	599.85138504	35.84851164
9.87500000	10001.70090570	600.10205462	-72.55294926
9.88000000	10001.73758528	600.10425479	35.51765676
9.88500000	9992.57023218	599.55421397	31.33588573
9.89000000	10000.04185075	600.00251117	12.04190492
9.89500000	9998.03365322	599.88201914	36.58923100
9.90000000	10003.44989621	600.20699361	-84.19212189
9.90500000	10001.79224484	600.10753495	35.26587409
9.91000000	9992.65659336	599.55939557	31.97967756
9.91500000	10000.01064846	600.00063878	11.73869521
9.92000000	9997.90646651	599.87438802	36.91165320
9.92500000	10002.11287982	600.12677240	-75.73192431
9.93000000	10001.65444643	600.09926638	36.02914691
9.93500000	9992.10348642	599.52620952	31.91714474
9.94000000	10000.48956819	600.02937424	16.61796696
9.94500000	9997.12053822	599.82723224	36.81103415
9.95000000	9999.77836660	599.98670195	-52.47256301
9.95500000	10001.15113014	600.06906809	37.31570744
9.96000000	9990.91763733	599.45505855	31.13637840
9.96500000	10001.28966071	600.07737948	24.71121784
9.97000000	9995.61741149	599.73704509	36.11061268
9.97500000	9998.35865500	599.90151958	-20.91650631
9.98000000	9999.99959462	599.99997587	38.36585202
9.98500000	10017.16521448	601.02991266	-146.70481219
9.99000000	10001.85734410	600.11144088	32.74050214
[truncated: 1,001 more rows]
