# Supplementary material for: An Efficient Contact Model for the Simulation of Cargo Airdrop Extraction Phase
Source: Hindawi journal article supplement (doi:10.1155/2018/9895451), 2018-10-17
Supplement: f1 [file 9895451.f1.zip › case1_stick_slip/extrcn_force.csv]

t(s)	fx(N)
0.00000000	0.00000000
0.00500000	0.00000000
0.01000000	0.00000000
0.01500000	0.00000000
0.02000000	0.00000000
0.02500000	0.00000000
0.03000000	0.00000000
0.03500000	0.00000000
0.04000000	0.00000000
0.04500000	0.00000000
0.05000000	0.00000000
0.05500000	0.00000000
0.06000000	0.00000000
0.06500000	0.00000000
0.07000000	0.00000000
0.07500000	0.00000000
0.08000000	0.00000000
0.08500000	0.00000000
0.09000000	0.00000000
0.09500000	0.00000000
0.10000000	0.00000000
0.10500000	0.00000000
0.11000000	0.00000000
0.11500000	0.00000000
0.12000000	0.00000000
0.12500000	0.00000000
0.13000000	0.00000000
0.13500000	0.00000000
0.14000000	0.00000000
0.14500000	0.00000000
0.15000000	0.00000000
0.15500000	0.00000000
0.16000000	0.00000000
0.16500000	0.00000000
0.17000000	0.00000000
0.17500000	0.00000000
0.18000000	0.00000000
0.18500000	0.00000000
0.19000000	0.00000000
0.19500000	0.00000000
0.20000000	0.00000000
0.20500000	0.00000000
0.21000000	0.00000000
0.21500000	0.00000000
0.22000000	0.00000000
0.22500000	0.00000000
0.23000000	0.00000000
0.23500000	0.00000000
0.24000000	0.00000000
0.24500000	0.00000000
0.25000000	0.00000000
0.25500000	0.00000000
0.26000000	0.00000000
0.26500000	0.00000000
0.27000000	0.00000000
0.27500000	0.00000000
0.28000000	0.00000000
0.28500000	0.00000000
0.29000000	0.00000000
0.29500000	0.00000000
0.30000000	0.00000000
0.30500000	0.00000000
0.31000000	0.00000000
0.31500000	0.00000000
0.32000000	0.00000000
0.32500000	0.00000000
0.33000000	0.00000000
0.33500000	0.00000000
0.34000000	0.00000000
0.34500000	0.00000000
0.35000000	0.00000000
0.35500000	0.00000000
0.36000000	0.00000000
0.36500000	0.00000000
0.37000000	0.00000000
0.37500000	0.00000000
0.38000000	0.00000000
0.38500000	0.00000000
0.39000000	0.00000000
0.39500000	0.00000000
0.40000000	0.00000000
0.40500000	0.00000000
0.41000000	0.00000000
0.41500000	0.00000000
0.42000000	0.00000000
0.42500000	0.00000000
0.43000000	0.00000000
0.43500000	0.00000000
0.44000000	0.00000000
0.44500000	0.00000000
0.45000000	0.00000000
0.45500000	0.00000000
0.46000000	0.00000000
0.46500000	0.00000000
0.47000000	0.00000000
0.47500000	0.00000000
0.48000000	0.00000000
0.48500000	0.00000000
0.49000000	0.00000000
0.49500000	0.00000000
0.50000000	0.00000000
0.50500000	0.00000000
0.51000000	0.00000000
0.51500000	0.00000000
0.52000000	0.00000000
0.52500000	0.00000000
0.53000000	0.00000000
0.53500000	0.00000000
0.54000000	0.00000000
0.54500000	0.00000000
0.55000000	0.00000000
0.55500000	0.00000000
0.56000000	0.00000000
0.56500000	0.00000000
0.57000000	0.00000000
0.57500000	0.00000000
0.58000000	0.00000000
0.58500000	0.00000000
0.59000000	0.00000000
0.59500000	0.00000000
0.60000000	0.00000000
0.60500000	0.00000000
0.61000000	0.00000000
0.61500000	0.00000000
0.62000000	0.00000000
0.62500000	0.00000000
0.63000000	0.00000000
0.63500000	0.00000000
0.64000000	0.00000000
0.64500000	0.00000000
0.65000000	0.00000000
0.65500000	0.00000000
0.66000000	0.00000000
0.66500000	0.00000000
0.67000000	0.00000000
0.67500000	0.00000000
0.68000000	0.00000000
0.68500000	0.00000000
0.69000000	0.00000000
0.69500000	0.00000000
0.70000000	0.00000000
0.70500000	0.00000000
0.71000000	0.00000000
0.71500000	0.00000000
0.72000000	0.00000000
0.72500000	0.00000000
0.73000000	0.00000000
0.73500000	0.00000000
0.74000000	0.00000000
0.74500000	0.00000000
0.75000000	0.00000000
0.75500000	0.00000000
0.76000000	0.00000000
0.76500000	0.00000000
0.77000000	0.00000000
0.77500000	0.00000000
0.78000000	0.00000000
0.78500000	0.00000000
0.79000000	0.00000000
0.79500000	0.00000000
0.80000000	0.00000000
0.80500000	0.00000000
0.81000000	0.00000000
0.81500000	0.00000000
0.82000000	0.00000000
0.82500000	0.00000000
0.83000000	0.00000000
0.83500000	0.00000000
0.84000000	0.00000000
0.84500000	0.00000000
0.85000000	0.00000000
0.85500000	0.00000000
0.86000000	0.00000000
0.86500000	0.00000000
0.87000000	0.00000000
0.87500000	0.00000000
0.88000000	0.00000000
0.88500000	0.00000000
0.89000000	0.00000000
0.89500000	0.00000000
0.90000000	0.00000000
0.90500000	0.00000000
0.91000000	0.00000000
0.91500000	0.00000000
0.92000000	0.00000000
0.92500000	0.00000000
0.93000000	0.00000000
0.93500000	0.00000000
0.94000000	0.00000000
0.94500000	0.00000000
0.95000000	0.00000000
0.95500000	0.00000000
0.96000000	0.00000000
0.96500000	0.00000000
0.97000000	0.00000000
0.97500000	0.00000000
0.98000000	0.00000000
0.98500000	0.00000000
0.99000000	0.00000000
0.99500000	0.00000000
1.00000000	0.00000000
1.00500000	0.00000000
1.01000000	0.00000000
1.01500000	0.00000000
1.02000000	0.00000000
1.02500000	0.00000000
1.03000000	0.00000000
1.03500000	0.00000000
1.04000000	0.00000000
1.04500000	0.00000000
1.05000000	0.00000000
1.05500000	0.00000000
1.06000000	0.00000000
1.06500000	0.00000000
1.07000000	0.00000000
1.07500000	0.00000000
1.08000000	0.00000000
1.08500000	0.00000000
1.09000000	0.00000000
1.09500000	0.00000000
1.10000000	0.00000000
1.10500000	0.00000000
1.11000000	0.00000000
1.11500000	0.00000000
1.12000000	0.00000000
1.12500000	0.00000000
1.13000000	0.00000000
1.13500000	0.00000000
1.14000000	0.00000000
1.14500000	0.00000000
1.15000000	0.00000000
1.15500000	0.00000000
1.16000000	0.00000000
1.16500000	0.00000000
1.17000000	0.00000000
1.17500000	0.00000000
1.18000000	0.00000000
1.18500000	0.00000000
1.19000000	0.00000000
1.19500000	0.00000000
1.20000000	0.00000000
1.20500000	0.00000000
1.21000000	0.00000000
1.21500000	0.00000000
1.22000000	0.00000000
1.22500000	0.00000000
1.23000000	0.00000000
1.23500000	0.00000000
1.24000000	0.00000000
1.24500000	0.00000000
1.25000000	0.00000000
1.25500000	0.00000000
1.26000000	0.00000000
1.26500000	0.00000000
1.27000000	0.00000000
1.27500000	0.00000000
1.28000000	0.00000000
1.28500000	0.00000000
1.29000000	0.00000000
1.29500000	0.00000000
1.30000000	0.00000000
1.30500000	0.00000000
1.31000000	0.00000000
1.31500000	0.00000000
1.32000000	0.00000000
1.32500000	0.00000000
1.33000000	0.00000000
1.33500000	0.00000000
1.34000000	0.00000000
1.34500000	0.00000000
1.35000000	0.00000000
1.35500000	0.00000000
1.36000000	0.00000000
1.36500000	0.00000000
1.37000000	0.00000000
1.37500000	0.00000000
1.38000000	0.00000000
1.38500000	0.00000000
1.39000000	0.00000000
1.39500000	0.00000000
1.40000000	0.00000000
1.40500000	0.00000000
1.41000000	0.00000000
1.41500000	0.00000000
1.42000000	0.00000000
1.42500000	0.00000000
1.43000000	0.00000000
1.43500000	0.00000000
1.44000000	0.00000000
1.44500000	0.00000000
1.45000000	0.00000000
1.45500000	0.00000000
1.46000000	0.00000000
1.46500000	0.00000000
1.47000000	0.00000000
1.47500000	0.00000000
1.48000000	0.00000000
1.48500000	0.00000000
1.49000000	0.00000000
1.49500000	0.00000000
1.50000000	0.00000000
1.50500000	0.00000000
1.51000000	0.00000000
1.51500000	0.00000000
1.52000000	0.00000000
1.52500000	0.00000000
1.53000000	0.00000000
1.53500000	0.00000000
1.54000000	0.00000000
1.54500000	0.00000000
1.55000000	0.00000000
1.55500000	0.00000000
1.56000000	0.00000000
1.56500000	0.00000000
1.57000000	0.00000000
1.57500000	0.00000000
1.58000000	0.00000000
1.58500000	0.00000000
1.59000000	0.00000000
1.59500000	0.00000000
1.60000000	0.00000000
1.60500000	0.00000000
1.61000000	0.00000000
1.61500000	0.00000000
1.62000000	0.00000000
1.62500000	0.00000000
1.63000000	0.00000000
1.63500000	0.00000000
1.64000000	0.00000000
1.64500000	0.00000000
1.65000000	0.00000000
1.65500000	0.00000000
1.66000000	0.00000000
1.66500000	0.00000000
1.67000000	0.00000000
1.67500000	0.00000000
1.68000000	0.00000000
1.68500000	0.00000000
1.69000000	0.00000000
1.69500000	0.00000000
1.70000000	0.00000000
1.70500000	0.00000000
1.71000000	0.00000000
1.71500000	0.00000000
1.72000000	0.00000000
1.72500000	0.00000000
1.73000000	0.00000000
1.73500000	0.00000000
1.74000000	0.00000000
1.74500000	0.00000000
1.75000000	0.00000000
1.75500000	0.00000000
1.76000000	0.00000000
1.76500000	0.00000000
1.77000000	0.00000000
1.77500000	0.00000000
1.78000000	0.00000000
1.78500000	0.00000000
1.79000000	0.00000000
1.79500000	0.00000000
1.80000000	0.00000000
1.80500000	0.00000000
1.81000000	0.00000000
1.81500000	0.00000000
1.82000000	0.00000000
1.82500000	0.00000000
1.83000000	0.00000000
1.83500000	0.00000000
1.84000000	0.00000000
1.84500000	0.00000000
1.85000000	0.00000000
1.85500000	0.00000000
1.86000000	0.00000000
1.86500000	0.00000000
1.87000000	0.00000000
1.87500000	0.00000000
1.88000000	0.00000000
1.88500000	0.00000000
1.89000000	0.00000000
1.89500000	0.00000000
1.90000000	0.00000000
1.90500000	0.00000000
1.91000000	0.00000000
1.91500000	0.00000000
1.92000000	0.00000000
1.92500000	0.00000000
1.93000000	0.00000000
1.93500000	0.00000000
1.94000000	0.00000000
1.94500000	0.00000000
1.95000000	0.00000000
1.95500000	0.00000000
1.96000000	0.00000000
1.96500000	0.00000000
1.97000000	0.00000000
1.97500000	0.00000000
1.98000000	0.00000000
1.98500000	0.00000000
1.99000000	0.00000000
1.99500000	0.00000000
2.00000000	0.00000000
2.00500000	1.00000000
2.01000000	2.00000000
2.01500000	3.00000000
2.02000000	4.00000000
2.02500000	5.00000000
2.03000000	6.00000000
2.03500000	7.00000000
2.04000000	8.00000000
2.04500000	9.00000000
2.05000000	10.00000000
2.05500000	11.00000000
2.06000000	12.00000000
2.06500000	13.00000000
2.07000000	14.00000000
2.07500000	15.00000000
2.08000000	16.00000000
2.08500000	17.00000000
2.09000000	18.00000000
2.09500000	19.00000000
2.10000000	20.00000000
2.10500000	21.00000000
2.11000000	22.00000000
2.11500000	23.00000000
2.12000000	24.00000000
2.12500000	25.00000000
2.13000000	26.00000000
2.13500000	27.00000000
2.14000000	28.00000000
2.14500000	29.00000000
2.15000000	30.00000000
2.15500000	31.00000000
2.16000000	32.00000000
2.16500000	33.00000000
2.17000000	34.00000000
2.17500000	35.00000000
2.18000000	36.00000000
2.18500000	37.00000000
2.19000000	38.00000000
2.19500000	39.00000000
2.20000000	40.00000000
2.20500000	41.00000000
2.21000000	42.00000000
2.21500000	43.00000000
2.22000000	44.00000000
2.22500000	45.00000000
2.23000000	46.00000000
2.23500000	47.00000000
2.24000000	48.00000000
2.24500000	49.00000000
2.25000000	50.00000000
2.25500000	51.00000000
2.26000000	52.00000000
2.26500000	53.00000000
2.27000000	54.00000000
2.27500000	55.00000000
2.28000000	56.00000000
2.28500000	57.00000000
2.29000000	58.00000000
2.29500000	59.00000000
2.30000000	60.00000000
2.30500000	61.00000000
2.31000000	62.00000000
2.31500000	63.00000000
2.32000000	64.00000000
2.32500000	65.00000000
2.33000000	66.00000000
2.33500000	67.00000000
2.34000000	68.00000000
2.34500000	69.00000000
2.35000000	70.00000000
2.35500000	71.00000000
2.36000000	72.00000000
2.36500000	73.00000000
2.37000000	74.00000000
2.37500000	75.00000000
2.38000000	76.00000000
2.38500000	77.00000000
2.39000000	78.00000000
2.39500000	79.00000000
2.40000000	80.00000000
2.40500000	81.00000000
2.41000000	82.00000000
2.41500000	83.00000000
2.42000000	84.00000000
2.42500000	85.00000000
2.43000000	86.00000000
2.43500000	87.00000000
2.44000000	88.00000000
2.44500000	89.00000000
2.45000000	90.00000000
2.45500000	91.00000000
2.46000000	92.00000000
2.46500000	93.00000000
2.47000000	94.00000000
2.47500000	95.00000000
2.48000000	96.00000000
2.48500000	97.00000000
2.49000000	98.00000000
2.49500000	99.00000000
2.50000000	100.00000000
2.50500000	101.00000000
2.51000000	102.00000000
2.51500000	103.00000000
2.52000000	104.00000000
2.52500000	105.00000000
2.53000000	106.00000000
2.53500000	107.00000000
2.54000000	108.00000000
2.54500000	109.00000000
2.55000000	110.00000000
2.55500000	111.00000000
2.56000000	112.00000000
2.56500000	113.00000000
2.57000000	114.00000000
2.57500000	115.00000000
2.58000000	116.00000000
2.58500000	117.00000000
2.59000000	118.00000000
2.59500000	119.00000000
2.60000000	120.00000000
2.60500000	121.00000000
2.61000000	122.00000000
2.61500000	123.00000000
2.62000000	124.00000000
2.62500000	125.00000000
2.63000000	126.00000000
2.63500000	127.00000000
2.64000000	128.00000000
2.64500000	129.00000000
2.65000000	130.00000000
2.65500000	131.00000000
2.66000000	132.00000000
2.66500000	133.00000000
2.67000000	134.00000000
2.67500000	135.00000000
2.68000000	136.00000000
2.68500000	137.00000000
2.69000000	138.00000000
2.69500000	139.00000000
2.70000000	140.00000000
2.70500000	141.00000000
2.71000000	142.00000000
2.71500000	143.00000000
2.72000000	144.00000000
2.72500000	145.00000000
2.73000000	146.00000000
2.73500000	147.00000000
2.74000000	148.00000000
2.74500000	149.00000000
2.75000000	150.00000000
2.75500000	151.00000000
2.76000000	152.00000000
2.76500000	153.00000000
2.77000000	154.00000000
2.77500000	155.00000000
2.78000000	156.00000000
2.78500000	157.00000000
2.79000000	158.00000000
2.79500000	159.00000000
2.80000000	160.00000000
2.80500000	161.00000000
2.81000000	162.00000000
2.81500000	163.00000000
2.82000000	164.00000000
2.82500000	165.00000000
2.83000000	166.00000000
2.83500000	167.00000000
2.84000000	168.00000000
2.84500000	169.00000000
2.85000000	170.00000000
2.85500000	171.00000000
2.86000000	172.00000000
2.86500000	173.00000000
2.87000000	174.00000000
2.87500000	175.00000000
2.88000000	176.00000000
2.88500000	177.00000000
2.89000000	178.00000000
2.89500000	179.00000000
2.90000000	180.00000000
2.90500000	181.00000000
2.91000000	182.00000000
2.91500000	183.00000000
2.92000000	184.00000000
2.92500000	185.00000000
2.93000000	186.00000000
2.93500000	187.00000000
2.94000000	188.00000000
2.94500000	189.00000000
2.95000000	190.00000000
2.95500000	191.00000000
2.96000000	192.00000000
2.96500000	193.00000000
2.97000000	194.00000000
2.97500000	195.00000000
2.98000000	196.00000000
2.98500000	197.00000000
2.99000000	198.00000000
2.99500000	199.00000000
3.00000000	200.00000000
3.00500000	201.00000000
3.01000000	202.00000000
3.01500000	203.00000000
3.02000000	204.00000000
3.02500000	205.00000000
3.03000000	206.00000000
3.03500000	207.00000000
3.04000000	208.00000000
3.04500000	209.00000000
3.05000000	210.00000000
3.05500000	211.00000000
3.06000000	212.00000000
3.06500000	213.00000000
3.07000000	214.00000000
3.07500000	215.00000000
3.08000000	216.00000000
3.08500000	217.00000000
3.09000000	218.00000000
3.09500000	219.00000000
3.10000000	220.00000000
3.10500000	221.00000000
3.11000000	222.00000000
3.11500000	223.00000000
3.12000000	224.00000000
3.12500000	225.00000000
3.13000000	226.00000000
3.13500000	227.00000000
3.14000000	228.00000000
3.14500000	229.00000000
3.15000000	230.00000000
3.15500000	231.00000000
3.16000000	232.00000000
3.16500000	233.00000000
3.17000000	234.00000000
3.17500000	235.00000000
3.18000000	236.00000000
3.18500000	237.00000000
3.19000000	238.00000000
3.19500000	239.00000000
3.20000000	240.00000000
3.20500000	241.00000000
3.21000000	242.00000000
3.21500000	243.00000000
3.22000000	244.00000000
3.22500000	245.00000000
3.23000000	246.00000000
3.23500000	247.00000000
3.24000000	248.00000000
3.24500000	249.00000000
3.25000000	250.00000000
3.25500000	251.00000000
3.26000000	252.00000000
3.26500000	253.00000000
3.27000000	254.00000000
3.27500000	255.00000000
3.28000000	256.00000000
3.28500000	257.00000000
3.29000000	258.00000000
3.29500000	259.00000000
3.30000000	260.00000000
3.30500000	261.00000000
3.31000000	262.00000000
3.31500000	263.00000000
3.32000000	264.00000000
3.32500000	265.00000000
3.33000000	266.00000000
3.33500000	267.00000000
3.34000000	268.00000000
3.34500000	269.00000000
3.35000000	270.00000000
3.35500000	271.00000000
3.36000000	272.00000000
3.36500000	273.00000000
3.37000000	274.00000000
3.37500000	275.00000000
3.38000000	276.00000000
3.38500000	277.00000000
3.39000000	278.00000000
3.39500000	279.00000000
3.40000000	280.00000000
3.40500000	281.00000000
3.41000000	282.00000000
3.41500000	283.00000000
3.42000000	284.00000000
3.42500000	285.00000000
3.43000000	286.00000000
3.43500000	287.00000000
3.44000000	288.00000000
3.44500000	289.00000000
3.45000000	290.00000000
3.45500000	291.00000000
3.46000000	292.00000000
3.46500000	293.00000000
3.47000000	294.00000000
3.47500000	295.00000000
3.48000000	296.00000000
3.48500000	297.00000000
3.49000000	298.00000000
3.49500000	299.00000000
3.50000000	300.00000000
3.50500000	301.00000000
3.51000000	302.00000000
3.51500000	303.00000000
3.52000000	304.00000000
3.52500000	305.00000000
3.53000000	306.00000000
3.53500000	307.00000000
3.54000000	308.00000000
3.54500000	309.00000000
3.55000000	310.00000000
3.55500000	311.00000000
3.56000000	312.00000000
3.56500000	313.00000000
3.57000000	314.00000000
3.57500000	315.00000000
3.58000000	316.00000000
3.58500000	317.00000000
3.59000000	318.00000000
3.59500000	319.00000000
3.60000000	320.00000000
3.60500000	321.00000000
3.61000000	322.00000000
3.61500000	323.00000000
3.62000000	324.00000000
3.62500000	325.00000000
3.63000000	326.00000000
3.63500000	327.00000000
3.64000000	328.00000000
3.64500000	329.00000000
3.65000000	330.00000000
3.65500000	331.00000000
3.66000000	332.00000000
3.66500000	333.00000000
3.67000000	334.00000000
3.67500000	335.00000000
3.68000000	336.00000000
3.68500000	337.00000000
3.69000000	338.00000000
3.69500000	339.00000000
3.70000000	340.00000000
3.70500000	341.00000000
3.71000000	342.00000000
3.71500000	343.00000000
3.72000000	344.00000000
3.72500000	345.00000000
3.73000000	346.00000000
3.73500000	347.00000000
3.74000000	348.00000000
3.74500000	349.00000000
3.75000000	350.00000000
3.75500000	351.00000000
3.76000000	352.00000000
3.76500000	353.00000000
3.77000000	354.00000000
3.77500000	355.00000000
3.78000000	356.00000000
3.78500000	357.00000000
3.79000000	358.00000000
3.79500000	359.00000000
3.80000000	360.00000000
3.80500000	361.00000000
3.81000000	362.00000000
3.81500000	363.00000000
3.82000000	364.00000000
3.82500000	365.00000000
3.83000000	366.00000000
3.83500000	367.00000000
3.84000000	368.00000000
3.84500000	369.00000000
3.85000000	370.00000000
3.85500000	371.00000000
3.86000000	372.00000000
3.86500000	373.00000000
3.87000000	374.00000000
3.87500000	375.00000000
3.88000000	376.00000000
3.88500000	377.00000000
3.89000000	378.00000000
3.89500000	379.00000000
3.90000000	380.00000000
3.90500000	381.00000000
3.91000000	382.00000000
3.91500000	383.00000000
3.92000000	384.00000000
3.92500000	385.00000000
3.93000000	386.00000000
3.93500000	387.00000000
3.94000000	388.00000000
3.94500000	389.00000000
3.95000000	390.00000000
3.95500000	391.00000000
3.96000000	392.00000000
3.96500000	393.00000000
3.97000000	394.00000000
3.97500000	395.00000000
3.98000000	396.00000000
3.98500000	397.00000000
3.99000000	398.00000000
3.99500000	399.00000000
4.00000000	400.00000000
4.00500000	401.00000000
4.01000000	402.00000000
4.01500000	403.00000000
4.02000000	404.00000000
4.02500000	405.00000000
4.03000000	406.00000000
4.03500000	407.00000000
4.04000000	408.00000000
4.04500000	409.00000000
4.05000000	410.00000000
4.05500000	411.00000000
4.06000000	412.00000000
4.06500000	413.00000000
4.07000000	414.00000000
4.07500000	415.00000000
4.08000000	416.00000000
4.08500000	417.00000000
4.09000000	418.00000000
4.09500000	419.00000000
4.10000000	420.00000000
4.10500000	421.00000000
4.11000000	422.00000000
4.11500000	423.00000000
4.12000000	424.00000000
4.12500000	425.00000000
4.13000000	426.00000000
4.13500000	427.00000000
4.14000000	428.00000000
4.14500000	429.00000000
4.15000000	430.00000000
4.15500000	431.00000000
4.16000000	432.00000000
4.16500000	433.00000000
4.17000000	434.00000000
4.17500000	435.00000000
4.18000000	436.00000000
4.18500000	437.00000000
4.19000000	438.00000000
4.19500000	439.00000000
4.20000000	440.00000000
4.20500000	441.00000000
4.21000000	442.00000000
4.21500000	443.00000000
4.22000000	444.00000000
4.22500000	445.00000000
4.23000000	446.00000000
4.23500000	447.00000000
4.24000000	448.00000000
4.24500000	449.00000000
4.25000000	450.00000000
4.25500000	451.00000000
4.26000000	452.00000000
4.26500000	453.00000000
4.27000000	454.00000000
4.27500000	455.00000000
4.28000000	456.00000000
4.28500000	457.00000000
4.29000000	458.00000000
4.29500000	459.00000000
4.30000000	460.00000000
4.30500000	461.00000000
4.31000000	462.00000000
4.31500000	463.00000000
4.32000000	464.00000000
4.32500000	465.00000000
4.33000000	466.00000000
4.33500000	467.00000000
4.34000000	468.00000000
4.34500000	469.00000000
4.35000000	470.00000000
4.35500000	471.00000000
4.36000000	472.00000000
4.36500000	473.00000000
4.37000000	474.00000000
4.37500000	475.00000000
4.38000000	476.00000000
4.38500000	477.00000000
4.39000000	478.00000000
4.39500000	479.00000000
4.40000000	480.00000000
4.40500000	481.00000000
4.41000000	482.00000000
4.41500000	483.00000000
4.42000000	484.00000000
4.42500000	485.00000000
4.43000000	486.00000000
4.43500000	487.00000000
4.44000000	488.00000000
4.44500000	489.00000000
4.45000000	490.00000000
4.45500000	491.00000000
4.46000000	492.00000000
4.46500000	493.00000000
4.47000000	494.00000000
4.47500000	495.00000000
4.48000000	496.00000000
4.48500000	497.00000000
4.49000000	498.00000000
4.49500000	499.00000000
4.50000000	500.00000000
4.50500000	501.00000000
4.51000000	502.00000000
4.51500000	503.00000000
4.52000000	504.00000000
4.52500000	505.00000000
4.53000000	506.00000000
4.53500000	507.00000000
4.54000000	508.00000000
4.54500000	509.00000000
4.55000000	510.00000000
4.55500000	511.00000000
4.56000000	512.00000000
4.56500000	513.00000000
4.57000000	514.00000000
4.57500000	515.00000000
4.58000000	516.00000000
4.58500000	517.00000000
4.59000000	518.00000000
4.59500000	519.00000000
4.60000000	520.00000000
4.60500000	521.00000000
4.61000000	522.00000000
4.61500000	523.00000000
4.62000000	524.00000000
4.62500000	525.00000000
4.63000000	526.00000000
4.63500000	527.00000000
4.64000000	528.00000000
4.64500000	529.00000000
4.65000000	530.00000000
4.65500000	531.00000000
4.66000000	532.00000000
4.66500000	533.00000000
4.67000000	534.00000000
4.67500000	535.00000000
4.68000000	536.00000000
4.68500000	537.00000000
4.69000000	538.00000000
4.69500000	539.00000000
4.70000000	540.00000000
4.70500000	541.00000000
4.71000000	542.00000000
4.71500000	543.00000000
4.72000000	544.00000000
4.72500000	545.00000000
4.73000000	546.00000000
4.73500000	547.00000000
4.74000000	548.00000000
4.74500000	549.00000000
4.75000000	550.00000000
4.75500000	551.00000000
4.76000000	552.00000000
4.76500000	553.00000000
4.77000000	554.00000000
4.77500000	555.00000000
4.78000000	556.00000000
4.78500000	557.00000000
4.79000000	558.00000000
4.79500000	559.00000000
4.80000000	560.00000000
4.80500000	561.00000000
4.81000000	562.00000000
4.81500000	563.00000000
4.82000000	564.00000000
4.82500000	565.00000000
4.83000000	566.00000000
4.83500000	567.00000000
4.84000000	568.00000000
4.84500000	569.00000000
4.85000000	570.00000000
4.85500000	571.00000000
4.86000000	572.00000000
4.86500000	573.00000000
4.87000000	574.00000000
4.87500000	575.00000000
4.88000000	576.00000000
4.88500000	577.00000000
4.89000000	578.00000000
4.89500000	579.00000000
4.90000000	580.00000000
4.90500000	581.00000000
4.91000000	582.00000000
4.91500000	583.00000000
4.92000000	584.00000000
4.92500000	585.00000000
4.93000000	586.00000000
4.93500000	587.00000000
4.94000000	588.00000000
4.94500000	589.00000000
4.95000000	590.00000000
4.95500000	591.00000000
4.96000000	592.00000000
4.96500000	593.00000000
4.97000000	594.00000000
4.97500000	595.00000000
4.98000000	596.00000000
4.98500000	597.00000000
4.99000000	598.00000000
4.99500000	599.00000000
5.00000000	600.00000000
5.00500000	601.00000000
5.01000000	602.00000000
5.01500000	603.00000000
5.02000000	604.00000000
5.02500000	605.00000000
5.03000000	606.00000000
5.03500000	607.00000000
5.04000000	608.00000000
5.04500000	609.00000000
5.05000000	610.00000000
5.05500000	611.00000000
5.06000000	612.00000000
5.06500000	613.00000000
5.07000000	614.00000000
5.07500000	615.00000000
5.08000000	616.00000000
5.08500000	617.00000000
5.09000000	618.00000000
5.09500000	619.00000000
5.10000000	620.00000000
5.10500000	621.00000000
5.11000000	622.00000000
5.11500000	623.00000000
5.12000000	624.00000000
5.12500000	625.00000000
5.13000000	626.00000000
5.13500000	627.00000000
5.14000000	628.00000000
5.14500000	629.00000000
5.15000000	630.00000000
5.15500000	631.00000000
5.16000000	632.00000000
5.16500000	633.00000000
5.17000000	634.00000000
5.17500000	635.00000000
5.18000000	636.00000000
5.18500000	637.00000000
5.19000000	638.00000000
5.19500000	639.00000000
5.20000000	640.00000000
5.20500000	641.00000000
5.21000000	642.00000000
5.21500000	643.00000000
5.22000000	644.00000000
5.22500000	645.00000000
5.23000000	646.00000000
5.23500000	647.00000000
5.24000000	648.00000000
5.24500000	649.00000000
5.25000000	650.00000000
5.25500000	651.00000000
5.26000000	652.00000000
5.26500000	653.00000000
5.27000000	654.00000000
5.27500000	655.00000000
5.28000000	656.00000000
5.28500000	657.00000000
5.29000000	658.00000000
5.29500000	659.00000000
5.30000000	660.00000000
5.30500000	661.00000000
5.31000000	662.00000000
5.31500000	663.00000000
5.32000000	664.00000000
5.32500000	665.00000000
5.33000000	666.00000000
5.33500000	667.00000000
5.34000000	668.00000000
5.34500000	669.00000000
5.35000000	670.00000000
5.35500000	671.00000000
5.36000000	672.00000000
5.36500000	673.00000000
5.37000000	674.00000000
5.37500000	675.00000000
5.38000000	676.00000000
5.38500000	677.00000000
5.39000000	678.00000000
5.39500000	679.00000000
5.40000000	680.00000000
5.40500000	681.00000000
5.41000000	682.00000000
5.41500000	683.00000000
5.42000000	684.00000000
5.42500000	685.00000000
5.43000000	686.00000000
5.43500000	687.00000000
5.44000000	688.00000000
5.44500000	689.00000000
5.45000000	690.00000000
5.45500000	691.00000000
5.46000000	692.00000000
5.46500000	693.00000000
5.47000000	694.00000000
5.47500000	695.00000000
5.48000000	696.00000000
5.48500000	697.00000000
5.49000000	698.00000000
5.49500000	699.00000000
5.50000000	700.00000000
5.50500000	701.00000000
5.51000000	702.00000000
5.51500000	703.00000000
5.52000000	704.00000000
5.52500000	705.00000000
5.53000000	706.00000000
5.53500000	707.00000000
5.54000000	708.00000000
5.54500000	709.00000000
5.55000000	710.00000000
5.55500000	711.00000000
5.56000000	712.00000000
5.56500000	713.00000000
5.57000000	714.00000000
5.57500000	715.00000000
5.58000000	716.00000000
5.58500000	717.00000000
5.59000000	718.00000000
5.59500000	719.00000000
5.60000000	720.00000000
5.60500000	721.00000000
5.61000000	722.00000000
5.61500000	723.00000000
5.62000000	724.00000000
5.62500000	725.00000000
5.63000000	726.00000000
5.63500000	727.00000000
5.64000000	728.00000000
5.64500000	729.00000000
5.65000000	730.00000000
5.65500000	731.00000000
5.66000000	732.00000000
5.66500000	733.00000000
5.67000000	734.00000000
5.67500000	735.00000000
5.68000000	736.00000000
5.68500000	737.00000000
5.69000000	738.00000000
5.69500000	739.00000000
5.70000000	740.00000000
5.70500000	741.00000000
5.71000000	742.00000000
5.71500000	743.00000000
5.72000000	744.00000000
5.72500000	745.00000000
5.73000000	746.00000000
5.73500000	747.00000000
5.74000000	748.00000000
5.74500000	749.00000000
5.75000000	750.00000000
5.75500000	751.00000000
5.76000000	752.00000000
5.76500000	753.00000000
5.77000000	754.00000000
5.77500000	755.00000000
5.78000000	756.00000000
5.78500000	757.00000000
5.79000000	758.00000000
5.79500000	759.00000000
5.80000000	760.00000000
5.80500000	761.00000000
5.81000000	762.00000000
5.81500000	763.00000000
5.82000000	764.00000000
5.82500000	765.00000000
5.83000000	766.00000000
5.83500000	767.00000000
5.84000000	768.00000000
5.84500000	769.00000000
5.85000000	770.00000000
5.85500000	771.00000000
5.86000000	772.00000000
5.86500000	773.00000000
5.87000000	774.00000000
5.87500000	775.00000000
5.88000000	776.00000000
5.88500000	777.00000000
5.89000000	778.00000000
5.89500000	779.00000000
5.90000000	780.00000000
5.90500000	781.00000000
5.91000000	782.00000000
5.91500000	783.00000000
5.92000000	784.00000000
5.92500000	785.00000000
5.93000000	786.00000000
5.93500000	787.00000000
5.94000000	788.00000000
5.94500000	789.00000000
5.95000000	790.00000000
5.95500000	791.00000000
5.96000000	792.00000000
5.96500000	793.00000000
5.97000000	794.00000000
5.97500000	795.00000000
5.98000000	796.00000000
5.98500000	797.00000000
5.99000000	798.00000000
5.99500000	799.00000000
6.00000000	800.00000000
6.00500000	801.00000000
6.01000000	802.00000000
6.01500000	803.00000000
6.02000000	804.00000000
6.02500000	805.00000000
6.03000000	806.00000000
6.03500000	807.00000000
6.04000000	808.00000000
6.04500000	809.00000000
6.05000000	810.00000000
6.05500000	811.00000000
6.06000000	812.00000000
6.06500000	813.00000000
6.07000000	814.00000000
6.07500000	815.00000000
6.08000000	816.00000000
6.08500000	817.00000000
6.09000000	818.00000000
6.09500000	819.00000000
6.10000000	820.00000000
6.10500000	821.00000000
6.11000000	822.00000000
6.11500000	823.00000000
6.12000000	824.00000000
6.12500000	825.00000000
6.13000000	826.00000000
6.13500000	827.00000000
6.14000000	828.00000000
6.14500000	829.00000000
6.15000000	830.00000000
6.15500000	831.00000000
6.16000000	832.00000000
6.16500000	833.00000000
6.17000000	834.00000000
6.17500000	835.00000000
6.18000000	836.00000000
6.18500000	837.00000000
6.19000000	838.00000000
6.19500000	839.00000000
6.20000000	840.00000000
6.20500000	841.00000000
6.21000000	842.00000000
6.21500000	843.00000000
6.22000000	844.00000000
6.22500000	845.00000000
6.23000000	846.00000000
6.23500000	847.00000000
6.24000000	848.00000000
6.24500000	849.00000000
6.25000000	850.00000000
6.25500000	851.00000000
6.26000000	852.00000000
6.26500000	853.00000000
6.27000000	854.00000000
6.27500000	855.00000000
6.28000000	856.00000000
6.28500000	857.00000000
6.29000000	858.00000000
6.29500000	859.00000000
6.30000000	860.00000000
6.30500000	861.00000000
6.31000000	862.00000000
6.31500000	863.00000000
6.32000000	864.00000000
6.32500000	865.00000000
6.33000000	866.00000000
6.33500000	867.00000000
6.34000000	868.00000000
6.34500000	869.00000000
6.35000000	870.00000000
6.35500000	871.00000000
6.36000000	872.00000000
6.36500000	873.00000000
6.37000000	874.00000000
6.37500000	875.00000000
6.38000000	876.00000000
6.38500000	877.00000000
6.39000000	878.00000000
6.39500000	879.00000000
6.40000000	880.00000000
6.40500000	881.00000000
6.41000000	882.00000000
6.41500000	883.00000000
6.42000000	884.00000000
6.42500000	885.00000000
6.43000000	886.00000000
6.43500000	887.00000000
6.44000000	888.00000000
6.44500000	889.00000000
6.45000000	890.00000000
6.45500000	891.00000000
6.46000000	892.00000000
6.46500000	893.00000000
6.47000000	894.00000000
6.47500000	895.00000000
6.48000000	896.00000000
6.48500000	897.00000000
6.49000000	898.00000000
6.49500000	899.00000000
6.50000000	900.00000000
6.50500000	901.00000000
6.51000000	902.00000000
6.51500000	903.00000000
6.52000000	904.00000000
6.52500000	905.00000000
6.53000000	906.00000000
6.53500000	907.00000000
6.54000000	908.00000000
6.54500000	909.00000000
6.55000000	910.00000000
6.55500000	911.00000000
6.56000000	912.00000000
6.56500000	913.00000000
6.57000000	914.00000000
6.57500000	915.00000000
6.58000000	916.00000000
6.58500000	917.00000000
6.59000000	918.00000000
6.59500000	919.00000000
6.60000000	920.00000000
6.60500000	921.00000000
6.61000000	922.00000000
6.61500000	923.00000000
6.62000000	924.00000000
6.62500000	925.00000000
6.63000000	926.00000000
6.63500000	927.00000000
6.64000000	928.00000000
6.64500000	929.00000000
6.65000000	930.00000000
6.65500000	931.00000000
6.66000000	932.00000000
6.66500000	933.00000000
6.67000000	934.00000000
6.67500000	935.00000000
6.68000000	936.00000000
6.68500000	937.00000000
6.69000000	938.00000000
6.69500000	939.00000000
6.70000000	940.00000000
6.70500000	941.00000000
6.71000000	942.00000000
6.71500000	943.00000000
6.72000000	944.00000000
6.72500000	945.00000000
6.73000000	946.00000000
6.73500000	947.00000000
6.74000000	948.00000000
6.74500000	949.00000000
6.75000000	950.00000000
6.75500000	951.00000000
6.76000000	952.00000000
6.76500000	953.00000000
6.77000000	954.00000000
6.77500000	955.00000000
6.78000000	956.00000000
6.78500000	957.00000000
6.79000000	958.00000000
6.79500000	959.00000000
6.80000000	960.00000000
6.80500000	961.00000000
6.81000000	962.00000000
6.81500000	963.00000000
6.82000000	964.00000000
6.82500000	965.00000000
6.83000000	966.00000000
6.83500000	967.00000000
6.84000000	968.00000000
6.84500000	969.00000000
6.85000000	970.00000000
6.85500000	971.00000000
6.86000000	972.00000000
6.86500000	973.00000000
6.87000000	974.00000000
6.87500000	975.00000000
6.88000000	976.00000000
6.88500000	977.00000000
6.89000000	978.00000000
6.89500000	979.00000000
6.90000000	980.00000000
6.90500000	981.00000000
6.91000000	982.00000000
6.91500000	983.00000000
6.92000000	984.00000000
6.92500000	985.00000000
6.93000000	986.00000000
6.93500000	987.00000000
6.94000000	988.00000000
6.94500000	989.00000000
6.95000000	990.00000000
6.95500000	991.00000000
6.96000000	992.00000000
6.96500000	993.00000000
6.97000000	994.00000000
6.97500000	995.00000000
6.98000000	996.00000000
6.98500000	997.00000000
6.99000000	998.00000000
6.99500000	999.00000000
7.00000000	1000.00000000
7.00500000	1001.00000000
7.01000000	1002.00000000
7.01500000	1003.00000000
7.02000000	1004.00000000
7.02500000	1005.00000000
7.03000000	1006.00000000
7.03500000	1007.00000000
7.04000000	1008.00000000
7.04500000	1009.00000000
7.05000000	1010.00000000
7.05500000	1011.00000000
7.06000000	1012.00000000
7.06500000	1013.00000000
7.07000000	1014.00000000
7.07500000	1015.00000000
7.08000000	1016.00000000
7.08500000	1017.00000000
7.09000000	1018.00000000
7.09500000	1019.00000000
7.10000000	1020.00000000
7.10500000	1021.00000000
7.11000000	1022.00000000
7.11500000	1023.00000000
7.12000000	1024.00000000
7.12500000	1025.00000000
7.13000000	1026.00000000
7.13500000	1027.00000000
7.14000000	1028.00000000
7.14500000	1029.00000000
7.15000000	1030.00000000
7.15500000	1031.00000000
7.16000000	1032.00000000
7.16500000	1033.00000000
7.17000000	1034.00000000
7.17500000	1035.00000000
7.18000000	1036.00000000
7.18500000	1037.00000000
7.19000000	1038.00000000
7.19500000	1039.00000000
7.20000000	1040.00000000
7.20500000	1041.00000000
7.21000000	1042.00000000
7.21500000	1043.00000000
7.22000000	1044.00000000
7.22500000	1045.00000000
7.23000000	1046.00000000
7.23500000	1047.00000000
7.24000000	1048.00000000
7.24500000	1049.00000000
7.25000000	1050.00000000
7.25500000	1051.00000000
7.26000000	1052.00000000
7.26500000	1053.00000000
7.27000000	1054.00000000
7.27500000	1055.00000000
7.28000000	1056.00000000
7.28500000	1057.00000000
7.29000000	1058.00000000
7.29500000	1059.00000000
7.30000000	1060.00000000
7.30500000	1061.00000000
7.31000000	1062.00000000
7.31500000	1063.00000000
7.32000000	1064.00000000
7.32500000	1065.00000000
7.33000000	1066.00000000
7.33500000	1067.00000000
7.34000000	1068.00000000
7.34500000	1069.00000000
7.35000000	1070.00000000
7.35500000	1071.00000000
7.36000000	1072.00000000
7.36500000	1073.00000000
7.37000000	1074.00000000
7.37500000	1075.00000000
7.38000000	1076.00000000
7.38500000	1077.00000000
7.39000000	1078.00000000
7.39500000	1079.00000000
7.40000000	1080.00000000
7.40500000	1081.00000000
7.41000000	1082.00000000
7.41500000	1083.00000000
7.42000000	1084.00000000
7.42500000	1085.00000000
7.43000000	1086.00000000
7.43500000	1087.00000000
7.44000000	1088.00000000
7.44500000	1089.00000000
7.45000000	1090.00000000
7.45500000	1091.00000000
7.46000000	1092.00000000
7.46500000	1093.00000000
7.47000000	1094.00000000
7.47500000	1095.00000000
7.48000000	1096.00000000
7.48500000	1097.00000000
7.49000000	1098.00000000
7.49500000	1099.00000000
7.50000000	1100.00000000
7.50500000	1101.00000000
7.51000000	1102.00000000
7.51500000	1103.00000000
7.52000000	1104.00000000
7.52500000	1105.00000000
7.53000000	1106.00000000
7.53500000	1107.00000000
7.54000000	1108.00000000
7.54500000	1109.00000000
7.55000000	1110.00000000
7.55500000	1111.00000000
7.56000000	1112.00000000
7.56500000	1113.00000000
7.57000000	1114.00000000
7.57500000	1115.00000000
7.58000000	1116.00000000
7.58500000	1117.00000000
7.59000000	1118.00000000
7.59500000	1119.00000000
7.60000000	1120.00000000
7.60500000	1121.00000000
7.61000000	1122.00000000
7.61500000	1123.00000000
7.62000000	1124.00000000
7.62500000	1125.00000000
7.63000000	1126.00000000
7.63500000	1127.00000000
7.64000000	1128.00000000
7.64500000	1129.00000000
7.65000000	1130.00000000
7.65500000	1131.00000000
7.66000000	1132.00000000
7.66500000	1133.00000000
7.67000000	1134.00000000
7.67500000	1135.00000000
7.68000000	1136.00000000
7.68500000	1137.00000000
7.69000000	1138.00000000
7.69500000	1139.00000000
7.70000000	1140.00000000
7.70500000	1141.00000000
7.71000000	1142.00000000
7.71500000	1143.00000000
7.72000000	1144.00000000
7.72500000	1145.00000000
7.73000000	1146.00000000
7.73500000	1147.00000000
7.74000000	1148.00000000
7.74500000	1149.00000000
7.75000000	1150.00000000
7.75500000	1151.00000000
7.76000000	1152.00000000
7.76500000	1153.00000000
7.77000000	1154.00000000
7.77500000	1155.00000000
7.78000000	1156.00000000
7.78500000	1157.00000000
7.79000000	1158.00000000
7.79500000	1159.00000000
7.80000000	1160.00000000
7.80500000	1161.00000000
7.81000000	1162.00000000
7.81500000	1163.00000000
7.82000000	1164.00000000
7.82500000	1165.00000000
7.83000000	1166.00000000
7.83500000	1167.00000000
7.84000000	1168.00000000
7.84500000	1169.00000000
7.85000000	1170.00000000
7.85500000	1171.00000000
7.86000000	1172.00000000
7.86500000	1173.00000000
7.87000000	1174.00000000
7.87500000	1175.00000000
7.88000000	1176.00000000
7.88500000	1177.00000000
7.89000000	1178.00000000
7.89500000	1179.00000000
7.90000000	1180.00000000
7.90500000	1181.00000000
7.91000000	1182.00000000
7.91500000	1183.00000000
7.92000000	1184.00000000
7.92500000	1185.00000000
7.93000000	1186.00000000
7.93500000	1187.00000000
7.94000000	1188.00000000
7.94500000	1189.00000000
7.95000000	1190.00000000
7.95500000	1191.00000000
7.96000000	1192.00000000
7.96500000	1193.00000000
7.97000000	1194.00000000
7.97500000	1195.00000000
7.98000000	1196.00000000
7.98500000	1197.00000000
7.99000000	1198.00000000
7.99500000	1199.00000000
8.00000000	1200.00000000
8.00500000	1201.00000000
8.01000000	1202.00000000
8.01500000	1203.00000000
8.02000000	1204.00000000
8.02500000	1205.00000000
8.03000000	1206.00000000
8.03500000	1207.00000000
8.04000000	1208.00000000
8.04500000	1209.00000000
8.05000000	1210.00000000
8.05500000	1211.00000000
8.06000000	1212.00000000
8.06500000	1213.00000000
8.07000000	1214.00000000
8.07500000	1215.00000000
8.08000000	1216.00000000
8.08500000	1217.00000000
8.09000000	1218.00000000
8.09500000	1219.00000000
8.10000000	1220.00000000
8.10500000	1221.00000000
8.11000000	1222.00000000
8.11500000	1223.00000000
8.12000000	1224.00000000
8.12500000	1225.00000000
8.13000000	1226.00000000
8.13500000	1227.00000000
8.14000000	1228.00000000
8.14500000	1229.00000000
8.15000000	1230.00000000
8.15500000	1231.00000000
8.16000000	1232.00000000
8.16500000	1233.00000000
8.17000000	1234.00000000
8.17500000	1235.00000000
8.18000000	1236.00000000
8.18500000	1237.00000000
8.19000000	1238.00000000
8.19500000	1239.00000000
8.20000000	1240.00000000
8.20500000	1241.00000000
8.21000000	1242.00000000
8.21500000	1243.00000000
8.22000000	1244.00000000
8.22500000	1245.00000000
8.23000000	1246.00000000
8.23500000	1247.00000000
8.24000000	1248.00000000
8.24500000	1249.00000000
8.25000000	1250.00000000
8.25500000	1251.00000000
8.26000000	1252.00000000
8.26500000	1253.00000000
8.27000000	1254.00000000
8.27500000	1255.00000000
8.28000000	1256.00000000
8.28500000	1257.00000000
8.29000000	1258.00000000
8.29500000	1259.00000000
8.30000000	1260.00000000
8.30500000	1261.00000000
8.31000000	1262.00000000
8.31500000	1263.00000000
8.32000000	1264.00000000
8.32500000	1265.00000000
8.33000000	1266.00000000
8.33500000	1267.00000000
8.34000000	1268.00000000
8.34500000	1269.00000000
8.35000000	1270.00000000
8.35500000	1271.00000000
8.36000000	1272.00000000
8.36500000	1273.00000000
8.37000000	1274.00000000
8.37500000	1275.00000000
8.38000000	1276.00000000
8.38500000	1277.00000000
8.39000000	1278.00000000
8.39500000	1279.00000000
8.40000000	1280.00000000
8.40500000	1281.00000000
8.41000000	1282.00000000
8.41500000	1283.00000000
8.42000000	1284.00000000
8.42500000	1285.00000000
8.43000000	1286.00000000
8.43500000	1287.00000000
8.44000000	1288.00000000
8.44500000	1289.00000000
8.45000000	1290.00000000
8.45500000	1291.00000000
8.46000000	1292.00000000
8.46500000	1293.00000000
8.47000000	1294.00000000
8.47500000	1295.00000000
8.48000000	1296.00000000
8.48500000	1297.00000000
8.49000000	1298.00000000
8.49500000	1299.00000000
8.50000000	1300.00000000
8.50500000	1301.00000000
8.51000000	1302.00000000
8.51500000	1303.00000000
8.52000000	1304.00000000
8.52500000	1305.00000000
8.53000000	1306.00000000
8.53500000	1307.00000000
8.54000000	1308.00000000
8.54500000	1309.00000000
8.55000000	1310.00000000
8.55500000	1311.00000000
8.56000000	1312.00000000
8.56500000	1313.00000000
8.57000000	1314.00000000
8.57500000	1315.00000000
8.58000000	1316.00000000
8.58500000	1317.00000000
8.59000000	1318.00000000
8.59500000	1319.00000000
8.60000000	1320.00000000
8.60500000	1321.00000000
8.61000000	1322.00000000
8.61500000	1323.00000000
8.62000000	1324.00000000
8.62500000	1325.00000000
8.63000000	1326.00000000
8.63500000	1327.00000000
8.64000000	1328.00000000
8.64500000	1329.00000000
8.65000000	1330.00000000
8.65500000	1331.00000000
8.66000000	1332.00000000
8.66500000	1333.00000000
8.67000000	1334.00000000
8.67500000	1335.00000000
8.68000000	1336.00000000
8.68500000	1337.00000000
8.69000000	1338.00000000
8.69500000	1339.00000000
8.70000000	1340.00000000
8.70500000	1341.00000000
8.71000000	1342.00000000
8.71500000	1343.00000000
8.72000000	1344.00000000
8.72500000	1345.00000000
8.73000000	1346.00000000
8.73500000	1347.00000000
8.74000000	1348.00000000
8.74500000	1349.00000000
8.75000000	1350.00000000
8.75500000	1351.00000000
8.76000000	1352.00000000
8.76500000	1353.00000000
8.77000000	1354.00000000
8.77500000	1355.00000000
8.78000000	1356.00000000
8.78500000	1357.00000000
8.79000000	1358.00000000
8.79500000	1359.00000000
8.80000000	1360.00000000
8.80500000	1361.00000000
8.81000000	1362.00000000
8.81500000	1363.00000000
8.82000000	1364.00000000
8.82500000	1365.00000000
8.83000000	1366.00000000
8.83500000	1367.00000000
8.84000000	1368.00000000
8.84500000	1369.00000000
8.85000000	1370.00000000
8.85500000	1371.00000000
8.86000000	1372.00000000
8.86500000	1373.00000000
8.87000000	1374.00000000
8.87500000	1375.00000000
8.88000000	1376.00000000
8.88500000	1377.00000000
8.89000000	1378.00000000
8.89500000	1379.00000000
8.90000000	1380.00000000
8.90500000	1381.00000000
8.91000000	1382.00000000
8.91500000	1383.00000000
8.92000000	1384.00000000
8.92500000	1385.00000000
8.93000000	1386.00000000
8.93500000	1387.00000000
8.94000000	1388.00000000
8.94500000	1389.00000000
8.95000000	1390.00000000
8.95500000	1391.00000000
8.96000000	1392.00000000
8.96500000	1393.00000000
8.97000000	1394.00000000
8.97500000	1395.00000000
8.98000000	1396.00000000
8.98500000	1397.00000000
8.99000000	1398.00000000
8.99500000	1399.00000000
9.00000000	1400.00000000
9.00500000	1401.00000000
9.01000000	1402.00000000
9.01500000	1403.00000000
9.02000000	1404.00000000
9.02500000	1405.00000000
9.03000000	1406.00000000
9.03500000	1407.00000000
9.04000000	1408.00000000
9.04500000	1409.00000000
9.05000000	1410.00000000
9.05500000	1411.00000000
9.06000000	1412.00000000
9.06500000	1413.00000000
9.07000000	1414.00000000
9.07500000	1415.00000000
9.08000000	1416.00000000
9.08500000	1417.00000000
9.09000000	1418.00000000
9.09500000	1419.00000000
9.10000000	1420.00000000
9.10500000	1421.00000000
9.11000000	1422.00000000
9.11500000	1423.00000000
9.12000000	1424.00000000
9.12500000	1425.00000000
9.13000000	1426.00000000
9.13500000	1427.00000000
9.14000000	1428.00000000
9.14500000	1429.00000000
9.15000000	1430.00000000
9.15500000	1431.00000000
9.16000000	1432.00000000
9.16500000	1433.00000000
9.17000000	1434.00000000
9.17500000	1435.00000000
9.18000000	1436.00000000
9.18500000	1437.00000000
9.19000000	1438.00000000
9.19500000	1439.00000000
9.20000000	1440.00000000
9.20500000	1441.00000000
9.21000000	1442.00000000
9.21500000	1443.00000000
9.22000000	1444.00000000
9.22500000	1445.00000000
9.23000000	1446.00000000
9.23500000	1447.00000000
9.24000000	1448.00000000
9.24500000	1449.00000000
9.25000000	1450.00000000
9.25500000	1451.00000000
9.26000000	1452.00000000
9.26500000	1453.00000000
9.27000000	1454.00000000
9.27500000	1455.00000000
9.28000000	1456.00000000
9.28500000	1457.00000000
9.29000000	1458.00000000
9.29500000	1459.00000000
9.30000000	1460.00000000
9.30500000	1461.00000000
9.31000000	1462.00000000
9.31500000	1463.00000000
9.32000000	1464.00000000
9.32500000	1465.00000000
9.33000000	1466.00000000
9.33500000	1467.00000000
9.34000000	1468.00000000
9.34500000	1469.00000000
9.35000000	1470.00000000
9.35500000	1471.00000000
9.36000000	1472.00000000
9.36500000	1473.00000000
9.37000000	1474.00000000
9.37500000	1475.00000000
9.38000000	1476.00000000
9.38500000	1477.00000000
9.39000000	1478.00000000
9.39500000	1479.00000000
9.40000000	1480.00000000
9.40500000	1481.00000000
9.41000000	1482.00000000
9.41500000	1483.00000000
9.42000000	1484.00000000
9.42500000	1485.00000000
9.43000000	1486.00000000
9.43500000	1487.00000000
9.44000000	1488.00000000
9.44500000	1489.00000000
9.45000000	1490.00000000
9.45500000	1491.00000000
9.46000000	1492.00000000
9.46500000	1493.00000000
9.47000000	1494.00000000
9.47500000	1495.00000000
9.48000000	1496.00000000
9.48500000	1497.00000000
9.49000000	1498.00000000
9.49500000	1499.00000000
9.50000000	1500.00000000
9.50500000	1501.00000000
9.51000000	1502.00000000
9.51500000	1503.00000000
9.52000000	1504.00000000
9.52500000	1505.00000000
9.53000000	1506.00000000
9.53500000	1507.00000000
9.54000000	1508.00000000
9.54500000	1509.00000000
9.55000000	1510.00000000
9.55500000	1511.00000000
9.56000000	1512.00000000
9.56500000	1513.00000000
9.57000000	1514.00000000
9.57500000	1515.00000000
9.58000000	1516.00000000
9.58500000	1517.00000000
9.59000000	1518.00000000
9.59500000	1519.00000000
9.60000000	1520.00000000
9.60500000	1521.00000000
9.61000000	1522.00000000
9.61500000	1523.00000000
9.62000000	1524.00000000
9.62500000	1525.00000000
9.63000000	1526.00000000
9.63500000	1527.00000000
9.64000000	1528.00000000
9.64500000	1529.00000000
9.65000000	1530.00000000
9.65500000	1531.00000000
9.66000000	1532.00000000
9.66500000	1533.00000000
9.67000000	1534.00000000
9.67500000	1535.00000000
9.68000000	1536.00000000
9.68500000	1537.00000000
9.69000000	1538.00000000
9.69500000	1539.00000000
9.70000000	1540.00000000
9.70500000	1541.00000000
9.71000000	1542.00000000
9.71500000	1543.00000000
9.72000000	1544.00000000
9.72500000	1545.00000000
9.73000000	1546.00000000
9.73500000	1547.00000000
9.74000000	1548.00000000
9.74500000	1549.00000000
9.75000000	1550.00000000
9.75500000	1551.00000000
9.76000000	1552.00000000
9.76500000	1553.00000000
9.77000000	1554.00000000
9.77500000	1555.00000000
9.78000000	1556.00000000
9.78500000	1557.00000000
9.79000000	1558.00000000
9.79500000	1559.00000000
9.80000000	1560.00000000
9.80500000	1561.00000000
9.81000000	1562.00000000
9.81500000	1563.00000000
9.82000000	1564.00000000
9.82500000	1565.00000000
9.83000000	1566.00000000
9.83500000	1567.00000000
9.84000000	1568.00000000
9.84500000	1569.00000000
9.85000000	1570.00000000
9.85500000	1571.00000000
9.86000000	1572.00000000
9.86500000	1573.00000000
9.87000000	1574.00000000
9.87500000	1575.00000000
9.88000000	1576.00000000
9.88500000	1577.00000000
9.89000000	1578.00000000
9.89500000	1579.00000000
9.90000000	1580.00000000
9.90500000	1581.00000000
9.91000000	1582.00000000
9.91500000	1583.00000000
9.92000000	1584.00000000
9.92500000	1585.00000000
9.93000000	1586.00000000
9.93500000	1587.00000000
9.94000000	1588.00000000
9.94500000	1589.00000000
9.95000000	1590.00000000
9.95500000	1591.00000000
9.96000000	1592.00000000
9.96500000	1593.00000000
9.97000000	1594.00000000
9.97500000	1595.00000000
9.98000000	1596.00000000
9.98500000	1597.00000000
9.99000000	1598.00000000
[truncated: 1,001 more rows]
