# Supplementary material for: An Efficient Contact Model for the Simulation of Cargo Airdrop Extraction Phase
Source: Hindawi journal article supplement (doi:10.1155/2018/9895451), 2018-10-17
Supplement: f1 [file 9895451.f1.zip › case1_stick_slip/motion_pts10.csv]

t	u	v	w	x_g	y_g	z_g	p	q	r	e0	e1	e2	e3	yaw(deg)	pitch(deg)	roll(deg)	yaw_fix(deg)	pitch_fix(deg)	roll_fix(deg)	vx_g	vy_g	vz_g	ax_g	ay_g	az_g
0.0	0.0	0.0	0.0	0.0	0.0	-0.1	0.0	0.0	0.0	1.0	0.0	0.0	0.0	0.0	-0.0	0.0	0.0	0.0	0.0	0.0	0.0	0.0	1.3568980692696335e-17	0.0	12.722059820077765
0.005	-1.6707510111496466e-20	0.0	0.04641708289669544	-2.862872073307516e-25	0.0	-0.09987865489666481	0.0	3.3475262298942837e-16	0.0	1.0	0.0	1.7400036099750995e-19	0.0	0.0	1.9938972637820117e-17	0.0	0.0	9.58995623911413e-17	0.0	-5.543317505437635e-22	0.0	0.04641708289669544	1.5942744533321005e-17	0.0	5.7854281989485665
0.01	-5.74176230211416e-19	0.0	0.058447733386004085	-1.6656840785282278e-22	0.0	-0.0995952061036926	0.0	2.8084964478620272e-15	0.0	1.0	0.0	3.732130152944021e-18	0.0	0.0	4.276706127144137e-16	0.0	0.0	9.004745285910293e-16	0.0	-1.3790713392913841e-19	0.0	0.058447733386004085	-1.0898239950126878e-16	0.0	-1.486654549879076
0.015	-2.3298943984475115e-18	0.0	0.03787230565748117	-3.178998464208011e-21	0.0	-0.09935293349403203	0.0	4.692709739367941e-15	0.0	1.0	0.0	1.3543303428663085e-17	0.0	0.0	1.551948254254904e-15	0.0	0.0	2.2448368413196272e-15	0.0	-1.3040621443228294e-18	0.0	0.03787230565748117	-3.752787773057757e-16	0.0	-4.394873358511712
0.02	-4.927186178314537e-18	0.0	0.02084105507903041	-1.5610887779674095e-20	0.0	-0.09920843104550338	0.0	4.076810691517115e-15	0.0	1.0	0.0	2.4904392888842957e-17	0.0	0.0	2.853833207732643e-15	0.0	0.0	3.4127570738083337e-15	0.0	-3.889118530502158e-18	0.0	0.02084105507903041	-6.361529915061455e-16	0.0	-2.8832164931313784
0.025	-8.104407794917509e-18	0.0	0.009256057951608793	-4.3780216717729955e-20	0.0	-0.09913539934861969	0.0	2.337698649929718e-15	0.0	1.0	0.0	3.2999411419154854e-17	0.0	0.0	3.781454001466775e-15	0.0	0.0	4.0824584058803506e-15	0.0	-7.493518865988153e-18	0.0	0.009256057951608793	-7.773911496874035e-16	0.0	-1.8016888584042232
0.03	-1.1668587475654009e-17	0.0	0.002510741326907809	-9.117619845898081e-20	0.0	-0.09910776407543177	0.0	6.850424116193111e-16	0.0	1.0	0.0	3.668359954027469e-17	0.0	0.0	4.203630862011573e-15	0.0	0.0	4.2787086007466015e-15	0.0	-1.1484381416883001e-17	0.0	0.002510741326907809	-8.03637597899986e-16	0.0	-0.9481317746819014
0.035	-1.5373303343868075e-17	0.0	-0.0006688728552462745	-1.585209431169409e-19	0.0	-0.09910434448882592	0.0	-3.855870486885645e-16	0.0	1.0	0.0	3.692249571041717e-17	0.0	0.0	4.23100634659358e-15	0.0	0.0	4.168246048122801e-15	0.0	-1.5422696254125365e-17	0.0	-0.0006688728552462745	-7.485140184306668e-16	0.0	-0.3766527983227938
0.04	-1.8986053920878587e-17	0.0	-0.0016704848948960436	-2.4499303547977754e-19	0.0	-0.09911084090474451	0.0	-9.91268825003158e-16	0.0	1.0	0.0	3.538728218475145e-17	0.0	0.0	4.05508383524949e-15	0.0	0.0	3.884268447944935e-15	0.0	-1.9104281761600688e-17	0.0	-0.0016704848948960436	-7.485554456967927e-16	0.0	-0.062575570903359
0.045	-2.333152626988174e-17	0.0	-0.0015945839234543992	-3.5039052541692546e-19	0.0	-0.09911927697976267	0.0	1.4843774554053723e-14	0.0	1.0	0.0	6.595897679446076e-17	0.0	0.0	7.558341982647873e-15	0.0	0.0	8.136696617899755e-15	0.0	-2.3541880517889637e-17	0.0	-0.0015945839234543992	-1.2260143606940822e-15	0.0	0.07066289227546403
0.05	-3.1305251990286674e-17	0.0	-0.0011404129645556486	-4.872844689889307e-19	0.0	-0.09912617555716313	0.0	5.675718409099761e-15	0.0	1.0	0.0	9.613920646210042e-17	0.0	0.0	1.101674155203041e-14	0.0	0.0	9.762670170630366e-15	0.0	-3.1524528785189615e-17	0.0	-0.0011404129645556486	-1.894008906307559e-15	0.0	0.10094559011032
0.055	-4.110688917495048e-17	0.0	-0.0006680709490509549	-6.685872387309041e-19	0.0	-0.09913066387778037	0.0	-2.198212432502975e-14	0.0	1.0	0.0	8.750689309829236e-17	0.0	0.0	1.0027551305669248e-14	0.0	0.0	3.465255427850025e-15	0.0	-4.1223810801191836e-17	0.0	-0.0006680709490509549	-1.640877219724482e-15	0.0	0.08513646267715705
0.06	-4.6895845102228076e-17	0.0	-0.0003151165062876889	-8.919531175227408e-19	0.0	-0.09913306254815925	0.0	-2.1674836608160644e-14	0.0	1.0	0.0	3.704113696178508e-17	0.0	0.0	4.244601632552644e-15	0.0	0.0	-2.744127868566262e-15	0.0	-4.691918964956472e-17	0.0	-0.0003151165062876889	-7.103734177484205e-16	0.0	0.05658271362736672
0.065	-4.824983213462875e-17	0.0	-0.00010040001794014399	-1.1315168727040232e-18	0.0	-0.09913404837386434	0.0	-1.4014671937887695e-14	0.0	1.0	0.0	-1.64237281767929e-17	0.0	0.0	-1.8820206168006472e-15	0.0	0.0	-6.75903563507324e-15	0.0	-4.824653424942156e-17	0.0	-0.00010040001794014399	2.274679648392179e-16	0.0	0.030947579516251725
0.07	-4.508341954453635e-17	0.0	5.991666688835476e-06	-1.3656059853522817e-18	0.0	-0.09913424772150413	0.0	-9.135827509718389e-15	0.0	1.0	0.0	-4.1037128011740315e-17	0.0	0.0	-4.702508476821615e-15	0.0	0.0	-9.376257428405124e-15	0.0	-4.508391130612218e-17	0.0	5.991666688835476e-06	8.883066343344525e-16	0.0	0.013220133141149665
0.075	-4.0185282358854485e-17	0.0	4.3939663786136666e-05	-1.5800031877673425e-18	0.0	-0.09913410209109463	0.0	1.474570426346712e-15	0.0	1.0	0.0	-4.983635254260678e-17	0.0	0.0	-5.710825334034876e-15	0.0	0.0	-8.953824118282759e-15	0.0	-4.0189661944004583e-17	0.0	4.3939663786136666e-05	9.253185424793812e-16	0.0	0.0031297666057651897
0.08	-3.5758632502011004e-17	0.0	4.6392959053576585e-05	-1.768718902803232e-18	0.0	-0.09913386683512772	0.0	6.438681056146884e-15	0.0	1.0	0.0	-4.2859567121271854e-17	0.0	0.0	-4.911344615613089e-15	0.0	0.0	-7.1092778675425e-15	0.0	-3.5762609266296027e-17	0.0	4.6392959053576585e-05	1.0029922078084592e-15	0.0	-0.0014471989231202818
0.085	-2.918785166661298e-17	0.0	3.5024324631873475e-05	-1.9339606720843257e-18	0.0	-0.09913366068136568	0.0	-2.3466325869946724e-14	0.0	1.0	0.0	-1.053384046629789e-16	0.0	0.0	-1.2070892015659764e-14	0.0	0.0	-1.3831885032675535e-14	0.0	-2.919523047957522e-17	0.0	3.5024324631873475e-05	1.9388030297314928e-15	0.0	-0.002766388212602196
0.09	-1.7302975620369367e-17	0.0	2.1500888841946867e-05	-2.0507513430929094e-18	0.0	-0.09913351987956912	0.0	1.5298881668853355e-14	0.0	1.0	0.0	-1.1665654527832868e-16	0.0	0.0	-1.336785539405005e-14	0.0	0.0	-9.44907827819874e-15	0.0	-1.7307992059194796e-17	0.0	2.1500888841946867e-05	2.426065624100187e-15	0.0	-0.0025242638095182993
0.095	-8.880380771734562e-18	0.0	1.0786394849230677e-05	-2.112584572055552e-18	0.0	-0.09913344080386628	0.0	8.86056580172811e-14	0.0	1.0	0.0	-2.4350089027800813e-17	0.0	0.0	-2.790314664121601e-15	0.0	0.0	1.5934572948649824e-14	0.0	-8.880906071084298e-18	0.0	1.0786394849230677e-05	1.343872808467995e-16	0.0	-0.0017629945516206855
0.1	-1.8813713945843703e-17	0.0	3.945349363532147e-06	-2.1714861554824882e-18	0.0	-0.09913340555738459	0.0	8.291715338122799e-14	0.0	1.0	0.0	2.233644351135852e-16	0.0	0.0	2.559567885066432e-14	0.0	0.0	3.968858763856616e-14	0.0	-1.8811951444379882e-17	0.0	3.945349363532147e-06	-3.3132810292404436e-15	0.0	-0.0010142566931081935
0.105	-4.9290421436562e-17	0.0	3.596819017968337e-07	-2.333839000717391e-18	0.0	-0.09913339595232185	0.0	5.951964958078129e-14	0.0	1.0	0.0	3.8787703346136683e-16	0.0	0.0	4.4447433974781856e-14	0.0	0.0	5.6739711233948e-14	0.0	-4.929014241186388e-17	0.0	3.596819017968337e-07	-1.5410821930031743e-14	0.0	-0.00046565861634872323
0.11	-1.4178182392185786e-16	0.0	-1.0574131510322607e-06	-2.798066917692862e-18	0.0	-0.09913339849700864	0.0	8.753367487814635e-13	0.0	1.0	0.0	1.5117596863032166e-15	0.0	0.0	1.7323489932639118e-13	0.0	0.0	3.0750521802335337e-13	0.0	-1.4178502103100486e-16	0.0	-1.0574131510322607e-06	-1.207164372402558e-14	0.0	-0.00013775064967645205
0.115	-6.80228891532668e-17	0.0	-1.2961882863611918e-06	-3.26707911453999e-18	0.0	-0.09913340486028636	0.0	-3.873158855359873e-12	0.0	1.0	0.0	-2.6007761211572494e-15	0.0	0.0	-2.980269904014305e-13	0.0	0.0	-8.020730609558547e-13	0.0	-6.801614696217941e-17	0.0	-1.2961882863611918e-06	5.255593665560523e-14	0.0	1.9916129629326953e-05
0.12	5.556510118220439e-16	0.0	-1.0365731611449342e-06	-2.4155310734905657e-18	0.0	-0.09913341087096116	0.0	-7.791638659913867e-12	0.0	1.0	0.0	-1.3324564836387006e-14	0.0	0.0	-1.5268826579467994e-12	0.0	0.0	-3.0342131144760202e-12	0.0	5.556786355946306e-16	0.0	-1.0365731611449342e-06	2.0439196840917907e-13	0.0	7.225340215486955e-05
0.125	2.377023225795013e-15	0.0	-6.685659568641711e-07	3.704051403621731e-18	0.0	-0.09913341512836905	0.0	-6.73356083401385e-12	0.0	1.0	0.0	-2.9679541326665035e-14	0.0	0.0	-3.4010249118040293e-12	0.0	0.0	-4.963236198893942e-12	0.0	2.3770629112569058e-15	0.0	-6.685659568641711e-07	6.303970197146457e-13	0.0	6.983625689042732e-05
0.13	7.155287710203464e-15	0.0	-3.71638644348267e-07	2.8003558763983576e-17	0.0	-0.09913341755928623	0.0	-6.042613447845546e-12	0.0	1.0	0.0	-5.600866339172606e-14	0.0	0.0	-6.4181200570295636e-12	0.0	0.0	-6.6943174378466644e-12	0.0	7.155329340170933e-15	0.0	-3.71638644348267e-07	1.3393559163887628e-12	0.0	5.027827515851918e-05
0.135	1.4905340325534035e-14	0.0	-1.668875654134937e-07	8.324451665303046e-17	0.0	-0.09913341880929023	0.0	-7.223267716262246e-12	0.0	1.0	0.0	-8.383259530991997e-14	0.0	0.0	-9.606507793773269e-12	0.0	0.0	-8.763631210021301e-12	0.0	1.4905368306769503e-14	0.0	-1.668875654134937e-07	1.3445113063463837e-12	0.0	3.267861049531946e-05
0.14	2.0420764162426323e-14	0.0	-3.9842539050665994e-08	1.696622483412241e-16	0.0	-0.09913341933759261	0.0	3.4842744020261085e-11	0.0	1.0	0.0	-3.330539887485e-14	0.0	0.0	-3.816517581057331e-12	0.0	0.0	1.2180796850569336e-12	0.0	2.0420766816369634e-14	0.0	-3.9842539050665994e-08	1.428511478858905e-12	0.0	1.8656935129457476e-05
0.145	2.7829886852636524e-14	0.0	2.5086255797469416e-08	2.9759667695299537e-16	0.0	-0.09913341941763183	0.0	-6.781639983899716e-12	0.0	1.0	0.0	-5.007867790572537e-14	0.0	0.0	-5.738593775186216e-12	0.0	0.0	-7.24717061216173e-13	0.0	2.7829884340063477e-14	0.0	2.5086255797469416e-08	1.2050440468775535e-12	0.0	7.853470047541659e-06
0.15	2.4840764757291638e-14	0.0	4.473581757198927e-08	4.2073378522351407e-16	0.0	-0.09913341926868238	0.0	2.054788117154615e-11	0.0	1.0	0.0	4.6022371075396547e-14	0.0	0.0	5.273775251610356e-12	0.0	0.0	5.1618172841134474e-12	0.0	2.484076887498843e-14	0.0	4.473581757198927e-08	-4.257324906065091e-12	0.0	7.181413647372617e-07
0.155	-2.2037317534842604e-14	0.0	3.853108471524887e-08	4.097316734512239e-16	0.0	-0.09913341905648371	0.0	4.688179916480704e-10	0.0	1.0	0.0	7.720767493701372e-13	0.0	0.0	8.847347839817741e-11	0.0	0.0	1.39468278690283e-10	0.0	-2.203725803693333e-14	0.0	3.853108471524887e-08	-1.508762723752026e-11	0.0	-2.4403494161051742e-06
0.16	-1.230769438624956e-13	0.0	2.4627610407333967e-08	3.7871277026893846e-17	0.0	-0.09913341887662802	0.0	1.5109175492295397e-10	0.0	1.0	0.0	1.3405035065644637e-12	0.0	0.0	1.5361038669726244e-10	0.0	0.0	1.827528780718342e-10	0.0	-1.2307687783569937e-13	0.0	2.4627610407333967e-08	-2.4283012942029535e-11	0.0	-2.9865344246642835e-06
0.165	-2.5025368496545345e-13	0.0	1.0641563446537444e-08	-8.708431925953445e-16	0.0	-0.09913341876382863	0.0	-1.7203252862223613e-10	0.0	1.0	0.0	1.4035169854434353e-12	0.0	0.0	1.6083119948166608e-10	0.0	0.0	1.334691889267459e-10	0.0	-2.5025365509422336e-13	0.0	1.0641563446537444e-08	-2.4168876661715803e-11	0.0	-2.4750721741844845e-06
0.17	-3.4390963226393293e-13	0.0	8.11712902154863e-10	-2.2755545601544413e-15	0.0	-0.09913341871146439	0.0	-5.61632780477356e-10	0.0	1.0	0.0	7.406394130323503e-13	0.0	0.0	8.487102501560051e-11	0.0	0.0	-2.74267508610039e-11	0.0	-3.4390963106155977e-13	0.0	8.117129021548635e-10	-1.0875168984028698e-11	0.0	-1.3866670091693228e-06
0.17500000000000002	-3.385666888266459e-13	0.0	-3.491764875114897e-09	-3.925450129849878e-15	0.0	-0.09913341870101677	0.0	-9.175473384317985e-10	0.0	1.0	0.0	-6.709755203397378e-13	0.0	0.0	-7.68881309441226e-11	0.0	0.0	-2.9028470083902315e-10	0.0	-3.385666841408684e-13	0.0	-3.4917648751148973e-09	1.6246958469448702e-11	0.0	-5.590329722597198e-07
0.18	-1.7707099663404587e-13	0.0	-5.238995615725393e-09	-5.151172319429045e-15	0.0	-0.09913341871142878	0.0	-5.754467686037318e-10	0.0	1.0	0.0	-2.4305143638240964e-12	0.0	0.0	-2.7851643018608995e-10	0.0	0.0	-4.551380567161988e-10	0.0	-1.770709711671377e-13	0.0	-5.238995615725394e-09	4.606258103680009e-11	0.0	-4.984551404086678e-08
0.185	1.0963808575379109e-13	0.0	-4.222126360921433e-09	-5.247578789348049e-15	0.0	-0.09913341873143185	0.0	-4.036498352815698e-10	0.0	1.0	0.0	-3.569343663114808e-12	0.0	0.0	-4.0901665505648727e-10	0.0	0.0	-5.707752165301229e-10	0.0	1.0963811589423103e-13	0.0	-4.222126360921432e-09	6.746208173024475e-11	0.0	3.725181975602286e-07
0.19	4.779738908205458e-13	0.0	-2.040448141845412e-09	-3.7715236028692444e-15	0.0	-0.09913341874906909	0.0	-1.227513047541202e-10	0.0	1.0	0.0	-3.967433557151555e-12	0.0	0.0	-4.546343966467188e-10	0.0	0.0	-6.059408749907991e-10	0.0	4.779739070112306e-13	0.0	-2.0404481418454084e-09	7.601394606367905e-11	0.0	4.122857951068463e-07
0.195	8.540674355127082e-13	0.0	-2.5447693768873676e-10	-5.735403297074188e-16	0.0	-0.09913341875952643	0.0	4.906267622207686e-10	0.0	1.0	0.0	-3.8484517585581104e-12	0.0	0.0	-4.4100008685015885e-10	0.0	0.0	-4.65386661033706e-10	0.0	8.540674374713926e-13	0.0	-2.544769376887302e-10	7.526696422532673e-11	0.0	3.971110813186065e-07
0.2	1.2175268494648696e-12	0.0	1.7650520637254344e-09	4.083016259914307e-15	0.0	-0.09913341876820113	0.0	6.322267935586886e-10	0.0	1.0	0.0	-3.352722080643877e-12	0.0	0.0	-3.841936502024284e-10	0.0	0.0	-2.842670262036978e-10	0.0	1.2175268376294115e-12	0.0	1.7650520637254425e-09	6.653830345008862e-11	0.0	2.7234283629590025e-07
0.20500000000000002	1.5100437188396982e-12	0.0	2.395210404528982e-09	1.0584957211608301e-14	0.0	-0.0991334187652237	0.0	5.054005391105814e-10	0.0	1.0	0.0	-2.404720651026644e-12	0.0	0.0	-2.7556068842355676e-10	0.0	0.0	-1.3948043693033372e-10	0.0	1.5100437073200745e-12	0.0	2.3952104045289894e-09	5.2223708521923666e-11	0.0	9.492242795625857e-08
0.21	1.7334858663859228e-12	0.0	2.8164804181423256e-09	1.8064725708512155e-14	0.0	-0.09913341876152304	0.0	4.310382055581951e-10	0.0	1.0	0.0	-1.3475250703037004e-12	0.0	0.0	-1.5441499863294316e-10	0.0	0.0	-1.5997086993448705e-11	0.0	1.7334858587953668e-12	0.0	2.81648041814233e-09	3.449800540014035e-11	0.0	1.289991641103472e-08
0.215	1.8483170967599964e-12	0.0	2.461604220270857e-09	2.6503542716008408e-14	0.0	-0.09913341875510853	0.0	3.979976742382738e-10	0.0	1.0	0.0	-2.592580580898013e-13	0.0	0.0	-2.9708785066606286e-11	0.0	0.0	9.802084795592981e-11	0.0	1.848317095483615e-12	0.0	2.461604220270858e-09	1.1603897945816029e-11	0.0	-1.4416571334926447e-07
0.22	1.8538336165660205e-12	0.0	1.5222076049983107e-09	3.5469651388104803e-14	0.0	-0.09913341874752694	0.0	3.727905952538615e-10	0.0	1.0	0.0	7.762725352423124e-13	0.0	0.0	8.895428004260992e-11	0.0	0.0	2.048174867070096e-10	0.0	1.8538336189293163e-12	0.0	1.5222076049983078e-09	-7.30064150051809e-12	0.0	-1.8689868852581483e-07
0.225	1.7765919093210392e-12	0.0	6.90970700332684e-10	4.4255171672858086e-14	0.0	-0.0991334187424995	0.0	2.942302899461074e-10	0.0	1.0	0.0	1.6800063505836427e-12	0.0	0.0	1.9251454688723694e-10	0.0	0.0	2.8910825580112187e-10	0.0	1.7765919116427096e-12	0.0	6.90970700332678e-10	-2.6497358657674185e-11	0.0	-1.676944113289861e-07
0.23	1.5977228787278674e-12	0.0	-1.3466642981421227e-10	5.26137569976471e-14	0.0	-0.09913341874069595	0.0	1.9753834318408817e-10	0.0	1.0	0.0	2.3341342805356537e-12	0.0	0.0	2.674720861829957e-10	0.0	0.0	3.456988225833974e-10	0.0	1.5977228780992083e-12	0.0	-1.3466642981421974e-10	-3.98732988397297e-11	0.0	-1.4886785777345584e-07
0.23500000000000001	1.3892726922514261e-12	0.0	-7.317233784901885e-10	6.025491483290796e-14	0.0	-0.09913341873980774	0.0	6.398882989605797e-11	0.0	1.0	0.0	2.697893649076593e-12	0.0	0.0	3.091558393344751e-10	0.0	0.0	3.6403027202852076e-10	0.0	1.3892726883032024e-12	0.0	-7.317233784901959e-10	-4.417475673492911e-11	0.0	-6.369732318030999e-08
0.24	1.1476777675422549e-12	0.0	-9.272735591773281e-10	6.6771552039309e-14	0.0	-0.09913341874158689	0.0	-1.0450808750035942e-10	0.0	1.0	0.0	2.6665342102972055e-12	0.0	0.0	3.0556231235455956e-10	0.0	0.0	3.340909103347482e-10	0.0	1.1476777625970416e-12	0.0	-9.272735591773342e-10	-5.5882428103416845e-11	0.0	-9.61906893919009e-08
0.245	8.26716402728441e-13	0.0	-1.828046943753634e-09	7.33780985595385e-14	0.0	-0.09913341874068038	0.0	-2.1803569625801216e-10	0.0	1.0	0.0	3.0106772406850063e-12	0.0	0.0	3.449981987346864e-10	0.0	0.0	2.7162828444084595e-10	0.0	8.267163917211223e-13	0.0	-1.828046943753639e-09	-7.080200416049852e-11	0.0	-2.3591836549267394e-07
0.25	4.502182140182531e-13	0.0	-3.1338135884077075e-09	7.956251080049467e-14	0.0	-0.09913341873818876	0.0	-2.888219373514691e-10	0.0	1.0	0.0	3.56924149618067e-12	0.0	0.0	4.0900494758822346e-10	0.0	0.0	1.888868942356907e-10	0.0	4.502181916475781e-13	0.0	-3.133813588407711e-09	-7.779845964134036e-11	0.0	-2.5218869589564027e-07
0.255	5.771640393451631e-14	0.0	-4.228941682772773e-09	8.442571710262246e-14	0.0	-0.09913341873665929	0.0	-3.5199278465817825e-10	0.0	1.0	0.0	3.9722835535128835e-12	0.0	0.0	4.551901652910346e-10	0.0	0.0	8.804838933583647e-11	0.0	5.771637033740532e-14	0.0	-4.228941682772774e-09	-7.914244356763888e-11	0.0	-1.9060699656032306e-07
0.26	-3.364147881214343e-13	0.0	-5.003109717592001e-09	8.768870957115492e-14	0.0	-0.09913341873632144	0.0	-4.059889126712012e-10	0.0	1.0	0.0	4.1844813783727336e-12	0.0	0.0	4.795062448636859e-10	0.0	0.0	-2.8258866789989415e-11	0.0	-3.364148299922732e-13	0.0	-5.003109717591999e-09	-7.803089515206638e-11	0.0	-1.153828337254726e-07
0.265	-7.17801122748262e-13	0.0	-5.345996183608563e-09	8.907248031132517e-14	0.0	-0.09913341873740467	0.0	-4.492509958835995e-10	0.0	1.0	0.0	4.170512936451309e-12	0.0	0.0	4.779055793267434e-10	0.0	0.0	-1.569597968208863e-10	0.0	-7.178011673393544e-13	0.0	-5.3459961836085575e-09	-7.404449840336155e-11	0.0	-1.8094369039256458e-08
0.27	-1.0720683605446304e-12	0.0	-5.1472795715656295e-09	8.829802142836626e-14	0.0	-0.09913341874013844	0.0	-4.802197087884347e-10	0.0	1.0	0.0	3.8950561934396984e-12	0.0	0.0	4.463405617007734e-10	0.0	0.0	-2.945326095837801e-10	0.0	-1.0720684006425168e-12	0.0	-5.147279571565621e-09	-6.718325359264804e-11	0.0	1.0125839749832508e-07
0.275	-1.3848422621092039e-12	0.0	-4.296638372206373e-09	8.508632502751126e-14	0.0	-0.0991334187447522	0.0	-4.973357258787684e-10	0.0	1.0	0.0	3.322789115028987e-12	0.0	0.0	3.8076358500634156e-10	0.0	0.0	-4.370088000534234e-10	0.0	-1.3848422906628504e-12	0.0	-4.296638372206364e-09	-5.578799696497864e-11	0.0	2.68221111607629e-07
0.28	-1.641748588040646e-12	0.0	-2.6837510762739635e-09	7.915838321399325e-14	0.0	-0.09913341875147545	0.0	-4.990397216476621e-10	0.0	1.0	0.0	2.4183896669102632e-12	0.0	0.0	2.7712704226401407e-10	0.0	0.0	-5.799731493523955e-10	0.0	-1.6417486010213578e-12	0.0	-2.6837510762739556e-09	-5.280632620227151e-11	0.0	2.8344357332611424e-07
0.28500000000000003	-1.9279629463481182e-12	0.0	-1.731034917732978e-09	7.340663920569877e-14	0.0	-0.09913341875602878	0.0	-4.952003565302282e-10	0.0	1.0	0.0	1.7686662795642488e-12	0.0	0.0	2.0267422637227362e-10	0.0	0.0	-7.218376015651741e-10	0.0	-1.9279629524713643e-12	0.0	-1.731034917732971e-09	-6.170057340081681e-11	0.0	9.361729635396672e-08
0.29	-2.248654118216063e-12	0.0	-1.6290663353453342e-09	6.817468510166912e-14	0.0	-0.09913341875775653	0.0	-4.865017777151578e-10	0.0	1.0	0.0	1.4604297877590654e-12	0.0	0.0	1.6735292622756206e-10	0.0	0.0	-8.612100945086254e-10	0.0	-2.248654122974337e-12	0.0	-1.6290663353453276e-09	-6.222810263608233e-11	0.0	1.0411956669014935e-08
0.295	-2.538052058880318e-12	0.0	-1.476198226015349e-09	6.154614953201775e-14	0.0	-0.09913341875921597	0.0	-4.654845949897884e-10	0.0	1.0	0.0	1.1371633275567063e-12	0.0	0.0	1.303093185721041e-10	0.0	0.0	-9.945616081149822e-10	0.0	-2.5380520622376747e-12	0.0	-1.4761982260153433e-09	-5.425816811042087e-11	0.0	3.584061769817685e-08
0.3	-2.78877531893686e-12	0.0	-1.269774942673834e-09	5.3464800348946936e-14	0.0	-0.09913341876031985	0.0	-4.3139223149887537e-10	0.0	1.0	0.0	8.072458627348598e-13	0.0	0.0	9.250356192820888e-11	0.0	0.0	-1.1181463790130628e-09	0.0	-2.7887753209869012e-12	0.0	-1.2697749426738294e-09	-4.5785087080241126e-11	0.0	4.68172172074017e-08
0.305	-2.993442448981671e-12	0.0	-1.0071408382515992e-09	4.387440540465896e-14	0.0	-0.09913341876098093	0.0	-3.8346811038717334e-10	0.0	1.0	0.0	4.790563570712115e-13	0.0	0.0	5.489581481818514e-11	0.0	0.0	-1.2280019005282717e-09	0.0	-2.993442449946625e-12	0.0	-1.0071408382515963e-09	-3.583571619430187e-11	0.0	5.832494613046453e-08
0.31	-3.144671999610731e-12	0.0	-6.856402656794552e-10	3.27187325513561e-14	0.0	-0.09913341876111194	0.0	-3.209556547994374e-10	0.0	1.0	0.0	1.6097377434344632e-13	0.0	0.0	1.8446235764341536e-11	0.0	0.0	-1.3199489226825994e-09	0.0	-3.144671999831471e-12	0.0	-6.856402656794542e-10	-2.441005544964006e-11	0.0	7.03638044673653e-08
0.315	-3.2350825214200215e-12	0.0	-3.0261757788821246e-10	1.9941549641240635e-14	0.0	-0.09913341876062562	0.0	-2.430982878804224e-10	0.0	1.0	0.0	-1.386229216707505e-13	0.0	0.0	-1.5885016711013204e-11	0.0	0.0	-1.3895914521946218e-09	0.0	-3.235082521336122e-12	0.0	-3.0261757788821333e-10	-1.0153697372467625e-11	0.0	8.532860253306786e-08
0.32	-3.257292565005524e-12	0.0	1.445828721913188e-10	5.486624526514837e-15	0.0	-0.09913341875943472	0.0	-1.4913943277488328e-10	0.0	1.0	0.0	-4.113547671936936e-13	0.0	0.0	-4.713778408557035e-11	0.0	0.0	-1.4323167524795013e-09	0.0	-3.2572925651244737e-12	0.0	1.445828721913161e-10	-3.10530582888642e-12	0.0	8.546936748694473e-08
0.325	-3.2851851292597266e-12	0.0	5.149281127304987e-10	-9.118443616289743e-15	0.0	-0.09913341875832221	0.0	-6.822731462315338e-11	0.0	1.0	0.0	-6.6306654421388e-13	0.0	0.0	-7.598182903955984e-11	0.0	0.0	-1.4518624383565908e-09	0.0	-3.2851851299425896e-12	0.0	5.149281127304943e-10	-1.0683387577825278e-11	0.0	5.7668985760466865e-08
0.33	-3.359174517651301e-12	0.0	7.265632100535299e-10	-2.2998355223914914e-14	0.0	-0.09913341875771259	0.0	-1.719389074267056e-11	0.0	1.0	0.0	-8.937449968593022e-13	0.0	0.0	-1.0241563256194207e-10	0.0	0.0	-1.4567881252214111e-09	0.0	-3.3591745189500255e-12	0.0	7.265632100535239e-10	-1.3571471556842156e-11	0.0	3.6082085974432025e-08
0.335	-3.409134895334759e-12	0.0	8.93085979381445e-10	-3.743222065438625e-14	0.0	-0.09913341875684674	0.0	2.7806951949450156e-11	0.0	1.0	0.0	-1.0840289888834646e-12	0.0	0.0	-1.2422057186571313e-10	0.0	0.0	-1.4488220202822784e-09	0.0	-3.4091348972710213e-12	0.0	8.930859793814377e-10	-7.558250957763957e-12	0.0	2.815493614731824e-08
0.34	-3.434602407875824e-12	0.0	1.0049206469329502e-09	-5.234144921683372e-14	0.0	-0.0991334187557115	0.0	6.49861591967902e-11	0.0	1.0	0.0	-1.2267503456572658e-12	0.0	0.0	-1.4057523464475246e-10	0.0	0.0	-1.4302048570385716e-09	0.0	-3.434602410341397e-12	0.0	1.0049206469329418e-09	-2.6132924516335168e-12	0.0	1.625973841390696e-08
0.34500000000000003	-3.435113200840219e-12	0.0	1.052491438926752e-09	-6.764745022038739e-14	0.0	-0.09913341875429366	0.0	9.255467674293115e-11	0.0	1.0	0.0	-1.3147408925516043e-12	0.0	0.0	-1.5065820859293955e-10	0.0	0.0	-1.4036898952807337e-09	0.0	-3.435113203607726e-12	0.0	1.0524914389267428e-09	2.4244369629315277e-12	0.0	2.4493859242370044e-09
0.35000000000000003	-3.410203419793669e-12	0.0	1.0262225815815566e-09	-8.327163297417721e-14	0.0	-0.09913341875258005	0.0	1.0872345033145447e-10	0.0	1.0	0.0	-1.3408324549373783e-12	0.0	0.0	-1.5364808140415383e-10	0.0	0.0	-1.3725429210902709e-09	0.0	-3.4102034225456543e-12	0.0	1.0262225815815475e-09	7.554937278101066e-12	0.0	-1.3276121321691458e-08
0.355	-3.359409210301899e-12	0.0	9.165383011160722e-10	-9.913540678733304e-14	0.0	-0.09913341875055749	0.0	1.117034257059417e-10	0.0	1.0	0.0	-1.2978568581854874e-12	0.0	0.0	-1.4872344077227487e-10	0.0	0.0	-1.3405422468397528e-09	0.0	-3.35940921268097e-12	0.0	9.165383011160635e-10	1.56595231037389e-11	0.0	-3.504355084783046e-08
0.36	-3.2822667179306306e-12	0.0	7.138628237490028e-10	-1.1516018096898522e-13	0.0	-0.09913341874821281	0.0	9.970554860997446e-11	0.0	1.0	0.0	-1.178645927666829e-12	0.0	0.0	-1.3506287439118202e-10	0.0	0.0	-1.3119787111928127e-09	0.0	-3.2822667196134136e-12	0.0	7.13862823748995e-10	-1.7275793590500452e-12	0.0	-2.6413024639730703e-08
0.365	-3.3511909648299005e-12	0.0	6.562264271361578e-10	-1.2515116754359577e-13	0.0	-0.09913341874997447	0.0	8.750060051800691e-11	0.0	1.0	0.0	-1.1766020493161652e-12	0.0	0.0	-1.3482866318451964e-10	0.0	0.0	-1.2869116356201026e-09	0.0	-3.3511909663741353e-12	0.0	6.562264271361499e-10	1.855969949816663e-12	0.0	-1.6104593487517463e-08
0.37	-3.2408026893843033e-12	0.0	5.285090681260875e-10	-1.4329460067825336e-13	0.0	-0.09913341874751833	0.0	9.304155574967314e-11	0.0	1.0	0.0	-1.1008979860215596e-12	0.0	0.0	-1.2615361654697532e-10	0.0	0.0	-1.2602571933011654e-09	0.0	-3.2408026905479724e-12	0.0	5.285090681260804e-10	2.434613367302378e-11	0.0	-2.67788081529857e-08
0.375	-3.1390551763297908e-12	0.0	3.999838653838006e-10	-1.608096683418371e-13	0.0	-0.09913341874564495	0.0	9.5192463168931e-11	0.0	1.0	0.0	-1.0208520726199199e-12	0.0	0.0	-1.1698103053660807e-10	0.0	0.0	-1.232986561395994e-09	0.0	-3.1390551771464394e-12	0.0	3.999838653837942e-10	1.9485426437595202e-11	0.0	-2.578582492167892e-08
0.38	-3.045948425666363e-12	0.0	2.7065081890929694e-10	-1.776963705343469e-13	0.0	-0.09913341874435437	0.0	9.39533227757805e-11	0.0	1.0	0.0	-9.364643091112453e-13	0.0	0.0	-1.0731090515341776e-10	0.0	0.0	-1.206070917064581e-09	0.0	-3.0459484261732728e-12	0.0	2.7065081890929125e-10	1.7757273951545545e-11	0.0	-2.594739366812223e-08
0.385	-2.96148243739402e-12	0.0	1.405099287025769e-10	-1.9395470725578285e-13	0.0	-0.09913341874364656	0.0	8.932413457022165e-11	0.0	1.0	0.0	-8.477346954955363e-13	0.0	0.0	-9.714324039740446e-11	0.0	0.0	-1.1804814374669195e-09	0.0	-2.9614824376322506e-12	0.0	1.4050992870257187e-10	1.6029121464735993e-11	0.0	-2.610896241456554e-08
0.39	-2.8856572115127624e-12	0.0	9.561194763640186e-12	-2.095846785061449e-13	0.0	-0.09913341874352155	0.0	8.130489855225441e-11	0.0	1.0	0.0	-7.546632317727929e-13	0.0	0.0	-8.647803626856816e-11	0.0	0.0	-1.157189299763002e-09	0.0	-2.8856572115271932e-12	0.0	9.56119476363583e-12	1.4300968977158185e-11	0.0	-2.627053116100888e-08
0.395	-2.818472748022589e-12	0.0	-1.2219538290751323e-10	-2.2458628428543307e-13	0.0	-0.09913341874397932	0.0	6.989561472187881e-11	0.0	1.0	0.0	-6.572499179430148e-13	0.0	0.0	-7.531529276690886e-11	0.0	0.0	-1.1371656811128215e-09	0.0	-2.8184727478619633e-12	0.0	-1.2219538290751692e-10	1.2468558653289658e-11	0.0	-2.676560492259365e-08
0.4	-2.7599290469235006e-12	0.0	-2.547598043108832e-10	-2.389595245936473e-13	0.0	-0.0991334187450199	0.0	5.5096283079094844e-11	0.0	1.0	0.0	-5.554947540062024e-13	0.0	0.0	-6.365500989242655e-11	0.0	0.0	-1.1213817586763705e-09	0.0	-2.759929046640465e-12	0.0	-2.5475980431088624e-10	1.1210749395715037e-11	0.0	-2.542261695203612e-08
0.405	-2.7037706380775634e-12	0.0	-3.6812176853798323e-10	-2.542159018607176e-13	0.0	-0.0991334187454564	0.0	4.546109163048883e-11	0.0	1.0	0.0	-4.641914686932106e-13	0.0	0.0	-5.31924240842001e-11	0.0	0.0	-1.1083581152639478e-09	0.0	-2.7037706377358053e-12	0.0	-3.6812176853798576e-10	1.1998105260964343e-11	0.0	-1.7537455713055754e-08
0.41000000000000003	-2.640685294611464e-12	0.0	-4.324928731579456e-10	-2.726055193141722e-13	0.0	-0.09913341874352208	0.0	5.372426141425988e-11	0.0	1.0	0.0	-4.0536279653977607e-13	0.0	0.0	-4.645115482669892e-11	0.0	0.0	-1.0929672480814747e-09	0.0	-2.640685294260831e-12	0.0	-4.3249287315794773e-10	1.2165093129729362e-11	0.0	-1.1636757690769601e-08
0.41500000000000004	-2.5844090448236e-12	0.0	-4.918125909006618e-10	-2.908093554108161e-13	0.0	-0.09913341874182303	0.0	6.110214133186798e-11	0.0	1.0	0.0	-3.4652403663532215e-13	0.0	0.0	-3.9708729598081356e-11	0.0	0.0	-1.075462773993835e-09	0.0	-2.5844090444827503e-12	0.0	-4.918125909006636e-10	1.0574340586045205e-11	0.0	-1.135880486081848e-08
0.42	-2.534941888713973e-12	0.0	-5.460809217661311e-10	-3.088274101506492e-13	0.0	-0.09913341874035925	0.0	6.759473138331311e-11	0.0	1.0	0.0	-2.8767518897984923e-13	0.0	0.0	-3.296514839834746e-11	0.0	0.0	-1.0560983098659134e-09	0.0	-2.5349418883997855e-12	0.0	-5.460809217661326e-10	9.212521847200289e-12	0.0	-1.0348527485369229e-08
0.425	-2.4922838262825812e-12	0.0	-5.952978657543548e-10	-3.266596835336719e-13	0.0	-0.09913341873913073	0.0	7.32020315685954e-11	0.0	1.0	0.0	-2.288162535733563e-13	0.0	0.0	-2.6220411227497118e-11	0.0	0.0	-1.0351274725625938e-09	0.0	-2.4922838260101537e-12	0.0	-5.952978657543559e-10	7.850703108711685e-12	0.0	-9.338250109920067e-09
0.43	-2.4564348575294255e-12	0.0	-6.394634228653324e-10	-3.44306175559884e-13	0.0	-0.09913341873813748	0.0	7.79240418877148e-11	0.0	1.0	0.0	-1.699472304158442e-13	0.0	0.0	-1.9474518085530416e-11	0.0	0.0	-1.0128038789487603e-09	0.0	-2.4564348573120753e-12	0.0	-6.394634228653332e-10	6.488884370579082e-12	0.0	-8.327972734470818e-09
0.435	-2.4273949824545055e-12	0.0	-6.785775930990637e-10	-3.6176688622928534e-13	0.0	-0.0991334187373795	0.0	8.176076234067126e-11	0.0	1.0	0.0	-1.110681195073125e-13	0.0	0.0	-1.2727468972447309e-11	0.0	0.0	-9.89381145889297e-10	0.0	-2.4273949823037688e-12	0.0	-6.785775930990642e-10	5.1270656328028975e-12	0.0	-7.3176953590215984e-09
0.44	-2.4051642010578217e-12	0.0	-7.126403764555489e-10	-3.790418155418762e-13	0.0	-0.09913341873685678	0.0	8.471219292746478e-11	0.0	1.0	0.0	-5.21789208477611e-14	0.0	0.0	-5.979263888247789e-12	0.0	0.0	-9.651128902490885e-10	0.0	-2.405164200983452e-12	0.0	-7.126403764555491e-10	3.765246895383226e-12	0.0	-6.307417983572362e-09
0.445	-2.389742513339374e-12	0.0	-7.416517729347877e-10	-3.9613096349765626e-13	0.0	-0.09913341873656935	0.0	8.677833364809541e-11	0.0	1.0	0.0	6.720365562809392e-15	0.0	0.0	7.700971670680766e-13	0.0	0.0	-9.402527288930186e-10	0.0	-2.389742513349342e-12	0.0	-7.416517729347877e-10	2.4034281583201955e-12	0.0	-5.297140608123104e-09
0.45	-2.3811299192991616e-12	0.0	-7.656117825367805e-10	-4.130343300966258e-13	0.0	-0.09913341873651717	0.0	8.795918450256313e-11	0.0	1.0	0.0	6.562973972439938e-14	0.0	0.0	7.520614193500334e-12	0.0	0.0	-9.150542786859717e-10	0.0	-2.3811299193996556e-12	0.0	-7.656117825367802e-10	1.0416094216138864e-12	0.0	-4.286863232673857e-09
0.455	-2.379326418937186e-12	0.0	-7.845204052615269e-10	-4.2975191533878466e-13	0.0	-0.09913341873670026	0.0	8.825474549086792e-11	0.0	1.0	0.0	1.2454920163700876e-13	0.0	0.0	1.4272287191048972e-11	0.0	0.0	-8.897711564928319e-10	0.0	-2.3793264191326085e-12	0.0	-7.845204052615263e-10	-3.202093147356e-13	0.0	-3.276585857224614e-09
0.46	-2.384332012253446e-12	0.0	-7.983776411090272e-10	-4.462837192241329e-13	0.0	-0.09913341873711862	0.0	8.76650166130098e-11	0.0	1.0	0.0	1.8347875130063764e-13	0.0	0.0	2.1025116159714003e-11	0.0	0.0	-8.646569791784833e-10	0.0	-2.3843320125464164e-12	0.0	-7.983776411090264e-10	-1.682028050728055e-12	0.0	-2.2663084817753803e-09
0.465	-2.3961466992479415e-12	0.0	-8.071834900792813e-10	-4.626297417526705e-13	0.0	-0.09913341873777225	0.0	8.618999786898876e-11	0.0	1.0	0.0	2.42418388715286e-13	0.0	0.0	2.777910109949542e-11	0.0	0.0	-8.399653636078102e-10	0.0	-2.3961466996392937e-12	0.0	-8.071834900792801e-10	-3.0438467863634183e-12	0.0	-1.2560311063261243e-09
0.47000000000000003	-2.4147704799206734e-12	0.0	-8.109379521722892e-10	-4.787899829243974e-13	0.0	-0.09913341873866115	0.0	8.382968925880481e-11	0.0	1.0	0.0	3.013681138809537e-13	0.0	0.0	3.453424201039321e-11	0.0	0.0	-8.159499266456968e-10	0.0	-2.414770480409455e-12	0.0	-8.109379521722877e-10	-4.405665521641622e-12	0.0	-2.457537308768923e-10
0.47500000000000003	-2.4402033542716414e-12	0.0	-8.096410273880508e-10	-4.947644427393138e-13	0.0	-0.09913341873978532	0.0	8.058409078245795e-11	0.0	1.0	0.0	3.6032792679764084e-13	0.0	0.0	4.129053889240739e-11	0.0	0.0	-7.928642851570272e-10	0.0	-2.440203354855114e-12	0.0	-8.09641027388049e-10	-5.7674842565623106e-12	0.0	7.645236445723346e-10
0.48	-2.4724453223008448e-12	0.0	-8.032927157265664e-10	-5.105531211974193e-13	0.0	-0.09913341874114474	0.0	7.64532024399482e-11	0.0	1.0	0.0	4.1929782746534673e-13	0.0	0.0	4.804799174553788e-11	0.0	0.0	-7.709620560066856e-10	0.0	-2.4724453229744824e-12	0.0	-8.032927157265643e-10	-7.129302991125671e-12	0.0	1.7748010200215666e-09
0.485	-2.5114963840082847e-12	0.0	-7.918930171878357e-10	-5.261560182987144e-13	0.0	-0.09913341874273945	0.0	7.143702423127551e-11	0.0	1.0	0.0	4.782778158840727e-13	0.0	0.0	5.480660056978483e-11	0.0	0.0	-7.504968560595562e-10	0.0	-2.5114963847657746e-12	0.0	-7.918930171878333e-10	-8.491121725331435e-12	0.0	2.785078395470833e-09
0.49	-2.55735653939396e-12	0.0	-7.754419317718588e-10	-5.415731340431988e-13	0.0	-0.09913341874456942	0.0	6.55355561564399e-11	0.0	1.0	0.0	5.372678920538181e-13	0.0	0.0	6.156636536514814e-11	0.0	0.0	-7.317223021805232e-10	0.0	-2.5573565402272003e-12	0.0	-7.75441931771856e-10	-9.852940459179373e-12	0.0	3.795355770920089e-09
0.495	-2.610025788457872e-12	0.0	-7.539394594786356e-10	-5.568044684308725e-13	0.0	-0.09913341874663466	0.0	5.874879821544137e-11	0.0	1.0	0.0	5.962680559745829e-13	0.0	0.0	6.832728613162786e-11	0.0	0.0	-7.148920112344708e-10	0.0	-2.610025789356972e-12	0.0	-7.539394594786325e-10	-1.1214759192669553e-11	0.0	4.805633146369326e-09
0.5	-2.6695041312000194e-12	0.0	-7.273856003081663e-10	-5.718500214617357e-13	0.0	-0.09913341874893516	0.0	5.107675040827993e-11	0.0	1.0	0.0	6.552783076463671e-13	0.0	0.0	7.508936286922396e-11	0.0	0.0	-7.00259600086283e-10	0.0	-2.6695041321532995e-12	0.0	-7.273856003081628e-10	-1.2576577925801812e-11	0.0	5.8159105218185705e-09
0.505	-2.735791567620403e-12	0.0	-6.957803542604507e-10	-5.867097931357882e-13	0.0	-0.09913341875147094	0.0	4.2519412734955566e-11	0.0	1.0	0.0	7.142986470691709e-13	0.0	0.0	8.185259557793644e-11	0.0	0.0	-6.880786856008442e-10	0.0	-2.735791568614393e-12	0.0	-6.957803542604467e-10	-1.3949293849497588e-11	0.0	6.870574039974125e-09
0.51	-2.8088880977190227e-12	0.0	-6.591237213354889e-10	-6.013837834530301e-13	0.0	-0.09913341875424199	0.0	3.307678519546829e-11	0.0	1.0	0.0	7.73329074242994e-13	0.0	0.0	8.86169842577653e-11	0.0	0.0	-6.786028846430385e-10	0.0	-2.8088880987384618e-12	0.0	-6.591237213354846e-10	-1.5365066689581337e-11	0.0	8.100615824712343e-09
0.515	-2.8881398900362438e-12	0.0	-6.200788700956591e-10	-6.164120891948634e-13	0.0	-0.0991334187570032	0.0	2.3581169781036446e-11	0.0	1.0	0.0	8.322912022399677e-13	0.0	0.0	9.53735464284388e-11	0.0	0.0	-6.718473771208644e-10	0.0	-2.888139891068416e-12	0.0	-6.200788700956544e-10	-1.5751034668347133e-11	0.0	5.136084359662272e-09
0.52	-2.9663867093283023e-12	0.0	-6.078106764725694e-10	-6.377094150642366e-13	0.0	-0.09913341875707037	0.0	2.3147267173556785e-11	0.0	1.0	0.0	8.903266005956164e-13	0.0	0.0	1.020239132047171e-10	0.0	0.0	-6.652161735393318e-10	0.0	-2.9663867104106023e-12	0.0	-6.078106764725641e-10	-1.6139685330145025e-11	0.0	2.182479923726913e-09
0.525	-3.050718380765188e-12	0.0	-5.934410569368253e-10	-6.594192185247099e-13	0.0	-0.09913341875710131	0.0	2.2750005973635003e-11	0.0	1.0	0.0	9.482852584103713e-13	0.0	0.0	1.0866548616277386e-10	0.0	0.0	-6.586987769083984e-10	0.0	-3.0507183818906908e-12	0.0	-5.934410569368195e-10	-1.7474819509759564e-11	0.0	3.0840664984143037e-09
0.53	-3.1411349043469e-12	0.0	-5.769700114884273e-10	-6.815414995762831e-13	0.0	-0.09913341875709601	0.0	2.23893861812711e-11	0.0	1.0	0.0	1.0061671756842316e-12	0.0	0.0	1.15298265302609e-10	0.0	0.0	-6.522846902380216e-10	0.0	-3.1411349055079566e-12	0.0	-5.76970011488421e-10	-1.8691789937122672e-11	0.0	3.504351680945124e-09
0.535	-3.2376362800734386e-12	0.0	-5.583975401273752e-10	-7.040762582189564e-13	0.0	-0.09913341875705448	0.0	2.206540779646508e-11	0.0	1.0	0.0	1.063972352417198e-12	0.0	0.0	1.219222506242226e-10	0.0	0.0	-6.45963416538159e-10	0.0	-3.2376362812616775e-12	0.0	-5.583975401273683e-10	-1.9908760364341786e-11	0.0	3.924636863475945e-09
0.54	-3.3402225079448043e-12	0.0	-5.37723642853669e-10	-7.270234944527298e-13	0.0	-0.09913341875697672	0.0	2.1778070819216936e-11	0.0	1.0	0.0	1.1217007886092698e-12	0.0	0.0	1.2853744212761457e-10	0.0	0.0	-6.397244588187683e-10	0.0	-3.3402225091511346e-12	0.0	-5.377236428536615e-10	-2.1125730791416883e-11	0.0	4.344922046006787e-09
0.545	-3.448893587960996e-12	0.0	-5.149483196673086e-10	-7.503832082776032e-13	0.0	-0.09913341875686273	0.0	2.1527375249526676e-11	0.0	1.0	0.0	1.1793524842604475e-12	0.0	0.0	1.35143839812785e-10	0.0	0.0	-6.335573200898069e-10	0.0	-3.4488935891756073e-12	0.0	-5.149483196673004e-10	-2.2342701218348478e-11	0.0	4.7652072285376086e-09
0.55	-3.5636495201220147e-12	0.0	-4.900715705682942e-10	-7.741553996935764e-13	0.0	-0.0991334187567125	0.0	2.131332108739429e-11	0.0	1.0	0.0	1.2369274393707314e-12	0.0	0.0	1.4174144367973386e-10	0.0	0.0	-6.274515033612325e-10	0.0	-3.563649521334381e-12	0.0	-4.900715705682854e-10	-2.355967164513702e-11	0.0	5.185492411068439e-09
0.555	-3.68449030442786e-12	0.0	-4.630933955566256e-10	-7.983400687006499e-13	0.0	-0.09913341875652604	0.0	2.1135908332819787e-11	0.0	1.0	0.0	1.2944256539401204e-12	0.0	0.0	1.4833025372846108e-10	0.0	0.0	-6.213965116430027e-10	0.0	-3.68449030562674e-12	0.0	-4.63093395556616e-10	-2.4776642071783006e-11	0.0	5.605777593599284e-09
0.56	-3.811415940878533e-12	0.0	-4.340137946323029e-10	-8.229372152988234e-13	0.0	-0.09913341875630334	0.0	2.0995136985803166e-11	0.0	1.0	0.0	1.3518471279686156e-12	0.0	0.0	1.5491026995896677e-10	0.0	0.0	-6.15381847945075e-10	0.0	-3.811415942051974e-12	0.0	-4.340137946322926e-10	-2.5993612498286576e-11	0.0	6.026062776130082e-09
0.5650000000000001	-3.944426429474031e-12	0.0	-4.0283276779532624e-10	-8.479468394880968e-13	0.0	-0.09913341875604442	0.0	2.089100704634442e-11	0.0	1.0	0.0	1.4091918614562167e-12	0.0	0.0	1.614814923712509e-10	0.0	0.0	-6.093970152774069e-10	0.0	-3.9444264306093686e-12	0.0	-4.0283276779531513e-10	-2.7210582924647927e-11	0.0	6.446347958660936e-09
0.5700000000000001	-4.0835217702143564e-12	0.0	-3.695503150456953e-10	-8.733689412684704e-13	0.0	-0.09913341875574927	0.0	2.082351851444356e-11	0.0	1.0	0.0	1.4664598544029234e-12	0.0	0.0	1.680439209653134e-10	0.0	0.0	-6.034315166499562e-10	0.0	-4.0835217712982175e-12	0.0	-3.695503150456833e-10	-2.8427553350868142e-11	0.0	6.866633141191766e-09
0.5750000000000001	-4.228701963099508e-12	0.0	-3.341664363834105e-10	-8.99203520639944e-13	0.0	-0.09913341875541788	0.0	2.0792671390100575e-11	0.0	1.0	0.0	1.5236511068087356e-12	0.0	0.0	1.745975557411543e-10	0.0	0.0	-5.974748550726802e-10	0.0	-4.2287019641178145e-12	0.0	-3.341664363833976e-10	-2.964452377694663e-11	0.0	7.286918323722467e-09
0.58	-4.379967008129483e-12	0.0	-2.9668113180847234e-10	-9.25450577602517e-13	0.0	-0.09913341875505026	0.0	2.0798465673315468e-11	0.0	1.0	0.0	1.5807656186736526e-12	0.0	0.0	1.8114239669877353e-10	0.0	0.0	-5.915165335555368e-10	0.0	-4.3799670090674495e-12	0.0	-2.966811318084585e-10	-3.0861494202884806e-11	0.0	7.707203506253315e-09
0.585	-4.537316905304289e-12	0.0	-2.570944013208792e-10	-9.521101121561907e-13	0.0	-0.0991334187546464	0.0	2.0840901364088244e-11	0.0	1.0	0.0	1.6378033899976766e-12	0.0	0.0	1.8767844383817131e-10	0.0	0.0	-5.855460551084833e-10	0.0	-4.5373169061464295e-12	0.0	-2.570944013208644e-10	-3.207846462868318e-11	0.0	8.127488688784252e-09
0.59	-4.700751654623921e-12	0.0	-2.1540624492063203e-10	-9.791821243009642e-13	0.0	-0.09913341875420631	0.0	2.0919978462418898e-11	0.0	1.0	0.0	1.6947644207808064e-12	0.0	0.0	1.9420569715934752e-10	0.0	0.0	-5.795529227414774e-10	0.0	-4.700751655354047e-12	0.0	-2.154062449206161e-10	-3.3295435054340686e-11	0.0	8.547773871315064e-09
0.595	-4.87027125608838e-12	0.0	-1.716166626077308e-10	-1.0066666140368378e-12	0.0	-0.09913341875373	0.0	2.1035696968307434e-11	0.0	1.0	0.0	1.751648711023042e-12	0.0	0.0	2.0072415666230214e-10	0.0	0.0	-5.735266394644766e-10	0.0	-4.870271256689604e-12	0.0	-1.7161666260771375e-10	-3.4512405479858916e-11	0.0	8.9680590538459e-09
0.6	-5.0458757096976654e-12	0.0	-1.2572565438217536e-10	-1.0345635813638115e-12	0.0	-0.09913341875321743	0.0	2.118805688175385e-11	0.0	1.0	0.0	1.8084562607243833e-12	0.0	0.0	2.0723382234703516e-10	0.0	0.0	-5.674567082874385e-10	0.0	-5.045875710152404e-12	0.0	-1.257256543821571e-10	-3.572937590523771e-11	0.0	9.388344236376733e-09
0.605	-5.227565015451777e-12	0.0	-7.773322024396593e-11	-1.0628730262818852e-12	0.0	-0.09913341875266865	0.0	2.1377058202758143e-11	0.0	1.0	0.0	1.8651870698848306e-12	0.0	0.0	2.1373469421354666e-10	0.0	0.0	-5.613326322203207e-10	0.0	-5.22756501574175e-12	0.0	-7.773322024394643e-11	-3.6946346330477935e-11	0.0	9.808629418907555e-09
0.61	-5.415339173350716e-12	0.0	-2.7639360193102354e-11	-1.091594948791059e-12	0.0	-0.09913341875208363	0.0	2.1602700931320315e-11	0.0	1.0	0.0	1.921841138504383e-12	0.0	0.0	2.2022677226183647e-10	0.0	0.0	-5.551439142730808e-10	0.0	-5.415339173456953e-12	0.0	-2.763936019308154e-11	-3.8163316755579706e-11	0.0	1.0228914601438395e-08
0.615	-5.609198183394481e-12	0.0	2.4555925770415327e-11	-1.1207293488913329e-12	0.0	-0.0991334187514624	0.0	2.186498506744037e-11	0.0	1.0	0.0	1.978418466583042e-12	0.0	0.0	2.267100564919048e-10	0.0	0.0	-5.488800574556763e-10	0.0	-5.609198183297317e-12	0.0	2.4555925770437522e-11	-3.938028718054306e-11	0.0	1.0649199783969226e-08
0.62	-5.8091420455830724e-12	0.0	7.885263764658707e-11	-1.1502762265827068e-12	0.0	-0.0991334187508049	0.0	2.2163910611118302e-11	0.0	1.0	0.0	2.0349190541208064e-12	0.0	0.0	2.331845469037515e-10	0.0	0.0	-5.425305647780648e-10	0.0	-5.809142045262155e-12	0.0	7.885263764661071e-11	-4.2866036463037285e-11	0.0	5.1095750808446e-09
0.625	-6.015170759916491e-12	0.0	1.3525077543541295e-10	-1.1802355818651805e-12	0.0	-0.0991334187501112	0.0	2.2499477562354117e-11	0.0	1.0	0.0	2.091342901117677e-12	0.0	0.0	2.396502434973767e-10	0.0	0.0	-5.360849392502038e-10	0.0	-6.01517075935078e-12	0.0	1.352507754354381e-10	-2.7004408569806727e-11	0.0	5.46089624228842e-08
0.63	-6.091157597364484e-12	0.0	5.51344932276211e-10	-1.0673308144113025e-12	0.0	-0.09913341874937395	0.0	4.3750987781685406e-11	0.0	1.0	0.0	2.958277766822258e-12	0.0	0.0	3.389936613326033e-10	0.0	0.0	-5.235512045031088e-10	0.0	-6.0911575941024214e-12	0.0	5.513449322762471e-10	-2.082136539251421e-11	0.0	4.526550985077023e-08
0.635	-6.245058062884585e-12	0.0	5.279565374344407e-10	-1.1142259340772648e-12	0.0	-0.09913341874911552	0.0	4.0459187349168586e-11	0.0	1.0	0.0	2.891843554182308e-12	0.0	0.0	3.313808613335157e-10	0.0	0.0	-5.119605011149266e-10	0.0	-6.245058059831049e-12	0.0	5.279565374344768e-10	-3.2078653661490764e-11	0.0	-1.2002388163063707e-08
0.64	-6.398958528404685e-12	0.0	5.045681425926704e-10	-1.1611210537432273e-12	0.0	-0.0991334187488571	0.0	3.7167386916651766e-11	0.0	1.0	0.0	2.8254093415423587e-12	0.0	0.0	3.237680613344282e-10	0.0	0.0	-5.013128290856571e-10	0.0	-6.398958525553462e-12	0.0	5.045681425927066e-10	-3.0780093143860904e-11	0.0	-4.67767896835404e-09
0.645	-6.552858993924785e-12	0.0	4.811797477509002e-10	-1.2080161734091897e-12	0.0	-0.09913341874859867	0.0	3.387558648413496e-11	0.0	1.0	0.0	2.7589751289024088e-12	0.0	0.0	3.1615526133534057e-10	0.0	0.0	-4.916081884153003e-10	0.0	-6.552858991269659e-12	0.0	4.811797477509364e-10	-3.078009314261798e-11	0.0	-4.6776789683540575e-09
0.65	-6.706759459444886e-12	0.0	4.5779135290912984e-10	-1.254911293075152e-12	0.0	-0.09913341874834025	0.0	3.058378605161813e-11	0.0	1.0	0.0	2.6925409162624596e-12	0.0	0.0	3.0854246133625305e-10	0.0	0.0	-4.828465791038563e-10	0.0	-6.706759456979642e-12	0.0	4.57791352909166e-10	-3.0780093141374975e-11	0.0	-4.677678968354073e-09
0.655	-6.860659924964986e-12	0.0	4.3440295806735963e-10	-1.3018064127411145e-12	0.0	-0.09913341874808183	0.0	2.7291985619101325e-11	0.0	1.0	0.0	2.6261067036225096e-12	0.0	0.0	3.009296613371655e-10	0.0	0.0	-4.750280011513251e-10	0.0	-6.860659922683409e-12	0.0	4.3440295806739566e-10	-3.078009314013177e-11	0.0	-4.6776789683540674e-09
0.66	-7.014560390485086e-12	0.0	4.1101456322558936e-10	-1.348701532407077e-12	0.0	-0.0991334187478234	0.0	2.4000185186584505e-11	0.0	1.0	0.0	2.5596724909825604e-12	0.0	0.0	2.9331686133807796e-10	0.0	0.0	-4.681524545577067e-10	0.0	-7.014560388380961e-12	0.0	4.110145632256253e-10	-3.0780093138889045e-11	0.0	-4.677678968354086e-09
0.665	-7.168460856005187e-12	0.0	3.876261683838191e-10	-1.3955966520730393e-12	0.0	-0.09913341874756498	0.0	2.0708384754067698e-11	0.0	1.0	0.0	2.4932382783426104e-12	0.0	0.0	2.8570406133899034e-10	0.0	0.0	-4.62219939323001e-10	0.0	-7.168460854072299e-12	0.0	3.876261683838548e-10	-3.0780093137646e-11	0.0	-4.677678968354096e-09
0.67	-7.322361321525288e-12	0.0	3.642377735420488e-10	-1.4424917717390017e-12	0.0	-0.09913341874730655	0.0	1.7416584321550878e-11	0.0	1.0	0.0	2.4268040657026612e-12	0.0	0.0	2.780912613399028e-10	0.0	0.0	-4.5723045544720806e-10	0.0	-7.32236131975742e-12	0.0	3.6423777354208434e-10	-3.078009313640256e-11	0.0	-4.677678968354094e-09
0.675	-7.476261787045387e-12	0.0	3.4084937870027855e-10	-1.489386891404964e-12	0.0	-0.09913341874704813	0.0	1.4124783889034064e-11	0.0	1.0	0.0	2.3603698530627112e-12	0.0	0.0	2.7047846134081526e-10	0.0	0.0	-4.5318400293032787e-10	0.0	-7.476261785436325e-12	0.0	3.4084937870031386e-10	-3.078009313515981e-11	0.0	-4.677678968354106e-09
0.68	-7.630162252565488e-12	0.0	3.174609838585083e-10	-1.5362820110709265e-12	0.0	-0.0991334187467897	0.0	1.083298345651725e-11	0.0	1.0	0.0	2.293935640422762e-12	0.0	0.0	2.6286566134172774e-10	0.0	0.0	-4.5008058177236046e-10	0.0	-7.630162251109019e-12	0.0	3.174609838585433e-10	-3.0780093133917075e-11	0.0	-4.677678968354113e-09
0.685	-7.784062718085589e-12	0.0	2.94072589016738e-10	-1.583177130736889e-12	0.0	-0.09913341874653128	0.0	7.54118302400043e-12	0.0	1.0	0.0	2.227501427782812e-12	0.0	0.0	2.552528613426401e-10	0.0	0.0	-4.4792019197330584e-10	0.0	-7.784062716775495e-12	0.0	2.940725890167727e-10	-3.078009313267348e-11	0.0	-4.677678968354125e-09
0.6900000000000001	-7.937963183605688e-12	0.0	2.706841941749677e-10	-1.6300722504028513e-12	0.0	-0.09913341874627285	0.0	4.249382591483617e-12	0.0	1.0	0.0	2.161067215142863e-12	0.0	0.0	2.476400613435526e-10	0.0	0.0	-4.4670283353316396e-10	0.0	-7.937963182435754e-12	0.0	2.70684194175002e-10	-3.078009313143071e-11	0.0	-4.6776789683541295e-09
0.6950000000000001	-8.091863649125789e-12	0.0	2.472957993331975e-10	-1.6769673700688136e-12	0.0	-0.09913341874601443	0.0	9.575821589668035e-13	0.0	1.0	0.0	2.094633002502913e-12	0.0	0.0	2.4002726134446503e-10	0.0	0.0	-4.4642850645193486e-10	0.0	-8.091863648089802e-12	0.0	2.472957993332314e-10	-3.078009313018795e-11	0.0	-4.677678968354148e-09
0.7000000000000001	-8.24576411464589e-12	0.0	2.2390740449142718e-10	-1.7238624897347762e-12	0.0	-0.09913341874575601	0.0	-2.33421827355001e-12	0.0	1.0	0.0	2.0281987898629637e-12	0.0	0.0	2.3241446134537751e-10	0.0	0.0	-4.470972107296185e-10	0.0	-8.245764113737633e-12	0.0	2.2390740449146063e-10	-3.0780093128944e-11	0.0	-4.677678968354088e-09
0.705	-8.399664580165986e-12	0.0	2.0051900964965745e-10	-1.7707576094007375e-12	0.0	-0.09913341874549758	0.0	-5.6260187060667526e-12	0.0	1.0	0.0	1.9617645772230153e-12	0.0	0.0	2.248016613462901e-10	0.0	0.0	-4.4870894636621487e-10	0.0	-8.399664579379244e-12	0.0	2.005190096496904e-10	-3.0780093127701104e-11	0.0	-4.677678968354097e-09
0.71	-8.553565045686087e-12	0.0	1.7713061480788716e-10	-1.8176527290666998e-12	0.0	-0.09913341874523916	0.0	-8.91781913858357e-12	0.0	1.0	0.0	1.8953303645830657e-12	0.0	0.0	2.1718886134720253e-10	0.0	0.0	-4.5126371336172403e-10	0.0	-8.553565045014644e-12	0.0	1.7713061480791958e-10	-3.078009312645885e-11	0.0	-4.677678968354177e-09
0.715	-8.707465511206188e-12	0.0	1.537422199661169e-10	-1.864547848732662e-12	0.0	-0.09913341874498073	0.0	-1.2209619571100383e-11	0.0	1.0	0.0	1.828896151943116e-12	0.0	0.0	2.09576061348115e-10	0.0	0.0	-4.547615117161459e-10	0.0	-8.707465510643831e-12	0.0	1.5374221996614874e-10	-3.078009312521547e-11	0.0	-4.677678968354171e-09
0.72	-8.861365976726287e-12	0.0	1.3035382512434662e-10	-1.911442968398625e-12	0.0	-0.09913341874472231	0.0	-1.5501420003617197e-11	0.0	1.0	0.0	1.7624619393031665e-12	0.0	0.0	2.0196326134902742e-10	0.0	0.0	-4.592023414294806e-10	0.0	-8.8613659762668e-12	0.0	1.3035382512437785e-10	-3.078009312397219e-11	0.0	-4.67767896835418e-09
0.725	-9.015266442246388e-12	0.0	1.0696543028257635e-10	-1.958338088064587e-12	0.0	-0.09913341874446388	0.0	-1.8793220436134013e-11	0.0	1.0	0.0	1.696027726663217e-12	0.0	0.0	1.9435046134993985e-10	0.0	0.0	-4.64586202501728e-10	0.0	-9.015266441883555e-12	0.0	1.0696543028260693e-10	-3.078009312272962e-11	0.0	-4.677678968354188e-09
0.73	-9.169166907766489e-12	0.0	8.357703544080608e-11	-2.0052332077305495e-12	0.0	-0.09913341874420546	0.0	-2.2085020868650827e-11	0.0	1.0	0.0	1.6295935140232674e-12	0.0	0.0	1.867376613508523e-10	0.0	0.0	-4.709130949328882e-10	0.0	-9.169166907494096e-12	0.0	8.357703544083597e-11	-3.86103939143103e-11	0.0	-4.920411233043881e-09
0.735	-9.32306737328659e-12	0.0	6.01886405990358e-11	-2.0521283273965118e-12	0.0	-0.09913341874394704	0.0	-2.5376821301167644e-11	0.0	1.0	0.0	1.5631593013833178e-12	0.0	0.0	1.7912486135176474e-10	0.0	0.0	-4.781830187229611e-10	0.0	-9.32306737309842e-12	0.0	6.018864059906495e-11	1.1728161118724465e-11	0.0	-3.3599614128720856e-09
0.74	-9.007149791280423e-12	0.0	5.1364181638647934e-11	-1.9114902808661853e-12	0.0	-0.09913341874385034	0.0	-2.659074877073471e-11	0.0	1.0	0.0	1.492422577911417e-12	0.0	0.0	1.7101902992871695e-10	0.0	0.0	-4.8580070711624e-10	0.0	-9.007149791127109e-12	0.0	5.136418163867482e-11	9.785512029565458e-11	0.0	-6.901033314525291e-10
0.745	-8.422819178215488e-12	0.0	5.086028463761896e-11	-1.663712149301171e-12	0.0	-0.09913341874384603	0.0	-2.661756096646974e-11	0.0	1.0	0.0	1.4192277752327925e-12	0.0	0.0	1.6263152337716088e-10	0.0	0.0	-4.934260766377944e-10	0.0	-8.422819178071124e-12	0.0	5.086028463764287e-11	1.2133967312928658e-10	0.0	3.7896632449593666e-11
0.75	-7.83848856515056e-12	0.0	5.035638763658999e-11	-1.4159340177361598e-12	0.0	-0.09913341874384171	0.0	-2.6644373162204773e-11	0.0	1.0	0.0	1.3460329725541689e-12	0.0	0.0	1.542440168256049e-10	0.0	0.0	-5.010591272876242e-10	0.0	-7.838488565014997e-12	0.0	5.035638763661109e-11	1.1686612261123995e-10	0.0	-1.0077940020633763e-10
0.755	-7.254157952085631e-12	0.0	4.985249063556102e-11	-1.1681558861711487e-12	0.0	-0.09913341874383741	0.0	-2.66711853579398e-11	0.0	1.0	0.0	1.2728381698755452e-12	0.0	0.0	1.4585651027404893e-10	0.0	0.0	-5.086998590657295e-10	0.0	-7.254157951958723e-12	0.0	4.985249063557949e-11	1.1686612261127032e-10	0.0	-1.0077940020630349e-10
0.76	-6.669827339020696e-12	0.0	4.934859363453205e-11	-9.203777546061343e-13	0.0	-0.0991334187438331	0.0	-2.6697997553674832e-11	0.0	1.0	0.0	1.1996433671969216e-12	0.0	0.0	1.3746900372249296e-10	0.0	0.0	-5.163482719721103e-10	0.0	-6.669827338902295e-12	0.0	4.934859363454805e-11	1.1686612261130046e-10	0.0	-1.007794002062701e-10
0.765	-6.085496725955761e-12	0.0	4.8844696633503076e-11	-6.725996230411232e-13	0.0	-0.09913341874382878	0.0	-2.6724809749409863e-11	0.0	1.0	0.0	1.1264485645182972e-12	0.0	0.0	1.2908149717093689e-10	0.0	0.0	-5.240043660067665e-10	0.0	-6.0854967258457195e-12	0.0	4.884469663351679e-11	1.168661226113292e-10	0.0	-1.0077940020623531e-10
0.77	-5.5011661128908326e-12	0.0	4.834079963247411e-11	-4.2482149147611206e-13	0.0	-0.09913341874382446	0.0	-2.6751621945144895e-11	0.0	1.0	0.0	1.0532537618396743e-12	0.0	0.0	1.20693990619381e-10	0.0	0.0	-5.316681411696983e-10	0.0	-5.501166112789002e-12	0.0	4.83407996324857e-11	1.1686612261135816e-10	0.0	-1.0077940020620225e-10
0.775	-4.916835499825904e-12	0.0	4.783690263144514e-11	-1.770433599110977e-13	0.0	-0.09913341874382015	0.0	-2.6778434140879926e-11	0.0	1.0	0.0	9.800589591610499e-13	0.0	0.0	1.1230648406782493e-10	0.0	0.0	-5.393395974609055e-10	0.0	-4.916835499732138e-12	0.0	4.783690263145477e-11	1.168661226113875e-10	0.0	-1.007794002061679e-10
0.78	-4.3325048867609755e-12	0.0	4.7333005630416164e-11	7.07347716539102e-14	0.0	-0.09913341874381584	0.0	-2.6805246336614957e-11	0.0	1.0	0.0	9.068641564824271e-13	0.0	0.0	1.0391897751626905e-10	0.0	0.0	-5.470187348803882e-10	0.0	-4.3325048866751264e-12	0.0	4.733300563042402e-11	1.168661226114177e-10	0.0	-1.0077940020613332e-10
0.785	-3.7481742736960405e-12	0.0	4.682910862938719e-11	3.1851290321892456e-13	0.0	-0.09913341874381153	0.0	-2.683205853234999e-11	0.0	1.0	0.0	8.336693538038034e-13	0.0	0.0	9.553147096471308e-11	0.0	0.0	-5.547055534281464e-10	0.0	-3.748174273617961e-12	0.0	4.682910862939344e-11	1.168661226114481e-10	0.0	-1.0077940020609939e-10
0.79	-3.1638436606311054e-12	0.0	4.632521162835822e-11	5.662910347839357e-13	0.0	-0.09913341874380721	0.0	-2.685887072808502e-11	0.0	1.0	0.0	7.60474551125179e-13	0.0	0.0	8.714396441315702e-11	0.0	0.0	-5.624000531041801e-10	0.0	-3.1638436605606473e-12	0.0	4.632521162836303e-11	1.168661226114768e-10	0.0	-1.0077940020606341e-10
0.795	-2.579513047566177e-12	0.0	4.582131462732925e-11	8.140691663489468e-13	0.0	-0.0991334187438029	0.0	-2.688568292382005e-11	0.0	1.0	0.0	6.872797484465562e-13	0.0	0.0	7.875645786160113e-11	0.0	0.0	-5.701022339084892e-10	0.0	-2.579513047503193e-12	0.0	4.58213146273328e-11	1.1686612261150542e-10	0.0	-1.0077940020603067e-10
0.8	-1.9951824345012483e-12	0.0	4.531741762630028e-11	1.0618472979139612e-12	0.0	-0.09913341874379858	0.0	-2.6912495119555083e-11	0.0	1.0	0.0	6.140849457679317e-13	0.0	0.0	7.036895131004506e-11	0.0	0.0	-5.778120958410739e-10	0.0	-1.995182434445591e-12	0.0	4.531741762630273e-11	1.168661226115359e-10	0.0	-1.0077940020599761e-10
0.805	-1.4108518214363133e-12	0.0	4.4813520625271306e-11	1.3096254294789723e-12	0.0	-0.09913341874379428	0.0	-2.6939307315290114e-11	0.0	1.0	0.0	5.408901430893081e-13	0.0	0.0	6.198144475848909e-11	0.0	0.0	-5.85529638901934e-10	0.0	-1.410851821387835e-12	0.0	4.481352062527283e-11	1.168661226115653e-10	0.0	-1.0077940020596078e-10
0.81	-8.265212083713847e-13	0.0	4.430962362424234e-11	1.5574035610439834e-12	0.0	-0.09913341874378996	0.0	-2.6966119511025145e-11	0.0	1.0	0.0	4.676953404106844e-13	0.0	0.0	5.3593938206933116e-11	0.0	0.0	-5.932548630910696e-10	0.0	-8.26521208329938e-13	0.0	4.4309623624243115e-11	1.168661226115947e-10	0.0	-1.0077940020592728e-10
0.8150000000000001	-2.421905953064497e-13	0.0	4.380572662321337e-11	1.8051816926089946e-12	0.0	-0.09913341874378565	0.0	-2.6992931706760177e-11	0.0	1.0	0.0	3.945005377320608e-13	0.0	0.0	4.520643165537714e-11	0.0	0.0	-6.009877684084806e-10	0.0	-2.4219059527188696e-13	0.0	4.380572662321356e-11	1.1686612261162526e-10	0.0	-1.0077940020589432e-10
0.8200000000000001	3.421400177584853e-13	0.0	4.3301829622184394e-11	2.052959824174009e-12	0.0	-0.09913341874378133	0.0	-2.7019743902495208e-11	0.0	1.0	0.0	3.2130573505343717e-13	0.0	0.0	3.6818925103821166e-11	0.0	0.0	-6.087283548541672e-10	0.0	3.4214001778631157e-13	0.0	4.3301829622184174e-11	1.1686612261165297e-10	0.0	-1.007794002058592e-10
0.8250000000000001	9.264706308234074e-13	0.0	4.279793262115543e-11	2.30073795573902e-12	0.0	-0.09913341874377703	0.0	-2.704655609823024e-11	0.0	1.0	0.0	2.4811093237481354e-13	0.0	0.0	2.843141855226519e-11	0.0	0.0	-6.164766224281292e-10	0.0	9.264706308446447e-13	0.0	4.279793262115497e-11	1.1686612261168275e-10	0.0	-1.0077940020582485e-10
0.8300000000000001	1.5108012438883424e-12	0.0	4.2294035620126455e-11	2.548516087304031e-12	0.0	-0.09913341874377271	0.0	-2.707336829396527e-11	0.0	1.0	0.0	1.749161296961899e-13	0.0	0.0	2.0043912000709216e-11	0.0	0.0	-6.242325711303667e-10	0.0	1.5108012439031382e-12	0.0	4.2294035620125925e-11	1.1686612261171144e-10	0.0	-1.0077940020578941e-10
0.835	2.095131856953258e-12	0.0	4.17901386190975e-11	2.796294218869036e-12	0.0	-0.0991334187437684	0.0	-2.71001804897003e-11	0.0	1.0	0.0	1.0172132701756788e-13	0.0	0.0	1.1656405449153427e-11	0.0	0.0	-6.319962009608797e-10	0.0	2.09513185696176e-12	0.0	4.1790138619097075e-11	1.1686612261174075e-10	0.0	-1.0077940020575441e-10
0.84	2.679462470018193e-12	0.0	4.128624161806853e-11	3.0440723504340502e-12	0.0	-0.09913341874376408	0.0	-2.712699268543533e-11	0.0	1.0	0.0	2.852652433894425e-14	0.0	0.0	3.2688988975974524e-12	0.0	0.0	-6.397675119196682e-10	0.0	2.6794624700205486e-12	0.0	4.128624161806837e-11	1.1686612261177301e-10	0.0	-1.0077940020572361e-10
0.845	3.263793083083128e-12	0.0	4.0782344617039555e-11	3.2918504819990613e-12	0.0	-0.09913341874375976	0.0	-2.715380488117036e-11	0.0	1.0	0.0	-4.4668278339680194e-14	0.0	0.0	-5.118607653958615e-12	0.0	0.0	-6.475465040067321e-10	0.0	3.2637930830794845e-12	0.0	4.0782344617039846e-11	1.168661226118005e-10	0.0	-1.0077940020568785e-10
0.85	3.84812369614805e-12	0.0	4.027844761601059e-11	3.5396286135640725e-12	0.0	-0.09913341874375546	0.0	-2.7180617076905393e-11	0.0	1.0	0.0	-1.1786308101830302e-13	0.0	0.0	-1.3506114205514496e-11	0.0	0.0	-6.553331772220715e-10	0.0	3.848123696138555e-12	0.0	4.0278447616011494e-11	1.1686612261183004e-10	0.0	-1.0077940020565392e-10
0.855	4.432454309212985e-12	0.0	3.9774550614981616e-11	3.787406745129087e-12	0.0	-0.09913341874375114	0.0	-2.7207429272640424e-11	0.0	1.0	0.0	-1.9105788369692666e-13	0.0	0.0	-2.189362075707047e-11	0.0	0.0	-6.631275315656865e-10	0.0	4.4324543091977866e-12	0.0	3.977455061498331e-11	1.168661226118614e-10	0.0	-1.0077940020562053e-10
0.86	5.01678492227792e-12	0.0	3.927065361395264e-11	4.035184876694098e-12	0.0	-0.09913341874374683	0.0	-2.7234241468375456e-11	0.0	1.0	0.0	-2.642526863755511e-13	0.0	0.0	-3.0281127308626536e-11	0.0	0.0	-6.709295670375768e-10	0.0	5.0167849222571656e-12	0.0	3.927065361395529e-11	1.1686612261188977e-10	0.0	-1.007794002055851e-10
0.865	5.601115535342849e-12	0.0	3.876675661292368e-11	4.282963008259109e-12	0.0	-0.09913341874374251	0.0	-2.7261053664110487e-11	0.0	1.0	0.0	-3.3744748905417393e-13	0.0	0.0	-3.866863386018242e-11	0.0	0.0	-6.787392836377427e-10	0.0	5.601115535316685e-12	0.0	3.876675661292746e-11	1.1686612261191935e-10	0.0	-1.0077940020555117e-10
0.87	6.185446148407784e-12	0.0	3.8262859611894704e-11	4.53074113982412e-12	0.0	-0.0991334187437382	0.0	-2.7287865859845518e-11	0.0	1.0	0.0	-4.1064229173279837e-13	0.0	0.0	-4.7056140411738486e-11	0.0	0.0	-6.865566813661841e-10	0.0	6.185446148376359e-12	0.0	3.8262859611899783e-11	1.1686612261194897e-10	0.0	-1.0077940020551702e-10
0.875	6.769776761472712e-12	0.0	3.775896261086573e-11	4.7785192713891346e-12	0.0	-0.0991334187437339	0.0	-2.731467805558055e-11	0.0	1.0	0.0	-4.83837094411422e-13	0.0	0.0	-5.544364696329446e-11	0.0	0.0	-6.943817602229009e-10	0.0	6.769776761436174e-12	0.0	3.7758962610872284e-11	1.1686612261197753e-10	0.0	-1.0077940020548331e-10
0.88	7.354107374537641e-12	0.0	3.725506560983676e-11	5.026297402954146e-12	0.0	-0.09913341874372958	0.0	-2.734149025131558e-11	0.0	1.0	0.0	-5.570318970900456e-13	0.0	0.0	-6.383115351485044e-11	0.0	0.0	-7.022145202078932e-10	0.0	7.354107374496136e-12	0.0	3.725506560984495e-11	1.1686612261200788e-10	0.0	-1.0077940020544949e-10
0.885	7.938437987602576e-12	0.0	3.6751168608807785e-11	5.274075534519157e-12	0.0	-0.09913341874372526	0.0	-2.736830244705061e-11	0.0	1.0	0.0	-6.302266997686693e-13	0.0	0.0	-7.221866006640641e-11	0.0	0.0	-7.10054961321161e-10	0.0	7.938437987556252e-12	0.0	3.675116860881779e-11	1.1686612261203727e-10	0.0	-1.0077940020541449e-10
0.89	8.522768600667505e-12	0.0	3.624727160777882e-11	5.521853666084168e-12	0.0	-0.09913341874372095	0.0	-2.739511464278564e-11	0.0	1.0	0.0	-7.034215024472921e-13	0.0	0.0	-8.060616661796229e-11	0.0	0.0	-7.179030835627043e-10	0.0	8.52276860061651e-12	0.0	3.6247271607790806e-11	1.1686612261206692e-10	0.0	-1.0077940020537927e-10
0.895	9.10709921373244e-12	0.0	3.5743374606749846e-11	5.769631797649182e-12	0.0	-0.09913341874371663	0.0	-2.7421926838520672e-11	0.0	1.0	0.0	-7.766163051259165e-13	0.0	0.0	-8.899367316951836e-11	0.0	0.0	-7.25758886932523e-10	0.0	9.107099213676921e-12	0.0	3.574337460676399e-11	1.1686612261209657e-10	0.0	-1.0077940020534641e-10
0.9	9.691429826797368e-12	0.0	3.523947760572087e-11	6.0174099292141935e-12	0.0	-0.09913341874371233	0.0	-2.7448739034255703e-11	0.0	1.0	0.0	-8.498111078045402e-13	0.0	0.0	-9.738117972107434e-11	0.0	0.0	-7.336223714306173e-10	0.0	9.691429826737475e-12	0.0	3.5239477605737346e-11	1.1686612261212516e-10	0.0	-1.0077940020531141e-10
0.905	1.0275760439862297e-11	0.0	3.4735580604691907e-11	6.265188060779205e-12	0.0	-0.09913341874370801	0.0	-2.7475551229990734e-11	0.0	1.0	0.0	-9.230059104831638e-13	0.0	0.0	-1.0576868627263031e-10	0.0	0.0	-7.41493537056987e-10	0.0	1.0275760439798174e-11	0.0	3.4735580604710874e-11	1.168661226121552e-10	0.0	-1.0077940020527791e-10
0.91	1.0860091052927232e-11	0.0	3.4231683603662934e-11	6.512966192344216e-12	0.0	-0.0991334187437037	0.0	-2.7502363425725766e-11	0.0	1.0	0.0	-9.962007131617874e-13	0.0	0.0	-1.1415619282418628e-10	0.0	0.0	-7.493723838116322e-10	0.0	1.0860091052859028e-11	0.0	3.423168360368457e-11	1.168661226121859e-10	0.0	-1.0077940020524334e-10
0.915	1.1444421665992167e-11	0.0	3.372778660263396e-11	6.76074432390923e-12	0.0	-0.09913341874369938	0.0	-2.7529175621460797e-11	0.0	1.0	0.0	-1.0693955158404119e-12	0.0	0.0	-1.2254369937574234e-10	0.0	0.0	-7.572589116945528e-10	0.0	1.144442166592003e-11	0.0	3.372778660265844e-11	1.168661226122145e-10	0.0	-1.0077940020520844e-10
0.92	1.2028752279057095e-11	0.0	3.3223889601604994e-11	7.008522455474241e-12	0.0	-0.09913341874369508	0.0	-2.7555987817195828e-11	0.0	1.0	0.0	-1.1425903185190347e-12	0.0	0.0	-1.3093120592729824e-10	0.0	0.0	-7.65153120705749e-10	0.0	1.2028752278981172e-11	0.0	3.3223889601632485e-11	1.1686612261224288e-10	0.0	-1.0077940020517506e-10
0.925	1.2613082892122024e-11	0.0	3.271999260057602e-11	7.256300587039252e-12	0.0	-0.09913341874369076	0.0	-2.758280001293086e-11	0.0	1.0	0.0	-1.2157851211976592e-12	0.0	0.0	-1.3931871247885428e-10	0.0	0.0	-7.730550108452206e-10	0.0	1.2613082892042463e-11	0.0	3.271999260060669e-11	1.168661226122735e-10	0.0	-1.0077940020514135e-10
0.93	1.3197413505186959e-11	0.0	3.221609559954705e-11	7.504078718604267e-12	0.0	-0.09913341874368645	0.0	-2.760961220866589e-11	0.0	1.0	0.0	-1.2889799238762828e-12	0.0	0.0	-1.4770621903041028e-10	0.0	0.0	-7.809645821129677e-10	0.0	1.3197413505103906e-11	0.0	3.221609559958107e-11	1.1686612261230303e-10	0.0	-1.0077940020510645e-10
0.935	1.3781744118251887e-11	0.0	3.171219859851808e-11	7.751856850169278e-12	0.0	-0.09913341874368213	0.0	-2.7636424404400922e-11	0.0	1.0	0.0	-1.3621747265549056e-12	0.0	0.0	-1.5609372558196615e-10	0.0	0.0	-7.888818345089903e-10	0.0	1.3781744118165492e-11	0.0	3.171219859855563e-11	1.1686612261233242e-10	0.0	-1.0077940020507231e-10
0.9400000000000001	1.4366074731316822e-11	0.0	3.120830159748911e-11	7.999634981734289e-12	0.0	-0.09913341874367781	0.0	-2.7663236600135954e-11	0.0	1.0	0.0	-1.43536952923353e-12	0.0	0.0	-1.6448123213352223e-10	0.0	0.0	-7.968067680332884e-10	0.0	1.4366074731227232e-11	0.0	3.120830159753035e-11	1.1686612261236222e-10	0.0	-1.0077940020503784e-10
0.9450000000000001	1.495040534438175e-11	0.0	3.070440459646014e-11	8.2474131132993e-12	0.0	-0.09913341874367351	0.0	-2.7690048795870985e-11	0.0	1.0	0.0	-1.5085643319121529e-12	0.0	0.0	-1.728687386850781e-10	0.0	0.0	-8.047393826858619e-10	0.0	1.4950405344289113e-11	0.0	3.070440459650525e-11	1.1686612261239076e-10	0.0	-1.0077940020500348e-10
0.9500000000000001	1.553473595744668e-11	0.0	3.020050759543117e-11	8.495191244864313e-12	0.0	-0.0991334187436692	0.0	-2.7716860991606016e-11	0.0	1.0	0.0	-1.5817591345907773e-12	0.0	0.0	-1.8125624523663417e-10	0.0	0.0	-8.12679678466711e-10	0.0	1.553473595735114e-11	0.0	3.0200507595480316e-11	1.1686612261242119e-10	0.0	-1.0077940020497063e-10
0.9550000000000001	1.6119066570511615e-11	0.0	2.96966105944022e-11	8.742969376429326e-12	0.0	-0.09913341874366488	0.0	-2.7743673187341048e-11	0.0	1.0	0.0	-1.654953937269401e-12	0.0	0.0	-1.8964375178819014e-10	0.0	0.0	-8.206276553758355e-10	0.0	1.6119066570413322e-11	0.0	2.969661059445555e-11	1.168661226124488e-10	0.0	-1.0077940020493359e-10
0.96	1.670339718357653e-11	0.0	2.9192713593373244e-11	8.99074750799433e-12	0.0	-0.09913341874366056	0.0	-2.7770485383076076e-11	0.0	1.0	0.0	-1.728148739948023e-12	0.0	0.0	-1.9803125833974593e-10	0.0	0.0	-8.285833134132355e-10	0.0	1.670339718347563e-11	0.0	2.919271359343098e-11	1.1686612261247842e-10	0.0	-1.0077940020489976e-10
0.965	1.7287727796641465e-11	0.0	2.8688816592344268e-11	9.238525639559343e-12	0.0	-0.09913341874365625	0.0	-2.7797297578811107e-11	0.0	1.0	0.0	-1.8013435426266466e-12	0.0	0.0	-2.064187648913019e-10	0.0	0.0	-8.36546652578911e-10	0.0	1.728772779653811e-11	0.0	2.868881659240655e-11	1.1686612261251107e-10	0.0	-1.0077940020486832e-10
0.97	1.78720584097064e-11	0.0	2.8184919591315295e-11	9.486303771124356e-12	0.0	-0.09913341874365195	0.0	-2.782410977454614e-11	0.0	1.0	0.0	-1.8745383453052703e-12	0.0	0.0	-2.1480627144285787e-10	0.0	0.0	-8.445176728728619e-10	0.0	1.7872058409600734e-11	0.0	2.81849195913823e-11	1.1686612261253803e-10	0.0	-1.0077940020483191e-10
0.975	1.8456389022771322e-11	0.0	2.7681022590286328e-11	9.734081902689365e-12	0.0	-0.09913341874364763	0.0	-2.785092197028117e-11	0.0	1.0	0.0	-1.947733147983894e-12	0.0	0.0	-2.2319377799441385e-10	0.0	0.0	-8.524963742950884e-10	0.0	1.845638902266349e-11	0.0	2.7681022590358225e-11	1.1686612261256744e-10	0.0	-1.007794002047983e-10
0.98	1.9040719635836257e-11	0.0	2.7177125589257355e-11	9.98186003425438e-12	0.0	-0.09913341874364331	0.0	-2.78777341660162e-11	0.0	1.0	0.0	-2.0209279506625175e-12	0.0	0.0	-2.3158128454596982e-10	0.0	0.0	-8.604827568455903e-10	0.0	1.904071963572641e-11	0.0	2.7177125589334315e-11	1.1686612261259885e-10	0.0	-1.0077940020476513e-10
0.985	1.9625050248901192e-11	0.0	2.6673228588228382e-11	1.0229638165819392e-11	0.0	-0.099133418743639	0.0	-2.7904546361751233e-11	0.0	1.0	0.0	-2.094122753341142e-12	0.0	0.0	-2.399687910975259e-10	0.0	0.0	-8.684768205243677e-10	0.0	1.9625050248789478e-11	0.0	2.6673228588310577e-11	1.168661226126277e-10	0.0	-1.007794002047299e-10
0.99	2.020938086196612e-11	0.0	2.6169331587199416e-11	1.0477416297384402e-11	0.0	-0.09913341874363468	0.0	-2.7931358557486264e-11	0.0	1.0	0.0	-2.167317556019765e-12	0.0	0.0	-2.483562976490818e-10	0.0	0.0	-8.764785653314205e-10	0.0	2.0209380861852687e-11	0.0	2.6169331587287016e-11	1.1686612261265667e-10	0.0	-1.0077940020469582e-10
0.995	2.0793711475031053e-11	0.0	2.5665434586170443e-11	1.0725194428949415e-11	0.0	-0.09913341874363038	0.0	-2.7958170753221295e-11	0.0	1.0	0.0	-2.240512358698389e-12	0.0	0.0	-2.567438042006378e-10	0.0	0.0	-8.844879912667489e-10	0.0	2.0793711474916046e-11	0.0	2.566543458626362e-11	1.168661226126864e-10	0.0	-1.0077940020466146e-10
1.0	2.1378042088095984e-11	0.0	2.5161537585141473e-11	1.0972972560514426e-11	0.0	-0.09913341874362606	0.0	-2.7984982948956327e-11	0.0	1.0	0.0	-2.3137071613770125e-12	0.0	0.0	-2.651313107521938e-10	0.0	0.0	-8.925050983303527e-10	0.0	2.1378042087979552e-11	0.0	2.51615375852404e-11	1.1686612261271721e-10	0.0	-1.0077940020462889e-10
1.0050000000000001	2.1962372701160926e-11	0.0	2.465764058411249e-11	1.1220750692079443e-11	0.0	-0.09913341874362175	0.0	-2.8011795144691358e-11	0.0	1.0	0.0	-2.3869019640556377e-12	0.0	0.0	-2.735188173037499e-10	0.0	0.0	-9.00529886522232e-10	0.0	2.1962372701043214e-11	0.0	2.4657640584217336e-11	1.168661226127449e-10	0.0	-1.0077940020459399e-10
1.01	2.2546703314225848e-11	0.0	2.4153743583083528e-11	1.1468528823644451e-11	0.0	-0.09913341874361743	0.0	-2.803860734042639e-11	0.0	1.0	0.0	-2.46009676673426e-12	0.0	0.0	-2.819063238553058e-10	0.0	0.0	-9.085623558423868e-10	0.0	2.2546703314107005e-11	0.0	2.415374358319446e-11	1.1686612261277548e-10	0.0	-1.007794002045592e-10
1.0150000000000001	2.3131033927290793e-11	0.0	2.3649846582054548e-11	1.1716306955209469e-11	0.0	-0.09913341874361313	0.0	-2.806541953616142e-11	0.0	1.0	0.0	-2.5332915694128854e-12	0.0	0.0	-2.902938304068619e-10	0.0	0.0	-9.166025062908171e-10	0.0	2.3131033927170968e-11	0.0	2.3649846582171743e-11	1.1686612261280477e-10	0.0	-1.0077940020452478e-10
1.02	2.371536454035571e-11	0.0	2.314594958102559e-11	1.1964085086774474e-11	0.0	-0.09913341874360881	0.0	-2.809223173189645e-11	0.0	1.0	0.0	-2.6064863720915074e-12	0.0	0.0	-2.986813369584177e-10	0.0	0.0	-9.246503378675229e-10	0.0	2.371536454023505e-11	0.0	2.3145949581149216e-11	1.168661226128302e-10	0.0	-1.0077940020448682e-10
1.025	2.4299695153420627e-11	0.0	2.2642052579996632e-11	1.221186321833948e-11	0.0	-0.0991334187436045	0.0	-2.811904392763148e-11	0.0	1.0	0.0	-2.679681174770129e-12	0.0	0.0	-3.070688435099735e-10	0.0	0.0	-9.327058505725042e-10	0.0	2.429969515329928e-11	0.0	2.2642052580126864e-11	1.1686612261286406e-10	0.0	-1.0077940020445699e-10
1.03	2.4884025766485572e-11	0.0	2.2138155578967646e-11	1.2459641349904499e-11	0.0	-0.09913341874360018	0.0	-2.814585612336651e-11	0.0	1.0	0.0	-2.7528759774487547e-12	0.0	0.0	-3.1545635006152966e-10	0.0	0.0	-9.40769044405761e-10	0.0	2.4884025766363686e-11	0.0	2.213815557910465e-11	1.1686612261289304e-10	0.0	-1.0077940020442267e-10
1.035	2.546835637955049e-11	0.0	2.1634258577938686e-11	1.2707419481469505e-11	0.0	-0.09913341874359587	0.0	-2.8172668319101543e-11	0.0	1.0	0.0	-2.8260707801273767e-12	0.0	0.0	-3.238438566130855e-10	0.0	0.0	-9.488399193672931e-10	0.0	2.546835637942821e-11	0.0	2.1634258578082638e-11	1.168661226129219e-10	0.0	-1.0077940020438762e-10
1.04	2.6052686992615432e-11	0.0	2.1130361576909707e-11	1.2955197613034521e-11	0.0	-0.09913341874359156	0.0	-2.8199480514836574e-11	0.0	1.0	0.0	-2.899265582806002e-12	0.0	0.0	-3.322313631646416e-10	0.0	0.0	-9.569184754571008e-10	0.0	2.6052686992492906e-11	0.0	2.1130361577060774e-11	1.1686612261295195e-10	0.0	-1.0077940020435412e-10
1.045	2.6637017605680354e-11	0.0	2.0626464575880743e-11	1.3202975744599529e-11	0.0	-0.09913341874358725	0.0	-2.8226292710571605e-11	0.0	1.0	0.0	-2.9724603854846244e-12	0.0	0.0	-3.406188697161975e-10	0.0	0.0	-9.65004712675184e-10	0.0	2.663701760555773e-11	0.0	2.0626464576039097e-11	1.1686612261298227e-10	0.0	-1.0077940020431944e-10
1.05	2.72213482187453e-11	0.0	2.0122567574851764e-11	1.3450753876164547e-11	0.0	-0.09913341874358293	0.0	-2.8253104906306637e-11	0.0	1.0	0.0	-3.0456551881632496e-12	0.0	0.0	-3.490063762677536e-10	0.0	0.0	-9.730986310215426e-10	0.0	2.7221348218622728e-11	0.0	2.0122567575017578e-11	1.168661226130107e-10	0.0	-1.0077940020428487e-10
1.055	2.7805678831810215e-11	0.0	1.9618670573822804e-11	1.3698532007729553e-11	0.0	-0.09913341874357862	0.0	-2.8279917102041668e-11	0.0	1.0	0.0	-3.1188499908418716e-12	0.0	0.0	-3.573938828193094e-10	0.0	0.0	-9.812002304961767e-10	0.0	2.780567883168784e-11	0.0	1.9618670573996247e-11	1.1686612261304e-10	0.0	-1.0077940020425105e-10
1.06	2.839000944487516e-11	0.0	1.9114773572793825e-11	1.3946310139294569e-11	0.0	-0.0991334187435743	0.0	-2.83067292977767e-11	0.0	1.0	0.0	-3.192044793520497e-12	0.0	0.0	-3.6578138937086555e-10	0.0	0.0	-9.893095110990863e-10	0.0	2.8390009444753128e-11	0.0	1.9114773572975068e-11	1.1686612261307e-10	0.0	-1.0077940020421674e-10
1.065	2.8974340057940078e-11	0.0	1.861087657176486e-11	1.4194088270859577e-11	0.0	-0.09913341874357	0.0	-2.833354149351173e-11	0.0	1.0	0.0	-3.265239596199119e-12	0.0	0.0	-3.7416889592242136e-10	0.0	0.0	-9.974264728302714e-10	0.0	2.897434005781854e-11	0.0	1.861087657195408e-11	1.1686612261309979e-10	0.0	-1.0077940020418276e-10
1.07	2.955867067100502e-11	0.0	1.810697957073588e-11	1.4441866402424594e-11	0.0	-0.09913341874356568	0.0	-2.8360353689246762e-11	0.0	1.0	0.0	-3.338434398877744e-12	0.0	0.0	-3.825564024739775e-10	0.0	0.0	-1.005551115689732e-09	0.0	2.9558670670884125e-11	0.0	1.810697957093324e-11	1.1686612261312946e-10	0.0	-1.0077940020414841e-10
1.075	3.0143001284069945e-11	0.0	1.7603082569706922e-11	1.46896445339896e-11	0.0	-0.09913341874356137	0.0	-2.838716588498179e-11	0.0	1.0	0.0	-3.411629201556366e-12	0.0	0.0	-3.909439090255333e-10	0.0	0.0	-1.013683439677468e-09	0.0	3.0143001283949836e-11	0.0	1.7603082569912596e-11	1.1686612261315906e-10	0.0	-1.0077940020411389e-10
1.08	3.0727331897134887e-11	0.0	1.709918556867794e-11	1.4937422665554617e-11	0.0	-0.09913341874355705	0.0	-2.8413978080716825e-11	0.0	1.0	0.0	-3.4848240042349914e-12	0.0	0.0	-3.9933141557708943e-10	0.0	0.0	-1.0218234447934795e-09	0.0	3.0727331897015714e-11	0.0	1.70991855688921e-11	1.1686612261318723e-10	0.0	-1.0077940020408034e-10
1.085	3.13116625101998e-11	0.0	1.659528856764898e-11	1.5185200797119625e-11	0.0	-0.09913341874355273	0.0	-2.8440790276451853e-11	0.0	1.0	0.0	-3.558018806913614e-12	0.0	0.0	-4.077189221286453e-10	0.0	0.0	-1.0299711310377665e-09	0.0	3.131166251008171e-11	0.0	1.6595288567871795e-11	1.168661226132162e-10	0.0	-1.0077940020404587e-10
1.09	3.1895993123264744e-11	0.0	1.6091391566619997e-11	1.5432978928684642e-11	0.0	-0.09913341874354843	0.0	-2.8467602472186884e-11	0.0	1.0	0.0	-3.631213609592239e-12	0.0	0.0	-4.1610642868020143e-10	0.0	0.0	-1.038126498410329e-09	0.0	3.189599312314788e-11	0.0	1.609139156685164e-11	1.1686612261324754e-10	0.0	-1.0077940020401156e-10
1.095	3.2480323736329666e-11	0.0	1.5587494565591037e-11	1.5680757060249647e-11	0.0	-0.09913341874354412	0.0	-2.8494414667921915e-11	0.0	1.0	0.0	-3.704408412270861e-12	0.0	0.0	-4.2449393523175724e-10	0.0	0.0	-1.046289546911167e-09	0.0	3.2480323736214184e-11	0.0	1.558749456583168e-11	1.1686612261327825e-10	0.0	-1.0077940020397683e-10
1.1	3.3064654349394614e-11	0.0	1.5083597564562058e-11	1.5928535191814664e-11	0.0	-0.0991334187435398	0.0	-2.8521226863656947e-11	0.0	1.0	0.0	-3.777603214949486e-12	0.0	0.0	-4.328814417833134e-10	0.0	0.0	-1.0544602765402804e-09	0.0	3.3064654349280657e-11	0.0	1.508359756481187e-11	1.168661226133054e-10	0.0	-1.0077940020394349e-10
1.105	3.364898496245953e-11	0.0	1.4579700563533095e-11	1.6176313323379672e-11	0.0	-0.09913341874353548	0.0	-2.8548039059391978e-11	0.0	1.0	0.0	-3.850798017628108e-12	0.0	0.0	-4.412689483348692e-10	0.0	0.0	-1.0626386872976693e-09	0.0	3.364898496234724e-11	0.0	1.4579700563792244e-11	1.1686612261333437e-10	0.0	-1.007794002039093e-10
1.11	3.423331557552447e-11	0.0	1.4075803562504115e-11	1.642409145494469e-11	0.0	-0.09913341874353118	0.0	-2.857485125512701e-11	0.0	1.0	0.0	-3.923992820306734e-12	0.0	0.0	-4.4965645488642537e-10	0.0	0.0	-1.0708247791833337e-09	0.0	3.4233315575414004e-11	0.0	1.4075803562772778e-11	1.1686612261336528e-10	0.0	-1.0077940020387429e-10
1.115	3.4817646188589387e-11	0.0	1.3571906561475155e-11	1.6671869586509695e-11	0.0	-0.09913341874352687	0.0	-2.860166345086204e-11	0.0	1.0	0.0	-3.997187622985356e-12	0.0	0.0	-4.5804396143798113e-10	0.0	0.0	-1.0790185521972736e-09	0.0	3.481764618848089e-11	0.0	1.35719065617535e-11	1.1686612261339457e-10	0.0	-1.0077940020384053e-10
1.12	3.5401976801654335e-11	0.0	1.3068009560446173e-11	1.6919647718074712e-11	0.0	-0.09913341874352255	0.0	-2.8628475646597072e-11	0.0	1.0	0.0	-4.070382425663981e-12	0.0	0.0	-4.664314679895373e-10	0.0	0.0	-1.087220006339489e-09	0.0	3.540197680154795e-11	0.0	1.3068009560734372e-11	1.168661226134243e-10	0.0	-1.0077940020380628e-10
1.125	3.5986307414719257e-11	0.0	1.2564112559417213e-11	1.716742584963972e-11	0.0	-0.09913341874351823	0.0	-2.8655287842332104e-11	0.0	1.0	0.0	-4.143577228342604e-12	0.0	0.0	-4.748189745410932e-10	0.0	0.0	-1.0954291416099798e-09	0.0	3.5986307414615135e-11	0.0	1.2564112559715437e-11	1.1686612261345348e-10	0.0	-1.0077940020377211e-10
1.1300000000000001	3.65706380277842e-11	0.0	1.2060215558388232e-11	1.7415203981204738e-11	0.0	-0.09913341874351392	0.0	-2.8682100038067135e-11	0.0	1.0	0.0	-4.216772031021228e-12	0.0	0.0	-4.832064810926492e-10	0.0	0.0	-1.1036459580087461e-09	0.0	3.657063802768249e-11	0.0	1.2060215558696652e-11	1.16866122613483e-10	0.0	-1.007794002037378e-10
1.135	3.715496864084912e-11	0.0	1.1556318557359272e-11	1.7662982112769742e-11	0.0	-0.09913341874350962	0.0	-2.8708912233802166e-11	0.0	1.0	0.0	-4.289966833699851e-12	0.0	0.0	-4.915939876442052e-10	0.0	0.0	-1.111870455535788e-09	0.0	3.715496864074997e-11	0.0	1.155631855767806e-11	1.1686612261351283e-10	0.0	-1.0077940020370353e-10
1.1400000000000001	3.773929925391406e-11	0.0	1.105242155633029e-11	1.791076024433476e-11	0.0	-0.0991334187435053	0.0	-2.8735724429537198e-11	0.0	1.0	0.0	-4.3631616363784755e-12	0.0	0.0	-4.999814941957612e-10	0.0	0.0	-1.1201026341911052e-09	0.0	3.773929925381762e-11	0.0	1.1052421556659617e-11	1.1686612261354202e-10	0.0	-1.0077940020366933e-10
1.145	3.8323629866978984e-11	0.0	1.0548524555301331e-11	1.8158538375899768e-11	0.0	-0.09913341874350098	0.0	-2.8762536625272226e-11	0.0	1.0	0.0	-4.436356439057098e-12	0.0	0.0	-5.083690007473171e-10	0.0	0.0	-1.128342493974698e-09	0.0	3.832362986688539e-11	0.0	1.0548524555641365e-11	1.1686612261357079e-10	0.0	-1.0077940020363538e-10
1.1500000000000001	3.8907960480043925e-11	0.0	1.0044627554272348e-11	1.8406316507464785e-11	0.0	-0.09913341874349667	0.0	-2.878934882100726e-11	0.0	1.0	0.0	-4.509551241735723e-12	0.0	0.0	-5.167565072988732e-10	0.0	0.0	-1.1365900348865662e-09	0.0	3.890796047995333e-11	0.0	1.0044627554623263e-11	1.1686612261360062e-10	0.0	-1.007794002036015e-10
1.155	3.949229109310884e-11	0.0	9.540730553243388e-12	1.865409463902979e-11	0.0	-0.09913341874349235	0.0	-2.8816161016742288e-11	0.0	1.0	0.0	-4.5827460444143456e-12	0.0	0.0	-5.251440138504291e-10	0.0	0.0	-1.14484525692671e-09	0.0	3.949229109302139e-11	0.0	9.540730553605354e-12	1.1686612261362732e-10	0.0	-1.007794002035638e-10
1.16	4.007662170617376e-11	0.0	9.036833552214428e-12	1.8901872770594798e-11	0.0	-0.09913341874348805	0.0	-2.884297321247732e-11	0.0	1.0	0.0	-4.6559408470929676e-12	0.0	0.0	-5.335315204019848e-10	0.0	0.0	-1.1531081600951291e-09	0.0	4.007662170608961e-11	0.0	9.036833552587618e-12	1.1686612261366113e-10	0.0	-1.0077940020353287e-10
1.165	4.0660952319238704e-11	0.0	8.532936551185447e-12	1.9149650902159816e-11	0.0	-0.09913341874348373	0.0	-2.886978540821235e-11	0.0	1.0	0.0	-4.729135649771593e-12	0.0	0.0	-5.41919026953541e-10	0.0	0.0	-1.1613787443918238e-09	0.0	4.0660952319157996e-11	0.0	8.53293655157003e-12	1.168661226136901e-10	0.0	-1.007794002034984e-10
1.17	4.1245282932303627e-11	0.0	8.029039550156487e-12	1.939742903372482e-11	0.0	-0.09913341874347942	0.0	-2.8896597603947382e-11	0.0	1.0	0.0	-4.802330452450215e-12	0.0	0.0	-5.503065335050968e-10	0.0	0.0	-1.169657009816794e-09	0.0	4.124528293222651e-11	0.0	8.029039550552634e-12	1.1686612261371908e-10	0.0	-1.0077940020346407e-10
1.175	4.182961354536857e-11	0.0	7.525142549127506e-12	1.9645207165289838e-11	0.0	-0.0991334187434751	0.0	-2.8923409799682414e-11	0.0	1.0	0.0	-4.87552525512884e-12	0.0	0.0	-5.586940400566529e-10	0.0	0.0	-1.1779429563700396e-09	0.0	4.182961354529519e-11	0.0	7.525142549535389e-12	1.1686612261374915e-10	0.0	-1.0077940020342995e-10
1.18	4.241394415843349e-11	0.0	7.021245548098546e-12	1.9892985296854846e-11	0.0	-0.09913341874347079	0.0	-2.8950221995417445e-11	0.0	1.0	0.0	-4.948720057807462e-12	0.0	0.0	-5.670815466082087e-10	0.0	0.0	-1.1862365840515607e-09	0.0	4.2413944158364e-11	0.0	7.021245548518335e-12	1.1686612261377875e-10	0.0	-1.0077940020339575e-10
1.185	4.299827477149843e-11	0.0	6.517348547069564e-12	2.0140763428419863e-11	0.0	-0.09913341874346648	0.0	-2.8977034191152476e-11	0.0	1.0	0.0	-5.021914860486087e-12	0.0	0.0	-5.754690531597649e-10	0.0	0.0	-1.1945378928613573e-09	0.0	4.2998274771432974e-11	0.0	6.517348547501431e-12	1.1686612261380677e-10	0.0	-1.0077940020336153e-10
1.19	4.358260538456335e-11	0.0	6.013451546040604e-12	2.0388541559984868e-11	0.0	-0.09913341874346217	0.0	-2.9003846386887508e-11	0.0	1.0	0.0	-5.095109663164709e-12	0.0	0.0	-5.838565597113207e-10	0.0	0.0	-1.2028468827994294e-09	0.0	4.358260538450207e-11	0.0	6.01345154648472e-12	1.1686612261383704e-10	0.0	-1.0077940020332724e-10
1.195	4.4166935997628295e-11	0.0	5.509554545011622e-12	2.0636319691549886e-11	0.0	-0.09913341874345785	0.0	-2.903065858262254e-11	0.0	1.0	0.0	-5.168304465843335e-12	0.0	0.0	-5.922440662628768e-10	0.0	0.0	-1.211163553865777e-09	0.0	4.416693599757134e-11	0.0	5.509554545468159e-12	1.1686612261386653e-10	0.0	-1.0077940020329292e-10
1.2	4.475126661069321e-11	0.0	5.005657543982663e-12	2.0884097823114894e-11	0.0	-0.09913341874345354	0.0	-2.905747077835757e-11	0.0	1.0	0.0	-5.241499268521957e-12	0.0	0.0	-6.006315728144326e-10	0.0	0.0	-1.2194879060604e-09	0.0	4.4751266610640737e-11	0.0	5.005657544451791e-12	1.1686612261389636e-10	0.0	-1.0077940020325886e-10
1.205	4.533559722375816e-11	0.0	4.5017605429536804e-12	2.113187595467991e-11	0.0	-0.09913341874344923	0.0	-2.9084282974092602e-11	0.0	1.0	0.0	-5.314694071200582e-12	0.0	0.0	-6.090190793659888e-10	0.0	0.0	-1.2278199393832985e-09	0.0	4.5335597223710305e-11	0.0	4.5017605434355705e-12	1.1686612261392567e-10	0.0	-1.007794002032247e-10
1.21	4.5919927836823074e-11	0.0	3.997863541924721e-12	2.1379654086244916e-11	0.0	-0.09913341874344492	0.0	-2.911109516982763e-11	0.0	1.0	0.0	-5.387888873879205e-12	0.0	0.0	-6.174065859175446e-10	0.0	0.0	-1.2361596538344725e-09	0.0	4.5919927836779996e-11	0.0	3.997863542419544e-12	1.1686612261395615e-10	0.0	-1.0077940020319039e-10
1.215	4.650425844988802e-11	0.0	3.493966540895739e-12	2.1627432217809933e-11	0.0	-0.0991334187434406	0.0	-2.9137907365562664e-11	0.0	1.0	0.0	-5.46108367655783e-12	0.0	0.0	-6.257940924691008e-10	0.0	0.0	-1.244507049413922e-09	0.0	4.650425844984986e-11	0.0	3.4939665414036664e-12	1.1686612261398523e-10	0.0	-1.0077940020315621e-10
1.22	4.708858906295294e-11	0.0	2.9900695398667796e-12	2.187521034937494e-11	0.0	-0.09913341874343629	0.0	-2.9164719561297696e-11	0.0	1.0	0.0	-5.534278479236452e-12	0.0	0.0	-6.341815990206566e-10	0.0	0.0	-1.252862126121647e-09	0.0	4.7088589062919844e-11	0.0	2.990069540387982e-12	1.1686612261401291e-10	0.0	-1.0077940020312202e-10
1.225	4.767291967601788e-11	0.0	2.4861725388377974e-12	2.212298848093996e-11	0.0	-0.09913341874343197	0.0	-2.919153175703273e-11	0.0	1.0	0.0	-5.607473281915077e-12	0.0	0.0	-6.425691055722128e-10	0.0	0.0	-1.2612248839576474e-09	0.0	4.7672919675989994e-11	0.0	2.4861725393724465e-12	1.168661226140435e-10	0.0	-1.0077940020308773e-10
1.23	4.82572502890828e-11	0.0	1.982275537808838e-12	2.2370766612504964e-11	0.0	-0.09913341874342767	0.0	-2.921834395276776e-11	0.0	1.0	0.0	-5.680668084593699e-12	0.0	0.0	-6.509566121237685e-10	0.0	0.0	-1.2695953229219234e-09	0.0	4.825725028906028e-11	0.0	1.9822755383571047e-12	1.1686612261407343e-10	0.0	-1.0077940020305347e-10
1.235	4.884158090214774e-11	0.0	1.478378536779856e-12	2.261854474406998e-11	0.0	-0.09913341874342335	0.0	-2.924515614850279e-11	0.0	1.0	0.0	-5.7538628872723245e-12	0.0	0.0	-6.593441186753247e-10	0.0	0.0	-1.2779734430144748e-09	0.0	4.884158090213073e-11	0.0	1.4783785373419115e-12	1.245448389828905e-10	0.0	-1.0486225330428979e-10
1.24	4.9425911515212665e-11	0.0	9.744815357508963e-13	2.286632287563499e-11	0.0	-0.09913341874341904	0.0	-2.9271968344237815e-11	0.0	1.0	0.0	-5.8270576899509465e-12	0.0	0.0	-6.677316252268805e-10	0.0	0.0	-1.2863592442353017e-09	0.0	4.942591151520131e-11	0.0	9.744815363269115e-13	7.298477645337209e-11	0.0	-7.744723351576779e-11
1.245	4.9549519146153095e-11	0.0	7.155557208137498e-13	2.311102129650077e-11	0.0	-0.09913341874348888	0.0	-2.8870907800908736e-11	0.0	1.0	0.0	-5.7976259085463055e-12	0.0	0.0	-6.643589915108054e-10	0.0	0.0	-1.2946301500738186e-09	0.0	4.95495191461448e-11	0.0	7.155557213882889e-13	3.897097508137694e-12	0.0	-4.071259836399899e-11
1.25	4.954166965397657e-11	0.0	5.265270211055606e-13	2.3354840989965774e-11	0.0	-0.09913341874357989	0.0	-2.8347763225482616e-11	0.0	1.0	0.0	-5.738911898943074e-12	0.0	0.0	-6.576308616136939e-10	0.0	0.0	-1.3027511860311002e-09	0.0	4.954166965397053e-11	0.0	5.265270216741912e-13	-3.760850486820006e-12	0.0	-3.6640788022411345e-11
1.2550000000000001	4.953382016180005e-11	0.0	3.3749832139736506e-13	2.3598660683430787e-11	0.0	-0.09913341874367092	0.0	-2.782461865005647e-11	0.0	1.0	0.0	-5.6801978893398395e-12	0.0	0.0	-6.50902731716582e-10	0.0	0.0	-1.3107223521071464e-09	0.0	4.9533820161796215e-11	0.0	3.3749832196008885e-13	-1.569898434866372e-12	0.0	-3.7805739942820015e-11
1.26	4.952597066962353e-11	0.0	1.484696216891727e-13	2.3842480376895794e-11	0.0	-0.09913341874376193	0.0	-2.730147407463035e-11	0.0	1.0	0.0	-5.621483879736608e-12	0.0	0.0	-6.441746018194705e-10	0.0	0.0	-1.3185436483019572e-09	0.0	4.952597066962186e-11	0.0	1.484696222459916e-13	-1.5698984348753114e-12	0.0	-3.7805739942819595e-11
1.2650000000000001	4.9518121177447006e-11	0.0	-4.055907801902289e-14	2.4086300070360808e-11	0.0	-0.09913341874385294	0.0	-2.6778329499204206e-11	0.0	1.0	0.0	-5.562769870133373e-12	0.0	0.0	-6.374464719223587e-10	0.0	0.0	-1.3262150746155325e-09	0.0	4.951812117744746e-11	0.0	-4.0559077468107065e-14	-1.569898434885005e-12	0.0	-3.780573994281923e-11
1.27	4.951027168527048e-11	0.0	-2.2958777772721525e-13	2.433011976382581e-11	0.0	-0.09913341874394395	0.0	-2.6255184923778086e-11	0.0	1.0	0.0	-5.5040558605301416e-12	0.0	0.0	-6.307183420252471e-10	0.0	0.0	-1.3337366310478725e-09	0.0	4.951027168527301e-11	0.0	-2.2958777718220067e-13	-1.5698984348944832e-12	0.0	-3.780573994281885e-11
1.2750000000000001	4.950242219309396e-11	0.0	-4.1861647743541084e-13	2.4573939457290828e-11	0.0	-0.09913341874403496	0.0	-2.5732040348351947e-11	0.0	1.0	0.0	-5.445341850926907e-12	0.0	0.0	-6.239902121281354e-10	0.0	0.0	-1.341108317598977e-09	0.0	4.9502422193098515e-11	0.0	-4.186164768962956e-13	-1.5698984349030995e-12	0.0	-3.7805739942818594e-11
1.28	4.9494572700917435e-11	0.0	-6.076451771436032e-13	2.4817759150755832e-11	0.0	-0.09913341874412597	0.0	-2.520889577292582e-11	0.0	1.0	0.0	-5.386627841323675e-12	0.0	0.0	-6.172620822310237e-10	0.0	0.0	-1.3483301342688463e-09	0.0	4.949457270092398e-11	0.0	-6.076451766103855e-13	-1.5698984349107467e-12	0.0	-3.7805739942817314e-11
1.285	4.948672320874091e-11	0.0	-7.966738768517923e-13	2.5061578844220835e-11	0.0	-0.09913341874421698	0.0	-2.4685751197499702e-11	0.0	1.0	0.0	-5.327913831720443e-12	0.0	0.0	-6.105339523339122e-10	0.0	0.0	-1.35540208105748e-09	0.0	4.94867232087494e-11	0.0	-7.966738763244703e-13	-1.5698984349200094e-12	0.0	-3.780573994281743e-11
1.29	4.9478873716564394e-11	0.0	-9.85702576559988e-13	2.5305398537685852e-11	0.0	-0.099133418744308	0.0	-2.4162606622073563e-11	0.0	1.0	0.0	-5.269199822117209e-12	0.0	0.0	-6.038058224368004e-10	0.0	0.0	-1.3623241579648783e-09	0.0	4.947887371657478e-11	0.0	-9.857025760385598e-13	-1.5698984349290567e-12	0.0	-3.7805739942817456e-11
1.295	4.947102422438787e-11	0.0	-1.1747312762681803e-12	2.5549218231150856e-11	0.0	-0.09913341874439902	0.0	-2.3639462046647437e-11	0.0	1.0	0.0	-5.210485812513977e-12	0.0	0.0	-5.970776925396888e-10	0.0	0.0	-1.3690963649910412e-09	0.0	4.947102422440011e-11	0.0	-1.1747312757526442e-12	-1.5698984349379962e-12	0.0	-3.7805739942817004e-11
1.3	4.946317473221135e-11	0.0	-1.3637599759763759e-12	2.579303792461587e-11	0.0	-0.09913341874449003	0.0	-2.3116317471221298e-11	0.0	1.0	0.0	-5.1517718029107426e-12	0.0	0.0	-5.90349562642577e-10	0.0	0.0	-1.3757187021359688e-09	0.0	4.9463174732225396e-11	0.0	-1.3637599754667298e-12	-1.5698984349468282e-12	0.0	-3.780573994281663e-11
1.305	4.9455325240034823e-11	0.0	-1.5527886756845682e-12	2.6036857618080876e-11	0.0	-0.09913341874458104	0.0	-2.259317289579518e-11	0.0	1.0	0.0	-5.093057793307511e-12	0.0	0.0	-5.836214327454655e-10	0.0	0.0	-1.382191169399661e-09	0.0	4.9455325240050643e-11	0.0	-1.5527886751808106e-12	-1.5698984349555524e-12	0.0	-3.780573994281633e-11
1.31	4.94474757478583e-11	0.0	-1.7418173753927638e-12	2.628067731154589e-11	0.0	-0.09913341874467205	0.0	-2.2070028320369033e-11	0.0	1.0	0.0	-5.0343437837042765e-12	0.0	0.0	-5.768933028483536e-10	0.0	0.0	-1.3885137667821177e-09	0.0	4.944747574787584e-11	0.0	-1.7418173748948926e-12	-1.5698984349658921e-12	0.0	-3.7805739942815466e-11
1.315	4.9439626255681776e-11	0.0	-1.930846075100953e-12	2.6524497005010893e-11	0.0	-0.09913341874476306	0.0	-2.1546883744942914e-11	0.0	1.0	0.0	-4.975629774101045e-12	0.0	0.0	-5.701651729512421e-10	0.0	0.0	-1.394686494283339e-09	0.0	4.943962625570099e-11	0.0	-1.9308460746089663e-12	-1.5698984349742932e-12	0.0	-3.780573994281559e-11
1.32	4.943177676350525e-11	0.0	-2.1198747748091518e-12	2.676831669847591e-11	0.0	-0.09913341874485407	0.0	-2.1023739169516768e-11	0.0	1.0	0.0	-4.9169157644978104e-12	0.0	0.0	-5.634370430541303e-10	0.0	0.0	-1.400709351903325e-09	0.0	4.94317767635261e-11	0.0	-2.119874774323048e-12	-1.5698984349809708e-12	0.0	-3.7805739942815175e-11
1.325	4.9423927271328735e-11	0.0	-2.308903474517341e-12	2.7012136391940913e-11	0.0	-0.09913341874494509	0.0	-2.050059459409065e-11	0.0	1.0	0.0	-4.858201754894578e-12	0.0	0.0	-5.567089131570187e-10	0.0	0.0	-1.4065823396420756e-09	0.0	4.942392727135117e-11	0.0	-2.308903474037118e-12	-1.5698984349909874e-12	0.0	-3.7805739942814807e-11
1.33	4.941607777915221e-11	0.0	-2.4979321742255397e-12	2.7255956085405926e-11	0.0	-0.0991334187450361	0.0	-1.997745001866451e-11	0.0	1.0	0.0	-4.7994877452913435e-12	0.0	0.0	-5.499807832599069e-10	0.0	0.0	-1.4123054574995907e-09	0.0	4.941607777917619e-11	0.0	-2.497932173751196e-12	-1.5698984350016503e-12	0.0	-3.780573994281441e-11
1.335	4.940822828697569e-11	0.0	-2.686960873933729e-12	2.7499775778870933e-11	0.0	-0.09913341874512711	0.0	-1.9454305443238384e-11	0.0	1.0	0.0	-4.740773735688112e-12	0.0	0.0	-5.432526533627953e-10	0.0	0.0	-1.4178787054758704e-09	0.0	4.940822828700116e-11	0.0	-2.6869608734652623e-12	-1.569898435009513e-12	0.0	-3.7805739942814044e-11
1.34	4.9400378794799164e-11	0.0	-2.8759895736419277e-12	2.7743595472335947e-11	0.0	-0.09913341874521812	0.0	-1.8931160867812245e-11	0.0	1.0	0.0	-4.6820597260848775e-12	0.0	0.0	-5.365245234656835e-10	0.0	0.0	-1.4233020835709147e-09	0.0	4.940037879482609e-11	0.0	-2.8759895731793366e-12	-1.569898435017483e-12	0.0	-3.780573994281369e-11
1.345	4.939252930262264e-11	0.0	-3.0650182733501168e-12	2.798741516580095e-11	0.0	-0.09913341874530913	0.0	-1.8408016292386125e-11	0.0	1.0	0.0	-4.623345716481646e-12	0.0	0.0	-5.29796393568572e-10	0.0	0.0	-1.4285755917847237e-09	0.0	4.9392529302650984e-11	0.0	-3.065018272893399e-12	-1.5698984350269613e-12	0.0	-3.780573994281331e-11
1.35	4.938467981044612e-11	0.0	-3.2540469730583156e-12	2.8231234859265967e-11	0.0	-0.09913341874540015	0.0	-1.788487171695998e-11	0.0	1.0	0.0	-4.564631706878411e-12	0.0	0.0	-5.230682636714601e-10	0.0	0.0	-1.4336992301172971e-09	0.0	4.9384679810475824e-11	0.0	-3.25404697260747e-12	-1.5698984350363317e-12	0.0	-3.780573994281295e-11
1.355	4.93768303182696e-11	0.0	-3.4430756727665047e-12	2.847505455273097e-11	0.0	-0.09913341874549116	0.0	-1.736172714153386e-11	0.0	1.0	0.0	-4.5059176972751796e-12	0.0	0.0	-5.163401337743486e-10	0.0	0.0	-1.4386729985686352e-09	0.0	4.9376830318300625e-11	0.0	-3.443075672321529e-12	-1.5698984350437634e-12	0.0	-3.7805739942812616e-11
1.36	4.9368980826093076e-11	0.0	-3.6321043724747036e-12	2.8718874246195987e-11	0.0	-0.09913341874558218	0.0	-1.6838582566107715e-11	0.0	1.0	0.0	-4.447203687671945e-12	0.0	0.0	-5.096120038772368e-10	0.0	0.0	-1.4434968971387379e-09	0.0	4.936898082612538e-11	0.0	-3.632104372035596e-12	-1.56989843505378e-12	0.0	-3.7805739942812254e-11
1.365	4.936113133391655e-11	0.0	-3.821133072182893e-12	2.896269393966099e-11	0.0	-0.09913341874567319	0.0	-1.6315437990681595e-11	0.0	1.0	0.0	-4.3884896780687135e-12	0.0	0.0	-5.028838739801253e-10	0.0	0.0	-1.4481709258276052e-09	0.0	4.936113133395009e-11	0.0	-3.821133071749651e-12	-1.5698984350627195e-12	0.0	-3.780573994281164e-11
1.37	4.935328184174003e-11	0.0	-4.01016177189109e-12	2.9206513633126004e-11	0.0	-0.0991334187457642	0.0	-1.5792293415255456e-11	0.0	1.0	0.0	-4.3297756684654784e-12	0.0	0.0	-4.961557440830134e-10	0.0	0.0	-1.4526950846352372e-09	0.0	4.935328184177476e-11	0.0	-4.010161771463713e-12	-1.5698984350715515e-12	0.0	-3.7805739942811537e-11
1.375	4.9345432349563505e-11	0.0	-4.199190471599281e-12	2.945033332659101e-11	0.0	-0.09913341874585521	0.0	-1.526914883982933e-11	0.0	1.0	0.0	-4.271061658862247e-12	0.0	0.0	-4.894276141859018e-10	0.0	0.0	-1.4570693735616336e-09	0.0	4.934543234959938e-11	0.0	-4.199190471177766e-12	-1.5698984350802757e-12	0.0	-3.7805739942811026e-11
1.3800000000000001	4.933758285738698e-11	0.0	-4.388219171307478e-12	2.9694153020056024e-11	0.0	-0.09913341874594622	0.0	-1.474600426440319e-11	0.0	1.0	0.0	-4.212347649259012e-12	0.0	0.0	-4.8269948428879e-10	0.0	0.0	-1.4612937926067947e-09	0.0	4.933758285742395e-11	0.0	-4.388219170891824e-12	-1.569898435088892e-12	0.0	-3.780573994281073e-11
1.385	4.9329733365210464e-11	0.0	-4.5772478710156686e-12	2.993797271352103e-11	0.0	-0.09913341874603723	0.0	-1.4222859688977072e-11	0.0	1.0	0.0	-4.1536336396557805e-12	0.0	0.0	-4.759713543916785e-10	0.0	0.0	-1.4653683417707204e-09	0.0	4.932973336524849e-11	0.0	-4.577247870605873e-12	-1.5698984350982624e-12	0.0	-3.78057399428105e-11
1.3900000000000001	4.932188387303394e-11	0.0	-4.766276570723866e-12	3.0181792406986044e-11	0.0	-0.09913341874612824	0.0	-1.3699715113550927e-11	0.0	1.0	0.0	-4.094919630052546e-12	0.0	0.0	-4.692432244945666e-10	0.0	0.0	-1.4692930210534108e-09	0.0	4.932188387307297e-11	0.0	-4.766276570319928e-12	-1.5698984351066635e-12	0.0	-3.780573994280981e-11
1.395	4.9314034380857417e-11	0.0	-4.955305270432055e-12	3.042561210045105e-11	0.0	-0.09913341874621927	0.0	-1.3176570538124807e-11	0.0	1.0	0.0	-4.0362056204493145e-12	0.0	0.0	-4.6251509459745513e-10	0.0	0.0	-1.4730678304548656e-09	0.0	4.931403438089742e-11	0.0	-4.955305270033972e-12	-1.5698984351148493e-12	0.0	-3.780573994280964e-11
1.4000000000000001	4.930618488868089e-11	0.0	-5.144333970140254e-12	3.066943179391606e-11	0.0	-0.09913341874631028	0.0	-1.2653425962698662e-11	0.0	1.0	0.0	-3.97749161084608e-12	0.0	0.0	-4.557869647003433e-10	0.0	0.0	-1.476692769975085e-09	0.0	4.930618488872182e-11	0.0	-5.144333969748024e-12	-1.5698984351256198e-12	0.0	-3.7805739942809436e-11
1.405	4.929833539650437e-11	0.0	-5.333362669848443e-12	3.091325148738107e-11	0.0	-0.09913341874640129	0.0	-1.2130281387272542e-11	0.0	1.0	0.0	-3.918777601242848e-12	0.0	0.0	-4.4905883480323175e-10	0.0	0.0	-1.4801678396140691e-09	0.0	4.929833539654617e-11	0.0	-5.333362669462065e-12	-1.5698984351344516e-12	0.0	-3.780573994280777e-11
1.41	4.9290485904327846e-11	0.0	-5.522391369556634e-12	3.115707118084607e-11	0.0	-0.0991334187464923	0.0	-1.1607136811846423e-11	0.0	1.0	0.0	-3.8600635916396166e-12	0.0	0.0	-4.423307049061202e-10	0.0	0.0	-1.4834930393718179e-09	0.0	4.929048590437048e-11	0.0	-5.522391369176105e-12	-1.5698984351414525e-12	0.0	-3.78057399428086e-11
1.415	4.928263641215133e-11	0.0	-5.711420069264831e-12	3.140089087431109e-11	0.0	-0.09913341874658331	0.0	-1.1083992236420277e-11	0.0	1.0	0.0	-3.8013495820363815e-12	0.0	0.0	-4.3560257500900833e-10	0.0	0.0	-1.486668369248331e-09	0.0	4.928263641219475e-11	0.0	-5.7114200688901495e-12	-1.5698984351510384e-12	0.0	-3.780573994280817e-11
1.42	4.9274786919974805e-11	0.0	-5.9004487689730216e-12	3.164471056777609e-11	0.0	-0.09913341874667432	0.0	-1.0560847660994158e-11	0.0	1.0	0.0	-3.74263557243315e-12	0.0	0.0	-4.288744451118968e-10	0.0	0.0	-1.4896938292436088e-09	0.0	4.927478692001897e-11	0.0	-5.900448768604186e-12	-1.5698984351604088e-12	0.0	-3.7805739942807834e-11
1.425	4.926693742779828e-11	0.0	-6.089477468681219e-12	3.188853026124111e-11	0.0	-0.09913341874676534	0.0	-1.0037703085568019e-11	0.0	1.0	0.0	-3.6839215628299154e-12	0.0	0.0	-4.2214631521478495e-10	0.0	0.0	-1.4925694193576513e-09	0.0	4.926693742784315e-11	0.0	-6.089477468318228e-12	-1.569898435168702e-12	0.0	-3.780573994280715e-11
1.43	4.925908793562176e-11	0.0	-6.278506168389408e-12	3.2132349954706106e-11	0.0	-0.09913341874685636	0.0	-9.514558510141893e-12	0.0	1.0	0.0	-3.6252075532266836e-12	0.0	0.0	-4.154181853176734e-10	0.0	0.0	-1.4952951395904584e-09	0.0	4.925908793566728e-11	0.0	-6.278506168032259e-12	-1.5698984351778572e-12	0.0	-3.780573994280719e-11
1.435	4.9251238443445234e-11	0.0	-6.467534868097608e-12	3.237616964817113e-11	0.0	-0.09913341874694737	0.0	-8.991413934715747e-12	0.0	1.0	0.0	-3.5664935436234485e-12	0.0	0.0	-4.086900554205615e-10	0.0	0.0	-1.4978709899420301e-09	0.0	4.925123844349137e-11	0.0	-6.4675348677463e-12	-1.5698984351867966e-12	0.0	-3.780573994280688e-11
1.44	4.924338895126871e-11	0.0	-6.6565635678057975e-12	3.2619989341636126e-11	0.0	-0.09913341874703838	0.0	-8.468269359289628e-12	0.0	1.0	0.0	-3.507779534020217e-12	0.0	0.0	-4.0196192552345004e-10	0.0	0.0	-1.5002969704123663e-09	0.0	4.924338895131541e-11	0.0	-6.6565635674603276e-12	-1.5698984351957362e-12	0.0	-3.780573994280607e-11
1.445	4.923553945909219e-11	0.0	-6.845592267513995e-12	3.286380903510115e-11	0.0	-0.09913341874712939	0.0	-7.945124783863483e-12	0.0	1.0	0.0	-3.4490655244169825e-12	0.0	0.0	-3.9523379562633815e-10	0.0	0.0	-1.5025730810014671e-09	0.0	4.9235539459139413e-11	0.0	-6.845592267174361e-12	-1.5698984352035987e-12	0.0	-3.7805739942805966e-11
1.45	4.922768996691567e-11	0.0	-7.0346209672221854e-12	3.3107628728566146e-11	0.0	-0.0991334187472204	0.0	-7.421980208437363e-12	0.0	1.0	0.0	-3.3903515148137506e-12	0.0	0.0	-3.885056657292266e-10	0.0	0.0	-1.5046993217093326e-09	0.0	4.922768996696337e-11	0.0	-7.034620966888387e-12	-1.5698984352140463e-12	0.0	-3.780573994280564e-11
1.455	4.9219840474739146e-11	0.0	-7.223649666930383e-12	3.335144842203116e-11	0.0	-0.09913341874731141	0.0	-6.898835633011224e-12	0.0	1.0	0.0	-3.3316375052105164e-12	0.0	0.0	-3.8177753583211483e-10	0.0	0.0	-1.5066756925359627e-09	0.0	4.921984047478728e-11	0.0	-7.223649666602418e-12	-1.5698984352224474e-12	0.0	-3.78057399428052e-11
1.46	4.921199098256262e-11	0.0	-7.412678366638573e-12	3.3595268115496167e-11	0.0	-0.09913341874740243	0.0	-6.375691057585098e-12	0.0	1.0	0.0	-3.2729234956072846e-12	0.0	0.0	-3.750494059350033e-10	0.0	0.0	-1.5085021934813573e-09	0.0	4.921199098261114e-11	0.0	-7.41267836631644e-12	-1.5698984352308484e-12	0.0	-3.780573994280485e-11
1.465	4.92041414903861e-11	0.0	-7.60170706634677e-12	3.3839087808961183e-11	0.0	-0.09913341874749344	0.0	-5.852546482158959e-12	0.0	1.0	0.0	-3.21420948600405e-12	0.0	0.0	-3.683212760378914e-10	0.0	0.0	-1.5101788245455165e-09	0.0	4.9204141490434967e-11	0.0	-7.601707066030466e-12	-1.5698984352400033e-12	0.0	-3.780573994280424e-11
1.47	4.9196291998209575e-11	0.0	-7.79073576605496e-12	3.408290750242619e-11	0.0	-0.09913341874758445	0.0	-5.329401906732836e-12	0.0	1.0	0.0	-3.155495476400818e-12	0.0	0.0	-3.6159314614077987e-10	0.0	0.0	-1.5117055857284403e-09	0.0	4.919629199825874e-11	0.0	-7.790735765744483e-12	-1.569898435248189e-12	0.0	-3.7805739942804144e-11
1.475	4.918844250603306e-11	0.0	-7.979764465763159e-12	3.4326727195891204e-11	0.0	-0.09913341874767546	0.0	-4.806257331306694e-12	0.0	1.0	0.0	-3.096781466797584e-12	0.0	0.0	-3.548650162436681e-10	0.0	0.0	-1.5130824770301288e-09	0.0	4.918844250608248e-11	0.0	-7.979764465458507e-12	-1.569898435257021e-12	0.0	-3.780573994280358e-11
1.48	4.9180593013856534e-11	0.0	-8.168793165471348e-12	3.457054688935621e-11	0.0	-0.09913341874776647	0.0	-4.283112755880575e-12	0.0	1.0	0.0	-3.038067457194352e-12	0.0	0.0	-3.4813688634655654e-10	0.0	0.0	-1.5143094984505817e-09	0.0	4.918059301390617e-11	0.0	-8.168793165172519e-12	-1.569898435267576e-12	0.0	-3.7805739942803174e-11
1.485	4.917274352168001e-11	0.0	-8.357821865179546e-12	3.4814366582821224e-11	0.0	-0.09913341874785749	0.0	-3.7599681804544325e-12	0.0	1.0	0.0	-2.9793534475911178e-12	0.0	0.0	-3.414087564494447e-10	0.0	0.0	-1.5153866499897993e-09	0.0	4.917274352172981e-11	0.0	-8.35782186488654e-12	-1.5698984352769464e-12	0.0	-3.780573994280312e-11
1.49	4.9164894029503486e-11	0.0	-8.546850564887736e-12	3.505818627628623e-11	0.0	-0.0991334187479485	0.0	-3.2368236050283098e-12	0.0	1.0	0.0	-2.9206394379878855e-12	0.0	0.0	-3.346806265523331e-10	0.0	0.0	-1.5163139316477815e-09	0.0	4.916489402955341e-11	0.0	-8.54685056460055e-12	-1.5698984352837318e-12	0.0	-3.7805739942802425e-11
1.495	4.915704453732696e-11	0.0	-8.735879264595933e-12	3.5302005969751244e-11	0.0	-0.09913341874803952	0.0	-2.7136790296021676e-12	0.0	1.0	0.0	-2.8619254283846513e-12	0.0	0.0	-3.2795249665522133e-10	0.0	0.0	-1.5170913434245283e-09	0.0	4.915704453737697e-11	0.0	-8.735879264314565e-12	-1.5698984352931022e-12	0.0	-3.78057399428021e-11
1.5	4.914919504515044e-11	0.0	-8.924907964304124e-12	3.554582566321625e-11	0.0	-0.09913341874813053	0.0	-2.190534454176048e-12	0.0	1.0	0.0	-2.8032114187814195e-12	0.0	0.0	-3.212243667581098e-10	0.0	0.0	-1.5177188853200398e-09	0.0	4.914919504520048e-11	0.0	-8.924907964028572e-12	-1.5698984353022574e-12	0.0	-3.7805739942801804e-11
1.5050000000000001	4.914134555297392e-11	0.0	-9.11393666401232e-12	3.578964535668126e-11	0.0	-0.09913341874822154	0.0	-1.667389878749906e-12	0.0	1.0	0.0	-2.7444974091781852e-12	0.0	0.0	-3.1449623686099795e-10	0.0	0.0	-1.5181965573343157e-09	0.0	4.914134555302395e-11	0.0	-9.113936663742584e-12	-1.5698984353103353e-12	0.0	-3.780573994280159e-11
1.51	4.91334960607974e-11	0.0	-9.302965363720511e-12	3.603346505014627e-11	0.0	-0.09913341874831255	0.0	-1.1442453033237832e-12	0.0	1.0	0.0	-2.685783399574953e-12	0.0	0.0	-3.0776810696388637e-10	0.0	0.0	-1.5185243594673563e-09	0.0	4.913349606084737e-11	0.0	-9.302965363456588e-12	-1.5698984353201365e-12	0.0	-3.7805739942801236e-11
1.5150000000000001	4.9125646568620874e-11	0.0	-9.491994063428709e-12	3.627728474361128e-11	0.0	-0.09913341874840356	0.0	-6.21100727897641e-13	0.0	1.0	0.0	-2.6270693899717187e-12	0.0	0.0	-3.010399770667746e-10	0.0	0.0	-1.5187022917191615e-09	0.0	4.9125646568670744e-11	0.0	-9.491994063170596e-12	-1.5698984353297223e-12	0.0	-3.780573994280075e-11
1.52	4.911779707644435e-11	0.0	-9.6810227631369e-12	3.652110443707629e-11	0.0	-0.09913341874849457	0.0	-9.795615247152148e-14	0.0	1.0	0.0	-2.568355380368487e-12	0.0	0.0	-2.9431184716966304e-10	0.0	0.0	-1.5187303540897314e-09	0.0	4.911779707649408e-11	0.0	-9.681022762884595e-12	-1.5698984353374772e-12	0.0	-3.780573994280035e-11
1.5250000000000001	4.910994758426783e-11	0.0	-9.870051462845097e-12	3.67649241305413e-11	0.0	-0.09913341874858558	0.0	4.2518842295462067e-13	0.0	1.0	0.0	-2.5096413707652527e-12	0.0	0.0	-2.875837172725512e-10	0.0	0.0	-1.5186085465790657e-09	0.0	4.910994758431737e-11	0.0	-9.8700514625986e-12	-1.5698984353469552e-12	0.0	-3.7805739942799814e-11
1.53	4.9102098092091303e-11	0.0	-1.0059080162553286e-11	3.70087438240063e-11	0.0	-0.09913341874867661	0.0	9.483329983807434e-13	0.0	1.0	0.0	-2.450927361162021e-12	0.0	0.0	-2.8085558737543967e-10	0.0	0.0	-1.5183368691871646e-09	0.0	4.910209809214061e-11	0.0	-1.0059080162312594e-11	-1.5698984353553563e-12	0.0	-3.780573994279954e-11
1.5350000000000001	4.9094248599914786e-11	0.0	-1.0248108862261485e-11	3.725256351747132e-11	0.0	-0.09913341874876762	0.0	1.4714775738068856e-12	0.0	1.0	0.0	-2.392213351558786e-12	0.0	0.0	-2.7412745747832783e-10	0.0	0.0	-1.5179153219140282e-09	0.0	4.9094248599963816e-11	0.0	-1.0248108862026596e-11	-1.5698984353636497e-12	0.0	-3.7805739942799594e-11
1.54	4.908639910773826e-11	0.0	-1.0437137561969674e-11	3.749638321093632e-11	0.0	-0.09913341874885863	0.0	1.994622149233005e-12	0.0	1.0	0.0	-2.3334993419555544e-12	0.0	0.0	-2.6739932758121624e-10	0.0	0.0	-1.5173439047596564e-09	0.0	4.9086399107786976e-11	0.0	-1.0437137561740588e-11	-1.5698984353735585e-12	0.0	-3.780573994279795e-11
1.545	4.907854961556174e-11	0.0	-1.0626166261677864e-11	3.7740202904401326e-11	0.0	-0.09913341874894964	0.0	2.517766724659128e-12	0.0	1.0	0.0	-2.2747853323523225e-12	0.0	0.0	-2.606711976841047e-10	0.0	0.0	-1.5166226177240493e-09	0.0	4.9078549615610084e-11	0.0	-1.0626166261454577e-11	-1.5698984353823905e-12	0.0	-3.78057399427986e-11
1.55	4.9070700123385215e-11	0.0	-1.0815194961386062e-11	3.798402259786634e-11	0.0	-0.09913341874904065	0.0	3.04091130008527e-12	0.0	1.0	0.0	-2.2160713227490883e-12	0.0	0.0	-2.539430677869929e-10	0.0	0.0	-1.5157514608072066e-09	0.0	4.907070012343315e-11	0.0	-1.0815194961168573e-11	-1.5698984353911147e-12	0.0	-3.7805739942798224e-11
1.555	4.906285063120869e-11	0.0	-1.100422366109425e-11	3.8227842291331346e-11	0.0	-0.09913341874913166	0.0	3.5640558755113896e-12	0.0	1.0	0.0	-2.157357313145856e-12	0.0	0.0	-2.4721493788988133e-10	0.0	0.0	-1.5147304340091286e-09	0.0	4.906285063125617e-11	0.0	-1.1004223660882559e-11	-1.5698984354007003e-12	0.0	-3.780573994279779e-11
1.56	4.905500113903217e-11	0.0	-1.119325236080245e-11	3.847166198479636e-11	0.0	-0.09913341874922267	0.0	4.087200450937532e-12	0.0	1.0	0.0	-2.098643303542622e-12	0.0	0.0	-2.404868079927695e-10	0.0	0.0	-1.5135595373298152e-09	0.0	4.905500113907915e-11	0.0	-1.1193252360596551e-11	-1.5698984354074858e-12	0.0	-3.780573994279747e-11
1.565	4.904715164685565e-11	0.0	-1.1382281060510639e-11	3.8715481678261366e-11	0.0	-0.0991334187493137	0.0	4.6103450263636545e-12	0.0	1.0	0.0	-2.03992929393939e-12	0.0	0.0	-2.3375867809565796e-10	0.0	0.0	-1.5122387707692664e-09	0.0	4.904715164690209e-11	0.0	-1.1382281060310534e-11	-1.5698984354168562e-12	0.0	-3.78057399427972e-11
1.57	4.903930215467913e-11	0.0	-1.1571309760218838e-11	3.895930137172638e-11	0.0	-0.0991334187494047	0.0	5.133489601789797e-12	0.0	1.0	0.0	-1.9812152843361557e-12	0.0	0.0	-2.2703054819854617e-10	0.0	0.0	-1.5107681343274821e-09	0.0	4.903930215472498e-11	0.0	-1.1571309760024523e-11	-1.5698984354268728e-12	0.0	-3.780573994279661e-11
1.575	4.9031452662502603e-11	0.0	-1.1760338459927027e-11	3.9203121065191386e-11	0.0	-0.09913341874949572	0.0	5.656634177215916e-12	0.0	1.0	0.0	-1.922501274732924e-12	0.0	0.0	-2.2030241830143464e-10	0.0	0.0	-1.5091476280044624e-09	0.0	4.903145266254782e-11	0.0	-1.17603384597385e-11	-1.5698984354349508e-12	0.0	-3.7805739942796286e-11
1.58	4.902360317032608e-11	0.0	-1.1949367159635226e-11	3.9446940758656397e-11	0.0	-0.09913341874958673	0.0	6.179778752642058e-12	0.0	1.0	0.0	-1.8637872651296893e-12	0.0	0.0	-2.1357428840432277e-10	0.0	0.0	-1.5073772518002074e-09	0.0	4.9023603170370625e-11	0.0	-1.1949367159452486e-11	-1.5698984354447521e-12	0.0	-3.7805739942796066e-11
1.585	4.9015753678149556e-11	0.0	-1.2138395859343415e-11	3.9690760452121407e-11	0.0	-0.09913341874967774	0.0	6.702923328068181e-12	0.0	1.0	0.0	-1.8050732555264574e-12	0.0	0.0	-2.0684615850721124e-10	0.0	0.0	-1.505457005714717e-09	0.0	4.901575367819338e-11	0.0	-1.2138395859166461e-11	-1.569898435453584e-12	0.0	-3.780573994279523e-11
1.59	4.900790418597303e-11	0.0	-1.2327424559051612e-11	3.993458014558642e-11	0.0	-0.09913341874976875	0.0	7.226067903494323e-12	0.0	1.0	0.0	-1.7463592459232232e-12	0.0	0.0	-2.0011802861009942e-10	0.0	0.0	-1.503386889747991e-09	0.0	4.900790418601609e-11	0.0	-1.232742455888044e-11	-1.5698984354613388e-12	0.0	-3.780573994279518e-11
1.595	4.9000054693796515e-11	0.0	-1.2516453258759803e-11	4.017839983905143e-11	0.0	-0.09913341874985976	0.0	7.749212478920443e-12	0.0	1.0	0.0	-1.6876452363199912e-12	0.0	0.0	-1.9338989871298786e-10	0.0	0.0	-1.5011669039000298e-09	0.0	4.900005469383876e-11	0.0	-1.2516453258594413e-11	-1.5698984354708168e-12	0.0	-3.7805739942794935e-11
1.6	4.899220520161999e-11	0.0	-1.2705481958468e-11	4.042221953251644e-11	0.0	-0.09913341874995078	0.0	8.272357054346585e-12	0.0	1.0	0.0	-1.628931226716757e-12	0.0	0.0	-1.8666176881587604e-10	0.0	0.0	-1.498797048170833e-09	0.0	4.899220520166138e-11	0.0	-1.270548195830839e-11	-1.5698984354800796e-12	0.0	-3.780573994279456e-11
1.605	4.898435570944347e-11	0.0	-1.289451065817619e-11	4.066603922598144e-11	0.0	-0.0991334187500418	0.0	8.795501629772708e-12	0.0	1.0	0.0	-1.5702172171135249e-12	0.0	0.0	-1.7993363891876449e-10	0.0	0.0	-1.496277322560401e-09	0.0	4.898435570948396e-11	0.0	-1.289451065802236e-11	-1.5698984354892345e-12	0.0	-3.780573994279429e-11
1.61	4.8976506217266944e-11	0.0	-1.3083539357884388e-11	4.090985891944646e-11	0.0	-0.0991334187501328	0.0	9.31864620519885e-12	0.0	1.0	0.0	-1.5115032075102906e-12	0.0	0.0	-1.7320550902165267e-10	0.0	0.0	-1.4936077270687337e-09	0.0	4.8976506217306494e-11	0.0	-1.3083539357736332e-11	-1.5698984354974203e-12	0.0	-3.780573994279386e-11
1.615	4.896865672509042e-11	0.0	-1.3272568057592579e-11	4.115367861291146e-11	0.0	-0.09913341875022381	0.0	9.841790780624971e-12	0.0	1.0	0.0	-1.4527891979070586e-12	0.0	0.0	-1.664773791245411e-10	0.0	0.0	-1.4907882616958308e-09	0.0	4.896865672512899e-11	0.0	-1.3272568057450297e-11	-1.5698984355063597e-12	0.0	-3.7805739942793106e-11
1.62	4.8960807232913897e-11	0.0	-1.3461596757300774e-11	4.139749830637648e-11	0.0	-0.09913341875031483	0.0	1.0364935356051113e-11	0.0	1.0	0.0	-1.3940751883038244e-12	0.0	0.0	-1.597492492274293e-10	0.0	0.0	-1.4878189264416925e-09	0.0	4.896080723295143e-11	0.0	-1.3461596757164263e-11	-1.5698984355151917e-12	0.0	-3.7805739942792835e-11
1.625	4.895295774073738e-11	0.0	-1.3650625457008965e-11	4.164131799984148e-11	0.0	-0.09913341875040584	0.0	1.0888079931477234e-11	0.0	1.0	0.0	-1.3353611787005923e-12	0.0	0.0	-1.5302111933031774e-10	0.0	0.0	-1.4846997213063188e-09	0.0	4.8952957740773834e-11	0.0	-1.3650625456878225e-11	-1.569898435523808e-12	0.0	-3.780573994279287e-11
1.6300000000000001	4.8945108248560856e-11	0.0	-1.3839654156717162e-11	4.18851376933065e-11	0.0	-0.09913341875049685	0.0	1.1411224506903376e-11	0.0	1.0	0.0	-1.276647169097358e-12	0.0	0.0	-1.4629298943320592e-10	0.0	0.0	-1.4814306462897098e-09	0.0	4.894510824859619e-11	0.0	-1.3839654156592192e-11	-1.5698984355332863e-12	0.0	-3.780573994279227e-11
1.635	4.893725875638433e-11	0.0	-1.4028682856425353e-11	4.21289573867715e-11	0.0	-0.09913341875058787	0.0	1.1934369082329498e-11	0.0	1.0	0.0	-1.2179331594941263e-12	0.0	0.0	-1.3956485953609436e-10	0.0	0.0	-1.4780117013918653e-09	0.0	4.8937258756418505e-11	0.0	-1.4028682856306148e-11	-1.5698984355416874e-12	0.0	-3.7805739942791814e-11
1.6400000000000001	4.892940926420781e-11	0.0	-1.421771155613355e-11	4.237277708023652e-11	0.0	-0.09913341875067888	0.0	1.2457513657755641e-11	0.0	1.0	0.0	-1.1592191498908916e-12	0.0	0.0	-1.3283672963898252e-10	0.0	0.0	-1.4744428866127853e-09	0.0	4.892940926424077e-11	0.0	-1.421771155602011e-11	-1.5698984355508423e-12	0.0	-3.780573994279122e-11
1.645	4.8921559772031285e-11	0.0	-1.4406740255841739e-11	4.261659677370152e-11	0.0	-0.09913341875076989	0.0	1.2980658233181761e-11	0.0	1.0	0.0	-1.10050514028766e-12	0.0	0.0	-1.2610859974187099e-10	0.0	0.0	-1.47072420195247e-09	0.0	4.8921559772062996e-11	0.0	-1.4406740255734062e-11	-1.5698984355598896e-12	0.0	-3.780573994279154e-11
1.6500000000000001	4.891371027985476e-11	0.0	-1.4595768955549938e-11	4.286041646716654e-11	0.0	-0.0991334187508609	0.0	1.3503802808607905e-11	0.0	1.0	0.0	-1.0417911306844253e-12	0.0	0.0	-1.1938046984475914e-10	0.0	0.0	-1.4668556474109194e-09	0.0	4.891371027988517e-11	0.0	-1.4595768955448023e-11	-1.5698984355696907e-12	0.0	-3.780573994279087e-11
1.655	4.890586078767824e-11	0.0	-1.4784797655258127e-11	4.310423616063154e-11	0.0	-0.09913341875095191	0.0	1.4026947384034024e-11	0.0	1.0	0.0	-9.830771210811937e-13	0.0	0.0	-1.1265233994764762e-10	0.0	0.0	-1.4628372229881332e-09	0.0	4.8905860787707305e-11	0.0	-1.478479765516197e-11	-1.5698984355767993e-12	0.0	-3.780573994279047e-11
1.6600000000000001	4.889801129550172e-11	0.0	-1.4973826354966326e-11	4.334805585409656e-11	0.0	-0.09913341875104292	0.0	1.4550091959460168e-11	0.0	1.0	0.0	-9.24363111477959e-13	0.0	0.0	-1.0592421005053575e-10	0.0	0.0	-1.4586689286841117e-09	0.0	4.8898011295529405e-11	0.0	-1.4973826354875927e-11	-1.5698984355855235e-12	0.0	-3.7805739942790224e-11
1.665	4.8890161803325197e-11	0.0	-1.5162855054674515e-11	4.3591875547561556e-11	0.0	-0.09913341875113393	0.0	1.5073236534886288e-11	0.0	1.0	0.0	-8.656491018747274e-13	0.0	0.0	-9.919608015342425e-11	0.0	0.0	-1.4543507644988547e-09	0.0	4.8890161803351447e-11	0.0	-1.516285505458987e-11	-1.5698984355958633e-12	0.0	-3.7805739942788447e-11
1.67	4.888231231114867e-11	0.0	-1.5351883754382704e-11	4.3835695241026566e-11	0.0	-0.09913341875122496	0.0	1.5596381110312407e-11	0.0	1.0	0.0	-8.069350922714955e-13	0.0	0.0	-9.246795025631269e-11	0.0	0.0	-1.4498827304323625e-09	0.0	4.888231231117345e-11	0.0	-1.5351883754303815e-11	-1.5698984356041567e-12	0.0	-3.7805739942789636e-11
1.675	4.887446281897215e-11	0.0	-1.5540912454090903e-11	4.4079514934491576e-11	0.0	-0.09913341875131597	0.0	1.6119525685738552e-11	0.0	1.0	0.0	-7.482210826682611e-13	0.0	0.0	-8.573982035920086e-11	0.0	0.0	-1.4452648264846348e-09	0.0	4.887446281899541e-11	0.0	-1.5540912454017765e-11	-1.5698984356134194e-12	0.0	-3.780573994278909e-11
1.68	4.8866613326795626e-11	0.0	-1.5729941153799092e-11	4.432333462795658e-11	0.0	-0.09913341875140698	0.0	1.6642670261164672e-11	0.0	1.0	0.0	-6.895070730650292e-13	0.0	0.0	-7.901169046208931e-11	0.0	0.0	-1.4404970526556717e-09	0.0	4.886661332681732e-11	0.0	-1.5729941153731706e-11	-1.5698984356224667e-12	0.0	-3.7805739942788343e-11
1.685	4.88587638346191e-11	0.0	-1.591896985350729e-11	4.4567154321421596e-11	0.0	-0.09913341875149799	0.0	1.7165814836590817e-11	0.0	1.0	0.0	-6.307930634617948e-13	0.0	0.0	-7.228356056497748e-11	0.0	0.0	-1.4355794089454731e-09	0.0	4.885876383463919e-11	0.0	-1.591896985344565e-11	-1.5698984356305447e-12	0.0	-3.7805739942788124e-11
1.69	4.8850914342442585e-11	0.0	-1.610799855321548e-11	4.48109740148866e-11	0.0	-0.099133418751589	0.0	1.7688959412016937e-11	0.0	1.0	0.0	-5.72079053858563e-13	0.0	0.0	-6.555543066786594e-11	0.0	0.0	-1.4305118953540392e-09	0.0	4.8850914342461015e-11	0.0	-1.6107998553159587e-11	-1.5698984356393765e-12	0.0	-3.780573994278818e-11
1.695	4.884306485026606e-11	0.0	-1.629702725292368e-11	4.5054793708351616e-11	0.0	-0.09913341875168001	0.0	1.821210398744308e-11	0.0	1.0	0.0	-5.133650442553285e-13	0.0	0.0	-5.882730077075411e-11	0.0	0.0	-1.42529451188137e-09	0.0	4.884306485028279e-11	0.0	-1.629702725287353e-11	-1.5698984356481006e-12	0.0	-3.7805739942787426e-11
1.7	4.883521535808954e-11	0.0	-1.6486055952631868e-11	4.529861340181662e-11	0.0	-0.09913341875177102	0.0	1.87352485628692e-11	0.0	1.0	0.0	-4.546510346520966e-13	0.0	0.0	-5.209917087364256e-11	0.0	0.0	-1.4199272585274651e-09	0.0	4.883521535810453e-11	0.0	-1.6486055952587462e-11	-1.569898435657471e-12	0.0	-3.780573994278699e-11
1.705	4.8827365865913014e-11	0.0	-1.6675084652340067e-11	4.5542433095281637e-11	0.0	-0.09913341875186205	0.0	1.925839313829534e-11	0.0	1.0	0.0	-3.9593702504886225e-13	0.0	0.0	-4.537104097653073e-11	0.0	0.0	-1.414410135292325e-09	0.0	4.8827365865926216e-11	0.0	-1.6675084652301403e-11	-1.5698984356668415e-12	0.0	-3.780573994278689e-11
1.71	4.881951637373649e-11	0.0	-1.6864113352048256e-11	4.578625278874664e-11	0.0	-0.09913341875195306	0.0	1.9781537713721463e-11	0.0	1.0	0.0	-3.372230154456304e-13	0.0	0.0	-3.864291107941919e-11	0.0	0.0	-1.4087431421759494e-09	0.0	4.8819516373747864e-11	0.0	-1.686411335201533e-11	-1.5698984356751349e-12	0.0	-3.7805739942786133e-11
1.715	4.8811666881559966e-11	0.0	-1.7053142051756455e-11	4.603007248221166e-11	0.0	-0.09913341875204407	0.0	2.0304682289147606e-11	0.0	1.0	0.0	-2.7850900584239597e-13	0.0	0.0	-3.1914781182307353e-11	0.0	0.0	-1.4029262791783386e-09	0.0	4.8811666881569466e-11	0.0	-1.7053142051729264e-11	-1.569898435683428e-12	0.0	-3.780573994278597e-11
1.72	4.880381738938345e-11	0.0	-1.7242170751464644e-11	4.627389217567666e-11	0.0	-0.09913341875213508	0.0	2.0827826864573725e-11	0.0	1.0	0.0	-2.197949962391641e-13	0.0	0.0	-2.5186651285195808e-11	0.0	0.0	-1.3969595462994923e-09	0.0	4.880381738939103e-11	0.0	-1.724217075144319e-11	-1.5698984356923677e-12	0.0	-3.7805739942786023e-11
1.725	4.8795967897206925e-11	0.0	-1.7431199451172843e-11	4.651771186914168e-11	0.0	-0.09913341875222609	0.0	2.135097143999987e-11	0.0	1.0	0.0	-1.610809866359297e-13	0.0	0.0	-1.8458521388083975e-11	0.0	0.0	-1.3908429435394105e-09	0.0	4.879596789721254e-11	0.0	-1.7431199451157123e-11	-1.5698984357020613e-12	0.0	-3.780573994278576e-11
1.73	4.87881184050304e-11	0.0	-1.7620228150881032e-11	4.676153156260668e-11	0.0	-0.0991334187523171	0.0	2.187411601542599e-11	0.0	1.0	0.0	-1.0236697703269785e-13	0.0	0.0	-1.1730391490972436e-11	0.0	0.0	-1.3845764708980933e-09	0.0	4.878811840503401e-11	0.0	-1.7620228150871044e-11	-1.5698984357106778e-12	0.0	-3.780573994278489e-11
1.735	4.878026891285388e-11	0.0	-1.780925685058923e-11	4.70053512560717e-11	0.0	-0.09913341875240812	0.0	2.2397260590852132e-11	0.0	1.0	0.0	-4.36529674294634e-14	0.0	0.0	-5.0022615938605975e-12	0.0	0.0	-1.3781601283755408e-09	0.0	4.8780268912855436e-11	0.0	-1.7809256850584972e-11	-1.5698984357192941e-12	0.0	-3.780573994278463e-11
1.74	4.8772419420677354e-11	0.0	-1.799828555029742e-11	4.72491709495367e-11	0.0	-0.09913341875249913	0.0	2.2920405166278252e-11	0.0	1.0	0.0	1.5061042173768427e-14	0.0	0.0	1.7258683032509398e-12	0.0	0.0	-1.371593915971753e-09	0.0	4.877241942067681e-11	0.0	-1.799828555029889e-11	-1.3607259164469186e-12	0.0	-7.826959986338191e-10
1.745	4.876456992850083e-11	0.0	-1.818731425000562e-11	4.749299064300171e-11	0.0	-0.09913341875259014	0.0	2.3443549741704397e-11	0.0	1.0	0.0	7.377505177700287e-14	0.0	0.0	8.453998200362777e-12	0.0	0.0	-1.3648778336867295e-09	0.0	4.876456992849815e-11	0.0	-1.8187314250012814e-11	-2.8066488621054325e-12	0.0	4.3664216801534825e-09
1.75	4.87441700851567e-11	0.0	2.631707257174611e-11	4.7736420912963284e-11	0.0	-0.09913341875180418	0.0	2.1237896292140485e-11	0.0	1.0	0.0	1.1035037052789966e-13	0.0	0.0	1.2645220997906954e-11	0.0	0.0	-1.3587936245703485e-09	0.0	4.874417008516251e-11	0.0	2.6317072571735354e-11	-4.398849322476963e-12	0.0	1.003645241534036e-08
1.7550000000000001	4.872267316044566e-11	0.0	7.47283073164942e-11	4.797981714170452e-11	0.0	-0.09913341875094155	0.0	1.8793706611415443e-11	0.0	1.0	0.0	1.4499044898971177e-13	0.0	0.0	1.661468159363467e-11	0.0	0.0	-1.3534096242191424e-09	0.0	4.8722673160467325e-11	0.0	7.472830731648007e-11	-4.317669627803319e-12	0.0	9.747361080998631e-09
1.76	4.8701176235734614e-11	0.0	1.2313954206124012e-10	4.8223213370445744e-11	0.0	-0.0991334187500789	0.0	1.6349516930690513e-11	0.0	1.0	0.0	1.7963052745152237e-13	0.0	0.0	2.0584142189362213e-11	0.0	0.0	-1.348725832633111e-09	0.0	4.8701176235778855e-11	0.0	1.2313954206122262e-10	-4.391061940659156e-12	0.0	1.1793534447520105e-08
1.7650000000000001	4.867967931102357e-11	0.0	1.7155077680598822e-10	4.846660959918698e-11	0.0	-0.09913341874921627	0.0	1.3905327249965476e-11	0.0	1.0	0.0	2.142706059133345e-13	0.0	0.0	2.455360278508993e-11	0.0	0.0	-1.3447422498122548e-09	0.0	4.8679679311097086e-11	0.0	1.7155077680596736e-10	-3.751209969095129e-12	0.0	-2.9420198576196752e-09
1.77	4.8663683006602623e-11	0.0	9.328476163644684e-11	4.8709699258942784e-11	0.0	-0.09913341874991462	0.0	8.992494579584497e-12	0.0	1.0	0.0	2.0100750705636768e-13	0.0	0.0	2.3033763609551963e-11	0.0	0.0	-1.3421660898787325e-09	0.0	4.8663683006640124e-11	0.0	9.328476163642727e-11	-3.096261555721969e-12	0.0	-1.802523964163843e-08
1.7750000000000001	4.8647799925498535e-11	0.0	1.241125537531598e-11	4.895278260836349e-11	0.0	-0.0991334187506451	0.0	4.028848013194402e-12	0.0	1.0	0.0	1.8675838183553558e-13	0.0	0.0	2.140093413573777e-11	0.0	0.0	-1.341011909941454e-09	0.0	4.864779992550317e-11	0.0	1.241125537529781e-11	-3.2310636553337824e-12	0.0	-1.630932613284698e-08
1.78	4.8631916844394447e-11	0.0	-6.846225088581127e-11	4.919586595778418e-11	0.0	-0.09913341875137559	0.0	-9.347985531954734e-13	0.0	1.0	0.0	1.7250925661470412e-13	0.0	0.0	1.976810466192365e-11	0.0	0.0	-1.341279710000419e-09	0.0	4.8631916844370827e-11	0.0	-6.846225088582805e-11	-4.188871682026633e-12	0.0	-1.781284505362947e-08
1.7850000000000001	4.86194138323072e-11	0.0	-1.4386575540124128e-10	4.943905741277028e-11	0.0	-0.09913341875201818	0.0	-5.888441564123953e-12	0.0	1.0	0.0	1.5454114580404508e-13	0.0	0.0	1.7709110831375348e-11	0.0	0.0	-1.3429666242480876e-09	0.0	4.861941383226273e-11	0.0	-1.438657554012563e-10	5.657306210875304e-12	0.0	-1.878670351479304e-09
1.79	4.868792656164659e-11	0.0	-8.816062135823274e-11	4.968484001382161e-11	0.0	-0.09913341875055401	0.0	-1.0602312706910307e-11	0.0	1.0	0.0	4.7433915817780207e-14	0.0	0.0	5.435526364275285e-12	0.0	0.0	-1.346003963104007e-09	0.0	4.8687926561638227e-11	0.0	-8.816062135823736e-11	1.50528082311688e-11	0.0	1.332617078457787e-08
1.795	4.875643929098598e-11	0.0	-3.245548731522421e-11	4.993062261487294e-11	0.0	-0.09913341874908983	0.0	-1.5316183849696658e-11	0.0	1.0	0.0	-5.967331416848467e-14	0.0	0.0	-6.838058102824778e-12	0.0	0.0	-1.3503917265681773e-09	0.0	4.875643929098985e-11	0.0	-3.245548731521839e-11	1.3702545867939003e-11	0.0	1.1141026808604082e-08
1.8	4.882495202032537e-11	0.0	2.3249646727786758e-11	5.017640521592429e-11	0.0	-0.09913341874762566	0.0	-2.0030054992483216e-11	0.0	1.0	0.0	-1.667805441547542e-13	0.0	0.0	-1.9111642569925374e-11	0.0	0.0	-1.3561299146405986e-09	0.0	4.882495202031761e-11	0.0	2.3249646727803043e-11	1.3702545863164511e-11	0.0	1.1141026808604042e-08
1.805	4.889346474966475e-11	0.0	7.895478077079527e-11	5.0422187816975615e-11	0.0	-0.09913341874616148	0.0	-2.474392613526957e-11	0.0	1.0	0.0	-2.7388777414101906e-13	0.0	0.0	-3.1385227037025436e-11	0.0	0.0	-1.3632185273212705e-09	0.0	4.88934647496215e-11	0.0	7.895478077082205e-11	1.370254585839196e-11	0.0	1.114102680860405e-08
1.81	4.896197747900414e-11	0.0	1.3465991481380626e-10	5.0667970418026956e-11	0.0	-0.0991334187446973	0.0	-2.945779727805613e-11	0.0	1.0	0.0	-3.8099500412728863e-13	0.0	0.0	-4.365881150412604e-11	0.0	0.0	-1.3716575646101934e-09	0.0	4.896197747890153e-11	0.0	1.3465991481384356e-10	1.3702545853618976e-11	0.0	1.114102680860406e-08
1.815	4.903049020834353e-11	0.0	1.9036504885681477e-10	5.091375301907829e-11	0.0	-0.09913341874323313	0.0	-3.417166842084248e-11	0.0	1.0	0.0	-4.881022341135535e-13	0.0	0.0	-5.59323959712261e-11	0.0	0.0	-1.3814470265073672e-09	0.0	4.903049020815769e-11	0.0	1.9036504885686264e-10	1.3596549224641685e-11	0.0	1.1524481803791631e-08
1.82	4.909900293768292e-11	0.0	2.4607018289982576e-10	5.115953562012963e-11	0.0	-0.09913341874176895	0.0	-3.888553956362904e-11	0.0	1.0	0.0	-5.952094640998231e-13	0.0	0.0	-6.82059804383267e-11	0.0	0.0	-1.392586913012792e-09	0.0	4.909900293738999e-11	0.0	2.4607018289988423e-10	1.3784056822794282e-11	0.0	1.0846151454394802e-08
1.825	4.9173875464437174e-11	0.0	2.787680172315813e-10	5.140600198018573e-11	0.0	-0.09913341874085899	0.0	-4.238001631238645e-11	0.0	1.0	0.0	-6.931985495947468e-13	0.0	0.0	-7.943470251273816e-11	0.0	0.0	-1.4047278933647686e-09	0.0	4.917387546405069e-11	0.0	2.787680172316495e-10	1.84073145523022e-11	0.0	-5.8790158303310605e-09
1.83	4.928201611696206e-11	0.0	1.9111457454837705e-10	5.165604508633665e-11	0.0	-0.09913341874284816	0.0	-3.94958360980026e-11	0.0	1.0	0.0	-7.434905847051423e-13	0.0	0.0	-8.519774522263698e-11	0.0	0.0	-1.4160426169485486e-09	0.0	4.928201611667788e-11	0.0	1.9111457454845033e-10	2.2182599293014217e-11	0.0	-1.9536543153555458e-08
1.835	4.9390156769486946e-11	0.0	1.0346113186517662e-10	5.190608819248756e-11	0.0	-0.09913341874483735	0.0	-3.661165588361888e-11	0.0	1.0	0.0	-7.937826198155356e-13	0.0	0.0	-9.096078793253557e-11	0.0	0.0	-1.426531083764132e-09	0.0	4.939015676932269e-11	0.0	1.0346113186525504e-10	2.1628130530727285e-11	0.0	-1.7530688536639434e-08
1.84	4.9498297422011835e-11	0.0	1.5807689181972418e-11	5.2156131298638484e-11	0.0	-0.09913341874682652	0.0	-3.3727475669235036e-11	0.0	1.0	0.0	-8.440746549259311e-13	0.0	0.0	-9.672383064243439e-11	0.0	0.0	-1.4361932938115188e-09	0.0	4.949829742198515e-11	0.0	1.580768918205598e-11	2.1628130534252926e-11	0.0	-1.7530688536639424e-08
1.845	4.960643807453671e-11	0.0	-7.184575350122796e-11	5.2406174404789393e-11	0.0	-0.09913341874881569	0.0	-3.084329545485132e-11	0.0	1.0	0.0	-8.943666900363244e-13	0.0	0.0	-1.0248687335233297e-10	0.0	0.0	-1.4450292470907089e-09	0.0	4.960643807466522e-11	0.0	-7.184575350113923e-11	2.1628130537779323e-11	0.0	-1.7530688536639427e-08
1.85	4.97145787270616e-11	0.0	-1.5949919618443222e-10	5.2656217510940316e-11	0.0	-0.09913341875080488	0.0	-2.7959115240467475e-11	0.0	1.0	0.0	-9.4465872514672e-13	0.0	0.0	-1.082499160622318e-10	0.0	0.0	-1.4530389436017024e-09	0.0	4.9714578727362946e-11	0.0	-1.5949919618433828e-10	2.1628130541307765e-11	0.0	-1.753068853663942e-08
1.855	4.982271937958648e-11	0.0	-2.471526388676326e-10	5.2906260617091226e-11	0.0	-0.09913341875279405	0.0	-2.5074935026083757e-11	0.0	1.0	0.0	-9.949507602571133e-13	0.0	0.0	-1.1401295877213038e-10	0.0	0.0	-1.4602223833444993e-09	0.0	4.9822719380078294e-11	0.0	-2.4715263886753343e-10	2.7772874627028175e-11	0.0	-1.815002638200195e-08
1.86	4.993086003211137e-11	0.0	-3.3480608155083685e-10	5.315630372324214e-11	0.0	-0.09913341875478322	0.0	-2.219075481169991e-11	0.0	1.0	0.0	-1.0452427953675088e-12	0.0	0.0	-1.1977600148202922e-10	0.0	0.0	-1.4665795663190995e-09	0.0	4.993086003281128e-11	0.0	-3.3480608155073247e-10	4.881486073975284e-13	0.0	-1.5399958486785152e-08
1.865	4.9670316040133766e-11	0.0	-3.8529925351223987e-10	5.339208418586852e-11	0.0	-0.0991334187562439	0.0	1.296459348300103e-12	0.0	1.0	0.0	-6.441526274149564e-13	0.0	0.0	-7.381445382628001e-11	0.0	0.0	-1.4662081580742602e-09	0.0	4.967031604063015e-11	0.0	-3.8529925351217587e-10	-1.5262443783426542e-10	0.0	3.248558699886879e-11
1.87	4.846606309595557e-11	0.0	-3.4067460413428033e-10	5.359135706789228e-11	0.0	-0.09913341875635175	0.0	7.75205256308185e-11	0.0	1.0	0.0	9.123244877464866e-13	0.0	0.0	1.0454468538861694e-10	0.0	0.0	-1.444000163352852e-09	0.0	4.846606309533396e-11	0.0	-3.406746041343688e-10	-2.5657907158799704e-10	0.0	1.051022689788266e-08
1.875	4.726181015177743e-11	0.0	-2.9604995475632276e-10	5.379062994991602e-11	0.0	-0.09913341875645958	0.0	1.537445919133335e-10	0.0	1.0	0.0	2.4688016029078616e-12	0.0	0.0	2.829038246035061e-10	0.0	0.0	-1.3999555821548762e-09	0.0	4.7261810150315653e-11	0.0	-2.9604995475655613e-10	-2.408505889758842e-10	0.0	8.924929875563473e-09
1.8800000000000001	4.605755720759923e-11	0.0	-2.5142530537836327e-10	5.398990283193977e-11	0.0	-0.09913341875656742	0.0	2.2996865819585189e-10	0.0	1.0	0.0	4.0252787180693045e-12	0.0	0.0	4.612629638184031e-10	0.0	0.0	-1.3340744144803315e-09	0.0	4.605755720557512e-11	0.0	-2.5142530537873405e-10	-2.4085058892031795e-10	0.0	8.924929875564964e-09
1.885	4.4853304263421094e-11	0.0	-2.0680065600040572e-10	5.4189175713963515e-11	0.0	-0.09913341875667527	0.0	3.061927244783669e-10	0.0	1.0	0.0	5.5817558332306796e-12	0.0	0.0	6.396221030332923e-10	0.0	0.0	-1.2463566603292192e-09	0.0	4.485330426111247e-11	0.0	-2.0680065600090645e-10	-2.408505888647524e-10	0.0	8.924929875566472e-09
1.8900000000000001	4.3649051319242894e-11	0.0	-1.6217600662244618e-10	5.438844859598727e-11	0.0	-0.09913341875678311	0.0	3.8241679076088527e-10	0.0	1.0	0.0	7.1382329483921225e-12	0.0	0.0	8.179812422481892e-10	0.0	0.0	-1.136802319701538e-09	0.0	4.3649051316927596e-11	0.0	-1.6217600662306933e-10	-2.4085058880918696e-10	0.0	8.924929875567975e-09
1.895	4.244479837506475e-11	0.0	-1.1755135724448864e-10	5.4587721478011015e-11	0.0	-0.09913341875689095	0.0	4.586408570434003e-10	0.0	1.0	0.0	8.694710063553498e-12	0.0	0.0	9.963403814630783e-10	0.0	0.0	-1.0054113925972892e-09	0.0	4.24447983730206e-11	0.0	-1.175513572452267e-10	-2.408505887536206e-10	0.0	8.924929875569467e-09
1.9000000000000001	4.124054543088656e-11	0.0	-7.292670786652912e-11	5.4786994360034765e-11	0.0	-0.0991334187569988	0.0	5.348649233259187e-10	0.0	1.0	0.0	1.025118717871494e-11	0.0	0.0	1.1746995206779752e-09	0.0	0.0	-8.521838790164716e-10	0.0	4.124054542939139e-11	0.0	-7.292670786737466e-11	-2.488871512538193e-10	0.0	9.892046284405326e-09
1.905	4.0036292486708416e-11	0.0	-2.8302058488571574e-11	5.498626724205851e-11	0.0	-0.09913341875710663	0.0	6.110889896084336e-10	0.0	1.0	0.0	1.1807664293876316e-11	0.0	0.0	1.3530586598928645e-09	0.0	0.0	-6.771197789590862e-10	0.0	4.0036292486040054e-11	0.0	-2.8302058489517044e-11	-1.9405939953010112e-10	0.0	3.294098725777787e-09
1.9100000000000001	3.931423329726912e-11	0.0	-4.1704393640809704e-11	5.516275974487209e-11	0.0	-0.09913341875806339	0.0	5.327651282545242e-10	0.0	1.0	0.0	1.1470655580870313e-11	0.0	0.0	1.3144403060641055e-09	0.0	0.0	-5.24493812355435e-10	0.0	3.9314233296312366e-11	0.0	-4.170439364171162e-11	-1.2780615802522703e-10	0.0	-4.678787258541433e-09
1.915	3.867786528160717e-11	0.0	-6.541876698575441e-11	5.533520392185311e-11	0.0	-0.099133418759171	0.0	4.2697638749505015e-10	0.0	1.0	0.0	1.07971534530247e-11	0.0	0.0	1.2372626472268372e-09	0.0	0.0	-4.02174087579391e-10	0.0	3.867786528019449e-11	0.0	-6.541876698658963e-11	-1.2584541699141898e-10	0.0	-4.9147419721871224e-09
1.92	3.804149726594522e-11	0.0	-8.913314033069917e-11	5.550764809883413e-11	0.0	-0.09913341876027862	0.0	3.2118764673557595e-10	0.0	1.0	0.0	1.0123651325179086e-11	0.0	0.0	1.1600849883895692e-09	0.0	0.0	-3.1016060463095435e-10	0.0	3.804149726414051e-11	0.0	-8.91331403314694e-11	-1.272736032044115e-10	0.0	-4.7428746689762475e-09
1.925	3.740512925028324e-11	0.0	-1.1284751367564496e-10	5.568009227581515e-11	0.0	-0.09913341876138625	0.0	2.153989059760971e-10	0.0	1.0	0.0	9.450149197333444e-12	0.0	0.0	1.0829073295522978e-09	0.0	0.0	-2.4845336351012633e-10	0.0	3.7405129248150386e-11	0.0	-1.1284751367635193e-10	-1.2727360319163361e-10	0.0	-4.742874668976574e-09
1.93	3.676876123462129e-11	0.0	-1.3656188702058972e-10	5.585253645279617e-11	0.0	-0.09913341876249386	0.0	1.096101652166229e-10	0.0	1.0	0.0	8.776647069487828e-12	0.0	0.0	1.0057296707150294e-09	0.0	0.0	-2.1705236421690559e-10	0.0	3.676876123222418e-11	0.0	-1.3656188702123512e-10	-1.2727360317885497e-10	0.0	-4.742874668976911e-09
1.935	3.6132393218959316e-11	0.0	-1.6027626036553548e-10	5.6024980629777194e-11	0.0	-0.09913341876360147	0.0	3.821424457144042e-12	0.0	1.0	0.0	8.103144941642186e-12	0.0	0.0	9.28552011877758e-10	0.0	0.0	-2.1595760675129346e-10	0.0	3.6132393216361834e-11	0.0	-1.6027626036612105e-10	-1.2727360316607792e-10	0.0	-4.742874668977257e-09
1.94	3.549602520329737e-11	0.0	-1.8399063371048024e-10	5.619742480675821e-11	0.0	-0.0991334187647091	0.0	-1.0196731630233016e-10	0.0	1.0	0.0	7.429642813796572e-12	0.0	0.0	8.513743530404899e-10	0.0	0.0	-2.451690911132886e-10	0.0	3.54960252005634e-11	0.0	-1.839906337110077e-10	-1.245522583429214e-10	0.0	-5.7644249833461835e-09
1.945	3.485965718763539e-11	0.0	-2.0770500705542603e-10	5.6369868983739235e-11	0.0	-0.09913341876581672	0.0	-2.07756057061809e-10	0.0	1.0	0.0	6.756140685950928e-12	0.0	0.0	7.741966942032183e-10	0.0	0.0	-3.046868173028924e-10	0.0	3.485965718482882e-11	0.0	-2.0770500705589706e-10	-1.398014518464069e-10	0.0	-4.0116043795276964e-11
1.95	3.4060008482832395e-11	0.0	-1.7012636153821228e-10	5.653327368207908e-11	0.0	-0.09913341876584092	0.0	-2.0598981493469702e-10	0.0	1.0	0.0	6.750976630527856e-12	0.0	0.0	7.736049370413909e-10	0.0	0.0	-3.6369855239508755e-10	0.0	3.406000848053536e-11	0.0	-1.7012636153867216e-10	-1.854524066076262e-10	0.0	1.70965389839863e-08
1.955	3.303234656764308e-11	0.0	-4.695512035921273e-11	5.668405520644755e-11	0.0	-0.09913341876435214	0.0	-5.402848807330658e-11	0.0	1.0	0.0	7.67911283441956e-12	0.0	0.0	8.799615116339675e-10	0.0	0.0	-3.791765740954544e-10	0.0	3.303234656692193e-11	0.0	-4.695512035972005e-11	-2.0933260283990514e-10	0.0	2.606079149681889e-08
1.96	3.200468465245381e-11	0.0	7.621612081978136e-11	5.6834836730816015e-11	0.0	-0.09913341876286336	0.0	9.793283878807709e-11	0.0	1.0	0.0	8.607249038311224e-12	0.0	0.0	9.863180862265395e-10	0.0	0.0	-3.511208824039949e-10	0.0	3.200468465376584e-11	0.0	7.621612081923042e-11	-2.1489199860873676e-10	0.0	2.4924144282303447e-08
1.965	3.0977022737264496e-11	0.0	1.9938736199878093e-10	5.698561825518448e-11	0.0	-0.09913341876137459	0.0	2.498941656494676e-10	0.0	1.0	0.0	9.535385242202928e-12	0.0	0.0	1.092674660819116e-09	0.0	0.0	-2.795314773207071e-10	0.0	3.097702274106697e-11	0.0	1.9938736199819017e-10	-1.8649391568324724e-10	0.0	2.4044568462363597e-08
1.97	3.051093778476071e-11	0.0	3.0516484038694874e-10	5.714387528223936e-11	0.0	-0.09913341875972961	0.0	2.2713906268320563e-10	0.0	1.0	0.0	8.944577238304478e-12	0.0	0.0	1.0249730505672564e-09	0.0	0.0	-2.144609290491814e-10	0.0	3.051093779021985e-11	0.0	3.051648403864029e-10	1.3885800189527759e-10	0.0	1.3967420597252174e-08
1.975	3.227200659795544e-11	0.0	3.419605284359943e-10	5.7331779348017e-11	0.0	-0.0991334187574652	0.0	-4.885225882284492e-10	0.0	1.0	0.0	2.3298000600143777e-12	0.0	0.0	2.669754210962995e-10	0.0	0.0	-3.5441234156066906e-10	0.0	3.227200659954884e-11	0.0	3.419605284358439e-10	3.8933299112092674e-10	0.0	6.209441104245703e-09
1.98	3.40330754111501e-11	0.0	3.7875621648503827e-10	5.7519683413794636e-11	0.0	-0.09913341875520079	0.0	-1.2041842391400725e-09	0.0	1.0	0.0	-4.2849771182754305e-12	0.0	0.0	-4.910222083746239e-10	0.0	0.0	-6.99385714855161e-10	0.0	3.403307540790418e-11	0.0	3.7875621648532995e-10	3.522137615737168e-10	0.0	7.359137609902028e-09
1.985	3.579414422434484e-11	0.0	4.155519045340839e-10	5.7707587479572284e-11	0.0	-0.09913341875293638	0.0	-1.9198458900517276e-09	0.0	1.0	0.0	-1.0899754296565531e-11	0.0	0.0	-1.2490198378455808e-09	0.0	0.0	-1.2493810489326663e-09	0.0	3.579414421528601e-11	0.0	4.155519045348642e-10	3.5074572593981215e-10	0.0	1.2216524877459001e-08
1.99	3.75552130375395e-11	0.0	4.523475925831278e-10	5.789549154534992e-11	0.0	-0.09913341875067197	0.0	-2.6355075409633506e-09	0.0	1.0	0.0	-1.751453147485534e-11	0.0	0.0	-2.007017467316504e-09	0.0	0.0	-2.004398343793176e-09	0.0	3.755521302169419e-11	0.0	4.523475925844433e-10	2.3692611888604603e-07	0.0	-2.421711369929636e-08
1.995	3.94043639606987e-11	0.0	1.9770004457977226e-10	5.808985535175559e-11	0.0	-0.0991334187494069	0.0	4.849943193836857e-10	0.0	1.0	0.0	-1.8256201276322376e-11	0.0	0.0	-2.092006566149238e-09	0.0	0.0	-1.8654577058506505e-09	0.0	3.9404363953480196e-11	0.0	1.97700044581211e-10	4.0383289318747375e-05	0.0	-4.183453924421795e-08
2.0	-1.4152652299846696e-08	0.0	8.896815922873844e-11	4.8600740653763e-11	0.0	-0.09913341874879383	0.0	1.7595112983933858e-09	0.0	1.0	0.0	-1.4656341129477543e-11	0.0	0.0	-1.6794929796461305e-09	0.0	0.0	-1.3613948488330273e-09	0.0	-1.4152652299849304e-08	0.0	8.896815881388624e-11	-0.0001709276603262138	0.0	-1.6060288515542843e-08
2.005	-2.5364832250835943e-06	0.0	1.858882659171499e-11	-7.3008770523146085e-09	0.0	-0.09913341874852098	0.0	3.5156530083168652e-09	0.0	1.0	0.0	-7.405574435962058e-12	0.0	0.0	-8.486163201012021e-10	0.0	0.0	-3.542344507878888e-10	0.0	-2.5364832250835948e-06	0.0	1.8588789023484332e-11	-0.000960702019946441	0.0	-1.0321732164498624e-08
2.0100000000000002	-1.0036483860794537e-05	0.0	-1.6925431032340845e-11	-4.33888755390177e-08	0.0	-0.09913341874848515	0.0	1.1518541195057435e-08	0.0	1.0	0.0	1.4451651859575289e-11	0.0	0.0	1.6560373170921037e-09	0.0	0.0	2.9455845323339445e-09	0.0	-1.0036483860794537e-05	0.0	-1.6925140944799543e-11	-0.001999628224784429	0.0	-4.498057045524734e-09
2.015	-2.253648906680708e-05	0.0	-3.014584010670159e-11	-1.2977642547494777e-07	0.0	-0.0991334187485782	0.0	3.282331994833395e-08	0.0	1.0	0.0	7.579903714426803e-11	0.0	0.0	8.685929839043836e-09	0.0	0.0	1.2348773045569439e-08	0.0	-2.2536489066807084e-05	0.0	-3.014242361835784e-11	-0.0030000019210083863	0.0	-1.2641115535015572e-09
2.02	-4.003650589902201e-05	0.0	-3.101607459996326e-11	-2.912902355996361e-07	0.0	-0.09913341874871823	0.0	7.674038057905361e-08	0.0	1.0	0.0	2.242329867822672e-10	0.0	0.0	2.569520754047337e-08	0.0	0.0	3.433327267260684e-08	0.0	-4.003650589902202e-05	0.0	-3.099811958936713e-11	-0.004000005030667864	0.0	1.4104619504207794e-09
2.025	-6.253654427040029e-05	0.0	-1.821231529227046e-11	-5.468738997660328e-07	0.0	-0.09913341874885671	0.0	1.48922517209176e-07	0.0	1.0	0.0	5.114479066104419e-10	0.0	0.0	5.860761297915879e-08	0.0	0.0	7.699643122535763e-08	0.0	-6.25365442704003e-05	0.0	-1.8148346922962966e-11	-0.0050000110500885535	0.0	2.909256761580809e-09
2.0300000000000002	-9.003662364946843e-05	0.0	-5.7837791159887806e-12	-9.2412747360144e-07	0.0	-0.09913341874896137	0.0	2.5415526862647905e-07	0.0	1.0	0.0	1.01922252113777e-09	0.0	0.0	1.167942976917551e-07	0.0	0.0	1.4980655239191238e-07	0.0	-9.003662364946844e-05	0.0	-5.600244406887293e-12	-0.006000021355583073	0.0	1.6265794363077385e-09
2.035	-0.00012253676806506526	0.0	-1.964645065288432e-12	-1.451744936655675e-06	0.0	-0.09913341874900887	0.0	3.966429304025641e-07	0.0	1.0	0.0	1.8354377180974755e-09	0.0	0.0	2.1032566961221582e-07	0.0	0.0	2.634363818207532e-07	0.0	-0.00012253676806506526	0.0	-1.514827853367666e-12	-0.007007991365135276	0.0	8.176014998635678e-10
2.04	-0.00016003701492135742	0.0	3.4984159706446195e-12	-2.154584180675022e-06	0.0	-0.0991334187490356	0.0	5.755381073863495e-07	0.0	1.0	0.0	3.051952758448968e-09	0.0	0.0	3.497280246648709e-07	0.0	0.0	4.2831590433167807e-07	0.0	-0.0001600370149213574	0.0	4.47526678893097e-12	-0.008625272221698869	0.0	7.676502342634929e-10
2.045	-0.00020206019253739537	0.0	1.1466032362071942e-11	-3.0590015691063093e-06	0.0	-0.09913341874899792	0.0	1.3268997369058059e-06	0.0	1.0	0.0	4.7847630585110814e-09	0.0	0.0	5.482934584455846e-07	0.0	0.0	8.084446781402881e-07	0.0	-0.00020206019253739526	0.0	1.3399652651769074e-11	-0.005022631072366775	0.0	5.998943639050923e-09
2.05	-0.00020870768612618167	0.0	4.78111330755574e-11	-4.091992862929803e-06	0.0	-0.09913341874883289	0.0	3.0726287671294545e-05	0.0	0.999999999999999	0.0	4.7543655126437446e-08	0.0	0.0	5.448101562740775e-06	0.0	0.0	9.610877696490447e-06	0.0	-0.00020870768612617628	0.0	6.765658557839706e-11	-0.00028056673752980074	0.0	1.5615884061463257e-08
2.055	-0.000210544273361642	0.0	8.470165136161344e-11	-5.140889917400356e-06	0.0	-0.09913341874828371	0.0	4.101724001624956e-05	0.0	0.9999999999999902	0.0	1.4081943861717792e-07	0.0	0.0	1.6136719012331766e-05	0.0	0.0	2.1361451397521508e-05	0.0	-0.00021054427336160991	0.0	1.439991041193057e-10	-0.00016561747255003525	0.0	7.037402054173474e-09
2.06	-0.00021107565726331592	0.0	9.74583774775926e-12	-6.195336568187273e-06	0.0	-0.09913341874758635	0.0	3.9262512834053365e-05	0.0	0.9999999999999708	0.0	2.429744822864992e-07	0.0	0.0	2.7842824728785457e-05	0.0	0.0	3.2609332789868944e-05	0.0	-0.00021107565726328652	0.0	1.1231783484142859e-10	-3.1963501979712137e-05	0.0	-2.0580239284273846e-08
2.065	-0.00021106691328119347	0.0	-1.922884829779611e-10	-7.250785035746166e-06	0.0	-0.09913341874738771	0.0	3.27873752907596e-05	0.0	0.9999999999999447	0.0	3.3338718109750947e-07	0.0	0.0	3.820335684130262e-05	0.0	0.0	4.200222391722917e-05	0.0	-0.000211066913281275	0.0	-5.15544764943872e-11	2.1605635233518718e-05	0.0	-4.0352831167674255e-08
2.07	-0.00021097099536443133	0.0	-4.3345315330225706e-10	-8.305849453944435e-06	0.0	-0.09913341874817541	0.0	2.5819211696091607e-05	0.0	0.9999999999999177	0.0	4.0644319549986435e-07	0.0	0.0	4.657495942790698e-05	0.0	0.0	4.939888321993347e-05	0.0	-0.00021097099536471426	0.0	-2.619577022747155e-10	1.1022714850480062e-05	0.0	-3.995609275202397e-08
2.075	-0.00021100331628655424	0.0	-6.247122197281206e-10	-9.360704799915267e-06	0.0	-0.09913341874993692	0.0	2.0306577139350906e-05	0.0	0.9999999999998928	0.0	4.636820416432264e-07	0.0	0.0	5.313404804433423e-05	0.0	0.0	5.5216289052141714e-05	0.0	-0.00021100331628704305	0.0	-4.2903532274939175e-10	-2.4993119715282005e-05	0.0	-2.543585789434092e-08
2.08	-0.00021122824419982992	0.0	-7.254383245061941e-10	-1.0416198930275764e-05	0.0	-0.09913341875232498	0.0	1.6746753599799915e-05	0.0	0.9999999999998704	0.0	5.095789988790942e-07	0.0	0.0	5.8393451928550146e-05	0.0	0.0	6.001388056121198e-05	0.0	-0.00021122824420045978	0.0	-5.101633700771697e-10	-6.33634645678161e-05	0.0	-7.563493971710818e-09
2.085	-0.00021162531678363367	0.0	-7.433320148473725e-10	-1.1473270428045295e-05	0.0	-0.09913341875490644	0.0	1.4877882319087151e-05	0.0	0.9999999999998497	0.0	5.488087935879669e-07	0.0	0.0	6.288885526451691e-05	0.0	0.0	6.4276079886092e-05	0.0	-0.0002116253167843223	0.0	-5.110483452535658e-10	-9.334641996120123e-05	0.0	5.717480547331868e-09
2.09	-0.00021214519146819065	0.0	-7.124472369047206e-10	-1.2532661086987834e-05	0.0	-0.09913341875735407	0.0	1.4182311910112836e-05	0.0	0.9999999999998292	0.0	5.849649270415642e-07	0.0	0.0	6.703204296532335e-05	0.0	0.0	6.833901296702993e-05	0.0	-0.00021214519146887925	0.0	-4.6425224400545877e-10	-0.00011277030855325884	0.0	1.1626935364421163e-08
2.095	-0.00021273810923606057	0.0	-6.687232582293871e-10	-1.3594849697288784e-05	0.0	-0.09913341875952442	0.0	1.4167544701856165e-05	0.0	0.9999999999998079	0.0	6.203122519069797e-07	0.0	0.0	7.108254802905636e-05	0.0	0.0	7.239771555442637e-05	0.0	-0.00021273810923672676	0.0	-4.0479514701561646e-10	-0.00012300391058078525	0.0	1.124722834400731e-08
2.1	-0.00021336436530584646	0.0	-6.377097708077505e-10	-1.4660098065129207e-05	0.0	-0.09913341876142236	0.0	1.4450171175237463e-05	0.0	0.9999999999997851	0.0	6.560511272984026e-07	0.0	0.0	7.517792147800217e-05	0.0	0.0	7.653738466233989e-05	0.0	-0.00021336436530649974	0.0	-3.577539060388449e-10	-0.00012666462287092234	0.0	7.269601084675402e-09
2.105	-0.00021399847284977113	0.0	-6.303302083746004e-10	-1.5728506423690132e-05	0.0	-0.09913341876314072	0.0	1.4790105378833476e-05	0.0	0.9999999999997604	0.0	6.926097702133456e-07	0.0	0.0	7.93672333655073e-05	0.0	0.0	8.077443774614437e-05	0.0	-0.0002139984728504392	0.0	-3.338953421610936e-10	-0.00012665684730021673	0.0	2.3660928397554472e-09
2.11	-0.00021462822300560795	0.0	-6.46570471271267e-10	-1.6800076822007982e-05	0.0	-0.0991334187648004	0.0	1.5076624971518123e-05	0.0	0.9999999999997339	0.0	7.299613178381367e-07	0.0	0.0	8.364740543987322e-05	0.0	0.0	8.509357264699203e-05	0.0	-0.00021462822300632342	0.0	-3.332298702498e-10	-0.00012517932684935916	0.0	-1.8628044302049397e-09
2.115	-0.00021524955999651066	0.0	-6.811537968559906e-10	-1.7874773282333984e-05	0.0	-0.09913341876650585	0.0	1.5275907599655287e-05	0.0	0.9999999999997055	0.0	7.679118270254777e-07	0.0	0.0	8.799621345348864e-05	0.0	0.0	8.946979781545237e-05	0.0	-0.00021524955999730318	0.0	-3.5056843108858405e-10	-0.00012338078491474065	0.0	-4.8338723155206656e-09
2.12	-0.00021586230286955746	0.0	-7.274481316040963e-10	-1.8952553964684204e-05	0.0	-0.09913341876832922	0.0	1.5390123526289105e-05	0.0	0.9999999999996753	0.0	8.062495751449724e-07	0.0	0.0	9.238939578005531e-05	0.0	0.0	9.387874343665917e-05	0.0	-0.00021586230287045006	0.0	-3.7937035164647226e-10	-0.00012179727066927653	0.0	-6.4364720332761844e-09
2.125	-0.00021646826466756102	0.0	-7.787282468730593e-10	-2.0033381637721255e-05	0.0	-0.09913341877030997	0.0	1.5439088594081414e-05	0.0	0.9999999999996434	0.0	8.447921754963267e-07	0.0	0.0	9.68060524432409e-05	0.0	0.0	9.830171651650633e-05	0.0	-0.00021646826466856797	0.0	-4.129868544032319e-10	-0.00012069250190602525	0.0	-6.829351185570862e-09
2.13	-0.00021707002413515753	0.0	-8.299106490364002e-10	-2.111722817319809e-05	0.0	-0.09913341877246003	0.0	1.5448648577010896e-05	0.0	0.99999999999961	0.0	8.834055180876697e-07	0.0	0.0	0.00010123081556999596	0.0	0.0	0.00010272742832972387	0.0	-0.00021707002413628518	0.0	-4.4638893477041143e-10	-0.00012009052294938147	0.0	-6.451087147727624e-09
2.1350000000000002	-0.00021766978000837278	0.0	-8.783458874700988e-10	-2.2204077580230044e-05	0.0	-0.09913341877477172	0.0	1.5440167497882122e-05	0.0	0.9999999999995751	0.0	9.220155928569671e-07	0.0	0.0	0.00010565520423192832	0.0	0.0	0.00010715071049274244	0.0	-0.00021766978000962254	0.0	-4.769560249458457e-10	-0.00011986020749671096	0.0	-5.766818491250487e-09
2.14	-0.00021826899422055238	0.0	-9.233949567267061e-10	-2.3293923666211786e-05	0.0	-0.09913341877722809	0.0	1.5427465277363654e-05	0.0	0.9999999999995388	0.0	9.605955969580992e-07	0.0	0.0	0.00011007614704911485	0.0	0.0	0.00011157035373763024	0.0	-0.00021826899422192376	0.0	-5.040584871237252e-10	-0.00011984700330795132	0.0	-5.110628054068309e-09
2.145	-0.00021886841290238103	0.0	-9.65697138878669e-10	-2.4386766063747827e-05	0.0	-0.09913341877981205	0.0	1.541734055145225e-05	0.0	0.9999999999995011	0.0	9.991459464672006e-07	0.0	0.0	0.00011449369170036844	0.0	0.0	0.0001159870964622008	0.0	-0.00021886841290387398	0.0	-5.283341637547128e-10	-0.00011992163019672227	0.0	-4.643929705658672e-09
2.15	-0.00021946826709020383	0.0	-1.0062508983805621e-09	-2.548260677234744e-05	0.0	-0.09913341878251135	0.0	1.54117061837024e-05	0.0	0.9999999999994618	0.0	1.0376774337817737e-06	0.0	0.0	0.00011890907490334454	0.0	0.0	0.0001204022250593099	0.0	-0.00021946826709181967	0.0	-5.507763619972497e-10	-0.00012002879118277314	0.0	-4.345627767396806e-09
2.1550000000000002	-0.0002200686651552454	0.0	-1.0457378893835793e-09	-2.6581447180515743e-05	0.0	-0.09913341878531878	0.0	1.5411421861659123e-05	0.0	0.999999999999421	0.0	1.0761973937833466e-06	0.0	0.0	0.00012332313717355273	0.0	0.0	0.00012481727220415347	0.0	-0.00022006866515698659	0.0	-5.720632415945214e-10	-0.00012010685294593196	0.0	-4.2176240936920325e-09
2.16	-0.00022066928477398724	0.0	-1.0851230471423338e-09	-2.7683290593949117e-05	0.0	-0.09913341878823151	0.0	1.5413266003482153e-05	0.0	0.9999999999993789	0.0	1.1147215251217232e-06	0.0	0.0	0.00012773767744374872	0.0	0.0	0.00012923284765671347	0.0	-0.00022066928477585825	0.0	-5.931534437983857e-10	-0.00012015235400933893	0.0	-4.214612483772372e-09
2.165	-0.00022127014319742104	0.0	-1.124653850239528e-09	-2.8788137436537316e-05	0.0	-0.09913341879124854	0.0	1.5417361739587776e-05	0.0	0.9999999999993352	0.0	1.1532520165615943e-06	0.0	0.0	0.00013215294652789064	0.0	0.0	0.00013364959645123775	0.0	-0.00022127014319942666	0.0	-6.142933725422795e-10	-0.00012017028163540419	0.0	-4.263859213485839e-09
2.17	-0.00022187095018863403	0.0	-1.1645906743966464e-09	-2.9895989382925723e-05	0.0	-0.09913341879437174	0.0	1.5420927479440452e-05	0.0	0.99999999999929	0.0	1.1917964325458445e-06	0.0	0.0	0.00013656981124728193	0.0	0.0	0.000138067366754984	0.0	-0.00022187095019077983	0.0	-6.357406605529729e-10	-0.0001201626356992436	0.0	-4.276959620364497e-09
2.1750000000000003	-0.00022247177157594478	0.0	-1.204366696612232e-09	-3.100684588711828e-05	0.0	-0.09913341879760071	0.0	1.5424608212156918e-05	0.0	0.9999999999992434	0.0	1.2303522148203306e-06	0.0	0.0	0.00014098797844759193	0.0	0.0	0.0001424861915109811	0.0	-0.00022247177157823505	0.0	-6.569294228220685e-10	-0.00012016018419989124	0.0	-4.2006916482558525e-09
2.18	-0.00022307255366193254	0.0	-1.2437465128266988e-09	-3.212070701700067e-05	0.0	-0.09913341880093486	0.0	1.5427911202116276e-05	0.0	0.9999999999991951	0.0	1.268919539214767e-06	0.0	0.0	0.00014540746827742165	0.0	0.0	0.00014690596250390044	0.0	-0.00022307255366437077	0.0	-6.776242688148284e-10	-0.00012015762971057395	0.0	-4.030326375385888e-09
2.185	-0.00022367335993357215	0.0	-1.2822246568905847e-09	-3.323757220076611e-05	0.0	-0.0991334188043716	0.0	1.5431462743897432e-05	0.0	0.9999999999991455	0.0	1.3074957100806224e-06	0.0	0.0	0.00014982797183820342	0.0	0.0	0.0001513267509385939	0.0	-0.0002236733599361606	0.0	-6.973207397417725e-10	-0.00012016450013321251	0.0	-3.927303933336506e-09
2.19	-0.0002242741992688065	0.0	-1.3208344563414597e-09	-3.435744164940811e-05	0.0	-0.09913341880790873	0.0	1.5435325094101735e-05	0.0	0.9999999999990943	0.0	1.346081816183632e-06	0.0	0.0	0.00015424961389330023	0.0	0.0	0.0001557486458551159	0.0	-0.0002242741992715499	0.0	-7.170516133874515e-10	-0.0001201719402242534	0.0	-3.938088342494755e-09
2.195	-0.00022487506642477245	0.0	-1.359468758144427e-09	-3.5480315262913796e-05	0.0	-0.09913341881154718	0.0	1.5439459576974362e-05	0.0	0.9999999999990415	0.0	1.3846773335924304e-06	0.0	0.0	0.00015867233440460001	0.0	0.0	0.00016017172521373324	0.0	-0.00022487506642767516	0.0	-7.367099434028627e-10	-0.00012016840253874293	0.0	-3.919871250903414e-09
2.2	-0.00022547588917996503	0.0	-1.398285200100904e-09	-3.660619349644556e-05	0.0	-0.09913341881529261	0.0	1.54431707382002e-05	0.0	0.9999999999989874	0.0	1.4232843362461312e-06	0.0	0.0	0.0001630963710280192	0.0	0.0	0.00016459586774172726	0.0	-0.00022547588918303205	0.0	-7.564525975538647e-10	-0.00012016870105701683	0.0	-4.038590554554116e-09
2.205	-0.000226076775072454	0.0	-1.4383401550081006e-09	-3.7735075963660116e-05	0.0	-0.0991334188191399	0.0	1.54474685275163e-05	0.0	0.9999999999989316	0.0	1.4619011987674212e-06	0.0	0.0	0.0001675215375090375	0.0	0.0	0.00016902124149566653	0.0	-0.0002260767750756933	0.0	-7.773363380188739e-10	-0.00012018774980512135	0.0	-4.364742002267083e-09
2.21	-0.00022667774638885282	0.0	-1.4800198944267416e-09	-3.886696264397874e-05	0.0	-0.09913341882308874	0.0	1.545255699225547e-05	0.0	0.9999999999988745	0.0	1.500527882017102e-06	0.0	0.0	0.00017194782936263313	0.0	0.0	0.00017344807298737456	0.0	-0.0002266777463922739	0.0	-7.997473370422937e-10	-0.00012018953510215949	0.0	-4.404379365463442e-09
2.215	-0.0002272786591096979	0.0	-1.5208226680468219e-09	-4.000185401434978e-05	0.0	-0.09913341882714702	0.0	1.5457086781857004e-05	0.0	0.9999999999988157	0.0	1.53916635113658e-06	0.0	0.0	0.00017637547177742357	0.0	0.0	0.00017787620216821385	0.0	-0.00022727865911330284	0.0	-8.211833391742694e-10	-0.00012018298877726647	0.0	-4.299132338109975e-09
2.22	-0.00022787958937398392	0.0	-1.5620699318659396e-09	-4.113974989308779e-05	0.0	-0.09913341883131183	0.0	1.5461764956996167e-05	0.0	0.9999999999987554	0.0	1.577815917970785e-06	0.0	0.0	0.00018080438589664644	0.0	0.0	0.00018230567154750964	0.0	-0.00022787958937777882	0.0	-8.429658448692223e-10	-0.00012018871947938356	0.0	-4.420779743839182e-09
2.225	-0.00022848053962910535	0.0	-1.603803435472094e-09	-4.228065031896546e-05	0.0	-0.0991334188355839	0.0	1.546661025487633e-05	0.0	0.9999999999986937	0.0	1.6164767824779734e-06	0.0	0.0	0.0001852345946338301	0.0	0.0	0.00018673652900240051	0.0	-0.00022848053963309654	0.0	-8.651364603477042e-10	-0.00012018840680727043	0.0	-4.339244706266286e-09
2.23	-0.0002290814673776718	0.0	-1.6444532201287307e-09	-4.342455523194542e-05	0.0	-0.09913341883995527	0.0	1.5471243342467153e-05	0.0	0.9999999999986304	0.0	1.655148508960643e-06	0.0	0.0	0.00018966604806171854	0.0	0.0	0.00019116871373911671	0.0	-0.00022908146738186047	0.0	-8.861255217994211e-10	-0.00012018389236709872	0.0	-4.097850670402554e-09
2.235	-0.00022968237873313197	0.0	-1.6841924991744757e-09	-4.457146467886025e-05	0.0	-0.09913341884442736	0.0	1.5475715426746555e-05	0.0	0.9999999999985657	0.0	1.6938313492261964e-06	0.0	0.0	0.00019409877503531465	0.0	0.0	0.0001956021796336071	0.0	-0.0002296823787375197	0.0	-9.061060722398829e-10	-0.0001201800279486785	0.0	-3.859144132233419e-09
2.24	-0.00023028326866655088	0.0	-1.7227949229575216e-09	-4.5721378682046364e-05	0.0	-0.09913341884899944	0.0	1.5479979028019088e-05	0.0	0.9999999999984994	0.0	1.7325253974948926e-06	0.0	0.0	0.00019853278635146473	0.0	0.0	0.0002000368669598897	0.0	-0.00023028326867113822	0.0	-9.248516997824998e-10	-0.00012017663696395467	0.0	-3.7152996032672105e-09
2.245	-0.00023088414826560712	0.0	-1.7612949486851647e-09	-4.6874297044198035e-05	0.0	-0.0991334188536613	0.0	1.5484152153105175e-05	0.0	0.9999999999984316	0.0	1.7712296806452197e-06	0.0	0.0	0.00020296797049865762	0.0	0.0	0.00020447274979844637	0.0	-0.00023088414827039793	0.0	-9.43397236278328e-10	-0.00012017574272623622	0.0	-3.6706315283832322e-09
2.25	-0.00023148502542205148	0.0	-1.7994871666871342e-09	-4.803021990703834e-05	0.0	-0.09913341885842562	0.0	1.5488293470981933e-05	0.0	0.9999999999983622	0.0	1.809944956996654e-06	0.0	0.0	0.00020740441437390437	0.0	0.0	0.00020890981903718284	0.0	-0.00023148502542704892	0.0	-9.615368579109492e-10	-0.00012017358783595182	0.0	-3.576653895630748e-09
2.255	-0.00023208588821602353	0.0	-1.8374500869295561e-09	-4.9189147125943054e-05	0.0	-0.09913341886327813	0.0	1.549230813490511e-05	0.0	0.9999999999982914	0.0	1.848670438237217e-06	0.0	0.0	0.0002118420276433064	0.0	0.0	0.00021334803839241412	0.0	-0.00023208588822123103	0.0	-9.793494455644842e-10	-0.00012017411140892734	0.0	-3.6149166048999705e-09
2.2600000000000002	-0.00023268677300222122	0.0	-1.8762192426372237e-09	-5.035107878514637e-05	0.0	-0.09913341886823543	0.0	1.5496519196261903e-05	0.0	0.999999999998219	0.0	1.8874066002091432e-06	0.0	0.0	0.00021628086483436722	0.0	0.0	0.00021778746412786046	0.0	-0.00023268677300764592	0.0	-9.978701403339036e-10	-0.00012017985371451579	0.0	-3.7947991724529714e-09
2.265	-0.00023328768222498884	0.0	-1.915864258921444e-09	-5.1516014890311626e-05	0.0	-0.09913341887329867	0.0	1.5500948375735186e-05	0.0	0.999999999998145	0.0	1.9261534749061544e-06	0.0	0.0	0.00022072092961329727	0.0	0.0	0.00022222815872975944	0.0	-0.00023328768223063837	0.0	-1.0171684993679656e-09	-0.00012018182069193179	0.0	-3.867173444078225e-09
2.27	-0.00023388858627355772	0.0	-1.955541697750185e-09	-5.268395537283058e-05	0.0	-0.0991334188784543	0.0	1.5505332549149196e-05	0.0	0.9999999999980695	0.0	1.964910674756493e-06	0.0	0.0	0.0002251621775676446	0.0	0.0	0.0002266701093048248	0.0	-0.00023388858627943661	0.0	-1.036401337991622e-09	-0.00012018029234023258	0.0	-3.840013282124364e-09
2.275	-0.00023448948514792788	0.0	-1.9952515591234463e-09	-5.3854900232703246e-05	0.0	-0.09913341888370229	0.0	1.5509671716503926e-05	0.0	0.9999999999979926	0.0	2.003678199760159e-06	0.0	0.0	0.00022960460869740921	0.0	0.0	0.00023111330295977028	0.0	-0.00023448948515404072	0.0	-1.0555686201815382e-09	-0.00012017925750140327	0.0	-3.826898393085838e-09
2.2800000000000002	-0.00023509037884809935	0.0	-2.0349938430412316e-09	-5.5028849469929717e-05	0.0	-0.09913341888904269	0.0	1.5513965877799378e-05	0.0	0.9999999999979141	0.0	2.0424560499171555e-06	0.0	0.0	0.00023404822300259154	0.0	0.0	0.00023555772680130966	0.0	-0.00023509037885445063	0.0	-1.0746703099150224e-09	-0.00012017822266255907	0.0	-3.8137762995725016e-09
2.285	-0.00023569126737407205	0.0	-2.0747685495035343e-09	-5.620580308450978e-05	0.0	-0.09913341889447547	0.0	1.5518215033035553e-05	0.0	0.9999999999978341	0.0	2.081244225227476e-06	0.0	0.0	0.00023849302048319077	0.0	0.0	0.00024000336793615667	0.0	-0.0002356912673806663	0.0	-1.093706371170019e-09	-0.0001201771878237013	0.0	-3.800647001712517e-09
2.29	-0.000236292150725846	0.0	-2.114575678510357e-09	-5.738576107644355e-05	0.0	-0.09913341890000062	0.0	1.5522419182212448e-05	0.0	0.9999999999977525	0.0	2.1200427256911237e-06	0.0	0.0	0.00024293900113920729	0.0	0.0	0.0002444502134710251	0.0	-0.00023629215073268768	0.0	-1.1126767679251177e-09	-0.00012017615298486884	0.0	-3.7875104996347055e-09
2.295	-0.00023689302890342125	0.0	-2.1544152300617008e-09	-5.856872344573103e-05	0.0	-0.09913341890561816	0.0	1.5526578325330066e-05	0.0	0.9999999999976694	0.0	2.158851551308099e-06	0.0	0.0	0.0002473861649706412	0.0	0.0	0.00024889825051262865	0.0	-0.000236893028910515	0.0	-1.13158146415955e-09	-0.00012017511814604271	0.0	-3.7743667934672905e-09
2.3000000000000003	-0.0002374939019067978	0.0	-2.1942872041575684e-09	-5.975469019237231e-05	0.0	-0.0991334189113281	0.0	1.553069246238841e-05	0.0	0.9999999999975848	0.0	2.1976707020784043e-06	0.0	0.0	0.0002518345119774928	0.0	0.0	0.00025334746616768113	0.0	-0.00023749390191414807	0.0	-1.1504204238531873e-09	-0.00012017408330719307	0.0	-3.761215883337729e-09
2.305	-0.00023809476973597556	0.0	-2.234191600797953e-09	-6.094366131636718e-05	0.0	-0.0991334189171304	0.0	1.553476159338747e-05	0.0	0.9999999999974987	0.0	2.236500178002034e-06	0.0	0.0	0.0002562840421597613	0.0	0.0	0.00025779784754289626	0.0	-0.0002380947697435869	0.0	-1.1691936109865377e-09	-0.00012017304846833124	0.0	-3.748057769374462e-09
2.31	-0.0002386956323909546	0.0	-2.274128419982858e-09	-6.213563681771576e-05	0.0	-0.0991334189230251	0.0	1.5538785718327257e-05	0.0	0.999999999997411	0.0	2.2753399790789904e-06	0.0	0.0	0.0002607347555174472	0.0	0.0	0.0002622493817449878	0.0	-0.00023869563239883144	0.0	-1.1879009895407568e-09	-0.00012017201362950466	0.0	-3.7348924517062954e-09
2.315	-0.00023929648987173493	0.0	-2.3140976617122833e-09	-6.333061669641804e-05	0.0	-0.09913341892901219	0.0	1.5542764837207763e-05	0.0	0.9999999999973218	0.0	2.314190105309275e-06	0.0	0.0	0.00026518665205055054	0.0	0.0	0.00026670205588066957	0.0	-0.00023929648987988195	0.0	-1.206542523497639e-09	-0.00012017097879066993	0.0	-3.7217199304610566e-09
2.32	-0.0002398973421783165	0.0	-2.3540993259862294e-09	-6.452860095247403e-05	0.0	-0.09913341893509166	0.0	1.5546698950028995e-05	0.0	0.9999999999972311	0.0	2.3530505566928863e-06	0.0	0.0	0.00026963973175907116	0.0	0.0	0.0002711558570566552	0.0	-0.00023989734218673813	0.0	-1.2251181768396195e-09	-0.00012016977583590712	0.0	-3.709318958597122e-09
2.325	-0.0002404981893106994	0.0	-2.3941334128046994e-09	-6.572958958588381e-05	0.0	-0.09913341894126351	0.0	1.5550588056790947e-05	0.0	0.9999999999971388	0.0	2.391921333229828e-06	0.0	0.0	0.00027409399464300955	0.0	0.0	0.0002756107723796585	0.0	-0.00024049818931940015	0.0	-1.2436279135497757e-09	-0.00012016933411587824	0.0	-3.693384663695241e-09
2.33	-0.00024109904135583856	0.0	-2.4341533725023134e-09	-6.693358265489653e-05	0.0	-0.09913341894752244	0.0	1.5554519587666668e-05	0.0	0.999999999997045	0.0	2.4308026971891522e-06	0.0	0.0	0.0002785494707561851	0.0	0.0	0.00028006681400329287	0.0	-0.0002410990413648227	0.0	-1.2620249724420228e-09	-0.00012017346662920754	0.0	-3.6562536128224153e-09
2.335	-0.00024169992324833445	0.0	-2.4740441359322617e-09	-6.814058030350252e-05	0.0	-0.09913341895385536	0.0	1.555870966698998e-05	0.0	0.9999999999969497	0.0	2.4696952968908145e-06	0.0	0.0	0.0002830062343905925	0.0	0.0	0.0002845240559962325	0.0	-0.00024169992325760565	0.0	-1.2801938084951518e-09	-0.00012017692136603194	0.0	-3.622253718529154e-09
2.34	-0.00024230080568506717	0.0	-2.513940932251877e-09	-6.935058236248459e-05	0.0	-0.09913341896027766	0.0	1.5562904305639114e-05	0.0	0.9999999999968527	0.0	2.508598370429793e-06	0.0	0.0	0.0002874641982383473	0.0	0.0	0.00028898249966462794	0.0	-0.00024230080569462978	0.0	-1.2982701196332842e-09	-0.00012017654182893873	0.0	-3.6060072102411995e-09
2.345	-0.00024290168866603675	0.0	-2.553843761461164e-09	-7.056358883184282e-05	0.0	-0.09913341896678934	0.0	1.5567103503614068e-05	0.0	0.9999999999967543	0.0	2.5475119178060913e-06	0.0	0.0	0.00029192336229945013	0.0	0.0	0.00029344214631462994	0.0	-0.00024290168867589505	0.0	-1.3162538679681174e-09	-0.0001201766506771642	0.0	-3.587490860746028e-09
2.35	-0.0002435025721912431	0.0	-2.5937526235601144e-09	-7.177959971157698e-05	0.0	-0.0991334189733904	0.0	1.5571307260914842e-05	0.0	0.9999999999966542	0.0	2.586435939019702e-06	0.0	0.0	0.0002963837265738999	0.0	0.0	0.00029790299725238913	0.0	-0.00024350257220140143	0.0	-1.3341450156112751e-09	-0.00012017675952540188	0.0	-3.5689669335692476e-09
2.355	-0.0002441034562606863	0.0	-2.633667518548733e-09	-7.29986150016872e-05	0.0	-0.09913341898008084	0.0	1.557551557754144e-05	0.0	0.9999999999965528	0.0	2.6253704340706294e-06	0.0	0.0	0.00030084529106169736	0.0	0.0	0.0003023650537840561	0.0	-0.00024410345627114905	0.0	-1.351943524674318e-09	-0.0001201768683736224	0.0	-3.550435428697386e-09
2.36	-0.00024470434087436627	0.0	-2.673588446427019e-09	-7.422063470217347e-05	0.0	-0.09913341898686066	0.0	1.5579728453493856e-05	0.0	0.9999999999964496	0.0	2.664315402958873e-06	0.0	0.0	0.0003053080557628422	0.0	0.0	0.0003068283172157815	0.0	-0.00024470434088513766	0.0	-1.3696493572687344e-09	-0.0001201769772218542	0.0	-3.531896346116759e-09
2.365	-0.0002453052260322832	0.0	-2.713515407194976e-09	-7.544565881303591e-05	0.0	-0.09913341899372986	0.0	1.5583945888772096e-05	0.0	0.999999999996345	0.0	2.7032708456844365e-06	0.0	0.0	0.00030977202067733505	0.0	0.0	0.000311292788853716	0.0	-0.0002453052260433676	0.0	-1.3872624755059481e-09	-0.0001201770860700851	0.0	-3.513349685813657e-09
2.37	-0.0002459061117344368	0.0	-2.753448400852597e-09	-7.66736873342743e-05	0.0	-0.09913341900068845	0.0	1.5588167883376157e-05	0.0	0.9999999999962389	0.0	2.7422367622473124e-06	0.0	0.0	0.000314237185805175	0.0	0.0	0.0003157584700040101	0.0	-0.0002459061117458385	0.0	-1.40478284149731e-09	-0.00012017719491829251	0.0	-3.4947954477739624e-09
2.375	-0.0002465069979808273	0.0	-2.793387427399886e-09	-7.790472026588874e-05	0.0	-0.09913341900773641	0.0	1.559239443730604e-05	0.0	0.9999999999961312	0.0	2.781213152647505e-06	0.0	0.0	0.00031870355114636253	0.0	0.0	0.0003202253619728146	0.0	-0.00024650699799255054	0.0	-1.4222104173541048e-09	-0.00012017730376651845	0.0	-3.4762336319845787e-09
2.38	-0.00024710788477145455	0.0	-2.8333324868368422e-09	-7.913875760787922e-05	0.0	-0.09913341901487376	0.0	1.5596625550561743e-05	0.0	0.999999999996022	0.0	2.8202000168850137e-06	0.0	0.0	0.0003231711167008975	0.0	0.0	0.00032469346606628005	0.0	-0.00024710788478350367	0.0	-1.43954516518755e-09	-0.00012017741261473896	0.0	-3.4576642384317984e-09
2.3850000000000002	-0.00024770877210631873	0.0	-2.8732835791634694e-09	-8.037579936024589e-05	0.0	-0.09913341902210047	0.0	1.560086122314327e-05	0.0	0.9999999999959112	0.0	2.8591973549598425e-06	0.0	0.0	0.00032763988246878057	0.0	0.0	0.0003291627835905571	0.0	-0.00024770877211869794	0.0	-1.4567870471087938e-09	-0.00012017752146295676	0.0	-3.439087267101556e-09
2.39	-0.00024830965998541967	0.0	-2.913240704379761e-09	-8.161584552298848e-05	0.0	-0.09913341902941658	0.0	1.5605101455050613e-05	0.0	0.9999999999957988	0.0	2.8982051668719835e-06	0.0	0.0	0.0003321098484500107	0.0	0.0	0.0003336333158517964	0.0	-0.00024830965999813324	0.0	-1.4739360252289141e-09	-0.00012017763031117456	0.0	-3.4205027179803786e-09
2.395	-0.00024891054840875745	0.0	-2.9532038624857203e-09	-8.285889609610713e-05	0.0	-0.09913341903682206	0.0	1.560934624628378e-05	0.0	0.999999999995685	0.0	2.9372234526214414e-06	0.0	0.0	0.0003365810146445885	0.0	0.0	0.00033810506415614855	0.0	-0.0002489105484218097	0.0	-1.4909920616589234e-09	-0.00012017778291063721	0.0	-3.4065047730257218e-09
2.4	-0.000249511437376332	0.0	-2.993173053481347e-09	-8.410495107960184e-05	0.0	-0.09913341904431693	0.0	1.561359559684277e-05	0.0	0.9999999999955697	0.0	2.976252212208215e-06	0.0	0.0	0.0003410533810525139	0.0	0.0	0.0003425780298097642	0.0	-0.00024951143738972714	0.0	-1.5079551185097644e-09	-0.00012017759360753296	0.0	-3.356597138136949e-09
2.4050000000000002	-0.0002501123242630705	0.0	-3.0328728142079497e-09	-8.53540106163058e-05	0.0	-0.09913341905184862	0.0	1.561781843241651e-05	0.0	0.9999999999954525	0.0	3.01529185263002e-06	0.0	0.0	0.0003455269943122894	0.0	0.0	0.0003470522052166597	0.0	-0.00025011232427681095	0.0	-1.524549506974053e-09	-0.0001201773454772135	0.0	-3.3005045935787972e-09
2.41	-0.00025071321120760177	0.0	-3.072527562619079e-09	-8.660607458985367e-05	0.0	-0.09913341905945997	0.0	1.562204006903395e-05	0.0	0.9999999999953338	0.0	3.054342042308594e-06	0.0	0.0	0.0003500018164278451	0.0	0.0	0.0003515275900333592	0.0	-0.0002507132112216914	0.0	-1.5409997594617334e-09	-0.00012017740513263447	0.0	-3.276724007247077e-09
2.415	-0.00025131409833444816	0.0	-3.1121503655154164e-09	-8.786114299347015e-05	0.0	-0.09913341906715345	0.0	1.5626261980728238e-05	0.0	0.9999999999952137	0.0	3.0934027619376994e-06	0.0	0.0	0.0003544778451868494	0.0	0.0	0.00035600418433866655	0.0	-0.00025131409834889103	0.0	-1.5573189136599467e-09	-0.00012017744367181771	0.0	-3.2507184769226466e-09
2.42	-0.00025191498564360975	0.0	-3.1517412228969612e-09	-8.911921582715523e-05	0.0	-0.09913341907492906	0.0	1.5630484167499378e-05	0.0	0.9999999999950919	0.0	3.1324740115173376e-06	0.0	0.0	0.0003589550805893021	0.0	0.0	0.0003604819882113854	0.0	-0.0002519149856584096	0.0	-1.57350693156209e-09	-0.00012017748013563561	0.0	-3.2244874170477212e-09
2.4250000000000003	-0.00025251587313508656	0.0	-3.1913001347637173e-09	-9.038029309090903e-05	0.0	-0.09913341908278682	0.0	1.563470662934737e-05	0.0	0.9999999999949687	0.0	3.171555791047511e-06	0.0	0.0	0.00036343352263520375	0.0	0.0	0.00036496100173031946	0.0	-0.0002525158731502474	0.0	-1.5895637751615459e-09	-0.0001201775165994562	0.0	-3.198248755845964e-09
2.43	-0.0002531167608088785	0.0	-3.230827101115678e-09	-9.164437478473133e-05	0.0	-0.0991334190907267	0.0	1.563892936627221e-05	0.0	0.9999999999948438	0.0	3.2106481005282134e-06	0.0	0.0	0.00036791317132455343	0.0	0.0	0.0003694412249742725	0.0	-0.00025311676082440414	0.0	-1.6054894064516637e-09	-0.00012017755306325422	0.0	-3.1720024933125837e-09
2.435	-0.0002537176486649856	0.0	-3.2703221219528463e-09	-9.291146090862224e-05	0.0	-0.09913341909874873	0.0	1.5643152378273904e-05	0.0	0.9999999999947174	0.0	3.249750939959448e-06	0.0	0.0	0.0003723940266573518	0.0	0.0	0.00037392265802204815	0.0	-0.00025371764868087994	0.0	-1.621283787425779e-09	-0.00012017758952705586	0.0	-3.1457486294435723e-09
2.44	-0.0002543185367034078	0.0	-3.309785197275222e-09	-9.418155146258176e-05	0.0	-0.0991334191068529	0.0	1.564737566535245e-05	0.0	0.9999999999945894	0.0	3.2888643093412145e-06	0.0	0.0	0.00037687608863359856	0.0	0.0	0.00037840530095245014	0.0	-0.0002543185367196747	0.0	-1.6369468800771987e-09	-0.00012017762599085659	0.0	-3.1194871642340523e-09
2.445	-0.00025491942492414523	0.0	-3.3492163270828063e-09	-9.545464644660989e-05	0.0	-0.0991334191150392	0.0	1.5651599227507844e-05	0.0	0.99999999999446	0.0	3.327988208673513e-06	0.0	0.0	0.0003813593572532939	0.0	0.0	0.00038288915384428223	0.0	-0.0002549194249407885	0.0	-1.652478646399211e-09	-0.00012017766245465823	0.0	-3.0932180976795053e-09
2.45	-0.00025552031332719787	0.0	-3.3886155113756012e-09	-9.673074586070674e-05	0.0	-0.09913341912330763	0.0	1.565582306474009e-05	0.0	0.9999999999943289	0.0	3.3671226379563474e-06	0.0	0.0	0.00038584383251643814	0.0	0.0	0.00038737421677634813	0.0	-0.00025552031334422125	0.0	-1.667879048385077e-09	-0.00012017769891845172	0.0	-3.066941429774907e-09
2.455	-0.0002561212019125656	0.0	-3.4279827501536004e-09	-9.800984970487209e-05	0.0	-0.09913341913165821	0.0	1.5660047177049186e-05	0.0	0.9999999999941963	0.0	3.4062675971897104e-06	0.0	0.0	0.0003903295144230306	0.0	0.0	0.0003918604898274515	0.0	-0.000256121201929973	0.0	-1.6831480480280363e-09	-0.00012017773538224974	0.0	-3.0406571605159927e-09
2.46	-0.0002567220906802485	0.0	-3.467318043416808e-09	-9.929195797910604e-05	0.0	-0.09913341914009091	0.0	1.5664271564435135e-05	0.0	0.9999999999940621	0.0	3.4454230863736052e-06	0.0	0.0	0.0003948164029730715	0.0	0.0	0.0003963479730763961	0.0	-0.0002567220906980437	0.0	-1.6982856073213053e-09	-0.00012017777184601794	0.0	-3.01436528989799e-09
2.465	-0.00025732297963024654	0.0	-3.5066213911652227e-09	-0.0001005770706834086	0.0	-0.09913341914860575	0.0	1.5668496226897934e-05	0.0	0.9999999999939263	0.0	3.4845891055080324e-06	0.0	0.0	0.000399304498166561	0.0	0.0	0.00040083666660198564	0.0	-0.0002573229796484332	0.0	-1.7132916882580774e-09	-0.00012017782594807497	0.0	-2.9781842686713858e-09
2.47	-0.0002579238687625598	0.0	-3.545892793398849e-09	-0.00010186518781777988	0.0	-0.09913341915720274	0.0	1.5672721164437583e-05	0.0	0.9999999999937891	0.0	3.5237656545929952e-06	0.0	0.0	0.0004037938000034996	0.0	0.0	0.0004053265704830238	0.0	-0.00025792386878114177	0.0	-1.728166252831527e-09	-0.00012017774899313136	0.0	-3.0154181587800058e-09
2.475	-0.0002585247570188882	0.0	-3.585725085150116e-09	-0.00010315630958685287	0.0	-0.09913341916574289	0.0	1.567693859497248e-05	0.0	0.9999999999936497	0.0	3.5629526361891346e-06	0.0	0.0	0.0004082842973181588	0.0	0.0	0.0004098176825689122	0.0	-0.000258524757037873	0.0	-1.743502155989527e-09	-0.00012017759283550601	0.0	-3.097016499273821e-09
2.48	-0.0002591256448545805	0.0	-3.6258631907476977e-09	-0.00010445043590258138	0.0	-0.099133419174286	0.0	1.568115186685348e-05	0.0	0.9999999999935086	0.0	3.6021500922211178e-06	0.0	0.0	0.0004127759949147518	0.0	0.0	0.00041431000166828415	0.0	-0.000259125644873974	0.0	-1.7590442596461012e-09	-0.00012017756945018312	0.0	-3.1042238320265852e-09
2.485	-0.0002597265328011545	0.0	-3.666009366165149e-09	-0.00010574756666219089	0.0	-0.09913341918290187	0.0	1.568536488853434e-05	0.0	0.999999999993366	0.0	3.6413580716266464e-06	0.0	0.0	0.00041726889840112627	0.0	0.0	0.0004188035277094627	0.0	-0.00025972653282096085	0.0	-1.7744947528182422e-09	-0.00012017760048597084	0.0	-3.0809350548987112e-09
2.49	-0.00026032742085861036	0.0	-3.706163611402472e-09	-0.00010704770186568152	0.0	-0.0991334191915905	0.0	1.5689577660015066e-05	0.0	0.9999999999932218	0.0	3.6805765744057236e-06	0.0	0.0	0.00042176300777728253	0.0	0.0	0.00042329826062077074	0.0	-0.0002603274208788337	0.0	-1.7898535975396537e-09	-0.00012017762266313925	0.0	-3.0626015681221e-09
2.495	-0.00026092830902694786	0.0	-3.7463259264596605e-09	-0.00010835084151305301	0.0	-0.09913341920035187	0.0	1.5693790181295657e-05	0.0	0.9999999999930759	0.0	3.7198056005583424e-06	0.0	0.0	0.0004262583230432197	0.0	0.0	0.0004277942003305312	0.0	-0.00026092830904759227	0.0	-1.8051207558440245e-09	-0.00012017764484031309	0.0	-3.0442604880823376e-09
2.5	-0.00026152919730616716	0.0	-3.786496311336717e-09	-0.0001096569856043055	0.0	-0.09913341920918602	0.0	1.569800245237611e-05	0.0	0.9999999999929285	0.0	3.7590451500845064e-06	0.0	0.0	0.0004307548441989384	0.0	0.0	0.000432291346767067	0.0	-0.00026152919732723684	0.0	-1.8202961897650338e-09	-0.00012017766701748512	0.0	-3.0259118147765867e-09
2.505	-0.0002621300856962682	0.0	-3.826674766033643e-09	-0.000110966134139439	0.0	-0.0991334192180929	0.0	1.5702214473256425e-05	0.0	0.9999999999927796	0.0	3.798295222984216e-06	0.0	0.0	0.00043525257124443854	0.0	0.0	0.00043678969985870114	0.0	-0.0002621300857177671	0.0	-1.8353798613363423e-09	-0.00012017768919462823	0.0	-3.0075555482018422e-09
2.5100000000000002	-0.00026273097419725105	0.0	-3.8668612905504405e-09	-0.0001122782871184536	0.0	-0.09913341922707256	0.0	1.570642624393661e-05	0.0	0.9999999999926289	0.0	3.837555819257474e-06	0.0	0.0	0.0004397515041797205	0.0	0.0	0.00044128925953375656	0.0	-0.00026273097421918316	0.0	-1.8503717325915998e-09	-0.00012017771137181291	0.0	-2.9891916883557953e-09
2.515	-0.0002633318628091156	0.0	-3.907055884887104e-09	-0.00011359344454134908	0.0	-0.09913341923612497	0.0	1.5710637764416653e-05	0.0	0.9999999999924768	0.0	3.876826938904274e-06	0.0	0.0	0.0004442516430047834	0.0	0.0	0.00044579002572055616	0.0	-0.0002633318628314852	0.0	-1.8652717655644424e-09	-0.00012017773354897952	0.0	-2.970820235235002e-09
2.52	-0.0002639327515318619	0.0	-3.9472585490436355e-09	-0.00011491160640812555	0.0	-0.09913341924525013	0.0	1.5714849034696558e-05	0.0	0.999999999992323	0.0	3.91610858192462e-06	0.0	0.0	0.000448752987719628	0.0	0.0	0.0004502919983474229	0.0	-0.0002639327515546729	0.0	-1.880079922288488e-09	-0.00012017775572612263	0.0	-2.952441188836995e-09
2.525	-0.00026453364036549	0.0	-3.987469283020036e-09	-0.00011623277271878304	0.0	-0.09913341925444805	0.0	1.571906005477633e-05	0.0	0.9999999999921677	0.0	3.95540074831851e-06	0.0	0.0	0.0004532555383242538	0.0	0.0	0.00045479517734267974	0.0	-0.00026453364038874644	0.0	-1.8947961647973456e-09	-0.00012017777790329195	0.0	-2.934054549158993e-09
2.5300000000000002	-0.0002651345293099999	0.0	-4.027688086816309e-09	-0.00011755694347332163	0.0	-0.09913341926371873	0.0	1.5723270824655967e-05	0.0	0.9999999999920107	0.0	3.9947034380859485e-06	0.0	0.0	0.00045775929481866153	0.0	0.0	0.00045929956263464957	0.0	-0.0002651345293337058	0.0	-1.9094204551246064e-09	-0.00012017780008045042	0.0	-2.915660316198242e-09
2.535	-0.00026573541836539145	0.0	-4.067914960432447e-09	-0.00011888411867174109	0.0	-0.09913341927306216	0.0	1.5727481344335464e-05	0.0	0.9999999999918523	0.0	4.03401665122693e-06	0.0	0.0	0.00046226425720285037	0.0	0.0	0.0004638051541516554	0.0	-0.00026573541838955094	0.0	-1.9239527553038517e-09	-0.0001201778222576107	0.0	-2.8972584899517126e-09
2.54	-0.0002663363075316648	0.0	-4.108149903868453e-09	-0.00012021429831404156	0.0	-0.09913341928247833	0.0	1.573169161381483e-05	0.0	0.9999999999916922	0.0	4.073340387741456e-06	0.0	0.0	0.00046677042547682075	0.0	0.0	0.0004683119518220201	0.0	-0.0002663363075562819	0.0	-1.9383930273686425e-09	-0.00012017784443477369	0.0	-2.87884907041653e-09
2.545	-0.0002669371968088199	0.0	-4.148392917124329e-09	-0.00012154748240022302	0.0	-0.09913341929196728	0.0	1.5735901633094054e-05	0.0	0.9999999999915306	0.0	4.112674647629527e-06	0.0	0.0	0.00047127779964057265	0.0	0.0	0.0004728199555740666	0.0	-0.00026693719683389865	0.0	-1.952741233352532e-09	-0.00012017786661192313	0.0	-2.86043205759033e-09
2.5500000000000003	-0.00026753808619685683	0.0	-4.188644000200076e-09	-0.0001228836709302856	0.0	-0.09913341930152898	0.0	1.5740111402173143e-05	0.0	0.9999999999913672	0.0	4.152019430891148e-06	0.0	0.0	0.00047578637969410636	0.0	0.0	0.000477329165336118	0.0	-0.0002675380862224011	0.0	-1.966997335289056e-09	-0.00012017788878906444	0.0	-2.8420074514701008e-09
2.555	-0.00026813897569577543	0.0	-4.2289031530956894e-09	-0.00012422286390422906	0.0	-0.09913341931116344	0.0	1.5744320921052096e-05	0.0	0.9999999999912024	0.0	4.191374737526309e-06	0.0	0.0	0.00048029616563742105	0.0	0.0	0.00048183958103649704	0.0	-0.0002681389757217893	0.0	-1.9811612952117383e-09	-0.00012017791096621027	0.0	-2.823575252052974e-09
2.56	-0.00026873986530557577	0.0	-4.269170375811171e-09	-0.0001255650613220535	0.0	-0.09913341932087065	0.0	1.5748530189730913e-05	0.0	0.999999999991036	0.0	4.230740567535017e-06	0.0	0.0	0.00048480715747051755	0.0	0.0	0.0004863512026035268	0.0	-0.00026873986533206326	0.0	-1.9952330751540865e-09	-0.00012017793314338229	0.0	-2.805135459336407e-09
2.565	-0.0002693407550262579	0.0	-4.3094456683465216e-09	-0.00012691026318375896	0.0	-0.09913341933065062	0.0	1.5752739208209595e-05	0.0	0.999999999990868	0.0	4.270116920917269e-06	0.0	0.0	0.0004893193551933953	0.0	0.0	0.0004908640299655301	0.0	-0.0002693407550532231	0.0	-2.0092126371495978e-09	-0.00012017795532052902	0.0	-2.7866880733169594e-09
2.57	-0.0002699416448578218	0.0	-4.34972903070174e-09	-0.0001282584694893454	0.0	-0.09913341934050335	0.0	1.575694797648814e-05	0.0	0.9999999999906983	0.0	4.309503797673068e-06	0.0	0.0	0.0004938327588060548	0.0	0.0	0.00049537806305083	0.0	-0.00026994164488526855	0.0	-2.023099943231748e-09	-0.00012017797749768479	0.0	-2.7682330939927148e-09
2.575	-0.0002705425348002675	0.0	-4.390020462876832e-09	-0.00012960968023881296	0.0	-0.09913341935042883	0.0	1.5761156494566546e-05	0.0	0.9999999999905272	0.0	4.348901197802414e-06	0.0	0.0	0.0004983473683084961	0.0	0.0	0.0004998933017877493	0.0	-0.00027054253482819993	0.0	-2.036894955434011e-09	-0.00012017799967482519	0.0	-2.7497705213601235e-09
2.58	-0.0002711434248535949	0.0	-4.4303199648717885e-09	-0.0001309638954321614	0.0	-0.09913341936042706	0.0	1.576536476244482e-05	0.0	0.9999999999903544	0.0	4.388309121305302e-06	0.0	0.0	0.0005028631837007187	0.0	0.0	0.0005044097461046111	0.0	-0.0002711434248820168	0.0	-2.0505976357898308e-09	-0.00012017802185194663	0.0	-2.7313003554164353e-09
2.585	-0.00027174431501780403	0.0	-4.470627536686614e-09	-0.00013232111506939083	0.0	-0.09913341937049806	0.0	1.5769572780122954e-05	0.0	0.9999999999901801	0.0	4.427727568181736e-06	0.0	0.0	0.0005073802049827228	0.0	0.0	0.0005089273959297383	0.0	-0.00027174431504671943	0.0	-2.0642079463326534e-09	-0.00012017804402909696	0.0	-2.7128225961597335e-09
2.59	-0.00027234520529289494	0.0	-4.5109431783213075e-09	-0.00013368133915050124	0.0	-0.09913341938064181	0.0	1.5773780547600952e-05	0.0	0.9999999999900041	0.0	4.467156538431714e-06	0.0	0.0	0.0005118984321545084	0.0	0.0	0.0005134462511914537	0.0	-0.0002723452053223078	0.0	-2.0777258490959002e-09	-0.00012017806620625454	0.0	-2.694337243586089e-09
2.595	-0.0002729460956788677	0.0	-4.5512668897758735e-09	-0.00013504456767549278	0.0	-0.09913341939085832	0.0	1.5777988064878815e-05	0.0	0.9999999999898266	0.0	4.506596032055242e-06	0.0	0.0	0.000516417865216076	0.0	0.0	0.0005179663118180804	0.0	-0.000272946095708782	0.0	-2.0911513061129824e-09	-0.00012017808838340669	0.0	-2.675844297693317e-09
2.6	-0.00027354698617572214	0.0	-4.591598671050305e-09	-0.0001364108006443652	0.0	-0.09913341940114757	0.0	1.578219533195654e-05	0.0	0.9999999999896475	0.0	4.546046049052311e-06	0.0	0.0	0.0005209385041674248	0.0	0.0	0.0005224875777379412	0.0	-0.0002735469862061418	0.0	-2.104484279417297e-09	-0.00012017811056053715	0.0	-2.6573437584787223e-09
2.605	-0.0002741478767834583	0.0	-4.631938522144605e-09	-0.00013778003805711865	0.0	-0.09913341941150959	0.0	1.578640234883413e-05	0.0	0.9999999999894669	0.0	4.585506589422926e-06	0.0	0.0	0.0005254603490085553	0.0	0.0	0.0005270100488793593	0.0	-0.00027414787681438735	0.0	-2.117724731042228e-09	-0.0001201781327376631	0.0	-2.638835625939003e-09
2.61	-0.0002747487675020762	0.0	-4.672286443058774e-09	-0.00013915227991375306	0.0	-0.09913341942194437	0.0	1.5790609115511583e-05	0.0	0.9999999999892846	0.0	4.624977653167086e-06	0.0	0.0	0.0005299833997394673	0.0	0.0	0.0005315337251706574	0.0	-0.00027474876753351846	0.0	-2.130872623021141e-09	-0.00012017815491480261	0.0	-2.6203199000716974e-09
2.615	-0.000275349658331576	0.0	-4.712642433792815e-09	-0.0001405275262142686	0.0	-0.09913341943245191	0.0	1.57948156319889e-05	0.0	0.9999999999891007	0.0	4.664459240284794e-06	0.0	0.0	0.0005345076563601612	0.0	0.0	0.0005360586065401585	0.0	-0.0002753496583635354	0.0	-2.1439279173873938e-09	-0.00012017817709193488	0.0	-2.601796580873684e-09
2.62	-0.00027595054927195747	0.0	-4.753006494346721e-09	-0.000141905776958665	0.0	-0.0991334194430322	0.0	1.579902189826608e-05	0.0	0.9999999999889152	0.0	4.703951350776044e-06	0.0	0.0	0.0005390331188706364	0.0	0.0	0.0005405846929161856	0.0	-0.00027595054930443783	0.0	-2.156890576174323e-09	-0.00012017819926907619	0.0	-2.58326566834275e-09
2.625	-0.00027655144032322064	0.0	-4.793378624720496e-09	-0.00014328703214694241	0.0	-0.09913341945368523	0.0	1.5803227914343124e-05	0.0	0.9999999999887282	0.0	4.74345398464084e-06	0.0	0.0	0.0005435597872708934	0.0	0.0	0.0005451119842270615	0.0	-0.00027655144035622614	0.0	-2.169760561415261e-09	-0.00012017822144620846	0.0	-2.564727162475834e-09
2.63	-0.0002771523314853656	0.0	-4.8337588249141396e-09	-0.0001446712917791008	0.0	-0.09913341946441104	0.0	1.5807433680220034e-05	0.0	0.9999999999885396	0.0	4.78296714187918e-06	0.0	0.0	0.0005480876615609317	0.0	0.0	0.0005496404804011093	0.0	-0.0002771523315188999	0.0	-2.182537835143516e-09	-0.00012017824362334163	0.0	-2.546181063269794e-09
2.6350000000000002	-0.0002777532227583924	0.0	-4.874147094927656e-09	-0.0001460585558551403	0.0	-0.0991334194752096	0.0	1.5811639195896806e-05	0.0	0.9999999999883494	0.0	4.822490822491071e-06	0.0	0.0	0.0005526167417407525	0.0	0.0	0.0005541701813666518	0.0	-0.00027775322279245955	0.0	-2.1952223593923895e-09	-0.0001201782658004703	0.0	-2.5276273707221472e-09
2.64	-0.0002783541141423009	0.0	-4.9145434347610374e-09	-0.00014744882437506073	0.0	-0.0991334194860809	0.0	1.5815844461373438e-05	0.0	0.9999999999881576	0.0	4.862025026476502e-06	0.0	0.0	0.0005571470278103543	0.0	0.0	0.0005587010870520121	0.0	-0.0002783541141769046	0.0	-2.2078140961951637e-09	-0.00012017828797758812	0.0	-2.509066084830261e-09
2.645	-0.0002789550056370911	0.0	-4.954947844414287e-09	-0.00014884209733886212	0.0	-0.09913341949702498	0.0	1.5820049476649937e-05	0.0	0.9999999999879643	0.0	4.901569753835478e-06	0.0	0.0	0.0005616785197697377	0.0	0.0	0.000563233197385513	0.0	-0.00027895500567223547	0.0	-2.220313007585113e-09	-0.00012017831015473394	0.0	-2.4904972055909162e-09
2.65	-0.0002795558972427631	0.0	-4.995360323887405e-09	-0.0001502383747465445	0.0	-0.0991334195080418	0.0	1.58242542417263e-05	0.0	0.9999999999877693	0.0	4.9411250045680005e-06	0.0	0.0	0.0005662112176189029	0.0	0.0	0.0005677665122954776	0.0	-0.0002795558972784519	0.0	-2.232719055595489e-09	-0.0001201783323318391	0.0	-2.4719207330013897e-09
2.6550000000000002	-0.0002801567889593169	0.0	-5.035780873180397e-09	-0.000151637656598108	0.0	-0.09913341951913138	0.0	1.5828458756602525e-05	0.0	0.9999999999875727	0.0	4.98069077867407e-06	0.0	0.0	0.00057074512135785	0.0	0.0	0.0005723010317102286	0.0	-0.0002801567889955539	0.0	-2.245032202259539e-09	-0.00012017835450897499	0.0	-2.45333666705938e-09
2.66	-0.00028075768078675246	0.0	-5.0762094922932526e-09	-0.00015303994289355238	0.0	-0.09913341953029371	0.0	1.5832663021278617e-05	0.0	0.9999999999873747	0.0	5.020267076153683e-06	0.0	0.0	0.0005752802309865786	0.0	0.0	0.0005768367555580891	0.0	-0.00028075768082354166	0.0	-2.2572524096104898e-09	-0.00012017837668610185	0.0	-2.4347450077613846e-09
2.665	-0.0002813585727250697	0.0	-5.116646181225977e-09	-0.00015444523363287776	0.0	-0.09913341954152881	0.0	1.583686703575457e-05	0.0	0.9999999999871749	0.0	5.059853897006841e-06	0.0	0.0	0.0005798165465050888	0.0	0.0	0.0005813736837673821	0.0	-0.00028135857276241486	0.0	-2.2693796396815552e-09	-0.0001201783988632043	0.0	-2.41614575510486e-09
2.67	-0.00028195946477426874	0.0	-5.157090939978571e-09	-0.00015585352881608412	0.0	-0.09913341955283667	0.0	1.5841070800030385e-05	0.0	0.9999999999869736	0.0	5.099451241233544e-06	0.0	0.0	0.0005843540679133808	0.0	0.0	0.0005859118162664304	0.0	-0.00028195946481217375	0.0	-2.281413854505937e-09	-0.00012017842104035194	0.0	-2.3975389090876077e-09
2.6750000000000003	-0.00028256035693434954	0.0	-5.197543768551036e-09	-0.00015726482844317162	0.0	-0.09913341956421727	0.0	1.5845274314106066e-05	0.0	0.9999999999867708	0.0	5.1390591088337955e-06	0.0	0.0	0.0005888927952114549	0.0	0.0	0.000590451152983557	0.0	-0.00028256035697281833	0.0	-2.293355016116824e-09	-0.00012017844321746615	0.0	-2.378924469705871e-09
2.68	-0.00028316124920531213	0.0	-5.238004666943367e-09	-0.00015867913251414	0.0	-0.09913341957567062	0.0	1.584947757798161e-05	0.0	0.9999999999865663	0.0	5.178677499807588e-06	0.0	0.0	0.00059343272839931	0.0	0.0	0.0005949916938470849	0.0	-0.0002831612492443484	0.0	-2.305203086547384e-09	-0.00012017846539455867	0.0	-2.360302436957126e-09
2.685	-0.0002837621415871564	0.0	-5.278473635155567e-09	-0.00016009644102898935	0.0	-0.09913341958719675	0.0	1.585368059165702e-05	0.0	0.9999999999863602	0.0	5.218306414154927e-06	0.0	0.0	0.0005979738674769472	0.0	0.0	0.000599533438785337	0.0	-0.000283762141626764	0.0	-2.3169580278307796e-09	-0.00012017848528681797	0.0	-2.349222718159606e-09
2.69	-0.00028436303407988246	0.0	-5.318950673187636e-09	-0.0001615167539877197	0.0	-0.09913341959879562	0.0	1.5857883355132288e-05	0.0	0.9999999999861526	0.0	5.257945851875811e-06	0.0	0.0	0.0006025162124443661	0.0	0.0	0.0006040763877266362	0.0	-0.00028436303412006527	0.0	-2.328619802000154e-09	-0.00012017852072169006	0.0	-2.286777828795104e-09
2.695	-0.00028496392682058794	0.0	-5.35898276058171e-09	-0.00016294007163028486	0.0	-0.09913341961022357	0.0	1.586208815241174e-05	0.0	0.9999999999859428	0.0	5.297595764769065e-06	0.0	0.0	0.0006070597577781184	0.0	0.0	0.0006086205412536245	0.0	-0.00028496392686134424	0.0	-2.3397353766494066e-09	-0.00012017857782955848	0.0	-2.152711221834818e-09
2.7	-0.00028556481983636186	0.0	-5.398480385603385e-09	-0.0001643663940040972	0.0	-0.09913341962143246	0.0	1.586629543478886e-05	0.0	0.999999999985731	0.0	5.337256143310684e-06	0.0	0.0	0.000611604502386834	0.0	0.0	0.00061316590007823	0.0	-0.0002855648198776891	0.0	-2.350215207368695e-09	-0.00012017861818231832	0.0	-2.074000992669496e-09
2.705	-0.00028616571297607977	0.0	-5.437942918145911e-09	-0.0001657957208446524	0.0	-0.0991334196326909	0.0	1.5870502684578264e-05	0.0	0.9999999999855175	0.0	5.376927040633395e-06	0.0	0.0	0.000616150452359075	0.0	0.0	0.0006177124641911168	0.0	-0.000286165713017981	0.0	-2.3605585974690225e-09	-0.00012017864045307687	0.0	-2.0550314279377366e-09
2.71	-0.0002867666062397416	0.0	-5.477370358209292e-09	-0.00016722805215195062	0.0	-0.09913341964399887	0.0	1.5874709901779946e-05	0.0	0.9999999999853023	0.0	5.4166084567372025e-06	0.0	0.0	0.0006206976076948416	0.0	0.0	0.0006222602335829494	0.0	-0.0002867666062822199	0.0	-2.3707655089969096e-09	-0.00012017866524249309	0.0	-2.0277319181006385e-09
2.715	-0.0002873674996273474	0.0	-5.516762705793528e-09	-0.00016866338792599183	0.0	-0.09913341965535638	0.0	1.5878917086393913e-05	0.0	0.9999999999850856	0.0	5.456300391622106e-06	0.0	0.0	0.0006252459683941342	0.0	0.0	0.0006268092082443922	0.0	-0.0002873674996704059	0.0	-2.3808359039988597e-09	-0.00012017869003192647	0.0	-2.0004248175620324e-09
2.72	-0.00028796839313889724	0.0	-5.556119960898621e-09	-0.0001701017281667762	0.0	-0.09913341966676344	0.0	1.588312423842016e-05	0.0	0.9999999999848672	0.0	5.4960028452881085e-06	0.0	0.0	0.0006297955344569529	0.0	0.0	0.0006313593881661092	0.0	-0.0002879683931825391	0.0	-2.3907697445213557e-09	-0.00012017871482131919	0.0	-1.9731101263188788e-09
2.725	-0.000288569286774391	0.0	-5.595442123524567e-09	-0.00017154307287430346	0.0	-0.09913341967822002	0.0	1.588733135785869e-05	0.0	0.9999999999846472	0.0	5.535715817735203e-06	0.0	0.0	0.0006343463058832971	0.0	0.0	0.0006359107733387649	0.0	-0.0002885692868186191	0.0	-2.400566992610869e-09	-0.00012017873961070921	0.0	-1.945787844368386e-09
2.73	-0.0002891701805338287	0.0	-5.634729193671365e-09	-0.0001729874220485737	0.0	-0.09913341968972615	0.0	1.5891538444709498e-05	0.0	0.9999999999844256	0.0	5.575439308963394e-06	0.0	0.0	0.0006388982826731673	0.0	0.0	0.0006404633637530237	0.0	-0.0002891701805786462	0.0	-2.410227610313855e-09	-0.00012017876440011097	0.0	-1.91845797170699e-09
2.735	-0.00028977107441721043	0.0	-5.6739811713390205e-09	-0.00017443477568958698	0.0	-0.09913341970128182	0.0	1.589574549897259e-05	0.0	0.9999999999842022	0.0	5.61517331897268e-06	0.0	0.0	0.000643451464826563	0.0	0.0	0.0006450171593995497	0.0	-0.00028977107446262023	0.0	-2.41975155967675e-09	-0.00012017878918951995	0.0	-1.891120508332368e-09
2.74	-0.0002903719684245362	0.0	-5.713198056527533e-09	-0.00017588513379734338	0.0	-0.09913341971288704	0.0	1.589995252064796e-05	0.0	0.9999999999839774	0.0	5.6549178477630665e-06	0.0	0.0	0.0006480058523434853	0.0	0.0	0.0006495721602690073	0.0	-0.0002903719684705414	0.0	-2.4291388027459834e-09	-0.00012017881397891087	0.0	-1.863775454240756e-09
2.745	-0.0002909728625558058	0.0	-5.752379849236897e-09	-0.00017733849637184264	0.0	-0.09913341972454179	0.0	1.5904159509735612e-05	0.0	0.9999999999837508	0.0	5.694672895334545e-06	0.0	0.0	0.0006525614452239329	0.0	0.0	0.0006541283663520608	0.0	-0.00029097286260240933	0.0	-2.4383893015679573e-09	-0.00012017883876828824	0.0	-1.8364228094288246e-09
2.75	-0.00029157375681101945	0.0	-5.791526549467116e-09	-0.00017879486341308495	0.0	-0.09913341973624608	0.0	1.5908366466235546e-05	0.0	0.9999999999835226	0.0	5.734438461687119e-06	0.0	0.0	0.0006571182434679065	0.0	0.0	0.0006586857776393746	0.0	-0.00029157375685822425	0.0	-2.4475030181890666e-09	-0.00012017886355767735	0.0	-1.809062573894024e-09
2.755	-0.00029217465119017706	0.0	-5.830638157218189e-09	-0.00018025423492107025	0.0	-0.09913341974799991	0.0	1.5912573390147763e-05	0.0	0.9999999999832928	0.0	5.774214546820789e-06	0.0	0.0	0.0006616762470754057	0.0	0.0	0.0006632443941216127	0.0	-0.0002921746512379861	0.0	-2.456479914655687e-09	-0.00012017888834705832	0.0	-1.7816947476327207e-09
2.7600000000000002	-0.0002927755456932787	0.0	-5.869714672490121e-09	-0.0001817166108957987	0.0	-0.09913341975980329	0.0	1.591678028147226e-05	0.0	0.9999999999830613	0.0	5.814001150735559e-06	0.0	0.0	0.0006662354560464316	0.0	0.0	0.0006678042157894398	0.0	-0.00029277554574169484	0.0	-2.4653199530141786e-09	-0.00012017891313644111	0.0	-1.754319330642413e-09
2.765	-0.00029337644032032423	0.0	-5.9087560952829035e-09	-0.00018318199133727	0.0	-0.0991334197716562	0.0	1.592098714020904e-05	0.0	0.9999999999828283	0.0	5.85379827343142e-06	0.0	0.0	0.0006707958703809826	0.0	0.0	0.00067236524263352	0.0	-0.0002933764403693505	0.0	-2.47402309531089e-09	-0.00012017893792581758	0.0	-1.726936322919344e-09
2.77	-0.0002939773350713138	0.0	-5.947762425596541e-09	-0.00018465037624548433	0.0	-0.09913341978355865	0.0	1.5925193966358096e-05	0.0	0.9999999999825936	0.0	5.893605914908378e-06	0.0	0.0	0.0006753574900790598	0.0	0.0	0.0006769274746445176	0.0	-0.00029397733512095297	0.0	-2.482589303592146e-09	-0.00012017896271517326	0.0	-1.699545724460446e-09
2.775	-0.0002945782299462473	0.0	-5.986733663431034e-09	-0.00018612176562044167	0.0	-0.09913341979551063	0.0	1.5929400759919438e-05	0.0	0.9999999999823572	0.0	5.933424075166432e-06	0.0	0.0	0.0006799203151406629	0.0	0.0	0.000681490911813097	0.0	-0.00029457822999650224	0.0	-2.491018539904264e-09	-0.00012017898750455152	0.0	-1.6721475352633757e-09
2.7800000000000002	-0.0002951791249451248	0.0	-6.025669808786384e-09	-0.00018759615946214214	0.0	-0.09913341980751217	0.0	1.593360752089306e-05	0.0	0.9999999999821193	0.0	5.973252754205585e-06	0.0	0.0	0.0006844843455657923	0.0	0.0	0.0006860555541299224	0.0	-0.0002951791249959985	0.0	-2.4993107662935427e-09	-0.00012017901229392166	0.0	-1.6447417553240314e-09
2.785	-0.00029578002006794626	0.0	-6.0645708616625854e-09	-0.0001890735577705855	0.0	-0.09913341981956324	0.0	1.5937814249278964e-05	0.0	0.9999999999818797	0.0	6.013091952025829e-06	0.0	0.0	0.000689049581354447	0.0	0.0	0.0006906214015856582	0.0	-0.0002957800201194414	0.0	-2.507465944806262e-09	-0.00012017903708326921	0.0	-1.6173283846393387e-09
2.79	-0.00029638091531471167	0.0	-6.103436822059642e-09	-0.00019055396054577185	0.0	-0.09913341983166385	0.0	1.594202094507715e-05	0.0	0.9999999999816385	0.0	6.05294166862717e-06	0.0	0.0	0.0006936160225066279	0.0	0.0	0.0006951884541709685	0.0	-0.00029638091536683117	0.0	-2.51548403748869e-09	-0.00012017906187263302	0.0	-1.5899074232071333e-09
2.795	-0.00029698181068542106	0.0	-6.142267689977554e-09	-0.00019203736778770122	0.0	-0.09913341984381399	0.0	1.5946227608287614e-05	0.0	0.9999999999813957	0.0	6.0928019040096075e-06	0.0	0.0	0.0006981836690223348	0.0	0.0	0.0006997567118765179	0.0	-0.0002969818107381677	0.0	-2.523365006387081e-09	-0.00012017908666199413	0.0	-1.562478871023493e-09
2.8000000000000003	-0.0002975827061800745	0.0	-6.181063465416323e-09	-0.00019352377949637372	0.0	-0.09913341985601368	0.0	1.595043423891036e-05	0.0	0.9999999999811512	0.0	6.132672658173144e-06	0.0	0.0	0.000702752520901568	0.0	0.0	0.0007043261746929705	0.0	-0.00029758270623345107	0.0	-2.531108813547667e-09	-0.00012017911145133264	0.0	-1.5350427280850124e-09
2.805	-0.0002981836017986718	0.0	-6.219824148375943e-09	-0.0001950131956717891	0.0	-0.0991334198682629	0.0	1.595464083694539e-05	0.0	0.999999999980905	0.0	6.172553931117772e-06	0.0	0.0	0.0007073225781443267	0.0	0.0	0.0007088968426109907	0.0	-0.000298183601852681	0.0	-2.5387154210166686e-09	-0.00012017913624065579	0.0	-1.5075989943891275e-09
2.81	-0.0002987844975412131	0.0	-6.258549738856419e-09	-0.0001965056163139475	0.0	-0.09913341988056168	0.0	1.5958847402392697e-05	0.0	0.9999999999806573	0.0	6.212445722843497e-06	0.0	0.0	0.0007118938407506115	0.0	0.0	0.0007134687156212428	0.0	-0.00029878449759585766	0.0	-2.546184790840291e-09	-0.00012017916103000696	0.0	-1.4801476699328742e-09
2.815	-0.0002993853934076984	0.0	-6.297240236857749e-09	-0.00019800104142284893	0.0	-0.09913341989291	0.0	1.596305393525229e-05	0.0	0.9999999999804079	0.0	6.252348033350317e-06	0.0	0.0	0.0007164663087204222	0.0	0.0	0.0007180417937143911	0.0	-0.0002993853934629811	0.0	-2.553516885064724e-09	-0.00012017918581936084	0.0	-1.452688754712509e-09
2.82	-0.00029998628939812767	0.0	-6.335895642379934e-09	-0.00019949947099849334	0.0	-0.09913341990530784	0.0	1.596726043552416e-05	0.0	0.9999999999801569	0.0	6.292260862638233e-06	0.0	0.0	0.000721039982053759	0.0	0.0	0.0007226160768810998	0.0	-0.00029998628945405125	0.0	-2.560711665736138e-09	-0.00012017921060871199	0.0	-1.4252222487254616e-09
2.825	-0.000300587185512501	0.0	-6.374515955422977e-09	-0.0002010009050408809	0.0	-0.09913341991775523	0.0	1.5971466903208316e-05	0.0	0.9999999999799043	0.0	6.332184210707249e-06	0.0	0.0	0.0007256148607506222	0.0	0.0	0.0007271915651120334	0.0	-0.00030058718556906814	0.0	-2.5677690949006952e-09	-0.00012017923539801888	0.0	-1.3977481519683535e-09
2.83	-0.00030118808175081817	0.0	-6.413101175986872e-09	-0.00020250534355001132	0.0	-0.09913341993025215	0.0	1.597567333830475e-05	0.0	0.99999999997965	0.0	6.372118077557357e-06	0.0	0.0	0.0007301909448110109	0.0	0.0	0.0007317682583978561	0.0	-0.00030118808180803146	0.0	-2.5746891346045327e-09	-0.0001201792601873303	0.0	-1.3702664644376974e-09
2.835	-0.00030178897811307935	0.0	-6.4516513040716205e-09	-0.00020401278652588478	0.0	-0.09913341994279862	0.0	1.5979879740813466e-05	0.0	0.999999999979394	0.0	6.41206246318856e-06	0.0	0.0	0.0007347682342349257	0.0	0.0	0.0007363461567292322	0.0	-0.0003017889781709415	0.0	-2.581471746893779e-09	-0.00012017928497668327	0.0	-1.3427771861313146e-09
2.84	-0.0003023898745992845	0.0	-6.490166339677224e-09	-0.00020552323396850122	0.0	-0.09913341995539462	0.0	1.5984086110734464e-05	0.0	0.9999999999791366	0.0	6.45201736760086e-06	0.0	0.0	0.0007393467290223667	0.0	0.0	0.0007409252600968259	0.0	-0.00030238987465779825	0.0	-2.5881168938145462e-09	-0.0001201793097660001	0.0	-1.3152803170450559e-09
2.845	-0.00030299077120943366	0.0	-6.528646282803686e-09	-0.00020703668587786081	0.0	-0.09913341996804018	0.0	1.5988292448067743e-05	0.0	0.9999999999788773	0.0	6.491982790794259e-06	0.0	0.0	0.000743926429173334	0.0	0.0	0.0007455055684913018	0.0	-0.0003029907712686015	0.0	-2.5946245374129255e-09	-0.00012017933455531421	0.0	-1.2877758571762875e-09
2.85	-0.0003035916679435268	0.0	-6.567091133451e-09	-0.00020855314225396327	0.0	-0.09913341998073527	0.0	1.5992498752813303e-05	0.0	0.9999999999786165	0.0	6.53195873276875e-06	0.0	0.0	0.0007485073346878271	0.0	0.0	0.0007500870819033239	0.0	-0.0003035916680033514	0.0	-2.6009946397349996e-09	-0.00012017935934462653	0.0	-1.2602638065218736e-09
2.855	-0.00030419256480156387	0.0	-6.605500891619168e-09	-0.00021007260309680877	0.0	-0.0991334199934799	0.0	1.5996705024971144e-05	0.0	0.9999999999783541	0.0	6.571945193524338e-06	0.0	0.0	0.0007530894455658461	0.0	0.0	0.0007546698003235568	0.0	-0.00030419256486204777	0.0	-2.6072271628268294e-09	-0.00012017938413393252	0.0	-1.2327441650787255e-09
2.86	-0.00030479346178354487	0.0	-6.64387555730819e-09	-0.00021159506840639724	0.0	-0.09913342000627406	0.0	1.6000911264541266e-05	0.0	0.9999999999780901	0.0	6.611942173061021e-06	0.0	0.0	0.0007576727618073912	0.0	0.0	0.0007592537237426645	0.0	-0.0003047934618446907	0.0	-2.6133220687344668e-09	-0.00012017940892325657	0.0	-1.205216932843666e-09
2.865	-0.00030539435888946997	0.0	-6.682215130518071e-09	-0.00021312053818272887	0.0	-0.09913342001911776	0.0	1.600511747152367e-05	0.0	0.9999999999778244	0.0	6.651949671378803e-06	0.0	0.0	0.0007622572834124629	0.0	0.0	0.0007638388521513115	0.0	-0.0003053943589512803	0.0	-2.6192793195039406e-09	-0.0001201794337125454	0.0	-1.177682109813262e-09
2.87	-0.00030599525611933894	0.0	-6.720519611248804e-09	-0.00021464901242580339	0.0	-0.09913342003201102	0.0	1.6009323645918353e-05	0.0	0.9999999999775571	0.0	6.691967688477678e-06	0.0	0.0	0.0007668430103810602	0.0	0.0	0.0007684251855401621	0.0	-0.0003059952561818162	0.0	-2.625098877181269e-09	-0.00012017945850185862	0.0	-1.1501396959848664e-09
2.875	-0.00030659615347315196	0.0	-6.7587889995003904e-09	-0.0002161804911356209	0.0	-0.0991334200449538	0.0	1.6013529787725318e-05	0.0	0.9999999999772882	0.0	6.731996224357649e-06	0.0	0.0	0.0007714299427131837	0.0	0.0	0.0007730127238998806	0.0	-0.0003065961535362988	0.0	-2.6307807038124532e-09	-0.00012017948329113841	0.0	-1.1225896913547366e-09
2.88	-0.00030719705095090885	0.0	-6.797023295272832e-09	-0.00021771497431218143	0.0	-0.09913342005794613	0.0	1.6017735896944567e-05	0.0	0.9999999999770175	0.0	6.772035279018715e-06	0.0	0.0	0.0007760180804088333	0.0	0.0	0.0007776014672211312	0.0	-0.0003071970510147276	0.0	-2.636324761443476e-09	-0.00012017950808043175	0.0	-1.0950320959206043e-09
2.8850000000000002	-0.00030779794855260984	0.0	-6.8352224985661315e-09	-0.0002192524619554851	0.0	-0.099133420070988	0.0	1.6021941973576094e-05	0.0	0.9999999999767454	0.0	6.812084852460881e-06	0.0	0.0	0.0007806074234680096	0.0	0.0	0.0007821914154945783	0.0	-0.00030779794861710317	0.0	-2.641731012120313e-09	-0.00012017953286973682	0.0	-1.0674669096788646e-09
2.89	-0.0003083988462782547	0.0	-6.8733866093802825e-09	-0.0002207929540655316	0.0	-0.0991334200840794	0.0	1.6026148017619905e-05	0.0	0.9999999999764715	0.0	6.852144944684139e-06	0.0	0.0	0.0007851979718907113	0.0	0.0	0.0007867825687108862	0.0	-0.0003083988463434249	0.0	-2.646999417888913e-09	-0.00012017955765899403	0.0	-1.0398941326262226e-09
2.895	-0.00030899974412784356	0.0	-6.911515627715289e-09	-0.00022233645064232118	0.0	-0.09913342009722034	0.0	1.6030354029075997e-05	0.0	0.999999999976196	0.0	6.8922155556884926e-06	0.0	0.0	0.0007897897256769394	0.0	0.0	0.0007913749268607191	0.0	-0.0003089997441936932	0.0	-2.652129940795219e-09	-0.00012017958244830092	0.0	-1.0123137647598106e-09
2.9	-0.0003096006421013764	0.0	-6.9496095535711494e-09	-0.00022388295168585372	0.0	-0.09913342011041083	0.0	1.6034560007944367e-05	0.0	0.9999999999759189	0.0	6.932296685473943e-06	0.0	0.0	0.0007943826848266936	0.0	0.0	0.0007959684899347414	0.0	-0.00030960064216790787	0.0	-2.657122542885149e-09	-0.00012017960723757438	0.0	-9.847258060758652e-10
2.9050000000000002	-0.0003102015401988533	0.0	-6.987668386947868e-09	-0.00022543245719612942	0.0	-0.09913342012365085	0.0	1.603876595422502e-05	0.0	0.9999999999756402	0.0	6.972388334040492e-06	0.0	0.0	0.0007989768493399743	0.0	0.0	0.0008005632579236175	0.0	-0.00031020154026606894	0.0	-2.6619771862046117e-09	-0.00012017963140294912	0.0	-9.553797012660454e-10
2.91	-0.00031080243842027404	0.0	-7.025692127845438e-09	-0.000226984967173148	0.0	-0.09913342013694042	0.0	1.6042971867917957e-05	0.0	0.9999999999753598	0.0	7.012490501388134e-06	0.0	0.0	0.0008035722192167809	0.0	0.0	0.0008051592308180116	0.0	-0.0003108024384881764	0.0	-2.6666938327995025e-09	-0.00012017965888625718	0.0	-9.353355093674753e-10
2.915	-0.00031140333680307184	0.0	-7.063785814590001e-09	-0.00022854048178319364	0.0	-0.09913342015012058	0.0	1.604717817826723e-05	0.0	0.9999999999750776	0.0	7.052603194709686e-06	0.0	0.0	0.0008081687952813493	0.0	0.0	0.0008097564087315573	0.0	-0.0003114033368716643	0.0	-2.6713774780340827e-09	-0.00012017969965539944	0.0	-9.525614640899951e-10
2.92	-0.0003120042354102078	0.0	-7.102126118663653e-09	-0.00023009900130595162	0.0	-0.09913342016292398	0.0	1.6051385607249164e-05	0.0	0.9999999999747927	0.0	7.092726426103262e-06	0.0	0.0	0.0008127665789200206	0.0	0.0	0.0008143547919847193	0.0	-0.0003120042354794956	0.0	-2.67620474695887e-09	-0.00012017973613630435	0.0	-9.577477916653975e-10
2.9250000000000003	-0.00031260513414731314	0.0	-7.1404482374912444e-09	-0.00023166052532221825	0.0	-0.09913342017575132	0.0	1.6055593072735583e-05	0.0	0.9999999999745062	0.0	7.132860177435709e-06	0.0	0.0	0.0008173655680548894	0.0	0.0	0.0008189543805879555	0.0	-0.00031260513421729877	0.0	-2.68091081163415e-09	-0.00012017976055781734	0.0	-9.290899794518017e-10
2.93	-0.0003132060330143877	0.0	-7.178752171072767e-09	-0.00023322505383199324	0.0	-0.09913342018860262	0.0	1.6059800574726486e-05	0.0	0.999999999974218	0.0	7.173004448707023e-06	0.0	0.0	0.0008219657626859551	0.0	0.0	0.0008235551745517235	0.0	-0.00031320603308507375	0.0	-2.685495634100117e-09	-0.00012017978655217882	0.0	-9.048377416075991e-10
2.935	-0.0003138069320114315	0.0	-7.217037919408224e-09	-0.00023479258683527677	0.0	-0.09913342020147788	0.0	1.6064008113221877e-05	0.0	0.9999999999739281	0.0	7.213159239917207e-06	0.0	0.0	0.000826567162813218	0.0	0.0	0.0008281571738864811	0.0	-0.00031380693208282056	0.0	-2.6899591763969495e-09	-0.00012017981254656016	0.0	-8.8057791179755e-10
2.94	-0.00031440783113844464	0.0	-7.255305482497616e-09	-0.0002363631243320688	0.0	-0.09913342021437709	0.0	1.6068215688221748e-05	0.0	0.9999999999736365	0.0	7.2533245510662595e-06	0.0	0.0	0.0008311697684366783	0.0	0.0	0.0008327603786026861	0.0	-0.0003144078312105393	0.0	-2.69430140056481e-09	-0.00012017983854091711	0.0	-8.563104900180425e-10
2.945	-0.000315008730395427	0.0	-7.293554860340942e-09	-0.00023793666632236936	0.0	-0.09913342022730025	0.0	1.6072423299726103e-05	0.0	0.9999999999733433	0.0	7.293500382154182e-06	0.0	0.0	0.0008357735795563358	0.0	0.0	0.0008373647887107963	0.0	-0.0003150087304682297	0.0	-2.698522268643842e-09	-0.00012017986453527135	0.0	-8.320354762657196e-10
2.95	-0.00031560962978237876	0.0	-7.331786052938208e-09	-0.00023951321280617856	0.0	-0.09913342024024736	0.0	1.6076630947734946e-05	0.0	0.9999999999730483	0.0	7.333686733180978e-06	0.0	0.0	0.000840378596172191	0.0	0.0	0.0008419704042212693	0.0	-0.000315609629855892	0.0	-2.7026217426741742e-09	-0.00012017989052962468	0.0	-8.077528705378171e-10
2.955	-0.00031621052929929974	0.0	-7.369999060289405e-09	-0.00024109276378349615	0.0	-0.09913342025321845	0.0	1.608083863224827e-05	0.0	0.9999999999727517	0.0	7.373883604146638e-06	0.0	0.0	0.000844984818284243	0.0	0.0	0.0008465772251445631	0.0	-0.00031621052937352595	0.0	-2.7065997846959217e-09	-0.00012017991652397259	0.0	-7.834626728308885e-10
2.96	-0.00031681142894619	0.0	-7.408193882394537e-09	-0.00024267531925432228	0.0	-0.09913342026621347	0.0	1.6085046353266077e-05	0.0	0.9999999999724534	0.0	7.41409099505117e-06	0.0	0.0	0.0008495922458924925	0.0	0.0	0.0008511852514911353	0.0	-0.00031681142902113173	0.0	-2.710456356749179e-09	-0.0001201799425183187	0.0	-7.59164883141508e-10
2.965	-0.00031741232872304953	0.0	-7.446370519253603e-09	-0.0002442608792186569	0.0	-0.09913342027923244	0.0	1.6089254110788372e-05	0.0	0.9999999999721534	0.0	7.45430890589457e-06	0.0	0.0	0.0008542008789969392	0.0	0.0	0.0008557944832714437	0.0	-0.00031741232879870917	0.0	-2.714191420874028e-09	-0.00012017996851266662	0.0	-7.348595014667871e-10
2.97	-0.0003180132286298784	0.0	-7.484528970866609e-09	-0.0002458494436765002	0.0	-0.09913342029227538	0.0	1.609346190481515e-05	0.0	0.9999999999718517	0.0	7.494537336676844e-06	0.0	0.0	0.0008588107175975838	0.0	0.0	0.0008604049204959461	0.0	-0.00031801322870625843	0.0	-2.717804939110532e-09	-0.0001201799945070335	0.0	-7.105465278030105e-10
2.975	-0.0003186141286666765	0.0	-7.522669237233544e-09	-0.0002474410126278518	0.0	-0.09913342030534228	0.0	1.609766973534641e-05	0.0	0.9999999999715484	0.0	7.534776287397982e-06	0.0	0.0	0.0008634217616944252	0.0	0.0	0.0008650165631751002	0.0	-0.00031861412874377947	0.0	-2.7212968734987366e-09	-0.00012018002050136606	0.0	-6.862259621462973e-10
2.98	-0.0003192150288334439	0.0	-7.560791318354415e-09	-0.000249035586072712	0.0	-0.09913342031843313	0.0	1.6101877602382157e-05	0.0	0.9999999999712433	0.0	7.575025758057991e-06	0.0	0.0	0.000868034011287464	0.0	0.0	0.0008696294113193639	0.0	-0.00031921502891127206	0.0	-2.7246671860786696e-09	-0.00012018004649567422	0.0	-6.61897804494566e-10
2.985	-0.00031981592913018055	0.0	-7.598895214229223e-09	-0.0002506331640110807	0.0	-0.09913342033154793	0.0	1.610608550592239e-05	0.0	0.9999999999709366	0.0	7.615285748656869e-06	0.0	0.0	0.0008726474663767	0.0	0.0	0.0008742434649391948	0.0	-0.00031981592920873625	0.0	-2.727915838890352e-09	-0.00012018007249003659	0.0	-6.375620548447694e-10
2.99	-0.0003204168295568866	0.0	-7.636980924857967e-09	-0.00025223374644295804	0.0	-0.09913342034468668	0.0	1.6110293445967104e-05	0.0	0.9999999999706283	0.0	7.655556259194621e-06	0.0	0.0	0.0008772621269621341	0.0	0.0	0.0008788587240450507	0.0	-0.00032041682963617244	0.0	-2.7310427939737793e-09	-0.00012018009848439896	0.0	-6.132187131919034e-10
2.995	-0.00032101773011356183	0.0	-7.675048450240642e-09	-0.0002538373333683438	0.0	-0.09913342035784939	0.0	1.6114501422516303e-05	0.0	0.9999999999703182	0.0	7.695837289671239e-06	0.0	0.0	0.0008818779930437649	0.0	0.0	0.0008834751886473895	0.0	-0.0003210177301935801	0.0	-2.7340480133689285e-09	-0.0001201801244786755	0.0	-5.888677795336173e-10
3.0	-0.0003216186308002063	0.0	-7.713097790377253e-09	-0.00025544392478723805	0.0	-0.09913342037103605	0.0	1.6118709435569986e-05	0.0	0.9999999999700063	0.0	7.736128840086725e-06	0.0	0.0	0.0008864950646215931	0.0	0.0	0.0008880928587566688	0.0	-0.00032161863088095926	0.0	-2.7369314591157686e-09	-0.00012018015047300986	0.0	-5.645092538676846e-10
3.005	-0.0003222195316168201	0.0	-7.751128945267799e-09	-0.00025705352069964083	0.0	-0.09913342038424668	0.0	1.6122917485128154e-05	0.0	0.9999999999696929	0.0	7.776430910441081e-06	0.0	0.0	0.0008911133416956188	0.0	0.0	0.0008927117343833464	0.0	-0.0003222195316983102	0.0	-2.739693093254251e-09	-0.00012018017646735054	0.0	-5.401431361888665e-10
3.0100000000000002	-0.00032282043256340326	0.0	-7.789141914912283e-09	-0.00025866612110555224	0.0	-0.09913342039748124	0.0	1.6127125571190805e-05	0.0	0.9999999999693777	0.0	7.816743500734311e-06	0.0	0.0	0.0008957328242658424	0.0	0.0	0.0008973318155378801	0.0	-0.00032282043264563273	0.0	-2.742332877824299e-09	-0.00012018020246167497	0.0	-5.157694264952674e-10
3.015	-0.0003234213336399557	0.0	-7.827136699310699e-09	-0.000260281726004972	0.0	-0.09913342041073978	0.0	1.613133369375794e-05	0.0	0.999999999969061	0.0	7.857066610966406e-06	0.0	0.0	0.000900353512332263	0.0	0.0	0.0009019531022307276	0.0	-0.00032342133372292696	0.0	-2.74485077486584e-09	-0.00012018022845598946	0.0	-4.913881247837026e-10
3.02	-0.0003240222348464773	0.0	-7.86511329846305e-09	-0.00026190033539790034	0.0	-0.09913342042402226	0.0	1.6135541852829563e-05	0.0	0.9999999999687424	0.0	7.897400241137371e-06	0.0	0.0	0.0009049754058948808	0.0	0.0	0.0009065755944723467	0.0	-0.00032402223493019263	0.0	-2.7472467464187656e-09	-0.00012018025445029671	0.0	-4.669992310495331e-10
3.025	-0.00032462313618296823	0.0	-7.903071712369334e-09	-0.0002635219492843372	0.0	-0.09913342043732869	0.0	1.6139750048405667e-05	0.0	0.9999999999684223	0.0	7.937744391247204e-06	0.0	0.0	0.0009095985049536961	0.0	0.0	0.0009111992922731952	0.0	-0.0003246231362674299	0.0	-2.7495207545229604e-09	-0.00012018028044460667	0.0	-4.4260274529043576e-10
3.0300000000000002	-0.00032522403764942854	0.0	-7.941011941029558e-09	-0.00026514656766428267	0.0	-0.09913342045065908	0.0	1.6143958280486258e-05	0.0	0.9999999999681003	0.0	7.978099061295912e-06	0.0	0.0	0.0009142228095087092	0.0	0.0	0.0009158241956437309	0.0	-0.0003252240377346387	0.0	-2.7516727612182896e-09	-0.00012018030643892207	0.0	-4.1819866750323296e-10
3.035	-0.00032582493924585807	0.0	-7.978933984443714e-09	-0.0002667741905377365	0.0	-0.09913342046401344	0.0	1.614816654907133e-05	0.0	0.9999999999677768	0.0	8.018464251283485e-06	0.0	0.0	0.0009188483195599198	0.0	0.0	0.0009204503045944115	0.0	-0.00032582493933181914	0.0	-2.7537027285446072e-09	-0.00012018033243324558	0.0	-3.937869976849468e-10
3.04	-0.0003264258409722568	0.0	-8.016837842611803e-09	-0.00026840481790469897	0.0	-0.09913342047739174	0.0	1.615237485416089e-05	0.0	0.9999999999674516	0.0	8.058839961209927e-06	0.0	0.0	0.0009234750351073274	0.0	0.0	0.0009250776191356948	0.0	-0.0003264258410589711	0.0	-2.7556106185417468e-09	-0.00012018035842753206	0.0	-3.6936773583112423e-10
3.045	-0.0003270267428286249	0.0	-8.05472351553383e-09	-0.00027003844976516983	0.0	-0.09913342049079399	0.0	1.615658319575493e-05	0.0	0.9999999999671246	0.0	8.09922619107524e-06	0.0	0.0	0.0009281029561509327	0.0	0.0	0.0009297061392780385	0.0	-0.0003270267429160945	0.0	-2.7573963932495214e-09	-0.0001201803844218348	0.0	-3.4494088193900115e-10
3.0500000000000003	-0.0003276276448149623	0.0	-8.092591003209792e-09	-0.00027167508611914944	0.0	-0.0991334205042202	0.0	1.6160791573853456e-05	0.0	0.999999999966796	0.0	8.139622940879425e-06	0.0	0.0	0.0009327320826907358	0.0	0.0	0.0009343358650319005	0.0	-0.00032762764490318943	0.0	-2.7590600147077347e-09	-0.0001201804104161294	0.0	-3.205064360058548e-10
3.055	-0.00032822854693126895	0.0	-8.130440305639686e-09	-0.00027331472696663737	0.0	-0.09913342051767036	0.0	1.6164999988456468e-05	0.0	0.9999999999664657	0.0	8.180030210622476e-06	0.0	0.0	0.0009373624147267361	0.0	0.0	0.0009389667964077384	0.0	-0.00032822854702025577	0.0	-2.7606014449561717e-09	-0.00012018043641043666	0.0	-2.9606439802774217e-10
3.06	-0.0003288294491775449	0.0	-8.168271422823516e-09	-0.0002749573723076338	0.0	-0.09913342053114449	0.0	1.6169208439563963e-05	0.0	0.9999999999661338	0.0	8.220448000304398e-06	0.0	0.0	0.0009419939522589339	0.0	0.0	0.0009435989334160101	0.0	-0.00032882944926729377	0.0	-2.762020646034599e-09	-0.000120180462404715	0.0	-2.7161476800172e-10
3.065	-0.0003294303515537901	0.0	-8.206084354761282e-09	-0.0002766030221421388	0.0	-0.09913342054464255	0.0	1.6173416927175942e-05	0.0	0.9999999999658	0.0	8.260876309925186e-06	0.0	0.0	0.0009466266952873292	0.0	0.0	0.0009482322760671733	0.0	-0.00032943035164430295	0.0	-2.763317579982771e-09	-0.0001201804883990051	0.0	-2.4715754592508605e-10
3.0700000000000003	-0.00033003125406000464	0.0	-8.243879101452985e-09	-0.00027825167647015244	0.0	-0.09913342055816458	0.0	1.6177625451292406e-05	0.0	0.9999999999654647	0.0	8.30131513948485e-06	0.0	0.0	0.0009512606438119224	0.0	0.0	0.0009528668243716856	0.0	-0.00033003125415128384	0.0	-2.7644922088404243e-09	-0.00012018051439331868	0.0	-2.22692731792898e-10
3.075	-0.00033063215669618844	0.0	-8.281655662898619e-09	-0.00027990333529167444	0.0	-0.09913342057171057	0.0	1.6181834011913354e-05	0.0	0.9999999999651277	0.0	8.34176448898338e-06	0.0	0.0	0.0009558957978327129	0.0	0.0	0.0009575025783400051	0.0	-0.00033063215678823607	0.0	-2.7655444946472697e-09	-0.00012018054038758256	0.0	-1.9822032560250196e-10
3.08	-0.0003312330594623415	0.0	-8.319414039098187e-09	-0.00028155799860670496	0.0	-0.0991334205852805	0.0	1.6186042609038785e-05	0.0	0.9999999999647889	0.0	8.382224358420778e-06	0.0	0.0	0.0009605321573497009	0.0	0.0	0.0009621395379825892	0.0	-0.0003312330595551597	0.0	-2.7664743994430155e-09	-0.00012018056638185639	0.0	-1.7374032735236762e-10
3.085	-0.0003318339623584638	0.0	-8.357154230051691e-09	-0.000283215666415244	0.0	-0.09913342059887441	0.0	1.61902512426687e-05	0.0	0.9999999999644485	0.0	8.422694747797046e-06	0.0	0.0	0.0009651697223628862	0.0	0.0	0.000966777703309896	0.0	-0.00033183396245205465	0.0	-2.7672818852673522e-09	-0.00012018059237613383	0.0	-1.492527370373458e-10
3.09	-0.00033243486538455546	0.0	-8.39487623575913e-09	-0.00028487633871729156	0.0	-0.09913342061249225	0.0	1.61944599128031e-05	0.0	0.9999999999641065	0.0	8.463175657112184e-06	0.0	0.0	0.0009698084928722693	0.0	0.0	0.0009714170743323832	0.0	-0.00033243486547892106	0.0	-2.7679669141599426e-09	-0.00012018061837043747	0.0	-1.2475755465438973e-10
3.095	-0.0003330357685406164	0.0	-8.432580056220508e-09	-0.0002865400155128478	0.0	-0.09913342062613405	0.0	1.6198668619441985e-05	0.0	0.9999999999637628	0.0	8.503667086366194e-06	0.0	0.0	0.0009744484688778504	0.0	0.0	0.0009760576510605084	0.0	-0.00033303576863575896	0.0	-2.768529448160444e-09	-0.0001201806443647086	0.0	-1.002547802001631e-10
3.1	-0.00033363667182664667	0.0	-8.470265691435816e-09	-0.0002882066968019124	0.0	-0.09913342063979981	0.0	1.6202877362585356e-05	0.0	0.9999999999634173	0.0	8.54416903555907e-06	0.0	0.0	0.0009790896503796287	0.0	0.0	0.0009806994335047293	0.0	-0.0003336366719225681	0.0	-2.7689694493084874e-09	-0.00012018067035895622	0.0	-7.574441367185349e-11
3.105	-0.00033423757524264614	0.0	-8.507933141405061e-09	-0.0002898763825844855	0.0	-0.09913342065348951	0.0	1.6207086142233208e-05	0.0	0.9999999999630701	0.0	8.584681504690816e-06	0.0	0.0	0.0009837320373776044	0.0	0.0	0.000985342421675504	0.0	-0.0003342375753393485	0.0	-2.769286879643701e-09	-0.00012018069635321739	0.0	-5.122645506656577e-11
3.11	-0.0003348384787886149	0.0	-8.545582406128239e-09	-0.00029154907286056713	0.0	-0.09913342066720318	0.0	1.6211294958385547e-05	0.0	0.9999999999627213	0.0	8.625204493761432e-06	0.0	0.0	0.0009883756298717779	0.0	0.0	0.0009899866155832898	0.0	-0.00033483847888610027	0.0	-2.7694817012056848e-09	-0.00012018072234749484	0.0	-2.6700904380122692e-11
3.115	-0.000335439382464553	0.0	-8.583213485605357e-09	-0.00029322476763015743	0.0	-0.0991334206809408	0.0	1.6215503811042367e-05	0.0	0.9999999999623708	0.0	8.66573800277092e-06	0.0	0.0	0.0009930204278621492	0.0	0.0	0.000994632015238545	0.0	-0.00033543938256282347	0.0	-2.7695538760340285e-09	-0.00012018074834176776	0.0	-2.1677616095877513e-12
3.12	-0.0003360402862704603	0.0	-8.620826379836405e-09	-0.0002949034668932561	0.0	-0.09913342069470238	0.0	1.6219712700203675e-05	0.0	0.9999999999620186	0.0	8.706282031719276e-06	0.0	0.0	0.0009976664313487184	0.0	0.0	0.0009992786206517272	0.0	-0.0003360402863695179	0.0	-2.7695033661683016e-09	-0.00012018077433602261	0.0	2.2372973248451167e-11
3.125	-0.00033664119020633695	0.0	-8.658421088821388e-09	-0.0002965851706498633	0.0	-0.09913342070848791	0.0	1.6223921625869466e-05	0.0	0.9999999999616648	0.0	8.7468365806065e-06	0.0	0.0	0.0010023136403314848	0.0	0.0	0.001003926431833294	0.0	-0.00033664119030618367	0.0	-2.7693301336480596e-09	-0.00012018080067036096	0.0	5.361895506779717e-11
3.13	-0.00033724209427218285	0.0	-8.695997612560307e-09	-0.000298269878899979	0.0	-0.09913342072229739	0.0	1.622813058803974e-05	0.0	0.9999999999613092	0.0	8.787401649432593e-06	0.0	0.0	0.0010069620548104486	0.0	0.0	0.0010085754487937032	0.0	-0.0003372420943728206	0.0	-2.769034140512842e-09	-0.0001201808277903863	0.0	1.0034610345918119e-10
3.1350000000000002	-0.00033784299844758783	0.0	-8.733957834034127e-09	-0.0002999575924602435	0.0	-0.09913342073566786	0.0	1.623233941785404e-05	0.0	0.9999999999609505	0.0	8.827977273789492e-06	0.0	0.0	0.0010116116788641443	0.0	0.0	0.0010132256714950375	0.0	-0.0003378429985490237	0.0	-2.7690172080944197e-09	-0.00012018082688940526	0.0	-4.047658561521183e-10
3.14	-0.0003384439025425264	0.0	-8.776043403812433e-09	-0.00030164831893381887	0.0	-0.09913342074428885	0.0	1.6236546543171087e-05	0.0	0.9999999999605746	0.0	8.86856378504866e-06	0.0	0.0	0.0010162625504649301	0.0	0.0	0.0010178770994489945	0.0	-0.0003384439026448151	0.0	-2.7730207279467344e-09	-0.00012018082849880852	0.0	-8.604316370838082e-10
3.145	-0.00033904480676563074	0.0	-8.81814629982274e-09	-0.0003033420499730633	0.0	-0.0991334207528929	0.0	1.6240753690071647e-05	0.0	0.999999999960197	0.0	8.909160819391697e-06	0.0	0.0	0.0010209146279223035	0.0	0.0	0.0010225297326617578	0.0	-0.00033904480686877523	0.0	-2.77693688175007e-09	-0.00012018085760890141	0.0	-7.744916243422679e-10
3.15	-0.0003396457111169008	0.0	-8.860266522065048e-09	-0.0003050387855779767	0.0	-0.09913342076147999	0.0	1.624496085855572e-05	0.0	0.9999999999598175	0.0	8.949768376818603e-06	0.0	0.0	0.0010255679112362648	0.0	0.0	0.0010271835711395101	0.0	-0.00033964571122090413	0.0	-2.7807656315330158e-09	-0.00012018088324265994	0.0	-7.570070231208673e-10
3.1550000000000002	-0.0003402466155963367	0.0	-8.902404070539358e-09	-0.00030673852574855946	0.0	-0.09913342077005012	0.0	1.624916804862331e-05	0.0	0.9999999999594361	0.0	8.990386457329385e-06	0.0	0.0	0.0010302224004068148	0.0	0.0	0.0010318386148884349	0.0	-0.0003402466157012019	0.0	-2.7845069393241334e-09	-0.00012018090887644106	0.0	-7.395148276122689e-10
3.16	-0.0003408475202039384	0.0	-8.944558945245665e-09	-0.0003084412704848109	0.0	-0.0991334207786033	0.0	1.6253375260274408e-05	0.0	0.999999999959053	0.0	9.031015060924029e-06	0.0	0.0	0.001034878095433952	0.0	0.0	0.0010364948639147152	0.0	-0.00034084752030966853	0.0	-2.7881607671519885e-09	-0.00012018093451021496	0.0	-7.220150378138395e-10
3.165	-0.0003414484249397058	0.0	-8.98673114618397e-09	-0.0003101470197867316	0.0	-0.09913342078713953	0.0	1.625758249350902e-05	0.0	0.9999999999586681	0.0	9.071654187602545e-06	0.0	0.0	0.0010395349963176772	0.0	0.0	0.0010411523182245344	0.0	-0.000341448425046304	0.0	-2.7917270770451145e-09	-0.00012018096014395451	0.0	-7.045076537205608e-10
3.17	-0.000342049329803639	0.0	-9.028920673354275e-09	-0.00031185577365432137	0.0	-0.0991334207956588	0.0	1.6261789748327145e-05	0.0	0.9999999999582813	0.0	9.112303837364929e-06	0.0	0.0	0.00104419310305799	0.0	0.0	0.0010458109778240757	0.0	-0.0003420493299111081	0.0	-2.7952058310320325e-09	-0.00012018098577771846	0.0	-6.869926753303995e-10
3.1750000000000003	-0.0003426502347957381	0.0	-9.071127526756583e-09	-0.0003135675320875803	0.0	-0.09913342080416111	0.0	1.6265997024728786e-05	0.0	0.9999999999578927	0.0	9.152964010211187e-06	0.0	0.0	0.0010488524156548912	0.0	0.0	0.0010504708427195224	0.0	-0.00034265023490408117	0.0	-2.7985969911412514e-09	-0.00012018101141149778	0.0	-6.694701026400123e-10
3.18	-0.00034325113991600287	0.0	-9.113351706390887e-09	-0.00031528229508650813	0.0	-0.09913342081264648	0.0	1.627020432271394e-05	0.0	0.9999999999575023	0.0	9.193634706141313e-06	0.0	0.0	0.0010535129341083804	0.0	0.0	0.0010551319129170574	0.0	-0.00034325114002522306	0.0	-2.80190051940126e-09	-0.00012018103704524005	0.0	-6.519399356461868e-10
3.185	-0.00034385204516443335	0.0	-9.155593212257191e-09	-0.0003170000626511049	0.0	-0.09913342082111487	0.0	1.62744116422826e-05	0.0	0.9999999999571101	0.0	9.234315925155306e-06	0.0	0.0	0.001058174658418457	0.0	0.0	0.0010597941884228643	0.0	-0.00034385204527453354	0.0	-2.805116377840535e-09	-0.00012018106267897058	0.0	-6.34402174345394e-10
3.19	-0.00034445295054102965	0.0	-9.197852044355492e-09	-0.00031872083478137086	0.0	-0.09913342082956632	0.0	1.627861898343478e-05	0.0	0.9999999999567161	0.0	9.275007667253166e-06	0.0	0.0	0.0010628375885851215	0.0	0.0	0.0010644576692431262	0.0	-0.0003444529506520128	0.0	-2.8082445284875304e-09	-0.00012018108831276797	0.0	-6.168568187343182e-10
3.1950000000000003	-0.0003450538560457919	0.0	-9.240128202685797e-09	-0.0003204446114773061	0.0	-0.09913342083800082	0.0	1.628282634617047e-05	0.0	0.9999999999563203	0.0	9.315709932434903e-06	0.0	0.0	0.0010675017246083746	0.0	0.0	0.001069122355384026	0.0	-0.00034505385615766116	0.0	-2.8112849333706895e-09	-0.00012018111394651927	0.0	-5.993038688101607e-10
3.2	-0.0003456547616787197	0.0	-9.2824216872481e-09	-0.0003221713927389102	0.0	-0.09913342084641835	0.0	1.6287033730489676e-05	0.0	0.9999999999559226	0.0	9.356422720700505e-06	0.0	0.0	0.001072167066488215	0.0	0.0	0.0010737882468517474	0.0	-0.00034565476179147797	0.0	-2.8142375545184373e-09	-0.0001201811395802498	0.0	-5.817433245691441e-10
3.205	-0.00034625566743981344	0.0	-9.324732498042401e-09	-0.00032390117856618335	0.0	-0.09913342085481894	0.0	1.6291241136392392e-05	0.0	0.9999999999555231	0.0	9.397146032049976e-06	0.0	0.0	0.001076833614224644	0.0	0.0	0.0010784553436524733	0.0	-0.0003462556675534637	0.0	-2.8171023539591818e-09	-0.0001201811652140002	0.0	-5.64175186008573e-10
3.21	-0.0003468565733290728	0.0	-9.3670606350687e-09	-0.0003256339689591255	0.0	-0.09913342086320256	0.0	1.629544856387862e-05	0.0	0.9999999999551218	0.0	9.437879866483318e-06	0.0	0.0	0.0010815013678176603	0.0	0.0	0.001083123645792387	0.0	-0.000346856573443618	0.0	-2.819879293721318e-09	-0.00012018119084774609	0.0	-5.465994531249529e-10
3.215	-0.00034745747934649806	0.0	-9.409406098327001e-09	-0.0003273697639177367	0.0	-0.09913342087156923	0.0	1.6299656012948364e-05	0.0	0.9999999999547187	0.0	9.478624224000528e-06	0.0	0.0	0.0010861703272672647	0.0	0.0	0.001087793153277672	0.0	-0.0003474574794619412	0.0	-2.822568335833221e-09	-0.00012018121648152359	0.0	-5.290161259151126e-10
3.22	-0.00034805838549208914	0.0	-9.451768887817304e-09	-0.00032910856344201727	0.0	-0.09913342087991896	0.0	1.630386348360162e-05	0.0	0.9999999999543138	0.0	9.519379104601611e-06	0.0	0.0	0.0010908404925734578	0.0	0.0	0.001092463866114511	0.0	-0.0003480583856084332	0.0	-2.825169442323253e-09	-0.00012018124211526225	0.0	-5.114252043756678e-10
3.225	-0.00034865929176584594	0.0	-9.494149003539602e-09	-0.0003308503675319666	0.0	-0.09913342088825171	0.0	1.630807097583839e-05	0.0	0.999999999953907	0.0	9.560144508286559e-06	0.0	0.0	0.001095511863736238	0.0	0.0	0.0010971357843090877	0.0	-0.0003486592918830938	0.0	-2.8276825752197566e-09	-0.00012018126774898917	0.0	-4.938266885036129e-10
3.23	-0.00034926019816776844	0.0	-9.536546445493899e-09	-0.000332595176187585	0.0	-0.09913342089656751	0.0	1.631227848965867e-05	0.0	0.9999999999534984	0.0	9.600920435055378e-06	0.0	0.0	0.0011001844407556066	0.0	0.0	0.001101808907867585	0.0	-0.0003492601982859231	0.0	-2.8301076965510634e-09	-0.00012018129338274589	0.0	-4.762205782961769e-10
3.235	-0.00034986110469785675	0.0	-9.578961213680198e-09	-0.0003343429894088725	0.0	-0.09913342090486638	0.0	1.6316486025062465e-05	0.0	0.9999999999530881	0.0	9.641706884908065e-06	0.0	0.0	0.0011048582236315631	0.0	0.0	0.0011064832367961863	0.0	-0.00034986110481692123	0.0	-2.8324447683454855e-09	-0.00012018131901649269	0.0	-4.586068737487621e-10
3.24	-0.00035046201135611094	0.0	-9.621393308098499e-09	-0.00033609380719582926	0.0	-0.09913342091314827	0.0	1.6320693582049774e-05	0.0	0.9999999999526759	0.0	9.682503857844627e-06	0.0	0.0	0.0011095332123641083	0.0	0.0	0.0011111587711010748	0.0	-0.00035046201147608804	0.0	-2.834693752631313e-09	-0.00012018134465023224	0.0	-4.4098557485841825e-10
3.245	-0.00035106291814253083	0.0	-9.663842728748794e-09	-0.0003378476295484549	0.0	-0.09913342092141321	0.0	1.6324901160620594e-05	0.0	0.9999999999522619	0.0	9.723311353865055e-06	0.0	0.0	0.001114209406953241	0.0	0.0	0.0011158355107884336	0.0	-0.00035106291826342355	0.0	-2.8368546114368283e-09	-0.00012018137028397993	0.0	-4.2335668162373907e-10
3.25	-0.0003516638250571165	0.0	-9.70630947563109e-09	-0.00033960445646674957	0.0	-0.0991334209296612	0.0	1.6329108760774928e-05	0.0	0.9999999999518461	0.0	9.764129372969352e-06	0.0	0.0	0.0011188868073989619	0.0	0.0	0.001120513455864446	0.0	-0.00035166382517892784	0.0	-2.838927306790302e-09	-0.00012018139591772672	0.0	-4.057201940396994e-10
3.255	-0.00035226473209986795	0.0	-9.748793548745387e-09	-0.00034136428795071333	0.0	-0.09913342093789222	0.0	1.6333316382512776e-05	0.0	0.9999999999514284	0.0	9.804957915157518e-06	0.0	0.0	0.0011235654137012705	0.0	0.0	0.0011251926063352955	0.0	-0.0003522647322226008	0.0	-2.840911800719971e-09	-0.00012018142155145815	0.0	-3.8807611210279766e-10
3.2600000000000002	-0.00035286563927078524	0.0	-9.791294948091685e-09	-0.0003431271240003462	0.0	-0.0991334209461063	0.0	1.6337524025834135e-05	0.0	0.999999999951009	0.0	9.845796980429556e-06	0.0	0.0	0.0011282452258601678	0.0	0.0	0.001129872962207165	0.0	-0.00035286563939444245	0.0	-2.8428080552540716e-09	-0.00012018144718520494	0.0	-3.70424435811269e-10
3.265	-0.00035346654656986823	0.0	-9.83381367366998e-09	-0.0003448929646156481	0.0	-0.09913342095430343	0.0	1.634173169073901e-05	0.0	0.9999999999505877	0.0	9.886646568785462e-06	0.0	0.0	0.0011329262438756528	0.0	0.0	0.0011345545234862375	0.0	-0.0003534665466944528	0.0	-2.844616032420819e-09	-0.00012018147281892824	0.0	-3.5276516516063996e-10
3.27	-0.00035406745399711704	0.0	-9.876349725480272e-09	-0.00034666180979661904	0.0	-0.09913342096248359	0.0	1.6345939377227396e-05	0.0	0.9999999999501646	0.0	9.927506680225235e-06	0.0	0.0	0.0011376084677477258	0.0	0.0	0.0011392372901786966	0.0	-0.00035406745412263176	0.0	-2.8463356942484083e-09	-0.00012018149845265877	0.0	-3.3509830014834614e-10
3.275	-0.0003546683615525316	0.0	-9.918903103522565e-09	-0.000348433659543259	0.0	-0.0991334209706468	0.0	1.6350147085299294e-05	0.0	0.9999999999497398	0.0	9.96837731474888e-06	0.0	0.0	0.001142291897476387	0.0	0.0	0.0011439212622907254	0.0	-0.00035466836167897945	0.0	-2.847967002765027e-09	-0.00012018152408640285	0.0	-3.17423840770872e-10
3.2800000000000002	-0.000355269269236112	0.0	-9.961473807796862e-09	-0.0003502085138555682	0.0	-0.09913342097879305	0.0	1.6354354814954706e-05	0.0	0.999999999949313	0.0	1.0009258472356398e-05	0.0	0.0	0.0011469765330616368	0.0	0.0	0.001148606439828507	0.0	-0.00035526926936349577	0.0	-2.8495099199988362e-09	-0.00012018154972012976	0.0	-2.997417870249779e-10
3.285	-0.00035587017704785814	0.0	-1.0004061838303154e-08	-0.0003519863727335463	0.0	-0.09913342098692235	0.0	1.6358562566193633e-05	0.0	0.9999999999488844	0.0	1.005015015304778e-05	0.0	0.0	0.001151662374503474	0.0	0.0	0.0011532928227982252	0.0	-0.0003558701771761808	0.0	-2.8509644079779916e-09	-0.00012018157535387112	0.0	-2.8205213890822353e-10
3.29	-0.00035647108498777005	0.0	-1.0046667195041445e-08	-0.00035376723617719353	0.0	-0.0991334209950347	0.0	1.636277033901607e-05	0.0	0.9999999999484541	0.0	1.0091052356823032e-05	0.0	0.0	0.0011563494218018993	0.0	0.0	0.0011579804112060626	0.0	-0.0003564710851170345	0.0	-2.8523304287306263e-09	-0.00012018160098759623	0.0	-2.6435489641570097e-10
3.295	-0.00035707199305584777	0.0	-1.0089289878011736e-08	-0.00035555110418650975	0.0	-0.09913342100313008	0.0	1.6366978133422022e-05	0.0	0.9999999999480219	0.0	1.0131965083682154e-05	0.0	0.0	0.0011610376749569132	0.0	0.0	0.0011626692050582025	0.0	-0.00035707199318605676	0.0	-2.853607944284852e-09	-0.00012018162662132043	0.0	-2.4665005954537676e-10
3.3000000000000003	-0.00035767290125209125	0.0	-1.0131929887214031e-08	-0.0003573379767614952	0.0	-0.09913342101120852	0.0	1.6371185949411484e-05	0.0	0.9999999999475879	0.0	1.017288833362515e-05	0.0	0.0	0.0011657271339685156	0.0	0.0	0.0011673592043608281	0.0	-0.0003576729013832477	0.0	-2.854796916668779e-09	-0.00012018165225505819	0.0	-2.2893762829479692e-10
3.305	-0.00035827380957650045	0.0	-1.017458722264832e-08	-0.00035912785390214956	0.0	-0.09913342101927	0.0	1.637539378698446e-05	0.0	0.9999999999471522	0.0	1.0213822106652011e-05	0.0	0.0	0.0011704177988367055	0.0	0.0	0.001172050409120123	0.0	-0.00035827380970860734	0.0	-2.855897307910491e-09	-0.000120181677888786	0.0	-2.1121760265833663e-10
3.31	-0.0003588747180290755	0.0	-1.021726188431461e-08	-0.000360920735608473	0.0	-0.09913342102731452	0.0	1.637960164614095e-05	0.0	0.9999999999467145	0.0	1.0254766402762743e-05	0.0	0.0	0.0011751096695614839	0.0	0.0	0.00117674281934227	0.0	-0.0003588747181621355	0.0	-2.8569090800380497e-09	-0.00012018170352249755	0.0	-1.934899826343622e-10
3.315	-0.0003594756266098163	0.0	-1.0259953872212898e-08	-0.00036271662188046543	0.0	-0.09913342103534209	0.0	1.6383809526880956e-05	0.0	0.9999999999462751	0.0	1.0295721221957341e-05	0.0	0.0	0.0011798027461428502	0.0	0.0	0.0011814364350334525	0.0	-0.00035947562674383234	0.0	-2.857832195079518e-09	-0.00012018172915624525	0.0	-1.7575476822053685e-10
3.3200000000000003	-0.0003600765353187229	0.0	-1.030266318634319e-08	-0.00036451551271812717	0.0	-0.0991334210433527	0.0	1.6388017429204472e-05	0.0	0.9999999999458339	0.0	1.0336686564235814e-05	0.0	0.0	0.001184497028580805	0.0	0.0	0.0011861312561998539	0.0	-0.00036007653545369795	0.0	-2.85866661506293e-09	-0.00012018175478996041	0.0	-1.580119594112771e-10
3.325	-0.00036067744415579526	0.0	-1.0345389826705476e-08	-0.0003663174081214578	0.0	-0.09913342105134636	0.0	1.6392225353111502e-05	0.0	0.9999999999453908	0.0	1.0377662429598152e-05	0.0	0.0	0.0011891925168753476	0.0	0.0	0.001190827282847657	0.0	-0.00036067744429173193	0.0	-2.859412302016301e-09	-0.00012018178042367377	0.0	-1.4026155620439094e-10
3.33	-0.0003612783531210334	0.0	-1.0388133793299762e-08	-0.00036812230809045747	0.0	-0.09913342105932306	0.0	1.6396433298602043e-05	0.0	0.9999999999449459	0.0	1.0418648818044361e-05	0.0	0.0	0.001193889211026479	0.0	0.0	0.0011955245149830452	0.0	-0.0003612783532579347	0.0	-2.8600692179676407e-09	-0.00012018180605738804	0.0	-1.2250355859754156e-10
3.335	-0.00036187926221443735	0.0	-1.0430895086126051e-08	-0.00036993021262512614	0.0	-0.09913342106728282	0.0	1.6400641265676098e-05	0.0	0.9999999999444992	0.0	1.0459645729574438e-05	0.0	0.0	0.0011985871110341978	0.0	0.0	0.001200222952612202	0.0	-0.00036187926235230585	0.0	-2.860637324944937e-09	-0.00012018183169111766	0.0	-1.0473796658717899e-10
3.34	-0.00036248017143600703	0.0	-1.0473673705184337e-08	-0.00037174112172546394	0.0	-0.0991334210752256	0.0	1.6404849254333667e-05	0.0	0.9999999999440508	0.0	1.0500653164188386e-05	0.0	0.0	0.0012032862168985057	0.0	0.0	0.0012049225957413102	0.0	-0.0003624801715748459	0.0	-2.8611165849761657e-09	-0.00012018185732484818	0.0	-8.696478016818161e-11
3.345	-0.0003630810807857426	0.0	-1.0516469650474624e-08	-0.00037355503539147103	0.0	-0.09913342108315144	0.0	1.6409057264574747e-05	0.0	0.9999999999436003	0.0	1.0541671121886206e-05	0.0	0.0	0.0012079865286194016	0.0	0.0	0.0012096234443765533	0.0	-0.0003630810809255543	0.0	-2.8615069600892694e-09	-0.0001201818829585507	0.0	-6.918399933959816e-11
3.35	-0.0003636819902636438	0.0	-1.0559282921996911e-08	-0.0003753719536231469	0.0	-0.09913342109106033	0.0	1.6413265296399344e-05	0.0	0.9999999999431483	0.0	1.0582699602667894e-05	0.0	0.0	0.001212688046196886	0.0	0.0	0.0012143254985241144	0.0	-0.0003636819904044314	0.0	-2.8618084123122066e-09	-0.00012018190859227038	0.0	-5.139562409815438e-11
3.355	-0.0003642828998697108	0.0	-1.0602113519751193e-08	-0.00037719187642049187	0.0	-0.09913342109895225	0.0	1.641747334980745e-05	0.0	0.9999999999426943	0.0	1.0623738606533448e-05	0.0	0.0	0.0012173907696309578	0.0	0.0	0.0012190287581901767	0.0	-0.000364282900011477	0.0	-2.862020903672888e-09	-0.00012018193422599097	0.0	-3.3599654438501167e-11
3.36	-0.00036488380960394366	0.0	-1.0644961443737477e-08	-0.00037901480378350585	0.0	-0.09913342110682723	0.0	1.642168142479907e-05	0.0	0.9999999999422385	0.0	1.0664788133482872e-05	0.0	0.0	0.0012220946989216185	0.0	0.0	0.0012237332233809236	0.0	-0.0003648838097466913	0.0	-2.862144396199225e-09	-0.00012018195985970343	0.0	-1.579609035907377e-11
3.365	-0.0003654847194663423	0.0	-1.0687826693955764e-08	-0.0003808407357121891	0.0	-0.09913342111468523	0.0	1.6425889521374205e-05	0.0	0.9999999999417809	0.0	1.0705848183516171e-05	0.0	0.0	0.0012267998340688678	0.0	0.0	0.0012284388941025382	0.0	-0.00036548471961007407	0.0	-2.862178851919107e-09	-0.00012018198549341226	0.0	2.0150681433124507e-12
3.37	-0.00036608562945690667	0.0	-1.0730709270406047e-08	-0.00038266967220654133	0.0	-0.0991334211225263	0.0	1.643009763953285e-05	0.0	0.9999999999413215	0.0	1.0746918756633335e-05	0.0	0.0	0.0012315061750727049	0.0	0.0	0.0012331457703612036	0.0	-0.0003660856296016254	0.0	-2.8621242328604138e-09	-0.00012018201112711931	0.0	1.9833821072559036e-11
3.375	-0.0003666865395756368	0.0	-1.0773609173088328e-08	-0.0003845016132665625	0.0	-0.09913342113035041	0.0	1.643430577927501e-05	0.0	0.9999999999408603	0.0	1.078799985283437e-05	0.0	0.0	0.0012362137219331306	0.0	0.0	0.0012378538521631032	0.0	-0.00036668653972134527	0.0	-2.8619805010509986e-09	-0.00012018203676082996	0.0	3.766016843175412e-11
3.38	-0.00036728744982253273	0.0	-1.081652640200261e-08	-0.0003863365588922528	0.0	-0.09913342113815755	0.0	1.6438513940600683e-05	0.0	0.9999999999403972	0.0	1.0829091472119273e-05	0.0	0.0	0.001240922474650144	0.0	0.0	0.0012425631395144201	0.0	-0.0003672874499692337	0.0	-2.8617476185187082e-09	-0.00012018206239454421	0.0	5.549411022367566e-11
3.3850000000000002	-0.00036788836019759454	0.0	-1.0859460957148896e-08	-0.0003881745090836123	0.0	-0.09913342114594775	0.0	1.6442722123509866e-05	0.0	0.9999999999399324	0.0	1.087019361448805e-05	0.0	0.0	0.0012456324332237466	0.0	0.0	0.0012472736324213377	0.0	-0.0003678883603452907	0.0	-2.8614255472913677e-09	-0.00012018208802823408	0.0	7.333564645234926e-11
3.39	-0.000368489270700822	0.0	-1.0902412838527174e-08	-0.0003900154638406407	0.0	-0.099133421153721	0.0	1.6446930328002567e-05	0.0	0.9999999999394656	0.0	1.091130627994069e-05	0.0	0.0	0.0012503435976539369	0.0	0.0	0.001251985330890039	0.0	-0.00036848927084951605	0.0	-2.861014249396786e-09	-0.00012018211366194925	0.0	9.118477712026336e-11
3.395	-0.0003690901813322152	0.0	-1.0945382046137454e-08	-0.00039185942316333813	0.0	-0.09913342116147728	0.0	1.645113855407878e-05	0.0	0.9999999999389972	0.0	1.0952429468477202e-05	0.0	0.0	0.001255055967940716	0.0	0.0	0.0012566982349267073	0.0	-0.0003690901814819102	0.0	-2.860513686862761e-09	-0.00012018213929567616	0.0	1.0904150223021658e-10
3.4	-0.00036969109209177426	0.0	-1.0988368579979733e-08	-0.00039370638705170467	0.0	-0.09913342116921661	0.0	1.64553468017385e-05	0.0	0.999999999938527	0.0	1.0993563180097583e-05	0.0	0.0	0.0012597695440840831	0.0	0.0	0.0012614123445375258	0.0	-0.00036969109224247273	0.0	-2.859923821717072e-09	-0.00012018216492935339	0.0	1.269058217876959e-10
3.4050000000000002	-0.0003702920029794992	0.0	-1.1031372440054015e-08	-0.0003955563555057404	0.0	-0.09913342117693899	0.0	1.6459555070981738e-05	0.0	0.9999999999380548	0.0	1.1034707414801838e-05	0.0	0.0	0.0012644843260840393	0.0	0.0	0.0012661276597286779	0.0	-0.0003702920031312038	0.0	-2.859244615987469e-09	-0.0001201821905630532	0.0	1.447777357943488e-10
3.41	-0.00037089291399538973	0.0	-1.1074393626360292e-08	-0.00039740932852544506	0.0	-0.09913342118464441	0.0	1.646376336180849e-05	0.0	0.9999999999375808	0.0	1.1075862172589959e-05	0.0	0.0	0.0012692003139405832	0.0	0.0	0.0012708441805063466	0.0	-0.0003708929141481033	0.0	-2.8584760317017096e-09	-0.00012018221619676113	0.0	1.626572442520226e-10
3.415	-0.0003714938251394461	0.0	-1.1117432138898572e-08	-0.00039926530611081876	0.0	-0.09913342119233287	0.0	1.6467971674218754e-05	0.0	0.9999999999371051	0.0	1.1117027453461949e-05	0.0	0.0	0.0012739175076537158	0.0	0.0	0.0012755619068767151	0.0	-0.0003714938252931714	0.0	-2.8576180308875214e-09	-0.00012018224183046545	0.0	1.8054434716642487e-10
3.42	-0.0003720947364116683	0.0	-1.1160487977668849e-08	-0.0004011242882618616	0.0	-0.09913342120000437	0.0	1.647218000821253e-05	0.0	0.9999999999366275	0.0	1.1158203257417808e-05	0.0	0.0	0.0012786359072234363	0.0	0.0	0.0012802808388459668	0.0	-0.00037209473656640797	0.0	-2.8566705755726133e-09	-0.00012018226746416526	0.0	1.9843904453997513e-10
3.4250000000000003	-0.0003726956478120563	0.0	-1.1203561142671127e-08	-0.00040298627497857353	0.0	-0.09913342120765893	0.0	1.647638836378982e-05	0.0	0.9999999999361481	0.0	1.119938958445754e-05	0.0	0.0	0.0012833555126497461	0.0	0.0	0.0012850009764202848	0.0	-0.00037269564796781307	0.0	-2.8556336277846857e-09	-0.00012018229309786958	0.0	2.1634133637483782e-10
3.43	-0.00037329655934061003	0.0	-1.1246651633905403e-08	-0.00040485126626095444	0.0	-0.09913342121529653	0.0	1.6480596740950624e-05	0.0	0.9999999999356669	0.0	1.1240586434581137e-05	0.0	0.0	0.0012880763239326435	0.0	0.0	0.0012897223196058525	0.0	-0.00037329655949738664	0.0	-2.8545071495514227e-09	-0.00012018231873157662	0.0	2.3425122267519025e-10
3.435	-0.0003738974709973295	0.0	-1.1289759451371678e-08	-0.0004067192621090043	0.0	-0.09913342122291717	0.0	1.648480513969494e-05	0.0	0.999999999935184	0.0	1.1281793807788603e-05	0.0	0.0	0.0012927983410721297	0.0	0.0	0.001294444868408853	0.0	-0.0003738974711551288	0.0	-2.853291102900485e-09	-0.00012018234436526559	0.0	2.5216870344513375e-10
3.44	-0.0003744983827822148	0.0	-1.1332884595069953e-08	-0.00040859026252272336	0.0	-0.09913342123052087	0.0	1.648901356002277e-05	0.0	0.9999999999346991	0.0	1.132301170407994e-05	0.0	0.0	0.0012975215640682043	0.0	0.0	0.0012991686228354695	0.0	-0.00037449838294103925	0.0	-2.8519854498595183e-09	-0.00012018236999893558	0.0	2.7009377868694314e-10
3.4450000000000003	-0.00037509929469526585	0.0	-1.137602706500023e-08	-0.00041046426750211164	0.0	-0.0991334212381076	0.0	1.649322200193411e-05	0.0	0.9999999999342124	0.0	1.1364240123455152e-05	0.0	0.0	0.0013022459929208678	0.0	0.0	0.0013038935828918851	0.0	-0.0003750992948551182	0.0	-2.850590152456157e-09	-0.00012018239563263177	0.0	2.8802644840372727e-10
3.45	-0.0003757002067364827	0.0	-1.1419186861162505e-08	-0.0004123412770471687	0.0	-0.09913342124567738	0.0	1.6497430465428963e-05	0.0	0.9999999999337239	0.0	1.1405479065914227e-05	0.0	0.0	0.0013069716276301194	0.0	0.0	0.0013086197485842833	0.0	-0.0003757002068973656	0.0	-2.849105172718018e-09	-0.00012018242126632073	0.0	3.059667125983467e-10
3.455	-0.0003763011189058653	0.0	-1.1462363983556778e-08	-0.00041422129115789493	0.0	-0.0991334212532302	0.0	1.650163895050733e-05	0.0	0.9999999999332336	0.0	1.1446728531457172e-05	0.0	0.0	0.0013116984681959595	0.0	0.0	0.001313347119918847	0.0	-0.0003763011190677814	0.0	-2.8475304726727047e-09	-0.00012018244690001241	0.0	3.239145712743998e-10
3.46	-0.0003769020312034137	0.0	-1.150555843218305e-08	-0.0004161043098342902	0.0	-0.09913342126076606	0.0	1.650584745716921e-05	0.0	0.9999999999327416	0.0	1.1487988520083987e-05	0.0	0.0	0.001316426514618388	0.0	0.0	0.0013180756969017598	0.0	-0.00037690203136636575	0.0	-2.8458660143477982e-09	-0.00012018247253372125	0.0	3.4187002443628436e-10
3.465	-0.0003775029436291279	0.0	-1.1548770207041323e-08	-0.00041799033307635456	0.0	-0.09913342126828498	0.0	1.6510055985414607e-05	0.0	0.9999999999322476	0.0	1.1529259031794672e-05	0.0	0.0	0.001321155766897405	0.0	0.0	0.0013228054795392046	0.0	-0.0003775029437931186	0.0	-2.8441117597708623e-09	-0.00012018249816741022	0.0	3.598330720859028e-10
3.47	-0.00037810385618300787	0.0	-1.1591999308131598e-08	-0.00041987936088408814	0.0	-0.09913342127578693	0.0	1.651426453524351e-05	0.0	0.9999999999317519	0.0	1.157054006658923e-05	0.0	0.0	0.0013258862250330112	0.0	0.0	0.0013275364678373648	0.0	-0.0003781038563480398	0.0	-2.8422676709694537e-09	-0.0001201825238010811	0.0	3.778037142268673e-10
3.475	-0.0003787047688650536	0.0	-1.1635245735453866e-08	-0.0004217713932574905	0.0	-0.09913342128327193	0.0	1.6518473106655933e-05	0.0	0.9999999999312543	0.0	1.1611831624467652e-05	0.0	0.0	0.001330617889025205	0.0	0.0	0.0013322686618024236	0.0	-0.0003787047690311294	0.0	-2.8403337099711033e-09	-0.0001201825494347764	0.0	3.957819508617489e-10
3.48	-0.0003793056816752651	0.0	-1.1678509489008137e-08	-0.0004236664301965621	0.0	-0.09913342129073999	0.0	1.6522681699651866e-05	0.0	0.9999999999307551	0.0	1.1653133705429946e-05	0.0	0.0	0.0013353507588739879	0.0	0.0	0.0013370020614405641	0.0	-0.00037930568184238754	0.0	-2.838309838803339e-09	-0.00012018257506845181	0.0	4.1376778199527637e-10
3.485	-0.0003799065946136424	0.0	-1.1721790568794406e-08	-0.00042556447170130255	0.0	-0.09913342129819108	0.0	1.652689031423131e-05	0.0	0.9999999999302538	0.0	1.1694446309476108e-05	0.0	0.0	0.001340084834579359	0.0	0.0	0.0013417366667579696	0.0	-0.0003799065947818139	0.0	-2.836196019493649e-09	-0.00012018260070214258	0.0	4.317612076297451e-10
3.49	-0.0003805075076801855	0.0	-1.176508897481268e-08	-0.0004274655177717124	0.0	-0.09913342130562522	0.0	1.653109895039427e-05	0.0	0.9999999999297509	0.0	1.1735769436606144e-05	0.0	0.0	0.0013448201161413193	0.0	0.0	0.0013464724777608233	0.0	-0.00038050750784940894	0.0	-2.8339922140695352e-09	-0.00012018262633582974	0.0	4.497622277677194e-10
3.495	-0.00038110842087489435	0.0	-1.1808404707062948e-08	-0.0004293695684077911	0.0	-0.0991334213130424	0.0	1.653530760814074e-05	0.0	0.999999999929246	0.0	1.1777103086820045e-05	0.0	0.0	0.0013495566035598677	0.0	0.0	0.0013512094944553084	0.0	-0.0003811084210451722	0.0	-2.8316983845584582e-09	-0.00012018265196950877	0.0	4.677708424143485e-10
3.5	-0.000381709334197769	0.0	-1.1851737765545216e-08	-0.00043127662360953887	0.0	-0.09913342132044263	0.0	1.6539516287470728e-05	0.0	0.9999999999287394	0.0	1.1818447260117816e-05	0.0	0.0	0.0013542942968350047	0.0	0.0	0.001355947716847608	0.0	-0.000381709334369104	0.0	-2.8293144929878748e-09	-0.00012018267760317876	0.0	4.857870515709281e-10
3.505	-0.0003823102476488094	0.0	-1.1895088150259484e-08	-0.0004331866833769556	0.0	-0.09913342132782589	0.0	1.6543724988384224e-05	0.0	0.999999999928231	0.0	1.1859801956499456e-05	0.0	0.0	0.0013590331959667304	0.0	0.0	0.0013606871449439058	0.0	-0.000382310247821204	0.0	-2.8268405013852255e-09	-0.00012018270323685507	0.0	5.038108552418012e-10
3.5100000000000002	-0.00038291116122801563	0.0	-1.1938455861205754e-08	-0.0004350997477100417	0.0	-0.0991334213351922	0.0	1.6547933710881235e-05	0.0	0.9999999999277207	0.0	1.190116717596497e-05	0.0	0.0	0.0013637733009550452	0.0	0.0	0.0013654277787503845	0.0	-0.00038291116140147253	0.0	-2.824276371777928e-09	-0.00012018272887052777	0.0	5.218422534301659e-10
3.515	-0.00038351207493538756	0.0	-1.1981840898384022e-08	-0.00043701581660879666	0.0	-0.09913342134254158	0.0	1.655214245496176e-05	0.0	0.9999999999272086	0.0	1.194254291851435e-05	0.0	0.0	0.0013685146117999479	0.0	0.0	0.0013701696182732276	0.0	-0.0003835120751099093	0.0	-2.821622066193391e-09	-0.0001201827545042059	0.0	5.398812461381663e-10
3.52	-0.0003841129887709253	0.0	-1.2025243261794286e-08	-0.0004389348900732206	0.0	-0.09913342134987398	0.0	1.6556351220625796e-05	0.0	0.9999999999266947	0.0	1.1983929184147597e-05	0.0	0.0	0.0013732571285014392	0.0	0.0	0.0013749126635186181	0.0	-0.0003841129889465146	0.0	-2.8188775466590065e-09	-0.00012018278013789486	0.0	5.579278333698761e-10
3.525	-0.0003847139027346288	0.0	-1.2068662951436551e-08	-0.00044085696810331366	0.0	-0.09913342135718943	0.0	1.6560560007873347e-05	0.0	0.999999999926179	0.0	1.2025325972864714e-05	0.0	0.0	0.0013780008510595194	0.0	0.0	0.0013796569144927395	0.0	-0.00038471390291128823	0.0	-2.8160427752021453e-09	-0.00012018280577156125	0.0	5.759820151300033e-10
3.5300000000000002	-0.0003853148168264982	0.0	-1.2112099967310818e-08	-0.0004427820506990759	0.0	-0.09913342136448793	0.0	1.656476881670441e-05	0.0	0.9999999999256615	0.0	1.2066733284665706e-05	0.0	0.0	0.0013827457794741886	0.0	0.0	0.001384402371201775	0.0	-0.0003853148170042302	0.0	-2.813117713850157e-09	-0.000120182831405224	0.0	5.940437914194649e-10
3.535	-0.0003859157310465333	0.0	-1.2155554309417084e-08	-0.0004447101378605071	0.0	-0.09913342137176946	0.0	1.6568977647118986e-05	0.0	0.9999999999251421	0.0	1.2108151119550564e-05	0.0	0.0	0.001387491913745446	0.0	0.0	0.0013891490336519075	0.0	-0.0003859157312253405	0.0	-2.810102324630396e-09	-0.00012018285703890123	0.0	6.121131622416796e-10
3.54	-0.0003865166453947341	0.0	-1.2199025977755347e-08	-0.0004466412295876074	0.0	-0.09913342137903405	0.0	1.6573186499117075e-05	0.0	0.999999999924621	0.0	1.2149579477519292e-05	0.0	0.0	0.0013922392538732926	0.0	0.0	0.0013938969018493206	0.0	-0.0003865166455746192	0.0	-2.806996569570179e-09	-0.00012018288267257935	0.0	6.301901276009146e-10
3.545	-0.00038711755987110073	0.0	-1.2242514972325609e-08	-0.0004485753258803767	0.0	-0.09913342138628167	0.0	1.6577395372698676e-05	0.0	0.999999999924098	0.0	1.2191018358571888e-05	0.0	0.0	0.0013969877998577277	0.0	0.0	0.0013986459758001974	0.0	-0.0003871175600520663	0.0	-2.8038004106968204e-09	-0.00012018290830625024	0.0	6.482746874997615e-10
3.5500000000000003	-0.0003877184744756332	0.0	-1.2286021293127876e-08	-0.0004505124267388152	0.0	-0.09913342139351235	0.0	1.658160426786379e-05	0.0	0.9999999999235732	0.0	1.2232467762708356e-05	0.0	0.0	0.0014017375516987517	0.0	0.0	0.001403396255510721	0.0	-0.0003877184746576817	0.0	-2.8005138100376087e-09	-0.00012018293393991572	0.0	6.663668419421977e-10
3.555	-0.0003883193892083314	0.0	-1.2329544940162137e-08	-0.0004524525321629226	0.0	-0.09913342140072608	0.0	1.658581318461242e-05	0.0	0.9999999999230467	0.0	1.227392768992869e-05	0.0	0.0	0.0014064885093963639	0.0	0.0	0.0014081477409870747	0.0	-0.0003883193893914654	0.0	-2.7971367296198206e-09	-0.00012018295957356764	0.0	6.84466590931594e-10
3.56	-0.0003889203040691954	0.0	-1.2373085913428397e-08	-0.0004543956421526991	0.0	-0.09913342140792283	0.0	1.659002212294456e-05	0.0	0.9999999999225182	0.0	1.2315398140232895e-05	0.0	0.0	0.0014112406729505649	0.0	0.0	0.0014129004322354416	0.0	-0.0003889203042534174	0.0	-2.793669131470711e-09	-0.00012018298520722768	0.0	7.025739344697633e-10
3.565	-0.0003895212190582251	0.0	-1.241664421292666e-08	-0.00045634175670814463	0.0	-0.09913342141510265	0.0	1.6594231082860215e-05	0.0	0.999999999921988	0.0	1.2356879113620968e-05	0.0	0.0	0.0014159940423613547	0.0	0.0	0.001417654329262005	0.0	-0.0003895212192435377	0.0	-2.790110977617535e-09	-0.0001201830108409013	0.0	7.206888725605313e-10
3.5700000000000003	-0.0003901221341754207	0.0	-1.2460219838656922e-08	-0.00045829087582925946	0.0	-0.0991334214222655	0.0	1.6598440064359382e-05	0.0	0.9999999999214559	0.0	1.2398370610092917e-05	0.0	0.0	0.001420748617628734	0.0	0.0	0.0014224094320729483	0.0	-0.0003901221343618264	0.0	-2.7864622300875113e-09	-0.0001201830364745749	0.0	7.388114052083648e-10
3.575	-0.000390723049420782	0.0	-1.2503812790619182e-08	-0.00046024299951604304	0.0	-0.0991334214294114	0.0	1.660264906744206e-05	0.0	0.999999999920922	0.0	1.243987262964873e-05	0.0	0.0	0.0014255043987527014	0.0	0.0	0.0014271657406744545	0.0	-0.0003907230496082834	0.0	-2.7827228509078532e-09	-0.00012018306210821959	0.0	7.569415324150216e-10
3.58	-0.0003913239647943091	0.0	-1.254742306881344e-08	-0.0004621981277684958	0.0	-0.09913342143654034	0.0	1.6606858092108254e-05	0.0	0.9999999999203864	0.0	1.2481385172288413e-05	0.0	0.0	0.0014302613857332578	0.0	0.0	0.001431923255072707	0.0	-0.00039132396498290864	0.0	-2.778892802105758e-09	-0.00012018308774188778	0.0	7.750792541834311e-10
3.585	-0.000391924880296002	0.0	-1.25910506732397e-08	-0.0004641562605866176	0.0	-0.09913342144365234	0.0	1.661106713835796e-05	0.0	0.9999999999198489	0.0	1.2522908238011966e-05	0.0	0.0	0.0014350195785704028	0.0	0.0	0.0014366819752738888	0.0	-0.0003919248804857023	0.0	-2.774972045708409e-09	-0.00012018311337554783	0.0	7.932245705178605e-10
3.59	-0.0003925257959258606	0.0	-1.2634695603897959e-08	-0.00046611739797040847	0.0	-0.09913342145074737	0.0	1.661527620619118e-05	0.0	0.9999999999193095	0.0	1.2564441826819387e-05	0.0	0.0	0.0014397789772641366	0.0	0.0	0.0014414419012841833	0.0	-0.0003925257961166641	0.0	-2.770960543742963e-09	-0.00012018313900919253	0.0	8.113774814223076e-10
3.595	-0.0003931267116838851	0.0	-1.2678357860788219e-08	-0.0004680815399198686	0.0	-0.09913342145782544	0.0	1.6619485295607913e-05	0.0	0.9999999999187684	0.0	1.260598593871068e-05	0.0	0.0	0.0014445395818144598	0.0	0.0	0.0014462030331097737	0.0	-0.00039312671187579425	0.0	-2.7668582582365657e-09	-0.00012018316464285348	0.0	8.295379868987921e-10
3.6	-0.0003937276275700753	0.0	-1.2722037443910474e-08	-0.0004700486864349975	0.0	-0.09913342146488656	0.0	1.6623694406608156e-05	0.0	0.9999999999182254	0.0	1.264754057368584e-05	0.0	0.0	0.001449301392221371	0.0	0.0	0.001450965370756843	0.0	-0.0003937276277630926	0.0	-2.76266515121635e-09	-0.00012018319027649727	0.0	8.477060869501058e-10
3.605	-0.00039432854358443126	0.0	-1.276573435326473e-08	-0.00047201883751579553	0.0	-0.09913342147193073	0.0	1.6627903539191916e-05	0.0	0.9999999999176806	0.0	1.268910573174487e-05	0.0	0.0	0.0014540644084848715	0.0	0.0	0.0014557289142315747	0.0	-0.00039432854377855923	0.0	-2.7583811847094337e-09	-0.00012018321591016365	0.0	8.658817815800537e-10
3.61	-0.00039492945972695304	0.0	-1.2809448588850987e-08	-0.00047399199316226266	0.0	-0.09913342147895794	0.0	1.6632112693359187e-05	0.0	0.9999999999171341	0.0	1.273068141288777e-05	0.0	0.0	0.0014588286306049605	0.0	0.0	0.0014604936635401519	0.0	-0.00039492945992219427	0.0	-2.7540063207429127e-09	-0.00012018324154384268	0.0	8.840650707922685e-10
3.615	-0.00039553037599764063	0.0	-1.2853180150669245e-08	-0.000475968153374399	0.0	-0.0991334214859682	0.0	1.6636321869109973e-05	0.0	0.9999999999165857	0.0	1.2772267617114544e-05	0.0	0.0	0.0014635940585816395	0.0	0.0	0.0014652596186887578	0.0	-0.0003955303761939976	0.0	-2.749540521343869e-09	-0.00012018326717747743	0.0	9.022559545897005e-10
3.62	-0.00039613129239649393	0.0	-1.28969290387195e-08	-0.00047794731815220423	0.0	-0.0991334214929615	0.0	1.664053106644427e-05	0.0	0.9999999999160355	0.0	1.2813864344425181e-05	0.0	0.0	0.0014683606924149064	0.0	0.0	0.0014700267796835757	0.0	-0.00039613129259396905	0.0	-2.7449837485393683e-09	-0.00012018329281112121	0.0	9.204544329753828e-10
3.625	-0.00039673220892351305	0.0	-1.2940695253001755e-08	-0.00047992948749567846	0.0	-0.09913342149993785	0.0	1.664474028536208e-05	0.0	0.9999999999154835	0.0	1.2855471594819688e-05	0.0	0.0	0.0014731285321047621	0.0	0.0	0.0014747951465307887	0.0	-0.00039673220912210885	0.0	-2.740335964356461e-09	-0.00012018331844477223	0.0	9.386605059537957e-10
3.63	-0.0003973331255786979	0.0	-1.2984478793516007e-08	-0.0004819146614048218	0.0	-0.09913342150689725	0.0	1.6648949525863403e-05	0.0	0.9999999999149296	0.0	1.2897089368298066e-05	0.0	0.0	0.001477897577651207	0.0	0.0	0.0014795647192365803	0.0	-0.00039733312577841675	0.0	-2.735597130822173e-09	-0.00012018334407841241	0.0	9.5687417352627e-10
3.6350000000000002	-0.0003979340423620486	0.0	-1.3028279660262264e-08	-0.00048390283987963446	0.0	-0.09913342151383968	0.0	1.665315878794824e-05	0.0	0.9999999999143739	0.0	1.2938717664860316e-05	0.0	0.0	0.001482667829054241	0.0	0.0	0.0014843354978071334	0.0	-0.000397934042562893	0.0	-2.7307672099635357e-09	-0.00012018336971207517	0.0	9.750954356961621e-10
3.64	-0.00039853495927356507	0.0	-1.3072097853240515e-08	-0.0004858940229201159	0.0	-0.09913342152076515	0.0	1.6657368071616588e-05	0.0	0.9999999999138165	0.0	1.2980356484506432e-05	0.0	0.0	0.0014874392863138638	0.0	0.0	0.0014891074822486314	0.0	-0.00039853495947553746	0.0	-2.7258461638075412e-09	-0.00012018339534570542	0.0	9.9332429246867e-10
3.645	-0.0003991358763132473	0.0	-1.3115933372450768e-08	-0.0004878882105262664	0.0	-0.09913342152767368	0.0	1.6661577376868452e-05	0.0	0.9999999999132572	0.0	1.3022005827236419e-05	0.0	0.0	0.0014922119494300756	0.0	0.0	0.0014938806725672575	0.0	-0.00039913587651635007	0.0	-2.720833954381175e-09	-0.00012018342097935101	0.0	1.0115607438453097e-09
3.65	-0.00039973679348109526	0.0	-1.315978621789302e-08	-0.000489885402698086	0.0	-0.09913342153456525	0.0	1.6665786703703826e-05	0.0	0.9999999999126961	0.0	1.3063665693050275e-05	0.0	0.0	0.0014969858184028762	0.0	0.0	0.0014986550687691948	0.0	-0.000399736793685331	0.0	-2.715730543711408e-09	-0.00012018344661298757	0.0	1.0298047898300728e-09
3.6550000000000002	-0.0004003377107771091	0.0	-1.3203656389567274e-08	-0.0004918855994355748	0.0	-0.09913342154143986	0.0	1.6669996052122715e-05	0.0	0.9999999999121331	0.0	1.3105336081948001e-05	0.0	0.0	0.001501760893232266	0.0	0.0	0.0015034306708606266	0.0	-0.00040033771098248	0.0	-2.7105358938251897e-09	-0.00012018347224665034	0.0	1.048056430425358e-09
3.66	-0.00040093862820128867	0.0	-1.3247543887473523e-08	-0.0004938888007387325	0.0	-0.09913342154829753	0.0	1.6674205422125118e-05	0.0	0.9999999999115684	0.0	1.3147016993929597e-05	0.0	0.0	0.0015065371739182449	0.0	0.0	0.0015082074788477363	0.0	-0.00040093862840779747	0.0	-2.7052499667494643e-09	-0.00012018349788029865	0.0	1.0663156656345703e-09
3.665	-0.000401539545753634	0.0	-1.3291448711611773e-08	-0.0004958950066075593	0.0	-0.09913342155513824	0.0	1.667841481371103e-05	0.0	0.9999999999110019	0.0	1.318870842899506e-05	0.0	0.0	0.0015113146604608125	0.0	0.0	0.0015129854927367068	0.0	-0.00040153954596128293	0.0	-2.6998727245111463e-09	-0.00012018352351390719	0.0	1.0845824954628039e-09
3.67	-0.0004021404634341451	0.0	-1.3335370861982022e-08	-0.0004979042170420552	0.0	-0.09913342156196199	0.0	1.668262422688046e-05	0.0	0.9999999999104334	0.0	1.3230410387144393e-05	0.0	0.0	0.0015160933528599691	0.0	0.0	0.0015177647125337215	0.0	-0.0004021404636429366	0.0	-2.6944041291371358e-09	-0.0001201835491475546	0.0	1.10285691991121e-09
3.6750000000000003	-0.000402741381242822	0.0	-1.3379310338584275e-08	-0.0004999164320422202	0.0	-0.09913342156876878	0.0	1.6686833661633398e-05	0.0	0.9999999999098632	0.0	1.32721228683776e-05	0.0	0.0	0.001520873251115715	0.0	0.0	0.0015225451382449636	0.0	-0.00040274138145275846	0.0	-2.688844142654328e-09	-0.00012018357478119658	0.0	1.1211389389833662e-09
3.68	-0.00040334229917966466	0.0	-1.342326714141852e-08	-0.0005019316516080541	0.0	-0.09913342157555863	0.0	1.669104311796985e-05	0.0	0.9999999999092912	0.0	1.3313845872694672e-05	0.0	0.0	0.0015256543552280499	0.0	0.0	0.0015273267698766163	0.0	-0.0004033422993907485	0.0	-2.68319272708959e-09	-0.00012018360041481507	0.0	1.1394285526830912e-09
3.685	-0.00040394321724467313	0.0	-1.3467241270484768e-08	-0.0005039498757395571	0.0	-0.0991334215823315	0.0	1.6695252595889818e-05	0.0	0.9999999999087174	0.0	1.3355579400095613e-05	0.0	0.0	0.0015304366651969737	0.0	0.0	0.0015321096074348629	0.0	-0.0004039432174569067	0.0	-2.6774498444697807e-09	-0.00012018362604848235	0.0	1.1577257610122393e-09
3.69	-0.00040454413543784736	0.0	-1.3511232725783015e-08	-0.0005059711044367293	0.0	-0.09913342158908743	0.0	1.66994620953933e-05	0.0	0.9999999999081418	0.0	1.3397323450580424e-05	0.0	0.0	0.0015352201810224866	0.0	0.0	0.0015368936509258864	0.0	-0.0004045441356512333	0.0	-2.6716154568217425e-09	-0.00012018365168211169	0.0	1.1760305639768422e-09
3.6950000000000003	-0.0004051450537591874	0.0	-1.3555241507313263e-08	-0.0005079953376995706	0.0	-0.09913342159582642	0.0	1.670367161648029e-05	0.0	0.9999999999075643	0.0	1.3439078024149109e-05	0.0	0.0	0.0015400049027045888	0.0	0.0	0.0015416789003558705	0.0	-0.0004051450539737278	0.0	-2.665689526172284e-09	-0.0001201836773157374	0.0	1.194342961578085e-09
3.7	-0.0004057459722086932	0.0	-1.359926761507551e-08	-0.0005100225755280808	0.0	-0.09913342160254843	0.0	1.6707881159150797e-05	0.0	0.9999999999069851	0.0	1.348084312080166e-05	0.0	0.0	0.00154479083024328	0.0	0.0	0.001546465355730998	0.0	-0.0004057459724243907	0.0	-2.6596720145482293e-09	-0.00012018370294938029	0.0	1.212662953818381e-09
3.705	-0.0004063468907863648	0.0	-1.3643311049069755e-08	-0.0005120528179222601	0.0	-0.0991334216092535	0.0	1.6712090723404814e-05	0.0	0.999999999906404	0.0	1.3522618740538079e-05	0.0	0.0	0.0015495779636385603	0.0	0.0	0.001551253017057452	0.0	-0.00040634689100322154	0.0	-2.65356288397636e-09	-0.00012018372858297258	0.0	1.2309905407036234e-09
3.71	-0.0004069478094922021	0.0	-1.3687371809296e-08	-0.0005140860648821083	0.0	-0.0991334216159416	0.0	1.6716300309242345e-05	0.0	0.999999999905821	0.0	1.3564404883358368e-05	0.0	0.0	0.0015543663028904295	0.0	0.0	0.0015560418843414163	0.0	-0.0004069478097102205	0.0	-2.64736209648345e-09	-0.00012018375421661638	0.0	1.249325722234157e-09
3.715	-0.0004075487283262052	0.0	-1.3731449895754244e-08	-0.0005161223164076257	0.0	-0.09913342162261275	0.0	1.672050991666339e-05	0.0	0.9999999999052364	0.0	1.3606201549262528e-05	0.0	0.0	0.0015591558479988881	0.0	0.0	0.0015608319575890735	0.0	-0.00040754872854538774	0.0	-2.641069614096268e-09	-0.0001201837798502692	0.0	1.267668498415e-09
3.72	-0.00040814964728837417	0.0	-1.3775545308444491e-08	-0.0005181615724988125	0.0	-0.09913342162926696	0.0	1.672471954566795e-05	0.0	0.9999999999046498	0.0	1.364800873825056e-05	0.0	0.0	0.001563946598963936	0.0	0.0	0.0015656232368066072	0.0	-0.00040814964750872314	0.0	-2.6346853988415434e-09	-0.00012018380548386781	0.0	1.2860188692504124e-09
3.725	-0.00040875056637870884	0.0	-1.3819658047366732e-08	-0.0005202038331556678	0.0	-0.09913342163590419	0.0	1.672892919625602e-05	0.0	0.9999999999040614	0.0	1.3689826450322454e-05	0.0	0.0	0.0015687385557855726	0.0	0.0	0.0015704157220002004	0.0	-0.00040875056660022647	0.0	-2.6282094127460043e-09	-0.00012018383111748812	0.0	1.30437683474118e-09
3.73	-0.0004093514855972093	0.0	-1.3863788112520975e-08	-0.0005222490983781924	0.0	-0.09913342164252448	0.0	1.67331388684276e-05	0.0	0.9999999999034712	0.0	1.3731654685478221e-05	0.0	0.0	0.0015735317184637984	0.0	0.0	0.0015752094131760365	0.0	-0.00040935148581989806	0.0	-2.6216416178363662e-09	-0.00012018385675112738	0.0	1.3227423948911905e-09
3.735	-0.00040995240494387557	0.0	-1.3907935503907216e-08	-0.000524297368166386	0.0	-0.09913342164912782	0.0	1.67373485621827e-05	0.0	0.9999999999028792	0.0	1.3773493443717859e-05	0.0	0.0	0.001578326086998614	0.0	0.0	0.0015800043103402987	0.0	-0.00040995240516773773	0.0	-2.614981976139321e-09	-0.00012018388238476034	0.0	1.3411155497041045e-09
3.74	-0.00041055332441870763	0.0	-1.3952100221525462e-08	-0.000526348642520249	0.0	-0.09913342165571419	0.0	1.674155827752131e-05	0.0	0.9999999999022855	0.0	1.381534272504137e-05	0.0	0.0	0.0015831216613900188	0.0	0.0	0.0015848004134991702	0.0	-0.00041055332464374567	0.0	-2.6082304496815482e-09	-0.00012018390801839238	0.0	1.3594962991833957e-09
3.745	-0.00041115424402170546	0.0	-1.3996282265375703e-08	-0.0005284029214397807	0.0	-0.09913342166228362	0.0	1.6745768014443434e-05	0.0	0.9999999999016899	0.0	1.3857202529448744e-05	0.0	0.0	0.0015879184416380122	0.0	0.0	0.0015895977226588341	0.0	-0.0004111542442479216	0.0	-2.6013870004897047e-09	-0.00012018393365198466	0.0	1.37788464333238e-09
3.75	-0.000411755163752869	0.0	-1.4040481635457942e-08	-0.0005304602049249815	0.0	-0.09913342166883608	0.0	1.6749977772949068e-05	0.0	0.9999999999010925	0.0	1.389907285693999e-05	0.0	0.0	0.0015927164277425953	0.0	0.0	0.0015943962378254738	0.0	-0.00041175516398026554	0.0	-2.594451590590437e-09	-0.00012018395928559773	0.0	1.3962805821538145e-09
3.755	-0.00041235608361219834	0.0	-1.4084698331772181e-08	-0.0005325204929758514	0.0	-0.09913342167537159	0.0	1.6754187553038217e-05	0.0	0.9999999999004932	0.0	1.3940953707515104e-05	0.0	0.0	0.0015975156197037671	0.0	0.0	0.0015991959590052724	0.0	-0.0004123560838407776	0.0	-2.5874241820103733e-09	-0.0001201839849192343	0.0	1.4146841156514285e-09
3.7600000000000002	-0.00041295700359969355	0.0	-1.4128932354318423e-08	-0.0005345837855923906	0.0	-0.09913342168189015	0.0	1.675839735471088e-05	0.0	0.9999999998998921	0.0	1.3982845081174092e-05	0.0	0.0	0.001602316017521529	0.0	0.0	0.0016039968862044131	0.0	-0.00041295700382945784	0.0	-2.580304736776126e-09	-0.00012018401055285911	0.0	1.433095243826704e-09
3.765	-0.0004135579237153544	0.0	-1.4173183703096661e-08	-0.0005366500827745984	0.0	-0.09913342168839175	0.0	1.6762607177967054e-05	0.0	0.9999999998992892	0.0	1.4024746977916943e-05	0.0	0.0	0.0016071176211958794	0.0	0.0	0.0016087990194290792	0.0	-0.0004135579239463061	0.0	-2.5730932169143013e-09	-0.0001201840361864514	0.0	1.4515139666851833e-09
3.77	-0.0004141588439591811	0.0	-1.42174523781069e-08	-0.0005387193845224755	0.0	-0.09913342169487639	0.0	1.676681702280674e-05	0.0	0.9999999998986845	0.0	1.4066659397743666e-05	0.0	0.0	0.0016119204307268192	0.0	0.0	0.0016136023586854537	0.0	-0.0004141588441913224	0.0	-2.5657895844514637e-09	-0.00012018406182006357	0.0	1.4699402842301266e-09
3.775	-0.0004147597643311736	0.0	-1.4261738379349136e-08	-0.0005407916908360217	0.0	-0.0991334217013441	0.0	1.6771026889229944e-05	0.0	0.999999999898078	0.0	1.4108582340654259e-05	0.0	0.0	0.0016167244461143485	0.0	0.0	0.0016184069039797203	0.0	-0.0004147597645645068	0.0	-2.558393801414187e-09	-0.0001201840874536929	0.0	1.4883741964620302e-09
3.7800000000000002	-0.00041536068483133187	0.0	-1.4306041706823377e-08	-0.000542867001715237	0.0	-0.09913342170779482	0.0	1.6775236777236657e-05	0.0	0.9999999998974697	0.0	1.4150515806648726e-05	0.0	0.0	0.0016215296673584676	0.0	0.0	0.0016232126553180617	0.0	-0.0004153606850658593	0.0	-2.550905829829022e-09	-0.00012018411308730237	0.0	1.5068157033872776e-09
3.785	-0.0004159616054596559	0.0	-1.4350362360529614e-08	-0.0005449453171601213	0.0	-0.0991334217142286	0.0	1.6779446686826884e-05	0.0	0.9999999998968595	0.0	1.4192459795727058e-05	0.0	0.0	0.0016263360944591757	0.0	0.0	0.0016280196127066615	0.0	-0.0004159616056953798	0.0	-2.543325631722489e-09	-0.00012018413872090189	0.0	1.5252648050077846e-09
3.79	-0.00041656252621614573	0.0	-1.4394700340467849e-08	-0.0005470266371706747	0.0	-0.09913342172064543	0.0	1.678365661800062e-05	0.0	0.9999999998962475	0.0	1.4234414307889258e-05	0.0	0.0	0.0016311437274164726	0.0	0.0	0.0016328277761517027	0.0	-0.0004165625264530684	0.0	-2.5356531691211147e-09	-0.00012018416435453393	0.0	1.543721501325316e-09
3.795	-0.0004171634471008013	0.0	-1.4439055646638083e-08	-0.000549110961746897	0.0	-0.0991334217270453	0.0	1.6787866570757877e-05	0.0	0.9999999998956338	0.0	1.4276379343135327e-05	0.0	0.0	0.0016359525662303592	0.0	0.0	0.0016376371456593686	0.0	-0.00041716344733892514	0.0	-2.527888404051398e-09	-0.00012018418998814609	0.0	1.56218579234631e-09
3.8000000000000003	-0.00041776436811362275	0.0	-1.4483428279040323e-08	-0.0005511982908887886	0.0	-0.09913342173342822	0.0	1.6792076545098643e-05	0.0	0.9999999998950182	0.0	1.4318354901465272e-05	0.0	0.0	0.0016407626109008358	0.0	0.0	0.0016424477212358425	0.0	-0.00041776436835294986	0.0	-2.5200312985398104e-09	-0.00012018421562174019	0.0	1.5806576780718283e-09
3.805	-0.00041836528925460987	0.0	-1.4527818237674556e-08	-0.0005532886245963491	0.0	-0.09913342173979418	0.0	1.679628654102292e-05	0.0	0.9999999998944008	0.0	1.436034098287908e-05	0.0	0.0	0.001645573861427901	0.0	0.0	0.0016472595028873076	0.0	-0.00041836528949514256	0.0	-2.512081814612833e-09	-0.00012018424125533158	0.0	1.599137158505152e-09
3.81	-0.0004189662105237628	0.0	-1.4572225522540788e-08	-0.0005553819628695786	0.0	-0.09913342174614319	0.0	1.6800496558530712e-05	0.0	0.9999999998937815	0.0	1.440233758737676e-05	0.0	0.0	0.0016503863178115557	0.0	0.0	0.001652072490619947	0.0	-0.0004189662107655032	0.0	-2.504039914296906e-09	-0.00012018426688893923	0.0	1.6176242336504515e-09
3.815	-0.0004195671319210815	0.0	-1.461665013363902e-08	-0.0005574783057084772	0.0	-0.09913342175247523	0.0	1.6804706597622017e-05	0.0	0.9999999998931605	0.0	1.4444344714958309e-05	0.0	0.0	0.0016551999800518	0.0	0.0	0.001656886684439944	0.0	-0.000419567132164032	0.0	-2.495905559618472e-09	-0.00012018429252256314	0.0	1.6361189035092707e-09
3.8200000000000003	-0.000420168053446566	0.0	-1.4661092070969257e-08	-0.0005595776531130451	0.0	-0.09913342175879032	0.0	1.6808916658296837e-05	0.0	0.9999999998925376	0.0	1.448636236562373e-05	0.0	0.0	0.001660014848148634	0.0	0.0	0.0016617020843534818	0.0	-0.0004201680536907288	0.0	-2.4876787126039498e-09	-0.00012018431815614459	0.0	1.6546211680865797e-09
3.825	-0.00042076897510021625	0.0	-1.4705551334531489e-08	-0.0005616800050832818	0.0	-0.09913342176508846	0.0	1.6813126740555167e-05	0.0	0.9999999998919129	0.0	1.4528390539373016e-05	0.0	0.0	0.0016648309221020568	0.0	0.0	0.0016665186903667437	0.0	-0.0004207689753455935	0.0	-2.4793593352797376e-09	-0.00012018434378976669	0.0	1.6731310273849496e-09
3.83	-0.0004213698968820323	0.0	-1.475002792432572e-08	-0.0005637853616191876	0.0	-0.09913342177136965	0.0	1.6817336844397012e-05	0.0	0.9999999998912865	0.0	1.4570429236206174e-05	0.0	0.0	0.0016696482019120695	0.0	0.0	0.0016713365024859127	0.0	-0.00042136989712862643	0.0	-2.4709473896722253e-09	-0.0001201843694233626	0.0	1.6916484814086612e-09
3.835	-0.00042197081879201414	0.0	-1.4794521840351949e-08	-0.0005658937227207624	0.0	-0.09913342177763387	0.0	1.6821546969822368e-05	0.0	0.9999999998906581	0.0	1.46124784561232e-05	0.0	0.0	0.0016744666875786714	0.0	0.0	0.0016761555207171722	0.0	-0.0004219708190398271	0.0	-2.4624428378077727e-09	-0.0001201843950569585	0.0	1.7101735301590308e-09
3.84	-0.0004225717408301617	0.0	-1.4839033082610179e-08	-0.0005680050883880064	0.0	-0.09913342178388115	0.0	1.6825757116831237e-05	0.0	0.9999999998900281	0.0	1.4654538199124094e-05	0.0	0.0	0.0016792863791018629	0.0	0.0	0.0016809757450667053	0.0	-0.000422571741079196	0.0	-2.453845641712751e-09	-0.00012018442069056795	0.0	1.7287061736397258e-09
3.845	-0.00042317266299647514	0.0	-1.4883561651100413e-08	-0.0005701194586209195	0.0	-0.09913342179011148	0.0	1.682996728542362e-05	0.0	0.9999999998893961	0.0	1.4696608465208864e-05	0.0	0.0	0.0016841072764816444	0.0	0.0	0.0016857971755406954	0.0	-0.00042317266324673274	0.0	-2.445155763413483e-09	-0.00012018444632413856	0.0	1.7472464118566194e-09
3.85	-0.00042377358529095433	0.0	-1.4928107545822642e-08	-0.0005722368334195017	0.0	-0.09913342179632484	0.0	1.6834177475599516e-05	0.0	0.9999999998887623	0.0	1.4738689254377499e-05	0.0	0.0	0.0016889293797180147	0.0	0.0	0.0016906198121453256	0.0	-0.0004237735855424374	0.0	-2.4363731649362904e-09	-0.00012018447195772995	0.0	1.7657942448096628e-09
3.855	-0.00042437450771359923	0.0	-1.497267076677687e-08	-0.0005743572127837526	0.0	-0.09913342180252124	0.0	1.6838387687358925e-05	0.0	0.9999999998881267	0.0	1.4780780566630003e-05	0.0	0.0	0.0016937526888109748	0.0	0.0	0.0016954436548867792	0.0	-0.00042437450796631006	0.0	-2.427497808307487e-09	-0.00012018449759134211	0.0	1.7843496725021443e-09
3.86	-0.00042497543026440995	0.0	-1.5017251313963097e-08	-0.0005764805967136729	0.0	-0.09913342180870069	0.0	1.6842597920701848e-05	0.0	0.9999999998874893	0.0	1.4822882401966376e-05	0.0	0.0	0.0016985772037605245	0.0	0.0	0.0017002687037712394	0.0	-0.0004249754305183508	0.0	-2.418529655553362e-09	-0.00012018452322494796	0.0	1.8029126949389169e-09
3.865	-0.0004255763529433865	0.0	-1.5061849187381328e-08	-0.0005786069852092622	0.0	-0.09913342181486319	0.0	1.6846808175628285e-05	0.0	0.9999999998868502	0.0	1.4864994760386623e-05	0.0	0.0	0.001703402924566664	0.0	0.0	0.0017050949588048893	0.0	-0.00042557635319855953	0.0	-2.4094686687001845e-09	-0.00012018454885853393	0.0	1.82148331212382e-09
3.87	-0.00042617727575052877	0.0	-1.5106464387031554e-08	-0.0005807363782705206	0.0	-0.09913342182100873	0.0	1.6851018452138233e-05	0.0	0.9999999998862091	0.0	1.4907117641890736e-05	0.0	0.0	0.0017082298512293927	0.0	0.0	0.0017099224199939123	0.0	-0.00042617727600693613	0.0	-2.400314809774207e-09	-0.00012018457449212351	0.0	1.8400615240587076e-09
3.875	-0.0004267781986858368	0.0	-1.515109691291378e-08	-0.0005828687758974479	0.0	-0.09913342182713732	0.0	1.6855228750231692e-05	0.0	0.9999999998855663	0.0	1.4949251046478717e-05	0.0	0.0	0.001713057983748711	0.0	0.0	0.0017147510873444915	0.0	-0.0004267781989434807	0.0	-2.3910680408016758e-09	-0.00012018460012569321	0.0	1.8586473307462888e-09
3.88	-0.00042737912174931064	0.0	-1.5195746765028006e-08	-0.0005850041780900443	0.0	-0.09913342183324896	0.0	1.6859439069908668e-05	0.0	0.9999999998849216	0.0	1.4991394974150569e-05	0.0	0.0	0.0017178873221246186	0.0	0.0	0.0017195809608628102	0.0	-0.0004273791220081931	0.0	-2.3817283238088158e-09	-0.00012018462575927736	0.0	1.8772407321912996e-09
3.8850000000000002	-0.00042798004494095027	0.0	-1.5240413943374235e-08	-0.00058714258484831	0.0	-0.09913342183934364	0.0	1.6863649411169155e-05	0.0	0.9999999998842751	0.0	1.5033549424906294e-05	0.0	0.0	0.0017227178663571168	0.0	0.0	0.0017244120405550515	0.0	-0.0004279800452010735	0.0	-2.37229562082183e-09	-0.00012018465139289947	0.0	1.895841728395663e-09
3.89	-0.00042858096826075566	0.0	-1.528509844795246e-08	-0.0005892839961722445	0.0	-0.09913342184542136	0.0	1.6867859774013153e-05	0.0	0.9999999998836269	0.0	1.5075714398745883e-05	0.0	0.0	0.0017275496164462039	0.0	0.0	0.0017292443264273988	0.0	-0.000428580968522122	0.0	-2.3627698938669203e-09	-0.00012018467702648364	0.0	1.914450319363363e-09
3.895	-0.0004291818917087268	0.0	-1.532980027876268e-08	-0.0005914284120618481	0.0	-0.09913342185148212	0.0	1.687207015844067e-05	0.0	0.9999999998829768	0.0	1.5117889895669343e-05	0.0	0.0	0.0017323825723918808	0.0	0.0	0.0017340778184860351	0.0	-0.00042918189197133837	0.0	-2.3531511049702514e-09	-0.00012018470266005694	0.0	1.933066505098308e-09
3.9	-0.0004297828152848638	0.0	-1.5374519435804906e-08	-0.0005935758325171207	0.0	-0.09913342185752592	0.0	1.6876280564451695e-05	0.0	0.9999999998823249	0.0	1.5160075915676672e-05	0.0	0.0	0.001737216734194147	0.0	0.0	0.0017389125167371438	0.0	-0.0004297828155487226	0.0	-2.3434392161579878e-09	-0.00012018472829363297	0.0	1.9516902856030554e-09
3.9050000000000002	-0.0004303837389891666	0.0	-1.5419255919079134e-08	-0.0005957262575380627	0.0	-0.09913342186355278	0.0	1.6880490992046233e-05	0.0	0.9999999998816711	0.0	1.5202272458767876e-05	0.0	0.0	0.001742052101853004	0.0	0.0	0.001743748421186908	0.0	-0.0004303837392542747	0.0	-2.333634189456267e-09	-0.00012018475392723069	0.0	1.9703216608799426e-09
3.91	-0.00043098466282163507	0.0	-1.5464009728585354e-08	-0.0005978796871246734	0.0	-0.09913342186956269	0.0	1.6884701441224287e-05	0.0	0.9999999998810156	0.0	1.5244479524942945e-05	0.0	0.0	0.00174688867536845	0.0	0.0	0.0017485855318415111	0.0	-0.00043098466308799486	0.0	-2.323735986891229e-09	-0.00012018477956081395	0.0	1.9889606309322568e-09
3.915	-0.0004315855867822693	0.0	-1.5508780864323576e-08	-0.0006000361212769533	0.0	-0.09913342187555564	0.0	1.688891191198585e-05	0.0	0.9999999998803583	0.0	1.5286697114201884e-05	0.0	0.0	0.0017517264547404854	0.0	0.0	0.001753423848707136	0.0	-0.0004315855870498828	0.0	-2.313744570488977e-09	-0.00012018480519436106	0.0	2.007607195765713e-09
3.92	-0.0004321865108710694	0.0	-1.5553569326293797e-08	-0.0006021955599949022	0.0	-0.09913342188153162	0.0	1.689312240433093e-05	0.0	0.999999999879699	0.0	1.532892522654469e-05	0.0	0.0	0.0017565654399691105	0.0	0.0	0.0017582633717899664	0.0	-0.0004321865111399385	0.0	-2.3036599022756014e-09	-0.00012018483082797593	0.0	2.0262613553808694e-09
3.9250000000000003	-0.0004327874350880353	0.0	-1.559837511449602e-08	-0.0006043580032785203	0.0	-0.09913342188749066	0.0	1.689733291825952e-05	0.0	0.9999999998790381	0.0	1.537116386197137e-05	0.0	0.0	0.0017614056310543262	0.0	0.0	0.0017631041010961852	0.0	-0.00043278743535816246	0.0	-2.293481944277191e-09	-0.00012018485646154563	0.0	2.0449231097825164e-09
3.93	-0.0004333883594331669	0.0	-1.564319822893024e-08	-0.0006065234511278073	0.0	-0.09913342189343274	0.0	1.6901543453771625e-05	0.0	0.9999999998783752	0.0	1.5413413020481917e-05	0.0	0.0	0.0017662470279961309	0.0	0.0	0.0017679460366319755	0.0	-0.00043338835970455395	0.0	-2.2832106585197955e-09	-0.00012018488209509276	0.0	2.063592458972144e-09
3.935	-0.0004339892839064643	0.0	-1.568803866959646e-08	-0.0006086919035427634	0.0	-0.09913342189935787	0.0	1.6905754010867244e-05	0.0	0.9999999998777106	0.0	1.545567270207633e-05	0.0	0.0	0.0017710896307945253	0.0	0.0	0.0017727891784035208	0.0	-0.0004339892841791135	0.0	-2.2728460070294822e-09	-0.00012018490772869588	0.0	2.0822694029543553e-09
3.94	-0.0004345902085079275	0.0	-1.573289643649468e-08	-0.0006108633605233886	0.0	-0.09913342190526604	0.0	1.6909964589546374e-05	0.0	0.9999999998770441	0.0	1.549794290675462e-05	0.0	0.0	0.0017759334394495101	0.0	0.0	0.0017776335264170042	0.0	-0.0004345902087818409	0.0	-2.262387951832258e-09	-0.00012018493336227913	0.0	2.100953941733356e-09
3.9450000000000003	-0.0004351911332375565	0.0	-1.57777715296249e-08	-0.0006130378220696829	0.0	-0.09913342191115725	0.0	1.6914175189809018e-05	0.0	0.9999999998763759	0.0	1.5540223634516776e-05	0.0	0.0	0.0017807784539610847	0.0	0.0	0.001782479080678609	0.0	-0.0004351911335127362	0.0	-2.251836454954151e-09	-0.00012018495899583619	0.0	2.119646075310794e-09
3.95	-0.00043579205809535123	0.0	-1.5822663948987117e-08	-0.0006152152881816462	0.0	-0.0991334219170315	0.0	1.6918385811655172e-05	0.0	0.9999999998757058	0.0	1.55825148853628e-05	0.0	0.0	0.0017856246743292487	0.0	0.0	0.0017873258411945183	0.0	-0.00043579205837179926	0.0	-2.2411914784211477e-09	-0.00012018498462942216	0.0	2.1383458036891636e-09
3.955	-0.00043639298308131174	0.0	-1.5867573694581333e-08	-0.0006173957588592786	0.0	-0.09913342192288882	0.0	1.692259645508484e-05	0.0	0.999999999875034	0.0	1.5624816659292693e-05	0.0	0.0	0.0017904721005540026	0.0	0.0	0.0017921738079709154	0.0	-0.0004363929833590304	0.0	-2.2304529842592505e-09	-0.00012018501026298011	0.0	2.1570531268728013e-09
3.96	-0.000436993908195438	0.0	-1.591250076640755e-08	-0.0006195792341025799	0.0	-0.09913342192872916	0.0	1.6926807120098024e-05	0.0	0.9999999998743602	0.0	1.5667128956306456e-05	0.0	0.0	0.0017953207326353458	0.0	0.0	0.0017970229810139835	0.0	-0.0004369939084744291	0.0	-2.219620934494403e-09	-0.00012018503589654981	0.0	2.1757680448671388e-09
3.9650000000000003	-0.00043759483343773015	0.0	-1.5957445164465768e-08	-0.0006217657139115506	0.0	-0.09913342193455256	0.0	1.6931017806694722e-05	0.0	0.9999999998736847	0.0	1.5709451776404093e-05	0.0	0.0	0.00180017057057328	0.0	0.0	0.0018018733603299057	0.0	-0.0004375948337179959	0.0	-2.208695291152562e-09	-0.0001201850615301376	0.0	2.1944905576709906e-09
3.97	-0.000438195758808188	0.0	-1.6002406888755987e-08	-0.00062395519828619	0.0	-0.099133421940359	0.0	1.693522851487493e-05	0.0	0.9999999998730074	0.0	1.5751785119585595e-05	0.0	0.0	0.0018050216143678033	0.0	0.0	0.0018067249459248653	0.0	-0.00043819575908973037	0.0	-2.1976760162596666e-09	-0.00012018508716365489	0.0	2.213220665291539e-09
3.975	-0.0004387966843068116	0.0	-1.60473859392782e-08	-0.0006261476872264987	0.0	-0.09913342194614848	0.0	1.693943924463865e-05	0.0	0.9999999998723281	0.0	1.579412898585097e-05	0.0	0.0	0.0018098738640189168	0.0	0.0	0.0018115777378050458	0.0	-0.0004387966845896326	0.0	-2.186563071841617e-09	-0.00012018511279724899	0.0	2.231958367729584e-09
3.98	-0.00043939760993360103	0.0	-1.6092382316032415e-08	-0.0006283431807324763	0.0	-0.09913342195192101	0.0	1.6943649995985885e-05	0.0	0.9999999998716472	0.0	1.583648337520021e-05	0.0	0.0	0.0018147273195266201	0.0	0.0	0.00181643173597663	0.0	-0.0004393976102177029	0.0	-2.175356419924336e-09	-0.0001201851384308458	0.0	2.2507036649878547e-09
3.985	-0.0004399985356885562	0.0	-1.6137396019018627e-08	-0.000630541678804123	0.0	-0.09913342195767658	0.0	1.6947860768916633e-05	0.0	0.9999999998709644	0.0	1.587884828763332e-05	0.0	0.0	0.0018195819808909132	0.0	0.0	0.0018212869404458014	0.0	-0.00043999853597394094	0.0	-2.1640560225336945e-09	-0.00012018516406436851	0.0	2.269456557073162e-09
3.99	-0.0004405994615716772	0.0	-1.6182427048236845e-08	-0.000632743181441439	0.0	-0.0991334219634152	0.0	1.6952071563430894e-05	0.0	0.9999999998702798	0.0	1.5921223723150305e-05	0.0	0.0	0.0018244378481117969	0.0	0.0	0.001826143351218743	0.0	-0.0004405994618583466	0.0	-2.1526618416955588e-09	-0.00012018518969792377	0.0	2.2882170439854784e-09
3.995	-0.000441200387582964	0.0	-1.6227475403687055e-08	-0.0006349476886444237	0.0	-0.09913342196913687	0.0	1.6956282379528667e-05	0.0	0.9999999998695933	0.0	1.5963609681751153e-05	0.0	0.0	0.0018292949211892694	0.0	0.0	0.0018310009683016383	0.0	-0.0004412003878709202	0.0	-2.141173839435789e-09	-0.00012018521533150611	0.0	2.3069851257279196e-09
4.0	-0.0004418013137224165	0.0	-1.627254108536927e-08	-0.0006371552004130776	0.0	-0.09913342197484157	0.0	1.6960493217209953e-05	0.0	0.9999999998689051	0.0	1.6006006163435873e-05	0.0	0.0	0.0018341532001233327	0.0	0.0	0.00183585979170067	0.0	-0.0004418013140116617	0.0	-2.129591977780221e-09	-0.00012018524096509117	0.0	2.325760802305614e-09
4.005	-0.00044240223999003484	0.0	-1.631762409328348e-08	-0.0006393657167474006	0.0	-0.09913342198052932	0.0	1.6964704076474754e-05	0.0	0.9999999998682151	0.0	1.6048413168204463e-05	0.0	0.0	0.0018390126849139859	0.0	0.0	0.001840719821422022	0.0	-0.00044240224028057104	0.0	-2.1179162187546694e-09	-0.00012018526659862655	0.0	2.3445440737214636e-09
4.01	-0.0004430031663858189	0.0	-1.636272442742969e-08	-0.0006415792376473925	0.0	-0.09913342198620012	0.0	1.6968914957323065e-05	0.0	0.9999999998675232	0.0	1.609083069605692e-05	0.0	0.0	0.001843873375561229	0.0	0.0	0.001845581057471877	0.0	-0.00044300316667764795	0.0	-2.1061465243849395e-09	-0.00012018529223217637	0.0	2.3633349399769986e-09
4.015	-0.00044360409290976875	0.0	-1.6407842087807902e-08	-0.0006437957631130536	0.0	-0.09913342199185396	0.0	1.697312585975489e-05	0.0	0.9999999998668295	0.0	1.6133258746993245e-05	0.0	0.0	0.0018487352720650615	0.0	0.0	0.0018504434998564186	0.0	-0.00044360409320289284	0.0	-2.0942828566968236e-09	-0.00012018531786574789	0.0	2.3821334010785333e-09
4.0200000000000005	-0.0004442050195618845	0.0	-1.645297707441812e-08	-0.0006460152931443841	0.0	-0.09913342199749085	0.0	1.697733678377023e-05	0.0	0.999999999866134	0.0	1.6175697321013452e-05	0.0	0.0	0.001853598374425486	0.0	0.0	0.0018553071485818298	0.0	-0.0004442050198563054	0.0	-2.0823251777160756e-09	-0.00012018534349929229	0.0	2.4009394570273088e-09
4.025	-0.0004448059463421659	0.0	-1.6498129387260328e-08	-0.0006482378277413833	0.0	-0.09913342200311077	0.0	1.698154772936908e-05	0.0	0.9999999998654366	0.0	1.621814641811752e-05	0.0	0.0	0.001858462682642499	0.0	0.0	0.0018601720036542939	0.0	-0.00044480594663788575	0.0	-2.0702734494684694e-09	-0.00012018536913285295	0.0	2.4197531078240138e-09
4.03	-0.0004454068732506131	0.0	-1.6543299026334536e-08	-0.0006504633669040516	0.0	-0.09913342200871375	0.0	1.6985758696551447e-05	0.0	0.9999999998647375	0.0	1.6260606038305454e-05	0.0	0.0	0.001863328196716102	0.0	0.0	0.001865038065079994	0.0	-0.0004454068735476339	0.0	-2.058127633979744e-09	-0.00012018539476639555	0.0	2.438574353476162e-09
4.035	-0.0004460078002872261	0.0	-1.6588485991640743e-08	-0.0006526919106323889	0.0	-0.09913342201429978	0.0	1.6989969685317326e-05	0.0	0.9999999998640365	0.0	1.6303076181577258e-05	0.0	0.0	0.0018681949166462948	0.0	0.0	0.0018699053328651136	0.0	-0.00044600780058554973	0.0	-2.0458876932756113e-09	-0.0001201854203999517	0.0	2.4574031939862075e-09
4.04	-0.00044660872745200486	0.0	-1.6633690283178952e-08	-0.0006549234589263952	0.0	-0.09913342201986884	0.0	1.6994180695666716e-05	0.0	0.9999999998633338	0.0	1.6345556847932934e-05	0.0	0.0	0.0018730628424330788	0.0	0.0	0.0018747738070158356	0.0	-0.0004466087277516334	0.0	-2.0335535893817813e-09	-0.0001201854460335205	0.0	2.4762396293566457e-09
4.045	-0.0004472096547449494	0.0	-1.6678911900949157e-08	-0.0006571580117860707	0.0	-0.09913342202542096	0.0	1.699839172759962e-05	0.0	0.9999999998626292	0.0	1.638804803737248e-05	0.0	0.0	0.0018779319740764523	0.0	0.0	0.0018796434875383433	0.0	-0.0004472096550458849	0.0	-2.0211252843239403e-09	-0.00012018547166705044	0.0	2.495083659589448e-09
4.05	-0.0004478105821660597	0.0	-1.6724150844951363e-08	-0.0006593955692114151	0.0	-0.09913342203095611	0.0	1.7002602781116034e-05	0.0	0.9999999998619228	0.0	1.6430549749895892e-05	0.0	0.0	0.001882802311576416	0.0	0.0	0.0018845143744388201	0.0	-0.00044781058246830393	0.0	-2.0086027401277755e-09	-0.00012018549730058673	0.0	2.5139352846890534e-09
4.055	-0.0004484115097153358	0.0	-1.676940711518557e-08	-0.0006616361312024286	0.0	-0.09913342203647431	0.0	1.7006813856215967e-05	0.0	0.9999999998612146	0.0	1.6473061985503176e-05	0.0	0.0	0.0018876738549329696	0.0	0.0	0.001889386467723449	0.0	-0.00044841151001889085	0.0	-1.9959859188189328e-09	-0.00012018552293417992	0.0	2.5327945046589915e-09
4.0600000000000005	-0.00044901243739277775	0.0	-1.6814680711651783e-08	-0.0006638796977591117	0.0	-0.09913342204197556	0.0	1.701102495289941e-05	0.0	0.9999999998605046	0.0	1.6515584744194336e-05	0.0	0.0	0.0018925466041461144	0.0	0.0	0.0018942597673984134	0.0	-0.00044901243769764564	0.0	-1.9832747824230636e-09	-0.00012018554856770987	0.0	2.551661319501985e-09
4.065	-0.0004496133651983854	0.0	-1.685997163434999e-08	-0.0006661262688814634	0.0	-0.09913342204745985	0.0	1.7015236071166364e-05	0.0	0.9999999998597927	0.0	1.655811802596936e-05	0.0	0.0	0.0018974205592158485	0.0	0.0	0.0018991342734698963	0.0	-0.00044961336550456793	0.0	-1.9704692929657838e-09	-0.00012018557420123981	0.0	2.5705357292229282e-09
4.07	-0.00045021429313215884	0.0	-1.690527988328019e-08	-0.0006683758445694841	0.0	-0.09913342205292719	0.0	1.7019447211016833e-05	0.0	0.9999999998590791	0.0	1.660066183082825e-05	0.0	0.0	0.001902295720142173	0.0	0.0	0.001904009985944081	0.0	-0.00045021429343965804	0.0	-1.957569412472702e-09	-0.00012018559983478422	0.0	2.5894177338232337e-09
4.075	-0.00045081522119409806	0.0	-1.6950605458442395e-08	-0.000670628424823174	0.0	-0.09913342205837757	0.0	1.7023658372450815e-05	0.0	0.9999999998583635	0.0	1.6643216158771014e-05	0.0	0.0	0.0019071720869250877	0.0	0.0	0.001908886904827151	0.0	-0.00045081522150291575	0.0	-1.944575102969416e-09	-0.00012018562546832953	0.0	2.6083073333041634e-09
4.08	-0.00045141614938420304	0.0	-1.6995948359836598e-08	-0.0006728840096425328	0.0	-0.09913342206381098	0.0	1.702786955546831e-05	0.0	0.9999999998576463	0.0	1.6685781009797644e-05	0.0	0.0	0.0019120496595645923	0.0	0.0	0.0019137650301252892	0.0	-0.00045141614969434134	0.0	-1.9314863264815144e-09	-0.0001201856511018667	0.0	2.62720452767352e-09
4.085	-0.00045201707770247383	0.0	-1.70413085874628e-08	-0.0006751425990275607	0.0	-0.09913342206922746	0.0	1.703208076006932e-05	0.0	0.9999999998569271	0.0	1.6728356383908143e-05	0.0	0.0	0.0019169284380606872	0.0	0.0	0.001918644361844679	0.0	-0.00045201707801393443	0.0	-1.9183030450345316e-09	-0.00012018567673541382	0.0	2.646109316932159e-09
4.09	-0.0004526180061489104	0.0	-1.7086686141321004e-08	-0.0006774041929782577	0.0	-0.09913342207462697	0.0	1.7036291986253837e-05	0.0	0.9999999998562062	0.0	1.6770942281102514e-05	0.0	0.0	0.0019218084224133728	0.0	0.0	0.0019235248999915034	0.0	-0.0004526180064616955	0.0	-1.9050252206540395e-09	-0.00012018570236896816	0.0	2.6650217010823614e-09
4.095	-0.0004532189347235127	0.0	-1.7132081021411203e-08	-0.0006796687914946238	0.0	-0.09913342208000953	0.0	1.7040503234021873e-05	0.0	0.9999999998554835	0.0	1.681353870138075e-05	0.0	0.0	0.0019266896126226482	0.0	0.0	0.0019284066445719459	0.0	-0.00045321893503762407	0.0	-1.891652815365547e-09	-0.00012018572800248004	0.0	2.683941680129676e-09
4.1	-0.0004538198634262808	0.0	-1.7177493227733404e-08	-0.0006819363945766588	0.0	-0.09913342208537514	0.0	1.704471450337342e-05	0.0	0.999999999854759	0.0	1.685614564474286e-05	0.0	0.0	0.0019315720086885142	0.0	0.0	0.0019332895955921894	0.0	-0.00045381986374172035	0.0	-1.878185791194577e-09	-0.0001201857536360371	0.0	2.7028692540763435e-09
4.105	-0.0004544207922572148	0.0	-1.722292276028761e-08	-0.0006842070022243634	0.0	-0.09913342209072379	0.0	1.704892579430848e-05	0.0	0.9999999998540325	0.0	1.6898763111188846e-05	0.0	0.0	0.0019364556106109712	0.0	0.0	0.0019381737530584173	0.0	-0.0004544207925739844	0.0	-1.8646241101666136e-09	-0.00012018577926956614	0.0	2.7218044229248317e-09
4.11	-0.00045502172121631443	0.0	-1.726836961907381e-08	-0.0006864806144377366	0.0	-0.09913342209605548	0.0	1.7053137106827052e-05	0.0	0.9999999998533043	0.0	1.6941391100718694e-05	0.0	0.0	0.0019413404183900177	0.0	0.0	0.001943059116976813	0.0	-0.000455021721534416	0.0	-1.8509677343071542e-09	-0.00012018580490310692	0.0	2.7407471866777463e-09
4.115	-0.0004556226503035799	0.0	-1.731383380409201e-08	-0.0006887572312167789	0.0	-0.09913342210137022	0.0	1.7057348440929138e-05	0.0	0.9999999998525744	0.0	1.698402961333241e-05	0.0	0.0	0.0019462264320256545	0.0	0.0	0.0019479456873535595	0.0	-0.0004556226506230154	0.0	-1.8372166256416522e-09	-0.00012018583053663145	0.0	2.759697545341732e-09
4.12	-0.0004562235795190111	0.0	-1.7359315315342208e-08	-0.0006910368525614903	0.0	-0.09913342210666799	0.0	1.7061559796614738e-05	0.0	0.9999999998518425	0.0	1.702667864903e-05	0.0	0.0	0.001951113651517882	0.0	0.0	0.00195283346419484	0.0	-0.00045622357983978227	0.0	-1.8233707461955508e-09	-0.00012018585617015057	0.0	2.7786554989169267e-09
4.125	-0.00045682450886260807	0.0	-1.7404814152824407e-08	-0.0006933194784718706	0.0	-0.09913342211194882	0.0	1.706577117388385e-05	0.0	0.9999999998511089	0.0	1.7069338207811456e-05	0.0	0.0	0.0019560020768666997	0.0	0.0	0.001957722447506838	0.0	-0.00045682450918471695	0.0	-1.8094300579942914e-09	-0.00012018588180369045	0.0	2.7976210474070494e-09
4.13	-0.0004574254383343709	0.0	-1.7450330316538605e-08	-0.0006956051089479201	0.0	-0.0991334221172127	0.0	1.7069982572736474e-05	0.0	0.9999999998503734	0.0	1.711200828967678e-05	0.0	0.0	0.0019608917080721072	0.0	0.0	0.001962612637295736	0.0	-0.0004574254386578192	0.0	-1.7953945230632837e-09	-0.00012018590743723034	0.0	2.816594190814754e-09
4.135	-0.0004580263679342994	0.0	-1.74958638064848e-08	-0.0006978937439896387	0.0	-0.09913342212245961	0.0	1.7074193993172613e-05	0.0	0.9999999998496362	0.0	1.7154688894625974e-05	0.0	0.0	0.0019657825451341055	0.0	0.0	0.001967504033567718	0.0	-0.00045802636825908923	0.0	-1.7812641034279378e-09	-0.00012018593307074041	0.0	2.8355749291466885e-09
4.14	-0.00045862729766239373	0.0	-1.7541414622662996e-08	-0.0007001853835970263	0.0	-0.09913342212768958	0.0	1.7078405435192263e-05	0.0	0.999999999848897	0.0	1.719738002265904e-05	0.0	0.0	0.001970674588052694	0.0	0.0	0.0019723966363289673	0.0	-0.0004586272979885266	0.0	-1.7670387611136076e-09	-0.00012018595870428119	0.0	2.854563262404325e-09
4.1450000000000005	-0.000459228227518654	0.0	-1.75869827650732e-08	-0.0007024800277700833	0.0	-0.09913342213290259	0.0	1.708261689879543e-05	0.0	0.9999999998481561	0.0	1.7240081673775982e-05	0.0	0.0	0.001975567836827875	0.0	0.0	0.0019772904455856665	0.0	-0.00045922822784613205	0.0	-1.7527184581456845e-09	-0.00012018598433782832	0.0	2.8735591905870055e-09
4.15	-0.0004598291575030799	0.0	-1.7632568233715397e-08	-0.000704777676508809	0.0	-0.09913342213809864	0.0	1.7086828383982106e-05	0.0	0.9999999998474134	0.0	1.7282793847976787e-05	0.0	0.0	0.0019804622914596447	0.0	0.0	0.001982185461343999	0.0	-0.00045982915783190486	0.0	-1.7383031565495173e-09	-0.00012018600997133748	0.0	2.8925627137023397e-09
4.155	-0.00046043008761567156	0.0	-1.767817102858959e-08	-0.0007070783298132039	0.0	-0.09913342214327774	0.0	1.7091039890752295e-05	0.0	0.9999999998466689	0.0	1.732551654526146e-05	0.0	0.0	0.0019853579519480053	0.0	0.0	0.0019870816836101484	0.0	-0.00046043008794584544	0.0	-1.7237928183504354e-09	-0.00012018603560485659	0.0	2.911573831753181e-09
4.16	-0.000461031017856429	0.0	-1.7723791149695785e-08	-0.0007093819876832677	0.0	-0.09913342214843987	0.0	1.7095251419105998e-05	0.0	0.9999999998459225	0.0	1.7368249765630003e-05	0.0	0.0	0.0019902548182929554	0.0	0.0	0.0019919791123902976	0.0	-0.0004610310181879534	0.0	-1.7091874055737555e-09	-0.00012018606123836033	0.0	2.930592544742043e-09
4.165	-0.00046163194822535224	0.0	-1.7769428597033978e-08	-0.0007116886501190006	0.0	-0.09913342215358506	0.0	1.7099462969043216e-05	0.0	0.9999999998451743	0.0	1.7410993509082415e-05	0.0	0.0	0.0019951528904944968	0.0	0.0	0.0019968777476906297	0.0	-0.0004616319485582291	0.0	-1.6944868802447807e-09	-0.00012018608687190564	0.0	2.9496188526710994e-09
4.17	-0.00046223287872244125	0.0	-1.7815083370604173e-08	-0.0007139983171204025	0.0	-0.09913342215871329	0.0	1.7103674540563944e-05	0.0	0.9999999998444243	0.0	1.7453747775618695e-05	0.0	0.0	0.002000052168552629	0.0	0.0	0.002001777589517328	0.0	-0.0004622328790566724	0.0	-1.6796912043888026e-09	-0.00012018611250541391	0.0	2.9686527555456067e-09
4.175	-0.000462833809347696	0.0	-1.7860755470406363e-08	-0.0007163109886874735	0.0	-0.09913342216382456	0.0	1.7107886133668187e-05	0.0	0.9999999998436725	0.0	1.7496512565238845e-05	0.0	0.0	0.002004952652467351	0.0	0.0	0.002006678637876576	0.0	-0.00046283380968328326	0.0	-1.6648003400310782e-09	-0.0001201861381389267	0.0	2.987694253368095e-09
4.18	-0.0004634347401011166	0.0	-1.7906444896440555e-08	-0.0007186266648202136	0.0	-0.09913342216891889	0.0	1.7112097748355943e-05	0.0	0.9999999998429189	0.0	1.7539287877942868e-05	0.0	0.0	0.0020098543422386638	0.0	0.0	0.0020115808927745563	0.0	-0.00046343474043806176	0.0	-1.649814249196871e-09	-0.00012018616377248645	0.0	3.006743346140873e-09
4.1850000000000005	-0.00046403567098270306	0.0	-1.7952151648706753e-08	-0.0007209453455186232	0.0	-0.09913342217399626	0.0	1.711630938462721e-05	0.0	0.9999999998421635	0.0	1.7582073713730766e-05	0.0	0.0	0.0020147572378665683	0.0	0.0	0.002016484354217453	0.0	-0.00046403567132100807	0.0	-1.6347328939114131e-09	-0.0001201861894059893	0.0	3.0258000338671843e-09
4.19	-0.00046463660199245517	0.0	-1.7997875727204946e-08	-0.0007232670307827014	0.0	-0.09913342217905667	0.0	1.7120521042481993e-05	0.0	0.9999999998414062	0.0	1.7624870072602524e-05	0.0	0.0	0.0020196613393510623	0.0	0.0	0.0020213890222114486	0.0	-0.00046463660233212167	0.0	-1.6195562361999353e-09	-0.0001201862150394813	0.0	3.0448643165521503e-09
4.195	-0.0004652375331303731	0.0	-1.8043617131935135e-08	-0.0007255917206124487	0.0	-0.09913342218410012	0.0	1.7124732721920285e-05	0.0	0.9999999998406471	0.0	1.7667676954558154e-05	0.0	0.0	0.002024566646692147	0.0	0.0	0.0020262948967627267	0.0	-0.000465237533471403	0.0	-1.6042842380876244e-09	-0.00012018624067303022	0.0	3.0639361941971945e-09
4.2	-0.0004658384643964568	0.0	-1.8089375862897326e-08	-0.000727919415007865	0.0	-0.09913342218912662	0.0	1.7128944422942092e-05	0.0	0.9999999998398863	0.0	1.7710494359597653e-05	0.0	0.0	0.0020294731598898223	0.0	0.0	0.0020312019778774702	0.0	-0.0004658384647388519	0.0	-1.58891686159969e-09	-0.00012018626630652584	0.0	3.0830156668062494e-09
4.205	-0.0004664393957907062	0.0	-1.8135151920091513e-08	-0.0007302501139689504	0.0	-0.09913342219413616	0.0	1.7133156145547413e-05	0.0	0.9999999998391236	0.0	1.775332228772102e-05	0.0	0.0	0.0020343808789440886	0.0	0.0	0.0020361102655618627	0.0	-0.00046643939613446824	0.0	-1.5734540687612827e-09	-0.0001201862919400332	0.0	3.102102734382955e-09
4.21	-0.0004670403273131215	0.0	-1.81809453035177e-08	-0.0007325838174957048	0.0	-0.09913342219912875	0.0	1.7137367889736248e-05	0.0	0.9999999998383591	0.0	1.7796160738928258e-05	0.0	0.0	0.002039289803854945	0.0	0.0	0.002041019759822087	0.0	-0.0004670403276582522	0.0	-1.5578958215975769e-09	-0.00012018631757353604	0.0	3.121197396929692e-09
4.215	-0.0004676412589637025	0.0	-1.822675601317589e-08	-0.0007349205255881284	0.0	-0.09913342220410438	0.0	1.7141579655508594e-05	0.0	0.9999999998375927	0.0	1.7839009713219364e-05	0.0	0.0	0.0020441999346223925	0.0	0.0	0.0020459304606643266	0.0	-0.0004676412593102036	0.0	-1.5422420821336973e-09	-0.00012018634320704611	0.0	3.1402996544494635e-09
4.22	-0.0004682421907424493	0.0	-1.8272584049066078e-08	-0.0007372602382462209	0.0	-0.09913342220906307	0.0	1.7145791442864454e-05	0.0	0.9999999998368245	0.0	1.788186921059434e-05	0.0	0.0	0.0020491112712464304	0.0	0.0	0.002050842368094765	0.0	-0.00046824219109032266	0.0	-1.526492812394788e-09	-0.00012018636884056613	0.0	3.159409506945512e-09
4.225	-0.00046884312264936184	0.0	-1.8318429411188263e-08	-0.0007396029554699825	0.0	-0.0991334222140048	0.0	1.7150003251803825e-05	0.0	0.9999999998360546	0.0	1.7924739231053185e-05	0.0	0.0	0.002054023813727059	0.0	0.0	0.002055755482119585	0.0	-0.0004688431229986093	0.0	-1.510647974405939e-09	-0.00012018639447407167	0.0	3.178526954424279e-09
4.23	-0.0004694440546844403	0.0	-1.8364292099542457e-08	-0.0007419486772594137	0.0	-0.09913342221892957	0.0	1.715421508232671e-05	0.0	0.9999999998352828	0.0	1.796761977459591e-05	0.0	0.0	0.0020589375620642795	0.0	0.0	0.0020606698027449697	0.0	-0.00046944405503506343	0.0	-1.494707530192242e-09	-0.00012018642010761698	0.0	3.1976519968841627e-09
4.235	-0.0004700449868476845	0.0	-1.8410172114128643e-08	-0.0007442974036145134	0.0	-0.09913342222383738	0.0	1.715842693443311e-05	0.0	0.9999999998345093	0.0	1.8010510841222495e-05	0.0	0.0	0.00206385251625809	0.0	0.0	0.002065585329977103	0.0	-0.00047004498719968536	0.0	-1.4786714417787862e-09	-0.00012018644574109181	0.0	3.216784634331135e-09
4.24	-0.0004706459191390944	0.0	-1.8456069454946828e-08	-0.0007466491345352823	0.0	-0.09913342222872824	0.0	1.716263880812302e-05	0.0	0.9999999998337338	0.0	1.8053412430932947e-05	0.0	0.0	0.0020687686763084913	0.0	0.0	0.0020705020638221673	0.0	-0.00047064591949247435	0.0	-1.4625396711906142e-09	-0.00012018647137459015	0.0	3.235924866768192e-09
4.245	-0.0004712468515586701	0.0	-1.850198412199701e-08	-0.0007490038700217201	0.0	-0.09913342223360214	0.0	1.7166850703396444e-05	0.0	0.9999999998329566	0.0	1.809632454372727e-05	0.0	0.0	0.0020736860422154828	0.0	0.0	0.002075420004286346	0.0	-0.00047124685191343127	0.0	-1.446312180452784e-09	-0.00012018649700811558	0.0	3.255072694196849e-09
4.25	-0.00047184778410641154	0.0	-1.8547916115279197e-08	-0.000751361610073827	0.0	-0.09913342223845908	0.0	1.7171062620253382e-05	0.0	0.9999999998321776	0.0	1.8139247179605465e-05	0.0	0.0	0.0020786046139790655	0.0	0.0	0.002080339151375823	0.0	-0.0004718477844625554	0.0	-1.4299889315903159e-09	-0.00012018652264156963	0.0	3.2742281166241453e-09
4.255	-0.0004724487167823188	0.0	-1.8593865434793378e-08	-0.0007537223546916031	0.0	-0.09913342224329909	0.0	1.7175274558693832e-05	0.0	0.9999999998313966	0.0	1.8182180338567528e-05	0.0	0.0	0.002083524391599239	0.0	0.0	0.0020852595050967807	0.0	-0.00047244871713984706	0.0	-1.4135698866282106e-09	-0.00012018654827508964	0.0	3.2933911340503004e-09
4.26	-0.00047304964958639186	0.0	-1.863983208053956e-08	-0.0007560861038750481	0.0	-0.09913342224812212	0.0	1.7179486518717795e-05	0.0	0.9999999998306139	0.0	1.822512402061346e-05	0.0	0.0	0.002088445375076003	0.0	0.0	0.002090181065455403	0.0	-0.0004730496499453063	0.0	-1.3970550075914767e-09	-0.0001201865739085988	0.0	3.312561746477869e-09
4.265	-0.00047365058251863066	0.0	-1.8685816052517744e-08	-0.0007584528576241623	0.0	-0.0991334222529282	0.0	1.7183698500325273e-05	0.0	0.9999999998298295	0.0	1.826807822574326e-05	0.0	0.0	0.0020933675644093587	0.0	0.0	0.0020951038324578722	0.0	-0.00047365058287893305	0.0	-1.3804442565050883e-09	-0.00012018659954211611	0.0	3.3317399539117205e-09
4.2700000000000005	-0.0004742515155790353	0.0	-1.8731817350727935e-08	-0.0007608226159389459	0.0	-0.09913342225771733	0.0	1.7187910503516265e-05	0.0	0.9999999998290432	0.0	1.831104295395694e-05	0.0	0.0	0.0020982909595993063	0.0	0.0	0.0021000278061103724	0.0	-0.00047425151594072745	0.0	-1.3637375953940095e-09	-0.00012018662517560721	0.0	3.35092575635585e-09
4.275	-0.0004748524487676057	0.0	-1.8777835975170114e-08	-0.0007631953788193981	0.0	-0.0991334222624895	0.0	1.7192122528290767e-05	0.0	0.999999999828255	0.0	1.835401820525448e-05	0.0	0.0	0.0021032155606458425	0.0	0.0	0.002104952986419087	0.0	-0.00047485244913068913	0.0	-1.3469349862831761e-09	-0.00012018665080909198	0.0	3.3701191538119834e-09
4.28	-0.00047545338208434184	0.0	-1.8823871925844296e-08	-0.0007655711462655195	0.0	-0.09913342226724473	0.0	1.719633457464878e-05	0.0	0.9999999998274651	0.0	1.8397003979635893e-05	0.0	0.0	0.002108141367548971	0.0	0.0	0.0021098793733901984	0.0	-0.00047545338244881836	0.0	-1.330036391197531e-09	-0.00012018667644258759	0.0	3.389320146282979e-09
4.285	-0.0004760543155292438	0.0	-1.8869925202750477e-08	-0.0007679499182773099	0.0	-0.09913342227198298	0.0	1.720054664259031e-05	0.0	0.9999999998266733	0.0	1.844000027710117e-05	0.0	0.0	0.00211306838030869	0.0	0.0	0.00211480696702989	0.0	-0.000476054315895115	0.0	-1.3130417721619801e-09	-0.0001201867020760805	0.0	3.4085287337741265e-09
4.29	-0.0004766552491023115	0.0	-1.8915995805888657e-08	-0.0007703316948547693	0.0	-0.09913342227670428	0.0	1.720475873211535e-05	0.0	0.9999999998258797	0.0	1.848300709765032e-05	0.0	0.0	0.0021179965989249995	0.0	0.0	0.0021197357673443454	0.0	-0.00047665524946957915	0.0	-1.2959510912014198e-09	-0.00012018672770957521	0.0	3.4277449162870948e-09
4.295	-0.000477256182803545	0.0	-1.8962083735258835e-08	-0.0007727164759978978	0.0	-0.09913342228140865	0.0	1.7208970843223906e-05	0.0	0.9999999998250844	0.0	1.852602444128334e-05	0.0	0.0	0.0021229260233979006	0.0	0.0	0.0021246657743397477	0.0	-0.00047725618317221076	0.0	-1.2787643103407347e-09	-0.00012018675334307625	0.0	3.4469686938245265e-09
4.3	-0.00047785711663294423	0.0	-1.9008188990861012e-08	-0.0007751042617066953	0.0	-0.09913342228609603	0.0	1.7213182975915973e-05	0.0	0.9999999998242872	0.0	1.8569052308000228e-05	0.0	0.0	0.0021278566537273925	0.0	0.0	0.00212959698802228	0.0	-0.0004778571170030099	0.0	-1.2614813916047931e-09	-0.00012018677897657186	0.0	3.466200066390741e-09
4.305	-0.0004784580505905093	0.0	-1.905431157269519e-08	-0.0007774950519811619	0.0	-0.09913342229076648	0.0	1.7217395130191554e-05	0.0	0.9999999998234882	0.0	1.8612090697800985e-05	0.0	0.0	0.0021327884899134753	0.0	0.0	0.0021345294083981252	0.0	-0.00047845805096197647	0.0	-1.2441022970184382e-09	-0.00012018680461003857	0.0	3.4854390339912452e-09
4.3100000000000005	-0.0004790589846762402	0.0	-1.9100451480761376e-08	-0.000779888846821298	0.0	-0.09913342229541997	0.0	1.722160730605065e-05	0.0	0.9999999998226873	0.0	1.865513961068562e-05	0.0	0.0	0.0021377215319561497	0.0	0.0	0.002139463035473467	0.0	-0.00047905898504911035	0.0	-1.2266269886064918e-09	-0.00012018683024355044	0.0	3.504685596624127e-09
4.315	-0.0004796599188901368	0.0	-1.9146608715059553e-08	-0.0007822856462271027	0.0	-0.09913342230005649	0.0	1.7225819503493256e-05	0.0	0.9999999998218847	0.0	1.8698199046654115e-05	0.0	0.0	0.0021426557798554144	0.0	0.0	0.0021443978692544884	0.0	-0.00047965991926441194	0.0	-1.209055428393799e-09	-0.00012018685587701805	0.0	3.523939754296162e-09
4.32	-0.0004802608532321992	0.0	-1.919278327558973e-08	-0.0007846854501985766	0.0	-0.09913342230467607	0.0	1.7230031722519376e-05	0.0	0.9999999998210801	0.0	1.8741269005706483e-05	0.0	0.0	0.002147591233611271	0.0	0.0	0.0021493339097473727	0.0	-0.00048026085360788055	0.0	-1.1913875784051264e-09	-0.00012018688151049108	0.0	3.5432015070107072e-09
4.325	-0.00048086178770242734	0.0	-1.9238975162351903e-08	-0.0007870882587357194	0.0	-0.09913342230927868	0.0	1.7234243963129007e-05	0.0	0.9999999998202739	0.0	1.8784349487842717e-05	0.0	0.0	0.0021525278932237176	0.0	0.0	0.0021542711569583033	0.0	-0.0004808617880795169	0.0	-1.1736234006652852e-09	-0.00012018690714400476	0.0	3.5624708547689653e-09
4.33	-0.0004814627223008213	0.0	-1.9285184375346077e-08	-0.0007894940718385314	0.0	-0.09913342231386435	0.0	1.7238456225322152e-05	0.0	0.9999999998194657	0.0	1.8827440493062823e-05	0.0	0.0	0.002157465758692756	0.0	0.0	0.002159209610893463	0.0	-0.00048146272267932057	0.0	-1.1557628571990238e-09	-0.00012018693277747508	0.0	3.5817477975750726e-09
4.335	-0.000482063657027381	0.0	-1.9331410914572252e-08	-0.0007919028895070124	0.0	-0.09913342231843307	0.0	1.724266850909881e-05	0.0	0.9999999998186558	0.0	1.8870542021366796e-05	0.0	0.0	0.002162404830018385	0.0	0.0	0.0021641492715590354	0.0	-0.0004820636574072917	0.0	-1.1378059100311163e-09	-0.00012018695841097973	0.0	3.601032335431793e-09
4.34	-0.0004826645918821065	0.0	-1.9377654780030426e-08	-0.0007943147117411624	0.0	-0.09913342232298482	0.0	1.7246880814458985e-05	0.0	0.9999999998178442	0.0	1.891365407275464e-05	0.0	0.0	0.002167345107200606	0.0	0.0	0.002169090138961204	0.0	-0.0004826645922634303	0.0	-1.1197525211862786e-09	-0.00012018698404445277	0.0	3.620324468345689e-09
4.345	-0.0004832655268649978	0.0	-1.94239159717206e-08	-0.0007967295385409815	0.0	-0.09913342232751962	0.0	1.725109314140267e-05	0.0	0.9999999998170306	0.0	1.8956776647226354e-05	0.0	0.0	0.002172286590239417	0.0	0.0	0.002174032213106151	0.0	-0.0004832655272477362	0.0	-1.1016026526892314e-09	-0.00012018700967794115	0.0	3.6396241963158124e-09
4.3500000000000005	-0.0004838664619760549	0.0	-1.947019448964278e-08	-0.0007991473699064701	0.0	-0.09913342233203747	0.0	1.7255305489929868e-05	0.0	0.9999999998162152	0.0	1.8999909744781944e-05	0.0	0.0	0.0021772292791348213	0.0	0.0	0.0021789754940000606	0.0	-0.0004838664623602097	0.0	-1.0833562665646858e-09	-0.00012018703531140062	0.0	3.65893151934673e-09
4.355	-0.00048446739721527774	0.0	-1.9516490333796952e-08	-0.0008015682058376273	0.0	-0.09913342233653835	0.0	1.7259517860040578e-05	0.0	0.999999999815398	0.0	1.9043053365421396e-05	0.0	0.0	0.0021821731738868146	0.0	0.0	0.0021839199816491156	0.0	-0.00048446739760085023	0.0	-1.0650133248373228e-09	-0.00012018706094487274	0.0	3.6782464374427125e-09
4.36	-0.0004850683325826664	0.0	-1.9562803504183125e-08	-0.0008039920463344536	0.0	-0.09913342234102229	0.0	1.72637302517348e-05	0.0	0.999999999814579	0.0	1.908620750914472e-05	0.0	0.0	0.0021871182744954	0.0	0.0	0.002188865676059499	0.0	-0.0004850683329696584	0.0	-1.0465737895318139e-09	-0.00012018708657836837	0.0	3.697568950605307e-09
4.365	-0.00048566926807822074	0.0	-1.9609134000801297e-08	-0.0008064188913969489	0.0	-0.09913342234548926	0.0	1.726794266501254e-05	0.0	0.9999999998137582	0.0	1.912937217595191e-05	0.0	0.0	0.0021920645809605766	0.0	0.0	0.0021938125772373944	0.0	-0.0004856692684666339	0.0	-1.0280376226728187e-09	-0.00012018711221182874	0.0	3.716899058838412e-09
4.37	-0.00048627020370194097	0.0	-1.9655481823651467e-08	-0.0008088487410251134	0.0	-0.09913342234993928	0.0	1.7272155099873788e-05	0.0	0.9999999998129355	0.0	1.917254736584297e-05	0.0	0.0	0.002197012093282344	0.0	0.0	0.002198760685188985	0.0	-0.00048627020409177675	0.0	-1.009404786284972e-09	-0.00012018713784529996	0.0	3.736236762146577e-09
4.375	-0.0004868711394538269	0.0	-1.9701846972733636e-08	-0.0008112815952189468	0.0	-0.09913342235437236	0.0	1.727636755631855e-05	0.0	0.9999999998121111	0.0	1.9215733078817903e-05	0.0	0.0	0.002201960811460703	0.0	0.0	0.002203709999920454	0.0	-0.00048687113984508695	0.0	-9.90675242392892e-10	-0.00012018716347879016	0.0	3.755582060530801e-09
4.38	-0.0004874720753338786	0.0	-1.9748229448047805e-08	-0.0008137174539784494	0.0	-0.09913342235878847	0.0	1.7280580034346827e-05	0.0	0.9999999998112848	0.0	1.92589293148767e-05	0.0	0.0	0.0022069107354956534	0.0	0.0	0.0022086605214379847	0.0	-0.00048747207572656464	0.0	-9.71848953021196e-10	-0.00012018718911225054	0.0	3.774934953995989e-09
4.385	-0.0004880730113420961	0.0	-1.9794629249593975e-08	-0.0008161563173036209	0.0	-0.09913342236318763	0.0	1.7284792533958615e-05	0.0	0.9999999998104567	0.0	1.930213607401937e-05	0.0	0.0	0.002211861865387195	0.0	0.0	0.00221361224974776	0.0	-0.0004880730117362095	0.0	-9.529258801944584e-10	-0.00012018721474572357	0.0	3.794295442545793e-09
4.39	-0.0004886739474784794	0.0	-1.984104637737214e-08	-0.0008185981851944617	0.0	-0.09913342236756983	0.0	1.7289005055153917e-05	0.0	0.9999999998096268	0.0	1.934535335624591e-05	0.0	0.0	0.002216814201135328	0.0	0.0	0.0022185651848559635	0.0	-0.0004886739478740219	0.0	-9.339059859372617e-10	-0.00012018724037924087	0.0	3.813663526180801e-09
4.3950000000000005	-0.0004892748837430286	0.0	-1.9887480831382318e-08	-0.0008210430576509718	0.0	-0.09913342237193508	0.0	1.7293217597932733e-05	0.0	0.9999999998087952	0.0	1.9388581161556326e-05	0.0	0.0	0.0022217677427400534	0.0	0.0	0.002223519326768778	0.0	-0.0004892748841400018	0.0	-9.147892322741663e-10	-0.00012018726601269582	0.0	3.833039204906523e-09
4.4	-0.0004898758201357435	0.0	-1.9933932611624485e-08	-0.0008234909346731506	0.0	-0.09913342237628338	0.0	1.729743016229506e-05	0.0	0.9999999998079616	0.0	1.9431819489950604e-05	0.0	0.0	0.002226722490201369	0.0	0.0	0.002228474675492387	0.0	-0.0004898758205341488	0.0	-8.955755812297074e-10	-0.00012018729121881792	0.0	3.817481431292331e-09
4.405	-0.0004904767566566241	0.0	-1.998040171809865e-08	-0.0008259418162609984	0.0	-0.0991334223806147	0.0	1.73016427482409e-05	0.0	0.9999999998071263	0.0	1.947506834142875e-05	0.0	0.0	0.002231678443519276	0.0	0.0	0.0022334312310329737	0.0	-0.0004904767570564631	0.0	-8.762649948284144e-10	-0.00012018731867637346	0.0	3.9860285277865114e-09
4.41	-0.0004910776933314088	0.0	-2.0024792080247738e-08	-0.0008283957070025194	0.0	-0.09913342237984932	0.0	1.7305855467571738e-05	0.0	0.9999999998062797	0.0	1.9518328114385202e-05	0.0	0.0	0.002236635648346393	0.0	0.0	0.00223838899342875	0.0	-0.0004910776937325829	0.0	-8.547609722487863e-10	-0.00012018735545777314	0.0	4.917014885495436e-09
4.415	-0.000491678630204656	0.0	-2.0063474976057755e-08	-0.0008308526148404759	0.0	-0.09913342236519304	0.0	1.7310068513838536e-05	0.0	0.9999999998054058	0.0	1.9561599498521265e-05	0.0	0.0	0.002241594183716631	0.0	0.0	0.002243347962773376	0.0	-0.000491678630606892	0.0	-8.274340720939883e-10	-0.00012018738890768338	0.0	5.575600644850233e-09
4.42	-0.0004922795672068183	0.0	-2.0102114182964953e-08	-0.0008333125273776552	0.0	-0.09913342235037194	0.0	1.731428158494331e-05	0.0	0.9999999998045298	0.0	1.9604881417338182e-05	0.0	0.0	0.002246553926272376	0.0	0.0	0.0022483081390739677	0.0	-0.0004922795676101135	0.0	-7.99949092484025e-10	-0.00012018741353550196	0.0	5.51280640201277e-09
4.425	-0.0004928805043378956	0.0	-2.0140709700969327e-08	-0.0008357754446140572	0.0	-0.09913342233538601	0.0	1.7318494680886063e-05	0.0	0.9999999998036517	0.0	1.9648173870835947e-05	0.0	0.0	0.002251514876013628	0.0	0.0	0.00225326952233764	0.0	-0.0004928805047422469	0.0	-7.723059954013385e-10	-0.00012018743931788203	0.0	5.544433698314437e-09
4.43	-0.0004934814415978879	0.0	-2.017926153007087e-08	-0.0008382413665496818	0.0	-0.09913342232023525	0.0	1.732270780166679e-05	0.0	0.9999999998027715	0.0	1.969147685901456e-05	0.0	0.0	0.0022564770329403863	0.0	0.0	0.0022582321125715096	0.0	-0.0004934814420032924	0.0	-7.445047428283532e-10	-0.00012018746510030547	0.0	5.57606859813288e-09
4.4350000000000005	-0.0004940823789867951	0.0	-2.0217769670269604e-08	-0.0008407102931845293	0.0	-0.09913342230491969	0.0	1.732692094728549e-05	0.0	0.9999999998018892	0.0	1.9734790381874036e-05	0.0	0.0	0.0022614403970526525	0.0	0.0	0.002263195909782691	0.0	-0.00049408237939325	0.0	-7.165452967474805e-10	-0.0001201874908827036	0.0	5.6077111014681995e-09
4.44	-0.0004946833165046174	0.0	-2.0256234121565508e-08	-0.0008431822245185993	0.0	-0.09913342228943929	0.0	1.7331134117742168e-05	0.0	0.999999999801005	0.0	1.977811443941435e-05	0.0	0.0	0.0022664049683504247	0.0	0.0	0.0022681609139783	0.0	-0.0004946833169121195	0.0	-6.884276191411339e-10	-0.00012018751666514511	0.0	5.639361208326015e-09
4.445	-0.0004952842541513548	0.0	-2.0294654883958587e-08	-0.0008456571605518918	0.0	-0.09913342227379407	0.0	1.733534731303682e-05	0.0	0.9999999998001186	0.0	1.982144903163552e-05	0.0	0.0	0.002271370746833703	0.0	0.0	0.0022731271251654524	0.0	-0.0004952842545599013	0.0	-6.601516719916762e-10	-0.00012018754244749264	0.0	5.671018918710665e-09
4.45	-0.000495885191927007	0.0	-2.0333031957448848e-08	-0.0008481351012844068	0.0	-0.09913342225798402	0.0	1.7339560533169445e-05	0.0	0.9999999997992299	0.0	1.9864794158537534e-05	0.0	0.0	0.002276337732502488	0.0	0.0	0.0022780945433512638	0.0	-0.0004958851923365944	0.0	-6.317174172814798e-10	-0.00012018756822985283	0.0	5.702684232623426e-09
4.455	-0.0004964861298315743	0.0	-2.0371365342036276e-08	-0.0008506160467161444	0.0	-0.09913342224200915	0.0	1.7343773778140045e-05	0.0	0.9999999997983394	0.0	1.99081498201204e-05	0.0	0.0	0.00228130592535678	0.0	0.0	0.002283063168542849	0.0	-0.0004964861302421999	0.0	-6.03124816992887e-10	-0.00012018759401229614	0.0	5.73435715006949e-09
4.46	-0.0004970870678650567	0.0	-2.040965503772089e-08	-0.0008530999968471047	0.0	-0.09913342222586945	0.0	1.7347987047948623e-05	0.0	0.9999999997974467	0.0	1.9951516016384115e-05	0.0	0.0	0.002286275325396578	0.0	0.0	0.0022880330007473246	0.0	-0.0004970870682767173	0.0	-5.743738331082258e-10	-0.00012018761979464729	0.0	5.766037671051068e-09
4.465	-0.000497688006027454	0.0	-2.0447901044502678e-08	-0.0008555869516772876	0.0	-0.09913342220956493	0.0	1.7352200342595177e-05	0.0	0.9999999997965519	0.0	1.9994892747328684e-05	0.0	0.0	0.0022912459326218837	0.0	0.0	0.0022930040399718053	0.0	-0.0004976880064401464	0.0	-5.454644276098139e-10	-0.00012018764557700386	0.0	5.797725795569338e-09
4.47	-0.0004982889443187662	0.0	-2.0486103362381644e-08	-0.0008580769112066931	0.0	-0.0991334221930956	0.0	1.7356413662079703e-05	0.0	0.999999999795655	0.0	2.00382800129541e-05	0.0	0.0	0.0022962177470326954	0.0	0.0	0.002297976286223407	0.0	-0.0004982889447324874	0.0	-5.163965624799593e-10	-0.00012018767135940742	0.0	5.829421523632584e-09
4.4750000000000005	-0.0004988898827389936	0.0	-2.052426199135779e-08	-0.0008605698754353216	0.0	-0.09913342217646143	0.0	1.7360627006402205e-05	0.0	0.9999999997947561	0.0	2.008167781326038e-05	0.0	0.0	0.0023011907686290157	0.0	0.0	0.0023029497395092454	0.0	-0.0004988898831537404	0.0	-4.871701997009151e-10	-0.00012018769714176218	0.0	5.8611248552388645e-09
4.48	-0.0004994908212881359	0.0	-2.0562376931431108e-08	-0.0008630658443631725	0.0	-0.09913342215966243	0.0	1.7364840375562685e-05	0.0	0.999999999793855	0.0	2.0125086148247493e-05	0.0	0.0	0.0023061649974108404	0.0	0.0	0.002307924399836436	0.0	-0.000499490821703905	0.0	-4.5778530125499034e-10	-0.00012018772292411335	0.0	5.892835790393116e-09
4.485	-0.0005000917599661933	0.0	-2.0600448182601606e-08	-0.0008655648179902458	0.0	-0.09913342214269862	0.0	1.736905376956114e-05	0.0	0.9999999997929518	0.0	2.0168505017915464e-05	0.0	0.0	0.002311140433378173	0.0	0.0	0.002312900267212094	0.0	-0.0005000917603829815	0.0	-4.282418291243942e-10	-0.00012018774870645727	0.0	5.9245543291023525e-09
4.49	-0.0005006926987731656	0.0	-2.0638475744869278e-08	-0.0008680667963165418	0.0	-0.09913342212556997	0.0	1.7373267188397568e-05	0.0	0.9999999997920466	0.0	2.0211934422264283e-05	0.0	0.0	0.0023161170765310123	0.0	0.0	0.0023178773416433355	0.0	-0.0005006926991909696	0.0	-3.9853974529137923e-10	-0.00012018777448881384	0.0	5.95628047136273e-09
4.495	-0.000501293637709053	0.0	-2.0676459618234125e-08	-0.0008705717793420605	0.0	-0.09913342210827651	0.0	1.737748063207197e-05	0.0	0.9999999997911393	0.0	2.0255374361293946e-05	0.0	0.0	0.002321094926869358	0.0	0.0	0.0023228556231372757	0.0	-0.0005012936381278697	0.0	-3.6867901173816744e-10	-0.00012018780027114692	0.0	5.988014217183643e-09
4.5	-0.0005018945767738553	0.0	-2.071439980269615e-08	-0.0008730797670668018	0.0	-0.09913342209081823	0.0	1.738169410058435e-05	0.0	0.9999999997902298	0.0	2.0298824835004468e-05	0.0	0.0	0.002326073984393211	0.0	0.0	0.0023278351117010303	0.0	-0.0005018945771936811	0.0	-3.3865959044693993e-10	-0.00012018782605348543	0.0	6.019755566566347e-09
4.505	-0.0005024955159675726	0.0	-2.0752296298255353e-08	-0.0008755907594907656	0.0	-0.09913342207319512	0.0	1.7385907593934703e-05	0.0	0.9999999997893183	0.0	2.0342285843395834e-05	0.0	0.0	0.00233105424910257	0.0	0.0	0.002332815807341715	0.0	-0.0005024955163884045	0.0	-3.084814433998982e-10	-0.00012018785183582213	0.0	6.051504519512059e-09
4.51	-0.0005030964552902049	0.0	-2.0790149104911735e-08	-0.0008781047566139521	0.0	-0.09913342205540718	0.0	1.739012111212303e-05	0.0	0.9999999997884047	0.0	2.0385757386468055e-05	0.0	0.0	0.0023360357209974373	0.0	0.0	0.002337797710066445	0.0	-0.0005030964557120394	0.0	-2.7814453257920597e-10	-0.0001201878776181769	0.0	6.083261076025695e-09
4.515	-0.0005036973947417523	0.0	-2.082795822266529e-08	-0.0008806217584363613	0.0	-0.09913342203745441	0.0	1.7394334655149336e-05	0.0	0.9999999997874891	0.0	2.042923946422112e-05	0.0	0.0	0.00234101840007781	0.0	0.0	0.0023427808198823357	0.0	-0.0005036973951645863	0.0	-2.4764881996701916e-10	-0.0001201879034005154	0.0	6.115025236113324e-09
4.5200000000000005	-0.0005042983343222148	0.0	-2.0865723651516035e-08	-0.0008831417649579934	0.0	-0.09913342201933682	0.0	1.7398548223013618e-05	0.0	0.9999999997865713	0.0	2.047273207665505e-05	0.0	0.0	0.0023460022863436916	0.0	0.0	0.0023477651367965033	0.0	-0.0005042983347460445	0.0	-2.1699426754544942e-10	-0.00012018792918283582	0.0	6.146796999774716e-09
4.525	-0.0005048992740315922	0.0	-2.0903445391463944e-08	-0.0008856647761788477	0.0	-0.09913342200105442	0.0	1.740276181571587e-05	0.0	0.9999999997856515	0.0	2.051623522376982e-05	0.0	0.0	0.0023509873797950788	0.0	0.0	0.002352750660816063	0.0	-0.0005048992744564146	0.0	-1.8618083729664525e-10	-0.0001201879549651418	0.0	6.1785763670114185e-09
4.53	-0.0005055002138698845	0.0	-2.0941123442509032e-08	-0.0008881907920989247	0.0	-0.09913342198260719	0.0	1.7406975433256102e-05	0.0	0.9999999997847295	0.0	2.0559748905565438e-05	0.0	0.0	0.002355973680431973	0.0	0.0	0.0023577373919481306	0.0	-0.0005055002142956959	0.0	-1.552084912026977e-10	-0.00012018798074741345	0.0	6.210363337831485e-09
4.535	-0.0005061011538370918	0.0	-2.0978757804651294e-08	-0.0008907198127182243	0.0	-0.09913342196399513	0.0	1.741118907563431e-05	0.0	0.9999999997838055	0.0	2.060327312204191e-05	0.0	0.0	0.002360961188254374	0.0	0.0	0.002362725330199821	0.0	-0.0005061011542638888	0.0	-1.2407719124569054e-10	-0.00012018800652975376	0.0	6.242157912234981e-09
4.54	-0.0005067020939332142	0.0	-2.1016348477890737e-08	-0.0008932518380367465	0.0	-0.09913342194521825	0.0	1.7415402742850488e-05	0.0	0.9999999997828793	0.0	2.0646807873199224e-05	0.0	0.0	0.002365949903262282	0.0	0.0	0.0023677144755782503	0.0	-0.0005067020943609933	0.0	-9.278689940770087e-11	-0.00012018803231204347	0.0	6.2739600902270134e-09
4.545	-0.0005073030341582516	0.0	-2.1053895462227356e-08	-0.0008957868680544914	0.0	-0.09913342192627654	0.0	1.7419616434904644e-05	0.0	0.9999999997819511	0.0	2.0690353159037394e-05	0.0	0.0	0.0023709398254556963	0.0	0.0	0.0023727048280905343	0.0	-0.0005073030345870092	0.0	-6.133757767076944e-11	-0.00012018805809433319	0.0	6.305769871809592e-09
4.55	-0.000507903974512204	0.0	-2.1091398757661152e-08	-0.0008983249027714589	0.0	-0.09913342190717	0.0	1.7423830151796777e-05	0.0	0.9999999997810208	0.0	2.073390897955642e-05	0.0	0.0	0.002375930954834619	0.0	0.0	0.002377696387743788	0.0	-0.0005079039749419367	0.0	-2.972918801694966e-11	-0.00012018808387664458	0.0	6.337587256984848e-09
4.555	-0.0005085049149950714	0.0	-2.1128858364192124e-08	-0.0009008659421876489	0.0	-0.09913342188789866	0.0	1.742804389352688e-05	0.0	0.9999999997800885	0.0	2.0777475334756288e-05	0.0	0.0	0.0023809232913990478	0.0	0.0	0.002382689154545127	0.0	-0.0005085049154257757	0.0	2.0383075717436034e-12	-0.00012018810965894334	0.0	6.369412245759541e-09
4.5600000000000005	-0.0005091058556068539	0.0	-2.116627428182028e-08	-0.000903409986303062	0.0	-0.09913342186846248	0.0	1.7432257660094966e-05	0.0	0.999999999779154	0.0	2.0821052224637015e-05	0.0	0.0	0.0023859168351489848	0.0	0.0	0.002387683128501667	0.0	-0.0005091058560385261	0.0	3.396494711331262e-11	-0.00012018813544120595	0.0	6.401244838133926e-09
4.565	-0.0005097067963475512	0.0	-2.1203646510545607e-08	-0.0009059570351176974	0.0	-0.09913342184886148	0.0	1.743647145150102e-05	0.0	0.9999999997782174	0.0	2.0864639649198587e-05	0.0	0.0	0.002390911586084428	0.0	0.0	0.0023926783096205237	0.0	-0.0005097067967801877	0.0	6.605076862575635e-11	-0.00012018816122345772	0.0	6.433085034112672e-09
4.57	-0.0005103077372171637	0.0	-2.124097505036811e-08	-0.0009085070886315553	0.0	-0.09913342182909565	0.0	1.7440685267745054e-05	0.0	0.9999999997772787	0.0	2.0908237608441007e-05	0.0	0.0	0.002395907544205378	0.0	0.0	0.0023976746979088126	0.0	-0.0005103077376507608	0.0	9.829581012711677e-11	-0.00012018818700577996	0.0	6.464932833697679e-09
4.575	-0.0005109086782156911	0.0	-2.127825990128779e-08	-0.0009110601468446358	0.0	-0.099133421809165	0.0	1.744489910882706e-05	0.0	0.999999999776338	0.0	2.0951846102364278e-05	0.0	0.0	0.002400904709511835	0.0	0.0	0.0024026722933736494	0.0	-0.0005109086786502454	0.0	1.3070010963541647e-10	-0.00012018821278800642	0.0	6.496788236892442e-09
4.58	-0.0005115096193431335	0.0	-2.131550106330465e-08	-0.0009136162097569389	0.0	-0.09913342178906953	0.0	1.7449112974747042e-05	0.0	0.9999999997753951	0.0	2.0995465130968397e-05	0.0	0.0	0.002405903082003799	0.0	0.0	0.002407671096022149	0.0	-0.0005115096197786409	0.0	1.6326370516873285e-10	-0.00012018823857027445	0.0	6.528651243702812e-09
4.585	-0.000512110560599491	0.0	-2.1352698536418682e-08	-0.0009161752773684648	0.0	-0.09913342176880922	0.0	1.7453326865505e-05	0.0	0.9999999997744502	0.0	2.1039094694253367e-05	0.0	0.0	0.0024109026616812705	0.0	0.0	0.0024126711058614276	0.0	-0.0005121105610359481	0.0	1.9598663474513856e-10	-0.00012018826435256959	0.0	6.560521854129196e-09
4.59	-0.0005127115019847633	0.0	-2.1389852320629894e-08	-0.0009187373496792132	0.0	-0.0991334217483841	0.0	1.7457540781100932e-05	0.0	0.9999999997735032	0.0	2.108273479221919e-05	0.0	0.0	0.002415903448544249	0.0	0.0	0.0024176723228986007	0.0	-0.0005127115024221665	0.0	2.2886893638272475e-10	-0.00012018829013479425	0.0	6.592400068175384e-09
4.595	-0.0005133124434989508	0.0	-2.142696241593828e-08	-0.0009213024266891842	0.0	-0.09913342172779416	0.0	1.7461754721534842e-05	0.0	0.9999999997725542	0.0	2.1126385424865862e-05	0.0	0.0	0.0024209054425927347	0.0	0.0	0.002422674747140784	0.0	-0.0005133124439372961	0.0	2.619106480996e-10	-0.00012018831591704964	0.0	6.624285885846716e-09
4.6000000000000005	-0.0005139133851420533	0.0	-2.146402882234385e-08	-0.0009238705083983784	0.0	-0.09913342170703938	0.0	1.7465968686806725e-05	0.0	0.9999999997716029	0.0	2.117004659219339e-05	0.0	0.0	0.0024259086438267285	0.0	0.0	0.0024276783785950923	0.0	-0.000513913385581337	0.0	2.9511180791390124e-10	-0.0001201883416993032	0.0	6.656179307143094e-09
4.605	-0.0005145143269140708	0.0	-2.1501051539846594e-08	-0.0009264415948067947	0.0	-0.0991334216861198	0.0	1.7470182676916583e-05	0.0	0.9999999997706497	0.0	2.1213718294201762e-05	0.0	0.0	0.002430913052246229	0.0	0.0	0.0024326832172686416	0.0	-0.0005145143273542892	0.0	3.284724538437475e-10	-0.00012018836748155137	0.0	6.688080332069659e-09
4.61	-0.0005151152688150033	0.0	-2.153803056844651e-08	-0.0009290156859144336	0.0	-0.09913342166503537	0.0	1.7474396691864418e-05	0.0	0.9999999997696943	0.0	2.125740053089099e-05	0.0	0.0	0.002435918667851236	0.0	0.0	0.0024376892631685475	0.0	-0.0005151152692561524	0.0	3.619926239073192e-10	-0.00012018839326376337	0.0	6.719988960628809e-09
4.615	-0.0005157162108448506	0.0	-2.157496590814361e-08	-0.0009315927817212951	0.0	-0.09913342164378613	0.0	1.7478610731650227e-05	0.0	0.9999999997687369	0.0	2.1301093302261057e-05	0.0	0.0	0.0024409254906417504	0.0	0.0	0.0024426965163019255	0.0	-0.0005157162112869268	0.0	3.956723561227642e-10	-0.00012018841904598443	0.0	6.7519051928253086e-09
4.62	-0.0005163171530036131	0.0	-2.161185755893788e-08	-0.0009341728822273792	0.0	-0.09913342162237206	0.0	1.748282479627401e-05	0.0	0.9999999997677773	0.0	2.134479660831198e-05	0.0	0.0	0.0024459335206177724	0.0	0.0	0.0024477049766758914	0.0	-0.0005163171534466123	0.0	4.295116885083064e-10	-0.00012018844482821812	0.0	6.783829028662727e-09
4.625	-0.0005169180952912906	0.0	-2.1648705520829332e-08	-0.0009367559874326859	0.0	-0.09913342160079316	0.0	1.748703888573577e-05	0.0	0.9999999997668156	0.0	2.138851044904375e-05	0.0	0.0	0.0024509427577793005	0.0	0.0	0.0024527146442975606	0.0	-0.0005169180957352089	0.0	4.635106590821267e-10	-0.00012018847061042833	0.0	6.815760468140446e-09
4.63	-0.000517519037707883	0.0	-2.168550979381796e-08	-0.0009393420973372153	0.0	-0.09913342157904946	0.0	1.7491253000035505e-05	0.0	0.999999999765852	0.0	2.1432234824456376e-05	0.0	0.0	0.0024559532021263377	0.0	0.0	0.0024577255191740484	0.0	-0.0005175190381527166	0.0	4.97669305862456e-10	-0.00012018849639265118	0.0	6.847699511265765e-09
4.635	-0.0005181199802533904	0.0	-2.1722270377903764e-08	-0.0009419312119409673	0.0	-0.09913342155714092	0.0	1.7495467139173214e-05	0.0	0.9999999997648862	0.0	2.147596973454985e-05	0.0	0.0	0.002460964853658881	0.0	0.0	0.0024627376013124707	0.0	-0.0005181199806991354	0.0	5.319876668675344e-10	-0.00012018852217487404	0.0	6.8796461580409995e-09
4.64	-0.000518720922927813	0.0	-2.1758987273086743e-08	-0.000944523331243942	0.0	-0.09913342153506755	0.0	1.74996813031489e-05	0.0	0.9999999997639183	0.0	2.151971517932417e-05	0.0	0.0	0.002465977712376931	0.0	0.0	0.002467750890719943	0.0	-0.0005187209233744653	0.0	5.664657801156222e-10	-0.00012018854795706438	0.0	6.911600408470472e-09
4.6450000000000005	-0.0005193218657311505	0.0	-2.1795660479366904e-08	-0.0009471184552461397	0.0	-0.09913342151282936	0.0	1.7503895491962563e-05	0.0	0.9999999997629483	0.0	2.1563471158779353e-05	0.0	0.0	0.0024709917782804905	0.0	0.0	0.0024727653874035806	0.0	-0.0005193218661787061	0.0	6.011036836249964e-10	-0.00012018857373926193	0.0	6.943562262553755e-09
4.65	-0.000519922808663403	0.0	-2.183228999674424e-08	-0.0009497165839475595	0.0	-0.09913342149042635	0.0	1.7508109705614197e-05	0.0	0.9999999997619762	0.0	2.1607237672915377e-05	0.0	0.0	0.002476007051369556	0.0	0.0	0.0024777810913704994	0.0	-0.0005199228091118579	0.0	6.359014154139237e-10	-0.00012018859952147756	0.0	6.975531720295238e-09
4.655	-0.0005205237517245706	0.0	-2.186887582521875e-08	-0.000952317717348202	0.0	-0.09913342146785852	0.0	1.751232394410381e-05	0.0	0.9999999997610021	0.0	2.165101472173225e-05	0.0	0.0	0.002481023531644128	0.0	0.0	0.0024827980026278147	0.0	-0.0005205237521739209	0.0	6.708590135007209e-10	-0.00012018862530366789	0.0	7.007508781700034e-09
4.66	-0.0005211246949146529	0.0	-2.190541796479044e-08	-0.000954921855448067	0.0	-0.09913342144512585	0.0	1.7516538207431394e-05	0.0	0.9999999997600258	0.0	2.1694802305229976e-05	0.0	0.0	0.0024860412191042088	0.0	0.0	0.002487816121182642	0.0	-0.0005211246953648946	0.0	7.059765159037045e-10	-0.000120188651085804	0.0	7.039493446774281e-09
4.665	-0.0005217256382336505	0.0	-2.1941916415459303e-08	-0.0009575289982471548	0.0	-0.09913342142222836	0.0	1.7520752495596957e-05	0.0	0.9999999997590474	0.0	2.173860042340855e-05	0.0	0.0	0.0024910601137497963	0.0	0.0	0.002492835447042097	0.0	-0.000521725638684779	0.0	7.412539606412404e-10	-0.00012018867686802506	0.0	7.07148571551315e-09
4.67	-0.000522326581681563	0.0	-2.1978371177225348e-08	-0.0009601391457454651	0.0	-0.09913342139916606	0.0	1.752496680860049e-05	0.0	0.9999999997580671	0.0	2.1782409076267973e-05	0.0	0.0	0.0024960802155808907	0.0	0.0	0.0024978559802132953	0.0	-0.0005223265821335748	0.0	7.766913857316225e-10	-0.00012018870265020273	0.0	7.1034855879236495e-09
4.675	-0.0005229275252583905	0.0	-2.2014782250088568e-08	-0.0009627522979429981	0.0	-0.09913342137593893	0.0	1.7529181146442004e-05	0.0	0.9999999997570845	0.0	2.182622826380825e-05	0.0	0.0	0.002501101524597494	0.0	0.0	0.0025028777207033526	0.0	-0.000522927525711281	0.0	8.12288829193276e-10	-0.00012018872843232982	0.0	7.135493064015435e-09
4.68	-0.000523528468964133	0.0	-2.2051149634048962e-08	-0.0009653684548397537	0.0	-0.09913342135254696	0.0	1.753339550912149e-05	0.0	0.9999999997560999	0.0	2.187005798602937e-05	0.0	0.0	0.002506124040799603	0.0	0.0	0.002507900668519384	0.0	-0.0005235284694178982	0.0	8.480463290445706e-10	-0.00012018875421455268	0.0	7.1675081437819986e-09
4.6850000000000005	-0.0005241294127987906	0.0	-2.2087473329106542e-08	-0.0009679876164357323	0.0	-0.09913342132899018	0.0	1.7537609896638955e-05	0.0	0.9999999997551132	0.0	2.1913898242931355e-05	0.0	0.0	0.002511147764187221	0.0	0.0	0.0025129248236685055	0.0	-0.0005241294132534265	0.0	8.839639233038991e-10	-0.00012018877999673397	0.0	7.1995308272307685e-09
4.69	-0.0005247303567623632	0.0	-2.212375333526129e-08	-0.0009706097827309332	0.0	-0.09913342130526859	0.0	1.754182430899439e-05	0.0	0.9999999997541245	0.0	2.195774903451418e-05	0.0	0.0	0.0025161726947603457	0.0	0.0	0.0025179501861578323	0.0	-0.0005247303572178655	0.0	9.200416499896869e-10	-0.0001201888057788466	0.0	7.231561114364513e-09
4.695	-0.0005253313008548507	0.0	-2.2159989652513218e-08	-0.0009732349537253566	0.0	-0.09913342128138215	0.0	1.7546038746187805e-05	0.0	0.9999999997531336	0.0	2.2001610360777855e-05	0.0	0.0	0.002521198832518978	0.0	0.0	0.0025229767559944802	0.0	-0.000525331301311215	0.0	9.5627954712036e-10	-0.0001201888315609791	0.0	7.2635990051879164e-09
4.7	-0.0005259322450762532	0.0	-2.2196182280862322e-08	-0.0009758631294190026	0.0	-0.09913342125733089	0.0	1.7550253208219193e-05	0.0	0.9999999997521406	0.0	2.204548222172238e-05	0.0	0.0	0.0025262261774631175	0.0	0.0	0.0025280045331855646	0.0	-0.0005259322455334753	0.0	9.926776527143868e-10	-0.00012018885734312425	0.0	7.295644499704095e-09
4.705	-0.0005265331894265707	0.0	-2.22323312203086e-08	-0.0009784943098118714	0.0	-0.09913342123311482	0.0	1.7554467695088554e-05	0.0	0.9999999997511455	0.0	2.2089364617347753e-05	0.0	0.0	0.002531254729592764	0.0	0.0	0.0025330335177382013	0.0	-0.0005265331898846462	0.0	1.0292360047902232e-09	-0.0001201888831252947	0.0	7.327697597912836e-09
4.71	-0.0005271341339058033	0.0	-2.226843647085206e-08	-0.0009811284949039628	0.0	-0.09913342120873392	0.0	1.7558682206795893e-05	0.0	0.9999999997501484	0.0	2.213325754765398e-05	0.0	0.0	0.002536284488907919	0.0	0.0	0.0025380637096595058	0.0	-0.0005271341343647282	0.0	1.0659546413663475e-09	-0.00012018890890745071	0.0	7.359758299821413e-09
4.715	-0.0005277350785139509	0.0	-2.2304498032492692e-08	-0.0009837656846952765	0.0	-0.09913342118418819	0.0	1.7562896743341207e-05	0.0	0.9999999997491492	0.0	2.2177161012641054e-05	0.0	0.0	0.0025413154554085812	0.0	0.0	0.0025430951089565933	0.0	-0.0005277350789737207	0.0	1.1028336004612751e-09	-0.00012018893468956153	0.0	7.3918266054330044e-09
4.72	-0.0005283360232510134	0.0	-2.2340515905230505e-08	-0.0009864058791858132	0.0	-0.09913342115947764	0.0	1.7567111304724494e-05	0.0	0.9999999997481479	0.0	2.2221075012308983e-05	0.0	0.0	0.002546347629094751	0.0	0.0	0.00254812771563658	0.0	-0.0005283360237116238	0.0	1.1398729200935174e-09	-0.00012018896047169042	0.0	7.4239025147481625e-09
4.7250000000000005	-0.000528936968116991	0.0	-2.23764900890655e-08	-0.0009890490783755726	0.0	-0.09913342113460226	0.0	1.757132589094576e-05	0.0	0.9999999997471445	0.0	2.2264999546657766e-05	0.0	0.0	0.0025513810099664293	0.0	0.0	0.0025531615297065807	0.0	-0.0005289369685784375	0.0	1.1770726382816027e-09	-0.00012018898625380846	0.0	7.455986027770873e-09
4.73	-0.0005295379131118836	0.0	-2.2412420583997666e-08	-0.0009916952822645545	0.0	-0.09913342110956207	0.0	1.7575540502004997e-05	0.0	0.999999999746139	0.0	2.230893461568739e-05	0.0	0.0	0.002556415598023614	0.0	0.0	0.0025581965511737113	0.0	-0.0005295379135741619	0.0	1.2144327930440794e-09	-0.00012018901203593194	0.0	7.488077144505876e-09
4.735	-0.0005301388582356912	0.0	-2.244830739002701e-08	-0.000994344490852759	0.0	-0.09913342108435705	0.0	1.7579755137902213e-05	0.0	0.9999999997451314	0.0	2.235288021939787e-05	0.0	0.0	0.0025614513932663073	0.0	0.0	0.0025632327800450875	0.0	-0.0005301388586987968	0.0	1.2519534223995185e-09	-0.00012018903781805179	0.0	7.520175864954944e-09
4.74	-0.0005307398034884137	0.0	-2.248415050715353e-08	-0.0009969967041401858	0.0	-0.0991334210589872	0.0	1.7583969798637403e-05	0.0	0.9999999997441218	0.0	2.2396836357789198e-05	0.0	0.0	0.0025664883956945076	0.0	0.0	0.0025682702163278247	0.0	-0.0005307398039523424	0.0	1.2896345643664915e-09	-0.00012018906360016985	0.0	7.552282189121342e-09
4.745	-0.0005313407488700513	0.0	-2.2519949935377226e-08	-0.0009996519221268357	0.0	-0.09913342103345253	0.0	1.7588184484210567e-05	0.0	0.99999999974311	0.0	2.2440803030861373e-05	0.0	0.0	0.0025715266053082156	0.0	0.0	0.0025733088600290383	0.0	-0.0005313407493347985	0.0	1.3274762569636027e-09	-0.0001201890893822409	0.0	7.58439611701078e-09
4.75	-0.0005319416943806039	0.0	-2.2555705674698098e-08	-0.001002310144812708	0.0	-0.09913342100775303	0.0	1.759239919462171e-05	0.0	0.9999999997420962	0.0	2.24847802386144e-05	0.0	0.0	0.002576566022107431	0.0	0.0	0.002578348711155844	0.0	-0.0005319416948461648	0.0	1.3654785382094729e-09	-0.00012018911516433186	0.0	7.616517648624118e-09
4.755	-0.0005325426400200714	0.0	-2.2591417725116148e-08	-0.0010049713721978029	0.0	-0.09913342098188871	0.0	1.7596613929870824e-05	0.0	0.9999999997410802	0.0	2.2528767981048274e-05	0.0	0.0	0.002581606646092154	0.0	0.0	0.0025833897697153576	0.0	-0.0005325426404864418	0.0	1.4036414461227232e-09	-0.0001201891409464246	0.0	7.648646783965006e-09
4.76	-0.000533143585788454	0.0	-2.2627086086631376e-08	-0.0010076356042821202	0.0	-0.09913342095585957	0.0	1.7600828689957913e-05	0.0	0.9999999997400622	0.0	2.2572766258163003e-05	0.0	0.0	0.0025866484772623854	0.0	0.0	0.0025884320357146945	0.0	-0.0005331435862556291	0.0	1.4419650187220075e-09	-0.00012018916672853904	0.0	7.68078352303656e-09
4.765	-0.0005337445316857517	0.0	-2.266271075924378e-08	-0.0010103028410656605	0.0	-0.0991334209296656	0.0	1.760504347488298e-05	0.0	0.9999999997390421	0.0	2.261677506995858e-05	0.0	0.0	0.0025916915156181243	0.0	0.0	0.0025934755091609704	0.0	-0.0005337445321537272	0.0	1.4804492940259796e-09	-0.00012018919251064986	0.0	7.712927865842625e-09
4.7700000000000005	-0.0005343454777119644	0.0	-2.2698291742953366e-08	-0.0010129730825484237	0.0	-0.0991334209033068	0.0	1.760925828464602e-05	0.0	0.9999999997380199	0.0	2.2660794416435016e-05	0.0	0.0	0.0025967357611593714	0.0	0.0	0.0025985201900613005	0.0	-0.0005343454781807355	0.0	1.51909431005333e-09	-0.00012018921829269743	0.0	7.745079812386733e-09
4.775	-0.0005349464238670919	0.0	-2.2733829037760125e-08	-0.001015646328730409	0.0	-0.09913342087678319	0.0	1.7613473119247036e-05	0.0	0.9999999997369956	0.0	2.2704824297592296e-05	0.0	0.0	0.002601781213886126	0.0	0.0	0.0026035660784228002	0.0	-0.0005349464243366542	0.0	1.5579001048227459e-09	-0.00012018924407473598	0.0	7.777239362669578e-09
4.78	-0.0005355473701511345	0.0	-2.276932264366406e-08	-0.0010183225796116168	0.0	-0.09913342085009476	0.0	1.7617687978686028e-05	0.0	0.9999999997359692	0.0	2.2748864713430423e-05	0.0	0.0	0.0026068278737983877	0.0	0.0	0.0026086131742525855	0.0	-0.000535547370621483	0.0	1.5968667163529342e-09	-0.00012018926985685402	0.0	7.809406516697864e-09
4.785	-0.0005361483165640922	0.0	-2.2804772560665168e-08	-0.0010210018351920476	0.0	-0.09913342082324149	0.0	1.7621902862962995e-05	0.0	0.9999999997349408	0.0	2.2792915663949402e-05	0.0	0.0	0.0026118757408961583	0.0	0.0	0.0026136614775577717	0.0	-0.0005361483170352226	0.0	1.635994182662638e-09	-0.00012018929563889799	0.0	7.841581274474499e-09
4.79	-0.0005367492631059647	0.0	-2.2840178788763458e-08	-0.0010236840954717008	0.0	-0.09913342079622339	0.0	1.7626117772077938e-05	0.0	0.9999999997339102	0.0	2.283697714914923e-05	0.0	0.0	0.0026169248151794357	0.0	0.0	0.0026187109883454747	0.0	-0.000536749263577872	0.0	1.6752825417705945e-09	-0.00012018932142094014	0.0	7.8737636359999e-09
4.795	-0.0005373502097767524	0.0	-2.2875541327958923e-08	-0.0010263693604505766	0.0	-0.09913342076904048	0.0	1.7630332706030853e-05	0.0	0.9999999997328776	0.0	2.2881049169029908e-05	0.0	0.0	0.002621975096648221	0.0	0.0	0.00262376170662281	0.0	-0.000537350210249432	0.0	1.7147318316955596e-09	-0.0001201893472030329	0.0	7.905953601278896e-09
4.8	-0.0005379511565764551	0.0	-2.2910860178251566e-08	-0.0010290576301286753	0.0	-0.09913342074169275	0.0	1.7634547664821744e-05	0.0	0.9999999997318428	0.0	2.2925131723591434e-05	0.0	0.0	0.0026270265853025145	0.0	0.0	0.0026288136323968925	0.0	-0.0005379511570499022	0.0	1.7543420904563135e-09	-0.00012018937298505878	0.0	7.938151170316129e-09
4.805	-0.0005385521035050727	0.0	-2.2946135339641388e-08	-0.0010317489045059962	0.0	-0.09913342071418019	0.0	1.7638762648450614e-05	0.0	0.999999999730806	0.0	2.296922481283382e-05	0.0	0.0	0.0026320792811423163	0.0	0.0	0.0026338667656748385	0.0	-0.0005385521039792826	0.0	1.7941133560716556e-09	-0.0001201893987670901	0.0	7.97035634311441e-09
4.8100000000000005	-0.0005391530505626054	0.0	-2.298136681212839e-08	-0.0010344431835825404	0.0	-0.0991334206865028	0.0	1.7642977656917457e-05	0.0	0.999999999729767	0.0	2.301332843675705e-05	0.0	0.0	0.0026371331841676254	0.0	0.0	0.0026389211064637634	0.0	-0.0005391530510375732	0.0	1.8340456665603953e-09	-0.00012018942454915394	0.0	8.002569119675049e-09
4.815	-0.0005397539977490531	0.0	-2.3016554595712565e-08	-0.0010371404673583068	0.0	-0.0991334206586606	0.0	1.7647192690222274e-05	0.0	0.9999999997287261	0.0	2.305744259536113e-05	0.0	0.0	0.0026421882943784432	0.0	0.0	0.002643976654770783	0.0	-0.0005397539982247741	0.0	1.8741390599413486e-09	-0.00012018945033120151	0.0	8.034789500000584e-09
4.82	-0.0005403549450644157	0.0	-2.3051698690393914e-08	-0.0010398407558332957	0.0	-0.09913342063065356	0.0	1.765140774836507e-05	0.0	0.999999999727683	0.0	2.310156728864606e-05	0.0	0.0	0.002647244611774768	0.0	0.0	0.002649033410603012	0.0	-0.0005403549455408851	0.0	1.914393574233355e-09	-0.0001201894761132238	0.0	8.067017484099181e-09
4.825	-0.0005409558925086933	0.0	-2.308679909617244e-08	-0.001042544049007507	0.0	-0.0991334206024817	0.0	1.7655622831345837e-05	0.0	0.9999999997266379	0.0	2.3145702516611842e-05	0.0	0.0	0.002652302136356602	0.0	0.0	0.0026540913739675665	0.0	-0.0005409558929859063	0.0	1.9548092474552967e-09	-0.00012018950189524788	0.0	8.099253071971756e-09
4.83	-0.000541556840081886	0.0	-2.3121855813048143e-08	-0.0010452503468809412	0.0	-0.09913342057414502	0.0	1.765983793916458e-05	0.0	0.9999999997255906	0.0	2.3189848279258473e-05	0.0	0.0	0.002657360868123943	0.0	0.0	0.0026591505448715622	0.0	-0.0005415568405598376	0.0	1.9953861176260294e-09	-0.00012018952767724486	0.0	8.131496263617296e-09
4.835	-0.0005421577877839937	0.0	-2.3156868841021026e-08	-0.001047959649453598	0.0	-0.09913342054564352	0.0	1.76640530718213e-05	0.0	0.9999999997245412	0.0	2.323400457658595e-05	0.0	0.0	0.0026624208070767917	0.0	0.0	0.0026642109233221147	0.0	-0.0005421577882626788	0.0	2.036124222764439e-09	-0.00012018955345924726	0.0	8.163747059045294e-09
4.84	-0.0005427587356150163	0.0	-2.3191838180091084e-08	-0.0010506719567254775	0.0	-0.09913342051697718	0.0	1.7668268229315994e-05	0.0	0.9999999997234897	0.0	2.327817140859428e-05	0.0	0.0	0.002667481953215148	0.0	0.0	0.0026692725093263392	0.0	-0.00054275873609443	0.0	2.0770236008894535e-09	-0.00012018957924128761	0.0	8.196005458255476e-09
4.845	-0.000543359683574954	0.0	-2.322676383025832e-08	-0.0010533872686965796	0.0	-0.09913342048814604	0.0	1.7672483411648662e-05	0.0	0.9999999997224363	0.0	2.332234877528346e-05	0.0	0.0	0.002672544306539013	0.0	0.0	0.0026743353028913512	0.0	-0.0005433596840550916	0.0	2.118084290019972e-09	-0.00012018960502331531	0.0	8.228271461252977e-09
4.8500000000000005	-0.0005439606316638068	0.0	-2.3261645791522735e-08	-0.0010561055853669048	0.0	-0.09913342045915005	0.0	1.7676698618819307e-05	0.0	0.9999999997213807	0.0	2.33665366766535e-05	0.0	0.0	0.0026776078670483873	0.0	0.0	0.0026793993040242665	0.0	-0.0005439606321446631	0.0	2.1593063281749662e-09	-0.00012018963080528699	0.0	8.26054506804045e-09
4.855	-0.0005445615798815744	0.0	-2.3296484063884324e-08	-0.001058826906736452	0.0	-0.09913342042998925	0.0	1.7680913850827927e-05	0.0	0.9999999997203229	0.0	2.341073511270438e-05	0.0	0.0	0.0026826726347432685	0.0	0.0	0.0026844645127322006	0.0	-0.0005445615803631445	0.0	2.2006897533733613e-09	-0.00012018965658728035	0.0	8.292826278618006e-09
4.86	-0.0005451625282282571	0.0	-2.3331278647343092e-08	-0.0010615512328052221	0.0	-0.09913342040066363	0.0	1.7685129107674524e-05	0.0	0.9999999997192631	0.0	2.345494408343611e-05	0.0	0.0	0.002687738609623658	0.0	0.0	0.002689530929022269	0.0	-0.0005451625287105359	0.0	2.242234603634142e-09	-0.00012018968236930263	0.0	8.325115092993877e-09
4.865	-0.0005457634767038549	0.0	-2.3366029541899034e-08	-0.0010642785635732145	0.0	-0.09913342037117318	0.0	1.768934438935909e-05	0.0	0.9999999997182013	0.0	2.349916358884869e-05	0.0	0.0	0.0026928057916895554	0.0	0.0	0.0026945985529015877	0.0	-0.0005457634771868375	0.0	2.2839409169762994e-09	-0.00012018970815126709	0.0	8.35741151116933e-09
4.87	-0.0005463644253083675	0.0	-2.3400736747552154e-08	-0.0010670088990404297	0.0	-0.0991334203415179	0.0	1.7693559695881636e-05	0.0	0.9999999997171373	0.0	2.3543393628942123e-05	0.0	0.0	0.002697874180940961	0.0	0.0	0.0026996673843772715	0.0	-0.0005463644257920486	0.0	2.3258087314188395e-09	-0.0001201897339332189	0.0	8.389715533146961e-09
4.875	-0.0005469653740417952	0.0	-2.343540026430245e-08	-0.0010697422392068675	0.0	-0.0991334203116978	0.0	1.769777502724216e-05	0.0	0.9999999997160712	0.0	2.3587634203716405e-05	0.0	0.0	0.0027029437773778745	0.0	0.0	0.0027047374234564366	0.0	-0.0005469653745261697	0.0	2.367838084980779e-09	-0.00012018975971521768	0.0	8.422027158930406e-09
4.88	-0.000547566322904138	0.0	-2.3470020092149923e-08	-0.0010724785840725277	0.0	-0.09913342028171288	0.0	1.7701990383440655e-05	0.0	0.9999999997150031	0.0	2.3631885313171535e-05	0.0	0.0	0.0027080145810002964	0.0	0.0	0.0027098086701461983	0.0	-0.0005475663233892007	0.0	2.410029015681159e-09	-0.00012018978549718936	0.0	8.454346388523065e-09
4.885	-0.0005481672718953956	0.0	-2.3504596231094574e-08	-0.001075217933637411	0.0	-0.09913342025156313	0.0	1.7706205764477125e-05	0.0	0.9999999997139328	0.0	2.3676146957307517e-05	0.0	0.0	0.0027130865918082265	0.0	0.0	0.002714881124453672	0.0	-0.0005481672723811415	0.0	2.452381561539031e-09	-0.00012018981127913394	0.0	8.486673221928773e-09
4.89	-0.0005487682210155684	0.0	-2.35391286811364e-08	-0.0010779602879015164	0.0	-0.09913342022124856	0.0	1.7710421170351573e-05	0.0	0.9999999997128605	0.0	2.372041913612435e-05	0.0	0.0	0.0027181598098016645	0.0	0.0	0.0027199547863859734	0.0	-0.0005487682215019921	0.0	2.494895760573472e-09	-0.00012018983706113634	0.0	8.519007659149807e-09
4.8950000000000005	-0.0005493691702646562	0.0	-2.357361744227541e-08	-0.0010807056468648453	0.0	-0.09913342019076916	0.0	1.7714636601063995e-05	0.0	0.9999999997117861	0.0	2.376470184962204e-05	0.0	0.0	0.002723234234980612	0.0	0.0	0.002725029655950218	0.0	-0.0005493691707517529	0.0	2.5375716508035593e-09	-0.00012018986284311525	0.0	8.551349700188766e-09
4.9	-0.000549970119642659	0.0	-2.3608062514511594e-08	-0.0010834540105273962	0.0	-0.09913342016012494	0.0	1.771885205661439e-05	0.0	0.9999999997107096	0.0	2.3808995097800574e-05	0.0	0.0	0.002728309867345067	0.0	0.0	0.0027301057331535214	0.0	-0.0005499701201304232	0.0	2.5804092702483974e-09	-0.00012018988862501285	0.0	8.583699345050454e-09
4.905	-0.0005505710691495766	0.0	-2.364246389784495e-08	-0.0010862053788891696	0.0	-0.0991334201293159	0.0	1.7723067537002764e-05	0.0	0.999999999709631	0.0	2.3853298880659954e-05	0.0	0.0	0.0027333867068950295	0.0	0.0	0.0027351830180029992	0.0	-0.0005505710696380031	0.0	2.6234086569271067e-09	-0.00012018991440696465	0.0	8.61605659373778e-09
4.91	-0.0005511720187854094	0.0	-2.3676821592275487e-08	-0.0010889597519501658	0.0	-0.09913342009834203	0.0	1.772728304222911e-05	0.0	0.9999999997085504	0.0	2.3897613198200186e-05	0.0	0.0	0.0027384647536305004	0.0	0.0	0.002740261510505767	0.0	-0.0005511720192744929	0.0	2.6665698488588243e-09	-0.00012018994018891827	0.0	8.648421446254576e-09
4.915	-0.0005517729685501571	0.0	-2.37111355978032e-08	-0.0010917171297103844	0.0	-0.09913342006720334	0.0	1.7731498572293432e-05	0.0	0.9999999997074676	0.0	2.394193805042127e-05	0.0	0.0	0.00274354400755148	0.0	0.0	0.0027453412106689403	0.0	-0.0005517729690398922	0.0	2.7098928840627063e-09	-0.00012018996597083754	0.0	8.680793902603932e-09
4.92	-0.0005523739184438199	0.0	-2.374540591442809e-08	-0.0010944775121698258	0.0	-0.09913342003589982	0.0	1.773571412719573e-05	0.0	0.9999999997063826	0.0	2.3986273437323203e-05	0.0	0.0	0.0027486244686579678	0.0	0.0	0.0027504221184996348	0.0	-0.0005523739189342013	0.0	2.7533778005579205e-09	-0.00012018999175278573	0.0	8.7131739627869e-09
4.925	-0.0005529748684663977	0.0	-2.3779632542150155e-08	-0.0010972408993284897	0.0	-0.09913342000443148	0.0	1.7739929706936004e-05	0.0	0.9999999997052957	0.0	2.4030619358905985e-05	0.0	0.0	0.002753706136949964	0.0	0.0	0.0027555042340049658	0.0	-0.00055297486895742	0.0	2.797024636363639e-09	-0.00012019001753470681	0.0	8.745561626808054e-09
4.93	-0.0005535758186178903	0.0	-2.3813815480969396e-08	-0.0011000072911863763	0.0	-0.09913341997279831	0.0	1.774414531151425e-05	0.0	0.9999999997042067	0.0	2.407497581516962e-05	0.0	0.0	0.002758789012427469	0.0	0.0	0.0027605875571920487	0.0	-0.0005535758191095484	0.0	2.8408334294990724e-09	-0.0001201900433166532	0.0	8.777956894672319e-09
4.9350000000000005	-0.0005541767688982982	0.0	-2.3847954730885826e-08	-0.001102776687743486	0.0	-0.09913341994100033	0.0	1.7748360940930475e-05	0.0	0.9999999997031156	0.0	2.411934280611411e-05	0.0	0.0	0.0027638730950904824	0.0	0.0	0.0027656720880679993	0.0	-0.0005541767693905865	0.0	2.8848042179834375e-09	-0.00012019006909854538	0.0	8.810359766381887e-09
4.94	-0.000554777719307621	0.0	-2.3882050291899423e-08	-0.0011055490889998179	0.0	-0.09913341990903753	0.0	1.7752576595184673e-05	0.0	0.9999999997020224	0.0	2.4163720331739446e-05	0.0	0.0	0.002768958384939004	0.0	0.0	0.0027707578266399336	0.0	-0.0005547777198005339	0.0	2.9289370398359697e-09	-0.00012019009488046827	0.0	8.842770241938153e-09
4.945	-0.0005553786698458587	0.0	-2.3916102164010195e-08	-0.0011083244949553724	0.0	-0.09913341987690988	0.0	1.7756792274276848e-05	0.0	0.9999999997009271	0.0	2.4208108392045627e-05	0.0	0.0	0.0027740448819730335	0.0	0.0	0.0027758447729149664	0.0	-0.0005553786703393911	0.0	2.9732319330759056e-09	-0.0001201901206623749	0.0	8.875188321346533e-09
4.95	-0.0005559796205130115	0.0	-2.3950110347218146e-08	-0.0011111029056101495	0.0	-0.09913341984461742	0.0	1.7761007978206998e-05	0.0	0.9999999996998297	0.0	2.4252506987032662e-05	0.0	0.0	0.002779132586192572	0.0	0.0	0.0027809329269002135	0.0	-0.0005559796210071575	0.0	3.0176889357225283e-09	-0.00012019014644425623	0.0	8.907614004611268e-09
4.955	-0.0005565805713090794	0.0	-2.398407484152327e-08	-0.001113884320964149	0.0	-0.09913341981216013	0.0	1.776522370697512e-05	0.0	0.9999999996987302	0.0	2.4296916116700545e-05	0.0	0.0	0.0027842214975976184	0.0	0.0	0.0027860222886027905	0.0	-0.0005565805718038338	0.0	3.0623080857951125e-09	-0.00012019017222619538	0.0	8.940047291731646e-09
4.96	-0.0005571815222340621	0.0	-2.4017995646925578e-08	-0.0011166687410173715	0.0	-0.09913341977953803	0.0	1.776943946058122e-05	0.0	0.9999999996976286	0.0	2.434133578104928e-05	0.0	0.0	0.002789311616188173	0.0	0.0	0.002791112858029813	0.0	-0.0005571815227294194	0.0	3.1070894213129484e-09	-0.00012019019800806407	0.0	8.972488182714686e-09
4.965	-0.0005577824732879599	0.0	-2.405187276342506e-08	-0.0011194561657698163	0.0	-0.09913341974675109	0.0	1.7773655239025294e-05	0.0	0.999999999696525	0.0	2.4385765980078866e-05	0.0	0.0	0.002794402941964237	0.0	0.0	0.0027962046351883967	0.0	-0.0005577824737839144	0.0	3.152032980295368e-09	-0.00012019022378993095	0.0	9.004936677563075e-09
4.97	-0.0005583834244707727	0.0	-2.408570619102172e-08	-0.001122246595221484	0.0	-0.09913341971379934	0.0	1.7777871042307346e-05	0.0	0.9999999996954192	0.0	2.44302067137893e-05	0.0	0.0	0.002799495474925809	0.0	0.0	0.002801297620085657	0.0	-0.0005583834249673188	0.0	3.1971388007616903e-09	-0.00012019024957185564	0.0	9.037392776277717e-09
4.9750000000000005	-0.0005589843757825006	0.0	-2.411949592971556e-08	-0.0011250400293723747	0.0	-0.09913341968068276	0.0	1.778208687042737e-05	0.0	0.9999999996943114	0.0	2.447465798218059e-05	0.0	0.0	0.0028045892150728906	0.0	0.0	0.0028063918127287095	0.0	-0.0005589843762796329	0.0	3.2424069207312633e-09	-0.0001201902753537406	0.0	9.069856478863353e-09
4.98	-0.0005595853272231434	0.0	-2.4153241979506573e-08	-0.0011278364682224874	0.0	-0.09913341964740136	0.0	1.778630272338537e-05	0.0	0.9999999996932015	0.0	2.4519119785252728e-05	0.0	0.0	0.0028096841624054803	0.0	0.0	0.0028114872131246695	0.0	-0.0005595853277208561	0.0	3.2878373782234493e-09	-0.00012019030113558939	0.0	9.102327785324459e-09
4.985	-0.0005601862787927012	0.0	-2.418694434039476e-08	-0.0011306359117718228	0.0	-0.09913341961395512	0.0	1.7790518601181347e-05	0.0	0.9999999996920895	0.0	2.4563592123005712e-05	0.0	0.0	0.0028147803169235775	0.0	0.0	0.002816583821280653	0.0	-0.0005601862792909888	0.0	3.3334302112576376e-09	-0.0001201903269174635	0.0	9.134806695663287e-09
4.99	-0.000560787230491174	0.0	-2.4220603012380126e-08	-0.0011334383600203808	0.0	-0.09913341958034406	0.0	1.7794734503815296e-05	0.0	0.9999999996909754	0.0	2.4608074995439548e-05	0.0	0.0	0.0028198776786271845	0.0	0.0	0.0028216816372037754	0.0	-0.0005607872309900307	0.0	3.379185457853216e-09	-0.0001201903526993105	0.0	9.167293209882106e-09
4.995	-0.0005613881823185618	0.0	-2.425421799546267e-08	-0.0011362438129681614	0.0	-0.09913341954656818	0.0	1.7798950431287222e-05	0.0	0.9999999996898592	0.0	2.4652568402554232e-05	0.0	0.0	0.002824976247516299	0.0	0.0	0.002826780660901152	0.0	-0.0005613881828179819	0.0	3.4251031560295993e-09	-0.00012019037848113581	0.0	9.199787327985459e-09
5.0	-0.0005619891342748646	0.0	-2.428778928964239e-08	-0.0011390522706151648	0.0	-0.09913341951262748	0.0	1.7803166383597125e-05	0.0	0.9999999996887409	0.0	2.469707234434977e-05	0.0	0.0	0.002830076023590923	0.0	0.0	0.0028318808923798984	0.0	-0.0005619891347748422	0.0	3.471183343806216e-09	-0.00012019040426302076	0.0	9.232289049976427e-09
5.005	-0.0005625900863600825	0.0	-2.4321316894919288e-08	-0.0011418637329613907	0.0	-0.09913341947852196	0.0	1.7807382360745002e-05	0.0	0.9999999996876205	0.0	2.4741586820826157e-05	0.0	0.0	0.0028351770068510552	0.0	0.0	0.0028369823316471304	0.0	-0.0005625900868606121	0.0	3.5174260592025133e-09	-0.00012019043004491113	0.0	9.264798375856945e-09
5.01	-0.0005631910385742153	0.0	-2.4354800811293363e-08	-0.0011446782000068393	0.0	-0.09913341944425161	0.0	1.7811598362730854e-05	0.0	0.9999999996864981	0.0	2.478611183198339e-05	0.0	0.0	0.002840279197296696	0.0	0.0	0.0028420849787099633	0.0	-0.0005631910390752912	0.0	3.563831340237943e-09	-0.0001201904558267003	0.0	9.297315305631874e-09
5.015	-0.0005637919909172631	0.0	-2.4388241038764612e-08	-0.0011474956717515104	0.0	-0.09913341940981643	0.0	1.781581438955468e-05	0.0	0.9999999996853736	0.0	2.483064737782148e-05	0.0	0.0	0.002845382594927846	0.0	0.0	0.002847188833575513	0.0	-0.0005637919914188792	0.0	3.6103992249319963e-09	-0.00012019048160854368	0.0	9.329839839305944e-09
5.0200000000000005	-0.000564392943389226	0.0	-2.4421637577333046e-08	-0.0011503161481954045	0.0	-0.09913341937521643	0.0	1.782003044121648e-05	0.0	0.9999999996842469	0.0	2.487519345834042e-05	0.0	0.0	0.002850487199744505	0.0	0.0	0.0028522938962508948	0.0	-0.0005643929438913767	0.0	3.6571297513041674e-09	-0.00012019050739043224	0.0	9.362371976878402e-09
5.025	-0.0005649938959901039	0.0	-2.4454990426998652e-08	-0.001153139629338521	0.0	-0.09913341934045161	0.0	1.7824246517716258e-05	0.0	0.9999999996831183	0.0	2.4919750073540208e-05	0.0	0.0	0.0028555930117466722	0.0	0.0	0.0028574001667432242	0.0	-0.0005649938964927834	0.0	3.704022957373953e-09	-0.00012019053317223226	0.0	9.39491171835466e-09
5.03	-0.0005655948487198968	0.0	-2.4488299587761433e-08	-0.0011559661151808599	0.0	-0.09913341930552197	0.0	1.7828462619054012e-05	0.0	0.9999999996819874	0.0	2.4964317223420844e-05	0.0	0.0	0.002860700030934348	0.0	0.0	0.002862507645059617	0.0	-0.000565594849223099	0.0	3.751078881160892e-09	-0.0001201905589540395	0.0	9.427459063738083e-09
5.035	-0.0005661958015786046	0.0	-2.452156505962139e-08	-0.0011587956057224217	0.0	-0.09913341927042749	0.0	1.783267874522974e-05	0.0	0.9999999996808545	0.0	2.5008894907982332e-05	0.0	0.0	0.0028658082573075326	0.0	0.0	0.0028676163312071888	0.0	-0.0005661958020823238	0.0	3.7982975606845175e-09	-0.00012019058473586482	0.0	9.460014013031363e-09
5.04	-0.0005667967545662275	0.0	-2.455478684257853e-08	-0.0011616281009632057	0.0	-0.09913341923516819	0.0	1.7836894896243443e-05	0.0	0.9999999996797195	0.0	2.505348312722467e-05	0.0	0.0	0.002870917690866226	0.0	0.0	0.0028727262251930547	0.0	-0.0005667967550704576	0.0	3.845679033964396e-09	-0.00012019061051767206	0.0	9.492576566239161e-09
5.045	-0.0005673977076827653	0.0	-2.458796493663284e-08	-0.0011644636009032127	0.0	-0.09913341919974407	0.0	1.7841111072095122e-05	0.0	0.9999999996785824	0.0	2.5098081881147857e-05	0.0	0.0	0.0028760283316104284	0.0	0.0	0.0028778373270243306	0.0	-0.0005673977081875005	0.0	3.893223339020103e-09	-0.00012019063629946846	0.0	9.525146723363058e-09
5.05	-0.0005679986609282182	0.0	-2.462109934178433e-08	-0.0011673021055424422	0.0	-0.09913341916415513	0.0	1.7845327272784776e-05	0.0	0.9999999996774432	0.0	2.5142691169751895e-05	0.0	0.0	0.0028811401795401396	0.0	0.0	0.002882949636708132	0.0	-0.0005679986614334523	0.0	3.940930513871226e-09	-0.00012019066208129379	0.0	9.557724484406428e-09
5.055	-0.0005685996143025862	0.0	-2.4654190058032995e-08	-0.0011701436148808943	0.0	-0.09913341912840136	0.0	1.7849543498312404e-05	0.0	0.999999999676302	0.0	2.518731099303678e-05	0.0	0.0	0.0028862532346553595	0.0	0.0	0.0028880631542515744	0.0	-0.0005685996148083135	0.0	3.988800596537374e-09	-0.00012019068786313356	0.0	9.590309849374692e-09
5.0600000000000005	-0.0005692005678058691	0.0	-2.4687237085378844e-08	-0.0011729881289185694	0.0	-0.09913341909248277	0.0	1.785375974867801e-05	0.0	0.9999999996751587	0.0	2.523194135100253e-05	0.0	0.0	0.0028913674969560897	0.0	0.0	0.0028931778796617734	0.0	-0.0005692005683120835	0.0	4.036833625038183e-09	-0.00012019071364487033	0.0	9.622902818268663e-09
5.065	-0.000569801521438067	0.0	-2.4720240423821865e-08	-0.0011758356476554667	0.0	-0.09913341905639936	0.0	1.7857976023881588e-05	0.0	0.9999999996740132	0.0	2.5276582243649114e-05	0.0	0.0	0.002896482966442327	0.0	0.0	0.0028982938129458445	0.0	-0.0005698015219447622	0.0	4.085029637393274e-09	-0.00012019073942667034	0.0	9.65550339108951e-09
5.07	-0.0005704024751991798	0.0	-2.4753200073362064e-08	-0.0011786861710915866	0.0	-0.09913341902015112	0.0	1.786219232392314e-05	0.0	0.9999999996728658	0.0	2.5321233670976554e-05	0.0	0.0	0.0029015996431140745	0.0	0.0	0.0029034109541109035	0.0	-0.0005704024757063503	0.0	4.133388671622303e-09	-0.000120190765208483	0.0	9.688111567846114e-09
5.075	-0.0005710034290892078	0.0	-2.4786116033999438e-08	-0.0011815396992269293	0.0	-0.09913341898373805	0.0	1.786640864880267e-05	0.0	0.9999999996717162	0.0	2.5365895632984842e-05	0.0	0.0	0.0029067175269713295	0.0	0.0	0.0029085293031640654	0.0	-0.000571003429596847	0.0	4.181910765744964e-09	-0.00012019079099020171	0.0	9.720727348540213e-09
5.08	-0.0005716043831081506	0.0	-2.481898830573399e-08	-0.0011843962320614945	0.0	-0.09913341894716016	0.0	1.7870624998520176e-05	0.0	0.9999999996705644	0.0	2.541056812967398e-05	0.0	0.0	0.002911836618014094	0.0	0.0	0.0029136488601124466	0.0	-0.0005716043836162524	0.0	4.230595957780935e-09	-0.00012019081677202702	0.0	9.753350733171474e-09
5.085	-0.0005722053372560086	0.0	-2.4851816888565716e-08	-0.0011872557695952824	0.0	-0.09913341891041745	0.0	1.7874841373075657e-05	0.0	0.9999999996694107	0.0	2.5455251161043968e-05	0.0	0.0	0.0029169569162423676	0.0	0.0	0.002918769624963162	0.0	-0.0005722053377645672	0.0	4.279444285749917e-09	-0.0001201908425538162	0.0	9.785981721746141e-09
5.09	-0.0005728062915327815	0.0	-2.488460178249462e-08	-0.0011901183118282928	0.0	-0.09913341887350992	0.0	1.787905777246911e-05	0.0	0.9999999996682548	0.0	2.549994472709481e-05	0.0	0.0	0.0029220784216561512	0.0	0.0	0.002923891597723327	0.0	-0.0005728062920417905	0.0	4.328455787671641e-09	-0.00012019086833554393	0.0	9.818620314267678e-09
5.095	-0.0005734072459384694	0.0	-2.4917342987520704e-08	-0.001192983858760526	0.0	-0.09913341883643755	0.0	1.7883274196700543e-05	0.0	0.9999999996670969	0.0	2.55446488278265e-05	0.0	0.0	0.0029272011342554426	0.0	0.0	0.0029290147784000577	0.0	-0.0005734072464479227	0.0	4.377630501565842e-09	-0.0001201908941173042	0.0	9.85126651073804e-09
5.1000000000000005	-0.0005740082004730724	0.0	-2.495004050364397e-08	-0.001195852410391982	0.0	-0.09913341879920036	0.0	1.7887490645769947e-05	0.0	0.9999999996659368	0.0	2.5589363463239044e-05	0.0	0.0	0.0029323250540402436	0.0	0.0	0.0029341391670004695	0.0	-0.0005740082009829635	0.0	4.426968465452277e-09	-0.00012019091989905724	0.0	9.88392031116211e-09
5.105	-0.0005746091551365903	0.0	-2.4982694330864405e-08	-0.0011987239667226603	0.0	-0.09913341876179836	0.0	1.789170711967733e-05	0.0	0.9999999996647746	0.0	2.5634088633332436e-05	0.0	0.0	0.002937450181010554	0.0	0.0	0.002939264763531678	0.0	-0.0005746091556469132	0.0	4.47646971735072e-09	-0.00012019094568082111	0.0	9.916581715539444e-09
5.11	-0.0005752101099290233	0.0	-2.501530446918202e-08	-0.0012015985277525612	0.0	-0.09913341872423152	0.0	1.7895923618422684e-05	0.0	0.9999999996636104	0.0	2.5678824338106673e-05	0.0	0.0	0.0029425765151663724	0.0	0.0	0.0029443915680007985	0.0	-0.0005752101104397717	0.0	4.526134295280937e-09	-0.00012019097146259402	0.0	9.949250723876453e-09
5.115	-0.0005758110648503712	0.0	-2.5047870918596807e-08	-0.0012044760934816847	0.0	-0.09913341868649986	0.0	1.7900140142006017e-05	0.0	0.9999999996624441	0.0	2.5723570577561765e-05	0.0	0.0	0.002947704056507701	0.0	0.0	0.002949519580414947	0.0	-0.0005758110653615391	0.0	4.575962237262756e-09	-0.00012019099724429104	0.0	9.981927336176337e-09
5.12	-0.0005764120199006341	0.0	-2.5080393679108774e-08	-0.0012073566639100308	0.0	-0.09913341864860338	0.0	1.7904356690427323e-05	0.0	0.9999999996612757	0.0	2.5768327351697704e-05	0.0	0.0	0.002952832805034538	0.0	0.0	0.0029546488007812385	0.0	-0.0005764120204122147	0.0	4.6259535813159765e-09	-0.00012019102302601335	0.0	1.0014611552441563e-08
5.125	-0.000577012975079812	0.0	-2.5112872750717916e-08	-0.0012102402390375996	0.0	-0.09913341861054208	0.0	1.7908573263686604e-05	0.0	0.9999999996601052	0.0	2.5813094660514492e-05	0.0	0.0	0.002957962760746884	0.0	0.0	0.0029597792291067887	0.0	-0.0005770129755917992	0.0	4.676108365460456e-09	-0.00012019104880776096	0.0	1.00473033726781e-08
5.13	-0.000577613930387905	0.0	-2.5145308133424236e-08	-0.0012131268188643911	0.0	-0.09913341857231595	0.0	1.7912789861783862e-05	0.0	0.9999999996589326	0.0	2.5857872504012134e-05	0.0	0.0	0.0029630939236447397	0.0	0.0	0.0029649108653987135	0.0	-0.0005776139309002922	0.0	4.726426627716041e-09	-0.00012019107458949593	0.0	1.0080002796883798e-08
5.135	-0.000578214885824913	0.0	-2.5177699827227734e-08	-0.0012160164033904052	0.0	-0.09913341853392499	0.0	1.7917006484719095e-05	0.0	0.999999999657758	0.0	2.5902660882190624e-05	0.0	0.0	0.0029682262937281044	0.0	0.0	0.002970043709664128	0.0	-0.0005782148863376941	0.0	4.776908406102587e-09	-0.00012019110037120018	0.0	1.0112709825065344e-08
5.14	-0.0005788158413908359	0.0	-2.521004783212841e-08	-0.001218908992615642	0.0	-0.09913341849536922	0.0	1.79212231324923e-05	0.0	0.9999999996565812	0.0	2.5947459795049966e-05	0.0	0.0	0.002973359870996978	0.0	0.0	0.002975177761910148	0.0	-0.0005788158419040042	0.0	4.827553738639996e-09	-0.00012019112615290984	0.0	1.014542445722843e-08
5.1450000000000005	-0.000579416797085674	0.0	-2.5242352148126265e-08	-0.0012218045865401016	0.0	-0.09913341845664861	0.0	1.7925439805103484e-05	0.0	0.9999999996554023	0.0	2.5992269242590162e-05	0.0	0.0	0.002978494655451362	0.0	0.0	0.002980313022143889	0.0	-0.0005794167975992232	0.0	4.878362663348171e-09	-0.00012019115193465926	0.0	1.0178146693370644e-08
5.15	-0.000580017752909427	0.0	-2.5274612775221294e-08	-0.0012247031851637833	0.0	-0.09913341841776319	0.0	1.7929656502552642e-05	0.0	0.9999999996542214	0.0	2.6037089224811206e-05	0.0	0.0	0.0029836306470912553	0.0	0.0	0.002985449490372467	0.0	-0.0005800177534233507	0.0	4.929335218247009e-09	-0.00012019117771636712	0.0	1.0210876533496302e-08
5.155	-0.000580618708862095	0.0	-2.53068297134135e-08	-0.001227604788486688	0.0	-0.09913341837871294	0.0	1.7933873224839777e-05	0.0	0.9999999996530384	0.0	2.6081919741713098e-05	0.0	0.0	0.0029887678459166573	0.0	0.0	0.002990587166602997	0.0	-0.0005806187093763868	0.0	4.98047144135645e-09	-0.00012019120349804426	0.0	1.0243613977611745e-08
5.16	-0.0005812196649436779	0.0	-2.5339002962702883e-08	-0.001230509396508815	0.0	-0.09913341833949786	0.0	1.7938089971964886e-05	0.0	0.9999999996518533	0.0	2.6126760793295838e-05	0.0	0.0	0.0029939062519275675	0.0	0.0	0.0029957260508425947	0.0	-0.0005812196654583311	0.0	5.031771370696448e-09	-0.00012019122927972502	0.0	1.0276359025719964e-08
5.165	-0.0005818206211541759	0.0	-2.5371132523089443e-08	-0.001233417009230165	0.0	-0.09913341830011796	0.0	1.794230674392797e-05	0.0	0.9999999996506661	0.0	2.617161237955943e-05	0.0	0.0	0.0029990458651239886	0.0	0.0	0.0030008661430983756	0.0	-0.0005818206216691842	0.0	5.083235044286975e-09	-0.00012019125506145818	0.0	1.0309111677823292e-08
5.17	-0.0005824215774935889	0.0	-2.540321839457318e-08	-0.0012363276266507371	0.0	-0.09913341826057323	0.0	1.7946523540729026e-05	0.0	0.9999999996494768	0.0	2.6216474500503872e-05	0.0	0.0	0.0030041866855059184	0.0	0.0	0.003006007443377455	0.0	-0.0005824215780089456	0.0	5.134862500148009e-09	-0.00012019128084310459	0.0	1.0341871933923461e-08
5.175	-0.0005830225339619169	0.0	-2.543526057715409e-08	-0.0012392412487705323	0.0	-0.09913341822086369	0.0	1.795074036236806e-05	0.0	0.9999999996482855	0.0	2.6261347156129162e-05	0.0	0.0	0.0030093287130733572	0.0	0.0	0.003011149951686949	0.0	-0.0005830225344776153	0.0	5.186653776299547e-09	-0.00012019130662477451	0.0	1.037463979402588e-08
5.18	-0.0005836234905591598	0.0	-2.546725907083218e-08	-0.0012421578755895497	0.0	-0.09913341818098932	0.0	1.795495720884507e-05	0.0	0.999999999647092	0.0	2.6306230346435304e-05	0.0	0.0	0.003014471947826305	0.0	0.0	0.0030162936680339734	0.0	-0.0005836234910751933	0.0	5.2386089107616115e-09	-0.00012019133240646249	0.0	1.0407415258135013e-08
5.1850000000000005	-0.000584224447285318	0.0	-2.5499213875607452e-08	-0.0012450775071077905	0.0	-0.09913341814095013	0.0	1.7959174080160055e-05	0.0	0.9999999996458964	0.0	2.6351124071422304e-05	0.0	0.0	0.003019616389764764	0.0	0.0	0.003021438592425643	0.0	-0.0005842244478016799	0.0	5.29072794155424e-09	-0.00012019135818813783	0.0	1.0440198326249026e-08
5.19	-0.0005848254041403909	0.0	-2.5531124991479896e-08	-0.0012480001433252533	0.0	-0.0991334181007461	0.0	1.7963390976313015e-05	0.0	0.9999999996446988	0.0	2.639602833109015e-05	0.0	0.0	0.003024762038888732	0.0	0.0	0.0030265847248690733	0.0	-0.0005848254046570747	0.0	5.3430109066974535e-09	-0.00012019138396981677	0.0	1.0472988998373836e-08
5.195	-0.000585426361124379	0.0	-2.556299241844952e-08	-0.001250925784241939	0.0	-0.09913341806037726	0.0	1.796760789730395e-05	0.0	0.9999999996434991	0.0	2.644094312543884e-05	0.0	0.0	0.003029908895198209	0.0	0.0	0.0030317320653713807	0.0	-0.0005854263616413781	0.0	5.395457844211338e-09	-0.00012019140975148669	0.0	1.0505787274515548e-08
5.2	-0.000586027318237282	0.0	-2.5594816156516316e-08	-0.0012538544298578468	0.0	-0.09913341801984359	0.0	1.797182484313286e-05	0.0	0.9999999996422972	0.0	2.648586845446838e-05	0.0	0.0	0.003035056958693195	0.0	0.0	0.00303688061393968	0.0	-0.0005860273187545896	0.0	5.44806879211597e-09	-0.00012019143553310058	0.0	1.0538593154673102e-08
5.205	-0.0005866282754791	0.0	-2.562659620568029e-08	-0.0012567860801729776	0.0	-0.0991334179791451	0.0	1.7976041813799746e-05	0.0	0.9999999996410933	0.0	2.6530804318178776e-05	0.0	0.0	0.0030402062293736908	0.0	0.0	0.003042030370581087	0.0	-0.0005866282759967092	0.0	5.500843788431439e-09	-0.00012019146131473435	0.0	1.0571406638853087e-08
5.21	-0.000587229232849833	0.0	-2.565833256594144e-08	-0.001259720735187331	0.0	-0.09913341793828179	0.0	1.7980258809304605e-05	0.0	0.9999999996398873	0.0	2.657575071657002e-05	0.0	0.0	0.003045356707239696	0.0	0.0	0.0030471813353027174	0.0	-0.000587229233367737	0.0	5.553782871177873e-09	-0.0001201914870964404	0.0	1.0604227727056014e-08
5.215	-0.0005878301903494811	0.0	-2.569002523729977e-08	-0.001262658394900907	0.0	-0.09913341789725363	0.0	1.7984475829647442e-05	0.0	0.9999999996386792	0.0	2.662070764964211e-05	0.0	0.0	0.003050508392291211	0.0	0.0	0.0030523335081116864	0.0	-0.0005878301908676735	0.0	5.60688607837538e-09	-0.00012019151287807237	0.0	1.06370564192881e-08
5.22	-0.0005884311479780441	0.0	-2.5721674219755276e-08	-0.0012655990593137055	0.0	-0.09913341785606068	0.0	1.7988692874828253e-05	0.0	0.999999999637469	0.0	2.6665675117395056e-05	0.0	0.0	0.0030556612845282355	0.0	0.0	0.00305748688901511	0.0	-0.0005884311484965176	0.0	5.66015344804414e-09	-0.00012019153865967724	0.0	1.0669892715552046e-08
5.2250000000000005	-0.0005890321057355223	0.0	-2.5753279513307963e-08	-0.0012685427284257272	0.0	-0.09913341781470289	0.0	1.799290994484704e-05	0.0	0.9999999996362567	0.0	2.6710653119828856e-05	0.0	0.0	0.00306081538395077	0.0	0.0	0.0030626414780201036	0.0	-0.0005890321062542703	0.0	5.713585018204286e-09	-0.00012019156444133269	0.0	1.0702736615846418e-08
5.23	-0.0005896330636219154	0.0	-2.5784841117957823e-08	-0.001271489402236971	0.0	-0.09913341777318027	0.0	1.7997127039703803e-05	0.0	0.9999999996350424	0.0	2.67556416569435e-05	0.0	0.0	0.0030659706905588145	0.0	0.0	0.0030677972751337827	0.0	-0.000589633064140931	0.0	5.767180826875999e-09	-0.00012019159022296646	0.0	1.0735588120177768e-08
5.235	-0.0005902340216372234	0.0	-2.581635903370486e-08	-0.0012744390807474374	0.0	-0.09913341773149284	0.0	1.800134415939854e-05	0.0	0.999999999633826	0.0	2.6800640728738994e-05	0.0	0.0	0.003071127204352368	0.0	0.0	0.0030729542803632627	0.0	-0.0005902340221565	0.0	5.820940912079466e-09	-0.00012019161600457674	0.0	1.0768447228551277e-08
5.24	-0.0005908349797814464	0.0	-2.5847833260549072e-08	-0.0012773917639571264	0.0	-0.09913341768964058	0.0	1.800556130393125e-05	0.0	0.9999999996326074	0.0	2.6845650335215338e-05	0.0	0.0	0.0030762849253314307	0.0	0.0	0.0030781124937156595	0.0	-0.0005908349803009767	0.0	5.87486531183492e-09	-0.0001201916417861834	0.0	1.0801313940970515e-08
5.245	-0.0005914359380545845	0.0	-2.5879263798490463e-08	-0.0012803474518660381	0.0	-0.09913341764762348	0.0	1.8009778473301938e-05	0.0	0.9999999996313869	0.0	2.6890670476372533e-05	0.0	0.0	0.0030814438534960036	0.0	0.0	0.003083271915198088	0.0	-0.0005914359385743619	0.0	5.928954064162579e-09	-0.0001201916675678226	0.0	1.0834188257433623e-08
5.25	-0.0005920368964566375	0.0	-2.591065064752903e-08	-0.0012833061444741723	0.0	-0.09913341760544159	0.0	1.80139956675106e-05	0.0	0.9999999996301642	0.0	2.6935701152210577e-05	0.0	0.0	0.0030866039888460856	0.0	0.0	0.003088432544817665	0.0	-0.0005920368969766548	0.0	5.983207207082675e-09	-0.00012019169334938229	0.0	1.0867070177948223e-08
5.255	-0.0005926378549876056	0.0	-2.5941993807664774e-08	-0.0012862678417815293	0.0	-0.09913341756309485	0.0	1.801821288655724e-05	0.0	0.9999999996289394	0.0	2.698074236272947e-05	0.0	0.0	0.003091765331381678	0.0	0.0	0.0030935943825815045	0.0	-0.0005926378555078558	0.0	6.037624778615487e-09	-0.00012019171913098896	0.0	1.089995970251906e-08
5.26	-0.0005932388136474887	0.0	-2.5973293278897696e-08	-0.001289232543788109	0.0	-0.09913341752058329	0.0	1.802243013044185e-05	0.0	0.9999999996277125	0.0	2.7025794107929218e-05	0.0	0.0	0.00309692788110278	0.0	0.0	0.003098757428496723	0.0	-0.0005932388141679648	0.0	6.092206816781292e-09	-0.0001201917449125902	0.0	1.0932856831145234e-08
5.265	-0.0005938397724362868	0.0	-2.6004549061227792e-08	-0.001292200250493911	0.0	-0.09913341747790691	0.0	1.802664739916444e-05	0.0	0.9999999996264834	0.0	2.707085638780981e-05	0.0	0.0	0.0031020916380093914	0.0	0.0	0.0031039216825704363	0.0	-0.0005938397729569817	0.0	6.14695335960037e-09	-0.00012019177069420229	0.0	1.0965761563829437e-08
5.2700000000000005	-0.0005944407313539999	0.0	-2.6035761154655073e-08	-0.0012951709618989364	0.0	-0.09913341743506571	0.0	1.8030864692725003e-05	0.0	0.9999999996252524	0.0	2.7115929202371264e-05	0.0	0.0	0.003107256602101514	0.0	0.0	0.003109087144809759	0.0	-0.0005944407318749068	0.0	6.201864445093026e-09	-0.00012019179647579812	0.0	1.099867390057812e-08
5.275	-0.0005950416904006281	0.0	-2.6066929559179525e-08	-0.0012981446780031838	0.0	-0.09913341739205966	0.0	1.8035082011123542e-05	0.0	0.9999999996240193	0.0	2.716101255161356e-05	0.0	0.0	0.0031124227733791456	0.0	0.0	0.0031142538152218076	0.0	-0.0005950416909217397	0.0	6.2569401112795954e-09	-0.00012019182225736142	0.0	1.1031593841392674e-08
5.28	-0.0005956426495761711	0.0	-2.6098054274801156e-08	-0.0013011213988066536	0.0	-0.09913341734888882	0.0	1.8039299354360054e-05	0.0	0.9999999996227841	0.0	2.7206106435536705e-05	0.0	0.0	0.0031175901518422865	0.0	0.0	0.0031194216938136973	0.0	-0.0005956426500974805	0.0	6.3121803961804035e-09	-0.00012019184803895362	0.0	1.1064521386277595e-08
5.285	-0.0005962436088806293	0.0	-2.612913530151996e-08	-0.0013041011243093462	0.0	-0.09913341730555314	0.0	1.8043516722434544e-05	0.0	0.9999999996215467	0.0	2.72512108541407e-05	0.0	0.0	0.0031227587374909375	0.0	0.0	0.0031245907805925433	0.0	-0.0005962436094021291	0.0	6.3675853378158294e-09	-0.00012019187382048078	0.0	1.1097456535237927e-08
5.29	-0.0005968445683140023	0.0	-2.616017263933594e-08	-0.0013070838545112616	0.0	-0.09913341726205263	0.0	1.804773411534701e-05	0.0	0.9999999996203073	0.0	2.7296325807425548e-05	0.0	0.0	0.0031279285303250984	0.0	0.0	0.0031297610755654614	0.0	-0.0005968445688356854	0.0	6.42315497420624e-09	-0.00012019189960206216	0.0	1.113039928827159e-08
5.295	-0.0005974455278762905	0.0	-2.6191166288249103e-08	-0.0013100695894123994	0.0	-0.09913341721838731	0.0	1.8051951533097446e-05	0.0	0.9999999996190658	0.0	2.7341451295391243e-05	0.0	0.0	0.0031330995303447693	0.0	0.0	0.0031349325787395676	0.0	-0.0005974455283981497	0.0	6.478889343372013e-09	-0.0001201919253836381	0.0	1.1163349645386331e-08
5.3	-0.0005980464875674936	0.0	-2.622211624825944e-08	-0.00131305832901276	0.0	-0.09913341717455716	0.0	1.8056168975685862e-05	0.0	0.9999999996178222	0.0	2.738658731803779e-05	0.0	0.0	0.00313827173754995	0.0	0.0	0.003140105290121977	0.0	-0.0005980464880895217	0.0	6.534788483333575e-09	-0.0001201919511651761	0.0	1.1196307606584729e-08
5.305	-0.0005986474473876117	0.0	-2.625302251936695e-08	-0.001316050073312343	0.0	-0.09913341713056219	0.0	1.806038644311225e-05	0.0	0.9999999996165765	0.0	2.7431733875365187e-05	0.0	0.0	0.0031434451519406414	0.0	0.0	0.0031452792097198053	0.0	-0.0005986474479098015	0.0	6.590852432111335e-09	-0.00012019197694674121	0.0	1.1229273171867996e-08
5.3100000000000005	-0.0005992484073366449	0.0	-2.6283885101571647e-08	-0.0013190448223111492	0.0	-0.09913341708640239	0.0	1.8064603935376618e-05	0.0	0.9999999996153287	0.0	2.747689096737344e-05	0.0	0.0	0.0031486197735168422	0.0	0.0	0.0031504543375401677	0.0	-0.0005992484078589891	0.0	6.647081227725738e-09	-0.00012019200272829727	0.0	1.1262246341241165e-08
5.315	-0.0005998493674145931	0.0	-2.6314703994873514e-08	-0.0013220425760091777	0.0	-0.09913341704207776	0.0	1.806882145247896e-05	0.0	0.9999999996140788	0.0	2.7522058594062536e-05	0.0	0.0	0.003153795602278553	0.0	0.0	0.00315563067359018	0.0	-0.0005998493679370844	0.0	6.703474908197233e-09	-0.00012019202850983347	0.0	1.1295227114705504e-08
5.32	-0.0006004503276214562	0.0	-2.634547919927256e-08	-0.0013250433344064287	0.0	-0.0991334169975883	0.0	1.8073038994419274e-05	0.0	0.9999999996128269	0.0	2.7567236755432485e-05	0.0	0.0	0.003158972638225774	0.0	0.0	0.003160808217876958	0.0	-0.0006004503281440875	0.0	6.760033511546287e-09	-0.00012019205429139316	0.0	1.1328215492266334e-08
5.325	-0.0006010512879572344	0.0	-2.637621071476878e-08	-0.0013280470975029022	0.0	-0.09913341695293404	0.0	1.8077256561197566e-05	0.0	0.9999999996115729	0.0	2.761242545148328e-05	0.0	0.0	0.003164150881358505	0.0	0.0	0.003165986970407617	0.0	-0.0006010512884799983	0.0	6.816757075793398e-09	-0.00012019208007288599	0.0	1.1361211473928729e-08
5.33	-0.0006016522484219275	0.0	-2.640689854136218e-08	-0.0013310538652985984	0.0	-0.09913341690811495	0.0	1.808147415281383e-05	0.0	0.9999999996103167	0.0	2.765762468221493e-05	0.0	0.0	0.0031693303316767457	0.0	0.0	0.003171166931189273	0.0	-0.0006016522489448164	0.0	6.873645638959077e-09	-0.0001201921058544023	0.0	1.139421505969273e-08
5.335	-0.0006022532090155356	0.0	-2.6437542679052756e-08	-0.0013340636377935174	0.0	-0.09913341686313103	0.0	1.8085691769268073e-05	0.0	0.9999999996090585	0.0	2.7702834447627427e-05	0.0	0.0	0.003174510989180497	0.0	0.0	0.0031763481002290406	0.0	-0.0006022532095385423	0.0	6.930699239063831e-09	-0.00012019213163595296	0.0	1.1427226249559026e-08
5.34	-0.0006028541697380588	0.0	-2.6468143127840507e-08	-0.0013370764149876588	0.0	-0.09913341681798228	0.0	1.8089909410560287e-05	0.0	0.9999999996077983	0.0	2.7748054747720774e-05	0.0	0.0	0.0031796928538697583	0.0	0.0	0.0031815304775340363	0.0	-0.0006028541702611759	0.0	6.987917914128187e-09	-0.00012019215741746204	0.0	1.1460245043537558e-08
5.345	-0.0006034551305894969	0.0	-2.6498699887725434e-08	-0.0013400921968810227	0.0	-0.09913341677266871	0.0	1.809412707669048e-05	0.0	0.9999999996065358	0.0	2.7793285582494972e-05	0.0	0.0	0.0031848759257445294	0.0	0.0	0.003186714063111375	0.0	-0.000603455131112717	0.0	7.0453017021727294e-09	-0.00012019218319899282	0.0	1.149327144163005e-08
5.3500000000000005	-0.0006040560915698502	0.0	-2.6529212958707545e-08	-0.00134311098347361	0.0	-0.09913341672719032	0.0	1.8098344767658648e-05	0.0	0.9999999996052714	0.0	2.783852695195003e-05	0.0	0.0	0.0031900602048048118	0.0	0.0	0.0031918988569681725	0.0	-0.0006040560920931658	0.0	7.102850641218009e-09	-0.00012019220898047299	0.0	1.1526305443834789e-08
5.355	-0.0006046570526791183	0.0	-2.655968234078683e-08	-0.0013461327747654192	0.0	-0.0991334166815471	0.0	1.810256248346479e-05	0.0	0.9999999996040048	0.0	2.7883778856085926e-05	0.0	0.0	0.0031952456910506032	0.0	0.0	0.0031970848591115443	0.0	-0.0006046570532025217	0.0	7.160564769284609e-09	-0.00012019223476194052	0.0	1.1559347050159442e-08
5.36	-0.0006052580139173016	0.0	-2.6590108033963288e-08	-0.0013491575707564513	0.0	-0.09913341663573906	0.0	1.810678022410891e-05	0.0	0.9999999996027361	0.0	2.7929041294902674e-05	0.0	0.0	0.003200432384481905	0.0	0.0	0.0032022720695486064	0.0	-0.0006052580144407854	0.0	7.218444124393138e-09	-0.00012019226054351827	0.0	1.1592396260604122e-08
5.365	-0.0006058589752843997	0.0	-2.6620490038236927e-08	-0.0013521853714467057	0.0	-0.0991334165897662	0.0	1.8110997989591e-05	0.0	0.9999999996014655	0.0	2.797431426840027e-05	0.0	0.0	0.003205620285098718	0.0	0.0	0.003207460488286474	0.0	-0.0006058589758079567	0.0	7.2764887445641946e-09	-0.00012019228632497496	0.0	1.1625453075175567e-08
5.37	-0.0006064599367804128	0.0	-2.665082835360774e-08	-0.001355216176836183	0.0	-0.0991334165436285	0.0	1.8115215779911068e-05	0.0	0.9999999996001926	0.0	2.8019597776578722e-05	0.0	0.0	0.0032108093929010396	0.0	0.0	0.0032126501153322625	0.0	-0.0006064599373040351	0.0	7.3346986678184455e-09	-0.00012019231210642622	0.0	1.1658517493879294e-08
5.375	-0.0006070608984053411	0.0	-2.668112298007573e-08	-0.0013582499869248827	0.0	-0.099133416497326	0.0	1.811943359506911e-05	0.0	0.9999999995989176	0.0	2.806489181943802e-05	0.0	0.0	0.0032159997078888727	0.0	0.0	0.0032178409506930876	0.0	-0.000607060898929021	0.0	7.393073932176534e-09	-0.00012019233788794073	0.0	1.1691589516709152e-08
5.38	-0.0006076618601591842	0.0	-2.67113739176409e-08	-0.0013612868017128053	0.0	-0.09913341645085866	0.0	1.8123651435065127e-05	0.0	0.9999999995976406	0.0	2.811019639697817e-05	0.0	0.0	0.0032211912300622154	0.0	0.0	0.003223032994376065	0.0	-0.0006076618606829145	0.0	7.451614575659096e-09	-0.00012019236366942272	0.0	1.1724669143674724e-08
5.385	-0.0006082628220419425	0.0	-2.6741581166303244e-08	-0.0013643266211999503	0.0	-0.0991334164042265	0.0	1.812786929989912e-05	0.0	0.9999999995963615	0.0	2.8155511509199167e-05	0.0	0.0	0.003226383959421069	0.0	0.0	0.0032282262463883098	0.0	-0.0006082628225657152	0.0	7.510320636286849e-09	-0.00012019238945086495	0.0	1.1757756374780875e-08
5.39	-0.0006088637840536156	0.0	-2.6771744726062763e-08	-0.001367369445386318	0.0	-0.0991334163574295	0.0	1.813208718957109e-05	0.0	0.9999999995950803	0.0	2.8200837156101017e-05	0.0	0.0	0.0032315778959654323	0.0	0.0	0.003233420706736938	0.0	-0.0006088637845774232	0.0	7.569192152080476e-09	-0.00012019241523235416	0.0	1.1790851210029924e-08
5.3950000000000005	-0.000609464746194204	0.0	-2.6801864596919467e-08	-0.0013704152742719086	0.0	-0.0991334163104677	0.0	1.8136305104081035e-05	0.0	0.999999999593797	0.0	2.8246173337683725e-05	0.0	0.0	0.0032367730396953075	0.0	0.0	0.003238616375429065	0.0	-0.0006094647467180387	0.0	7.62822916106072e-09	-0.00012019244101384337	0.0	1.1823953649421468e-08
5.4	-0.0006100657084637072	0.0	-2.6831940778873343e-08	-0.0013734641078567216	0.0	-0.09913341626334107	0.0	1.8140523043428954e-05	0.0	0.9999999995925117	0.0	2.8291520053947274e-05	0.0	0.0	0.003241969390610692	0.0	0.0	0.003243813252471807	0.0	-0.0006100657089875615	0.0	7.687431701248268e-09	-0.00012019246679524404	0.0	1.1857063692959618e-08
5.405	-0.0006106666708621253	0.0	-2.6861973271924394e-08	-0.0013765159461407571	0.0	-0.09913341621604961	0.0	1.8144741007614848e-05	0.0	0.9999999995912242	0.0	2.8336877304891674e-05	0.0	0.0	0.003247166948711587	0.0	0.0	0.0032490113378722783	0.0	-0.0006106666713859912	0.0	7.746799810663904e-09	-0.0001201924925766935	0.0	1.1890181340650907e-08
5.41	-0.0006112676333894586	0.0	-2.6891962076072626e-08	-0.0013795707891240151	0.0	-0.09913341616859332	0.0	1.814895899663872e-05	0.0	0.9999999995899347	0.0	2.8382245090516926e-05	0.0	0.0	0.0032523657139979924	0.0	0.0	0.003254210631637595	0.0	-0.0006112676339133285	0.0	7.80633352732837e-09	-0.00012019251835818452	0.0	1.1923306592497072e-08
5.415	-0.0006118685960457068	0.0	-2.692190719131803e-08	-0.0013826286368064959	0.0	-0.09913341612097222	0.0	1.8153177010500564e-05	0.0	0.999999999588643	0.0	2.8427623410823026e-05	0.0	0.0	0.0032575656864699087	0.0	0.0	0.003259411133774873	0.0	-0.0006118685965695729	0.0	7.86603288926247e-09	-0.00012019254413959783	0.0	1.195643944850145e-08
5.42	-0.0006124695588308701	0.0	-2.6951808617660614e-08	-0.0013856894891881993	0.0	-0.09913341607318629	0.0	1.8157395049200383e-05	0.0	0.9999999995873493	0.0	2.8473012265809977e-05	0.0	0.0	0.0032627668661273346	0.0	0.0	0.0032646128442912277	0.0	-0.0006124695593547245	0.0	7.925897934486983e-09	-0.00012019256992105813	0.0	1.198957990866429e-08
5.425	-0.0006130705217449483	0.0	-2.6981666355100374e-08	-0.0013887533462691253	0.0	-0.09913341602523554	0.0	1.816161311273818e-05	0.0	0.9999999995860536	0.0	2.8518411655477776e-05	0.0	0.0	0.0032679692529702714	0.0	0.0	0.0032698157631937744	0.0	-0.0006130705222687834	0.0	7.985928701022723e-09	-0.00012019259570247326	0.0	1.2022727972993283e-08
5.43	-0.0006136714847879415	0.0	-2.7011480403637312e-08	-0.001391820208049274	0.0	-0.09913341597711996	0.0	1.816583120111395e-05	0.0	0.9999999995847556	0.0	2.8563821579826426e-05	0.0	0.0	0.0032731728469987185	0.0	0.0	0.0032750198904896288	0.0	-0.0006136714853117492	0.0	8.046125226890532e-09	-0.00012019262148389923	0.0	1.2055883641493173e-08
5.4350000000000005	-0.0006142724479598499	0.0	-2.7041250763271428e-08	-0.0013948900745286458	0.0	-0.09913341592883955	0.0	1.8170049314327694e-05	0.0	0.9999999995834556	0.0	2.8609242038855938e-05	0.0	0.0	0.0032783776482126783	0.0	0.0	0.0032802252261859067	0.0	-0.0006142724484836224	0.0	8.106487550111268e-09	-0.00012019264726534145	0.0	1.2089046914160154e-08
5.44	-0.0006148734112606731	0.0	-2.7070977434002722e-08	-0.0013979629457072395	0.0	-0.09913341588039433	0.0	1.8174267452379416e-05	0.0	0.9999999995821536	0.0	2.8654673032566287e-05	0.0	0.0	0.003283583656612147	0.0	0.0	0.003285431770289723	0.0	-0.0006148734117844025	0.0	8.167015708705755e-09	-0.00012019267304671864	0.0	1.212221779100007e-08
5.445	-0.0006154743746904114	0.0	-2.7100660415831188e-08	-0.0014010388215850561	0.0	-0.09913341583178428	0.0	1.817848561526911e-05	0.0	0.9999999995808494	0.0	2.8700114560957488e-05	0.0	0.0	0.003288790872197126	0.0	0.0	0.003290639522808194	0.0	-0.0006154743752140897	0.0	8.2277097406949e-09	-0.00012019269882815545	0.0	1.2155396272018853e-08
5.45	-0.0006160753382490646	0.0	-2.7130299708756832e-08	-0.0014041177021620953	0.0	-0.0991334157830094	0.0	1.8182703802996785e-05	0.0	0.9999999995795432	0.0	2.874556662402954e-05	0.0	0.0	0.0032939992949676165	0.0	0.0	0.003295848483748435	0.0	-0.0006160753387726841	0.0	8.28856968409958e-09	-0.00012019272460955612	0.0	1.2188582357219066e-08
5.455	-0.000616676301936633	0.0	-2.7159895312779654e-08	-0.001407199587438357	0.0	-0.0991334157340697	0.0	1.8186922015562432e-05	0.0	0.9999999995782348	0.0	2.879102922178244e-05	0.0	0.0	0.0032992089249236165	0.0	0.0	0.0033010586531175617	0.0	-0.0006166763024601853	0.0	8.349595576940731e-09	-0.00012019275039095317	0.0	1.2221776046604042e-08
5.46	-0.0006172772657531162	0.0	-2.7189447227899654e-08	-0.0014102844774138412	0.0	-0.09913341568496518	0.0	1.8191140252966053e-05	0.0	0.9999999995769244	0.0	2.8836502354216195e-05	0.0	0.0	0.0033044197620651283	0.0	0.0	0.0033062700309226894	0.0	-0.0006172772662765936	0.0	8.410787457239262e-09	-0.00012019277617234842	0.0	1.2254977340174143e-08
5.465	-0.0006178782296985144	0.0	-2.721895545411683e-08	-0.0014133723720885483	0.0	-0.09913341563569583	0.0	1.8195358515207648e-05	0.0	0.9999999995756119	0.0	2.8881986021330797e-05	0.0	0.0	0.0033096318063921505	0.0	0.0	0.0033114826171709334	0.0	-0.0006178782302219088	0.0	8.472145363016124e-09	-0.00012019280195375089	0.0	1.2288186237935185e-08
5.47	-0.0006184791937728278	0.0	-2.724841999143118e-08	-0.0014164632714624777	0.0	-0.09913341558626165	0.0	1.819957680228722e-05	0.0	0.9999999995742973	0.0	2.8927480223126248e-05	0.0	0.0	0.0033148450579046826	0.0	0.0	0.0033166964118694097	0.0	-0.0006184791942961311	0.0	8.533669332292272e-09	-0.00012019282773510639	0.0	1.2321402739891029e-08
5.4750000000000005	-0.0006190801579760561	0.0	-2.7277840839842716e-08	-0.0014195571755356304	0.0	-0.09913341553666266	0.0	1.820379511420477e-05	0.0	0.9999999995729806	0.0	2.8972984959602557e-05	0.0	0.0	0.003320059516602727	0.0	0.0	0.0033219114150252337	0.0	-0.00061908015849926	0.0	8.595359403088696e-09	-0.00012019285351652694	0.0	1.2354626846043413e-08
5.48	-0.0006196811223081994	0.0	-2.7307217999351422e-08	-0.0014226540843080054	0.0	-0.09913341548689884	0.0	1.8208013450960292e-05	0.0	0.9999999995716619	0.0	2.901850023075971e-05	0.0	0.0	0.0033252751824862817	0.0	0.0	0.003327127626645521	0.0	-0.0006196811228312963	0.0	8.657215613426372e-09	-0.00012019287929788604	0.0	1.238785855639501e-08
5.485	-0.0006202820867692577	0.0	-2.7336551469957306e-08	-0.0014257539977796027	0.0	-0.0991334154369702	0.0	1.821223181255379e-05	0.0	0.9999999995703409	0.0	2.9064026036597715e-05	0.0	0.0	0.0033304920555553468	0.0	0.0	0.0033323450467373874	0.0	-0.0006202820872922389	0.0	8.71923800132632e-09	-0.00012019290507921985	0.0	1.2421097870951087e-08
5.49	-0.000620883051359231	0.0	-2.7365841251660365e-08	-0.0014288569159504228	0.0	-0.09913341538687673	0.0	1.8216450198985262e-05	0.0	0.999999999569018	0.0	2.9109562377116567e-05	0.0	0.0	0.003335710135809923	0.0	0.0	0.003337563675307948	0.0	-0.0006208830518820886	0.0	8.781426604809562e-09	-0.00012019293086062775	0.0	1.2454344789713987e-08
5.495	-0.0006214840160781194	0.0	-2.7395087344460602e-08	-0.0014319628388204655	0.0	-0.09913341533661844	0.0	1.822066861025471e-05	0.0	0.9999999995676929	0.0	2.9155109252316268e-05	0.0	0.0	0.00334092942325001	0.0	0.0	0.0033427835123643183	0.0	-0.0006214840166008451	0.0	8.843781461897142e-09	-0.00012019295664195974	0.0	1.2487599312686137e-08
5.5	-0.0006220849809259226	0.0	-2.7424289748358017e-08	-0.0014350717663897308	0.0	-0.09913341528619532	0.0	1.8224887046362135e-05	0.0	0.9999999995663658	0.0	2.9200666662196823e-05	0.0	0.0	0.003346149917875608	0.0	0.0	0.003348004557913614	0.0	-0.0006220849814485083	0.0	8.906302610610111e-09	-0.00012019298242334777	0.0	1.2520861439869825e-08
5.505	-0.0006226859459026409	0.0	-2.7453448463352607e-08	-0.0014381836986582187	0.0	-0.09913341523560738	0.0	1.8229105507307533e-05	0.0	0.9999999995650366	0.0	2.9246234606758226e-05	0.0	0.0	0.0033513716196867166	0.0	0.0	0.0033532268119629513	0.0	-0.0006226859464250785	0.0	8.96899008896954e-09	-0.00012019300820469785	0.0	1.255413117127404e-08
5.51	-0.0006232869110082743	0.0	-2.7482563489444375e-08	-0.0014412986356259292	0.0	-0.09913341518485462	0.0	1.8233323993090907e-05	0.0	0.9999999995637052	0.0	2.929181308600048e-05	0.0	0.0	0.0033565945286833368	0.0	0.0	0.0033584502745194447	0.0	-0.0006232869115305552	0.0	9.031843934996549e-09	-0.00012019303398602262	0.0	1.2587408506895778e-08
5.515	-0.0006238878762428226	0.0	-2.751163482663332e-08	-0.0014444165772928624	0.0	-0.09913341513393703	0.0	1.8237542503712256e-05	0.0	0.9999999995623718	0.0	2.9337402099923582e-05	0.0	0.0	0.003361818644865467	0.0	0.0	0.0033636749455902104	0.0	-0.0006238878767649388	0.0	9.094864186712203e-09	-0.0001201930597674016	0.0	1.2620693446741406e-08
5.5200000000000005	-0.000624488841606286	0.0	-2.754066247491945e-08	-0.0014475375236590188	0.0	-0.09913341508285461	0.0	1.8241761039171583e-05	0.0	0.9999999995610364	0.0	2.9383001648527546e-05	0.0	0.0	0.00336704396823311	0.0	0.0	0.003368900825182364	0.0	-0.0006244888421282291	0.0	9.158050882137673e-09	-0.0001201930855487083	0.0	1.2653985990813518e-08
5.525	-0.0006250898070986644	0.0	-2.7569646434302748e-08	-0.0014506614747243972	0.0	-0.09913341503160737	0.0	1.8245979599468883e-05	0.0	0.9999999995596988	0.0	2.9428611731812348e-05	0.0	0.0	0.0033722704987862624	0.0	0.0	0.003374127913303021	0.0	-0.0006250898076204259	0.0	9.221404059294052e-09	-0.00012019311133002405	0.0	1.2687286139112636e-08
5.53	-0.0006256907727199577	0.0	-2.759858670478322e-08	-0.0014537884304889983	0.0	-0.09913341498019532	0.0	1.8250198184604158e-05	0.0	0.999999999558359	0.0	2.9474232349778004e-05	0.0	0.0	0.003377498236524926	0.0	0.0	0.003379356209959297	0.0	-0.0006256907732415294	0.0	9.284923756202523e-09	-0.00012019313711135785	0.0	1.2720593891645902e-08
5.535	-0.000626291738470166	0.0	-2.7627483286360877e-08	-0.001456918390952822	0.0	-0.09913341492861842	0.0	1.8254416794577406e-05	0.0	0.9999999995570173	0.0	2.951986350242451e-05	0.0	0.0	0.0033827271814491017	0.0	0.0	0.003384585715158307	0.0	-0.0006262917389915396	0.0	9.348610010884237e-09	-0.00012019316289270793	0.0	1.275390924841544e-08
5.54	-0.0006268927043492894	0.0	-2.7656336179035704e-08	-0.001460051356115868	0.0	-0.09913341487687671	0.0	1.8258635429388632e-05	0.0	0.9999999995556735	0.0	2.9565505189751864e-05	0.0	0.0	0.003387957333558788	0.0	0.0	0.003389816428907167	0.0	-0.0006268927048704565	0.0	9.41246286136041e-09	-0.00012019318867401824	0.0	1.278723220942486e-08
5.545	-0.0006274936703573277	0.0	-2.7685145382807712e-08	-0.001463187325978137	0.0	-0.09913341482497018	0.0	1.8262854089037832e-05	0.0	0.9999999995543276	0.0	2.9611157411760067e-05	0.0	0.0	0.0033931886928539844	0.0	0.0	0.0033950483512129926	0.0	-0.0006274936708782797	0.0	9.476482345652222e-09	-0.00012019321445530327	0.0	1.2820562774675487e-08
5.55	-0.000628094636494281	0.0	-2.7713910897676895e-08	-0.0014663263005396286	0.0	-0.09913341477289883	0.0	1.826707277352501e-05	0.0	0.9999999995529796	0.0	2.9656820168449122e-05	0.0	0.0	0.0033984212593346926	0.0	0.0	0.003400281482082899	0.0	-0.0006280946370150095	0.0	9.540668501780911e-09	-0.00012019324023659371	0.0	1.2853900944174104e-08
5.555	-0.0006286956027601494	0.0	-2.7742632723643257e-08	-0.0014694682798003427	0.0	-0.09913341472066264	0.0	1.827129148285016e-05	0.0	0.9999999995516294	0.0	2.9702493459819028e-05	0.0	0.0	0.003403655033000912	0.0	0.0	0.003405515821524002	0.0	-0.0006286956032806457	0.0	9.605021367767712e-09	-0.00012019326601791125	0.0	1.2887246717923163e-08
5.5600000000000005	-0.0006292965691549329	0.0	-2.77713108607068e-08	-0.00147261326376028	0.0	-0.09913341466826164	0.0	1.8275510217013286e-05	0.0	0.9999999995502772	0.0	2.9748177285869792e-05	0.0	0.0	0.0034088900138526438	0.0	0.0	0.0034107513695434176	0.0	-0.0006292965696751886	0.0	9.669540981633891e-09	-0.0001201932917992306	0.0	1.292060009592082e-08
5.565	-0.0006298975356786313	0.0	-2.7799945308867513e-08	-0.0014757612524194392	0.0	-0.0991334146156958	0.0	1.8279728976014388e-05	0.0	0.9999999995489229	0.0	2.9793871646601398e-05	0.0	0.0	0.003414126201889886	0.0	0.0	0.0034159881261482607	0.0	-0.0006298975361986379	0.0	9.73422738140068e-09	-0.00012019331758052105	0.0	1.2953961078173525e-08
5.57	-0.0006304985023312447	0.0	-2.7828536068125402e-08	-0.0014789122457778213	0.0	-0.09913341456296515	0.0	1.8283947759853465e-05	0.0	0.9999999995475666	0.0	2.983957654201385e-05	0.0	0.0	0.0034193635971126388	0.0	0.0	0.003421226091345647	0.0	-0.0006304985028509938	0.0	9.799080605089394e-09	-0.000120193343361788	0.0	1.2987329664687812e-08
5.575	-0.000631099469112773	0.0	-2.7857083138480473e-08	-0.0014820662438354258	0.0	-0.09913341451006967	0.0	1.8288166568530516e-05	0.0	0.9999999995462081	0.0	2.988529197210716e-05	0.0	0.0	0.003424602199520904	0.0	0.0	0.003426465265142692	0.0	-0.0006310994696322558	0.0	9.864100690721327e-09	-0.0001201933691430676	0.0	1.3020705855463021e-08
5.58	-0.0006317004360232165	0.0	-2.7885586519932718e-08	-0.001485223246592253	0.0	-0.09913341445700936	0.0	1.8292385402045544e-05	0.0	0.9999999995448475	0.0	2.9931017936881315e-05	0.0	0.0	0.0034298420091146793	0.0	0.0	0.003431705647546512	0.0	-0.0006317004365424244	0.0	9.9292876763178e-09	-0.0001201933949243201	0.0	1.3054089650503894e-08
5.585	-0.0006323014030625748	0.0	-2.7914046212482138e-08	-0.001488383254048303	0.0	-0.09913341440378425	0.0	1.8296604260398546e-05	0.0	0.9999999995434848	0.0	2.997675443633632e-05	0.0	0.0	0.0034350830258939656	0.0	0.0	0.0034369472385642214	0.0	-0.0006323014035814991	0.0	9.994641599900147e-09	-0.00012019342070561235	0.0	1.3087481049812993e-08
5.59	-0.0006329023702308482	0.0	-2.794246221612874e-08	-0.0014915462662035753	0.0	-0.09913341435039429	0.0	1.8300823143589526e-05	0.0	0.9999999995421202	0.0	3.0022501470472177e-05	0.0	0.0	0.003440325249858765	0.0	0.0	0.0034421900382029364	0.0	-0.0006329023707494806	0.0	1.0060162499489718e-08	-0.00012019344648689194	0.0	1.3120880053394264e-08
5.595	-0.0006335033375280365	0.0	-2.7970834530872513e-08	-0.0014947122830580705	0.0	-0.09913341429683951	0.0	1.8305042051618476e-05	0.0	0.9999999995407534	0.0	3.0068259039288884e-05	0.0	0.0	0.0034455686810090746	0.0	0.0	0.0034474340464697726	0.0	-0.000633503338046368	0.0	1.0125850413107884e-08	-0.00012019347226813721	0.0	1.3154286661252256e-08
5.6000000000000005	-0.0006341043049541401	0.0	-2.7999163156713474e-08	-0.0014978813046117887	0.0	-0.09913341424311992	0.0	1.8309260984485407e-05	0.0	0.9999999995393845	0.0	3.011402714278645e-05	0.0	0.0	0.003450813319344897	0.0	0.0	0.0034526792633718453	0.0	-0.000634104305472162	0.0	1.0191705378776038e-08	-0.0001201934980494168	0.0	1.3187700873388099e-08
5.605	-0.0006347052725091585	0.0	-2.8027448093651603e-08	-0.001501053330864729	0.0	-0.09913341418923549	0.0	1.831347994219031e-05	0.0	0.9999999995380134	0.0	3.0159805780964854e-05	0.0	0.0	0.003456059164866229	0.0	0.0	0.00345792568891627	0.0	-0.0006347052730268621	0.0	1.0257727434515566e-08	-0.0001201935238306169	0.0	1.3221122689803886e-08
5.61	-0.000635306240193092	0.0	-2.805568934168691e-08	-0.001504228361816892	0.0	-0.09913341413518624	0.0	1.8317698924733187e-05	0.0	0.9999999995366403	0.0	3.020559495382411e-05	0.0	0.0	0.003461306217573073	0.0	0.0	0.0034631733231101627	0.0	-0.0006353062407104682	0.0	1.0323916618347885e-08	-0.00012019354961189108	0.0	1.325455211050497e-08
5.615	-0.0006359072080059404	0.0	-2.8083886900819392e-08	-0.0015074063974682777	0.0	-0.09913341408097218	0.0	1.832191793211404e-05	0.0	0.9999999995352652	0.0	3.025139466136422e-05	0.0	0.0	0.003466554477465429	0.0	0.0	0.0034684221659606385	0.0	-0.000635907208522981	0.0	1.039027296829443e-08	-0.00012019357539313092	0.0	1.3287989135494602e-08
5.62	-0.0006365081759477038	0.0	-2.8112040771049053e-08	-0.0015105874378188858	0.0	-0.09913341402659327	0.0	1.832613696433287e-05	0.0	0.9999999995338879	0.0	3.0297204903585176e-05	0.0	0.0	0.003471803944543296	0.0	0.0	0.0034736722174748135	0.0	-0.0006365081764643996	0.0	1.0456796522376652e-08	-0.00012019360117434909	0.0	1.3321433764776093e-08
5.625	-0.0006371091440183823	0.0	-2.814015095237589e-08	-0.0015137714828687165	0.0	-0.09913341397204956	0.0	1.8330356021389675e-05	0.0	0.9999999995325085	0.0	3.0343025680486984e-05	0.0	0.0	0.003477054618806675	0.0	0.0	0.003478923477659803	0.0	-0.0006371091445347245	0.0	1.0523487318616016e-08	-0.00012019362695559977	0.0	1.3354885998352613e-08
5.63	-0.0006377101122179757	0.0	-2.8168217444799904e-08	-0.00151695853261777	0.0	-0.09913341391734101	0.0	1.8334575103284454e-05	0.0	0.9999999995311271	0.0	3.0388856992069643e-05	0.0	0.0	0.003482306500255565	0.0	0.0	0.003484175946522722	0.0	-0.0006377101127339555	0.0	1.0590345395034006e-08	-0.00012019365273682517	0.0	1.3388345836225622e-08
5.635	-0.0006383110805464841	0.0	-2.8196240248321096e-08	-0.001520148587066046	0.0	-0.09913341386246764	0.0	1.833879421001721e-05	0.0	0.9999999995297436	0.0	3.043469883833315e-05	0.0	0.0	0.003487559588889967	0.0	0.0	0.0034894296240706867	0.0	-0.0006383110810620928	0.0	1.065737078965211e-08	-0.0001201936785180361	0.0	1.3421813278400138e-08
5.64	-0.0006389120490039075	0.0	-2.8224219362939465e-08	-0.0015233416462135448	0.0	-0.09913341380742945	0.0	1.834301334158794e-05	0.0	0.9999999995283579	0.0	3.0480551219277508e-05	0.0	0.0	0.0034928138847098804	0.0	0.0	0.0034946845103108123	0.0	-0.0006389120495191359	0.0	1.0724563540491854e-08	-0.00012019370429925426	0.0	1.3455288324883444e-08
5.6450000000000005	-0.0006395130175902461	0.0	-2.8252154788655016e-08	-0.0015265377100602666	0.0	-0.09913341375222644	0.0	1.8347232497996643e-05	0.0	0.9999999995269703	0.0	3.052641413490273e-05	0.0	0.0	0.0034980693877153073	0.0	0.0	0.0034999406052502145	0.0	-0.0006395130181050853	0.0	1.0791923685574785e-08	-0.00012019373008047061	0.0	1.3488770975669663e-08
5.65	-0.0006401139863054995	0.0	-2.828004652546774e-08	-0.0015297367786062104	0.0	-0.09913341369685859	0.0	1.8351451679243325e-05	0.0	0.9999999995255805	0.0	3.0572287585208785e-05	0.0	0.0	0.0035033260979062436	0.0	0.0	0.003505197908896009	0.0	-0.0006401139868199406	0.0	1.0859451262922401e-08	-0.00012019375586169059	0.0	1.3522261230766405e-08
5.655	-0.000640714955149668	0.0	-2.8307894573377636e-08	-0.001532938851851377	0.0	-0.09913341364132593	0.0	1.835567088532798e-05	0.0	0.9999999995241886	0.0	3.061817157019569e-05	0.0	0.0	0.0035085840152826926	0.0	0.0	0.0035104564212553114	0.0	-0.0006407149556637022	0.0	1.0927146310556308e-08	-0.00012019378164287984	0.0	1.3555759090179986e-08
5.66	-0.0006413159241227515	0.0	-2.8335698932384715e-08	-0.0015361439297957662	0.0	-0.09913341358562844	0.0	1.835989011625061e-05	0.0	0.9999999995227946	0.0	3.066406608986345e-05	0.0	0.0	0.003513843139844653	0.0	0.0	0.003515716142335237	0.0	-0.0006413159246363694	0.0	1.0995008866498063e-08	-0.00012019380742401668	0.0	1.3589264553909607e-08
5.665	-0.0006419168932247499	0.0	-2.8363459602488965e-08	-0.001539352012439378	0.0	-0.09913341352976612	0.0	1.8364109372011216e-05	0.0	0.9999999995213985	0.0	3.070997114421206e-05	0.0	0.0	0.003519103471592124	0.0	0.0	0.0035209770721429012	0.0	-0.0006419168937379425	0.0	1.1063038968769274e-08	-0.00012019383320526556	0.0	1.362277762196125e-08
5.67	-0.0006425178624556634	0.0	-2.8391176583690396e-08	-0.0015425630997822123	0.0	-0.09913341347373898	0.0	1.8368328652609797e-05	0.0	0.9999999995200004	0.0	3.075588673324152e-05	0.0	0.0	0.003524365010525108	0.0	0.0	0.00352623921068542	0.0	-0.0006425178629684219	0.0	1.1131236655391549e-08	-0.00012019385898641506	0.0	1.3656298294336626e-08
5.675	-0.0006431188318154918	0.0	-2.8418849875989003e-08	-0.0015457771918242693	0.0	-0.09913341341754703	0.0	1.8372547958046355e-05	0.0	0.9999999995186001	0.0	3.0801812856951825e-05	0.0	0.0	0.003529627756643603	0.0	0.0	0.0035315025579699087	0.0	-0.0006431188323278066	0.0	1.119960196438652e-08	-0.00012021121033287242	0.0	1.1647113885645296e-08
5.68	-0.0006437198013042354	0.0	-2.8446479479384787e-08	-0.001548994288565549	0.0	-0.09913341336119025	0.0	1.8376767288320884e-05	0.0	0.9999999995171978	0.0	3.084774951534299e-05	0.0	0.0	0.0035348917099476116	0.0	0.0	0.003536767114003483	0.0	-0.0006437198018160976	0.0	1.1268134933775835e-08	-0.00012007221927161585	0.0	2.8070969693589415e-08
5.6850000000000005	-0.0006443197313861052	0.0	-2.835119671071115e-08	-0.0015522118579780625	0.0	-0.09913341525364495	0.0	1.8380908437277697e-05	0.0	0.9999999995194682	0.0	3.089350915298554e-05	0.0	0.0	0.003540135378181043	0.0	0.0	0.003542032856388845	0.0	-0.0006443197318993765	0.0	1.1459398362704845e-08	-0.00012007513128410897	0.0	2.7764184903890774e-08
5.69	-0.0006449207258719304	0.0	-2.8381663010019924e-08	-0.0015554350243759127	0.0	-0.09913341515057607	0.0	1.8385129678406784e-05	0.0	0.9999999995179741	0.0	3.093947134425089e-05	0.0	0.0	0.003545402257336639	0.0	0.0	0.003547299808070712	0.0	-0.0006449207263846838	0.0	1.152534966032279e-08	-0.00012021664787714577	0.0	1.111570116566212e-08
5.695	-0.0006455217204872231	0.0	-2.8412085685717336e-08	-0.001558661195474331	0.0	-0.09913341504734133	0.0	1.8389350944415407e-05	0.0	0.9999999995164781	0.0	3.098544407029676e-05	0.0	0.0	0.0035506703436891675	0.0	0.0	0.003552567969056212	0.0	-0.0006455217209994497	0.0	1.1591468682528705e-08	-0.00012019893592440435	0.0	1.3240576440265375e-08
5.7	-0.0006461227152323641	0.0	-2.8442464782835248e-08	-0.001561890371274245	0.0	-0.09913341494394001	0.0	1.8393572235332224e-05	0.0	0.99999999951498	0.0	3.1031427331191884e-05	0.0	0.0	0.0035559396372465053	0.0	0.0	0.0035578373393524796	0.0	-0.0006461227157440548	0.0	1.165775542242699e-08	-0.00012019896193032342	0.0	1.3274119289210366e-08
5.705	-0.0006467237101077344	0.0	-2.847280034640552e-08	-0.0015651225517765836	0.0	-0.0991334148403714	0.0	1.8397793551185904e-05	0.0	0.9999999995134797	0.0	3.1077421127005e-05	0.0	0.0	0.0035612101380165274	0.0	0.0	0.0035631079189666595	0.0	-0.00064672371061888	0.0	1.1724209873122522e-08	-0.00012019898801246189	0.0	1.3307660759183375e-08
5.71	-0.0006473247051137151	0.0	-2.850309242146001e-08	-0.0015683577369822743	0.0	-0.0991334147366348	0.0	1.84020148920051e-05	0.0	0.9999999995119774	0.0	3.112342545780485e-05	0.0	0.0	0.0035664818460071136	0.0	0.0	0.0035683797079059036	0.0	-0.0006473247056243065	0.0	1.17908320277207e-08	-0.00012019901417084687	0.0	1.3341200850283252e-08
5.715	-0.0006479257002506873	0.0	-2.8533341053030573e-08	-0.001571595926892245	0.0	-0.09913341463272947	0.0	1.8406236257818484e-05	0.0	0.999999999510473	0.0	3.116944032366018e-05	0.0	0.0	0.0035717547612261397	0.0	0.0	0.003573652706177372	0.0	-0.0006479257007607154	0.0	1.1857621879327388e-08	-0.00012019904040536636	0.0	1.3374739562602913e-08
5.72	-0.0006485266955190319	0.0	-2.8563546286149075e-08	-0.0015748371215074239	0.0	-0.0991334145286547	0.0	1.8410457648654716e-05	0.0	0.9999999995089665	0.0	3.121546572463972e-05	0.0	0.0	0.003577028883681481	0.0	0.0	0.003578926913788233	0.0	-0.0006485266960284872	0.0	1.1924579421048932e-08	-0.00012019906671611247	0.0	1.3408276896244435e-08
5.7250000000000005	-0.00064912769091913	0.0	-2.8593708165847374e-08	-0.0015780813208287393	0.0	-0.09913341442440982	0.0	1.841467906454246e-05	0.0	0.9999999995074579	0.0	3.126150166081223e-05	0.0	0.0	0.0035823042133810187	0.0	0.0	0.0035842023307456642	0.0	-0.0006491276914280035	0.0	1.1991704645992191e-08	-0.00012019909310302017	0.0	1.3441812851301042e-08
5.73	-0.0006497286864513621	0.0	-2.8623826737157325e-08	-0.0015813285248571182	0.0	-0.09913341431999405	0.0	1.8418900505510375e-05	0.0	0.9999999995059471	0.0	3.1307548132246416e-05	0.0	0.0	0.0035875807503326254	0.0	0.0	0.0035894789570568497	0.0	-0.0006497286869596444	0.0	1.2058997547264465e-08	-0.00012019911956612562	0.0	1.3475347427870752e-08
5.735	-0.0006503296821161099	0.0	-2.8653902045110786e-08	-0.0015845787335934895	0.0	-0.09913341421540671	0.0	1.8423121971587127e-05	0.0	0.9999999995044343	0.0	3.135360513901104e-05	0.0	0.0	0.0035928584945441816	0.0	0.0	0.003594756792728983	0.0	-0.0006503296826237919	0.0	1.2126458117973587e-08	-0.0001201991461054884	0.0	1.350888062605349e-08
5.74	-0.0006509306779137539	0.0	-2.8683934134739618e-08	-0.0015878319470387808	0.0	-0.09913341411064709	0.0	1.8427343462801377e-05	0.0	0.9999999995029194	0.0	3.139967268117484e-05	0.0	0.0	0.0035981374460235622	0.0	0.0	0.0036000358377692655	0.0	-0.0006509306784208261	0.0	1.2194086351227847e-08	-0.0001201991727209658	0.0	1.35424124459435e-08
5.745	-0.0006515316738446752	0.0	-2.8713923051075687e-08	-0.00159108816519392	0.0	-0.09913341400571446	0.0	1.8431564979181793e-05	0.0	0.9999999995014024	0.0	3.144575075880655e-05	0.0	0.0	0.0036034176047786445	0.0	0.0	0.0036053160921849067	0.0	-0.0006515316743511284	0.0	1.2261882240136037e-08	-0.00012019919941262287	0.0	1.357594288764393e-08
5.75	-0.0006521326699092548	0.0	-2.8743868839150843e-08	-0.0015943473880598354	0.0	-0.0991334139006081	0.0	1.843578652075703e-05	0.0	0.9999999994998832	0.0	3.149183937197492e-05	0.0	0.0	0.003608698970817306	0.0	0.0	0.0036105975559831247	0.0	-0.0006521326704150794	0.0	1.232984577780746e-08	-0.00012019922618050657	0.0	1.3609471951248557e-08
5.755	-0.0006527336661078739	0.0	-2.8773771543996948e-08	-0.001597609615637455	0.0	-0.09913341379532734	0.0	1.8440008087555754e-05	0.0	0.9999999994983619	0.0	3.153793852074868e-05	0.0	0.0	0.003613981544147424	0.0	0.0	0.003615880229171145	0.0	-0.0006527336666130606	0.0	1.2397976957351855e-08	-0.00012019925302462594	0.0	1.3642999636851125e-08
5.76	-0.0006533346624409132	0.0	-2.8803631210645863e-08	-0.0016008748479277067	0.0	-0.09913341368987141	0.0	1.844422967960663e-05	0.0	0.9999999994968386	0.0	3.158404820519657e-05	0.0	0.0	0.003619265324776874	0.0	0.0	0.003621164111756202	0.0	-0.0006533346629454526	0.0	1.2466275771879473e-08	-0.00012019927994489064	0.0	1.3676525944555889e-08
5.765	-0.0006539356589087539	0.0	-2.8833447884129444e-08	-0.0016041430849315183	0.0	-0.09913341358423963	0.0	1.844845129693832e-05	0.0	0.9999999994953132	0.0	3.163016842538734e-05	0.0	0.0	0.003624550312713536	0.0	0.0	0.003626449203745538	0.0	-0.0006539356594126366	0.0	1.253474221450108e-08	-0.00012019930694140185	0.0	1.3710050874461612e-08
5.7700000000000005	-0.000654536655511777	0.0	-2.886322160947956e-08	-0.0016074143266498189	0.0	-0.09913341347843127	0.0	1.845267293957949e-05	0.0	0.9999999994937856	0.0	3.1676299181389725e-05	0.0	0.0	0.0036298365079652857	0.0	0.0	0.003631735505146404	0.0	-0.0006545366560149936	0.0	1.2603376278327907e-08	-0.00012019933401405478	0.0	1.3743574426656998e-08
5.775	-0.0006551376522503632	0.0	-2.8892952431728055e-08	-0.0016106885730835345	0.0	-0.09913341337244563	0.0	1.8456894607558793e-05	0.0	0.9999999994922559	0.0	3.172244047327246e-05	0.0	0.0	0.003635123910539998	0.0	0.0	0.0036370230159660584	0.0	-0.0006551376527529041	0.0	1.2672177956471635e-08	-0.00012019936116289822	0.0	1.3777096601242464e-08
5.78	-0.0006557386491248938	0.0	-2.8922640395906797e-08	-0.0016139658242335948	0.0	-0.09913341326628197	0.0	1.8461116300904903e-05	0.0	0.9999999994907242	0.0	3.176859230110428e-05	0.0	0.0	0.0036404125204455512	0.0	0.0	0.0036423117362117687	0.0	-0.0006557386496267495	0.0	1.2741147242044489e-08	-0.00012019938838792312	0.0	1.3810617398323532e-08
5.785	-0.0006563396461357496	0.0	-2.895228554704764e-08	-0.001617246080100927	0.0	-0.0991334131599396	0.0	1.8465338019646473e-05	0.0	0.9999999994891902	0.0	3.181475466495393e-05	0.0	0.0	0.003645702337689823	0.0	0.0	0.00364760166589081	0.0	-0.0006563396466369104	0.0	1.2810284128159185e-08	-0.00012019941568916924	0.0	1.3844136817993564e-08
5.79	-0.0006569406432833119	0.0	-2.898188793018245e-08	-0.0016205293406864592	0.0	-0.09913341305341782	0.0	1.8469559763812175e-05	0.0	0.9999999994876542	0.0	3.186092756489017e-05	0.0	0.0	0.003650993362280691	0.0	0.0	0.003652892805010465	0.0	-0.0006569406437837683	0.0	1.2879588607928893e-08	-0.00012019944306666005	0.0	1.3877654860342888e-08
5.795	-0.0006575416405679613	0.0	-2.901144759034308e-08	-0.0016238156059911193	0.0	-0.09913341294671588	0.0	1.8473781533430664e-05	0.0	0.9999999994861161	0.0	3.19071110009817e-05	0.0	0.0	0.00365628559422603	0.0	0.0	0.0036581851535780266	0.0	-0.0006575416410677039	0.0	1.2949060674467257e-08	-0.00012019947052026188	0.0	1.3911171525480359e-08
[truncated: 1,840 more rows]
