# Supplementary material for: An Efficient Contact Model for the Simulation of Cargo Airdrop Extraction Phase
Source: Hindawi journal article supplement (doi:10.1155/2018/9895451), 2018-10-17
Supplement: f1 [file 9895451.f1.zip › case1_stick_slip/motion_pts20.csv]

t	u	v	w	x_g	y_g	z_g	p	q	r	e0	e1	e2	e3	yaw(deg)	pitch(deg)	roll(deg)	yaw_fix(deg)	pitch_fix(deg)	roll_fix(deg)	vx_g	vy_g	vz_g	ax_g	ay_g	az_g
0.0	0.0	0.0	0.0	0.0	0.0	-0.1	0.0	0.0	0.0	1.0	0.0	0.0	0.0	0.0	-0.0	0.0	0.0	0.0	0.0	0.0	0.0	0.0	1.0087599611466636e-17	0.0	13.496837436997073
0.005	-1.0119841014648022e-20	0.0	0.04319112342504738	-3.490268389486624e-25	0.0	-0.09988207795203427	0.0	2.0286653105717648e-16	0.0	1.0	0.0	1.0949690810897664e-19	0.0	0.0	1.2547421408752323e-17	0.0	0.0	5.811698017017926e-17	0.0	-6.612520690562597e-22	0.0	0.04319112342504738	-3.87041742701658e-18	0.0	2.7642365147924832
0.01	-2.5409479847771597e-19	0.0	0.037796119330218786	-1.375886124991653e-22	0.0	-0.09965720913933859	0.0	1.242083494752739e-15	0.0	1.0	0.0	1.991921350063546e-18	0.0	0.0	2.282573729612844e-16	0.0	0.0	4.139476904311377e-16	0.0	-1.035210043908914e-19	0.0	0.037796119330218786	-5.156839485363164e-17	0.0	-3.934596794466855
0.015	-5.859637312698028e-19	0.0	0.014276250262396097	-1.6430444770316514e-21	0.0	-0.09953190855294614	0.0	2.8393922631689785e-16	0.0	1.0	0.0	2.9046136911934854e-18	0.0	0.0	3.3284421124260426e-16	0.0	0.0	4.952902869619785e-16	0.0	-5.030297473276822e-19	0.0	0.014276250262396097	-8.542483983643889e-17	0.0	-3.7197025924899876
0.02	-9.653288922320904e-19	0.0	0.004756822366801024	-5.18033839671451e-21	0.0	-0.0994890978237858	0.0	7.387695817115548e-16	0.0	1.0	0.0	4.2554270749663405e-18	0.0	0.0	4.876360228425446e-16	0.0	0.0	7.06932182285565e-16	0.0	-9.248442708511093e-19	0.0	0.004756822366801024	-9.499895444049494e-17	0.0	-1.0175942303808456
0.025	-1.4683694041864246e-18	0.0	0.0020589032671045186	-1.1066557027878641e-20	0.0	-0.09947335955790598	0.0	3.5711654342726404e-16	0.0	1.0	0.0	5.491372757341704e-18	0.0	0.0	6.292649654575943e-16	0.0	0.0	8.09238535948978e-16	0.0	-1.4457569935644655e-18	0.0	0.0020589032671045186	-1.0812671999954286e-16	0.0	-0.2590764680643975
0.03	-1.9535981771828142e-18	0.0	0.0011129971907368906	-1.9631896790528587e-20	0.0	-0.09946577224580427	0.0	-1.247192705147886e-15	0.0	1.0	0.0	3.682160833634512e-18	0.0	0.0	4.2194455051126083e-16	0.0	0.0	4.519441447265882e-16	0.0	-1.945401707855461e-18	0.0	0.0011129971907368906	-8.896548574247631e-17	0.0	-0.11288199840897972
0.035	-2.1788775767903993e-18	0.0	0.0006702369377468781	-3.008203318531894e-20	0.0	-0.09946143091391467	0.0	-5.26364628522713e-15	0.0	1.0	0.0	-7.523209649669876e-19	0.0	0.0	-8.620963226363571e-17	0.0	0.0	-1.0559794402395541e-15	0.0	-2.1798860433899237e-18	0.0	0.0006702369377468781	3.6383015869600774e-17	0.0	-0.062484445245890245
0.04	-1.4485923771674978e-18	0.0	0.00042041163647868343	-3.9717046852181896e-20	0.0	-0.09945875770081275	0.0	-5.7579737599766585e-15	0.0	1.0	0.0	-1.3504797148111081e-17	0.0	0.0	-1.5475357595341509e-15	0.0	0.0	-2.705517415208235e-15	0.0	-1.4599475249061978e-18	0.0	0.00042041163647868343	2.6138102443879225e-16	0.0	-0.038020376174744
0.045	2.6405367242707925e-19	0.0	0.0002672855477922761	-4.2884297995695086e-20	0.0	-0.09945706827705349	0.0	1.3385673073948287e-15	0.0	1.0	0.0	-1.7131780317214088e-17	0.0	0.0	-1.963157415443324e-15	0.0	0.0	-2.322046128668663e-15	0.0	2.5489551785359223e-19	0.0	0.0002672855477922761	3.505946613979858e-16	0.0	-0.023953243610852992
0.05	1.8550778713504218e-18	0.0	0.00017060864158471403	-3.7553578079259813e-20	0.0	-0.09945599174939675	0.0	1.943874082456222e-15	0.0	1.0	0.0	-1.4912947955111794e-17	0.0	0.0	-1.7088979558523145e-15	0.0	0.0	-1.7651672245206285e-15	0.0	1.8499893157651316e-18	0.0	0.00017060864158471403	2.6250571754131504e-16	0.0	-0.015257698269713299
0.055	3.267795271215565e-18	0.0	0.00010900759524630263	-2.477165045035072e-20	0.0	-0.09945530422995538	0.0	-1.3543937674756954e-14	0.0	1.0	0.0	-1.7733962047624092e-17	0.0	0.0	-2.03216235874808e-15	0.0	0.0	-5.645219558279645e-15	0.0	3.2639289981015636e-18	0.0	0.00010900759524630263	4.836633303815643e-16	0.0	-0.009748078118126816
0.06	6.869112815207431e-18	0.0	6.964991229369355e-05	-1.1405094715887879e-21	0.0	-0.09945486491971726	0.0	4.393080382099109e-16	0.0	1.0	0.0	-5.1224404839644465e-17	0.0	0.0	-5.869884410762273e-15	0.0	0.0	-5.519367075801646e-15	0.0	6.861977264598675e-18	0.0	6.964991229369355e-05	1.0504401920549023e-15	0.0	-0.0062312776737556645
0.065	1.1332558586700875e-17	0.0	4.450040055172122e-05	4.563238950618442e-20	0.0	-0.09945458426633041	0.0	1.9733984811547154e-14	0.0	1.0	0.0	-1.7520079071885803e-17	0.0	0.0	-2.007653175109074e-15	0.0	0.0	1.340031375829598e-16	0.0	1.1330999285628082e-17	0.0	4.450040055172122e-05	2.1338067669071372e-16	0.0	-0.003982125179749828
0.07	3.3469313854364605e-18	0.0	2.8427744453402574e-05	9.240326573737335e-20	0.0	-0.09945440498374956	0.0	1.7973433945713595e-13	0.0	1.0	0.0	2.323207046610321e-16	0.0	0.0	2.6621991741164825e-14	0.0	0.0	5.162409855991073e-14	0.0	3.360140092683137e-18	0.0	2.8427744453402574e-05	-4.8303513615744266e-15	0.0	-0.002544838780318815
0.075	-3.757343482625661e-17	0.0	1.8157763308964524e-05	2.2813205453999534e-20	0.0	-0.09945429045392866	0.0	8.784407030426507e-15	0.0	1.0	0.0	5.459330880600463e-16	0.0	0.0	6.255932368476913e-14	0.0	0.0	5.414064580175317e-14	0.0	-3.755360897866556e-17	0.0	1.8157763308964524e-05	-1.0304524740288973e-14	0.0	-0.0016256656994867032
0.08	-9.44048815609546e-17	0.0	1.1599141170768877e-05	-3.0491915734953965e-19	0.0	-0.09945421732060737	0.0	-2.5302873917300288e-14	0.0	1.0	0.0	4.773804157853203e-16	0.0	0.0	5.470376609339855e-14	0.0	0.0	4.689190637668838e-14	0.0	-9.439380715528489e-17	0.0	1.1599141170768877e-05	-1.1813584794914336e-14	0.0	-0.00103797405171771
0.085	-1.5243655858288132e-16	0.0	7.4115162598538235e-06	-9.129103689376961e-19	0.0	-0.09945417063625861	0.0	6.603025982115933e-14	0.0	1.0	0.0	5.035610691490118e-16	0.0	0.0	5.770384797866756e-14	0.0	0.0	6.58081824162118e-14	0.0	-1.5242909428077767e-16	0.0	7.4115162598538235e-06	-1.1155007093137653e-14	0.0	-0.000662861051188549
0.09	-2.0683430292870423e-16	0.0	4.736211163579568e-06	-1.8245643243676455e-18	0.0	-0.099454140815914	0.0	6.285126361288594e-14	0.0	1.0	0.0	5.962888008612743e-16	0.0	0.0	6.832966332053564e-14	0.0	0.0	8.381374312662443e-14	0.0	-2.0682865462935353e-16	0.0	4.736211163579568e-06	-1.1322712181694502e-14	0.0	-0.00042365505661111244
0.095	-2.6773591854633326e-16	0.0	3.0259863227629917e-06	-3.0034504539701724e-18	0.0	-0.09945412175034572	0.0	-3.830864192035501e-14	0.0	1.0	0.0	6.5356597088723425e-16	0.0	0.0	7.48931435304171e-14	0.0	0.0	7.283912562205302e-14	0.0	-2.677319631829554e-16	0.0	3.0259863227629917e-06	-1.2888004974042805e-14	0.0	-0.00027071332369822877
0.1	-3.374567140856086e-16	0.0	1.9342050707089666e-06	-4.51495466155058e-18	0.0	-0.09945410957849576	0.0	8.309051724866305e-14	0.0	1.0	0.0	6.945009638781607e-16	0.0	0.0	7.95839481959725e-14	0.0	0.0	9.664280540158982e-14	0.0	-3.3745402747103673e-16	0.0	1.9342050707089666e-06	-2.2440755533063133e-14	0.0	-0.0001726563835146716
0.105	-4.241542023301769e-16	0.0	1.2382669387827366e-06	-6.421806323477808e-18	0.0	-0.09945410182197037	0.0	2.0189870651225305e-13	0.0	1.0	0.0	9.786898228536288e-16	0.0	0.0	1.1214959260383822e-13	0.0	0.0	1.5448252426310267e-13	0.0	-4.24151778571675e-16	0.0	1.2382669387827366e-06	5.855204310034992e-15	0.0	-0.000110093804816238
0.11	-1.1172839940821744e-16	0.0	7.938391026178237e-07	-7.898410941470892e-18	0.0	-0.09945409686930788	0.0	-8.918491348253985e-12	0.0	1.0	0.0	-8.46918919762501e-15	0.0	0.0	-9.704975938434023e-13	0.0	0.0	-2.4004770451313605e-12	0.0	-1.1174184575532251e-16	0.0	7.938391026178237e-07	1.3285074982921955e-13	0.0	-7.04647465832597e-05
0.115	1.186673280362511e-15	0.0	5.086868670081292e-07	-5.747569877797094e-18	0.0	-0.09945409369037092	0.0	3.704025415566177e-13	0.0	1.0	0.0	-1.970605410956126e-14	0.0	0.0	-2.2581474626685835e-12	0.0	0.0	-2.294364533370794e-12	0.0	1.1866532319406588e-15	0.0	5.086868670081292e-07	4.768326336654276e-13	0.0	-4.528459167083885e-05
0.12	4.5779735271804556e-15	0.0	3.254492915076891e-07	7.585526408379137e-18	0.0	-0.09945409164714036	0.0	-2.40761715995364e-11	0.0	1.0	0.0	-4.986999025796439e-14	0.0	0.0	-5.714679932279782e-12	0.0	0.0	-9.191679630801655e-12	0.0	4.5779410668744615e-15	0.0	3.254492915076891e-07	7.004945853854582e-13	0.0	-2.9067429128799825e-05
0.125	8.483363288244271e-15	0.0	2.082239501519905e-07	3.939360504415957e-17	0.0	-0.09945409034074848	0.0	4.995323856439442e-11	0.0	1.0	0.0	-2.3498025374040124e-14	0.0	0.0	-2.6926753616476335e-12	0.0	0.0	5.118869082948063e-12	0.0	8.483353502540943e-15	0.0	2.082239501519905e-07	1.0534140145209264e-12	0.0	-1.848398032040382e-05
0.13	1.6232216788147613e-14	0.0	1.341815154967037e-07	1.0232361324621162e-16	0.0	-0.09945408951643246	0.0	-1.3080766920342147e-10	0.0	1.0	0.0	-1.1772198290512773e-13	0.0	0.0	-1.3489945552750089e-11	0.0	0.0	-3.2354767783549164e-11	0.0	1.6232185195919467e-14	0.0	1.341815154967037e-07	2.285809986981934e-12	0.0	-1.1641873904998528e-05
0.135	3.1215803752485895e-14	0.0	8.758347814447509e-08	2.2030759202652821e-16	0.0	-0.09945408899745894	0.0	-5.7668951569570244e-11	0.0	1.0	0.0	-2.1898788209823085e-13	0.0	0.0	-2.5094162817474206e-11	0.0	0.0	-4.887570545295276e-11	0.0	3.121576539304512e-14	0.0	8.758347814447509e-08	3.5150951835102675e-12	0.0	-7.230176608956822e-06
0.14	4.928866235356098e-14	0.0	5.883794974747733e-08	4.134357828931925e-16	0.0	-0.09945408867708898	0.0	8.083286259442805e-11	0.0	1.0	0.0	-2.156904620510643e-13	0.0	0.0	-2.471630631350526e-11	0.0	0.0	-2.5718796089844616e-11	0.0	4.928863697199185e-14	0.0	5.883794974747733e-08	3.4920929879665246e-12	0.0	-4.633821734395935e-06
0.145	6.20292577118772e-14	0.0	3.928602069558876e-08	6.841812917739533e-16	0.0	-0.09945408845849874	0.0	1.5837735519123928e-10	0.0	1.0	0.0	-1.2871922778089452e-14	0.0	0.0	-1.4750136988056707e-12	0.0	0.0	1.9652974024667233e-11	0.0	6.202925670050395e-14	0.0	3.928602069558876e-08	6.847808111510389e-13	0.0	-3.216523283556008e-06
0.15	5.3214522063098574e-14	0.0	2.5831159969369224e-08	9.75025157145534e-16	0.0	-0.09945408830818103	0.0	9.601060525601151e-11	0.0	1.0	0.0	2.770781504790129e-13	0.0	0.0	3.1750817235476336e-11	0.0	0.0	4.715798637299733e-11	0.0	5.3214536377598633e-14	0.0	2.5831159969369224e-08	-4.144607888027954e-12	0.0	-2.2281081788289667e-06
0.155	2.1536096369196627e-14	0.0	1.652055693297074e-08	1.1854828572113496e-15	0.0	-0.09945408820426975	0.0	-2.212272292168555e-11	0.0	1.0	0.0	4.721281639049889e-13	0.0	0.0	5.410190236203327e-11	0.0	0.0	4.0820293099247794e-11	0.0	2.153611196883705e-14	0.0	1.652055693297074e-08	-8.431270174418036e-12	0.0	-1.5147796249925306e-06
0.16	-2.598005653188192e-14	0.0	1.0400730376271141e-08	1.2112990126402204e-15	0.0	-0.09945408813624182	0.0	-1.0558872562979143e-10	0.0	1.0	0.0	4.294032950215334e-13	0.0	0.0	4.920599302748964e-11	0.0	0.0	1.0571351385488422e-11	0.0	-2.5980047599666133e-14	0.0	1.0400730376271141e-08	-9.307038201948418e-12	0.0	-9.517573681867121e-07
0.165	-6.565120753476828e-14	0.0	6.729361450355956e-09	9.999232410706425e-16	0.0	-0.0994540880953233	0.0	-7.278908792513405e-11	0.0	1.0	0.0	2.1415376635356768e-13	0.0	0.0	2.4540213957780324e-11	0.0	0.0	-1.0281186278095797e-11	0.0	-6.565120465253208e-14	0.0	6.729361450355956e-09	-6.267711901276635e-12	0.0	-5.776871504891561e-07
0.17	-8.586170469726008e-14	0.0	4.607038199653681e-09	6.096372270210054e-16	0.0	-0.099454088071602	0.0	-4.9135022943762096e-12	0.0	1.0	0.0	2.3964506029647992e-14	0.0	0.0	2.7461301072292865e-12	0.0	0.0	-1.1688800998573814e-11	0.0	-8.586170447644929e-14	0.0	4.607038199653681e-09	-1.6477559325718553e-12	0.0	-1.6969393713689134e-07
0.17500000000000002	-8.145442577152954e-14	0.0	4.832248549380424e-09	1.6834218312644617e-17	0.0	-0.09945408807378298	0.0	2.1274710959317393e-10	0.0	1.0	0.0	-3.308294757190989e-13	0.0	0.0	-3.791026539446023e-11	0.0	0.0	4.9258756417906456e-11	0.0	-8.145442896883005e-14	0.0	4.832248549380424e-09	3.3546342514482e-12	0.0	1.297268378668952e-07
0.18	-5.3540480934943436e-14	0.0	5.4054633966803645e-09	-5.463060650832518e-16	0.0	-0.09945408807990236	0.0	3.2237193414156885e-10	0.0	1.0	0.0	-4.847683465222115e-13	0.0	0.0	-5.555036059451624e-11	0.0	0.0	1.4161151271681258e-10	0.0	-5.3540486175738544e-14	0.0	5.4054633966803645e-09	7.46474840335272e-12	0.0	4.362687297268192e-08
0.185	-8.359509916237905e-15	0.0	5.333152754555713e-09	-9.15484495134161e-16	0.0	-0.09945408807906161	0.0	2.1611116362229637e-10	0.0	1.0	0.0	-3.204014932724166e-13	0.0	0.0	-3.671530662839742e-11	0.0	0.0	2.0352280062290634e-10	0.0	-8.359513333738118e-15	0.0	5.333152754555713e-09	1.109248132814153e-11	0.0	7.514343504881164e-08
0.19	5.1012718996629385e-14	0.0	5.9966594626950805e-09	-1.1406539018232723e-15	0.0	-0.09945408808625342	0.0	1.7042415418325897e-10	0.0	1.0	0.0	-2.1624593198457413e-13	0.0	0.0	-2.4779958479178312e-11	0.0	0.0	2.523457244318441e-10	0.0	5.1012716403122954e-14	0.0	5.9966594626950805e-09	9.727315275996629e-12	0.0	-1.6243312315677386e-08
0.195	8.942231336036579e-14	0.0	5.053210974569451e-09	-9.580641698691876e-16	0.0	-0.09945408807601255	0.0	-4.405820535320149e-12	0.0	1.0	0.0	-1.3721923821492624e-13	0.0	0.0	-1.572416643543107e-11	0.0	0.0	2.5108354982201453e-10	0.0	8.942231197357027e-14	0.0	5.053210974569451e-09	8.931121468990278e-12	0.0	-2.0713260284992143e-07
0.2	1.4507520081172346e-13	0.0	4.140527895730912e-09	-4.2678546345865454e-16	0.0	-0.09945408806576864	0.0	-2.0617254178027087e-10	0.0	1.0	0.0	-1.3147993625123306e-13	0.0	0.0	-1.506649087568954e-11	0.0	0.0	1.9201946734454377e-10	0.0	1.4507519972293077e-13	0.0	4.140527895730912e-09	1.1955275592013443e-11	0.0	-2.126454321046353e-07
0.20500000000000002	2.0827306780876076e-13	0.0	2.912056389837652e-09	4.916623063925273e-16	0.0	-0.09945408805155975	0.0	-3.661838115534246e-10	0.0	1.0	0.0	-4.676167863733989e-13	0.0	0.0	-5.358493657733277e-11	0.0	0.0	8.711553270441826e-11	0.0	2.0827306508530785e-13	0.0	2.912056389837652e-09	1.3793424577838336e-11	0.0	-2.5694776677174557e-07
0.21	2.8450220936268707e-13	0.0	1.6261487111188022e-09	1.8213292236396734e-15	0.0	-0.09945408803643593	0.0	-3.9974620028062414e-10	0.0	1.0	0.0	-1.1027497033722253e-12	0.0	0.0	-1.2636580772506391e-10	0.0	0.0	-2.7403318057937197e-11	0.0	2.8450220577621707e-13	0.0	1.6261487111188028e-09	1.6564934748286013e-11	0.0	-2.677283238080209e-07
0.215	3.7723288681529953e-13	0.0	3.550435039773066e-10	3.656490839690832e-15	0.0	-0.09945408802224695	0.0	-2.574962389497037e-10	0.0	1.0	0.0	-1.5290227123460053e-12	0.0	0.0	-1.7521309639414364e-10	0.0	0.0	-1.0117055671948812e-10	0.0	3.7723288572956035e-13	0.0	3.5504350397730775e-10	2.2590819154446935e-11	0.0	-1.9249974006236578e-07
0.22	5.028576792289806e-13	0.0	-2.5187576267058703e-10	5.943911571819317e-15	0.0	-0.09945408801669049	0.0	2.0364046659201955e-10	0.0	1.0	0.0	-1.4904365894026038e-12	0.0	0.0	-1.70791452409284e-10	0.0	0.0	-4.283186035050032e-11	0.0	5.028576799797903e-13	0.0	-2.5187576267058554e-10	2.3723401146489045e-11	0.0	-8.736504203368319e-08
0.225	5.996677081633015e-13	0.0	-5.621549967355092e-10	8.613270035966269e-15	0.0	-0.09945408801422768	0.0	6.2443182141235e-10	0.0	1.0	0.0	-1.1418345450967342e-12	0.0	0.0	-1.308446006725663e-10	0.0	0.0	1.360546794524717e-10	0.0	5.996677094470775e-13	0.0	-5.621549967355078e-10	1.4498734786808821e-11	0.0	-2.1713252972130765e-08
0.23	6.405767266474189e-13	0.0	-4.695367725627306e-10	1.1581519631839187e-14	0.0	-0.0994540880159282	0.0	8.370347781738612e-10	0.0	1.0	0.0	-8.475677711219165e-14	0.0	0.0	-9.71241122731919e-12	0.0	0.0	3.758474799276283e-10	0.0	6.405767267270117e-13	0.0	-4.695367725627305e-10	1.0354073569353987e-12	0.0	5.193899139228575e-08
0.23500000000000001	6.090611727284773e-13	0.0	-8.344939683200483e-11	1.4638166413273068e-14	0.0	-0.09945408802038615	0.0	7.193498920717749e-10	0.0	1.0	0.0	1.3761349814150318e-12	0.0	0.0	1.576934529507906e-10	0.0	0.0	5.819260439721482e-10	0.0	6.09061172498802e-13	0.0	-8.344939683200651e-11	-1.228163799342791e-11	0.0	1.0244069608011715e-07
0.24	5.158809408064345e-13	0.0	4.614295530202825e-10	1.7448138909171166e-14	0.0	-0.09945408802634355	0.0	2.9770223981613333e-10	0.0	1.0	0.0	2.3525021333490012e-12	0.0	0.0	2.695768870728403e-10	0.0	0.0	6.672114534374279e-10	0.0	5.158809429774625e-13	0.0	4.6142955302028006e-10	-2.6642325033414635e-11	0.0	7.16113485553117e-08
0.245	3.3899971566820303e-13	0.0	7.391338431215497e-10	1.966019251673551e-14	0.0	-0.0994540880286948	0.0	-5.720487438148096e-10	0.0	1.0	0.0	2.2919774632017927e-12	0.0	0.0	2.6264127076112735e-10	0.0	0.0	5.033315599556826e-10	0.0	3.3899971905635925e-13	0.0	7.391338431215482e-10	-4.388818460742723e-11	0.0	1.3429589211770222e-07
0.25	7.862458690618938e-14	0.0	1.8144482337470056e-09	2.121726548289573e-14	0.0	-0.09945408804010765	0.0	-1.14115273161815e-09	0.0	1.0	0.0	3.936777577503968e-12	0.0	0.0	4.5112148014542736e-10	0.0	0.0	1.7641538344795695e-10	0.0	7.862460119234762e-14	0.0	1.814448233747005e-09	-5.997709525481447e-11	0.0	2.2004697442334132e-07
0.255	-2.556985129446343e-13	0.0	2.682946521919658e-09	2.145521618173734e-14	0.0	-0.09945408804929623	0.0	-1.5026749452680679e-09	0.0	1.0	0.0	5.145117628330411e-12	0.0	0.0	5.895870504033846e-10	0.0	0.0	-2.540692782716044e-10	0.0	-2.556984853364834e-13	0.0	2.6829465219196603e-09	-7.276933074056214e-11	0.0	1.0035117665524214e-07
0.26	-6.43079004714289e-13	0.0	2.8091125180046907e-09	1.9768156206202247e-14	0.0	-0.09945408805066877	0.0	-1.3628180937499884e-09	0.0	1.0	0.0	4.954923965009484e-12	0.0	0.0	5.677924620065421e-10	0.0	0.0	-6.444879033512969e-10	0.0	-6.430789768764111e-13	0.0	2.809112518004697e-09	-8.188563555211452e-11	0.0	-1.9288208729661078e-08
0.265	-1.0684690841485914e-12	0.0	2.6753775178685454e-09	1.627578397861277e-14	0.0	-0.09945408804901204	0.0	-1.050069378928813e-09	0.0	1.0	0.0	4.315018841392858e-12	0.0	0.0	4.944647362624823e-10	0.0	0.0	-9.453106213940196e-10	0.0	-1.0684690610599826e-12	0.0	2.6753775178685545e-09	-8.789710999785171e-11	0.0	1.1086825476828462e-08
0.27	-1.510401897267902e-12	0.0	2.9111887251178105e-09	1.1210421535404447e-14	0.0	-0.09945408805058856	0.0	-9.998489480714275e-10	0.0	1.0	0.0	4.431029573957675e-12	0.0	0.0	5.077585869708521e-10	0.0	0.0	-1.2317462457694586e-09	0.0	-1.5104018714687752e-12	0.0	2.9111887251178238e-09	-8.682823914668595e-11	0.0	2.9693105166240314e-08
0.275	-1.920455064851104e-12	0.0	2.834346650214951e-09	3.89040515773526e-15	0.0	-0.09945408804822602	0.0	-8.913835038888303e-10	0.0	1.0	0.0	3.995067070923514e-12	0.0	0.0	4.5780096407121857e-10	0.0	0.0	-1.4871088092715245e-09	0.0	-1.9204550422042937e-12	0.0	2.8343466502149665e-09	-7.346286242582057e-11	0.0	-6.843194222412994e-08
0.28	-2.2492724896274823e-12	0.0	2.29927926680156e-09	-5.979095943690277e-15	0.0	-0.0994540880402105	0.0	-7.413753951350236e-10	0.0	1.0	0.0	2.6960054378558094e-12	0.0	0.0	3.0893946626691486e-10	0.0	0.0	-1.6994972151519275e-09	0.0	-2.2492724772297433e-12	0.0	2.299279266801572e-09	-6.504527697804107e-11	0.0	-1.0096357449294638e-07
0.28500000000000003	-2.5716621686783816e-12	0.0	1.886018384786325e-09	-1.708008561124906e-14	0.0	-0.0994540880343609	0.0	-5.604012598569514e-10	0.0	1.0	0.0	1.876940352220765e-12	0.0	0.0	2.1508152116009607e-10	0.0	0.0	-1.8600403502700147e-09	0.0	-2.5716621615984935e-12	0.0	1.8860183847863345e-09	-5.84015436036405e-11	0.0	-8.92626894928656e-08
0.29	-2.8173422108375615e-12	0.0	1.3823770712655449e-09	-2.976284277795723e-14	0.0	-0.09945408802817558	0.0	-3.7682256518415594e-10	0.0	1.0	0.0	1.0480685445171332e-12	0.0	0.0	1.2009980848250153e-10	0.0	0.0	-1.9679920633217423e-09	0.0	-2.81734220793991e-12	0.0	1.3823770712655509e-09	-3.9124854802020415e-11	0.0	-1.0493695016606976e-07
0.295	-2.960920272260694e-12	0.0	8.548904554987314e-10	-4.3730851112251226e-14	0.0	-0.09945408802284046	0.0	-2.1991487877150947e-10	0.0	1.0	0.0	3.471200694765395e-13	0.0	0.0	3.977702993058725e-11	0.0	0.0	-2.0309930353504353e-09	0.0	-2.960920271667195e-12	0.0	8.548904554987334e-10	-1.871481849069938e-11	0.0	-1.045740386100358e-07
0.3	-3.015846069519766e-12	0.0	3.464728424649494e-10	-5.866420855398379e-14	0.0	-0.09945408801857658	0.0	-9.310436562605576e-11	0.0	1.0	0.0	-1.9967323000676465e-13	0.0	0.0	-2.288086672226512e-11	0.0	0.0	-2.0576654713735147e-09	0.0	-3.0158460696581287e-12	0.0	3.464728424649482e-10	-6.993447583486883e-12	0.0	-1.0024840205891035e-07
0.305	-3.036803946076639e-12	0.0	-1.2677312901633538e-10	-7.422464924446545e-14	0.0	-0.09945408801455509	0.0	2.7942037369226208e-11	0.0	1.0	0.0	-6.876698797935449e-13	0.0	0.0	-7.880116362087755e-11	0.0	0.0	-2.049660667312247e-09	0.0	-3.036803945902283e-12	0.0	-1.2677312901633957e-10	1.0643205984796198e-12	0.0	-8.352837100192671e-08
0.31	-3.0048047476615913e-12	0.0	-4.56027481320407e-10	-8.988345112655467e-14	0.0	-0.09945408801245616	0.0	1.070247098303754e-10	0.0	1.0	0.0	-9.321693800173643e-13	0.0	0.0	-1.068187425326431e-10	0.0	0.0	-2.019000346427783e-09	0.0	-3.0048047468114015e-12	0.0	-4.5602748132041256e-10	1.0304592969171545e-11	0.0	-4.121256979029353e-08
0.315	-2.936448925743315e-12	0.0	-5.534098746685454e-10	-1.0508507406650227e-13	0.0	-0.09945408801308489	0.0	1.313657967613471e-10	0.0	1.0	0.0	-8.50330015444333e-13	0.0	0.0	-9.744064215650879e-11	0.0	0.0	-1.9813668177937907e-09	0.0	-2.936448924802153e-12	0.0	-5.534098746685504e-10	1.8181282184712225e-11	0.0	-1.0808341389040695e-08
0.32	-2.8312814798057017e-12	0.0	-5.938669353351226e-10	-1.2038632024137464e-13	0.0	-0.09945408801433847	0.0	1.3123276710092415e-10	0.0	1.0	0.0	-6.721381160140083e-13	0.0	0.0	-7.702135459495432e-11	0.0	0.0	-1.9437713993502594e-09	0.0	-2.8312814790073804e-12	0.0	-5.938669353351265e-10	2.0598347350915365e-11	0.0	-3.7348481883329264e-09
0.325	-2.7394947351297717e-12	0.0	-5.809882777916065e-10	-1.3537762884706614e-13	0.0	-0.0994540880155606	0.0	1.2464285112809517e-10	0.0	1.0	0.0	-4.965027872270635e-13	0.0	0.0	-5.689502844918531e-11	0.0	0.0	-1.908063852769673e-09	0.0	-2.739494734552847e-12	0.0	-5.809882777916092e-10	1.576668060553532e-11	0.0	1.3631006539536107e-08
0.33	-2.6650720660990132e-12	0.0	-4.525638150049062e-10	-1.4967891133032703e-13	0.0	-0.09945408801739684	0.0	9.864100446300652e-11	0.0	1.0	0.0	-2.50944649285527e-13	0.0	0.0	-2.875613859090265e-11	0.0	0.0	-1.879805286556366e-09	0.0	-2.6650720658718762e-12	0.0	-4.5256381500490753e-10	1.5252015690448432e-11	0.0	3.513424857183866e-08
0.335	-2.552774456018194e-12	0.0	-2.408453043989655e-10	-1.633129438552775e-13	0.0	-0.0994540880201504	0.0	4.3667618217324514e-11	0.0	1.0	0.0	6.652429781667663e-14	0.0	0.0	7.623122999933856e-12	0.0	0.0	-1.8672954354301595e-09	0.0	-2.552774456050238e-12	0.0	-2.4084530439896516e-10	4.1665658921929774e-11	0.0	4.8189260620051344e-08
0.34	-2.2526401924353453e-12	0.0	1.9221937495703892e-11	-1.7655525712905234e-13	0.0	-0.09945408802527331	0.0	-7.763873716036405e-11	0.0	1.0	0.0	5.705097484317276e-13	0.0	0.0	6.537560151241665e-11	0.0	0.0	-1.8895372952602316e-09	0.0	-2.2526401924134125e-12	0.0	1.922193749570646e-11	6.451804087923235e-11	0.0	5.5209348329530724e-08
0.34500000000000003	-1.939979282798102e-12	0.0	3.0194210501021823e-10	-1.8881343881449288e-13	0.0	-0.09945408803027264	0.0	-2.0716980519559557e-10	0.0	1.0	0.0	9.888953886492852e-13	0.0	0.0	1.1331906429910659e-10	0.0	0.0	-1.948887072661507e-09	0.0	-1.9399792822009234e-12	0.0	3.0194210501022205e-10	6.251808654294348e-11	0.0	5.679995022169853e-08
0.35000000000000003	-1.6337931292573866e-12	0.0	5.771745604967427e-10	-1.9991216468395202e-13	0.0	-0.09945408803455126	0.0	-3.3269507579599464e-10	0.0	1.0	0.0	1.2354033099626978e-12	0.0	0.0	1.4156679131470968e-10	0.0	0.0	-2.0441971912009845e-09	0.0	-1.6337931278313e-12	0.0	5.771745604967467e-10	5.932299511325e-11	0.0	5.228834405131668e-08
0.355	-1.3530831339641251e-12	0.0	8.147786663074415e-10	-2.096761105097825e-13	0.0	-0.09945408803751196	0.0	-4.4198403886918544e-10	0.0	1.0	0.0	1.2237556038653176e-12	0.0	0.0	1.402320625139323e-10	0.0	0.0	-2.1708162913977367e-09	0.0	-1.3530831319699451e-12	0.0	8.147786663074448e-10	5.2327623135292026e-11	0.0	4.1748610351368524e-08
0.36	-1.1168506990692334e-12	0.0	9.84613784794486e-10	-2.1792995206433742e-13	0.0	-0.09945408803855757	0.0	-5.228061843227958e-10	0.0	1.0	0.0	8.676743618504946e-13	0.0	0.0	9.942815785148069e-11	0.0	0.0	-2.3205892307229106e-09	0.0	-1.1168506973605852e-12	0.0	9.846137847944878e-10	4.0338031142639484e-11	0.0	2.3626469181325673e-08
0.365	-9.440972267236374e-13	0.0	1.0565392783100388e-09	-2.2449836511996953e-13	0.0	-0.09945408803709091	0.0	-5.62931002064449e-10	0.0	1.0	0.0	8.088167541157689e-14	0.0	0.0	9.268357282060804e-12	0.0	0.0	-2.4818570835997264e-09	0.0	-9.44097226552728e-13	0.0	1.056539278310039e-09	3.051152026903762e-11	0.0	7.239352184359917e-09
0.37	-7.821877514028634e-13	0.0	1.0936713056379617e-09	-2.2987674645435055e-13	0.0	-0.09945408803503157	0.0	-5.7971580569809e-10	0.0	1.0	0.0	-7.539146045844161e-13	0.0	0.0	-8.639224991192269e-11	0.0	0.0	-2.6479334285173596e-09	0.0	-7.82187753051933e-13	0.0	1.0936713056379605e-09	4.3817444668344824e-11	0.0	1.988533192573015e-08
0.375	-5.064707916821497e-13	0.0	1.252877701993632e-09	-2.352347731236148e-13	0.0	-0.0994540880368293	0.0	-6.202627443745492e-10	0.0	1.0	0.0	-7.825321305457737e-13	0.0	0.0	-8.96715768273064e-11	0.0	0.0	-2.8256256157266772e-09	0.0	-5.064707936429837e-13	0.0	1.2528777019936312e-09	5.59660949466965e-11	0.0	2.994387085772374e-08
0.38	-2.448859119917009e-13	0.0	1.3622012587194176e-09	-2.3937714855795727e-13	0.0	-0.09945408803805961	0.0	-6.273467997102748e-10	0.0	1.0	0.0	-8.044402864713926e-13	0.0	0.0	-9.218206657021139e-11	0.0	0.0	-3.0053472352988657e-09	0.0	-2.4488591418332e-13	0.0	1.3622012587194172e-09	5.048942804820046e-11	0.0	1.5976739094365404e-08
0.385	-3.648210090034698e-15	0.0	1.4081466514982682e-09	-2.422482648583873e-13	0.0	-0.09945408803857457	0.0	-5.940185629915126e-10	0.0	1.0	0.0	-8.222081766718918e-13	0.0	0.0	-9.42181168088923e-11	0.0	0.0	-3.175521018358064e-09	0.0	-3.64821240561408e-15	0.0	1.4081466514982682e-09	4.579848273833013e-11	0.0	1.9515738732732246e-09
0.39	2.110272162643306e-13	0.0	1.3772185560131318e-09	-2.4379251412591437e-13	0.0	-0.09945408803822618	0.0	-5.133286255045088e-10	0.0	1.0	0.0	-8.384049054578898e-13	0.0	0.0	-9.607412521160377e-11	0.0	0.0	-3.3225788370813636e-09	0.0	2.1102721395499703e-13	0.0	1.3772185560131323e-09	3.9864517881351716e-11	0.0	-1.4772656211229267e-08
0.395	3.9292526931287694e-13	0.0	1.255921647946958e-09	-2.439542884615478e-13	0.0	-0.09945408803686652	0.0	-3.783275785355095e-10	0.0	1.0	0.0	-8.555995771400052e-13	0.0	0.0	-9.804448944660041e-11	0.0	0.0	-3.430961704698808e-09	0.0	3.929252671637449e-13	0.0	1.2559216479469587e-09	3.1955974258414275e-11	0.0	-3.578189779642615e-08
0.4	5.358308512970862e-13	0.0	1.030760602982695e-09	-2.4267797996629705e-13	0.0	-0.09945408803434759	0.0	-1.8206601337076095e-10	0.0	1.0	0.0	-8.763612960288567e-13	0.0	0.0	-1.0042360718213688e-10	0.0	0.0	-3.483119775493393e-09	0.0	5.358308494904488e-13	0.0	1.030760602982696e-09	2.6487194015743912e-11	0.0	-5.150630213273223e-08
0.405	6.774224178256704e-13	0.0	7.833968950403462e-10	-2.401288802102584e-13	0.0	-0.09945408803157965	0.0	1.1011834787194916e-11	0.0	1.0	0.0	-9.27069592320451e-13	0.0	0.0	-1.0623434990975135e-10	0.0	0.0	-3.479965117203385e-09	0.0	6.774224163731436e-13	0.0	7.833968950403474e-10	3.6058371744966924e-11	0.0	-3.4629917603819106e-08
0.41000000000000003	8.977727681388518e-13	0.0	6.873986607241742e-10	-2.366856352833169e-13	0.0	-0.09945408803049498	0.0	6.750657807432175e-11	0.0	1.0	0.0	-1.057101163210524e-12	0.0	0.0	-1.2113487034066607e-10	0.0	0.0	-3.46062590713824e-09	0.0	8.977727666855519e-13	0.0	6.873986607241761e-10	4.592676182885961e-11	0.0	-1.7113530459797776e-08
0.41500000000000004	1.1249583014741018e-12	0.0	5.868211661079424e-10	-2.319619515179673e-13	0.0	-0.09945408802936148	0.0	1.0124367204644242e-10	0.0	1.0	0.0	-1.2333809848679788e-12	0.0	0.0	-1.413350499292481e-10	0.0	0.0	-3.431621731584901e-09	0.0	1.1249583000265537e-12	0.0	5.868211661079452e-10	4.6222837810379016e-11	0.0	-2.0353279091939414e-08
0.42	1.3605122104048562e-12	0.0	4.84966599111341e-10	-2.2594121519749317e-13	0.0	-0.09945408802821802	0.0	1.0656979361540744e-10	0.0	1.0	0.0	-1.4626812866305624e-12	0.0	0.0	-1.6761092899339255e-10	0.0	0.0	-3.4010917345961856e-09	0.0	1.360512208986153e-12	0.0	4.84966599111345e-10	4.804983219321934e-11	0.0	-2.027847477604453e-08
0.425	1.6059676875045585e-12	0.0	3.8513714765405726e-10	-2.1860681260517792e-13	0.0	-0.09945408802710341	0.0	7.783161969306689e-11	0.0	1.0	0.0	-1.7517742978360299e-12	0.0	0.0	-2.0073854785099555e-10	0.0	0.0	-3.3787946179907853e-09	0.0	1.6059676861552119e-12	0.0	3.851371476540629e-10	5.018346509407944e-11	0.0	-1.9543232876211882e-08
0.43	1.8628579253466444e-12	0.0	2.906349996557816e-10	-2.0994213002430506e-13	0.0	-0.0994540880260565	0.0	9.3758271912706e-12	0.0	1.0	0.0	-2.1074322478221277e-12	0.0	0.0	-2.414939468199522e-10	0.0	0.0	-3.3761086413532662e-09	0.0	1.8628579241216574e-12	0.0	2.9063499965578947e-10	5.86471921765921e-11	0.0	-2.0356885145302002e-08
0.435	2.132716116504552e-12	0.0	2.0476234303620346e-10	-1.9993055373815813e-13	0.0	-0.09945408802511613	0.0	-1.0445090697813142e-10	0.0	1.0	0.0	-2.5364273659266062e-12	0.0	0.0	-2.90653166218158e-10	0.0	0.0	-3.406031622034069e-09	0.0	2.1327161154658226e-12	0.0	2.047623430362143e-10	1.4145824906694881e-11	0.0	4.551675244267391e-10
0.44	2.0556681136574793e-12	0.0	2.6338127088667004e-10	-1.9463102633642204e-13	0.0	-0.0994540880254024	0.0	6.524472753993338e-11	0.0	1.0	0.0	-1.4844759739997858e-12	0.0	0.0	-1.701084161975197e-10	0.0	0.0	-3.3873403844164733e-09	0.0	2.055668112875513e-12	0.0	2.6338127088667614e-10	1.2327373311834628e-11	0.0	-4.57952046210405e-09
0.445	2.299699702297055e-12	0.0	1.3979726603554368e-10	-1.82620527414177e-13	0.0	-0.09945408802399897	0.0	-1.0380438047733312e-11	0.0	1.0	0.0	-1.8336969558346186e-12	0.0	0.0	-2.1012619295062114e-10	0.0	0.0	-3.390314160864634e-09	0.0	2.2996997017843633e-12	0.0	1.397972660355521e-10	4.710372141559811e-11	0.0	-2.5297487332558997e-08
0.45	2.459084216127484e-12	0.0	4.5685611376725864e-11	-1.708686601826871e-13	0.0	-0.099454088022826	0.0	-2.4624721274121703e-11	0.0	1.0	0.0	-1.8340387485107625e-12	0.0	0.0	-2.1016535950624418e-10	0.0	0.0	-3.3973686238681e-09	0.0	2.4590842159599055e-12	0.0	4.5685611376734885e-11	2.341219534658368e-11	0.0	-1.5875095912532796e-08
0.455	2.5338216551487663e-12	0.0	-1.895369308978345e-11	-1.5937542464195233e-13	0.0	-0.09945408802188352	0.0	2.2511877860768307e-11	0.0	1.0	0.0	-1.4855013520282174e-12	0.0	0.0	-1.7022591586438887e-10	0.0	0.0	-3.3909194459164198e-09	0.0	2.5338216552050776e-12	0.0	-1.895369308977592e-11	6.482780349029336e-12	0.0	-9.980625874071524e-09
0.46	2.523912019360902e-12	0.0	-5.412064736398425e-11	-1.4814082079197267e-13	0.0	-0.0994540880211715	0.0	1.310293593569366e-10	0.0	1.0	0.0	-7.880847663869854e-13	0.0	0.0	-9.030786202505542e-11	0.0	0.0	-3.3533822994991423e-09	0.0	2.5239120194462054e-12	0.0	-5.412064736398027e-11	-1.0446634650921142e-11	0.0	-4.086155835610202e-09
0.465	2.4293553087638915e-12	0.0	-5.98152514458765e-11	-1.3716484863274816e-13	0.0	-0.09945408802068997	0.0	3.0092772321438327e-10	0.0	1.0	0.0	2.5821100841293386e-13	0.0	0.0	2.9588802011756206e-11	0.0	0.0	-3.2671728571058166e-09	0.0	2.4293553087330015e-12	0.0	-5.981525144587775e-11	-3.044562190830198e-11	0.0	2.640387977895173e-09
0.47000000000000003	2.250151523357735e-12	0.0	-3.603750533546023e-11	-1.2644750816427878e-13	0.0	-0.09945408802043891	0.0	5.322069694331082e-10	0.0	1.0	0.0	1.6533859723715413e-12	0.0	0.0	1.894640762460461e-10	0.0	0.0	-3.114706791225991e-09	0.0	2.250151523238567e-12	0.0	-3.6037505335467666e-11	-3.2873392427716017e-11	0.0	4.6038745094202785e-09
0.47500000000000003	2.1704750002122415e-12	0.0	-3.271183553537422e-11	-1.1417600731799343e-13	0.0	-0.09945408802009399	0.0	6.860341916893088e-10	0.0	1.0	0.0	2.6007638042505662e-12	0.0	0.0	2.980255789878913e-10	0.0	0.0	-2.9181724722986598e-09	0.0	2.17047500004209e-12	0.0	-3.271183553538551e-11	1.9409072617416073e-11	0.0	-8.263028360622704e-09
0.48	2.4252730960550593e-12	0.0	-1.1352579064524896e-10	-9.803780509831304e-14	0.0	-0.09945408801924148	0.0	5.853031498490506e-10	0.0	1.0	0.0	2.0840411535376325e-12	0.0	0.0	2.3881352485856386e-10	0.0	0.0	-2.7504954711883407e-09	0.0	2.4252730955818745e-12	0.0	-1.1352579064525907e-10	5.534355769710228e-11	0.0	-1.6698458648116837e-08
0.485	2.6657835310274607e-12	0.0	-1.839398322868382e-10	-8.14657005846497e-14	0.0	-0.09945408801849553	0.0	4.929151889056327e-10	0.0	1.0	0.0	1.6118464997760783e-12	0.0	0.0	1.8470400332020736e-10	0.0	0.0	-2.6092856712774085e-09	0.0	2.665783530434495e-12	0.0	-1.839398322868468e-10	4.667332089849636e-11	0.0	-1.3042816981488892e-08
0.49	2.892006305129442e-12	0.0	-2.4395396046014106e-10	-6.445969377700349e-14	0.0	-0.09945408801785616	0.0	4.088703088590562e-10	0.0	1.0	0.0	1.1841798429659091e-12	0.0	0.0	1.3569701437282235e-10	0.0	0.0	-2.4921529559482368e-09	0.0	2.8920063045516714e-12	0.0	-2.439539604601479e-10	4.3815788746950396e-11	0.0	-1.096283428783158e-08
0.495	3.1039414183610054e-12	0.0	-2.9356817516515766e-10	-4.7019784675374415e-14	0.0	-0.09945408801732335	0.0	3.3316850970932085e-10	0.0	1.0	0.0	8.010411831071241e-13	0.0	0.0	9.179255801640877e-11	0.0	0.0	-2.3967072085831995e-09	0.0	3.103941417890685e-12	0.0	-2.935681751651626e-10	4.095825658741605e-11	0.0	-8.882851594174293e-09
0.5	3.301588870722148e-12	0.0	-3.3278247640188774e-10	-2.9145973279762584e-14	0.0	-0.09945408801689712	0.0	2.6580979145642717e-10	0.0	1.0	0.0	4.624305201997245e-13	0.0	0.0	5.2990634250966747e-11	0.0	0.0	-2.3205583125646704e-09	0.0	3.3015888704143704e-12	0.0	-3.327824764018908e-10	3.810072442100485e-11	0.0	-6.8028689005170005e-09
0.505	3.4849486622128726e-12	0.0	-3.6159686417033145e-10	-1.0838259590167845e-14	0.0	-0.09945408801657746	0.0	2.0679415410037475e-10	0.0	1.0	0.0	1.6834785424370943e-13	0.0	0.0	1.9291243076496192e-11	0.0	0.0	-2.261316151275023e-09	0.0	3.4849486620911244e-12	0.0	-3.6159686417033264e-10	3.5243192248828175e-11	0.0	-4.722886206859732e-09
0.51	3.6540207928331766e-12	0.0	-3.800113384704887e-10	7.903356393409677e-15	0.0	-0.09945408801636436	0.0	1.5612159764116388e-10	0.0	1.0	0.0	-8.120681476092013e-14	0.0	0.0	-9.305615507002797e-12	0.0	0.0	-2.2165906080966315e-09	0.0	3.654020792894895e-12	0.0	-3.8001133847048813e-10	3.2385660071997374e-11	0.0	-2.6429035132024713e-09
0.515	3.808805262583062e-12	0.0	-3.8802589930235953e-10	2.7078874670970008e-14	0.0	-0.09945408801625785	0.0	1.1379212207879437e-10	0.0	1.0	0.0	-2.8623348681416486e-13	0.0	0.0	-3.279994149953029e-11	0.0	0.0	-2.1839915664118698e-09	0.0	3.808805262805194e-12	0.0	-3.8802589930235736e-10	2.95281278916241e-11	0.0	-5.629208195452338e-10
0.52	3.9493020714625275e-12	0.0	-3.85640546665944e-10	4.668829524251322e-14	0.0	-0.09945408801625791	0.0	7.980572741326625e-11	0.0	1.0	0.0	-4.467321619160248e-13	0.0	0.0	-5.11917349010863e-11	0.0	0.0	-2.1611289096031116e-09	0.0	3.949302071807084e-12	0.0	-3.856405466659405e-10	2.6670595708819346e-11	0.0	1.517061874112001e-09
0.525	4.0755112194715745e-12	0.0	-3.72855280561242e-10	6.673161810803924e-14	0.0	-0.09945408801636453	0.0	5.416241364457953e-11	0.0	1.0	0.0	-5.627028400664997e-13	0.0	0.0	-6.448099571167079e-11	0.0	0.0	-2.1456125210527305e-09	0.0	4.075511219891188e-12	0.0	-3.728552805612374e-10	2.3813063524694864e-11	0.0	3.5970445677692177e-09
0.53	4.1874327066102014e-12	0.0	-3.4967010098825364e-10	8.720884326754811e-14	0.0	-0.09945408801657772	0.0	3.686218077273423e-11	0.0	1.0	0.0	-6.341455212655897e-13	0.0	0.0	-7.266772393128378e-11	0.0	0.0	-2.1350522841431006e-09	0.0	4.187432707053685e-12	0.0	-3.496701009882483e-10	2.0955531340361864e-11	0.0	5.6770272614264204e-09
0.535	4.285066532878409e-12	0.0	-3.1608500794697886e-10	1.0811997072103977e-13	0.0	-0.0994540880168975	0.0	2.7905028797730342e-11	0.0	1.0	0.0	-6.610602055132947e-13	0.0	0.0	-7.575191955992524e-11	0.0	0.0	-2.127058082256596e-09	0.0	4.285066533296311e-12	0.0	-3.160850079469732e-10	1.8097999156931923e-11	0.0	7.757009955083626e-09
0.54	4.3684126982761975e-12	0.0	-2.7210000143741767e-10	1.2946500046851428e-13	0.0	-0.09945408801732383	0.0	2.7290957719567863e-11	0.0	1.0	0.0	-6.434468928096149e-13	0.0	0.0	-7.373358259759521e-11	0.0	0.0	-2.1192397987755896e-09	0.0	4.3684126986263615e-12	0.0	-2.7210000143741204e-10	1.524046697551643e-11	0.0	9.836992648740828e-09
0.545	4.437471202803567e-12	0.0	-2.1771508145957007e-10	1.5124393250997163e-13	0.0	-0.09945408801785675	0.0	3.50199675382468e-11	0.0	1.0	0.0	-5.8130558315455e-13	0.0	0.0	-6.661271304429367e-11	0.0	0.0	-2.1092073170824563e-09	0.0	4.437471203056685e-12	0.0	-2.177150814595649e-10	1.073342468904847e-11	0.0	1.2986887745083568e-08
0.55	4.492242046460517e-12	0.0	-1.5293024801343605e-10	1.734567668454118e-13	0.0	-0.09945408801849623	0.0	5.1092058253767134e-11	0.0	1.0	0.0	-4.746362765481002e-13	0.0	0.0	-5.4389310900020627e-11	0.0	0.0	-2.0945705205595695e-09	0.0	4.492242046605689e-12	0.0	-1.5293024801343178e-10	1.8896710163198613e-11	0.0	7.918499883125796e-09
0.555	4.6316958356263274e-12	0.0	-1.4194024526015048e-10	1.97720783380257e-13	0.0	-0.09945408801857197	0.0	3.5562163964137294e-11	0.0	1.0	0.0	-5.69607429120499e-13	0.0	0.0	-6.527220333580356e-11	0.0	0.0	-2.084382711032083e-09	0.0	4.6316958357880275e-12	0.0	-1.419402452601452e-10	3.1026650360198486e-11	0.0	2.7724322509928676e-10
0.56	4.788407150488193e-12	0.0	-1.4101130482960905e-10	2.229341824937185e-13	0.0	-0.09945408801854064	0.0	1.5643544610097246e-11	0.0	1.0	0.0	-6.985125661266713e-13	0.0	0.0	-8.004364395182218e-11	0.0	0.0	-2.079901165618167e-09	0.0	4.788407150685189e-12	0.0	-1.4101130482960235e-10	3.163610078289283e-11	0.0	1.084566227439032e-10
0.5650000000000001	4.945193013853205e-12	0.0	-1.3899812949489486e-10	2.4881617694253225e-13	0.0	-0.0994540880185186	0.0	-1.728658340868052e-12	0.0	1.0	0.0	-8.186126651230368e-13	0.0	0.0	-9.380610153501242e-11	0.0	0.0	-2.080396389753926e-09	0.0	4.945193014080777e-12	0.0	-1.3899812949488676e-10	3.1364627528913356e-11	0.0	5.110585573603893e-10
0.5700000000000001	5.102053425721366e-12	0.0	-1.3590071925600793e-10	2.7536676672669837e-13	0.0	-0.09945408801850586	0.0	-1.6554444888758668e-11	0.0	1.0	0.0	-9.29907726109596e-13	0.0	0.0	-1.0655957608537432e-10	0.0	0.0	-2.085138888875465e-09	0.0	5.102053425974117e-12	0.0	-1.3590071925599844e-10	3.1379537228403796e-11	0.0	7.279055381949458e-10
0.5750000000000001	5.258988386092674e-12	0.0	-1.3171907411294818e-10	3.025859518462167e-13	0.0	-0.09945408801850242	0.0	-2.883381503357454e-11	0.0	1.0	0.0	-1.0323977490863486e-12	0.0	0.0	-1.1830406760290783e-10	0.0	0.0	-2.093399168418888e-09	0.0	5.2589883863646464e-12	0.0	-1.3171907411293733e-10	3.139444692779319e-11	0.0	9.447525190294877e-10
0.58	5.415997894967126e-12	0.0	-1.2645319406571576e-10	3.304737323010868e-13	0.0	-0.09945408801850827	0.0	-3.8566768775315546e-11	0.0	1.0	0.0	-1.1260827340532924e-12	0.0	0.0	-1.2903957608761274e-10	0.0	0.0	-2.1044477338203007e-09	0.0	5.4159978952519194e-12	0.0	-1.2645319406570356e-10	3.1409356627105515e-11	0.0	1.1615994998640304e-09
0.585	5.573081952344729e-12	0.0	-1.201030791143105e-10	3.5903010809130975e-13	0.0	-0.09945408801852343	0.0	-4.575330611398212e-11	0.0	1.0	0.0	-1.2109626810104323e-12	0.0	0.0	-1.3876610153948954e-10	0.0	0.0	-2.1175550905158072e-09	0.0	5.57308195263561e-12	0.0	-1.20103079114297e-10	3.1424266326363284e-11	0.0	1.3784464806985869e-09
0.59	5.73024055822548e-12	0.0	-1.1266872925873245e-10	3.88255079216885e-13	0.0	-0.09945408801854788	0.0	-5.0393427049573956e-11	0.0	1.0	0.0	-1.2870375899577652e-12	0.0	0.0	-1.4748364395853793e-10	0.0	0.0	-2.131991743941512e-09	0.0	5.730240558515498e-12	0.0	-1.126687292587177e-10	3.143917602558857e-11	0.0	1.5952934615331343e-09
0.595	5.887473712609379e-12	0.0	-1.0415014449898162e-10	4.1814864567781264e-13	0.0	-0.09945408801858163	0.0	-5.24871315820911e-11	0.0	1.0	0.0	-1.3543074608952919e-12	0.0	0.0	-1.5519220334475802e-10	0.0	0.0	-2.14702819953352e-09	0.0	5.887473712891481e-12	0.0	-1.0415014449896567e-10	3.145408572480513e-11	0.0	1.8121404423676765e-09
0.6	6.044781415496425e-12	0.0	-9.454732483505801e-11	4.4871080747409253e-13	0.0	-0.09945408801862468	0.0	-5.203441971153355e-11	0.0	1.0	0.0	-1.412772293823012e-12	0.0	0.0	-1.6189177969814969e-10	0.0	0.0	-2.161934962727936e-09	0.0	6.044781415763573e-12	0.0	-9.454732483504094e-11	3.146899542403557e-11	0.0	2.0289874232022198e-09
0.605	6.202163666886619e-12	0.0	-8.386027026696163e-11	4.799415646057247e-13	0.0	-0.09945408801867703	0.0	-4.9035291437901295e-11	0.0	1.0	0.0	-1.4624320887409255e-12	0.0	0.0	-1.6758237301871302e-10	0.0	0.0	-2.1759825389608646e-09	0.0	6.202163667131899e-12	0.0	-8.386027026694348e-11	3.1483905123302867e-11	0.0	2.2458344040367605e-09
0.61	6.359620466779961e-12	0.0	-7.208898079469246e-11	5.118409170727092e-13	0.0	-0.09945408801873869	0.0	-4.3489746761194326e-11	0.0	1.0	0.0	-1.5032868456490326e-12	0.0	0.0	-1.7226398330644797e-10	0.0	0.0	-2.1884414336684107e-09	0.0	6.3596204669967014e-12	0.0	-7.208898079467334e-11	3.1498814822630054e-11	0.0	2.4626813848712964e-09
0.615	6.51715181517645e-12	0.0	-5.923345641825053e-11	5.44408864875046e-13	0.0	-0.09945408801880963	0.0	-3.539778568141265e-11	0.0	1.0	0.0	-1.535336564547333e-12	0.0	0.0	-1.7593661056135455e-10	0.0	0.0	-2.1985821522866783e-09	0.0	6.517151815358337e-12	0.0	-5.923345641823052e-11	3.151372452203971e-11	0.0	2.6795283657058343e-09
0.62	6.674757712076087e-12	0.0	-4.529369713763581e-11	5.776454080127352e-13	0.0	-0.09945408801888987	0.0	-2.4759408198556287e-11	0.0	1.0	0.0	-1.5585812454358271e-12	0.0	0.0	-1.786002547834328e-10	0.0	0.0	-2.2056752002517726e-09	0.0	6.674757712217275e-12	0.0	-4.5293697137615e-11	2.3458252659707882e-11	0.0	2.0579303389150707e-09
0.625	6.832438157478872e-12	0.0	-3.026970295284831e-11	6.115505464857766e-13	0.0	-0.09945408801897941	0.0	-1.1574614312625214e-11	0.0	1.0	0.0	-1.5730208883145146e-12	0.0	0.0	-1.8025491597268264e-10	0.0	0.0	-2.2089910829997983e-09	0.0	6.832438157574102e-12	0.0	-3.026970295282682e-11	8.972704789358633e-11	0.0	9.322860329517065e-09
0.63	7.474416045328193e-12	0.0	3.6145226593613174e-11	5.858711478741327e-13	0.0	-0.09945408801887835	0.0	-5.5005128770592545e-11	0.0	1.0	0.0	-2.5984356025717682e-12	0.0	0.0	-2.977587867277905e-10	0.0	0.0	-2.2247488916504412e-09	0.0	7.47441604514035e-12	0.0	3.614522659365202e-11	7.790736879221863e-11	0.0	7.174117250732362e-09
0.635	7.530795605289921e-12	0.0	3.2906313660844586e-11	6.275083877910045e-13	0.0	-0.09945408801894265	0.0	-4.7814497487782416e-11	0.0	1.0	0.0	-2.4639598411974366e-12	0.0	0.0	-2.823489995806753e-10	0.0	0.0	-2.2384467361783853e-09	0.0	7.530795605127761e-12	0.0	3.29063136608817e-11	1.5159398710229165e-12	0.0	-1.8086799612082197e-09
0.64	7.587175165251649e-12	0.0	2.9667400728076e-11	6.691456277078763e-13	0.0	-0.09945408801900696	0.0	-4.062386620497227e-11	0.0	1.0	0.0	-2.329484079823105e-12	0.0	0.0	-2.6693921243356015e-10	0.0	0.0	-2.2500846165836304e-09	0.0	7.587175165113429e-12	0.0	2.966740072811135e-11	1.1275911996959204e-11	0.0	-6.477825865540734e-10
0.645	7.643554725213375e-12	0.0	2.642848779530741e-11	7.107828676247482e-13	0.0	-0.09945408801907125	0.0	-3.3433234922162144e-11	0.0	1.0	0.0	-2.1950083184487734e-12	0.0	0.0	-2.5152942528644503e-10	0.0	0.0	-2.2596625328661766e-09	0.0	7.643554725097354e-12	0.0	2.6428487795340966e-11	1.1275911996610937e-11	0.0	-6.477825865540785e-10
0.65	7.699934285175103e-12	0.0	2.3189574862538828e-11	7.524201075416199e-13	0.0	-0.09945408801913555	0.0	-2.6242603639352027e-11	0.0	1.0	0.0	-2.0605325570744418e-12	0.0	0.0	-2.3611963813932986e-10	0.0	0.0	-2.2671804850260244e-09	0.0	7.699934285079538e-12	0.0	2.3189574862570562e-11	1.1275911996262697e-11	0.0	-6.477825865540847e-10
0.655	7.756313845136831e-12	0.0	1.995066192977024e-11	7.940573474584916e-13	0.0	-0.09945408801919986	0.0	-1.9051972356541898e-11	0.0	1.0	0.0	-1.92605679570011e-12	0.0	0.0	-2.207098509922147e-10	0.0	0.0	-2.272638473063173e-09	0.0	7.75631384505998e-12	0.0	1.995066192980012e-11	1.1275911995913945e-11	0.0	-6.477825865540926e-10
0.66	7.812693405098558e-12	0.0	1.6711748997001646e-11	8.356945873753636e-13	0.0	-0.09945408801926416	0.0	-1.1861341073731755e-11	0.0	1.0	0.0	-1.7915810343257785e-12	0.0	0.0	-2.0530006384509956e-10	0.0	0.0	-2.276036496977623e-09	0.0	7.812693405038678e-12	0.0	1.671174899702964e-11	1.127591199556549e-11	0.0	-6.477825865540974e-10
0.665	7.869072965060286e-12	0.0	1.3472836064233064e-11	8.773318272922353e-13	0.0	-0.09945408801932845	0.0	-4.670709790921626e-12	0.0	1.0	0.0	-1.657105272951447e-12	0.0	0.0	-1.8989027669798442e-10	0.0	0.0	-2.277374556769374e-09	0.0	7.869072965015634e-12	0.0	1.3472836064259145e-11	1.127591199521717e-11	0.0	-6.477825865541027e-10
0.67	7.925452525022014e-12	0.0	1.0233923131464477e-11	9.18969067209107e-13	0.0	-0.09945408801939276	0.0	2.51992149188851e-12	0.0	1.0	0.0	-1.5226295115771153e-12	0.0	0.0	-1.7448048955086925e-10	0.0	0.0	-2.2766526524384267e-09	0.0	7.925452524990849e-12	0.0	1.0233923131488612e-11	1.1275911994868445e-11	0.0	-6.477825865541098e-10
0.675	7.98183208498374e-12	0.0	6.9950101986958886e-12	9.60606307125979e-13	0.0	-0.09945408801945706	0.0	9.710552774698646e-12	0.0	1.0	0.0	-1.3881537502027837e-12	0.0	0.0	-1.590707024037541e-10	0.0	0.0	-2.2738707839847804e-09	0.0	7.981832084964319e-12	0.0	6.995010198718049e-12	1.1275911994520206e-11	0.0	-6.477825865541157e-10
0.68	8.038211644945468e-12	0.0	3.756097265927301e-12	1.0022435470428507e-12	0.0	-0.09945408801952135	0.0	1.6901184057508782e-11	0.0	1.0	0.0	-1.253677988828452e-12	0.0	0.0	-1.4366091525663895e-10	0.0	0.0	-2.269028951408435e-09	0.0	8.038211644936051e-12	0.0	3.756097265947455e-12	1.1275911994171913e-11	0.0	-6.477825865541215e-10
0.685	8.094591204907196e-12	0.0	5.171843331587143e-13	1.0438807869597225e-12	0.0	-0.09945408801958566	0.0	2.409181534031891e-11	0.0	1.0	0.0	-1.1192022274541205e-12	0.0	0.0	-1.282511281095238e-10	0.0	0.0	-2.262127154709391e-09	0.0	8.094591204906038e-12	0.0	5.171843331768333e-13	1.1275911993823188e-11	0.0	-6.477825865541276e-10
0.6900000000000001	8.150970764868922e-12	0.0	-2.7217285996098736e-12	1.0855180268765944e-12	0.0	-0.09945408801964996	0.0	3.128244662312905e-11	0.0	1.0	0.0	-9.847264660797889e-13	0.0	0.0	-1.1284134096240865e-10	0.0	0.0	-2.2531653938876483e-09	0.0	8.150970764874283e-12	0.0	-2.7217285995938208e-12	1.1275911993474893e-11	0.0	-6.477825865541337e-10
0.6950000000000001	8.20735032483065e-12	0.0	-5.96064153237846e-12	1.1271552667934661e-12	0.0	-0.09945408801971425	0.0	3.8473077905939176e-11	0.0	1.0	0.0	-8.502507047054572e-13	0.0	0.0	-9.743155381529349e-11	0.0	0.0	-2.2421436689432068e-09	0.0	8.207350324840787e-12	0.0	-5.960641532364504e-12	1.12759119931266e-11	0.0	-6.47782586554141e-10
0.7000000000000001	8.263729884792378e-12	0.0	-9.199554465147048e-12	1.1687925067103379e-12	0.0	-0.09945408801977856	0.0	4.566370918874931e-11	0.0	1.0	0.0	-7.157749433311256e-13	0.0	0.0	-8.202176666817834e-11	0.0	0.0	-2.2290619798760663e-09	0.0	8.263729884805549e-12	0.0	-9.199554465135219e-12	3.62559662007431e-12	0.0	-6.957360056160709e-10
0.705	8.320109444754105e-12	0.0	-1.2438467397915562e-11	1.2104297466272088e-12	0.0	-0.09945408801984286	0.0	5.2854340471559287e-11	0.0	1.0	0.0	-5.812991819567969e-13	0.0	0.0	-6.661197952106352e-11	0.0	0.0	-2.213920326686227e-09	0.0	8.320109444768566e-12	0.0	-1.2438467397905889e-11	5.603299479528808e-11	0.0	-3.6723792361197323e-10
0.71	8.835507927076866e-12	0.0	-1.2800175186971146e-11	1.6454842733130302e-12	0.0	-0.09945408801986079	0.0	5.341163564384499e-11	0.0	1.0	0.0	-5.934341679703193e-13	0.0	0.0	-6.800254648711375e-11	0.0	0.0	-2.198619020189813e-09	0.0	8.835507927092057e-12	0.0	-1.2800175186960659e-11	1.1759886843737542e-10	0.0	1.8666969827555397e-11
0.715	9.419594975399594e-12	0.0	-1.273133189026146e-11	2.1394105979821777e-12	0.0	-0.09945408801987178	0.0	5.297630431854744e-11	0.0	1.0	0.0	-6.275082974650208e-13	0.0	0.0	-7.190715410837102e-11	0.0	0.0	-2.1834424269315457e-09	0.0	9.419594975415572e-12	0.0	-1.2731331890249638e-11	1.179622190980359e-10	0.0	2.0944510771640814e-11
0.72	1.0003682023722322e-11	0.0	-1.2662488593551773e-11	2.633336922651338e-12	0.0	-0.09945408801988277	0.0	5.25409729932499e-11	0.0	1.0	0.0	-6.615824269597216e-13	0.0	0.0	-7.58117617296282e-11	0.0	0.0	-2.1683905469114254e-09	0.0	1.0003682023739077e-11	0.0	-1.2662488593538537e-11	1.1681740966469976e-10	0.0	1.3768659342228203e-11
0.725	1.058776907204505e-11	0.0	-1.2593645296842087e-11	3.1272632473204857e-12	0.0	-0.09945408801989376	0.0	5.2105641667952363e-11	0.0	1.0	0.0	-6.956565564544232e-13	0.0	0.0	-7.971636935088547e-11	0.0	0.0	-2.153463380129452e-09	0.0	1.0587769072062571e-11	0.0	-1.2593645296827356e-11	1.168174096646995e-10	0.0	1.3768659342244144e-11
0.73	1.1171856120367792e-11	0.0	-1.25248020001324e-11	3.621189571989646e-12	0.0	-0.09945408801990475	0.0	5.167031034265481e-11	0.0	1.0	0.0	-7.297306859491248e-13	0.0	0.0	-8.362097697214275e-11	0.0	0.0	-2.1386609265856254e-09	0.0	1.117185612038607e-11	0.0	-1.2524802000116095e-11	1.1681740966469803e-10	0.0	1.3768659342260139e-11
0.735	1.175594316869052e-11	0.0	-1.2455958703422713e-11	4.115115896658794e-12	0.0	-0.09945408801991575	0.0	5.123497901735727e-11	0.0	1.0	0.0	-7.638048154438255e-13	0.0	0.0	-8.752558459339992e-11	0.0	0.0	-2.1239831862799457e-09	0.0	1.1755943168709548e-11	0.0	-1.2455958703404754e-11	1.168174096646942e-10	0.0	1.376865934227616e-11
0.74	1.2340030217013248e-11	0.0	-1.2387115406713027e-11	4.609042221327954e-12	0.0	-0.09945408801992674	0.0	5.0799647692059734e-11	0.0	1.0	0.0	-7.978789449385271e-13	0.0	0.0	-9.14301922146572e-11	0.0	0.0	-2.1094301592124133e-09	0.0	1.2340030217033015e-11	0.0	-1.2387115406693335e-11	1.168174096646922e-10	0.0	1.3768659342291589e-11
0.745	1.2924117265335976e-11	0.0	-1.2318272110003343e-11	5.102968545997102e-12	0.0	-0.09945408801993773	0.0	5.0364316366762195e-11	0.0	1.0	0.0	-8.319530744332279e-13	0.0	0.0	-9.533479983591438e-11	0.0	0.0	-2.095001845383028e-09	0.0	1.2924117265356473e-11	0.0	-1.2318272109981837e-11	1.1681740966469198e-10	0.0	1.376865934230769e-11
0.75	1.3508204313658717e-11	0.0	-1.2249428813293655e-11	5.596894870666262e-12	0.0	-0.09945408801994872	0.0	4.992898504146464e-11	0.0	1.0	0.0	-8.660272039279302e-13	0.0	0.0	-9.923940745717175e-11	0.0	0.0	-2.080698244791789e-09	0.0	1.3508204313679933e-11	0.0	-1.2249428813270258e-11	1.1681740966469007e-10	0.0	1.376865934232382e-11
0.755	1.4092291361981446e-11	0.0	-1.2180585516583969e-11	6.09082119533541e-12	0.0	-0.09945408801995971	0.0	4.9493653716167104e-11	0.0	1.0	0.0	-9.00101333422631e-13	0.0	0.0	-1.0314401507842893e-10	0.0	0.0	-2.0665193574386973e-09	0.0	1.4092291362003372e-11	0.0	-1.2180585516558599e-11	1.168174096646865e-10	0.0	1.3768659342339734e-11
0.76	1.4676378410304174e-11	0.0	-1.2111742219874282e-11	6.58474752000457e-12	0.0	-0.0994540880199707	0.0	4.9058322390869565e-11	0.0	1.0	0.0	-9.341754629173326e-13	0.0	0.0	-1.0704862269968619e-10	0.0	0.0	-2.0524651833237524e-09	0.0	1.4676378410326802e-11	0.0	-1.2111742219846861e-11	1.1681740966468513e-10	0.0	1.3768659342355511e-11
0.765	1.5260465458626902e-11	0.0	-1.2042898923164596e-11	7.078673844673718e-12	0.0	-0.09945408801998169	0.0	4.8622991065572026e-11	0.0	1.0	0.0	-9.682495924120333e-13	0.0	0.0	-1.1095323032094338e-10	0.0	0.0	-2.0385357224469543e-09	0.0	1.5260465458650225e-11	0.0	-1.2042898923135044e-11	1.1681740966468492e-10	0.0	1.3768659342371533e-11
0.77	1.5844552506949643e-11	0.0	-1.1974055626454908e-11	7.572600169342878e-12	0.0	-0.09945408801999268	0.0	4.8187659740274474e-11	0.0	1.0	0.0	-1.002323721906735e-12	0.0	0.0	-1.1485783794220065e-10	0.0	0.0	-2.024730974808303e-09	0.0	1.5844552506973648e-11	0.0	-1.1974055626423146e-11	1.168174096646824e-10	0.0	1.3768659342387581e-11
0.775	1.642863955527237e-11	0.0	-1.1905212329745222e-11	8.066526494012026e-12	0.0	-0.09945408802000368	0.0	4.7752328414976935e-11	0.0	1.0	0.0	-1.0363978514014365e-12	0.0	0.0	-1.1876244556345793e-10	0.0	0.0	-2.0110509404077993e-09	0.0	1.6428639555297048e-11	0.0	-1.1905212329711169e-11	1.168174096646791e-10	0.0	1.3768659342403226e-11
0.78	1.70127266035951e-11	0.0	-1.1836369033035536e-11	8.560452818681186e-12	0.0	-0.09945408802001467	0.0	4.7316997089679383e-11	0.0	1.0	0.0	-1.0704719808961373e-12	0.0	0.0	-1.2266705318471512e-10	0.0	0.0	-1.9974956192454422e-09	0.0	1.7012726603620442e-11	0.0	-1.1836369032999113e-11	1.1681740966467732e-10	0.0	1.376865934241914e-11
0.785	1.7596813651917828e-11	0.0	-1.176752573632585e-11	9.054379143350334e-12	0.0	-0.09945408802002566	0.0	4.6881665764381844e-11	0.0	1.0	0.0	-1.1045461103908388e-12	0.0	0.0	-1.2657166080597238e-10	0.0	0.0	-1.984065011321232e-09	0.0	1.7596813651943823e-11	0.0	-1.1767525736286977e-11	1.1681740966467688e-10	0.0	1.3768659342435079e-11
0.79	1.818090070024057e-11	0.0	-1.1698682439616164e-11	9.548305468019494e-12	0.0	-0.09945408802003665	0.0	4.6446334439084306e-11	0.0	1.0	0.0	-1.1386202398855404e-12	0.0	0.0	-1.3047626842722965e-10	0.0	0.0	-1.9707591166351688e-09	0.0	1.818090070026721e-11	0.0	-1.1698682439574761e-11	1.168174096646755e-10	0.0	1.3768659342451262e-11
0.795	1.8764987748563297e-11	0.0	-1.1629839142906477e-11	1.0042231792688655e-11	0.0	-0.09945408802004764	0.0	4.6011003113786754e-11	0.0	1.0	0.0	-1.172694369380242e-12	0.0	0.0	-1.3438087604848692e-10	0.0	0.0	-1.9575779351872524e-09	0.0	1.8764987748590575e-11	0.0	-1.1629839142862466e-11	1.1681740966467171e-10	0.0	1.3768659342467042e-11
0.8	1.9349074796886026e-11	0.0	-1.1560995846196791e-11	1.0536158117357802e-11	0.0	-0.09945408802005863	0.0	4.5575671788489215e-11	0.0	1.0	0.0	-1.2067684988749427e-12	0.0	0.0	-1.382854836697441e-10	0.0	0.0	-1.944521466977483e-09	0.0	1.934907479691393e-11	0.0	-1.1560995846150091e-11	1.1681740966466936e-10	0.0	1.3768659342482658e-11
0.805	1.9933161845208754e-11	0.0	-1.1492152549487105e-11	1.103008444202695e-11	0.0	-0.09945408802006962	0.0	4.5140340463191676e-11	0.0	1.0	0.0	-1.2408426283696443e-12	0.0	0.0	-1.4219009129100137e-10	0.0	0.0	-1.93158971200586e-09	0.0	1.9933161845237272e-11	0.0	-1.1492152549437637e-11	1.1681740966466962e-10	0.0	1.376865934249895e-11
0.81	2.0517248893531495e-11	0.0	-1.1423309252777417e-11	1.152401076669611e-11	0.0	-0.09945408802008061	0.0	4.4705009137894124e-11	0.0	1.0	0.0	-1.2749167578643459e-12	0.0	0.0	-1.4609469891225864e-10	0.0	0.0	-1.9187826702723848e-09	0.0	2.0517248893560624e-11	0.0	-1.1423309252725101e-11	1.1681740966466802e-10	0.0	1.376865934251505e-11
0.8150000000000001	2.1101335941854223e-11	0.0	-1.1354465956067731e-11	1.201793709136527e-11	0.0	-0.0994540880200916	0.0	4.4269677812596585e-11	0.0	1.0	0.0	-1.3089908873590467e-12	0.0	0.0	-1.4999930653351583e-10	0.0	0.0	-1.9061003417770562e-09	0.0	2.110133594188395e-11	0.0	-1.1354465956012488e-11	1.16817409664664e-10	0.0	1.3768659342530534e-11
0.8200000000000001	2.168542299017695e-11	0.0	-1.1285622659358045e-11	1.2511863416034418e-11	0.0	-0.0994540880201026	0.0	4.3834346487299046e-11	0.0	1.0	0.0	-1.3430650168537482e-12	0.0	0.0	-1.539039141547731e-10	0.0	0.0	-1.8935427265198746e-09	0.0	2.1685422990207266e-11	0.0	-1.1285622659299795e-11	1.1681740966466192e-10	0.0	1.3768659342546529e-11
0.8250000000000001	2.226951003849968e-11	0.0	-1.1216779362648359e-11	1.3005789740703566e-11	0.0	-0.09945408802011359	0.0	4.33990151620015e-11	0.0	1.0	0.0	-1.377139146348449e-12	0.0	0.0	-1.5780852177603029e-10	0.0	0.0	-1.88110982450084e-09	0.0	2.2269510038530573e-11	0.0	-1.1216779362587023e-11	1.1681740966466285e-10	0.0	1.3768659342562523e-11
0.8300000000000001	2.285359708682242e-11	0.0	-1.1147936065938673e-11	1.3499716065372726e-11	0.0	-0.09945408802012458	0.0	4.2963683836703955e-11	0.0	1.0	0.0	-1.4112132758431506e-12	0.0	0.0	-1.6171312939728755e-10	0.0	0.0	-1.868801635719952e-09	0.0	2.2853597086853886e-11	0.0	-1.114793606587417e-11	1.1681740966465714e-10	0.0	1.3768659342578328e-11
0.835	2.3437684135145123e-11	0.0	-1.1079092769228988e-11	1.3993642390041861e-11	0.0	-0.09945408802013557	0.0	4.252835251140643e-11	0.0	1.0	0.0	-1.4452874053378505e-12	0.0	0.0	-1.6561773701854464e-10	0.0	0.0	-1.856618160177211e-09	0.0	2.3437684135177148e-11	0.0	-1.107909276916124e-11	1.1681740966465515e-10	0.0	1.3768659342594376e-11
0.84	2.4021771183467865e-11	0.0	-1.1010249472519302e-11	1.4487568714711021e-11	0.0	-0.09945408802014656	0.0	4.209302118610888e-11	0.0	1.0	0.0	-1.479361534832553e-12	0.0	0.0	-1.69522344639802e-10	0.0	0.0	-1.844559397872617e-09	0.0	2.402177118350044e-11	0.0	-1.1010249472448227e-11	1.1681740966465714e-10	0.0	1.3768659342610264e-11
0.845	2.4605858231790593e-11	0.0	-1.0941406175809616e-11	1.4981495039380182e-11	0.0	-0.09945408802015755	0.0	4.165768986081134e-11	0.0	1.0	0.0	-1.5134356643272537e-12	0.0	0.0	-1.734269522610592e-10	0.0	0.0	-1.83262534880617e-09	0.0	2.4605858231823712e-11	0.0	-1.0941406175735137e-11	1.1681740966465266e-10	0.0	1.376865934262615e-11
0.85	2.518994528011332e-11	0.0	-1.087256287909993e-11	1.547542136404933e-11	0.0	-0.09945408802016854	0.0	4.12223585355138e-11	0.0	1.0	0.0	-1.5475097938219552e-12	0.0	0.0	-1.7733155988231646e-10	0.0	0.0	-1.8208160129778698e-09	0.0	2.518994528014697e-11	0.0	-1.0872562879021966e-11	1.1681740966465088e-10	0.0	1.3768659342642117e-11
0.855	2.577403232843605e-11	0.0	-1.0803719582390243e-11	1.5969347688718477e-11	0.0	-0.09945408802017955	0.0	4.0787027210216254e-11	0.0	1.0	0.0	-1.581583923316656e-12	0.0	0.0	-1.8123616750357365e-10	0.0	0.0	-1.8091313903877166e-09	0.0	2.5774032328470222e-11	0.0	-1.0803719582308716e-11	1.1681740966465088e-10	0.0	1.37686593426583e-11
0.86	2.635811937675879e-11	0.0	-1.0734876285680556e-11	1.6463274013387637e-11	0.0	-0.09945408802019054	0.0	4.035169588491871e-11	0.0	1.0	0.0	-1.6156580528113576e-12	0.0	0.0	-1.8514077512483092e-10	0.0	0.0	-1.7975714810357104e-09	0.0	2.6358119376793477e-11	0.0	-1.0734876285595383e-11	1.1681740966464894e-10	0.0	1.3768659342674105e-11
0.865	2.694220642508152e-11	0.0	-1.066603298897087e-11	1.6957200338056798e-11	0.0	-0.09945408802020153	0.0	3.991636455962117e-11	0.0	1.0	0.0	-1.6497321823060592e-12	0.0	0.0	-1.8904538274608819e-10	0.0	0.0	-1.786136284921851e-09	0.0	2.694220642511671e-11	0.0	-1.0666032988881975e-11	1.168174096646456e-10	0.0	1.3768659342689723e-11
0.87	2.7526293473404247e-11	0.0	-1.0597189692261183e-11	1.7451126662725945e-11	0.0	-0.09945408802021252	0.0	3.9481033234323625e-11	0.0	1.0	0.0	-1.68380631180076e-12	0.0	0.0	-1.9294999036734538e-10	0.0	0.0	-1.7748258020461386e-09	0.0	2.7526293473439935e-11	0.0	-1.0597189692168486e-11	1.1681740966464362e-10	0.0	1.3768659342705852e-11
0.875	2.8110380521726975e-11	0.0	-1.0528346395551497e-11	1.7945052987395106e-11	0.0	-0.09945408802022351	0.0	3.9045701909026086e-11	0.0	1.0	0.0	-1.7178804412954615e-12	0.0	0.0	-1.9685459798860264e-10	0.0	0.0	-1.7636400324085732e-09	0.0	2.8110380521763148e-11	0.0	-1.0528346395454917e-11	1.1681740966464297e-10	0.0	1.376865934272174e-11
0.88	2.8694467570049716e-11	0.0	-1.0459503098841811e-11	1.8438979312064266e-11	0.0	-0.0994540880202345	0.0	3.8610370583728534e-11	0.0	1.0	0.0	-1.751954570790163e-12	0.0	0.0	-2.007592056098599e-10	0.0	0.0	-1.7525789760091546e-09	0.0	2.8694467570086364e-11	0.0	-1.0459503098741268e-11	1.1681740966464093e-10	0.0	1.3768659342737679e-11
0.885	2.9278554618372444e-11	0.0	-1.0390659802132125e-11	1.8932905636733414e-11	0.0	-0.0994540880202455	0.0	3.8175039258430995e-11	0.0	1.0	0.0	-1.7860287002848646e-12	0.0	0.0	-2.046638132311172e-10	0.0	0.0	-1.7416426328478829e-09	0.0	2.927855461840956e-11	0.0	-1.039065980202754e-11	1.168174096646378e-10	0.0	1.3768659342753647e-11
0.89	2.986264166669517e-11	0.0	-1.0321816505422438e-11	1.942683196140256e-11	0.0	-0.09945408802025649	0.0	3.7739707933133456e-11	0.0	1.0	0.0	-1.8201028297795654e-12	0.0	0.0	-2.0856842085237437e-10	0.0	0.0	-1.7308310029247583e-09	0.0	2.9862641666732745e-11	0.0	-1.0321816505313732e-11	1.1681740966463687e-10	0.0	1.3768659342769452e-11
0.895	3.04467287150179e-11	0.0	-1.0252973208712752e-11	1.9920758286071715e-11	0.0	-0.09945408802026748	0.0	3.730437660783591e-11	0.0	1.0	0.0	-1.854176959274267e-12	0.0	0.0	-2.1247302847363163e-10	0.0	0.0	-1.7201440862397805e-09	0.0	3.0446728715055925e-11	0.0	-1.0252973208599845e-11	1.1681740966463558e-10	0.0	1.37686593427855e-11
0.9	3.103081576334064e-11	0.0	-1.0184129912003064e-11	2.0414684610740876e-11	0.0	-0.09945408802027847	0.0	3.6869045282538365e-11	0.0	1.0	0.0	-1.8882510887689685e-12	0.0	0.0	-2.1637763609488892e-10	0.0	0.0	-1.7095818827929496e-09	0.0	3.10308157633791e-11	0.0	-1.0184129911885876e-11	1.1681740966463377e-10	0.0	1.3768659342801575e-11
0.905	3.161490281166337e-11	0.0	-1.0115286615293378e-11	2.090861093541003e-11	0.0	-0.09945408802028946	0.0	3.643371395724082e-11	0.0	1.0	0.0	-1.9223252182636693e-12	0.0	0.0	-2.202822437161461e-10	0.0	0.0	-1.6991443925842658e-09	0.0	3.161490281170226e-11	0.0	-1.011528661517183e-11	1.1681740966463095e-10	0.0	1.3768659342817246e-11
0.91	3.21989898599861e-11	0.0	-1.0046443318583692e-11	2.1402537260079184e-11	0.0	-0.09945408802030045	0.0	3.599838263194328e-11	0.0	1.0	0.0	-1.956399347758371e-12	0.0	0.0	-2.2418685133740338e-10	0.0	0.0	-1.6888316156137288e-09	0.0	3.219898986002541e-11	0.0	-1.0046443318457704e-11	1.1681740966462806e-10	0.0	1.3768659342832998e-11
0.915	3.278307690830883e-11	0.0	-9.977600021874006e-12	2.189646358474833e-11	0.0	-0.09945408802031144	0.0	3.556305130664574e-11	0.0	1.0	0.0	-1.9904734772530717e-12	0.0	0.0	-2.2809145895866054e-10	0.0	0.0	-1.6786435518813388e-09	0.0	3.2783076908348544e-11	0.0	-9.977600021743499e-12	1.1681740966462837e-10	0.0	1.3768659342849182e-11
0.92	3.336716395663157e-11	0.0	-9.90875672516432e-12	2.2390389909417492e-11	0.0	-0.09945408802032243	0.0	3.512771998134819e-11	0.0	1.0	0.0	-2.0245476067477732e-12	0.0	0.0	-2.3199606657991784e-10	0.0	0.0	-1.6685802013870956e-09	0.0	3.336716395667169e-11	0.0	-9.908756725029213e-12	1.1681740966462632e-10	0.0	1.3768659342865176e-11
0.925	3.3951251004954296e-11	0.0	-9.839913428454634e-12	2.2884316234086646e-11	0.0	-0.09945408802033343	0.0	3.469238865605065e-11	0.0	1.0	0.0	-2.0586217362424748e-12	0.0	0.0	-2.359006742011751e-10	0.0	0.0	-1.6586415641309994e-09	0.0	3.395125100499481e-11	0.0	-9.839913428314848e-12	1.1681740966462234e-10	0.0	1.3768659342880766e-11
0.93	3.4535338053277024e-11	0.0	-9.771070131744947e-12	2.33782425587558e-11	0.0	-0.09945408802034442	0.0	3.425705733075311e-11	0.0	1.0	0.0	-2.0926958657371756e-12	0.0	0.0	-2.3980528182243227e-10	0.0	0.0	-1.6488276401130502e-09	0.0	3.453533805331792e-11	0.0	-9.771070131600404e-12	1.1681740966462115e-10	0.0	1.3768659342896841e-11
0.935	3.511942510159975e-11	0.0	-9.702226835035261e-12	2.3872168883424947e-11	0.0	-0.09945408802035541	0.0	3.3821726005455567e-11	0.0	1.0	0.0	-2.126769995231877e-12	0.0	0.0	-2.4370988944368956e-10	0.0	0.0	-1.6391384293332478e-09	0.0	3.511942510164102e-11	0.0	-9.702226834885879e-12	1.1681740966462115e-10	0.0	1.3768659342913159e-11
0.9400000000000001	3.5703512149922494e-11	0.0	-9.633383538325573e-12	2.4366095208094108e-11	0.0	-0.0994540880203664	0.0	3.338639468015802e-11	0.0	1.0	0.0	-2.1608441247265787e-12	0.0	0.0	-2.476144970649468e-10	0.0	0.0	-1.6295739317915925e-09	0.0	3.5703512149964124e-11	0.0	-9.633383538171274e-12	1.1681740966461847e-10	0.0	1.3768659342928857e-11
0.9450000000000001	3.628759919824522e-11	0.0	-9.564540241615887e-12	2.4860021532763262e-11	0.0	-0.09945408802037739	0.0	3.2951063354860476e-11	0.0	1.0	0.0	-2.1949182542212803e-12	0.0	0.0	-2.515191046862041e-10	0.0	0.0	-1.620134147488084e-09	0.0	3.628759919828721e-11	0.0	-9.56454024145659e-12	1.1681740966461567e-10	0.0	1.376865934294461e-11
0.9500000000000001	3.687168624656795e-11	0.0	-9.495696944906201e-12	2.5353947857432416e-11	0.0	-0.09945408802038838	0.0	3.251573202956294e-11	0.0	1.0	0.0	-2.228992383715981e-12	0.0	0.0	-2.554237123074613e-10	0.0	0.0	-1.6108190764227225e-09	0.0	3.6871686246610285e-11	0.0	-9.495696944741828e-12	1.1681740966461373e-10	0.0	1.376865934296063e-11
0.9550000000000001	3.745577329489068e-11	0.0	-9.426853648196515e-12	2.584787418210157e-11	0.0	-0.09945408802039937	0.0	3.20804007042654e-11	0.0	1.0	0.0	-2.2630665132106822e-12	0.0	0.0	-2.593283199287185e-10	0.0	0.0	-1.6016287185955078e-09	0.0	3.745577329493334e-11	0.0	-9.426853648026985e-12	1.1681740966460973e-10	0.0	1.3768659342976437e-11
0.96	3.8039860343213394e-11	0.0	-9.35801035148683e-12	2.634180050677071e-11	0.0	-0.09945408802041036	0.0	3.164506937896786e-11	0.0	1.0	0.0	-2.297140642705383e-12	0.0	0.0	-2.6323292754997566e-10	0.0	0.0	-1.5925630740064402e-09	0.0	3.803986034325639e-11	0.0	-9.358010351312064e-12	1.1681740966460908e-10	0.0	1.376865934299227e-11
0.965	3.862394739153612e-11	0.0	-9.289167054777144e-12	2.6835726831439865e-11	0.0	-0.09945408802042136	0.0	3.120973805367032e-11	0.0	1.0	0.0	-2.331214772200084e-12	0.0	0.0	-2.671375351712329e-10	0.0	0.0	-1.5836221426555194e-09	0.0	3.862394739157943e-11	0.0	-9.289167054597063e-12	1.1681740966460898e-10	0.0	1.376865934300837e-11
0.97	3.9208034439858863e-11	0.0	-9.220323758067456e-12	2.7329653156109025e-11	0.0	-0.09945408802043235	0.0	3.0774406728372775e-11	0.0	1.0	0.0	-2.3652889016947857e-12	0.0	0.0	-2.710421427924902e-10	0.0	0.0	-1.5748059245427455e-09	0.0	3.920803443990248e-11	0.0	-9.22032375788198e-12	1.168174096646078e-10	0.0	1.3768659343024473e-11
0.975	3.979212148818159e-11	0.0	-9.15148046135777e-12	2.7823579480778173e-11	0.0	-0.09945408802044334	0.0	3.033907540307523e-11	0.0	1.0	0.0	-2.399363031189487e-12	0.0	0.0	-2.7494675041374743e-10	0.0	0.0	-1.5661144196681187e-09	0.0	3.979212148822551e-11	0.0	-9.151480461166819e-12	1.1681740966460404e-10	0.0	1.3768659343040197e-11
0.98	4.037620853650432e-11	0.0	-9.082637164648084e-12	2.8317505805447327e-11	0.0	-0.09945408802045433	0.0	2.990374407777769e-11	0.0	1.0	0.0	-2.433437160684188e-12	0.0	0.0	-2.788513580350046e-10	0.0	0.0	-1.5575476280316388e-09	0.0	4.037620853654852e-11	0.0	-9.082637164451579e-12	1.1681740966460112e-10	0.0	1.3768659343056192e-11
0.985	4.096029558482705e-11	0.0	-9.013793867938398e-12	2.881143213011648e-11	0.0	-0.09945408802046532	0.0	2.946841275248015e-11	0.0	1.0	0.0	-2.4675112901788892e-12	0.0	0.0	-2.8275596565626186e-10	0.0	0.0	-1.5491055496333057e-09	0.0	4.096029558487153e-11	0.0	-9.013793867736257e-12	1.168174096646023e-10	0.0	1.3768659343071999e-11
0.99	4.154438263314979e-11	0.0	-8.944950571228712e-12	2.930535845478564e-11	0.0	-0.09945408802047631	0.0	2.90330814271826e-11	0.0	1.0	0.0	-2.5015854196735912e-12	0.0	0.0	-2.866605732775192e-10	0.0	0.0	-1.5407881844731195e-09	0.0	4.154438263319454e-11	0.0	-8.944950571020858e-12	1.1681740966460146e-10	0.0	1.3768659343087831e-11
0.995	4.212846968147252e-11	0.0	-8.876107274519025e-12	2.9799284779454795e-11	0.0	-0.0994540880204873	0.0	2.859775010188506e-11	0.0	1.0	0.0	-2.5356595491682924e-12	0.0	0.0	-2.905651808987764e-10	0.0	0.0	-1.5325955325510804e-09	0.0	4.2128469681517534e-11	0.0	-8.876107274305379e-12	1.1681740966459616e-10	0.0	1.3768659343103717e-11
1.0	4.2712556729795246e-11	0.0	-8.80726397780934e-12	3.029321110412394e-11	0.0	-0.0994540880204983	0.0	2.8162418776587515e-11	0.0	1.0	0.0	-2.5697336786629935e-12	0.0	0.0	-2.9446978852003364e-10	0.0	0.0	-1.5245275938671882e-09	0.0	4.271255672984051e-11	0.0	-8.80726397758982e-12	1.1681740966459704e-10	0.0	1.376865934312025e-11
1.0050000000000001	4.3296643778117993e-11	0.0	-8.73842068109965e-12	3.0787137428793116e-11	0.0	-0.09945408802050928	0.0	2.7727087451289964e-11	0.0	1.0	0.0	-2.6038078081576955e-12	0.0	0.0	-2.9837439614129093e-10	0.0	0.0	-1.5165843684214428e-09	0.0	4.32966437781635e-11	0.0	-8.738420680874177e-12	1.16817409664595e-10	0.0	1.3768659343135544e-11
1.01	4.3880730826440715e-11	0.0	-8.669577384389967e-12	3.128106375346226e-11	0.0	-0.09945408802052028	0.0	2.729175612599243e-11	0.0	1.0	0.0	-2.6378819376523963e-12	0.0	0.0	-3.022790037625481e-10	0.0	0.0	-1.5087658562138445e-09	0.0	4.3880730826486456e-11	0.0	-8.669577384158463e-12	1.1681740966459088e-10	0.0	1.3768659343151511e-11
1.0150000000000001	4.446481787476345e-11	0.0	-8.600734087680277e-12	3.177499007813142e-11	0.0	-0.09945408802053127	0.0	2.685642480069488e-11	0.0	1.0	0.0	-2.671956067147098e-12	0.0	0.0	-3.061836113838054e-10	0.0	0.0	-1.5010720572443931e-09	0.0	4.446481787480941e-11	0.0	-8.600734087442662e-12	1.1681740966458884e-10	0.0	1.3768659343167586e-11
1.02	4.504890492308617e-11	0.0	-8.531890790970595e-12	3.226891640280056e-11	0.0	-0.09945408802054226	0.0	2.6421093475397347e-11	0.0	1.0	0.0	-2.7060301966417986e-12	0.0	0.0	-3.100882190050626e-10	0.0	0.0	-1.4935029715130886e-09	0.0	4.5048904923132345e-11	0.0	-8.531890790726788e-12	1.168174096645853e-10	0.0	1.3768659343183123e-11
1.025	4.563299197140889e-11	0.0	-8.463047494260908e-12	3.2762842727469707e-11	0.0	-0.09945408802055325	0.0	2.5985762150099814e-11	0.0	1.0	0.0	-2.740104326136499e-12	0.0	0.0	-3.1399282662631974e-10	0.0	0.0	-1.4860585990199309e-09	0.0	4.563299197145527e-11	0.0	-8.46304749401083e-12	1.1681740966458776e-10	0.0	1.3768659343199898e-11
1.03	4.621707901973164e-11	0.0	-8.39420419755122e-12	3.3256769052138874e-11	0.0	-0.09945408802056424	0.0	2.5550430824802256e-11	0.0	1.0	0.0	-2.7741784556312014e-12	0.0	0.0	-3.178974342475771e-10	0.0	0.0	-1.4787389397649203e-09	0.0	4.6217079019778215e-11	0.0	-8.394204197294791e-12	1.168174096645856e-10	0.0	1.3768659343215301e-11
1.035	4.6801166068054356e-11	0.0	-8.325360900841536e-12	3.375069537680802e-11	0.0	-0.09945408802057523	0.0	2.5115099499504724e-11	0.0	1.0	0.0	-2.808252585125902e-12	0.0	0.0	-3.2180204186883427e-10	0.0	0.0	-1.4715439937480565e-09	0.0	4.680116606810112e-11	0.0	-8.325360900578677e-12	1.1681740966458153e-10	0.0	1.3768659343231134e-11
1.04	4.73852531163771e-11	0.0	-8.256517604131848e-12	3.424462170147718e-11	0.0	-0.09945408802058622	0.0	2.4679768174207172e-11	0.0	1.0	0.0	-2.8423267146206037e-12	0.0	0.0	-3.2570664949009157e-10	0.0	0.0	-1.4644737609693397e-09	0.0	4.7385253116424033e-11	0.0	-8.25651760386248e-12	1.168174096645796e-10	0.0	1.3768659343247128e-11
1.045	4.796934016469981e-11	0.0	-8.187674307422164e-12	3.473854802614632e-11	0.0	-0.09945408802059721	0.0	2.424443684890964e-11	0.0	1.0	0.0	-2.8764008441153045e-12	0.0	0.0	-3.296112571113487e-10	0.0	0.0	-1.4575282414287699e-09	0.0	4.7969340164746917e-11	0.0	-8.187674307146205e-12	1.1681740966457948e-10	0.0	1.3768659343263418e-11
1.05	4.8553427213022567e-11	0.0	-8.118831010712474e-12	3.523247435081549e-11	0.0	-0.0994540880206082	0.0	2.380910552361208e-11	0.0	1.0	0.0	-2.910474973610007e-12	0.0	0.0	-3.335158647326061e-10	0.0	0.0	-1.450707435126347e-09	0.0	4.8553427213069826e-11	0.0	-8.118831010429847e-12	1.1681740966457786e-10	0.0	1.3768659343279143e-11
1.055	4.913751426134528e-11	0.0	-8.04998771400279e-12	3.572640067548464e-11	0.0	-0.0994540880206192	0.0	2.337377419831455e-11	0.0	1.0	0.0	-2.9445491031047072e-12	0.0	0.0	-3.3742047235386324e-10	0.0	0.0	-1.444011342062071e-09	0.0	4.913751426139269e-11	0.0	-8.049987713713414e-12	1.1681740966457398e-10	0.0	1.376865934329476e-11
1.06	4.972160130966802e-11	0.0	-7.981144417293102e-12	3.62203270001538e-11	0.0	-0.09945408802063019	0.0	2.2938442873017003e-11	0.0	1.0	0.0	-2.978623232599409e-12	0.0	0.0	-3.4132507997512053e-10	0.0	0.0	-1.4374399622359418e-09	0.0	4.9721601309715567e-11	0.0	-7.981144416996899e-12	1.1681740966457225e-10	0.0	1.3768659343310808e-11
1.065	5.030568835799074e-11	0.0	-7.912301120583417e-12	3.671425332482294e-11	0.0	-0.09945408802064118	0.0	2.250311154771947e-11	0.0	1.0	0.0	-3.0126973620941096e-12	0.0	0.0	-3.4522968759637767e-10	0.0	0.0	-1.4309932956479597e-09	0.0	5.030568835803841e-11	0.0	-7.912301120280306e-12	1.1681740966457238e-10	0.0	1.376865934332691e-11
1.07	5.088977540631349e-11	0.0	-7.84345782387373e-12	3.7208179649492106e-11	0.0	-0.09945408802065217	0.0	2.2067780222421912e-11	0.0	1.0	0.0	-3.046771491588812e-12	0.0	0.0	-3.4913429521763506e-10	0.0	0.0	-1.4246713422981244e-09	0.0	5.088977540636129e-11	0.0	-7.84345782356363e-12	1.1681740966456925e-10	0.0	1.3768659343342448e-11
1.075	5.14738624546362e-11	0.0	-7.774614527164047e-12	3.770210597416124e-11	0.0	-0.09945408802066316	0.0	2.1632448897124386e-11	0.0	1.0	0.0	-3.080845621083512e-12	0.0	0.0	-3.5303890283889215e-10	0.0	0.0	-1.418474102186436e-09	0.0	5.147386245468411e-11	0.0	-7.774614526846881e-12	1.1681740966456643e-10	0.0	1.376865934335863e-11
1.08	5.205794950295895e-11	0.0	-7.705771230454357e-12	3.8196032298830414e-11	0.0	-0.09945408802067415	0.0	2.1197117571826828e-11	0.0	1.0	0.0	-3.1149197505782143e-12	0.0	0.0	-3.569435104601495e-10	0.0	0.0	-1.4124015753128948e-09	0.0	5.205794950300696e-11	0.0	-7.705771230130044e-12	1.1681740966456591e-10	0.0	1.3768659343375109e-11
1.085	5.2642036551281664e-11	0.0	-7.636927933744671e-12	3.8689958623499555e-11	0.0	-0.09945408802068514	0.0	2.0761786246529296e-11	0.0	1.0	0.0	-3.148993880072915e-12	0.0	0.0	-3.608481180814067e-10	0.0	0.0	-1.4064537616775004e-09	0.0	5.2642036551329764e-11	0.0	-7.636927933413131e-12	1.168174096645618e-10	0.0	1.3768659343390457e-11
1.09	5.3226123599604406e-11	0.0	-7.568084637034985e-12	3.9183884948168715e-11	0.0	-0.09945408802069614	0.0	2.0326454921231744e-11	0.0	1.0	0.0	-3.1830680095676166e-12	0.0	0.0	-3.64752725702664e-10	0.0	0.0	-1.4006306612802529e-09	0.0	5.322612359965258e-11	0.0	-7.56808463669614e-12	1.168174096645617e-10	0.0	1.376865934340629e-11
1.095	5.381021064792713e-11	0.0	-7.499241340325299e-12	3.967781127283786e-11	0.0	-0.09945408802070713	0.0	1.989112359593421e-11	0.0	1.0	0.0	-3.2171421390623174e-12	0.0	0.0	-3.686573333239211e-10	0.0	0.0	-1.3949322741211522e-09	0.0	5.381021064797538e-11	0.0	-7.499241339979069e-12	1.1681740966456085e-10	0.0	1.3768659343422311e-11
1.1	5.4394297696249875e-11	0.0	-7.430398043615612e-12	4.017173759750703e-11	0.0	-0.09945408802071812	0.0	1.945579227063666e-11	0.0	1.0	0.0	-3.2512162685570193e-12	0.0	0.0	-3.7256194094517846e-10	0.0	0.0	-1.3893586002001986e-09	0.0	5.439429769629819e-11	0.0	-7.430398043261917e-12	1.1681740966455762e-10	0.0	1.3768659343438252e-11
1.105	5.497838474457259e-11	0.0	-7.361554746905926e-12	4.066566392217617e-11	0.0	-0.09945408802072911	0.0	1.902046094533912e-11	0.0	1.0	0.0	-3.28529039805172e-12	0.0	0.0	-3.7646654856643565e-10	0.0	0.0	-1.3839096395173919e-09	0.0	5.497838474462096e-11	0.0	-7.361554746544686e-12	1.1681740966455663e-10	0.0	1.3768659343454327e-11
1.11	5.556247179289534e-11	0.0	-7.292711450196238e-12	4.115959024684534e-11	0.0	-0.0994540880207401	0.0	1.858512962004157e-11	0.0	1.0	0.0	-3.319364527546422e-12	0.0	0.0	-3.8037115618769294e-10	0.0	0.0	-1.378585392072732e-09	0.0	5.5562471792943754e-11	0.0	-7.292711449827374e-12	1.1681740966455405e-10	0.0	1.3768659343470024e-11
1.115	5.614655884121805e-11	0.0	-7.223868153486554e-12	4.165351657151448e-11	0.0	-0.09945408802075109	0.0	1.8149798294744036e-11	0.0	1.0	0.0	-3.353438657041123e-12	0.0	0.0	-3.8427576380895013e-10	0.0	0.0	-1.3733858578662193e-09	0.0	5.61465588412665e-11	0.0	-7.2238681531099856e-12	1.168174096645518e-10	0.0	1.3768659343485965e-11
1.12	5.67306458895408e-11	0.0	-7.155024856776866e-12	4.2147442896183646e-11	0.0	-0.09945408802076208	0.0	1.7714466969446484e-11	0.0	1.0	0.0	-3.387512786535825e-12	0.0	0.0	-3.8818037143020747e-10	0.0	0.0	-1.3683110368978534e-09	0.0	5.6730645889589275e-11	0.0	-7.155024856392515e-12	1.1681740966455071e-10	0.0	1.376865934350196e-11
1.125	5.7314732937863516e-11	0.0	-7.086181560067181e-12	4.2641369220852787e-11	0.0	-0.09945408802077307	0.0	1.7279135644148952e-11	0.0	1.0	0.0	-3.421586916030525e-12	0.0	0.0	-3.920849790514646e-10	0.0	0.0	-1.3633609291676344e-09	0.0	5.731473293791201e-11	0.0	-7.086181559674966e-12	1.1681740966454888e-10	0.0	1.3768659343517941e-11
1.1300000000000001	5.7898819986186264e-11	0.0	-7.017338263357493e-12	4.3135295545521954e-11	0.0	-0.09945408802078406	0.0	1.68438043188514e-11	0.0	1.0	0.0	-3.4556610455252276e-12	0.0	0.0	-3.9598958667272195e-10	0.0	0.0	-1.3585355346755622e-09	0.0	5.7898819986234764e-11	0.0	-7.0173382629573354e-12	1.1681740966454748e-10	0.0	1.3768659343533787e-11
1.135	5.848290703450899e-11	0.0	-6.948494966647808e-12	4.36292218701911e-11	0.0	-0.09945408802079506	0.0	1.6408472993553867e-11	0.0	1.0	0.0	-3.489735175019928e-12	0.0	0.0	-3.998941942939791e-10	0.0	0.0	-1.3538348534216371e-09	0.0	5.848290703455748e-11	0.0	-6.948494966239629e-12	1.168174096645437e-10	0.0	1.3768659343549632e-11
1.1400000000000001	5.906699408283173e-11	0.0	-6.8796516699381206e-12	4.412314819486026e-11	0.0	-0.09945408802080605	0.0	1.5973141668256316e-11	0.0	1.0	0.0	-3.52380930451463e-12	0.0	0.0	-4.037988019152364e-10	0.0	0.0	-1.349258885405859e-09	0.0	5.906699408288021e-11	0.0	-6.879651669521839e-12	1.168174096645437e-10	0.0	1.3768659343565667e-11
1.145	5.965108113115444e-11	0.0	-6.810808373228435e-12	4.461707451952941e-11	0.0	-0.09945408802081704	0.0	1.5537810342958777e-11	0.0	1.0	0.0	-3.5578834340093307e-12	0.0	0.0	-4.0770340953649357e-10	0.0	0.0	-1.3448076306282276e-09	0.0	5.965108113120291e-11	0.0	-6.810808372803972e-12	1.1681740966454048e-10	0.0	1.3768659343581568e-11
1.1500000000000001	6.023516817947718e-11	0.0	-6.7419650765187474e-12	4.511100084419857e-11	0.0	-0.09945408802082803	0.0	1.5102479017661228e-11	0.0	1.0	0.0	-3.5919575635040327e-12	0.0	0.0	-4.116080171577509e-10	0.0	0.0	-1.3404810890887433e-09	0.0	6.023516817952561e-11	0.0	-6.741965076086023e-12	1.1681740966453748e-10	0.0	1.3768659343597454e-11
1.155	6.08192552277999e-11	0.0	-6.673121779809063e-12	4.560492716886772e-11	0.0	-0.09945408802083902	0.0	1.4667147692363692e-11	0.0	1.0	0.0	-3.626031692998733e-12	0.0	0.0	-4.1551262477900805e-10	0.0	0.0	-1.336279260787406e-09	0.0	6.081925522784829e-11	0.0	-6.673121779367998e-12	1.168174096645349e-10	0.0	1.3768659343613004e-11
1.16	6.140334227612263e-11	0.0	-6.6042784830993775e-12	4.609885349353686e-11	0.0	-0.09945408802085001	0.0	1.423181636706616e-11	0.0	1.0	0.0	-3.660105822493433e-12	0.0	0.0	-4.194172324002652e-10	0.0	0.0	-1.3322021457242154e-09	0.0	6.140334227617097e-11	0.0	-6.604278482649892e-12	1.1681740966453748e-10	0.0	1.3768659343629497e-11
1.165	6.198742932444537e-11	0.0	-6.53543518638969e-12	4.6592779818206025e-11	0.0	-0.099454088020861	0.0	1.3796485041768608e-11	0.0	1.0	0.0	-3.694179951988136e-12	0.0	0.0	-4.2332184002152254e-10	0.0	0.0	-1.3282497438991717e-09	0.0	6.198742932449365e-11	0.0	-6.535435185931704e-12	1.168174096645336e-10	0.0	1.3768659343645209e-11
1.17	6.257151637276808e-11	0.0	-6.466591889680005e-12	4.7086706142875166e-11	0.0	-0.099454088020872	0.0	1.3361153716471072e-11	0.0	1.0	0.0	-3.7282540814828365e-12	0.0	0.0	-4.272264476427797e-10	0.0	0.0	-1.3244220553122752e-09	0.0	6.25715163728163e-11	0.0	-6.46659188921344e-12	1.1681740966453316e-10	0.0	1.3768659343661082e-11
1.175	6.315560342109084e-11	0.0	-6.397748592970317e-12	4.758063246754433e-11	0.0	-0.09945408802088299	0.0	1.292582239117352e-11	0.0	1.0	0.0	-3.762328210977538e-12	0.0	0.0	-4.3113105526403697e-10	0.0	0.0	-1.3207190799635255e-09	0.0	6.315560342113898e-11	0.0	-6.397748592495093e-12	1.1681740966452864e-10	0.0	1.3768659343676928e-11
1.18	6.373969046941354e-11	0.0	-6.328905296260633e-12	4.8074558792213474e-11	0.0	-0.09945408802089398	0.0	1.2490491065875991e-11	0.0	1.0	0.0	-3.796402340472239e-12	0.0	0.0	-4.3503566288529416e-10	0.0	0.0	-1.3171408178529226e-09	0.0	6.37396904694616e-11	0.0	-6.32890529577667e-12	1.1681740966452779e-10	0.0	1.376865934369307e-11
1.185	6.43237775177363e-11	0.0	-6.260061999550944e-12	4.856848511688264e-11	0.0	-0.09945408802090497	0.0	1.2055159740578433e-11	0.0	1.0	0.0	-3.830476469966941e-12	0.0	0.0	-4.3894027050655155e-10	0.0	0.0	-1.3136872689804669e-09	0.0	6.432377751778426e-11	0.0	-6.260061999058163e-12	1.168174096645265e-10	0.0	1.3768659343708863e-11
1.19	6.490786456605901e-11	0.0	-6.19121870284126e-12	4.9062411441551776e-11	0.0	-0.09945408802091596	0.0	1.1619828415280904e-11	0.0	1.0	0.0	-3.864550599461641e-12	0.0	0.0	-4.4284487812780864e-10	0.0	0.0	-1.310358433346158e-09	0.0	6.490786456610686e-11	0.0	-6.191218702339581e-12	1.1681740966452326e-10	0.0	1.3768659343724749e-11
1.195	6.549195161438175e-11	0.0	-6.122375406131572e-12	4.955633776622095e-11	0.0	-0.09945408802092695	0.0	1.1184497089983349e-11	0.0	1.0	0.0	-3.8986247289563436e-12	0.0	0.0	-4.46749485749066e-10	0.0	0.0	-1.307154310949996e-09	0.0	6.54919516144295e-11	0.0	-6.1223754056209146e-12	1.1681740966452432e-10	0.0	1.3768659343740852e-11
1.2	6.607603866270448e-11	0.0	-6.053532109421887e-12	5.0050264090890084e-11	0.0	-0.09945408802093794	0.0	1.074916576468582e-11	0.0	1.0	0.0	-3.932698858451044e-12	0.0	0.0	-4.5065409337032317e-10	0.0	0.0	-1.3040749017919809e-09	0.0	6.607603866275209e-11	0.0	-6.053532108902173e-12	1.1681740966451915e-10	0.0	1.3768659343756576e-11
1.205	6.666012571102721e-11	0.0	-5.9846888127121994e-12	5.054419041555926e-11	0.0	-0.09945408802094893	0.0	1.0313834439388268e-11	0.0	1.0	0.0	-3.966772987945746e-12	0.0	0.0	-4.5455870099158046e-10	0.0	0.0	-1.3011202058721128e-09	0.0	6.666012571107469e-11	0.0	-5.984688812183348e-12	1.1681740966451894e-10	0.0	1.3768659343772638e-11
1.21	6.724421275934993e-11	0.0	-5.915845516002514e-12	5.10381167402284e-11	0.0	-0.09945408802095992	0.0	9.878503114090732e-12	0.0	1.0	0.0	-4.000847117440447e-12	0.0	0.0	-4.584633086128376e-10	0.0	0.0	-1.2982902231903916e-09	0.0	6.724421275939728e-11	0.0	-5.915845515464447e-12	1.168174096645181e-10	0.0	1.3768659343788552e-11
1.215	6.782829980767268e-11	0.0	-5.847002219292826e-12	5.1532043064897565e-11	0.0	-0.09945408802097092	0.0	9.44317178879318e-12	0.0	1.0	0.0	-4.034921246935149e-12	0.0	0.0	-4.62367916234095e-10	0.0	0.0	-1.2955849537468173e-09	0.0	6.782829980771986e-11	0.0	-5.847002218745463e-12	1.1681740966451204e-10	0.0	1.376865934380445e-11
1.22	6.841238685599539e-11	0.0	-5.778158922583142e-12	5.2025969389566706e-11	0.0	-0.0994540880209819	0.0	9.007840463495648e-12	0.0	1.0	0.0	-4.068995376429849e-12	0.0	0.0	-4.662725238553521e-10	0.0	0.0	-1.29300439754139e-09	0.0	6.841238685604241e-11	0.0	-5.778158922026402e-12	1.1681740966451442e-10	0.0	1.3768659343820338e-11
1.225	6.899647390431815e-11	0.0	-5.709315625873454e-12	5.251989571423587e-11	0.0	-0.0994540880209929	0.0	8.572509138198092e-12	0.0	1.0	0.0	-4.1030695059245514e-12	0.0	0.0	-4.701771314766095e-10	0.0	0.0	-1.2905485545741097e-09	0.0	6.8996473904365e-11	0.0	-5.709315625307259e-12	1.1681740966451334e-10	0.0	1.3768659343836414e-11
1.23	6.958056095264086e-11	0.0	-5.6404723291637685e-12	5.3013822038905014e-11	0.0	-0.09945408802100389	0.0	8.13717781290056e-12	0.0	1.0	0.0	-4.137143635419252e-12	0.0	0.0	-4.740817390978667e-10	0.0	0.0	-1.2882174248449761e-09	0.0	6.958056095268753e-11	0.0	-5.640472328588039e-12	1.1681740966450817e-10	0.0	1.376865934385226e-11
1.235	7.01646480009636e-11	0.0	-5.571629032454081e-12	5.350774836357418e-11	0.0	-0.09945408802101488	0.0	7.701846487603008e-12	0.0	1.0	0.0	-4.171217764913954e-12	0.0	0.0	-4.779863467191239e-10	0.0	0.0	-1.2860110083539895e-09	0.0	7.016464800101008e-11	0.0	-5.5716290318687366e-12	1.168174096645071e-10	0.0	1.3768659343868079e-11
1.24	7.074873504928632e-11	0.0	-5.502785735744396e-12	5.400167468824332e-11	0.0	-0.09945408802102587	0.0	7.266515162305476e-12	0.0	1.0	0.0	-4.2052918944086545e-12	0.0	0.0	-4.81890954340381e-10	0.0	0.0	-1.28392930510115e-09	0.0	7.07487350493326e-11	0.0	-5.502785735149358e-12	1.1681740966450517e-10	0.0	1.3768659343884006e-11
1.245	7.133282209760906e-11	0.0	-5.433942439034708e-12	5.449560101291249e-11	0.0	-0.09945408802103686	0.0	6.831183837007921e-12	0.0	1.0	0.0	-4.239366023903357e-12	0.0	0.0	-4.857955619616384e-10	0.0	0.0	-1.2819723150864573e-09	0.0	7.133282209765513e-11	0.0	-5.433942438429896e-12	1.1681740966450517e-10	0.0	1.3768659343899892e-11
1.25	7.191690914593179e-11	0.0	-5.365099142325024e-12	5.498952733758163e-11	0.0	-0.09945408802104785	0.0	6.395852511710388e-12	0.0	1.0	0.0	-4.273440153398057e-12	0.0	0.0	-4.897001695828955e-10	0.0	0.0	-1.2801400383099115e-09	0.0	7.191690914597764e-11	0.0	-5.365099141710358e-12	1.168174096645013e-10	0.0	1.3768659343915873e-11
1.2550000000000001	7.250099619425453e-11	0.0	-5.296255845615336e-12	5.54834536622508e-11	0.0	-0.09945408802105885	0.0	5.960521186412836e-12	0.0	1.0	0.0	-4.307514282892759e-12	0.0	0.0	-4.936047772041529e-10	0.0	0.0	-1.2784324747715127e-09	0.0	7.250099619430015e-11	0.0	-5.296255844990738e-12	1.1681740966449935e-10	0.0	1.3768659343931827e-11
1.26	7.308508324257724e-11	0.0	-5.227412548905651e-12	5.597737998691994e-11	0.0	-0.09945408802106984	0.0	5.5251898611153006e-12	0.0	1.0	0.0	-4.34158841238746e-12	0.0	0.0	-4.975093848254101e-10	0.0	0.0	-1.2768496244712609e-09	0.0	7.308508324262263e-11	0.0	-5.22741254827104e-12	1.168174096644987e-10	0.0	1.3768659343947768e-11
1.2650000000000001	7.36691702909e-11	0.0	-5.158569252195963e-12	5.6471306311589105e-11	0.0	-0.09945408802108083	0.0	5.089858535817749e-12	0.0	1.0	0.0	-4.3756625418821616e-12	0.0	0.0	-5.014139924466673e-10	0.0	0.0	-1.2753914874091559e-09	0.0	7.366917029094514e-11	0.0	-5.15856925155126e-12	1.1681740966449633e-10	0.0	1.3768659343963788e-11
1.27	7.425325733922271e-11	0.0	-5.0897259554862775e-12	5.6965232636258246e-11	0.0	-0.09945408802109182	0.0	4.654527210520216e-12	0.0	1.0	0.0	-4.409736671376862e-12	0.0	0.0	-5.053186000679245e-10	0.0	0.0	-1.2740580635851977e-09	0.0	7.42532573392676e-11	0.0	-5.0897259548314025e-12	1.1681740966449353e-10	0.0	1.3768659343979702e-11
1.2750000000000001	7.483734438754545e-11	0.0	-5.02088265877659e-12	5.7459158960927413e-11	0.0	-0.09945408802110281	0.0	4.2191958852226644e-12	0.0	1.0	0.0	-4.443810800871565e-12	0.0	0.0	-5.092232076891819e-10	0.0	0.0	-1.2728493529993867e-09	0.0	7.483734438759008e-11	0.0	-5.020882658111464e-12	1.1681740966449116e-10	0.0	1.3768659343995468e-11
1.28	7.542143143586817e-11	0.0	-4.952039362066905e-12	5.795308528559656e-11	0.0	-0.0994540880211138	0.0	3.783864559925129e-12	0.0	1.0	0.0	-4.477884930366265e-12	0.0	0.0	-5.13127815310439e-10	0.0	0.0	-1.2717653556517225e-09	0.0	7.542143143591251e-11	0.0	-4.952039361391448e-12	1.168174096644845e-10	0.0	1.3768659344011031e-11
1.285	7.600551848419088e-11	0.0	-4.8831960653572206e-12	5.84470116102657e-11	0.0	-0.09945408802112479	0.0	3.3485332346275963e-12	0.0	1.0	0.0	-4.5119590598609654e-12	0.0	0.0	-5.170324229316962e-10	0.0	0.0	-1.2708060715422052e-09	0.0	7.600551848423494e-11	0.0	-4.883196064671353e-12	1.168174096644903e-10	0.0	1.3768659344027402e-11
1.29	7.658960553251364e-11	0.0	-4.814352768647533e-12	5.894093793493487e-11	0.0	-0.09945408802113578	0.0	2.9132019093300444e-12	0.0	1.0	0.0	-4.546033189355668e-12	0.0	0.0	-5.209370305529536e-10	0.0	0.0	-1.269971500670835e-09	0.0	7.658960553255741e-11	0.0	-4.814352767951175e-12	1.1681740966448837e-10	0.0	1.376865934404333e-11
1.295	7.717369258083635e-11	0.0	-4.745509471937847e-12	5.9434864259604e-11	0.0	-0.09945408802114677	0.0	2.4778705840325087e-12	0.0	1.0	0.0	-4.580107318850368e-12	0.0	0.0	-5.248416381742106e-10	0.0	0.0	-1.2692616430376116e-09	0.0	7.717369258087982e-11	0.0	-4.74550947123092e-12	1.1681740966448296e-10	0.0	1.3768659344059188e-11
1.3	7.77577796291591e-11	0.0	-4.6766661752281596e-12	5.992879058427318e-11	0.0	-0.09945408802115777	0.0	2.042539258734957e-12	0.0	1.0	0.0	-4.61418144834507e-12	0.0	0.0	-5.287462457954679e-10	0.0	0.0	-1.2686764986425351e-09	0.0	7.775777962920225e-11	0.0	-4.676666174510583e-12	1.168174096644834e-10	0.0	1.376865934407513e-11
1.305	7.834186667748182e-11	0.0	-4.607822878518474e-12	6.042271690894232e-11	0.0	-0.09945408802116876	0.0	1.6072079334374244e-12	0.0	1.0	0.0	-4.648255577839771e-12	0.0	0.0	-5.326508534167251e-10	0.0	0.0	-1.2682160674856055e-09	0.0	7.834186667752466e-11	0.0	-4.607822877790168e-12	1.1681740966448102e-10	0.0	1.3768659344091177e-11
1.31	7.892595372580455e-11	0.0	-4.5389795818087864e-12	6.091664323361148e-11	0.0	-0.09945408802117975	0.0	1.1718766081398725e-12	0.0	1.0	0.0	-4.6823297073344725e-12	0.0	0.0	-5.365554610379824e-10	0.0	0.0	-1.267880349566823e-09	0.0	7.892595372584706e-11	0.0	-4.5389795810696715e-12	1.1681740966447909e-10	0.0	1.376865934410697e-11
1.315	7.951004077412728e-11	0.0	-4.470136285099102e-12	6.141056955828062e-11	0.0	-0.09945408802119074	0.0	7.365452828423385e-13	0.0	1.0	0.0	-4.716403836829173e-12	0.0	0.0	-5.404600686592396e-10	0.0	0.0	-1.2676693448861873e-09	0.0	7.951004077416944e-11	0.0	-4.470136284349099e-12	1.1681740966447673e-10	0.0	1.3768659344122762e-11
1.32	8.009412782245002e-11	0.0	-4.401292988389414e-12	6.190449588294979e-11	0.0	-0.09945408802120173	0.0	3.01213957544785e-13	0.0	1.0	0.0	-4.750477966323876e-12	0.0	0.0	-5.44364676280497e-10	0.0	0.0	-1.2675830534436985e-09	0.0	8.009412782249183e-11	0.0	-4.4012929876284434e-12	1.1681740966447609e-10	0.0	1.3768659344138743e-11
1.325	8.067821487077274e-11	0.0	-4.3324496916797295e-12	6.239842220761894e-11	0.0	-0.09945408802121272	0.0	-1.3411736775274747e-13	0.0	1.0	0.0	-4.7845520958185756e-12	0.0	0.0	-5.482692839017541e-10	0.0	0.0	-1.2676214752393568e-09	0.0	8.06782148708142e-11	0.0	-4.3324496909077115e-12	1.16817409664475e-10	0.0	1.3768659344154697e-11
1.33	8.126230191909549e-11	0.0	-4.263606394970042e-12	6.28923485322881e-11	0.0	-0.09945408802122371	0.0	-5.694486930503009e-13	0.0	1.0	0.0	-4.818626225313278e-12	0.0	0.0	-5.521738915230115e-10	0.0	0.0	-1.267784610273162e-09	0.0	8.126230191913658e-11	0.0	-4.263606394186896e-12	1.1681740966447242e-10	0.0	1.3768659344170732e-11
1.335	8.18463889674182e-11	0.0	-4.194763098260356e-12	6.338627485695724e-11	0.0	-0.0994540880212347	0.0	-1.004780018347835e-12	0.0	1.0	0.0	-4.852700354807979e-12	0.0	0.0	-5.560784991442686e-10	0.0	0.0	-1.268072458545114e-09	0.0	8.184638896745892e-11	0.0	-4.1947630974660045e-12	1.168174096644694e-10	0.0	1.3768659344186645e-11
1.34	8.243047601574095e-11	0.0	-4.1259198015506685e-12	6.388020118162641e-11	0.0	-0.0994540880212457	0.0	-1.4401113436453869e-12	0.0	1.0	0.0	-4.88677448430268e-12	0.0	0.0	-5.599831067655259e-10	0.0	0.0	-1.2684850200552128e-09	0.0	8.243047601578127e-11	0.0	-4.12591980074503e-12	1.168174096644666e-10	0.0	1.3768659344202546e-11
1.345	8.301456306406366e-11	0.0	-4.057076504840983e-12	6.437412750629556e-11	0.0	-0.09945408802125669	0.0	-1.875442668942921e-12	0.0	1.0	0.0	-4.920848613797381e-12	0.0	0.0	-5.638877143867831e-10	0.0	0.0	-1.2690222948034588e-09	0.0	8.301456306410359e-11	0.0	-4.057076504023979e-12	1.1681740966446487e-10	0.0	1.3768659344218432e-11
1.35	8.35986501123864e-11	0.0	-3.988233208131295e-12	6.486805383096472e-11	0.0	-0.09945408802126768	0.0	-2.310773994240473e-12	0.0	1.0	0.0	-4.9549227432920835e-12	0.0	0.0	-5.677923220080404e-10	0.0	0.0	-1.2696842827898516e-09	0.0	8.359865011242593e-11	0.0	-3.988233207302846e-12	1.168174096644668e-10	0.0	1.3768659344234292e-11
1.355	8.418273716070913e-11	0.0	-3.919389911421611e-12	6.536198015563386e-11	0.0	-0.09945408802127867	0.0	-2.746105319538007e-12	0.0	1.0	0.0	-4.9889968727867834e-12	0.0	0.0	-5.716969296292975e-10	0.0	0.0	-1.2704709840143913e-09	0.0	8.418273716074824e-11	0.0	-3.919389910581636e-12	1.1681740966446293e-10	0.0	1.3768659344250138e-11
1.36	8.476682420903187e-11	0.0	-3.850546614711923e-12	6.585590648030302e-11	0.0	-0.09945408802128966	0.0	-3.1814366448355587e-12	0.0	1.0	0.0	-5.023071002281486e-12	0.0	0.0	-5.756015372505549e-10	0.0	0.0	-1.2713823984770781e-09	0.0	8.476682420907056e-11	0.0	-3.850546613860344e-12	1.1681740966445776e-10	0.0	1.3768659344266281e-11
1.365	8.535091125735459e-11	0.0	-3.781703318002238e-12	6.634983280497217e-11	0.0	-0.09945408802130065	0.0	-3.616767970133093e-12	0.0	1.0	0.0	-5.0571451317761866e-12	0.0	0.0	-5.795061448718121e-10	0.0	0.0	-1.2724185261779118e-09	0.0	8.535091125739283e-11	0.0	-3.781703317138974e-12	1.1681740966445905e-10	0.0	1.376865934428218e-11
1.37	8.593499830567734e-11	0.0	-3.71286002129255e-12	6.684375912964133e-11	0.0	-0.09945408802131164	0.0	-4.052099295430645e-12	0.0	1.0	0.0	-5.091219261270888e-12	0.0	0.0	-5.834107524930693e-10	0.0	0.0	-1.2735793671168923e-09	0.0	8.593499830571515e-11	0.0	-3.712860020417522e-12	1.1681740966445864e-10	0.0	1.3768659344298013e-11
1.375	8.651908535400006e-11	0.0	-3.644016724582865e-12	6.733768545431047e-11	0.0	-0.09945408802132263	0.0	-4.487430620728177e-12	0.0	1.0	0.0	-5.125293390765589e-12	0.0	0.0	-5.873153601143265e-10	0.0	0.0	-1.2748649212940197e-09	0.0	8.651908535403741e-11	0.0	-3.6440167236959936e-12	1.1681740966445411e-10	0.0	1.3768659344313954e-11
1.3800000000000001	8.71031724023228e-11	0.0	-3.5751734278731775e-12	6.783161177897964e-11	0.0	-0.09945408802133363	0.0	-4.922761946025731e-12	0.0	1.0	0.0	-5.159367520260291e-12	0.0	0.0	-5.912199677355839e-10	0.0	0.0	-1.2762751887092942e-09	0.0	8.710317240235969e-11	0.0	-3.5751734269743827e-12	1.1681740966445194e-10	0.0	1.3768659344329854e-11
1.385	8.768725945064551e-11	0.0	-3.5063301311634925e-12	6.832553810364879e-11	0.0	-0.09945408802134462	0.0	-5.358093271323263e-12	0.0	1.0	0.0	-5.193441649754991e-12	0.0	0.0	-5.95124575356841e-10	0.0	0.0	-1.2778101693627155e-09	0.0	8.768725945068194e-11	0.0	-3.506330130252695e-12	1.1681740966445065e-10	0.0	1.376865934434574e-11
1.3900000000000001	8.827134649896825e-11	0.0	-3.4374868344538047e-12	6.881946442831795e-11	0.0	-0.09945408802135561	0.0	-5.7934245966208165e-12	0.0	1.0	0.0	-5.227515779249694e-12	0.0	0.0	-5.990291829780984e-10	0.0	0.0	-1.2794698632542838e-09	0.0	8.82713464990042e-11	0.0	-3.4374868335309252e-12	1.168174096644496e-10	0.0	1.3768659344361707e-11
1.395	8.885543354729098e-11	0.0	-3.3686435377441198e-12	6.93133907529871e-11	0.0	-0.0994540880213666	0.0	-6.228755921918349e-12	0.0	1.0	0.0	-5.261589908744394e-12	0.0	0.0	-6.029337905993556e-10	0.0	0.0	-1.281254270383999e-09	0.0	8.885543354732644e-11	0.0	-3.368643536809078e-12	1.1681740966444807e-10	0.0	1.3768659344377661e-11
1.4000000000000001	8.943952059561372e-11	0.0	-3.299800241034432e-12	6.980731707765626e-11	0.0	-0.09945408802137759	0.0	-6.6640872472159025e-12	0.0	1.0	0.0	-5.295664038239096e-12	0.0	0.0	-6.068383982206128e-10	0.0	0.0	-1.2831633907518612e-09	0.0	8.943952059564867e-11	0.0	-3.2998002400871486e-12	1.1681740966444507e-10	0.0	1.3768659344393589e-11
1.405	9.002360764393644e-11	0.0	-3.2309569443247474e-12	7.03012434023254e-11	0.0	-0.09945408802138858	0.0	-7.099418572513435e-12	0.0	1.0	0.0	-5.329738167733797e-12	0.0	0.0	-6.107430058418699e-10	0.0	0.0	-1.2851972243578702e-09	0.0	9.002360764397088e-11	0.0	-3.2309569433651428e-12	1.168174096644399e-10	0.0	1.3768659344409131e-11
1.41	9.060769469225915e-11	0.0	-3.162113647615062e-12	7.079516972699454e-11	0.0	-0.09945408802139957	0.0	-7.534749897810969e-12	0.0	1.0	0.0	-5.3638122972284975e-12	0.0	0.0	-6.146476134631271e-10	0.0	0.0	-1.2873557712020262e-09	0.0	9.060769469229308e-11	0.0	-3.1621136466430565e-12	1.168174096644416e-10	0.0	1.376865934442551e-11
1.415	9.11917817405819e-11	0.0	-3.0932703509053742e-12	7.128909605166371e-11	0.0	-0.09945408802141056	0.0	-7.970081223108521e-12	0.0	1.0	0.0	-5.397886426723199e-12	0.0	0.0	-6.185522210843844e-10	0.0	0.0	-1.2896390312843291e-09	0.0	9.119178174061529e-11	0.0	-3.0932703499208883e-12	1.1681740966443946e-10	0.0	1.3768659344441275e-11
1.42	9.177586878890462e-11	0.0	-3.0244270541956897e-12	7.178302237633285e-11	0.0	-0.09945408802142156	0.0	-8.405412548406055e-12	0.0	1.0	0.0	-5.4319605562179e-12	0.0	0.0	-6.224568287056416e-10	0.0	0.0	-1.292047004604779e-09	0.0	9.177586878893748e-11	0.0	-3.0244270531986438e-12	1.168174096644388e-10	0.0	1.376865934445725e-11
1.425	9.235995583722737e-11	0.0	-2.9555837574860015e-12	7.227694870100202e-11	0.0	-0.09945408802143255	0.0	-8.840743873703607e-12	0.0	1.0	0.0	-5.466034685712602e-12	0.0	0.0	-6.26361436326899e-10	0.0	0.0	-1.2945796911633757e-09	0.0	9.235995583725968e-11	0.0	-2.955583756476316e-12	1.1681740966443667e-10	0.0	1.3768659344473189e-11
1.43	9.294404288555008e-11	0.0	-2.8867404607763165e-12	7.277087502567116e-11	0.0	-0.09945408802144354	0.0	-9.276075199001141e-12	0.0	1.0	0.0	-5.500108815207302e-12	0.0	0.0	-6.302660439481561e-10	0.0	0.0	-1.2972370909601195e-09	0.0	9.294404288558184e-11	0.0	-2.886740459753912e-12	1.1681740966443235e-10	0.0	1.376865934448911e-11
1.435	9.352812993387282e-11	0.0	-2.8178971640666287e-12	7.326480135034033e-11	0.0	-0.09945408802145453	0.0	-9.711406524298694e-12	0.0	1.0	0.0	-5.5341829447020045e-12	0.0	0.0	-6.341706515694134e-10	0.0	0.0	-1.3000192039950102e-09	0.0	9.352812993390401e-11	0.0	-2.817897163031425e-12	1.1681740966443344e-10	0.0	1.3768659344504963e-11
1.44	9.411221698219555e-11	0.0	-2.749053867356944e-12	7.375872767500946e-11	0.0	-0.09945408802146552	0.0	-1.0146737849596227e-11	0.0	1.0	0.0	-5.568257074196705e-12	0.0	0.0	-6.380752591906706e-10	0.0	0.0	-1.3029260302680477e-09	0.0	9.411221698222617e-11	0.0	-2.7490538663088623e-12	1.1681740966443214e-10	0.0	1.3768659344520904e-11
1.445	9.469630403051829e-11	0.0	-2.680210570647256e-12	7.425265399967864e-11	0.0	-0.09945408802147651	0.0	-1.0582069174893779e-11	0.0	1.0	0.0	-5.602331203691407e-12	0.0	0.0	-6.419798668119279e-10	0.0	0.0	-1.3059575697792322e-09	0.0	9.469630403054833e-11	0.0	-2.680210569586216e-12	1.1681740966442762e-10	0.0	1.3768659344536932e-11
1.45	9.528039107884101e-11	0.0	-2.611367273937571e-12	7.474658032434777e-11	0.0	-0.0994540880214875	0.0	-1.1017400500191313e-11	0.0	1.0	0.0	-5.636405333186108e-12	0.0	0.0	-6.458844744331851e-10	0.0	0.0	-1.3091138225285636e-09	0.0	9.528039107887045e-11	0.0	-2.611367272863493e-12	1.168174096644246e-10	0.0	1.3768659344552771e-11
1.455	9.586447812716375e-11	0.0	-2.542523977227883e-12	7.524050664901694e-11	0.0	-0.0994540880214985	0.0	-1.1452731825488866e-11	0.0	1.0	0.0	-5.67047946268081e-12	0.0	0.0	-6.497890820544425e-10	0.0	0.0	-1.312394788516042e-09	0.0	9.586447812719258e-11	0.0	-2.542523976140688e-12	1.1681740966442503e-10	0.0	1.3768659344568657e-11
1.46	9.644856517548648e-11	0.0	-2.4736806805181986e-12	7.573443297368608e-11	0.0	-0.09945408802150948	0.0	-1.1888063150786399e-11	0.0	1.0	0.0	-5.70455359217551e-12	0.0	0.0	-6.536936896756995e-10	0.0	0.0	-1.3158004677416672e-09	0.0	9.64485651755147e-11	0.0	-2.4736806794178065e-12	1.168174096644248e-10	0.0	1.3768659344584632e-11
1.465	9.703265222380922e-11	0.0	-2.4048373838085104e-12	7.622835929835525e-11	0.0	-0.09945408802152048	0.0	-1.232339447608395e-11	0.0	1.0	0.0	-5.738627721670212e-12	0.0	0.0	-6.575982972969568e-10	0.0	0.0	-1.3193308602054395e-09	0.0	9.703265222383682e-11	0.0	-2.4048373826948418e-12	1.1681740966441963e-10	0.0	1.3768659344600578e-11
1.47	9.761673927213193e-11	0.0	-2.3359940870988254e-12	7.672228562302439e-11	0.0	-0.09945408802153148	0.0	-1.2758725801381485e-11	0.0	1.0	0.0	-5.772701851164913e-12	0.0	0.0	-6.61502904918214e-10	0.0	0.0	-1.3229859659073587e-09	0.0	9.76167392721589e-11	0.0	-2.3359940859718007e-12	1.168174096644177e-10	0.0	1.3768659344616451e-11
1.475	9.820082632045467e-11	0.0	-2.2671507903891376e-12	7.721621194769356e-11	0.0	-0.09945408802154247	0.0	-1.3194057126679036e-11	0.0	1.0	0.0	-5.806775980659615e-12	0.0	0.0	-6.654075125394713e-10	0.0	0.0	-1.3267657848474248e-09	0.0	9.8200826320481e-11	0.0	-2.2671507892486773e-12	1.3047557779851472e-10	0.0	1.0802721266563912e-11
1.48	9.87849133687774e-11	0.0	-2.198307493679453e-12	7.77101382723627e-11	0.0	-0.09945408802155346	0.0	-1.362938845197657e-11	0.0	1.0	0.0	-5.8408501101543155e-12	0.0	0.0	-6.693121201607285e-10	0.0	0.0	-1.3306703170256377e-09	0.0	9.878491336880308e-11	0.0	-2.198307492525477e-12	3.487662670957369e-11	0.0	3.156250152951331e-11
1.485	9.854951032905738e-11	0.0	-1.9515079122276003e-12	7.815842532464094e-11	0.0	-0.09945408802151669	0.0	-1.1091148134235646e-11	0.0	1.0	0.0	-5.629212380649059e-12	0.0	0.0	-6.450602227879634e-10	0.0	0.0	-1.3338476969158682e-09	0.0	9.854951032907936e-11	0.0	-1.951507911118088e-12	-6.078813117727576e-11	0.0	5.233657206082545e-11
1.49	9.831361373835286e-11	0.0	-1.7046011537630996e-12	7.860668488993897e-11	0.0	-0.09945408802147988	0.0	-8.551116935514735e-12	0.0	1.0	0.0	-5.417426667255177e-12	0.0	0.0	-6.207913677106901e-10	0.0	0.0	-1.3362974114685075e-09	0.0	9.831361373837133e-11	0.0	-1.704601152697886e-12	-4.718754399132855e-11	0.0	4.9383137967605103e-11
1.495	9.807771714764832e-11	0.0	-1.457694395298589e-12	7.905494445523701e-11	0.0	-0.09945408802144307	0.0	-6.011085736793734e-12	0.0	1.0	0.0	-5.205640953861286e-12	0.0	0.0	-5.965225126334156e-10	0.0	0.0	-1.3380194606835554e-09	0.0	9.80777171476635e-11	0.0	-1.4576943942774744e-12	-4.717931814154365e-11	0.0	4.938135168410134e-11
1.5	9.78418205569438e-11	0.0	-1.2107876368340883e-12	7.950320402053504e-11	0.0	-0.09945408802140626	0.0	-3.471054538072823e-12	0.0	1.0	0.0	-4.9938552404674046e-12	0.0	0.0	-5.722536575561423e-10	0.0	0.0	-1.339013844561012e-09	0.0	9.784182055695589e-11	0.0	-1.2107876358568725e-12	-4.717931814150229e-11	0.0	4.9381351684141316e-11
1.5050000000000001	9.760592396623926e-11	0.0	-9.638808783695778e-13	7.995146358583308e-11	0.0	-0.09945408802136946	0.0	-9.310233393518216e-13	0.0	1.0	0.0	-4.782069527073514e-12	0.0	0.0	-5.479848024788679e-10	0.0	0.0	-1.3392805631008772e-09	0.0	9.760592396624847e-11	0.0	-9.638808774360613e-13	-4.717931814146287e-11	0.0	4.938135168418129e-11
1.51	9.737002737553472e-11	0.0	-7.16974119905077e-13	8.039972315113111e-11	0.0	-0.09945408802133265	0.0	1.6090078593690893e-12	0.0	1.0	0.0	-4.570283813679633e-12	0.0	0.0	-5.237159474015945e-10	0.0	0.0	-1.338819616303151e-09	0.0	9.737002737554127e-11	0.0	-7.169741190150597e-13	-4.717931814141957e-11	0.0	4.938135168422129e-11
1.5150000000000001	9.713413078483018e-11	0.0	-4.700673614405665e-13	8.084798271642916e-11	0.0	-0.09945408802129584	0.0	4.1490390580901036e-12	0.0	1.0	0.0	-4.358498100285742e-12	0.0	0.0	-4.994470923243201e-10	0.0	0.0	-1.3376310041678337e-09	0.0	9.713413078483428e-11	0.0	-4.700673605938487e-13	-4.717931814137671e-11	0.0	4.9381351684260986e-11
1.52	9.689823419412565e-11	0.0	-2.2316060297606738e-13	8.129624228172718e-11	0.0	-0.09945408802125903	0.0	6.689070256810989e-12	0.0	1.0	0.0	-4.1467123868918615e-12	0.0	0.0	-4.751782372470468e-10	0.0	0.0	-1.335714726694925e-09	0.0	9.68982341941275e-11	0.0	-2.2316060217244917e-13	-4.7179318141333623e-11	0.0	4.938135168430122e-11
1.5250000000000001	9.666233760342111e-11	0.0	2.3746155488444716e-14	8.174450184702522e-11	0.0	-0.09945408802122223	0.0	9.229101455532016e-12	0.0	1.0	0.0	-3.93492667349797e-12	0.0	0.0	-4.5090938216977237e-10	0.0	0.0	-1.3330707838844248e-09	0.0	9.666233760342093e-11	0.0	2.3746156249163138e-14	-4.717931814129399e-11	0.0	4.938135168434117e-11
1.53	9.642644101271657e-11	0.0	2.706529139529439e-13	8.219276141232325e-11	0.0	-0.09945408802118542	0.0	1.1769132654252901e-11	0.0	1.0	0.0	-3.7231409601040895e-12	0.0	0.0	-4.266405270924991e-10	0.0	0.0	-1.3296991757363334e-09	0.0	9.642644101271456e-11	0.0	2.7065291467096235e-13	-4.7179318141254136e-11	0.0	4.938135168438101e-11
1.5350000000000001	9.619054442201204e-11	0.0	5.175596724174552e-13	8.264102097762129e-11	0.0	-0.09945408802114862	0.0	1.4309163852973915e-11	0.0	1.0	0.0	-3.511355246710199e-12	0.0	0.0	-4.023716720152247e-10	0.0	0.0	-1.3255999022506507e-09	0.0	9.61905444220084e-11	0.0	5.175596730929736e-13	-4.717931814120912e-11	0.0	4.93813516844213e-11
1.54	9.595464783130751e-11	0.0	7.644664308819551e-13	8.308928054291932e-11	0.0	-0.0994540880211118	0.0	1.6849195051694813e-11	0.0	1.0	0.0	-3.2995695333163175e-12	0.0	0.0	-3.7810281693795136e-10	0.0	0.0	-1.3207729634273767e-09	0.0	9.595464783130247e-11	0.0	7.644664315151732e-13	-4.717931814116776e-11	0.0	4.938135168445955e-11
1.545	9.571875124060297e-11	0.0	1.0113731893464551e-12	8.353754010821734e-11	0.0	-0.099454088021075	0.0	1.9389226250415724e-11	0.0	1.0	0.0	-3.087783819922436e-12	0.0	0.0	-3.53833961860678e-10	0.0	0.0	-1.3152183592665113e-09	0.0	9.571875124059673e-11	0.0	1.0113731899375728e-12	-4.717931814112791e-11	0.0	4.9381351684501204e-11
1.55	9.548285464989843e-11	0.0	1.2582799478109664e-12	8.398579967351538e-11	0.0	-0.0994540880210382	0.0	2.1929257449136725e-11	0.0	1.0	0.0	-2.8759981065285448e-12	0.0	0.0	-3.295651067834035e-10	0.0	0.0	-1.3089360897680546e-09	0.0	9.54828546498912e-11	0.0	1.2582799483601834e-12	-4.7179318141084396e-11	0.0	4.9381351684540973e-11
1.555	9.524695805919391e-11	0.0	1.5051867062754664e-12	8.443405923881341e-11	0.0	-0.09945408802100139	0.0	2.4469288647857636e-11	0.0	1.0	0.0	-2.664212393134664e-12	0.0	0.0	-3.0529625170613024e-10	0.0	0.0	-1.3019261549320066e-09	0.0	9.524695805918588e-11	0.0	1.5051867067829827e-12	-4.717931814104282e-11	0.0	4.938135168458095e-11
1.56	9.501106146848937e-11	0.0	1.7520934647399777e-12	8.488231880411145e-11	0.0	-0.09945408802096459	0.0	2.7009319846578644e-11	0.0	1.0	0.0	-2.452426679740773e-12	0.0	0.0	-2.8102739662885577e-10	0.0	0.0	-1.2941885547583672e-09	0.0	9.501106146848077e-11	0.0	1.752093465205993e-12	-4.717931814099952e-11	0.0	4.9381351684620945e-11
1.565	9.477516487778484e-11	0.0	1.9990002232044776e-12	8.533057836940948e-11	0.0	-0.09945408802092777	0.0	2.954935104529955e-11	0.0	1.0	0.0	-2.2406409663468913e-12	0.0	0.0	-2.567585415515824e-10	0.0	0.0	-1.2857232892471366e-09	0.0	9.477516487777589e-11	0.0	1.999000223629192e-12	-4.7179318140959453e-11	0.0	4.938135168466091e-11
1.57	9.453926828708029e-11	0.0	2.245906981668989e-12	8.577883793470752e-11	0.0	-0.09945408802089097	0.0	3.2089382244020557e-11	0.0	1.0	0.0	-2.028855252953001e-12	0.0	0.0	-2.32489686474308e-10	0.0	0.0	-1.2765303583983146e-09	0.0	9.453926828707118e-11	0.0	2.245906982052602e-12	-4.717931814091767e-11	0.0	4.938135168470085e-11
1.575	9.430337169637576e-11	0.0	2.492813740133489e-12	8.622709750000555e-11	0.0	-0.09945408802085416	0.0	3.462941344274146e-11	0.0	1.0	0.0	-1.8170695395591193e-12	0.0	0.0	-2.0822083139703462e-10	0.0	0.0	-1.2666097622119012e-09	0.0	9.43033716963667e-11	0.0	2.4928137404762006e-12	-4.717931814087566e-11	0.0	4.938135168474072e-11
1.58	9.406747510567123e-11	0.0	2.7397204985979994e-12	8.667535706530359e-11	0.0	-0.09945408802081736	0.0	3.7169444641462475e-11	0.0	1.0	0.0	-1.6052838261652289e-12	0.0	0.0	-1.8395197631976026e-10	0.0	0.0	-1.2559615006878964e-09	0.0	9.406747510566242e-11	0.0	2.7397204989000096e-12	-4.7179318140832365e-11	0.0	4.938135168478081e-11
1.585	9.38315785149667e-11	0.0	2.9866272570625e-12	8.712361663060162e-11	0.0	-0.09945408802078054	0.0	3.9709475840183373e-11	0.0	1.0	0.0	-1.3934981127713473e-12	0.0	0.0	-1.5968312124248688e-10	0.0	0.0	-1.2445855738263004e-09	0.0	9.383157851495838e-11	0.0	2.9866272573240084e-12	-4.717931814079208e-11	0.0	4.938135168482071e-11
1.59	9.359568192426215e-11	0.0	3.2335340155270107e-12	8.757187619589967e-11	0.0	-0.09945408802074374	0.0	4.224950703890439e-11	0.0	1.0	0.0	-1.181712399377457e-12	0.0	0.0	-1.354142661652125e-10	0.0	0.0	-1.2324819816271129e-09	0.0	9.359568192425451e-11	0.0	3.233534015748217e-12	-4.717931814075029e-11	0.0	4.9381351684860666e-11
1.595	9.335978533355762e-11	0.0	3.4804407739915106e-12	8.802013576119769e-11	0.0	-0.09945408802070693	0.0	4.4789538237625286e-11	0.0	1.0	0.0	-9.699266859835758e-13	0.0	0.0	-1.1114541108793918e-10	0.0	0.0	-1.219650724090334e-09	0.0	9.335978533355088e-11	0.0	3.480440774172615e-12	-4.717931814070807e-11	0.0	4.938135168490077e-11
1.6	9.312388874285308e-11	0.0	3.727347532456022e-12	8.846839532649574e-11	0.0	-0.09945408802067013	0.0	4.73295694363463e-11	0.0	1.0	0.0	-7.581409725896845e-13	0.0	0.0	-8.687655601066471e-11	0.0	0.0	-1.2060918012159638e-09	0.0	9.312388874284744e-11	0.0	3.727347532597224e-12	-4.717931814066628e-11	0.0	4.9381351684940657e-11
1.605	9.288799215214856e-11	0.0	3.974254290920522e-12	8.891665489179375e-11	0.0	-0.09945408802063332	0.0	4.98696006350672e-11	0.0	1.0	0.0	-5.463552591958038e-13	0.0	0.0	-6.260770093339144e-11	0.0	0.0	-1.1918052130040024e-09	0.0	9.288799215214421e-11	0.0	3.974254291022022e-12	-4.717931814062578e-11	0.0	4.938135168498064e-11
1.61	9.2652095561444e-11	0.0	4.221161049385033e-12	8.936491445709181e-11	0.0	-0.0994540880205965	0.0	5.240963183378821e-11	0.0	1.0	0.0	-3.345695458019126e-13	0.0	0.0	-3.833884585611696e-11	0.0	0.0	-1.1767909594544495e-09	0.0	9.265209556144118e-11	0.0	4.2211610494470305e-12	-4.717931814058378e-11	0.0	4.9381351685020525e-11
1.615	9.241619897073948e-11	0.0	4.468067807849533e-12	8.981317402238982e-11	0.0	-0.0994540880205597	0.0	5.494966303250911e-11	0.0	1.0	0.0	-1.2278383240803145e-13	0.0	0.0	-1.4069990778843643e-11	0.0	0.0	-1.1610490405673054e-09	0.0	9.241619897073838e-11	0.0	4.468067807872227e-12	-4.717931814053811e-11	0.0	4.938135168506043e-11
1.62	9.218030238003494e-11	0.0	4.714974566314044e-12	9.026143358768788e-11	0.0	-0.0994540880205229	0.0	5.7489694231230124e-11	0.0	1.0	0.0	8.900188098585898e-14	0.0	0.0	1.019886429843074e-11	0.0	0.0	-1.14457945634257e-09	0.0	9.218030238003578e-11	0.0	4.714974566297635e-12	-4.717931814049804e-11	0.0	4.938135168510061e-11
1.625	9.194440578933042e-11	0.0	4.9618813247785444e-12	9.070969315298589e-11	0.0	-0.0994540880204861	0.0	6.002972542995102e-11	0.0	1.0	0.0	3.007875943797405e-13	0.0	0.0	3.44677193757041e-11	0.0	0.0	-1.1273822067802431e-09	0.0	9.19444057893334e-11	0.0	4.961881324723233e-12	-4.717931814045733e-11	0.0	4.938135168514049e-11
1.6300000000000001	9.170850919862588e-11	0.0	5.208788083243055e-12	9.115795271828394e-11	0.0	-0.09945408802044929	0.0	6.256975662867204e-11	0.0	1.0	0.0	5.125733077736313e-13	0.0	0.0	5.873657445297854e-11	0.0	0.0	-1.109457291880325e-09	0.0	9.170850919863121e-11	0.0	5.20878808314904e-12	-4.717931814041511e-11	0.0	4.938135168518044e-11
1.635	9.147261260792134e-11	0.0	5.455694841707556e-12	9.160621228358196e-11	0.0	-0.09945408802041247	0.0	6.510978782739295e-11	0.0	1.0	0.0	7.243590211675127e-13	0.0	0.0	8.300542953025188e-11	0.0	0.0	-1.0908047116428155e-09	0.0	9.147261260792925e-11	0.0	5.455694841575038e-12	-4.71793181403744e-11	0.0	4.938135168522044e-11
1.6400000000000001	9.12367160172168e-11	0.0	5.702601600172066e-12	9.205447184888001e-11	0.0	-0.09945408802037567	0.0	6.764981902611395e-11	0.0	1.0	0.0	9.361447345614033e-13	0.0	0.0	1.0727428460752628e-10	0.0	0.0	-1.0714244660677148e-09	0.0	9.123671601722747e-11	0.0	5.7026016000012445e-12	-4.717931814033218e-11	0.0	4.938135168526025e-11
1.645	9.100081942651227e-11	0.0	5.949508358636566e-12	9.250273141417804e-11	0.0	-0.09945408802033887	0.0	7.018985022483485e-11	0.0	1.0	0.0	1.1479304479552846e-12	0.0	0.0	1.3154313968479962e-10	0.0	0.0	-1.0513165551550226e-09	0.0	9.100081942652593e-11	0.0	5.949508358427641e-12	-4.7179318140288015e-11	0.0	4.9381351685300345e-11
1.6500000000000001	9.076492283580773e-11	0.0	6.1964151171010774e-12	9.295099097947608e-11	0.0	-0.09945408802030206	0.0	7.272988142355586e-11	0.0	1.0	0.0	1.3597161613491753e-12	0.0	0.0	1.5581199476207403e-10	0.0	0.0	-1.0304809789047392e-09	0.0	9.076492283582459e-11	0.0	6.196415116854248e-12	-4.717931814024924e-11	0.0	4.938135168534035e-11
1.655	9.05290262451032e-11	0.0	6.443321875565577e-12	9.339925054477411e-11	0.0	-0.09945408802026524	0.0	7.526991262227677e-11	0.0	1.0	0.0	1.5715018747430568e-12	0.0	0.0	1.8008084983934739e-10	0.0	0.0	-1.0089177373168645e-09	0.0	9.052902624512345e-11	0.0	6.443321875281044e-12	-4.7179318140208315e-11	0.0	4.93813516853803e-11
1.6600000000000001	9.029312965439866e-11	0.0	6.690228634030089e-12	9.384751011007215e-11	0.0	-0.09945408802022844	0.0	7.780994382099777e-11	0.0	1.0	0.0	1.7832875881369474e-12	0.0	0.0	2.043497049166218e-10	0.0	0.0	-9.866268303913984e-10	0.0	9.029312965442252e-11	0.0	6.690228633708051e-12	-4.717931814016243e-11	0.0	4.938135168542053e-11
1.665	9.005723306369413e-11	0.0	6.937135392494589e-12	9.429576967537018e-11	0.0	-0.09945408802019164	0.0	8.034997501971868e-11	0.0	1.0	0.0	1.9950733015308288e-12	0.0	0.0	2.2861855999389515e-10	0.0	0.0	-9.63608258128341e-10	0.0	9.005723306372182e-11	0.0	6.937135392135247e-12	-5.111429446898e-11	0.0	5.158032200711198e-11
1.67	8.982133647298959e-11	0.0	7.184042150959089e-12	9.474402924066819e-11	0.0	-0.09945408802015483	0.0	8.289000621843958e-11	0.0	1.0	0.0	2.20685901492471e-12	0.0	0.0	2.5288741507116845e-10	0.0	0.0	-9.398620205276922e-10	0.0	8.98213364730213e-11	0.0	7.184042150562643e-12	-3.3598766705752196e-11	0.0	4.179217526866234e-11
1.675	8.982153846201893e-11	0.0	7.299010690103879e-12	9.522512629395896e-11	0.0	-0.0994540880201301	0.0	8.3467736948357e-11	0.0	1.0	0.0	2.2979862814413534e-12	0.0	0.0	2.6332983061110344e-10	0.0	0.0	-9.159502752644472e-10	0.0	8.982153846205248e-11	0.0	7.29901068969106e-12	6.415121336802946e-11	0.0	-1.2833135574440836e-11
1.68	9.042349884338354e-11	0.0	7.077700498411264e-12	9.578991819202636e-11	0.0	-0.09945408802013614	0.0	7.904403659505023e-11	0.0	1.0	0.0	2.0815842392413926e-12	0.0	0.0	2.385319832189641e-10	0.0	0.0	-8.933058268015771e-10	0.0	9.042349884341301e-11	0.0	7.077700498034816e-12	1.3042138281094785e-10	0.0	-4.986668384428437e-11
1.685	9.102545922474818e-11	0.0	6.85639030671864e-12	9.63547100900938e-11	0.0	-0.09945408802014218	0.0	7.462033624174329e-11	0.0	1.0	0.0	1.8651821970414237e-12	0.0	0.0	2.1373413582682377e-10	0.0	0.0	-8.719286751390823e-10	0.0	9.102545922477376e-11	0.0	6.856390306379082e-12	1.2039207627216594e-10	0.0	-4.426203833109383e-11
1.69	9.16274196061128e-11	0.0	6.635080115026026e-12	9.691950198816121e-11	0.0	-0.09945408802014821	0.0	7.019663588843652e-11	0.0	1.0	0.0	1.648780154841463e-12	0.0	0.0	1.889362884346844e-10	0.0	0.0	-8.518188202769624e-10	0.0	9.162741960613468e-11	0.0	6.635080114723879e-12	1.2039207627220644e-10	0.0	-4.426203833098949e-11
1.695	9.222937998747743e-11	0.0	6.413769923333402e-12	9.748429388622864e-11	0.0	-0.09945408802015425	0.0	6.577293553512957e-11	0.0	1.0	0.0	1.432378112641494e-12	0.0	0.0	1.6413844104254408e-10	0.0	0.0	-8.329762622152175e-10	0.0	9.222937998749581e-11	0.0	6.413769923069187e-12	1.20392076272242e-10	0.0	-4.426203833088527e-11
1.7	9.283134036884205e-11	0.0	6.192459731640788e-12	9.804908578429605e-11	0.0	-0.09945408802016029	0.0	6.134923518182281e-11	0.0	1.0	0.0	1.215976070441534e-12	0.0	0.0	1.3934059365040478e-10	0.0	0.0	-8.154010009538478e-10	0.0	9.28313403688571e-11	0.0	6.192459731415026e-12	1.2039207627228205e-10	0.0	-4.426203833078103e-11
1.705	9.343330075020669e-11	0.0	5.971149539948164e-12	9.861387768236348e-11	0.0	-0.09945408802016632	0.0	5.692553482851586e-11	0.0	1.0	0.0	9.995740282415644e-13	0.0	0.0	1.145427462582644e-10	0.0	0.0	-7.990930364928531e-10	0.0	9.343330075021863e-11	0.0	5.971149539761377e-12	1.2039207627232062e-10	0.0	-4.426203833067698e-11
1.71	9.40352611315713e-11	0.0	5.7498393482555485e-12	9.917866958043089e-11	0.0	-0.09945408802017236	0.0	5.2501834475209095e-11	0.0	1.0	0.0	7.831719860416044e-13	0.0	0.0	8.97448988661251e-11	0.0	0.0	-7.840523688322335e-10	0.0	9.403526113158031e-11	0.0	5.749839348108257e-12	1.203920762723583e-10	0.0	-4.4262038330572707e-11
1.715	9.463722151293594e-11	0.0	5.5285291565629245e-12	9.974346147849833e-11	0.0	-0.0994540880201784	0.0	4.807813412190215e-11	0.0	1.0	0.0	5.667699438416347e-13	0.0	0.0	6.49470514739847e-11	0.0	0.0	-7.702789979719889e-10	0.0	9.463722151294221e-11	0.0	5.5285291564556495e-12	1.203920762723947e-10	0.0	-4.4262038330468424e-11
1.72	9.523918189430054e-11	0.0	5.30721896487031e-12	1.0030825337656573e-10	0.0	-0.09945408802018443	0.0	4.365443376859538e-11	0.0	1.0	0.0	3.503679016416747e-13	0.0	0.0	4.014920408184541e-11	0.0	0.0	-7.577729239121194e-10	0.0	9.523918189430426e-11	0.0	5.307218964803573e-12	1.2039207627243198e-10	0.0	-4.4262038330364244e-11
1.725	9.584114227566518e-11	0.0	5.085908773177686e-12	1.0087304527463317e-10	0.0	-0.09945408802019047	0.0	3.9230733415288437e-11	0.0	1.0	0.0	1.3396585944170498e-13	0.0	0.0	1.5351356689705012e-11	0.0	0.0	-7.46534146652625e-10	0.0	9.584114227566654e-11	0.0	5.085908773152007e-12	1.203920762724729e-10	0.0	-4.426203833026004e-11
1.73	9.644310265702979e-11	0.0	4.864598581485072e-12	1.0143783717270058e-10	0.0	-0.09945408802019651	0.0	3.480703306198167e-11	0.0	1.0	0.0	-8.243618275825501e-14	0.0	0.0	-9.446490702434275e-12	0.0	0.0	-7.365626661935057e-10	0.0	9.644310265702899e-11	0.0	4.8645985815009725e-12	1.2039207627251126e-10	0.0	-4.426203833015582e-11
1.735	9.704506303839443e-11	0.0	4.643288389792448e-12	1.0200262907076801e-10	0.0	-0.09945408802020254	0.0	3.0383332708674725e-11	0.0	1.0	0.0	-2.988382249582247e-13	0.0	0.0	-3.4244338094574674e-11	0.0	0.0	-7.278584825347615e-10	0.0	9.704506303839165e-11	0.0	4.643288389850449e-12	1.203920762725498e-10	0.0	-4.426203833005148e-11
1.74	9.764702341975905e-11	0.0	4.4219781980998335e-12	1.0256742096883542e-10	0.0	-0.09945408802020858	0.0	2.5959632355367972e-11	0.0	1.0	0.0	-5.152402671581847e-13	0.0	0.0	-5.904218548671396e-11	0.0	0.0	-7.204215956763923e-10	0.0	9.764702341975448e-11	0.0	4.421978198200457e-12	1.2039207627258793e-10	0.0	-4.426203832994734e-11
1.745	9.824898380112368e-11	0.0	4.2006680064072095e-12	1.0313221286690285e-10	0.0	-0.09945408802021462	0.0	2.1535932002061025e-11	0.0	1.0	0.0	-7.316423093581544e-13	0.0	0.0	-8.384003287885436e-11	0.0	0.0	-7.142520056183982e-10	0.0	9.824898380111753e-11	0.0	4.200668006550976e-12	1.2039207627262606e-10	0.0	-4.426203832984324e-11
1.75	9.88509441824883e-11	0.0	3.979357814714595e-12	1.0369700476497028e-10	0.0	-0.09945408802022065	0.0	1.711223164875426e-11	0.0	1.0	0.0	-9.480443515581144e-13	0.0	0.0	-1.0863788027099365e-10	0.0	0.0	-7.093497123607791e-10	0.0	9.885094418248075e-11	0.0	3.979357814902025e-12	1.2039207627266527e-10	0.0	-4.42620383297389e-11
1.7550000000000001	9.945290456385294e-11	0.0	3.758047623021971e-12	1.0426179666303771e-10	0.0	-0.09945408802022669	0.0	1.2688531295447313e-11	0.0	1.0	0.0	-1.164446393758084e-12	0.0	0.0	-1.3343572766313405e-10	0.0	0.0	-7.057147159035351e-10	0.0	9.945290456384419e-11	0.0	3.758047623253587e-12	1.2039207627270296e-10	0.0	-4.426203832963478e-11
1.76	1.0005486494521755e-10	0.0	3.536737431329356e-12	1.0482658856110512e-10	0.0	-0.09945408802023271	0.0	8.264830942140548e-12	0.0	1.0	0.0	-1.380848435958044e-12	0.0	0.0	-1.5823357505527333e-10	0.0	0.0	-7.033470162466662e-10	0.0	1.0005486494520778e-10	0.0	3.5367374316056772e-12	1.2039207627274173e-10	0.0	-4.426203832953064e-11
1.7650000000000001	1.0065682532658219e-10	0.0	3.315427239636732e-12	1.0539138045917255e-10	0.0	-0.09945408802023875	0.0	3.841130588833601e-12	0.0	1.0	0.0	-1.5972504781580138e-12	0.0	0.0	-1.8303142244741374e-10	0.0	0.0	-7.022466133901724e-10	0.0	1.006568253265716e-10	0.0	3.3154272399582804e-12	1.2039207627278074e-10	0.0	-4.426203832942631e-11
1.77	1.012587857079468e-10	0.0	3.0941170479441178e-12	1.0595617235723996e-10	0.0	-0.09945408802024479	0.0	-5.825697644731645e-13	0.0	1.0	0.0	-1.8136525203579738e-12	0.0	0.0	-2.0782926983955302e-10	0.0	0.0	-7.024135073340536e-10	0.0	1.0125878570793558e-10	0.0	3.0941170483114142e-12	1.2039207627281887e-10	0.0	-4.4262038329322e-11
1.7750000000000001	1.0186074608931144e-10	0.0	2.8728068562514946e-12	1.065209642553074e-10	0.0	-0.09945408802025082	0.0	-5.006270117780098e-12	0.0	1.0	0.0	-2.0300545625579427e-12	0.0	0.0	-2.3262711723169333e-10	0.0	0.0	-7.038476980783099e-10	0.0	1.0186074608929978e-10	0.0	2.8728068566650602e-12	1.203920762728557e-10	0.0	-4.426203832921782e-11
1.78	1.0246270647067606e-10	0.0	2.6514966645588803e-12	1.070857561533748e-10	0.0	-0.09945408802025686	0.0	-9.429970471086864e-12	0.0	1.0	0.0	-2.2464566047579027e-12	0.0	0.0	-2.574249646238326e-10	0.0	0.0	-7.065491856229412e-10	0.0	1.0246270647066414e-10	0.0	2.651496665019236e-12	1.203920762728934e-10	0.0	-4.426203832911367e-11
1.7850000000000001	1.030646668520407e-10	0.0	2.430186472866256e-12	1.0765054805144224e-10	0.0	-0.0994540880202629	0.0	-1.385367082439381e-11	0.0	1.0	0.0	-2.4628586469578723e-12	0.0	0.0	-2.8222281201597304e-10	0.0	0.0	-7.105179699679477e-10	0.0	1.0306466685202873e-10	0.0	2.4301864733739234e-12	1.2039207627293302e-10	0.0	-4.426203832900966e-11
1.79	1.0366662723340531e-10	0.0	2.2088762811736415e-12	1.0821533994950965e-10	0.0	-0.09945408802026894	0.0	-1.8277371177700576e-11	0.0	1.0	0.0	-2.6792606891578327e-12	0.0	0.0	-3.0702065940811234e-10	0.0	0.0	-7.157540511133291e-10	0.0	1.0366662723339347e-10	0.0	2.2088762817291414e-12	1.2039207627296662e-10	0.0	-4.426203832890393e-11
1.795	1.0426858761476992e-10	0.0	1.9875660894810276e-12	1.0878013184757705e-10	0.0	-0.09945408802027497	0.0	-2.270107153100733e-11	0.0	1.0	0.0	-2.8956627313577923e-12	0.0	0.0	-3.318185068002516e-10	0.0	0.0	-7.222574290590856e-10	0.0	1.042685876147584e-10	0.0	1.9875660900848808e-12	1.2039207627300927e-10	0.0	-4.426203832880125e-11
1.8	1.0487054799613456e-10	0.0	1.7662558977884028e-12	1.0934492374564449e-10	0.0	-0.09945408802028101	0.0	-2.7124771884314288e-11	0.0	1.0	0.0	-3.1120647735577624e-12	0.0	0.0	-3.5661635419239203e-10	0.0	0.0	-7.300281038052173e-10	0.0	1.0487054799612356e-10	0.0	1.7662558984411307e-12	1.2039207627304764e-10	0.0	-4.426203832869686e-11
1.805	1.0547250837749917e-10	0.0	1.544945706095789e-12	1.099097156437119e-10	0.0	-0.09945408802028705	0.0	-3.154847223762104e-11	0.0	1.0	0.0	-3.328466815757722e-12	0.0	0.0	-3.814142015845313e-10	0.0	0.0	-7.390660753517239e-10	0.0	1.0547250837748889e-10	0.0	1.5449457067979124e-12	1.2039207627308747e-10	0.0	-4.426203832859254e-11
1.81	1.0607446875886381e-10	0.0	1.323635514403165e-12	1.1047450754177933e-10	0.0	-0.09945408802029308	0.0	-3.597217259092799e-11	0.0	1.0	0.0	-3.5448688579576913e-12	0.0	0.0	-4.062120489766716e-10	0.0	0.0	-7.493713436986057e-10	0.0	1.0607446875885443e-10	0.0	1.3236355151552052e-12	1.203920762731241e-10	0.0	-4.42620383284884e-11
1.815	1.0667642914022843e-10	0.0	1.1023253227105506e-12	1.1103929943984674e-10	0.0	-0.09945408802029912	0.0	-4.0395872944234746e-11	0.0	1.0	0.0	-3.761270900157652e-12	0.0	0.0	-4.3100989636881097e-10	0.0	0.0	-7.609439088458625e-10	0.0	1.0667642914022013e-10	0.0	1.1023253235130285e-12	1.2039207627316352e-10	0.0	-4.426203832838423e-11
1.82	1.0727838952159307e-10	0.0	8.810151310179262e-13	1.1160409133791417e-10	0.0	-0.09945408802030516	0.0	-4.4819573297541706e-11	0.0	1.0	0.0	-3.9776729423576214e-12	0.0	0.0	-4.5580774376095136e-10	0.0	0.0	-7.737837707934944e-10	0.0	1.0727838952158606e-10	0.0	8.810151318713629e-13	1.2039207627320144e-10	0.0	-4.426203832828003e-11
1.825	1.0788034990295768e-10	0.0	6.597049393253119e-13	1.1216888323598158e-10	0.0	-0.0994540880203112	0.0	-4.924327365084846e-11	0.0	1.0	0.0	-4.1940749845575814e-12	0.0	0.0	-4.806055911530907e-10	0.0	0.0	-7.878909295415014e-10	0.0	1.0788034990295215e-10	0.0	6.597049402302284e-13	1.2039207627323848e-10	0.0	-4.426203832817573e-11
1.83	1.0848231028432232e-10	0.0	4.383947476326881e-13	1.1273367513404902e-10	0.0	-0.09945408802031723	0.0	-5.366697400415541e-11	0.0	1.0	0.0	-4.410477026757551e-12	0.0	0.0	-5.054034385452311e-10	0.0	0.0	-8.032653850898835e-10	0.0	1.0848231028431845e-10	0.0	4.3839474858960554e-13	1.203920762732777e-10	0.0	-4.426203832807154e-11
1.835	1.0908427066568693e-10	0.0	2.1708455594007356e-13	1.1329846703211642e-10	0.0	-0.09945408802032327	0.0	-5.809067435746217e-11	0.0	1.0	0.0	-4.626879068957511e-12	0.0	0.0	-5.302012859373704e-10	0.0	0.0	-8.199071374386406e-10	0.0	1.0908427066568493e-10	0.0	2.1708455694951303e-13	1.2039207627331603e-10	0.0	-4.426203832796735e-11
1.84	1.0968623104705157e-10	0.0	-4.225635752550441e-15	1.1386325893018386e-10	0.0	-0.0994540880203293	0.0	-6.251437471076912e-11	0.0	1.0	0.0	-4.843281111157481e-12	0.0	0.0	-5.549991333295107e-10	0.0	0.0	-8.378161865877727e-10	0.0	1.0968623104705161e-10	0.0	-4.225634690067939e-15	1.2039207627335286e-10	0.0	-4.426203832786312e-11
1.845	1.1028819142841617e-10	0.0	-2.2553582744516475e-13	1.1442805082825128e-10	0.0	-0.09945408802033534	0.0	-6.693807506407588e-11	0.0	1.0	0.0	-5.059683153357441e-12	0.0	0.0	-5.7979698072165e-10	0.0	0.0	-8.5699253253728e-10	0.0	1.1028819142841846e-10	0.0	-2.2553582632911814e-13	1.203920762733925e-10	0.0	-4.426203832775893e-11
1.85	1.1089015180978081e-10	0.0	-4.4684601913778896e-13	1.1499284272631871e-10	0.0	-0.09945408802034138	0.0	-7.136177541738284e-11	0.0	1.0	0.0	-5.2760851955574105e-12	0.0	0.0	-6.045948281137905e-10	0.0	0.0	-8.774361752871623e-10	0.0	1.1089015180978553e-10	0.0	-4.4684601796765716e-13	1.2039207627343041e-10	0.0	-4.42620383276547e-11
1.855	1.1149211219114542e-10	0.0	-6.681562108304032e-13	1.1555763462438612e-10	0.0	-0.09945408802034741	0.0	-7.578547577068959e-11	0.0	1.0	0.0	-5.49248723775737e-12	0.0	0.0	-6.293926755059297e-10	0.0	0.0	-8.991471148374196e-10	0.0	1.1149211219115277e-10	0.0	-6.681562096056651e-13	1.203920762734694e-10	0.0	-4.4262038327550486e-11
1.86	1.1209407257251006e-10	0.0	-8.894664025230273e-13	1.1612242652245356e-10	0.0	-0.09945408802035344	0.0	-8.020917612399653e-11	0.0	1.0	0.0	-5.708889279957339e-12	0.0	0.0	-6.5419052289807e-10	0.0	0.0	-9.221253511880521e-10	0.0	1.1209407257252022e-10	0.0	-8.89466401243162e-13	1.2393967804163107e-10	0.0	-4.853362919530582e-11
1.865	1.1269603295387468e-10	0.0	-1.1107765942156416e-12	1.1668721842052096e-10	0.0	-0.09945408802035947	0.0	-8.46328764773033e-11	0.0	1.0	0.0	-5.925291322157299e-12	0.0	0.0	-6.789883702902093e-10	0.0	0.0	-9.463708843390596e-10	0.0	1.1269603295388783e-10	0.0	-1.110776592880128e-12	1.0184694014308025e-10	0.0	-2.193223940517742e-11
1.87	1.1308513722915546e-10	0.0	-1.0757913337815971e-12	1.1726427967945209e-10	0.0	-0.0994540880203528	0.0	-8.17662514322256e-11	0.0	1.0	0.0	-5.9096507113558674e-12	0.0	0.0	-6.771960883143518e-10	0.0	0.0	-9.697951899074199e-10	0.0	1.1308513722916818e-10	0.0	-1.0757913324450098e-12	5.7830406418255997e-11	0.0	3.106712066490329e-11
1.875	1.13309813035742e-10	0.0	-8.428212962048798e-13	1.1785081885403142e-10	0.0	-0.09945408802033628	0.0	-7.326794842595107e-11	0.0	1.0	0.0	-5.714760283357632e-12	0.0	0.0	-6.548632903307575e-10	0.0	0.0	-9.907849109993658e-10	0.0	1.1330981303575163e-10	0.0	-8.428212949098029e-13	4.219468683842606e-11	0.0	4.9893753792029666e-11
1.8800000000000001	1.1353448884232855e-10	0.0	-6.098512586281503e-13	1.184373580286108e-10	0.0	-0.09945408802031977	0.0	-6.476964541967618e-11	0.0	1.0	0.0	-5.519869855359386e-12	0.0	0.0	-6.32530492347162e-10	0.0	0.0	-1.0093400476148973e-09	0.0	1.1353448884233529e-10	0.0	-6.098512573747591e-13	4.493516131674861e-11	0.0	4.659400750699005e-11
1.885	1.137591646489151e-10	0.0	-3.7688122105143296e-13	1.1902389720319016e-10	0.0	-0.09945408802030326	0.0	-5.627134241340167e-11	0.0	1.0	0.0	-5.32497942736115e-12	0.0	0.0	-6.101976943635676e-10	0.0	0.0	-1.0254605997540144e-09	0.0	1.1375916464891912e-10	0.0	-3.7688121983990255e-13	4.493516131678458e-11	0.0	4.659400750695491e-11
1.8900000000000001	1.1398384045550166e-10	0.0	-1.439111834747043e-13	1.1961043637776954e-10	0.0	-0.09945408802028674	0.0	-4.777303940712678e-11	0.0	1.0	0.0	-5.130088999362905e-12	0.0	0.0	-5.878648963799722e-10	0.0	0.0	-1.039146567416717e-09	0.0	1.1398384045550313e-10	0.0	-1.439111823052098e-13	4.4935161316818615e-11	0.0	4.659400750692005e-11
1.895	1.1420851626208819e-10	0.0	8.905885410201427e-14	1.201969755523489e-10	0.0	-0.09945408802027023	0.0	-3.9274736400852246e-11	0.0	1.0	0.0	-4.935198571364669e-12	0.0	0.0	-5.655320983963779e-10	0.0	0.0	-1.0503979506030051e-09	0.0	1.1420851626208731e-10	0.0	8.905885522929768e-14	4.493516131685739e-11	0.0	4.6594007506884954e-11
1.9000000000000001	1.1443319206867475e-10	0.0	3.2202889167874253e-13	1.2078351472692828e-10	0.0	-0.09945408802025371	0.0	-3.077643339457735e-11	0.0	1.0	0.0	-4.740308143366424e-12	0.0	0.0	-5.431993004127825e-10	0.0	0.0	-1.059214749312879e-09	0.0	1.144331920686717e-10	0.0	3.2202889276363974e-13	4.493516131689573e-11	0.0	4.659400750684993e-11
1.905	1.146578678752613e-10	0.0	5.549989292554611e-13	1.2137005390150761e-10	0.0	-0.0994540880202372	0.0	-2.227813038830282e-11	0.0	1.0	0.0	-4.545417715368188e-12	0.0	0.0	-5.208665024291881e-10	0.0	0.0	-1.0655969635463386e-09	0.0	1.1465786787525626e-10	0.0	5.549989302977969e-13	4.493516131692998e-11	0.0	4.65940075068149e-11
1.9100000000000001	1.1488254368184784e-10	0.0	7.879689668321894e-13	1.21956593076087e-10	0.0	-0.09945408802022068	0.0	-1.3779827382027925e-11	0.0	1.0	0.0	-4.350527287369943e-12	0.0	0.0	-4.985337044455927e-10	0.0	0.0	-1.0695445933033836e-09	0.0	1.14882543681841e-10	0.0	7.879689678317887e-13	4.493516131696423e-11	0.0	4.6594007506780045e-11
1.915	1.1510721948843439e-10	0.0	1.020939004408908e-12	1.2254313225066635e-10	0.0	-0.09945408802020417	0.0	-5.281524375753405e-12	0.0	1.0	0.0	-4.155636859371706e-12	0.0	0.0	-4.762009064619983e-10	0.0	0.0	-1.0710576385840143e-09	0.0	1.151072194884259e-10	0.0	1.0209390053655956e-12	4.493516131699956e-11	0.0	4.659400750674345e-11
1.92	1.1533189529502094e-10	0.0	1.2539090419856257e-12	1.231296714252457e-10	0.0	-0.09945408802018765	0.0	3.2167786305211143e-12	0.0	1.0	0.0	-3.960746431373471e-12	0.0	0.0	-4.53868108478404e-10	0.0	0.0	-1.0701360993882306e-09	0.0	1.15331895295011e-10	0.0	1.2539090428992265e-12	4.493516131703963e-11	0.0	4.6594007506709896e-11
1.925	1.1555657110160748e-10	0.0	1.4868790795623543e-12	1.237162105998251e-10	0.0	-0.09945408802017114	0.0	1.1715081636796009e-11	0.0	1.0	0.0	-3.765856003375226e-12	0.0	0.0	-4.3153531049480867e-10	0.0	0.0	-1.0667799757160325e-09	0.0	1.1555657110159629e-10	0.0	1.4868790804326931e-12	4.49351613170756e-11	0.0	4.6594007506674805e-11
1.93	1.1578124690819403e-10	0.0	1.7198491171390727e-12	1.2430274977440445e-10	0.0	-0.09945408802015462	0.0	2.021338464307054e-11	0.0	1.0	0.0	-3.5709655753769887e-12	0.0	0.0	-4.092025125112142e-10	0.0	0.0	-1.06098926756742e-09	0.0	1.1578124690818175e-10	0.0	1.7198491179659744e-12	4.493516131711136e-11	0.0	4.6594007506639767e-11
1.935	1.1600592271478059e-10	0.0	1.952819154715801e-12	1.248892889489838e-10	0.0	-0.09945408802013811	0.0	2.871168764934543e-11	0.0	1.0	0.0	-3.376075147378744e-12	0.0	0.0	-3.8686971452761887e-10	0.0	0.0	-1.052763974942393e-09	0.0	1.1600592271476741e-10	0.0	1.9528191554990907e-12	4.493516131714863e-11	0.0	4.659400750660468e-11
1.94	1.1623059852136714e-10	0.0	2.1857891922925193e-12	1.2547582812356317e-10	0.0	-0.0994540880201216	0.0	3.7209990655619955e-11	0.0	1.0	0.0	-3.1811847193805076e-12	0.0	0.0	-3.6453691654402445e-10	0.0	0.0	-1.042104097840952e-09	0.0	1.1623059852135323e-10	0.0	2.1857891930320212e-12	4.4935161317183524e-11	0.0	4.659400750656966e-11
1.945	1.164552743279537e-10	0.0	2.418759229869248e-12	1.2606236729814255e-10	0.0	-0.09945408802010508	0.0	4.5708293661894856e-11	0.0	1.0	0.0	-2.9862942913822626e-12	0.0	0.0	-3.4220411856042906e-10	0.0	0.0	-1.0290096362630962e-09	0.0	1.1645527432793925e-10	0.0	2.4187592305647873e-12	4.493516131721648e-11	0.0	4.6594007506534695e-11
1.95	1.1667995013454022e-10	0.0	2.651729267445966e-12	1.266489064727219e-10	0.0	-0.09945408802008857	0.0	5.420659666816937e-11	0.0	1.0	0.0	-2.7914038633840265e-12	0.0	0.0	-3.198713205768347e-10	0.0	0.0	-1.0134805902088261e-09	0.0	1.166799501345254e-10	0.0	2.651729268097368e-12	4.4935161317253964e-11	0.0	4.6594007506499585e-11
1.955	1.169046259411268e-10	0.0	2.8846993050226944e-12	1.272354456473013e-10	0.0	-0.09945408802007207	0.0	6.270489967444426e-11	0.0	1.0	0.0	-2.5965134353857815e-12	0.0	0.0	-2.975385225932393e-10	0.0	0.0	-9.955169596781415e-10	0.0	1.169046259411118e-10	0.0	2.884699305629783e-12	4.609836609839284e-11	0.0	5.347846773136696e-11
1.96	1.1712930174771334e-10	0.0	3.117669342599413e-12	1.2782198482188062e-10	0.0	-0.09945408802005555	0.0	7.12032026807188e-11	0.0	1.0	0.0	-2.4016230073875453e-12	0.0	0.0	-2.7520572460964494e-10	0.0	0.0	-9.751187446710426e-10	0.0	1.1712930174769837e-10	0.0	3.1176693431620137e-12	4.245655166050812e-11	0.0	3.192428651392141e-11
1.965	1.172841852674318e-10	0.0	2.9375717667067435e-12	1.2840795171112033e-10	0.0	-0.09945408802004786	0.0	8.656681249111144e-11	0.0	1.0	0.0	-2.102550252827461e-12	0.0	0.0	-2.409345114023554e-10	0.0	0.0	-9.503191796628372e-10	0.0	1.1728418526741944e-10	0.0	2.9375717671999354e-12	2.8097849847611317e-12	0.0	-2.0272621755878055e-10
1.97	1.1716903164535932e-10	0.0	1.1592517694951382e-12	1.289917043399545e-10	0.0	-0.09945408802007438	0.0	1.2849335511392414e-10	0.0	1.0	0.0	-1.4003799791522945e-12	0.0	0.0	-1.6047172504008938e-10	0.0	0.0	-9.135085449453192e-10	0.0	1.1716903164535606e-10	0.0	1.1592517698233005e-12	-2.753134344283517e-11	0.0	-3.8230103983221845e-10
1.975	1.1705387802328682e-10	0.0	-6.190682277165454e-13	1.295754569687887e-10	0.0	-0.0994540880201009	0.0	1.704198977367387e-10	0.0	1.0	0.0	-6.982097054770964e-13	0.0	0.0	-8.000893867781972e-11	0.0	0.0	-8.646868405184882e-10	0.0	1.1705387802328767e-10	0.0	-6.190682275530891e-13	-2.303072441417745e-11	0.0	-3.556639994752378e-10
1.98	1.1693872440121431e-10	0.0	-2.397388224928151e-12	1.301592095976229e-10	0.0	-0.09945408802012742	0.0	2.1234644035955143e-10	0.0	1.0	0.0	3.960568198070845e-15	0.0	0.0	4.5384768444638583e-13	0.0	0.0	-8.038540663823445e-10	0.0	1.169387244012143e-10	0.0	-2.3973882249290773e-12	-2.2980010625915266e-11	0.0	-4.374072792171719e-10
1.985	1.1682357077914184e-10	0.0	-4.175708222139834e-12	1.3074296222645708e-10	0.0	-0.09945408802015394	0.0	2.54272982982366e-10	0.0	1.0	0.0	7.06130841873269e-13	0.0	0.0	8.091663404671603e-11	0.0	0.0	-7.310102225368877e-10	0.0	1.1682357077913594e-10	0.0	-4.17570822230482e-12	-2.5367869807471758e-11	0.0	1.4518830389932007e-09
1.99	1.167053743296998e-10	0.0	-1.0494314348669766e-12	1.313266582906602e-10	0.0	-0.09945408802017458	0.0	6.016010743977293e-11	0.0	1.0	0.0	1.256381382356447e-12	0.0	0.0	1.4397070133567313e-10	0.0	0.0	-7.137756212801248e-10	0.0	1.1670537432969717e-10	0.0	-1.0494314351602295e-12	8.418070710348775e-08	0.0	-7.1556971674181365e-09
1.995	1.1670914963968162e-10	0.0	-7.694839624886906e-11	1.3191030657399223e-10	0.0	-0.09945408802086737	0.0	-1.611527607457255e-10	0.0	1.0	0.0	5.367601122297091e-13	0.0	0.0	6.150817808346147e-11	0.0	0.0	-7.599424865181828e-10	0.0	1.16709149639599e-10	0.0	-7.694839624899435e-11	4.131475502349279e-05	0.0	-2.2288724706493426e-08
2.0	-4.934819070924449e-09	0.0	-1.5523706239009214e-10	1.3085708530238145e-10	0.0	-0.09945408802170234	0.0	-3.3291893316998003e-10	0.0	1.0	0.0	-3.3081422292429e-13	0.0	0.0	-3.790851755292357e-11	0.0	0.0	-8.553167354713716e-10	0.0	-4.934819070924346e-09	0.0	-1.5523706239335715e-10	-0.0001689180219061	0.0	2.184403524861449e-08
2.005	-2.5191806734008203e-06	0.0	9.964672629595473e-11	-6.3916887227667355e-09	0.0	-0.09945408802184445	0.0	5.907405726943237e-10	0.0	1.0	0.0	4.08407471736863e-14	0.0	0.0	4.68000489042614e-12	0.0	0.0	-6.860820274587418e-10	0.0	-2.5191806734008203e-06	0.0	9.964672650172517e-11	-0.0009599111492570182	0.0	3.1794281231307466e-08
2.0100000000000002	-1.001918104066335e-05	0.0	1.0106928071369158e-10	-3.8093766113315083e-08	0.0	-0.09945408802140944	0.0	5.805233278393825e-09	0.0	1.0	0.0	7.732170622285394e-12	0.0	0.0	8.86041486263993e-10	0.0	0.0	9.769948022455615e-10	0.0	-1.0019181040663348e-05	0.0	1.0106943565372619e-10	-0.001999762819082624	0.0	-7.541681782427494e-09
2.015	-2.251918410816866e-05	0.0	6.584475512458722e-11	-1.238793786394401e-07	0.0	-0.09945408802104064	0.0	1.9775304437821644e-08	0.0	1.0	0.0	4.3499014608886555e-11	0.0	0.0	4.984619900134222e-09	0.0	0.0	6.642202216613098e-09	0.0	-2.2519184108168654e-05	0.0	6.584671424922422e-11	-0.0030000010310020234	0.0	-8.14342350947948e-09
2.02	-4.001919315225616e-05	0.0	2.685338579529231e-11	-2.791566114874267e-07	0.0	-0.09945408802069541	0.0	4.752174091028046e-08	0.0	1.0	0.0	1.2944709995912384e-10	0.0	0.0	1.4833544995731776e-08	0.0	0.0	2.0256178162979363e-08	0.0	-4.0019193152256157e-05	0.0	2.686374653228484e-11	-0.004000002861453039	0.0	-7.540759011855686e-09
2.025	-6.251921570602185e-05	0.0	-5.4313374088449275e-12	-5.319684892430401e-07	0.0	-0.09945408802049588	0.0	9.131472116656612e-08	0.0	1.0	0.0	3.035987206444974e-10	0.0	0.0	3.4789850717001996e-08	0.0	0.0	4.641591881427018e-08	0.0	-6.251921570602185e-05	0.0	-5.393375901036836e-12	-0.005000006468890441	0.0	-4.62278651142627e-09
2.0300000000000002	-9.001926213630658e-05	0.0	-1.651535623316421e-11	-9.100234238683491e-07	0.0	-0.09945408802046538	0.0	1.535736299878541e-07	0.0	1.0	0.0	6.088218984570153e-10	0.0	0.0	6.976585051345868e-08	0.0	0.0	9.041152302830905e-08	0.0	-9.001926213630659e-05	0.0	-1.6405744837021157e-11	-0.00600001261075338	0.0	6.60749486018835e-10
2.035	-0.00012251934784714567	0.0	-3.210050997648734e-12	-1.4385336864403456e-06	0.0	-0.099454088020476	0.0	2.3594914148346338e-07	0.0	1.0	0.0	1.093806744448228e-09	0.0	0.0	1.253410201196561e-07	0.0	0.0	1.5800597296199697e-07	0.0	-0.00012251934784714567	0.0	-2.9420260196475213e-12	-0.0070082132387146254	0.0	2.651281491702659e-09
2.04	-0.00016001949363604387	0.0	6.2502684086836436e-12	-2.1423906927110424e-06	0.0	-0.0994540880204733	0.0	3.3918867760829584e-07	0.0	1.0	0.0	1.8101170064417751e-09	0.0	0.0	2.0742412978793714e-07	0.0	0.0	2.551763713898914e-07	0.0	-0.00016001949363604384	0.0	6.829576422269252e-12	-0.008635813316369964	0.0	1.6648350759809503e-09
2.045	-0.0002020282733810425	0.0	2.0264765072357525e-11	-3.0467924203424756e-06	0.0	-0.09945408802039786	0.0	1.0063149865053131e-06	0.0	1.0	0.0	2.840047037884214e-09	0.0	0.0	3.2544541777879295e-07	0.0	0.0	5.434643793274856e-07	0.0	-0.0002020282733810424	0.0	2.1412304671126908e-11	-0.004951343525447602	0.0	7.730388788761676e-09
2.05	-0.00020794186742528767	0.0	6.349881266882068e-11	-4.078373556856224e-06	0.0	-0.09945408802017622	0.0	2.1494903524542904e-05	0.0	0.9999999999999993	0.0	3.6163913616146914e-08	0.0	0.0	4.144079241761819e-06	0.0	0.0	6.701300644313417e-06	0.0	-0.00020794186742528254	0.0	7.853879613031726e-11	-8.70303889011025e-05	0.0	1.0580723381648934e-08
2.055	-0.00020881772663421553	0.0	6.786282808498414e-11	-5.1207549451855134e-06	0.0	-0.09945408801967463	0.0	2.279642486013574e-05	0.0	0.9999999999999957	0.0	9.349200583542671e-08	0.0	0.0	1.0713394705164844e-05	0.0	0.0	1.3231995306677848e-05	0.0	-0.00020881772663419924	0.0	1.0690840431903603e-10	-3.3633754129358605e-05	0.0	-2.1958281915201105e-09
2.06	-0.0002091132963272398	0.0	-5.357433678952709e-12	-6.1656486463145655e-06	0.0	-0.09945408801924323	0.0	1.9514047740528937e-05	0.0	0.9999999999999892	0.0	1.46600922711323e-07	0.0	0.0	1.679922828816483e-05	0.0	0.0	1.882235819042339e-05	0.0	-0.00020911329632723237	0.0	5.595497070660619e-11	-4.533736255910546e-05	0.0	-1.5293167990255337e-08
2.065	-0.00020938167934885353	0.0	-1.0755081106449614e-10	-7.211856869899106e-06	0.0	-0.09945408801916628	0.0	1.6250168860229265e-05	0.0	0.9999999999999818	0.0	1.9113946379180427e-07	0.0	0.0	2.1902969147328136e-05	0.0	0.0	2.3477688650753652e-05	0.0	-0.0002093816793488794	0.0	-2.7508607227355032e-11	-6.015461034753689e-05	0.0	-1.3650359627407803e-08
2.07	-0.00020973324738911931	0.0	-1.7509641941610623e-10	-8.25960935990395e-06	0.0	-0.09945408801945242	0.0	1.3856949963905681e-05	0.0	0.9999999999999738	0.0	2.285980019483879e-07	0.0	0.0	2.619540143353222e-05	0.0	0.0	2.744741240003242e-05	0.0	-0.00020973324738917737	0.0	-7.920721682549115e-11	-7.903529860966215e-05	0.0	-1.2817390880159334e-08
2.075	-0.00021016805850879725	0.0	-2.651267204834192e-10	-9.30933256575057e-06	0.0	-0.09945408802000211	0.0	1.2277807656166277e-05	0.0	0.9999999999999659	0.0	2.6112246306333433e-07	0.0	0.0	2.9922430139179913e-05	0.0	0.0	3.0964745201891104e-05	0.0	-0.00021016805850890705	0.0	-1.553675182932746e-10	-9.361684652188227e-05	0.0	-1.333404376460166e-08
2.08	-0.00021066221169072351	0.0	-3.202531945862551e-10	-1.0361389260726936e-05	0.0	-0.09945408802093551	0.0	1.1269661097295649e-05	0.0	0.9999999999999578	0.0	2.904657854695945e-07	0.0	0.0	3.328492720072079e-05	0.0	0.0	3.419326528898017e-05	0.0	-0.000210662211690874	0.0	-1.9787286501119018e-10	-0.00010340172594118264	0.0	-7.141520360945249e-10
2.085	-0.00021119638297098444	0.0	-3.1102495485984585e-10	-1.1416022772507335e-05	0.0	-0.09945408802187417	0.0	1.0642223662124797e-05	0.0	0.9999999999999495	0.0	3.177937664808021e-07	0.0	0.0	3.6416483149832627e-05	0.0	0.0	3.724203779135022e-05	0.0	-0.00021119638297113945	0.0	-1.7679116683684764e-10	-0.0001097624877969963	0.0	-3.2809790972804995e-09
2.09	-0.00021175573953037254	0.0	-3.5338209465625103e-10	-1.247339469106337e-05	0.0	-0.09945408802280979	0.0	1.0254245401579095e-05	0.0	0.9999999999999408	0.0	3.438745319743344e-07	0.0	0.0	3.940511872833246e-05	0.0	0.0	4.01796627093598e-05	0.0	-0.00021175573953056547	0.0	-2.0774728300840415e-10	-0.00011366712918076656	0.0	2.537856628614412e-08
2.095	-0.00021233053195853342	0.0	-1.942846703222071e-10	-1.3533606634303633e-05	0.0	-0.09945408802360031	0.0	1.001338721372065e-05	0.0	0.9999999999999318	0.0	3.6918984858622787e-07	0.0	0.0	4.230604032613048e-05	0.0	0.0	4.3048286839242075e-05	0.0	-0.000212330531958619	0.0	-3.7504116434156457e-11	-0.0001161125531201814	0.0	-1.1300628860664366e-07
2.1	-0.00021291537583932065	0.0	-7.740794796632064e-10	-1.459671904462043e-05	0.0	-0.09945408802512753	0.0	9.866714711402574e-06	0.0	0.9999999999999223	0.0	3.9402753334098115e-07	0.0	0.0	4.5152229344778267e-05	0.0	0.0	4.5874892392357115e-05	0.0	-0.00021291537583986448	0.0	-6.06290438958308e-10	-0.00011772950103147985	0.0	4.231367172364014e-07
2.105	-0.00021350672026110507	0.0	3.236503782538762e-09	-1.566277129993615e-05	0.0	-0.09945408801958454	0.0	9.78253673494162e-06	0.0	0.9999999999999123	0.0	4.18574926368468e-07	0.0	0.0	4.796515338182622e-05	0.0	0.0	4.867738273157633e-05	0.0	-0.00021350672025832073	0.0	3.415240901962541e-09	-0.00011868890668546632	0.0	3.904571329599274e-07
2.11	-0.00021410147586800143	0.0	1.836335329586044e-09	-1.6731789623416935e-05	0.0	-0.09945408800589364	0.0	9.72920188805716e-06	0.0	0.9999999999999017	0.0	4.42954677511726e-07	0.0	0.0	5.0758867074002324e-05	0.0	0.0	5.146459376265827e-05	0.0	-0.00021410147586629048	0.0	2.026009829981094e-09	-0.00011916154554807193	0.0	-7.09628138610177e-07
2.115	-0.00021469799776655646	0.0	-2.607157271004116e-09	-1.7803787867373886e-05	0.0	-0.09945408800218623	0.0	9.693822852539013e-06	0.0	0.9999999999998908	0.0	4.672314846330343e-07	0.0	0.0	5.3540784250210826e-05	0.0	0.0	5.4241669446648043e-05	0.0	-0.00021469799776889894	0.0	-2.406529942514583e-09	-0.00011945088187517605	0.0	-7.762771460892594e-07
2.12	-0.00021529590318697807	0.0	-4.81437897620488e-09	-1.8878773182978787e-05	0.0	-0.09945408801722362	0.0	9.672334505674472e-06	0.0	0.9999999999998791	0.0	4.914401410000718e-07	0.0	0.0	5.631489192523866e-05	0.0	0.0	5.701258917271756e-05	0.0	-0.0002152959031916059	0.0	-4.602768878164685e-09	-0.00011972000900498214	0.0	-4.412126575071239e-08
2.125	-0.0002158950859450856	0.0	-3.260994307183032e-09	-1.9956751002132064e-05	0.0	-0.0994540880405844	0.0	9.66210862050848e-06	0.0	0.999999999999867	0.0	5.156076349737584e-07	0.0	0.0	5.90842827374392e-05	0.0	0.0	5.978057939847809e-05	0.0	-0.0002158950859483335	0.0	-3.038359997848123e-09	-0.00011992225829814198	0.0	4.897019475501461e-07
2.13	-0.00021649498076093047	0.0	-6.150633537066184e-10	-2.1037725926159667e-05	0.0	-0.09945408805923964	0.0	9.658351664924506e-06	0.0	0.9999999999998542	0.0	5.397554373786784e-07	0.0	0.0	6.185141706207513e-05	0.0	0.0	6.254749333574472e-05	0.0	-0.0002164949807614682	0.0	-3.8135466764448466e-10	-0.00012003125170628352	0.0	5.57971473578866e-07
2.1350000000000002	-0.00021709528283200702	0.0	1.7378276037224534e-09	-2.2121701052244506e-05	0.0	-0.0994540880640605	0.0	9.658136415530147e-06	0.0	0.9999999999998409	0.0	5.638982149290019e-07	0.0	0.0	6.461797558078903e-05	0.0	0.0	6.531434560860215e-05	0.0	-0.00021709528282990896	0.0	1.98266688863826e-09	-0.00012006944997905284	0.0	2.620796156562759e-07
2.14	-0.00021769560314413672	0.0	1.8311289566988268e-09	-2.320867805350431e-05	0.0	-0.09945408805608658	0.0	9.658430276298723e-06	0.0	0.9999999999998269	0.0	5.880432094151789e-07	0.0	0.0	6.738478814163864e-05	0.0	0.0	6.808128206636861e-05	0.0	-0.0002176956031418324	0.0	2.0871577989944174e-09	-0.00012006123624003727	0.0	-1.381906670854691e-07
2.145	-0.0002182958979935464	0.0	7.176854592840748e-10	-2.4298656969846278e-05	0.0	-0.09945408804631914	0.0	9.658613201698265e-06	0.0	0.9999999999998125	0.0	6.121904695867336e-07	0.0	0.0	7.015186033090801e-05	0.0	0.0	7.084827092840186e-05	0.0	-0.00021829589799250395	0.0	9.849627958865401e-10	-0.00012006413926712268	0.0	-2.1580777384102253e-07
2.15	-0.0002188962278875577	0.0	-3.501320539436892e-10	-2.5391637683674736e-05	0.0	-0.09945408804030877	0.0	9.659159824433648e-06	0.0	0.9999999999997974	0.0	6.363395845187134e-07	0.0	0.0	7.291914506006613e-05	0.0	0.0	7.361541638631373e-05	0.0	-0.0002188962278878259	0.0	-7.154738453009773e-11	-0.00012005124330399997	0.0	-3.5647699052995645e-07
2.1550000000000002	-0.00021949643243854896	0.0	-2.628461241596759e-09	-2.6487621401995126e-05	0.0	-0.09945408803271158	0.0	9.658732933268572e-06	0.0	0.9999999999997817	0.0	6.604961394513648e-07	0.0	0.0	7.568728235050044e-05	0.0	0.0	7.638243954891524e-05	0.0	-0.0002194964324418295	0.0	-2.3385081490965093e-09	-0.00012005256260722377	0.0	-3.502124514215898e-07
2.16	-0.00022009680413372939	0.0	-3.413370637508185e-09	-2.7586606728591775e-05	0.0	-0.0994540880322313	0.0	9.659748507823977e-06	0.0	0.9999999999997655	0.0	6.846539858192298e-07	0.0	0.0	7.845556762850928e-05	0.0	0.0	7.914975365219578e-05	0.0	-0.00022009680413819692	0.0	-3.11199032907259e-09	-0.0001200955923495699	0.0	3.2807037975997035e-08
2.165	-0.00022069735423551988	0.0	-2.6387002209002874e-09	-2.8688593739390848e-05	0.0	-0.09945408803830233	0.0	9.662296291336316e-06	0.0	0.9999999999997486	0.0	7.08813539753229e-07	0.0	0.0	8.122404857918362e-05	0.0	0.0	8.191779764168818e-05	0.0	-0.0002206973542390387	0.0	-2.325833675158011e-09	-0.00012010642872441521	0.0	1.312325979890195e-07
2.17	-0.00022129786672144542	0.0	-2.26298761292647e-09	-2.9793583560472193e-05	0.0	-0.09945408804443699	0.0	9.664580658377486e-06	0.0	0.9999999999997313	0.0	7.329798207014395e-07	0.0	0.0	8.39933003889041e-05	0.0	0.0	8.468649605413216e-05	0.0	-0.00022129786672452504	0.0	-1.938573871581933e-09	-0.00012011909702676032	0.0	1.4512401358717668e-07
2.1750000000000003	-0.00022189854740748574	0.0	-1.1611530479950995e-09	-3.090157537539026e-05	0.0	-0.09945408805020653	0.0	9.668339878730118e-06	0.0	0.9999999999997133	0.0	7.57149344615555e-07	0.0	0.0	8.676292381514353e-05	0.0	0.0	8.745627140387847e-05	0.0	-0.00022189854740898963	0.0	-8.251323685124214e-10	-0.00012013671004962098	0.0	2.3282669273140495e-07
2.18	-0.00022249920367621817	0.0	-1.615094376962904e-10	-3.201257003720737e-05	0.0	-0.09945408805670587	0.0	9.67189020570053e-06	0.0	0.9999999999996947	0.0	7.813258223244803e-07	0.0	0.0	8.953334408757142e-05	0.0	0.0	9.022706384738125e-05	0.0	-0.00022249920367619882	0.0	1.8617930886152708e-10	-0.00012013017388155694	0.0	1.6069831125099083e-07
2.185	-0.0002230998472502939	0.0	3.431721458467186e-10	-3.312656757125898e-05	0.0	-0.09945408806007183	0.0	9.675337166398662e-06	0.0	0.9999999999996756	0.0	8.055094234465968e-07	0.0	0.0	9.230458064302253e-05	0.0	0.0	9.29988437723848e-05	0.0	-0.00022309984724945152	0.0	7.025902045053728e-10	-0.0001201253003460616	0.0	3.803757550213953e-08
2.19	-0.0002237004550160829	0.0	2.70099273752054e-10	-3.424356806509621e-05	0.0	-0.09945408806027346	0.0	9.678465945280873e-06	0.0	0.9999999999996557	0.0	8.297005111650991e-07	0.0	0.0	9.507667509922534e-05	0.0	0.0	9.577152002651324e-05	0.0	-0.00022370045501532662	0.0	6.413080375009728e-10	-0.00012012020742377318	0.0	-1.7956296832758335e-08
2.195	-0.00022430104010183276	0.0	1.5058235079410077e-10	-3.5363571370849864e-05	0.0	-0.09945408806052858	0.0	9.681358118651898e-06	0.0	0.9999999999996354	0.0	8.53898357999414e-07	0.0	0.0	9.784954409304681e-05	0.0	0.0	9.854502482728058e-05	0.0	-0.00022430104010124846	0.0	5.33642930474773e-10	-0.00012010683255223863	0.0	-7.825822439919385e-08
2.2	-0.00022490153404464662	0.0	-4.82994927216589e-10	-3.6486577728725885e-05	0.0	-0.09945408805956484	0.0	9.683389379345953e-06	0.0	0.9999999999996144	0.0	8.781039566404559e-07	0.0	0.0	0.00010062330137848645	0.0	0.0	0.00010131911154137223	0.0	-0.000224901534045148	0.0	-8.802107341777162e-11	-0.00012010151768081562	0.0	-1.06939349241271e-07
2.205	-0.00022550206953373338	0.0	-8.434973368573313e-10	-3.761258673639131e-05	0.0	-0.09945408805946745	0.0	9.685863125164961e-06	0.0	0.9999999999995929	0.0	9.023157055822387e-07	0.0	0.0	0.00010339776343647654	0.0	0.0	0.00010409390693143896	0.0	-0.00022550206953488836	0.0	-4.3654921889295203e-10	-0.00012010742946255594	0.0	-5.643597257927826e-08
2.21	-0.00022610259942190425	0.0	-1.122851771887883e-09	-3.8741598537314276e-05	0.0	-0.09945408806015578	0.0	9.688332972909368e-06	0.0	0.9999999999995708	0.0	9.265341707543806e-07	0.0	0.0	0.0001061729951177743	0.0	0.0	0.00010686940988076466	0.0	-0.0002261025994235968	0.0	-7.03868202964567e-10	-0.00012010516273088189	0.0	-5.15332103044624e-08
2.215	-0.0002267031173587608	0.0	-1.4380560232905499e-09	-3.987361315907225e-05	0.0	-0.09945408806094969	0.0	9.690698327093114e-06	0.0	0.999999999999548	0.0	9.507594716111909e-07	0.0	0.0	0.0001089490101108353	0.0	0.0	0.00010964559045414928	0.0	-0.00022670311736108545	0.0	-1.0069757511428944e-09	-0.00012009987278065851	0.0	-9.203098120135889e-08
2.22	-0.00022730360688739875	0.0	-2.002679065967961e-09	-4.100863067035033e-05	0.0	-0.09945408806071314	0.0	9.692751598473601e-06	0.0	0.9999999999995247	0.0	9.749919037456547e-07	0.0	0.0	0.00011172584228812054	0.0	0.0	0.00011242235924645538	0.0	-0.0002273036068908718	0.0	-1.559440713149567e-09	-0.00012010029228333799	0.0	-8.92356951624412e-08
2.225	-0.00022790413690227794	0.0	-2.2147278551797e-09	-4.214665079267304e-05	0.0	-0.0994540880621607	0.0	9.695188780436376e-06	0.0	0.9999999999995007	0.0	9.99230275226157e-07	0.0	0.0	0.00011450335506432797	0.0	0.0	0.00011519982623996334	0.0	-0.00022790413690624883	0.0	-1.7592704282914184e-09	-0.00012011442336044163	0.0	3.026137370337388e-08
2.23	-0.0002285047382446244	0.0	-1.8358212535470441e-09	-4.3287673402343884e-05	0.0	-0.0994540880662902	0.0	9.69830301116411e-06	0.0	0.9999999999994763	0.0	1.0234740573222218e-06	0.0	0.0	0.00011728148785140808	0.0	0.0	0.00011797818539485694	0.0	-0.00022850473824790354	0.0	-1.3680839104062875e-09	-0.00012011776931189716	0.0	5.6972253818573044e-08
2.235	-0.00022910530281250278	0.0	-1.771882608771457e-09	-4.443169897813656e-05	0.0	-0.0994540880691593	0.0	9.70105904762181e-06	0.0	0.9999999999994512	0.0	1.0477253286486133e-06	0.0	0.0	0.0001200604788410673	0.0	0.0	0.0001207573340960366	0.0	-0.00022910530281571278	0.0	-1.2918037513990918e-09	-0.00012011203447420292	0.0	5.770529678119193e-09
2.24	-0.00022970586800468717	0.0	-1.7305242990869172e-09	-4.557872736792049e-05	0.0	-0.09945408807199893	0.0	9.703812722144298e-06	0.0	0.9999999999994255	0.0	1.071983437418841e-06	0.0	0.0	0.00012284025334407555	0.0	0.0	0.00012353727166685772	0.0	-0.00022970586800786946	0.0	-1.2380425271253367e-09	-0.00012011478905884472	0.0	2.0819996583296695e-08
2.245	-0.00023030645291463494	0.0	-1.5701171542338111e-09	-4.6728758498938236e-05	0.0	-0.09945408807538923	0.0	9.70674485709484e-06	0.0	0.9999999999993991	0.0	1.0962480753557928e-06	0.0	0.0	0.00012562077603447787	0.0	0.0	0.00012631804923246697	0.0	-0.0002303064529175239	0.0	-1.0651711427309648e-09	-0.00012011919814643176	0.0	4.766327060863065e-08
2.25	-0.0002309070517164797	0.0	-1.3216944159999916e-09	-4.7881792371125146e-05	0.0	-0.0994540880792174	0.0	9.709799223843312e-06	0.0	0.9999999999993723	0.0	1.1205192221095639e-06	0.0	0.0	0.00012840204458034704	0.0	0.0	0.00012909970180969508	0.0	-0.0002309070517188619	0.0	-8.042228360590725e-10	-0.00012011720332961686	0.0	4.067556504104578e-08
2.255	-0.00023150762061270008	0.0	-1.2111008811210101e-09	-4.9037829021040155e-05	0.0	-0.09945408808271979	0.0	9.712560880704099e-06	0.0	0.9999999999993447	0.0	1.1447969192731804e-06	0.0	0.0	0.00013118406374789274	0.0	0.0	0.00013188214554333614	0.0	-0.00023150762061486624	0.0	-6.810424593868165e-10	-0.00012011234964703469	0.0	1.8791631769016013e-08
2.2600000000000002	-0.00023210817738478082	0.0	-1.148253533216984e-09	-5.019686842584937e-05	0.0	-0.09945408808618823	0.0	9.715196614478834e-06	0.0	0.9999999999993167	0.0	1.1690811079862093e-06	0.0	0.0	0.00013396682679220616	0.0	0.0	0.00013466534435908325	0.0	-0.00023210817738683118	0.0	-6.055469628348979e-10	-0.00012010941618874658	0.0	7.31471813062994e-09
2.265	-0.00023270871728035353	0.0	-1.1586780889590064e-09	-5.135891058445246e-05	0.0	-0.09945408808952838	0.0	9.717660337728266e-06	0.0	0.999999999999288	0.0	1.1933717661475495e-06	0.0	0.0	0.00013675033118068776	0.0	0.0	0.00013744924897955078	0.0	-0.00023270871728245626	0.0	-6.032620630785295e-10	-0.00012010801600732042	0.0	-3.145000988398479e-09
2.27	-0.0002333092600860532	0.0	-1.1890495437549779e-09	-5.252395546017267e-05	0.0	-0.09945408809278374	0.0	9.720182142040628e-06	0.0	0.9999999999992587	0.0	1.2176687502924931e-06	0.0	0.0	0.00013953456047349283	0.0	0.0	0.00014023387604373758	0.0	-0.00023330926008825715	0.0	-6.208627534305721e-10	-0.00012010841618815517	0.0	-1.1440420507084849e-09
2.275	-0.00023390980126358592	0.0	-1.1958877318044409e-09	-5.3692003104828955e-05	0.0	-0.09945408809631198	0.0	9.72266905771516e-06	0.0	0.9999999999992287	0.0	1.241972341078102e-06	0.0	0.0	0.0001423195468315518	0.0	0.0	0.00014301921555678516	0.0	-0.0002339098012658348	0.0	-6.148687248483008e-10	-0.00012010836164156802	0.0	-1.4820249369575534e-10
2.2800000000000002	-0.0002345103442802231	0.0	-1.2236703180234814e-09	-5.486305347005949e-05	0.0	-0.09945408809976555	0.0	9.7252002370688e-06	0.0	0.9999999999991983	0.0	1.2662822740130192e-06	0.0	0.0	0.00014510525994638766	0.0	0.0	0.0001458052801993035	0.0	-0.0002345103442825701	0.0	-6.297577339505596e-10	-0.00012010880394383244	0.0	-6.4239142663201495e-09
2.285	-0.00023511088913596466	0.0	-1.2723973024120943e-09	-5.603710655586406e-05	0.0	-0.09945408810314443	0.0	9.727775680101548e-06	0.0	0.9999999999991672	0.0	1.2905985490972408e-06	0.0	0.0	0.00014789169981799997	0.0	0.0	0.00014859208265190262	0.0	-0.0002351108891384658	0.0	-6.655297576166848e-10	-0.00012010905867270841	0.0	-1.3939400427517137e-09
2.29	-0.00023571143483017525	0.0	-1.26060050050688e-09	-5.7214162548752044e-05	0.0	-0.09945408810681279	0.0	9.730287521829589e-06	0.0	0.9999999999991355	0.0	1.31492208121179e-06	0.0	0.0	0.00015067897128403154	0.0	0.0	0.00015137960469415083	0.0	-0.0002357114348326753	0.0	-6.407161595984341e-10	-0.00012010928704465352	0.0	5.7814513669482125e-09
2.295	-0.0002363119821438086	0.0	-1.2518623907758511e-09	-5.839422130316087e-05	0.0	-0.09945408811048642	0.0	9.732819946318839e-06	0.0	0.9999999999991033	0.0	1.339252156330656e-06	0.0	0.0	0.00015346699252312854	0.0	0.0	0.0001541678522225749	0.0	-0.00023631198214631407	0.0	-6.18899727466194e-10	-0.00012010962827856585	0.0	3.769893314607568e-09
2.3000000000000003	-0.0002369125311201498	0.0	-1.249707091941444e-09	-5.957728281102267e-05	0.0	-0.09945408811414955	0.0	9.735377619550398e-06	0.0	0.9999999999990703	0.0	1.3635887348782763e-06	0.0	0.0	0.00015625575900026558	0.0	0.0	0.0001569568324704067	0.0	-0.00023691253112267694	0.0	-6.036045747635267e-10	-0.00012010996154505226	0.0	2.4069041760107685e-09
2.305	-0.00023751308175919874	0.0	-1.254134604003659e-09	-6.076334707233722e-05	0.0	-0.0994540881178022	0.0	9.737960541524266e-06	0.0	0.9999999999990368	0.0	1.3879318168546468e-06	0.0	0.0	0.00015904527071544224	0.0	0.0	0.00015974655267087803	0.0	-0.00023751308176176493	0.0	-5.9483067781388e-10	-0.00012011029409018013	0.0	1.1026553930708728e-09
2.31	-0.0002381136340609555	0.0	-1.2651449269624957e-09	-6.195241408710464e-05	0.0	-0.09945408812144436	0.0	9.740568712240441e-06	0.0	0.9999999999990027	0.0	1.4122814022597694e-06	0.0	0.0	0.00016183552766865875	0.0	0.0	0.0001625370200572208	0.0	-0.00023811363406357907	0.0	-5.925780129405678e-10	-0.00012011062663551218	0.0	-2.015886545188581e-10
2.315	-0.00023871418802542005	0.0	-1.282738060817954e-09	-6.314448385532492e-05	0.0	-0.09945408812507603	0.0	9.743202131698926e-06	0.0	0.999999999998968	0.0	1.436637491093644e-06	0.0	0.0	0.00016462652985991502	0.0	0.0	0.0001653282418626669	0.0	-0.00023871418802812034	0.0	-5.968465564667751e-10	-0.00012011095918100777	0.0	-1.505827966732461e-09
2.32	-0.00023931474365259243	0.0	-1.306914005570034e-09	-6.433955637699806e-05	0.0	-0.09945408812869723	0.0	9.74586079989972e-06	0.0	0.9999999999989326	0.0	1.461000083356271e-06	0.0	0.0	0.00016741827728921114	0.0	0.0	0.00016812022532044813	0.0	-0.00023931474365538948	0.0	-6.076362847155562e-10	-0.00012011129172671614	0.0	-2.810062543544486e-09
2.325	-0.00023991530094247268	0.0	-1.3376727612187388e-09	-6.553763165212417e-05	0.0	-0.09945408813230792	0.0	9.748544716842821e-06	0.0	0.9999999999988968	0.0	1.4853691790476523e-06	0.0	0.0	0.00017021076995654732	0.0	0.0	0.0001709129776637964	0.0	-0.00023991530094538783	0.0	-6.249471740098399e-10	-0.00012011162427262508	0.0	-4.11429238492849e-09
2.33	-0.00024051585989506068	0.0	-1.3750143277640628e-09	-6.673870968070304e-05	0.0	-0.09945408813590814	0.0	9.751253882528233e-06	0.0	0.9999999999988602	0.0	1.5097447781677836e-06	0.0	0.0	0.00017300400786192315	0.0	0.0	0.00017370650612594352	0.0	-0.00024051585989811602	0.0	-6.487792006724177e-10	-0.0001201119604616408	0.0	-5.432642939701599e-09
2.335	-0.00024111642051035648	0.0	-1.4189387052060087e-09	-6.794279046273476e-05	0.0	-0.09945408813949787	0.0	9.753988296955952e-06	0.0	0.9999999999988232	0.0	1.5341268807166673e-06	0.0	0.0	0.00017579799100533877	0.0	0.0	0.00017650081794012138	0.0	-0.00024111642051357512	0.0	-6.79132341025957e-10	-0.00012011240304469506	0.0	-7.1635284620731724e-09
2.34	-0.00024171698256978595	0.0	-1.4685983722894945e-09	-6.914987400147444e-05	0.0	-0.09945408814308684	0.0	9.756744259450306e-06	0.0	0.9999999999987854	0.0	1.5585154998436099e-06	0.0	0.0	0.0001785927208935938	0.0	0.0	0.00017929591927939636	0.0	-0.00024171698257318926	0.0	-7.151590444623965e-10	-0.00012011178455738797	0.0	-4.780131320321097e-09
2.345	-0.00024231753815977895	0.0	-1.4933084640011893e-09	-7.035996041477524e-05	0.0	-0.09945408814702757	0.0	9.759387785485447e-06	0.0	0.9999999999987471	0.0	1.582911111624851e-06	0.0	0.0	0.00018138825208100675	0.0	0.0	0.00018209177793309557	0.0	-0.00024231753816329212	0.0	-7.261742166052807e-10	-0.00012011103261319196	0.0	-1.879254081574631e-09
2.35	-0.00024291809401878034	0.0	-1.519197297936932e-09	-7.157304960228449e-05	0.0	-0.09945408815101987	0.0	9.762032963562097e-06	0.0	0.9999999999987081	0.0	1.6073133106790653e-06	0.0	0.0	0.0001841845381142995	0.0	0.0	0.00018488839437449405	0.0	-0.00024291809402240874	0.0	-7.383063260877419e-10	-0.00012011119872471572	0.0	-2.538114045414392e-09
2.355	-0.0002435186501467902	0.0	-1.5462648740967249e-09	-7.27891415640023e-05	0.0	-0.09945408815506378	0.0	9.764679793680259e-06	0.0	0.9999999999986685	0.0	1.631722097006255e-06	0.0	0.0	0.00018698157899347235	0.0	0.0	0.00018768576907686682	0.0	-0.00024351865015053938	0.0	-7.515553491342415e-10	-0.00012011125252756097	0.0	-2.761494380666842e-09
2.36	-0.00024411920654380853	0.0	-1.574511192480568e-09	-7.400823629992867e-05	0.0	-0.09945408815915928	0.0	9.76732827583993e-06	0.0	0.9999999999986284	0.0	1.6561374706064202e-06	0.0	0.0	0.00018977937471852533	0.0	0.0	0.0001904839025134889	0.0	-0.00024411920654768442	0.0	-7.659212619692201e-10	-0.0001201113063304532	0.0	-2.984869960805231e-09
2.365	-0.00024471976320983535	0.0	-1.6039362530884637e-09	-7.523033381006371e-05	0.0	-0.09945408816330636	0.0	9.769978410041112e-06	0.0	0.9999999999985877	0.0	1.680559431479563e-06	0.0	0.0	0.00019257792528945867	0.0	0.0	0.00019328279515763537	0.0	-0.0002447197632138439	0.0	-7.81404040817096e-10	-0.00012011136013332464	0.0	-3.2082407858248146e-09
2.37	-0.00024532032014487056	0.0	-1.6345400559204071e-09	-7.645543409440719e-05	0.0	-0.09945408816750505	0.0	9.772630196283806e-06	0.0	0.9999999999985463	0.0	1.7049879796256788e-06	0.0	0.0	0.0001953772307062718	0.0	0.0	0.00019608244748258122	0.0	-0.00024532032014901775	0.0	-7.980036619022634e-10	-0.00012011141393626069	0.0	-3.4316068557214976e-09
2.375	-0.0002459208773489143	0.0	-1.6663226009764008e-09	-7.768353715295922e-05	0.0	-0.09945408817175531	0.0	9.775283634568008e-06	0.0	0.9999999999985043	0.0	1.7294231150447701e-06	0.0	0.0	0.00019817729096896505	0.0	0.0	0.00019888285996160147	0.0	-0.0002459208773532066	0.0	-8.157201014490994e-10	-0.00012011146773923016	0.0	-3.6549681704913314e-09
2.38	-0.0002465214348219664	0.0	-1.6992838882564446e-09	-7.891464298571983e-05	0.0	-0.09945408817605718	0.0	9.777938724893723e-06	0.0	0.9999999999984617	0.0	1.7538648377368368e-06	0.0	0.0	0.0002009781060775384	0.0	0.0	0.00020168403306797117	0.0	-0.0002465214348264101	0.0	-8.345533356819581e-10	-0.00012011152154222358	0.0	-3.878324730130076e-09
2.3850000000000002	-0.00024712199256402706	0.0	-1.7334239177605415e-09	-8.014875159268909e-05	0.0	-0.09945408818041064	0.0	9.780595467260947e-06	0.0	0.9999999999984185	0.0	1.7783131477018813e-06	0.0	0.0	0.00020377967603199212	0.0	0.0	0.00020448596727496536	0.0	-0.0002471219925686289	0.0	-8.545033408251741e-10	-0.000120111578951652	0.0	-4.1165355293354366e-09
2.39	-0.0002477225505750961	0.0	-1.7687426894886858e-09	-8.13858629738668e-05	0.0	-0.09945408818481569	0.0	9.783253861669681e-06	0.0	0.9999999999983747	0.0	1.8027680449398987e-06	0.0	0.0	0.00020658200083232569	0.0	0.0	0.00020728866305585905	0.0	-0.0002477225505798629	0.0	-8.755700931030563e-10	-0.00012011164265508453	0.0	-4.380674128051106e-09
2.395	-0.00024832310863879463	0.0	-1.8043486609566705e-09	-8.262597713080852e-05	0.0	-0.0994540881892745	0.0	9.785911886856151e-06	0.0	0.9999999999983303	0.0	1.8272295254010905e-06	0.0	0.0	0.00020938508001446633	0.0	0.0	0.00021009212030487787	0.0	-0.0002483231086437301	0.0	-8.968620290577587e-10	-0.00012011143158759563	0.0	-3.512695093048827e-09
2.4	-0.00024892366486283543	0.0	-1.8324450764242089e-09	-8.386909407711733e-05	0.0	-0.09945408819380602	0.0	9.788551866377298e-06	0.0	0.9999999999982853	0.0	1.8516975536689662e-06	0.0	0.0	0.0002121889095199832	0.0	0.0	0.0002128963338523195	0.0	-0.0002489236648679144	0.0	-9.10582393859569e-10	-0.00012011120464931592	0.0	-2.57932072211984e-09
2.4050000000000002	-0.0002495242209725618	0.0	-1.8601408355904041e-09	-8.51152138003904e-05	0.0	-0.09945408819839299	0.0	9.791189917200862e-06	0.0	0.9999999999982396	0.0	1.8761721620354565e-06	0.0	0.0	0.00021499349304925902	0.0	0.0	0.00021570130314565279	0.0	-0.0002495242209777847	0.0	-9.238400412943458e-10	-0.00012011121054264861	0.0	-2.60525617068339e-09
2.41	-0.0002501247769679736	0.0	-1.8874359384552513e-09	-8.636433630062748e-05	0.0	-0.0994540882030354	0.0	9.793826039326842e-06	0.0	0.9999999999981934	0.0	1.9006533505005573e-06	0.0	0.0	0.00021779883060229327	0.0	0.0	0.00021850702763234655	0.0	-0.0002501247769733408	0.0	-9.366349476685627e-10	-0.00012011118767980002	0.0	-2.512705589219595e-09
2.415	-0.0002507253328490709	0.0	-1.9143303850187533e-09	-8.761646157782872e-05	0.0	-0.09945408820773323	0.0	9.796460232755236e-06	0.0	0.9999999999981465	0.0	1.9251411190642705e-06	0.0	0.0	0.0002206049221790862	0.0	0.0	0.00022131350675986966	0.0	-0.0002507253328545827	0.0	-9.489670892887055e-10	-0.00012011116481696498	0.0	-2.4201502690540763e-09
2.42	-0.0002513258886158537	0.0	-1.9408241752809097e-09	-8.887158963199409e-05	0.0	-0.0994540882124865	0.0	9.799092497486045e-06	0.0	0.9999999999980991	0.0	1.9496354677265967e-06	0.0	0.0	0.00022341176777963785	0.0	0.0	0.00022412073997569095	0.0	-0.00025132588862151046	0.0	-9.608364424612701e-10	-0.00012011114195412996	0.0	-2.3275902101886287e-09
2.4250000000000003	-0.00025192644426832203	0.0	-1.9669173092417234e-09	-9.012972046312372e-05	0.0	-0.0994540882172952	0.0	9.80172283351927e-06	0.0	0.999999999998051	0.0	1.9741363964875375e-06	0.0	0.0	0.0002262193674039485	0.0	0.0	0.00022692872672727929	0.0	-0.0002519264442741239	0.0	-9.722429834927606e-10	-0.00012011111909124975	0.0	-2.235025412624367e-09
2.43	-0.0002525269998064758	0.0	-1.992609786901189e-09	-9.139085407121737e-05	0.0	-0.09945408822215934	0.0	9.804351240854911e-06	0.0	0.9999999999980023	0.0	1.998643905347089e-06	0.0	0.0	0.0002290277210520175	0.0	0.0	0.00022973746646210347	0.0	-0.00025252699981242294	0.0	-9.83186688689686e-10	-0.00012011109622837044	0.0	-2.1424558763634468e-09
2.435	-0.00025312755523031514	0.0	-2.0179016082593094e-09	-9.265499045627517e-05	0.0	-0.09945408822707891	0.0	9.806977719492965e-06	0.0	0.999999999997953	0.0	2.0231579943052523e-06	0.0	0.0	0.00023183682872384527	0.0	0.0	0.00023254695862763236	0.0	-0.0002531275552364076	0.0	-9.936675343585707e-10	-0.00012011107336547396	0.0	-2.049881601407919e-09
2.44	-0.0002537281105398399	0.0	-2.0427927733160842e-09	-9.392212961829709e-05	0.0	-0.09945408823205391	0.0	9.809602269433436e-06	0.0	0.999999999997903	0.0	2.0476786633620288e-06	0.0	0.0	0.0002346466904194317	0.0	0.0	0.0002353572026713348	0.0	-0.00025372811054607766	0.0	-1.0036854968059435e-09	-0.0001201110431527303	0.0	-1.94261919795255e-09
2.445	-0.0002543286657350502	0.0	-2.0672832820715134e-09	-9.519227155728318e-05	0.0	-0.09945408823708435	0.0	9.812224890676323e-06	0.0	0.9999999999978525	0.0	2.072205912517418e-06	0.0	0.0	0.00023745730613877693	0.0	0.0	0.00023816819804067964	0.0	-0.00025432866574143324	0.0	-1.013240552338345e-09	-0.00012011103621251639	0.0	-1.8818455965580704e-09
2.45	-0.00025492922125693247	0.0	-2.0922541300477954e-09	-9.64654163008831e-05	0.0	-0.09945408824214347	0.0	9.814850032582127e-06	0.0	0.9999999999978013	0.0	2.096739722716167e-06	0.0	0.0	0.00024026867369830965	0.0	0.0	0.00024097994545778362	0.0	-0.00025492922126346424	0.0	-1.0232136806507271e-09	-0.00012011131154353216	0.0	-2.384984350445088e-09
2.455	-0.0002555297787960509	0.0	-2.1210826983542815e-09	-9.774156395509428e-05	0.0	-0.09945408824712866	0.0	9.81749475220249e-06	0.0	0.9999999999977494	0.0	2.1212800209081246e-06	0.0	0.0	0.00024308078472709928	0.0	0.0	0.0002437924505312488	0.0	-0.00025552977880274934	0.0	-1.0369822693233554e-09	-0.00012011154164127007	0.0	-2.7977519406836943e-09
2.46	-0.0002561303363371285	0.0	-2.1497428999289114e-09	-9.90207143935599e-05	0.0	-0.09945408825216222	0.0	9.820138716275428e-06	0.0	0.9999999999976967	0.0	2.1458268941744513e-06	0.0	0.0	0.0002458936492039116	0.0	0.0	0.0002466057130446268	0.0	-0.0002561303363439947	0.0	-1.0505201716593214e-09	-0.00012011150844511646	0.0	-2.684510254023839e-09
2.465	-0.0002567308938801652	0.0	-2.178234734771687e-09	-0.00010030286761627997	0.0	-0.09945408825724417	0.0	9.822781924800938e-06	0.0	0.9999999999976436	0.0	2.1703803425151456e-06	0.0	0.0	0.0002487072671287467	0.0	0.0	0.00024941973278146926	0.0	-0.0002567308938872005	0.0	-1.0638273639660765e-09	-0.000120111508837201	0.0	-2.638365878926253e-09
2.47	-0.0002573314514251611	0.0	-2.2065582028826083e-09	-0.00010158802362325459	0.0	-0.0994540882623745	0.0	9.825424377779022e-06	0.0	0.9999999999975897	0.0	2.1949403659302113e-06	0.0	0.0	0.0002515216385016048	0.0	0.0	0.0002522345095253277	0.0	-0.00025733145143236666	0.0	-1.0769038225510663e-09	-0.00012011150922926388	0.0	-2.5922167653180724e-09
2.475	-0.0002579320089721161	0.0	-2.2347133042616724e-09	-0.00010287618241448357	0.0	-0.0994540882675532	0.0	9.828066075209679e-06	0.0	0.9999999999975353	0.0	2.2195069644196425e-06	0.0	0.0	0.0002543367633224854	0.0	0.0	0.0002550500430597538	0.0	-0.00025793200897949314	0.0	-1.08974952372174e-09	-0.0001201115096213168	0.0	-2.54606291319959e-09
2.48	-0.00025853256652103024	0.0	-2.2627000389088808e-09	-0.00010416734398996694	0.0	-0.09945408827278028	0.0	9.830707017092908e-06	0.0	0.9999999999974802	0.0	2.244080137983442e-06	0.0	0.0	0.0002571526415913887	0.0	0.0	0.0002578663331682991	0.0	-0.0002585325665285798	0.0	-1.1023644437855448e-09	-0.00012011151001335978	0.0	-2.4999043225705173e-09
2.485	-0.0002591331240719035	0.0	-2.290518406824234e-09	-0.00010546150834970478	0.0	-0.09945408827805574	0.0	9.833347203428711e-06	0.0	0.9999999999974245	0.0	2.2686598866216107e-06	0.0	0.0	0.00025996927330831476	0.0	0.0	0.0002606833796345153	0.0	-0.00025913312407962677	0.0	-1.1147485590499282e-09	-0.00012011151040542265	0.0	-2.453740993431401e-09
2.49	-0.000259733681624736	0.0	-2.318168408007734e-09	-0.00010675867549369717	0.0	-0.09945408828337958	0.0	9.835986634217089e-06	0.0	0.9999999999973682	0.0	2.293246210334149e-06	0.0	0.0	0.0002627866584732637	0.0	0.0	0.0002635011822419539	0.0	-0.000259733681632634	0.0	-1.1269018458223411e-09	-0.00012011151079746654	0.0	-2.4075729257815975e-09
2.495	-0.0002603342391795276	0.0	-2.345650042459376e-09	-0.00010805884542194389	0.0	-0.09945408828875178	0.0	9.838625309458038e-06	0.0	0.9999999999973113	0.0	2.317839109121054e-06	0.0	0.0	0.00026560479708623525	0.0	0.0	0.0002663197407741666	0.0	-0.0002603342391876014	0.0	-1.1388242804102262e-09	-0.00012011151118948243	0.0	-2.3614001196209617e-09
2.5	-0.0002609347967362783	0.0	-2.372963310179163e-09	-0.00010936201813444506	0.0	-0.09945408829417238	0.0	9.841263229151561e-06	0.0	0.9999999999972536	0.0	2.342438582982327e-06	0.0	0.0	0.0002684236891472295	0.0	0.0	0.000269139055014705	0.0	-0.00026093479674452885	0.0	-1.1505158391210337e-09	-0.00012011151158151367	0.0	-2.315222574950152e-09
2.505	-0.00026153535429498817	0.0	-2.400108211167094e-09	-0.00011066819363120066	0.0	-0.09945408829964135	0.0	9.843900393297657e-06	0.0	0.9999999999971955	0.0	2.3670446319179687e-06	0.0	0.0	0.00027124333465624657	0.0	0.0	0.0002719591247471206	0.0	-0.00026153535430341654	0.0	-1.16197649826221e-09	-0.00012011151197356118	0.0	-2.269040291768747e-09
2.5100000000000002	-0.00026213591185565726	0.0	-2.427084745423172e-09	-0.00011197737191221083	0.0	-0.0994540883051587	0.0	9.846536801896327e-06	0.0	0.9999999999971366	0.0	2.391657255927981e-06	0.0	0.0	0.00027406373361328656	0.0	0.0	0.0002747799497549651	0.0	-0.0002621359118642644	0.0	-1.1732062341412033e-09	-0.00012011151236558067	0.0	-2.2228532700767073e-09
2.515	-0.0002627364694182854	0.0	-2.453892912947392e-09	-0.00011328955297747531	0.0	-0.09945408831072441	0.0	9.84917245494757e-06	0.0	0.9999999999970772	0.0	2.416276455012359e-06	0.0	0.0	0.000276884886018349	0.0	0.0	0.0002776015298217901	0.0	-0.0002627364694270723	0.0	-1.1842050230654591e-09	-0.00012011151275757125	0.0	-2.176661509873869e-09
2.52	-0.0002633370269828727	0.0	-2.480532713739757e-09	-0.00011460473682699422	0.0	-0.09945408831633852	0.0	9.851807352451387e-06	0.0	0.9999999999970172	0.0	2.4409022291711055e-06	0.0	0.0	0.00027970679187143426	0.0	0.0	0.00028042386473114717	0.0	-0.0002633370269918402	0.0	-1.1949728413424245e-09	-0.00012011151314958985	0.0	-2.1304650111605678e-09
2.525	-0.00026393758454941913	0.0	-2.5070041478002664e-09	-0.0001159229234607676	0.0	-0.099454088322001	0.0	9.854441494407777e-06	0.0	0.9999999999969565	0.0	2.4655345784042204e-06	0.0	0.0	0.00028252945117254226	0.0	0.0	0.00028324695426658797	0.0	-0.0002639375845585682	0.0	-1.2055096652795469e-09	-0.00012011151354161206	0.0	-2.0842637739365993e-09
2.5300000000000002	-0.0002645381421179248	0.0	-2.5333072151289226e-09	-0.00011724411287879552	0.0	-0.09945408832771185	0.0	9.85707488081674e-06	0.0	0.9999999999968953	0.0	2.490173502711706e-06	0.0	0.0	0.00028535286392167335	0.0	0.0	0.00028607079821166406	0.0	-0.00026453814212725623	0.0	-1.2158154711842723e-09	-0.0001201115139335936	0.0	-2.038057798201647e-09
2.535	-0.0002651386996883895	0.0	-2.559441915725721e-09	-0.00011856830508107777	0.0	-0.0994540883334711	0.0	9.859707511678276e-06	0.0	0.9999999999968333	0.0	2.514819002093558e-06	0.0	0.0	0.00028817703011882684	0.0	0.0	0.00028889539634992706	0.0	-0.00026513869969790416	0.0	-1.2258902353640456e-09	-0.00012011151432558148	0.0	-1.991847083956035e-09
2.54	-0.00026573925726081337	0.0	-2.585408249590664e-09	-0.00011989550006761448	0.0	-0.09945408833927871	0.0	9.862339386992385e-06	0.0	0.9999999999967708	0.0	2.539471076549778e-06	0.0	0.0	0.0002910019497640031	0.0	0.0	0.0002917207484649286	0.0	-0.00026573925727051205	0.0	-1.235733934126315e-09	-0.00012011151471756122	0.0	-1.9456316311997316e-09
2.545	-0.0002663398148351964	0.0	-2.6112062167237517e-09	-0.00012122569783840561	0.0	-0.0994540883451347	0.0	9.864970506759068e-06	0.0	0.9999999999967076	0.0	2.5641297260803663e-06	0.0	0.0	0.00029382762285720215	0.0	0.0	0.00029454685434022023	0.0	-0.0002663398148450798	0.0	-1.245346543778525e-09	-0.00012011151510955362	0.0	-1.8994114399326857e-09
2.5500000000000003	-0.00026694037241153863	0.0	-2.636835817124986e-09	-0.0001225588983934513	0.0	-0.09945408835103907	0.0	9.867600870978323e-06	0.0	0.9999999999966439	0.0	2.5887949506853252e-06	0.0	0.0	0.00029665404939842424	0.0	0.0	0.00029737371375935357	0.0	-0.00026694037242160757	0.0	-1.2547280406281236e-09	-0.00012011151550153426	0.0	-1.853186510154656e-09
2.555	-0.00026754092998983994	0.0	-2.6622970507943623e-09	-0.00012389510173275132	0.0	-0.09945408835699181	0.0	9.870230479650153e-06	0.0	0.9999999999965795	0.0	2.6134667503646506e-06	0.0	0.0	0.0002994812293876689	0.0	0.0	0.00030020132650588027	0.0	-0.0002675409300000951	0.0	-1.2638784009825531e-09	-0.00012011151589348329	0.0	-1.8069568418655596e-09
2.56	-0.0002681414875701004	0.0	-2.6875899177318835e-09	-0.00012523430785630577	0.0	-0.09945408836299294	0.0	9.872859332774555e-06	0.0	0.9999999999965145	0.0	2.638145125118344e-06	0.0	0.0	0.00030230916282493616	0.0	0.0	0.0003030296923633519	0.0	-0.0002681414875805424	0.0	-1.2727976011492612e-09	-0.00012011151628545037	0.0	-1.7607224350658927e-09
2.565	-0.00026874204515231996	0.0	-2.7127144179375493e-09	-0.00012657651676411467	0.0	-0.09945408836904243	0.0	9.875487430351531e-06	0.0	0.9999999999964488	0.0	2.6628300749464058e-06	0.0	0.0	0.00030513784971022626	0.0	0.0	0.0003058588111153201	0.0	-0.0002687420451629496	0.0	-1.2814856174356936e-09	-0.00012011151667740934	0.0	-1.7144832897550698e-09
2.57	-0.00026934260273649873	0.0	-2.7376705514113594e-09	-0.00012792172845617803	0.0	-0.09945408837514032	0.0	9.87811477238108e-06	0.0	0.9999999999963826	0.0	2.687521599848836e-06	0.0	0.0	0.00030796729004353924	0.0	0.0	0.00030868868254533644	0.0	-0.0002693426027473165	0.0	-1.2899424261492938e-09	-0.00012011151706937553	0.0	-1.6682394059334696e-09
2.575	-0.00026994316032263665	0.0	-2.7624583181533163e-09	-0.00012926994293249592	0.0	-0.09945408838128657	0.0	9.880741358863203e-06	0.0	0.9999999999963157	0.0	2.7122196998256365e-06	0.0	0.0	0.0003107974838248751	0.0	0.0	0.00031151930643695254	0.0	-0.0002699431603336433	0.0	-1.2981680035975099e-09	-0.00012011151746131371	0.0	-1.6219907836008924e-09
2.58	-0.00027054371791073367	0.0	-2.787077718163416e-09	-0.00013062116019306816	0.0	-0.09945408838748121	0.0	9.883367189797899e-06	0.0	0.9999999999962482	0.0	2.7369243748768037e-06	0.0	0.0	0.0003136284310542336	0.0	0.0	0.00031435068257372	0.0	-0.00027054371792192963	0.0	-1.3061623260877837e-09	-0.00012011151785322931	0.0	-1.5757374227568245e-09
2.585	-0.00027114427550078984	0.0	-2.8115287514416593e-09	-0.00013197538023789482	0.0	-0.09945408839372422	0.0	9.885992265185168e-06	0.0	0.9999999999961801	0.0	2.761635625002339e-06	0.0	0.0	0.0003164601317316148	0.0	0.0	0.00031718281073919046	0.0	-0.00027114427551217565	0.0	-1.3139253699275602e-09	-0.00012011151824517833	0.0	-1.529479323402097e-09
2.59	-0.00027174483309280517	0.0	-2.835811417988048e-09	-0.00013333260306697592	0.0	-0.09945408840001561	0.0	9.88861658502501e-06	0.0	0.9999999999961113	0.0	2.7863534502022423e-06	0.0	0.0	0.0003192925858570187	0.0	0.0	0.00032001569071691546	0.0	-0.0002717448331043814	0.0	-1.3214571114242864e-09	-0.00012011151863713368	0.0	-1.4832164855364714e-09
2.595	-0.0002723453906867797	0.0	-2.8599257178025827e-09	-0.0001346928286803116	0.0	-0.09945408840635538	0.0	9.891240149317427e-06	0.0	0.999999999996042	0.0	2.8110778504765166e-06	0.0	0.0	0.00032212579343044584	0.0	0.0	0.00032284932229044666	0.0	-0.00027234539069854693	0.0	-1.3287575268854057e-09	-0.00012011151902904747	0.0	-1.4369489091592346e-09
2.6	-0.00027294594828271334	0.0	-2.8838716508852603e-09	-0.00013605605707790158	0.0	-0.09945408841274352	0.0	9.893862958062415e-06	0.0	0.999999999995972	0.0	2.835808825825157e-06	0.0	0.0	0.00032495975445189537	0.0	0.0	0.00032568370524333563	0.0	-0.00027294594829467187	0.0	-1.3358265926183602e-09	-0.00012011151942093506	0.0	-1.3906765942709555e-09
2.605	-0.00027354650588060607	0.0	-2.9076492172360825e-09	-0.00013742228825974602	0.0	-0.09945408841918005	0.0	9.896485011259976e-06	0.0	0.9999999999959014	0.0	2.8605463762481655e-06	0.0	0.0	0.00032779446892136773	0.0	0.0	0.00032851883935913404	0.0	-0.00027354650589275634	0.0	-1.342664284930597e-09	-0.0001201115198128651	0.0	-1.344399540871806e-09
2.61	-0.00027414706348045795	0.0	-2.931258416855049e-09	-0.0001387915222258449	0.0	-0.09945408842566494	0.0	9.899106308910112e-06	0.0	0.9999999999958302	0.0	2.8852905017455426e-06	0.0	0.0	0.00033062993683886287	0.0	0.0	0.00033135472442139344	0.0	-0.0002741470634928005	0.0	-1.3492705801295594e-09	-0.00012011152020478522	0.0	-1.2981177489612764e-09
2.615	-0.00027474762108226905	0.0	-2.954699249742162e-09	-0.00014016375897619833	0.0	-0.09945408843219822	0.0	9.901726851012821e-06	0.0	0.9999999999957584	0.0	2.9100412023172903e-06	0.0	0.0	0.00033346615820438105	0.0	0.0	0.00033419136021366544	0.0	-0.00027474762109480416	0.0	-1.3556454545226908e-09	-0.0001201115205966719	0.0	-1.2518312185393525e-09
2.62	-0.00027534817868603924	0.0	-2.977971715897418e-09	-0.00014153899851080607	0.0	-0.09945408843877988	0.0	9.904346637568103e-06	0.0	0.9999999999956859	0.0	2.934798477963404e-06	0.0	0.0	0.0003363031330179218	0.0	0.0	0.00033702874651950166	0.0	-0.00027534817869876723	0.0	-1.3617888844174343e-09	-0.00012011152098856039	0.0	-1.2055399496062347e-09
2.625	-0.0002759487362917686	0.0	-3.0010758153208177e-09	-0.00014291724082966827	0.0	-0.09945408844540991	0.0	9.90696566857596e-06	0.0	0.9999999999956128	0.0	2.959562328683886e-06	0.0	0.0	0.0003391408612794853	0.0	0.0	0.00033986688312245367	0.0	-0.0002759487363046898	0.0	-1.3677008461212345e-09	-0.00012011152138045068	0.0	-1.1592439421618777e-09
2.63	-0.00027654929389945703	0.0	-3.0240115480123626e-09	-0.00014429848593278493	0.0	-0.09945408845208832	0.0	9.909583944036388e-06	0.0	0.9999999999955391	0.0	2.9843327544787366e-06	0.0	0.0	0.0003419793429890716	0.0	0.0	0.0003427057698060731	0.0	-0.00027654929391257175	0.0	-1.3733813159415342e-09	-0.00012011152177235273	0.0	-1.1129431962063093e-09
2.6350000000000002	-0.00027714985150910473	0.0	-3.046778913972054e-09	-0.00014568273382015612	0.0	-0.09945408845881511	0.0	9.912201463949389e-06	0.0	0.9999999999954648	0.0	3.0091097553479574e-06	0.0	0.0	0.000344818578146681	0.0	0.0	0.0003455454063539116	0.0	-0.00027714985152241326	0.0	-1.3788302701857784e-09	-0.00012011152216422405	0.0	-1.0666377117392298e-09
2.64	-0.0002777504091207115	0.0	-3.069377913199888e-09	-0.00014706998449178166	0.0	-0.09945408846559028	0.0	9.914818228314964e-06	0.0	0.9999999999953899	0.0	3.033893331291545e-06	0.0	0.0	0.0003476585667523129	0.0	0.0	0.00034838579254952074	0.0	-0.000277750409134214	0.0	-1.3840476851614073e-09	-0.0001201115225560782	0.0	-1.0203274887604977e-09
2.645	-0.0002783509667342774	0.0	-3.091808545695866e-09	-0.00014846023794766163	0.0	-0.09945408847241383	0.0	9.917434237133113e-06	0.0	0.9999999999953143	0.0	3.0586834823095004e-06	0.0	0.0	0.00035049930880596766	0.0	0.0	0.0003512269281764521	0.0	-0.00027835096674797406	0.0	-1.3890335371758647e-09	-0.00012011152294795675	0.0	-9.740125272706162e-10
2.65	-0.00027895152434980245	0.0	-3.114070811459989e-09	-0.00014985349418779602	0.0	-0.09945408847928575	0.0	9.920049490403835e-06	0.0	0.9999999999952381	0.0	3.0834802084018244e-06	0.0	0.0	0.0003533408043076453	0.0	0.0	0.0003540688130182573	0.0	-0.0002789515243636935	0.0	-1.3937878025365946e-09	-0.00012011152333981092	0.0	-9.276928272694025e-10
2.6550000000000002	-0.00027955208196728666	0.0	-3.1361647104922582e-09	-0.000151249753212185	0.0	-0.09945408848620604	0.0	9.92266398812713e-06	0.0	0.9999999999951613	0.0	3.1082835095685185e-06	0.0	0.0	0.00035618305325734584	0.0	0.0	0.00035691144685848794	0.0	-0.0002795520819813722	0.0	-1.3983104575510394e-09	-0.00012011151582114893	0.0	-8.667881202570372e-10
2.66	-0.00028015263958673	0.0	-3.15809024279267e-09	-0.00015264901502082829	0.0	-0.09945408849317472	0.0	9.925277730302998e-06	0.0	0.9999999999950839	0.0	3.133093385809579e-06	0.0	0.0	0.00035902605565506896	0.0	0.0	0.00035975482948069566	0.0	-0.0002801526396010102	0.0	-1.4026014785266413e-09	-0.0001201115502626795	0.0	-8.832175912166869e-10
2.665	-0.0002807531976827583	0.0	-3.180722224797182e-09	-0.0001540512796978971	0.0	-0.09945408850010347	0.0	9.927895335484624e-06	0.0	0.9999999999950058	0.0	3.157909832366934e-06	0.0	0.0	0.0003618698109555798	0.0	0.0	0.0003625989619915501	0.0	-0.0002807531976972386	0.0	-1.4075356578808168e-09	-0.00012011175398063474	0.0	-1.2116439800649836e-09
2.67	-0.0002813537570601686	0.0	-3.20554403492316e-09	-0.00015545654738611592	0.0	-0.09945408850684258	0.0	9.930524635100218e-06	0.0	0.9999999999949267	0.0	3.182732841172583e-06	0.0	0.0	0.0003647143182343534	0.0	0.0	0.0003654438477412598	0.0	-0.0002813537570748639	0.0	-1.4145963497018131e-09	-0.00012011190362120214	0.0	-1.4403928524806926e-09
2.6750000000000003	-0.0002819543165184521	0.0	-3.230342930251618e-09	-0.00015686481787258405	0.0	-0.09945408851361538	0.0	9.933153947075189e-06	0.0	0.999999999994847	0.0	3.207562424261498e-06	0.0	0.0	0.00036755957887049624	0.0	0.0	0.0003682894867333654	0.0	-0.0002819543165333635	0.0	-1.421570788148515e-09	-0.00012011189978734671	0.0	-1.3862607718084282e-09
2.68	-0.0002825548760576086	0.0	-3.2551189107825515e-09	-0.0001582760911573013	0.0	-0.09945408852042188	0.0	9.93578327140954e-06	0.0	0.9999999999947666	0.0	3.232398581633676e-06	0.0	0.0	0.00037040559286400786	0.0	0.0	0.0003711358789714077	0.0	-0.0002825548760727374	0.0	-1.4284589495193842e-09	-0.00012011191596223366	0.0	-1.36900298648803e-09
2.685	-0.0002831554356776383	0.0	-3.2798719765159635e-09	-0.00015969036724026775	0.0	-0.09945408852726209	0.0	9.938412608103268e-06	0.0	0.9999999999946857	0.0	3.2572413132891175e-06	0.0	0.0	0.00037325236021488843	0.0	0.0	0.0003739830244589273	0.0	-0.0002831554356929858	0.0	-1.43526081011288e-09	-0.00012011193213712422	0.0	-1.3517404608585087e-09
2.69	-0.00028375599537854105	0.0	-3.304602127451853e-09	-0.0001611076461214834	0.0	-0.09945408853413598	0.0	9.941041957156376e-06	0.0	0.9999999999946041	0.0	3.2820906192278233e-06	0.0	0.0	0.0003760998809231379	0.0	0.0	0.00037683092319946494	0.0	-0.00028375599539410857	0.0	-1.4419763462274518e-09	-0.00012011194831197413	0.0	-1.3344731949184686e-09
2.695	-0.0002843565551603169	0.0	-3.3293093635902207e-09	-0.00016252792780094825	0.0	-0.09945408854104357	0.0	9.943671318568861e-06	0.0	0.9999999999945218	0.0	3.3069464994497934e-06	0.0	0.0	0.00037894815498875636	0.0	0.0	0.00037967957519656134	0.0	-0.0002843565551761056	0.0	-1.4486055341615452e-09	-0.00012011196448686017	0.0	-1.3172011886668207e-09
2.7	-0.000284957115022966	0.0	-3.3539936849310682e-09	-0.00016395121227866244	0.0	-0.09945408854798486	0.0	9.946300692340726e-06	0.0	0.999999999994439	0.0	3.3318089539550303e-06	0.0	0.0	0.00038179718241174415	0.0	0.0	0.0003825289804537572	0.0	-0.00028495711503897717	0.0	-1.4551483502135983e-09	-0.00012011198066173539	0.0	-1.299924442102076e-09
2.705	-0.0002855576749664881	0.0	-3.3786550914743918e-09	-0.00016537749955462572	0.0	-0.09945408855495985	0.0	9.948930078471969e-06	0.0	0.9999999999943555	0.0	3.3566779827435293e-06	0.0	0.0	0.0003846469631921005	0.0	0.0	0.00038537913897459327	0.0	-0.0002855576749827229	0.0	-1.4616047706820422e-09	-0.00012011199683658439	0.0	-1.282642955223028e-09
2.71	-0.00028615823499088337	0.0	-3.403293583220194e-09	-0.00016680678962883823	0.0	-0.09945408856196852	0.0	9.951559476962592e-06	0.0	0.9999999999942714	0.0	3.381553585815292e-06	0.0	0.0	0.00038749749732982597	0.0	0.0	0.00038823005076261014	0.0	-0.000286158235007343	0.0	-1.4679747718653024e-09	-0.00012011201301145508	0.0	-1.2653567280282984e-09
2.715	-0.0002867587950961517	0.0	-3.427909160168473e-09	-0.0001682390825012999	0.0	-0.0994540885690109	0.0	9.95418888781259e-06	0.0	0.9999999999941865	0.0	3.406435763170319e-06	0.0	0.0	0.0003903487848249202	0.0	0.0	0.0003910817158213486	0.0	-0.0002867587951128374	0.0	-1.474258330061797e-09	-0.00012011202918630498	0.0	-1.2480657605167494e-09
2.72	-0.0002873593552822933	0.0	-3.452501822319233e-09	-0.00016967437817201096	0.0	-0.09945408857608698	0.0	9.95681831102197e-06	0.0	0.999999999994101	0.0	3.431324514808613e-06	0.0	0.0	0.00039320082567738385	0.0	0.0	0.0003939341341543493	0.0	-0.00028735935529920607	0.0	-1.48045542156994e-09	-0.00012011204536118108	0.0	-1.2307700526872026e-09
2.725	-0.0002879599155493079	0.0	-3.4770715696724684e-09	-0.00017111267664097107	0.0	-0.09945408858319675	0.0	9.959447746590727e-06	0.0	0.999999999994015	0.0	3.456219840730169e-06	0.0	0.0	0.00039605361988721615	0.0	0.0	0.0003967873057651529	0.0	-0.00028795991556644917	0.0	-1.4865660226881368e-09	-0.00012011206153603822	0.0	-1.2134696045383035e-09
2.73	-0.00028856047589719555	0.0	-3.501618402228182e-09	-0.00017255397790818042	0.0	-0.09945408859034022	0.0	9.962077194518863e-06	0.0	0.9999999999939283	0.0	3.481121740934989e-06	0.0	0.0	0.00039890716745441746	0.0	0.0	0.0003996412306573002	0.0	-0.0002885604759145664	0.0	-1.4925901097147883e-09	-0.00012011207771088362	0.0	-1.1961644160685147e-09
2.735	-0.0002891610363259564	0.0	-3.526142319986373e-09	-0.00017399828197363896	0.0	-0.09945408859751739	0.0	9.964706654806378e-06	0.0	0.9999999999938409	0.0	3.5060302154230735e-06	0.0	0.0	0.00040176146837898777	0.0	0.0	0.00040249590883433185	0.0	-0.00028916103634355806	0.0	-1.4985276589482857e-09	-0.00012011209388577057	0.0	-1.1788544872770195e-09
2.74	-0.0002897615968355904	0.0	-3.5506433229470447e-09	-0.00017544558883734684	0.0	-0.09945408860472825	0.0	9.967336127453272e-06	0.0	0.999999999993753	0.0	3.5309452641944248e-06	0.0	0.0	0.00040461652266092735	0.0	0.0	0.00040535134029978854	0.0	-0.0002897615968534241	0.0	-1.50437864668702e-09	-0.0001201121100606295	0.0	-1.1615398181623911e-09
2.745	-0.0002903621574260975	0.0	-3.575121411110192e-09	-0.00017689589849930381	0.0	-0.0994540886119728	0.0	9.969965612459543e-06	0.0	0.9999999999936644	0.0	3.5558668872490374e-06	0.0	0.0	0.0004074723303002356	0.0	0.0	0.00040820752505721104	0.0	-0.0002903621574441643	0.0	-1.5101430492293682e-09	-0.00012011212623547851	0.0	-1.1442204087227992e-09
2.75	-0.0002909627180974777	0.0	-3.5995765844758174e-09	-0.00017834921095950996	0.0	-0.09945408861925106	0.0	9.972595109825194e-06	0.0	0.9999999999935751	0.0	3.5807950845869147e-06	0.0	0.0	0.00041032889129691285	0.0	0.0	0.00041106446311013997	0.0	-0.00029096271811577883	0.0	-1.5158208428737053e-09	-0.00012011214241031758	0.0	-1.1268962589577336e-09
2.755	-0.000291563278849731	0.0	-3.624008843043921e-09	-0.00017980552621796536	0.0	-0.099454088626563	0.0	9.975224619550223e-06	0.0	0.9999999999934852	0.0	3.6057298562080562e-06	0.0	0.0	0.00041318620565095906	0.0	0.0	0.00041392215446211606	0.0	-0.0002915632788682675	0.0	-1.5214120039184005e-09	-0.00012011215858516567	0.0	-1.1095673688655954e-09
2.7600000000000002	-0.0002921638396828575	0.0	-3.6484181868145044e-09	-0.00018126484427467008	0.0	-0.09945408863390866	0.0	9.97785414163463e-06	0.0	0.9999999999933946	0.0	3.630671202112464e-06	0.0	0.0	0.0004160442733623746	0.0	0.0	0.00041678059911668004	0.0	-0.0002921638397016305	0.0	-1.526916508661814e-09	-0.00012011217476003094	0.0	-1.0922337384450818e-09
2.765	-0.00029276440059685706	0.0	-3.6728046157875636e-09	-0.00018272716512962388	0.0	-0.099454088641288	0.0	9.980483676078416e-06	0.0	0.9999999999933035	0.0	3.655619122300134e-06	0.0	0.0	0.00041890309443115884	0.0	0.0	0.00041963979707737256	0.0	-0.0002927644006158678	0.0	-1.532334333402302e-09	-0.00012011219093487543	0.0	-1.0748953676950413e-09
2.77	-0.00029336496159172975	0.0	-3.697168129963101e-09	-0.0001841924887828269	0.0	-0.09945408864870105	0.0	9.98311322288158e-06	0.0	0.9999999999932117	0.0	3.680573616771069e-06	0.0	0.0	0.00042176266885731215	0.0	0.0	0.0004224997483477344	0.0	-0.00029336496161097927	0.0	-1.5376654544382129e-09	-0.0001201122071097163	0.0	-1.0575522566139817e-09
2.775	-0.0002939655226674755	0.0	-3.721508729341116e-09	-0.00018566081523427913	0.0	-0.09945408865614778	0.0	9.985742782044124e-06	0.0	0.9999999999931192	0.0	3.7055346855252674e-06	0.0	0.0	0.00042462299664083436	0.0	0.0	0.00042536045293130613	0.0	-0.000293965522686965	0.0	-1.5429098480678886e-09	-0.00012011222328458157	0.0	-1.0402044052010345e-09
2.7800000000000002	-0.0002945660838240945	0.0	-3.745826413921611e-09	-0.00018713214448398067	0.0	-0.09945408866362822	0.0	9.988372353566046e-06	0.0	0.9999999999930261	0.0	3.7305023285627328e-06	0.0	0.0	0.0004274840777817259	0.0	0.0	0.00042822191083162855	0.0	-0.00029456608384382507	0.0	-1.5480674905896675e-09	-0.00012011223945943418	0.0	-1.022851813454559e-09
2.785	-0.00029516664506158653	0.0	-3.770121183704582e-09	-0.0001886064765319313	0.0	-0.09945408867114235	0.0	9.991001937447345e-06	0.0	0.9999999999929324	0.0	3.75547654588346e-06	0.0	0.0	0.0004303459122799862	0.0	0.0	0.00043108412205224237	0.0	-0.00029516664508155927	0.0	-1.5531383583018762e-09	-0.00012011225563426692	0.0	-1.0054944813731768e-09
2.79	-0.0002957672063799517	0.0	-3.794393038690032e-09	-0.00019008381137813118	0.0	-0.09945408867869017	0.0	9.993631533688025e-06	0.0	0.9999999999928381	0.0	3.7804573374874516e-06	0.0	0.0	0.00043320850013561546	0.0	0.0	0.0004339470865966883	0.0	-0.00029576720640016774	0.0	-1.5581224275028394e-09	-0.00012011227180910419	0.0	-9.881324089559088e-10
2.795	-0.00029636776777918996	0.0	-3.818641978877959e-09	-0.00019156414902258024	0.0	-0.09945408868627169	0.0	9.996261142288082e-06	0.0	0.999999999992743	0.0	3.805444703374707e-06	0.0	0.0	0.0004360718413486138	0.0	0.0	0.00043681080446850693	0.0	-0.0002963677677996503	0.0	-1.5630196744908734e-09	-0.00012011228798394866	0.0	-9.707655962015318e-10
2.8000000000000003	-0.0002969683292593014	0.0	-3.8428680042683655e-09	-0.00019304748946527865	0.0	-0.09945408869388692	0.0	9.998890763247519e-06	0.0	0.9999999999926474	0.0	3.8304386435452295e-06	0.0	0.0	0.00043893593591898136	0.0	0.0	0.0004396752756712391	0.0	-0.0002969683292800072	0.0	-1.5678300755642902e-09	-0.00012011230415878864	0.0	-9.533940431083462e-10
2.805	-0.0002975688908202859	0.0	-3.867071114861249e-09	-0.00019453383270622612	0.0	-0.09945408870153583	0.0	1.0001520396566334e-05	0.0	0.9999999999925511	0.0	3.8554391579990136e-06	0.0	0.0	0.0004418007838467177	0.0	0.0	0.0004425405002084254	0.0	-0.0002975688908412382	0.0	-1.572553607021391e-09	-0.00012011232033362138	0.0	-9.360177496756699e-10
2.81	-0.00029816945246214353	0.0	-3.89125131065661e-09	-0.00019602317874542282	0.0	-0.09945408870921844	0.0	1.0004150042244526e-05	0.0	0.9999999999924543	0.0	3.880446246736063e-06	0.0	0.0	0.00044466638513182305	0.0	0.0	0.0004454064780836066	0.0	-0.0002981694524833435	0.0	-1.5771902451604784e-09	-0.00012011233650846496	0.0	-9.186367159018967e-10
2.815	-0.00029877001418487426	0.0	-3.9154085916544484e-09	-0.00019751552758286872	0.0	-0.09945408871693476	0.0	1.0006779700282099e-05	0.0	0.9999999999923567	0.0	3.905459909756375e-06	0.0	0.0	0.0004475327397742973	0.0	0.0	0.00044827320930032334	0.0	-0.0002987700142063228	0.0	-1.5817399662798388e-09	-0.00012011235268327873	0.0	-9.012509417852103e-10
2.82	-0.00029937057598847813	0.0	-3.9395429578547656e-09	-0.00019901087921856382	0.0	-0.09945408872468475	0.0	1.0009409370679049e-05	0.0	0.9999999999922584	0.0	3.930480147059952e-06	0.0	0.0	0.00045039984777414075	0.0	0.0	0.00045114069386211636	0.0	-0.0002993705760101763	0.0	-1.5862027466777585e-09	-0.00012011236885813947	0.0	-8.838604273255036e-10
2.825	-0.0002999711378729552	0.0	-3.963654409257563e-09	-0.00020050923365250829	0.0	-0.09945408873246846	0.0	1.0012039053435378e-05	0.0	0.9999999999921596	0.0	3.955506958646796e-06	0.0	0.0	0.00045326770913135345	0.0	0.0	0.00045400893177252637	0.0	-0.00029997113789490416	0.0	-1.590578562652519e-09	-0.00012011238503296319	0.0	-8.664651725207952e-10
2.83	-0.0003005716998383053	0.0	-3.987742945862835e-09	-0.00020201059088470182	0.0	-0.09945408874028586	0.0	1.0014668748551086e-05	0.0	0.9999999999920601	0.0	3.980540344516902e-06	0.0	0.0	0.0004561363238459348	0.0	0.0	0.00045687792303509406	0.0	-0.000300571699860506	0.0	-1.5948673905023892e-09	-0.00012011240120780224	0.0	-8.490651773697131e-10
2.835	-0.0003011722618845285	0.0	-4.011808567670586e-09	-0.00020351495091514455	0.0	-0.09945408874813695	0.0	1.0017298456026172e-05	0.0	0.9999999999919601	0.0	4.0055803046702715e-06	0.0	0.0	0.00045900569191788536	0.0	0.0	0.00045974766765336016	0.0	-0.00030117226190698215	0.0	-1.599069206525637e-09	-0.00012011241738263769	0.0	-8.316604418712406e-10
2.84	-0.00030177282401162484	0.0	-4.035851274680816e-09	-0.0002050223137438365	0.0	-0.09945408875602174	0.0	1.0019928175860637e-05	0.0	0.9999999999918593	0.0	4.030626839106906e-06	0.0	0.0	0.0004618758133472049	0.0	0.0	0.00046261816563086534	0.0	-0.0003017728240343323	0.0	-1.6031839870205203e-09	-0.00012011243355745688	0.0	-8.142509660239956e-10
2.845	-0.0003023733862195944	0.0	-4.0598710668935244e-09	-0.0002065326793707778	0.0	-0.09945408876394024	0.0	1.002255790805448e-05	0.0	0.9999999999917579	0.0	4.055679947826807e-06	0.0	0.0	0.00046474668813389366	0.0	0.0	0.0004654894169711503	0.0	-0.0003023733862425567	0.0	-1.6072117082852935e-09	-0.00012011244973227969	0.0	-7.968367498267341e-10
2.85	-0.00030297394850843694	0.0	-4.083867944308709e-09	-0.00020804604779596817	0.0	-0.09945408877189242	0.0	1.0025187652607701e-05	0.0	0.9999999999916559	0.0	4.08073963082997e-06	0.0	0.0	0.0004676183162779513	0.0	0.0	0.00046836142167775574	0.0	-0.00030297394853165513	0.0	-1.611152346618202e-09	-0.00012011246590710068	0.0	-7.794177932781047e-10
2.855	-0.00030357451087815264	0.0	-4.1078419069263716e-09	-0.00020956241901940776	0.0	-0.0994540887798783	0.0	1.0027817409520302e-05	0.0	0.9999999999915532	0.0	4.105805888116397e-06	0.0	0.0	0.00047049069777937785	0.0	0.0	0.00047123417975422237	0.0	-0.00030357451090162773	0.0	-1.6150058783174872e-09	-0.00012011248208193795	0.0	-7.619940963771426e-10
2.86	-0.00030417507332874147	0.0	-4.1317929547465125e-09	-0.00021108179304109656	0.0	-0.09945408878789788	0.0	1.0030447178792282e-05	0.0	0.99999999999145	0.0	4.130878719686088e-06	0.0	0.0	0.00047336383263817355	0.0	0.0	0.00047410769120409085	0.0	-0.0003041750733524745	0.0	-1.6187722796813837e-09	-0.00012011249825677429	0.0	-7.445656591224243e-10
2.865	-0.00030477563586020343	0.0	-4.1557210877691335e-09	-0.0002126041698610347	0.0	-0.09945408879595116	0.0	1.0033076960423638e-05	0.0	0.999999999991346	0.0	4.155958125539046e-06	0.0	0.0	0.00047623772085433853	0.0	0.0	0.0004769819560309019	0.0	-0.0003047756358841954	0.0	-1.6224515270081189e-09	-0.00012011251443158264	0.0	-7.271324815121023e-10
2.87	-0.00030537619847253853	0.0	-4.17962630599423e-09	-0.0002141295494792219	0.0	-0.09945408880403812	0.0	1.0035706754414376e-05	0.0	0.9999999999912415	0.0	4.181044105675266e-06	0.0	0.0	0.00047911236242787234	0.0	0.0	0.0004798569742381963	0.0	-0.0003053761984967903	0.0	-1.6260435965959107e-09	-0.00012011253056377552	0.0	-7.078817124229663e-10
2.875	-0.0003059767611657467	0.0	-4.203508609421804e-09	-0.0002156579318956583	0.0	-0.0994540888121588	0.0	1.003833656076449e-05	0.0	0.9999999999911362	0.0	4.206136660094751e-06	0.0	0.0	0.0004819877573587752	0.0	0.0	0.0004827327458295147	0.0	-0.0003059767611902593	0.0	-1.6295484647429771e-09	-0.00012011254696409972	0.0	-7.000332011504931e-10
2.88	-0.00030657732394238387	0.0	-4.227476774320735e-09	-0.0002171893172445496	0.0	-0.09945408882018549	0.0	1.0040966426125885e-05	0.0	0.9999999999910302	0.0	4.231235797245447e-06	0.0	0.0	0.00048486390661511033	0.0	0.0	0.0004856092708217626	0.0	-0.00030657732396715897	0.0	-1.6330748788148709e-09	-0.00012011256394139748	0.0	-7.167266118041757e-10
2.8850000000000002	-0.00030717788680425894	0.0	-4.251607781991242e-09	-0.00021872370562087384	0.0	-0.09945408882802782	0.0	1.0043596383514259e-05	0.0	0.9999999999909233	0.0	4.256341523105999e-06	0.0	0.0	0.0004877408108819802	0.0	0.0	0.0004884865492413037	0.0	-0.0003071778868292988	0.0	-1.6366997926907712e-09	-0.00012011258061398382	0.0	-7.204512422844205e-10
2.89	-0.000307778449747317	0.0	-4.27572906500256e-09	-0.00022026109681172086	0.0	-0.09945408883588838	0.0	1.004622635891899e-05	0.0	0.9999999999908157	0.0	4.2814538242742055e-06	0.0	0.0	0.0004906184686236056	0.0	0.0	0.0004913645810932993	0.0	-0.00030777844977262277	0.0	-1.640250623470013e-09	-0.00012011259678319046	0.0	-7.02756265812768e-10
2.895	-0.00030837901277155807	0.0	-4.299840623354691e-09	-0.00022180149081709076	0.0	-0.09945408884376715	0.0	1.0048856352340076e-05	0.0	0.9999999999907074	0.0	4.30657270075007e-06	0.0	0.0	0.0004934968798399868	0.0	0.0	0.0004942433663829109	0.0	-0.0003083790127971307	0.0	-1.6437273474470485e-09	-0.00012011261302000342	0.0	-6.879325348163601e-10
2.9	-0.0003089795758769822	0.0	-4.323942457047636e-09	-0.0002233448876369836	0.0	-0.09945408885166414	0.0	1.0051486363777522e-05	0.0	0.9999999999905985	0.0	4.3316981525335906e-06	0.0	0.0	0.0004963760445311238	0.0	0.0	0.0004971229051152997	0.0	-0.0003089795759028228	0.0	-1.6471299409163238e-09	-0.00012011262925682993	0.0	-6.731040627082435e-10
2.9050000000000002	-0.0003095801390635895	0.0	-4.348034566081397e-09	-0.00022489128727139947	0.0	-0.09945408885957933	0.0	1.0054116393231324e-05	0.0	0.9999999999904889	0.0	4.3568301796247705e-06	0.0	0.0	0.0004992559626970169	0.0	0.0	0.0005000031972956269	0.0	-0.000309580139089699	0.0	-1.6504583801722758e-09	-0.00012011264549363838	0.0	-6.582708494869741e-10
2.91	-0.00031018070233137965	0.0	-4.372116950455968e-09	-0.00022644068972033814	0.0	-0.09945408886751275	0.0	1.0056746440701484e-05	0.0	0.9999999999903787	0.0	4.381968782023605e-06	0.0	0.0	0.0005021366343376654	0.0	0.0	0.0005028842429290539	0.0	-0.0003101807023577592	0.0	-1.6537126415093364e-09	-0.00012011266173046761	0.0	-6.434328951515834e-10
2.915	-0.0003107812656803529	0.0	-4.396189610171353e-09	-0.00022799309498379967	0.0	-0.09945408887546438	0.0	1.0059376506188e-05	0.0	0.9999999999902679	0.0	4.4071139597300976e-06	0.0	0.0	0.00050501805945307	0.0	0.0	0.0005057660420207421	0.0	-0.0003107812657070037	0.0	-1.656892701221932e-09	-0.0001201126779672887	0.0	-6.285901997003998e-10
2.92	-0.00031138182911050926	0.0	-4.420252545227551e-09	-0.00022954850306178414	0.0	-0.09945408888343422	0.0	1.0062006589690876e-05	0.0	0.9999999999901563	0.0	4.432265712744246e-06	0.0	0.0	0.0005079002380432302	0.0	0.0	0.0005086485945758526	0.0	-0.0003113818291374321	0.0	-1.659998535604479e-09	-0.00012011269420409895	0.0	-6.137427631323031e-10
2.9250000000000003	-0.0003119823926218487	0.0	-4.444305755624564e-09	-0.00023110691395429166	0.0	-0.09945408889142228	0.0	1.0064636691210107e-05	0.0	0.9999999999900441	0.0	4.4574240410660535e-06	0.0	0.0	0.0005107831701081463	0.0	0.0	0.0005115319005995469	0.0	-0.0003119823926490447	0.0	-1.6630301209513918e-09	-0.00012011271044092548	0.0	-5.988905854464352e-10
2.93	-0.0003125829562143711	0.0	-4.4683492413623885e-09	-0.00023266832766132193	0.0	-0.09945408889942856	0.0	1.0067266810745696e-05	0.0	0.9999999999899313	0.0	4.482588944695516e-06	0.0	0.0	0.0005136668556478183	0.0	0.0	0.0005144159600969862	0.0	-0.00031258295624184135	0.0	-1.6659874335570775e-09	-0.0001201127266777258	0.0	-5.84033666640952e-10
2.935	-0.0003131835198880765	0.0	-4.492383002441027e-09	-0.00023423274418287512	0.0	-0.09945408890745304	0.0	1.0069896948297644e-05	0.0	0.9999999999898177	0.0	4.507760423632636e-06	0.0	0.0	0.0005165512946622461	0.0	0.0	0.0005173007730733319	0.0	-0.000313183519915822	0.0	-1.6688704497159338e-09	-0.00012011274291454056	0.0	-5.691720067148783e-10
2.94	-0.000313784083642965	0.0	-4.516407038860478e-09	-0.0002358001635189512	0.0	-0.09945408891549573	0.0	1.0072527103865947e-05	0.0	0.9999999999897036	0.0	4.532938477877413e-06	0.0	0.0	0.0005194364871514295	0.0	0.0	0.0005201863395337452	0.0	-0.00031378408367098675	0.0	-1.6716791457223565e-09	-0.00012011275915135985	0.0	-5.543056056669285e-10
2.945	-0.00031438464747903655	0.0	-4.540421350620743e-09	-0.00023737058566955022	0.0	-0.09945408892355664	0.0	1.007515727745061e-05	0.0	0.9999999999895888	0.0	4.558123107429846e-06	0.0	0.0	0.0005223224331153689	0.0	0.0	0.0005230726594833874	0.0	-0.00031438464750733564	0.0	-1.6744134978707307e-09	-0.00012011277538819089	0.0	-5.394344634954931e-10
2.95	-0.0003149852113962912	0.0	-4.564425937721823e-09	-0.00023894401063467228	0.0	-0.09945408893163578	0.0	1.007778746905163e-05	0.0	0.9999999999894733	0.0	4.583314312289939e-06	0.0	0.0	0.0005252091325540643	0.0	0.0	0.0005259597329274198	0.0	-0.0003149852114248686	0.0	-1.6770734824554371e-09	-0.0001201127916249623	0.0	-5.245585801993759e-10
2.955	-0.0003155857753947288	0.0	-4.5884208001637135e-09	-0.0002405204384143171	0.0	-0.09945408893973312	0.0	1.0080417678669005e-05	0.0	0.9999999999893571	0.0	4.608512092457686e-06	0.0	0.0	0.0005280965854675152	0.0	0.0	0.0005288475598710038	0.0	-0.0003155857754235853	0.0	-1.6796590757708485e-09	-0.00012011280786176893	0.0	-5.096779557776086e-10
2.96	-0.0003161863394743495	0.0	-4.612405937946418e-09	-0.00024209986900848481	0.0	-0.09945408894784867	0.0	1.008304790630274e-05	0.0	0.9999999999892403	0.0	4.633716447933091e-06	0.0	0.0	0.0005309847918557221	0.0	0.0	0.0005317361403193007	0.0	-0.00031618633950348634	0.0	-1.6821702541113353e-09	-0.00012011282409860268	0.0	-4.947925902290745e-10
2.965	-0.0003167869036351532	0.0	-4.636381351069936e-09	-0.00024368230241717545	0.0	-0.09945408895598244	0.0	1.008567815195283e-05	0.0	0.9999999999891228	0.0	4.658927378716152e-06	0.0	0.0	0.0005338737517186847	0.0	0.0	0.0005346254742774716	0.0	-0.0003167869036645713	0.0	-1.6846069937712586e-09	-0.00012011284033540028	0.0	-4.799024835519951e-10
2.97	-0.00031738746787714	0.0	-4.660347039534269e-09	-0.00024526773864038916	0.0	-0.09945408896413442	0.0	1.008830841561928e-05	0.0	0.9999999999890047	0.0	4.684144884806873e-06	0.0	0.0	0.0005367634650564035	0.0	0.0	0.0005375155617506781	0.0	-0.00031738746790684036	0.0	-1.6869692710449726e-09	-0.00012011285657222861	0.0	-4.650076357453295e-10
2.975	-0.0003179880322003098	0.0	-4.684303003339414e-09	-0.00024685617767812557	0.0	-0.09945408897230462	0.0	1.0090938697302085e-05	0.0	0.999999999988886	0.0	4.709368966205248e-06	0.0	0.0	0.000539653931868878	0.0	0.0	0.0005404064027440814	0.0	-0.0003179880322302935	0.0	-1.6892570622268268e-09	-0.0001201128728090235	0.0	-4.50108046807575e-10
2.98	-0.00031858859660466267	0.0	-4.708249242485372e-09	-0.00024844761953038495	0.0	-0.09945408898049304	0.0	1.009356899700125e-05	0.0	0.9999999999887665	0.0	4.7345996229112805e-06	0.0	0.0	0.0005425451521561081	0.0	0.0	0.0005432979972628427	0.0	-0.0003185885966349306	0.0	-1.6914703436111612e-09	-0.00012011288904580303	0.0	-4.3520371673747376e-10
2.985	-0.0003191891610901985	0.0	-4.732185756972143e-09	-0.0002500420641971672	0.0	-0.09945408898869967	0.0	1.0096199314716771e-05	0.0	0.9999999999886464	0.0	4.75983685492497e-06	0.0	0.0	0.0005454371259180942	0.0	0.0	0.0005461903453121234	0.0	-0.0003191891611207516	0.0	-1.6936090914923124e-09	-0.00012011290528260968	0.0	-4.202946455338262e-10
2.99	-0.00031978972565691754	0.0	-4.756112546799729e-09	-0.0002516395116784725	0.0	-0.09945408899692451	0.0	1.009882965044865e-05	0.0	0.9999999999885256	0.0	4.7850806622463185e-06	0.0	0.0	0.0005483298531548365	0.0	0.0	0.0005490834468970848	0.0	-0.00031978972568775675	0.0	-1.6956732821646088e-09	-0.00012011292151943348	0.0	-4.053808331958534e-10
2.995	-0.0003203902903048195	0.0	-4.780029611968126e-09	-0.0002532399619743006	0.0	-0.09945408900516757	0.0	1.0101460004196886e-05	0.0	0.9999999999884043	0.0	4.810331044875321e-06	0.0	0.0	0.000551223333866334	0.0	0.0	0.0005519773020228882	0.0	-0.0003203902903359459	0.0	-1.6976628919223772e-09	-0.00012011293775621664	0.0	-3.9046227972153573e-10
3.0	-0.0003209908550339045	0.0	-4.803936952477337e-09	-0.0002548434150846516	0.0	-0.09945408901342884	0.0	1.0104090375961479e-05	0.0	0.9999999999882822	0.0	4.835588002811982e-06	0.0	0.0	0.0005541175680525877	0.0	0.0	0.000554871910694695	0.0	-0.00032099085506531895	0.0	-1.6995778970599286e-09	-0.00012011295399302056	0.0	-3.7553898510987363e-10
3.005	-0.0003215914198441726	0.0	-4.8278345683273616e-09	-0.0002564498710095255	0.0	-0.09945408902170833	0.0	1.0106720765742429e-05	0.0	0.9999999999881595	0.0	4.860851536056299e-06	0.0	0.0	0.0005570125557135972	0.0	0.0	0.0005577672729176664	0.0	-0.0003215914198758761	0.0	-1.7014182738715786e-09	-0.00012011297022984347	0.0	-3.6061094935998136e-10
3.0100000000000002	-0.00032219198473562376	0.0	-4.851722459518201e-09	-0.00025805932974892244	0.0	-0.09945408903000602	0.0	1.0109351173539737e-05	0.0	0.9999999999880361	0.0	4.886121644608275e-06	0.0	0.0	0.0005599082968493627	0.0	0.0	0.0005606633886969636	0.0	-0.0003221919847676173	0.0	-1.703183998651628e-09	-0.00012011298646661758	0.0	-3.4567817246957383e-10
3.015	-0.00032279254970825794	0.0	-4.8756006260498525e-09	-0.00025967179130284215	0.0	-0.09945408903832192	0.0	1.0111981599353402e-05	0.0	0.999999999987912	0.0	4.911398328467906e-06	0.0	0.0	0.0005628047914598838	0.0	0.0	0.0005635602580377481	0.0	-0.0003227925497405423	0.0	-1.7048750476943725e-09	-0.00012011300270339802	0.0	-3.307406544381857e-10
3.02	-0.0003233931147620751	0.0	-4.899469067922317e-09	-0.0002612872556712848	0.0	-0.09945408904665605	0.0	1.0114612043183426e-05	0.0	0.9999999999877873	0.0	4.936681587635194e-06	0.0	0.0	0.0005657020395451608	0.0	0.0	0.0005664578809451812	0.0	-0.0003233931147946514	0.0	-1.7064913972941059e-09	-0.00012011301894021911	0.0	-3.15798395264466e-10
3.025	-0.0003239936798970754	0.0	-4.923327785135594e-09	-0.00026290572285425027	0.0	-0.0994540890550084	0.0	1.0117242505029807e-05	0.0	0.999999999987662	0.0	4.96197142211014e-06	0.0	0.0	0.0005686000411051938	0.0	0.0	0.000569356257424424	0.0	-0.00032399367992994445	0.0	-1.7080330237451108e-09	-0.0001201130351770113	0.0	-3.008513949469843e-10
3.0300000000000002	-0.0003245942451132587	0.0	-4.947176777689687e-09	-0.0002645271928517389	0.0	-0.09945408906337895	0.0	1.0119872984892545e-05	0.0	0.999999999987536	0.0	4.9872678318927435e-06	0.0	0.0	0.0005714987961399829	0.0	0.0	0.000572255387480638	0.0	-0.0003245942451464215	0.0	-1.7094999033416673e-09	-0.00012011305141380258	0.0	-2.8589965348446546e-10
3.035	-0.00032519481041062506	0.0	-4.971016045584591e-09	-0.0002661516656637502	0.0	-0.09945408907176773	0.0	1.012250348277164e-05	0.0	0.9999999999874093	0.0	5.012570816983002e-06	0.0	0.0	0.0005743983046495276	0.0	0.0	0.0005751552711189844	0.0	-0.00032519481044408245	0.0	-1.7108920123780447e-09	-0.00012011306765059024	0.0	-2.7094317087550663e-10
3.04	-0.00032579537578917444	0.0	-4.994845588820308e-09	-0.0002677791412902845	0.0	-0.09945408908017471	0.0	1.0125133998667092e-05	0.0	0.999999999987282	0.0	5.037880377380918e-06	0.0	0.0	0.000577298566633828	0.0	0.0	0.0005780559083446246	0.0	-0.0003257953758229274	0.0	-1.7122093271485098e-09	-0.00012011308388738153	0.0	-2.559819471189911e-10
3.045	-0.0003263959412489069	0.0	-5.018665407396839e-09	-0.0002694096197313416	0.0	-0.0994540890885999	0.0	1.0127764532578902e-05	0.0	0.9999999999871539	0.0	5.063196513086491e-06	0.0	0.0	0.0005801995820928843	0.0	0.0	0.0005809572991627199	0.0	-0.0003263959412829563	0.0	-1.7134518239473203e-09	-0.00012011310012418274	0.0	-2.4101598221395743e-10
3.0500000000000003	-0.00032699650678982237	0.0	-5.042475501314185e-09	-0.00027104310098692184	0.0	-0.09945408909704331	0.0	1.013039508450707e-05	0.0	0.9999999999870254	0.0	5.088519224099724e-06	0.0	0.0	0.000583101351026697	0.0	0.0	0.0005838594435784315	0.0	-0.0003269965068241692	0.0	-1.7146194790687321e-09	-0.00012011311636097312	0.0	-2.2604527615846157e-10
3.055	-0.0003275970724119209	0.0	-5.066275870572342e-09	-0.0002726795850570248	0.0	-0.09945408910550495	0.0	1.0133025654451595e-05	0.0	0.999999999986896	0.0	5.11384851042061e-06	0.0	0.0	0.0005860038734352652	0.0	0.0	0.0005867623415969209	0.0	-0.000327597072446566	0.0	-1.7157122688069856e-09	-0.0001201131325977382	0.0	-2.1106982895126283e-10
3.06	-0.00032819763811520246	0.0	-5.090066515171313e-09	-0.0002743190719416507	0.0	-0.09945408911398478	0.0	1.0135656242412478e-05	0.0	0.999999999986766	0.0	5.139184372049154e-06	0.0	0.0	0.000588907149318589	0.0	0.0	0.0005896659932233492	0.0	-0.0003281976381501466	0.0	-1.7167301694563242e-09	-0.00012011314883452858	0.0	-1.960896405919752e-10
3.065	-0.00032879820389966705	0.0	-5.113847435111097e-09	-0.0002759615616407995	0.0	-0.09945408912248284	0.0	1.0138286848389717e-05	0.0	0.9999999999866355	0.0	5.164526808985354e-06	0.0	0.0	0.0005918111786766691	0.0	0.0	0.0005925703984628779	0.0	-0.0003287982039349113	0.0	-1.7176731573109816e-09	-0.00012011316507132166	0.0	-1.8110471107826877e-10
3.0700000000000003	-0.00032939876976531476	0.0	-5.137618630391696e-09	-0.00027760705415447135	0.0	-0.09945408913099911	0.0	1.0140917472383315e-05	0.0	0.9999999999865041	0.0	5.189875821229214e-06	0.0	0.0	0.000594715961509505	0.0	0.0	0.0005954755573206681	0.0	-0.00032939876980085984	0.0	-1.7185412086651815e-09	-0.00012011318130810843	0.0	-1.6611504040938528e-10
3.075	-0.00032999933571214546	0.0	-5.161380101013107e-09	-0.0002792555494826659	0.0	-0.09945408913953359	0.0	1.0143548114393268e-05	0.0	0.9999999999863722	0.0	5.215231408780729e-06	0.0	0.0	0.0005976214978170968	0.0	0.0	0.0005983814698018811	0.0	-0.00032999933574799243	0.0	-1.719334299813148e-09	-0.00012011319754490785	0.0	-1.5112062858414946e-10
3.08	-0.0003305999017401592	0.0	-5.185131846975331e-09	-0.00028090704762538345	0.0	-0.09945408914808629	0.0	1.014617877441958e-05	0.0	0.9999999999862397	0.0	5.240593571639901e-06	0.0	0.0	0.0006005277875994444	0.0	0.0	0.0006012881359116785	0.0	-0.0003305999017763089	0.0	-1.7200524070490926e-09	-0.0001201132137816648	0.0	-1.3612147560056574e-10
3.085	-0.00033120046784935596	0.0	-5.208873868278368e-09	-0.0002825615485826239	0.0	-0.0994540891566572	0.0	1.014880945246225e-05	0.0	0.9999999999861063	0.0	5.26596230980673e-06	0.0	0.0	0.000603434830856548	0.0	0.0	0.0006041955556552212	0.0	-0.0003312004678858091	0.0	-1.720695506667222e-09	-0.00012011323176233744	0.0	-8.657386656994227e-11
3.09	-0.0003318010340397358	0.0	-5.232606164922218e-09	-0.0002842190523543872	0.0	-0.09945408916524633	0.0	1.0151440148521276e-05	0.0	0.9999999999859724	0.0	5.291337623281215e-06	0.0	0.0	0.0006063426275884073	0.0	0.0	0.0006071037290376708	0.0	-0.00033180103407649337	0.0	-1.7212635749617402e-09	-0.00012011323766712473	0.0	-2.7622596392094274e-10
3.095	-0.00033240160020665246	0.0	-5.258401531343131e-09	-0.0002858795653769725	0.0	-0.0994540891703637	0.0	1.0154070209821345e-05	0.0	0.9999999999858309	0.0	5.3167197717724975e-06	0.0	0.0	0.0006092512075554935	0.0	0.0	0.0006100126558771823	0.0	-0.00033240160024372806	0.0	-1.723829211120133e-09	-0.0001201132285876959	0.0	-7.626862755520713e-10
3.1	-0.00033300216634222455	0.0	-5.28641607480395e-09	-0.0002875430881351134	0.0	-0.0994540891717465	0.0	1.0156699587200335e-05	0.0	0.9999999999856811	0.0	5.3421087748399e-06	0.0	0.0	0.0006121605729991396	0.0	0.0	0.0006129223359778265	0.0	-0.00033300216637963294	0.0	-1.728548484837125e-09	-0.00012011323333599817	0.0	-9.752366465483957e-10
3.105	-0.0003336027325579217	0.0	-5.314441849642909e-09	-0.0002892096137728483	0.0	-0.09945408917311223	0.0	1.0159328975996096e-05	0.0	0.9999999999855306	0.0	5.367504355840632e-06	0.0	0.0	0.0006150706922184214	0.0	0.0	0.0006158327693428742	0.0	-0.0003336027325956641	0.0	-1.7332136091371754e-09	-0.00012011325121887488	0.0	-9.276083373089687e-10
3.11	-0.00033420329885374393	0.0	-5.3424788558600126e-09	-0.0002908791422901773	0.0	-0.09945408917446089	0.0	1.016195837620863e-05	0.0	0.9999999999853793	0.0	5.392906514774689e-06	0.0	0.0	0.0006179815652133382	0.0	0.0	0.000618743955975596	0.0	-0.0003342032988918217	0.0	-1.7378245603051754e-09	-0.00012011326724417626	0.0	-9.167713393864062e-10
3.115	-0.00033480386522969133	0.0	-5.37052709345526e-09	-0.00029255167368710073	0.0	-0.09945408917579246	0.0	1.0164587787837935e-05	0.0	0.9999999999852273	0.0	5.418315251642077e-06	0.0	0.0	0.0006208931919838911	0.0	0.0	0.0006216558958792627	0.0	-0.00033480386526810586	0.0	-1.7423813146259978e-09	-0.00012011328326947494	0.0	-9.05929598438918e-10
3.12	-0.0003354044316857637	0.0	-5.398586562428649e-09	-0.000294227207963618	0.0	-0.09945408917710698	0.0	1.0167217210884014e-05	0.0	0.9999999999850746	0.0	5.4437305664427875e-06	0.0	0.0	0.0006238055725300787	0.0	0.0	0.0006245685890571449	0.0	-0.0003354044317245164	0.0	-1.7468838483845207e-09	-0.0001201132992947447	0.0	-8.950831144651909e-10
3.125	-0.0003360049982219611	0.0	-5.426657262780181e-09	-0.00029590574511972954	0.0	-0.09945408917840443	0.0	1.0169846645346862e-05	0.0	0.9999999999849212	0.0	5.469152459176827e-06	0.0	0.0	0.0006267187068519021	0.0	0.0	0.0006274820355125131	0.0	-0.0003360049982610533	0.0	-1.7513321378656023e-09	-0.0001201133153200018	0.0	-8.842318874626916e-10
3.13	-0.0003366055648382836	0.0	-5.4547391945098545e-09	-0.00029758728515543527	0.0	-0.0994540891796848	0.0	1.0172476091226484e-05	0.0	0.999999999984767	0.0	5.494580929844194e-06	0.0	0.0	0.0006296325949493609	0.0	0.0	0.0006303962352486383	0.0	-0.00033660556487771645	0.0	-1.7557261593541001e-09	-0.00012011333134529416	0.0	-8.73375917431982e-10
3.1350000000000002	-0.0003372061315347312	0.0	-5.482832357617674e-09	-0.0002992718280707353	0.0	-0.09945408918094811	0.0	1.0175105548522877e-05	0.0	0.9999999999846121	0.0	5.520015978444889e-06	0.0	0.0	0.0006325472368224552	0.0	0.0	0.0006333111882687908	0.0	-0.0003372061315745062	0.0	-1.760065889134872e-09	-0.0001201133473705847	0.0	-8.625152043712836e-10
3.14	-0.0003378066983113038	0.0	-5.510936752103634e-09	-0.00030095937386562927	0.0	-0.09945408918219435	0.0	1.0177735017236045e-05	0.0	0.9999999999844564	0.0	5.545457604978907e-06	0.0	0.0	0.0006354626324711846	0.0	0.0	0.0006362268945762415	0.0	-0.0003378066983514223	0.0	-1.7643513034927602e-09	-0.00012011336339584362	0.0	-8.516497482789661e-10
3.145	-0.0003384072651680015	0.0	-5.539052377967738e-09	-0.00030264992254011754	0.0	-0.09945408918342352	0.0	1.0180364497365981e-05	0.0	0.9999999999843001	0.0	5.570905809446255e-06	0.0	0.0	0.0006383787818955495	0.0	0.0	0.0006391433541742609	0.0	-0.0003384072652084647	0.0	-1.7685823787126065e-09	-0.00012011337942113417	0.0	-8.407795491532718e-10
3.15	-0.0003390078321048243	0.0	-5.567179235209982e-09	-0.0003043434740941999	0.0	-0.09945408918463562	0.0	1.0182993988912692e-05	0.0	0.999999999984143	0.0	5.59636059184693e-06	0.0	0.0	0.0006412956850955501	0.0	0.0	0.0006420605670661198	0.0	-0.0003390078321456336	0.0	-1.7727590910792369e-09	-0.00012011339544640753	0.0	-8.299046069939974e-10
3.1550000000000002	-0.0003396083991217721	0.0	-5.595317323830374e-09	-0.0003060400285278764	0.0	-0.09945408918583065	0.0	1.0185623491876174e-05	0.0	0.9999999999839851	0.0	5.621821952180932e-06	0.0	0.0	0.000644213342071186	0.0	0.0	0.0006449785332550889	0.0	-0.00033960839916292876	0.0	-1.7768814168774884e-09	-0.00012011341147166556	0.0	-8.190249218000813e-10
3.16	-0.000340208966218845	0.0	-5.623466643828906e-09	-0.0003077395858411471	0.0	-0.09945408918700861	0.0	1.0188253006256426e-05	0.0	0.9999999999838266	0.0	5.6472898904482605e-06	0.0	0.0	0.0006471317528224573	0.0	0.0	0.0006478972527444387	0.0	-0.0003402089662603503	0.0	-1.780949332392176e-09	-0.00012011342749696694	0.0	-8.081404935689317e-10
3.165	-0.00034080953339604296	0.0	-5.65162719520558e-09	-0.00030944214603401186	0.0	-0.0994540891881695	0.0	1.0190882532053453e-05	0.0	0.9999999999836674	0.0	5.672764406648916e-06	0.0	0.0	0.000650050917349364	0.0	0.0	0.0006508167255374399	0.0	-0.0003408095334378984	0.0	-1.784962813908115e-09	-0.00012011344352225116	0.0	-7.972513223003142e-10
3.17	-0.00034141010065336596	0.0	-5.679798977960399e-09	-0.0003111477091064708	0.0	-0.09945408918931332	0.0	1.019351206926725e-05	0.0	0.9999999999835074	0.0	5.6982455007828975e-06	0.0	0.0	0.000652970835651906	0.0	0.0	0.0006537369516373633	0.0	-0.0003414101006955728	0.0	-1.7889218377101134e-09	-0.00012011345954750555	0.0	-7.863574079921678e-10
3.1750000000000003	-0.0003420106679908141	0.0	-5.707981992093361e-09	-0.00031285627505852405	0.0	-0.09945408919044008	0.0	1.019614161789782e-05	0.0	0.9999999999833467	0.0	5.72373317285021e-06	0.0	0.0	0.0006558915077300838	0.0	0.0	0.0006566579310474795	0.0	-0.00034201066803337353	0.0	-1.7928263800829694e-09	-0.00012011347557279068	0.0	-7.754587506436789e-10
3.18	-0.00034261123540838727	0.0	-5.7361762376044636e-09	-0.00031456784389017136	0.0	-0.09945408919154976	0.0	1.0198771177945161e-05	0.0	0.9999999999831852	0.0	5.749227422850846e-06	0.0	0.0	0.0006588129335838968	0.0	0.0	0.0006595796637710591	0.0	-0.0003426112354513007	0.0	-1.7966764173114815e-09	-0.00012011349159807309	0.0	-7.645553502540481e-10
3.185	-0.0003432118029060855	0.0	-5.76438171449371e-09	-0.00031628241560141275	0.0	-0.09945408919264237	0.0	1.0201400749409277e-05	0.0	0.999999999983023	0.0	5.77472825078481e-06	0.0	0.0	0.0006617351132133452	0.0	0.0	0.0006625021498113729	0.0	-0.0003432118029493542	0.0	-1.8004719256804382e-09	-0.00012011350762331032	0.0	-7.536472068213488e-10
3.19	-0.0003438123704839087	0.0	-5.792598422761099e-09	-0.0003179999901922484	0.0	-0.09945408919371791	0.0	1.020403033229016e-05	0.0	0.99999999998286	0.0	5.800235656652099e-06	0.0	0.0	0.000664658046618429	0.0	0.0	0.0006654253891716914	0.0	-0.0003438123705275339	0.0	-1.8042128814746216e-09	-0.00012011352364859093	0.0	-7.427343203448157e-10
3.1950000000000003	-0.00034441293814185716	0.0	-5.820826362406635e-09	-0.00031972056766267827	0.0	-0.09945408919477638	0.0	1.020665992658782e-05	0.0	0.9999999999826964	0.0	5.825749640452719e-06	0.0	0.0	0.0006675817337991485	0.0	0.0	0.0006683493818552853	0.0	-0.00034441293818584015	0.0	-1.8078992609788104e-09	-0.00012011353967389863	0.0	-7.318166908227221e-10
3.2	-0.00034501350587993053	0.0	-5.8490655334303086e-09	-0.0003214441480127022	0.0	-0.09945408919581779	0.0	1.0209289532302249e-05	0.0	0.9999999999825321	0.0	5.8512702021866635e-06	0.0	0.0	0.0006705061747555033	0.0	0.0	0.0006712741278654253	0.0	-0.00034501350592427277	0.0	-1.8115310404777703e-09	-0.000120113555699144	0.0	-7.208943182534206e-10
3.205	-0.00034561407369812904	0.0	-5.8773159358321275e-09	-0.0003231707312423202	0.0	-0.09945408919684212	0.0	1.021191914943345e-05	0.0	0.9999999999823669	0.0	5.876797341853935e-06	0.0	0.0	0.0006734313694874934	0.0	0.0	0.0006741996272053821	0.0	-0.0003456140737428316	0.0	-1.8151081962562655e-09	-0.00012011357172442822	0.0	-7.099672026369766e-10
3.21	-0.0003462146415964526	0.0	-5.905577569612089e-09	-0.00032490031735153246	0.0	-0.0994540891978494	0.0	1.0214548777981425e-05	0.0	0.9999999999822011	0.0	5.902331059454534e-06	0.0	0.0	0.0006763573179951191	0.0	0.0	0.0006771258798784264	0.0	-0.000346214641641517	0.0	-1.8186307045990578e-09	-0.00012011358774968172	0.0	-6.990353439710328e-10
3.215	-0.00034681520957490115	0.0	-5.933850434770192e-09	-0.0003266329063403387	0.0	-0.0994540891988396	0.0	1.021717841794617e-05	0.0	0.9999999999820345	0.0	5.927871354988459e-06	0.0	0.0	0.00067928402027838	0.0	0.0	0.0006800528858878287	0.0	-0.00034681520962032847	0.0	-1.8220985417908916e-09	-0.00012011360377496775	0.0	-6.880987422543896e-10
3.22	-0.0003474157776334749	0.0	-5.962134531306441e-09	-0.00032836849820873945	0.0	-0.09945408919981272	0.0	1.0219808069327689e-05	0.0	0.9999999999818673	0.0	5.953418228455715e-06	0.0	0.0	0.0006822114763372771	0.0	0.0	0.0006829806452368598	0.0	-0.0003474157776792667	0.0	-1.8255116841165163e-09	-0.0001201136198002628	0.0	-6.771573974867196e-10
3.225	-0.0003480163457721737	0.0	-5.990429859220832e-09	-0.00033010709295673416	0.0	-0.09945408920076877	0.0	1.0222437732125979e-05	0.0	0.9999999999816992	0.0	5.978971679856293e-06	0.0	0.0	0.0006851396861718089	0.0	0.0	0.0006859091579287903	0.0	-0.000348016345818331	0.0	-1.8288701078606696e-09	-0.00012011363582547926	0.0	-6.66211309665338e-10
3.23	-0.0003486169139909974	0.0	-6.018736418513362e-09	-0.00033184869058432284	0.0	-0.09945408920170776	0.0	1.0225067406341042e-05	0.0	0.9999999999815304	0.0	6.0045317091902e-06	0.0	0.0	0.0006880686497819764	0.0	0.0	0.0006888384239668909	0.0	-0.00034861691403752156	0.0	-1.8321737893080794e-09	-0.00012011365185077341	0.0	-6.552604787897104e-10
3.235	-0.00034921748228994634	0.0	-6.047054209184038e-09	-0.0003335932910915059	0.0	-0.09945408920262969	0.0	1.0227697091972876e-05	0.0	0.999999999981361	0.0	6.0300983164574345e-06	0.0	0.0	0.0006909983671677794	0.0	0.0	0.0006917684433544322	0.0	-0.00034921748233683874	0.0	-1.8354227047434754e-09	-0.00012011366787606848	0.0	-6.443049048596578e-10
3.24	-0.0003498180506690203	0.0	-6.0753832312328605e-09	-0.0003353408944782834	0.0	-0.09945408920353453	0.0	1.0230326789021482e-05	0.0	0.9999999999811908	0.0	6.0556715016579965e-06	0.0	0.0	0.0006939288383292179	0.0	0.0	0.000694699216094685	0.0	-0.0003498180507162822	0.0	-1.83861683045158e-09	-0.00012011368390131022	0.0	-6.33344587871613e-10
3.245	-0.0003504186191282193	0.0	-6.103723484659819e-09	-0.0003370915007446546	0.0	-0.09945408920442231	0.0	1.023295649748686e-05	0.0	0.9999999999810198	0.0	6.081251264791884e-06	0.0	0.0	0.0006968600632662917	0.0	0.0	0.0006976307421909199	0.0	-0.0003504186191758519	0.0	-1.8417561427170948e-09	-0.00012011369992656914	0.0	-6.223795278255413e-10
3.25	-0.00035101918766754334	0.0	-6.132074969464923e-09	-0.0003388451098906201	0.0	-0.09945408920529301	0.0	1.023558621736901e-05	0.0	0.9999999999808482	0.0	6.106837605859099e-06	0.0	0.0	0.0006997920419790012	0.0	0.0	0.0007005630216464075	0.0	-0.0003510191877155479	0.0	-1.8448406178247378e-09	-0.00012011371595183981	0.0	-6.114097247212567e-10
3.255	-0.0003516197562869925	0.0	-6.160437685648172e-09	-0.00034060172191617967	0.0	-0.09945408920614666	0.0	1.0238215948667932e-05	0.0	0.9999999999806758	0.0	6.132430524859642e-06	0.0	0.0	0.000702724774467346	0.0	0.0	0.0007034960544644185	0.0	-0.0003516197563353703	0.0	-1.8478702320592055e-09	-0.00012011373197713577	0.0	-6.004351785554987e-10
3.2600000000000002	-0.0003522203249865668	0.0	-6.188811633209562e-09	-0.00034236133682133353	0.0	-0.09945408920698323	0.0	1.0240845691383626e-05	0.0	0.9999999999805027	0.0	6.158030021793512e-06	0.0	0.0	0.0007056582607313264	0.0	0.0	0.0007064298406482236	0.0	-0.00035222032503531923	0.0	-1.8508449617051898e-09	-0.00012011374800240102	0.0	-5.894558893280641e-10
3.265	-0.0003528208937662661	0.0	-6.217196812149096e-09	-0.00034412395460608157	0.0	-0.09945408920780273	0.0	1.0243475445516092e-05	0.0	0.9999999999803288	0.0	6.183636096660708e-06	0.0	0.0	0.0007085925007709422	0.0	0.0	0.0007093643802010935	0.0	-0.00035282089381539426	0.0	-1.853764783047381e-09	-0.00012011376402762199	0.0	-5.784718570374811e-10
3.27	-0.00035342146262609035	0.0	-6.2455932224667725e-09	-0.0003458895752704236	0.0	-0.09945408920860517	0.0	1.024610521106533e-05	0.0	0.9999999999801542	0.0	6.209248749461233e-06	0.0	0.0	0.0007115274945861935	0.0	0.0	0.0007122996731262986	0.0	-0.0003534214626755955	0.0	-1.8566296723704575e-09	-0.00012011378005290169	0.0	-5.674830816826157e-10
3.275	-0.0003540220315660398	0.0	-6.274000864162589e-09	-0.00034765819881435976	0.0	-0.09945408920939053	0.0	1.0248734988031341e-05	0.0	0.9999999999799789	0.0	6.23486798019508e-06	0.0	0.0	0.0007144632421770799	0.0	0.0	0.0007152357194271099	0.0	-0.00035402203161592326	0.0	-1.859439605959098e-09	-0.0001201137960781832	0.0	-5.564895632624168e-10
3.2800000000000002	-0.0003546226005861143	0.0	-6.302419737236555e-09	-0.00034942982523789045	0.0	-0.09945408921015883	0.0	1.0251364776414123e-05	0.0	0.9999999999798028	0.0	6.26049378886226e-06	0.0	0.0	0.0007173997435436024	0.0	0.0	0.0007181725191067979	0.0	-0.0003546226006363773	0.0	-1.8621945600979698e-09	-0.00012011381210343941	0.0	-5.454913017750025e-10
3.285	-0.0003552231696863138	0.0	-6.3308498416886595e-09	-0.000351204454541015	0.0	-0.09945408921091005	0.0	1.0253994576213677e-05	0.0	0.9999999999796261	0.0	6.286126175462765e-06	0.0	0.0	0.0007203369986857602	0.0	0.0	0.0007211100721686333	0.0	-0.00035522316973695767	0.0	-1.8648945110717343e-09	-0.00012011382812870375	0.0	-5.344882972192113e-10
3.29	-0.00035582373886663846	0.0	-6.359291177518906e-09	-0.0003529820867237336	0.0	-0.0994540892116442	0.0	1.0256624387430004e-05	0.0	0.9999999999794486	0.0	6.311765139996596e-06	0.0	0.0	0.0007232750076035533	0.0	0.0	0.0007240483786158868	0.0	-0.00035582373891766437	0.0	-1.867539435165047e-09	-0.0001201138441539726	0.0	-5.234805495945435e-10
3.295	-0.0003564243081270881	0.0	-6.387743744727297e-09	-0.0003547627217860466	0.0	-0.09945408921236129	0.0	1.0259254210063101e-05	0.0	0.9999999999792704	0.0	6.337410682463753e-06	0.0	0.0	0.0007262137702969819	0.0	0.0	0.000726987438451829	0.0	-0.0003564243081784974	0.0	-1.870129308662562e-09	-0.00012011386017923965	0.0	-5.124680588991103e-10
3.3000000000000003	-0.0003570248774676629	0.0	-6.416207543313833e-09	-0.0003565463597279537	0.0	-0.0994540892130613	0.0	1.0261884044112971e-05	0.0	0.9999999999790914	0.0	6.363062802864241e-06	0.0	0.0	0.0007291532867660464	0.0	0.0	0.0007299272516797306	0.0	-0.0003570248775194568	0.0	-1.8726641078489176e-09	-0.0001201138762045049	0.0	-5.014508251311162e-10
3.305	-0.00035762544688836267	0.0	-6.4446825732785066e-09	-0.00035833300054945486	0.0	-0.09945408921374425	0.0	1.0264513889579614e-05	0.0	0.9999999999789118	0.0	6.388721501198053e-06	0.0	0.0	0.000732093557010746	0.0	0.0	0.0007328678183028622	0.0	-0.00035762544694054244	0.0	-1.875143809008752e-09	-0.00012011389222976833	0.0	-4.904288482906713e-10
3.31	-0.00035822601638918754	0.0	-6.473168834621327e-09	-0.0003601226442505503	0.0	-0.09945408921441012	0.0	1.026714374646303e-05	0.0	0.9999999999787313	0.0	6.414386777465192e-06	0.0	0.0	0.0007350345810310811	0.0	0.0	0.0007358091383244946	0.0	-0.00035822601644175443	0.0	-1.8775683884267e-09	-0.00012011390825500828	0.0	-4.794021283755835e-10
3.315	-0.00035882658597013745	0.0	-6.50166632734229e-09	-0.0003619152908312398	0.0	-0.09945408921505894	0.0	1.0269773614763215e-05	0.0	0.9999999999785502	0.0	6.4400586316656586e-06	0.0	0.0	0.0007379763588270517	0.0	0.0	0.0007387512117478982	0.0	-0.00035882658602309254	0.0	-1.8799378223873804e-09	-0.00012011392428027442	0.0	-4.683706653839024e-10
3.3200000000000003	-0.0003594271556312125	0.0	-6.530175051441395e-09	-0.0003637109402915235	0.0	-0.09945408921569067	0.0	1.0272403494480174e-05	0.0	0.9999999999783683	0.0	6.465737063799454e-06	0.0	0.0	0.0007409188903986581	0.0	0.0	0.000741694038576344	0.0	-0.0003594271556845572	0.0	-1.8822520871754113e-09	-0.00012011394030556045	0.0	-4.5733445931586195e-10
3.325	-0.0003600277253724126	0.0	-6.558695006918644e-09	-0.0003655095926314014	0.0	-0.09945408921630534	0.0	1.0275033385613903e-05	0.0	0.9999999999781857	0.0	6.491422073866576e-06	0.0	0.0	0.0007438621757458998	0.0	0.0	0.0007446376188131025	0.0	-0.0003600277254261481	0.0	-1.8845111590754093e-09	-0.00012011395633079768	0.0	-4.462935101701872e-10
3.33	-0.0003606282951937377	0.0	-6.5872261937740355e-09	-0.00036731124785087334	0.0	-0.09945408921690295	0.0	1.0277663288164407e-05	0.0	0.9999999999780024	0.0	6.517113661867021e-06	0.0	0.0	0.0007468062148687768	0.0	0.0	0.0007475819524614443	0.0	-0.0003606282952478652	0.0	-1.8867150143719798e-09	-0.00012011397235605842	0.0	-4.35247817944231e-10
3.335	-0.00036122886509518787	0.0	-6.615768612007569e-09	-0.00036911590594993946	0.0	-0.09945408921748347	0.0	1.028029320213168e-05	0.0	0.9999999999778183	0.0	6.542811827800796e-06	0.0	0.0	0.0007497510077672895	0.0	0.0	0.0007505270395246403	0.0	-0.00036122886514970866	0.0	-1.8888636293497168e-09	-0.00012011398838131552	0.0	-4.2419738263745577e-10
3.34	-0.00036182943507676306	0.0	-6.644322261619245e-09	-0.00037092356692859977	0.0	-0.09945408921804694	0.0	1.0282923127515727e-05	0.0	0.9999999999776336	0.0	6.568516571667898e-06	0.0	0.0	0.0007526965544414377	0.0	0.0	0.0007534728800059608	0.0	-0.0003618294351316784	0.0	-1.8909569802932174e-09	-0.00012011400440659794	0.0	-4.131422042484415e-10
3.345	-0.0003624300051384635	0.0	-6.672887142609066e-09	-0.00037273423078685436	0.0	-0.09945408921859332	0.0	1.0285553064316547e-05	0.0	0.999999999977448	0.0	6.594227893468329e-06	0.0	0.0	0.0007556428548912217	0.0	0.0	0.0007564194739086768	0.0	-0.00036243000519377457	0.0	-1.892995043487063e-09	-0.0001201140204318424	0.0	-4.020822827765747e-10
3.35	-0.00036303057528028887	0.0	-6.7014632549770295e-09	-0.0003745478975247029	0.0	-0.09945408921912265	0.0	1.0288183012534137e-05	0.0	0.9999999999772617	0.0	6.619945793202083e-06	0.0	0.0	0.0007585899091166406	0.0	0.0	0.0007593668212360588	0.0	-0.0003630305753359968	0.0	-1.894977795215842e-09	-0.00012011403645708415	0.0	-3.910176182198288e-10
3.355	-0.00036363114550223933	0.0	-6.7300505987231335e-09	-0.00037636456714214566	0.0	-0.0994540892196349	0.0	1.0290812972168498e-05	0.0	0.9999999999770748	0.0	6.645670270869167e-06	0.0	0.0	0.0007615377171176956	0.0	0.0	0.0007623149219913775	0.0	-0.00036363114555834544	0.0	-1.8969052117641175e-09	-0.00012011405248234035	0.0	-3.7994821057679754e-10
3.36	-0.0003642317158043148	0.0	-6.7586491738473815e-09	-0.0003781842396391827	0.0	-0.09945408922013008	0.0	1.0293442943219634e-05	0.0	0.999999999976887	0.0	6.671401326469577e-06	0.0	0.0	0.0007644862788943858	0.0	0.0	0.0007652637761779035	0.0	-0.00036423171586082024	0.0	-1.898777269416466e-09	-0.00012011406850761193	0.0	-3.688740598477153e-10
3.365	-0.0003648322861865155	0.0	-6.787258980349775e-09	-0.0003800069150158138	0.0	-0.0994540892206082	0.0	1.029607292568754e-05	0.0	0.9999999999766986	0.0	6.697138960003315e-06	0.0	0.0	0.0007674355944467117	0.0	0.0	0.0007682133837989075	0.0	-0.00036483228624342154	0.0	-1.900593944457447e-09	-0.00012011408453288259	0.0	-3.577951660297697e-10
3.37	-0.0003654328566488411	0.0	-6.815880018230309e-09	-0.00038183259327203905	0.0	-0.09945408922106924	0.0	1.0298702919572218e-05	0.0	0.9999999999765095	0.0	6.722883171470378e-06	0.0	0.0	0.0007703856637746729	0.0	0.0	0.0007711637448576602	0.0	-0.000365432856706149	0.0	-1.9023552131716135e-09	-0.00012011410055812706	0.0	-3.467115291216855e-10
3.375	-0.00036603342719129187	0.0	-6.844512287488985e-09	-0.0003836612744078585	0.0	-0.09945408922151322	0.0	1.0301332924873669e-05	0.0	0.9999999999763196	0.0	6.748633960870771e-06	0.0	0.0	0.0007733364868782698	0.0	0.0	0.0007741148593574323	0.0	-0.0003660334272490028	0.0	-1.9040610518435127e-09	-0.00012011411658337243	0.0	-3.356231491231938e-10
3.38	-0.00036663399781386755	0.0	-6.8731557881258055e-09	-0.00038549295842327193	0.0	-0.09945408922194011	0.0	1.0303962941591891e-05	0.0	0.999999999976129	0.0	6.774391328204487e-06	0.0	0.0	0.0007762880637575022	0.0	0.0	0.0007770667273014944	0.0	-0.00036663399787198274	0.0	-1.9057114367576917e-09	-0.0001201141326086205	0.0	-3.2453002603244044e-10
3.3850000000000002	-0.0003672345685165685	0.0	-6.901810520140771e-09	-0.00038732764531827985	0.0	-0.09945408922234995	0.0	1.0306592969726886e-05	0.0	0.9999999999759376	0.0	6.800155273471534e-06	0.0	0.0	0.0007792403944123702	0.0	0.0	0.0007800193486931172	0.0	-0.00036723456857508906	0.0	-1.9073063441986806e-09	-0.00012011414863389569	0.0	-3.134321598475573e-10
3.39	-0.00036783513929939445	0.0	-6.930476483533876e-09	-0.00038916533509288174	0.0	-0.09945408922274272	0.0	1.0309223009278654e-05	0.0	0.9999999999757455	0.0	6.825925796671907e-06	0.0	0.0	0.0007821934788428738	0.0	0.0	0.0007829727235355714	0.0	-0.00036783513935832165	0.0	-1.9088457504510103e-09	-0.00012011416465913653	0.0	-3.023295505686409e-10
3.395	-0.0003684357101623454	0.0	-6.9591536783051245e-09	-0.0003910060277470776	0.0	-0.09945408922311842	0.0	1.0311853060247192e-05	0.0	0.9999999999755527	0.0	6.851702897805606e-06	0.0	0.0	0.0007851473170490126	0.0	0.0	0.0007859268518321275	0.0	-0.0003684357102216804	0.0	-1.9103296317992073e-09	-0.00012011418068439093	0.0	-2.9122219819389904e-10
3.4	-0.0003690362811054215	0.0	-6.987842104454515e-09	-0.00039284972328086783	0.0	-0.09945408922347705	0.0	1.0314483122632503e-05	0.0	0.9999999999753592	0.0	6.8774865768726305e-06	0.0	0.0	0.000788101909030787	0.0	0.0	0.0007888817335860562	0.0	-0.0003690362811651656	0.0	-1.911757964527787e-09	-0.00012011419670965708	0.0	-2.8011010272171865e-10
3.4050000000000002	-0.0003696368521286226	0.0	-7.016541761982053e-09	-0.00039469642169425237	0.0	-0.0994540892238186	0.0	1.0317113196434585e-05	0.0	0.9999999999751649	0.0	6.903276833872986e-06	0.0	0.0	0.0007910572547881972	0.0	0.0	0.0007918373688006284	0.0	-0.00036963685218877697	0.0	-1.91313072492126e-09	-0.00012011421273490426	0.0	-2.6899326415083146e-10
3.41	-0.00037023742323194877	0.0	-7.04525265088773e-09	-0.00039654612298723076	0.0	-0.09945408922414309	0.0	1.031974328165344e-05	0.0	0.9999999999749699	0.0	6.929073668806667e-06	0.0	0.0	0.000794013354321243	0.0	0.0	0.0007947937574791145	0.0	-0.00037023742329251463	0.0	-1.914447889264129e-09	-0.00012011422876015052	0.0	-2.5787168248018965e-10
3.415	-0.0003708379944154	0.0	-7.073974771171549e-09	-0.00039839882715980344	0.0	-0.09945408922445051	0.0	1.0322373378289067e-05	0.0	0.9999999999747742	0.0	6.954877081673672e-06	0.0	0.0	0.0007969702076299238	0.0	0.0	0.0007977508996247853	0.0	-0.00037083799447637847	0.0	-1.915709433840894e-09	-0.00012011424478540764	0.0	-2.4674535770889717e-10
3.42	-0.0003714385656789763	0.0	-7.102708122833514e-09	-0.0004002545342119703	0.0	-0.09945408922474086	0.0	1.0325003486341465e-05	0.0	0.9999999999745778	0.0	6.980687072474008e-06	0.0	0.0	0.0007999278147142408	0.0	0.0	0.0008007087952409114	0.0	-0.0003714385657403687	0.0	-1.9169153349360466e-09	-0.00012011426081067649	0.0	-2.356142898345896e-10
3.4250000000000003	-0.00037203913702267777	0.0	-7.131452705873621e-09	-0.00040211324414373133	0.0	-0.09945408922501414	0.0	1.0327633605810637e-05	0.0	0.9999999999743806	0.0	7.006503641207671e-06	0.0	0.0	0.0008028861755741933	0.0	0.0	0.0008036674443307636	0.0	-0.0003720391370844852	0.0	-1.9180655688340675e-09	-0.0001201142768359047	0.0	-2.244784788568534e-10
3.43	-0.00037263970844650423	0.0	-7.16020852029187e-09	-0.00040397495695508644	0.0	-0.09945408922527035	0.0	1.033026373669658e-05	0.0	0.9999999999741827	0.0	7.032326787874658e-06	0.0	0.0	0.0008058452902097808	0.0	0.0	0.0008066268468976123	0.0	-0.0003726397085087278	0.0	-1.9191601118194413e-09	-0.00012011429286114645	0.0	-2.1333792477513017e-10
3.435	-0.0003732402799504557	0.0	-7.188975566088263e-09	-0.00040583967264603584	0.0	-0.0994540892255095	0.0	1.0332893878999295e-05	0.0	0.999999999973984	0.0	7.058156512474973e-06	0.0	0.0	0.0008088051586210042	0.0	0.0	0.0008095870029447284	0.0	-0.0003732402800130967	0.0	-1.9201989401766406e-09	-0.00012011430888640717	0.0	-2.0219262758609055e-10
3.44	-0.0003738408515345323	0.0	-7.217753843262795e-09	-0.0004077073912165792	0.0	-0.09945408922573157	0.0	1.033552403271878e-05	0.0	0.9999999999737846	0.0	7.083992815008615e-06	0.0	0.0	0.0008117657808078631	0.0	0.0	0.0008125479124753825	0.0	-0.00037384085159759183	0.0	-1.9211820301901237e-09	-0.00012011432491166158	0.0	-1.910425872899965e-10
3.4450000000000003	-0.00037444142319873397	0.0	-7.246543351815476e-09	-0.00040957811266671685	0.0	-0.09945408922593657	0.0	1.033815419785504e-05	0.0	0.9999999999735846	0.0	7.109835695475588e-06	0.0	0.0	0.0008147271567703581	0.0	0.0	0.0008155095754928453	0.0	-0.0003744414232622133	0.0	-1.9221093581443606e-09	-0.00012011434093690694	0.0	-1.7988780388635855e-10
3.45	-0.00037504199494306067	0.0	-7.275344091746297e-09	-0.0004114518369964487	0.0	-0.0994540892261245	0.0	1.034078437440807e-05	0.0	0.9999999999733837	0.0	7.135685153875884e-06	0.0	0.0	0.0008176892865084881	0.0	0.0	0.0008184719920003873	0.0	-0.0003750419950069609	0.0	-1.9229809003238025e-09	-0.00012011435696213424	0.0	-1.6872827737150266e-10
3.455	-0.0003756425667675124	0.0	-7.304156063055259e-09	-0.00041332856420577446	0.0	-0.09945408922629537	0.0	1.0343414562377874e-05	0.0	0.9999999999731821	0.0	7.1615411902095065e-06	0.0	0.0	0.0008206521700222536	0.0	0.0	0.0008214351620012794	0.0	-0.0003756425668318347	0.0	-1.923796633012891e-09	-0.00012011437298738864	0.0	-1.5756400774591825e-10
3.46	-0.0003762431386720893	0.0	-7.3329792657423665e-09	-0.00041520829429469443	0.0	-0.09945408922644916	0.0	1.0346044761764449e-05	0.0	0.9999999999729798	0.0	7.187403804476457e-06	0.0	0.0	0.0008236158073116546	0.0	0.0	0.000824399085498792	0.0	-0.0003762431387368348	0.0	-1.924556532496075e-09	-0.00012011438901265931	0.0	-1.4639499500826117e-10
3.465	-0.0003768437106567912	0.0	-7.361813699807616e-09	-0.0004170910272632087	0.0	-0.09945408922658588	0.0	1.0348674972567796e-05	0.0	0.9999999999727769	0.0	7.213272996676736e-06	0.0	0.0	0.0008265801983766917	0.0	0.0	0.0008273637624961961	0.0	-0.0003768437107219613	0.0	-1.9252605750577837e-09	-0.00012011440503791913	0.0	-1.3522123915664265e-10
3.47	-0.0003774442827216182	0.0	-7.39065936525101e-09	-0.00041897676311131724	0.0	-0.09945408922670554	0.0	1.0351305194787915e-05	0.0	0.9999999999725732	0.0	7.239148766810339e-06	0.0	0.0	0.0008295453432173639	0.0	0.0	0.000830329192996762	0.0	-0.00037744428278721395	0.0	-1.9259087369824495e-09	-0.0001201144210631401	0.0	-1.240427401899667e-10
3.475	-0.00037804485486657023	0.0	-7.419516262072546e-09	-0.00042086550183901975	0.0	-0.09945408922680812	0.0	1.0353935428424806e-05	0.0	0.9999999999723687	0.0	7.265031114877272e-06	0.0	0.0	0.0008325112418336719	0.0	0.0	0.0008332953770037606	0.0	-0.0003780448549325927	0.0	-1.9265009945544895e-09	-0.00012011443708838908	0.0	-1.1285949810688227e-10
3.48	-0.00037864542709164736	0.0	-7.448384390272224e-09	-0.00042275724344631655	0.0	-0.09945408922689364	0.0	1.0356565673478469e-05	0.0	0.9999999999721635	0.0	7.290920040877532e-06	0.0	0.0	0.0008354778942256156	0.0	0.0	0.0008362623145204626	0.0	-0.00037864542715809784	0.0	-1.9270373240583227e-09	-0.00012011445311362631	0.0	-1.016715129065277e-10
3.485	-0.00037924599939684946	0.0	-7.477263749850042e-09	-0.0004246519879332073	0.0	-0.09945408922696208	0.0	1.0359195929948903e-05	0.0	0.9999999999719575	0.0	7.316815544811116e-06	0.0	0.0	0.0008384453003931944	0.0	0.0	0.0008392300055501384	0.0	-0.000379245999463729	0.0	-1.927517701778357e-09	-0.00012011446913886536	0.0	-9.047878458738647e-11
3.49	-0.00037984657178217676	0.0	-7.50615434080601e-09	-0.00042654973529969236	0.0	-0.09945408922701346	0.0	1.0361826197836111e-05	0.0	0.9999999999717508	0.0	7.342717626678031e-06	0.0	0.0	0.0008414134603364095	0.0	0.0	0.0008421984500960589	0.0	-0.00037984657184948653	0.0	-1.9279421039989965e-09	-0.00012011448516412428	0.0	-7.928131314815581e-11
3.495	-0.0003804471442476291	0.0	-7.535056163140116e-09	-0.0004284504855457715	0.0	-0.09945408922704776	0.0	1.036445647714009e-05	0.0	0.9999999999715434	0.0	7.368626286478271e-06	0.0	0.0	0.0008443823740552598	0.0	0.0	0.0008451676481614947	0.0	-0.00038044714431537027	0.0	-1.9283105070046367e-09	-0.00012011450118936965	0.0	-6.807909858798784e-11
3.5	-0.0003810477167932064	0.0	-7.563969216852365e-09	-0.0004303542386714448	0.0	-0.09945408922706502	0.0	1.0367086767860841e-05	0.0	0.9999999999713354	0.0	7.394541524211837e-06	0.0	0.0	0.0008473520415497456	0.0	0.0	0.0008481375997497165	0.0	-0.00038104771686138023	0.0	-1.928622887079672e-09	-0.00012011451721460598	0.0	-5.6872140905366054e-11
3.505	-0.0003816482894189088	0.0	-7.592893501942757e-09	-0.00043226099467671226	0.0	-0.09945408922706518	0.0	1.0369717069998364e-05	0.0	0.9999999999711265	0.0	7.420463339878731e-06	0.0	0.0	0.000850322462819867	0.0	0.0	0.0008511083048639949	0.0	-0.00038164828948751637	0.0	-1.928879220508483e-09	-0.00012011453323985315	0.0	-4.5660440098263876e-11
3.5100000000000002	-0.0003822488621247364	0.0	-7.621829018411296e-09	-0.00043417075356157414	0.0	-0.09945408922704828	0.0	1.0372347383552659e-05	0.0	0.9999999999709169	0.0	7.446391733478954e-06	0.0	0.0	0.0008532936378656242	0.0	0.0	0.0008540797635076006	0.0	-0.0003822488621937788	0.0	-1.9290794835754463e-09	-0.00012011454926509671	0.0	-3.444399616613674e-11
3.515	-0.00038284943491068894	0.0	-7.650775766257973e-09	-0.0004360835153260299	0.0	-0.0994540892270143	0.0	1.0374977708523726e-05	0.0	0.9999999999707067	0.0	7.4723267050125024e-06	0.0	0.0	0.000856265566687017	0.0	0.0	0.0008570519756838042	0.0	-0.00038284943498016733	0.0	-1.929223652564935e-09	-0.00012011456529033575	0.0	-2.3222809108446976e-11
3.52	-0.00038345000777676656	0.0	-7.679733745482795e-09	-0.0004379992799700798	0.0	-0.09945408922696326	0.0	1.0377608044911566e-05	0.0	0.9999999999704956	0.0	7.498268254479375e-06	0.0	0.0	0.000859238249284045	0.0	0.0	0.0008600249413958764	0.0	-0.00038345000784668215	0.0	-1.9293117037613176e-09	-0.00012011458131559377	0.0	-1.1996878922719936e-11
3.525	-0.0003840505807229693	0.0	-7.70870295608576e-09	-0.000439918047493724	0.0	-0.09945408922689516	0.0	1.0380238392716177e-05	0.0	0.9999999999702839	0.0	7.524216381879578e-06	0.0	0.0	0.0008622116856567091	0.0	0.0	0.0008629986606470879	0.0	-0.00038405058079332325	0.0	-1.9293436134489466e-09	-0.0001201145973408319	0.0	-7.662056075011617e-13
3.5300000000000002	-0.0003846511537492971	0.0	-7.737683398066867e-09	-0.00044183981789696237	0.0	-0.09945408922680998	0.0	1.038286875193756e-05	0.0	0.9999999999700714	0.0	7.550171087213109e-06	0.0	0.0	0.0008651858758050089	0.0	0.0	0.0008659731334407094	0.0	-0.00038465115382009047	0.0	-1.9293193579121764e-09	-0.00012011461336605288	0.0	1.046921083719556e-11
3.535	-0.00038525172685574993	0.0	-7.766675071426118e-09	-0.0004437645911797948	0.0	-0.09945408922670773	0.0	1.0385499122575715e-05	0.0	0.9999999999698581	0.0	7.576132370479964e-06	0.0	0.0	0.0008681608197289438	0.0	0.0	0.0008689483597800114	0.0	-0.0003852517269269838	0.0	-1.9292389134353557e-09	-0.00012011462939129282	0.0	2.1709370413314106e-11
3.54	-0.0003858523000423278	0.0	-7.795677976163511e-09	-0.00044569236734222134	0.0	-0.09945408922658841	0.0	1.0388129504630643e-05	0.0	0.9999999999696442	0.0	7.602100231680148e-06	0.0	0.0	0.0008711365174285146	0.0	0.0	0.0008719243396682647	0.0	-0.00038585230011400337	0.0	-1.929102256302822e-09	-0.00012011464541652735	0.0	3.295427312239854e-11
3.545	-0.00038645287330903074	0.0	-7.824692112279046e-09	-0.00044762314638424204	0.0	-0.09945408922645203	0.0	1.039075989810234e-05	0.0	0.9999999999694295	0.0	7.628074670813658e-06	0.0	0.0	0.000874112968903721	0.0	0.0	0.00087490107310874	0.0	-0.0003864528733811491	0.0	-1.928909362798909e-09	-0.0001201146614417926	0.0	4.4203918965131294e-11
3.5500000000000003	-0.00038705344665585883	0.0	-7.853717479772727e-09	-0.0004495569283058569	0.0	-0.09945408922629857	0.0	1.0393390302990813e-05	0.0	0.9999999999692141	0.0	7.654055687880498e-06	0.0	0.0	0.0008770901741545632	0.0	0.0	0.0008778785601047079	0.0	-0.00038705344672842123	0.0	-1.9286602092079453e-09	-0.00012011467746702532	0.0	5.545830794300819e-11
3.555	-0.0003876540200828119	0.0	-7.882754078644549e-09	-0.000451493713107066	0.0	-0.09945408922612806	0.0	1.0396020719296057e-05	0.0	0.9999999999689979	0.0	7.680043282880661e-06	0.0	0.0	0.0008800681331810406	0.0	0.0	0.000880856800659439	0.0	-0.00038765402015581937	0.0	-1.9283547718142513e-09	-0.00012011469349225351	0.0	6.671744005726309e-11
3.56	-0.00038825459358989006	0.0	-7.911801908894514e-09	-0.0004534335007878691	0.0	-0.09945408922594046	0.0	1.0398651147018072e-05	0.0	0.9999999999687811	0.0	7.706037455814152e-06	0.0	0.0	0.0008830468459831539	0.0	0.0	0.0008838357947762041	0.0	-0.0003882545936633438	0.0	-1.9279930269021426e-09	-0.00012011470951749526	0.0	7.798131530967444e-11
3.565	-0.00038885516717709326	0.0	-7.940860970522622e-09	-0.00045537629134826654	0.0	-0.09945408922573579	0.0	1.0401281586156858e-05	0.0	0.9999999999685635	0.0	7.732038206680971e-06	0.0	0.0	0.000886026312560903	0.0	0.0	0.0008868155424582737	0.0	-0.0003888551672509943	0.0	-1.927574950755923e-09	-0.00012011472554275871	0.0	8.924993370123486e-11
3.5700000000000003	-0.00038945574084442165	0.0	-7.969931263528873e-09	-0.00045732208478825825	0.0	-0.09945408922551406	0.0	1.0403912036712419e-05	0.0	0.9999999999683452	0.0	7.758045535481118e-06	0.0	0.0	0.0008890065329142876	0.0	0.0	0.0008897960437089186	0.0	-0.0003894557409187713	0.0	-1.9271005196598976e-09	-0.00012011474156799052	0.0	1.0052329523204086e-10
3.575	-0.00039005631459187496	0.0	-7.999012787913267e-09	-0.0004592708811078438	0.0	-0.09945408922527525	0.0	1.040654249868475e-05	0.0	0.9999999999681262	0.0	7.784059442214589e-06	0.0	0.0	0.0008919875070433075	0.0	0.0	0.0008927772985314094	0.0	-0.0003900563146666742	0.0	-1.9265697098983656e-09	-0.000120114757593188	0.0	1.1180139990520125e-10
3.58	-0.00039065688841945337	0.0	-8.028105543675803e-09	-0.00046122268030702367	0.0	-0.09945408922501939	0.0	1.0409172972073854e-05	0.0	0.9999999999679063	0.0	7.810079926881389e-06	0.0	0.0	0.0008949692349479634	0.0	0.0	0.0008957593069290168	0.0	-0.00039065688849470323	0.0	-1.925982497755607e-09	-0.00012011477361843607	0.0	1.2308424772170175e-10
3.585	-0.0003912574623271568	0.0	-8.057209530816481e-09	-0.0004631774823857977	0.0	-0.09945408922474644	0.0	1.0411803456879728e-05	0.0	0.9999999999676858	0.0	7.836106989481516e-06	0.0	0.0	0.0008979517166282548	0.0	0.0	0.0008987420689050115	0.0	-0.0003912574624028585	0.0	-1.92533885951591e-09	-0.00012011478964366066	0.0	1.343718386809013e-10
3.59	-0.00039185803631498534	0.0	-8.086324749335303e-09	-0.0004651352873441658	0.0	-0.09945408922445642	0.0	1.0414433953102375e-05	0.0	0.9999999999674646	0.0	7.862140630014968e-06	0.0	0.0	0.0009009349520841816	0.0	0.0	0.0009017255844626641	0.0	-0.0003918580363911399	0.0	-1.9246387714635553e-09	-0.00012011480566893133	0.0	1.4566417278608105e-10
3.595	-0.0003924586103829391	0.0	-8.11545119923227e-09	-0.0004670960951821281	0.0	-0.09945408922414935	0.0	1.0417064460741795e-05	0.0	0.9999999999672426	0.0	7.88818084848175e-06	0.0	0.0	0.0009039189413157445	0.0	0.0	0.0009047098536052452	0.0	-0.0003924586104595478	0.0	-1.9238822098828045e-09	-0.00012011482169416946	0.0	1.5696125003821296e-10
3.6	-0.00039305918453101776	0.0	-8.144588880507379e-09	-0.00046905990589968466	0.0	-0.0994540892238252	0.0	1.0419694979797987e-05	0.0	0.9999999999670199	0.0	7.914227644881858e-06	0.0	0.0	0.000906903684322943	0.0	0.0	0.0009076948763360256	0.0	-0.00039305918460808155	0.0	-1.923069151057928e-09	-0.00012011483771937328	0.0	1.6826307043723495e-10
3.605	-0.00039365975875922145	0.0	-8.17373779316063e-09	-0.0004710267194968351	0.0	-0.09945408922348398	0.0	1.042232551027095e-05	0.0	0.9999999999667966	0.0	7.940281019215292e-06	0.0	0.0	0.0009098891811057771	0.0	0.0	0.0009106806526582758	0.0	-0.0003936597588367416	0.0	-1.922199571273183e-09	-0.00012011485374462135	0.0	1.7956963398609733e-10
3.61	-0.0003942603330675503	0.0	-8.202897937192022e-09	-0.0004729965359735799	0.0	-0.0994540892231257	0.0	1.0424956052160686e-05	0.0	0.9999999999665724	0.0	7.966340971482053e-06	0.0	0.0	0.0009128754316642466	0.0	0.0	0.0009136671825752667	0.0	-0.0003942603331455278	0.0	-1.921273446812816e-09	-0.00012011486976985226	0.0	1.9088094068560657e-10
3.615	-0.00039486090745600424	0.0	-8.232069312601562e-09	-0.00047496935532991913	0.0	-0.09945408922275033	0.0	1.0427586605467194e-05	0.0	0.9999999999663475	0.0	7.992407501682145e-06	0.0	0.0	0.0009158624359983523	0.0	0.0	0.0009166544660902688	0.0	-0.0003948609075344401	0.0	-1.9202907539610747e-09	-0.00012011488579508046	0.0	2.0219699053613493e-10
3.62	-0.00039546148192458314	0.0	-8.26125191938924e-09	-0.0004769451775658521	0.0	-0.0994540892223579	0.0	1.0430217170190473e-05	0.0	0.9999999999661219	0.0	8.01848060981556e-06	0.0	0.0	0.0009188501941080931	0.0	0.0	0.0009196425032065528	0.0	-0.0003954614820034786	0.0	-1.9192514690021994e-09	-0.00012011490182031138	0.0	2.135177835399089e-10
3.625	-0.0003960620564732872	0.0	-8.290445757555062e-09	-0.00047892400268137935	0.0	-0.0994540892219484	0.0	1.0432847746330525e-05	0.0	0.9999999999658955	0.0	8.044560295882301e-06	0.0	0.0	0.0009218387059934695	0.0	0.0	0.0009226312939273894	0.0	-0.0003960620565526432	0.0	-1.918155568220419e-09	-0.00012011491784554408	0.0	2.2484331969745923e-10
3.63	-0.00039666263110211625	0.0	-8.319650827099028e-09	-0.0004809058306765008	0.0	-0.09945408922152184	0.0	1.0435478333887349e-05	0.0	0.9999999999656685	0.0	8.070646559882372e-06	0.0	0.0	0.000924827971654482	0.0	0.0	0.0009256208382560491	0.0	-0.000396662631181934	0.0	-1.9170030278999654e-09	-0.00012011493387078674	0.0	2.36173599010785e-10
3.6350000000000002	-0.00039726320581107046	0.0	-8.348867128021138e-09	-0.0004828906615512164	0.0	-0.0994540892210782	0.0	1.0438108932860944e-05	0.0	0.9999999999654406	0.0	8.09673940181577e-06	0.0	0.0	0.0009278179910911303	0.0	0.0	0.0009286111361958029	0.0	-0.00039726320589135103	0.0	-1.9157938243250504e-09	-0.00012011494989602398	0.0	2.4750862148067885e-10
3.64	-0.00039786378060014966	0.0	-8.37809466032139e-09	-0.000484878495305526	0.0	-0.09945408922061749	0.0	1.0440739543251313e-05	0.0	0.9999999999652122	0.0	8.122838821682493e-06	0.0	0.0	0.0009308087643034137	0.0	0.0	0.0009316021877499211	0.0	-0.0003978637806808942	0.0	-1.9145279337798958e-09	-0.00012011496592123592	0.0	2.5884838710800934e-10
3.645	-0.0003984643554693539	0.0	-8.407333423999784e-09	-0.00048686933193942995	0.0	-0.09945408922013972	0.0	1.0443370165058451e-05	0.0	0.9999999999649829	0.0	8.148944819482545e-06	0.0	0.0	0.0009338002912913331	0.0	0.0	0.0009345939929216745	0.0	-0.0003984643555505634	0.0	-1.913205332548703e-09	-0.00012011498194645057	0.0	2.7019289589619555e-10
3.65	-0.00039906493041868326	0.0	-8.436583419056318e-09	-0.0004888631714529279	0.0	-0.09945408921964488	0.0	1.0446000798282364e-05	0.0	0.9999999999647529	0.0	8.175057395215922e-06	0.0	0.0	0.000936792572054888	0.0	0.0	0.0009375865517143339	0.0	-0.00039906493050035876	0.0	-1.9118259969156676e-09	-0.00012011499797170406	0.0	2.8154214784381736e-10
3.6550000000000002	-0.00039966550544813767	0.0	-8.465844645491001e-09	-0.0004908600138460202	0.0	-0.09945408921913296	0.0	1.0448631442923047e-05	0.0	0.9999999999645222	0.0	8.20117654888263e-06	0.0	0.0	0.0009397856065940792	0.0	0.0	0.0009405798641311697	0.0	-0.0003996655055302804	0.0	-1.910389903164996e-09	-0.00012011501399692865	0.0	2.9289614295254304e-10
3.66	-0.00040026608055771716	0.0	-8.495117103303826e-09	-0.0004928598591187066	0.0	-0.09945408921860398	0.0	1.0451262098980503e-05	0.0	0.9999999999642907	0.0	8.227302280482662e-06	0.0	0.0	0.0009427793949089055	0.0	0.0	0.0009435739301754528	0.0	-0.00040026608064032805	0.0	-1.9088970275808695e-09	-0.00012011503002215594	0.0	3.0425488122527455e-10
3.665	-0.0004008666557474217	0.0	-8.52440079249479e-09	-0.000494862707270987	0.0	-0.09945408921805793	0.0	1.045389276645473e-05	0.0	0.9999999999640585	0.0	8.25343459001602e-06	0.0	0.0	0.0009457739369993674	0.0	0.0	0.0009465687498504538	0.0	-0.00040086665583050193	0.0	-1.90734734644747e-09	-0.00012011504604738053	0.0	3.1561836266205325e-10
3.67	-0.0004014672310172513	0.0	-8.553695713063899e-09	-0.0004968685583028617	0.0	-0.09945408921749481	0.0	1.0456523445345731e-05	0.0	0.9999999999638256	0.0	8.279573477482707e-06	0.0	0.0	0.0009487692328654652	0.0	0.0	0.0009495643231594434	0.0	-0.0004014672311008019	0.0	-1.905740836048973e-09	-0.00012011506207261957	0.0	3.269865872642854e-10
3.6750000000000003	-0.000402067806367206	0.0	-8.583001865011152e-09	-0.0004988774122143306	0.0	-0.0994540892169146	0.0	1.0459154135653503e-05	0.0	0.999999999963592	0.0	8.305718942882721e-06	0.0	0.0	0.000951765282507199	0.0	0.0	0.0009525606501056921	0.0	-0.0004020678064512281	0.0	-1.904077472669549e-09	-0.00012011507809784778	0.0	3.383595550335219e-10
3.68	-0.00040266838179728575	0.0	-8.612319248336546e-09	-0.0005008892690053936	0.0	-0.09945408921631735	0.0	1.0461784837378046e-05	0.0	0.9999999999633576	0.0	8.331870986216061e-06	0.0	0.0	0.0009547620859245682	0.0	0.0	0.0009555577306924707	0.0	-0.00040266838188178034	0.0	-1.9023572325933584e-09	-0.00012011509412306242	0.0	3.497372659704245e-10
3.685	-0.0004032689573074905	0.0	-8.641647863040084e-09	-0.0005029041286760506	0.0	-0.09945408921570302	0.0	1.0464415550519362e-05	0.0	0.9999999999631226	0.0	8.358029607482729e-06	0.0	0.0	0.0009577596431175731	0.0	0.0	0.0009585555649230499	0.0	-0.00040326895739245874	0.0	-1.900580092104562e-09	-0.00012011511014828159	0.0	3.6111972007700605e-10
3.69	-0.0004038695328978204	0.0	-8.670987709121764e-09	-0.0005049219912263019	0.0	-0.09945408921507162	0.0	1.0467046275077449e-05	0.0	0.9999999999628867	0.0	8.384194806682722e-06	0.0	0.0	0.0009607579540862134	0.0	0.0	0.0009615541528007003	0.0	-0.00040386953298326316	0.0	-1.898746027487304e-09	-0.00012011512617351521	0.0	3.725069173544177e-10
3.6950000000000003	-0.00040447010856827534	0.0	-8.700338786581588e-09	-0.0005069428566561475	0.0	-0.09945408921442316	0.0	1.0469677011052309e-05	0.0	0.9999999999626502	0.0	8.410366583816045e-06	0.0	0.0	0.00096375701883049	0.0	0.0	0.0009645534943286925	0.0	-0.0004044701086541939	0.0	-1.896855015025732e-09	-0.000120115142198766	0.0	3.838988578029765e-10
3.7	-0.0004050706843188554	0.0	-8.729701095419555e-09	-0.000508966724965587	0.0	-0.0994540892137576	0.0	1.0472307758443942e-05	0.0	0.999999999962413	0.0	8.436544938882693e-06	0.0	0.0	0.000966756837350402	0.0	0.0	0.0009675535895102973	0.0	-0.0004050706844052508	0.0	-1.8949070310039845e-09	-0.0001201151582239662	0.0	3.9529554142558453e-10
3.705	-0.00040567126014956045	0.0	-8.759074635635664e-09	-0.0005109935961546208	0.0	-0.099454089213075	0.0	1.0474938517252346e-05	0.0	0.9999999999621749	0.0	8.462729871882668e-06	0.0	0.0	0.0009697574096459497	0.0	0.0	0.0009705544383487852	0.0	-0.0004056712602364336	0.0	-1.892902051706186e-09	-0.00012011517424919348	0.0	4.0669696822228996e-10
3.71	-0.00040627183606039056	0.0	-8.788459407229914e-09	-0.0005130234702232486	0.0	-0.09945408921237532	0.0	1.0477569287477522e-05	0.0	0.9999999999619362	0.0	8.48892138281597e-06	0.0	0.0	0.0009727587357171329	0.0	0.0	0.000973556040847427	0.0	-0.0004062718361477427	0.0	-1.890840053416469e-09	-0.00012011519027442259	0.0	4.181031381945335e-10
3.715	-0.00040687241205134575	0.0	-8.817855410202309e-09	-0.0005150563471714708	0.0	-0.09945408921165858	0.0	1.0480200069119469e-05	0.0	0.9999999999616968	0.0	8.5151194716826e-06	0.0	0.0	0.0009757608155639523	0.0	0.0	0.0009765583970094933	0.0	-0.0004068724121391778	0.0	-1.8887210124189456e-09	-0.00012011520629962911	0.0	4.295140513439351e-10
3.72	-0.0004074729881224261	0.0	-8.84726264455285e-09	-0.0005170922269992872	0.0	-0.09945408921092476	0.0	1.0482830862178189e-05	0.0	0.9999999999614565	0.0	8.541324138482558e-06	0.0	0.0	0.0009787636491864072	0.0	0.0	0.0009795615068382548	0.0	-0.000407472988210739	0.0	-1.8865449049977333e-09	-0.0001201152223248546	0.0	4.4092970767108063e-10
3.725	-0.00040807356427363135	0.0	-8.876681110281529e-09	-0.0005191311097066975	0.0	-0.09945408921017387	0.0	1.0485461666653681e-05	0.0	0.9999999999612156	0.0	8.567535383215842e-06	0.0	0.0	0.0009817672365844978	0.0	0.0	0.0009825653703369821	0.0	-0.0004080735643624263	0.0	-1.884311707436936e-09	-0.00012011523835009363	0.0	4.5235010717759003e-10
3.73	-0.00040867414050496176	0.0	-8.906110807388353e-09	-0.000521172995293702	0.0	-0.09945408920940592	0.0	1.0488092482545946e-05	0.0	0.999999999960974	0.0	8.593753205882451e-06	0.0	0.0	0.000984771577758224	0.0	0.0	0.0009855699875089459	0.0	-0.0004086741405942399	0.0	-1.882021396020655e-09	-0.00012011525437530647	0.0	4.6377524986597923e-10
3.735	-0.00040927471681641726	0.0	-8.935551735873318e-09	-0.0005232178837603007	0.0	-0.0994540892086209	0.0	1.0490723309854981e-05	0.0	0.9999999999607315	0.0	8.61997760648239e-06	0.0	0.0	0.0009877766727075864	0.0	0.0	0.0009885753583574169	0.0	-0.0004092747169061794	0.0	-1.879673947032974e-09	-0.00012011527040052745	0.0	4.752051357353039e-10
3.74	-0.0004098752932079978	0.0	-8.96500389573643e-09	-0.0005252657751064935	0.0	-0.0994540892078188	0.0	1.049335414858079e-05	0.0	0.9999999999604885	0.0	8.646208585015655e-06	0.0	0.0	0.0009907825214325841	0.0	0.0	0.0009915814828856658	0.0	-0.0004098752932982452	0.0	-1.8772693367579967e-09	-0.00012011528642574571	0.0	4.866397647878457e-10
3.745	-0.00041047586967970335	0.0	-8.994467286977682e-09	-0.0005273166693322806	0.0	-0.09945408920699964	0.0	1.0495984998723369e-05	0.0	0.9999999999602446	0.0	8.672446141482245e-06	0.0	0.0	0.0009937891239332176	0.0	0.0	0.0009945883610969631	0.0	-0.00041047586977043687	0.0	-1.8748075414797867e-09	-0.00012011530245097663	0.0	4.980791370260655e-10
3.75	-0.00041107644623153406	0.0	-9.023941909597077e-09	-0.0005293705664376618	0.0	-0.0994540892061634	0.0	1.0498615860282722e-05	0.0	0.9999999999600001	0.0	8.698690275882166e-06	0.0	0.0	0.0009967964802094873	0.0	0.0	0.0009975959929945796	0.0	-0.000411076446322755	0.0	-1.872288537482428e-09	-0.0001201153184761985	0.0	5.095232524487018e-10
3.755	-0.00041167702286348974	0.0	-9.053427763594616e-09	-0.000531427466422637	0.0	-0.0994540892053101	0.0	1.0501246733258846e-05	0.0	0.9999999999597547	0.0	8.72494098821541e-06	0.0	0.0	0.000999804590261392	0.0	0.0	0.001000604378581786	0.0	-0.0004116770229551988	0.0	-1.8697123010499876e-09	-0.00012011533450138152	0.0	5.20972111058822e-10
3.7600000000000002	-0.00041227759957557057	0.0	-9.082924848970298e-09	-0.0005334873692872067	0.0	-0.09945408920443972	0.0	1.0503877617651743e-05	0.0	0.9999999999595087	0.0	8.751198278481985e-06	0.0	0.0	0.0010028134540889329	0.0	0.0	0.0010036135178618528	0.0	-0.0004122775996677689	0.0	-1.867078808466525e-09	-0.00012011535052665128	0.0	5.324257128578188e-10
3.765	-0.0004128781763677765	0.0	-9.112433165724122e-09	-0.0005355502750313704	0.0	-0.09945408920355228	0.0	1.050650851346141e-05	0.0	0.999999999959262	0.0	8.777462146681886e-06	0.0	0.0	0.0010058230716921096	0.0	0.0	0.0010066234108380508	0.0	-0.00041287817646046526	0.0	-1.8643880360160934e-09	-0.00012011536655184425	0.0	5.438840578464019e-10
3.77	-0.00041347875324010733	0.0	-9.141952713856087e-09	-0.0005376161836551281	0.0	-0.09945408920264777	0.0	1.050913942068785e-05	0.0	0.9999999999590145	0.0	8.803732592815111e-06	0.0	0.0	0.0010088334430709215	0.0	0.0	0.0010096340575136507	0.0	-0.00041347875333328735	0.0	-1.861639959982744e-09	-0.00012011538257705528	0.0	5.553471460248608e-10
3.775	-0.0004140793301925633	0.0	-9.171483493366197e-09	-0.00053968509515848	0.0	-0.09945408920172619	0.0	1.0511770339331063e-05	0.0	0.9999999999587663	0.0	8.830009616881664e-06	0.0	0.0	0.0010118445682253698	0.0	0.0	0.0010126454578919231	0.0	-0.00041407933028623584	0.0	-1.858834556650524e-09	-0.00012011539860228529	0.0	5.66814977396015e-10
3.7800000000000002	-0.00041467990722514445	0.0	-9.201025504254454e-09	-0.0005417570095414263	0.0	-0.09945408920078755	0.0	1.0514401269391046e-05	0.0	0.9999999999585173	0.0	8.856293218881548e-06	0.0	0.0	0.0010148564471554537	0.0	0.0	0.0010156576119761387	0.0	-0.0004146799073193102	0.0	-1.8559718023034611e-09	-0.00012011541462750355	0.0	5.78287551960895e-10
3.785	-0.00041528048433785056	0.0	-9.230578746520848e-09	-0.0005438319268039664	0.0	-0.09945408919983183	0.0	1.0517032210867802e-05	0.0	0.9999999999582677	0.0	8.882583398814755e-06	0.0	0.0	0.0010178690798611733	0.0	0.0	0.001018670519769568	0.0	-0.0004152804844325109	0.0	-1.853051673225591e-09	-0.0001201154306527209	0.0	5.897648697201315e-10
3.79	-0.0004158810615306817	0.0	-9.260143220165385e-09	-0.0005459098469461008	0.0	-0.09945408919885904	0.0	1.051966316376133e-05	0.0	0.9999999999580172	0.0	8.90888015668129e-06	0.0	0.0	0.0010208824663425287	0.0	0.0	0.001021684181275482	0.0	-0.0004158810616258374	0.0	-1.8500741457009332e-09	-0.00012011544667792201	0.0	6.012469306755305e-10
3.795	-0.000416481638803638	0.0	-9.289718925188067e-09	-0.0005479907699678294	0.0	-0.09945408919786917	0.0	1.0522294128071632e-05	0.0	0.9999999999577661	0.0	8.935183492481153e-06	0.0	0.0	0.0010238966065995198	0.0	0.0	0.0010246985964971508	0.0	-0.00041648163889929015	0.0	-1.847039196013508e-09	-0.00012011546270317098	0.0	6.127337348273677e-10
3.8000000000000003	-0.00041708221615671936	0.0	-9.319305861588893e-09	-0.0005500746958691522	0.0	-0.09945408919686224	0.0	1.0524925103798704e-05	0.0	0.9999999999575143	0.0	8.961493406214341e-06	0.0	0.0	0.0010269115006321468	0.0	0.0	0.0010277137654378457	0.0	-0.00041708221625286906	0.0	-1.8439468004473286e-09	-0.00012011547872838111	0.0	6.24225282177749e-10
3.805	-0.0004176827935899257	0.0	-9.34890402936786e-09	-0.0005521616246500692	0.0	-0.09945408919583824	0.0	1.0527556090942548e-05	0.0	0.9999999999572617	0.0	8.987809897880859e-06	0.0	0.0	0.0010299271484404096	0.0	0.0	0.001030729688100837	0.0	-0.00041768279368657393	0.0	-1.8407969352863966e-09	-0.00012011549475357318	0.0	6.357215727287216e-10
3.81	-0.00041828337110325715	0.0	-9.37851342852497e-09	-0.0005542515563105802	0.0	-0.09945408919479719	0.0	1.0530187089503163e-05	0.0	0.9999999999570084	0.0	9.014132967480704e-06	0.0	0.0	0.001032943550024308	0.0	0.0	0.0010337463644893954	0.0	-0.0004182833712004048	0.0	-1.8375895768147068e-09	-0.0001201155107787824	0.0	6.472226064802098e-10
3.815	-0.00041888394869671363	0.0	-9.408134059060223e-09	-0.0005563444908506854	0.0	-0.09945408919373905	0.0	1.0532818099480553e-05	0.0	0.9999999999567544	0.0	9.04046261501387e-06	0.0	0.0	0.001035960705383842	0.0	0.0	0.0010367637946067916	0.0	-0.00041888394879436176	0.0	-1.8343247013162575e-09	-0.00012011552680401241	0.0	6.587283834339919e-10
3.8200000000000003	-0.0004194845263702953	0.0	-9.43776592097362e-09	-0.000558440428270385	0.0	-0.09945408919266384	0.0	1.0535449120874713e-05	0.0	0.9999999999564996	0.0	9.066798840480372e-06	0.0	0.0	0.0010389786145190126	0.0	0.0	0.0010397819784562963	0.0	-0.0004194845264684449	0.0	-1.8310022850750281e-09	-0.00012011554282924242	0.0	6.702389035909916e-10
3.825	-0.0004200851041240019	0.0	-9.46740901426516e-09	-0.0005605393685696783	0.0	-0.09945408919157157	0.0	1.0538080153685645e-05	0.0	0.9999999999562441	0.0	9.093141643880196e-06	0.0	0.0	0.0010419972774298183	0.0	0.0	0.0010428009160411802	0.0	-0.0004200851042226541	0.0	-1.8276223043750067e-09	-0.00012011555885442996	0.0	6.817541669522948e-10
3.83	-0.0004206856819578336	0.0	-9.49706333893484e-09	-0.0005626413117485661	0.0	-0.09945408919046222	0.0	1.054071119791335e-05	0.0	0.9999999999559879	0.0	9.119491025213344e-06	0.0	0.0	0.0010450166941162594	0.0	0.0	0.0010458206073647137	0.0	-0.00042068568205698924	0.0	-1.8241847355001596e-09	-0.00012011557487963558	0.0	6.932741735215374e-10
3.835	-0.0004212862598717904	0.0	-9.526728894982664e-09	-0.0005647462578070477	0.0	-0.0994540891893358	0.0	1.0543342253557826e-05	0.0	0.9999999999557309	0.0	9.145846984479824e-06	0.0	0.0	0.0010480368645783371	0.0	0.0	0.0010488410524301679	0.0	-0.0004212862599714505	0.0	-1.8206895547344471e-09	-0.00012011559090486287	0.0	7.047989232969134e-10
3.84	-0.0004218868378658723	0.0	-9.556405682408633e-09	-0.0005668542067451237	0.0	-0.09945408918819233	0.0	1.0545973320619074e-05	0.0	0.9999999999554732	0.0	9.172209521679628e-06	0.0	0.0	0.0010510577888160502	0.0	0.0	0.001051862251240813	0.0	-0.0004218868379660379	0.0	-1.8171367383618444e-09	-0.00012011560693008926	0.0	7.163284162794638e-10
3.845	-0.0004224874159400792	0.0	-9.586093701212745e-09	-0.000568965158562794	0.0	-0.09945408918703177	0.0	1.0548604399097095e-05	0.0	0.9999999999552148	0.0	9.198578636812763e-06	0.0	0.0	0.0010540794668293997	0.0	0.0	0.0010548842037999202	0.0	-0.00042248741604075137	0.0	-1.8135262626663004e-09	-0.0001201156229552741	0.0	7.278626524739413e-10
3.85	-0.00042308799409441117	0.0	-9.615792951394998e-09	-0.0005710791132600583	0.0	-0.09945408918585415	0.0	1.0551235488991887e-05	0.0	0.9999999999549556	0.0	9.224954329879222e-06	0.0	0.0	0.0010571018986183843	0.0	0.0	0.0010579069101107595	0.0	-0.00042308799419559065	0.0	-1.809858103931754e-09	-0.00012011563898048965	0.0	7.394016318786745e-10
3.855	-0.0004236885723288682	0.0	-9.645503432955395e-09	-0.0005731960708369168	0.0	-0.09945408918465946	0.0	1.0553866590303452e-05	0.0	0.9999999999546958	0.0	9.251336600879009e-06	0.0	0.0	0.001060125084183005	0.0	0.0	0.0010609303701766021	0.0	-0.00042368857243055627	0.0	-1.80613223844216e-09	-0.000120115655005707	0.0	7.509453544954899e-10
3.86	-0.0004242891506434503	0.0	-9.675225145893932e-09	-0.0005753160312933693	0.0	-0.0994540891834477	0.0	1.0556497703031788e-05	0.0	0.9999999999544351	0.0	9.277725449812121e-06	0.0	0.0	0.0010631490235232612	0.0	0.0	0.0010639545840007184	0.0	-0.00042428915074564774	0.0	-1.8023486424814422e-09	-0.00012011567103092798	0.0	7.624938203267382e-10
3.865	-0.00042488972903815755	0.0	-9.704958090210617e-09	-0.0005774389946294164	0.0	-0.09945408918221886	0.0	1.0559128827176898e-05	0.0	0.9999999999541739	0.0	9.304120876678564e-06	0.0	0.0	0.001066173716639154	0.0	0.0	0.0010669795515863792	0.0	-0.00042488972914086554	0.0	-1.7985072923335352e-09	-0.00012011568705613991	0.0	7.740470293723021e-10
3.87	-0.0004254903075129898	0.0	-9.734702265905442e-09	-0.0005795649608450571	0.0	-0.09945408918097297	0.0	1.0561759962738778e-05	0.0	0.9999999999539118	0.0	9.330522881478332e-06	0.0	0.0	0.001069199163530682	0.0	0.0	0.0010700052729368551	0.0	-0.0004254903076162091	0.0	-1.794608164282359e-09	-0.000120115703081313	0.0	7.856049816339877e-10
3.875	-0.00042609088606794705	0.0	-9.764457672978409e-09	-0.0005816939299402921	0.0	-0.09945408917970999	0.0	1.056439110971743e-05	0.0	0.999999999953649	0.0	9.356931464211426e-06	0.0	0.0	0.001072225364197846	0.0	0.0	0.0010730317480554168	0.0	-0.00042609088617167874	0.0	-1.7906512346118331e-09	-0.00012011571910652765	0.0	7.971676771130012e-10
3.88	-0.0004266914647030294	0.0	-9.79422431142952e-09	-0.0005838259019151214	0.0	-0.09945408917842996	0.0	1.0567022268112854e-05	0.0	0.9999999999533854	0.0	9.383346624877846e-06	0.0	0.0	0.0010752523186406454	0.0	0.0	0.001076058976945335	0.0	-0.0004266914648072744	0.0	-1.7866364796058641e-09	-0.00012011573513175946	0.0	8.087351158111005e-10
3.8850000000000002	-0.0004272920434182369	0.0	-9.824002181258777e-09	-0.000585960876769545	0.0	-0.09945408917713285	0.0	1.0569653437925052e-05	0.0	0.9999999999531212	0.0	9.409768363477598e-06	0.0	0.0	0.0010782800268590812	0.0	0.0	0.0010790869596098802	0.0	-0.0004272920435229963	0.0	-1.782563875548356e-09	-0.00012011575115697863	0.0	8.203072977287302e-10
3.89	-0.0004278926222135694	0.0	-9.853791282466171e-09	-0.0005880988545035624	0.0	-0.09945408917581867	0.0	1.057228461915402e-05	0.0	0.9999999999528563	0.0	9.436196680010673e-06	0.0	0.0	0.0010813084888531526	0.0	0.0	0.0010821156960523232	0.0	-0.00042789262231884416	0.0	-1.7784333987232077e-09	-0.00012011576718215443	0.0	8.318842228679236e-10
3.895	-0.00042849320108902695	0.0	-9.883591615051712e-09	-0.0005902398351171742	0.0	-0.09945408917448742	0.0	1.057491581179976e-05	0.0	0.9999999999525905	0.0	9.462631574477075e-06	0.0	0.0	0.0010843377046228597	0.0	0.0	0.0010851451862759346	0.0	-0.0004284932011948179	0.0	-1.7742450254143054e-09	-0.00012011578320735552	0.0	8.434658912299906e-10
3.9	-0.0004290937800446096	0.0	-9.913403179015394e-09	-0.00059238381861038	0.0	-0.09945408917313911	0.0	1.0577547015862274e-05	0.0	0.999999999952324	0.0	9.489073046876805e-06	0.0	0.0	0.001087367674168203	0.0	0.0	0.0010881754302839851	0.0	-0.0004290937801509178	0.0	-1.7699987319055357e-09	-0.00012011579923259909	0.0	8.550523028151034e-10
3.9050000000000002	-0.00042969435908031734	0.0	-9.94322597435722e-09	-0.0005945308049831803	0.0	-0.09945408917177373	0.0	1.0580178231341558e-05	0.0	0.9999999999520569	0.0	9.515521097209863e-06	0.0	0.0	0.0010903983974891822	0.0	0.0	0.0010912064280797454	0.0	-0.00042969435918714384	0.0	-1.7656944944807796e-09	-0.00012011581525779747	0.0	8.666434576251474e-10
3.91	-0.0004302949381961501	0.0	-9.97306000107719e-09	-0.0005966807942355744	0.0	-0.09945408917039127	0.0	1.0582809458237616e-05	0.0	0.999999999951789	0.0	9.541975725476248e-06	0.0	0.0	0.001093429874585797	0.0	0.0	0.001094238179666486	0.0	-0.00043029493830349573	0.0	-1.7613322894239072e-09	-0.00012011583128299766	0.0	8.782393556613048e-10
3.915	-0.00043089551739210793	0.0	-1.00029052591753e-08	-0.0005988337863675628	0.0	-0.09945408916899175	0.0	1.0585440696550444e-05	0.0	0.9999999999515204	0.0	9.568436931675959e-06	0.0	0.0	0.0010964621054580478	0.0	0.0	0.001097270685047478	0.0	-0.0004308955174999738	0.0	-1.756912093018786e-09	-0.00012011584730817887	0.0	8.89839996926119e-10
3.92	-0.0004314960966681908	0.0	-1.0032761748651552e-08	-0.0006009897813791452	0.0	-0.09945408916757514	0.0	1.0588071946280045e-05	0.0	0.999999999951251	0.0	9.594904715808995e-06	0.0	0.0	0.001099495090105934	0.0	0.0	0.0011003039442259916	0.0	-0.00043149609677657755	0.0	-1.7524338815492655e-09	-0.00012011586333340075	0.0	9.014453814190077e-10
3.9250000000000003	-0.0004320966760243988	0.0	-1.0062629469505953e-08	-0.000603148779270322	0.0	-0.09945408916614148	0.0	1.0590703207426417e-05	0.0	0.999999999950981	0.0	9.621379077875364e-06	0.0	0.0	0.0011025288285294568	0.0	0.0	0.0011033379572052977	0.0	-0.0004320966761333078	0.0	-1.7478976312992132e-09	-0.00012011587935863979	0.0	9.130555091413357e-10
3.93	-0.00043269725546073184	0.0	-1.0092508421738492e-08	-0.0006053107800410928	0.0	-0.09945408916469076	0.0	1.0593334479989562e-05	0.0	0.9999999999507102	0.0	9.647860017875055e-06	0.0	0.0	0.001105563320728615	0.0	0.0	0.0011063727239886668	0.0	-0.00043269725557016384	0.0	-1.7433033185524654e-09	-0.00012011589538379391	0.0	9.246703800959808e-10
3.935	-0.0004332978349771899	0.0	-1.0122398605349174e-08	-0.0006074757836914577	0.0	-0.09945408916322294	0.0	1.0595965763969479e-05	0.0	0.9999999999504386	0.0	9.674347535808072e-06	0.0	0.0	0.001108598566703409	0.0	0.0	0.0011094082445793697	0.0	-0.0004332978350871458	0.0	-1.7386509195928654e-09	-0.00012011591140899229	0.0	9.362899942833946e-10
3.94	-0.0004338984145737731	0.0	-1.0152300020338e-08	-0.0006096437902214167	0.0	-0.09945408916173808	0.0	1.0598597059366168e-05	0.0	0.9999999999501663	0.0	9.70084163167442e-06	0.0	0.0	0.001111634566453839	0.0	0.0	0.001112444518980677	0.0	-0.0004338984146842538	0.0	-1.7339404107042424e-09	-0.00012011592743421597	0.0	9.479143517041112e-10
3.9450000000000003	-0.0004344989942504814	0.0	-1.0182212666704973e-08	-0.0006118147996309703	0.0	-0.09945408916023614	0.0	1.0601228366179629e-05	0.0	0.9999999999498933	0.0	9.727342305474093e-06	0.0	0.0	0.001114671319979905	0.0	0.0	0.0011154815471958594	0.0	-0.0004344989943614879	0.0	-1.7291717681704332e-09	-0.00012011594345942339	0.0	9.595434523593475e-10
3.95	-0.00043509957400731465	0.0	-1.0212136544450083e-08	-0.0006139888119201176	0.0	-0.09945408915871712	0.0	1.0603859684409862e-05	0.0	0.9999999999496196	0.0	9.753849557207094e-06	0.0	0.0	0.0011177088272816067	0.0	0.0	0.0011185193292281874	0.0	-0.000435099574118848	0.0	-1.724344968275254e-09	-0.0001201159594846245	0.0	9.711772962517641e-10
3.955	-0.000435700153844273	0.0	-1.0242071653573336e-08	-0.0006161658270888592	0.0	-0.09945408915718104	0.0	1.0606491014056867e-05	0.0	0.9999999999493452	0.0	9.78036338687342e-06	0.0	0.0	0.0011207470883589441	0.0	0.0	0.0011215578650809318	0.0	-0.00043570015395633414	0.0	-1.719459987302519e-09	-0.0001201159755098057	0.0	9.82815883382164e-10
3.96	-0.0004363007337613564	0.0	-1.0272017994074733e-08	-0.000618345845137195	0.0	-0.0994540891556279	0.0	1.0609122355120643e-05	0.0	0.99999999994907	0.0	9.806883794473075e-06	0.0	0.0	0.0011237861032119178	0.0	0.0	0.0011245971547573634	0.0	-0.0004363007338739461	0.0	-1.7145168015360347e-09	-0.00012011599153501494	0.0	9.944592137509989e-10
3.9650000000000003	-0.00043690131375856493	0.0	-1.0301975565954276e-08	-0.0006205288660651249	0.0	-0.09945408915405768	0.0	1.0611753707601192e-05	0.0	0.9999999999487941	0.0	9.833410780006058e-06	0.0	0.0	0.0011268258718405274	0.0	0.0	0.0011276371982607526	0.0	-0.0004369013138716843	0.0	-1.709515387259609e-09	-0.00012011600756023229	0.0	1.006107287359971e-09
3.97	-0.0004375018938358985	0.0	-1.0331944369211959e-08	-0.000622714889872649	0.0	-0.09945408915247039	0.0	1.0614385071498514e-05	0.0	0.9999999999485174	0.0	9.859944343472366e-06	0.0	0.0	0.0011298663942447727	0.0	0.0	0.0011306779955943703	0.0	-0.00043750189394954836	0.0	-1.7044557207570327e-09	-0.00012011602358542436	0.0	1.017760104210387e-09
3.975	-0.00043810247399335715	0.0	-1.0361924403847786e-08	-0.0006249039165597672	0.0	-0.09945408915086602	0.0	1.0617016446812606e-05	0.0	0.9999999999482401	0.0	9.886484484872e-06	0.0	0.0	0.001132907670424654	0.0	0.0	0.001133719546761487	0.0	-0.00043810247410753855	0.0	-1.6993377783121006e-09	-0.00012011603961062094	0.0	1.0294176643033876e-09
3.98	-0.0004387030542309408	0.0	-1.0391915669861753e-08	-0.0006270959461264795	0.0	-0.0994540891492446	0.0	1.0619647833543471e-05	0.0	0.999999999947962	0.0	9.913031204204962e-06	0.0	0.0	0.0011359497003801708	0.0	0.0	0.0011367618517653735	0.0	-0.0004387030543456546	0.0	-1.6941615362085917e-09	-0.00012011605563582203	0.0	1.0410799676407615e-09
3.985	-0.00043930363454864957	0.0	-1.0421918167253864e-08	-0.000629290978572786	0.0	-0.0994540891476061	0.0	1.0622279231691108e-05	0.0	0.9999999999476832	0.0	9.939584501471252e-06	0.0	0.0	0.0011389924841113239	0.0	0.0	0.0011398049106093003	0.0	-0.00043930363466389673	0.0	-1.688926970730284e-09	-0.00012011607166100325	0.0	1.052747014223622e-09
3.99	-0.0004399042149464834	0.0	-1.045193189602412e-08	-0.0006314890138986868	0.0	-0.09945408914595054	0.0	1.0624910641255518e-05	0.0	0.9999999999474035	0.0	9.966144376670869e-06	0.0	0.0	0.0011420360216181126	0.0	0.0	0.0011428487232965382	0.0	-0.0004399042150622646	0.0	-1.6836340581609455e-09	-0.00012011608768621067	0.0	1.0644188040524103e-09
3.995	-0.0004405047954244423	0.0	-1.0481956856172519e-08	-0.0006336900521041817	0.0	-0.0994540891442779	0.0	1.0627542062236699e-05	0.0	0.9999999999471233	0.0	9.992710829803813e-06	0.0	0.0	0.0011450803129005379	0.0	0.0	0.0011458932898303579	0.0	-0.00044050479554075885	0.0	-1.6782827747843472e-09	-0.00012011610371143435	0.0	1.0760953371287667e-09
4.0	-0.0004411053759825262	0.0	-1.0511993047699059e-08	-0.0006358940931892707	0.0	-0.0994540891425882	0.0	1.0630173494634652e-05	0.0	0.9999999999468423	0.0	1.0019283860870085e-05	0.0	0.0	0.0011481253579585986	0.0	0.0	0.0011489386102140299	0.0	-0.0004411053760993789	0.0	-1.6728730968842418e-09	-0.00012011611973660292	0.0	1.0877766134548906e-09
4.005	-0.00044170595662073524	0.0	-1.0542040470603742e-08	-0.0006381011371539539	0.0	-0.09945408914088143	0.0	1.0632804938449376e-05	0.0	0.9999999999465605	0.0	1.0045863469869681e-05	0.0	0.0	0.001151171156792295	0.0	0.0	0.001151984684450825	0.0	-0.0004417059567381249	0.0	-1.6674050007443815e-09	-0.00012011613576181305	0.0	1.099462633030909e-09
4.01	-0.00044230653733906935	0.0	-1.0572099124886568e-08	-0.0006403111839982311	0.0	-0.09945408913915758	0.0	1.0635436393680873e-05	0.0	0.9999999999462781	0.0	1.0072449656802604e-05	0.0	0.0	0.0011542177094016274	0.0	0.0	0.0011550315125440137	0.0	-0.00044230653745699704	0.0	-1.6618784626485132e-09	-0.00012011615178701324	0.0	1.111153395858749e-09
4.015	-0.0004429071181375285	0.0	-1.0602169010547538e-08	-0.0006425242337221025	0.0	-0.09945408913741667	0.0	1.0638067860329142e-05	0.0	0.9999999999459949	0.0	1.0099042421668857e-05	0.0	0.0	0.0011572650157865962	0.0	0.0	0.0011580790944968667	0.0	-0.000442907118255995	0.0	-1.6562934588803728e-09	-0.00012011616781218272	0.0	1.122848901939217e-09
4.0200000000000005	-0.0004435076990161128	0.0	-1.0632250127586655e-08	-0.0006447402863255685	0.0	-0.09945408913565867	0.0	1.0640699338394184e-05	0.0	0.9999999999457109	0.0	1.0125641764468438e-05	0.0	0.0	0.0011603130759472008	0.0	0.0	0.001161127430312655	0.0	-0.0004435076991351189	0.0	-1.6506499657236977e-09	-0.00012011618383737658	0.0	1.134549151273781e-09
4.025	-0.000444108279974822	0.0	-1.0662342476003909e-08	-0.0006469593418086283	0.0	-0.09945408913388362	0.0	1.0643330827875997e-05	0.0	0.9999999999454262	0.0	1.0152247685201344e-05	0.0	0.0	0.0011633618898834414	0.0	0.0	0.0011641765199946487	0.0	-0.0004441082800943688	0.0	-1.6449479594622096e-09	-0.00012011619986259574	0.0	1.1462541438635475e-09
4.03	-0.00044470886101365635	0.0	-1.0692446055799307e-08	-0.0006491814001712823	0.0	-0.0994540891320915	0.0	1.0645962328774582e-05	0.0	0.9999999999451409	0.0	1.0178860183867577e-05	0.0	0.0	0.0011664114575953178	0.0	0.0	0.001167226363546119	0.0	-0.0004447088611337448	0.0	-1.6391874163796344e-09	-0.00012011621588779955	0.0	1.1579638797098125e-09
4.035	-0.00044530944213261574	0.0	-1.0722560866972847e-08	-0.0006514064614135302	0.0	-0.09945408913028231	0.0	1.064859384108994e-05	0.0	0.9999999999448548	0.0	1.0205479260467136e-05	0.0	0.0	0.0011694617790828296	0.0	0.0	0.0011702769609703361	0.0	-0.00044530944225324673	0.0	-1.6333683127596801e-09	-0.00012011623191297445	0.0	1.1696783588153779e-09
4.04	-0.0004459100233317003	0.0	-1.075268690952453e-08	-0.0006536345255353724	0.0	-0.09945408912845606	0.0	1.0651225364822068e-05	0.0	0.9999999999445679	0.0	1.0232104915000024e-05	0.0	0.0	0.0011725128543459782	0.0	0.0	0.0011733283122705711	0.0	-0.00044591002345287456	0.0	-1.6274906248860506e-09	-0.00012011624793817283	0.0	1.181397581178424e-09
4.045	-0.0004465106046109098	0.0	-1.0782824183454358e-08	-0.000655865592536809	0.0	-0.09945408912661273	0.0	1.0653856899970971e-05	0.0	0.9999999999442803	0.0	1.0258737147466236e-05	0.0	0.0	0.001175564683384762	0.0	0.0	0.0011763804174500945	0.0	-0.00044651060473262845	0.0	-1.6215543290424616e-09	-0.00012011626396336218	0.0	1.193121546802039e-09
4.05	-0.0004471111859702444	0.0	-1.0812972688762328e-08	-0.0006580996624178395	0.0	-0.09945408912475233	0.0	1.0656488446536643e-05	0.0	0.999999999943992	0.0	1.0285375957865778e-05	0.0	0.0	0.0011786172661991821	0.0	0.0	0.001179433276512177	0.0	-0.0004471111860925082	0.0	-1.6155594015125924e-09	-0.00012011627998852804	0.0	1.2048502556889596e-09
4.055	-0.0004477117674097041	0.0	-1.0843132425448439e-08	-0.0006603367351784641	0.0	-0.09945408912287486	0.0	1.065912000451909e-05	0.0	0.9999999999437029	0.0	1.0312021346198645e-05	0.0	0.0	0.0011816706027892381	0.0	0.0	0.001182486889460089	0.0	-0.00044771176753251383	0.0	-1.609505818580136e-09	-0.00012011629601376707	0.0	1.2165837078369313e-09
4.0600000000000005	-0.00044831234892928886	0.0	-1.0873303393512699e-08	-0.0006625768108186834	0.0	-0.09945408912098032	0.0	1.0661751573918306e-05	0.0	0.9999999999434133	0.0	1.0338673312464844e-05	0.0	0.0	0.0011847246931549307	0.0	0.0	0.0011855412562971014	0.0	-0.0004483123490526458	0.0	-1.6033935565287824e-09	-0.00012011631203895281	0.0	1.2283219032495459e-09
4.065	-0.0004489129305289987	0.0	-1.0903485592955097e-08	-0.0006648198893384963	0.0	-0.09945408911906871	0.0	1.0664383154734296e-05	0.0	0.9999999999431227	0.0	1.0365331856664364e-05	0.0	0.0	0.0011877795372962584	0.0	0.0	0.0011885963770264848	0.0	-0.00044891293065290336	0.0	-1.597222591642197e-09	-0.00012011632806411506	0.0	1.2400648419283712e-09
4.07	-0.0004495135122088335	0.0	-1.0933679023775638e-08	-0.0006670659707379035	0.0	-0.09945408911714003	0.0	1.0667014746967056e-05	0.0	0.9999999999428315	0.0	1.0391996978797213e-05	0.0	0.0	0.0011908351352132222	0.0	0.0	0.0011916522516515098	0.0	-0.00044951351233328703	0.0	-1.590992900204054e-09	-0.00012011634408931886	0.0	1.2518125238739797e-09
4.075	-0.0004501140939687935	0.0	-1.0963883685974321e-08	-0.0006693150550169048	0.0	-0.09945408911519428	0.0	1.0669646350616591e-05	0.0	0.9999999999425395	0.0	1.041866867886339e-05	0.0	0.0	0.0011938914869058222	0.0	0.0	0.0011947088801754473	0.0	-0.00045011409409379655	0.0	-1.5847044584980112e-09	-0.00012011636011450099	0.0	1.2635649490871603e-09
4.08	-0.0004507146758088785	0.0	-1.0994099579551148e-08	-0.0006715671421755003	0.0	-0.09945408911323146	0.0	1.0672277965682896e-05	0.0	0.9999999999422469	0.0	1.0445346956862892e-05	0.0	0.0	0.001196948592374058	0.0	0.0	0.0011977662626015677	0.0	-0.0004507146759344321	0.0	-1.5783572428077343e-09	-0.00012011637613969215	0.0	1.2753221175690819e-09
4.085	-0.00045131525772908854	0.0	-1.102432670450612e-08	-0.0006738222322136899	0.0	-0.09945408911125159	0.0	1.0674909592165973e-05	0.0	0.9999999999419534	0.0	1.0472031812795722e-05	0.0	0.0	0.0012000064516179299	0.0	0.0	0.0012008243989331418	0.0	-0.0004513152578551935	0.0	-1.5719512294168685e-09	-0.00012011639216489504	0.0	1.2870840293223151e-09
4.09	-0.0004519158397294237	0.0	-1.1054565060839232e-08	-0.0006760803251314738	0.0	-0.09945408910925463	0.0	1.0677541230065822e-05	0.0	0.9999999999416593	0.0	1.049872324666188e-05	0.0	0.0	0.0012030650646374379	0.0	0.0	0.0012038832891734404	0.0	-0.00045191583985608106	0.0	-1.5654863946090582e-09	-0.00012011640819010517	0.0	1.298850684347143e-09
4.095	-0.0004525164218098839	0.0	-1.1084814648550488e-08	-0.0006783414209288518	0.0	-0.0994540891072406	0.0	1.0680172879382443e-05	0.0	0.9999999999413645	0.0	1.0525421258461363e-05	0.0	0.0	0.0012061244314325818	0.0	0.0	0.0012069429333257339	0.0	-0.00045251642193709445	0.0	-1.5589627146679415e-09	-0.00012011642421524122	0.0	1.3106220826453297e-09
4.1	-0.0004531170039704691	0.0	-1.1115075467639884e-08	-0.0006806055196058238	0.0	-0.0994540891052095	0.0	1.0682804540115837e-05	0.0	0.9999999999410688	0.0	1.0552125848194174e-05	0.0	0.0	0.0012091845520033613	0.0	0.0	0.001210003331393293	0.0	-0.00045311700409823353	0.0	-1.5523801658771479e-09	-0.00012011644024044412	0.0	1.3223982242177925e-09
4.105	-0.00045371758621117955	0.0	-1.1145347518107432e-08	-0.0006828726211623905	0.0	-0.09945408910316135	0.0	1.0685436212266004e-05	0.0	0.9999999999407725	0.0	1.0578837015860318e-05	0.0	0.0	0.0012122454263497778	0.0	0.0	0.0012130644833793886	0.0	-0.00045371758633949895	0.0	-1.5457387245203056e-09	-0.00012011645626567322	0.0	1.3341791090647553e-09
4.11	-0.00045431816853201495	0.0	-1.1175630799953115e-08	-0.000685142725598551	0.0	-0.09945408910109611	0.0	1.0688067895832941e-05	0.0	0.9999999999404755	0.0	1.060555476145978e-05	0.0	0.0	0.0012153070544718293	0.0	0.0	0.001216126389287291	0.0	-0.0004543181686608902	0.0	-1.5390383668810378e-09	-0.00012011647229085353	0.0	1.3459647371895095e-09
4.115	-0.0004549187509329754	0.0	-1.1205925313176943e-08	-0.0006874158329143055	0.0	-0.0994540890990138	0.0	1.069069959081665e-05	0.0	0.9999999999401777	0.0	1.0632279084992574e-05	0.0	0.0	0.0012183694363695173	0.0	0.0	0.0012191890491202713	0.0	-0.00045491875106240743	0.0	-1.5322790692429461e-09	-0.00012011648831601759	0.0	1.3577551085930754e-09
4.12	-0.00045551933341406094	0.0	-1.1236231057778913e-08	-0.0006896919431096543	0.0	-0.09945408909691444	0.0	1.0693331297217132e-05	0.0	0.9999999999398792	0.0	1.0659009986458692e-05	0.0	0.0	0.0012214325720428412	0.0	0.0	0.0012222524628815999	0.0	-0.0004555193335440504	0.0	-1.525460807889642e-09	-0.0001201165043411717	0.0	1.3695502232756526e-09
4.125	-0.00045611991597527154	0.0	-1.1266548033759027e-08	-0.0006919710561845971	0.0	-0.099454089094798	0.0	1.0695963015034385e-05	0.0	0.9999999999395799	0.0	1.068574746585814e-05	0.0	0.0	0.001224496461491801	0.0	0.0	0.0012253166305745474	0.0	-0.00045611991610581924	0.0	-1.5185835591047235e-09	-0.00012011652036639719	0.0	1.3813500812374931e-09
4.13	-0.0004567204986166072	0.0	-1.1296876241117283e-08	-0.0006942531721391341	0.0	-0.09945408909266448	0.0	1.0698594744268411e-05	0.0	0.99999999993928	0.0	1.0712491523190911e-05	0.0	0.0	0.0012275611047163969	0.0	0.0	0.0012283815522023845	0.0	-0.00045672049874771433	0.0	-1.511647299171796e-09	-0.00012011653639158203	0.0	1.3931546824822431e-09
4.135	-0.0004573210813380679	0.0	-1.1327215679853682e-08	-0.0006965382909732654	0.0	-0.09945408909051391	0.0	1.0701226484919208e-05	0.0	0.9999999999389793	0.0	1.0739242158457014e-05	0.0	0.0	0.0012306265017166288	0.0	0.0	0.001231447227768382	0.0	-0.00045732108146973505	0.0	-1.5046520043744276e-09	-0.00012011655241673613	0.0	1.4049640270113158e-09
4.14	-0.00045792166413965367	0.0	-1.1357566349968223e-08	-0.0006988264126869907	0.0	-0.09945408908834626	0.0	1.0703858236986777e-05	0.0	0.9999999999386778	0.0	1.076599937165644e-05	0.0	0.0	0.0012336926524924967	0.0	0.0	0.0012345136572758104	0.0	-0.00045792166427188177	0.0	-1.4975976509962102e-09	-0.0001201165684419806	0.0	1.4167781148235257e-09
4.1450000000000005	-0.0004585222470213647	0.0	-1.1387928251460912e-08	-0.0007011175372803108	0.0	-0.09945408908616153	0.0	1.070649000047112e-05	0.0	0.9999999999383757	0.0	1.0792763162789199e-05	0.0	0.0	0.001236759557044001	0.0	0.0	0.0012375808407279405	0.0	-0.0004585222471541547	0.0	-1.4904842153207156e-09	-0.00012011658446713924	0.0	1.4285969459222745e-09
4.15	-0.0004591228299832006	0.0	-1.141830138433174e-08	-0.0007034116647532243	0.0	-0.09945408908395975	0.0	1.0709121775372233e-05	0.0	0.9999999999380728	0.0	1.081953353185528e-05	0.0	0.0	0.001239827215371141	0.0	0.0	0.001240648778128043	0.0	-0.00045912283011655315	0.0	-1.4833116736315106e-09	-0.00012011660049230509	0.0	1.4404205203067383e-09
4.155	-0.0004597234130251616	0.0	-1.144868574858071e-08	-0.0007057087951057321	0.0	-0.09945408908174089	0.0	1.0711753561690118e-05	0.0	0.9999999999377692	0.0	1.0846310478854688e-05	0.0	0.0	0.001242895627473917	0.0	0.0	0.0012437174694793882	0.0	-0.0004597234131590778	0.0	-1.4760800022121673e-09	-0.00012011661651748902	0.0	1.452248837979816e-09
4.16	-0.0004603239961472476	0.0	-1.1479081344207825e-08	-0.0007080089283378341	0.0	-0.09945408907950497	0.0	1.0714385359424776e-05	0.0	0.9999999999374648	0.0	1.0873094003787423e-05	0.0	0.0	0.001245964793352329	0.0	0.0	0.0012467869147852473	0.0	-0.00046032399628172807	0.0	-1.468789177346229e-09	-0.00012011663254267837	0.0	1.4640818989431409e-09
4.165	-0.00046092457934945874	0.0	-1.150948817121308e-08	-0.0007103120644495303	0.0	-0.09945408907725196	0.0	1.0717017168576207e-05	0.0	0.9999999999371598	0.0	1.0899884106653486e-05	0.0	0.0	0.001249034713006377	0.0	0.0	0.0012498571140488906	0.0	-0.0004609245794845046	0.0	-1.461439175317251e-09	-0.00012011664856787134	0.0	1.475919703197375e-09
4.17	-0.0004615251626317949	0.0	-1.1539906229596479e-08	-0.0007126182034408207	0.0	-0.0994540890749819	0.0	1.0719648989144408e-05	0.0	0.999999999936854	0.0	1.0926680787452875e-05	0.0	0.0	0.0012521053864360612	0.0	0.0	0.001252928067273589	0.0	-0.0004615251627674067	0.0	-1.454029972408769e-09	-0.0001201166645930146	0.0	1.4877622507433867e-09
4.175	-0.00046212574599425614	0.0	-1.1570335519358021e-08	-0.0007149273453117051	0.0	-0.09945408907269476	0.0	1.0722280821129381e-05	0.0	0.9999999999365474	0.0	1.0953484046185592e-05	0.0	0.0	0.0012551768136413813	0.0	0.0	0.0012559997744626128	0.0	-0.0004621257461304348	0.0	-1.44656154490433e-09	-0.00012011668061824099	0.0	1.499609541581259e-09
4.18	-0.0004627263294368425	0.0	-1.1600776040497706e-08	-0.0007172394900621837	0.0	-0.09945408907039056	0.0	1.0724912664531128e-05	0.0	0.9999999999362402	0.0	1.0980293882851634e-05	0.0	0.0	0.0012582489946223372	0.0	0.0	0.001259072235619233	0.0	-0.00046272632957358907	0.0	-1.4390338690874626e-09	-0.00012011669664340324	0.0	1.5114615757162095e-09
4.1850000000000005	-0.00046332691295955395	0.0	-1.1631227793015538e-08	-0.0007195546376922569	0.0	-0.09945408906806928	0.0	1.0727544519349646e-05	0.0	0.9999999999359321	0.0	1.100711029745101e-05	0.0	0.0	0.0012613219293789303	0.0	0.0	0.0012621454507467202	0.0	-0.00046332691309686886	0.0	-1.4314469212416758e-09	-0.00012011671266858627	0.0	1.523318353146064e-09
4.19	-0.00046392749656239043	0.0	-1.166169077691151e-08	-0.0007218727882019239	0.0	-0.09945408906573094	0.0	1.0730176385584936e-05	0.0	0.9999999999356235	0.0	1.1033933289983708e-05	0.0	0.0	0.0012643956179111588	0.0	0.0	0.001265219419848345	0.0	-0.0004639274967002749	0.0	-1.4238006776505086e-09	-0.00012011672869376478	0.0	1.5351798738715702e-09
4.195	-0.0004645280802453519	0.0	-1.1692164992185624e-08	-0.0007241939415911849	0.0	-0.09945408906337552	0.0	1.0732808263236998e-05	0.0	0.999999999935314	0.0	1.1060762860449733e-05	0.0	0.0	0.0012674700602190228	0.0	0.0	0.0012682941429273782	0.0	-0.0004645280803838065	0.0	-1.4160951145974612e-09	-0.00012011674471894961	0.0	1.5470461378969017e-09
4.2	-0.0004651286640084385	0.0	-1.172265043883788e-08	-0.0007265180978600402	0.0	-0.09945408906100305	0.0	1.0735440152305831e-05	0.0	0.9999999999350039	0.0	1.1087599008849085e-05	0.0	0.0	0.0012705452563025236	0.0	0.0	0.0012713696199870902	0.0	-0.0004651286641474644	0.0	-1.4083302083660397e-09	-0.00012011676074413172	0.0	1.5589171452221412e-09
4.205	-0.00046572924785165013	0.0	-1.1753147116868279e-08	-0.0007288452570084896	0.0	-0.0994540890586135	0.0	1.0738072052791437e-05	0.0	0.9999999999346929	0.0	1.1114441735181764e-05	0.0	0.0	0.0012736212061616602	0.0	0.0	0.0012744458510307519	0.0	-0.0004657292479912478	0.0	-1.4005059352397394e-09	-0.00012011677676926958	0.0	1.5707928958472996e-09
4.21	-0.0004663298317749868	0.0	-1.1783655026276822e-08	-0.000731175419036533	0.0	-0.09945408905620687	0.0	1.0740703964693815e-05	0.0	0.9999999999343813	0.0	1.114129103944777e-05	0.0	0.0	0.0012766979097964327	0.0	0.0	0.0012775228360616339	0.0	-0.0004663298319151572	0.0	-1.392622271502063e-09	-0.00012011679279449868	0.0	1.5826733897746097e-09
4.215	-0.0004669304157784486	0.0	-1.1814174167063508e-08	-0.0007335085839441708	0.0	-0.09945408905378318	0.0	1.0743335888012965e-05	0.0	0.999999999934069	0.0	1.1168146921647102e-05	0.0	0.0	0.0012797753672068415	0.0	0.0	0.0012806005750830068	0.0	-0.0004669304159191927	0.0	-1.3846791934364866e-09	-0.00012011680881967629	0.0	1.5945586270061224e-09
4.22	-0.00046753099986203547	0.0	-1.1844704539228335e-08	-0.0007358447517314026	0.0	-0.09945408905134241	0.0	1.0745967822748887e-05	0.0	0.9999999999337559	0.0	1.119500938177976e-05	0.0	0.0	0.0012828535783928861	0.0	0.0	0.0012836790680981413	0.0	-0.0004675310000033539	0.0	-1.3766766773264939e-09	-0.00012011682484481052	0.0	1.6064486075423616e-09
4.225	-0.00046813158402574735	0.0	-1.1875246142771307e-08	-0.0007381839223982287	0.0	-0.09945408904888459	0.0	1.0748599768901581e-05	0.0	0.999999999933442	0.0	1.122187841984575e-05	0.0	0.0	0.0012859325433545671	0.0	0.0	0.0012867583151103081	0.0	-0.0004681315841676409	0.0	-1.3686146994555538e-09	-0.00012011684087001161	0.0	1.6183433313840752e-09
4.23	-0.00046873216826958443	0.0	-1.1905798977692426e-08	-0.0007405260959446494	0.0	-0.09945408904640969	0.0	1.0751231726471047e-05	0.0	0.9999999999331275	0.0	1.1248754035845066e-05	0.0	0.0	0.0012890122620918844	0.0	0.0	0.0012898383161227779	0.0	-0.000468732168412054	0.0	-1.3604932361071413e-09	-0.00012011685689520006	0.0	1.6302427985329555e-09
4.235	-0.00046933275259354644	0.0	-1.1936363043991684e-08	-0.0007428712723706637	0.0	-0.09945408904391773	0.0	1.0753863695457285e-05	0.0	0.9999999999328122	0.0	1.1275636229777707e-05	0.0	0.0	0.0012920927346048376	0.0	0.0	0.0012929190711388212	0.0	-0.0004693327527365929	0.0	-1.3523122635647102e-09	-0.00012011687292035598	0.0	1.6421470089902262e-09
4.24	-0.00046993333699763354	0.0	-1.1966938341669083e-08	-0.0007452194516762722	0.0	-0.09945408904140868	0.0	1.0756495675860295e-05	0.0	0.9999999999324962	0.0	1.1302525001643675e-05	0.0	0.0	0.0012951739608934268	0.0	0.0	0.0012960005801617087	0.0	-0.00046993333714125763	0.0	-1.344071758111722e-09	-0.00012011688894554262	0.0	1.6540559627577273e-09
4.245	-0.0004705339214818458	0.0	-1.1997524870724627e-08	-0.0007475706338614748	0.0	-0.09945408903888257	0.0	1.0759127667680077e-05	0.0	0.9999999999321795	0.0	1.132942035144297e-05	0.0	0.0	0.0012982559409576522	0.0	0.0	0.0012990828431947111	0.0	-0.0004705339216260483	0.0	-1.3357716960316142e-09	-0.0001201169049707103	0.0	1.6659696598367138e-09
4.25	-0.000471134506046183	0.0	-1.2028122631158312e-08	-0.0007499248189262716	0.0	-0.0994540890363394	0.0	1.076175967091663e-05	0.0	0.999999999931862	0.0	1.1356322279175592e-05	0.0	0.0	0.0013013386747975134	0.0	0.0	0.0013021658602410992	0.0	-0.00047113450619096475	0.0	-1.3274120536078358e-09	-0.00012011692099587615	0.0	1.6778881002269615e-09
4.255	-0.0004717350906906453	0.0	-1.205873162297014e-08	-0.0007522820068706626	0.0	-0.09945408903377916	0.0	1.0764391685569957e-05	0.0	0.9999999999315438	0.0	1.138323078484154e-05	0.0	0.0	0.001304422162413011	0.0	0.0	0.0013052496313041436	0.0	-0.0004717350908360071	0.0	-1.318992807123822e-09	-0.00012011693702107634	0.0	1.6898112839308556e-09
4.26	-0.00047233567541523264	0.0	-1.2089351846160112e-08	-0.0007546421976946477	0.0	-0.09945408903120183	0.0	1.0767023711640055e-05	0.0	0.9999999999312249	0.0	1.1410145868440818e-05	0.0	0.0	0.001307506403804145	0.0	0.0	0.0013083341563871148	0.0	-0.00047233567556117547	0.0	-1.3105139328630024e-09	-0.00012011695304625124	0.0	1.701739210949616e-09
4.265	-0.00047293626021994507	0.0	-1.2119983300728225e-08	-0.0007570053913982269	0.0	-0.09945408902860745	0.0	1.0769655749126926e-05	0.0	0.9999999999309053	0.0	1.143706752997342e-05	0.0	0.0	0.0013105913989709147	0.0	0.0	0.0013114194354932837	0.0	-0.00047293626036646957	0.0	-1.3019754071087977e-09	-0.00012011696907141709	0.0	1.7136718812854726e-09
4.2700000000000005	-0.0004735368451047827	0.0	-1.2150625986674488e-08	-0.0007593715879814008	0.0	-0.09945408902599599	0.0	1.0772287798030568e-05	0.0	0.9999999999305849	0.0	1.1463995769439356e-05	0.0	0.0	0.001313677147913321	0.0	0.0	0.0013145054686259207	0.0	-0.0004735368452518896	0.0	-1.2933772061446192e-09	-0.0001201169850965685	0.0	1.7256092949383187e-09
4.275	-0.00047413743006974524	0.0	-1.2181279903998889e-08	-0.0007617407874441685	0.0	-0.09945408902336747	0.0	1.0774919858350982e-05	0.0	0.9999999999302637	0.0	1.1490930586838613e-05	0.0	0.0	0.0013167636506313631	0.0	0.0	0.0013175922557882968	0.0	-0.0004741374302174353	0.0	-1.284719306253885e-09	-0.00012011700112175875	0.0	1.7375514519084712e-09
4.28	-0.0004747380151148329	0.0	-1.2211945052701432e-08	-0.0007641129897865302	0.0	-0.09945408902072188	0.0	1.0777551930088168e-05	0.0	0.9999999999299419	0.0	1.1517871982171197e-05	0.0	0.0	0.0013198509071250415	0.0	0.0	0.0013206797969836826	0.0	-0.0004747380152631072	0.0	-1.2760016837200008e-09	-0.00012011701714693364	0.0	1.7494983521990531e-09
4.285	-0.00047533860024004556	0.0	-1.2242621432782118e-08	-0.0007664881950084861	0.0	-0.09945408901805922	0.0	1.0780184013242127e-05	0.0	0.9999999999296193	0.0	1.1544819955437108e-05	0.0	0.0	0.0013229389173943554	0.0	0.0	0.0013237680922153485	0.0	-0.0004753386003889046	0.0	-1.2672243148263582e-09	-0.0001201170331720733	0.0	1.7614499958116115e-09
4.29	-0.0004759391854453833	0.0	-1.2273309044240947e-08	-0.0007688664031100362	0.0	-0.09945408901537948	0.0	1.0782816107812857e-05	0.0	0.999999999929296	0.0	1.1571774506636347e-05	0.0	0.0	0.001326027681439306	0.0	0.0	0.0013268571414865654	0.0	-0.000475939185594828	0.0	-1.258387175856348e-09	-0.00012011704919728794	0.0	1.7734063827457778e-09
4.295	-0.00047653977073084617	0.0	-1.2304007887077918e-08	-0.0007712476140911803	0.0	-0.09945408901268267	0.0	1.0785448213800358e-05	0.0	0.999999999928972	0.0	1.159873563576891e-05	0.0	0.0	0.0013291171992598925	0.0	0.0	0.0013299469448006037	0.0	-0.0004765397708808774	0.0	-1.24949024309336e-09	-0.00012011706522243755	0.0	1.785367513004585e-09
4.3	-0.00047714035609643405	0.0	-1.2334717961293033e-08	-0.0007736318279519188	0.0	-0.0994540890099688	0.0	1.0788080331204632e-05	0.0	0.9999999999286472	0.0	1.1625703342834804e-05	0.0	0.0	0.0013322074708561156	0.0	0.0	0.0013330375021607342	0.0	-0.0004771403562470524	0.0	-1.2405334928207619e-09	-0.00012011708124760791	0.0	1.7973333865871163e-09
4.305	-0.000477740941542147	0.0	-1.236543926688629e-08	-0.0007760190446922514	0.0	-0.09945408900723786	0.0	1.0790712460025678e-05	0.0	0.9999999999283218	0.0	1.1652677627834022e-05	0.0	0.0	0.0013352984962279742	0.0	0.0	0.0013361288135702277	0.0	-0.0004777409416933535	0.0	-1.2315169013219446e-09	-0.00012011709727279276	0.0	1.809304003496353e-09
4.3100000000000005	-0.00047834152706798514	0.0	-1.2396171803857697e-08	-0.0007784092643121784	0.0	-0.09945408900448985	0.0	1.0793344600263497e-05	0.0	0.9999999999279955	0.0	1.1679658490766574e-05	0.0	0.0	0.0013383902753754699	0.0	0.0	0.0013392208790323548	0.0	-0.0004783415272197803	0.0	-1.222440444880252e-09	-0.0001201171132979559	0.0	1.8212793637335806e-09
4.315	-0.00047894211267394824	0.0	-1.242691557220724e-08	-0.0007808024868116992	0.0	-0.09945408900172477	0.0	1.0795976751918089e-05	0.0	0.9999999999276686	0.0	1.1706645931632447e-05	0.0	0.0	0.0013414828082986014	0.0	0.0	0.001342313698550386	0.0	-0.00047894211282633307	0.0	-1.213304099779062e-09	-0.00012011712932312086	0.0	1.8332594672986199e-09
4.32	-0.0004795426983600364	0.0	-1.2457670571934927e-08	-0.0007831987121908143	0.0	-0.09945408899894262	0.0	1.079860891498945e-05	0.0	0.9999999999273409	0.0	1.1733639950431649e-05	0.0	0.0	0.0013445760949973688	0.0	0.0	0.0013454072721275922	0.0	-0.0004795426985130115	0.0	-1.204107842301715e-09	-0.00012011714534827316	0.0	1.845244314194504e-09
4.325	-0.00048014328412624964	0.0	-1.2488436803040755e-08	-0.0007855979404495235	0.0	-0.0994540889961434	0.0	1.0801241089477585e-05	0.0	0.9999999999270125	0.0	1.1760640547164175e-05	0.0	0.0	0.0013476701354717723	0.0	0.0	0.001348501599767244	0.0	-0.0004801432842798158	0.0	-1.1948516487315659e-09	-0.0001201171613734616	0.0	1.8572339044205814e-09
4.33	-0.0004807438699725879	0.0	-1.2519214265524728e-08	-0.0007880001715878267	0.0	-0.09945408899332711	0.0	1.0803873275382491e-05	0.0	0.9999999999266834	0.0	1.178764772183003e-05	0.0	0.0	0.0013507649297218123	0.0	0.0	0.001351596681472612	0.0	-0.0004807438701267461	0.0	-1.1855354953519543e-09	-0.0001201171773986365	0.0	1.8692282379798853e-09
4.335	-0.00048134445589905124	0.0	-1.2550002959386842e-08	-0.0007904054056057242	0.0	-0.09945408899049375	0.0	1.0806505472704169e-05	0.0	0.9999999999263536	0.0	1.1814661474429212e-05	0.0	0.0	0.0013538604777474882	0.0	0.0	0.0013546925172469668	0.0	-0.0004813444560538021	0.0	-1.1761593584462103e-09	-0.00012011719342377345	0.0	1.8812273148732286e-09
4.34	-0.00048194504190563967	0.0	-1.25808028846271e-08	-0.0007928136425032158	0.0	-0.09945408898764334	0.0	1.080913768144262e-05	0.0	0.999999999926023	0.0	1.184168180496172e-05	0.0	0.0	0.0013569567795488004	0.0	0.0	0.0013577891070935793	0.0	-0.0004819450420609839	0.0	-1.1667232142976641e-09	-0.00012011720944895285	0.0	1.893231135101063e-09
4.345	-0.0004825456279923532	0.0	-1.2611614041245502e-08	-0.0007952248822803017	0.0	-0.09945408898477584	0.0	1.0811769901597843e-05	0.0	0.9999999999256917	0.0	1.1868708713427556e-05	0.0	0.0	0.001360053835125749	0.0	0.0	0.00136088645101572	0.0	-0.00048254562814829165	0.0	-1.1572270391896382e-09	-0.00012011722547414221	0.0	1.9052396986661843e-09
4.3500000000000005	-0.00048314621415919184	0.0	-1.264243642924205e-08	-0.000797639124936982	0.0	-0.09945408898189127	0.0	1.0814402133169837e-05	0.0	0.9999999999253596	0.0	1.1895742199826724e-05	0.0	0.0	0.0013631516444783341	0.0	0.0	0.0013639845490166596	0.0	-0.00048314621431572527	0.0	-1.1476708094054409e-09	-0.00012011724149931259	0.0	1.9172530055679093e-09
4.355	-0.0004837468004061555	0.0	-1.2673270048616737e-08	-0.0008000563704732562	0.0	-0.09945408897898964	0.0	1.0817034376158604e-05	0.0	0.9999999999250269	0.0	1.1922782264159213e-05	0.0	0.0	0.0013662502076065548	0.0	0.0	0.0013670834010996687	0.0	-0.00048374680056328473	0.0	-1.1380545012283949e-09	-0.00012011725752445405	0.0	1.9292710558081097e-09
4.36	-0.00048434738673324416	0.0	-1.2704114899369567e-08	-0.0008024766188891243	0.0	-0.09945408897607093	0.0	1.0819666630564143e-05	0.0	0.9999999999246934	0.0	1.194982890642503e-05	0.0	0.0	0.0013693495245104118	0.0	0.0	0.001370183007268018	0.0	-0.0004843473868909698	0.0	-1.1283780909417914e-09	-0.00012011727354958557	0.0	1.94129384938975e-09
4.365	-0.00048494797314045787	0.0	-1.2734970981500541e-08	-0.0008048998701845868	0.0	-0.09945408897313515	0.0	1.0822298896386453e-05	0.0	0.9999999999243591	0.0	1.1976882126624175e-05	0.0	0.0	0.0013724495951899052	0.0	0.0	0.0013732833675249782	0.0	-0.00048494797329878066	0.0	-1.1186415548289295e-09	-0.00012011728957477944	0.0	1.953321386311747e-09
4.37	-0.0004855485596277967	0.0	-1.2765838295009655e-08	-0.0008073261243596434	0.0	-0.0994540889701823	0.0	1.0824931173625535e-05	0.0	0.9999999999240241	0.0	1.2003941924756644e-05	0.0	0.0	0.0013755504196450343	0.0	0.0	0.00137638448187382	0.0	-0.00048554855978671756	0.0	-1.1088448691731023e-09	-0.00012011730559993807	0.0	1.965353666576852e-09
4.375	-0.00048614914619526055	0.0	-1.2796716839896914e-08	-0.0008097553814142941	0.0	-0.0994540889672124	0.0	1.0827563462281389e-05	0.0	0.9999999999236884	0.0	1.2031008300822442e-05	0.0	0.0	0.0013786519978758	0.0	0.0	0.001379486350317814	0.0	-0.00048614914635478003	0.0	-1.0989880102575877e-09	-0.00012011732162509941	0.0	1.977390690185785e-09
4.38	-0.0004867497328428495	0.0	-1.2827606616162316e-08	-0.000812187641348539	0.0	-0.09945408896422542	0.0	1.0830195762354016e-05	0.0	0.999999999923352	0.0	1.2058081254821568e-05	0.0	0.0	0.001381754329882202	0.0	0.0	0.0013825889728602307	0.0	-0.00048674973300296857	0.0	-1.0890709543656692e-09	-0.00012011733765026888	0.0	1.9894324571399147e-09
4.385	-0.00048735031957056353	0.0	-1.2858507623805859e-08	-0.0008146229041623781	0.0	-0.09945408896122136	0.0	1.0832828073843415e-05	0.0	0.9999999999230148	0.0	1.208516078675402e-05	0.0	0.0	0.0013848574156642402	0.0	0.0	0.001385692349504341	0.0	-0.00048735031973128274	0.0	-1.0790936777806112e-09	-0.00012011735367543113	0.0	2.0014789674404225e-09
4.39	-0.00048795090637840263	0.0	-1.2889419862827546e-08	-0.0008170611698558113	0.0	-0.09945408895820024	0.0	1.0835460396749586e-05	0.0	0.999999999922677	0.0	1.2112246896619799e-05	0.0	0.0	0.0013879612552219144	0.0	0.0	0.0013887964802534155	0.0	-0.0004879509065397229	0.0	-1.0690561567856858e-09	-0.00012011736970060874	0.0	2.013530221088301e-09
4.3950000000000005	-0.0004885514932663668	0.0	-1.2920343333227383e-08	-0.000819502438428839	0.0	-0.09945408895516206	0.0	1.0838092731072528e-05	0.0	0.9999999999223383	0.0	1.213933958441891e-05	0.0	0.0	0.0013910658485552256	0.0	0.0	0.0013919013651107247	0.0	-0.0004885514934282888	0.0	-1.058958367664146e-09	-0.00012011738572578724	0.0	2.0255862180857125e-09
4.4	-0.0004891520802344561	0.0	-1.2951278035005354e-08	-0.0008219467098814605	0.0	-0.09945408895210679	0.0	1.0840725076812242e-05	0.0	0.9999999999219991	0.0	1.2166438850151343e-05	0.0	0.0	0.0013941711956641726	0.0	0.0	0.0013950070040795396	0.0	-0.0004891520803969807	0.0	-1.0488002866992454e-09	-0.00012011740175092238	0.0	2.037646958432904e-09
4.405	-0.0004897526672826703	0.0	-1.298222396816147e-08	-0.0008243939842136761	0.0	-0.09945408894903446	0.0	1.0843357433968729e-05	0.0	0.999999999921659	0.0	1.2193544693817103e-05	0.0	0.0	0.0013972772965487555	0.0	0.0	0.0013981133971631306	0.0	-0.000489752667445798	0.0	-1.0385818901742304e-09	-0.000120117417776053	0.0	2.0497124421322016e-09
4.41	-0.0004903532544110096	0.0	-1.3013181132695728e-08	-0.000826844261425486	0.0	-0.09945408894594505	0.0	1.0845989802541988e-05	0.0	0.9999999999213182	0.0	1.222065711541619e-05	0.0	0.0	0.001400384151208975	0.0	0.0	0.0014012205443647684	0.0	-0.0004903532545747413	0.0	-1.0283031543723357e-09	-0.00012011743380124055	0.0	2.061782669183951e-09
4.415	-0.0004909538416194741	0.0	-1.3044149528608131e-08	-0.00082929754151689	0.0	-0.0994540889428386	0.0	1.0848622182532019e-05	0.0	0.9999999999209767	0.0	1.2247776114948604e-05	0.0	0.0	0.0014034917596448305	0.0	0.0	0.001404328445687724	0.0	-0.0004909538417838104	0.0	-1.0179640555768011e-09	-0.00012011744982639736	0.0	2.073857639589486e-09
4.42	-0.0004915544289080635	0.0	-1.3075129155898675e-08	-0.0008317538244878881	0.0	-0.09945408893971505	0.0	1.0851254573938822e-05	0.0	0.9999999999206344	0.0	1.2274901692414346e-05	0.0	0.0	0.0014066001218563224	0.0	0.0	0.0014074371011352676	0.0	-0.0004915544290730053	0.0	-1.0075645700708487e-09	-0.00012011746585155239	0.0	2.085937353350253e-09
4.425	-0.0004921550162767781	0.0	-1.3106120014567362e-08	-0.0008342131103384804	0.0	-0.09945408893657445	0.0	1.0853886976762395e-05	0.0	0.9999999999202914	0.0	1.2302033847813414e-05	0.0	0.0	0.0014097092378434505	0.0	0.0	0.00141054651071067	0.0	-0.000492155016442326	0.0	-9.971046741377038e-10	-0.00012011748187672005	0.0	2.0980218104680835e-09
4.43	-0.0004927556037256178	0.0	-1.3137122104614193e-08	-0.0008366753990686668	0.0	-0.09945408893341677	0.0	1.0856519391002743e-05	0.0	0.9999999999199477	0.0	1.2329172581145809e-05	0.0	0.0	0.001412819107606215	0.0	0.0	0.001413656674417202	0.0	-0.0004927556038917725	0.0	-9.865843440605715e-10	-0.0001201174979019112	0.0	2.1101110109437246e-09
4.4350000000000005	-0.0004933561912545825	0.0	-1.3168135426039172e-08	-0.000839140690678448	0.0	-0.09945408893024202	0.0	1.0859151816659862e-05	0.0	0.9999999999196033	0.0	1.2356317892411537e-05	0.0	0.0	0.0014159297311446162	0.0	0.0	0.0014167675922581342	0.0	-0.000493356191421345	0.0	-9.76003556122669e-10	-0.00012011751392705719	0.0	2.1222049547776764e-09
4.44	-0.0004939567788636723	0.0	-1.3199159978842288e-08	-0.0008416089851678227	0.0	-0.09945408892705021	0.0	1.0861784253733754e-05	0.0	0.9999999999192581	0.0	1.2383469781610585e-05	0.0	0.0	0.001419041108458653	0.0	0.0	0.0014198792642367373	0.0	-0.0004939567790310431	0.0	-9.653622866071931e-10	-0.00012011752995217065	0.0	2.1343036419729507e-09
4.445	-0.0004945573665528871	0.0	-1.3230195763023547e-08	-0.0008440802825367916	0.0	-0.09945408892384132	0.0	1.0864416702224416e-05	0.0	0.9999999999189122	0.0	1.2410628248742962e-05	0.0	0.0	0.0014221532395483265	0.0	0.0	0.0014229916903562819	0.0	-0.0004945573667208669	0.0	-9.546605117973372e-10	-0.00012011754597735639	0.0	2.14640707252939e-09
4.45	-0.0004951579543222269	0.0	-1.3261242778582947e-08	-0.0008465545827853547	0.0	-0.09945408892061537	0.0	1.086704916213185e-05	0.0	0.9999999999185656	0.0	1.2437793293808666e-05	0.0	0.0	0.001425266124413636	0.0	0.0	0.0014261048706200386	0.0	-0.0004951579544908165	0.0	-9.438982079762947e-10	-0.00012011756200248971	0.0	2.158515246448568e-09
4.455	-0.0004957585421716919	0.0	-1.3292301025520495e-08	-0.0008490318859135119	0.0	-0.09945408891737234	0.0	1.0869681633456058e-05	0.0	0.9999999999182182	0.0	1.2464964916807696e-05	0.0	0.0	0.0014283797630545818	0.0	0.0	0.001429218805031278	0.0	-0.0004957585423408918	0.0	-9.330753514272447e-10	-0.00012011757802767003	0.0	2.1706281637317026e-09
4.46	-0.0004963591301012819	0.0	-1.3323370503836183e-08	-0.0008515121919212634	0.0	-0.09945408891411225	0.0	1.0872314116197036e-05	0.0	0.9999999999178701	0.0	1.2492143117740053e-05	0.0	0.0	0.0014314941554711639	0.0	0.0	0.0014323334935932711	0.0	-0.0004963591302710932	0.0	-9.221919184333679e-10	-0.00012011759405282686	0.0	2.1827458243809815e-09
4.465	-0.0004969597181109969	0.0	-1.3354451213530011e-08	-0.0008539955008086089	0.0	-0.09945408891083508	0.0	1.0874946610354787e-05	0.0	0.9999999999175213	0.0	1.2519327896605738e-05	0.0	0.0	0.0014346093016633823	0.0	0.0	0.0014354489363092883	0.0	-0.0004969597182814201	0.0	-9.112478852778246e-10	-0.00012011761007796922	0.0	2.1948682283961572e-09
4.47	-0.000497560306200837	0.0	-1.3385543154601987e-08	-0.0008564818125755486	0.0	-0.09945408890754086	0.0	1.087757911592931e-05	0.0	0.9999999999171718	0.0	1.254651925340475e-05	0.0	0.0	0.0014377252016312373	0.0	0.0	0.0014385651331826003	0.0	-0.0004975603063718729	0.0	-9.002432282437924e-10	-0.00012011762610316399	0.0	2.2069953757798006e-09
4.4750000000000005	-0.0004981608943708023	0.0	-1.3416646327052108e-08	-0.000858971127222083	0.0	-0.09945408890422955	0.0	1.0880211632920606e-05	0.0	0.9999999999168215	0.0	1.2573717188137093e-05	0.0	0.0	0.0014408418553747287	0.0	0.0	0.0014416820842164777	0.0	-0.0004981608945424516	0.0	-8.891779236144102e-10	-0.00012011764212827745	0.0	2.2191272665335607e-09
4.48	-0.0004987614826208926	0.0	-1.3447760730880367e-08	-0.0008614634447482109	0.0	-0.09945408890090118	0.0	1.0882844161328672e-05	0.0	0.9999999999164705	0.0	1.2600921700802759e-05	0.0	0.0	0.0014439592628938563	0.0	0.0	0.0014447997894141912	0.0	-0.0004987614827931557	0.0	-8.780519476728414e-10	-0.00012011765815343427	0.0	2.231263900656114e-09
4.485	-0.000499362070951108	0.0	-1.347888636608677e-08	-0.0008639587651539332	0.0	-0.09945408889755573	0.0	1.0885476701153511e-05	0.0	0.9999999999161188	0.0	1.2628132791401752e-05	0.0	0.0	0.00144707742418862	0.0	0.0	0.0014479182487790116	0.0	-0.000499362071123986	0.0	-8.668652767022301e-10	-0.00012011767417861639	0.0	2.243405278149953e-09
4.49	-0.0004999626593614483	0.0	-1.3510023232671315e-08	-0.0008664570884392494	0.0	-0.09945408889419323	0.0	1.0888109252395121e-05	0.0	0.9999999999157664	0.0	1.265535045993407e-05	0.0	0.0	0.0014501963392590197	0.0	0.0	0.0014510374623142096	0.0	-0.0004999626595349418	0.0	-8.556178869857182e-10	-0.00012011769020373165	0.0	2.2555513990184164e-09
4.495	-0.0005005632478519138	0.0	-1.3541171330634004e-08	-0.0008689584146041599	0.0	-0.09945408889081365	0.0	1.0890741815053506e-05	0.0	0.9999999999154131	0.0	1.2682574706399716e-05	0.0	0.0	0.0014533160081050562	0.0	0.0	0.0014541574300230556	0.0	-0.0005005632480260233	0.0	-8.443097548064221e-10	-0.00012011770622889209	0.0	2.26770226326115e-09
4.5	-0.0005011638364225043	0.0	-1.3572330659974833e-08	-0.0008714627436486646	0.0	-0.099454088887417	0.0	1.089337438912866e-05	0.0	0.9999999999150593	0.0	1.2709805530798692e-05	0.0	0.0	0.001456436430726729	0.0	0.0	0.0014572781519088204	0.0	-0.0005011638365972307	0.0	-8.329408564474814e-10	-0.00012011772225405253	0.0	2.2798578708788482e-09
4.505	-0.0005017644250732199	0.0	-1.3603501220693808e-08	-0.0008739700755727634	0.0	-0.09945408888400328	0.0	1.0896006974620587e-05	0.0	0.9999999999147046	0.0	1.2737042933130992e-05	0.0	0.0	0.0014595576071240379	0.0	0.0	0.0014603996279747746	0.0	-0.0005017644252485638	0.0	-8.215111681920051e-10	-0.00012011773827919309	0.0	2.2920182218738925e-09
4.51	-0.0005023650138040606	0.0	-1.3634683012790925e-08	-0.0008764804103764564	0.0	-0.0994540888805725	0.0	1.0898639571529287e-05	0.0	0.9999999999143492	0.0	1.276428691339662e-05	0.0	0.0	0.0014626795372969835	0.0	0.0	0.0014635218582241892	0.0	-0.0005023650139800227	0.0	-8.100206663231138e-10	-0.00012011775430435353	0.0	2.3041833162457846e-09
4.515	-0.0005029656026150263	0.0	-1.3665876036266184e-08	-0.0008789937480597435	0.0	-0.09945408887712463	0.0	1.0901272179854758e-05	0.0	0.9999999999139931	0.0	1.2791537471595575e-05	0.0	0.0	0.0014658022212455653	0.0	0.0	0.0014666448426603345	0.0	-0.0005029656027916074	0.0	-7.984693271239144e-10	-0.00012011777032951577	0.0	2.3163531539976133e-09
4.5200000000000005	-0.0005035661915061172	0.0	-1.3697080291119592e-08	-0.0008815100886226253	0.0	-0.09945408887365971	0.0	1.0903904799597002e-05	0.0	0.9999999999136363	0.0	1.2818794607727863e-05	0.0	0.0	0.001468925658969784	0.0	0.0	0.0014697685812864814	0.0	-0.0005035661916833179	0.0	-7.868571268775028e-10	-0.00012011778635465995	0.0	2.3285277351303963e-09
4.525	-0.0005041667804773331	0.0	-1.3728295777351139e-08	-0.0008840294320651006	0.0	-0.09945408887017772	0.0	1.0906537430756016e-05	0.0	0.9999999999132787	0.0	1.284605832179347e-05	0.0	0.0	0.0014720498504696383	0.0	0.0	0.0014728930741059003	0.0	-0.000504166780655154	0.0	-7.751840418669744e-10	-0.00012011780237982219	0.0	2.3407070596447044e-09
4.53	-0.000504767369528674	0.0	-1.3759522494960826e-08	-0.0008865517783871702	0.0	-0.09945408886667864	0.0	1.0909170073331803e-05	0.0	0.9999999999129204	0.0	1.2873328613792407e-05	0.0	0.0	0.0014751747957451292	0.0	0.0	0.001476018321121862	0.0	-0.0005047673697071161	0.0	-7.634500483754174e-10	-0.00012011781840495913	0.0	2.3528911275420766e-09
4.535	-0.0005053679586601399	0.0	-1.3790760443948659e-08	-0.000889077127588834	0.0	-0.09945408886316251	0.0	1.0911802727324362e-05	0.0	0.9999999999125614	0.0	1.290060548372467e-05	0.0	0.0	0.0014783004947962564	0.0	0.0	0.001479144322337637	0.0	-0.0005053679588392036	0.0	-7.516551226859127e-10	-0.00012011783443010512	0.0	2.3650799388241342e-09
4.54	-0.000505968547871731	0.0	-1.3822009624314633e-08	-0.0008916054796700918	0.0	-0.09945408885962931	0.0	1.0914435392733693e-05	0.0	0.9999999999122017	0.0	1.292788893159026e-05	0.0	0.0	0.00148142694762302	0.0	0.0	0.0014822710777564962	0.0	-0.0005059685480514172	0.0	-7.397992410815337e-10	-0.00012011785045527097	0.0	2.3772734934914942e-09
4.545	-0.0005065691371634472	0.0	-1.385327003605875e-08	-0.0008941368346309439	0.0	-0.09945408885607904	0.0	1.0917068069559797e-05	0.0	0.9999999999118412	0.0	1.2955178957389178e-05	0.0	0.0	0.0014845541542254199	0.0	0.0	0.0014853985873817103	0.0	-0.0005065691373437563	0.0	-7.278823798453531e-10	-0.0001201178664803989	0.0	2.389471791545508e-09
4.55	-0.0005071697265352883	0.0	-1.388454167918101e-08	-0.0008966711924713901	0.0	-0.0994540888525117	0.0	1.0919700757802671e-05	0.0	0.99999999991148	0.0	1.2982475561121421e-05	0.0	0.0	0.0014876821146034562	0.0	0.0	0.0014885268512165497	0.0	-0.0005071697267162212	0.0	-7.15904515260431e-10	-0.00012011788250554849	0.0	2.4016748329880624e-09
4.555	-0.0005077703159872545	0.0	-1.3915824553681413e-08	-0.0008992085531914305	0.0	-0.09945408884892727	0.0	1.092233345746232e-05	0.0	0.9999999999111181	0.0	1.3009778742786992e-05	0.0	0.0	0.001490810828757129	0.0	0.0	0.0014916558692642853	0.0	-0.0005077703161688118	0.0	-7.03865623609822e-10	-0.00012011789853069808	0.0	2.4138826178212907e-09
4.5600000000000005	-0.000508370905519346	0.0	-1.3947118659559964e-08	-0.0009017489167910655	0.0	-0.09945408884532579	0.0	1.0924966168538738e-05	0.0	0.9999999999107554	0.0	1.3037088502385895e-05	0.0	0.0	0.0014939402966864387	0.0	0.0	0.0014947856415281878	0.0	-0.0005083709057015282	0.0	-6.917656811765682e-10	-0.00012011791455586575	0.0	2.426095146044133e-09
4.565	-0.0005089714951315624	0.0	-1.3978423996816652e-08	-0.0009042922832702943	0.0	-0.09945408884170724	0.0	1.092759889103193e-05	0.0	0.999999999910392	0.0	1.306440483991812e-05	0.0	0.0	0.0014970705183913842	0.0	0.0	0.0014979161680115276	0.0	-0.0005089714953143703	0.0	-6.796046642437284e-10	-0.00012011793058097739	0.0	2.438312417658156e-09
4.57	-0.0005095720848239038	0.0	-1.4009740565451484e-08	-0.0009068386526291171	0.0	-0.09945408883807162	0.0	1.0930231624941893e-05	0.0	0.9999999999100279	0.0	1.3091727755383673e-05	0.0	0.0	0.0015002014938719664	0.0	0.0	0.0015010474487175756	0.0	-0.000509572085007338	0.0	-6.673825490943305e-10	-0.0001201179466061288	0.0	2.450534432666112e-09
4.575	-0.0005101726745963703	0.0	-1.404106836546446e-08	-0.000909388024867534	0.0	-0.09945408883441893	0.0	1.0932864370268628e-05	0.0	0.999999999909663	0.0	1.3119057248782552e-05	0.0	0.0	0.0015033332231281845	0.0	0.0	0.0015041794836496024	0.0	-0.0005101726747804317	0.0	-6.550993120114098e-10	-0.0001201179626313055	0.0	2.462761191068425e-09
4.58	-0.0005107732644489619	0.0	-1.4072407396855578e-08	-0.0009119403999855452	0.0	-0.09945408883074917	0.0	1.0935497127012135e-05	0.0	0.9999999999092974	0.0	1.3146393320114758e-05	0.0	0.0	0.001506465706160039	0.0	0.0	0.0015073122728108785	0.0	-0.000510773264633651	0.0	-6.42754929277986e-10	-0.00012011797865643702	0.0	2.4749926928670226e-09
4.585	-0.0005113738543816785	0.0	-1.4103757659624837e-08	-0.0009144957779831505	0.0	-0.09945408882706235	0.0	1.0938129895172415e-05	0.0	0.9999999999089312	0.0	1.3173735969380292e-05	0.0	0.0	0.0015095989429675305	0.0	0.0	0.0015104458162046748	0.0	-0.000511373854566996	0.0	-6.30349377177078e-10	-0.00012011799468159023	0.0	2.487228938062581e-09
4.59	-0.0005119744443945203	0.0	-1.4135119153772241e-08	-0.00091705415886035	0.0	-0.09945408882335845	0.0	1.0940762674749466e-05	0.0	0.9999999999085641	0.0	1.3201085196579153e-05	0.0	0.0	0.0015127329335506581	0.0	0.0	0.001513580113834262	0.0	-0.0005119744445804668	0.0	-6.17882631991697e-10	-0.00012011801070670911	0.0	2.4994699266558822e-09
4.595	-0.000512575034487487	0.0	-1.4166491879297787e-08	-0.0009196155426171436	0.0	-0.09945408881963748	0.0	1.0943395465743291e-05	0.0	0.9999999999081963	0.0	1.322844100171134e-05	0.0	0.0	0.0015158676779094221	0.0	0.0	0.0015167151657029105	0.0	-0.0005125750346740631	0.0	-6.053546700048525e-10	-0.0001201180267318587	0.0	2.5117156586493114e-09
4.6000000000000005	-0.000513175624660579	0.0	-1.4197875836201483e-08	-0.0009221799292535318	0.0	-0.09945408881589944	0.0	1.0946028268153887e-05	0.0	0.9999999999078278	0.0	1.325580338477686e-05	0.0	0.0	0.0015190031760438233	0.0	0.0	0.001519850971813891	0.0	-0.0005131756248477854	0.0	-5.927654674995352e-10	-0.0001201180427570336	0.0	2.5239661340443282e-09
4.605	-0.0005137762149137959	0.0	-1.4229271024483314e-08	-0.0009247473187695138	0.0	-0.09945408881214433	0.0	1.0948661081981253e-05	0.0	0.9999999999074586	0.0	1.3283172345775702e-05	0.0	0.0	0.0015221394279538603	0.0	0.0	0.0015229875321704743	0.0	-0.0005137762151016334	0.0	-5.801150007587415e-10	-0.0001201180587821561	0.0	2.536221352839368e-09
4.61	-0.0005143768052471378	0.0	-1.426067744414329e-08	-0.0009273177111650899	0.0	-0.09945408880837216	0.0	1.0951293907225393e-05	0.0	0.9999999999070887	0.0	1.3310547884707871e-05	0.0	0.0	0.0015252764336395337	0.0	0.0	0.001526124846775931	0.0	-0.000514376805435607	0.0	-5.674032460654688e-10	-0.00012011807480727136	0.0	2.548481315038161e-09
4.615	-0.0005149773956606049	0.0	-1.4292095095181407e-08	-0.0009298911064402601	0.0	-0.09945408880458291	0.0	1.0953926743886304e-05	0.0	0.999999999906718	0.0	1.3337930001573366e-05	0.0	0.0	0.0015284141931008433	0.0	0.0	0.0015292629156335319	0.0	-0.0005149773958497062	0.0	-5.546301797026838e-10	-0.00012011809083243901	0.0	2.5607460206429025e-09
4.62	-0.0005155779861541971	0.0	-1.4323523977597668e-08	-0.0009324675045950246	0.0	-0.0994540888007766	0.0	1.0956559591963989e-05	0.0	0.9999999999063466	0.0	1.3365318696372188e-05	0.0	0.0	0.0015315527063377895	0.0	0.0	0.0015324017387465475	0.0	-0.0005155779863439314	0.0	-5.417957779533641e-10	-0.00012011810685759222	0.0	2.573015469652664e-09
4.625	-0.0005161785767279142	0.0	-1.4354964091392073e-08	-0.000935046905629383	0.0	-0.09945408879695321	0.0	1.0959192451458444e-05	0.0	0.9999999999059744	0.0	1.3392713969104337e-05	0.0	0.0	0.0015346919733503724	0.0	0.0	0.0015355413161182484	0.0	-0.0005161785769182821	0.0	-5.28900017100478e-10	-0.0001201181228827111	0.0	2.585289662070169e-09
4.63	-0.0005167791673817564	0.0	-1.4386415436564618e-08	-0.0009376293095433358	0.0	-0.09945408879311275	0.0	1.0961825322369671e-05	0.0	0.9999999999056015	0.0	1.3420115819769814e-05	0.0	0.0	0.0015378319941385915	0.0	0.0	0.0015386816477519056	0.0	-0.0005167791675727585	0.0	-5.159428734269817e-10	-0.00012011813890785709	0.0	2.597568597896206e-09
4.635	-0.0005173797581157237	0.0	-1.4417878013115307e-08	-0.0009402147163368827	0.0	-0.09945408878925523	0.0	1.096445820469767e-05	0.0	0.9999999999052279	0.0	1.3447524248368619e-05	0.0	0.0	0.0015409727687024474	0.0	0.0	0.0015418227336507894	0.0	-0.0005173797583073607	0.0	-5.029243232158347e-10	-0.00012011815493302475	0.0	2.6098522771305136e-09
4.64	-0.0005179803489298162	0.0	-1.444935182104414e-08	-0.0009428031260100237	0.0	-0.09945408878538063	0.0	1.0967091098442443e-05	0.0	0.9999999999048537	0.0	1.3474939254900749e-05	0.0	0.0	0.0015441142970419395	0.0	0.0	0.0015449645738181707	0.0	-0.0005179803491220887	0.0	-4.898443427499902e-10	-0.00012011817095814363	0.0	2.622140699777145e-09
4.6450000000000005	-0.0005185809398240336	0.0	-1.448083686035112e-08	-0.0009453945385627594	0.0	-0.09945408878148897	0.0	1.0969724003603986e-05	0.0	0.9999999999044785	0.0	1.3502360839366212e-05	0.0	0.0	0.0015472565791570685	0.0	0.0	0.00154810716825732	0.0	-0.0005185809400169421	0.0	-4.767029083123768e-10	-0.00012011818698328057	0.0	2.634433865835463e-09
4.65	-0.0005191815307983761	0.0	-1.451233313103624e-08	-0.0009479889539950887	0.0	-0.09945408877758023	0.0	1.0972356920182302e-05	0.0	0.9999999999041028	0.0	1.3529789001764997e-05	0.0	0.0	0.0015503996150478337	0.0	0.0	0.001551250516971508	0.0	-0.0005191815309919215	0.0	-4.634999961859469e-10	-0.00012011820300842114	0.0	2.6467317753067576e-09
4.655	-0.0005197821218528437	0.0	-1.4543840633099501e-08	-0.0009505863723070123	0.0	-0.09945408877365443	0.0	1.097498984817739e-05	0.0	0.9999999999037262	0.0	1.3557223742097108e-05	0.0	0.0	0.0015535434047142351	0.0	0.0	0.0015543946199640054	0.0	-0.0005197821220470263	0.0	-4.502355826536162e-10	-0.00012011821903355267	0.0	2.6590344281944084e-09
4.66	-0.0005203827129874363	0.0	-1.4575359366540905e-08	-0.0009531867934985299	0.0	-0.09945408876971157	0.0	1.0977622787589249e-05	0.0	0.999999999903349	0.0	1.3584665060362547e-05	0.0	0.0	0.0015566879481562733	0.0	0.0	0.001557539477238083	0.0	-0.0005203827131822571	0.0	-4.3690964399831087e-10	-0.00012011823505871852	0.0	2.671341824496878e-09
4.665	-0.0005209833042021541	0.0	-1.4606889331360451e-08	-0.0009557902175696418	0.0	-0.09945408876575162	0.0	1.0980255738417881e-05	0.0	0.9999999999029711	0.0	1.3612112956561313e-05	0.0	0.0	0.001559833245373948	0.0	0.0	0.0015606850887970112	0.0	-0.0005209833043976135	0.0	-4.235221565029527e-10	-0.0001201182510838392	0.0	2.6836539642159772e-09
4.67	-0.0005215838954969968	0.0	-1.4638430527558143e-08	-0.0009583966445203477	0.0	-0.09945408876177461	0.0	1.0982888700663284e-05	0.0	0.9999999999025924	0.0	1.3639567430693406e-05	0.0	0.0	0.001562979296367259	0.0	0.0	0.0015638314546440608	0.0	-0.0005215838956930955	0.0	-4.100730964504517e-10	-0.00012011826710896531	0.0	2.695970847355259e-09
4.675	-0.0005221844868719647	0.0	-1.4669982955133975e-08	-0.0009610060743506479	0.0	-0.09945408875778053	0.0	1.098552167432546e-05	0.0	0.9999999999022129	0.0	1.3667028482758827e-05	0.0	0.0	0.0015661261011362068	0.0	0.0	0.0015669785747825025	0.0	-0.0005221844870687032	0.0	-3.965624401237015e-10	-0.00012011828313410045	0.0	2.7082924739132877e-09
4.68	-0.0005227850783270575	0.0	-1.470154661408795e-08	-0.0009636185070605421	0.0	-0.09945408875376939	0.0	1.0988154659404407e-05	0.0	0.9999999999018327	0.0	1.3694496112757573e-05	0.0	0.0	0.0015692736596807906	0.0	0.0	0.001570126449215607	0.0	-0.0005227850785244365	0.0	-3.8299016380561696e-10	-0.00012011829915925004	0.0	2.720618843892467e-09
4.6850000000000005	-0.0005233856698622756	0.0	-1.4733121504420074e-08	-0.0009662339426500311	0.0	-0.09945408874974117	0.0	1.0990787655900128e-05	0.0	0.9999999999014518	0.0	1.3721970320689652e-05	0.0	0.0	0.0015724219720010119	0.0	0.0	0.0015732750779466449	0.0	-0.0005233856700602957	0.0	-3.693562437790719e-10	-0.0001201183151844159	0.0	2.732949957295013e-09
4.69	-0.0005239862614776187	0.0	-1.4764707626130336e-08	-0.0009688523811191136	0.0	-0.09945408874569588	0.0	1.099342066381262e-05	0.0	0.9999999999010702	0.0	1.3749451106555054e-05	0.0	0.0	0.0015755710380968692	0.0	0.0	0.0015764244609788867	0.0	-0.0005239862616762806	0.0	-3.55660656326963e-10	-0.00012011833120952574	0.0	2.745285814119246e-09
4.695	-0.0005245868531730867	0.0	-1.479630497921874e-08	-0.0009714738224677904	0.0	-0.09945408874163351	0.0	1.0996053683141883e-05	0.0	0.9999999999006879	0.0	1.3776938470353781e-05	0.0	0.0	0.0015787208579683626	0.0	0.0	0.0015795745983156033	0.0	-0.0005245868533723909	0.0	-3.4190337773217065e-10	-0.00012011834723464642	0.0	2.757626414369022e-09
4.7	-0.0005251874449486799	0.0	-1.4827913563685288e-08	-0.0009740982666960614	0.0	-0.0994540887375541	0.0	1.099868671388792e-05	0.0	0.9999999999003049	0.0	1.3804432412085837e-05	0.0	0.0	0.001581871431615493	0.0	0.0	0.0015827254899600652	0.0	-0.0005251874451486271	0.0	-3.280843842775618e-10	-0.00012011836325980687	0.0	2.7699717580453545e-09
4.705	-0.0005257880368043981	0.0	-1.4859533379529979e-08	-0.0009767257138039265	0.0	-0.0994540887334576	0.0	1.1001319756050727e-05	0.0	0.999999999899921	0.0	1.3831932931751219e-05	0.0	0.0	0.00158502275903826	0.0	0.0	0.0015858771359155432	0.0	-0.0005257880370049889	0.0	-3.1420365224600364e-10	-0.00012011837928492032	0.0	2.7823218451500396e-09
4.71	-0.0005263886287402414	0.0	-1.4891164426752811e-08	-0.0009793561637913856	0.0	-0.09945408872934403	0.0	1.1003952809630307e-05	0.0	0.9999999998995365	0.0	1.3859440029349928e-05	0.0	0.0	0.0015881748402366632	0.0	0.0	0.001589029536185308	0.0	-0.0005263886289414764	0.0	-3.002611579203482e-10	-0.00012011839531007534	0.0	2.794676675682354e-09
4.715	-0.0005269892207562098	0.0	-1.4922806705353788e-08	-0.000981989616658439	0.0	-0.0994540887252134	0.0	1.100658587462666e-05	0.0	0.9999999998991512	0.0	1.3886953704881965e-05	0.0	0.0	0.001591327675210703	0.0	0.0	0.00159218269077263	0.0	-0.0005269892209580897	0.0	-2.862568775834642e-10	-0.00012011841133518699	0.0	2.807036249644142e-09
4.72	-0.0005275898128523032	0.0	-1.4954460215332905e-08	-0.0009846260724050866	0.0	-0.09945408872106569	0.0	1.1009218951039783e-05	0.0	0.9999999998987652	0.0	1.3914473958347329e-05	0.0	0.0	0.0015944812639603794	0.0	0.0	0.00159533659968078	0.0	-0.0005275898130548283	0.0	-2.721907875181873e-10	-0.00012011842736032213	0.0	2.8194005670379806e-09
4.7250000000000005	-0.0005281904050285218	0.0	-1.4986124956690173e-08	-0.0009872655310313287	0.0	-0.09945408871690092	0.0	1.1011852038869679e-05	0.0	0.9999999998983785	0.0	1.3942000789746023e-05	0.0	0.0	0.001597635606485693	0.0	0.0	0.0015984912629130289	0.0	-0.0005281904052316929	0.0	-2.580628640073646e-10	-0.00012011844338547534	0.0	2.8317696278634316e-09
4.73	-0.0005287909972848654	0.0	-1.5017800929425577e-08	-0.0009899079925371646	0.0	-0.09945408871271907	0.0	1.1014485138116347e-05	0.0	0.999999999897991	0.0	1.396953419907804e-05	0.0	0.0	0.0016007907027866424	0.0	0.0	0.001601646680472647	0.0	-0.000528790997488683	0.0	-2.4387308333383015e-10	-0.00012011845941061047	0.0	2.8441434321226326e-09
4.735	-0.000529391589621334	0.0	-1.5049488133539126e-08	-0.0009925534569225946	0.0	-0.09945408870852017	0.0	1.1017118248779786e-05	0.0	0.9999999998976029	0.0	1.3997074186343385e-05	0.0	0.0	0.001603946552863229	0.0	0.0	0.001604802852362905	0.0	-0.000529391589825799	0.0	-2.2962142178041292e-10	-0.00012011847543576007	0.0	2.8565219798170414e-09
4.74	-0.0005299921820379277	0.0	-1.508118656903082e-08	-0.0009952019241876188	0.0	-0.09945408870430418	0.0	1.101975137086e-05	0.0	0.999999999897214	0.0	1.4024620751542057e-05	0.0	0.0	0.0016071031567154515	0.0	0.0	0.001607959778587074	0.0	-0.0005299921822430405	0.0	-2.1530785562993194e-10	-0.00012011849146082113	0.0	2.86890527094822e-09
4.745	-0.0005305927745346464	0.0	-1.5112896235900652e-08	-0.0009978533943322372	0.0	-0.09945408870007114	0.0	1.1022384504356982e-05	0.0	0.9999999998968243	0.0	1.4052173894674056e-05	0.0	0.0	0.0016102605143433109	0.0	0.0	0.0016111174591484244	0.0	-0.0005305927747404073	0.0	-2.009323611652013e-10	-0.00012011850748595988	0.0	2.881293305517201e-09
4.75	-0.0005311933671114902	0.0	-1.5144617134148626e-08	-0.0010005078673564496	0.0	-0.09945408869582101	0.0	1.1025017649270739e-05	0.0	0.999999999896434	0.0	1.4079733615739382e-05	0.0	0.0	0.0016134186257468067	0.0	0.0	0.0016142758940502267	0.0	-0.0005311933673179002	0.0	-1.8649491466903022e-10	-0.00012011852351114741	0.0	2.8936860835235368e-09
4.755	-0.0005317939597684591	0.0	-1.5176349263774747e-08	-0.0010031653432602562	0.0	-0.09945408869155382	0.0	1.1027650805601267e-05	0.0	0.9999999998960429	0.0	1.4107299914738034e-05	0.0	0.0	0.0016165774909259393	0.0	0.0	0.0016174350832957518	0.0	-0.0005317939599755187	0.0	-1.719954924242312e-10	-0.00012011853953624461	0.0	2.9060836049712234e-09
4.76	-0.0005323945525055531	0.0	-1.520809262477901e-08	-0.001005825822043657	0.0	-0.09945408868726956	0.0	1.1030283973348567e-05	0.0	0.999999999895651	0.0	1.4134872791670014e-05	0.0	0.0	0.0016197371098807083	0.0	0.0	0.00162059502688827	0.0	-0.0005323945527132627	0.0	-1.574340707135833e-10	-0.00012011855556138518	0.0	2.9184858698593755e-09
4.765	-0.0005329951453227721	0.0	-1.5239847217161414e-08	-0.001008489303706652	0.0	-0.09945408868296823	0.0	1.103291715251264e-05	0.0	0.9999999998952586	0.0	1.416245224653532e-05	0.0	0.0	0.001622897482611114	0.0	0.0	0.0016237557248310525	0.0	-0.0005329951455311326	0.0	-1.4281062581989942e-10	-0.00012011857158652754	0.0	2.930892878190337e-09
4.7700000000000005	-0.0005335957382201163	0.0	-1.5271613040921967e-08	-0.0010111557882492416	0.0	-0.09945408867864983	0.0	1.1035550343093483e-05	0.0	0.9999999998948652	0.0	1.4190038279333958e-05	0.0	0.0	0.0016260586091171568	0.0	0.0	0.0016269171771273695	0.0	-0.000533595738429128	0.0	-1.281251340259386e-10	-0.00012011858761163919	0.0	2.943304629966828e-09
4.775	-0.0005341963311975854	0.0	-1.5303390096060657e-08	-0.0010138252756714248	0.0	-0.09945408867431436	0.0	1.10381835450911e-05	0.0	0.9999999998944712	0.0	1.421763089006592e-05	0.0	0.0	0.001629220489398836	0.0	0.0	0.0016300793837804918	0.0	-0.000534196331407249	0.0	-1.1337757161449375e-10	-0.00012011860363676349	0.0	2.955721125184474e-09
4.78	-0.0005347969242551796	0.0	-1.5335178382577494e-08	-0.0010164977659732023	0.0	-0.09945408866996182	0.0	1.1040816758505488e-05	0.0	0.9999999998940765	0.0	1.4245230078731207e-05	0.0	0.0	0.0016323831234561514	0.0	0.0	0.0016332423447936902	0.0	-0.0005347969244654956	0.0	-9.856791486834756e-11	-0.00012011861966190766	0.0	2.968142363850574e-09
4.785	-0.0005353975173928989	0.0	-1.5366977900472468e-08	-0.0010191732591545738	0.0	-0.09945408866559222	0.0	1.1043449983336648e-05	0.0	0.999999999893681	0.0	1.4272835845329822e-05	0.0	0.0	0.0016355465112891036	0.0	0.0	0.0016364060601702353	0.0	-0.000535397517603868	0.0	-8.36961400702395e-11	-0.0001201186356870175	0.0	2.9805683459662873e-09
4.79	-0.0005359981106107432	0.0	-1.539878864974559e-08	-0.0010218517552155397	0.0	-0.09945408866120554	0.0	1.104608321958458e-05	0.0	0.9999999998932848	0.0	1.4300448189861765e-05	0.0	0.0	0.0016387106528976923	0.0	0.0	0.0016395705299133976	0.0	-0.0005359981108223658	0.0	-6.876222350293898e-11	-0.0001201186517121418	0.0	2.9929990715286377e-09
4.795	-0.0005365987039087127	0.0	-1.5430610630396852e-08	-0.0010245332541560996	0.0	-0.09945408865680179	0.0	1.1048716467249285e-05	0.0	0.9999999998928879	0.0	1.4328067112327034e-05	0.0	0.0	0.001641875548281918	0.0	0.0	0.001642735754026448	0.0	-0.0005365987041209895	0.0	-5.3766141449202436e-11	-0.00012011866773728417	0.0	3.0054345405417913e-09
4.8	-0.0005371992972868072	0.0	-1.5462443842426258e-08	-0.0010272177559762536	0.0	-0.09945408865238098	0.0	1.105134972633076e-05	0.0	0.9999999998924902	0.0	1.435569261272563e-05	0.0	0.0	0.0016450411974417798	0.0	0.0	0.001645901732512657	0.0	-0.0005371992974997386	0.0	-3.870787019176928e-11	-0.00012011868376240846	0.0	3.0178747530057993e-09
4.805	-0.0005377998907450267	0.0	-1.5494288285833805e-08	-0.0010299052606760018	0.0	-0.0994540886479431	0.0	1.1053982996829008e-05	0.0	0.9999999998920919	0.0	1.4383324691057552e-05	0.0	0.0	0.0016482076003772785	0.0	0.0	0.0016490684653752954	0.0	-0.0005377998909586136	0.0	-2.3587386013389346e-11	-0.00012011869978755264	0.0	3.0303197089229208e-09
4.8100000000000005	-0.0005384004842833714	0.0	-1.5526143960619502e-08	-0.0010325957682553446	0.0	-0.09945408864348813	0.0	1.1056616278744029e-05	0.0	0.9999999998916927	0.0	1.4410963347322808e-05	0.0	0.0	0.0016513747570884147	0.0	0.0	0.0016522359526176338	0.0	-0.0005384004844976141	0.0	-8.404665196782177e-12	-0.00012011871581265164	0.0	3.0427694082952394e-09
4.815	-0.0005390010779018411	0.0	-1.5558010866783336e-08	-0.001035289278714281	0.0	-0.09945408863901611	0.0	1.1059249572075822e-05	0.0	0.9999999998912928	0.0	1.4438608581521384e-05	0.0	0.0	0.0016545426675751865	0.0	0.0	0.0016554041942429428	0.0	-0.0005390010781167401	0.0	6.840315975319203e-12	-0.00012011873183776148	0.0	3.0552238511205287e-09
4.82	-0.0005396016716004358	0.0	-1.5589889004325315e-08	-0.0010379857920528117	0.0	-0.09945408863452702	0.0	1.1061882876824386e-05	0.0	0.9999999998908923	0.0	1.4466260393653288e-05	0.0	0.0	0.0016577113318375952	0.0	0.0	0.0016585731902544931	0.0	-0.0005396016718159917	0.0	2.214758122018478e-11	-0.0001201187478629147	0.0	3.067683037403195e-09
4.825	-0.0005402022653791557	0.0	-1.5621778373245433e-08	-0.0010406853082709365	0.0	-0.09945408863002086	0.0	1.1064516192989722e-05	0.0	0.999999999890491	0.0	1.449391878371852e-05	0.0	0.0	0.0016608807498756407	0.0	0.0	0.0016617429406555555	0.0	-0.0005402022655953692	0.0	3.7517154255114574e-11	-0.00012011876388805164	0.0	3.0801469671439798e-09
4.83	-0.0005408028592380005	0.0	-1.5653678973543696e-08	-0.0010433878273686556	0.0	-0.09945408862549762	0.0	1.106714952057183e-05	0.0	0.999999999890089	0.0	1.4521583751717077e-05	0.0	0.0	0.001664050921689323	0.0	0.0	0.0016649134454494005	0.0	-0.0005408028594548722	0.0	5.294905879738911e-11	-0.00012011877991314702	0.0	3.0926156403432738e-09
4.835	-0.0005414034531769704	0.0	-1.5685590805220103e-08	-0.0010460933493459687	0.0	-0.09945408862095732	0.0	1.1069782859570711e-05	0.0	0.9999999998896862	0.0	1.4549255297648963e-05	0.0	0.0	0.0016672218472786415	0.0	0.0	0.0016680847046392987	0.0	-0.0005414034533945007	0.0	6.844331856431505e-11	-0.00012011879593828217	0.0	3.1050890570034688e-09
4.84	-0.0005420040471960654	0.0	-1.571751386827465e-08	-0.0010488018742028761	0.0	-0.09945408861639995	0.0	1.1072416209986364e-05	0.0	0.9999999998892828	0.0	1.4576933421514175e-05	0.0	0.0	0.001670393526643597	0.0	0.0	0.001671256718228521	0.0	-0.000542004047414255	0.0	8.399995727319213e-11	-0.00012011881196341007	0.0	3.117567217124226e-09
4.845	-0.0005426046412952855	0.0	-1.5749448162707344e-08	-0.0010515134019393776	0.0	-0.09945408861182552	0.0	1.1075049571818787e-05	0.0	0.9999999998888786	0.0	1.4604618123312715e-05	0.0	0.0	0.001673565959784189	0.0	0.0	0.001674429486220338	0.0	-0.0005426046415141348	0.0	9.961899864133066e-11	-0.00012011882798852172	0.0	3.130050120709623e-09
4.8500000000000005	-0.0005432052354746307	0.0	-1.5781393688518183e-08	-0.0010542279325554736	0.0	-0.09945408860723401	0.0	1.1077682945067985e-05	0.0	0.9999999998884735	0.0	1.4632309403044585e-05	0.0	0.0	0.0016767391467004183	0.0	0.0	0.00167760300861802	0.0	-0.0005432052356941403	0.0	1.1530046638606048e-10	-0.00012011884401364422	0.0	3.1425377677579584e-09
4.855	-0.0005438058297341009	0.0	-1.5813350445707162e-08	-0.0010569454660511635	0.0	-0.09945408860262543	0.0	1.1080316329733953e-05	0.0	0.9999999998880679	0.0	1.4660007260709778e-05	0.0	0.0	0.0016799130873922838	0.0	0.0	0.0016807772854248383	0.0	-0.0005438058299542713	0.0	1.3104438422468458e-10	-0.00012011886003877212	0.0	3.1550301582706097e-09
4.86	-0.0005444064240736962	0.0	-1.584531843427428e-08	-0.0010596660024264474	0.0	-0.09945408859799977	0.0	1.1082949725816694e-05	0.0	0.9999999998876615	0.0	1.46877116963083e-05	0.0	0.0	0.0016830877818597863	0.0	0.0	0.0016839523166440632	0.0	-0.000544406424294528	0.0	1.46850775874546e-10	-0.00012011887606390185	0.0	3.167527292251484e-09
4.865	-0.0005450070184934166	0.0	-1.5877297654219545e-08	-0.0010623895416813254	0.0	-0.09945408859335705	0.0	1.1085583133316206e-05	0.0	0.9999999998872544	0.0	1.4715422709840147e-05	0.0	0.0	0.0016862632301029251	0.0	0.0	0.0016871281022789654	0.0	-0.0005450070187149103	0.0	1.627196650529783e-10	-0.00012011889208901711	0.0	3.1800291696993158e-09
4.87	-0.000545607612993262	0.0	-1.5909288105542952e-08	-0.0010651160838157977	0.0	-0.09945408858869727	0.0	1.108821655223249e-05	0.0	0.9999999998868465	0.0	1.474314030130532e-05	0.0	0.0	0.0016894394321217007	0.0	0.0	0.0016903046423328155	0.0	-0.0005456076132154182	0.0	1.7865107547732122e-10	-0.00012011890811413417	0.0	3.1925357906164736e-09
4.875	-0.0005462082075732324	0.0	-1.59412897882445e-08	-0.001067845628829864	0.0	-0.09945408858402041	0.0	1.1090849982565547e-05	0.0	0.999999999886438	0.0	1.4770864470703823e-05	0.0	0.0	0.0016926163879161134	0.0	0.0	0.0016934819368088843	0.0	-0.0005462082077960516	0.0	1.9464503086492735e-10	-0.00012011892413922956	0.0	3.205047155004344e-09
4.88	-0.0005468088022333279	0.0	-1.597330270232419e-08	-0.0010705781767235247	0.0	-0.09945408857932649	0.0	1.1093483424315375e-05	0.0	0.9999999998860286	0.0	1.4798595218035651e-05	0.0	0.0	0.0016957940974861622	0.0	0.0	0.0016966599857104424	0.0	-0.0005468088024568105	0.0	2.1070155493315009e-10	-0.00012011894016437554	0.0	3.2175632628632504e-09
4.885	-0.0005474093969735485	0.0	-1.6005326847782027e-08	-0.0010733137274967794	0.0	-0.09945408857461549	0.0	1.1096116877481977e-05	0.0	0.9999999998856186	0.0	1.4826332543300807e-05	0.0	0.0	0.0016989725608318484	0.0	0.0	0.0016998387890407604	0.0	-0.0005474093971976953	0.0	2.268206713993486e-10	-0.00012011895618951429	0.0	3.230084114195456e-09
4.89	-0.0005480099917938942	0.0	-1.6037362224618006e-08	-0.0010760522811496282	0.0	-0.09945408856988742	0.0	1.1098750342065348e-05	0.0	0.9999999998852078	0.0	1.485407644649929e-05	0.0	0.0	0.001702151777953171	0.0	0.0	0.001703018346803109	0.0	-0.0005480099920187056	0.0	2.430024039808962e-10	-0.00012011897221460065	0.0	3.242609709002961e-09
4.8950000000000005	-0.000548610586694365	0.0	-1.606940883283213e-08	-0.001078793837682072	0.0	-0.09945408856514229	0.0	1.1101383818065493e-05	0.0	0.9999999998847963	0.0	1.4881826927631103e-05	0.0	0.0	0.0017053317488501306	0.0	0.0	0.0017061986590007588	0.0	-0.0005486105869198413	0.0	2.592467763951691e-10	-0.00012011898823972855	0.0	3.2551400472845344e-09
4.9	-0.0005492111816749609	0.0	-1.6101466672424394e-08	-0.001081538397094109	0.0	-0.09945408856038009	0.0	1.110401730548241e-05	0.0	0.999999999884384	0.0	1.490958398669624e-05	0.0	0.0	0.0017085124735227266	0.0	0.0	0.0017093797256369806	0.0	-0.0005492111819011029	0.0	2.7555381235953633e-10	-0.00012011900426484743	0.0	3.2676751290432044e-09
4.905	-0.0005498117767356817	0.0	-1.61335357433948e-08	-0.0010842859593857403	0.0	-0.09945408855560081	0.0	1.1106650804316098e-05	0.0	0.999999999883971	0.0	1.4937347623694705e-05	0.0	0.0	0.0017116939519709596	0.0	0.0	0.001712561546715045	0.0	-0.0005498117769624898	0.0	2.9192353559139763e-10	-0.00012011902028995728	0.0	3.2802149542797528e-09
4.91	-0.0005504123718765276	0.0	-1.616561604574335e-08	-0.0010870365245569658	0.0	-0.09945408855080447	0.0	1.110928431456656e-05	0.0	0.9999999998835574	0.0	1.4965117838626494e-05	0.0	0.0	0.0017148761841948293	0.0	0.0	0.0017157441222382227	0.0	-0.0005504123721040025	0.0	3.08355969808132e-10	-0.00012011903631507074	0.0	3.2927595229949568e-09
4.915	-0.0005510129670974986	0.0	-1.6197707579470042e-08	-0.0010897900926077854	0.0	-0.09945408854599105	0.0	1.1111917836233791e-05	0.0	0.9999999998831429	0.0	1.4992894631491613e-05	0.0	0.0	0.0017180591701943355	0.0	0.0	0.0017189274522097845	0.0	-0.0005510129673256405	0.0	3.248511387271492e-10	-0.00012011905234020226	0.0	3.305308835191675e-09
4.92	-0.0005516135623985947	0.0	-1.622981034457488e-08	-0.0010925466635381992	0.0	-0.09945408854116057	0.0	1.1114551369317796e-05	0.0	0.9999999998827278	0.0	1.5020678002290058e-05	0.0	0.0	0.0017212429099694789	0.0	0.0	0.0017221115366330008	0.0	-0.0005516135626274045	0.0	3.4140906606585126e-10	-0.00012011906836533017	0.0	3.317862890869747e-09
4.925	-0.0005522141577798158	0.0	-1.6261924341057855e-08	-0.0010953062373482074	0.0	-0.09945408853631302	0.0	1.1117184913818573e-05	0.0	0.9999999998823119	0.0	1.504846795102183e-05	0.0	0.0	0.0017244274035202588	0.0	0.0	0.0017252963755111422	0.0	-0.0005522141580092938	0.0	3.580297755416514e-10	-0.00012011908439042555	0.0	3.3304216900304974e-09
4.93	-0.0005528147532411619	0.0	-1.629404956891898e-08	-0.0010980688140378094	0.0	-0.09945408853144841	0.0	1.1119818469736121e-05	0.0	0.9999999998818954	0.0	1.5076264477686929e-05	0.0	0.0	0.0017276126508466757	0.0	0.0	0.0017284819688474797	0.0	-0.0005528147534713088	0.0	3.747132908719648e-10	-0.00012011910041556973	0.0	3.342985232676768e-09
4.9350000000000005	-0.0005534153487826333	0.0	-1.6326186028158247e-08	-0.0011008343936070061	0.0	-0.09945408852656672	0.0	1.1122452037070444e-05	0.0	0.999999999881478	0.0	1.5104067582285359e-05	0.0	0.0	0.0017307986519487298	0.0	0.0	0.0017316683166452838	0.0	-0.0005534153490134495	0.0	3.914596357742278e-10	-0.00012011911644067415	0.0	3.3555535188080795e-09
4.94	-0.0005540159444042297	0.0	-1.6358333718775655e-08	-0.0011036029760557967	0.0	-0.09945408852166795	0.0	1.1125085615821535e-05	0.0	0.9999999998810599	0.0	1.5131877264817113e-05	0.0	0.0	0.00173398540682642	0.0	0.0	0.001734855418907825	0.0	-0.0005540159446357155	0.0	4.082688339658563e-10	-0.00012011913246576592	0.0	3.3681265484257224e-09
4.945	-0.000554616540105951	0.0	-1.6390492640771204e-08	-0.0011063745613841811	0.0	-0.09945408851675212	0.0	1.1127719205989401e-05	0.0	0.9999999998806411	0.0	1.5159693525282192e-05	0.0	0.0	0.0017371729154797473	0.0	0.0	0.0017380432756383744	0.0	-0.0005546165403381071	0.0	4.251409091642986e-10	-0.00012011914849086673	0.0	3.3807043215316146e-09
4.95	-0.0005552171358877974	0.0	-1.6422662794144897e-08	-0.00110914914959216	0.0	-0.09945408851181922	0.0	1.1130352807574037e-05	0.0	0.9999999998802216	0.0	1.51875163636806e-05	0.0	0.0	0.001740361177908711	0.0	0.0	0.0017412318868402024	0.0	-0.0005552171361206242	0.0	4.420758850869877e-10	-0.00012011916451599284	0.0	3.39328683812637e-09
4.955	-0.000555817731749769	0.0	-1.6454844178896734e-08	-0.0011119267406797329	0.0	-0.09945408850686925	0.0	1.1132986420575446e-05	0.0	0.9999999998798014	0.0	1.5215345780012332e-05	0.0	0.0	0.0017435501941133118	0.0	0.0	0.0017444212525165796	0.0	-0.0005558177319832671	0.0	4.590737854513819e-10	-0.00012011918054114062	0.0	3.4058740982132634e-09
4.96	-0.0005564183276918655	0.0	-1.648703679502671e-08	-0.0011147073346469	0.0	-0.09945408850190222	0.0	1.1135620044993626e-05	0.0	0.9999999998793804	0.0	1.5243181774277394e-05	0.0	0.0	0.0017467399640935493	0.0	0.0	0.0017476113726707767	0.0	-0.0005564183279260355	0.0	4.761346339749407e-10	-0.00012011919656621432	0.0	3.4184661017925456e-09
4.965	-0.0005570189237140873	0.0	-1.6519240642534833e-08	-0.0011174909314936611	0.0	-0.09945408849691811	0.0	1.113825368082858e-05	0.0	0.9999999998789586	0.0	1.5271024346475783e-05	0.0	0.0	0.001749930487849424	0.0	0.0	0.0017508022473060644	0.0	-0.0005570189239489292	0.0	4.932584543751263e-10	-0.00012011921259131332	0.0	3.4310628488625162e-09
4.97	-0.0005576195198164339	0.0	-1.6551455721421098e-08	-0.0011202775312200166	0.0	-0.09945408849191693	0.0	1.1140887328080306e-05	0.0	0.9999999998785362	0.0	1.52988734966075e-05	0.0	0.0	0.0017531217653809347	0.0	0.0	0.0017539938764257134	0.0	-0.0005576195200519487	0.0	5.104452703693903e-10	-0.00012011922861647015	0.0	3.4436643394272928e-09
4.9750000000000005	-0.0005582201159989058	0.0	-1.658368203168551e-08	-0.0011230671338259665	0.0	-0.09945408848689868	0.0	1.1143520986748801e-05	0.0	0.999999999878113	0.0	1.5326729224672544e-05	0.0	0.0	0.0017563137966880838	0.0	0.0	0.0017571862600329943	0.0	-0.0005582201162350939	0.0	5.276951056752278e-10	-0.00012011924464159263	0.0	3.456270573489785e-09
4.98	-0.0005588207122615026	0.0	-1.661591957332806e-08	-0.0011258597393115103	0.0	-0.09945408848186338	0.0	1.1146154656834072e-05	0.0	0.9999999998776892	0.0	1.5354591530670914e-05	0.0	0.0	0.0017595065817708688	0.0	0.0	0.0017603793981311776	0.0	-0.0005588207124983647	0.0	5.45007984010115e-10	-0.0001201192606666826	0.0	3.4688815510480682e-09
4.985	-0.0005594213086042246	0.0	-1.6648168346348753e-08	-0.0011286553476766482	0.0	-0.09945408847681099	0.0	1.1148788338336113e-05	0.0	0.9999999998772645	0.0	1.5382460414602612e-05	0.0	0.0	0.0017627001206292903	0.0	0.0	0.0017635732907235343	0.0	-0.0005594213088417608	0.0	5.623839290915374e-10	-0.00012011927669179605	0.0	3.4814972721033342e-09
4.99	-0.0005600219050270716	0.0	-1.668042835074759e-08	-0.0011314539589213802	0.0	-0.09945408847174153	0.0	1.1151422031254924e-05	0.0	0.9999999998768392	0.0	1.5410335876467633e-05	0.0	0.0	0.0017658944132633492	0.0	0.0	0.0017667679378133348	0.0	-0.0005600219052652826	0.0	5.798229646369828e-10	-0.00012011929271690228	0.0	3.4941177366597903e-09
4.995	-0.0005606225015300436	0.0	-1.671269958652457e-08	-0.0011342555730457064	0.0	-0.09945408846665502	0.0	1.115405573559051e-05	0.0	0.9999999998764131	0.0	1.5438217916265985e-05	0.0	0.0	0.0017690894596730446	0.0	0.0	0.00176996333940385	0.0	-0.0005606225017689298	0.0	5.973251143639705e-10	-0.00012011930874196875	0.0	3.5067429447174595e-09
5.0	-0.0005612230981131407	0.0	-1.674498205367969e-08	-0.0011370601900496267	0.0	-0.09945408846155142	0.0	1.1156689451342867e-05	0.0	0.9999999998759862	0.0	1.546610653399766e-05	0.0	0.0	0.0017722852598583767	0.0	0.0	0.0017731594954983503	0.0	-0.0005612230983527024	0.0	6.148904019899923e-10	-0.00012011932476708763	0.0	3.5193728962757125e-09
5.005	-0.0005618236947763629	0.0	-1.6777275752212956e-08	-0.001139867809933141	0.0	-0.09945408845643076	0.0	1.1159323178511997e-05	0.0	0.9999999998755587	0.0	1.5494001729662665e-05	0.0	0.0	0.001775481813819346	0.0	0.0	0.0017763564061001067	0.0	-0.0005618236950166007	0.0	6.325188512325659e-10	-0.00012011934079223904	0.0	3.5320075913368433e-09
5.01	-0.0005624242915197101	0.0	-1.6809580682124362e-08	-0.0011426784326962498	0.0	-0.09945408845129303	0.0	1.1161956917097897e-05	0.0	0.9999999998751304	0.0	1.5521903503260996e-05	0.0	0.0	0.001778679121555952	0.0	0.0	0.0017795540712123895	0.0	-0.0005624242917606247	0.0	6.50210485809203e-10	-0.00012011935681736695	0.0	3.5446470299035313e-09
5.015	-0.0005630248883431824	0.0	-1.6841896843413912e-08	-0.0011454920583389525	0.0	-0.09945408844613822	0.0	1.116459066710057e-05	0.0	0.9999999998747015	0.0	1.5549811854792655e-05	0.0	0.0	0.0017818771830681952	0.0	0.0	0.0017827524908384696	0.0	-0.0005630248885847743	0.0	6.679653294374463e-10	-0.00012011937284246053	0.0	3.5572912119779324e-09
5.0200000000000005	-0.0005636254852467799	0.0	-1.6874224236081613e-08	-0.00114830868686125	0.0	-0.09945408844096636	0.0	1.1167224428520015e-05	0.0	0.9999999998742717	0.0	1.5577726784257648e-05	0.0	0.0	0.001785075998356076	0.0	0.0	0.0017859516649816175	0.0	-0.0005636254854890494	0.0	6.857834058348239e-10	-0.00012011938886756314	0.0	3.5699401375563455e-09
5.025	-0.0005642260822305024	0.0	-1.6906562860127448e-08	-0.001151128318263141	0.0	-0.09945408843577741	0.0	1.1169858201356233e-05	0.0	0.9999999998738412	0.0	1.5605648291655958e-05	0.0	0.0	0.0017882755674195926	0.0	0.0	0.001789151593645104	0.0	-0.00056422608247345	0.0	7.036647387188569e-10	-0.00012011940489264406	0.0	3.5825938066431865e-09
5.03	-0.0005648266792943499	0.0	-1.693891271555143e-08	-0.0011539509525446265	0.0	-0.09945408843057141	0.0	1.1172491985609222e-05	0.0	0.99999999987341	0.0	1.56335763769876e-05	0.0	0.0	0.0017914758902587463	0.0	0.0	0.0017923522768321998	0.0	-0.0005648266795379758	0.0	7.216093518071074e-10	-0.00012011942091774488	0.0	3.5952522192415924e-09
5.035	-0.0005654272764383224	0.0	-1.697127380235355e-08	-0.0011567765897057057	0.0	-0.09945408842534832	0.0	1.1175125781278983e-05	0.0	0.9999999998729782	0.0	1.5661511040252567e-05	0.0	0.0	0.001794676966873537	0.0	0.0	0.0017955537145461753	0.0	-0.0005654272766826275	0.0	7.396172688171228e-10	-0.00012011943694289627	0.0	3.6079153753493898e-09
5.04	-0.0005660278736624201	0.0	-1.7003646120533815e-08	-0.0011596052297463794	0.0	-0.09945408842010818	0.0	1.1177759588365515e-05	0.0	0.9999999998725455	0.0	1.568945228145086e-05	0.0	0.0	0.0017978787972639644	0.0	0.0	0.0017987559067903015	0.0	-0.0005660278739074048	0.0	7.576885134664557e-10	-0.00012011945296797721	0.0	3.6205832749702357e-09
5.045	-0.0005666284709666428	0.0	-1.7036029670092222e-08	-0.001162436872666647	0.0	-0.09945408841485096	0.0	1.1180393406868822e-05	0.0	0.9999999998721121	0.0	1.571740010058248e-05	0.0	0.0	0.0018010813814300286	0.0	0.0	0.0018019588535678488	0.0	-0.0005666284712123072	0.0	7.758231094726805e-10	-0.00012011946899305452	0.0	3.633255918104206e-09
5.05	-0.0005672290683509905	0.0	-1.7068424451028773e-08	-0.001165271518466509	0.0	-0.09945408840957667	0.0	1.1183027236788899e-05	0.0	0.999999999871678	0.0	1.5745354497647426e-05	0.0	0.0	0.0018042847193717303	0.0	0.0	0.001805162554882088	0.0	-0.0005672290685973354	0.0	7.940210805533547e-10	-0.00012011948501821135	0.0	3.645933304751985e-09
5.055	-0.0005678296658154634	0.0	-1.7100830463343467e-08	-0.0011681091671459651	0.0	-0.09945408840428531	0.0	1.1185661078125747e-05	0.0	0.9999999998712432	0.0	1.57733154726457e-05	0.0	0.0	0.0018074888110890686	0.0	0.0	0.0018083670107362899	0.0	-0.0005678296660624893	0.0	8.122824504260627e-10	-0.00012011950104329769	0.0	3.6586154349179854e-09
5.0600000000000005	-0.0005684302633600614	0.0	-1.713324770703631e-08	-0.0011709498187050158	0.0	-0.09945408839897689	0.0	1.118829493087937e-05	0.0	0.9999999998708076	0.0	1.580128302557731e-05	0.0	0.0	0.0018106936565820445	0.0	0.0	0.0018115722211337248	0.0	-0.0005684302636077684	0.0	8.306072428083943e-10	-0.00012011951706840753	0.0	3.6713023085991697e-09
5.065	-0.0005690308609847843	0.0	-1.716567618210729e-08	-0.0011737934731436601	0.0	-0.09945408839365139	0.0	1.1190928795049763e-05	0.0	0.9999999998703714	0.0	1.582925715644224e-05	0.0	0.0	0.001813899255850657	0.0	0.0	0.0018147781860776637	0.0	-0.0005690308612331734	0.0	8.489954814179182e-10	-0.00012011953309352641	0.0	3.6839939257986137e-09
5.07	-0.0005696314586896324	0.0	-1.719811588855641e-08	-0.0011766401304618985	0.0	-0.09945408838830883	0.0	1.1193562670636928e-05	0.0	0.9999999998699343	0.0	1.5857237865240492e-05	0.0	0.0	0.0018171056088949055	0.0	0.0	0.0018179849055713771	0.0	-0.0005696314589387036	0.0	8.674471899722481e-10	-0.00012011954911857482	0.0	3.6966902865192503e-09
5.075	-0.0005702320564746054	0.0	-1.7230566826383678e-08	-0.0011794897906597312	0.0	-0.0994540883829492	0.0	1.1196196557640865e-05	0.0	0.9999999998694965	0.0	1.5885225151972076e-05	0.0	0.0	0.0018203127157147918	0.0	0.0	0.0018211923796181357	0.0	-0.0005702320567243592	0.0	8.859623921889768e-10	-0.00012011956514370815	0.0	3.709391390758793e-09
5.08	-0.0005708326543397036	0.0	-1.7263028995589086e-08	-0.0011823424537371582	0.0	-0.09945408837757248	0.0	1.1198830456061574e-05	0.0	0.9999999998690581	0.0	1.5913219016636985e-05	0.0	0.0	0.001823520576310315	0.0	0.0	0.00182440060822121	0.0	-0.0005708326545901406	0.0	9.045411117857088e-10	-0.00012011958116884148	0.0	3.722097238522629e-09
5.085	-0.0005714332522849269	0.0	-1.7295502396172637e-08	-0.0011851981196941792	0.0	-0.09945408837217871	0.0	1.1201464365899056e-05	0.0	0.9999999998686189	0.0	1.5941219459235224e-05	0.0	0.0	0.0018267291906814748	0.0	0.0	0.0018276095913838711	0.0	-0.0005714332525360475	0.0	9.231833724800759e-10	-0.0001201195971938935	0.0	3.734807829810138e-09
5.09	-0.0005720338503102751	0.0	-1.7327987028134332e-08	-0.0011880567885307943	0.0	-0.09945408836676788	0.0	1.120409828715331e-05	0.0	0.9999999998681789	0.0	1.5969226479766787e-05	0.0	0.0	0.001829938558828272	0.0	0.0	0.0018308193291093893	0.0	-0.0005720338505620796	0.0	9.418891979896826e-10	-0.00012011961321898527	0.0	3.747523164620239e-09
5.095	-0.0005726344484157485	0.0	-1.7360482891474168e-08	-0.0011909184602470035	0.0	-0.09945408836133995	0.0	1.1206732219824335e-05	0.0	0.9999999998677382	0.0	1.5997240078231678e-05	0.0	0.0	0.0018331486807507062	0.0	0.0	0.0018340298214010353	0.0	-0.0005726344486682375	0.0	9.606586120321587e-10	-0.00012011962924414029	0.0	3.760243242959778e-09
5.1000000000000005	-0.0005732350466013471	0.0	-1.7392989986192154e-08	-0.0011937831348428076	0.0	-0.09945408835589498	0.0	1.1209366163912132e-05	0.0	0.9999999998672968	0.0	1.6025260254629903e-05	0.0	0.0	0.001836359556448778	0.0	0.0	0.0018372410682620799	0.0	-0.000573235046854521	0.0	9.794916383251563e-10	-0.00012011964526923929	0.0	3.772968064823948e-09
5.105	-0.0005738356448670705	0.0	-1.7425508312288278e-08	-0.0011966508123182052	0.0	-0.09945408835043293	0.0	1.1212000119416703e-05	0.0	0.9999999998668547	0.0	1.6053287008961448e-05	0.0	0.0	0.0018395711859224859	0.0	0.0	0.0018404530696957935	0.0	-0.0005738356451209298	0.0	9.983883005862785e-10	-0.00012011966129431841	0.0	3.7856976302162935e-09
5.11	-0.0005744362432129191	0.0	-1.7458037869762542e-08	-0.001199521492673197	0.0	-0.09945408834495381	0.0	1.1214634086338044e-05	0.0	0.9999999998664119	0.0	1.6081320341226318e-05	0.0	0.0	0.0018427835691718307	0.0	0.0	0.0018436658257054471	0.0	-0.0005744362434674642	0.0	1.0173486225332039e-09	-0.00012011967731943548	0.0	3.79843193913993e-09
5.115	-0.0005750368416388927	0.0	-1.7490578658614954e-08	-0.001202395175907783	0.0	-0.09945408833945761	0.0	1.1217268064676157e-05	0.0	0.9999999998659683	0.0	1.6109360251424518e-05	0.0	0.0	0.0018459967061968128	0.0	0.0	0.0018468793362943112	0.0	-0.0005750368418941242	0.0	1.036372627883562e-09	-0.00012011969334454171	0.0	3.811170991593503e-09
5.12	-0.0005756374401449915	0.0	-1.7523130678845505e-08	-0.0012052718620219629	0.0	-0.09945408833394435	0.0	1.1219902054431041e-05	0.0	0.999999999865524	0.0	1.6137406739556046e-05	0.0	0.0	0.001849210596997432	0.0	0.0	0.0018500936014656565	0.0	-0.0005756374404009096	0.0	1.0554603403550283e-09	-0.00012011970936960999	0.0	3.823914787581274e-09
5.125	-0.0005762380387312151	0.0	-1.7555693930454198e-08	-0.0012081515510157371	0.0	-0.09945408832841403	0.0	1.12225360556027e-05	0.0	0.9999999998650789	0.0	1.6165459805620897e-05	0.0	0.0	0.0018524252415736877	0.0	0.0	0.0018533086212227537	0.0	-0.0005762380389878203	0.0	1.074611783665263e-09	-0.00012011972539470176	0.0	3.8366633271015554e-09
5.13	-0.000576838637397564	0.0	-1.7588268413441034e-08	-0.0012110342428891055	0.0	-0.09945408832286663	0.0	1.122517006819113e-05	0.0	0.9999999998646332	0.0	1.6193519449619077e-05	0.0	0.0	0.0018556406399255806	0.0	0.0	0.0018565243955688733	0.0	-0.0005768386376548566	0.0	1.0938269815319361e-09	-0.00012011973484338817	0.0	3.416826769810888e-09
5.135	-0.0005774392361440378	0.0	-1.7620854127806015e-08	-0.001213919937642068	0.0	-0.09945408831730217	0.0	1.122780409219633e-05	0.0	0.9999999998641866	0.0	1.6221585671550587e-05	0.0	0.0	0.0018588567920531111	0.0	0.0	0.001859740924507286	0.0	-0.0005774392364020183	0.0	1.1131059576727324e-09	-0.00012011979608680121	0.0	6.404001475038445e-09
5.14	-0.000578039835366079	0.0	-1.762749676767724e-08	-0.0012168086396053366	0.0	-0.09945408829989517	0.0	1.1230442000590365e-05	0.0	0.9999999998637331	0.0	1.624965939843728e-05	0.0	0.0	0.0018620738041851468	0.0	0.0	0.0018629582091507875	0.0	-0.0005780398356238898	0.0	1.15840412622613e-09	-0.00012011986372144874	0.0	9.811611768032885e-09
5.1450000000000005	-0.000578640434717345	0.0	-1.7630928043773658e-08	-0.001219700344985919	0.0	-0.09945408828100281	0.0	1.1233080401285578e-05	0.0	0.999999999863278	0.0	1.6277739818360216e-05	0.0	0.0	0.00186529158328264	0.0	0.0	0.0018661762496404114	0.0	-0.0005786404349748769	0.0	1.2069888527165075e-09	-0.00012011987973058466	0.0	9.823375583286565e-09
5.15	-0.000579241034157207	0.0	-1.7633814569916938e-08	-0.0012225950533388656	0.0	-0.09945408826184006	0.0	1.123571889636261e-05	0.0	0.9999999998628222	0.0	1.630582683607472e-05	0.0	0.0	0.0018685101184313573	0.0	0.0	0.0018693950460031963	0.0	-0.0005792410344144387	0.0	1.256193435800163e-09	-0.0001201198967698012	0.0	9.902903862105946e-09
5.155	-0.000579841633685665	0.0	-1.7636156346107082e-08	-0.001225492764664177	0.0	-0.09945408824240692	0.0	1.1238357485821459e-05	0.0	0.9999999998623653	0.0	1.6333920451580787e-05	0.0	0.0	0.0018717294096312973	0.0	0.0	0.0018726145982661804	0.0	-0.000579841633942575	0.0	1.3060178992678028e-09	-0.0001201199144847106	0.0	1.0026882317973197e-08
5.16	-0.0005804422333027192	0.0	-1.763795337234409e-08	-0.0012283934789618528	0.0	-0.0994540882227034	0.0	1.1240996169662124e-05	0.0	0.9999999998619077	0.0	1.6362020664878422e-05	0.0	0.0	0.0018749494568824608	0.0	0.0	0.0018758349064564022	0.0	-0.0005804422335592859	0.0	1.3564622669101353e-09	-0.00012011993219962903	0.0	1.0150865531985135e-08
5.165	-0.0005810428330083694	0.0	-1.763920564862796e-08	-0.0012312971962318935	0.0	-0.09945408820272948	0.0	1.1243634947884608e-05	0.0	0.9999999998614492	0.0	1.6390127475967625e-05	0.0	0.0	0.0018781702601848482	0.0	0.0	0.0018790559706009001	0.0	-0.0005810428332645712	0.0	1.4075265625178956e-09	-0.00012011994991448062	0.0	1.0274853504142083e-08
5.17	-0.0005816434328026155	0.0	-1.763991317495869e-08	-0.001234203916474299	0.0	-0.09945408818248518	0.0	1.1246273820488907e-05	0.0	0.9999999998609898	0.0	1.6418240884848395e-05	0.0	0.0	0.0018813918195384589	0.0	0.0	0.0018822777907267125	0.0	-0.0005816434330584307	0.0	1.4592108098817974e-09	-0.00012011996762932677	0.0	1.0398846234442959e-08
5.175	-0.0005822440326854577	0.0	-1.7640075951336285e-08	-0.001237113639689069	0.0	-0.09945408816197049	0.0	1.1248912787475026e-05	0.0	0.9999999998605296	0.0	1.6446360891520733e-05	0.0	0.0	0.001884614134943293	0.0	0.0	0.0018855003668608779	0.0	-0.0005822440329408645	0.0	1.5115150327925737e-09	-0.00012011998534420726	0.0	1.0522843722893331e-08
5.18	-0.0005828446326568961	0.0	-1.763969397776074e-08	-0.0012400263658762037	0.0	-0.0994540881411854	0.0	1.125155184884296e-05	0.0	0.9999999998600685	0.0	1.647448749598464e-05	0.0	0.0	0.0018878372063993508	0.0	0.0	0.0018887236990304344	0.0	-0.0005828446329118727	0.0	1.5644392550409824e-09	-0.00012012000305898656	0.0	1.0646845969495518e-08
5.1850000000000005	-0.0005834452327169305	0.0	-1.763876725423206e-08	-0.0012429420950357036	0.0	-0.09945408812012993	0.0	1.1254191004592713e-05	0.0	0.9999999998596064	0.0	1.650262069824012e-05	0.0	0.0	0.0018910610339066326	0.0	0.0	0.0018919477872624206	0.0	-0.0005834452329714544	0.0	1.6179835004177751e-09	-0.00012012002077378572	0.0	1.0770852974244491e-08
5.19	-0.0005840458328655609	0.0	-1.763729578075024e-08	-0.0012458608271675678	0.0	-0.09945408809880407	0.0	1.1256830254724284e-05	0.0	0.9999999998591437	0.0	1.653076049828716e-05	0.0	0.0	0.0018942856174651377	0.0	0.0	0.001895172631583875	0.0	-0.0005840458331196105	0.0	1.6721477927136786e-09	-0.00012012003848857226	0.0	1.0894864737143967e-08
5.195	-0.0005846464331027872	0.0	-1.7635279557315285e-08	-0.0012487825622717968	0.0	-0.09945408807720783	0.0	1.125946959923767e-05	0.0	0.9999999998586799	0.0	1.655890689612577e-05	0.0	0.0	0.0018975109570748664	0.0	0.0	0.0018983982320218357	0.0	-0.00058464643335634	0.0	1.7269321557194736e-09	-0.00012012005620329372	0.0	1.1018881258199599e-08
5.2	-0.0005852470334286097	0.0	-1.7632718583927192e-08	-0.0012517073003483902	0.0	-0.09945408805534119	0.0	1.1262109038132874e-05	0.0	0.9999999998582153	0.0	1.658705989175594e-05	0.0	0.0	0.0019007370527358177	0.0	0.0	0.0019016245886033414	0.0	-0.0005852470336816434	0.0	1.782336613225932e-09	-0.00012012007391804591	0.0	1.1142902537409312e-08
5.205	-0.0005858476338430282	0.0	-1.762961286058596e-08	-0.0012546350413973485	0.0	-0.09945408803320416	0.0	1.1264748571409895e-05	0.0	0.9999999998577499	0.0	1.6615219485177686e-05	0.0	0.0	0.001903963904447993	0.0	0.0	0.0019048517013554305	0.0	-0.0005858476340955205	0.0	1.8383611890238261e-09	-0.00012012009163277462	0.0	1.126692857477464e-08
5.21	-0.0005864482343460428	0.0	-1.7625962387291594e-08	-0.0012575657854186715	0.0	-0.09945408801079675	0.0	1.1267388199068735e-05	0.0	0.9999999998572836	0.0	1.6643385676390997e-05	0.0	0.0	0.0019071915122113921	0.0	0.0	0.0019080795703051412	0.0	-0.0005864482345979711	0.0	1.895005906903941e-09	-0.00012012010934745452	0.0	1.1390959370297522e-08
5.215	-0.0005870488349376535	0.0	-1.762176716404409e-08	-0.001260499532412359	0.0	-0.09945408798811894	0.0	1.1270027921109391e-05	0.0	0.9999999998568164	0.0	1.6671558465395876e-05	0.0	0.0	0.0019104198760260148	0.0	0.0	0.0019113081954795122	0.0	-0.0005870488351889951	0.0	1.952270790657066e-09	-0.00012012012706215612	0.0	1.1514994923978847e-08
5.22	-0.0005876494356178601	0.0	-1.7617027190843445e-08	-0.0012634362823784114	0.0	-0.09945408796517075	0.0	1.1272667737531865e-05	0.0	0.9999999998563485	0.0	1.6699737852192323e-05	0.0	0.0	0.0019136489958918612	0.0	0.0	0.0019145375769055815	0.0	-0.0005876494358685926	0.0	2.0101558640739995e-09	-0.00012012014477681977	0.0	1.163903523582328e-08
5.2250000000000005	-0.000588250036386663	0.0	-1.7611742467689665e-08	-0.001266376035316829	0.0	-0.09945408794195217	0.0	1.1275307648336156e-05	0.0	0.9999999998558795	0.0	1.672792383678034e-05	0.0	0.0	0.0019168788718089316	0.0	0.0	0.0019177677146103877	0.0	-0.0005882500366367632	0.0	2.0686611509455648e-09	-0.00012012016249144186	0.0	1.17630803058266e-08
5.23	-0.0005888506372440617	0.0	-1.7605912994582746e-08	-0.0012693187912276105	0.0	-0.09945408791846319	0.0	1.1277947653522264e-05	0.0	0.9999999998554098	0.0	1.6756116419159923e-05	0.0	0.0	0.0019201095037772245	0.0	0.0	0.001920998608620969	0.0	-0.000588850637493507	0.0	2.127786675062535e-09	-0.00012012018020605491	0.0	1.1887130133991379e-08
5.235	-0.0005894512381900566	0.0	-1.759953877152269e-08	-0.001272264550110757	0.0	-0.09945408789470384	0.0	1.1280587753090191e-05	0.0	0.9999999998549391	0.0	1.678431559933107e-05	0.0	0.0	0.001923340891796741	0.0	0.0	0.0019242302589643644	0.0	-0.0005894512384388238	0.0	2.1875324602157556e-09	-0.0001201201979206788	0.0	1.201118472032313e-08
5.24	-0.0005900518392246474	0.0	-1.75926197985095e-08	-0.001275213311966268	0.0	-0.09945408787067408	0.0	1.1283227947039933e-05	0.0	0.9999999998544677	0.0	1.6812521377293787e-05	0.0	0.0	0.001926573035867482	0.0	0.0	0.0019274626656676115	0.0	-0.0005900518394727137	0.0	2.2478985301960434e-09	-0.00012012021563524487	0.0	1.2135244064820842e-08
5.245	-0.0005906524403478344	0.0	-1.7585156075543168e-08	-0.001278165076794144	0.0	-0.09945408784637395	0.0	1.1285868235371493e-05	0.0	0.9999999998539953	0.0	1.6840733753048072e-05	0.0	0.0	0.0019298059359894458	0.0	0.0	0.0019306958287577493	0.0	-0.0005906524405951762	0.0	2.3088849087942417e-09	-0.00012012023334979106	0.0	1.2259308167485045e-08
5.25	-0.0005912530415596173	0.0	-1.75771476026237e-08	-0.0012811198445943843	0.0	-0.09945408782180343	0.0	1.1288508618084872e-05	0.0	0.9999999998535222	0.0	1.686895272659392e-05	0.0	0.0	0.0019330395921626337	0.0	0.0	0.001933929748261816	0.0	-0.0005912530418062116	0.0	2.3704916198011734e-09	-0.00012012025106433726	0.0	1.2383377028316477e-08
5.255	-0.0005918536428599963	0.0	-1.7568594379751098e-08	-0.0012840776153669896	0.0	-0.0994540877969625	0.0	1.1291149095180066e-05	0.0	0.9999999998530481	0.0	1.689717829793134e-05	0.0	0.0	0.0019362740043870447	0.0	0.0	0.0019371644242068499	0.0	-0.0005918536431058195	0.0	2.432718687007693e-09	-0.00012012026877884188	0.0	1.2507450647320823e-08
5.26	-0.0005924542442489714	0.0	-1.7559496406925356e-08	-0.0012870383891119593	0.0	-0.0994540877718512	0.0	1.1293789666657078e-05	0.0	0.9999999998525732	0.0	1.692541046706033e-05	0.0	0.0	0.0019395091726626798	0.0	0.0	0.0019403998566198894	0.0	-0.0005924542444940001	0.0	2.495566134204667e-09	-0.00012012028649335555	0.0	1.2631529024495825e-08
5.265	-0.0005930548457265425	0.0	-1.7549853684146474e-08	-0.001290002165829294	0.0	-0.09945408774646951	0.0	1.1296430332515909e-05	0.0	0.9999999998520973	0.0	1.6953649233980882e-05	0.0	0.0	0.0019427450969895378	0.0	0.0	0.001943636045527973	0.0	-0.0005930548459707531	0.0	2.55903398518294e-09	-0.00012012030420784211	0.0	1.2755612159844162e-08
5.2700000000000005	-0.0005936554472927097	0.0	-1.7539666211414457e-08	-0.0012929689455189936	0.0	-0.09945408772081743	0.0	1.1299071092756556e-05	0.0	0.9999999998516207	0.0	1.698189459869301e-05	0.0	0.0	0.0019459817773676206	0.0	0.0	0.001946872990958139	0.0	-0.0005936554475360784	0.0	2.623122263733398e-09	-0.00012012032192229073	0.0	1.2879700053366221e-08
5.275	-0.000594256048947473	0.0	-1.7528933988729303e-08	-0.0012959387281810577	0.0	-0.09945408769489496	0.0	1.130171194737902e-05	0.0	0.9999999998511431	0.0	1.70101465611967e-05	0.0	0.0	0.0019492192137969262	0.0	0.0	0.0019501106929374259	0.0	-0.0005942560491899759	0.0	2.687830993646892e-09	-0.00012012033963671043	0.0	1.3003792705061444e-08
5.28	-0.0005948566506908321	0.0	-1.751765701609101e-08	-0.0012989115138154863	0.0	-0.09945408766870209	0.0	1.1304352896383301e-05	0.0	0.9999999998506647	0.0	1.7038405121491955e-05	0.0	0.0	0.0019524574062774554	0.0	0.0	0.001953349151492872	0.0	-0.0005948566509324456	0.0	2.753160198714309e-09	-0.00012012035735118796	0.0	1.3127890114935449e-08
5.285	-0.0005954572525227875	0.0	-1.750583529349958e-08	-0.0013018873024222795	0.0	-0.09945408764223884	0.0	1.13069939397694e-05	0.0	0.9999999998501855	0.0	1.7066670279578777e-05	0.0	0.0	0.0019556963548092087	0.0	0.0	0.001956588366651516	0.0	-0.0005954572527634876	0.0	2.819109902726545e-09	-0.00012012037506556068	0.0	1.32519922829886e-08
5.29	-0.0005960578544433388	0.0	-1.7493468820955017e-08	-0.0013048660940014377	0.0	-0.0994540876155052	0.0	1.1309635077537316e-05	0.0	0.9999999998497053	0.0	1.709494203545717e-05	0.0	0.0	0.0019589360593921853	0.0	0.0	0.001959828338440396	0.0	-0.0005960578546831012	0.0	2.8856801294744945e-09	-0.00012012039277992979	0.0	1.3376099209221304e-08
5.295	-0.0005966584564524862	0.0	-1.7480557598457312e-08	-0.0013078478885529604	0.0	-0.09945408758850117	0.0	1.131227630968705e-05	0.0	0.9999999998492244	0.0	1.712322038912713e-05	0.0	0.0	0.001962176520026385	0.0	0.0	0.0019630690668865506	0.0	-0.0005966584566912869	0.0	2.95287090274906e-09	-0.00012012041049426999	0.0	1.3500210893635051e-08
5.3	-0.0005972590585502296	0.0	-1.7467101626006472e-08	-0.0013108326860768477	0.0	-0.09945408756122676	0.0	1.13149176362186e-05	0.0	0.9999999998487424	0.0	1.7151505340588655e-05	0.0	0.0	0.001965417736711809	0.0	0.0	0.001966310552017018	0.0	-0.0005972590587880439	0.0	3.020682246341151e-09	-0.00012012042820859572	0.0	1.362432733623253e-08
5.305	-0.0005978596607365691	0.0	-1.7453100903602492e-08	-0.0013138204865730998	0.0	-0.09945408753368196	0.0	1.1317559057131968e-05	0.0	0.9999999998482597	0.0	1.7179796889841752e-05	0.0	0.0	0.001968659709448457	0.0	0.0	0.0019695527938588366	0.0	-0.000597859660973373	0.0	3.0891141840416925e-09	-0.00012012044592301903	0.0	1.3748448537014242e-08
5.3100000000000005	-0.0005984602630115048	0.0	-1.7438555431245373e-08	-0.0013168112900417172	0.0	-0.09945408750586676	0.0	1.1320200572427155e-05	0.0	0.9999999998477762	0.0	1.7208095036886416e-05	0.0	0.0	0.001971902438236328	0.0	0.0	0.0019727957924390448	0.0	-0.0005984602632472739	0.0	3.1581667396416004e-09	-0.00012012046363727973	0.0	1.3872574495980023e-08
5.315	-0.0005990608653750364	0.0	-1.7423465208935118e-08	-0.0013198050964826986	0.0	-0.09945408747778117	0.0	1.1322842182104158e-05	0.0	0.9999999998472917	0.0	1.723639978172265e-05	0.0	0.0	0.001975145923075423	0.0	0.0	0.001976039547784681	0.0	-0.0005990608656097458	0.0	3.2278399369318027e-09	-0.00012012048135152053	0.0	1.3996705213131753e-08
5.32	-0.000599661467827164	0.0	-1.7407830236671727e-08	-0.001322801905896045	0.0	-0.0994540874494252	0.0	1.1325483886162978e-05	0.0	0.9999999998468064	0.0	1.7264711124350445e-05	0.0	0.0	0.0019783901639657416	0.0	0.0	0.0019792840599227837	0.0	-0.0005996614680607892	0.0	3.298133799703232e-09	-0.00012012049906581013	0.0	1.4120840688472083e-08
5.325	-0.0006002620703678877	0.0	-1.73916505144552e-08	-0.0013258017182817558	0.0	-0.09945408742079884	0.0	1.1328125684603615e-05	0.0	0.9999999998463203	0.0	1.729302906476981e-05	0.0	0.0	0.0019816351609072834	0.0	0.0	0.0019825293288803915	0.0	-0.0006002620706004038	0.0	3.3690483517468416e-09	-0.00012012051678004733	0.0	1.4244980922003698e-08
5.33	-0.0006008626729972074	0.0	-1.7374926042285534e-08	-0.0013288045336398314	0.0	-0.09945408739190209	0.0	1.133076757742607e-05	0.0	0.9999999998458332	0.0	1.732135360298074e-05	0.0	0.0	0.0019848809139000495	0.0	0.0	0.0019857753546845425	0.0	-0.0006008626732285896	0.0	3.4405836168535866e-09	-0.00012012053449424115	0.0	1.4369125913725674e-08
5.335	-0.0006014632757151231	0.0	-1.735765682016273e-08	-0.0013318103519702716	0.0	-0.09945408736273495	0.0	1.1333409564630342e-05	0.0	0.9999999998453453	0.0	1.734968473898324e-05	0.0	0.0	0.001988127422944039	0.0	0.0	0.001989022137362275	0.0	-0.0006014632759453463	0.0	3.512739618814419e-09	-0.00012012055220847473	0.0	1.4493275663639853e-08
5.34	-0.000602063878521635	0.0	-1.733984284808679e-08	-0.0013348191732730766	0.0	-0.09945408733329743	0.0	1.1336051646216432e-05	0.0	0.9999999998448565	0.0	1.7378022472777307e-05	0.0	0.0	0.001991374688039252	0.0	0.0	0.0019922696769406278	0.0	-0.0006020638787506743	0.0	3.585516381420309e-09	-0.00012012056992267217	0.0	1.461743017174844e-08
5.345	-0.0006026644814167429	0.0	-1.7321484126057712e-08	-0.0013378309975482462	0.0	-0.09945408730358951	0.0	1.1338693822184339e-05	0.0	0.9999999998443669	0.0	1.740636680436294e-05	0.0	0.0	0.001994622709185689	0.0	0.0	0.001995517973446639	0.0	-0.000602664481644573	0.0	3.6589139284622295e-09	-0.00012012058763681721	0.0	1.4741589438052924e-08
5.3500000000000005	-0.0006032650844004469	0.0	-1.7302580654075495e-08	-0.001340845824795781	0.0	-0.0994540872736112	0.0	1.1341336092534063e-05	0.0	0.9999999998438764	0.0	1.743471773374015e-05	0.0	0.0	0.0019978714863833503	0.0	0.0	0.001998767026907347	0.0	-0.0006032650846270425	0.0	3.732932283731166e-09	-0.00012012060535095863	0.0	1.4865753462553782e-08
5.355	-0.0006038656874727469	0.0	-1.728313243214014e-08	-0.0013438636550156802	0.0	-0.09945408724336251	0.0	1.1343978457265605e-05	0.0	0.9999999998433851	0.0	1.746307526090892e-05	0.0	0.0	0.002001121019632235	0.0	0.0	0.00200201683734979	0.0	-0.0006038656876980826	0.0	3.807571471018095e-09	-0.0001201206230650567	0.0	1.498992224525075e-08
5.36	-0.0006044662906336429	0.0	-1.7263139460251652e-08	-0.001346884488207944	0.0	-0.09945408721284342	0.0	1.1346620916378963e-05	0.0	0.9999999998428928	0.0	1.7491439385869257e-05	0.0	0.0	0.0020043713089323424	0.0	0.0	0.0020052674048010068	0.0	-0.0006044662908576931	0.0	3.8828315141140066e-09	-0.00012012064077918727	0.0	1.5114095786147974e-08
5.365	-0.000605066893883135	0.0	-1.7242601738410024e-08	-0.0013499083243725723	0.0	-0.09945408718205395	0.0	1.134926346987414e-05	0.0	0.9999999998423997	0.0	1.7519810108621162e-05	0.0	0.0	0.002007622354283674	0.0	0.0	0.0020085187292880357	0.0	-0.0006050668941058744	0.0	3.9587124368099105e-09	-0.00012012065849328714	0.0	1.5238274085246758e-08
5.37	-0.0006056674972212231	0.0	-1.722151926661526e-08	-0.0013529351635095655	0.0	-0.09945408715099409	0.0	1.1351906117751132e-05	0.0	0.9999999998419058	0.0	1.7548187429164635e-05	0.0	0.0	0.0020108741556862297	0.0	0.0	0.002011770810837915	0.0	-0.0006056674974426259	0.0	4.035214262896812e-09	-0.00012012067620732556	0.0	1.5362457142548494e-08
5.375	-0.0006062681006479073	0.0	-1.7199892044867356e-08	-0.0013559650056189233	0.0	-0.09945408711966383	0.0	1.1354548860009943e-05	0.0	0.999999999841411	0.0	1.7576571347499676e-05	0.0	0.0	0.002014126713140009	0.0	0.0	0.0020150236494776833	0.0	-0.0006062681008679477	0.0	4.112337016165733e-09	-0.0001201206939213676	0.0	1.548664495805228e-08
5.38	-0.0006068687041631875	0.0	-1.7177720073166316e-08	-0.0013589978507006458	0.0	-0.09945408708806319	0.0	1.1357191696650571e-05	0.0	0.9999999998409153	0.0	1.760496186362628e-05	0.0	0.0	0.0020173800266450118	0.0	0.0	0.002018277245234379	0.0	-0.0006068687043818395	0.0	4.190080720407676e-09	-0.00012012071163535723	0.0	1.5610837531761045e-08
5.385	-0.0006074693077670637	0.0	-1.715500335151214e-08	-0.001362033698754733	0.0	-0.09945408705619217	0.0	1.1359834627673017e-05	0.0	0.9999999998404187	0.0	1.7633358977544456e-05	0.0	0.0	0.002020634096201238	0.0	0.0	0.0020215315981350402	0.0	-0.0006074693079843013	0.0	4.268445399413689e-09	-0.00012012072934938482	0.0	1.5735034863677332e-08
5.39	-0.000608069911459536	0.0	-1.7131741879904825e-08	-0.0013650725497811847	0.0	-0.09945408702405076	0.0	1.136247765307728e-05	0.0	0.9999999998399213	0.0	1.76617626892542e-05	0.0	0.0	0.002023888921808688	0.0	0.0	0.0020247867082067053	0.0	-0.0006080699116753334	0.0	4.347431076974799e-09	-0.00012012074706340336	0.0	1.5859236953803822e-08
5.3950000000000005	-0.0006086705152406045	0.0	-1.7107935658344367e-08	-0.001368114403780002	0.0	-0.09945408699163895	0.0	1.136512077286336e-05	0.0	0.999999999839423	0.0	1.7690172998755514e-05	0.0	0.0	0.002027144503467363	0.0	0.0	0.002028042575476413	0.0	-0.0006086705154549352	0.0	4.427037776882073e-09	-0.00012012076477735144	0.0	1.5983443802137177e-08
5.4	-0.0006092711191102689	0.0	-1.708358468683078e-08	-0.0013711592607511833	0.0	-0.09945408695895674	0.0	1.1367763987031258e-05	0.0	0.9999999998389238	0.0	1.7718589906048392e-05	0.0	0.0	0.002030400841177261	0.0	0.0	0.0020312991999712014	0.0	-0.0006092711193231068	0.0	4.507265522926519e-09	-0.00012012078249126518	0.0	1.6107655408678568e-08
5.405	-0.0006098717230685293	0.0	-1.7058688965364053e-08	-0.0013742071206947293	0.0	-0.09945408692600416	0.0	1.1370407295580973e-05	0.0	0.9999999998384238	0.0	1.774701341113284e-05	0.0	0.0	0.0020336579349383827	0.0	0.0	0.0020345565817181093	0.0	-0.0006098717232798479	0.0	4.588114338899216e-09	-0.00012012080020520784	0.0	1.623187177343552e-08
5.41	-0.0006104723271153859	0.0	-1.7033248493944187e-08	-0.0013772579836106398	0.0	-0.0994540868927812	0.0	1.1373050698512504e-05	0.0	0.999999999837923	0.0	1.777544351400885e-05	0.0	0.0	0.002036915784750728	0.0	0.0	0.0020378147207441746	0.0	-0.0006104723273251589	0.0	4.669584248591228e-09	-0.00012012081791913603	0.0	1.6356092896404344e-08
5.415	-0.0006110729312508384	0.0	-1.7007263272571185e-08	-0.0013803118494989152	0.0	-0.09945408685928783	0.0	1.1375694195825854e-05	0.0	0.9999999998374213	0.0	1.780388021467643e-05	0.0	0.0	0.002040174390614297	0.0	0.0	0.002041073617076436	0.0	-0.0006110729314590392	0.0	4.751675275793618e-09	-0.00012012083563298653	0.0	1.6480318777588592e-08
5.42	-0.0006116735354748871	0.0	-1.6980733301245047e-08	-0.0013833687183595553	0.0	-0.09945408682552408	0.0	1.1378337787521021e-05	0.0	0.9999999998369187	0.0	1.783232351313558e-05	0.0	0.0	0.0020434337525290906	0.0	0.0	0.0020443332707419317	0.0	-0.0006116735356814887	0.0	4.834387444297475e-09	-0.00012012085334685329	0.0	1.6604549416989258e-08
5.425	-0.0006122741397875317	0.0	-1.695365857996577e-08	-0.00138642859019256	0.0	-0.09945408679148994	0.0	1.1380981473598004e-05	0.0	0.9999999998364152	0.0	1.7860773409386293e-05	0.0	0.0	0.002046693870495107	0.0	0.0	0.0020475936817677003	0.0	-0.0006122741399925076	0.0	4.917720777893874e-09	-0.00012012087106066946	0.0	1.6728784814607293e-08
5.43	-0.0006128747441887724	0.0	-1.6926039108733356e-08	-0.0013894914649979296	0.0	-0.09945408675718541	0.0	1.1383625254056805e-05	0.0	0.9999999998359108	0.0	1.7889229903428578e-05	0.0	0.0	0.0020499547445123473	0.0	0.0	0.0020508548501807803	0.0	-0.0006128747443920955	0.0	5.001675300373915e-09	-0.0001201208887745344	0.0	1.685302497044653e-08
5.4350000000000005	-0.0006134753486786093	0.0	-1.68978748875478e-08	-0.0013925573427756642	0.0	-0.0994540867226105	0.0	1.1386269128897425e-05	0.0	0.9999999998354057	0.0	1.7917692995262433e-05	0.0	0.0	0.002053216374580812	0.0	0.0	0.00205411677600821	0.0	-0.0006134753488802529	0.0	5.086251035528704e-09	-0.00012012090648834876	0.0	1.6977269884503964e-08
5.44	-0.000614075953257042	0.0	-1.686916591640911e-08	-0.001395626223525763	0.0	-0.09945408668776519	0.0	1.138891309811986e-05	0.0	0.9999999998348996	0.0	1.794616268488785e-05	0.0	0.0	0.0020564787607005	0.0	0.0	0.0020573794592770277	0.0	-0.0006140759534569789	0.0	5.171448007149324e-09	-0.0001201209242021071	0.0	1.7101519556782618e-08
5.445	-0.0006146765579240709	0.0	-1.6839912195317283e-08	-0.0013986981072482267	0.0	-0.09945408665264949	0.0	1.1391557161724114e-05	0.0	0.9999999998343927	0.0	1.7974638972304837e-05	0.0	0.0	0.002059741902871412	0.0	0.0	0.0020606429000142716	0.0	-0.0006146765581222739	0.0	5.257266239026903e-09	-0.00012012094191584557	0.0	1.7225773987285032e-08
5.45	-0.0006152771626796957	0.0	-1.6810113724272323e-08	-0.0014017729939430547	0.0	-0.0994540866172634	0.0	1.1394201319710185e-05	0.0	0.9999999998338849	0.0	1.800312185751339e-05	0.0	0.0	0.0020630058010935475	0.0	0.0	0.0020639070982469807	0.0	-0.0006152771628761374	0.0	5.34370575495255e-09	-0.00012012095962960932	0.0	1.7350033176012967e-08
5.455	-0.0006158777675239166	0.0	-1.677977050327422e-08	-0.0014048508836102477	0.0	-0.09945408658160693	0.0	1.1396845572078072e-05	0.0	0.9999999998333763	0.0	1.803161134051351e-05	0.0	0.0	0.002066270455366908	0.0	0.0	0.002067172054002193	0.0	-0.0006158777677185698	0.0	5.43076657871741e-09	-0.00012012097734331526	0.0	1.7474297122967052e-08
5.46	-0.0006164783724567336	0.0	-1.6748882532322983e-08	-0.0014079317762498054	0.0	-0.09945408654568007	0.0	1.1399489918827778e-05	0.0	0.9999999998328667	0.0	1.80601074213052e-05	0.0	0.0	0.0020695358656914902	0.0	0.0	0.0020704377673069468	0.0	-0.0006164783726495705	0.0	5.518448734112598e-09	-0.00012012099505701577	0.0	1.7598565828146903e-08
5.465	-0.0006170789774781467	0.0	-1.6717449811418607e-08	-0.0014110156718617275	0.0	-0.09945408650948281	0.0	1.14021343599593e-05	0.0	0.9999999998323563	0.0	1.8088610099888453e-05	0.0	0.0	0.0020728020320672975	0.0	0.0	0.0020737042381882807	0.0	-0.0006170789776691399	0.0	5.6067522449292635e-09	-0.00012012101277071629	0.0	1.772283929155852e-08
5.47	-0.0006176795825881558	0.0	-1.6685472340561093e-08	-0.0014141025704460146	0.0	-0.09945408647301518	0.0	1.140477889547264e-05	0.0	0.9999999998318451	0.0	1.811711937626328e-05	0.0	0.0	0.002076068954494329	0.0	0.0	0.002076971466673233	0.0	-0.0006176795827772777	0.0	5.695677134958567e-09	-0.00012012103048440596	0.0	1.7847117513200747e-08
5.4750000000000005	-0.000618280187786761	0.0	-1.6652950119750435e-08	-0.0014171924720026668	0.0	-0.09945408643627715	0.0	1.1407423525367798e-05	0.0	0.999999999831333	0.0	1.8145635250429675e-05	0.0	0.0	0.0020793366329725847	0.0	0.0	0.0020802394527888422	0.0	-0.000618280187973984	0.0	5.785223427991653e-09	-0.00012012104819801974	0.0	1.797140049307182e-08
5.48	-0.0006188807930739621	0.0	-1.661988314898665e-08	-0.0014202853765316833	0.0	-0.09945408639926873	0.0	1.1410068249644772e-05	0.0	0.99999999983082	0.0	1.8174157722387633e-05	0.0	0.0	0.002082605067502063	0.0	0.0	0.0020835081965621467	0.0	-0.0006188807932592579	0.0	5.875391147819672e-09	-0.00012012106591161003	0.0	1.8095688231175523e-08
5.485	-0.0006194813984497594	0.0	-1.6586271428269722e-08	-0.0014233812840330643	0.0	-0.09945408636198992	0.0	1.1412713068303563e-05	0.0	0.9999999998303062	0.0	1.8202686792137158e-05	0.0	0.0	0.0020858742580827654	0.0	0.0	0.002086777698020185	0.0	-0.0006194813986331001	0.0	5.966180318233801e-09	-0.00012012108362523645	0.0	1.8219980727514875e-08
5.49	-0.0006200820039141526	0.0	-1.655211495759966e-08	-0.0014264801945068101	0.0	-0.09945408632444072	0.0	1.1415357981344173e-05	0.0	0.9999999998297915	0.0	1.823122245967825e-05	0.0	0.0	0.0020891442047146916	0.0	0.0	0.0020900479571899946	0.0	-0.0006200820040955103	0.0	6.057590963025214e-09	-0.0001201211013388141	0.0	1.8344277982090403e-08
5.495	-0.000620682609467142	0.0	-1.651741373697646e-08	-0.0014295821079529205	0.0	-0.09945408628662114	0.0	1.14180029887666e-05	0.0	0.9999999998292759	0.0	1.825976472501091e-05	0.0	0.0	0.0020924149073978417	0.0	0.0	0.002093318974098615	0.0	-0.0006206826096464882	0.0	6.1496231059851e-09	-0.00012012111905238089	0.0	1.8468579994902777e-08
5.5	-0.0006212832151087273	0.0	-1.648216776640012e-08	-0.0014326870243713957	0.0	-0.09945408624853116	0.0	1.1420648090570844e-05	0.0	0.9999999998287595	0.0	1.8288313588135143e-05	0.0	0.0	0.0020956863661322164	0.0	0.0	0.002096590748773084	0.0	-0.000621283215286034	0.0	6.24227677090464e-09	-0.00012012113676591698	0.0	1.859288676595417e-08
5.505	-0.0006218838208389087	0.0	-1.6446377045870647e-08	-0.0014357949437622355	0.0	-0.0994540862101708	0.0	1.1423293286756904e-05	0.0	0.9999999998282422	0.0	1.831686904905094e-05	0.0	0.0	0.002098958580917814	0.0	0.0	0.0020998632812404406	0.0	-0.0006218838210141473	0.0	6.335551981575044e-09	-0.00012012115447943498	0.0	1.87171982952473e-08
5.51	-0.0006224844266576863	0.0	-1.6410041575388034e-08	-0.0014389058661254401	0.0	-0.09945408617154004	0.0	1.1425938577324783e-05	0.0	0.999999999827724	0.0	1.8345431107758302e-05	0.0	0.0	0.0021022315517546363	0.0	0.0	0.002103136571527723	0.0	-0.0006224844268308284	0.0	6.429448761787512e-09	-0.00012012117219293492	0.0	1.884151458277883e-08
5.515	-0.0006230850325650597	0.0	-1.6373161354952285e-08	-0.0014420197914610093	0.0	-0.09945408613263891	0.0	1.142858396227448e-05	0.0	0.999999999827205	0.0	1.8373999764257233e-05	0.0	0.0	0.0021055052786426815	0.0	0.0	0.0021064106196619693	0.0	-0.0006230850327360767	0.0	6.52396713533324e-09	-0.00012012118990641137	0.0	1.896583562855647e-08
5.5200000000000005	-0.0006236856385610294	0.0	-1.633573638456339e-08	-0.0014451367197689437	0.0	-0.09945408609346737	0.0	1.1431229441605993e-05	0.0	0.9999999998266851	0.0	1.8402575018547735e-05	0.0	0.0	0.0021087797615819514	0.0	0.0	0.002109685425670218	0.0	-0.0006236856387298925	0.0	6.619107126003483e-09	-0.0001201212076199113	0.0	1.909016143257787e-08
5.525	-0.0006242862446455951	0.0	-1.6297766664221366e-08	-0.0014482566510492425	0.0	-0.09945408605402546	0.0	1.1433875015319323e-05	0.0	0.9999999998261644	0.0	1.84311568706298e-05	0.0	0.0	0.002112055000572445	0.0	0.0	0.0021129609895795074	0.0	-0.0006242862448122756	0.0	6.714868757589422e-09	-0.00012012122533335522	0.0	1.921449199483991e-08
5.53	-0.0006248868508187567	0.0	-1.6259252193926206e-08	-0.0014513795853019057	0.0	-0.09945408601431314	0.0	1.1436520683414472e-05	0.0	0.9999999998256428	0.0	1.8459745320503435e-05	0.0	0.0	0.0021153309956141626	0.0	0.0	0.002116237311416876	0.0	-0.0006248868509832259	0.0	6.8112520538822984e-09	-0.00012012124304674673	0.0	1.933882731535348e-08
5.535	-0.0006254874570805144	0.0	-1.6220192973677906e-08	-0.0014545055225269336	0.0	-0.09945408597433045	0.0	1.1439166445891436e-05	0.0	0.9999999998251203	0.0	1.8488340368168637e-05	0.0	0.0	0.0021186077467071044	0.0	0.0	0.0021195143912093625	0.0	-0.0006254874572427431	0.0	6.908257038673372e-09	-0.00012012126076012741	0.0	1.946316739411592e-08
5.54	-0.0006260880634308681	0.0	-1.6180589003476467e-08	-0.0014576344627243265	0.0	-0.09945408593407737	0.0	1.1441812302750218e-05	0.0	0.999999999824597	0.0	1.8516942013625406e-05	0.0	0.0	0.0021218852538512694	0.0	0.0	0.0021227922289840046	0.0	-0.0006260880635908272	0.0	7.005883735753873e-09	-0.00012012127847350628	0.0	1.958751223112718e-08
5.545	-0.000626688669869818	0.0	-1.6140440283321892e-08	-0.0014607664058940838	0.0	-0.0994540858935539	0.0	1.1444458253990819e-05	0.0	0.9999999998240727	0.0	1.8545550256873743e-05	0.0	0.0	0.0021251635170466583	0.0	0.0	0.002126070824767841	0.0	-0.0006266886700274782	0.0	7.1041321689150615e-09	-0.00012012129618688154	0.0	1.97118618263892e-08
5.55	-0.0006272892763973638	0.0	-1.609974681321418e-08	-0.0014639013520362058	0.0	-0.09945408585276003	0.0	1.1447104299613236e-05	0.0	0.9999999998235477	0.0	1.8574165097913648e-05	0.0	0.0	0.002128442536293272	0.0	0.0	0.0021293501785879104	0.0	-0.000627289276552696	0.0	7.203002361948187e-09	-0.00012012131390019354	0.0	1.983621617990453e-08
5.555	-0.0006278898830135057	0.0	-1.6058508593153334e-08	-0.0014670393011506928	0.0	-0.09945408581169578	0.0	1.144975043961747e-05	0.0	0.9999999998230217	0.0	1.860278653674512e-05	0.0	0.0	0.0021317223115911088	0.0	0.0	0.002132630290471251	0.0	-0.0006278898831664801	0.0	7.302494338644533e-09	-0.00012012133161350194	0.0	1.996057529167631e-08
5.5600000000000005	-0.0006284904897182437	0.0	-1.6016725623139338e-08	-0.0014701802532375448	0.0	-0.09945408577036113	0.0	1.1452396674003523e-05	0.0	0.9999999998224949	0.0	1.8631414573368163e-05	0.0	0.0	0.0021350028429401695	0.0	0.0	0.0021359111604449016	0.0	-0.000628490489868831	0.0	7.4026081227953715e-09	-0.0001201213493268754	0.0	2.0084939161699696e-08
5.565	-0.0006290910965115777	0.0	-1.5974397903172215e-08	-0.001473324208296761	0.0	-0.0994540857287561	0.0	1.1455043002771392e-05	0.0	0.9999999998219673	0.0	1.866004920778277e-05	0.0	0.0	0.002138284130340455	0.0	0.0	0.0021391927885359	0.0	-0.0006290910966597487	0.0	7.503343738191958e-09	-0.00012012136704013499	0.0	2.0209307789980194e-08
5.57	-0.0006296917033935078	0.0	-1.5931525433251953e-08	-0.0014764711663283418	0.0	-0.09945408568688067	0.0	1.1457689425921079e-05	0.0	0.9999999998214387	0.0	1.8688690439988942e-05	0.0	0.0	0.0021415661737919636	0.0	0.0	0.0021424751747712847	0.0	-0.0006296917035392323	0.0	7.604701208625606e-09	-0.00012012138475335846	0.0	2.0333681176520746e-08
5.575	-0.0006302923103640339	0.0	-1.5888108213378556e-08	-0.0014796211273322873	0.0	-0.09945408564473487	0.0	1.1460335943452581e-05	0.0	0.9999999998209094	0.0	1.8717338269986685e-05	0.0	0.0	0.0021448489732946966	0.0	0.0	0.0021457583191780943	0.0	-0.0006302923105072823	0.0	7.706680557887598e-09	-0.0001201214024665747	0.0	2.0458059321320538e-08
5.58	-0.000630892917423156	0.0	-1.584414624355202e-08	-0.0014827740913085977	0.0	-0.09945408560231868	0.0	1.1462982555365903e-05	0.0	0.999999999820379	0.0	1.8745992697775996e-05	0.0	0.0	0.0021481325288486533	0.0	0.0	0.002149042221783367	0.0	-0.0006308929175638981	0.0	7.809281809769247e-09	-0.00012012142017978552	0.0	2.0582442224381758e-08
5.585	-0.0006314935245708742	0.0	-1.5799639523772345e-08	-0.0014859300582572726	0.0	-0.09945408555963209	0.0	1.146562926166104e-05	0.0	0.9999999998198479	0.0	1.8774653723356874e-05	0.0	0.0	0.002151416840453834	0.0	0.0	0.0021523268826141415	0.0	-0.0006314935247090801	0.0	7.912504988061852e-09	-0.0001201214378930397	0.0	2.070682988570405e-08
5.59	-0.0006320941318071885	0.0	-1.5754588054039533e-08	-0.0014890890281783122	0.0	-0.09945408551667512	0.0	1.1468276062337997e-05	0.0	0.999999999819316	0.0	1.8803321346729316e-05	0.0	0.0	0.0021547019081102387	0.0	0.0	0.002155612301697456	0.0	-0.0006320941319428283	0.0	8.01635011655673e-09	-0.00012012145560618547	0.0	2.0831222305291358e-08
5.595	-0.0006326947391320987	0.0	-1.5708991834353584e-08	-0.0014922510010717165	0.0	-0.09945408547344775	0.0	1.147092295739677e-05	0.0	0.9999999998187831	0.0	1.883199556789333e-05	0.0	0.0	0.0021579877318178673	0.0	0.0	0.002158898479060349	0.0	-0.000632694739265142	0.0	8.12081721904521e-09	-0.00012012147331934388	0.0	2.0955619483146025e-08
5.6000000000000005	-0.0006332953465456051	0.0	-1.5662850864714493e-08	-0.0014954159769374861	0.0	-0.09945408542994999	0.0	1.147356994683736e-05	0.0	0.9999999998182494	0.0	1.8860676386848914e-05	0.0	0.0	0.0021612743115767205	0.0	0.0	0.0021621854147298586	0.0	-0.0006332953466760217	0.0	8.225906319318631e-09	-0.00012012149103251494	0.0	2.108002141926499e-08
5.605	-0.0006338959540477076	0.0	-1.561616514512227e-08	-0.0014985839557756198	0.0	-0.09945408538618185	0.0	1.1476217030659769e-05	0.0	0.9999999998177148	0.0	1.888936380359606e-05	0.0	0.0	0.002164561647386797	0.0	0.0	0.0021654731087330232	0.0	-0.000633895954175467	0.0	8.331617441168305e-09	-0.00012012150874559927	0.0	2.1204428113649938e-08
5.61	-0.0006344965616384059	0.0	-1.556893467557691e-08	-0.0015017549375861182	0.0	-0.09945408534214333	0.0	1.1478864208863994e-05	0.0	0.9999999998171794	0.0	1.8918057818134775e-05	0.0	0.0	0.002167849739248098	0.0	0.0	0.0021687615610968816	0.0	-0.0006344965617634777	0.0	8.437950608385583e-09	-0.00012012152645865107	0.0	2.1328839566307177e-08
5.615	-0.0006350971693177004	0.0	-1.552115945607841e-08	-0.0015049289223689813	0.0	-0.09945408529783441	0.0	1.1481511481450036e-05	0.0	0.999999999816643	0.0	1.8946758430465056e-05	0.0	0.0	0.0021711385871606217	0.0	0.0	0.002172050771848472	0.0	-0.0006350971694400536	0.0	8.544905844761828e-09	-0.0001201215441717625	0.0	2.1453255777234864e-08
5.62	-0.0006356977770855909	0.0	-1.5472839486626775e-08	-0.001508105910124209	0.0	-0.0994540852532551	0.0	1.1484158848417896e-05	0.0	0.9999999998161059	0.0	1.8975465640586907e-05	0.0	0.0	0.002174428191124371	0.0	0.0	0.002175340741014833	0.0	-0.0006356977772051952	0.0	8.652483174088386e-09	-0.00012012156188484322	0.0	2.1577676746434953e-08
5.625	-0.0006362983849420775	0.0	-1.5423974767222e-08	-0.0015112859008518016	0.0	-0.0994540852084054	0.0	1.1486806309767572e-05	0.0	0.9999999998155679	0.0	1.9004179448500323e-05	0.0	0.0	0.0021777185511393433	0.0	0.0	0.0021786314686230023	0.0	-0.000636298385058902	0.0	8.760682620156634e-09	-0.00012012157959787875	0.0	2.1702102473908635e-08
5.63	-0.0006368989928871602	0.0	-1.5374565297864093e-08	-0.0015144688945517588	0.0	-0.09945408516328531	0.0	1.1489453865499067e-05	0.0	0.999999999815029	0.0	1.903289985420531e-05	0.0	0.0	0.00218100966720554	0.0	0.0	0.002181922954700019	0.0	-0.0006368989930011739	0.0	8.86950420675793e-09	-0.00012012159731086009	0.0	2.182653295965687e-08
5.635	-0.0006374996009208388	0.0	-1.5324611078553043e-08	-0.0015176548912240807	0.0	-0.09945408511789483	0.0	1.1492101515612378e-05	0.0	0.9999999998144892	0.0	1.906162685770186e-05	0.0	0.0	0.0021843015393229605	0.0	0.0	0.0021852151992729214	0.0	-0.0006374996010320105	0.0	8.978947957683665e-09	-0.00012012161502382153	0.0	2.1950968203682888e-08
5.64	-0.0006381002090431136	0.0	-1.527411210928886e-08	-0.0015208438908687672	0.0	-0.09945408507223397	0.0	1.1494749260107507e-05	0.0	0.9999999998139485	0.0	1.909036045898998e-05	0.0	0.0	0.0021875941674916054	0.0	0.0	0.0021885082023687477	0.0	-0.0006381002091514122	0.0	9.089013896725224e-09	-0.00012012165003659836	0.0	2.27413208585475e-08
5.6450000000000005	-0.0006387008172539844	0.0	-1.522306839007153e-08	-0.0015240358934858192	0.0	-0.09945408502630271	0.0	1.1497397098984454e-05	0.0	0.999999999813407	0.0	1.9119100658069673e-05	0.0	0.0	0.0021908875517114746	0.0	0.0	0.0021918019640145363	0.0	-0.0006387008173593788	0.0	9.199702047674006e-09	-0.00012012155245510866	0.0	1.8427789100499788e-08
5.65	-0.0006393014245139433	0.0	-1.521143448929834e-08	-0.0015272309011163203	0.0	-0.09945408498209383	0.0	1.1500039116434276e-05	0.0	0.9999999998128614	0.0	1.9147847336860743e-05	0.0	0.0	0.002194181678451568	0.0	0.0	0.0021950964825425716	0.0	-0.0006393014246179238	0.0	9.271057675167807e-09	-0.00012012140888338911	0.0	1.2343959028639549e-08
5.655	-0.000639902031513746	0.0	-1.521266049706035e-08	-0.0015304289124039652	0.0	-0.09945408493828313	0.0	1.1502679243526702e-05	0.0	0.9999999998123137	0.0	1.917660057382777e-05	0.0	0.0	0.002197476556703268	0.0	0.0	0.0021983917574113056	0.0	-0.0006399020316167968	0.0	9.329630839194345e-09	-0.00012012140062029586	0.0	1.1468481680310668e-08
5.66	-0.0006405026385756177	0.0	-1.521436134878547e-08	-0.0015336299267160608	0.0	-0.09945408489425289	0.0	1.1505319314036412e-05	0.0	0.9999999998117651	0.0	1.92053604055731e-05	0.0	0.0	0.0022007721906608965	0.0	0.0	0.002201687788604529	0.0	-0.0006405026386777525	0.0	9.387806687169564e-09	-0.00012012141839941171	0.0	1.1595439574975917e-08
5.665	-0.0006411032456995584	0.0	-1.5216537044473694e-08	-0.0015368339440526072	0.0	-0.09945408485000311	0.0	1.1507959327963405e-05	0.0	0.9999999998112156	0.0	1.9234126832096728e-05	0.0	0.0	0.0022040685803244547	0.0	0.0	0.0022049845761060315	0.0	-0.0006411032458007908	0.0	9.445585242869417e-09	-0.00012012143081592628	0.0	1.1515983497494708e-08
5.67	-0.0006417038528855681	0.0	-1.5219187584125027e-08	-0.0015400409644136044	0.0	-0.0994540848055338	0.0	1.1510599285307682e-05	0.0	0.9999999998106651	0.0	1.9262899853398653e-05	0.0	0.0	0.0022073657256939413	0.0	0.0	0.0022082821198996035	0.0	-0.0006417038529859118	0.0	9.502966530069824e-09	-0.0001201214432324499	0.0	1.143653217519986e-08
5.675	-0.0006423044601336468	0.0	-1.5222312967739466e-08	-0.0015432509877990525	0.0	-0.09945408476084495	0.0	1.1513239186069242e-05	0.0	0.9999999998101137	0.0	1.929167946947888e-05	0.0	0.0	0.0022106636267693563	0.0	0.0	0.0022115804199690356	0.0	-0.0006423044602331154	0.0	9.559950572546734e-09	-0.00012012145564903494	0.0	1.1357085608097352e-08
5.68	-0.0006429050674437946	0.0	-1.5225913195317012e-08	-0.0015464640142089513	0.0	-0.09945408471593657	0.0	1.1515879030248084e-05	0.0	0.9999999998095613	0.0	1.9320465680337405e-05	0.0	0.0	0.0022139622835507006	0.0	0.0	0.0022148794762981176	0.0	-0.0006429050675424022	0.0	9.616537394076115e-09	-0.00012012146806564168	0.0	1.127764379618581e-08
5.6850000000000005	-0.0006435056748160115	0.0	-1.5229988266857665e-08	-0.0015496800436433015	0.0	-0.09945408467080864	0.0	1.151851881784421e-05	0.0	0.999999999809008	0.0	1.9349258485974233e-05	0.0	0.0	0.0022172616960379737	0.0	0.0	0.00221817928887064	0.0	-0.0006435056749137717	0.0	9.67272701843391e-09	-0.000120121480482196	0.0	1.1198206739464127e-08
5.69	-0.0006441062822502973	0.0	-1.5234538182361424e-08	-0.001552899076102102	0.0	-0.0994540846254612	0.0	1.1521158548857618e-05	0.0	0.9999999998084537	0.0	1.9378057886389356e-05	0.0	0.0	0.002220561864231175	0.0	0.0	0.0022214798576703928	0.0	-0.0006441062823472241	0.0	9.728519469396077e-09	-0.00012012149289877924	0.0	1.1118774437934567e-08
5.695	-0.0006447068897466521	0.0	-1.523956294182829e-08	-0.0015561211115853533	0.0	-0.0994540845798942	0.0	1.1523798223288311e-05	0.0	0.9999999998078984	0.0	1.940686388158278e-05	0.0	0.0	0.002223862788130305	0.0	0.0	0.0022247811826811665	0.0	-0.0006447068898427596	0.0	9.783914770738578e-09	-0.00012012150531542935	0.0	1.1039346891598755e-08
5.7	-0.0006453074973050759	0.0	-1.5245062545258264e-08	-0.0015593461500930553	0.0	-0.09945408453410767	0.0	1.1526437841136285e-05	0.0	0.9999999998073423	0.0	1.94356764715545e-05	0.0	0.0	0.002227164467735364	0.0	0.0	0.0022280832638867515	0.0	-0.0006453074974003784	0.0	9.838912946237393e-09	-0.00012012151773203067	0.0	1.0959924100460415e-08
5.705	-0.0006459081049255688	0.0	-1.5251036992651345e-08	-0.001562574191625208	0.0	-0.09945408448810161	0.0	1.1529077402401543e-05	0.0	0.9999999998067851	0.0	1.9464495656304522e-05	0.0	0.0	0.002230466903046352	0.0	0.0	0.002231386101270938	0.0	-0.00064590810502008	0.0	9.893514019668505e-09	-0.0001201215301487169	0.0	1.0880506064515272e-08
5.71	-0.0006465087126081308	0.0	-1.525748628400753e-08	-0.0015658052361818117	0.0	-0.099454084441876	0.0	1.1531716907084085e-05	0.0	0.9999999998062271	0.0	1.949332143583284e-05	0.0	0.0	0.0022337700940632684	0.0	0.0	0.002234689694817516	0.0	-0.0006465087127018656	0.0	9.947718014807872e-09	-0.00012012154256540676	0.0	1.0801092783765613e-08
5.715	-0.0006471093203527617	0.0	-1.5264410419326826e-08	-0.0015690392837628662	0.0	-0.09945408439543087	0.0	1.1534356355183909e-05	0.0	0.9999999998056681	0.0	1.952215381013946e-05	0.0	0.0	0.002237074040786114	0.0	0.0	0.0022379940445102753	0.0	-0.0006471093204457341	0.0	1.0001524955431492e-08	-0.00012012155498203336	0.0	1.0721684258214419e-08
5.72	-0.0006477099281594616	0.0	-1.5271809398609226e-08	-0.0015722763343683716	0.0	-0.0994540843487662	0.0	1.1536995746701017e-05	0.0	0.9999999998051081	0.0	1.9550992779224376e-05	0.0	0.0	0.0022403787432148875	0.0	0.0	0.002241299150333007	0.0	-0.000647709928251686	0.0	1.005493486531535e-08	-0.00012012156739873045	0.0	1.0642280487864225e-08
5.7250000000000005	-0.0006483105360282306	0.0	-1.5279683221854734e-08	-0.0015755163879983282	0.0	-0.09945408430188199	0.0	1.1539635081635409e-05	0.0	0.9999999998045471	0.0	1.95798383430876e-05	0.0	0.0	0.002243684201349591	0.0	0.0	0.0022446050122695007	0.0	-0.0006483105361197215	0.0	1.0107947768235464e-08	-0.00012012157981548174	0.0	1.0562881472711006e-08
5.73	-0.0006489111439590686	0.0	-1.528803188906335e-08	-0.001578759444652735	0.0	-0.09945408425477825	0.0	1.1542274359987082e-05	0.0	0.9999999998039854	0.0	1.9608690501729118e-05	0.0	0.0	0.002246990415190223	0.0	0.0	0.002247911630303547	0.0	-0.0006489111440498408	0.0	1.0160563687967792e-08	-0.00012012159223219509	0.0	1.0483487212756857e-08
5.735	-0.0006495117519519756	0.0	-1.529685540023507e-08	-0.0015820055043315926	0.0	-0.09945408420745497	0.0	1.1544913581756039e-05	0.0	0.9999999998034225	0.0	1.9637549255148933e-05	0.0	0.0	0.002250297384736783	0.0	0.0	0.0022512190044189366	0.0	-0.0006495117520420434	0.0	1.0212782648288373e-08	-0.00012012160464891386	0.0	1.0404097708007568e-08
5.74	-0.0006501123600069517	0.0	-1.5306153755369898e-08	-0.0015852545670349012	0.0	-0.09945408415991215	0.0	1.1547552746942279e-05	0.0	0.9999999998028587	0.0	1.9666414603347047e-05	0.0	0.0	0.002253605109989272	0.0	0.0	0.0022545271345994593	0.0	-0.00065011236009633	0.0	1.0264604672973203e-08	-0.0001201216170657031	0.0	1.0324712958458397e-08
5.745	-0.0006507129681239967	0.0	-1.5315926954467833e-08	-0.0015885066327626604	0.0	-0.0994540841121498	0.0	1.1550191855545802e-05	0.0	0.999999999802294	0.0	1.969528654632346e-05	0.0	0.0	0.0022569135909476902	0.0	0.0	0.002257836020828905	0.0	-0.0006507129682127005	0.0	1.0316029785798296e-08	-0.00012012162948247969	0.0	1.0245332964113039e-08
5.75	-0.0006513135763031107	0.0	-1.5326174997528875e-08	-0.0015917617015148704	0.0	-0.09945408406416792	0.0	1.1552830907566607e-05	0.0	0.9999999998017284	0.0	1.9724165084078175e-05	0.0	0.0	0.0022602228276120376	0.0	0.0	0.0022611456630910643	0.0	-0.0006513135763911548	0.0	1.0367058010539675e-08	-0.00012012164189924182	0.0	1.0165957724973368e-08
5.755	-0.0006519141845442939	0.0	-1.5336897884553027e-08	-0.0015950197732915313	0.0	-0.09945408401596649	0.0	1.1555469903004696e-05	0.0	0.9999999998011617	0.0	1.975305021661119e-05	0.0	0.0	0.0022635328199823133	0.0	0.0	0.002264456061369727	0.0	-0.0006519141846316929	0.0	1.0417689370973368e-08	-0.00012012165431604371	0.0	1.0086587241036904e-08
5.76	-0.000652514792847546	0.0	-1.5348095615540282e-08	-0.001598280848092643	0.0	-0.09945408396754553	0.0	1.1558108841860068e-05	0.0	0.9999999998005942	0.0	1.9781941943922498e-05	0.0	0.0	0.002266843568058517	0.0	0.0	0.002267767215648684	0.0	-0.0006525147929343153	0.0	1.046792389087539e-08	-0.00012012166673285825	0.0	1.0007221512307534e-08
5.765	-0.0006531154012128671	0.0	-1.5359768190490644e-08	-0.0016015449259182055	0.0	-0.09945408391890503	0.0	1.1560747724132725e-05	0.0	0.9999999998000256	0.0	1.981084026601211e-05	0.0	0.0	0.0022701550718406504	0.0	0.0	0.0022710791259117256	0.0	-0.0006531154012990216	0.0	1.0517761594021792e-08	-0.00012012167914969809	0.0	9.92786053878873e-09
5.7700000000000005	-0.0006537160096402573	0.0	-1.5371915609404114e-08	-0.0016048120067682194	0.0	-0.09945408387004501	0.0	1.1563386549822664e-05	0.0	0.9999999997994562	0.0	1.9839745182880023e-05	0.0	0.0	0.002273467331328713	0.0	0.0	0.0022743917921426416	0.0	-0.0006537160097258123	0.0	1.0567202504188619e-08	-0.0001201216915665849	0.0	9.848504320474072e-09
5.775	-0.0006543166181297164	0.0	-1.538453787228069e-08	-0.0016080820906426835	0.0	-0.09945408382096543	0.0	1.1566025318929884e-05	0.0	0.9999999997988859	0.0	1.9868656694526232e-05	0.0	0.0	0.0022767803465227046	0.0	0.0	0.002277705214325222	0.0	-0.0006543166182146874	0.0	1.0616246645151883e-08	-0.00012012170398339764	0.0	9.769152857369706e-09
5.78	-0.0006549172266812446	0.0	-1.5397634979120376e-08	-0.0016113551775415983	0.0	-0.09945408377166633	0.0	1.156866403145439e-05	0.0	0.9999999997983144	0.0	1.9897574800950743e-05	0.0	0.0	0.0022800941174226244	0.0	0.0	0.002281019392443258	0.0	-0.0006549172267656464	0.0	1.0664894040687669e-08	-0.00012012171640026097	0.0	9.689806149477589e-09
5.785	-0.0006555178352948419	0.0	-1.5411206929923166e-08	-0.001614631267464964	0.0	-0.09945408372214769	0.0	1.1571302687396177e-05	0.0	0.9999999997977421	0.0	1.992649950215355e-05	0.0	0.0	0.002283408644028473	0.0	0.0	0.002284334326480539	0.0	-0.0006555178353786902	0.0	1.0713144714572009e-08	-0.000120121728817202	0.0	9.610464196793944e-09
5.79	-0.0006561184439705081	0.0	-1.5425253724689062e-08	-0.0016179103604127805	0.0	-0.09945408367240952	0.0	1.1573941286755249e-05	0.0	0.9999999997971689	0.0	1.9955430798134654e-05	0.0	0.0	0.0022867239263402507	0.0	0.0	0.0022876500164208556	0.0	-0.0006561184440538184	0.0	1.0760998690580963e-08	-0.00012012174123409785	0.0	9.531126999323845e-09
5.795	-0.0006567190527082433	0.0	-1.5439775363418066e-08	-0.0016211924563850478	0.0	-0.0994540836224518	0.0	1.1576579829531603e-05	0.0	0.9999999997965947	0.0	1.998436868889406e-05	0.0	0.0	0.002290039964357957	0.0	0.0	0.002290966462247998	0.0	-0.0006567190527910311	0.0	1.0808455992490604e-08	-0.00012012175365103527	0.0	9.451794557068037e-09
[truncated: 1,840 more rows]
