# Supplementary material for: An Efficient Contact Model for the Simulation of Cargo Airdrop Extraction Phase
Source: Hindawi journal article supplement (doi:10.1155/2018/9895451), 2018-10-17
Supplement: f1 [file 9895451.f1.zip › case1_stick_slip/motion_pts40.csv]

t	u	v	w	x_g	y_g	z_g	p	q	r	e0	e1	e2	e3	yaw(deg)	pitch(deg)	roll(deg)	yaw_fix(deg)	pitch_fix(deg)	roll_fix(deg)	vx_g	vy_g	vz_g	ax_g	ay_g	az_g
0.0	0.0	0.0	0.0	0.0	0.0	-0.1	0.0	0.0	0.0	1.0	0.0	0.0	0.0	0.0	-0.0	0.0	0.0	0.0	0.0	0.0	0.0	0.0	4.669151340756563e-17	0.0	13.147115394449774
0.005	-5.82298802189629e-20	0.0	0.03763643775751147	-4.111899804264415e-24	0.0	-0.09988831338818882	0.0	1.1617067613429318e-15	0.0	1.0	0.0	6.7498825394944e-19	0.0	0.0	7.734795634441506e-17	0.0	0.0	3.3280447228380787e-16	0.0	-7.421573405324008e-21	0.0	0.03763643775751147	-4.2440027865845215e-17	0.0	-0.10603354646089211
0.01	-7.520709666575238e-19	0.0	0.019074597085548147	-8.370651655801642e-22	0.0	-0.09973358839784739	0.0	2.7030443381197317e-15	0.0	1.0	0.0	6.69659070162294e-18	0.0	0.0	7.673727686590905e-16	0.0	0.0	1.1071696343387763e-15	0.0	-4.966014276969523e-19	0.0	0.019074597085548147	-1.7410304647556383e-16	0.0	-4.4143064749386465
0.015	-1.7901327967035177e-18	0.0	0.00471927563458121	-6.187639621018104e-21	0.0	-0.0996818486284638	0.0	9.871133369301397e-16	0.0	1.0	0.0	1.1229454996914729e-17	0.0	0.0	1.2868007551106137e-15	0.0	0.0	1.3899567748746374e-15	0.0	-1.6841430099903858e-18	0.0	0.00471927563458121	-2.582995544602708e-16	0.0	-1.7253392584773413
0.02	-3.0060279798100475e-18	0.0	0.001521091512876662	-1.780413693139913e-20	0.0	-0.09966824779355353	0.0	2.8612906640649087e-16	0.0	1.0	0.0	1.2635425067452607e-17	0.0	0.0	1.4479130574376758e-15	0.0	0.0	1.4719267143801893e-15	0.0	-2.9675887041466653e-18	0.0	0.001521091512876662	-2.606005462250049e-16	0.0	-0.22107552081289633
0.025	-4.2964177531598354e-18	0.0	0.0007287486847800669	-3.5907460310818856e-20	0.0	-0.09966298928857564	0.0	1.1914986947433854e-16	0.0	1.0	0.0	1.3084919514338531e-17	0.0	0.0	1.4994213268799374e-15	0.0	0.0	1.5060606376322604e-15	0.0	-4.277346517386781e-18	0.0	0.0007287486847800669	-2.6407760477410153e-16	0.0	-0.07297202252780279
0.03	-5.617238247297609e-18	0.0	0.000414912735912784	-6.060953014597956e-20	0.0	-0.0996602233985929	0.0	6.58609143301536e-17	0.0	1.0	0.0	1.330585081401809e-17	0.0	0.0	1.524738188947895e-15	0.0	0.0	1.5249283997622129e-15	0.0	-5.6061967133678255e-18	0.0	0.000414912735912784	-2.6727573766690054e-16	0.0	-0.04123595535491059
0.035	-6.955021129194725e-18	0.0	0.0002481667705383533	-9.19913989154961e-20	0.0	-0.09965860445755874	0.0	3.862194390399618e-17	0.0	1.0	0.0	1.3439212402768864e-17	0.0	0.0	1.5400203013170523e-15	0.0	0.0	1.535992771673663e-15	0.0	-6.948350797313576e-18	0.0	0.0002481667705383533	-2.6942138649605316e-16	0.0	-0.024628100073231775
0.04	-8.303149496323988e-18	0.0	0.00015059352023758812	-1.3010716433662328e-19	0.0	-0.09965762846913102	0.0	2.862877709784361e-17	0.0	1.0	0.0	1.3515896203804268e-17	0.0	0.0	1.5488076176297515e-15	0.0	0.0	1.544194312175299e-15	0.0	-8.299078683546995e-18	0.0	0.00015059352023758812	-2.7077050284431966e-16	0.0	-0.014859755689884105
0.045	-9.657613314760525e-18	0.0	9.18809637724062e-05	-1.7499110358715201e-19	0.0	-0.09965703449885259	0.0	5.362353178369021e-18	0.0	1.0	0.0	1.357313637760563e-17	0.0	0.0	1.5553668583845782e-15	0.0	0.0	1.5457305132021946e-15	0.0	-9.655119089056948e-18	0.0	9.18809637724062e-05	-2.688168790794642e-16	0.0	-0.009021899386227425
0.05	-1.1015643377579129e-17	0.0	5.621162317825342e-05	-2.2666467974006345e-19	0.0	-0.09965667159692716	0.0	4.444175906218067e-19	0.0	1.0	0.0	1.3613740690770678e-17	0.0	0.0	1.5600197699333477e-15	0.0	0.0	1.5458578294636147e-15	0.0	-1.1014112876655617e-17	0.0	5.621162317825342e-05	-6.617147925833386e-16	0.0	-0.005502627470623136
0.055	-1.2540970337047843e-17	0.0	3.442555723732138e-05	-2.853638171966264e-19	0.0	-0.09965644936902085	0.0	9.01037443859254e-15	0.0	1.0	0.0	1.9734460996290848e-17	0.0	0.0	2.2614026521060065e-15	0.0	0.0	4.12713996528317e-15	0.0	-1.2539611597414693e-17	0.0	3.442555723732138e-05	-2.6285424679708983e-16	0.0	-0.0033649114113453106
0.06	8.358427303233367e-18	0.0	2.1107916194297742e-05	-3.180244273843849e-19	0.0	-0.09965631315960656	0.0	-9.623093895841714e-13	0.0	1.0	0.0	-7.238634633735038e-16	0.0	0.0	-8.294864279004882e-14	0.0	0.0	-2.715541930796344e-13	0.0	8.327868804591364e-18	0.0	2.1107916194297742e-05	1.6116703494121638e-14	0.0	-0.0020594857258748084
0.065	1.6091581112950618e-16	0.0	1.2945992581479413e-05	1.9098251262913396e-20	0.0	-0.09965622965228617	0.0	1.0048270465903122e-13	0.0	1.0	0.0	-2.464931149937382e-15	0.0	0.0	-2.824603033634814e-13	0.0	0.0	-2.427680186245243e-13	0.0	1.6085198916874428e-16	0.0	1.2945992581479413e-05	4.320360848899568e-14	0.0	-0.0012626288683637698
0.07	4.0914828604009867e-16	0.0	7.944249484006217e-06	1.4265199591846605e-18	0.0	-0.09965617841251485	0.0	-4.737049973728111e-14	0.0	1.0	0.0	-2.0016009595914263e-15	0.0	0.0	-2.2936657450784874e-13	0.0	0.0	-2.5633866716638325e-13	0.0	4.0911648360531785e-16	0.0	7.944249484006217e-06	4.551046509124166e-14	0.0	-0.0007743191616596455
0.075	6.01572796418034e-16	0.0	4.873955656815367e-06	3.996548924188347e-18	0.0	-0.09965614695886499	0.0	-5.9034044576887145e-15	0.0	1.0	0.0	-2.0516138005293295e-15	0.0	0.0	-2.3509762392225063e-13	0.0	0.0	-2.5802986796730467e-13	0.0	6.015527974686567e-16	0.0	4.873955656815367e-06	5.227996004900281e-14	0.0	-0.00047525744084174357
0.08	8.033181839030111e-16	0.0	2.9907704965640955e-06	7.496281527136427e-18	0.0	-0.09965612766157558	0.0	1.6832426499773613e-13	0.0	1.0	0.0	-1.9650744906331005e-15	0.0	0.0	-2.2518094948419336e-13	0.0	0.0	-2.09808518097245e-13	0.0	8.033064297293909e-16	0.0	2.9907704965640955e-06	5.338914533647701e-14	0.0	-0.00029184482054694265
0.085	1.775134664388588e-16	0.0	1.833607132447056e-06	1.0000578362803183e-17	0.0	-0.09965611578469417	0.0	1.4799679194187456e-11	0.0	1.0	0.0	1.6494477260551615e-14	0.0	0.0	1.890127864608231e-12	0.0	0.0	4.029987261775337e-12	0.0	1.7757395522116065e-16	0.0	1.833607132447056e-06	-6.092769625837694e-13	0.0	-0.000178143148792464
0.09	-6.186342797197692e-15	0.0	1.1321505218762877e-06	-3.5351885524528034e-18	0.0	-0.09965610857051589	0.0	7.644607875914933e-11	0.0	1.0	0.0	1.2358013754119444e-13	0.0	0.0	1.4161240625513328e-11	0.0	0.0	2.593017562789507e-11	0.0	-6.1860629745632705e-15	0.0	1.1321505218762877e-06	-1.0338826765754171e-12	0.0	-0.00010914423386459968
0.095	-1.875700992023596e-14	0.0	6.935847868607404e-07	-5.773030289396098e-17	0.0	-0.09965610413272452	0.0	-3.880283540022185e-11	0.0	1.0	0.0	1.6237264264800757e-13	0.0	0.0	1.86065342642335e-11	0.0	0.0	1.4813982120027387e-11	0.0	-1.8756784681846473e-14	0.0	6.935847868607404e-07	-1.0249765746480079e-11	0.0	-6.890456921699864e-05
0.1	-8.863950251029288e-14	0.0	4.1924576374954923e-07	-3.2964718488789193e-16	0.0	-0.09965610135178361	0.0	5.715145905136091e-10	0.0	1.0	0.0	1.0738784790156604e-12	0.0	0.0	1.2305740911505096e-10	0.0	0.0	1.7854085195291376e-10	0.0	-8.863860207228666e-14	0.0	4.1924576374954923e-07	3.9860348869959213e-11	0.0	-4.1016760252861534e-05
0.105	-4.4456234050096887e-14	0.0	2.6464322045306633e-07	-5.492466991929683e-16	0.0	-0.09965609966993297	0.0	-1.4008252081579209e-09	0.0	1.0	0.0	-1.0580049309877263e-12	0.0	0.0	-1.2123843449925329e-10	0.0	0.0	-2.2276600936200568e-10	0.0	-4.445679403776127e-14	0.0	2.6464322045306633e-07	-2.3416502033422044e-10	0.0	-2.4426056625994305e-05
0.11	-2.6034186932569863e-12	0.0	1.6162360578658726e-07	-7.4951295595956e-15	0.0	-0.09965609864141704	0.0	1.623208085973289e-09	0.0	1.0	0.0	3.5957734934861274e-11	0.0	0.0	4.120452905235338e-09	0.0	0.0	2.42248853626884e-10	0.0	-2.603407070019434e-12	0.0	1.6162360578658745e-07	-6.588404015781664e-10	0.0	-1.621793313310765e-05
0.115	-6.087009737545597e-12	0.0	9.817092071670392e-08	-2.9569632551542304e-14	0.0	-0.0996560980077107	0.0	-2.6847286756470878e-09	0.0	1.0	0.0	3.2745642744534756e-11	0.0	0.0	3.752374253410055e-09	0.0	0.0	-5.268692576347412e-10	0.0	-6.087003308205802e-12	0.0	9.817092071670432e-08	-6.645692929526715e-10	0.0	-9.689135972820158e-06
0.12	-8.898589120961246e-12	0.0	6.054335384511149e-08	-6.732181322720262e-14	0.0	-0.0996560976193412	0.0	-4.0952022787808755e-09	0.0	1.0	0.0	2.0648299606890445e-11	0.0	0.0	2.3661208431929185e-09	0.0	0.0	-1.7000582917672479e-09	0.0	-8.898586620726627e-12	0.0	6.054335384511186e-08	-4.4472572106338714e-10	0.0	-5.794451758178821e-06
0.125	-1.0531736438550708e-11	0.0	3.734936329047083e-08	-1.1624381591141379e-13	0.0	-0.09965609738085796	0.0	-1.4742996961941503e-09	0.0	1.0	0.0	1.0924091093224406e-11	0.0	0.0	1.251808629316424e-09	0.0	0.0	-2.1224140434139693e-09	0.0	-1.0531735622535014e-11	0.0	3.734936329047106e-08	-2.4193100303491933e-10	0.0	-3.633848407042354e-06
0.13	-1.147772269189228e-11	0.0	2.2718251867450454e-08	-1.7154479270307473e-13	0.0	-0.09965609723359835	0.0	-1.041247040886616e-09	0.0	1.0	0.0	8.166173570975538e-12	0.0	0.0	9.357745607763491e-10	0.0	0.0	-2.420709347780414e-09	0.0	-1.1477722320849904e-11	0.0	2.2718251867450643e-08	-1.5829614776537046e-10	0.0	-2.2887494264785725e-06
0.135	-1.2204228905425948e-11	0.0	1.3601009317955615e-08	-2.3081053220027614e-13	0.0	-0.09965609714066057	0.0	-6.567791730817085e-10	0.0	1.0	0.0	6.555730108533389e-12	0.0	0.0	7.512313336916086e-10	0.0	0.0	-2.6088627212287844e-09	0.0	-1.2204228727096856e-11	0.0	1.3601009317955775e-08	-1.290706834076109e-10	0.0	-1.4299984536159338e-06
0.14	-1.2780762670393732e-11	0.0	7.881487653703793e-09	-2.9316142750059476e-13	0.0	-0.09965609708316854	0.0	-6.029847235189926e-10	0.0	1.0	0.0	5.017745779001035e-12	0.0	0.0	5.749913116126855e-10	0.0	0.0	-2.7816051200712898e-09	0.0	-1.2780762591299129e-11	0.0	7.881487653703922e-09	-9.789429971664443e-11	0.0	-8.649464066143429e-07
0.145	-1.3211816813566984e-11	0.0	4.455156797453223e-09	-3.5795773047294113e-13	0.0	-0.09965609704866173	0.0	-5.554574498001596e-10	0.0	1.0	0.0	3.579539536584567e-12	0.0	0.0	4.1018501609302047e-10	0.0	0.0	-2.9407319579345346e-09	0.0	-1.3211816781672165e-11	0.0	4.455156797453317e-09	-8.679963827993495e-11	0.0	-6.256471626523461e-07
0.15	-1.366476878304954e-11	0.0	1.4482161002914594e-09	-4.246685849427404e-13	0.0	-0.09965609701967743	0.0	-3.5722602365772843e-10	0.0	1.0	0.0	2.967728896498199e-12	0.0	0.0	3.4007668101672783e-10	0.0	0.0	-3.043069675373676e-09	0.0	-1.3664768774453715e-11	0.0	1.4482161002915404e-09	-8.725682464618056e-11	0.0	-4.921928891052845e-07
0.155	-1.4068299893662729e-11	0.0	-3.2633335020258985e-10	-4.935288385750854e-13	0.0	-0.09965609700382738	0.0	-8.13464667183575e-11	0.0	1.0	0.0	2.872404356092948e-12	0.0	0.0	3.2915329331823753e-10	0.0	0.0	-3.066373721479993e-09	0.0	-1.4068299895537452e-11	0.0	-3.2633335020250905e-10	-8.18654245747302e-11	0.0	-2.1497500280873754e-07
0.16	-1.4397218018215768e-11	0.0	-8.388601812257151e-10	-5.643201051072724e-13	0.0	-0.09965609700087011	0.0	2.2836406084336535e-10	0.0	1.0	0.0	3.120198392893227e-12	0.0	0.0	3.5754839831256833e-10	0.0	0.0	-3.000952237086025e-09	0.0	-1.4397218023450588e-11	0.0	-8.388601812256253e-10	-1.3211144050243535e-11	0.0	-5.4562130955804204e-08
0.165	-1.4159485299220597e-11	0.0	-9.429532861597548e-10	-6.311010999564621e-13	0.0	-0.09965609698979253	0.0	-3.840742717882926e-10	0.0	1.0	0.0	-3.0361223808429954e-14	0.0	0.0	-3.4791399701502963e-12	0.0	0.0	-3.110981411051173e-09	0.0	-1.4159485299163339e-11	0.0	-9.429532861597556e-10	8.825695193795162e-11	0.0	6.34897883241667e-08
0.17	-1.3601583362431865e-11	0.0	-2.1101553001805146e-10	-6.96848052412257e-13	0.0	-0.0996560969811209	0.0	-1.439772575674874e-09	0.0	1.0	0.0	-4.705020015202879e-12	0.0	0.0	-5.391555787914068e-10	0.0	0.0	-3.5234458712754243e-09	0.0	-1.36015833604462e-11	0.0	-2.1101553001817944e-10	1.555609788904021e-10	0.0	2.50424536178301e-07
0.17500000000000002	-1.299863969172043e-11	0.0	8.870365600072914e-10	-7.633171428614847e-13	0.0	-0.09965609697681758	0.0	-2.4295521339343158e-09	0.0	1.0	0.0	-9.052059246095296e-12	0.0	0.0	-1.0372895814072686e-09	0.0	0.0	-4.21946128818262e-09	0.0	-1.2998639707779445e-11	0.0	8.870365600070561e-10	-6.782188725292575e-11	0.0	-7.3275769748224e-08
0.18	-1.4444112023309843e-11	0.0	-1.2244135825892165e-09	-8.438712290066266e-13	0.0	-0.09965609699181385	0.0	5.20951435282937e-10	0.0	1.0	0.0	1.0183344927894455e-12	0.0	0.0	1.1669253713886118e-10	0.0	0.0	-4.070219695317646e-09	0.0	-1.4444112025803567e-11	0.0	-1.2244135825891871e-09	-4.051830913067745e-10	0.0	-6.076823558975185e-07
0.185	-1.6830401218837436e-11	0.0	-4.653591521834986e-09	-9.314403378450132e-13	0.0	-0.09965609701820992	0.0	5.3619032694013096e-09	0.0	1.0	0.0	1.8051573071119298e-11	0.0	0.0	2.068557901094291e-09	0.0	0.0	-2.5341475578471825e-09	0.0	-1.683040138684673e-11	0.0	-4.653591521834378e-09	-5.674401888176325e-10	0.0	-7.933232750868411e-07
0.19	-1.9944690707961925e-11	0.0	-8.075098830900041e-09	-1.0283408126377463e-12	0.0	-0.0996560970490135	0.0	1.0249047573009025e-08	0.0	1.0	0.0	3.7560907883454405e-11	0.0	0.0	4.3041629928031985e-09	0.0	0.0	4.019882919639011e-10	0.0	-1.9944691314578013e-11	0.0	-8.075098830898542e-09	-6.186576593975702e-10	0.0	-2.0398483330880382e-07
0.195	-2.2956862157545694e-11	0.0	-6.319048921259246e-09	-1.1436078474197494e-12	0.0	-0.09965609705695039	0.0	7.98862803140049e-09	0.0	1.0	0.0	4.2045200425483924e-11	0.0	0.0	4.818025066323764e-09	0.0	0.0	2.690561643459658e-09	0.0	-2.2956862688917052e-11	0.0	-6.319048921257315e-09	-6.371665731111816e-10	0.0	6.545851314970433e-07
0.2	-2.6336342687322428e-11	0.0	-2.308982779446636e-09	-1.2721320921830327e-12	0.0	-0.09965609705744399	0.0	2.6486722643420396e-09	0.0	1.0	0.0	4.14012433738453e-11	0.0	0.0	4.744233023830602e-09	0.0	0.0	3.449350353760448e-09	0.0	-2.6336342878511943e-11	0.0	-2.308982779444455e-09	-6.968150203354688e-10	0.0	9.480246888590765e-07
0.20500000000000002	-2.97336196748269e-11	0.0	2.2002289999735232e-09	-1.4135308172921336e-12	0.0	-0.09965609705252	0.0	-3.3874949898733036e-09	0.0	1.0	0.0	3.7082415166170666e-11	0.0	0.0	4.249331766346989e-09	0.0	0.0	2.4789045235531887e-09	0.0	-2.973361951164729e-11	0.0	2.2002289999757285e-09	-6.064616141454875e-10	0.0	5.763266473718642e-07
0.21	-3.2349844883566624e-11	0.0	3.1976432074191172e-09	-1.5669292534978435e-12	0.0	-0.09965609704680829	0.0	-4.672531799084953e-09	0.0	1.0	0.0	3.2410566651993e-11	0.0	0.0	3.713977361573299e-09	0.0	0.0	1.1403227649120021e-09	0.0	-3.2349844676291764e-11	0.0	3.197643207421214e-09	-4.666787366064129e-10	0.0	3.0043588751887174e-08
0.215	-3.467718038228391e-11	0.0	3.154360131354432e-09	-1.7328663370131961e-12	0.0	-0.09965609703745645	0.0	-4.562488727102331e-09	0.0	1.0	0.0	2.5339140160561425e-11	0.0	0.0	2.9036515753812336e-09	0.0	0.0	-1.6673397578289205e-10	0.0	-3.4677180222426363e-11	0.0	3.1543601313561893e-09	-5.908915180061087e-10	0.0	3.7295191701439136e-08
0.22	-3.788410448310039e-11	0.0	3.521450946484765e-09	-1.8825624406232415e-12	0.0	-0.09965609702570591	0.0	-5.03177685003122e-09	0.0	1.0	0.0	1.6291666131074208e-11	0.0	0.0	1.8668874210935576e-09	0.0	0.0	-1.6082318605749955e-09	0.0	-3.788410436835978e-11	0.0	3.5214509464859994e-09	-4.023623847857141e-10	0.0	-5.32985072416052e-08
0.225	-3.8554206031301145e-11	0.0	2.552979410406704e-09	-2.0803080098014615e-12	0.0	-0.09965609702013052	0.0	-3.6280621124556487e-09	0.0	1.0	0.0	1.2431794351918903e-11	0.0	0.0	1.4245786962790553e-09	0.0	0.0	-2.647595094850128e-09	0.0	-3.8554205967824913e-11	0.0	2.552979410407663e-09	-9.608201157067627e-11	0.0	-2.2308541223119285e-07
0.23	-3.922430757950191e-11	0.0	1.584507874328643e-09	-2.2780535789796815e-12	0.0	-0.09965609701455513	0.0	-2.2243473748800767e-09	0.0	1.0	0.0	8.571922572763602e-12	0.0	0.0	9.822699714645535e-10	0.0	0.0	-3.28482367860829e-09	0.0	-3.922430755233735e-11	0.0	1.5845078743293154e-09	-1.1205233810857001e-10	0.0	-1.5761248835441475e-07
0.23500000000000001	-3.96338850131609e-11	0.0	1.0439402879737883e-09	-2.4785558260845064e-12	0.0	-0.09965609701129306	0.0	-1.4462604764136604e-09	0.0	1.0	0.0	6.300425801183838e-12	0.0	0.0	7.219756150863284e-10	0.0	0.0	-3.699146785483702e-09	0.0	-3.963388500000636e-11	0.0	1.0439402879742877e-09	-5.3066809755742985e-11	0.0	-6.073032810915464e-08
0.24	-3.979839634930368e-11	0.0	9.058872682834425e-10	-2.6816511855496582e-12	0.0	-0.09965609701020706	0.0	-1.2566802246261771e-09	0.0	1.0	0.0	5.523058911528676e-12	0.0	0.0	6.32895931265423e-10	0.0	0.0	-4.059159150826863e-09	0.0	-3.979839633929714e-11	0.0	9.058872682838822e-10	-2.8817832682747536e-11	0.0	-2.0902027827004204e-08
0.245	-3.996290768544647e-11	0.0	7.67834248593096e-10	-2.8847465450148117e-12	0.0	-0.09965609700912105	0.0	-1.067099972838693e-09	0.0	1.0	0.0	4.7456920218735094e-12	0.0	0.0	5.438162474445169e-10	0.0	0.0	-4.364860774637773e-09	0.0	-3.996290767815866e-11	0.0	7.678342485934753e-10	-3.290226772937614e-11	0.0	-2.761060393808145e-08
0.25	-4.0127419021589257e-11	0.0	6.297812289027494e-10	-3.0878419044799643e-12	0.0	-0.09965609700803506	0.0	-8.775197210512087e-10	0.0	1.0	0.0	3.9683251322183435e-12	0.0	0.0	4.5473656362361093e-10	0.0	0.0	-4.616251656916431e-09	0.0	-4.01274190165909e-11	0.0	6.297812289030679e-10	-3.29022676435218e-11	0.0	-2.7610603938081515e-08
0.255	-4.0291930357732047e-11	0.0	4.917282092124029e-10	-3.2909372639451174e-12	0.0	-0.09965609700694905	0.0	-6.879394692637244e-10	0.0	1.0	0.0	3.1909582425631767e-12	0.0	0.0	3.656568798027049e-10	0.0	0.0	-4.813331797662837e-09	0.0	-4.029193035459388e-11	0.0	4.9172820921266e-10	-3.292512585619824e-11	0.0	-2.7632709742518217e-08
0.26	-4.045644169387483e-11	0.0	3.536751895220562e-10	-3.494032623410271e-12	0.0	-0.09965609700586305	0.0	-4.983592174762402e-10	0.0	1.0	0.0	2.41359135290801e-12	0.0	0.0	2.765771959817988e-10	0.0	0.0	-4.956101196876992e-09	0.0	-4.0456441692167575e-11	0.0	3.536751895222515e-10	-3.474129178023421e-11	0.0	-2.9389087657620605e-08
0.265	-4.061958153211307e-11	0.0	2.1694851809790339e-10	-3.697144555888046e-12	0.0	-0.09965609700478524	0.0	-3.1052975983823173e-10	0.0	1.0	0.0	1.6430046580080078e-12	0.0	0.0	1.882744652483881e-10	0.0	0.0	-5.045061420136701e-09	0.0	-4.0619581531400175e-11	0.0	2.1694851809803687e-10	-2.0748064900552625e-11	0.0	-1.5856517203456688e-08
0.27	-4.0664150924795767e-11	0.0	1.9488895944320036e-10	-3.901689279100834e-12	0.0	-0.09965609700441659	0.0	-2.7406213927649997e-10	0.0	1.0	0.0	1.4585878073378096e-12	0.0	0.0	1.6714185081939467e-10	0.0	0.0	-5.123574439661051e-09	0.0	-4.066415092422724e-11	0.0	1.9488895944331898e-10	-6.937704457299311e-12	0.0	-2.500793184785303e-09
0.275	-4.070872031747847e-11	0.0	1.7282940078849733e-10	-4.106234002313622e-12	0.0	-0.09965609700404796	0.0	-2.3759451871476815e-10	0.0	1.0	0.0	1.2741709566676115e-12	0.0	0.0	1.4600923639040127e-10	0.0	0.0	-5.191640255450042e-09	0.0	-4.070872031703804e-11	0.0	1.7282940078860107e-10	-8.913878560532356e-12	0.0	-4.411911730943583e-09
0.28	-4.075328971016117e-11	0.0	1.5076984213379433e-10	-4.310778725526409e-12	0.0	-0.0996560970036793	0.0	-2.0112689815303641e-10	0.0	1.0	0.0	1.089754105997413e-12	0.0	0.0	1.2487662196140785e-10	0.0	0.0	-5.249258867503675e-09	0.0	-4.0753289709832564e-11	0.0	1.5076984213388315e-10	-8.913878557277917e-12	0.0	-4.411911730943592e-09
0.28500000000000003	-4.079785910284387e-11	0.0	1.287102834790913e-10	-4.515323448739197e-12	0.0	-0.09965609700331066	0.0	-1.6465927759130463e-10	0.0	1.0	0.0	9.053372553272148e-13	0.0	0.0	1.0374400753241443e-10	0.0	0.0	-5.296430275821949e-09	0.0	-4.079785910261082e-11	0.0	1.2871028347916518e-10	-8.913878554023802e-12	0.0	-4.411911730943573e-09
0.29	-4.084242849552657e-11	0.0	1.0665072482438851e-10	-4.719868171951982e-12	0.0	-0.09965609700294202	0.0	-1.2819165702957328e-10	0.0	1.0	0.0	7.209204046570186e-13	0.0	0.0	8.261139310342125e-11	0.0	0.0	-5.333154480404864e-09	0.0	-4.08424284953728e-11	0.0	1.066507248244474e-10	-2.7982044831926206e-12	0.0	-4.575590085006429e-09
0.295	-4.088699788820927e-11	0.0	8.459116616968548e-11	-4.92441289516477e-12	0.0	-0.09965609700257337	0.0	-9.17240364678415e-11	0.0	1.0	0.0	5.365035539868203e-13	0.0	0.0	6.147877867442783e-11	0.0	0.0	-5.359431481252421e-09	0.0	-4.08869978881185e-11	0.0	8.459116616972935e-11	-3.967496071841464e-11	0.0	-3.5886299073325887e-09
0.3	-4.1298507724984845e-11	0.0	7.235230875873518e-11	-5.1867099627930875e-12	0.0	-0.09965609700240878	0.0	-7.083430443345319e-11	0.0	1.0	0.0	5.694515678704296e-13	0.0	0.0	6.525434295216633e-11	0.0	0.0	-5.379724014696329e-09	0.0	-4.1298507724902444e-11	0.0	7.235230875878221e-11	-1.2401541482972115e-10	0.0	-1.331363323530194e-09
0.305	-4.206599529585639e-11	0.0	6.964074939373062e-11	-5.505033966221829e-12	0.0	-0.09965609700244211	0.0	-6.505705604384862e-11	0.0	1.0	0.0	8.132704552202392e-13	0.0	0.0	9.319392937360583e-11	0.0	0.0	-5.398361488390622e-09	0.0	-4.206599529574312e-11	0.0	6.964074939379904e-11	-1.594304764026344e-10	0.0	-3.835235722305055e-10
0.31	-4.283348286672794e-11	0.0	6.692919002872606e-11	-5.8233579696505725e-12	0.0	-0.09965609700247546	0.0	-5.927980765424403e-11	0.0	1.0	0.0	1.0570893425700488e-12	0.0	0.0	1.2113351579504534e-10	0.0	0.0	-5.415343902335299e-09	0.0	-4.283348286658644e-11	0.0	6.692919002881663e-11	-1.534975141689282e-10	0.0	-5.423118729964105e-10
0.315	-4.360097043759948e-11	0.0	6.42176306637215e-11	-6.141681973079314e-12	0.0	-0.09965609700250881	0.0	-5.350255926463946e-11	0.0	1.0	0.0	1.3009082299198584e-12	0.0	0.0	1.4907310221648483e-10	0.0	0.0	-5.430671256530361e-09	0.0	-4.36009704374324e-11	0.0	6.421763066383494e-11	-1.5349751416945693e-10	0.0	-5.423118729962588e-10
0.32	-4.436845800847103e-11	0.0	6.150607129871696e-11	-6.460005976508056e-12	0.0	-0.09965609700254215	0.0	-4.772531087503489e-11	0.0	1.0	0.0	1.544727117269668e-12	0.0	0.0	1.7701268863792432e-10	0.0	0.0	-5.444343550975808e-09	0.0	-4.436845800828101e-11	0.0	6.150607129885404e-11	-1.5349751416998589e-10	0.0	-5.423118729961085e-10
0.325	-4.513594557934257e-11	0.0	5.87945119337124e-11	-6.7783299799367975e-12	0.0	-0.0996560970025755	0.0	-4.194806248543032e-11	0.0	1.0	0.0	1.7885460046194776e-12	0.0	0.0	2.049522750593638e-10	0.0	0.0	-5.456360785671639e-09	0.0	-4.513594557913226e-11	0.0	5.879451193387386e-11	-1.534975141705157e-10	0.0	-5.423118729959613e-10
0.33	-4.590343315021412e-11	0.0	5.608295256870784e-11	-7.096653983365539e-12	0.0	-0.09965609700260883	0.0	-3.6170814095825754e-11	0.0	1.0	0.0	2.032364891969288e-12	0.0	0.0	2.328918614808034e-10	0.0	0.0	-5.4667229606178546e-09	0.0	-4.590343314998616e-11	0.0	5.608295256889443e-11	-1.5349751417104398e-10	0.0	-5.423118729958108e-10
0.335	-4.6670920721085665e-11	0.0	5.337139320370328e-11	-7.414977986794281e-12	0.0	-0.09965609700264218	0.0	-3.0393565706221185e-11	0.0	1.0	0.0	2.2761837793190976e-12	0.0	0.0	2.608314479022429e-10	0.0	0.0	-5.475430075814455e-09	0.0	-4.66709207208427e-11	0.0	5.3371393203915746e-11	-1.534975141715724e-10	0.0	-5.423118729956611e-10
0.34	-4.7438408291957215e-11	0.0	5.065983383869873e-11	-7.733301990223023e-12	0.0	-0.09965609700267553	0.0	-2.4616317316616616e-11	0.0	1.0	0.0	2.520002666668907e-12	0.0	0.0	2.887710343236824e-10	0.0	0.0	-5.48248213126144e-09	0.0	-4.743840829170189e-11	0.0	5.065983383893782e-11	-1.5349751417210187e-10	0.0	-5.423118729955099e-10
0.34500000000000003	-4.820589586282876e-11	0.0	4.794827447369418e-11	-8.051625993651764e-12	0.0	-0.09965609700270886	0.0	-1.8839068927012047e-11	0.0	1.0	0.0	2.7638215540187168e-12	0.0	0.0	3.1671062074512187e-10	0.0	0.0	-5.487879126958809e-09	0.0	-4.820589586256372e-11	0.0	4.794827447396064e-11	-1.5349751417263049e-10	0.0	-5.423118729953611e-10
0.35000000000000003	-4.89733834337003e-11	0.0	4.523671510868963e-11	-8.369949997080506e-12	0.0	-0.09965609700274221	0.0	-1.3061820537407478e-11	0.0	1.0	0.0	3.0076404413685256e-12	0.0	0.0	3.4465020716656126e-10	0.0	0.0	-5.491621062906563e-09	0.0	-4.897338343342819e-11	0.0	4.523671510898421e-11	-1.5349751417315846e-10	0.0	-5.423118729952074e-10
0.355	-4.974087100457184e-11	0.0	4.25251557436851e-11	-8.688274000509244e-12	0.0	-0.09965609700277554	0.0	-7.28457214780296e-12	0.0	1.0	0.0	3.2514593287183327e-12	0.0	0.0	3.725897935880005e-10	0.0	0.0	-5.493707939104702e-09	0.0	-4.97408710042953e-11	0.0	4.252515574400856e-11	-1.5349751417368742e-10	0.0	-5.423118729950593e-10
0.36	-5.050835857544339e-11	0.0	3.9813596378680536e-11	-9.006598003937988e-12	0.0	-0.09965609700280889	0.0	-1.5073237581983787e-12	0.0	1.0	0.0	3.495278216068143e-12	0.0	0.0	4.005293800094401e-10	0.0	0.0	-5.494139755553225e-09	0.0	-5.050835857516507e-11	0.0	3.981359637903362e-11	-1.5349751417421818e-10	0.0	-5.423118729949134e-10
0.365	-5.1275846146314934e-11	0.0	3.7102037013675983e-11	-9.32492200736673e-12	0.0	-0.09965609700284224	0.0	4.26992463140619e-12	0.0	1.0	0.0	3.739097103417953e-12	0.0	0.0	4.284689664308796e-10	0.0	0.0	-5.492916512252132e-09	0.0	-5.127584614603748e-11	0.0	3.7102037014059433e-11	-1.534975141747455e-10	0.0	-5.423118729947622e-10
0.37	-5.204333371718648e-11	0.0	3.439047764867143e-11	-9.643246010795471e-12	0.0	-0.09965609700287557	0.0	1.0047173021010759e-11	0.0	1.0	0.0	3.982915990767762e-12	0.0	0.0	4.5640855285231907e-10	0.0	0.0	-5.490038209201424e-09	0.0	-5.2043333716912526e-11	0.0	3.4390477649086e-11	-1.5349751417527403e-10	0.0	-5.423118729946122e-10
0.375	-5.281082128805802e-11	0.0	3.167891828366688e-11	-9.961570014224213e-12	0.0	-0.09965609700290892	0.0	1.5824421410615328e-11	0.0	1.0	0.0	4.226734878117572e-12	0.0	0.0	4.843481392737586e-10	0.0	0.0	-5.4855048464011e-09	0.0	-5.281082128779022e-11	0.0	3.167891828411331e-11	-1.5349751417580438e-10	0.0	-5.423118729944625e-10
0.38	-5.3578308858929565e-11	0.0	2.896735891866232e-11	-1.0279894017652954e-11	0.0	-0.09965609700294226	0.0	2.160166980021991e-11	0.0	1.0	0.0	4.4705537654673815e-12	0.0	0.0	5.12287725695198e-10	0.0	0.0	-5.4793164238511604e-09	0.0	-5.357830885867057e-11	0.0	2.896735891914137e-11	-1.5349751417633385e-10	0.0	-5.423118729943128e-10
0.385	-5.4345796429801115e-11	0.0	2.625579955365777e-11	-1.0598218021081696e-11	0.0	-0.0996560970029756	0.0	2.737891818982448e-11	0.0	1.0	0.0	4.714372652817191e-12	0.0	0.0	5.402273121166375e-10	0.0	0.0	-5.471472941551606e-09	0.0	-5.4345796429553556e-11	0.0	2.625579955417018e-11	-1.5349751417686183e-10	0.0	-5.42311872994164e-10
0.39	-5.511328400067266e-11	0.0	2.354424018865321e-11	-1.0916542024510438e-11	0.0	-0.09965609700300895	0.0	3.315616657942906e-11	0.0	1.0	0.0	4.9581915401670015e-12	0.0	0.0	5.681668985380771e-10	0.0	0.0	-5.461974399502436e-09	0.0	-5.511328400043919e-11	0.0	2.3544240189199734e-11	-1.5349751417739089e-10	0.0	-5.423118729940143e-10
0.395	-5.58807715715442e-11	0.0	2.0832680823648655e-11	-1.123486602793918e-11	0.0	-0.09965609700304229	0.0	3.893341496903363e-11	0.0	1.0	0.0	5.20201042751681e-12	0.0	0.0	5.961064849595165e-10	0.0	0.0	-5.45082079770365e-09	0.0	-5.588077157132746e-11	0.0	2.083268082423004e-11	-1.5349751417792002e-10	0.0	-5.423118729938646e-10
0.4	-5.6648259142415753e-11	0.0	1.8121121458644096e-11	-1.1553190031367921e-11	0.0	-0.09965609700307564	0.0	4.4710663358638205e-11	0.0	1.0	0.0	5.445829314866621e-12	0.0	0.0	6.240460713809561e-10	0.0	0.0	-5.438012136155249e-09	0.0	-5.6648259142218387e-11	0.0	1.812112145926109e-11	-1.5349751417844844e-10	0.0	-5.423118729937146e-10
0.405	-5.74157467132873e-11	0.0	1.5409562093639544e-11	-1.1871514034796663e-11	0.0	-0.09965609700310897	0.0	5.0487911748242774e-11	0.0	1.0	0.0	5.6896482022164295e-12	0.0	0.0	6.519856578023955e-10	0.0	0.0	-5.423548414857233e-09	0.0	-5.741574671311195e-11	0.0	1.5409562094292894e-11	-1.534975141789761e-10	0.0	-5.423118729935643e-10
0.41000000000000003	-5.818323428415884e-11	0.0	1.2698002728634989e-11	-1.2189838038225406e-11	0.0	-0.09965609700314232	0.0	5.626516013784734e-11	0.0	1.0	0.0	5.93346708956624e-12	0.0	0.0	6.799252442238351e-10	0.0	0.0	-5.407429633809601e-09	0.0	-5.818323428400815e-11	0.0	1.2698002729325446e-11	-1.5349751417950568e-10	0.0	-5.423118729934154e-10
0.41500000000000004	-5.895072185503038e-11	0.0	9.986443363630434e-12	-1.2508162041654148e-11	0.0	-0.09965609700317567	0.0	6.204240852745192e-11	0.0	1.0	0.0	6.1772859769160495e-12	0.0	0.0	7.078648306452746e-10	0.0	0.0	-5.389655793012354e-09	0.0	-5.8950721854907e-11	0.0	9.986443364358745e-12	-1.5349751418003613e-10	0.0	-5.423118729932623e-10
0.42	-5.971820942590193e-11	0.0	7.274883998625906e-12	-1.2826486045082886e-11	0.0	-0.099656097003209	0.0	6.781965691705644e-11	0.0	1.0	0.0	6.421104864265857e-12	0.0	0.0	7.358044170667139e-10	0.0	0.0	-5.370226892465491e-09	0.0	-5.971820942580851e-11	0.0	7.274883999392819e-12	-1.534975141805641e-10	0.0	-5.423118729931125e-10
0.425	-6.048569699677347e-11	0.0	4.56332463362135e-12	-1.3144810048511628e-11	0.0	-0.09965609700324235	0.0	7.3596905306661e-11	0.0	1.0	0.0	6.664923751615666e-12	0.0	0.0	7.637440034881534e-10	0.0	0.0	-5.349142932169013e-09	0.0	-6.048569699671265e-11	0.0	4.5633246344276156e-12	-1.5349751418109143e-10	0.0	-5.423118729929665e-10
0.43	-6.125318456764502e-11	0.0	1.851765268616795e-12	-1.346313405194037e-11	0.0	-0.09965609700327568	0.0	7.937415369626557e-11	0.0	1.0	0.0	6.908742638965476e-12	0.0	0.0	7.916835899095928e-10	0.0	0.0	-5.32640391212292e-09	0.0	-6.125318456761943e-11	0.0	1.85176526946316e-12	-1.5349751418162155e-10	0.0	-5.423118729928163e-10
0.435	-6.202067213851656e-11	0.0	-8.597940963877603e-13	-1.3781458055369111e-11	0.0	-0.09965609700330903	0.0	8.515140208587014e-11	0.0	1.0	0.0	7.1525615263152855e-12	0.0	0.0	8.196231763310323e-10	0.0	0.0	-5.302009832327211e-09	0.0	-6.202067213852886e-11	0.0	-8.59794095500547e-13	-1.534975141821517e-10	0.0	-5.423118729926665e-10
0.44	-6.27881597093881e-11	0.0	-3.5713534613923156e-12	-1.4099782058797853e-11	0.0	-0.09965609700334238	0.0	9.092865047547472e-11	0.0	1.0	0.0	7.396380413665096e-12	0.0	0.0	8.475627627524719e-10	0.0	0.0	-5.275960692781887e-09	0.0	-6.278815970944094e-11	0.0	-3.5713534604635053e-12	-1.5966227200966164e-10	0.0	-5.847166954531702e-10
0.445	-6.355564728025966e-11	0.0	-6.282912826396871e-12	-1.4418106062226596e-11	0.0	-0.09965609700337572	0.0	9.670589886507929e-11	0.0	1.0	0.0	7.640199301014905e-12	0.0	0.0	8.755023491739113e-10	0.0	0.0	-5.248256493486946e-09	0.0	-6.355564728035567e-11	0.0	-6.282912825425716e-12	-1.175310992599333e-10	0.0	-2.949137622840723e-10
0.45	-6.395324938155673e-11	0.0	-6.450182843713692e-12	-1.4779192299548465e-11	0.0	-0.09965609700337669	0.0	9.302304818234448e-11	0.0	1.0	0.0	7.550124247526807e-12	0.0	0.0	8.651805083653451e-10	0.0	0.0	-5.221607353195494e-09	0.0	-6.395324938165413e-11	0.0	-6.450182842747982e-12	-6.722287020133425e-11	0.0	5.11357633300379e-11
0.455	-6.428952356054665e-11	0.0	-6.1956034176841145e-12	-1.5147368620622188e-11	0.0	-0.09965609700337229	0.0	8.777168976235293e-11	0.0	1.0	0.0	7.40468875588445e-12	0.0	0.0	8.485148286403106e-10	0.0	0.0	-5.196462616274922e-09	0.0	-6.42895235606384e-11	0.0	-6.195603416732026e-12	-6.623270375829749e-11	0.0	5.7946709258811997e-11
0.46	-6.462579773953657e-11	0.0	-5.941023991654535e-12	-1.551554494169591e-11	0.0	-0.09965609700336789	0.0	8.252033134236135e-11	0.0	1.0	0.0	7.259253264242093e-12	0.0	0.0	8.318491489152762e-10	0.0	0.0	-5.172822282725229e-09	0.0	-6.462579773962283e-11	0.0	-5.941023990716265e-12	-6.725483579689997e-11	0.0	5.0915885203132656e-11
0.465	-6.496207191852649e-11	0.0	-5.686444565624956e-12	-1.5883721262769632e-11	0.0	-0.09965609700336349	0.0	7.72689729223698e-11	0.0	1.0	0.0	7.1138177725997355e-12	0.0	0.0	8.151834691902417e-10	0.0	0.0	-5.150686352546417e-09	0.0	-6.49620719186074e-11	0.0	-5.6864445647006994e-12	-6.725483579692905e-11	0.0	5.0915885203093584e-11
0.47000000000000003	-6.529834609751642e-11	0.0	-5.4318651395953765e-12	-1.6251897583843355e-11	0.0	-0.09965609700335909	0.0	7.201761450237822e-11	0.0	1.0	0.0	6.968382280957378e-12	0.0	0.0	7.985177894652072e-10	0.0	0.0	-5.1300548257384845e-09	0.0	-6.529834609759212e-11	0.0	-5.431865138685329e-12	-6.725483579695898e-11	0.0	5.091588520305461e-11
0.47500000000000003	-6.563462027650634e-11	0.0	-5.177285713565797e-12	-1.662007390491708e-11	0.0	-0.0996560970033547	0.0	6.676625608238665e-11	0.0	1.0	0.0	6.822946789315021e-12	0.0	0.0	7.818521097401728e-10	0.0	0.0	-5.110927702301433e-09	0.0	-6.563462027657699e-11	0.0	-5.1772857126701544e-12	-6.725483579698871e-11	0.0	5.0915885203014963e-11
0.48	-6.597089445549626e-11	0.0	-4.922706287536222e-12	-1.69882502259908e-11	0.0	-0.0996560970033503	0.0	6.151489766239515e-11	0.0	1.0	0.0	6.677511297672665e-12	0.0	0.0	7.651864300151385e-10	0.0	0.0	-5.093304982235261e-09	0.0	-6.597089445556201e-11	0.0	-4.922706286655179e-12	-6.725483579701672e-11	0.0	5.091588520297582e-11
0.485	-6.630716863448618e-11	0.0	-4.6681268615066425e-12	-1.7356426547064522e-11	0.0	-0.0996560970033459	0.0	5.626353924240359e-11	0.0	1.0	0.0	6.5320758060303076e-12	0.0	0.0	7.48520750290104e-10	0.0	0.0	-5.077186665539969e-09	0.0	-6.630716863454716e-11	0.0	-4.6681268606403954e-12	-6.725483579704709e-11	0.0	5.0915885202937195e-11
0.49	-6.66434428134761e-11	0.0	-4.413547435477063e-12	-1.7724602868138246e-11	0.0	-0.0996560970033415	0.0	5.1012180822412025e-11	0.0	1.0	0.0	6.38664031438795e-12	0.0	0.0	7.318550705650695e-10	0.0	0.0	-5.062572752215557e-09	0.0	-6.664344281353248e-11	0.0	-4.413547434625808e-12	-6.725483579707918e-11	0.0	5.0915885202897937e-11
0.495	-6.697971699246602e-11	0.0	-4.158968009447484e-12	-1.809277918921197e-11	0.0	-0.09965609700333711	0.0	4.576082240242045e-11	0.0	1.0	0.0	6.241204822745593e-12	0.0	0.0	7.151893908400351e-10	0.0	0.0	-5.049463242262025e-09	0.0	-6.697971699251794e-11	0.0	-4.158968008611416e-12	-6.725483579710654e-11	0.0	5.091588520285888e-11
0.5	-6.731599117145594e-11	0.0	-3.9043885834179046e-12	-1.8460955510285693e-11	0.0	-0.09965609700333271	0.0	4.0509463982428886e-11	0.0	1.0	0.0	6.095769331103236e-12	0.0	0.0	6.985237111150007e-10	0.0	0.0	-5.037858135679372e-09	0.0	-6.731599117150354e-11	0.0	-3.9043885825972194e-12	-6.725483579713498e-11	0.0	5.091588520281957e-11
0.505	-6.765226535044586e-11	0.0	-3.649809157388327e-12	-1.8829131831359413e-11	0.0	-0.09965609700332831	0.0	3.5258105562437336e-11	0.0	1.0	0.0	5.950333839460879e-12	0.0	0.0	6.818580313899663e-10	0.0	0.0	-5.0277574324676e-09	0.0	-6.76522653504893e-11	0.0	-3.64980915658322e-12	-6.725483579716751e-11	0.0	5.0915885202780496e-11
0.51	-6.798853952943579e-11	0.0	-3.3952297313587475e-12	-1.9197308152433136e-11	0.0	-0.09965609700332391	0.0	3.000674714244577e-11	0.0	1.0	0.0	5.804898347818521e-12	0.0	0.0	6.651923516649316e-10	0.0	0.0	-5.0191611326267085e-09	0.0	-6.798853952947521e-11	0.0	-3.3952297305694144e-12	-6.72548357971955e-11	0.0	5.091588520274156e-11
0.515	-6.832481370842571e-11	0.0	-3.140650305329168e-12	-1.956548447350686e-11	0.0	-0.09965609700331951	0.0	2.4755388722454197e-11	0.0	1.0	0.0	5.659462856176163e-12	0.0	0.0	6.485266719398971e-10	0.0	0.0	-5.012069236156697e-09	0.0	-6.832481370846126e-11	0.0	-3.1406503045558048e-12	-6.725483579722438e-11	0.0	5.091588520270236e-11
0.52	-6.866108788741563e-11	0.0	-2.886070879299589e-12	-1.9933660794580583e-11	0.0	-0.09965609700331511	0.0	1.9504030302462634e-11	0.0	1.0	0.0	5.514027364533806e-12	0.0	0.0	6.318609922148627e-10	0.0	0.0	-5.006481743057565e-09	0.0	-6.866108788744747e-11	0.0	-2.8860708785423906e-12	-6.725483579725582e-11	0.0	5.091588520266326e-11
0.525	-6.899736206640555e-11	0.0	-2.6314914532700095e-12	-2.0301837115654307e-11	0.0	-0.09965609700331071	0.0	1.425267188247107e-11	0.0	1.0	0.0	5.368591872891449e-12	0.0	0.0	6.151953124898283e-10	0.0	0.0	-5.002398653329313e-09	0.0	-6.89973620664338e-11	0.0	-2.6314914525291723e-12	-6.725483579728254e-11	0.0	5.0915885202624075e-11
0.53	-6.933363624539547e-11	0.0	-2.376912027240431e-12	-2.0670013436728027e-11	0.0	-0.09965609700330631	0.0	9.001313462479508e-12	0.0	1.0	0.0	5.223156381249092e-12	0.0	0.0	5.985296327647939e-10	0.0	0.0	-4.999819966971941e-09	0.0	-6.93336362454203e-11	0.0	-2.37691202651615e-12	-6.72548357973155e-11	0.0	5.091588520258492e-11
0.535	-6.966991042438539e-11	0.0	-2.1223326012108517e-12	-2.103818975780175e-11	0.0	-0.09965609700330191	0.0	3.749955042487932e-12	0.0	1.0	0.0	5.0777208896067345e-12	0.0	0.0	5.818639530397594e-10	0.0	0.0	-4.998745683985449e-09	0.0	-6.966991042440695e-11	0.0	-2.122332600503323e-12	-6.725483579734371e-11	0.0	5.091588520254589e-11
0.54	-7.000618460337531e-11	0.0	-1.8677531751812723e-12	-2.1406366078875474e-11	0.0	-0.09965609700329751	0.0	-1.5014033775036313e-12	0.0	1.0	0.0	4.932285397964377e-12	0.0	0.0	5.651982733147249e-10	0.0	0.0	-4.999175804369837e-09	0.0	-7.000618460339374e-11	0.0	-1.8677531744906912e-12	-6.725483579737451e-11	0.0	5.091588520250666e-11
0.545	-7.034245878236524e-11	0.0	-1.6131737491516938e-12	-2.1774542399949197e-11	0.0	-0.09965609700329311	0.0	-6.752761797495188e-12	0.0	1.0	0.0	4.78684990632202e-12	0.0	0.0	5.485325935896904e-10	0.0	0.0	-5.001110328125105e-09	0.0	-7.034245878238069e-11	0.0	-1.6131737484782563e-12	-6.725483579740446e-11	0.0	5.091588520246752e-11
0.55	-7.067873296135516e-11	0.0	-1.3585943231221145e-12	-2.214271872102292e-11	0.0	-0.09965609700328873	0.0	-1.2004120217486757e-11	0.0	1.0	0.0	4.641414414679663e-12	0.0	0.0	5.31866913864656e-10	0.0	0.0	-5.004549255251254e-09	0.0	-7.067873296136778e-11	0.0	-1.3585943224660158e-12	-6.72548357974316e-11	0.0	5.0915885202428486e-11
0.555	-7.101500714034508e-11	0.0	-1.1040148970925355e-12	-2.2510895042096644e-11	0.0	-0.09965609700328433	0.0	-1.7255478637478327e-11	0.0	1.0	0.0	4.495978923037305e-12	0.0	0.0	5.152012341396215e-10	0.0	0.0	-5.009492585748282e-09	0.0	-7.101500714035501e-11	0.0	-1.1040148964539715e-12	-6.725483579746132e-11	0.0	5.09158852023893e-11
0.56	-7.1351281319335e-11	0.0	-8.494354710629564e-13	-2.2879071363170368e-11	0.0	-0.09965609700327993	0.0	-2.250683705746989e-11	0.0	1.0	0.0	4.350543431394947e-12	0.0	0.0	4.98535554414587e-10	0.0	0.0	-5.01594031961619e-09	0.0	-7.13512813193424e-11	0.0	-8.494354704421227e-13	-6.72548357974917e-11	0.0	5.0915885202350214e-11
0.5650000000000001	-7.168755549832492e-11	0.0	-5.948560450333773e-13	-2.324724768424409e-11	0.0	-0.09965609700327553	0.0	-2.7758195477461453e-11	0.0	1.0	0.0	4.20510793975259e-12	0.0	0.0	4.818698746895526e-10	0.0	0.0	-5.0238924568549786e-09	0.0	-7.168755549832992e-11	0.0	-5.948560444304694e-13	-6.7254835797521e-11	0.0	5.09158852023111e-11
0.5700000000000001	-7.202382967731484e-11	0.0	-3.4027661900379814e-13	-2.3615424005317815e-11	0.0	-0.09965609700327113	0.0	-3.300955389745302e-11	0.0	1.0	0.0	4.059672448110233e-12	0.0	0.0	4.652041949645181e-10	0.0	0.0	-5.033348997464647e-09	0.0	-7.202382967731761e-11	0.0	-3.4027661841901184e-13	-6.725483579755287e-11	0.0	5.091588520227203e-11
0.5750000000000001	-7.236010385630477e-11	0.0	-8.569719297421922e-14	-2.3983600326391538e-11	0.0	-0.09965609700326673	0.0	-3.8260912317444585e-11	0.0	1.0	0.0	3.9142369564678754e-12	0.0	0.0	4.485385152394836e-10	0.0	0.0	-5.0443099414451954e-09	0.0	-7.236010385630545e-11	0.0	-8.569719240775003e-14	-6.725483579758023e-11	0.0	5.0915885202232166e-11
0.58	-7.269637803529468e-11	0.0	1.6888223305535426e-13	-2.4351776647465252e-11	0.0	-0.09965609700326233	0.0	-4.351227073743603e-11	0.0	1.0	0.0	3.768801464825522e-12	0.0	0.0	4.3187283551444957e-10	0.0	0.0	-5.056775288796624e-09	0.0	-7.269637803529341e-11	0.0	1.688822336033107e-13	-6.725483579760845e-11	0.0	5.091588520219305e-11
0.585	-7.30326522142846e-11	0.0	4.234616590849333e-13	-2.4719952968538975e-11	0.0	-0.09965609700325793	0.0	-4.87636291574276e-11	0.0	1.0	0.0	3.623365973183164e-12	0.0	0.0	4.15207155789415e-10	0.0	0.0	-5.070745039518933e-09	0.0	-7.303265221428154e-11	0.0	4.2346165961418136e-13	-6.795996047073271e-11	0.0	5.1806741563868505e-11
0.59	-7.336892639327452e-11	0.0	6.780410851145123e-13	-2.50881292896127e-11	0.0	-0.09965609700325354	0.0	-5.4014987577419164e-11	0.0	1.0	0.0	3.477930481540807e-12	0.0	0.0	3.985414760643806e-10	0.0	0.0	-5.086219193612121e-09	0.0	-7.33689263932698e-11	0.0	6.780410856248564e-13	-6.570940540913234e-11	0.0	4.8963384395164716e-11
0.595	-7.366289309187851e-11	0.0	8.791691294373506e-13	-2.548889109738888e-11	0.0	-0.09965609700324973	0.0	-5.812594832231557e-11	0.0	1.0	0.0	3.3609482229417698e-12	0.0	0.0	3.85136296673115e-10	0.0	0.0	-5.102871051207443e-09	0.0	-7.36628930918726e-11	0.0	8.791691299325049e-13	-4.197630914732642e-11	0.0	1.8978928319798956e-11
0.6	-7.379574073147986e-11	0.0	8.767389319452418e-13	-2.601374781478272e-11	0.0	-0.09965609700324819	0.0	-5.789394657868617e-11	0.0	1.0	0.0	3.3523240629981848e-12	0.0	0.0	3.8414804073988857e-10	0.0	0.0	-5.119456445199016e-09	0.0	-7.379574073147398e-11	0.0	8.767389324400163e-13	-2.3884210270254982e-11	0.0	-3.87867686183374e-12
0.605	-7.392858837108123e-11	0.0	8.743087344531328e-13	-2.6538604532176588e-11	0.0	-0.09965609700324667	0.0	-5.766194483505675e-11	0.0	1.0	0.0	3.3436999030545994e-12	0.0	0.0	3.831597848066621e-10	0.0	0.0	-5.1359753755868404e-09	0.0	-7.392858837107539e-11	0.0	8.743087349475229e-13	-2.6569527920281645e-11	0.0	-4.860394984991526e-13
0.61	-7.40614360106826e-11	0.0	8.718785369610239e-13	-2.7063461249570455e-11	0.0	-0.09965609700324514	0.0	-5.742994309142734e-11	0.0	1.0	0.0	3.335075743111014e-12	0.0	0.0	3.8217152887343566e-10	0.0	0.0	-5.152427842370917e-09	0.0	-7.406143601067678e-11	0.0	8.718785374550249e-13	-2.6569527920277768e-11	0.0	-4.860394985000361e-13
0.615	-7.419428365028396e-11	0.0	8.694483394689151e-13	-2.7588317966964297e-11	0.0	-0.0996560970032436	0.0	-5.719794134779793e-11	0.0	1.0	0.0	3.3264515831674294e-12	0.0	0.0	3.811832729402093e-10	0.0	0.0	-5.168813845551245e-09	0.0	-7.419428365027817e-11	0.0	8.694483399625225e-13	-2.6569527920277768e-11	0.0	-4.860394985009449e-13
0.62	-7.432713128988531e-11	0.0	8.670181419768062e-13	-2.8113174684358164e-11	0.0	-0.09965609700324207	0.0	-5.6965939604168525e-11	0.0	1.0	0.0	3.317827423223844e-12	0.0	0.0	3.8019501700698285e-10	0.0	0.0	-5.1851333851278246e-09	0.0	-7.432713128987956e-11	0.0	8.670181424700154e-13	-2.656952792027755e-11	0.0	-4.860394985018773e-13
0.625	-7.445997892948667e-11	0.0	8.645879444846973e-13	-2.8638031401752032e-11	0.0	-0.09965609700324053	0.0	-5.673393786053912e-11	0.0	1.0	0.0	3.309203263280259e-12	0.0	0.0	3.7920676107375645e-10	0.0	0.0	-5.201386461100657e-09	0.0	-7.445997892948094e-11	0.0	8.645879449775037e-13	-2.6569527920278844e-11	0.0	-4.860394985028012e-13
0.63	-7.459282656908804e-11	0.0	8.621577469925883e-13	-2.91628881191459e-11	0.0	-0.099656097003239	0.0	-5.65019361169097e-11	0.0	1.0	0.0	3.3005791033366737e-12	0.0	0.0	3.7821850514053e-10	0.0	0.0	-5.217573073469741e-09	0.0	-7.459282656908235e-11	0.0	8.621577474849874e-13	-2.656952792027863e-11	0.0	-4.860394985037234e-13
0.635	-7.472567420868939e-11	0.0	8.597275495004795e-13	-2.968774483653974e-11	0.0	-0.09965609700323746	0.0	-5.626993437328029e-11	0.0	1.0	0.0	3.2919549433930887e-12	0.0	0.0	3.772302492073036e-10	0.0	0.0	-5.233693222235076e-09	0.0	-7.472567420868373e-11	0.0	8.597275499924665e-13	-2.6569527920274753e-11	0.0	-4.860394985046271e-13
0.64	-7.485852184829075e-11	0.0	8.572973520083706e-13	-3.021260155393358e-11	0.0	-0.09965609700323594	0.0	-5.603793262965089e-11	0.0	1.0	0.0	3.2833307834495037e-12	0.0	0.0	3.762419932740772e-10	0.0	0.0	-5.249746907396663e-09	0.0	-7.485852184828511e-11	0.0	8.572973524999411e-13	-2.6569527920279923e-11	0.0	-4.860394985055275e-13
0.645	-7.499136948789211e-11	0.0	8.548671545162617e-13	-3.073745827132745e-11	0.0	-0.09965609700323441	0.0	-5.5805930886021474e-11	0.0	1.0	0.0	3.2747066235059187e-12	0.0	0.0	3.752537373408508e-10	0.0	0.0	-5.265734128954502e-09	0.0	-7.499136948788652e-11	0.0	8.548671550074112e-13	-2.656952792027949e-11	0.0	-4.860394985064631e-13
0.65	-7.512421712749347e-11	0.0	8.524369570241527e-13	-3.126231498872132e-11	0.0	-0.09965609700323287	0.0	-5.5573929142392055e-11	0.0	1.0	0.0	3.2660824635623333e-12	0.0	0.0	3.742654814076244e-10	0.0	0.0	-5.281654886908593e-09	0.0	-7.51242171274879e-11	0.0	8.524369575148765e-13	-2.6569527920277338e-11	0.0	-4.860394985073804e-13
0.655	-7.525706476709483e-11	0.0	8.500067595320438e-13	-3.178717170611516e-11	0.0	-0.09965609700323134	0.0	-5.5341927398762655e-11	0.0	1.0	0.0	3.2574583036187483e-12	0.0	0.0	3.73277225474398e-10	0.0	0.0	-5.297509181258935e-09	0.0	-7.52570647670893e-11	0.0	8.500067600223374e-13	-2.6569527920277338e-11	0.0	-4.860394985082791e-13
0.66	-7.538991240669618e-11	0.0	8.475765620399351e-13	-3.2312028423509e-11	0.0	-0.0996560970032298	0.0	-5.510992565513325e-11	0.0	1.0	0.0	3.2488341436751633e-12	0.0	0.0	3.722889695411716e-10	0.0	0.0	-5.3132970120055295e-09	0.0	-7.538991240669068e-11	0.0	8.475765625297937e-13	-2.6569527920276905e-11	0.0	-4.860394985092164e-13
0.665	-7.552276004629755e-11	0.0	8.451463645478261e-13	-3.283688514090288e-11	0.0	-0.09965609700322828	0.0	-5.4877923911503836e-11	0.0	1.0	0.0	3.2402099837315784e-12	0.0	0.0	3.7130071360794517e-10	0.0	0.0	-5.329018379148376e-09	0.0	-7.552276004629207e-11	0.0	8.451463650372453e-13	-2.6569527920280136e-11	0.0	-4.860394985101471e-13
0.67	-7.565560768589892e-11	0.0	8.427161670557171e-13	-3.336174185829675e-11	0.0	-0.09965609700322675	0.0	-5.464592216787442e-11	0.0	1.0	0.0	3.231585823787993e-12	0.0	0.0	3.703124576747187e-10	0.0	0.0	-5.344673282687474e-09	0.0	-7.565560768589348e-11	0.0	8.427161675446923e-13	-2.6569527920279707e-11	0.0	-4.860394985110457e-13
0.675	-7.578845532550027e-11	0.0	8.402859695636082e-13	-3.38865985756906e-11	0.0	-0.09965609700322521	0.0	-5.441392042424501e-11	0.0	1.0	0.0	3.222961663844408e-12	0.0	0.0	3.693242017414923e-10	0.0	0.0	-5.3602617226228235e-09	0.0	-7.578845532549486e-11	0.0	8.402859700521348e-13	-2.6569527920276046e-11	0.0	-4.860394985119427e-13
0.68	-7.592130296510163e-11	0.0	8.378557720714994e-13	-3.4411455293084444e-11	0.0	-0.09965609700322368	0.0	-5.418191868061561e-11	0.0	1.0	0.0	3.214337503900823e-12	0.0	0.0	3.683359458082659e-10	0.0	0.0	-5.375783698954425e-09	0.0	-7.592130296509624e-11	0.0	8.378557725595728e-13	-2.6569527920277768e-11	0.0	-4.86039498512875e-13
0.685	-7.605415060470298e-11	0.0	8.354255745793904e-13	-3.493631201047831e-11	0.0	-0.09965609700322214	0.0	-5.394991693698619e-11	0.0	1.0	0.0	3.2057133439572376e-12	0.0	0.0	3.6734768987503945e-10	0.0	0.0	-5.391239211682278e-09	0.0	-7.605415060469763e-11	0.0	8.35425575067006e-13	-2.656952792027906e-11	0.0	-4.860394985138158e-13
0.6900000000000001	-7.618699824430435e-11	0.0	8.329953770872815e-13	-3.546116872787218e-11	0.0	-0.09965609700322062	0.0	-5.371791519335678e-11	0.0	1.0	0.0	3.1970891840136522e-12	0.0	0.0	3.66359433941813e-10	0.0	0.0	-5.406628260806383e-09	0.0	-7.618699824429903e-11	0.0	8.329953775744347e-13	-2.6569527920276905e-11	0.0	-4.86039498514696e-13
0.6950000000000001	-7.631984588390571e-11	0.0	8.305651795951727e-13	-3.598602544526602e-11	0.0	-0.09965609700321909	0.0	-5.348591344972737e-11	0.0	1.0	0.0	3.1884650240700676e-12	0.0	0.0	3.6537117800858665e-10	0.0	0.0	-5.4219508463267404e-09	0.0	-7.631984588390041e-11	0.0	8.30565180081859e-13	-2.6569527920276692e-11	0.0	-4.860394985156164e-13
0.7000000000000001	-7.645269352350706e-11	0.0	8.281349821030638e-13	-3.651088216265986e-11	0.0	-0.09965609700321755	0.0	-5.325391170609797e-11	0.0	1.0	0.0	3.1798408641264827e-12	0.0	0.0	3.6438292207536024e-10	0.0	0.0	-5.437206968243349e-09	0.0	-7.64526935235018e-11	0.0	8.281349825892786e-13	-2.6569527920278198e-11	0.0	-4.86039498516532e-13
0.705	-7.658554116310842e-11	0.0	8.25704784610955e-13	-3.7035738880053704e-11	0.0	-0.09965609700321602	0.0	-5.3021909962468566e-11	0.0	1.0	0.0	3.1712167041828977e-12	0.0	0.0	3.6339466614213384e-10	0.0	0.0	-5.45239662655621e-09	0.0	-7.658554116310318e-11	0.0	8.257047850966937e-13	-2.6569527920277768e-11	0.0	-4.860394985174526e-13
0.71	-7.671838880270979e-11	0.0	8.23274587118846e-13	-3.756059559744757e-11	0.0	-0.09965609700321448	0.0	-5.278990821883915e-11	0.0	1.0	0.0	3.1625925442393123e-12	0.0	0.0	3.624064102089074e-10	0.0	0.0	-5.467519821265322e-09	0.0	-7.671838880270458e-11	0.0	8.232745876041041e-13	-2.656952792027755e-11	0.0	-4.860394985183983e-13
0.715	-7.685123644231114e-11	0.0	8.208443896267371e-13	-3.808545231484145e-11	0.0	-0.09965609700321296	0.0	-5.2557906475209734e-11	0.0	1.0	0.0	3.153968384295727e-12	0.0	0.0	3.6141815427568093e-10	0.0	0.0	-5.482576552370686e-09	0.0	-7.685123644230596e-11	0.0	8.208443901115098e-13	-2.656952792027712e-11	0.0	-4.860394985193105e-13
0.72	-7.69840840819125e-11	0.0	8.184141921346282e-13	-3.8610309032235306e-11	0.0	-0.09965609700321143	0.0	-5.232590473158033e-11	0.0	1.0	0.0	3.145344224352142e-12	0.0	0.0	3.6042989834245453e-10	0.0	0.0	-5.497566819872302e-09	0.0	-7.698408408190735e-11	0.0	8.18414192618911e-13	-2.6569527920276905e-11	0.0	-4.860394985202074e-13
0.725	-7.711693172151385e-11	0.0	8.159839946425193e-13	-3.913516574962915e-11	0.0	-0.09965609700320989	0.0	-5.209390298795093e-11	0.0	1.0	0.0	3.1367200644085573e-12	0.0	0.0	3.594416424092282e-10	0.0	0.0	-5.51249062377017e-09	0.0	-7.711693172150874e-11	0.0	8.159839951263078e-13	-2.6569527920278198e-11	0.0	-4.860394985211145e-13
0.73	-7.724977936111522e-11	0.0	8.135537971504104e-13	-3.9660022467023015e-11	0.0	-0.09965609700320836	0.0	-5.186190124432151e-11	0.0	1.0	0.0	3.1280959044649715e-12	0.0	0.0	3.5845338647600167e-10	0.0	0.0	-5.5273479640642894e-09	0.0	-7.724977936111013e-11	0.0	8.135537976336999e-13	-2.6569527920277984e-11	0.0	-4.86039498522057e-13
0.735	-7.738262700071658e-11	0.0	8.111235996583014e-13	-4.018487918441688e-11	0.0	-0.09965609700320682	0.0	-5.1629899500692095e-11	0.0	1.0	0.0	3.1194717445213865e-12	0.0	0.0	3.5746513054277527e-10	0.0	0.0	-5.542138840754661e-09	0.0	-7.738262700071151e-11	0.0	8.111236001410872e-13	-2.6569527920279277e-11	0.0	-4.860394985229658e-13
0.74	-7.751547464031795e-11	0.0	8.086934021661926e-13	-4.0709735901810724e-11	0.0	-0.0996560970032053	0.0	-5.139789775706269e-11	0.0	1.0	0.0	3.1108475845778016e-12	0.0	0.0	3.5647687460954886e-10	0.0	0.0	-5.556863253841284e-09	0.0	-7.751547464031292e-11	0.0	8.086934026484703e-13	-2.656952792027906e-11	0.0	-4.860394985238577e-13
0.745	-7.76483222799193e-11	0.0	8.062632046740838e-13	-4.1234592619204566e-11	0.0	-0.09965609700320377	0.0	-5.116589601343329e-11	0.0	1.0	0.0	3.1022234246342166e-12	0.0	0.0	3.5548861867632246e-10	0.0	0.0	-5.571521203324158e-09	0.0	-7.76483222799143e-11	0.0	8.062632051558486e-13	-2.6569527920275183e-11	0.0	-4.860394985247883e-13
0.75	-7.778116991952066e-11	0.0	8.038330071819748e-13	-4.1759449336598433e-11	0.0	-0.09965609700320223	0.0	-5.093389426980387e-11	0.0	1.0	0.0	3.0935992646906316e-12	0.0	0.0	3.5450036274309605e-10	0.0	0.0	-5.5861126892032845e-09	0.0	-7.778116991951568e-11	0.0	8.038330076632224e-13	-2.6569527920276905e-11	0.0	-4.86039498525724e-13
0.755	-7.791401755912201e-11	0.0	8.014028096898658e-13	-4.22843060539923e-11	0.0	-0.0996560970032007	0.0	-5.070189252617446e-11	0.0	1.0	0.0	3.084975104747046e-12	0.0	0.0	3.535121068098696e-10	0.0	0.0	-5.600637711478663e-09	0.0	-7.791401755911706e-11	0.0	8.014028101705914e-13	-2.6569527920278198e-11	0.0	-4.860394985266294e-13
0.76	-7.804686519872337e-11	0.0	7.98972612197757e-13	-4.280916277138614e-11	0.0	-0.09965609700319916	0.0	-5.046989078254505e-11	0.0	1.0	0.0	3.0763509448034612e-12	0.0	0.0	3.525238508766432e-10	0.0	0.0	-5.615096270150294e-09	0.0	-7.804686519871846e-11	0.0	7.989726126779561e-13	-2.656952792027949e-11	0.0	-4.86039498527518e-13
0.765	-7.817971283832474e-11	0.0	7.965424147056482e-13	-4.333401948878e-11	0.0	-0.09965609700319764	0.0	-5.0237889038915644e-11	0.0	1.0	0.0	3.0677267848598762e-12	0.0	0.0	3.515355949434168e-10	0.0	0.0	-5.629488365218176e-09	0.0	-7.817971283831985e-11	0.0	7.965424151853162e-13	-2.6569527920277338e-11	0.0	-4.86039498528457e-13
0.77	-7.831256047792609e-11	0.0	7.941122172135392e-13	-4.385887620617388e-11	0.0	-0.09965609700319611	0.0	-5.000588729528623e-11	0.0	1.0	0.0	3.059102624916291e-12	0.0	0.0	3.5054733901019034e-10	0.0	0.0	-5.6438139966823095e-09	0.0	-7.831256047792123e-11	0.0	7.941122176926715e-13	-2.656952792027712e-11	0.0	-4.860394985293893e-13
0.775	-7.844540811752746e-11	0.0	7.916820197214303e-13	-4.438373292356773e-11	0.0	-0.09965609700319457	0.0	-4.977388555165682e-11	0.0	1.0	0.0	3.050478464972706e-12	0.0	0.0	3.4955908307696393e-10	0.0	0.0	-5.658073164542695e-09	0.0	-7.844540811752263e-11	0.0	7.916820202000223e-13	-2.6569527920276905e-11	0.0	-4.860394985302897e-13
0.78	-7.857825575712882e-11	0.0	7.892518222293214e-13	-4.4908589640961586e-11	0.0	-0.09965609700319304	0.0	-4.954188380802741e-11	0.0	1.0	0.0	3.041854305029121e-12	0.0	0.0	3.4857082714373753e-10	0.0	0.0	-5.672265868799332e-09	0.0	-7.857825575712401e-11	0.0	7.892518227073686e-13	-2.6569527920278198e-11	0.0	-4.860394985312018e-13
0.785	-7.871110339673017e-11	0.0	7.868216247372125e-13	-4.543344635835544e-11	0.0	-0.0996560970031915	0.0	-4.9309882064398e-11	0.0	1.0	0.0	3.033230145085536e-12	0.0	0.0	3.4758257121051113e-10	0.0	0.0	-5.6863921094522215e-09	0.0	-7.87111033967254e-11	0.0	7.868216252147103e-13	-2.6569527920277984e-11	0.0	-4.860394985321358e-13
0.79	-7.884395103633153e-11	0.0	7.843914272451036e-13	-4.5958303075749296e-11	0.0	-0.09965609700318998	0.0	-4.9077880320768593e-11	0.0	1.0	0.0	3.0246059851419505e-12	0.0	0.0	3.4659431527728467e-10	0.0	0.0	-5.700451886501363e-09	0.0	-7.884395103632678e-11	0.0	7.843914277220473e-13	-2.656952792027755e-11	0.0	-4.860394985330514e-13
0.795	-7.89767986759329e-11	0.0	7.819612297529947e-13	-4.648315979314315e-11	0.0	-0.09965609700318843	0.0	-4.884587857713918e-11	0.0	1.0	0.0	3.0159818251983655e-12	0.0	0.0	3.4560605934405827e-10	0.0	0.0	-5.714445199946756e-09	0.0	-7.897679867592818e-11	0.0	7.819612302293798e-13	-2.6569527920277338e-11	0.0	-4.860394985339483e-13
0.8	-7.910964631553425e-11	0.0	7.795310322608858e-13	-4.7008016510537005e-11	0.0	-0.09965609700318691	0.0	-4.8613876833509774e-11	0.0	1.0	0.0	3.00735766525478e-12	0.0	0.0	3.446178034108318e-10	0.0	0.0	-5.7283720497884e-09	0.0	-7.910964631552956e-11	0.0	7.795310327367078e-13	-2.6569527920275183e-11	0.0	-4.860394985348706e-13
0.805	-7.92424939551356e-11	0.0	7.771008347687769e-13	-4.753287322793086e-11	0.0	-0.09965609700318538	0.0	-4.838187508988036e-11	0.0	1.0	0.0	2.998733505311195e-12	0.0	0.0	3.436295474776054e-10	0.0	0.0	-5.742232436026296e-09	0.0	-7.924249395513094e-11	0.0	7.771008352440312e-13	-2.6569527920278414e-11	0.0	-4.860394985357996e-13
0.81	-7.937534159473697e-11	0.0	7.746706372766679e-13	-4.8057729945324727e-11	0.0	-0.09965609700318384	0.0	-4.814987334625095e-11	0.0	1.0	0.0	2.99010934536761e-12	0.0	0.0	3.42641291544379e-10	0.0	0.0	-5.756026358660444e-09	0.0	-7.937534159473235e-11	0.0	7.746706377513498e-13	-2.6569527920279707e-11	0.0	-4.8603949853671e-13
0.8150000000000001	-7.950818923433833e-11	0.0	7.722404397845591e-13	-4.858258666271858e-11	0.0	-0.09965609700318231	0.0	-4.791787160262154e-11	0.0	1.0	0.0	2.981485185424025e-12	0.0	0.0	3.416530356111526e-10	0.0	0.0	-5.7697538176908446e-09	0.0	-7.950818923433373e-11	0.0	7.72240440258664e-13	-2.656952792027583e-11	0.0	-4.860394985376305e-13
0.8200000000000001	-7.964103687393968e-11	0.0	7.698102422924502e-13	-4.9107443380112436e-11	0.0	-0.09965609700318077	0.0	-4.768586985899213e-11	0.0	1.0	0.0	2.9728610254804398e-12	0.0	0.0	3.4066477967792615e-10	0.0	0.0	-5.783414813117497e-09	0.0	-7.964103687393511e-11	0.0	7.698102427659736e-13	-2.656952792027755e-11	0.0	-4.860394985385343e-13
0.8250000000000001	-7.977388451354105e-11	0.0	7.673800448003413e-13	-4.96323000975063e-11	0.0	-0.09965609700317925	0.0	-4.745386811536272e-11	0.0	1.0	0.0	2.9642368655368548e-12	0.0	0.0	3.3967652374469974e-10	0.0	0.0	-5.7970093449404e-09	0.0	-7.97738845135365e-11	0.0	7.673800452732787e-13	-2.656952792027712e-11	0.0	-4.860394985394464e-13
0.8300000000000001	-7.990673215314241e-11	0.0	7.649498473082324e-13	-5.015715681490016e-11	0.0	-0.09965609700317772	0.0	-4.722186637173331e-11	0.0	1.0	0.0	2.9556127055932694e-12	0.0	0.0	3.3868826781147334e-10	0.0	0.0	-5.810537413159556e-09	0.0	-7.990673215313788e-11	0.0	7.649498477805791e-13	-2.6569527920276692e-11	0.0	-4.860394985403669e-13
0.835	-8.003957979274376e-11	0.0	7.625196498161235e-13	-5.0682013532294e-11	0.0	-0.09965609700317618	0.0	-4.698986462810391e-11	0.0	1.0	0.0	2.946988545649685e-12	0.0	0.0	3.3770001187824694e-10	0.0	0.0	-5.823999017774963e-09	0.0	-8.003957979273927e-11	0.0	7.62519650287875e-13	-2.6569527920276475e-11	0.0	-4.860394985412825e-13
0.84	-8.017242743234512e-11	0.0	7.600894523240147e-13	-5.1206870249687854e-11	0.0	-0.09965609700317465	0.0	-4.67578628844745e-11	0.0	1.0	0.0	2.9383643857060994e-12	0.0	0.0	3.3671175594502053e-10	0.0	0.0	-5.837394158786621e-09	0.0	-8.017242743234065e-11	0.0	7.600894527951663e-13	-2.656952792027949e-11	0.0	-4.860394985421946e-13
0.845	-8.030527507194649e-11	0.0	7.576592548319058e-13	-5.173172696708171e-11	0.0	-0.09965609700317311	0.0	-4.652586114084509e-11	0.0	1.0	0.0	2.9297402257625144e-12	0.0	0.0	3.3572350001179413e-10	0.0	0.0	-5.850722836194532e-09	0.0	-8.030527507194205e-11	0.0	7.57659255302453e-13	-2.656952792027906e-11	0.0	-4.86039498543142e-13
0.85	-8.043812271154784e-11	0.0	7.552290573397968e-13	-5.2256583684475576e-11	0.0	-0.09965609700317159	0.0	-4.629385939721567e-11	0.0	1.0	0.0	2.9211160658189295e-12	0.0	0.0	3.3473524407856773e-10	0.0	0.0	-5.8639850499986945e-09	0.0	-8.043812271154344e-11	0.0	7.552290578097349e-13	-2.6569527920275183e-11	0.0	-4.860394985440441e-13
0.855	-8.05709703511492e-11	0.0	7.527988598476879e-13	-5.278144040186943e-11	0.0	-0.09965609700317006	0.0	-4.6061857653586266e-11	0.0	1.0	0.0	2.9124919058753445e-12	0.0	0.0	3.337469881453413e-10	0.0	0.0	-5.877180800199109e-09	0.0	-8.057097035114482e-11	0.0	7.527988603170125e-13	-2.6569527920276905e-11	0.0	-4.860394985449428e-13
0.86	-8.070381799075057e-11	0.0	7.50368662355579e-13	-5.3306297119263285e-11	0.0	-0.09965609700316852	0.0	-4.582985590995685e-11	0.0	1.0	0.0	2.903867745931759e-12	0.0	0.0	3.3275873221211487e-10	0.0	0.0	-5.890310086795775e-09	0.0	-8.070381799074621e-11	0.0	7.503686628242855e-13	-2.6569527920278198e-11	0.0	-4.860394985458801e-13
0.865	-8.083666563035192e-11	0.0	7.479384648634701e-13	-5.383115383665714e-11	0.0	-0.099656097003167	0.0	-4.5597854166327447e-11	0.0	1.0	0.0	2.895243585988174e-12	0.0	0.0	3.3177047627888847e-10	0.0	0.0	-5.903372909788693e-09	0.0	-8.083666563034759e-11	0.0	7.479384653315538e-13	-2.6569527920276046e-11	0.0	-4.860394985467957e-13
0.87	-8.096951326995328e-11	0.0	7.455082673713613e-13	-5.4356010554050994e-11	0.0	-0.09965609700316545	0.0	-4.536585242269804e-11	0.0	1.0	0.0	2.8866194260445887e-12	0.0	0.0	3.30782220345662e-10	0.0	0.0	-5.9163692691778625e-09	0.0	-8.096951326994897e-11	0.0	7.455082678388176e-13	-2.656952792027755e-11	0.0	-4.860394985477078e-13
0.875	-8.110236090955465e-11	0.0	7.430780698792524e-13	-5.488086727144485e-11	0.0	-0.09965609700316393	0.0	-4.513385067906863e-11	0.0	1.0	0.0	2.8779952661010037e-12	0.0	0.0	3.297939644124356e-10	0.0	0.0	-5.929299164963284e-09	0.0	-8.110236090955037e-11	0.0	7.430780703460768e-13	-2.656952792027712e-11	0.0	-4.860394985486031e-13
0.88	-8.1235208549156e-11	0.0	7.406478723871435e-13	-5.54057239888387e-11	0.0	-0.0996560970031624	0.0	-4.490184893543922e-11	0.0	1.0	0.0	2.8693711061574187e-12	0.0	0.0	3.288057084792092e-10	0.0	0.0	-5.942162597144957e-09	0.0	-8.123520854915175e-11	0.0	7.406478728533315e-13	-2.6569527920276692e-11	0.0	-4.860394985495337e-13
0.885	-8.136805618875736e-11	0.0	7.382176748950345e-13	-5.593058070623256e-11	0.0	-0.09965609700316086	0.0	-4.466984719180981e-11	0.0	1.0	0.0	2.8607469462138337e-12	0.0	0.0	3.278174525459828e-10	0.0	0.0	-5.9549595657228826e-09	0.0	-8.136805618875313e-11	0.0	7.382176753605814e-13	-2.6569527920276475e-11	0.0	-4.860394985504727e-13
0.89	-8.150090382835871e-11	0.0	7.357874774029256e-13	-5.6455437423626425e-11	0.0	-0.09965609700315933	0.0	-4.44378454481804e-11	0.0	1.0	0.0	2.8521227862702488e-12	0.0	0.0	3.268291966127564e-10	0.0	0.0	-5.9676900706970595e-09	0.0	-8.150090382835451e-11	0.0	7.357874778678268e-13	-2.6569527920277768e-11	0.0	-4.860394985513799e-13
0.895	-8.163375146796008e-11	0.0	7.333572799108168e-13	-5.698029414102028e-11	0.0	-0.09965609700315779	0.0	-4.420584370455099e-11	0.0	1.0	0.0	2.8434986263266638e-12	0.0	0.0	3.2584094067953e-10	0.0	0.0	-5.980354112067488e-09	0.0	-8.16337514679559e-11	0.0	7.333572803750676e-13	-2.6569527920277338e-11	0.0	-4.860394985522988e-13
0.9	-8.176659910756144e-11	0.0	7.309270824187078e-13	-5.7505150858414147e-11	0.0	-0.09965609700315627	0.0	-4.3973841960921577e-11	0.0	1.0	0.0	2.834874466383078e-12	0.0	0.0	3.248526847463035e-10	0.0	0.0	-5.9929516898341684e-09	0.0	-8.176659910755729e-11	0.0	7.309270828823038e-13	-2.6569527920276905e-11	0.0	-4.86039498553199e-13
0.905	-8.18994467471628e-11	0.0	7.284968849265989e-13	-5.8030007575808e-11	0.0	-0.09965609700315474	0.0	-4.3741840217292164e-11	0.0	1.0	0.0	2.826250306439493e-12	0.0	0.0	3.238644288130771e-10	0.0	0.0	-6.0054828039971e-09	0.0	-8.189944674715868e-11	0.0	7.284968853895356e-13	-2.6569527920278414e-11	0.0	-4.860394985541078e-13
0.91	-8.203229438676416e-11	0.0	7.2606668743449e-13	-5.855486429320186e-11	0.0	-0.0996560970031532	0.0	-4.350983847366276e-11	0.0	1.0	0.0	2.817626146495908e-12	0.0	0.0	3.228761728798507e-10	0.0	0.0	-6.017947454556285e-09	0.0	-8.203229438676006e-11	0.0	7.260666878967627e-13	-2.656952792027626e-11	0.0	-4.860394985550267e-13
0.915	-8.216514202636552e-11	0.0	7.236364899423811e-13	-5.907972101059571e-11	0.0	-0.09965609700315167	0.0	-4.327783673003335e-11	0.0	1.0	0.0	2.809001986552323e-12	0.0	0.0	3.218879169466243e-10	0.0	0.0	-6.030345641511721e-09	0.0	-8.216514202636144e-11	0.0	7.236364904039853e-13	-2.6569527920276046e-11	0.0	-4.860394985559523e-13
0.92	-8.229798966596687e-11	0.0	7.212062924502723e-13	-5.960457772798956e-11	0.0	-0.09965609700315013	0.0	-4.304583498640394e-11	0.0	1.0	0.0	2.800377826608738e-12	0.0	0.0	3.2089966101339787e-10	0.0	0.0	-6.042677364863409e-09	0.0	-8.229798966596283e-11	0.0	7.212062929112032e-13	-2.6569527920277338e-11	0.0	-4.860394985568745e-13
0.925	-8.243083730556824e-11	0.0	7.187760949581634e-13	-6.012943444538342e-11	0.0	-0.0996560970031486	0.0	-4.281383324277453e-11	0.0	1.0	0.0	2.791753666665153e-12	0.0	0.0	3.1991140508017147e-10	0.0	0.0	-6.054942624611348e-09	0.0	-8.243083730556422e-11	0.0	7.187760954184166e-13	-2.656952792027863e-11	0.0	-4.860394985577918e-13
0.93	-8.25636849451696e-11	0.0	7.163458974660545e-13	-6.065429116277727e-11	0.0	-0.09965609700314706	0.0	-4.258183149914512e-11	0.0	1.0	0.0	2.7831295067215677e-12	0.0	0.0	3.18923149146945e-10	0.0	0.0	-6.067141420755539e-09	0.0	-8.25636849451656e-11	0.0	7.163458979256253e-13	-2.6569527920276475e-11	0.0	-4.860394985587056e-13
0.935	-8.269653258477095e-11	0.0	7.139156999739456e-13	-6.117914788017113e-11	0.0	-0.09965609700314554	0.0	-4.234982975551571e-11	0.0	1.0	0.0	2.7745053467779827e-12	0.0	0.0	3.179348932137186e-10	0.0	0.0	-6.079273753295982e-09	0.0	-8.269653258476698e-11	0.0	7.139157004328295e-13	-2.6569527920277984e-11	0.0	-4.860394985596278e-13
0.9400000000000001	-8.282938022437232e-11	0.0	7.114855024818366e-13	-6.170400459756498e-11	0.0	-0.09965609700314401	0.0	-4.21178280118863e-11	0.0	1.0	0.0	2.7658811868343973e-12	0.0	0.0	3.1694663728049216e-10	0.0	0.0	-6.0913396222326764e-09	0.0	-8.282938022436838e-11	0.0	7.114855029400291e-13	-2.656952792027755e-11	0.0	-4.860394985605466e-13
0.9450000000000001	-8.296222786397367e-11	0.0	7.090553049897277e-13	-6.222886131495886e-11	0.0	-0.09965609700314247	0.0	-4.188582626825689e-11	0.0	1.0	0.0	2.7572570268908123e-12	0.0	0.0	3.1595838134726575e-10	0.0	0.0	-6.103339027565623e-09	0.0	-8.296222786396976e-11	0.0	7.090553054472241e-13	-2.65695279202754e-11	0.0	-4.86039498561447e-13
0.9500000000000001	-8.309507550357503e-11	0.0	7.066251074976188e-13	-6.275371803235272e-11	0.0	-0.09965609700314094	0.0	-4.1653824524627474e-11	0.0	1.0	0.0	2.7486328669472273e-12	0.0	0.0	3.1497012541403935e-10	0.0	0.0	-6.115271969294822e-09	0.0	-8.309507550357114e-11	0.0	7.066251079544145e-13	-2.6569527920276905e-11	0.0	-4.860394985623709e-13
0.9550000000000001	-8.32279231431764e-11	0.0	7.041949100055099e-13	-6.327857474974657e-11	0.0	-0.0996560970031394	0.0	-4.142182278099807e-11	0.0	1.0	0.0	2.740008707003642e-12	0.0	0.0	3.139818694808129e-10	0.0	0.0	-6.127138447420272e-09	0.0	-8.322792314317253e-11	0.0	7.041949104616003e-13	-2.6569527920278198e-11	0.0	-4.860394985632898e-13
0.96	-8.336077078277775e-11	0.0	7.01764712513401e-13	-6.380343146714041e-11	0.0	-0.09965609700313788	0.0	-4.118982103736866e-11	0.0	1.0	0.0	2.7313845470600573e-12	0.0	0.0	3.1299361354758654e-10	0.0	0.0	-6.138938461941974e-09	0.0	-8.336077078277391e-11	0.0	7.017647129687816e-13	-2.6569527920276046e-11	0.0	-4.860394985642036e-13
0.965	-8.349361842237911e-11	0.0	6.993345150212921e-13	-6.432828818453427e-11	0.0	-0.09965609700313635	0.0	-4.0957819293739255e-11	0.0	1.0	0.0	2.7227603871164724e-12	0.0	0.0	3.1200535761436014e-10	0.0	0.0	-6.150672012859928e-09	0.0	-8.34936184223753e-11	0.0	6.993345154759583e-13	-2.656952792027583e-11	0.0	-4.86039498565114e-13
0.97	-8.362646606198046e-11	0.0	6.969043175291833e-13	-6.485314490192812e-11	0.0	-0.09965609700313481	0.0	-4.072581755010985e-11	0.0	1.0	0.0	2.714136227172887e-12	0.0	0.0	3.110171016811337e-10	0.0	0.0	-6.162339100174133e-09	0.0	-8.362646606197668e-11	0.0	6.969043179831305e-13	-2.656952792027712e-11	0.0	-4.860394985660329e-13
0.975	-8.375931370158183e-11	0.0	6.944741200370744e-13	-6.537800161932198e-11	0.0	-0.09965609700313328	0.0	-4.0493815806480436e-11	0.0	1.0	0.0	2.705512067229302e-12	0.0	0.0	3.100288457479073e-10	0.0	0.0	-6.1739397238845906e-09	0.0	-8.375931370157807e-11	0.0	6.944741204902981e-13	-2.6569527920278414e-11	0.0	-4.860394985669602e-13
0.98	-8.389216134118319e-11	0.0	6.920439225449655e-13	-6.590285833671583e-11	0.0	-0.09965609700313174	0.0	-4.026181406285103e-11	0.0	1.0	0.0	2.6968879072857166e-12	0.0	0.0	3.090405898146808e-10	0.0	0.0	-6.1854738839913e-09	0.0	-8.389216134117945e-11	0.0	6.92043922997461e-13	-2.656952792027626e-11	0.0	-4.86039498567869e-13
0.985	-8.402500898078454e-11	0.0	6.896137250528566e-13	-6.64277150541097e-11	0.0	-0.09965609700313022	0.0	-4.002981231922161e-11	0.0	1.0	0.0	2.6882637473421316e-12	0.0	0.0	3.080523338814544e-10	0.0	0.0	-6.196941580494261e-09	0.0	-8.402500898078083e-11	0.0	6.896137255046194e-13	-2.6569527920277768e-11	0.0	-4.860394985687878e-13
0.99	-8.415785662038591e-11	0.0	6.871835275607476e-13	-6.695257177150355e-11	0.0	-0.09965609700312869	0.0	-3.9797810575592204e-11	0.0	1.0	0.0	2.6796395873985466e-12	0.0	0.0	3.07064077948228e-10	0.0	0.0	-6.208342813393474e-09	0.0	-8.415785662038223e-11	0.0	6.871835280117731e-13	-2.6569527920277338e-11	0.0	-4.860394985697168e-13
0.995	-8.429070425998727e-11	0.0	6.847533300686388e-13	-6.747742848889741e-11	0.0	-0.09965609700312715	0.0	-3.956580883196279e-11	0.0	1.0	0.0	2.6710154274549612e-12	0.0	0.0	3.0607582201500156e-10	0.0	0.0	-6.219677582688938e-09	0.0	-8.429070425998361e-11	0.0	6.847533305189223e-13	-2.6569527920275183e-11	0.0	-4.860394985706256e-13
1.0	-8.442355189958862e-11	0.0	6.823231325765299e-13	-6.800228520629126e-11	0.0	-0.09965609700312562	0.0	-3.9333807088333385e-11	0.0	1.0	0.0	2.6623912675113763e-12	0.0	0.0	3.0508756608177516e-10	0.0	0.0	-6.230945888380654e-09	0.0	-8.442355189958499e-11	0.0	6.823231330260669e-13	-2.6569527920278414e-11	0.0	-4.860394985715461e-13
1.0050000000000001	-8.455639953918999e-11	0.0	6.798929350844209e-13	-6.852714192368514e-11	0.0	-0.09965609700312408	0.0	-3.9101805344703966e-11	0.0	1.0	0.0	2.653767107567791e-12	0.0	0.0	3.040993101485487e-10	0.0	0.0	-6.242147730468622e-09	0.0	-8.455639953918638e-11	0.0	6.798929355332069e-13	-2.6569527920277984e-11	0.0	-4.860394985724616e-13
1.01	-8.468924717879135e-11	0.0	6.77462737592312e-13	-6.905199864107898e-11	0.0	-0.09965609700312256	0.0	-3.8869803601074566e-11	0.0	1.0	0.0	2.645142947624206e-12	0.0	0.0	3.031110542153223e-10	0.0	0.0	-6.253283108952842e-09	0.0	-8.468924717878777e-11	0.0	6.774627380403423e-13	-2.656952792027583e-11	0.0	-4.860394985733721e-13
1.0150000000000001	-8.48220948183927e-11	0.0	6.750325401002031e-13	-6.957685535847285e-11	0.0	-0.09965609700312103	0.0	-3.8637801857445153e-11	0.0	1.0	0.0	2.636518787680621e-12	0.0	0.0	3.021227982820959e-10	0.0	0.0	-6.264352023833314e-09	0.0	-8.482209481838915e-11	0.0	6.750325405474732e-13	-2.6569527920275613e-11	0.0	-4.860394985742791e-13
1.02	-8.495494245799406e-11	0.0	6.726023426080943e-13	-7.01017120758667e-11	0.0	-0.09965609700311949	0.0	-3.840580011381575e-11	0.0	1.0	0.0	2.627894627737036e-12	0.0	0.0	3.011345423488695e-10	0.0	0.0	-6.275354475110037e-09	0.0	-8.495494245799052e-11	0.0	6.726023430545995e-13	-2.6569527920275183e-11	0.0	-4.860394985751947e-13
1.025	-8.508779009759541e-11	0.0	6.701721451159854e-13	-7.062656879326055e-11	0.0	-0.09965609700311796	0.0	-3.817379837018634e-11	0.0	1.0	0.0	2.619270467793451e-12	0.0	0.0	3.001462864156431e-10	0.0	0.0	-6.2862904627830126e-09	0.0	-8.50877900975919e-11	0.0	6.701721455617212e-13	-2.6569527920278198e-11	0.0	-4.860394985761186e-13
1.03	-8.522063773719678e-11	0.0	6.677419476238765e-13	-7.11514255106544e-11	0.0	-0.09965609700311642	0.0	-3.794179662655693e-11	0.0	1.0	0.0	2.610646307849866e-12	0.0	0.0	2.991580304824167e-10	0.0	0.0	-6.297159986852239e-09	0.0	-8.522063773719329e-11	0.0	6.677419480688384e-13	-2.656952792027755e-11	0.0	-4.860394985770239e-13
1.035	-8.535348537679814e-11	0.0	6.653117501317676e-13	-7.167628222804826e-11	0.0	-0.0996560970031149	0.0	-3.770979488292752e-11	0.0	1.0	0.0	2.6020221479062805e-12	0.0	0.0	2.981697745491903e-10	0.0	0.0	-6.307963047317718e-09	0.0	-8.535348537679467e-11	0.0	6.65311750575951e-13	-2.656952792027712e-11	0.0	-4.860394985779529e-13
1.04	-8.54863330163995e-11	0.0	6.628815526396586e-13	-7.220113894544213e-11	0.0	-0.09965609700311337	0.0	-3.74777931392981e-11	0.0	1.0	0.0	2.593397987962695e-12	0.0	0.0	2.9718151861596383e-10	0.0	0.0	-6.318699644179449e-09	0.0	-8.548633301639607e-11	0.0	6.628815530830588e-13	-2.6569527920276905e-11	0.0	-4.860394985788768e-13
1.045	-8.561918065600086e-11	0.0	6.604513551475498e-13	-7.272599566283597e-11	0.0	-0.09965609700311183	0.0	-3.72457913956687e-11	0.0	1.0	0.0	2.58477382801911e-12	0.0	0.0	2.961932626827374e-10	0.0	0.0	-6.3293697774374316e-09	0.0	-8.561918065599745e-11	0.0	6.604513555901623e-13	-2.6569527920276475e-11	0.0	-4.860394985797822e-13
1.05	-8.575202829560222e-11	0.0	6.580211576554409e-13	-7.325085238022983e-11	0.0	-0.0996560970031103	0.0	-3.701378965203928e-11	0.0	1.0	0.0	2.576149668075525e-12	0.0	0.0	2.95205006749511e-10	0.0	0.0	-6.339973447091666e-09	0.0	-8.575202829559883e-11	0.0	6.58021158097261e-13	-2.656952792027626e-11	0.0	-4.860394985806994e-13
1.055	-8.588487593520357e-11	0.0	6.555909601633321e-13	-7.377570909762368e-11	0.0	-0.09965609700310876	0.0	-3.678178790840988e-11	0.0	1.0	0.0	2.56752550813194e-12	0.0	0.0	2.942167508162846e-10	0.0	0.0	-6.350510653142152e-09	0.0	-8.588487593520021e-11	0.0	6.555909606043553e-13	-2.656952792027583e-11	0.0	-4.860394985816368e-13
1.06	-8.601772357480494e-11	0.0	6.53160762671223e-13	-7.430056581501754e-11	0.0	-0.09965609700310724	0.0	-3.6549786164780464e-11	0.0	1.0	0.0	2.5589013481883552e-12	0.0	0.0	2.932284948830582e-10	0.0	0.0	-6.3609813955888895e-09	0.0	-8.601772357480159e-11	0.0	6.531607631114448e-13	-2.65695279202754e-11	0.0	-4.860394985825439e-13
1.065	-8.61505712144063e-11	0.0	6.507305651791142e-13	-7.48254225324114e-11	0.0	-0.09965609700310571	0.0	-3.6317784421151064e-11	0.0	1.0	0.0	2.5502771882447702e-12	0.0	0.0	2.922402389498318e-10	0.0	0.0	-6.371385674431879e-09	0.0	-8.615057121440297e-11	0.0	6.507305656185299e-13	-2.6569527920278414e-11	0.0	-4.860394985834459e-13
1.07	-8.628341885400766e-11	0.0	6.483003676870052e-13	-7.535027924980527e-11	0.0	-0.09965609700310417	0.0	-3.608578267752165e-11	0.0	1.0	0.0	2.541653028301185e-12	0.0	0.0	2.9125198301660536e-10	0.0	0.0	-6.381723489671121e-09	0.0	-8.628341885400437e-11	0.0	6.483003681256103e-13	-2.6569527920277984e-11	0.0	-4.860394985843732e-13
1.075	-8.641626649360902e-11	0.0	6.458701701948964e-13	-7.587513596719912e-11	0.0	-0.09965609700310264	0.0	-3.585378093389224e-11	0.0	1.0	0.0	2.5330288683575994e-12	0.0	0.0	2.902637270833789e-10	0.0	0.0	-6.391994841306614e-09	0.0	-8.641626649360575e-11	0.0	6.458701706326861e-13	-2.656952792027583e-11	0.0	-4.860394985852785e-13
1.08	-8.654911413321037e-11	0.0	6.434399727027875e-13	-7.639999268459299e-11	0.0	-0.0996560970031011	0.0	-3.5621779190262826e-11	0.0	1.0	0.0	2.5244047084140145e-12	0.0	0.0	2.892754711501525e-10	0.0	0.0	-6.402199729338359e-09	0.0	-8.654911413320713e-11	0.0	6.434399731397575e-13	-2.656952792027389e-11	0.0	-4.860394985861823e-13
1.085	-8.668196177281173e-11	0.0	6.410097752106786e-13	-7.692484940198683e-11	0.0	-0.09965609700309958	0.0	-3.538977744663342e-11	0.0	1.0	0.0	2.5157805484704295e-12	0.0	0.0	2.882872152169261e-10	0.0	0.0	-6.412338153766356e-09	0.0	-8.66819617728085e-11	0.0	6.410097756468242e-13	-2.6569527920276905e-11	0.0	-4.860394985871213e-13
1.09	-8.68148094124131e-11	0.0	6.385795777185696e-13	-7.74497061193807e-11	0.0	-0.09965609700309803	0.0	-3.5157775703004007e-11	0.0	1.0	0.0	2.5071563885268445e-12	0.0	0.0	2.872989592836997e-10	0.0	0.0	-6.4224101145906045e-09	0.0	-8.681480941240989e-11	0.0	6.385795781538862e-13	-2.6569527920278198e-11	0.0	-4.860394985880285e-13
1.095	-8.694765705201445e-11	0.0	6.361493802264608e-13	-7.797456283677454e-11	0.0	-0.09965609700309651	0.0	-3.49257739593746e-11	0.0	1.0	0.0	2.4985322285832595e-12	0.0	0.0	2.863107033504733e-10	0.0	0.0	-6.432415611811105e-09	0.0	-8.694765705201127e-11	0.0	6.361493806609439e-13	-2.656952792027755e-11	0.0	-4.860394985889439e-13
1.1	-8.708050469161582e-11	0.0	6.337191827343519e-13	-7.84994195541684e-11	0.0	-0.09965609700309498	0.0	-3.469377221574519e-11	0.0	1.0	0.0	2.489908068639674e-12	0.0	0.0	2.8532244741724683e-10	0.0	0.0	-6.442354645427856e-09	0.0	-8.708050469161267e-11	0.0	6.337191831679968e-13	-2.6569527920277338e-11	0.0	-4.860394985898713e-13
1.105	-8.721335233121718e-11	0.0	6.312889852422431e-13	-7.902427627156225e-11	0.0	-0.09965609700309344	0.0	-3.446177047211578e-11	0.0	1.0	0.0	2.481283908696089e-12	0.0	0.0	2.8433419148402043e-10	0.0	0.0	-6.452227215440861e-09	0.0	-8.721335233121405e-11	0.0	6.312889856750452e-13	-2.6569527920275183e-11	0.0	-4.860394985907901e-13
1.11	-8.734619997081853e-11	0.0	6.28858787750134e-13	-7.954913298895611e-11	0.0	-0.09965609700309191	0.0	-3.422976872848637e-11	0.0	1.0	0.0	2.4726597487525037e-12	0.0	0.0	2.83345935550794e-10	0.0	0.0	-6.462033321850117e-09	0.0	-8.734619997081542e-11	0.0	6.288587881820889e-13	-2.6569527920274966e-11	0.0	-4.86039498591709e-13
1.115	-8.747904761041989e-11	0.0	6.264285902580252e-13	-8.007398970634996e-11	0.0	-0.09965609700309037	0.0	-3.399776698485696e-11	0.0	1.0	0.0	2.4640355888089188e-12	0.0	0.0	2.8235767961756757e-10	0.0	0.0	-6.471772964655624e-09	0.0	-8.74790476104168e-11	0.0	6.264285906891282e-13	-2.656952792027626e-11	0.0	-4.860394985926059e-13
1.12	-8.761189525002124e-11	0.0	6.239983927659162e-13	-8.059884642374384e-11	0.0	-0.09965609700308885	0.0	-3.376576524122755e-11	0.0	1.0	0.0	2.4554114288653338e-12	0.0	0.0	2.8136942368434117e-10	0.0	0.0	-6.4814461438573834e-09	0.0	-8.761189525001818e-11	0.0	6.239983931961627e-13	-2.6569527920277338e-11	0.0	-4.860394985935433e-13
1.125	-8.774474288962261e-11	0.0	6.215681952738074e-13	-8.112370314113769e-11	0.0	-0.09965609700308732	0.0	-3.353376349759814e-11	0.0	1.0	0.0	2.4467872689217488e-12	0.0	0.0	2.8038116775111476e-10	0.0	0.0	-6.491052859455394e-09	0.0	-8.774474288961957e-11	0.0	6.215681957031928e-13	-2.6569527920276905e-11	0.0	-4.860394985944319e-13
1.1300000000000001	-8.787759052922398e-11	0.0	6.191379977816985e-13	-8.164855985853156e-11	0.0	-0.09965609700308578	0.0	-3.3301761753968724e-11	0.0	1.0	0.0	2.4381631089781634e-12	0.0	0.0	2.793929118178883e-10	0.0	0.0	-6.500593111449657e-09	0.0	-8.787759052922096e-11	0.0	6.191379982102183e-13	-2.6569527920276475e-11	0.0	-4.860394985953592e-13
1.135	-8.801043816882534e-11	0.0	6.167078002895896e-13	-8.21734165759254e-11	0.0	-0.09965609700308425	0.0	-3.3069760010339324e-11	0.0	1.0	0.0	2.4295389490345784e-12	0.0	0.0	2.784046558846619e-10	0.0	0.0	-6.510066899840172e-09	0.0	-8.801043816882234e-11	0.0	6.167078007172391e-13	-2.656952792027626e-11	0.0	-4.860394985962814e-13
1.1400000000000001	-8.814328580842669e-11	0.0	6.142776027974807e-13	-8.269827329331927e-11	0.0	-0.09965609700308271	0.0	-3.2837758266709904e-11	0.0	1.0	0.0	2.420914789090993e-12	0.0	0.0	2.7741639995143545e-10	0.0	0.0	-6.519474224626939e-09	0.0	-8.814328580842372e-11	0.0	6.142776032242555e-13	-2.656952792027583e-11	0.0	-4.860394985971834e-13
1.145	-8.827613344802805e-11	0.0	6.118474053053718e-13	-8.322313001071311e-11	0.0	-0.09965609700308119	0.0	-3.2605756523080505e-11	0.0	1.0	0.0	2.412290629147408e-12	0.0	0.0	2.7642814401820905e-10	0.0	0.0	-6.528815085809957e-09	0.0	-8.82761334480251e-11	0.0	6.118474057312673e-13	-2.65695279202754e-11	0.0	-4.860394985981376e-13
1.1500000000000001	-8.84089810876294e-11	0.0	6.094172078132629e-13	-8.374798672810698e-11	0.0	-0.09965609700307966	0.0	-3.2373754779451085e-11	0.0	1.0	0.0	2.403666469203823e-12	0.0	0.0	2.7543988808498264e-10	0.0	0.0	-6.538089483389227e-09	0.0	-8.840898108762647e-11	0.0	6.094172082382743e-13	-2.6569527920274966e-11	0.0	-4.860394985990312e-13
1.155	-8.854182872723076e-11	0.0	6.069870103211541e-13	-8.427284344550082e-11	0.0	-0.09965609700307812	0.0	-3.2141753035821685e-11	0.0	1.0	0.0	2.395042309260238e-12	0.0	0.0	2.7445163215175624e-10	0.0	0.0	-6.547297417364749e-09	0.0	-8.854182872722785e-11	0.0	6.069870107452769e-13	-2.6569527920277984e-11	0.0	-4.860394985999349e-13
1.16	-8.867467636683213e-11	0.0	6.045568128290452e-13	-8.479770016289467e-11	0.0	-0.0996560970030766	0.0	-3.190975129219227e-11	0.0	1.0	0.0	2.386418149316653e-12	0.0	0.0	2.7346337621852984e-10	0.0	0.0	-6.556438887736522e-09	0.0	-8.867467636682924e-11	0.0	6.045568132522749e-13	-2.6569527920275613e-11	0.0	-4.860394986008774e-13
1.165	-8.880752400643348e-11	0.0	6.021266153369362e-13	-8.532255688028853e-11	0.0	-0.09965609700307505	0.0	-3.1677749548562866e-11	0.0	1.0	0.0	2.377793989373068e-12	0.0	0.0	2.7247512028530343e-10	0.0	0.0	-6.565513894504548e-09	0.0	-8.880752400643061e-11	0.0	6.021266157592682e-13	-2.6569527920275183e-11	0.0	-4.860394986017979e-13
1.17	-8.894037164603485e-11	0.0	5.996964178448273e-13	-8.584741359768238e-11	0.0	-0.09965609700307353	0.0	-3.144574780493346e-11	0.0	1.0	0.0	2.369169829429483e-12	0.0	0.0	2.7148686435207703e-10	0.0	0.0	-6.574522437668826e-09	0.0	-8.894037164603201e-11	0.0	5.99696418266257e-13	-2.6569527920278414e-11	0.0	-4.860394986027016e-13
1.175	-8.90732192856362e-11	0.0	5.972662203527184e-13	-8.637227031507625e-11	0.0	-0.099656097003072	0.0	-3.121374606130404e-11	0.0	1.0	0.0	2.3605456694858973e-12	0.0	0.0	2.704986084188505e-10	0.0	0.0	-6.583464517229355e-09	0.0	-8.907321928563339e-11	0.0	5.972662207732411e-13	-2.6569527920276046e-11	0.0	-4.860394986036037e-13
1.18	-8.920606692523756e-11	0.0	5.948360228606096e-13	-8.689712703247009e-11	0.0	-0.09965609700307046	0.0	-3.0981744317674634e-11	0.0	1.0	0.0	2.3519215095423127e-12	0.0	0.0	2.6951035248562417e-10	0.0	0.0	-6.592340133186136e-09	0.0	-8.920606692523477e-11	0.0	5.948360232802209e-13	-2.6569527920274107e-11	0.0	-4.860394986045259e-13
1.185	-8.933891456483892e-11	0.0	5.924058253685006e-13	-8.742198374986397e-11	0.0	-0.09965609700306893	0.0	-3.074974257404522e-11	0.0	1.0	0.0	2.3432973495987273e-12	0.0	0.0	2.685220965523977e-10	0.0	0.0	-6.6011492855391684e-09	0.0	-8.933891456483614e-11	0.0	5.924058257871959e-13	-2.6569527920273674e-11	0.0	-4.860394986054448e-13
1.19	-8.947176220444027e-11	0.0	5.899756278763917e-13	-8.794684046725781e-11	0.0	-0.09965609700306739	0.0	-3.051774083041582e-11	0.0	1.0	0.0	2.3346731896551424e-12	0.0	0.0	2.675338406191713e-10	0.0	0.0	-6.609891974288453e-09	0.0	-8.947176220443752e-11	0.0	5.899756282941664e-13	-2.6569527920278414e-11	0.0	-4.860394986063569e-13
1.195	-8.960460984404164e-11	0.0	5.875454303842828e-13	-8.847169718465168e-11	0.0	-0.09965609700306587	0.0	-3.02857390867864e-11	0.0	1.0	0.0	2.3260490297115574e-12	0.0	0.0	2.665455846859449e-10	0.0	0.0	-6.6185681994339885e-09	0.0	-8.960460984403891e-11	0.0	5.875454308011323e-13	-2.6569527920276046e-11	0.0	-4.860394986072808e-13
1.2	-8.9737457483643e-11	0.0	5.85115232892174e-13	-8.899655390204552e-11	0.0	-0.09965609700306434	0.0	-3.0053737343156996e-11	0.0	1.0	0.0	2.3174248697679724e-12	0.0	0.0	2.655573287527185e-10	0.0	0.0	-6.627177960975777e-09	0.0	-8.973745748364028e-11	0.0	5.851152333080936e-13	-2.6569527920275613e-11	0.0	-4.860394986082115e-13
1.205	-8.987030512324436e-11	0.0	5.82685035400065e-13	-8.952141061943939e-11	0.0	-0.0996560970030628	0.0	-2.9821735599527583e-11	0.0	1.0	0.0	2.3088007098243866e-12	0.0	0.0	2.6456907281949205e-10	0.0	0.0	-6.635721258913817e-09	0.0	-8.987030512324168e-11	0.0	5.826850358150502e-13	-2.656952792027712e-11	0.0	-4.860394986091119e-13
1.21	-9.000315276284572e-11	0.0	5.802548379079562e-13	-9.004626733683324e-11	0.0	-0.09965609700306127	0.0	-2.9589733855898183e-11	0.0	1.0	0.0	2.300176549880802e-12	0.0	0.0	2.6358081688626565e-10	0.0	0.0	-6.6441980932481086e-09	0.0	-9.000315276284304e-11	0.0	5.802548383220025e-13	-2.6569527920274753e-11	0.0	-4.860394986100341e-13
1.215	-9.013600040244707e-11	0.0	5.778246404158472e-13	-9.057112405422711e-11	0.0	-0.09965609700305973	0.0	-2.9357732112268764e-11	0.0	1.0	0.0	2.2915523899372166e-12	0.0	0.0	2.6259256095303924e-10	0.0	0.0	-6.652608463978652e-09	0.0	-9.013600040244443e-11	0.0	5.778246408289499e-13	-2.656952792027626e-11	0.0	-4.860394986109681e-13
1.22	-9.026884804204843e-11	0.0	5.753944429237383e-13	-9.109598077162095e-11	0.0	-0.0996560970030582	0.0	-2.912573036863936e-11	0.0	1.0	0.0	2.2829282299936316e-12	0.0	0.0	2.6160430501981284e-10	0.0	0.0	-6.660952371105447e-09	0.0	-9.026884804204581e-11	0.0	5.753944433358929e-13	-2.6569527920275613e-11	0.0	-4.860394986118668e-13
1.225	-9.04016956816498e-11	0.0	5.729642454316293e-13	-9.162083748901483e-11	0.0	-0.09965609700305667	0.0	-2.8893728625009942e-11	0.0	1.0	0.0	2.2743040700500466e-12	0.0	0.0	2.6061604908658644e-10	0.0	0.0	-6.6692298146284936e-09	0.0	-9.040169568164719e-11	0.0	5.729642458428312e-13	-2.6569527920275183e-11	0.0	-4.860394986127654e-13
1.23	-9.053454332125115e-11	0.0	5.705340479395206e-13	-9.214569420640867e-11	0.0	-0.09965609700305514	0.0	-2.866172688138054e-11	0.0	1.0	0.0	2.2656799101064617e-12	0.0	0.0	2.5962779315336003e-10	0.0	0.0	-6.677440794547793e-09	0.0	-9.053454332124857e-11	0.0	5.705340483497652e-13	-2.6569527920278198e-11	0.0	-4.860394986136843e-13
1.235	-9.066739096085252e-11	0.0	5.681038504474116e-13	-9.267055092380254e-11	0.0	-0.09965609700305361	0.0	-2.8429725137751126e-11	0.0	1.0	0.0	2.2570557501628763e-12	0.0	0.0	2.586395372201336e-10	0.0	0.0	-6.6855853108633436e-09	0.0	-9.066739096084996e-11	0.0	5.681038508566943e-13	-2.6569527920276046e-11	0.0	-4.860394986146267e-13
1.24	-9.080023860045388e-11	0.0	5.656736529553027e-13	-9.319540764119638e-11	0.0	-0.09965609700305207	0.0	-2.819772339412172e-11	0.0	1.0	0.0	2.2484315902192913e-12	0.0	0.0	2.576512812869072e-10	0.0	0.0	-6.693663363575146e-09	0.0	-9.080023860045133e-11	0.0	5.656736533636189e-13	-2.6569527920275613e-11	0.0	-4.860394986155203e-13
1.245	-9.093308624005523e-11	0.0	5.632434554631938e-13	-9.372026435859025e-11	0.0	-0.09965609700305054	0.0	-2.7965721650492307e-11	0.0	1.0	0.0	2.239807430275706e-12	0.0	0.0	2.566630253536807e-10	0.0	0.0	-6.7016749526832e-09	0.0	-9.093308624005271e-11	0.0	5.632434558705391e-13	-2.65695279202754e-11	0.0	-4.860394986164409e-13
1.25	-9.106593387965659e-11	0.0	5.608132579710849e-13	-9.424512107598409e-11	0.0	-0.099656097003049	0.0	-2.77337199068629e-11	0.0	1.0	0.0	2.231183270332121e-12	0.0	0.0	2.556747694204543e-10	0.0	0.0	-6.709620078187506e-09	0.0	-9.106593387965408e-11	0.0	5.608132583774545e-13	-2.6569527920276475e-11	0.0	-4.860394986173833e-13
1.2550000000000001	-9.119878151925796e-11	0.0	5.58383060478976e-13	-9.476997779337796e-11	0.0	-0.09965609700304748	0.0	-2.7501718163233484e-11	0.0	1.0	0.0	2.222559110388536e-12	0.0	0.0	2.546865134872279e-10	0.0	0.0	-6.7174987400880635e-09	0.0	-9.119878151925548e-11	0.0	5.583830608843653e-13	-2.6569527920277768e-11	0.0	-4.860394986182652e-13
1.26	-9.133162915885931e-11	0.0	5.559528629868672e-13	-9.52948345107718e-11	0.0	-0.09965609700304595	0.0	-2.726971641960408e-11	0.0	1.0	0.0	2.213934950444951e-12	0.0	0.0	2.536982575540015e-10	0.0	0.0	-6.7253109383848735e-09	0.0	-9.133162915885686e-11	0.0	5.559528633912718e-13	-2.65695279202754e-11	0.0	-4.860394986191857e-13
1.2650000000000001	-9.146447679846068e-11	0.0	5.535226654947582e-13	-9.581969122816567e-11	0.0	-0.09965609700304441	0.0	-2.7037714675974665e-11	0.0	1.0	0.0	2.2053107905013656e-12	0.0	0.0	2.5271000162077505e-10	0.0	0.0	-6.733056673077935e-09	0.0	-9.146447679845824e-11	0.0	5.535226658981734e-13	-2.6569527920276905e-11	0.0	-4.860394986201282e-13
1.27	-9.159732443806204e-11	0.0	5.510924680026493e-13	-9.634454794555952e-11	0.0	-0.09965609700304288	0.0	-2.680571293234526e-11	0.0	1.0	0.0	2.1966866305577806e-12	0.0	0.0	2.5172174568754865e-10	0.0	0.0	-6.740735944167248e-09	0.0	-9.159732443805962e-11	0.0	5.510924684050706e-13	-2.6569527920274753e-11	0.0	-4.860394986210369e-13
1.2750000000000001	-9.173017207766339e-11	0.0	5.486622705105403e-13	-9.686940466295339e-11	0.0	-0.09965609700304134	0.0	-2.6573711188715843e-11	0.0	1.0	0.0	2.188062470614195e-12	0.0	0.0	2.507334897543222e-10	0.0	0.0	-6.748348751652813e-09	0.0	-9.173017207766099e-11	0.0	5.486622709119631e-13	-2.656952792027432e-11	0.0	-4.86039498621944e-13
1.28	-9.186301971726475e-11	0.0	5.462320730184316e-13	-9.739426138034723e-11	0.0	-0.09965609700303982	0.0	-2.634170944508644e-11	0.0	1.0	0.0	2.1794383106706106e-12	0.0	0.0	2.4974523382109584e-10	0.0	0.0	-6.75589509553463e-09	0.0	-9.186301971726237e-11	0.0	5.462320734188511e-13	-2.6569527920275613e-11	0.0	-4.860394986228595e-13
1.285	-9.19958673568661e-11	0.0	5.438018755263227e-13	-9.791911809774109e-11	0.0	-0.09965609700303829	0.0	-2.6109707701457034e-11	0.0	1.0	0.0	2.1708141507270256e-12	0.0	0.0	2.4875697788786944e-10	0.0	0.0	-6.763374975812698e-09	0.0	-9.199586735686374e-11	0.0	5.438018759257345e-13	-2.6569527920276692e-11	0.0	-4.860394986237851e-13
1.29	-9.212871499646747e-11	0.0	5.413716780342137e-13	-9.844397481513495e-11	0.0	-0.09965609700303675	0.0	-2.587770595782762e-11	0.0	1.0	0.0	2.1621899907834402e-12	0.0	0.0	2.47768721954643e-10	0.0	0.0	-6.770788392487018e-09	0.0	-9.212871499646513e-11	0.0	5.413716784326132e-13	-2.656952792027626e-11	0.0	-4.860394986246771e-13
1.295	-9.226156263606883e-11	0.0	5.389414805421049e-13	-9.89688315325288e-11	0.0	-0.09965609700303522	0.0	-2.5645704214198218e-11	0.0	1.0	0.0	2.1535658308398552e-12	0.0	0.0	2.467804660214166e-10	0.0	0.0	-6.778135345557591e-09	0.0	-9.22615626360665e-11	0.0	5.389414809394877e-13	-2.656952792027389e-11	0.0	-4.860394986255925e-13
1.3	-9.239441027567018e-11	0.0	5.365112830499959e-13	-9.949368824992266e-11	0.0	-0.09965609700303368	0.0	-2.54137024705688e-11	0.0	1.0	0.0	2.1449416708962702e-12	0.0	0.0	2.457922100881902e-10	0.0	0.0	-6.785415835024415e-09	0.0	-9.239441027566788e-11	0.0	5.365112834463572e-13	-2.656952792027712e-11	0.0	-4.860394986265451e-13
1.305	-9.252725791527155e-11	0.0	5.340810855578871e-13	-1.000185449673165e-10	0.0	-0.09965609700303216	0.0	-2.51817007269394e-11	0.0	1.0	0.0	2.1363175109526853e-12	0.0	0.0	2.448039541549638e-10	0.0	0.0	-6.7926298608874905e-09	0.0	-9.252725791526926e-11	0.0	5.340810859532222e-13	-2.6569527920276475e-11	0.0	-4.860394986274488e-13
1.31	-9.26601055548729e-11	0.0	5.316508880657782e-13	-1.0054340168471037e-10	0.0	-0.09965609700303063	0.0	-2.4949698983309982e-11	0.0	1.0	0.0	2.1276933510091e-12	0.0	0.0	2.438156982217373e-10	0.0	0.0	-6.799777423146818e-09	0.0	-9.266010555487064e-11	0.0	5.316508884600827e-13	-2.656952792027432e-11	0.0	-4.860394986283525e-13
1.315	-9.279295319447426e-11	0.0	5.292206905736693e-13	-1.0106825840210423e-10	0.0	-0.09965609700302909	0.0	-2.4717697239680576e-11	0.0	1.0	0.0	2.119069191065515e-12	0.0	0.0	2.428274422885109e-10	0.0	0.0	-6.806858521802397e-09	0.0	-9.279295319447201e-11	0.0	5.292206909669386e-13	-2.6569527920277338e-11	0.0	-4.86039498629278e-13
1.32	-9.292580083407563e-11	0.0	5.267904930815603e-13	-1.015931151194981e-10	0.0	-0.09965609700302756	0.0	-2.448569549605116e-11	0.0	1.0	0.0	2.1104450311219295e-12	0.0	0.0	2.4183918635528446e-10	0.0	0.0	-6.813873156854228e-09	0.0	-9.292580083407341e-11	0.0	5.267904934737899e-13	-2.6569527920276905e-11	0.0	-4.860394986301852e-13
1.325	-9.305864847367699e-11	0.0	5.243602955894515e-13	-1.0211797183689194e-10	0.0	-0.09965609700302602	0.0	-2.4253693752421757e-11	0.0	1.0	0.0	2.1018208711783445e-12	0.0	0.0	2.4085093042205806e-10	0.0	0.0	-6.820821328302311e-09	0.0	-9.305864847367477e-11	0.0	5.243602959806368e-13	-2.6569527920274537e-11	0.0	-4.860394986311142e-13
1.33	-9.319149611327834e-11	0.0	5.219300980973426e-13	-1.026428285542858e-10	0.0	-0.0996560970030245	0.0	-2.402169200879234e-11	0.0	1.0	0.0	2.0931967112347595e-12	0.0	0.0	2.3986267448883165e-10	0.0	0.0	-6.827703036146646e-09	0.0	-9.319149611327616e-11	0.0	5.219300984874788e-13	-2.656952792027432e-11	0.0	-4.860394986320397e-13
1.335	-9.33243437528797e-11	0.0	5.194999006052337e-13	-1.0316768527167966e-10	0.0	-0.09965609700302297	0.0	-2.3789690265162935e-11	0.0	1.0	0.0	2.0845725512911745e-12	0.0	0.0	2.3887441855560525e-10	0.0	0.0	-6.8345182803872325e-09	0.0	-9.332434375287752e-11	0.0	5.194999009943164e-13	-2.656952792027712e-11	0.0	-4.860394986329451e-13
1.34	-9.345719139248106e-11	0.0	5.170697031131247e-13	-1.0369254198907353e-10	0.0	-0.09965609700302143	0.0	-2.3557688521533522e-11	0.0	1.0	0.0	2.075948391347589e-12	0.0	0.0	2.378861626223788e-10	0.0	0.0	-6.841267061024071e-09	0.0	-9.345719139247892e-11	0.0	5.170697035011493e-13	-2.6569527920276692e-11	0.0	-4.86039498633864e-13
1.345	-9.359003903208242e-11	0.0	5.146395056210159e-13	-1.0421739870646737e-10	0.0	-0.0996560970030199	0.0	-2.332568677790412e-11	0.0	1.0	0.0	2.067324231404004e-12	0.0	0.0	2.368979066891524e-10	0.0	0.0	-6.847949378057161e-09	0.0	-9.359003903208029e-11	0.0	5.146395060079778e-13	-2.656952792027432e-11	0.0	-4.860394986347811e-13
1.35	-9.372288667168378e-11	0.0	5.122093081289069e-13	-1.0474225542386123e-10	0.0	-0.09965609700301836	0.0	-2.3093685034274703e-11	0.0	1.0	0.0	2.0587000714604188e-12	0.0	0.0	2.3590965075592594e-10	0.0	0.0	-6.854565231486502e-09	0.0	-9.372288667168167e-11	0.0	5.122093085148015e-13	-2.656952792027583e-11	0.0	-4.860394986357034e-13
1.355	-9.385573431128514e-11	0.0	5.097791106367981e-13	-1.0526711214125508e-10	0.0	-0.09965609700301684	0.0	-2.2861683290645296e-11	0.0	1.0	0.0	2.0500759115168338e-12	0.0	0.0	2.3492139482269953e-10	0.0	0.0	-6.861114621312096e-09	0.0	-9.385573431128305e-11	0.0	5.097791110216208e-13	-2.6569527920276905e-11	0.0	-4.860394986366054e-13
1.36	-9.39885819508865e-11	0.0	5.073489131446892e-13	-1.0579196885864894e-10	0.0	-0.09965609700301531	0.0	-2.262968154701588e-11	0.0	1.0	0.0	2.041451751573249e-12	0.0	0.0	2.3393313888947313e-10	0.0	0.0	-6.867597547533942e-09	0.0	-9.398858195088443e-11	0.0	5.073489135284354e-13	-2.6569527920274753e-11	0.0	-4.86039498637526e-13
1.365	-9.412142959048785e-11	0.0	5.049187156525803e-13	-1.0631682557604279e-10	0.0	-0.09965609700301377	0.0	-2.2397679803386477e-11	0.0	1.0	0.0	2.032827591629664e-12	0.0	0.0	2.3294488295624673e-10	0.0	0.0	-6.874014010152039e-09	0.0	-9.41214295904858e-11	0.0	5.049187160352455e-13	-2.6569527920276046e-11	0.0	-4.860394986384465e-13
1.37	-9.425427723008922e-11	0.0	5.024885181604713e-13	-1.0684168229343667e-10	0.0	-0.09965609700301224	0.0	-2.216567805975706e-11	0.0	1.0	0.0	2.0242034316860784e-12	0.0	0.0	2.319566270230203e-10	0.0	0.0	-6.880364009166388e-09	0.0	-9.42542772300872e-11	0.0	5.02488518542051e-13	-2.6569527920277338e-11	0.0	-4.860394986393502e-13
1.375	-9.438712486969058e-11	0.0	5.000583206683625e-13	-1.0736653901083051e-10	0.0	-0.0996560970030107	0.0	-2.1933676316127658e-11	0.0	1.0	0.0	2.0155792717424934e-12	0.0	0.0	2.309683710897939e-10	0.0	0.0	-6.886647544576989e-09	0.0	-9.438712486968856e-11	0.0	5.00058321048852e-13	-2.6569527920273244e-11	0.0	-4.860394986402759e-13
1.3800000000000001	-9.451997250929193e-11	0.0	4.976281231762536e-13	-1.0789139572822437e-10	0.0	-0.09965609700300918	0.0	-2.1701674572498242e-11	0.0	1.0	0.0	2.006955111798908e-12	0.0	0.0	2.2998011515656744e-10	0.0	0.0	-6.8928646163838414e-09	0.0	-9.451997250928993e-11	0.0	4.976281235556482e-13	-2.6569527920274753e-11	0.0	-4.860394986412048e-13
1.385	-9.465282014889329e-11	0.0	4.951979256841447e-13	-1.0841625244561823e-10	0.0	-0.09965609700300763	0.0	-2.1469672828868836e-11	0.0	1.0	0.0	1.998330951855323e-12	0.0	0.0	2.2899185922334104e-10	0.0	0.0	-6.8990152245869455e-09	0.0	-9.465282014889131e-11	0.0	4.9519792606244e-13	-2.656952792027583e-11	0.0	-4.86039498642127e-13
1.3900000000000001	-9.478566778849466e-11	0.0	4.927677281920357e-13	-1.089411091630121e-10	0.0	-0.09965609700300611	0.0	-2.1237671085239423e-11	0.0	1.0	0.0	1.989706791911738e-12	0.0	0.0	2.2800360329011463e-10	0.0	0.0	-6.905099369186302e-09	0.0	-9.478566778849269e-11	0.0	4.92767728569227e-13	-2.6569527920276905e-11	0.0	-4.86039498643014e-13
1.395	-9.491851542809601e-11	0.0	4.903375306999269e-13	-1.0946596588040594e-10	0.0	-0.09965609700300458	0.0	-2.100566934161002e-11	0.0	1.0	0.0	1.981082631968153e-12	0.0	0.0	2.2701534735688823e-10	0.0	0.0	-6.91111705018191e-09	0.0	-9.491851542809407e-11	0.0	4.903375310760097e-13	-2.6569527920276475e-11	0.0	-4.860394986439362e-13
1.4000000000000001	-9.505136306769738e-11	0.0	4.879073332078179e-13	-1.099908225977998e-10	0.0	-0.09965609700300304	0.0	-2.0773667597980604e-11	0.0	1.0	0.0	1.9724584720245677e-12	0.0	0.0	2.2602709142366177e-10	0.0	0.0	-6.91706826757377e-09	0.0	-9.505136306769546e-11	0.0	4.879073335827876e-13	-2.656952792027432e-11	0.0	-4.860394986448752e-13
1.405	-9.518421070729874e-11	0.0	4.85477135715709e-13	-1.1051567931519365e-10	0.0	-0.09965609700300151	0.0	-2.0541665854351197e-11	0.0	1.0	0.0	1.9638343120809827e-12	0.0	0.0	2.2503883549043537e-10	0.0	0.0	-6.9229530213618815e-09	0.0	-9.518421070729682e-11	0.0	4.854771360895611e-13	-2.6569527920275613e-11	0.0	-4.86039498645752e-13
1.41	-9.531705834690009e-11	0.0	4.830469382236003e-13	-1.1104053603258749e-10	0.0	-0.09965609700299997	0.0	-2.0309664110721794e-11	0.0	1.0	0.0	1.955210152137398e-12	0.0	0.0	2.2405057955720902e-10	0.0	0.0	-6.928771311546245e-09	0.0	-9.53170583468982e-11	0.0	4.830469385963301e-13	-2.6569527920275183e-11	0.0	-4.860394986466894e-13
1.415	-9.544990598650145e-11	0.0	4.806167407314913e-13	-1.1156539274998136e-10	0.0	-0.09965609700299845	0.0	-2.0077662367092378e-11	0.0	1.0	0.0	1.9465859921938128e-12	0.0	0.0	2.2306232362398256e-10	0.0	0.0	-6.9345231381268595e-09	0.0	-9.544990598649957e-11	0.0	4.806167411030942e-13	-2.6569527920274537e-11	0.0	-4.8603949864762e-13
1.42	-9.55827536261028e-11	0.0	4.781865432393824e-13	-1.1209024946737521e-10	0.0	-0.09965609700299692	0.0	-1.9845660623462972e-11	0.0	1.0	0.0	1.9379618322502278e-12	0.0	0.0	2.2207406769075616e-10	0.0	0.0	-6.940208501103727e-09	0.0	-9.558275362610095e-11	0.0	4.781865436098539e-13	-2.656952792027755e-11	0.0	-4.860394986485237e-13
1.425	-9.571560126570417e-11	0.0	4.757563457472735e-13	-1.1261510618476908e-10	0.0	-0.09965609700299538	0.0	-1.9613658879833556e-11	0.0	1.0	0.0	1.9293376723066424e-12	0.0	0.0	2.210858117575297e-10	0.0	0.0	-6.945827400476846e-09	0.0	-9.571560126570234e-11	0.0	4.75756346116609e-13	-2.6569527920275183e-11	0.0	-4.86039498649441e-13
1.43	-9.584844890530553e-11	0.0	4.733261482551646e-13	-1.1313996290216292e-10	0.0	-0.09965609700299385	0.0	-1.9381657136204153e-11	0.0	1.0	0.0	1.9207135123630574e-12	0.0	0.0	2.200975558243033e-10	0.0	0.0	-6.9513798362462165e-09	0.0	-9.58484489053037e-11	0.0	4.733261486233595e-13	-2.6569527920276475e-11	0.0	-4.860394986503716e-13
1.435	-9.59812965449069e-11	0.0	4.708959507630557e-13	-1.136648196195568e-10	0.0	-0.09965609700299231	0.0	-1.914965539257474e-11	0.0	1.0	0.0	1.9120893524194724e-12	0.0	0.0	2.191092998910769e-10	0.0	0.0	-6.956865808411839e-09	0.0	-9.59812965449051e-11	0.0	4.708959511301052e-13	-2.6569527920276046e-11	0.0	-4.860394986512787e-13
1.44	-9.611414418450825e-11	0.0	4.684657532709468e-13	-1.1418967633695064e-10	0.0	-0.09965609700299079	0.0	-1.8917653648945334e-11	0.0	1.0	0.0	1.9034651924758874e-12	0.0	0.0	2.181210439578505e-10	0.0	0.0	-6.962285316973713e-09	0.0	-9.611414418450647e-11	0.0	4.684657536368467e-13	-2.6569527920273674e-11	0.0	-4.860394986521875e-13
1.445	-9.62469918241096e-11	0.0	4.660355557788379e-13	-1.1471453305434451e-10	0.0	-0.09965609700298926	0.0	-1.868565190531592e-11	0.0	1.0	0.0	1.894841032532302e-12	0.0	0.0	2.1713278802462404e-10	0.0	0.0	-6.9676383619318384e-09	0.0	-9.624699182410784e-11	0.0	4.660355561435834e-13	-2.6569527920275183e-11	0.0	-4.86039498653108e-13
1.45	-9.637983946371096e-11	0.0	4.63605358286729e-13	-1.1523938977173835e-10	0.0	-0.09965609700298772	0.0	-1.8453650161686515e-11	0.0	1.0	0.0	1.886216872588717e-12	0.0	0.0	2.1614453209139764e-10	0.0	0.0	-6.9729249432862166e-09	0.0	-9.637983946370922e-11	0.0	4.636053586503156e-13	-2.656952792027626e-11	0.0	-4.860394986540268e-13
1.455	-9.651268710331233e-11	0.0	4.6117516079462e-13	-1.1576424648913222e-10	0.0	-0.0996560970029862	0.0	-1.82216484180571e-11	0.0	1.0	0.0	1.8775927126451317e-12	0.0	0.0	2.151562761581712e-10	0.0	0.0	-6.978145061036846e-09	0.0	-9.65126871033106e-11	0.0	4.611751611570431e-13	-2.656952792027389e-11	0.0	-4.860394986549373e-13
1.46	-9.664553474291369e-11	0.0	4.587449633025113e-13	-1.1628910320652606e-10	0.0	-0.09965609700298465	0.0	-1.7989646674427696e-11	0.0	1.0	0.0	1.8689685527015467e-12	0.0	0.0	2.141680202249448e-10	0.0	0.0	-6.983298715183728e-09	0.0	-9.664553474291197e-11	0.0	4.587449636637662e-13	-2.6569527920276905e-11	0.0	-4.860394986558545e-13
1.465	-9.677838238251505e-11	0.0	4.563147658104023e-13	-1.1681395992391993e-10	0.0	-0.09965609700298313	0.0	-1.775764493079828e-11	0.0	1.0	0.0	1.8603443927579617e-12	0.0	0.0	2.131797642917184e-10	0.0	0.0	-6.988385905726861e-09	0.0	-9.677838238251336e-11	0.0	4.563147661704845e-13	-2.6569527920276475e-11	0.0	-4.860394986567902e-13
1.47	-9.691123002211641e-11	0.0	4.538845683182934e-13	-1.1733881664131377e-10	0.0	-0.0996560970029816	0.0	-1.7525643187168873e-11	0.0	1.0	0.0	1.8517202328143767e-12	0.0	0.0	2.12191508358492e-10	0.0	0.0	-6.993406632666246e-09	0.0	-9.691123002211473e-11	0.0	4.5388456867719835e-13	-2.656952792027238e-11	0.0	-4.860394986576972e-13
1.475	-9.704407766171776e-11	0.0	4.5145437082618447e-13	-1.1786367335870764e-10	0.0	-0.09965609700298006	0.0	-1.729364144353946e-11	0.0	1.0	0.0	1.8430960728707913e-12	0.0	0.0	2.1120325242526554e-10	0.0	0.0	-6.998360896001882e-09	0.0	-9.70440776617161e-11	0.0	4.5145437118390757e-13	-2.6569527920275613e-11	0.0	-4.860394986585976e-13
1.48	-9.717692530131912e-11	0.0	4.4902417333407564e-13	-1.183885300761015e-10	0.0	-0.09965609700297853	0.0	-1.7061639699910054e-11	0.0	1.0	0.0	1.8344719129272063e-12	0.0	0.0	2.1021499649203914e-10	0.0	0.0	-7.00324869573377e-09	0.0	-9.717692530131748e-11	0.0	4.4902417369061235e-13	-2.6569527920276692e-11	0.0	-4.860394986595258e-13
1.485	-9.730977294092049e-11	0.0	4.4659397584196666e-13	-1.1891338679349537e-10	0.0	-0.09965609700297699	0.0	-1.682963795628064e-11	0.0	1.0	0.0	1.825847752983621e-12	0.0	0.0	2.0922674055881268e-10	0.0	0.0	-7.008070031861911e-09	0.0	-9.730977294091886e-11	0.0	4.465939761973123e-13	-2.656952792027432e-11	0.0	-4.860394986604429e-13
1.49	-9.744262058052184e-11	0.0	4.4416377834985783e-13	-1.1943824351088921e-10	0.0	-0.09965609700297547	0.0	-1.6597636212651235e-11	0.0	1.0	0.0	1.8172235930400362e-12	0.0	0.0	2.082384846255863e-10	0.0	0.0	-7.012824904386303e-09	0.0	-9.744262058052023e-11	0.0	4.441637787040079e-13	-2.656952792027389e-11	0.0	-4.860394986613534e-13
1.495	-9.75754682201232e-11	0.0	4.417335808577489e-13	-1.1996310022828308e-10	0.0	-0.09965609700297394	0.0	-1.6365634469021822e-11	0.0	1.0	0.0	1.808599433096451e-12	0.0	0.0	2.0725022869235988e-10	0.0	0.0	-7.017513313306947e-09	0.0	-9.75754682201216e-11	0.0	4.4173358121069875e-13	-2.6569527920275183e-11	0.0	-4.860394986622764e-13
1.5	-9.770831585972455e-11	0.0	4.3930338336564e-13	-1.2048795694567692e-10	0.0	-0.0996560970029724	0.0	-1.6133632725392416e-11	0.0	1.0	0.0	1.799975273152866e-12	0.0	0.0	2.0626197275913347e-10	0.0	0.0	-7.022135258623843e-09	0.0	-9.770831585972298e-11	0.0	4.3930338371738514e-13	-2.656952792027626e-11	0.0	-4.860394986631987e-13
1.5050000000000001	-9.784116349932592e-11	0.0	4.3687318587353104e-13	-1.210128136630708e-10	0.0	-0.09965609700297087	0.0	-1.5901630981763e-11	0.0	1.0	0.0	1.7913511132092806e-12	0.0	0.0	2.0527371682590702e-10	0.0	0.0	-7.02669074033699e-09	0.0	-9.784116349932436e-11	0.0	4.368731862240668e-13	-2.6569527920275613e-11	0.0	-4.860394986641125e-13
1.51	-9.797401113892728e-11	0.0	4.3444298838142226e-13	-1.2153767038046463e-10	0.0	-0.09965609700296933	0.0	-1.5669629238133597e-11	0.0	1.0	0.0	1.7827269532656958e-12	0.0	0.0	2.0428546089268064e-10	0.0	0.0	-7.031179758446389e-09	0.0	-9.797401113892573e-11	0.0	4.3444298873074405e-13	-2.6569527920275183e-11	0.0	-4.860394986650196e-13
1.5150000000000001	-9.810685877852865e-11	0.0	4.320127908893133e-13	-1.220625270978585e-10	0.0	-0.0996560970029678	0.0	-1.5437627494504177e-11	0.0	1.0	0.0	1.7741027933221104e-12	0.0	0.0	2.0329720495945419e-10	0.0	0.0	-7.03560231295204e-09	0.0	-9.810685877852711e-11	0.0	4.3201279123741657e-13	-2.6569527920276475e-11	0.0	-4.860394986659519e-13
1.52	-9.823970641813e-11	0.0	4.295825933972044e-13	-1.2258738381525234e-10	0.0	-0.09965609700296628	0.0	-1.5205625750874774e-11	0.0	1.0	0.0	1.7654786333785254e-12	0.0	0.0	2.0230894902622778e-10	0.0	0.0	-7.039958403853943e-09	0.0	-9.823970641812849e-11	0.0	4.295825937440846e-13	-2.656952792027583e-11	0.0	-4.860394986668565e-13
1.5250000000000001	-9.837255405773136e-11	0.0	4.2715239590509546e-13	-1.231122405326462e-10	0.0	-0.09965609700296474	0.0	-1.4973624007245358e-11	0.0	1.0	0.0	1.7568544734349402e-12	0.0	0.0	2.0132069309300135e-10	0.0	0.0	-7.044248031152098e-09	0.0	-9.837255405772986e-11	0.0	4.27152396250748e-13	-2.6569527920273674e-11	0.0	-4.860394986677661e-13
1.53	-9.850540169733271e-11	0.0	4.2472219841298663e-13	-1.2363709725004008e-10	0.0	-0.09965609700296321	0.0	-1.4741622263615955e-11	0.0	1.0	0.0	1.7482303134913553e-12	0.0	0.0	2.0033243715977495e-10	0.0	0.0	-7.0484711948465044e-09	0.0	-9.850540169733123e-11	0.0	4.247221987574069e-13	-2.6569527920274966e-11	0.0	-4.860394986686968e-13
1.5350000000000001	-9.863824933693408e-11	0.0	4.2229200092087765e-13	-1.2416195396743394e-10	0.0	-0.09965609700296167	0.0	-1.450962051998654e-11	0.0	1.0	0.0	1.73960615354777e-12	0.0	0.0	1.9934418122654852e-10	0.0	0.0	-7.0526278949371625e-09	0.0	-9.863824933693261e-11	0.0	4.222920012640611e-13	-2.6569527920276046e-11	0.0	-4.860394986696097e-13
1.54	-9.877109697653544e-11	0.0	4.198618034287688e-13	-1.2468681068482778e-10	0.0	-0.09965609700296015	0.0	-1.4277618776357136e-11	0.0	1.0	0.0	1.730981993604185e-12	0.0	0.0	1.9835592529332212e-10	0.0	0.0	-7.056718131424072e-09	0.0	-9.877109697653399e-11	0.0	4.198618037707108e-13	-2.65695279202754e-11	0.0	-4.860394986705042e-13
1.545	-9.890394461613679e-11	0.0	4.1743160593666e-13	-1.2521166740222163e-10	0.0	-0.0996560970029586	0.0	-1.4045617032727731e-11	0.0	1.0	0.0	1.7223578336606003e-12	0.0	0.0	1.9736766936009574e-10	0.0	0.0	-7.0607419043072344e-09	0.0	-9.890394461613536e-11	0.0	4.1743160627735597e-13	-2.6569527920274966e-11	0.0	-4.860394986714499e-13
1.55	-9.903679225573816e-11	0.0	4.15001408444551e-13	-1.257365241196155e-10	0.0	-0.09965609700295708	0.0	-1.3813615289098317e-11	0.0	1.0	0.0	1.713733673717015e-12	0.0	0.0	1.963794134268693e-10	0.0	0.0	-7.064699213586648e-09	0.0	-9.903679225573674e-11	0.0	4.1500140878399637e-13	-2.6569527920274537e-11	0.0	-4.860394986723621e-13
1.555	-9.916963989533952e-11	0.0	4.125712109524422e-13	-1.2626138083700933e-10	0.0	-0.09965609700295555	0.0	-1.3581613545468912e-11	0.0	1.0	0.0	1.70510951377343e-12	0.0	0.0	1.953911574936429e-10	0.0	0.0	-7.068590059262314e-09	0.0	-9.916963989533811e-11	0.0	4.125712112906324e-13	-2.656952792027389e-11	0.0	-4.860394986732633e-13
1.56	-9.930248753494087e-11	0.0	4.1014101346033325e-13	-1.267862375544032e-10	0.0	-0.09965609700295401	0.0	-1.3349611801839496e-11	0.0	1.0	0.0	1.6964853538298445e-12	0.0	0.0	1.9440290156041645e-10	0.0	0.0	-7.072414441334231e-09	0.0	-9.930248753493948e-11	0.0	4.101410137972637e-13	-2.6569527920275183e-11	0.0	-4.860394986741898e-13
1.565	-9.943533517454223e-11	0.0	4.0771081596822437e-13	-1.2731109427179704e-10	0.0	-0.09965609700295248	0.0	-1.3117610058210091e-11	0.0	1.0	0.0	1.6878611938862598e-12	0.0	0.0	1.9341464562719007e-10	0.0	0.0	-7.0761723598024e-09	0.0	-9.943533517454086e-11	0.0	4.0771081630389047e-13	-2.656952792027626e-11	0.0	-4.860394986751153e-13
1.57	-9.95681828141436e-11	0.0	4.052806184761154e-13	-1.278359509891909e-10	0.0	-0.09965609700295094	0.0	-1.2885608314580675e-11	0.0	1.0	0.0	1.6792370339426744e-12	0.0	0.0	1.9242638969396362e-10	0.0	0.0	-7.0798638146668205e-09	0.0	-9.956818281414224e-11	0.0	4.0528061881051254e-13	-2.6569527920275613e-11	0.0	-4.86039498676025e-13
1.575	-9.970103045374495e-11	0.0	4.0285042098400656e-13	-1.2836080770658478e-10	0.0	-0.09965609700294942	0.0	-1.265360657095127e-11	0.0	1.0	0.0	1.6706128739990896e-12	0.0	0.0	1.9143813376073724e-10	0.0	0.0	-7.083488805927493e-09	0.0	-9.970103045374361e-11	0.0	4.0285042131713023e-13	-2.656952792027346e-11	0.0	-4.860394986769363e-13
1.58	-9.983387809334631e-11	0.0	4.0042022349189763e-13	-1.2888566442397865e-10	0.0	-0.09965609700294789	0.0	-1.2421604827321856e-11	0.0	1.0	0.0	1.6619887140555042e-12	0.0	0.0	1.9044987782751079e-10	0.0	0.0	-7.087047333584417e-09	0.0	-9.983387809334498e-11	0.0	4.0042022382374316e-13	-2.6569527920274753e-11	0.0	-4.860394986778652e-13
1.585	-9.996672573294767e-11	0.0	3.9799002599978875e-13	-1.294105211413725e-10	0.0	-0.09965609700294635	0.0	-1.2189603083692452e-11	0.0	1.0	0.0	1.6533645541119192e-12	0.0	0.0	1.8946162189428438e-10	0.0	0.0	-7.090539397637594e-09	0.0	-9.996672573294636e-11	0.0	3.979900263303516e-13	-2.656952792027583e-11	0.0	-4.860394986787731e-13
1.59	-1.0009957337254903e-10	0.0	3.955598285076798e-13	-1.2993537785876636e-10	0.0	-0.09965609700294482	0.0	-1.1957601340063036e-11	0.0	1.0	0.0	1.644740394168334e-12	0.0	0.0	1.8847336596105795e-10	0.0	0.0	-7.093964998087022e-09	0.0	-1.0009957337254773e-10	0.0	3.9555982883695546e-13	-2.656952792027346e-11	0.0	-4.860394986796861e-13
1.595	-1.0023242101215039e-10	0.0	3.93129631015571e-13	-1.304602345761602e-10	0.0	-0.09965609700294328	0.0	-1.172559959643363e-11	0.0	1.0	0.0	1.636116234224749e-12	0.0	0.0	1.8748511002783155e-10	0.0	0.0	-7.097324134932701e-09	0.0	-1.0023242101214909e-10	0.0	3.9312963134355476e-13	-2.6569527920276475e-11	0.0	-4.860394986806133e-13
1.6	-1.0036526865175175e-10	0.0	3.90699433523462e-13	-1.3098509129355406e-10	0.0	-0.09965609700294176	0.0	-1.1493597852804216e-11	0.0	1.0	0.0	1.6274920742811638e-12	0.0	0.0	1.8649685409460512e-10	0.0	0.0	-7.100616808174633e-09	0.0	-1.0036526865175049e-10	0.0	3.906994338501494e-13	-2.656952792027583e-11	0.0	-4.86039498681523e-13
1.605	-1.0049811629135311e-10	0.0	3.882692360313532e-13	-1.315099480109479e-10	0.0	-0.09965609700294023	0.0	-1.1261596109174812e-11	0.0	1.0	0.0	1.6188679143375789e-12	0.0	0.0	1.8550859816137872e-10	0.0	0.0	-7.103843017812816e-09	0.0	-1.0049811629135186e-10	0.0	3.8826923635673954e-13	-2.656952792027346e-11	0.0	-4.860394986824343e-13
1.61	-1.0063096393095447e-10	0.0	3.8583903853924425e-13	-1.3203480472834177e-10	0.0	-0.09965609700293869	0.0	-1.1029594365545397e-11	0.0	1.0	0.0	1.6102437543939935e-12	0.0	0.0	1.8452034222815226e-10	0.0	0.0	-7.107002763847251e-09	0.0	-1.0063096393095322e-10	0.0	3.85839038863325e-13	-2.6569527920273244e-11	0.0	-4.860394986833633e-13
1.615	-1.0076381157055582e-10	0.0	3.8340884104713536e-13	-1.3255966144573561e-10	0.0	-0.09965609700293716	0.0	-1.0797592621915993e-11	0.0	1.0	0.0	1.6016195944504087e-12	0.0	0.0	1.8353208629492588e-10	0.0	0.0	-7.110096046277938e-09	0.0	-1.0076381157055459e-10	0.0	3.8340884136990595e-13	-2.6569527920276046e-11	0.0	-4.86039498684272e-13
1.62	-1.0089665921015719e-10	0.0	3.8097864355502643e-13	-1.3308451816312948e-10	0.0	-0.09965609700293562	0.0	-1.0565590878286577e-11	0.0	1.0	0.0	1.5929954345068233e-12	0.0	0.0	1.8254383036169943e-10	0.0	0.0	-7.113122865104877e-09	0.0	-1.0089665921015597e-10	0.0	3.809786438764823e-13	-2.65695279202754e-11	0.0	-4.860394986851849e-13
1.625	-1.0102950684975854e-10	0.0	3.7854844606291755e-13	-1.3360937488052332e-10	0.0	-0.0996560970029341	0.0	-1.0333589134657173e-11	0.0	1.0	0.0	1.5843712745632385e-12	0.0	0.0	1.8155557442847305e-10	0.0	0.0	-7.116083220328068e-09	0.0	-1.0102950684975734e-10	0.0	3.7854844638305407e-13	-2.6569527920274753e-11	0.0	-4.860394986861063e-13
1.6300000000000001	-1.0116235448935991e-10	0.0	3.761182485708086e-13	-1.3413423159791722e-10	0.0	-0.09965609700293257	0.0	-1.0101587391027757e-11	0.0	1.0	0.0	1.5757471146196531e-12	0.0	0.0	1.805673184952466e-10	0.0	0.0	-7.11897711194751e-09	0.0	-1.0116235448935872e-10	0.0	3.761182488896212e-13	-2.656952792027432e-11	0.0	-4.860394986870236e-13
1.635	-1.0129520212896127e-10	0.0	3.7368805107869974e-13	-1.3465908831531106e-10	0.0	-0.09965609700293103	0.0	-9.869585647398353e-12	0.0	1.0	0.0	1.5671229546760681e-12	0.0	0.0	1.795790625620202e-10	0.0	0.0	-7.121804539963204e-09	0.0	-1.0129520212896009e-10	0.0	3.736880513961838e-13	-2.6569527920273674e-11	0.0	-4.860394986879491e-13
1.6400000000000001	-1.0142804976856262e-10	0.0	3.712578535865908e-13	-1.3518394503270493e-10	0.0	-0.0996560970029295	0.0	-9.637583903768938e-12	0.0	1.0	0.0	1.5584987947324827e-12	0.0	0.0	1.7859080662879376e-10	0.0	0.0	-7.124565504375149e-09	0.0	-1.0142804976856146e-10	0.0	3.712578539027418e-13	-2.6569527920274966e-11	0.0	-4.860394986888512e-13
1.645	-1.0156089740816398e-10	0.0	3.68827656094482e-13	-1.3570880175009877e-10	0.0	-0.09965609700292796	0.0	-9.405582160139532e-12	0.0	1.0	0.0	1.549874634788898e-12	0.0	0.0	1.7760255069556739e-10	0.0	0.0	-7.127260005183347e-09	0.0	-1.0156089740816284e-10	0.0	3.688276564092953e-13	-2.6569527920276046e-11	0.0	-4.860394986897751e-13
1.6500000000000001	-1.0169374504776535e-10	0.0	3.66397458602373e-13	-1.3623365846749264e-10	0.0	-0.09965609700292644	0.0	-9.173580416510119e-12	0.0	1.0	0.0	1.5412504748453126e-12	0.0	0.0	1.7661429476234093e-10	0.0	0.0	-7.129888042387797e-09	0.0	-1.0169374504776422e-10	0.0	3.6639745891584406e-13	-2.65695279202754e-11	0.0	-4.860394986906889e-13
1.655	-1.018265926873667e-10	0.0	3.6396726111026417e-13	-1.3675851518488648e-10	0.0	-0.09965609700292491	0.0	-8.941578672880713e-12	0.0	1.0	0.0	1.5326263149017278e-12	0.0	0.0	1.7562603882911455e-10	0.0	0.0	-7.132449615988498e-09	0.0	-1.0182659268736559e-10	0.0	3.639672614223884e-13	-2.6569527920273244e-11	0.0	-4.860394986916028e-13
1.6600000000000001	-1.0195944032696806e-10	0.0	3.615370636181552e-13	-1.3728337190228034e-10	0.0	-0.09965609700292337	0.0	-8.709576929251298e-12	0.0	1.0	0.0	1.5240021549581424e-12	0.0	0.0	1.746377828958881e-10	0.0	0.0	-7.134944725985451e-09	0.0	-1.0195944032696696e-10	0.0	3.61537063928928e-13	-2.6569527920274537e-11	0.0	-4.860394986925283e-13
1.665	-1.0209228796656943e-10	0.0	3.5910686612604636e-13	-1.3780822861967419e-10	0.0	-0.09965609700292184	0.0	-8.477575185621894e-12	0.0	1.0	0.0	1.5153779950145574e-12	0.0	0.0	1.736495269626617e-10	0.0	0.0	-7.1373733723786555e-09	0.0	-1.0209228796656834e-10	0.0	3.5910686643546315e-13	-2.6569527920275613e-11	0.0	-4.860394986934203e-13
1.67	-1.0222513560617078e-10	0.0	3.5667666863393753e-13	-1.3833308533706803e-10	0.0	-0.0996560970029203	0.0	-8.245573441992489e-12	0.0	1.0	0.0	1.5067538350709726e-12	0.0	0.0	1.7266127102943532e-10	0.0	0.0	-7.139735555168112e-09	0.0	-1.0222513560616971e-10	0.0	3.5667666894199375e-13	-2.6569527920273244e-11	0.0	-4.860394986943568e-13
1.675	-1.0235798324577214e-10	0.0	3.5424647114182855e-13	-1.388579420544619e-10	0.0	-0.09965609700291878	0.0	-8.013571698363073e-12	0.0	1.0	0.0	1.4981296751273872e-12	0.0	0.0	1.7167301509620886e-10	0.0	0.0	-7.1420312743538206e-09	0.0	-1.0235798324577108e-10	0.0	3.542464714485196e-13	-2.6569527920272814e-11	0.0	-4.860394986952672e-13
1.68	-1.0249083088537349e-10	0.0	3.518162736497197e-13	-1.3938279877185576e-10	0.0	-0.09965609700291723	0.0	-7.781569954733668e-12	0.0	1.0	0.0	1.4895055151838025e-12	0.0	0.0	1.7068475916298248e-10	0.0	0.0	-7.144260529935781e-09	0.0	-1.0249083088537245e-10	0.0	3.5181627395504105e-13	-2.6569527920275613e-11	0.0	-4.860394986961861e-13
1.685	-1.0262367852497486e-10	0.0	3.4938607615761074e-13	-1.3990765548924963e-10	0.0	-0.09965609700291571	0.0	-7.549568211104252e-12	0.0	1.0	0.0	1.480881355240217e-12	0.0	0.0	1.6969650322975603e-10	0.0	0.0	-7.146423321913993e-09	0.0	-1.0262367852497383e-10	0.0	3.493860764615577e-13	-2.6569527920274966e-11	0.0	-4.8603949869711e-13
1.69	-1.0275652616457622e-10	0.0	3.469558786655019e-13	-1.4043251220664347e-10	0.0	-0.09965609700291418	0.0	-7.317566467474849e-12	0.0	1.0	0.0	1.472257195296632e-12	0.0	0.0	1.6870824729652963e-10	0.0	0.0	-7.148519650288457e-09	0.0	-1.027565261645752e-10	0.0	3.4695587896806997e-13	-2.6569527920272598e-11	0.0	-4.860394986980129e-13
1.695	-1.0288937380417757e-10	0.0	3.44525681173393e-13	-1.4095736892403734e-10	0.0	-0.09965609700291264	0.0	-7.085564723845434e-12	0.0	1.0	0.0	1.4636330353530469e-12	0.0	0.0	1.677199913633032e-10	0.0	0.0	-7.150549515059172e-09	0.0	-1.0288937380417656e-10	0.0	3.4452568147457755e-13	-2.656952792027389e-11	0.0	-4.860394986989419e-13
1.7	-1.0302222144377893e-10	0.0	3.420954836812841e-13	-1.4148222564143118e-10	0.0	-0.09965609700291111	0.0	-6.853562980216028e-12	0.0	1.0	0.0	1.455008875409462e-12	0.0	0.0	1.667317354300768e-10	0.0	0.0	-7.152512916226139e-09	0.0	-1.0302222144377793e-10	0.0	3.4209548398108057e-13	-2.6569527920274966e-11	0.0	-4.860394986998565e-13
1.705	-1.031550690833803e-10	0.0	3.3966528618917516e-13	-1.4200708235882505e-10	0.0	-0.09965609700290957	0.0	-6.621561236586614e-12	0.0	1.0	0.0	1.4463847154658767e-12	0.0	0.0	1.6574347949685036e-10	0.0	0.0	-7.154409853789359e-09	0.0	-1.0315506908337931e-10	0.0	3.39665286487579e-13	-2.656952792027432e-11	0.0	-4.860394987007687e-13
1.71	-1.0328791672298165e-10	0.0	3.3723508869706633e-13	-1.425319390762189e-10	0.0	-0.09965609700290805	0.0	-6.389559492957209e-12	0.0	1.0	0.0	1.4377605555222917e-12	0.0	0.0	1.6475522356362396e-10	0.0	0.0	-7.15624032774883e-09	0.0	-1.0328791672298068e-10	0.0	3.372350889940729e-13	-2.65695279202754e-11	0.0	-4.860394987016959e-13
1.715	-1.0342076436258302e-10	0.0	3.3480489120495735e-13	-1.4305679579361276e-10	0.0	-0.09965609700290652	0.0	-6.157557749327794e-12	0.0	1.0	0.0	1.4291363955787063e-12	0.0	0.0	1.637669676303975e-10	0.0	0.0	-7.158004338104553e-09	0.0	-1.0342076436258206e-10	0.0	3.348048915005621e-13	-2.6569527920274966e-11	0.0	-4.860394987025988e-13
1.72	-1.0355361200218438e-10	0.0	3.323746937128485e-13	-1.435816525110066e-10	0.0	-0.09965609700290498	0.0	-5.925556005698389e-12	0.0	1.0	0.0	1.4205122356351216e-12	0.0	0.0	1.6277871169717113e-10	0.0	0.0	-7.159701884856528e-09	0.0	-1.0355361200218343e-10	0.0	3.323746940070469e-13	-2.6569527920272598e-11	0.0	-4.860394987035168e-13
1.725	-1.0368645964178573e-10	0.0	3.2994449622073954e-13	-1.4410650922840047e-10	0.0	-0.09965609700290345	0.0	-5.693554262068974e-12	0.0	1.0	0.0	1.4118880756915362e-12	0.0	0.0	1.6179045576394467e-10	0.0	0.0	-7.161332968004754e-09	0.0	-1.036864596417848e-10	0.0	3.299444965135269e-13	-2.656952792027389e-11	0.0	-4.860394987044391e-13
1.73	-1.0381930728138709e-10	0.0	3.275142987286307e-13	-1.446313659457943e-10	0.0	-0.09965609700290191	0.0	-5.461552518439569e-12	0.0	1.0	0.0	1.4032639157479512e-12	0.0	0.0	1.6080219983071827e-10	0.0	0.0	-7.162897587549232e-09	0.0	-1.0381930728138617e-10	0.0	3.275142990200025e-13	-2.6569527920274966e-11	0.0	-4.860394987053605e-13
1.735	-1.0395215492098845e-10	0.0	3.2508410123652173e-13	-1.451562226631882e-10	0.0	-0.09965609700290039	0.0	-5.229550774810155e-12	0.0	1.0	0.0	1.394639755804366e-12	0.0	0.0	1.5981394389749187e-10	0.0	0.0	-7.164395743489961e-09	0.0	-1.0395215492098755e-10	0.0	3.250841015264733e-13	-2.656952792027432e-11	0.0	-4.860394987062743e-13
1.74	-1.0408500256058981e-10	0.0	3.226539037444129e-13	-1.4568107938058204e-10	0.0	-0.09965609700289886	0.0	-4.99754903118075e-12	0.0	1.0	0.0	1.386015595860781e-12	0.0	0.0	1.5882568796426546e-10	0.0	0.0	-7.165827435826943e-09	0.0	-1.0408500256058892e-10	0.0	3.226539040329398e-13	-2.65695279202754e-11	0.0	-4.860394987071738e-13
1.745	-1.0421785020019118e-10	0.0	3.2022370625230397e-13	-1.462059360979759e-10	0.0	-0.09965609700289732	0.0	-4.765547287551334e-12	0.0	1.0	0.0	1.3773914359171956e-12	0.0	0.0	1.57837432031039e-10	0.0	0.0	-7.167192664560177e-09	0.0	-1.042178502001903e-10	0.0	3.2022370653940153e-13	-2.6569527920274966e-11	0.0	-4.860394987081128e-13
1.75	-1.0435069783979253e-10	0.0	3.177935087601951e-13	-1.4673079281536975e-10	0.0	-0.0996560970028958	0.0	-4.5335455439219294e-12	0.0	1.0	0.0	1.3687672759736108e-12	0.0	0.0	1.5684917609781263e-10	0.0	0.0	-7.168491429689662e-09	0.0	-1.0435069783979167e-10	0.0	3.177935090458587e-13	-2.6569527920272598e-11	0.0	-4.860394987090233e-13
1.7550000000000001	-1.0448354547939389e-10	0.0	3.1536331126808616e-13	-1.4725564953276362e-10	0.0	-0.09965609700289425	0.0	-4.301543800292515e-12	0.0	1.0	0.0	1.3601431160300255e-12	0.0	0.0	1.5586092016458617e-10	0.0	0.0	-7.1697237312153994e-09	0.0	-1.0448354547939304e-10	0.0	3.153633115523113e-13	-2.656952792027389e-11	0.0	-4.860394987099253e-13
1.76	-1.0461639311899524e-10	0.0	3.1293311377597733e-13	-1.4778050625015746e-10	0.0	-0.09965609700289273	0.0	-4.06954205666311e-12	0.0	1.0	0.0	1.3515189560864407e-12	0.0	0.0	1.548726642313598e-10	0.0	0.0	-7.170889569137388e-09	0.0	-1.046163931189944e-10	0.0	3.129331140587594e-13	-2.6569527920273244e-11	0.0	-4.86039498710856e-13
1.7650000000000001	-1.0474924075859661e-10	0.0	3.1050291628386835e-13	-1.4830536296755133e-10	0.0	-0.0996560970028912	0.0	-3.837540313033695e-12	0.0	1.0	0.0	1.3428947961428553e-12	0.0	0.0	1.5388440829813334e-10	0.0	0.0	-7.1719889434556285e-09	0.0	-1.0474924075859577e-10	0.0	3.1050291656520275e-13	-2.7252608706909414e-11	0.0	-1.5015584640763797e-11
1.77	-1.0488208839819797e-10	0.0	3.080727187917595e-13	-1.4883021968494517e-10	0.0	-0.09965609700288966	0.0	-3.6055385694042904e-12	0.0	1.0	0.0	1.3342706361992703e-12	0.0	0.0	1.5289615236490694e-10	0.0	0.0	-7.173021854170121e-09	0.0	-1.0488208839819714e-10	0.0	3.080727190716417e-13	-2.386963853760078e-11	0.0	5.694225512095277e-11
1.7750000000000001	-1.0497395119060343e-10	0.0	1.1774152298281233e-12	-1.4935526862595453e-10	0.0	-0.09965609700282393	0.0	-4.127178558949077e-12	0.0	1.0	0.0	1.3006759137961657e-12	0.0	0.0	1.4904648074968395e-10	0.0	0.0	-7.174204203733744e-09	0.0	-1.0497395119060037e-10	0.0	1.1774152301011975e-12	-9.297905671144408e-12	0.0	3.66891904743841e-10
1.78	-1.049818982627844e-10	0.0	3.831696314834245e-12	-1.4988071114127842e-10	0.0	-0.09965609700262675	0.0	-6.191886124865624e-12	0.0	1.0	0.0	1.2159544243909697e-12	0.0	0.0	1.3933811319572385e-10	0.0	0.0	-7.175978048444646e-09	0.0	-1.0498189826277509e-10	0.0	3.831696315089551e-12	-1.908190978773332e-13	0.0	5.606051932303307e-10
1.7850000000000001	-1.0498984533496537e-10	0.0	6.485977399840483e-12	-1.5040615365660232e-10	0.0	-0.09965609700242956	0.0	-8.256593690782258e-12	0.0	1.0	0.0	1.13123293498577e-12	0.0	0.0	1.2962974564176335e-10	0.0	0.0	-7.178343388302827e-09	0.0	-1.049898453349507e-10	0.0	6.485977400078019e-12	-1.5894144352118705e-12	0.0	5.308562169976835e-10
1.79	-1.0499779240714633e-10	0.0	9.140258484846605e-12	-1.5093159617192621e-10	0.0	-0.09965609700223237	0.0	-1.0321301256698802e-11	0.0	1.0	0.0	1.046511445580574e-12	0.0	0.0	1.1992137808780325e-10	0.0	0.0	-7.181300223308286e-09	0.0	-1.049977924071272e-10	0.0	9.140258485066368e-12	-1.5894144353908776e-12	0.0	5.30856216997666e-10
1.795	-1.0500573947932729e-10	0.0	1.179453956985273e-11	-1.5145703868725008e-10	0.0	-0.09965609700203519	0.0	-1.2386008822615343e-11	0.0	1.0	0.0	9.617899561753783e-13	0.0	0.0	1.1021301053384317e-10	0.0	0.0	-7.184848553461024e-09	0.0	-1.0500573947930461e-10	0.0	1.1794539570054717e-11	-1.5894144355709616e-12	0.0	5.308562169976828e-10
1.8	-1.0501368655150825e-10	0.0	1.4448820654858967e-11	-1.51982481202574e-10	0.0	-0.099656097001838	0.0	-1.4450716388531977e-11	0.0	1.0	0.0	8.770684667701786e-13	0.0	0.0	1.0050464297988264e-10	0.0	0.0	-7.188988378761041e-09	0.0	-1.0501368655148291e-10	0.0	1.4448820655043175e-11	-1.5894144357503994e-12	0.0	5.308562169976798e-10
1.805	-1.0502163362368921e-10	0.0	1.710310173986509e-11	-1.5250792371789787e-10	0.0	-0.09965609700164081	0.0	-1.651542395444852e-11	0.0	1.0	0.0	7.923469773649827e-13	0.0	0.0	9.079627542592256e-11	0.0	0.0	-7.1937196992083374e-09	0.0	-1.0502163362366211e-10	0.0	1.7103101740031517e-11	-1.58941443593113e-12	0.0	5.308562169976804e-10
1.81	-1.0502958069587018e-10	0.0	1.9757382824871333e-11	-1.5303336623322177e-10	0.0	-0.09965609700144364	0.0	-1.8580131520365158e-11	0.0	1.0	0.0	7.076254879597829e-13	0.0	0.0	8.108790787196201e-11	0.0	0.0	-7.199042514802912e-09	0.0	-1.0502958069584222e-10	0.0	1.9757382825019977e-11	-1.589414436111214e-12	0.0	5.308562169976792e-10
1.815	-1.0503752776805114e-10	0.0	2.2411663909877455e-11	-1.5355880874854566e-10	0.0	-0.09965609700124645	0.0	-2.06448390862817e-11	0.0	1.0	0.0	6.22903998554587e-13	0.0	0.0	7.137954031800193e-11	0.0	0.0	-7.204956825544766e-09	0.0	-1.0503752776802322e-10	0.0	2.241166391000831e-11	-1.5894144362908673e-12	0.0	5.30856216997679e-10
1.82	-1.050454748402321e-10	0.0	2.5065944994883696e-11	-1.5408425126386956e-10	0.0	-0.09965609700104926	0.0	-2.2709546652198336e-11	0.0	1.0	0.0	5.381825091493874e-13	0.0	0.0	6.167117276404142e-11	0.0	0.0	-7.211462631433898e-09	0.0	-1.0504547484020513e-10	0.0	2.5065944994996765e-11	-1.589414436471813e-12	0.0	5.308562169976782e-10
1.825	-1.0505342191241308e-10	0.0	2.7720226079889818e-11	-1.5460969377919346e-10	0.0	-0.09965609700085207	0.0	-2.4774254218114876e-11	0.0	1.0	0.0	4.534610197441915e-13	0.0	0.0	5.196280521008133e-11	0.0	0.0	-7.218559932470309e-09	0.0	-1.0505342191238794e-10	0.0	2.7720226079985092e-11	-1.5894144366521125e-12	0.0	5.308562169976774e-10
1.83	-1.0506136898459404e-10	0.0	3.0374507164896056e-11	-1.5513513629451735e-10	0.0	-0.09965609700065489	0.0	-2.6838961784031514e-11	0.0	1.0	0.0	3.6873953033899176e-13	0.0	0.0	4.2254437656120804e-11	0.0	0.0	-7.226248728653999e-09	0.0	-1.0506136898457164e-10	0.0	3.037450716497354e-11	-1.5894144368285347e-12	0.0	5.308562169976771e-10
1.835	-1.05069316056775e-10	0.0	3.302878824990218e-11	-1.5566057880984125e-10	0.0	-0.0996560970004577	0.0	-2.8903669349948054e-11	0.0	1.0	0.0	2.8401804093379587e-13	0.0	0.0	3.2546070102160715e-11	0.0	0.0	-7.234529019984968e-09	0.0	-1.0506931605675623e-10	0.0	3.3028788249961864e-11	-1.5894144370114191e-12	0.0	5.308562169976763e-10
1.84	-1.0507726312895596e-10	0.0	3.568306933490842e-11	-1.5618602132516514e-10	0.0	-0.09965609700026051	0.0	-3.096837691586469e-11	0.0	1.0	0.0	1.9929655152859614e-13	0.0	0.0	2.283770254820019e-11	0.0	0.0	-7.243400806463215e-09	0.0	-1.0507726312894174e-10	0.0	3.5683069334950304e-11	-8.104907257838805e-13	0.0	6.574325543418467e-10
1.845	-1.0508521020113692e-10	0.0	3.8337350419914544e-11	-1.56711463840489e-10	0.0	-0.09965609700006332	0.0	-3.303308448178123e-11	0.0	1.0	0.0	1.1457506212340023e-13	0.0	0.0	1.3129334994240099e-11	0.0	0.0	-7.252864088088741e-09	0.0	-1.0508521020112814e-10	0.0	3.833735041993862e-11	-5.711865022995415e-12	0.0	-1.3904853538312267e-10
1.85	-1.0513989269600724e-10	0.0	3.3397051264253425e-11	-1.5724069441103335e-10	0.0	-0.09965609700031137	0.0	-3.168222958631226e-11	0.0	1.0	0.0	1.111718988722386e-13	0.0	0.0	1.2739361211668936e-11	0.0	0.0	-7.261940378293042e-09	0.0	-1.0513989269599981e-10	0.0	3.33970512642768e-11	-1.5021972782676885e-11	0.0	-1.651955798581905e-09
1.855	-1.0522764069184868e-10	0.0	2.3083555807526404e-11	-1.5777260504599909e-10	0.0	-0.09965609700087442	0.0	-2.791485040615627e-11	0.0	1.0	0.0	1.6530178095780858e-13	0.0	0.0	1.894218878975686e-11	0.0	0.0	-7.269937393863101e-09	0.0	-1.0522764069184106e-10	0.0	2.3083555807561194e-11	-1.810069085126022e-11	0.0	-2.152252363027401e-09
1.86	-1.0531538868769014e-10	0.0	1.2770060350798943e-11	-1.5830451568096482e-10	0.0	-0.09965609700143747	0.0	-2.4147471226000112e-11	0.0	1.0	0.0	2.1943166304338088e-13	0.0	0.0	2.514501636784505e-11	0.0	0.0	-7.276855134798918e-09	0.0	-1.0531538868768453e-10	0.0	1.2770060350845161e-11	-1.7549599168918897e-11	0.0	-2.0626990913431633e-09
1.865	-1.054031366835316e-10	0.0	2.4565648940718952e-12	-1.5883642631593055e-10	0.0	-0.09965609700200052	0.0	-2.0380092045844114e-11	0.0	1.0	0.0	2.7356154512895096e-13	0.0	0.0	3.134784394593299e-11	0.0	0.0	-7.282693601100493e-09	0.0	-1.0540313668353025e-10	0.0	2.4565648941295636e-12	-1.7549599169364153e-11	0.0	-2.0626990913431616e-09
1.87	-1.0549088467937304e-10	0.0	-7.856930562655579e-12	-1.593683369508963e-10	0.0	-0.09965609700256356	0.0	-1.6612712865687954e-11	0.0	1.0	0.0	3.2769142721452326e-13	0.0	0.0	3.7550671524021175e-11	0.0	0.0	-7.2874527927678265e-09	0.0	-1.0549088467937818e-10	0.0	-7.856930562586441e-12	-1.7549599169811993e-11	0.0	-2.062699091343152e-09
1.875	-1.0557863267521449e-10	0.0	-1.8170426019382587e-11	-1.5990024758586202e-10	0.0	-0.09965609700312661	0.0	-1.2845333685531962e-11	0.0	1.0	0.0	3.8182130930009323e-13	0.0	0.0	4.37534991021091e-11	0.0	0.0	-7.291132709800917e-09	0.0	-1.0557863267522837e-10	0.0	-1.8170426019301963e-11	-1.7549599170261126e-11	0.0	-2.0626990913431488e-09
1.8800000000000001	-1.0566638067105595e-10	0.0	-2.848392147611006e-11	-1.6043215822082776e-10	0.0	-0.09965609700368966	0.0	-9.077954505375803e-12	0.0	1.0	0.0	4.359511913856656e-13	0.0	0.0	4.99563266801973e-11	0.0	0.0	-7.293733352199766e-09	0.0	-1.0566638067108079e-10	0.0	-2.848392147601793e-11	-1.7549599170705736e-11	0.0	-2.062699091343148e-09
1.885	-1.057541286668974e-10	0.0	-3.8797416932837096e-11	-1.609640688557935e-10	0.0	-0.09965609700425271	0.0	-5.310575325219808e-12	0.0	1.0	0.0	4.900810734712356e-13	0.0	0.0	5.6159154258285226e-11	0.0	0.0	-7.295254719964373e-09	0.0	-1.0575412866693542e-10	0.0	-3.879741693273344e-11	-1.754959917115185e-11	0.0	-2.0626990913431442e-09
1.8900000000000001	-1.0584187666273884e-10	0.0	-4.911091238956457e-11	-1.6149597949075922e-10	0.0	-0.09965609700481576	0.0	-1.5431961450636482e-12	0.0	1.0	0.0	5.44210955556808e-13	0.0	0.0	6.236198183637342e-11	0.0	0.0	-7.295696813094739e-09	0.0	-1.058418766627923e-10	0.0	-4.911091238944937e-11	-1.7549599171598833e-11	0.0	-2.062699091343139e-09
1.895	-1.059296246585803e-10	0.0	-5.942440784629159e-11	-1.6202789012572496e-10	0.0	-0.09965609700537881	0.0	2.2241830350923435e-12	0.0	1.0	0.0	5.983408376423779e-13	0.0	0.0	6.856480941446134e-11	0.0	0.0	-7.2950596315908615e-09	0.0	-1.0592962465865141e-10	0.0	-5.942440784616483e-11	-1.7549599172046673e-11	0.0	-2.0626990913431347e-09
1.9000000000000001	-1.0601737265442175e-10	0.0	-6.973790330301906e-11	-1.6255980076069072e-10	0.0	-0.09965609700594184	0.0	5.991562215248506e-12	0.0	1.0	0.0	6.524707197279503e-13	0.0	0.0	7.476763699254955e-11	0.0	0.0	-7.2933431754527426e-09	0.0	-1.0601737265451275e-10	0.0	-6.973790330288072e-11	-1.754959917249042e-11	0.0	-2.062699091343129e-09
1.905	-1.061051206502632e-10	0.0	-8.005139875974607e-11	-1.6309171139565642e-10	0.0	-0.09965609700650489	0.0	9.7589413954045e-12	0.0	1.0	0.0	7.066006018135203e-13	0.0	0.0	8.097046457063748e-11	0.0	0.0	-7.290547444680382e-09	0.0	-1.0610512065037632e-10	0.0	-8.005139875959612e-11	-1.754959917293869e-11	0.0	-2.062699091343127e-09
1.9100000000000001	-1.0619286864610465e-10	0.0	-9.036489421647356e-11	-1.6362362203062218e-10	0.0	-0.09965609700706794	0.0	1.352632057556066e-11	0.0	1.0	0.0	7.607304838990927e-13	0.0	0.0	8.717329214872567e-11	0.0	0.0	-7.2866724392737786e-09	0.0	-1.0619286864624214e-10	0.0	-9.036489421631199e-11	-1.7549599173386318e-11	0.0	-2.062699091343134e-09
1.915	-1.062806166419461e-10	0.0	-1.0067838967320058e-10	-1.641555326655879e-10	0.0	-0.09965609700763099	0.0	1.7293699755716656e-11	0.0	1.0	0.0	8.148603659846626e-13	0.0	0.0	9.33761197268136e-11	0.0	0.0	-7.2817181592329335e-09	0.0	-1.0628061664211018e-10	0.0	-1.0067838967302738e-10	-1.848345529859608e-11	0.0	-2.406499348369936e-09
1.92	-1.0636836463778756e-10	0.0	-1.109918851299276e-10	-1.6468744330055363e-10	0.0	-0.09965609700819404	0.0	2.1061078935872647e-11	0.0	1.0	0.0	8.689902480702326e-13	0.0	0.0	9.957894730490151e-11	0.0	0.0	-7.275684604557847e-09	0.0	-1.0636836463798046e-10	0.0	-1.1099188512974274e-10	-1.2120172571822661e-11	0.0	-6.38491487050369e-11
1.925	-1.0640008126620572e-10	0.0	-1.0067736516501651e-10	-1.652200156623397e-10	0.0	-0.09965609700831732	0.0	1.5050429199884445e-11	0.0	1.0	0.0	8.014665128218674e-13	0.0	0.0	9.184129721152136e-11	0.0	0.0	-7.271372974192777e-09	0.0	-1.064000812663671e-10	0.0	-1.0067736516484596e-10	-4.367208675954365e-12	0.0	2.7904138471452927e-09
1.93	-1.0642137528586503e-10	0.0	-8.652574922870981e-11	-1.657527111144602e-10	0.0	-0.09965609700835878	0.0	7.220930941853329e-12	0.0	1.0	0.0	7.113135233560519e-13	0.0	0.0	8.151052559776416e-11	0.0	0.0	-7.269304329857159e-09	0.0	-1.0642137528598812e-10	0.0	-8.652574922855841e-11	-4.085093778534074e-12	0.0	2.8942747867807626e-09
1.935	-1.0644266930552432e-10	0.0	-7.237413329240247e-11	-1.6628540656658072e-10	0.0	-0.09965609700840025	0.0	-6.085673161781294e-13	0.0	1.0	0.0	6.211605338902323e-13	0.0	0.0	7.117975398400651e-11	0.0	0.0	-7.269478671550992e-09	0.0	-1.0644266930561424e-10	0.0	-7.237413329227024e-11	-4.258803925733882e-12	0.0	2.8303231872575726e-09
1.94	-1.0646396332518363e-10	0.0	-5.822251735609575e-11	-1.668181020187012e-10	0.0	-0.09965609700844173	0.0	-8.438065574209242e-12	0.0	1.0	0.0	5.310075444244167e-13	0.0	0.0	6.08489823702493e-11	0.0	0.0	-7.271895999274276e-09	0.0	-1.0646396332524546e-10	0.0	-5.822251735598269e-11	-4.258803926753856e-12	0.0	2.830323187257571e-09
1.945	-1.0648525734484293e-10	0.0	-4.407090141978842e-11	-1.6735079747082173e-10	0.0	-0.0996560970084832	0.0	-1.62675638322407e-11	0.0	1.0	0.0	4.408545549585973e-13	0.0	0.0	5.051821075649165e-11	0.0	0.0	-7.2765563130270115e-09	0.0	-1.0648525734488178e-10	0.0	-4.407090141969453e-11	-4.2588039277759844e-12	0.0	2.8303231872575676e-09
1.95	-1.0650655136450222e-10	0.0	-2.9919285483481717e-11	-1.6788349292294222e-10	0.0	-0.09965609700852468	0.0	-2.4097062090271813e-11	0.0	1.0	0.0	3.5070156549278177e-13	0.0	0.0	4.018743914273445e-11	0.0	0.0	-7.283459612809198e-09	0.0	-1.0650655136452321e-10	0.0	-2.991928548340701e-11	-4.26954101405334e-12	0.0	2.688512252130886e-09
1.955	-1.0652784538416153e-10	0.0	-1.5767669547174378e-11	-1.6841618837506274e-10	0.0	-0.09965609700856615	0.0	-3.192656034830327e-11	0.0	1.0	0.0	2.605485760269622e-13	0.0	0.0	2.985666752897679e-11	0.0	0.0	-7.292605898620836e-09	0.0	-1.0652784538416975e-10	0.0	-1.5767669547118867e-11	-4.206396460160575e-12	0.0	3.5224991465526164e-09
1.96	-1.0654849517870887e-10	0.0	6.892602496724289e-12	-1.6894923045098921e-10	0.0	-0.09965609700804788	0.0	-3.379994194315976e-11	0.0	1.0	0.0	2.1206622447710093e-13	0.0	0.0	2.4300999279623593e-11	0.0	0.0	-7.3022888687264865e-09	0.0	-1.0654849517870595e-10	0.0	6.892602496769479e-12	-4.047131571248335e-12	0.0	5.626003252694625e-09
1.965	-1.0656842407075042e-10	0.0	3.907425362851563e-11	-1.694826604068131e-10	0.0	-0.09965609700690325	0.0	-2.9008293958174894e-11	0.0	1.0	0.0	2.1021426148861118e-13	0.0	0.0	2.4088779953513798e-11	0.0	0.0	-7.310599132799878e-09	0.0	-1.0656842407073399e-10	0.0	3.9074253628560434e-11	-3.973763363827107e-12	0.0	6.595019877823064e-09
1.97	-1.0658835296279197e-10	0.0	7.12559047603055e-11	-1.7001609036263694e-10	0.0	-0.09965609700575863	0.0	-2.4216645973190243e-11	0.0	1.0	0.0	2.0836229850012152e-13	0.0	0.0	2.3876560627404013e-11	0.0	0.0	-7.31753669084101e-09	0.0	-1.0658835296276228e-10	0.0	7.125590476034992e-11	-3.98577840567985e-12	0.0	6.436330226358042e-09
1.975	-1.0660828185483351e-10	0.0	1.0343755589209681e-10	-1.7054952031846082e-10	0.0	-0.09965609700461402	0.0	-1.9424997988205373e-11	0.0	1.0	0.0	2.065103355116318e-13	0.0	0.0	2.3664341301294222e-11	0.0	0.0	-7.323101542849881e-09	0.0	-1.0660828185479079e-10	0.0	1.0343755589214085e-10	-3.985778405726594e-12	0.0	6.43633022635804e-09
1.98	-1.0662821074687506e-10	0.0	1.3561920702388668e-10	-1.7108295027428467e-10	0.0	-0.09965609700346939	0.0	-1.4633350003220722e-11	0.0	1.0	0.0	2.0465837252314213e-13	0.0	0.0	2.3452121975184434e-11	0.0	0.0	-7.3272936888264924e-09	0.0	-1.0662821074681955e-10	0.0	1.3561920702393032e-10	-3.985778405775708e-12	0.0	6.436330226358037e-09
1.985	-1.0664813963891661e-10	0.0	1.6780085815567797e-10	-1.7161638023010854e-10	0.0	-0.09965609700232476	0.0	-9.841702018235856e-12	0.0	1.0	0.0	2.028064095346524e-13	0.0	0.0	2.323990264907464e-11	0.0	0.0	-7.330113128770844e-09	0.0	-1.0664813963884855e-10	0.0	1.6780085815572122e-10	-3.985450321395815e-12	0.0	8.050855646340257e-09
1.99	-1.0666806853095815e-10	0.0	1.9998250928746787e-10	-1.7214981018593242e-10	0.0	-0.09965609700118015	0.0	-5.050054033251203e-12	0.0	1.0	0.0	2.0095444654616275e-13	0.0	0.0	2.3027683322964858e-11	0.0	0.0	-7.3315598626829356e-09	0.0	-1.0666806853087777e-10	0.0	1.9998250928751072e-10	1.6280376801387483e-09	0.0	1.578976497442023e-09
1.995	-1.0668801710802729e-10	0.0	1.3529263522032566e-10	-1.7268324110408798e-10	0.0	-0.09965609700008037	0.0	7.748534564596448e-12	0.0	1.0	0.0	2.013142015162267e-13	0.0	0.0	2.3068908205851896e-11	0.0	0.0	-7.329340071043122e-09	0.0	-1.0668801710797281e-10	0.0	1.3529263522036863e-10	4.1999326551324354e-05	0.0	-5.132789715262367e-08
2.0	-2.0462949130804257e-10	0.0	-2.1918516630550138e-10	-1.7324827661563078e-10	0.0	-0.09965609700065048	0.0	3.1228994796555656e-12	0.0	1.0	0.0	2.1897132148567875e-13	0.0	0.0	2.509226511106343e-11	0.0	0.0	-7.328445426242983e-09	0.0	-2.0462949130813855e-10	0.0	-2.1918516630541176e-10	-0.00016908669855695023	0.0	-2.7851927416111738e-08
2.005	-2.5208499326013175e-06	0.0	-1.0586672614294925e-10	-7.606029506232252e-09	0.0	-0.09965609700147043	0.0	8.724202872707013e-10	0.0	1.0	0.0	1.728129599250444e-12	0.0	0.0	1.9802906497736949e-10	0.0	0.0	-7.078515424131973e-09	0.0	-2.520849932601318e-06	0.0	-1.0586671743023848e-10	-0.000960740363187592	0.0	2.4359833732909784e-08
2.0100000000000002	-1.0020850711325195e-05	0.0	-5.817688458507086e-11	-4.369719223490804e-08	0.0	-0.0996560970019394	0.0	5.107451481719866e-09	0.0	1.0	0.0	1.0859079493672073e-11	0.0	0.0	1.2443588487689376e-09	0.0	0.0	-5.615338354280038e-09	0.0	-1.0020850711325197e-05	0.0	-5.817666695064192e-11	-0.001999656198479881	0.0	5.821888312056546e-09
2.015	-2.25208535514327e-05	0.0	-3.8231151440016793e-11	-1.3016301116845038e-07	0.0	-0.09965609700221723	0.0	1.519545414660682e-08	0.0	1.0	0.0	3.901992331858658e-11	0.0	0.0	4.471353846158233e-09	0.0	0.0	-1.2621614023543539e-09	0.0	-2.2520853551432704e-05	0.0	-3.82293939160595e-11	-0.003000000968751171	0.0	2.6291648277654343e-09
2.02	-4.002086167134955e-05	0.0	-2.7408450452533258e-11	-2.912961897080358e-07	0.0	-0.09965609700239003	0.0	3.539398967960184e-08	0.0	1.0	0.0	1.0711335041968243e-10	0.0	0.0	1.2274285817107296e-08	0.0	0.0	8.877469741499539e-09	0.0	-4.0020861671349554e-05	0.0	-2.7399876915372654e-11	-0.004000002379814716	0.0	2.045955978579336e-09
2.025	-6.252087948772592e-05	0.0	-1.7431910025061752e-11	-5.467036928752485e-07	0.0	-0.09965609700247467	0.0	6.738117786512926e-08	0.0	1.0	0.0	2.3690654461416825e-10	0.0	0.0	2.7147490290839167e-08	0.0	0.0	2.8180755292960682e-08	0.0	-6.252087948772594e-05	0.0	-1.7402286814010402e-11	-0.005000005068850853	0.0	1.3646731656411542e-09
2.0300000000000002	-9.002091541278809e-05	0.0	-1.4399829907565732e-11	-9.238237276042161e-07	0.0	-0.0996560970025041	0.0	1.1057648680165902e-07	0.0	1.0	0.0	4.5912140627214124e-10	0.0	0.0	5.261143772700979e-08	0.0	0.0	5.985858532855626e-08	0.0	-9.00209154127881e-05	0.0	-1.4317168849009283e-11	-0.006000009577703572	0.0	-9.09262759236368e-11
2.035	-0.00012252097935188988	0.0	-1.5645620916318394e-11	-1.4513613628832542e-06	0.0	-0.09965609700251661	0.0	1.6594907838104213e-07	0.0	1.0	0.0	8.059909157653788e-10	0.0	0.0	9.235975559848091e-08	0.0	0.0	1.0739949435515329e-07	0.0	-0.0001225209793518899	0.0	-1.5448119323621793e-11	-0.007008140935488464	0.0	7.939356899471243e-10
2.04	-0.000160021085922447	0.0	-6.729779229100074e-12	-2.1541704159742137e-06	0.0	-0.09965609700253421	0.0	2.3659280198735528e-07	0.0	1.0	0.0	1.3086362645279162e-09	0.0	0.0	1.499586697504303e-07	0.0	0.0	1.7517833944040257e-07	0.0	-0.00016002108592244702	0.0	-6.31096043684557e-12	-0.00864328083180929	0.0	2.8833151202723274e-09
2.045	-0.00020203378743568955	0.0	-1.809466967485564e-12	-3.0585189280370506e-06	0.0	-0.09965609700254849	0.0	8.490956255453786e-07	0.0	1.0	0.0	2.031110895791764e-09	0.0	0.0	2.3274816410380807e-07	0.0	0.0	4.184263181742562e-07	0.0	-0.00020203378743568955	0.0	-9.887609135281516e-13	-0.004908230510108196	0.0	-3.835629390811664e-09
2.05	-0.00020752653017462312	0.0	-8.409026458457405e-11	-4.089297988211581e-06	0.0	-0.09965609700260909	0.0	1.6636920646671103e-05	0.0	0.9999999999999997	0.0	2.999388991253038e-08	0.0	0.0	3.4370466063360097e-06	0.0	0.0	5.184553003915828e-06	0.0	-0.0002075265301746279	0.0	-7.164120878459982e-11	6.015608711407762e-07	0.0	-3.478196102983663e-08
2.055	-0.00020807070276279946	0.0	-3.3739302373648145e-10	-5.128597085616868e-06	0.0	-0.09965609700359099	0.0	1.5095779644819431e-05	0.0	0.9999999999999977	0.0	7.074681992371799e-08	0.0	0.0	8.10698839120218e-06	0.0	0.0	9.50917531445408e-06	0.0	-0.00020807070276284524	0.0	-3.079523426569559e-10	1.1997220592864894e-06	0.0	-3.512028723524879e-08
2.06	-0.00020835250219187803	0.0	-4.1860511684101657e-10	-6.169640388583701e-06	0.0	-0.09965609700537632	0.0	1.192678196431481e-05	0.0	0.9999999999999947	0.0	1.043979884793376e-07	0.0	0.0	1.1963128259042895e-05	0.0	0.0	1.2925946663094022e-05	0.0	-0.000208352502191961	0.0	-3.7510195259407017e-10	-5.843645704476989e-05	0.0	1.8529708878652531e-09
2.065	-0.00020871354689782007	0.0	-3.76209089553139e-10	-7.212265747235949e-06	0.0	-0.0996560970071934	0.0	9.645377457939086e-06	0.0	0.9999999999999915	0.0	1.3116449097951411e-07	0.0	0.0	1.5030343510215878e-05	0.0	0.0	1.5689143763846685e-05	0.0	-0.00020871354689791163	0.0	-3.2145747727436356e-10	-8.13999859813414e-05	0.0	1.517222209153865e-08
2.07	-0.00020916309583237375	0.0	-3.5501162637689595e-10	-8.25692677862592e-06	0.0	-0.09965609700870717	0.0	8.220695320401312e-06	0.0	0.9999999999999882	0.0	1.5335183084236656e-07	0.0	0.0	1.7572825375743535e-05	0.0	0.0	1.804419949645639e-05	0.0	-0.0002091630958324728	0.0	-2.908605389957762e-10	-9.665182656173473e-05	0.0	-2.7649052418818913e-08
2.075	-0.00020967145272785838	0.0	-6.167894294281885e-10	-9.303994801254778e-06	0.0	-0.09965609701085965	0.0	7.354998245344915e-06	0.0	0.9999999999999851	0.0	1.7273469783997373e-07	0.0	0.0	1.9793938323396164e-05	0.0	0.0	2.015125128537834e-05	0.0	-0.00020967145272805899	0.0	-5.443543593629229e-10	-0.00010596534988556291	0.0	-4.934436208196578e-08
2.08	-0.00021021663923923034	0.0	-5.793938527365192e-10	-1.0353704002857623e-05	0.0	-0.09965609701318753	0.0	6.836798741574998e-06	0.0	0.9999999999999819	0.0	1.9042257752003716e-07	0.0	0.0	2.1820820031801883e-05	0.0	0.0	2.210984985174134e-05	0.0	-0.0002102166392394358	0.0	-4.993338641734106e-10	-0.00011164854960574853	0.0	2.039068836862973e-07
2.085	-0.00021078397316086613	0.0	8.841116591426358e-10	-1.1406199192552735e-05	0.0	-0.09965609701147715	0.0	6.5272424629390385e-06	0.0	0.9999999999999786	0.0	2.07098257449867e-07	0.0	0.0	2.3731712192782447e-05	0.0	0.0	2.3979767076666257e-05	0.0	-0.00021078397316048186	0.0	9.71417646222508e-10	-0.00011500586087317873	0.0	1.3974349100307252e-08
2.09	-0.00021136434631531165	0.0	-4.934378550209464e-10	-1.2461567159772543e-05	0.0	-0.09965609701001366	0.0	6.340705298316966e-06	0.0	0.9999999999999752	0.0	2.231699460560802e-07	0.0	0.0	2.557339204635151e-05	0.0	0.0	2.5796245340315265e-05	0.0	-0.00021136434631551095	0.0	-3.9909751549016644e-10	-0.00011701405689874392	0.0	-2.123728472779367e-07
2.095	-0.00021195275768396785	0.0	-6.821859489110184e-10	-1.3519858655751247e-05	0.0	-0.09965609701223202	0.0	6.230075230539368e-06	0.0	0.9999999999999716	0.0	2.388773661216648e-07	0.0	0.0	2.7373329799945763e-05	0.0	0.0	2.758103042410976e-05	0.0	-0.00021195275768426966	0.0	-5.809245159154043e-10	-0.00011825982845041494	0.0	4.371283220556781e-08
2.1	-0.0002125460720156965	0.0	-2.838297774200097e-10	-1.4581104756478028e-05	0.0	-0.09965609701469559	0.0	6.165392305691786e-06	0.0	0.9999999999999678	0.0	2.5436709272963117e-07	0.0	0.0	2.9148321720841742e-05	0.0	0.0	2.9347285214902615e-05	0.0	-0.0002125460720158135	0.0	-1.7570032460050557e-10	-0.00011899766229574638	0.0	9.210652288359555e-08
2.105	-0.00021314218905591956	0.0	2.0841742415615567e-11	-1.5645325670790737e-05	0.0	-0.09965609701626058	0.0	6.1270941350647165e-06	0.0	0.9999999999999638	0.0	2.6973425369097363e-07	0.0	0.0	3.0909268653208056e-05	0.0	0.0	3.110256838799545e-05	0.0	-0.00021314218905587747	0.0	1.3582524100572613e-10	-0.00011941681437951364	0.0	-5.6118413127641735e-09
2.11	-0.00021373993755048452	0.0	-3.1333506704713875e-10	-1.6712532125738904e-05	0.0	-0.09965609701688577	0.0	6.104362199532265e-06	0.0	0.9999999999999596	0.0	2.850291698093578e-07	0.0	0.0	3.266193693638818e-05	0.0	0.0	3.2851339341257426e-05	0.0	-0.00021373993755062858	0.0	-1.9149083313685588e-10	-0.00011966469105505526	0.0	-6.41667522743473e-08
2.115	-0.00021433867309975807	0.0	-4.992611402766752e-10	-1.7782730026154192e-05	0.0	-0.09965609701783315	0.0	6.090712712206177e-06	0.0	0.9999999999999551	0.0	3.0027953652658005e-07	0.0	0.0	3.4409500234235486e-05	0.0	0.0	3.459620000443789e-05	0.0	-0.00021433867310001944	0.0	-3.7053810544035635e-10	-0.00011982177796558563	0.0	-1.7421606841178867e-08
2.12	-0.0002149380629053654	0.0	-5.122291432773061e-10	-1.885592307567914e-05	0.0	-0.09965609701920644	0.0	6.083410813777149e-06	0.0	0.9999999999999505	0.0	3.155029447450588e-07	0.0	0.0	3.615397431568277e-05	0.0	0.0	3.633896882780627e-05	0.0	-0.00021493806290564605	0.0	-3.7660195970832843e-10	-0.00011992699577924212	0.0	1.0328326361734067e-08
2.125	-0.0002155378852178363	0.0	-4.423290795747772e-10	-1.9932113820432935e-05	0.0	-0.09965609702081236	0.0	6.08020413373194e-06	0.0	0.9999999999999456	0.0	3.307115088729862e-07	0.0	0.0	3.789674738965147e-05	0.0	0.0	3.808081900501046e-05	0.0	-0.000215537885218082	0.0	-2.997673610953224e-10	-0.00011999999207120397	0.0	1.4678601786853702e-08
2.13	-0.00021613801474815313	0.0	-3.9455416673501164e-10	-2.101130379533351e-05	0.0	-0.0996560970224054	0.0	6.07984613995947e-06	0.0	0.9999999999999404	0.0	3.459125569107592e-07	0.0	0.0	3.96386591831316e-05	0.0	0.0	3.9822566624553375e-05	0.0	-0.00021613801474837456	0.0	-2.450244600806284e-10	-0.00012004419710189213	0.0	8.91396875333613e-09
2.1350000000000002	-0.00021673828831737514	0.0	-3.551680302022123e-10	-2.2093494377814003e-05	0.0	-0.09965609702414509	0.0	6.08082137705496e-06	0.0	0.9999999999999349	0.0	3.611125099016548e-07	0.0	0.0	4.138044549348284e-05	0.0	0.0	4.156459362894427e-05	0.0	-0.00021673828831757526	0.0	-1.9863421562997838e-10	-0.00012006488354646198	0.0	1.8145791478938635e-08
2.14	-0.00021733863587533988	0.0	-2.6594986327776376e-10	-2.3178686042503467e-05	0.0	-0.09965609702625579	0.0	6.082497909376056e-06	0.0	0.9999999999999294	0.0	3.763135381639617e-07	0.0	0.0	4.31223550208615e-05	0.0	0.0	4.3307100924466244e-05	0.0	-0.00021733863587547865	0.0	-1.0237492118574402e-10	-0.00012006834409899743	0.0	-4.228816179536736e-09
2.145	-0.00021793896122186652	0.0	-4.17972853673756e-10	-2.426687943753144e-05	0.0	-0.09965609702832118	0.0	6.0838760539235596e-06	0.0	0.9999999999999235	0.0	3.915186023745111e-07	0.0	0.0	4.4864727033841424e-05	0.0	0.0	4.505000302931887e-05	0.0	-0.00021793896122212713	0.0	-2.4731853867256525e-10	-0.00012006555188282986	0.0	-3.451393047681782e-08
2.15	-0.0002185392973384674	0.0	-5.585416577707499e-10	-2.535807436587802e-05	0.0	-0.09965609703032509	0.0	6.085352418064882e-06	0.0	0.9999999999999175	0.0	4.067268136360241e-07	0.0	0.0	4.660745967229762e-05	0.0	0.0	4.679332808134311e-05	0.0	-0.00021853929733884963	0.0	-3.807700736491193e-10	-0.00012006976319505735	0.0	-1.1243519323584637e-08
2.1550000000000002	-0.0002191396469111955	0.0	-5.398863580608753e-10	-2.6452270820172837e-05	0.0	-0.09965609703221118	0.0	6.0870050781917305e-06	0.0	0.9999999999999112	0.0	4.2193814295896953e-07	0.0	0.0	4.83505496142745e-05	0.0	0.0	4.853712658561854e-05	0.0	-0.00021913964691157325	0.0	-3.5495960672791173e-10	-0.00012006362377931426	0.0	1.2228451976744544e-08
2.16	-0.0002197399355990075	0.0	-4.810130184240022e-10	-2.754946927523451e-05	0.0	-0.09965609703382117	0.0	6.088102236323171e-06	0.0	0.9999999999999046	0.0	4.371547476945448e-07	0.0	0.0	5.0094244074009144e-05	0.0	0.0	5.028123940254592e-05	0.0	-0.00021973993559934422	0.0	-2.8889230621343777e-10	-0.00012005914158663057	0.0	1.2009557434915892e-08
2.165	-0.00022034024987901214	0.0	-4.453562432971624e-10	-2.8649669302452002e-05	0.0	-0.09965609703537504	0.0	6.089448941462972e-06	0.0	0.9999999999998977	0.0	4.5237473774010557e-07	0.0	0.0	5.183832646169283e-05	0.0	0.0	5.20257380220771e-05	0.0	-0.00022034024987932496	0.0	-2.460035177917857e-10	-0.00012006402908030414	0.0	6.3145905758039455e-09
2.17	-0.00022094057258535406	0.0	-4.3631787169635566e-10	-2.97528710357057e-05	0.0	-0.09965609703681734	0.0	6.090889227867639e-06	0.0	0.9999999999998908	0.0	4.675987325987849e-07	0.0	0.0	5.35828677671554e-05	0.0	0.0	5.377064925326966e-05	0.0	-0.00022094057258566555	0.0	-2.2969480825506478e-10	-0.00012006534143578197	0.0	-2.1336118209530025e-09
2.1750000000000003	-0.00022154090105697084	0.0	-4.741870291833159e-10	-3.085907458267439e-05	0.0	-0.0996560970383629	0.0	6.092380060451057e-06	0.0	0.9999999999998835	0.0	4.828272579764884e-07	0.0	0.0	5.532792823185616e-05	0.0	0.0	5.5515987576537176e-05	0.0	-0.00022154090105732554	0.0	-2.602550576091644e-10	-0.00012006506385000968	0.0	-4.709780044272664e-09
2.18	-0.0002221412245368177	0.0	-4.961670200426165e-10	-3.196827979007218e-05	0.0	-0.09965609703967558	0.0	6.093842750942933e-06	0.0	0.9999999999998761	0.0	4.980595227394094e-07	0.0	0.0	5.707341719853879e-05	0.0	0.0	5.726174492976428e-05	0.0	-0.00022214122453720182	0.0	-2.748879154952872e-10	-0.0001200659307122354	0.0	-6.21544921540767e-09
2.185	-0.00022274156166016346	0.0	-5.536262586377499e-10	-3.308048673480874e-05	0.0	-0.09965609704125976	0.0	6.095411751074766e-06	0.0	0.9999999999998684	0.0	5.132959558063011e-07	0.0	0.0	5.881938381767195e-05	0.0	0.0	5.9007951768419434e-05	0.0	-0.00022274156166061457	0.0	-3.2496157305720515e-10	-0.00012006825704304543	0.0	-1.1792278406862661e-08
2.19	-0.00022334190156872295	0.0	-6.105086647132808e-10	-3.419569540930422e-05	0.0	-0.099656097042941	0.0	6.0970022317936525e-06	0.0	0.9999999999998606	0.0	5.285364818240292e-07	0.0	0.0	6.056581945442248e-05	0.0	0.0	6.0754614246237534e-05	0.0	-0.00022334190156924371	0.0	-3.744199789149303e-10	-0.0001200659689646422	0.0	-2.221745895764215e-09
2.195	-0.00022394222189056582	0.0	-5.925258868860761e-10	-3.5313905797941263e-05	0.0	-0.09965609704435983	0.0	6.0984394150747755e-06	0.0	0.9999999999998523	0.0	5.437809455383294e-07	0.0	0.0	6.231270631796218e-05	0.0	0.0	6.250168844673761e-05	0.0	-0.00022394222189107795	0.0	-3.489748605545496e-10	-0.00012006424043009038	0.0	5.490772191618652e-09
2.2	-0.00022454254824251667	0.0	-5.847412897762898e-10	-3.643511791860246e-05	0.0	-0.09965609704592787	0.0	6.099923429290562e-06	0.0	0.9999999999998439	0.0	5.590295247220272e-07	0.0	0.0	6.406006477955629e-05	0.0	0.0	6.42491877859942e-05	0.0	-0.00022454254824303023	0.0	-3.336894617281899e-10	-0.0001200658734023128	0.0	2.0411088368948095e-09
2.205	-0.00022514288062457538	0.0	-5.871548733839231e-10	-3.755933177128761e-05	0.0	-0.09965609704764508	0.0	6.101454274441012e-06	0.0	0.9999999999998352	0.0	5.742822193751199e-07	0.0	0.0	6.580789483920451e-05	0.0	0.0	6.599712568008182e-05	0.0	-0.00022514288062510138	0.0	-3.2856376706040105e-10	-0.00012006707942618136	0.0	9.16954274594102e-12
2.21	-0.00022574321903674201	0.0	-5.997666377089748e-10	-3.868654735599682e-05	0.0	-0.09965609704951148	0.0	6.103031950526124e-06	0.0	0.9999999999998264	0.0	5.89539029497609e-07	0.0	0.0	6.7556196496907e-05	0.0	0.0	6.774551554507502e-05	0.0	-0.00022574321903729238	0.0	-3.3359776117543034e-10	-0.00012006828545024553	0.0	-2.0227666762226894e-09
2.215	-0.00022634356347901656	0.0	-6.225765827514451e-10	-3.981676467273007e-05	0.0	-0.09965609705152705	0.0	6.104656457545901e-06	0.0	0.9999999999998173	0.0	6.047999550894944e-07	0.0	0.0	6.930496975266376e-05	0.0	0.0	6.949437079704835e-05	0.0	-0.00022634356347960417	0.0	-3.487914286972293e-10	-0.000120069491474508	0.0	-4.054699819952294e-09
2.22	-0.0002269439139513991	0.0	-6.555847085113374e-10	-4.094998372148748e-05	0.0	-0.09965609705369181	0.0	6.10632779550034e-06	0.0	0.9999999999998079	0.0	6.200649961507774e-07	0.0	0.0	7.105421460647493e-05	0.0	0.0	7.124370485207632e-05	0.0	-0.00022694391395203776	0.0	-3.741447542494545e-10	-0.00012007069749894893	0.0	-6.0866298883825854e-09
2.225	-0.0002275442704538895	0.0	-6.987910149886458e-10	-4.2086204502268835e-05	0.0	-0.09965609705600575	0.0	6.108045964389443e-06	0.0	0.9999999999997984	0.0	6.353341526814555e-07	0.0	0.0	7.280393105834022e-05	0.0	0.0	7.299353112623347e-05	0.0	-0.00022754427045459393	0.0	-4.096577224554569e-10	-0.00012007190352354797	0.0	-8.118556881453822e-09
2.23	-0.0002281446329864878	0.0	-7.521955021833728e-10	-4.322542701507425e-05	0.0	-0.0996560970584689	0.0	6.109810964213209e-06	0.0	0.9999999999997885	0.0	6.506074246815297e-07	0.0	0.0	7.455411910825975e-05	0.0	0.0	7.474386303559434e-05	0.0	-0.00022814463298727355	0.0	-4.55330317938296e-10	-0.0001200732306491147	0.0	-1.040821937669887e-08
2.235	-0.00022874500154919402	0.0	-8.157981700955183e-10	-4.436765125990371e-05	0.0	-0.09965609706108121	0.0	6.111622794971639e-06	0.0	0.9999999999997784	0.0	6.658848121510003e-07	0.0	0.0	7.630477875623355e-05	0.0	0.0	7.649471399623345e-05	0.0	-0.0002287450015500777	0.0	-5.11162525320732e-10	-0.00012007401425825961	0.0	-1.1541113075426602e-08
2.24	-0.0002293453688759829	0.0	-8.741347063962881e-10	-4.5512877249063356e-05	0.0	-0.09965609706370746	0.0	6.113424583369392e-06	0.0	0.9999999999997682	0.0	6.811663417428302e-07	0.0	0.0	7.805591305646622e-05	0.0	0.0	7.82460811312264e-05	0.0	-0.0002293453688769611	0.0	-5.616900145697235e-10	-0.00012007149036666134	0.0	-5.634655655227824e-09
2.245	-0.00022994571671558427	0.0	-8.883608565559321e-10	-4.6661105013463846e-05	0.0	-0.0996560970660079	0.0	6.115073471404562e-06	0.0	0.9999999999997576	0.0	6.964520804056371e-07	0.0	0.0	7.98075296807042e-05	0.0	0.0	7.999792063784587e-05	0.0	-0.00022994571671659876	0.0	-5.680685109812806e-10	-0.00012006927157393817	0.0	-3.775376935482574e-10
2.25	-0.00023054606489639372	0.0	-9.006774779907179e-10	-4.78123345195233e-05	0.0	-0.09965609706835164	0.0	6.116724661699575e-06	0.0	0.9999999999997469	0.0	7.117419554056489e-07	0.0	0.0	8.155962029427116e-05	0.0	0.0	8.175023317564072e-05	0.0	-0.00023054606489744238	0.0	-5.724988639090152e-10	-0.00012006967028931512	0.0	-6.912552417811759e-10
2.255	-0.00023114641341841127	0.0	-9.110845707006455e-10	-4.896656576724172e-05	0.0	-0.09965609707073866	0.0	6.1183781542544325e-06	0.0	0.9999999999997359	0.0	7.270359667428653e-07	0.0	0.0	8.331218489716708e-05	0.0	0.0	8.350301940415983e-05	0.0	-0.00023114641341949184	0.0	-5.749810584221704e-10	-0.00012006973853045313	0.0	-3.016220657884094e-10
2.2600000000000002	-0.00023174676228163691	0.0	-9.195821346857156e-10	-5.0123798756619204e-05	0.0	-0.09965609707316898	0.0	6.120033949069133e-06	0.0	0.9999999999997246	0.0	7.423341144172878e-07	0.0	0.0	8.506522348939211e-05	0.0	0.0	8.525627998295205e-05	0.0	-0.00023174676228274687	0.0	-5.755150795899718e-10	-0.00012006980677155773	0.0	8.801409636080668e-11
2.265	-0.00023234711148607058	0.0	-9.261701699459265e-10	-5.1284033487655546e-05	0.0	-0.09965609707564259	0.0	6.121692046143677e-06	0.0	0.9999999999997131	0.0	7.576363984289135e-07	0.0	0.0	8.681873607094594e-05	0.0	0.0	8.701001557156624e-05	0.0	-0.00023234711148720734	0.0	-5.741009124816292e-10	-0.000120069875012623	0.0	4.776532446699121e-10
2.27	-0.00023294746103171235	0.0	-9.308486764812793e-10	-5.244726996035085e-05	0.0	-0.09965609707815948	0.0	6.123352445478064e-06	0.0	0.9999999999997014	0.0	7.729428187777441e-07	0.0	0.0	8.857272264182877e-05	0.0	0.0	8.876422682955126e-05	0.0	-0.00023294746103287304	0.0	-5.70738542166334e-10	-0.000120069943253663	0.0	8.672953791422395e-10
2.275	-0.00023354781091856216	0.0	-9.336176542917739e-10	-5.361350817470512e-05	0.0	-0.09965609708071967	0.0	6.125015147072295e-06	0.0	0.9999999999996895	0.0	7.882533754637793e-07	0.0	0.0	9.032718320204056e-05	0.0	0.0	9.051891441645597e-05	0.0	-0.00023354781091974392	0.0	-5.654279537132623e-10	-0.00012007001149467181	0.0	1.2569404997813013e-09
2.2800000000000002	-0.00023414816114662013	0.0	-9.344771033774103e-10	-5.478274813071845e-05	0.0	-0.09965609708332314	0.0	6.126680150926369e-06	0.0	0.9999999999996773	0.0	8.035680684870207e-07	0.0	0.0	9.208211775158147e-05	0.0	0.0	9.227407899182925e-05	0.0	-0.0002341481611478197	0.0	-5.581691321915709e-10	-0.00012007008849448153	0.0	1.7148890382067751e-09
2.285	-0.00023474851171588612	0.0	-9.334270237381883e-10	-5.5954989828390645e-05	0.0	-0.0996560970859699	0.0	6.1283474570402865e-06	0.0	0.9999999999996648	0.0	8.188868978474653e-07	0.0	0.0	9.383752629045118e-05	0.0	0.0	9.402972121521994e-05	0.0	-0.00023474851171710015	0.0	-5.48962062670403e-10	-0.00012007013115099524	0.0	1.9050362179898886e-09
2.29	-0.00023534886210082226	0.0	-9.345654320939741e-10	-5.71302332666564e-05	0.0	-0.09965609708868356	0.0	6.130012941106976e-06	0.0	0.9999999999996522	0.0	8.342098459110692e-07	0.0	0.0	9.559340679793708e-05	0.0	0.0	9.578584056464998e-05	0.0	-0.00023534886210205405	0.0	-5.419047561158657e-10	-0.00012006989574476858	0.0	-7.311251141260609e-11
2.295	-0.00023594921068328449	0.0	-9.505102205515053e-10	-5.830847844223508e-05	0.0	-0.09965609709153679	0.0	6.131663904285703e-06	0.0	0.9999999999996393	0.0	8.495368583821781e-07	0.0	0.0	9.734975305221558e-05	0.0	0.0	9.754243288019138e-05	0.0	-0.00023594921068455905	0.0	-5.496151181870142e-10	-0.00012006967610524436	0.0	-1.9283125869824986e-09
2.3000000000000003	-0.00023654955914148378	0.0	-9.681751098848488e-10	-5.948972535852915e-05	0.0	-0.09965609709445421	0.0	6.133313516809204e-06	0.0	0.9999999999996262	0.0	8.648679915719486e-07	0.0	0.0	9.91065715060698e-05	0.0	0.0	9.929949777490991e-05	0.0	-0.00023654955914280477	0.0	-5.590068256397042e-10	-0.00012006967922321963	0.0	-2.0464750399070216e-09
2.305	-0.0002371499074754201	0.0	-9.875601000940015e-10	-6.0673974015538404e-05	0.0	-0.09965609709743582	0.0	6.13496177867748e-06	0.0	0.9999999999996128	0.0	8.802032454803782e-07	0.0	0.0	0.00010086386215949949	0.0	0.0	0.00010105703486187137	0.0	-0.00023714990747679128	0.0	-5.700798636421612e-10	-0.00012006965437139402	0.0	-2.3827396666837076e-09
2.31	-0.00023775025568509344	0.0	-1.0086651911789653e-09	-6.186122441326295e-05	0.0	-0.09965609710048162	0.0	6.136608689890529e-06	0.0	0.9999999999995991	0.0	8.955426201074679e-07	0.0	0.0	0.00010262162501250477	0.0	0.0	0.00010281504375414153	0.0	-0.00023775025568651878	0.0	-5.828342173626205e-10	-0.00012006962951961269	0.0	-2.7190013271079493e-09
2.315	-0.0002383506037705038	0.0	-1.0314903831397397e-09	-6.305147655170278e-05	0.0	-0.09965609710359163	0.0	6.138254250448352e-06	0.0	0.9999999999995852	0.0	9.108861154532181e-07	0.0	0.0	0.00010437986006508572	0.0	0.0	0.00010457352406478617	0.0	-0.00023835060377198748	0.0	-5.972698719693217e-10	-0.0001200696046678693	0.0	-3.055260021180735e-09
2.32	-0.0002389509517316512	0.0	-1.056035675976325e-09	-6.42447304308579e-05	0.0	-0.09965609710676583	0.0	6.1398984603509505e-06	0.0	0.9999999999995711	0.0	9.262337315176284e-07	0.0	0.0	0.00010613856731724222	0.0	0.0	0.00010633247540687108	0.0	-0.00023895095173319755	0.0	-6.133868126305112e-10	-0.00012006957981616748	0.0	-3.3915157489036335e-09
2.325	-0.0002395512995685357	0.0	-1.0823010696887238e-09	-6.544098605072842e-05	0.0	-0.09965609711000421	0.0	6.141541319598322e-06	0.0	0.9999999999995568	0.0	9.415854683007004e-07	0.0	0.0	0.00010789774676897455	0.0	0.0	0.00010809189739346204	0.0	-0.0002395512995701492	0.0	-6.311850245144428e-10	-0.00012006955496448147	0.0	-3.727768510277362e-09
2.33	-0.00024015164728115717	0.0	-1.1102865642769308e-09	-6.664024341131412e-05	0.0	-0.09965609711330681	0.0	6.143182828190468e-06	0.0	0.9999999999995423	0.0	9.569413258024313e-07	0.0	0.0	0.0001096573984202823	0.0	0.0	0.00010985178963762481	0.0	-0.0002401516472828424	0.0	-6.506644927893716e-10	-0.00012006952164743615	0.0	-4.148301460933156e-09
2.335	-0.0002407519948695157	0.0	-1.139992159740949e-09	-6.784250251261512e-05	0.0	-0.09965609711667359	0.0	6.144822986127387e-06	0.0	0.9999999999995274	0.0	9.723013040228227e-07	0.0	0.0	0.00011141752227116572	0.0	0.0	0.00011161215175242518	0.0	-0.0002407519948712774	0.0	-6.71825202623563e-10	-0.00012006951918845838	0.0	-4.261602487601397e-09
2.34	-0.0002413523428415438	0.0	-1.1663608822908704e-09	-6.904776338092347e-05	0.0	-0.09965609712001028	0.0	6.146465883542373e-06	0.0	0.9999999999995124	0.0	9.876654330932854e-07	0.0	0.0	0.0001131781217744301	0.0	0.0	0.00011337298452266581	0.0	-0.00024135234284337702	0.0	-6.89610149847483e-10	-0.00012006980953111471	0.0	-1.4597018063375826e-09
2.345	-0.0002419526929012537	0.0	-1.172427596509746e-09	-7.025602610444388e-05	0.0	-0.09965609712300053	0.0	6.148125242014386e-06	0.0	0.999999999999497	0.0	1.003033814098676e-06	0.0	0.0	0.00011493920851354675	0.0	0.0	0.00011513429266409217	0.0	-0.0002419526929031188	0.0	-6.870541317232508e-10	-0.00012007004697959158	0.0	8.155774988378628e-10
2.35	-0.00024255304296380881	0.0	-1.1789489226193682e-09	-7.146729057525896e-05	0.0	-0.09965609712603136	0.0	6.1497842733719e-06	0.0	0.9999999999994814	0.0	1.0184063233629994e-06	0.0	0.0	0.00011670076831629063	0.0	0.0	0.00011689607608299285	0.0	-0.00024255304296570695	0.0	-6.849138172066185e-10	-0.00012007001280225442	0.0	3.8649353394427704e-10
2.355	-0.00024315339302920922	0.0	-1.1859248606197375e-09	-7.268155679336882e-05	0.0	-0.09965609712910281	0.0	6.151442977614914e-06	0.0	0.9999999999994655	0.0	1.0337829608862573e-06	0.0	0.0	0.0001184628011826619	0.0	0.0	0.00011865833468565647	0.0	-0.00024315339303114137	0.0	-6.831891914269193e-10	-0.00012007001337151568	0.0	3.033572736242125e-10
2.36	-0.00024375374309745492	0.0	-1.1933554105108536e-09	-7.389882475877347e-05	0.0	-0.09965609713221485	0.0	6.15310135474343e-06	0.0	0.9999999999994494	0.0	1.0491637266684496e-06	0.0	0.0	0.00012022530711266055	0.0	0.0	0.00012042106837837161	0.0	-0.00024375374309942215	0.0	-6.818802395134879e-10	-0.00012007001394078958	0.0	2.2022398743728613e-10
2.365	-0.0002443540931685459	0.0	-1.2012405722927177e-09	-7.5119094471473e-05	0.0	-0.09965609713536748	0.0	6.154759404757446e-06	0.0	0.999999999999433	0.0	1.0645486207095776e-06	0.0	0.0	0.00012198828610628673	0.0	0.0	0.00012218427706742687	0.0	-0.0002443540931705493	0.0	-6.80986946595658e-10	-0.0001200700145100784	0.0	1.3709367538347204e-10
2.37	-0.00024495444324248213	0.0	-1.209580345965328e-09	-7.63423659314672e-05	0.0	-0.09965609713856072	0.0	6.156417127656963e-06	0.0	0.9999999999994165	0.0	1.0799376430096387e-06	0.0	0.0	0.00012375173816354013	0.0	0.0	0.00012394796065911087	0.0	-0.0002449544432445229	0.0	-6.805092978027644e-10	-0.00012007001507936178	0.0	5.396633746292533e-11
2.375	-0.0002455547933192637	0.0	-1.2183747315286852e-09	-7.756863913875619e-05	0.0	-0.09965609714179455	0.0	6.158074523441981e-06	0.0	0.9999999999993996	0.0	1.0953307935686345e-06	0.0	0.0	0.00012551566328442097	0.0	0.0	0.00012571211905971217	0.0	-0.00024555479332134296	0.0	-6.804472782641399e-10	-0.00012007001564867273	0.0	-2.915802632436261e-11
2.38	-0.0002461551433988905	0.0	-1.2276237289827893e-09	-7.879791409333995e-05	0.0	-0.09965609714506898	0.0	6.1597315921124994e-06	0.0	0.9999999999993826	0.0	1.1107280723865642e-06	0.0	0.0	0.00012728006146892916	0.0	0.0	0.0001274767521755194	0.0	-0.00024615514340100967	0.0	-6.808008731091193e-10	-0.00012007001621800535	0.0	-1.1227941597844693e-10
2.3850000000000002	-0.00024675549348136263	0.0	-1.2373273383276414e-09	-8.00301907952186e-05	0.0	-0.09965609714838401	0.0	6.161388333668519e-06	0.0	0.9999999999993653	0.0	1.12612947946343e-06	0.0	0.0	0.0001290449327170649	0.0	0.0	0.00012924185991282114	0.0	-0.00024675549348352296	0.0	-6.815700674670354e-10	-0.00012007001678730456	0.0	-1.9539783149911048e-10
2.39	-0.00024735584356668	0.0	-1.2474855595632394e-09	-8.126546924439195e-05	0.0	-0.09965609715173965	0.0	6.16304474811004e-06	0.0	0.9999999999993477	0.0	1.1415350147992287e-06	0.0	0.0	0.00013081027702882786	0.0	0.0	0.000131007442177906	0.0	-0.0002473558435688827	0.0	-6.827548464672216e-10	-0.00012007001735660015	0.0	-2.7851327288647734e-10
2.395	-0.0002479561936548426	0.0	-1.2580983926895849e-09	-8.250374944086004e-05	0.0	-0.09965609715513588	0.0	6.164700835437061e-06	0.0	0.9999999999993299	0.0	1.156944678393962e-06	0.0	0.0	0.00013257609440421822	0.0	0.0	0.00013277349887706258	0.0	-0.00024795619365708903	0.0	-6.843551952390114e-10	-0.00012007001792595536	0.0	-3.616257401405665e-10
2.4	-0.0002485565437458506	0.0	-1.269165837706677e-09	-8.374503138462293e-05	0.0	-0.0996560971585727	0.0	6.166356595649583e-06	0.0	0.9999999999993119	0.0	1.1723584702476293e-06	0.0	0.0	0.00013434238484323594	0.0	0.0	0.0001345400299165795	0.0	-0.00024855654374814225	0.0	-6.863710989117381e-10	-0.00012007001849531058	0.0	-4.4473523326118837e-10
2.4050000000000002	-0.0002491568938397038	0.0	-1.2806878946145172e-09	-8.498931507568071e-05	0.0	-0.09965609716205012	0.0	6.168012028747606e-06	0.0	0.9999999999992936	0.0	1.1877763903602327e-06	0.0	0.0	0.00013610914834588127	0.0	0.0	0.0001363070352027453	0.0	-0.0002491568938420421	0.0	-6.888025426147341e-10	-0.00012007001906464592	0.0	-5.278417522483481e-10
2.41	-0.0002497572439364023	0.0	-1.2926645634131031e-09	-8.623660051403317e-05	0.0	-0.09965609716556814	0.0	6.169667134731129e-06	0.0	0.999999999999275	0.0	1.203198438731769e-06	0.0	0.0	0.00013787638491215376	0.0	0.0	0.00013807451464184863	0.0	-0.00024975724393878874	0.0	-6.916495114773327e-10	-0.00012007001963399934	0.0	-6.109452971021578e-10
2.415	-0.00025035759403594607	0.0	-1.3050958441024364e-09	-8.74868876996804e-05	0.0	-0.09965609716912677	0.0	6.171321913600153e-06	0.0	0.9999999999992563	0.0	1.2186246153622397e-06	0.0	0.0	0.00013964409454205365	0.0	0.0	0.00013984246814017806	0.0	-0.0002503575940383821	0.0	-6.949119906288665e-10	-0.00012007002020336269	0.0	-6.94045867822476e-10
2.42	-0.0002509579441383351	0.0	-1.3179817366825166e-09	-8.874017663262241e-05	0.0	-0.09965609717272599	0.0	6.172976365354678e-06	0.0	0.9999999999992373	0.0	1.234054920251645e-06	0.0	0.0	0.000141412277235581	0.0	0.0	0.00014161089560402223	0.0	-0.0002509579441408224	0.0	-6.985899651986682e-10	-0.00012007002077274952	0.0	-7.771434644093321e-10
2.4250000000000003	-0.0002515582942435695	0.0	-1.331322241153345e-09	-8.999646731285932e-05	0.0	-0.0996560971763658	0.0	6.174630489994704e-06	0.0	0.9999999999992181	0.0	1.2494893533999858e-06	0.0	0.0	0.00014318093299273583	0.0	0.0	0.00014337979693966968	0.0	-0.0002515582942461096	0.0	-7.026834203160705e-10	-0.00012007002134212282	0.0	-8.602380868625538e-10
2.43	-0.00025215864435164907	0.0	-1.345117357514919e-09	-9.125575974039089e-05	0.0	-0.09965609718004621	0.0	6.176284287520231e-06	0.0	0.9999999999991985	0.0	1.2649279148072599e-06	0.0	0.0	0.00014495006181351793	0.0	0.0	0.00014514917205340905	0.0	-0.0002521586443542436	0.0	-7.071923411104044e-10	-0.00012007002191150695	0.0	-9.433297351821272e-10
2.435	-0.000252758994462574	0.0	-1.3593670857672402e-09	-9.251805391521725e-05	0.0	-0.09965609718376722	0.0	6.177937757931259e-06	0.0	0.9999999999991788	0.0	1.280370604473468e-06	0.0	0.0	0.0001467196636979274	0.0	0.0	0.00014691902085152894	0.0	-0.0002527589944652247	0.0	-7.121167127110026e-10	-0.00012007002248091004	0.0	-1.026418409368266e-09
2.44	-0.0002533593445763441	0.0	-1.3740714259103082e-09	-9.378334983733837e-05	0.0	-0.09965609718752884	0.0	6.179590901227787e-06	0.0	0.9999999999991588	0.0	1.2958174223986108e-06	0.0	0.0	0.00014848973864596424	0.0	0.0	0.00014868934324031792	0.0	-0.0002533593445790527	0.0	-7.174565202471977e-10	-0.00012007002305030774	0.0	-1.1095041094207809e-09
2.445	-0.00025395969469295957	0.0	-1.3892303779441235e-09	-9.505164750675429e-05	0.0	-0.09965609719133105	0.0	6.181243717409816e-06	0.0	0.9999999999991386	0.0	1.311268368582688e-06	0.0	0.0	0.00015026028665762853	0.0	0.0	0.0001504601391260646	0.0	-0.0002539596946957278	0.0	-7.232117488483211e-10	-0.00012007002361974065	0.0	-1.1925868353396647e-09
2.45	-0.00025456004481242035	0.0	-1.4048439418686867e-09	-9.63229469234651e-05	0.0	-0.09965609719517385	0.0	6.182896206477346e-06	0.0	0.9999999999991181	0.0	1.3267234430257008e-06	0.0	0.0	0.00015203130773292032	0.0	0.0	0.00015223140841505762	0.0	-0.0002545600448152501	0.0	-7.293823836437048e-10	-0.00012007002418914917	0.0	-1.2756665871247933e-09
2.455	-0.00025516039493472635	0.0	-1.420912117683996e-09	-9.759724808747058e-05	0.0	-0.09965609719905726	0.0	6.1845483684303765e-06	0.0	0.9999999999990974	0.0	1.3421826457276467e-06	0.0	0.0	0.00015380280187183936	0.0	0.0	0.00015400315101358553	0.0	-0.00025516039493761933	0.0	-7.359684097626795e-10	-0.00012007002475857848	0.0	-1.3587433647762342e-09
2.46	-0.0002557607450598776	0.0	-1.437434905390052e-09	-9.887455099877084e-05	0.0	-0.09965609720298126	0.0	6.1862002032689086e-06	0.0	0.9999999999990765	0.0	1.357645976688527e-06	0.0	0.0	0.00015557476907438578	0.0	0.0	0.00015577536682793693	0.0	-0.0002557607450628359	0.0	-7.429698123345776e-10	-0.00012007002532803128	0.0	-1.4418171682939407e-09
2.465	-0.0002563610951878742	0.0	-1.454412304986855e-09	-0.00010015485565736587	0.0	-0.09965609720694586	0.0	6.18785171099294e-06	0.0	0.9999999999990553	0.0	1.3731134359083418e-06	0.0	0.0	0.00015734720934055963	0.0	0.0	0.00015754805576440042	0.0	-0.00025636109519089963	0.0	-7.503865764887294e-10	-0.00012007002589746601	0.0	-1.5248879976779368e-09
2.47	-0.0002569614453187161	0.0	-1.4718443164744067e-09	-0.0001014381620632558	0.0	-0.09965609721095106	0.0	6.189502891602474e-06	0.0	0.9999999999990339	0.0	1.3885850233870923e-06	0.0	0.0	0.00015912012267036102	0.0	0.0	0.00015932121772926463	0.0	-0.0002569614453218106	0.0	-7.582186873544674e-10	-0.00012007002646693416	0.0	-1.60795585292814e-09
2.475	-0.00025756179545240323	0.0	-1.4897309398527038e-09	-0.00010272447021644041	0.0	-0.09965609721499685	0.0	6.191153745097508e-06	0.0	0.9999999999990122	0.0	1.4040607391247758e-06	0.0	0.0	0.00016089350906378964	0.0	0.0	0.00016109485262881813	0.0	-0.00025756179545556894	0.0	-7.66466130061121e-10	-0.00012007002703637702	0.0	-1.6910207340443228e-09
2.48	-0.00025816214558893564	0.0	-1.5080721751217478e-09	-0.00010401378011691979	0.0	-0.09965609721908325	0.0	6.192804271478043e-06	0.0	0.9999999999989903	0.0	1.4195405831213939e-06	0.0	0.0	0.00016266736852084567	0.0	0.0	0.00016286896036934954	0.0	-0.0002581621455921744	0.0	-7.75128889738021e-10	-0.00012007002760585511	0.0	-1.7740826410267883e-09
2.485	-0.0002587624957283133	0.0	-1.5268680222815387e-09	-0.00010530609176469395	0.0	-0.09965609722321024	0.0	6.194454470744079e-06	0.0	0.9999999999989682	0.0	1.4350245553769462e-06	0.0	0.0	0.00016444170104152911	0.0	0.0	0.00016464354085714744	0.0	-0.0002587624957316275	0.0	-7.842069515144993e-10	-0.00012007002817535489	0.0	-1.8571415738756125e-09
2.49	-0.00025936284587053634	0.0	-1.5461184813320785e-09	-0.000106601405159763	0.0	-0.09965609722737784	0.0	6.196104342895615e-06	0.0	0.9999999999989457	0.0	1.4505126558914342e-06	0.0	0.0	0.00016621650662584003	0.0	0.0	0.00016641859399850044	0.0	-0.00025936284587392794	0.0	-7.937003005198871e-10	-0.00012007002874482666	0.0	-1.940197532590287e-09
2.495	-0.0002599631960156046	0.0	-1.5658235522733636e-09	-0.00010789972030212673	0.0	-0.09965609723158603	0.0	6.197753887932652e-06	0.0	0.9999999999989231	0.0	1.4660048846648554e-06	0.0	0.0	0.00016799178527377823	0.0	0.0	0.00016819411969969713	0.0	-0.0002599631960190758	0.0	-8.036089218835122e-10	-0.00012007002931431379	0.0	-2.02325051717091e-09
2.5	-0.0002605635461635181	0.0	-1.5859832351053956e-09	-0.00010920103719178523	0.0	-0.09965609723583482	0.0	6.19940310585519e-06	0.0	0.9999999999989002	0.0	1.481501241697211e-06	0.0	0.0	0.00016976753698534386	0.0	0.0	0.00016997011786702612	0.0	-0.0002605635461670711	0.0	-8.139328007347064e-10	-0.00012007002988383345	0.0	-2.106300527617738e-09
2.505	-0.00026116389631427694	0.0	-1.6065975298281745e-09	-0.00011050535582873852	0.0	-0.0996560972401242	0.0	6.201051996663229e-06	0.0	0.9999999999988771	0.0	1.497001726988501e-06	0.0	0.0	0.00017154376176053689	0.0	0.0	0.00017174658840677599	0.0	-0.0002611638963179141	0.0	-8.246719222027997e-10	-0.00012007003045334046	0.0	-2.189347563930627e-09
2.5100000000000002	-0.0002617642464678811	0.0	-1.6276664364417024e-09	-0.0001118126762129867	0.0	-0.09965609724445419	0.0	6.202700560356769e-06	0.0	0.9999999999988537	0.0	1.5125063405387266e-06	0.0	0.0	0.0001733204595993574	0.0	0.0	0.00017352353122523535	0.0	-0.0002617642464716045	0.0	-8.358262714171226e-10	-0.00012007003102286011	0.0	-2.2723916261094696e-09
2.515	-0.00026236459662433046	0.0	-1.6491899549459755e-09	-0.00011312299834452954	0.0	-0.09965609724882477	0.0	6.204348796935809e-06	0.0	0.9999999999988302	0.0	1.5280150823478852e-06	0.0	0.0	0.00017509763050180523	0.0	0.0	0.00017530094622869282	0.0	-0.00026236459662814273	0.0	-8.473958335070042e-10	-0.00012007003159240055	0.0	-2.355432714154114e-09
2.52	-0.0002629649467836251	0.0	-1.6711680853409955e-09	-0.00011443632222336717	0.0	-0.09965609725323595	0.0	6.20599670640035e-06	0.0	0.9999999999988063	0.0	1.5435279524159784e-06	0.0	0.0	0.00017687527446788042	0.0	0.0	0.00017707883332343698	0.0	-0.0002629649467875285	0.0	-8.593805936017737e-10	-0.0001200700321619202	0.0	-2.438470828064709e-09
2.525	-0.000263565296945765	0.0	-1.6936008276267624e-09	-0.00011575264784949958	0.0	-0.09965609725768773	0.0	6.207644288750393e-06	0.0	0.9999999999987822	0.0	1.5590449507430059e-06	0.0	0.0	0.00017865339149758305	0.0	0.0	0.0001788571924157564	0.0	-0.000263565296949762	0.0	-8.717805368307614e-10	-0.00012007003273148051	0.0	-2.5215059678414316e-09
2.5300000000000002	-0.0002641656471107503	0.0	-1.7164881818032784e-09	-0.00011707197522292689	0.0	-0.09965609726218011	0.0	6.209291543985936e-06	0.0	0.9999999999987579	0.0	1.5745660773289694e-06	0.0	0.0	0.00018043198159091323	0.0	0.0	0.00018063602341193973	0.0	-0.0002641656471148433	0.0	-8.845956483232975e-10	-0.00012007003330101191	0.0	-2.6045381334837906e-09
2.535	-0.00026476599727858077	0.0	-1.7398301478705393e-09	-0.00011839430434364885	0.0	-0.09965609726671308	0.0	6.210938472106979e-06	0.0	0.9999999999987332	0.0	1.5900913321738657e-06	0.0	0.0	0.00018221104474787063	0.0	0.0	0.00018241532621827554	0.0	-0.00026476599728277213	0.0	-8.978259132087089e-10	-0.00012007003387057494	0.0	-2.6875673249919536e-09
2.54	-0.00026536634744925655	0.0	-1.7636267258285474e-09	-0.0001197196352116656	0.0	-0.09965609727128666	0.0	6.212585073113524e-06	0.0	0.9999999999987085	0.0	1.6056207152776964e-06	0.0	0.0	0.00018399058096845545	0.0	0.0	0.00018419510074105244	0.0	-0.00026536634745354907	0.0	-9.114713166163269e-10	-0.00012007002016670761	0.0	-2.8944590459137816e-09
2.545	-0.0002659666976227776	0.0	-1.7878779156773023e-09	-0.00012104796782697714	0.0	-0.09965609727590083	0.0	6.214231347005569e-06	0.0	0.9999999999986834	0.0	1.6211542266404615e-06	0.0	0.0	0.00018577059025266763	0.0	0.0	0.000185975346886559	0.0	-0.00026596669762717377	0.0	-9.255318436754789e-10	-0.000120070115854116	0.0	-2.1520469412568747e-09
2.5500000000000003	-0.00026656704865557604	0.0	-1.8051518316840006e-09	-0.0001223793023503465	0.0	-0.0996560972803432	0.0	6.215883210194033e-06	0.0	0.999999999998658	0.0	1.6366919444351195e-06	0.0	0.0	0.00018755108155846841	0.0	0.0	0.00018775606625601074	0.0	-0.000266567048660054	0.0	-9.325755493026296e-10	-0.00012007024904520328	0.0	-1.084173427519739e-09
2.555	-0.0002671673999790111	0.0	-1.8203829841935095e-09	-0.00012371363867503247	0.0	-0.09965609728475483	0.0	6.217536734390467e-06	0.0	0.9999999999986322	0.0	1.652233816757577e-06	0.0	0.0	0.0001893320489380868	0.0	0.0	0.00018953725932525136	0.0	-0.00026716739998356473	0.0	-9.37536958223718e-10	-0.00012007027412007998	0.0	-9.545321045152858e-10
2.56	-0.00026776775135733445	0.0	-1.8356171328000355e-09	-0.0001250509767567824	0.0	-0.09965609728919414	0.0	6.219190290996849e-06	0.0	0.9999999999986063	0.0	1.6677798220893304e-06	0.0	0.0	0.00019111348992568392	0.0	0.0	0.00019131892610356566	0.0	-0.00026776775136196453	0.0	-9.424618273510566e-10	-0.00012007028116884422	0.0	-9.813188532482608e-10
2.565	-0.00026836810279054615	0.0	-1.850854277503579e-09	-0.0001263913165955962	0.0	-0.09965609729366115	0.0	6.22084388001318e-06	0.0	0.9999999999985801	0.0	1.6833299604303794e-06	0.0	0.0	0.00019289540452125973	0.0	0.0	0.00019310106660023837	0.0	-0.00026836810279525316	0.0	-9.473501417919779e-10	-0.00012007029214662161	0.0	-9.740064266979449e-10
2.57	-0.00026896845427864624	0.0	-1.8660944183041395e-09	-0.00012773465819147393	0.0	-0.09965609729815585	0.0	6.222497501439459e-06	0.0	0.9999999999985537	0.0	1.698884231780724e-06	0.0	0.0	0.00019467779272481426	0.0	0.0	0.00019488368082455428	0.0	-0.00026896845428343077	0.0	-9.522018866538123e-10	-0.00012007030312441436	0.0	-9.666910216133212e-10
2.575	-0.00026956880582163477	0.0	-1.8813375552017183e-09	-0.0001290810015444157	0.0	-0.09965609730267823	0.0	6.224151155275687e-06	0.0	0.999999999998527	0.0	1.7144426361403658e-06	0.0	0.0	0.00019646065453634762	0.0	0.0	0.00019666676878579814	0.0	-0.0002695688058264973	0.0	-9.570170470438868e-10	-0.00012007031410220711	0.0	-9.59372637994197e-10
2.58	-0.00027016915741951157	0.0	-1.8965836881963134e-09	-0.00013043034665442127	0.0	-0.09965609730722831	0.0	6.225804841521863e-06	0.0	0.9999999999985001	0.0	1.7300051735093014e-06	0.0	0.0	0.00019824398995585952	0.0	0.0	0.00019845033049325472	0.0	-0.0002701691574244528	0.0	-9.617956080695288e-10	-0.00012007032507999173	0.0	-9.520512758398032e-10
2.585	-0.00027076950907227676	0.0	-1.9118328172879256e-09	-0.00013178269352149074	0.0	-0.09965609731180608	0.0	6.227458560177987e-06	0.0	0.9999999999984729	0.0	1.745571843887533e-06	0.0	0.0	0.00020002779898335019	0.0	0.0	0.0002002343659562088	0.0	-0.0002707695090772972	0.0	-9.665375548380583e-10	-0.00012007033605778176	0.0	-9.447269351494372e-10
2.59	-0.0002713698607799303	0.0	-1.927084942476555e-09	-0.0001331380421456241	0.0	-0.09965609731641155	0.0	6.2291123112440595e-06	0.0	0.9999999999984455	0.0	1.7611426472750604e-06	0.0	0.0	0.0002018120816188195	0.0	0.0	0.00020201887518394513	0.0	-0.00027136986078503064	0.0	-9.712428724567961e-10	-0.00012007034703558174	0.0	-9.373996159229542e-10
2.595	-0.00027197021254247224	0.0	-1.942340063762203e-09	-0.00013449639252682155	0.0	-0.0996560973210447	0.0	6.230766094720081e-06	0.0	0.9999999999984178	0.0	1.7767175836718845e-06	0.0	0.0	0.00020359683786226772	0.0	0.0	0.0002038038581857485	0.0	-0.000271970212547653	0.0	-9.759115460330594e-10	-0.00012007035801335009	0.0	-9.300693181593301e-10
2.6	-0.00027257056435990253	0.0	-1.957598181144867e-09	-0.00013585774466508274	0.0	-0.09965609732570554	0.0	6.232419910606051e-06	0.0	0.9999999999983898	0.0	1.792296653078003e-06	0.0	0.0	0.00020538206771369448	0.0	0.0	0.00020558931497090363	0.0	-0.00027257056436516417	0.0	-9.805435606741604e-10	-0.00012007036899113652	0.0	-9.227360418582966e-10
2.605	-0.00027317091623222116	0.0	-1.972859294624548e-09	-0.00013722209856040788	0.0	-0.0996560973303941	0.0	6.234073758901968e-06	0.0	0.9999999999983616	0.0	1.807879855493417e-06	0.0	0.0	0.00020716777117309992	0.0	0.0	0.00020737524554869532	0.0	-0.0002731709162375644	0.0	-9.851389014874126e-10	-0.00012007037996892837	0.0	-9.153997870194985e-10
2.61	-0.00027377126815942817	0.0	-1.9881234042012464e-09	-0.00013858945421279687	0.0	-0.09965609733511033	0.0	6.2357276396078345e-06	0.0	0.9999999999983332	0.0	1.8234671909181267e-06	0.0	0.0	0.00020895394824048405	0.0	0.0	0.00020916164992840835	0.0	-0.00027377126816485346	0.0	-9.896975535801244e-10	-0.00012007039094672021	0.0	-9.080605536420155e-10
2.615	-0.00027437162014152356	0.0	-2.003390509874963e-09	-0.00013995981162224995	0.0	-0.09965609733985425	0.0	6.23738155272365e-06	0.0	0.9999999999983046	0.0	1.8390586593521336e-06	0.0	0.0	0.00021074059891584712	0.0	0.0	0.00021094852811932746	0.0	-0.0002743716201470316	0.0	-9.94219502059601e-10	-0.00012007040192451206	0.0	-9.007183417255271e-10
2.62	-0.0002749719721785073	0.0	-2.018660611645696e-09	-0.0001413331707887668	0.0	-0.09965609734462587	0.0	6.239035498249413e-06	0.0	0.9999999999982757	0.0	1.8546542607954346e-06	0.0	0.0	0.0002125277231991887	0.0	0.0	0.00021273588013073742	0.0	-0.00027497197218409857	0.0	-9.98704732033147e-10	-0.00012007041290229036	0.0	-8.933731512693648e-10
2.625	-0.0002755723242703794	0.0	-2.0339337095134458e-09	-0.00014270953171234758	0.0	-0.09965609734942518	0.0	6.240689476185125e-06	0.0	0.9999999999982465	0.0	1.8702539952480311e-06	0.0	0.0	0.00021431532109050897	0.0	0.0	0.000214523705971923	0.0	-0.0002755723242760545	0.0	-1.0031532286080611e-09	-0.00012007042388007588	0.0	-8.86024982273032e-10
2.63	-0.00027617267641713984	0.0	-2.049209803478213e-09	-0.00014408889439299224	0.0	-0.09965609735425218	0.0	6.242343486530785e-06	0.0	0.9999999999982171	0.0	1.8858578627099234e-06	0.0	0.0	0.00021610339258980795	0.0	0.0	0.00021631200565216897	0.0	-0.00027617267642289934	0.0	-1.0075649768916429e-09	-0.00012007043485786229	0.0	-8.786738347361637e-10
2.6350000000000002	-0.00027677302861878867	0.0	-2.064488893539999e-09	-0.00014547125883070098	0.0	-0.09965609735910688	0.0	6.243997529286393e-06	0.0	0.9999999999981874	0.0	1.9014658631811127e-06	0.0	0.0	0.00021789193769708584	0.0	0.0	0.0002181007791807601	0.0	-0.0002767730286246331	0.0	-1.011939961991187e-09	-0.00012007044583563608	0.0	-8.713197086577601e-10
2.64	-0.00027737338087532583	0.0	-2.0797709796988e-09	-0.00014685662502547347	0.0	-0.09965609736398927	0.0	6.24565160445195e-06	0.0	0.9999999999981575	0.0	1.9170779966615963e-06	0.0	0.0	0.0002196809564123423	0.0	0.0	0.00021989002656698116	0.0	-0.0002773733808812557	0.0	-1.0162781690139842e-09	-0.00012007045681341889	0.0	-8.639626040375801e-10
2.645	-0.00027797373318675137	0.0	-2.095056061954619e-09	-0.00014824499297730987	0.0	-0.09965609736889935	0.0	6.247305712027455e-06	0.0	0.9999999999981273	0.0	1.9326942631513756e-06	0.0	0.0	0.0002214704487355774	0.0	0.0	0.00022167974782011688	0.0	-0.00027797373319276734	0.0	-1.0205795830673261e-09	-0.00012007046779123603	0.0	-8.566025208754755e-10
2.65	-0.0002785740855530653	0.0	-2.110344140307455e-09	-0.0001496363626862102	0.0	-0.09965609737383713	0.0	6.248959852012909e-06	0.0	0.999999999998097	0.0	1.9483146626504502e-06	0.0	0.0	0.00022326041466679125	0.0	0.0	0.00022346994294945207	0.0	-0.000278574085559168	0.0	-1.0248441892585004e-09	-0.00012007047876900257	0.0	-8.492394591701503e-10
2.6550000000000002	-0.0002791744379742676	0.0	-2.1256352147573093e-09	-0.00015103073415217457	0.0	-0.09965609737880259	0.0	6.250614024408311e-06	0.0	0.9999999999980662	0.0	1.963939195158822e-06	0.0	0.0	0.00022505085420598394	0.0	0.0	0.00022526061196427146	0.0	-0.0002791744379804574	0.0	-1.0290719726947885e-09	-0.00012007048974677634	0.0	-8.418734189213909e-10
2.66	-0.0002797747904503582	0.0	-2.14092928530418e-09	-0.00015242810737520272	0.0	-0.09965609738379574	0.0	6.252268229213662e-06	0.0	0.9999999999980353	0.0	1.9795678606764883e-06	0.0	0.0	0.00022684176735315523	0.0	0.0	0.00022705175487385985	0.0	-0.0002797747904566358	0.0	-1.0332629184834746e-09	-0.0001200705007245682	0.0	-8.345044001288181e-10
2.665	-0.0002803751429813372	0.0	-2.1562263519480676e-09	-0.0001538284823552948	0.0	-0.09965609738881659	0.0	6.253922466428961e-06	0.0	0.9999999999980042	0.0	1.99520065920345e-06	0.0	0.0	0.0002286331541083052	0.0	0.0	0.000228843371687502	0.0	-0.0002803751429877031	0.0	-1.0374170117318356e-09	-0.000120070511702351	0.0	-8.271324027915083e-10
2.67	-0.00028097549556720455	0.0	-2.1715264146889723e-09	-0.00015523185909245075	0.0	-0.09965609739386513	0.0	6.255576736054208e-06	0.0	0.9999999999979727	0.0	2.010837590739707e-06	0.0	0.0	0.0002304250144714339	0.0	0.0	0.00023063546241448263	0.0	-0.0002809754955736593	0.0	-1.0415342375471482e-09	-0.00012007052268014466	0.0	-8.197574269093683e-10
2.6750000000000003	-0.0002815758482079603	0.0	-2.1868294735268958e-09	-0.00015663823758667076	0.0	-0.09965609739894137	0.0	6.257231038089404e-06	0.0	0.9999999999979411	0.0	2.026478655285262e-06	0.0	0.0	0.00023221734844254148	0.0	0.0	0.00023242802706408656	0.0	-0.0002815758482145045	0.0	-1.0456145810366866e-09	-0.00012007053365792476	0.0	-8.123794724816641e-10
2.68	-0.0002821762009036044	0.0	-2.202135528461835e-09	-0.00015804761783795457	0.0	-0.0996560974040453	0.0	6.258885372534548e-06	0.0	0.9999999999979092	0.0	2.04212385284011e-06	0.0	0.0	0.00023401015602162763	0.0	0.0	0.00023422106564559853	0.0	-0.00028217620091023856	0.0	-1.0496580273077209e-09	-0.00012007054463570666	0.0	-8.049985395075133e-10
2.685	-0.00028277655365413685	0.0	-2.2174445794937914e-09	-0.00015945999984630227	0.0	-0.09965609740917691	0.0	6.260539739389641e-06	0.0	0.999999999997877	0.0	2.0577731834042544e-06	0.0	0.0	0.0002358034372086924	0.0	0.0	0.00023601457816830332	0.0	-0.00028277655366086156	0.0	-1.0536645614675174e-09	-0.00012007055561349129	0.0	-7.976146279867851e-10
2.69	-0.00028337690645955765	0.0	-2.2327566266227652e-09	-0.0001608753836117139	0.0	-0.09965609741433622	0.0	6.2621941386546816e-06	0.0	0.9999999999978446	0.0	2.0734266469776944e-06	0.0	0.0	0.000237597192003736	0.0	0.0	0.0002378085646414857	0.0	-0.00028337690646637343	0.0	-1.0576341686233435e-09	-0.00012007056659126235	0.0	-7.902277379189967e-10
2.695	-0.0002839772593198668	0.0	-2.248071669848756e-09	-0.00016229376913418943	0.0	-0.09965609741952322	0.0	6.263848570329671e-06	0.0	0.999999999997812	0.0	2.08908424356043e-06	0.0	0.0	0.00023939142040675827	0.0	0.0	0.00023960302507443042	0.0	-0.0002839772593267742	0.0	-1.061566833882461e-09	-0.00012007057756904967	0.0	-7.828378693033764e-10
2.7	-0.00028457761223506435	0.0	-2.2633897091717657e-09	-0.00016371515641372902	0.0	-0.09965609742473792	0.0	6.265503034414609e-06	0.0	0.9999999999977791	0.0	2.1047459731524627e-06	0.0	0.0	0.00024118612241775942	0.0	0.0	0.00024139795947642227	0.0	-0.00028457761224206395	0.0	-1.06546254235213e-09	-0.00012007058854684514	0.0	-7.754450221392483e-10
2.705	-0.00028517796520515025	0.0	-2.278710744591791e-09	-0.00016513954545033235	0.0	-0.0996560974299803	0.0	6.2671575309094955e-06	0.0	0.9999999999977459	0.0	2.1204118357537893e-06	0.0	0.0	0.0002429812980367391	0.0	0.0	0.000243193367856746	0.0	-0.0002851779652122426	0.0	-1.0693212791396055e-09	-0.00012007059952462704	0.0	-7.680491964263783e-10
2.71	-0.00028577831823012453	0.0	-2.2940347761088336e-09	-0.00016656693624399964	0.0	-0.09965609743525039	0.0	6.26881205981433e-06	0.0	0.9999999999977126	0.0	2.136081831364412e-06	0.0	0.0	0.00024477694726369754	0.0	0.0	0.00024498925022468633	0.0	-0.00028577831823731024	0.0	-1.0731430293521446e-09	-0.00012007061050241256	0.0	-7.606503921641114e-10
2.715	-0.00028637867130998715	0.0	-2.309361803722893e-09	-0.0001679973287947308	0.0	-0.09965609744054815	0.0	6.270466621129113e-06	0.0	0.999999999997679	0.0	2.15175595998433e-06	0.0	0.0	0.0002465730700986348	0.0	0.0	0.00024678560658952814	0.0	-0.0002863786713172667	0.0	-1.0769277780969965e-09	-0.0001200706214801773	0.0	-7.53248609351786e-10
2.72	-0.00028697902444473815	0.0	-2.324691827433972e-09	-0.00016943072310252603	0.0	-0.09965609744587363	0.0	6.2721212148538445e-06	0.0	0.999999999997645	0.0	2.167434221613545e-06	0.0	0.0	0.00024836966654155076	0.0	0.0	0.0002485824369605561	0.0	-0.000286979024452112	0.0	-1.0806755104814118e-09	-0.00012007063245796643	0.0	-7.458438479891056e-10
2.725	-0.0002875793776343775	0.0	-2.340024847242066e-09	-0.00017086711916738506	0.0	-0.09965609745122678	0.0	6.273775840988524e-06	0.0	0.9999999999976109	0.0	2.1831166162520546e-06	0.0	0.0	0.0002501667365924453	0.0	0.0	0.000250379741347055	0.0	-0.00028757937764184633	0.0	-1.0843862116126356e-09	-0.00012007064343574835	0.0	-7.384361080752292e-10
2.73	-0.0002881797308789052	0.0	-2.3553608631471775e-09	-0.00017230651698930797	0.0	-0.09965609745660763	0.0	6.275430499533153e-06	0.0	0.9999999999975765	0.0	2.1988031438998595e-06	0.0	0.0	0.00025196428025131865	0.0	0.0	0.0002521775197583096	0.0	-0.0002881797308864695	0.0	-1.0880598665979115e-09	-0.00012007065441352392	0.0	-7.310253896097812e-10
2.735	-0.00028878008417832125	0.0	-2.370699875149306e-09	-0.00017374891656829478	0.0	-0.09965609746201617	0.0	6.2770851904877295e-06	0.0	0.9999999999975419	0.0	2.2144938045569603e-06	0.0	0.0	0.0002537622975181707	0.0	0.0	0.0002539757722036047	0.0	-0.0002887800841859816	0.0	-1.09169646054448e-09	-0.00012007066539131668	0.0	-7.236116925923239e-10
2.74	-0.00028938043753262574	0.0	-2.386041883248453e-09	-0.00017519431790434566	0.0	-0.09965609746745241	0.0	6.278739913852255e-06	0.0	0.999999999997507	0.0	2.2301885982233577e-06	0.0	0.0	0.00025556078839300154	0.0	0.0	0.00025577449869222506	0.0	-0.00028938043754038267	0.0	-1.0952959785595802e-09	-0.00012007067636909587	0.0	-7.161950170220851e-10
2.745	-0.0002899807909418185	0.0	-2.4013868874446163e-09	-0.00017664272099746032	0.0	-0.09965609747291633	0.0	6.280394669626728e-06	0.0	0.9999999999974718	0.0	2.2458875248990497e-06	0.0	0.0	0.00025735975287581104	0.0	0.0	0.0002575736992334554	0.0	-0.0002899807909496725	0.0	-1.0988584057504454e-09	-0.00012007068849256687	0.0	-7.092682164306703e-10
2.75	-0.00029058114440589966	0.0	-2.4167348877377965e-09	-0.00017809412584763888	0.0	-0.09965609747840795	0.0	6.28204945781115e-06	0.0	0.9999999999974365	0.0	2.2615905845840375e-06	0.0	0.0	0.0002591591909665993	0.0	0.0	0.00025937337383658053	0.0	-0.00029058114441385136	0.0	-1.10238372722431e-09	-0.00012007069351980814	0.0	-6.992857960064471e-10
2.755	-0.0002911814978561273	0.0	-2.4320563138830917e-09	-0.0001795485325286785	0.0	-0.09965609748385071	0.0	6.283703884706953e-06	0.0	0.9999999999974009	0.0	2.2772977794764584e-06	0.0	0.0	0.00026095910291725426	0.0	0.0	0.00026117352239809886	0.0	-0.000291181497864177	0.0	-1.105842356876478e-09	-0.00012007068214121928	0.0	-6.82243007946578e-10
2.7600000000000002	-0.00029178185123708247	0.0	-2.44732732665521e-09	-0.00018100594110007366	0.0	-0.09965609748918286	0.0	6.2853576329184264e-06	0.0	0.9999999999973648	0.0	2.2930091113484296e-06	0.0	0.0	0.0002627594889308455	0.0	0.0	0.00026297414472358166	0.0	-0.0002917818512452303	0.0	-1.109210439807455e-09	-0.00012007067888505658	0.0	-6.686913224231078e-10
2.765	-0.0002923822046639845	0.0	-2.462597489248637e-09	-0.00018246635143813155	0.0	-0.09965609749453276	0.0	6.287011362330491e-06	0.0	0.9999999999973285	0.0	2.308724576515612e-06	0.0	0.0	0.00026456034858517906	0.0	0.0	0.00026477524080764333	0.0	-0.0002923822046722309	0.0	-1.112537525938811e-09	-0.00012007068999488166	0.0	-6.613165534451709e-10
2.77	-0.00029298255813683347	0.0	-2.4778668016633742e-09	-0.0001839297635428523	0.0	-0.09965609749990038	0.0	6.288665072943146e-06	0.0	0.9999999999972919	0.0	2.324444174978007e-06	0.0	0.0	0.000266361681880255	0.0	0.0	0.0002665768106448982	0.0	-0.0002929825581451791	0.0	-1.1158236003775861e-09	-0.00012007069918437327	0.0	-6.53112725632719e-10
2.775	-0.0002935829116556294	0.0	-2.4931352638994215e-09	-0.00018539617741423597	0.0	-0.09965609750528574	0.0	6.2903187647563916e-06	0.0	0.9999999999972551	0.0	2.3401679067356154e-06	0.0	0.0	0.00026816348881607337	0.0	0.0	0.00026837885422996064	0.0	-0.00029358291166407466	0.0	-1.119068648230817e-09	-0.00012007070837384592	0.0	-6.449059192275948e-10
2.7800000000000002	-0.00029418326522037225	0.0	-2.5084028759567806e-09	-0.00018686559305228266	0.0	-0.09965609751068884	0.0	6.291972437770229e-06	0.0	0.999999999997218	0.0	2.355895771788438e-06	0.0	0.0	0.0002699657693926344	0.0	0.0	0.000270181371557445	0.0	-0.0002941832652289176	0.0	-1.1222726546055401e-09	-0.00012007071756333935	0.0	-6.366961342293331e-10
2.785	-0.000294783618831062	0.0	-2.523669637835448e-09	-0.00018833801045699207	0.0	-0.09965609751610967	0.0	6.293626091984657e-06	0.0	0.9999999999971807	0.0	2.3716277701364723e-06	0.0	0.0	0.00027176852360993767	0.0	0.0	0.0002719843626219657	0.0	-0.00029478361883970806	0.0	-1.1254356046087876e-09	-0.0001200707267528427	0.0	-6.284833706374895e-10
2.79	-0.0002953839724876987	0.0	-2.538935549535426e-09	-0.0001898134296283644	0.0	-0.09965609752154823	0.0	6.295279727399676e-06	0.0	0.9999999999971432	0.0	2.387363901779719e-06	0.0	0.0	0.00027357175146798334	0.0	0.0	0.00027378782741813704	0.0	-0.000295383972496446	0.0	-1.1285574833475913e-09	-0.00012007073594232076	0.0	-6.202676284514054e-10
2.795	-0.0002959843261902823	0.0	-2.554200611056714e-09	-0.0001912918505663996	0.0	-0.09965609752700452	0.0	6.296933344015287e-06	0.0	0.9999999999971053	0.0	2.403104166718179e-06	0.0	0.0	0.0002753754529667714	0.0	0.0	0.00027559176594057344	0.0	-0.00029598432619913124	0.0	-1.1316382759289773e-09	-0.00012007074513179702	0.0	-6.120489076707811e-10
2.8000000000000003	-0.00029658467993881295	0.0	-2.5694648223993134e-09	-0.0001927732732710978	0.0	-0.09965609753247856	0.0	6.298586941831488e-06	0.0	0.9999999999970672	0.0	2.418848564951853e-06	0.0	0.0	0.0002771796281063021	0.0	0.0	0.0002773961781838892	0.0	-0.00029658467994776396	0.0	-1.1346779674599741e-09	-0.0001200707543212778	0.0	-6.038272082952099e-10
2.805	-0.00029718503373329046	0.0	-2.5847281835632217e-09	-0.0001942576977424588	0.0	-0.09965609753797032	0.0	6.3002405208482805e-06	0.0	0.9999999999970288	0.0	2.4345970964807386e-06	0.0	0.0	0.0002789842768865751	0.0	0.0	0.0002792010641426988	0.0	-0.00029718503374234404	0.0	-1.1376765430476037e-09	-0.00012007076351075406	0.0	-5.956025303241576e-10
2.81	-0.0002977853875737149	0.0	-2.59999069454844e-09	-0.0001957451239804826	0.0	-0.09965609754347982	0.0	6.301894081065664e-06	0.0	0.9999999999969902	0.0	2.450349761304837e-06	0.0	0.0	0.0002807893993075905	0.0	0.0	0.0002810064238116165	0.0	-0.0002977853875828715	0.0	-1.1406339877988894e-09	-0.00012007077270024206	0.0	-5.873748737573518e-10
2.815	-0.0002983857414600862	0.0	-2.6152523553549683e-09	-0.00019723555198516936	0.0	-0.09965609754900705	0.0	6.303547622483639e-06	0.0	0.9999999999969513	0.0	2.466106559424148e-06	0.0	0.0	0.0002825949953693483	0.0	0.0	0.00028281225718525667	0.0	-0.00029838574146934645	0.0	-1.1435502868208497e-09	-0.00012007078188974	0.0	-5.791442385940517e-10
2.82	-0.00029898609539240453	0.0	-2.630513165982807e-09	-0.00019872898175651897	0.0	-0.09965609755455201	0.0	6.305201145102204e-06	0.0	0.9999999999969122	0.0	2.4818674908386727e-06	0.0	0.0	0.00028440106507184856	0.0	0.0	0.0002846185642582337	0.0	-0.0002989860954017689	0.0	-1.1464254252205019e-09	-0.00012007079107922709	0.0	-5.709106248340089e-10
2.825	-0.0002995864493706698	0.0	-2.6457731264319574e-09	-0.0002002254132945316	0.0	-0.09965609756011472	0.0	6.306854648921361e-06	0.0	0.9999999999968728	0.0	2.4976325555484107e-06	0.0	0.0	0.00028620760841509144	0.0	0.0	0.000286425345025162	0.0	-0.0002995864493801387	0.0	-1.149259388104861e-09	-0.00012007080026870426	0.0	-5.626740324766204e-10
2.83	-0.00030018680339488195	0.0	-2.6610322367024163e-09	-0.000201724846599207	0.0	-0.09965609756569514	0.0	6.308508133941109e-06	0.0	0.9999999999968332	0.0	2.513401753553361e-06	0.0	0.0	0.00028801462539907656	0.0	0.0	0.0002882325994806559	0.0	-0.00030018680340445595	0.0	-1.1520521605809385e-09	-0.00012007080945819406	0.0	-5.544344615214793e-10
2.835	-0.00030078715746504107	0.0	-2.6762904967941853e-09	-0.00020322728167054526	0.0	-0.09965609757129332	0.0	6.310161600161448e-06	0.0	0.9999999999967933	0.0	2.529175084853524e-06	0.0	0.0	0.00028982211602380413	0.0	0.0	0.00029004032761932976	0.0	-0.0003007871574747206	0.0	-1.1548037277557455e-09	-0.00012007081864765767	0.0	-5.461919119681448e-10
2.84	-0.0003013875115811471	0.0	-2.6915479067072643e-09	-0.0002047327185085464	0.0	-0.09965609757690921	0.0	6.311815047582378e-06	0.0	0.9999999999967532	0.0	2.5449525494488994e-06	0.0	0.0	0.00029163008028927406	0.0	0.0	0.0002918485294357979	0.0	-0.00030138751159093256	0.0	-1.157514074736289e-09	-0.00012007082783714747	0.0	-5.379463838161996e-10
2.845	-0.0003019878657432001	0.0	-2.706804466441655e-09	-0.00020624115711321056	0.0	-0.09965609758254285	0.0	6.313468476203899e-06	0.0	0.9999999999967127	0.0	2.5607341473394897e-06	0.0	0.0	0.0002934385181954867	0.0	0.0	0.0002936572049246748	0.0	-0.0003019878657530921	0.0	-1.1601831866295758e-09	-0.0001200708370266409	0.0	-5.296978770652716e-10
2.85	-0.0003025882199512	0.0	-2.7220601759973545e-09	-0.0002077525974845375	0.0	-0.09965609758819421	0.0	6.3151218860260106e-06	0.0	0.9999999999966721	0.0	2.576519878525291e-06	0.0	0.0	0.00029524742974244156	0.0	0.0	0.00029546635408057474	0.0	-0.00030258821996119895	0.0	-1.162811048542609e-09	-0.00012007084621612168	0.0	-5.214463917147023e-10
2.855	-0.00030318857420514683	0.0	-2.737315035374364e-09	-0.00020926703962252728	0.0	-0.09965609759386332	0.0	6.316775277048714e-06	0.0	0.9999999999966313	0.0	2.5923097430063053e-06	0.0	0.0	0.00029705681493013886	0.0	0.0	0.0002972759768981121	0.0	-0.0003031885742152533	0.0	-1.1653976455823894e-09	-0.00012007085540560154	0.0	-5.131919277640543e-10
2.86	-0.0003037889285050406	0.0	-2.752569044572684e-09	-0.00021078448352717999	0.0	-0.09965609759955016	0.0	6.318428649272007e-06	0.0	0.9999999999965901	0.0	2.6081037407825327e-06	0.0	0.0	0.0002988666737585786	0.0	0.0	0.0002990860733719013	0.0	-0.00030378892851525496	0.0	-1.1679429628559155e-09	-0.00012007086459509136	0.0	-5.04934485212986e-10
2.865	-0.00030438928285088135	0.0	-2.767822203592315e-09	-0.00021230492919849567	0.0	-0.09965609760525473	0.0	6.320082002695893e-06	0.0	0.9999999999965486	0.0	2.6239018718539745e-06	0.0	0.0	0.00030067700622776094	0.0	0.0	0.0003008966434965566	0.0	-0.00030438928286120415	0.0	-1.1704469854701843e-09	-0.00012007087378455676	0.0	-4.966740640609567e-10
2.87	-0.000304989637242669	0.0	-2.7830745124332548e-09	-0.00021382837663647412	0.0	-0.09965609761097703	0.0	6.321735337320369e-06	0.0	0.9999999999965069	0.0	2.639704136220627e-06	0.0	0.0	0.0003024878123376855	0.0	0.0	0.00030270768726669244	0.0	-0.0003049896372531005	0.0	-1.1729096985321892e-09	-0.00012007088297401767	0.0	-4.884106643074974e-10
2.875	-0.00030558999168040353	0.0	-2.798325971095505e-09	-0.00021535482584111548	0.0	-0.09965609761671707	0.0	6.323388653145436e-06	0.0	0.9999999999964649	0.0	2.6555105338824934e-06	0.0	0.0	0.0003042990920883526	0.0	0.0	0.0003045192046769232	0.0	-0.00030558999169094436	0.0	-1.175331087148923e-09	-0.00012007089216352012	0.0	-4.801442859523634e-10
2.88	-0.00030619034616408505	0.0	-2.8135765795790653e-09	-0.00021688427681241967	0.0	-0.09965609762247485	0.0	6.325041950171094e-06	0.0	0.9999999999964228	0.0	2.671321064839572e-06	0.0	0.0	0.0003061108454797621	0.0	0.0	0.0003063311957218632	0.0	-0.0003061903461747357	0.0	-1.1777111364273759e-09	-0.00012007090135301535	0.0	-4.71874928995055e-10
2.8850000000000002	-0.0003067907006937135	0.0	-2.828826337883937e-09	-0.00021841672955038693	0.0	-0.09965609762825035	0.0	6.326695228397344e-06	0.0	0.9999999999963803	0.0	2.6871357290918654e-06	0.0	0.0	0.00030792307251191416	0.0	0.0	0.0003081436603961268	0.0	-0.00030679070070447446	0.0	-1.1800498314745354e-09	-0.00012007091054247896	0.0	-4.636025934347311e-10
2.89	-0.0003073910552692889	0.0	-2.8440752460101176e-09	-0.0002199521840550169	0.0	-0.0996560976340436	0.0	6.3283484878241845e-06	0.0	0.9999999999963376	0.0	2.70295452663937e-06	0.0	0.0	0.0003097357731848085	0.0	0.0	0.00030995659869432845	0.0	-0.0003073910552801605	0.0	-1.1823471573973845e-09	-0.00012007091973195521	0.0	-4.553272792712507e-10
2.895	-0.00030799140989081115	0.0	-2.8593233039576082e-09	-0.00022149064032630977	0.0	-0.09965609763985456	0.0	6.330001728451616e-06	0.0	0.9999999999962946	0.0	2.718777457482087e-06	0.0	0.0	0.00031154894749844524	0.0	0.0	0.00031177001061108244	0.0	-0.000307991409901794	0.0	-1.1846030993029086e-09	-0.00012007092892144231	0.0	-4.4704898650426884e-10
2.9	-0.0003085917645582804	0.0	-2.874570511726409e-09	-0.00022303209836426553	0.0	-0.09965609764568327	0.0	6.331654950279638e-06	0.0	0.9999999999962514	0.0	2.7346045216200178e-06	0.0	0.0	0.00031336259545282455	0.0	0.0	0.00031358389614100313	0.0	-0.0003085917645693749	0.0	-1.1868176422980867e-09	-0.00012007093811091676	0.0	-4.3876771513299987e-10
2.9050000000000002	-0.0003091921192716966	0.0	-2.8898168693165215e-09	-0.0002245765581688843	0.0	-0.0996560976515297	0.0	6.333308153308252e-06	0.0	0.9999999999962079	0.0	2.7504357190531624e-06	0.0	0.0	0.0003151767170479464	0.0	0.0	0.0003153982552787049	0.0	-0.0003091921192829032	0.0	-1.1889907714898978e-09	-0.00012007094730041019	0.0	-4.304834651573921e-10
2.91	-0.00030979247403105966	0.0	-2.9050623767279425e-09	-0.00022612401974016582	0.0	-0.09965609765739389	0.0	6.334961337537456e-06	0.0	0.9999999999961643	0.0	2.7662710497815183e-06	0.0	0.0	0.0003169913122838105	0.0	0.0	0.00031721308801880215	0.0	-0.00030979247404237895	0.0	-1.1911224719853186e-09	-0.00012007095648986386	0.0	-4.2219623657640103e-10
2.915	-0.0003103928288363697	0.0	-2.9203070339606736e-09	-0.00022767448307811023	0.0	-0.0996560976632758	0.0	6.336614502967252e-06	0.0	0.9999999999961202	0.0	2.7821105138050874e-06	0.0	0.0	0.00031880638116041707	0.0	0.0	0.0003190283943559092	0.0	-0.00031039282884780185	0.0	-1.1932127288913197e-09	-0.00012007096567934192	0.0	-4.139060293901165e-10
2.92	-0.00031099318368762666	0.0	-2.935550841014715e-09	-0.00022922794818271751	0.0	-0.09965609766917544	0.0	6.338267649597638e-06	0.0	0.999999999996076	0.0	2.797954111123869e-06	0.0	0.0	0.00032062192367776605	0.0	0.0	0.00032084417428464046	0.0	-0.00031099318369917243	0.0	-1.1952615273148769e-09	-0.00012007097486884709	0.0	-4.0561284359806273e-10
2.9250000000000003	-0.00031159353858483063	0.0	-2.950793797890068e-09	-0.00023078441505398783	0.0	-0.09965609767509281	0.0	6.339920777428616e-06	0.0	0.9999999999960315	0.0	2.813801841737865e-06	0.0	0.0	0.0003224379398358577	0.0	0.0	0.00032266042779961025	0.0	-0.0003115935385964903	0.0	-1.1972688523629562e-09	-0.00012007098405830798	0.0	-3.9731667919938846e-10
2.93	-0.0003121938935279814	0.0	-2.9660359045867295e-09	-0.0002323438836919209	0.0	-0.09965609768102793	0.0	6.341573886460185e-06	0.0	0.9999999999959868	0.0	2.829653705647073e-06	0.0	0.0	0.00032425442963469165	0.0	0.0	0.00032447715489543295	0.0	-0.00031219389353975553	0.0	-1.199234689142526e-09	-0.00012007099324776978	0.0	-3.8901753619387996e-10
2.935	-0.0003127942485170792	0.0	-2.9812771611047014e-09	-0.00023390635409651682	0.0	-0.09965609768698076	0.0	6.343226976692345e-06	0.0	0.9999999999959417	0.0	2.8455097028514934e-06	0.0	0.0	0.00032607139307426795	0.0	0.0	0.00032629435556672296	0.0	-0.00031279424852896805	0.0	-1.2011590227605496e-09	-0.0001200710024372623	0.0	-3.807154145811892e-10
2.94	-0.0003133946035521239	0.0	-2.9965175674439834e-09	-0.00023547182626777564	0.0	-0.09965609769295135	0.0	6.344880048125096e-06	0.0	0.9999999999958965	0.0	2.861369833351127e-06	0.0	0.0	0.00032788883015458676	0.0	0.0	0.0003281120298080946	0.0	-0.00031339460356412814	0.0	-1.2030418383239916e-09	-0.00012007101162672862	0.0	-3.724103143606751e-10
2.945	-0.0003139949586331155	0.0	-3.0117571236045755e-09	-0.00023704030020569734	0.0	-0.09965609769893966	0.0	6.346533100758438e-06	0.0	0.9999999999958509	0.0	2.877234097145973e-06	0.0	0.0	0.00032970674087564797	0.0	0.0	0.0003299301776141623	0.0	-0.00031399495864523535	0.0	-1.2048831209398094e-09	-0.00012007102081619674	0.0	-3.641022355319723e-10
2.95	-0.0003145953137600541	0.0	-3.026995829586479e-09	-0.00023861177591028208	0.0	-0.0996560977049457	0.0	6.348186134592371e-06	0.0	0.9999999999958051	0.0	2.8931024942360336e-06	0.0	0.0	0.0003315251252374518	0.0	0.0	0.00033174879897954033	0.0	-0.00031459531377229014	0.0	-1.2066828557149634e-09	-0.00012007103000569287	0.0	-3.557911780945397e-10
2.955	-0.00031519566893293963	0.0	-3.0422336853896913e-09	-0.00024018625338152955	0.0	-0.09965609771096949	0.0	6.349839149626895e-06	0.0	0.9999999999957591	0.0	2.908975024621306e-06	0.0	0.0	0.000333343983239998	0.0	0.0	0.00033356789389884313	0.0	-0.0003151956689452923	0.0	-1.2084410277564062e-09	-0.00012007103424534259	0.0	-3.242024395997238e-10
2.96	-0.000315796024151772	0.0	-3.0574706910142138e-09	-0.00024176373261943992	0.0	-0.09965609771701099	0.0	6.35149214586201e-06	0.0	0.9999999999957128	0.0	2.924851688301791e-06	0.0	0.0	0.0003351633148832866	0.0	0.0	0.00033538746236668507	0.0	-0.0003157960241642417	0.0	-1.210157622171094e-09	-0.00012007107781897886	0.0	-4.775645286634966e-10
2.965	-0.0003163963797135353	0.0	-3.0741034235362222e-09	-0.00024334421752763647	0.0	-0.09965609772092907	0.0	6.353146845539275e-06	0.0	0.9999999999956635	0.0	2.9407326325334853e-06	0.0	0.0	0.0003369831370416109	0.0	0.0	0.00033720750487106635	0.0	-0.00031639637972612726	0.0	-1.2132291062128705e-09	-0.00012007112347133699	0.0	-6.406980490397477e-10
2.97	-0.00031699673533711655	0.0	-3.0908099401401676e-09	-0.0002449277044111087	0.0	-0.09965609772475044	0.0	6.354801618455177e-06	0.0	0.9999999999956137	0.0	2.9566177179298774e-06	0.0	0.0	0.00033880343374245416	0.0	0.0	0.0003390280214329683	0.0	-0.0003169967353498315	0.0	-1.2163336116468674e-09	-0.00012007112978736759	0.0	-6.188636532366674e-10
2.975	-0.00031759709100889175	0.0	-3.1075261735241695e-09	-0.00024651419309077967	0.0	-0.09965609772857334	0.0	6.356456385602713e-06	0.0	0.9999999999955638	0.0	2.9725069377356676e-06	0.0	0.0	0.00034062420421171604	0.0	0.0	0.0003408490120507384	0.0	-0.0003175970910217303	0.0	-1.219407060620209e-09	-0.0001200711391992137	0.0	-6.115831554499029e-10
2.98	-0.0003181974467288609	0.0	-3.1242521236882298e-09	-0.00024810368356664974	0.0	-0.09965609773239778	0.0	6.358111146981882e-06	0.0	0.9999999999955135	0.0	2.9884002919508592e-06	0.0	0.0	0.00034244544844939695	0.0	0.0	0.0003426704767227241	0.0	-0.0003181974467418236	0.0	-1.222449438235602e-09	-0.0001200711488380999	0.0	-6.05367394130914e-10
2.985	-0.00031879780249702413	0.0	-3.1409877906323467e-09	-0.0002496961758387188	0.0	-0.09965609773622375	0.0	6.359765902592685e-06	0.0	0.9999999999954629	0.0	3.004297780575449e-06	0.0	0.0	0.0003442671664554965	0.0	0.0	0.00034449241544727295	0.0	-0.0003187978025101113	0.0	-1.2254607295957535e-09	-0.00012007115847702313	0.0	-5.991486533532398e-10
2.99	-0.00031939815831338143	0.0	-3.1577331743565236e-09	-0.00025129166990698693	0.0	-0.09965609774005124	0.0	6.361420652435122e-06	0.0	0.999999999995412	0.0	3.02019940360944e-06	0.0	0.0	0.0003460893582300152	0.0	0.0	0.0003463148282227324	0.0	-0.00031939815832659384	0.0	-1.2284409198033683e-09	-0.00012007116811596082	0.0	-5.929269331158253e-10
2.995	-0.0003199985141779327	0.0	-3.1744882748607554e-09	-0.00025289016577145394	0.0	-0.09965609774388029	0.0	6.363075396509192e-06	0.0	0.9999999999953609	0.0	3.036105161052831e-06	0.0	0.0	0.0003479120237729526	0.0	0.0	0.00034813771504744995	0.0	-0.0003199985141912709	0.0	-1.2313899939611452e-09	-0.00012007117775485333	0.0	-5.867022334184743e-10
3.0	-0.00032059887009067796	0.0	-3.1912530921450464e-09	-0.0002544916634321198	0.0	-0.09965609774771085	0.0	6.364730134814897e-06	0.0	0.9999999999953095	0.0	3.052015052905621e-06	0.0	0.0	0.0003497351630843089	0.0	0.0	0.00034996107591977305	0.0	-0.0003205988701041424	0.0	-1.234307937171786e-09	-0.00012007118739375036	0.0	-5.804745542608214e-10
3.005	-0.0003211992260516172	0.0	-3.208027626209395e-09	-0.0002560961628889848	0.0	-0.09965609775154295	0.0	6.366384867352235e-06	0.0	0.9999999999952578	0.0	3.0679290791678116e-06	0.0	0.0	0.00035155877616408404	0.0	0.0	0.00035178491083804925	0.0	-0.0003211992260652084	0.0	-1.2371947345379851e-09	-0.00012007119703266907	0.0	-5.742438956422014e-10
3.0100000000000002	-0.0003217995820607505	0.0	-3.2248118770538025e-09	-0.00025770366414204883	0.0	-0.0996560977553766	0.0	6.368039594121207e-06	0.0	0.9999999999952058	0.0	3.083847239839403e-06	0.0	0.0	0.00035338286301227814	0.0	0.0	0.000353609219800626	0.0	-0.0003217995820744691	0.0	-1.240050371162439e-09	-0.00012007120667160134	0.0	-5.68010257562304e-10
3.015	-0.0003223999381180778	0.0	-3.241605844678266e-09	-0.00025931416719131165	0.0	-0.09965609775921176	0.0	6.369694315121813e-06	0.0	0.9999999999951537	0.0	3.099769534920392e-06	0.0	0.0	0.00035520742362889093	0.0	0.0	0.0003554340028058508	0.0	-0.0003223999381319244	0.0	-1.2428748321478382e-09	-0.00012007121631051192	0.0	-5.617736400203712e-10
3.02	-0.0003230002942235991	0.0	-3.2584095290827877e-09	-0.00026092767203677344	0.0	-0.09965609776304846	0.0	6.371349030354052e-06	0.0	0.9999999999951011	0.0	3.115695964410782e-06	0.0	0.0	0.00035703245801392265	0.0	0.0	0.0003572592598520711	0.0	-0.0003230002942375742	0.0	-1.2456681025968722e-09	-0.00012007122594940985	0.0	-5.55534043016165e-10
3.025	-0.0003236006503773144	0.0	-3.2752229302673677e-09	-0.0002625441786784343	0.0	-0.09965609776688669	0.0	6.3730037398179246e-06	0.0	0.9999999999950484	0.0	3.1316265283105717e-06	0.0	0.0	0.0003588579661673733	0.0	0.0	0.0003590849909376344	0.0	-0.00032360065039141857	0.0	-1.2484301676122287e-09	-0.00012007123558832495	0.0	-5.492914665492993e-10
3.0300000000000002	-0.0003242010065792237	0.0	-3.292046048232006e-09	-0.0002641636871162942	0.0	-0.09965609777072645	0.0	6.374658443513432e-06	0.0	0.9999999999949953	0.0	3.147561226619762e-06	0.0	0.0	0.00036068394808924274	0.0	0.0	0.0003609111960608882	0.0	-0.0003242010065934574	0.0	-1.2511610122965923e-09	-0.00012007124522723101	0.0	-5.430459106185163e-10
3.035	-0.00032480136282932707	0.0	-3.3088788829767002e-09	-0.0002657861973503529	0.0	-0.09965609777456776	0.0	6.376313141440572e-06	0.0	0.9999999999949419	0.0	3.163500059338352e-06	0.0	0.0	0.00036251040377953116	0.0	0.0	0.00036273787522017993	0.0	-0.0003248013628436909	0.0	-1.2538606217526412e-09	-0.00012007125486614611	0.0	-5.367973752240986e-10
3.04	-0.00032540171912762443	0.0	-3.3257214345014527e-09	-0.00026741170938061074	0.0	-0.09965609777841059	0.0	6.377967833599346e-06	0.0	0.9999999999948883	0.0	3.179443026466341e-06	0.0	0.0	0.0003643373332382383	0.0	0.0	0.0003645650284138571	0.0	-0.0003254017191421189	0.0	-1.2565289810830605e-09	-0.00012007126450506032	0.0	-5.305458603661943e-10
3.045	-0.0003260020754741157	0.0	-3.3425737028062635e-09	-0.0002690402232070673	0.0	-0.09965609778225495	0.0	6.3796225199897545e-06	0.0	0.9999999999948345	0.0	3.19539012800373e-06	0.0	0.0	0.0003661647364653643	0.0	0.0	0.00036639265564026723	0.0	-0.0003260020754887415	0.0	-1.259166075390528e-09	-0.00012007127414397631	0.0	-5.242913660430526e-10
3.0500000000000003	-0.00032660243186880114	0.0	-3.3594356878911334e-09	-0.0002706717388297231	0.0	-0.09965609778610085	0.0	6.381277200611796e-06	0.0	0.9999999999947803	0.0	3.211341363950521e-06	0.0	0.0	0.0003679926134609094	0.0	0.0	0.0003682207568977578	0.0	-0.00032660243188355865	0.0	-1.2617718897777153e-09	-0.00012007128378287064	0.0	-5.180338922544184e-10
3.055	-0.0003272027883116805	0.0	-3.376307389756059e-09	-0.00027230625624857774	0.0	-0.09965609778994829	0.0	6.382931875465472e-06	0.0	0.9999999999947258	0.0	3.2272967343067096e-06	0.0	0.0	0.0003698209642248731	0.0	0.0	0.00037004933218467626	0.0	-0.0003272027883265702	0.0	-1.2643464093472964e-09	-0.00012007129342179478	0.0	-5.117734390004089e-10
3.06	-0.00032780314480275387	0.0	-3.3931888084010423e-09	-0.00027394377546363126	0.0	-0.09965609779379725	0.0	6.384586544550781e-06	0.0	0.9999999999946712	0.0	3.2432562390722986e-06	0.0	0.0	0.0003716497887572558	0.0	0.0	0.00037187838149937015	0.0	-0.0003278031448177766	0.0	-1.2668896192019425e-09	-0.00012007130306070535	0.0	-5.055100062801555e-10
3.065	-0.00032840350134202124	0.0	-3.410079943826084e-09	-0.00027558429647488386	0.0	-0.09965609779764774	0.0	6.386241207867724e-06	0.0	0.9999999999946161	0.0	3.2592198782472874e-06	0.0	0.0	0.00037347908705805724	0.0	0.0	0.0003737079048401869	0.0	-0.00032840350135717724	0.0	-1.26940150444432e-09	-0.0001200713126996069	0.0	-4.992435940932172e-10
3.0700000000000003	-0.0003290038579294827	0.0	-3.4269807960311845e-09	-0.00027722781928233556	0.0	-0.09965609780149977	0.0	6.387895865416301e-06	0.0	0.9999999999945608	0.0	3.275187651831677e-06	0.0	0.0	0.00037530885912727776	0.0	0.0	0.000375537902205474	0.0	-0.00032900385794477265	0.0	-1.271882050177096e-09	-0.00012007132233852742	0.0	-4.929742024391872e-10
3.075	-0.00032960421456513806	0.0	-3.44389136501634e-09	-0.0002788743438859861	0.0	-0.09965609780535334	0.0	6.389550517196511e-06	0.0	0.9999999999945053	0.0	3.2911595598254652e-06	0.0	0.0	0.00037713910496491693	0.0	0.0	0.000377368373593579	0.0	-0.0003296042145805625	0.0	-1.2743312415029324e-09	-0.0001200713319774371	0.0	-4.867018313174175e-10
3.08	-0.0003302045712489875	0.0	-3.460811650781555e-09	-0.00028052387028583555	0.0	-0.09965609780920844	0.0	6.391205163208356e-06	0.0	0.9999999999944494	0.0	3.3071356022286534e-06	0.0	0.0	0.000378969824570975	0.0	0.0	0.0003791993190028493	0.0	-0.000330204571264547	0.0	-1.2767490635244904e-09	-0.0001200713416163504	0.0	-4.804264807278152e-10
3.085	-0.0003308049279810309	0.0	-3.477741653326827e-09	-0.0002821763984818841	0.0	-0.09965609781306506	0.0	6.392859803451834e-06	0.0	0.9999999999943934	0.0	3.3231157790412414e-06	0.0	0.0	0.000380801017945452	0.0	0.0	0.0003810307384316324	0.0	-0.000330804927996726	0.0	-1.2791355013444295e-09	-0.0001200713512552411	0.0	-4.741481506695185e-10
3.09	-0.00033140528476126833	0.0	-3.494681372652157e-09	-0.00028383192847413147	0.0	-0.09965609781692322	0.0	6.3945144379269455e-06	0.0	0.999999999994337	0.0	3.33910009026323e-06	0.0	0.0	0.00038263268508834786	0.0	0.0	0.0003828626318782758	0.0	-0.0003314052847770995	0.0	-1.2814905400654035e-09	-0.00012007136089414807	0.0	-4.678668411420105e-10
3.095	-0.0003320056415896998	0.0	-3.5116308087575465e-09	-0.00028549046026257806	0.0	-0.09965609782078293	0.0	6.396169066633691e-06	0.0	0.9999999999942802	0.0	3.355088535894619e-06	0.0	0.0	0.0003844648259996627	0.0	0.0	0.00038469499934112704	0.0	-0.0003320056416056675	0.0	-1.2838141647900671e-09	-0.00012007137053306137	0.0	-4.615825521450774e-10
3.1	-0.0003326059984663253	0.0	-3.528589961642992e-09	-0.0002871519938472234	0.0	-0.09965609782464414	0.0	6.39782368957207e-06	0.0	0.9999999999942233	0.0	3.3710811159354073e-06	0.0	0.0	0.0003862974406793963	0.0	0.0	0.0003865278408185335	0.0	-0.0003326059984824301	0.0	-1.2861063606210711e-09	-0.00012007138017198911	0.0	-4.552952836782437e-10
3.105	-0.00033320635539114474	0.0	-3.545558831308495e-09	-0.00028881652922806774	0.0	-0.09965609782850691	0.0	6.399478306742083e-06	0.0	0.9999999999941661	0.0	3.3870778303855952e-06	0.0	0.0	0.0003881305291275488	0.0	0.0	0.00038836115630884276	0.0	-0.00033320635540738734	0.0	-1.2883671126610656e-09	-0.00012007138981088795	0.0	-4.490050357409923e-10
3.11	-0.0003338067123641582	0.0	-3.5625374177540562e-09	-0.00029048406640511104	0.0	-0.0996560978323712	0.0	6.401132918143729e-06	0.0	0.9999999999941086	0.0	3.403078679245182e-06	0.0	0.0	0.00038996409134412006	0.0	0.0	0.00039019494581040223	0.0	-0.000333806712380539	0.0	-1.290596406012696e-09	-0.00012007139944980305	0.0	-4.427118083327719e-10
3.115	-0.0003344070693853657	0.0	-3.5795257209796766e-09	-0.00029215460537835355	0.0	-0.09965609783623702	0.0	6.40278752377701e-06	0.0	0.9999999999940509	0.0	3.4190836625141713e-06	0.0	0.0	0.0003917981273291104	0.0	0.0	0.00039202920932155944	0.0	-0.0003344070694018854	0.0	-1.292794225778607e-09	-0.00012007140908872628	0.0	-4.364156014527689e-10
3.12	-0.00033500742645476724	0.0	-3.596523740985352e-09	-0.0002938281461477948	0.0	-0.09965609784010439	0.0	6.404442123641924e-06	0.0	0.9999999999939928	0.0	3.4350927801925586e-06	0.0	0.0	0.0003936326370825195	0.0	0.0	0.00039386394684066186	0.0	-0.0003350074264714262	0.0	-1.294960557061437e-09	-0.00012007141872760524	0.0	-4.301164151007836e-10
3.125	-0.00033560778357236273	0.0	-3.6135314777710857e-09	-0.00029550468871343506	0.0	-0.09965609784397328	0.0	6.406096717738472e-06	0.0	0.9999999999939344	0.0	3.4511060322803456e-06	0.0	0.0	0.00039546762060434736	0.0	0.0	0.000395699158366057	0.0	-0.00033560778358916147	0.0	-1.2970953849638282e-09	-0.00012007142836650136	0.0	-4.238142492768779e-10
3.13	-0.0003362081407381522	0.0	-3.6305489313368778e-09	-0.0002971842330752743	0.0	-0.09965609784784371	0.0	6.407751306066654e-06	0.0	0.9999999999938758	0.0	3.4671234187775333e-06	0.0	0.0	0.00039730307789459426	0.0	0.0	0.0003975348438960923	0.0	-0.0003362081407550913	0.0	-1.2991986945884178e-09	-0.00012007143800543273	0.0	-4.1750910398015225e-10
3.1350000000000002	-0.00033680849795213576	0.0	-3.647576101682729e-09	-0.0002988667792333126	0.0	-0.09965609785171567	0.0	6.409405888626469e-06	0.0	0.999999999993817	0.0	3.4831449396841216e-06	0.0	0.0	0.00039913900895326013	0.0	0.0	0.00039937100342911526	0.0	-0.0003368084979692158	0.0	-1.3012704710378406e-09	-0.00012007144764434783	0.0	-4.11200979209914e-10
3.14	-0.0003374088552143133	0.0	-3.6646129888086367e-09	-0.00030055232718754967	0.0	-0.09965609785558915	0.0	6.411060465417919e-06	0.0	0.9999999999937578	0.0	3.499170595000108e-06	0.0	0.0	0.0004009754137803447	0.0	0.0	0.0004012076369634734	0.0	-0.00033740885523153477	0.0	-1.303310699414727e-09	-0.00012007145728324938	0.0	-4.0488987496576666e-10
3.145	-0.0003380092125246848	0.0	-3.681659592714602e-09	-0.00030224087693798583	0.0	-0.09965609785946418	0.0	6.412715036441001e-06	0.0	0.9999999999936984	0.0	3.515200384725495e-06	0.0	0.0	0.00040281229237584815	0.0	0.0	0.0004030447444975141	0.0	-0.0003380092125420483	0.0	-1.3053193648217076e-09	-0.0001200714669221681	0.0	-3.9857579124730704e-10
3.15	-0.0003386095698832504	0.0	-3.6987159134006255e-09	-0.0003039324284846209	0.0	-0.09965609786334075	0.0	6.414369601695718e-06	0.0	0.9999999999936386	0.0	3.531234308860282e-06	0.0	0.0	0.0004046496447397705	0.0	0.0	0.000404882326029585	0.0	-0.00033860956990075644	0.0	-1.3072964523614087e-09	-0.00012007147656107868	0.0	-3.922587280539182e-10
3.1550000000000002	-0.00033920992729001	0.0	-3.7157819508667066e-09	-0.0003056269818274551	0.0	-0.09965609786721884	0.0	6.416024161182069e-06	0.0	0.9999999999935787	0.0	3.5472723674044702e-06	0.0	0.0	0.0004064874708721119	0.0	0.0	0.0004067203815580335	0.0	-0.0003392099273076591	0.0	-1.309241947136455e-09	-0.0001200714861999757	0.0	-3.8593868538545195e-10
3.16	-0.00033981028474496357	0.0	-3.732857705112845e-09	-0.0003073245369664882	0.0	-0.09965609787109846	0.0	6.417678714900053e-06	0.0	0.9999999999935184	0.0	3.5633145603580566e-06	0.0	0.0	0.000408325770772872	0.0	0.0	0.00040855891108120706	0.0	-0.0003398102847627562	0.0	-1.3111558342494703e-09	-0.00012007149583886641	0.0	-3.796156632411983e-10
3.165	-0.0003404106422481111	0.0	-3.749943176139041e-09	-0.0003090250939017202	0.0	-0.09965609787497962	0.0	6.419333262849671e-06	0.0	0.9999999999934578	0.0	3.579360887721043e-06	0.0	0.0	0.0004101645444420509	0.0	0.0	0.0004103979145974532	0.0	-0.0003404106422660478	0.0	-1.3130380988030734e-09	-0.00012007150547780048	0.0	-3.7328966162091247e-10
3.17	-0.00034101099979945274	0.0	-3.767038363945295e-09	-0.00031072865263315116	0.0	-0.0996560978788623	0.0	6.420987805030922e-06	0.0	0.9999999999933971	0.0	3.5954113494934296e-06	0.0	0.0	0.00041200379187964885	0.0	0.0	0.00041223739210511945	0.0	-0.00034101099981753415	0.0	-1.3148887258998846e-09	-0.00012007151511670474	0.0	-3.669606805237053e-10
3.1750000000000003	-0.00034161135739898835	0.0	-3.784143268531608e-09	-0.0003124352131607813	0.0	-0.09965609788274653	0.0	6.4226423414438075e-06	0.0	0.9999999999933359	0.0	3.611465945675217e-06	0.0	0.0	0.0004138435130856657	0.0	0.0	0.0004140773436025532	0.0	-0.0003416113574172148	0.0	-1.3167077006425152e-09	-0.00012007152475558642	0.0	-3.606287199492597e-10
3.18	-0.00034221171504671794	0.0	-3.801257889897977e-09	-0.00031414477548461026	0.0	-0.09965609788663228	0.0	6.424296872088327e-06	0.0	0.9999999999932745	0.0	3.6275246762664026e-06	0.0	0.0	0.00041568370806010124	0.0	0.0	0.000415917769088102	0.0	-0.0003422117150650901	0.0	-1.3184950081335816e-09	-0.0001200715343945232	0.0	-3.542937798975343e-10
3.185	-0.0003428120727426416	0.0	-3.818382228044405e-09	-0.00031585733960463815	0.0	-0.09965609789051957	0.0	6.425951396964479e-06	0.0	0.9999999999932129	0.0	3.6435875412669888e-06	0.0	0.0	0.00041752437680295576	0.0	0.0	0.0004177586685601133	0.0	-0.00034281207276116	0.0	-1.3202506334756932e-09	-0.00012007154403343469	0.0	-3.479558603672918e-10
3.19	-0.0003434124304867593	0.0	-3.835516282970889e-09	-0.000317572905520865	0.0	-0.0996560978944084	0.0	6.427605916072266e-06	0.0	0.9999999999931509	0.0	3.6596545406769743e-06	0.0	0.0	0.0004193655193142291	0.0	0.0	0.0004196000420169346	0.0	-0.0003434124305054244	0.0	-1.3219745617714569e-09	-0.00012007155367233261	0.0	-3.416149613586183e-10
3.1950000000000003	-0.0003440127882790709	0.0	-3.852660054677433e-09	-0.000319291473233291	0.0	-0.09965609789829874	0.0	6.429260429411687e-06	0.0	0.9999999999930888	0.0	3.6757256744963617e-06	0.0	0.0	0.00042120713559392156	0.0	0.0	0.0004214418894569134	0.0	-0.00034401278829788334	0.0	-1.323666778123481e-09	-0.00012007156331123327	0.0	-3.352710828708797e-10
3.2	-0.0003446131461195765	0.0	-3.869813543164033e-09	-0.00032101304274191584	0.0	-0.09965609790219063	0.0	6.430914936982741e-06	0.0	0.9999999999930262	0.0	3.6918009427251472e-06	0.0	0.0	0.0004230492256420327	0.0	0.0	0.00042328421087839716	0.0	-0.0003446131461385367	0.0	-1.3253272676343663e-09	-0.00012007157295014024	0.0	-3.289242249035073e-10
3.205	-0.0003452135040082762	0.0	-3.8869767484306915e-09	-0.00032273761404673964	0.0	-0.09965609790608405	0.0	6.432569438785429e-06	0.0	0.9999999999929635	0.0	3.707880345363332e-06	0.0	0.0	0.0004248917894585627	0.0	0.0	0.0004251270062797334	0.0	-0.00034521350402738475	0.0	-1.3269560154067159e-09	-0.00012007158258905443	0.0	-3.2257438745603923e-10
3.21	-0.0003458138619451699	0.0	-3.904149670477407e-09	-0.00032446518714776237	0.0	-0.09965609790997901	0.0	6.43422393481975e-06	0.0	0.9999999999929005	0.0	3.723963882410918e-06	0.0	0.0	0.0004267348270435116	0.0	0.0	0.00042697027565926954	0.0	-0.00034581386196442723	0.0	-1.3285530065431257e-09	-0.00012007159222793158	0.0	-3.162215705278896e-10
3.215	-0.00034641421993025757	0.0	-3.9213323093041805e-09	-0.00032619576204498407	0.0	-0.09965609791387549	0.0	6.435878425085706e-06	0.0	0.9999999999928371	0.0	3.740051553867903e-06	0.0	0.0	0.0004285783383968793	0.0	0.0	0.0004288140190153531	0.0	-0.00034641421994966413	0.0	-1.3301182261461938e-09	-0.00012007160186687559	0.0	-3.0986577411933754e-10
3.22	-0.0003470145779635393	0.0	-3.938524664911014e-09	-0.00032792933873840497	0.0	-0.09965609791777351	0.0	6.4375329095832945e-06	0.0	0.9999999999927736	0.0	3.7561433597342892e-06	0.0	0.0	0.0004304223235186662	0.0	0.0	0.0004306582363463316	0.0	-0.00034701457798309594	0.0	-1.331651659318516e-09	-0.00012007161150577533	0.0	-3.035069982288597e-10
3.225	-0.000347614936045015	0.0	-3.955726737297903e-09	-0.00032966591722802463	0.0	-0.09965609792167306	0.0	6.4391873883125176e-06	0.0	0.9999999999927096	0.0	3.7722393000100745e-06	0.0	0.0	0.0004322667824088718	0.0	0.0	0.0004325029276505525	0.0	-0.0003476149360647219	0.0	-1.3331532911626787e-09	-0.00012007162114465158	0.0	-2.971452428562114e-10
3.23	-0.0003482152941746847	0.0	-3.972938526464849e-09	-0.0003314054975138433	0.0	-0.09965609792557414	0.0	6.440841861273374e-06	0.0	0.9999999999926454	0.0	3.788339374695259e-06	0.0	0.0	0.00043411171506749625	0.0	0.0	0.00043434809292636326	0.0	-0.0003482152941945425	0.0	-1.3346231067812745e-09	-0.00012007163078359198	0.0	-2.9078050800146836e-10
3.235	-0.00034881565235254843	0.0	-3.990160032411853e-09	-0.0003331480795958609	0.0	-0.09965609792947676	0.0	6.442496328465864e-06	0.0	0.999999999992581	0.0	3.8044435837898444e-06	0.0	0.0	0.00043595712149453964	0.0	0.0	0.0004361937321721114	0.0	-0.00034881565237255776	0.0	-1.3360610912768887e-09	-0.00012007164042248991	0.0	-2.8441279366385515e-10
3.24	-0.0003494160105786062	0.0	-4.007391255138917e-09	-0.00033489366347407766	0.0	-0.09965609793338091	0.0	6.444150789889989e-06	0.0	0.9999999999925163	0.0	3.82055192729383e-06	0.0	0.0	0.00043780300169000193	0.0	0.0	0.0004380398453861443	0.0	-0.00034941601059876743	0.0	-1.3374672297521074e-09	-0.00012007165006139056	0.0	-2.780420998429548e-10
3.245	-0.00035001636885285796	0.0	-4.024632194646037e-09	-0.00033664224914849313	0.0	-0.0996560979372866	0.0	6.445805245545746e-06	0.0	0.9999999999924514	0.0	3.836664405207214e-06	0.0	0.0	0.00043964935565388304	0.0	0.0	0.00043988643256680964	0.0	-0.0003500163688731717	0.0	-1.3388415073095111e-09	-0.000120071659700293	0.0	-2.7166842653761954e-10
3.25	-0.0003506167271753037	0.0	-4.041882850933214e-09	-0.00033839383661910774	0.0	-0.09965609794119382	0.0	6.447459695433138e-06	0.0	0.9999999999923861	0.0	3.852781017529999e-06	0.0	0.0	0.0004414961833861831	0.0	0.0	0.00044173349371245474	0.0	-0.0003506167271957704	0.0	-1.3401839090516768e-09	-0.00012007166933920088	0.0	-2.652917737483973e-10
3.255	-0.0003512170855459434	0.0	-4.05914322400045e-09	-0.0003401484258859213	0.0	-0.09965609794510256	0.0	6.449114139552163e-06	0.0	0.9999999999923206	0.0	3.868901764262183e-06	0.0	0.0	0.0004433434848869021	0.0	0.0	0.00044358102882142715	0.0	-0.0003512170855665637	0.0	-1.341494420081187e-09	-0.00012007167897811689	0.0	-2.5891214147444387e-10
3.2600000000000002	-0.00035181744396477725	0.0	-4.076413313847744e-09	-0.00034190601694893385	0.0	-0.09965609794901285	0.0	6.450768577902822e-06	0.0	0.9999999999922548	0.0	3.885026645403769e-06	0.0	0.0	0.0004451912601560399	0.0	0.0	0.00044542903789207436	0.0	-0.00035181744398555154	0.0	-1.342773025500612e-09	-0.00012007168861702475	0.0	-2.5252952971480434e-10
3.265	-0.00035241780243180503	0.0	-4.093693120475096e-09	-0.0003436666098081453	0.0	-0.09965609795292467	0.0	6.452423010485115e-06	0.0	0.9999999999921887	0.0	3.901155660954753e-06	0.0	0.0	0.00044703950919359667	0.0	0.0	0.00044727752092274384	0.0	-0.0003524178024527339	0.0	-1.3440197104125258e-09	-0.0001200716982559263	0.0	-2.461439384696098e-10
3.27	-0.00035301816094702684	0.0	-4.1109826438825045e-09	-0.0003454302044635557	0.0	-0.09965609795683801	0.0	6.4540774372990416e-06	0.0	0.9999999999921223	0.0	3.9172888109151365e-06	0.0	0.0	0.00044888823199957216	0.0	0.0	0.00044912647791178306	0.0	-0.0003530181609681108	0.0	-1.3452344599194977e-09	-0.00012007170789482153	0.0	-2.3975536773814674e-10
3.275	-0.0003536185195104426	0.0	-4.128281884069971e-09	-0.00034719680091516516	0.0	-0.09965609796075289	0.0	6.455731858344602e-06	0.0	0.9999999999920557	0.0	3.933426095284921e-06	0.0	0.0	0.00045073742857396667	0.0	0.0	0.0004509759088575395	0.0	-0.00035361851953168215	0.0	-1.3464172591240957e-09	-0.00012007171753373121	0.0	-2.3336381751977066e-10
3.2800000000000002	-0.00035421887812205245	0.0	-4.145590841037496e-09	-0.00034896639916297365	0.0	-0.09965609796466932	0.0	6.457386273621796e-06	0.0	0.9999999999919887	0.0	3.949567514064106e-06	0.0	0.0	0.00045258709891678027	0.0	0.0	0.00045282581375836073	0.0	-0.0003542188781434481	0.0	-1.3475680931288836e-09	-0.00012007172717264721	0.0	-2.2696928781430927e-10
3.285	-0.0003548192367818563	0.0	-4.162909514785078e-09	-0.00035073899920698106	0.0	-0.09965609796858726	0.0	6.459040683130623e-06	0.0	0.9999999999919216	0.0	3.9657130672526895e-06	0.0	0.0	0.0004544372430280125	0.0	0.0	0.00045467619261259416	0.0	-0.00035481923680340857	0.0	-1.3486869470364262e-09	-0.00012007173681153431	0.0	-2.2057177862126281e-10
3.29	-0.0003554195954898541	0.0	-4.180237905312718e-09	-0.00035251460104718734	0.0	-0.09965609797250674	0.0	6.460695086871085e-06	0.0	0.9999999999918541	0.0	3.981862754850674e-06	0.0	0.0	0.00045628786090766367	0.0	0.0	0.00045652704541858727	0.0	-0.00035541959551156345	0.0	-1.3497738059492823e-09	-0.0001200717464504223	0.0	-2.1417128993972824e-10
3.295	-0.00035601995424604596	0.0	-4.197576012620416e-09	-0.0003542932046835926	0.0	-0.09965609797642776	0.0	6.46234948484318e-06	0.0	0.9999999999917862	0.0	3.998016576858057e-06	0.0	0.0	0.0004581389525557337	0.0	0.0	0.00045837837217468756	0.0	-0.00035601995426791285	0.0	-1.3508286549700094e-09	-0.00012007175608936089	0.0	-2.077678217699572e-10
3.3000000000000003	-0.0003566203130504318	0.0	-4.214923836708172e-09	-0.00035607481011619706	0.0	-0.0996560979803503	0.0	6.464003877046909e-06	0.0	0.9999999999917183	0.0	4.014174533274841e-06	0.0	0.0	0.00045999051797222275	0.0	0.0	0.0004602301728792425	0.0	-0.000356620313072457	0.0	-1.3518514792011663e-09	-0.0001200717657282543	0.0	-2.013613741106606e-10
3.305	-0.0003572206719030117	0.0	-4.2322813775759846e-09	-0.0003578594173450003	0.0	-0.09965609798427438	0.0	6.465658263482272e-06	0.0	0.9999999999916499	0.0	4.030336624101025e-06	0.0	0.0	0.00046184255715713067	0.0	0.0	0.0004620824475305996	0.0	-0.0003572206719251954	0.0	-1.3528422637453003e-09	-0.00012007177536715494	0.0	-1.949519469621039e-10
3.31	-0.00035782103080378555	0.0	-4.249648635223856e-09	-0.0003596470263700025	0.0	-0.0996560979882	0.0	6.467312644149269e-06	0.0	0.9999999999915814	0.0	4.046502849336607e-06	0.0	0.0	0.00046369507011045734	0.0	0.0	0.0004639351961271063	0.0	-0.00035782103082612857	0.0	-1.3538009937049702e-09	-0.0001200717850060592	0.0	-1.8853954032321862e-10
3.315	-0.00035842138975275344	0.0	-4.2670256096517834e-09	-0.00036143763719120365	0.0	-0.09965609799212714	0.0	6.468967019047899e-06	0.0	0.9999999999915125	0.0	4.06267320898159e-06	0.0	0.0	0.000465548056832203	0.0	0.0	0.00046578841866711017	0.0	-0.000358421389775256	0.0	-1.3547276541827149e-09	-0.00012007179464496617	0.0	-1.82124154193798e-10
3.3200000000000003	-0.0003590217487499153	0.0	-4.284412300859771e-09	-0.00036323124980860386	0.0	-0.09965609799605582	0.0	6.470621388178163e-06	0.0	0.9999999999914434	0.0	4.078847703035975e-06	0.0	0.0	0.00046740151732236777	0.0	0.0	0.0004676421151489586	0.0	-0.00035902174877257823	0.0	-1.3556222302810898e-09	-0.00012007180428387767	0.0	-1.7570578857340773e-10
3.325	-0.0003596221077952713	0.0	-4.301808708847815e-09	-0.00036502786422220305	0.0	-0.09965609799998602	0.0	6.47227575154006e-06	0.0	0.9999999999913739	0.0	4.0950263314997576e-06	0.0	0.0	0.0004692554515809512	0.0	0.0	0.00046949628557099916	0.0	-0.00035962210781809476	0.0	-1.3564847071026294e-09	-0.00012007181392275571	0.0	-1.6928444346125855e-10
3.33	-0.00036022246688882116	0.0	-4.3192148336159165e-09	-0.00036682748043200116	0.0	-0.09965609800391777	0.0	6.473930109133592e-06	0.0	0.9999999999913042	0.0	4.11120909437294e-06	0.0	0.0	0.0004711098596079534	0.0	0.0	0.00047135092993157927	0.0	-0.0003602224669118058	0.0	-1.357315069749883e-09	-0.00012007182356167443	0.0	-1.6286011885757795e-10
3.335	-0.0003608228260305651	0.0	-4.336630675164075e-09	-0.0003686300984379982	0.0	-0.09965609800785105	0.0	6.475584460958757e-06	0.0	0.9999999999912342	0.0	4.127395991655522e-06	0.0	0.0	0.00047296474140337465	0.0	0.0	0.00047320604822904646	0.0	-0.0003608228260537115	0.0	-1.3581133033253841e-09	-0.00012007183320058231	0.0	-1.5643281476111825e-10
3.34	-0.000361423185220503	0.0	-4.3540562334922926e-09	-0.0003704357182401942	0.0	-0.09965609801178586	0.0	6.477238807015556e-06	0.0	0.999999999991164	0.0	4.143587023347504e-06	0.0	0.0	0.0004748200969672148	0.0	0.0	0.0004750616404617482	0.0	-0.00036142318524381165	0.0	-1.3588793929316724e-09	-0.00012007184283949017	0.0	-1.5000253117172437e-10
3.345	-0.00036202354445863497	0.0	-4.3714915086005685e-09	-0.0003722443398385893	0.0	-0.0996560980157222	0.0	6.478893147303989e-06	0.0	0.9999999999910935	0.0	4.1597821894488885e-06	0.0	0.0	0.0004766759262994741	0.0	0.0	0.00047691770662803195	0.0	-0.0003620235444821064	0.0	-1.359613323671279e-09	-0.0001200718524783854	0.0	-1.435692680889379e-10
3.35	-0.00036262390374496093	0.0	-4.388936500488902e-09	-0.0003740559632331833	0.0	-0.09965609801966008	0.0	6.480547481824055e-06	0.0	0.9999999999910226	0.0	4.17598148995967e-06	0.0	0.0	0.00047853222940015186	0.0	0.0	0.00047877424672624524	0.0	-0.0003626239037685955	0.0	-1.3603150806467385e-09	-0.00012007186211728695	0.0	-1.3713302551233148e-10
3.355	-0.0003632242630794809	0.0	-4.406391209157292e-09	-0.0003758705884239763	0.0	-0.09965609802359948	0.0	6.482201810575755e-06	0.0	0.9999999999909516	0.0	4.192184924879852e-06	0.0	0.0	0.0004803890062692488	0.0	0.0	0.0004806312607547355	0.0	-0.0003632242631032793	0.0	-1.3609846489605779e-09	-0.00012007187175619663	0.0	-1.3069380344104344e-10
3.36	-0.00036382462246219486	0.0	-4.42385563460574e-09	-0.00037768821541096814	0.0	-0.09965609802754043	0.0	6.483856133559089e-06	0.0	0.9999999999908802	0.0	4.208392494209434e-06	0.0	0.0	0.00048224625690676456	0.0	0.0	0.0004824887487118502	0.0	-0.00036382462248615746	0.0	-1.3616220137153243e-09	-0.00012007188139509005	0.0	-1.242516018750669e-10
3.365	-0.00036442498189310287	0.0	-4.441329776834247e-09	-0.0003795088441941592	0.0	-0.0996560980314829	0.0	6.485510450774057e-06	0.0	0.9999999999908086	0.0	4.224604197948418e-06	0.0	0.0	0.0004841039813126994	0.0	0.0	0.00048434671059593694	0.0	-0.0003644249819172302	0.0	-1.362227160013503e-09	-0.00012007189103399973	0.0	-1.1780642081376768e-10
3.37	-0.00036502534137220486	0.0	-4.45881363584281e-09	-0.0003813324747735491	0.0	-0.09965609803542691	0.0	6.487164762220658e-06	0.0	0.9999999999907366	0.0	4.2408200360967985e-06	0.0	0.0	0.00048596217948705287	0.0	0.0	0.0004862051464053431	0.0	-0.00036502534139649744	0.0	-1.3628000729576356e-09	-0.00012007190067290037	0.0	-1.1135826025665638e-10
3.375	-0.00036562570089950083	0.0	-4.476307211631432e-09	-0.0003831591071491379	0.0	-0.09965609803937245	0.0	6.488819067898894e-06	0.0	0.9999999999906645	0.0	4.257040008654581e-06	0.0	0.0	0.0004878208514298254	0.0	0.0	0.0004880640561384162	0.0	-0.00036562570092395924	0.0	-1.3633407376502423e-09	-0.00012007191031180191	0.0	-1.0490712020301956e-10
3.38	-0.00036622606047499083	0.0	-4.49381050420011e-09	-0.0003849887413209257	0.0	-0.09965609804331953	0.0	6.490473367808763e-06	0.0	0.999999999990592	0.0	4.273264115621762e-06	0.0	0.0	0.0004896799971410168	0.0	0.0	0.0004899234397935038	0.0	-0.00036622606049961545	0.0	-1.363849139193838e-09	-0.00012007191995070979	0.0	-9.845300065276758e-11
3.3850000000000002	-0.0003668264200986749	0.0	-4.511323513548848e-09	-0.0003868213772889127	0.0	-0.09965609804726813	0.0	6.4921276619502654e-06	0.0	0.9999999999905193	0.0	4.289492356998344e-06	0.0	0.0	0.0004915396166206271	0.0	0.0	0.0004917832973689532	0.0	-0.00036682642012346634	0.0	-1.3643252626909413e-09	-0.00012007192958961856	0.0	-9.199590160546276e-11
3.39	-0.00036742677977055294	0.0	-4.528846239677643e-09	-0.0003886570150530984	0.0	-0.09965609805121828	0.0	6.493781950323402e-06	0.0	0.9999999999904462	0.0	4.305724732784326e-06	0.0	0.0	0.0004933997098686564	0.0	0.0	0.0004936436288631121	0.0	-0.0003674267797955116	0.0	-1.3647690932440627e-09	-0.00012007193922850385	0.0	-8.553582306021585e-11
3.395	-0.00036802713949062493	0.0	-4.5463786825864954e-09	-0.00039049565461348314	0.0	-0.09965609805516995	0.0	6.495436232928172e-06	0.0	0.9999999999903729	0.0	4.321961242979707e-06	0.0	0.0	0.0004952602768851046	0.0	0.0	0.0004955044342743278	0.0	-0.0003680271395157514	0.0	-1.365180615955713e-09	-0.0001200719488674063	0.0	-7.907276501669944e-11
3.4	-0.000368627499258891	0.0	-4.563920842275406e-09	-0.0003923372959700669	0.0	-0.09965609805912315	0.0	6.497090509764575e-06	0.0	0.9999999999902993	0.0	4.338201887584488e-06	0.0	0.0	0.0004971213176699717	0.0	0.0	0.0004973657136009478	0.0	-0.00036862749928418567	0.0	-1.3655598159283985e-09	-0.0001200719585063205	0.0	-7.260672747438963e-11
3.4050000000000002	-0.00036922785907535113	0.0	-4.581472718744374e-09	-0.0003941819391228497	0.0	-0.09965609806307789	0.0	6.4987447808326134e-06	0.0	0.9999999999902255	0.0	4.35444666659867e-06	0.0	0.0	0.0004989828322232576	0.0	0.0	0.0004992274668413197	0.0	-0.0003692278591008146	0.0	-1.3659066782646255e-09	-0.00012007196814524192	0.0	-6.613771043338295e-11
3.41	-0.00036982821894000523	0.0	-4.599034311993401e-09	-0.00039602958407183137	0.0	-0.09965609806703417	0.0	6.500399046132284e-06	0.0	0.9999999999901514	0.0	4.3706955800222515e-06	0.0	0.0	0.0005008448205449626	0.0	0.0	0.000501089693993791	0.0	-0.00036982821896563804	0.0	-1.366221188066899e-09	-0.00012007197778411275	0.0	-5.966571389222839e-11
3.415	-0.00037042857885285325	0.0	-4.616605622022484e-09	-0.00039788023081701197	0.0	-0.09965609807099197	0.0	6.50205330566359e-06	0.0	0.9999999999900769	0.0	4.386948627855232e-06	0.0	0.0	0.0005027072826350863	0.0	0.0	0.000502952395056709	0.0	-0.00037042857887865574	0.0	-1.3665033304377143e-09	-0.00012007198742302152	0.0	-5.319073785114306e-11
3.42	-0.00037102893881389536	0.0	-4.634186648831624e-09	-0.00039973387935839154	0.0	-0.09965609807495131	0.0	6.503707559426529e-06	0.0	0.9999999999900023	0.0	4.403205810097612e-06	0.0	0.0	0.000504570218493629	0.0	0.0	0.0005048155700284213	0.0	-0.00037102893883986823	0.0	-1.366753090479576e-09	-0.00012007199706192307	0.0	-4.671278230945489e-11
3.4250000000000003	-0.0003716292988231315	0.0	-4.651777392420825e-09	-0.00040159052969597025	0.0	-0.09965609807891218	0.0	6.505361807421101e-06	0.0	0.9999999999899273	0.0	4.419467126749394e-06	0.0	0.0	0.0005064336281205906	0.0	0.0	0.0005066792189072754	0.0	-0.000371629298849275	0.0	-1.3669704532949735e-09	-0.0001200720067008201	0.0	-4.023184726650558e-11
3.43	-0.0003722296588805616	0.0	-4.669377852790081e-09	-0.00040345018182974784	0.0	-0.09965609808287458	0.0	6.5070160496473075e-06	0.0	0.9999999999898521	0.0	4.435732577810575e-06	0.0	0.0	0.0005082975115159713	0.0	0.0	0.0005085433416916189	0.0	-0.00037222965890687645	0.0	-1.3671554039864053e-09	-0.00012007201633972165	0.0	-3.374793272222275e-11
3.435	-0.0003728300189861857	0.0	-4.686988029939395e-09	-0.00040531283575972424	0.0	-0.09965609808683852	0.0	6.508670286105147e-06	0.0	0.9999999999897765	0.0	4.452002163281154e-06	0.0	0.0	0.0005101618686797704	0.0	0.0	0.000510407938379799	0.0	-0.0003728300190126722	0.0	-1.3673079276563589e-09	-0.0001200720259786259	0.0	-2.7261038675824028e-11
3.44	-0.00037343037914000385	0.0	-4.704607923868767e-09	-0.0004071784914858998	0.0	-0.09965609809080399	0.0	6.510324516794622e-06	0.0	0.9999999999897008	0.0	4.468275883161134e-06	0.0	0.0	0.000512026699611989	0.0	0.0	0.0005122730089701634	0.0	-0.0003734303791666627	0.0	-1.3674280094073263e-09	-0.00012007203561754823	0.0	-2.0771165127137082e-11
3.4450000000000003	-0.000374030739342016	0.0	-4.722237534578198e-09	-0.00040904714900827436	0.0	-0.099656098094771	0.0	6.511978741715729e-06	0.0	0.9999999999896247	0.0	4.484553737450516e-06	0.0	0.0	0.0005138920043126264	0.0	0.0	0.0005141385534610596	0.0	-0.0003740307393688476	0.0	-1.3675156343417912e-09	-0.00012007204525642267	0.0	-1.4278312074817746e-11
3.45	-0.00037463109959222216	0.0	-4.739876862067684e-09	-0.00041091880832684776	0.0	-0.09965609809873953	0.0	6.51363296086847e-06	0.0	0.9999999999895484	0.0	4.500835726149296e-06	0.0	0.0	0.0005157577827816825	0.0	0.0	0.0005160045718508349	0.0	-0.00037463109961922693	0.0	-1.3675707875622357e-09	-0.00012007205489532332	0.0	-7.782479519472618e-12
3.455	-0.0003752314598906223	0.0	-4.75752590633723e-09	-0.00041279346944162013	0.0	-0.09965609810270959	0.0	6.515287174252846e-06	0.0	0.9999999999894718	0.0	4.5171218492574754e-06	0.0	0.0	0.0005176240350191576	0.0	0.0	0.000517871064137837	0.0	-0.0003752314599178008	0.0	-1.3675934541711462e-09	-0.00012007206453422125	0.0	-1.28366746030209e-12
3.46	-0.00037583182023721645	0.0	-4.775184667386833e-09	-0.0004146711323525915	0.0	-0.09965609810668119	0.0	6.5169413818688545e-06	0.0	0.9999999999893948	0.0	4.533412106775055e-06	0.0	0.0	0.0005194907610250514	0.0	0.0	0.0005197380303204132	0.0	-0.00037583182026456913	0.0	-1.3675836192709976e-09	-0.00012007207417312551	0.0	5.2181241036623296e-12
3.465	-0.00037643218063200464	0.0	-4.792853145216493e-09	-0.0004165517970597618	0.0	-0.09965609811065433	0.0	6.518595583716497e-06	0.0	0.9999999999893177	0.0	4.549706498702035e-06	0.0	0.0	0.0005213579607993644	0.0	0.0	0.0005216054703969111	0.0	-0.00037643218065953204	0.0	-1.3675412679642683e-09	-0.000120072083812037	0.0	1.172289517234826e-11
3.47	-0.0003770325410749869	0.0	-4.810531339826213e-09	-0.0004184354635631313	0.0	-0.099656098114629	0.0	6.520249779795773e-06	0.0	0.9999999999892402	0.0	4.566005025038415e-06	0.0	0.0	0.0005232256343420963	0.0	0.0	0.0005234733843656781	0.0	-0.0003770325411026895	0.0	-1.367466385353432e-09	-0.00012007209345093312	0.0	1.8230645746289925e-11
3.475	-0.00037763290156616307	0.0	-4.828219251215989e-09	-0.00042032213186269957	0.0	-0.0996560981186052	0.0	6.521903970106683e-06	0.0	0.9999999999891624	0.0	4.582307685784194e-06	0.0	0.0	0.0005250937816532471	0.0	0.0	0.0005253417722250617	0.0	-0.0003776329015940414	0.0	-1.367358956540962e-09	-0.00012007210308983015	0.0	2.4741375826321397e-11
3.48	-0.0003782332621055333	0.0	-4.845916879385823e-09	-0.0004222118019584668	0.0	-0.09965609812258293	0.0	6.523558154649227e-06	0.0	0.9999999999890844	0.0	4.598614480939373e-06	0.0	0.0	0.0005269624027328168	0.0	0.0	0.0005272106339734094	0.0	-0.00037823326213358774	0.0	-1.3672189666293247e-09	-0.00012007211272871995	0.0	3.1255085412666704e-11
3.485	-0.00037883362269309747	0.0	-4.863624224335715e-09	-0.00042410447385043303	0.0	-0.0996560981265622	0.0	6.525212333423404e-06	0.0	0.9999999999890061	0.0	4.6149254105039525e-06	0.0	0.0	0.0005288314975808054	0.0	0.0	0.0005290799696090688	0.0	-0.0003788336227213286	0.0	-1.3670464007209905e-09	-0.00012007212236763054	0.0	3.7771774505911765e-11
3.49	-0.00037943398332885577	0.0	-4.881341286065665e-09	-0.0004260001475385984	0.0	-0.09965609813054299	0.0	6.526866506429216e-06	0.0	0.9999999999889275	0.0	4.631240474477933e-06	0.0	0.0	0.0005307010661972131	0.0	0.0	0.0005309497791303872	0.0	-0.00037943398335726404	0.0	-1.3668412439184205e-09	-0.00012007213200654022	0.0	4.4291443106235804e-11
3.495	-0.000380034344012808	0.0	-4.8990680645756726e-09	-0.00042789882302296257	0.0	-0.09965609813452533	0.0	6.528520673666661e-06	0.0	0.9999999999888487	0.0	4.647559672861312e-06	0.0	0.0	0.0005325711085820395	0.0	0.0	0.0005328200625357122	0.0	-0.0003800343440413939	0.0	-1.3666034813240819e-09	-0.00012007214164541286	0.0	5.081409121425231e-11
3.5	-0.0003806347047449542	0.0	-4.916804559865737e-09	-0.0004298005003035257	0.0	-0.0996560981385092	0.0	6.53017483513574e-06	0.0	0.9999999999887695	0.0	4.66388300565409e-06	0.0	0.0	0.0005344416247352849	0.0	0.0	0.0005346908198233913	0.0	-0.0003806347047737182	0.0	-1.3663330980404304e-09	-0.00012007215128430899	0.0	5.733971883088842e-11
3.505	-0.00038123506552529445	0.0	-4.9345507719358595e-09	-0.00043170517938028775	0.0	-0.0996560981424946	0.0	6.531828990836452e-06	0.0	0.9999999999886902	0.0	4.6802104728562685e-06	0.0	0.0	0.0005363126146569491	0.0	0.0	0.000536562050991772	0.0	-0.00038123506555423707	0.0	-1.3660300791699253e-09	-0.00012007216092324666	0.0	6.386832595592355e-11
3.5100000000000002	-0.0003818354263538288	0.0	-4.952306700786041e-09	-0.00043361286025324906	0.0	-0.09965609814648152	0.0	6.533483140768798e-06	0.0	0.9999999999886106	0.0	4.696542074467848e-06	0.0	0.0	0.0005381840783470326	0.0	0.0	0.0005384337560392017	0.0	-0.0003818354263829506	0.0	-1.365694409815022e-09	-0.00012007217056213919	0.0	7.039991259068118e-11
3.515	-0.0003824357872305571	0.0	-4.97007234641628e-09	-0.00043552354292240907	0.0	-0.09965609815047	0.0	6.5351372849327786e-06	0.0	0.9999999999885305	0.0	4.712877810488827e-06	0.0	0.0	0.0005400560158055347	0.0	0.0	0.0005403059349640278	0.0	-0.0003824357872598584	0.0	-1.3653260750781697e-09	-0.00012007218020101092	0.0	7.693447873463055e-11
3.52	-0.0003830361481554793	0.0	-4.9878477088265755e-09	-0.0004374372273877681	0.0	-0.09965609815445998	0.0	6.536791423328392e-06	0.0	0.9999999999884503	0.0	4.729217680919205e-06	0.0	0.0	0.0005419284270324558	0.0	0.0	0.000542178587764598	0.0	-0.0003830361481849608	0.0	-1.3649250600618254e-09	-0.00012007218983993595	0.0	8.347202438866088e-11
3.525	-0.00038363650912859564	0.0	-5.005632788016929e-09	-0.00043935391364932614	0.0	-0.09965609815845151	0.0	6.53844555595564e-06	0.0	0.9999999999883699	0.0	4.745561685758984e-06	0.0	0.0	0.0005438013120277959	0.0	0.0	0.0005440517144392596	0.0	-0.00038363650915825774	0.0	-1.364491349868431e-09	-0.00012007219947882757	0.0	9.001254955403706e-11
3.5300000000000002	-0.000384236870149906	0.0	-5.023427583987341e-09	-0.00044127360170708325	0.0	-0.09965609816244458	0.0	6.540099682814521e-06	0.0	0.999999999988289	0.0	4.761909825008163e-06	0.0	0.0	0.000545674670791555	0.0	0.0	0.0005459253149863603	0.0	-0.00038423687017974904	0.0	-1.3640249296004336e-09	-0.00012007220911772007	0.0	9.655605423004563e-11
3.535	-0.00038483723121941033	0.0	-5.04123209673781e-09	-0.00044319629156103923	0.0	-0.09965609816643918	0.0	6.541753803905036e-06	0.0	0.999999999988208	0.0	4.778262098666741e-06	0.0	0.0	0.0005475485033237328	0.0	0.0	0.0005477993894042473	0.0	-0.0003848372312494349	0.0	-1.3635257843602778e-09	-0.00012007221875662071	0.0	1.0310253841771715e-10
3.54	-0.00038543759233710865	0.0	-5.059046326268337e-09	-0.0004451219832111941	0.0	-0.0996560981704353	0.0	6.543407919227185e-06	0.0	0.9999999999881266	0.0	4.794618506734719e-06	0.0	0.0	0.0005494228096243296	0.0	0.0	0.0005496739376912683	0.0	-0.0003854375923673152	0.0	-1.362993899250403e-09	-0.00012007222839551866	0.0	1.0965200211744452e-10
3.545	-0.000386037953503001	0.0	-5.076870272578921e-09	-0.000447050676657548	0.0	-0.09965609817443297	0.0	6.545062028780967e-06	0.0	0.999999999988045	0.0	4.810979049212096e-06	0.0	0.0	0.0005512975896933453	0.0	0.0	0.0005515489598457707	0.0	-0.0003860379535333901	0.0	-1.3624292593732492e-09	-0.00012007223803441749	0.0	1.1620444532968268e-10
3.5500000000000003	-0.00038663831471708737	0.0	-5.094703935669565e-09	-0.000448982371900101	0.0	-0.09965609817843216	0.0	6.546716132566384e-06	0.0	0.9999999999879631	0.0	4.827343726098875e-06	0.0	0.0	0.0005531728435307802	0.0	0.0	0.000553424455866102	0.0	-0.0003866383147476594	0.0	-1.3618318498312508e-09	-0.00012007224767331451	0.0	1.227598680551761e-10
3.555	-0.00038723867597936773	0.0	-5.112547315540265e-09	-0.00045091706893885284	0.0	-0.09965609818243289	0.0	6.548370230583433e-06	0.0	0.9999999999878809	0.0	4.843712537395053e-06	0.0	0.0	0.0005550485711366338	0.0	0.0	0.0005553004257506097	0.0	-0.00038723867601012324	0.0	-1.361201655726842e-09	-0.0001200722573122269	0.0	1.2931827029371454e-10
3.56	-0.00038783903728984207	0.0	-5.130400412191023e-09	-0.0004528547677738036	0.0	-0.09965609818643514	0.0	6.5500243228321174e-06	0.0	0.9999999999877985	0.0	4.86008548310063e-06	0.0	0.0	0.0005569247725109064	0.0	0.0	0.0005571768694976413	0.0	-0.0003878390373207816	0.0	-1.3605386621624565e-09	-0.00012007226695110135	0.0	1.3587965204672834e-10
3.565	-0.00038843939864851044	0.0	-5.148263225621839e-09	-0.00045479546840495336	0.0	-0.09965609819043894	0.0	6.551678409312434e-06	0.0	0.9999999999877157	0.0	4.876462563215608e-06	0.0	0.0	0.0005588014476535978	0.0	0.0	0.0005590537871055442	0.0	-0.0003884393986796343	0.0	-1.3598428542405172e-09	-0.00012007227659001284	0.0	1.4244401331424505e-10
3.5700000000000003	-0.0003890397600553729	0.0	-5.166135755832713e-09	-0.0004567391708323023	0.0	-0.09965609819444426	0.0	6.5533324900243856e-06	0.0	0.9999999999876328	0.0	4.892843777739986e-06	0.0	0.0	0.0005606785965647083	0.0	0.0	0.000560931178572666	0.0	-0.00038903976008668173	0.0	-1.359114217063456e-09	-0.0001200722862289171	0.0	1.4901135409651973e-10
3.575	-0.00038964012151042923	0.0	-5.184018002823643e-09	-0.00045868587505585	0.0	-0.09965609819845113	0.0	6.5549865649679705e-06	0.0	0.9999999999875495	0.0	4.909229126673763e-06	0.0	0.0	0.0005625562192442378	0.0	0.0	0.0005628090438973541	0.0	-0.00038964012154192346	0.0	-1.358352735733693e-09	-0.00012007229586778883	0.0	1.5558167439426237e-10
3.58	-0.00039024048301367965	0.0	-5.201909966594632e-09	-0.0004606355810755967	0.0	-0.09965609820245952	0.0	6.556640634143189e-06	0.0	0.9999999999874659	0.0	4.925618610016939e-06	0.0	0.0	0.0005644343156921859	0.0	0.0	0.000564687383077956	0.0	-0.00039024048304535966	0.0	-1.3575583953536536e-09	-0.00012007230550670031	0.0	1.621549742077901e-10
3.585	-0.0003908408445651241	0.0	-5.2198116471456786e-09	-0.00046258828889154236	0.0	-0.09965609820646945	0.0	6.558294697550042e-06	0.0	0.9999999999873821	0.0	4.942012227769516e-06	0.0	0.0	0.0005663128859085531	0.0	0.0	0.0005665661961128192	0.0	-0.0003908408445969905	0.0	-1.356731181025754e-09	-0.00012007231514560095	0.0	1.687312535381058e-10
3.59	-0.00039144120616476253	0.0	-5.2377230444767824e-09	-0.00046454399850368695	0.0	-0.09965609821048091	0.0	6.559948755188528e-06	0.0	0.9999999999872979	0.0	4.958409979931493e-06	0.0	0.0	0.0005681919298933393	0.0	0.0	0.0005684454830002912	0.0	-0.00039144120619681567	0.0	-1.3558710778524115e-09	-0.00012007232478449347	0.0	1.7531051238496825e-10
3.595	-0.000392041567812595	0.0	-5.255644158587945e-09	-0.0004665027099120308	0.0	-0.0996560982144939	0.0	6.561602807058648e-06	0.0	0.9999999999872136	0.0	4.974811866502871e-06	0.0	0.0	0.0005700714476465445	0.0	0.0	0.0005703252437387195	0.0	-0.0003920415678448354	0.0	-1.3549780709360422e-09	-0.00012007233442338778	0.0	1.8189275074906677e-10
3.6	-0.00039264192950862144	0.0	-5.273574989479166e-09	-0.00046846442311657333	0.0	-0.09965609821850842	0.0	6.563256853160401e-06	0.0	0.9999999999871289	0.0	4.991217887483647e-06	0.0	0.0	0.0005719514391681686	0.0	0.0	0.0005722054783264516	0.0	-0.00039264192954104954	0.0	-1.3540521453790576e-09	-0.00012007234406227217	0.0	1.8847796863114927e-10
3.605	-0.00039324229125284186	0.0	-5.291515537150443e-09	-0.00047042913811731486	0.0	-0.09965609822252448	0.0	6.564910893493789e-06	0.0	0.9999999999870439	0.0	5.007628042873824e-06	0.0	0.0	0.0005738319044582116	0.0	0.0	0.0005740861867618349	0.0	-0.0003932422912854582	0.0	-1.3530932862838672e-09	-0.00012007235370120083	0.0	1.9506616603129504e-10
3.61	-0.0003938426530452563	0.0	-5.309465801601778e-09	-0.00047239685491425536	0.0	-0.09965609822654208	0.0	6.56656492805881e-06	0.0	0.9999999999869588	0.0	5.024042332673399e-06	0.0	0.0	0.0005757128435166734	0.0	0.0	0.0005759673690432168	0.0	-0.0003938426530780615	0.0	-1.3521014787528797e-09	-0.00012007236334011231	0.0	2.016573429505173e-10
3.615	-0.00039444301488586486	0.0	-5.327425782833172e-09	-0.00047436757350739506	0.0	-0.0996560982305612	0.0	6.568218956855465e-06	0.0	0.9999999999868733	0.0	5.040460756882377e-06	0.0	0.0	0.0005775942563435544	0.0	0.0	0.000577849025168945	0.0	-0.00039444301491885924	0.0	-1.3510767078884962e-09	-0.0001200723729789732	0.0	2.0825149938939173e-10
3.62	-0.0003950433767746673	0.0	-5.3453954808446224e-09	-0.0004763412938967335	0.0	-0.09965609823458185	0.0	6.569872979883753e-06	0.0	0.9999999999867875	0.0	5.056883315500753e-06	0.0	0.0	0.0005794761429388543	0.0	0.0	0.0005797311551373669	0.0	-0.0003950433768078513	0.0	-1.3500189587931203e-09	-0.00012007238261787294	0.0	2.1484863534729442e-10
3.625	-0.0003956437387116638	0.0	-5.363374895636131e-09	-0.0004783180160822709	0.0	-0.09965609823860404	0.0	6.571526997143676e-06	0.0	0.9999999999867014	0.0	5.073310008528528e-06	0.0	0.0	0.000581358503302573	0.0	0.0	0.00058161375894683	0.0	-0.00039564373874503795	0.0	-1.348928216569156e-09	-0.00012007239225676365	0.0	2.2144875082560407e-10
3.63	-0.0003962441006968543	0.0	-5.381364027207696e-09	-0.00048029774006400734	0.0	-0.09965609824262776	0.0	6.573181008635232e-06	0.0	0.999999999986615	0.0	5.089740835965704e-06	0.0	0.0	0.0005832413374347107	0.0	0.0	0.0005834968365956817	0.0	-0.00039624410073041893	0.0	-1.3478044663189963e-09	-0.00012007240189565796	0.0	2.2805184582474798e-10
3.6350000000000002	-0.0003968444627302389	0.0	-5.3993628755593225e-09	-0.00048228046584194284	0.0	-0.09965609824665302	0.0	6.574835014358422e-06	0.0	0.9999999999865284	0.0	5.106175797812281e-06	0.0	0.0	0.0005851246453352674	0.0	0.0	0.0005853803880822696	0.0	-0.0003968444627639946	0.0	-1.3466476931450403e-09	-0.00012007241153459745	0.0	2.3465792034475723e-10
3.64	-0.0003974448248118174	0.0	-5.417371440691004e-09	-0.0004842661934160773	0.0	-0.09965609825067981	0.0	6.576489014313245e-06	0.0	0.9999999999864416	0.0	5.122614894068256e-06	0.0	0.0	0.000587008427004243	0.0	0.0	0.0005872644134049411	0.0	-0.0003974448248457648	0.0	-1.3454578821496791e-09	-0.00012007242117347552	0.0	2.4126697438662443e-10
3.645	-0.0003980451869415899	0.0	-5.435389722602743e-09	-0.0004862549227864105	0.0	-0.09965609825470813	0.0	6.578143008499703e-06	0.0	0.9999999999863545	0.0	5.139058124733632e-06	0.0	0.0	0.0005888926824416376	0.0	0.0	0.0005891489125620438	0.0	-0.0003980451869757293	0.0	-1.3442350184353038e-09	-0.0001200724308123346	0.0	2.4787900795060116e-10
3.65	-0.00039864554911955646	0.0	-5.453417721294541e-09	-0.00048824665395294286	0.0	-0.09965609825873799	0.0	6.579796996917794e-06	0.0	0.999999999986267	0.0	5.155505489808407e-06	0.0	0.0	0.0005907774116474512	0.0	0.0	0.000591033885551925	0.0	-0.00039864554915388826	0.0	-1.3429790871043016e-09	-0.00012007244045125964	0.0	2.544940210375973e-10
3.6550000000000002	-0.0003992459113457171	0.0	-5.471455436766396e-09	-0.0004902413869156743	0.0	-0.09965609826276937	0.0	6.5814509795675194e-06	0.0	0.9999999999861793	0.0	5.171956989292584e-06	0.0	0.0	0.0005926626146216837	0.0	0.0	0.0005929193323729323	0.0	-0.0003992459113802419	0.0	-1.3416900732590565e-09	-0.00012007245009015125	0.0	2.611120136471752e-10
3.66	-0.0003998462736200716	0.0	-5.489502869018309e-09	-0.0004922391216746045	0.0	-0.09965609826680229	0.0	6.583104956448878e-06	0.0	0.9999999999860912	0.0	5.188412623186159e-06	0.0	0.0	0.0005945482913643351	0.0	0.0	0.0005948052530234131	0.0	-0.0003998462736547898	0.0	-1.3403679620019574e-09	-0.0001200724597290275	0.0	2.677329857802516e-10
3.665	-0.0004004466359426202	0.0	-5.5075600180502795e-09	-0.0004942398582297337	0.0	-0.09965609827083674	0.0	6.58475892756187e-06	0.0	0.999999999986003	0.0	5.204872391489134e-06	0.0	0.0	0.0005964344418754054	0.0	0.0	0.000596691647501715	0.0	-0.00040044663597753224	0.0	-1.3390127384353803e-09	-0.00012007246936795706	0.0	2.7435693743771917e-10
3.67	-0.0004010469983133628	0.0	-5.525626883862307e-09	-0.0004962435965810618	0.0	-0.09965609827487273	0.0	6.586412892906496e-06	0.0	0.9999999999859145	0.0	5.221336294201509e-06	0.0	0.0	0.0005983210661548948	0.0	0.0	0.0005985785158061854	0.0	-0.00040104699834846933	0.0	-1.3376243876617065e-09	-0.0001200724790068604	0.0	2.80983868619285e-10
3.6750000000000003	-0.00040164736073229943	0.0	-5.543703466454395e-09	-0.0004982503367285892	0.0	-0.09965609827891025	0.0	6.5880668524827555e-06	0.0	0.9999999999858257	0.0	5.237804331323285e-06	0.0	0.0	0.0006002081642028031	0.0	0.0	0.0006004658579351719	0.0	-0.0004016473607676008	0.0	-1.3362028947833121e-09	-0.0001200724886457213	0.0	2.87613779326138e-10
3.68	-0.00040224772319943003	0.0	-5.561789765826538e-09	-0.0005002600786723154	0.0	-0.0996560982829493	0.0	6.589720806290649e-06	0.0	0.9999999999857365	0.0	5.254276502854459e-06	0.0	0.0	0.0006020957360191303	0.0	0.0	0.000602353673887022	0.0	-0.0004022477232349266	0.0	-1.3347482449025692e-09	-0.00012007249828462013	0.0	2.942466695585541e-10
3.685	-0.00040284808571475466	0.0	-5.57988578197874e-09	-0.0005022728224122405	0.0	-0.09965609828698989	0.0	6.591374754330177e-06	0.0	0.9999999999856471	0.0	5.270752808795034e-06	0.0	0.0	0.0006039837816038764	0.0	0.0	0.000604241963660083	0.0	-0.000402848085750447	0.0	-1.33326042312185e-09	-0.00012007250792350904	0.0	3.0088253931694686e-10
3.69	-0.00040344844827827327	0.0	-5.597991514910998e-09	-0.0005042885679483645	0.0	-0.099656098291032	0.0	6.593028696601338e-06	0.0	0.9999999999855574	0.0	5.287233249145008e-06	0.0	0.0	0.0006058723009570417	0.0	0.0	0.0006061307272527025	0.0	-0.0004034484483141617	0.0	-1.3317394145435228e-09	-0.0001200725175624169	0.0	3.075213886014437e-10
3.6950000000000003	-0.00040404881088998597	0.0	-5.616106964623316e-09	-0.0005063073152806877	0.0	-0.09965609829507566	0.0	6.594682633104133e-06	0.0	0.9999999999854675	0.0	5.3037178239043835e-06	0.0	0.0	0.0006077612940786257	0.0	0.0	0.0006080199646632279	0.0	-0.00040404881092607114	0.0	-1.3301852042699575e-09	-0.00012007252720134013	0.0	3.1416321741282704e-10
3.7	-0.0004046491735498926	0.0	-5.6342321311156905e-09	-0.0005083290644092098	0.0	-0.09965609829912084	0.0	6.596336563838561e-06	0.0	0.9999999999853774	0.0	5.3202065330731584e-06	0.0	0.0	0.0006096507609686288	0.0	0.0	0.0006099096758900068	0.0	-0.00040464917358617504	0.0	-1.3285977774035152e-09	-0.00012007253684021006	0.0	3.2080802575186204e-10
3.705	-0.00040524953625799325	0.0	-5.652367014388123e-09	-0.0005103538153339308	0.0	-0.09965609830316756	0.0	6.597990488804623e-06	0.0	0.9999999999852869	0.0	5.3366993766513314e-06	0.0	0.0	0.0006115407016270508	0.0	0.0	0.0006117998609313866	0.0	-0.00040524953629447324	0.0	-1.326977119046559e-09	-0.0001200725464790827	0.0	3.2745581361876926e-10
3.71	-0.0004058498990142879	0.0	-5.670511614440613e-09	-0.0005123815680548507	0.0	-0.0996560983072158	0.0	6.59964440800232e-06	0.0	0.9999999999851961	0.0	5.353196354638906e-06	0.0	0.0	0.0006134311160538917	0.0	0.0	0.0006136905197857149	0.0	-0.0004058498990509659	0.0	-1.3253232143014469e-09	-0.00012007255611799056	0.0	3.34106581014045e-10
3.715	-0.00040645026181877655	0.0	-5.68866593127316e-09	-0.0005144123225719697	0.0	-0.09965609831126558	0.0	6.60129832143165e-06	0.0	0.999999999985105	0.0	5.369697467035879e-06	0.0	0.0	0.0006153220042491516	0.0	0.0	0.000615581652451339	0.0	-0.00040645026185565314	0.0	-1.3236360482705376e-09	-0.00012007256575688038	0.0	3.4076032793785475e-10
3.72	-0.00040705062467145925	0.0	-5.7068299648857676e-09	-0.0005164460788852877	0.0	-0.09965609831531691	0.0	6.602952229092613e-06	0.0	0.9999999999850137	0.0	5.386202713842254e-06	0.0	0.0	0.0006172133662128305	0.0	0.0	0.0006174732589266065	0.0	-0.00040705062470853474	0.0	-1.3219156060561859e-09	-0.00012007257539578373	0.0	3.474170543912772e-10
3.725	-0.000407650987572336	0.0	-5.725003715278431e-09	-0.0005184828369948046	0.0	-0.09965609831936975	0.0	6.6046061309852105e-06	0.0	0.9999999999849221	0.0	5.402712095058028e-06	0.0	0.0	0.0006191052019449283	0.0	0.0	0.0006193653392098649	0.0	-0.00040765098760961097	0.0	-1.3201618727607422e-09	-0.0001200725850346952	0.0	3.5407676037427113e-10
3.73	-0.0004082513505214067	0.0	-5.743187182451151e-09	-0.0005205225969005204	0.0	-0.09965609832342413	0.0	6.6062600271094414e-06	0.0	0.9999999999848302	0.0	5.419225610683202e-06	0.0	0.0	0.0006209975114454452	0.0	0.0	0.0006212578932994617	0.0	-0.00040825135055888167	0.0	-1.3183748334865595e-09	-0.00012007259467358231	0.0	3.607394458873051e-10
3.735	-0.0004088517135186714	0.0	-5.76138036640393e-09	-0.0005225653586024353	0.0	-0.09965609832748006	0.0	6.607913917465306e-06	0.0	0.9999999999847381	0.0	5.435743260717775e-06	0.0	0.0	0.0006228902947143809	0.0	0.0	0.0006231509211937443	0.0	-0.0004088517135563468	0.0	-1.3165544733359837e-09	-0.00012007260431246397	0.0	3.6740511093180274e-10
3.74	-0.0004094520765641302	0.0	-5.7795832671367676e-09	-0.0005246111221005492	0.0	-0.09965609833153749	0.0	6.609567802052804e-06	0.0	0.9999999999846456	0.0	5.45226504516175e-06	0.0	0.0	0.0006247835517517357	0.0	0.0	0.0006250444228910602	0.0	-0.0004094520766020063	0.0	-1.3147007774113564e-09	-0.00012007261395134474	0.0	3.7407375550718487e-10
3.745	-0.0004100524396577829	0.0	-5.7977958846496615e-09	-0.000526659887394862	0.0	-0.09965609833559648	0.0	6.611221680871937e-06	0.0	0.9999999999845529	0.0	5.468790964015123e-06	0.0	0.0	0.0006266772825575095	0.0	0.0	0.000626938398389757	0.0	-0.0004100524396958603	0.0	-1.3128137308150264e-09	-0.00012007262359026707	0.0	3.807453796136583e-10
3.75	-0.00041065280279962963	0.0	-5.816018218942614e-09	-0.0005287116544853737	0.0	-0.099656098339657	0.0	6.612875553922703e-06	0.0	0.99999999998446	0.0	5.4853210172778956e-06	0.0	0.0	0.0006285714871317021	0.0	0.0	0.0006288328476881821	0.0	-0.0004106528028379089	0.0	-1.3108933186493323e-09	-0.00012007263322915145	0.0	3.874199832527879e-10
3.755	-0.00041125316598967035	0.0	-5.834250270015623e-09	-0.0005307664233720844	0.0	-0.09965609834371904	0.0	6.614529421205102e-06	0.0	0.9999999999843667	0.0	5.501855204950068e-06	0.0	0.0	0.0006304661654743137	0.0	0.0	0.0006307277707846829	0.0	-0.00041125316602815177	0.0	-1.3089395260166104e-09	-0.00012007264286803493	0.0	3.940975664248975e-10
3.7600000000000002	-0.0004118535292279052	0.0	-5.852492037868692e-09	-0.0005328241940549943	0.0	-0.09965609834778262	0.0	6.616183282719136e-06	0.0	0.9999999999842731	0.0	5.518393527031642e-06	0.0	0.0	0.0006323613175853443	0.0	0.0	0.000632623167677607	0.0	-0.00041185352926658927	0.0	-1.306952338019195e-09	-0.00012007265250693467	0.0	4.0077812912989764e-10
3.765	-0.00041245389251433394	0.0	-5.870743522501817e-09	-0.000534884966534103	0.0	-0.09965609835184773	0.0	6.617837138464803e-06	0.0	0.9999999999841793	0.0	5.534935983522615e-06	0.0	0.0	0.000634256943464794	0.0	0.0	0.0006345190383653018	0.0	-0.00041245389255322113	0.0	-1.3049317397594226e-09	-0.00012007266214583711	0.0	4.0746167136811905e-10
3.77	-0.00041305425584895676	0.0	-5.889004723915e-09	-0.0005369487408094105	0.0	-0.09965609835591438	0.0	6.6194909884421044e-06	0.0	0.9999999999840853	0.0	5.551482574422988e-06	0.0	0.0	0.0006361530431126624	0.0	0.0	0.0006364153828461148	0.0	-0.0004130542558880476	0.0	-1.3028777163396238e-09	-0.00012007267178473415	0.0	4.1414819314043035e-10
3.775	-0.0004136546192317735	0.0	-5.907275642108241e-09	-0.0005390155168809171	0.0	-0.09965609835998256	0.0	6.621144832651039e-06	0.0	0.9999999999839909	0.0	5.568033299732759e-06	0.0	0.0	0.0006380496165289499	0.0	0.0	0.0006383122011183936	0.0	-0.0004136546192710684	0.0	-1.3007902528621267e-09	-0.00012007268142359955	0.0	4.2083769444790687e-10
3.7800000000000002	-0.00041425498266278434	0.0	-5.9255562770815405e-09	-0.0005410852947486228	0.0	-0.09965609836405226	0.0	6.622798671091608e-06	0.0	0.9999999999838962	0.0	5.584588159451933e-06	0.0	0.0	0.0006399466637136564	0.0	0.0	0.0006402094931804856	0.0	-0.00041425498270228366	0.0	-1.2986693344292529e-09	-0.00012007269106250292	0.0	4.275301752903728e-10
3.785	-0.0004148553461419892	0.0	-5.943846628834897e-09	-0.0005431580744125274	0.0	-0.0996560983681235	0.0	6.6244525037638094e-06	0.0	0.9999999999838013	0.0	5.6011471535805054e-06	0.0	0.0	0.0006418441846667818	0.0	0.0	0.0006421072590307383	0.0	-0.00041485534618169344	0.0	-1.2965149461433306e-09	-0.0001200727007013882	0.0	4.342256356682142e-10
3.79	-0.000415455709669388	0.0	-5.9621466973683095e-09	-0.0005452338558726309	0.0	-0.09965609837219629	0.0	6.626106330667646e-06	0.0	0.999999999983706	0.0	5.617710282118478e-06	0.0	0.0	0.0006437421793883263	0.0	0.0	0.0006440054986674992	0.0	-0.00041545570970929753	0.0	-1.294327073106678e-09	-0.00012007271034026535	0.0	4.4092407558173774e-10
3.795	-0.0004160560732449808	0.0	-5.9804564826817815e-09	-0.0005473126391289334	0.0	-0.0996560983762706	0.0	6.627760151803115e-06	0.0	0.9999999999836106	0.0	5.63427754506585e-06	0.0	0.0	0.0006456406478782896	0.0	0.0	0.0006459042120891158	0.0	-0.0004160560732850962	0.0	-1.2921057004216196e-09	-0.00012007271997920756	0.0	4.476254950313571e-10
3.8000000000000003	-0.00041665643686876773	0.0	-5.9987759847753126e-09	-0.000549394424181435	0.0	-0.09965609838034643	0.0	6.629413967170219e-06	0.0	0.9999999999835149	0.0	5.650848942422623e-06	0.0	0.0	0.0006475395901366721	0.0	0.0	0.0006478033992939354	0.0	-0.00041665643690908953	0.0	-1.2898508131904684e-09	-0.00012007272961810278	0.0	4.543298940187852e-10
3.805	-0.00041725680054074856	0.0	-6.0171052036488995e-09	-0.0005514792110301354	0.0	-0.09965609838442381	0.0	6.631067776768956e-06	0.0	0.9999999999834188	0.0	5.667424474188795e-06	0.0	0.0	0.0006494390061634735	0.0	0.0	0.0006497030602803058	0.0	-0.0004172568005812771	0.0	-1.287562396515536e-09	-0.00012007273925694831	0.0	4.6103727254358776e-10
3.81	-0.00041785716426092343	0.0	-6.035444139302544e-09	-0.0005535669996750349	0.0	-0.09965609838850273	0.0	6.632721580599327e-06	0.0	0.9999999999833225	0.0	5.684004140364366e-06	0.0	0.0	0.0006513388959586937	0.0	0.0	0.0006516031950465742	0.0	-0.0004178571643016591	0.0	-1.2852404354991365e-09	-0.00012007274889584715	0.0	4.677476306058544e-10
3.815	-0.0004184575280292923	0.0	-6.0537927917362466e-09	-0.0005556577901161333	0.0	-0.09965609839258317	0.0	6.634375378661332e-06	0.0	0.9999999999832259	0.0	5.7005879409493376e-06	0.0	0.0	0.0006532392595223329	0.0	0.0	0.0006535038035910883	0.0	-0.0004184575280702356	0.0	-1.28288491524358e-09	-0.00012007275853476314	0.0	4.744609682066364e-10
3.8200000000000003	-0.0004190578918458552	0.0	-6.0721511609500084e-09	-0.0005577515823534308	0.0	-0.09965609839666514	0.0	6.63602917095497e-06	0.0	0.999999999983129	0.0	5.717175875943711e-06	0.0	0.0	0.0006551400968543915	0.0	0.0	0.0006554048859121953	0.0	-0.0004190578918870067	0.0	-1.2804958208511718e-09	-0.00012007276817366922	0.0	4.811772853463334e-10
3.825	-0.00041965825571061214	0.0	-6.090519246943827e-09	-0.000559848376386927	0.0	-0.09965609840074865	0.0	6.637682957480242e-06	0.0	0.9999999999830319	0.0	5.733767945347482e-06	0.0	0.0	0.0006570414079548687	0.0	0.0	0.000657306442008243	0.0	-0.0004196582557519722	0.0	-1.2780731374242175e-09	-0.00012007277781251836	0.0	4.878965820254969e-10
3.83	-0.000420258619623563	0.0	-6.108897049717702e-09	-0.0005619481722166223	0.0	-0.09965609840483369	0.0	6.639336738237148e-06	0.0	0.9999999999829344	0.0	5.750364149160653e-06	0.0	0.0	0.0006589431928237648	0.0	0.0	0.0006592084718775788	0.0	-0.00042025861966513194	0.0	-1.275616850065017e-09	-0.00012007278745139731	0.0	4.946188582445372e-10
3.835	-0.0004208589835847079	0.0	-6.1272845692716355e-09	-0.0005640509698425166	0.0	-0.09965609840892027	0.0	6.640990513225688e-06	0.0	0.9999999999828367	0.0	5.766964487383224e-06	0.0	0.0	0.00066084545146108	0.0	0.0	0.0006611109755185501	0.0	-0.0004208589836264863	0.0	-1.2731269438758724e-09	-0.0001200727970903323	0.0	5.013441140033094e-10
3.84	-0.0004214593475940468	0.0	-6.145681805605626e-09	-0.0005661567692646099	0.0	-0.09965609841300838	0.0	6.642644282445861e-06	0.0	0.9999999999827388	0.0	5.783568960015194e-06	0.0	0.0	0.0006627481838668141	0.0	0.0	0.0006630139529295044	0.0	-0.0004214593476360352	0.0	-1.270603403959082e-09	-0.00012007280672923293	0.0	5.080723493033334e-10
3.845	-0.0004220597116515798	0.0	-6.164088758719677e-09	-0.0005682655704829022	0.0	-0.09965609841709801	0.0	6.644298045897668e-06	0.0	0.9999999999826406	0.0	5.800177567056567e-06	0.0	0.0	0.0006646513900409674	0.0	0.0	0.0006649174041087892	0.0	-0.00042205971169377853	0.0	-1.2680462154169366e-09	-0.00012007281636809202	0.0	5.14803564144854e-10
3.85	-0.00042266007575730673	0.0	-6.182505428613784e-09	-0.0005703773734973933	0.0	-0.09965609842118918	0.0	6.645951803581109e-06	0.0	0.999999999982542	0.0	5.816790308507337e-06	0.0	0.0	0.0006665550699835396	0.0	0.0	0.0006668213290547519	0.0	-0.00042266007579971616	0.0	-1.2654553633517314e-09	-0.00012007282600700261	0.0	5.215377585274577e-10
3.855	-0.0004232604399112277	0.0	-6.200931815287948e-09	-0.0005724921783080835	0.0	-0.09965609842528189	0.0	6.647605555496184e-06	0.0	0.9999999999824433	0.0	5.833407184367508e-06	0.0	0.0	0.0006684592236945307	0.0	0.0	0.0006687257277657401	0.0	-0.00042326043995384854	0.0	-1.262830832865758e-09	-0.00012007283564588247	0.0	5.282749324526815e-10
3.86	-0.0004238608041133426	0.0	-6.219367918742171e-09	-0.0005746099849149726	0.0	-0.09965609842937613	0.0	6.649259301642892e-06	0.0	0.9999999999823441	0.0	5.850028194637078e-06	0.0	0.0	0.0006703638511739408	0.0	0.0	0.0006706306002401014	0.0	-0.000423860804156175	0.0	-1.2601726090612996e-09	-0.00012007284528476594	0.0	5.350150859209943e-10
3.865	-0.0004244611683636517	0.0	-6.237813738976451e-09	-0.0005767307933180609	0.0	-0.0996560984334719	0.0	6.650913042021234e-06	0.0	0.9999999999822448	0.0	5.86665333931605e-06	0.0	0.0	0.00067226895242177	0.0	0.0	0.0006725359464761831	0.0	-0.00042446116840669625	0.0	-1.2574806770406437e-09	-0.00012007285492368195	0.0	5.417582189315997e-10
3.87	-0.00042506153266215463	0.0	-6.25626927599079e-09	-0.000578854603517348	0.0	-0.0996560984375692	0.0	6.65256677663121e-06	0.0	0.9999999999821452	0.0	5.8832826184044204e-06	0.0	0.0	0.0006741745274380182	0.0	0.0	0.0006744417664723327	0.0	-0.0004250615327054118	0.0	-1.2547550219060773e-09	-0.00012007286456256181	0.0	5.485043314859661e-10
3.875	-0.00042566189700885167	0.0	-6.274734529785185e-09	-0.000580981415512834	0.0	-0.09965609844166805	0.0	6.65422050547282e-06	0.0	0.9999999999820453	0.0	5.89991603190219e-06	0.0	0.0	0.0006760805762226853	0.0	0.0	0.0006763480602268977	0.0	-0.0004256618970523219	0.0	-1.2519956287598763e-09	-0.00012007287420143174	0.0	5.552534235851861e-10
3.88	-0.0004262622614037426	0.0	-6.293209500359638e-09	-0.000583111229304519	0.0	-0.09965609844576842	0.0	6.655874228546063e-06	0.0	0.999999999981945	0.0	5.91655357980936e-06	0.0	0.0	0.0006779870987757711	0.0	0.0	0.0006782548277382256	0.0	-0.00042626226144742616	0.0	-1.2492024827043182e-09	-0.00012007288384031974	0.0	5.620054952287358e-10
3.8850000000000002	-0.00042686262584682767	0.0	-6.31169418771415e-09	-0.0005852440448924031	0.0	-0.09965609844987032	0.0	6.6575279458509406e-06	0.0	0.9999999999818445	0.0	5.933195262125932e-06	0.0	0.0	0.0006798940950972765	0.0	0.0	0.0006801620690046639	0.0	-0.0004268626258907251	0.0	-1.2463755688416811e-09	-0.00012007289347924386	0.0	5.68760546416853e-10
3.89	-0.0004274629903381067	0.0	-6.330188591848719e-09	-0.0005873798622764862	0.0	-0.09965609845397376	0.0	6.659181657387451e-06	0.0	0.9999999999817438	0.0	5.949841078851902e-06	0.0	0.0	0.0006818015651872006	0.0	0.0	0.00068206978402456	0.0	-0.00042746299038221854	0.0	-1.2435148722742402e-09	-0.00012007290311813367	0.0	5.75518577150744e-10
3.895	-0.00042806335487757975	0.0	-6.3486927127633455e-09	-0.000589518681456768	0.0	-0.09965609845807873	0.0	6.660835363155595e-06	0.0	0.9999999999816428	0.0	5.966491029987271e-06	0.0	0.0	0.0006837095090455436	0.0	0.0	0.0006839779727962615	0.0	-0.00042806335492190644	0.0	-1.2406203781042632e-09	-0.00012007291275699004	0.0	5.822795874309671e-10
3.9	-0.00042866371946524674	0.0	-6.3672065504580295e-09	-0.0005916605024332489	0.0	-0.09965609846218523	0.0	6.662489063155374e-06	0.0	0.9999999999815414	0.0	5.983145115532041e-06	0.0	0.0	0.0006856179266723055	0.0	0.0	0.0006858866353181159	0.0	-0.00042866371950978847	0.0	-1.2376920714340196e-09	-0.00012007292239588165	0.0	5.890435772577464e-10
3.9050000000000002	-0.00042926408410110786	0.0	-6.3857301049327725e-09	-0.000593805325205929	0.0	-0.09965609846629327	0.0	6.664142757386786e-06	0.0	0.9999999999814398	0.0	5.999803335486211e-06	0.0	0.0	0.0006875268180674866	0.0	0.0	0.0006877957715884706	0.0	-0.0004292640841458653	0.0	-1.2347299373657746e-09	-0.0001200729320348085	0.0	5.958105466310164e-10
3.91	-0.0004298644487851629	0.0	-6.404263376187572e-09	-0.0005959531497748078	0.0	-0.09965609847040283	0.0	6.665796445849832e-06	0.0	0.999999999981338	0.0	6.01646568984978e-06	0.0	0.0	0.0006894361832310866	0.0	0.0	0.000689705381605673	0.0	-0.0004298644488301365	0.0	-1.2317339610017965e-09	-0.00012007294167367842	0.0	6.025804955521971e-10
3.915	-0.000430464813517412	0.0	-6.4228063642224295e-09	-0.0005981039761398856	0.0	-0.09965609847451393	0.0	6.667450128544511e-06	0.0	0.9999999999812359	0.0	6.03313217862275e-06	0.0	0.0	0.0006913460221631058	0.0	0.0	0.0006916154653680708	0.0	-0.00043046481356260214	0.0	-1.2287041274443394e-09	-0.00012007295131257454	0.0	6.093534240211815e-10
3.92	-0.00043106517829785506	0.0	-6.441359069037344e-09	-0.0006002578043011624	0.0	-0.09965609847862657	0.0	6.6691038054708245e-06	0.0	0.9999999999811335	0.0	6.049802801805119e-06	0.0	0.0	0.0006932563348635437	0.0	0.0	0.0006935260228740114	0.0	-0.00043106517834326226	0.0	-1.2256404217956707e-09	-0.0001200729609514752	0.0	6.161293320384455e-10
3.9250000000000003	-0.0004316655431264922	0.0	-6.459921490632319e-09	-0.0006024146342586383	0.0	-0.09965609848274073	0.0	6.670757476628772e-06	0.0	0.9999999999810308	0.0	6.06647755939689e-06	0.0	0.0	0.000695167121332401	0.0	0.0	0.0006954370541218422	0.0	-0.00043166554317211684	0.0	-1.2225428291580395e-09	-0.00012007297059033156	0.0	6.229082196052262e-10
3.93	-0.0004322659080033233	0.0	-6.478493629007349e-09	-0.000604574466012313	0.0	-0.09965609848685643	0.0	6.6724111420183525e-06	0.0	0.9999999999809278	0.0	6.083156451398058e-06	0.0	0.0	0.0006970783815696769	0.0	0.0	0.0006973485591099108	0.0	-0.00043226590804916563	0.0	-1.2194113346337036e-09	-0.00012007298022921595	0.0	6.29690086720607e-10
3.935	-0.0004328662729283484	0.0	-6.497075484162438e-09	-0.0006067372995621868	0.0	-0.09965609849097366	0.0	6.674064801639567e-06	0.0	0.9999999999808246	0.0	6.099839477808626e-06	0.0	0.0	0.0006989901155753719	0.0	0.0	0.0006992605378365646	0.0	-0.00043286627297440904	0.0	-1.2162459233249168e-09	-0.00012007298986813556	0.0	6.364749333860457e-10
3.94	-0.00043346663790156753	0.0	-6.515667056097584e-09	-0.0006089031349082594	0.0	-0.09965609849509244	0.0	6.675718455492415e-06	0.0	0.9999999999807211	0.0	6.116526638628596e-06	0.0	0.0	0.000700902323349486	0.0	0.0	0.0007011729903001511	0.0	-0.000433466637947847	0.0	-1.2130465803339257e-09	-0.00012007299950703531	0.0	6.432627596020557e-10
3.9450000000000003	-0.0004340670029229807	0.0	-6.5342683448127896e-09	-0.0006110719720505312	0.0	-0.09965609849921274	0.0	6.677372103576897e-06	0.0	0.9999999999806173	0.0	6.133217933857965e-06	0.0	0.0	0.0007028150048920189	0.0	0.0	0.0007030859164990178	0.0	-0.0004340670029694793	0.0	-1.2098132907629781e-09	-0.00012007300914589349	0.0	6.500535653689957e-10
3.95	-0.00043466736799258786	0.0	-6.552879350308051e-09	-0.0006132438109890018	0.0	-0.09965609850333457	0.0	6.679025745893013e-06	0.0	0.9999999999805131	0.0	6.149913363496734e-06	0.0	0.0	0.000704728160202971	0.0	0.0	0.0007049993164315123	0.0	-0.0004346673680393059	0.0	-1.2065460397143171e-09	-0.00012007301878477335	0.0	6.568473506870414e-10
3.955	-0.000435267733110389	0.0	-6.57150007258337e-09	-0.0006154186517236714	0.0	-0.09965609850745794	0.0	6.680679382440762e-06	0.0	0.9999999999804088	0.0	6.166612927544902e-06	0.0	0.0	0.000706641789282342	0.0	0.0	0.0007069131900959819	0.0	-0.0004352677331573271	0.0	-1.2032448122901885e-09	-0.00012007302842369477	0.0	6.636441155565959e-10
3.96	-0.00043586809827638416	0.0	-6.590130511638747e-09	-0.00061759649425454	0.0	-0.09965609851158283	0.0	6.682333013220146e-06	0.0	0.9999999999803042	0.0	6.1833166260024705e-06	0.0	0.0	0.0007085558921301321	0.0	0.0	0.0007088275374907742	0.0	-0.00043586809832354284	0.0	-1.1999095935928303e-09	-0.00012007303806258276	0.0	6.704438599787485e-10
3.9650000000000003	-0.00043646846349057336	0.0	-6.608770667474183e-09	-0.0006197773385816077	0.0	-0.09965609851570927	0.0	6.683986638231163e-06	0.0	0.9999999999801993	0.0	6.200024458869439e-06	0.0	0.0	0.0007104704687463412	0.0	0.0	0.0007107423586142366	0.0	-0.0004364684635379529	0.0	-1.1965403687244801e-09	-0.00012007304770146444	0.0	6.772465839533302e-10
3.97	-0.00043706882875295654	0.0	-6.627420540089676e-09	-0.0006219611847048742	0.0	-0.09965609851983723	0.0	6.685640257473814e-06	0.0	0.9999999999800941	0.0	6.216736426145807e-06	0.0	0.0	0.0007123855191309692	0.0	0.0	0.0007126576534647166	0.0	-0.00043706882880055746	0.0	-1.1931371227873748e-09	-0.00012007305734035424	0.0	6.8405228748132e-10
3.975	-0.0004376691940635337	0.0	-6.646080129485226e-09	-0.0006241480326243397	0.0	-0.09965609852396672	0.0	6.687293870948098e-06	0.0	0.9999999999799887	0.0	6.233452527831575e-06	0.0	0.0	0.0007143010432840162	0.0	0.0	0.0007145734220405617	0.0	-0.0004376691941113564	0.0	-1.1896998408837435e-09	-0.00012007306697921151	0.0	6.908609705635966e-10
3.98	-0.0004382695594223049	0.0	-6.664749435660834e-09	-0.0006263378823400042	0.0	-0.09965609852809774	0.0	6.688947478654016e-06	0.0	0.9999999999798829	0.0	6.250172763926743e-06	0.0	0.0	0.0007162170412054824	0.0	0.0	0.0007164896643401194	0.0	-0.00043826955947034963	0.0	-1.1862285081158163e-09	-0.00012007307661812661	0.0	6.976726331991192e-10
3.985	-0.0004388699248292701	0.0	-6.6834284586165e-09	-0.0006285307338518676	0.0	-0.09965609853223031	0.0	6.690601080591568e-06	0.0	0.999999999979777	0.0	6.266897134431311e-06	0.0	0.0	0.0007181335128953675	0.0	0.0	0.0007184063803617372	0.0	-0.00043886992487753766	0.0	-1.1827231095858278e-09	-0.00012007308625703178	0.0	7.044872753893732e-10
3.99	-0.0004394702902844294	0.0	-6.702117198352224e-09	-0.0006307265871599301	0.0	-0.09965609853636441	0.0	6.692254676760754e-06	0.0	0.9999999999796706	0.0	6.283625639345279e-06	0.0	0.0	0.0007200504583536715	0.0	0.0	0.0007203235701037626	0.0	-0.0004394702903329199	0.0	-1.1791836303959967e-09	-0.00012007309589588996	0.0	7.113048971354169e-10
3.995	-0.0004400706557877826	0.0	-6.720815654868005e-09	-0.0006329254422641915	0.0	-0.09965609854050003	0.0	6.693908267161573e-06	0.0	0.999999999979564	0.0	6.3003582786686464e-06	0.0	0.0	0.0007219678775803946	0.0	0.0	0.000722241233564543	0.0	-0.0004400706558364966	0.0	-1.1756100556485482e-09	-0.0001200731055347888	0.0	7.181254984364401e-10
4.0	-0.00044067102133932984	0.0	-6.7395238281638445e-09	-0.0006351272991646518	0.0	-0.0996560985446372	0.0	6.695561851794027e-06	0.0	0.9999999999794572	0.0	6.317095052401414e-06	0.0	0.0	0.0007238857705755368	0.0	0.0	0.000724159370742426	0.0	-0.0004406710213882678	0.0	-1.1720023704457053e-09	-0.00012007311517368221	0.0	7.249490792937183e-10
4.005	-0.0004412713869390711	0.0	-6.758241718239741e-09	-0.0006373321578613112	0.0	-0.0996560985487759	0.0	6.6972154306581136e-06	0.0	0.9999999999793501	0.0	6.333835960543581e-06	0.0	0.0	0.0007258041373390978	0.0	0.0	0.000726077981635759	0.0	-0.0004412713869882334	0.0	-1.1683605598896836e-09	-0.00012007312481257472	0.0	7.31775639707341e-10
4.01	-0.0004418717525870063	0.0	-6.7769693250956955e-09	-0.0006395400183541694	0.0	-0.09965609855291613	0.0	6.698869003753835e-06	0.0	0.9999999999792427	0.0	6.350581003095148e-06	0.0	0.0	0.0007277229778710779	0.0	0.0	0.0007279970662428895	0.0	-0.0004418717526363935	0.0	-1.1646846090827028e-09	-0.00012007313445145278	0.0	7.386051796784316e-10
4.015	-0.00044247211828313563	0.0	-6.795706648731707e-09	-0.0006417508806432266	0.0	-0.09965609855705788	0.0	6.700522571081189e-06	0.0	0.999999999979135	0.0	6.367330180056115e-06	0.0	0.0	0.0007296422921714771	0.0	0.0	0.0007299166245621651	0.0	-0.00044247211833274797	0.0	-1.1609745031269697e-09	-0.00012007314409032902	0.0	7.45437699207266e-10
4.0200000000000005	-0.000443072484027459	0.0	-6.814453689147781e-09	-0.0006439647447284832	0.0	-0.09965609856120118	0.0	6.7021761326401775e-06	0.0	0.999999999979027	0.0	6.384083491426484e-06	0.0	0.0	0.0007315620802402956	0.0	0.0	0.000731836656591933	0.0	-0.00044307248407729683	0.0	-1.1572302271247009e-09	-0.0001200731537292116	0.0	7.522731982934755e-10
4.025	-0.00044367284981997626	0.0	-6.833210446343909e-09	-0.0006461816106099384	0.0	-0.099656098565346	0.0	6.7038296884307995e-06	0.0	0.9999999999789188	0.0	6.400840937206251e-06	0.0	0.0	0.0007334823420775327	0.0	0.0	0.000733757162330541	0.0	-0.0004436728498700401	0.0	-1.1534517661781042e-09	-0.00012007316336812038	0.0	7.59111676938287e-10
4.03	-0.00044427321566068757	0.0	-6.851976920320094e-09	-0.0006484014782875925	0.0	-0.09965609856949237	0.0	6.705483238453055e-06	0.0	0.9999999999788103	0.0	6.417602517395418e-06	0.0	0.0	0.0007354030776831889	0.0	0.0	0.0007356781417763364	0.0	-0.000444273215710978	0.0	-1.1496391053893866e-09	-0.00012007317300700567	0.0	7.659531351419624e-10
4.035	-0.00044487358154959286	0.0	-6.870753111076337e-09	-0.0006506243477614458	0.0	-0.09965609857364026	0.0	6.707136782706944e-06	0.0	0.9999999999787015	0.0	6.434368231993984e-06	0.0	0.0	0.0007373242870572641	0.0	0.0	0.0007375995949276666	0.0	-0.0004448735816001102	0.0	-1.145792229860752e-09	-0.00012007318264588914	0.0	7.727975729051841e-10
4.04	-0.0004454739474866922	0.0	-6.889539018612638e-09	-0.0006528502190314978	0.0	-0.09965609857778968	0.0	6.708790321192467e-06	0.0	0.9999999999785925	0.0	6.45113808100195e-06	0.0	0.0	0.0007392459701997583	0.0	0.0	0.0007395215217828793	0.0	-0.0004454739475374369	0.0	-1.1419111246944014e-09	-0.00012007319228478888	0.0	7.796449902283762e-10
4.045	-0.00044607431347198554	0.0	-6.908334642928997e-09	-0.000655079092097749	0.0	-0.09965609858194065	0.0	6.710443853909624e-06	0.0	0.9999999999784831	0.0	6.467912064419316e-06	0.0	0.0	0.0007411681271106714	0.0	0.0	0.0007414439223403219	0.0	-0.000446074313522958	0.0	-1.137995774992534e-09	-0.00012007320192364073	0.0	7.864953871122588e-10
4.05	-0.00044667467950547287	0.0	-6.9271399840254125e-09	-0.0006573109669601989	0.0	-0.09965609858609313	0.0	6.712097380858415e-06	0.0	0.9999999999783734	0.0	6.484690182246083e-06	0.0	0.0	0.0007430907577900038	0.0	0.0	0.000743366796598342	0.0	-0.0004466746795566734	0.0	-1.1340461658573448e-09	-0.00012007321156255132	0.0	7.933487635564185e-10
4.055	-0.0004472750455871542	0.0	-6.9459550419018864e-09	-0.0006595458436188479	0.0	-0.09965609859024716	0.0	6.713750902038839e-06	0.0	0.9999999999782636	0.0	6.501472434482249e-06	0.0	0.0	0.0007450138622377553	0.0	0.0	0.0007452901445552868	0.0	-0.0004472750456385835	0.0	-1.1300622823910342e-09	-0.00012007322120144473	0.0	8.002051195619857e-10
4.0600000000000005	-0.00044787541171702964	0.0	-6.964779816558422e-09	-0.0006617837220736964	0.0	-0.09965609859440272	0.0	6.715404417450898e-06	0.0	0.9999999999781534	0.0	6.518258821127818e-06	0.0	0.0	0.0007469374404539256	0.0	0.0	0.000747213966209504	0.0	-0.0004478754117686878	0.0	-1.1260441096957879e-09	-0.00012007323084031285	0.0	8.070644551299668e-10
4.065	-0.000448475777895099	0.0	-6.983614307995011e-09	-0.0006640246023247433	0.0	-0.09965609859855981	0.0	6.71705792709459e-06	0.0	0.9999999999780429	0.0	6.535049342182783e-06	0.0	0.0	0.000748861492438515	0.0	0.0	0.0007491382615593411	0.0	-0.00044847577794698666	0.0	-1.1219916328737981e-09	-0.0001200732404792126	0.0	8.139267702594622e-10
4.07	-0.0004490761441213624	0.0	-7.002458516211658e-09	-0.0006662684843719893	0.0	-0.09965609860271843	0.0	6.718711430969915e-06	0.0	0.9999999999779322	0.0	6.551843997647148e-06	0.0	0.0	0.0007507860181915233	0.0	0.0	0.0007510630306031455	0.0	-0.0004490761441734799	0.0	-1.1179048370272548e-09	-0.00012007325011809337	0.0	8.20792064952185e-10
4.075	-0.0004496765103958198	0.0	-7.021312441208364e-09	-0.0006685153682154342	0.0	-0.09965609860687859	0.0	6.720364929076874e-06	0.0	0.9999999999778212	0.0	6.568642787520915e-06	0.0	0.0	0.0007527110177129509	0.0	0.0	0.0007529882733392648	0.0	-0.0004496765104481676	0.0	-1.1137837072583376e-09	-0.00012007325975698136	0.0	8.276603392080592e-10
4.08	-0.00045027687671847115	0.0	-7.040176082985127e-09	-0.000670765253855078	0.0	-0.09965609861104027	0.0	6.722018421415468e-06	0.0	0.9999999999777099	0.0	6.58544571180408e-06	0.0	0.0	0.0007546364910027973	0.0	0.0	0.0007549139897660462	0.0	-0.00045027687677104975	0.0	-1.1096282286692347e-09	-0.00012007326939586032	0.0	8.34531593027571e-10
4.085	-0.00045087724308931655	0.0	-7.0590494415419465e-09	-0.0006730181412909209	0.0	-0.0996560986152035	0.0	6.723671907985694e-06	0.0	0.9999999999775984	0.0	6.602252770496645e-06	0.0	0.0	0.0007565624380610627	0.0	0.0	0.0007568401798818375	0.0	-0.00045087724314212625	0.0	-1.1054383863621214e-09	-0.00012007327903475915	0.0	8.414058264114336e-10
4.09	-0.000451477609508356	0.0	-7.077932516878825e-09	-0.0006752740305229628	0.0	-0.09965609861936825	0.0	6.725325388787555e-06	0.0	0.9999999999774866	0.0	6.61906396359861e-06	0.0	0.0	0.0007584888588877471	0.0	0.0	0.0007587668436849859	0.0	-0.00045147760956139733	0.0	-1.1012141654391791e-09	-0.00012007328867364263	0.0	8.482830393599675e-10
4.095	-0.0004520779759755894	0.0	-7.096825308995761e-09	-0.0006775329215512035	0.0	-0.09965609862353454	0.0	6.72697886382105e-06	0.0	0.9999999999773744	0.0	6.635879291109975e-06	0.0	0.0	0.0007604157534828506	0.0	0.0	0.0007606939811738392	0.0	-0.00045207797602886266	0.0	-1.0969555510025794e-09	-0.00012007329831250171	0.0	8.551632318740692e-10
4.1	-0.00045267834249101686	0.0	-7.1157278178927545e-09	-0.0006797948143756433	0.0	-0.09965609862770236	0.0	6.728632333086178e-06	0.0	0.999999999977262	0.0	6.6526987530307396e-06	0.0	0.0	0.0007623431218463732	0.0	0.0	0.0007626215923467448	0.0	-0.0004526783425445224	0.0	-1.0926625281544965e-09	-0.00012007330795142676	0.0	8.620464039530145e-10
4.105	-0.0004532787090546384	0.0	-7.13464004356981e-09	-0.0006820597089962824	0.0	-0.09965609863187172	0.0	6.730285796582939e-06	0.0	0.9999999999771494	0.0	6.669522349360908e-06	0.0	0.0	0.0007642709639783152	0.0	0.0	0.00076454967720205	0.0	-0.0004532787091083769	0.0	-1.0883350819971052e-09	-0.00012007331759031836	0.0	8.689325555985889e-10
4.11	-0.00045387907566645387	0.0	-7.1535619860269186e-09	-0.0006843276054131201	0.0	-0.0996560986360426	0.0	6.731939254311335e-06	0.0	0.9999999999770364	0.0	6.686350080100473e-06	0.0	0.0	0.0007661992798786759	0.0	0.0	0.0007664782357381024	0.0	-0.0004538790757204255	0.0	-1.0839731976325662e-09	-0.00012007332722915756	0.0	8.758216868107958e-10
4.115	-0.0004544794423264633	0.0	-7.172493645264086e-09	-0.0006865985036261569	0.0	-0.09965609864021502	0.0	6.733592706271365e-06	0.0	0.9999999999769231	0.0	6.703181945249437e-06	0.0	0.0	0.0007681280695474553	0.0	0.0	0.0007684072679532496	0.0	-0.00045447944238066854	0.0	-1.0795768601630528e-09	-0.00012007333686805822	0.0	8.827137975894078e-10
4.12	-0.0004550798090346668	0.0	-7.19143502128131e-09	-0.0006888724036353926	0.0	-0.09965609864438897	0.0	6.735246152463027e-06	0.0	0.9999999999768097	0.0	6.720017944807802e-06	0.0	0.0	0.0007700573329846541	0.0	0.0	0.0007703367738458389	0.0	-0.0004550798090891061	0.0	-1.0751460546907253e-09	-0.00012007334650695253	0.0	8.896088879363067e-10
4.125	-0.0004556801757910643	0.0	-7.210386114078593e-09	-0.0006911493054408271	0.0	-0.09965609864856446	0.0	6.736899592886324e-06	0.0	0.9999999999766959	0.0	6.736858078775566e-06	0.0	0.0	0.0007719870701902718	0.0	0.0	0.0007722667534142178	0.0	-0.00045568017584573806	0.0	-1.0706807663177432e-09	-0.00012007335614584505	0.0	8.965069578510169e-10
4.13	-0.0004562805425956558	0.0	-7.229346923655933e-09	-0.0006934292090424607	0.0	-0.09965609865274148	0.0	6.738553027541255e-06	0.0	0.9999999999765818	0.0	6.75370234715273e-06	0.0	0.0	0.0007739172811643087	0.0	0.0	0.0007741972066567338	0.0	-0.0004562805426505645	0.0	-1.0661809801462676e-09	-0.00012007336578471587	0.0	9.034080073342138e-10
4.135	-0.00045688090944844125	0.0	-7.248317450013331e-09	-0.0006957121144402933	0.0	-0.09965609865692003	0.0	6.740206456427819e-06	0.0	0.9999999999764675	0.0	6.770550749939294e-06	0.0	0.0	0.0007758479659067645	0.0	0.0	0.0007761281335717346	0.0	-0.00045688090950358524	0.0	-1.061646681278453e-09	-0.00012007337542359935	0.0	9.103120363862285e-10
4.14	-0.00045748127634942076	0.0	-7.267297693150787e-09	-0.0006979980216343249	0.0	-0.09965609866110012	0.0	6.741859879546017e-06	0.0	0.9999999999763529	0.0	6.787403287135258e-06	0.0	0.0	0.0007777791244176391	0.0	0.0	0.0007780595341575674	0.0	-0.0004574812764048005	0.0	-1.0570778548164555e-09	-0.00012007338506250361	0.0	9.172190450082774e-10
4.1450000000000005	-0.0004580816432985944	0.0	-7.286287653068304e-09	-0.0007002869306245558	0.0	-0.09965609866528173	0.0	6.743513296895849e-06	0.0	0.999999999976238	0.0	6.804259958740625e-06	0.0	0.0	0.0007797107566969336	0.0	0.0	0.0007799914084125797	0.0	-0.0004580816433542103	0.0	-1.0524744858624206e-09	-0.00012007339470140425	0.0	9.241290332000298e-10
4.15	-0.00045868201029596197	0.0	-7.305287329765875e-09	-0.0007025788414109853	0.0	-0.09965609866946488	0.0	6.745166708477315e-06	0.0	0.9999999999761229	0.0	6.821120764755388e-06	0.0	0.0	0.0007816428627446464	0.0	0.0	0.0007819237563351192	0.0	-0.0004586820103518145	0.0	-1.0478365595185051e-09	-0.00012007340434026152	0.0	9.31042000961596e-10
4.155	-0.00045928237734152346	0.0	-7.324296723243503e-09	-0.0007048737539936137	0.0	-0.09965609867364957	0.0	6.746820114290414e-06	0.0	0.9999999999760074	0.0	6.837985705179552e-06	0.0	0.0	0.0007835754425607784	0.0	0.0	0.0007838565779235332	0.0	-0.0004592823773976129	0.0	-1.043164060886852e-09	-0.00012007341397911157	0.0	9.379579482950748e-10
4.16	-0.00045988274443527905	0.0	-7.34331583350119e-09	-0.0007071716683724411	0.0	-0.09965609867783579	0.0	6.748473514335147e-06	0.0	0.9999999999758916	0.0	6.8548547800131155e-06	0.0	0.0	0.0007855084961453293	0.0	0.0	0.0007857898731761693	0.0	-0.0004598827444916057	0.0	-1.0384569750696027e-09	-0.00012007342361802487	0.0	9.448768751993497e-10
4.165	-0.0004604831115772286	0.0	-7.362344660538934e-09	-0.0007094725845474676	0.0	-0.09965609868202353	0.0	6.7501269086115135e-06	0.0	0.9999999999757757	0.0	6.87172798925608e-06	0.0	0.0	0.0007874420234982995	0.0	0.0	0.000787723642091375	0.0	-0.0004604831116337931	0.0	-1.0337152871689056e-09	-0.00012007343325691106	0.0	9.517987816754027e-10
4.17	-0.0004610834787673722	0.0	-7.381383204356737e-09	-0.0007117765025186929	0.0	-0.09965609868621282	0.0	6.751780297119514e-06	0.0	0.9999999999756594	0.0	6.888605332908443e-06	0.0	0.0	0.0007893760246196886	0.0	0.0	0.0007896578846674977	0.0	-0.0004610834788241748	0.0	-1.0289389822868948e-09	-0.00012007344289580266	0.0	9.587236677237547e-10
4.175	-0.0004616838460057098	0.0	-7.400431464954596e-09	-0.0007140834222861172	0.0	-0.09965609869040364	0.0	6.753433679859148e-06	0.0	0.9999999999755429	0.0	6.9054868109702055e-06	0.0	0.0	0.0007913104995094967	0.0	0.0	0.0007915926009028849	0.0	-0.0004616838460627511	0.0	-1.0241280455257131e-09	-0.00012007345253467439	0.0	9.656515333451013e-10
4.18	-0.0004622842132922413	0.0	-7.419489442332514e-09	-0.0007163933438497406	0.0	-0.09965609869459599	0.0	6.755087056830416e-06	0.0	0.999999999975426	0.0	6.922372423441369e-06	0.0	0.0	0.000793245448167724	0.0	0.0	0.000793527790795884	0.0	-0.00046228421334952157	0.0	-1.0192824619874878e-09	-0.00012007346217355607	0.0	9.72582378540308e-10
4.1850000000000005	-0.0004628845806269671	0.0	-7.438557136490493e-09	-0.0007187062672095633	0.0	-0.09965609869878987	0.0	6.756740428033319e-06	0.0	0.9999999999753089	0.0	6.939262170321935e-06	0.0	0.0	0.0007951808705943705	0.0	0.0	0.0007954634543448426	0.0	-0.0004628845806844867	0.0	-1.0144022167743547e-09	-0.00012007347181246846	0.0	9.795162033084685e-10
4.19	-0.0004634849480098867	0.0	-7.457634547428525e-09	-0.0007210221923655846	0.0	-0.09965609870298528	0.0	6.758393793467854e-06	0.0	0.9999999999751915	0.0	6.956156051611898e-06	0.0	0.0	0.0007971167667894359	0.0	0.0	0.0007973995915481082	0.0	-0.0004634849480676462	0.0	-1.0094872949884458e-09	-0.00012007348145133115	0.0	9.864530076511818e-10
4.195	-0.0004640853154410003	0.0	-7.476721675146616e-09	-0.0007233411193178048	0.0	-0.09965609870718223	0.0	6.760047153134023e-06	0.0	0.9999999999750738	0.0	6.973054067311261e-06	0.0	0.0	0.0007990531367529203	0.0	0.0	0.0007993362024040282	0.0	-0.000464085315499	0.0	-1.0045376817318853e-09	-0.00012007349109021102	0.0	9.933927915683442e-10
4.2	-0.0004646856829203079	0.0	-7.495818519644765e-09	-0.000725663048066224	0.0	-0.0996560987113807	0.0	6.761700507031827e-06	0.0	0.9999999999749559	0.0	6.989956217420023e-06	0.0	0.0	0.0008009899804848238	0.0	0.0	0.0008012732869109502	0.0	-0.00046468568297854834	0.0	-9.995533621068034e-10	-0.0001200735007290954	0.0	1.0003355550609558e-09
4.205	-0.0004652860504478096	0.0	-7.514925080922971e-09	-0.0007279879786108421	0.0	-0.09965609871558072	0.0	6.763353855161263e-06	0.0	0.9999999999748377	0.0	7.0068625019381856e-06	0.0	0.0	0.0008029272979851462	0.0	0.0	0.0008032108450672216	0.0	-0.00046528605050629097	0.0	-9.94534321215316e-10	-0.00012007351036797617	0.0	1.0072812981295607e-09
4.21	-0.00046588641802350523	0.0	-7.534041358981235e-09	-0.0007303159109516593	0.0	-0.09965609871978227	0.0	6.765007197522333e-06	0.0	0.9999999999747192	0.0	7.023772920865748e-06	0.0	0.0	0.0008048650892538878	0.0	0.0	0.0008051488768711898	0.0	-0.0004658864180822281	0.0	-9.894805441595481e-10	-0.00012007352000685694	0.0	1.0142300207737834e-09
4.215	-0.00046648678564739486	0.0	-7.553167353819557e-09	-0.0007326468450886755	0.0	-0.09965609872398534	0.0	6.766660534115037e-06	0.0	0.9999999999746004	0.0	7.0406874742027105e-06	0.0	0.0	0.0008068033542910484	0.0	0.0	0.0008070873823212024	0.0	-0.00046648678570635957	0.0	-9.843920160416168e-10	-0.00012007352964574854	0.0	1.0211817229948715e-09
4.22	-0.00046708715331947857	0.0	-7.572303065437936e-09	-0.0007349807810218906	0.0	-0.09965609872818997	0.0	6.768313864939375e-06	0.0	0.9999999999744814	0.0	7.057606161949072e-06	0.0	0.0	0.0008087420930966279	0.0	0.0	0.000809026361415607	0.0	-0.0004670871533786856	0.0	-9.792687219636372e-10	-0.00012007353928464015	0.0	1.0281364047933456e-09
4.225	-0.00046768752103975626	0.0	-7.591448493836373e-09	-0.0007373177187513046	0.0	-0.0996560987323961	0.0	6.7699671899953474e-06	0.0	0.9999999999743621	0.0	7.074528984104835e-06	0.0	0.0	0.0008106813056706268	0.0	0.0	0.0008109658141527508	0.0	-0.00046768752109920594	0.0	-9.741106470277211e-10	-0.00012007354892352815	0.0	1.0350940661689503e-09
4.23	-0.00046828788880822804	0.0	-7.610603639014872e-09	-0.0007396576582769181	0.0	-0.09965609873660379	0.0	6.771620509282953e-06	0.0	0.9999999999742425	0.0	7.091455940669999e-06	0.0	0.0	0.0008126209920130449	0.0	0.0	0.0008129057405309815	0.0	-0.00046828788886792085	0.0	-9.689177763359839e-10	-0.00012007355856240259	0.0	1.0420547071229476e-09
4.235	-0.00046888825662489374	0.0	-7.629768500973425e-09	-0.0007420005995987301	0.0	-0.09965609874081299	0.0	6.773273822802192e-06	0.0	0.9999999999741226	0.0	7.108387031644561e-06	0.0	0.0	0.0008145611521238816	0.0	0.0	0.0008148461405486465	0.0	-0.00046888825668482995	0.0	-9.636900949905275e-10	-0.00012007356820128065	0.0	1.0490183276554715e-09
4.24	-0.0004694886244897534	0.0	-7.648943079712035e-09	-0.0007443465427167411	0.0	-0.09965609874502374	0.0	6.774927130553065e-06	0.0	0.9999999999740025	0.0	7.125322257028523e-06	0.0	0.0	0.0008165017860031377	0.0	0.0	0.0008167870142040933	0.0	-0.00046948862454993364	0.0	-9.584275880934643e-10	-0.00012007357784016683	0.0	1.0559849277669012e-09
4.245	-0.0004700889924028072	0.0	-7.668127375230704e-09	-0.000746695487630951	0.0	-0.09965609874923602	0.0	6.776580432535572e-06	0.0	0.999999999973882	0.0	7.1422616168218844e-06	0.0	0.0	0.0008184428936508126	0.0	0.0	0.0008187283614956695	0.0	-0.0004700889924632316	0.0	-9.531302407468926e-10	-0.00012007358747903314	0.0	1.0629545074578225e-09
4.25	-0.0004706893603640549	0.0	-7.68732138752943e-09	-0.0007490474343413599	0.0	-0.09965609875344983	0.0	6.778233728749712e-06	0.0	0.9999999999737613	0.0	7.159205111024646e-06	0.0	0.0	0.0008203844750669067	0.0	0.0	0.0008206701824217224	0.0	-0.000470689360424724	0.0	-9.477980380529191e-10	-0.00012007359711792927	0.0	1.0699270667289525e-09
4.255	-0.00047128972837349667	0.0	-7.706525116608213e-09	-0.0007514023828479678	0.0	-0.09965609875766517	0.0	6.7798870191954864e-06	0.0	0.9999999999736403	0.0	7.176152739636808e-06	0.0	0.0	0.0008223265302514198	0.0	0.0	0.0008226124769805996	0.0	-0.0004712897284344109	0.0	-9.424309651136359e-10	-0.00012007360675680733	0.0	1.0769026055803464e-09
4.26	-0.0004718900964311324	0.0	-7.725738562467055e-09	-0.0007537603331507748	0.0	-0.09965609876188204	0.0	6.781540303872894e-06	0.0	0.9999999999735191	0.0	7.1931045026583685e-06	0.0	0.0	0.0008242690592043519	0.0	0.0	0.0008245552451706485	0.0	-0.0004718900964922921	0.0	-9.370290070311474e-10	-0.00012007361639568357	0.0	1.0838811240126521e-09
4.265	-0.00047249046453696217	0.0	-7.744961725105954e-09	-0.0007561212852497806	0.0	-0.09965609876610046	0.0	6.7831935827819354e-06	0.0	0.9999999999733975	0.0	7.21006040008933e-06	0.0	0.0	0.0008262120619257032	0.0	0.0	0.0008264984869902167	0.0	-0.00047249046459836775	0.0	-9.315921489075398e-10	-0.00012007362603458783	0.0	1.0908626220268138e-09
4.2700000000000005	-0.00047309083269098605	0.0	-7.764194604524915e-09	-0.0007584852391449859	0.0	-0.0996560987703204	0.0	6.784846855922611e-06	0.0	0.9999999999732757	0.0	7.227020431929694e-06	0.0	0.0	0.0008281555384154738	0.0	0.0	0.0008284422024376515	0.0	-0.00047309083275263796	0.0	-9.261203758449101e-10	-0.00012007363567346047	0.0	1.0978470996222181e-09
4.275	-0.0004736912008932038	0.0	-7.78343720072393e-09	-0.0007608521948363897	0.0	-0.09965609877454187	0.0	6.786500123294921e-06	0.0	0.9999999999731536	0.0	7.243984598179455e-06	0.0	0.0	0.0008300994886736632	0.0	0.0	0.0008303863915113005	0.0	-0.0004736912009551024	0.0	-9.206136729453465e-10	-0.0001200736453123313	0.0	1.1048345568004745e-09
4.28	-0.0004742915691436156	0.0	-7.802689513703002e-09	-0.0007632221523239923	0.0	-0.09965609877876488	0.0	6.788153384898864e-06	0.0	0.9999999999730312	0.0	7.260952898838616e-06	0.0	0.0	0.0008320439127002717	0.0	0.0	0.0008323310542095113	0.0	-0.0004742915692057613	0.0	-9.150720253109339e-10	-0.00012007365495121749	0.0	1.1118249935615367e-09
4.285	-0.0004748919374422214	0.0	-7.821951543462132e-09	-0.0007655951116077941	0.0	-0.09965609878298942	0.0	6.78980664073444e-06	0.0	0.9999999999729086	0.0	7.277925333907176e-06	0.0	0.0	0.0008339888104952992	0.0	0.0	0.0008342761905306312	0.0	-0.00047489193750461454	0.0	-9.09495418043759e-10	-0.00012007366459009826	0.0	1.11881840990578e-09
4.29	-0.0004754923057890212	0.0	-7.84122329000132e-09	-0.0007679710726877948	0.0	-0.0996560987872155	0.0	6.791459890801651e-06	0.0	0.9999999999727857	0.0	7.294901903385137e-06	0.0	0.0	0.0008359341820587458	0.0	0.0	0.0008362218004730078	0.0	-0.0004754923058516623	0.0	-9.038838362459028e-10	-0.0001200736742289718	0.0	1.1258148058341422e-09
4.295	-0.00047609267418401505	0.0	-7.860504753320565e-09	-0.0007703500355639945	0.0	-0.0996560987914431	0.0	6.793113135100495e-06	0.0	0.9999999999726624	0.0	7.311882607272497e-06	0.0	0.0	0.0008378800273906115	0.0	0.0	0.0008381678840349886	0.0	-0.0004760926742469043	0.0	-8.982372650194442e-10	-0.00012007368386785617	0.0	1.1328141813463803e-09
4.3	-0.00047669304262720286	0.0	-7.879795933419868e-09	-0.0007727320002363931	0.0	-0.09965609879567223	0.0	6.794766373630972e-06	0.0	0.999999999972539	0.0	7.328867445569258e-06	0.0	0.0	0.0008398263464908963	0.0	0.0	0.0008401144412149209	0.0	-0.0004766930426903409	0.0	-8.925556894664645e-10	-0.00012007369350674778	0.0	1.1398165364432902e-09
4.305	-0.0004772934111185847	0.0	-7.89909683029923e-09	-0.0007751169667049908	0.0	-0.09965609879990292	0.0	6.796419606393084e-06	0.0	0.9999999999724152	0.0	7.345856418275417e-06	0.0	0.0	0.0008417731393596	0.0	0.0	0.0008420614720111523	0.0	-0.00047729341118197177	0.0	-8.868390946890351e-10	-0.00012007370314564211	0.0	1.146821871126132e-09
4.3100000000000005	-0.0004778937796581607	0.0	-7.918407443958652e-09	-0.0007775049349697877	0.0	-0.09965609880413512	0.0	6.79807283338683e-06	0.0	0.9999999999722912	0.0	7.362849525390981e-06	0.0	0.0	0.0008437204059967234	0.0	0.0	0.0008440089764220304	0.0	-0.0004778937797217973	0.0	-8.810874657892273e-10	-0.00012007371278452287	0.0	1.1538301853943935e-09
4.315	-0.00047849414824593055	0.0	-7.937727774398129e-09	-0.0007798959050307833	0.0	-0.09965609880836886	0.0	6.7997260546122085e-06	0.0	0.9999999999721668	0.0	7.3798467669159404e-06	0.0	0.0	0.0008456681464022653	0.0	0.0	0.0008459569544459026	0.0	-0.00047849414830981695	0.0	-8.753007878691149e-10	-0.00012007372242337833	0.0	1.1608414792482714e-09
4.32	-0.0004790945168818944	0.0	-7.957057821617664e-09	-0.0007822898768879778	0.0	-0.09965609881260414	0.0	6.8013792700692214e-06	0.0	0.9999999999720423	0.0	7.3968481428503e-06	0.0	0.0	0.0008476163605762265	0.0	0.0	0.0008479054060811163	0.0	-0.00047909451694603107	0.0	-8.69479046030766e-10	-0.0001200737320622573	0.0	1.167855752689501e-09
4.325	-0.00047969488556605226	0.0	-7.976397585617256e-09	-0.0007846868505413713	0.0	-0.09965609881684094	0.0	6.803032479757868e-06	0.0	0.9999999999719174	0.0	7.41385365319406e-06	0.0	0.0	0.0008495650485186065	0.0	0.0	0.000849854331326019	0.0	-0.00047969488563043955	0.0	-8.636222253762412e-10	-0.00012007374170115161	0.0	1.1748730057178961e-09
4.33	-0.00048029525429840416	0.0	-7.995747066396906e-09	-0.0007870868259909639	0.0	-0.09965609882107927	0.0	6.804685683678148e-06	0.0	0.9999999999717922	0.0	7.4308632979472205e-06	0.0	0.0	0.0008515142102294058	0.0	0.0	0.0008518037301789582	0.0	-0.00048029525436304256	0.0	-8.577303110076077e-10	-0.00012007374898556991	0.0	1.1570919092198856e-09
4.335	-0.0004808956230789501	0.0	-8.015106263956612e-09	-0.0007894898032367553	0.0	-0.09965609882531914	0.0	6.806338881830063e-06	0.0	0.9999999999716668	0.0	7.44787707710978e-06	0.0	0.0	0.0008534638457086242	0.0	0.0	0.0008537536026382816	0.0	-0.00048089562314383987	0.0	-8.51803288026922e-10	-0.00012007377172924842	0.0	1.302157804881988e-09
4.34	-0.0004814959920489849	0.0	-8.032987363504451e-09	-0.0007918957854915165	0.0	-0.09965609882604745	0.0	6.807992951143939e-06	0.0	0.9999999999715385	0.0	7.464895263628475e-06	0.0	0.0	0.0008554139862336515	0.0	0.0	0.0008557039489535584	0.0	-0.00048149599211409945	0.0	-8.443530617894055e-10	-0.00012007382144315708	0.0	1.7313243258889014e-09
4.345	-0.0004820963612698395	0.0	-8.048744563715259e-09	-0.0007943047741497844	0.0	-0.0996560988217393	0.0	6.809648272260414e-06	0.0	0.9999999999714063	0.0	7.481917975978648e-06	0.0	0.0	0.0008573646453807607	0.0	0.0	0.0008576547694834038	0.0	-0.00048209636133514	0.0	-8.347336999235433e-10	-0.00012007385261059134	0.0	1.9651304120345105e-09
4.3500000000000005	-0.0004826967305413681	0.0	-8.064485367969043e-09	-0.0007967167646606392	0.0	-0.09965609881737102	0.0	6.811303602999587e-06	0.0	0.9999999999712738	0.0	7.49894482752873e-06	0.0	0.0	0.0008593157788452408	0.0	0.0	0.0008596060642305744	0.0	-0.0004826967306068541	0.0	-8.250530657339123e-10	-0.00012007385941015713	0.0	1.9422550646672663e-09
4.355	-0.0004832970998635704	0.0	-8.080209776265797e-09	-0.0007991317570240803	0.0	-0.0996560988129426	0.0	6.812958943361455e-06	0.0	0.9999999999711409	0.0	7.515975818278715e-06	0.0	0.0	0.0008612673866270913	0.0	0.0	0.000861557833197827	0.0	-0.0004832970999292416	0.0	-8.153111443050474e-10	-0.00012007386954485531	0.0	1.954514004061463e-09
4.36	-0.0004838974692364467	0.0	-8.095917788605525e-09	-0.0008015497512401078	0.0	-0.09965609880845407	0.0	6.814614293346021e-06	0.0	0.9999999999710076	0.0	7.5330109482286074e-06	0.0	0.0	0.0008632194687263125	0.0	0.0	0.0008635100763879183	0.0	-0.00048389746930230265	0.0	-8.05507920721474e-10	-0.00012007387967955618	0.0	1.966775926549844e-09
4.365	-0.0004844978386599968	0.0	-8.111609404988225e-09	-0.0008039707473087218	0.0	-0.09965609880390541	0.0	6.816269652953283e-06	0.0	0.9999999999708741	0.0	7.550050217378405e-06	0.0	0.0	0.0008651720251429041	0.0	0.0	0.0008654627938036049	0.0	-0.0004844978387260371	0.0	-7.956433800677246e-10	-0.00012007388981424079	0.0	1.9790408321327533e-09
4.37	-0.0004850982081342208	0.0	-8.127284625413899e-09	-0.0008063947452299224	0.0	-0.09965609879929663	0.0	6.817925022183242e-06	0.0	0.9999999999707402	0.0	7.5670936257281095e-06	0.0	0.0	0.0008671250558768665	0.0	0.0	0.0008674159854476436	0.0	-0.0004850982082004451	0.0	-7.857175074283205e-10	-0.00012007389994895703	0.0	1.9913087208114885e-09
4.375	-0.00048569857765911874	0.0	-8.142943449882545e-09	-0.0008088217450037095	0.0	-0.09965609879462771	0.0	6.819580401035897e-06	0.0	0.999999999970606	0.0	7.58414117327772e-06	0.0	0.0	0.0008690785609281995	0.0	0.0	0.000869369651322791	0.0	-0.00048569857772552666	0.0	-7.757302878877844e-10	-0.00012007391008367236	0.0	2.0035795925850853e-09
4.38	-0.00048629894723469056	0.0	-8.158585878394167e-09	-0.0008112517466300832	0.0	-0.09965609878989867	0.0	6.821235789511249e-06	0.0	0.9999999999704715	0.0	7.601192860027237e-06	0.0	0.0	0.0008710325402969032	0.0	0.0	0.0008713237914318039	0.0	-0.0004862989473012818	0.0	-7.656817065306419e-10	-0.00012007392021836059	0.0	2.0158534474555574e-09
4.385	-0.0004868993168609362	0.0	-8.17421191094876e-09	-0.0008136847501090433	0.0	-0.09965609878510952	0.0	6.822891187609298e-06	0.0	0.9999999999703366	0.0	7.618248685976661e-06	0.0	0.0	0.0008729869939829775	0.0	0.0	0.000873278405777439	0.0	-0.00048689931692771026	0.0	-7.555717484414008e-10	-0.00012007393035305062	0.0	2.028130285422847e-09
4.39	-0.0004874996865378558	0.0	-8.189821547546327e-09	-0.0008161207554405901	0.0	-0.09965609878026023	0.0	6.824546595330043e-06	0.0	0.9999999999702015	0.0	7.63530865112599e-06	0.0	0.0	0.0008749419219864222	0.0	0.0	0.0008752334943624529	0.0	-0.0004874996866048124	0.0	-7.454003987045851e-10	-0.00012007394048779397	0.0	2.0404101064870085e-09
4.3950000000000005	-0.0004881000562654494	0.0	-8.20541478818687e-09	-0.0008185597626247237	0.0	-0.09965609877535081	0.0	6.826202012673486e-06	0.0	0.9999999999700661	0.0	7.65237275547523e-06	0.0	0.0	0.0008768973243072381	0.0	0.0	0.0008771890571896023	0.0	-0.0004881000563325881	0.0	-7.351676424047e-10	-0.00012007395062245509	0.0	2.0526929106501203e-09
4.4	-0.0004887004260437167	0.0	-8.220991632870383e-09	-0.0008210017716614435	0.0	-0.09965609877038127	0.0	6.827857439639625e-06	0.0	0.9999999999699302	0.0	7.669440999024372e-06	0.0	0.0	0.0008788532009454245	0.0	0.0	0.0008791450942616441	0.0	-0.000488700426111037	0.0	-7.248734646262552e-10	-0.00012007396075713519	0.0	2.0649786979099495e-09
4.405	-0.000489300795872658	0.0	-8.23655208159687e-09	-0.0008234467825507498	0.0	-0.09965609876535161	0.0	6.82951287622846e-06	0.0	0.999999999969794	0.0	7.68651338177342e-06	0.0	0.0	0.0008808095519009812	0.0	0.0	0.0008811016055813348	0.0	-0.0004893007959401595	0.0	-7.145178504537688e-10	-0.00012007397089186769	0.0	2.0772674682689326e-09
4.41	-0.0004899011657522731	0.0	-8.25209613436633e-09	-0.0008258947952926426	0.0	-0.09965609876026182	0.0	6.831168322439993e-06	0.0	0.9999999999696576	0.0	7.703589903722377e-06	0.0	0.0	0.0008827663771739089	0.0	0.0	0.0008830585911514311	0.0	-0.0004899011658199556	0.0	-7.04100784971733e-10	-0.00012007398102653061	0.0	2.089559221727804e-09
4.415	-0.0004905015356825621	0.0	-8.267623791178763e-09	-0.0008283458098871221	0.0	-0.0996560987551119	0.0	6.8328237782742215e-06	0.0	0.9999999999695208	0.0	7.720670564871238e-06	0.0	0.0	0.0008847236767642069	0.0	0.0	0.0008850160509746898	0.0	-0.0004905015357504249	0.0	-6.936222532646587e-10	-0.00012007399116124775	0.0	2.101853958285644e-09
4.42	-0.0004911019056635249	0.0	-8.283135052034169e-09	-0.0008307998263341879	0.0	-0.09965609874990186	0.0	6.8344792437311476e-06	0.0	0.9999999999693838	0.0	7.737755365220006e-06	0.0	0.0	0.0008866814506718759	0.0	0.0	0.0008869739850538676	0.0	-0.0004911019057315681	0.0	-6.830822404170421e-10	-0.0001200740012959667	0.0	2.114151677944417e-09
4.425	-0.0004917022756951618	0.0	-8.298629916932549e-09	-0.0008332568446338403	0.0	-0.09965609874463169	0.0	6.83613471881077e-06	0.0	0.9999999999692464	0.0	7.75484430476868e-06	0.0	0.0	0.0008886396988969152	0.0	0.0	0.0008889323933917212	0.0	-0.0004917022757633845	0.0	-6.724807315133797e-10	-0.00012007401143060252	0.0	2.1264523807040396e-09
4.43	-0.0004923026457774724	0.0	-8.314108385873902e-09	-0.0008357168647860794	0.0	-0.0996560987393014	0.0	6.837790203513089e-06	0.0	0.9999999999691086	0.0	7.77193738351726e-06	0.0	0.0	0.0008905984214393251	0.0	0.0	0.0008908912759910072	0.0	-0.0004923026458458742	0.0	-6.618177116381665e-10	-0.00012007402156533954	0.0	2.1387560665646013e-09
4.4350000000000005	-0.0004929030159104571	0.0	-8.329570458858231e-09	-0.0008381798867909052	0.0	-0.09965609873391099	0.0	6.839445697838105e-06	0.0	0.9999999999689706	0.0	7.789034601465749e-06	0.0	0.0	0.000892557618299106	0.0	0.0	0.0008928506328544823	0.0	-0.0004929030159790378	0.0	-6.51093165875897e-10	-0.0001200740317000368	0.0	2.1510627355273327e-09
4.44	-0.0004935033860941156	0.0	-8.345016135885532e-09	-0.0008406459106483173	0.0	-0.09965609872846044	0.0	6.841101201785818e-06	0.0	0.9999999999688322	0.0	7.806135958614143e-06	0.0	0.0	0.0008945172894762575	0.0	0.0	0.0008948104639849033	0.0	-0.0004935033861628745	0.0	-6.403070793110562e-10	-0.00012007404183470335	0.0	2.163372387592156e-09
4.445	-0.000494103756328448	0.0	-8.360445416955804e-09	-0.0008431149363583158	0.0	-0.09965609872294977	0.0	6.842756715356227e-06	0.0	0.9999999999686935	0.0	7.823241454962442e-06	0.0	0.0	0.0008964774349707795	0.0	0.0	0.0008967707693850269	0.0	-0.0004941037563973849	0.0	-6.294594370281378e-10	-0.00012007405196942772	0.0	2.175685022759492e-09
4.45	-0.0004947041266134542	0.0	-8.37585830206905e-09	-0.000845586963920901	0.0	-0.09965609871737897	0.0	6.844412238549333e-06	0.0	0.9999999999685545	0.0	7.840351090510649e-06	0.0	0.0	0.0008984380547826721	0.0	0.0	0.0008987315490576098	0.0	-0.0004947041266825687	0.0	-6.18550224111622e-10	-0.00012007406210408884	0.0	2.188000641030502e-09
4.455	-0.0004953044969491343	0.0	-8.391254791225269e-09	-0.0008480619933360725	0.0	-0.09965609871174805	0.0	6.846067771365135e-06	0.0	0.9999999999684152	0.0	7.85746486525876e-06	0.0	0.0	0.0009003991489119354	0.0	0.0	0.0009006928030054085	0.0	-0.0004953044970184258	0.0	-6.075794256459933e-10	-0.0001200740722387608	0.0	2.200319242404934e-09
4.46	-0.0004959048673354883	0.0	-8.406634884424462e-09	-0.0008505400246038307	0.0	-0.099656098706057	0.0	6.847723313803634e-06	0.0	0.9999999999682755	0.0	7.874582779206779e-06	0.0	0.0	0.0009023607173585693	0.0	0.0	0.0009026545312311799	0.0	-0.0004959048674049564	0.0	-5.965470267157312e-10	-0.00012007408237348336	0.0	2.212640826884578e-09
4.465	-0.0004965052377725163	0.0	-8.421998581666627e-09	-0.0008530210577241754	0.0	-0.09965609870030583	0.0	6.84937886586483e-06	0.0	0.9999999999681355	0.0	7.891704832354705e-06	0.0	0.0	0.000904322760122574	0.0	0.0	0.0009046167337376808	0.0	-0.0004965052378421605	0.0	-5.854530124053064e-10	-0.00012007409250815171	0.0	2.2249653944688143e-09
4.47	-0.000497105608260218	0.0	-8.437345882951765e-09	-0.0008555050926971067	0.0	-0.09965609869449453	0.0	6.851034427548723e-06	0.0	0.9999999999679952	0.0	7.908831024702536e-06	0.0	0.0	0.0009062852772039492	0.0	0.0	0.0009065794105276677	0.0	-0.0004971056083300379	0.0	-5.74297367799202e-10	-0.00012007410264284355	0.0	2.2372929451573778e-09
4.4750000000000005	-0.0004977059787985938	0.0	-8.452676788279882e-09	-0.0008579921295226249	0.0	-0.0996560986886231	0.0	6.852689998855313e-06	0.0	0.9999999999678545	0.0	7.925961356250275e-06	0.0	0.0	0.0009082482686026953	0.0	0.0	0.0009085425616038972	0.0	-0.0004977059788685889	0.0	-5.630800779818886e-10	-0.00012007411277752998	0.0	2.2496234789527258e-09
4.48	-0.0004983063493876434	0.0	-8.467991297650968e-09	-0.000860482168200729	0.0	-0.09965609868269155	0.0	6.854345579784599e-06	0.0	0.9999999999677135	0.0	7.94309582699792e-06	0.0	0.0	0.0009102117343188119	0.0	0.0	0.0009105061869691262	0.0	-0.0004983063494578132	0.0	-5.51801128037831e-10	-0.00012007412291223447	0.0	2.261956995854209e-09
4.485	-0.0004989067200273669	0.0	-8.483289411065027e-09	-0.0008629752087314199	0.0	-0.09965609867669988	0.0	6.856001170336581e-06	0.0	0.9999999999675723	0.0	7.960234436945471e-06	0.0	0.0	0.0009121756743522994	0.0	0.0	0.0009124702866261114	0.0	-0.0004989067200977112	0.0	-5.404605030515021e-10	-0.00012007413304690643	0.0	2.274293495862313e-09
4.49	-0.0004995070907177642	0.0	-8.498571128522059e-09	-0.0008654712511146973	0.0	-0.09965609867064808	0.0	6.857656770511261e-06	0.0	0.9999999999674306	0.0	7.977377186092928e-06	0.0	0.0	0.0009141400887031569	0.0	0.0	0.0009144348605776094	0.0	-0.0004995070907882822	0.0	-5.290581881073624e-10	-0.00012007414318156756	0.0	2.2866329789777115e-09
4.495	-0.0005001074614588354	0.0	-8.513836450022064e-09	-0.0008679702953505611	0.0	-0.09965609866453615	0.0	6.859312380308637e-06	0.0	0.9999999999672887	0.0	7.99452407444029e-06	0.0	0.0	0.0009161049773713854	0.0	0.0	0.000916399908826377	0.0	-0.0005001074615295269	0.0	-5.175941682898788e-10	-0.00012007415331628469	0.0	2.298975445200696e-09
4.5	-0.0005007078322505805	0.0	-8.529085375565042e-09	-0.0008704723414390116	0.0	-0.0996560986583641	0.0	6.86096799972871e-06	0.0	0.9999999999671465	0.0	8.01167510198756e-06	0.0	0.0	0.0009180703403569846	0.0	0.0	0.0009183654313751709	0.0	-0.000500707832321445	0.0	-5.06068428683507e-10	-0.00012007416345094401	0.0	2.3113208945329897e-09
4.505	-0.0005013082030929996	0.0	-8.544317905150995e-09	-0.0008729773893800486	0.0	-0.09965609865213192	0.0	6.862623628771479e-06	0.0	0.9999999999670038	0.0	8.028830268734735e-06	0.0	0.0	0.0009200361776599544	0.0	0.0	0.0009203314282267477	0.0	-0.0005013082031640364	0.0	-4.94480954372701e-10	-0.0001200741735856214	0.0	2.32366932697389e-09
4.51	-0.0005019085739860925	0.0	-8.55953403877992e-09	-0.0008754854391736721	0.0	-0.09965609864583962	0.0	6.864279267436945e-06	0.0	0.999999999966861	0.0	8.045989574681816e-06	0.0	0.0	0.000922002489280295	0.0	0.0	0.0009222978993838641	0.0	-0.0005019085740573013	0.0	-4.828317304419197e-10	-0.00012007418372031323	0.0	2.3360207425237404e-09
4.515	-0.0005025089449298592	0.0	-8.574733776451818e-09	-0.0008779964908198822	0.0	-0.09965609863948718	0.0	6.865934915725108e-06	0.0	0.9999999999667177	0.0	8.063153019828807e-06	0.0	0.0	0.0009239692752180061	0.0	0.0	0.000924264844849277	0.0	-0.0005025089450012395	0.0	-4.711207419756139e-10	-0.00012007419385498701	0.0	2.348375141183478e-09
4.5200000000000005	-0.0005031093159243	0.0	-8.589917118166692e-09	-0.0008805105443186791	0.0	-0.09965609863307463	0.0	6.867590573635968e-06	0.0	0.9999999999665742	0.0	8.080320604175704e-06	0.0	0.0	0.0009259365354730882	0.0	0.0	0.0009262322646257428	0.0	-0.0005031093159958512	0.0	-4.593479740582346e-10	-0.00012007420398970595	0.0	2.360732522953331e-09
4.525	-0.0005037096869694146	0.0	-8.605084063924538e-09	-0.0008830275996700622	0.0	-0.09965609862660195	0.0	6.869246241169524e-06	0.0	0.9999999999664304	0.0	8.097492327722505e-06	0.0	0.0	0.0009279042700455408	0.0	0.0	0.0009282001587160184	0.0	-0.0005037096870411365	0.0	-4.475134117742287e-10	-0.00012007421412437249	0.0	2.3730928878343836e-09
4.53	-0.000504310058065203	0.0	-8.620234613725356e-09	-0.0008855476568740318	0.0	-0.09965609862006915	0.0	6.8709019183257775e-06	0.0	0.9999999999662862	0.0	8.114668190469212e-06	0.0	0.0	0.0009298724789353639	0.0	0.0	0.0009301685271228604	0.0	-0.0005043100581370949	0.0	-4.356170402080381e-10	-0.0001200742242590029	0.0	2.3854562358271968e-09
4.535	-0.0005049104292116654	0.0	-8.635368767569148e-09	-0.000888070715930588	0.0	-0.09965609861347621	0.0	6.872557605104727e-06	0.0	0.9999999999661416	0.0	8.131848192415826e-06	0.0	0.0	0.0009318411621425577	0.0	0.0	0.0009321373698490256	0.0	-0.0005049104292837266	0.0	-4.236588444441046e-10	-0.00012007423439373088	0.0	2.3978225669310445e-09
4.54	-0.0005055108004088017	0.0	-8.650486525455912e-09	-0.0008905967768397306	0.0	-0.09965609860682316	0.0	6.874213301506373e-06	0.0	0.9999999999659969	0.0	8.149032333562344e-06	0.0	0.0	0.0009338103196671219	0.0	0.0	0.0009341066868972707	0.0	-0.0005055108004810321	0.0	-4.116388095668733e-10	-0.00012007424452838658	0.0	2.410191881147627e-09
4.545	-0.0005061111716566117	0.0	-8.66558788738565e-09	-0.0008931258396014598	0.0	-0.09965609860010997	0.0	6.8758690075307166e-06	0.0	0.9999999999658516	0.0	8.166220613908771e-06	0.0	0.0	0.0009357799515090572	0.0	0.0	0.0009360764782703522	0.0	-0.0005061111717290105	0.0	-3.995569206607729e-10	-0.00012007425466304951	0.0	2.422564178477583e-09
4.55	-0.0005067115429550958	0.0	-8.68067285335836e-09	-0.0008956579042157755	0.0	-0.09965609859333667	0.0	6.8775247231777564e-06	0.0	0.9999999999657062	0.0	8.183413033455104e-06	0.0	0.0	0.0009377500576683628	0.0	0.0	0.000938046743971027	0.0	-0.0005067115430276626	0.0	-3.8741316281024245e-10	-0.00012007426479775942	0.0	2.434939458920354e-09
4.555	-0.0005073119143042537	0.0	-8.695741423374045e-09	-0.0008981929706826778	0.0	-0.09965609858650323	0.0	6.879180448447493e-06	0.0	0.9999999999655604	0.0	8.200609592201344e-06	0.0	0.0	0.0009397206381450395	0.0	0.0	0.0009400174840020518	0.0	-0.0005073119143769881	0.0	-3.752075210997128e-10	-0.00012007427493241874	0.0	2.4473177224771842e-09
4.5600000000000005	-0.0005079122857040855	0.0	-8.710793597432706e-09	-0.0009007310390021672	0.0	-0.09965609857960966	0.0	6.880836183339926e-06	0.0	0.9999999999654143	0.0	8.217810290147492e-06	0.0	0.0	0.000941691692939087	0.0	0.0	0.0009419886983661832	0.0	-0.0005079122857769868	0.0	-3.6293998061361354e-10	-0.00012007428506709612	0.0	2.459698969148153e-09
4.565	-0.0005085126571545912	0.0	-8.725829375534337e-09	-0.0009032721091742424	0.0	-0.09965609857265598	0.0	6.882491927855056e-06	0.0	0.9999999999652679	0.0	8.235015127293544e-06	0.0	0.0	0.0009436632220505049	0.0	0.0	0.0009439603870661779	0.0	-0.000508512657227659	0.0	-3.506105264363729e-10	-0.00012007429520176447	0.0	2.4720831989341656e-09
4.57	-0.0005091130286557707	0.0	-8.740848757678942e-09	-0.0009058161811989043	0.0	-0.09965609856564217	0.0	6.884147681992882e-06	0.0	0.9999999999651211	0.0	8.252224103639503e-06	0.0	0.0	0.0009456352254792933	0.0	0.0	0.0009459325501047927	0.0	-0.0005091130287290045	0.0	-3.382191436524121e-10	-0.00012007430533643101	0.0	2.484470411836327e-09
4.575	-0.0005097134002076243	0.0	-8.75585174386652e-09	-0.0009083632550761527	0.0	-0.09965609855856823	0.0	6.885803445753406e-06	0.0	0.999999999964974	0.0	8.269437219185368e-06	0.0	0.0	0.0009476077032254526	0.0	0.0	0.0009479051874847843	0.0	-0.0005097134002810234	0.0	-3.2576581734615116e-10	-0.00012007431547109756	0.0	2.4968606078531607e-09
4.58	-0.0005103137718101516	0.0	-8.770838334097069e-09	-0.0009109133308059876	0.0	-0.09965609855143417	0.0	6.887459219136626e-06	0.0	0.9999999999648266	0.0	8.286654473931137e-06	0.0	0.0	0.000949580655288982	0.0	0.0	0.0009498782992089093	0.0	-0.0005103137718837155	0.0	-3.132505326020196e-10	-0.00012007432560577494	0.0	2.509253786986654e-09
4.585	-0.0005109141434633529	0.0	-8.785808528370595e-09	-0.0009134664083884092	0.0	-0.09965609854423998	0.0	6.889115002142542e-06	0.0	0.9999999999646788	0.0	8.303875867876814e-06	0.0	0.0	0.0009515540816698826	0.0	0.0	0.0009518518852799244	0.0	-0.0005109141435370811	0.0	-3.0067327450442246e-10	-0.00012007433574045957	0.0	2.5216499492376057e-09
4.59	-0.0005115145151672279	0.0	-8.80076232668709e-09	-0.0009160224878234171	0.0	-0.09965609853698566	0.0	6.890770794771156e-06	0.0	0.9999999999645308	0.0	8.321101401022397e-06	0.0	0.0	0.0009535279823681539	0.0	0.0	0.0009538259457005864	0.0	-0.00051151451524112	0.0	-2.8803402813778173e-10	-0.00012007434587508996	0.0	2.5340490946053903e-09
4.595	-0.0005121148869217769	0.0	-8.815699729046563e-09	-0.0009185815691110116	0.0	-0.09965609852967122	0.0	6.892426597022465e-06	0.0	0.9999999999643824	0.0	8.338331073367887e-06	0.0	0.0	0.0009555023573837957	0.0	0.0	0.0009558004804736519	0.0	-0.0005121148869958321	0.0	-2.7533277858650436e-10	-0.00012007435600980168	0.0	2.546451223092054e-09
4.6000000000000005	-0.000512715258727	0.0	-8.830620735449008e-09	-0.0009211436522511932	0.0	-0.09965609852229666	0.0	6.894082408896473e-06	0.0	0.9999999999642337	0.0	8.355564884913287e-06	0.0	0.0	0.0009574772067168087	0.0	0.0	0.0009577754896018776	0.0	-0.0005127152588012179	0.0	-2.6256951093499817e-10	-0.00012007436614449533	0.0	2.5588563346962302e-09
4.605	-0.0005133156305828967	0.0	-8.845525345894425e-09	-0.0009237087372439607	0.0	-0.09965609851486197	0.0	6.895738230393176e-06	0.0	0.9999999999640847	0.0	8.37280283565859e-06	0.0	0.0	0.0009594525303671919	0.0	0.0	0.0009597509730880203	0.0	-0.0005133156306572769	0.0	-2.4974421026767735e-10	-0.00012007437627909863	0.0	2.5712644294192292e-09
4.61	-0.0005139160024894674	0.0	-8.860413560382816e-09	-0.000926276824089315	0.0	-0.09965609850736716	0.0	6.897394061512576e-06	0.0	0.9999999999639353	0.0	8.390044925603798e-06	0.0	0.0	0.0009614283283349457	0.0	0.0	0.0009617269309348367	0.0	-0.000513916002564009	0.0	-2.368568616689396e-10	-0.0001200743864137724	0.0	2.583675507262195e-09
4.615	-0.0005145163744467119	0.0	-8.875285378914179e-09	-0.0009288479127872556	0.0	-0.09965609849981222	0.0	6.899049902254673e-06	0.0	0.9999999999637856	0.0	8.407291154748913e-06	0.0	0.0	0.0009634046006200702	0.0	0.0	0.0009637033631450833	0.0	-0.0005145163745214147	0.0	-2.2390745022318935e-10	-0.00012007439654846967	0.0	2.5960895682246047e-09
4.62	-0.0005151167464546305	0.0	-8.890140801488516e-09	-0.0009314220033377827	0.0	-0.09965609849219714	0.0	6.900705752619466e-06	0.0	0.9999999999636356	0.0	8.424541523093934e-06	0.0	0.0	0.0009653813472225652	0.0	0.0	0.000965680269721517	0.0	-0.0005151167465294936	0.0	-2.1089596101482592e-10	-0.00012007440668311813	0.0	2.608506612307706e-09
4.625	-0.0005157171185132227	0.0	-8.904979828105827e-09	-0.0009339990957408965	0.0	-0.09965609848452195	0.0	6.902361612606956e-06	0.0	0.9999999999634853	0.0	8.441796030638862e-06	0.0	0.0	0.0009673585681424314	0.0	0.0	0.0009676576506668945	0.0	-0.0005157171185882458	0.0	-1.9782237912824433e-10	-0.00012007441681779733	0.0	2.620926639511427e-09
4.63	-0.000516317490622489	0.0	-8.91980245876611e-09	-0.0009365791899965969	0.0	-0.09965609847678664	0.0	6.904017482217144e-06	0.0	0.9999999999633348	0.0	8.459054677383696e-06	0.0	0.0	0.0009693362633796679	0.0	0.0	0.0009696355059839724	0.0	-0.0005163174906976716	0.0	-1.846866896478418e-10	-0.00012007442695248194	0.0	2.6333496498372676e-09
4.635	-0.0005169178627824291	0.0	-8.934608693469366e-09	-0.0009391622861048836	0.0	-0.09965609846899118	0.0	6.905673361450027e-06	0.0	0.9999999999631838	0.0	8.476317463328437e-06	0.0	0.0	0.0009713144329342753	0.0	0.0	0.0009716138356755075	0.0	-0.0005169178628577706	0.0	-1.714888776580021e-10	-0.00012007443708710512	0.0	2.645775643284705e-09
4.64	-0.0005175182349930432	0.0	-8.949398532215597e-09	-0.0009417483840657569	0.0	-0.09965609846113561	0.0	6.907329250305607e-06	0.0	0.9999999999630325	0.0	8.493584388473083e-06	0.0	0.0	0.0009732930768062532	0.0	0.0	0.0009735926397442564	0.0	-0.0005175182350685427	0.0	-1.5822892824312416e-10	-0.00012007444722177346	0.0	2.658204619854465e-09
4.6450000000000005	-0.0005181186072543312	0.0	-8.964171975004802e-09	-0.0009443374838792172	0.0	-0.09965609845321992	0.0	6.908985148783884e-06	0.0	0.9999999999628809	0.0	8.51085545281764e-06	0.0	0.0	0.0009752721949956025	0.0	0.0	0.0009755719181929758	0.0	-0.0005181186073299883	0.0	-1.4490682648758542e-10	-0.00012007445735643098	0.0	2.6706365795476884e-09
4.65	-0.0005187189795662929	0.0	-8.978929021836979e-09	-0.0009469295855452636	0.0	-0.09965609844524409	0.0	6.910641056884858e-06	0.0	0.9999999999627289	0.0	8.5281306563621e-06	0.0	0.0	0.0009772517875023215	0.0	0.0	0.0009775516710244226	0.0	-0.000518718979642107	0.0	-1.315225574757762e-10	-0.00012007446749108307	0.0	2.683071522363207e-09
4.655	-0.0005193193519289286	0.0	-8.993669672712129e-09	-0.0009495246890638966	0.0	-0.09965609843720814	0.0	6.912296974608528e-06	0.0	0.9999999999625767	0.0	8.545409999106467e-06	0.0	0.0	0.0009792318543264118	0.0	0.0	0.000979531898241353	0.0	-0.0005193193520048992	0.0	-1.180761062920796e-10	-0.00012007447762576587	0.0	2.695509448303163e-09
4.66	-0.0005199197243422381	0.0	-9.008393927630251e-09	-0.000952122794435116	0.0	-0.09965609842911208	0.0	6.913952901954895e-06	0.0	0.9999999999624242	0.0	8.562693481050739e-06	0.0	0.0	0.0009812123954678726	0.0	0.0	0.0009815125998465244	0.0	-0.0005199197244183646	0.0	-1.0456745802087004e-10	-0.000120074487760427	0.0	2.7079503573678396e-09
4.665	-0.0005205200968062216	0.0	-9.023101786591348e-09	-0.000954723901658922	0.0	-0.09965609842095588	0.0	6.915608838923959e-06	0.0	0.9999999999622713	0.0	8.579981102194917e-06	0.0	0.0	0.000983193410926704	0.0	0.0	0.0009834937758426928	0.0	-0.0005205200968825034	0.0	-9.099659774652597e-11	-0.00012007449789510438	0.0	2.7203942495577273e-09
4.67	-0.000521120469320879	0.0	-9.037793249595417e-09	-0.0009573280107353146	0.0	-0.09965609841273955	0.0	6.91726478551572e-06	0.0	0.9999999999621181	0.0	8.597272862539002e-06	0.0	0.0	0.000985174900702906	0.0	0.0	0.0009854754262326154	0.0	-0.0005211204693973155	0.0	-7.736351055341753e-11	-0.00012007450802972756	0.0	2.7328411248725912e-09
4.675	-0.0005217208418862101	0.0	-9.05246831664246e-09	-0.0009599351216642936	0.0	-0.0996560984044631	0.0	6.918920741730177e-06	0.0	0.9999999999619645	0.0	8.614568762082993e-06	0.0	0.0	0.0009871568647964789	0.0	0.0	0.0009874575510190487	0.0	-0.0005217208419628007	0.0	-6.366818152592317e-11	-0.00012007451816437964	0.0	2.745290983313617e-09
4.68	-0.0005223212145022153	0.0	-9.067126987732477e-09	-0.0009625452344458592	0.0	-0.09965609839612652	0.0	6.9205767075673306e-06	0.0	0.9999999999618107	0.0	8.63186880082689e-06	0.0	0.0	0.0009891393032074223	0.0	0.0	0.0009894401502047495	0.0	-0.0005223212145789594	0.0	-4.9910595748403084e-11	-0.00012007452829907148	0.0	2.7577438248818542e-09
4.6850000000000005	-0.0005229215871688944	0.0	-9.081769262865468e-09	-0.0009651583490800118	0.0	-0.09965609838772982	0.0	6.922232683027181e-06	0.0	0.9999999999616564	0.0	8.649172978770698e-06	0.0	0.0	0.0009911222159357368	0.0	0.0	0.0009914232237924745	0.0	-0.0005229215872457914	0.0	-3.609073830522746e-11	-0.0001200745384337073	0.0	2.7701996495761796e-09
4.69	-0.0005235219598862473	0.0	-9.096395142041431e-09	-0.0009677744655667504	0.0	-0.09965609837927299	0.0	6.923888668109729e-06	0.0	0.9999999999615019	0.0	8.666481295914408e-06	0.0	0.0	0.0009931056029814217	0.0	0.0	0.0009934067717849802	0.0	-0.0005235219599632965	0.0	-2.2208594280763142e-11	-0.00012007454856835036	0.0	2.782658457397137e-09
4.695	-0.000524122332654274	0.0	-9.111004625260367e-09	-0.0009703935839060757	0.0	-0.09965609837075604	0.0	6.925544662814972e-06	0.0	0.9999999999613471	0.0	8.683793752258025e-06	0.0	0.0	0.0009950894643444776	0.0	0.0	0.0009953907941850234	0.0	-0.0005241223327314749	0.0	-8.264148759374392e-12	-0.00012007455870300606	0.0	2.7951202483476755e-09
4.7	-0.0005247227054729748	0.0	-9.125597712522275e-09	-0.0009730157040979873	0.0	-0.09965609836217897	0.0	6.927200667142913e-06	0.0	0.9999999999611919	0.0	8.701110347801548e-06	0.0	0.0	0.0009970738000249038	0.0	0.0	0.0009973752909953608	0.0	-0.0005247227055503265	0.0	5.742613174593253e-12	-0.00012007456883766357	0.0	2.807585022425614e-09
4.705	-0.0005253230783423493	0.0	-9.140174403827158e-09	-0.0009756408261424855	0.0	-0.09965609835354175	0.0	6.92885668109355e-06	0.0	0.9999999999610365	0.0	8.718431082544976e-06	0.0	0.0	0.0009990586100227007	0.0	0.0	0.0009993602622187492	0.0	-0.0005253230784198515	0.0	1.9811706436763196e-11	-0.00012007457897233373	0.0	2.8200527796322367e-09
4.71	-0.0005259234512623978	0.0	-9.154734699175013e-09	-0.0009782689500395705	0.0	-0.09965609834484443	0.0	6.930512704666884e-06	0.0	0.9999999999608807	0.0	8.735755956488312e-06	0.0	0.0	0.0010010438943378684	0.0	0.0	0.0010013457078579453	0.0	-0.0005259234513400498	0.0	3.394314594280076e-11	-0.00012007458910696413	0.0	2.8325235199707344e-09
4.715	-0.0005265238242331201	0.0	-9.169278598565841e-09	-0.0009809000757892417	0.0	-0.09965609833608698	0.0	6.932168737862915e-06	0.0	0.9999999999607245	0.0	8.753084969631555e-06	0.0	0.0	0.0010030296529704068	0.0	0.0	0.0010033316279157056	0.0	-0.0005265238243109212	0.0	4.813694660835144e-11	-0.00012007459924159996	0.0	2.84499724343699e-09
4.72	-0.0005271241972545163	0.0	-9.183806101999644e-09	-0.0009835342033914995	0.0	-0.09965609832726939	0.0	6.933824780681642e-06	0.0	0.9999999999605681	0.0	8.770418121974702e-06	0.0	0.0	0.0010050158859203158	0.0	0.0	0.001005318022394787	0.0	-0.0005271241973324659	0.0	6.239312334905514e-11	-0.00012007460937630625	0.0	2.857473950034211e-09
4.7250000000000005	-0.0005277245703265866	0.0	-9.198317209476422e-09	-0.0009861713328463443	0.0	-0.09965609831839169	0.0	6.9354808331230664e-06	0.0	0.9999999999604113	0.0	8.78775541351776e-06	0.0	0.0	0.0010070025931875962	0.0	0.0	0.0010073048912979461	0.0	-0.0005277245704046841	0.0	7.671169108057884e-11	-0.00012007461951093305	0.0	2.8699536397627126e-09
4.73	-0.0005283249434493305	0.0	-9.21281192099617e-09	-0.0009888114641537753	0.0	-0.09965609830945385	0.0	6.937136895187187e-06	0.0	0.9999999999602542	0.0	8.80509684426072e-06	0.0	0.0	0.0010089897747722464	0.0	0.0	0.0010092922346279396	0.0	-0.0005283249435275752	0.0	9.10926647185673e-11	-0.00012007462964555983	0.0	2.882436312621962e-09
4.735	-0.0005289253166227484	0.0	-9.227290236558892e-09	-0.0009914545973137927	0.0	-0.0996560983004559	0.0	6.938792966874005e-06	0.0	0.9999999999600969	0.0	8.822442414203589e-06	0.0	0.0	0.0010109774306742679	0.0	0.0	0.0010112800523875243	0.0	-0.0005289253167011398	0.0	1.0553605917868596e-10	-0.00012007463978023721	0.0	2.8949219686139547e-09
4.74	-0.0005295256898468402	0.0	-9.241752156164587e-09	-0.0009941007323263967	0.0	-0.09965609829139781	0.0	6.940449048183519e-06	0.0	0.9999999999599392	0.0	8.839792123346362e-06	0.0	0.0	0.0010129655608936599	0.0	0.0	0.0010132683445794569	0.0	-0.0005295256899253776	0.0	1.2004188937659435e-10	-0.0001200746499148622	0.0	2.9074106077384014e-09
4.745	-0.0005301260631216058	0.0	-9.256197679813256e-09	-0.000996749869191587	0.0	-0.0996560982822796	0.0	6.942105139115729e-06	0.0	0.9999999999597811	0.0	8.857145971689043e-06	0.0	0.0	0.0010149541654304226	0.0	0.0	0.001015257111206494	0.0	-0.0005301260632002884	0.0	1.3461017022795792e-10	-0.00012007466004950887	0.0	2.9199022299954774e-09
4.75	-0.0005307264364470454	0.0	-9.270626807504898e-09	-0.000999402007909364	0.0	-0.09965609827310126	0.0	6.9437612396706375e-06	0.0	0.9999999999596227	0.0	8.874503959231629e-06	0.0	0.0	0.0010169432442845557	0.0	0.0	0.0010172463522713923	0.0	-0.0005307264365258727	0.0	1.4924091664843883e-10	-0.00012007467018416637	0.0	2.9323968353865113e-09
4.755	-0.0005313268098231589	0.0	-9.285039539239514e-09	-0.0010020571484797279	0.0	-0.0996560982638628	0.0	6.945417349848241e-06	0.0	0.999999999959464	0.0	8.891866085974123e-06	0.0	0.0	0.00101893279745606	0.0	0.0	0.0010192360677769084	0.0	-0.0005313268099021301	0.0	1.6393414355371314e-10	-0.00012007468031881123	0.0	2.944894423911643e-09
4.76	-0.0005319271832499462	0.0	-9.299435875017102e-09	-0.001004715290902678	0.0	-0.09965609825456422	0.0	6.947073469648542e-06	0.0	0.999999999959305	0.0	8.909232351916521e-06	0.0	0.0	0.0010209228249449347	0.0	0.0	0.0010212262577257993	0.0	-0.0005319271833290608	0.0	1.7868986585944551e-10	-0.00012007469045345429	0.0	2.9573949955707007e-09
4.765	-0.0005325275567274074	0.0	-9.313815814837662e-09	-0.0010073764351782146	0.0	-0.09965609824520551	0.0	6.94872959907154e-06	0.0	0.9999999999591457	0.0	8.926602757058826e-06	0.0	0.0	0.0010229133267511802	0.0	0.0	0.0010232169221208215	0.0	-0.0005325275568066647	0.0	1.935080984813129e-10	-0.00012007470058812987	0.0	2.969898550365776e-09
4.7700000000000005	-0.0005331279302555427	0.0	-9.3281793587012e-09	-0.0010100405813063384	0.0	-0.09965609823578667	0.0	6.9503857381172346e-06	0.0	0.999999999958986	0.0	8.943977301401043e-06	0.0	0.0	0.001024904302874797	0.0	0.0	0.0010252080609647316	0.0	-0.000533127930334942	0.0	2.0838885633499479e-10	-0.00012007471072277291	0.0	2.9824050882954675e-09
4.775	-0.0005337283038343517	0.0	-9.342526506607708e-09	-0.001012707729287048	0.0	-0.0996560982263077	0.0	6.952041886785626e-06	0.0	0.999999999958826	0.0	8.961355984943161e-06	0.0	0.0	0.0010268957533157838	0.0	0.0	0.0010271996742602866	0.0	-0.0005337283039138923	0.0	2.233321543361607e-10	-0.00012007472085736176	0.0	2.994914609361071e-09
4.78	-0.0005343286774638345	0.0	-9.356857258557189e-09	-0.0010153778791203443	0.0	-0.09965609821676862	0.0	6.953698045076714e-06	0.0	0.9999999999586657	0.0	8.978738807685185e-06	0.0	0.0	0.0010288876780741416	0.0	0.0	0.001029191762010243	0.0	-0.0005343286775435157	0.0	2.3833800740050004e-10	-0.00012007473099201566	0.0	3.007427113563404e-09
4.785	-0.0005349290511439913	0.0	-9.371171614549644e-09	-0.001018051030806227	0.0	-0.09965609820716939	0.0	6.955354212990497e-06	0.0	0.9999999999585051	0.0	8.996125769627114e-06	0.0	0.0	0.0010308800771498695	0.0	0.0	0.0010311843242173575	0.0	-0.0005349290512238125	0.0	2.5340643044369066e-10	-0.00012007474112667678	0.0	3.0199426009034523e-09
4.79	-0.000535529424874822	0.0	-9.385469574585071e-09	-0.0010207271843446961	0.0	-0.09965609819751005	0.0	6.957010390526978e-06	0.0	0.9999999999583441	0.0	9.013516870768953e-06	0.0	0.0	0.0010328729505429688	0.0	0.0	0.0010331773608843868	0.0	-0.0005355294249547824	0.0	2.685374383814302e-10	-0.0001200747512612873	0.0	3.0324610713809264e-09
4.795	-0.0005361297986563266	0.0	-9.399751138663472e-09	-0.001023406339735752	0.0	-0.09965609818779059	0.0	6.958666577686156e-06	0.0	0.9999999999581828	0.0	9.030912111110697e-06	0.0	0.0	0.0010348662982534386	0.0	0.0	0.0010351708720140876	0.0	-0.0005361297987364254	0.0	2.8373104612939484e-10	-0.00012007476139595566	0.0	3.044982524994849e-09
4.8	-0.000536730172488505	0.0	-9.414016306784847e-09	-0.0010260884969793944	0.0	-0.099656098178011	0.0	6.960322774468031e-06	0.0	0.9999999999580212	0.0	9.048311490652345e-06	0.0	0.0	0.0010368601202812792	0.0	0.0	0.0010371648576092166	0.0	-0.0005367301725687419	0.0	2.9898726860327804e-10	-0.00012007477153057522	0.0	3.057506961748874e-09
4.805	-0.0005373305463713574	0.0	-9.428265078949195e-09	-0.0010287736560756233	0.0	-0.09965609816817128	0.0	6.961978980872602e-06	0.0	0.9999999999578593	0.0	9.065715009393902e-06	0.0	0.0	0.0010388544166264903	0.0	0.0	0.0010391593176725306	0.0	-0.0005373305464517312	0.0	3.1430612071878253e-10	-0.00012007478166523996	0.0	3.0700343816423523e-09
4.8100000000000005	-0.0005379309203048837	0.0	-9.442497455156518e-09	-0.0010314618170244394	0.0	-0.09965609815827144	0.0	6.96363519689987e-06	0.0	0.9999999999576971	0.0	9.083122667335368e-06	0.0	0.0	0.0010408491872890726	0.0	0.0	0.0010411542522067861	0.0	-0.0005379309203853942	0.0	3.2968761739159923e-10	-0.00012007479179989024	0.0	3.0825647846739753e-09
4.815	-0.0005385312942890837	0.0	-9.456713435406812e-09	-0.0010341529798258411	0.0	-0.09965609814831146	0.0	6.965291422549835e-06	0.0	0.9999999999575345	0.0	9.100534464476736e-06	0.0	0.0	0.0010428444322690253	0.0	0.0	0.00104314966121474	0.0	-0.0005385312943697301	0.0	3.4513177353742347e-10	-0.00012007480193446643	0.0	3.095098170846763e-09
4.82	-0.0005391316683239578	0.0	-9.470913019700079e-09	-0.0010368471444798296	0.0	-0.09965609813829136	0.0	6.966947657822496e-06	0.0	0.9999999999573715	0.0	9.117950400818011e-06	0.0	0.0	0.0010448401515663487	0.0	0.0	0.001045145544699149	0.0	-0.000539131668404739	0.0	3.60638604071967e-10	-0.00012007481206911851	0.0	3.1076345401593703e-09
4.825	-0.0005397320424095056	0.0	-9.48509620803632e-09	-0.001039544310986405	0.0	-0.09965609812821115	0.0	6.968603902717854e-06	0.0	0.9999999999572083	0.0	9.135370476359192e-06	0.0	0.0	0.0010468363451810428	0.0	0.0	0.0010471419026627695	0.0	-0.0005397320424904212	0.0	3.76208123910919e-10	-0.00012007482220378145	0.0	3.1201738926130815e-09
4.83	-0.0005403324165457274	0.0	-9.499263000415533e-09	-0.0010422444793455662	0.0	-0.0996560981180708	0.0	6.970260157235909e-06	0.0	0.9999999999570448	0.0	9.15279469110028e-06	0.0	0.0	0.0010488330131131077	0.0	0.0	0.0010491387351083585	0.0	-0.0005403324166267767	0.0	3.9184034797000135e-10	-0.00012007483233838836	0.0	3.132716228209187e-09
4.835	-0.0005409327907326231	0.0	-9.513413396837722e-09	-0.0010449476495573142	0.0	-0.09965609810787034	0.0	6.97191642137666e-06	0.0	0.9999999999568809	0.0	9.170223045041275e-06	0.0	0.0	0.0010508301553625434	0.0	0.0	0.0010511360420386727	0.0	-0.0005409327908138052	0.0	4.0753529116491326e-10	-0.00012007484247305851	0.0	3.145261546946408e-09
4.84	-0.0005415331649701926	0.0	-9.52754739730288e-09	-0.0010476538216216491	0.0	-0.09965609809760974	0.0	6.973572695140108e-06	0.0	0.9999999999567168	0.0	9.187655538182175e-06	0.0	0.0	0.00105282777192935	0.0	0.0	0.0010531338234564687	0.0	-0.0005415331650515073	0.0	4.2329296841136974e-10	-0.00012007485260768892	0.0	3.1578098488261747e-09
4.845	-0.0005421335392584361	0.0	-9.541665001811015e-09	-0.0010503629955385702	0.0	-0.09965609808728901	0.0	6.975228978526253e-06	0.0	0.9999999999565523	0.0	9.205092170522981e-06	0.0	0.0	0.0010548258628135267	0.0	0.0	0.0010551320793645033	0.0	-0.0005421335393398821	0.0	4.391133946250818e-10	-0.00012007486274229041	0.0	3.1703611338504584e-09
4.8500000000000005	-0.0005427339135973536	0.0	-9.555766210362124e-09	-0.0010530751713080785	0.0	-0.09965609807690816	0.0	6.976885271535094e-06	0.0	0.9999999999563874	0.0	9.222532942063699e-06	0.0	0.0	0.001056824428015075	0.0	0.0	0.0010571308097655331	0.0	-0.0005427339136789303	0.0	4.549965847217793e-10	-0.0001200748728769443	0.0	3.182915402017514e-09
4.855	-0.0005433342879869448	0.0	-9.569851022956204e-09	-0.0010557903489301725	0.0	-0.09965609806646719	0.0	6.978541574166633e-06	0.0	0.9999999999562224	0.0	9.239977852804318e-06	0.0	0.0	0.0010588234675339937	0.0	0.0	0.001059130014662315	0.0	-0.0005433342880686515	0.0	4.709425536171624e-10	-0.00012007488301156567	0.0	3.1954726533275374e-09
4.86	-0.0005439346624272099	0.0	-9.583919439593257e-09	-0.0010585085284048534	0.0	-0.09965609805596609	0.0	6.980197886420868e-06	0.0	0.9999999999560568	0.0	9.257426902744844e-06	0.0	0.0	0.0010608229813702827	0.0	0.0	0.001061129694057605	0.0	-0.0005439346625090459	0.0	4.869513162269635e-10	-0.00012007489314618523	0.0	3.2080328877833127e-09
4.865	-0.0005445350369181488	0.0	-9.597971460273285e-09	-0.0010612297097321206	0.0	-0.09965609804540486	0.0	6.981854208297799e-06	0.0	0.9999999999558911	0.0	9.274880091885277e-06	0.0	0.0	0.0010628229695239428	0.0	0.0	0.0010631298479541606	0.0	-0.0005445350370001134	0.0	5.030228874669034e-10	-0.00012007490328084274	0.0	3.2205961053834683e-09
4.87	-0.0005451354114597617	0.0	-9.612007084996285e-09	-0.0010639538929119745	0.0	-0.09965609803478351	0.0	6.983510539797427e-06	0.0	0.999999999955725	0.0	9.292337420225615e-06	0.0	0.0	0.0010648234319949735	0.0	0.0	0.001065130476354738	0.0	-0.0005451354115418543	0.0	5.191572822527088e-10	-0.000120074913415437	0.0	3.2331623061303488e-09
4.875	-0.0005457357860520485	0.0	-9.626026313762257e-09	-0.0010666810779444147	0.0	-0.09965609802410204	0.0	6.985166880919752e-06	0.0	0.9999999999555584	0.0	9.30979888776586e-06	0.0	0.0	0.001066824368783375	0.0	0.0	0.0010671315792620945	0.0	-0.0005457357861342678	0.0	5.353545155001163e-10	-0.00012007492355005475	0.0	3.245731490022512e-09
4.88	-0.0005463361606950092	0.0	-9.640029146571205e-09	-0.0010694112648294417	0.0	-0.09965609801336044	0.0	6.986823231664773e-06	0.0	0.9999999999553917	0.0	9.327264494506011e-06	0.0	0.0	0.0010688257798891472	0.0	0.0	0.0010691331566789863	0.0	-0.0005463361607773549	0.0	5.516146021248448e-10	-0.0001200749336847213	0.0	3.2583036570613114e-09
4.885	-0.0005469365353886438	0.0	-9.654015583423123e-09	-0.0010721444535670551	0.0	-0.0996560980025587	0.0	6.988479592032492e-06	0.0	0.9999999999552246	0.0	9.344734240446069e-06	0.0	0.0	0.0010708276653122902	0.0	0.0	0.0010711352086081702	0.0	-0.000546936535471115	0.0	5.67937557042641e-10	-0.00012007494381936797	0.0	3.2708788072469966e-09
4.89	-0.0005475369101329522	0.0	-9.667985624318016e-09	-0.0010748806441572552	0.0	-0.09965609799169685	0.0	6.990135962022907e-06	0.0	0.9999999999550573	0.0	9.362208125586033e-06	0.0	0.0	0.001072830025052804	0.0	0.0	0.001073137735052403	0.0	-0.0005475369102155485	0.0	5.843233951692281e-10	-0.00012007495395398753	0.0	3.283456940580613e-09
4.8950000000000005	-0.0005481372849279346	0.0	-9.681939269255886e-09	-0.001077619836600042	0.0	-0.09965609798077486	0.0	6.991792341636019e-06	0.0	0.9999999999548895	0.0	9.379686149925907e-06	0.0	0.0	0.0010748328591106888	0.0	0.0	0.001075140736014441	0.0	-0.0005481372850106548	0.0	6.007721314203617e-10	-0.00012007496408857818	0.0	3.2960380570633196e-09
4.9	-0.0005487376597735909	0.0	-9.695876518236725e-09	-0.0010803620308954152	0.0	-0.09965609796979276	0.0	6.9934487308718275e-06	0.0	0.9999999999547214	0.0	9.397168313465684e-06	0.0	0.0	0.001076836167485944	0.0	0.0	0.0010771442114970414	0.0	-0.0005487376598564343	0.0	6.172837807117735e-10	-0.0001200749742232122	0.0	3.3086221566926893e-09
4.905	-0.0005493380346699209	0.0	-9.709797371260538e-09	-0.0010831072270433746	0.0	-0.09965609795875054	0.0	6.995105129730332e-06	0.0	0.9999999999545531	0.0	9.414654616205367e-06	0.0	0.0	0.00107883995017857	0.0	0.0	0.0010791481615029608	0.0	-0.0005493380347528869	0.0	6.338583579592048e-10	-0.00012007498435781369	0.0	3.321209239472117e-09
4.91	-0.0005499384096169249	0.0	-9.723701828327324e-09	-0.0010858554250439208	0.0	-0.09965609794764818	0.0	6.996761538211534e-06	0.0	0.9999999999543844	0.0	9.432145058144957e-06	0.0	0.0	0.0010808442071885667	0.0	0.0	0.0010811525860349557	0.0	-0.0005499384097000126	0.0	6.504958780784113e-10	-0.00012007499449246217	0.0	3.3337993054015465e-09
4.915	-0.0005505387846146028	0.0	-9.737589889437083e-09	-0.0010886066248970534	0.0	-0.0996560979364857	0.0	6.998417956315433e-06	0.0	0.9999999999542154	0.0	9.449639639284451e-06	0.0	0.0	0.0010828489385159342	0.0	0.0	0.001083157485095783	0.0	-0.0005505387846978114	0.0	6.671963559851369e-10	-0.00012007500462706726	0.0	3.3463923544809217e-09
4.92	-0.0005511391596629546	0.0	-9.751461554589815e-09	-0.0010913608266027723	0.0	-0.09965609792526309	0.0	7.000074384042028e-06	0.0	0.999999999954046	0.0	9.467138359623854e-06	0.0	0.0	0.0010848541441606722	0.0	0.0	0.001085162858688199	0.0	-0.0005511391597462832	0.0	6.839598065951374e-10	-0.00012007501476167417	0.0	3.358988386710204e-09
4.925	-0.0005517395347619802	0.0	-9.76531682378552e-09	-0.001094118030161078	0.0	-0.09965609791398035	0.0	7.001730821391319e-06	0.0	0.9999999999538763	0.0	9.484641219163161e-06	0.0	0.0	0.001086859824122781	0.0	0.0	0.001087168706814961	0.0	-0.0005517395348454282	0.0	7.007862448241581e-10	-0.00012007502489634253	0.0	3.371587402091073e-09
4.93	-0.0005523399099116799	0.0	-9.7791556970242e-09	-0.0010968782355719703	0.0	-0.09965609790263749	0.0	7.003387268363308e-06	0.0	0.9999999999537064	0.0	9.502148217902376e-06	0.0	0.0	0.0010888659784022607	0.0	0.0	0.0010891750294788254	0.0	-0.0005523399099952466	0.0	7.176756855879688e-10	-0.00012007503503096571	0.0	3.384189400624664e-09
4.9350000000000005	-0.0005529402851120534	0.0	-9.792978174305854e-09	-0.0010996414428354495	0.0	-0.0996560978912345	0.0	7.005043724957993e-06	0.0	0.9999999999535361	0.0	9.5196593558415e-06	0.0	0.0	0.0010908726069991117	0.0	0.0	0.001091181826682549	0.0	-0.0005529402851957378	0.0	7.346281438023235e-10	-0.00012007504516555636	0.0	3.3967943823091097e-09
4.94	-0.0005535406603631007	0.0	-9.80678425563048e-09	-0.0011024076519515148	0.0	-0.0996560978797714	0.0	7.006700191175375e-06	0.0	0.9999999999533654	0.0	9.537174632980528e-06	0.0	0.0	0.001092879709913333	0.0	0.0	0.0010931890984288881	0.0	-0.0005535406604469022	0.0	7.516436343829809e-10	-0.00012007505530018134	0.0	3.40940234714629e-09
4.945	-0.000554141035664822	0.0	-9.82057394099808e-09	-0.0011051768629201666	0.0	-0.09965609786824817	0.0	7.008356667015454e-06	0.0	0.9999999999531944	0.0	9.554694049319461e-06	0.0	0.0	0.0010948872871449247	0.0	0.0	0.0010951968447206	0.0	-0.0005541410357487397	0.0	7.687221722457084e-10	-0.00012007506543481174	0.0	3.4220132951366595e-09
4.95	-0.0005547414110172171	0.0	-9.834347230408652e-09	-0.001107949075741405	0.0	-0.0996560978566648	0.0	7.010013152478229e-06	0.0	0.9999999999530232	0.0	9.572217604858302e-06	0.0	0.0	0.001096895338693888	0.0	0.0	0.001097205065560441	0.0	-0.0005547414111012502	0.0	7.858637723062701e-10	-0.00012007507556938612	0.0	3.434627226280451e-09
4.955	-0.000555341786420286	0.0	-9.848104123862197e-09	-0.0011107242904152298	0.0	-0.09965609784502132	0.0	7.011669647563701e-06	0.0	0.9999999999528516	0.0	9.589745299597048e-06	0.0	0.0	0.001098903864560221	0.0	0.0	0.0010992137609511679	0.0	-0.0005553417865044336	0.0	8.030684494804372e-10	-0.00012007508570404906	0.0	3.4472441405789503e-09
4.96	-0.000555942161874029	0.0	-9.861844621358716e-09	-0.0011135025069416412	0.0	-0.0996560978333177	0.0	7.01332615227187e-06	0.0	0.9999999999526797	0.0	9.607277133535702e-06	0.0	0.0	0.0011009128647439255	0.0	0.0	0.0011012229308955373	0.0	-0.0005559421619582907	0.0	8.203362186839845e-10	-0.00012007509583865597	0.0	3.459864038032509e-09
4.965	-0.0005565425373784457	0.0	-9.875568722898207e-09	-0.001116283725320639	0.0	-0.09965609782155396	0.0	7.014982666602735e-06	0.0	0.9999999999525074	0.0	9.62481310667426e-06	0.0	0.0	0.0011029223392450003	0.0	0.0	0.0011032325753963061	0.0	-0.0005565425374628202	0.0	8.376670948326863e-10	-0.00012007510597323036	0.0	3.4724869186401322e-09
4.97	-0.0005571429129335363	0.0	-9.889276428480673e-09	-0.0011190679455522236	0.0	-0.0996560978097301	0.0	7.016639190556297e-06	0.0	0.9999999999523349	0.0	9.642353219012726e-06	0.0	0.0	0.001104932288063446	0.0	0.0	0.001105242694456231	0.0	-0.0005571429130180231	0.0	8.550610928423127e-10	-0.00012007511610791677	0.0	3.4851127824041386e-09
4.9750000000000005	-0.000557743288539301	0.0	-9.902967738106114e-09	-0.0011218551676363952	0.0	-0.09965609779784611	0.0	7.018295724132557e-06	0.0	0.999999999952162	0.0	9.6598974705511e-06	0.0	0.0	0.001106942711199263	0.0	0.0	0.0011072532880780684	0.0	-0.0005577432886238992	0.0	8.725182276286548e-10	-0.00012007512624246405	0.0	3.497741629324512e-09
4.98	-0.0005583436641957394	0.0	-9.916642651774526e-09	-0.0011246453915731527	0.0	-0.099656097785902	0.0	7.019952267331512e-06	0.0	0.9999999999519887	0.0	9.677445861289379e-06	0.0	0.0	0.0011089536086524503	0.0	0.0	0.0011092643562645753	0.0	-0.0005583436642804478	0.0	8.900385141074844e-10	-0.00012007513637706194	0.0	3.5103734594005268e-09
4.985	-0.0005589440399028518	0.0	-9.93030116948591e-09	-0.0011274386173624968	0.0	-0.09965609777389775	0.0	7.021608820153164e-06	0.0	0.9999999999518152	0.0	9.694998391227563e-06	0.0	0.0	0.001110964980423008	0.0	0.0	0.0011112758990185084	0.0	-0.0005589440399876699	0.0	9.076219671945895e-10	-0.00012007514651171944	0.0	3.523008272634434e-09
4.99	-0.000559544415660638	0.0	-9.943943291240268e-09	-0.0011302348450044273	0.0	-0.09965609776183339	0.0	7.023265382597513e-06	0.0	0.9999999999516413	0.0	9.712555060365654e-06	0.0	0.0	0.001112976826510937	0.0	0.0	0.0011132879163426243	0.0	-0.000559544415745565	0.0	9.252686018057581e-10	-0.0001200751566463119	0.0	3.535646069025977e-09
4.995	-0.0005601447914690981	0.0	-9.9575690170376e-09	-0.0011330340744989446	0.0	-0.09965609774970889	0.0	7.024921954664558e-06	0.0	0.9999999999514672	0.0	9.730115868703651e-06	0.0	0.0	0.0011149891469162364	0.0	0.0	0.0011153004082396798	0.0	-0.000560144791554133	0.0	9.429784328567791e-10	-0.00012007516678094049	0.0	3.548286848575326e-09
5.0	-0.0005607451673282321	0.0	-9.971178346877905e-09	-0.0011358363058460482	0.0	-0.09965609773752426	0.0	7.026578536354301e-06	0.0	0.9999999999512927	0.0	9.747680816241555e-06	0.0	0.0	0.001117001941638907	0.0	0.0	0.0011173133747124312	0.0	-0.0005607451674133744	0.0	9.60751475263443e-10	-0.00012007517691554018	0.0	3.5609306112837823e-09
5.005	-0.0005613455432380399	0.0	-9.984771280761183e-09	-0.0011386415390457383	0.0	-0.09965609772527953	0.0	7.028235127666739e-06	0.0	0.9999999999511179	0.0	9.765249902979365e-06	0.0	0.0	0.0011190152106789484	0.0	0.0	0.0011193268157636356	0.0	-0.0005613455433232885	0.0	9.785877439415494e-10	-0.00012007518705012541	0.0	3.5735773571519797e-09
5.01	-0.0005619459191985218	0.0	-9.998347818687434e-09	-0.0011414497740980152	0.0	-0.09965609771297465	0.0	7.029891728601875e-06	0.0	0.9999999999509427	0.0	9.782823128917082e-06	0.0	0.0	0.0011210289540363602	0.0	0.0	0.0011213407313960496	0.0	-0.0005619459192838757	0.0	9.96487253806894e-10	-0.00012007519718475762	0.0	3.5862270861783127e-09
5.015	-0.0005625462952096774	0.0	-1.0011907960656659e-08	-0.0011442610110028784	0.0	-0.09965609770060967	0.0	7.031548339159708e-06	0.0	0.9999999999507673	0.0	9.800400494054703e-06	0.0	0.0	0.0011230431717111427	0.0	0.0	0.00112335512161243	0.0	-0.000562546295295136	0.0	1.0144500197752673e-09	-0.00012007520731940067	0.0	3.598879798365747e-09
5.0200000000000005	-0.0005631466712715071	0.0	-1.0025451706668858e-08	-0.0011470752497603287	0.0	-0.09965609768818454	0.0	7.033204959340237e-06	0.0	0.9999999999505915	0.0	9.817981998392236e-06	0.0	0.0	0.0011250578637032964	0.0	0.0	0.0011253699864155332	0.0	-0.0005631466713570696	0.0	1.0324760567624874e-09	-0.00012007521745398771	0.0	3.6115354937152678e-09
5.025	-0.0005637470473840105	0.0	-1.003897905672403e-08	-0.001149892490370365	0.0	-0.09965609767569929	0.0	7.0348615891434625e-06	0.0	0.9999999999504153	0.0	9.835567641929671e-06	0.0	0.0	0.001127073030012821	0.0	0.0	0.0011273853258081162	0.0	-0.0005637470474696758	0.0	1.0505653796843523e-09	-0.00012007522758854764	0.0	3.6241941722234493e-09
5.03	-0.0005643474235471878	0.0	-1.0052490010822173e-08	-0.0011527127328329878	0.0	-0.09965609766315392	0.0	7.036518228569385e-06	0.0	0.9999999999502389	0.0	9.853157424667012e-06	0.0	0.0	0.001129088670639716	0.0	0.0	0.0011294011397929356	0.0	-0.0005643474236329551	0.0	1.0687180034566585e-09	-0.00012007523772316901	0.0	3.6368558338937456e-09
5.035	-0.000564947799761039	0.0	-1.006598456896329e-08	-0.0011555359771481973	0.0	-0.09965609765054842	0.0	7.038174877618005e-06	0.0	0.9999999999500622	0.0	9.87075134660426e-06	0.0	0.0	0.0011311047855839817	0.0	0.0	0.001131417428372748	0.0	-0.0005649477998469076	0.0	1.0869339429952287e-09	-0.00012007524785779941	0.0	3.6495204787277587e-09
5.04	-0.0005655481760255642	0.0	-1.0079462731147382e-08	-0.001158362223315993	0.0	-0.0996560976378828	0.0	7.03983153628932e-06	0.0	0.9999999999498851	0.0	9.888349407741414e-06	0.0	0.0	0.0011331213748456183	0.0	0.0	0.0011334341915503106	0.0	-0.000565548176111533	0.0	1.1052132132158733e-09	-0.00012007525799238644	0.0	3.6621881067238827e-09
5.045	-0.0005661485523407631	0.0	-1.0092924497374447e-08	-0.0011611914713363755	0.0	-0.09965609762515705	0.0	7.041488204583332e-06	0.0	0.9999999999497077	0.0	9.905951608078475e-06	0.0	0.0	0.0011351384384246255	0.0	0.0	0.0011354514293283795	0.0	-0.0005661485524268314	0.0	1.1235558290344054e-09	-0.00012007526812696264	0.0	3.674858717882576e-09
5.05	-0.000566748928706636	0.0	-1.0106369867644483e-08	-0.0011640237212093446	0.0	-0.09965609761237117	0.0	7.043144882500042e-06	0.0	0.9999999999495299	0.0	9.923557947615442e-06	0.0	0.0	0.0011371559763210038	0.0	0.0	0.0011374691417097116	0.0	-0.0005667489287928028	0.0	1.1419618053666388e-09	-0.0001200752782616111	0.0	3.6875323122052206e-09
5.055	-0.0005673493051231828	0.0	-1.0119798841957493e-08	-0.0011668589729349002	0.0	-0.09965609759952518	0.0	7.0448015700394474e-06	0.0	0.999999999949352	0.0	9.941168426352316e-06	0.0	0.0	0.0011391739885347528	0.0	0.0	0.0011394873286970635	0.0	-0.0005673493052094475	0.0	1.1604311571283988e-09	-0.00012007528839622886	0.0	3.7002088896926406e-09
5.0600000000000005	-0.0005679496815904036	0.0	-1.0133211420313481e-08	-0.0011696972265130426	0.0	-0.09965609758661904	0.0	7.04645826720155e-06	0.0	0.9999999999491735	0.0	9.958783044289097e-06	0.0	0.0	0.0011411924750658726	0.0	0.0	0.001141505990293192	0.0	-0.000567949681676765	0.0	1.1789638992355063e-09	-0.00012007529853075988	0.0	3.7128884503446187e-09
5.065	-0.000568550058108298	0.0	-1.0146607602712438e-08	-0.0011725384819437712	0.0	-0.09965609757365279	0.0	7.04811497398635e-06	0.0	0.9999999999489948	0.0	9.976401801425784e-06	0.0	0.0	0.001143211435914363	0.0	0.0	0.001143525126500854	0.0	-0.0005685500581947552	0.0	1.1975600466037866e-09	-0.00012007530866538305	0.0	3.725570994161489e-09
5.07	-0.0005691504346768665	0.0	-1.0159987389154367e-08	-0.0011753827392270864	0.0	-0.09965609756062642	0.0	7.049771690393846e-06	0.0	0.9999999999488158	0.0	9.994024697762376e-06	0.0	0.0	0.0011452308710802246	0.0	0.0	0.0011455447373228058	0.0	-0.0005691504347634189	0.0	1.216219614149064e-09	-0.00012007531880003153	0.0	3.738256521143958e-09
5.075	-0.0005697508112961088	0.0	-1.017335077963927e-08	-0.001178229998362988	0.0	-0.09965609754753992	0.0	7.051428416424038e-06	0.0	0.9999999999486365	0.0	1.0011651733298876e-05	0.0	0.0	0.0011472507805634566	0.0	0.0	0.0011475648227618042	0.0	-0.0005697508113827554	0.0	1.234942616787171e-09	-0.00012007532893458785	0.0	3.750945031293684e-09
5.08	-0.0005703511879660251	0.0	-1.0186697774167148e-08	-0.0011810802593514762	0.0	-0.09965609753439328	0.0	7.053085152076927e-06	0.0	0.9999999999484568	0.0	1.002928290803528e-05	0.0	0.0	0.0011492711643640596	0.0	0.0	0.0011495853828206062	0.0	-0.0005703511880527647	0.0	1.253729069433944e-09	-0.00012007533906916584	0.0	3.763636524608916e-09
5.085	-0.0005709515646866152	0.0	-1.0200028372737998e-08	-0.0011839335221925508	0.0	-0.09965609752118652	0.0	7.054741897352514e-06	0.0	0.9999999999482768	0.0	1.004691822197159e-05	0.0	0.0	0.0011512920224820329	0.0	0.0	0.0011516064175019682	0.0	-0.0005709515647734471	0.0	1.2725789870052052e-09	-0.00012007534920378541	0.0	3.776331001091128e-09
5.09	-0.0005715519414578791	0.0	-1.0213342575351821e-08	-0.0011867897868862122	0.0	-0.09965609750791965	0.0	7.056398652250797e-06	0.0	0.9999999999480965	0.0	1.006455767510781e-05	0.0	0.0	0.0011533133549173774	0.0	0.0	0.0011536279268086471	0.0	-0.0005715519415448025	0.0	1.291492384416803e-09	-0.00012007535933837244	0.0	3.789028460742307e-09
5.095	-0.000572152318279817	0.0	-1.0226640382008619e-08	-0.00118964905343246	0.0	-0.09965609749459264	0.0	7.058055416771776e-06	0.0	0.9999999999479159	0.0	1.0082201267443934e-05	0.0	0.0	0.0011553351616700926	0.0	0.0	0.0011556499107433994	0.0	-0.0005721523183668309	0.0	1.3104692765845752e-09	-0.00012007536947297394	0.0	3.801728903561522e-09
5.1000000000000005	-0.0005727526951524288	0.0	-1.023992179270839e-08	-0.0011925113218312947	0.0	-0.0996560974812055	0.0	7.059712190915453e-06	0.0	0.9999999999477349	0.0	1.0099848998979966e-05	0.0	0.0	0.001157357442740179	0.0	0.0	0.001157672369308982	0.0	-0.0005727526952395323	0.0	1.3295096784243652e-09	-0.00012007537960759169	0.0	3.814432329548716e-09
5.105	-0.0005733530720757145	0.0	-1.0253186807451135e-08	-0.0011953765920827157	0.0	-0.09965609746775825	0.0	7.061368974681825e-06	0.0	0.9999999999475537	0.0	1.0117500869715903e-05	0.0	0.0	0.0011593801981276358	0.0	0.0	0.0011596953025081514	0.0	-0.0005733530721629068	0.0	1.3486136048520116e-09	-0.00012007538974217872	0.0	3.827138738705598e-09
5.11	-0.0005739534490496741	0.0	-1.0266435426236851e-08	-0.001198244864186723	0.0	-0.09965609745425087	0.0	7.063025768070894e-06	0.0	0.9999999999473721	0.0	1.0135156879651746e-05	0.0	0.0	0.0011614034278324636	0.0	0.0	0.0011617187103436645	0.0	-0.0005739534491369541	0.0	1.367781070783372e-09	-0.00012007539987673866	0.0	3.839848131033296e-09
5.115	-0.0005745538260743075	0.0	-1.027966764906554e-08	-0.001201116138143317	0.0	-0.09965609744068336	0.0	7.064682571082661e-06	0.0	0.9999999999471901	0.0	1.0152817028787496e-05	0.0	0.0	0.001163427131854662	0.0	0.0	0.001163742592818278	0.0	-0.0005745538261616742	0.0	1.387012091134293e-09	-0.00012007541001135641	0.0	3.852560506529475e-09
5.12	-0.0005751542031496149	0.0	-1.0292883475937203e-08	-0.0012039904139524973	0.0	-0.09965609742705572	0.0	7.066339383717124e-06	0.0	0.999999999947008	0.0	1.017048131712315e-05	0.0	0.0	0.0011654513101942308	0.0	0.0	0.0011657669499347482	0.0	-0.0005751542032370676	0.0	1.4063066808206186e-09	-0.00012007542014595609	0.0	3.8652758651969635e-09
5.125	-0.0005757545802755961	0.0	-1.030608290685184e-08	-0.0012068676916142643	0.0	-0.09965609741336796	0.0	7.067996205974283e-06	0.0	0.9999999999468253	0.0	1.0188149744658713e-05	0.0	0.0	0.001167475962851171	0.0	0.0	0.0011677917816958323	0.0	-0.0005757545803631337	0.0	1.4256648547582158e-09	-0.00012007543028051061	0.0	3.877994207036485e-09
5.13	-0.0005763549574522511	0.0	-1.0319265941809449e-08	-0.0012097479711286178	0.0	-0.09965609739962009	0.0	7.06965303785414e-06	0.0	0.9999999999466425	0.0	1.0205822311394182e-05	0.0	0.0	0.001169501089825482	0.0	0.0	0.0011698170881042867	0.0	-0.0005763549575398728	0.0	1.4450866278629354e-09	-0.00012007544041512655	0.0	3.890715532046832e-09
5.135	-0.0005769553346795801	0.0	-1.0332432580810032e-08	-0.001212631252495558	0.0	-0.09965609738581208	0.0	7.071309879356693e-06	0.0	0.9999999999464593	0.0	1.0223499017329556e-05	0.0	0.0	0.0011715266911171637	0.0	0.0	0.0011718428691628682	0.0	-0.000576955334767285	0.0	1.4645720150506382e-09	-0.00012007545054973708	0.0	3.903439840229701e-09
5.14	-0.000577555711957583	0.0	-1.0345582823853587e-08	-0.0012155175357150844	0.0	-0.09965609737194393	0.0	7.072966730481942e-06	0.0	0.9999999999462758	0.0	1.0241179862464838e-05	0.0	0.0	0.001173552766726216	0.0	0.0	0.0011738691248743334	0.0	-0.00057755571204537	0.0	1.4841210312371877e-09	-0.00012007546068430424	0.0	3.9161671315858235e-09
5.1450000000000005	-0.0005781560892862598	0.0	-1.0358716670940119e-08	-0.001218406820787198	0.0	-0.09965609735801567	0.0	7.0746235912298895e-06	0.0	0.9999999999460919	0.0	1.0258864846800028e-05	0.0	0.0	0.0011755793166526396	0.0	0.0	0.0011758958552414392	0.0	-0.000578156089374128	0.0	1.5037336913384515e-09	-0.00012007547081888765	0.0	3.928897406114914e-09
5.15	-0.0005787564666656105	0.0	-1.0371834122069622e-08	-0.0012212991077118977	0.0	-0.09965609734402728	0.0	7.0762804616005325e-06	0.0	0.9999999999459077	0.0	1.027655397033512e-05	0.0	0.0	0.0011776063408964338	0.0	0.0	0.0011779230602669423	0.0	-0.0005787564667535589	0.0	1.5234100102702931e-09	-0.00012007548095346928	0.0	3.941630663817806e-09
5.155	-0.000579356844095635	0.0	-1.0384935177242097e-08	-0.0012241943964891838	0.0	-0.09965609732997877	0.0	7.077937341593872e-06	0.0	0.9999999999457232	0.0	1.0294247233070122e-05	0.0	0.0	0.0011796338394575985	0.0	0.0	0.0011799507399535992	0.0	-0.0005793568441836627	0.0	1.5431500029485868e-09	-0.00012007549108804908	0.0	3.9543669046952655e-09
5.16	-0.0005799572215763335	0.0	-1.0398019836457547e-08	-0.0012270926871190565	0.0	-0.09965609731587013	0.0	7.079594231209908e-06	0.0	0.9999999999455383	0.0	1.0311944635005028e-05	0.0	0.0	0.0011816618123361342	0.0	0.0	0.0011819788943041667	0.0	-0.0005799572216644394	0.0	1.5629536842892027e-09	-0.00012007550122267044	0.0	3.967106128746581e-09
5.165	-0.0005805575991077058	0.0	-1.0411088099715969e-08	-0.0012299939796015158	0.0	-0.09965609730170136	0.0	7.081251130448642e-06	0.0	0.9999999999453533	0.0	1.0329646176139842e-05	0.0	0.0	0.0011836902595320409	0.0	0.0	0.0011840075233214016	0.0	-0.0005805575991958893	0.0	1.5828210692080123e-09	-0.00012007551135724664	0.0	3.979848335974146e-09
5.17	-0.0005811579766897521	0.0	-1.0424139967017364e-08	-0.0012328982739365617	0.0	-0.09965609728747248	0.0	7.082908039310071e-06	0.0	0.9999999999451678	0.0	1.034735185647456e-05	0.0	0.0	0.0011857191810453183	0.0	0.0	0.0011860366270080604	0.0	-0.0005811579767780118	0.0	1.602752172620903e-09	-0.00012007552149180657	0.0	3.992593526376616e-09
5.175	-0.0005817583543224721	0.0	-1.0437175438361734e-08	-0.001235805570124194	0.0	-0.09965609727318346	0.0	7.084564957794198e-06	0.0	0.999999999944982	0.0	1.0365061676009186e-05	0.0	0.0	0.0011877485768759662	0.0	0.0	0.0011880662053669	0.0	-0.0005817583544108074	0.0	1.6227470094437398e-09	-0.00012007553162638458	0.0	4.005341699956006e-09
5.18	-0.0005823587320058661	0.0	-1.0450194513749075e-08	-0.0012387158681644128	0.0	-0.09965609725883431	0.0	7.086221885901022e-06	0.0	0.9999999999447958	0.0	1.0382775634743717e-05	0.0	0.0	0.0011897784470239852	0.0	0.0	0.0011900962584006768	0.0	-0.0005823587320942757	0.0	1.6428055945924253e-09	-0.0001200755417609698	0.0	4.018092856713135e-09
5.1850000000000005	-0.0005829591097399341	0.0	-1.0463197193179394e-08	-0.0012416291680572185	0.0	-0.09965609724442505	0.0	7.087878823630542e-06	0.0	0.9999999999446094	0.0	1.0400493732678159e-05	0.0	0.0	0.0011918087914893753	0.0	0.0	0.0011921267861121478	0.0	-0.0005829591098284172	0.0	1.6629279429828314e-09	-0.0001200755518956002	0.0	4.0308469966458015e-09
5.19	-0.0005835594875246759	0.0	-1.0476183476652681e-08	-0.0012445454698026106	0.0	-0.09965609722995565	0.0	7.0895357709827585e-06	0.0	0.9999999999444227	0.0	1.0418215969812503e-05	0.0	0.0	0.0011938396102721357	0.0	0.0	0.0011941577885040695	0.0	-0.0005835594876132316	0.0	1.683114069530847e-09	-0.0001200755620301529	0.0	4.043604119757037e-09
5.195	-0.0005841598653600915	0.0	-1.0489153364168943e-08	-0.001247464773400589	0.0	-0.09965609721542613	0.0	7.091192727957671e-06	0.0	0.9999999999442356	0.0	1.0435942346146754e-05	0.0	0.0	0.0011958709033722673	0.0	0.0	0.0011961892655791987	0.0	-0.0005841598654487187	0.0	1.7033639891523655e-09	-0.00012007557216470923	0.0	4.0563642260464066e-09
5.2	-0.000584760243246181	0.0	-1.0502106855728178e-08	-0.0012503870788511538	0.0	-0.09965609720083649	0.0	7.092849694555282e-06	0.0	0.9999999999440482	0.0	1.0453672861680911e-05	0.0	0.0	0.0011979026707897695	0.0	0.0	0.001198221217340292	0.0	-0.0005847602433348788	0.0	1.7236777167632761e-09	-0.0001200755822993071	0.0	4.069127315514896e-09
5.205	-0.0005853606211829445	0.0	-1.0515043951330388e-08	-0.0012533123861543055	0.0	-0.09965609718618672	0.0	7.0945066707755885e-06	0.0	0.9999999999438605	0.0	1.0471407516414975e-05	0.0	0.0	0.0011999349125246424	0.0	0.0	0.0012002536437901062	0.0	-0.0005853606212717116	0.0	1.74405526727948e-09	-0.00012007559243385618	0.0	4.0818933881626464e-09
5.21	-0.0005859609991703818	0.0	-1.052796465097557e-08	-0.0012562406953100433	0.0	-0.09965609717147682	0.0	7.096163656618592e-06	0.0	0.9999999999436724	0.0	1.0489146310348945e-05	0.0	0.0	0.0012019676285768865	0.0	0.0	0.001202286544931398	0.0	-0.0005859609992592174	0.0	1.7644966556168686e-09	-0.00012007560256847755	0.0	4.094662443989878e-09
5.215	-0.000586561377208493	0.0	-1.0540868954663724e-08	-0.001259172006318368	0.0	-0.0996560971567068	0.0	7.097820652084292e-06	0.0	0.9999999999434841	0.0	1.0506889243482822e-05	0.0	0.0	0.0012040008189465013	0.0	0.0	0.0012043199207669242	0.0	-0.0005865613772973963	0.0	1.7850018966913465e-09	-0.00012007561270305194	0.0	4.10743448299794e-09
5.22	-0.0005871617552972782	0.0	-1.0553756862394852e-08	-0.001262106319179279	0.0	-0.09965609714187665	0.0	7.099477657172689e-06	0.0	0.9999999999432954	0.0	1.0524636315816603e-05	0.0	0.0	0.0012060344836334865	0.0	0.0	0.0012063537712994413	0.0	-0.0005871617553862479	0.0	1.8055710054188158e-09	-0.00012007562283762452	0.0	4.120209505186617e-09
5.2250000000000005	-0.0005877621334367372	0.0	-1.0566628374168956e-08	-0.0012650436338927772	0.0	-0.09965609712698638	0.0	7.101134671883782e-06	0.0	0.9999999999431064	0.0	1.0542387527350296e-05	0.0	0.0	0.0012080686226378433	0.0	0.0	0.0012083880965317061	0.0	-0.0005877621335257725	0.0	1.8262039967151818e-09	-0.00012007563297218445	0.0	4.13298751055682e-09
5.23	-0.00058836251162687	0.0	-1.0579483489986031e-08	-0.0012679839504588612	0.0	-0.09965609711203598	0.0	7.102791696217573e-06	0.0	0.999999999942917	0.0	1.0560142878083892e-05	0.0	0.0	0.0012101032359595706	0.0	0.0	0.0012104228964664753	0.0	-0.0005883625117159698	0.0	1.8469008854963533e-09	-0.00012007564310676788	0.0	4.145768499108372e-09
5.235	-0.0005889628898676769	0.0	-1.0592322209846078e-08	-0.001270927268877532	0.0	-0.09965609709702546	0.0	7.10444873017406e-06	0.0	0.9999999999427274	0.0	1.0577902368017392e-05	0.0	0.0	0.0012121383235986685	0.0	0.0	0.0012124581711065055	0.0	-0.0005889628899568402	0.0	1.8676616866782367e-09	-0.00012007565324136575	0.0	4.158552470842722e-09
5.24	-0.0005895632681591575	0.0	-1.0605144533749099e-08	-0.0012738735891487892	0.0	-0.0996560970819548	0.0	7.106105773753243e-06	0.0	0.9999999999425374	0.0	1.0595665997150801e-05	0.0	0.0	0.0012141738855551375	0.0	0.0	0.0012144939204545536	0.0	-0.0005895632682483833	0.0	1.8884864151767513e-09	-0.00012007566337591483	0.0	4.171339425759445e-09
5.245	-0.000590163646501312	0.0	-1.0617950461695094e-08	-0.001276822911272633	0.0	-0.09965609706682403	0.0	7.107762826955123e-06	0.0	0.9999999999423471	0.0	1.0613433765484114e-05	0.0	0.0	0.001216209921828977	0.0	0.0	0.001216530144513376	0.0	-0.0005901636465905993	0.0	1.9093750859078032e-09	-0.0001200756735104802	0.0	4.1841293638594595e-09
5.25	-0.0005907640248941405	0.0	-1.0630739993684062e-08	-0.0012797752352490632	0.0	-0.09965609705163313	0.0	7.1094198897797e-06	0.0	0.9999999999421565	0.0	1.0631205673017334e-05	0.0	0.0	0.0012182464324201876	0.0	0.0	0.0012185668432857298	0.0	-0.0005907640249834882	0.0	1.93032771378732e-09	-0.00012007568364507084	0.0	4.196922285144114e-09
5.255	-0.0005913644033376428	0.0	-1.0643513129716003e-08	-0.00128273056107808	0.0	-0.0996560970363821	0.0	7.111076962226974e-06	0.0	0.9999999999419655	0.0	1.0648981719750462e-05	0.0	0.0	0.001220283417328769	0.0	0.0	0.0012206040167743713	0.0	-0.0005913644034270499	0.0	1.9513443137312177e-09	-0.0001200756937796145	0.0	4.209718189612579e-09
5.26	-0.000591964781831819	0.0	-1.0656269869790917e-08	-0.0012856888887596836	0.0	-0.09965609702107095	0.0	7.112734044296944e-06	0.0	0.9999999999417742	0.0	1.0666761905683495e-05	0.0	0.0	0.001222320876554721	0.0	0.0	0.0012226416649820575	0.0	-0.0005919647819212844	0.0	1.9724249006554207e-09	-0.00012007570391417083	0.0	4.222517077266124e-09
5.265	-0.0005925651603766691	0.0	-1.0669010213908805e-08	-0.0012886502182938733	0.0	-0.09965609700569966	0.0	7.114391135989611e-06	0.0	0.9999999999415826	0.0	1.0684546230816436e-05	0.0	0.0	0.0012243588100980442	0.0	0.0	0.0012246797879115448	0.0	-0.0005925651604661917	0.0	1.9935694894758547e-09	-0.00012007571404878316	0.0	4.235318948105085e-09
5.2700000000000005	-0.0005931655389721931	0.0	-1.0681734162069668e-08	-0.0012916145496806503	0.0	-0.09965609699026827	0.0	7.116048237304976e-06	0.0	0.9999999999413908	0.0	1.0702334695149285e-05	0.0	0.0	0.0012263972179587385	0.0	0.0	0.0012267183855655902	0.0	-0.0005931655390617722	0.0	2.0147780951084478e-09	-0.00012007572418333224	0.0	4.2481238021296484e-09
5.275	-0.000593765917618391	0.0	-1.0694441714273501e-08	-0.0012945818829200133	0.0	-0.09965609697477673	0.0	7.117705348243036e-06	0.0	0.9999999999411985	0.0	1.0720127298682037e-05	0.0	0.0	0.001228436100136803	0.0	0.0	0.0012287574579469504	0.0	-0.0005937659177080251	0.0	2.0360507324691283e-09	-0.00012007573431790843	0.0	4.2609316393403946e-09
5.28	-0.0005943662963152628	0.0	-1.070713287052031e-08	-0.0012975522180119626	0.0	-0.09965609695922507	0.0	7.1193624688037925e-06	0.0	0.999999999941006	0.0	1.0737924041414695e-05	0.0	0.0	0.0012304754566322387	0.0	0.0	0.001230797005058382	0.0	-0.0005943662964049513	0.0	2.05738741647383e-09	-0.00012007574445248644	0.0	4.273742459738239e-09
5.285	-0.0005949666750628084	0.0	-1.071980763081009e-08	-0.0013005255549564988	0.0	-0.0996560969436133	0.0	7.121019598987247e-06	0.0	0.999999999940813	0.0	1.075572492334726e-05	0.0	0.0	0.001232515287445045	0.0	0.0	0.0012328370269026414	0.0	-0.0005949666751525499	0.0	2.07878816203849e-09	-0.0001200757545870265	0.0	4.286556263323775e-09
5.29	-0.000595567053861028	0.0	-1.0732465995142844e-08	-0.0013035018937536213	0.0	-0.09965609692794139	0.0	7.122676738793398e-06	0.0	0.9999999999406198	0.0	1.0773529944479731e-05	0.0	0.0	0.0012345555925752224	0.0	0.0	0.0012348775234824858	0.0	-0.0005955670539508216	0.0	2.100252984079047e-09	-0.00012007576472161353	0.0	4.2993730500965e-09
5.295	-0.0005961674327099214	0.0	-1.0745107963518571e-08	-0.0013064812344033305	0.0	-0.09965609691220936	0.0	7.124333888222244e-06	0.0	0.9999999999404263	0.0	1.0791339104812109e-05	0.0	0.0	0.0012365963720227704	0.0	0.0	0.0012369184948006716	0.0	-0.0005961674327997661	0.0	2.1217818975114357e-09	-0.00012007577485617707	0.0	4.3121928200577495e-09
5.3	-0.0005967678116094887	0.0	-1.0757733535937271e-08	-0.001309463576905626	0.0	-0.0996560968964172	0.0	7.1259910472737884e-06	0.0	0.9999999999402325	0.0	1.0809152404344393e-05	0.0	0.0	0.0012386376257876894	0.0	0.0	0.0012389599408599557	0.0	-0.0005967678116993834	0.0	2.143374917251607e-09	-0.00012007578499072797	0.0	4.325015573208627e-09
5.305	-0.0005973681905597299	0.0	-1.0770342712398944e-08	-0.0013124489212605081	0.0	-0.09965609688056491	0.0	7.127648215948029e-06	0.0	0.9999999999400383	0.0	1.0826969843076583e-05	0.0	0.0	0.0012406793538699793	0.0	0.0	0.0012410018616630946	0.0	-0.0005973681906496734	0.0	2.1650320582155046e-09	-0.00012007579512530236	0.0	4.337841309549003e-09
5.3100000000000005	-0.0005979685695606451	0.0	-1.0782935492903593e-08	-0.0013154372674679773	0.0	-0.0996560968646525	0.0	7.1293053942449665e-06	0.0	0.9999999999398438	0.0	1.0844791421008684e-05	0.0	0.0	0.0012427215562696404	0.0	0.0	0.001243044257212845	0.0	-0.0005979685696506364	0.0	2.1867533353190793e-09	-0.00012007580525987493	0.0	4.3506700290786835e-09
5.315	-0.0005985689486122341	0.0	-1.0795511877451213e-08	-0.0013184286155280326	0.0	-0.09965609684867997	0.0	7.1309625821646005e-06	0.0	0.9999999999396489	0.0	1.0862617138140687e-05	0.0	0.0	0.001244764232986672	0.0	0.0	0.0012450871275119636	0.0	-0.0005985689487022721	0.0	2.208538763478274e-09	-0.00012007581539444209	0.0	4.3635017317975236e-09
5.32	-0.000599169327714497	0.0	-1.0808071866041807e-08	-0.0013214229654406743	0.0	-0.09965609683264731	0.0	7.132619779706931e-06	0.0	0.9999999999394539	0.0	1.0880446994472595e-05	0.0	0.0	0.0012468073840210742	0.0	0.0	0.0012471304725632073	0.0	-0.0005991693278045808	0.0	2.230388357609041e-09	-0.00012007582552900925	0.0	4.376336417708474e-09
5.325	-0.0005997697068674337	0.0	-1.0820615458675373e-08	-0.0013244203172059026	0.0	-0.09965609681655452	0.0	7.134276986871958e-06	0.0	0.9999999999392584	0.0	1.0898280990004412e-05	0.0	0.0	0.0012488510093728474	0.0	0.0	0.0012491742923693326	0.0	-0.000599769706957562	0.0	2.252302132627346e-09	-0.00012007583566351316	0.0	4.3891740868121475e-09
5.33	-0.0006003700860710444	0.0	-1.0833142655351913e-08	-0.0013274206708237173	0.0	-0.0996560968004016	0.0	7.135934203659683e-06	0.0	0.9999999999390625	0.0	1.0916119124736134e-05	0.0	0.0	0.0012508951090419917	0.0	0.0	0.0012512185869330962	0.0	-0.000600370086161216	0.0	2.274280103449146e-09	-0.00012007584579808935	0.0	4.4020147391053465e-09
5.335	-0.0006009704653253289	0.0	-1.0845653456071427e-08	-0.0013304240262941188	0.0	-0.09965609678418857	0.0	7.1375914300701035e-06	0.0	0.9999999999388665	0.0	1.0933961398667762e-05	0.0	0.0	0.0012529396830285066	0.0	0.0	0.001253263356257255	0.0	-0.000600970465415543	0.0	2.2963222849903873e-09	-0.00012007585593267278	0.0	4.414858374591434e-09
5.34	-0.0006015708446302873	0.0	-1.0858147860833914e-08	-0.0013334303836171066	0.0	-0.09965609676791541	0.0	7.139248666103221e-06	0.0	0.9999999999386701	0.0	1.0951807811799297e-05	0.0	0.0	0.0012549847313323924	0.0	0.0	0.0012553086003445656	0.0	-0.0006015708447205427	0.0	2.3184286921670502e-09	-0.00012007586606723632	0.0	4.42770499327192e-09
5.345	-0.0006021712239859196	0.0	-1.0870625869639373e-08	-0.001336439742792681	0.0	-0.09965609675158212	0.0	7.140905911759035e-06	0.0	0.9999999999384733	0.0	1.0969658364130739e-05	0.0	0.0	0.0012570302539536493	0.0	0.0	0.0012573543191977848	0.0	-0.0006021712240762154	0.0	2.3405993398950952e-09	-0.00012007587620178541	0.0	4.440554595145433e-09
5.3500000000000005	-0.0006027716033922259	0.0	-1.0883087482487808e-08	-0.0013394521038208424	0.0	-0.0996560967351887	0.0	7.142563167037546e-06	0.0	0.9999999999382762	0.0	1.0987513055662089e-05	0.0	0.0	0.0012590762508922768	0.0	0.0	0.001259400512819669	0.0	-0.0006027716034825606	0.0	2.3628342430904932e-09	-0.00012007588633633089	0.0	4.453407180212166e-09
5.355	-0.0006033719828492061	0.0	-1.0895532699379215e-08	-0.0013424674667015899	0.0	-0.09965609671873517	0.0	7.144220431938754e-06	0.0	0.9999999999380788	0.0	1.1005371886393342e-05	0.0	0.0	0.0012611227221482751	0.0	0.0	0.0012614471812129751	0.0	-0.0006033719829395787	0.0	2.3851334166692067e-09	-0.00012007589647091792	0.0	4.466262748472525e-09
5.36	-0.00060397236235686	0.0	-1.0907961520313594e-08	-0.001345485831434924	0.0	-0.0996560967022215	0.0	7.145877706462658e-06	0.0	0.9999999999378811	0.0	1.1023234856324503e-05	0.0	0.0	0.0012631696677216447	0.0	0.0	0.0012634943243804598	0.0	-0.0006039723624472697	0.0	2.407496875547211e-09	-0.00012007590660548326	0.0	4.479121299928475e-09
5.365	-0.0006045727419151879	0.0	-1.0920373945290947e-08	-0.0013485071980208444	0.0	-0.0996560966856477	0.0	7.147534990609259e-06	0.0	0.9999999999376831	0.0	1.104110196545557e-05	0.0	0.0	0.001265217087612385	0.0	0.0	0.0012655419423248796	0.0	-0.0006045727420056334	0.0	2.4299246346404853e-09	-0.00012007591673998899	0.0	4.491982834580899e-09
5.37	-0.0006051731215241897	0.0	-1.0932769974311273e-08	-0.0013515315664593514	0.0	-0.09965609666901379	0.0	7.1491922843785564e-06	0.0	0.9999999999374847	0.0	1.1058973213786542e-05	0.0	0.0	0.001267264981820496	0.0	0.0	0.0012675900350489916	0.0	-0.0006051731216146697	0.0	2.4524167088650128e-09	-0.00012007592687452181	0.0	4.504847352428804e-09
5.375	-0.0006057735011838653	0.0	-1.0945149607374573e-08	-0.001354558936750445	0.0	-0.09965609665231975	0.0	7.150849587770551e-06	0.0	0.9999999999372859	0.0	1.107684860131742e-05	0.0	0.0	0.0012693133503459777	0.0	0.0	0.0012696386025555521	0.0	-0.0006057735012743788	0.0	2.4749731131367667e-09	-0.00012007593700913595	0.0	4.5177148534725195e-09
5.38	-0.0006063738808942149	0.0	-1.0957512844480845e-08	-0.0013575893088941253	0.0	-0.09965609663556559	0.0	7.152506900785242e-06	0.0	0.999999999937087	0.0	1.1094728128048207e-05	0.0	0.0	0.0012713621931888307	0.0	0.0	0.001271687644847318	0.0	-0.000606373880984761	0.0	2.4975938623717333e-09	-0.00012007594714367059	0.0	4.530585337713723e-09
5.385	-0.0006069742606552383	0.0	-1.0969859685630091e-08	-0.001360622682890392	0.0	-0.09965609661875129	0.0	7.15416422342263e-06	0.0	0.9999999999368876	0.0	1.1112611793978899e-05	0.0	0.0	0.0012734115103490542	0.0	0.0	0.001273737161927046	0.0	-0.0006069742607458155	0.0	2.520278971485899e-09	-0.0001200759572782016	0.0	4.543458805151819e-09
5.39	-0.0006075746404669356	0.0	-1.098219013082231e-08	-0.0013636590587392452	0.0	-0.09965609660187687	0.0	7.155821555682714e-06	0.0	0.999999999936688	0.0	1.1130499599109497e-05	0.0	0.0	0.0012754613018266488	0.0	0.0	0.0012757871537974928	0.0	-0.000607574640557543	0.0	2.5430284553952483e-09	-0.00012007596741280671	0.0	4.556335255788313e-09
5.3950000000000005	-0.0006081750203293069	0.0	-1.0994504180057504e-08	-0.0013666984364406854	0.0	-0.09965609658494232	0.0	7.157478897565496e-06	0.0	0.999999999936488	0.0	1.1148391543440005e-05	0.0	0.0	0.0012775115676216145	0.0	0.0	0.001277837620461415	0.0	-0.0006081750204199435	0.0	2.565842329015779e-09	-0.00012007597754732869	0.0	4.569214689622775e-09
5.4	-0.0006087754002423519	0.0	-1.100680183333567e-08	-0.0013697408159947116	0.0	-0.09965609656794765	0.0	7.159136249070973e-06	0.0	0.9999999999362877	0.0	1.1166287626970416e-05	0.0	0.0	0.0012795623077339509	0.0	0.0	0.0012798885619215695	0.0	-0.0006087754003330163	0.0	2.588720607263475e-09	-0.00012007598768186513	0.0	4.582097106656682e-09
5.405	-0.000609375780206071	0.0	-1.1019083090656809e-08	-0.0013727861974013244	0.0	-0.09965609655089284	0.0	7.160793610199148e-06	0.0	0.9999999999360871	0.0	1.1184187849700733e-05	0.0	0.0	0.0012816135221636583	0.0	0.0	0.0012819399781807128	0.0	-0.0006093757802967621	0.0	2.6116633050543443e-09	-0.00012007599781642868	0.0	4.594982506889682e-09
5.41	-0.0006099761602204638	0.0	-1.103134795202092e-08	-0.0013758345806605238	0.0	-0.09965609653377792	0.0	7.162450980950019e-06	0.0	0.9999999999358862	0.0	1.1202092211630955e-05	0.0	0.0	0.001283665210910736	0.0	0.0	0.0012839918692416016	0.0	-0.0006099761603111805	0.0	2.6346704373043717e-09	-0.00012007600795096692	0.0	4.607870890322471e-09
5.415	-0.0006105765402855306	0.0	-1.1043596417428006e-08	-0.0013788859657723096	0.0	-0.09965609651660289	0.0	7.164108361323587e-06	0.0	0.9999999999356849	0.0	1.1220000712761086e-05	0.0	0.0	0.0012857173739751848	0.0	0.0	0.0012860442351069928	0.0	-0.0006105765403762718	0.0	2.6577420189295715e-09	-0.00012007601808550517	0.0	4.6207622569570745e-09
5.42	-0.0006111769204012712	0.0	-1.1055828486878065e-08	-0.001381940352736682	0.0	-0.0996560964993677	0.0	7.1657657513198515e-06	0.0	0.9999999999354833	0.0	1.1237913353091122e-05	0.0	0.0	0.001287770011357005	0.0	0.0	0.001288097075779643	0.0	-0.0006111769204920355	0.0	2.680878064845943e-09	-0.00012007602822003619	0.0	4.633656606791716e-09
5.425	-0.0006117773005676857	0.0	-1.1068044160371096e-08	-0.0013849977415536408	0.0	-0.09965609648207241	0.0	7.167423150938813e-06	0.0	0.9999999999352813	0.0	1.1255830132621065e-05	0.0	0.0	0.0012898231230561955	0.0	0.0	0.0012901503912623087	0.0	-0.0006117773006584722	0.0	2.70407858996949e-09	-0.00012007603835462322	0.0	4.646553939826767e-09
5.43	-0.0006123776807847741	0.0	-1.1080243437907102e-08	-0.0013880581322231863	0.0	-0.09965609646471699	0.0	7.169080560180471e-06	0.0	0.9999999999350792	0.0	1.1273751051350913e-05	0.0	0.0	0.001291876709072757	0.0	0.0	0.0012922041815577468	0.0	-0.0006123776808755817	0.0	2.727343609216216e-09	-0.00012007604848915786	0.0	4.659454256065819e-09
5.4350000000000005	-0.0006129780610525366	0.0	-1.1092426319486082e-08	-0.001391121524745319	0.0	-0.09965609644730143	0.0	7.1707379790448254e-06	0.0	0.9999999999348765	0.0	1.1291676109280672e-05	0.0	0.0	0.0012939307694066898	0.0	0.0	0.0012942584466687141	0.0	-0.0006129780611433637	0.0	2.7506731375021514e-09	-0.00012007605862369068	0.0	4.6723575555068096e-09
5.44	-0.0006135784413709728	0.0	-1.1104592805108034e-08	-0.0013941879191200373	0.0	-0.09965609642982576	0.0	7.172395407531877e-06	0.0	0.9999999999346737	0.0	1.1309605306410335e-05	0.0	0.0	0.0012959853040579933	0.0	0.0	0.001296313186597967	0.0	-0.0006135784414618186	0.0	2.7740671897432864e-09	-0.00012007606875826507	0.0	4.685263838148438e-09
5.445	-0.0006141788217400828	0.0	-1.1116742894772958e-08	-0.0013972573153473425	0.0	-0.09965609641228995	0.0	7.174052845641625e-06	0.0	0.9999999999344705	0.0	1.1327538642739902e-05	0.0	0.0	0.0012980403130266676	0.0	0.0	0.0012983684013482624	0.0	-0.0006141788218309462	0.0	2.7975257808556445e-09	-0.00012007607889275814	0.0	4.698173103996135e-09
5.45	-0.0006147792021598668	0.0	-1.1128876588480857e-08	-0.001400329713427234	0.0	-0.09965609639469403	0.0	7.17571029337407e-06	0.0	0.9999999999342669	0.0	1.1345476118269377e-05	0.0	0.0	0.0013000957963127126	0.0	0.0	0.001300424090922357	0.0	-0.0006147792022507463	0.0	2.8210489257552543e-09	-0.00012007608902730722	0.0	4.711085353047612e-09
5.455	-0.0006153795826303247	0.0	-1.1140993886231728e-08	-0.0014034051133597122	0.0	-0.09965609637703797	0.0	7.177367750729212e-06	0.0	0.9999999999340631	0.0	1.1363417732998757e-05	0.0	0.0	0.0013021517539161288	0.0	0.0	0.0013024802553230075	0.0	-0.0006153795827212194	0.0	2.8446366393581266e-09	-0.0001200760991618798	0.0	4.7240005853024555e-09
5.46	-0.0006159799631514565	0.0	-1.1153094788025572e-08	-0.0014064835151447767	0.0	-0.0996560963593218	0.0	7.179025217707049e-06	0.0	0.9999999999338589	0.0	1.1381363486928043e-05	0.0	0.0	0.0013042081858369156	0.0	0.0	0.0013045368945529706	0.0	-0.000615979963242365	0.0	2.8682889365802878e-09	-0.00012007610929639998	0.0	4.736918800762926e-09
5.465	-0.0006165803437232621	0.0	-1.1165179293862391e-08	-0.001409564918782428	0.0	-0.09965609634154549	0.0	7.180682694307585e-06	0.0	0.9999999999336544	0.0	1.1399313380057238e-05	0.0	0.0	0.0013062650920750735	0.0	0.0	0.001306594008615003	0.0	-0.0006165803438141833	0.0	2.8920058323377647e-09	-0.00012007611943093462	0.0	4.749839999428618e-09
5.47	-0.0006171807243457416	0.0	-1.1177247403742183e-08	-0.0014126493242726658	0.0	-0.09965609632370906	0.0	7.1823401805308155e-06	0.0	0.9999999999334496	0.0	1.1417267412386337e-05	0.0	0.0	0.0013083224726306022	0.0	0.0	0.0013086515975118613	0.0	-0.0006171807244366743	0.0	2.915787341546584e-09	-0.00012007612956550539	0.0	4.762764181300379e-09
5.4750000000000005	-0.0006177811050188951	0.0	-1.118929911766495e-08	-0.0014157367316154905	0.0	-0.0996560963058125	0.0	7.183997676376744e-06	0.0	0.9999999999332445	0.0	1.1435225583915346e-05	0.0	0.0	0.0013103803275035023	0.0	0.0	0.0013107096612463023	0.0	-0.0006177811051098383	0.0	2.9396334791227802e-09	-0.00012007613970004182	0.0	4.775691346379393e-09
5.48	-0.0006183814857427225	0.0	-1.1201334435630687e-08	-0.0014188271408109012	0.0	-0.09965609628785582	0.0	7.185655181845369e-06	0.0	0.999999999933039	0.0	1.1453187894644258e-05	0.0	0.0	0.001312438656693773	0.0	0.0	0.0013127681998210826	0.0	-0.0006183814858336747	0.0	2.9635442599823887e-09	-0.00012007614983455838	0.0	4.788621494664422e-09
5.485	-0.0006189818665172236	0.0	-1.1213353357639397e-08	-0.0014219205518588986	0.0	-0.09965609626983901	0.0	7.187312696936691e-06	0.0	0.9999999999328333	0.0	1.1471154344573076e-05	0.0	0.0	0.0013144974602014143	0.0	0.0	0.001314827213238959	0.0	-0.000618981866608184	0.0	2.9875196990414374e-09	-0.00012007615996910386	0.0	4.801554626157594e-09
5.49	-0.0006195822473423988	0.0	-1.1225355883691081e-08	-0.0014250169647594825	0.0	-0.09965609625176207	0.0	7.188970221650709e-06	0.0	0.9999999999326271	0.0	1.1489124933701803e-05	0.0	0.0	0.0013165567380264266	0.0	0.0	0.0013168867015026882	0.0	-0.0006195822474333657	0.0	3.011559811215978e-09	-0.00012007617010362404	0.0	4.814490740858648e-09
5.495	-0.0006201826282182478	0.0	-1.1237342013785739e-08	-0.0014281163795126527	0.0	-0.09965609623362502	0.0	7.190627755987424e-06	0.0	0.9999999999324207	0.0	1.1507099662030432e-05	0.0	0.0	0.0013186164901688102	0.0	0.0	0.0013189466646150267	0.0	-0.0006201826283092202	0.0	3.0356646114220367e-09	-0.00012007618023817132	0.0	4.827429838767018e-09
5.5	-0.0006207830091447706	0.0	-1.124931174792337e-08	-0.0014312187961184096	0.0	-0.09965609621542783	0.0	7.192285299946836e-06	0.0	0.999999999932214	0.0	1.152507852955897e-05	0.0	0.0	0.0013206767166285642	0.0	0.0	0.0013210071025787314	0.0	-0.0006207830092357474	0.0	3.0598341145756654e-09	-0.00012007619037268065	0.0	4.8403719198864535e-09
5.505	-0.0006213833901219674	0.0	-1.1261265086103974e-08	-0.0014343242145767531	0.0	-0.09965609619717052	0.0	7.193942853528944e-06	0.0	0.9999999999320068	0.0	1.1543061536287414e-05	0.0	0.0	0.0013227374174056893	0.0	0.0	0.001323068015396559	0.0	-0.0006213833902129471	0.0	3.084068335592916e-09	-0.00012007620050721529	0.0	4.8533169842143844e-09
5.51	-0.000621983771149838	0.0	-1.127320202832755e-08	-0.001437432634887683	0.0	-0.09965609617885308	0.0	7.195600416733749e-06	0.0	0.9999999999317994	0.0	1.1561048682215765e-05	0.0	0.0	0.001324798592500185	0.0	0.0	0.001325129403071266	0.0	-0.0006219837712408196	0.0	3.108367289389825e-09	-0.00012007621064174449	0.0	4.866265031751528e-09
5.515	-0.0006225841522283825	0.0	-1.1285122574594101e-08	-0.0014405440570511997	0.0	-0.09965609616047552	0.0	7.197257989561251e-06	0.0	0.9999999999315917	0.0	1.1579039967344022e-05	0.0	0.0	0.0013268602419120523	0.0	0.0	0.0013271912656056095	0.0	-0.0006225841523193646	0.0	3.132730990882451e-09	-0.00012007622077629359	0.0	4.879216062501413e-09
5.5200000000000005	-0.0006231845333576011	0.0	-1.1297026724903628e-08	-0.0014436584810673032	0.0	-0.09965609614203784	0.0	7.19891557201145e-06	0.0	0.9999999999313837	0.0	1.1597035391672189e-05	0.0	0.0	0.0013289223656412904	0.0	0.0	0.0013292536030023458	0.0	-0.0006231845334485826	0.0	3.1571594549868557e-09	-0.00012007623091086798	0.0	4.892170076460598e-09
5.525	-0.0006237849145374933	0.0	-1.1308914479256125e-08	-0.0014467759069359929	0.0	-0.09965609612354003	0.0	7.200573164084345e-06	0.0	0.9999999999311754	0.0	1.1615034955200259e-05	0.0	0.0	0.0013309849636878993	0.0	0.0	0.0013313164152642318	0.0	-0.0006237849146284732	0.0	3.1816526966190755e-09	-0.00012007624104537731	0.0	4.9051270736307335e-09
5.53	-0.0006243852957680595	0.0	-1.1320785837651596e-08	-0.001449896334657269	0.0	-0.09965609610498209	0.0	7.202230765779937e-06	0.0	0.9999999999309667	0.0	1.1633038657928233e-05	0.0	0.0	0.001333048036051879	0.0	0.0	0.001333379702394024	0.0	-0.0006243852958590363	0.0	3.2062107306951853e-09	-0.00012007625117987038	0.0	4.918087054014692e-09
5.535	-0.0006249856770492996	0.0	-1.133264080009004e-08	-0.0014530197642311316	0.0	-0.09965609608636403	0.0	7.203888377098226e-06	0.0	0.9999999999307576	0.0	1.1651046499856116e-05	0.0	0.0	0.0013351115827332294	0.0	0.0	0.0013354434643944794	0.0	-0.0006249856771402719	0.0	3.230833572131242e-09	-0.00012007626131441585	0.0	4.931050017609848e-09
5.54	-0.0006255860583812136	0.0	-1.1344479366571455e-08	-0.0014561461956575806	0.0	-0.09965609606768583	0.0	7.205545998039211e-06	0.0	0.9999999999305483	0.0	1.1669058480983903e-05	0.0	0.0	0.001337175603731951	0.0	0.0	0.0013375077012683545	0.0	-0.0006255860584721805	0.0	3.255521235843306e-09	-0.0001200762714489812	0.0	4.9440159644185724e-09
5.545	-0.0006261864397638015	0.0	-1.1356301537095845e-08	-0.0014592756289366164	0.0	-0.09965609604894751	0.0	7.207203628602893e-06	0.0	0.9999999999303387	0.0	1.1687074601311599e-05	0.0	0.0	0.0013392400990480439	0.0	0.0	0.0013395724130184062	0.0	-0.0006261864398547616	0.0	3.2802737367474506e-09	-0.0001200762815834526	0.0	4.95698489444101e-09
5.55	-0.0006267868211970632	0.0	-1.136810731166321e-08	-0.0014624080640682387	0.0	-0.09965609603014908	0.0	7.2088612687892715e-06	0.0	0.9999999999301287	0.0	1.1705094860839199e-05	0.0	0.0	0.0013413050686815068	0.0	0.0	0.001341637599647391	0.0	-0.0006267868212880151	0.0	3.305091089759739e-09	-0.00012007629171796553	0.0	4.969956807677078e-09
5.555	-0.0006273872026809988	0.0	-1.1379896690273546e-08	-0.0014655435010524473	0.0	-0.09965609601129051	0.0	7.210518918598347e-06	0.0	0.9999999999299184	0.0	1.1723119259566708e-05	0.0	0.0	0.0013433705126323413	0.0	0.0	0.0013437032611580656	0.0	-0.0006273872027719414	0.0	3.3299733097962467e-09	-0.000120076301852558	0.0	4.982931704128527e-09
5.5600000000000005	-0.0006279875842156085	0.0	-1.1391669672926858e-08	-0.0014686819398892432	0.0	-0.09965609599237181	0.0	7.2121765780301185e-06	0.0	0.9999999999297078	0.0	1.1741147797494124e-05	0.0	0.0	0.0013454364309005468	0.0	0.0	0.0013457693975531867	0.0	-0.0006279875843065405	0.0	3.354920411773049e-09	-0.00012007631198706733	0.0	4.995909583794606e-09
5.565	-0.0006285879658008918	0.0	-1.140342625962314e-08	-0.001471823380578625	0.0	-0.09965609597339299	0.0	7.213834247084588e-06	0.0	0.9999999999294968	0.0	1.1759180474621445e-05	0.0	0.0	0.0013475028234861232	0.0	0.0	0.0013478360088355111	0.0	-0.000628587965891812	0.0	3.3799324106062176e-09	-0.00012007632212155859	0.0	5.008890446675378e-09
5.57	-0.0006291883474368492	0.0	-1.1415166450362397e-08	-0.0014749678231205934	0.0	-0.09965609595435405	0.0	7.215491925761753e-06	0.0	0.9999999999292856	0.0	1.1777217290948671e-05	0.0	0.0	0.0013495696903890702	0.0	0.0	0.0013499030950077954	0.0	-0.0006291883475277562	0.0	3.4050093212118302e-09	-0.00012007633225610587	0.0	5.021874292772785e-09
5.575	-0.0006297887291234804	0.0	-1.1426890245144628e-08	-0.0014781152675151484	0.0	-0.09965609593525498	0.0	7.217149614061615e-06	0.0	0.999999999929074	0.0	1.1795258246475804e-05	0.0	0.0	0.0013516370316093882	0.0	0.0	0.0013519706560727964	0.0	-0.000629788729214373	0.0	3.4301511585059737e-09	-0.0001200763423906116	0.0	5.034861122086993e-09
5.58	-0.0006303891108607855	0.0	-1.1438597643969831e-08	-0.0014812657137622898	0.0	-0.09965609591609578	0.0	7.218807311984174e-06	0.0	0.999999999928862	0.0	1.1813303341202843e-05	0.0	0.0	0.0013537048471470772	0.0	0.0	0.0013540386920332709	0.0	-0.0006303891109516623	0.0	3.455357937404729e-09	-0.00012007635252515706	0.0	5.047850934618548e-09
5.585	-0.0006309894926487644	0.0	-1.1450288646838006e-08	-0.0014844191618620178	0.0	-0.09965609589687646	0.0	7.2204650195294295e-06	0.0	0.9999999999286499	0.0	1.183135257512979e-05	0.0	0.0	0.0013557731370021373	0.0	0.0	0.0013561072028919752	0.0	-0.0006309894927396245	0.0	3.480629672824188e-09	-0.0001200763626596664	0.0	5.060843730367373e-09
5.59	-0.0006315898744874173	0.0	-1.1461963253749156e-08	-0.0014875756118143321	0.0	-0.09965609587759702	0.0	7.222122736697382e-06	0.0	0.9999999999284372	0.0	1.1849405948256641e-05	0.0	0.0	0.001357841901174568	0.0	0.0	0.0013581761886516663	0.0	-0.000631589874578259	0.0	3.5059663796804316e-09	-0.00012007637279419742	0.0	5.073839509333185e-09
5.595	-0.0006321902563767441	0.0	-1.147362146470328e-08	-0.0014907350636192331	0.0	-0.09965609585825745	0.0	7.22378046348803e-06	0.0	0.9999999999282244	0.0	1.18674634605834e-05	0.0	0.0	0.0013599111396643698	0.0	0.0	0.001360245649315101	0.0	-0.0006321902564675664	0.0	3.5313680728895535e-09	-0.00012007638292871037	0.0	5.0868382715198515e-09
5.6000000000000005	-0.0006327906383167448	0.0	-1.1485263279700377e-08	-0.0014938975172767213	0.0	-0.09965609583885775	0.0	7.2254381999013765e-06	0.0	0.9999999999280111	0.0	1.1885525112110067e-05	0.0	0.0	0.001361980852471543	0.0	0.0	0.0013623155848850358	0.0	-0.0006327906384075461	0.0	3.556834767367661e-09	-0.00012007639306321248	0.0	5.09984001692494e-09
5.605	-0.0006333910203074193	0.0	-1.1496888698740445e-08	-0.0014970629727867955	0.0	-0.09965609581939792	0.0	7.227095945937419e-06	0.0	0.9999999999277976	0.0	1.1903590902836638e-05	0.0	0.0	0.0013640510395960866	0.0	0.0	0.0013643859953642273	0.0	-0.0006333910203981986	0.0	3.582366478030833e-09	-0.0001200764031977706	0.0	5.11284474554738e-09
5.61	-0.0006339914023487678	0.0	-1.1508497721823489e-08	-0.001500231430149456	0.0	-0.09965609579987798	0.0	7.228753701596158e-06	0.0	0.9999999999275838	0.0	1.1921660832763114e-05	0.0	0.0	0.001366121701038001	0.0	0.0	0.0013664568807554324	0.0	-0.0006339914024395236	0.0	3.60796321979517e-09	-0.00012007641333224379	0.0	5.125852457391413e-09
5.615	-0.00063459178444079	0.0	-1.1520090348949504e-08	-0.0015034028893647032	0.0	-0.09965609578029791	0.0	7.230411466877593e-06	0.0	0.9999999999273697	0.0	1.1939734901889498e-05	0.0	0.0	0.0013681928367972867	0.0	0.0	0.0013685282410614077	0.0	-0.0006345917845315211	0.0	3.633625007576782e-09	-0.00012007642346675855	0.0	5.138863152456604e-09
5.62	-0.0006351921665834862	0.0	-1.1531666580118494e-08	-0.001506577350432537	0.0	-0.0996560957606577	0.0	7.232069241781725e-06	0.0	0.9999999999271552	0.0	1.1957813110215788e-05	0.0	0.0	0.0013702644468739434	0.0	0.0	0.00137060007628491	0.0	-0.0006351921666741913	0.0	3.659351856291772e-09	-0.00012007643360130763	0.0	5.151876830743283e-09
5.625	-0.0006357925487768564	0.0	-1.1543226415330455e-08	-0.0015097548133529571	0.0	-0.09965609574095738	0.0	7.233727026308555e-06	0.0	0.9999999999269403	0.0	1.1975895457741985e-05	0.0	0.0	0.0013723365312679708	0.0	0.0	0.001372672386428696	0.0	-0.0006357925488675341	0.0	3.6851437808562496e-09	-0.00012007644373580432	0.0	5.1648934922507e-09
5.63	-0.0006363929310209003	0.0	-1.1554769854585392e-08	-0.0015129352781259639	0.0	-0.09965609572119692	0.0	7.23538482045808e-06	0.0	0.9999999999267252	0.0	1.1993981944468088e-05	0.0	0.0	0.001374409089979369	0.0	0.0	0.0013747451714955223	0.0	-0.0006363929311115494	0.0	3.7110007961863143e-09	-0.0001200764538703245	0.0	5.1779131369788815e-09
5.635	-0.0006369933133156181	0.0	-1.15662968978833e-08	-0.0015161187447515572	0.0	-0.09965609570137635	0.0	7.237042624230303e-06	0.0	0.9999999999265098	0.0	1.2012072570394096e-05	0.0	0.0	0.0013764821230081387	0.0	0.0	0.0013768184314881457	0.0	-0.0006369933134062374	0.0	3.7369229171980784e-09	-0.00012007646400485371	0.0	5.190935764931399e-09
5.64	-0.0006375936956610099	0.0	-1.1577807545224182e-08	-0.001519305213229737	0.0	-0.09965609568149565	0.0	7.238700437625222e-06	0.0	0.999999999926294	0.0	1.2030167335520012e-05	0.0	0.0	0.0013785556303542788	0.0	0.0	0.0013788921664093228	0.0	-0.0006375936957515978	0.0	3.762910158807668e-09	-0.00012007647413935762	0.0	5.203961376107604e-09
5.6450000000000005	-0.0006381940780570756	0.0	-1.1589301796608039e-08	-0.0015224946835605039	0.0	-0.09965609566155481	0.0	7.240358260642838e-06	0.0	0.9999999999260779	0.0	1.2048266239845836e-05	0.0	0.0	0.0013806296120177906	0.0	0.0	0.0013809663762618103	0.0	-0.000638194078147631	0.0	3.788962535931193e-09	-0.00012007648427385792	0.0	5.216989970506414e-09
5.65	-0.0006387944605038151	0.0	-1.1600779652034868e-08	-0.0015256871557438568	0.0	-0.09965609564155387	0.0	7.2420160932831505e-06	0.0	0.9999999999258614	0.0	1.2066369283371564e-05	0.0	0.0	0.0013827040679986727	0.0	0.0	0.001383041061048365	0.0	-0.0006387944605943365	0.0	3.815080063484772e-09	-0.00012007649440836364	0.0	5.230021548129064e-09
5.655	-0.0006393948430012286	0.0	-1.161224111150467e-08	-0.001528882629779796	0.0	-0.09965609562149279	0.0	7.24367393554616e-06	0.0	0.9999999999256447	0.0	1.2084476466097198e-05	0.0	0.0	0.0013847789982969262	0.0	0.0	0.0013851162207717436	0.0	-0.0006393948430917147	0.0	3.8412627563845246e-09	-0.00012007650454289285	0.0	5.243056108976594e-09
5.66	-0.0006399952255493159	0.0	-1.1623686175017444e-08	-0.0015320811056683222	0.0	-0.09965609560137158	0.0	7.245331787431866e-06	0.0	0.9999999999254277	0.0	1.210258778802274e-05	0.0	0.0	0.0013868544029125504	0.0	0.0	0.0013871918554347027	0.0	-0.0006399952256397654	0.0	3.8675106295465794e-09	-0.00012007651467739676	0.0	5.2560936530493344e-09
5.665	-0.000640595608148077	0.0	-1.1635114842573193e-08	-0.0015352825834094347	0.0	-0.09965609558119025	0.0	7.246989648940268e-06	0.0	0.9999999999252103	0.0	1.2120703249148186e-05	0.0	0.0	0.0013889302818455454	0.0	0.0	0.001389267965039999	0.0	-0.0006405956082384886	0.0	3.893823697887061e-09	-0.00012007652481190972	0.0	5.269134180347548e-09
5.67	-0.0006411959907975122	0.0	-1.1646527114171915e-08	-0.0015384870630031336	0.0	-0.09965609556094879	0.0	7.2486475200713676e-06	0.0	0.9999999999249926	0.0	1.2138822849473539e-05	0.0	0.0	0.0013910066350959114	0.0	0.0	0.0013913445495903893	0.0	-0.0006411959908878846	0.0	3.920201976322099e-09	-0.00012007653494641543	0.0	5.282177690872503e-09
5.675	-0.0006417963734976211	0.0	-1.165792298981361e-08	-0.001541694544449419	0.0	-0.09965609554064721	0.0	7.250305400825163e-06	0.0	0.9999999999247745	0.0	1.21569465889988e-05	0.0	0.0	0.0013930834626636485	0.0	0.0	0.0013934216090886304	0.0	-0.0006417963735879528	0.0	3.94664547976783e-09	-0.00012007654508089766	0.0	5.295224184623593e-09
5.68	-0.0006423967562484039	0.0	-1.1669302469498278e-08	-0.0015449050277482911	0.0	-0.0996560955202855	0.0	7.251963291201657e-06	0.0	0.9999999999245561	0.0	1.2175074467723965e-05	0.0	0.0	0.0013951607645487567	0.0	0.0	0.0013954991435374787	0.0	-0.0006423967563386935	0.0	3.973154223140381e-09	-0.00012007655521541784	0.0	5.308273661602141e-09
5.6850000000000005	-0.0006429971390498608	0.0	-1.1680665553225922e-08	-0.0015481185128997505	0.0	-0.09965609549986366	0.0	7.253621191200846e-06	0.0	0.9999999999243374	0.0	1.219320648564904e-05	0.0	0.0	0.001397238540751236	0.0	0.0	0.001397577152939691	0.0	-0.000642997139140107	0.0	3.999728221355897e-09	-0.00012007656534992717	0.0	5.321326121808533e-09
5.69	-0.0006435975219019914	0.0	-1.1692012240996536e-08	-0.0015513349999037955	0.0	-0.0996560954793817	0.0	7.255279100822732e-06	0.0	0.9999999999241184	0.0	1.221134264277402e-05	0.0	0.0	0.0013993167912710858	0.0	0.0	0.0013996556372980241	0.0	-0.0006435975219921928	0.0	4.026367489330511e-09	-0.00012007657548445639	0.0	5.3343815652416804e-09
5.695	-0.000644197904804796	0.0	-1.1703342532810125e-08	-0.0015545544887604272	0.0	-0.09965609545883962	0.0	7.2569370200673145e-06	0.0	0.9999999999238991	0.0	1.2229482939098904e-05	0.0	0.0	0.0014013955161083069	0.0	0.0	0.0014017345966152346	0.0	-0.0006441979048949515	0.0	4.053072041980362e-09	-0.00012007658561898017	0.0	5.3474399919037475e-09
5.7	-0.0006447982877582744	0.0	-1.1714656428666686e-08	-0.0015577769794696454	0.0	-0.0996560954382374	0.0	7.258594948934594e-06	0.0	0.9999999999236795	0.0	1.2247627374623696e-05	0.0	0.0	0.0014034747152628989	0.0	0.0	0.0014038140308940792	0.0	-0.0006447982878483825	0.0	4.079841894221599e-09	-0.00012007659575342265	0.0	5.360501401796347e-09
5.705	-0.0006453986707624267	0.0	-1.172595392856622e-08	-0.00156100247203145	0.0	-0.09965609541757507	0.0	7.260252887424571e-06	0.0	0.9999999999234594	0.0	1.2265775949348393e-05	0.0	0.0	0.0014055543887348616	0.0	0.0	0.0014058939401373146	0.0	-0.0006453986708524858	0.0	4.106677060970375e-09	-0.00012007660588793378	0.0	5.373565794918293e-09
5.71	-0.0006459990538172528	0.0	-1.1737235032508727e-08	-0.0015642309664458413	0.0	-0.0996560953968526	0.0	7.261910835537243e-06	0.0	0.9999999999232392	0.0	1.2283928663272998e-05	0.0	0.0	0.0014076345365241956	0.0	0.0	0.0014079743243476978	0.0	-0.0006459990539072619	0.0	4.133577557142831e-09	-0.00012007661259988249	0.0	5.210884803120611e-09
5.715	-0.000646599436922753	0.0	-1.174849974049421e-08	-0.0015674624627128192	0.0	-0.09965609537607002	0.0	7.2635687932726125e-06	0.0	0.9999999999230186	0.0	1.2302085516397508e-05	0.0	0.0	0.0014097151586309005	0.0	0.0	0.001410055183527985	0.0	-0.0006465994370127104	0.0	4.160543397655122e-09	-0.00012007664607510343	0.0	6.4224920555978845e-09
5.72	-0.0006471998202845456	0.0	-1.174920362700163e-08	-0.0015706969623320308	0.0	-0.09965609535106201	0.0	7.265228781538653e-06	0.0	0.9999999999227962	0.0	1.232024687298699e-05	0.0	0.0	0.0014117962967966759	0.0	0.0	0.0014121365182598808	0.0	-0.0006471998203741865	0.0	4.198119499512337e-09	-0.0001200766843764371	0.0	7.88192311976117e-09
5.7250000000000005	-0.000647800203734102	0.0	-1.1747989103436944e-08	-0.001573934464074338	0.0	-0.09965609532524253	0.0	7.266889143960811e-06	0.0	0.9999999999225733	0.0	1.233841243448288e-05	0.0	0.0	0.0014138779168092327	0.0	0.0	0.0014142183286505728	0.0	-0.0006478002038233768	0.0	4.2376630765905486e-09	-0.00012007669608663372	0.0	7.97591873430747e-09
5.73	-0.0006484005872411094	0.0	-1.174641064201882e-08	-0.0015771749677186589	0.0	-0.09965609529922563	0.0	7.2685495826143365e-06	0.0	0.99999999992235	0.0	1.235658214718477e-05	0.0	0.0	0.0014159600125149573	0.0	0.0	0.0014163006147218996	0.0	-0.0006484005873300072	0.0	4.277619601440575e-09	-0.00012007670707002095	0.0	8.032600744531164e-09
5.735	-0.0006490009708055677	0.0	-1.174446824274726e-08	-0.0015804184732649946	0.0	-0.09965609527301134	0.0	7.270210097499233e-06	0.0	0.9999999999221263	0.0	1.2374756011092659e-05	0.0	0.0	0.0014180425839138496	0.0	0.0	0.0014183833764957001	0.0	-0.0006490009708940771	0.0	4.31798908902258e-09	-0.0001200767185580031	0.0	8.11519478694303e-09
5.74	-0.0006496013544274771	0.0	-1.1742161905622258e-08	-0.0015836649807133448	0.0	-0.09965609524659962	0.0	7.271870688615498e-06	0.0	0.9999999999219022	0.0	1.239293402620655e-05	0.0	0.0	0.00142012563100591	0.0	0.0	0.0014204666139938128	0.0	-0.0006496013545155872	0.0	4.3587715542967255e-09	-0.00012007673004602681	0.0	8.19779182138667e-09
5.745	-0.0006502017381068377	0.0	-1.173949163064382e-08	-0.0015869144900637097	0.0	-0.09965609521999048	0.0	7.2735313559631335e-06	0.0	0.9999999999216779	0.0	1.2411116192526441e-05	0.0	0.0	0.0014222091537911383	0.0	0.0	0.0014225503272380766	0.0	-0.0006502017381945373	0.0	4.3999670122231684e-09	-0.00012007674153401257	0.0	8.280391847863065e-09
5.75	-0.0006508021218436491	0.0	-1.1736457417811943e-08	-0.001590167001316089	0.0	-0.09965609519318394	0.0	7.275192099542138e-06	0.0	0.9999999999214532	0.0	1.2429302510052335e-05	0.0	0.0	0.0014242931522695354	0.0	0.0	0.00142463451625033	0.0	-0.0006508021219309273	0.0	4.4415754777620786e-09	-0.00012007675302196943	0.0	8.36299486637274e-09
5.755	-0.0006514025056379117	0.0	-1.1733059267126629e-08	-0.0015934225144704829	0.0	-0.09965609516617997	0.0	7.276852919352512e-06	0.0	0.999999999921228	0.0	1.2447492978784228e-05	0.0	0.0	0.0014263776264410997	0.0	0.0	0.0014267191810524117	0.0	-0.0006514025057247569	0.0	4.483596965873619e-09	-0.00012007676450989375	0.0	8.445600876916258e-09
5.76	-0.0006520028894896253	0.0	-1.1729297178587876e-08	-0.0015966810295268915	0.0	-0.0996560951389786	0.0	7.278513815394255e-06	0.0	0.9999999999210024	0.0	1.2465687598722123e-05	0.0	0.0	0.0014284625763058322	0.0	0.0	0.0014288043216661604	0.0	-0.0006520028895760263	0.0	4.526031491517965e-09	-0.00012007677599785784	0.0	8.528209879493494e-09
5.765	-0.0006526032733987899	0.0	-1.1725171152195685e-08	-0.0015999425464853145	0.0	-0.09965609511157983	0.0	7.280174787667368e-06	0.0	0.9999999999207766	0.0	1.248388636986602e-05	0.0	0.0	0.001430548001863733	0.0	0.0	0.001430889938113415	0.0	-0.0006526032734847355	0.0	4.568879069655279e-09	-0.00012007678748581288	0.0	8.610821874106533e-09
5.7700000000000005	-0.0006532036573654057	0.0	-1.1720681187950055e-08	-0.0016032070653457528	0.0	-0.09965609508398363	0.0	7.281835836171851e-06	0.0	0.9999999999205503	0.0	1.250208929221592e-05	0.0	0.0	0.001432633903114802	0.0	0.0	0.0014329760304160138	0.0	-0.0006532036574508844	0.0	4.612139715245755e-09	-0.00012007679897374625	0.0	8.693436860754476e-09
5.775	-0.0006538040413894724	0.0	-1.1715827285850988e-08	-0.0016064745861082053	0.0	-0.09965609505619001	0.0	7.283496960907704e-06	0.0	0.9999999999203237	0.0	1.2520296365771817e-05	0.0	0.0	0.0014347202800590382	0.0	0.0	0.0014350625985957957	0.0	-0.000653804041474473	0.0	4.655813443249549e-09	-0.00012007681046167419	0.0	8.77605483943698e-09
5.78	-0.0006544044254709901	0.0	-1.1710609445898481e-08	-0.001609745108772672	0.0	-0.099656095028199	0.0	7.285158161874925e-06	0.0	0.9999999999200968	0.0	1.2538507590533716e-05	0.0	0.0	0.0014368071326964433	0.0	0.0	0.0014371496426745993	0.0	-0.0006544044255555011	0.0	4.699900268626855e-09	-0.00012007682194958044	0.0	8.858675810158388e-09
5.785	-0.0006550048096099589	0.0	-1.1705027668092539e-08	-0.0016130186333391536	0.0	-0.09965609500001056	0.0	7.286819439073517e-06	0.0	0.9999999999198694	0.0	1.2556722966501616e-05	0.0	0.0	0.001438894461027016	0.0	0.0	0.0014392371626742633	0.0	-0.0006550048096939688	0.0	4.744400206337861e-09	-0.00012007683343749212	0.0	8.941299772916161e-09
5.79	-0.0006556051938063787	0.0	-1.1699081952433157e-08	-0.0016162951598076496	0.0	-0.09965609497162471	0.0	7.288480792503478e-06	0.0	0.9999999999196417	0.0	1.2574942493675517e-05	0.0	0.0	0.0014409822650507569	0.0	0.0	0.0014413251586166264	0.0	-0.000655605193889876	0.0	4.789313271342746e-09	-0.00012007684492536586	0.0	9.023926727711141e-09
5.795	-0.0006562055780602495	0.0	-1.1692772298920337e-08	-0.0016195746881781602	0.0	-0.09965609494304145	0.0	7.290142222164808e-06	0.0	0.9999999999194136	0.0	1.259316617205542e-05	0.0	0.0	0.0014430705447676655	0.0	0.0	0.0014434136305235272	0.0	-0.0006562055781432225	0.0	4.834639478601704e-09	-0.00012007685641328657	0.0	9.10655667454504e-09
5.8	-0.0006568059623715714	0.0	-1.1686098707554078e-08	-0.0016228572184506854	0.0	-0.09965609491426078	0.0	7.291803728057508e-06	0.0	0.9999999999191852	0.0	1.2611394001641322e-05	0.0	0.0	0.0014451593001777426	0.0	0.0	0.0014455025784168045	0.0	-0.0006568059624540088	0.0	4.880378843074928e-09	-0.00012007686790118199	0.0	9.189189613417483e-09
[truncated: 1,839 more rows]
