# Supplementary material for: An Efficient Contact Model for the Simulation of Cargo Airdrop Extraction Phase
Source: Hindawi journal article supplement (doi:10.1155/2018/9895451), 2018-10-17
Supplement: f1 [file 9895451.f1.zip › case2_ramp_drop/contact_pts20.csv]

t(s)	cntcNrmForc(N)	cntcFricForc(N)	cntcPitchMoment(N/m)	cntcPtsNum
0.00000000	0.00000000	0.00000000	0.00000000	40.00000000
0.00500000	9139.76193241	884.39886545	237.02808999	40.00000000
0.01000000	29772.28800365	959.11887364	-215.34291762	40.00000000
0.01500000	26848.05205477	724.96736018	-31.92771297	40.00000000
0.02000000	21795.44354907	620.13145687	50.09021282	40.00000000
0.02500000	20200.16216534	627.86183140	44.17568790	40.00000000
0.03000000	19753.87589631	653.03541833	24.22541956	40.00000000
0.03500000	19634.26209977	673.12934892	8.41257008	40.00000000
0.04000000	19606.12634079	684.67772910	-0.56543360	40.00000000
0.04500000	19601.74280453	689.66836055	-4.32938069	40.00000000
0.05000000	19602.84149451	690.67734824	-4.96771535	40.00000000
0.05500000	19604.55166025	689.79471923	-4.15686915	40.00000000
0.06000000	19605.88951357	688.32279894	-2.91363340	40.00000000
0.06500000	19606.78244470	686.92063915	-1.75967430	40.00000000
0.07000000	19607.32338187	685.86425227	-0.90463494	40.00000000
0.07500000	19607.64867378	685.16970449	-0.34926978	40.00000000
0.08000000	19607.83466645	684.78106547	-0.04294020	40.00000000
0.08500000	19607.93607776	684.60179883	0.09329862	40.00000000
0.09000000	19607.98953965	684.55147233	0.13011693	40.00000000
0.09500000	19608.01888904	684.56322386	0.11751904	40.00000000
0.10000000	19608.03397729	684.60001169	0.08612722	40.00000000
0.10500000	19608.04053750	684.63891913	0.05390029	40.00000000
0.11000000	19608.04489149	684.66729174	0.03096656	40.00000000
0.11500000	19608.04722880	684.68623579	0.01579337	40.00000000
0.12000000	19608.04765422	684.69970080	0.00510887	40.00000000
0.12500000	19608.04732863	684.70763613	-0.00117983	40.00000000
0.13000000	19608.04736976	684.71029505	-0.00336183	40.00000000
0.13500000	19608.04770532	684.70943784	-0.00381621	40.00000000
0.14000000	19608.04821327	684.70783374	-0.00204648	40.00000000
0.14500000	19608.04860183	684.70690748	-0.00095958	40.00000000
0.15000000	19608.04885414	684.70658334	-0.00030047	40.00000000
0.15500000	19608.04893808	684.70685649	0.00013099	40.00000000
0.16000000	19608.04878324	684.70666773	0.00020712	40.00000000
0.16500000	19608.04863209	684.70614172	0.00056526	40.00000000
0.17000000	19608.04848891	684.70540814	0.00111430	40.00000000
0.17500000	19608.04834573	684.70467456	0.00166333	40.00000000
0.18000000	19608.04840730	684.70420955	0.00205140	40.00000000
0.18500000	19608.04852715	684.70382099	0.00239364	40.00000000
0.19000000	19608.04864701	684.70343243	0.00273589	40.00000000
0.19500000	19608.04858986	684.70400343	0.00231269	40.00000000
0.20000000	19608.04852340	684.70462494	0.00184921	40.00000000
0.20500000	19608.04848728	684.70525062	0.00139109	40.00000000
0.21000000	19608.04867077	684.70590647	0.00097178	40.00000000
0.21500000	19608.04885427	684.70656232	0.00055246	40.00000000
0.22000000	19608.04895568	684.70712169	0.00016806	40.00000000
0.22500000	19608.04885904	684.70744827	-0.00013206	40.00000000
0.23000000	19608.04876240	684.70777486	-0.00043219	40.00000000
0.23500000	19608.04866576	684.70810144	-0.00073231	40.00000000
0.24000000	19608.04856912	684.70842803	-0.00103244	40.00000000
0.24500000	19608.04847248	684.70875461	-0.00133256	40.00000000
0.25000000	19608.04837584	684.70908119	-0.00163269	40.00000000
0.25500000	19608.04827920	684.70940778	-0.00193282	40.00000000
0.26000000	19608.04818256	684.70973436	-0.00223294	40.00000000
0.26500000	19608.04810421	684.70997400	-0.00243590	40.00000000
0.27000000	19608.04805656	684.71006773	-0.00247582	40.00000000
0.27500000	19608.04800891	684.71016145	-0.00251573	40.00000000
0.28000000	19608.04796126	684.71025518	-0.00255564	40.00000000
0.28500000	19608.04791361	684.71034891	-0.00259556	40.00000000
0.29000000	19608.04786596	684.71044264	-0.00263547	40.00000000
0.29500000	19608.04781831	684.71053637	-0.00267538	40.00000000
0.30000000	19608.04777067	684.71063010	-0.00271529	40.00000000
0.30500000	19608.04772302	684.71072382	-0.00275521	40.00000000
0.31000000	19608.04779829	684.71062291	-0.00262242	40.00000000
0.31500000	19608.04802140	684.71028791	-0.00228192	40.00000000
0.32000000	19608.04824451	684.70995291	-0.00194143	40.00000000
0.32500000	19608.04846762	684.70961791	-0.00160093	40.00000000
0.33000000	19608.04869073	684.70928291	-0.00126044	40.00000000
0.33500000	19608.04891384	684.70894791	-0.00091995	40.00000000
0.34000000	19608.04913695	684.70861291	-0.00057945	40.00000000
0.34500000	19608.04936006	684.70827791	-0.00023896	40.00000000
0.35000000	19608.04958316	684.70794291	0.00010153	40.00000000
0.35500000	19608.04955921	684.70780378	0.00026887	40.00000000
0.36000000	19608.04932019	684.70783517	0.00028546	40.00000000
0.36500000	19608.04908116	684.70786657	0.00030206	40.00000000
0.37000000	19608.04884213	684.70789796	0.00031865	40.00000000
0.37500000	19608.04860310	684.70792935	0.00033524	40.00000000
0.38000000	19608.04836407	684.70796074	0.00035184	40.00000000
0.38500000	19608.04812504	684.70799214	0.00036843	40.00000000
0.39000000	19608.04788601	684.70802353	0.00038502	40.00000000
0.39500000	19608.04764698	684.70805492	0.00040161	40.00000000
0.40000000	19608.04771513	684.70812808	0.00036427	40.00000000
0.40500000	19608.04797543	684.70822738	0.00029319	40.00000000
0.41000000	19608.04823573	684.70832667	0.00022211	40.00000000
0.41500000	19608.04849602	684.70842596	0.00015103	40.00000000
0.42000000	19608.04875632	684.70852525	0.00007995	40.00000000
0.42500000	19608.04901661	684.70862455	0.00000887	40.00000000
0.43000000	19608.04927691	684.70872384	-0.00006221	40.00000000
0.43500000	19608.04953720	684.70882313	-0.00013329	40.00000000
0.44000000	19608.04979750	684.70892242	-0.00020437	40.00000000
0.44500000	19608.05005779	684.70902172	-0.00027545	40.00000000
0.45000000	19608.05031809	684.70912101	-0.00034653	40.00000000
0.45500000	19608.05057839	684.70922030	-0.00041761	40.00000000
0.46000000	19608.05083868	684.70931959	-0.00048869	40.00000000
0.46500000	19608.05109898	684.70941889	-0.00055977	40.00000000
0.47000000	19608.05135927	684.70951818	-0.00063085	40.00000000
0.47500000	19608.05161957	684.70961747	-0.00070193	40.00000000
0.48000000	19608.05187986	684.70971676	-0.00077301	40.00000000
0.48500000	19608.05214016	684.70981605	-0.00084409	40.00000000
0.49000000	19608.05240046	684.70991535	-0.00091517	40.00000000
0.49500000	19608.05244210	684.70997521	-0.00093793	40.00000000
0.50000000	19608.05227366	684.70999720	-0.00091428	40.00000000
0.50500000	19608.05210523	684.71001918	-0.00089062	40.00000000
0.51000000	19608.05193679	684.71004116	-0.00086696	40.00000000
0.51500000	19608.05176835	684.71006315	-0.00084330	40.00000000
0.52000000	19608.05159992	684.71008513	-0.00081964	40.00000000
0.52500000	19608.05143148	684.71010711	-0.00079598	40.00000000
0.53000000	19608.05126305	684.71012910	-0.00077232	40.00000000
0.53500000	19608.05109461	684.71015108	-0.00074867	40.00000000
0.54000000	19608.05092618	684.71017306	-0.00072501	40.00000000
0.54500000	19608.05075774	684.71019505	-0.00070135	40.00000000
0.55000000	19608.05058930	684.71021703	-0.00067769	40.00000000
0.55500000	19608.05042087	684.71023901	-0.00065403	40.00000000
0.56000000	19608.05025243	684.71026100	-0.00063037	40.00000000
0.56500000	19608.05008400	684.71028298	-0.00060672	40.00000000
0.57000000	19608.04991556	684.71030496	-0.00058306	40.00000000
0.57500000	19608.04974712	684.71032695	-0.00055940	40.00000000
0.58000000	19608.04957869	684.71034893	-0.00053574	40.00000000
0.58500000	19608.04941025	684.71037092	-0.00051208	40.00000000
0.59000000	19608.04929631	684.71038794	-0.00048900	40.00000000
0.59500000	19608.04926250	684.71039768	-0.00046675	40.00000000
0.60000000	19608.04922869	684.71040741	-0.00044450	40.00000000
0.60500000	19608.04919487	684.71041715	-0.00042226	40.00000000
0.61000000	19608.04916106	684.71042688	-0.00040001	40.00000000
0.61500000	19608.04912725	684.71043662	-0.00037777	40.00000000
0.62000000	19608.04909343	684.71044636	-0.00035552	40.00000000
0.62500000	19608.04905962	684.71045609	-0.00033328	40.00000000
0.63000000	19608.04902581	684.71046583	-0.00031103	40.00000000
0.63500000	19608.04899199	684.71047556	-0.00028879	40.00000000
0.64000000	19608.04895818	684.71048530	-0.00026654	40.00000000
0.64500000	19608.04892437	684.71049503	-0.00024429	40.00000000
0.65000000	19608.04889055	684.71050477	-0.00022205	40.00000000
0.65500000	19608.04885674	684.71051450	-0.00019980	40.00000000
0.66000000	19608.04882293	684.71052424	-0.00017756	40.00000000
0.66500000	19608.04878912	684.71053398	-0.00015531	40.00000000
0.67000000	19608.04875530	684.71054371	-0.00013307	40.00000000
0.67500000	19608.04872149	684.71055345	-0.00011082	40.00000000
0.68000000	19608.04868768	684.71056318	-0.00008858	40.00000000
0.68500000	19608.04865662	684.71058008	-0.00007255	40.00000000
0.69000000	19608.04863200	684.71061369	-0.00007106	40.00000000
0.69500000	19608.04860737	684.71064731	-0.00006957	40.00000000
0.70000000	19608.04858275	684.71068092	-0.00006808	40.00000000
0.70500000	19608.04855813	684.71071453	-0.00006658	40.00000000
0.71000000	19608.04853351	684.71074815	-0.00006509	40.00000000
0.71500000	19608.04850889	684.71078176	-0.00006360	40.00000000
0.72000000	19608.04848426	684.71081538	-0.00006211	40.00000000
0.72500000	19608.04845964	684.71084899	-0.00006061	40.00000000
0.73000000	19608.04843502	684.71088260	-0.00005912	40.00000000
0.73500000	19608.04841040	684.71091622	-0.00005763	40.00000000
0.74000000	19608.04838577	684.71094983	-0.00005614	40.00000000
0.74500000	19608.04836115	684.71098345	-0.00005464	40.00000000
0.75000000	19608.04833653	684.71101706	-0.00005315	40.00000000
0.75500000	19608.04831191	684.71105068	-0.00005166	40.00000000
0.76000000	19608.04828729	684.71108429	-0.00005017	40.00000000
0.76500000	19608.04826266	684.71111790	-0.00004867	40.00000000
0.77000000	19608.04823804	684.71115152	-0.00004718	40.00000000
0.77500000	19608.04821342	684.71118513	-0.00004569	40.00000000
0.78000000	19608.04818880	684.71121875	-0.00004420	40.00000000
0.78500000	19608.04816417	684.71125236	-0.00004270	40.00000000
0.79000000	19608.04813955	684.71128597	-0.00004121	40.00000000
0.79500000	19608.04811493	684.71131959	-0.00003972	40.00000000
0.80000000	19608.04809031	684.71135320	-0.00003823	40.00000000
0.80500000	19608.04806569	684.71138682	-0.00003673	40.00000000
0.81000000	19608.04804106	684.71142043	-0.00003524	40.00000000
0.81500000	19608.04801644	684.71145404	-0.00003375	40.00000000
0.82000000	19608.04799182	684.71148766	-0.00003226	40.00000000
0.82500000	19608.04796720	684.71152127	-0.00003076	40.00000000
0.83000000	19608.04794257	684.71155489	-0.00002927	40.00000000
0.83500000	19608.04791795	684.71158850	-0.00002778	40.00000000
0.84000000	19608.04789333	684.71162212	-0.00002629	40.00000000
0.84500000	19608.04786871	684.71165573	-0.00002480	40.00000000
0.85000000	19608.04784409	684.71168934	-0.00002330	40.00000000
0.85500000	19608.04781946	684.71172296	-0.00002181	40.00000000
0.86000000	19608.04779484	684.71175657	-0.00002032	40.00000000
0.86500000	19608.04777022	684.71179019	-0.00001883	40.00000000
0.87000000	19608.04774560	684.71182380	-0.00001733	40.00000000
0.87500000	19608.04772098	684.71185741	-0.00001584	40.00000000
0.88000000	19608.04769635	684.71189103	-0.00001435	40.00000000
0.88500000	19608.04767173	684.71192464	-0.00001286	40.00000000
0.89000000	19608.04764711	684.71195826	-0.00001136	40.00000000
0.89500000	19608.04762249	684.71199187	-0.00000987	40.00000000
0.90000000	19608.04759786	684.71202549	-0.00000838	40.00000000
0.90500000	19608.04757324	684.71205910	-0.00000689	40.00000000
0.91000000	19608.04754862	684.71209271	-0.00000539	40.00000000
0.91500000	19608.04752400	684.71212633	-0.00000390	40.00000000
0.92000000	19608.04749938	684.71215994	-0.00000241	40.00000000
0.92500000	19608.04747475	684.71219356	-0.00000092	40.00000000
0.93000000	19608.04745013	684.71222717	0.00000058	40.00000000
0.93500000	19608.04742551	684.71226078	0.00000207	40.00000000
0.94000000	19608.04740089	684.71229440	0.00000356	40.00000000
0.94500000	19608.04737626	684.71232801	0.00000505	40.00000000
0.95000000	19608.04735164	684.71236163	0.00000655	40.00000000
0.95500000	19608.04732702	684.71239524	0.00000804	40.00000000
0.96000000	19608.04730240	684.71242885	0.00000953	40.00000000
0.96500000	19608.04727778	684.71246247	0.00001102	40.00000000
0.97000000	19608.04725315	684.71249608	0.00001252	40.00000000
0.97500000	19608.04722853	684.71252970	0.00001401	40.00000000
0.98000000	19608.04720391	684.71256331	0.00001550	40.00000000
0.98500000	19608.04717929	684.71259693	0.00001699	40.00000000
0.99000000	19608.04715466	684.71263054	0.00001848	40.00000000
0.99500000	19608.04713004	684.71266415	0.00001998	40.00000000
1.00000000	19608.04710542	684.71269777	0.00002147	40.00000000
1.00500000	19608.04708080	684.71273138	0.00002296	40.00000000
1.01000000	19608.04705618	684.71276500	0.00002445	40.00000000
1.01500000	19608.04703155	684.71279861	0.00002595	40.00000000
1.02000000	19608.04700693	684.71283222	0.00002744	40.00000000
1.02500000	19608.04698231	684.71286584	0.00002893	40.00000000
1.03000000	19608.04695769	684.71289945	0.00003042	40.00000000
1.03500000	19608.04693307	684.71293307	0.00003192	40.00000000
1.04000000	19608.04690844	684.71296668	0.00003341	40.00000000
1.04500000	19608.04688382	684.71300029	0.00003490	40.00000000
1.05000000	19608.04685920	684.71303391	0.00003639	40.00000000
1.05500000	19608.04683458	684.71306752	0.00003789	40.00000000
1.06000000	19608.04680995	684.71310114	0.00003938	40.00000000
1.06500000	19608.04678533	684.71313475	0.00004087	40.00000000
1.07000000	19608.04676071	684.71316837	0.00004236	40.00000000
1.07500000	19608.04673609	684.71320198	0.00004386	40.00000000
1.08000000	19608.04671147	684.71323559	0.00004535	40.00000000
1.08500000	19608.04668684	684.71326921	0.00004684	40.00000000
1.09000000	19608.04666222	684.71330282	0.00004833	40.00000000
1.09500000	19608.04663760	684.71333644	0.00004983	40.00000000
1.10000000	19608.04661298	684.71337005	0.00005132	40.00000000
1.10500000	19608.04658835	684.71340366	0.00005281	40.00000000
1.11000000	19608.04656373	684.71343728	0.00005430	40.00000000
1.11500000	19608.04653911	684.71347089	0.00005580	40.00000000
1.12000000	19608.04651449	684.71350451	0.00005729	40.00000000
1.12500000	19608.04648987	684.71353812	0.00005878	40.00000000
1.13000000	19608.04646524	684.71357173	0.00006027	40.00000000
1.13500000	19608.04644062	684.71360535	0.00006176	40.00000000
1.14000000	19608.04641600	684.71363896	0.00006326	40.00000000
1.14500000	19608.04639138	684.71367258	0.00006475	40.00000000
1.15000000	19608.04636675	684.71370619	0.00006624	40.00000000
1.15500000	19608.04634213	684.71373981	0.00006773	40.00000000
1.16000000	19608.04631751	684.71377342	0.00006923	40.00000000
1.16500000	19608.04629289	684.71380703	0.00007072	40.00000000
1.17000000	19608.04626827	684.71384065	0.00007221	40.00000000
1.17500000	19608.04624364	684.71387426	0.00007370	40.00000000
1.18000000	19608.04621902	684.71390788	0.00007520	40.00000000
1.18500000	19608.04619440	684.71394149	0.00007669	40.00000000
1.19000000	19608.04616978	684.71397510	0.00007818	40.00000000
1.19500000	19608.04614516	684.71400872	0.00007967	40.00000000
1.20000000	19608.04612053	684.71404233	0.00008117	40.00000000
1.20500000	19608.04609591	684.71407595	0.00008266	40.00000000
1.21000000	19608.04607129	684.71410956	0.00008415	40.00000000
1.21500000	19608.04604667	684.71414318	0.00008564	40.00000000
1.22000000	19608.04602204	684.71417679	0.00008714	40.00000000
1.22500000	19608.04599742	684.71421040	0.00008863	40.00000000
1.23000000	19608.04597280	684.71424402	0.00009012	40.00000000
1.23500000	19608.04594818	684.71427763	0.00009161	40.00000000
1.24000000	19608.04592356	684.71431125	0.00009311	40.00000000
1.24500000	19608.04589893	684.71434486	0.00009460	40.00000000
1.25000000	19608.04587431	684.71437847	0.00009609	40.00000000
1.25500000	19608.04584969	684.71441209	0.00009758	40.00000000
1.26000000	19608.04582507	684.71444570	0.00009908	40.00000000
1.26500000	19608.04580044	684.71447932	0.00010057	40.00000000
1.27000000	19608.04577582	684.71451293	0.00010206	40.00000000
1.27500000	19608.04575120	684.71454654	0.00010355	40.00000000
1.28000000	19608.04572658	684.71458016	0.00010504	40.00000000
1.28500000	19608.04570196	684.71461377	0.00010654	40.00000000
1.29000000	19608.04567733	684.71464739	0.00010803	40.00000000
1.29500000	19608.04565271	684.71468100	0.00010952	40.00000000
1.30000000	19608.04562809	684.71471462	0.00011101	40.00000000
1.30500000	19608.04560347	684.71474823	0.00011251	40.00000000
1.31000000	19608.04557884	684.71478184	0.00011400	40.00000000
1.31500000	19608.04555422	684.71481546	0.00011549	40.00000000
1.32000000	19608.04552960	684.71484907	0.00011698	40.00000000
1.32500000	19608.04550498	684.71488269	0.00011848	40.00000000
1.33000000	19608.04548036	684.71491630	0.00011997	40.00000000
1.33500000	19608.04545573	684.71494991	0.00012146	40.00000000
1.34000000	19608.04543111	684.71498353	0.00012295	40.00000000
1.34500000	19608.04540649	684.71501714	0.00012445	40.00000000
1.35000000	19608.04538187	684.71505076	0.00012594	40.00000000
1.35500000	19608.04535724	684.71508437	0.00012743	40.00000000
1.36000000	19608.04533262	684.71511798	0.00012892	40.00000000
1.36500000	19608.04530800	684.71515160	0.00013042	40.00000000
1.37000000	19608.04528338	684.71518521	0.00013191	40.00000000
1.37500000	19608.04525876	684.71521883	0.00013340	40.00000000
1.38000000	19608.04523413	684.71525244	0.00013489	40.00000000
1.38500000	19608.04520951	684.71528606	0.00013639	40.00000000
1.39000000	19608.04518489	684.71531967	0.00013788	40.00000000
1.39500000	19608.04516027	684.71535328	0.00013937	40.00000000
1.40000000	19608.04513565	684.71538690	0.00014086	40.00000000
1.40500000	19608.04511102	684.71542051	0.00014236	40.00000000
1.41000000	19608.04508640	684.71545413	0.00014385	40.00000000
1.41500000	19608.04506178	684.71548774	0.00014534	40.00000000
1.42000000	19608.04503716	684.71552135	0.00014683	40.00000000
1.42500000	19608.04501253	684.71555497	0.00014832	40.00000000
1.43000000	19608.04498791	684.71558858	0.00014982	40.00000000
1.43500000	19608.04496329	684.71562220	0.00015131	40.00000000
1.44000000	19608.04493867	684.71565581	0.00015280	40.00000000
1.44500000	19608.04491405	684.71568943	0.00015429	40.00000000
1.45000000	19608.04488942	684.71572304	0.00015579	40.00000000
1.45500000	19608.04486480	684.71575665	0.00015728	40.00000000
1.46000000	19608.04484018	684.71579027	0.00015877	40.00000000
1.46500000	19608.04481556	684.71582388	0.00016026	40.00000000
1.47000000	19608.04479093	684.71585750	0.00016176	40.00000000
1.47500000	19608.04476631	684.71589111	0.00016325	40.00000000
1.48000000	19608.04474169	684.71592472	0.00016474	40.00000000
1.48500000	19608.04471707	684.71595834	0.00016623	40.00000000
1.49000000	19608.04469245	684.71599195	0.00016773	40.00000000
1.49500000	19608.04466782	684.71602557	0.00016922	40.00000000
1.50000000	19608.04464320	684.71605918	0.00017071	40.00000000
1.50500000	19608.04461858	684.71609279	0.00017220	40.00000000
1.51000000	19608.04459396	684.71612641	0.00017370	40.00000000
1.51500000	19608.04456933	684.71616002	0.00017519	40.00000000
1.52000000	19608.04454471	684.71619364	0.00017668	40.00000000
1.52500000	19608.04452009	684.71622725	0.00017817	40.00000000
1.53000000	19608.04449547	684.71626087	0.00017967	40.00000000
1.53500000	19608.04447085	684.71629448	0.00018116	40.00000000
1.54000000	19608.04444622	684.71632809	0.00018265	40.00000000
1.54500000	19608.04442160	684.71636171	0.00018414	40.00000000
1.55000000	19608.04439698	684.71639532	0.00018564	40.00000000
1.55500000	19608.04437236	684.71642894	0.00018713	40.00000000
1.56000000	19608.04434774	684.71646255	0.00018862	40.00000000
1.56500000	19608.04432311	684.71649616	0.00019011	40.00000000
1.57000000	19608.04429849	684.71652978	0.00019161	40.00000000
1.57500000	19608.04427387	684.71656339	0.00019310	40.00000000
1.58000000	19608.04424925	684.71659701	0.00019459	40.00000000
1.58500000	19608.04422462	684.71663062	0.00019608	40.00000000
1.59000000	19608.04420000	684.71666423	0.00019757	40.00000000
1.59500000	19608.04417538	684.71669785	0.00019907	40.00000000
1.60000000	19608.04415076	684.71673146	0.00020056	40.00000000
1.60500000	19608.04412614	684.71676508	0.00020205	40.00000000
1.61000000	19608.04410151	684.71679869	0.00020354	40.00000000
1.61500000	19608.04407689	684.71683231	0.00020504	40.00000000
1.62000000	19608.04484648	684.71691397	0.00016852	40.00000000
1.62500000	19608.04706160	684.71708310	0.00006281	40.00000000
1.63000000	19608.04836514	684.71719677	0.00000014	40.00000000
1.63500000	19608.04838473	684.71723235	-0.00000192	40.00000000
1.64000000	19608.04839426	684.71726817	-0.00000239	40.00000000
1.64500000	19608.04839272	684.71730427	-0.00000110	40.00000000
1.65000000	19608.04839117	684.71734036	0.00000019	40.00000000
1.65500000	19608.04838962	684.71737645	0.00000148	40.00000000
1.66000000	19608.04838992	684.71741162	0.00000154	40.00000000
1.66500000	19608.04839147	684.71744617	0.00000076	40.00000000
1.67000000	19608.04839302	684.71748072	-0.00000001	40.00000000
1.67500000	19608.04839456	684.71751526	-0.00000078	40.00000000
1.68000000	19608.04839002	684.71755022	-0.00000096	40.00000000
1.68500000	19608.04838308	684.71758533	-0.00000091	40.00000000
1.69000000	19608.04837615	684.71762045	-0.00000086	40.00000000
1.69500000	19608.04836921	684.71765556	-0.00000081	40.00000000
1.70000000	19608.04836228	684.71769067	-0.00000076	40.00000000
1.70500000	19608.04835534	684.71772579	-0.00000071	40.00000000
1.71000000	19608.04834841	684.71776090	-0.00000065	40.00000000
1.71500000	19608.04834147	684.71779601	-0.00000060	40.00000000
1.72000000	19608.04833454	684.71783113	-0.00000055	40.00000000
1.72500000	19608.04832760	684.71786624	-0.00000050	40.00000000
1.73000000	19608.04832067	684.71790135	-0.00000045	40.00000000
1.73500000	19608.04831373	684.71793647	-0.00000040	40.00000000
1.74000000	19608.04830680	684.71797158	-0.00000034	40.00000000
1.74500000	19608.04829986	684.71800670	-0.00000029	40.00000000
1.75000000	19608.04829293	684.71804181	-0.00000024	40.00000000
1.75500000	19608.04828599	684.71807692	-0.00000019	40.00000000
1.76000000	19608.04827906	684.71811204	-0.00000014	40.00000000
1.76500000	19608.04827212	684.71814715	-0.00000009	40.00000000
1.77000000	19608.04826519	684.71818226	-0.00000003	40.00000000
1.77500000	19608.04825825	684.71821738	0.00000002	40.00000000
1.78000000	19608.04825132	684.71825249	0.00000007	40.00000000
1.78500000	19608.04824438	684.71828760	0.00000012	40.00000000
1.79000000	19608.04823745	684.71832272	0.00000017	40.00000000
1.79500000	19608.04823051	684.71835783	0.00000022	40.00000000
1.80000000	19608.04822358	684.71839294	0.00000027	40.00000000
1.80500000	19608.04821664	684.71842806	0.00000033	40.00000000
1.81000000	19608.04820971	684.71846317	0.00000038	40.00000000
1.81500000	19608.04820277	684.71849829	0.00000043	40.00000000
1.82000000	19608.04819584	684.71853340	0.00000048	40.00000000
1.82500000	19608.04818890	684.71856851	0.00000053	40.00000000
1.83000000	19608.04818197	684.71860363	0.00000058	40.00000000
1.83500000	19608.04817503	684.71863874	0.00000064	40.00000000
1.84000000	19608.04816810	684.71867385	0.00000069	40.00000000
1.84500000	19608.04816116	684.71870897	0.00000074	40.00000000
1.85000000	19608.04815423	684.71874408	0.00000079	40.00000000
1.85500000	19608.04814729	684.71877919	0.00000084	40.00000000
1.86000000	19608.04814036	684.71881431	0.00000089	40.00000000
1.86500000	19608.04813342	684.71884942	0.00000094	40.00000000
1.87000000	19608.04812649	684.71888454	0.00000100	40.00000000
1.87500000	19608.04830025	684.71892627	-0.00000064	40.00000000
1.88000000	19608.04834109	684.71896291	0.00000040	40.00000000
1.88500000	19608.04834142	684.71899810	0.00000071	40.00000000
1.89000000	19608.04834054	684.71903329	0.00000027	40.00000000
1.89500000	19608.04833966	684.71906848	0.00000000	40.00000000
1.90000000	19608.04833878	684.71910367	0.00000000	40.00000000
1.90500000	19608.04833791	684.71913886	0.00000000	40.00000000
1.91000000	19608.04833709	684.71917410	0.00000000	40.00000000
1.91500000	19608.04833627	684.71920933	0.00000000	40.00000000
1.92000000	19608.04833490	684.71924484	0.00000000	40.00000000
1.92500000	19608.04833327	684.71928048	0.00000000	40.00000000
1.93000000	19608.04833172	684.71931603	0.00000000	40.00000000
1.93500000	19608.04833049	684.71935126	0.00000000	40.00000000
1.94000000	19608.04832926	684.71938649	0.00000000	40.00000000
1.94500000	19608.04832888	684.71942189	0.00000000	40.00000000
1.95000000	19608.04832773	684.71945708	0.00000000	40.00000000
1.95500000	19608.04832702	684.71949182	0.00000000	40.00000000
1.96000000	19608.04832563	684.71952725	0.00000000	40.00000000
1.96500000	19608.04832400	684.71956240	0.00000000	40.00000000
1.97000000	19608.04832314	684.71959826	0.00000000	40.00000000
1.97500000	19608.04832165	684.71963314	0.00000000	40.00000000
1.98000000	19608.04832100	684.71966851	0.00000000	40.00000000
1.98500000	19608.04831943	684.71970352	0.00000000	40.00000000
1.99000000	19608.04831821	684.71973888	0.00000000	40.00000000
1.99500000	19608.04831700	684.71977466	0.00000000	40.00000000
2.00000000	19608.04831602	684.71980955	0.00000000	40.00000000
2.00500000	19608.05923306	691.86634590	3.24551781	40.00000000
2.01000000	19608.07397043	699.96125490	6.20554822	40.00000000
2.01500000	19608.07696951	708.35276009	8.92519978	40.00000000
2.02000000	19608.07115854	716.80888872	11.53853498	40.00000000
2.02500000	19608.06309218	725.36973258	14.19890892	40.00000000
2.03000000	19608.05590065	733.86880028	16.87879810	40.00000000
2.03500000	19608.05087885	742.29565354	19.58591633	40.00000000
2.04000000	19608.04785107	750.69457999	22.32887195	40.00000000
2.04500000	19608.04665443	759.05600872	25.09684079	40.00000000
2.05000000	19608.04635341	767.39850542	27.87917284	40.00000000
2.05500000	19608.04626670	775.73737504	30.66575349	40.00000000
2.06000000	19608.04639222	784.07241234	33.45641567	40.00000000
2.06500000	19608.04674537	792.40336386	36.25002126	40.00000000
2.07000000	19608.04730860	800.73046616	39.04546738	40.00000000
2.07500000	19608.04766498	809.05982527	41.83877398	40.00000000
2.08000000	19608.04779043	817.39216588	44.62985731	40.00000000
2.08500000	19608.04778157	825.72632854	47.41956105	40.00000000
2.09000000	19608.04769482	834.06158470	50.20841495	40.00000000
2.09500000	19608.04756770	842.39703037	52.99707831	40.00000000
2.10000000	19608.04744058	850.73247604	55.78574168	40.00000000
2.10500000	19608.04732254	859.06772993	58.57457130	40.00000000
2.11000000	19608.04721547	867.40275187	61.36360202	40.00000000
2.11500000	19608.04710841	875.73777382	64.15263274	40.00000000
2.12000000	19608.04713271	884.07206476	66.94285163	40.00000000
2.12500000	19608.04718795	892.40618356	69.73335030	40.00000000
2.13000000	19608.04723362	900.74035583	72.52368158	40.00000000
2.13500000	19608.04723135	909.07479590	75.31317424	40.00000000
2.14000000	19608.04722908	917.40923597	78.10266690	40.00000000
2.14500000	19608.04717990	925.74418971	80.89175932	40.00000000
2.15000000	19608.04708797	934.07961154	83.68048700	40.00000000
2.15500000	19608.04699603	942.41503338	86.46921468	40.00000000
2.16000000	19608.04686503	950.75088275	89.25763538	40.00000000
2.16500000	19608.04672869	959.08679042	92.04601422	40.00000000
2.17000000	19608.04659236	967.42269809	94.83439307	40.00000000
2.17500000	19608.04645602	975.75860576	97.62277191	40.00000000
2.18000000	19608.04631969	984.09451343	100.41115075	40.00000000
2.18500000	19608.04621173	992.43020506	103.19996182	40.00000000
2.19000000	19608.04611628	1000.76580152	105.98896328	40.00000000
2.19500000	19608.04602082	1009.10139798	108.77796475	40.00000000
2.20000000	19608.04592536	1017.43699444	111.56696621	40.00000000
2.20500000	19608.04582991	1025.77259090	114.35596768	40.00000000
2.21000000	19608.04580154	1034.10712323	117.14563274	40.00000000
2.21500000	19608.04583798	1042.44062741	119.93593896	40.00000000
2.22000000	19608.04587443	1050.77413160	122.72624519	40.00000000
2.22500000	19608.04591087	1059.10763578	125.51655141	40.00000000
2.23000000	19608.04594732	1067.44113997	128.30685763	40.00000000
2.23500000	19608.04597044	1075.77481135	131.09702927	40.00000000
2.24000000	19608.04596562	1084.10883348	133.88691858	40.00000000
2.24500000	19608.04596080	1092.44285562	136.67680790	40.00000000
2.25000000	19608.04595598	1100.77687776	139.46669721	40.00000000
2.25500000	19608.04595116	1109.11089990	142.25658652	40.00000000
2.26000000	19608.04594040	1117.44503447	145.04641082	40.00000000
2.26500000	19608.04589225	1125.77987732	147.83582560	40.00000000
2.27000000	19608.04584409	1134.11472017	150.62524037	40.00000000
2.27500000	19608.04579593	1142.44956302	153.41465515	40.00000000
2.28000000	19608.04574777	1150.78440587	156.20406992	40.00000000
2.28500000	19608.04569962	1159.11924872	158.99348469	40.00000000
2.29000000	19608.04565146	1167.45409157	161.78289947	40.00000000
2.29500000	19608.04560330	1175.78893442	164.57231424	40.00000000
2.30000000	19608.04555515	1184.12377727	167.36172902	40.00000000
2.30500000	19608.04550453	1192.45864323	170.15112894	40.00000000
2.31000000	19608.04543946	1200.79364478	172.94044173	40.00000000
2.31500000	19608.04537440	1209.12864634	175.72975452	40.00000000
2.32000000	19608.04530934	1217.46364790	178.51906731	40.00000000
2.32500000	19608.04524428	1225.79864945	181.30838009	40.00000000
2.33000000	19608.04517922	1234.13365101	184.09769288	40.00000000
2.33500000	19608.04511415	1242.46865257	186.88700567	40.00000000
2.34000000	19608.04504909	1250.80365413	189.67631846	40.00000000
2.34500000	19608.04498403	1259.13865568	192.46563124	40.00000000
2.35000000	19608.04492012	1267.47361948	195.25494367	40.00000000
2.35500000	19608.04486251	1275.80837614	198.04425414	40.00000000
2.36000000	19608.04480490	1284.14313280	200.83356461	40.00000000
2.36500000	19608.04474729	1292.47788946	203.62287508	40.00000000
2.37000000	19608.04468968	1300.81264612	206.41218554	40.00000000
2.37500000	19608.04463207	1309.14740279	209.20149601	40.00000000
2.38000000	19608.04457446	1317.48215945	211.99080648	40.00000000
2.38500000	19608.04451685	1325.81691611	214.78011695	40.00000000
2.39000000	19608.04445924	1334.15167277	217.56942741	40.00000000
2.39500000	19608.04440031	1342.48644665	220.35875659	40.00000000
2.40000000	19608.04433458	1350.82130916	223.14818211	40.00000000
2.40500000	19608.04426885	1359.15617168	225.93760763	40.00000000
2.41000000	19608.04420312	1367.49103420	228.72703315	40.00000000
2.41500000	19608.04413739	1375.82589672	231.51645867	40.00000000
2.42000000	19608.04407166	1384.16075923	234.30588419	40.00000000
2.42500000	19608.04400593	1392.49562175	237.09530971	40.00000000
2.43000000	19608.04394020	1400.83048427	239.88473523	40.00000000
2.43500000	19608.04387447	1409.16534679	242.67416075	40.00000000
2.44000000	19608.04380874	1417.50020930	245.46358626	40.00000000
2.44500000	19608.04374301	1425.83507182	248.25301178	40.00000000
2.45000000	19608.04367728	1434.16993434	251.04243730	40.00000000
2.45500000	19608.04361155	1442.50479686	253.83186282	40.00000000
2.46000000	19608.04354582	1450.83965937	256.62128834	40.00000000
2.46500000	19608.04348009	1459.17452189	259.41071386	40.00000000
2.47000000	19608.04341436	1467.50938441	262.20013938	40.00000000
2.47500000	19608.04334863	1475.84424693	264.98956490	40.00000000
2.48000000	19608.04328290	1484.17910944	267.77899042	40.00000000
2.48500000	19608.04321717	1492.51397196	270.56841594	40.00000000
2.49000000	19608.04315144	1500.84883448	273.35784146	40.00000000
2.49500000	19608.04308571	1509.18369700	276.14726698	40.00000000
2.50000000	19608.04301997	1517.51855951	278.93669250	40.00000000
2.50500000	19608.04295097	1525.85342009	281.72613659	40.00000000
2.51000000	19608.04287954	1534.18827922	284.51559444	40.00000000
2.51500000	19608.04280812	1542.52313836	287.30505229	40.00000000
2.52000000	19608.04273669	1550.85799750	290.09451015	40.00000000
2.52500000	19608.04266526	1559.19285663	292.88396800	40.00000000
2.53000000	19608.04259383	1567.52771577	295.67342585	40.00000000
2.53500000	19608.04252240	1575.86257490	298.46288370	40.00000000
2.54000000	19608.04245098	1584.19743404	301.25234155	40.00000000
2.54500000	19608.04237955	1592.53229318	304.04179941	40.00000000
2.55000000	19608.04230812	1600.86715231	306.83125726	40.00000000
2.55500000	19608.04223669	1609.20201145	309.62071511	40.00000000
2.56000000	19608.04216526	1617.53687058	312.41017296	40.00000000
2.56500000	19608.04209384	1625.87172972	315.19963081	40.00000000
2.57000000	19608.04202241	1634.20658886	317.98908867	40.00000000
2.57500000	19608.04195098	1642.54144799	320.77854652	40.00000000
2.58000000	19608.04187955	1650.87630713	323.56800437	40.00000000
2.58500000	19608.04180813	1659.21116626	326.35746222	40.00000000
2.59000000	19608.04173670	1667.54602540	329.14692007	40.00000000
2.59500000	19608.04166527	1675.88088454	331.93637793	40.00000000
2.60000000	19608.04159384	1684.21574367	334.72583578	40.00000000
2.60500000	19608.04152241	1692.55060281	337.51529363	40.00000000
2.61000000	19608.04145099	1700.88546194	340.30475148	40.00000000
2.61500000	19608.04139683	1709.22025873	343.09420303	40.00000000
2.62000000	19608.04134291	1717.55505463	345.88365450	40.00000000
2.62500000	19608.04128899	1725.88985054	348.67310596	40.00000000
2.63000000	19608.04123507	1734.22464645	351.46255743	40.00000000
2.63500000	19608.04118115	1742.55944236	354.25200889	40.00000000
2.64000000	19608.04112724	1750.89423827	357.04146036	40.00000000
2.64500000	19608.04107332	1759.22903418	359.83091182	40.00000000
2.65000000	19608.04101940	1767.56383009	362.62036329	40.00000000
2.65500000	19608.04096548	1775.89862600	365.40981475	40.00000000
2.66000000	19608.04091157	1784.23342191	368.19926622	40.00000000
2.66500000	19608.04085765	1792.56821781	370.98871768	40.00000000
2.67000000	19608.04080373	1800.90301372	373.77816915	40.00000000
2.67500000	19608.04074981	1809.23780963	376.56762061	40.00000000
2.68000000	19608.04069589	1817.57260554	379.35707208	40.00000000
2.68500000	19608.04064198	1825.90740145	382.14652354	40.00000000
2.69000000	19608.04058806	1834.24219736	384.93597500	40.00000000
2.69500000	19608.04053414	1842.57699327	387.72542647	40.00000000
2.70000000	19608.04048022	1850.91178918	390.51487793	40.00000000
2.70500000	19608.04042631	1859.24658509	393.30432940	40.00000000
2.71000000	19608.04037239	1867.58138099	396.09378086	40.00000000
2.71500000	19608.04031847	1875.91617690	398.88323233	40.00000000
2.72000000	19608.04015279	1884.25098585	401.67274027	40.00000000
2.72500000	19608.03981792	1892.58581455	404.46233372	40.00000000
2.73000000	19608.03948305	1900.92064324	407.25192717	40.00000000
2.73500000	19608.03914818	1909.25547194	410.04152062	40.00000000
2.74000000	19608.03881331	1917.59030063	412.83111407	40.00000000
2.74500000	19608.03847843	1925.92512932	415.62070752	40.00000000
2.75000000	19608.03814356	1934.25995802	418.41030097	40.00000000
2.75500000	19608.03780869	1942.59478671	421.19989442	40.00000000
2.76000000	19608.03747382	1950.92961541	423.98948787	40.00000000
2.76500000	19608.03713895	1959.26444410	426.77908132	40.00000000
2.77000000	19608.03680408	1967.59927279	429.56867477	40.00000000
2.77500000	19608.03646921	1975.93410149	432.35826822	40.00000000
2.78000000	19608.03613434	1984.26893018	435.14786167	40.00000000
2.78500000	19608.03579947	1992.60375888	437.93745511	40.00000000
2.79000000	19608.03546460	2000.93858757	440.72704856	40.00000000
2.79500000	19608.03512973	2009.27341626	443.51664201	40.00000000
2.80000000	19608.03479486	2017.60824496	446.30623546	40.00000000
2.80500000	19608.03445998	2025.94307365	449.09582891	40.00000000
2.81000000	19608.03412511	2034.27790235	451.88542236	40.00000000
2.81500000	19608.03379024	2042.61273104	454.67501581	40.00000000
2.82000000	19608.03345537	2050.94755973	457.46460926	40.00000000
2.82500000	19608.03312050	2059.28238843	460.25420271	40.00000000
2.83000000	19608.03278563	2067.61721712	463.04379616	40.00000000
2.83500000	19608.03245076	2075.95204582	465.83338961	40.00000000
2.84000000	19608.03211589	2084.28687451	468.62298306	40.00000000
2.84500000	19608.03178102	2092.62170320	471.41257651	40.00000000
2.85000000	19608.03144615	2100.95653190	474.20216996	40.00000000
2.85500000	19608.03111128	2109.29136059	476.99176340	40.00000000
2.86000000	19608.03077641	2117.62618929	479.78135685	40.00000000
2.86500000	19608.03044153	2125.96101798	482.57095030	40.00000000
2.87000000	19608.03010666	2134.29584667	485.36054375	40.00000000
2.87500000	19608.02977179	2142.63067537	488.15013720	40.00000000
2.88000000	19608.02943692	2150.96550406	490.93973065	40.00000000
2.88500000	19608.02910205	2159.30033276	493.72932410	40.00000000
2.89000000	19608.02876718	2167.63516145	496.51891755	40.00000000
2.89500000	19608.02843231	2175.96999014	499.30851100	40.00000000
2.90000000	19608.02809744	2184.30481884	502.09810445	40.00000000
2.90500000	19608.02776257	2192.63964753	504.88769790	40.00000000
2.91000000	19608.02742770	2200.97447623	507.67729135	40.00000000
2.91500000	19608.02709283	2209.30930492	510.46688480	40.00000000
2.92000000	19608.02675796	2217.64413361	513.25647824	40.00000000
2.92500000	19608.02642308	2225.97896231	516.04607169	40.00000000
2.93000000	19608.02608821	2234.31379100	518.83566514	40.00000000
2.93500000	19608.02575334	2242.64861970	521.62525859	40.00000000
2.94000000	19608.02541847	2250.98344839	524.41485204	40.00000000
2.94500000	19608.02508360	2259.31827708	527.20444549	40.00000000
2.95000000	19608.02474873	2267.65310578	529.99403894	40.00000000
2.95500000	19608.02441386	2275.98793447	532.78363239	40.00000000
2.96000000	19608.02407899	2284.32276317	535.57322584	40.00000000
2.96500000	19608.02374412	2292.65759186	538.36281929	40.00000000
2.97000000	19608.02340925	2300.99242055	541.15241274	40.00000000
2.97500000	19608.02307438	2309.32724925	543.94200619	40.00000000
2.98000000	19608.02273951	2317.66207794	546.73159964	40.00000000
2.98500000	19608.02240463	2325.99690664	549.52119309	40.00000000
2.99000000	19608.02206976	2334.33173533	552.31078653	40.00000000
2.99500000	19608.02173489	2342.66656402	555.10037998	40.00000000
3.00000000	19608.02140002	2351.00139272	557.88997343	40.00000000
3.00500000	19608.02106515	2359.33622141	560.67956688	40.00000000
3.01000000	19608.02073028	2367.67105011	563.46916033	40.00000000
3.01500000	19608.02039541	2376.00587880	566.25875378	40.00000000
3.02000000	19608.02006054	2384.34070749	569.04834723	40.00000000
3.02500000	19608.01972567	2392.67553619	571.83794068	40.00000000
3.03000000	19608.01939080	2401.01036488	574.62753413	40.00000000
3.03500000	19608.01905593	2409.34519358	577.41712758	40.00000000
3.04000000	19608.01872106	2417.68002227	580.20672103	40.00000000
3.04500000	19608.01838618	2426.01485096	582.99631448	40.00000000
3.05000000	19608.01805131	2434.34967966	585.78590793	40.00000000
3.05500000	19608.01771644	2442.68450835	588.57550138	40.00000000
3.06000000	19608.01738157	2451.01933705	591.36509482	40.00000000
3.06500000	19608.01704670	2459.35416574	594.15468827	40.00000000
3.07000000	19608.01671183	2467.68899444	596.94428172	40.00000000
3.07500000	19608.01637696	2476.02382313	599.73387517	40.00000000
3.08000000	19608.01604209	2484.35865182	602.52346862	40.00000000
3.08500000	19608.01570722	2492.69348052	605.31306207	40.00000000
3.09000000	19608.01537235	2501.02830921	608.10265552	40.00000000
3.09500000	19608.01503748	2509.36313791	610.89224897	40.00000000
3.10000000	19608.01470261	2517.69796660	613.68184242	40.00000000
3.10500000	19608.01436773	2526.03279529	616.47143587	40.00000000
3.11000000	19608.01403286	2534.36762399	619.26102932	40.00000000
3.11500000	19608.01369799	2542.70245268	622.05062277	40.00000000
3.12000000	19608.01336312	2551.03728138	624.84021622	40.00000000
3.12500000	19608.01302825	2559.37211007	627.62980966	40.00000000
3.13000000	19608.01269338	2567.70693876	630.41940311	40.00000000
3.13500000	19608.01235851	2576.04176746	633.20899656	40.00000000
3.14000000	19608.01202364	2584.37659615	635.99859001	40.00000000
3.14500000	19608.01168877	2592.71142485	638.78818346	40.00000000
3.15000000	19608.01135390	2601.04625354	641.57777691	40.00000000
3.15500000	19608.01101903	2609.38108223	644.36737036	40.00000000
3.16000000	19608.01068416	2617.71591093	647.15696381	40.00000000
3.16500000	19608.01034928	2626.05073962	649.94655726	40.00000000
3.17000000	19608.01001441	2634.38556832	652.73615071	40.00000000
3.17500000	19608.00967954	2642.72039701	655.52574416	40.00000000
3.18000000	19608.00934467	2651.05522570	658.31533761	40.00000000
3.18500000	19608.00900980	2659.39005440	661.10493106	40.00000000
3.19000000	19608.00867493	2667.72488309	663.89452451	40.00000000
3.19500000	19608.00834006	2676.05971179	666.68411795	40.00000000
3.20000000	19608.00800519	2684.39454048	669.47371140	40.00000000
3.20500000	19608.00767032	2692.72936917	672.26330485	40.00000000
3.21000000	19608.00733545	2701.06419787	675.05289830	40.00000000
3.21500000	19608.00700058	2709.39902656	677.84249175	40.00000000
3.22000000	19608.00666571	2717.73385526	680.63208520	40.00000000
3.22500000	19608.00633084	2726.06868395	683.42167865	40.00000000
3.23000000	19608.00599596	2734.40351264	686.21127210	40.00000000
3.23500000	19608.00566109	2742.73834134	689.00086555	40.00000000
3.24000000	19608.00532622	2751.07317003	691.79045900	40.00000000
3.24500000	19608.00499135	2759.40799873	694.58005245	40.00000000
3.25000000	19608.00465648	2767.74282742	697.36964590	40.00000000
3.25500000	19608.00432161	2776.07765611	700.15923935	40.00000000
3.26000000	19608.00398674	2784.41248481	702.94883279	40.00000000
3.26500000	19608.00365187	2792.74731350	705.73842624	40.00000000
3.27000000	19608.00331700	2801.08214220	708.52801969	40.00000000
3.27500000	19608.00298213	2809.41697089	711.31761314	40.00000000
3.28000000	19608.00264726	2817.75179958	714.10720659	40.00000000
3.28500000	19608.00231239	2826.08662828	716.89680004	40.00000000
3.29000000	19608.00197751	2834.42145697	719.68639349	40.00000000
3.29500000	19608.00164264	2842.75628567	722.47598694	40.00000000
3.30000000	19608.00130777	2851.09111436	725.26558039	40.00000000
3.30500000	19608.00097290	2859.42594305	728.05517384	40.00000000
3.31000000	19608.00271490	2867.76102667	730.84456129	40.00000000
3.31500000	19608.00692658	2876.09641344	733.63370379	40.00000000
3.32000000	19608.01113826	2884.43180020	736.42284629	40.00000000
3.32500000	19608.01534995	2892.76718697	739.21198878	40.00000000
3.33000000	19608.01956163	2901.10257373	742.00113128	40.00000000
3.33500000	19608.02377331	2909.43796050	744.79027378	40.00000000
3.34000000	19608.02798499	2917.77334726	747.57941627	40.00000000
3.34500000	19608.03195907	2926.10872019	750.36859228	40.00000000
3.35000000	19608.03338841	2934.44394484	753.15812723	40.00000000
3.35500000	19608.02930558	2941.10895822	755.22148376	40.00000000
3.36000000	19596.80338387	1587.34107397	391.69867424	40.00000000
3.36500000	19601.00847448	1587.68168621	766.12067203	40.00000000
3.37000000	19610.05817766	1588.41471242	856.08356920	40.00000000
3.37500000	19613.16246428	1588.66615962	853.83280652	40.00000000
3.38000000	19612.56498841	1588.61776414	831.14150227	40.00000000
3.38500000	19610.94580366	1588.48661046	810.74807899	40.00000000
3.39000000	19609.55371262	1588.37385097	797.46395173	40.00000000
3.39500000	19608.67377507	1588.30257587	790.39299891	40.00000000
3.40000000	19608.21689529	1588.26556834	787.57709873	40.00000000
3.40500000	19608.03064129	1588.25048174	787.42532887	40.00000000
3.41000000	19607.97258096	1588.24577881	788.60980867	40.00000000
3.41500000	19607.97538796	1588.24600654	790.64512839	40.00000000
3.42000000	19607.98966687	1588.24716273	793.04462366	40.00000000
3.42500000	19608.01371778	1588.24911068	795.67011058	40.00000000
3.43000000	19608.03380539	1588.25073822	798.39550789	40.00000000
3.43500000	19608.04331444	1588.25150862	801.14777667	40.00000000
3.44000000	19608.05568817	1588.25251081	803.94331360	40.00000000
3.44500000	19608.05632257	1588.25256184	806.71827392	40.00000000
3.45000000	19608.06075088	1588.25292067	809.52041337	40.00000000
3.45500000	19608.06064064	1588.25291227	812.31146220	40.00000000
3.46000000	19608.05754851	1588.25266135	815.09676130	40.00000000
3.46500000	19608.05772911	1588.25267638	817.89712451	40.00000000
3.47000000	19608.05628283	1588.25255886	820.69195172	40.00000000
3.47500000	19608.05335436	1588.25232178	823.48337698	40.00000000
3.48000000	19608.05004471	1588.25205357	826.27457544	40.00000000
3.48500000	19608.04631877	1588.25175147	829.06555485	40.00000000
3.49000000	19608.04378077	1588.25154630	831.86142210	40.00000000
3.49500000	19608.04136862	1588.25135090	834.65779730	40.00000000
3.50000000	19608.03872161	1588.25113623	837.45363513	40.00000000
3.50500000	19608.03532462	1588.25086098	840.24757590	40.00000000
3.51000000	19608.03137335	1588.25054107	843.04125984	40.00000000
3.51500000	19608.02737869	1588.25021766	845.83492367	40.00000000
3.52000000	19608.02264945	1588.24983475	848.62837233	40.00000000
3.52500000	19608.01784328	1588.24944561	851.42179846	40.00000000
3.53000000	19608.01272937	1588.24903115	854.21574403	40.00000000
3.53500000	19608.00757461	1588.24861333	857.00975857	40.00000000
3.54000000	19608.00246834	1588.24819976	859.80404496	40.00000000
3.54500000	19607.99736994	1588.24778689	862.59837546	40.00000000
3.55000000	19607.98900626	1588.24710945	865.39284182	40.00000000
3.55500000	19607.98001133	1588.24638087	868.18733443	40.00000000
3.56000000	19607.97101641	1588.24565229	870.98182705	40.00000000
3.56500000	19607.96202149	1588.24492371	873.77631967	40.00000000
3.57000000	19607.95170749	1588.24408830	876.57080967	40.00000000
3.57500000	19607.93579193	1588.24279919	879.36528852	40.00000000
3.58000000	19607.91987636	1588.24151008	882.15976737	40.00000000
3.58500000	19607.90396080	1588.24022097	884.95424621	40.00000000
3.59000000	19607.88804523	1588.23893186	887.74872506	40.00000000
3.59500000	19607.87459124	1588.23784206	890.54345825	40.00000000
3.60000000	19607.86320730	1588.23691987	893.33840532	40.00000000
3.60500000	19607.85182336	1588.23599767	896.13335239	40.00000000
3.61000000	19607.84043942	1588.23507547	898.92829946	40.00000000
3.61500000	19607.82905548	1588.23415328	901.72324653	40.00000000
3.62000000	19607.81967567	1588.23339350	904.51870023	40.00000000
3.62500000	19607.81052948	1588.23265266	907.31421299	40.00000000
3.63000000	19607.80138329	1588.23191181	910.10972575	40.00000000
3.63500000	19607.79223711	1588.23117097	912.90523851	40.00000000
3.64000000	19607.81344428	1588.23288897	915.70201127	40.00000000
3.64500000	19607.85485554	1588.23624324	918.49869624	40.00000000
3.65000000	19607.84533580	1588.23547211	921.29525325	40.00000000
3.65500000	19607.83490686	1588.23462716	924.09100577	40.00000000
3.66000000	19607.82428541	1588.23376670	926.88678703	40.00000000
3.66500000	19607.81364877	1588.23290525	929.68262199	40.00000000
3.67000000	19607.80387722	1588.23211389	932.47911505	40.00000000
3.67500000	19607.79377772	1588.23129596	935.27539517	40.00000000
3.68000000	19252.05952659	1559.41682147	547.32781626	39.00000000
3.68500000	19602.71213043	1587.81968221	902.77403015	39.00000000
3.69000000	19666.93713828	1593.02190789	1004.48273781	39.00000000
3.69500000	19660.46497921	1592.49766343	1015.73685557	39.00000000
3.70000000	19679.15654758	1594.01168014	919.76664903	40.00000000
3.70500000	19576.13692585	1585.66709119	1033.48276061	40.00000000
3.71000000	19570.93714131	1585.24590817	1040.32851747	40.00000000
3.71500000	19581.31726738	1586.08669905	1020.05568204	40.00000000
3.72000000	19590.53566922	1586.83338955	999.74333005	40.00000000
3.72500000	19596.78871454	1587.33988620	985.93447487	40.00000000
3.73000000	19600.80161515	1587.66493104	978.39023006	40.00000000
3.73500000	19603.38413142	1587.87411472	975.17824748	40.00000000
3.74000000	19605.01375840	1588.00611440	974.74791622	40.00000000
3.74500000	19606.05240844	1588.09024503	975.84820101	40.00000000
3.75000000	19606.69266215	1588.14210565	977.80784365	40.00000000
3.75500000	19607.08424603	1588.17382400	980.19445741	40.00000000
3.76000000	19607.31936885	1588.19286907	982.80055236	40.00000000
3.76500000	19607.45174608	1588.20359138	985.51796629	40.00000000
3.77000000	19607.52451191	1588.20948524	988.27951212	40.00000000
3.77500000	19607.55917971	1588.21229397	991.06463716	40.00000000
3.78000000	19607.57159074	1588.21329872	993.85913072	40.00000000
3.78500000	19607.57311063	1588.21342166	996.65594796	40.00000000
3.79000000	19607.56579614	1588.21282941	999.45419453	40.00000000
3.79500000	19607.55328186	1588.21181618	1002.25290996	40.00000000
3.80000000	19607.53748865	1588.21053667	1005.05226236	40.00000000
3.80500000	19607.52079340	1588.20918415	1007.85148417	40.00000000
3.81000000	19607.50378451	1588.20780639	1010.65037969	40.00000000
3.81500000	19607.48647092	1588.20640380	1013.44892148	40.00000000
3.82000000	19607.46834172	1588.20493569	1016.24767755	40.00000000
3.82500000	19607.44948324	1588.20340806	1019.04624727	40.00000000
3.83000000	19348.01568418	1567.18927053	717.09525865	39.00000000
3.83500000	19626.12473420	1589.71610350	1015.66512977	39.00000000
3.84000000	19970.61251153	1617.61961301	769.20263275	40.00000000
3.84500000	19646.77084553	1591.38843851	1077.43603082	40.00000000
3.85000000	19587.06150198	1586.55198159	1141.35747594	40.00000000
3.85500000	19584.17182398	1586.31791802	1128.57428175	40.00000000
3.86000000	19590.03232629	1586.79261831	1101.58670509	40.00000000
3.86500000	19595.38691550	1587.22634008	1079.59359853	40.00000000
3.87000000	19599.28341102	1587.54195610	1065.71372430	40.00000000
3.87500000	19601.99869734	1587.76189425	1058.45866707	40.00000000
3.88000000	19603.85412556	1587.91218401	1055.64420871	40.00000000
3.88500000	19605.10886231	1588.01381784	1055.40554858	40.00000000
3.89000000	19605.92260332	1588.07973072	1056.65940082	40.00000000
3.89500000	19606.42961128	1588.12079880	1058.70623160	40.00000000
3.90000000	19606.73870286	1588.14583518	1061.14462538	40.00000000
3.90500000	19606.91608507	1588.16020293	1063.78170327	40.00000000
3.91000000	19607.01229036	1588.16799537	1066.51025009	40.00000000
3.91500000	19607.05791974	1588.17169162	1069.28487818	40.00000000
3.92000000	19607.07394129	1588.17298874	1072.07599260	40.00000000
3.92500000	19607.07033026	1588.17269677	1074.87345396	40.00000000
3.93000000	19607.05647588	1588.17157445	1077.67493604	40.00000000
3.93500000	19176.29254801	1553.27969667	622.96110374	39.00000000
3.94000000	19589.21319960	1586.72626883	1026.72626768	39.00000000
3.94500000	19862.01018253	1608.82282478	910.70284402	40.00000000
3.95000000	19634.51905419	1590.39604318	1167.02326564	40.00000000
3.95500000	19593.35300222	1587.06159306	1209.07923134	40.00000000
3.96000000	19590.67064120	1586.84432193	1188.43664204	40.00000000
3.96500000	19594.03455518	1587.11679930	1159.21359067	40.00000000
3.97000000	19597.46570264	1587.39472164	1136.95891645	40.00000000
3.97500000	19600.22016988	1587.61783357	1123.35580411	40.00000000
3.98000000	19602.30275450	1587.78652301	1116.56027087	40.00000000
3.98500000	19603.83488062	1587.91062497	1113.93757236	40.00000000
3.99000000	19604.90402481	1587.99722637	1113.85213220	40.00000000
3.99500000	19605.59736112	1588.05338625	1115.23485725	40.00000000
4.00000000	19606.04112002	1588.08933077	1117.31503258	40.00000000
4.00500000	19606.30563028	1588.11075625	1119.77782088	40.00000000
4.01000000	19606.45347853	1588.12273135	1122.43346295	40.00000000
4.01500000	19606.52534669	1588.12855316	1125.17231531	40.00000000
4.02000000	19606.55387967	1588.13086379	1127.94702580	40.00000000
4.02500000	19545.54756635	1583.18935304	1023.39764854	39.00000000
4.03000000	19833.77149744	1606.53549164	969.25246803	40.00000000
4.03500000	19635.71870434	1590.49321483	1222.29299751	40.00000000
4.04000000	19598.54085371	1587.48180910	1261.34349650	40.00000000
4.04500000	19594.41421765	1587.14755177	1238.55338956	40.00000000
4.05000000	19595.99066705	1587.27524438	1208.09548855	40.00000000
4.05500000	19598.23823728	1587.45729744	1185.12079874	40.00000000
4.06000000	19600.34679866	1587.62809046	1171.23821696	40.00000000
4.06500000	19602.11067568	1587.77096472	1164.30139327	40.00000000
4.07000000	19603.49712111	1587.88326704	1161.51141135	40.00000000
4.07500000	19604.49365429	1587.96398568	1161.37056359	40.00000000
4.08000000	19605.15122058	1588.01724899	1162.72391289	40.00000000
4.08500000	19605.56976390	1588.05115095	1164.80267237	40.00000000
4.09000000	19605.81512494	1588.07102518	1167.26873461	40.00000000
4.09500000	19217.79911952	1556.64172896	747.81911813	39.00000000
4.10000000	19600.98324208	1587.67964236	1129.70726628	39.00000000
4.10500000	19708.21759906	1596.36562581	1160.34851517	40.00000000
4.11000000	19615.70311507	1588.87195222	1296.42041925	40.00000000
4.11500000	19598.83573894	1587.50569522	1298.19395242	40.00000000
4.12000000	19596.83775907	1587.34385803	1267.78931346	40.00000000
4.12500000	19597.71417441	1587.41484778	1239.14518140	40.00000000
4.13000000	19599.25715855	1587.53982959	1219.64629721	40.00000000
4.13500000	19600.90581413	1587.67337074	1208.58090947	40.00000000
4.14000000	19602.36125770	1587.79126219	1203.53447954	40.00000000
4.14500000	19603.50785382	1587.88413649	1201.99654042	40.00000000
4.15000000	19604.31442612	1587.94946850	1202.59236742	40.00000000
4.15500000	19604.84845234	1587.99272446	1204.27965881	40.00000000
4.16000000	19203.94463338	1555.51951561	772.63282298	39.00000000
4.16500000	20038.84367533	1623.14633736	733.03703434	40.00000000
4.17000000	19689.57869531	1594.85587411	1219.93650746	40.00000000
4.17500000	19615.59343561	1588.86306848	1337.91085506	40.00000000
4.18000000	19600.91688027	1587.67426694	1333.90752037	40.00000000
4.18500000	19598.18540696	1587.45301796	1302.25490388	40.00000000
4.19000000	19598.22393277	1587.45613824	1273.70621393	40.00000000
4.19500000	19599.28978785	1587.54247267	1254.84754284	40.00000000
4.20000000	19600.68747335	1587.65568530	1244.28835466	40.00000000
4.20500000	19602.01928680	1587.76356239	1239.44960222	40.00000000
4.21000000	19603.09074705	1587.85035033	1238.11942737	40.00000000
4.21500000	19603.85943829	1587.91261457	1238.78128756	40.00000000
4.22000000	19361.20692262	1568.25776113	948.04391975	39.00000000
4.22500000	19846.03653315	1607.52895893	991.82825779	40.00000000
4.23000000	19650.90332324	1591.72316891	1317.73425856	40.00000000
4.23500000	19610.21158899	1588.42713908	1378.00811812	40.00000000
4.24000000	19601.07700400	1587.68723752	1357.86598997	40.00000000
4.24500000	19598.64153625	1587.48996437	1325.10936008	40.00000000
4.25000000	19598.50572229	1587.47896354	1299.32662316	40.00000000
4.25500000	19599.41628149	1587.55271907	1283.30834791	40.00000000
4.26000000	19600.69055522	1587.65593529	1274.87298713	40.00000000
4.26500000	19601.89589468	1587.75356731	1271.32744101	40.00000000
4.27000000	19602.84135627	1587.83014992	1270.79275355	40.00000000
4.27500000	19466.91046873	1576.81974805	1082.74236366	39.00000000
4.28000000	19743.65787223	1599.23628767	1170.32784458	40.00000000
4.28500000	19632.51981147	1590.23410430	1383.24911848	40.00000000
4.29000000	19607.84474479	1588.23542407	1406.90867088	40.00000000
4.29500000	19600.93432049	1587.67568002	1378.45795667	40.00000000
4.30000000	19598.63949079	1587.48979861	1346.60320130	40.00000000
4.30500000	19598.48113840	1587.47697208	1323.68578237	40.00000000
4.31000000	19599.34608635	1587.54703296	1310.06966869	40.00000000
4.31500000	19600.54832381	1587.64441448	1303.31080668	40.00000000
4.32000000	19601.66101850	1587.73454226	1300.84173340	40.00000000
4.32500000	19481.39322653	1577.99285120	1126.95347251	39.00000000
4.33000000	19719.48055872	1597.27792510	1232.31086040	40.00000000
4.33500000	19629.58994859	1589.99678571	1419.09510326	40.00000000
4.34000000	19608.33717072	1588.27531092	1433.94921786	40.00000000
4.34500000	19601.24700189	1587.70100764	1403.72913008	40.00000000
4.35000000	19598.56461385	1587.48373348	1372.23111876	40.00000000
4.35500000	19598.18329029	1587.45284631	1350.01299592	40.00000000
4.36000000	19598.94069429	1587.51419639	1337.04752147	40.00000000
4.36500000	19600.09247275	1587.60749033	1330.68589350	40.00000000
4.37000000	19345.91378470	1567.01901671	1024.15462225	39.00000000
4.37500000	19767.94390804	1601.20345660	1147.54735112	40.00000000
4.38000000	19641.65787280	1590.97428735	1423.16685682	40.00000000
4.38500000	19613.04817437	1588.65690207	1463.92530591	40.00000000
4.39000000	19603.19022281	1587.85840790	1439.06913796	40.00000000
4.39500000	19598.96797527	1587.51640595	1405.88043702	40.00000000
4.40000000	19597.77562075	1587.41982513	1380.75254278	40.00000000
4.40500000	19598.15059784	1587.45019857	1365.61560679	40.00000000
4.41000000	19599.20176631	1587.53534322	1357.76658047	40.00000000
4.41500000	19464.96397074	1576.66208168	1165.08300255	39.00000000
4.42000000	19705.06571986	1596.11032325	1295.02113936	40.00000000
4.42500000	19630.12429335	1590.04006795	1473.58812199	40.00000000
4.43000000	19610.17880886	1588.42448309	1485.08063919	40.00000000
4.43500000	19601.82294139	1587.74765862	1453.92829456	40.00000000
4.44000000	19598.16115891	1587.45105358	1422.09475247	40.00000000
4.44500000	19597.30572275	1587.38176319	1399.89280566	40.00000000
4.45000000	19597.83512052	1587.42464516	1387.08872164	40.00000000
4.45500000	19340.17914128	1566.55451056	1072.06842498	39.00000000
4.46000000	19741.08498156	1599.02788374	1222.60661243	40.00000000
4.46500000	19639.56641935	1590.80487971	1478.55560726	40.00000000
4.47000000	19614.29702443	1588.75805880	1512.41912217	40.00000000
4.47500000	19603.55086130	1587.88761959	1485.69019667	40.00000000
4.48000000	19598.49731874	1587.47828306	1452.18508772	40.00000000
4.48500000	19596.87085009	1587.34653847	1427.35575843	40.00000000
4.49000000	19597.01853341	1587.35850118	1412.49645293	40.00000000
4.49500000	19414.22122268	1572.55191880	1166.71124534	39.00000000
4.50000000	19706.06212232	1596.19103205	1320.00373820	40.00000000
4.50500000	19633.44913929	1590.30937983	1516.42781373	40.00000000
4.51000000	19612.42680222	1588.60657066	1532.82133450	40.00000000
4.51500000	19602.42128920	1587.79612425	1501.93112732	40.00000000
4.52000000	19597.69073125	1587.41294925	1469.21560453	40.00000000
4.52500000	19596.25038237	1587.29628138	1446.07124698	40.00000000
4.53000000	19100.21000390	1547.11701010	914.62900630	39.00000000
4.53500000	19793.41206105	1603.26637703	1108.01472333	40.00000000
4.54000000	19654.09307279	1591.98153910	1483.92379742	40.00000000
4.54500000	19620.67198887	1589.27443113	1557.77025465	40.00000000
4.55000000	19606.48405744	1588.12520864	1539.43774171	40.00000000
4.55500000	19599.07639882	1587.52518801	1504.57744705	40.00000000
4.56000000	19596.13060867	1587.28657892	1476.47493549	40.00000000
4.56500000	19595.60566131	1587.24405884	1458.78224224	40.00000000
4.57000000	19826.88515691	1605.97769784	1027.96105899	40.00000000
4.57500000	19662.21969747	1592.63979570	1478.24464807	40.00000000
4.58000000	19624.17022898	1589.55778831	1576.97286649	40.00000000
4.58500000	19608.21647543	1588.26553490	1564.59415003	40.00000000
4.59000000	19599.58781937	1587.56661363	1529.73552817	40.00000000
4.59500000	19595.84771786	1587.26366506	1499.96974673	40.00000000
4.60000000	19594.90246968	1587.18710021	1480.67382267	40.00000000
4.60500000	19775.97402876	1601.85389655	1153.33528675	40.00000000
4.61000000	19652.85948664	1591.88161849	1526.97654770	40.00000000
4.61500000	19621.64654031	1589.35336953	1599.19903238	40.00000000
4.62000000	19606.59231450	1588.13397756	1579.67141615	40.00000000
4.62500000	19598.43706096	1587.47340185	1544.25437486	40.00000000
4.63000000	19595.00805288	1587.19565254	1515.77252291	40.00000000
4.63500000	19344.11613235	1566.87340666	1195.95673222	39.00000000
4.64000000	19698.77136116	1595.60047993	1386.09200585	40.00000000
4.64500000	19636.67481892	1590.57066076	1596.06485172	40.00000000
4.65000000	19614.79976192	1588.79878068	1615.56916971	40.00000000
4.65500000	19602.37125786	1587.79207221	1584.08163873	40.00000000
4.66000000	19596.04390568	1587.27955654	1549.94026566	40.00000000
4.66500000	19593.78918600	1587.09692400	1525.66829400	40.00000000
4.67000000	19751.13997944	1599.84233855	1225.97807977	40.00000000
4.67500000	19649.79667159	1591.63353049	1575.14332268	40.00000000
4.68000000	19621.42459691	1589.33539203	1637.97034189	40.00000000
4.68500000	19605.91840584	1588.07939056	1615.39707363	40.00000000
4.69000000	19597.26115987	1587.37815420	1579.34878538	40.00000000
4.69500000	19593.62617154	1587.08371983	1550.90512930	40.00000000
4.70000000	19776.72997334	1601.91512779	1149.77686289	40.00000000
4.70500000	19656.27013468	1592.15788069	1568.63767752	40.00000000
4.71000000	19624.65908186	1589.59738545	1655.17008494	40.00000000
4.71500000	19607.57625666	1588.21367693	1638.20751350	40.00000000
4.72000000	19597.63856848	1587.40872419	1601.66356381	40.00000000
4.72500000	19593.26622847	1587.05456449	1571.53430551	40.00000000
4.73000000	19758.56966169	1600.44414292	1205.87998702	40.00000000
4.73500000	19653.31925585	1591.91885969	1596.88348786	40.00000000
4.74000000	19623.74785854	1589.52357658	1673.30858806	40.00000000
4.74500000	19606.68326573	1588.14134484	1653.58988599	40.00000000
4.75000000	19596.79338591	1587.34026470	1616.66521214	40.00000000
4.75500000	19173.39537421	1553.04502540	1132.31244212	39.00000000
4.76000000	19712.67440555	1596.72662646	1367.26092350	40.00000000
4.76500000	19643.89885037	1591.15580670	1650.00015289	40.00000000
4.77000000	19619.09268945	1589.14650780	1690.42760478	40.00000000
4.77500000	19603.39004849	1587.87459418	1661.65086228	40.00000000
4.78000000	19594.78393126	1587.17749892	1625.06039697	40.00000000
4.78500000	19842.75433564	1607.26310106	943.99715916	40.00000000
4.79000000	19671.41126878	1593.38431276	1548.47220936	40.00000000
4.79500000	19632.38170885	1590.22291874	1699.18038909	40.00000000
4.80000000	19611.79711403	1588.55556615	1698.38976256	40.00000000
4.80500000	19598.65994992	1587.49145578	1662.22836546	40.00000000
4.81000000	19129.18720776	1549.46416377	1135.55475212	39.00000000
4.81500000	19710.18078050	1596.52464322	1386.67186782	40.00000000
4.82000000	19645.00383034	1591.24531012	1680.42524438	40.00000000
4.82500000	19619.83805020	1589.20688250	1724.12092333	40.00000000
4.83000000	19603.07116346	1587.84876419	1694.94191329	40.00000000
4.83500000	19593.74998290	1587.09374882	1657.50296719	40.00000000
4.84000000	19754.53792352	1600.11757208	1215.89614346	40.00000000
4.84500000	19655.45163791	1592.09158244	1651.95158941	40.00000000
4.85000000	19626.26689572	1589.72761843	1739.70195614	40.00000000
4.85500000	19606.96203304	1588.16392497	1721.38701695	40.00000000
4.86000000	19595.20579414	1587.21166926	1682.94243817	40.00000000
4.86500000	19783.47133889	1602.46117830	1107.20938489	40.00000000
4.87000000	19662.16529174	1592.63538841	1632.31068538	40.00000000
4.87500000	19630.06061110	1590.03490916	1752.32685648	40.00000000
4.88000000	19609.27705335	1588.35144175	1742.04505450	40.00000000
4.88500000	19595.96771038	1587.27338458	1703.60592771	40.00000000
4.89000000	19785.18215974	1602.59975505	1096.39081110	40.00000000
4.89500000	19662.92604273	1592.69700925	1641.25517120	40.00000000
4.90000000	19630.88384699	1590.10159159	1767.12835736	40.00000000
4.90500000	19609.50823267	1588.37016697	1758.01899409	40.00000000
4.91000000	19595.65537976	1587.24808563	1719.18740915	40.00000000
4.91500000	19757.01982373	1600.31860592	1195.25999763	40.00000000
4.92000000	19658.42567476	1592.33247951	1679.49222620	40.00000000
4.92500000	19628.76188203	1589.92971282	1784.68761735	40.00000000
4.93000000	19607.56920077	1588.21310519	1769.54161837	40.00000000
4.93500000	19594.17898821	1587.12849804	1729.80656245	40.00000000
4.94000000	19717.88798845	1597.14892686	1363.16882942	40.00000000
4.94500000	19650.64856646	1591.70253420	1736.17425806	40.00000000
4.95000000	19623.90444446	1589.53625954	1802.03502390	40.00000000
4.95500000	19603.78613937	1587.90667717	1775.93593747	40.00000000
4.96000000	19190.85167720	1554.45898602	1294.54202980	39.00000000
4.96500000	19683.25561169	1594.34370407	1551.16858648	40.00000000
4.97000000	19641.53325880	1590.96419377	1789.72876124	40.00000000
4.97500000	19616.78908512	1588.95991549	1812.54231266	40.00000000
4.98000000	19598.62942996	1587.48898416	1777.04630314	40.00000000
4.98500000	19757.83140693	1600.38434398	1176.61579665	40.00000000
4.99000000	19660.42250580	1592.49422310	1707.19550904	40.00000000
4.99500000	19630.82814115	1590.09707976	1827.23096027	40.00000000
5.00000000	19607.99909043	1588.24792655	1814.25830664	40.00000000
5.00500000	19110.55522893	1547.95497378	1260.63134691	39.00000000
5.01000000	19686.63766293	1594.61765098	1536.70041977	40.00000000
5.01500000	19643.86714432	1591.15323887	1802.94912320	40.00000000
5.02000000	19618.15805817	1589.07080291	1831.36792220	40.00000000
5.02500000	19598.46519292	1587.47568075	1793.61830724	40.00000000
5.03000000	19730.81722206	1598.19619495	1277.50698735	40.00000000
5.03500000	19655.87329671	1592.12573709	1741.59961585	40.00000000
5.04000000	19627.90745031	1589.86050318	1834.75244517	40.00000000
5.04500000	19604.95840819	1588.00163073	1811.94286658	40.00000000
5.05000000	19303.13892679	1563.55425293	1426.58100036	39.00000000
5.05500000	19668.01384976	1593.10912227	1653.88282839	40.00000000
5.06000000	19636.11154020	1590.52503462	1826.96079220	40.00000000
5.06500000	19611.16427453	1588.50430651	1825.15867742	40.00000000
5.07000000	19128.51125374	1549.40941189	1285.07098124	39.00000000
5.07500000	19680.40610867	1594.11289526	1557.97747385	40.00000000
5.08000000	19642.41360873	1591.03550203	1811.58053490	40.00000000
5.08500000	19616.34558860	1588.92399289	1833.35972510	40.00000000
5.09000000	19595.97965825	1587.27435271	1793.52240321	40.00000000
5.09500000	19691.23867266	1594.99033244	1474.54687119	40.00000000
5.10000000	19646.76280562	1591.38778732	1795.22961318	40.00000000
5.10500000	19620.06911128	1589.22559829	1838.04568245	40.00000000
5.11000000	19598.11753207	1587.44752019	1801.84970583	40.00000000
5.11500000	19697.82017241	1595.52343424	1421.03752291	40.00000000
5.12000000	19649.12935476	1591.57947734	1784.37418936	40.00000000
5.12500000	19622.14485183	1589.39373284	1840.38131950	40.00000000
5.13000000	19599.18388888	1587.53389504	1806.81564291	40.00000000
5.13500000	19698.28493443	1595.56107983	1408.17908807	40.00000000
5.14000000	19649.60215973	1591.61777460	1782.57410411	40.00000000
5.14500000	19622.48390021	1589.42119632	1841.90437150	40.00000000
5.15000000	19599.00192580	1587.51915601	1808.66504960	40.00000000
5.15500000	19692.43665900	1595.08736980	1438.66971569	40.00000000
5.16000000	19648.29109350	1591.51157847	1790.49504715	40.00000000
5.16500000	19621.08221275	1589.30765923	1842.85863657	40.00000000
5.17000000	19597.51442803	1587.39866899	1807.50450994	40.00000000
5.17500000	19682.92174339	1594.31666078	1502.99221600	40.00000000
5.18000000	19645.33609436	1591.27222326	1806.31853684	40.00000000
5.18500000	19617.98670086	1589.05692307	1842.54676297	40.00000000
5.19000000	19130.79476497	1549.59437582	1306.58329847	39.00000000
5.19500000	19672.57174425	1593.47831145	1586.43318938	40.00000000
5.20000000	19640.81710857	1590.90618541	1824.78019110	40.00000000
5.20500000	19613.31103657	1588.67819444	1839.69207505	40.00000000
5.21000000	19288.42424578	1562.36236386	1439.89079971	39.00000000
5.21500000	19620.21921172	1589.23775613	1747.27512821	39.00000000
5.22000000	19662.94430860	1592.69848914	1803.70094654	39.00000000
5.22500000	19637.22258493	1590.61502945	1781.08158541	39.00000000
5.23000000	19467.62309669	1576.87747108	1528.48664529	38.00000000
5.23500000	19662.90906699	1592.69563466	1745.65604704	38.00000000
5.24000000	19663.65612415	1592.75614619	1783.53582662	38.00000000
5.24500000	19629.49687739	1589.98924726	1763.53216030	38.00000000
5.25000000	19581.86916135	1586.13140206	1627.40635322	37.00000000
5.25500000	19671.16173939	1593.36410125	1764.03315148	37.00000000
5.26000000	19646.15531601	1591.33858092	1778.35625624	37.00000000
5.26500000	19347.02387577	1567.10893423	1422.73187936	36.00000000
5.27000000	19641.10399040	1590.92942349	1700.67987287	36.00000000
5.27500000	19658.27286057	1592.32010142	1774.29904148	36.00000000
5.28000000	19622.53637208	1589.42544598	1772.00856829	36.00000000
5.28500000	19534.36944631	1582.28392505	1586.83699444	35.00000000
5.29000000	19655.83039880	1592.12226260	1743.99257679	35.00000000
5.29500000	19634.52311456	1590.39637239	1776.33471479	35.00000000
5.30000000	19309.79944554	1564.09375542	1428.43521728	34.00000000
5.30500000	19620.89193721	1589.29224733	1687.87359354	34.00000000
5.31000000	19642.42292654	1591.03625752	1765.83412073	34.00000000
5.31500000	19606.62078922	1588.13628393	1773.63586257	34.00000000
5.32000000	19530.12700949	1581.94028809	1608.22854407	33.00000000
5.32500000	19635.87435129	1590.50582224	1739.53758553	33.00000000
5.33000000	19614.09809827	1588.74194573	1772.39139129	33.00000000
5.33500000	19382.11335364	1569.95118187	1518.55736357	32.00000000
5.34000000	19605.76856526	1588.06725356	1703.46555434	32.00000000
5.34500000	19615.84050565	1588.88308108	1762.77854584	32.00000000
5.35000000	19581.37462952	1586.09134523	1771.29234001	32.00000000
5.35500000	19551.54268721	1583.67495800	1666.24860946	31.00000000
5.36000000	19606.37627543	1588.11647848	1748.69011393	31.00000000
5.36500000	19581.20821071	1586.07786471	1770.01408056	31.00000000
5.37000000	19479.39868814	1577.83129336	1635.59036584	30.00000000
5.37500000	19582.52548672	1586.18456465	1734.80688992	30.00000000
5.38000000	19574.18573114	1585.50904407	1766.66385757	30.00000000
5.38500000	19414.24699686	1572.55400670	1624.11982140	29.00000000
5.39000000	19549.32723751	1583.49550639	1728.54341285	29.00000000
5.39500000	19557.39752641	1584.14919983	1765.31216477	29.00000000
5.40000000	19533.00529080	1582.17342855	1773.77851205	29.00000000
5.40500000	19513.51011960	1580.59431985	1735.32262255	28.00000000
5.41000000	19530.21368490	1581.94730840	1770.61659214	28.00000000
5.41500000	19513.15023420	1580.56516893	1782.09452389	28.00000000
5.42000000	19485.25270189	1578.30546889	1761.59166448	27.00000000
5.42500000	19495.68848885	1579.15076755	1789.51676810	27.00000000
5.43000000	19482.77427925	1578.10471675	1802.83477850	27.00000000
5.43500000	19465.38012309	1576.69579006	1810.87419701	26.00000000
5.44000000	19457.05137551	1576.02116146	1831.87383189	26.00000000
5.44500000	19445.19523960	1575.06081457	1856.80593551	26.00000000
5.45000000	19428.71927470	1573.72626133	1886.02914356	25.13112885
5.45500000	19408.46255590	1572.08546728	1919.64366149	25.00000000
5.46000000	19383.33690175	1570.05028902	1956.95808393	25.00000000
5.46500000	19353.12711408	1567.60329650	1997.44383524	25.00000000
5.47000000	19321.69657961	1565.05742314	2043.86263629	24.00000000
5.47500000	19283.57882675	1561.96988514	2093.60153512	24.00000000
5.48000000	19244.19333647	1558.77966016	2149.96892962	24.00000000
5.48500000	19197.77921329	1555.02011663	2211.16893408	23.00000000
5.49000000	19147.15334938	1550.91942121	2278.78622647	23.00000000
5.49500000	19090.36510260	1546.31957311	2353.30900617	23.00000000
5.50000000	19024.19567575	1540.95984969	2432.96412140	22.00000000
5.50500000	18952.91703292	1535.18627926	2521.31386186	22.00000000
5.51000000	18861.59861475	1527.78948783	2610.79429599	22.00000000
5.51500000	18767.92439688	1520.20187638	2711.44238789	21.00000000
5.52000000	18657.54265855	1511.26095525	2816.99076689	21.00000000
5.52500000	18550.46928389	1502.58801181	2934.90280926	21.00000000
5.53000000	18396.50247487	1490.11670039	3043.45783821	20.00000000
5.53500000	18261.34481471	1479.16893027	3172.31605558	20.00000000
5.54000000	18095.71332508	1465.75277978	3298.32723520	20.00000000
5.54500000	17891.83466191	1449.23860776	3417.49206275	19.00000000
5.55000000	17717.81006986	1435.14261538	3558.83823461	19.00000000
5.55500000	17466.65787593	1414.79928793	3676.50841247	19.00000000
5.56000000	17244.17096565	1396.77784833	3810.31888909	18.00000000
5.56500000	16998.16800682	1376.85160868	3943.88570036	18.00000000
5.57000000	16647.32924421	1348.43366850	4034.65336010	18.00000000
5.57500000	16421.04049862	1330.10428043	4180.68229209	17.00000000
5.58000000	16112.51123097	1305.11340983	4297.05044066	17.00000000
5.58500000	15707.93050224	1272.34237084	4370.32766250	17.00000000
5.59000000	15396.71987498	1247.13431005	4479.38978344	16.00000000
5.59500000	15100.01124388	1223.10091081	4596.94670418	16.00000000
5.60000000	14703.95403180	1191.02027628	4668.94561941	16.00000000
5.60500000	14235.00639606	1153.03551784	4700.71212132	15.00000000
5.61000000	13835.45759835	1120.67206507	4753.40115411	15.00000000
5.61500000	13558.85770983	1098.26747461	4859.17928652	15.00000000
5.62000000	13194.58860062	1068.76167687	4920.73346488	14.00000000
5.62500000	12755.88697259	1033.22684470	4939.75874163	14.00000000
5.63000000	12264.11397547	993.39323232	4921.46511844	14.00000000
5.63500000	11750.94029929	951.82616429	4878.45533251	13.00000000
5.64000000	11361.68267344	920.29629629	4883.37620579	13.00000000
5.64500000	11129.71172538	901.50664987	4962.09756581	13.00000000
5.65000000	10837.02085823	877.79868990	5004.31167587	12.00000000
5.65500000	10483.81272217	849.18882999	5007.31139909	12.00000000
5.66000000	10076.32723168	816.18250583	4970.72158106	12.00000000
5.66500000	9632.88166368	780.26341494	4902.09615637	11.00000000
5.67000000	9172.45351063	742.96873406	4810.14197210	11.00000000
5.67500000	8715.20157158	705.93132759	4705.13711508	11.00000000
5.68000000	8285.06590956	671.09033829	4599.58091325	10.00000000
5.68500000	7891.25776669	639.19187928	4503.02366842	10.00000000
5.69000000	7547.18278749	611.32180618	4424.07725286	10.00000000
5.69500000	7458.98089761	604.17745247	4499.93096850	9.00000000
5.70000000	7375.83273711	597.44245141	4577.39156135	9.00000000
5.70500000	7260.91710779	588.13428550	4632.04632633	8.71012327
5.71000000	7104.17409752	575.43810213	4655.65932698	8.00000000
5.71500000	6900.17260327	558.91398101	4642.45056028	8.00000000
5.72000000	6647.16999249	538.42076946	4588.35636920	7.71106095
5.72500000	6352.90585168	514.58537437	4496.64597801	7.00000000
5.73000000	6027.08078668	488.19354388	4371.91546584	7.00000000
5.73500000	5683.61532155	460.37284063	4223.54072463	6.02424942
5.74000000	5337.29564426	432.32094749	4060.67249808	6.00000000
5.74500000	5004.11663053	405.33344675	3896.12273844	6.00000000
5.75000000	4698.36523995	380.56758444	3741.72246702	5.38745271
5.75500000	4428.06995565	358.67366617	3606.08813770	5.00000000
5.76000000	4202.17265838	340.37598535	3497.80313622	5.00000000
5.76500000	4022.38590329	325.81325788	3420.96511126	4.00000000
5.77000000	3884.77661984	314.66690599	3374.78800861	4.00000000
5.77500000	3788.66338193	306.88173358	3360.50651788	3.96268657
5.78000000	3724.32788247	301.67055879	3371.82356208	3.00000000
5.78500000	3682.68998648	298.29788932	3402.05451832	3.00000000
5.79000000	3652.91562330	295.88616528	3442.30500055	2.29943503
5.79500000	3625.35311993	293.65360267	3483.89617932	2.00000000
5.80000000	3591.38586841	290.90225500	3518.57059354	2.00000000
5.80500000	3543.27744054	287.00547286	3538.15000019	1.00000000
5.81000000	3477.02583723	281.63909264	3537.80731508	1.00000000
5.81500000	3391.29289366	274.69472458	3515.14772184	1.00000000
5.82000000	0.00000000	0.00000000	0.00000000	0.00000000
5.82500000	0.00000000	0.00000000	0.00000000	0.00000000
5.83000000	0.00000000	0.00000000	0.00000000	0.00000000
5.83500000	0.00000000	0.00000000	0.00000000	0.00000000
5.84000000	0.00000000	0.00000000	0.00000000	0.00000000
5.84500000	0.00000000	0.00000000	0.00000000	0.00000000
5.85000000	0.00000000	0.00000000	0.00000000	0.00000000
5.85500000	0.00000000	0.00000000	0.00000000	0.00000000
5.86000000	0.00000000	0.00000000	0.00000000	0.00000000
5.86500000	0.00000000	0.00000000	0.00000000	0.00000000
5.87000000	0.00000000	0.00000000	0.00000000	0.00000000
5.87500000	0.00000000	0.00000000	0.00000000	0.00000000
5.88000000	0.00000000	0.00000000	0.00000000	0.00000000
5.88500000	0.00000000	0.00000000	0.00000000	0.00000000
5.89000000	0.00000000	0.00000000	0.00000000	0.00000000
5.89500000	0.00000000	0.00000000	0.00000000	0.00000000
5.90000000	0.00000000	0.00000000	0.00000000	0.00000000
5.90500000	0.00000000	0.00000000	0.00000000	0.00000000
5.91000000	0.00000000	0.00000000	0.00000000	0.00000000
5.91500000	0.00000000	0.00000000	0.00000000	0.00000000
5.92000000	0.00000000	0.00000000	0.00000000	0.00000000
5.92500000	0.00000000	0.00000000	0.00000000	0.00000000
5.93000000	0.00000000	0.00000000	0.00000000	0.00000000
5.93500000	0.00000000	0.00000000	0.00000000	0.00000000
5.94000000	0.00000000	0.00000000	0.00000000	0.00000000
5.94500000	0.00000000	0.00000000	0.00000000	0.00000000
5.95000000	0.00000000	0.00000000	0.00000000	0.00000000
5.95500000	0.00000000	0.00000000	0.00000000	0.00000000
5.96000000	0.00000000	0.00000000	0.00000000	0.00000000
5.96500000	0.00000000	0.00000000	0.00000000	0.00000000
5.97000000	0.00000000	0.00000000	0.00000000	0.00000000
5.97500000	0.00000000	0.00000000	0.00000000	0.00000000
5.98000000	0.00000000	0.00000000	0.00000000	0.00000000
5.98500000	0.00000000	0.00000000	0.00000000	0.00000000
5.99000000	0.00000000	0.00000000	0.00000000	0.00000000
5.99500000	0.00000000	0.00000000	0.00000000	0.00000000
6.00000000	0.00000000	0.00000000	0.00000000	0.00000000
6.00500000	0.00000000	0.00000000	0.00000000	0.00000000
6.01000000	0.00000000	0.00000000	0.00000000	0.00000000
6.01500000	0.00000000	0.00000000	0.00000000	0.00000000
6.02000000	0.00000000	0.00000000	0.00000000	0.00000000
6.02500000	0.00000000	0.00000000	0.00000000	0.00000000
6.03000000	0.00000000	0.00000000	0.00000000	0.00000000
6.03500000	0.00000000	0.00000000	0.00000000	0.00000000
6.04000000	0.00000000	0.00000000	0.00000000	0.00000000
6.04500000	0.00000000	0.00000000	0.00000000	0.00000000
6.05000000	0.00000000	0.00000000	0.00000000	0.00000000
6.05500000	0.00000000	0.00000000	0.00000000	0.00000000
6.06000000	0.00000000	0.00000000	0.00000000	0.00000000
6.06500000	0.00000000	0.00000000	0.00000000	0.00000000
6.07000000	0.00000000	0.00000000	0.00000000	0.00000000
6.07500000	0.00000000	0.00000000	0.00000000	0.00000000
6.08000000	0.00000000	0.00000000	0.00000000	0.00000000
6.08500000	0.00000000	0.00000000	0.00000000	0.00000000
6.09000000	0.00000000	0.00000000	0.00000000	0.00000000
6.09500000	0.00000000	0.00000000	0.00000000	0.00000000
6.10000000	0.00000000	0.00000000	0.00000000	0.00000000
6.10500000	0.00000000	0.00000000	0.00000000	0.00000000
6.11000000	0.00000000	0.00000000	0.00000000	0.00000000
6.11500000	0.00000000	0.00000000	0.00000000	0.00000000
6.12000000	0.00000000	0.00000000	0.00000000	0.00000000
6.12500000	0.00000000	0.00000000	0.00000000	0.00000000
6.13000000	0.00000000	0.00000000	0.00000000	0.00000000
6.13500000	0.00000000	0.00000000	0.00000000	0.00000000
6.14000000	0.00000000	0.00000000	0.00000000	0.00000000
6.14500000	0.00000000	0.00000000	0.00000000	0.00000000
6.15000000	0.00000000	0.00000000	0.00000000	0.00000000
6.15500000	0.00000000	0.00000000	0.00000000	0.00000000
6.16000000	0.00000000	0.00000000	0.00000000	0.00000000
6.16500000	0.00000000	0.00000000	0.00000000	0.00000000
6.17000000	0.00000000	0.00000000	0.00000000	0.00000000
6.17500000	0.00000000	0.00000000	0.00000000	0.00000000
6.18000000	0.00000000	0.00000000	0.00000000	0.00000000
6.18500000	0.00000000	0.00000000	0.00000000	0.00000000
6.19000000	0.00000000	0.00000000	0.00000000	0.00000000
6.19500000	0.00000000	0.00000000	0.00000000	0.00000000
6.20000000	0.00000000	0.00000000	0.00000000	0.00000000
6.20500000	0.00000000	0.00000000	0.00000000	0.00000000
6.21000000	0.00000000	0.00000000	0.00000000	0.00000000
6.21500000	0.00000000	0.00000000	0.00000000	0.00000000
6.22000000	0.00000000	0.00000000	0.00000000	0.00000000
6.22500000	0.00000000	0.00000000	0.00000000	0.00000000
6.23000000	0.00000000	0.00000000	0.00000000	0.00000000
6.23500000	0.00000000	0.00000000	0.00000000	0.00000000
6.24000000	0.00000000	0.00000000	0.00000000	0.00000000
6.24500000	0.00000000	0.00000000	0.00000000	0.00000000
6.25000000	0.00000000	0.00000000	0.00000000	0.00000000
6.25500000	0.00000000	0.00000000	0.00000000	0.00000000
6.26000000	0.00000000	0.00000000	0.00000000	0.00000000
6.26500000	0.00000000	0.00000000	0.00000000	0.00000000
6.27000000	0.00000000	0.00000000	0.00000000	0.00000000
6.27500000	0.00000000	0.00000000	0.00000000	0.00000000
6.28000000	0.00000000	0.00000000	0.00000000	0.00000000
6.28500000	0.00000000	0.00000000	0.00000000	0.00000000
6.29000000	0.00000000	0.00000000	0.00000000	0.00000000
6.29500000	0.00000000	0.00000000	0.00000000	0.00000000
6.30000000	0.00000000	0.00000000	0.00000000	0.00000000
6.30500000	0.00000000	0.00000000	0.00000000	0.00000000
6.31000000	0.00000000	0.00000000	0.00000000	0.00000000
6.31500000	0.00000000	0.00000000	0.00000000	0.00000000
6.32000000	0.00000000	0.00000000	0.00000000	0.00000000
6.32500000	0.00000000	0.00000000	0.00000000	0.00000000
6.33000000	0.00000000	0.00000000	0.00000000	0.00000000
6.33500000	0.00000000	0.00000000	0.00000000	0.00000000
6.34000000	0.00000000	0.00000000	0.00000000	0.00000000
6.34500000	0.00000000	0.00000000	0.00000000	0.00000000
6.35000000	0.00000000	0.00000000	0.00000000	0.00000000
6.35500000	0.00000000	0.00000000	0.00000000	0.00000000
6.36000000	0.00000000	0.00000000	0.00000000	0.00000000
6.36500000	0.00000000	0.00000000	0.00000000	0.00000000
6.37000000	0.00000000	0.00000000	0.00000000	0.00000000
6.37500000	0.00000000	0.00000000	0.00000000	0.00000000
6.38000000	0.00000000	0.00000000	0.00000000	0.00000000
6.38500000	0.00000000	0.00000000	0.00000000	0.00000000
6.39000000	0.00000000	0.00000000	0.00000000	0.00000000
6.39500000	0.00000000	0.00000000	0.00000000	0.00000000
6.40000000	0.00000000	0.00000000	0.00000000	0.00000000
6.40500000	0.00000000	0.00000000	0.00000000	0.00000000
6.41000000	0.00000000	0.00000000	0.00000000	0.00000000
6.41500000	0.00000000	0.00000000	0.00000000	0.00000000
6.42000000	0.00000000	0.00000000	0.00000000	0.00000000
6.42500000	0.00000000	0.00000000	0.00000000	0.00000000
6.43000000	0.00000000	0.00000000	0.00000000	0.00000000
6.43500000	0.00000000	0.00000000	0.00000000	0.00000000
6.44000000	0.00000000	0.00000000	0.00000000	0.00000000
6.44500000	0.00000000	0.00000000	0.00000000	0.00000000
6.45000000	0.00000000	0.00000000	0.00000000	0.00000000
6.45500000	0.00000000	0.00000000	0.00000000	0.00000000
6.46000000	0.00000000	0.00000000	0.00000000	0.00000000
6.46500000	0.00000000	0.00000000	0.00000000	0.00000000
6.47000000	0.00000000	0.00000000	0.00000000	0.00000000
6.47500000	0.00000000	0.00000000	0.00000000	0.00000000
6.48000000	0.00000000	0.00000000	0.00000000	0.00000000
6.48500000	0.00000000	0.00000000	0.00000000	0.00000000
6.49000000	0.00000000	0.00000000	0.00000000	0.00000000
6.49500000	0.00000000	0.00000000	0.00000000	0.00000000
6.50000000	0.00000000	0.00000000	0.00000000	0.00000000
6.50500000	0.00000000	0.00000000	0.00000000	0.00000000
6.51000000	0.00000000	0.00000000	0.00000000	0.00000000
6.51500000	0.00000000	0.00000000	0.00000000	0.00000000
6.52000000	0.00000000	0.00000000	0.00000000	0.00000000
6.52500000	0.00000000	0.00000000	0.00000000	0.00000000
6.53000000	0.00000000	0.00000000	0.00000000	0.00000000
6.53500000	0.00000000	0.00000000	0.00000000	0.00000000
6.54000000	0.00000000	0.00000000	0.00000000	0.00000000
6.54500000	0.00000000	0.00000000	0.00000000	0.00000000
6.55000000	0.00000000	0.00000000	0.00000000	0.00000000
6.55500000	0.00000000	0.00000000	0.00000000	0.00000000
6.56000000	0.00000000	0.00000000	0.00000000	0.00000000
6.56500000	0.00000000	0.00000000	0.00000000	0.00000000
6.57000000	0.00000000	0.00000000	0.00000000	0.00000000
6.57500000	0.00000000	0.00000000	0.00000000	0.00000000
6.58000000	0.00000000	0.00000000	0.00000000	0.00000000
6.58500000	0.00000000	0.00000000	0.00000000	0.00000000
6.59000000	0.00000000	0.00000000	0.00000000	0.00000000
6.59500000	0.00000000	0.00000000	0.00000000	0.00000000
6.60000000	0.00000000	0.00000000	0.00000000	0.00000000
6.60500000	0.00000000	0.00000000	0.00000000	0.00000000
6.61000000	0.00000000	0.00000000	0.00000000	0.00000000
6.61500000	0.00000000	0.00000000	0.00000000	0.00000000
6.62000000	0.00000000	0.00000000	0.00000000	0.00000000
6.62500000	0.00000000	0.00000000	0.00000000	0.00000000
6.63000000	0.00000000	0.00000000	0.00000000	0.00000000
6.63500000	0.00000000	0.00000000	0.00000000	0.00000000
6.64000000	0.00000000	0.00000000	0.00000000	0.00000000
6.64500000	0.00000000	0.00000000	0.00000000	0.00000000
6.65000000	0.00000000	0.00000000	0.00000000	0.00000000
6.65500000	0.00000000	0.00000000	0.00000000	0.00000000
6.66000000	0.00000000	0.00000000	0.00000000	0.00000000
6.66500000	0.00000000	0.00000000	0.00000000	0.00000000
6.67000000	0.00000000	0.00000000	0.00000000	0.00000000
6.67500000	0.00000000	0.00000000	0.00000000	0.00000000
6.68000000	0.00000000	0.00000000	0.00000000	0.00000000
6.68500000	0.00000000	0.00000000	0.00000000	0.00000000
6.69000000	0.00000000	0.00000000	0.00000000	0.00000000
6.69500000	0.00000000	0.00000000	0.00000000	0.00000000
6.70000000	0.00000000	0.00000000	0.00000000	0.00000000
6.70500000	0.00000000	0.00000000	0.00000000	0.00000000
6.71000000	0.00000000	0.00000000	0.00000000	0.00000000
6.71500000	0.00000000	0.00000000	0.00000000	0.00000000
6.72000000	0.00000000	0.00000000	0.00000000	0.00000000
6.72500000	0.00000000	0.00000000	0.00000000	0.00000000
6.73000000	0.00000000	0.00000000	0.00000000	0.00000000
6.73500000	0.00000000	0.00000000	0.00000000	0.00000000
6.74000000	0.00000000	0.00000000	0.00000000	0.00000000
6.74500000	0.00000000	0.00000000	0.00000000	0.00000000
6.75000000	0.00000000	0.00000000	0.00000000	0.00000000
6.75500000	0.00000000	0.00000000	0.00000000	0.00000000
6.76000000	0.00000000	0.00000000	0.00000000	0.00000000
6.76500000	0.00000000	0.00000000	0.00000000	0.00000000
6.77000000	0.00000000	0.00000000	0.00000000	0.00000000
6.77500000	0.00000000	0.00000000	0.00000000	0.00000000
6.78000000	0.00000000	0.00000000	0.00000000	0.00000000
6.78500000	0.00000000	0.00000000	0.00000000	0.00000000
6.79000000	0.00000000	0.00000000	0.00000000	0.00000000
6.79500000	0.00000000	0.00000000	0.00000000	0.00000000
6.80000000	0.00000000	0.00000000	0.00000000	0.00000000
6.80500000	0.00000000	0.00000000	0.00000000	0.00000000
6.81000000	0.00000000	0.00000000	0.00000000	0.00000000
6.81500000	0.00000000	0.00000000	0.00000000	0.00000000
6.82000000	0.00000000	0.00000000	0.00000000	0.00000000
6.82500000	0.00000000	0.00000000	0.00000000	0.00000000
6.83000000	0.00000000	0.00000000	0.00000000	0.00000000
6.83500000	0.00000000	0.00000000	0.00000000	0.00000000
6.84000000	0.00000000	0.00000000	0.00000000	0.00000000
6.84500000	0.00000000	0.00000000	0.00000000	0.00000000
6.85000000	0.00000000	0.00000000	0.00000000	0.00000000
6.85500000	0.00000000	0.00000000	0.00000000	0.00000000
6.86000000	0.00000000	0.00000000	0.00000000	0.00000000
6.86500000	0.00000000	0.00000000	0.00000000	0.00000000
6.87000000	0.00000000	0.00000000	0.00000000	0.00000000
6.87500000	0.00000000	0.00000000	0.00000000	0.00000000
6.88000000	0.00000000	0.00000000	0.00000000	0.00000000
6.88500000	0.00000000	0.00000000	0.00000000	0.00000000
6.89000000	0.00000000	0.00000000	0.00000000	0.00000000
6.89500000	0.00000000	0.00000000	0.00000000	0.00000000
6.90000000	0.00000000	0.00000000	0.00000000	0.00000000
6.90500000	0.00000000	0.00000000	0.00000000	0.00000000
6.91000000	0.00000000	0.00000000	0.00000000	0.00000000
6.91500000	0.00000000	0.00000000	0.00000000	0.00000000
6.92000000	0.00000000	0.00000000	0.00000000	0.00000000
6.92500000	0.00000000	0.00000000	0.00000000	0.00000000
6.93000000	0.00000000	0.00000000	0.00000000	0.00000000
6.93500000	0.00000000	0.00000000	0.00000000	0.00000000
6.94000000	0.00000000	0.00000000	0.00000000	0.00000000
6.94500000	0.00000000	0.00000000	0.00000000	0.00000000
6.95000000	0.00000000	0.00000000	0.00000000	0.00000000
6.95500000	0.00000000	0.00000000	0.00000000	0.00000000
6.96000000	0.00000000	0.00000000	0.00000000	0.00000000
6.96500000	0.00000000	0.00000000	0.00000000	0.00000000
6.97000000	0.00000000	0.00000000	0.00000000	0.00000000
6.97500000	0.00000000	0.00000000	0.00000000	0.00000000
6.98000000	0.00000000	0.00000000	0.00000000	0.00000000
6.98500000	0.00000000	0.00000000	0.00000000	0.00000000
6.99000000	0.00000000	0.00000000	0.00000000	0.00000000
6.99500000	0.00000000	0.00000000	0.00000000	0.00000000
7.00000000	0.00000000	0.00000000	0.00000000	0.00000000
7.00500000	0.00000000	0.00000000	0.00000000	0.00000000
7.01000000	0.00000000	0.00000000	0.00000000	0.00000000
7.01500000	0.00000000	0.00000000	0.00000000	0.00000000
7.02000000	0.00000000	0.00000000	0.00000000	0.00000000
7.02500000	0.00000000	0.00000000	0.00000000	0.00000000
7.03000000	0.00000000	0.00000000	0.00000000	0.00000000
7.03500000	0.00000000	0.00000000	0.00000000	0.00000000
7.04000000	0.00000000	0.00000000	0.00000000	0.00000000
7.04500000	0.00000000	0.00000000	0.00000000	0.00000000
7.05000000	0.00000000	0.00000000	0.00000000	0.00000000
7.05500000	0.00000000	0.00000000	0.00000000	0.00000000
7.06000000	0.00000000	0.00000000	0.00000000	0.00000000
7.06500000	0.00000000	0.00000000	0.00000000	0.00000000
7.07000000	0.00000000	0.00000000	0.00000000	0.00000000
7.07500000	0.00000000	0.00000000	0.00000000	0.00000000
7.08000000	0.00000000	0.00000000	0.00000000	0.00000000
7.08500000	0.00000000	0.00000000	0.00000000	0.00000000
7.09000000	0.00000000	0.00000000	0.00000000	0.00000000
7.09500000	0.00000000	0.00000000	0.00000000	0.00000000
7.10000000	0.00000000	0.00000000	0.00000000	0.00000000
7.10500000	0.00000000	0.00000000	0.00000000	0.00000000
7.11000000	0.00000000	0.00000000	0.00000000	0.00000000
7.11500000	0.00000000	0.00000000	0.00000000	0.00000000
7.12000000	0.00000000	0.00000000	0.00000000	0.00000000
7.12500000	0.00000000	0.00000000	0.00000000	0.00000000
7.13000000	0.00000000	0.00000000	0.00000000	0.00000000
7.13500000	0.00000000	0.00000000	0.00000000	0.00000000
7.14000000	0.00000000	0.00000000	0.00000000	0.00000000
7.14500000	0.00000000	0.00000000	0.00000000	0.00000000
7.15000000	0.00000000	0.00000000	0.00000000	0.00000000
7.15500000	0.00000000	0.00000000	0.00000000	0.00000000
7.16000000	0.00000000	0.00000000	0.00000000	0.00000000
7.16500000	0.00000000	0.00000000	0.00000000	0.00000000
7.17000000	0.00000000	0.00000000	0.00000000	0.00000000
7.17500000	0.00000000	0.00000000	0.00000000	0.00000000
7.18000000	0.00000000	0.00000000	0.00000000	0.00000000
7.18500000	0.00000000	0.00000000	0.00000000	0.00000000
7.19000000	0.00000000	0.00000000	0.00000000	0.00000000
7.19500000	0.00000000	0.00000000	0.00000000	0.00000000
7.20000000	0.00000000	0.00000000	0.00000000	0.00000000
7.20500000	0.00000000	0.00000000	0.00000000	0.00000000
7.21000000	0.00000000	0.00000000	0.00000000	0.00000000
7.21500000	0.00000000	0.00000000	0.00000000	0.00000000
7.22000000	0.00000000	0.00000000	0.00000000	0.00000000
7.22500000	0.00000000	0.00000000	0.00000000	0.00000000
7.23000000	0.00000000	0.00000000	0.00000000	0.00000000
7.23500000	0.00000000	0.00000000	0.00000000	0.00000000
7.24000000	0.00000000	0.00000000	0.00000000	0.00000000
7.24500000	0.00000000	0.00000000	0.00000000	0.00000000
7.25000000	0.00000000	0.00000000	0.00000000	0.00000000
7.25500000	0.00000000	0.00000000	0.00000000	0.00000000
7.26000000	0.00000000	0.00000000	0.00000000	0.00000000
7.26500000	0.00000000	0.00000000	0.00000000	0.00000000
7.27000000	0.00000000	0.00000000	0.00000000	0.00000000
7.27500000	0.00000000	0.00000000	0.00000000	0.00000000
7.28000000	0.00000000	0.00000000	0.00000000	0.00000000
7.28500000	0.00000000	0.00000000	0.00000000	0.00000000
7.29000000	0.00000000	0.00000000	0.00000000	0.00000000
7.29500000	0.00000000	0.00000000	0.00000000	0.00000000
7.30000000	0.00000000	0.00000000	0.00000000	0.00000000
7.30500000	0.00000000	0.00000000	0.00000000	0.00000000
7.31000000	0.00000000	0.00000000	0.00000000	0.00000000
7.31500000	0.00000000	0.00000000	0.00000000	0.00000000
7.32000000	0.00000000	0.00000000	0.00000000	0.00000000
7.32500000	0.00000000	0.00000000	0.00000000	0.00000000
7.33000000	0.00000000	0.00000000	0.00000000	0.00000000
7.33500000	0.00000000	0.00000000	0.00000000	0.00000000
7.34000000	0.00000000	0.00000000	0.00000000	0.00000000
7.34500000	0.00000000	0.00000000	0.00000000	0.00000000
7.35000000	0.00000000	0.00000000	0.00000000	0.00000000
7.35500000	0.00000000	0.00000000	0.00000000	0.00000000
7.36000000	0.00000000	0.00000000	0.00000000	0.00000000
7.36500000	0.00000000	0.00000000	0.00000000	0.00000000
7.37000000	0.00000000	0.00000000	0.00000000	0.00000000
7.37500000	0.00000000	0.00000000	0.00000000	0.00000000
7.38000000	0.00000000	0.00000000	0.00000000	0.00000000
7.38500000	0.00000000	0.00000000	0.00000000	0.00000000
7.39000000	0.00000000	0.00000000	0.00000000	0.00000000
7.39500000	0.00000000	0.00000000	0.00000000	0.00000000
7.40000000	0.00000000	0.00000000	0.00000000	0.00000000
7.40500000	0.00000000	0.00000000	0.00000000	0.00000000
7.41000000	0.00000000	0.00000000	0.00000000	0.00000000
7.41500000	0.00000000	0.00000000	0.00000000	0.00000000
7.42000000	0.00000000	0.00000000	0.00000000	0.00000000
7.42500000	0.00000000	0.00000000	0.00000000	0.00000000
7.43000000	0.00000000	0.00000000	0.00000000	0.00000000
7.43500000	0.00000000	0.00000000	0.00000000	0.00000000
7.44000000	0.00000000	0.00000000	0.00000000	0.00000000
7.44500000	0.00000000	0.00000000	0.00000000	0.00000000
7.45000000	0.00000000	0.00000000	0.00000000	0.00000000
7.45500000	0.00000000	0.00000000	0.00000000	0.00000000
7.46000000	0.00000000	0.00000000	0.00000000	0.00000000
7.46500000	0.00000000	0.00000000	0.00000000	0.00000000
7.47000000	0.00000000	0.00000000	0.00000000	0.00000000
7.47500000	0.00000000	0.00000000	0.00000000	0.00000000
7.48000000	0.00000000	0.00000000	0.00000000	0.00000000
7.48500000	0.00000000	0.00000000	0.00000000	0.00000000
7.49000000	0.00000000	0.00000000	0.00000000	0.00000000
7.49500000	0.00000000	0.00000000	0.00000000	0.00000000
7.50000000	0.00000000	0.00000000	0.00000000	0.00000000
7.50500000	0.00000000	0.00000000	0.00000000	0.00000000
7.51000000	0.00000000	0.00000000	0.00000000	0.00000000
7.51500000	0.00000000	0.00000000	0.00000000	0.00000000
7.52000000	0.00000000	0.00000000	0.00000000	0.00000000
7.52500000	0.00000000	0.00000000	0.00000000	0.00000000
7.53000000	0.00000000	0.00000000	0.00000000	0.00000000
7.53500000	0.00000000	0.00000000	0.00000000	0.00000000
7.54000000	0.00000000	0.00000000	0.00000000	0.00000000
7.54500000	0.00000000	0.00000000	0.00000000	0.00000000
7.55000000	0.00000000	0.00000000	0.00000000	0.00000000
7.55500000	0.00000000	0.00000000	0.00000000	0.00000000
7.56000000	0.00000000	0.00000000	0.00000000	0.00000000
7.56500000	0.00000000	0.00000000	0.00000000	0.00000000
7.57000000	0.00000000	0.00000000	0.00000000	0.00000000
7.57500000	0.00000000	0.00000000	0.00000000	0.00000000
7.58000000	0.00000000	0.00000000	0.00000000	0.00000000
7.58500000	0.00000000	0.00000000	0.00000000	0.00000000
7.59000000	0.00000000	0.00000000	0.00000000	0.00000000
7.59500000	0.00000000	0.00000000	0.00000000	0.00000000
7.60000000	0.00000000	0.00000000	0.00000000	0.00000000
7.60500000	0.00000000	0.00000000	0.00000000	0.00000000
7.61000000	0.00000000	0.00000000	0.00000000	0.00000000
7.61500000	0.00000000	0.00000000	0.00000000	0.00000000
7.62000000	0.00000000	0.00000000	0.00000000	0.00000000
7.62500000	0.00000000	0.00000000	0.00000000	0.00000000
7.63000000	0.00000000	0.00000000	0.00000000	0.00000000
7.63500000	0.00000000	0.00000000	0.00000000	0.00000000
7.64000000	0.00000000	0.00000000	0.00000000	0.00000000
7.64500000	0.00000000	0.00000000	0.00000000	0.00000000
7.65000000	0.00000000	0.00000000	0.00000000	0.00000000
7.65500000	0.00000000	0.00000000	0.00000000	0.00000000
7.66000000	0.00000000	0.00000000	0.00000000	0.00000000
7.66500000	0.00000000	0.00000000	0.00000000	0.00000000
7.67000000	0.00000000	0.00000000	0.00000000	0.00000000
7.67500000	0.00000000	0.00000000	0.00000000	0.00000000
7.68000000	0.00000000	0.00000000	0.00000000	0.00000000
7.68500000	0.00000000	0.00000000	0.00000000	0.00000000
7.69000000	0.00000000	0.00000000	0.00000000	0.00000000
7.69500000	0.00000000	0.00000000	0.00000000	0.00000000
7.70000000	0.00000000	0.00000000	0.00000000	0.00000000
7.70500000	0.00000000	0.00000000	0.00000000	0.00000000
7.71000000	0.00000000	0.00000000	0.00000000	0.00000000
7.71500000	0.00000000	0.00000000	0.00000000	0.00000000
7.72000000	0.00000000	0.00000000	0.00000000	0.00000000
7.72500000	0.00000000	0.00000000	0.00000000	0.00000000
7.73000000	0.00000000	0.00000000	0.00000000	0.00000000
7.73500000	0.00000000	0.00000000	0.00000000	0.00000000
7.74000000	0.00000000	0.00000000	0.00000000	0.00000000
7.74500000	0.00000000	0.00000000	0.00000000	0.00000000
7.75000000	0.00000000	0.00000000	0.00000000	0.00000000
7.75500000	0.00000000	0.00000000	0.00000000	0.00000000
7.76000000	0.00000000	0.00000000	0.00000000	0.00000000
7.76500000	0.00000000	0.00000000	0.00000000	0.00000000
7.77000000	0.00000000	0.00000000	0.00000000	0.00000000
7.77500000	0.00000000	0.00000000	0.00000000	0.00000000
7.78000000	0.00000000	0.00000000	0.00000000	0.00000000
7.78500000	0.00000000	0.00000000	0.00000000	0.00000000
7.79000000	0.00000000	0.00000000	0.00000000	0.00000000
7.79500000	0.00000000	0.00000000	0.00000000	0.00000000
7.80000000	0.00000000	0.00000000	0.00000000	0.00000000
7.80500000	0.00000000	0.00000000	0.00000000	0.00000000
7.81000000	0.00000000	0.00000000	0.00000000	0.00000000
7.81500000	0.00000000	0.00000000	0.00000000	0.00000000
7.82000000	0.00000000	0.00000000	0.00000000	0.00000000
7.82500000	0.00000000	0.00000000	0.00000000	0.00000000
7.83000000	0.00000000	0.00000000	0.00000000	0.00000000
7.83500000	0.00000000	0.00000000	0.00000000	0.00000000
7.84000000	0.00000000	0.00000000	0.00000000	0.00000000
7.84500000	0.00000000	0.00000000	0.00000000	0.00000000
7.85000000	0.00000000	0.00000000	0.00000000	0.00000000
7.85500000	0.00000000	0.00000000	0.00000000	0.00000000
7.86000000	0.00000000	0.00000000	0.00000000	0.00000000
7.86500000	0.00000000	0.00000000	0.00000000	0.00000000
7.87000000	0.00000000	0.00000000	0.00000000	0.00000000
7.87500000	0.00000000	0.00000000	0.00000000	0.00000000
7.88000000	0.00000000	0.00000000	0.00000000	0.00000000
7.88500000	0.00000000	0.00000000	0.00000000	0.00000000
7.89000000	0.00000000	0.00000000	0.00000000	0.00000000
7.89500000	0.00000000	0.00000000	0.00000000	0.00000000
7.90000000	0.00000000	0.00000000	0.00000000	0.00000000
7.90500000	0.00000000	0.00000000	0.00000000	0.00000000
7.91000000	0.00000000	0.00000000	0.00000000	0.00000000
7.91500000	0.00000000	0.00000000	0.00000000	0.00000000
7.92000000	0.00000000	0.00000000	0.00000000	0.00000000
7.92500000	0.00000000	0.00000000	0.00000000	0.00000000
7.93000000	0.00000000	0.00000000	0.00000000	0.00000000
7.93500000	0.00000000	0.00000000	0.00000000	0.00000000
7.94000000	0.00000000	0.00000000	0.00000000	0.00000000
7.94500000	0.00000000	0.00000000	0.00000000	0.00000000
7.95000000	0.00000000	0.00000000	0.00000000	0.00000000
7.95500000	0.00000000	0.00000000	0.00000000	0.00000000
7.96000000	0.00000000	0.00000000	0.00000000	0.00000000
7.96500000	0.00000000	0.00000000	0.00000000	0.00000000
7.97000000	0.00000000	0.00000000	0.00000000	0.00000000
7.97500000	0.00000000	0.00000000	0.00000000	0.00000000
7.98000000	0.00000000	0.00000000	0.00000000	0.00000000
7.98500000	0.00000000	0.00000000	0.00000000	0.00000000
7.99000000	0.00000000	0.00000000	0.00000000	0.00000000
7.99500000	0.00000000	0.00000000	0.00000000	0.00000000
8.00000000	0.00000000	0.00000000	0.00000000	0.00000000
8.00500000	0.00000000	0.00000000	0.00000000	0.00000000
8.01000000	0.00000000	0.00000000	0.00000000	0.00000000
8.01500000	0.00000000	0.00000000	0.00000000	0.00000000
8.02000000	0.00000000	0.00000000	0.00000000	0.00000000
8.02500000	0.00000000	0.00000000	0.00000000	0.00000000
8.03000000	0.00000000	0.00000000	0.00000000	0.00000000
8.03500000	0.00000000	0.00000000	0.00000000	0.00000000
8.04000000	0.00000000	0.00000000	0.00000000	0.00000000
8.04500000	0.00000000	0.00000000	0.00000000	0.00000000
8.05000000	0.00000000	0.00000000	0.00000000	0.00000000
8.05500000	0.00000000	0.00000000	0.00000000	0.00000000
8.06000000	0.00000000	0.00000000	0.00000000	0.00000000
8.06500000	0.00000000	0.00000000	0.00000000	0.00000000
8.07000000	0.00000000	0.00000000	0.00000000	0.00000000
8.07500000	0.00000000	0.00000000	0.00000000	0.00000000
8.08000000	0.00000000	0.00000000	0.00000000	0.00000000
8.08500000	0.00000000	0.00000000	0.00000000	0.00000000
8.09000000	0.00000000	0.00000000	0.00000000	0.00000000
8.09500000	0.00000000	0.00000000	0.00000000	0.00000000
8.10000000	0.00000000	0.00000000	0.00000000	0.00000000
8.10500000	0.00000000	0.00000000	0.00000000	0.00000000
8.11000000	0.00000000	0.00000000	0.00000000	0.00000000
8.11500000	0.00000000	0.00000000	0.00000000	0.00000000
8.12000000	0.00000000	0.00000000	0.00000000	0.00000000
8.12500000	0.00000000	0.00000000	0.00000000	0.00000000
8.13000000	0.00000000	0.00000000	0.00000000	0.00000000
8.13500000	0.00000000	0.00000000	0.00000000	0.00000000
8.14000000	0.00000000	0.00000000	0.00000000	0.00000000
8.14500000	0.00000000	0.00000000	0.00000000	0.00000000
8.15000000	0.00000000	0.00000000	0.00000000	0.00000000
8.15500000	0.00000000	0.00000000	0.00000000	0.00000000
8.16000000	0.00000000	0.00000000	0.00000000	0.00000000
8.16500000	0.00000000	0.00000000	0.00000000	0.00000000
8.17000000	0.00000000	0.00000000	0.00000000	0.00000000
8.17500000	0.00000000	0.00000000	0.00000000	0.00000000
8.18000000	0.00000000	0.00000000	0.00000000	0.00000000
8.18500000	0.00000000	0.00000000	0.00000000	0.00000000
8.19000000	0.00000000	0.00000000	0.00000000	0.00000000
8.19500000	0.00000000	0.00000000	0.00000000	0.00000000
8.20000000	0.00000000	0.00000000	0.00000000	0.00000000
8.20500000	0.00000000	0.00000000	0.00000000	0.00000000
8.21000000	0.00000000	0.00000000	0.00000000	0.00000000
8.21500000	0.00000000	0.00000000	0.00000000	0.00000000
8.22000000	0.00000000	0.00000000	0.00000000	0.00000000
8.22500000	0.00000000	0.00000000	0.00000000	0.00000000
8.23000000	0.00000000	0.00000000	0.00000000	0.00000000
8.23500000	0.00000000	0.00000000	0.00000000	0.00000000
8.24000000	0.00000000	0.00000000	0.00000000	0.00000000
8.24500000	0.00000000	0.00000000	0.00000000	0.00000000
8.25000000	0.00000000	0.00000000	0.00000000	0.00000000
8.25500000	0.00000000	0.00000000	0.00000000	0.00000000
8.26000000	0.00000000	0.00000000	0.00000000	0.00000000
8.26500000	0.00000000	0.00000000	0.00000000	0.00000000
8.27000000	0.00000000	0.00000000	0.00000000	0.00000000
8.27500000	0.00000000	0.00000000	0.00000000	0.00000000
8.28000000	0.00000000	0.00000000	0.00000000	0.00000000
8.28500000	0.00000000	0.00000000	0.00000000	0.00000000
8.29000000	0.00000000	0.00000000	0.00000000	0.00000000
8.29500000	0.00000000	0.00000000	0.00000000	0.00000000
8.30000000	0.00000000	0.00000000	0.00000000	0.00000000
8.30500000	0.00000000	0.00000000	0.00000000	0.00000000
8.31000000	0.00000000	0.00000000	0.00000000	0.00000000
8.31500000	0.00000000	0.00000000	0.00000000	0.00000000
8.32000000	0.00000000	0.00000000	0.00000000	0.00000000
8.32500000	0.00000000	0.00000000	0.00000000	0.00000000
8.33000000	0.00000000	0.00000000	0.00000000	0.00000000
8.33500000	0.00000000	0.00000000	0.00000000	0.00000000
8.34000000	0.00000000	0.00000000	0.00000000	0.00000000
8.34500000	0.00000000	0.00000000	0.00000000	0.00000000
8.35000000	0.00000000	0.00000000	0.00000000	0.00000000
8.35500000	0.00000000	0.00000000	0.00000000	0.00000000
8.36000000	0.00000000	0.00000000	0.00000000	0.00000000
8.36500000	0.00000000	0.00000000	0.00000000	0.00000000
8.37000000	0.00000000	0.00000000	0.00000000	0.00000000
8.37500000	0.00000000	0.00000000	0.00000000	0.00000000
8.38000000	0.00000000	0.00000000	0.00000000	0.00000000
8.38500000	0.00000000	0.00000000	0.00000000	0.00000000
8.39000000	0.00000000	0.00000000	0.00000000	0.00000000
8.39500000	0.00000000	0.00000000	0.00000000	0.00000000
8.40000000	0.00000000	0.00000000	0.00000000	0.00000000
8.40500000	0.00000000	0.00000000	0.00000000	0.00000000
8.41000000	0.00000000	0.00000000	0.00000000	0.00000000
8.41500000	0.00000000	0.00000000	0.00000000	0.00000000
8.42000000	0.00000000	0.00000000	0.00000000	0.00000000
8.42500000	0.00000000	0.00000000	0.00000000	0.00000000
8.43000000	0.00000000	0.00000000	0.00000000	0.00000000
8.43500000	0.00000000	0.00000000	0.00000000	0.00000000
8.44000000	0.00000000	0.00000000	0.00000000	0.00000000
8.44500000	0.00000000	0.00000000	0.00000000	0.00000000
8.45000000	0.00000000	0.00000000	0.00000000	0.00000000
8.45500000	0.00000000	0.00000000	0.00000000	0.00000000
8.46000000	0.00000000	0.00000000	0.00000000	0.00000000
8.46500000	0.00000000	0.00000000	0.00000000	0.00000000
8.47000000	0.00000000	0.00000000	0.00000000	0.00000000
8.47500000	0.00000000	0.00000000	0.00000000	0.00000000
8.48000000	0.00000000	0.00000000	0.00000000	0.00000000
8.48500000	0.00000000	0.00000000	0.00000000	0.00000000
8.49000000	0.00000000	0.00000000	0.00000000	0.00000000
8.49500000	0.00000000	0.00000000	0.00000000	0.00000000
8.50000000	0.00000000	0.00000000	0.00000000	0.00000000
8.50500000	0.00000000	0.00000000	0.00000000	0.00000000
8.51000000	0.00000000	0.00000000	0.00000000	0.00000000
8.51500000	0.00000000	0.00000000	0.00000000	0.00000000
8.52000000	0.00000000	0.00000000	0.00000000	0.00000000
8.52500000	0.00000000	0.00000000	0.00000000	0.00000000
8.53000000	0.00000000	0.00000000	0.00000000	0.00000000
8.53500000	0.00000000	0.00000000	0.00000000	0.00000000
8.54000000	0.00000000	0.00000000	0.00000000	0.00000000
8.54500000	0.00000000	0.00000000	0.00000000	0.00000000
8.55000000	0.00000000	0.00000000	0.00000000	0.00000000
8.55500000	0.00000000	0.00000000	0.00000000	0.00000000
8.56000000	0.00000000	0.00000000	0.00000000	0.00000000
8.56500000	0.00000000	0.00000000	0.00000000	0.00000000
8.57000000	0.00000000	0.00000000	0.00000000	0.00000000
8.57500000	0.00000000	0.00000000	0.00000000	0.00000000
8.58000000	0.00000000	0.00000000	0.00000000	0.00000000
8.58500000	0.00000000	0.00000000	0.00000000	0.00000000
8.59000000	0.00000000	0.00000000	0.00000000	0.00000000
8.59500000	0.00000000	0.00000000	0.00000000	0.00000000
8.60000000	0.00000000	0.00000000	0.00000000	0.00000000
8.60500000	0.00000000	0.00000000	0.00000000	0.00000000
8.61000000	0.00000000	0.00000000	0.00000000	0.00000000
8.61500000	0.00000000	0.00000000	0.00000000	0.00000000
8.62000000	0.00000000	0.00000000	0.00000000	0.00000000
8.62500000	0.00000000	0.00000000	0.00000000	0.00000000
8.63000000	0.00000000	0.00000000	0.00000000	0.00000000
8.63500000	0.00000000	0.00000000	0.00000000	0.00000000
8.64000000	0.00000000	0.00000000	0.00000000	0.00000000
8.64500000	0.00000000	0.00000000	0.00000000	0.00000000
8.65000000	0.00000000	0.00000000	0.00000000	0.00000000
8.65500000	0.00000000	0.00000000	0.00000000	0.00000000
8.66000000	0.00000000	0.00000000	0.00000000	0.00000000
8.66500000	0.00000000	0.00000000	0.00000000	0.00000000
8.67000000	0.00000000	0.00000000	0.00000000	0.00000000
8.67500000	0.00000000	0.00000000	0.00000000	0.00000000
8.68000000	0.00000000	0.00000000	0.00000000	0.00000000
8.68500000	0.00000000	0.00000000	0.00000000	0.00000000
8.69000000	0.00000000	0.00000000	0.00000000	0.00000000
8.69500000	0.00000000	0.00000000	0.00000000	0.00000000
8.70000000	0.00000000	0.00000000	0.00000000	0.00000000
8.70500000	0.00000000	0.00000000	0.00000000	0.00000000
8.71000000	0.00000000	0.00000000	0.00000000	0.00000000
8.71500000	0.00000000	0.00000000	0.00000000	0.00000000
8.72000000	0.00000000	0.00000000	0.00000000	0.00000000
8.72500000	0.00000000	0.00000000	0.00000000	0.00000000
8.73000000	0.00000000	0.00000000	0.00000000	0.00000000
8.73500000	0.00000000	0.00000000	0.00000000	0.00000000
8.74000000	0.00000000	0.00000000	0.00000000	0.00000000
8.74500000	0.00000000	0.00000000	0.00000000	0.00000000
8.75000000	0.00000000	0.00000000	0.00000000	0.00000000
8.75500000	0.00000000	0.00000000	0.00000000	0.00000000
8.76000000	0.00000000	0.00000000	0.00000000	0.00000000
8.76500000	0.00000000	0.00000000	0.00000000	0.00000000
8.77000000	0.00000000	0.00000000	0.00000000	0.00000000
8.77500000	0.00000000	0.00000000	0.00000000	0.00000000
8.78000000	0.00000000	0.00000000	0.00000000	0.00000000
8.78500000	0.00000000	0.00000000	0.00000000	0.00000000
8.79000000	0.00000000	0.00000000	0.00000000	0.00000000
8.79500000	0.00000000	0.00000000	0.00000000	0.00000000
8.80000000	0.00000000	0.00000000	0.00000000	0.00000000
8.80500000	0.00000000	0.00000000	0.00000000	0.00000000
8.81000000	0.00000000	0.00000000	0.00000000	0.00000000
8.81500000	0.00000000	0.00000000	0.00000000	0.00000000
8.82000000	0.00000000	0.00000000	0.00000000	0.00000000
8.82500000	0.00000000	0.00000000	0.00000000	0.00000000
8.83000000	0.00000000	0.00000000	0.00000000	0.00000000
8.83500000	0.00000000	0.00000000	0.00000000	0.00000000
8.84000000	0.00000000	0.00000000	0.00000000	0.00000000
8.84500000	0.00000000	0.00000000	0.00000000	0.00000000
8.85000000	0.00000000	0.00000000	0.00000000	0.00000000
8.85500000	0.00000000	0.00000000	0.00000000	0.00000000
8.86000000	0.00000000	0.00000000	0.00000000	0.00000000
8.86500000	0.00000000	0.00000000	0.00000000	0.00000000
8.87000000	0.00000000	0.00000000	0.00000000	0.00000000
8.87500000	0.00000000	0.00000000	0.00000000	0.00000000
8.88000000	0.00000000	0.00000000	0.00000000	0.00000000
8.88500000	0.00000000	0.00000000	0.00000000	0.00000000
8.89000000	0.00000000	0.00000000	0.00000000	0.00000000
8.89500000	0.00000000	0.00000000	0.00000000	0.00000000
8.90000000	0.00000000	0.00000000	0.00000000	0.00000000
8.90500000	0.00000000	0.00000000	0.00000000	0.00000000
8.91000000	0.00000000	0.00000000	0.00000000	0.00000000
8.91500000	0.00000000	0.00000000	0.00000000	0.00000000
8.92000000	0.00000000	0.00000000	0.00000000	0.00000000
8.92500000	0.00000000	0.00000000	0.00000000	0.00000000
8.93000000	0.00000000	0.00000000	0.00000000	0.00000000
8.93500000	0.00000000	0.00000000	0.00000000	0.00000000
8.94000000	0.00000000	0.00000000	0.00000000	0.00000000
8.94500000	0.00000000	0.00000000	0.00000000	0.00000000
8.95000000	0.00000000	0.00000000	0.00000000	0.00000000
8.95500000	0.00000000	0.00000000	0.00000000	0.00000000
8.96000000	0.00000000	0.00000000	0.00000000	0.00000000
8.96500000	0.00000000	0.00000000	0.00000000	0.00000000
8.97000000	0.00000000	0.00000000	0.00000000	0.00000000
8.97500000	0.00000000	0.00000000	0.00000000	0.00000000
8.98000000	0.00000000	0.00000000	0.00000000	0.00000000
8.98500000	0.00000000	0.00000000	0.00000000	0.00000000
8.99000000	0.00000000	0.00000000	0.00000000	0.00000000
8.99500000	0.00000000	0.00000000	0.00000000	0.00000000
9.00000000	0.00000000	0.00000000	0.00000000	0.00000000
9.00500000	0.00000000	0.00000000	0.00000000	0.00000000
9.01000000	0.00000000	0.00000000	0.00000000	0.00000000
9.01500000	0.00000000	0.00000000	0.00000000	0.00000000
9.02000000	0.00000000	0.00000000	0.00000000	0.00000000
9.02500000	0.00000000	0.00000000	0.00000000	0.00000000
9.03000000	0.00000000	0.00000000	0.00000000	0.00000000
9.03500000	0.00000000	0.00000000	0.00000000	0.00000000
9.04000000	0.00000000	0.00000000	0.00000000	0.00000000
9.04500000	0.00000000	0.00000000	0.00000000	0.00000000
9.05000000	0.00000000	0.00000000	0.00000000	0.00000000
9.05500000	0.00000000	0.00000000	0.00000000	0.00000000
9.06000000	0.00000000	0.00000000	0.00000000	0.00000000
9.06500000	0.00000000	0.00000000	0.00000000	0.00000000
9.07000000	0.00000000	0.00000000	0.00000000	0.00000000
9.07500000	0.00000000	0.00000000	0.00000000	0.00000000
9.08000000	0.00000000	0.00000000	0.00000000	0.00000000
9.08500000	0.00000000	0.00000000	0.00000000	0.00000000
9.09000000	0.00000000	0.00000000	0.00000000	0.00000000
9.09500000	0.00000000	0.00000000	0.00000000	0.00000000
9.10000000	0.00000000	0.00000000	0.00000000	0.00000000
9.10500000	0.00000000	0.00000000	0.00000000	0.00000000
9.11000000	0.00000000	0.00000000	0.00000000	0.00000000
9.11500000	0.00000000	0.00000000	0.00000000	0.00000000
9.12000000	0.00000000	0.00000000	0.00000000	0.00000000
9.12500000	0.00000000	0.00000000	0.00000000	0.00000000
9.13000000	0.00000000	0.00000000	0.00000000	0.00000000
9.13500000	0.00000000	0.00000000	0.00000000	0.00000000
9.14000000	0.00000000	0.00000000	0.00000000	0.00000000
9.14500000	0.00000000	0.00000000	0.00000000	0.00000000
9.15000000	0.00000000	0.00000000	0.00000000	0.00000000
9.15500000	0.00000000	0.00000000	0.00000000	0.00000000
9.16000000	0.00000000	0.00000000	0.00000000	0.00000000
9.16500000	0.00000000	0.00000000	0.00000000	0.00000000
9.17000000	0.00000000	0.00000000	0.00000000	0.00000000
9.17500000	0.00000000	0.00000000	0.00000000	0.00000000
9.18000000	0.00000000	0.00000000	0.00000000	0.00000000
9.18500000	0.00000000	0.00000000	0.00000000	0.00000000
9.19000000	0.00000000	0.00000000	0.00000000	0.00000000
9.19500000	0.00000000	0.00000000	0.00000000	0.00000000
9.20000000	0.00000000	0.00000000	0.00000000	0.00000000
9.20500000	0.00000000	0.00000000	0.00000000	0.00000000
9.21000000	0.00000000	0.00000000	0.00000000	0.00000000
9.21500000	0.00000000	0.00000000	0.00000000	0.00000000
9.22000000	0.00000000	0.00000000	0.00000000	0.00000000
9.22500000	0.00000000	0.00000000	0.00000000	0.00000000
9.23000000	0.00000000	0.00000000	0.00000000	0.00000000
9.23500000	0.00000000	0.00000000	0.00000000	0.00000000
9.24000000	0.00000000	0.00000000	0.00000000	0.00000000
9.24500000	0.00000000	0.00000000	0.00000000	0.00000000
9.25000000	0.00000000	0.00000000	0.00000000	0.00000000
9.25500000	0.00000000	0.00000000	0.00000000	0.00000000
9.26000000	0.00000000	0.00000000	0.00000000	0.00000000
9.26500000	0.00000000	0.00000000	0.00000000	0.00000000
9.27000000	0.00000000	0.00000000	0.00000000	0.00000000
9.27500000	0.00000000	0.00000000	0.00000000	0.00000000
9.28000000	0.00000000	0.00000000	0.00000000	0.00000000
9.28500000	0.00000000	0.00000000	0.00000000	0.00000000
9.29000000	0.00000000	0.00000000	0.00000000	0.00000000
9.29500000	0.00000000	0.00000000	0.00000000	0.00000000
9.30000000	0.00000000	0.00000000	0.00000000	0.00000000
9.30500000	0.00000000	0.00000000	0.00000000	0.00000000
9.31000000	0.00000000	0.00000000	0.00000000	0.00000000
9.31500000	0.00000000	0.00000000	0.00000000	0.00000000
9.32000000	0.00000000	0.00000000	0.00000000	0.00000000
9.32500000	0.00000000	0.00000000	0.00000000	0.00000000
9.33000000	0.00000000	0.00000000	0.00000000	0.00000000
9.33500000	0.00000000	0.00000000	0.00000000	0.00000000
9.34000000	0.00000000	0.00000000	0.00000000	0.00000000
9.34500000	0.00000000	0.00000000	0.00000000	0.00000000
9.35000000	0.00000000	0.00000000	0.00000000	0.00000000
9.35500000	0.00000000	0.00000000	0.00000000	0.00000000
9.36000000	0.00000000	0.00000000	0.00000000	0.00000000
9.36500000	0.00000000	0.00000000	0.00000000	0.00000000
9.37000000	0.00000000	0.00000000	0.00000000	0.00000000
9.37500000	0.00000000	0.00000000	0.00000000	0.00000000
9.38000000	0.00000000	0.00000000	0.00000000	0.00000000
9.38500000	0.00000000	0.00000000	0.00000000	0.00000000
9.39000000	0.00000000	0.00000000	0.00000000	0.00000000
9.39500000	0.00000000	0.00000000	0.00000000	0.00000000
9.40000000	0.00000000	0.00000000	0.00000000	0.00000000
9.40500000	0.00000000	0.00000000	0.00000000	0.00000000
9.41000000	0.00000000	0.00000000	0.00000000	0.00000000
9.41500000	0.00000000	0.00000000	0.00000000	0.00000000
9.42000000	0.00000000	0.00000000	0.00000000	0.00000000
9.42500000	0.00000000	0.00000000	0.00000000	0.00000000
9.43000000	0.00000000	0.00000000	0.00000000	0.00000000
9.43500000	0.00000000	0.00000000	0.00000000	0.00000000
9.44000000	0.00000000	0.00000000	0.00000000	0.00000000
9.44500000	0.00000000	0.00000000	0.00000000	0.00000000
9.45000000	0.00000000	0.00000000	0.00000000	0.00000000
9.45500000	0.00000000	0.00000000	0.00000000	0.00000000
9.46000000	0.00000000	0.00000000	0.00000000	0.00000000
9.46500000	0.00000000	0.00000000	0.00000000	0.00000000
9.47000000	0.00000000	0.00000000	0.00000000	0.00000000
9.47500000	0.00000000	0.00000000	0.00000000	0.00000000
9.48000000	0.00000000	0.00000000	0.00000000	0.00000000
9.48500000	0.00000000	0.00000000	0.00000000	0.00000000
9.49000000	0.00000000	0.00000000	0.00000000	0.00000000
9.49500000	0.00000000	0.00000000	0.00000000	0.00000000
9.50000000	0.00000000	0.00000000	0.00000000	0.00000000
9.50500000	0.00000000	0.00000000	0.00000000	0.00000000
9.51000000	0.00000000	0.00000000	0.00000000	0.00000000
9.51500000	0.00000000	0.00000000	0.00000000	0.00000000
9.52000000	0.00000000	0.00000000	0.00000000	0.00000000
9.52500000	0.00000000	0.00000000	0.00000000	0.00000000
9.53000000	0.00000000	0.00000000	0.00000000	0.00000000
9.53500000	0.00000000	0.00000000	0.00000000	0.00000000
9.54000000	0.00000000	0.00000000	0.00000000	0.00000000
9.54500000	0.00000000	0.00000000	0.00000000	0.00000000
9.55000000	0.00000000	0.00000000	0.00000000	0.00000000
9.55500000	0.00000000	0.00000000	0.00000000	0.00000000
9.56000000	0.00000000	0.00000000	0.00000000	0.00000000
9.56500000	0.00000000	0.00000000	0.00000000	0.00000000
9.57000000	0.00000000	0.00000000	0.00000000	0.00000000
9.57500000	0.00000000	0.00000000	0.00000000	0.00000000
9.58000000	0.00000000	0.00000000	0.00000000	0.00000000
9.58500000	0.00000000	0.00000000	0.00000000	0.00000000
9.59000000	0.00000000	0.00000000	0.00000000	0.00000000
9.59500000	0.00000000	0.00000000	0.00000000	0.00000000
9.60000000	0.00000000	0.00000000	0.00000000	0.00000000
9.60500000	0.00000000	0.00000000	0.00000000	0.00000000
9.61000000	0.00000000	0.00000000	0.00000000	0.00000000
9.61500000	0.00000000	0.00000000	0.00000000	0.00000000
9.62000000	0.00000000	0.00000000	0.00000000	0.00000000
9.62500000	0.00000000	0.00000000	0.00000000	0.00000000
9.63000000	0.00000000	0.00000000	0.00000000	0.00000000
9.63500000	0.00000000	0.00000000	0.00000000	0.00000000
9.64000000	0.00000000	0.00000000	0.00000000	0.00000000
9.64500000	0.00000000	0.00000000	0.00000000	0.00000000
9.65000000	0.00000000	0.00000000	0.00000000	0.00000000
9.65500000	0.00000000	0.00000000	0.00000000	0.00000000
9.66000000	0.00000000	0.00000000	0.00000000	0.00000000
9.66500000	0.00000000	0.00000000	0.00000000	0.00000000
9.67000000	0.00000000	0.00000000	0.00000000	0.00000000
9.67500000	0.00000000	0.00000000	0.00000000	0.00000000
9.68000000	0.00000000	0.00000000	0.00000000	0.00000000
9.68500000	0.00000000	0.00000000	0.00000000	0.00000000
9.69000000	0.00000000	0.00000000	0.00000000	0.00000000
9.69500000	0.00000000	0.00000000	0.00000000	0.00000000
9.70000000	0.00000000	0.00000000	0.00000000	0.00000000
9.70500000	0.00000000	0.00000000	0.00000000	0.00000000
9.71000000	0.00000000	0.00000000	0.00000000	0.00000000
9.71500000	0.00000000	0.00000000	0.00000000	0.00000000
9.72000000	0.00000000	0.00000000	0.00000000	0.00000000
9.72500000	0.00000000	0.00000000	0.00000000	0.00000000
9.73000000	0.00000000	0.00000000	0.00000000	0.00000000
9.73500000	0.00000000	0.00000000	0.00000000	0.00000000
9.74000000	0.00000000	0.00000000	0.00000000	0.00000000
9.74500000	0.00000000	0.00000000	0.00000000	0.00000000
9.75000000	0.00000000	0.00000000	0.00000000	0.00000000
9.75500000	0.00000000	0.00000000	0.00000000	0.00000000
9.76000000	0.00000000	0.00000000	0.00000000	0.00000000
9.76500000	0.00000000	0.00000000	0.00000000	0.00000000
9.77000000	0.00000000	0.00000000	0.00000000	0.00000000
9.77500000	0.00000000	0.00000000	0.00000000	0.00000000
9.78000000	0.00000000	0.00000000	0.00000000	0.00000000
9.78500000	0.00000000	0.00000000	0.00000000	0.00000000
9.79000000	0.00000000	0.00000000	0.00000000	0.00000000
9.79500000	0.00000000	0.00000000	0.00000000	0.00000000
9.80000000	0.00000000	0.00000000	0.00000000	0.00000000
9.80500000	0.00000000	0.00000000	0.00000000	0.00000000
9.81000000	0.00000000	0.00000000	0.00000000	0.00000000
9.81500000	0.00000000	0.00000000	0.00000000	0.00000000
9.82000000	0.00000000	0.00000000	0.00000000	0.00000000
9.82500000	0.00000000	0.00000000	0.00000000	0.00000000
9.83000000	0.00000000	0.00000000	0.00000000	0.00000000
9.83500000	0.00000000	0.00000000	0.00000000	0.00000000
9.84000000	0.00000000	0.00000000	0.00000000	0.00000000
9.84500000	0.00000000	0.00000000	0.00000000	0.00000000
9.85000000	0.00000000	0.00000000	0.00000000	0.00000000
9.85500000	0.00000000	0.00000000	0.00000000	0.00000000
9.86000000	0.00000000	0.00000000	0.00000000	0.00000000
9.86500000	0.00000000	0.00000000	0.00000000	0.00000000
9.87000000	0.00000000	0.00000000	0.00000000	0.00000000
9.87500000	0.00000000	0.00000000	0.00000000	0.00000000
9.88000000	0.00000000	0.00000000	0.00000000	0.00000000
9.88500000	0.00000000	0.00000000	0.00000000	0.00000000
9.89000000	0.00000000	0.00000000	0.00000000	0.00000000
9.89500000	0.00000000	0.00000000	0.00000000	0.00000000
9.90000000	0.00000000	0.00000000	0.00000000	0.00000000
9.90500000	0.00000000	0.00000000	0.00000000	0.00000000
9.91000000	0.00000000	0.00000000	0.00000000	0.00000000
9.91500000	0.00000000	0.00000000	0.00000000	0.00000000
9.92000000	0.00000000	0.00000000	0.00000000	0.00000000
9.92500000	0.00000000	0.00000000	0.00000000	0.00000000
9.93000000	0.00000000	0.00000000	0.00000000	0.00000000
9.93500000	0.00000000	0.00000000	0.00000000	0.00000000
9.94000000	0.00000000	0.00000000	0.00000000	0.00000000
9.94500000	0.00000000	0.00000000	0.00000000	0.00000000
9.95000000	0.00000000	0.00000000	0.00000000	0.00000000
9.95500000	0.00000000	0.00000000	0.00000000	0.00000000
9.96000000	0.00000000	0.00000000	0.00000000	0.00000000
9.96500000	0.00000000	0.00000000	0.00000000	0.00000000
9.97000000	0.00000000	0.00000000	0.00000000	0.00000000
9.97500000	0.00000000	0.00000000	0.00000000	0.00000000
9.98000000	0.00000000	0.00000000	0.00000000	0.00000000
9.98500000	0.00000000	0.00000000	0.00000000	0.00000000
9.99000000	0.00000000	0.00000000	0.00000000	0.00000000
[truncated: 998 more rows]
