# Supplementary material for: An Efficient Contact Model for the Simulation of Cargo Airdrop Extraction Phase
Source: Hindawi journal article supplement (doi:10.1155/2018/9895451), 2018-10-17
Supplement: f1 [file 9895451.f1.zip › case2_ramp_drop/contact_pts40.csv]

t(s)	cntcNrmForc(N)	cntcFricForc(N)	cntcPitchMoment(N/m)	cntcPtsNum
0.00000000	0.00000000	0.00000000	0.00000000	80.00000000
0.00500000	15683.44943558	749.24990988	93.18216306	80.00000000
0.01000000	29936.59763530	817.30830954	-109.70247264	80.00000000
0.01500000	22577.81717887	676.13346139	1.95438793	80.00000000
0.02000000	20132.18500230	666.99969505	11.90774267	80.00000000
0.02500000	19686.83040399	680.56988917	2.41828280	80.00000000
0.03000000	19615.44298812	687.91557935	-2.88541625	80.00000000
0.03500000	19606.02739185	689.55684317	-3.94585873	80.00000000
0.04000000	19605.89369066	688.70663193	-3.13928491	80.00000000
0.04500000	19606.70238265	687.29069432	-1.95668532	80.00000000
0.05000000	19607.30119714	686.12156528	-1.00410247	80.00000000
0.05500000	19607.64343160	685.38384694	-0.41757918	80.00000000
0.06000000	19607.83040707	684.98874539	-0.10768536	80.00000000
0.06500000	19607.94174284	684.81817731	0.02124152	80.00000000
0.07000000	19607.98861215	684.77080714	0.05524546	80.00000000
0.07500000	19608.01045605	684.77790263	0.04693183	80.00000000
0.08000000	19608.02800910	684.79945269	0.02918512	80.00000000
0.08500000	19608.03960734	684.81525614	0.01651786	80.00000000
0.09000000	19608.04038115	684.82420303	0.00921988	80.00000000
0.09500000	19608.03972918	684.83136391	0.00347244	80.00000000
0.10000000	19608.04279353	684.83583558	-0.00005333	80.00000000
0.10500000	19608.04555914	684.83783574	-0.00128827	80.00000000
0.11000000	19608.04637651	684.83756569	-0.00142800	80.00000000
0.11500000	19608.04375501	684.83714233	-0.00029548	80.00000000
0.12000000	19608.04391065	684.83594954	-0.00030318	80.00000000
0.12500000	19608.04362095	684.83592344	0.00058246	80.00000000
0.13000000	19608.04193187	684.83689117	0.00247801	80.00000000
0.13500000	19608.04059824	684.83768683	0.00396553	80.00000000
0.14000000	19608.04006775	684.83809370	0.00453116	80.00000000
0.14500000	19608.03954092	684.83849807	0.00509274	80.00000000
0.15000000	19608.04162646	684.83712130	0.00276343	80.00000000
0.15500000	19608.04371200	684.83574454	0.00043411	80.00000000
0.16000000	19608.04406098	684.83594525	0.00021452	80.00000000
0.16500000	19608.04365147	684.83683498	0.00091641	80.00000000
0.17000000	19608.04368820	684.83709444	0.00100525	80.00000000
0.17500000	19608.04442053	684.83637140	0.00013845	80.00000000
0.18000000	19608.04515286	684.83564836	-0.00072836	80.00000000
0.18500000	19608.04588520	684.83492532	-0.00159517	80.00000000
0.19000000	19608.04661753	684.83420227	-0.00246197	80.00000000
0.19500000	19608.04734987	684.83347923	-0.00332878	80.00000000
0.20000000	19608.04808220	684.83275619	-0.00419558	80.00000000
0.20500000	19608.04836439	684.83256097	-0.00451933	80.00000000
0.21000000	19608.04820465	684.83288395	-0.00430992	80.00000000
0.21500000	19608.04804490	684.83320692	-0.00410051	80.00000000
0.22000000	19608.04788516	684.83352990	-0.00389110	80.00000000
0.22500000	19608.04772542	684.83385287	-0.00368169	80.00000000
0.23000000	19608.04756567	684.83417584	-0.00347228	80.00000000
0.23500000	19608.04740593	684.83449882	-0.00326287	80.00000000
0.24000000	19608.04723370	684.83483491	-0.00291610	80.00000000
0.24500000	19608.04705376	684.83517908	-0.00248465	80.00000000
0.25000000	19608.04687383	684.83552326	-0.00205319	80.00000000
0.25500000	19608.04669390	684.83586744	-0.00162174	80.00000000
0.26000000	19608.04651397	684.83621161	-0.00119028	80.00000000
0.26500000	19608.04633404	684.83655579	-0.00075883	80.00000000
0.27000000	19608.04615411	684.83689997	-0.00032737	80.00000000
0.27500000	19608.04597042	684.83699548	-0.00019953	80.00000000
0.28000000	19608.04578535	684.83700023	-0.00018251	80.00000000
0.28500000	19608.04560028	684.83700498	-0.00016549	80.00000000
0.29000000	19608.04541521	684.83700973	-0.00014846	80.00000000
0.29500000	19608.04523014	684.83701448	-0.00013144	80.00000000
0.30000000	19608.04504507	684.83701924	-0.00011442	80.00000000
0.30500000	19608.04486000	684.83702399	-0.00009740	80.00000000
0.31000000	19608.04467493	684.83702874	-0.00008038	80.00000000
0.31500000	19608.04448986	684.83703349	-0.00006335	80.00000000
0.32000000	19608.04430479	684.83703824	-0.00004633	80.00000000
0.32500000	19608.04411972	684.83704299	-0.00002931	80.00000000
0.33000000	19608.04393465	684.83704774	-0.00001229	80.00000000
0.33500000	19608.04374958	684.83705249	0.00000473	80.00000000
0.34000000	19608.04356451	684.83705724	0.00002176	80.00000000
0.34500000	19608.04337944	684.83706199	0.00003878	80.00000000
0.35000000	19608.04319437	684.83706674	0.00005580	80.00000000
0.35500000	19608.04300931	684.83707150	0.00007282	80.00000000
0.36000000	19608.04282424	684.83707625	0.00008984	80.00000000
0.36500000	19608.04263917	684.83708100	0.00010687	80.00000000
0.37000000	19608.04245410	684.83708575	0.00012389	80.00000000
0.37500000	19608.04226903	684.83709050	0.00014091	80.00000000
0.38000000	19608.04208396	684.83709525	0.00015793	80.00000000
0.38500000	19608.04189889	684.83710000	0.00017495	80.00000000
0.39000000	19608.04171382	684.83710475	0.00019198	80.00000000
0.39500000	19608.04152875	684.83710950	0.00020900	80.00000000
0.40000000	19608.04134368	684.83711425	0.00022602	80.00000000
0.40500000	19608.04115861	684.83711901	0.00024304	80.00000000
0.41000000	19608.04097354	684.83712376	0.00026006	80.00000000
0.41500000	19608.04078847	684.83712851	0.00027708	80.00000000
0.42000000	19608.04060340	684.83713326	0.00029411	80.00000000
0.42500000	19608.04041833	684.83713801	0.00031113	80.00000000
0.43000000	19608.04023326	684.83714276	0.00032815	80.00000000
0.43500000	19608.04004819	684.83714751	0.00034517	80.00000000
0.44000000	19608.03986312	684.83715226	0.00036219	80.00000000
0.44500000	19608.03967805	684.83715701	0.00037922	80.00000000
0.45000000	19608.03949298	684.83716176	0.00039624	80.00000000
0.45500000	19608.03930791	684.83716651	0.00041326	80.00000000
0.46000000	19608.03939710	684.83719676	0.00040696	80.00000000
0.46500000	19608.03951750	684.83722991	0.00039800	80.00000000
0.47000000	19608.03963790	684.83726306	0.00038904	80.00000000
0.47500000	19608.03975831	684.83729620	0.00038008	80.00000000
0.48000000	19608.03987871	684.83732935	0.00037112	80.00000000
0.48500000	19608.03999911	684.83736250	0.00036216	80.00000000
0.49000000	19608.04011952	684.83739565	0.00035320	80.00000000
0.49500000	19608.04023992	684.83742880	0.00034424	80.00000000
0.50000000	19608.04036032	684.83746195	0.00033528	80.00000000
0.50500000	19608.04048073	684.83749509	0.00032633	80.00000000
0.51000000	19608.04060113	684.83752824	0.00031737	80.00000000
0.51500000	19608.04072153	684.83756139	0.00030841	80.00000000
0.52000000	19608.04084194	684.83759454	0.00029945	80.00000000
0.52500000	19608.04096234	684.83762769	0.00029049	80.00000000
0.53000000	19608.04108274	684.83766083	0.00028153	80.00000000
0.53500000	19608.04120314	684.83769398	0.00027257	80.00000000
0.54000000	19608.04132355	684.83772713	0.00026361	80.00000000
0.54500000	19608.04144395	684.83776028	0.00025465	80.00000000
0.55000000	19608.04156435	684.83779343	0.00024570	80.00000000
0.55500000	19608.04168476	684.83782658	0.00023674	80.00000000
0.56000000	19608.04180516	684.83785972	0.00022778	80.00000000
0.56500000	19608.04192556	684.83789287	0.00021882	80.00000000
0.57000000	19608.04204597	684.83792602	0.00020986	80.00000000
0.57500000	19608.04216637	684.83795917	0.00020090	80.00000000
0.58000000	19608.04228677	684.83799232	0.00019194	80.00000000
0.58500000	19608.04240718	684.83802546	0.00018298	80.00000000
0.59000000	19608.04252758	684.83805861	0.00017402	80.00000000
0.59500000	19608.04264798	684.83809176	0.00016506	80.00000000
0.60000000	19608.04276838	684.83812491	0.00015611	80.00000000
0.60500000	19608.04288879	684.83815806	0.00014715	80.00000000
0.61000000	19608.04300919	684.83819121	0.00013819	80.00000000
0.61500000	19608.04312959	684.83822435	0.00012923	80.00000000
0.62000000	19608.04325000	684.83825750	0.00012027	80.00000000
0.62500000	19608.04337040	684.83829065	0.00011131	80.00000000
0.63000000	19608.04349080	684.83832380	0.00010235	80.00000000
0.63500000	19608.04361121	684.83835695	0.00009339	80.00000000
0.64000000	19608.04373273	684.83839014	0.00008317	80.00000000
0.64500000	19608.04387094	684.83842404	0.00005416	80.00000000
0.65000000	19608.04400914	684.83845794	0.00002515	80.00000000
0.65500000	19608.04414734	684.83849184	-0.00000386	80.00000000
0.66000000	19608.04415157	684.83851471	-0.00000205	80.00000000
0.66500000	19608.04415515	684.83853752	-0.00000010	80.00000000
0.67000000	19608.04415874	684.83856033	0.00000186	80.00000000
0.67500000	19608.04415976	684.83858239	0.00000140	80.00000000
0.68000000	19608.04416057	684.83860440	0.00000074	80.00000000
0.68500000	19608.04416139	684.83862640	0.00000009	80.00000000
0.69000000	19608.04416220	684.83864840	-0.00000056	80.00000000
0.69500000	19608.04416301	684.83867040	-0.00000121	80.00000000
0.70000000	19608.04416383	684.83869240	-0.00000186	80.00000000
0.70500000	19608.04416168	684.83871466	-0.00000161	80.00000000
0.71000000	19608.04415875	684.83873698	-0.00000112	80.00000000
0.71500000	19608.04415581	684.83875931	-0.00000064	80.00000000
0.72000000	19608.04415288	684.83878164	-0.00000015	80.00000000
0.72500000	19608.04414995	684.83880397	0.00000034	80.00000000
0.73000000	19608.04414701	684.83882629	0.00000083	80.00000000
0.73500000	19608.04413959	684.83884838	0.00000090	80.00000000
0.74000000	19608.04412979	684.83887035	0.00000076	80.00000000
0.74500000	19608.04412000	684.83889232	0.00000061	80.00000000
0.75000000	19608.04411020	684.83891429	0.00000046	80.00000000
0.75500000	19608.04410041	684.83893626	0.00000032	80.00000000
0.76000000	19608.04409061	684.83895823	0.00000017	80.00000000
0.76500000	19608.04408082	684.83898019	0.00000002	80.00000000
0.77000000	19608.04407103	684.83900216	-0.00000012	80.00000000
0.77500000	19608.04406123	684.83902413	-0.00000027	80.00000000
0.78000000	19608.04405144	684.83904610	-0.00000042	80.00000000
0.78500000	19608.04404164	684.83906807	-0.00000056	80.00000000
0.79000000	19608.04403185	684.83909003	-0.00000071	80.00000000
0.79500000	19608.04402205	684.83911200	-0.00000086	80.00000000
0.80000000	19608.04401226	684.83913397	-0.00000100	80.00000000
0.80500000	19608.04400247	684.83915594	-0.00000115	80.00000000
0.81000000	19608.04399267	684.83917791	-0.00000130	80.00000000
0.81500000	19608.04398288	684.83919987	-0.00000144	80.00000000
0.82000000	19608.04397308	684.83922184	-0.00000159	80.00000000
0.82500000	19608.04396329	684.83924381	-0.00000174	80.00000000
0.83000000	19608.04395349	684.83926578	-0.00000188	80.00000000
0.83500000	19608.04394370	684.83928775	-0.00000203	80.00000000
0.84000000	19608.04393390	684.83930971	-0.00000218	80.00000000
0.84500000	19608.04392411	684.83933168	-0.00000232	80.00000000
0.85000000	19608.04391432	684.83935365	-0.00000247	80.00000000
0.85500000	19608.04390452	684.83937562	-0.00000262	80.00000000
0.86000000	19608.04389473	684.83939759	-0.00000276	80.00000000
0.86500000	19608.04388493	684.83941955	-0.00000291	80.00000000
0.87000000	19608.04387514	684.83944152	-0.00000306	80.00000000
0.87500000	19608.04386534	684.83946349	-0.00000320	80.00000000
0.88000000	19608.04385555	684.83948546	-0.00000335	80.00000000
0.88500000	19608.04384576	684.83950743	-0.00000350	80.00000000
0.89000000	19608.04383596	684.83952939	-0.00000364	80.00000000
0.89500000	19608.04382617	684.83955136	-0.00000379	80.00000000
0.90000000	19608.04381637	684.83957333	-0.00000394	80.00000000
0.90500000	19608.04380658	684.83959530	-0.00000408	80.00000000
0.91000000	19608.04379678	684.83961727	-0.00000423	80.00000000
0.91500000	19608.04378699	684.83963924	-0.00000438	80.00000000
0.92000000	19608.04377720	684.83966120	-0.00000452	80.00000000
0.92500000	19608.04376740	684.83968317	-0.00000467	80.00000000
0.93000000	19608.04375761	684.83970514	-0.00000482	80.00000000
0.93500000	19608.04374781	684.83972711	-0.00000496	80.00000000
0.94000000	19608.04373802	684.83974908	-0.00000511	80.00000000
0.94500000	19608.04372822	684.83977104	-0.00000526	80.00000000
0.95000000	19608.04371843	684.83979301	-0.00000540	80.00000000
0.95500000	19608.04370863	684.83981498	-0.00000555	80.00000000
0.96000000	19608.04369884	684.83983695	-0.00000570	80.00000000
0.96500000	19608.04368905	684.83985892	-0.00000584	80.00000000
0.97000000	19608.04367925	684.83988088	-0.00000599	80.00000000
0.97500000	19608.04366946	684.83990285	-0.00000614	80.00000000
0.98000000	19608.04365966	684.83992482	-0.00000628	80.00000000
0.98500000	19608.04364987	684.83994679	-0.00000643	80.00000000
0.99000000	19608.04364007	684.83996876	-0.00000658	80.00000000
0.99500000	19608.04363028	684.83999072	-0.00000672	80.00000000
1.00000000	19608.04362049	684.84001269	-0.00000687	80.00000000
1.00500000	19608.04361069	684.84003466	-0.00000702	80.00000000
1.01000000	19608.04360090	684.84005663	-0.00000716	80.00000000
1.01500000	19608.04359110	684.84007860	-0.00000731	80.00000000
1.02000000	19608.04358131	684.84010056	-0.00000746	80.00000000
1.02500000	19608.04357151	684.84012253	-0.00000760	80.00000000
1.03000000	19608.04356172	684.84014450	-0.00000775	80.00000000
1.03500000	19608.04355192	684.84016647	-0.00000790	80.00000000
1.04000000	19608.04354240	684.84018844	-0.00000798	80.00000000
1.04500000	19608.04353354	684.84021040	-0.00000789	80.00000000
1.05000000	19608.04352467	684.84023237	-0.00000781	80.00000000
1.05500000	19608.04351581	684.84025434	-0.00000773	80.00000000
1.06000000	19608.04350694	684.84027631	-0.00000765	80.00000000
1.06500000	19608.04349808	684.84029828	-0.00000757	80.00000000
1.07000000	19608.04348921	684.84032025	-0.00000749	80.00000000
1.07500000	19608.04348034	684.84034221	-0.00000741	80.00000000
1.08000000	19608.04347148	684.84036418	-0.00000732	80.00000000
1.08500000	19608.04346261	684.84038615	-0.00000724	80.00000000
1.09000000	19608.04345375	684.84040812	-0.00000716	80.00000000
1.09500000	19608.04344488	684.84043009	-0.00000708	80.00000000
1.10000000	19608.04343602	684.84045205	-0.00000700	80.00000000
1.10500000	19608.04342715	684.84047402	-0.00000692	80.00000000
1.11000000	19608.04341829	684.84049599	-0.00000684	80.00000000
1.11500000	19608.04340942	684.84051796	-0.00000675	80.00000000
1.12000000	19608.04340056	684.84053993	-0.00000667	80.00000000
1.12500000	19608.04339169	684.84056189	-0.00000659	80.00000000
1.13000000	19608.04338282	684.84058386	-0.00000651	80.00000000
1.13500000	19608.04337396	684.84060583	-0.00000643	80.00000000
1.14000000	19608.04336509	684.84062780	-0.00000635	80.00000000
1.14500000	19608.04335623	684.84064977	-0.00000626	80.00000000
1.15000000	19608.04334736	684.84067173	-0.00000618	80.00000000
1.15500000	19608.04333850	684.84069370	-0.00000610	80.00000000
1.16000000	19608.04332963	684.84071567	-0.00000602	80.00000000
1.16500000	19608.04332077	684.84073764	-0.00000594	80.00000000
1.17000000	19608.04331190	684.84075961	-0.00000586	80.00000000
1.17500000	19608.04330304	684.84078157	-0.00000578	80.00000000
1.18000000	19608.04329417	684.84080354	-0.00000569	80.00000000
1.18500000	19608.04328530	684.84082551	-0.00000561	80.00000000
1.19000000	19608.04327644	684.84084748	-0.00000553	80.00000000
1.19500000	19608.04326757	684.84086945	-0.00000545	80.00000000
1.20000000	19608.04325871	684.84089141	-0.00000537	80.00000000
1.20500000	19608.04324984	684.84091338	-0.00000529	80.00000000
1.21000000	19608.04324098	684.84093535	-0.00000521	80.00000000
1.21500000	19608.04323211	684.84095732	-0.00000512	80.00000000
1.22000000	19608.04322325	684.84097929	-0.00000504	80.00000000
1.22500000	19608.04321438	684.84100126	-0.00000496	80.00000000
1.23000000	19608.04320552	684.84102322	-0.00000488	80.00000000
1.23500000	19608.04319665	684.84104519	-0.00000480	80.00000000
1.24000000	19608.04318778	684.84106716	-0.00000472	80.00000000
1.24500000	19608.04317892	684.84108913	-0.00000464	80.00000000
1.25000000	19608.04317005	684.84111110	-0.00000455	80.00000000
1.25500000	19608.04316119	684.84113306	-0.00000447	80.00000000
1.26000000	19608.04315232	684.84115503	-0.00000439	80.00000000
1.26500000	19608.04314346	684.84117700	-0.00000431	80.00000000
1.27000000	19608.04313459	684.84119897	-0.00000423	80.00000000
1.27500000	19608.04312573	684.84122094	-0.00000415	80.00000000
1.28000000	19608.04311686	684.84124290	-0.00000406	80.00000000
1.28500000	19608.04310800	684.84126487	-0.00000398	80.00000000
1.29000000	19608.04309913	684.84128684	-0.00000390	80.00000000
1.29500000	19608.04309026	684.84130881	-0.00000382	80.00000000
1.30000000	19608.04308140	684.84133078	-0.00000374	80.00000000
1.30500000	19608.04307253	684.84135274	-0.00000366	80.00000000
1.31000000	19608.04306367	684.84137471	-0.00000358	80.00000000
1.31500000	19608.04305480	684.84139668	-0.00000349	80.00000000
1.32000000	19608.04304594	684.84141865	-0.00000341	80.00000000
1.32500000	19608.04303707	684.84144062	-0.00000333	80.00000000
1.33000000	19608.04302821	684.84146258	-0.00000325	80.00000000
1.33500000	19608.04301934	684.84148455	-0.00000317	80.00000000
1.34000000	19608.04301048	684.84150652	-0.00000309	80.00000000
1.34500000	19608.04300161	684.84152849	-0.00000301	80.00000000
1.35000000	19608.04327142	684.84156025	-0.00000221	80.00000000
1.35500000	19608.04356181	684.84159274	-0.00000136	80.00000000
1.36000000	19608.04385221	684.84162522	-0.00000052	80.00000000
1.36500000	19608.04403154	684.84165384	0.00000011	80.00000000
1.37000000	19608.04403804	684.84167644	0.00000039	80.00000000
1.37500000	19608.04404454	684.84169904	0.00000068	80.00000000
1.38000000	19608.04405103	684.84172163	0.00000096	80.00000000
1.38500000	19608.04405116	684.84174387	0.00000076	80.00000000
1.39000000	19608.04405017	684.84176605	0.00000048	80.00000000
1.39500000	19608.04404918	684.84178822	0.00000019	80.00000000
1.40000000	19608.04404819	684.84181039	-0.00000009	80.00000000
1.40500000	19608.04404720	684.84183257	-0.00000037	80.00000000
1.41000000	19608.04404622	684.84185474	-0.00000065	80.00000000
1.41500000	19608.04404523	684.84187692	-0.00000094	80.00000000
1.42000000	19608.04404402	684.84189920	-0.00000089	80.00000000
1.42500000	19608.04404275	684.84192152	-0.00000075	80.00000000
1.43000000	19608.04404148	684.84194383	-0.00000061	80.00000000
1.43500000	19608.04404021	684.84196615	-0.00000047	80.00000000
1.44000000	19608.04403894	684.84198846	-0.00000033	80.00000000
1.44500000	19608.04403766	684.84201078	-0.00000018	80.00000000
1.45000000	19608.04403639	684.84203309	-0.00000004	80.00000000
1.45500000	19608.04402789	684.84205510	-0.00000004	80.00000000
1.46000000	19608.04401614	684.84207698	-0.00000010	80.00000000
1.46500000	19608.04400439	684.84209886	-0.00000015	80.00000000
1.47000000	19608.04399263	684.84212074	-0.00000021	80.00000000
1.47500000	19608.04398088	684.84214262	-0.00000026	80.00000000
1.48000000	19608.04396913	684.84216449	-0.00000032	80.00000000
1.48500000	19608.04395738	684.84218637	-0.00000038	80.00000000
1.49000000	19608.04394563	684.84220825	-0.00000043	80.00000000
1.49500000	19608.04393388	684.84223013	-0.00000049	80.00000000
1.50000000	19608.04392213	684.84225200	-0.00000055	80.00000000
1.50500000	19608.04391038	684.84227388	-0.00000060	80.00000000
1.51000000	19608.04389863	684.84229576	-0.00000066	80.00000000
1.51500000	19608.04388687	684.84231764	-0.00000072	80.00000000
1.52000000	19608.04387512	684.84233952	-0.00000077	80.00000000
1.52500000	19608.04386337	684.84236139	-0.00000083	80.00000000
1.53000000	19608.04385162	684.84238327	-0.00000089	80.00000000
1.53500000	19608.04383987	684.84240515	-0.00000094	80.00000000
1.54000000	19608.04382812	684.84242703	-0.00000100	80.00000000
1.54500000	19608.04381637	684.84244890	-0.00000106	80.00000000
1.55000000	19608.04380462	684.84247078	-0.00000111	80.00000000
1.55500000	19608.04379287	684.84249266	-0.00000117	80.00000000
1.56000000	19608.04378112	684.84251454	-0.00000123	80.00000000
1.56500000	19608.04376936	684.84253642	-0.00000128	80.00000000
1.57000000	19608.04375761	684.84255829	-0.00000134	80.00000000
1.57500000	19608.04374586	684.84258017	-0.00000139	80.00000000
1.58000000	19608.04373411	684.84260205	-0.00000145	80.00000000
1.58500000	19608.04372236	684.84262393	-0.00000151	80.00000000
1.59000000	19608.04371061	684.84264580	-0.00000156	80.00000000
1.59500000	19608.04369886	684.84266768	-0.00000162	80.00000000
1.60000000	19608.04368711	684.84268956	-0.00000168	80.00000000
1.60500000	19608.04367536	684.84271144	-0.00000173	80.00000000
1.61000000	19608.04366361	684.84273332	-0.00000179	80.00000000
1.61500000	19608.04365185	684.84275519	-0.00000185	80.00000000
1.62000000	19608.04364010	684.84277707	-0.00000190	80.00000000
1.62500000	19608.04362835	684.84279895	-0.00000196	80.00000000
1.63000000	19608.04361660	684.84282083	-0.00000202	80.00000000
1.63500000	19608.04360485	684.84284270	-0.00000207	80.00000000
1.64000000	19608.04359310	684.84286458	-0.00000213	80.00000000
1.64500000	19608.04358135	684.84288646	-0.00000219	80.00000000
1.65000000	19608.04356960	684.84290834	-0.00000224	80.00000000
1.65500000	19608.04355785	684.84293022	-0.00000230	80.00000000
1.66000000	19608.04354610	684.84295209	-0.00000236	80.00000000
1.66500000	19608.04353434	684.84297397	-0.00000241	80.00000000
1.67000000	19608.04352259	684.84299585	-0.00000247	80.00000000
1.67500000	19608.04351084	684.84301773	-0.00000252	80.00000000
1.68000000	19608.04349909	684.84303960	-0.00000258	80.00000000
1.68500000	19608.04348734	684.84306148	-0.00000264	80.00000000
1.69000000	19608.04347559	684.84308336	-0.00000269	80.00000000
1.69500000	19608.04346384	684.84310524	-0.00000275	80.00000000
1.70000000	19608.04345209	684.84312712	-0.00000281	80.00000000
1.70500000	19608.04344034	684.84314899	-0.00000286	80.00000000
1.71000000	19608.04342859	684.84317087	-0.00000292	80.00000000
1.71500000	19608.04341683	684.84319275	-0.00000298	80.00000000
1.72000000	19608.04340508	684.84321463	-0.00000303	80.00000000
1.72500000	19608.04339333	684.84323651	-0.00000309	80.00000000
1.73000000	19608.04338158	684.84325838	-0.00000315	80.00000000
1.73500000	19608.04336983	684.84328026	-0.00000320	80.00000000
1.74000000	19608.04335808	684.84330214	-0.00000326	80.00000000
1.74500000	19608.04334633	684.84332402	-0.00000332	80.00000000
1.75000000	19608.04333458	684.84334589	-0.00000337	80.00000000
1.75500000	19608.04332283	684.84336777	-0.00000343	80.00000000
1.76000000	19608.04331108	684.84338965	-0.00000349	80.00000000
1.76500000	19608.04329932	684.84341153	-0.00000354	80.00000000
1.77000000	19608.04328757	684.84343341	-0.00000360	80.00000000
1.77500000	19608.04327582	684.84345528	-0.00000365	80.00000000
1.78000000	19608.04326407	684.84347716	-0.00000371	80.00000000
1.78500000	19608.04325232	684.84349904	-0.00000377	80.00000000
1.79000000	19608.04324057	684.84352092	-0.00000382	80.00000000
1.79500000	19608.04322882	684.84354279	-0.00000388	80.00000000
1.80000000	19608.04321707	684.84356467	-0.00000394	80.00000000
1.80500000	19608.04320532	684.84358655	-0.00000399	80.00000000
1.81000000	19608.04370932	684.84362692	-0.00000139	80.00000000
1.81500000	19608.04398051	684.84365909	0.00000039	80.00000000
1.82000000	19608.04398594	684.84368179	0.00000087	80.00000000
1.82500000	19608.04398557	684.84370387	0.00000014	80.00000000
1.83000000	19608.04398520	684.84372596	-0.00000060	80.00000000
1.83500000	19608.04398483	684.84374821	-0.00000067	80.00000000
1.84000000	19608.04398446	684.84377067	0.00000007	80.00000000
1.84500000	19608.04398410	684.84379312	0.00000081	80.00000000
1.85000000	19608.04398049	684.84381530	0.00000095	80.00000000
1.85500000	19608.04397575	684.84383739	0.00000087	80.00000000
1.86000000	19608.04397100	684.84385948	0.00000080	80.00000000
1.86500000	19608.04396625	684.84388156	0.00000072	80.00000000
1.87000000	19608.04396150	684.84390365	0.00000065	80.00000000
1.87500000	19608.04395675	684.84392574	0.00000058	80.00000000
1.88000000	19608.04395200	684.84394782	0.00000050	80.00000000
1.88500000	19608.04394725	684.84396991	0.00000043	80.00000000
1.89000000	19608.04394251	684.84399200	0.00000036	80.00000000
1.89500000	19608.04393776	684.84401408	0.00000028	80.00000000
1.90000000	19608.04393301	684.84403617	0.00000021	80.00000000
1.90500000	19608.04392826	684.84405825	0.00000014	80.00000000
1.91000000	19608.04392351	684.84408034	0.00000006	80.00000000
1.91500000	19608.04391876	684.84410243	-0.00000001	80.00000000
1.92000000	19608.04391401	684.84412451	-0.00000009	80.00000000
1.92500000	19608.04390927	684.84414660	-0.00000016	80.00000000
1.93000000	19608.04390452	684.84416869	-0.00000023	80.00000000
1.93500000	19608.04389977	684.84419077	-0.00000031	80.00000000
1.94000000	19608.04389502	684.84421286	-0.00000038	80.00000000
1.94500000	19608.04389027	684.84423495	-0.00000045	80.00000000
1.95000000	19608.04388552	684.84425703	-0.00000053	80.00000000
1.95500000	19608.04388077	684.84427912	-0.00000060	80.00000000
1.96000000	19608.04387603	684.84430121	-0.00000067	80.00000000
1.96500000	19608.04387128	684.84432329	-0.00000075	80.00000000
1.97000000	19608.04386653	684.84434538	-0.00000082	80.00000000
1.97500000	19608.04386178	684.84436746	-0.00000089	80.00000000
1.98000000	19608.04385703	684.84438955	-0.00000097	80.00000000
1.98500000	19608.04395856	684.84441642	-0.00000100	80.00000000
1.99000000	19608.04396200	684.84443857	0.00000000	80.00000000
1.99500000	19608.04396200	684.84446056	0.00000000	80.00000000
2.00000000	19608.04396200	684.84448300	0.00000000	80.00000000
2.00500000	19608.05321871	692.03752733	3.19120401	80.00000000
2.01000000	19608.06055866	700.26373591	6.04685618	80.00000000
2.01500000	19608.05720899	708.73411051	8.71860285	80.00000000
2.02000000	19608.05092847	717.23536570	11.36415123	80.00000000
2.02500000	19608.04648169	725.70391697	14.04820623	80.00000000
2.03000000	19608.04386917	734.11219195	16.77842862	80.00000000
2.03500000	19608.04230439	742.49369116	19.52921704	80.00000000
2.04000000	19608.04246848	750.83978726	22.31005421	80.00000000
2.04500000	19608.04286791	759.17871645	25.09819170	80.00000000
2.05000000	19608.04316772	767.51147529	27.88814420	80.00000000
2.05500000	19608.04338839	775.84321674	30.67949375	80.00000000
2.06000000	19608.04355238	784.17509970	33.47098710	80.00000000
2.06500000	19608.04362335	792.50824257	36.26143735	80.00000000
2.07000000	19608.04360081	800.84200623	39.05094442	80.00000000
2.07500000	19608.04356768	809.17582288	41.84034912	80.00000000
2.08000000	19608.04353946	817.51071139	44.62985747	80.00000000
2.08500000	19608.04351159	825.84564090	47.41936694	80.00000000
2.09000000	19608.04348882	834.17968014	50.20863343	80.00000000
2.09500000	19608.04346454	842.51374739	52.99789981	80.00000000
2.10000000	19608.04342426	850.84811239	55.78716509	80.00000000
2.10500000	19608.04338398	859.18247739	58.57643037	80.00000000
2.11000000	19608.04334370	867.51684239	61.36569565	80.00000000
2.11500000	19608.04331301	875.85107914	64.15506339	80.00000000
2.12000000	19608.04329245	884.18518025	66.94453950	80.00000000
2.12500000	19608.04327190	892.51928136	69.73401561	80.00000000
2.13000000	19608.04325134	900.85338247	72.52349172	80.00000000
2.13500000	19608.04322316	909.18754241	75.31292083	80.00000000
2.14000000	19608.04319399	917.52170991	78.10234388	80.00000000
2.14500000	19608.04316482	925.85587741	80.89176694	80.00000000
2.15000000	19608.04313448	934.19008023	83.68119099	80.00000000
2.15500000	19608.04310121	942.52437125	86.47061752	80.00000000
2.16000000	19608.04306794	950.85866226	89.26004406	80.00000000
2.16500000	19608.04303467	959.19295328	92.04947059	80.00000000
2.17000000	19608.04300140	967.52724430	94.83889712	80.00000000
2.17500000	19608.04296813	975.86153531	97.62832366	80.00000000
2.18000000	19608.04293486	984.19582633	100.41775019	80.00000000
2.18500000	19608.04290159	992.53011734	103.20717672	80.00000000
2.19000000	19608.04286832	1000.86440836	105.99660326	80.00000000
2.19500000	19608.04283505	1009.19869938	108.78602979	80.00000000
2.20000000	19608.04280178	1017.53299039	111.57545633	80.00000000
2.20500000	19608.04276459	1025.86722174	114.36482781	80.00000000
2.21000000	19608.04272495	1034.20141587	117.15416495	80.00000000
2.21500000	19608.04268530	1042.53560999	119.94350209	80.00000000
2.22000000	19608.04264566	1050.86980412	122.73283922	80.00000000
2.22500000	19608.04260602	1059.20399825	125.52217636	80.00000000
2.23000000	19608.04256638	1067.53819237	128.31151350	80.00000000
2.23500000	19608.04252673	1075.87238650	131.10085064	80.00000000
2.24000000	19608.04248709	1084.20658062	133.89018778	80.00000000
2.24500000	19608.04244745	1092.54077475	136.67952492	80.00000000
2.25000000	19608.04240781	1100.87496887	139.46886205	80.00000000
2.25500000	19608.04236816	1109.20916300	142.25819919	80.00000000
2.26000000	19608.04233322	1117.54350206	145.04759719	80.00000000
2.26500000	19608.04229854	1125.87784950	147.83699870	80.00000000
2.27000000	19608.04226387	1134.21219693	150.62640021	80.00000000
2.27500000	19608.04222919	1142.54654437	153.41580172	80.00000000
2.28000000	19608.04219451	1150.88089180	156.20520323	80.00000000
2.28500000	19608.04215984	1159.21523924	158.99460474	80.00000000
2.29000000	19608.04212516	1167.54958667	161.78400625	80.00000000
2.29500000	19608.04209049	1175.88393411	164.57340776	80.00000000
2.30000000	19608.04205581	1184.21828154	167.36280927	80.00000000
2.30500000	19608.04202113	1192.55262898	170.15221079	80.00000000
2.31000000	19608.04196913	1200.88696034	172.94162167	80.00000000
2.31500000	19608.04187148	1209.22124937	175.73105726	80.00000000
2.32000000	19608.04177384	1217.55553839	178.52049284	80.00000000
2.32500000	19608.04167619	1225.88982742	181.30992842	80.00000000
2.33000000	19608.04157854	1234.22411645	184.09936401	80.00000000
2.33500000	19608.04148090	1242.55840547	186.88879959	80.00000000
2.34000000	19608.04138325	1250.89269450	189.67823518	80.00000000
2.34500000	19608.04128561	1259.22698353	192.46767076	80.00000000
2.35000000	19608.04118796	1267.56127255	195.25710634	80.00000000
2.35500000	19608.04109031	1275.89556158	198.04654193	80.00000000
2.36000000	19608.04099267	1284.22985061	200.83597751	80.00000000
2.36500000	19608.04089502	1292.56413963	203.62541310	80.00000000
2.37000000	19608.04079738	1300.89842866	206.41484868	80.00000000
2.37500000	19608.04069973	1309.23271769	209.20428426	80.00000000
2.38000000	19608.04060208	1317.56700671	211.99371985	80.00000000
2.38500000	19608.04050444	1325.90129574	214.78315543	80.00000000
2.39000000	19608.04040679	1334.23558477	217.57259102	80.00000000
2.39500000	19608.04030914	1342.56987379	220.36202660	80.00000000
2.40000000	19608.04021150	1350.90416282	223.15146218	80.00000000
2.40500000	19608.04011385	1359.23845185	225.94089777	80.00000000
2.41000000	19608.04001621	1367.57274087	228.73033335	80.00000000
2.41500000	19608.03991856	1375.90702990	231.51976893	80.00000000
2.42000000	19608.03982091	1384.24131893	234.30920452	80.00000000
2.42500000	19608.03972327	1392.57560795	237.09864010	80.00000000
2.43000000	19608.03962562	1400.90989698	239.88807569	80.00000000
2.43500000	19608.03952798	1409.24418601	242.67751127	80.00000000
2.44000000	19608.03943033	1417.57847503	245.46694685	80.00000000
2.44500000	19608.03933268	1425.91276406	248.25638244	80.00000000
2.45000000	19608.03923504	1434.24705309	251.04581802	80.00000000
2.45500000	19608.03913739	1442.58134211	253.83525361	80.00000000
2.46000000	19608.03903975	1450.91563114	256.62468919	80.00000000
2.46500000	19608.03894210	1459.24992017	259.41412477	80.00000000
2.47000000	19608.03884445	1467.58420919	262.20356036	80.00000000
2.47500000	19608.03874681	1475.91849822	264.99299594	80.00000000
2.48000000	19608.03864916	1484.25278725	267.78243153	80.00000000
2.48500000	19608.03855152	1492.58707628	270.57186711	80.00000000
2.49000000	19608.03845387	1500.92136530	273.36130269	80.00000000
2.49500000	19608.03835622	1509.25565433	276.15073828	80.00000000
2.50000000	19608.03825858	1517.58994336	278.94017386	80.00000000
2.50500000	19608.03816093	1525.92423238	281.72960944	80.00000000
2.51000000	19608.03806329	1534.25852141	284.51904503	80.00000000
2.51500000	19608.03796564	1542.59281044	287.30848061	80.00000000
2.52000000	19608.03786799	1550.92709946	290.09791620	80.00000000
2.52500000	19608.03777035	1559.26138849	292.88735178	80.00000000
2.53000000	19608.03767270	1567.59567752	295.67678736	80.00000000
2.53500000	19608.03757505	1575.92996654	298.46622295	80.00000000
2.54000000	19608.03747741	1584.26425557	301.25565853	80.00000000
2.54500000	19608.03737976	1592.59854460	304.04509412	80.00000000
2.55000000	19608.03728212	1600.93283362	306.83452970	80.00000000
2.55500000	19608.03718447	1609.26712265	309.62396528	80.00000000
2.56000000	19608.03708682	1617.60141168	312.41340087	80.00000000
2.56500000	19608.03698918	1625.93570070	315.20283645	80.00000000
2.57000000	19608.03689153	1634.26998973	317.99227204	80.00000000
2.57500000	19608.03679389	1642.60427876	320.78170762	80.00000000
2.58000000	19608.03669624	1650.93856778	323.57114320	80.00000000
2.58500000	19608.03659859	1659.27285681	326.36057879	80.00000000
2.59000000	19608.03650095	1667.60714584	329.15001437	80.00000000
2.59500000	19608.03635550	1675.94142944	331.93948066	80.00000000
2.60000000	19608.03616580	1684.27570802	334.72897537	80.00000000
2.60500000	19608.03597609	1692.60998659	337.51847008	80.00000000
2.61000000	19608.03578638	1700.94426517	340.30796480	80.00000000
2.61500000	19608.03559668	1709.27854375	343.09745951	80.00000000
2.62000000	19608.03540697	1717.61282233	345.88695423	80.00000000
2.62500000	19608.03521726	1725.94710091	348.67644894	80.00000000
2.63000000	19608.03502756	1734.28137949	351.46594366	80.00000000
2.63500000	19608.03483785	1742.61565807	354.25543837	80.00000000
2.64000000	19608.03464814	1750.94993664	357.04493308	80.00000000
2.64500000	19608.03445844	1759.28421522	359.83442780	80.00000000
2.65000000	19608.03426873	1767.61849380	362.62392251	80.00000000
2.65500000	19608.03407902	1775.95277238	365.41341723	80.00000000
2.66000000	19608.03388932	1784.28705096	368.20291194	80.00000000
2.66500000	19608.03369961	1792.62132954	370.99240665	80.00000000
2.67000000	19608.03350990	1800.95560812	373.78190137	80.00000000
2.67500000	19608.03332020	1809.28988669	376.57139608	80.00000000
2.68000000	19608.03313049	1817.62416527	379.36089080	80.00000000
2.68500000	19608.03294078	1825.95844385	382.15038551	80.00000000
2.69000000	19608.03275107	1834.29272243	384.93988023	80.00000000
2.69500000	19608.03256137	1842.62700101	387.72937494	80.00000000
2.70000000	19608.03237166	1850.96127959	390.51886965	80.00000000
2.70500000	19608.03218195	1859.29555816	393.30836437	80.00000000
2.71000000	19608.03199225	1867.62983674	396.09785908	80.00000000
2.71500000	19608.03180254	1875.96411532	398.88735380	80.00000000
2.72000000	19608.03161283	1884.29839390	401.67684851	80.00000000
2.72500000	19608.03142313	1892.63267248	404.46634323	80.00000000
2.73000000	19608.03123342	1900.96695106	407.25583794	80.00000000
2.73500000	19608.03104371	1909.30122964	410.04533265	80.00000000
2.74000000	19608.03085401	1917.63550821	412.83482737	80.00000000
2.74500000	19608.03066430	1925.96978679	415.62432208	80.00000000
2.75000000	19608.03047459	1934.30406537	418.41381680	80.00000000
2.75500000	19608.03028489	1942.63834395	421.20331151	80.00000000
2.76000000	19608.03009518	1950.97262253	423.99280622	80.00000000
2.76500000	19608.02990547	1959.30690111	426.78230094	80.00000000
2.77000000	19608.02971577	1967.64117968	429.57179565	80.00000000
2.77500000	19608.02952606	1975.97545826	432.36129037	80.00000000
2.78000000	19608.02933635	1984.30973684	435.15078508	80.00000000
2.78500000	19608.02914665	1992.64401542	437.94027980	80.00000000
2.79000000	19608.02895694	2000.97829400	440.72977451	80.00000000
2.79500000	19608.02876723	2009.31257258	443.51926922	80.00000000
2.80000000	19608.02857752	2017.64685116	446.30876394	80.00000000
2.80500000	19608.02838782	2025.98112973	449.09825865	80.00000000
2.81000000	19608.02819811	2034.31540831	451.88775337	80.00000000
2.81500000	19608.02800840	2042.64968689	454.67724808	80.00000000
2.82000000	19608.02781870	2050.98396547	457.46674280	80.00000000
2.82500000	19608.02762899	2059.31824405	460.25623751	80.00000000
2.83000000	19608.02743928	2067.65252263	463.04573222	80.00000000
2.83500000	19608.02724958	2075.98680120	465.83522694	80.00000000
2.84000000	19608.02705987	2084.32107978	468.62472165	80.00000000
2.84500000	19608.02687016	2092.65535836	471.41421637	80.00000000
2.85000000	19608.02668046	2100.98963694	474.20371108	80.00000000
2.85500000	19608.02649075	2109.32391552	476.99320579	80.00000000
2.86000000	19608.02630104	2117.65819410	479.78270051	80.00000000
2.86500000	19608.02611134	2125.99247268	482.57219522	80.00000000
2.87000000	19608.02592163	2134.32675125	485.36168994	80.00000000
2.87500000	19608.02573192	2142.66102983	488.15118465	80.00000000
2.88000000	19608.02564381	2150.99531078	490.94069920	80.00000000
2.88500000	19608.02558722	2159.32959246	493.73021991	80.00000000
2.89000000	19608.02553062	2167.66387414	496.51974061	80.00000000
2.89500000	19608.02547403	2175.99815583	499.30926131	80.00000000
2.90000000	19608.02541744	2184.33243751	502.09878202	80.00000000
2.90500000	19608.02536084	2192.66671919	504.88830272	80.00000000
2.91000000	19608.02530425	2201.00100087	507.67782343	80.00000000
2.91500000	19608.02524766	2209.33528255	510.46734413	80.00000000
2.92000000	19608.02519106	2217.66956424	513.25686484	80.00000000
2.92500000	19608.02513447	2226.00384592	516.04638554	80.00000000
2.93000000	19608.02507788	2234.33812760	518.83590625	80.00000000
2.93500000	19608.02502129	2242.67240928	521.62542695	80.00000000
2.94000000	19608.02496469	2251.00669096	524.41494765	80.00000000
2.94500000	19608.02490810	2259.34097265	527.20446836	80.00000000
2.95000000	19608.02485151	2267.67525433	529.99398906	80.00000000
2.95500000	19608.02479491	2276.00953601	532.78350977	80.00000000
2.96000000	19608.02473832	2284.34381769	535.57303047	80.00000000
2.96500000	19608.02468173	2292.67809937	538.36255118	80.00000000
2.97000000	19608.02462514	2301.01238106	541.15207188	80.00000000
2.97500000	19608.02456854	2309.34666274	543.94159258	80.00000000
2.98000000	19608.02451195	2317.68094442	546.73111329	80.00000000
2.98500000	19608.02445536	2326.01522610	549.52063399	80.00000000
2.99000000	19608.02439876	2334.34950778	552.31015470	80.00000000
2.99500000	19608.02434217	2342.68378947	555.09967540	80.00000000
3.00000000	19608.02428558	2351.01807115	557.88919611	80.00000000
3.00500000	19608.02422898	2359.35235283	560.67871681	80.00000000
3.01000000	19608.02417239	2367.68663451	563.46823751	80.00000000
3.01500000	19608.02411580	2376.02091619	566.25775822	80.00000000
3.02000000	19608.02405921	2384.35519788	569.04727892	80.00000000
3.02500000	19608.02400261	2392.68947956	571.83679963	80.00000000
3.03000000	19608.02394602	2401.02376124	574.62632033	80.00000000
3.03500000	19608.02388943	2409.35804292	577.41584104	80.00000000
3.04000000	19608.02383283	2417.69232460	580.20536174	80.00000000
3.04500000	19608.02377624	2426.02660629	582.99488244	80.00000000
3.05000000	19608.02371965	2434.36088797	585.78440315	80.00000000
3.05500000	19608.02366306	2442.69516965	588.57392385	80.00000000
3.06000000	19608.02360646	2451.02945133	591.36344456	80.00000000
3.06500000	19608.02354987	2459.36373301	594.15296526	80.00000000
3.07000000	19608.02349328	2467.69801470	596.94248597	80.00000000
3.07500000	19608.02343668	2476.03229638	599.73200667	80.00000000
3.08000000	19608.02338009	2484.36657806	602.52152738	80.00000000
3.08500000	19608.02332350	2492.70085974	605.31104808	80.00000000
3.09000000	19608.02326690	2501.03514142	608.10056878	80.00000000
3.09500000	19608.02321031	2509.36942311	610.89008949	80.00000000
3.10000000	19608.02315372	2517.70370479	613.67961019	80.00000000
3.10500000	19608.02309713	2526.03798647	616.46913090	80.00000000
3.11000000	19608.02304053	2534.37226815	619.25865160	80.00000000
3.11500000	19608.02298394	2542.70654983	622.04817231	80.00000000
3.12000000	19608.02292735	2551.04083152	624.83769301	80.00000000
3.12500000	19608.02287075	2559.37511320	627.62721371	80.00000000
3.13000000	19608.02281416	2567.70939488	630.41673442	80.00000000
3.13500000	19608.02275757	2576.04367656	633.20625512	80.00000000
3.14000000	19608.02270098	2584.37795824	635.99577583	80.00000000
3.14500000	19608.02264438	2592.71223993	638.78529653	80.00000000
3.15000000	19608.02258779	2601.04652161	641.57481724	80.00000000
3.15500000	19608.02253120	2609.38080329	644.36433794	80.00000000
3.16000000	19608.02247822	2617.71508589	647.15385854	80.00000000
3.16500000	19608.02293784	2626.04949843	649.94336383	80.00000000
3.17000000	19608.02339747	2634.38391097	652.73286912	80.00000000
3.17500000	19608.02385710	2642.71832351	655.52237441	80.00000000
3.18000000	19608.02431673	2651.05273606	658.31187970	80.00000000
3.18500000	19608.02477636	2659.38714860	661.10138499	80.00000000
3.19000000	19608.02523598	2667.72156114	663.89089029	80.00000000
3.19500000	19608.02569561	2676.05597368	666.68039558	80.00000000
3.20000000	19608.02615524	2684.39038623	669.46990087	80.00000000
3.20500000	19608.02661487	2692.72479877	672.25940616	80.00000000
3.21000000	19608.02707449	2701.05921131	675.04891145	80.00000000
3.21500000	19608.02753412	2709.39362385	677.83841674	80.00000000
3.22000000	19608.02799375	2717.72803639	680.62792204	80.00000000
3.22500000	19608.02845338	2726.06244894	683.41742733	80.00000000
3.23000000	19608.02891300	2734.39686148	686.20693262	80.00000000
3.23500000	19608.02937263	2742.73127402	688.99643791	80.00000000
3.24000000	19608.02983226	2751.06568656	691.78594320	80.00000000
3.24500000	19608.03029189	2759.40009911	694.57544849	80.00000000
3.25000000	19608.03075151	2767.73451165	697.36495379	80.00000000
3.25500000	19608.03121114	2776.06892419	700.15445908	80.00000000
3.26000000	19608.03167077	2784.40333673	702.94396437	80.00000000
3.26500000	19608.03213040	2792.73774927	705.73346966	80.00000000
3.27000000	19608.03259002	2801.07216182	708.52297495	80.00000000
3.27500000	19608.03310077	2809.40633715	711.31237805	80.00000000
3.28000000	19608.03361625	2817.74049051	714.10177167	80.00000000
3.28500000	19608.03413173	2826.07464387	716.89116530	80.00000000
3.29000000	19608.03464721	2834.40879723	719.68055893	80.00000000
3.29500000	19608.03516269	2842.74295059	722.46995255	80.00000000
3.30000000	19608.03545853	2851.07718923	725.25942863	80.00000000
3.30500000	19608.03541399	2859.41156005	728.04903246	80.00000000
3.31000000	19608.03536945	2867.74593086	730.83863630	80.00000000
3.31500000	19608.03532491	2876.08030167	733.62824014	80.00000000
3.32000000	19608.03528037	2884.41467248	736.41784398	80.00000000
3.32500000	19608.03523583	2892.74904330	739.20744782	80.00000000
3.33000000	19608.03520230	2901.08329985	741.99699799	80.00000000
3.33500000	19608.03517043	2909.41753922	744.78654009	80.00000000
3.34000000	19608.03513857	2917.75177858	747.57608218	80.00000000
3.34500000	19608.03510670	2926.08601794	750.36562428	80.00000000
3.35000000	19608.03507483	2934.42025730	753.15516638	80.00000000
3.35500000	19608.02560424	2941.10850926	755.26605265	80.00000000
3.36000000	19591.30706710	1586.89587261	459.03136832	80.00000000
3.36500000	19610.84647706	1588.47856494	815.23401312	80.00000000
3.37000000	19614.67419427	1588.78860975	850.13295604	80.00000000
3.37500000	19610.97299765	1588.48881270	826.37821053	80.00000000
3.38000000	19608.68857705	1588.30377485	803.78878483	80.00000000
3.38500000	19607.96137662	1588.24487153	790.62609981	80.00000000
3.39000000	19607.85501411	1588.23625616	784.71232313	80.00000000
3.39500000	19607.90247023	1588.24010022	782.93705594	80.00000000
3.40000000	19607.95913130	1588.24468971	783.48730379	80.00000000
3.40500000	19607.99894681	1588.24791427	785.18306912	80.00000000
3.41000000	19608.02225978	1588.24980323	787.44538227	80.00000000
3.41500000	19608.03802192	1588.25107957	789.99227174	80.00000000
3.42000000	19608.04458936	1588.25161158	792.66269393	80.00000000
3.42500000	19608.04742595	1588.25184136	795.39346859	80.00000000
3.43000000	19608.05024114	1588.25206949	798.16190457	80.00000000
3.43500000	19608.05051864	1588.25209192	800.94188588	80.00000000
3.44000000	19608.04931419	1588.25199437	803.72562602	80.00000000
3.44500000	19608.04842074	1588.25192245	806.51259995	80.00000000
3.45000000	19608.04861456	1588.25193805	809.30447311	80.00000000
3.45500000	19608.04791816	1588.25188171	812.09801487	80.00000000
3.46000000	19608.04612878	1588.25173665	814.89009222	80.00000000
3.46500000	19608.04443211	1588.25159903	817.68039614	80.00000000
3.47000000	19608.04295686	1588.25147933	820.46979763	80.00000000
3.47500000	19608.04183176	1588.25138809	823.25981762	80.00000000
3.48000000	19608.04092319	1588.25131451	826.05073887	80.00000000
3.48500000	19608.03925514	1588.25117956	828.84498762	80.00000000
3.49000000	19608.03670314	1588.25097275	831.64137134	80.00000000
3.49500000	19608.03378944	1588.25073666	834.43753715	80.00000000
3.50000000	19608.03118232	1588.25052589	837.22919407	80.00000000
3.50500000	19608.02997007	1588.25042790	840.01736217	80.00000000
3.51000000	19608.02884402	1588.25033661	842.80607677	80.00000000
3.51500000	19608.02717550	1588.25020099	845.59756724	80.00000000
3.52000000	19608.02268370	1588.24983707	848.39409212	80.00000000
3.52500000	19608.01834708	1588.24948596	851.19006461	80.00000000
3.53000000	19608.01464632	1588.24918657	853.98467206	80.00000000
3.53500000	19608.01517699	1588.24922969	856.77371226	80.00000000
3.54000000	19608.01442098	1588.24916823	859.56247480	80.00000000
3.54500000	19608.01147078	1588.24892901	862.35177006	80.00000000
3.55000000	19608.00475476	1588.24838542	865.14309875	80.00000000
3.55500000	19607.99932905	1588.24794544	867.93947471	80.00000000
3.56000000	19607.99671910	1588.24773412	870.73626465	80.00000000
3.56500000	19607.99579905	1588.24766000	873.53153608	80.00000000
3.57000000	19607.99421164	1588.24753139	876.32222772	80.00000000
3.57500000	19607.98849552	1588.24706816	879.10927620	80.00000000
3.58000000	19607.98303756	1588.24662593	881.90192947	80.00000000
3.58500000	19426.08700767	1573.51304727	685.94112938	79.00000000
3.59000000	19621.48111611	1589.33997012	891.99723186	79.00000000
3.59500000	19635.14488324	1590.44673560	923.09383207	79.00000000
3.60000000	19645.47145050	1591.28318729	877.35439003	80.00000000
3.60500000	19591.96973816	1586.94954887	937.97300067	80.00000000
3.61000000	19592.94275404	1587.02836284	934.68808858	80.00000000
3.61500000	19598.54586263	1587.48221493	923.60089402	80.00000000
3.62000000	19602.61622825	1587.81191485	916.26739955	80.00000000
3.62500000	19605.04142518	1588.00835535	913.15940899	80.00000000
3.63000000	19606.39276075	1588.11781401	912.82882365	80.00000000
3.63500000	19607.12657961	1588.17725290	914.03174975	80.00000000
3.64000000	19607.51543651	1588.20875033	916.05533957	80.00000000
3.64500000	19607.71591321	1588.22498874	918.48695316	80.00000000
3.65000000	19607.81931136	1588.23336389	921.11185787	80.00000000
3.65500000	19607.87719816	1588.23805352	923.81676657	80.00000000
3.66000000	19607.89737076	1588.23968698	926.57976540	80.00000000
3.66500000	19607.90853719	1588.24059149	929.35799226	80.00000000
3.67000000	19607.91062806	1588.24076063	932.14113499	80.00000000
3.67500000	19607.90809028	1588.24055537	934.93347761	80.00000000
3.68000000	19607.90393459	1588.24021881	937.72699713	80.00000000
3.68500000	19607.89863956	1588.23978986	940.51897063	80.00000000
3.69000000	19607.89216585	1588.23926584	943.31107543	80.00000000
3.69500000	19607.88508893	1588.23869220	946.10664364	80.00000000
3.70000000	19611.94376681	1588.56744526	939.92850348	79.00000000
3.70500000	19713.26129136	1596.77416448	885.71879316	80.00000000
3.71000000	19604.71943821	1587.98227472	1000.03328128	80.00000000
3.71500000	19595.93947284	1587.27109744	1003.57299704	80.00000000
3.72000000	19599.30132871	1587.54340791	989.90074018	80.00000000
3.72500000	19602.80310371	1587.82705103	979.38473183	80.00000000
3.73000000	19605.06788201	1588.01049840	974.20165291	80.00000000
3.73500000	19606.37165172	1588.11610380	972.66343954	80.00000000
3.74000000	19607.07083857	1588.17273769	973.26052833	80.00000000
3.74500000	19607.43619701	1588.20233151	974.96695025	80.00000000
3.75000000	19607.61973429	1588.21719846	977.25036747	80.00000000
3.75500000	19607.70986957	1588.22449964	979.80133596	80.00000000
3.76000000	19607.75261665	1588.22796217	982.48093620	80.00000000
3.76500000	19607.76945269	1588.22932538	985.22325330	80.00000000
3.77000000	19607.77402253	1588.22969561	987.99278193	80.00000000
3.77500000	19431.30030348	1573.93532448	796.00079417	79.00000000
3.78000000	19623.35921643	1589.49209680	1000.03039712	79.00000000
3.78500000	19635.30883954	1590.46001585	1014.08486153	80.00000000
3.79000000	19599.90877796	1587.59261113	1053.86503159	80.00000000
3.79500000	19599.14833836	1587.53101570	1042.53968536	80.00000000
3.80000000	19602.14002269	1587.77334190	1028.57961370	80.00000000
3.80500000	19604.56589272	1587.96983688	1020.16524938	80.00000000
3.81000000	19606.03863066	1588.08912923	1016.69690878	80.00000000
3.81500000	19606.85320943	1588.15511009	1016.20631399	80.00000000
3.82000000	19607.27079144	1588.18893387	1017.37026723	80.00000000
3.82500000	19607.47874231	1588.20577859	1019.37645002	80.00000000
3.83000000	19607.57731348	1588.21376278	1021.79441876	80.00000000
3.83500000	19607.62175412	1588.21736189	1024.40939251	80.00000000
3.84000000	19488.81655685	1578.59414099	885.67243227	79.00000000
3.84500000	19751.26362088	1599.85235324	908.74314142	80.00000000
3.85000000	19615.99175874	1588.89533226	1076.85015938	80.00000000
3.85500000	19600.14111520	1587.61143073	1089.15826567	80.00000000
3.86000000	19601.03425516	1587.68377486	1073.99657525	80.00000000
3.86500000	19603.53081595	1587.88599614	1061.14465251	80.00000000
3.87000000	19605.36013631	1588.03417095	1054.30565374	80.00000000
3.87500000	19606.44338689	1588.12191445	1051.79453019	80.00000000
3.88000000	19607.00620396	1588.16750275	1051.92393982	80.00000000
3.88500000	19607.29336449	1588.19076301	1053.36952886	80.00000000
3.89000000	19607.42201153	1588.20118258	1055.53830745	80.00000000
3.89500000	19480.19745012	1577.89599348	908.01595436	79.00000000
3.90000000	19718.12526343	1597.16814605	967.04434802	80.00000000
3.90500000	19613.49053404	1588.69273290	1112.99981936	80.00000000
3.91000000	19601.02496734	1587.68302238	1119.87227037	80.00000000
3.91500000	19601.86293981	1587.75089819	1103.89408621	80.00000000
3.92000000	19604.01449529	1587.92517411	1091.23114222	80.00000000
3.92500000	19605.60487081	1588.05399426	1084.57466117	80.00000000
3.93000000	19606.52080813	1588.12818519	1082.29531926	80.00000000
3.93500000	19606.99149987	1588.16631149	1082.52127585	80.00000000
3.94000000	19607.21917016	1588.18475289	1084.04254656	80.00000000
3.94500000	19546.34003142	1583.25354263	1001.42303693	79.00000000
3.95000000	19660.17770330	1592.47439402	1068.95243852	80.00000000
3.95500000	19607.13118714	1588.17762590	1149.38132715	80.00000000
3.96000000	19601.53698455	1587.72449560	1143.02369340	80.00000000
3.96500000	19602.89155069	1587.83421538	1126.77843136	80.00000000
3.97000000	19604.73915242	1587.98387157	1115.80570814	80.00000000
3.97500000	19605.97058734	1588.08361761	1110.74413013	80.00000000
3.98000000	19606.67893239	1588.14099315	1109.24879018	80.00000000
3.98500000	19607.00140953	1588.16711407	1109.96388693	80.00000000
3.99000000	19578.40352491	1585.85068508	1061.37839013	79.00000000
3.99500000	19636.69988954	1590.57269064	1129.17659830	80.00000000
4.00000000	19604.92957450	1587.99929525	1176.40328949	80.00000000
4.00500000	19602.06019047	1587.76687584	1164.26377627	80.00000000
4.01000000	19603.54224154	1587.88692111	1148.48504670	80.00000000
4.01500000	19605.13395302	1588.01585006	1138.92153265	80.00000000
4.02000000	19606.14825606	1588.09800899	1134.74858260	80.00000000
4.02500000	19606.69953860	1588.14266271	1133.82787688	80.00000000
4.03000000	19558.69065509	1584.25394312	1062.96785258	79.00000000
4.03500000	19640.44922265	1590.87638735	1143.74432344	80.00000000
4.04000000	19605.98790970	1588.08502105	1199.46107369	80.00000000
4.04500000	19602.38204514	1587.79294593	1188.24082897	80.00000000
4.05000000	19603.59014272	1587.89080178	1172.05125573	80.00000000
4.05500000	19605.09107580	1588.01237730	1161.91790860	80.00000000
4.06000000	19606.07329515	1588.09193648	1157.37982145	80.00000000
4.06500000	19375.45776007	1569.41207876	912.22385314	79.00000000
4.07000000	19697.74668755	1595.51748122	1057.30553066	80.00000000
4.07500000	19614.84083936	1588.80210775	1210.86805901	80.00000000
4.08000000	19603.24972776	1587.86322777	1217.41335722	80.00000000
4.08500000	19603.01463826	1587.84418596	1200.46403410	80.00000000
4.09000000	19604.46344644	1587.96153916	1186.99308461	80.00000000
4.09500000	19605.63949100	1588.05679900	1179.96623245	80.00000000
4.10000000	19356.58075780	1567.88304120	917.33572840	79.00000000
4.10500000	19694.74882251	1595.27465436	1075.30948011	80.00000000
4.11000000	19614.98463247	1588.81375530	1230.94376254	80.00000000
4.11500000	19603.53222779	1587.88611073	1237.42050539	80.00000000
4.12000000	19603.13818907	1587.85419318	1220.23739067	80.00000000
4.12500000	19604.47941769	1587.96283266	1206.66702381	80.00000000
4.13000000	19605.59059514	1588.05283834	1199.57247196	80.00000000
4.13500000	19518.44764153	1580.99425937	1083.74085471	79.00000000
4.14000000	19642.84088668	1591.07011154	1193.08635478	80.00000000
4.14500000	19607.86392494	1588.23697807	1259.48482633	80.00000000
4.15000000	19603.03329315	1587.84569710	1249.52372630	80.00000000
4.15500000	19603.69427809	1587.89923626	1232.50339808	80.00000000
4.16000000	19604.95849284	1588.00163769	1221.56913881	80.00000000
4.16500000	19418.10051903	1572.86614199	1009.73287085	79.00000000
4.17000000	19664.43247917	1592.81903076	1161.29379892	80.00000000
4.17500000	19611.72899129	1588.55004818	1273.51382853	80.00000000
4.18000000	19603.53461407	1587.88630377	1271.55222707	80.00000000
4.18500000	19603.43860925	1587.87852745	1253.85528992	80.00000000
4.19000000	19604.63926135	1587.97578013	1241.15271183	80.00000000
4.19500000	19436.89172465	1574.38822954	1044.97987369	79.00000000
4.20000000	19656.17310785	1592.15002177	1193.22600378	80.00000000
4.20500000	19610.79356235	1588.47427870	1292.18918994	80.00000000
4.21000000	19603.54062063	1587.88679055	1287.46834241	80.00000000
4.21500000	19603.51600799	1587.88479640	1269.64891470	80.00000000
4.22000000	19604.65812616	1587.97730778	1257.26063791	80.00000000
4.22500000	19542.44213235	1582.93781271	1162.18925885	79.00000000
4.23000000	19631.37289849	1590.14120455	1266.33118562	80.00000000
4.23500000	19606.87595669	1588.15695248	1311.49566273	80.00000000
4.24000000	19603.23101280	1587.86171215	1297.58277754	80.00000000
4.24500000	19603.84979957	1587.91183396	1280.73013156	80.00000000
4.25000000	19368.19133854	1568.82349863	1020.81048930	79.00000000
4.25500000	19663.74438641	1592.76329506	1200.23781607	80.00000000
4.26000000	19612.66862707	1588.62615844	1322.34354127	80.00000000
4.26500000	19603.92568474	1587.91798069	1321.00146593	80.00000000
4.27000000	19603.40664352	1587.87593838	1302.68909981	80.00000000
4.27500000	19604.41465797	1587.95758723	1289.38880888	80.00000000
4.28000000	19689.53943642	1594.85269414	1146.26229937	80.00000000
4.28500000	19617.74935822	1589.03769814	1328.21461086	80.00000000
4.29000000	19604.78646390	1587.98770377	1339.35056287	80.00000000
4.29500000	19603.26642857	1587.86458067	1321.25977813	80.00000000
4.30000000	19604.11447918	1587.93327287	1306.33441953	80.00000000
4.30500000	19691.27525328	1594.99329515	1150.46376817	80.00000000
4.31000000	19618.15051980	1589.07019229	1342.21255315	80.00000000
4.31500000	19604.93888800	1588.00005003	1354.20889400	80.00000000
4.32000000	19603.22459834	1587.86119282	1335.91685610	80.00000000
4.32500000	19604.00988926	1587.92480114	1320.70372453	80.00000000
4.33000000	19668.01691242	1593.10936954	1221.01490133	80.00000000
4.33500000	19614.62776926	1588.78484964	1363.55300344	80.00000000
4.34000000	19604.35586286	1587.95282478	1365.80903755	80.00000000
4.34500000	19603.24208618	1587.86260899	1346.93128776	80.00000000
4.35000000	19457.04266520	1576.02045599	1161.50616205	79.00000000
4.35500000	19640.25192443	1590.86040603	1311.09530196	80.00000000
4.36000000	19609.47257435	1588.36727843	1384.43788407	80.00000000
4.36500000	19603.51363808	1587.88460433	1373.52032488	80.00000000
4.37000000	19603.35909131	1587.87208627	1354.88780512	80.00000000
4.37500000	19694.46510823	1595.25167358	1162.87494412	80.00000000
4.38000000	19619.89940881	1589.21185204	1379.94950761	80.00000000
4.38500000	19605.42221826	1588.03919941	1395.98004776	80.00000000
4.39000000	19603.09713312	1587.85086775	1377.34696614	80.00000000
4.39500000	19473.16066585	1577.32601383	1205.09391342	79.00000000
4.40000000	19635.97048341	1590.51360939	1347.78697205	80.00000000
4.40500000	19608.88988546	1588.32008043	1410.99823188	80.00000000
4.41000000	19603.37163210	1587.87310255	1398.01288362	80.00000000
4.41500000	19603.22587850	1587.86129650	1379.27281150	80.00000000
4.42000000	19653.32905020	1591.91965302	1304.32240222	80.00000000
4.42500000	19612.73378924	1588.63143688	1420.25465972	80.00000000
4.43000000	19604.01387444	1587.92512381	1415.82494296	80.00000000
4.43500000	19602.97970415	1587.84135594	1396.04950010	80.00000000
4.44000000	19666.75845553	1593.00743464	1269.35332586	80.00000000
4.44500000	19615.84924911	1588.88378915	1427.17159927	80.00000000
4.45000000	19604.59522327	1587.97221265	1430.84004114	80.00000000
4.45500000	19602.85119275	1587.83094634	1410.82609360	80.00000000
4.46000000	19670.84017377	1593.33805379	1263.32972920	80.00000000
4.46500000	19616.97122460	1588.97466886	1437.05113671	80.00000000
4.47000000	19604.83923491	1587.99197821	1443.43657555	80.00000000
4.47500000	19602.75710134	1587.82332493	1423.34606765	80.00000000
4.48000000	19664.21576451	1592.80147688	1293.94695444	80.00000000
4.48500000	19615.91063055	1588.88876149	1451.00564477	80.00000000
4.49000000	19604.54903503	1587.96847202	1454.08601495	80.00000000
4.49500000	19602.65462478	1587.81502410	1433.61028314	80.00000000
4.50000000	19650.98415892	1591.72971687	1350.11717411	80.00000000
4.50500000	19612.97804279	1588.65122176	1467.90404603	80.00000000
4.51000000	19603.89097244	1587.91516888	1462.48557822	80.00000000
4.51500000	19433.18789065	1574.08821905	1249.51214337	79.00000000
4.52000000	19636.11285920	1590.52514185	1413.76661968	80.00000000
4.52500000	19609.53534948	1588.37236359	1482.29934630	80.00000000
4.53000000	19603.11440699	1587.85226709	1468.43543234	80.00000000
4.53500000	19693.70567951	1595.19016030	1201.06119424	80.00000000
4.54000000	19623.24226604	1589.48262373	1466.97691298	80.00000000
4.54500000	19606.32231444	1588.11210713	1491.66046543	80.00000000
4.55000000	19602.48163663	1587.80101264	1472.02204355	80.00000000
4.55500000	19651.28576219	1591.75414642	1374.99770329	80.00000000
4.56000000	19613.72450042	1588.71168484	1499.99798265	80.00000000
4.56500000	19603.85564567	1587.91230749	1495.49658722	80.00000000
4.57000000	19707.32380643	1596.29322821	1150.12218916	80.00000000
4.57500000	19626.95714273	1589.78352818	1476.81612091	80.00000000
4.58000000	19607.29788916	1588.19112908	1514.06172800	80.00000000
4.58500000	19602.42458426	1587.79639104	1495.23042425	80.00000000
4.59000000	19648.35762559	1591.51696743	1403.44951516	80.00000000
4.59500000	19613.23936669	1588.67238911	1521.89279311	80.00000000
4.60000000	19603.60551556	1587.89204661	1515.34883902	80.00000000
4.60500000	19680.57636885	1594.12668615	1267.44578493	80.00000000
4.61000000	19621.62183713	1589.35136847	1514.15690695	80.00000000
4.61500000	19605.76816976	1588.06722172	1532.56116752	80.00000000
4.62000000	19440.66449390	1574.69382425	1325.49119131	79.00000000
4.62500000	19632.31382445	1590.21741981	1487.45095966	80.00000000
4.63000000	19608.88644919	1588.31980251	1545.18598643	80.00000000
4.63500000	19602.42752209	1587.79662894	1528.18289906	80.00000000
4.64000000	19644.19094168	1591.17946630	1446.39651655	80.00000000
4.64500000	19612.50115421	1588.61259393	1553.14083148	80.00000000
4.65000000	19603.16327628	1587.85622518	1543.66461562	80.00000000
4.65500000	19656.53789943	1592.17956970	1394.89085349	80.00000000
4.66000000	19616.26031862	1588.91708551	1556.81068825	80.00000000
4.66500000	19604.07909011	1587.93040629	1557.36673804	80.00000000
4.67000000	19666.93594649	1593.02181162	1347.41438336	80.00000000
4.67500000	19619.45453503	1589.17581718	1559.24361799	80.00000000
4.68000000	19604.94007430	1588.00014590	1569.44519766	80.00000000
4.68500000	19673.49624003	1593.55319517	1315.82041980	80.00000000
4.69000000	19621.63839772	1589.35271014	1563.03493767	80.00000000
4.69500000	19605.52938454	1588.04787975	1580.26872117	80.00000000
4.70000000	19675.80578559	1593.74026855	1304.93917331	80.00000000
4.70500000	19622.57610205	1589.42866445	1569.78786850	80.00000000
4.71000000	19605.81048226	1588.07064915	1589.89397926	80.00000000
4.71500000	19673.79793220	1593.57763264	1317.68038506	80.00000000
4.72000000	19622.29036997	1589.40551970	1579.63042534	80.00000000
4.72500000	19605.66952675	1588.05923153	1598.57909092	80.00000000
4.73000000	19667.02961850	1593.02939900	1360.15353650	80.00000000
4.73500000	19620.71270248	1589.27772891	1593.38832998	80.00000000
4.74000000	19605.07764011	1588.01128863	1606.41777213	80.00000000
4.74500000	19658.58722608	1592.34556538	1414.69806406	80.00000000
4.75000000	19618.20041779	1589.07423359	1608.74415725	80.00000000
4.75500000	19604.15602305	1587.93663773	1613.11386843	80.00000000
4.76000000	19648.67635300	1591.54278439	1480.43634982	80.00000000
4.76500000	19615.07725372	1588.82125774	1623.56229187	80.00000000
4.77000000	19603.08876075	1587.85018995	1618.27884877	80.00000000
4.77500000	19639.19308044	1590.77463924	1541.45238357	80.00000000
4.78000000	19611.66325439	1588.54472361	1635.96915921	80.00000000
4.78500000	19428.45951435	1573.70522089	1424.17734715	79.00000000
4.79000000	19630.27067606	1590.05192469	1593.70805930	80.00000000
4.79500000	19608.26739352	1588.26965852	1644.90084654	80.00000000
4.80000000	19666.34320862	1592.97379969	1372.45266978	80.00000000
4.80500000	19622.15209942	1589.39432038	1633.20349599	80.00000000
4.81000000	19605.20958380	1588.02197648	1649.74234354	80.00000000
4.81500000	19647.32683443	1591.43347340	1512.08922163	80.00000000
4.82000000	19615.19713979	1588.83096828	1657.11926446	80.00000000
4.82500000	19379.29515795	1569.72290791	1409.75966475	79.00000000
4.83000000	19632.76934988	1590.25431716	1606.63210707	80.00000000
4.83500000	19609.25120650	1588.34934737	1669.94725657	80.00000000
4.84000000	19661.62246873	1592.59141971	1411.22768902	80.00000000
4.84500000	19621.47058273	1589.33911699	1660.07271520	80.00000000
4.85000000	19604.69747758	1587.98049534	1673.32019580	80.00000000
4.85500000	19640.49624562	1590.88019615	1576.22482838	80.00000000
4.86000000	19612.65164687	1588.62478335	1684.48848414	80.00000000
4.86500000	19668.98570332	1593.18784212	1340.66973837	80.00000000
4.87000000	19625.35307094	1589.65359829	1663.18589021	80.00000000
4.87500000	19606.05670440	1588.09059270	1691.45888774	80.00000000
4.88000000	19643.24682400	1591.10299261	1569.86855444	80.00000000
4.88500000	19614.09674902	1588.74183695	1698.88306924	80.00000000
4.89000000	19667.65067049	1593.07970472	1343.76411975	80.00000000
4.89500000	19625.82556877	1589.69187133	1677.15983236	80.00000000
4.90000000	19606.11464199	1588.09528631	1706.99181001	80.00000000
4.90500000	19641.04361265	1590.92453285	1598.48465406	80.00000000
4.91000000	19613.23770216	1588.67225403	1715.08660905	80.00000000
4.91500000	19659.79303786	1592.44323599	1422.80739784	80.00000000
4.92000000	19623.03725020	1589.46601704	1702.64542038	80.00000000
4.92500000	19604.74182194	1587.98408737	1720.19667504	80.00000000
4.93000000	19635.13195537	1590.44568834	1652.59022787	80.00000000
4.93500000	19610.32291556	1588.43615607	1731.73743708	80.00000000
4.94000000	19648.78086645	1591.55125032	1545.02172618	80.00000000
4.94500000	19617.84953997	1589.04581284	1730.83462747	80.00000000
4.95000000	19663.60997957	1592.75240831	1352.24982315	80.00000000
4.95500000	19626.88029294	1589.77730329	1710.55577570	80.00000000
4.96000000	19606.16154315	1588.09908478	1744.47255539	80.00000000
4.96500000	19636.79298607	1590.58023210	1662.08533478	80.00000000
4.97000000	19611.23080151	1588.50969499	1753.51380794	80.00000000
4.97500000	19646.93415957	1591.40166710	1573.72321481	80.00000000
4.98000000	19617.39403067	1589.00891640	1754.05489210	80.00000000
4.98500000	19656.57477696	1592.18255683	1436.13187234	80.00000000
4.99000000	19624.30961867	1589.56907910	1742.93523949	80.00000000
4.99500000	19365.46104646	1568.60234466	1508.08072998	79.00000000
5.00000000	19631.50557188	1590.15195107	1716.83444203	80.00000000
5.00500000	19608.16376599	1588.26126473	1772.80231593	80.00000000
5.01000000	19638.36394708	1590.70747984	1668.17891460	80.00000000
5.01500000	19612.21915011	1588.58975144	1773.21234898	80.00000000
5.02000000	19644.71009343	1591.22151775	1599.99455281	80.00000000
5.02500000	19616.60640420	1588.94511897	1769.41694452	80.00000000
5.03000000	19650.16583995	1591.66343301	1515.97287519	80.00000000
5.03500000	19621.08444439	1589.30783961	1760.88030955	80.00000000
5.04000000	19654.48413651	1592.01321540	1414.22695507	80.00000000
5.04500000	19625.39807242	1589.65724400	1747.73050178	80.00000000
5.05000000	19395.36322981	1571.02442156	1540.40598508	79.00000000
5.05500000	19629.37808454	1589.97962480	1730.27077832	80.00000000
5.06000000	19606.72521852	1588.14474230	1774.31786503	80.00000000
5.06500000	19632.87191526	1590.26262467	1710.44974618	80.00000000
5.07000000	19608.79163337	1588.31212214	1776.11818112	80.00000000
5.07500000	19635.81548652	1590.50105461	1688.14934669	80.00000000
5.08000000	19610.63504188	1588.46143829	1777.35795224	80.00000000
5.08500000	19638.14712582	1590.68991687	1665.23433424	80.00000000
5.09000000	19612.33190527	1588.59888443	1777.39246620	80.00000000
5.09500000	19639.90109388	1590.83198843	1645.88293823	80.00000000
5.10000000	19613.71219888	1588.71068809	1777.36558358	80.00000000
5.10500000	19641.09351042	1590.92857407	1629.39273758	80.00000000
5.11000000	19614.75014590	1588.79476170	1777.32461264	80.00000000
5.11500000	19641.74003555	1590.98094264	1616.47526426	80.00000000
5.12000000	19615.46399942	1588.85258367	1777.04173334	80.00000000
5.12500000	19641.97239647	1590.99976423	1611.75126341	80.00000000
5.13000000	19615.80682489	1588.88035288	1777.22931976	80.00000000
5.13500000	19641.75494879	1590.98215073	1611.36320994	80.00000000
5.14000000	19615.75582342	1588.87622146	1777.85780791	80.00000000
5.14500000	19641.18505023	1590.93598909	1618.78494552	80.00000000
5.15000000	19615.34495678	1588.84294132	1778.87474336	80.00000000
5.15500000	19640.24916809	1590.86018258	1630.72047401	80.00000000
5.16000000	19614.54206143	1588.77790672	1780.40732568	80.00000000
5.16500000	19638.98021441	1590.75739730	1647.45019713	80.00000000
5.17000000	19613.40206759	1588.68556766	1782.12350461	80.00000000
5.17500000	19637.36732694	1590.62675343	1668.59570002	80.00000000
5.18000000	19611.96502254	1588.56916650	1783.54553887	80.00000000
5.18500000	19635.34678945	1590.46308976	1690.08248626	80.00000000
5.19000000	19610.18716703	1588.42516056	1784.98116370	80.00000000
5.19500000	19632.96141210	1590.26987480	1712.66572122	80.00000000
5.20000000	19346.16611627	1567.03945499	1510.06026234	79.00000000
5.20500000	19616.07697524	1588.90223466	1757.13002075	79.00000000
5.21000000	19440.01502743	1574.64121681	1549.71523191	78.00000000
5.21500000	19638.67429455	1590.73261755	1739.43818682	78.00000000
5.22000000	19512.44742297	1580.50824174	1587.76635860	77.00000000
5.22500000	19646.29895298	1591.35021524	1736.36723488	77.00000000
5.23000000	19562.40401032	1584.55472477	1627.81462615	76.00000000
5.23500000	19646.54004286	1591.36974368	1738.67332230	76.00000000
5.24000000	19597.07044479	1587.36270605	1662.58535227	75.00000000
5.24500000	19643.56950086	1591.12912924	1741.37850692	75.00000000
5.25000000	19619.65567671	1589.19210977	1690.04322997	74.00000000
5.25500000	19638.24898264	1590.69816746	1742.44311622	74.00000000
5.26000000	19632.94105380	1590.26822544	1710.99578704	73.00000000
5.26500000	19467.62631669	1576.87773161	1551.39695199	72.00000000
5.27000000	19637.53664804	1590.64046867	1725.18602293	72.00000000
5.27500000	19545.06204109	1583.15002496	1617.18179232	71.00000000
5.28000000	19636.40416708	1590.54873761	1734.49440252	71.00000000
5.28500000	19591.04442689	1586.87459889	1663.63409562	70.00000000
5.29000000	19631.20606046	1590.12769095	1739.83606281	70.00000000
5.29500000	19615.64054420	1588.86688422	1695.99300933	69.00000000
5.30000000	19436.19384233	1574.33170100	1545.75895558	68.00000000
5.30500000	19625.17238869	1589.63896333	1717.56608745	68.00000000
5.31000000	19534.10697221	1582.26266476	1620.69843410	67.00000000
5.31500000	19624.24662787	1589.56397701	1730.52748057	67.00000000
5.32000000	19585.47536322	1586.42350424	1670.44747509	66.00000000
5.32500000	19617.49223901	1589.01687120	1737.50464962	66.00000000
5.33000000	19607.14005196	1588.17834434	1702.15517110	65.00000000
5.33500000	19488.61271593	1578.57763039	1602.81286487	64.00000000
5.34000000	19610.85421359	1588.47919097	1721.91869220	64.00000000
5.34500000	19558.92010671	1584.27252852	1662.66035508	63.00000000
5.35000000	19604.07336256	1587.92994261	1734.28980336	63.00000000
5.35500000	19587.35854694	1586.57604233	1699.88781008	62.00000000
5.36000000	19592.92667065	1587.02706063	1739.88737357	62.00000000
5.36500000	19592.54514629	1586.99615695	1721.33839077	61.00000000
5.37000000	19547.49871177	1583.34739594	1676.39191385	60.00000000
5.37500000	19586.00246572	1586.46620007	1733.02318909	60.00000000
5.38000000	19571.64515915	1585.30325773	1708.98098535	59.00000000
5.38500000	19574.13249348	1585.50473155	1738.90736345	59.00000000
5.39000000	19571.97064742	1585.32962206	1727.41207395	58.00000000
5.39500000	19544.40061389	1583.09644939	1704.78364666	57.00000000
5.40000000	19561.72618418	1584.49982091	1738.09404468	57.00000000
5.40500000	19551.93931318	1583.70708429	1729.17833326	56.00000000
5.41000000	19522.29079488	1581.30555418	1716.17447294	55.00000000
5.41500000	19542.96448418	1582.98012358	1744.79128862	55.00000000
5.42000000	19530.72271969	1581.98854033	1744.38816097	54.00000000
5.42500000	19527.39894980	1581.71931517	1758.44225803	54.00000000
5.43000000	19519.32767426	1581.06554206	1766.50635618	53.00000000
5.43500000	19510.56689330	1580.35591812	1779.33141211	52.00000000
5.44000000	19502.00940058	1579.66276149	1797.75454498	52.00000000
5.44500000	19490.15853258	1578.70284115	1820.24545149	51.00000000
5.45000000	19474.87538244	1577.46490569	1845.83873556	50.51687117
5.45500000	19456.61101963	1575.98549273	1874.35813216	50.00000000
5.46000000	19435.62977966	1574.28601199	1906.05346079	49.00000000
5.46500000	19411.89756371	1572.36370282	1941.39582482	49.00000000
5.47000000	19385.26241543	1570.20625588	1981.02944768	48.00000000
5.47500000	19355.01220793	1567.75598909	2025.49112975	47.00000000
5.48000000	19320.51645753	1564.96183350	2075.47491450	47.00000000
5.48500000	19281.33445585	1561.78809110	2131.63526057	46.00000000
5.49000000	19236.26166177	1558.13719474	2194.50939153	45.00000000
5.49500000	19184.60341918	1553.95287724	2264.67493675	45.00000000
5.50000000	19125.20664521	1549.14173823	2342.39023353	44.00000000
5.50500000	19055.95850352	1543.53263897	2427.41826956	43.17619494
5.51000000	18977.53463858	1537.18030534	2521.03574292	43.00000000
5.51500000	18888.01771806	1529.92943494	2622.36405056	42.00000000
5.52000000	18783.34792617	1521.45118215	2730.56023190	41.21782178
5.52500000	18666.65537744	1511.99908563	2846.18724320	41.00000000
5.53000000	18535.93780117	1501.41096187	2969.19651173	40.00000000
5.53500000	18386.33607191	1489.29322157	3096.72387578	39.03736264
5.54000000	18220.29646100	1475.84401307	3228.90618015	39.00000000
5.54500000	18028.84058986	1460.33608769	3361.88243367	38.00000000
5.55000000	17828.27740227	1444.09046931	3500.75858207	37.85876289
5.55500000	17602.10073137	1425.77015909	3637.90935267	37.00000000
5.56000000	17358.57538765	1406.04460642	3775.51204295	36.00000000
5.56500000	17093.39346287	1384.56487044	3909.67293793	35.37980769
5.57000000	16793.04465099	1360.23661694	4034.61271714	35.00000000
5.57500000	16499.45755154	1336.45606178	4164.49421308	34.00000000
5.58000000	16175.91849975	1310.24939860	4283.58676505	33.53398058
5.58500000	15821.29687471	1281.52504708	4389.37679760	33.00000000
5.59000000	15487.39075347	1254.47865117	4501.89312009	32.00000000
5.59500000	15071.49210782	1220.79086095	4577.23783605	31.31818182
5.60000000	14737.71725687	1193.75509758	4681.36328805	31.00000000
5.60500000	14329.25078170	1160.66931323	4749.75778073	30.00000000
5.61000000	13894.66247399	1125.46766062	4797.70056772	29.42565056
5.61500000	13548.29541625	1097.41192864	4877.56859066	29.00000000
5.62000000	13116.77839540	1062.45905025	4911.93154714	28.00000000
5.62500000	12632.60989468	1023.24140181	4910.68875215	27.05894309
5.63000000	12302.24039512	996.48147157	4970.55134364	27.00000000
5.63500000	11920.08520588	965.52690160	4998.32098552	26.00000000
5.64000000	11480.01461957	929.88118414	4987.27378968	25.15878788
5.64500000	11009.28223828	891.75186102	4947.59247214	25.00000000
5.65000000	10638.75601347	861.73923714	4945.91642423	24.00000000
5.65500000	10335.92847324	837.21020617	4971.07336039	23.00000000
5.66000000	9981.17105352	808.47485512	4959.73991245	23.00000000
5.66500000	9586.62360225	776.51651158	4915.72386310	22.00000000
5.67000000	9170.97969669	742.84935537	4847.44331752	21.00000000
5.67500000	8754.49362397	709.11398360	4765.22246872	21.00000000
5.68000000	8356.14920152	676.84808539	4680.01231813	20.00000000
5.68500000	8162.30436035	661.14665308	4708.35675665	19.06694344
5.69000000	7939.02580256	643.06109034	4712.69350347	19.00000000
5.69500000	7680.95196015	622.15710923	4688.15273991	18.00000000
5.70000000	7392.07380505	598.75797811	4635.66805296	17.00000000
5.70500000	7080.84519593	573.54846082	4559.50910327	16.98779281
5.71000000	6757.63572400	547.36849359	4464.15862987	16.00000000
5.71500000	6437.06459379	521.40223211	4360.35077958	15.00000000
5.72000000	6131.27637498	496.63338621	4256.10613901	14.44030147
5.72500000	5850.14093439	473.86141545	4159.39221990	14.00000000
5.73000000	5599.69178696	453.57503435	4075.95724664	13.00000000
5.73500000	5383.09974972	436.03107981	4009.52125032	12.36382598
5.74000000	5207.11086135	421.77597969	3967.92877386	12.00000000
5.74500000	5116.57413429	414.44250462	3988.71890109	11.00000000
5.75000000	5058.10302904	409.70634515	4033.29996227	10.00000000
5.75500000	4984.93990331	403.78013177	4064.35381332	9.96851504
5.76000000	4880.88778115	395.35191007	4067.25926988	9.00000000
5.76500000	4746.28092448	384.44875495	4040.97850366	8.00000000
5.77000000	4579.23754711	370.91824138	3981.75620786	7.19838199
5.77500000	4386.94260176	355.34235103	3894.38480391	6.44022504
5.78000000	4178.03759618	338.42104506	3785.65909666	6.00000000
5.78500000	3961.71082011	320.89857647	3662.44026617	5.00000000
5.79000000	3749.49478727	303.70907776	3535.58163747	4.16639610
5.79500000	3550.95975776	287.62774043	3414.43641185	3.94232750
5.80000000	3374.78227897	273.35736463	3307.98450747	3.00000000
5.80500000	3225.04587307	261.22871578	3221.80721114	2.00000000
5.81000000	3104.65677121	251.47719854	3160.12500517	1.43910406
5.81500000	3011.52880304	243.93383280	3122.55860698	1.00000000
5.82000000	0.00000000	0.00000000	0.00000000	0.00000000
5.82500000	0.00000000	0.00000000	0.00000000	0.00000000
5.83000000	0.00000000	0.00000000	0.00000000	0.00000000
5.83500000	0.00000000	0.00000000	0.00000000	0.00000000
5.84000000	0.00000000	0.00000000	0.00000000	0.00000000
5.84500000	0.00000000	0.00000000	0.00000000	0.00000000
5.85000000	0.00000000	0.00000000	0.00000000	0.00000000
5.85500000	0.00000000	0.00000000	0.00000000	0.00000000
5.86000000	0.00000000	0.00000000	0.00000000	0.00000000
5.86500000	0.00000000	0.00000000	0.00000000	0.00000000
5.87000000	0.00000000	0.00000000	0.00000000	0.00000000
5.87500000	0.00000000	0.00000000	0.00000000	0.00000000
5.88000000	0.00000000	0.00000000	0.00000000	0.00000000
5.88500000	0.00000000	0.00000000	0.00000000	0.00000000
5.89000000	0.00000000	0.00000000	0.00000000	0.00000000
5.89500000	0.00000000	0.00000000	0.00000000	0.00000000
5.90000000	0.00000000	0.00000000	0.00000000	0.00000000
5.90500000	0.00000000	0.00000000	0.00000000	0.00000000
5.91000000	0.00000000	0.00000000	0.00000000	0.00000000
5.91500000	0.00000000	0.00000000	0.00000000	0.00000000
5.92000000	0.00000000	0.00000000	0.00000000	0.00000000
5.92500000	0.00000000	0.00000000	0.00000000	0.00000000
5.93000000	0.00000000	0.00000000	0.00000000	0.00000000
5.93500000	0.00000000	0.00000000	0.00000000	0.00000000
5.94000000	0.00000000	0.00000000	0.00000000	0.00000000
5.94500000	0.00000000	0.00000000	0.00000000	0.00000000
5.95000000	0.00000000	0.00000000	0.00000000	0.00000000
5.95500000	0.00000000	0.00000000	0.00000000	0.00000000
5.96000000	0.00000000	0.00000000	0.00000000	0.00000000
5.96500000	0.00000000	0.00000000	0.00000000	0.00000000
5.97000000	0.00000000	0.00000000	0.00000000	0.00000000
5.97500000	0.00000000	0.00000000	0.00000000	0.00000000
5.98000000	0.00000000	0.00000000	0.00000000	0.00000000
5.98500000	0.00000000	0.00000000	0.00000000	0.00000000
5.99000000	0.00000000	0.00000000	0.00000000	0.00000000
5.99500000	0.00000000	0.00000000	0.00000000	0.00000000
6.00000000	0.00000000	0.00000000	0.00000000	0.00000000
6.00500000	0.00000000	0.00000000	0.00000000	0.00000000
6.01000000	0.00000000	0.00000000	0.00000000	0.00000000
6.01500000	0.00000000	0.00000000	0.00000000	0.00000000
6.02000000	0.00000000	0.00000000	0.00000000	0.00000000
6.02500000	0.00000000	0.00000000	0.00000000	0.00000000
6.03000000	0.00000000	0.00000000	0.00000000	0.00000000
6.03500000	0.00000000	0.00000000	0.00000000	0.00000000
6.04000000	0.00000000	0.00000000	0.00000000	0.00000000
6.04500000	0.00000000	0.00000000	0.00000000	0.00000000
6.05000000	0.00000000	0.00000000	0.00000000	0.00000000
6.05500000	0.00000000	0.00000000	0.00000000	0.00000000
6.06000000	0.00000000	0.00000000	0.00000000	0.00000000
6.06500000	0.00000000	0.00000000	0.00000000	0.00000000
6.07000000	0.00000000	0.00000000	0.00000000	0.00000000
6.07500000	0.00000000	0.00000000	0.00000000	0.00000000
6.08000000	0.00000000	0.00000000	0.00000000	0.00000000
6.08500000	0.00000000	0.00000000	0.00000000	0.00000000
6.09000000	0.00000000	0.00000000	0.00000000	0.00000000
6.09500000	0.00000000	0.00000000	0.00000000	0.00000000
6.10000000	0.00000000	0.00000000	0.00000000	0.00000000
6.10500000	0.00000000	0.00000000	0.00000000	0.00000000
6.11000000	0.00000000	0.00000000	0.00000000	0.00000000
6.11500000	0.00000000	0.00000000	0.00000000	0.00000000
6.12000000	0.00000000	0.00000000	0.00000000	0.00000000
6.12500000	0.00000000	0.00000000	0.00000000	0.00000000
6.13000000	0.00000000	0.00000000	0.00000000	0.00000000
6.13500000	0.00000000	0.00000000	0.00000000	0.00000000
6.14000000	0.00000000	0.00000000	0.00000000	0.00000000
6.14500000	0.00000000	0.00000000	0.00000000	0.00000000
6.15000000	0.00000000	0.00000000	0.00000000	0.00000000
6.15500000	0.00000000	0.00000000	0.00000000	0.00000000
6.16000000	0.00000000	0.00000000	0.00000000	0.00000000
6.16500000	0.00000000	0.00000000	0.00000000	0.00000000
6.17000000	0.00000000	0.00000000	0.00000000	0.00000000
6.17500000	0.00000000	0.00000000	0.00000000	0.00000000
6.18000000	0.00000000	0.00000000	0.00000000	0.00000000
6.18500000	0.00000000	0.00000000	0.00000000	0.00000000
6.19000000	0.00000000	0.00000000	0.00000000	0.00000000
6.19500000	0.00000000	0.00000000	0.00000000	0.00000000
6.20000000	0.00000000	0.00000000	0.00000000	0.00000000
6.20500000	0.00000000	0.00000000	0.00000000	0.00000000
6.21000000	0.00000000	0.00000000	0.00000000	0.00000000
6.21500000	0.00000000	0.00000000	0.00000000	0.00000000
6.22000000	0.00000000	0.00000000	0.00000000	0.00000000
6.22500000	0.00000000	0.00000000	0.00000000	0.00000000
6.23000000	0.00000000	0.00000000	0.00000000	0.00000000
6.23500000	0.00000000	0.00000000	0.00000000	0.00000000
6.24000000	0.00000000	0.00000000	0.00000000	0.00000000
6.24500000	0.00000000	0.00000000	0.00000000	0.00000000
6.25000000	0.00000000	0.00000000	0.00000000	0.00000000
6.25500000	0.00000000	0.00000000	0.00000000	0.00000000
6.26000000	0.00000000	0.00000000	0.00000000	0.00000000
6.26500000	0.00000000	0.00000000	0.00000000	0.00000000
6.27000000	0.00000000	0.00000000	0.00000000	0.00000000
6.27500000	0.00000000	0.00000000	0.00000000	0.00000000
6.28000000	0.00000000	0.00000000	0.00000000	0.00000000
6.28500000	0.00000000	0.00000000	0.00000000	0.00000000
6.29000000	0.00000000	0.00000000	0.00000000	0.00000000
6.29500000	0.00000000	0.00000000	0.00000000	0.00000000
6.30000000	0.00000000	0.00000000	0.00000000	0.00000000
6.30500000	0.00000000	0.00000000	0.00000000	0.00000000
6.31000000	0.00000000	0.00000000	0.00000000	0.00000000
6.31500000	0.00000000	0.00000000	0.00000000	0.00000000
6.32000000	0.00000000	0.00000000	0.00000000	0.00000000
6.32500000	0.00000000	0.00000000	0.00000000	0.00000000
6.33000000	0.00000000	0.00000000	0.00000000	0.00000000
6.33500000	0.00000000	0.00000000	0.00000000	0.00000000
6.34000000	0.00000000	0.00000000	0.00000000	0.00000000
6.34500000	0.00000000	0.00000000	0.00000000	0.00000000
6.35000000	0.00000000	0.00000000	0.00000000	0.00000000
6.35500000	0.00000000	0.00000000	0.00000000	0.00000000
6.36000000	0.00000000	0.00000000	0.00000000	0.00000000
6.36500000	0.00000000	0.00000000	0.00000000	0.00000000
6.37000000	0.00000000	0.00000000	0.00000000	0.00000000
6.37500000	0.00000000	0.00000000	0.00000000	0.00000000
6.38000000	0.00000000	0.00000000	0.00000000	0.00000000
6.38500000	0.00000000	0.00000000	0.00000000	0.00000000
6.39000000	0.00000000	0.00000000	0.00000000	0.00000000
6.39500000	0.00000000	0.00000000	0.00000000	0.00000000
6.40000000	0.00000000	0.00000000	0.00000000	0.00000000
6.40500000	0.00000000	0.00000000	0.00000000	0.00000000
6.41000000	0.00000000	0.00000000	0.00000000	0.00000000
6.41500000	0.00000000	0.00000000	0.00000000	0.00000000
6.42000000	0.00000000	0.00000000	0.00000000	0.00000000
6.42500000	0.00000000	0.00000000	0.00000000	0.00000000
6.43000000	0.00000000	0.00000000	0.00000000	0.00000000
6.43500000	0.00000000	0.00000000	0.00000000	0.00000000
6.44000000	0.00000000	0.00000000	0.00000000	0.00000000
6.44500000	0.00000000	0.00000000	0.00000000	0.00000000
6.45000000	0.00000000	0.00000000	0.00000000	0.00000000
6.45500000	0.00000000	0.00000000	0.00000000	0.00000000
6.46000000	0.00000000	0.00000000	0.00000000	0.00000000
6.46500000	0.00000000	0.00000000	0.00000000	0.00000000
6.47000000	0.00000000	0.00000000	0.00000000	0.00000000
6.47500000	0.00000000	0.00000000	0.00000000	0.00000000
6.48000000	0.00000000	0.00000000	0.00000000	0.00000000
6.48500000	0.00000000	0.00000000	0.00000000	0.00000000
6.49000000	0.00000000	0.00000000	0.00000000	0.00000000
6.49500000	0.00000000	0.00000000	0.00000000	0.00000000
6.50000000	0.00000000	0.00000000	0.00000000	0.00000000
6.50500000	0.00000000	0.00000000	0.00000000	0.00000000
6.51000000	0.00000000	0.00000000	0.00000000	0.00000000
6.51500000	0.00000000	0.00000000	0.00000000	0.00000000
6.52000000	0.00000000	0.00000000	0.00000000	0.00000000
6.52500000	0.00000000	0.00000000	0.00000000	0.00000000
6.53000000	0.00000000	0.00000000	0.00000000	0.00000000
6.53500000	0.00000000	0.00000000	0.00000000	0.00000000
6.54000000	0.00000000	0.00000000	0.00000000	0.00000000
6.54500000	0.00000000	0.00000000	0.00000000	0.00000000
6.55000000	0.00000000	0.00000000	0.00000000	0.00000000
6.55500000	0.00000000	0.00000000	0.00000000	0.00000000
6.56000000	0.00000000	0.00000000	0.00000000	0.00000000
6.56500000	0.00000000	0.00000000	0.00000000	0.00000000
6.57000000	0.00000000	0.00000000	0.00000000	0.00000000
6.57500000	0.00000000	0.00000000	0.00000000	0.00000000
6.58000000	0.00000000	0.00000000	0.00000000	0.00000000
6.58500000	0.00000000	0.00000000	0.00000000	0.00000000
6.59000000	0.00000000	0.00000000	0.00000000	0.00000000
6.59500000	0.00000000	0.00000000	0.00000000	0.00000000
6.60000000	0.00000000	0.00000000	0.00000000	0.00000000
6.60500000	0.00000000	0.00000000	0.00000000	0.00000000
6.61000000	0.00000000	0.00000000	0.00000000	0.00000000
6.61500000	0.00000000	0.00000000	0.00000000	0.00000000
6.62000000	0.00000000	0.00000000	0.00000000	0.00000000
6.62500000	0.00000000	0.00000000	0.00000000	0.00000000
6.63000000	0.00000000	0.00000000	0.00000000	0.00000000
6.63500000	0.00000000	0.00000000	0.00000000	0.00000000
6.64000000	0.00000000	0.00000000	0.00000000	0.00000000
6.64500000	0.00000000	0.00000000	0.00000000	0.00000000
6.65000000	0.00000000	0.00000000	0.00000000	0.00000000
6.65500000	0.00000000	0.00000000	0.00000000	0.00000000
6.66000000	0.00000000	0.00000000	0.00000000	0.00000000
6.66500000	0.00000000	0.00000000	0.00000000	0.00000000
6.67000000	0.00000000	0.00000000	0.00000000	0.00000000
6.67500000	0.00000000	0.00000000	0.00000000	0.00000000
6.68000000	0.00000000	0.00000000	0.00000000	0.00000000
6.68500000	0.00000000	0.00000000	0.00000000	0.00000000
6.69000000	0.00000000	0.00000000	0.00000000	0.00000000
6.69500000	0.00000000	0.00000000	0.00000000	0.00000000
6.70000000	0.00000000	0.00000000	0.00000000	0.00000000
6.70500000	0.00000000	0.00000000	0.00000000	0.00000000
6.71000000	0.00000000	0.00000000	0.00000000	0.00000000
6.71500000	0.00000000	0.00000000	0.00000000	0.00000000
6.72000000	0.00000000	0.00000000	0.00000000	0.00000000
6.72500000	0.00000000	0.00000000	0.00000000	0.00000000
6.73000000	0.00000000	0.00000000	0.00000000	0.00000000
6.73500000	0.00000000	0.00000000	0.00000000	0.00000000
6.74000000	0.00000000	0.00000000	0.00000000	0.00000000
6.74500000	0.00000000	0.00000000	0.00000000	0.00000000
6.75000000	0.00000000	0.00000000	0.00000000	0.00000000
6.75500000	0.00000000	0.00000000	0.00000000	0.00000000
6.76000000	0.00000000	0.00000000	0.00000000	0.00000000
6.76500000	0.00000000	0.00000000	0.00000000	0.00000000
6.77000000	0.00000000	0.00000000	0.00000000	0.00000000
6.77500000	0.00000000	0.00000000	0.00000000	0.00000000
6.78000000	0.00000000	0.00000000	0.00000000	0.00000000
6.78500000	0.00000000	0.00000000	0.00000000	0.00000000
6.79000000	0.00000000	0.00000000	0.00000000	0.00000000
6.79500000	0.00000000	0.00000000	0.00000000	0.00000000
6.80000000	0.00000000	0.00000000	0.00000000	0.00000000
6.80500000	0.00000000	0.00000000	0.00000000	0.00000000
6.81000000	0.00000000	0.00000000	0.00000000	0.00000000
6.81500000	0.00000000	0.00000000	0.00000000	0.00000000
6.82000000	0.00000000	0.00000000	0.00000000	0.00000000
6.82500000	0.00000000	0.00000000	0.00000000	0.00000000
6.83000000	0.00000000	0.00000000	0.00000000	0.00000000
6.83500000	0.00000000	0.00000000	0.00000000	0.00000000
6.84000000	0.00000000	0.00000000	0.00000000	0.00000000
6.84500000	0.00000000	0.00000000	0.00000000	0.00000000
6.85000000	0.00000000	0.00000000	0.00000000	0.00000000
6.85500000	0.00000000	0.00000000	0.00000000	0.00000000
6.86000000	0.00000000	0.00000000	0.00000000	0.00000000
6.86500000	0.00000000	0.00000000	0.00000000	0.00000000
6.87000000	0.00000000	0.00000000	0.00000000	0.00000000
6.87500000	0.00000000	0.00000000	0.00000000	0.00000000
6.88000000	0.00000000	0.00000000	0.00000000	0.00000000
6.88500000	0.00000000	0.00000000	0.00000000	0.00000000
6.89000000	0.00000000	0.00000000	0.00000000	0.00000000
6.89500000	0.00000000	0.00000000	0.00000000	0.00000000
6.90000000	0.00000000	0.00000000	0.00000000	0.00000000
6.90500000	0.00000000	0.00000000	0.00000000	0.00000000
6.91000000	0.00000000	0.00000000	0.00000000	0.00000000
6.91500000	0.00000000	0.00000000	0.00000000	0.00000000
6.92000000	0.00000000	0.00000000	0.00000000	0.00000000
6.92500000	0.00000000	0.00000000	0.00000000	0.00000000
6.93000000	0.00000000	0.00000000	0.00000000	0.00000000
6.93500000	0.00000000	0.00000000	0.00000000	0.00000000
6.94000000	0.00000000	0.00000000	0.00000000	0.00000000
6.94500000	0.00000000	0.00000000	0.00000000	0.00000000
6.95000000	0.00000000	0.00000000	0.00000000	0.00000000
6.95500000	0.00000000	0.00000000	0.00000000	0.00000000
6.96000000	0.00000000	0.00000000	0.00000000	0.00000000
6.96500000	0.00000000	0.00000000	0.00000000	0.00000000
6.97000000	0.00000000	0.00000000	0.00000000	0.00000000
6.97500000	0.00000000	0.00000000	0.00000000	0.00000000
6.98000000	0.00000000	0.00000000	0.00000000	0.00000000
6.98500000	0.00000000	0.00000000	0.00000000	0.00000000
6.99000000	0.00000000	0.00000000	0.00000000	0.00000000
6.99500000	0.00000000	0.00000000	0.00000000	0.00000000
7.00000000	0.00000000	0.00000000	0.00000000	0.00000000
7.00500000	0.00000000	0.00000000	0.00000000	0.00000000
7.01000000	0.00000000	0.00000000	0.00000000	0.00000000
7.01500000	0.00000000	0.00000000	0.00000000	0.00000000
7.02000000	0.00000000	0.00000000	0.00000000	0.00000000
7.02500000	0.00000000	0.00000000	0.00000000	0.00000000
7.03000000	0.00000000	0.00000000	0.00000000	0.00000000
7.03500000	0.00000000	0.00000000	0.00000000	0.00000000
7.04000000	0.00000000	0.00000000	0.00000000	0.00000000
7.04500000	0.00000000	0.00000000	0.00000000	0.00000000
7.05000000	0.00000000	0.00000000	0.00000000	0.00000000
7.05500000	0.00000000	0.00000000	0.00000000	0.00000000
7.06000000	0.00000000	0.00000000	0.00000000	0.00000000
7.06500000	0.00000000	0.00000000	0.00000000	0.00000000
7.07000000	0.00000000	0.00000000	0.00000000	0.00000000
7.07500000	0.00000000	0.00000000	0.00000000	0.00000000
7.08000000	0.00000000	0.00000000	0.00000000	0.00000000
7.08500000	0.00000000	0.00000000	0.00000000	0.00000000
7.09000000	0.00000000	0.00000000	0.00000000	0.00000000
7.09500000	0.00000000	0.00000000	0.00000000	0.00000000
7.10000000	0.00000000	0.00000000	0.00000000	0.00000000
7.10500000	0.00000000	0.00000000	0.00000000	0.00000000
7.11000000	0.00000000	0.00000000	0.00000000	0.00000000
7.11500000	0.00000000	0.00000000	0.00000000	0.00000000
7.12000000	0.00000000	0.00000000	0.00000000	0.00000000
7.12500000	0.00000000	0.00000000	0.00000000	0.00000000
7.13000000	0.00000000	0.00000000	0.00000000	0.00000000
7.13500000	0.00000000	0.00000000	0.00000000	0.00000000
7.14000000	0.00000000	0.00000000	0.00000000	0.00000000
7.14500000	0.00000000	0.00000000	0.00000000	0.00000000
7.15000000	0.00000000	0.00000000	0.00000000	0.00000000
7.15500000	0.00000000	0.00000000	0.00000000	0.00000000
7.16000000	0.00000000	0.00000000	0.00000000	0.00000000
7.16500000	0.00000000	0.00000000	0.00000000	0.00000000
7.17000000	0.00000000	0.00000000	0.00000000	0.00000000
7.17500000	0.00000000	0.00000000	0.00000000	0.00000000
7.18000000	0.00000000	0.00000000	0.00000000	0.00000000
7.18500000	0.00000000	0.00000000	0.00000000	0.00000000
7.19000000	0.00000000	0.00000000	0.00000000	0.00000000
7.19500000	0.00000000	0.00000000	0.00000000	0.00000000
7.20000000	0.00000000	0.00000000	0.00000000	0.00000000
7.20500000	0.00000000	0.00000000	0.00000000	0.00000000
7.21000000	0.00000000	0.00000000	0.00000000	0.00000000
7.21500000	0.00000000	0.00000000	0.00000000	0.00000000
7.22000000	0.00000000	0.00000000	0.00000000	0.00000000
7.22500000	0.00000000	0.00000000	0.00000000	0.00000000
7.23000000	0.00000000	0.00000000	0.00000000	0.00000000
7.23500000	0.00000000	0.00000000	0.00000000	0.00000000
7.24000000	0.00000000	0.00000000	0.00000000	0.00000000
7.24500000	0.00000000	0.00000000	0.00000000	0.00000000
7.25000000	0.00000000	0.00000000	0.00000000	0.00000000
7.25500000	0.00000000	0.00000000	0.00000000	0.00000000
7.26000000	0.00000000	0.00000000	0.00000000	0.00000000
7.26500000	0.00000000	0.00000000	0.00000000	0.00000000
7.27000000	0.00000000	0.00000000	0.00000000	0.00000000
7.27500000	0.00000000	0.00000000	0.00000000	0.00000000
7.28000000	0.00000000	0.00000000	0.00000000	0.00000000
7.28500000	0.00000000	0.00000000	0.00000000	0.00000000
7.29000000	0.00000000	0.00000000	0.00000000	0.00000000
7.29500000	0.00000000	0.00000000	0.00000000	0.00000000
7.30000000	0.00000000	0.00000000	0.00000000	0.00000000
7.30500000	0.00000000	0.00000000	0.00000000	0.00000000
7.31000000	0.00000000	0.00000000	0.00000000	0.00000000
7.31500000	0.00000000	0.00000000	0.00000000	0.00000000
7.32000000	0.00000000	0.00000000	0.00000000	0.00000000
7.32500000	0.00000000	0.00000000	0.00000000	0.00000000
7.33000000	0.00000000	0.00000000	0.00000000	0.00000000
7.33500000	0.00000000	0.00000000	0.00000000	0.00000000
7.34000000	0.00000000	0.00000000	0.00000000	0.00000000
7.34500000	0.00000000	0.00000000	0.00000000	0.00000000
7.35000000	0.00000000	0.00000000	0.00000000	0.00000000
7.35500000	0.00000000	0.00000000	0.00000000	0.00000000
7.36000000	0.00000000	0.00000000	0.00000000	0.00000000
7.36500000	0.00000000	0.00000000	0.00000000	0.00000000
7.37000000	0.00000000	0.00000000	0.00000000	0.00000000
7.37500000	0.00000000	0.00000000	0.00000000	0.00000000
7.38000000	0.00000000	0.00000000	0.00000000	0.00000000
7.38500000	0.00000000	0.00000000	0.00000000	0.00000000
7.39000000	0.00000000	0.00000000	0.00000000	0.00000000
7.39500000	0.00000000	0.00000000	0.00000000	0.00000000
7.40000000	0.00000000	0.00000000	0.00000000	0.00000000
7.40500000	0.00000000	0.00000000	0.00000000	0.00000000
7.41000000	0.00000000	0.00000000	0.00000000	0.00000000
7.41500000	0.00000000	0.00000000	0.00000000	0.00000000
7.42000000	0.00000000	0.00000000	0.00000000	0.00000000
7.42500000	0.00000000	0.00000000	0.00000000	0.00000000
7.43000000	0.00000000	0.00000000	0.00000000	0.00000000
7.43500000	0.00000000	0.00000000	0.00000000	0.00000000
7.44000000	0.00000000	0.00000000	0.00000000	0.00000000
7.44500000	0.00000000	0.00000000	0.00000000	0.00000000
7.45000000	0.00000000	0.00000000	0.00000000	0.00000000
7.45500000	0.00000000	0.00000000	0.00000000	0.00000000
7.46000000	0.00000000	0.00000000	0.00000000	0.00000000
7.46500000	0.00000000	0.00000000	0.00000000	0.00000000
7.47000000	0.00000000	0.00000000	0.00000000	0.00000000
7.47500000	0.00000000	0.00000000	0.00000000	0.00000000
7.48000000	0.00000000	0.00000000	0.00000000	0.00000000
7.48500000	0.00000000	0.00000000	0.00000000	0.00000000
7.49000000	0.00000000	0.00000000	0.00000000	0.00000000
7.49500000	0.00000000	0.00000000	0.00000000	0.00000000
7.50000000	0.00000000	0.00000000	0.00000000	0.00000000
7.50500000	0.00000000	0.00000000	0.00000000	0.00000000
7.51000000	0.00000000	0.00000000	0.00000000	0.00000000
7.51500000	0.00000000	0.00000000	0.00000000	0.00000000
7.52000000	0.00000000	0.00000000	0.00000000	0.00000000
7.52500000	0.00000000	0.00000000	0.00000000	0.00000000
7.53000000	0.00000000	0.00000000	0.00000000	0.00000000
7.53500000	0.00000000	0.00000000	0.00000000	0.00000000
7.54000000	0.00000000	0.00000000	0.00000000	0.00000000
7.54500000	0.00000000	0.00000000	0.00000000	0.00000000
7.55000000	0.00000000	0.00000000	0.00000000	0.00000000
7.55500000	0.00000000	0.00000000	0.00000000	0.00000000
7.56000000	0.00000000	0.00000000	0.00000000	0.00000000
7.56500000	0.00000000	0.00000000	0.00000000	0.00000000
7.57000000	0.00000000	0.00000000	0.00000000	0.00000000
7.57500000	0.00000000	0.00000000	0.00000000	0.00000000
7.58000000	0.00000000	0.00000000	0.00000000	0.00000000
7.58500000	0.00000000	0.00000000	0.00000000	0.00000000
7.59000000	0.00000000	0.00000000	0.00000000	0.00000000
7.59500000	0.00000000	0.00000000	0.00000000	0.00000000
7.60000000	0.00000000	0.00000000	0.00000000	0.00000000
7.60500000	0.00000000	0.00000000	0.00000000	0.00000000
7.61000000	0.00000000	0.00000000	0.00000000	0.00000000
7.61500000	0.00000000	0.00000000	0.00000000	0.00000000
7.62000000	0.00000000	0.00000000	0.00000000	0.00000000
7.62500000	0.00000000	0.00000000	0.00000000	0.00000000
7.63000000	0.00000000	0.00000000	0.00000000	0.00000000
7.63500000	0.00000000	0.00000000	0.00000000	0.00000000
7.64000000	0.00000000	0.00000000	0.00000000	0.00000000
7.64500000	0.00000000	0.00000000	0.00000000	0.00000000
7.65000000	0.00000000	0.00000000	0.00000000	0.00000000
7.65500000	0.00000000	0.00000000	0.00000000	0.00000000
7.66000000	0.00000000	0.00000000	0.00000000	0.00000000
7.66500000	0.00000000	0.00000000	0.00000000	0.00000000
7.67000000	0.00000000	0.00000000	0.00000000	0.00000000
7.67500000	0.00000000	0.00000000	0.00000000	0.00000000
7.68000000	0.00000000	0.00000000	0.00000000	0.00000000
7.68500000	0.00000000	0.00000000	0.00000000	0.00000000
7.69000000	0.00000000	0.00000000	0.00000000	0.00000000
7.69500000	0.00000000	0.00000000	0.00000000	0.00000000
7.70000000	0.00000000	0.00000000	0.00000000	0.00000000
7.70500000	0.00000000	0.00000000	0.00000000	0.00000000
7.71000000	0.00000000	0.00000000	0.00000000	0.00000000
7.71500000	0.00000000	0.00000000	0.00000000	0.00000000
7.72000000	0.00000000	0.00000000	0.00000000	0.00000000
7.72500000	0.00000000	0.00000000	0.00000000	0.00000000
7.73000000	0.00000000	0.00000000	0.00000000	0.00000000
7.73500000	0.00000000	0.00000000	0.00000000	0.00000000
7.74000000	0.00000000	0.00000000	0.00000000	0.00000000
7.74500000	0.00000000	0.00000000	0.00000000	0.00000000
7.75000000	0.00000000	0.00000000	0.00000000	0.00000000
7.75500000	0.00000000	0.00000000	0.00000000	0.00000000
7.76000000	0.00000000	0.00000000	0.00000000	0.00000000
7.76500000	0.00000000	0.00000000	0.00000000	0.00000000
7.77000000	0.00000000	0.00000000	0.00000000	0.00000000
7.77500000	0.00000000	0.00000000	0.00000000	0.00000000
7.78000000	0.00000000	0.00000000	0.00000000	0.00000000
7.78500000	0.00000000	0.00000000	0.00000000	0.00000000
7.79000000	0.00000000	0.00000000	0.00000000	0.00000000
7.79500000	0.00000000	0.00000000	0.00000000	0.00000000
7.80000000	0.00000000	0.00000000	0.00000000	0.00000000
7.80500000	0.00000000	0.00000000	0.00000000	0.00000000
7.81000000	0.00000000	0.00000000	0.00000000	0.00000000
7.81500000	0.00000000	0.00000000	0.00000000	0.00000000
7.82000000	0.00000000	0.00000000	0.00000000	0.00000000
7.82500000	0.00000000	0.00000000	0.00000000	0.00000000
7.83000000	0.00000000	0.00000000	0.00000000	0.00000000
7.83500000	0.00000000	0.00000000	0.00000000	0.00000000
7.84000000	0.00000000	0.00000000	0.00000000	0.00000000
7.84500000	0.00000000	0.00000000	0.00000000	0.00000000
7.85000000	0.00000000	0.00000000	0.00000000	0.00000000
7.85500000	0.00000000	0.00000000	0.00000000	0.00000000
7.86000000	0.00000000	0.00000000	0.00000000	0.00000000
7.86500000	0.00000000	0.00000000	0.00000000	0.00000000
7.87000000	0.00000000	0.00000000	0.00000000	0.00000000
7.87500000	0.00000000	0.00000000	0.00000000	0.00000000
7.88000000	0.00000000	0.00000000	0.00000000	0.00000000
7.88500000	0.00000000	0.00000000	0.00000000	0.00000000
7.89000000	0.00000000	0.00000000	0.00000000	0.00000000
7.89500000	0.00000000	0.00000000	0.00000000	0.00000000
7.90000000	0.00000000	0.00000000	0.00000000	0.00000000
7.90500000	0.00000000	0.00000000	0.00000000	0.00000000
7.91000000	0.00000000	0.00000000	0.00000000	0.00000000
7.91500000	0.00000000	0.00000000	0.00000000	0.00000000
7.92000000	0.00000000	0.00000000	0.00000000	0.00000000
7.92500000	0.00000000	0.00000000	0.00000000	0.00000000
7.93000000	0.00000000	0.00000000	0.00000000	0.00000000
7.93500000	0.00000000	0.00000000	0.00000000	0.00000000
7.94000000	0.00000000	0.00000000	0.00000000	0.00000000
7.94500000	0.00000000	0.00000000	0.00000000	0.00000000
7.95000000	0.00000000	0.00000000	0.00000000	0.00000000
7.95500000	0.00000000	0.00000000	0.00000000	0.00000000
7.96000000	0.00000000	0.00000000	0.00000000	0.00000000
7.96500000	0.00000000	0.00000000	0.00000000	0.00000000
7.97000000	0.00000000	0.00000000	0.00000000	0.00000000
7.97500000	0.00000000	0.00000000	0.00000000	0.00000000
7.98000000	0.00000000	0.00000000	0.00000000	0.00000000
7.98500000	0.00000000	0.00000000	0.00000000	0.00000000
7.99000000	0.00000000	0.00000000	0.00000000	0.00000000
7.99500000	0.00000000	0.00000000	0.00000000	0.00000000
8.00000000	0.00000000	0.00000000	0.00000000	0.00000000
8.00500000	0.00000000	0.00000000	0.00000000	0.00000000
8.01000000	0.00000000	0.00000000	0.00000000	0.00000000
8.01500000	0.00000000	0.00000000	0.00000000	0.00000000
8.02000000	0.00000000	0.00000000	0.00000000	0.00000000
8.02500000	0.00000000	0.00000000	0.00000000	0.00000000
8.03000000	0.00000000	0.00000000	0.00000000	0.00000000
8.03500000	0.00000000	0.00000000	0.00000000	0.00000000
8.04000000	0.00000000	0.00000000	0.00000000	0.00000000
8.04500000	0.00000000	0.00000000	0.00000000	0.00000000
8.05000000	0.00000000	0.00000000	0.00000000	0.00000000
8.05500000	0.00000000	0.00000000	0.00000000	0.00000000
8.06000000	0.00000000	0.00000000	0.00000000	0.00000000
8.06500000	0.00000000	0.00000000	0.00000000	0.00000000
8.07000000	0.00000000	0.00000000	0.00000000	0.00000000
8.07500000	0.00000000	0.00000000	0.00000000	0.00000000
8.08000000	0.00000000	0.00000000	0.00000000	0.00000000
8.08500000	0.00000000	0.00000000	0.00000000	0.00000000
8.09000000	0.00000000	0.00000000	0.00000000	0.00000000
8.09500000	0.00000000	0.00000000	0.00000000	0.00000000
8.10000000	0.00000000	0.00000000	0.00000000	0.00000000
8.10500000	0.00000000	0.00000000	0.00000000	0.00000000
8.11000000	0.00000000	0.00000000	0.00000000	0.00000000
8.11500000	0.00000000	0.00000000	0.00000000	0.00000000
8.12000000	0.00000000	0.00000000	0.00000000	0.00000000
8.12500000	0.00000000	0.00000000	0.00000000	0.00000000
8.13000000	0.00000000	0.00000000	0.00000000	0.00000000
8.13500000	0.00000000	0.00000000	0.00000000	0.00000000
8.14000000	0.00000000	0.00000000	0.00000000	0.00000000
8.14500000	0.00000000	0.00000000	0.00000000	0.00000000
8.15000000	0.00000000	0.00000000	0.00000000	0.00000000
8.15500000	0.00000000	0.00000000	0.00000000	0.00000000
8.16000000	0.00000000	0.00000000	0.00000000	0.00000000
8.16500000	0.00000000	0.00000000	0.00000000	0.00000000
8.17000000	0.00000000	0.00000000	0.00000000	0.00000000
8.17500000	0.00000000	0.00000000	0.00000000	0.00000000
8.18000000	0.00000000	0.00000000	0.00000000	0.00000000
8.18500000	0.00000000	0.00000000	0.00000000	0.00000000
8.19000000	0.00000000	0.00000000	0.00000000	0.00000000
8.19500000	0.00000000	0.00000000	0.00000000	0.00000000
8.20000000	0.00000000	0.00000000	0.00000000	0.00000000
8.20500000	0.00000000	0.00000000	0.00000000	0.00000000
8.21000000	0.00000000	0.00000000	0.00000000	0.00000000
8.21500000	0.00000000	0.00000000	0.00000000	0.00000000
8.22000000	0.00000000	0.00000000	0.00000000	0.00000000
8.22500000	0.00000000	0.00000000	0.00000000	0.00000000
8.23000000	0.00000000	0.00000000	0.00000000	0.00000000
8.23500000	0.00000000	0.00000000	0.00000000	0.00000000
8.24000000	0.00000000	0.00000000	0.00000000	0.00000000
8.24500000	0.00000000	0.00000000	0.00000000	0.00000000
8.25000000	0.00000000	0.00000000	0.00000000	0.00000000
8.25500000	0.00000000	0.00000000	0.00000000	0.00000000
8.26000000	0.00000000	0.00000000	0.00000000	0.00000000
8.26500000	0.00000000	0.00000000	0.00000000	0.00000000
8.27000000	0.00000000	0.00000000	0.00000000	0.00000000
8.27500000	0.00000000	0.00000000	0.00000000	0.00000000
8.28000000	0.00000000	0.00000000	0.00000000	0.00000000
8.28500000	0.00000000	0.00000000	0.00000000	0.00000000
8.29000000	0.00000000	0.00000000	0.00000000	0.00000000
8.29500000	0.00000000	0.00000000	0.00000000	0.00000000
8.30000000	0.00000000	0.00000000	0.00000000	0.00000000
8.30500000	0.00000000	0.00000000	0.00000000	0.00000000
8.31000000	0.00000000	0.00000000	0.00000000	0.00000000
8.31500000	0.00000000	0.00000000	0.00000000	0.00000000
8.32000000	0.00000000	0.00000000	0.00000000	0.00000000
8.32500000	0.00000000	0.00000000	0.00000000	0.00000000
8.33000000	0.00000000	0.00000000	0.00000000	0.00000000
8.33500000	0.00000000	0.00000000	0.00000000	0.00000000
8.34000000	0.00000000	0.00000000	0.00000000	0.00000000
8.34500000	0.00000000	0.00000000	0.00000000	0.00000000
8.35000000	0.00000000	0.00000000	0.00000000	0.00000000
8.35500000	0.00000000	0.00000000	0.00000000	0.00000000
8.36000000	0.00000000	0.00000000	0.00000000	0.00000000
8.36500000	0.00000000	0.00000000	0.00000000	0.00000000
8.37000000	0.00000000	0.00000000	0.00000000	0.00000000
8.37500000	0.00000000	0.00000000	0.00000000	0.00000000
8.38000000	0.00000000	0.00000000	0.00000000	0.00000000
8.38500000	0.00000000	0.00000000	0.00000000	0.00000000
8.39000000	0.00000000	0.00000000	0.00000000	0.00000000
8.39500000	0.00000000	0.00000000	0.00000000	0.00000000
8.40000000	0.00000000	0.00000000	0.00000000	0.00000000
8.40500000	0.00000000	0.00000000	0.00000000	0.00000000
8.41000000	0.00000000	0.00000000	0.00000000	0.00000000
8.41500000	0.00000000	0.00000000	0.00000000	0.00000000
8.42000000	0.00000000	0.00000000	0.00000000	0.00000000
8.42500000	0.00000000	0.00000000	0.00000000	0.00000000
8.43000000	0.00000000	0.00000000	0.00000000	0.00000000
8.43500000	0.00000000	0.00000000	0.00000000	0.00000000
8.44000000	0.00000000	0.00000000	0.00000000	0.00000000
8.44500000	0.00000000	0.00000000	0.00000000	0.00000000
8.45000000	0.00000000	0.00000000	0.00000000	0.00000000
8.45500000	0.00000000	0.00000000	0.00000000	0.00000000
8.46000000	0.00000000	0.00000000	0.00000000	0.00000000
8.46500000	0.00000000	0.00000000	0.00000000	0.00000000
8.47000000	0.00000000	0.00000000	0.00000000	0.00000000
8.47500000	0.00000000	0.00000000	0.00000000	0.00000000
8.48000000	0.00000000	0.00000000	0.00000000	0.00000000
8.48500000	0.00000000	0.00000000	0.00000000	0.00000000
8.49000000	0.00000000	0.00000000	0.00000000	0.00000000
8.49500000	0.00000000	0.00000000	0.00000000	0.00000000
8.50000000	0.00000000	0.00000000	0.00000000	0.00000000
8.50500000	0.00000000	0.00000000	0.00000000	0.00000000
8.51000000	0.00000000	0.00000000	0.00000000	0.00000000
8.51500000	0.00000000	0.00000000	0.00000000	0.00000000
8.52000000	0.00000000	0.00000000	0.00000000	0.00000000
8.52500000	0.00000000	0.00000000	0.00000000	0.00000000
8.53000000	0.00000000	0.00000000	0.00000000	0.00000000
8.53500000	0.00000000	0.00000000	0.00000000	0.00000000
8.54000000	0.00000000	0.00000000	0.00000000	0.00000000
8.54500000	0.00000000	0.00000000	0.00000000	0.00000000
8.55000000	0.00000000	0.00000000	0.00000000	0.00000000
8.55500000	0.00000000	0.00000000	0.00000000	0.00000000
8.56000000	0.00000000	0.00000000	0.00000000	0.00000000
8.56500000	0.00000000	0.00000000	0.00000000	0.00000000
8.57000000	0.00000000	0.00000000	0.00000000	0.00000000
8.57500000	0.00000000	0.00000000	0.00000000	0.00000000
8.58000000	0.00000000	0.00000000	0.00000000	0.00000000
8.58500000	0.00000000	0.00000000	0.00000000	0.00000000
8.59000000	0.00000000	0.00000000	0.00000000	0.00000000
8.59500000	0.00000000	0.00000000	0.00000000	0.00000000
8.60000000	0.00000000	0.00000000	0.00000000	0.00000000
8.60500000	0.00000000	0.00000000	0.00000000	0.00000000
8.61000000	0.00000000	0.00000000	0.00000000	0.00000000
8.61500000	0.00000000	0.00000000	0.00000000	0.00000000
8.62000000	0.00000000	0.00000000	0.00000000	0.00000000
8.62500000	0.00000000	0.00000000	0.00000000	0.00000000
8.63000000	0.00000000	0.00000000	0.00000000	0.00000000
8.63500000	0.00000000	0.00000000	0.00000000	0.00000000
8.64000000	0.00000000	0.00000000	0.00000000	0.00000000
8.64500000	0.00000000	0.00000000	0.00000000	0.00000000
8.65000000	0.00000000	0.00000000	0.00000000	0.00000000
8.65500000	0.00000000	0.00000000	0.00000000	0.00000000
8.66000000	0.00000000	0.00000000	0.00000000	0.00000000
8.66500000	0.00000000	0.00000000	0.00000000	0.00000000
8.67000000	0.00000000	0.00000000	0.00000000	0.00000000
8.67500000	0.00000000	0.00000000	0.00000000	0.00000000
8.68000000	0.00000000	0.00000000	0.00000000	0.00000000
8.68500000	0.00000000	0.00000000	0.00000000	0.00000000
8.69000000	0.00000000	0.00000000	0.00000000	0.00000000
8.69500000	0.00000000	0.00000000	0.00000000	0.00000000
8.70000000	0.00000000	0.00000000	0.00000000	0.00000000
8.70500000	0.00000000	0.00000000	0.00000000	0.00000000
8.71000000	0.00000000	0.00000000	0.00000000	0.00000000
8.71500000	0.00000000	0.00000000	0.00000000	0.00000000
8.72000000	0.00000000	0.00000000	0.00000000	0.00000000
8.72500000	0.00000000	0.00000000	0.00000000	0.00000000
8.73000000	0.00000000	0.00000000	0.00000000	0.00000000
8.73500000	0.00000000	0.00000000	0.00000000	0.00000000
8.74000000	0.00000000	0.00000000	0.00000000	0.00000000
8.74500000	0.00000000	0.00000000	0.00000000	0.00000000
8.75000000	0.00000000	0.00000000	0.00000000	0.00000000
8.75500000	0.00000000	0.00000000	0.00000000	0.00000000
8.76000000	0.00000000	0.00000000	0.00000000	0.00000000
8.76500000	0.00000000	0.00000000	0.00000000	0.00000000
8.77000000	0.00000000	0.00000000	0.00000000	0.00000000
8.77500000	0.00000000	0.00000000	0.00000000	0.00000000
8.78000000	0.00000000	0.00000000	0.00000000	0.00000000
8.78500000	0.00000000	0.00000000	0.00000000	0.00000000
8.79000000	0.00000000	0.00000000	0.00000000	0.00000000
8.79500000	0.00000000	0.00000000	0.00000000	0.00000000
8.80000000	0.00000000	0.00000000	0.00000000	0.00000000
8.80500000	0.00000000	0.00000000	0.00000000	0.00000000
8.81000000	0.00000000	0.00000000	0.00000000	0.00000000
8.81500000	0.00000000	0.00000000	0.00000000	0.00000000
8.82000000	0.00000000	0.00000000	0.00000000	0.00000000
8.82500000	0.00000000	0.00000000	0.00000000	0.00000000
8.83000000	0.00000000	0.00000000	0.00000000	0.00000000
8.83500000	0.00000000	0.00000000	0.00000000	0.00000000
8.84000000	0.00000000	0.00000000	0.00000000	0.00000000
8.84500000	0.00000000	0.00000000	0.00000000	0.00000000
8.85000000	0.00000000	0.00000000	0.00000000	0.00000000
8.85500000	0.00000000	0.00000000	0.00000000	0.00000000
8.86000000	0.00000000	0.00000000	0.00000000	0.00000000
8.86500000	0.00000000	0.00000000	0.00000000	0.00000000
8.87000000	0.00000000	0.00000000	0.00000000	0.00000000
8.87500000	0.00000000	0.00000000	0.00000000	0.00000000
8.88000000	0.00000000	0.00000000	0.00000000	0.00000000
8.88500000	0.00000000	0.00000000	0.00000000	0.00000000
8.89000000	0.00000000	0.00000000	0.00000000	0.00000000
8.89500000	0.00000000	0.00000000	0.00000000	0.00000000
8.90000000	0.00000000	0.00000000	0.00000000	0.00000000
8.90500000	0.00000000	0.00000000	0.00000000	0.00000000
8.91000000	0.00000000	0.00000000	0.00000000	0.00000000
8.91500000	0.00000000	0.00000000	0.00000000	0.00000000
8.92000000	0.00000000	0.00000000	0.00000000	0.00000000
8.92500000	0.00000000	0.00000000	0.00000000	0.00000000
8.93000000	0.00000000	0.00000000	0.00000000	0.00000000
8.93500000	0.00000000	0.00000000	0.00000000	0.00000000
8.94000000	0.00000000	0.00000000	0.00000000	0.00000000
8.94500000	0.00000000	0.00000000	0.00000000	0.00000000
8.95000000	0.00000000	0.00000000	0.00000000	0.00000000
8.95500000	0.00000000	0.00000000	0.00000000	0.00000000
8.96000000	0.00000000	0.00000000	0.00000000	0.00000000
8.96500000	0.00000000	0.00000000	0.00000000	0.00000000
8.97000000	0.00000000	0.00000000	0.00000000	0.00000000
8.97500000	0.00000000	0.00000000	0.00000000	0.00000000
8.98000000	0.00000000	0.00000000	0.00000000	0.00000000
8.98500000	0.00000000	0.00000000	0.00000000	0.00000000
8.99000000	0.00000000	0.00000000	0.00000000	0.00000000
8.99500000	0.00000000	0.00000000	0.00000000	0.00000000
9.00000000	0.00000000	0.00000000	0.00000000	0.00000000
9.00500000	0.00000000	0.00000000	0.00000000	0.00000000
9.01000000	0.00000000	0.00000000	0.00000000	0.00000000
9.01500000	0.00000000	0.00000000	0.00000000	0.00000000
9.02000000	0.00000000	0.00000000	0.00000000	0.00000000
9.02500000	0.00000000	0.00000000	0.00000000	0.00000000
9.03000000	0.00000000	0.00000000	0.00000000	0.00000000
9.03500000	0.00000000	0.00000000	0.00000000	0.00000000
9.04000000	0.00000000	0.00000000	0.00000000	0.00000000
9.04500000	0.00000000	0.00000000	0.00000000	0.00000000
9.05000000	0.00000000	0.00000000	0.00000000	0.00000000
9.05500000	0.00000000	0.00000000	0.00000000	0.00000000
9.06000000	0.00000000	0.00000000	0.00000000	0.00000000
9.06500000	0.00000000	0.00000000	0.00000000	0.00000000
9.07000000	0.00000000	0.00000000	0.00000000	0.00000000
9.07500000	0.00000000	0.00000000	0.00000000	0.00000000
9.08000000	0.00000000	0.00000000	0.00000000	0.00000000
9.08500000	0.00000000	0.00000000	0.00000000	0.00000000
9.09000000	0.00000000	0.00000000	0.00000000	0.00000000
9.09500000	0.00000000	0.00000000	0.00000000	0.00000000
9.10000000	0.00000000	0.00000000	0.00000000	0.00000000
9.10500000	0.00000000	0.00000000	0.00000000	0.00000000
9.11000000	0.00000000	0.00000000	0.00000000	0.00000000
9.11500000	0.00000000	0.00000000	0.00000000	0.00000000
9.12000000	0.00000000	0.00000000	0.00000000	0.00000000
9.12500000	0.00000000	0.00000000	0.00000000	0.00000000
9.13000000	0.00000000	0.00000000	0.00000000	0.00000000
9.13500000	0.00000000	0.00000000	0.00000000	0.00000000
9.14000000	0.00000000	0.00000000	0.00000000	0.00000000
9.14500000	0.00000000	0.00000000	0.00000000	0.00000000
9.15000000	0.00000000	0.00000000	0.00000000	0.00000000
9.15500000	0.00000000	0.00000000	0.00000000	0.00000000
9.16000000	0.00000000	0.00000000	0.00000000	0.00000000
9.16500000	0.00000000	0.00000000	0.00000000	0.00000000
9.17000000	0.00000000	0.00000000	0.00000000	0.00000000
9.17500000	0.00000000	0.00000000	0.00000000	0.00000000
9.18000000	0.00000000	0.00000000	0.00000000	0.00000000
9.18500000	0.00000000	0.00000000	0.00000000	0.00000000
9.19000000	0.00000000	0.00000000	0.00000000	0.00000000
9.19500000	0.00000000	0.00000000	0.00000000	0.00000000
9.20000000	0.00000000	0.00000000	0.00000000	0.00000000
9.20500000	0.00000000	0.00000000	0.00000000	0.00000000
9.21000000	0.00000000	0.00000000	0.00000000	0.00000000
9.21500000	0.00000000	0.00000000	0.00000000	0.00000000
9.22000000	0.00000000	0.00000000	0.00000000	0.00000000
9.22500000	0.00000000	0.00000000	0.00000000	0.00000000
9.23000000	0.00000000	0.00000000	0.00000000	0.00000000
9.23500000	0.00000000	0.00000000	0.00000000	0.00000000
9.24000000	0.00000000	0.00000000	0.00000000	0.00000000
9.24500000	0.00000000	0.00000000	0.00000000	0.00000000
9.25000000	0.00000000	0.00000000	0.00000000	0.00000000
9.25500000	0.00000000	0.00000000	0.00000000	0.00000000
9.26000000	0.00000000	0.00000000	0.00000000	0.00000000
9.26500000	0.00000000	0.00000000	0.00000000	0.00000000
9.27000000	0.00000000	0.00000000	0.00000000	0.00000000
9.27500000	0.00000000	0.00000000	0.00000000	0.00000000
9.28000000	0.00000000	0.00000000	0.00000000	0.00000000
9.28500000	0.00000000	0.00000000	0.00000000	0.00000000
9.29000000	0.00000000	0.00000000	0.00000000	0.00000000
9.29500000	0.00000000	0.00000000	0.00000000	0.00000000
9.30000000	0.00000000	0.00000000	0.00000000	0.00000000
9.30500000	0.00000000	0.00000000	0.00000000	0.00000000
9.31000000	0.00000000	0.00000000	0.00000000	0.00000000
9.31500000	0.00000000	0.00000000	0.00000000	0.00000000
9.32000000	0.00000000	0.00000000	0.00000000	0.00000000
9.32500000	0.00000000	0.00000000	0.00000000	0.00000000
9.33000000	0.00000000	0.00000000	0.00000000	0.00000000
9.33500000	0.00000000	0.00000000	0.00000000	0.00000000
9.34000000	0.00000000	0.00000000	0.00000000	0.00000000
9.34500000	0.00000000	0.00000000	0.00000000	0.00000000
9.35000000	0.00000000	0.00000000	0.00000000	0.00000000
9.35500000	0.00000000	0.00000000	0.00000000	0.00000000
9.36000000	0.00000000	0.00000000	0.00000000	0.00000000
9.36500000	0.00000000	0.00000000	0.00000000	0.00000000
9.37000000	0.00000000	0.00000000	0.00000000	0.00000000
9.37500000	0.00000000	0.00000000	0.00000000	0.00000000
9.38000000	0.00000000	0.00000000	0.00000000	0.00000000
9.38500000	0.00000000	0.00000000	0.00000000	0.00000000
9.39000000	0.00000000	0.00000000	0.00000000	0.00000000
9.39500000	0.00000000	0.00000000	0.00000000	0.00000000
9.40000000	0.00000000	0.00000000	0.00000000	0.00000000
9.40500000	0.00000000	0.00000000	0.00000000	0.00000000
9.41000000	0.00000000	0.00000000	0.00000000	0.00000000
9.41500000	0.00000000	0.00000000	0.00000000	0.00000000
9.42000000	0.00000000	0.00000000	0.00000000	0.00000000
9.42500000	0.00000000	0.00000000	0.00000000	0.00000000
9.43000000	0.00000000	0.00000000	0.00000000	0.00000000
9.43500000	0.00000000	0.00000000	0.00000000	0.00000000
9.44000000	0.00000000	0.00000000	0.00000000	0.00000000
9.44500000	0.00000000	0.00000000	0.00000000	0.00000000
9.45000000	0.00000000	0.00000000	0.00000000	0.00000000
9.45500000	0.00000000	0.00000000	0.00000000	0.00000000
9.46000000	0.00000000	0.00000000	0.00000000	0.00000000
9.46500000	0.00000000	0.00000000	0.00000000	0.00000000
9.47000000	0.00000000	0.00000000	0.00000000	0.00000000
9.47500000	0.00000000	0.00000000	0.00000000	0.00000000
9.48000000	0.00000000	0.00000000	0.00000000	0.00000000
9.48500000	0.00000000	0.00000000	0.00000000	0.00000000
9.49000000	0.00000000	0.00000000	0.00000000	0.00000000
9.49500000	0.00000000	0.00000000	0.00000000	0.00000000
9.50000000	0.00000000	0.00000000	0.00000000	0.00000000
9.50500000	0.00000000	0.00000000	0.00000000	0.00000000
9.51000000	0.00000000	0.00000000	0.00000000	0.00000000
9.51500000	0.00000000	0.00000000	0.00000000	0.00000000
9.52000000	0.00000000	0.00000000	0.00000000	0.00000000
9.52500000	0.00000000	0.00000000	0.00000000	0.00000000
9.53000000	0.00000000	0.00000000	0.00000000	0.00000000
9.53500000	0.00000000	0.00000000	0.00000000	0.00000000
9.54000000	0.00000000	0.00000000	0.00000000	0.00000000
9.54500000	0.00000000	0.00000000	0.00000000	0.00000000
9.55000000	0.00000000	0.00000000	0.00000000	0.00000000
9.55500000	0.00000000	0.00000000	0.00000000	0.00000000
9.56000000	0.00000000	0.00000000	0.00000000	0.00000000
9.56500000	0.00000000	0.00000000	0.00000000	0.00000000
9.57000000	0.00000000	0.00000000	0.00000000	0.00000000
9.57500000	0.00000000	0.00000000	0.00000000	0.00000000
9.58000000	0.00000000	0.00000000	0.00000000	0.00000000
9.58500000	0.00000000	0.00000000	0.00000000	0.00000000
9.59000000	0.00000000	0.00000000	0.00000000	0.00000000
9.59500000	0.00000000	0.00000000	0.00000000	0.00000000
9.60000000	0.00000000	0.00000000	0.00000000	0.00000000
9.60500000	0.00000000	0.00000000	0.00000000	0.00000000
9.61000000	0.00000000	0.00000000	0.00000000	0.00000000
9.61500000	0.00000000	0.00000000	0.00000000	0.00000000
9.62000000	0.00000000	0.00000000	0.00000000	0.00000000
9.62500000	0.00000000	0.00000000	0.00000000	0.00000000
9.63000000	0.00000000	0.00000000	0.00000000	0.00000000
9.63500000	0.00000000	0.00000000	0.00000000	0.00000000
9.64000000	0.00000000	0.00000000	0.00000000	0.00000000
9.64500000	0.00000000	0.00000000	0.00000000	0.00000000
9.65000000	0.00000000	0.00000000	0.00000000	0.00000000
9.65500000	0.00000000	0.00000000	0.00000000	0.00000000
9.66000000	0.00000000	0.00000000	0.00000000	0.00000000
9.66500000	0.00000000	0.00000000	0.00000000	0.00000000
9.67000000	0.00000000	0.00000000	0.00000000	0.00000000
9.67500000	0.00000000	0.00000000	0.00000000	0.00000000
9.68000000	0.00000000	0.00000000	0.00000000	0.00000000
9.68500000	0.00000000	0.00000000	0.00000000	0.00000000
9.69000000	0.00000000	0.00000000	0.00000000	0.00000000
9.69500000	0.00000000	0.00000000	0.00000000	0.00000000
9.70000000	0.00000000	0.00000000	0.00000000	0.00000000
9.70500000	0.00000000	0.00000000	0.00000000	0.00000000
9.71000000	0.00000000	0.00000000	0.00000000	0.00000000
9.71500000	0.00000000	0.00000000	0.00000000	0.00000000
9.72000000	0.00000000	0.00000000	0.00000000	0.00000000
9.72500000	0.00000000	0.00000000	0.00000000	0.00000000
9.73000000	0.00000000	0.00000000	0.00000000	0.00000000
9.73500000	0.00000000	0.00000000	0.00000000	0.00000000
9.74000000	0.00000000	0.00000000	0.00000000	0.00000000
9.74500000	0.00000000	0.00000000	0.00000000	0.00000000
9.75000000	0.00000000	0.00000000	0.00000000	0.00000000
9.75500000	0.00000000	0.00000000	0.00000000	0.00000000
9.76000000	0.00000000	0.00000000	0.00000000	0.00000000
9.76500000	0.00000000	0.00000000	0.00000000	0.00000000
9.77000000	0.00000000	0.00000000	0.00000000	0.00000000
9.77500000	0.00000000	0.00000000	0.00000000	0.00000000
9.78000000	0.00000000	0.00000000	0.00000000	0.00000000
9.78500000	0.00000000	0.00000000	0.00000000	0.00000000
9.79000000	0.00000000	0.00000000	0.00000000	0.00000000
9.79500000	0.00000000	0.00000000	0.00000000	0.00000000
9.80000000	0.00000000	0.00000000	0.00000000	0.00000000
9.80500000	0.00000000	0.00000000	0.00000000	0.00000000
9.81000000	0.00000000	0.00000000	0.00000000	0.00000000
9.81500000	0.00000000	0.00000000	0.00000000	0.00000000
9.82000000	0.00000000	0.00000000	0.00000000	0.00000000
9.82500000	0.00000000	0.00000000	0.00000000	0.00000000
9.83000000	0.00000000	0.00000000	0.00000000	0.00000000
9.83500000	0.00000000	0.00000000	0.00000000	0.00000000
9.84000000	0.00000000	0.00000000	0.00000000	0.00000000
9.84500000	0.00000000	0.00000000	0.00000000	0.00000000
9.85000000	0.00000000	0.00000000	0.00000000	0.00000000
9.85500000	0.00000000	0.00000000	0.00000000	0.00000000
9.86000000	0.00000000	0.00000000	0.00000000	0.00000000
9.86500000	0.00000000	0.00000000	0.00000000	0.00000000
9.87000000	0.00000000	0.00000000	0.00000000	0.00000000
9.87500000	0.00000000	0.00000000	0.00000000	0.00000000
9.88000000	0.00000000	0.00000000	0.00000000	0.00000000
9.88500000	0.00000000	0.00000000	0.00000000	0.00000000
9.89000000	0.00000000	0.00000000	0.00000000	0.00000000
9.89500000	0.00000000	0.00000000	0.00000000	0.00000000
9.90000000	0.00000000	0.00000000	0.00000000	0.00000000
9.90500000	0.00000000	0.00000000	0.00000000	0.00000000
9.91000000	0.00000000	0.00000000	0.00000000	0.00000000
9.91500000	0.00000000	0.00000000	0.00000000	0.00000000
9.92000000	0.00000000	0.00000000	0.00000000	0.00000000
9.92500000	0.00000000	0.00000000	0.00000000	0.00000000
9.93000000	0.00000000	0.00000000	0.00000000	0.00000000
9.93500000	0.00000000	0.00000000	0.00000000	0.00000000
9.94000000	0.00000000	0.00000000	0.00000000	0.00000000
9.94500000	0.00000000	0.00000000	0.00000000	0.00000000
9.95000000	0.00000000	0.00000000	0.00000000	0.00000000
9.95500000	0.00000000	0.00000000	0.00000000	0.00000000
9.96000000	0.00000000	0.00000000	0.00000000	0.00000000
9.96500000	0.00000000	0.00000000	0.00000000	0.00000000
9.97000000	0.00000000	0.00000000	0.00000000	0.00000000
9.97500000	0.00000000	0.00000000	0.00000000	0.00000000
9.98000000	0.00000000	0.00000000	0.00000000	0.00000000
9.98500000	0.00000000	0.00000000	0.00000000	0.00000000
9.99000000	0.00000000	0.00000000	0.00000000	0.00000000
[truncated: 998 more rows]
