# Supplementary material for: An Efficient Contact Model for the Simulation of Cargo Airdrop Extraction Phase
Source: Hindawi journal article supplement (doi:10.1155/2018/9895451), 2018-10-17
Supplement: f1 [file 9895451.f1.zip › case2_ramp_drop/extrcn_force.csv]

t(s)	fx(N)
0.00000000	0.00000000
0.00500000	0.00000000
0.01000000	0.00000000
0.01500000	0.00000000
0.02000000	0.00000000
0.02500000	0.00000000
0.03000000	0.00000000
0.03500000	0.00000000
0.04000000	0.00000000
0.04500000	0.00000000
0.05000000	0.00000000
0.05500000	0.00000000
0.06000000	0.00000000
0.06500000	0.00000000
0.07000000	0.00000000
0.07500000	0.00000000
0.08000000	0.00000000
0.08500000	0.00000000
0.09000000	0.00000000
0.09500000	0.00000000
0.10000000	0.00000000
0.10500000	0.00000000
0.11000000	0.00000000
0.11500000	0.00000000
0.12000000	0.00000000
0.12500000	0.00000000
0.13000000	0.00000000
0.13500000	0.00000000
0.14000000	0.00000000
0.14500000	0.00000000
0.15000000	0.00000000
0.15500000	0.00000000
0.16000000	0.00000000
0.16500000	0.00000000
0.17000000	0.00000000
0.17500000	0.00000000
0.18000000	0.00000000
0.18500000	0.00000000
0.19000000	0.00000000
0.19500000	0.00000000
0.20000000	0.00000000
0.20500000	0.00000000
0.21000000	0.00000000
0.21500000	0.00000000
0.22000000	0.00000000
0.22500000	0.00000000
0.23000000	0.00000000
0.23500000	0.00000000
0.24000000	0.00000000
0.24500000	0.00000000
0.25000000	0.00000000
0.25500000	0.00000000
0.26000000	0.00000000
0.26500000	0.00000000
0.27000000	0.00000000
0.27500000	0.00000000
0.28000000	0.00000000
0.28500000	0.00000000
0.29000000	0.00000000
0.29500000	0.00000000
0.30000000	0.00000000
0.30500000	0.00000000
0.31000000	0.00000000
0.31500000	0.00000000
0.32000000	0.00000000
0.32500000	0.00000000
0.33000000	0.00000000
0.33500000	0.00000000
0.34000000	0.00000000
0.34500000	0.00000000
0.35000000	0.00000000
0.35500000	0.00000000
0.36000000	0.00000000
0.36500000	0.00000000
0.37000000	0.00000000
0.37500000	0.00000000
0.38000000	0.00000000
0.38500000	0.00000000
0.39000000	0.00000000
0.39500000	0.00000000
0.40000000	0.00000000
0.40500000	0.00000000
0.41000000	0.00000000
0.41500000	0.00000000
0.42000000	0.00000000
0.42500000	0.00000000
0.43000000	0.00000000
0.43500000	0.00000000
0.44000000	0.00000000
0.44500000	0.00000000
0.45000000	0.00000000
0.45500000	0.00000000
0.46000000	0.00000000
0.46500000	0.00000000
0.47000000	0.00000000
0.47500000	0.00000000
0.48000000	0.00000000
0.48500000	0.00000000
0.49000000	0.00000000
0.49500000	0.00000000
0.50000000	0.00000000
0.50500000	0.00000000
0.51000000	0.00000000
0.51500000	0.00000000
0.52000000	0.00000000
0.52500000	0.00000000
0.53000000	0.00000000
0.53500000	0.00000000
0.54000000	0.00000000
0.54500000	0.00000000
0.55000000	0.00000000
0.55500000	0.00000000
0.56000000	0.00000000
0.56500000	0.00000000
0.57000000	0.00000000
0.57500000	0.00000000
0.58000000	0.00000000
0.58500000	0.00000000
0.59000000	0.00000000
0.59500000	0.00000000
0.60000000	0.00000000
0.60500000	0.00000000
0.61000000	0.00000000
0.61500000	0.00000000
0.62000000	0.00000000
0.62500000	0.00000000
0.63000000	0.00000000
0.63500000	0.00000000
0.64000000	0.00000000
0.64500000	0.00000000
0.65000000	0.00000000
0.65500000	0.00000000
0.66000000	0.00000000
0.66500000	0.00000000
0.67000000	0.00000000
0.67500000	0.00000000
0.68000000	0.00000000
0.68500000	0.00000000
0.69000000	0.00000000
0.69500000	0.00000000
0.70000000	0.00000000
0.70500000	0.00000000
0.71000000	0.00000000
0.71500000	0.00000000
0.72000000	0.00000000
0.72500000	0.00000000
0.73000000	0.00000000
0.73500000	0.00000000
0.74000000	0.00000000
0.74500000	0.00000000
0.75000000	0.00000000
0.75500000	0.00000000
0.76000000	0.00000000
0.76500000	0.00000000
0.77000000	0.00000000
0.77500000	0.00000000
0.78000000	0.00000000
0.78500000	0.00000000
0.79000000	0.00000000
0.79500000	0.00000000
0.80000000	0.00000000
0.80500000	0.00000000
0.81000000	0.00000000
0.81500000	0.00000000
0.82000000	0.00000000
0.82500000	0.00000000
0.83000000	0.00000000
0.83500000	0.00000000
0.84000000	0.00000000
0.84500000	0.00000000
0.85000000	0.00000000
0.85500000	0.00000000
0.86000000	0.00000000
0.86500000	0.00000000
0.87000000	0.00000000
0.87500000	0.00000000
0.88000000	0.00000000
0.88500000	0.00000000
0.89000000	0.00000000
0.89500000	0.00000000
0.90000000	0.00000000
0.90500000	0.00000000
0.91000000	0.00000000
0.91500000	0.00000000
0.92000000	0.00000000
0.92500000	0.00000000
0.93000000	0.00000000
0.93500000	0.00000000
0.94000000	0.00000000
0.94500000	0.00000000
0.95000000	0.00000000
0.95500000	0.00000000
0.96000000	0.00000000
0.96500000	0.00000000
0.97000000	0.00000000
0.97500000	0.00000000
0.98000000	0.00000000
0.98500000	0.00000000
0.99000000	0.00000000
0.99500000	0.00000000
1.00000000	0.00000000
1.00500000	0.00000000
1.01000000	0.00000000
1.01500000	0.00000000
1.02000000	0.00000000
1.02500000	0.00000000
1.03000000	0.00000000
1.03500000	0.00000000
1.04000000	0.00000000
1.04500000	0.00000000
1.05000000	0.00000000
1.05500000	0.00000000
1.06000000	0.00000000
1.06500000	0.00000000
1.07000000	0.00000000
1.07500000	0.00000000
1.08000000	0.00000000
1.08500000	0.00000000
1.09000000	0.00000000
1.09500000	0.00000000
1.10000000	0.00000000
1.10500000	0.00000000
1.11000000	0.00000000
1.11500000	0.00000000
1.12000000	0.00000000
1.12500000	0.00000000
1.13000000	0.00000000
1.13500000	0.00000000
1.14000000	0.00000000
1.14500000	0.00000000
1.15000000	0.00000000
1.15500000	0.00000000
1.16000000	0.00000000
1.16500000	0.00000000
1.17000000	0.00000000
1.17500000	0.00000000
1.18000000	0.00000000
1.18500000	0.00000000
1.19000000	0.00000000
1.19500000	0.00000000
1.20000000	0.00000000
1.20500000	0.00000000
1.21000000	0.00000000
1.21500000	0.00000000
1.22000000	0.00000000
1.22500000	0.00000000
1.23000000	0.00000000
1.23500000	0.00000000
1.24000000	0.00000000
1.24500000	0.00000000
1.25000000	0.00000000
1.25500000	0.00000000
1.26000000	0.00000000
1.26500000	0.00000000
1.27000000	0.00000000
1.27500000	0.00000000
1.28000000	0.00000000
1.28500000	0.00000000
1.29000000	0.00000000
1.29500000	0.00000000
1.30000000	0.00000000
1.30500000	0.00000000
1.31000000	0.00000000
1.31500000	0.00000000
1.32000000	0.00000000
1.32500000	0.00000000
1.33000000	0.00000000
1.33500000	0.00000000
1.34000000	0.00000000
1.34500000	0.00000000
1.35000000	0.00000000
1.35500000	0.00000000
1.36000000	0.00000000
1.36500000	0.00000000
1.37000000	0.00000000
1.37500000	0.00000000
1.38000000	0.00000000
1.38500000	0.00000000
1.39000000	0.00000000
1.39500000	0.00000000
1.40000000	0.00000000
1.40500000	0.00000000
1.41000000	0.00000000
1.41500000	0.00000000
1.42000000	0.00000000
1.42500000	0.00000000
1.43000000	0.00000000
1.43500000	0.00000000
1.44000000	0.00000000
1.44500000	0.00000000
1.45000000	0.00000000
1.45500000	0.00000000
1.46000000	0.00000000
1.46500000	0.00000000
1.47000000	0.00000000
1.47500000	0.00000000
1.48000000	0.00000000
1.48500000	0.00000000
1.49000000	0.00000000
1.49500000	0.00000000
1.50000000	0.00000000
1.50500000	0.00000000
1.51000000	0.00000000
1.51500000	0.00000000
1.52000000	0.00000000
1.52500000	0.00000000
1.53000000	0.00000000
1.53500000	0.00000000
1.54000000	0.00000000
1.54500000	0.00000000
1.55000000	0.00000000
1.55500000	0.00000000
1.56000000	0.00000000
1.56500000	0.00000000
1.57000000	0.00000000
1.57500000	0.00000000
1.58000000	0.00000000
1.58500000	0.00000000
1.59000000	0.00000000
1.59500000	0.00000000
1.60000000	0.00000000
1.60500000	0.00000000
1.61000000	0.00000000
1.61500000	0.00000000
1.62000000	0.00000000
1.62500000	0.00000000
1.63000000	0.00000000
1.63500000	0.00000000
1.64000000	0.00000000
1.64500000	0.00000000
1.65000000	0.00000000
1.65500000	0.00000000
1.66000000	0.00000000
1.66500000	0.00000000
1.67000000	0.00000000
1.67500000	0.00000000
1.68000000	0.00000000
1.68500000	0.00000000
1.69000000	0.00000000
1.69500000	0.00000000
1.70000000	0.00000000
1.70500000	0.00000000
1.71000000	0.00000000
1.71500000	0.00000000
1.72000000	0.00000000
1.72500000	0.00000000
1.73000000	0.00000000
1.73500000	0.00000000
1.74000000	0.00000000
1.74500000	0.00000000
1.75000000	0.00000000
1.75500000	0.00000000
1.76000000	0.00000000
1.76500000	0.00000000
1.77000000	0.00000000
1.77500000	0.00000000
1.78000000	0.00000000
1.78500000	0.00000000
1.79000000	0.00000000
1.79500000	0.00000000
1.80000000	0.00000000
1.80500000	0.00000000
1.81000000	0.00000000
1.81500000	0.00000000
1.82000000	0.00000000
1.82500000	0.00000000
1.83000000	0.00000000
1.83500000	0.00000000
1.84000000	0.00000000
1.84500000	0.00000000
1.85000000	0.00000000
1.85500000	0.00000000
1.86000000	0.00000000
1.86500000	0.00000000
1.87000000	0.00000000
1.87500000	0.00000000
1.88000000	0.00000000
1.88500000	0.00000000
1.89000000	0.00000000
1.89500000	0.00000000
1.90000000	0.00000000
1.90500000	0.00000000
1.91000000	0.00000000
1.91500000	0.00000000
1.92000000	0.00000000
1.92500000	0.00000000
1.93000000	0.00000000
1.93500000	0.00000000
1.94000000	0.00000000
1.94500000	0.00000000
1.95000000	0.00000000
1.95500000	0.00000000
1.96000000	0.00000000
1.96500000	0.00000000
1.97000000	0.00000000
1.97500000	0.00000000
1.98000000	0.00000000
1.98500000	0.00000000
1.99000000	0.00000000
1.99500000	0.00000000
2.00000000	0.00000000
2.00500000	8.33333333
2.01000000	16.66666667
2.01500000	25.00000000
2.02000000	33.33333333
2.02500000	41.66666667
2.03000000	50.00000000
2.03500000	58.33333333
2.04000000	66.66666667
2.04500000	75.00000000
2.05000000	83.33333333
2.05500000	91.66666667
2.06000000	100.00000000
2.06500000	108.33333333
2.07000000	116.66666667
2.07500000	125.00000000
2.08000000	133.33333333
2.08500000	141.66666667
2.09000000	150.00000000
2.09500000	158.33333333
2.10000000	166.66666667
2.10500000	175.00000000
2.11000000	183.33333333
2.11500000	191.66666667
2.12000000	200.00000000
2.12500000	208.33333333
2.13000000	216.66666667
2.13500000	225.00000000
2.14000000	233.33333333
2.14500000	241.66666667
2.15000000	250.00000000
2.15500000	258.33333333
2.16000000	266.66666667
2.16500000	275.00000000
2.17000000	283.33333333
2.17500000	291.66666667
2.18000000	300.00000000
2.18500000	308.33333333
2.19000000	316.66666667
2.19500000	325.00000000
2.20000000	333.33333333
2.20500000	341.66666667
2.21000000	350.00000000
2.21500000	358.33333333
2.22000000	366.66666667
2.22500000	375.00000000
2.23000000	383.33333333
2.23500000	391.66666667
2.24000000	400.00000000
2.24500000	408.33333333
2.25000000	416.66666667
2.25500000	425.00000000
2.26000000	433.33333333
2.26500000	441.66666667
2.27000000	450.00000000
2.27500000	458.33333333
2.28000000	466.66666667
2.28500000	475.00000000
2.29000000	483.33333333
2.29500000	491.66666667
2.30000000	500.00000000
2.30500000	508.33333333
2.31000000	516.66666667
2.31500000	525.00000000
2.32000000	533.33333333
2.32500000	541.66666667
2.33000000	550.00000000
2.33500000	558.33333333
2.34000000	566.66666667
2.34500000	575.00000000
2.35000000	583.33333333
2.35500000	591.66666667
2.36000000	600.00000000
2.36500000	608.33333333
2.37000000	616.66666667
2.37500000	625.00000000
2.38000000	633.33333333
2.38500000	641.66666667
2.39000000	650.00000000
2.39500000	658.33333333
2.40000000	666.66666667
2.40500000	675.00000000
2.41000000	683.33333333
2.41500000	691.66666667
2.42000000	700.00000000
2.42500000	708.33333333
2.43000000	716.66666667
2.43500000	725.00000000
2.44000000	733.33333333
2.44500000	741.66666667
2.45000000	750.00000000
2.45500000	758.33333333
2.46000000	766.66666667
2.46500000	775.00000000
2.47000000	783.33333333
2.47500000	791.66666667
2.48000000	800.00000000
2.48500000	808.33333333
2.49000000	816.66666667
2.49500000	825.00000000
2.50000000	833.33333333
2.50500000	841.66666667
2.51000000	850.00000000
2.51500000	858.33333333
2.52000000	866.66666667
2.52500000	875.00000000
2.53000000	883.33333333
2.53500000	891.66666667
2.54000000	900.00000000
2.54500000	908.33333333
2.55000000	916.66666667
2.55500000	925.00000000
2.56000000	933.33333333
2.56500000	941.66666667
2.57000000	950.00000000
2.57500000	958.33333333
2.58000000	966.66666667
2.58500000	975.00000000
2.59000000	983.33333333
2.59500000	991.66666667
2.60000000	1000.00000000
2.60500000	1008.33333333
2.61000000	1016.66666667
2.61500000	1025.00000000
2.62000000	1033.33333333
2.62500000	1041.66666667
2.63000000	1050.00000000
2.63500000	1058.33333333
2.64000000	1066.66666667
2.64500000	1075.00000000
2.65000000	1083.33333333
2.65500000	1091.66666667
2.66000000	1100.00000000
2.66500000	1108.33333333
2.67000000	1116.66666667
2.67500000	1125.00000000
2.68000000	1133.33333333
2.68500000	1141.66666667
2.69000000	1150.00000000
2.69500000	1158.33333333
2.70000000	1166.66666667
2.70500000	1175.00000000
2.71000000	1183.33333333
2.71500000	1191.66666667
2.72000000	1200.00000000
2.72500000	1208.33333333
2.73000000	1216.66666667
2.73500000	1225.00000000
2.74000000	1233.33333333
2.74500000	1241.66666667
2.75000000	1250.00000000
2.75500000	1258.33333333
2.76000000	1266.66666667
2.76500000	1275.00000000
2.77000000	1283.33333333
2.77500000	1291.66666667
2.78000000	1300.00000000
2.78500000	1308.33333333
2.79000000	1316.66666667
2.79500000	1325.00000000
2.80000000	1333.33333333
2.80500000	1341.66666667
2.81000000	1350.00000000
2.81500000	1358.33333333
2.82000000	1366.66666667
2.82500000	1375.00000000
2.83000000	1383.33333333
2.83500000	1391.66666667
2.84000000	1400.00000000
2.84500000	1408.33333333
2.85000000	1416.66666667
2.85500000	1425.00000000
2.86000000	1433.33333333
2.86500000	1441.66666667
2.87000000	1450.00000000
2.87500000	1458.33333333
2.88000000	1466.66666667
2.88500000	1475.00000000
2.89000000	1483.33333333
2.89500000	1491.66666667
2.90000000	1500.00000000
2.90500000	1508.33333333
2.91000000	1516.66666667
2.91500000	1525.00000000
2.92000000	1533.33333333
2.92500000	1541.66666667
2.93000000	1550.00000000
2.93500000	1558.33333333
2.94000000	1566.66666667
2.94500000	1575.00000000
2.95000000	1583.33333333
2.95500000	1591.66666667
2.96000000	1600.00000000
2.96500000	1608.33333333
2.97000000	1616.66666667
2.97500000	1625.00000000
2.98000000	1633.33333333
2.98500000	1641.66666667
2.99000000	1650.00000000
2.99500000	1658.33333333
3.00000000	1666.66666667
3.00500000	1675.00000000
3.01000000	1683.33333333
3.01500000	1691.66666667
3.02000000	1700.00000000
3.02500000	1708.33333333
3.03000000	1716.66666667
3.03500000	1725.00000000
3.04000000	1733.33333333
3.04500000	1741.66666667
3.05000000	1750.00000000
3.05500000	1758.33333333
3.06000000	1766.66666667
3.06500000	1775.00000000
3.07000000	1783.33333333
3.07500000	1791.66666667
3.08000000	1800.00000000
3.08500000	1808.33333333
3.09000000	1816.66666667
3.09500000	1825.00000000
3.10000000	1833.33333333
3.10500000	1841.66666667
3.11000000	1850.00000000
3.11500000	1858.33333333
3.12000000	1866.66666667
3.12500000	1875.00000000
3.13000000	1883.33333333
3.13500000	1891.66666667
3.14000000	1900.00000000
3.14500000	1908.33333333
3.15000000	1916.66666667
3.15500000	1925.00000000
3.16000000	1933.33333333
3.16500000	1941.66666667
3.17000000	1950.00000000
3.17500000	1958.33333333
3.18000000	1966.66666667
3.18500000	1975.00000000
3.19000000	1983.33333333
3.19500000	1991.66666667
3.20000000	2000.00000000
3.20500000	2008.33333333
3.21000000	2016.66666667
3.21500000	2025.00000000
3.22000000	2033.33333333
3.22500000	2041.66666667
3.23000000	2050.00000000
3.23500000	2058.33333333
3.24000000	2066.66666667
3.24500000	2075.00000000
3.25000000	2083.33333333
3.25500000	2091.66666667
3.26000000	2100.00000000
3.26500000	2108.33333333
3.27000000	2116.66666667
3.27500000	2125.00000000
3.28000000	2133.33333333
3.28500000	2141.66666667
3.29000000	2150.00000000
3.29500000	2158.33333333
3.30000000	2166.66666667
3.30500000	2175.00000000
3.31000000	2183.33333333
3.31500000	2191.66666667
3.32000000	2200.00000000
3.32500000	2208.33333333
3.33000000	2216.66666667
3.33500000	2225.00000000
3.34000000	2233.33333333
3.34500000	2241.66666667
3.35000000	2250.00000000
3.35500000	2258.33333333
3.36000000	2266.66666667
3.36500000	2275.00000000
3.37000000	2283.33333333
3.37500000	2291.66666667
3.38000000	2300.00000000
3.38500000	2308.33333333
3.39000000	2316.66666667
3.39500000	2325.00000000
3.40000000	2333.33333333
3.40500000	2341.66666667
3.41000000	2350.00000000
3.41500000	2358.33333333
3.42000000	2366.66666667
3.42500000	2375.00000000
3.43000000	2383.33333333
3.43500000	2391.66666667
3.44000000	2400.00000000
3.44500000	2408.33333333
3.45000000	2416.66666667
3.45500000	2425.00000000
3.46000000	2433.33333333
3.46500000	2441.66666667
3.47000000	2450.00000000
3.47500000	2458.33333333
3.48000000	2466.66666667
3.48500000	2475.00000000
3.49000000	2483.33333333
3.49500000	2491.66666667
3.50000000	2500.00000000
3.50500000	2508.33333333
3.51000000	2516.66666667
3.51500000	2525.00000000
3.52000000	2533.33333333
3.52500000	2541.66666667
3.53000000	2550.00000000
3.53500000	2558.33333333
3.54000000	2566.66666667
3.54500000	2575.00000000
3.55000000	2583.33333333
3.55500000	2591.66666667
3.56000000	2600.00000000
3.56500000	2608.33333333
3.57000000	2616.66666667
3.57500000	2625.00000000
3.58000000	2633.33333333
3.58500000	2641.66666667
3.59000000	2650.00000000
3.59500000	2658.33333333
3.60000000	2666.66666667
3.60500000	2675.00000000
3.61000000	2683.33333333
3.61500000	2691.66666667
3.62000000	2700.00000000
3.62500000	2708.33333333
3.63000000	2716.66666667
3.63500000	2725.00000000
3.64000000	2733.33333333
3.64500000	2741.66666667
3.65000000	2750.00000000
3.65500000	2758.33333333
3.66000000	2766.66666667
3.66500000	2775.00000000
3.67000000	2783.33333333
3.67500000	2791.66666667
3.68000000	2800.00000000
3.68500000	2808.33333333
3.69000000	2816.66666667
3.69500000	2825.00000000
3.70000000	2833.33333333
3.70500000	2841.66666667
3.71000000	2850.00000000
3.71500000	2858.33333333
3.72000000	2866.66666667
3.72500000	2875.00000000
3.73000000	2883.33333333
3.73500000	2891.66666667
3.74000000	2900.00000000
3.74500000	2908.33333333
3.75000000	2916.66666667
3.75500000	2925.00000000
3.76000000	2933.33333333
3.76500000	2941.66666667
3.77000000	2950.00000000
3.77500000	2958.33333333
3.78000000	2966.66666667
3.78500000	2975.00000000
3.79000000	2983.33333333
3.79500000	2991.66666667
3.80000000	3000.00000000
3.80500000	3008.33333333
3.81000000	3016.66666667
3.81500000	3025.00000000
3.82000000	3033.33333333
3.82500000	3041.66666667
3.83000000	3050.00000000
3.83500000	3058.33333333
3.84000000	3066.66666667
3.84500000	3075.00000000
3.85000000	3083.33333333
3.85500000	3091.66666667
3.86000000	3100.00000000
3.86500000	3108.33333333
3.87000000	3116.66666667
3.87500000	3125.00000000
3.88000000	3133.33333333
3.88500000	3141.66666667
3.89000000	3150.00000000
3.89500000	3158.33333333
3.90000000	3166.66666667
3.90500000	3175.00000000
3.91000000	3183.33333333
3.91500000	3191.66666667
3.92000000	3200.00000000
3.92500000	3208.33333333
3.93000000	3216.66666667
3.93500000	3225.00000000
3.94000000	3233.33333333
3.94500000	3241.66666667
3.95000000	3250.00000000
3.95500000	3258.33333333
3.96000000	3266.66666667
3.96500000	3275.00000000
3.97000000	3283.33333333
3.97500000	3291.66666667
3.98000000	3300.00000000
3.98500000	3308.33333333
3.99000000	3316.66666667
3.99500000	3325.00000000
4.00000000	3333.33333333
4.00500000	3341.66666667
4.01000000	3350.00000000
4.01500000	3358.33333333
4.02000000	3366.66666667
4.02500000	3375.00000000
4.03000000	3383.33333333
4.03500000	3391.66666667
4.04000000	3400.00000000
4.04500000	3408.33333333
4.05000000	3416.66666667
4.05500000	3425.00000000
4.06000000	3433.33333333
4.06500000	3441.66666667
4.07000000	3450.00000000
4.07500000	3458.33333333
4.08000000	3466.66666667
4.08500000	3475.00000000
4.09000000	3483.33333333
4.09500000	3491.66666667
4.10000000	3500.00000000
4.10500000	3508.33333333
4.11000000	3516.66666667
4.11500000	3525.00000000
4.12000000	3533.33333333
4.12500000	3541.66666667
4.13000000	3550.00000000
4.13500000	3558.33333333
4.14000000	3566.66666667
4.14500000	3575.00000000
4.15000000	3583.33333333
4.15500000	3591.66666667
4.16000000	3600.00000000
4.16500000	3608.33333333
4.17000000	3616.66666667
4.17500000	3625.00000000
4.18000000	3633.33333333
4.18500000	3641.66666667
4.19000000	3650.00000000
4.19500000	3658.33333333
4.20000000	3666.66666667
4.20500000	3675.00000000
4.21000000	3683.33333333
4.21500000	3691.66666667
4.22000000	3700.00000000
4.22500000	3708.33333333
4.23000000	3716.66666667
4.23500000	3725.00000000
4.24000000	3733.33333333
4.24500000	3741.66666667
4.25000000	3750.00000000
4.25500000	3758.33333333
4.26000000	3766.66666667
4.26500000	3775.00000000
4.27000000	3783.33333333
4.27500000	3791.66666667
4.28000000	3800.00000000
4.28500000	3808.33333333
4.29000000	3816.66666667
4.29500000	3825.00000000
4.30000000	3833.33333333
4.30500000	3841.66666667
4.31000000	3850.00000000
4.31500000	3858.33333333
4.32000000	3866.66666667
4.32500000	3875.00000000
4.33000000	3883.33333333
4.33500000	3891.66666667
4.34000000	3900.00000000
4.34500000	3908.33333333
4.35000000	3916.66666667
4.35500000	3925.00000000
4.36000000	3933.33333333
4.36500000	3941.66666667
4.37000000	3950.00000000
4.37500000	3958.33333333
4.38000000	3966.66666667
4.38500000	3975.00000000
4.39000000	3983.33333333
4.39500000	3991.66666667
4.40000000	4000.00000000
4.40500000	4008.33333333
4.41000000	4016.66666667
4.41500000	4025.00000000
4.42000000	4033.33333333
4.42500000	4041.66666667
4.43000000	4050.00000000
4.43500000	4058.33333333
4.44000000	4066.66666667
4.44500000	4075.00000000
4.45000000	4083.33333333
4.45500000	4091.66666667
4.46000000	4100.00000000
4.46500000	4108.33333333
4.47000000	4116.66666667
4.47500000	4125.00000000
4.48000000	4133.33333333
4.48500000	4141.66666667
4.49000000	4150.00000000
4.49500000	4158.33333333
4.50000000	4166.66666667
4.50500000	4175.00000000
4.51000000	4183.33333333
4.51500000	4191.66666667
4.52000000	4200.00000000
4.52500000	4208.33333333
4.53000000	4216.66666667
4.53500000	4225.00000000
4.54000000	4233.33333333
4.54500000	4241.66666667
4.55000000	4250.00000000
4.55500000	4258.33333333
4.56000000	4266.66666667
4.56500000	4275.00000000
4.57000000	4283.33333333
4.57500000	4291.66666667
4.58000000	4300.00000000
4.58500000	4308.33333333
4.59000000	4316.66666667
4.59500000	4325.00000000
4.60000000	4333.33333333
4.60500000	4341.66666667
4.61000000	4350.00000000
4.61500000	4358.33333333
4.62000000	4366.66666667
4.62500000	4375.00000000
4.63000000	4383.33333333
4.63500000	4391.66666667
4.64000000	4400.00000000
4.64500000	4408.33333333
4.65000000	4416.66666667
4.65500000	4425.00000000
4.66000000	4433.33333333
4.66500000	4441.66666667
4.67000000	4450.00000000
4.67500000	4458.33333333
4.68000000	4466.66666667
4.68500000	4475.00000000
4.69000000	4483.33333333
4.69500000	4491.66666667
4.70000000	4500.00000000
4.70500000	4508.33333333
4.71000000	4516.66666667
4.71500000	4525.00000000
4.72000000	4533.33333333
4.72500000	4541.66666667
4.73000000	4550.00000000
4.73500000	4558.33333333
4.74000000	4566.66666667
4.74500000	4575.00000000
4.75000000	4583.33333333
4.75500000	4591.66666667
4.76000000	4600.00000000
4.76500000	4608.33333333
4.77000000	4616.66666667
4.77500000	4625.00000000
4.78000000	4633.33333333
4.78500000	4641.66666667
4.79000000	4650.00000000
4.79500000	4658.33333333
4.80000000	4666.66666667
4.80500000	4675.00000000
4.81000000	4683.33333333
4.81500000	4691.66666667
4.82000000	4700.00000000
4.82500000	4708.33333333
4.83000000	4716.66666667
4.83500000	4725.00000000
4.84000000	4733.33333333
4.84500000	4741.66666667
4.85000000	4750.00000000
4.85500000	4758.33333333
4.86000000	4766.66666667
4.86500000	4775.00000000
4.87000000	4783.33333333
4.87500000	4791.66666667
4.88000000	4800.00000000
4.88500000	4808.33333333
4.89000000	4816.66666667
4.89500000	4825.00000000
4.90000000	4833.33333333
4.90500000	4841.66666667
4.91000000	4850.00000000
4.91500000	4858.33333333
4.92000000	4866.66666667
4.92500000	4875.00000000
4.93000000	4883.33333333
4.93500000	4891.66666667
4.94000000	4900.00000000
4.94500000	4908.33333333
4.95000000	4916.66666667
4.95500000	4925.00000000
4.96000000	4933.33333333
4.96500000	4941.66666667
4.97000000	4950.00000000
4.97500000	4958.33333333
4.98000000	4966.66666667
4.98500000	4975.00000000
4.99000000	4983.33333333
4.99500000	4991.66666667
5.00000000	5000.00000000
5.00500000	5000.00000000
5.01000000	5000.00000000
5.01500000	5000.00000000
5.02000000	5000.00000000
5.02500000	5000.00000000
5.03000000	5000.00000000
5.03500000	5000.00000000
5.04000000	5000.00000000
5.04500000	5000.00000000
5.05000000	5000.00000000
5.05500000	5000.00000000
5.06000000	5000.00000000
5.06500000	5000.00000000
5.07000000	5000.00000000
5.07500000	5000.00000000
5.08000000	5000.00000000
5.08500000	5000.00000000
5.09000000	5000.00000000
5.09500000	5000.00000000
5.10000000	5000.00000000
5.10500000	5000.00000000
5.11000000	5000.00000000
5.11500000	5000.00000000
5.12000000	5000.00000000
5.12500000	5000.00000000
5.13000000	5000.00000000
5.13500000	5000.00000000
5.14000000	5000.00000000
5.14500000	5000.00000000
5.15000000	5000.00000000
5.15500000	5000.00000000
5.16000000	5000.00000000
5.16500000	5000.00000000
5.17000000	5000.00000000
5.17500000	5000.00000000
5.18000000	5000.00000000
5.18500000	5000.00000000
5.19000000	5000.00000000
5.19500000	5000.00000000
5.20000000	5000.00000000
5.20500000	5000.00000000
5.21000000	5000.00000000
5.21500000	5000.00000000
5.22000000	5000.00000000
5.22500000	5000.00000000
5.23000000	5000.00000000
5.23500000	5000.00000000
5.24000000	5000.00000000
5.24500000	5000.00000000
5.25000000	5000.00000000
5.25500000	5000.00000000
5.26000000	5000.00000000
5.26500000	5000.00000000
5.27000000	5000.00000000
5.27500000	5000.00000000
5.28000000	5000.00000000
5.28500000	5000.00000000
5.29000000	5000.00000000
5.29500000	5000.00000000
5.30000000	5000.00000000
5.30500000	5000.00000000
5.31000000	5000.00000000
5.31500000	5000.00000000
5.32000000	5000.00000000
5.32500000	5000.00000000
5.33000000	5000.00000000
5.33500000	5000.00000000
5.34000000	5000.00000000
5.34500000	5000.00000000
5.35000000	5000.00000000
5.35500000	5000.00000000
5.36000000	5000.00000000
5.36500000	5000.00000000
5.37000000	5000.00000000
5.37500000	5000.00000000
5.38000000	5000.00000000
5.38500000	5000.00000000
5.39000000	5000.00000000
5.39500000	5000.00000000
5.40000000	5000.00000000
5.40500000	5000.00000000
5.41000000	5000.00000000
5.41500000	5000.00000000
5.42000000	5000.00000000
5.42500000	5000.00000000
5.43000000	5000.00000000
5.43500000	5000.00000000
5.44000000	5000.00000000
5.44500000	5000.00000000
5.45000000	5000.00000000
5.45500000	5000.00000000
5.46000000	5000.00000000
5.46500000	5000.00000000
5.47000000	5000.00000000
5.47500000	5000.00000000
5.48000000	5000.00000000
5.48500000	5000.00000000
5.49000000	5000.00000000
5.49500000	5000.00000000
5.50000000	5000.00000000
5.50500000	5000.00000000
5.51000000	5000.00000000
5.51500000	5000.00000000
5.52000000	5000.00000000
5.52500000	5000.00000000
5.53000000	5000.00000000
5.53500000	5000.00000000
5.54000000	5000.00000000
5.54500000	5000.00000000
5.55000000	5000.00000000
5.55500000	5000.00000000
5.56000000	5000.00000000
5.56500000	5000.00000000
5.57000000	5000.00000000
5.57500000	5000.00000000
5.58000000	5000.00000000
5.58500000	5000.00000000
5.59000000	5000.00000000
5.59500000	5000.00000000
5.60000000	5000.00000000
5.60500000	5000.00000000
5.61000000	5000.00000000
5.61500000	5000.00000000
5.62000000	5000.00000000
5.62500000	5000.00000000
5.63000000	5000.00000000
5.63500000	5000.00000000
5.64000000	5000.00000000
5.64500000	5000.00000000
5.65000000	5000.00000000
5.65500000	5000.00000000
5.66000000	5000.00000000
5.66500000	5000.00000000
5.67000000	5000.00000000
5.67500000	5000.00000000
5.68000000	5000.00000000
5.68500000	5000.00000000
5.69000000	5000.00000000
5.69500000	5000.00000000
5.70000000	5000.00000000
5.70500000	5000.00000000
5.71000000	5000.00000000
5.71500000	5000.00000000
5.72000000	5000.00000000
5.72500000	5000.00000000
5.73000000	5000.00000000
5.73500000	5000.00000000
5.74000000	5000.00000000
5.74500000	5000.00000000
5.75000000	5000.00000000
5.75500000	5000.00000000
5.76000000	5000.00000000
5.76500000	5000.00000000
5.77000000	5000.00000000
5.77500000	5000.00000000
5.78000000	5000.00000000
5.78500000	5000.00000000
5.79000000	5000.00000000
5.79500000	5000.00000000
5.80000000	5000.00000000
5.80500000	5000.00000000
5.81000000	5000.00000000
5.81500000	5000.00000000
5.82000000	5000.00000000
5.82500000	5000.00000000
5.83000000	5000.00000000
5.83500000	5000.00000000
5.84000000	5000.00000000
5.84500000	5000.00000000
5.85000000	5000.00000000
5.85500000	5000.00000000
5.86000000	5000.00000000
5.86500000	5000.00000000
5.87000000	5000.00000000
5.87500000	5000.00000000
5.88000000	5000.00000000
5.88500000	5000.00000000
5.89000000	5000.00000000
5.89500000	5000.00000000
5.90000000	5000.00000000
5.90500000	5000.00000000
5.91000000	5000.00000000
5.91500000	5000.00000000
5.92000000	5000.00000000
5.92500000	5000.00000000
5.93000000	5000.00000000
5.93500000	5000.00000000
5.94000000	5000.00000000
5.94500000	5000.00000000
5.95000000	5000.00000000
5.95500000	5000.00000000
5.96000000	5000.00000000
5.96500000	5000.00000000
5.97000000	5000.00000000
5.97500000	5000.00000000
5.98000000	5000.00000000
5.98500000	5000.00000000
5.99000000	5000.00000000
5.99500000	5000.00000000
6.00000000	5000.00000000
6.00500000	5000.00000000
6.01000000	5000.00000000
6.01500000	5000.00000000
6.02000000	5000.00000000
6.02500000	5000.00000000
6.03000000	5000.00000000
6.03500000	5000.00000000
6.04000000	5000.00000000
6.04500000	5000.00000000
6.05000000	5000.00000000
6.05500000	5000.00000000
6.06000000	5000.00000000
6.06500000	5000.00000000
6.07000000	5000.00000000
6.07500000	5000.00000000
6.08000000	5000.00000000
6.08500000	5000.00000000
6.09000000	5000.00000000
6.09500000	5000.00000000
6.10000000	5000.00000000
6.10500000	5000.00000000
6.11000000	5000.00000000
6.11500000	5000.00000000
6.12000000	5000.00000000
6.12500000	5000.00000000
6.13000000	5000.00000000
6.13500000	5000.00000000
6.14000000	5000.00000000
6.14500000	5000.00000000
6.15000000	5000.00000000
6.15500000	5000.00000000
6.16000000	5000.00000000
6.16500000	5000.00000000
6.17000000	5000.00000000
6.17500000	5000.00000000
6.18000000	5000.00000000
6.18500000	5000.00000000
6.19000000	5000.00000000
6.19500000	5000.00000000
6.20000000	5000.00000000
6.20500000	5000.00000000
6.21000000	5000.00000000
6.21500000	5000.00000000
6.22000000	5000.00000000
6.22500000	5000.00000000
6.23000000	5000.00000000
6.23500000	5000.00000000
6.24000000	5000.00000000
6.24500000	5000.00000000
6.25000000	5000.00000000
6.25500000	5000.00000000
6.26000000	5000.00000000
6.26500000	5000.00000000
6.27000000	5000.00000000
6.27500000	5000.00000000
6.28000000	5000.00000000
6.28500000	5000.00000000
6.29000000	5000.00000000
6.29500000	5000.00000000
6.30000000	5000.00000000
6.30500000	5000.00000000
6.31000000	5000.00000000
6.31500000	5000.00000000
6.32000000	5000.00000000
6.32500000	5000.00000000
6.33000000	5000.00000000
6.33500000	5000.00000000
6.34000000	5000.00000000
6.34500000	5000.00000000
6.35000000	5000.00000000
6.35500000	5000.00000000
6.36000000	5000.00000000
6.36500000	5000.00000000
6.37000000	5000.00000000
6.37500000	5000.00000000
6.38000000	5000.00000000
6.38500000	5000.00000000
6.39000000	5000.00000000
6.39500000	5000.00000000
6.40000000	5000.00000000
6.40500000	5000.00000000
6.41000000	5000.00000000
6.41500000	5000.00000000
6.42000000	5000.00000000
6.42500000	5000.00000000
6.43000000	5000.00000000
6.43500000	5000.00000000
6.44000000	5000.00000000
6.44500000	5000.00000000
6.45000000	5000.00000000
6.45500000	5000.00000000
6.46000000	5000.00000000
6.46500000	5000.00000000
6.47000000	5000.00000000
6.47500000	5000.00000000
6.48000000	5000.00000000
6.48500000	5000.00000000
6.49000000	5000.00000000
6.49500000	5000.00000000
6.50000000	5000.00000000
6.50500000	5000.00000000
6.51000000	5000.00000000
6.51500000	5000.00000000
6.52000000	5000.00000000
6.52500000	5000.00000000
6.53000000	5000.00000000
6.53500000	5000.00000000
6.54000000	5000.00000000
6.54500000	5000.00000000
6.55000000	5000.00000000
6.55500000	5000.00000000
6.56000000	5000.00000000
6.56500000	5000.00000000
6.57000000	5000.00000000
6.57500000	5000.00000000
6.58000000	5000.00000000
6.58500000	5000.00000000
6.59000000	5000.00000000
6.59500000	5000.00000000
6.60000000	5000.00000000
6.60500000	5000.00000000
6.61000000	5000.00000000
6.61500000	5000.00000000
6.62000000	5000.00000000
6.62500000	5000.00000000
6.63000000	5000.00000000
6.63500000	5000.00000000
6.64000000	5000.00000000
6.64500000	5000.00000000
6.65000000	5000.00000000
6.65500000	5000.00000000
6.66000000	5000.00000000
6.66500000	5000.00000000
6.67000000	5000.00000000
6.67500000	5000.00000000
6.68000000	5000.00000000
6.68500000	5000.00000000
6.69000000	5000.00000000
6.69500000	5000.00000000
6.70000000	5000.00000000
6.70500000	5000.00000000
6.71000000	5000.00000000
6.71500000	5000.00000000
6.72000000	5000.00000000
6.72500000	5000.00000000
6.73000000	5000.00000000
6.73500000	5000.00000000
6.74000000	5000.00000000
6.74500000	5000.00000000
6.75000000	5000.00000000
6.75500000	5000.00000000
6.76000000	5000.00000000
6.76500000	5000.00000000
6.77000000	5000.00000000
6.77500000	5000.00000000
6.78000000	5000.00000000
6.78500000	5000.00000000
6.79000000	5000.00000000
6.79500000	5000.00000000
6.80000000	5000.00000000
6.80500000	5000.00000000
6.81000000	5000.00000000
6.81500000	5000.00000000
6.82000000	5000.00000000
6.82500000	5000.00000000
6.83000000	5000.00000000
6.83500000	5000.00000000
6.84000000	5000.00000000
6.84500000	5000.00000000
6.85000000	5000.00000000
6.85500000	5000.00000000
6.86000000	5000.00000000
6.86500000	5000.00000000
6.87000000	5000.00000000
6.87500000	5000.00000000
6.88000000	5000.00000000
6.88500000	5000.00000000
6.89000000	5000.00000000
6.89500000	5000.00000000
6.90000000	5000.00000000
6.90500000	5000.00000000
6.91000000	5000.00000000
6.91500000	5000.00000000
6.92000000	5000.00000000
6.92500000	5000.00000000
6.93000000	5000.00000000
6.93500000	5000.00000000
6.94000000	5000.00000000
6.94500000	5000.00000000
6.95000000	5000.00000000
6.95500000	5000.00000000
6.96000000	5000.00000000
6.96500000	5000.00000000
6.97000000	5000.00000000
6.97500000	5000.00000000
6.98000000	5000.00000000
6.98500000	5000.00000000
6.99000000	5000.00000000
6.99500000	5000.00000000
7.00000000	5000.00000000
7.00500000	5000.00000000
7.01000000	5000.00000000
7.01500000	5000.00000000
7.02000000	5000.00000000
7.02500000	5000.00000000
7.03000000	5000.00000000
7.03500000	5000.00000000
7.04000000	5000.00000000
7.04500000	5000.00000000
7.05000000	5000.00000000
7.05500000	5000.00000000
7.06000000	5000.00000000
7.06500000	5000.00000000
7.07000000	5000.00000000
7.07500000	5000.00000000
7.08000000	5000.00000000
7.08500000	5000.00000000
7.09000000	5000.00000000
7.09500000	5000.00000000
7.10000000	5000.00000000
7.10500000	5000.00000000
7.11000000	5000.00000000
7.11500000	5000.00000000
7.12000000	5000.00000000
7.12500000	5000.00000000
7.13000000	5000.00000000
7.13500000	5000.00000000
7.14000000	5000.00000000
7.14500000	5000.00000000
7.15000000	5000.00000000
7.15500000	5000.00000000
7.16000000	5000.00000000
7.16500000	5000.00000000
7.17000000	5000.00000000
7.17500000	5000.00000000
7.18000000	5000.00000000
7.18500000	5000.00000000
7.19000000	5000.00000000
7.19500000	5000.00000000
7.20000000	5000.00000000
7.20500000	5000.00000000
7.21000000	5000.00000000
7.21500000	5000.00000000
7.22000000	5000.00000000
7.22500000	5000.00000000
7.23000000	5000.00000000
7.23500000	5000.00000000
7.24000000	5000.00000000
7.24500000	5000.00000000
7.25000000	5000.00000000
7.25500000	5000.00000000
7.26000000	5000.00000000
7.26500000	5000.00000000
7.27000000	5000.00000000
7.27500000	5000.00000000
7.28000000	5000.00000000
7.28500000	5000.00000000
7.29000000	5000.00000000
7.29500000	5000.00000000
7.30000000	5000.00000000
7.30500000	5000.00000000
7.31000000	5000.00000000
7.31500000	5000.00000000
7.32000000	5000.00000000
7.32500000	5000.00000000
7.33000000	5000.00000000
7.33500000	5000.00000000
7.34000000	5000.00000000
7.34500000	5000.00000000
7.35000000	5000.00000000
7.35500000	5000.00000000
7.36000000	5000.00000000
7.36500000	5000.00000000
7.37000000	5000.00000000
7.37500000	5000.00000000
7.38000000	5000.00000000
7.38500000	5000.00000000
7.39000000	5000.00000000
7.39500000	5000.00000000
7.40000000	5000.00000000
7.40500000	5000.00000000
7.41000000	5000.00000000
7.41500000	5000.00000000
7.42000000	5000.00000000
7.42500000	5000.00000000
7.43000000	5000.00000000
7.43500000	5000.00000000
7.44000000	5000.00000000
7.44500000	5000.00000000
7.45000000	5000.00000000
7.45500000	5000.00000000
7.46000000	5000.00000000
7.46500000	5000.00000000
7.47000000	5000.00000000
7.47500000	5000.00000000
7.48000000	5000.00000000
7.48500000	5000.00000000
7.49000000	5000.00000000
7.49500000	5000.00000000
7.50000000	5000.00000000
7.50500000	5000.00000000
7.51000000	5000.00000000
7.51500000	5000.00000000
7.52000000	5000.00000000
7.52500000	5000.00000000
7.53000000	5000.00000000
7.53500000	5000.00000000
7.54000000	5000.00000000
7.54500000	5000.00000000
7.55000000	5000.00000000
7.55500000	5000.00000000
7.56000000	5000.00000000
7.56500000	5000.00000000
7.57000000	5000.00000000
7.57500000	5000.00000000
7.58000000	5000.00000000
7.58500000	5000.00000000
7.59000000	5000.00000000
7.59500000	5000.00000000
7.60000000	5000.00000000
7.60500000	5000.00000000
7.61000000	5000.00000000
7.61500000	5000.00000000
7.62000000	5000.00000000
7.62500000	5000.00000000
7.63000000	5000.00000000
7.63500000	5000.00000000
7.64000000	5000.00000000
7.64500000	5000.00000000
7.65000000	5000.00000000
7.65500000	5000.00000000
7.66000000	5000.00000000
7.66500000	5000.00000000
7.67000000	5000.00000000
7.67500000	5000.00000000
7.68000000	5000.00000000
7.68500000	5000.00000000
7.69000000	5000.00000000
7.69500000	5000.00000000
7.70000000	5000.00000000
7.70500000	5000.00000000
7.71000000	5000.00000000
7.71500000	5000.00000000
7.72000000	5000.00000000
7.72500000	5000.00000000
7.73000000	5000.00000000
7.73500000	5000.00000000
7.74000000	5000.00000000
7.74500000	5000.00000000
7.75000000	5000.00000000
7.75500000	5000.00000000
7.76000000	5000.00000000
7.76500000	5000.00000000
7.77000000	5000.00000000
7.77500000	5000.00000000
7.78000000	5000.00000000
7.78500000	5000.00000000
7.79000000	5000.00000000
7.79500000	5000.00000000
7.80000000	5000.00000000
7.80500000	5000.00000000
7.81000000	5000.00000000
7.81500000	5000.00000000
7.82000000	5000.00000000
7.82500000	5000.00000000
7.83000000	5000.00000000
7.83500000	5000.00000000
7.84000000	5000.00000000
7.84500000	5000.00000000
7.85000000	5000.00000000
7.85500000	5000.00000000
7.86000000	5000.00000000
7.86500000	5000.00000000
7.87000000	5000.00000000
7.87500000	5000.00000000
7.88000000	5000.00000000
7.88500000	5000.00000000
7.89000000	5000.00000000
7.89500000	5000.00000000
7.90000000	5000.00000000
7.90500000	5000.00000000
7.91000000	5000.00000000
7.91500000	5000.00000000
7.92000000	5000.00000000
7.92500000	5000.00000000
7.93000000	5000.00000000
7.93500000	5000.00000000
7.94000000	5000.00000000
7.94500000	5000.00000000
7.95000000	5000.00000000
7.95500000	5000.00000000
7.96000000	5000.00000000
7.96500000	5000.00000000
7.97000000	5000.00000000
7.97500000	5000.00000000
7.98000000	5000.00000000
7.98500000	5000.00000000
7.99000000	5000.00000000
7.99500000	5000.00000000
8.00000000	5000.00000000
8.00500000	5000.00000000
8.01000000	5000.00000000
8.01500000	5000.00000000
8.02000000	5000.00000000
8.02500000	5000.00000000
8.03000000	5000.00000000
8.03500000	5000.00000000
8.04000000	5000.00000000
8.04500000	5000.00000000
8.05000000	5000.00000000
8.05500000	5000.00000000
8.06000000	5000.00000000
8.06500000	5000.00000000
8.07000000	5000.00000000
8.07500000	5000.00000000
8.08000000	5000.00000000
8.08500000	5000.00000000
8.09000000	5000.00000000
8.09500000	5000.00000000
8.10000000	5000.00000000
8.10500000	5000.00000000
8.11000000	5000.00000000
8.11500000	5000.00000000
8.12000000	5000.00000000
8.12500000	5000.00000000
8.13000000	5000.00000000
8.13500000	5000.00000000
8.14000000	5000.00000000
8.14500000	5000.00000000
8.15000000	5000.00000000
8.15500000	5000.00000000
8.16000000	5000.00000000
8.16500000	5000.00000000
8.17000000	5000.00000000
8.17500000	5000.00000000
8.18000000	5000.00000000
8.18500000	5000.00000000
8.19000000	5000.00000000
8.19500000	5000.00000000
8.20000000	5000.00000000
8.20500000	5000.00000000
8.21000000	5000.00000000
8.21500000	5000.00000000
8.22000000	5000.00000000
8.22500000	5000.00000000
8.23000000	5000.00000000
8.23500000	5000.00000000
8.24000000	5000.00000000
8.24500000	5000.00000000
8.25000000	5000.00000000
8.25500000	5000.00000000
8.26000000	5000.00000000
8.26500000	5000.00000000
8.27000000	5000.00000000
8.27500000	5000.00000000
8.28000000	5000.00000000
8.28500000	5000.00000000
8.29000000	5000.00000000
8.29500000	5000.00000000
8.30000000	5000.00000000
8.30500000	5000.00000000
8.31000000	5000.00000000
8.31500000	5000.00000000
8.32000000	5000.00000000
8.32500000	5000.00000000
8.33000000	5000.00000000
8.33500000	5000.00000000
8.34000000	5000.00000000
8.34500000	5000.00000000
8.35000000	5000.00000000
8.35500000	5000.00000000
8.36000000	5000.00000000
8.36500000	5000.00000000
8.37000000	5000.00000000
8.37500000	5000.00000000
8.38000000	5000.00000000
8.38500000	5000.00000000
8.39000000	5000.00000000
8.39500000	5000.00000000
8.40000000	5000.00000000
8.40500000	5000.00000000
8.41000000	5000.00000000
8.41500000	5000.00000000
8.42000000	5000.00000000
8.42500000	5000.00000000
8.43000000	5000.00000000
8.43500000	5000.00000000
8.44000000	5000.00000000
8.44500000	5000.00000000
8.45000000	5000.00000000
8.45500000	5000.00000000
8.46000000	5000.00000000
8.46500000	5000.00000000
8.47000000	5000.00000000
8.47500000	5000.00000000
8.48000000	5000.00000000
8.48500000	5000.00000000
8.49000000	5000.00000000
8.49500000	5000.00000000
8.50000000	5000.00000000
8.50500000	5000.00000000
8.51000000	5000.00000000
8.51500000	5000.00000000
8.52000000	5000.00000000
8.52500000	5000.00000000
8.53000000	5000.00000000
8.53500000	5000.00000000
8.54000000	5000.00000000
8.54500000	5000.00000000
8.55000000	5000.00000000
8.55500000	5000.00000000
8.56000000	5000.00000000
8.56500000	5000.00000000
8.57000000	5000.00000000
8.57500000	5000.00000000
8.58000000	5000.00000000
8.58500000	5000.00000000
8.59000000	5000.00000000
8.59500000	5000.00000000
8.60000000	5000.00000000
8.60500000	5000.00000000
8.61000000	5000.00000000
8.61500000	5000.00000000
8.62000000	5000.00000000
8.62500000	5000.00000000
8.63000000	5000.00000000
8.63500000	5000.00000000
8.64000000	5000.00000000
8.64500000	5000.00000000
8.65000000	5000.00000000
8.65500000	5000.00000000
8.66000000	5000.00000000
8.66500000	5000.00000000
8.67000000	5000.00000000
8.67500000	5000.00000000
8.68000000	5000.00000000
8.68500000	5000.00000000
8.69000000	5000.00000000
8.69500000	5000.00000000
8.70000000	5000.00000000
8.70500000	5000.00000000
8.71000000	5000.00000000
8.71500000	5000.00000000
8.72000000	5000.00000000
8.72500000	5000.00000000
8.73000000	5000.00000000
8.73500000	5000.00000000
8.74000000	5000.00000000
8.74500000	5000.00000000
8.75000000	5000.00000000
8.75500000	5000.00000000
8.76000000	5000.00000000
8.76500000	5000.00000000
8.77000000	5000.00000000
8.77500000	5000.00000000
8.78000000	5000.00000000
8.78500000	5000.00000000
8.79000000	5000.00000000
8.79500000	5000.00000000
8.80000000	5000.00000000
8.80500000	5000.00000000
8.81000000	5000.00000000
8.81500000	5000.00000000
8.82000000	5000.00000000
8.82500000	5000.00000000
8.83000000	5000.00000000
8.83500000	5000.00000000
8.84000000	5000.00000000
8.84500000	5000.00000000
8.85000000	5000.00000000
8.85500000	5000.00000000
8.86000000	5000.00000000
8.86500000	5000.00000000
8.87000000	5000.00000000
8.87500000	5000.00000000
8.88000000	5000.00000000
8.88500000	5000.00000000
8.89000000	5000.00000000
8.89500000	5000.00000000
8.90000000	5000.00000000
8.90500000	5000.00000000
8.91000000	5000.00000000
8.91500000	5000.00000000
8.92000000	5000.00000000
8.92500000	5000.00000000
8.93000000	5000.00000000
8.93500000	5000.00000000
8.94000000	5000.00000000
8.94500000	5000.00000000
8.95000000	5000.00000000
8.95500000	5000.00000000
8.96000000	5000.00000000
8.96500000	5000.00000000
8.97000000	5000.00000000
8.97500000	5000.00000000
8.98000000	5000.00000000
8.98500000	5000.00000000
8.99000000	5000.00000000
8.99500000	5000.00000000
9.00000000	5000.00000000
9.00500000	5000.00000000
9.01000000	5000.00000000
9.01500000	5000.00000000
9.02000000	5000.00000000
9.02500000	5000.00000000
9.03000000	5000.00000000
9.03500000	5000.00000000
9.04000000	5000.00000000
9.04500000	5000.00000000
9.05000000	5000.00000000
9.05500000	5000.00000000
9.06000000	5000.00000000
9.06500000	5000.00000000
9.07000000	5000.00000000
9.07500000	5000.00000000
9.08000000	5000.00000000
9.08500000	5000.00000000
9.09000000	5000.00000000
9.09500000	5000.00000000
9.10000000	5000.00000000
9.10500000	5000.00000000
9.11000000	5000.00000000
9.11500000	5000.00000000
9.12000000	5000.00000000
9.12500000	5000.00000000
9.13000000	5000.00000000
9.13500000	5000.00000000
9.14000000	5000.00000000
9.14500000	5000.00000000
9.15000000	5000.00000000
9.15500000	5000.00000000
9.16000000	5000.00000000
9.16500000	5000.00000000
9.17000000	5000.00000000
9.17500000	5000.00000000
9.18000000	5000.00000000
9.18500000	5000.00000000
9.19000000	5000.00000000
9.19500000	5000.00000000
9.20000000	5000.00000000
9.20500000	5000.00000000
9.21000000	5000.00000000
9.21500000	5000.00000000
9.22000000	5000.00000000
9.22500000	5000.00000000
9.23000000	5000.00000000
9.23500000	5000.00000000
9.24000000	5000.00000000
9.24500000	5000.00000000
9.25000000	5000.00000000
9.25500000	5000.00000000
9.26000000	5000.00000000
9.26500000	5000.00000000
9.27000000	5000.00000000
9.27500000	5000.00000000
9.28000000	5000.00000000
9.28500000	5000.00000000
9.29000000	5000.00000000
9.29500000	5000.00000000
9.30000000	5000.00000000
9.30500000	5000.00000000
9.31000000	5000.00000000
9.31500000	5000.00000000
9.32000000	5000.00000000
9.32500000	5000.00000000
9.33000000	5000.00000000
9.33500000	5000.00000000
9.34000000	5000.00000000
9.34500000	5000.00000000
9.35000000	5000.00000000
9.35500000	5000.00000000
9.36000000	5000.00000000
9.36500000	5000.00000000
9.37000000	5000.00000000
9.37500000	5000.00000000
9.38000000	5000.00000000
9.38500000	5000.00000000
9.39000000	5000.00000000
9.39500000	5000.00000000
9.40000000	5000.00000000
9.40500000	5000.00000000
9.41000000	5000.00000000
9.41500000	5000.00000000
9.42000000	5000.00000000
9.42500000	5000.00000000
9.43000000	5000.00000000
9.43500000	5000.00000000
9.44000000	5000.00000000
9.44500000	5000.00000000
9.45000000	5000.00000000
9.45500000	5000.00000000
9.46000000	5000.00000000
9.46500000	5000.00000000
9.47000000	5000.00000000
9.47500000	5000.00000000
9.48000000	5000.00000000
9.48500000	5000.00000000
9.49000000	5000.00000000
9.49500000	5000.00000000
9.50000000	5000.00000000
9.50500000	5000.00000000
9.51000000	5000.00000000
9.51500000	5000.00000000
9.52000000	5000.00000000
9.52500000	5000.00000000
9.53000000	5000.00000000
9.53500000	5000.00000000
9.54000000	5000.00000000
9.54500000	5000.00000000
9.55000000	5000.00000000
9.55500000	5000.00000000
9.56000000	5000.00000000
9.56500000	5000.00000000
9.57000000	5000.00000000
9.57500000	5000.00000000
9.58000000	5000.00000000
9.58500000	5000.00000000
9.59000000	5000.00000000
9.59500000	5000.00000000
9.60000000	5000.00000000
9.60500000	5000.00000000
9.61000000	5000.00000000
9.61500000	5000.00000000
9.62000000	5000.00000000
9.62500000	5000.00000000
9.63000000	5000.00000000
9.63500000	5000.00000000
9.64000000	5000.00000000
9.64500000	5000.00000000
9.65000000	5000.00000000
9.65500000	5000.00000000
9.66000000	5000.00000000
9.66500000	5000.00000000
9.67000000	5000.00000000
9.67500000	5000.00000000
9.68000000	5000.00000000
9.68500000	5000.00000000
9.69000000	5000.00000000
9.69500000	5000.00000000
9.70000000	5000.00000000
9.70500000	5000.00000000
9.71000000	5000.00000000
9.71500000	5000.00000000
9.72000000	5000.00000000
9.72500000	5000.00000000
9.73000000	5000.00000000
9.73500000	5000.00000000
9.74000000	5000.00000000
9.74500000	5000.00000000
9.75000000	5000.00000000
9.75500000	5000.00000000
9.76000000	5000.00000000
9.76500000	5000.00000000
9.77000000	5000.00000000
9.77500000	5000.00000000
9.78000000	5000.00000000
9.78500000	5000.00000000
9.79000000	5000.00000000
9.79500000	5000.00000000
9.80000000	5000.00000000
9.80500000	5000.00000000
9.81000000	5000.00000000
9.81500000	5000.00000000
9.82000000	5000.00000000
9.82500000	5000.00000000
9.83000000	5000.00000000
9.83500000	5000.00000000
9.84000000	5000.00000000
9.84500000	5000.00000000
9.85000000	5000.00000000
9.85500000	5000.00000000
9.86000000	5000.00000000
9.86500000	5000.00000000
9.87000000	5000.00000000
9.87500000	5000.00000000
9.88000000	5000.00000000
9.88500000	5000.00000000
9.89000000	5000.00000000
9.89500000	5000.00000000
9.90000000	5000.00000000
9.90500000	5000.00000000
9.91000000	5000.00000000
9.91500000	5000.00000000
9.92000000	5000.00000000
9.92500000	5000.00000000
9.93000000	5000.00000000
9.93500000	5000.00000000
9.94000000	5000.00000000
9.94500000	5000.00000000
9.95000000	5000.00000000
9.95500000	5000.00000000
9.96000000	5000.00000000
9.96500000	5000.00000000
9.97000000	5000.00000000
9.97500000	5000.00000000
9.98000000	5000.00000000
9.98500000	5000.00000000
9.99000000	5000.00000000
[truncated: 1,001 more rows]
