# Supplementary material for: An Efficient Contact Model for the Simulation of Cargo Airdrop Extraction Phase
Source: Hindawi journal article supplement (doi:10.1155/2018/9895451), 2018-10-17
Supplement: f1 [file 9895451.f1.zip › case2_ramp_drop/motion_pts20.csv]

t	u	v	w	x_g	y_g	z_g	p	q	r	e0	e1	e2	e3	yaw(deg)	pitch(deg)	roll(deg)	yaw_fix(deg)	pitch_fix(deg)	roll_fix(deg)	vx_g	vy_g	vz_g	ax_g	ay_g	az_g
0.0	0.0	0.0	0.0	-0.017449748351250485	0.0	-0.49969541350954794	0.0	0.0	0.0	0.9998476951563913	0.0	0.01745240643728351	0.0	0.0	2.0	0.0	0.0	2.0	0.0	0.0	0.0	0.0	0.04911036880418881	0.0	13.209541879562595
0.005	-0.001132151472337662	0.0	0.04289208882171953	-0.01744930509064298	0.0	-0.49957915350686355	0.0	0.0003863575690892307	0.0	0.9998476908786221	0.0	0.017452651508787335	0.0	0.0	2.0000280874036034	0.0	0.0	2.0001106832904587	0.0	0.00036547154916690094	0.0	0.042905471457534906	0.13989900378365147	0.0	3.1186924363900417
0.01	-0.00040939912866170663	0.0	0.039536266986945116	-0.017444936515885426	0.0	-0.4993504186344282	0.0	0.00016119041684042475	0.0	0.9998476650369739	0.0	0.017454131892203368	0.0	0.0	2.0001977526909656	0.0	0.0	2.000156860943373	0.0	0.0009707825086257157	0.0	0.03952646703451367	0.02083039020534914	0.0	-3.803434431668597
0.015	1.1599635631423549e-05	0.0	0.01489109174728013	-0.017441048061928553	0.0	-0.49921814557194893	0.0	-0.000639850996346844	0.0	0.9998476798434357	0.0	0.017453283693836193	0.0	0.0	2.0001005415097652	0.0	0.0	1.9999735571353336	0.0	0.0005313102907440471	0.0	0.01488161474277606	-0.10992542353629554	0.0	-4.035735225021518
0.02	-6.328399932111766e-05	0.0	0.004015449606118404	-0.017439607813921846	0.0	-0.4991762280709721	0.0	-0.0005015781248400955	0.0	0.9998477064606854	0.0	0.017451758802663902	0.0	0.0	1.9999257752348873	0.0	0.0	1.9998298655870865	0.0	7.688652029622122e-05	0.0	0.00401521218204508	-0.0745394163002398	0.0	-1.200163721878523
0.025	-0.00022353988372126823	0.0	0.0009523254180356933	-0.01743995689586067	0.0	-0.4991654096027707	0.0	-0.00020179635424811485	0.0	0.9998477216537285	0.0	0.017450888339783508	0.0	0.0	1.9998260123438625	0.0	0.0	1.999772055189989	0.0	-0.00019017094529132168	0.0	0.000959546139077209	-0.03877132319536507	0.0	-0.2657040051508241
0.03	-0.0003340765477349463	0.0	0.00014817382209880353	-0.017441296443155698	0.0	-0.4991630626411839	0.0	3.679053440873047e-06	0.0	0.9998477255344961	0.0	0.017450665989986097	0.0	0.0	1.999800529053424	0.0	0.0	1.9997731091611628	0.0	-0.00032870240164284745	0.0	0.0001597415176342438	-0.01830240424552406	0.0	-0.0629942954452266
0.035	-0.00038619111727028726	0.0	-3.340725609633745e-05	-0.01744311115092272	0.0	-0.4991628329933399	0.0	9.821741347252802e-05	0.0	0.9998477229661936	0.0	0.01745081314199308	0.0	0.0	1.9998173939994401	0.0	0.0	1.9998012463774961	0.0	-0.00038712169304659834	0.0	-1.991026346118409e-05	-0.006206396703651916	0.0	-0.010269866076265814
0.04	-0.00039890808372938335	0.0	-5.473529557528341e-05	-0.017445093386079948	0.0	-0.49916301272664904	0.0	0.00011855704718686762	0.0	0.9998477180417514	0.0	0.017451095286581356	0.0	0.0	1.9998497303118388	0.0	0.0	1.9998352104696728	0.0	-0.0004005752070145487	0.0	-4.0781311548468354e-05	6.788950999991171e-05	0.0	0.0017605077137970813
0.045	-0.0003915377085617175	0.0	-4.213385542377114e-05	-0.017447082045858934	0.0	-0.4991631898857365	0.0	0.00010170734734653335	0.0	0.999847713155266	0.0	0.017451375251936713	0.0	0.0	1.999881816864664	0.0	0.0	1.9998643474784148	0.0	-0.0003927695860458167	0.0	-2.844452980853922e-05	0.0026217677937318356	0.0	0.003280696736841399
0.05	-0.00037723443409512134	0.0	-2.7344411068291234e-05	-0.017449009815294004	0.0	-0.4991632951190529	0.0	7.267434685044576e-05	0.0	0.9998477093381275	0.0	0.017451593947211092	0.0	0.0	1.9999068813141405	0.0	0.0	1.9998851671451818	0.0	-0.0003779589162365891	0.0	-1.4163075972422126e-05	0.0030989343735132132	0.0	0.002559346386923135
0.055	-0.0003631431897473301	0.0	-1.6489257687211007e-05	-0.017450862427347513	0.0	-0.49916333825135994	0.0	4.484769153515857e-05	0.0	0.9998477067929358	0.0	0.01745173976732461	0.0	0.0	1.9999235936134343	0.0	0.0	1.9998980150624113	0.0	-0.0003634974344468317	0.0	-3.8061830632982273e-06	0.0026199001852137494	0.0	0.0016713112652431451
0.06	-0.0003522159212704539	0.0	-9.532875666114882e-06	-0.017452650379056224	0.0	-0.49916333950695363	0.0	2.3593471637502306e-05	0.0	0.9998477053276932	0.0	0.017451823714023318	0.0	0.0	1.9999332146617417	0.0	0.0	1.9999047740941558	0.0	-0.0003523340566334617	0.0	2.7646791980715134e-06	0.0018511275344979654	0.0	0.0010149692412840124
0.065	-0.0003449883689390434	0.0	-5.343965809751963e-06	-0.017454392100903413	0.0	-0.49916331498416794	0.0	9.708608424214121e-06	0.0	0.9998477046268677	0.0	0.01745186386559414	0.0	0.0	1.9999378163936607	0.0	0.0	1.9999075554055938	0.0	-0.0003449647203336223	0.0	6.6988356408212e-06	0.001130756985137469	0.0	0.0005939556255445357
0.07	-0.00034087063350795585	0.0	-2.9187116869481055e-06	-0.017456105286101437	0.0	-0.4991632752719621	0.0	1.90689796093466e-06	0.0	0.9998477043924339	0.0	0.017451877296710373	0.0	0.0	1.999939355720642	0.0	0.0	1.9999081016916196	0.0	-0.00034076485540079194	0.0	8.978919183492563e-06	0.00058716662223508	0.0	0.00033914365898282987
0.075	-0.00033894129585791894	0.0	-1.5590722374651011e-06	-0.017457803436365386	0.0	-0.49916322685455183	0.0	-1.6689137173881557e-06	0.0	0.9998477043993385	0.0	0.017451876901130117	0.0	0.0	1.9999393103835785	0.0	0.0	1.9999076235830577	0.0	-0.0003387892436937217	0.0	1.0270399287398018e-05	0.0002349226889806581	0.0	0.00018988438226658796
0.08	-0.00033833773916583555	0.0	-8.193849784307864e-07	-0.017459495410262458	0.0	-0.499163173541614	0.0	-2.7168284070893236e-06	0.0	0.9998477045014893	0.0	0.017451871048731544	0.0	0.0	1.999938639645952	0.0	0.0	1.9999068452690507	0.0	-0.00033816024084836176	0.0	1.0988568831716265e-05	3.866443627369028e-05	0.0	0.00010469971972311598
0.085	-0.0003384143892229987	0.0	-4.2741563840669557e-07	-0.01746118623060545	0.0	-0.4991631175364943	0.0	-2.4901975628563174e-06	0.0	0.9998477046171999	0.0	0.017451864419469772	0.0	0.0	1.9999378798727998	0.0	0.0	1.9999061318799982	0.0	-0.0003382231652530205	0.0	1.1382969890615545e-05	-5.046444164413272e-05	0.0	5.715867112321063e-05
0.09	-0.0003387546020145494	0.0	-2.2463047098288097e-07	-0.01746287820926039	0.0	-0.49916306006415434	0.0	-1.787734387063006e-06	0.0	0.9998477047098621	0.0	0.017451859110694305	0.0	0.0	1.9999372714392811	0.0	0.0	1.999905619731822	0.0	-0.0003385560940516037	0.0	1.1597500825845813e-05	-7.604513755312485e-05	0.0	3.083342696621932e-05
0.095	-0.0003391304916487073	0.0	-1.2284993375682046e-07	-0.017464572000536267	0.0	-0.49916300178205325	0.0	-1.0395523772083308e-06	0.0	0.9998477047701001	0.0	0.017451855659555728	0.0	0.0	1.9999368759076943	0.0	0.0	1.9999053219220029	0.0	-0.00033892820282100907	0.0	1.1712334973041757e-05	-7.035541572339093e-05	0.0	1.6403008963730994e-05
0.1	-0.00033944206735902794	0.0	-7.254268521817362e-08	-0.01746626748861987	0.0	-0.49916294306115383	0.0	-4.298695702767297e-07	0.0	0.9998477048008885	0.0	0.017451853895635687	0.0	0.0	1.9999366737465583	0.0	0.0	1.9999051987734422	0.0	-0.00033923783313908294	0.0	1.1773483873152811e-05	-5.30627530450325e-05	0.0	8.795835540440452e-06
0.105	-0.00033966101206166525	0.0	-4.699775073168035e-08	-0.01746796427734804	0.0	-0.49916288410660214	0.0	-6.7709975884408465e-09	0.0	0.9998477048094787	0.0	0.01745185340348272	0.0	0.0	1.999936617341392	0.0	0.0	1.9999051968336943	0.0	-0.00033945575300945086	0.0	1.1806653731247672e-05	-3.501925289955669e-05	0.0	4.746021035944547e-06
0.11	-0.0003397985218438862	0.0	-3.414197035577271e-08	-0.017469661892767465	0.0	-0.49916282501615317	0.0	2.5584573351833306e-07	0.0	0.9998477048041295	0.0	0.017451853709943333	0.0	0.0	1.9999366524645403	0.0	0.0	1.9999052701280982	0.0	-0.00033959273037643603	0.0	1.18243007590667e-05	-2.046080041034036e-05	0.0	2.5397634168784334e-06
0.115	-0.00033987231452962523	0.0	-2.6905294983598907e-08	-0.017471359998861336	0.0	-0.4991627658520622	0.0	3.9463787332282443e-07	0.0	0.9998477047906217	0.0	0.017451854483834964	0.0	0.0	1.9999367411594973	0.0	0.0	1.999905383183521	0.0	-0.00033966622554586055	0.0	1.1834108798196193e-05	-9.511395865001214e-06	0.0	1.540008315039184e-06
0.12	-0.0003399002688617175	0.0	-2.1248303293700462e-08	-0.017473058376405337	0.0	-0.49916270665398016	0.0	4.452754698515028e-07	0.0	0.9998477047726805	0.0	0.017451855511713896	0.0	0.0	1.9999368589636872	0.0	0.0	1.9999055107455466	0.0	-0.00033969396540573985	0.0	1.1840738603728277e-05	-2.2899771934380476e-06	0.0	1.137238960309633e-06
0.125	-0.0003399014274471988	0.0	-1.626907705723404e-08	-0.0174747568546868	0.0	-0.4991626474362424	0.0	4.450009198582751e-07	0.0	0.9998477047531601	0.0	0.01745185663007299	0.0	0.0	1.9999369871377195	0.0	0.0	1.9999056382289195	0.0	-0.00033969494949198127	0.0	1.1845755989637931e-05	1.3006655320461176e-06	0.0	8.461702731056835e-07
0.13	-0.0003398917289787824	0.0	-1.2441069130690835e-08	-0.017476455319602232	0.0	-0.49916258820096193	0.0	4.2471844716010536e-07	0.0	0.9998477047339402	0.0	0.017451857731214077	0.0	0.0	1.9999371133384132	0.0	0.0	1.9999057599017922	0.0	-0.00033968512331379564	0.0	1.1849243952982023e-05	2.368673736163021e-06	0.0	5.541158115567553e-07
0.135	-0.0003398802160624888	0.0	-9.901025021848067e-09	-0.017478153726161082	0.0	-0.49916252895114194	0.0	4.0168937273727287e-07	0.0	0.9998477047157437	0.0	0.017451858773723343	0.0	0.0	1.9999372328193719	0.0	0.0	1.9999058749773209	0.0	-0.0003396735287422296	0.0	1.1851381375839816e-05	2.119186929614553e-06	0.0	3.1143920106765623e-07
0.14	-0.0003398714513727443	0.0	-8.481582913301966e-09	-0.0174798520675252	0.0	-0.49916246969094147	0.0	3.84477238431222e-07	0.0	0.99984770469866	0.0	0.017451859752477993	0.0	0.0	1.9999373449934768	0.0	0.0	1.999905985121936	0.0	-0.0003396647198318962	0.0	1.1852494744649953e-05	1.456381700131873e-06	0.0	1.5567335719598918e-07
0.145	-0.0003398656282388637	0.0	-7.697295408742167e-09	-0.0174815503627851	0.0	-0.49916241042532616	0.0	3.732547736516591e-07	0.0	0.9998477046823575	0.0	0.01745186068647496	0.0	0.0	1.9999374520379471	0.0	0.0	1.9999060920515523	0.0	-0.0003396588728525623	0.0	1.1853075970917304e-05	9.230510397848886e-07	0.0	8.988761615291968e-08
0.15	-0.00033986203009891405	0.0	-7.1876943448117004e-09	-0.017483248635590008	0.0	-0.49916235115772056	0.0	3.6640095429288644e-07	0.0	0.9998477046664306	0.0	0.01745186159895609	0.0	0.0	1.9999375566165094	0.0	0.0	1.9999061970176937	0.0	-0.000339655259098465	0.0	1.1853460312170169e-05	5.412548251552875e-07	0.0	6.154346530698004e-08
0.155	-0.0003398600069825775	0.0	-6.8651606389334605e-09	-0.017484946897766772	0.0	-0.4991622918892215	0.0	3.6259062046366673e-07	0.0	0.9998477046506781	0.0	0.017451862501446952	0.0	0.0	1.9999376600500969	0.0	0.0	1.9999063008922549	0.0	-0.00033965322593716767	0.0	1.1853712659032364e-05	3.068067279850985e-07	0.0	4.0752660519559606e-08
0.16	-0.00033985880796415	0.0	-6.640809365670164e-09	-0.017486645157696882	0.0	-0.49916223262050446	0.0	3.603361498072528e-07	0.0	0.9998477046349593	0.0	0.017451863401999952	0.0	0.0	1.999937763261588	0.0	0.0	1.9999064041209578	0.0	-0.00033965201979824835	0.0	1.185389564165201e-05	1.7800712228379392e-07	0.0	3.839728123304825e-08
0.165	-0.00033985816301919456	0.0	-6.400963995277158e-09	-0.017488343420296384	0.0	-0.49916217335234736	0.0	3.590807329320736e-07	0.0	0.999847704619191	0.0	0.017451864305393066	0.0	0.0	1.9999378667985817	0.0	0.0	1.9999065069900104	0.0	-0.00033965136685450804	0.0	1.185411344714085e-05	8.489901258593199e-08	0.0	5.038003006776958e-08
0.17	-0.0003398578719132617	0.0	-6.141929106711668e-09	-0.01749004168469118	0.0	-0.49916211408443145	0.0	3.584619077008338e-07	0.0	0.9998477046033897	0.0	0.017451865210679922	0.0	0.0	1.9999379705526148	0.0	0.0	1.9999066096817826	0.0	-0.00033965106686452504	0.0	1.1854362780164076e-05	6.469088712250052e-08	0.0	3.222291736930132e-08
0.17500000000000002	-0.0003398575039224806	0.0	-6.06546669362163e-09	-0.017491739944030266	0.0	-0.4991620548146209	0.0	3.577579339914787e-07	0.0	0.9998477045876767	0.0	0.017451866110906798	0.0	0.0	1.9999380737267287	0.0	0.0	1.999906712171881	0.0	-0.0003396506964081365	0.0	1.1854426965324833e-05	5.615645615530124e-08	0.0	8.400592547918182e-09
0.18	-0.0003398573468077463	0.0	-6.017119254817281e-09	-0.017493438203621557	0.0	-0.49916199554485585	0.0	3.5744358390694896e-07	0.0	0.9998477045719583	0.0	0.017451867011436015	0.0	0.0	1.9999381769354936	0.0	0.0	1.999906814571925	0.0	-0.0003396505376805033	0.0	1.1854470412081708e-05	1.434040313435849e-08	0.0	6.163162451363561e-09
0.185	-0.00033985731192011506	0.0	-6.016457751707417e-09	-0.017495136462377367	0.0	-0.49916193627495037	0.0	3.5736672634878383e-07	0.0	0.9998477045562542	0.0	0.017451867911150887	0.0	0.0	1.9999382800509278	0.0	0.0	1.9999069169499506	0.0	-0.00033965050276970335	0.0	1.1854470466929034e-05	1.7091781901465777e-08	0.0	-1.4471231848727541e-08
0.19	-0.0003398571828894622	0.0	-6.142103463962535e-09	-0.017496834717039892	0.0	-0.49916187700399717	0.0	3.571625130973731e-07	0.0	0.9998477045406221	0.0	0.017451868806736298	0.0	0.0	1.9999383826930883	0.0	0.0	1.9999070192694737	0.0	-0.0003396503781812481	0.0	1.1854341003250607e-05	8.459915314038986e-09	0.0	-2.340313095116695e-08
0.195	-0.00033985724775996694	0.0	-6.226062221516346e-09	-0.01749853297256665	0.0	-0.49916181773331997	0.0	3.5730701785358485e-07	0.0	0.9998477045249745	0.0	0.017451869703217732	0.0	0.0	1.9999384854379412	0.0	0.0	1.9999071216303943	0.0	-0.00033965044592100866	0.0	1.1854259968586953e-05	-2.3575727820164018e-08	0.0	-1.4557952330732814e-08
0.2	-0.0003398573898163585	0.0	-6.301029413751942e-09	-0.017500231227397002	0.0	-0.49916175846258126	0.0	3.576013564219509e-07	0.0	0.9998477045093391	0.0	0.01745187059899919	0.0	0.0	1.9999385881025702	0.0	0.0	1.9999072240756366	0.0	-0.00033965059048586473	0.0	1.185419061320213e-05	-3.4804159498352e-08	0.0	-1.1513743181496222e-08
0.20500000000000002	-0.00033985758413637506	0.0	-6.35824339066249e-09	-0.01750192948157116	0.0	-0.4991616991918269	0.0	3.579987426753862e-07	0.0	0.9998477044937155	0.0	0.017451871494109032	0.0	0.0	1.9999386906902266	0.0	0.0	1.9999073266347218	0.0	-0.00033965078666296723	0.0	1.1854140823681057e-05	-4.303190140464922e-08	0.0	-1.1062840348974125e-08
0.21	-0.00033985781103201194	0.0	-6.428968499388571e-09	-0.01750362773650212	0.0	-0.49916163992119633	0.0	3.584509089718405e-07	0.0	0.999847704478079	0.0	0.017451872389950954	0.0	0.0	1.9999387933617854	0.0	0.0	1.999907429323343	0.0	-0.00033965101586734694	0.0	1.1854078668594334e-05	-4.825566948615772e-08	0.0	-1.143864162457841e-08
0.215	-0.0003398580603085279	0.0	-6.4887999017039384e-09	-0.017505325992215097	0.0	-0.499161580650782	0.0	3.58937626174925e-07	0.0	0.9998477044624294	0.0	0.01745187328654187	0.0	0.0	1.9999388961191857	0.0	0.0	1.9999075321513984	0.0	-0.00033965126705878194	0.0	1.1854028182145532e-05	-5.208594168492654e-08	0.0	-9.447497887899847e-09
0.22	-0.00033985832956864214	0.0	-6.551226482004442e-09	-0.0175070242478361	0.0	-0.49916152138034614	0.0	3.5946256131173315e-07	0.0	0.9998477044467818	0.0	0.017451874183013097	0.0	0.0	1.9999389988628684	0.0	0.0	1.9999076351298366	0.0	-0.000339651538312213	0.0	1.18539757994154e-05	-5.7799519325630405e-08	0.0	-1.4475998801952156e-08
0.225	-0.0003398586289588697	0.0	-6.653423628984448e-09	-0.017508722500937296	0.0	-0.49916146210925	0.0	3.600674371034788e-07	0.0	0.9998477044311784	0.0	0.017451875076958338	0.0	0.0	1.9999391013170507	0.0	0.0	1.999907738281559	0.0	-0.00033965184106539485	0.0	1.1853884720122858e-05	-6.095328223455014e-08	0.0	-1.84359194474664e-08
0.23	-0.0003398589246875724	0.0	-6.749598124439589e-09	-0.01751042075453361	0.0	-0.49916140283825966	0.0	3.606606755577742e-07	0.0	0.9998477044155671	0.0	0.017451875971357268	0.0	0.0	1.9999392038232298	0.0	0.0	1.9999078416032319	0.0	-0.00033965213994909064	0.0	1.1853799532341055e-05	-5.8589361801811984e-08	0.0	-1.618409544294638e-08
0.23500000000000001	-0.00033985920489399253	0.0	-6.8353689281090115e-09	-0.01751211900892332	0.0	-0.49916134356744	0.0	3.612172331592826e-07	0.0	0.9998477043999429	0.0	0.01745187686650125	0.0	0.0	1.9999393064147988	0.0	0.0	1.9999079450843467	0.0	-0.00033965242295686915	0.0	1.1853724200717625e-05	-5.4213535219039814e-08	0.0	-1.3816399010230673e-08
0.24	-0.00033985945771737266	0.0	-6.906354999731865e-09	-0.0175138172644047	0.0	-0.49916128429685597	0.0	3.6171206639266743e-07	0.0	0.9998477043843004	0.0	0.01745187776268166	0.0	0.0	1.9999394091251508	0.0	0.0	1.9999080487072207	0.0	-0.0003396526780822991	0.0	1.1853662689900122e-05	-4.7436422396285725e-08	0.0	-1.0655773076148123e-08
0.245	-0.0003398596712969551	0.0	-6.958175299047298e-09	-0.017515515521276028	0.0	-0.4991612250265724	0.0	3.6212013174259205e-07	0.0	0.9998477043686348	0.0	0.017451878660189855	0.0	0.0	1.9999395119876797	0.0	0.0	1.9999081524469968	0.0	-0.00033965289331894943	0.0	1.1853618964536004e-05	-3.82580233733038e-08	0.0	-6.702217657639385e-09
0.25	-0.0003398598337719824	0.0	-6.986448785794456e-09	-0.01751721377983558	0.0	-0.4991611657566542	0.0	3.624163856937197e-07	0.0	0.999847704352941	0.0	0.01745187955931721	0.0	0.0	1.9999396150357789	0.0	0.0	1.9999082562716435	0.0	-0.00033965305666038904	0.0	1.185359698927266e-05	-2.6678338080524402e-08	0.0	-1.9557327705157425e-09
0.255	-0.000339859933281697	0.0	-6.98679441971249e-09	-0.01751891204038163	0.0	-0.4991611064871662	0.0	3.625757847307138e-07	0.0	0.9998477043372138	0.0	0.017451880460355094	0.0	0.0	1.999939718302842	0.0	0.0	1.9999083601419545	0.0	-0.0003396531561001864	0.0	1.1853600728757381e-05	-1.1364495904841605e-08	0.0	4.132097638218246e-09
0.26	-0.0003398599579653413	0.0	-6.954831160540546e-09	-0.017520610303212458	0.0	-0.4991610472181734	0.0	3.625732853382376e-07	0.0	0.9998477043214481	0.0	0.017451881363594872	0.0	0.0	1.999939821822262	0.0	0.0	1.9999084640115496	0.0	-0.00033965317963191024	0.0	1.1853634147637362e-05	-1.2507715042361692e-09	0.0	7.885222895062606e-09
0.265	-0.00033985997473734685	0.0	-6.921851913308815e-09	-0.017522308565802225	0.0	-0.4991609879490492	0.0	3.6255868919817267e-07	0.0	0.9998477043056873	0.0	0.01745188226655887	0.0	0.0	1.9999399253100751	0.0	0.0	1.999908567876963	0.0	-0.0003396531952213647	0.0	1.185366830559533e-05	-1.1925977728333785e-08	0.0	2.8895503240375397e-09
0.27	-0.0003398600739058327	0.0	-6.9297435929527264e-09	-0.01752400682478642	0.0	-0.4991609286789617	0.0	3.6273372137054374e-07	0.0	0.9998477042899888	0.0	0.017451883165947122	0.0	0.0	1.999940028388075	0.0	0.0	1.9999086717925196	0.0	-0.0003396532945835254	0.0	1.1853664490602552e-05	-1.8526293391818556e-08	0.0	-6.245800856059376e-10
0.275	-0.00033986013963253783	0.0	-6.927038153527558e-09	-0.017525705084190952	0.0	-0.49916086940888854	0.0	3.6284255543310435e-07	0.0	0.9998477042742839	0.0	0.017451884065705907	0.0	0.0	1.9999401315085419	0.0	0.0	1.999908775739255	0.0	-0.0003396533601544442	0.0	1.1853670099459457e-05	-9.440714347969982e-09	0.0	2.1202356477104695e-09
0.28	-0.00033986016753432955	0.0	-6.912740854286189e-09	-0.017527403344046014	0.0	-0.4991608101388289	0.0	3.6287674480706323e-07	0.0	0.9998477042585722	0.0	0.01745188496586375	0.0	0.0	1.9999402346747446	0.0	0.0	1.999908879695785	0.0	-0.00033965338751894275	0.0	1.1853685973355508e-05	-1.3579124550783714e-09	0.0	4.2573624195686905e-09
0.28500000000000003	-0.00033986015322807534	0.0	-6.885856954481499e-09	-0.017529101604381817	0.0	-0.49916075086878203	0.0	3.628278429136291e-07	0.0	0.9998477042428529	0.0	0.017451885866449173	0.0	0.0	1.9999403378899512	0.0	0.0	1.9999089836383053	0.0	-0.00033965337226184264	0.0	1.1853712953480122e-05	7.607925109849012e-09	0.0	6.562727073333927e-09
0.29	-0.0003398600923306426	0.0	-6.845391713366364e-09	-0.017530799865228555	0.0	-0.4991606915987472	0.0	3.6268740317401056e-07	0.0	0.9998477042271255	0.0	0.017451886767490696	0.0	0.0	1.999940441157431	0.0	0.0	1.9999090875405927	0.0	-0.00033965330996796556	0.0	1.18537518810227e-05	1.745679831970711e-08	0.0	9.036329602427555e-09
0.295	-0.0003398599804588987	0.0	-6.790350390193663e-09	-0.017532498126616433	0.0	-0.49916063232872365	0.0	3.624469790094163e-07	0.0	0.9998477042113898	0.0	0.017451887669016838	0.0	0.0	1.999940544480453	0.0	0.0	1.9999091913740037	0.0	-0.00033965319622213336	0.0	1.1853803597172597e-05	2.818870717539943e-08	0.0	1.1678170001569736e-08
0.3	-0.0003398598132297112	0.0	-6.719738244216275e-09	-0.01753419638857565	0.0	-0.49916057305871064	0.0	3.620981238410551e-07	0.0	0.9998477041956452	0.0	0.017451888571056125	0.0	0.0	1.9999406478622856	0.0	0.0	1.999909295107475	0.0	-0.00033965302660916765	0.0	1.1853868943119153e-05	4.135100160686187e-08	0.0	1.4967994373415755e-08
0.305	-0.00033985958625994746	0.0	-6.632560534687078e-09	-0.017535894651136412	0.0	-0.4991605137887074	0.0	3.6163239109013556e-07	0.0	0.999847704179891	0.0	0.017451889473637072	0.0	0.0	1.9999407513061978	0.0	0.0	1.9999093987075236	0.0	-0.00033965279671389	0.0	1.1853948760051659e-05	4.5706669523773335e-08	0.0	1.5421837701961834e-08
0.31	-0.0003398593869463707	0.0	-6.559829131778026e-09	-0.017537592913366002	0.0	-0.4991604545187057	0.0	3.612217462538205e-07	0.0	0.999847704164143	0.0	0.017451890375861576	0.0	0.0	1.9999408547092579	0.0	0.0	1.9999095021899314	0.0	-0.00033965259496211497	0.0	1.1854015104392794e-05	3.066935330553235e-08	0.0	9.757466399882812e-09
0.315	-0.0003398592786300855	0.0	-6.5241669212966695e-09	-0.017539291174584082	0.0	-0.4991603952486994	0.0	3.609908685330711e-07	0.0	0.9998477041484127	0.0	0.017451891277074402	0.0	0.0	1.999940957996371	0.0	0.0	1.9999096056061973	0.0	-0.0003396524854458835	0.0	1.1854047577099612e-05	2.035359949067861e-08	0.0	5.451444192324302e-09
0.32	-0.0003398591708000089	0.0	-6.494543567316261e-09	-0.017540989435724477	0.0	-0.49916033597869464	0.0	3.607620093229436e-07	0.0	0.9998477041326844	0.0	0.017451892178173632	0.0	0.0	1.9999410612704647	0.0	0.0	1.9999097089569	0.0	-0.00033965237662631387	0.0	1.1854074031518785e-05	2.1511578108186713e-08	0.0	4.597238918513773e-09
0.325	-0.0003398590661464526	0.0	-6.472431067380851e-09	-0.01754268769674318	0.0	-0.4991602767086901	0.0	3.6054062634013955e-07	0.0	0.9998477041169589	0.0	0.017451893079116376	0.0	0.0	1.9999411645266238	0.0	0.0	1.9999098122441812	0.0	-0.0003396522712434506	0.0	1.1854093090408044e-05	2.0550232375349545e-08	0.0	2.9804087100797434e-09
0.33	-0.0003398589673597286	0.0	-6.459301419034488e-09	-0.017544385957596168	0.0	-0.49916021743868455	0.0	3.603321773013606e-07	0.0	0.9998477041012368	0.0	0.017451893979859735	0.0	0.0	1.9999412677599313	0.0	0.0	1.9999099154717461	0.0	-0.00033965217203733833	0.0	1.1854103376525141e-05	1.9040877696167163e-08	0.0	1.0881300548443358e-09
0.335	-0.0003398588771301487	0.0	-6.456626619821226e-09	-0.017546084218239447	0.0	-0.4991601581686766	0.0	3.6014211992330843e-07	0.0	0.999847704085519	0.0	0.017451894880360818	0.0	0.0	1.9999413709654723	0.0	0.0	1.9999100186448637	0.0	-0.00033965208174802184	0.0	1.1854103512627855e-05	1.6983514117621668e-08	0.0	-1.0795970430137547e-09
0.34	-0.0003398587981480247	0.0	-6.4658786672851135e-09	-0.017547782478629	0.0	-0.499160098898665	0.0	3.599759119226845e-07	0.0	0.9998477040698062	0.0	0.017451895780576734	0.0	0.0	1.9999414741383308	0.0	0.0	1.999910121770366	0.0	-0.00033965200311554533	0.0	1.1854092121473978e-05	1.4378141642423561e-08	0.0	-3.5227725808404913e-09
0.34500000000000003	-0.0003398587331036685	0.0	-6.488529558970202e-09	-0.017549480738720813	0.0	-0.4991600396286483	0.0	3.5983901101619054e-07	0.0	0.999847704054099	0.0	0.017451896680464582	0.0	0.0	1.999941577273589	0.0	0.0	1.9999102248566492	0.0	-0.00033965193887995366	0.0	1.185406782582132e-05	1.3358281970088256e-08	0.0	-7.943217938535015e-09
0.35000000000000003	-0.00033985868468739186	0.0	-6.526051292420542e-09	-0.017551178998470883	0.0	-0.49915998035862524	0.0	3.597368749205281e-07	0.0	0.9998477040383983	0.0	0.017451897579981474	0.0	0.0	1.9999416803663328	0.0	0.0	1.9999103279136725	0.0	-0.00033965189178129156	0.0	1.1854029248427714e-05	-8.940307861792878e-09	0.0	1.781979145214432e-09
0.355	-0.0003398587870862953	0.0	-6.482336240559175e-09	-0.017552877257837503	0.0	-0.4991599210878153	0.0	3.5992233038839414e-07	0.0	0.9998477040227034	0.0	0.017451898479172258	0.0	0.0	1.9999417834217015	0.0	0.0	1.999910431023825	0.0	-0.0003396519925709098	0.0	1.1854077121334052e-05	-2.5184187851454154e-09	0.0	4.328388497140187e-09
0.36	-0.00033985869018615916	0.0	-6.497129678634481e-09	-0.017554575518339638	0.0	-0.49915986181778704	0.0	3.597230154540537e-07	0.0	0.9998477040069912	0.0	0.01745189937935029	0.0	0.0	1.9999418865902177	0.0	0.0	1.999910534076878	0.0	-0.0003396518962247229	0.0	1.1854059566827123e-05	2.0601189010998125e-08	0.0	-3.879909395045378e-09
0.365	-0.0003398586170176136	0.0	-6.504089058133718e-09	-0.017556273778721602	0.0	-0.4991598025476369	0.0	3.59569834036255e-07	0.0	0.9998477039912814	0.0	0.017451900279386732	0.0	0.0	1.9999419897425066	0.0	0.0	1.9999106370860475	0.0	-0.00033965182332227744	0.0	1.1854050669706761e-05	1.2236114943360635e-08	0.0	-9.136854075285676e-10
0.37	-0.0003398585675806586	0.0	-6.503214379056889e-09	-0.017557972038983394	0.0	-0.4991597432773648	0.0	3.5946278613499806e-07	0.0	0.9998477039755742	0.0	0.01745190117928158	0.0	0.0	1.9999420928785674	0.0	0.0	1.9999107400645502	0.0	-0.00033965177386357343	0.0	1.185405042997309e-05	7.547366685796709e-09	0.0	8.177919430598479e-10
0.375	-0.00033985854187529416	0.0	-6.494505641403991e-09	-0.017559670299125016	0.0	-0.49915968400697075	0.0	3.594018717502829e-07	0.0	0.9998477039598693	0.0	0.01745190207903484	0.0	0.0	1.9999421959984007	0.0	0.0	1.9999108430256023	0.0	-0.00033965174784861057	0.0	1.1854058847626235e-05	2.858618448109823e-09	0.0	2.549269319482768e-09
0.38	-0.0003398585399015203	0.0	-6.477962845175026e-09	-0.017561368559146466	0.0	-0.49915962473645475	0.0	3.593870908821095e-07	0.0	0.999847703944167	0.0	0.017451902978646506	0.0	0.0	1.9999422991020062	0.0	0.0	1.9999109459824198	0.0	-0.000339651745277389	0.0	1.1854075922666327e-05	-1.8301298284276412e-09	0.0	4.280746721090802e-09
0.385	-0.000339858561659337	0.0	-6.453585990369993e-09	-0.01756306681904775	0.0	-0.49915956546581686	0.0	3.5941844353047793e-07	0.0	0.9998477039284672	0.0	0.017451903878116577	0.0	0.0	1.999942402189384	0.0	0.0	1.9999110489482192	0.0	-0.0003396517661499088	0.0	1.1854101655093489e-05	-6.5188780588865125e-09	0.0	6.012224147742775e-09
0.39	-0.00033985860714874427	0.0	-6.421375076988892e-09	-0.017564765078828856	0.0	-0.499159506195057	0.0	3.594959296953881e-07	0.0	0.9998477039127698	0.0	0.01745190477744506	0.0	0.0	1.9999425052605342	0.0	0.0	1.999911151936217	0.0	-0.0003396518104661696	0.0	1.1854136044907848e-05	-1.2804504742021269e-08	0.0	8.47336361427088e-09
0.395	-0.0003398586763697421	0.0	-6.381330105031724e-09	-0.017566463338489796	0.0	-0.4991594469241752	0.0	3.5961954937684003e-07	0.0	0.9998477038970749	0.0	0.017451905676631952	0.0	0.0	1.9999426083154568	0.0	0.0	1.999911254959629	0.0	-0.0003396518782261717	0.0	1.1854179092109534e-05	-7.526781625809102e-09	0.0	5.650859207108955e-09
0.4	-0.00033985867204014013	0.0	-6.3738608412904425e-09	-0.017568161598731525	0.0	-0.4991593876537553	0.0	3.595992262903854e-07	0.0	0.9998477038813713	0.0	0.01745190657631471	0.0	0.0	1.9999427114272108	0.0	0.0	1.999911357977219	0.0	-0.00033965187361720766	0.0	1.1854187016977827e-05	7.1810876563014004e-09	0.0	-1.4805639381644605e-09
0.405	-0.0003398586176264467	0.0	-6.38921960096399e-09	-0.017569859859384956	0.0	-0.4991593283836565	0.0	3.594808108295318e-07	0.0	0.9998477038656618	0.0	0.017451907476339564	0.0	0.0	1.999942814578171	0.0	0.0	1.9999114609608852	0.0	-0.00033965181975131593	0.0	1.1854170380100902e-05	1.095686391822722e-08	0.0	-3.61678354753352e-09
0.41000000000000003	-0.00033985857090548826	0.0	-6.403406635723006e-09	-0.017571558120033783	0.0	-0.499159269113532	0.0	3.5937719112386486e-07	0.0	0.9998477038499529	0.0	0.017451908376327922	0.0	0.0	1.9999429177249488	0.0	0.0	1.9999115639148668	0.0	-0.0003396517735325828	0.0	1.185415518267508e-05	8.479030770507854e-09	0.0	-2.895540050551977e-09
0.41500000000000004	-0.0003398585318772649	0.0	-6.416421945567489e-09	-0.017573256380678005	0.0	-0.49915920984338186	0.0	3.592883671733846e-07	0.0	0.9998477038342446	0.0	0.01745190927627979	0.0	0.0	1.9999430208675442	0.0	0.0	1.999911666843402	0.0	-0.00033965173496100824	0.0	1.185414142470041e-05	6.9495990667918506e-09	0.0	-2.6076498169021753e-09
0.42	-0.0003398585005417766	0.0	-6.428265530497439e-09	-0.01757495464131762	0.0	-0.499159150573206	0.0	3.5921433897809114e-07	0.0	0.9998477038185369	0.0	0.017451910176195157	0.0	0.0	1.999943124005957	0.0	0.0	1.99991176975073	0.0	-0.0003396517040365922	0.0	1.1854129106176925e-05	5.420167332356787e-09	0.0	-2.319759575487905e-09
0.425	-0.00033985847689902327	0.0	-6.438937390512856e-09	-0.017576652901952636	0.0	-0.49915909130300445	0.0	3.591551065379844e-07	0.0	0.99984770380283	0.0	0.017451911076074033	0.0	0.0	1.9999432271401874	0.0	0.0	1.999911872641089	0.0	-0.00033965168075933487	0.0	1.185411822710467e-05	3.890735619605767e-09	0.0	-2.0318693259421187e-09
0.43	-0.000339858460949005	0.0	-6.448437525613742e-09	-0.017578351162583047	0.0	-0.4991590320327773	0.0	3.5911066985306433e-07	0.0	0.9998477037871236	0.0	0.01745191197591641	0.0	0.0	1.9999433302702345	0.0	0.0	1.9999119755187178	0.0	-0.000339651665129236	0.0	1.185410878748368e-05	2.3613039204072733e-09	0.0	-1.7439790672483765e-09
0.435	-0.0003398584526917218	0.0	-6.456765935800093e-09	-0.017580049423208854	0.0	-0.4991589727625244	0.0	3.59081028923331e-07	0.0	0.9998477037714179	0.0	0.017451912875722297	0.0	0.0	1.9999434333961	0.0	0.0	1.999912078387855	0.0	-0.00033965165714629566	0.0	1.1854100787314011e-05	8.318721968142314e-10	0.0	-1.4560888002537113e-09
0.44	-0.0003398584521271736	0.0	-6.463922621071913e-09	-0.017581747683830057	0.0	-0.49915891349224584	0.0	3.5906618374878435e-07	0.0	0.9998477037557129	0.0	0.017451913775491688	0.0	0.0	1.999943536517782	0.0	0.0	1.9999121812527394	0.0	-0.00033965165681051397	0.0	1.185409422659569e-05	-6.975594897352366e-10	0.0	-1.168198526369845e-09
0.445	-0.0003398584592553605	0.0	-6.4699075814292e-09	-0.017583445944446656	0.0	-0.4991588542219416	0.0	3.5906613432942446e-07	0.0	0.9998477037400083	0.0	0.017451914675224587	0.0	0.0	1.9999436396352817	0.0	0.0	1.9999122841176098	0.0	-0.00033965166412189057	0.0	1.1854089105328763e-05	-2.2269911844162208e-09	0.0	-8.803082431403815e-10
0.45	-0.00033985847407628237	0.0	-6.474720816871955e-09	-0.017585144205058648	0.0	-0.4991587949516117	0.0	3.590808806652513e-07	0.0	0.9998477037243045	0.0	0.017451915574920988	0.0	0.0	1.9999437427485989	0.0	0.0	1.9999123869867046	0.0	-0.00033965167908042585	0.0	1.1854085423513273e-05	-3.756422902588252e-09	0.0	-5.924179514405888e-10
0.455	-0.00033985849658993927	0.0	-6.4783623274001765e-09	-0.01758684246566604	0.0	-0.49915873568125607	0.0	3.5911042275626483e-07	0.0	0.9998477037086013	0.0	0.017451916474580897	0.0	0.0	1.9999438458577339	0.0	0.0	1.9999124898642626	0.0	-0.0003396517016861196	0.0	1.185408318114926e-05	-5.285854595462233e-09	0.0	-3.0452765231514045e-10
0.46	-0.00033985852679633123	0.0	-6.480832113013866e-09	-0.017588540726268826	0.0	-0.4991586764108748	0.0	3.591547606024651e-07	0.0	0.9998477036928988	0.0	0.017451917374204307	0.0	0.0	1.9999439489626856	0.0	0.0	1.9999125927545225	0.0	-0.00033965173193897184	0.0	1.1854082378236763e-05	-6.815286298274733e-09	0.0	-1.663734480406599e-11
0.465	-0.0003398585646954582	0.0	-6.482130173713023e-09	-0.01759023898686701	0.0	-0.4991586171404679	0.0	3.5921389420385207e-07	0.0	0.9998477036771969	0.0	0.017451918273791226	0.0	0.0	1.9999440520634546	0.0	0.0	1.999912695661723	0.0	-0.0003396517698389826	0.0	1.1854083014775826e-05	-8.344718007411746e-09	0.0	2.712529712902757e-10
0.47000000000000003	-0.00033985861028732026	0.0	-6.482256509497647e-09	-0.01759193724746059	0.0	-0.49915855787003527	0.0	3.5928782356042577e-07	0.0	0.9998477036614957	0.0	0.01745191917334165	0.0	0.0	1.9999441551600416	0.0	0.0	1.9999127985901026	0.0	-0.0003396518153861519	0.0	1.1854085090766492e-05	-9.87414970209273e-09	0.0	5.591432961655256e-10
0.47500000000000003	-0.00033985866357191737	0.0	-6.481211120367738e-09	-0.01759363550804956	0.0	-0.49915849859957695	0.0	3.593765486721862e-07	0.0	0.999847703645795	0.0	0.017451920072855582	0.0	0.0	1.999944258252446	0.0	0.0	1.9999129015439001	0.0	-0.0003396518685804796	0.0	1.1854088606208801e-05	-1.14035813895457e-08	0.0	8.470336282970244e-10
0.48	-0.00033985872454924944	0.0	-6.478994006323297e-09	-0.017595333768633932	0.0	-0.49915843932909293	0.0	3.594800695391333e-07	0.0	0.999847703630095	0.0	0.017451920972333015	0.0	0.0	1.9999443613406673	0.0	0.0	1.999913004527354	0.0	-0.00033965192942196577	0.0	1.1854093561102788e-05	-1.2933013084226685e-08	0.0	1.1349239688423838e-09
0.485	-0.0003398587932193166	0.0	-6.475605167364323e-09	-0.0175970320292137	0.0	-0.49915838005858326	0.0	3.5959838616126717e-07	0.0	0.9998477036143957	0.0	0.017451921871773957	0.0	0.0	1.9999444644247064	0.0	0.0	1.9999131075447032	0.0	-0.0003396519979106105	0.0	1.1854099955448504e-05	-1.5094120089020543e-08	0.0	1.5240431824398637e-09
0.49	-0.0003398588695821188	0.0	-6.471044603490817e-09	-0.017598730289788863	0.0	-0.49915832078804795	0.0	3.5973149853858774e-07	0.0	0.9998477035986969	0.0	0.0174519227711784	0.0	0.0	1.9999445675045626	0.0	0.0	1.9999132106001865	0.0	-0.00033965207404641366	0.0	1.1854107789245983e-05	-1.2904047728721942e-08	0.0	1.2158659578613566e-09
0.495	-0.00033985891554826037	0.0	-6.470059807671317e-09	-0.017600428550574913	0.0	-0.4991582615175757	0.0	3.5980605266438344e-07	0.0	0.9998477035829955	0.0	0.0174519236707424	0.0	0.0	1.9999446706027053	0.0	0.0	1.9999133136770277	0.0	-0.0003396521199288573	0.0	1.1854110988763407e-05	-5.222476266365505e-09	0.0	2.7650795466002327e-11
0.5	-0.0003398589268637817	0.0	-6.473180996871601e-09	-0.01760212681159592	0.0	-0.4991582022471765	0.0	3.598138561012722e-07	0.0	0.9998477035672908	0.0	0.017451924570487852	0.0	0.0	1.999944773721644	0.0	0.0	1.9999134167561046	0.0	-0.00033965213132507627	0.0	1.1854108875664544e-05	-1.7103100466185513e-09	0.0	-4.923980782731753e-10
0.505	-0.00033985893825715904	0.0	-6.476079585818655e-09	-0.017603825072655406	0.0	-0.49915814297676936	0.0	3.598217902696738e-07	0.0	0.999847703551586	0.0	0.017451925470236003	0.0	0.0	1.9999448768408918	0.0	0.0	1.9999135198374542	0.0	-0.0003396521427913352	0.0	1.1854106987749272e-05	-2.3002558028912407e-09	0.0	-3.5506469463612877e-10
0.51	-0.00033985894972839235	0.0	-6.47875557451248e-09	-0.01760552333375337	0.0	-0.4991580837063543	0.0	3.5982985516958814e-07	0.0	0.9998477035358813	0.0	0.017451926369986853	0.0	0.0	1.9999449799604494	0.0	0.0	1.9999136229211145	0.0	-0.0003396521543276343	0.0	1.1854105325017598e-05	-2.314263831388527e-09	0.0	-3.10027975361694e-10
0.515	-0.00033985896127748167	0.0	-6.481208962953077e-09	-0.017607221594889814	0.0	-0.49915802443593127	0.0	3.598380508010153e-07	0.0	0.9998477035201765	0.0	0.017451927269740403	0.0	0.0	1.9999450830803165	0.0	0.0	1.9999137260071227	0.0	-0.0003396521659339735	0.0	1.1854103887469518e-05	-2.328271846333286e-09	0.0	-2.649912569060578e-10
0.52	-0.00033985897290442695	0.0	-6.483439751140443e-09	-0.01760891985606473	0.0	-0.4991579651655003	0.0	3.5984637716395527e-07	0.0	0.9998477035044716	0.0	0.017451928169496655	0.0	0.0	1.9999451862004924	0.0	0.0	1.999913829095516	0.0	-0.00033965217761035277	0.0	1.185410267510503e-05	-2.342279851339525e-09	0.0	-2.1995453782926405e-10
0.525	-0.00033985898460922825	0.0	-6.48544793907458e-09	-0.01761061811727813	0.0	-0.4991579058950615	0.0	3.5985483425840804e-07	0.0	0.9998477034887666	0.0	0.017451929069255606	0.0	0.0	1.9999452893209784	0.0	0.0	1.9999139321863322	0.0	-0.00033965218935677204	0.0	1.185410168792414e-05	-2.3562878816438147e-09	0.0	-1.7491781796190623e-10
0.53	-0.00033985899639188557	0.0	-6.487233526755488e-09	-0.017612316378530002	0.0	-0.4991578466246147	0.0	3.598634220843736e-07	0.0	0.9998477034730617	0.0	0.017451929969017257	0.0	0.0	1.9999453924417743	0.0	0.0	1.9999140352796088	0.0	-0.0003396522011732316	0.0	1.185410092592685e-05	-2.37029591465861e-09	0.0	-1.2988109891334695e-10
0.535	-0.00033985900825239885	0.0	-6.488796514183166e-09	-0.017614014639820354	0.0	-0.49915778735416	0.0	3.5987214064185196e-07	0.0	0.9998477034573567	0.0	0.017451930868781607	0.0	0.0	1.9999454955628786	0.0	0.0	1.999914138375383	0.0	-0.0003396522130597311	0.0	1.1854100389113152e-05	-2.3843039061123214e-09	0.0	-8.484438011889753e-11
0.54	-0.00033985902019076814	0.0	-6.4901369013576155e-09	-0.017615712901149185	0.0	-0.49915772808369735	0.0	3.598809899308431e-07	0.0	0.9998477034416516	0.0	0.017451931768548656	0.0	0.0	1.9999455986842922	0.0	0.0	1.9999142414736921	0.0	-0.00033965222501627066	0.0	1.1854100077483051e-05	-2.3983119400306186e-09	0.0	-3.9807660223305273e-11
0.545	-0.00033985903220699345	0.0	-6.491254688278835e-09	-0.017617411162516493	0.0	-0.49915766881322676	0.0	3.5988996995134704e-07	0.0	0.9998477034259465	0.0	0.017451932668318407	0.0	0.0	1.999945701806016	0.0	0.0	1.999914344574574	0.0	-0.0003396522370428505	0.0	1.1854099991036549e-05	-2.412319946843861e-09	0.0	5.229058853488458e-12
0.55	-0.0003398590443010747	0.0	-6.492149874946826e-09	-0.017619109423922277	0.0	-0.4991576095427483	0.0	3.5989908070336376e-07	0.0	0.9998477034102413	0.0	0.017451933568090855	0.0	0.0	1.9999458049280487	0.0	0.0	1.9999144476780657	0.0	-0.00033965224913947014	0.0	1.185410012977364e-05	-2.4263279482360928e-09	0.0	5.026577855143969e-11
0.555	-0.000339859056473012	0.0	-6.492822461361587e-09	-0.01762080768536654	0.0	-0.49915755027226183	0.0	3.599083221868933e-07	0.0	0.9998477033945361	0.0	0.017451934467866005	0.0	0.0	1.9999459080503912	0.0	0.0	1.999914550784205	0.0	-0.00033965226130613	0.0	1.1854100493694335e-05	-2.4403359848648954e-09	0.0	9.530249867290739e-11
0.56	-0.00033985906872280525	0.0	-6.493272447523119e-09	-0.01762250594684928	0.0	-0.4991574910017675	0.0	3.5991769440193567e-07	0.0	0.9998477033788309	0.0	0.017451935367643855	0.0	0.0	1.999946011173043	0.0	0.0	1.9999146538930295	0.0	-0.00033965227354282995	0.0	1.1854101082798626e-05	-2.454343991678138e-09	0.0	1.40339218003811e-10
0.5650000000000001	-0.0003398590810504545	0.0	-6.493499833431421e-09	-0.0176242042083705	0.0	-0.4991574317312652	0.0	3.599271973484908e-07	0.0	0.9998477033631256	0.0	0.017451936267424407	0.0	0.0	1.9999461142960044	0.0	0.0	1.999914757004576	0.0	-0.00033965228584956995	0.0	1.1854101897086516e-05	-2.468352011140406e-09	0.0	1.853759380405754e-10
0.5700000000000001	-0.0003398590934559598	0.0	-6.493504619086495e-09	-0.017625902469930194	0.0	-0.499157372460755	0.0	3.5993683102655874e-07	0.0	0.9998477033474202	0.0	0.017451937167207655	0.0	0.0	1.9999462174192746	0.0	0.0	1.9999148601188828	0.0	-0.00033965229822635005	0.0	1.1854102936558007e-05	-2.4823600188571505e-09	0.0	2.3041265756912005e-10
0.5750000000000001	-0.00033985910593932104	0.0	-6.4932868044883385e-09	-0.017627600731528366	0.0	-0.4991573131902368	0.0	3.5994659543613946e-07	0.0	0.9998477033317148	0.0	0.017451938066993605	0.0	0.0	1.9999463205428547	0.0	0.0	1.9999149632359865	0.0	-0.00033965231067317015	0.0	1.1854104201213093e-05	-2.4963680365124147e-09	0.0	2.754493777470566e-10
0.58	-0.0003398591185005383	0.0	-6.4928463896369535e-09	-0.017629298993165017	0.0	-0.4991572539197108	0.0	3.5995649057723297e-07	0.0	0.9998477033160094	0.0	0.017451938966782255	0.0	0.0	1.9999464236667448	0.0	0.0	1.999915066355925	0.0	-0.0003396523231900304	0.0	1.1854105691051785e-05	-1.7434848775925902e-09	0.0	6.117076141828683e-10
0.585	-0.0003398591311396115	0.0	-6.492183374532338e-09	-0.017630997254840148	0.0	-0.4991571946491768	0.0	3.599665164498393e-07	0.0	0.9998477033003039	0.0	0.017451939866573604	0.0	0.0	1.999946526790944	0.0	0.0	1.9999151694787358	0.0	-0.0003396523357769308	0.0	1.1854107406074073e-05	-8.034200345842572e-09	0.0	-1.6801287555539232e-09
0.59	-0.0003398591892321904	0.0	-6.510366238141007e-09	-0.017632695510328856	0.0	-0.49915713538006595	0.0	3.6006238859534557e-07	0.0	0.9998477032845978	0.0	0.017451940766408165	0.0	0.0	1.9999466299200956	0.0	0.0	1.9999152726290121	0.0	-0.00033965239444734243	0.0	1.1854091872988997e-05	-7.058329982953469e-09	0.0	-1.5816322520274362e-09
0.595	-0.0003398591935523415	0.0	-6.508535747410799e-09	-0.01763439377269691	0.0	-0.4991570761093643	0.0	3.6005684886908456e-07	0.0	0.9998477032688928	0.0	0.0174519416661681	0.0	0.0	1.999946733040694	0.0	0.0	1.999915375777701	0.0	-0.00033965239867964547	0.0	1.1854094464436116e-05	6.084119662791201e-11	0.0	8.203649620841182e-10
0.6	-0.00033985919787249267	0.0	-6.50670525668059e-09	-0.017636092035064967	0.0	-0.49915701683866265	0.0	3.600513091428235e-07	0.0	0.9998477032531878	0.0	0.01745194256592803	0.0	0.0	1.9999468361612922	0.0	0.0	1.9999154789248033	0.0	-0.00033965240291194856	0.0	1.1854097055883255e-05	-8.464606375850267e-10	0.0	5.182894289290088e-10
0.605	-0.0003398592021926438	0.0	-6.5048747659503814e-09	-0.017637790297433023	0.0	-0.49915695756796097	0.0	3.600457694165625e-07	0.0	0.999847703237483	0.0	0.017451943465687965	0.0	0.0	1.9999469392818907	0.0	0.0	1.9999155820703183	0.0	-0.0003396524071442518	0.0	1.1854099647330406e-05	-8.464606402955321e-10	0.0	5.18289432345375e-10
0.61	-0.00033985920651279496	0.0	-6.503044275220173e-09	-0.01763948855980108	0.0	-0.4991568982972593	0.0	3.600402296903015e-07	0.0	0.999847703221778	0.0	0.0174519443654479	0.0	0.0	1.9999470424024894	0.0	0.0	1.9999156852142463	0.0	-0.0003396524113765549	0.0	1.185410223877758e-05	-8.46460607769467e-10	0.0	5.182894356488035e-10
0.615	-0.00033985921083294607	0.0	-6.501213784489964e-09	-0.017641186822169135	0.0	-0.4991568390265576	0.0	3.6003468996404043e-07	0.0	0.999847703206073	0.0	0.017451945265207835	0.0	0.0	1.9999471455230882	0.0	0.0	1.9999157883565875	0.0	-0.00033965241560885795	0.0	1.185410483022476e-05	-8.464605996379507e-10	0.0	5.182894377946203e-10
0.62	-0.00033985921515309724	0.0	-6.499383293759756e-09	-0.01764288508453719	0.0	-0.49915677975585593	0.0	3.600291502377794e-07	0.0	0.999847703190368	0.0	0.017451946164967768	0.0	0.0	1.999947248643686	0.0	0.0	1.9999158914973416	0.0	-0.00033965241984116093	0.0	1.1854107421671959e-05	-8.464606249360014e-10	0.0	5.18289441436862e-10
0.625	-0.0003398592194732484	0.0	-6.4975528030295476e-09	-0.017644583346905246	0.0	-0.4991567204851543	0.0	3.6002361051151836e-07	0.0	0.9998477031746631	0.0	0.0174519470647277	0.0	0.0	1.9999473517642852	0.0	0.0	1.9999159946365086	0.0	-0.0003396524240734642	0.0	1.1854110013119175e-05	-8.464606276465069e-10	0.0	5.182894445426494e-10
0.63	-0.00033985922379339953	0.0	-6.495722312299339e-09	-0.0176462816092733	0.0	-0.4991566612144526	0.0	3.6001807078525736e-07	0.0	0.9998477031589581	0.0	0.017451947964487638	0.0	0.0	1.9999474548848835	0.0	0.0	1.9999160977740886	0.0	-0.0003396524283057672	0.0	1.1854112604566403e-05	-8.464606005414526e-10	0.0	5.182894474790303e-10
0.635	-0.0003398592281135507	0.0	-6.49389182156913e-09	-0.017647979871641357	0.0	-0.49915660194375094	0.0	3.6001253105899635e-07	0.0	0.9998477031432531	0.0	0.01745194886424757	0.0	0.0	1.9999475580054822	0.0	0.0	1.9999162009100817	0.0	-0.0003396524325380702	0.0	1.185411519601365e-05	-8.464605996379507e-10	0.0	5.182894502460047e-10
0.64	-0.0003398592324337018	0.0	-6.492061330838922e-09	-0.017649678134009413	0.0	-0.49915654267304926	0.0	3.600069913327353e-07	0.0	0.9998477031275481	0.0	0.017451949764007504	0.0	0.0	1.9999476611260805	0.0	0.0	1.9999163040444876	0.0	-0.0003396524367703732	0.0	1.1854117787460907e-05	-8.464606231289978e-10	0.0	5.182894539164807e-10
0.645	-0.000339859236753853	0.0	-6.490230840108714e-09	-0.01765137639637747	0.0	-0.4991564834023476	0.0	3.600014516064743e-07	0.0	0.9998477031118432	0.0	0.01745195066376744	0.0	0.0	1.9999477642466794	0.0	0.0	1.9999164071773066	0.0	-0.0003396524410026764	0.0	1.1854120378908187e-05	-8.464606113834743e-10	0.0	5.182894567399239e-10
0.65	-0.0003398592410740041	0.0	-6.488400349378505e-09	-0.017653074658745525	0.0	-0.4991564241316459	0.0	3.599959118802132e-07	0.0	0.9998477030961382	0.0	0.017451951563527374	0.0	0.0	1.9999478673672773	0.0	0.0	1.9999165103085386	0.0	-0.00033965244523497933	0.0	1.1854122970355473e-05	-8.464605915064344e-10	0.0	5.182894593092572e-10
0.655	-0.00033985924539415527	0.0	-6.486569858648296e-09	-0.01765477292111358	0.0	-0.4991563648609443	0.0	3.599903721539522e-07	0.0	0.9998477030804332	0.0	0.017451952463287308	0.0	0.0	1.999947970487876	0.0	0.0	1.9999166134381836	0.0	-0.00033965244946728237	0.0	1.185412556180278e-05	-8.464605969274452e-10	0.0	5.18289462697389e-10
0.66	-0.0003398592497143064	0.0	-6.484739367918088e-09	-0.017656471183481636	0.0	-0.4991563055902426	0.0	3.599848324276912e-07	0.0	0.9998477030647283	0.0	0.01745195336304724	0.0	0.0	1.9999480736084747	0.0	0.0	1.9999167165662415	0.0	-0.00033965245369958535	0.0	1.18541281532501e-05	-8.464606195149906e-10	0.0	5.18289465972583e-10
0.665	-0.00033985925403445756	0.0	-6.48290887718788e-09	-0.017658169445849692	0.0	-0.4991562463195409	0.0	3.5997929270143015e-07	0.0	0.9998477030490234	0.0	0.017451954262807177	0.0	0.0	1.9999481767290734	0.0	0.0	1.9999168196927124	0.0	-0.00033965245793188856	0.0	1.185413074469744e-05	-8.46460607769467e-10	0.0	5.182894686830884e-10
0.67	-0.0003398592583546087	0.0	-6.481078386457671e-09	-0.017659867708217748	0.0	-0.49915618704883924	0.0	3.5997375297516915e-07	0.0	0.9998477030333184	0.0	0.01745195516256711	0.0	0.0	1.9999482798496717	0.0	0.0	1.9999169228175964	0.0	-0.00033965246216419143	0.0	1.1854133336144787e-05	-8.464605878924272e-10	0.0	5.182894713935939e-10
0.675	-0.00033985926267475985	0.0	-6.4792478957274625e-09	-0.017661565970585803	0.0	-0.49915612777813756	0.0	3.5996821324890814e-07	0.0	0.9998477030176134	0.0	0.017451956062327044	0.0	0.0	1.9999483829702702	0.0	0.0	1.9999170259408932	0.0	-0.00033965246639649447	0.0	1.1854135927592155e-05	-8.316801132328411e-10	0.0	5.276030900124676e-10
0.68	-0.00033985926699491096	0.0	-6.477417404997254e-09	-0.01766326423295386	0.0	-0.4991560685074359	0.0	3.599626735226471e-07	0.0	0.9998477030019085	0.0	0.017451956962086977	0.0	0.0	1.9999484860908685	0.0	0.0	1.999917129062603	0.0	-0.0003396524706287975	0.0	1.1854138519039538e-05	-9.006137885516723e-10	0.0	4.841660044867905e-10
0.685	-0.00033985927218185016	0.0	-6.476176340913306e-09	-0.017664962497336605	0.0	-0.4991560092365305	0.0	3.599587975295196e-07	0.0	0.9998477029862034	0.0	0.01745195786184842	0.0	0.0	1.9999485892116398	0.0	0.0	1.9999172321832026	0.0	-0.0003396524757479305	0.0	1.1854140551670046e-05	-1.245785960465815e-09	0.0	2.6666319598476074e-10
0.6900000000000001	-0.0003398592793937561	0.0	-6.47631227944641e-09	-0.017666660766426024	0.0	-0.4991559499651491	0.0	3.5995880830481954e-07	0.0	0.9998477029704982	0.0	0.017451958761613387	0.0	0.0	1.999948692332815	0.0	0.0	1.999917335303805	0.0	-0.0003396524829388521	0.0	1.1854141278807648e-05	-1.4727141471748927e-09	0.0	1.2366930754989738e-10
0.6950000000000001	-0.00033985928660566203	0.0	-6.476448217979514e-09	-0.017668359035515446	0.0	-0.49915589069376776	0.0	3.5995881908011953e-07	0.0	0.9998477029547931	0.0	0.017451959661378354	0.0	0.0	1.9999487954539905	0.0	0.0	1.9999174384244107	0.0	-0.0003396524901297738	0.0	1.1854142005945277e-05	-1.4381843245972702e-09	0.0	1.4542752830060067e-10
0.7000000000000001	-0.00033985929381756796	0.0	-6.476584156512618e-09	-0.017670057304604865	0.0	-0.49915583142238645	0.0	3.599588298554195e-07	0.0	0.9998477029390879	0.0	0.017451960561143322	0.0	0.0	1.9999488985751652	0.0	0.0	1.9999175415450194	0.0	-0.0003396524973206954	0.0	1.185414273308293e-05	-1.4381843128517466e-09	0.0	1.4542753304398517e-10
0.705	-0.0003398593010294739	0.0	-6.476720095045722e-09	-0.017671755573694284	0.0	-0.4991557721510051	0.0	3.5995884063071945e-07	0.0	0.9998477029233827	0.0	0.017451961460908286	0.0	0.0	1.9999490016963404	0.0	0.0	1.9999176446656313	0.0	-0.00033965250451161697	0.0	1.1854143460220608e-05	-1.4381843453778118e-09	0.0	1.4542753869087148e-10
0.71	-0.0003398593082413799	0.0	-6.476856033578826e-09	-0.017673453842783706	0.0	-0.49915571287962374	0.0	3.5995885140601944e-07	0.0	0.9998477029076775	0.0	0.017451962360673253	0.0	0.0	1.9999491048175155	0.0	0.0	1.9999177477862462	0.0	-0.00033965251170253876	0.0	1.1854144187358317e-05	-1.4381843327287865e-09	0.0	1.4542754382953804e-10
0.715	-0.0003398593154532858	0.0	-6.47699197211193e-09	-0.017675152111873125	0.0	-0.4991556536082424	0.0	3.599588621813194e-07	0.0	0.9998477028919723	0.0	0.01745196326043822	0.0	0.0	1.9999492079386902	0.0	0.0	1.9999178509068642	0.0	-0.0003396525188934603	0.0	1.1854144914496046e-05	-1.4381843128517466e-09	0.0	1.4542754893997014e-10
0.72	-0.00033985932266519174	0.0	-6.477127910645033e-09	-0.017676850380962544	0.0	-0.4991555943368611	0.0	3.5995887295661936e-07	0.0	0.9998477028762671	0.0	0.017451964160203188	0.0	0.0	1.9999493110598658	0.0	0.0	1.9999179540274854	0.0	-0.0003396525260843819	0.0	1.1854145641633807e-05	-1.4381843182727574e-09	0.0	1.454275543327466e-10
0.725	-0.00033985932987709767	0.0	-6.477263849178137e-09	-0.017678548650051966	0.0	-0.4991555350654797	0.0	3.5995888373191934e-07	0.0	0.9998477028605619	0.0	0.017451965059968155	0.0	0.0	1.999949414181041	0.0	0.0	1.9999180571481094	0.0	-0.0003396525332753035	0.0	1.1854146368771589e-05	-1.4381843336322884e-09	0.0	1.454275591608344e-10
0.73	-0.0003398593370890036	0.0	-6.477399787711241e-09	-0.017680246919141385	0.0	-0.49915547579409836	0.0	3.5995889450721933e-07	0.0	0.9998477028448568	0.0	0.017451965959733123	0.0	0.0	1.9999495173022162	0.0	0.0	1.9999181602687368	0.0	-0.00033965254046622523	0.0	1.1854147095909399e-05	-1.4381843291147792e-09	0.0	1.4542756497712729e-10
0.735	-0.00033985934430090953	0.0	-6.477535726244344e-09	-0.017681945188230803	0.0	-0.499155416522717	0.0	3.5995890528251926e-07	0.0	0.9998477028291516	0.0	0.01745196685949809	0.0	0.0	1.9999496204233913	0.0	0.0	1.999918263389367	0.0	-0.00033965254765714676	0.0	1.1854147823047237e-05	-1.4381843020097249e-09	0.0	1.454275695511052e-10
0.74	-0.00033985935151281546	0.0	-6.477671664777448e-09	-0.017683643457320226	0.0	-0.4991553572513357	0.0	3.5995891605781925e-07	0.0	0.9998477028134464	0.0	0.017451967759263057	0.0	0.0	1.9999497235445665	0.0	0.0	1.9999183665100007	0.0	-0.00033965255484806834	0.0	1.1854148550185096e-05	-1.438184335439292e-09	0.0	1.4542757483094391e-10
0.745	-0.00033985935872472145	0.0	-6.477807603310552e-09	-0.017685341726409644	0.0	-0.49915529797995434	0.0	3.5995892683311924e-07	0.0	0.9998477027977413	0.0	0.017451968659028025	0.0	0.0	1.9999498266657416	0.0	0.0	1.9999184696306371	0.0	-0.0003396525620389901	0.0	1.1854149277322986e-05	-1.4381843363427938e-09	0.0	1.4542758033665807e-10
0.75	-0.0003398593659366274	0.0	-6.477943541843656e-09	-0.017687039995499067	0.0	-0.499155238708573	0.0	3.599589376084192e-07	0.0	0.999847702782036	0.0	0.017451969558792992	0.0	0.0	1.9999499297869172	0.0	0.0	1.9999185727512767	0.0	-0.00033965256922991165	0.0	1.18541500044609e-05	-1.4381843020097249e-09	0.0	1.4542758530591802e-10
0.755	-0.0003398593731485333	0.0	-6.4780794803767595e-09	-0.017688738264588486	0.0	-0.4991551794371916	0.0	3.5995894838371916e-07	0.0	0.9998477027663308	0.0	0.01745197045855796	0.0	0.0	1.9999500329080924	0.0	0.0	1.9999186758719194	0.0	-0.0003396525764208332	0.0	1.1854150731598839e-05	-1.4381843282112775e-09	0.0	1.4542759010577138e-10
0.76	-0.00033985938036043924	0.0	-6.4782154189098635e-09	-0.017690436533677904	0.0	-0.49915512016581026	0.0	3.5995895915901914e-07	0.0	0.9998477027506257	0.0	0.017451971358322924	0.0	0.0	1.9999501360292666	0.0	0.0	1.9999187789925652	0.0	-0.0003396525836117549	0.0	1.1854151458736802e-05	-1.438184330018281e-09	0.0	1.4542759507503135e-10
0.765	-0.0003398593875723452	0.0	-6.4783513574429675e-09	-0.017692134802767327	0.0	-0.49915506089442896	0.0	3.5995896993431913e-07	0.0	0.9998477027349205	0.0	0.01745197225808789	0.0	0.0	1.9999502391504418	0.0	0.0	1.9999188821132141	0.0	-0.00033965259080267644	0.0	1.1854152185874792e-05	-1.4381843092377395e-09	0.0	1.454276009195587e-10
0.77	-0.0003398593947842511	0.0	-6.478487295976071e-09	-0.017693833071856745	0.0	-0.4991550016230476	0.0	3.5995898070961906e-07	0.0	0.9998477027192153	0.0	0.01745197315785286	0.0	0.0	1.9999503422716174	0.0	0.0	1.9999189852338661	0.0	-0.000339652597993598	0.0	1.185415291301281e-05	-1.4381843209832629e-09	0.0	1.4542760625586626e-10
0.775	-0.00033985940199615704	0.0	-6.478623234509175e-09	-0.017695531340946164	0.0	-0.49915494235166624	0.0	3.5995899148491905e-07	0.0	0.9998477027035101	0.0	0.017451974057617826	0.0	0.0	1.9999504453927925	0.0	0.0	1.999919088354521	0.0	-0.00033965260518451965	0.0	1.1854153640150854e-05	-1.4381843507988226e-09	0.0	1.454276111404229e-10
0.78	-0.000339859409208063	0.0	-6.478759173042279e-09	-0.017697229610035586	0.0	-0.4991548830802849	0.0	3.5995900226021904e-07	0.0	0.999847702687805	0.0	0.017451974957382793	0.0	0.0	1.9999505485139677	0.0	0.0	1.9999191914751793	0.0	-0.00033965261237544145	0.0	1.1854154367288922e-05	-1.4381843381497973e-09	0.0	1.4542761650496492e-10
0.785	-0.00033985941641996896	0.0	-6.478895111575383e-09	-0.017698927879125005	0.0	-0.4991548238089036	0.0	3.5995901303551897e-07	0.0	0.9998477026720998	0.0	0.01745197585714776	0.0	0.0	1.9999506516351429	0.0	0.0	1.9999192945958404	0.0	-0.000339652619566363	0.0	1.1854155094427019e-05	-1.4381843047202303e-09	0.0	1.4542762184127249e-10
0.79	-0.0003398594236318749	0.0	-6.479031050108486e-09	-0.017700626148214427	0.0	-0.4991547645375222	0.0	3.5995902381081896e-07	0.0	0.9998477026563946	0.0	0.017451976756912728	0.0	0.0	1.999950754756318	0.0	0.0	1.9999193977165048	0.0	-0.00033965262675728455	0.0	1.185415582156514e-05	-1.4381843245972702e-09	0.0	1.4542762666936029e-10
0.795	-0.0003398594308437808	0.0	-6.47916698864159e-09	-0.017702324417303846	0.0	-0.49915470526614086	0.0	3.5995903458611895e-07	0.0	0.9998477026406895	0.0	0.017451977656677695	0.0	0.0	1.9999508578774936	0.0	0.0	1.9999195008371722	0.0	-0.00033965263394820623	0.0	1.1854156548703287e-05	-1.4381843191762593e-09	0.0	1.4542763197743341e-10
0.8	-0.00033985943805568675	0.0	-6.479302927174694e-09	-0.017704022686393265	0.0	-0.4991546459947595	0.0	3.599590453614189e-07	0.0	0.9998477026249842	0.0	0.017451978556442663	0.0	0.0	1.9999509609986688	0.0	0.0	1.9999196039578426	0.0	-0.00033965264113912776	0.0	1.185415727584146e-05	-1.4381843056237322e-09	0.0	1.4542763700316224e-10
0.805	-0.0003398594452675927	0.0	-6.479438865707797e-09	-0.017705720955482687	0.0	-0.4991545867233782	0.0	3.5995905613671887e-07	0.0	0.999847702609279	0.0	0.01745197945620763	0.0	0.0	1.999951064119844	0.0	0.0	1.9999197070785162	0.0	-0.00033965264833004933	0.0	1.1854158002979658e-05	-1.4381843381497973e-09	0.0	1.4542764225476651e-10
0.81	-0.0003398594524794986	0.0	-6.479574804240901e-09	-0.017707419224572106	0.0	-0.49915452745199684	0.0	3.5995906691201885e-07	0.0	0.9998477025935739	0.0	0.017451980355972594	0.0	0.0	1.999951167241019	0.0	0.0	1.9999198101991928	0.0	-0.0003396526555209711	0.0	1.1854158730117883e-05	-1.4381843318252846e-09	0.0	1.454276477040118e-10
0.8150000000000001	-0.0003398594596914046	0.0	-6.479710742774005e-09	-0.017709117493661525	0.0	-0.4991544681806155	0.0	3.599590776873188e-07	0.0	0.9998477025778687	0.0	0.01745198125573756	0.0	0.0	1.9999512703621942	0.0	0.0	1.9999199133198726	0.0	-0.00033965266271189265	0.0	1.1854159457256134e-05	-1.438184311948245e-09	0.0	1.4542765267327177e-10
0.8200000000000001	-0.00033985946690331053	0.0	-6.479846681307109e-09	-0.017710815762750947	0.0	-0.4991544089092341	0.0	3.5995908846261877e-07	0.0	0.9998477025621635	0.0	0.01745198215550253	0.0	0.0	1.9999513734833694	0.0	0.0	1.9999200164405555	0.0	-0.00033965266990281423	0.0	1.185416018439441e-05	-1.4381843164657539e-09	0.0	1.4542765809428263e-10
0.8250000000000001	-0.00033985947411521646	0.0	-6.4799826198402126e-09	-0.017712514031840366	0.0	-0.49915434963785277	0.0	3.5995909923791876e-07	0.0	0.9998477025464583	0.0	0.017451983055267496	0.0	0.0	1.9999514766045445	0.0	0.0	1.9999201195612415	0.0	-0.0003396526770937358	0.0	1.1854160911532714e-05	-1.4381843327287865e-09	0.0	1.4542766303530814e-10
0.8300000000000001	-0.0003398594813271224	0.0	-6.480118558373317e-09	-0.017714212300929788	0.0	-0.49915429036647146	0.0	3.599591100132187e-07	0.0	0.9998477025307532	0.0	0.017451983955032464	0.0	0.0	1.9999515797257197	0.0	0.0	1.9999202226819304	0.0	-0.00033965268428465755	0.0	1.185416163867104e-05	-1.43818433453579e-09	0.0	1.454276681739747e-10
0.835	-0.0003398594885390283	0.0	-6.480254496906421e-09	-0.017715910570019207	0.0	-0.4991542310950901	0.0	3.599591207885187e-07	0.0	0.999847702515048	0.0	0.01745198485479743	0.0	0.0	1.9999516828468948	0.0	0.0	1.9999203258026226	0.0	-0.0003396526914755791	0.0	1.1854162365809395e-05	-1.4381843146587503e-09	0.0	1.4542767331264124e-10
0.84	-0.00033985949575093425	0.0	-6.480390435439524e-09	-0.017717608839108626	0.0	-0.49915417182370875	0.0	3.5995913156381867e-07	0.0	0.9998477024993427	0.0	0.0174519857545624	0.0	0.0	1.99995178596807	0.0	0.0	1.9999204289233177	0.0	-0.0003396526986665007	0.0	1.1854163092947774e-05	-1.4381843264042737e-09	0.0	1.4542767884658984e-10
0.845	-0.0003398595029628402	0.0	-6.480526373972628e-09	-0.017719307108198048	0.0	-0.4991541125523274	0.0	3.5995914233911865e-07	0.0	0.9998477024836376	0.0	0.017451986654327366	0.0	0.0	1.9999518890892456	0.0	0.0	1.9999205320440159	0.0	-0.0003396527058574224	0.0	1.1854163820086183e-05	-1.4381843209832629e-09	0.0	1.4542768392878752e-10
0.85	-0.0003398595101747461	0.0	-6.480662312505732e-09	-0.017721005377287467	0.0	-0.4991540532809461	0.0	3.599591531144186e-07	0.0	0.9998477024679324	0.0	0.017451987554092333	0.0	0.0	1.9999519922104212	0.0	0.0	1.9999206351647172	0.0	-0.0003396527130483439	0.0	1.1854164547224615e-05	-1.438184315562252e-09	0.0	1.4542768943450168e-10
0.855	-0.0003398595173866521	0.0	-6.480798251038836e-09	-0.017722703646376885	0.0	-0.4991539940095647	0.0	3.5995916388971857e-07	0.0	0.9998477024522272	0.0	0.0174519884538573	0.0	0.0	1.9999520953315963	0.0	0.0	1.9999207382854218	0.0	-0.00033965272023926555	0.0	1.1854165274363076e-05	-1.438184311948245e-09	0.0	1.454276942908239e-10
0.86	-0.00033985952459855803	0.0	-6.480934189571939e-09	-0.017724401915466308	0.0	-0.49915393473818337	0.0	3.5995917466501856e-07	0.0	0.999847702436522	0.0	0.017451989353622265	0.0	0.0	1.999952198452771	0.0	0.0	1.9999208414061294	0.0	-0.00033965272743018707	0.0	1.1854166001501557e-05	-1.4381843200797612e-09	0.0	1.454276988648018e-10
0.865	-0.00033985953181046397	0.0	-6.481070128105043e-09	-0.017726100184555726	0.0	-0.499153875466802	0.0	3.599591854403185e-07	0.0	0.9998477024208169	0.0	0.017451990253387232	0.0	0.0	1.9999523015739462	0.0	0.0	1.9999209445268398	0.0	-0.00033965273462110876	0.0	1.1854166728640065e-05	-1.438184330018281e-09	0.0	1.4542770459639143e-10
0.87	-0.0003398595390223699	0.0	-6.481206066638147e-09	-0.01772779845364515	0.0	-0.4991538161954207	0.0	3.599591962156185e-07	0.0	0.9998477024051117	0.0	0.0174519911531522	0.0	0.0	1.9999524046951214	0.0	0.0	1.9999210476475535	0.0	-0.00033965274181203033	0.0	1.1854167455778602e-05	-1.4381843020097249e-09	0.0	1.454277097632924e-10
0.875	-0.00033985954623427583	0.0	-6.481342005171251e-09	-0.017729496722734567	0.0	-0.49915375692403935	0.0	3.5995920699091847e-07	0.0	0.9998477023894065	0.0	0.017451992052917167	0.0	0.0	1.999952507816297	0.0	0.0	1.9999211507682704	0.0	-0.00033965274900295186	0.0	1.1854168182917163e-05	-1.4381843273077756e-09	0.0	1.4542771470431792e-10
0.88	-0.00033985955344618176	0.0	-6.4814779437043544e-09	-0.017731194991823986	0.0	-0.499153697652658	0.0	3.599592177662184e-07	0.0	0.9998477023737014	0.0	0.017451992952682134	0.0	0.0	1.9999526109374721	0.0	0.0	1.9999212538889903	0.0	-0.0003396527561938736	0.0	1.1854168910055751e-05	-1.4381843363427938e-09	0.0	1.4542772035120425e-10
0.885	-0.0003398595606580877	0.0	-6.4816138822374584e-09	-0.01773289326091341	0.0	-0.49915363838127663	0.0	3.599592285415184e-07	0.0	0.9998477023579961	0.0	0.0174519938524471	0.0	0.0	1.9999527140586473	0.0	0.0	1.9999213570097132	0.0	-0.0003396527633847952	0.0	1.1854169637194366e-05	-1.438184315562252e-09	0.0	1.454277254898708e-10
0.89	-0.0003398595678699937	0.0	-6.4817498207705625e-09	-0.017734591530002827	0.0	-0.4991535791098953	0.0	3.599592393168184e-07	0.0	0.9998477023422909	0.0	0.01745199475221207	0.0	0.0	1.9999528171798224	0.0	0.0	1.9999214601304391	0.0	-0.0003396527705757168	0.0	1.1854170364333006e-05	-1.43818433453579e-09	0.0	1.4542773108028824e-10
0.895	-0.0003398595750818996	0.0	-6.481885759303666e-09	-0.017736289799092246	0.0	-0.49915351983851397	0.0	3.599592500921183e-07	0.0	0.9998477023265858	0.0	0.017451995651977036	0.0	0.0	1.9999529203009982	0.0	0.0	1.9999215632511684	0.0	-0.0003396527777666385	0.0	1.1854171091471676e-05	-1.4381843291147792e-09	0.0	1.4542773621895478e-10
0.9	-0.00033985958229380554	0.0	-6.48202169783677e-09	-0.01773798806818167	0.0	-0.4991534605671326	0.0	3.599592608674183e-07	0.0	0.9998477023108806	0.0	0.017451996551742004	0.0	0.0	1.9999530234221734	0.0	0.0	1.9999216663719006	0.0	-0.00033965278495756007	0.0	1.1854171818610367e-05	-1.4381843101412412e-09	0.0	1.454277404258851e-10
0.905	-0.00033985958950571147	0.0	-6.482157636369874e-09	-0.017739686337271087	0.0	-0.49915340129575125	0.0	3.599592716427183e-07	0.0	0.9998477022951754	0.0	0.01745199745150697	0.0	0.0	1.9999531265433481	0.0	0.0	1.999921769492636	0.0	-0.0003396527921484816	0.0	1.1854172545749082e-05	-1.438184306527234e-09	0.0	1.4542774556455164e-10
0.91	-0.0003398595967176174	0.0	-6.482293574902978e-09	-0.01774138460636051	0.0	-0.4991533420243699	0.0	3.599592824180182e-07	0.0	0.9998477022794702	0.0	0.01745199835127194	0.0	0.0	1.9999532296645237	0.0	0.0	1.9999218726133743	0.0	-0.0003396527993394032	0.0	1.1854173272887824e-05	-1.4381843227902666e-09	0.0	1.454277510702658e-10
0.915	-0.00033985960392952333	0.0	-6.482429513436081e-09	-0.017743082875449928	0.0	-0.4991532827529886	0.0	3.599592931933182e-07	0.0	0.9998477022637651	0.0	0.017451999251036902	0.0	0.0	1.9999533327856989	0.0	0.0	1.9999219757341158	0.0	-0.0003396528065303248	0.0	1.1854174000026593e-05	-1.4381843236937683e-09	0.0	1.454277565195111e-10
0.92	-0.00033985961114142927	0.0	-6.482565451969185e-09	-0.017744781144539347	0.0	-0.49915322348160723	0.0	3.599593039686182e-07	0.0	0.9998477022480599	0.0	0.01745200015080187	0.0	0.0	1.999953435906874	0.0	0.0	1.9999220788548604	0.0	-0.0003396528137212464	0.0	1.185417472716539e-05	-1.4381843182727574e-09	0.0	1.454277615170055e-10
0.925	-0.00033985961835333525	0.0	-6.482701390502289e-09	-0.01774647941362877	0.0	-0.4991531642102259	0.0	3.599593147439181e-07	0.0	0.9998477022323546	0.0	0.017452001050566837	0.0	0.0	1.9999535390280492	0.0	0.0	1.999922181975608	0.0	-0.000339652820912168	0.0	1.185417545430421e-05	-1.438184335439292e-09	0.0	1.4542776696625077e-10
0.93	-0.0003398596255652412	0.0	-6.482837329035392e-09	-0.017748177682718188	0.0	-0.4991531049388445	0.0	3.599593255192181e-07	0.0	0.9998477022166495	0.0	0.017452001950331805	0.0	0.0	1.9999536421492248	0.0	0.0	1.9999222850963587	0.0	-0.0003396528281030897	0.0	1.185417618144306e-05	-1.4381843227902666e-09	0.0	1.4542777241549607e-10
0.935	-0.0003398596327771471	0.0	-6.482973267568496e-09	-0.017749875951807607	0.0	-0.4991530456674632	0.0	3.599593362945181e-07	0.0	0.9998477022009443	0.0	0.017452002850096772	0.0	0.0	1.9999537452704004	0.0	0.0	1.9999223882171127	0.0	-0.0003396528352940112	0.0	1.1854176908581932e-05	-1.4381843038167286e-09	0.0	1.454277769047707e-10
0.9400000000000001	-0.00033985963998905305	0.0	-6.4831092061016e-09	-0.01775157422089703	0.0	-0.49915298639608185	0.0	3.599593470698181e-07	0.0	0.9998477021852391	0.0	0.01745200374986174	0.0	0.0	1.999953848391575	0.0	0.0	1.9999224913378695	0.0	-0.0003396528424849328	0.0	1.185417763572083e-05	-1.4381843218867648e-09	0.0	1.4542778212814052e-10
0.9450000000000001	-0.000339859647200959	0.0	-6.483245144634704e-09	-0.017753272489986448	0.0	-0.4991529271247005	0.0	3.59959357845118e-07	0.0	0.9998477021695339	0.0	0.017452004649626707	0.0	0.0	1.9999539515127502	0.0	0.0	1.9999225944586294	0.0	-0.00033965284967585444	0.0	1.1854178362859755e-05	-1.4381843372462955e-09	0.0	1.4542778794443344e-10
0.9500000000000001	-0.0003398596544128649	0.0	-6.4833810831678075e-09	-0.01775497075907587	0.0	-0.49915286785331914	0.0	3.59959368620418e-07	0.0	0.9998477021538288	0.0	0.017452005549391674	0.0	0.0	1.9999540546339263	0.0	0.0	1.9999226975793927	0.0	-0.0003396528568667761	0.0	1.185417908999871e-05	-1.4381843173692558e-09	0.0	1.454277928289901e-10
0.9550000000000001	-0.00033985966162477084	0.0	-6.4835170217009116e-09	-0.01775666902816529	0.0	-0.4991528085819378	0.0	3.59959379395718e-07	0.0	0.9998477021381236	0.0	0.01745200644915664	0.0	0.0	1.999954157755101	0.0	0.0	1.9999228007001588	0.0	-0.0003396528640576976	0.0	1.1854179817137683e-05	-1.4381843056237322e-09	0.0	1.4542779771354675e-10
0.96	-0.0003398596688366768	0.0	-6.483652960234016e-09	-0.017758367297254708	0.0	-0.4991527493105565	0.0	3.599593901710179e-07	0.0	0.9998477021224184	0.0	0.01745200734892161	0.0	0.0	1.9999542608762766	0.0	0.0	1.999922903820928	0.0	-0.0003396528712486192	0.0	1.1854180544276688e-05	-1.4381843381497973e-09	0.0	1.4542780375571512e-10
0.965	-0.00033985967604858276	0.0	-6.483788898767119e-09	-0.01776006556634413	0.0	-0.4991526900391751	0.0	3.599594009463179e-07	0.0	0.9998477021067133	0.0	0.017452008248686573	0.0	0.0	1.9999543639974517	0.0	0.0	1.9999230069417004	0.0	-0.0003396528784395409	0.0	1.185418127141572e-05	-1.438184330921783e-09	0.0	1.4542780832969303e-10
0.97	-0.0003398596832604887	0.0	-6.483924837300223e-09	-0.01776176383543355	0.0	-0.49915263076779376	0.0	3.599594117216179e-07	0.0	0.999847702091008	0.0	0.01745200914845154	0.0	0.0	1.999954467118627	0.0	0.0	1.999923110062476	0.0	-0.0003396528856304625	0.0	1.1854181998554772e-05	-1.4381843047202303e-09	0.0	1.4542781318601527e-10
0.975	-0.0003398596904723946	0.0	-6.484060775833327e-09	-0.017763462104522967	0.0	-0.4991525714964124	0.0	3.5995942249691783e-07	0.0	0.9998477020753028	0.0	0.017452010048216508	0.0	0.0	1.9999545702398023	0.0	0.0	1.9999232131832543	0.0	-0.000339652892821384	0.0	1.1854182725693853e-05	-1.4381843227902666e-09	0.0	1.4542781871996384e-10
0.98	-0.00033985969768430055	0.0	-6.484196714366431e-09	-0.01776516037361239	0.0	-0.4991525122250311	0.0	3.599594332722178e-07	0.0	0.9998477020595977	0.0	0.017452010947981475	0.0	0.0	1.9999546733609774	0.0	0.0	1.999923316304036	0.0	-0.0003396529000123057	0.0	1.1854183452832959e-05	-1.4381843245972702e-09	0.0	1.4542782391509926e-10
0.985	-0.0003398597048962065	0.0	-6.484332652899534e-09	-0.01776685864270181	0.0	-0.49915245295364974	0.0	3.599594440475178e-07	0.0	0.9998477020438925	0.0	0.017452011847746442	0.0	0.0	1.999954776482153	0.0	0.0	1.9999234194248205	0.0	-0.0003396529072032272	0.0	1.1854184179972093e-05	-1.4381843038167286e-09	0.0	1.454278291384691e-10
0.99	-0.0003398597121081124	0.0	-6.484468591432638e-09	-0.01776855691179123	0.0	-0.4991523936822684	0.0	3.5995945482281774e-07	0.0	0.9998477020281873	0.0	0.01745201274751141	0.0	0.0	1.9999548796033282	0.0	0.0	1.9999235225456085	0.0	-0.0003396529143941488	0.0	1.1854184907111251e-05	-1.4381843146587503e-09	0.0	1.4542783455947996e-10
0.995	-0.0003398597193200184	0.0	-6.484604529965742e-09	-0.01777025518088065	0.0	-0.499152334410887	0.0	3.599594655981177e-07	0.0	0.9998477020124821	0.0	0.017452013647276377	0.0	0.0	1.9999549827245038	0.0	0.0	1.9999236256663993	0.0	-0.0003396529215850704	0.0	1.1854185634250437e-05	-1.438184330018281e-09	0.0	1.4542783975461537e-10
1.0	-0.00033985972653192433	0.0	-6.484740468498845e-09	-0.017771953449970068	0.0	-0.4991522751395057	0.0	3.599594763734177e-07	0.0	0.999847701996777	0.0	0.017452014547041345	0.0	0.0	1.9999550858456794	0.0	0.0	1.9999237287871934	0.0	-0.00033965292877599206	0.0	1.1854186361389649e-05	-1.4381843318252846e-09	0.0	1.4542784492151635e-10
1.0050000000000001	-0.00033985973374383026	0.0	-6.484876407031949e-09	-0.01777365171905949	0.0	-0.49915221586812436	0.0	3.5995948714871764e-07	0.0	0.9998477019810718	0.0	0.017452015446806312	0.0	0.0	1.9999551889668545	0.0	0.0	1.9999238319079904	0.0	-0.0003396529359669137	0.0	1.1854187088528885e-05	-1.438184311948245e-09	0.0	1.4542784941079097e-10
1.01	-0.0003398597409557362	0.0	-6.485012345565053e-09	-0.01777534998814891	0.0	-0.499152156596743	0.0	3.5995949792401763e-07	0.0	0.9998477019653665	0.0	0.01745201634657128	0.0	0.0	1.9999552920880297	0.0	0.0	1.9999239350287905	0.0	-0.0003396529431578352	0.0	1.1854187815668144e-05	-1.4381843227902666e-09	0.0	1.4542785522708387e-10
1.0150000000000001	-0.0003398597481676421	0.0	-6.4851482840981574e-09	-0.017777048257238328	0.0	-0.49915209732536164	0.0	3.599595086993176e-07	0.0	0.9998477019496614	0.0	0.017452017246336247	0.0	0.0	1.9999553952092055	0.0	0.0	1.9999240381495937	0.0	-0.0003396529503487569	0.0	1.1854188542807437e-05	-1.438184325500772e-09	0.0	1.45427860337516e-10
1.02	-0.00033985975537954806	0.0	-6.485284222631261e-09	-0.01777874652632775	0.0	-0.4991520380539803	0.0	3.599595194746176e-07	0.0	0.9998477019339562	0.0	0.01745201814610121	0.0	0.0	1.99995549833038	0.0	0.0	1.9999241412704	0.0	-0.00033965295753967843	0.0	1.1854189269946746e-05	-1.4381843047202303e-09	0.0	1.4542786468561846e-10
1.025	-0.000339859762591454	0.0	-6.485420161164365e-09	-0.01778044479541717	0.0	-0.499151978782599	0.0	3.5995953024991754e-07	0.0	0.999847701918251	0.0	0.017452019045866178	0.0	0.0	1.9999556014515556	0.0	0.0	1.9999242443912093	0.0	-0.0003396529647306	0.0	1.1854189997086086e-05	-1.4381843372462955e-09	0.0	1.4542787095366227e-10
1.03	-0.00033985976980335997	0.0	-6.485556099697469e-09	-0.01778214306450659	0.0	-0.4991519195112176	0.0	3.599595410252175e-07	0.0	0.9998477019025459	0.0	0.017452019945631145	0.0	0.0	1.999955704572731	0.0	0.0	1.9999243475120219	0.0	-0.00033965297192152175	0.0	1.1854190724225455e-05	-1.438184330921783e-09	0.0	1.4542787637467314e-10
1.035	-0.0003398597770152659	0.0	-6.485692038230572e-09	-0.01778384133359601	0.0	-0.49915186023983626	0.0	3.599595518005175e-07	0.0	0.9998477018868407	0.0	0.017452020845396113	0.0	0.0	1.9999558076939061	0.0	0.0	1.9999244506328375	0.0	-0.00033965297911244327	0.0	1.1854191451364848e-05	-1.4381843038167286e-09	0.0	1.4542788049690014e-10
1.04	-0.00033985978422717184	0.0	-6.485827976763676e-09	-0.01778553960268543	0.0	-0.4991518009684549	0.0	3.5995956257581745e-07	0.0	0.9998477018711355	0.0	0.01745202174516108	0.0	0.0	1.9999559108150813	0.0	0.0	1.999924553753656	0.0	-0.0003396529863033648	0.0	1.1854192178504263e-05	-1.4381843011062232e-09	0.0	1.454278860026143e-10
1.045	-0.00033985979143907777	0.0	-6.48596391529678e-09	-0.01778723787177485	0.0	-0.4991517416970736	0.0	3.5995957335111743e-07	0.0	0.9998477018554303	0.0	0.017452022644926048	0.0	0.0	1.9999560139362569	0.0	0.0	1.9999246568744777	0.0	-0.0003396529934942863	0.0	1.185419290564371e-05	-1.4381843236937683e-09	0.0	1.4542789190361049e-10
1.05	-0.0003398597986509837	0.0	-6.486099853829884e-09	-0.01778893614086427	0.0	-0.49915168242569224	0.0	3.599595841264174e-07	0.0	0.9998477018397252	0.0	0.017452023544691015	0.0	0.0	1.9999561170574325	0.0	0.0	1.9999247599953027	0.0	-0.000339653000685208	0.0	1.185419363278318e-05	-1.4381843173692558e-09	0.0	1.4542789659052614e-10
1.055	-0.00033985980586288963	0.0	-6.486235792362987e-09	-0.01779063440995369	0.0	-0.4991516231543109	0.0	3.5995959490171735e-07	0.0	0.9998477018240199	0.0	0.017452024444455982	0.0	0.0	1.999956220178608	0.0	0.0	1.9999248631161306	0.0	-0.0003396530078761295	0.0	1.1854194359922676e-05	-1.4381843182727574e-09	0.0	1.4542790158802052e-10
1.06	-0.00033985981307479556	0.0	-6.486371730896091e-09	-0.01779233267904311	0.0	-0.4991515638829295	0.0	3.5995960567701734e-07	0.0	0.9998477018083147	0.0	0.01745202534422095	0.0	0.0	1.9999563232997832	0.0	0.0	1.9999249662369616	0.0	-0.0003396530150670512	0.0	1.1854195087062197e-05	-1.4381843507988226e-09	0.0	1.4542790743254786e-10
1.065	-0.00033985982028670155	0.0	-6.486507669429195e-09	-0.01779403094813253	0.0	-0.4991515046115482	0.0	3.599596164523173e-07	0.0	0.9998477017926096	0.0	0.017452026243985917	0.0	0.0	1.9999564264209588	0.0	0.0	1.9999250693577957	0.0	-0.00033965302225797295	0.0	1.1854195814201749e-05	-1.438184330018281e-09	0.0	1.454279121194635e-10
1.07	-0.0003398598274986075	0.0	-6.4866436079622985e-09	-0.017795729217221952	0.0	-0.49915144534016687	0.0	3.5995962722761726e-07	0.0	0.9998477017769044	0.0	0.01745202714375088	0.0	0.0	1.9999565295421335	0.0	0.0	1.9999251724786329	0.0	-0.0003396530294488945	0.0	1.1854196541341318e-05	-1.4381842974922159e-09	0.0	1.4542791677814472e-10
1.075	-0.0003398598347105134	0.0	-6.4867795464954025e-09	-0.01779742748631137	0.0	-0.4991513860687855	0.0	3.5995963800291725e-07	0.0	0.9998477017611992	0.0	0.01745202804351585	0.0	0.0	1.9999566326633091	0.0	0.0	1.9999252755994732	0.0	-0.000339653036639816	0.0	1.1854197268480917e-05	-1.4381843020097249e-09	0.0	1.4542792217092114e-10
1.08	-0.00033985984192241934	0.0	-6.4869154850285065e-09	-0.01779912575540079	0.0	-0.49915132679740415	0.0	3.5995964877821723e-07	0.0	0.999847701745494	0.0	0.017452028943280816	0.0	0.0	1.9999567357844843	0.0	0.0	1.9999253787203164	0.0	-0.0003396530438307375	0.0	1.185419799562054e-05	-1.4381843173692558e-09	0.0	1.4542792807191733e-10
1.085	-0.00033985984913432527	0.0	-6.4870514235616106e-09	-0.017800824024490212	0.0	-0.4991512675260228	0.0	3.5995965955351717e-07	0.0	0.9998477017297889	0.0	0.017452029843045783	0.0	0.0	1.9999568389056601	0.0	0.0	1.999925481841163	0.0	-0.00033965305102165916	0.0	1.1854198722760197e-05	-1.4381843182727574e-09	0.0	1.454279331258806e-10
1.09	-0.0003398598563462312	0.0	-6.487187362094714e-09	-0.01780252229357963	0.0	-0.4991512082546415	0.0	3.5995967032881715e-07	0.0	0.9998477017140837	0.0	0.01745203074281075	0.0	0.0	1.9999569420268353	0.0	0.0	1.9999255849620123	0.0	-0.0003396530582125807	0.0	1.185419944989987e-05	-1.4381843047202303e-09	0.0	1.4542793767162408e-10
1.095	-0.00033985986355813713	0.0	-6.487323300627818e-09	-0.01780422056266905	0.0	-0.49915114898326013	0.0	3.5995968110411714e-07	0.0	0.9998477016983784	0.0	0.017452031642575718	0.0	0.0	1.9999570451480109	0.0	0.0	1.999925688082865	0.0	-0.00033965306540350226	0.0	1.1854200177039575e-05	-1.4381843291147792e-09	0.0	1.45427943685558e-10
1.1	-0.00033985987077004307	0.0	-6.487459239160922e-09	-0.01780591883175847	0.0	-0.49915108971187877	0.0	3.599596918794171e-07	0.0	0.9998477016826733	0.0	0.017452032542340686	0.0	0.0	1.9999571482691865	0.0	0.0	1.9999257912037207	0.0	-0.00033965307259442394	0.0	1.1854200904179307e-05	-1.438184330018281e-09	0.0	1.4542794862658354e-10
1.105	-0.00033985987798194905	0.0	-6.487595177694026e-09	-0.01780761710084789	0.0	-0.4991510304404974	0.0	3.5995970265471706e-07	0.0	0.9998477016669681	0.0	0.017452033442105653	0.0	0.0	1.9999572513903616	0.0	0.0	1.9999258943245795	0.0	-0.0003396530797853455	0.0	1.1854201631319062e-05	-1.4381843029132267e-09	0.0	1.4542795339820246e-10
1.11	-0.000339859885193855	0.0	-6.487731116227129e-09	-0.01780931536993731	0.0	-0.4991509711691161	0.0	3.5995971343001705e-07	0.0	0.9998477016512629	0.0	0.01745203434187062	0.0	0.0	1.999957354511537	0.0	0.0	1.9999259974454413	0.0	-0.00033965308697626704	0.0	1.1854202358458842e-05	-1.4381843282112775e-09	0.0	1.454279590733232e-10
1.115	-0.0003398598924057609	0.0	-6.487867054760233e-09	-0.01781101363902673	0.0	-0.49915091189773475	0.0	3.5995972420531703e-07	0.0	0.9998477016355578	0.0	0.017452035241635588	0.0	0.0	1.9999574576327126	0.0	0.0	1.9999261005663063	0.0	-0.0003396530941671888	0.0	1.1854203085598652e-05	-1.438184330018281e-09	0.0	1.4542796446609965e-10
1.12	-0.00033985989961766685	0.0	-6.488002993293337e-09	-0.01781271190811615	0.0	-0.4991508526263534	0.0	3.5995973498061697e-07	0.0	0.9998477016198526	0.0	0.017452036141400555	0.0	0.0	1.9999575607538882	0.0	0.0	1.9999262036871743	0.0	-0.0003396531013581103	0.0	1.1854203812738485e-05	-1.4381843092377395e-09	0.0	1.4542796870126439e-10
1.125	-0.0003398599068295728	0.0	-6.48813893182644e-09	-0.017814410177205572	0.0	-0.49915079335497203	0.0	3.5995974575591695e-07	0.0	0.9998477016041474	0.0	0.01745203704116552	0.0	0.0	1.999957663875063	0.0	0.0	1.9999263068080455	0.0	-0.0003396531085490319	0.0	1.185420453987834e-05	-1.438184306527234e-09	0.0	1.4542797431991625e-10
1.1300000000000001	-0.0003398599140414787	0.0	-6.488274870359544e-09	-0.01781610844629499	0.0	-0.49915073408359073	0.0	3.5995975653121694e-07	0.0	0.9998477015884422	0.0	0.017452037940930486	0.0	0.0	1.9999577669962385	0.0	0.0	1.9999264099289198	0.0	-0.0003396531157399534	0.0	1.1854205267018227e-05	-1.4381843146587503e-09	0.0	1.454279798820993e-10
1.135	-0.00033985992125338464	0.0	-6.488410808892648e-09	-0.01781780671538441	0.0	-0.49915067481220937	0.0	3.599597673065169e-07	0.0	0.9998477015727371	0.0	0.017452038840695454	0.0	0.0	1.999957870117414	0.0	0.0	1.999926513049797	0.0	-0.00033965312293087504	0.0	1.1854205994158138e-05	-1.4381843236937683e-09	0.0	1.454279849078281e-10
1.1400000000000001	-0.0003398599284652906	0.0	-6.488546747425752e-09	-0.017819504984473832	0.0	-0.499150615540828	0.0	3.5995977808181686e-07	0.0	0.9998477015570318	0.0	0.01745203974046042	0.0	0.0	1.9999579732385893	0.0	0.0	1.9999266161706775	0.0	-0.0003396531301217966	0.0	1.1854206721298076e-05	-1.4381843101412412e-09	0.0	1.4542799001826022e-10
1.145	-0.00033985993567719656	0.0	-6.488682685958856e-09	-0.01782120325356325	0.0	-0.49915055626944665	0.0	3.5995978885711685e-07	0.0	0.9998477015413266	0.0	0.01745204064022539	0.0	0.0	1.9999580763597649	0.0	0.0	1.9999267192915609	0.0	-0.0003396531373127182	0.0	1.1854207448438038e-05	-1.4381843273077756e-09	0.0	1.4542799529809893e-10
1.1500000000000001	-0.0003398599428891025	0.0	-6.48881862449196e-09	-0.01782290152265267	0.0	-0.4991504969980653	0.0	3.599597996324168e-07	0.0	0.9998477015256215	0.0	0.017452041539990356	0.0	0.0	1.9999581794809402	0.0	0.0	1.9999268224124476	0.0	-0.0003396531445036399	0.0	1.1854208175578028e-05	-1.4381843218867648e-09	0.0	1.4542800035206217e-10
1.155	-0.0003398599501010084	0.0	-6.488954563025064e-09	-0.017824599791742092	0.0	-0.499150437726684	0.0	3.5995981040771677e-07	0.0	0.9998477015099163	0.0	0.017452042439755323	0.0	0.0	1.9999582826021154	0.0	0.0	1.9999269255333372	0.0	-0.0003396531516945614	0.0	1.1854208902718041e-05	-1.4381842947817104e-09	0.0	1.4542800534955656e-10
1.16	-0.00033985995731291435	0.0	-6.489090501558167e-09	-0.01782629806083151	0.0	-0.49915037845530263	0.0	3.5995982118301676e-07	0.0	0.9998477014942111	0.0	0.01745204333952029	0.0	0.0	1.999958385723291	0.0	0.0	1.9999270286542299	0.0	-0.0003396531588854829	0.0	1.1854209629858083e-05	-1.4381843273077756e-09	0.0	1.4542801105291175e-10
1.165	-0.0003398599645248203	0.0	-6.489226440091271e-09	-0.017827996329920933	0.0	-0.4991503191839213	0.0	3.599598319583167e-07	0.0	0.999847701478506	0.0	0.017452044239285258	0.0	0.0	1.999958488844467	0.0	0.0	1.9999271317751257	0.0	-0.0003396531660764046	0.0	1.1854210356998151e-05	-1.4381843282112775e-09	0.0	1.4542801599393726e-10
1.17	-0.0003398599717367262	0.0	-6.489362378624375e-09	-0.017829694599010352	0.0	-0.4991502599125399	0.0	3.599598427336167e-07	0.0	0.9998477014628008	0.0	0.017452045139050226	0.0	0.0	1.9999585919656422	0.0	0.0	1.9999272348960246	0.0	-0.00033965317326732614	0.0	1.1854211084138242e-05	-1.4381843137552485e-09	0.0	1.4542802073732176e-10
1.175	-0.0003398599789486322	0.0	-6.489498317157479e-09	-0.01783139286809977	0.0	-0.4991502006411586	0.0	3.5995985350891666e-07	0.0	0.9998477014470956	0.0	0.01745204603881519	0.0	0.0	1.999958695086817	0.0	0.0	1.9999273380169267	0.0	-0.0003396531804582478	0.0	1.185421181127836e-05	-1.4381843182727574e-09	0.0	1.4542802615833262e-10
1.18	-0.00033985998616053813	0.0	-6.489634255690582e-09	-0.017833091137189193	0.0	-0.49915014136977726	0.0	3.599598642842166e-07	0.0	0.9998477014313903	0.0	0.017452046938580157	0.0	0.0	1.9999587982079925	0.0	0.0	1.9999274411378316	0.0	-0.0003396531876491693	0.0	1.1854212538418504e-05	-1.4381843191762593e-09	0.0	1.4542803172051566e-10
1.185	-0.00033985999337244406	0.0	-6.489770194223686e-09	-0.01783478940627861	0.0	-0.4991500820983959	0.0	3.599598750595166e-07	0.0	0.9998477014156852	0.0	0.017452047838345124	0.0	0.0	1.999958901329168	0.0	0.0	1.9999275442587399	0.0	-0.000339653194840091	0.0	1.1854213265558676e-05	-1.4381843218867648e-09	0.0	1.4542803660507232e-10
1.19	-0.00033986000058435	0.0	-6.48990613275679e-09	-0.01783648767536803	0.0	-0.49915002282701454	0.0	3.5995988583481657e-07	0.0	0.99984770139998	0.0	0.01745204873811009	0.0	0.0	1.9999590044503435	0.0	0.0	1.9999276473796512	0.0	-0.0003396532020310125	0.0	1.185421399269887e-05	-1.4381843011062232e-09	0.0	1.4542804171550444e-10
1.195	-0.0003398600077962559	0.0	-6.4900420712898934e-09	-0.017838185944457453	0.0	-0.49914996355563324	0.0	3.599598966101165e-07	0.0	0.9998477013842748	0.0	0.01745204963787506	0.0	0.0	1.999959107571519	0.0	0.0	1.9999277505005655	0.0	-0.00033965320922193403	0.0	1.1854214719839094e-05	-1.4381843264042737e-09	0.0	1.4542804727768745e-10
1.2	-0.00033986001500816186	0.0	-6.4901780098229975e-09	-0.01783988421354687	0.0	-0.4991499042842519	0.0	3.599599073854165e-07	0.0	0.9998477013685697	0.0	0.017452050537640026	0.0	0.0	1.9999592106926947	0.0	0.0	1.9999278536214828	0.0	-0.0003396532164128557	0.0	1.1854215446979342e-05	-1.4381843128517466e-09	0.0	1.454280520775408e-10
1.205	-0.0003398600222200678	0.0	-6.4903139483561015e-09	-0.017841582482636294	0.0	-0.4991498450128705	0.0	3.599599181607165e-07	0.0	0.9998477013528645	0.0	0.017452051437404994	0.0	0.0	1.9999593138138703	0.0	0.0	1.9999279567424035	0.0	-0.0003396532236037772	0.0	1.1854216174119616e-05	-1.438184306527234e-09	0.0	1.454280571597385e-10
1.21	-0.0003398600294319738	0.0	-6.4904498868892055e-09	-0.017843280751725712	0.0	-0.49914978574148916	0.0	3.5995992893601646e-07	0.0	0.9998477013371593	0.0	0.01745205233716996	0.0	0.0	1.9999594169350454	0.0	0.0	1.9999280598633271	0.0	-0.0003396532307946988	0.0	1.1854216901259915e-05	-1.4381843101412412e-09	0.0	1.4542806286309368e-10
1.215	-0.0003398600366438797	0.0	-6.490585825422309e-09	-0.01784497902081513	0.0	-0.4991497264701078	0.0	3.599599397113164e-07	0.0	0.9998477013214541	0.0	0.01745205323693493	0.0	0.0	1.999959520056221	0.0	0.0	1.9999281629842538	0.0	-0.0003396532379856203	0.0	1.1854217628400244e-05	-1.4381843173692558e-09	0.0	1.4542806831233898e-10
1.22	-0.00033986004385578564	0.0	-6.490721763955413e-09	-0.017846677289904554	0.0	-0.4991496671987265	0.0	3.599599504866164e-07	0.0	0.999847701305749	0.0	0.017452054136699896	0.0	0.0	1.9999596231773968	0.0	0.0	1.9999282661051836	0.0	-0.000339653245176542	0.0	1.1854218355540597e-05	-1.4381843273077756e-09	0.0	1.4542807260397257e-10
1.225	-0.00033986005106769157	0.0	-6.490857702488517e-09	-0.017848375558993972	0.0	-0.49914960792734514	0.0	3.5995996126191637e-07	0.0	0.9998477012900437	0.0	0.01745205503646486	0.0	0.0	1.9999597262985715	0.0	0.0	1.9999283692261165	0.0	-0.0003396532523674635	0.0	1.185421908268097e-05	-1.4381843056237322e-09	0.0	1.454280776297014e-10
1.23	-0.0003398600582795975	0.0	-6.49099364102162e-09	-0.01785007382808339	0.0	-0.4991495486559638	0.0	3.599599720372163e-07	0.0	0.9998477012743385	0.0	0.017452055936229827	0.0	0.0	1.9999598294197467	0.0	0.0	1.9999284723470523	0.0	-0.0003396532595583851	0.0	1.1854219809821375e-05	-1.4381843381497973e-09	0.0	1.454280832765877e-10
1.235	-0.00033986006549150343	0.0	-6.491129579554724e-09	-0.017851772097172813	0.0	-0.4991494893845824	0.0	3.599599828125163e-07	0.0	0.9998477012586334	0.0	0.017452056835994795	0.0	0.0	1.9999599325409227	0.0	0.0	1.9999285754679914	0.0	-0.0003396532667493068	0.0	1.1854220536961804e-05	-1.4381843245972702e-09	0.0	1.454280888105363e-10
1.24	-0.00033986007270340936	0.0	-6.491265518087828e-09	-0.017853470366262232	0.0	-0.4991494301132011	0.0	3.599599935878163e-07	0.0	0.9998477012429282	0.0	0.017452057735759762	0.0	0.0	1.9999600356620983	0.0	0.0	1.9999286785889336	0.0	-0.0003396532739402283	0.0	1.1854221264102262e-05	-1.4381843047202303e-09	0.0	1.454280937233274e-10
1.245	-0.00033986007991531535	0.0	-6.491401456620932e-09	-0.017855168635351654	0.0	-0.49914937084181976	0.0	3.599600043631162e-07	0.0	0.999847701227223	0.0	0.01745205863552473	0.0	0.0	1.999960138783274	0.0	0.0	1.9999287817098788	0.0	-0.0003396532811311499	0.0	1.1854221991242742e-05	-1.438184330921783e-09	0.0	1.4542809905963497e-10
1.25	-0.0003398600871272213	0.0	-6.491537395154035e-09	-0.017856866904441073	0.0	-0.4991493115704384	0.0	3.599600151384162e-07	0.0	0.9998477012115179	0.0	0.017452059535289697	0.0	0.0	1.9999602419044493	0.0	0.0	1.999928884830827	0.0	-0.00033965328832207155	0.0	1.1854222718383253e-05	-1.4381843092377395e-09	0.0	1.4542810442417695e-10
1.2550000000000001	-0.0003398600943391272	0.0	-6.491673333687139e-09	-0.017858565173530492	0.0	-0.49914925229905704	0.0	3.599600259137162e-07	0.0	0.9998477011958127	0.0	0.017452060435054664	0.0	0.0	1.9999603450256245	0.0	0.0	1.9999289879517785	0.0	-0.000339653295512993	0.0	1.1854223445523786e-05	-1.4381843047202303e-09	0.0	1.4542810880051386e-10
1.26	-0.00033986010155103314	0.0	-6.491809272220243e-09	-0.017860263442619914	0.0	-0.49914919302767574	0.0	3.599600366890161e-07	0.0	0.9998477011801075	0.0	0.01745206133481963	0.0	0.0	1.9999604481468	0.0	0.0	1.999929091072733	0.0	-0.0003396533027039146	0.0	1.1854224172664342e-05	-1.4381843002027213e-09	0.0	1.4542811458857232e-10
1.2650000000000001	-0.0003398601087629391	0.0	-6.4919452107533465e-09	-0.017861961711709333	0.0	-0.4991491337562944	0.0	3.599600474643161e-07	0.0	0.9998477011644022	0.0	0.0174520622345846	0.0	0.0	1.9999605512679757	0.0	0.0	1.9999291941936905	0.0	-0.00033965330989483607	0.0	1.1854224899804931e-05	-1.4381843146587503e-09	0.0	1.454281202919275e-10
1.27	-0.000339860115974845	0.0	-6.4920811492864506e-09	-0.01786365998079875	0.0	-0.499149074484913	0.0	3.599600582396161e-07	0.0	0.9998477011486971	0.0	0.017452063134349566	0.0	0.0	1.9999606543891515	0.0	0.0	1.9999292973146512	0.0	-0.00033965331708575775	0.0	1.1854225626945543e-05	-1.4381843236937683e-09	0.0	1.4542812480943657e-10
1.2750000000000001	-0.00033986012318675094	0.0	-6.492217087819555e-09	-0.017865358249888174	0.0	-0.49914901521353167	0.0	3.59960069014916e-07	0.0	0.9998477011329919	0.0	0.017452064034114534	0.0	0.0	1.9999607575103266	0.0	0.0	1.999929400435615	0.0	-0.0003396533242766793	0.0	1.185422635408618e-05	-1.4381843020097249e-09	0.0	1.4542812963752437e-10
1.28	-0.0003398601303986569	0.0	-6.492353026352659e-09	-0.017867056518977593	0.0	-0.4991489559421503	0.0	3.59960079790216e-07	0.0	0.9998477011172867	0.0	0.017452064933879498	0.0	0.0	1.9999608606315018	0.0	0.0	1.9999295035565816	0.0	-0.00033965333146760085	0.0	1.185422708122684e-05	-1.43818433453579e-09	0.0	1.454281353126451e-10
1.285	-0.00033986013761056285	0.0	-6.492488964885762e-09	-0.017868754788067015	0.0	-0.499148896670769	0.0	3.59960090565516e-07	0.0	0.9998477011015816	0.0	0.017452065833644465	0.0	0.0	1.9999609637526778	0.0	0.0	1.9999296066775516	0.0	-0.0003396533386585226	0.0	1.1854227808367533e-05	-1.4381843282112775e-09	0.0	1.454281404795461e-10
1.29	-0.0003398601448224688	0.0	-6.492624903418866e-09	-0.017870453057156434	0.0	-0.49914883739938765	0.0	3.59960101340816e-07	0.0	0.9998477010858764	0.0	0.017452066733409433	0.0	0.0	1.999961066873853	0.0	0.0	1.9999297097985247	0.0	-0.0003396533458494441	0.0	1.1854228535508245e-05	-1.4381842938782086e-09	0.0	1.4542814516646171e-10
1.295	-0.0003398601520343747	0.0	-6.49276084195197e-09	-0.017872151326245853	0.0	-0.4991487781280063	0.0	3.599601121161159e-07	0.0	0.9998477010701712	0.0	0.0174520676331744	0.0	0.0	1.9999611699950286	0.0	0.0	1.9999298129195007	0.0	-0.0003396533530403656	0.0	1.1854229262648986e-05	-1.4381843200797612e-09	0.0	1.454281510392235e-10
1.3	-0.00033986015924628065	0.0	-6.492896780485073e-09	-0.017873849595335275	0.0	-0.49914871885662493	0.0	3.599601228914159e-07	0.0	0.9998477010544661	0.0	0.017452068532939367	0.0	0.0	1.9999612731162042	0.0	0.0	1.99992991604048	0.0	-0.00033965336023128727	0.0	1.1854229989789754e-05	-1.4381843209832629e-09	0.0	1.4542815612142117e-10
1.305	-0.0003398601664581866	0.0	-6.493032719018177e-09	-0.017875547864424694	0.0	-0.4991486595852436	0.0	3.599601336667159e-07	0.0	0.9998477010387609	0.0	0.017452069432704335	0.0	0.0	1.9999613762373796	0.0	0.0	1.9999300191614622	0.0	-0.0003396533674222088	0.0	1.1854230716930548e-05	-1.4381842992992194e-09	0.0	1.454281612318533e-10
1.31	-0.0003398601736700925	0.0	-6.493168657551281e-09	-0.017877246133514112	0.0	-0.49914860031386227	0.0	3.5996014444201583e-07	0.0	0.9998477010230556	0.0	0.017452070332469302	0.0	0.0	1.9999614793585556	0.0	0.0	1.9999301222824475	0.0	-0.0003396533746131303	0.0	1.1854231444071367e-05	-1.4381843029132267e-09	0.0	1.4542816656816087e-10
1.315	-0.0003398601808819985	0.0	-6.493304596084385e-09	-0.017878944402603535	0.0	-0.4991485410424809	0.0	3.599601552173158e-07	0.0	0.9998477010073504	0.0	0.01745207123223427	0.0	0.0	1.9999615824797308	0.0	0.0	1.999930225403436	0.0	-0.00033965338180405184	0.0	1.1854232171212213e-05	-1.438184325500772e-09	0.0	1.45428171876234e-10
1.32	-0.0003398601880939044	0.0	-6.493440534617488e-09	-0.017880642671692953	0.0	-0.49914848177109955	0.0	3.599601659926158e-07	0.0	0.9998477009916453	0.0	0.017452072131999237	0.0	0.0	1.9999616856009068	0.0	0.0	1.9999303285244274	0.0	-0.00033965338899497353	0.0	1.1854232898353084e-05	-1.4381843264042737e-09	0.0	1.4542817693019724e-10
1.325	-0.00033986019530581036	0.0	-6.4935764731505924e-09	-0.017882340940782376	0.0	-0.49914842249971825	0.0	3.5996017676791573e-07	0.0	0.9998477009759401	0.0	0.017452073031764204	0.0	0.0	1.9999617887220822	0.0	0.0	1.999930431645422	0.0	-0.00033965339618589505	0.0	1.1854233625493981e-05	-1.4381842983957178e-09	0.0	1.454281815324096e-10
1.33	-0.0003398602025177163	0.0	-6.4937124116836964e-09	-0.017884039209871794	0.0	-0.4991483632283369	0.0	3.599601875432157e-07	0.0	0.9998477009602349	0.0	0.01745207393152917	0.0	0.0	1.9999618918432571	0.0	0.0	1.9999305347664198	0.0	-0.0003396534033768166	0.0	1.18542343526349e-05	-1.4381843164657539e-09	0.0	1.4542818678401386e-10
1.335	-0.0003398602097296222	0.0	-6.4938483502168005e-09	-0.017885737478961213	0.0	-0.49914830395695553	0.0	3.599601983185157e-07	0.0	0.9998477009445298	0.0	0.017452074831294136	0.0	0.0	1.999961994964433	0.0	0.0	1.9999306378874204	0.0	-0.0003396534105677382	0.0	1.185423507977585e-05	-1.4381843173692558e-09	0.0	1.454281924591346e-10
1.34	-0.00033986021694152815	0.0	-6.493984288749904e-09	-0.017887435748050635	0.0	-0.49914824468557417	0.0	3.5996020909381564e-07	0.0	0.9998477009288246	0.0	0.017452075731059103	0.0	0.0	1.9999620980856085	0.0	0.0	1.9999307410084244	0.0	-0.00033965341775865973	0.0	1.1854235806916825e-05	-1.438184311044743e-09	0.0	1.4542819759780115e-10
1.345	-0.0003398602241534341	0.0	-6.494120227283008e-09	-0.017889134017140054	0.0	-0.4991481854141928	0.0	3.5996021986911563e-07	0.0	0.9998477009131194	0.0	0.01745207663082407	0.0	0.0	1.9999622012067841	0.0	0.0	1.9999308441294315	0.0	-0.0003396534249495813	0.0	1.1854236534057825e-05	-1.438184306527234e-09	0.0	1.4542820256706112e-10
1.35	-0.00033986023136534	0.0	-6.494256165816112e-09	-0.017890832286229473	0.0	-0.4991481261428115	0.0	3.599602306444156e-07	0.0	0.9998477008974141	0.0	0.017452077530589038	0.0	0.0	1.9999623043279593	0.0	0.0	1.9999309472504414	0.0	-0.00033965343214050283	0.0	1.185423726119885e-05	-1.4381843218867648e-09	0.0	1.45428208185713e-10
1.355	-0.000339860238577246	0.0	-6.494392104349215e-09	-0.017892530555318895	0.0	-0.49914806687143015	0.0	3.5996024141971555e-07	0.0	0.999847700881709	0.0	0.017452078430354005	0.0	0.0	1.9999624074491351	0.0	0.0	1.9999310503714545	0.0	-0.0003396534393314245	0.0	1.1854237988339907e-05	-1.4381843236937683e-09	0.0	1.4542821332437955e-10
1.36	-0.00033986024578915193	0.0	-6.494528042882319e-09	-0.017894228824408314	0.0	-0.4991480076000488	0.0	3.5996025219501553e-07	0.0	0.9998477008660038	0.0	0.017452079330118973	0.0	0.0	1.9999625105703107	0.0	0.0	1.9999311534924706	0.0	-0.00033965344652234604	0.0	1.1854238715480983e-05	-1.4381843029132267e-09	0.0	1.454282177571853e-10
1.365	-0.00033986025300105786	0.0	-6.494663981415423e-09	-0.017895927093497736	0.0	-0.49914794832866743	0.0	3.599602629703155e-07	0.0	0.9998477008502986	0.0	0.01745208022988394	0.0	0.0	1.9999626136914863	0.0	0.0	1.9999312566134901	0.0	-0.00033965345371326757	0.0	1.1854239442622087e-05	-1.4381843209832629e-09	0.0	1.4542822360171263e-10
1.37	-0.0003398602602129638	0.0	-6.494799919948527e-09	-0.017897625362587155	0.0	-0.49914788905728613	0.0	3.5996027374561546e-07	0.0	0.9998477008345935	0.0	0.017452081129648907	0.0	0.0	1.9999627168126624	0.0	0.0	1.9999313597345125	0.0	-0.0003396534609041892	0.0	1.185424016976322e-05	-1.4381843146587503e-09	0.0	1.4542822888155134e-10
1.375	-0.0003398602674248697	0.0	-6.49493585848163e-09	-0.017899323631676574	0.0	-0.4991478297859048	0.0	3.5996028452091544e-07	0.0	0.9998477008188883	0.0	0.017452082029413875	0.0	0.0	1.9999628199338377	0.0	0.0	1.9999314628555378	0.0	-0.0003396534680951107	0.0	1.1854240896904375e-05	-1.4381843011062232e-09	0.0	1.4542823370963914e-10
1.3800000000000001	-0.00033986027463677566	0.0	-6.495071797014734e-09	-0.017901021900765996	0.0	-0.4991477705145234	0.0	3.5996029529621543e-07	0.0	0.9998477008031831	0.0	0.017452082929178842	0.0	0.0	1.9999629230550129	0.0	0.0	1.9999315659765664	0.0	-0.00033965347528603225	0.0	1.1854241624045557e-05	-1.4381843182727574e-09	0.0	1.4542823879183683e-10
1.385	-0.0003398602818486816	0.0	-6.495207735547838e-09	-0.017902720169855415	0.0	-0.49914771124314206	0.0	3.599603060715154e-07	0.0	0.999847700787478	0.0	0.017452083828943806	0.0	0.0	1.9999630261761885	0.0	0.0	1.9999316690975981	0.0	-0.0003396534824769539	0.0	1.1854242351186764e-05	-1.4381843264042737e-09	0.0	1.4542824426931654e-10
1.3900000000000001	-0.0003398602890605876	0.0	-6.4953436740809415e-09	-0.017904418438944834	0.0	-0.49914765197176075	0.0	3.5996031684681535e-07	0.0	0.9998477007717728	0.0	0.017452084728708774	0.0	0.0	1.999963129297364	0.0	0.0	1.999931772218633	0.0	-0.00033965348966787546	0.0	1.1854243078328e-05	-1.4381843056237322e-09	0.0	1.454282494926864e-10
1.395	-0.0003398602962724935	0.0	-6.4954796126140455e-09	-0.017906116708034256	0.0	-0.4991475927003794	0.0	3.5996032762211534e-07	0.0	0.9998477007560675	0.0	0.01745208562847374	0.0	0.0	1.9999632324185397	0.0	0.0	1.9999318753396707	0.0	-0.000339653496858797	0.0	1.1854243805469259e-05	-1.4381843083342376e-09	0.0	1.4542825446194635e-10
1.4000000000000001	-0.00033986030348439944	0.0	-6.4956155511471496e-09	-0.017907814977123675	0.0	-0.49914753342899804	0.0	3.599603383974153e-07	0.0	0.9998477007403623	0.0	0.01745208652823871	0.0	0.0	1.999963335539715	0.0	0.0	1.9999319784607117	0.0	-0.00033965350404971856	0.0	1.1854244532610544e-05	-1.4381843245972702e-09	0.0	1.4542825968531618e-10
1.405	-0.00033986031069630537	0.0	-6.495751489680254e-09	-0.017909513246213097	0.0	-0.4991474741576167	0.0	3.5996034917271526e-07	0.0	0.9998477007246572	0.0	0.017452087428003676	0.0	0.0	1.9999634386608907	0.0	0.0	1.9999320815817556	0.0	-0.0003396535112406402	0.0	1.1854245259751856e-05	-1.4381843182727574e-09	0.0	1.4542826462634172e-10
1.41	-0.0003398603179082113	0.0	-6.495887428213357e-09	-0.017911211515302516	0.0	-0.4991474148862353	0.0	3.5996035994801524e-07	0.0	0.999847700708952	0.0	0.017452088327768643	0.0	0.0	1.9999635417820663	0.0	0.0	1.9999321847028027	0.0	-0.0003396535184315617	0.0	1.1854245986893192e-05	-1.4381842983957178e-09	0.0	1.4542827021675917e-10
1.415	-0.00033986032512011723	0.0	-6.496023366746461e-09	-0.017912909784391935	0.0	-0.499147355614854	0.0	3.5996037072331523e-07	0.0	0.9998477006932468	0.0	0.01745208922753361	0.0	0.0	1.9999636449032423	0.0	0.0	1.9999322878238528	0.0	-0.00033965352562248324	0.0	1.1854246714034558e-05	-1.438184315562252e-09	0.0	1.4542827558130118e-10
1.42	-0.00033986033233202316	0.0	-6.496159305279565e-09	-0.017914608053481357	0.0	-0.49914729634347266	0.0	3.5996038149861516e-07	0.0	0.9998477006775417	0.0	0.017452090127298578	0.0	0.0	1.9999637480244177	0.0	0.0	1.999932390944906	0.0	-0.00033965353281340487	0.0	1.1854247441175946e-05	-1.4381843236937683e-09	0.0	1.454282804376234e-10
1.425	-0.00033986033954392915	0.0	-6.496295243812668e-09	-0.017916306322570776	0.0	-0.4991472370720913	0.0	3.5996039227391515e-07	0.0	0.9998477006618365	0.0	0.017452091027063545	0.0	0.0	1.9999638511455933	0.0	0.0	1.9999324940659624	0.0	-0.00033965354000432645	0.0	1.1854248168317363e-05	-1.4381843101412412e-09	0.0	1.4542828602804084e-10
1.43	-0.0003398603467558351	0.0	-6.496431182345772e-09	-0.017918004591660194	0.0	-0.49914717780070994	0.0	3.5996040304921514e-07	0.0	0.9998477006461313	0.0	0.017452091926828513	0.0	0.0	1.9999639542667689	0.0	0.0	1.9999325971870219	0.0	-0.00033965354719524797	0.0	1.1854248895458806e-05	-1.4381842983957178e-09	0.0	1.454282906302532e-10
1.435	-0.000339860353967741	0.0	-6.496567120878876e-09	-0.017919702860749617	0.0	-0.49914711852932864	0.0	3.5996041382451507e-07	0.0	0.999847700630426	0.0	0.017452092826593477	0.0	0.0	1.999964057387944	0.0	0.0	1.9999327003080845	0.0	-0.00033965355438616944	0.0	1.185424962260027e-05	-1.4381843074307357e-09	0.0	1.4542829593832633e-10
1.44	-0.00033986036117964694	0.0	-6.49670305941198e-09	-0.017921401129839035	0.0	-0.4991470592579473	0.0	3.5996042459981506e-07	0.0	0.999847700614721	0.0	0.017452093726358444	0.0	0.0	1.99996416050912	0.0	0.0	1.99993280342915	0.0	-0.00033965356157709107	0.0	1.1854250349741765e-05	-1.438184315562252e-09	0.0	1.4542830144404048e-10
1.445	-0.0003398603683915529	0.0	-6.496838997945083e-09	-0.017923099398928454	0.0	-0.4991469999865659	0.0	3.5996043537511504e-07	0.0	0.9998477005990157	0.0	0.01745209462612341	0.0	0.0	1.9999642636302954	0.0	0.0	1.9999329065502187	0.0	-0.0003396535687680126	0.0	1.1854251076883284e-05	-1.4381843011062232e-09	0.0	1.4542830641330046e-10
1.45	-0.0003398603756034588	0.0	-6.496974936478187e-09	-0.017924797668017876	0.0	-0.49914694071518456	0.0	3.59960446150415e-07	0.0	0.9998477005833105	0.0	0.01745209552588838	0.0	0.0	1.999964366751471	0.0	0.0	1.9999330096712904	0.0	-0.0003396535759589341	0.0	1.185425180402483e-05	-1.4381843327287865e-09	0.0	1.4542831143902926e-10
1.455	-0.00033986038281536474	0.0	-6.497110875011291e-09	-0.017926495937107295	0.0	-0.49914688144380326	0.0	3.5996045692571496e-07	0.0	0.9998477005676054	0.0	0.017452096425653346	0.0	0.0	1.9999644698726466	0.0	0.0	1.9999331127923654	0.0	-0.00033965358314985586	0.0	1.1854252531166399e-05	-1.4381843336322884e-09	0.0	1.454283170859156e-10
1.46	-0.0003398603900272707	0.0	-6.497246813544395e-09	-0.017928194206196717	0.0	-0.4991468221724219	0.0	3.5996046770101495e-07	0.0	0.9998477005519002	0.0	0.017452097325418314	0.0	0.0	1.9999645729938227	0.0	0.0	1.9999332159134433	0.0	-0.0003396535903407774	0.0	1.1854253258308e-05	-1.4381842911677031e-09	0.0	1.4542832250692645e-10
1.465	-0.00033986039723917665	0.0	-6.497382752077499e-09	-0.017929892475286136	0.0	-0.49914676290104054	0.0	3.599604784763149e-07	0.0	0.999847700536195	0.0	0.01745209822518328	0.0	0.0	1.999964676114998	0.0	0.0	1.9999333190345243	0.0	-0.00033965359753169885	0.0	1.1854253985449622e-05	-1.4381843173692558e-09	0.0	1.4542832719384208e-10
1.47	-0.0003398604044510826	0.0	-6.497518690610603e-09	-0.017931590744375555	0.0	-0.4991467036296592	0.0	3.5996048925161487e-07	0.0	0.9998477005204899	0.0	0.01745209912494825	0.0	0.0	1.999964779236174	0.0	0.0	1.9999334221556084	0.0	-0.00033965360472262054	0.0	1.1854254712591273e-05	-1.4381843182727574e-09	0.0	1.4542833264308738e-10
1.475	-0.0003398604116629885	0.0	-6.497654629143707e-09	-0.017933289013464977	0.0	-0.4991466443582778	0.0	3.5996050002691486e-07	0.0	0.9998477005047847	0.0	0.017452100024713216	0.0	0.0	1.9999648823573497	0.0	0.0	1.9999335252766957	0.0	-0.000339653611913542	0.0	1.1854255439732948e-05	-1.438184296588714e-09	0.0	1.4542833752764404e-10
1.48	-0.00033986041887489445	0.0	-6.49779056767681e-09	-0.017934987282554396	0.0	-0.4991465850868965	0.0	3.5996051080221484e-07	0.0	0.9998477004890794	0.0	0.017452100924478183	0.0	0.0	1.999964985478525	0.0	0.0	1.999933628397786	0.0	-0.00033965361910446353	0.0	1.185425616687465e-05	-1.4381843002027213e-09	0.0	1.4542834244043513e-10
1.485	-0.0003398604260868004	0.0	-6.497926506209914e-09	-0.017936685551643815	0.0	-0.49914652581551516	0.0	3.599605215775148e-07	0.0	0.9998477004733742	0.0	0.01745210182424315	0.0	0.0	1.9999650885997002	0.0	0.0	1.9999337315188794	0.0	-0.00033965362629538506	0.0	1.1854256894016373e-05	-1.4381843146587503e-09	0.0	1.4542834752263281e-10
1.49	-0.0003398604332987063	0.0	-6.498062444743018e-09	-0.017938383820733237	0.0	-0.4991464665441338	0.0	3.5996053235281477e-07	0.0	0.9998477004576691	0.0	0.017452102724008114	0.0	0.0	1.9999651917208763	0.0	0.0	1.9999338346399758	0.0	-0.0003396536334863067	0.0	1.1854257621158125e-05	-1.4381843227902666e-09	0.0	1.4542835328245685e-10
1.495	-0.0003398604405106123	0.0	-6.498198383276121e-09	-0.017940082089822656	0.0	-0.49914640727275245	0.0	3.5996054312811475e-07	0.0	0.9998477004419639	0.0	0.017452103623773082	0.0	0.0	1.9999652948420519	0.0	0.0	1.9999339377610754	0.0	-0.00033965364067722827	0.0	1.1854258348299905e-05	-1.4381842947817104e-09	0.0	1.4542835850582671e-10
1.5	-0.00033986044772251823	0.0	-6.498334321809225e-09	-0.017941780358912078	0.0	-0.49914634800137114	0.0	3.599605539034147e-07	0.0	0.9998477004262587	0.0	0.01745210452353805	0.0	0.0	1.9999653979632275	0.0	0.0	1.999934040882178	0.0	-0.0003396536478681497	0.0	1.185425907544171e-05	-1.438184311948245e-09	0.0	1.4542836353155552e-10
1.5050000000000001	-0.00033986045493442416	0.0	-6.498470260342329e-09	-0.017943478628001497	0.0	-0.4991462887299898	0.0	3.5996056467871467e-07	0.0	0.9998477004105536	0.0	0.017452105423303017	0.0	0.0	1.9999655010844033	0.0	0.0	1.9999341440032838	0.0	-0.00033965365505907137	0.0	1.185425980258354e-05	-1.4381843209832629e-09	0.0	1.454283687831598e-10
1.51	-0.0003398604621463301	0.0	-6.498606198875433e-09	-0.017945176897090916	0.0	-0.4991462294586084	0.0	3.5996057545401466e-07	0.0	0.9998477003948484	0.0	0.017452106323067984	0.0	0.0	1.999965604205579	0.0	0.0	1.9999342471243926	0.0	-0.00033965366224999284	0.0	1.1854260529725398e-05	-1.4381842983957178e-09	0.0	1.4542837400652965e-10
1.5150000000000001	-0.000339860469358236	0.0	-6.4987421374085365e-09	-0.017946875166180338	0.0	-0.49914617018722707	0.0	3.599605862293146e-07	0.0	0.9998477003791432	0.0	0.01745210722283295	0.0	0.0	1.9999657073267545	0.0	0.0	1.9999343502455045	0.0	-0.0003396536694409144	0.0	1.185426125686728e-05	-1.438184330921783e-09	0.0	1.4542837920166504e-10
1.52	-0.00033986047657014195	0.0	-6.4988780759416405e-09	-0.017948573435269757	0.0	-0.49914611091584576	0.0	3.599605970046146e-07	0.0	0.9998477003634381	0.0	0.01745210812259792	0.0	0.0	1.99996581044793	0.0	0.0	1.9999344533666195	0.0	-0.0003396536766318361	0.0	1.1854261984009189e-05	-1.4381843164657539e-09	0.0	1.4542838417092502e-10
1.5250000000000001	-0.0003398604837820479	0.0	-6.4990140144747445e-09	-0.017950271704359175	0.0	-0.4991460516444644	0.0	3.5996060777991457e-07	0.0	0.9998477003477328	0.0	0.017452109022362886	0.0	0.0	1.999965913569106	0.0	0.0	1.9999345564877375	0.0	-0.00033965368382275757	0.0	1.1854262711151123e-05	-1.4381843038167286e-09	0.0	1.4542838956370144e-10
1.53	-0.00033986049099395387	0.0	-6.499149953007848e-09	-0.017951969973448598	0.0	-0.49914599237308305	0.0	3.599606185552145e-07	0.0	0.9998477003320276	0.0	0.017452109922127854	0.0	0.0	1.9999660166902815	0.0	0.0	1.9999346596088587	0.0	-0.00033965369101367915	0.0	1.1854263438293085e-05	-1.4381843002027213e-09	0.0	1.4542839492824345e-10
1.5350000000000001	-0.0003398604982058598	0.0	-6.499285891540952e-09	-0.017953668242538016	0.0	-0.4991459331017017	0.0	3.599606293305145e-07	0.0	0.9998477003163224	0.0	0.01745211082189282	0.0	0.0	1.9999661198114576	0.0	0.0	1.999934762729983	0.0	-0.0003396536982046006	0.0	1.1854264165435071e-05	-1.4381843146587503e-09	0.0	1.4542839958692466e-10
1.54	-0.00033986050541776573	0.0	-6.499421830074056e-09	-0.01795536651162744	0.0	-0.49914587383032033	0.0	3.5996064010581447e-07	0.0	0.9998477003006173	0.0	0.017452111721657785	0.0	0.0	1.9999662229326327	0.0	0.0	1.9999348658511105	0.0	-0.0003396537053955223	0.0	1.1854264892577081e-05	-1.4381843164657539e-09	0.0	1.4542840495146664e-10
1.545	-0.00033986051262967166	0.0	-6.49955776860716e-09	-0.017957064780716857	0.0	-0.499145814558939	0.0	3.599606508811144e-07	0.0	0.9998477002849121	0.0	0.017452112621422752	0.0	0.0	1.999966326053808	0.0	0.0	1.9999349689722408	0.0	-0.00033965371258644377	0.0	1.185426561971912e-05	-1.4381842947817104e-09	0.0	1.454284102595398e-10
1.55	-0.0003398605198415776	0.0	-6.499693707140263e-09	-0.017958763049806276	0.0	-0.49914575528755767	0.0	3.599606616564144e-07	0.0	0.9998477002692069	0.0	0.01745211352118772	0.0	0.0	1.9999664291749841	0.0	0.0	1.9999350720933744	0.0	-0.0003396537197773653	0.0	1.1854266346861184e-05	-1.4381843200797612e-09	0.0	1.454284152852686e-10
1.555	-0.00033986052705348353	0.0	-6.499829645673367e-09	-0.0179604613188957	0.0	-0.4991456960161763	0.0	3.599606724317144e-07	0.0	0.9998477002535018	0.0	0.017452114420952687	0.0	0.0	1.9999665322961597	0.0	0.0	1.999935175214511	0.0	-0.00033965372696828693	0.0	1.1854267074003274e-05	-1.4381843128517466e-09	0.0	1.454284205651073e-10
1.56	-0.00033986053426538946	0.0	-6.499965584206471e-09	-0.017962159587985117	0.0	-0.49914563674479495	0.0	3.5996068320701437e-07	0.0	0.9998477002377966	0.0	0.017452115320717655	0.0	0.0	1.9999666354173355	0.0	0.0	1.9999352783356505	0.0	-0.0003396537341592084	0.0	1.185426780114539e-05	-1.438184306527234e-09	0.0	1.4542842604258702e-10
1.565	-0.00033986054147729544	0.0	-6.500101522739575e-09	-0.017963857857074536	0.0	-0.49914557747341365	0.0	3.599606939823143e-07	0.0	0.9998477002220914	0.0	0.017452116220482622	0.0	0.0	1.9999667385385111	0.0	0.0	1.9999353814567935	0.0	-0.00033965374135013	0.0	1.1854268528287534e-05	-1.4381843092377395e-09	0.0	1.4542843126595688e-10
1.57	-0.0003398605486892014	0.0	-6.500237461272678e-09	-0.01796555612616396	0.0	-0.4991455182020323	0.0	3.599607047576143e-07	0.0	0.9998477002063861	0.0	0.01745211712024759	0.0	0.0	1.9999668416596872	0.0	0.0	1.9999354845779393	0.0	-0.0003396537485410515	0.0	1.1854269255429702e-05	-1.4381843236937683e-09	0.0	1.454284360375758e-10
1.575	-0.0003398605559011073	0.0	-6.500373399805782e-09	-0.017967254395253377	0.0	-0.49914545893065093	0.0	3.599607155329143e-07	0.0	0.999847700190681	0.0	0.017452118020012557	0.0	0.0	1.9999669447808626	0.0	0.0	1.9999355876990883	0.0	-0.0003396537557319732	0.0	1.1854269982571895e-05	-1.4381843182727574e-09	0.0	1.454284414868211e-10
1.58	-0.00033986056311301324	0.0	-6.500509338338886e-09	-0.0179689526643428	0.0	-0.4991453996592696	0.0	3.599607263082142e-07	0.0	0.9998477001749758	0.0	0.017452118919777524	0.0	0.0	1.9999670479020386	0.0	0.0	1.9999356908202404	0.0	-0.00033965376292289465	0.0	1.1854270709714116e-05	-1.4381842902642015e-09	0.0	1.4542844687959753e-10
1.585	-0.00033986057032491917	0.0	-6.5006452768719896e-09	-0.017970650933432218	0.0	-0.49914534038788827	0.0	3.599607370835142e-07	0.0	0.9998477001592706	0.0	0.01745211981954249	0.0	0.0	1.9999671510232142	0.0	0.0	1.9999357939413953	0.0	-0.0003396537701138161	0.0	1.1854271436856362e-05	-1.4381843083342376e-09	0.0	1.4542845134063773e-10
1.59	-0.0003398605775368251	0.0	-6.500781215405094e-09	-0.017972349202521637	0.0	-0.4991452811165069	0.0	3.599607478588142e-07	0.0	0.9998477001435655	0.0	0.017452120719307455	0.0	0.0	1.9999672541443898	0.0	0.0	1.9999358970625536	0.0	-0.00033965377730473776	0.0	1.185427216399863e-05	-1.4381843227902666e-09	0.0	1.454284569592896e-10
1.595	-0.00033986058474873103	0.0	-6.500917153938198e-09	-0.01797404747161106	0.0	-0.49914522184512555	0.0	3.599607586341141e-07	0.0	0.9998477001278603	0.0	0.017452121619072423	0.0	0.0	1.9999673572655652	0.0	0.0	1.999936000183715	0.0	-0.0003396537844956593	0.0	1.185427289114093e-05	-1.4381842938782086e-09	0.0	1.4542846184384628e-10
1.6	-0.00033986059196063696	0.0	-6.501053092471302e-09	-0.017975745740700478	0.0	-0.4991451625737442	0.0	3.599607694094141e-07	0.0	0.9998477001121551	0.0	0.01745212251883739	0.0	0.0	1.9999674603867408	0.0	0.0	1.9999361033048793	0.0	-0.00033965379168658075	0.0	1.185427361828325e-05	-1.4381843182727574e-09	0.0	1.4542846734956044e-10
1.605	-0.00033986059917254295	0.0	-6.501189031004405e-09	-0.017977444009789897	0.0	-0.49914510330236284	0.0	3.599607801847141e-07	0.0	0.99984770009645	0.0	0.017452123418602358	0.0	0.0	1.9999675635079173	0.0	0.0	1.9999362064260469	0.0	-0.00033965379887750244	0.0	1.1854274345425604e-05	-1.4381843191762593e-09	0.0	1.4542847291174345e-10
1.61	-0.0003398606063844489	0.0	-6.501324969537509e-09	-0.01797914227887932	0.0	-0.49914504403098153	0.0	3.59960790960014e-07	0.0	0.9998477000807448	0.0	0.017452124318367325	0.0	0.0	1.9999676666290924	0.0	0.0	1.9999363095472174	0.0	-0.0003396538060684239	0.0	1.1854275072567978e-05	-1.4363389203425152e-09	0.0	3.3708592766805973e-11
1.615	-0.0003398606135963548	0.0	-6.501460908070613e-09	-0.017980840547968738	0.0	-0.4991449847596002	0.0	3.59960801735314e-07	0.0	0.9998477000650395	0.0	0.017452125218132292	0.0	0.0	1.9999677697502682	0.0	0.0	1.999936412668391	0.0	-0.00033965381325934543	0.0	1.185427579971038e-05	-1.4458979369705305e-09	0.0	6.124147801088464e-10
1.62	-0.00033986062115285006	0.0	-6.4949016032212825e-09	-0.017982538817084004	0.0	-0.4991449254881513	0.0	3.5996151383377083e-07	0.0	0.9998477000493343	0.0	0.01745212611790068	0.0	0.0	1.9999678728718362	0.0	0.0	1.9999365157897686	0.0	-0.00033965382056098947	0.0	1.1854283230045886e-05	-1.49276469368446e-09	0.0	2.861170980738762e-09
1.625	-0.00033986062933650634	0.0	-6.4761567863585856e-09	-0.017984237086246302	0.0	-0.4991448662165796	0.0	3.599635023580819e-07	0.0	0.999847700033629	0.0	0.017452127017675286	0.0	0.0	1.9999679759941162	0.0	0.0	1.999936618911716	0.0	-0.0003396538280641509	0.0	1.1854302860362059e-05	-1.456061523703462e-09	0.0	3.930190709282213e-09
1.6300000000000001	-0.00033986063680337093	0.0	-6.459991679093555e-09	-0.017985935355432716	0.0	-0.49914480694495417	0.0	3.5996397839537717e-07	0.0	0.9998477000179236	0.0	0.017452127917446564	0.0	0.0	1.9999680791160153	0.0	0.0	1.9999367220337996	0.0	-0.00033965383494098623	0.0	1.1854319887522572e-05	-1.268791336462664e-09	0.0	3.0458563577202096e-09
1.635	-0.0003398606432606187	0.0	-6.447460149292356e-09	-0.017987633624653096	0.0	-0.4991447476732529	0.0	3.599623240615873e-07	0.0	0.9998477000022183	0.0	0.017452128817213152	0.0	0.0	1.9999681822373765	0.0	0.0	1.9999368251554095	0.0	-0.0003396538409356279	0.0	1.1854333248081305e-05	-1.2230069198039886e-09	0.0	2.363788822339931e-09
1.6400000000000001	-0.0003398606500869511	0.0	-6.437971575784246e-09	-0.017989331893937997	0.0	-0.4991446884014871	0.0	3.599615055272506e-07	0.0	0.9998476999865131	0.0	0.01745212971698021	0.0	0.0	1.9999682853587923	0.0	0.0	1.9999369282767847	0.0	-0.00033965384740532536	0.0	1.1854343580418384e-05	-1.3541996950888757e-09	0.0	1.6823414293700215e-09
1.645	-0.00033986065731994846	0.0	-6.431835793443266e-09	-0.01799103016329399	0.0	-0.4991446291296502	0.0	3.599616078937596e-07	0.0	0.9998476999708079	0.0	0.017452130616747788	0.0	0.0	1.9999683884802673	0.0	0.0	1.9999370313981892	0.0	-0.0003396538543984489	0.0	1.1854350576199212e-05	-1.4073484610399706e-09	0.0	1.3435468965998514e-09
1.6500000000000001	-0.0003398606645529458	0.0	-6.425700011102287e-09	-0.017992728432649985	0.0	-0.49914456985781325	0.0	3.599617102602686e-07	0.0	0.9998476999551027	0.0	0.017452131516515368	0.0	0.0	1.9999684916017426	0.0	0.0	1.9999371345196233	0.0	-0.0003396538613915723	0.0	1.1854357571980064e-05	-1.3984397497785138e-09	0.0	1.4384500834996945e-09
1.655	-0.00033986067178594316	0.0	-6.419564228761308e-09	-0.01799442670200598	0.0	-0.4991445105859763	0.0	3.599618126267776e-07	0.0	0.9998476999393975	0.0	0.017452132416282948	0.0	0.0	1.9999685947232178	0.0	0.0	1.9999372376410864	0.0	-0.0003396538683846958	0.0	1.1854364567760944e-05	-1.3996094521343215e-09	0.0	1.1899233359341781e-09
1.6600000000000001	-0.0003398606789477513	0.0	-6.415785031377061e-09	-0.017996124971443157	0.0	-0.4991444513141041	0.0	3.5996174004131246e-07	0.0	0.9998476999236922	0.0	0.017452133316049424	0.0	0.0	1.9999686978445663	0.0	0.0	1.999937340762529	0.0	-0.0003396538753889155	0.0	1.1854369205907236e-05	-1.4017781221088248e-09	0.0	7.291516386873601e-10
1.665	-0.0003398606860614936	0.0	-6.413596962397486e-09	-0.017997823240935146	0.0	-0.4991443920422081	0.0	3.599615493310775e-07	0.0	0.9998476999079869	0.0	0.017452134215815155	0.0	0.0	1.9999688009658294	0.0	0.0	1.9999374438839168	0.0	-0.00033965388240062765	0.0	1.1854372252216435e-05	-1.402467305158285e-09	0.0	5.827312237869988e-10
1.67	-0.00033986069317523584	0.0	-6.411408893417912e-09	-0.017999521510427132	0.0	-0.49914433277031206	0.0	3.5996135862084254e-07	0.0	0.9998476998922818	0.0	0.017452135115580886	0.0	0.0	1.9999689040870927	0.0	0.0	1.9999375470052498	0.0	-0.0003396538894123398	0.0	1.185437529852566e-05	-1.4002855949421522e-09	0.0	6.346654031064108e-10
1.675	-0.0003398607002889781	0.0	-6.409220824438337e-09	-0.01800121977991912	0.0	-0.49914427349841606	0.0	3.599611679106076e-07	0.0	0.9998476998765766	0.0	0.017452136015346616	0.0	0.0	1.9999690072083562	0.0	0.0	1.9999376501265285	0.0	-0.00033965389642405183	0.0	1.1854378344834912e-05	-1.4138759851485896e-09	0.0	4.668120169827258e-10
1.68	-0.00033986070747286126	0.0	-6.408560347500956e-09	-0.018002918050411577	0.0	-0.4991442142263913	0.0	3.5996111933077853e-07	0.0	0.9998476998608713	0.0	0.01745213691511285	0.0	0.0	1.9999691103296768	0.0	0.0	1.999937753247793	0.0	-0.00033965390355917326	0.0	1.1854379866930868e-05	-1.433925236036561e-09	0.0	2.1918666188969985e-10
1.685	-0.0003398607146842764	0.0	-6.4084994865619445e-09	-0.018004616321296744	0.0	-0.4991441549543162	0.0	3.5996112654049465e-07	0.0	0.9998476998451661	0.0	0.017452137814879278	0.0	0.0	1.99996921345102	0.0	0.0	1.9999378563690597	0.0	-0.000339653910742736	0.0	1.1854380790737083e-05	-1.4375198947869094e-09	0.0	1.7478974878256705e-10
1.69	-0.0003398607218956915	0.0	-6.408438625622934e-09	-0.018006314592181907	0.0	-0.499144095682241	0.0	3.5996113375021076e-07	0.0	0.9998476998294609	0.0	0.017452138714645706	0.0	0.0	1.999969316572363	0.0	0.0	1.9999379594903286	0.0	-0.00033965391792629865	0.0	1.1854381714543319e-05	-1.4367125174376157e-09	0.0	1.8476125040944885e-10
1.695	-0.0003398607291071066	0.0	-6.408377764683922e-09	-0.01800801286306707	0.0	-0.4991440364101658	0.0	3.5996114095992683e-07	0.0	0.9998476998137555	0.0	0.017452139614412138	0.0	0.0	1.9999694196937063	0.0	0.0	1.9999380626115995	0.0	-0.0003396539251098612	0.0	1.1854382638349586e-05	-1.4367125165341138e-09	0.0	1.8476125588692856e-10
1.7	-0.0003398607363185217	0.0	-6.408316903744911e-09	-0.018009711133952232	0.0	-0.4991439771380906	0.0	3.5996114816964295e-07	0.0	0.9998476997980503	0.0	0.017452140514178566	0.0	0.0	1.9999695228150498	0.0	0.0	1.9999381657328723	0.0	-0.00033965393229342387	0.0	1.1854383562155877e-05	-1.4367125436391681e-09	0.0	1.847612608279541e-10
1.705	-0.0003398607435299368	0.0	-6.4082560428059e-09	-0.018011409404837395	0.0	-0.4991439178660154	0.0	3.59961155379359e-07	0.0	0.9998476997823451	0.0	0.017452141413944994	0.0	0.0	1.999969625936393	0.0	0.0	1.9999382688541472	0.0	-0.0003396539394769866	0.0	1.1854384485962195e-05	-1.436712540025161e-09	0.0	1.8476126605132393e-10
1.71	-0.00033986075074135194	0.0	-6.408195181866889e-09	-0.018013107675722558	0.0	-0.4991438585939402	0.0	3.5996116258907513e-07	0.0	0.9998476997666399	0.0	0.017452142313711422	0.0	0.0	1.9999697290577363	0.0	0.0	1.9999383719754242	0.0	-0.00033965394666054925	0.0	1.1854385409768536e-05	-1.4367125165341138e-09	0.0	1.8476127099234947e-10
1.715	-0.00033986075795276705	0.0	-6.408134320927878e-09	-0.01801480594660772	0.0	-0.4991437993218651	0.0	3.599611697987912e-07	0.0	0.9998476997509346	0.0	0.017452143213477853	0.0	0.0	1.9999698321790793	0.0	0.0	1.9999384750967033	0.0	-0.0003396539538441118	0.0	1.1854386333574905e-05	-1.4367125228586265e-09	0.0	1.847612763851259e-10
1.72	-0.00033986076516418217	0.0	-6.4080734599888664e-09	-0.018016504217492884	0.0	-0.4991437400497899	0.0	3.599611770085073e-07	0.0	0.9998476997352294	0.0	0.01745214411324428	0.0	0.0	1.9999699353004226	0.0	0.0	1.9999385782179846	0.0	-0.00033965396102767447	0.0	1.18543872573813e-05	-1.4367125427356664e-09	0.0	1.84761281495558e-10
1.725	-0.0003398607723755973	0.0	-6.408012599049855e-09	-0.01801820248837805	0.0	-0.4991436807777147	0.0	3.599611842182234e-07	0.0	0.9998476997195241	0.0	0.01745214501301071	0.0	0.0	1.999970038421766	0.0	0.0	1.9999386813392677	0.0	-0.0003396539682112372	0.0	1.185438818118772e-05	-1.43671252466563e-09	0.0	1.847612866059901e-10
1.73	-0.00033986077958701245	0.0	-6.407951738110844e-09	-0.018019900759263213	0.0	-0.4991436215056395	0.0	3.599611914279395e-07	0.0	0.9998476997038188	0.0	0.017452145912777137	0.0	0.0	1.9999701415431088	0.0	0.0	1.999938784460553	0.0	-0.00033965397539479974	0.0	1.1854389104994167e-05	-1.4367125228586265e-09	0.0	1.847612923940486e-10
1.735	-0.00033986078679842756	0.0	-6.407890877171833e-09	-0.018021599030148376	0.0	-0.4991435622335643	0.0	3.5996119863765557e-07	0.0	0.9998476996881136	0.0	0.01745214681254357	0.0	0.0	1.9999702446644527	0.0	0.0	1.9999388875818405	0.0	-0.00033965398257836246	0.0	1.1854390028800642e-05	-1.4367125508671827e-09	0.0	1.847612972221364e-10
1.74	-0.00033986079400984267	0.0	-6.407830016232822e-09	-0.01802329730103354	0.0	-0.4991435029614891	0.0	3.599612058473717e-07	0.0	0.9998476996724084	0.0	0.017452147712309997	0.0	0.0	1.9999703477857955	0.0	0.0	1.9999389907031297	0.0	-0.0003396539897619252	0.0	1.185439095260714e-05	-1.436712525569132e-09	0.0	1.8476130182434875e-10
1.745	-0.0003398608012212578	0.0	-6.4077691552938106e-09	-0.018024995571918702	0.0	-0.499143443689414	0.0	3.5996121305708775e-07	0.0	0.9998476996567031	0.0	0.017452148612076425	0.0	0.0	1.999970450907139	0.0	0.0	1.9999390938244213	0.0	-0.00033965399694548773	0.0	1.1854391876413662e-05	-1.4367125174376157e-09	0.0	1.8476130735829732e-10
1.75	-0.0003398608084326729	0.0	-6.407708294354799e-09	-0.018026693842803865	0.0	-0.4991433844173388	0.0	3.5996122026680387e-07	0.0	0.9998476996409978	0.0	0.017452149511842853	0.0	0.0	1.9999705540284822	0.0	0.0	1.9999391969457148	0.0	-0.0003396540041290504	0.0	1.1854392800220214e-05	-1.4367125454461719e-09	0.0	1.8476131303341806e-10
1.7550000000000001	-0.000339860815644088	0.0	-6.407647433415788e-09	-0.018028392113689028	0.0	-0.4991433251452636	0.0	3.5996122747651994e-07	0.0	0.9998476996252926	0.0	0.017452150411609284	0.0	0.0	1.9999706571498255	0.0	0.0	1.9999393000670105	0.0	-0.0003396540113126131	0.0	1.1854393724026791e-05	-1.4367125201481211e-09	0.0	1.8476131777680257e-10
1.76	-0.0003398608228555031	0.0	-6.407586572476777e-09	-0.018030090384574194	0.0	-0.4991432658731884	0.0	3.5996123468623606e-07	0.0	0.9998476996095873	0.0	0.017452151311375712	0.0	0.0	1.999970760271169	0.0	0.0	1.999939403188308	0.0	-0.0003396540184961756	0.0	1.1854394647833392e-05	-1.436712511113103e-09	0.0	1.847613225484215e-10
1.7650000000000001	-0.00033986083006691824	0.0	-6.407525711537765e-09	-0.018031788655459357	0.0	-0.4991432066011132	0.0	3.599612418959521e-07	0.0	0.9998476995938821	0.0	0.01745215221114214	0.0	0.0	1.9999708633925117	0.0	0.0	1.999939506309608	0.0	-0.0003396540256797383	0.0	1.1854395571640018e-05	-1.4367125391216591e-09	0.0	1.8476132819530782e-10
1.77	-0.00033986083727833335	0.0	-6.407464850598755e-09	-0.01803348692634452	0.0	-0.49914314732903803	0.0	3.5996124910566824e-07	0.0	0.9998476995781769	0.0	0.01745215311090857	0.0	0.0	1.9999709665138554	0.0	0.0	1.9999396094309096	0.0	-0.000339654032863301	0.0	1.1854396495446673e-05	-1.4367125418321646e-09	0.0	1.8476133378572527e-10
1.7750000000000001	-0.00033986084448974846	0.0	-6.407403989659743e-09	-0.018035185197229683	0.0	-0.49914308805696284	0.0	3.599612563153843e-07	0.0	0.9998476995624717	0.0	0.017452154010675	0.0	0.0	1.9999710696351989	0.0	0.0	1.9999397125522136	0.0	-0.00033965404004686366	0.0	1.1854397419253355e-05	-1.436712511113103e-09	0.0	1.8476133867028195e-10
1.78	-0.0003398608517011636	0.0	-6.4073431287207325e-09	-0.018036883468114846	0.0	-0.4991430287848877	0.0	3.599612635251004e-07	0.0	0.9998476995467663	0.0	0.017452154910441428	0.0	0.0	1.9999711727565417	0.0	0.0	1.9999398156735195	0.0	-0.00033965404723042616	0.0	1.1854398343060059e-05	-1.4367125174376157e-09	0.0	1.8476134335719758e-10
1.7850000000000001	-0.00033986085891257874	0.0	-6.407282267781721e-09	-0.01803858173900001	0.0	-0.4991429695128125	0.0	3.599612707348165e-07	0.0	0.9998476995310611	0.0	0.017452155810207856	0.0	0.0	1.9999712758778851	0.0	0.0	1.9999399187948275	0.0	-0.0003396540544139889	0.0	1.185439926686679e-05	-1.4367125517706844e-09	0.0	1.8476134939936594e-10
1.79	-0.00033986086612399386	0.0	-6.4072214068427095e-09	-0.01804028000988517	0.0	-0.4991429102407373	0.0	3.599612779445326e-07	0.0	0.9998476995153559	0.0	0.017452156709974288	0.0	0.0	1.9999713789992288	0.0	0.0	1.9999400219161376	0.0	-0.0003396540615975516	0.0	1.1854400190673552e-05	-1.436712525569132e-09	0.0	1.847613540015783e-10
1.795	-0.00033986087333540897	0.0	-6.407160545903699e-09	-0.018041978280770338	0.0	-0.4991428509686621	0.0	3.599612851542487e-07	0.0	0.9998476994996506	0.0	0.017452157609740716	0.0	0.0	1.9999714821205719	0.0	0.0	1.9999401250374498	0.0	-0.00033965406878111416	0.0	1.185440111448033e-05	-1.43671252466563e-09	0.0	1.8476135905554154e-10
1.8	-0.0003398608805468241	0.0	-6.407099684964687e-09	-0.0180436765516555	0.0	-0.49914279169658693	0.0	3.599612923639648e-07	0.0	0.9998476994839454	0.0	0.017452158509507144	0.0	0.0	1.999971585241915	0.0	0.0	1.999940228158764	0.0	-0.0003396540759646769	0.0	1.1854402038287143e-05	-1.4367125454461719e-09	0.0	1.8476136461772455e-10
1.805	-0.0003398608877582392	0.0	-6.407038824025677e-09	-0.018045374822540663	0.0	-0.49914273242451174	0.0	3.599612995736809e-07	0.0	0.9998476994682401	0.0	0.01745215940927357	0.0	0.0	1.9999716883632583	0.0	0.0	1.99994033128008	0.0	-0.00033965408314823954	0.0	1.1854402962093976e-05	-1.4367125129201067e-09	0.0	1.8476136933287464e-10
1.81	-0.0003398608949696543	0.0	-6.406977963086665e-09	-0.018047073093425826	0.0	-0.4991426731524366	0.0	3.59961306783397e-07	0.0	0.9998476994525348	0.0	0.017452160309040003	0.0	0.0	1.9999717914846018	0.0	0.0	1.9999404344013985	0.0	-0.00033965409033180204	0.0	1.1854403885900837e-05	-1.4367125120166048e-09	0.0	1.8476137506446424e-10
1.815	-0.0003398609021810694	0.0	-6.406917102147654e-09	-0.01804877136431099	0.0	-0.4991426138803614	0.0	3.599613139931131e-07	0.0	0.9998476994368296	0.0	0.01745216120880643	0.0	0.0	1.999971894605945	0.0	0.0	1.9999405375227188	0.0	-0.0003396540975153647	0.0	1.1854404809707726e-05	-1.4367125318936447e-09	0.0	1.8476138000548978e-10
1.82	-0.00033986090939248454	0.0	-6.406856241208643e-09	-0.018050469635196152	0.0	-0.4991425546082862	0.0	3.5996132120282916e-07	0.0	0.9998476994211244	0.0	0.01745216210857286	0.0	0.0	1.999971997727288	0.0	0.0	1.9999406406440414	0.0	-0.00033965410469892737	0.0	1.1854405733514637e-05	-1.4367125346041501e-09	0.0	1.8476138497474973e-10
1.825	-0.00033986091660389965	0.0	-6.4067953802696315e-09	-0.018052167906081315	0.0	-0.499142495336211	0.0	3.599613284125453e-07	0.0	0.9998476994054192	0.0	0.017452163008339287	0.0	0.0	1.9999721008486318	0.0	0.0	1.9999407437653658	0.0	-0.00033965411188249003	0.0	1.1854406657321576e-05	-1.4367125183411176e-09	0.0	1.8476139062163603e-10
1.83	-0.00033986092381531476	0.0	-6.406734519330621e-09	-0.01805386617696648	0.0	-0.49914243606413583	0.0	3.5996133562226135e-07	0.0	0.9998476993897139	0.0	0.01745216390810572	0.0	0.0	1.9999722039699754	0.0	0.0	1.9999408468866924	0.0	-0.0003396541190660526	0.0	1.1854407581128543e-05	-1.4367125237621284e-09	0.0	1.8476139573206816e-10
1.835	-0.0003398609310267299	0.0	-6.406673658391609e-09	-0.018055564447851644	0.0	-0.49914237679206064	0.0	3.5996134283197747e-07	0.0	0.9998476993740086	0.0	0.017452164807872147	0.0	0.0	1.9999723070913185	0.0	0.0	1.9999409500080212	0.0	-0.00033965412624961525	0.0	1.1854408504935533e-05	-1.4367125364111537e-09	0.0	1.847614004189838e-10
1.84	-0.000339860938238145	0.0	-6.406612797452598e-09	-0.018057262718736807	0.0	-0.4991423175199855	0.0	3.5996135004169353e-07	0.0	0.9998476993583034	0.0	0.017452165707638575	0.0	0.0	1.9999724102126617	0.0	0.0	1.9999410531293518	0.0	-0.0003396541334331779	0.0	1.1854409428742547e-05	-1.436712511113103e-09	0.0	1.847614057835258e-10
1.845	-0.00033986094544956016	0.0	-6.406551936513587e-09	-0.01805896098962197	0.0	-0.4991422582479103	0.0	3.5996135725140965e-07	0.0	0.9998476993425981	0.0	0.017452166607405003	0.0	0.0	1.999972513334005	0.0	0.0	1.9999411562506846	0.0	-0.0003396541406167404	0.0	1.1854410352549592e-05	-1.4367125165341138e-09	0.0	1.8476141154334983e-10
1.85	-0.00033986095266097527	0.0	-6.4064910755745756e-09	-0.018060659260507133	0.0	-0.4991421989758351	0.0	3.599613644611257e-07	0.0	0.9998476993268929	0.0	0.017452167507171434	0.0	0.0	1.9999726164553484	0.0	0.0	1.9999412593720196	0.0	-0.00033965414780030314	0.0	1.1854411276356662e-05	-1.4367125436391681e-09	0.0	1.8476141611732774e-10
1.855	-0.0003398609598723904	0.0	-6.406430214635565e-09	-0.018062357531392296	0.0	-0.4991421397037599	0.0	3.5996137167084183e-07	0.0	0.9998476993111877	0.0	0.017452168406937862	0.0	0.0	1.9999727195766916	0.0	0.0	1.9999413624933564	0.0	-0.0003396541549838658	0.0	1.1854412200163754e-05	-1.4367125102096013e-09	0.0	1.8476142119952543e-10
1.86	-0.0003398609670838055	0.0	-6.406369353696553e-09	-0.01806405580227746	0.0	-0.49914208043168473	0.0	3.599613788805579e-07	0.0	0.9998476992954823	0.0	0.01745216930670429	0.0	0.0	1.999972822698035	0.0	0.0	1.9999414656146954	0.0	-0.0003396541621674283	0.0	1.1854413123970875e-05	-1.4367125165341138e-09	0.0	1.8476142647936414e-10
1.865	-0.0003398609742952206	0.0	-6.406308492757542e-09	-0.01806575407316262	0.0	-0.49914202115960954	0.0	3.59961386090274e-07	0.0	0.9998476992797771	0.0	0.01745217020647072	0.0	0.0	1.999972925819378	0.0	0.0	1.9999415687360365	0.0	-0.00033965416935099096	0.0	1.185441404777802e-05	-1.4478780406961915e-09	0.0	1.1621726072951833e-10
1.87	-0.0003398609815066357	0.0	-6.406247631818531e-09	-0.018067452344047788	0.0	-0.4991419618875344	0.0	3.599613932999901e-07	0.0	0.9998476992640719	0.0	0.01745217110623715	0.0	0.0	1.999973028940722	0.0	0.0	1.9999416718573797	0.0	-0.00033965417653455363	0.0	1.1854414971585196e-05	-1.3642191028099063e-09	0.0	5.910687407804013e-10
1.875	-0.0003398609881920563	0.0	-6.402053243696709e-09	-0.018069150614967142	0.0	-0.49914190261543095	0.0	3.599602402087225e-07	0.0	0.9998476992483667	0.0	0.0174521720060003	0.0	0.0	1.9999731320616894	0.0	0.0	1.9999417749783923	0.0	-0.0003396541830481861	0.0	1.1854420008042684e-05	-1.3204618288916471e-09	0.0	1.1277601627599776e-09
1.8800000000000001	-0.00033986099521768164	0.0	-6.3975730904711325e-09	-0.018070848885920365	0.0	-0.49914184334330136	0.0	3.5995991193070376e-07	0.0	0.9998476992326616	0.0	0.017452172905762998	0.0	0.0	1.9999732351826052	0.0	0.0	1.999941878099311	0.0	-0.0003396541898918433	0.0	1.1854425341963736e-05	-1.3975608747169555e-09	0.0	9.502506815904268e-10
1.885	-0.00033986100244281565	0.0	-6.39443140383272e-09	-0.018072547156935227	0.0	-0.4991417840711408	0.0	3.599599806353627e-07	0.0	0.9998476992169565	0.0	0.017452173805526213	0.0	0.0	1.9999733383035805	0.0	0.0	1.9999419812202495	0.0	-0.00033965419698159873	0.0	1.185442934519657e-05	-1.4292205530319856e-09	0.0	7.160100111668247e-10
1.8900000000000001	-0.00033986100972050837	0.0	-6.3919866302063704e-09	-0.018074245427978072	0.0	-0.49914172479896735	0.0	3.599601325668572e-07	0.0	0.9998476992012513	0.0	0.017452174705289723	0.0	0.0	1.9999734414245893	0.0	0.0	1.9999420843412314	0.0	-0.0003396542041482024	0.0	1.1854432653775396e-05	-1.4368708796209362e-09	0.0	6.193812391188939e-10
1.895	-0.0003398610170145301	0.0	-6.389963102353832e-09	-0.018075943699052473	0.0	-0.49914166552678424	0.0	3.599603153311566e-07	0.0	0.999847699185546	0.0	0.01745217560505374	0.0	0.0	1.999973544545656	0.0	0.0	1.9999421874622658	0.0	-0.00033965421134582593	0.0	1.185443554193529e-05	-1.445014278770388e-09	0.0	5.034330536516639e-10
1.9000000000000001	-0.00033986102433485	0.0	-6.388618002164742e-09	-0.0180776419701777	0.0	-0.49914160625458565	0.0	3.5996054775251855e-07	0.0	0.9998476991698407	0.0	0.01745217650481857	0.0	0.0	1.999973647666816	0.0	0.0	1.9999422905833666	0.0	-0.0003396542185934083	0.0	1.1854437752999147e-05	-1.4502997499052257e-09	0.0	4.3202396144688415e-10
1.905	-0.00033986103165548363	0.0	-6.387303991597203e-09	-0.018079340241307792	0.0	-0.4991415469823857	0.0	3.599607805278045e-07	0.0	0.9998476991541354	0.0	0.01745217740458348	0.0	0.0	1.9999737507879851	0.0	0.0	1.9999423937045342	0.0	-0.0003396542258423891	0.0	1.1854439933003352e-05	-1.4514879333905654e-09	0.0	4.131652956932366e-10
1.9100000000000001	-0.0003398610389786642	0.0	-6.3862423494559985e-09	-0.01808103851247733	0.0	-0.49914148771017536	0.0	3.5996101617605107e-07	0.0	0.9998476991384302	0.0	0.01745217830434903	0.0	0.0	1.999973853909228	0.0	0.0	1.9999424968257693	0.0	-0.0003396542331027228	0.0	1.1854441860882209e-05	-1.4495092508732522e-09	0.0	3.681412687275311e-10
1.915	-0.00033986104626381234	0.0	-6.385353164376492e-09	-0.01808273678368607	0.0	-0.4991414284379556	0.0	3.599611670240393e-07	0.0	0.999847699122725	0.0	0.017452179204114966	0.0	0.0	1.9999739570305148	0.0	0.0	1.9999425999470477	0.0	-0.0003396542403310658	0.0	1.185444361508205e-05	-1.4426124005225902e-09	0.0	3.2500244510192235e-10
1.92	-0.0003398610535131756	0.0	-6.38471101038971e-09	-0.018084435054958367	0.0	-0.49914136916572327	0.0	3.59961246753662e-07	0.0	0.9998476991070196	0.0	0.017452180103881144	0.0	0.0	1.9999740601518294	0.0	0.0	1.9999427030683488	0.0	-0.0003396542475322667	0.0	1.1854445121152613e-05	-1.438678623209728e-09	0.0	2.8629360376221917e-10
1.925	-0.00033986106074715877	0.0	-6.384180591113475e-09	-0.01808613332625974	0.0	-0.4991413098934853	0.0	3.5996129648569456e-07	0.0	0.9998476990913144	0.0	0.017452181003647427	0.0	0.0	1.9999741632731558	0.0	0.0	1.9999428061896642	0.0	-0.0003396542547219965	0.0	1.1854446515019873e-05	-1.4376558103712522e-09	0.0	2.7576759131055657e-10
1.93	-0.0003398610679779561	0.0	-6.383676195124592e-09	-0.018087831597581063	0.0	-0.49914125062124376	0.0	3.59961340221089e-07	0.0	0.9998476990756092	0.0	0.01745218190341374	0.0	0.0	1.999974266394486	0.0	0.0	1.999942909310992	0.0	-0.00033965426190945056	0.0	1.1854447882768566e-05	-1.4366812264594159e-09	0.0	2.64258122728686e-10
1.935	-0.00033986107519795084	0.0	-6.383260039046708e-09	-0.018089529868970063	0.0	-0.4991411913489902	0.0	3.59961363623049e-07	0.0	0.9998476990599039	0.0	0.017452182803180165	0.0	0.0	1.999974369515829	0.0	0.0	1.9999430124323267	0.0	-0.000339654269089188	0.0	1.1854449161954199e-05	-1.4359133664723057e-09	0.0	2.5239181579621745e-10
1.94	-0.0003398610824179456	0.0	-6.3828438829688225e-09	-0.018091228140359062	0.0	-0.4991411320767366	0.0	3.599613870250089e-07	0.0	0.9998476990441987	0.0	0.01745218370294659	0.0	0.0	1.9999744726371718	0.0	0.0	1.999943115553668	0.0	-0.0003396542762689255	0.0	1.1854450441139858e-05	-1.4354851409472426e-09	0.0	2.6695531548423995e-10
1.945	-0.0003398610896363982	0.0	-6.382309445318072e-09	-0.01809292641177002	0.0	-0.4991410728044787	0.0	3.599614067010895e-07	0.0	0.9998476990284934	0.0	0.01745218460271304	0.0	0.0	1.9999745757585174	0.0	0.0	1.999943218675015	0.0	-0.0003396542834429938	0.0	1.1854451838481261e-05	-1.4341118136779185e-09	0.0	2.8676109138196977e-10
1.95	-0.0003398610968500414	0.0	-6.381732970800845e-09	-0.01809462468322861	0.0	-0.49914101353221124	0.0	3.599614172895781e-07	0.0	0.999847699012788	0.0	0.017452185502479532	0.0	0.0	1.999974678879868	0.0	0.0	1.999943321796365	0.0	-0.0003396542906107885	0.0	1.1854453277666136e-05	-1.4332925290782654e-09	0.0	2.8270719257167805e-10
1.955	-0.0003398611040601	0.0	-6.381224764863159e-09	-0.018096322954718715	0.0	-0.4991409542599378	0.0	3.599614212548487e-07	0.0	0.9998476989970828	0.0	0.01745218640224603	0.0	0.0	1.9999747820012193	0.0	0.0	1.9999434249177162	0.0	-0.0003396542977773835	0.0	1.1854454648498949e-05	-1.4335571629515292e-09	0.0	2.6645715279218e-10
1.96	-0.00033986111127055885	0.0	-6.3807770917650475e-09	-0.018098021226257657	0.0	-0.4991408949876554	0.0	3.599614264157285e-07	0.0	0.9998476989813776	0.0	0.017452187302012544	0.0	0.0	1.9999748851225725	0.0	0.0	1.9999435280390687	0.0	-0.00033965430494649107	0.0	1.18544559588498e-05	-1.4338227879662792e-09	0.0	2.639241075961485e-10
1.965	-0.0003398611184816966	0.0	-6.380298102560728e-09	-0.01809971949780938	0.0	-0.4991408357153706	0.0	3.5996143260198807e-07	0.0	0.9998476989656724	0.0	0.017452188201779066	0.0	0.0	1.9999749882439266	0.0	0.0	1.999943631160423	0.0	-0.0003396543121151843	0.0	1.1854457300521408e-05	-1.4337169761587574e-09	0.0	2.7114543690008337e-10
1.97	-0.00033986112569335053	0.0	-6.3798029151979126e-09	-0.018101417769407293	0.0	-0.49914077644307697	0.0	3.5996143994486703e-07	0.0	0.9998476989499671	0.0	0.017452189101545612	0.0	0.0	1.9999750913652834	0.0	0.0	1.9999437342817796	0.0	-0.0003396543192838277	0.0	1.185445865839936e-05	-1.4337979778065654e-09	0.0	2.6788008903068995e-10
1.975	-0.0003398611329041913	0.0	-6.379347832016199e-09	-0.018103116041040767	0.0	-0.4991407171707769	0.0	3.5996144571989897e-07	0.0	0.9998476989342617	0.0	0.017452190001312172	0.0	0.0	1.999975194486642	0.0	0.0	1.9999438374031377	0.0	-0.00033965432645305816	0.0	1.1854459976169216e-05	-1.4337906133633088e-09	0.0	2.621632915808102e-10
1.98	-0.00033986114011425267	0.0	-6.378895435454146e-09	-0.018104814312702798	0.0	-0.49914065789847156	0.0	3.5996144956865575e-07	0.0	0.9998476989185564	0.0	0.01745219090107874	0.0	0.0	1.9999752976080012	0.0	0.0	1.999943940524497	0.0	-0.0003396543336216035	0.0	1.1854461291226924e-05	-1.433651939387939e-09	0.0	2.6634095413020464e-10
1.985	-0.00033986114732506323	0.0	-6.378415988801815e-09	-0.018106512584401935	0.0	-0.4991405986261593	0.0	3.599614553161215e-07	0.0	0.9998476989028512	0.0	0.01745219180084532	0.0	0.0	1.999975400729362	0.0	0.0	1.9999440436458578	0.0	-0.00033965434078995365	0.0	1.1854462633344421e-05	-1.4338301307254924e-09	0.0	2.645555623009348e-10
1.99	-0.00033986115453604456	0.0	-6.3779766907746334e-09	-0.018108210856137563	0.0	-0.4991405393538404	0.0	3.599614614830145e-07	0.0	0.9998476988871459	0.0	0.017452192700611917	0.0	0.0	1.9999755038507243	0.0	0.0	1.9999441467672205	0.0	-0.00033965434795987543	0.0	1.185446393534375e-05	4.3284396912242427e-07	0.0	-1.2197226776647433e-08
1.995	-0.00033986116174729747	0.0	-6.377518964014781e-09	-0.018109909127903074	0.0	-0.499140480081516	0.0	3.5996146788544534e-07	0.0	0.9998476988714406	0.0	0.017452193600378522	0.0	0.0	1.999975606972088	0.0	0.0	1.9999442498885849	0.0	-0.00033965435512942565	0.0	1.1854465255770095e-05	3.076133853699216e-05	0.0	-9.632516456096697e-07
2.0	-0.00033988723585049905	0.0	-6.5393588992868645e-09	-0.018111607479609344	0.0	-0.49914042080689236	0.0	3.7577695837745146e-07	0.0	0.9998476988553122	0.0	0.017452194524390632	0.0	0.0	1.999975712872205	0.0	0.0	1.9999443575407536	0.0	-0.0003396804189755269	0.0	1.1855214104238908e-05	-0.00018348944911431752	0.0	6.285441787106722e-06
2.005	-0.0003419163708371228	0.0	-1.4315214784204679e-08	-0.01811330998228631	0.0	-0.4991403613956839	0.0	1.557606900524417e-06	0.0	0.9998476988254855	0.0	0.017452196233180388	0.0	0.0	1.9999759087149143	0.0	0.0	1.9999448037622614	0.0	-0.00034170858922738496	0.0	1.1918259083242261e-05	-0.0005705587885537543	0.0	1.4570139874598848e-05
2.0100000000000002	-0.00034528700538752143	0.0	-6.255316756599744e-08	-0.018115026683676205	0.0	-0.49914030162341755	0.0	5.000154822537683e-06	0.0	0.9998476986864081	0.0	0.017452204201018513	0.0	0.0	1.9999768219009868	0.0	0.0	1.9999462362011027	0.0	-0.00034507885379669097	0.0	1.1987688047894684e-05	-0.0007177911307107624	0.0	1.2380817089198687e-05
2.015	-0.00034881613530364465	0.0	-1.3341136051430643e-07	-0.01811676099947307	0.0	-0.4991402415480424	0.0	8.635768993389614e-06	0.0	0.9998476983869687	0.0	0.01745222135607337	0.0	0.0	1.9999787880249111	0.0	0.0	1.9999487101666835	0.0	-0.00034860830638551297	0.0	1.2040048412540368e-05	-0.0006835804148185814	0.0	9.584596919299496e-06
2.02	-0.00035201819393438033	0.0	-1.9858672157688814e-07	-0.018118512238522327	0.0	-0.49914018123095955	0.0	1.1570948945813385e-05	0.0	0.9998476979427471	0.0	0.017452246805776374	0.0	0.0	1.999981704790284	0.0	0.0	1.9999520249993812	0.0	-0.00035181068839790545	0.0	1.2086679713271835e-05	-0.0005955130711267835	0.0	9.330655952757694e-06
2.025	-0.00035475596934162075	0.0	-2.457471121367937e-07	-0.018120278340734607	0.0	-0.4991401206786569	0.0	1.3573191602862132e-05	0.0	0.999847697390702	0.0	0.017452278432677677	0.0	0.0	1.9999853295182664	0.0	0.0	1.9999559134323481	0.0	-0.0003545484411479857	0.0	1.2135116591101494e-05	-0.0005032315740795617	0.0	1.0126386025834644e-05
2.0300000000000002	-0.0003570771214573817	0.0	-2.7351833371190024e-07	-0.018122057044784364	0.0	-0.49914005987222126	0.0	1.475632891820638e-05	0.0	0.9998476967699692	0.0	0.017452313994662752	0.0	0.0	1.9999894052423226	0.0	0.0	1.9999601408091887	0.0	-0.00035686914762886595	0.0	1.218839411921823e-05	-0.00042965393740891807	0.0	1.1140487342169815e-05
2.035	-0.0003590908500856853	0.0	-2.860444065196183e-07	-0.018123846528806525	0.0	-0.4991399987877437	0.0	1.5343284717054063e-05	0.0	0.9998476961115665	0.0	0.017452351714681354	0.0	0.0	1.9999937282964773	0.0	0.0	1.9999645363364795	0.0	-0.0003588820857884232	0.0	1.2246180498561462e-05	-0.00037977850181897217	0.0	1.1891094513903514e-05
2.04	-0.0003609103800112927	0.0	-2.889933537620254e-07	-0.018125645544125154	0.0	-0.49913993740639434	0.0	1.5558148213716933e-05	0.0	0.9998476954364773	0.0	0.017452390390598153	0.0	0.0	1.999998160905185	0.0	0.0	1.999968993417628	0.0	-0.00036070060927687037	0.0	1.2306761732421389e-05	-0.00035062476045938005	0.0	1.2285383563223943e-05
2.045	-0.00036262430937344904	0.0	-2.8700548800120963e-07	-0.018127453352174888	0.0	-0.4991398757181777	0.0	1.557361422946275e-05	0.0	0.9998476947569584	0.0	0.017452429320201423	0.0	0.0	2.0000026225886525	0.0	0.0	1.9999734549294634	0.0	-0.0003624134242228829	0.0	1.2368591825892542e-05	-0.0003365640453587545	0.0	1.2408877334789145e-05
2.05	-0.00036429440064763	0.0	-2.833470360496693e-07	-0.018129269539512455	0.0	-0.49913981371894	0.0	1.5508998859366206e-05	0.0	0.9998476940797852	0.0	0.017452468115334185	0.0	0.0	2.0000070688605907	0.0	0.0	1.999977897930359	0.0	-0.0003640823694769805	0.0	1.243056172407344e-05	-0.00033209799128268685	0.0	1.2358965961416253e-05
2.055	-0.0003659554904502452	0.0	-2.7985844970331655e-07	-0.01813109398198393	0.0	-0.49913975140978345	0.0	1.543037723494814e-05	0.0	0.9998476934068772	0.0	0.017452506666029488	0.0	0.0	2.0000114871177948	0.0	0.0	1.9999823184078183	0.0	-0.000365742324667779	0.0	1.2492047791690534e-05	-0.0003320728781342464	0.0	1.2232593079345394e-05
2.06	-0.00036762020841218994	0.0	-2.771594619311755e-07	-0.018132926757642647	0.0	-0.49913968879538173	0.0	1.5360345948973785e-05	0.0	0.999847692736784	0.0	0.01745254505538459	0.0	0.0	2.000015886883961	0.0	0.0	1.999986718822792	0.0	-0.00036740593335907797	0.0	1.2552871501120345e-05	-0.0003334518846990754	0.0	1.2102736553240593e-05
2.065	-0.000369292921761659	0.0	-2.7532095515542915e-07	-0.018134767904819122	0.0	-0.49913962587899663	0.0	1.5306583955530892e-05	0.0	0.9998476920688069	0.0	0.017452583323418744	0.0	0.0	2.0000202727456555	0.0	0.0	1.9999911038360891	0.0	-0.00036907756259160795	0.0	1.261311445750705e-05	-0.0003351442890913675	0.0	1.2001234008775488e-05
2.07	-0.0003709735833322118	0.0	-2.741870179158264e-07	-0.018136617458071713	0.0	-0.49913956266307813	0.0	1.5268632522595895e-05	0.0	0.9998476914023444	0.0	0.017452621504596814	0.0	0.0	2.000024648652863	0.0	0.0	1.9999954779771014	0.0	-0.0003707571597856673	0.0	1.267293085741113e-05	-0.00033665110941139703	0.0	1.192918867341037e-05
2.075	-0.00037266095214033644	0.0	-2.735863583138198e-07	-0.018138475448142104	0.0	-0.4991394991493654	0.0	1.5243845349685212e-05	0.0	0.9998476907368697	0.0	0.017452659629101874	0.0	0.0	2.0000290180648346	0.0	0.0	1.999999845017112	0.0	-0.0003724434787350117	0.0	1.273244860149028e-05	-0.0003377458638611239	0.0	1.1883648006304108e-05
2.08	-0.0003743527104882883	0.0	-2.7331233372511483e-07	-0.01814034189333669	0.0	-0.4991394353388408	0.0	1.5227715831279586e-05	0.0	0.9998476900720805	0.0	0.017452697714261996	0.0	0.0	2.000033382967526	0.0	0.0	2.0000042074363558	0.0	-0.0003741341959416242	0.0	1.2791793332581558e-05	-0.00033858120113747616	0.0	1.1853559450754267e-05
2.085	-0.0003760486481653059	0.0	-2.733272654765611e-07	-0.018142216804224443	0.0	-0.4991393712320124	0.0	1.5219735182401908e-05	0.0	0.9998476894077938	0.0	0.01745273577054575	0.0	0.0	2.000037744560727	0.0	0.0	2.000008567569312	0.0	-0.00037582910000759535	0.0	1.285099537849224e-05	-0.000339347432764533	0.0	1.1827894973503907e-05
2.09	-0.0003777478339880634	0.0	-2.735618579461996e-07	-0.0181441001965652	0.0	-0.4991393068294331	0.0	1.5218001148164868e-05	0.0	0.9998476887437415	0.0	0.017452773813317703	0.0	0.0	2.000042104605358	0.0	0.0	2.0000129272055043	0.0	-0.00037752725789808804	0.0	1.2910091506381552e-05	-0.00033983476969076307	0.0	1.1815613046824874e-05
2.095	-0.0003794487304455191	0.0	-2.738838022829473e-07	-0.018145992081532034	0.0	-0.49913924213169725	0.0	1.5219534037739853e-05	0.0	0.9998476880797399	0.0	0.017452811853103697	0.0	0.0	2.000046464307773	0.0	0.0	2.0000172872808366	0.0	-0.00037922712842085055	0.0	1.2969160293479984e-05	-0.00034012561298786174	0.0	1.1808608086695753e-05
2.1	-0.0003811509623532609	0.0	-2.743058895119879e-07	-0.018147892468248352	0.0	-0.499139177138763	0.0	1.5223537177161774e-05	0.0	0.9998476874156323	0.0	0.017452849898878582	0.0	0.0	2.0000508246965722	0.0	0.0	2.000021648502984	0.0	-0.00038092833706621993	0.0	1.3028175869674014e-05	-0.0003403319828439949	0.0	1.1798105639362581e-05
2.105	-0.0003828538434123438	0.0	-2.7478858309419026e-07	-0.018149801362217163	0.0	-0.49913911185074045	0.0	1.5228675071306209e-05	0.0	0.9998476867513275	0.0	0.01745288795586211	0.0	0.0	2.0000551863699854	0.0	0.0	2.00002601119703	0.0	-0.0003826301965733786	0.0	1.308715379963019e-05	-0.0003403747393879699	0.0	1.1797239742583181e-05
2.11	-0.00038455655339315745	0.0	-2.752440691231972e-07	-0.018151718763333363	0.0	-0.4991390462678887	0.0	1.5233424155907532e-05	0.0	0.9998476860868336	0.0	0.017452926023602988	0.0	0.0	2.000059549276291	0.0	0.0	2.000030375251588	0.0	-0.00038433188414767246	0.0	1.3146153217221446e-05	-0.0003402884634427051	0.0	1.1799207234473919e-05
2.115	-0.00038625871241950365	0.0	-2.756885341896842e-07	-0.01815364467358979	0.0	-0.4991389803899138	0.0	1.5237057320250405e-05	0.0	0.9998476854221182	0.0	0.017452964103949642	0.0	0.0	2.0000639136273355	0.0	0.0	2.0000347403469716	0.0	-0.0003860330207091924	0.0	1.3205144689304445e-05	-0.0003401733853302985	0.0	1.1799315623983624e-05
2.12	-0.000387960337349395	0.0	-2.761002152634967e-07	-0.018155579091682975	0.0	-0.49913891421696444	0.0	1.5239620470991991e-05	0.0	0.9998476847572041	0.0	0.01745300219559935	0.0	0.0	2.000068279273815	0.0	0.0	2.0000391061766436	0.0	-0.00038773362234616844	0.0	1.3264150552999623e-05	-0.0003400661756455516	0.0	1.1802959896784284e-05
2.125	-0.0003896614382553198	0.0	-2.764767192322666e-07	-0.018157522013659	0.0	-0.49913884774893774	0.0	1.5241176054464905e-05	0.0	0.9998476840921601	0.0	0.01745304029460411	0.0	0.0	2.000072645763252	0.0	0.0	2.000043472451957	0.0	-0.00038943369904152867	0.0	1.3323173548416585e-05	-0.0003399674260888256	0.0	1.1805716000664577e-05
2.13	-0.00039136210430457504	0.0	-2.7682833962139166e-07	-0.01815947343441752	0.0	-0.4991387809856333	0.0	1.5241946033308725e-05	0.0	0.9998476834270744	0.0	0.017453078395904983	0.0	0.0	2.000077012515847	0.0	0.0	2.0000478389478533	0.0	-0.0003911333402676293	0.0	1.3382206496311503e-05	-0.00033989172540940197	0.0	1.1807741386435156e-05
2.1350000000000002	-0.0003930625078789374	0.0	-2.7716122060832255e-07	-0.018161433358097105	0.0	-0.49913871392723064	0.0	1.5242204854874845e-05	0.0	0.999847682761874	0.0	0.017453116503706335	0.0	0.0	2.0000813800134587	0.0	0.0	2.0000522055178966	0.0	-0.0003928327185155496	0.0	1.344124927575962e-05	-0.0003398844408506421	0.0	1.180874615680795e-05
2.14	-0.00039476308918938625	0.0	-2.7750073431291526e-07	-0.01816340177773868	0.0	-0.4991386465735461	0.0	1.5242847088233988e-05	0.0	0.9998476820966768	0.0	0.01745315461123305	0.0	0.0	2.0000857474795977	0.0	0.0	2.0000565722719266	0.0	-0.00039453227461377194	0.0	1.3500291888557791e-05	-0.00033993954174463937	0.0	1.1808321379628724e-05
2.145	-0.00039646394688868416	0.0	-2.778527447957103e-07	-0.018165378692842304	0.0	-0.4991385789245708	0.0	1.5244061475121853e-05	0.0	0.999847681431491	0.0	0.01745319271802549	0.0	0.0	2.0000901148615844	0.0	0.0	2.000060939373852	0.0	-0.00039623210735963133	0.0	1.3559331916978415e-05	-0.0003399766920771666	0.0	1.1807791308250652e-05
2.15	-0.00039816494278800023	0.0	-2.782134487958583e-07	-0.018167364108758147	0.0	-0.4991385109804307	0.0	1.5245532101138433e-05	0.0	0.9998476807662243	0.0	0.017453230829374552	0.0	0.0	2.0000944827658045	0.0	0.0	2.0000653068970813	0.0	-0.00039793207851560454	0.0	1.3618368343284146e-05	-0.0003400556501729682	0.0	1.1805779006671757e-05
2.1550000000000002	-0.00039986643652195375	0.0	-2.786031406542841e-07	-0.01816935802260098	0.0	-0.4991384427410696	0.0	1.524795883130749e-05	0.0	0.9998476801009243	0.0	0.017453268942543055	0.0	0.0	2.000098850878552	0.0	0.0	2.0000696751155176	0.0	-0.0003996325482055805	0.0	1.367739343507542e-05	-0.0003400457913037378	0.0	1.180671535356753e-05
2.16	-0.0004015673757246854	0.0	-2.7895495008430456e-07	-0.018171360434595225	0.0	-0.4991383742064397	0.0	1.5249384865456928e-05	0.0	0.9998476794355947	0.0	0.01745330705732587	0.0	0.0	2.000103219176317	0.0	0.0	2.000074043742482	0.0	-0.00040133246237098727	0.0	1.3736437292933527e-05	-0.00033997408233111474	0.0	1.1809177098085391e-05
2.165	-0.00040326836906295595	0.0	-2.793094706138945e-07	-0.018173371346605443	0.0	-0.4991383053766158	0.0	1.5250919926233464e-05	0.0	0.9998476787701986	0.0	0.017453345175834814	0.0	0.0	2.0001075879011325	0.0	0.0	2.0000784128092097	0.0	-0.00040303243072446895	0.0	1.37954805929594e-05	-0.0003400173506816916	0.0	1.1807980983747302e-05
2.17	-0.00040496965655949474	0.0	-2.796834456109661e-07	-0.01817539076013219	0.0	-0.4991382362516454	0.0	1.5252993162452536e-05	0.0	0.9998476781047081	0.0	0.017453383299667488	0.0	0.0	2.0001119572360984	0.0	0.0	2.0000827824698755	0.0	-0.0004047326937268453	0.0	1.385451498047086e-05	-0.00034008917425987824	0.0	1.180569430874437e-05
2.1750000000000003	-0.0004066713446299196	0.0	-2.8008497446515576e-07	-0.018177418676544096	0.0	-0.4991381668315662	0.0	1.525578706356139e-05	0.0	0.9998476774390986	0.0	0.01745342143023513	0.0	0.0	2.0001163273429556	0.0	0.0	2.0000871529309348	0.0	-0.0004064333580115434	0.0	1.3913536076349251e-05	-0.00034019581564810586	0.0	1.1802021088816213e-05
2.18	-0.000408373539689848	0.0	-2.805221565660998e-07	-0.018179455097209786	0.0	-0.4991380971164159	0.0	1.525948411900727e-05	0.0	0.9998476767733454	0.0	0.01745345956894897	0.0	0.0	2.0001206983834434	0.0	0.0	2.000091524451123	0.0	-0.0004081345302119901	0.0	1.3972539501527668e-05	-0.00034021551714937426	0.0	1.1801445468481707e-05
2.185	-0.00041007540664299465	0.0	-2.809355656171494e-07	-0.018181500017650527	0.0	-0.49913802710605504	0.0	1.5262583001904905e-05	0.0	0.9998476761075327	0.0	0.017453497710990754	0.0	0.0	2.000125069805347	0.0	0.0	2.000095896859075	0.0	-0.0004098353736667407	0.0	1.4031555496084895e-05	-0.0003401308638062246	0.0	1.1804606556084603e-05
2.19	-0.00041177694503759823	0.0	-2.813256364281539e-07	-0.01818355343857124	0.0	-0.4991379568005012	0.0	1.52650750782145e-05	0.0	0.9998476754416481	0.0	0.01745353585706464	0.0	0.0	2.0001294416893676	0.0	0.0	2.0001002699809547	0.0	-0.00041153588793946114	0.0	1.4090583610247106e-05	-0.00034009482842847294	0.0	1.1805890200269184e-05
2.195	-0.00041347844927265017	0.0	-2.8171395064667036e-07	-0.01818561536250804	0.0	-0.49913788619982746	0.0	1.526747903013209e-05	0.0	0.9998476747756453	0.0	0.017453574009825647	0.0	0.0	2.000133814339796	0.0	0.0	2.000104643791516	0.0	-0.0004132363680029384	0.0	1.4149612552739676e-05	-0.000340091347683857	0.0	1.1805885943990826e-05
2.2	-0.00041517990070586043	0.0	-2.8209963844906037e-07	-0.018187685790052872	0.0	-0.499137815304048	0.0	1.5269753691358008e-05	0.0	0.9998476741095143	0.0	0.01745361216985757	0.0	0.0	2.00013818782354	0.0	0.0	2.0001090182537196	0.0	-0.000414936795195863	0.0	1.4208642542749776e-05	-0.000340078656691051	0.0	1.1806098312944972e-05
2.205	-0.00041688128069493845	0.0	-2.824818300116857e-07	-0.018189764721797678	0.0	-0.49913774411317696	0.0	1.5271857895592588e-05	0.0	0.9998476734432445	0.0	0.017453650337744195	0.0	0.0	2.0001425622075066	0.0	0.0	2.000113393318733	0.0	-0.00041663715085692404	0.0	1.4267673799466797e-05	-0.00034006378606752687	0.0	1.1806472497949294e-05
2.21	-0.00041858258567340195	0.0	-2.8285903505989833e-07	-0.01819185215468755	0.0	-0.49913767262712644	0.0	1.5273818805503114e-05	0.0	0.9998476727768897	0.0	0.017453688510430762	0.0	0.0	2.000146937141593	0.0	0.0	2.0001177689455063	0.0	-0.0004183374313698834	0.0	1.4326707685287375e-05	-0.000340048490510447	0.0	1.1807141825827904e-05
2.215	-0.00042028380918141667	0.0	-2.8322988239612467e-07	-0.01819394808636748	0.0	-0.49913760084582826	0.0	1.527565047004867e-05	0.0	0.9998476721104906	0.0	0.017453726685560812	0.0	0.0	2.0001513123557273	0.0	0.0	2.0001221450970124	0.0	-0.00042003763023104997	0.0	1.4385745343163504e-05	-0.00034002964680384973	0.0	1.180786897267866e-05
2.22	-0.00042198492453943576	0.0	-2.83593832973303e-07	-0.018196052519373635	0.0	-0.49913752876935086	0.0	1.527727529519975e-05	0.0	0.9998476714440034	0.0	0.01745376486565794	0.0	0.0	2.0001556881391362	0.0	0.0	2.0001265217139967	0.0	-0.0004217377207582436	0.0	1.4444786382773756e-05	-0.00034000621898212736	0.0	1.1808575220833852e-05
2.225	-0.00042368591597644355	0.0	-2.8394989879930714e-07	-0.018198165453603393	0.0	-0.4991374563976891	0.0	1.5278665128304147e-05	0.0	0.99984767077743	0.0	0.01745380305061296	0.0	0.0	2.000160064479306	0.0	0.0	2.000130898729139	0.0	-0.0004234376871555748	0.0	1.4503831240997128e-05	-0.00033997382283045176	0.0	1.180954803292776e-05
2.23	-0.0004253867677214249	0.0	-2.8429709188201086e-07	-0.018200286888954132	0.0	-0.49913738373083766	0.0	1.5279791816709647e-05	0.0	0.9998476701107721	0.0	0.01745384124031667	0.0	0.0	2.0001644413637223	0.0	0.0	2.000135276067054	0.0	-0.0004251375136271547	0.0	1.4562880354706323e-05	-0.0003399876643355197	0.0	1.180924451357059e-05
2.235	-0.00042708782287341333	0.0	-2.8465688392006315e-07	-0.018202416821013596	0.0	-0.4991373107686305	0.0	1.5281341640135854e-05	0.0	0.9998476694441044	0.0	0.01745387943049789	0.0	0.0	2.0001688183028676	0.0	0.0	2.00013965384896	0.0	-0.00042683754381251163	0.0	1.4621924236648382e-05	-0.00033998246202682865	0.0	1.180946575759747e-05
2.24	-0.00042878861860321286	0.0	-2.85000320688217e-07	-0.01820455525885452	0.0	-0.49913723751142336	0.0	1.5282354161293395e-05	0.0	0.9998476687772719	0.0	0.017453917630039933	0.0	0.0	2.000173196314851	0.0	0.0	2.0001440319209323	0.0	-0.0004285373141536068	0.0	1.468097567716955e-05	-0.00033995466672133185	0.0	1.1810310542840165e-05
2.245	-0.00043048947340443647	0.0	-2.8534732619676537e-07	-0.018206702196024334	0.0	-0.4991371639589626	0.0	1.528349262448392e-05	0.0	0.999847668110385	0.0	0.01745395583262052	0.0	0.0	2.0001775746750816	0.0	0.0	2.0001484103190506	0.0	-0.0004302371436455818	0.0	1.4740025875247087e-05	-0.00033997181348293575	0.0	1.1809915374115282e-05
2.25	-0.00043219038727708436	0.0	-2.8569790044570845e-07	-0.01820885763252304	0.0	-0.4991370901112483	0.0	1.528475702970743e-05	0.0	0.9998476674434434	0.0	0.017453994038239655	0.0	0.0	2.00018195338356	0.0	0.0	2.0001527890793938	0.0	-0.00043193703228843594	0.0	1.4799074830925556e-05	-0.00033998384213919055	0.0	1.1809663781671188e-05
2.255	-0.00043389136022115645	0.0	-2.860520434350462e-07	-0.018211021568350635	0.0	-0.49913701596828036	0.0	1.5286147376963927e-05	0.0	0.9998476667764474	0.0	0.01745403224689733	0.0	0.0	2.000186332440286	0.0	0.0	2.0001571682380423	0.0	-0.00043363698008216863	0.0	1.4858122544249507e-05	-0.00033999571339125313	0.0	1.1809414669994207e-05
2.2600000000000002	-0.0004355923803416069	0.0	-2.8640915306430434e-07	-0.018213194004043632	0.0	-0.49913694153007465	0.0	1.528763561240599e-05	0.0	0.9998476661093878	0.0	0.01745407045912431	0.0	0.0	2.0001907119060895	0.0	0.0	2.0001615478230392	0.0	-0.00043533697511795	0.0	1.4917169202288632e-05	-0.000339996458482626	0.0	1.1809340301535975e-05
2.265	-0.0004372933738064293	0.0	-2.8676549212342855e-07	-0.018215374942932096	0.0	-0.4991368667967295	0.0	1.5289047607088192e-05	0.0	0.9998476654422067	0.0	0.017454108678214984	0.0	0.0	2.0001950921585365	0.0	0.0	2.0001659278125423	0.0	-0.0004370369434782193	0.0	1.497621596595205e-05	-0.0003399965699116109	0.0	1.1809275895463574e-05
2.27	-0.0004389944073232351	0.0	-2.871244372016405e-07	-0.018217564382007292	0.0	-0.49913679176815595	0.0	1.5290540687441675e-05	0.0	0.9998476647749563	0.0	0.01745414690119285	0.0	0.0	2.000199472856494	0.0	0.0	2.0001703082297815	0.0	-0.0004387369519478838	0.0	1.5035261786453744e-05	-0.00034000570487235666	0.0	1.1809069787424044e-05
2.275	-0.00044069548089202434	0.0	-2.8748598829893994e-07	-0.018219762321269223	0.0	-0.4991367164443542	0.0	1.5292114853466448e-05	0.0	0.9998476641076367	0.0	0.01745418512805791	0.0	0.0	2.000203853999962	0.0	0.0	2.000174689097986	0.0	-0.0004404370005269425	0.0	1.5094306663842577e-05	-0.0003400137267510863	0.0	1.1808881169737826e-05
2.2800000000000002	-0.00044239659451279724	0.0	-2.8785014541532717e-07	-0.018221968760717886	0.0	-0.49913664082532416	0.0	1.529377010516251e-05	0.0	0.9998476634402477	0.0	0.017454223358810163	0.0	0.0	2.00020823558894	0.0	0.0	2.0001790704403857	0.0	-0.00044213708921539424	0.0	1.5153350598167408e-05	-0.00034002174862956755	0.0	1.1808692561822587e-05
2.285	-0.0004440977481855534	0.0	-2.8821690855080194e-07	-0.018224183700353277	0.0	-0.49913656491106584	0.0	1.5295506442529855e-05	0.0	0.9998476627727894	0.0	0.01745426159344961	0.0	0.0	2.0002126176234287	0.0	0.0	2.000183452280209	0.0	-0.0004438372180132377	0.0	1.521239358947709e-05	-0.0003400297705077822	0.0	1.1808503963679114e-05
2.29	-0.00044579894191029305	0.0	-2.8858627770536437e-07	-0.018226407140175406	0.0	-0.49913648870157923	0.0	1.5297323865568488e-05	0.0	0.9998476621052617	0.0	0.01745429983197625	0.0	0.0	2.0002170001034276	0.0	0.0	2.000187834640686	0.0	-0.0004455373869204717	0.0	1.5271435637820488e-05	-0.000340037792385799	0.0	1.1808315375308763e-05
2.295	-0.00044750017568701613	0.0	-2.8895825287901445e-07	-0.018228639080184263	0.0	-0.49913641219686433	0.0	1.529922237427841e-05	0.0	0.9998476614376647	0.0	0.017454338074390084	0.0	0.0	2.000221383028937	0.0	0.0	2.0001922175450453	0.0	-0.0004472375959370954	0.0	1.5330476743246467e-05	-0.000340046157974101	0.0	1.1808116404570214e-05
2.3000000000000003	-0.00044920144951572286	0.0	-2.8933283407175223e-07	-0.018230879520379852	0.0	-0.49913633539692115	0.0	1.530120196865962e-05	0.0	0.9998476607699984	0.0	0.017454376320691113	0.0	0.0	2.0002257663999568	0.0	0.0	2.0001966010165164	0.0	-0.00044893784506310776	0.0	1.53895169058039e-05	-0.0003400540873643762	0.0	1.1807930632166036e-05
2.305	-0.00045090274280811454	0.0	-2.897086786593512e-07	-0.01823312846113371	0.0	-0.49913625830175534	0.0	1.530322032596293e-05	0.0	0.9998476601022563	0.0	0.0174544145712413	0.0	0.0	2.000230150257971	0.0	0.0	2.0002009850662046	0.0	-0.00045063811367587986	0.0	1.5448556749070174e-05	-0.0003400440257011829	0.0	1.1808288831690166e-05
2.31	-0.00045260393757440076	0.0	-2.900780921763087e-07	-0.018235385904575047	0.0	-0.49913618091139983	0.0	1.5305034898104405e-05	0.0	0.9998476594344026	0.0	0.017454452828114995	0.0	0.0	2.0002345348407196	0.0	0.0	2.0002053696357294	0.0	-0.0004523382835888847	0.0	1.5507599846480178e-05	-0.0003400330958840639	0.0	1.1808673289032148e-05
2.315	-0.0004543051414342571	0.0	-2.9044809282206027e-07	-0.018237651848761784	0.0	-0.4991361032258246	0.0	1.530686691563283e-05	0.0	0.99984765876647	0.0	0.01745449108942016	0.0	0.0	2.0002389199313577	0.0	0.0	2.0002097547300886	0.0	-0.0004540384626012398	0.0	1.5566642938755275e-05	-0.0003400367124059245	0.0	1.1808617944683275e-05
2.32	-0.00045600635438768365	0.0	-2.908186805966057e-07	-0.01823992629369392	0.0	-0.49913602524502965	0.0	1.53087163785482e-05	0.0	0.9998476580984584	0.0	0.0174545293551568	0.0	0.0	2.000243305529885	0.0	0.0	2.00021414035428	0.0	-0.00045573865071294346	0.0	1.562568602594278e-05	-0.0003400385322755457	0.0	1.1808616931894506e-05
2.325	-0.00045770757643468055	0.0	-2.9118985549994506e-07	-0.01824220923937146	0.0	-0.49913594696901503	0.0	1.5310583286850522e-05	0.0	0.9998476574303682	0.0	0.017454567625324904	0.0	0.0	2.000247691636302	0.0	0.0	2.0002185265133012	0.0	-0.00045743884792399475	0.0	1.5684729108089988e-05	-0.0003400403521448724	0.0	1.180861592856625e-05
2.33	-0.00045940880757524747	0.0	-2.915616175320783e-07	-0.0182445006857944	0.0	-0.4991358683977807	0.0	1.531246764053979e-05	0.0	0.9998476567621991	0.0	0.01745460589992448	0.0	0.0	2.000252078250608	0.0	0.0	2.00022291321215	0.0	-0.00045913905423439156	0.0	1.5743772185244208e-05	-0.00034004217201381057	0.0	1.1808614934697882e-05
2.335	-0.0004611100478093846	0.0	-2.919339666930055e-07	-0.018246800632962742	0.0	-0.4991357895313267	0.0	1.5314369439616e-05	0.0	0.9998476560939512	0.0	0.017454644178955522	0.0	0.0	2.000256465372803	0.0	0.0	2.0002273004558235	0.0	-0.0004608392696441324	0.0	1.5802815257452735e-05	-0.00034004399188247497	0.0	1.1808613950290478e-05
2.34	-0.0004628112971370919	0.0	-2.9230690298272655e-07	-0.018249109080876482	0.0	-0.49913571036965304	0.0	1.531628868407916e-05	0.0	0.9998476554256244	0.0	0.017454682462418037	0.0	0.0	2.0002608530028874	0.0	0.0	2.0002316882493205	0.0	-0.00046253949415321583	0.0	1.5861858324762884e-05	-0.0003400459512996051	0.0	1.180860840502389e-05
2.345	-0.0004645125555583695	0.0	-2.9268042640124163e-07	-0.018251426029535625	0.0	-0.49913563091275964	0.0	1.531822537392927e-05	0.0	0.9998476547572188	0.0	0.017454720750312017	0.0	0.0	2.0002652411408612	0.0	0.0	2.0002360765976386	0.0	-0.00046423972776164053	0.0	1.592090138722196e-05	-0.00034004767455048915	0.0	1.180861060387828e-05
2.35	-0.0004662138147149663	0.0	-2.930539707094782e-07	-0.018253751479012648	0.0	-0.4991355511606405	0.0	1.53201632164039e-05	0.0	0.9998476540887332	0.0	0.017454759042705405	0.0	0.0	2.00026962979451	0.0	0.0	2.0002404655011072	0.0	-0.0004659399620964805	0.0	1.597994471909657e-05	-0.0003400425540295973	0.0	1.1808836950313612e-05
2.355	-0.00046791503024424966	0.0	-2.934245305111239e-07	-0.018256085429692228	0.0	-0.4991354711132632	0.0	1.5322015735294483e-05	0.0	0.9998476534201614	0.0	0.01745479733995881	0.0	0.0	2.000274019005164	0.0	0.0	2.0002448549352834	0.0	-0.0004676401527172206	0.0	1.6038989775889522e-05	-0.000340037163756367	0.0	1.1809072139977106e-05
2.36	-0.0004696162430067086	0.0	-2.937948739458342e-07	-0.018258427881220052	0.0	-0.49913539077065755	0.0	1.5323862580070602e-05	0.0	0.9998476527515089	0.0	0.017454835641740087	0.0	0.0	2.000278408734756	0.0	0.0	2.000249244898542	0.0	-0.00046934034055608057	0.0	1.6098035217084556e-05	-0.00034003728958387566	0.0	1.180912668225275e-05
2.365	-0.00047131745300234333	0.0	-2.94165001013609e-07	-0.018260778833596128	0.0	-0.49913531013282353	0.0	1.5325703750732263e-05	0.0	0.9998476520827759	0.0	0.017454873948049242	0.0	0.0	2.000282798983286	0.0	0.0	2.000253635389257	0.0	-0.0004710405256130588	0.0	1.6157081042727235e-05	-0.0003400367332073542	0.0	1.1809203576336705e-05
2.37	-0.0004730186602311535	0.0	-2.945349117144483e-07	-0.018263138286820444	0.0	-0.49913522919976117	0.0	1.532753924727946e-05	0.0	0.9998476514139625	0.0	0.017454912258886273	0.0	0.0	2.000287189750755	0.0	0.0	2.000258026405803	0.0	-0.00047274070788815356	0.0	1.621612725286311e-05	-0.0003400361768305084	0.0	1.1809280479531854e-05
2.375	-0.0004747198646931393	0.0	-2.949046060483521e-07	-0.018265506240893008	0.0	-0.4991351479714705	0.0	1.53293690697122e-05	0.0	0.9998476507450685	0.0	0.01745495057425118	0.0	0.0	2.000291581037162	0.0	0.0	2.0002624179465545	0.0	-0.00047444088738136334	0.0	1.627517384753774e-05	-0.000340035620453312	0.0	1.1809357391838876e-05
2.38	-0.0004764210663883007	0.0	-2.952740840153204e-07	-0.01826788269581382	0.0	-0.49913506644795147	0.0	1.5331193218030476e-05	0.0	0.999847650076094	0.0	0.017454988894143965	0.0	0.0	2.0002959728425074	0.0	0.0	2.0002668100098857	0.0	-0.00047614106409268615	0.0	1.6334220826796685e-05	-0.0003400350640758148	0.0	1.18094343132589e-05
2.3850000000000002	-0.0004781222653166379	0.0	-2.9564334561535327e-07	-0.018270267651582874	0.0	-0.4991349846292041	0.0	1.533301169223429e-05	0.0	0.9998476494070391	0.0	0.017455027218564623	0.0	0.0	2.0003003651667917	0.0	0.0	2.000271202594172	0.0	-0.0004778412380221209	0.0	1.6393268190685514e-05	-0.0003400344713812021	0.0	1.1809514372364358e-05
2.39	-0.0004798234614781505	0.0	-2.960123908484506e-07	-0.018272661108200177	0.0	-0.49913490251522835	0.0	1.5334824492323643e-05	0.0	0.9998476487379035	0.0	0.01745506554751316	0.0	0.0	2.0003047580100137	0.0	0.0	2.0002755956977865	0.0	-0.0004795414091696653	0.0	1.6452315939249766e-05	-0.0003400339703275665	0.0	1.1809586545960464e-05
2.395	-0.0004815246570439654	0.0	-2.96381483337369e-07	-0.018275063065632365	0.0	-0.499134820105998	0.0	1.5336636127580106e-05	0.0	0.9998476480686881	0.0	0.017455103880952897	0.0	0.0	2.000309151367971	0.0	0.0	2.0002799893203966	0.0	-0.00048124157971432443	0.0	1.651136388482052e-05	-0.00034003503988616835	0.0	1.1809523425438326e-05
2.4	-0.00048322586173337037	0.0	-2.967518032184194e-07	-0.0182774735237301	0.0	-0.4991347374013953	0.0	1.5338466784299383e-05	0.0	0.9998476473993957	0.0	0.01745514221871967	0.0	0.0	2.0003135452218492	0.0	0.0	2.0002843834674517	0.0	-0.00048294175941066025	0.0	1.657041118711911e-05	-0.00034003596262132866	0.0	1.1809472962442185e-05
2.4050000000000002	-0.00048492706488330567	0.0	-2.9712205576050445e-07	-0.01827989248265722	0.0	-0.49913465440154936	0.0	1.5340294316035724e-05	0.0	0.999847646730023	0.0	0.01745518056099359	0.0	0.0	2.0003179395922888	0.0	0.0	2.0002887781380556	0.0	-0.0004846419375569104	0.0	1.6629458768113955e-05	-0.00034003547424134875	0.0	1.1809544071637886e-05
2.41	-0.0004866282664937711	0.0	-2.97492240963624e-07	-0.01828231994241373	0.0	-0.49913457110646015	0.0	1.5342118722789124e-05	0.0	0.9998476460605702	0.0	0.017455218907774652	0.0	0.0	2.0003223344792915	0.0	0.0	2.0002931733313134	0.0	-0.0004863421141530732	0.0	1.6688506627850698e-05	-0.0003400351642237339	0.0	1.1809599824579302e-05
2.415	-0.0004883294665647667	0.0	-2.9786235882777817e-07	-0.018284755902999623	0.0	-0.4991344875161278	0.0	1.534394000455959e-05	0.0	0.9998476453910373	0.0	0.01745525725906286	0.0	0.0	2.0003267298828558	0.0	0.0	2.0002975690463303	0.0	-0.00048804228919914716	0.0	1.6747554766374956e-05	-0.00034003485420579916	0.0	1.1809655586645692e-05
2.42	-0.0004900306650962925	0.0	-2.982324093529669e-07	-0.018287200364414904	0.0	-0.4991344036305522	0.0	1.5345758161347115e-05	0.0	0.9998476447214242	0.0	0.017455295614858212	0.0	0.0	2.0003311258029832	0.0	0.0	2.000301965282211	0.0	-0.0004897424626951306	0.0	1.6806603183732367e-05	-0.00034003454418756086	0.0	1.1809711357839426e-05
2.4250000000000003	-0.0004917318620883487	0.0	-2.986023925391902e-07	-0.018289653326659574	0.0	-0.4991343194497334	0.0	1.5347573193151703e-05	0.0	0.999847644051731	0.0	0.01745533397516071	0.0	0.0	2.000335522239673	0.0	0.0	2.0003063620380592	0.0	-0.0004914426346410222	0.0	1.686565187996856e-05	-0.000340034234168972	0.0	1.1809767138157568e-05
2.43	-0.000493433057540935	0.0	-2.989723083864481e-07	-0.01829211478973363	0.0	-0.49913423497367143	0.0	1.5349385099973355e-05	0.0	0.9998476433819575	0.0	0.01745537233997035	0.0	0.0	2.0003399191929248	0.0	0.0	2.000310759312981	0.0	-0.0004931428050368198	0.0	1.6924700855129153e-05	-0.00034003392415004073	0.0	1.1809822927601586e-05
2.435	-0.0004951342514540513	0.0	-2.993421568947405e-07	-0.018294584753637076	0.0	-0.49913415020236623	0.0	1.5351193881812066e-05	0.0	0.999847642712104	0.0	0.017455410709287137	0.0	0.0	2.0003443166627393	0.0	0.0	2.0003151571060807	0.0	-0.000494842973882522	0.0	1.6983750109259784e-05	-0.0003400336141307869	0.0	1.1809878726171652e-05
2.44	-0.0004968354438276981	0.0	-2.997119380640675e-07	-0.018297063218369908	0.0	-0.4991340651358178	0.0	1.5352999538667842e-05	0.0	0.9998476420421702	0.0	0.017455449083111068	0.0	0.0	2.0003487146491152	0.0	0.0	2.000319555416463	0.0	-0.0004965431411781271	0.0	1.704279964240608e-05	-0.0003400333041112205	0.0	1.1809934533868044e-05
2.445	-0.0004985366346618749	0.0	-3.0008165189442913e-07	-0.018299550183932128	0.0	-0.4991339797740262	0.0	1.5354802070540676e-05	0.0	0.9998476413721564	0.0	0.017455487461442144	0.0	0.0	2.0003531131520544	0.0	0.0	2.0003239542432323	0.0	-0.0004982433069236337	0.0	1.7101849454613676e-05	-0.0003400329940913757	0.0	1.1809990350691501e-05
2.45	-0.0005002378239565822	0.0	-3.004512983858253e-07	-0.018302045650323732	0.0	-0.49913389411699133	0.0	1.5356601477430575e-05	0.0	0.9998476407020624	0.0	0.017455525844280367	0.0	0.0	2.000357512171557	0.0	0.0	2.000328353585494	0.0	-0.0004999434711190402	0.0	1.7160899545928202e-05	-0.00034003268407112807	0.0	1.18100461766388e-05
2.455	-0.0005019390117118194	0.0	-3.0082087753825605e-07	-0.018304549617544724	0.0	-0.49913380816471326	0.0	1.5358397759337536e-05	0.0	0.9998476400318882	0.0	0.017455564231625732	0.0	0.0	2.0003619117076203	0.0	0.0	2.0003327534423523	0.0	-0.0005016436337643445	0.0	1.721994991639527e-05	-0.0003400323740505714	0.0	1.1810102011710225e-05
2.46	-0.0005036401979275869	0.0	-3.0119038935172137e-07	-0.018307062085595106	0.0	-0.499133721917192	0.0	1.5360190916261558e-05	0.0	0.9998476393616339	0.0	0.017455602623478242	0.0	0.0	2.0003663117602466	0.0	0.0	2.0003371538129127	0.0	-0.0005033437948595454	0.0	1.7279000566060516e-05	-0.0003400320640297075	0.0	1.1810157855909165e-05
2.465	-0.0005053413826038846	0.0	-3.015598338262213e-07	-0.018309583054474873	0.0	-0.4991336353744275	0.0	1.5361980948202642e-05	0.0	0.9998476386912993	0.0	0.0174556410198379	0.0	0.0	2.0003707123294356	0.0	0.0	2.000341554696279	0.0	-0.000505043954404641	0.0	1.7338051494969573e-05	-0.0003400317540085003	0.0	1.181021370923528e-05
2.47	-0.0005070425657407127	0.0	-3.019292109617558e-07	-0.018312112524184028	0.0	-0.49913354853641984	0.0	1.536376785516079e-05	0.0	0.9998476380208847	0.0	0.0174556794207047	0.0	0.0	2.000375113415187	0.0	0.0	2.0003459560915564	0.0	-0.0005067441123996299	0.0	1.7397102703168076e-05	-0.0003400314439869841	0.0	1.1810269571685236e-05
2.475	-0.0005087437473380709	0.0	-3.0229852075832486e-07	-0.01831465049472257	0.0	-0.49913346140316894	0.0	1.5365551637135998e-05	0.0	0.9998476373503898	0.0	0.017455717826078646	0.0	0.0	2.0003795150175003	0.0	0.0	2.00035035799785	0.0	-0.0005084442688445103	0.0	1.7456154190701636e-05	-0.00034003113396513724	0.0	1.1810325443261128e-05
2.48	-0.0005104449273959592	0.0	-3.026677632159285e-07	-0.0183171969660905	0.0	-0.49913337397467483	0.0	1.536733229412827e-05	0.0	0.9998476366798149	0.0	0.017455756235959737	0.0	0.0	2.0003839171363773	0.0	0.0	2.000354760414264	0.0	-0.0005101444237392808	0.0	1.7515205957615895e-05	-0.0003400308239429759	0.0	1.1810381323962783e-05
2.485	-0.0005121461059143777	0.0	-3.0303693833456663e-07	-0.018319751938287814	0.0	-0.4991332862509375	0.0	1.5369109826137603e-05	0.0	0.9998476360091598	0.0	0.01745579465034797	0.0	0.0	2.0003883197718153	0.0	0.0	2.000359163339904	0.0	-0.0005118445770839395	0.0	1.757425800395647e-05	-0.00034003051392046045	0.0	1.1810437213789636e-05
2.49	-0.0005138472828933266	0.0	-3.034060461142395e-07	-0.01832231541131452	0.0	-0.499133198231957	0.0	1.5370884233163998e-05	0.0	0.9998476353384245	0.0	0.01745583306924335	0.0	0.0	2.0003927229238165	0.0	0.0	2.0003635667738737	0.0	-0.0005135447288784849	0.0	1.7633310329769e-05	-0.0003400302038976703	0.0	1.1810493112742988e-05
2.495	-0.0005155484583328056	0.0	-3.037750865549468e-07	-0.01832488738517061	0.0	-0.49913310991773324	0.0	1.5372655515207454e-05	0.0	0.9998476346676091	0.0	0.017455871492645877	0.0	0.0	2.0003971265923797	0.0	0.0	2.000367970715278	0.0	-0.0005152448791229155	0.0	1.7692362935099108e-05	-0.0003400297303202033	0.0	1.1810543978538701e-05
2.5	-0.0005172496322328147	0.0	-3.0414405965668874e-07	-0.01832746785985609	0.0	-0.4991330213082663	0.0	1.5374423672267972e-05	0.0	0.9998476339967134	0.0	0.017455909920555547	0.0	0.0	2.0004015307775056	0.0	0.0	2.0003723751632223	0.0	-0.0005169450278172291	0.0	1.775141581999242e-05	-0.00034003042375866494	0.0	1.1810630831860148e-05
2.505	-0.0005189508144111905	0.0	-3.0451300554992085e-07	-0.01833005683532711	0.0	-0.49913293240337475	0.0	1.53762080992863e-05	0.0	0.9998476333257387	0.0	0.017455948352910543	0.0	0.0	2.000405935472109	0.0	0.0	2.0003767801223673	0.0	-0.0005186451847746809	0.0	1.7810469287031497e-05	-0.0003400322228443374	0.0	1.1810751780943101e-05
2.5100000000000002	-0.000520652003539132	0.0	-3.0488191880316224e-07	-0.01833265431158961	0.0	-0.4991328432030831	0.0	1.5378006171242395e-05	0.0	0.9998476326546847	0.0	0.01745598678971924	0.0	0.0	2.000410340677149	0.0	0.0	2.000381185596622	0.0	-0.000520345348667088	0.0	1.7869523295316494e-05	-0.0003400328933666466	0.0	1.1810837946469787e-05
2.515	-0.0005223531926700764	0.0	-3.052507710223031e-07	-0.018335260288674604	0.0	-0.4991327537075198	0.0	1.5379804165339756e-05	0.0	0.9998476319835506	0.0	0.017456025231025372	0.0	0.0	2.000414746397639	0.0	0.0	2.0003855915859643	0.0	-0.0005220455125511265	0.0	1.7928577630835126e-05	-0.0003400327759707551	0.0	1.18108998301486e-05
2.52	-0.0005240543818040237	0.0	-3.0561956220734356e-07	-0.0183378747665821	0.0	-0.49913266391668476	0.0	1.538160208157838e-05	0.0	0.9998476313123367	0.0	0.017456063676828937	0.0	0.0	2.000419152633578	0.0	0.0	2.0003899980903714	0.0	-0.000523745676426795	0.0	1.7987632293633276e-05	-0.0003400327742965843	0.0	1.1810965290641043e-05
2.525	-0.0005257555709409739	0.0	-3.0598829235828356e-07	-0.018340497745312094	0.0	-0.4991325738305781	0.0	1.538339991995827e-05	0.0	0.9998476306410427	0.0	0.017456102127129933	0.0	0.0	2.0004235593849664	0.0	0.0	2.0003944051098212	0.0	-0.0005254458402940918	0.0	1.8046687283756832e-05	-0.00034003277262211894	0.0	1.1811030760311823e-05
2.5300000000000002	-0.0005274567600809272	0.0	-3.0635696147512316e-07	-0.01834312922486459	0.0	-0.4991324834491996	0.0	1.5385197680479424e-05	0.0	0.9998476299696687	0.0	0.017456140581928365	0.0	0.0	2.000427966651805	0.0	0.0	2.0003988126442915	0.0	-0.0005271460041530156	0.0	1.8105742601251687e-05	-0.00034003277094729405	0.0	1.1811096239157664e-05
2.535	-0.0005291579492238832	0.0	-3.067255695578622e-07	-0.01834576920523958	0.0	-0.49913239277254945	0.0	1.538699536314184e-05	0.0	0.9998476292982147	0.0	0.017456179041224228	0.0	0.0	2.000432374434092	0.0	0.0	2.00040322069376	0.0	-0.0005288461680035641	0.0	1.8164798246163703e-05	-0.0003400327692720571	0.0	1.1811161727179016e-05
2.54	-0.0005308591383698421	0.0	-3.070941166065009e-07	-0.018348417686437073	0.0	-0.49913230180062756	0.0	1.538879296794552e-05	0.0	0.9998476286266806	0.0	0.017456217505017524	0.0	0.0	2.0004367827318283	0.0	0.0	2.0004076292582043	0.0	-0.0005305463318457358	0.0	1.8223854218538774e-05	-0.0003400327675965979	0.0	1.1811227224379553e-05
2.545	-0.000532560327518804	0.0	-3.0746260262103904e-07	-0.018351074668457062	0.0	-0.49913221053343404	0.0	1.5390590494890466e-05	0.0	0.9998476279550667	0.0	0.017456255973308254	0.0	0.0	2.000441191545015	0.0	0.0	2.0004120383376023	0.0	-0.0005322464956795295	0.0	1.8282910518422797e-05	-0.00034003276592081894	0.0	1.181129273075882e-05
2.5500000000000003	-0.0005342615166707691	0.0	-3.0783102760147676e-07	-0.01835374015129955	0.0	-0.49913211897096876	0.0	1.5392387943976677e-05	0.0	0.9998476272833726	0.0	0.017456294446096417	0.0	0.0	2.00044560087365	0.0	0.0	2.0004164479319315	0.0	-0.0005339466595049434	0.0	1.8341967145861653e-05	-0.00034003276424466765	0.0	1.1811358246312414e-05
2.555	-0.0005359627058257368	0.0	-3.0819939154781404e-07	-0.018356414134964538	0.0	-0.49913202711323174	0.0	1.539418531520415e-05	0.0	0.9998476266115986	0.0	0.017456332923382015	0.0	0.0	2.000450010717735	0.0	0.0	2.0004208580411693	0.0	-0.0005356468233219757	0.0	1.8401024100901215e-05	-0.00034003276256819656	0.0	1.1811423771042255e-05
2.56	-0.0005376638949837076	0.0	-3.085676944600508e-07	-0.018359096619452026	0.0	-0.49913193496022307	0.0	1.5395982608572888e-05	0.0	0.9998476259397446	0.0	0.017456371405165042	0.0	0.0	2.000454421077269	0.0	0.0	2.000425268665294	0.0	-0.0005373469871306248	0.0	1.8460081383587372e-05	-0.0003400327608914165	0.0	1.181148930495049e-05
2.565	-0.0005393650841446811	0.0	-3.0893593633818716e-07	-0.01836178760476201	0.0	-0.49913184251194265	0.0	1.539777982408289e-05	0.0	0.9998476252678107	0.0	0.017456409891445507	0.0	0.0	2.000458831952253	0.0	0.0	2.000429679804283	0.0	-0.0005390471509308893	0.0	1.8519138993966015e-05	-0.00034003275921427856	0.0	1.1811554848035477e-05
2.57	-0.0005410662733086577	0.0	-3.0930411718222305e-07	-0.018364487090894496	0.0	-0.49913174976839053	0.0	1.5399576961734156e-05	0.0	0.9998476245957967	0.0	0.0174564483822234	0.0	0.0	2.000463243342686	0.0	0.0	2.000434091458114	0.0	-0.0005407473147227671	0.0	1.8578196932083024e-05	-0.00034003275753684975	0.0	1.1811620400298576e-05
2.575	-0.0005427674624756373	0.0	-3.0967223699215855e-07	-0.018367195077849476	0.0	-0.4991316567295667	0.0	1.5401374021526685e-05	0.0	0.9998476239237027	0.0	0.017456486877498734	0.0	0.0	2.0004676552485687	0.0	0.0	2.0004385036267647	0.0	-0.0005424474785062572	0.0	1.8637255197984294e-05	-0.00034003275585908305	0.0	1.1811685961736678e-05
2.58	-0.0005444686516456197	0.0	-3.100402957679935e-07	-0.018369911565626958	0.0	-0.49913156339547116	0.0	1.540317100346048e-05	0.0	0.9998476232515288	0.0	0.017456525377271496	0.0	0.0	2.0004720676699	0.0	0.0	2.0004429163102126	0.0	-0.0005441476422813574	0.0	1.8696313791715687e-05	-0.00034003275418094587	0.0	1.1811751532351424e-05
2.585	-0.0005461698408186051	0.0	-3.1040829350972806e-07	-0.01837263655422694	0.0	-0.49913146976610395	0.0	1.5404967907535537e-05	0.0	0.9998476225792747	0.0	0.01745656388154169	0.0	0.0	2.0004764806066815	0.0	0.0	2.000447329508436	0.0	-0.0005458478060480662	0.0	1.8755372713323105e-05	-0.00034003275250252865	0.0	1.181181711214428e-05
2.59	-0.0005478710299945933	0.0	-3.107762302173621e-07	-0.01837537004364942	0.0	-0.499131375841465	0.0	1.540676473375186e-05	0.0	0.9998476219069408	0.0	0.01745660239030932	0.0	0.0	2.0004808940589127	0.0	0.0	2.000451743221412	0.0	-0.0005475479698063821	0.0	1.8814431962852426e-05	-0.00034003275082381505	0.0	1.1811882701114793e-05
2.595	-0.0005495722191735847	0.0	-3.1114410589089573e-07	-0.0183781120338944	0.0	-0.4991312816215543	0.0	1.5408561482109446e-05	0.0	0.9998476212345269	0.0	0.017456640903574384	0.0	0.0	2.000485308026593	0.0	0.0	2.0004561574491184	0.0	-0.0005492481335563037	0.0	1.8873491540349548e-05	-0.00034003274914473283	0.0	1.1811948299261385e-05
2.6	-0.0005512734083555788	0.0	-3.115119205303289e-07	-0.018380862524961877	0.0	-0.49913118710637194	0.0	1.54103581526083e-05	0.0	0.9998476205620329	0.0	0.01745667942133688	0.0	0.0	2.0004897225097222	0.0	0.0	2.0004605721915327	0.0	-0.0005509482972978288	0.0	1.8932551445860334e-05	-0.0003400327474652621	0.0	1.1812013906583884e-05
2.605	-0.0005529745975405759	0.0	-3.118796741356616e-07	-0.018383621516851852	0.0	-0.49913109229591784	0.0	1.5412154745248412e-05	0.0	0.9998476198894589	0.0	0.01745671794359681	0.0	0.0	2.000494137508301	0.0	0.0	2.0004649874486335	0.0	-0.0005526484610309559	0.0	1.8991611679430683e-05	-0.0003400327129889142	0.0	1.1812086491603486e-05
2.61	-0.0005546757867285759	0.0	-3.122473667068938e-07	-0.018386389009564328	0.0	-0.49913099719019205	0.0	1.5413951260029792e-05	0.0	0.999847619216805	0.0	0.017456756470354173	0.0	0.0	2.0004985530223296	0.0	0.0	2.000469403220398	0.0	-0.0005543486247556838	0.0	1.905067224110648e-05	-0.0003400329374977318	0.0	1.1812104057421027e-05
2.615	-0.0005563769778715828	0.0	-3.1261548486964384e-07	-0.01838916500320862	0.0	-0.49913090178885605	0.0	1.5415751486053463e-05	0.0	0.9998476185440696	0.0	0.01745679500167807	0.0	0.0	2.000502969059727	0.0	0.0	2.0004738195078886	0.0	-0.0005560487904398085	0.0	1.9109732712822507e-05	-0.00034003318616036555	0.0	1.1812116500323955e-05
2.62	-0.000558078169219216	0.0	-3.1298359226210793e-07	-0.018391949497686706	0.0	-0.4991308060922134	0.0	1.5417552025596626e-05	0.0	0.9998476178712542	0.0	0.01745683353750654	0.0	0.0	2.000507385613392	0.0	0.0	2.0004782363111957	0.0	-0.0005577489563187859	0.0	1.916879346954965e-05	-0.0003400331930753528	0.0	1.181218031816642e-05
2.625	-0.0005597793607452254	0.0	-3.133516823401952e-07	-0.01839474249299711	0.0	-0.4991307101002686	0.0	1.541935282770384e-05	0.0	0.9998476171983586	0.0	0.017456872077838654	0.0	0.0	2.000511802683218	0.0	0.0	2.000482653630395	0.0	-0.000559449122366151	0.0	1.922785451695662e-05	-0.000340033226311715	0.0	1.1812238552441501e-05
2.63	-0.000561480552449611	0.0	-3.137197551039057e-07	-0.018397543989139835	0.0	-0.4991306138130217	0.0	1.5421153892375108e-05	0.0	0.999847616525383	0.0	0.017456910622674408	0.0	0.0	2.000516220269205	0.0	0.0	2.0004870714655616	0.0	-0.0005611492885819026	0.0	1.9286915855089397e-05	-0.0003400332599887963	0.0	1.1812296702203137e-05
2.6350000000000002	-0.0005631817443323726	0.0	-3.140878105532394e-07	-0.018400353986114882	0.0	-0.4991305172304727	0.0	1.5422955219610427e-05	0.0	0.9998476158523272	0.0	0.017456949172013802	0.0	0.0	2.0005206383713525	0.0	0.0	2.00049148981677	0.0	-0.0005628494549660384	0.0	1.934597748399398e-05	-0.00034003329366548364	0.0	1.1812354861161348e-05
2.64	-0.0005648829363935102	0.0	-3.1445584868819627e-07	-0.01840317248392225	0.0	-0.49913042035262156	0.0	1.54247568094098e-05	0.0	0.9998476151791913	0.0	0.017456987725856837	0.0	0.0	2.0005250569896607	0.0	0.0	2.000495908684096	0.0	-0.000564549621518557	0.0	1.940503940371634e-05	-0.00034003332734195964	0.0	1.1812413029318674e-05
2.645	-0.000566584128633024	0.0	-3.148238695087764e-07	-0.018405999482561934	0.0	-0.4991303231794683	0.0	1.5426558661773222e-05	0.0	0.9998476145059754	0.0	0.017457026284203515	0.0	0.0	2.0005294761241306	0.0	0.0	2.0005003280676146	0.0	-0.0005662497882394574	0.0	1.9464101614302495e-05	-0.0003400333610180435	0.0	1.1812471206673256e-05
2.65	-0.0005682853210509138	0.0	-3.151918730149797e-07	-0.01840883498203394	0.0	-0.4991302257110129	0.0	1.54283607767007e-05	0.0	0.9998476138326792	0.0	0.017457064847053835	0.0	0.0	2.0005338957747614	0.0	0.0	2.000504747967401	0.0	-0.0005679499551287369	0.0	1.9523164115798404e-05	-0.00034003339469379664	0.0	1.1812529393226049e-05
2.6550000000000002	-0.0005699865136471799	0.0	-3.1555985920680624e-07	-0.018411678982338267	0.0	-0.4991301279472554	0.0	1.543016315419223e-05	0.0	0.9998476131593029	0.0	0.017457103414407798	0.0	0.0	2.000538315941553	0.0	0.0	2.0005091683835308	0.0	-0.0005696501221863949	0.0	1.9582226908250083e-05	-0.0003400334283692896	0.0	1.1812587588975983e-05
2.66	-0.0005716877064218218	0.0	-3.159278280842559e-07	-0.018414531483474914	0.0	-0.4991300298881958	0.0	1.5431965794247814e-05	0.0	0.9998476124858466	0.0	0.017457141986265398	0.0	0.0	2.000542736624505	0.0	0.0	2.000513589316079	0.0	-0.0005713502894124292	0.0	1.9641289991703492e-05	-0.0003400334620443904	0.0	1.1812645793922041e-05
2.665	-0.0005733888993748399	0.0	-3.162957796473288e-07	-0.018417392485443884	0.0	-0.49912993153383406	0.0	1.5433768696867447e-05	0.0	0.9998476118123102	0.0	0.017457180562626642	0.0	0.0	2.0005471578236187	0.0	0.0	2.0005180107651204	0.0	-0.0005730504568068382	0.0	1.970035336620464e-05	-0.00034003349571916055	0.0	1.1812704008069023e-05
2.67	-0.0005750900925062341	0.0	-3.1666371389602496e-07	-0.018420261988245173	0.0	-0.49912983288417023	0.0	1.5435571862051135e-05	0.0	0.9998476111386936	0.0	0.01745721914349153	0.0	0.0	2.000551579538893	0.0	0.0	2.0005224327307305	0.0	-0.0005747506243696204	0.0	1.9759417031799513e-05	-0.00034003352939368135	0.0	1.1812762231414047e-05
2.6750000000000003	-0.0005767912858160045	0.0	-3.1703163083034434e-07	-0.018423139991878782	0.0	-0.49912973393920423	0.0	1.5437375289798876e-05	0.0	0.9998476104649969	0.0	0.01745725772886006	0.0	0.0	2.0005560017703288	0.0	0.0	2.000526855212985	0.0	-0.0005764507921007743	0.0	1.9818480988534106e-05	-0.00034003356306779373	0.0	1.1812820463954575e-05
2.68	-0.0005784924793041508	0.0	-3.1739953045028686e-07	-0.01842602649634471	0.0	-0.4991296346989361	0.0	1.543917898011067e-05	0.0	0.9998476097912201	0.0	0.01745729631873223	0.0	0.0	2.000560424517925	0.0	0.0	2.0005312782119584	0.0	-0.0005781509600002977	0.0	1.9877545236454387e-05	-0.000340033596741561	0.0	1.1812878705693203e-05
2.685	-0.0005801936729706733	0.0	-3.177674127558526e-07	-0.01842892150164296	0.0	-0.4991295351633659	0.0	1.5440982932986514e-05	0.0	0.9998476091173631	0.0	0.01745733491310804	0.0	0.0	2.0005648477816824	0.0	0.0	2.0005357017277263	0.0	-0.0005798511280681895	0.0	1.9936609775606368e-05	-0.000340033630415059	0.0	1.1812936956630722e-05
2.69	-0.0005818948668155718	0.0	-3.1813527774704154e-07	-0.01843182500777353	0.0	-0.4991294353324936	0.0	1.5442787148426412e-05	0.0	0.9998476084434261	0.0	0.017457373511987492	0.0	0.0	2.000569271561601	0.0	0.0	2.0005401257603643	0.0	-0.0005815512963044478	0.0	1.9995674606036022e-05	-0.00034003366408824983	0.0	1.1812995216764872e-05
2.695	-0.0005835960608388465	0.0	-3.185031254238537e-07	-0.01843473701473642	0.0	-0.49912933520631914	0.0	1.544459162643036e-05	0.0	0.999847607769409	0.0	0.017457412115370587	0.0	0.0	2.00057369585768	0.0	0.0	2.0005445503099466	0.0	-0.0005832514647090714	0.0	2.0054739727789346e-05	-0.0003400336977610865	0.0	1.1813053486097687e-05
2.7	-0.0005852972550404973	0.0	-3.1887095578628906e-07	-0.018437657522531632	0.0	-0.49912923478484256	0.0	1.5446396366998367e-05	0.0	0.9998476070953116	0.0	0.01745745072325732	0.0	0.0	2.00057812066992	0.0	0.0	2.000548975376549	0.0	-0.0005849516332820581	0.0	2.011380514091233e-05	-0.0003400337314335834	0.0	1.1813111764628772e-05
2.705	-0.0005869984494205242	0.0	-3.1923876883434765e-07	-0.018440586531159164	0.0	-0.49912913406806386	0.0	1.544820137013042e-05	0.0	0.9998476064211342	0.0	0.0174574893356477	0.0	0.0	2.0005825459983213	0.0	0.0	2.0005534009602473	0.0	-0.0005866518020234067	0.0	2.0172870845450963e-05	-0.00034003376510578944	0.0	1.1813170052356772e-05
2.71	-0.000588699643978927	0.0	-3.196065645680294e-07	-0.018443524040619018	0.0	-0.499129033055983	0.0	1.545000663582653e-05	0.0	0.9998476057468768	0.0	0.01745752795254172	0.0	0.0	2.0005869718428837	0.0	0.0	2.0005578270611153	0.0	-0.0005883519709331154	0.0	2.0231936841451227e-05	-0.00034003381976013364	0.0	1.181326103869626e-05
2.715	-0.000590400838715706	0.0	-3.1997434298733437e-07	-0.018446470050911188	0.0	-0.49912893174860007	0.0	1.545181216408669e-05	0.0	0.9998476050725391	0.0	0.017457566573939383	0.0	0.0	2.0005913982036074	0.0	0.0	2.0005622536792296	0.0	-0.0005900521400111823	0.0	2.029100312895912e-05	-0.0003400337389331237	0.0	1.1813140963415433e-05
2.72	-0.0005921020323042078	0.0	-3.20344020621641e-07	-0.018449424562539198	0.0	-0.4991288301448431	0.0	1.545361538210805e-05	0.0	0.9998476043981162	0.0	0.017457605200102328	0.0	0.0	2.000595825110477	0.0	0.0	2.0005666808139275	0.0	-0.0005917523079986552	0.0	2.035006774665581e-05	-0.00034003339996445755	0.0	1.181261872995374e-05
2.725	-0.0005938032240238654	0.0	-3.2071663842613175e-07	-0.018452387575776528	0.0	-0.4991287282441299	0.0	1.545541489248314e-05	0.0	0.9998476037236051	0.0	0.017457643831172664	0.0	0.0	2.000600252579779	0.0	0.0	2.0005711084641473	0.0	-0.0005934524742117384	0.0	2.04091296292827e-05	-0.00034003322261641966	0.0	1.1812348301201242e-05
2.73	-0.0005955044158655443	0.0	-3.2108932032833183e-07	-0.018455359089867562	0.0	-0.499128626048069	0.0	1.545721455613241e-05	0.0	0.9998476030490138	0.0	0.017457682466757756	0.0	0.0	2.0006046805665156	0.0	0.0	2.000575536629933	0.0	-0.0005951526405396966	0.0	2.0468191720242642e-05	-0.0003400332770790697	0.0	1.1812439028365533e-05
2.735	-0.0005972056078292446	0.0	-3.214620663282413e-07	-0.01845833910481231	0.0	-0.4991285235566605	0.0	1.5459014373055865e-05	0.0	0.999847602374342	0.0	0.017457721106857605	0.0	0.0	2.000609109070687	0.0	0.0	2.000579965311328	0.0	-0.0005968528069825286	0.0	2.0527254019581718e-05	-0.00034003330005365526	0.0	1.1812480708800722e-05
2.74	-0.0005989067999149663	0.0	-3.218348764258602e-07	-0.018461327620610764	0.0	-0.49912842076990427	0.0	1.5460814343253503e-05	0.0	0.99984760169959	0.0	0.017457759751472207	0.0	0.0	2.0006135380922925	0.0	0.0	2.0005843945083766	0.0	-0.0005985529735402327	0.0	2.0586316527346013e-05	-0.00034003332302793546	0.0	1.1812522398455189e-05
2.745	-0.0006006079921227091	0.0	-3.2220775062118846e-07	-0.018464324637262927	0.0	-0.4991283176878004	0.0	1.546261446672532e-05	0.0	0.9998476010247576	0.0	0.01745779840060157	0.0	0.0	2.000617967631334	0.0	0.0	2.0005888242211225	0.0	-0.0006002531402128073	0.0	2.064537924358163e-05	-0.0003400333460018307	0.0	1.1812564097326333e-05
2.75	-0.0006023091844524732	0.0	-3.2258068891422614e-07	-0.018467330154768802	0.0	-0.4991282143103489	0.0	1.546441474347132e-05	0.0	0.9998476003498448	0.0	0.017457837054245685	0.0	0.0	2.0006223976878093	0.0	0.0	2.0005932544496097	0.0	-0.0006019533070002505	0.0	2.070444216833464e-05	-0.0003400333689754315	0.0	1.1812605805415625e-05
2.755	-0.0006040103769042587	0.0	-3.2295369130497317e-07	-0.018470344173128383	0.0	-0.4991281106375498	0.0	1.5466215173491503e-05	0.0	0.9998475996748517	0.0	0.017457875712404557	0.0	0.0	2.0006268282617197	0.0	0.0	2.000597685193882	0.0	-0.0006036534739025611	0.0	2.0763505301651152e-05	-0.0003400333919487232	0.0	1.1812647522724362e-05
2.7600000000000002	-0.0006057115694780655	0.0	-3.2332675779342964e-07	-0.018473366692341675	0.0	-0.499128006669403	0.0	1.546801575678587e-05	0.0	0.9998475989997783	0.0	0.017457914375078185	0.0	0.0	2.000631259353065	0.0	0.0	2.0006021164539836	0.0	-0.0006053536409197373	0.0	2.0822568643577248e-05	-0.00034003341492170415	0.0	1.1812689249249268e-05
2.765	-0.0006074127621738934	0.0	-3.236998883795955e-07	-0.018476397712408676	0.0	-0.4991279024059085	0.0	1.5469816493354414e-05	0.0	0.9998475983246246	0.0	0.017457953042266567	0.0	0.0	2.000635690961845	0.0	0.0	2.000606548229958	0.0	-0.0006070538080517776	0.0	2.0881632194159007e-05	-0.00034003343789433814	0.0	1.1812730984992153e-05
2.77	-0.0006091139549917427	0.0	-3.2407308306347075e-07	-0.01847943723332939	0.0	-0.4991277978470664	0.0	1.5471617383197142e-05	0.0	0.9998475976493905	0.0	0.01745799171396971	0.0	0.0	2.0006401230880595	0.0	0.0	2.0006109805218495	0.0	-0.0006087539752986801	0.0	2.0940695953442536e-05	-0.00034003346086661256	0.0	1.1812772729954933e-05
2.775	-0.0006108151479316133	0.0	-3.244463418450554e-07	-0.018482485255103806	0.0	-0.4991276929928766	0.0	1.5473418426314053e-05	0.0	0.999847596974076	0.0	0.017458030390187604	0.0	0.0	2.0006445557317085	0.0	0.0	2.000615413329702	0.0	-0.0006104541426604433	0.0	2.099975992147392e-05	-0.0003400334838386448	0.0	1.1812814484135804e-05
2.7800000000000002	-0.0006125163409935054	0.0	-3.2481966472434945e-07	-0.018485541777731936	0.0	-0.4991275878433392	0.0	1.5475219622705147e-05	0.0	0.9998475962986813	0.0	0.017458069070920255	0.0	0.0	2.000648988892793	0.0	0.0	2.000619846653559	0.0	-0.0006121543101370659	0.0	2.1058824098299256e-05	-0.00034003350681030304	0.0	1.1812856247533862e-05
2.785	-0.0006142175341774185	0.0	-3.251930517013529e-07	-0.018488606801213774	0.0	-0.4991274823984541	0.0	1.547702097237042e-05	0.0	0.9998475956232061	0.0	0.017458107756167664	0.0	0.0	2.000653422571312	0.0	0.0	2.0006242804934646	0.0	-0.0006138544777285458	0.0	2.1117888483964618e-05	-0.0003400335297815908	0.0	1.1812898020147866e-05
2.79	-0.0006159187274833529	0.0	-3.255665027760657e-07	-0.01849168032554932	0.0	-0.4991273766582214	0.0	1.5478822475309877e-05	0.0	0.9998475949476506	0.0	0.017458146445929825	0.0	0.0	2.000657856767265	0.0	0.0	2.000628714849463	0.0	-0.0006155546454348815	0.0	2.11769530785161e-05	-0.00034003355275264547	0.0	1.1812939801981765e-05
2.795	-0.0006176199209113086	0.0	-3.259400179484879e-07	-0.01849476235073858	0.0	-0.499127270622641	0.0	1.5480624131523516e-05	0.0	0.9998475942720149	0.0	0.017458185140206743	0.0	0.0	2.0006622914806536	0.0	0.0	2.000633149721598	0.0	-0.0006172548132560718	0.0	2.12360178819998e-05	-0.000340033575723402	0.0	1.1812981593035449e-05
2.8000000000000003	-0.0006193211144612858	0.0	-3.2631359721861956e-07	-0.018497852876781545	0.0	-0.499127164291713	0.0	1.5482425941011335e-05	0.0	0.9998475935962988	0.0	0.01745822383899842	0.0	0.0	2.000666726711477	0.0	0.0	2.000637585109913	0.0	-0.0006189549811921149	0.0	2.1295082894461815e-05	-0.00034003359869373565	0.0	1.181302339330423e-05
2.805	-0.000621022308133284	0.0	-3.2668724058646054e-07	-0.01850095190367822	0.0	-0.4991270576654373	0.0	1.5484227903773337e-05	0.0	0.9998475929205023	0.0	0.01745826254230485	0.0	0.0	2.0006711624597346	0.0	0.0	2.000642021014453	0.0	-0.0006206551492430086	0.0	2.1354148115948206e-05	-0.0003400336216637567	0.0	1.1813065202792005e-05
2.81	-0.0006227235019273037	0.0	-3.270609480520109e-07	-0.018504059431428604	0.0	-0.4991269507438139	0.0	1.548603001980952e-05	0.0	0.9998475922446255	0.0	0.017458301250126037	0.0	0.0	2.000675598725427	0.0	0.0	2.0006464574352605	0.0	-0.000622355317408752	0.0	2.1413213546505098e-05	-0.0003400336446335212	0.0	1.1813107021499112e-05
2.815	-0.0006244246958433445	0.0	-3.2743471961527074e-07	-0.018507175460032697	0.0	-0.49912684352684294	0.0	1.548783228911989e-05	0.0	0.9998475915686684	0.0	0.01745833996246198	0.0	0.0	2.0006800355085548	0.0	0.0	2.0006508943723804	0.0	-0.0006240554856893432	0.0	2.1472279186178557e-05	-0.0003400336676029062	0.0	1.1813148849421655e-05
2.82	-0.0006261258898814067	0.0	-3.278085552762399e-07	-0.0185102999894905	0.0	-0.4991267360145243	0.0	1.548963471170444e-05	0.0	0.999847590892631	0.0	0.01745837867931268	0.0	0.0	2.000684472809117	0.0	0.0	2.000655331825856	0.0	-0.0006257556540847806	0.0	2.153134503501468e-05	-0.00034003369057201114	0.0	1.1813190686564886e-05
2.825	-0.0006278270840414903	0.0	-3.2818245503491854e-07	-0.01851343301980201	0.0	-0.499126628206858	0.0	1.549143728756317e-05	0.0	0.9998475902165131	0.0	0.017458417400678133	0.0	0.0	2.000688910627114	0.0	0.0	2.0006597697957322	0.0	-0.0006274558225950628	0.0	2.159041109305957e-05	-0.0003400337135407781	0.0	1.1813232532925473e-05
2.83	-0.000629528278323595	0.0	-3.285564188913065e-07	-0.018516574550967235	0.0	-0.499126520103844	0.0	1.5493240016696082e-05	0.0	0.999847589540315	0.0	0.017458456126558344	0.0	0.0	2.0006933489625456	0.0	0.0	2.0006642082820516	0.0	-0.0006291559912201878	0.0	2.1649477360359295e-05	-0.000340033736509191	0.0	1.181327438850144e-05
2.835	-0.0006312294727277211	0.0	-3.2893044684540384e-07	-0.018519724582986164	0.0	-0.4991264117054824	0.0	1.5495042899103174e-05	0.0	0.9998475888640366	0.0	0.01745849485695331	0.0	0.0	2.0006977878154117	0.0	0.0	2.000668647284859	0.0	-0.0006308561599601541	0.0	2.1708543836959952e-05	-0.0003400337594772731	0.0	1.1813316253298602e-05
2.84	-0.0006329306672538685	0.0	-3.293045388972106e-07	-0.018522883115858802	0.0	-0.49912630301177313	0.0	1.5496845934784453e-05	0.0	0.9998475881876777	0.0	0.017458533591863033	0.0	0.0	2.0007022271857138	0.0	0.0	2.0006730868041984	0.0	-0.0006325563288149601	0.0	2.1767610522907647e-05	-0.0003400337824451059	0.0	1.181335812731459e-05
2.845	-0.0006346318619020372	0.0	-3.296786950467268e-07	-0.018526050149585152	0.0	-0.4991261940227162	0.0	1.549864912373991e-05	0.0	0.9998475875112386	0.0	0.01745857233128751	0.0	0.0	2.0007066670734495	0.0	0.0	2.000677526840113	0.0	-0.0006342564977846046	0.0	2.1826677418248457e-05	-0.00034003380541259177	0.0	1.1813400010545561e-05
2.85	-0.0006363330566722271	0.0	-3.3005291529395236e-07	-0.01852922568416521	0.0	-0.4991260847383116	0.0	1.5500452465969552e-05	0.0	0.9998475868347191	0.0	0.017458611075226744	0.0	0.0	2.00071110747862	0.0	0.0	2.0006819673926475	0.0	-0.0006359566668690854	0.0	2.1885744523028466e-05	-0.00034003382837968906	0.0	1.1813441902995187e-05
2.855	-0.0006380342515644383	0.0	-3.3042719963888734e-07	-0.018532409719598977	0.0	-0.4991259751585594	0.0	1.5502255961473372e-05	0.0	0.9998475861581193	0.0	0.017458649823680734	0.0	0.0	2.0007155484012253	0.0	0.0	2.0006864084618448	0.0	-0.000637656836068401	0.0	2.1944811837293773e-05	-0.0003400338513465226	0.0	1.1813483804663412e-05
2.86	-0.0006397354465786707	0.0	-3.3080154808153166e-07	-0.018535602255886453	0.0	-0.49912586528345954	0.0	1.550405961025138e-05	0.0	0.9998475854814391	0.0	0.017458688576649478	0.0	0.0	2.0007199898412655	0.0	0.0	2.00069085004775	0.0	-0.00063935700538255	0.0	2.2003879361090464e-05	-0.0003400338743130128	0.0	1.1813525715550799e-05
2.865	-0.0006414366417149247	0.0	-3.3117596062188544e-07	-0.01853880329302764	0.0	-0.499125755113012	0.0	1.5505863412303565e-05	0.0	0.9998475848046786	0.0	0.017458727334132982	0.0	0.0	2.000724431798741	0.0	0.0	2.000695292150406	0.0	-0.0006410571748115306	0.0	2.2062947094464645e-05	-0.0003400338972792084	0.0	1.1813567635655882e-05
2.87	-0.0006431378369731997	0.0	-3.3155043725994856e-07	-0.018542012831022536	0.0	-0.49912564464721676	0.0	1.5507667367629935e-05	0.0	0.9998475841278378	0.0	0.01745876609613124	0.0	0.0	2.0007288742736518	0.0	0.0	2.0006997347698574	0.0	-0.0006427573443553414	0.0	2.2122015037462384e-05	-0.00034003392024503903	0.0	1.1813609564976966e-05
2.875	-0.0006448390323534961	0.0	-3.319249779957211e-07	-0.01854523086987114	0.0	-0.49912553388607395	0.0	1.5509471476230483e-05	0.0	0.9998475834509166	0.0	0.017458804862644253	0.0	0.0	2.000733317265996	0.0	0.0	2.000704177906148	0.0	-0.0006444575140139804	0.0	2.218108319012978e-05	-0.00034003394321057876	0.0	1.1813651503518115e-05
2.88	-0.0006465402278558138	0.0	-3.3229958282920295e-07	-0.018548457409573452	0.0	-0.49912542282958344	0.0	1.5511275738105215e-05	0.0	0.9998475827739152	0.0	0.017458843633672023	0.0	0.0	2.0007377607757757	0.0	0.0	2.000708621559321	0.0	-0.0006461576837874467	0.0	2.2240151552512927e-05	-0.000340033966175804	0.0	1.1813693451276451e-05
2.8850000000000002	-0.0006482414234801528	0.0	-3.3267425176039433e-07	-0.018551692450129477	0.0	-0.49912531147774525	0.0	1.551308015325413e-05	0.0	0.9998475820968333	0.0	0.017458882409214546	0.0	0.0	2.00074220480299	0.0	0.0	2.000713065729421	0.0	-0.0006478578536757379	0.0	2.2299220124657906e-05	-0.00034003398914065166	0.0	1.181373540825367e-05
2.89	-0.0006499426192265131	0.0	-3.33048984789295e-07	-0.018554935991539206	0.0	-0.4991251998305595	0.0	1.5514884721677227e-05	0.0	0.9998475814196711	0.0	0.01745892118927183	0.0	0.0	2.000746649347639	0.0	0.0	2.000717510416492	0.0	-0.0006495580236788527	0.0	2.2358288906610825e-05	-0.0003400340121052065	0.0	1.1813777374448694e-05
2.895	-0.0006516438150948946	0.0	-3.334237819159051e-07	-0.018558188033802648	0.0	-0.499125087888026	0.0	1.5516689443374507e-05	0.0	0.9998475807424286	0.0	0.017458959973843866	0.0	0.0	2.000751094409723	0.0	0.0	2.0007219556205778	0.0	-0.0006512581937967894	0.0	2.2417357898417753e-05	-0.000340034035069447	0.0	1.1813819349860171e-05
2.9	-0.0006533450110852973	0.0	-3.3379864314022465e-07	-0.0185614485769198	0.0	-0.4991249756501449	0.0	1.5518494318345967e-05	0.0	0.9998475800651058	0.0	0.01745899876293066	0.0	0.0	2.000755539989242	0.0	0.0	2.000726401341722	0.0	-0.0006529583640295466	0.0	2.247642710012479e-05	-0.00034003405803334773	0.0	1.181386133449132e-05
2.9050000000000002	-0.0006550462071977216	0.0	-3.341735684622535e-07	-0.01856471762089066	0.0	-0.4991248631169161	0.0	1.552029934659161e-05	0.0	0.9998475793877025	0.0	0.017459037556532206	0.0	0.0	2.000759986086195	0.0	0.0	2.0007308475799683	0.0	-0.0006546585343771224	0.0	2.253549651177803e-05	-0.00034003408099694127	0.0	1.1813903328340164e-05
2.91	-0.000656747403432167	0.0	-3.3454855788199184e-07	-0.01856799516571523	0.0	-0.4991247502883397	0.0	1.5522104528111435e-05	0.0	0.999847578710219	0.0	0.017459076354648512	0.0	0.0	2.0007644327005836	0.0	0.0	2.0007352943353616	0.0	-0.0006563587048395154	0.0	2.2594566133423555e-05	-0.00034003410396020055	0.0	1.1813945331407097e-05
2.915	-0.0006584485997886336	0.0	-3.349236113994395e-07	-0.018571281211393505	0.0	-0.49912463716441563	0.0	1.552390986290544e-05	0.0	0.9998475780326551	0.0	0.017459115157279572	0.0	0.0	2.000768879832407	0.0	0.0	2.000739741607945	0.0	-0.0006580588754167239	0.0	2.265363596510746e-05	-0.0003400341269231418	0.0	1.1813987343692292e-05
2.92	-0.0006601497962671216	0.0	-3.352987290145966e-07	-0.018574575757925493	0.0	-0.4991245237451439	0.0	1.5525715350973628e-05	0.0	0.999847577355011	0.0	0.01745915396442539	0.0	0.0	2.0007733274816646	0.0	0.0	2.000744189397763	0.0	-0.0006597590461087464	0.0	2.271270600687584e-05	-0.0003400341498857957	0.0	1.1814029365195914e-05
2.9250000000000003	-0.0006618509928676311	0.0	-3.3567391072746306e-07	-0.018577878805311192	0.0	-0.4991244100305245	0.0	1.5527520992316e-05	0.0	0.9998475766772864	0.0	0.01745919277608596	0.0	0.0	2.000777775648358	0.0	0.0	2.0007486377048584	0.0	-0.0006614592169155813	0.0	2.277177625877478e-05	-0.0003400341728480918	0.0	1.1814071395916384e-05
2.93	-0.0006635521895901616	0.0	-3.3604915653803893e-07	-0.018581190353550596	0.0	-0.49912429602055747	0.0	1.5529326786932553e-05	0.0	0.9998475759994816	0.0	0.01745923159226129	0.0	0.0	2.000782224332485	0.0	0.0	2.000753086529276	0.0	-0.0006631593878372267	0.0	2.283084672085037e-05	-0.0003400341958100627	0.0	1.1814113435855284e-05
2.935	-0.0006652533864347134	0.0	-3.364244664463242e-07	-0.018584510402643712	0.0	-0.49912418171524275	0.0	1.5531132734823286e-05	0.0	0.9998475753215964	0.0	0.017459270412951373	0.0	0.0	2.000786673534048	0.0	0.0	2.00075753587106	0.0	-0.0006648595588736813	0.0	2.2889917393148698e-05	-0.00034003421877169744	0.0	1.1814155485011878e-05
2.94	-0.0006669545834012865	0.0	-3.367998404523188e-07	-0.018587838952590537	0.0	-0.4991240671145804	0.0	1.5532938835988202e-05	0.0	0.9998475746436308	0.0	0.017459309238156213	0.0	0.0	2.0007911232530446	0.0	0.0	2.0007619857302537	0.0	-0.0006665597300249431	0.0	2.2948988275715852e-05	-0.00034003424173297805	0.0	1.1814197543387183e-05
2.945	-0.0006686557804898809	0.0	-3.371752785560229e-07	-0.01859117600339107	0.0	-0.4991239522185704	0.0	1.55347450904273e-05	0.0	0.9998475739655849	0.0	0.01745934806787581	0.0	0.0	2.0007955734894765	0.0	0.0	2.0007664361069013	0.0	-0.0006682599012910106	0.0	2.3008059368597936e-05	-0.0003400342646939984	0.0	1.1814239610981934e-05
2.95	-0.0006703569777004967	0.0	-3.3755078075743637e-07	-0.018594521555045315	0.0	-0.49912383702721275	0.0	1.5536551498140583e-05	0.0	0.9998475732874587	0.0	0.01745938690211016	0.0	0.0	2.0008000242433437	0.0	0.0	2.0007708870010465	0.0	-0.0006699600726718826	0.0	2.306713067184103e-05	-0.0003400342876547243	0.0	1.1814281687792574e-05
2.955	-0.0006720581750331337	0.0	-3.379263470565592e-07	-0.018597875607553264	0.0	-0.49912372154050744	0.0	1.5538358059128045e-05	0.0	0.9998475726092522	0.0	0.01745942574085927	0.0	0.0	2.0008044755146455	0.0	0.0	2.0007753384127334	0.0	-0.0006716602441675573	0.0	2.3126202185491224e-05	-0.0003400343106150887	0.0	1.181432377382181e-05
2.96	-0.000673759372487792	0.0	-3.383019774533914e-07	-0.018601238160914926	0.0	-0.4991236057584545	0.0	1.554016477338969e-05	0.0	0.9998475719309653	0.0	0.017459464584123133	0.0	0.0	2.000808927303382	0.0	0.0	2.0007797903420057	0.0	-0.0006733604157780329	0.0	2.3185273909594614e-05	-0.000340034333575099	0.0	1.181436586906925e-05
2.965	-0.0006754605700644716	0.0	-3.3867767194793303e-07	-0.018604609215130297	0.0	-0.49912348968105386	0.0	1.5541971640925517e-05	0.0	0.999847571252598	0.0	0.01745950343190175	0.0	0.0	2.000813379609553	0.0	0.0	2.000784242788907	0.0	-0.0006750605875033077	0.0	2.324434584419728e-05	-0.00034003435653480024	0.0	1.1814407973535459e-05
2.97	-0.0006771617677631726	0.0	-3.390534305401841e-07	-0.018607988770199375	0.0	-0.4991233733083056	0.0	1.5543778661735527e-05	0.0	0.9998475705741504	0.0	0.017459542284195127	0.0	0.0	2.000817832433159	0.0	0.0	2.0007886957534824	0.0	-0.0006767607593433804	0.0	2.3303417989345332e-05	-0.0003400343794941889	0.0	1.1814450087219418e-05
2.975	-0.0006788629655838948	0.0	-3.3942925323014447e-07	-0.018611376826122166	0.0	-0.4991232566402097	0.0	1.5545585835819716e-05	0.0	0.9998475698956225	0.0	0.01745958114100326	0.0	0.0	2.0008222857742	0.0	0.0	2.0007931492357747	0.0	-0.0006784609312982491	0.0	2.336249034508484e-05	-0.00034003440245326675	0.0	1.1814492210120734e-05
2.98	-0.0006805641635266382	0.0	-3.398051400178143e-07	-0.018614773382898665	0.0	-0.4991231396767661	0.0	1.554739316317809e-05	0.0	0.9998475692170143	0.0	0.01745962000232615	0.0	0.0	2.0008267396326764	0.0	0.0	2.000797603235828	0.0	-0.0006801611033679124	0.0	2.3421562911461904e-05	-0.00034003442541196696	0.0	1.1814534342240308e-05
2.985	-0.0006822653615914029	0.0	-3.401810909031935e-07	-0.018618178440528873	0.0	-0.49912302241797485	0.0	1.5549200643810644e-05	0.0	0.9998475685383257	0.0	0.01745965886816379	0.0	0.0	2.0008311940085868	0.0	0.0	2.0008020577536865	0.0	-0.0006818612755523683	0.0	2.3480635688522606e-05	-0.00034003444837046295	0.0	1.1814576483578482e-05
2.99	-0.0006839665597781891	0.0	-3.4055710588628213e-07	-0.01862159199901279	0.0	-0.499122904863836	0.0	1.555100827771738e-05	0.0	0.9998475678595569	0.0	0.01745969773851619	0.0	0.0	2.0008356489019326	0.0	0.0	2.000806512789394	0.0	-0.0006835614478516163	0.0	2.3539708676313053e-05	-0.00034003447132852706	0.0	1.1814618634134746e-05
2.995	-0.0006856677580869963	0.0	-3.409331849670801e-07	-0.018625014058350414	0.0	-0.4991227870143494	0.0	1.55528160648983e-05	0.0	0.9998475671807076	0.0	0.017459736613383344	0.0	0.0	2.000840104312713	0.0	0.0	2.000810968342994	0.0	-0.000685261620265653	0.0	2.3598781874879314e-05	-0.00034003449428622796	0.0	1.1814660793908196e-05
3.0	-0.000687368956517825	0.0	-3.4130932814558747e-07	-0.01862844461854175	0.0	-0.49912266886951523	0.0	1.55546240053534e-05	0.0	0.999847566501778	0.0	0.017459775492765256	0.0	0.0	2.000844560240928	0.0	0.0	2.0008154244145313	0.0	-0.0006869617927944782	0.0	2.36578552842675e-05	-0.00034003451724371565	0.0	1.1814702962899793e-05
3.005	-0.0006890701550706748	0.0	-3.416855354218043e-07	-0.018631883679586795	0.0	-0.4991225504293334	0.0	1.5556432099082682e-05	0.0	0.999847565822768	0.0	0.01745981437666192	0.0	0.0	2.0008490166865776	0.0	0.0	2.000819881004049	0.0	-0.0006886619654380896	0.0	2.371692890452368e-05	-0.0003400345402008618	0.0	1.1814745141111173e-05
3.0100000000000002	-0.0006907713537455462	0.0	-3.4206180679573046e-07	-0.01863533124148555	0.0	-0.4991224316938039	0.0	1.555824034608615e-05	0.0	0.9998475651436778	0.0	0.017459853265073346	0.0	0.0	2.000853473649663	0.0	0.0	2.0008243381115913	0.0	-0.0006903621381964863	0.0	2.3776002735693973e-05	-0.0003400345631576773	0.0	1.1814787328540137e-05
3.015	-0.0006924725525424386	0.0	-3.4243814226736603e-07	-0.01863878730423801	0.0	-0.4991223126629267	0.0	1.5560048746363794e-05	0.0	0.9998475644645072	0.0	0.017459892157999524	0.0	0.0	2.0008579311301826	0.0	0.0	2.000828795737202	0.0	-0.0006920623110696658	0.0	2.3835076777824442e-05	-0.00034003458611413863	0.0	1.1814829525185213e-05
3.02	-0.0006941737514613523	0.0	-3.42814541836711e-07	-0.018642251867844184	0.0	-0.4991221933367019	0.0	1.5561857299915623e-05	0.0	0.9998475637852563	0.0	0.01745993105544046	0.0	0.0	2.0008623891281374	0.0	0.0	2.0008332538809257	0.0	-0.0006937624840576272	0.0	2.389415103096119e-05	-0.0003400346090703162	0.0	1.181487173104934e-05
3.025	-0.0006958749505022874	0.0	-3.4319100550376537e-07	-0.018645724932304063	0.0	-0.49912207371512946	0.0	1.5563666006741635e-05	0.0	0.999847563105925	0.0	0.017459969957396147	0.0	0.0	2.0008668476435267	0.0	0.0	2.0008377125428054	0.0	-0.0006954626571603684	0.0	2.3953225495150302e-05	-0.0003400346320261415	0.0	1.1814913946132687e-05
3.0300000000000002	-0.0006975761496652438	0.0	-3.4356753326852913e-07	-0.018649206497617653	0.0	-0.49912195379820934	0.0	1.5565474866841827e-05	0.0	0.9998475624265134	0.0	0.017460008863866595	0.0	0.0	2.000871306676351	0.0	0.0	2.0008421717228853	0.0	-0.0006971628303778881	0.0	2.401230017043788e-05	-0.0003400346549816126	0.0	1.1814956170433389e-05
3.035	-0.0006992773489502215	0.0	-3.4394412513100225e-07	-0.018652696563784953	0.0	-0.49912183358594153	0.0	1.55672838802162e-05	0.0	0.9998475617470214	0.0	0.017460047774851797	0.0	0.0	2.00087576622661	0.0	0.0	2.000846631421209	0.0	-0.000698863003710184	0.0	2.407137505687e-05	-0.00034003467793679634	0.0	1.181499840395156e-05
3.04	-0.0007009785483572204	0.0	-3.443207810911848e-07	-0.018656195130805964	0.0	-0.49912171307832615	0.0	1.5569093046864758e-05	0.0	0.9998475610674491	0.0	0.017460086690351755	0.0	0.0	2.000880226294304	0.0	0.0	2.0008510916378217	0.0	-0.0007005631771572555	0.0	2.413045015449276e-05	-0.0003400347008916982	0.0	1.1815040646689403e-05
3.045	-0.0007026797478862407	0.0	-3.4469750114907674e-07	-0.01865970219868068	0.0	-0.499121592275363	0.0	1.5570902366787498e-05	0.0	0.9998475603877965	0.0	0.01746012561036647	0.0	0.0	2.000884686879433	0.0	0.0	2.000855552372766	0.0	-0.0007022633507191005	0.0	2.4189525463352255e-05	-0.0003400347238462549	0.0	1.1815082898644151e-05
3.0500000000000003	-0.0007043809475372823	0.0	-3.450742853046781e-07	-0.018663217767409108	0.0	-0.4991214711770523	0.0	1.5572711839984418e-05	0.0	0.9998475597080636	0.0	0.017460164534895937	0.0	0.0	2.0008891479819972	0.0	0.0	2.0008600136260855	0.0	-0.0007039635243957175	0.0	2.4248600983494567e-05	-0.00034003474680046654	0.0	1.1815125159816648e-05
3.055	-0.000706082147310345	0.0	-3.454511335579888e-07	-0.018666741836991244	0.0	-0.4991213497833939	0.0	1.557452146645552e-05	0.0	0.9998475590282503	0.0	0.017460203463940165	0.0	0.0	2.0008936096019956	0.0	0.0	2.0008644753978255	0.0	-0.0007056636981871046	0.0	2.4307676714965785e-05	-0.00034003476975434383	0.0	1.1815167430207971e-05
3.06	-0.0007077833472054291	0.0	-3.4582804590900894e-07	-0.018670274407427093	0.0	-0.49912122809438786	0.0	1.5576331246200806e-05	0.0	0.9998475583483567	0.0	0.017460242397499146	0.0	0.0	2.000898071739429	0.0	0.0	2.000868937688029	0.0	-0.0007073638720932605	0.0	2.4366752657812008e-05	-0.00034003479270790487	0.0	1.1815209709816876e-05
3.065	-0.0007094845472225345	0.0	-3.4620502235773846e-07	-0.018673815478716646	0.0	-0.4991211061100342	0.0	1.5578141179220274e-05	0.0	0.9998475576683827	0.0	0.017460281335572883	0.0	0.0	2.000902534394297	0.0	0.0	2.00087340049674	0.0	-0.0007090640461141831	0.0	2.442582881207932e-05	-0.0003400348156611606	0.0	1.1815251998644887e-05
3.0700000000000003	-0.0007111857473616613	0.0	-3.465820629041774e-07	-0.01867736505085991	0.0	-0.4991209838303328	0.0	1.557995126551392e-05	0.0	0.9998475569883284	0.0	0.017460320278161377	0.0	0.0	2.000906997566601	0.0	0.0	2.000877863824003	0.0	-0.0007107642202498715	0.0	2.448490517781382e-05	-0.0003400348386141181	0.0	1.1815294296690085e-05
3.075	-0.0007128869476228092	0.0	-3.469591675483257e-07	-0.018680923123856885	0.0	-0.4991208612552838	0.0	1.5581761505081752e-05	0.0	0.9998475563081938	0.0	0.017460359225264625	0.0	0.0	2.0009114612563383	0.0	0.0	2.000882327669861	0.0	-0.0007124643945003237	0.0	2.4543981755061583e-05	-0.00034003486156668715	0.0	1.1815336603952977e-05
3.08	-0.0007145881480059784	0.0	-3.4733633629018336e-07	-0.018684489697707567	0.0	-0.4991207383848872	0.0	1.5583571897923766e-05	0.0	0.9998475556279788	0.0	0.017460398176882632	0.0	0.0	2.000915925463512	0.0	0.0	2.0008867920343585	0.0	-0.0007141645688655379	0.0	2.4603058543868712e-05	-0.0003400348845189363	0.0	1.1815378920434864e-05
3.085	-0.000716289348511169	0.0	-3.477135691297504e-07	-0.01868806477241196	0.0	-0.49912061521914286	0.0	1.558538244403996e-05	0.0	0.9998475549476834	0.0	0.017460437133015393	0.0	0.0	2.0009203901881194	0.0	0.0	2.000891256917539	0.0	-0.0007158647433455125	0.0	2.4662135544281296e-05	-0.0003400349074708765	0.0	1.1815421246134333e-05
3.09	-0.0007179905491383808	0.0	-3.4809086606702694e-07	-0.01869164834797006	0.0	-0.4991204917580509	0.0	1.5587193143430338e-05	0.0	0.9998475542673078	0.0	0.01746047609366291	0.0	0.0	2.000924855430162	0.0	0.0	2.000895722319447	0.0	-0.0007175649179402462	0.0	2.472121275634542e-05	-0.00034003493042259446	0.0	1.1815463581053076e-05
3.095	-0.000719691749887614	0.0	-3.484682271020128e-07	-0.018695240424381872	0.0	-0.49912036800161125	0.0	1.5589003996094897e-05	0.0	0.9998475535868518	0.0	0.017460515058825184	0.0	0.0	2.00092932118964	0.0	0.0	2.000900188240126	0.0	-0.0007192650926497378	0.0	2.478029018010719e-05	-0.0003400349533738895	0.0	1.1815505925188612e-05
3.1	-0.0007213929507588684	0.0	-3.488456522347081e-07	-0.01869884100164739	0.0	-0.49912024394982396	0.0	1.5590815002033636e-05	0.0	0.9998475529063154	0.0	0.01746055402850221	0.0	0.0	2.0009337874665523	0.0	0.0	2.0009046546796196	0.0	-0.0007209652674739845	0.0	2.483936781561267e-05	-0.00034003497632479794	0.0	1.1815548278541052e-05
3.105	-0.000723094151752144	0.0	-3.492231414651128e-07	-0.018702450079766623	0.0	-0.49912011960268904	0.0	1.559262616124656e-05	0.0	0.9998475522256988	0.0	0.017460593002693994	0.0	0.0	2.0009382542608996	0.0	0.0	2.0009091216379726	0.0	-0.0007226654424129854	0.0	2.4898445662907966e-05	-0.0003400349992755003	0.0	1.1815590641114406e-05
3.11	-0.000724795352867441	0.0	-3.496006947932268e-07	-0.01870606765873956	0.0	-0.4991199949602065	0.0	1.5594437473733664e-05	0.0	0.9998475515450018	0.0	0.017460631981400538	0.0	0.0	2.0009427215726823	0.0	0.0	2.0009135891152283	0.0	-0.000724365617466739	0.0	2.4957523722039178e-05	-0.00034003502222590995	0.0	1.1815633012906246e-05
3.115	-0.0007264965541047594	0.0	-3.499783122190503e-07	-0.018709693738566208	0.0	-0.49911987002237623	0.0	1.559624893949495e-05	0.0	0.9998475508642245	0.0	0.01746067096462183	0.0	0.0	2.000947189401899	0.0	0.0	2.0009180571114307	0.0	-0.0007260657926352438	0.0	2.5016601993052388e-05	-0.0003400350451758787	0.0	1.181567539391335e-05
3.12	-0.0007281977554640989	0.0	-3.5035599374258314e-07	-0.018713328319246565	0.0	-0.49911974478919835	0.0	1.559806055853042e-05	0.0	0.9998475501833668	0.0	0.017460709952357885	0.0	0.0	2.0009516577485513	0.0	0.0	2.0009225256266236	0.0	-0.0007277659679184973	0.0	2.5075680475993675e-05	-0.00034003506812555655	0.0	1.1815717784139734e-05
3.125	-0.0007298989569454598	0.0	-3.507337393638254e-07	-0.01871697140078063	0.0	-0.49911961926067283	0.0	1.559987233084007e-05	0.0	0.9998475495024288	0.0	0.017460748944608695	0.0	0.0	2.0009561266126386	0.0	0.0	2.000926994660851	0.0	-0.0007294661433164989	0.0	2.5134759170909148e-05	-0.00034003509107494704	0.0	1.1815760183584544e-05
3.13	-0.0007316001585488419	0.0	-3.51111549082777e-07	-0.018720622983168407	0.0	-0.4991194934367996	0.0	1.5601684256423903e-05	0.0	0.9998475488214105	0.0	0.017460787941374258	0.0	0.0	2.0009605959941603	0.0	0.0	2.000931464214157	0.0	-0.0007311663188292462	0.0	2.5193838077844882e-05	-0.00034003511402397974	0.0	1.1815802592246428e-05
3.1350000000000002	-0.0007333013602742454	0.0	-3.514894228994381e-07	-0.01872428306640989	0.0	-0.4991193673175788	0.0	1.560349633528192e-05	0.0	0.9998475481403117	0.0	0.017460826942654578	0.0	0.0	2.000965065893117	0.0	0.0	2.000935934286585	0.0	-0.0007328664944567381	0.0	2.5252917196846977e-05	-0.00034003513697271613	0.0	1.1815845010128154e-05
3.14	-0.0007350025621216702	0.0	-3.5186736081380855e-07	-0.018727951650505083	0.0	-0.49911924090301024	0.0	1.5605308567414117e-05	0.0	0.9998475474591327	0.0	0.017460865948449655	0.0	0.0	2.0009695363095084	0.0	0.0	2.00094040487818	0.0	-0.0007345666701989728	0.0	2.5311996527961525e-05	-0.00034003515992107484	0.0	1.1815887437225598e-05
3.145	-0.0007367037640911161	0.0	-3.5224536282588836e-07	-0.018731628735453986	0.0	-0.49911911419309407	0.0	1.5607120952820494e-05	0.0	0.9998475467778734	0.0	0.017460904958759484	0.0	0.0	2.0009740072433346	0.0	0.0	2.0009448759889845	0.0	-0.0007362668460559485	0.0	2.53710760712346e-05	-0.00034003518286918055	0.0	1.1815929873543163e-05
3.15	-0.0007384049661825834	0.0	-3.526234289356776e-07	-0.0187353143212566	0.0	-0.49911898718783027	0.0	1.5608933491501055e-05	0.0	0.9998475460965337	0.0	0.017460943973584074	0.0	0.0	2.0009784786945968	0.0	0.0	2.0009493476190436	0.0	-0.000737967022027664	0.0	2.543015582671232e-05	-0.0003400352058169737	0.0	1.1815972319080176e-05
3.1550000000000002	-0.0007401061683960722	0.0	-3.530015591431762e-07	-0.01873900840791292	0.0	-0.4991188598872188	0.0	1.56107461834558e-05	0.0	0.9998475454151137	0.0	0.017460982992923417	0.0	0.0	2.000982950663293	0.0	0.0	2.0009538197684003	0.0	-0.0007396671981141176	0.0	2.5489235794440762e-05	-0.00034003522876438193	0.0	1.1816014773831608e-05
3.16	-0.000741807370731582	0.0	-3.533797534483842e-07	-0.01874271099542295	0.0	-0.4991187322912597	0.0	1.5612559028684725e-05	0.0	0.9998475447336133	0.0	0.017461022016777517	0.0	0.0	2.0009874231494242	0.0	0.0	2.0009582924370988	0.0	-0.0007413673743153073	0.0	2.5548315974466003e-05	-0.0003400352517114884	0.0	1.1816057237803107e-05
3.165	-0.0007435085731891132	0.0	-3.5375801185130157e-07	-0.01874642208378669	0.0	-0.4991186043999529	0.0	1.561437202718783e-05	0.0	0.9998475440520326	0.0	0.017461061045146373	0.0	0.0	2.0009918961529904	0.0	0.0	2.0009627656251836	0.0	-0.0007430675506312319	0.0	2.5607396366834158e-05	-0.0003400352746582605	0.0	1.1816099710993655e-05
3.17	-0.0007452097757686656	0.0	-3.541363343519284e-07	-0.01875014167300414	0.0	-0.49911847621329847	0.0	1.561618517896512e-05	0.0	0.9998475433703715	0.0	0.017461100078029985	0.0	0.0	2.0009963696739916	0.0	0.0	2.000967239332698	0.0	-0.0007447677270618894	0.0	2.56664769715913e-05	-0.00034003529760473993	0.0	1.1816142193401051e-05
3.1750000000000003	-0.0007469109784702394	0.0	-3.545147209502646e-07	-0.0187538697630753	0.0	-0.4991183477312964	0.0	1.561799848401659e-05	0.0	0.9998475426886302	0.0	0.01746113911542835	0.0	0.0	2.0010008437124283	0.0	0.0	2.0009717135596854	0.0	-0.0007464679036072789	0.0	2.572555778878353e-05	-0.00034003532055092124	0.0	1.1816184685027215e-05
3.18	-0.0007486121812938345	0.0	-3.5489317164631016e-07	-0.018757606354000166	0.0	-0.49911821895394665	0.0	1.5619811942342246e-05	0.0	0.9998475420068085	0.0	0.017461178157341474	0.0	0.0	2.001005318268299	0.0	0.0	2.000976188306191	0.0	-0.000748168080267398	0.0	2.5784638818456933e-05	-0.00034003534349665433	0.0	1.1816227185869831e-05
3.185	-0.0007503133842394509	0.0	-3.552716864400652e-07	-0.018761351445778743	0.0	-0.4991180898812493	0.0	1.562162555394208e-05	0.0	0.9998475413249064	0.0	0.017461217203769353	0.0	0.0	2.0010097933416047	0.0	0.0	2.000980663572258	0.0	-0.000749868257042245	0.0	2.5843720060657594e-05	-0.00034003536644216885	0.0	1.1816269695931498e-05
3.19	-0.0007520145873070884	0.0	-3.5565026533152954e-07	-0.01876510503841103	0.0	-0.49911796051320423	0.0	1.5623439318816097e-05	0.0	0.999847540642924	0.0	0.01746125625471199	0.0	0.0	2.001014268932346	0.0	0.0	2.00098513935793	0.0	-0.0007515684339318192	0.0	2.5902801515431615e-05	-0.00034003538938738516	0.0	1.1816312215212329e-05
3.1950000000000003	-0.0007537157904967474	0.0	-3.560289083207033e-07	-0.018768867131897026	0.0	-0.49911783084981154	0.0	1.5625253236964297e-05	0.0	0.9998475399608613	0.0	0.017461295310169378	0.0	0.0	2.001018745040521	0.0	0.0	2.0009896156632516	0.0	-0.0007532686109361183	0.0	2.5961883182825082e-05	-0.0003400354123322148	0.0	1.1816354743711079e-05
3.2	-0.0007554169938084277	0.0	-3.5640761540758646e-07	-0.01877263772623673	0.0	-0.49911770089107116	0.0	1.5627067308386676e-05	0.0	0.9998475392787183	0.0	0.017461334370141527	0.0	0.0	2.001023221666132	0.0	0.0	2.0009940924882663	0.0	-0.0007549687880551407	0.0	2.602096506288409e-05	-0.00034003543527674627	0.0	1.1816397281427694e-05
3.205	-0.0007571181972421291	0.0	-3.56786386592179e-07	-0.018776416821430143	0.0	-0.49911757063698314	0.0	1.5628881533083238e-05	0.0	0.9998475385964949	0.0	0.01746137343462843	0.0	0.0	2.0010276988091777	0.0	0.0	2.000998569833018	0.0	-0.0007566689652888851	0.0	2.608004715565472e-05	-0.00034003545822091453	0.0	1.1816439828361382e-05
3.21	-0.0007588194007978518	0.0	-3.57165221874481e-07	-0.018780204417477266	0.0	-0.4991174400875475	0.0	1.5630695911053983e-05	0.0	0.9998475379141911	0.0	0.017461412503630088	0.0	0.0	2.001032176469658	0.0	0.0	2.001003047697551	0.0	-0.0007583691426373494	0.0	2.6139129461183068e-05	-0.0003400354811647792	0.0	1.181648238451333e-05
3.215	-0.0007605206044755959	0.0	-3.575441212544923e-07	-0.018784000514378098	0.0	-0.4991173092427642	0.0	1.563251044229891e-05	0.0	0.9998475372318071	0.0	0.0174614515771465	0.0	0.0	2.001036654647574	0.0	0.0	2.0010075260819087	0.0	-0.0007600693201005325	0.0	2.6198211979515222e-05	-0.0003400355041084036	0.0	1.1816524949885854e-05
3.22	-0.0007622218082753613	0.0	-3.5792308473221306e-07	-0.01878780511213264	0.0	-0.49911717810263323	0.0	1.563432512681802e-05	0.0	0.9998475365493427	0.0	0.017461490655177672	0.0	0.0	2.001041133342924	0.0	0.0	2.0010120049861353	0.0	-0.0007617694976784327	0.0	2.625729471069729e-05	-0.0003400355270515798	0.0	1.1816567524475111e-05
3.225	-0.000763923012197148	0.0	-3.583021123076432e-07	-0.01879161821074089	0.0	-0.4991170466671546	0.0	1.5636139964611313e-05	0.0	0.9998475358667979	0.0	0.017461529737723597	0.0	0.0	2.0010456125557092	0.0	0.0	2.0010164844102745	0.0	-0.0007634696753710478	0.0	2.6316377654775335e-05	-0.00034003554999447957	0.0	1.1816610108279974e-05
3.23	-0.0007656242162409559	0.0	-3.5868120398078273e-07	-0.01879543981020285	0.0	-0.4991169149363283	0.0	1.5637954955678786e-05	0.0	0.9998475351841728	0.0	0.01746156882478428	0.0	0.0	2.0010500922859293	0.0	0.0	2.00102096435437	0.0	-0.000765169853178377	0.0	2.6375460811795458e-05	-0.0003400355729370866	0.0	1.1816652701305865e-05
3.235	-0.0007673254204067851	0.0	-3.5906035975163165e-07	-0.01879926991051852	0.0	-0.4991167829101544	0.0	1.563977010002044e-05	0.0	0.9998475345014673	0.0	0.017461607916359718	0.0	0.0	2.0010545725335844	0.0	0.0	2.001025444818467	0.0	-0.0007668700311004181	0.0	2.643454418180376e-05	-0.0003400355958793521	0.0	1.18166953035512e-05
3.24	-0.0007690266246946358	0.0	-3.5943957962019e-07	-0.0188031085116879	0.0	-0.4991166505886328	0.0	1.5641585397636278e-05	0.0	0.9998475338186816	0.0	0.017461647012449913	0.0	0.0	2.001059053298675	0.0	0.0	2.0010299258026074	0.0	-0.00076857020913717	0.0	2.649362776484633e-05	-0.00034003561882130315	0.0	1.1816737915011803e-05
3.245	-0.0007707278291045075	0.0	-3.5981886358645767e-07	-0.018806955613710985	0.0	-0.4991165179717636	0.0	1.5643400848526297e-05	0.0	0.9998475331358155	0.0	0.01746168611305486	0.0	0.0	2.0010635345812	0.0	0.0	2.001034407306837	0.0	-0.0007702703872886306	0.0	2.655271156096924e-05	-0.00034003564176287654	0.0	1.1816780535689874e-05
3.25	-0.0007724290336364006	0.0	-3.601982116504348e-07	-0.018810811216587783	0.0	-0.4991163850595467	0.0	1.56452164526905e-05	0.0	0.9998475324528691	0.0	0.01746172521817457	0.0	0.0	2.00106801638116	0.0	0.0	2.0010388893311983	0.0	-0.0007719705655547984	0.0	2.6611795570218597e-05	-0.000340035664704197	0.0	1.1816823165588746e-05
3.255	-0.0007741302382903149	0.0	-3.605776238121213e-07	-0.01881467532031829	0.0	-0.4991162518519821	0.0	1.564703221012888e-05	0.0	0.9998475317698423	0.0	0.01746176432780903	0.0	0.0	2.0010724986985555	0.0	0.0	2.001043371875736	0.0	-0.000773670743935672	0.0	2.667087979264049e-05	-0.0003400356876451723	0.0	1.1816865804704691e-05
3.2600000000000002	-0.0007758314430662507	0.0	-3.609571000715172e-07	-0.018818547924902503	0.0	-0.49911611834906994	0.0	1.5648848120841447e-05	0.0	0.9998475310867352	0.0	0.017461803441958246	0.0	0.0	2.0010769815333846	0.0	0.0	2.0010478549404938	0.0	-0.0007753709224312496	0.0	2.672996422828101e-05	-0.00034003571058582047	0.0	1.1816908453039968e-05
3.265	-0.0007775326479642077	0.0	-3.613366404286225e-07	-0.01882242903034043	0.0	-0.4991159845508101	0.0	1.5650664184828194e-05	0.0	0.9998475304035478	0.0	0.01746184256062222	0.0	0.0	2.00108146488565	0.0	0.0	2.0010523385255157	0.0	-0.0007770711010415297	0.0	2.678904887718625e-05	-0.00034003573352614887	0.0	1.1816951110591642e-05
3.27	-0.0007792338529841859	0.0	-3.6171624488343717e-07	-0.01882631863663206	0.0	-0.4991158504572026	0.0	1.565248040208912e-05	0.0	0.99984752972028	0.0	0.01746188168380095	0.0	0.0	2.00108594875535	0.0	0.0	2.0010568226308454	0.0	-0.0007787712797665106	0.0	2.6848133739402288e-05	-0.0003400357564661249	0.0	1.181699377736073e-05
3.275	-0.0007809350581261855	0.0	-3.6209591343596123e-07	-0.018830216743777405	0.0	-0.4991157160682474	0.0	1.5654296772624233e-05	0.0	0.9998475290369319	0.0	0.017461920811494436	0.0	0.0	2.001090433142485	0.0	0.0	2.001061307256527	0.0	-0.0007804714586061905	0.0	2.6907218814975225e-05	-0.00034003577940582626	0.0	1.1817036453350786e-05
3.2800000000000002	-0.0007826362633902064	0.0	-3.6247564608619474e-07	-0.01883412335177646	0.0	-0.4991155813839446	0.0	1.5656113296433525e-05	0.0	0.9998475283535034	0.0	0.017461959943702678	0.0	0.0	2.001094918047055	0.0	0.0	2.0010657924026045	0.0	-0.0007821716375605683	0.0	2.6966304103951157e-05	-0.0003400358023451951	0.0	1.1817079138557126e-05
3.285	-0.0007843374687762485	0.0	-3.628554428341376e-07	-0.01883803846062922	0.0	-0.4991154464042941	0.0	1.5657929973517e-05	0.0	0.9998475276699946	0.0	0.017461999080425672	0.0	0.0	2.0010994034690595	0.0	0.0	2.0010702780691214	0.0	-0.0007838718166296418	0.0	2.702538960637616e-05	-0.00034003582528420256	0.0	1.1817121832981104e-05
3.29	-0.000786038674284312	0.0	-3.6323530367978986e-07	-0.01884196207033569	0.0	-0.499115311129296	0.0	1.5659746803874658e-05	0.0	0.9998475269864056	0.0	0.017462038221663426	0.0	0.0	2.0011038894084994	0.0	0.0	2.001074764256122	0.0	-0.0007855719958134098	0.0	2.7084475322296334e-05	-0.0003400358482229155	0.0	1.1817164536624809e-05
3.295	-0.0007877398799143965	0.0	-3.636152286231515e-07	-0.01884589418089587	0.0	-0.49911517555895024	0.0	1.56615637875065e-05	0.0	0.9998475263027361	0.0	0.017462077367415934	0.0	0.0	2.0011083758653743	0.0	0.0	2.0010792509636497	0.0	-0.0007872721751118704	0.0	2.714356125175777e-05	-0.00034003587116129954	0.0	1.1817207249485476e-05
3.3000000000000003	-0.0007894410856665026	0.0	-3.639952176642226e-07	-0.01884983479230976	0.0	-0.49911503969325677	0.0	1.566338092441252e-05	0.0	0.9998475256189863	0.0	0.017462116517683198	0.0	0.0	2.0011128628396833	0.0	0.0	2.0010837381917495	0.0	-0.0007889723545250223	0.0	2.7202647394806554e-05	-0.0003400357777121651	0.0	1.1816651811762367e-05
3.305	-0.00079114229154063	0.0	-3.6437527080300304e-07	-0.01885378390457736	0.0	-0.4991149035322157	0.0	1.5665198214592722e-05	0.0	0.9998475249351562	0.0	0.01746215567246522	0.0	0.0	2.001117350331428	0.0	0.0	2.001088225940464	0.0	-0.0007906725340528639	0.0	2.7261733751488787e-05	-0.0003400364294881019	0.0	1.1819926389063916e-05
3.31	-0.0007928435057689858	0.0	-3.6471976456555934e-07	-0.018857741517925825	0.0	-0.49911476707483887	0.0	1.566703222834456e-05	0.0	0.9998475242512413	0.0	0.01746219483200077	0.0	0.0	2.001121838367973	0.0	0.0	2.0010927142145847	0.0	-0.0007923727206786277	0.0	2.732085621143871e-05	-0.00034003850313503643	0.0	1.1830508536014619e-05
3.315	-0.0007945447332663541	0.0	-3.6500743106324097e-07	-0.01886170763249078	0.0	-0.49911463032053627	0.0	1.5668892858449447e-05	0.0	0.9998475235672396	0.0	0.017462233996432402	0.0	0.0	2.001126326965657	0.0	0.0	2.001097203021737	0.0	-0.0007940729185714275	0.0	2.738003620147118e-05	-0.0003400401014441499	0.0	1.1838647757163047e-05
3.3200000000000003	-0.0007962459654909748	0.0	-3.6527523330638173e-07	-0.018865682248036517	0.0	-0.49911449327033325	0.0	1.5670762911523134e-05	0.0	0.999847522883155	0.0	0.017462273165512365	0.0	0.0	2.0011308160960835	0.0	0.0	2.0011016923646197	0.0	-0.0007957731204854293	0.0	2.743923648250484e-05	-0.00034004078492017053	0.0	1.1842085310074075e-05
3.325	-0.0007979472024428478	0.0	-3.655231712949816e-07	-0.018869665364563044	0.0	-0.4991143559242298	0.0	1.567264238756562e-05	0.0	0.9998475221989879	0.0	0.017462312339240654	0.0	0.0	2.001135305759254	0.0	0.0	2.001106182245933	0.0	-0.0007974733264206272	0.0	2.7498457054588045e-05	-0.0003400415891587925	0.0	1.1846143524821205e-05
3.33	-0.0007996484441219731	0.0	-3.657512450290406e-07	-0.01887365698207035	0.0	-0.49911421828222596	0.0	1.5674531286576896e-05	0.0	0.999847521514738	0.0	0.017462351517617273	0.0	0.0	2.001139795955168	0.0	0.0	2.001110672668376	0.0	-0.000799173536377015	0.0	2.7557697917769177e-05	-0.0003400423933960447	0.0	1.1850201749243823e-05
3.335	-0.0008013496905283506	0.0	-3.659594545085587e-07	-0.01887765710055845	0.0	-0.49911408034432164	0.0	1.5676429608556974e-05	0.0	0.9998475208304054	0.0	0.017462390700642223	0.0	0.0	2.0011442866838265	0.0	0.0	2.001115163634648	0.0	-0.0008008737503545856	0.0	2.761695907209661e-05	-0.00034004321554138953	0.0	1.1854375448864474e-05
3.34	-0.0008030509416619805	0.0	-3.6614779973353587e-07	-0.018881665720027332	0.0	-0.4991139421105169	0.0	1.5678337353505846e-05	0.0	0.9998475201459901	0.0	0.017462429888315503	0.0	0.0	2.001148777945228	0.0	0.0	2.0011196551474484	0.0	-0.0008025739683533334	0.0	2.767624051761872e-05	-0.000340044204296505	0.0	1.185962333717997e-05
3.345	-0.0008047521962070368	0.0	-3.6632316688906734e-07	-0.01888568284047897	0.0	-0.49911380358081353	0.0	1.568025182779309e-05	0.0	0.9998475194614921	0.0	0.01746246908063846	0.0	0.0	2.001153269739527	0.0	0.0	2.0011241472087056	0.0	-0.000804274189298691	0.0	2.7735535326452523e-05	-0.00033337822681548247	0.0	1.1601997895547034e-05
3.35	-0.0008064534327115694	0.0	-3.665978216440422e-07	-0.01888970846194549	0.0	-0.4991136647552397	0.0	1.5682129117086265e-05	0.0	0.9998475187769109	0.0	0.01746250827763309	0.0	0.0	2.0011577620692464	0.0	0.0	2.001128639807767	0.0	-0.0008059743956720678	0.0	2.7794730552385684e-05	0.022075677913746743	0.0	-0.0008858894665210293
3.355	-0.0008085548165803802	0.0	-3.6601144841869087e-07	-0.01889374273900067	0.0	-0.49911352562808753	0.0	1.5252675495982233e-05	0.0	0.9998475180936791	0.0	0.01746254739728524	0.0	0.0	2.0011622455348217	0.0	0.0	2.0011330093774276	0.0	-0.0008080744752955322	0.0	2.7868759476499497e-05	-0.10068192944615124	0.0	0.003863074528330069
3.36	-0.0021590608626383657	0.0	6.508184187063099e-06	-0.01889914383268356	0.0	-0.4991133335820362	0.0	-0.001194997744011398	0.0	0.9998475291034762	0.0	0.017461917001466317	0.0	0.0	2.0010899964788518	0.0	0.0	2.0007906677411302	0.0	-0.0021575169311528674	0.0	8.189540170925625e-05	-0.4988962062704456	0.0	0.021348583140734893
3.365	-0.0055802859653106655	0.0	3.397227196564017e-05	-0.018918468636260805	0.0	-0.4991125517531166	0.0	-0.0020559406074201346	0.0	0.9998476079955791	0.0	0.017457399153797588	0.0	0.0	2.0005722103441625	0.0	0.0	2.0002016841424566	0.0	-0.0055756987063760146	0.0	0.00022875643288161287	-0.7197183968627203	0.0	0.028998784439536875
3.37	-0.009020059052382755	0.0	3.920571516152538e-05	-0.018954932833049363	0.0	-0.4991110856271161	0.0	-0.0016871105164816354	0.0	0.9998476915003598	0.0	0.017452615881304367	0.0	0.0	2.000024004172573	0.0	0.0	1.9997183625816237	0.0	-0.009013195868089194	0.0	0.0003539811293491992	-0.6894517741573793	0.0	0.02325540580744836
3.375	-0.012479020600640909	0.0	2.921615480364504e-05	-0.019008633442291086	0.0	-0.49910903621493996	0.0	-0.0011290782750789665	0.0	0.9998477527972935	0.0	0.01744910387115387	0.0	0.0	1.9996214961610626	0.0	0.0	1.999394905482114	0.0	-0.012470402159022927	0.0	0.0004646275142238308	-0.6934660773258973	0.0	0.021647503418539073
3.38	-0.01595833905110799	0.0	1.6788488037934368e-05	-0.019079670927000057	0.0	-0.49910644177750774	0.0	-0.0006826645457544119	0.0	0.9998477917472672	0.0	0.01744687186344228	0.0	0.0	1.999365687976536	0.0	0.0	1.9991993364956393	0.0	-0.015948038102885413	0.0	0.000573539704000098	-0.6975990819928852	0.0	0.022068529510773153
3.3850000000000002	-0.019458579714320755	0.0	7.550984545126467e-06	-0.019168148501123118	0.0	-0.4991032940062512	0.0	-0.00038774660012189387	0.0	0.9998478145838456	0.0	0.01744556309249189	0.0	0.0	1.999215691043865	0.0	0.0	1.9990882552771017	0.0	-0.019446471945191928	0.0	0.0006863748249764585	-0.7017754344463543	0.0	0.023036588401609187
3.39	-0.022979872941764273	0.0	2.2110192483523005e-06	-0.019274170491351245	0.0	-0.49909957020808354	0.0	-0.0002109713725475141	0.0	0.9998478272899118	0.0	0.017444834861599926	0.0	0.0	1.9991322292294826	0.0	0.0	1.9990278164308763	0.0	-0.022965809237868097	0.0	0.0008038478447238314	-0.7059579142825493	0.0	0.0238901374524643
3.395	-0.026522176865097537	0.0	-2.913304827897023e-07	-0.019397841425958455	0.0	-0.4990952495601719	0.0	-0.00011104846812089331	0.0	0.999847834098043	0.0	0.017444444650305032	0.0	0.0	1.9990875075035766	0.0	0.0	1.9989960033881529	0.0	-0.02650604517210315	0.0	0.0009248973359171465	-0.7101349234222285	0.0	0.024480882899983143
3.4	-0.030085418534728074	0.0	-1.1641053577026725e-06	-0.0195392657228787	0.0	-0.49909031731061987	0.0	-5.6484817307194e-05	0.0	0.999847837629921	0.0	0.017444242215587248	0.0	0.0	1.9990643066633285	0.0	0.0	1.9989798216799615	0.0	-0.030067149061222237	0.0	0.001048311544377744	-0.7143056761667642	0.0	0.024855878031584375
3.4050000000000002	-0.03366954221966924	0.0	-1.2631090708111873e-06	-0.01969854765310358	0.0	-0.4990847639557074	0.0	-2.7004297154972972e-05	0.0	0.9998478393844961	0.0	0.017444141648662266	0.0	0.0	1.9990527807888125	0.0	0.0	1.998972085518683	0.0	-0.033649095126691356	0.0	0.0011732314482087712	-0.7184722846839549	0.0	0.02509767910178503
3.41	-0.037274515807419625	0.0	-1.075227414875057e-06	-0.019875791385530205	0.0	-0.4990785833287515	0.0	-1.0729106767605394e-05	0.0	0.9998478401704283	0.0	0.01744409660108999	0.0	0.0	1.999047617931689	0.0	0.0	1.9989690118560044	0.0	-0.037251868304567906	0.0	0.0012991680611617658	-0.7226368323231772	0.0	0.025271201742514453
3.415	-0.04090032462914581	0.0	-8.319760503647077e-07	-0.02007110103621177	0.0	-0.4990717710102199	0.0	-1.1230194366141528e-06	0.0	0.9998478404075323	0.0	0.017444083010800818	0.0	0.0	1.9990460603622608	0.0	0.0	1.9989686901346342	0.0	-0.04087546203783123	0.0	0.0014258887240822195	-0.7268006370693287	0.0	0.025414974816605995
3.42	-0.04454696342910117	0.0	-6.286124591125809e-07	-0.02028458070287051	0.0	-0.4990643233204565	0.0	5.3240378971056774e-06	0.0	0.9998478403092889	0.0	0.01744408864188856	0.0	0.0	1.999046705735585	0.0	0.0	1.9989702153591415	0.0	-0.0445198744109506	0.0	0.001553297646814464	-0.7309643335661274	0.0	0.025548262964301197
3.4250000000000003	-0.04821443165825634	0.0	-4.902458565869378e-07	-0.02051633447863606	0.0	-0.4990562369258801	0.0	1.0303259521630476e-05	0.0	0.9998478399649166	0.0	0.017444108380378655	0.0	0.0	1.9990489679441563	0.0	0.0	1.9989731670255706	0.0	-0.04818510575359321	0.0	0.0016813696444339958	-0.7351283066064274	0.0	0.0256818671003591
3.43	-0.05190273178714133	0.0	-4.020668430701627e-07	-0.020766466461928652	0.0	-0.49904750849623153	0.0	1.4588737971421866e-05	0.0	0.9998478394198392	0.0	0.017444139622679888	0.0	0.0	1.999052548592995	0.0	0.0	1.9989773463911416	0.0	-0.05187115801669609	0.0	0.0018101196461179044	-0.7392926205085986	0.0	0.025817887564871144
3.435	-0.05561186527795308	0.0	-3.592046764077833e-07	-0.021035080762218356	0.0	-0.4990381345956284	0.0	1.8647983888980152e-05	0.0	0.9998478386954817	0.0	0.01744418114074302	0.0	0.0	1.9990573069366122	0.0	0.0	1.998982688645008	0.0	-0.0555780324874095	0.0	0.001939552692488198	-0.7434572479467968	0.0	0.02595641454421083
3.44	-0.059341834712215005	0.0	-3.41951080587316e-07	-0.0213222814940286	0.0	-0.49902811178875406	0.0	2.2587213855310426e-05	0.0	0.9998478377957087	0.0	0.017444232712948808	0.0	0.0	1.9990632175754492	0.0	0.0	1.9989891594051323	0.0	-0.059305731050965066	0.0	0.0020696887773558135	-0.7476222241641087	0.0	0.026098295171297275
3.4450000000000003	-0.0630926418786924	0.0	-3.406396207600678e-07	-0.021628172781719683	0.0	-0.499017436525349	0.0	2.6501404637237663e-05	0.0	0.9998478367251307	0.0	0.01744429407498029	0.0	0.0	1.999070250216408	0.0	0.0	1.9989967514983167	0.0	-0.06305425515093722	0.0	0.0022005378216846186	-0.7517874387457972	0.0	0.02624115756983661
3.45	-0.06686428797413473	0.0	-3.523922705792857e-07	-0.02195285875665491	0.0	-0.49900610521463956	0.0	3.045166000565255e-05	0.0	0.9998478354840029	0.0	0.017444365212091084	0.0	0.0	1.9990784031694246	0.0	0.0	1.9990054752563042	0.0	-0.06682360587507134	0.0	0.0023321029694114326	-0.7559529204160277	0.0	0.02638572472785138
3.455	-0.07065677496768395	0.0	-3.649692739977014e-07	-0.022296443554224436	0.0	-0.49899411427811496	0.0	3.4385275534211275e-05	0.0	0.9998478340694563	0.0	0.017444446288606065	0.0	0.0	1.9990876952676113	0.0	0.0	1.9990153259121317	0.0	-0.07061378475551189	0.0	0.0024643967747429545	-0.7601186460171848	0.0	0.026531383824386925
3.46	-0.07447010364823824	0.0	-3.8094040096258025e-07	-0.022659031318617014	0.0	-0.4989814600500018	0.0	3.836205469428849e-05	0.0	0.9998478324832514	0.0	0.017444537203483382	0.0	0.0	1.9990981149306681	0.0	0.0	1.9990263158312689	0.0	-0.07442479266260069	0.0	0.002597416918151419	-0.7642845563780761	0.0	0.026676853661567673
3.465	-0.07830427521297476	0.0	-3.9761928474017623e-07	-0.0230407261976432	0.0	-0.49896813889386354	0.0	4.236943459764655e-05	0.0	0.9998478307231955	0.0	0.01744463808223941	0.0	0.0	1.999109676543907	0.0	0.0	1.9990384537801829	0.0	-0.07825663069014088	0.0	0.0027311663821412945	-0.7684506946065216	0.0	0.026823093453693117
3.47	-0.08215929091256902	0.0	-4.11861691594382e-07	-0.02344163234440475	0.0	-0.49895414716169445	0.0	4.639180733068898e-05	0.0	0.9998478287877435	0.0	0.017444749013267973	0.0	0.0	1.9991223902380604	0.0	0.0	1.999051744054003	0.0	-0.08210929996941871	0.0	0.0028656486089040927	-0.7726170507568348	0.0	0.02696981423766737
3.475	-0.08603515181782716	0.0	-4.228623636515447e-07	-0.023861853917672555	0.0	-0.4989394811880774	0.0	5.043154714491581e-05	0.0	0.9998478266762113	0.0	0.017444870035580817	0.0	0.0	1.999136260484234	0.0	0.0	1.9990661916280317	0.0	-0.08598280153366479	0.0	0.0030008646935427577	-0.7767836062937628	0.0	0.02711658654884208
3.48	-0.0899318589078333	0.0	-4.3099310576186004e-07	-0.024301495081477744	0.0	-0.49892413730047497	0.0	5.4496056329989435e-05	0.0	0.999847824387938	0.0	0.01744500118684895	0.0	0.0	1.9991512915998702	0.0	0.0	1.9990818035981706	0.0	-0.08987713636538185	0.0	0.003136814555103082	-0.7809503606976812	0.0	0.02726338734946362
3.485	-0.09384941321734105	0.0	-4.35988409866088e-07	-0.02476066000476565	0.0	-0.49890811182705685	0.0	5.858580479682584e-05	0.0	0.9998478219219273	0.0	0.017445142523934514	0.0	0.0	1.99916749010189	0.0	0.0	1.9990985871949418	0.0	-0.09379230548022026	0.0	0.0032734987588026844	-0.7851173190992787	0.0	0.02741030917686207
3.49	-0.09778781578797564	0.0	-4.375673744296563e-07	-0.025239452861580143	0.0	-0.4988914010930689	0.0	6.270060861535137e-05	0.0	0.9998478192771645	0.0	0.01744529410476399	0.0	0.0	1.9991848626292001	0.0	0.0	1.9991165495961747	0.0	-0.09772830990000154	0.0	0.0034109178900156886	-0.7892844837187976	0.0	0.027557378115760197
3.495	-0.10174706768952194	0.0	-4.351675015037886e-07	-0.025737977831006235	0.0	-0.49887400142243926	0.0	6.683739070712389e-05	0.0	0.9998478164525202	0.0	0.01744545599378335	0.0	0.0	1.9992034165678958	0.0	0.0	1.9991356970981806	0.0	-0.10168515066466566	0.0	0.0035490728222318866	-0.7934518571439275	0.0	0.02770462695296396
3.5	-0.10572716999356774	0.0	-4.282830558126006e-07	-0.026256339097017502	0.0	-0.4988559091358919	0.0	7.09941284381485e-05	0.0	0.9998478134469723	0.0	0.01744562824929327	0.0	0.0	1.999223158599771	0.0	0.0	1.999156035417829	0.0	-0.10566282881781716	0.0	0.003687964375591087	-0.7976194383653409	0.0	0.027852004322634807
3.505	-0.10972812375075573	0.0	-4.1675477327884094e-07	-0.026794640849977187	0.0	-0.4988371205490423	0.0	7.517164402676165e-05	0.0	0.9998478102596142	0.0	0.017445810922944775	0.0	0.0	1.999244094644509	0.0	0.0	1.999177570507538	0.0	-0.10966134539410959	0.0	0.0038275930262280334	-0.8017872269312498	0.0	0.027999474140777178
3.5100000000000002	-0.1137499300175939	0.0	-4.0041638330798366e-07	-0.027352987285771357	0.0	-0.4988176319752848	0.0	7.937010150608654e-05	0.0	0.9998478068894706	0.0	0.01744600407029049	0.0	0.0	1.99926623106895	0.0	0.0	1.9992003083667171	0.0	-0.11368070143363253	0.0	0.003967959262626773	-0.8059552231730545	0.0	0.028147028658586322
3.515	-0.11779258984582952	0.0	-3.792074705888461e-07	-0.027931482602803426	0.0	-0.49879743972550705	0.0	8.359112944182809e-05	0.0	0.9998478033356886	0.0	0.017446207739889637	0.0	0.0	1.9992895734384322	0.0	0.0	1.999224255461326	0.0	-0.11772089797531357	0.0	0.004109063470070742	-0.8101234292764278	0.0	0.028294677499082693
3.52	-0.1218561043122202	0.0	-3.529018691808962e-07	-0.028530231011519445	0.0	-0.49877654010616285	0.0	8.783420327572229e-05	0.0	0.9998477995972523	0.0	0.017446421989548863	0.0	0.0	1.999314128378129	0.0	0.0	1.999249418107049	0.0	-0.12178193607706578	0.0	0.004250906206817579	-0.814291845609731	0.0	0.028442427224775198
3.525	-0.12594047447818493	0.0	-3.2137745350925877e-07	-0.02914933671524286	0.0	-0.49875492942634564	0.0	9.210008154558078e-05	0.0	0.9998477956732388	0.0	0.01744664687181198	0.0	0.0	1.9993399019100488	0.0	0.0	1.9992758028368758	0.0	-0.12586381678498987	0.0	0.004393487929809521	-0.8184604741475564	0.0	0.02859028940957268
3.5300000000000002	-0.13004570144176286	0.0	-2.843077813553849e-07	-0.02978890393664349	0.0	-0.4987326039859225	0.0	9.638813864160284e-05	0.0	0.9998477915626416	0.0	0.017446882443909822	0.0	0.0	1.9993669005933747	0.0	0.0	1.9993034160045722	0.0	-0.129966541174459	0.0	0.004536809307050489	-0.8226293163216122	0.0	0.028738277908802075
3.535	-0.13417178628230317	0.0	-2.414690063645083e-07	-0.03044903688843575	0.0	-0.4987095600895847	0.0	0.00010069838471024583	0.0	0.999847787264491	0.0	0.0174471287610249	0.0	0.0	1.9993951307525346	0.0	0.0	1.9993322639668107	0.0	-0.13409011030560591	0.0	0.004680870907359664	-0.8267983728609106	0.0	0.02888638399273372
3.54	-0.13831873010513066	0.0	-1.925896063304695e-07	-0.031129839804288545	0.0	-0.4986857940307599	0.0	0.00010503063646821772	0.0	0.9998477827778106	0.0	0.01744738587861096	0.0	0.0	1.9994245987430423	0.0	0.0	1.9993623530277567	0.0	-0.13823452526269744	0.0	0.004825673352690599	-0.8309676447137325	0.0	0.029034621992693424
3.545	-0.14248653400448466	0.0	-1.3741187467218868e-07	-0.03183141690844212	0.0	-0.4986613021079994	0.0	0.0001093847406100768	0.0	0.9998477781016237	0.0	0.01744765385220915	0.0	0.0	1.999455310930432	0.0	0.0	1.9993936894476572	0.0	-0.14239978711924278	0.0	0.004971217255366374	-0.835137137301691	0.0	0.029182927791479935
3.5500000000000003	-0.1466751991106408	0.0	-7.613984642293201e-08	-0.032553872495506335	0.0	-0.4986360805858967	0.0	0.00011376104684039321	0.0	0.9998477732349794	0.0	0.01744793273555582	0.0	0.0	1.999487273473381	0.0	0.0	1.9994262795869417	0.0	-0.14658589700073	0.0	0.0051175027715425645	-0.8393068496428647	0.0	0.029331311515968798
3.555	-0.15088472651163512	0.0	-8.447598699715913e-09	-0.03329731077848928	0.0	-0.49861012576845476	0.0	0.00011815933279788444	0.0	0.9998477681768969	0.0	0.017448222584451858	0.0	0.0	1.9995204927671966	0.0	0.0	1.9994601297423389	0.0	-0.15079285597176492	0.0	0.005264530590686595	-0.8434767744985444	0.0	0.029479837228238437
3.56	-0.15511511730082797	0.0	6.592805076742376e-08	-0.03406183598036697	0.0	-0.4985834339548512	0.0	0.00012257944191509934	0.0	0.9998477629263992	0.0	0.01744852345445627	0.0	0.0	1.9995549751794646	0.0	0.0	1.999495246165723	0.0	-0.15502066510430265	0.0	0.005412301344294243	-0.8476469140562641	0.0	0.02962848041478121
3.565	-0.15936637257709155	0.0	1.471853210823531e-07	-0.034847552334436295	0.0	-0.49855600143926737	0.0	0.00012702128574912844	0.0	0.9998477574825125	0.0	0.01744883540087761	0.0	0.0	1.9995907270490665	0.0	0.0	1.9995316350836316	0.0	-0.15926932547791148	0.0	0.005560815603685493	-0.8518172706009607	0.0	0.02977724019194384
3.5700000000000003	-0.16363849347750162	0.0	2.3562711493104603e-07	-0.03565456410288862	0.0	-0.4985278244998434	0.0	0.00013148489271188777	0.0	0.9998477518442686	0.0	0.01744915847860721	0.0	0.0	1.999627754667063	0.0	0.0	1.9995693027307422	0.0	-0.1635388382065265	0.0	0.0057100740506468815	-0.8559878698577879	0.0	0.029926197900368386
3.575	-0.1679314813046243	0.0	3.3200981026701434e-07	-0.03648297567308196	0.0	-0.49849889934523156	0.0	0.0001359707974147556	0.0	0.9998477460107202	0.0	0.017449492740729065	0.0	0.0	1.9996660641173618	0.0	0.0	1.9996082554948866	0.0	-0.16782920455349817	0.0	0.005860077829991075	-0.8601586960786921	0.0	0.030075306313861655
3.58	-0.17224533706841305	0.0	4.3628797239413814e-07	-0.0373328912110607	0.0	-0.49846922230694923	0.0	0.0001404786394321336	0.0	0.9998477399808824	0.0	0.017449838243522815	0.0	0.0	1.9997056618501547	0.0	0.0	1.9996484996606427	0.0	-0.17214042551752887	0.0	0.006010827280716792	-0.8643297280208615	0.0	0.03022450137701299
3.585	-0.17658006189394368	0.0	5.487316227971923e-07	-0.038204414969940384	0.0	-0.49843878966817506	0.0	0.0001450084104717386	0.0	0.9998477337537849	0.0	0.017450195042010844	0.0	0.0	1.9997465541715294	0.0	0.0	1.9996900415102123	0.0	-0.17647250220120886	0.0	0.006162323065413074	-0.8685009801479724	0.0	0.030373832792559556
3.59	-0.18093565690629193	0.0	6.696107829609522e-07	-0.039097651202836564	0.0	-0.49840759771208776	0.0	0.00014956010224128737	0.0	0.9998477273284575	0.0	0.017450563191215532	0.0	0.0	1.9997887473875755	0.0	0.0	1.9997328873234221	0.0	-0.18082543570696036	0.0	0.006314565851402096	-0.8726724655938365	0.0	0.030523310384512864
3.595	-0.18531212335758876	0.0	7.993081928714569e-07	-0.04001270427947303	0.0	-0.4983756426528147	0.0	0.00015413387911937843	0.0	0.9998477207039173	0.0	0.017450942746358996	0.0	0.0	1.9998322478272565	0.0	0.0	1.9997770434271898	0.0	-0.18519922726007174	0.0	0.006467556427919937	-0.8768441971553511	0.0	0.03067294732532395
3.6	-0.1897094624660328	0.0	9.381764898232213e-07	-0.04094967853843191	0.0	-0.4983429207229241	0.0	0.00015872985937098809	0.0	0.9998477138791847	0.0	0.017451333762610013	0.0	0.0	1.9998770618134314	0.0	0.0	1.999822516182313	0.0	-0.1895938780528017	0.0	0.006621295557700917	-0.881016151490933	0.0	0.030822722380107956
3.605	-0.19412767530667321	0.0	1.0864413132393013e-06	-0.041908678186915224	0.0	-0.498309428232783	0.0	0.00016334796671597316	0.0	0.9998477068532946	0.0	0.017451736294912316	0.0	0.0	1.9999231956431873	0.0	0.0	1.9998693119277375	0.0	-0.19400938913861843	0.0	0.006775783876284204	-0.8851883216986263	0.0	0.03097262997203678
3.61	-0.1985667630320712	0.0	1.2443970686569594e-06	-0.042889807503264016	0.0	-0.4982751614506326	0.0	0.00016798823021542007	0.0	0.9998476996252742	0.0	0.0174521503983315	0.0	0.0	1.9999706556275711	0.0	0.0	1.9999174370107335	0.0	-0.19844576164587788	0.0	0.0069310220955097574	-0.8893607152290891	0.0	0.03112268581279873
3.615	-0.20302672679478828	0.0	1.4123381616134736e-06	-0.04389317076581942	0.0	-0.4982401166447138	0.0	0.0001726506789304156	0.0	0.9998476921941504	0.0	0.01745257612793315	0.0	0.0	2.000019448077629	0.0	0.0	1.9999668977868974	0.0	-0.20290299670276346	0.0	0.0070870109320684575	-0.8935333603732387	0.0	0.031272854961525175
3.62	-0.2075075679533961	0.0	1.5902984090029628e-06	-0.0449188724812167	0.0	-0.4982042899469427	0.0	0.00017733534176012173	0.0	0.9998476845588925	0.0	0.017453013541005043	0.0	0.0	2.000069579559054	0.0	0.0	2.0000177006201043	0.0	-0.20738109565221657	0.0	0.007243750855207024	-0.8977062496280825	0.0	0.03142314716892499
3.625	-0.21200928760760793	0.0	1.7786390655197224e-06	-0.045967016869232366	0.0	-0.4981676776605321	0.0	0.0001820422478071639	0.0	0.9998476767185426	0.0	0.017453462692042697	0.0	0.0	2.000121056317573	0.0	0.0	2.0000698518825666	0.0	-0.21188005956693368	0.0	0.007401242656170826	-0.9018793548069578	0.0	0.03157359647040172
3.63	-0.21653188691667724	0.0	1.977646071459059e-06	-0.04703770821562359	0.0	-0.49813027604929433	0.0	0.00018677142612736833	0.0	0.9998476686721256	0.0	0.0174539236361839	0.0	0.0	2.0001738846725106	0.0	0.0	2.00012335795482	0.0	-0.21639988958155457	0.0	0.007559487058193202	-0.9060526894406645	0.0	0.031724182321781175
3.6350000000000002	-0.2210753670575965	0.0	2.1875829290377343e-06	-0.048131050825805065	0.0	-0.49809208136530364	0.0	0.0001915229057626192	0.0	0.999847660418662	0.0	0.017454396428757766	0.0	0.0	2.0002280709651212	0.0	0.0	2.0001782252257216	0.0	-0.2209405868490499	0.0	0.0077184847677337735	-0.9102262534930332	0.0	0.03187489342606089
3.64	-0.2256397292387365	0.0	2.4090242868883545e-06	-0.049247149011448714	0.0	-0.49805308985633984	0.0	0.00019629693862020155	0.0	0.9998476519571666	0.0	0.01745488112536431	0.0	0.0	2.0002836215677062	0.0	0.0	2.000234460156293	0.0	-0.22550215254270664	0.0	0.007878236808403738	-0.9144000780484001	0.0	0.03202619219435906
3.645	-0.23022497497853514	0.0	2.645377611357097e-06	-0.05038610716606649	0.0	-0.498013297712462	0.0	0.00020109494748425915	0.0	0.9998476432865885	0.0	0.01745537778497581	0.0	0.0	2.000340543239046	0.0	0.0	2.000292069615154	0.0	-0.2300845880465683	0.0	0.008038747052291463	-0.918574156511394	0.0	0.03217775142013568
3.65	-0.2348311053353517	0.0	2.8944905589640923e-06	-0.05154802967388909	0.0	-0.4979727011270721	0.0	0.00020591408538852375	0.0	0.999847634405921	0.0	0.017455886464072007	0.0	0.0	2.0003988424522605	0.0	0.0	2.0003510596553293	0.0	-0.23468789447879776	0.0	0.008200013802993174	-0.9227484519338279	0.0	0.032328880220990903
3.6550000000000002	-0.23945812136668687	0.0	3.1544823359770593e-06	-0.0527330208959333	0.0	-0.4979312963200465	0.0	0.00021075471889965802	0.0	0.9998476253142071	0.0	0.017456407216397796	0.0	0.0	2.000458525367034	0.0	0.0	2.0004114364348564	0.0	-0.23931207294709533	0.0	0.008362035639241119	-0.9269229747779518	0.0	0.03247986222315536
3.66	-0.24410602425586714	0.0	3.425014345581662e-06	-0.053941185194232286	0.0	-0.49788907951469386	0.0	0.00021561753682073953	0.0	0.9998476160104788	0.0	0.017456940096336554	0.0	0.0	2.000519598216232	0.0	0.0	2.000473206309101	0.0	-0.2439571246308932	0.0	0.008524812690741528	-0.9310977413448177	0.0	0.03263103028811789
3.665	-0.24877481529977058	0.0	3.707072823805574e-06	-0.055172626937351435	0.0	-0.49784604693117196	0.0	0.00022050287336655916	0.0	0.9998476064937444	0.0	0.017457485159556668	0.0	0.0	2.000582067379991	0.0	0.0	2.0005363757291725	0.0	-0.24862305077665467	0.0	0.008688346420888967	-0.9352727588296583	0.0	0.03278251228218601
3.67	-0.2534644957971296	0.0	4.001584218301157e-06	-0.05642745050101802	0.0	-0.49780219478243803	0.0	0.0002254108421715638	0.0	0.9998475967629995	0.0	0.01745804246245021	0.0	0.0	2.0006459393213922	0.0	0.0	2.0006009511787375	0.0	-0.25330985263458344	0.0	0.008852638238888893	-0.939327183898217	0.0	0.0303153797356353
3.6750000000000003	-0.2581750670293419	0.0	4.309203697584566e-06	-0.0577057602659367	0.0	-0.497757519276595	0.0	0.00023034152171533018	0.0	0.9998475868172363	0.0	0.017458612061562007	0.0	0.0	2.000711220521024	0.0	0.0	2.000666939163942	0.0	-0.2580175314468379	0.0	0.009017689287488877	-0.9442059906103468	0.0	0.0456388783057698
3.68	-0.2629192622991337	0.0	0.00016145562121248495	-0.05900770094135627	0.0	-0.49771195249655475	0.0	-0.0001663727770856334	0.0	0.9998475780447191	0.0	0.017459114452787475	0.0	0.0	2.0007687990907765	0.0	0.0	2.0006192768741773	0.0	-0.2627533389584661	0.0	0.009340632839402695	-0.950570552311215	0.0	0.093627452132819
3.685	-0.26769952004907355	0.0	0.0005092928823319019	-0.060333388481240306	0.0	-0.4976636110105122	0.0	-0.0012514455201713159	0.0	0.9998476165544313	0.0	0.017456908941564462	0.0	0.0	2.0005160275982288	0.0	0.0	2.0002607641411956	0.0	-0.267518581931095	0.0	0.009853970526653195	-0.9532546569390232	0.0	0.06245408367686036
3.69	-0.2724645424149123	0.0	0.0004158349973996422	-0.06168288936476842	0.0	-0.4976140997255854	0.0	-0.0011032270837965064	0.0	0.9998476700311167	0.0	0.017453845785921136	0.0	0.0	2.000164962330373	0.0	0.0	1.9999447128624652	0.0	-0.2722840233699673	0.0	0.00992524102423429	-0.9549201346462477	0.0	0.009470250419330145
3.6950000000000003	-0.2772461008162807	0.0	0.00027217125645703246	-0.06305625980320002	0.0	-0.4975644263622445	0.0	-0.0006836818187306162	0.0	0.9998477091738817	0.0	0.017451603339431684	0.0	0.0	1.9999079577466479	0.0	0.0	1.99974885244875	0.0	-0.2770677273225064	0.0	0.009947309745530021	-0.956241055203666	0.0	-0.051228863044579964
3.7	-0.28201181330420094	0.0	-0.00032087146449917515	-0.06445353442109625	0.0	-0.4975160904136426	0.0	-0.0016668075510067337	0.0	0.999847765204555	0.0	0.01744839290116636	0.0	0.0	1.9995400125963054	0.0	0.0	1.9992713472590837	0.0	-0.28185129401098236	0.0	0.009519131565257487	-0.9610328974487705	0.0	-0.036085407958557386
3.705	-0.2868454361027334	0.0	-0.000327546499277816	-0.06587485514321237	0.0	-0.4974681982949931	0.0	-0.0014152580093226975	0.0	0.999847834768643	0.0	0.01744440620468872	0.0	0.0	1.999083101289664	0.0	0.0	1.9988659057048024	0.0	-0.28668228374699534	0.0	0.009678826637513576	-0.9691782730859355	0.0	0.0523534968040153
3.71	-0.29170789691980714	0.0	-0.00023175813323437873	-0.0673203983570692	0.0	-0.49741914938790643	0.0	-0.000881217087564877	0.0	0.9998478848989545	0.0	0.017441532686947783	0.0	0.0	1.9987537703073754	0.0	0.0	1.998613455605041	0.0	-0.2915385009189526	0.0	0.009942500637616177	-0.9733351768438527	0.0	0.05357204281421097
3.715	-0.2965898546350836	0.0	-0.00015047610181710575	-0.06879027322241106	0.0	-0.4973687997569069	0.0	-0.0004275640001138475	0.0	0.9998479129193911	0.0	0.017439926322185734	0.0	0.0	1.9985696664625352	0.0	0.0	1.9984909675416498	0.0	-0.2964146862011124	0.0	0.01019305251615862	-0.9771913214411362	0.0	0.04770254449113252
3.72	-0.30149045994316204	0.0	-9.539105806663009e-05	-0.07028457773888837	0.0	-0.49731726126577497	0.0	-0.00011921025831127206	0.0	0.9998479243337567	0.0	0.017439271913269078	0.0	0.0	1.9984946653182591	0.0	0.0	1.99845681631827	0.0	-0.3013104030332876	0.0	0.010418616025565177	-0.9811214928310052	0.0	0.04303716435665325
3.725	-0.3064103064333539	0.0	-5.993384556771446e-05	-0.07180341042509404	0.0	-0.4972646445339059	0.0	6.922572288123704e-05	0.0	0.9998479250622776	0.0	0.017439230144861814	0.0	0.0	1.9984898782833633	0.0	0.0	1.9984766480270444	0.0	-0.3062260213752072	0.0	0.010625597071637625	-0.9851391696525279	0.0	0.040014627714930695
3.73	-0.31134997683186216	0.0	-3.735187678322357e-05	-0.07334687171429358	0.0	-0.4972110250934275	0.0	0.00017757736405181056	0.0	0.9998479194571682	0.0	0.01743955150110045	0.0	0.0	1.9985267085968226	0.0	0.0	1.9985275201945305	0.0	-0.31116189274185085	0.0	0.01082062722004902	-0.9892167846805874	0.0	0.038141776962975486
3.735	-0.3163098665429747	0.0	-2.3009172335487738e-05	-0.07491506350659742	0.0	-0.49715645049434193	0.0	0.00023787264498608337	0.0	0.9998479102711968	0.0	0.01744007814515014	0.0	0.0	1.9985870667391052	0.0	0.0	1.9985956656876271	0.0	-0.3161182536904667	0.0	0.011008264409133526	-0.9933320798903957	0.0	0.03700155793613053
3.74	-0.32129022824119857	0.0	-1.3920546839729825e-05	-0.07650808865289066	0.0	-0.4971009498352099	0.0	0.0002712697179227571	0.0	0.9998478991032074	0.0	0.017440718399500697	0.0	0.0	1.9986604456438968	0.0	0.0	1.9986733787373605	0.0	-0.3210952544745282	0.0	0.011191448107753858	-0.9974710631597855	0.0	0.03632857531895295
3.745	-0.3262912232065982	0.0	-8.16898943665198e-06	-0.07812605061005137	0.0	-0.49704454028051337	0.0	0.00029034399857879456	0.0	0.9998478868237592	0.0	0.017441422346016505	0.0	0.0	1.9987411242443975	0.0	0.0	1.9987565561659881	0.0	-0.32609299044320217	0.0	0.011372070697108492	-1.0016251715806437	0.0	0.035957779097952995
3.75	-0.33131295569814767	0.0	-4.511215990820675e-06	-0.07976905321807995	0.0	-0.4969872313488757	0.0	0.00030213280053278745	0.0	0.9998478738892849	0.0	0.01744216381263464	0.0	0.0	1.9988261029870722	0.0	0.0	1.998843110837603	0.0	-0.33111152297414764	0.0	0.011551363004711568	-1.005789014051009	0.0	0.035782908872845735
3.755	-0.33635549262757175	0.0	-2.1497804911689634e-06	-0.08143720056689624	0.0	-0.4969290275353429	0.0	0.0003103370913963574	0.0	0.9998478605256521	0.0	0.017442929847609066	0.0	0.0	1.9989138974854852	0.0	0.0	1.99893201586542	0.0	-0.33615089139258364	0.0	0.011730116838918033	-1.0099591290011256	0.0	0.035734156348572944
3.7600000000000002	-0.3414188773095339	0.0	-5.71834231320471e-07	-0.08313059690299503	0.0	-0.496869930188178	0.0	0.00031688473575233744	0.0	0.9998478468446635	0.0	0.017443714039269184	0.0	0.0	1.9990037729046082	0.0	0.0	1.9990227966551735	0.0	-0.34121112122651964	0.0	0.011908842709859434	-1.0141332892152124	0.0	0.03576565054161666
3.765	-0.34650313708175495	0.0	5.415616865775689e-07	-0.08484934657615284	0.0	-0.4968099386064979	0.0	0.00032271024688894617	0.0	0.9998478328968564	0.0	0.01744451348861801	0.0	0.0	1.9990953969933867	0.0	0.0	1.9991152463309354	0.0	-0.3462922287221108	0.0	0.01208785895737704	-1.0183100150431326	0.0	0.035846552809904855
3.77	-0.3516082891284194	0.0	1.3854805417409475e-06	-0.08659355400380535	0.0	-0.4967490507848894	0.0	0.0003282207828729028	0.0	0.9998478187015809	0.0	0.017445327084548407	0.0	0.0	1.9991886424090168	0.0	0.0	1.999209274658971	0.0	-0.35139422425745204	0.0	0.012267360919886623	-1.0224884103492464	0.0	0.03595784315091235
3.775	-0.35673434456179287	0.0	2.080232017197e-06	-0.08836332364374745	0.0	-0.49668726398398727	0.0	0.0003336310072870853	0.0	0.9998478042687371	0.0	0.017446154257646732	0.0	0.0	1.999283443891635	0.0	0.0	1.999304852902132	0.0	-0.3565171147374548	0.0	0.012447469350541255	-1.0266679170642454	0.0	0.03608754827897715
3.7800000000000002	-0.361881310422378	0.0	2.69618658594841e-06	-0.09015875998299762	0.0	-0.4966245749757478	0.0	0.0003390180904427155	0.0	0.9998477896001636	0.0	0.01744699490064673	0.0	0.0	1.9993797891476324	0.0	0.0	1.9994019744309368	0.0	-0.36166090472831663	0.0	0.012628255266118407	-1.03084817716179	0.0	0.03622801369006559
3.785	-0.3670491914141967	0.0	3.274828730561185e-06	-0.09197996752810356	0.0	-0.4965609802485446	0.0	0.00034440702135215607	0.0	0.9998477746953681	0.0	0.017447849039863905	0.0	0.0	1.9994776811930717	0.0	0.0	1.9995006397747277	0.0	-0.3668255974651729	0.0	0.012809760830492673	-1.035028996374531	0.0	0.03637497034515326
3.79	-0.372237990940654	0.0	3.841417178600934e-06	-0.09382705079920388	0.0	-0.4964964761357663	0.0	0.0003498154667005091	0.0	0.9998477595541536	0.0	0.017448716684571684	0.0	0.0	1.99957712109084	0.0	0.0	1.9996008545239794	0.0	-0.3720111954494896	0.0	0.01299201193809403	-1.0392102633843205	0.0	0.03652596009691602
3.795	-0.3774477115990829	0.0	4.4112218889780994e-06	-0.09570011432729039	0.0	-0.49643105887752426	0.0	0.00035525051274537604	0.0	0.999847744175645	0.0	0.01744959788288434	0.0	0.0	1.999678114355336	0.0	0.0	1.9997026262992301	0.0	-0.3772177007243664	0.0	0.013175024505637048	-1.0433919009439139	0.0	0.03667929422006963
3.8000000000000003	-0.3826783553952116	0.0	4.992126920680379e-06	-0.09759926265323063	0.0	-0.4963647246418154	0.0	0.00036071392052768373	0.0	0.9998477285587785	0.0	0.017450492693703534	0.0	0.0	1.9997806677372927	0.0	0.0	1.9998059632255194	0.0	-0.3824451149988055	0.0	0.013358807061458451	-1.047573857244418	0.0	0.036833824538248565
3.805	-0.38792992401766435	0.0	5.58803836704443e-06	-0.09952460032639766	0.0	-0.4962974695551237	0.0	0.000366203227876849	0.0	0.9998477127022409	0.0	0.0174514011901548	0.0	0.0	1.999884789617628	0.0	0.0	1.9999108727225265	0.0	-0.38769343980306564	0.0	0.013543364164203866	-1.0517561149879109	0.0	0.03698915370685665
3.81	-0.3932024191098552	0.0	6.202223675136325e-06	-0.101476231903323	0.0	-0.4962292897325097	0.0	0.0003717169018893334	0.0	0.999847696604827	0.0	0.017452323439179875	0.0	0.0	1.9999904876685441	0.0	0.0	2.0000173617707864	0.0	-0.3929626766444185	0.0	0.013728699734333655	-1.0559386703525964	0.0	0.037145168092171464
3.815	-0.3984958422393037	0.0	6.836924010434685e-06	-0.10345426194784507	0.0	-0.4961601812746856	0.0	0.00037725446227011925	0.0	0.9998476802654187	0.0	0.017453259502629853	0.0	0.0	2.00009776897881	0.0	0.0	2.000125437213239	0.0	-0.3982528269899952	0.0	0.013914816666227275	-1.0601215147135015	0.0	0.037301662047921666
3.8200000000000003	-0.403810194909642	0.0	7.493515080167001e-06	-0.10545879503107991	0.0	-0.4960901402693619	0.0	0.00038281562035433127	0.0	0.999847663682921	0.0	0.017454209441018775	0.0	0.0	2.000206640483958	0.0	0.0	2.0002351058101286	0.0	-0.40356389227308614	0.0	0.014101716992115427	-1.0640825357471304	0.0	0.0326364797276256
3.825	-0.4091454786387252	0.0	8.17312766077553e-06	-0.10748993777624254	0.0	-0.49601916272140717	0.0	0.00038840125177944416	0.0	0.9998476468562886	0.0	0.01745517331190028	0.0	0.0	2.0003171087802323	0.0	0.0	2.0003463745725516	0.0	-0.4088958739495968	0.0	0.014289402503582738	-1.069881106680156	0.0	0.06778625987397623
3.83	-0.41452511270781434	0.0	0.0002978321174989542	-0.10954785326149895	0.0	-0.4959469867875819	0.0	-0.00036635208587467956	0.0	0.9998476355555865	0.0	0.017455820613875704	0.0	0.0	2.000391295425739	0.0	0.0	2.0002414224308693	0.0	-0.41426210017640364	0.0	0.014767197649519821	-1.0756415847335583	0.0	0.10257651149568513
3.835	-0.41991946549654835	0.0	0.0005158320998106309	-0.11163262687710857	0.0	-0.4958718598704151	0.0	-0.0011313235541741454	0.0	0.999847674559498	0.0	0.01745358637557238	0.0	0.0	2.0001352315652956	0.0	0.0	1.9999173221062798	0.0	-0.41964562381572573	0.0	0.015171486333023851	-1.0761101428764872	0.0	0.0231492311141529
3.84	-0.42528810778644294	0.0	0.00016292997505282822	-0.11374431269152709	0.0	-0.4957959469461351	0.0	-0.0014547617590098167	0.0	0.9998477233789074	0.0	0.017450789478488736	0.0	0.0	1.9998146819480098	0.0	0.0	1.9995005635613385	0.0	-0.4250233961181042	0.0	0.015003796937903227	-1.0766577755720745	0.0	-0.054062850768250646
3.845	-0.43067371252622383	0.0	-0.00023188579117112642	-0.11588289678806486	0.0	-0.49572178081863066	0.0	-0.0018852549923832128	0.0	0.9998478027567315	0.0	0.0174462409115208	0.0	0.0	1.9992933752056814	0.0	0.0	1.998960477789491	0.0	-0.4304196329106122	0.0	0.01479324294380081	-1.083052250406938	0.0	-0.003581369926750616
3.85	-0.4361121699434554	0.0	-0.00022625542736697966	-0.11804857142073837	0.0	-0.49564739435875793	0.0	-0.0013426167544030167	0.0	0.9998478744116914	0.0	0.01744213386693175	0.0	0.0	1.9988226709402088	0.0	0.0	1.9985758464218366	0.0	-0.4358547064011707	0.0	0.014985021581830531	-1.0896431551525818	0.0	0.05111894536189178
3.855	-0.44157587396840037	0.0	-0.00016338991943236326	-0.12024148194496223	0.0	-0.4955718438070195	0.0	-0.000714899222494671	0.0	0.9998479189013377	0.0	0.017439583368756055	0.0	0.0	1.9985303609166327	0.0	0.0	1.998371042880706	0.0	-0.4413129710558414	0.0	0.015236165680047317	-1.0937323542829716	0.0	0.05072416500089868
3.86	-0.4470595875747137	0.0	-0.00010968474334273851	-0.12246173481281343	0.0	-0.49549504730382815	0.0	-0.00024129873715338166	0.0	0.9998479390876311	0.0	0.017438426007801402	0.0	0.0	1.998397716949183	0.0	0.0	1.9983019158845023	0.0	-0.44679151197078304	0.0	0.015480042106161775	-1.0977160857266086	0.0	0.04743864712710713
3.865	-0.45256288508945425	0.0	-7.148261179176615e-05	-0.12470943052377911	0.0	-0.49541706698969934	0.0	6.406945905499584e-05	0.0	0.9998479424086532	0.0	0.017438235592988845	0.0	0.0	1.9983758937005247	0.0	0.0	1.9983202704325	0.0	-0.4522901362105326	0.0	0.015709957238396847	-1.1017480654162	0.0	0.04479084857106879
3.87	-0.45808609431902325	0.0	-4.5362448554234185e-05	-0.12698467001497638	0.0	-0.495337965757978	0.0	0.0002451719316257319	0.0	0.9998479353056482	0.0	0.01743864284992264	0.0	0.0	1.9984225690049935	0.0	0.0	1.9983905070171861	0.0	-0.4578090624951039	0.0	0.015929035221000348	-1.1058298091611816	0.0	0.04297176594575683
3.875	-0.46362953372258797	0.0	-2.773600768188935e-05	-0.1292875553232994	0.0	-0.49525778900319345	0.0	0.0003474550544664747	0.0	0.9998479221699127	0.0	0.01743939597360277	0.0	0.0	1.998508883747632	0.0	0.0	1.9984900455581431	0.0	-0.46334849132543626	0.0	0.016140659684491764	-1.1099461950998888	0.0	0.041759653374730143
3.88	-0.46919343292156684	0.0	-1.595260514743992e-05	-0.13161818933673938	0.0	-0.4951765673499549	0.0	0.00040391519518382746	0.0	0.9998479056708018	0.0	0.017440341886781462	0.0	0.0	1.9986172939011577	0.0	0.0	1.9986057587379693	0.0	-0.46890856434034156	0.0	0.016347355718175687	-1.1140860355344155	0.0	0.04097618744303116
3.8850000000000002	-0.4747779529977462	0.0	-8.122611622371398e-06	-0.13397667553601575	0.0	-0.4950943206367162	0.0	0.0004352691482910802	0.0	0.9998478873140563	0.0	0.017441394239966868	0.0	0.0	1.9987379030383912	0.0	0.0	1.998730454163716	0.0	-0.4744893792664406	0.0	0.016550942013315757	-1.118242046545804	0.0	0.04049967338851969
3.89	-0.4803832071627012	0.0	-2.904422489183179e-06	-0.13636311781134688	0.0	-0.49501106095346525	0.0	0.0004534752848724511	0.0	0.9998478679058624	0.0	0.017442506801396418	0.0	0.0	1.9988654125841725	0.0	0.0	1.9988603652633994	0.0	-0.4800910038910735	0.0	0.016752722605010425	-1.122409262656071	0.0	0.04024156428911336
3.895	-0.486009274079924	0.0	6.377077517018406e-07	-0.1387776203350894	0.0	-0.4949267949014975	0.0	0.00046508414415381946	0.0	0.9998478478626199	0.0	0.017443655692075486	0.0	0.0	1.9989970857912784	0.0	0.0	1.9989936020562917	0.0	-0.48571348493854366	0.0	0.016953614375858496	-1.1265841318727128	0.0	0.04013458731499213
3.9	-0.4916562070167831	0.0	3.1359177487699156e-06	-0.14122028747354964	0.0	-0.49484152526071806	0.0	0.0004735152474583117	0.0	0.9998478273891704	0.0	0.01744482916434287	0.0	0.0	1.9991315762722637	0.0	0.0	1.9991292541823642	0.0	-0.49135685395780176	0.0	0.017154240761170794	-1.1307641167768983	0.0	0.04012855986793776
3.9050000000000002	-0.49732404120554036	0.0	5.004029641937121e-06	-0.14369122372271462	0.0	-0.4947552522549457	0.0	0.00048048082551621374	0.0	0.9998478065822398	0.0	0.017446021669793185	0.0	0.0	1.9992682481300992	0.0	0.0	1.9992669017995592	0.0	-0.49702113188790364	0.0	0.01735501202369919	-1.1349474719475274	0.0	0.04018785112140759
3.91	-0.5030127995262983	0.0	6.505156644049135e-06	-0.14619053366401868	0.0	-0.49466797445236627	0.0	0.00048680949396669106	0.0	0.9998477854854148	0.0	0.017447230706682013	0.0	0.0	1.999406814642484	0.0	0.0	1.9994063624467153	0.0	-0.5027063324793394	0.0	0.017556190195659724	-1.1391330395506558	0.0	0.040288307038722125
3.915	-0.5087224967381454	0.0	7.802783837013812e-06	-0.14871832193426573	0.0	-0.49457968939110253	0.0	0.0004928973009409717	0.0	0.9998477641176632	0.0	0.017448455184648624	0.0	0.0	1.9995471508443783	0.0	0.0	1.9995475671221017	0.0	-0.5084124647939928	0.0	0.01775793878448548	-1.143320065770274	0.0	0.04041399058878174
3.92	-0.5144531422796472	0.0	8.994949685086202e-06	-0.15127469320836018	0.0	-0.49449039394533567	0.0	0.000498904594097706	0.0	0.999847742484965	0.0	0.017449694757829783	0.0	0.0	1.9996892170968534	0.0	0.0	1.9996904927602093	0.0	-0.5141395348334757	0.0	0.017960356425137786	-1.1475080770888602	0.0	0.04055478443028398
3.9250000000000003	-0.5202047423943869	0.0	1.0140196354241024e-05	-0.15385975218616582	0.0	-0.49440008460460094	0.0	0.0005049000334663269	0.0	0.999847720588814	0.0	0.017450949337419204	0.0	0.0	1.9998330032220213	0.0	0.0	1.9998351359651774	0.0	-0.5198875467747781	0.0	0.018163502424196794	-1.1516447559136038	0.0	0.039574721252098474
3.93	-0.5259773014005784	0.0	1.1273190538653334e-05	-0.15647360358493265	0.0	-0.4943087576372284	0.0	0.0005109173719032565	0.0	0.9998476984292476	0.0	0.01745221891799385	0.0	0.0	1.9999785085984656	0.0	0.0	1.9999815030106272	0.0	-0.5256565037002899	0.0	0.018367412247533202	-1.1559146211402325	0.0	0.041426651530608885
3.935	-0.5317763090560774	0.0	8.007266187210212e-05	-0.1591163628389261	0.0	-0.49421639856432226	0.0	0.00034633409574220004	0.0	0.9998476762292623	0.0	0.01745349072159581	0.0	0.0	2.0001242687571077	0.0	0.0	2.0000807204205646	0.0	-0.5314495303736899	0.0	0.018639902088522883	-1.163133252461505	0.0	0.10763634497757656
3.94	-0.5376262994900797	0.0	0.0005235892550965061	-0.16178819861107133	0.0	-0.4941211652573547	0.0	-0.0009703055872401284	0.0	0.9998476984517494	0.0	0.01745221762895003	0.0	0.0	1.9999783608624278	0.0	0.0	1.9998027483456307	0.0	-0.5372805263563563	0.0	0.019285954647909966	-1.1643921181797783	0.0	0.044966703969276614
3.9450000000000003	-0.5434258586720637	0.0	9.186853139147688e-05	-0.16448914483651855	0.0	-0.4940247999992095	0.0	-0.0017576184486047316	0.0	0.9998477504334513	0.0	0.017449239312808205	0.0	0.0	1.9996370189944408	0.0	0.0	1.9992992277501338	0.0	-0.5430917328756183	0.0	0.019053660928556326	-1.1641231588477186	0.0	-0.04996289229253192
3.95	-0.5492585802282622	0.0	-0.0001806822973024564	-0.16721918168570185	0.0	-0.49392994588513356	0.0	-0.001869647840299273	0.0	0.9998478349366122	0.0	0.01744439657875616	0.0	0.0	1.9990819980712236	0.0	0.0	1.9987636130980093	0.0	-0.5489305966249302	0.0	0.01897948072964414	-1.1711839497978938	0.0	0.015150601752820087
3.955	-0.5551343142074794	0.0	-0.00017490648089792652	-0.1699785045378285	0.0	-0.49383457367510375	0.0	-0.0012186324936113793	0.0	0.9998479030779093	0.0	0.017440490536133797	0.0	0.0	1.9986343304533913	0.0	0.0	1.998414500604702	0.0	-0.554802702991418	0.0	0.019185884279948183	-1.176877492906727	0.0	0.050246487337187534
3.96	-0.5610339539908995	0.0	-0.0001293463451921773	-0.17276724572815583	0.0	-0.4937380248147579	0.0	-0.0005644437310454451	0.0	0.9998479414166151	0.0	0.017438292473583993	0.0	0.0	1.998382412727895	0.0	0.0	1.9982527993868946	0.0	-0.5606972502948804	0.0	0.019434705353875616	-1.1809952358040665	0.0	0.05032195248161336
3.9650000000000003	-0.5669539960821675	0.0	-8.89145610812299e-05	-0.17558551115639343	0.0	-0.4936402330951952	0.0	-9.13916395762953e-05	0.0	0.9998479550090353	0.0	0.017437513116521298	0.0	0.0	1.9982930914055779	0.0	0.0	1.998226617610742	0.0	-0.5666123126608162	0.0	0.019680668682176876	-1.1850510088424675	0.0	0.0484429182432914
3.97	-0.5728941246653024	0.0	-5.845836945397508e-05	-0.17843340281977652	0.0	-0.4935412320449112	0.0	0.00020731217663958392	0.0	0.9998479519359488	0.0	0.017437689323067454	0.0	0.0	1.99831328625897	0.0	0.0	1.9982860081745575	0.0	-0.5725477598318723	0.0	0.01991843879857689	-1.1891364537173692	0.0	0.046802837590235034
3.975	-0.5788545072926642	0.0	-3.642239221910946e-05	-0.1813110229418382	0.0	-0.49344106044534186	0.0	0.0003823559314579581	0.0	0.9998479387275104	0.0	0.017438446656382788	0.0	0.0	1.9984000834621962	0.0	0.0	1.9983955450802793	0.0	-0.5785037187568053	0.0	0.020149176742960878	-1.1932515720255925	0.0	0.045561799838100714
3.98	-0.5848353262274659	0.0	-2.082572826322224e-05	-0.18421847439899372	0.0	-0.4933397491291364	0.0	0.00048058300607849267	0.0	0.9998479197066052	0.0	0.017439537201809813	0.0	0.0	1.9985250697696342	0.0	0.0	1.9985332219700493	0.0	-0.5844803118397509	0.0	0.020374599584733522	-1.1973887567130563	0.0	0.04465975285562161
3.985	-0.590836730425963	0.0	-9.969908953079164e-06	-0.1871558606102209	0.0	-0.4932373207349373	0.0	0.0005347484177719907	0.0	0.9998478974574919	0.0	0.01744081274683523	0.0	0.0	1.9986712586967839	0.0	0.0	1.9986864161072475	0.0	-0.5904776344023096	0.0	0.020596246981143887	-1.2015426359501313	0.0	0.04404271432315495
3.99	-0.5968588381946591	0.0	-2.4698417677941354e-06	-0.19012328541435755	0.0	-0.4931337907875863	0.0	0.0005649799630940062	0.0	0.9998478734209434	0.0	0.01744219066099227	0.0	0.0	1.9988291800503803	0.0	0.0	1.9988482709442212	0.0	-0.5964957595931236	0.0	0.020815415532703673	-1.2057092346856129	0.0	0.04365926837646862
3.995	-0.6029017408380227	0.0	2.7573788449548848e-06	-0.193120852969411	0.0	-0.4930291689808609	0.0	0.0005828015136863048	0.0	0.9998478483647725	0.0	0.0174436269099145	0.0	0.0	1.9989937870966974	0.0	0.0	1.9990152312793614	0.0	-0.602534742626779	0.0	0.0210331414673328	-1.209885261498365	0.0	0.04345636284203587
4.0	-0.6089655053868623	0.0	6.509420637987154e-06	-0.19614866767085942	0.0	-0.4929234604789935	0.0	0.0005944218193131068	0.0	0.9998478226789657	0.0	0.01744509912759991	0.0	0.0	1.9991625164911166	0.0	0.0	1.9991855205868472	0.0	-0.6085946235543688	0.0	0.021250199371656713	-1.2140679949001014	0.0	0.043384246490238136
4.005	-0.6150501789111036	0.0	9.343755774494176e-06	-0.1992068340824977	0.0	-0.4928166671712657	0.0	0.0006030823947516278	0.0	0.9998477965562421	0.0	0.017446596260271396	0.0	0.0	1.9993341013715815	0.0	0.0	1.9993582909664367	0.0	-0.6146754304023687	0.0	0.02146713592224605	-1.2182553294837177	0.0	0.043401685256731486
4.01	-0.6211557930691458	0.0	1.163017608336264e-05	-0.20229545688374617	0.0	-0.49270878869882445	0.0	0.0006104110251377703	0.0	0.999847770087907	0.0	0.017448113069368984	0.0	0.0	1.9995079413521635	0.0	0.0	1.99953316084398	0.0	-0.6207771821038355	0.0	0.021684316382595385	-1.2224457358445517	0.0	0.04347768671453505
4.015	-0.6272823686676944	0.0	1.3605587956831379e-05	-0.20541464083310024	0.0	-0.4925998231981672	0.0	0.0006171503831318147	0.0	0.9998477433116242	0.0	0.01744964739175706	0.0	0.0	1.999683788518217	0.0	0.0	1.9997099614053715	0.0	-0.6268998912534894	0.0	0.021901976439438267	-1.2262629607143936	0.0	0.035404734783289184
4.0200000000000005	-0.6334299191631008	0.0	1.5416236228916077e-05	-0.2085644907400198	0.0	-0.4924897678773716	0.0	0.0006236653779898501	0.0	0.9998477162445172	0.0	0.01745119824167659	0.0	0.0	1.9998615298930327	0.0	0.0	1.999888628375308	0.0	-0.6330435662126618	0.0	0.02212026230632235	-1.2337807592701349	0.0	0.1079051274270757
4.025	-0.6396380921722177	0.0	0.0005095829455419218	-0.21174517378686522	0.0	-0.49237726146588656	0.0	-0.0007719476779677229	0.0	0.9998477211028198	0.0	0.01745091988836007	0.0	0.0	1.9998296280944898	0.0	0.0	1.9996674816555455	0.0	-0.6392307256301156	0.0	0.02283041922506442	-1.2356103191077181	0.0	0.0573347944231202
4.03	-0.6457938913865751	0.0	0.00010533930408286437	-0.21495675844380793	0.0	-0.49226307230470157	0.0	-0.0017901244756526747	0.0	0.999847770942187	0.0	0.017448064115936614	0.0	0.0	1.9995023308479565	0.0	0.0	1.9991546487692555	0.0	-0.6453970115606371	0.0	0.022637551021980055	-1.235135578689652	0.0	-0.04216802078502689
4.035	-0.6519826416296556	0.0	-0.00014177616384274604	-0.21819921044828752	0.0	-0.4921501770051198	0.0	-0.0018442217642665468	0.0	0.999847855521843	0.0	0.017443216670825375	0.0	0.0	1.9989467700063581	0.0	0.0	1.9986263181513624	0.0	-0.6515908348908287	0.0	0.022600198499312697	-1.2420150477716183	0.0	0.01900848651011257
4.04	-0.6582115935466107	0.0	-0.00014568317026522658	-0.22147271807921778	0.0	-0.4920366923189291	0.0	-0.0011555639978629258	0.0	0.9998479216606435	0.0	0.01743942517258006	0.0	0.0	1.998512230212928	0.0	0.0	1.9982952734511883	0.0	-0.6578163055769877	0.0	0.02280857774741018	-1.2475157022801997	0.0	0.04985967183445764
4.045	-0.664464365501746	0.0	-0.00011150207130483909	-0.22477741050584032	0.0	-0.49192202978872324	0.0	-0.00047949909284243636	0.0	0.999847956725131	0.0	0.017437414717858448	0.0	0.0	1.9982818140347607	0.0	0.0	1.9981579070796873	0.0	-0.6640641748946229	0.0	0.02305812383789865	-1.2516786616085889	0.0	0.05083917115796591
4.05	-0.6707379289890568	0.0	-7.825036067150128e-05	-0.22811339434102018	0.0	-0.4918061096589879	0.0	5.579807855670172e-06	0.0	0.9998479663250752	0.0	0.01743686425576833	0.0	0.0	1.9982187261338817	0.0	0.0	1.9981595055768904	0.0	-0.670332789454179	0.0	0.02330937342060022	-1.2557828885299291	0.0	0.04991720546096412
4.055	-0.6770319082441556	0.0	-5.1433587883586504e-05	-0.23148077269549006	0.0	-0.491688943642628	0.0	0.0003107178303772237	0.0	0.9998479588699012	0.0	0.017437291737977634	0.0	0.0	1.9982677194355163	0.0	0.0	1.9982485196783908	0.0	-0.6766219862118436	0.0	0.02355621361535506	-1.2599011488989251	0.0	0.04888477284258983
4.0600000000000005	-0.6833463477568439	0.0	-3.0945207422857674e-05	-0.23487964860242688	0.0	-0.4915705555534995	0.0	0.0004891987978873722	0.0	0.9998479410711433	0.0	0.017438312282404184	0.0	0.0	1.9983846829967231	0.0	0.0	1.9983886648106999	0.0	-0.6829318228029574	0.0	0.02379826363940363	-1.2640362902418156	0.0	0.04796826681680953
4.065	-0.689681343223623	0.0	-1.582543486122549e-05	-0.23831012544591804	0.0	-0.4914509679512931	0.0	0.0005893172245812828	0.0	0.9998479173472111	0.0	0.017439672471334565	0.0	0.0	1.9985405728731225	0.0	0.0	1.9985574917595141	0.0	-0.6892623727509153	0.0	0.024036159217770546	-1.2681860150108175	0.0	0.047225379503941456
4.07	-0.6960369957422579	0.0	-4.938192401423542e-06	-0.24177230696620824	0.0	-0.4913301993234594	0.0	0.000644579089557632	0.0	0.9998478903307146	0.0	0.017441221306996702	0.0	0.0	1.9987180833649836	0.0	0.0	1.9987421500664844	0.0	-0.6956137043522435	0.0	0.024270842230915513	-1.2723486730786475	0.0	0.04668420788602011
4.075	-0.7024134004710402	0.0	2.8314821324552263e-06	-0.24526629722575263	0.0	-0.49120826320702093	0.0	0.0006755318537218189	0.0	0.9998478614878995	0.0	0.01744287469236195	0.0	0.0	1.998907576198082	0.0	0.0	1.998935675687209	0.0	-0.701985877705483	0.0	0.02450331957721364	-1.2765223237907113	0.0	0.04633818466329466
4.08	-0.7088106380916913	0.0	8.443226916254504e-06	-0.24879220056147994	0.0	-0.4910851683030572	0.0	0.0006938712800012525	0.0	0.9998478315975177	0.0	0.0174445879630752	0.0	0.0	1.999103932436428	0.0	0.0	1.999134455166556	0.0	-0.7083789420547802	0.0	0.024734494041787174	-1.2807046492764245	0.0	0.046155673044975636
4.085	-0.7152287711196103	0.0	1.2642416510674089e-05	-0.2523501215270933	0.0	-0.4909609192464403	0.0	0.0007059293521503127	0.0	0.9998478010572723	0.0	0.01744633830915543	0.0	0.0	1.999304537851466	0.0	0.0	1.999336689029119	0.0	-0.7147929349437669	0.0	0.02496508262494616	-1.2847896980380025	0.0	0.043841669804143765
4.09	-0.7216678446292186	0.0	1.596313940059141e-05	-0.2559401648366596	0.0	-0.49083551758637617	0.0	0.0007149840351389755	0.0	0.999847770061468	0.0	0.017448114585004823	0.0	0.0	1.9995081150577003	0.0	0.0	1.9995415168672825	0.0	-0.7212278833019293	0.0	0.02519560623007714	-1.28952404826548	0.0	0.05559444929615296
4.095	-0.7281388269782952	0.0	0.0001538435132777451	-0.2595624417062889	0.0	-0.49070891906458475	0.0	0.00037839003129106743	0.0	0.999847739659781	0.0	0.01744985663807529	0.0	0.0	1.9997077700314516	0.0	0.0	1.9996499176262965	0.0	-0.7276900258003957	0.0	0.02556171689528474	-1.2964805019698509	0.0	0.115894376197239
4.1	-0.7346503632028792	0.0	0.0005385040032552063	-0.263217136569568	0.0	-0.49057919655977994	0.0	-0.0007996947189721288	0.0	0.9998477569862652	0.0	0.01744886383123979	0.0	0.0	1.9995939854244666	0.0	0.0	1.9994208219648166	0.0	-0.7341842260118808	0.0	0.026171901246726623	-1.2963141740245396	0.0	0.02217259998588001
4.105	-0.7411048272665033	0.0	-3.1417688804587086e-05	-0.2669042150652386	0.0	-0.4904494515630479	0.0	-0.0019689445579217477	0.0	0.9998478248071007	0.0	0.017444977156073814	0.0	0.0	1.9991485374565343	0.0	0.0	1.9988567608984957	0.0	-0.7406548465051878	0.0	0.02582178018630769	-1.297517613297041	0.0	-0.04049699185912463
4.11	-0.7476179413088385	0.0	-0.00012792263854080084	-0.27062375845246206	0.0	-0.49032012515875495	0.0	-0.0015348421186604573	0.0	0.9998479040063962	0.0	0.017440437307721823	0.0	0.0	1.9986282299988563	0.0	0.0	1.9984170610204048	0.0	-0.7471675984987937	0.0	0.025945756559107937	-1.3054546255015287	0.0	0.0436443426252299
4.115	-0.754160567201792	0.0	-0.00011510123546061099	-0.27437593300360347	0.0	-0.49018982163597125	0.0	-0.0007868770398709659	0.0	0.9998479545513018	0.0	0.017437539363356697	0.0	0.0	1.9982960995287682	0.0	0.0	1.9981916373535031	0.0	-0.7537059488978762	0.0	0.026182378905882722	-1.3098969541025205	0.0	0.05108508247556893
4.12	-0.7607253113823707	0.0	-8.658585935256273e-05	-0.27816085358019604	0.0	-0.490058272781381	0.0	-0.00017168948317312495	0.0	0.9998479747075184	0.0	0.017436383591382644	0.0	0.0	1.998163637677498	0.0	0.0	1.99814245193964	0.0	-0.7602657676232968	0.0	0.02643803044581309	-1.3140556670129016	0.0	0.05160719910195921
4.125	-0.767310879840288	0.0	-5.954907820322608e-05	-0.28197862531736484	0.0	-0.48992543990342335	0.0	0.0002409518296000364	0.0	0.9998479725080585	0.0	0.01743650971374947	0.0	0.0	1.9981780924336454	0.0	0.0	1.9982114795541503	0.0	-0.766846382255062	0.0	0.02669486633141478	-1.3181965230609458	0.0	0.051194727617365904
4.13	-0.7739170776869794	0.0	-3.6979815641005365e-05	-0.28582935194730497	0.0	-0.48979132835846306	0.0	0.0004914113460946219	0.0	0.9998479560606759	0.0	0.01743745281749023	0.0	0.0	1.998286180594884	0.0	0.0	1.9983522585348306	0.0	-0.7734477253355058	0.0	0.02694922401724684	-1.322342615074044	0.0	0.050549612502812674
4.135	-0.7805438973818092	0.0	-1.924717385932161e-05	-0.2897131371546585	0.0	-0.48965595327362343	0.0	0.0006349409642891256	0.0	0.9998479312093543	0.0	0.01743887771183676	0.0	0.0	1.998449486291172	0.0	0.0	1.9985341557222993	0.0	-0.7800698192118912	0.0	0.027200243820310784	-1.3264965526594545	0.0	0.04987137868725205
4.14	-0.7871913865641514	0.0	-5.893444520136572e-06	-0.2936300847944805	0.0	-0.48951933126408204	0.0	0.0007147320981858739	0.0	0.9998479016160084	0.0	0.01744057434660819	0.0	0.0	1.9986439358873207	0.0	0.0	1.9987389113858423	0.0	-0.7867127063734879	0.0	0.027448073606812364	-1.3306601528814708	0.0	0.04928864662813732
4.1450000000000005	-0.7938596190261239	0.0	3.927649300181054e-06	-0.2975802989583138	0.0	-0.48938147674912386	0.0	0.0007589319086866914	0.0	0.9998478693945565	0.0	0.017442421467259144	0.0	0.0	1.9988556325245501	0.0	0.0	1.99895632936237	0.0	-0.7933764373993522	0.0	0.02769338032670386	-1.3348340076105025	0.0	0.048865575130638855
4.15	-0.800548673149737	0.0	1.1146945554904653e-05	-0.3015638839910375	0.0	-0.48924240027152793	0.0	0.0007842167399947175	0.0	0.9998478356993723	0.0	0.01744435286153183	0.0	0.0	1.9990769876839756	0.0	0.0	1.999180990909496	0.0	-0.8000610616623048	0.0	0.02793699727070319	-1.3389243353351732	0.0	0.04658943748809258
4.155	-0.8072586177964369	0.0	1.6588797576822916e-05	-0.3055809444672732	0.0	-0.48910210829534984	0.0	0.0007998562220596395	0.0	0.9998478011321364	0.0	0.017446334019188624	0.0	0.0	1.9993040461826674	0.0	0.0	1.9994101328382026	0.0	-0.8067666210657971	0.0	0.028179698623599078	-1.3435944234638861	0.0	0.056866224428096974
4.16	-0.8139992982013203	0.0	0.0001418489742655244	-0.30963158672270324	0.0	-0.4889605696731905	0.0	0.0005032247603370993	0.0	0.9998477667451245	0.0	0.01744830462439091	0.0	0.0	1.9995298952828837	0.0	0.0	1.9995542961127715	0.0	-0.8134987155849375	0.0	0.02854325373268857	-1.3503156027357281	0.0	0.1119348371228159
4.165	-0.8207789904055074	0.0	0.0004949391654023355	-0.3137160037550766	0.0	-0.48881586627360196	0.0	-0.0008257588358105902	0.0	0.9998477797484885	0.0	0.01744755947101398	0.0	0.0	1.999444493995345	0.0	0.0	1.9993177336318335	0.0	-0.8202620033725803	0.0	0.029131458556901073	-1.350484984415131	0.0	0.025463856813452472
4.17	-0.8275077219193204	0.0	-2.994214314094763e-05	-0.31783414701279505	0.0	-0.4886713030359323	0.0	-0.0019262652492537126	0.0	0.999847850146724	0.0	0.01744352477143441	0.0	0.0	1.9989820811079924	0.0	0.0	1.9987658992868087	0.0	-0.8270051839524265	0.0	0.02883498650975019	-1.3519805395647475	0.0	-0.030842190194585856
4.175	-0.8342929375764062	0.0	-0.00010873398242090293	-0.32198612127200765	0.0	-0.488526824931831	0.0	-0.0014140833935385635	0.0	0.9998479253824488	0.0	0.01743921179103417	0.0	0.0	1.9984877747698402	0.0	0.0	1.9983607942351622	0.0	-0.8337892689408013	0.0	0.028985729431284878	-1.3596062609266713	0.0	0.04644327135872629
4.18	-0.8411059825485294	0.0	-9.976742458827979e-05	-0.3261720802316687	0.0	-0.4883813054027461	0.0	-0.0006554587095112653	0.0	0.9998479703001197	0.0	0.017436636321648106	0.0	0.0	1.998192602836141	0.0	0.0	1.9981730191466618	0.0	-0.8405980077568214	0.0	0.02922795213943415	-1.3639570256046507	0.0	0.051753780439887875
4.1850000000000005	-0.8479411276282798	0.0	-7.6027507115575e-05	-0.33039213702983117	0.0	-0.4882345170703935	0.0	-4.884933501923129e-05	0.0	0.9998479848875809	0.0	0.017435799830456383	0.0	0.0	1.9980967334320734	0.0	0.0	1.9981590248430188	0.0	-0.8474282181521388	0.0	0.02948858731284916	-1.3681455183694013	0.0	0.05278808476672121
4.19	-0.8547973058884074	0.0	-5.1743767409418146e-05	-0.33464639727665585	0.0	-0.48808641426715926	0.0	0.00035311916681480084	0.0	0.9998479775716552	0.0	0.01743621935385843	0.0	0.0	1.9981448145820009	0.0	0.0	1.998260186032637	0.0	-0.854279356106847	0.0	0.029752622735871165	-1.3723124942600196	0.0	0.05281969767860709
4.195	-0.8616742724491139	0.0	-3.0413580860216342e-05	-0.3389349653053934	0.0	-0.48793699237346805	0.0	0.0005955220674212971	0.0	0.999847956422067	0.0	0.017437432095978936	0.0	0.0	1.9982838057235273	0.0	0.0	1.9984307905379879	0.0	-0.8611513246388426	0.0	0.03001580911677774	-1.3764752630935888	0.0	0.05242365347407745
4.2	-0.8685719578056027	0.0	-1.3100755207140195e-05	-0.3432579452159136	0.0	-0.48778626033136135	0.0	0.000733986300696828	0.0	0.9998479271518608	0.0	0.01743911034466967	0.0	0.0	1.9984761481046713	0.0	0.0	1.9986410621242396	0.0	-0.8680441099948504	0.0	0.030276544710146364	-1.380639858472734	0.0	0.051870633325745534
4.205	-0.8754903732951776	0.0	2.4533346023134274e-07	-0.3476154411344715	0.0	-0.487634231528193	0.0	0.00081093738544875	0.0	0.999847893307596	0.0	0.017441050652107222	0.0	0.0	1.9986985247801488	0.0	0.0	1.9988733785724175	0.0	-0.8749577334705503	0.0	0.0305345438986061	-1.3848111126124034	0.0	0.05135192980321695
4.21	-0.8824295749741782	0.0	1.0274329806824703e-05	-0.3520075573475424	0.0	-0.48748091870753396	0.0	0.0008537099407687313	0.0	0.9998478569251213	0.0	0.01744313623549158	0.0	0.0	1.9989375513935375	0.0	0.0	1.9991179484550896	0.0	-0.8818922352521446	0.0	0.030790262990953315	-1.3887419169169801	0.0	0.04553840083553456
4.215	-0.8893896331158309	0.0	1.7828386472064775e-05	-0.35643439835876684	0.0	-0.48732633146830723	0.0	0.0008783763640111034	0.0	0.9998478191105893	0.0	0.017445303645591874	0.0	0.0	1.9991859560937313	0.0	0.0	1.999369584747499	0.0	-0.8888476599404521	0.0	0.03104443957504032	-1.3950369947537697	0.0	0.09107711065428943
4.22	-0.896396923113814	0.0	0.0003493429425113856	-0.3608960841163782	0.0	-0.4871701446423466	0.0	3.1322159521046515e-05	0.0	0.9998477879283932	0.0	0.01744709070842462	0.0	0.0	1.999390769581706	0.0	0.0	1.999378557885228	0.0	-0.8958390067390464	0.0	0.03162340607148805	-1.3985783301274868	0.0	0.07704704907637137
4.225	-0.9033872409664436	0.0	0.00021991076172719762	-0.3653927805398647	0.0	-0.4870110241309109	0.0	-0.001480146826667864	0.0	0.9998478157074137	0.0	0.01744549869179469	0.0	0.0	1.9992083101440945	0.0	0.0	1.9989545270540892	0.0	-0.9028296856805387	0.0	0.03173506190362661	-1.39893496968637	0.0	-0.004973181102112835
4.23	-0.9103855462715387	0.0	-5.89034622494575e-05	-0.3699244216918267	0.0	-0.4868526499000025	0.0	-0.0017839895331714305	0.0	0.9998478937314794	0.0	0.017441026352048916	0.0	0.0	1.9986957397749674	0.0	0.0	1.9984434516993579	0.0	-0.9098337413651879	0.0	0.03169241867506136	-1.4038160696761912	0.0	0.01254204001702441
4.235	-0.9174240270085118	0.0	-9.517028073199772e-05	-0.37449116926354864	0.0	-0.4866937221121182	0.0	-0.001094776611870701	0.0	0.9998479576585853	0.0	0.017437361195088985	0.0	0.0	1.9982756798445354	0.0	0.0	1.998129821302509	0.0	-0.9168694387684024	0.0	0.031894931269753575	-1.4096047991226288	0.0	0.04960576433933305
4.24	-0.9244872517603526	0.0	-8.324450275760316e-05	-0.37909315400320337	0.0	-0.48653361966921205	0.0	-0.00035868605549016253	0.0	0.9998479888140381	0.0	0.017435574668417476	0.0	0.0	1.9980709278402236	0.0	0.0	1.99802706531676	0.0	-0.9239280672613847	0.0	0.03214983859948227	-1.4138889326435755	0.0	0.05312817319428562
4.245	-0.9315722371365519	0.0	-6.169523356227412e-05	-0.3837304854011367	0.0	-0.48637220266269554	0.0	0.00018389859799853507	0.0	0.9998479918418611	0.0	0.017435401036211648	0.0	0.0	1.9980510280300983	0.0	0.0	1.9980797483843784	0.0	-0.9310080049027547	0.0	0.03241807543863391	-1.4180936387207597	0.0	0.05423323274986655
4.25	-0.9386783260342796	0.0	-3.937440175511048e-05	-0.388403269031011	0.0	-0.48620943319334414	0.0	0.0005300850950741719	0.0	0.9998479756571786	0.0	0.01743632913597817	0.0	0.0	1.9981573965990265	0.0	0.0	1.9982316065780312	0.0	-0.9381089344813915	0.0	0.032689881634446916	-1.4222774159397897	0.0	0.054415126251142434
4.255	-0.9458052822662332	0.0	-1.9493110240060188e-05	-0.39311160956633084	0.0	-0.4860453046346479	0.0	0.0007344386997638766	0.0	0.9998479476850578	0.0	0.017437933062003863	0.0	0.0	1.9983412209312184	0.0	0.0	1.9984420077670688	0.0	-0.9452307582052119	0.0	0.032961281584478766	-1.426451638864216	0.0	0.05410327176073292
4.26	-0.9529530194542297	0.0	-3.2290129457335273e-06	-0.39785561138846687	0.0	-0.48587982396140333	0.0	0.0008498743214454684	0.0	0.999847912905295	0.0	0.017439927133532433	0.0	0.0	1.9985697594502723	0.0	0.0	1.9986854788257458	0.0	-0.9523734487246547	0.0	0.03323058019117255	-1.430625376660825	0.0	0.053616220263437896
4.265	-0.9601215412594787	0.0	9.421107339567427e-06	-0.40263537885428835	0.0	-0.48571300289590624	0.0	0.0009139076998186335	0.0	0.9998478743165521	0.0	0.017442139323209514	0.0	0.0	1.9988232962788024	0.0	0.0	1.9989472940960662	0.0	-0.9595370205170071	0.0	0.03349746758679504	-1.4344673177223488	0.0	0.045810208971530424
4.2700000000000005	-0.9673109002149374	0.0	1.9085944584291323e-05	-0.4074510164572765	0.0	-0.48554485255444596	0.0	0.0009498419991089123	0.0	0.9998478336057827	0.0	0.017444472858854292	0.0	0.0	1.9990907404569553	0.0	0.0	1.9992194037848323	0.0	-0.9667215103761037	0.0	0.03376239643717084	-1.4416639151316413	0.0	0.11090115560233259
4.275	-0.9745567918159496	0.0	0.00046881366970213316	-0.4123026660710357	0.0	-0.4853745719071234	0.0	-0.00024506115013130065	0.0	0.999847810450195	0.0	0.017445799994648813	0.0	0.0	1.99924284216322	0.0	0.0	1.9991491989367065	0.0	-0.9739472123534623	0.0	0.03446719901417326	-1.443541074320931	0.0	0.060842299538292274
4.28	-0.9817557057928988	0.0	8.956732794829263e-05	-0.41719042726365496	0.0	-0.4852022683339189	0.0	-0.0017379076646218618	0.0	0.9998478545849147	0.0	0.0174432703770219	0.0	0.0	1.998952925219681	0.0	0.0	1.9986513250648752	0.0	-0.9811551485083976	0.0	0.03433436227405834	-1.443899444655622	0.0	-0.020785842879456295
4.285	-0.9889928939299738	0.0	-6.60292592844247e-05	-0.4221142856728521	0.0	-0.48503048743884214	0.0	-0.0015562642629312236	0.0	0.9998479308690563	0.0	0.01743889722342957	0.0	0.0	1.9984517224950962	0.0	0.0	1.9982054881945102	0.0	-0.9883936611161026	0.0	0.034422656309597476	-1.4505385390103525	0.0	0.034996331116250376
4.29	-0.996261987860109	0.0	-8.309509068210807e-05	-0.4270744079800123	0.0	-0.484857822543177	0.0	-0.0007908150868887451	0.0	0.9998479824189597	0.0	0.01743594139246559	0.0	0.0	1.9981129577097854	0.0	0.0	1.9979789363602403	0.0	-0.9956591337978888	0.0	0.034653205373331976	-1.4554067562776034	0.0	0.0517321407025891
4.295	-1.003554443677434	0.0	-7.0241957473171e-05	-0.43207091381386287	0.0	-0.48468390147149665	0.0	-9.853198272614412e-05	0.0	0.9998480011048344	0.0	0.017434869835316027	0.0	0.0	1.9979901476372899	0.0	0.0	1.9979507090264539	0.0	-1.002946782328771	0.0	0.03491816394138734	-1.459676862999541	0.0	0.05464382540202213
4.3	-1.0108685648060594	0.0	-4.9710448860783215e-05	-0.4371039112507203	0.0	-0.48450862250230636	0.0	0.00038405261857365396	0.0	0.9998479941223501	0.0	0.01743527025952144	0.0	0.0	1.9980360398469874	0.0	0.0	1.99806073199723	0.0	-1.0102557128330882	0.0	0.03519449488622188	-1.4638957036567444	0.0	0.055812769593459904
4.305	-1.0182038340301063	0.0	-2.8376135521809768e-05	-0.44217350599964383	0.0	-0.4843319508513203	0.0	0.0006832612929657648	0.0	0.9998479702988957	0.0	0.01743663639266731	0.0	0.0	1.9981926109756085	0.0	0.0	1.998256471939188	0.0	-1.0175856816177253	0.0	0.03547434288859538	-1.4680895630042046	0.0	0.05602899005534579
4.3100000000000005	-1.0255600149609456	0.0	-9.320410550188783e-06	-0.4472798029565918	0.0	-0.48415387970235707	0.0	0.000857077504904278	0.0	0.9998479363687782	0.0	0.01743858189785913	0.0	0.0	1.9984155833508404	0.0	0.0	1.998502006557921	0.0	-1.0249365858901185	0.0	0.035753870775388684	-1.4722714556521819	0.0	0.055740188758558046
4.315	-1.0329370175849526	0.0	6.3001986209684525e-06	-0.4524229066941767	0.0	-0.4839744154975687	0.0	0.0009545292142407645	0.0	0.9998478966684194	0.0	0.017440857984998667	0.0	0.0	1.9986764433971453	0.0	0.0	1.9987754590349107	0.0	-1.0323083930047605	0.0	0.03603143165140101	-1.476103354165274	0.0	0.04768777874692096
4.32	-1.0403348474233274	0.0	1.8543358213335535e-05	-0.4576029217466875	0.0	-0.4837935690820202	0.0	0.0010086714287730848	0.0	0.9998478537506384	0.0	0.017443318198090422	0.0	0.0	1.9989584059443621	0.0	0.0	1.9990644221138314	0.0	-1.0397011165902388	0.0	0.036306793663153494	-1.483419554814399	0.0	0.11532680265881462
4.325	-1.047790385578305	0.0	0.00048559949753471305	-0.46281999460866563	0.0	-0.48361044439001943	0.0	-0.00022672786932155926	0.0	0.9998478301400853	0.0	0.017444671498301874	0.0	0.0	1.999113506325197	0.0	0.0	1.998999469363781	0.0	-1.0471357259687712	0.0	0.03703645926589861	-1.485036123170395	0.0	0.05960336047553747
4.33	-1.0551945725689413	0.0	7.079124959980554e-05	-0.468074205419064	0.0	-0.48342556295659594	0.0	-0.001730825586689117	0.0	0.9998478773469781	0.0	0.017441965607745507	0.0	0.0	1.9988033869242827	0.0	0.0	1.998503624357828	0.0	-1.0545500763133409	0.0	0.03687448353184059	-1.4854496962273998	0.0	-0.020780703601780186
4.335	-1.0626421330388014	0.0	-5.789698819057315e-05	-0.4733655627308495	0.0	-0.48324097508466407	0.0	-0.0014369401417810186	0.0	0.9998479503030122	0.0	0.01743778295497832	0.0	0.0	1.9983240173173369	0.0	0.0	1.9980919713301433	0.0	-1.0619979033993534	0.0	0.03699674897236555	-1.4923375974038589	0.0	0.04035417731670203
4.34	-1.0701195803095918	0.0	-7.382103884231405e-05	-0.47869422683045637	0.0	-0.48305541484629505	0.0	-0.0006561068174121333	0.0	0.9998479961300212	0.0	0.01743515512705554	0.0	0.0	1.9980228446325023	0.0	0.0	1.9979040105724057	0.0	-1.0694715542612516	0.0	0.037235953530995826	-1.497013492876979	0.0	0.05276529789671666
4.345	-1.0776202116157096	0.0	-6.2697274500203e-05	-0.48406031496890617	0.0	-0.48286856515142174	0.0	2.3922149651337386e-05	0.0	0.9998480091740997	0.0	0.017434407076657464	0.0	0.0	1.9979371113399256	0.0	0.0	1.9979108637634653	0.0	-1.0769672937078254	0.0	0.03750696862013838	-1.501299996723393	0.0	0.05589609728558591
4.3500000000000005	-1.0851426160112476	0.0	-4.307894882431492e-05	-0.48946393534503857	0.0	-0.4826803250048553	0.0	0.0004912541616046619	0.0	0.9998479971941349	0.0	0.01743509410364564	0.0	0.0	1.9980158508017414	0.0	0.0	1.9980515977141062	0.0	-1.0844843892084979	0.0	0.037790322840220214	-1.505535263417642	0.0	0.05730121059589535
4.355	-1.092686254609658	0.0	-2.1994929274378178e-05	-0.49490519401790384	0.0	-0.48249065503164873	0.0	0.0007787320612784083	0.0	0.9998479689695219	0.0	0.017436712621596774	0.0	0.0	1.99820134749571	0.0	0.0	1.99827468801652	0.0	-1.0920225831739199	0.0	0.03807793760902552	-1.5097392562826828	0.0	0.05763159894990634
4.36	-1.1002508604456265	0.0	-2.8334683531338633e-06	-0.5003841961353823	0.0	-0.4822995455984661	0.0	0.0009450684027542836	0.0	0.9998479310534305	0.0	0.017438886653149643	0.0	0.0	1.9984505110460409	0.0	0.0	1.998545430170665	0.0	-1.0995817541849486	0.0	0.03836563280633917	-1.513681750798368	0.0	0.05203699075135941
4.365	-1.1078363247615517	0.0	1.3057166804360555e-05	-0.5059010464452451	0.0	-0.48210700174410653	0.0	0.0010382524693153539	0.0	0.9998478876188679	0.0	0.01744137676949516	0.0	0.0	1.9987359007653427	0.0	0.0	1.998842867593469	0.0	-1.107161858142471	0.0	0.03865155241209568	-1.5200007049345952	0.0	0.09794851282679656
4.37	-1.115468635844045	0.0	0.0003474971115406835	-0.5114558640978224	0.0	-0.4819127191383425	0.0	0.00023951602546712022	0.0	0.999847848209655	0.0	0.017443635803699717	0.0	0.0	1.9989948064045922	0.0	0.0	1.998911483880394	0.0	-1.1147776839090042	0.0	0.03925702181969999	-1.5230738390537422	0.0	0.07355179766090857
4.375	-1.1230789178186718	0.0	0.0001603970529538233	-0.5170488021975856	0.0	-0.4817156471623302	0.0	-0.0014965930940051895	0.0	0.9998478743047078	0.0	0.0174421400029719	0.0	0.0	1.9988233741857135	0.0	0.0	1.9984827415407196	0.0	-1.122389978670289	0.0	0.039332138946304274	-1.5239372599678225	0.0	0.002486185285448944
4.38	-1.1307088534463692	0.0	-3.141873688119928e-05	-0.522679818598697	0.0	-0.4815189493793669	0.0	-0.001547534868500641	0.0	0.9998479464324099	0.0	0.01743800488638803	0.0	0.0	1.9983494526510615	0.0	0.0	1.9980394054576476	0.0	-1.130022288064268	0.0	0.039397217220353414	-1.5292050978536884	0.0	0.028296165201709828
4.385	-1.138372269048124	0.0	-6.516790581868545e-05	-0.5283490705733416	0.0	-0.48132142570881115	0.0	-0.0007978664231246222	0.0	0.9998479983335186	0.0	0.017435028763498207	0.0	0.0	1.998008362234103	0.0	0.0	1.9978108335643463	0.0	-1.137682455786512	0.0	0.03962394450019613	-1.534395563934347	0.0	0.052052554953729846
4.39	-1.1460597423897176	0.0	-6.104704424774682e-05	-0.5340566806047816	0.0	-0.48112264195492377	0.0	-6.518971564453344e-05	0.0	0.9998480165114527	0.0	0.017433986280942563	0.0	0.0	1.997888884373049	0.0	0.0	1.997792158086476	0.0	-1.1453651949675674	0.0	0.03989369633873225	-1.5387269072502578	0.0	0.056285603572233764
4.3950000000000005	-1.1537693739327812	0.0	-4.393588325799817e-05	-0.5398027584448581	0.0	-0.4809224603217413	0.0	0.00046013377564725806	0.0	0.9998480071134512	0.0	0.0174345252528201	0.0	0.0	1.9979506553892332	0.0	0.0	1.997923976703256	0.0	-1.153069500060623	0.0	0.04018081859611117	-1.5429919434098698	0.0	0.05840165695452556
4.4	-1.1615004639220259	0.0	-2.2913119235369654e-05	-0.5455874109689594	0.0	-0.48072082210243827	0.0	0.000790539728221304	0.0	0.9998479792480581	0.0	0.01743612322467369	0.0	0.0	1.998133797314037	0.0	0.0	1.9981504496530784	0.0	-1.1607950278221417	0.0	0.040475073773339684	-1.5472144244417527	0.0	0.059143334107080475
4.405	-1.169252641237355	0.0	-2.64155379542397e-06	-0.5514107437956864	0.0	-0.4805177071688521	0.0	0.0009841145998183724	0.0	0.9998479401756591	0.0	0.01743836362802616	0.0	0.0	1.9983905676664828	0.0	0.0	1.9984323777187123	0.0	-1.1685416020185144	0.0	0.04077086455978406	-1.551072177240894	0.0	0.05167126791829624
4.41	-1.177025733412419	0.0	1.4769380783517905e-05	-0.5572728619331998	0.0	-0.48031311555814166	0.0	0.0010933022423505647	0.0	0.9998478946583479	0.0	0.017440973218313074	0.0	0.0	1.99868965017112	0.0	0.0	1.9987455857398067	0.0	-1.176309145164193	0.0	0.041065464001690616	-1.5583219983400214	0.0	0.11778711102634876
4.415	-1.1848556932328111	0.0	0.00047607547904599364	-0.5631739077763487	0.0	-0.4801062377934726	0.0	-7.592402882985219e-05	0.0	0.9998478645196831	0.0	0.017442700907816303	0.0	0.0	1.9988876589259785	0.0	0.0	1.9987238351077288	0.0	-1.1841181081625787	0.0	0.04180366434782083	-1.5599958987006466	0.0	0.06319262113182074
4.42	-1.1926359481343372	0.0	7.71181372720827e-05	-0.5691139646291977	0.0	-0.47989753874122526	0.0	-0.0016412308357553283	0.0	0.9998479090073978	0.0	0.017440150603207253	0.0	0.0	1.9985953710839848	0.0	0.0	1.9982536571072513	0.0	-1.191907757074254	0.0	0.04167024541605294	-1.5605231145010778	0.0	-0.014815951356661935
4.425	-1.2004593134638415	0.0	-3.91447190001049e-05	-0.5750930489214572	0.0	-0.4796888944108782	0.0	-0.0013003742781690824	0.0	0.9998479768464534	0.0	0.01743626094044458	0.0	0.0	1.9981495807783567	0.0	0.0	1.997881127317619	0.0	-1.1997307433769642	0.0	0.04181755860677337	-1.5672942249291315	0.0	0.0436611719315821
4.43	-1.208311286018646	0.0	-5.9445654729614834e-05	-0.5811113133734106	0.0	-0.4794792069456089	0.0	-0.0005056882739583348	0.0	0.999848016344143	0.0	0.01743399587630454	0.0	0.0	1.9978899840876778	0.0	0.0	1.9977362582983837	0.0	-1.2075788400092125	0.0	0.04206557515471065	-1.5718971854882988	0.0	0.05433119532831608
4.4350000000000005	-1.2161865783398882	0.0	-5.204351067304638e-05	-0.5871688742097667	0.0	-0.4792681853907129	0.0	0.00017661621294460422	0.0	0.9998480227610852	0.0	0.017433627857777714	0.0	0.0	1.9978478058606755	0.0	0.0	1.9977868551163602	0.0	-1.215449118146498	0.0	0.0423466319411876	-1.5762245027428772	0.0	0.058188886638637964
4.44	-1.2240839176795406	0.0	-3.3633219151514455e-05	-0.5932658404238846	0.0	-0.47905571547062753	0.0	0.0006428534974744749	0.0	0.9998480041444535	0.0	0.017434695520381127	0.0	0.0	1.997970169580554	0.0	0.0	1.9979710190776128	0.0	-1.2233409241012265	0.0	0.042642960371667794	-1.5804906762520963	0.0	0.06010589788807408
4.445	-1.2320026699126037	0.0	-1.2267752237011957e-05	-0.5994023188024696	0.0	-0.4788417459865566	0.0	0.0009286303674911635	0.0	0.9998479693496813	0.0	0.017436690822927835	0.0	0.0	1.998198849172439	0.0	0.0	1.9982370520815373	0.0	-1.2312539459485037	0.0	0.04294530714411225	-1.5844693646239159	0.0	0.05537553800739718
4.45	-1.2399424973846362	0.0	7.900041794662687e-06	-0.6055784149700342	0.0	-0.4786262608942271	0.0	0.0010938167954838644	0.0	0.999847924926266	0.0	0.01743923794712352	0.0	0.0	1.9984907724928322	0.0	0.0	1.9985504075112461	0.0	-1.2391880218501328	0.0	0.04324862290482338	-1.5907993127975826	0.0	0.10149468364126375
4.455	-1.2479290163605015	0.0	0.0003442104471976096	-0.6117942489934761	0.0	-0.47840895811122647	0.0	0.00034399883804230166	0.0	0.9998478818834701	0.0	0.017441705555268236	0.0	0.0	1.9987735825716524	0.0	0.0	1.9986489559191323	0.0	-1.2471577382603127	0.0	0.043869399925988456	-1.5937587204164125	0.0	0.07455170233222042
4.46	-1.2558924074755904	0.0	0.00014654357919350924	-0.6180499664136522	0.0	-0.4781889102138958	0.0	-0.0014547659155288387	0.0	0.9998479067549705	0.0	0.017440279735060654	0.0	0.0	1.9986101707553043	0.0	0.0	1.9982321961834357	0.0	-1.2551233038278442	0.0	0.0439460216082016	-1.5947820045752792	0.0	0.006914932820450739
4.465	-1.2638785983398917	0.0	-1.6890019955099116e-05	-0.6243455382248727	0.0	-0.47796901765941535	0.0	-0.0014075384825704088	0.0	0.9998479744950988	0.0	0.017436395773807265	0.0	0.0	1.9981650338928483	0.0	0.0	1.997828966110668	0.0	-1.2631106785452104	0.0	0.044051394631204804	-1.60011973312821	0.0	0.03415217382226471
4.47	-1.2718959795799636	0.0	-5.158768774607988e-05	-0.6306811167328087	0.0	-0.47774819087160114	0.0	-0.0006340274580556081	0.0	0.9998480196178566	0.0	0.017433808126323714	0.0	0.0	1.997868466254347	0.0	0.0	1.9976473306234581	0.0	-1.271124623854797	0.0	0.044289684577327106	-1.6051244895601946	0.0	0.053703229684962106
4.4750000000000005	-1.279937342661325	0.0	-5.042381715867563e-05	-0.6370568219214401	0.0	-0.4775260540566416	0.0	9.819142884960174e-05	0.0	0.9998480306234255	0.0	0.01743317693347771	0.0	0.0	1.9977961258881602	0.0	0.0	1.9976754603957454	0.0	-1.2791611144882422	0.0	0.0445695732496566	-1.609490013474376	0.0	0.058505297679623446
4.48	-1.2880010993624735	0.0	-3.426216537883862e-05	-0.6434727640579571	0.0	-0.47730246252796155	0.0	0.0006174541699551544	0.0	0.9998480142313513	0.0	0.01743411704561148	0.0	0.0	1.9979038711780956	0.0	0.0	1.9978523479856514	0.0	-1.2872193219984875	0.0	0.04486925677471824	-1.6137847793651128	0.0	0.06109882620721636
4.485	-1.2960864803262364	0.0	-1.2870951043687949e-05	-0.6499290506875434	0.0	-0.4770773472297392	0.0	0.0009419544894081775	0.0	0.9998479796433928	0.0	0.01743610055493139	0.0	0.0	1.9981311991579553	0.0	0.0	1.9981221980693338	0.0	-1.2952988628862718	0.0	0.045177654349556465	-1.617717252530578	0.0	0.055365672095368065
4.49	-1.3041930511617632	0.0	8.426810343231807e-06	-0.6564257878817487	0.0	-0.47685068223283983	0.0	0.001131505431179508	0.0	0.9998479340655131	0.0	0.017438713956644123	0.0	0.0	1.9984307184744383	0.0	0.0	1.9984463504978474	0.0	-1.3033995242771275	0.0	0.045488403804093004	-1.6246732045819687	0.0	0.11507026668625005
4.495	-1.3123531184637771	0.0	0.00043071893824081806	-0.6629631078688369	0.0	-0.4766218869781135	0.0	0.00014776130026560925	0.0	0.9998478954291928	0.0	0.0174409290277398	0.0	0.0	1.998684585534082	0.0	0.0	1.9984886809922502	0.0	-1.3115396975655271	0.0	0.04620080915893266	-1.6267702093278695	0.0	0.0694983160842907
4.5	-1.320472321760268	0.0	0.000102262783287588	-0.6695411196242508	0.0	-0.4763908664317306	0.0	-0.0015253571664451998	0.0	0.9998479313975124	0.0	0.017438866925647726	0.0	0.0	1.9984482500970289	0.0	0.0	1.9980516983528136	0.0	-1.3196656071576123	0.0	0.0461502792485528	-1.627505811527763	0.0	-0.004182851340070806
4.505	-1.3286283849637557	0.0	-1.9956417320126315e-05	-0.6761598250664432	0.0	-0.4761598066683984	0.0	-0.0012378274583532895	0.0	0.9998479957261296	0.0	0.017435178289213902	0.0	0.0	1.99802549922386	0.0	0.0	1.9976970869071684	0.0	-1.3278213133704784	0.0	0.04630275894017738	-1.6337731130295057	0.0	0.04323691214123416
4.51	-1.3368129936108866	0.0	-4.7490743018149626e-05	-0.6828193740358116	0.0	-0.47592768392747375	0.0	-0.0004353961648254303	0.0	0.9998480324281729	0.0	0.01743307342519695	0.0	0.0	1.997784262910098	0.0	0.0	1.9975723550938649	0.0	-1.3360021020250725	0.0	0.046554973134455	-1.638451839315939	0.0	0.0554882190361667
4.515	-1.3450212560356045	0.0	-4.401460942537443e-05	-0.6895198833173897	0.0	-0.4756941968467677	0.0	0.00026753221377062757	0.0	0.9998480353373065	0.0	0.017432906575406935	0.0	0.0	1.9977651404265686	0.0	0.0	1.997648997427529	0.0	-1.3442052697234383	0.0	0.04684414551767627	-1.642821959716334	0.0	0.060192489201466026
4.5200000000000005	-1.3532518693960478	0.0	-2.6560537820917992e-05	-0.6962614629064462	0.0	-0.47545921149301257	0.0	0.0007515264875856053	0.0	0.9998480123513521	0.0	0.017434224863470387	0.0	0.0	1.9979162280727258	0.0	0.0	1.9978642939071838	0.0	-1.352430147622335	0.0	0.04715207872637388	-1.6471101131514991	0.0	0.06248241706247604
4.525	-1.361504085328649	0.0	-4.483422453939334e-06	-0.703044220341611	0.0	-0.4752226629362994	0.0	0.0010491913367365706	0.0	0.9998479725412179	0.0	0.01743650781424461	0.0	0.0	1.998177874733393	0.0	0.0	1.9981648650846673	0.0	-1.3606763605655985	0.0	0.04746805432344043	-1.6512675036354674	0.0	0.061485118481723056
4.53	-1.3697783995294501	0.0	2.8448155401410117e-05	-0.7098682617364016	0.0	-0.47498452750698106	0.0	0.0011935855604651572	0.0	0.9998479226948486	0.0	0.01743936588115402	0.0	0.0	1.9985054348826443	0.0	0.0	1.9985068021601795	0.0	-1.368944221973263	0.0	0.047797298556819724	-1.656926508098807	0.0	0.09300422253793253
4.535	-1.3780890615880295	0.0	0.00025749516563069823	-0.7167337609116352	0.0	-0.47474331232855727	0.0	-0.0009889879618004492	0.0	0.9998479178226763	0.0	0.017439645214199034	0.0	0.0	1.9985374489604502	0.0	0.0	1.9982234779791774	0.0	-1.377241814312735	0.0	0.04831679705233964	-1.6594129798212918	0.0	0.05661347351396777
4.54	-1.386381956012694	0.0	2.286861908199256e-05	-0.7236406959757918	0.0	-0.4745017556438338	0.0	-0.0014607041098283551	0.0	0.9998479791921729	0.0	0.017436126429417415	0.0	0.0	1.9981341646064559	0.0	0.0	1.9978050170761246	0.0	-1.3855381871134989	0.0	0.04836176720529163	-1.661743629707994	0.0	0.018208615829233672
4.545	-1.3947098630481958	0.0	-3.43346864550577e-05	-0.7305891896008366	0.0	-0.4742594175476503	0.0	-0.0007597888089606342	0.0	0.9998480290517477	0.0	0.017433267073966398	0.0	0.0	1.9978064567972804	0.0	0.0	1.997587353615751	0.0	-1.3938633028982077	0.0	0.04858699510037764	-1.6674444344691897	0.0	0.053014108048039105
4.55	-1.4030627379627636	0.0	-4.367203331478368e-05	-0.7375793673277932	0.0	-0.4740157990760418	0.0	2.711858867686506e-05	0.0	0.9998480445236991	0.0	0.01743237969049331	0.0	0.0	1.9977047546866677	0.0	0.0	1.9975951225191386	0.0	-1.4022115128745656	0.0	0.04886636599136968	-1.6718709838658161	0.0	0.059255225753526014
4.555	-1.4114385722027234	0.0	-3.167002893698186e-05	-0.7446113414323228	0.0	-0.4737707092978531	0.0	0.0006162916654354167	0.0	0.9998480296743213	0.0	0.01743323136763611	0.0	0.0	1.9978023645313245	0.0	0.0	1.9977716770760312	0.0	-1.4105817543331167	0.0	0.04917274085808168	-1.6762157929667842	0.0	0.06297588523006398
4.5600000000000005	-1.4198364009546514	0.0	-1.0560568380037108e-05	-0.7516852207675245	0.0	-0.47352404977122875	0.0	0.0009944426623686971	0.0	0.9998479938950456	0.0	0.01743528329546694	0.0	0.0	1.9980375338834386	0.0	0.0	1.9980565639136387	0.0	-1.418973539560822	0.0	0.04949241972171242	-1.6802718060318411	0.0	0.059885394854356074
4.565	-1.4282556274661786	0.0	1.2397525481662925e-05	-0.75880111222448	0.0	-0.47327577741124177	0.0	0.0012184578991436992	0.0	0.9998479452187276	0.0	0.01743807447596876	0.0	0.0	1.9983574282423473	0.0	0.0	1.9984056263893153	0.0	-1.4273865688102518	0.0	0.049816871829315705	-1.6864896080994471	0.0	0.1035118886315444
4.57	-1.4367188933224069	0.0	0.0003236361307295378	-0.7659591796596609	0.0	-0.4730246184002775	0.0	-0.000653999096337633	0.0	0.999847925496678	0.0	0.01743920524378067	0.0	0.0	1.9984870243958073	0.0	0.0	1.9982182694491877	0.0	-1.4358337203297364	0.0	0.050426290069980485	-1.688792022388134	0.0	0.06285513450752697
4.575	-1.4451540966823377	0.0	4.523778718991101e-05	-0.7731594324021741	0.0	-0.47277263529704444	0.0	-0.00146382881602734	0.0	0.9998479812313955	0.0	0.017436009493249235	0.0	0.0	1.9981207626712894	0.0	0.0	1.9977989133837477	0.0	-1.4442738239984658	0.0	0.050432990326333506	-1.690526566605418	0.0	0.011315264300746619
4.58	-1.4536267509250507	0.0	-2.4501859704502396e-05	-0.7804019668049011	0.0	-0.4725199660818965	0.0	-0.0008253041699780736	0.0	0.9998480331187434	0.0	0.017433033818811873	0.0	0.0	1.997779723662878	0.0	0.0	1.9975624811549761	0.0	-1.452744059723246	0.0	0.050650059627403196	-1.6965189115813943	0.0	0.05250591256618145
4.585	-1.4621249117737798	0.0	-3.969390616755108e-05	-0.7876869117875123	0.0	-0.47226603743127415	0.0	-1.725251698983163e-05	0.0	0.9998480511139546	0.0	0.017432001697348428	0.0	0.0	1.9976614332801232	0.0	0.0	1.9975575386729287	0.0	-1.4612376899620023	0.0	0.050928112430652615	-1.7009743030297713	0.0	0.05943763464978345
4.59	-1.4706463239815843	0.0	-3.0242008388481742e-05	-0.7950143806751281	0.0	-0.47201063416041283	0.0	0.0006071892202162654	0.0	0.99984803742566	0.0	0.017432786799792262	0.0	0.0	1.9977514130661027	0.0	0.0	1.99773148557135	0.0	-1.4697535133431452	0.0	0.05123691215056249	-1.7053451616416324	0.0	0.06375375099537742
4.595	-1.4791899333208485	0.0	-9.533848459866492e-06	-0.802384483008856	0.0	-0.47175364216590343	0.0	0.0010139343138247472	0.0	0.9998480013847687	0.0	0.01743485378300086	0.0	0.0	1.9979883078978742	0.0	0.0	1.9980219563557782	0.0	-1.4782909947758733	0.0	0.05156155243262085	-1.7094801862316193	0.0	0.062364700381865756
4.6000000000000005	-1.4877550571034415	0.0	1.4142992114492547e-05	-0.8097973261323016	0.0	-0.471495008656605	0.0	0.0012567246673121537	0.0	0.999847951417558	0.0	0.01743771904991785	0.0	0.0	1.9983166932232368	0.0	0.0	1.998381981453013	0.0	-1.4868497885357168	0.0	0.05189235458342645	-1.7151754651584992	0.0	0.09465123858533066
4.605	-1.496357865326264	0.0	0.00025024622956841997	-0.8172530808851031	0.0	-0.4712333244737882	0.0	-0.0009314634920553562	0.0	0.9998479428203778	0.0	0.01743821199017377	0.0	0.0	1.99837318860596	0.0	0.0	1.9981151368186865	0.0	-1.495439080328678	0.0	0.052429769870652364	-1.7178322769684489	0.0	0.06189349524644029
4.61	-1.5049438049764878	0.0	3.454084163900201e-05	-0.8247517335876934	0.0	-0.4709711139835126	0.0	-0.0013705301988881447	0.0	0.9998480009005789	0.0	0.0174348815502413	0.0	0.0	1.9979914902729676	0.0	0.0	1.9977225088382289	0.0	-1.5040276698560713	0.0	0.05250357733969471	-1.7201060364227232	0.0	0.02217154784893427
4.615	-1.5135631690454083	0.0	-2.3961014328990776e-05	-0.8322934030188675	0.0	-0.47070804247330983	0.0	-0.0006518399530747016	0.0	0.9998480464009444	0.0	0.017432272019782515	0.0	0.0	1.9976924146569508	0.0	0.0	1.997535770447083	0.0	-1.5126441087206022	0.0	0.05273772476798053	-1.7256930393599177	0.0	0.05439516989498792
4.62	-1.522207501644431	0.0	-3.54887587010829e-05	-0.8398782130554815	0.0	-0.4704436498177126	0.0	0.00014488338045518258	0.0	0.9998480569318418	0.0	0.01743166799759996	0.0	0.0	1.9976231882945361	0.0	0.0	1.9975772764781914	0.0	-1.5212836534857472	0.0	0.05302570089111573	-1.7301501742802576	0.0	0.06118169851752758
4.625	-1.53087501326391	0.0	-2.3795282667554753e-05	-0.8475062764910001	0.0	-0.4701777368060397	0.0	0.0007389342992039137	0.0	0.9998480368306555	0.0	0.017432820926150935	0.0	0.0	1.9977553242531103	0.0	0.0	1.9977889655616006	0.0	-1.5299453670044911	0.0	0.05334304808832127	-1.7342609885205345	0.0	0.05968452353547725
4.63	-1.53956467522769	0.0	-1.7602253333345378e-06	-0.8551777027900388	0.0	-0.469910194855609	0.0	0.0011190568985897872	0.0	0.9998479956563333	0.0	0.017435182292481196	0.0	0.0	1.9980259580342654	0.0	0.0	1.9981095517482215	0.0	-1.5386287256703681	0.0	0.05367526199136899	-1.740849129112084	0.0	0.11148494801670994
4.635	-1.548303311034559	0.0	0.0003634723695692003	-0.8628926158971785	0.0	-0.46964062417124164	0.0	0.00044097619415829213	0.0	0.9998479494745296	0.0	0.017437830459638384	0.0	0.0	1.9983294617782663	0.0	0.0	1.9982358821221766	0.0	-1.5473490268863372	0.0	0.05435314215787795	-1.7435159802873135	0.0	0.07814784036422653
4.64	-1.5570132089143696	0.0	0.00012839997725024765	-0.8706511460989604	0.0	-0.46936845366069513	0.0	-0.0013477119410486653	0.0	0.9998479750991887	0.0	0.01743636113441221	0.0	0.0	1.9981610639070524	0.0	0.0	1.9978497910910693	0.0	-1.5560619847937913	0.0	0.05441735656656652	-1.744611060734495	0.0	0.01203508038850008
4.6450000000000005	-1.5657524440143284	0.0	7.49191023479408e-06	-0.8784532908694307	0.0	-0.46909599530417057	0.0	-0.001083927509335114	0.0	0.9998480324925567	0.0	0.01743306973314822	0.0	0.0	1.9977838397681942	0.0	0.0	1.9975392687331541	0.0	-1.564800481174637	0.0	0.05459093426804796	-1.7502191303723436	0.0	0.04493426213797898
4.65	-1.5745195555627058	0.0	-2.825965839714798e-05	-0.8862991916768239	0.0	-0.4688224019241468	0.0	-0.0002593445309535153	0.0	0.9998480620672111	0.0	0.01743137343991609	0.0	0.0	1.9975894293409675	0.0	0.0	1.9974649719978368	0.0	-1.5735636963326958	0.0	0.054855494049419105	-1.754954408282161	0.0	0.058243261408455135
4.655	-1.5833107818720549	0.0	-2.8983590687657648e-05	-0.8941889655613434	0.0	-0.4685473709997925	0.0	0.0004710035561928894	0.0	0.9998480566912656	0.0	0.017431681796670588	0.0	0.0	1.9976247697918532	0.0	0.0	1.9975999045773645	0.0	-1.582349571375233	0.0	0.05516218629241986	-1.7593934957860362	0.0	0.06424765259354752
4.66	-1.5921248233409064	0.0	-1.1523498156560315e-05	-0.9021227240424834	0.0	-0.46827074045526856	0.0	0.0009752301085660783	0.0	0.9998480243665604	0.0	0.017433535781572983	0.0	0.0	1.9978372531010813	0.0	0.0	1.997879287423739	0.0	-1.591157441901629	0.0	0.05549277707703442	-1.763601685843763	0.0	0.06453770854111934
4.665	-1.600960757980539	0.0	1.2867140044038353e-05	-0.9101005760700912	0.0	-0.46799242527745993	0.0	0.0012852953877089425	0.0	0.9998479745125075	0.0	0.017436394776383025	0.0	0.0	1.9981649195791	0.0	0.0	1.9982474974294557	0.0	-1.5999868359789404	0.0	0.055834339333357644	-1.7691607886473837	0.0	0.0938793250890495
4.67	-1.609832591869983	0.0	0.00022847640852834567	-0.918122690242223	0.0	-0.4677110361853396	0.0	-0.0009578164673620228	0.0	0.9998479674689037	0.0	0.01743679867022725	0.0	0.0	1.998211209441795	0.0	0.0	1.997973103223816	0.0	-1.6088457120117292	0.0	0.05636045586445422	-1.7719707262394913	0.0	0.06446895235992778
4.675	-1.6186914262232275	0.0	4.023572577931483e-05	-0.9261890565578426	0.0	-0.4674290589902312	0.0	-0.0012666902753271205	0.0	0.9998480233245656	0.0	0.01743359554191434	0.0	0.0	1.9978441021726594	0.0	0.0	1.9976102231901833	0.0	-1.617706084937191	0.0	0.0564708570864353	-1.774388115615777	0.0	0.027829151891402053
4.68	-1.6275817026576422	0.0	-1.6341930016747904e-05	-0.9342997948359373	0.0	-0.4671461190505195	0.0	-0.0005119167241073993	0.0	0.9998480633194828	0.0	0.017431301610636177	0.0	0.0	1.9975811970610102	0.0	0.0	1.9974635698514158	0.0	-1.6265931899932629	0.0	0.05671678196006002	-1.7798032222576736	0.0	0.05618050104283628
4.6850000000000005	-1.6364968728631355	0.0	-2.7886128526871726e-05	-0.9424550268337794	0.0	-0.4668618055716427	0.0	0.000288684124421137	0.0	0.9998480676072513	0.0	0.017431055665349877	0.0	0.0	1.9975530095245597	0.0	0.0	1.9975462717611245	0.0	-1.6355033728942632	0.0	0.05701519898471988	-1.7842859629019325	0.0	0.06337207907060351
4.69	-1.645435367700941	0.0	-1.5238891295855823e-05	-0.9506548656704158	0.0	-0.46657591599964027	0.0	0.0008772955989149462	0.0	0.9998480413445969	0.0	0.017432562030246342	0.0	0.0	1.9977256524588312	0.0	0.0	1.9977975984371408	0.0	-1.644435822332847	0.0	0.05734436098816066	-1.7884939630293917	0.0	0.06382007583699638
4.695	-1.6543961088723589	0.0	8.282997764991266e-06	-0.9588994212360539	0.0	-0.4662883361986343	0.0	0.0012509443334031527	0.0	0.999847994284629	0.0	0.017435260955075495	0.0	0.0	1.9980349734739833	0.0	0.0	1.9981559675906897	0.0	-1.653389985879748	0.0	0.05768916456700421	-1.7944701403733019	0.0	0.10222331586616183
4.7	-1.6633976914869362	0.0	0.0002806963882558695	-0.9671888552436506	0.0	-0.4659978443312319	0.0	-0.0006712370039217238	0.0	0.999847973058169	0.0	0.017436478171965822	0.0	0.0	1.9981744774620063	0.0	0.0	1.9979636723538012	0.0	-1.6623764560953789	0.0	0.05827930206811488	-1.797101182785151	0.0	0.06868535331677034
4.705	-1.6723788670265363	0.0	5.934008926374004e-05	-0.9755231829070916	0.0	-0.46570636292379725	0.0	-0.0012911452900208767	0.0	0.9998480247167227	0.0	0.017433515699242064	0.0	0.0	1.99783495148569	0.0	0.0	1.9975937864745192	0.0	-1.6713602345721192	0.0	0.05836132867238394	-1.7990954344907828	0.0	0.02269829807889599
4.71	-1.6813932354890833	0.0	-7.506006229840462e-06	-0.9839025028020482	0.0	-0.46541399044273707	0.0	-0.0005877026994463535	0.0	0.9998480673908693	0.0	0.017431068077226844	0.0	0.0	1.9975544320370235	0.0	0.0	1.9974254220530856	0.0	-1.680371740904708	0.0	0.058600552632192264	-1.804718877402478	0.0	0.05564273955790122
4.715	-1.6904328852570616	0.0	-2.4504876828873375e-05	-0.9923269390235909	0.0	-0.46512026395950384	0.0	0.0002381666466276399	0.0	0.999848074543735	0.0	0.017430657783222548	0.0	0.0	1.9975074086631974	0.0	0.0	1.9974936517714483	0.0	-1.6894065382849348	0.0	0.0588972711948895	-1.8092256137615819	0.0	0.06342760934739343
4.72	-1.699496133999463	0.0	-1.424686395598171e-05	-1.0007966055433881	0.0	-0.46482496073249324	0.0	0.0008633397239056965	0.0	0.9998480496757791	0.0	0.01743208418726359	0.0	0.0	1.9976708873646716	0.0	0.0	1.9977409803837773	0.0	-1.6984637531537548	0.0	0.05922827787468531	-1.8134805712875068	0.0	0.06492751644932282
4.7250000000000005	-1.708581831408005	0.0	9.016719127810482e-06	-1.009311612923275	0.0	-0.46452795117835044	0.0	0.001265736931247649	0.0	0.9998480025603329	0.0	0.01743478636758706	0.0	0.0	1.9979805814861251	0.0	0.0	1.998103587304449	0.0	-1.7075427957387976	0.0	0.05957747405148474	-1.8192936623585787	0.0	0.09980082810191529
4.73	-1.7177063035058497	0.0	0.00025665953411136306	-1.0178721246505018	0.0	-0.4642279733941787	0.0	-0.0007615803902601524	0.0	0.9998479850905383	0.0	0.01743578819451661	0.0	0.0	1.9980953998489588	0.0	0.0	1.9978854105938397	0.0	-1.7166529662583598	0.0	0.060146524497994784	-1.8220533183181213	0.0	0.06912268093518514
4.735	-1.7268142104389135	0.0	5.789090930556519e-05	-1.026478150311401	0.0	-0.4639270729474365	0.0	-0.001233566846029523	0.0	0.999848036819881	0.0	0.017432821544387866	0.0	0.0	1.9977553951086209	0.0	0.0	1.997532019723716	0.0	-1.7257626233802612	0.0	0.06025519449525037	-1.824225090344959	0.0	0.027012710488921038
4.74	-1.7359538364811231	0.0	-5.476710036678289e-06	-1.0351297948492633	0.0	-0.46362520844931576	0.0	-0.000494429290374868	0.0	0.9998480759823846	0.0	0.017430575260033332	0.0	0.0	1.9974979507654025	0.0	0.0	1.9973903761656853	0.0	-1.734899175186376	0.0	0.060502680568699306	-1.8297080593113006	0.0	0.05681806586530491
4.745	-1.7451186281642235	0.0	-2.1043507676148202e-05	-1.0438271807059523	0.0	-0.4633219549170146	0.0	0.00033035627629259586	0.0	0.9998480790300481	0.0	0.017430400439927746	0.0	0.0	1.997477914813044	0.0	0.0	1.9974850162675215	0.0	-1.744058961742229	0.0	0.060805959987785624	-1.8341221456641337	0.0	0.062487935054154786
4.75	-1.754307043903002	0.0	-9.467440603416064e-06	-1.0525704218673788	0.0	-0.4630170917370744	0.0	0.000945567417210775	0.0	0.9998480503535346	0.0	0.017432045313428405	0.0	0.0	1.9976664320743136	0.0	0.0	1.9977559013787778	0.0	-1.7532411895954243	0.0	0.0611435644863585	-1.8393709899856485	0.0	0.08548373553770526
4.755	-1.7635287283343435	0.0	0.00014856583268696641	-1.0613596310809281	0.0	-0.4627104498963218	0.0	0.0009984904687029643	0.0	0.9998480007410745	0.0	0.017434890698017468	0.0	0.0	1.9979925386902795	0.0	0.0	1.9980419478274813	0.0	-1.7624514099127986	0.0	0.06163298973327465	-1.8437996196148165	0.0	0.090316286012077
4.76	-1.7727606543865697	0.0	0.00018440582901222368	-1.070194973242594	0.0	-0.462400718389948	0.0	-0.0010799439174110765	0.0	0.9998480045782745	0.0	0.017434670642552438	0.0	0.0	1.997967318358042	0.0	0.0	1.9977325666845889	0.0	-1.7716765011517925	0.0	0.06198989440034917	-1.8460357986454476	0.0	0.04859413279147881
4.765	-1.7819978622185981	0.0	4.076798685193342e-05	-1.0790764365221268	0.0	-0.4620904176452923	0.0	-0.0010667666556313448	0.0	0.9998480572823131	0.0	0.017431647895520645	0.0	0.0	1.997620884415881	0.0	0.0	1.9974269605491242	0.0	-1.7809134770162856	0.0	0.06215762213898634	-1.8497219257501807	0.0	0.0395197179051697
4.7700000000000005	-1.7912636543512968	0.0	-8.887719371833425e-06	-1.0880041493845156	0.0	-0.4617789868718938	0.0	-0.00024147996582229807	0.0	0.9998480865311401	0.0	0.017429970154590857	0.0	0.0	1.9974286002537316	0.0	0.0	1.9973577816347312	0.0	-1.7901755785045939	0.0	0.06242497576456329	-1.8547699735000072	0.0	0.05962610181785994
4.775	-1.8005542130193632	0.0	-1.6762561308088256e-05	-1.096978230667213	0.0	-0.46146608497981606	0.0	0.0005495454037482044	0.0	0.9998480791078007	0.0	0.017430395979868295	0.0	0.0	1.9974774036502225	0.0	0.0	1.9975152147961592	0.0	-1.7994607131901987	0.0	0.06274245757267742	-1.8589869970321602	0.0	0.060749075853212244
4.78	-1.8098681854330538	0.0	-5.303746106809794e-07	-1.1059987937547733	0.0	-0.46115151062310306	0.0	0.001111029595104299	0.0	0.9998480420588572	0.0	0.017432521063914855	0.0	0.0	1.9977209573495864	0.0	0.0	1.9978335013297273	0.0	-1.808768192133098	0.0	0.06309101176080624	-1.8660355540259836	0.0	0.12265074656960517
4.785	-1.8192356237901748	0.0	0.000414330305784269	-1.1150659776678613	0.0	-0.46083452362255095	0.0	0.00023631630498624582	0.0	0.9998479998736373	0.0	0.01743494044333327	0.0	0.0	1.9979982399501612	0.0	0.0	1.9979012009642565	0.0	-1.8181151662223896	0.0	0.06384096555773724	-1.8682410656292836	0.0	0.07944621995545145
4.79	-1.8285643063383268	0.0	0.0001092754682388144	-1.1241798718313751	0.0	-0.460515456965701	0.0	-0.0012509643098789947	0.0	0.9998480348948078	0.0	0.01743293195547116	0.0	0.0	1.9977680492097634	0.0	0.0	1.9975428260878687	0.0	-1.827449069520562	0.0	0.06385399485086557	-1.869196129262855	0.0	0.010432939545533306
4.795	-1.837930676355949	0.0	1.7954733607737008e-05	-1.1333405173208462	0.0	-0.46019566228099856	0.0	-0.0007190299726430229	0.0	0.9998480809100362	0.0	0.017430292599118213	0.0	0.0	1.9974655552888934	0.0	0.0	1.9973368391739894	0.0	-1.8368132683521532	0.0	0.06407954909582497	-1.8753422355653546	0.0	0.054798070470981716
4.8	-1.847323197866527	0.0	-1.2688682601863643e-05	-1.1425480439618645	0.0	-0.45987455089768126	0.0	0.0001501502227140379	0.0	0.9998480931817026	0.0	0.01742958864944876	0.0	0.0	1.9973848763426205	0.0	0.0	1.9973798540442615	0.0	-1.8462012414154367	0.0	0.06437370369277605	-1.8798408756205607	0.0	0.06253650691340207
4.805	-1.8567399933226365	0.0	-8.711105308720532e-06	-1.1518025677236665	0.0	-0.4595518537902322	0.0	0.0008579044568066552	0.0	0.9998480703498183	0.0	0.017430898350892936	0.0	0.0	1.9975349798764297	0.0	0.0	1.997625625567264	0.0	-1.8556120072474664	0.0	0.06471075206476216	-1.8847654906673692	0.0	0.07862995529771544
4.8100000000000005	-1.8661861408741292	0.0	9.246115752326972e-05	-1.1611042015147242	0.0	-0.4592273893314092	0.0	0.0011299818163855741	0.0	0.9998480221870624	0.0	0.017433660780065655	0.0	0.0	1.9978515790504567	0.0	0.0	1.997949341512291	0.0	-1.8650485281458336	0.0	0.06515142818755897	-1.8896446046531512	0.0	0.09327293320008807
4.815	-1.8756525614176154	0.0	0.00019446989005830347	-1.170453112191489	0.0	-0.458899814962458	0.0	-0.0010044684944286212	0.0	0.9998480214697301	0.0	0.017433701920043905	0.0	0.0	1.9978562940612774	0.0	0.0	1.997661582485368	0.0	-1.8745056327552851	0.0	0.06558354773622538	-1.8922306230501729	0.0	0.05907627286498365
4.82	-1.8851188843544036	0.0	5.1370401962607e-05	-1.1798492936916172	0.0	-0.45857152127801626	0.0	-0.0010179267210230097	0.0	0.9998480717043793	0.0	0.017430820651997695	0.0	0.0	1.997526074885957	0.0	0.0	1.997369967960527	0.0	-1.8839715691987975	0.0	0.06575969307247649	-1.8954479693921982	0.0	0.039737141971168725
4.825	-1.8946135480306734	0.0	-1.1582081176746193e-06	-1.1892928690604683	0.0	-0.45824206742245976	0.0	-0.00018130584068083613	0.0	0.9998480986341848	0.0	0.017429275864929844	0.0	0.0	1.9973490284315085	0.0	0.0	1.9973180276631666	0.0	-1.8934624982881672	0.0	0.06603229477220336	-1.900542519368013	0.0	0.0607985359419666
4.83	-1.9041331667787085	0.0	-1.0348261268499995e-05	-1.1987839572359962	0.0	-0.4579111115743978	0.0	0.000626796242996122	0.0	0.9998480882113967	0.0	0.01742987376855143	0.0	0.0	1.9974175535490717	0.0	0.0	1.9974975915598583	0.0	-1.9029765742453582	0.0	0.0663571759571127	-1.9049015683913633	0.0	0.06492638101252025
4.835	-1.9136764092753378	0.0	6.424624945871045e-06	-1.2083226722564389	0.0	-0.45757843998474884	0.0	0.001201424020065012	0.0	0.999848047491318	0.0	0.017432209480502735	0.0	0.0	1.9976852470942639	0.0	0.0	1.9978417741886352	0.0	-1.9125131219656892	0.0	0.06671549865679702	-1.910992964312682	0.0	0.10595881125798831
4.84	-1.9232613487692332	0.0	0.0002807072613747173	-1.2179091712991732	0.0	-0.4572429304726826	0.0	-0.000519397717259933	0.0	0.9998480202630712	0.0	0.017433771123649442	0.0	0.0	1.9978642254157304	0.0	0.0	1.9976929777031964	0.0	-1.9220824645154928	0.0	0.06732974128847453	-1.9137961935526897	0.0	0.0760660063034146
4.845	-1.9328274874358555	0.0	8.26965353619952e-05	-1.2275434895639596	0.0	-0.4569060646823419	0.0	-0.0011428433748253658	0.0	0.9998480656536044	0.0	0.017431167726581383	0.0	0.0	1.9975658527471016	0.0	0.0	1.9973655771930865	0.0	-1.9316500425904843	0.0	0.06745528874761875	-1.9157505441267302	0.0	0.029045343221452413
4.8500000000000005	-1.9424247142076096	0.0	1.226774200209695e-05	-1.2372257151243342	0.0	-0.45656817776657527	0.0	-0.00040285135964798015	0.0	0.9998481011082011	0.0	0.017429133939856248	0.0	0.0	1.997332762545269	0.0	0.0	1.997250168779692	0.0	-1.9412441676305585	0.0	0.06771153630548166	-1.921230857007609	0.0	0.05869947886484433
4.855	-1.9520474173435516	0.0	-7.908114367777855e-06	-1.2469559702213724	0.0	-0.4562288515615268	0.0	0.00045913699733212435	0.0	0.999848099385349	0.0	0.01742923277360697	0.0	0.0	1.9973440897794548	0.0	0.0	1.997381701840519	0.0	-1.9508617142386115	0.0	0.06802713819956686	-1.925571071821297	0.0	0.06264094169439553
4.86	-1.9616942202679732	0.0	3.4167439882606983e-06	-1.2567343701501497	0.0	-0.45588783990209386	0.0	0.0011088891460789131	0.0	0.9998480643100772	0.0	0.017431244790990248	0.0	0.0	1.9975746850197955	0.0	0.0	1.99769937518061	0.0	-1.9605019862800535	0.0	0.06838256817216883	-1.9321457929353247	0.0	0.11428753999230361
4.865	-1.971388473365225	0.0	0.00033973109800400434	-1.266561062117435	0.0	-0.4555442234761785	0.0	-0.00010956594209719734	0.0	0.9998480267296518	0.0	0.017433400253331576	0.0	0.0	1.9978217203480348	0.0	0.0	1.9976679868503073	0.0	-1.970178327477166	0.0	0.06906508717945234	-1.934773921120973	0.0	0.08039689942430303
4.87	-1.981055828276052	0.0	0.00010419145666097022	-1.276436114659629	0.0	-0.4551987862136322	0.0	-0.0011623220818076342	0.0	0.9998480656184007	0.0	0.01743116974584134	0.0	0.0	1.9975660841724088	0.0	0.0	1.9973350061016952	0.0	-1.979848325962875	0.0	0.06915787574502724	-1.9362679303181438	0.0	0.023180547468078933
4.875	-1.9907562468520408	0.0	2.2776008988128364e-05	-1.286359590388093	0.0	-0.45485240982548997	0.0	-0.0005050624617655222	0.0	0.9998481043975698	0.0	0.017428945239293104	0.0	0.0	1.9973111357685003	0.0	0.0	1.9971903163644469	0.0	-1.9895459964339257	0.0	0.06940578481697601	-1.9419733724618324	0.0	0.05780048748208709
4.88	-2.0004824641980905	0.0	-4.146201224059727e-06	-1.2963316138647323	0.0	-0.45450462411099235	0.0	0.00038061296761265407	0.0	0.9998481067794887	0.0	0.01742880859504635	0.0	0.0	1.9972954751124692	0.0	0.0	1.9972993539478077	0.0	-1.999267262115043	0.0	0.0697173164242735	-1.9463241037309824	0.0	0.06207449994011701
4.885	-2.010233078503019	0.0	3.782302221844365e-06	-1.306352301165106	0.0	-0.4541551635767748	0.0	0.0010730310321757487	0.0	0.9998480741945646	0.0	0.01743067781217853	0.0	0.0	1.9975097041612355	0.0	0.0	1.9976067546949587	0.0	-2.0090114143468005	0.0	0.07007258336449723	-1.9529912665710545	0.0	0.1157847614751952
4.89	-2.0200321777130226	0.0	0.0003485853365606309	-1.316421799560699	0.0	-0.4538031519875712	0.0	-1.4812434047977336e-05	0.0	0.9998480350822319	0.0	0.01743292120593154	0.0	0.0	1.997766817216039	0.0	0.0	1.9976025112451825	0.0	-2.018792223042014	0.0	0.07076779412878996	-1.9556293870205004	0.0	0.08208277412980239
4.8950000000000005	-2.029803523537914	0.0	0.00011109527145502921	-1.3265401815392985	0.0	-0.45344919639833564	0.0	-0.0011427708009903194	0.0	0.9998480718700502	0.0	0.01743081114915751	0.0	0.0	1.9975249857752249	0.0	0.0	1.997275131525945	0.0	-2.0285662078554325	0.0	0.07086252076459591	-1.9570547307192174	0.0	0.023323448356212438
4.9	-2.0396078970900877	0.0	2.7572679982980614e-05	-1.3367075065991094	0.0	-0.4530942932039533	0.0	-0.0004942133196526961	0.0	0.9998481101101236	0.0	0.017428617523782847	0.0	0.0	1.997273576632311	0.0	0.0	1.9971335498389686	0.0	-2.038367846962869	0.0	0.07111184917727482	-1.9627696158456573	0.0	0.05813206199458109
4.905	-2.049438138423905	0.0	-8.756244567441613e-07	-1.3469238993216663	0.0	-0.45273797219199546	0.0	0.0004012255226225251	0.0	0.9998481118302314	0.0	0.01742851884410756	0.0	0.0	1.997262267056677	0.0	0.0	1.9972484924843645	0.0	-2.0481931218704887	0.0	0.07142561685100339	-1.9671676417332955	0.0	0.06341517621536337
4.91	-2.0592929044899386	0.0	6.728664306605462e-06	-1.3571894761010745	0.0	-0.452379961362399	0.0	0.0011048771045056736	0.0	0.9998480780949341	0.0	0.017430454080277182	0.0	0.0	1.9974840624782795	0.0	0.0	1.9975650164592087	0.0	-2.058041358211724	0.0	0.07178463910037493	-1.9735515024334203	0.0	0.11094868940984665
4.915	-2.069192622154439	0.0	0.000309006751774584	-1.3675043879060667	0.0	-0.4520192615161567	0.0	-0.0002640882781143445	0.0	0.9998480438067386	0.0	0.01743242081350353	0.0	0.0	1.997709467752741	0.0	0.0	1.9974893607404345	0.0	-2.067924239342273	0.0	0.07243992957647488	-1.9763687361979754	0.0	0.08124261919312328
4.92	-2.0790705887402083	0.0	0.00010356315079972673	-1.37786869470188	0.0	-0.45165683552646374	0.0	-0.001096539290524044	0.0	0.9998480837507479	0.0	0.017430129647822302	0.0	0.0	1.997446879608693	0.0	0.0	1.9971752253733481	0.0	-2.07780369659114	0.0	0.072569429616456	-1.9780965732487	0.0	0.02914057818230199
4.925	-2.0889796384133543	0.0	2.6281335203864883e-05	-1.3882824682202508	0.0	-0.4512933690072671	0.0	-0.0003751117443451496	0.0	0.9998481179397374	0.0	0.01742816834751924	0.0	0.0	1.9972220970049612	0.0	0.0	1.9970677637743641	0.0	-2.087709704733939	0.0	0.07282938382806455	-1.9836189685271899	0.0	0.05967342479852219
4.93	-2.098914426465701	0.0	1.622299288118455e-06	-1.3987458309965235	0.0	-0.45092843841145025	0.0	0.000519273376740384	0.0	0.9998481143632209	0.0	0.017428373529902293	0.0	0.0	1.997245612745783	0.0	0.0	1.9972165246388678	0.0	-2.097639286950128	0.0	0.0731518384221541	-1.9880873673974695	0.0	0.06634366509601804
4.9350000000000005	-2.1088737065155354	0.0	1.2183171750846044e-05	-1.4092588993623998	0.0	-0.4505617762050707	0.0	0.0012038794671156681	0.0	0.999848075882449	0.0	0.017430580992929084	0.0	0.0	1.9974986078066994	0.0	0.0	1.9975614107014088	0.0	-2.107591824102545	0.0	0.07351879453414839	-1.9939617675251617	0.0	0.10274299943648485
4.94	-2.1188716271101895	0.0	0.00024430835056563923	-1.419821834021002	0.0	-0.45019217116802845	0.0	-0.000681682390011588	0.0	0.9998480560008651	0.0	0.01743172139750019	0.0	0.0	1.9976293084022971	0.0	0.0	1.9973661230818285	0.0	-2.1175754094961405	0.0	0.07410409535936563	-1.9970142545018204	0.0	0.0783962256502307
4.945	-2.128857359111744	0.0	8.565205453077144e-05	-1.4304346633951845	0.0	-0.4498212699095236	0.0	-0.0009805665540712025	0.0	0.9998481000784797	0.0	0.017429193011864633	0.0	0.0	1.9973395327272128	0.0	0.0	1.9970852114564286	0.0	-2.127560979050529	0.0	0.07428285935956773	-1.999267905288164	0.0	0.03788440026321523
4.95	-2.1388716487859636	0.0	2.0659371831434352e-05	-1.4410974851340426	0.0	-0.44944918925945293	0.0	-0.00014846353971581974	0.0	0.9998481259721189	0.0	0.017427707526655917	0.0	0.0	1.997169282802492	0.0	0.0	1.9970426797852423	0.0	-2.13757167126389	0.0	0.07456058348649491	-2.0043925949780217	0.0	0.059575759546332915
4.955	-2.1489114725055414	0.0	4.563991135122251e-06	-1.4518104192436028	0.0	-0.4490755651547573	0.0	0.0007235408337954762	0.0	0.99984811279082	0.0	0.017428463736950967	0.0	0.0	1.9972559512824173	0.0	0.0	1.9972499589656516	0.0	-2.147605843927252	0.0	0.07489763553538971	-2.0101168020465243	0.0	0.09328010397027311
4.96	-2.1589894606451963	0.0	0.00019246206641217975	-1.4625735847473356	0.0	-0.4487000771962358	0.0	0.0009201688759311685	0.0	0.9998480679359515	0.0	0.017431036811965405	0.0	0.0	1.9975508487575815	0.0	0.0	1.9975135679308023	0.0	-2.1576707728112434	0.0	0.07544775919316145	-2.0143480176908923	0.0	0.09397672203827756
4.965	-2.1690710493849776	0.0	0.00017857051740868173	-1.4733871425856226	0.0	-0.44832151796718017	0.0	-0.001009279605458442	0.0	0.9998480752894385	0.0	0.017430615009160832	0.0	0.0	1.9975025063720204	0.0	0.0	1.9972244306220952	0.0	-2.1677467833065633	0.0	0.07578345877468357	-2.0165359983604842	0.0	0.05124032474836694
4.97	-2.1791642852177406	0.0	6.256035273542078e-05	-1.484251094820703	0.0	-0.447942079795575	0.0	-0.0007374835364886785	0.0	0.9998481183546689	0.0	0.01742814454319242	0.0	0.0	1.9972193688156832	0.0	0.0	1.9970131571515894	0.0	-2.177838305236927	0.0	0.07600856607854908	-2.0205850580926907	0.0	0.04985738967277244
4.9750000000000005	-2.1892842721522734	0.0	1.4094792079707253e-05	-1.495165565608636	0.0	-0.4475613103227737	0.0	0.00017871622395224029	0.0	0.9998481309018277	0.0	0.017427424701163784	0.0	0.0	1.9971368684656006	0.0	0.0	1.9970643555784042	0.0	-2.1879539434310895	0.0	0.0763096711335888	-2.025264047438354	0.0	0.061524825397477056
4.98	-2.199429538759012	0.0	1.0221951835252598e-05	-1.5061306732295896	0.0	-0.4471788904746138	0.0	0.0009931837587282913	0.0	0.9998481045148663	0.0	0.017428938511101333	0.0	0.0	1.9973103646574144	0.0	0.0	1.9973488817666847	0.0	-2.1980929503218913	0.0	0.07666601468403696	-2.031879251789359	0.0	0.11425373157239414
4.985	-2.209622402237558	0.0	0.00033104362087744646	-1.5171465644085367	0.0	-0.4467939213739187	0.0	-3.479909438233187e-05	0.0	0.9998480663556271	0.0	0.017431127459481163	0.0	0.0	1.9975612377761678	0.0	0.0	1.9973389125604897	0.0	-2.2082681011399785	0.0	0.0773515580947379	-2.0347480447205912	0.0	0.08560390117024706
4.99	-2.2197917030160106	0.0	0.00012221726804445446	-1.5282133187057636	0.0	-0.4464069172636869	0.0	-0.001049930040874813	0.0	0.9998481012862219	0.0	0.017429123727961432	0.0	0.0	1.9973315921705614	0.0	0.0	1.9970381297598592	0.0	-2.2184388118006764	0.0	0.07748843787339818	-2.0363165670881442	0.0	0.02989940406404069
4.995	-2.2299918629888285	0.0	3.942734303591638e-05	-1.5393309956332748	0.0	-0.44601884452418705	0.0	-0.000342564340424385	0.0	0.9998481340578151	0.0	0.017427243634454276	0.0	0.0	1.9971161165975313	0.0	0.0	1.996939992305269	0.0	-2.228635952578134	0.0	0.07775282257826378	-2.041972357627131	0.0	0.05958124879297024
5.0	-2.2402179472801307	0.0	1.0942193563728437e-05	-1.5504997176890634	0.0	-0.44562928132200885	0.0	0.0005823294404990092	0.0	0.9998481284502494	0.0	0.017427565352772203	0.0	0.0	1.997152988400827	0.0	0.0	1.997106817401403	0.0	-2.238856767801845	0.0	0.07808216630840163	-2.0461188022244503	0.0	0.07805892012560425
5.005	-2.2504638547985194	0.0	8.746606535862995e-05	-1.5617195850654426	0.0	-0.44523793260058053	0.0	0.0011370798109645581	0.0	0.9998480866092311	0.0	0.017429965675599218	0.0	0.0	1.9974280869211358	0.0	0.0	1.9974325667720922	0.0	-2.249093407691699	0.0	0.07852651064718734	-2.0479095338070317	0.0	0.09721591018701722
5.01	-2.2607118594376554	0.0	0.00019795712415356873	-1.5729906776507905	0.0	-0.44484346583170237	0.0	-0.0009071017745143567	0.0	0.9998480855207729	0.0	0.01743002811346213	0.0	0.0	1.9974352428602735	0.0	0.0	1.9971727012557496	0.0	-2.2593313245757285	0.0	0.07899440721725041	-2.046407793468312	0.0	0.06824050674914608
5.015	-2.270939941658666	0.0	7.552082033604072e-05	-1.5843128987004667	0.0	-0.4444479776461991	0.0	-0.0007276075480610717	0.0	0.9998481267876694	0.0	0.01742766073740914	0.0	0.0	1.9971639203353375	0.0	0.0	1.9969642570475208	0.0	-2.26955783474078	0.0	0.07921779523783302	-2.0454039656881235	0.0	0.04732114237488127
5.0200000000000005	-2.281174071952092	0.0	2.2194808752523994e-05	-1.5956862613716158	0.0	-0.44405116497854213	0.0	0.00020023511222862513	0.0	0.9998481388224921	0.0	0.017426970269977745	0.0	0.0	1.997084786578098	0.0	0.0	1.997021620181726	0.0	-2.2797877165863945	0.0	0.07951801262861831	-2.0460803123363736	0.0	0.06234004183096678
5.025	-2.2914129243564774	0.0	1.6086125281112722e-05	-1.6071107804134708	0.0	-0.4436527003679382	0.0	0.0010477084117550138	0.0	0.9998481107876908	0.0	0.01742857865345825	0.0	0.0	1.9972691217445824	0.0	0.0	1.9973217665324956	0.0	-2.29002030583574	0.0	0.07987608539563763	-2.048265702193963	0.0	0.10911844933031457
5.03	-2.301675122728223	0.0	0.0002938657489761814	-1.6185865036725788	0.0	-0.44325156313265385	0.0	-0.00026128043581217456	0.0	0.9998480767927308	0.0	0.017430528777781125	0.0	0.0	1.9974926234823387	0.0	0.0	1.9972469152012886	0.0	-2.300266274595227	0.0	0.08052032596982923	-2.047151152258072	0.0	0.08433521391309785
5.035	-2.3118988777810734	0.0	0.00011586434211569747	-1.6301133919670068	0.0	-0.44284861264493947	0.0	-0.0009448324420974433	0.0	0.9998481129813652	0.0	0.017428452805750307	0.0	0.0	1.9972546984688102	0.0	0.0	1.9969762406448925	0.0	-2.310490356679805	0.0	0.0806891950077016	-2.0448648987531737	0.0	0.03525999990536845
5.04	-2.322130896006339	0.0	3.9669508459621516e-05	-1.6416914142317758	0.0	-0.44244451147522934	0.0	-0.00015080250954002916	0.0	0.9998481387847673	0.0	0.017426972434642633	0.0	0.0	1.9970850346681066	0.0	0.0	1.9969330389082094	0.0	-2.3207190542034293	0.0	0.08096277669034418	-2.0458232338344358	0.0	0.056748831631597135
5.045	-2.332368030905993	0.0	1.6427596843037087e-05	-1.6533205873470922	0.0	-0.44203887841836265	0.0	0.0007768318684562809	0.0	0.9998481246096063	0.0	0.0174277856957428	0.0	0.0	1.9971782416806632	0.0	0.0	1.9971555848454785	0.0	-2.3309506487761666	0.0	0.08130009116543507	-2.048480453493995	0.0	0.11411941634884455
5.05	-2.342634857122399	0.0	0.00034954265656267483	-1.6650009380234239	0.0	-0.44163115277531995	0.0	0.0006369599317691468	0.0	0.9998480808370467	0.0	0.017430296786894697	0.0	0.0	1.9974660352456755	0.0	0.0	1.997338060424525	0.0	-2.341199217336054	0.0	0.08200256533380121	-2.0474335969334754	0.0	0.09056476387785303
5.055	-2.352857761050757	0.0	0.00015607643890991026	-1.676732494308578	0.0	-0.4412207216120818	0.0	-0.0009826317441602303	0.0	0.9998481001088169	0.0	0.017429191271867334	0.0	0.0	1.9973393333079292	0.0	0.0	1.9970565571657453	0.0	-2.3514228345311627	0.0	0.08216033917442711	-2.0446641308579316	0.0	0.03061519621718282
5.0600000000000005	-2.363087968808656	0.0	5.929189583837688e-05	-1.6885151763171868	0.0	-0.4408093255275158	0.0	-0.00042560034048328766	0.0	0.9998481343978409	0.0	0.01742722412656313	0.0	0.0	1.9971138808183446	0.0	0.0	1.9969346316494	0.0	-2.3616505244273895	0.0	0.08241087492960925	-2.0457964014999703	0.0	0.05604918878135181
5.065	-2.373323596985176	0.0	2.0671543875127964e-05	-1.7003490045597895	0.0	-0.440396500435451	0.0	0.0005353621203168716	0.0	0.9998481319176008	0.0	0.01742736642428199	0.0	0.0	1.9971301894125313	0.0	0.0	1.9970880015994268	0.0	-2.371881257655375	0.0	0.08272965615886843	-2.046901323759309	0.0	0.07998845124651544
5.07	-2.3835711269301747	0.0	0.00011687795543082742	-1.7122339941252753	0.0	-0.4399819198803654	0.0	0.0010928222789030415	0.0	0.9998480908540105	0.0	0.01742972217774621	0.0	0.0	1.9974001798831562	0.0	0.0	1.997401072121122	0.0	-2.3821188182397535	0.0	0.0831941498824507	-2.0476560701712407	0.0	0.09555371223028686
5.075	-2.393816289517866	0.0	0.0001929914045766741	-1.7241702061060646	0.0	-0.4395642759424498	0.0	-0.0008801355086930185	0.0	0.9998480911155081	0.0	0.01742970717689544	0.0	0.0	1.9973984606511077	0.0	0.0	1.9971489318708833	0.0	-2.3923551056045174	0.0	0.08362723172236787	-2.0462376331074434	0.0	0.06467060223030868
5.08	-2.4040449658622927	0.0	7.785926332875514e-05	-1.7361575471085753	0.0	-0.4391455994162659	0.0	-0.0006110737476172962	0.0	0.9998481289251957	0.0	0.01742753810429583	0.0	0.0	1.9971498654811561	0.0	0.0	1.9969738721373347	0.0	-2.402581943810254	0.0	0.0838582567037875	-2.045485402270053	0.0	0.04914469312505346
5.085	-2.4142794070947624	0.0	2.68944154130471e-05	-1.7481960307353854	0.0	-0.43872557543146584	0.0	0.0003455041637787521	0.0	0.9998481351233757	0.0	0.017427182500375008	0.0	0.0	1.997109110084036	0.0	0.0	1.9970728517892784	0.0	-2.412812004232933	0.0	0.08416227459574435	-2.04619367608343	0.0	0.06469629757353754
5.09	-2.4245187394353582	0.0	2.399887622315835e-05	-1.7602856718936428	0.0	-0.43830387652527597	0.0	0.0011979509987926542	0.0	0.9998481006012804	0.0	0.017429163020765845	0.0	0.0	1.9973360954783306	0.0	0.0	1.9974160394707499	0.0	-2.423044883130874	0.0	0.08452581128195938	-2.0478122350568193	0.0	0.09909020584354875
5.095	-2.434774154124425	0.0	0.00022276119990001194	-1.7724265298028266	0.0	-0.43787924314228877	0.0	-0.0007201108905595012	0.0	0.9998480862561362	0.0	0.017429985930384046	0.0	0.0	1.9974304083011545	0.0	0.0	1.9972097428966975	0.0	-2.433286999604472	0.0	0.0850858904933306	-2.0469258676625897	0.0	0.07957492510440173
5.1000000000000005	-2.4450016377679904	0.0	9.27638894926949e-05	-1.7846185283392657	0.0	-0.4374533171516544	0.0	-0.0007166135971394066	0.0	0.9998481243315438	0.0	0.017427801647916987	0.0	0.0	1.9971800699428235	0.0	0.0	1.9970044482234086	0.0	-2.443513172679159	0.0	0.08530177153386452	-2.045262470404256	0.0	0.044180220280301094
5.105	-2.455235254743584	0.0	3.307104140487667e-05	-1.7968616669366761	0.0	-0.4370261019641058	0.0	0.00021833017302337653	0.0	0.9998481360453991	0.0	0.0174271296009661	0.0	0.0	1.9971030473375766	0.0	0.0	1.9970669952106817	0.0	-2.453742768559455	0.0	0.08559546110472142	-2.0460928248132357	0.0	0.06253111389229091
5.11	-2.465473967277753	0.0	2.3918882725141087e-05	-1.8091559609439438	0.0	-0.4365972574762143	0.0	0.0011142022612342934	0.0	0.9998481061971832	0.0	0.01742884200101368	0.0	0.0	1.9972993037359086	0.0	0.0	1.997386190646145	0.0	-2.4639752865464835	0.0	0.08595156295626792	-2.047893818057471	0.0	0.1009586740365255
5.115	-2.4757310414315694	0.0	0.00024120563988649257	-1.8215014659342759	0.0	-0.4361655965302106	0.0	-0.0005895493982052155	0.0	0.9998480845221996	0.0	0.01743008539505806	0.0	0.0	1.9974418078449747	0.0	0.0	1.9972172971844868	0.0	-2.4742183410542755	0.0	0.0865323550390204	-2.0469999957358174	0.0	0.08117997826053783
5.12	-2.4859578267877414	0.0	0.0001022937773455234	-1.833898120014613	0.0	-0.4357324643253161	0.0	-0.0007599471595174139	0.0	0.9998481216271016	0.0	0.017427956803301035	0.0	0.0	1.997197852140876	0.0	0.0	1.9969995883600202	0.0	-2.4844441235542765	0.0	0.0867394025660648	-2.04517474240377	0.0	0.0422048479588819
5.125	-2.496190990229044	0.0	3.7683088420575425e-05	-1.8463459127237634	0.0	-0.4352980755314652	0.0	0.00015781488337079447	0.0	0.9998481358920611	0.0	0.017427138398326047	0.0	0.0	1.9971040555938822	0.0	0.0	1.9970447989938276	0.0	-2.49467346487765	0.0	0.08702737928746415	-2.0460445313473206	0.0	0.06147730841843113
5.13	-2.506429372677932	0.0	2.4998986838419372e-05	-1.8588448596908567	0.0	-0.4348620825996979	0.0	0.0010790745406205693	0.0	0.9998481081804225	0.0	0.01742872822712848	0.0	0.0	1.9972862642284148	0.0	0.0	1.9973539310786155	0.0	-2.5049057925892515	0.0	0.08737946606628502	-2.0478969608518067	0.0	0.10106516622190634
5.135	-2.516686759328711	0.0	0.0002456528796403553	-1.8713950151665395	0.0	-0.4344233212527133	0.0	-0.0005466174001125681	0.0	0.9998480848044875	0.0	0.017430069201988856	0.0	0.0	1.9974399519739903	0.0	0.0	1.9971973367284412	0.0	-2.5151490214532384	0.0	0.08796422453567636	-2.0470190363868213	0.0	0.08161012233359143
5.14	-2.5269134638022357	0.0	0.00010567367898343366	-1.8839963225335519	0.0	-0.43398303224432655	0.0	-0.0007555983174666844	0.0	0.9998481211273472	0.0	0.017427985474260298	0.0	0.0	1.9972011380898578	0.0	0.0	1.996980873755451	0.0	-2.5253747585078776	0.0	0.08817025457844803	-2.0451608275138775	0.0	0.04188967850700711
5.1450000000000005	-2.5371465373570556	0.0	3.99336966140707e-05	-1.896648768286129	0.0	-0.43354149221066335	0.0	0.00016402264130799222	0.0	0.9998481352311447	0.0	0.017427176316970782	0.0	0.0	1.9971084014104696	0.0	0.0	1.9970278627809088	0.0	-2.53560405004345	0.0	0.08845708004475276	-2.046047809566698	0.0	0.06152887590587959
5.15	-2.5473849054490842	0.0	2.6735083748388057e-05	-1.9093523681381728	0.0	-0.4330983519008939	0.0	0.0010961672633336898	0.0	0.9998481070184467	0.0	0.017428794886937025	0.0	0.0	1.9972939040402269	0.0	0.0	1.9973418915700558	0.0	-2.545836371660114	0.0	0.08880892942847586	-2.047829015122956	0.0	0.09957218530529412
5.155	-2.557641338767306	0.0	0.00023639332462988908	-1.9221071780388346	0.0	-0.4326524167521365	0.0	-0.0006021911650964455	0.0	0.9998480866635154	0.0	0.01742996256142947	0.0	0.0	1.997427730009342	0.0	0.0	1.9971693765089555	0.0	-2.5560790580971267	0.0	0.08938189078154625	-2.0469868415072963	0.0	0.08094022844242466
5.16	-2.5678685561467227	0.0	0.00010297696505579123	-1.9349131364943881	0.0	-0.43220501908180087	0.0	-0.0007076932180786523	0.0	0.9998481226989534	0.0	0.01742789531052594	0.0	0.0	1.997190804517526	0.0	0.0	1.9969666373360258	0.0	-2.5663050820299116	0.0	0.08959440935447828	-2.0452176945872758	0.0	0.04316477984183133
5.165	-2.5781018925747095	0.0	3.9751387225323495e-05	-1.9477702342237153	0.0	-0.4317563502440589	0.0	0.00023558821161237254	0.0	0.9998481340397315	0.0	0.0174272446716506	0.0	0.0	1.9971162354695173	0.0	0.0	1.997034128387168	0.0	-2.576534522511395	0.0	0.0898845057462266	-2.0461002316807995	0.0	0.06263127595063113
5.17	-2.5883405674572746	0.0	2.9094787741133746e-05	-1.9606784868830156	0.0	-0.43130606380608627	0.0	0.0011651082219477664	0.0	0.9998481027203303	0.0	0.017429041457715434	0.0	0.0	1.99732216326257	0.0	0.0	1.997367907306136	0.0	-2.586767025299025	0.0	0.09023996235540875	-2.047708161895686	0.0	0.0968847225050827
5.175	-2.5985950265386006	0.0	0.00021662040920872338	-1.973637953443005	0.0	-0.4308528953181906	0.0	-0.0007200524135064085	0.0	0.9998480904127609	0.0	0.017429747488998743	0.0	0.0	1.9974030807796903	0.0	0.0	1.9971616274845252	0.0	-2.597008590349187	0.0	0.09078843823195219	-2.0469080170550864	0.0	0.07927787881257184
5.18	-2.6088231767326837	0.0	9.499730418477506e-05	-1.9866485611435407	0.0	-0.43039842916732124	0.0	-0.0006094773053893082	0.0	0.9998481258323485	0.0	0.01742771554480725	0.0	0.0	1.9971702017544968	0.0	0.0	1.9969870250979862	0.0	-2.607235135018504	0.0	0.09101278588997812	-2.0452593446471212	0.0	0.044149209188565124
5.1850000000000005	-2.619057119479872	0.0	3.772234941442754e-05	-1.9997103099729918	0.0	-0.4299426498495643	0.0	0.0003702222805868507	0.0	0.9998481317539476	0.0	0.01742737581262096	0.0	0.0	1.9971312654003102	0.0	0.0	1.9970930859687828	0.0	-2.6174649192439228	0.0	0.09131042129402722	-2.0467747169062633	0.0	0.07722291787198554
5.19	-2.62930398536926	0.0	0.0001261289234749407	-2.012823216704274	0.0	-0.4294851970581957	0.0	0.0010453242038500692	0.0	0.9998480952668226	0.0	0.017429469036156785	0.0	0.0	1.9973711675865735	0.0	0.0	1.9973925492943003	0.0	-2.627702095778082	0.0	0.09176687430069508	-2.047552347696395	0.0	0.09341034886292376
5.195	-2.639548133805314	0.0	0.0001904335378904582	-2.0259873412717053	0.0	-0.4290247768836201	0.0	-0.0008344140735841838	0.0	0.9998480966387783	0.0	0.017429390333076476	0.0	0.0	1.9973621475077086	0.0	0.0	1.9971535072703868	0.0	-2.6379377934114356	0.0	0.09218777044536873	-2.0462123372980923	0.0	0.0642460034236699
5.2	-2.6497774504125973	0.0	8.305055930084117e-05	-2.03920259685664	0.0	-0.4285632714951645	0.0	-0.00044860338836467576	0.0	0.999848129617418	0.0	0.017427498389637044	0.0	0.0	1.9971453138252047	0.0	0.0	1.997024991866244	0.0	-2.6481649874968216	0.0	0.09242695816893472	-2.0453304058729804	0.0	0.045791441925465325
5.205	-2.6600123430065947	0.0	3.502419418680759e-05	-2.0524689962698526	0.0	-0.42810039223342555	0.0	0.0005638433689103913	0.0	0.9998481273619831	0.0	0.017427627787753436	0.0	0.0	1.9971601440093827	0.0	0.0	1.997186521092969	0.0	-2.6583953127559545	0.0	0.09273633203452411	-2.0478207326082964	0.0	0.09985771503090597
5.21	-2.670276636866506	0.0	0.0003370074381803401	-2.0657865660966657	0.0	-0.42763556359170934	0.0	0.0006563716216866558	0.0	0.9998480880509043	0.0	0.017429882975106746	0.0	0.0	1.9974186087028911	0.0	0.0	1.997374557711543	0.0	-2.6686424261818558	0.0	0.09340788049841017	-2.049853507432757	0.0	0.14331415332659697
5.215	-2.6805382061519993	0.0	0.0006103994968132612	-2.079155407744207	0.0	-0.42716659835701576	0.0	0.0003795256886023227	0.0	0.9998480720507121	0.0	0.01743080078616292	0.0	0.0	1.9975237980830733	0.0	0.0	1.9974832838124115	0.0	-2.6788880589352106	0.0	0.09404368617931798	-2.04729990109469	0.0	0.08724179032795903
5.22	-2.690768159403806	0.0	0.00048764726821425524	-2.0925754190435235	0.0	-0.426695731445899	0.0	0.0010650567203013223	0.0	0.99984804172904	0.0	0.01743253998067815	0.0	0.0	1.9977231253804335	0.0	0.0	1.9977884000874881	0.0	-2.689115746484907	0.0	0.09428694212768986	-2.044898781510285	0.0	0.03431008110185661
5.2250000000000005	-2.7009987036229206	0.0	0.000358837509690885	-2.106046566672434	0.0	-0.42622370644822066	0.0	0.001796609156524428	0.0	0.9998479788453626	0.0	0.017436146317880187	0.0	0.0	1.998136444002968	0.0	0.0	1.9983030906980053	0.0	-2.6993438811146837	0.0	0.09453431764908406	-2.0482060450409088	0.0	0.1046956724216538
5.23	-2.7112694742318713	0.0	0.0007179094620517063	-2.1195688979304084	0.0	-0.4257495572079384	0.0	0.0011394452403856695	0.0	0.9998479046886604	0.0	0.017440398196968188	0.0	0.0	1.9986237475549675	0.0	0.0	1.998629517714307	0.0	-2.709595076727023	0.0	0.09527432739042735	-2.0491680690631084	0.0	0.12398203822939421
5.235	-2.7215119992760117	0.0	0.0007338279332237618	-2.1331424703043087	0.0	-0.4252720244628415	0.0	0.0010695531262708614	0.0	0.9998478611502314	0.0	0.017442894051071554	0.0	0.0	1.9989097948804537	0.0	0.0	1.9989359221148086	0.0	-2.7198303381696873	0.0	0.09566102793591866	-2.045906300356237	0.0	0.051856566482183744
5.24	-2.7317397601316924	0.0	0.0005591904276347428	-2.1467671891850038	0.0	-0.4247932203740459	0.0	0.0016696300620330322	0.0	0.9998478021842618	0.0	0.017446273724585227	0.0	0.0	1.9992971358784208	0.0	0.0	1.999414235894322	0.0	-2.7300573187811508	0.0	0.09586170212860298	-2.045163774077589	0.0	0.03427814778768727
5.245	-2.741972736136894	0.0	0.0004351161122466089	-2.160443049207527	0.0	-0.4243132977199083	0.0	0.002282398752526711	0.0	0.9998477155291998	0.0	0.017451239228573598	0.0	0.0	1.9998662273609362	0.0	0.0	2.0000680949727507	0.0	-2.7402874395263304	0.0	0.09612192156555809	-2.048918619419345	0.0	0.11395767521190231
5.25	-2.7522484389087953	0.0	0.0008357420949453061	-2.1741701322537788	0.0	-0.4238305289356157	0.0	0.001289318392850573	0.0	0.9998476397292277	0.0	0.017455581556082077	0.0	0.0	2.000363897246187	0.0	0.0	2.000437457484545	0.0	-2.7505420611355103	0.0	0.09690478756028156	-2.049005259044597	0.0	0.1140212232958344
5.255	-2.762482504150068	0.0	0.0007234266057391078	-2.1879484241384257	0.0	-0.4233452600170574	0.0	0.0015210880403435647	0.0	0.999847581296449	0.0	0.017458928237655262	0.0	0.0	2.0007474571557182	0.0	0.0	2.0008732171094428	0.0	-2.760773159839403	0.0	0.09716825087663318	-2.045437159746122	0.0	0.0349036641015837
5.26	-2.7727136579968903	0.0	0.000563667877122336	-2.201777862490087	0.0	-0.42285888956921547	0.0	0.002140902025324321	0.0	0.9998475016524851	0.0	0.01746348873653884	0.0	0.0	2.0012701315188863	0.0	0.0	2.0014865403614532	0.0	-2.771002765743055	0.0	0.09739106321945364	-2.047326620214651	0.0	0.0740967561740825
5.265	-2.782969897407674	0.0	0.0006996367843959693	-2.2156584667261208	0.0	-0.4223710530753729	0.0	0.0021138103430009343	0.0	0.9998473986813203	0.0	0.017469383210739497	0.0	0.0	2.001945691563748	0.0	0.0	2.0020921024181786	0.0	-2.781246846801922	0.0	0.09791790699283963	-2.049391277629442	0.0	0.1167542521636332
5.2700000000000005	-2.793227570004517	0.0	0.0008557248533815957	-2.2295903271146513	0.0	-0.42187982277339875	0.0	0.0015975447039684196	0.0	0.9998473235889186	0.0	0.01747368054087461	0.0	0.0	2.002438204500197	0.0	0.0	2.0025497652637827	0.0	-2.791491959622782	0.0	0.09845623111948823	-2.0476118047720577	0.0	0.07605329011596575
5.275	-2.8034605736981	0.0	0.0007011793206520411	-2.2435733655788086	0.0	-0.4213869570012764	0.0	0.002043053881871561	0.0	0.9998472456284699	0.0	0.017478140883103108	0.0	0.0	2.002949400137391	0.0	0.0	2.003135057087528	0.0	-2.8017232342194514	0.0	0.098684338947092	-2.0459470947949385	0.0	0.037908110518425124
5.28	-2.813697861627127	0.0	0.0005851935267269106	-2.2576075645479734	0.0	-0.4208928864508197	0.0	0.002661048390300798	0.0	0.9998471427590441	0.0	0.017484024598004255	0.0	0.0	2.0036237272418735	0.0	0.0	2.0038973912967495	0.0	-2.8119571567969692	0.0	0.09895932144651463	-2.0491610321736076	0.0	0.1054653178528787
5.285	-2.8239708277181257	0.0	0.0008998261530540881	-2.2716929791810676	0.0	-0.4203964708404912	0.0	0.0020505992956071496	0.0	0.9998470336721584	0.0	0.017490261763322298	0.0	0.0	2.004338563046384	0.0	0.0	2.004484844722304	0.0	-2.8222115985077236	0.0	0.09966814297794539	-2.0495971218936093	0.0	0.11244236394148863
5.29	-2.83421374905997	0.0	0.0008438396191821567	-2.285829636428329	0.0	-0.41989718545204174	0.0	0.002100076983702213	0.0	0.9998469462665422	0.0	0.017495257672619897	0.0	0.0	2.004911139691515	0.0	0.0	2.005086472461397	0.0	-2.832449211998544	0.0	0.09999874429514267	-2.046785556378302	0.0	0.04896537447111026
5.295	-2.8444510302751818	0.0	0.000706461695776409	-2.300017467706474	0.0	-0.41939658040600214	0.0	0.0026552656776701435	0.0	0.9998468429260527	0.0	0.017501162543358414	0.0	0.0	2.0055878916496717	0.0	0.0	2.0058471500454793	0.0	-2.8426838485184334	0.0	0.10025317989962697	-2.047698807363796	0.0	0.0663777183664382
5.3	-2.854704637895325	0.0	0.0007542610421624693	-2.3142564845199027	0.0	-0.41889446755939086	0.0	0.0029575043356933036	0.0	0.9998467143845761	0.0	0.017508504617268907	0.0	0.0	2.0064293602765124	0.0	0.0	2.006694412627114	0.0	-2.8529280234999477	0.0	0.10070169435170066	-2.05003587457131	0.0	0.11439942705442746
5.305	-2.8649717690677936	0.0	0.000965778318534536	-2.3285467690521013	0.0	-0.4183891281540113	0.0	0.002400640170102842	0.0	0.9998466026750282	0.0	0.017514882779257755	0.0	0.0	2.0071603558944773	0.0	0.0	2.007382145376496	0.0	-2.8631801620771262	0.0	0.10130908032842306	-2.0490433716701637	0.0	0.08996532962208745
5.3100000000000005	-2.8752124631007465	0.0	0.0008433194793669762	-2.3428882639730984	0.0	-0.41788188191401593	0.0	0.0027719696168080118	0.0	0.999846491072597	0.0	0.017521252506078267	0.0	0.0	2.007890384846633	0.0	0.0	2.008176256176404	0.0	-2.8734175679938097	0.0	0.10158198210224578	-2.0472092196148983	0.0	0.047244622018011856
5.315	-2.8854572789492092	0.0	0.0007557040136914614	-2.35728094982511	0.0	-0.4173732215933515	0.0	0.003365072415544143	0.0	0.9998463567844285	0.0	0.01752891395587175	0.0	0.0	2.0087684571737627	0.0	0.0	2.0091402784122367	0.0	-2.88365760216912	0.0	0.10189756212666262	-2.0500093061392484	0.0	0.10514561201926491
5.32	-2.8957321231190285	0.0	0.001025121124696478	-2.3717248741741384	0.0	-0.4168621927137084	0.0	0.0029886082008930563	0.0	0.9998462116830964	0.0	0.017537188558179772	0.0	0.0	2.009716802528185	0.0	0.0	2.009996451594884	0.0	-2.893914991059003	0.0	0.10257487141653647	-2.0504626672437576	0.0	0.11165134414216257
5.325	-2.9059827601079546	0.0	0.000991190757153921	-2.3862200635628072	0.0	-0.41634829340713125	0.0	0.0030648695809066162	0.0	0.9998460817741317	0.0	0.01754459348284884	0.0	0.0	2.010565474961508	0.0	0.0	2.0108744720536036	0.0	-2.9041589882303183	0.0	0.10294345812159265	-2.048199475837431	0.0	0.05901944909249095
5.33	-2.9162291353578826	0.0	0.0008900336883749075	-2.40076646178574	0.0	-0.4158328348583917	0.0	0.0035853311763514245	0.0	0.9998459365851924	0.0	0.017552865681725757	0.0	0.0	2.011513545121484	0.0	0.0	2.0119015937764115	0.0	-2.9144008964487726	0.0	0.10325006941315631	-2.049295148682388	0.0	0.07946393932625635
5.335	-2.92649264553597	0.0	0.0009814699667092448	-2.4153640837146075	0.0	-0.41531558591181356	0.0	0.0038498616646425706	0.0	0.999845767659507	0.0	0.017562485385918807	0.0	0.0	2.0126160519714156	0.0	0.0	2.0130044979018775	0.0	-2.924652876737031	0.0	0.10375797915407188	-2.051081191648474	0.0	0.11457238048409753
5.34	-2.9367617039400002	0.0	0.0011330731641172851	-2.430012996899995	0.0	-0.41479515596764016	0.0	0.003565835913192593	0.0	0.999845608834085	0.0	0.017571525111958742	0.0	0.0	2.0136520881440556	0.0	0.0	2.014026034643188	0.0	-2.9349083901917616	0.0	0.1043232033167949	-2.050122889533664	0.0	0.08972169131648787
5.345	-2.9470127035979585	0.0	0.001048836656003988	-2.4447131529655315	0.0	-0.41427270597257104	0.0	0.003957735335470877	0.0	0.9998454448024912	0.0	0.0175808562722566	0.0	0.0	2.0147215255494952	0.0	0.0	2.01515984229895	0.0	-2.9451540666753226	0.0	0.10465418652165545	-2.049062964999071	0.0	0.06258789510995497
5.3500000000000005	-2.9572688040365187	0.0	0.0010078531372039582	-2.4594645436148057	0.0	-0.4137485166172638	0.0	0.004526981782148932	0.0	0.9998452584557611	0.0	0.01759145085228321	0.0	0.0	2.015935762771767	0.0	0.0	2.0164567270491984	0.0	-2.955403042583087	0.0	0.10503642687483562	-2.0514686847624475	0.0	0.11079728216360682
5.355	-2.9675493974715526	0.0	0.001252515405014862	-2.4742672178756266	0.0	-0.4132216374637133	0.0	0.0042808720804803505	0.0	0.999845062911711	0.0	0.017602561479410275	0.0	0.0	2.0172091440254887	0.0	0.0	2.017683106563433	0.0	-2.9656663179676865	0.0	0.1057084939118004	-2.051752030162583	0.0	0.11235136639704685
5.36	-2.9778091600231673	0.0	0.0012278034662195117	-2.4891211813900136	0.0	-0.4126920378134698	0.0	0.004522035906785221	0.0	0.9998448709461102	0.0	0.017613461962988176	0.0	0.0	2.0184584411151762	0.0	0.0	2.01897857442476	0.0	-2.975918279444927	0.0	0.10610982550813812	-2.050079837953763	0.0	0.0710799313645152
5.365	-2.9880691409592868	0.0	0.0011855947204577292	-2.5040264024390164	0.0	-0.4121605403560626	0.0	0.005046370275318251	0.0	0.9998446606605189	0.0	0.017625394980425764	0.0	0.0	2.019826076490997	0.0	0.0	2.02042425301794	0.0	-2.986170839760288	0.0	0.10650029360425266	-2.0516749793898432	0.0	0.10100150277425105
5.37	-2.998347736705616	0.0	0.001350685377082981	-2.518982911955631	0.0	-0.4116267336502633	0.0	0.005192227489375312	0.0	0.9998444297765398	0.0	0.017638487586679037	0.0	0.0	2.0213266119186146	0.0	0.0	2.021911716625005	0.0	-2.9964344266466734	0.0	0.10710602853258275	-2.052644614113571	0.0	0.1168212068583407
5.375	-3.008620019385382	0.0	0.001422252033954573	-2.5339907397367143	0.0	-0.4110898194353352	0.0	0.005303677653494943	0.0	0.999844200437241	0.0	0.017651482983929788	0.0	0.0	2.0228160066259755	0.0	0.0	2.0234311083522205	0.0	-3.0066949968182666	0.0	0.1076180279409024	-2.0517025537766838	0.0	0.09060091227600353
5.38	-3.0188865095381847	0.0	0.001400910687196452	-2.54904985831371	0.0	-0.41055067946752943	0.0	0.005777395261203713	0.0	0.9998439565206588	0.0	0.017665293901616662	0.0	0.0	2.024398868017424	0.0	0.0	2.02508621017745	0.0	-3.016952859061942	0.0	0.10804242778983558	-2.051953291577998	0.0	0.0902649741397768
5.385	-3.029161558273457	0.0	0.0014593301790507308	-2.5641602773323884	0.0	-0.4100092823225047	0.0	0.006268660456381712	0.0	0.9998436889795399	0.0	0.017680430065078426	0.0	0.0	2.026133615514227	0.0	0.0	2.026882049114206	0.0	-3.027216145855834	0.0	0.1085554329257151	-2.053533533154006	0.0	0.11864121907206016
5.39	-3.039447878520647	0.0	0.001634868794419074	-2.5793220393652954	0.0	-0.40946478316480533	0.0	0.006322480140255117	0.0	0.9998434128618068	0.0	0.017696037871796168	0.0	0.0	2.0279224182755042	0.0	0.0	2.0286933062546657	0.0	-3.0374864214525332	0.0	0.10918936996269772	-2.0535980814484565	0.0	0.11343002011068952
5.3950000000000005	-3.049723755769953	0.0	0.0016574974231108718	-2.5945351337614513	0.0	-0.40891761570806806	0.0	0.0067694477807257215	0.0	0.9998431239252038	0.0	0.017712355546192608	0.0	0.0	2.0297925791375473	0.0	0.0	2.0306326101920145	0.0	-3.047751483953755	0.0	0.10967509217947585	-2.0531037478120684	0.0	0.09564927335997259
5.4	-3.0600039456774644	0.0	0.0017044313138208833	-2.609799559771733	0.0	-0.40836796945736753	0.0	0.007337723993139422	0.0	0.9998428116096367	0.0	0.0177299766508938	0.0	0.0	2.0318121261309394	0.0	0.0	2.0327347132722084	0.0	-3.058019678958401	0.0	0.11019390061328029	-2.0545418119679955	0.0	0.11986692745802954
5.405	-3.0702972177453884	0.0	0.0018835785381747466	-2.625115348625444	0.0	-0.40781535211707454	0.0	0.007606319611081887	0.0	0.9998424796222112	0.0	0.017748688470131068	0.0	0.0	2.0339566801244597	0.0	0.0	2.0349137633289214	0.0	-3.0682959810340518	0.0	0.11085272172877722	-2.055114673952385	0.0	0.12458162364956948
5.41	-3.0805848090183594	0.0	0.0019636777648579626	-2.6404825132287786	0.0	-0.4072596586754949	0.0	0.008084147243098116	0.0	0.9998421320891244	0.0	0.017768255372188912	0.0	0.0	2.036199235574366	0.0	0.0	2.0372297009188802	0.0	-3.0785698893768276	0.0	0.1114183907096269	-2.054892358946877	0.0	0.11138174631023165
5.415	-3.090875333315556	0.0	0.0020463842363817332	-2.6559010519860298	0.0	-0.406701141070817	0.0	0.008688846636275392	0.0	0.9998417595780551	0.0	0.017789204685862134	0.0	0.0	2.038600229575725	0.0	0.0	2.0397188721243555	0.0	-3.088846286864025	0.0	0.11199611553127466	-2.0558831047348347	0.0	0.1243761681209372
5.42	-3.1011747749831278	0.0	0.0022030648325419215	-2.671370990327768	0.0	-0.4061395544087337	0.0	0.009217319444367576	0.0	0.9998413601924989	0.0	0.017811637988350174	0.0	0.0	2.041171304043075	0.0	0.0	2.0423594396372864	0.0	-3.099128584061374	0.0	0.11265814625464589	-2.0566773936621026	0.0	0.13243129294436667
5.425	-3.1114754857604128	0.0	0.0023385377556479165	-2.6868923426531803	0.0	-0.40557462896198776	0.0	0.009820021910037635	0.0	0.9998409366583743	0.0	0.01783539687000623	0.0	0.0	2.043894303885435	0.0	0.0	2.0451726686881417	0.0	-3.1094125522263325	0.0	0.11330819600167283	-2.057032287213767	0.0	0.13019358615913695
5.43	-3.1217794607707847	0.0	0.002473428059284776	-2.702465120803882	0.0	-0.4050064496657723	0.0	0.010536289464728581	0.0	0.9998404827928267	0.0	0.017860822153880244	0.0	0.0	2.046808290972884	0.0	0.0	2.0481910932784273	0.0	-3.11969936865556	0.0	0.11396915689615024	-2.0577882089326316	0.0	0.1361431526424893
5.4350000000000005	-3.132089424807087	0.0	0.0026378315246493762	-2.7180893440306053	0.0	-0.4044348666393329	0.0	0.011308817787852437	0.0	0.999839994813374	0.0	0.017888118151105248	0.0	0.0	2.0499366816453035	0.0	0.0	2.0514308309310594	0.0	-3.129990626384689	0.0	0.11467258549376129	-2.058656961272913	0.0	0.14381272199545242
5.44	-3.1424044523230656	0.0	0.002816882523728305	-2.7337650336951045	0.0	-0.40385968335472433	0.0	0.012171260298933324	0.0	0.9998394698162665	0.0	0.01791743834729066	0.0	0.0	2.0532970671981197	0.0	0.0	2.0549176401634797	0.0	-3.1402858847922666	0.0	0.11540467303280424	-2.0594513226758577	0.0	0.14898412806199937
5.445	-3.1527246051583244	0.0	0.0030067633121081756	-2.7494922097766143	0.0	-0.4032807745230366	0.0	0.01316600539468822	0.0	0.9998389024121382	0.0	0.017949073031577726	0.0	0.0	2.056922718044573	0.0	0.0	2.05868942287429	0.0	-3.1505852636436096	0.0	0.11616356177517767	-2.060326433231663	0.0	0.1549822084439071
5.45	-3.1630508289753294	0.0	0.0032136326095715565	-2.765270894282052	0.0	-0.402697987652862	0.0	0.014322879910004837	0.0	0.9998382857388741	0.0	0.0179833915075618	0.0	0.0	2.060855960559207	0.0	0.0	2.06279262572087	0.0	-3.160889387366373	0.0	0.11695791946376129	-2.061354320541102	0.0	0.16325704532773092
5.455	-3.1733843697660236	0.0	0.003446400196040577	-2.781101113006084	0.0	-0.4021111143255275	0.0	0.015665788098766176	0.0	0.9998376116711418	0.0	0.01802082924083446	0.0	0.0	2.0651467041007656	0.0	0.0	2.067280543424898	0.0	-3.1711990609836405	0.0	0.11779962443478319	-2.0625333584852967	0.0	0.17360148206872947
5.46	-3.1837262930615755	0.0	0.0037107419777168303	-2.796982895359226	0.0	-0.40151989716685993	0.0	0.017221019048228637	0.0	0.9998368708615663	0.0	0.018061884304131918	0.0	0.0	2.0698520336428374	0.0	0.0	2.0722140019767874	0.0	-3.181515004280047	0.0	0.11869775158998448	-2.0638855063370265	0.0	0.18630982426400383
5.465	-3.1940781029478016	0.0	0.004016666973269965	-2.812916275148425	0.0	-0.4009240192560607	0.0	0.01900758656973196	0.0	0.9998360528053054	0.0	0.01810711212664625	0.0	0.0	2.075035608047474	0.0	0.0	2.0776592744226634	0.0	-3.1918381974438863	0.0	0.11966612986083948	-2.0654065722297554	0.0	0.20106743299835653
5.47	-3.204440779007339	0.0	0.0043665896143407264	-2.828901290564473	0.0	-0.40032310841923996	0.0	0.021053501183042684	0.0	0.9998351458651037	0.0	0.018157122341634455	0.0	0.0	2.080767298842742	0.0	0.0	2.0836906582314736	0.0	-3.202169348668117	0.0	0.12071137341637143	-2.0670888035721	0.0	0.2174626667118237
5.4750000000000005	-3.214815726801258	0.0	0.004766836812494908	-2.8449379835238298	0.0	-0.39971675846516064	0.0	0.023385075711353377	0.0	0.9998341368578396	0.0	0.018212599280418233	0.0	0.0	2.0871255391362817	0.0	0.0	2.090389988940746	0.0	-3.2125094217544143	0.0	0.12184455306597738	-2.0689791376723297	0.0	0.23628189361878407
5.48	-3.225204476968082	0.0	0.005223936041328189	-2.8610264015510363	0.0	-0.39910449361079914	0.0	0.02602883371273659	0.0	0.9998330113027828	0.0	0.01827428542172198	0.0	0.0	2.094195426848538	0.0	0.0	2.097846700527684	0.0	-3.222859470549944	0.0	0.12307737722837829	-2.0710584181116896	0.0	0.2568049844354277
5.485	-3.2356082923341223	0.0	0.005739481019883348	-2.877166596480482	0.0	-0.39848580455627997	0.0	0.02902289510407619	0.0	0.999831752813094	0.0	0.018343011342329397	0.0	0.0	2.1020721575146624	0.0	0.0	2.1061611475212563	0.0	-3.233220424238161	0.0	0.12441724673976726	-2.0733957417008826	0.0	0.2802786794552125
5.49	-3.246029582705019	0.0	0.006327541898609247	-2.893358626942697	0.0	-0.397860100837118	0.0	0.032392291908722684	0.0	0.9998303432706651	0.0	0.018419681691901522	0.0	0.0	2.11085941702355	0.0	0.0	2.1154408555968844	0.0	-3.2435938634513866	0.0	0.12588462374056472	-2.07598673737992	0.0	0.306257251307081
5.495	-3.25646971227501	0.0	0.006987372481988149	-2.909602557805591	0.0	-0.39722673155783395	0.0	0.03618462892099273	0.0	0.9998287623939074	0.0	0.01850529351929312	0.0	0.0	2.1206714822281465	0.0	0.0	2.125806988198984	0.0	-3.2539808204639034	0.0	0.12748580439615612	-2.0789002959499703	0.0	0.33595210209681253
5.5	-3.266932041709536	0.0	0.00774077930295012	-2.9258984617128436	0.0	-0.3965849596251169	0.0	0.04042458316161926	0.0	0.9998269875649674	0.0	0.01860093909637534	0.0	0.0	2.1316335448569808	0.0	0.0	2.137387778217666	0.0	-3.2643834361130883	0.0	0.12925040340106433	-2.0821519836749847	0.0	0.36931705042932744
5.505	-3.2774183022899868	0.0	0.00858726464103209	-2.9422464203317666	0.0	-0.395933943148034	0.0	0.045165161462992875	0.0	0.9998249938175225	0.0	0.01870779881069165	0.0	0.0	2.1438808972592778	0.0	0.0	2.1503266438819475	0.0	-3.274802987774776	0.0	0.13118635789795538	-2.0857952335188243	0.0	0.4071892835818015
5.51	-3.287932658174395	0.0	0.009553811720496486	-2.958646523906726	0.0	-0.3952727556443343	0.0	0.05043311439642929	0.0	0.9998227531264837	0.0	0.018827169965162094	0.0	0.0	2.1575622335825444	0.0	0.0	2.164774666895027	0.0	-3.2852420829178675	0.0	0.1333300287291992	-2.0898532350480745	0.0	0.4496524630486947
5.515	-3.298477296015239	0.0	0.010640566326387546	-2.9750988754026637	0.0	-0.3946003013740128	0.0	0.05628387631690349	0.0	0.9998202351077381	0.0	0.018960418421000533	0.0	0.0	2.1728341079709024	0.0	0.0	2.1808988097330015	0.0	-3.2957022808910055	0.0	0.13569145000632693	-2.0943520916173686	0.0	0.49689430806919704
5.5200000000000005	-3.3090570967900255	0.0	0.011877930059510324	-2.991603587021544	0.0	-0.3939154062744748	0.0	0.06274324071633305	0.0	0.9998174055654193	0.0	0.01910904303955237	0.0	0.0	2.189868320941844	0.0	0.0	2.198873424163098	0.0	-3.306186586940041	0.0	0.138311992485115	-2.0994768782208073	0.0	0.552785113813185
5.525	-3.319676750814903	0.0	0.013291239207540013	-3.0081607873757137	0.0	-0.3932166625529954	0.0	0.06983768277350721	0.0	0.9998142278241532	0.0	0.019274590408846288	0.0	0.0	2.2088421466977826	0.0	0.0	2.2188804465325753	0.0	-3.31669789445512	0.0	0.14122840946113005	-2.1050771828806956	0.0	0.6134026110856977
5.53	-3.330339611148242	0.0	0.014885898378633362	-3.024770614063599	0.0	-0.3925026119926297	0.0	0.07762476522994262	0.0	0.9998106605380604	0.0	0.019458753037817595	0.0	0.0	2.22994958823001	0.0	0.0	2.241118303699423	0.0	-3.3272383787375364	0.0	0.1444585975388331	-2.1113008437879	0.0	0.6818319063656921
5.535	-3.3410524583366374	0.0	0.01670678316568168	-3.0414332264768738	0.0	-0.39177145479671516	0.0	0.086105189981738	0.0	0.9998066602738197	0.0	0.01966321609198127	0.0	0.0	2.2533838121825913	0.0	0.0	2.2657856236000518	0.0	-3.337811984298129	0.0	0.14806013377092997	-2.11817487246031	0.0	0.758316463193047
5.54	-3.351819481787812	0.0	0.01876303242886195	-3.058148793836548	0.0	-0.391021341768892	0.0	0.09532298884091236	0.0	0.9998021782888787	0.0	0.01988980354128251	0.0	0.0	2.2793539003923264	0.0	0.0	2.2930936483558364	0.0	-3.348421255056836	0.0	0.15205587258157277	-2.125720443346772	0.0	0.8431515190202253
5.545	-3.362648266802636	0.0	0.02110229691843793	-3.0749175046667228	0.0	-0.3902501564171869	0.0	0.1052786058156901	0.0	0.9997971622985814	0.0	0.020140363833122187	0.0	0.0	2.308071747751279	0.0	0.0	2.3232537472871386	0.0	-3.3590704126618993	0.0	0.15650762201146445	-2.1340385586336774	0.0	0.9384824160406573
5.55	-3.3735444190482236	0.0	0.023744573808442884	-3.091739569955978	0.0	-0.38945544069906834	0.0	0.11598450869794706	0.0	0.9997915572757559	0.0	0.02041670874258937	0.0	0.0	2.3397450548600958	0.0	0.0	2.3564808614735924	0.0	-3.3697625790468915	0.0	0.16144941232189558	-2.142806433746684	0.0	1.036184462040197
5.555	-3.384512516428491	0.0	0.026692654245185424	-3.1086152055720713	0.0	-0.38863483402416815	0.0	0.1274869292837345	0.0	0.9997853003364869	0.0	0.020720840403216593	0.0	0.0	2.3746033507431785	0.0	0.0	2.3930031764287962	0.0	-3.380500262700552	0.0	0.16689950673107304	-2.1528385709487896	0.0	1.156808452266266
5.5600000000000005	-3.3955690852031117	0.0	0.03009408867866037	-3.125544664706356	0.0	-0.3877852625659581	0.0	0.13965033383770986	0.0	0.999778328972758	0.0	0.021054522348117596	0.0	0.0	2.412848829274812	0.0	0.0	2.4330100501112653	0.0	-3.391291669341258	0.0	0.1730198826160297	-2.1631380693195297	0.0	1.274770842146857
5.565	-3.4067058821923526	0.0	0.03378627103090295	-3.1425282031517985	0.0	-0.3869038164282676	0.0	0.15267062952726468	0.0	0.9997705723578229	0.0	0.021419678807942905	0.0	0.0	2.454702116808042	0.0	0.0	2.4767469637488535	0.0	-3.402132820759904	0.0	0.17966287722856158	-2.1740980096153812	0.0	1.4010094562243562
5.57	-3.4179464457801365	0.0	0.037994666044879555	-3.1595660944615536	0.0	-0.38598735475865353	0.0	0.16633789288269318	0.0	0.9997619539117398	0.0	0.021818237881601168	0.0	0.0	2.5003842994284997	0.0	0.0	2.5243992599252407	0.0	-3.413034759362536	0.0	0.1870701257729926	-2.1866479013679703	0.0	1.5598285015015234
5.575	-3.4292951274300565	0.0	0.04270579525482581	-3.1766586565714805	0.0	-0.38503179273035737	0.0	0.18065327416279595	0.0	0.9997524006735465	0.0	0.022251681696734575	0.0	0.0	2.5500653648637415	0.0	0.0	2.5761526107489807	0.0	-3.423999102293855	0.0	0.1952408846133146	-2.198688813058447	0.0	1.6959355011923698
5.58	-3.44074675841081	0.0	0.04778296433411541	-3.1938061846148016	0.0	-0.3840338817621323	0.0	0.19577107502223082	0.0	0.9997418230801669	0.0	0.02272195347520163	0.0	0.0	2.603968171502539	0.0	0.0	2.632236892496545	0.0	-3.4350230475307875	0.0	0.20405423160396235	-2.2116158568511235	0.0	1.8480117982104334
5.585	-3.452328118088371	0.0	0.05348040272671794	-3.2110090052869253	0.0	-0.38298972516886326	0.0	0.21142545178176822	0.0	0.999730130181109	0.0	0.023230729519513094	0.0	0.0	2.662285007364461	0.0	0.0	2.692805822840255	0.0	-3.4461177973224095	0.0	0.21377959380477748	-2.226520161408385	0.0	2.0483003593095392
5.59	-3.464051306592753	0.0	0.059869307727094624	-3.2282674900883452	0.0	-0.3818943459104411	0.0	0.22750402539638082	0.0	0.9997172371227863	0.0	0.02377910404742654	0.0	0.0	2.7251414661441675	0.0	0.0	2.7579809252275034	0.0	-3.4572873681799043	0.0	0.22449909141206972	-2.240489526698871	0.0	2.214013317841985
5.595	-3.47589681501022	0.0	0.06662585315854944	-3.2455819860621182	0.0	-0.3807436583872406	0.0	0.24432383548373732	0.0	0.9997030421086134	0.0	0.024368577688762882	0.0	0.0	2.7927097531075	0.0	0.0	2.8279745482658374	0.0	-3.468522457802285	0.0	0.2359017415196012	-2.2541014626809392	0.0	2.3620990092619563
5.6000000000000005	-3.487886941940017	0.0	0.07393761632993388	-3.2629528372145833	0.0	-0.3795338474002825	0.0	0.261675148584567	0.0	0.999687431100248	0.0	0.02500080145545492	0.0	0.0	2.8651793438390656	0.0	0.0	2.9029389563526093	0.0	-3.4798309597678614	0.0	0.24819061425203284	-2.2696260851705548	0.0	2.5632297907330837
5.605	-3.500045872418221	0.0	0.08201352484656886	-3.2803804308342848	0.0	-0.37825990337400367	0.0	0.2792947641680022	0.0	0.9996702974925036	0.0	0.025676765496402396	0.0	0.0	2.942663997274938	0.0	0.0	2.9829510124872503	0.0	-3.491220442265211	0.0	0.261585835968765	-2.2864283101201663	0.0	2.8044399087247096
5.61	-3.51238775484006	0.0	0.09093727903777883	-3.297865182851837	0.0	-0.3769159378090566	0.0	0.2970251355974723	0.0	0.9996515417561443	0.0	0.026396875589151495	0.0	0.0	3.0252105218115526	0.0	0.0	3.068042445882431	0.0	-3.5026936787730762	0.0	0.27617805956139513	-2.301974342492101	0.0	3.0011689360175016
5.615	-3.5248845561573843	0.0	0.10026856032672099	-3.3154074839910033	0.0	-0.3754969507401986	0.0	0.3152927707744281	0.0	0.9996310481983479	0.0	0.02716187503104804	0.0	0.0	3.1129044524873066	0.0	0.0	3.158367171264233	0.0	-3.5142385112367944	0.0	0.2915349094710169	-2.3162114084352687	0.0	3.1490661936511244
5.62	-3.537547773435995	0.0	0.1100501104187943	-3.3330076908942727	0.0	-0.3739992190986996	0.0	0.3340190767466908	0.0	0.9996086751678078	0.0	0.027973139043175152	0.0	0.0	3.2059038079347335	0.0	0.0	3.254056588136442	0.0	-3.5258570509910037	0.0	0.3077130661089978	-2.3314799036115037	0.0	3.3324882329223584
5.625	-3.550401689984095	0.0	0.12048070112587622	-3.350666186531786	0.0	-0.37241809983245694	0.0	0.35293551186282507	0.0	0.9995842866546344	0.0	0.028831473333080036	0.0	0.0	3.304301371634753	0.0	0.0	3.3551651644865883	0.0	-3.5375547355025128	0.0	0.32492191673051873	-2.3477021656538906	0.0	3.5568668279310196
5.63	-3.563467281927988	0.0	0.13171760435296928	-3.368383375481341	0.0	-0.37074800630878196	0.0	0.37179714867463565	0.0	0.9995577565912885	0.0	0.0297370345170244	0.0	0.0	3.4081155664459426	0.0	0.0	3.4616772017568618	0.0	-3.549334678682134	0.0	0.3433248236620682	-2.364305268390273	0.0	3.80857196134132
5.635	-3.576760310244472	0.0	0.14385388178750094	-3.386159671418412	0.0	-0.36898269857630983	0.0	0.39041339557911237	0.0	0.9995289685323827	0.0	0.03068942890063188	0.0	0.0	3.517301773919019	0.0	0.0	3.5735224009171347	0.0	-3.5611974028266036	0.0	0.36301696021971885	-2.3807769910587493	0.0	4.073289226927606
5.64	-3.5902858242293485	0.0	0.15685111983090902	-3.4039954838759185	0.0	-0.3671156911947254	0.0	0.40873923266009876	0.0	0.9994978123804019	0.0	0.031687900307062596	0.0	0.0	3.6317738627141494	0.0	0.0	3.690617565681332	0.0	-3.5731400734803156	0.0	0.3839590963421196	-2.3955882635560366	0.0	4.267641860237594
5.6450000000000005	-3.604007160651378	0.0	0.1701540167279122	-3.421891184410421	0.0	-0.36514204904794373	0.0	0.4273804152483641	0.0	0.9994641507075058	0.0	0.03273242161380106	0.0	0.0	3.7515293320826326	0.0	0.0	3.8130530358827315	0.0	-3.5851512744244385	0.0	0.40559874455527367	-2.409014743098041	0.0	4.3938095342010985
5.65	-3.6179308140860575	0.0	0.18373591299205036	-3.4398471098041212	0.0	-0.3630585673681415	0.0	0.44632501264031005	0.0	0.9994278078855049	0.0	0.03382390877510466	0.0	0.0	3.8766738677936554	0.0	0.0	3.9409157334597955	0.0	-3.5972303556514507	0.0	0.4279205867322511	-2.4227240449050376	0.0	4.543127432885594
5.655	-3.6320773729738147	0.0	0.19774364863233523	-3.4578636035988426	0.0	-0.3608614463297683	0.0	0.4653403363893507	0.0	0.9993886134720124	0.0	0.034962826653198595	0.0	0.0	4.0072615093032145	0.0	0.0	4.074225920021335	0.0	-3.6093787756098	0.0	0.45108031128870474	-2.436650364793014	0.0	4.725973293263288
5.66	-3.646466902892993	0.0	0.2123185981521096	-3.4759410133873065	0.0	-0.35854612282036274	0.0	0.4841871026568766	0.0	0.9993464096850929	0.0	0.03614904466892165	0.0	0.0	4.14327809401472	0.0	0.0	4.212935307405868	0.0	-3.6215966402689057	0.0	0.47522398423643236	-2.4504460279616134	0.0	4.935608947926692
5.665	-3.6611171883267293	0.0	0.22757618069530341	-3.4940796834600607	0.0	-0.35610737103495355	0.0	0.5026462833921552	0.0	0.99930105424535	0.0	0.03738185340750664	0.0	0.0	4.28464315209937	0.0	0.0	4.356932860537404	0.0	-3.6338825294764985	0.0	0.5004675269929267	-2.463809421238583	0.0	5.164300894165656
5.67	-3.6760424020450184	0.0	0.24359046019469843	-3.512279947419591	0.0	-0.35353949350517805	0.0	0.5205429631657413	0.0	0.9992524209490892	0.0	0.03866004663191355	0.0	0.0	4.431219299459735	0.0	0.0	4.506057434760558	0.0	-3.646233624907341	0.0	0.5268817754904256	-2.4764919142455266	0.0	5.40199173337748
5.675	-3.691252335576985	0.0	0.260385382832665	-3.530542122020571	0.0	-0.35083656938185637	0.0	0.5377638959026088	0.0	0.9992003979473056	0.0	0.03998205493599843	0.0	0.0	4.582827552674083	0.0	0.0	4.660115442809218	0.0	-3.658646087442968	0.0	0.5544845876707111	-2.4883394540122414	0.0	5.6378460299814845
5.68	-3.7067522889734423	0.0	0.2779337379882423	-3.5488665033619626	0.0	-0.3479927223400194	0.0	0.5542658006112574	0.0	0.999144883868181	0.0	0.04134611239832389	0.0	0.0	4.739266430719829	0.0	0.0	4.818900898326541	0.0	-3.6711155891459293	0.0	0.583240965656058	-2.4993114634681053	0.0	5.8618112148906745
5.6850000000000005	-3.72254356464284	0.0	0.2961631133228862	-3.5672533658552683	0.0	-0.34500236938408396	0.0	0.5700737434707739	0.0	0.999085782399492	0.0	0.04275043132940901	0.0	0.0	4.900331989270691	0.0	0.0	4.982214995887036	0.0	-3.683637876144471	0.0	0.613070286519097	-2.5094364437526626	0.0	6.069844210332682
5.69	-3.738624420716724	0.0	0.3149670697366385	-3.585702963877454	0.0	-0.3418604197772298	0.0	0.5852707173448658	0.0	0.999022996096754	0.0	0.044193361945088286	0.0	0.0	5.065836131833207	0.0	0.0	5.149882705769311	0.0	-3.6962092467112764	0.0	0.6438586933840722	-2.5191004592612996	0.0	6.228833813923166
5.695	-3.7549720109025615	0.0	0.3339794522173614	-3.6042155387305073	0.0	-0.3385627725017811	0.0	0.6003514175123654	0.0	0.9989564073761773	0.0	0.04567380135794254	0.0	0.0	5.235653527358912	0.0	0.0	5.321870718010086	0.0	-3.7088291613405864	0.0	0.6752357568748643	-2.529036303530393	0.0	6.302677030317115
5.7	-3.7715634455620113	0.0	0.35282510192507965	-3.6227913401682317	0.0	-0.335107698154261	0.0	0.6158524240998857	0.0	0.9988858209579053	0.0	0.04719233697302239	0.0	0.0	5.409852798568459	0.0	0.0	5.498299441529207	0.0	-3.721499843159177	0.0	0.7068346996668056	-2.5391783679802105	0.0	6.345568275837818
5.705	-3.7884105115831415	0.0	0.37155372916553764	-3.6414306204487845	0.0	-0.33149395304923374	0.0	0.6316665712946956	0.0	0.9988110172589235	0.0	0.048749890175793294	0.0	0.0	5.588540986101996	0.0	0.0	5.6792585845026355	0.0	-3.7342204695158516	0.0	0.7387177149619367	-2.54900757561715	0.0	6.411047054329406
5.71	-3.805527778347381	0.0	0.3902506026545248	-3.6601336247713796	0.0	-0.32771988895800935	0.0	0.6476273403663758	0.0	0.9987317839548139	0.0	0.05034703292469856	0.0	0.0	5.7717851584098305	0.0	0.0	5.864790151004014	0.0	-3.746989010034587	0.0	0.770980261530383	-2.5582945089901594	0.0	6.498025537807206
5.715	-3.822931420012342	0.0	0.40902396489126414	-3.6789005847492837	0.0	-0.3237833261161726	0.0	0.6635252209528538	0.0	0.99864792492702	0.0	0.05198386351831623	0.0	0.0	5.9595981484277605	0.0	0.0	6.054876124809434	0.0	-3.7598020418068394	0.0	0.8037374285237193	-2.566753897916578	0.0	6.609127479904344
5.72	-3.8406380571589227	0.0	0.42799275707162976	-3.6977317113644546	0.0	-0.31968148708588645	0.0	0.6791256710699815	0.0	0.998559268612156	0.0	0.05365992084785755	0.0	0.0	6.151928696783682	0.0	0.0	6.249431298365932	0.0	-3.7726547509476696	0.0	0.8371108758926339	-2.574123324175681	0.0	6.744277455992888
5.7250000000000005	-3.858663516241582	0.0	0.4472731884605797	-3.7166271884643973	0.0	-0.3154109986396926	0.0	0.6941911089585047	0.0	0.9984656747650521	0.0	0.055374148879612096	0.0	0.0	6.348657350708863	0.0	0.0	6.448302401960075	0.0	-3.785541162945517	0.0	0.8712149810656827	-2.580208317279542	0.0	6.900681197897355
5.73	-3.877021670397047	0.0	0.46696591848667357	-3.735587168010207	0.0	-0.31096796100542784	0.0	0.7085040016238418	0.0	0.9983670385919348	0.0	0.057124918476051834	0.0	0.0	6.54959893669442	0.0	0.0	6.651273847265956	0.0	-3.798454579693466	0.0	0.9061440345065168	-2.584919795135162	0.0	7.073177597380774
5.735	-3.8957234820485858	0.0	0.48714518650288213	-3.7546117678686706	0.0	-0.30634807512458945	0.0	0.7218884321579239	0.0	0.9982632917216983	0.0	0.05891010478745791	0.0	0.0	6.754511408399891	0.0	0.0	6.858079649475782	0.0	-3.811388172736439	0.0	0.9419618255609412	-2.5882971480459225	0.0	7.254859896644171
5.74	-3.914776371938184	0.0	0.5078512681852839	-3.7737010728086227	0.0	-0.30154681487141466	0.0	0.7342271930040308	0.0	0.9981543995848108	0.0	0.0607272149081455	0.0	0.0	6.963110465654229	0.0	0.0	7.068420246290123	0.0	-3.824335641566935	0.0	0.9786949760118552	-2.590510480343748	0.0	7.437942227389683
5.745	-3.9341840025621413	0.0	0.5290872805560993	-3.792855138727678	0.0	-0.29655961861367747	0.0	0.745471715587482	0.0	0.9980403554738233	0.0	0.06257354779460036	0.0	0.0	7.175087882254874	0.0	0.0	7.281982161537821	0.0	-3.837291829050513	0.0	1.0163309193097394	-2.591842277959929	0.0	7.614683848566846
5.75	-3.9539464596008767	0.0	0.550820178371797	-3.8120739996357256	0.0	-0.29138208158205303	0.0	0.7556442907767921	0.0	0.9979211719170117	0.0	0.06444637051704193	0.0	0.0	7.390131719129367	0.0	0.0	7.4984583049111535	0.0	-3.850253201385433	0.0	1.0548202508535216	-2.5926515242004884	0.0	7.778233289457517
5.755	-3.974060799470707	0.0	0.5729856524208119	-3.831357676534785	0.0	-0.28601012572427853	0.0	0.7648322956806074	0.0	0.9977968703648485	0.0	0.06634308943647076	0.0	0.0	7.607945967381467	0.0	0.0	7.7175666178001565	0.0	-3.863218114606828	0.0	1.0940829933802623	-2.593326296899656	0.0	7.923305679938967
5.76	-3.9945218604825916	0.0	0.595495871629468	-3.850706187025638	0.0	-0.28044013105372106	0.0	0.7731758043843939	0.0	0.9976674704082955	0.0	0.06826139837876624	0.0	0.0	7.828267563877143	0.0	0.0	7.939065169864448	0.0	-3.8761868345654222	0.0	1.1340175712085874	-2.594233846948265	0.0	8.046591464337627
5.765	-4.0153232168865385	0.0	0.618248842473113	-3.8701195544036624	0.0	-0.2746690180660449	0.0	0.7808505875009446	0.0	0.997532979770641	0.0	0.07019938949359564	0.0	0.0	8.05087913491314	0.0	0.0	8.162762385335022	0.0	-3.889161316676447	0.0	1.1745111413539275	-2.5956758551226886	0.0	8.14688861611929
5.7700000000000005	-4.036458150921201	0.0	0.6411381346370506	-3.889597815125004	0.0	-0.26869427789959516	0.0	0.7880488626640918	0.0	0.9973933861673826	0.0	0.07215561824703831	0.0	0.0	8.275616483265338	0.0	0.0	8.388521754738708	0.0	-3.90214478712549	0.0	1.2154499467825863	-2.597853993140394	0.0	8.224997080296326
5.775	-4.057920542274922	0.0	0.664061998612292	-3.9091410238213693	0.0	-0.2625139531330673	0.0	0.7949598951387176	0.0	0.9972486518295302	0.0	0.07412912006512759	0.0	0.0	8.502370529343766	0.0	0.0	8.616260989106763	0.0	-3.9151411837800065	0.0	1.256728681005097	-2.6008493834302446	0.0	8.283428859162905
5.78	-4.07970559091957	0.0	0.6869310852115146	-3.9287492552630305	0.0	-0.2561265749047057	0.0	0.80175235158344	0.0	0.9970987113146227	0.0	0.07611937933237711	0.0	0.0	8.731083782409256	0.0	0.0	8.845946118908863	0.0	-3.928154531805477	0.0	1.2982580636001633	-2.6046154404288187	0.0	8.326011696989585
5.785	-4.101810335954717	0.0	0.7096744285427263	-3.9484226032512764	0.0	-0.24953106897988575	0.0	0.8085595390548678	0.0	0.9969434726172756	0.0	0.0781262594506814	0.0	0.0	8.961742336897435	0.0	0.0	9.0775813642733	0.0	-3.941188311110528	0.0	1.3399703443447695	-2.6089822701526266	0.0	8.357456413558857
5.79	-4.1242339450485925	0.0	0.7322434678185066	-3.9681611764252844	0.0	-0.24272663934538385	0.0	0.8154684142391737	0.0	0.9967828216289342	0.0	0.08014990026559551	0.0	0.0	9.194364113431106	0.0	0.0	9.311195856583954	0.0	-3.95424487934393	0.0	1.3818225516805906	-2.613676090123492	0.0	8.382869022363623
5.795	-4.1469777459931745	0.0	0.7546137553638537	-3.9879650913912035	0.0	-0.23571263999510306	0.0	0.8225135439065773	0.0	0.9966166296845158	0.0	0.0821905921732814	0.0	0.0	9.428984410273834	0.0	0.0	9.546828629874929	0.0	-3.9673250278784735	0.0	1.4237972008349844	-2.6183491054684835	0.0	8.407269085416562
5.8	-4.170045031909833	0.0	0.7767845195707528	-4.00783446422075	0.0	-0.2284884520660542	0.0	0.8296761303549494	0.0	0.9964447630680272	0.0	0.08424864490316931	0.0	0.0	9.66564083034522	0.0	0.0	9.784513333035353	0.0	-3.9804277005416338	0.0	1.4659007741800651	-2.622617761316537	0.0	8.435147443542473
5.805	-4.193440648485924	0.0	0.7987760177644251	-4.027769400981912	0.0	-0.2210533724984148	0.0	0.8368885468208749	0.0	0.9962670938527202	0.0	0.0863242592622393	0.0	0.0	9.904358534152797	0.0	0.0	10.024264241313716	0.0	-3.993549934364048	0.0	1.5081599792155709	-2.6261130927853316	0.0	8.47002169549462
5.8100000000000005	-4.217170388012218	0.0	0.8206247161580026	-4.047769988409768	0.0	-0.213406524375334	0.0	0.8440445881027747	0.0	0.9960835109895252	0.0	0.088417414504002	0.0	0.0	10.145137274328519	0.0	0.0	10.26606520440945	0.0	-4.006687065549536	0.0	1.5506159321127342	-2.639993726010522	0.0	8.403241727736015
5.815	-4.241240291008274	0.0	0.8423770070068947	-4.067836286576754	0.0	-0.20554680420651003	0.0	0.8510140803027433	0.0	0.9958939295375742	0.0	0.0905277923572279	0.0	0.0	10.387942632551598	0.0	0.0	10.509862779947223	0.0	-4.019833162374572	0.0	1.593317162566659	-2.5638353034596792	0.0	9.209950327457284
5.82	-4.266178015119392	0.0	0.8708898232706732	-4.087966949368956	0.0	-0.19745949344004482	0.0	0.8408962567344628	0.0	0.9956998544179207	0.0	0.09263800509959531	0.0	0.0	10.630775763975423	0.0	0.0	10.750761812543393	0.0	-4.032293901065191	0.0	1.6429637373246089	-2.4628734804282626	0.0	10.217734167511388
5.825	-4.291520734276573	0.0	0.9012430352275547	-4.108159124422006	0.0	-0.18911624192315002	0.0	0.8264582318774653	0.0	0.9955046141894174	0.0	0.09471305720001867	0.0	0.0	10.869609467834861	0.0	0.0	10.987524655695509	0.0	-4.044574500281707	0.0	1.6943454012631323	-2.4523064344338303	0.0	10.309493690454156
5.83	-4.317122949189667	0.0	0.9317638156899516	-4.1284126781385195	0.0	-0.18051595488300892	0.0	0.8119054760349171	0.0	0.9953085563593943	0.0	0.09675162900054869	0.0	0.0	11.104290494296574	0.0	0.0	11.220118441397313	0.0	-4.056845359980918	0.0	1.7457777916338388	-2.453195612469239	0.0	10.291488622359639
5.835	-4.34297673374586	0.0	0.962457160750168	-4.148727561734376	0.0	-0.171658381017142	0.0	0.7972402514035186	0.0	0.9951119314233995	0.0	0.09875345064925446	0.0	0.0	11.334786299279058	0.0	0.0	11.448510949714164	0.0	-4.0691064476343595	0.0	1.7972599756132488	-2.451238781136341	0.0	10.301353689654347
5.84	-4.369074081578122	0.0	0.9933281972220822	-4.169103726293843	0.0	-0.16254327370114754	0.0	0.7824648246212853	0.0	0.9949149875485992	0.0	0.10071825866243124	0.0	0.0	11.561064987402629	0.0	0.0	11.672670610055382	0.0	-4.081357743138259	0.0	1.8487910147839623	-2.4492791616337772	0.0	10.31103050025452
5.845	-4.395406906574975	0.0	1.0243821794347574	-4.189541122830072	0.0	-0.15317039101494573	0.0	0.7675814663879879	0.0	0.9947179704193669	0.0	0.10264579588757594	0.0	0.0	11.783095312958407	0.0	0.0	11.892566502337855	0.0	-4.093599238672253	0.0	1.9003699650848587	-2.4473191993312624	0.0	10.320517976220682
5.8500000000000005	-4.421967043683658	0.0	1.0556244864698046	-4.210039702348062	0.0	-0.14353949577123215	0.0	0.7525924510292035	0.0	0.9945211230734133	0.0	0.10453581147132017	0.0	0.0	12.000846681380082	0.0	0.0	12.108168358024752	0.0	-4.105830938586038	0.0	1.9519958773914476	-2.4453613147810436	0.0	10.329815148215442
5.855	-4.448746249519228	0.0	1.0870606191020604	-4.23059941590604	0.0	-0.133650355542128	0.0	0.7375000560975153	0.0	0.9943246857440627	0.0	0.10638806082386454	0.0	0.0	12.214289150400765	0.0	0.0	12.319446561049997	0.0	-4.118052859256718	0.0	2.003667797899891	-2.4434078977891778	0.0	10.338921111832027
5.86	-4.475736202840386	0.0	1.1186961965346987	-4.251220214675823	0.0	-0.12350274268437485	0.0	0.7223065619991159	0.0	0.9941288957066844	0.0	0.1082023055808856	0.0	0.0	12.423393430977892	0.0	0.0	12.526372148635765	0.0	-4.130265028927117	0.0	2.055384768411295	-2.441461303926573	0.0	10.347835037190316
5.865	-4.50292850489745	0.0	1.1505369529426153	-4.271902050001931	0.0	-0.11309643436258511	0.0	0.7070142516457084	0.0	0.9939339871295347	0.0	0.1099783135634982	0.0	0.0	12.628130888049379	0.0	0.0	12.728916812010262	0.0	-4.1424674875335326	0.0	2.107145826533716	-2.4395238581905216	0.0	10.356555916073651
5.87	-4.530314678612775	0.0	1.1825887323271473	-4.292644873448056	0.0	-0.10243121255528319	0.0	0.6916254103434318	0.0	0.9937401909681614	0.0	0.11171585872504305	0.0	0.0	12.82847354031582	0.0	0.0	12.927052897093674	0.0	-4.154660286564964	0.0	2.158950004230628	-2.4375978527856557	0.0	10.365082759567047
5.875	-4.557886169765754	0.0	1.2148574862413117	-4.313448636866081	0.0	-0.09150686409099015	0.0	0.6761423252715155	0.0	0.9935477347833226	0.0	0.1134147211182832	0.0	0.0	13.024394061416112	0.0	0.0	13.12075340503477	0.0	-4.166843488868056	0.0	2.2107963294901363	-2.4356855383595852	0.0	10.37341482192784
5.88	-4.585634347121933	0.0	1.2473492699868696	-4.334313292453695	0.0	-0.08032318066876606	0.0	0.6605672851751755	0.0	0.9933568425982425	0.0	0.11507468685060708	0.0	0.0	13.215865780159294	0.0	0.0	13.309991992659532	0.0	-4.179017168436169	0.0	2.262683826488634	-2.433789123186407	0.0	10.381551310700887
5.885	-4.613550502188627	0.0	1.280070238264015	-4.355238792808144	0.0	-0.06887995887338358	0.0	0.6449025801335102	0.0	0.9931677347693786	0.0	0.11669554803446208	0.0	0.0	13.402862680342494	0.0	0.0	13.494742972853269	0.0	-4.191181410201601	0.0	2.314611515282091	-2.431910769282301	0.0	10.389491373884844
5.89	-4.641625849142362	0.0	1.3130266410917686	-4.37622509098062	0.0	-0.057177000194092456	0.0	0.6291505012972944	0.0	0.992980627853012	0.0	0.11827710274238257	0.0	0.0	13.585359401007974	0.0	0.0	13.674981314867644	0.0	-4.203336309842136	0.0	2.366578411924212	-2.430052650889314	0.0	10.397234453312043
5.8950000000000005	-4.669851525305757	0.0	1.34622482093219	-4.397272140517516	0.0	-0.04521411106220111	0.0	0.6133133405898545	0.0	0.9927957344869165	0.0	0.11981915501142643	0.0	0.0	13.763331242643112	0.0	0.0	13.850682644541985	0.0	-4.215481973958856	0.0	2.418583530541669	-2.428216896228423	0.0	10.40478000293903
5.9	-4.698218590253185	0.0	1.3796712069918224	-4.418379895525444	0.0	-0.032991102847736056	0.0	0.5973933905351488	0.0	0.9926132632509995	0.0	0.12132151474430697	0.0	0.0	13.936754160938483	0.0	0.0	14.021823244475359	0.0	-4.227618519440852	0.0	2.470625881366537	-2.4264055306360297	0.0	10.412127197203104
5.905	-4.726718025450059	0.0	1.4133723106937501	-4.439548310723466	0.0	-0.020507791874400536	0.0	0.581392944050254	0.0	0.9924334185427224	0.0	0.12278399765867462	0.0	0.0	14.105604766294025	0.0	0.0	14.188380054139184	0.0	-4.23974607321762	0.0	2.5227044706443493	-2.424620543044176	0.0	10.419275262169503
5.91	-4.755340733939011	0.0	1.4473347212999508	-4.4607773414918075	0.0	-0.007763999437746667	0.0	0.5653142942439056	0.0	0.9922564004581507	0.0	0.12420642524584972	0.0	0.0	14.26986032442803	0.0	0.0	14.350330669932147	0.0	-4.251864772074082	0.0	2.5748183009134658	-2.4228638720624307	0.0	10.426223414299685
5.915	-4.784077539978081	0.0	1.4815651013872775	-4.482066943921257	0.0	0.005240448179583315	0.0	0.5491597342237093	0.0	0.9920824046734712	0.0	0.12558862472587007	0.0	0.0	14.429498756468783	0.0	0.0	14.50765334517987	0.0	-4.26397476244205	0.0	2.6269663711869264	-2.4211375129600032	0.0	10.432971404998408
5.92	-4.812919190377055	0.0	1.5160701848601286	-4.503417074852965	0.0	0.018505719672761184	0.0	0.5329315567083226	0.0	0.9919116223259606	0.0	0.12693042908172503	0.0	0.0	14.584498648233065	0.0	0.0	14.660326990023488	0.0	-4.2760762009125495	0.0	2.6791476808491743	-2.4194434018254425	0.0	10.439518990007672
5.925	-4.84185635211151	0.0	1.5508567693975683	-4.524827691935149	0.0	0.03203197872320175	0.0	0.5166320540896252	0.0	0.9917442399053945	0.0	0.1282316769284915	0.0	0.0	14.734839240173546	0.0	0.0	14.808331171326039	0.0	-4.288169253147758	0.0	2.7313612258301125	-2.417783310650575	0.0	10.445865409312598
5.93	-4.870879611731001	0.0	1.585931711580651	-4.546298753669729	0.0	0.04581938398602195	0.0	0.5002635182884272	0.0	0.9915804391447147	0.0	0.12949221246598389	0.0	0.0	14.880500426981806	0.0	0.0	14.951646112537501	0.0	-4.300254093610217	0.0	2.783605998658493	-2.4161589809111357	0.0	10.452010045058106
5.9350000000000005	-4.899979474991292	0.0	1.6213019223529748	-4.567830219456564	0.0	0.05986808907487924	0.0	0.48382824059056656	0.0	0.9914203969131377	0.0	0.13071188544415577	0.0	0.0	15.021462758596202	0.0	0.0	15.0902526935129	0.0	-4.312330905384359	0.0	2.8358809891027184	-2.4145720966670376	0.0	10.457952330553496
5.94	-4.929146366238566	0.0	1.6569743620232538	-4.589422049636449	0.0	0.07417824255060149	0.0	0.46732851152641836	0.0	0.9912642851146207	0.0	0.13189055111966821	0.0	0.0	15.157707440116328	0.0	0.0	15.224132450295873	0.0	-4.324399879950691	0.0	2.888185184326534	-2.413024447915113	0.0	10.46369203371685
5.945	-4.958370629143169	0.0	1.6929560364417473	-4.611074205515044	0.0	0.0887499879029264	0.0	0.45076662066409107	0.0	0.9911122706057599	0.0	0.13302807027285482	0.0	0.0	15.289216338988423	0.0	0.0	15.353267574843008	0.0	-4.3364612180715225	0.0	2.9405175713412324	-2.411517754479527	0.0	10.469228917083173
5.95	-4.987642524392976	0.0	1.7292539903867303	-4.632786649423711	0.0	0.1035834635492798	0.0	0.43414485663115276	0.0	0.9909645150825349	0.0	0.1341243090967436	0.0	0.0	15.41597197650084	0.0	0.0	15.477640914754394	0.0	-4.348515128232618	0.0	2.992877134543595	-2.410053510605392	0.0	10.474562420750223
5.955	-5.016952228924596	0.0	1.765875302294849	-4.654559344758871	0.0	0.11867880282562732	0.0	0.41746550703654833	0.0	0.9908211749886551	0.0	0.13517913915455537	0.0	0.0	15.5379575274944	0.0	0.0	15.59723597298181	0.0	-4.360561826371007	0.0	3.045262855814217	-2.4086331893118373	0.0	10.479692075298656
5.96	-5.0462898352686745	0.0	1.8028270790498182	-4.676392256018025	0.0	0.13403613397714928	0.0	0.40073085839482786	0.0	0.990682401429101	0.0	0.13619243734459605	0.0	0.0	15.655156820858142	0.0	0.0	15.712036907515202	0.0	-4.372601535710242	0.0	3.0976737148653966	-2.4072582027155383	0.0	10.484617429582437
5.965	-5.075645350797103	0.0	1.8401164505811896	-4.698285348836369	0.0	0.14965558014882338	0.0	0.3839431960671641	0.0	0.9905483400854452	0.0	0.13716408586092646	0.0	0.0	15.767554339381586	0.0	0.0	15.822028531052263	0.0	-4.384634486533803	0.0	3.1501086893977246	-2.405930110787624	0.0	10.489338358468311
5.97	-5.1050086987012415	0.0	1.8777505654835343	-4.720238590010127	0.0	0.1655372593574801	0.0	0.36710480408230006	0.0	0.9904191311464642	0.0	0.13809397220871727	0.0	0.0	15.875135226126606	0.0	0.0	15.927196310616727	0.0	-4.3966609173720546	0.0	3.2025667574367094	-2.4046503883246473	0.0	10.49385471775192
5.9750000000000005	-5.134369715074247	0.0	1.9157365841398248	-4.742251947544859	0.0	0.18168128450600873	0.0	0.3502179652611098	0.0	0.9902949092160246	0.0	0.1389819891022554	0.0	0.0	15.977885276402642	0.0	0.0	16.02752636721233	0.0	-4.4086810730182515	0.0	3.2550468948766222	-2.403420233347727	0.0	10.498166050486464
5.98	-5.163718148104131	0.0	1.9540816731024835	-4.764325390687883	0.0	0.198087763374933	0.0	0.333284961192509	0.0	0.9901758032388278	0.0	0.13982803442924427	0.0	0.0	16.07579093764137	0.0	0.0	16.123005475469892	0.0	-4.4206952042863525	0.0	3.307548075631461	-2.402240833606258	0.0	10.502271990099972
5.985	-5.193043657365711	0.0	1.9927929994749731	-4.786458889958552	0.0	0.2147567986130795	0.0	0.3163080722121692	0.0	0.9900619364304165	0.0	0.14063201121989036	0.0	0.0	16.16883930970484	0.0	0.0	16.213621063288272	0.0	-4.432703567847322	0.0	3.3600692719265477	-2.4011133069764323	0.0	10.506172175819632
5.99	-5.222335813022259	0.0	2.0318777251423503	-4.808652417178046	0.0	0.23168848773106554	0.0	0.2992895773970843	0.0	0.9899534262093511	0.0	0.1413938276128859	0.0	0.0	16.2570181446554	0.0	0.0	16.29936121147381	0.0	-4.444706425988243	0.0	3.412609454430116	-2.40003897697935	0.0	10.509866591969413
5.995	-5.251584097338394	0.0	2.0713430020623345	-4.830905945486469	0.0	0.2488829230868406	0.0	0.282231754384316	0.0	0.9898503841406708	0.0	0.14211339687341754	0.0	0.0	16.340315852650836	0.0	0.0	16.38021465332778	0.0	-4.456704048214787	0.0	3.4651675947166845	-2.3990190491722503	0.0	10.513355169630552
6.0	-5.280777900932121	0.0	2.111195964922331	-4.853219449384202	0.0	0.2663401918908074	0.0	0.26513687962284066	0.0	0.9897529158649734	0.0	0.1427906372973035	0.0	0.0	16.418721493923993	0.0	0.0	16.456170774306067	0.0	-4.468696708607312	0.0	3.5177426624343893	-2.39805440149176	0.0	10.516637521737142
6.005	-5.309906522348755	0.0	2.151443725350053	-4.875592904755605	0.0	0.28406037619931046	0.0	0.2480072283683141	0.0	0.9896611210422066	0.0	0.14342547218929846	0.0	0.0	16.49222477953987	0.0	0.0	16.527219611677275	0.0	-4.480684685849538	0.0	3.5703336257829017	-2.3971459317179074	0.0	10.519713376278002
6.01	-5.338959167313483	0.0	2.1920933659001514	-4.898026288892849	0.0	0.30204355290973406	0.0	0.23084507471373264	0.0	0.9895750932978206	0.0	0.14401782983574637	0.0	0.0	16.560816071295996	0.0	0.0	16.59335185418967	0.0	-4.492668262976746	0.0	3.622939451655625	-2.3962944591282715	0.0	10.522582455258034
6.015000000000001	-5.36792494819173	0.0	2.2331519340445203	-4.920519580517961	0.0	0.32028979375552563	0.0	0.21365269161183054	0.0	0.9894949201722432	0.0	0.14456764348053006	0.0	0.0	16.62448638183493	0.0	0.0	16.65455884174451	0.0	-4.504647727267188	0.0	3.6755591059098895	-2.3955011077351283	0.0	10.525244892722396
6.0200000000000005	-5.3967928863317685	0.0	2.2746264373020932	-4.94307275979366	0.0	0.3387991652926797	0.0	0.19643235066529152	0.0	0.9894206830781302	0.0	0.14507485134825784	0.0	0.0	16.683227380243036	0.0	0.0	16.710832565009284	0.0	-4.516623372400817	0.0	3.7281915561348113	-2.394766823563425	0.0	10.527700712565384
6.025	-5.425551907146006	0.0	2.316523835254677	-4.96568580835753	0.0	0.35757172890934985	0.0	0.17918632253693134	0.0	0.9893524572499902	0.0	0.14553939655274828	0.0	0.0	16.737031383701854	0.0	0.0	16.762165665148466	0.0	-4.528595494777994	0.0	3.780835768053047	-2.394092103290957	0.0	10.529949528510748
6.03	-5.454190839981552	0.0	2.3588510335025292	-4.988358709338478	0.0	0.37660754082095593	0.0	0.1619168769675245	0.0	0.989290311704496	0.0	0.14596122708325032	0.0	0.0	16.785891358269158	0.0	0.0	16.808551433559355	0.0	-4.540564393649387	0.0	3.8334907060469625	-2.3934775212418975	0.0	10.531991116871968
6.035	-5.482698417812954	0.0	2.4016148774770465	-5.011091447372386	0.0	0.39590665206631553	0.0	0.1446262828185482	0.0	0.9892343092039455	0.0	0.14634029578911298	0.0	0.0	16.829800919281958	0.0	0.0	16.8499838116202	0.0	-4.552530371058288	0.0	3.8861553334964536	-2.392923596084777	0.0	10.533825274070786
6.04	-5.511063276471892	0.0	2.4448221459911954	-5.033884008617936	0.0	0.415469108505668	0.0	0.12731680816383445	0.0	0.9891845062224468	0.0	0.1466765603583748	0.0	0.0	16.868754330833436	0.0	0.0	16.88645739046452	0.0	-4.564493731368656	0.0	3.9388286126697465	-2.3924307063609858	0.0	10.53545172909362
6.045	-5.5392739539042015	0.0	2.488479544733619	-5.056736380770913	0.0	0.43529495081906405	0.0	0.10999072038894418	0.0	0.9891409529155798	0.0	0.14696998329812713	0.0	0.0	16.902746505263462	0.0	0.0	16.91796741078397	0.0	-4.576454780767062	0.0	3.991509504591073	-2.391999353453504	0.0	10.536870403866054
6.05	-5.567318892220448	0.0	2.5325937007880133	-5.079648553065958	0.0	0.45538421449137007	0.0	0.09265028606145263	0.0	0.9891036930945027	0.0	0.14722053194619822	0.0	0.0	16.93177300617812	0.0	0.0	16.944509762593974	0.0	-4.588413828937913	0.0	4.0441969710583	-2.3916304896618445	0.0	10.538081742513429
6.055	-5.5951864394236965	0.0	2.5771711569602394	-5.102620516278216	0.0	0.47573692979939897	0.0	0.07529777083898052	0.0	0.9890727642034453	0.0	0.14742817848098957	0.0	0.0	16.95583005104996	0.0	0.0	16.966080984973058	0.0	-4.600371190405133	0.0	4.096889976372918	-2.391324528239321	0.0	10.539085738713146
6.0600000000000005	-5.622864842698674	0.0	2.6222183627416076	-5.125652262757201	0.0	0.4963531218415408	0.0	0.05793544010985655	0.0	0.989048197297797	0.0	0.1475928998429951	0.0	0.0	16.97491450309953	0.0	0.0	16.982678265985697	0.0	-4.612327179093516	0.0	4.149587482373695	-2.3910814608401054	0.0	10.539882048817056
[truncated: 1,787 more rows]
