# Supplementary material for: An Efficient Contact Model for the Simulation of Cargo Airdrop Extraction Phase
Source: Hindawi journal article supplement (doi:10.1155/2018/9895451), 2018-10-17
Supplement: f1 [file 9895451.f1.zip › case2_ramp_drop/motion_pts40.csv]

t	u	v	w	x_g	y_g	z_g	p	q	r	e0	e1	e2	e3	yaw(deg)	pitch(deg)	roll(deg)	yaw_fix(deg)	pitch_fix(deg)	roll_fix(deg)	vx_g	vy_g	vz_g	ax_g	ay_g	az_g
0.0	0.0	0.0	0.0	-0.017449748351250485	0.0	-0.49969541350954794	0.0	0.0	0.0	0.9998476951563913	0.0	0.01745240643728351	0.0	0.0	2.0	0.0	0.0	2.0	0.0	0.0	0.0	0.0	0.19594794359754966	0.0	13.0924987467597
0.005	-0.0007588523392068015	0.0	0.037792070321101406	-0.0174489291021219	0.0	-0.4995848298934381	0.0	0.0007355151998884068	0.0	0.9998476855112133	0.0	0.017452959000391666	0.0	0.0	2.000063328713598	0.0	0.0	2.0002107095836066	0.0	0.0005605759418823746	0.0	0.03779553135810069	0.005672860084946873	0.0	0.1303079279294836
0.01	-0.0004243923630376324	0.0	0.02025466660426402	-0.017446406797557892	0.0	-0.49942478202483825	0.0	0.00023050429794278492	0.0	0.9998476604790723	0.0	0.017454392986459472	0.0	0.0	2.0002276764473286	0.0	0.0	2.0002767442007654	0.0	0.00028282433155400174	0.0	0.02025713796480573	-0.08996824525761829	0.0	-4.484356246290248
0.015	-0.00030310896871922887	0.0	0.004238999162354585	-0.0174462166990383	0.0	-0.4993715618343202	0.0	-3.338624505860524e-05	0.0	0.999847658690342	0.0	0.0174544954507678	0.0	0.0	2.000239419781148	0.0	0.0	2.000267179746087	0.0	-0.00015496763887151973	0.0	0.004246995876647805	-0.06563402933388235	0.0	-1.9826228636896408
0.02	-0.0003495484709536016	0.0	0.0006612933449326927	-0.01744749840710837	0.0	-0.49936171670368645	0.0	3.405647071138373e-05	0.0	0.9998476588541403	0.0	0.01745448606788854	0.0	0.0	2.0002383444185634	0.0	0.0	2.0002769362062716	0.0	-0.0003262539305740575	0.0	0.0006730909257917886	-0.018212966722159274	0.0	-0.21791173156288843
0.025	-0.00037659120723141146	0.0	6.742342779892222e-05	-0.01744927890530425	0.0	-0.4993602727775297	0.0	7.66647336560117e-05	0.0	0.9998476562250986	0.0	0.017454636666976563	0.0	0.0	2.000255604432281	0.0	0.0	2.0002988990346515	0.0	-0.0003740083951091587	0.0	8.052686736760194e-05	-0.0032085839526215317	0.0	-0.01890508964736266
0.03	-0.0003764972952393152	0.0	-1.3059563366912147e-05	-0.017451165766022625	0.0	-0.49936014104526716	0.0	7.248204199878177e-05	0.0	0.9998476528557494	0.0	0.017454829671133296	0.0	0.0	2.0002777244493837	0.0	0.0	2.0003196636101364	0.0	-0.0003767237150175535	0.0	8.978433741196948e-08	0.0015184789379673119	0.0	7.580444521564104e-05
0.035	-0.00036589320810456613	0.0	-1.548868881846196e-05	-0.017453025076337655	0.0	-0.4993601566663271	0.0	5.045085738825578e-05	0.0	0.9998476501514865	0.0	0.017454984576048414	0.0	0.0	2.000295477949827	0.0	0.0	2.000334116716142	0.0	-0.0003662108772621958	0.0	-2.707876145448465e-06	0.0024472981072302547	0.0	0.001573368160949152
0.04	-0.00035485922332058643	0.0	-9.727523247694722e-06	-0.017454827135563577	0.0	-0.499360156846291	0.0	2.871588569369565e-05	0.0	0.9998476484423734	0.0	0.017455082476328373	0.0	0.0	2.0003066982049504	0.0	0.0	2.0003423432114187	0.0	-0.0003549825240763925	0.0	2.6647109744468263e-06	0.0019978215399679236	0.0	0.001107513252206987
0.045	-0.00034694006318161007	0.0	-5.389018179712991e-06	-0.017456580366484325	0.0	-0.4993601325875127	0.0	1.3457466309564042e-05	0.0	0.999847647548204	0.0	0.017455133695324802	0.0	0.0	2.0003125683639333	0.0	0.0	2.0003461984915307	0.0	-0.00034691675401368624	0.0	6.724190806931687e-06	0.0012622931633489486	0.0	0.000639145481694138
0.05	-0.00034234895159407196	0.0	-2.8559028338520542e-06	-0.017458302018977134	0.0	-0.49936009247162433	0.0	4.7571477608091665e-06	0.0	0.9998476471714594	0.0	0.01745515527563104	0.0	0.0	2.0003150416616826	0.0	0.0	2.0003475613139767	0.0	-0.0003422400214275527	0.0	9.095524824033973e-06	0.0006580338480440859	0.0	0.00034851795497446096
0.055	-0.0003401639162203672	0.0	-1.4844216662061294e-06	-0.01746000685559044	0.0	-0.49936004343249984	0.0	6.946833506806101e-07	0.0	0.9998476470653875	0.0	0.01745516135152623	0.0	0.0	2.0003157380140766	0.0	0.0	2.0003477603260973	0.0	-0.00034000844587241406	0.0	1.038990574960044e-05	0.00027484083811715797	0.0	0.00018588728604772043
0.06	-0.00033937811914691503	0.0	-7.671085741452848e-07	-0.017461704471290328	0.0	-0.49935998958196204	0.0	-7.149297113139346e-07	0.0	0.9998476470722989	0.0	0.01745516095563631	0.0	0.0	2.0003156926415206	0.0	0.0	2.0003475555138217	0.0	-0.00033919808982886036	0.0	1.1079353217329205e-05	7.413780883122258e-05	0.0	9.790233865890173e-05
0.065	-0.0003392645013717391	0.0	-4.006904374931036e-07	-0.017463399972878012	0.0	-0.4993599331781107	0.0	-8.737751623852193e-07	0.0	0.9998476471096793	0.0	0.0174551588144554	0.0	0.0	2.0003154472428752	0.0	0.0	2.000347305195677	0.0	-0.000339071751511177	0.0	1.1441580790430312e-05	-1.0402754260175544e-05	0.0	5.1607576285034086e-05
0.07	-0.0003393941537738328	0.0	-2.1189559385789227e-07	-0.017465095588034787	0.0	-0.4993598754370205	0.0	-5.955491719676591e-07	0.0	0.9998476471424825	0.0	0.01745515693545483	0.0	0.0	2.0003152318924613	0.0	0.0	2.0003471345834063	0.0	-0.00033919473506752965	0.0	1.1634784831138849e-05	-3.329407312234301e-05	0.0	2.7532321516471436e-05
0.075	-0.0003395603265564726	0.0	-1.1551713882752553e-07	-0.017466791959969787	0.0	-0.4993598169760873	0.0	-2.6495827493256967e-07	0.0	0.9998476471613521	0.0	0.0174551558545859	0.0	0.0	2.000315108015132	0.0	0.0	2.000347058678452	0.0	-0.00033935744252615785	0.0	1.173690408297554e-05	-3.058559096775651e-05	0.0	1.4392369739443222e-05
0.08	-0.0003396906325913458	0.0	-6.693944297599018e-08	-0.017468489057218744	0.0	-0.4993597581298907	0.0	-1.2170435524312731e-08	0.0	0.9998476471675689	0.0	0.01745515549848661	0.0	0.0	2.0003150672029415	0.0	0.0	2.000347055191879	0.0	-0.0003394859735613664	0.0	1.1790000266702732e-05	-2.102316821542915e-05	0.0	7.669282715204492e-06
0.085	-0.0003397721727853933	0.0	-4.000747144040827e-08	-0.017470186676338758	0.0	-0.4993596990884399	0.0	1.431779823024138e-07	0.0	0.9998476471648988	0.0	0.017455155651435454	0.0	0.0	2.000315084732259	0.0	0.0	2.0003470962093495	0.0	-0.00033956652400380565	0.0	1.1819762090574793e-05	-1.1640825069585543e-05	0.0	4.49704039312008e-06
0.09	-0.0003398122403838981	0.0	-2.3666541472912982e-08	-0.01747188460731247	0.0	-0.49935963994099125	0.0	2.1798960549588194e-07	0.0	0.9998476471570134	0.0	0.017455156103122094	0.0	0.0	2.0003151364996223	0.0	0.0	2.0003471586587716	0.0	-0.00033960599679578636	0.0	1.1837491929020607e-05	-4.775926733081924e-06	0.0	2.611231818813158e-06
0.095	-0.00033982574685398917	0.0	-1.4609831771322461e-08	-0.017473582676211803	0.0	-0.4993595807274194	0.0	2.422955322089257e-07	0.0	0.9998476471468677	0.0	0.01745515668427217	0.0	0.0	2.0003152031046625	0.0	0.0	2.000347228071328	0.0	-0.0003396191788973425	0.0	1.184701495793134e-05	-1.0811328207989905e-06	0.0	1.280564026580822e-06
0.1	-0.0003398273754516043	0.0	-1.0330145585992468e-08	-0.017475280776788255	0.0	-0.49935952147358414	0.0	2.4451731567073153e-07	0.0	0.9998476471362285	0.0	0.01745515729369683	0.0	0.0	2.000315272950226	0.0	0.0	2.000347298120379	0.0	-0.0003396206571056766	0.0	1.185134929642632e-05	2.1561051597818268e-07	0.0	5.972830127101324e-07
0.105	-0.00033982574300145147	0.0	-7.834159637100087e-09	-0.017476978868472236	0.0	-0.49935946220202887	0.0	2.4099392831460937e-07	0.0	0.9998476471257569	0.0	0.01745515789351734	0.0	0.0	2.0003153416950665	0.0	0.0	2.000347367160054	0.0	-0.00033961893851367994	0.0	1.185378718822565e-05	4.2106574422818286e-07	0.0	4.2655832663577233e-07
0.11	-0.0003398238874219058	0.0	-5.722901449056226e-09	-0.017478676948640533	0.0	-0.49935940292451836	0.0	2.3725779400298967e-07	0.0	0.9998476471154847	0.0	0.01745515848192066	0.0	0.0	2.000315409131395	0.0	0.0	2.0003474351294055	0.0	-0.0003396170103574446	0.0	1.1855832790612486e-05	3.74210801874688e-07	0.0	3.5138078166516956e-07
0.115	-0.0003398221978251675	0.0	-4.2067768040116606e-09	-0.01748037502283926	0.0	-0.4993593436424904	0.0	2.3391155376154769e-07	0.0	0.999847647105313	0.0	0.017455159064564366	0.0	0.0	2.0003154759076187	0.0	0.0	2.0003475021401296	0.0	-0.00033961526885614024	0.0	1.1857289411822522e-05	3.3094124933049447e-07	0.0	2.3991238086803533e-07
0.12	-0.00033982071711093114	0.0	-3.1600215115518846e-09	-0.01748207309319224	0.0	-0.49935928435503596	0.0	2.3106640196837056e-07	0.0	0.9998476470952039	0.0	0.017455159643622573	0.0	0.0	2.0003155422729124	0.0	0.0	2.0003475683357776	0.0	-0.0003396137524934713	0.0	1.185828423830138e-05	2.5582004212922093e-07	0.0	1.685114405908127e-07
0.125	-0.00033981972244033764	0.0	-2.405445833251948e-09	-0.017483771160809035	0.0	-0.4993592250650567	0.0	2.2916237755081747e-07	0.0	0.9998476470851378	0.0	0.01745516022021342	0.0	0.0	2.0003156083554248	0.0	0.0	2.000347633985963	0.0	-0.00033961273207685317	0.0	1.1859004026884725e-05	1.6118942245681948e-07	0.0	1.2270649901476428e-07
0.13	-0.0003398190712790517	0.0	-1.9478303662883555e-09	-0.017485469225699275	0.0	-0.4993591657734364	0.0	2.2790443636161916e-07	0.0	0.9998476470751163	0.0	0.017455160794257123	0.0	0.0	2.0003156741460106	0.0	0.0	2.0003476992757747	0.0	-0.00033961206532567585	0.0	1.1859439024674651e-05	1.3012380865743203e-07	0.0	7.24930184116723e-09
0.135	-0.00033981843965788327	0.0	-2.200036162775514e-09	-0.017487167286202907	0.0	-0.4993591064792077	0.0	2.2660926332047877e-07	0.0	0.9998476470651698	0.0	0.01745516136400225	0.0	0.0	2.0003157394439413	0.0	0.0	2.0003477641945464	0.0	-0.00033961144287912413	0.0	1.1859165312867798e-05	8.372532461800904e-08	0.0	-3.972534553800006e-08
0.14	-0.00033981824234005626	0.0	-2.219291987370656e-09	-0.01748886534597702	0.0	-0.4993590471848581	0.0	2.2625902069090456e-07	0.0	0.9998476470552332	0.0	0.017455161933181144	0.0	0.0	2.0003158046769767	0.0	0.0	2.0003478290129815	0.0	-0.00033961124634015837	0.0	1.1859139568055504e-05	1.7758358658003424e-08	0.0	-1.2318834686004572e-08
0.145	-0.0003398181945835213	0.0	-2.365772716271831e-09	-0.017490563403272562	0.0	-0.4993589878899953	0.0	2.26237470833025e-07	0.0	0.9998476470453387	0.0	0.01745516249994747	0.0	0.0	2.0003158696335097	0.0	0.0	2.0003478938252424	0.0	-0.0003396112037121906	0.0	1.1858991894663829e-05	-8.154191478577008e-12	0.0	-3.657705759622384e-08
0.15	-0.0003398182013357658	0.0	-2.567601519824014e-09	-0.017492261459953168	0.0	-0.4993589285954929	0.0	2.2626687455488553e-07	0.0	0.9998476470354553	0.0	0.017455163066080946	0.0	0.0	2.0003159345175123	0.0	0.0	2.000347958645927	0.0	-0.0003396112174917268	0.0	1.1858790809124055e-05	-1.2268814210735757e-09	0.0	-4.4783821896181946e-08
0.155	-0.00033981818773798415	0.0	-2.788589944843681e-09	-0.017493959516039683	0.0	-0.49935886930185625	0.0	2.2620404867573967e-07	0.0	0.9998476470255833	0.0	0.0174551636315546	0.0	0.0	2.000315999325894	0.0	0.0	2.000348023448614	0.0	-0.0003396112116024203	0.0	1.1858569864871985e-05	-1.410480049814436e-10	0.0	-3.5170910994609065e-08
0.16	-0.00033981820779854365	0.0	-2.9092537608580546e-09	-0.01749565757229867	0.0	-0.4993588100087755	0.0	2.2622097614802477e-07	0.0	0.9998476470157089	0.0	0.017455164197168464	0.0	0.0	2.000316064150345	0.0	0.0	2.0003480882561497	0.0	-0.0003396112358491105	0.0	1.1858450359034522e-05	-1.3617559254879298e-08	0.0	-1.7946326918553854e-08
0.165	-0.0003398183114865155	0.0	-2.9851136430398738e-09	-0.01749735562820354	0.0	-0.4993587507158567	0.0	2.2642036977543836e-07	0.0	0.9998476470058406	0.0	0.017455164762432758	0.0	0.0	2.0003161289347315	0.0	0.0	2.000348153120808	0.0	-0.00033961134210838006	0.0	1.1858378548607232e-05	-2.2829914191571366e-08	0.0	-7.67005382662642e-09
0.17	-0.0003398184123533878	0.0	-3.0305363446657217e-09	-0.017499053684542267	0.0	-0.4993586914229232	0.0	2.266169662191109e-07	0.0	0.9998476469959652	0.0	0.0174551653281067	0.0	0.0	2.000316193766068	0.0	0.0	2.000348218041786	0.0	-0.0003396114444858496	0.0	1.1858337058621144e-05	-1.6728032923695596e-08	0.0	-2.644199387376945e-08
0.17500000000000002	-0.00033981847128003055	0.0	-3.2465027147174112e-09	-0.017500751740640443	0.0	-0.4993586321293003	0.0	2.2667871202319706e-07	0.0	0.9998476469860942	0.0	0.0174551658935282	0.0	0.0	2.0003162585684717	0.0	0.0	2.000348282980454	0.0	-0.0003396115109014815	0.0	1.1858123664794556e-05	-1.311666520027472e-08	0.0	-3.8249062861629516e-08
0.18	-0.0003398185384538279	0.0	-3.3751669610214143e-09	-0.017502449797363297	0.0	-0.4993585728358536	0.0	2.2677502346842303e-07	0.0	0.9998476469762126	0.0	0.01745516645954668	0.0	0.0	2.000316323439295	0.0	0.0	2.0003483479467126	0.0	-0.00033961158251194674	0.0	1.1857997808165542e-05	-1.4841576396320532e-08	0.0	-1.641760604401192e-08
0.185	-0.0003398186138747798	0.0	-3.4165290835777324e-09	-0.01750414785471082	0.0	-0.49935851354258315	0.0	2.2690590055478886e-07	0.0	0.9998476469663208	0.0	0.017455167026162142	0.0	0.0	2.000316388378538	0.0	0.0	2.0003484129504647	0.0	-0.0003396116593172454	0.0	1.1857959488734121e-05	-1.588054302769018e-08	0.0	1.08983347630245e-09
0.19	-0.00033981869754288633	0.0	-3.3705890823863644e-09	-0.01750584591268302	0.0	-0.49935845424948894	0.0	2.2707134328229452e-07	0.0	0.9998476469564185	0.0	0.017455167593374583	0.0	0.0	2.0003164533862	0.0	0.0	2.0003484780016128	0.0	-0.00033961174131737687	0.0	1.185800870650031e-05	-1.6919509565095636e-08	0.0	1.8597272999383795e-08
0.195	-0.00033981878945814743	0.0	-3.2373469574473106e-09	-0.017507543971279894	0.0	-0.4993583949565709	0.0	2.2727135165094e-07	0.0	0.9998476469465057	0.0	0.017455168161184	0.0	0.0	2.000316518462281	0.0	0.0	2.000348543110059	0.0	-0.000339611828512341	0.0	1.1858145461464121e-05	-1.8494295923992175e-08	0.0	3.865034071835821e-08
0.2	-0.0003398188896205632	0.0	-3.0168027087605712e-09	-0.01750924203050144	0.0	-0.4993583356638292	0.0	2.2750592566072532e-07	0.0	0.9998476469365827	0.0	0.017455168729590402	0.0	0.0	2.0003165836067818	0.0	0.0	2.000348608285706	0.0	-0.0003396119209021376	0.0	1.1858369753625581e-05	-1.6524541485405237e-08	0.0	4.186363866341286e-08
0.20500000000000002	-0.00033981896056922174	0.0	-2.8604782480757214e-09	-0.017510940089551518	0.0	-0.4993582763707407	0.0	2.2766562890112984e-07	0.0	0.9998476469266628	0.0	0.017455169297801568	0.0	0.0	2.0003166487289064	0.0	0.0	2.000348673507104	0.0	-0.00033961198633757577	0.0	1.1858528845293194e-05	-8.905945023516352e-09	0.0	1.8239834706671223e-08
0.21	-0.00033981898788813683	0.0	-2.826683363760615e-09	-0.017512638148123753	0.0	-0.4993582170771043	0.0	2.2770834723919737e-07	0.0	0.9998476469167519	0.0	0.01745516986551263	0.0	0.0	2.000316713793715	0.0	0.0	2.0003487387407404	0.0	-0.00033961201244676604	0.0	1.1858563958813086e-05	-3.5627931522253893e-09	0.0	5.4264472484343675e-09
0.215	-0.00033981900336798487	0.0	-2.7868311136567047e-09	-0.01751433620689378	0.0	-0.49935815778336373	0.0	2.277269523475934e-07	0.0	0.9998476469068379	0.0	0.017455170433395895	0.0	0.0	2.0003167788782594	0.0	0.0	2.0003488039797066	0.0	-0.000339612026512667	0.0	1.1858604712881754e-05	-1.6088512295040053e-09	0.0	8.714868608572021e-09
0.22	-0.00033981900700876585	0.0	-2.74092149776399e-09	-0.017516034265861596	0.0	-0.499358098489519	0.0	2.27721444226318e-07	0.0	0.9998476468969208	0.0	0.01745517100145136	0.0	0.0	2.000316843982539	0.0	0.0	2.000348869217095	0.0	-0.00033961202853527835	0.0	1.1858651107499158e-05	7.998066582579529e-10	0.0	9.842978352473711e-09
0.225	-0.00033981899881047983	0.0	-2.6889545160824716e-09	-0.0175177323250272	0.0	-0.4993580391955701	0.0	2.2769182287537106e-07	0.0	0.9998476468870008	0.0	0.017455171569679025	0.0	0.0	2.000316909106555	0.0	0.0	2.0003489344459977	0.0	-0.00033961201851460043	0.0	1.1858703142665265e-05	3.2084645062658316e-09	0.0	1.0971088088441527e-08
0.23	-0.00033981897877312676	0.0	-2.630930168612149e-09	-0.017519430384390595	0.0	-0.49935797990151704	0.0	2.2763808829475263e-07	0.0	0.9998476468770778	0.0	0.01745517213807889	0.0	0.0	2.0003169742503073	0.0	0.0	2.000348999659506	0.0	-0.00033961199645063324	0.0	1.1858760818380028e-05	6.780248620039987e-09	0.0	8.539170345407475e-09
0.23500000000000001	-0.00033981894689670664	0.0	-2.5668484553530224e-09	-0.017521128443951782	0.0	-0.49935792060735984	0.0	2.2756024048446275e-07	0.0	0.9998476468671518	0.0	0.017455172706650954	0.0	0.0	2.000317039413794	0.0	0.0	2.0003490648507127	0.0	-0.00033961196234337635	0.0	1.1858824134643398e-05	3.8371456619751276e-10	0.0	4.082968930179965e-08
0.24	-0.0003398189803820375	0.0	-2.2856738795418904e-09	-0.017522826503263984	0.0	-0.49935786131155896	0.0	2.2760202846951113e-07	0.0	0.9998476468572213	0.0	0.017455173275472614	0.0	0.0	2.000317104605887	0.0	0.0	2.000349130053891	0.0	-0.0003396119859804027	0.0	1.1859106693103499e-05	-5.056301044815045e-10	0.0	2.3276481766123206e-08
0.245	-0.0003398189491809583	0.0	-2.371356779453883e-09	-0.01752452456231113	0.0	-0.4993578020187309	0.0	2.2753360149066142e-07	0.0	0.999847646847308	0.0	0.017455173843319006	0.0	0.0	2.0003171696862054	0.0	0.0	2.0003491952374666	0.0	-0.0003396119577756302	0.0	1.1859020359094928e-05	6.504984473349544e-09	0.0	-2.3415009530759793e-08
0.25	-0.0003398189179798791	0.0	-2.4570396793658757e-09	-0.017526222621358275	0.0	-0.4993577427259029	0.0	2.2746517451181172e-07	0.0	0.9998476468373946	0.0	0.017455174411165397	0.0	0.0	2.000317234766524	0.0	0.0	2.000349260401439	0.0	-0.0003396119295708578	0.0	1.1858934025086292e-05	5.640954474181159e-09	0.0	-1.726680173376063e-08
0.255	-0.0003398188867787999	0.0	-2.5427225792778684e-09	-0.017527920680405422	0.0	-0.49935768343307485	0.0	2.2739674753296201e-07	0.0	0.9998476468274812	0.0	0.01745517497901179	0.0	0.0	2.0003172998468424	0.0	0.0	2.0003493255458085	0.0	-0.00033961190136608553	0.0	1.1858847691077591e-05	5.640954412743036e-09	0.0	-1.726680174638142e-08
0.26	-0.0003398188555777207	0.0	-2.628405479189861e-09	-0.017529618739452565	0.0	-0.49935762414024676	0.0	2.273283205541123e-07	0.0	0.9998476468175679	0.0	0.01745517554685818	0.0	0.0	2.000317364927161	0.0	0.0	2.000349390670575	0.0	-0.0003396118731613137	0.0	1.1858761357068828e-05	5.640954363953938e-09	0.0	-1.7266801759171617e-08
0.265	-0.00033981882437664147	0.0	-2.714088379101854e-09	-0.017531316798499712	0.0	-0.4993575648474187	0.0	2.2725989357526258e-07	0.0	0.9998476468076545	0.0	0.01745517611470457	0.0	0.0	2.0003174300074797	0.0	0.0	2.000349455775739	0.0	-0.0003396118449565418	0.0	1.1858675023059998e-05	6.030293814390393e-09	0.0	-1.8359789146305433e-08
0.27	-0.00033981879317556226	0.0	-2.7997712790138465e-09	-0.01753301485754686	0.0	-0.4993575055545907	0.0	2.2719146659641287e-07	0.0	0.9998476467977411	0.0	0.017455176682550963	0.0	0.0	2.0003174950877978	0.0	0.0	2.0003495208613	0.0	-0.00033961181675177025	0.0	1.1858588689051107e-05	3.447049186345273e-09	0.0	-1.1107881878661605e-08
0.275	-0.0003398187876096618	0.0	-2.8207302327453873e-09	-0.017534712917087438	0.0	-0.49935744626133294	0.0	2.271722082870542e-07	0.0	0.9998476467878292	0.0	0.01745517725030907	0.0	0.0	2.000317560157998	0.0	0.0	2.0003495859413434	0.0	-0.0003396118119073668	0.0	1.185856793428459e-05	-2.732488777708204e-10	0.0	-6.639399097691506e-10
0.28	-0.0003398187914021014	0.0	-2.8180611594423846e-09	-0.01753641097680815	0.0	-0.4993573869679183	0.0	2.2717089941867594e-07	0.0	0.9998476467779179	0.0	0.01745517781803495	0.0	0.0	2.000317625224505	0.0	0.0	2.000349651021012	0.0	-0.00033961181559086435	0.0	1.1858571119778281e-05	-8.788311911244833e-10	0.0	1.0361030757810687e-09
0.28500000000000003	-0.000339818795194541	0.0	-2.815392086139382e-09	-0.017538109036528863	0.0	-0.49935732767450364	0.0	2.2716959055029768e-07	0.0	0.9998476467680066	0.0	0.01745517838576083	0.0	0.0	2.000317690291012	0.0	0.0	2.000349716100306	0.0	-0.00033961181927436186	0.0	1.1858574305271981e-05	-7.366995296856476e-10	0.0	6.370987408919648e-10
0.29	-0.0003398187989869806	0.0	-2.8127230128363797e-09	-0.017539807096249575	0.0	-0.499357268381089	0.0	2.271682816819194e-07	0.0	0.9998476467580955	0.0	0.01745517895348671	0.0	0.0	2.000317755357518	0.0	0.0	2.0003497811792252	0.0	-0.00033961182295785965	0.0	1.185857749076569e-05	-7.366995378171639e-10	0.0	6.370987423601551e-10
0.295	-0.0003398188027794202	0.0	-2.810053939533377e-09	-0.017541505155970288	0.0	-0.49935720908767434	0.0	2.2716697281354115e-07	0.0	0.9998476467481842	0.0	0.01745517952121259	0.0	0.0	2.0003178204240255	0.0	0.0	2.000349846257769	0.0	-0.0003396118266413572	0.0	1.1858580676259405e-05	-7.366995089051059e-10	0.0	6.370987441953932e-10
0.3	-0.0003398188065718598	0.0	-2.8073848662303744e-09	-0.017543203215690997	0.0	-0.4993571497942597	0.0	2.2716566394516288e-07	0.0	0.9998476467382729	0.0	0.017455180088938472	0.0	0.0	2.0003178854905324	0.0	0.0	2.0003499113359378	0.0	-0.00033961183032485474	0.0	1.1858583861753132e-05	-7.366994989665861e-10	0.0	6.370987457200525e-10
0.305	-0.00033981881036429935	0.0	-2.804715792927372e-09	-0.01754490127541171	0.0	-0.49935709050084504	0.0	2.2716435507678462e-07	0.0	0.9998476467283616	0.0	0.017455180656664352	0.0	0.0	2.0003179505570388	0.0	0.0	2.000349976413732	0.0	-0.00033961183400835226	0.0	1.1858587047246862e-05	-7.366995070981024e-10	0.0	6.370987471317741e-10
0.31	-0.00033981881415673897	0.0	-2.8020467196243696e-09	-0.01754659933513242	0.0	-0.4993570312074304	0.0	2.2716304620840636e-07	0.0	0.9998476467184503	0.0	0.017455181224390232	0.0	0.0	2.0003180156235456	0.0	0.0	2.000350041491151	0.0	-0.00033961183769184983	0.0	1.1858590232740605e-05	-7.366995070981024e-10	0.0	6.370987494187631e-10
0.315	-0.0003398188179491786	0.0	-2.799377646321367e-09	-0.017548297394853134	0.0	-0.49935697191401573	0.0	2.271617373400281e-07	0.0	0.999847646708539	0.0	0.017455181792116112	0.0	0.0	2.0003180806900525	0.0	0.0	2.0003501065681952	0.0	-0.00033961184137534735	0.0	1.1858593418234355e-05	-7.366995287821458e-10	0.0	6.370987508587191e-10
0.32	-0.00033981882174161814	0.0	-2.7967085730183643e-09	-0.017549995454573846	0.0	-0.4993569126206011	0.0	2.2716042847164983e-07	0.0	0.9998476466986278	0.0	0.017455182359841993	0.0	0.0	2.0003181457565593	0.0	0.0	2.000350171644864	0.0	-0.0003396118450588451	0.0	1.1858596603728113e-05	-7.366995369136621e-10	0.0	6.370987524963161e-10
0.325	-0.00033981882553405776	0.0	-2.794039499715362e-09	-0.01755169351429456	0.0	-0.49935685332718643	0.0	2.2715911960327157e-07	0.0	0.9998476466887165	0.0	0.017455182927567873	0.0	0.0	2.000318210823066	0.0	0.0	2.0003502367211583	0.0	-0.00033961184874234265	0.0	1.185859978922188e-05	-7.366994935455752e-10	0.0	6.370987540492098e-10
0.33	-0.0003398188293264973	0.0	-2.7913704264123594e-09	-0.01755339157401527	0.0	-0.4993567940337718	0.0	2.271578107348933e-07	0.0	0.9998476466788052	0.0	0.017455183495293753	0.0	0.0	2.000318275889573	0.0	0.0	2.0003503017970776	0.0	-0.00033961185242584006	0.0	1.1858602974715653e-05	-7.366994971595824e-10	0.0	6.370987557150413e-10
0.335	-0.00033981883311893693	0.0	-2.7887013531093567e-09	-0.017555089633735983	0.0	-0.49935673474035713	0.0	2.27156501866515e-07	0.0	0.9998476466688939	0.0	0.017455184063019633	0.0	0.0	2.0003183409560794	0.0	0.0	2.0003503668726217	0.0	-0.00033961185610933764	0.0	1.1858606160209438e-05	-7.366995052910987e-10	0.0	6.370987580020303e-10
0.34	-0.00033981883691137655	0.0	-2.786032279806354e-09	-0.017556787693456696	0.0	-0.4993566754469425	0.0	2.2715519299813675e-07	0.0	0.9998476466589826	0.0	0.017455184630745513	0.0	0.0	2.0003184060225867	0.0	0.0	2.000350431947791	0.0	-0.0003396118597928351	0.0	1.1858609345703231e-05	-7.366994962560807e-10	0.0	6.370987587925943e-10
0.34500000000000003	-0.0003398188407038161	0.0	-2.783363206503352e-09	-0.017558485753177405	0.0	-0.49935661615352783	0.0	2.2715388412975849e-07	0.0	0.9998476466490713	0.0	0.017455185198471394	0.0	0.0	2.000318471089093	0.0	0.0	2.0003504970225854	0.0	-0.0003396118634763326	0.0	1.1858612531197028e-05	-7.366995332996548e-10	0.0	6.370987611360522e-10
0.35000000000000003	-0.0003398188444962557	0.0	-2.7806941332003492e-09	-0.017560183812898117	0.0	-0.4993565568601132	0.0	2.2715257526138022e-07	0.0	0.9998476466391601	0.0	0.017455185766197274	0.0	0.0	2.0003185361556004	0.0	0.0	2.0003505620970046	0.0	-0.00033961186715983035	0.0	1.1858615716690841e-05	-7.366995251681385e-10	0.0	6.370987629430557e-10
0.355	-0.00033981884828869534	0.0	-2.7780250598973466e-09	-0.01756188187261883	0.0	-0.49935649756669853	0.0	2.2715126639300196e-07	0.0	0.9998476466292489	0.0	0.017455186333923154	0.0	0.0	2.000318601222107	0.0	0.0	2.000350627171049	0.0	-0.0003396118708433278	0.0	1.1858618902184656e-05	-7.366994890280661e-10	0.0	6.370987639030264e-10
0.36	-0.0003398188520811349	0.0	-2.7753559865943443e-09	-0.01756357993233954	0.0	-0.4993564382732839	0.0	2.271499575246237e-07	0.0	0.9998476466193376	0.0	0.017455186901649034	0.0	0.0	2.000318666288614	0.0	0.0	2.0003506922447185	0.0	-0.0003396118745268253	0.0	1.1858622087678481e-05	-7.366994854140589e-10	0.0	6.370987662747187e-10
0.365	-0.0003398188558735745	0.0	-2.7726869132913417e-09	-0.017565277992060254	0.0	-0.49935637897986923	0.0	2.2714864865624543e-07	0.0	0.9998476466094263	0.0	0.017455187469374914	0.0	0.0	2.0003187313551205	0.0	0.0	2.000350757318013	0.0	-0.0003396118782103227	0.0	1.1858625273172317e-05	-7.366994917385716e-10	0.0	6.370987673193927e-10
0.37	-0.0003398188596660141	0.0	-2.770017839988339e-09	-0.017566976051780966	0.0	-0.4993563196864546	0.0	2.2714733978786717e-07	0.0	0.999847646599515	0.0	0.017455188037100795	0.0	0.0	2.0003187964216274	0.0	0.0	2.0003508223909323	0.0	-0.0003396118818938202	0.0	1.1858628458666156e-05	-7.366995052910987e-10	0.0	6.370987689852241e-10
0.375	-0.0003398188634584537	0.0	-2.7673487666853364e-09	-0.01756867411150168	0.0	-0.49935626039303993	0.0	2.271460309194889e-07	0.0	0.9998476465896037	0.0	0.017455188604826675	0.0	0.0	2.000318861488134	0.0	0.0	2.000350887463477	0.0	-0.0003396118855773177	0.0	1.1858631644160008e-05	-7.366994890280661e-10	0.0	6.370987714980885e-10
0.38	-0.0003398188672508933	0.0	-2.764679693382334e-09	-0.01757037217122239	0.0	-0.4993562010996253	0.0	2.2714472205111064e-07	0.0	0.9998476465796924	0.0	0.017455189172552555	0.0	0.0	2.000318926554641	0.0	0.0	2.0003509525356464	0.0	-0.00033961188926081513	0.0	1.1858634829653869e-05	-7.366994962560807e-10	0.0	6.370987727121691e-10
0.385	-0.00033981887104333287	0.0	-2.7620106200793315e-09	-0.0175720702309431	0.0	-0.49935614180621063	0.0	2.2714341318273238e-07	0.0	0.9998476465697812	0.0	0.017455189740278435	0.0	0.0	2.000318991621148	0.0	0.0	2.000351017607441	0.0	-0.0003396118929443127	0.0	1.1858638015147735e-05	-7.366995034840951e-10	0.0	6.370987739262497e-10
0.39	-0.0003398188748357725	0.0	-2.759341546776329e-09	-0.017573768290663812	0.0	-0.499356082512796	0.0	2.2714210431435411e-07	0.0	0.9998476465598699	0.0	0.017455190308004315	0.0	0.0	2.0003190566876543	0.0	0.0	2.000351082678861	0.0	-0.00033961189662781016	0.0	1.185864120064161e-05	-7.36699494449077e-10	0.0	6.370987759591288e-10
0.395	-0.0003398188786282121	0.0	-2.7566724734733262e-09	-0.017575466350384525	0.0	-0.49935602321938133	0.0	2.2714079544597585e-07	0.0	0.9998476465499586	0.0	0.017455190875730196	0.0	0.0	2.000319121754161	0.0	0.0	2.0003511477499054	0.0	-0.0003396119003113077	0.0	1.1858644386135494e-05	-7.366994953525788e-10	0.0	6.370987778508356e-10
0.4	-0.00033981888242065166	0.0	-2.754003400170324e-09	-0.017577164410105237	0.0	-0.4993559639259667	0.0	2.2713948657759759e-07	0.0	0.9998476465400473	0.0	0.017455191443456076	0.0	0.0	2.0003191868206684	0.0	0.0	2.000351212820575	0.0	-0.0003396119039948051	0.0	1.1858647571629387e-05	-7.366994799930481e-10	0.0	6.370987792060883e-10
0.405	-0.0003398188862130913	0.0	-2.7513343268673213e-09	-0.01757886246982595	0.0	-0.49935590463255203	0.0	2.2713817770921932e-07	0.0	0.999847646530136	0.0	0.017455192011181956	0.0	0.0	2.000319251887175	0.0	0.0	2.00035127789087	0.0	-0.0003396119076783025	0.0	1.1858650757123287e-05	-7.366994799930481e-10	0.0	6.370987807307476e-10
0.41000000000000003	-0.00033981889000553084	0.0	-2.7486652535643187e-09	-0.017580560529546662	0.0	-0.4993558453391374	0.0	2.2713686884084106e-07	0.0	0.9998476465202247	0.0	0.017455192578907836	0.0	0.0	2.0003193169536817	0.0	0.0	2.0003513429607898	0.0	-0.0003396119113617999	0.0	1.1858653942617195e-05	-7.366994926420734e-10	0.0	6.3709878284833e-10
0.41500000000000004	-0.00033981889379797046	0.0	-2.7459961802613165e-09	-0.017582258589267374	0.0	-0.4993557860457227	0.0	2.271355599724628e-07	0.0	0.9998476465103135	0.0	0.017455193146633716	0.0	0.0	2.0003193820201886	0.0	0.0	2.0003514080303346	0.0	-0.0003396119150452974	0.0	1.1858657128111115e-05	-7.366995052910987e-10	0.0	6.370987848529747e-10
0.42	-0.00033981889759041007	0.0	-2.743327106958314e-09	-0.017583956648988087	0.0	-0.4993557267523081	0.0	2.2713425110408453e-07	0.0	0.9998476465004023	0.0	0.017455193714359597	0.0	0.0	2.0003194470866954	0.0	0.0	2.0003514730995042	0.0	-0.00033961191872879494	0.0	1.1858660313605042e-05	-7.366994818000516e-10	0.0	6.370987858694142e-10
0.425	-0.00033981890138284963	0.0	-2.740658033655311e-09	-0.0175856547087088	0.0	-0.4993556674588934	0.0	2.2713294223570627e-07	0.0	0.999847646490491	0.0	0.017455194282085477	0.0	0.0	2.0003195121532023	0.0	0.0	2.000351538168299	0.0	-0.00033961192241229224	0.0	1.1858663499098974e-05	-7.366994745720372e-10	0.0	6.370987875352457e-10
0.43	-0.00033981890517528925	0.0	-2.7379889603523085e-09	-0.017587352768429508	0.0	-0.4993556081654788	0.0	2.27131633367328e-07	0.0	0.9998476464805797	0.0	0.017455194849811357	0.0	0.0	2.000319577219709	0.0	0.0	2.000351603236719	0.0	-0.0003396119260957897	0.0	1.1858666684592918e-05	-7.366994818000516e-10	0.0	6.370987897657658e-10
0.435	-0.00033981890896772886	0.0	-2.7353198870493063e-09	-0.01758905082815022	0.0	-0.4993555488720641	0.0	2.2713032449894974e-07	0.0	0.9998476464706684	0.0	0.017455195417537237	0.0	0.0	2.000319642286216	0.0	0.0	2.000351668304764	0.0	-0.00033961192977928706	0.0	1.185866987008687e-05	-7.366994781860444e-10	0.0	6.370987909516119e-10
0.44	-0.0003398189127601684	0.0	-2.7326508137463036e-09	-0.017590748887870933	0.0	-0.4993554895786495	0.0	2.2712901563057148e-07	0.0	0.9998476464607571	0.0	0.017455195985263117	0.0	0.0	2.0003197073527224	0.0	0.0	2.000351733372434	0.0	-0.00033961193346278447	0.0	1.1858673055580828e-05	-7.366994845105571e-10	0.0	6.370987925609745e-10
0.445	-0.00033981891655260804	0.0	-2.729981740443301e-09	-0.017592446947591645	0.0	-0.4993554302852348	0.0	2.2712770676219321e-07	0.0	0.9998476464508458	0.0	0.017455196552988998	0.0	0.0	2.0003197724192296	0.0	0.0	2.000351798439729	0.0	-0.0003396119371462819	0.0	1.1858676241074797e-05	-7.366994890280661e-10	0.0	6.370987945373847e-10
0.45	-0.0003398189203450476	0.0	-2.7273126671402988e-09	-0.017594145007312358	0.0	-0.4993553709918202	0.0	2.2712639789381495e-07	0.0	0.9998476464409346	0.0	0.017455197120714878	0.0	0.0	2.0003198374857365	0.0	0.0	2.000351863506649	0.0	-0.00033961194082977934	0.0	1.1858679426568773e-05	-7.210222924356607e-10	0.0	6.691790949862268e-10
0.455	-0.0003398189241374872	0.0	-2.724643593837296e-09	-0.01759584306703307	0.0	-0.4993553116984055	0.0	2.2712508902543669e-07	0.0	0.9998476464310233	0.0	0.017455197688440758	0.0	0.0	2.0003199025522433	0.0	0.0	2.0003519285731945	0.0	-0.0003396119445132767	0.0	1.185868261206276e-05	-8.289799655463819e-10	0.0	4.4826486953358443e-10
0.46	-0.00033981892880279924	0.0	-2.7239310208309217e-09	-0.01759754112753959	0.0	-0.49935525240481854	0.0	2.2712531456885607e-07	0.0	0.9998476464211115	0.0	0.017455198256199712	0.0	0.0	2.000319967622541	0.0	0.0	2.000351993639804	0.0	-0.00033961194913740563	0.0	1.1858683872738833e-05	-9.511989385888853e-10	0.0	1.9816773516583624e-10
0.465	-0.0003398189335673659	0.0	-2.723440922252732e-09	-0.01759923918813547	0.0	-0.499355193111212	0.0	2.2712571459085227e-07	0.0	0.9998476464111995	0.0	0.01745519882396242	0.0	0.0	2.0003200326932684	0.0	0.0	2.0003520587065284	0.0	-0.00033961195386849414	0.0	1.1858684914543098e-05	-9.480003443131566e-10	0.0	2.0471299055395344e-10
0.47000000000000003	-0.0003398189383319326	0.0	-2.722950823674542e-09	-0.017600937248731352	0.0	-0.49935513381760543	0.0	2.2712611461284844e-07	0.0	0.9998476464012875	0.0	0.017455199391725133	0.0	0.0	2.0003200977639963	0.0	0.0	2.0003521237733675	0.0	-0.0003396119585995825	0.0	1.1858685956347375e-05	-9.462176656715889e-10	0.0	2.0836085686472988e-10
0.47500000000000003	-0.00033981894309649926	0.0	-2.7224607250963524e-09	-0.01760263530932723	0.0	-0.49935507452399885	0.0	2.271265146348446e-07	0.0	0.9998476463913756	0.0	0.017455199959487844	0.0	0.0	2.0003201628347242	0.0	0.0	2.000352188840321	0.0	-0.0003396119633306709	0.0	1.1858686998151666e-05	-9.462177045221668e-10	0.0	2.0836085926465657e-10
0.48	-0.000339818947861066	0.0	-2.7219706265181627e-09	-0.01760433336992311	0.0	-0.49935501523039233	0.0	2.271269146568408e-07	0.0	0.9998476463814637	0.0	0.017455200527250556	0.0	0.0	2.0003202279054526	0.0	0.0	2.000352253907389	0.0	-0.0003396119680617595	0.0	1.1858688039955968e-05	-9.462177045221668e-10	0.0	2.0836086163634882e-10
0.485	-0.00033981895262563265	0.0	-2.721480527939973e-09	-0.01760603143051899	0.0	-0.49935495593678575	0.0	2.2712731467883697e-07	0.0	0.9998476463715518	0.0	0.017455201095013268	0.0	0.0	2.0003202929761805	0.0	0.0	2.0003523189745716	0.0	-0.00033961197279284793	0.0	1.185868908176028e-05	-9.462176909696396e-10	0.0	2.083608628786638e-10
0.49	-0.0003398189573901993	0.0	-2.720990429361783e-09	-0.01760772949111487	0.0	-0.4993548966431792	0.0	2.2712771470083314e-07	0.0	0.9998476463616398	0.0	0.017455201662775977	0.0	0.0	2.000320358046908	0.0	0.0	2.000352384041869	0.0	-0.00033961197752393644	0.0	1.1858690123564599e-05	-9.462176810311196e-10	0.0	2.0836086499624617e-10
0.495	-0.000339818962154766	0.0	-2.7205003307835935e-09	-0.017609427551710747	0.0	-0.49935483734957264	0.0	2.2712811472282934e-07	0.0	0.9998476463517278	0.0	0.01745520223053869	0.0	0.0	2.000320423117636	0.0	0.0	2.000352449109281	0.0	-0.0003396119822550248	0.0	1.1858691165368932e-05	-9.462176963906505e-10	0.0	2.0836086818673696e-10
0.5	-0.0003398189669193327	0.0	-2.7200102322054037e-09	-0.017611125612306627	0.0	-0.49935477805596606	0.0	2.271285147448255e-07	0.0	0.999847646341816	0.0	0.0174552027983014	0.0	0.0	2.0003204881883643	0.0	0.0	2.0003525141768073	0.0	-0.0003396119869861134	0.0	1.1858692207173278e-05	-9.462177063291703e-10	0.0	2.0836087033255374e-10
0.505	-0.0003398189716838994	0.0	-2.7195201336272136e-09	-0.017612823672902508	0.0	-0.49935471876235954	0.0	2.2712891476682168e-07	0.0	0.999847646331904	0.0	0.017455203366064112	0.0	0.0	2.0003205532590926	0.0	0.0	2.0003525792444488	0.0	-0.0003396119917172018	0.0	1.1858693248977633e-05	-9.462176774171125e-10	0.0	2.0836087115135227e-10
0.51	-0.00033981897644846606	0.0	-2.719030035049024e-09	-0.017614521733498385	0.0	-0.49935465946875296	0.0	2.2712931478881788e-07	0.0	0.9998476463219921	0.0	0.01745520393382682	0.0	0.0	2.0003206183298197	0.0	0.0	2.0003526443122044	0.0	-0.0003396119964482902	0.0	1.1858694290781992e-05	-9.462176819346215e-10	0.0	2.083608733254035e-10
0.515	-0.00033981898121303273	0.0	-2.718539936470834e-09	-0.017616219794094265	0.0	-0.4993546001751464	0.0	2.2712971481081405e-07	0.0	0.9998476463120801	0.0	0.017455204501589532	0.0	0.0	2.000320683400548	0.0	0.0	2.0003527093800746	0.0	-0.0003396120011793787	0.0	1.1858695332586369e-05	-9.462177045221668e-10	0.0	2.083608769958796e-10
0.52	-0.00033981898597759946	0.0	-2.7180498378926443e-09	-0.017617917854690145	0.0	-0.49935454088153985	0.0	2.2713011483281024e-07	0.0	0.9998476463021683	0.0	0.017455205069352244	0.0	0.0	2.000320748471276	0.0	0.0	2.0003527744480594	0.0	-0.00033961200591046725	0.0	1.185869637439076e-05	-9.462177054256685e-10	0.0	2.0836087891582095e-10
0.525	-0.00033981899074216613	0.0	-2.7175597393144546e-09	-0.017619615915286022	0.0	-0.4993544815879333	0.0	2.2713051485480641e-07	0.0	0.9998476462922563	0.0	0.017455205637114956	0.0	0.0	2.000320813542004	0.0	0.0	2.000352839516159	0.0	-0.0003396120106415557	0.0	1.1858697416195157e-05	-9.462176783206142e-10	0.0	2.083608804687147e-10
0.53	-0.0003398189955067328	0.0	-2.717069640736265e-09	-0.017621313975881903	0.0	-0.4993544222943267	0.0	2.2713091487680259e-07	0.0	0.9998476462823443	0.0	0.017455206204877668	0.0	0.0	2.0003208786127322	0.0	0.0	2.000352904584373	0.0	-0.00033961201537264406	0.0	1.1858698457999564e-05	-9.462176674785924e-10	0.0	2.0836088224748388e-10
0.535	-0.00033981900027129947	0.0	-2.716579542158075e-09	-0.017623012036477783	0.0	-0.49935436300072017	0.0	2.2713131489879878e-07	0.0	0.9998476462724324	0.0	0.017455206772640376	0.0	0.0	2.0003209436834597	0.0	0.0	2.0003529696527016	0.0	-0.00033961202010373247	0.0	1.185869949980398e-05	-9.462177054256685e-10	0.0	2.0836088481681714e-10
0.54	-0.0003398190050358662	0.0	-2.7160894435798853e-09	-0.017624710097073663	0.0	-0.4993543037071136	0.0	2.2713171492079495e-07	0.0	0.9998476462625205	0.0	0.017455207340403088	0.0	0.0	2.000321008754188	0.0	0.0	2.000353034721145	0.0	-0.0003396120248348211	0.0	1.1858700541608412e-05	-9.462177054256685e-10	0.0	2.083608871038061e-10
0.545	-0.00033981900980043287	0.0	-2.7155993450016956e-09	-0.01762640815766954	0.0	-0.49935424441350706	0.0	2.2713211494279112e-07	0.0	0.9998476462526086	0.0	0.0174552079081658	0.0	0.0	2.0003210738249155	0.0	0.0	2.0003530997897028	0.0	-0.0003396120295659095	0.0	1.1858701583412851e-05	-9.462176701890979e-10	0.0	2.083608890802163e-10
0.55	-0.00033981901456499954	0.0	-2.715109246423506e-09	-0.01762810621826542	0.0	-0.4993541851199005	0.0	2.2713251496478732e-07	0.0	0.9998476462426966	0.0	0.01745520847592851	0.0	0.0	2.000321138895644	0.0	0.0	2.0003531648583754	0.0	-0.00033961203429699785	0.0	1.1858702625217303e-05	-9.46217674706607e-10	0.0	2.0836089131073642e-10
0.555	-0.0003398190193295662	0.0	-2.714619147845316e-09	-0.0176298042788613	0.0	-0.4993541258262939	0.0	2.271329149867835e-07	0.0	0.9998476462327847	0.0	0.017455209043691224	0.0	0.0	2.0003212039663723	0.0	0.0	2.0003532299271627	0.0	-0.00033961203902808625	0.0	1.1858703667021765e-05	-9.462176972941522e-10	0.0	2.083608934565532e-10
0.56	-0.00033981902409413293	0.0	-2.7141290492671264e-09	-0.017631502339457178	0.0	-0.4993540665326874	0.0	2.2713331500877966e-07	0.0	0.9998476462228728	0.0	0.017455209611453932	0.0	0.0	2.0003212690370997	0.0	0.0	2.000353294996064	0.0	-0.0003396120437591748	0.0	1.1858704708826238e-05	-9.462177117501812e-10	0.0	2.0836089557413557e-10
0.5650000000000001	-0.0003398190288586996	0.0	-2.7136389506889366e-09	-0.01763320040005306	0.0	-0.4993540072390808	0.0	2.2713371503077586e-07	0.0	0.9998476462129608	0.0	0.017455210179216644	0.0	0.0	2.0003213341078276	0.0	0.0	2.0003533600650805	0.0	-0.00033961204849026333	0.0	1.185870575063072e-05	-9.46217683741625e-10	0.0	2.0836089786112452e-10
0.5700000000000001	-0.0003398190336232663	0.0	-2.713148852110747e-09	-0.01763489846064894	0.0	-0.4993539479454742	0.0	2.2713411505277203e-07	0.0	0.9998476462030489	0.0	0.017455210746979356	0.0	0.0	2.0003213991785556	0.0	0.0	2.0003534251342114	0.0	-0.0003396120532213517	0.0	1.1858706792435216e-05	-9.462176873556323e-10	0.0	2.083608998940036e-10
0.5750000000000001	-0.00033981903838783294	0.0	-2.712658753532557e-09	-0.017636596521244816	0.0	-0.4993538886518677	0.0	2.2713451507476822e-07	0.0	0.999847646193137	0.0	0.017455211314742067	0.0	0.0	2.000321464249284	0.0	0.0	2.000353490203457	0.0	-0.0003396120579524402	0.0	1.185870783423972e-05	-9.462176972941522e-10	0.0	2.0836090251980573e-10
0.58	-0.00033981904315239967	0.0	-2.7121686549543674e-09	-0.017638294581840696	0.0	-0.4993538293582611	0.0	2.271349150967644e-07	0.0	0.9998476461832251	0.0	0.01745521188250478	0.0	0.0	2.0003215293200123	0.0	0.0	2.000353555272817	0.0	-0.00033961206268352866	0.0	1.185870887604424e-05	-9.462176828381233e-10	0.0	2.0836090401623062e-10
0.585	-0.00033981904791696634	0.0	-2.7116785563761777e-09	-0.017639992642436576	0.0	-0.49935377006465453	0.0	2.2713531511876056e-07	0.0	0.9998476461733131	0.0	0.017455212450267488	0.0	0.0	2.0003215943907398	0.0	0.0	2.0003536203422914	0.0	-0.00033961206741461706	0.0	1.185870991784876e-05	-9.462176783206142e-10	0.0	2.083609058797031e-10
0.59	-0.000339819052681533	0.0	-2.711188457797988e-09	-0.017641690703032453	0.0	-0.499353710771048	0.0	2.2713571514075676e-07	0.0	0.9998476461634012	0.0	0.0174552130180302	0.0	0.0	2.0003216594614677	0.0	0.0	2.0003536854118806	0.0	-0.00033961207214570547	0.0	1.18587109596533e-05	-9.462176945836467e-10	0.0	2.0836090890078728e-10
0.595	-0.0003398190574460997	0.0	-2.710698359219798e-09	-0.017643388763628334	0.0	-0.49935365147744143	0.0	2.2713611516275293e-07	0.0	0.9998476461534893	0.0	0.01745521358579291	0.0	0.0	2.000321724532196	0.0	0.0	2.000353750481585	0.0	-0.000339612076876794	0.0	1.1858712001457849e-05	-9.46217702715163e-10	0.0	2.0836091082072862e-10
0.6	-0.0003398190622106664	0.0	-2.7102082606416084e-09	-0.017645086824224214	0.0	-0.4993535921838349	0.0	2.271365151847491e-07	0.0	0.9998476461435774	0.0	0.017455214153555623	0.0	0.0	2.000321789602924	0.0	0.0	2.0003538155514033	0.0	-0.00033961208160788244	0.0	1.1858713043262409e-05	-9.462176819346215e-10	0.0	2.0836091282537328e-10
0.605	-0.0003398190669752331	0.0	-2.7097181620634187e-09	-0.017646784884820094	0.0	-0.4993535328902283	0.0	2.271369152067453e-07	0.0	0.9998476461336654	0.0	0.017455214721318335	0.0	0.0	2.000321854673652	0.0	0.0	2.0003538806213363	0.0	-0.0003396120863389708	0.0	1.1858714085066977e-05	-9.462176629610834e-10	0.0	2.0836091474531461e-10
0.61	-0.00033981907173979975	0.0	-2.709228063485229e-09	-0.01764848294541597	0.0	-0.49935347359662174	0.0	2.2713731522874147e-07	0.0	0.9998476461237534	0.0	0.017455215289081043	0.0	0.0	2.0003219197443793	0.0	0.0	2.000353945691384	0.0	-0.00033961209107005914	0.0	1.1858715126871556e-05	-9.46217693680145e-10	0.0	2.0836091686289698e-10
0.615	-0.0003398190765043664	0.0	-2.708737964907039e-09	-0.01765018100601185	0.0	-0.4993534143030152	0.0	2.2713771525073766e-07	0.0	0.9998476461138416	0.0	0.017455215856843755	0.0	0.0	2.0003219848151077	0.0	0.0	2.000354010761546	0.0	-0.0003396120958011477	0.0	1.1858716168676146e-05	-9.462177081361739e-10	0.0	2.0836091957340241e-10
0.62	-0.00033981908126893315	0.0	-2.7082478663288495e-09	-0.017651879066607732	0.0	-0.49935335500940864	0.0	2.2713811527273383e-07	0.0	0.9998476461039296	0.0	0.017455216424606467	0.0	0.0	2.000322049885836	0.0	0.0	2.0003540758318232	0.0	-0.00033961210053223617	0.0	1.185871721048075e-05	-9.46217679224116e-10	0.0	2.0836092200156352e-10
0.625	-0.0003398190860334998	0.0	-2.7077577677506597e-09	-0.01765357712720361	0.0	-0.49935329571580206	0.0	2.2713851529473e-07	0.0	0.9998476460940177	0.0	0.01745521699236918	0.0	0.0	2.000322114956564	0.0	0.0	2.0003541409022145	0.0	-0.0003396121052633245	0.0	1.1858718252285365e-05	-9.462176683820943e-10	0.0	2.0836092372386386e-10
0.63	-0.0003398190907980665	0.0	-2.70726766917247e-09	-0.01765527518779949	0.0	-0.49935323642219553	0.0	2.271389153167262e-07	0.0	0.9998476460841057	0.0	0.01745521756013189	0.0	0.0	2.000322180027292	0.0	0.0	2.0003542059727204	0.0	-0.00033961210999441287	0.0	1.1858719294089987e-05	-9.473418721937337e-10	0.0	2.0611736940173188e-10
0.635	-0.00033981909556263316	0.0	-2.7067775705942802e-09	-0.01765697324839537	0.0	-0.49935317712858895	0.0	2.2713931533872237e-07	0.0	0.9998476460741939	0.0	0.0174552181278946	0.0	0.0	2.00032224509802	0.0	0.0	2.0003542710433413	0.0	-0.0003396121147255014	0.0	1.1858720335894619e-05	-9.561278273747162e-10	0.0	1.8858316293264473e-10
0.64	-0.00033981910026448844	0.0	-2.7061505857667127e-09	-0.0176586713089948	0.0	-0.4993531178349794	0.0	2.2713958796168973e-07	0.0	0.9998476460642819	0.0	0.017455218695656527	0.0	0.0	2.000322310168658	0.0	0.0	2.00035433611404	0.0	-0.0003396121193891386	0.0	1.185872151231262e-05	-8.316717323500478e-10	0.0	4.369617583652836e-10
0.645	-0.0003398191040372504	0.0	-2.703495581116852e-09	-0.017660369369646794	0.0	-0.49935305854132417	0.0	2.2713797312147513e-07	0.0	0.9998476460543702	0.0	0.017455219263406853	0.0	0.0	2.0003223752379666	0.0	0.0	2.000354401184276	0.0	-0.0003396121230534606	0.0	1.1858724683076642e-05	-7.162091404247391e-10	0.0	6.673919055836363e-10
0.65	-0.0003398191078100123	0.0	-2.7008405764669917e-09	-0.017662067430298793	0.0	-0.49935299924766896	0.0	2.2713635828126052e-07	0.0	0.9998476460444584	0.0	0.01745521983115718	0.0	0.0	2.000322440307275	0.0	0.0	2.00035446625405	0.0	-0.0003396121267177826	0.0	1.1858727853840672e-05	-7.196988059402059e-10	0.0	6.410017504953475e-10
0.655	-0.0003398191115827743	0.0	-2.698185571817131e-09	-0.01766376549095079	0.0	-0.49935293995401375	0.0	2.2713474344104592e-07	0.0	0.9998476460345468	0.0	0.017455220398907505	0.0	0.0	2.0003225053765834	0.0	0.0	2.0003545313233606	0.0	-0.0003396121303821048	0.0	1.1858731024604715e-05	-8.117938603959795e-10	0.0	5.930925728643085e-10
0.66	-0.000339819116130648	0.0	-2.695968826553774e-09	-0.017665463551670847	0.0	-0.49935288066031647	0.0	2.2713480472148382e-07	0.0	0.999847646024635	0.0	0.017455220966658365	0.0	0.0	2.0003225704459537	0.0	0.0	2.0003545963926888	0.0	-0.0003396121348363637	0.0	1.1858733784432172e-05	-9.044028989616561e-10	0.0	5.449160123710442e-10
0.665	-0.0003398191206823043	0.0	-2.693754219991977e-09	-0.01766716161239124	0.0	-0.49935282136661896	0.0	2.2713487418137426e-07	0.0	0.9998476460147233	0.0	0.01745522153440922	0.0	0.0	2.0003226355153227	0.0	0.0	2.0003546614620373	0.0	-0.00033961213929447763	0.0	1.1858736542254271e-05	-8.925163333727814e-10	0.0	5.822287997004156e-10
0.67	-0.00033981912523396056	0.0	-2.69153961343018e-09	-0.017668859673111628	0.0	-0.49935276207292145	0.0	2.2713494364126472e-07	0.0	0.9998476460048116	0.0	0.017455222102160082	0.0	0.0	2.000322700584692	0.0	0.0	2.0003547265314054	0.0	-0.0003396121437525914	0.0	1.185873930007638e-05	-8.867121419715504e-10	0.0	3.6979296095182037e-10
0.675	-0.0003398191296715977	0.0	-2.6911640134737114e-09	-0.017670557733957315	0.0	-0.49935270277920196	0.0	2.2713473057788934e-07	0.0	0.9998476459949	0.0	0.017455222669907598	0.0	0.0	2.0003227656536793	0.0	0.0	2.0003547916007127	0.0	-0.0003396121481609465	0.0	1.185874021603041e-05	-8.804501724045399e-10	0.0	1.3800092310299752e-10
0.68	-0.0003398191341002637	0.0	-2.690933109187984e-09	-0.01767225579481286	0.0	-0.4993526434854808	0.0	2.2713449528517918e-07	0.0	0.9998476459849882	0.0	0.01745522323765485	0.0	0.0	2.0003228307226353	0.0	0.0	2.0003548566699525	0.0	-0.0003396121525653863	0.0	1.1858740987063628e-05	-8.808227295690567e-10	0.0	1.517912977035784e-10
0.685	-0.00033981913852892975	0.0	-2.6907022049022566e-09	-0.017673953855668407	0.0	-0.49935258419175965	0.0	2.2713425999246902e-07	0.0	0.9998476459750766	0.0	0.017455223805402098	0.0	0.0	2.000322895791591	0.0	0.0	2.0003549217391248	0.0	-0.00033961215696982634	0.0	1.1858741758096857e-05	-8.808880256448947e-10	0.0	1.5420664721983805e-10
0.6900000000000001	-0.00033981914295759573	0.0	-2.6904713006165293e-09	-0.01767565191652395	0.0	-0.4993525248980385	0.0	2.271340246997589e-07	0.0	0.999847645965165	0.0	0.01745522437314935	0.0	0.0	2.0003229608605473	0.0	0.0	2.00035498680823	0.0	-0.0003396121613742665	0.0	1.1858742529130098e-05	-8.808880021538475e-10	0.0	1.542066489703728e-10
0.6950000000000001	-0.00033981914738626177	0.0	-2.6902403963308023e-09	-0.0176773499773795	0.0	-0.49935246560431734	0.0	2.2713378940704873e-07	0.0	0.9998476459552532	0.0	0.0174552249408966	0.0	0.0	2.0003230259295033	0.0	0.0	2.0003550518772677	0.0	-0.00033961216577870634	0.0	1.1858743300163347e-05	-8.784385527287285e-10	0.0	1.5197176284460984e-10
0.7000000000000001	-0.00033981915181492776	0.0	-2.690009492045075e-09	-0.017679048038235046	0.0	-0.4993524063105962	0.0	2.2713355411433857e-07	0.0	0.9998476459453416	0.0	0.01745522550864385	0.0	0.0	2.0003230909984593	0.0	0.0	2.000355116946238	0.0	-0.0003396121701831463	0.0	1.1858744071196608e-05	-8.9493689694152e-10	0.0	1.6702506647769334e-10
0.705	-0.00033981915639515	0.0	-2.6896497071978627e-09	-0.01768074609920195	0.0	-0.49935234701685216	0.0	2.2713361686303317e-07	0.0	0.99984764593543	0.0	0.01745522607639282	0.0	0.0	2.000323156067613	0.0	0.0	2.000355182015226	0.0	-0.0003396121747345517	0.0	1.1858744976323164e-05	-9.166163352425025e-10	0.0	1.8680569249902873e-10
0.71	-0.0003398191610154446	0.0	-2.689255845697534e-09	-0.0176824441601983	0.0	-0.49935228772310214	0.0	2.2713375841533823e-07	0.0	0.9998476459255182	0.0	0.01745522664414224	0.0	0.0	2.000323221136817	0.0	0.0	2.0003552470842547	0.0	-0.0003396121793248154	0.0	1.1858745916904653e-05	-9.187003678779125e-10	0.0	1.887072139288543e-10
0.715	-0.00033981916563573917	0.0	-2.6888619841972053e-09	-0.017684142221194656	0.0	-0.4993522284293521	0.0	2.271338999676433e-07	0.0	0.9998476459156065	0.0	0.01745522721189166	0.0	0.0	2.0003232862060223	0.0	0.0	2.000355312153324	0.0	-0.00033961218391507895	0.0	1.185874685748615e-05	-9.180527106751601e-10	0.0	1.8811630087496012e-10
0.72	-0.00033981917025603377	0.0	-2.6884681226968766e-09	-0.017685840282191008	0.0	-0.4993521691356021	0.0	2.2713404151994839e-07	0.0	0.9998476459056947	0.0	0.017455227779641085	0.0	0.0	2.0003233512752274	0.0	0.0	2.0003553772224336	0.0	-0.00033961218850534256	0.0	1.1858747798067662e-05	-9.180527504292398e-10	0.0	1.881163033595901e-10
0.725	-0.00033981917487632836	0.0	-2.688074261196548e-09	-0.01768753834318736	0.0	-0.4993521098418521	0.0	2.2713418307225345e-07	0.0	0.9998476458957831	0.0	0.017455228347390505	0.0	0.0	2.000323416344432	0.0	0.0	2.000355442291584	0.0	-0.0003396121930956064	0.0	1.1858748738649183e-05	-9.186857447011111e-10	0.0	1.9274078920001616e-10
0.73	-0.0003398191794966229	0.0	-2.6876803996962193e-09	-0.01768923640418371	0.0	-0.49935205054810206	0.0	2.271343246245585e-07	0.0	0.9998476458858714	0.0	0.01745522891513993	0.0	0.0	2.0003234814136372	0.0	0.0	2.000355507360775	0.0	-0.00033961219768587	0.0	1.1858749679230714e-05	-9.145885754103499e-10	0.0	1.628082832881135e-10
0.735	-0.0003398191840692757	0.0	-2.6875625123844552e-09	-0.017690934466090477	0.0	-0.49935199125424823	0.0	2.2713437266648962e-07	0.0	0.9998476458759596	0.0	0.01745522948288922	0.0	0.0	2.0003235464828273	0.0	0.0	2.0003555724299797	0.0	-0.00033961220223815384	0.0	1.1858750342343206e-05	-9.078207595742428e-10	0.0	1.1336472933121803e-10
0.74	-0.00033981918861680294	0.0	-2.687590169569872e-09	-0.017692632528477383	0.0	-0.49935193196033967	0.0	2.2713437139250307e-07	0.0	0.9998476458660479	0.0	0.017455230050638447	0.0	0.0	2.0003236115520098	0.0	0.0	2.000355637499184	0.0	-0.0003396122067704076	0.0	1.1858750859122849e-05	-9.061169232111565e-10	0.0	1.0091704826285963e-10
0.745	-0.0003398191931643302	0.0	-2.687617826755288e-09	-0.01769433059086429	0.0	-0.4993518726664311	0.0	2.271343701185165e-07	0.0	0.9998476458561362	0.0	0.017455230618387673	0.0	0.0	2.0003236766211923	0.0	0.0	2.000355702568388	0.0	-0.0003396122113026614	0.0	1.1858751375902499e-05	-9.064507553845774e-10	0.0	1.0335593072608626e-10
0.75	-0.0003398191977118574	0.0	-2.6876454839407046e-09	-0.017696028653251192	0.0	-0.49935181337252255	0.0	2.2713436884452995e-07	0.0	0.9998476458462244	0.0	0.0174552311861369	0.0	0.0	2.0003237416903747	0.0	0.0	2.0003557676375916	0.0	-0.00033961221583491514	0.0	1.1858751892682157e-05	-9.06450752674072e-10	0.0	1.0335593304130965e-10
0.755	-0.00033981920225938464	0.0	-2.687673141126121e-09	-0.017697726715638098	0.0	-0.49935175407861393	0.0	2.2713436757054338e-07	0.0	0.9998476458363127	0.0	0.017455231753886125	0.0	0.0	2.0003238067595572	0.0	0.0	2.0003558327067945	0.0	-0.00033961222036716894	0.0	1.1858752409461828e-05	-9.064507580950829e-10	0.0	1.0335593524359531e-10
0.76	-0.00033981920680691187	0.0	-2.6877007983115374e-09	-0.017699424778025004	0.0	-0.49935169478470537	0.0	2.2713436629655683e-07	0.0	0.999847645826401	0.0	0.01745523232163535	0.0	0.0	2.0003238718287393	0.0	0.0	2.0003558977759974	0.0	-0.00033961222489942275	0.0	1.1858752926241508e-05	-9.064507770686209e-10	0.0	1.0335593758705314e-10
0.765	-0.0003398192113544391	0.0	-2.6877284554969536e-09	-0.01770112284041191	0.0	-0.4993516354907968	0.0	2.2713436502257025e-07	0.0	0.9998476458164893	0.0	0.017455232889384577	0.0	0.0	2.0003239368979226	0.0	0.0	2.0003559628452	0.0	-0.00033961222943167666	0.0	1.1858753443021202e-05	-9.064507680336028e-10	0.0	1.0335593880113369e-10
0.77	-0.0003398192159019663	0.0	-2.68775611268237e-09	-0.017702820902798812	0.0	-0.49935157619688825	0.0	2.271343637485837e-07	0.0	0.9998476458065776	0.0	0.0174552334571338	0.0	0.0	2.0003240019671042	0.0	0.0	2.0003560279144024	0.0	-0.0003396122339639304	0.0	1.1858753959800897e-05	-9.064507445425557e-10	0.0	1.0335594060813732e-10
0.775	-0.0003398192204494935	0.0	-2.6877837698677864e-09	-0.01770451896518572	0.0	-0.4993515169029797	0.0	2.2713436247459713e-07	0.0	0.9998476457966659	0.0	0.017455234024883026	0.0	0.0	2.0003240670362867	0.0	0.0	2.000356092983604	0.0	-0.00033961223849618416	0.0	1.185875447658061e-05	-9.064507517705702e-10	0.0	1.033559435445182e-10
0.78	-0.00033981922499702074	0.0	-2.687811427053203e-09	-0.017706217027572625	0.0	-0.49935145760907107	0.0	2.2713436120061058e-07	0.0	0.9998476457867541	0.0	0.017455234592632252	0.0	0.0	2.000324132105469	0.0	0.0	2.0003561580528055	0.0	-0.00033961224302843796	0.0	1.1858754993360332e-05	-9.064507707441082e-10	0.0	1.0335594537975625e-10
0.785	-0.00033981922954454797	0.0	-2.687839084238619e-09	-0.01770791508995953	0.0	-0.4993513983151625	0.0	2.27134359926624e-07	0.0	0.9998476457768424	0.0	0.01745523516038148	0.0	0.0	2.0003241971746517	0.0	0.0	2.0003562231220062	0.0	-0.0003396122475606918	0.0	1.1858755510140064e-05	-9.064507608055883e-10	0.0	1.0335594772321408e-10
0.79	-0.0003398192340920752	0.0	-2.6878667414240358e-09	-0.017709613152346433	0.0	-0.49935133902125395	0.0	2.2713435865263746e-07	0.0	0.9998476457669306	0.0	0.017455235728130705	0.0	0.0	2.000324262243834	0.0	0.0	2.000356288191207	0.0	-0.00033961225209294557	0.0	1.1858756026919809e-05	-9.064507662265991e-10	0.0	1.0335594978432758e-10
0.795	-0.00033981923863960243	0.0	-2.687894398609452e-09	-0.01771131121473334	0.0	-0.4993512797273454	0.0	2.2713435737865088e-07	0.0	0.999847645757019	0.0	0.01745523629587993	0.0	0.0	2.0003243273130167	0.0	0.0	2.000356353260407	0.0	-0.0003396122566251995	0.0	1.1858756543699561e-05	-9.064507725511119e-10	0.0	1.0335595156309677e-10
0.8	-0.00033981924318712966	0.0	-2.6879220557948686e-09	-0.017713009277120245	0.0	-0.4993512204334368	0.0	2.2713435610466434e-07	0.0	0.9998476457471073	0.0	0.017455236863629157	0.0	0.0	2.000324392382199	0.0	0.0	2.0003564183296074	0.0	-0.0003396122611574533	0.0	1.1858757060479324e-05	-9.064507553845774e-10	0.0	1.0335595353950697e-10
0.805	-0.0003398192477346569	0.0	-2.6879497129802848e-09	-0.01771470733950715	0.0	-0.4993511611395282	0.0	2.2713435483067776e-07	0.0	0.9998476457371955	0.0	0.017455237431378383	0.0	0.0	2.0003244574513817	0.0	0.0	2.000356483398807	0.0	-0.00033961226568970704	0.0	1.1858757577259098e-05	-9.064507553845774e-10	0.0	1.033559558829648e-10
0.81	-0.0003398192522821841	0.0	-2.687977370165701e-09	-0.017716405401894057	0.0	-0.49935110184561965	0.0	2.271343535566912e-07	0.0	0.9998476457272838	0.0	0.01745523799912761	0.0	0.0	2.0003245225205646	0.0	0.0	2.000356548468006	0.0	-0.00033961227022196084	0.0	1.1858758094038883e-05	-9.064507608055883e-10	0.0	1.0335595816995376e-10
0.8150000000000001	-0.00033981925682971135	0.0	-2.6880050273511176e-09	-0.01771810346428096	0.0	-0.4993510425517111	0.0	2.2713435228270464e-07	0.0	0.9998476457173721	0.0	0.017455238566876835	0.0	0.0	2.0003245875897466	0.0	0.0	2.000356613537205	0.0	-0.00033961227475421465	0.0	1.1858758610818678e-05	-9.064507508670684e-10	0.0	1.0335595994872294e-10
0.8200000000000001	-0.0003398192613772386	0.0	-2.6880326845365337e-09	-0.017719801526667866	0.0	-0.4993509832578025	0.0	2.2713435100871806e-07	0.0	0.9998476457074603	0.0	0.01745523913462606	0.0	0.0	2.000324652658929	0.0	0.0	2.0003566786064035	0.0	-0.0003396122792864684	0.0	1.1858759127598482e-05	-9.064507779721228e-10	0.0	1.0335596192513315e-10
0.8250000000000001	-0.0003398192659247658	0.0	-2.6880603417219503e-09	-0.017721499589054772	0.0	-0.49935092396389397	0.0	2.2713434973473152e-07	0.0	0.9998476456975487	0.0	0.017455239702375287	0.0	0.0	2.0003247177281116	0.0	0.0	2.0003567436756016	0.0	-0.00033961228381872236	0.0	1.1858759644378297e-05	-9.064507689371046e-10	0.0	1.033559642968254e-10
0.8300000000000001	-0.000339819270472293	0.0	-2.6880879989073665e-09	-0.017723197651441678	0.0	-0.49935086466998535	0.0	2.2713434846074494e-07	0.0	0.999847645687637	0.0	0.017455240270124513	0.0	0.0	2.0003247827972945	0.0	0.0	2.000356808744799	0.0	-0.00033961228835097606	0.0	1.1858760161158123e-05	-9.064507445425557e-10	0.0	1.03355965906188e-10
0.835	-0.0003398192750198202	0.0	-2.688115656092783e-09	-0.01772489571382858	0.0	-0.4993508053760768	0.0	2.271343471867584e-07	0.0	0.9998476456777252	0.0	0.01745524083787374	0.0	0.0	2.000324847866477	0.0	0.0	2.0003568738139967	0.0	-0.00033961229288322986	0.0	1.1858760677937957e-05	-9.064507599020865e-10	0.0	1.0335596793906708e-10
0.84	-0.00033981927956734746	0.0	-2.6881433132781993e-09	-0.017726593776215487	0.0	-0.49935074608216823	0.0	2.2713434591277182e-07	0.0	0.9998476456678135	0.0	0.017455241405622966	0.0	0.0	2.0003249129356595	0.0	0.0	2.0003569388831934	0.0	-0.00033961229741548367	0.0	1.1858761194717803e-05	-9.064507562880793e-10	0.0	1.033559703672282e-10
0.845	-0.0003398192841148747	0.0	-2.688170970463616e-09	-0.017728291838602393	0.0	-0.49935068678825967	0.0	2.2713434463878527e-07	0.0	0.9998476456579017	0.0	0.01745524197337219	0.0	0.0	2.0003249780048415	0.0	0.0	2.00035700395239	0.0	-0.0003396123019477374	0.0	1.185876171149766e-05	-9.064507472530611e-10	0.0	1.0335597203305966e-10
0.85	-0.0003398192886624019	0.0	-2.688198627649032e-09	-0.0177299899009893	0.0	-0.49935062749435105	0.0	2.271343433647987e-07	0.0	0.99984764564799	0.0	0.017455242541121414	0.0	0.0	2.000325043074024	0.0	0.0	2.0003570690215864	0.0	-0.00033961230647999117	0.0	1.1858762228277524e-05	-9.06450752674072e-10	0.0	1.0335597389653215e-10
0.855	-0.00033981929320992915	0.0	-2.6882262848344487e-09	-0.0177316879633762	0.0	-0.4993505682004425	0.0	2.2713434209081215e-07	0.0	0.9998476456380783	0.0	0.01745524310887064	0.0	0.0	2.0003251081432065	0.0	0.0	2.0003571340907826	0.0	-0.00033961231101224497	0.0	1.1858762745057399e-05	-9.064507788756245e-10	0.0	1.0335597660703758e-10
0.86	-0.0003398192977574564	0.0	-2.688253942019865e-09	-0.017733386025763107	0.0	-0.49935050890653393	0.0	2.2713434081682557e-07	0.0	0.9998476456281666	0.0	0.017455243676619867	0.0	0.0	2.000325173212389	0.0	0.0	2.000357199159978	0.0	-0.00033961231554449894	0.0	1.1858763261837289e-05	-9.064507833931336e-10	0.0	1.0335597900696426e-10
0.865	-0.0003398193023049836	0.0	-2.6882815992052815e-09	-0.017735084088150013	0.0	-0.49935044961262537	0.0	2.2713433954283902e-07	0.0	0.9998476456182549	0.0	0.017455244244369093	0.0	0.0	2.0003252382815715	0.0	0.0	2.0003572642291734	0.0	-0.00033961232007675274	0.0	1.1858763778617188e-05	-9.06450752674072e-10	0.0	1.0335598044692027e-10
0.87	-0.00033981930685251084	0.0	-2.6883092563906977e-09	-0.01773678215053692	0.0	-0.4993503903187168	0.0	2.2713433826885245e-07	0.0	0.9998476456083432	0.0	0.01745524481211832	0.0	0.0	2.000325303350754	0.0	0.0	2.0003573292983683	0.0	-0.0003396123246090065	0.0	1.1858764295397095e-05	-9.064507463495594e-10	0.0	1.0335598236686162e-10
0.875	-0.0003398193114000381	0.0	-2.6883369135761143e-09	-0.017738480212923825	0.0	-0.4993503310248082	0.0	2.271343369948659e-07	0.0	0.9998476455984314	0.0	0.017455245379867545	0.0	0.0	2.0003253684199365	0.0	0.0	2.0003573943675623	0.0	-0.00033961232914126024	0.0	1.1858764812177012e-05	-9.064507589985847e-10	0.0	1.0335598465385058e-10
0.88	-0.0003398193159475653	0.0	-2.6883645707615305e-09	-0.017740178275310728	0.0	-0.49935027173089963	0.0	2.2713433572087933e-07	0.0	0.9998476455885197	0.0	0.01745524594761677	0.0	0.0	2.000325433489119	0.0	0.0	2.000357459436757	0.0	-0.00033961233367351404	0.0	1.1858765328956941e-05	-9.064507635160937e-10	0.0	1.0335598663026078e-10
0.885	-0.00033981932049509254	0.0	-2.688392227946947e-09	-0.017741876337697634	0.0	-0.49935021243699107	0.0	2.2713433444689278e-07	0.0	0.999847645578608	0.0	0.017455246515365997	0.0	0.0	2.000325498558301	0.0	0.0	2.0003575245059504	0.0	-0.00033961233820576785	0.0	1.1858765845736878e-05	-9.064507680336028e-10	0.0	1.0335598877607758e-10
0.89	-0.0003398193250426197	0.0	-2.6884198851323633e-09	-0.01774357440008454	0.0	-0.4993501531430825	0.0	2.271343331729062e-07	0.0	0.9998476455686963	0.0	0.017455247083115223	0.0	0.0	2.0003255636274844	0.0	0.0	2.0003575895751435	0.0	-0.0003396123427380217	0.0	1.185876636251683e-05	-9.064507662265991e-10	0.0	1.033559911195354e-10
0.895	-0.00033981932959014694	0.0	-2.6884475423177795e-09	-0.017745272462471446	0.0	-0.49935009384917395	0.0	2.2713433189891965e-07	0.0	0.9998476455587846	0.0	0.01745524765086445	0.0	0.0	2.000325628696667	0.0	0.0	2.0003576546443367	0.0	-0.0003396123472702755	0.0	1.1858766879296789e-05	-9.064507499635666e-10	0.0	1.0335599270066358e-10
0.9	-0.0003398193341376742	0.0	-2.688475199503196e-09	-0.01774697052485835	0.0	-0.49935003455526533	0.0	2.2713433062493308e-07	0.0	0.9998476455488728	0.0	0.017455248218613675	0.0	0.0	2.000325693765849	0.0	0.0	2.0003577197135294	0.0	-0.00033961235180252926	0.0	1.1858767396076757e-05	-9.064507562880793e-10	0.0	1.0335599473354265e-10
0.905	-0.0003398193386852014	0.0	-2.6885028566886123e-09	-0.017748668587245255	0.0	-0.49934997526135677	0.0	2.2713432935094653e-07	0.0	0.9998476455389611	0.0	0.0174552487863629	0.0	0.0	2.0003257588350314	0.0	0.0	2.0003577847827216	0.0	-0.00033961235633478306	0.0	1.1858767912856737e-05	-9.064507617090902e-10	0.0	1.0335599690759387e-10
0.91	-0.00033981934323272864	0.0	-2.688530513874029e-09	-0.01775036664963216	0.0	-0.4993499159674482	0.0	2.2713432807695996e-07	0.0	0.9998476455290494	0.0	0.017455249354112128	0.0	0.0	2.0003258239042143	0.0	0.0	2.0003578498519134	0.0	-0.00033961236086703687	0.0	1.1858768429636727e-05	-9.064507517705702e-10	0.0	1.0335599922281727e-10
0.915	-0.00033981934778025587	0.0	-2.688558171059445e-09	-0.017752064712019067	0.0	-0.49934985667353965	0.0	2.271343268029734e-07	0.0	0.9998476455191376	0.0	0.017455249921861354	0.0	0.0	2.0003258889733964	0.0	0.0	2.0003579149211053	0.0	-0.0003396123653992906	0.0	1.1858768946416729e-05	-9.064507788756245e-10	0.0	1.0335600150980623e-10
0.92	-0.0003398193523277831	0.0	-2.6885858282448617e-09	-0.017753762774405973	0.0	-0.4993497973796311	0.0	2.2713432552898683e-07	0.0	0.999847645509226	0.0	0.01745525048961058	0.0	0.0	2.0003259540425793	0.0	0.0	2.000357979990296	0.0	-0.0003396123699315446	0.0	1.1858769463196741e-05	-9.064507698406065e-10	0.0	1.0335600328857542e-10
0.925	-0.00033981935687531033	0.0	-2.688613485430278e-09	-0.017755460836792875	0.0	-0.49934973808572247	0.0	2.2713432425500029e-07	0.0	0.9998476454993143	0.0	0.017455251057359806	0.0	0.0	2.0003260191117618	0.0	0.0	2.000358045059487	0.0	-0.0003396123744637983	0.0	1.1858769979976761e-05	-9.064507454460576e-10	0.0	1.0335600526498562e-10
0.93	-0.00033981936142283756	0.0	-2.6886411426156944e-09	-0.01775715889917978	0.0	-0.4993496787918139	0.0	2.271343229810137e-07	0.0	0.9998476454894025	0.0	0.017455251625109032	0.0	0.0	2.0003260841809443	0.0	0.0	2.0003581101286776	0.0	-0.0003396123789960521	0.0	1.1858770496756794e-05	-9.064507680336028e-10	0.0	1.0335600718492697e-10
0.935	-0.0003398193659703648	0.0	-2.6886687998011106e-09	-0.017758856961566687	0.0	-0.49934961949790535	0.0	2.2713432170702716e-07	0.0	0.9998476454794908	0.0	0.017455252192858255	0.0	0.0	2.0003261492501263	0.0	0.0	2.0003581751978676	0.0	-0.00033961238352830594	0.0	1.1858771013536833e-05	-9.064507571915811e-10	0.0	1.0335600924604047e-10
0.9400000000000001	-0.000339819370517892	0.0	-2.6886964569865272e-09	-0.017760555023953593	0.0	-0.4993495602039968	0.0	2.271343204330406e-07	0.0	0.999847645469579	0.0	0.01745525276060748	0.0	0.0	2.000326214319309	0.0	0.0	2.000358240267057	0.0	-0.00033961238806055964	0.0	1.1858771530316886e-05	-9.06450748156563e-10	0.0	1.03356011504795e-10
0.9450000000000001	-0.00033981937506541925	0.0	-2.6887241141719434e-09	-0.017762253086340496	0.0	-0.4993495009100882	0.0	2.2713431915905404e-07	0.0	0.9998476454596673	0.0	0.017455253328356707	0.0	0.0	2.0003262793884913	0.0	0.0	2.000358305336247	0.0	-0.00033961239259281344	0.0	1.1858772047096947e-05	-9.064507544810756e-10	0.0	1.0335601342473634e-10
0.9500000000000001	-0.0003398193796129465	0.0	-2.68875177135736e-09	-0.017763951148727402	0.0	-0.4993494416161796	0.0	2.2713431788506747e-07	0.0	0.9998476454497556	0.0	0.017455253896105933	0.0	0.0	2.0003263444576738	0.0	0.0	2.0003583704054355	0.0	-0.0003396123971250672	0.0	1.185877256387702e-05	-9.064507653230974e-10	0.0	1.033560153446777e-10
0.9550000000000001	-0.00033981938416047366	0.0	-2.6887794285427762e-09	-0.017765649211114308	0.0	-0.49934938232227105	0.0	2.2713431661108092e-07	0.0	0.999847645439844	0.0	0.01745525446385516	0.0	0.0	2.0003264095268563	0.0	0.0	2.000358435474624	0.0	-0.0003396124016573211	0.0	1.1858773080657102e-05	-9.064507779721228e-10	0.0	1.0335601763166665e-10
0.96	-0.0003398193887080009	0.0	-2.688807085728193e-09	-0.017767347273501214	0.0	-0.4993493230283625	0.0	2.2713431533709434e-07	0.0	0.9998476454299322	0.0	0.017455255031604385	0.0	0.0	2.0003264745960387	0.0	0.0	2.0003585005438125	0.0	-0.0003396124061895749	0.0	1.1858773597437197e-05	-9.064507535775739e-10	0.0	1.0335601989042118e-10
0.965	-0.0003398193932555281	0.0	-2.688834742913609e-09	-0.017769045335888117	0.0	-0.49934926373445393	0.0	2.271343140631078e-07	0.0	0.9998476454200205	0.0	0.01745525559935361	0.0	0.0	2.0003265396652217	0.0	0.0	2.0003585656130003	0.0	-0.00033961241072182866	0.0	1.18587741142173e-05	-9.064507463495594e-10	0.0	1.0335602138684605e-10
0.97	-0.00033981939780305536	0.0	-2.6888624000990256e-09	-0.017770743398275023	0.0	-0.4993492044405453	0.0	2.2713431278912122e-07	0.0	0.9998476454101087	0.0	0.017455256167102837	0.0	0.0	2.0003266047344037	0.0	0.0	2.000358630682188	0.0	-0.0003396124152540824	0.0	1.1858774630997412e-05	-9.064507517705702e-10	0.0	1.0335602378677274e-10
0.975	-0.0003398194023505826	0.0	-2.688890057284442e-09	-0.01777244146066193	0.0	-0.49934914514663675	0.0	2.2713431151513467e-07	0.0	0.999847645400197	0.0	0.017455256734852063	0.0	0.0	2.000326669803586	0.0	0.0	2.000358695751375	0.0	-0.00033961241978633616	0.0	1.1858775147777538e-05	-9.064507562880793e-10	0.0	1.0335602587612067e-10
0.98	-0.0003398194068981098	0.0	-2.688917714469858e-09	-0.017774139523048835	0.0	-0.4993490858527282	0.0	2.271343102411481e-07	0.0	0.9998476453902853	0.0	0.01745525730260129	0.0	0.0	2.000326734872769	0.0	0.0	2.000358760820562	0.0	-0.00033961242431858996	0.0	1.1858775664557672e-05	-9.064507824896317e-10	0.0	1.0335602833251622e-10
0.985	-0.00033981941144563705	0.0	-2.6889453716552746e-09	-0.01777583758543574	0.0	-0.49934902655881963	0.0	2.2713430896716155e-07	0.0	0.9998476453803736	0.0	0.017455257870350516	0.0	0.0	2.0003267999419516	0.0	0.0	2.0003588258897484	0.0	-0.00033961242885084393	0.0	1.1858776181337821e-05	-9.064507725511119e-10	0.0	1.0335603056303632e-10
0.99	-0.0003398194159931643	0.0	-2.6889730288406908e-09	-0.017777535647822643	0.0	-0.49934896726491107	0.0	2.2713430769317497e-07	0.0	0.9998476453704619	0.0	0.017455258438099742	0.0	0.0	2.0003268650111345	0.0	0.0	2.0003588909589345	0.0	-0.0003396124333830977	0.0	1.1858776698117975e-05	-9.064507490600648e-10	0.0	1.033560318053513e-10
0.995	-0.0003398194205406915	0.0	-2.6890006860261074e-09	-0.01777923371020955	0.0	-0.49934890797100245	0.0	2.2713430641918843e-07	0.0	0.9998476453605502	0.0	0.017455259005848968	0.0	0.0	2.0003269300803166	0.0	0.0	2.00035895602812	0.0	-0.00033961243791535143	0.0	1.185877721489814e-05	-9.064507499635666e-10	0.0	1.0335603397940253e-10
1.0	-0.00033981942508821874	0.0	-2.6890283432115236e-09	-0.017780931772596455	0.0	-0.4993488486770939	0.0	2.2713430514520185e-07	0.0	0.9998476453506384	0.0	0.017455259573598194	0.0	0.0	2.000326995149499	0.0	0.0	2.0003590210973057	0.0	-0.0003396124424476052	0.0	1.1858777731678316e-05	-9.064507617090902e-10	0.0	1.0335603623815706e-10
1.0050000000000001	-0.000339819429635746	0.0	-2.68905600039694e-09	-0.01778262983498336	0.0	-0.49934878938318533	0.0	2.271343038712153e-07	0.0	0.9998476453407267	0.0	0.01745526014134742	0.0	0.0	2.000327060218682	0.0	0.0	2.0003590861664904	0.0	-0.00033961244697985904	0.0	1.1858778248458503e-05	-9.064507589985847e-10	0.0	1.0335603866631817e-10
1.01	-0.0003398194341832732	0.0	-2.6890836575823564e-09	-0.017784327897370264	0.0	-0.49934873008927677	0.0	2.2713430259722873e-07	0.0	0.9998476453308149	0.0	0.017455260709096646	0.0	0.0	2.000327125287864	0.0	0.0	2.000359151235675	0.0	-0.0003396124515121128	0.0	1.1858778765238701e-05	-9.064507635160937e-10	0.0	1.0335603993686759e-10
1.0150000000000001	-0.0003398194387308004	0.0	-2.689111314767773e-09	-0.01778602595975717	0.0	-0.4993486707953682	0.0	2.2713430132324218e-07	0.0	0.9998476453209033	0.0	0.01745526127684587	0.0	0.0	2.0003271903570465	0.0	0.0	2.0003592163048594	0.0	-0.00033961245604436664	0.0	1.1858779282018903e-05	-9.064507626125919e-10	0.0	1.0335604182857452e-10
1.02	-0.0003398194432783276	0.0	-2.689138971953189e-09	-0.017787724022144076	0.0	-0.4993486115014596	0.0	2.271343000492556e-07	0.0	0.9998476453109916	0.0	0.017455261844595095	0.0	0.0	2.000327255426229	0.0	0.0	2.000359281374043	0.0	-0.0003396124605766204	0.0	1.185877979879912e-05	-9.064507454460576e-10	0.0	1.033560445955488e-10
1.025	-0.00033981944782585484	0.0	-2.6891666291386058e-09	-0.017789422084530982	0.0	-0.49934855220755103	0.0	2.2713429877526906e-07	0.0	0.9998476453010798	0.0	0.01745526241234432	0.0	0.0	2.0003273204954115	0.0	0.0	2.0003593464432265	0.0	-0.00033961246510887414	0.0	1.1858780315579347e-05	-9.064507589985847e-10	0.0	1.0335604674136561e-10
1.03	-0.0003398194523733821	0.0	-2.689194286324022e-09	-0.017791120146917885	0.0	-0.49934849291364247	0.0	2.2713429750128248e-07	0.0	0.9998476452911681	0.0	0.017455262980093547	0.0	0.0	2.000327385564594	0.0	0.0	2.00035941151241	0.0	-0.000339612469641128	0.0	1.1858780832359586e-05	-9.064724764716014e-10	0.0	1.0201459289833029e-10
1.035	-0.0003398194569209093	0.0	-2.6892219435094386e-09	-0.01779281820930479	0.0	-0.4993484336197339	0.0	2.2713429622729593e-07	0.0	0.9998476452812564	0.0	0.017455263547842773	0.0	0.0	2.0003274506337765	0.0	0.0	2.0003594765815924	0.0	-0.00033961247417338175	0.0	1.1858781349139834e-05	-9.063728717215169e-10	0.0	1.0816781910502283e-10
1.04	-0.0003398194614699437	0.0	-2.689169117174227e-09	-0.017794516272098708	0.0	-0.4993483743257542	0.0	2.271342978209192e-07	0.0	0.9998476452713447	0.0	0.01745526411559238	0.0	0.0	2.0003275157030034	0.0	0.0	2.000359541650776	0.0	-0.0003396124787043326	0.0	1.185878194640744e-05	-9.058540005703216e-10	0.0	1.4021677461966645e-10
1.045	-0.00033981946602261475	0.0	-2.6889220820862107e-09	-0.017796214335874756	0.0	-0.49934831503160276	0.0	2.2713430633415696e-07	0.0	0.999847645261433	0.0	0.01745526468334291	0.0	0.0	2.0003275807723355	0.0	0.0	2.0003596067199614	0.0	-0.00033961248323213886	0.0	1.1858782737893023e-05	-9.055088168001546e-10	0.0	1.6153408394579347e-10
1.05	-0.0003398194705752858	0.0	-2.688675046998194e-09	-0.017797912399650805	0.0	-0.49934825573745134	0.0	2.2713431484739468e-07	0.0	0.9998476452515211	0.0	0.017455265251093442	0.0	0.0	2.000327645841667	0.0	0.0	2.0003596717891496	0.0	-0.00033961248775994494	0.0	1.1858783529378618e-05	-9.055612515277214e-10	0.0	1.5829712034810356e-10
1.055	-0.0003398194751279569	0.0	-2.688428011910178e-09	-0.017799610463426853	0.0	-0.4993481964433	0.0	2.271343233606324e-07	0.0	0.9998476452416094	0.0	0.017455265818843976	0.0	0.0	2.0003277109109994	0.0	0.0	2.00035973685834	0.0	-0.00033961249228775135	0.0	1.1858784320864226e-05	-9.055612686942559e-10	0.0	1.5829712260685808e-10
1.06	-0.00033981947968062795	0.0	-2.688180976822162e-09	-0.017801308527202898	0.0	-0.49934813714914855	0.0	2.2713433187387014e-07	0.0	0.9998476452316977	0.0	0.017455266386594507	0.0	0.0	2.000327775980332	0.0	0.0	2.0003598019275333	0.0	-0.0003396124968155576	0.0	1.1858785112349843e-05	-9.055612542382269e-10	0.0	1.5829712483737818e-10
1.065	-0.00033981948423329907	0.0	-2.6879339417341453e-09	-0.017803006590978946	0.0	-0.49934807785499713	0.0	2.2713434038710786e-07	0.0	0.9998476452217859	0.0	0.017455266954345038	0.0	0.0	2.000327841049664	0.0	0.0	2.0003598669967286	0.0	-0.0003396125013433639	0.0	1.1858785903835473e-05	-9.055612452032088e-10	0.0	1.5829712636203748e-10
1.07	-0.00033981948878597013	0.0	-2.687686906646129e-09	-0.017804704654754994	0.0	-0.49934801856084576	0.0	2.271343489003456e-07	0.0	0.9998476452118741	0.0	0.017455267522095568	0.0	0.0	2.0003279061189954	0.0	0.0	2.0003599320659267	0.0	-0.00033961250587117	0.0	1.1858786695321107e-05	-9.055612262296708e-10	0.0	1.5829712805610338e-10
1.075	-0.0003398194933386412	0.0	-2.687439871558113e-09	-0.017806402718531043	0.0	-0.49934795926669434	0.0	2.2713435741358334e-07	0.0	0.9998476452019623	0.0	0.0174552680898461	0.0	0.0	2.0003279711883275	0.0	0.0	2.000359997135127	0.0	-0.0003396125103989762	0.0	1.1858787486806755e-05	-9.055612659837505e-10	0.0	1.582971308513121e-10
1.08	-0.00033981949789131227	0.0	-2.6871928364700964e-09	-0.01780810078230709	0.0	-0.4993478999725429	0.0	2.2713436592682107e-07	0.0	0.9998476451920506	0.0	0.017455268657596633	0.0	0.0	2.00032803625766	0.0	0.0	2.0003600622043294	0.0	-0.0003396125149267826	0.0	1.1858788278292415e-05	-9.055612668872522e-10	0.0	1.5829713305359777e-10
1.085	-0.0003398195024439834	0.0	-2.6869458013820803e-09	-0.017809798846083136	0.0	-0.4993478406783915	0.0	2.271343744400588e-07	0.0	0.9998476451821389	0.0	0.017455269225347163	0.0	0.0	2.0003281013269927	0.0	0.0	2.000360127273535	0.0	-0.00033961251945458887	0.0	1.1858789069778085e-05	-9.055612542382269e-10	0.0	1.5829713457825707e-10
1.09	-0.00033981950699665445	0.0	-2.686698766294064e-09	-0.017811496909859184	0.0	-0.49934778138424013	0.0	2.2713438295329652e-07	0.0	0.9998476451722271	0.0	0.017455269793097694	0.0	0.0	2.0003281663963244	0.0	0.0	2.0003601923427423	0.0	-0.00033961252398239517	0.0	1.1858789861263762e-05	-9.055612379751943e-10	0.0	1.5829713652643285e-10
1.095	-0.0003398195115493255	0.0	-2.6864517312060475e-09	-0.017813194973635232	0.0	-0.4993477220900887	0.0	2.2713439146653425e-07	0.0	0.9998476451623153	0.0	0.017455270360848225	0.0	0.0	2.000328231465656	0.0	0.0	2.0003602574119523	0.0	-0.00033961252851020125	0.0	1.185879065274945e-05	-9.055612334576853e-10	0.0	1.5829713864401522e-10
1.1	-0.0003398195161019966	0.0	-2.6862046961180314e-09	-0.01781489303741128	0.0	-0.4993476627959373	0.0	2.2713439997977198e-07	0.0	0.9998476451524035	0.0	0.017455270928598755	0.0	0.0	2.0003282965349882	0.0	0.0	2.000360322481165	0.0	-0.00033961253303800755	0.0	1.185879144423515e-05	-9.055612732117649e-10	0.0	1.5829714110041077e-10
1.105	-0.0003398195206546677	0.0	-2.6859576610300152e-09	-0.017816591101187326	0.0	-0.49934760350178586	0.0	2.2713440849300973e-07	0.0	0.9998476451424918	0.0	0.01745527149634929	0.0	0.0	2.0003283616043213	0.0	0.0	2.00036038755038	0.0	-0.0003396125375658139	0.0	1.1858792235720862e-05	-9.055612659837505e-10	0.0	1.5829714352857187e-10
1.11	-0.00033981952520733877	0.0	-2.6857106259419987e-09	-0.017818289164963374	0.0	-0.4993475442076345	0.0	2.2713441700624746e-07	0.0	0.9998476451325801	0.0	0.01745527206409982	0.0	0.0	2.0003284266736534	0.0	0.0	2.000360452619597	0.0	-0.00033961254209362014	0.0	1.1858793027206583e-05	-9.055612334576853e-10	0.0	1.5829714477088685e-10
1.115	-0.00033981952976000983	0.0	-2.6854635908539825e-09	-0.017819987228739422	0.0	-0.4993474849134831	0.0	2.2713442551948518e-07	0.0	0.9998476451226682	0.0	0.01745527263185035	0.0	0.0	2.0003284917429847	0.0	0.0	2.0003605176888173	0.0	-0.0003396125466214263	0.0	1.185879381869231e-05	-9.055612379751943e-10	0.0	1.5829714691670366e-10
1.12	-0.0003398195343126809	0.0	-2.685216555765966e-09	-0.01782168529251547	0.0	-0.49934742561933165	0.0	2.271344340327229e-07	0.0	0.9998476451127565	0.0	0.01745527319960088	0.0	0.0	2.000328556812317	0.0	0.0	2.0003605827580393	0.0	-0.0003396125511492325	0.0	1.1858794610178052e-05	-9.055612479137142e-10	0.0	1.5829714920369262e-10
1.125	-0.00033981953886535196	0.0	-2.68496952067795e-09	-0.017823383356291515	0.0	-0.49934736632518023	0.0	2.2713444254596063e-07	0.0	0.9998476451028447	0.0	0.017455273767351412	0.0	0.0	2.0003286218816494	0.0	0.0	2.000360647827264	0.0	-0.00033961255567703877	0.0	1.1858795401663802e-05	-9.055612705012595e-10	0.0	1.5829715137774384e-10
1.1300000000000001	-0.0003398195434180231	0.0	-2.6847224855899336e-09	-0.017825081420067564	0.0	-0.49934730703102886	0.0	2.2713445105919836e-07	0.0	0.999847645092933	0.0	0.017455274335101946	0.0	0.0	2.0003286869509815	0.0	0.0	2.0003607128964913	0.0	-0.0003396125602048452	0.0	1.1858796193149565e-05	-9.055612659837505e-10	0.0	1.5829715332591962e-10
1.135	-0.00033981954797069415	0.0	-2.684475450501917e-09	-0.017826779483843612	0.0	-0.49934724773687744	0.0	2.2713445957243611e-07	0.0	0.9998476450830213	0.0	0.017455274902852477	0.0	0.0	2.0003287520203137	0.0	0.0	2.000360777965721	0.0	-0.00033961256473265136	0.0	1.1858796984635335e-05	-9.055612180981545e-10	0.0	1.5829715541526757e-10
1.1400000000000001	-0.0003398195525233652	0.0	-2.684228415413901e-09	-0.01782847754761966	0.0	-0.499347188442726	0.0	2.2713446808567384e-07	0.0	0.9998476450731094	0.0	0.017455275470603007	0.0	0.0	2.0003288170896454	0.0	0.0	2.0003608430349527	0.0	-0.00033961256926045744	0.0	1.1858797776121118e-05	-9.055612379751943e-10	0.0	1.5829715727874006e-10
1.145	-0.0003398195570760363	0.0	-2.6839813803258848e-09	-0.01783017561139571	0.0	-0.49934712914857465	0.0	2.2713447659891157e-07	0.0	0.9998476450631977	0.0	0.017455276038353538	0.0	0.0	2.000328882158977	0.0	0.0	2.000360908104187	0.0	-0.00033961257378826374	0.0	1.1858798567606909e-05	-9.055612614662414e-10	0.0	1.5829715970690117e-10
1.1500000000000001	-0.0003398195616287074	0.0	-2.6837343452378682e-09	-0.017831873675171753	0.0	-0.49934706985442323	0.0	2.271344851121493e-07	0.0	0.9998476450532859	0.0	0.017455276606104072	0.0	0.0	2.00032894722831	0.0	0.0	2.000360973173424	0.0	-0.00033961257831607004	0.0	1.1858799359092714e-05	-9.055612614662414e-10	0.0	1.5829716190918683e-10
1.155	-0.00033981956618137847	0.0	-2.683487310149852e-09	-0.0178335717389478	0.0	-0.4993470105602718	0.0	2.2713449362538702e-07	0.0	0.9998476450433742	0.0	0.017455277173854603	0.0	0.0	2.0003290122976423	0.0	0.0	2.0003610382426635	0.0	-0.00033961258284387634	0.0	1.1858800150578527e-05	-9.055612578522342e-10	0.0	1.5829716354678387e-10
1.16	-0.00033981957073404953	0.0	-2.683240275061836e-09	-0.01783526980272385	0.0	-0.4993469512661204	0.0	2.2713450213862475e-07	0.0	0.9998476450334625	0.0	0.017455277741605133	0.0	0.0	2.0003290773669744	0.0	0.0	2.000361103311905	0.0	-0.0003396125873716826	0.0	1.185880094206435e-05	-9.055612325541834e-10	0.0	1.5829716521261532e-10
1.165	-0.0003398195752867206	0.0	-2.6829932399738193e-09	-0.0178369678664999	0.0	-0.499346891971969	0.0	2.2713451065186247e-07	0.0	0.9998476450235506	0.0	0.017455278309355664	0.0	0.0	2.000329142436306	0.0	0.0	2.0003611683811493	0.0	-0.0003396125918994887	0.0	1.185880173355018e-05	-9.055612361681907e-10	0.0	1.5829716744313543e-10
1.17	-0.0003398195798393917	0.0	-2.682746204885803e-09	-0.017838665930275943	0.0	-0.4993468326778176	0.0	2.2713451916510023e-07	0.0	0.9998476450136389	0.0	0.017455278877106194	0.0	0.0	2.0003292075056383	0.0	0.0	2.000361233450396	0.0	-0.00033961259642729496	0.0	1.1858802525036025e-05	-9.055612533347251e-10	0.0	1.5829717006893756e-10
1.175	-0.0003398195843920628	0.0	-2.682499169797787e-09	-0.01784036399405199	0.0	-0.4993467733836662	0.0	2.2713452767833795e-07	0.0	0.9998476450037271	0.0	0.01745527944485673	0.0	0.0	2.000329272574971	0.0	0.0	2.0003612985196453	0.0	-0.0003396126009551012	0.0	1.1858803316521881e-05	-9.055612542382269e-10	0.0	1.5829717238416093e-10
1.18	-0.00033981958894473385	0.0	-2.6822521347097705e-09	-0.01784206205782804	0.0	-0.49934671408951475	0.0	2.2713453619157568e-07	0.0	0.9998476449938154	0.0	0.01745528001260726	0.0	0.0	2.000329337644303	0.0	0.0	2.0003613635888966	0.0	-0.0003396126054829075	0.0	1.1858804108007748e-05	-9.055612424927034e-10	0.0	1.5829717379588253e-10
1.185	-0.0003398195934974049	0.0	-2.6820050996217543e-09	-0.017843760121604088	0.0	-0.4993466547953634	0.0	2.271345447048134e-07	0.0	0.9998476449839035	0.0	0.01745528058035779	0.0	0.0	2.0003294027136347	0.0	0.0	2.0003614286581506	0.0	-0.00033961261001071364	0.0	1.185880489949362e-05	-9.055612307471799e-10	0.0	1.5829717563112057e-10
1.19	-0.000339819598050076	0.0	-2.681758064533738e-09	-0.017845458185380136	0.0	-0.49934659550121197	0.0	2.2713455321805113e-07	0.0	0.9998476449739918	0.0	0.01745528114810832	0.0	0.0	2.000329467782967	0.0	0.0	2.0003614937274072	0.0	-0.0003396126145385199	0.0	1.1858805690979505e-05	-9.055612560452305e-10	0.0	1.5829717786164068e-10
1.195	-0.0003398196026027471	0.0	-2.6815110294457216e-09	-0.01784715624915618	0.0	-0.49934653620706054	0.0	2.2713456173128886e-07	0.0	0.9998476449640801	0.0	0.01745528171585885	0.0	0.0	2.000329532852299	0.0	0.0	2.000361558796666	0.0	-0.0003396126190663262	0.0	1.1858806482465398e-05	-9.055612497207179e-10	0.0	1.5829718040273952e-10
1.2	-0.00033981960715541817	0.0	-2.6812639943577054e-09	-0.01784885431293223	0.0	-0.4993464769129091	0.0	2.271345702445266e-07	0.0	0.9998476449541683	0.0	0.017455282283609385	0.0	0.0	2.0003295979216316	0.0	0.0	2.000361623865927	0.0	-0.0003396126235941324	0.0	1.1858807273951307e-05	-9.055612524312233e-10	0.0	1.5829718249208745e-10
1.205	-0.00033981961170808923	0.0	-2.6810169592696893e-09	-0.017850552376708278	0.0	-0.49934641761875775	0.0	2.2713457875776434e-07	0.0	0.9998476449442566	0.0	0.017455282851359916	0.0	0.0	2.0003296629909637	0.0	0.0	2.000361688935191	0.0	-0.00033961262812193867	0.0	1.1858808065437223e-05	-9.055612343611871e-10	0.0	1.5829718359323028e-10
1.21	-0.0003398196162607603	0.0	-2.6807699241816727e-09	-0.017852250440484326	0.0	-0.49934635832460633	0.0	2.2713458727100206e-07	0.0	0.9998476449343447	0.0	0.017455283419110446	0.0	0.0	2.0003297280602954	0.0	0.0	2.000361754004457	0.0	-0.00033961263264974475	0.0	1.1858808856923145e-05	-9.055612433962051e-10	0.0	1.582971863037357e-10
1.215	-0.0003398196208134314	0.0	-2.6805228890936566e-09	-0.01785394850426037	0.0	-0.4993462990304549	0.0	2.271345957842398e-07	0.0	0.999847644924433	0.0	0.017455283986860977	0.0	0.0	2.0003297931296276	0.0	0.0	2.0003618190737256	0.0	-0.0003396126371775511	0.0	1.1858809648409085e-05	-9.055612614662414e-10	0.0	1.5829718867542796e-10
1.22	-0.0003398196253661025	0.0	-2.6802758540056404e-09	-0.01785564656803642	0.0	-0.49934623973630354	0.0	2.2713460429747752e-07	0.0	0.9998476449145213	0.0	0.017455284554611507	0.0	0.0	2.00032985819896	0.0	0.0	2.000361884142997	0.0	-0.0003396126417053573	0.0	1.1858810439895031e-05	-9.055612397821979e-10	0.0	1.5829719070830703e-10
1.225	-0.00033981962991877355	0.0	-2.680028818917624e-09	-0.017857344631812468	0.0	-0.4993461804421521	0.0	2.2713461281071524e-07	0.0	0.9998476449046095	0.0	0.01745528512236204	0.0	0.0	2.0003299232682927	0.0	0.0	2.0003619492122704	0.0	-0.00033961264623316354	0.0	1.185881123138099e-05	-9.055612370716925e-10	0.0	1.5829719234590407e-10
1.23	-0.0003398196344714446	0.0	-2.6797817838296077e-09	-0.017859042695588516	0.0	-0.4993461211480007	0.0	2.27134621323953e-07	0.0	0.9998476448946977	0.0	0.017455285690112572	0.0	0.0	2.0003299883376244	0.0	0.0	2.000362014281546	0.0	-0.0003396126507609697	0.0	1.1858812022866956e-05	-9.055612388786962e-10	0.0	1.5829719454818974e-10
1.235	-0.00033981963902411573	0.0	-2.679534748741591e-09	-0.01786074075936456	0.0	-0.4993460618538493	0.0	2.2713462983719072e-07	0.0	0.999847644884786	0.0	0.017455286257863103	0.0	0.0	2.0003300534069566	0.0	0.0	2.0003620793508246	0.0	-0.000339612655288776	0.0	1.1858812814352936e-05	-9.055612560452305e-10	0.0	1.5829719652459993e-10
1.24	-0.0003398196435767868	0.0	-2.679287713653575e-09	-0.01786243882314061	0.0	-0.4993460025596979	0.0	2.2713463835042845e-07	0.0	0.9998476448748742	0.0	0.017455286825613633	0.0	0.0	2.0003301184762883	0.0	0.0	2.000362144420105	0.0	-0.0003396126598165822	0.0	1.1858813605838921e-05	-9.055612424927034e-10	0.0	1.58297198359838e-10
1.245	-0.00033981964812945787	0.0	-2.679040678565559e-09	-0.017864136886916657	0.0	-0.4993459432655465	0.0	2.2713464686366617e-07	0.0	0.9998476448649625	0.0	0.017455287393364164	0.0	0.0	2.0003301835456204	0.0	0.0	2.0003622094893885	0.0	-0.0003396126643443884	0.0	1.185881439732492e-05	-9.055612461067106e-10	0.0	1.5829720090093684e-10
1.25	-0.00033981965268212893	0.0	-2.6787936434775423e-09	-0.017865834950692706	0.0	-0.49934588397139507	0.0	2.271346553769039e-07	0.0	0.9998476448550507	0.0	0.017455287961114698	0.0	0.0	2.000330248614953	0.0	0.0	2.000362274558674	0.0	-0.00033961266887219465	0.0	1.1858815188810928e-05	-9.055612343611871e-10	0.0	1.5829720262323715e-10
1.2550000000000001	-0.0003398196572348	0.0	-2.678546608389526e-09	-0.017867533014468754	0.0	-0.49934582467724364	0.0	2.2713466389014163e-07	0.0	0.9998476448451389	0.0	0.01745528852886523	0.0	0.0	2.0003303136842847	0.0	0.0	2.000362339627962	0.0	-0.0003396126734000008	0.0	1.1858815980296946e-05	-9.055612433962051e-10	0.0	1.582972047972884e-10
1.26	-0.0003398196617874711	0.0	-2.67829957330151e-09	-0.0178692310782448	0.0	-0.4993457653830923	0.0	2.2713467240337938e-07	0.0	0.9998476448352271	0.0	0.01745528909661576	0.0	0.0	2.000330378753617	0.0	0.0	2.000362404697253	0.0	-0.0003396126779278071	0.0	1.1858816771782977e-05	-9.055612533347251e-10	0.0	1.582972071407462e-10
1.2650000000000001	-0.0003398196663401422	0.0	-2.6780525382134934e-09	-0.017870929142020847	0.0	-0.49934570608894085	0.0	2.271346809166171e-07	0.0	0.9998476448253154	0.0	0.01745528966436629	0.0	0.0	2.0003304438229494	0.0	0.0	2.0003624697665456	0.0	-0.0003396126824556133	0.0	1.1858817563269016e-05	-9.055612470102125e-10	0.0	1.5829720917362528e-10
1.27	-0.00033981967089281325	0.0	-2.6778055031254772e-09	-0.017872627205796895	0.0	-0.49934564679478943	0.0	2.2713468942985483e-07	0.0	0.9998476448154037	0.0	0.01745529023211682	0.0	0.0	2.0003305088922816	0.0	0.0	2.0003625348358414	0.0	-0.0003396126869834196	0.0	1.1858818354755067e-05	-9.055612650802486e-10	0.0	1.5829721120650436e-10
1.2750000000000001	-0.0003398196754454843	0.0	-2.677558468037461e-09	-0.017874325269572944	0.0	-0.49934558750063807	0.0	2.2713469794309256e-07	0.0	0.9998476448054919	0.0	0.017455290799867355	0.0	0.0	2.0003305739616137	0.0	0.0	2.0003625999051393	0.0	-0.00033961269151122587	0.0	1.1858819146241127e-05	-9.055612379751943e-10	0.0	1.582972129288047e-10
1.28	-0.00033981967999815543	0.0	-2.6773114329494445e-09	-0.01787602333334899	0.0	-0.49934552820648664	0.0	2.2713470645633029e-07	0.0	0.9998476447955801	0.0	0.017455291367617885	0.0	0.0	2.0003306390309454	0.0	0.0	2.0003626649744395	0.0	-0.00033961269603903195	0.0	1.1858819937727197e-05	-9.055612271331726e-10	0.0	1.5829721530049695e-10
1.285	-0.0003398196845508265	0.0	-2.6770643978614284e-09	-0.017877721397125037	0.0	-0.4993454689123352	0.0	2.27134714969568e-07	0.0	0.9998476447856683	0.0	0.017455291935368416	0.0	0.0	2.0003307041002776	0.0	0.0	2.0003627300437423	0.0	-0.0003396127005668382	0.0	1.1858820729213279e-05	-9.055612524312233e-10	0.0	1.58297217135735e-10
1.29	-0.00033981968910349756	0.0	-2.676817362773412e-09	-0.017879419460901085	0.0	-0.4993454096181838	0.0	2.2713472348280577e-07	0.0	0.9998476447757566	0.0	0.017455292503118947	0.0	0.0	2.00033076916961	0.0	0.0	2.0003627951130474	0.0	-0.00033961270509464444	0.0	1.1858821520699369e-05	-9.055612452032088e-10	0.0	1.582972193662551e-10
1.295	-0.00033981969365616863	0.0	-2.6765703276853956e-09	-0.017881117524677134	0.0	-0.49934535032403243	0.0	2.271347319960435e-07	0.0	0.9998476447658449	0.0	0.01745529307086948	0.0	0.0	2.0003308342389428	0.0	0.0	2.000362860182355	0.0	-0.00033961270962245063	0.0	1.1858822312185473e-05	-9.055612262296708e-10	0.0	1.5829722156854075e-10
1.3	-0.00033981969820883975	0.0	-2.6763232925973795e-09	-0.017882815588453182	0.0	-0.499345291029881	0.0	2.2713474050928122e-07	0.0	0.999847644755933	0.0	0.01745529363862001	0.0	0.0	2.000330899308275	0.0	0.0	2.000362925251665	0.0	-0.00033961271415025677	0.0	1.1858823103671585e-05	-9.055612361681907e-10	0.0	1.5829722346024765e-10
1.305	-0.0003398197027615108	0.0	-2.6760762575093633e-09	-0.017884513652229227	0.0	-0.4993452317357296	0.0	2.2713474902251894e-07	0.0	0.9998476447460213	0.0	0.017455294206370542	0.0	0.0	2.000330964377607	0.0	0.0	2.0003629903209776	0.0	-0.000339612718678063	0.0	1.1858823895157707e-05	-9.055612452032088e-10	0.0	1.5829722512607913e-10
1.31	-0.0003398197073141819	0.0	-2.6758292224213468e-09	-0.017886211716005275	0.0	-0.49934517244157817	0.0	2.2713475753575667e-07	0.0	0.9998476447361095	0.0	0.017455294774121072	0.0	0.0	2.0003310294469387	0.0	0.0	2.0003630553902925	0.0	-0.0003396127232058692	0.0	1.1858824686643836e-05	-9.055612461067106e-10	0.0	1.582972271589582e-10
1.315	-0.00033981971186685295	0.0	-2.6755821873333306e-09	-0.017887909779781323	0.0	-0.4993451131474268	0.0	2.271347660489944e-07	0.0	0.9998476447261978	0.0	0.017455295341871603	0.0	0.0	2.0003310945162713	0.0	0.0	2.00036312045961	0.0	-0.00033961272773367545	0.0	1.1858825478129979e-05	-9.055612415892016e-10	0.0	1.5829722981299476e-10
1.32	-0.000339819716419524	0.0	-2.6753351522453145e-09	-0.01788960784355737	0.0	-0.4993450538532754	0.0	2.2713477456223215e-07	0.0	0.9998476447162861	0.0	0.017455295909622137	0.0	0.0	2.000331159585604	0.0	0.0	2.0003631855289297	0.0	-0.00033961273226148164	0.0	1.1858826269616134e-05	-9.055612361681907e-10	0.0	1.582972319023427e-10
1.325	-0.00033981972097219513	0.0	-2.675088117157298e-09	-0.017891305907333416	0.0	-0.49934499455912396	0.0	2.2713478307546988e-07	0.0	0.9998476447063742	0.0	0.017455296477372668	0.0	0.0	2.0003312246549356	0.0	0.0	2.000363250598252	0.0	-0.0003396127367892878	0.0	1.1858827061102298e-05	-9.055612461067106e-10	0.0	1.582972337658152e-10
1.33	-0.0003398197255248662	0.0	-2.6748410820692817e-09	-0.017893003971109465	0.0	-0.49934493526497253	0.0	2.271347915887076e-07	0.0	0.9998476446964625	0.0	0.0174552970451232	0.0	0.0	2.0003312897242678	0.0	0.0	2.0003633156675766	0.0	-0.00033961274131709407	0.0	1.1858827852588472e-05	-9.055612406856997e-10	0.0	1.5829723514930233e-10
1.335	-0.00033981973007753726	0.0	-2.6745940469812656e-09	-0.017894702034885513	0.0	-0.49934487597082117	0.0	2.2713480010194533e-07	0.0	0.9998476446865507	0.0	0.01745529761287373	0.0	0.0	2.0003313547935995	0.0	0.0	2.000363380736904	0.0	-0.00033961274584490026	0.0	1.1858828644074652e-05	-9.055612424927034e-10	0.0	1.5829723737982243e-10
1.34	-0.00033981973463020833	0.0	-2.674347011893249e-09	-0.01789640009866156	0.0	-0.49934481667666974	0.0	2.2713480861518306e-07	0.0	0.999847644676639	0.0	0.01745529818062426	0.0	0.0	2.000331419862932	0.0	0.0	2.0003634458062334	0.0	-0.0003396127503727065	0.0	1.1858829435560847e-05	-9.075602465727362e-10	0.0	1.1074600407030071e-10
1.345	-0.00033981973918287945	0.0	-2.674099976805233e-09	-0.017898098162437606	0.0	-0.4993447573825183	0.0	2.2713481712842078e-07	0.0	0.9998476446667272	0.0	0.017455298748374794	0.0	0.0	2.000331484932264	0.0	0.0	2.0003635108755655	0.0	-0.00033961275490051264	0.0	1.1858830227047054e-05	-8.937146975165206e-10	0.0	4.400956145340112e-10
1.35	-0.0003398197437152704	0.0	-2.6709974192890863e-09	-0.017899796226286225	0.0	-0.49934469808830334	0.0	2.2713477113443876e-07	0.0	0.9998476446568154	0.0	0.01745529931612491	0.0	0.0	2.000331550001549	0.0	0.0	2.0003635759448843	0.0	-0.0003396127593083783	0.0	1.185883387160745e-05	-8.786890242111142e-10	0.0	7.975175907379826e-10
1.355	-0.0003398197482461648	0.0	-2.6676841383608244e-09	-0.017901494290140197	0.0	-0.4993446387940837	0.0	2.2713472111809389e-07	0.0	0.9998476446469037	0.0	0.017455299883874998	0.0	0.0	2.0003316150708303	0.0	0.0	2.0003636410141885	0.0	-0.00033961276370739294	0.0	1.1858837726710598e-05	-8.787738386365623e-10	0.0	7.845898084305052e-10
1.36	-0.00033981975277705916	0.0	-2.6643708574325626e-09	-0.01790319235399417	0.0	-0.49934457949986405	0.0	2.2713467110174899e-07	0.0	0.9998476446369919	0.0	0.017455300451625088	0.0	0.0	2.000331680140112	0.0	0.0	2.000363706083479	0.0	-0.00033961276810640757	0.0	1.1858841581813756e-05	-8.837201008587056e-10	0.0	7.263192823715484e-10
1.365	-0.0003398197573397466	0.0	-2.661662663255512e-09	-0.017904890417879505	0.0	-0.49934452020562836	0.0	2.2713470006251675e-07	0.0	0.9998476446270801	0.0	0.0174553010193757	0.0	0.0	2.000331745209453	0.0	0.0	2.0003637711527773	0.0	-0.0003396127725583164	0.0	1.1858844833308999e-05	-8.994967973949854e-10	0.0	5.462822640071122e-10
1.37	-0.0003398197619519224	0.0	-2.6598963375305703e-09	-0.017906588481813663	0.0	-0.4993444609113678	0.0	2.2713485195780706e-07	0.0	0.9998476446171684	0.0	0.01745530158712713	0.0	0.0	2.0003318102788885	0.0	0.0	2.000363836222119	0.0	-0.00033961277709255983	0.0	1.1858847145237717e-05	-9.082209105875511e-10	0.0	4.467263017498917e-10
1.375	-0.00033981976656409816	0.0	-2.6581300118056286e-09	-0.017908286545747824	0.0	-0.49934440161710725	0.0	2.2713500385309735e-07	0.0	0.9998476446072565	0.0	0.017455302154878564	0.0	0.0	2.0003318753483237	0.0	0.0	2.0003639012915047	0.0	-0.0003396127816268031	0.0	1.185884945716644e-05	-9.073380583110233e-10	0.0	4.810419901915181e-10
1.3800000000000001	-0.000339819771176274	0.0	-2.6563636860806865e-09	-0.017909984609681982	0.0	-0.4993443423228467	0.0	2.2713515574838763e-07	0.0	0.9998476445973448	0.0	0.017455302722629996	0.0	0.0	2.0003319404177593	0.0	0.0	2.0003639663609336	0.0	-0.00033961278616104646	0.0	1.185885176909518e-05	-9.039979602922545e-10	0.0	3.537143234843347e-10
1.385	-0.0003398197757200316	0.0	-2.655715027532997e-09	-0.017911682673751705	0.0	-0.4993442830285561	0.0	2.2713514637989425e-07	0.0	0.999847644587433	0.0	0.017455303290380864	0.0	0.0	2.0003320054871305	0.0	0.0	2.0003640314303603	0.0	-0.0003396127906659259	0.0	1.1858852961649288e-05	-8.999724269495348e-10	0.0	2.002583480896347e-10
1.3900000000000001	-0.00033981978025181167	0.0	-2.6552620323725686e-09	-0.017913380737845163	0.0	-0.49934422373426024	0.0	2.2713510877990328e-07	0.0	0.9998476445775213	0.0	0.01745530385813163	0.0	0.0	2.0003320705564898	0.0	0.0	2.0003640964997755	0.0	-0.0003396127951656647	0.0	1.1858853958241101e-05	-8.998620651068958e-10	0.0	1.9605232560661678e-10
1.395	-0.00033981978478359173	0.0	-2.65480903721214e-09	-0.017915078801938617	0.0	-0.4993441644399644	0.0	2.2713507117991233e-07	0.0	0.9998476445676094	0.0	0.0174553044258824	0.0	0.0	2.000332135625849	0.0	0.0	2.0003641615691805	0.0	-0.0003396127996654034	0.0	1.1858854954832928e-05	-8.999477514115908e-10	0.0	1.9931836623602334e-10
1.4000000000000001	-0.0003398197893153718	0.0	-2.6543560420517116e-09	-0.017916776866032075	0.0	-0.49934410514566857	0.0	2.271350335799214e-07	0.0	0.9998476445576977	0.0	0.017455304993633167	0.0	0.0	2.0003322006952082	0.0	0.0	2.0003642266385744	0.0	-0.00033961280416514223	0.0	1.1858855951424763e-05	-8.999477749026379e-10	0.0	1.9931836838184015e-10
1.405	-0.00033981979384715185	0.0	-2.653903046891283e-09	-0.017918474930125532	0.0	-0.4993440458513727	0.0	2.2713499597993044e-07	0.0	0.999847644547786	0.0	0.017455305561383933	0.0	0.0	2.0003322657645675	0.0	0.0	2.0003642917079576	0.0	-0.0003396128086648811	0.0	1.1858856948016612e-05	-8.9994774599058e-10	0.0	1.9931837030178148e-10
1.41	-0.0003398197983789319	0.0	-2.6534500517308545e-09	-0.017920172994218986	0.0	-0.49934398655707685	0.0	2.271349583799395e-07	0.0	0.9998476445378741	0.0	0.0174553061291347	0.0	0.0	2.0003323308339267	0.0	0.0	2.00036435677733	0.0	-0.0003396128131646197	0.0	1.1858857944608466e-05	-8.99393013045526e-10	0.0	2.024526854211943e-10
1.415	-0.0003398198029107119	0.0	-2.652997056570426e-09	-0.017921871058312444	0.0	-0.499343927262781	0.0	2.2713492077994855e-07	0.0	0.9998476445279624	0.0	0.017455306696885466	0.0	0.0	2.000332395903286	0.0	0.0	2.000364421846692	0.0	-0.00033961281766435846	0.0	1.1858858941200334e-05	-9.031110991781939e-10	0.0	1.8144471207565366e-10
1.42	-0.0003398198074691908	0.0	-2.652733167731647e-09	-0.017923569122529872	0.0	-0.49934386796846464	0.0	2.2713494153343454e-07	0.0	0.9998476445180506	0.0	0.017455307264636753	0.0	0.0	2.0003324609727042	0.0	0.0	2.0003644869160597	0.0	-0.0003396128221973806	0.0	1.1858859749733406e-05	-9.081490894216384e-10	0.0	1.5297899386262893e-10
1.425	-0.0003398198120356105	0.0	-2.6525255235389455e-09	-0.017925267186784173	0.0	-0.49934380867414213	0.0	2.271349796426103e-07	0.0	0.9998476445081389	0.0	0.017455307832388196	0.0	0.0	2.0003325260421416	0.0	0.0	2.000364551985438	0.0	-0.00033961282674030207	0.0	1.1858860502333406e-05	-9.087492612797413e-10	0.0	1.4958778237475324e-10
1.43	-0.0003398198166020302	0.0	-2.652317879346244e-09	-0.01792696525103847	0.0	-0.4993437493798197	0.0	2.271350177517861e-07	0.0	0.999847644498227	0.0	0.01745530840013964	0.0	0.0	2.000332591111578	0.0	0.0	2.0003646170548275	0.0	-0.0003396128312832233	0.0	1.185886125493341e-05	-9.085842484195944e-10	0.0	1.5052000145374735e-10
1.435	-0.00033981982116844985	0.0	-2.6521102351535423e-09	-0.017928663315292772	0.0	-0.49934369008549717	0.0	2.2713505586096186e-07	0.0	0.9998476444883153	0.0	0.01745530896789108	0.0	0.0	2.000332656181014	0.0	0.0	2.000364682124228	0.0	-0.0003396128358261446	0.0	1.1858862007533423e-05	-9.085842538406053e-10	0.0	1.5052000424895607e-10
1.44	-0.0003398198257348695	0.0	-2.651902590960841e-09	-0.017930361379547073	0.0	-0.49934363079117466	0.0	2.2713509397013764e-07	0.0	0.9998476444784035	0.0	0.017455309535642522	0.0	0.0	2.000332721250451	0.0	0.0	2.000364747193639	0.0	-0.0003396128403690658	0.0	1.185886276013345e-05	-9.085842619721216e-10	0.0	1.5052000619713185e-10
1.445	-0.0003398198303012892	0.0	-2.6516949467681395e-09	-0.017932059443801374	0.0	-0.4993435714968522	0.0	2.2713513207931342e-07	0.0	0.9998476444684917	0.0	0.01745531010339396	0.0	0.0	2.000332786319887	0.0	0.0	2.0003648122630615	0.0	-0.0003396128449119872	0.0	1.1858863512733485e-05	-9.086699238822679e-10	0.0	1.5315072730805477e-10
1.45	-0.0003398198348677089	0.0	-2.651487302575438e-09	-0.017933757508055672	0.0	-0.4993435122025297	0.0	2.271351701884892e-07	0.0	0.9998476444585799	0.0	0.017455310671145405	0.0	0.0	2.0003328513893237	0.0	0.0	2.000364877332495	0.0	-0.00033961284945490853	0.0	1.185886426533353e-05	-9.081087561973202e-10	0.0	1.3591485397450686e-10
1.455	-0.00033981983942348314	0.0	-2.6514372264286473e-09	-0.017935455573418652	0.0	-0.49934345290807913	0.0	2.2713518568968497e-07	0.0	0.9998476444486681	0.0	0.017455311238897504	0.0	0.0	2.0003329164588357	0.0	0.0	2.0003649424019323	0.0	-0.00033961285399269084	0.0	1.1858864860090425e-05	-9.072404584314561e-10	0.0	1.0924570085882809e-10
1.46	-0.0003398198439744858	0.0	-2.6514577765604803e-09	-0.01793715363927857	0.0	-0.4993433936135711	0.0	2.2713519105736995e-07	0.0	0.9998476444387563	0.0	0.017455311806649894	0.0	0.0	2.000332981528381	0.0	0.0	2.0003650074713715	0.0	-0.0003396128585281696	0.0	1.1858865384097732e-05	-9.070573610790722e-10	0.0	1.0362230237214473e-10
1.465	-0.0003398198485254884	0.0	-2.651478326692313e-09	-0.017938851705138485	0.0	-0.49934333431906314	0.0	2.2713519642505492e-07	0.0	0.9998476444288444	0.0	0.017455312374402284	0.0	0.0	2.0003330465979263	0.0	0.0	2.000365072540812	0.0	-0.00033961286306364837	0.0	1.1858865908105048e-05	-9.070957752655452e-10	0.0	1.0480146436367295e-10
1.47	-0.00033981985307649106	0.0	-2.6514988768241457e-09	-0.0179405497709984	0.0	-0.4993432750245551	0.0	2.271352017927399e-07	0.0	0.9998476444189327	0.0	0.017455312942154674	0.0	0.0	2.0003331116674716	0.0	0.0	2.0003651376102543	0.0	-0.0003396128675991273	0.0	1.1858866432112375e-05	-9.070957680375307e-10	0.0	1.0480146634008316e-10
1.475	-0.00033981985762749365	0.0	-2.6515194269559788e-09	-0.017942247836858317	0.0	-0.49934321573004714	0.0	2.2713520716042485e-07	0.0	0.9998476444090209	0.0	0.017455313509907068	0.0	0.0	2.000333176737017	0.0	0.0	2.0003652026796983	0.0	-0.000339612872134606	0.0	1.1858866956119711e-05	-9.070957535815018e-10	0.0	1.0480146823179008e-10
1.48	-0.0003398198621784963	0.0	-2.6515399770878114e-09	-0.017943945902718233	0.0	-0.4993431564355391	0.0	2.2713521252810983e-07	0.0	0.999847644399109	0.0	0.01745531407765946	0.0	0.0	2.0003332418065622	0.0	0.0	2.0003652677491432	0.0	-0.0003396128766700848	0.0	1.1858867480127059e-05	-9.070957490639927e-10	0.0	1.0480147054701346e-10
1.485	-0.00033981986672949893	0.0	-2.651560527219644e-09	-0.01794564396857815	0.0	-0.49934309714103114	0.0	2.271352178957948e-07	0.0	0.9998476443891972	0.0	0.01745531464541185	0.0	0.0	2.0003333068761076	0.0	0.0	2.0003653328185904	0.0	-0.00033961288120556353	0.0	1.1858868004134417e-05	-9.070957626165199e-10	0.0	1.0480147300340901e-10
1.49	-0.00033981987128050157	0.0	-2.6515810773514768e-09	-0.017947342034438065	0.0	-0.4993430378465231	0.0	2.2713522326347978e-07	0.0	0.9998476443792854	0.0	0.017455315213164242	0.0	0.0	2.0003333719456533	0.0	0.0	2.0003653978880385	0.0	-0.00033961288574104246	0.0	1.1858868528141788e-05	-9.070957635200216e-10	0.0	1.0480147520569467e-10
1.495	-0.0003398198758315042	0.0	-2.65160162748331e-09	-0.01794904010029798	0.0	-0.49934297855201515	0.0	2.2713522863116476e-07	0.0	0.9998476443693736	0.0	0.017455315780916632	0.0	0.0	2.0003334370151986	0.0	0.0	2.0003654629574883	0.0	-0.00033961289027652116	0.0	1.1858869052149168e-05	-9.070957553885053e-10	0.0	1.0480147644800967e-10
1.5	-0.00033981988038250685	0.0	-2.6516221776151425e-09	-0.017950738166157897	0.0	-0.4993429192575071	0.0	2.271352339988497e-07	0.0	0.9998476443594617	0.0	0.017455316348669023	0.0	0.0	2.0003335020847435	0.0	0.0	2.00036552802694	0.0	-0.00033961289481200004	0.0	1.1858869576156555e-05	-9.070957580990108e-10	0.0	1.0480147904557736e-10
1.5050000000000001	-0.0003398198849335095	0.0	-2.651642727746975e-09	-0.017952436232017813	0.0	-0.49934285996299915	0.0	2.2713523936653468e-07	0.0	0.9998476443495499	0.0	0.017455316916421416	0.0	0.0	2.0003335671542892	0.0	0.0	2.000365593096393	0.0	-0.00033961289934747875	0.0	1.1858870100163959e-05	-9.070957644235235e-10	0.0	1.0480148133256632e-10
1.51	-0.00033981988948451213	0.0	-2.651663277878808e-09	-0.01795413429787773	0.0	-0.4993428006684911	0.0	2.2713524473421966e-07	0.0	0.9998476443396381	0.0	0.017455317484173807	0.0	0.0	2.0003336322238345	0.0	0.0	2.0003656581658475	0.0	-0.00033961290388295767	0.0	1.1858870624171368e-05	-9.070957734585416e-10	0.0	1.0480148260311574e-10
1.5150000000000001	-0.0003398198940355148	0.0	-2.651683828010641e-09	-0.017955832363737646	0.0	-0.49934274137398316	0.0	2.2713525010190464e-07	0.0	0.9998476443297263	0.0	0.017455318051926197	0.0	0.0	2.0003336972933794	0.0	0.0	2.0003657232353036	0.0	-0.00033961290841843644	0.0	1.1858871148178787e-05	-9.070957436429818e-10	0.0	1.0480148528538675e-10
1.52	-0.0003398198985865174	0.0	-2.6517043781424736e-09	-0.01795753042959756	0.0	-0.49934268207947513	0.0	2.2713525546958961e-07	0.0	0.9998476443198144	0.0	0.01745531861967859	0.0	0.0	2.000333762362925	0.0	0.0	2.000365788304761	0.0	-0.00033961291295391514	0.0	1.185887167218622e-05	-9.070957608095162e-10	0.0	1.0480148737473469e-10
1.5250000000000001	-0.00033981990313752006	0.0	-2.6517249282743063e-09	-0.017959228495457478	0.0	-0.49934262278496716	0.0	2.2713526083727456e-07	0.0	0.9998476443099026	0.0	0.01745531918743098	0.0	0.0	2.0003338274324705	0.0	0.0	2.00036585337422	0.0	-0.000339612917489394	0.0	1.185887219619366e-05	-9.070957535815018e-10	0.0	1.0480148895586285e-10
1.53	-0.0003398199076885227	0.0	-2.651745478406139e-09	-0.017960926561317394	0.0	-0.49934256349045913	0.0	2.2713526620495954e-07	0.0	0.9998476442999907	0.0	0.01745531975518337	0.0	0.0	2.0003338925020153	0.0	0.0	2.0003659184436806	0.0	-0.0003396129220248727	0.0	1.185887272020111e-05	-9.070957671340289e-10	0.0	1.0480149166636828e-10
1.5350000000000001	-0.00033981991223952534	0.0	-2.651766028537972e-09	-0.01796262462717731	0.0	-0.49934250419595116	0.0	2.2713527157264452e-07	0.0	0.999847644290079	0.0	0.017455320322935765	0.0	0.0	2.0003339575715615	0.0	0.0	2.000365983513143	0.0	-0.00033961292656035165	0.0	1.1858873244208576e-05	-9.070957617130181e-10	0.0	1.0480149384041951e-10
1.54	-0.000339819916790528	0.0	-2.6517865786698047e-09	-0.017964322693037226	0.0	-0.49934244490144314	0.0	2.271352769403295e-07	0.0	0.9998476442801671	0.0	0.017455320890688155	0.0	0.0	2.0003340226411064	0.0	0.0	2.000366048582607	0.0	-0.00033961293109583036	0.0	1.1858873768216046e-05	-9.070957535815018e-10	0.0	1.0480149457451474e-10
1.545	-0.00033981992134153057	0.0	-2.6518071288016374e-09	-0.017966020758897142	0.0	-0.49934238560693517	0.0	2.2713528230801447e-07	0.0	0.9998476442702553	0.0	0.017455321458440545	0.0	0.0	2.0003340877106512	0.0	0.0	2.000366113652072	0.0	-0.0003396129356313092	0.0	1.1858874292223524e-05	-9.070957490639927e-10	0.0	1.0480149739795789e-10
1.55	-0.0003398199258925332	0.0	-2.65182767893347e-09	-0.01796771882475706	0.0	-0.49934232631242714	0.0	2.2713528767569945e-07	0.0	0.9998476442603434	0.0	0.01745532202619294	0.0	0.0	2.000334152780197	0.0	0.0	2.000366178721539	0.0	-0.0003396129401667879	0.0	1.1858874816231019e-05	-9.070957626165199e-10	0.0	1.0480150005199446e-10
1.555	-0.00033981993044353585	0.0	-2.651848229065303e-09	-0.017969416890616974	0.0	-0.4993422670179192	0.0	2.271352930433844e-07	0.0	0.9998476442504317	0.0	0.01745532259394533	0.0	0.0	2.0003342178497427	0.0	0.0	2.000366243791007	0.0	-0.0003396129447022668	0.0	1.1858875340238523e-05	-9.070957635200216e-10	0.0	1.0480150171782592e-10
1.56	-0.0003398199349945385	0.0	-2.651868779197136e-09	-0.01797111495647689	0.0	-0.49934220772341115	0.0	2.2713529841106938e-07	0.0	0.9998476442405199	0.0	0.01745532316169772	0.0	0.0	2.0003342829192876	0.0	0.0	2.000366308860477	0.0	-0.0003396129492377455	0.0	1.1858875864246037e-05	-9.070957409324764e-10	0.0	1.048015036660017e-10
1.565	-0.00033981993954554113	0.0	-2.6518893293289685e-09	-0.017972813022336807	0.0	-0.4993421484289032	0.0	2.2713530377875435e-07	0.0	0.999847644230608	0.0	0.017455323729450113	0.0	0.0	2.0003343479888334	0.0	0.0	2.0003663739299484	0.0	-0.0003396129537732243	0.0	1.185887638825356e-05	-9.070957580990108e-10	0.0	1.0480150575534964e-10
1.57	-0.0003398199440965438	0.0	-2.651909879460801e-09	-0.017974511088196723	0.0	-0.4993420891343952	0.0	2.2713530914643933e-07	0.0	0.9998476442206962	0.0	0.017455324297202503	0.0	0.0	2.0003344130583787	0.0	0.0	2.0003664389994213	0.0	-0.0003396129583087031	0.0	1.1858876912261095e-05	-9.070957788795524e-10	0.0	1.0480150778822872e-10
1.575	-0.0003398199486475464	0.0	-2.6519304295926342e-09	-0.01797620915405664	0.0	-0.4993420298398872	0.0	2.271353145141243e-07	0.0	0.9998476442107844	0.0	0.017455324864954894	0.0	0.0	2.000334478127924	0.0	0.0	2.000366504068896	0.0	-0.00033961296284418203	0.0	1.1858877436268639e-05	-9.070957644235235e-10	0.0	1.0480150976463892e-10
1.58	-0.00033981995319854906	0.0	-2.651950979724467e-09	-0.017977907219916555	0.0	-0.4993419705453792	0.0	2.2713531988180926e-07	0.0	0.9998476442008726	0.0	0.017455325432707284	0.0	0.0	2.000334543197469	0.0	0.0	2.000366569138372	0.0	-0.00033961296737966074	0.0	1.1858877960276193e-05	-9.070957436429818e-10	0.0	1.0480151213633117e-10
1.585	-0.0003398199577495517	0.0	-2.6519715298562996e-09	-0.01797960528577647	0.0	-0.4993419112508712	0.0	2.2713532524949423e-07	0.0	0.9998476441909607	0.0	0.017455326000459678	0.0	0.0	2.0003346082670146	0.0	0.0	2.0003666342078494	0.0	-0.0003396129719151395	0.0	1.185887848428376e-05	-9.070957535815018e-10	0.0	1.0480151422567912e-10
1.59	-0.00033981996230055434	0.0	-2.6519920799881327e-09	-0.01798130335163639	0.0	-0.4993418519563632	0.0	2.271353306171792e-07	0.0	0.9998476441810489	0.0	0.017455326568212068	0.0	0.0	2.00033467333656	0.0	0.0	2.0003666992773286	0.0	-0.00033961297645061827	0.0	1.1858879008291335e-05	-9.070957599060144e-10	0.0	1.0480151580680728e-10
1.595	-0.000339819966851557	0.0	-2.6520126301199653e-09	-0.017983001417496307	0.0	-0.4993417926618552	0.0	2.2713533598486419e-07	0.0	0.999847644171137	0.0	0.017455327135964458	0.0	0.0	2.0003347384061057	0.0	0.0	2.0003667643468095	0.0	-0.0003396129809860971	0.0	1.185887953229892e-05	-9.070957815900579e-10	0.0	1.0480151848907828e-10
1.6	-0.0003398199714025596	0.0	-2.652033180251798e-09	-0.017984699483356223	0.0	-0.4993417333673472	0.0	2.2713534135254916e-07	0.0	0.9998476441612253	0.0	0.017455327703716852	0.0	0.0	2.000334803475651	0.0	0.0	2.0003668294162913	0.0	-0.000339612985521576	0.0	1.1858880056306518e-05	-9.070957671340289e-10	0.0	1.0480152018314417e-10
1.605	-0.00033981997595356226	0.0	-2.6520537303836307e-09	-0.01798639754921614	0.0	-0.4993416740728392	0.0	2.2713534672023414e-07	0.0	0.9998476441513134	0.0	0.017455328271469242	0.0	0.0	2.0003348685451963	0.0	0.0	2.0003668944857753	0.0	-0.0003396129900570547	0.0	1.1858880580314122e-05	-9.070957463534873e-10	0.0	1.0480152204661666e-10
1.61	-0.0003398199805045649	0.0	-2.6520742805154638e-09	-0.017988095615076055	0.0	-0.4993416147783312	0.0	2.271353520879191e-07	0.0	0.9998476441414016	0.0	0.017455328839221632	0.0	0.0	2.0003349336147416	0.0	0.0	2.0003669595552607	0.0	-0.0003396129945925335	0.0	1.1858881104321739e-05	-9.070957346079638e-10	0.0	1.0480152436184004e-10
1.615	-0.0003398199850555675	0.0	-2.6520948306472964e-09	-0.01798979368093597	0.0	-0.4993415554838232	0.0	2.2713535745560407e-07	0.0	0.9998476441314897	0.0	0.017455329406974026	0.0	0.0	2.0003349986842873	0.0	0.0	2.0003670246247474	0.0	-0.00033961299912801214	0.0	1.1858881628329364e-05	-9.070957698445344e-10	0.0	1.0480152631001582e-10
1.62	-0.00033981998960657013	0.0	-2.652115380779129e-09	-0.017991491746795887	0.0	-0.4993414961893152	0.0	2.2713536282328904e-07	0.0	0.999847644121578	0.0	0.017455329974726416	0.0	0.0	2.000335063753832	0.0	0.0	2.000367089694236	0.0	-0.0003396130036634911	0.0	1.1858882152337002e-05	-9.070957698445344e-10	0.0	1.0480152848406706e-10
1.625	-0.00033981999415757277	0.0	-2.6521359309109618e-09	-0.017993189812655803	0.0	-0.4993414368948072	0.0	2.2713536819097402e-07	0.0	0.9998476441116662	0.0	0.017455330542478806	0.0	0.0	2.0003351288233775	0.0	0.0	2.0003671547637256	0.0	-0.0003396130081989698	0.0	1.185888267634465e-05	-9.070957391254728e-10	0.0	1.04801530573415e-10
1.6300000000000001	-0.0003398199987085754	0.0	-2.652156481042795e-09	-0.01799488787851572	0.0	-0.49934137760029923	0.0	2.27135373558659e-07	0.0	0.9998476441017543	0.0	0.0174553311102312	0.0	0.0	2.0003351938929232	0.0	0.0	2.0003672198332167	0.0	-0.0003396130127344486	0.0	1.1858883200352307e-05	-9.07095757195509e-10	0.0	1.0480153286040396e-10
1.635	-0.00033982000325957806	0.0	-2.6521770311746275e-09	-0.017996585944375636	0.0	-0.4993413183057912	0.0	2.2713537892634395e-07	0.0	0.9998476440918425	0.0	0.01745533167798359	0.0	0.0	2.0003352589624686	0.0	0.0	2.00036728490271	0.0	-0.0003396130172699274	0.0	1.1858883724359977e-05	-9.070957635200216e-10	0.0	1.0480153463917314e-10
1.6400000000000001	-0.0003398200078105807	0.0	-2.65219758130646e-09	-0.017998284010235552	0.0	-0.49934125901128323	0.0	2.2713538429402892e-07	0.0	0.9998476440819307	0.0	0.01745533224573598	0.0	0.0	2.000335324032014	0.0	0.0	2.0003673499722043	0.0	-0.0003396130218054062	0.0	1.1858884248367653e-05	-9.070957707480362e-10	0.0	1.0480153681322437e-10
1.645	-0.00033982001236158334	0.0	-2.652218131438293e-09	-0.017999982076095468	0.0	-0.4993411997167752	0.0	2.271353896617139e-07	0.0	0.9998476440720189	0.0	0.017455332813488374	0.0	0.0	2.000335389101559	0.0	0.0	2.0003674150417003	0.0	-0.0003396130263408851	0.0	1.1858884772375345e-05	-9.07095757195509e-10	0.0	1.0480153918491662e-10
1.6500000000000001	-0.000339820016912586	0.0	-2.652238681570126e-09	-0.018001680141955384	0.0	-0.49934114042226724	0.0	2.2713539502939888e-07	0.0	0.999847644062107	0.0	0.017455333381240765	0.0	0.0	2.0003354541711045	0.0	0.0	2.000367480111198	0.0	-0.0003396130308763638	0.0	1.1858885296383044e-05	-9.070957436429818e-10	0.0	1.0480154054016933e-10
1.655	-0.0003398200214635886	0.0	-2.6522592317019586e-09	-0.0180033782078153	0.0	-0.4993410811277592	0.0	2.2713540039708385e-07	0.0	0.9998476440521952	0.0	0.017455333948993155	0.0	0.0	2.00033551924065	0.0	0.0	2.0003675451806973	0.0	-0.00033961303541184257	0.0	1.1858885820390752e-05	-9.070957454499855e-10	0.0	1.0480154282715829e-10
1.6600000000000001	-0.00033982002601459126	0.0	-2.6522797818337913e-09	-0.018005076273675216	0.0	-0.49934102183325124	0.0	2.271354057647688e-07	0.0	0.9998476440422833	0.0	0.01745533451674555	0.0	0.0	2.0003355843101955	0.0	0.0	2.0003676102501977	0.0	-0.0003396130399473213	0.0	1.1858886344398473e-05	-9.070957662305271e-10	0.0	1.0480154522708499e-10
1.665	-0.0003398200305655939	0.0	-2.652300331965624e-09	-0.018006774339535132	0.0	-0.4993409625387432	0.0	2.2713541113245378e-07	0.0	0.9998476440323716	0.0	0.01745533508449794	0.0	0.0	2.000335649379741	0.0	0.0	2.0003676753197	0.0	-0.0003396130444828002	0.0	1.1858886868406203e-05	-9.070957734585416e-10	0.0	1.0480154689291644e-10
1.67	-0.00033982003511659654	0.0	-2.652320882097457e-09	-0.01800847240539505	0.0	-0.49934090324423525	0.0	2.2713541650013876e-07	0.0	0.9998476440224597	0.0	0.01745533565225033	0.0	0.0	2.000335714449286	0.0	0.0	2.0003677403892035	0.0	-0.00033961304901827897	0.0	1.1858887392413943e-05	-9.070957508709964e-10	0.0	1.0480154898226438e-10
1.675	-0.0003398200396675992	0.0	-2.6523414322292897e-09	-0.018010170471254965	0.0	-0.4993408439497272	0.0	2.2713542186782374e-07	0.0	0.9998476440125479	0.0	0.01745533622000272	0.0	0.0	2.000335779518831	0.0	0.0	2.000367805458709	0.0	-0.00033961305355375773	0.0	1.1858887916421694e-05	-9.070957535815018e-10	0.0	1.0480155146689435e-10
1.68	-0.0003398200442186018	0.0	-2.6523619823611224e-09	-0.01801186853711488	0.0	-0.49934078465521925	0.0	2.271354272355087e-07	0.0	0.999847644002636	0.0	0.017455336787755113	0.0	0.0	2.0003358445883768	0.0	0.0	2.0003678705282155	0.0	-0.0003396130580892365	0.0	1.1858888440429456e-05	-9.070957680375307e-10	0.0	1.0480155341507013e-10
1.685	-0.00033982004876960447	0.0	-2.652382532492955e-09	-0.018013566602974797	0.0	-0.4993407253607113	0.0	2.271354326031937e-07	0.0	0.9998476439927243	0.0	0.017455337355507503	0.0	0.0	2.000335909657922	0.0	0.0	2.000367935597724	0.0	-0.00033961306262471537	0.0	1.1858888964437228e-05	-9.070957608095162e-10	0.0	1.0480155510913603e-10
1.69	-0.00033982005332060705	0.0	-2.652403082624788e-09	-0.018015264668834713	0.0	-0.49934066606620325	0.0	2.2713543797087864e-07	0.0	0.9998476439828125	0.0	0.017455337923259893	0.0	0.0	2.0003359747274674	0.0	0.0	2.0003680006672337	0.0	-0.0003396130671601941	0.0	1.1858889488445007e-05	-9.070957463534873e-10	0.0	1.0480155745259385e-10
1.695	-0.0003398200578716097	0.0	-2.652423632756621e-09	-0.01801696273469463	0.0	-0.4993406067716953	0.0	2.2713544333856362e-07	0.0	0.9998476439729006	0.0	0.017455338491012287	0.0	0.0	2.000336039797013	0.0	0.0	2.0003680657367453	0.0	-0.00033961307169567284	0.0	1.1858890012452802e-05	-9.070957553885053e-10	0.0	1.0480155948547293e-10
1.7	-0.00033982006242261234	0.0	-2.6524441828884535e-09	-0.018018660800554545	0.0	-0.49934054747718726	0.0	2.271354487062486e-07	0.0	0.9998476439629888	0.0	0.017455339058764677	0.0	0.0	2.0003361048665584	0.0	0.0	2.000368130806258	0.0	-0.0003396130762311516	0.0	1.1858890536460603e-05	-9.070957689410325e-10	0.0	1.0480156120777325e-10
1.705	-0.000339820066973615	0.0	-2.652464733020286e-09	-0.01802035886641446	0.0	-0.4993404881826793	0.0	2.2713545407393357e-07	0.0	0.999847643953077	0.0	0.017455339626517068	0.0	0.0	2.0003361699361037	0.0	0.0	2.000368195875773	0.0	-0.0003396130807666305	0.0	1.1858891060468416e-05	-9.070957689410325e-10	0.0	1.0480156386180982e-10
1.71	-0.0003398200715246176	0.0	-2.6524852831521192e-09	-0.018022056932274377	0.0	-0.49934042888817126	0.0	2.2713545944161855e-07	0.0	0.9998476439431652	0.0	0.01745534019426946	0.0	0.0	2.0003362350056495	0.0	0.0	2.000368260945289	0.0	-0.00033961308530210924	0.0	1.185889158447624e-05	-9.070957400289746e-10	0.0	1.0480156592292333e-10
1.715	-0.00033982007607562026	0.0	-2.652505833283952e-09	-0.018023754998134293	0.0	-0.4993403695936633	0.0	2.271354648093035e-07	0.0	0.9998476439332533	0.0	0.01745534076202185	0.0	0.0	2.0003363000751944	0.0	0.0	2.000368326014806	0.0	-0.00033961308983758795	0.0	1.1858892108484074e-05	-9.070957562920072e-10	0.0	1.0480156753228593e-10
1.72	-0.0003398200806266229	0.0	-2.6525263834157846e-09	-0.01802545306399421	0.0	-0.49934031029915527	0.0	2.2713547017698847e-07	0.0	0.9998476439233415	0.0	0.017455341329774242	0.0	0.0	2.0003363651447397	0.0	0.0	2.0003683910843253	0.0	-0.00033961309437306676	0.0	1.1858892632491917e-05	-9.070957562920072e-10	0.0	1.0480156976280602e-10
1.725	-0.00033982008517762554	0.0	-2.6525469335476177e-09	-0.01802715112985413	0.0	-0.4993402510046473	0.0	2.2713547554467345e-07	0.0	0.9998476439134296	0.0	0.017455341897526636	0.0	0.0	2.0003364302142854	0.0	0.0	2.000368456153846	0.0	-0.00033961309890854553	0.0	1.1858893156499773e-05	-9.070957626165199e-10	0.0	1.0480157216273271e-10
1.73	-0.0003398200897286282	0.0	-2.6525674836794503e-09	-0.018028849195714045	0.0	-0.49934019171013927	0.0	2.2713548091235843e-07	0.0	0.9998476439035179	0.0	0.017455342465279026	0.0	0.0	2.0003364952838307	0.0	0.0	2.000368521223368	0.0	-0.0003396131034440244	0.0	1.1858893680507637e-05	-9.070957635200216e-10	0.0	1.0480157380032973e-10
1.735	-0.0003398200942796308	0.0	-2.652588033811283e-09	-0.01803054726157396	0.0	-0.4993401324156313	0.0	2.271354862800434e-07	0.0	0.999847643893606	0.0	0.017455343033031416	0.0	0.0	2.000336560353376	0.0	0.0	2.000368586292892	0.0	-0.00033961310797950316	0.0	1.1858894204515512e-05	-9.070957418359782e-10	0.0	1.0480157611555312e-10
1.74	-0.00033982009883063346	0.0	-2.6526085839431157e-09	-0.018032245327433877	0.0	-0.4993400731211233	0.0	2.2713549164772835e-07	0.0	0.9998476438836942	0.0	0.01745534360078381	0.0	0.0	2.000336625422922	0.0	0.0	2.0003686513624173	0.0	-0.00033961311251498187	0.0	1.1858894728523398e-05	-9.070957508709964e-10	0.0	1.0480157789432231e-10
1.745	-0.0003398201033816361	0.0	-2.6526291340749488e-09	-0.018033943393293794	0.0	-0.4993400138266153	0.0	2.2713549701541333e-07	0.0	0.9998476438737823	0.0	0.0174553441685362	0.0	0.0	2.0003366904924667	0.0	0.0	2.000368716431944	0.0	-0.0003396131170504607	0.0	1.1858895252531291e-05	-9.070957725550398e-10	0.0	1.0480157984249809e-10
1.75	-0.00033982010793263875	0.0	-2.6526496842067814e-09	-0.01803564145915371	0.0	-0.4993399545321073	0.0	2.271355023830983e-07	0.0	0.9998476438638706	0.0	0.01745534473628859	0.0	0.0	2.0003367555620124	0.0	0.0	2.0003687815014723	0.0	-0.00033961312158593956	0.0	1.1858895776539198e-05	-9.070957644235235e-10	0.0	1.0480158266594125e-10
1.7550000000000001	-0.0003398201124836414	0.0	-2.652670234338614e-09	-0.018037339525013626	0.0	-0.4993398952375993	0.0	2.2713550775078328e-07	0.0	0.9998476438539587	0.0	0.017455345304040984	0.0	0.0	2.000336820631558	0.0	0.0	2.000368846571002	0.0	-0.0003396131261214183	0.0	1.1858896300547117e-05	-9.070957436429818e-10	0.0	1.0480158379531851e-10
1.76	-0.000339820117034644	0.0	-2.6526907844704468e-09	-0.018039037590873542	0.0	-0.4993398359430913	0.0	2.2713551311846826e-07	0.0	0.9998476438440469	0.0	0.017455345871793374	0.0	0.0	2.000336885701103	0.0	0.0	2.0003689116405337	0.0	-0.00033961313065689703	0.0	1.1858896824555037e-05	-9.07095738221971e-10	0.0	1.0480158560232213e-10
1.7650000000000001	-0.0003398201215856466	0.0	-2.65271133460228e-09	-0.018040735656733458	0.0	-0.4993397766485833	0.0	2.2713551848615324e-07	0.0	0.999847643834135	0.0	0.017455346439545764	0.0	0.0	2.0003369507706488	0.0	0.0	2.0003689767100665	0.0	-0.00033961313519237574	0.0	1.1858897348562975e-05	-9.070957743620434e-10	0.0	1.0480158896221949e-10
1.77	-0.00033982012613664926	0.0	-2.6527318847341125e-09	-0.018042433722593374	0.0	-0.4993397173540753	0.0	2.271355238538382e-07	0.0	0.9998476438242233	0.0	0.017455347007298158	0.0	0.0	2.0003370158401945	0.0	0.0	2.0003690417796007	0.0	-0.0003396131397278547	0.0	1.1858897872570926e-05	-9.070957662305271e-10	0.0	1.0480159054334766e-10
1.7750000000000001	-0.0003398201306876519	0.0	-2.652752434865945e-09	-0.01804413178845329	0.0	-0.4993396580595673	0.0	2.2713552922152317e-07	0.0	0.9998476438143115	0.0	0.01745534757505055	0.0	0.0	2.00033708090974	0.0	0.0	2.0003691068491367	0.0	-0.0003396131442633334	0.0	1.185889839657888e-05	-9.070957364149673e-10	0.0	1.0480159218094469e-10
1.78	-0.00033982013523865454	0.0	-2.652772984997778e-09	-0.018045829854313206	0.0	-0.4993395987650593	0.0	2.2713553458920814e-07	0.0	0.9998476438043996	0.0	0.01745534814280294	0.0	0.0	2.000337145979285	0.0	0.0	2.0003691719186745	0.0	-0.00033961314879881214	0.0	1.1858898920586848e-05	-9.07095747256989e-10	0.0	1.0480159472204353e-10
1.7850000000000001	-0.0003398201397896572	0.0	-2.652793535129611e-09	-0.018047527920173122	0.0	-0.4993395394705513	0.0	2.2713553995689312e-07	0.0	0.9998476437944878	0.0	0.01745534871055533	0.0	0.0	2.0003372110488304	0.0	0.0	2.0003692369882136	0.0	-0.00033961315333429085	0.0	1.1858899444594826e-05	-9.070957743620434e-10	0.0	1.0480159686786033e-10
1.79	-0.0003398201443406598	0.0	-2.6528140852614436e-09	-0.01804922598603304	0.0	-0.4993394801760433	0.0	2.271355453245781e-07	0.0	0.999847643784576	0.0	0.017455349278307723	0.0	0.0	2.000337276118376	0.0	0.0	2.000369302057754	0.0	-0.00033961315786976983	0.0	1.1858899968602816e-05	-9.070957815900579e-10	0.0	1.0480159878780168e-10
1.795	-0.00033982014889166246	0.0	-2.6528346353932763e-09	-0.018050924051892955	0.0	-0.4993394208815353	0.0	2.2713555069226305e-07	0.0	0.9998476437746642	0.0	0.017455349846060113	0.0	0.0	2.0003373411879215	0.0	0.0	2.000369367127296	0.0	-0.0003396131624052486	0.0	1.1858900492610814e-05	-9.070957445464836e-10	0.0	1.0480160065127416e-10
1.8	-0.0003398201534426651	0.0	-2.652855185525109e-09	-0.01805262211775287	0.0	-0.49933936158702735	0.0	2.2713555605994802e-07	0.0	0.9998476437647523	0.0	0.017455350413812503	0.0	0.0	2.000337406257467	0.0	0.0	2.00036943219684	0.0	-0.0003396131669407273	0.0	1.1858901016618822e-05	-9.120534577505719e-10	0.0	2.2582181508679484e-11
1.805	-0.00033982015799366775	0.0	-2.652875735656942e-09	-0.018054320183612787	0.0	-0.4993393022925193	0.0	2.27135561427633e-07	0.0	0.9998476437548405	0.0	0.017455350981564897	0.0	0.0	2.0003374713270126	0.0	0.0	2.000369497266385	0.0	-0.00033961317147620607	0.0	1.1858901540626844e-05	-8.747716264825729e-10	0.0	5.976044744170485e-10
1.81	-0.00033982016241958295	0.0	-2.6479557429491153e-09	-0.018056018249498016	0.0	-0.49933924299797466	0.0	2.271352747976244e-07	0.0	0.9998476437449287	0.0	0.017455351549316312	0.0	0.0	2.000337536396446	0.0	0.0	2.000369562335848	0.0	-0.00033961317571422215	0.0	1.1858906997800164e-05	-8.557085902852434e-10	0.0	1.1920661697944275e-09
1.815	-0.00033982016700115104	0.0	-2.643010348740306e-09	-0.01805771631540287	0.0	-0.4993391837034075	0.0	2.2713535156778366e-07	0.0	0.999847643735017	0.0	0.017455352117068387	0.0	0.0	2.0003376014659553	0.0	0.0	2.0003696274053335	0.0	-0.00033961318010690975	0.0	1.1858912485793087e-05	-8.976746664433646e-10	0.0	1.0378994001798854e-09
1.82	-0.00033982017169476914	0.0	-2.6389892367371184e-09	-0.018059414381332576	0.0	-0.49933912440881834	0.0	2.271356902267996e-07	0.0	0.9998476437251052	0.0	0.017455352684821013	0.0	0.0	2.0003376665355277	0.0	0.0	2.0003696924749157	0.0	-0.00033961318464384123	0.0	1.1858917053978578e-05	-8.969809848583903e-10	0.0	7.076995821741377e-10
1.825	-0.0003398201761938393	0.0	-2.63686856554421e-09	-0.018061112447311893	0.0	-0.4993390651141992	0.0	2.2713557609398582e-07	0.0	0.9998476437151933	0.0	0.017455353252572997	0.0	0.0	2.0003377316050264	0.0	0.0	2.000369757544465	0.0	-0.00033961318905267895	0.0	1.1858919716090149e-05	-8.785274591138759e-10	0.0	5.088112201476633e-10
1.83	-0.0003398201806929095	0.0	-2.6347478943513014e-09	-0.018062810513291214	0.0	-0.49933900581958	0.0	2.2713546196117205e-07	0.0	0.9998476437052815	0.0	0.01745535382032498	0.0	0.0	2.000337796674525	0.0	0.0	2.000369822613982	0.0	-0.0003396131934615167	0.0	1.185892237820173e-05	-8.870734785470837e-10	0.0	4.932623139231341e-10
1.835	-0.0003398201852411678	0.0	-2.6331186480592578e-09	-0.018064508579298668	0.0	-0.4993389465249511	0.0	2.2713545858506296e-07	0.0	0.9998476436953697	0.0	0.017455354388077368	0.0	0.0	2.00033786174407	0.0	0.0	2.0003698876834974	0.0	-0.0003396131979366661	0.0	1.1858924550905087e-05	-9.040864727506125e-10	0.0	3.6769894860246027e-10
1.84	-0.00033982018984840757	0.0	-2.6320786691547897e-09	-0.018066206645339856	0.0	-0.4993388872303104	0.0	2.2713558801727091e-07	0.0	0.9998476436854579	0.0	0.017455354955830234	0.0	0.0	2.00033792681367	0.0	0.0	2.0003699527530503	0.0	-0.00033961320249132953	0.0	1.1858926136759253e-05	-9.124680548543267e-10	0.0	3.1979348060868264e-10
1.845	-0.00033982019445564734	0.0	-2.631038690250322e-09	-0.018067904711381044	0.0	-0.4993388279356697	0.0	2.2713571744947886e-07	0.0	0.999847643675546	0.0	0.0174553555235831	0.0	0.0	2.0003379918832693	0.0	0.0	2.0003700178226405	0.0	-0.000339613207045993	0.0	1.1858927722613426e-05	-9.097464390613504e-10	0.0	2.471501856750079e-10
1.85	-0.00033982019902431	0.0	-2.6307420262239363e-09	-0.018069602777877173	0.0	-0.49933876864097115	0.0	2.2713576136858528e-07	0.0	0.9998476436656342	0.0	0.01745535609133664	0.0	0.0	2.0003380569529465	0.0	0.0	2.000370082892243	0.0	-0.00033961321158804846	0.0	1.1858928564259606e-05	-9.077536817928347e-10	0.0	1.295248671795113e-10
1.855	-0.00033982020357928733	0.0	-2.6307090543900936e-09	-0.018071300844534694	0.0	-0.499338709346252	0.0	2.2713577495177633e-07	0.0	0.9998476436557223	0.0	0.01745535665909043	0.0	0.0	2.0003381220226526	0.0	0.0	2.000370147961849	0.0	-0.0003396132161256312	0.0	1.1858929141896765e-05	-9.074420016768013e-10	0.0	1.1112728180605701e-10
1.86	-0.00033982020813426466	0.0	-2.630676082556251e-09	-0.018072998911192212	0.0	-0.49933865005153283	0.0	2.271357885349674e-07	0.0	0.9998476436458105	0.0	0.017455357226844215	0.0	0.0	2.0003381870923573	0.0	0.0	2.0003702130314593	0.0	-0.00033961322066321394	0.0	1.1858929719533931e-05	-9.07516572198723e-10	0.0	1.1552743495145763e-10
1.865	-0.00033982021268924204	0.0	-2.630643110722408e-09	-0.01807469697784973	0.0	-0.4993385907568137	0.0	2.2713580211815845e-07	0.0	0.9998476436358986	0.0	0.017455357794598003	0.0	0.0	2.000338252162063	0.0	0.0	2.000370278101074	0.0	-0.00033961322520079687	0.0	1.1858930297171114e-05	-9.07516553225185e-10	0.0	1.1552743684316454e-10
1.87	-0.00033982021724421937	0.0	-2.6306101388885655e-09	-0.018076395044507247	0.0	-0.49933853146209456	0.0	2.271358157013495e-07	0.0	0.9998476436259867	0.0	0.017455358362351788	0.0	0.0	2.000338317231768	0.0	0.0	2.0003703431706916	0.0	-0.0003396132297383795	0.0	1.18589308748083e-05	-9.075165279271343e-10	0.0	1.1552743862193373e-10
1.875	-0.0003398202217991967	0.0	-2.6305771670547228e-09	-0.018078093111164765	0.0	-0.49933847216737537	0.0	2.2713582928454054e-07	0.0	0.9998476436160748	0.0	0.017455358930105577	0.0	0.0	2.0003383823014733	0.0	0.0	2.0003704082403138	0.0	-0.00033961323427596224	0.0	1.1858931452445502e-05	-9.075165559356904e-10	0.0	1.1552744113479814e-10
1.8800000000000001	-0.0003398202263541741	0.0	-2.63054419522088e-09	-0.018079791177822286	0.0	-0.49933841287265623	0.0	2.271358428677316e-07	0.0	0.999847643606163	0.0	0.01745535949785936	0.0	0.0	2.0003384473711785	0.0	0.0	2.0003704733099394	0.0	-0.000339613238813545	0.0	1.1858932030082712e-05	-9.075165496111778e-10	0.0	1.1552744302650506e-10
1.885	-0.0003398202309091514	0.0	-2.6305112233870373e-09	-0.018081489244479804	0.0	-0.4993383535779371	0.0	2.2713585645092266e-07	0.0	0.9998476435962511	0.0	0.01745536006561315	0.0	0.0	2.000338512440884	0.0	0.0	2.0003705383795696	0.0	-0.00033961324335112777	0.0	1.1858932607719933e-05	-9.07516567681214e-10	0.0	1.1552744539819731e-10
1.8900000000000001	-0.00033982023546412873	0.0	-2.6304782515531946e-09	-0.01808318731113732	0.0	-0.49933829428321796	0.0	2.271358700341137e-07	0.0	0.9998476435863393	0.0	0.017455360633366935	0.0	0.0	2.0003385775105893	0.0	0.0	2.0003706034492033	0.0	-0.00033961324788871065	0.0	1.1858933185357165e-05	-9.075165640672067e-10	0.0	1.1552744700755991e-10
1.895	-0.00033982024001910605	0.0	-2.630445279719352e-09	-0.01808488537779484	0.0	-0.4993382349884988	0.0	2.2713588361730475e-07	0.0	0.9998476435764274	0.0	0.017455361201120723	0.0	0.0	2.000338642580295	0.0	0.0	2.0003706685188405	0.0	-0.0003396132524262934	0.0	1.1858933762994403e-05	-9.075165604531995e-10	0.0	1.1552744923808001e-10
1.9000000000000001	-0.00033982024457408343	0.0	-2.630412307885509e-09	-0.018086583444452357	0.0	-0.49933817569377964	0.0	2.2713589720049582e-07	0.0	0.9998476435665156	0.0	0.01745536176887451	0.0	0.0	2.00033870765	0.0	0.0	2.000370733588482	0.0	-0.00033961325696387623	0.0	1.1858934340631658e-05	-9.075165514181814e-10	0.0	1.1552745189211657e-10
1.905	-0.00033982024912906076	0.0	-2.6303793360516665e-09	-0.018088281511109878	0.0	-0.4993381163990605	0.0	2.2713591078368687e-07	0.0	0.9998476435566037	0.0	0.017455362336628297	0.0	0.0	2.0003387727197057	0.0	0.0	2.0003707986581274	0.0	-0.00033961326150145894	0.0	1.185893491826892e-05	-9.075165478041741e-10	0.0	1.155274530779627e-10
1.9100000000000001	-0.0003398202536840381	0.0	-2.630346364217824e-09	-0.018089979577767396	0.0	-0.49933805710434137	0.0	2.2713592436687791e-07	0.0	0.9998476435466919	0.0	0.01745536290438208	0.0	0.0	2.000338837789411	0.0	0.0	2.0003708637277766	0.0	-0.0003396132660390417	0.0	1.185893549590619e-05	-9.075165667777121e-10	0.0	1.1552745564729597e-10
1.915	-0.00033982025823901547	0.0	-2.6303133923839815e-09	-0.018091677644424913	0.0	-0.4993379978096222	0.0	2.2713593795006896e-07	0.0	0.99984764353678	0.0	0.01745536347213587	0.0	0.0	2.000338902859116	0.0	0.0	2.00037092879743	0.0	-0.0003396132705766246	0.0	1.1858936073543476e-05	-9.075165478041741e-10	0.0	1.1552745768017504e-10
1.92	-0.0003398202627939928	0.0	-2.6302804205501387e-09	-0.01809337571108243	0.0	-0.49933793851490305	0.0	2.2713595153326003e-07	0.0	0.9998476435268681	0.0	0.017455364039889655	0.0	0.0	2.0003389679288213	0.0	0.0	2.0003709938670866	0.0	-0.0003396132751142072	0.0	1.1858936651180765e-05	-9.07516529734138e-10	0.0	1.1552745937424094e-10
1.925	-0.0003398202673489701	0.0	-2.630247448716296e-09	-0.01809507377773995	0.0	-0.4993378792201839	0.0	2.2713596511645108e-07	0.0	0.9998476435169562	0.0	0.017455364607643443	0.0	0.0	2.000339032998527	0.0	0.0	2.0003710589367474	0.0	-0.00033961327965178995	0.0	1.185893722881807e-05	-9.075165496111778e-10	0.0	1.155274615765266e-10
1.93	-0.00033982027190394745	0.0	-2.6302144768824533e-09	-0.01809677184439747	0.0	-0.4993378199254648	0.0	2.2713597869964212e-07	0.0	0.9998476435070444	0.0	0.01745536517539723	0.0	0.0	2.000339098068232	0.0	0.0	2.000371124006412	0.0	-0.00033961328418937267	0.0	1.1858937806455382e-05	-9.075165505146796e-10	0.0	1.1552746383528113e-10
1.935	-0.0003398202764589248	0.0	-2.6301815050486106e-09	-0.018098469911054987	0.0	-0.4993377606307456	0.0	2.2713599228283317e-07	0.0	0.9998476434971325	0.0	0.017455365743151017	0.0	0.0	2.0003391631379377	0.0	0.0	2.000371189076081	0.0	-0.0003396132887269555	0.0	1.1858938384092709e-05	-9.075165758127303e-10	0.0	1.1552746589639463e-10
1.94	-0.00033982028101390215	0.0	-2.630148533214768e-09	-0.018100167977712505	0.0	-0.49933770133602645	0.0	2.2713600586602424e-07	0.0	0.9998476434872207	0.0	0.017455366310904802	0.0	0.0	2.000339228207643	0.0	0.0	2.0003712541457537	0.0	-0.00033961329326453836	0.0	1.1858938961730041e-05	-9.075165640672067e-10	0.0	1.1552746761869497e-10
1.945	-0.0003398202855688795	0.0	-2.630115561380925e-09	-0.018101866044370023	0.0	-0.4993376420413073	0.0	2.271360194492153e-07	0.0	0.9998476434773088	0.0	0.01745536687865859	0.0	0.0	2.0003392932773485	0.0	0.0	2.00037131921543	0.0	-0.00033961329780212113	0.0	1.1858939539367387e-05	-9.075165541286869e-10	0.0	1.1552746982098063e-10
1.95	-0.0003398202901238568	0.0	-2.6300825895470825e-09	-0.018103564111027544	0.0	-0.4993375827465882	0.0	2.2713603303240633e-07	0.0	0.999847643467397	0.0	0.017455367446412375	0.0	0.0	2.0003393583470537	0.0	0.0	2.0003713842851103	0.0	-0.0003396133023397039	0.0	1.1858940117004739e-05	-9.075165523216832e-10	0.0	1.1552747210796959e-10
1.955	-0.0003398202946788342	0.0	-2.6300496177132398e-09	-0.01810526217768506	0.0	-0.499337523451869	0.0	2.2713604661559738e-07	0.0	0.9998476434574851	0.0	0.017455368014166164	0.0	0.0	2.0003394234167593	0.0	0.0	2.0003714493547946	0.0	-0.00033961330687728666	0.0	1.1858940694642107e-05	-9.075165559356904e-10	0.0	1.1552747416908309e-10
1.96	-0.0003398202992338115	0.0	-2.630016645879397e-09	-0.01810696024434258	0.0	-0.49933746415714986	0.0	2.2713606019878845e-07	0.0	0.9998476434475733	0.0	0.01745536858191995	0.0	0.0	2.000339488486464	0.0	0.0	2.0003715144244825	0.0	-0.0003396133114148694	0.0	1.1858941272279481e-05	-9.075165595496977e-10	0.0	1.1552747611725887e-10
1.965	-0.00033982030378878884	0.0	-2.6299836740455543e-09	-0.018108658311000097	0.0	-0.4993374048624307	0.0	2.271360737819795e-07	0.0	0.9998476434376614	0.0	0.017455369149673737	0.0	0.0	2.00033955355617	0.0	0.0	2.0003715794941748	0.0	-0.00033961331595245225	0.0	1.1858941849916869e-05	-9.075165703917195e-10	0.0	1.1552747831954453e-10
1.97	-0.0003398203083437662	0.0	-2.629950702211712e-09	-0.018110356377657615	0.0	-0.4993373455677116	0.0	2.2713608736517054e-07	0.0	0.9998476434277496	0.0	0.017455369717427522	0.0	0.0	2.000339618625875	0.0	0.0	2.0003716445638706	0.0	-0.00033961332049003507	0.0	1.1858942427554264e-05	-9.075165378656543e-10	0.0	1.1552747995714156e-10
1.975	-0.00033982031289874355	0.0	-2.6299177303778693e-09	-0.018112054444315136	0.0	-0.4993372862729924	0.0	2.271361009483616e-07	0.0	0.9998476434178376	0.0	0.01745537028518131	0.0	0.0	2.0003396836955805	0.0	0.0	2.0003717096335705	0.0	-0.00033961332502761767	0.0	1.185894300519167e-05	-9.117754909010919e-10	0.0	9.432001863523343e-11
1.98	-0.00033982031745372087	0.0	-2.6298847585440266e-09	-0.018113752510972653	0.0	-0.49933722697827326	0.0	2.2713611453155266e-07	0.0	0.9998476434079258	0.0	0.0174553708529351	0.0	0.0	2.000339748765286	0.0	0.0	2.000371774703274	0.0	-0.0003396133295652004	0.0	1.1858943582829089e-05	-8.817383898033239e-10	0.0	2.249685584802573e-10
1.985	-0.00033982032179773154	0.0	-2.628571194135599e-09	-0.0181154505776371	0.0	-0.4993371676835494	0.0	2.2713563297328518e-07	0.0	0.999847643398014	0.0	0.017455371420688162	0.0	0.0	2.0003398138349087	0.0	0.0	2.0003718397728396	0.0	-0.00033961333384724553	0.0	1.1858945432914352e-05	-8.502913885864485e-10	0.0	5.065346528011154e-10
1.99	-0.00033982032619248476	0.0	-2.6261905272611583e-09	-0.018117148644329166	0.0	-0.4993371083888069	0.0	2.2713535564017683e-07	0.0	0.9998476433881022	0.0	0.01745537198844006	0.0	0.0	2.0003398789043976	0.0	0.0	2.0003719048423263	0.0	-0.0003396133381427546	0.0	1.1858948351222217e-05	2.7400222236889536e-09	0.0	4.3222351213192413e-10
1.995	-0.0003398203307616486	0.0	-2.624325535190739e-09	-0.018118846711043177	0.0	-0.49933704909405274	0.0	2.2713543019019876e-07	0.0	0.9998476433781904	0.0	0.017455372556192134	0.0	0.0	2.000339943973907	0.0	0.0	2.000371969911834	0.0	-0.00033961334263056796	0.0	1.1858950760257528e-05	3.362104752523667e-05	0.0	-1.0557577312162814e-06
2.0	-0.0003398205525610285	0.0	-2.622944478925872e-09	-0.018120544777786105	0.0	-0.4993369897992894	0.0	2.2697338885979994e-07	0.0	0.9998476433682785	0.0	0.017455373123941714	0.0	0.0	2.00034000904313	0.0	0.0	2.00037203493492	0.0	-0.00033961356423311325	0.0	1.1858960268163774e-05	-0.0001843121596433947	0.0	6.203295886990558e-06
2.005	-0.0003418403774182558	0.0	-9.705033504372742e-09	-0.01812224701529886	0.0	-0.49933693036613724	0.0	1.3330851811159884e-06	0.0	0.9998476433456011	0.0	0.017455374422881406	0.0	0.0	2.000340157913335	0.0	0.0	2.000372416835693	0.0	-0.0003416324054216292	0.0	1.1922386232319778e-05	-0.0005446961128192186	0.0	1.4695944184636596e-05
2.0100000000000002	-0.00034491571711433954	0.0	-4.522924651631447e-08	-0.018123962747448024	0.0	-0.49933687057055154	0.0	4.130297782651327e-06	0.0	0.9998476432277893	0.0	0.01745538117116797	0.0	0.0	2.000340931327848	0.0	0.0	2.0003736000788486	0.0	-0.0003447071108926406	0.0	1.1994234374500782e-05	-0.00062915542558361	0.0	1.3859458414754575e-05
2.015	-0.0003478890179467904	0.0	-8.389407112937282e-08	-0.018125693875778837	0.0	-0.4993368104348462	0.0	6.623213315891636e-06	0.0	0.9998476429902098	0.0	0.017455394779773432	0.0	0.0	2.0003424909967906	0.0	0.0	2.0003754974896975	0.0	-0.00034767994913763344	0.0	1.2059386959875403e-05	-0.0005584837536793285	0.0	1.2800704677318816e-05
2.02	-0.00035045432874299804	0.0	-1.0945458647637778e-07	-0.018127438873210746	0.0	-0.49933674997829697	0.0	8.284697655774406e-06	0.0	0.9998476426617199	0.0	0.01745541359570715	0.0	0.0	2.0003446474725237	0.0	0.0	2.0003778708807487	0.0	-0.00035024458842613084	0.0	1.2123398583723497e-05	-0.0004719241535634039	0.0	1.2805764372819451e-05
2.025	-0.00035263385616585385	0.0	-1.2129576933826548e-07	-0.018129195689421184	0.0	-0.49933668920096097	0.0	9.190656692106277e-06	0.0	0.9998476422779561	0.0	0.01745543557771676	0.0	0.0	2.000347166809116	0.0	0.0	2.0003805038099456	0.0	-0.00035242320046879156	0.0	1.2187657625462363e-05	-0.0004053214829787867	0.0	1.2883201849159842e-05
2.0300000000000002	-0.00035454940915524073	0.0	-1.2378121590535032e-07	-0.018130962699876525	0.0	-0.49933662810201784	0.0	9.589472974766676e-06	0.0	0.9998476418664086	0.0	0.017455459151138657	0.0	0.0	2.000349868535911	0.0	0.0	2.0003832509915918	0.0	-0.00035433767232810116	0.0	1.2252053836827293e-05	-0.00036488234780040964	0.0	1.2820478028932853e-05
2.035	-0.00035631821041304696	0.0	-1.2195538140598404e-07	-0.018132738904353334	0.0	-0.4993365666830582	0.0	9.710817587507453e-06	0.0	0.9998476414437031	0.0	0.017455483363670046	0.0	0.0	2.000352643510422	0.0	0.0	2.0003860329359084	0.0	-0.000356105331374669	0.0	1.2315636873756191e-05	-0.00034499090709096277	0.0	1.2599616654577948e-05
2.04	-0.00035802271278985367	0.0	-1.1910081256362342e-07	-0.01813452376455917	0.0	-0.4993365049488274	0.0	9.713027522850574e-06	0.0	0.9998476410186508	0.0	0.017455507710594287	0.0	0.0	2.000355433887567	0.0	0.0	2.0003888155133254	0.0	-0.0003578086948051256	0.0	1.2378003888338145e-05	-0.0003375900609937995	0.0	1.2358263169649956e-05
2.045	-0.0003597070570168579	0.0	-1.1663282462064193e-07	-0.018136317058717245	0.0	-0.4993364429051858	0.0	9.67986386163496e-06	0.0	0.9998476405948117	0.0	0.01745553198798826	0.0	0.0	2.000358216295917	0.0	0.0	2.000391588590053	0.0	-0.0003594919258595292	0.0	1.2439281038274501e-05	-0.00033620911448364513	0.0	1.2161760091101372e-05
2.05	-0.0003613912393990994	0.0	-1.150066129493062e-07	-0.018138118742774625	0.0	-0.49933638055723023	0.0	9.648291866670668e-06	0.0	0.9998476401728152	0.0	0.017455556159798772	0.0	0.0	2.0003609866034506	0.0	0.0	2.00039435262207	0.0	-0.0003611750245473551	0.0	1.2499711362794782e-05	-0.00033706248740064237	0.0	1.2022592816045814e-05
2.055	-0.00036308069854053976	0.0	-1.1411577328436198e-07	-0.01813992884862295	0.0	-0.4993363179089138	0.0	9.62759436838138e-06	0.0	0.9998476397520685	0.0	0.01745558025999974	0.0	0.0	2.000363748703886	0.0	0.0	2.000397110724691	0.0	-0.00036286342244348644	0.0	1.2559591063943201e-05	-0.0003382231670393642	0.0	1.1935986703076368e-05
2.06	-0.00036477524052236176	0.0	-1.1374504448277256e-07	-0.01814174740646383	0.0	-0.49933625496235384	0.0	9.616898776808477e-06	0.0	0.9998476393320468	0.0	0.017455604318636072	0.0	0.0	2.000366506040641	0.0	0.0	2.0003998657632507	0.0	-0.00036455691823274465	0.0	1.2619128524725002e-05	-0.00033909000864580283	0.0	1.1882252423969296e-05
2.065	-0.0003664730445885514	0.0	-1.1369537907022387e-07	-0.018143574437690685	0.0	-0.49933619171861765	0.0	9.612541077684895e-06	0.0	0.9998476389123903	0.0	0.017455628356316602	0.0	0.0	2.0003692609756727	0.0	0.0	2.0004026195534217	0.0	-0.00036625368532028346	0.0	1.2678459131531677e-05	-0.00033950935223771024	0.0	1.1857250081324093e-05
2.07	-0.0003681721201053218	0.0	-1.137593055240441e-07	-0.018145409961344398	0.0	-0.49933612817870326	0.0	9.61059025207557e-06	0.0	0.9998476384927815	0.0	0.017455652391230352	0.0	0.0	2.000372015593607	0.0	0.0	2.000405372784722	0.0	-0.0003679517270429833	0.0	1.2737720758064433e-05	-0.0003397822646731406	0.0	1.184247916542581e-05
2.075	-0.00036987275460728165	0.0	-1.1396635523153138e-07	-0.01814725397459496	0.0	-0.499336064342468	0.0	9.611615484644254e-06	0.0	0.9998476380732678	0.0	0.017455676420670287	0.0	0.0	2.0003747695841945	0.0	0.0	2.00040812630973	0.0	-0.00036965133179113317	0.0	1.2796893925779197e-05	-0.00033995946968283616	0.0	1.1832751937227611e-05
2.08	-0.00037157360624357584	0.0	-1.1419012531411311e-07	-0.018149106487221033	0.0	-0.499336000210425	0.0	9.613019696478876e-06	0.0	0.9998476376536882	0.0	0.01745570045384648	0.0	0.0	2.000377524002992	0.0	0.0	2.000410880237015	0.0	-0.0003713511541191539	0.0	1.2856058128779615e-05	-0.00034002729336485564	0.0	1.1829596909611313e-05
2.085	-0.0003732750138172092	0.0	-1.1446284603491991e-07	-0.0181509674966728	0.0	-0.49933593578244106	0.0	9.615460022227436e-06	0.0	0.9998476372340849	0.0	0.0174557244883528	0.0	0.0	2.0003802785742355	0.0	0.0	2.0004136348634014	0.0	-0.00037305153374867834	0.0	1.291519298101948e-05	-0.00034006380528706494	0.0	1.1827486641556032e-05
2.09	-0.00037497621357442074	0.0	-1.1471891767079006e-07	-0.01815283700700096	0.0	-0.4993358710587382	0.0	9.617484648991749e-06	0.0	0.9998476368143926	0.0	0.017455748527918615	0.0	0.0	2.0003830337253437	0.0	0.0	2.000416390069801	0.0	-0.00037475170510145334	0.0	1.2974337385410022e-05	-0.00034003804008714484	0.0	1.1828581283362808e-05
2.095	-0.00037667744808337955	0.0	-1.1497938083084304e-07	-0.01815471501678038	0.0	-0.49933580603924177	0.0	9.619557076272526e-06	0.0	0.9998476363946345	0.0	0.01745577257122095	0.0	0.0	2.0003857893046915	0.0	0.0	2.000419145869907	0.0	-0.0003764519113323044	0.0	1.3033478780329092e-05	-0.0003400204910464032	0.0	1.1829141480447524e-05
2.1	-0.00037837845787991586	0.0	-1.152226849651936e-07	-0.018156601526047526	0.0	-0.49933574072399295	0.0	9.621207288067982e-06	0.0	0.9998476359748119	0.0	0.017455796618187785	0.0	0.0	2.0003885453040255	0.0	0.0	2.0004219021427643	0.0	-0.0003781518923829336	0.0	1.3092629646254751e-05	-0.0003399865491366215	0.0	1.1830503265619964e-05
2.105	-0.00038007939689595037	0.0	-1.1546161533640433e-07	-0.018158496534780768	0.0	-0.4993356751129673	0.0	9.622714130069915e-06	0.0	0.999847635554924	0.0	0.017455820668861845	0.0	0.0	2.000391301728242	0.0	0.0	2.0004246588473	0.0	-0.00037985180253773625	0.0	1.3151782578950468e-05	-0.00033997458226669666	0.0	1.1830802882535155e-05
2.11	-0.00038178026513148303	0.0	-1.1569617194447528e-07	-0.018160400042980102	0.0	-0.49933560920616477	0.0	9.62407760227833e-06	0.0	0.9998476351349707	0.0	0.01745584472324313	0.0	0.0	2.000394058577341	0.0	0.0	2.0004274159424416	0.0	-0.0003815516417967107	0.0	1.3210937578443826e-05	-0.00033996226831637516	0.0	1.1831166047422213e-05
2.115	-0.0003834810840998058	0.0	-1.1592768598730139e-07	-0.01816231205006525	0.0	-0.4993355430035743	0.0	9.625346698602961e-06	0.0	0.9998476347149621	0.0	0.017455868780760102	0.0	0.0	2.0003968157858196	0.0	0.0	2.0004301734011527	0.0	-0.0003832514317065195	0.0	1.3270094064889582e-05	-0.00033995478116695475	0.0	1.1831399316581817e-05
2.12	-0.00038518187114107633	0.0	-1.1615723043791877e-07	-0.018164232555568496	0.0	-0.49933547650518706	0.0	9.626560909148381e-06	0.0	0.9998476342949062	0.0	0.017455892840952076	0.0	0.0	2.0003995733008786	0.0	0.0	2.000432931207709	0.0	-0.00038495118963421737	0.0	1.3329251570922335e-05	-0.00033994695299251253	0.0	1.1831641768297898e-05
2.125	-0.00038688260906992206	0.0	-1.1638374190108119e-07	-0.018166161559953382	0.0	-0.49933540971101176	0.0	9.627681096314614e-06	0.0	0.9998476338747951	0.0	0.017455916904275625	0.0	0.0	2.0004023311748456	0.0	0.0	2.0004356893351756	0.0	-0.00038665089836777236	0.0	1.3388410559783622e-05	-0.0003399355213753552	0.0	1.18319801769824e-05
2.13	-0.00038858329788634294	0.0	-1.1660722037678865e-07	-0.01816809906321991	0.0	-0.4993353426210485	0.0	9.628707260101655e-06	0.0	0.9998476334546288	0.0	0.017455940970730745	0.0	0.0	2.0004050894077197	0.0	0.0	2.0004384477566166	0.0	-0.00038835055790718283	0.0	1.3447571031498269e-05	-0.0003399340362815988	0.0	1.1832058489381125e-05
2.1350000000000002	-0.0003902840158264007	0.0	-1.1683244648818646e-07	-0.01817004506474803	0.0	-0.49933527523527904	0.0	9.629791747658963e-06	0.0	0.9998476330344175	0.0	0.01745596503972911	0.0	0.0	2.000407847932074	0.0	0.0	2.0004412064887402	0.0	-0.00039005024660772195	0.0	1.350673093887811e-05	-0.0003399381957571424	0.0	1.1831989329785037e-05
2.14	-0.00039198473184493004	0.0	-1.1705752321705668e-07	-0.018171999564783783	0.0	-0.49933520755371064	0.0	9.630874105503973e-06	0.0	0.9998476326141571	0.0	0.01745598911150418	0.0	0.0	2.0004106067746648	0.0	0.0	2.0004439655309367	0.0	-0.0003917499333769182	0.0	1.3565891094315376e-05	-0.0003399362682989349	0.0	1.1832080293480653e-05
2.145	-0.0003936854381193066	0.0	-1.1728197256106386e-07	-0.018173962563389174	0.0	-0.4993351395763451	0.0	9.631939100833126e-06	0.0	0.9998476321938466	0.0	0.017456013186114772	0.0	0.0	2.0004133659422334	0.0	0.0	2.0004467248782314	0.0	-0.00039344961038022643	0.0	1.3625051702533376e-05	-0.00033993516499561106	0.0	1.1832144217396574e-05
2.15	-0.000395386148997035	0.0	-1.1750673633842998e-07	-0.018175934060548484	0.0	-0.4993350713031764	0.0	9.633013004333739e-06	0.0	0.9998476317734863	0.0	0.017456037263549943	0.0	0.0	2.0004161254335253	0.0	0.0	2.0004494845331773	0.0	-0.00039514929198928265	0.0	1.368421232313155e-05	-0.00033993960932006325	0.0	1.1832038726492905e-05
2.1550000000000002	-0.0003970868918349166	0.0	-1.177336103411224e-07	-0.018177914056231755	0.0	-0.4993350027341932	0.0	9.63414590708299e-06	0.0	0.9998476313530764	0.0	0.01745606134378881	0.0	0.0	2.0004188852461464	0.0	0.0	2.0004522445126756	0.0	-0.0003968490056069009	0.0	1.3743372116363707e-05	-0.0003399432075489513	0.0	1.1831959170901495e-05
2.16	-0.0003987876340857252	0.0	-1.1796045806032228e-07	-0.01817990255047463	0.0	-0.499334933869409	0.0	9.635278214188993e-06	0.0	0.9998476309326165	0.0	0.017456085426856206	0.0	0.0	2.000421645382945	0.0	0.0	2.000455004816556	0.0	-0.0003985487186311102	0.0	1.3802532081368461e-05	-0.0003399425455009118	0.0	1.1832010180128714e-05
2.165	-0.00040048837574946096	0.0	-1.1818727949602962e-07	-0.01818189954327711	0.0	-0.4993348647088239	0.0	9.636409925651751e-06	0.0	0.9998476305121068	0.0	0.017456109512752144	0.0	0.0	2.0004244058439205	0.0	0.0	2.000457765444648	0.0	-0.00040024843106190966	0.0	1.3861692218174582e-05	-0.0003399424268188104	0.0	1.183204454327819e-05
2.17	-0.0004021891168261238	0.0	-1.1841407464824443e-07	-0.01818390503463919	0.0	-0.49933479525243774	0.0	9.637541041471261e-06	0.0	0.999847630091547	0.0	0.017456133601476617	0.0	0.0	2.000427166629073	0.0	0.0	2.000460526396781	0.0	-0.000401948142899298	0.0	1.3920852526810833e-05	-0.00033994230813651476	0.0	1.1832078912181956e-05
2.1750000000000003	-0.00040388985731571397	0.0	-1.1864084351696674e-07	-0.01818591902456088	0.0	-0.49933472550025065	0.0	9.638671561647524e-06	0.0	0.9998476296709372	0.0	0.01745615769302963	0.0	0.0	2.0004299277384026	0.0	0.0	2.000463287672784	0.0	-0.0004036478541432745	0.0	1.3980013007305988e-05	-0.00033994218945400953	0.0	1.1832113286837726e-05
2.18	-0.0004055905972182311	0.0	-1.1886758610219651e-07	-0.018187941513042174	0.0	-0.49933465545226263	0.0	9.63980148618054e-06	0.0	0.9998476292502775	0.0	0.017456181787411176	0.0	0.0	2.000432689171909	0.0	0.0	2.0004660492724864	0.0	-0.00040534756479383775	0.0	1.4039173659688797e-05	-0.0003399420707712956	0.0	1.183214766724581e-05
2.185	-0.0004072913365336754	0.0	-1.1909430240393374e-07	-0.01818997250008307	0.0	-0.4993345851084736	0.0	9.640930815070308e-06	0.0	0.9998476288295678	0.0	0.01745620588462126	0.0	0.0	2.0004354509295923	0.0	0.0	2.000468811195718	0.0	-0.00040704727485098714	0.0	1.4098334483988038e-05	-0.0003399419520884046	0.0	1.1832182053408945e-05
2.19	-0.0004089920752620468	0.0	-1.1932099242217844e-07	-0.018192011985683574	0.0	-0.49933451446888366	0.0	9.64205954831683e-06	0.0	0.9998476284088081	0.0	0.017456229984659885	0.0	0.0	2.000438213011453	0.0	0.0	2.0004715734423075	0.0	-0.00040874698431472145	0.0	1.4157495480232474e-05	-0.0003399418334052841	0.0	1.183221644532383e-05
2.195	-0.0004106928134033454	0.0	-1.195476561569306e-07	-0.018194059969843683	0.0	-0.4993344435334927	0.0	9.643187685920105e-06	0.0	0.9998476279879985	0.0	0.017456254087527046	0.0	0.0	2.0004409754174906	0.0	0.0	2.000474336012085	0.0	-0.0004104466931850397	0.0	1.4216656648450866e-05	-0.00033994163222747357	0.0	1.1832250299584354e-05
2.2	-0.0004123935509575712	0.0	-1.1977429360819028e-07	-0.018196116452563395	0.0	-0.4993343723023008	0.0	9.644315227880135e-06	0.0	0.9998476275671391	0.0	0.017456278193222742	0.0	0.0	2.000443738147706	0.0	0.0	2.000477098904879	0.0	-0.00041214640146194117	0.0	1.427581798867199e-05	-0.00033994202034617833	0.0	1.1832288041390257e-05
2.205	-0.00041409429287251806	0.0	-1.200010450450478e-07	-0.018198181433933806	0.0	-0.4993343007752811	0.0	9.645449730537548e-06	0.0	0.9998476271462279	0.0	0.017456302301836438	0.0	0.0	2.00044650121235	0.0	0.0	2.0004798621226842	0.0	-0.00041384611409509665	0.0	1.4334979533529103e-05	-0.0003399429499994791	0.0	1.1832329356317036e-05
2.21	-0.00041579503843835607	0.0	-1.2022789034394554e-07	-0.018200254913941852	0.0	-0.49933422895243745	0.0	9.646590109829878e-06	0.0	0.9998476267252655	0.0	0.0174563264133553	0.0	0.0	2.000449264609954	0.0	0.0	2.0004826256671846	0.0	-0.00041554583037440603	0.0	1.4394141278374961e-05	-0.0003399433858873058	0.0	1.1832367424728849e-05
2.215	-0.00041749578484107493	0.0	-1.2045474972818927e-07	-0.018202336892535715	0.0	-0.49933415683378507	0.0	9.647732068161165e-06	0.0	0.9998476263042527	0.0	0.017456350527728443	0.0	0.0	2.000452028334686	0.0	0.0	2.0004853895388313	0.0	-0.00041724554748478966	0.0	1.4453303204695604e-05	-0.00033994350518411453	0.0	1.1832403413557038e-05
2.22	-0.00041919653208067486	0.0	-1.2068162319777897e-07	-0.018204427369715403	0.0	-0.49933408441932403	0.0	9.648875605531408e-06	0.0	0.9998476258831895	0.0	0.017456374644955874	0.0	0.0	2.0004547923865466	0.0	0.0	2.0004881537380776	0.0	-0.00041894526542624673	0.0	1.4512465312520275e-05	-0.0003399436713986194	0.0	1.1832439717284266e-05
2.225	-0.00042089728015715555	0.0	-1.2090851075271465e-07	-0.018206526345480912	0.0	-0.4993340117090543	0.0	9.65002072194061e-06	0.0	0.9998476254620758	0.0	0.017456398765037587	0.0	0.0	2.0004575567655336	0.0	0.0	2.0004909182653754	0.0	-0.0004206449841987755	0.0	1.457162760187819e-05	-0.00033994383761289126	0.0	1.1832476026856841e-05
2.23	-0.0004225980290705171	0.0	-1.211354123929963e-07	-0.018208633819832242	0.0	-0.4993339387029759	0.0	9.651167417388768e-06	0.0	0.9998476250409117	0.0	0.017456422887973583	0.0	0.0	2.000460321471649	0.0	0.0	2.0004936831211775	0.0	-0.0004223447038023754	0.0	1.463079007279859e-05	-0.0003399440038270393	0.0	1.183251234227832e-05
2.235	-0.00042429877882075955	0.0	-1.2136232811862394e-07	-0.018210749792769394	0.0	-0.49933386540108876	0.0	9.652315691875881e-06	0.0	0.9998476246196973	0.0	0.017456447013763865	0.0	0.0	2.000463086504893	0.0	0.0	2.0004964483059355	0.0	-0.00042404442423704555	0.0	1.4689952725310718e-05	-0.00033994417004097675	0.0	1.1832548663547319e-05
2.24	-0.0004259995294078831	0.0	-1.2158925792959759e-07	-0.018212874264292366	0.0	-0.49933379180339293	0.0	9.653465545401954e-06	0.0	0.9998476241984324	0.0	0.01745647114240843	0.0	0.0	2.000465851865264	0.0	0.0	2.000499213820103	0.0	-0.00042574414550278477	0.0	1.4749115559443806e-05	-0.0003399443362546649	0.0	1.1832584990661465e-05
2.245	-0.0004277002808318873	0.0	-1.218162018259172e-07	-0.01821500723440116	0.0	-0.49933371790988845	0.0	9.654616977966985e-06	0.0	0.9998476237771171	0.0	0.01745649527390728	0.0	0.0	2.0004686175527637	0.0	0.0	2.000501979664131	0.0	-0.0004274438675995919	0.0	1.4808278575227078e-05	-0.0003399445024681624	0.0	1.1832621323622285e-05
2.25	-0.0004294010330927725	0.0	-1.2204315980758278e-07	-0.018217148703095775	0.0	-0.49933364372057526	0.0	9.65576998957097e-06	0.0	0.9998476233557514	0.0	0.017456519408260415	0.0	0.0	2.0004713835673904	0.0	0.0	2.000504745838473	0.0	-0.00042914359052746606	0.0	1.4867441772689775e-05	-0.00033994473821661025	0.0	1.1832657385253493e-05
2.255	-0.00043110178619053854	0.0	-1.2227013187459436e-07	-0.018219298670376215	0.0	-0.49933356923545336	0.0	9.656924580213914e-06	0.0	0.9998476229343353	0.0	0.017456543545467832	0.0	0.0	2.0004741499091456	0.0	0.0	2.0005075123435807	0.0	-0.00043084331428640623	0.0	1.492660515186113e-05	-0.00033994443401041117	0.0	1.1832695605069706e-05
2.2600000000000002	-0.00043280253595620046	0.0	-1.2249695581390725e-07	-0.018221457136304384	0.0	-0.4993334944544725	0.0	9.658072458897121e-06	0.0	0.9998476225128677	0.0	0.017456567685583416	0.0	0.0	2.000476916584204	0.0	0.0	2.000510279177531	0.0	-0.000432543034704303	0.0	1.4985768729401017e-05	-0.00033994401185335994	0.0	1.1832734300897542e-05
2.265	-0.00043450328557987554	0.0	-1.227237557513378e-07	-0.018223624100832912	0.0	-0.49933341937767123	0.0	9.659219969912961e-06	0.0	0.9998476220913496	0.0	0.01745659182856594	0.0	0.0	2.00047968358784	0.0	0.0	2.0005130463402194	0.0	-0.0004342427549736626	0.0	1.5044932492612825e-05	-0.000339944057337402	0.0	1.183277113847793e-05
2.27	-0.0004362040352812306	0.0	-1.2295054023400193e-07	-0.018225799563958537	0.0	-0.4993333440050521	0.0	9.660367550119808e-06	0.0	0.9998476216697808	0.0	0.017456615974412556	0.0	0.0	2.0004824509197285	0.0	0.0	2.000515813831665	0.0	-0.00043594247531431523	0.0	1.5104096440649491e-05	-0.0003399440752597988	0.0	1.1832808091768044e-05
2.275	-0.00043790478506026563	0.0	-1.2317730926189962e-07	-0.01822798352568126	0.0	-0.4993332683366151	0.0	9.661515199517657e-06	0.0	0.9998476212481615	0.0	0.01745664012312327	0.0	0.0	2.00048521857987	0.0	0.0	2.0005185816518885	0.0	-0.00043764219572626025	0.0	1.5163260573540247e-05	-0.0003399440895181605	0.0	1.1832845065508386e-05
2.2800000000000002	-0.00043960553491698086	0.0	-1.2340406283503089e-07	-0.018230175986001077	0.0	-0.49933319237236035	0.0	9.66266291810651e-06	0.0	0.9998476208264916	0.0	0.01745666427469808	0.0	0.0	2.0004879865682637	0.0	0.0	2.0005213498009087	0.0	-0.00043934191620949645	0.0	1.5222424891314316e-05	-0.00033994410377628825	0.0	1.1832882045093112e-05
2.285	-0.00044130628485137586	0.0	-1.2363080095339574e-07	-0.01823237694491799	0.0	-0.4993331161122877	0.0	9.66381070588637e-06	0.0	0.9998476204047712	0.0	0.017456688429136988	0.0	0.0	2.00049075488491	0.0	0.0	2.000524118278746	0.0	-0.0004410416367640228	0.0	1.528158939400092e-05	-0.0003399441180341919	0.0	1.1832919030522678e-05
2.29	-0.00044300703486345087	0.0	-1.2385752361699414e-07	-0.018234586402431998	0.0	-0.4993330395563972	0.0	9.664958562857234e-06	0.0	0.9998476199830001	0.0	0.017456712586439993	0.0	0.0	2.000493523529809	0.0	0.0	2.00052688708542	0.0	-0.000442741357389838	0.0	1.5340754081629285e-05	-0.0003399441322918589	0.0	1.1832956021797137e-05
2.295	-0.00044470778495320587	0.0	-1.240842308258261e-07	-0.018236804358543104	0.0	-0.49933296270468885	0.0	9.6661064890191e-06	0.0	0.9998476195611784	0.0	0.017456736746607093	0.0	0.0	2.0004962925029597	0.0	0.0	2.0005296562209507	0.0	-0.00044444107808694117	0.0	1.5399918954228633e-05	-0.0003399441465494165	0.0	1.18329930189181e-05
2.3000000000000003	-0.000446408535120641	0.0	-1.2431092257989166e-07	-0.018239030813251306	0.0	-0.4993328855571627	0.0	9.667254484371973e-06	0.0	0.9998476191393062	0.0	0.017456760909638293	0.0	0.0	2.000499061804364	0.0	0.0	2.0005324256853583	0.0	-0.0004461407988553318	0.0	1.5459084011828204e-05	-0.0003399441649277736	0.0	1.1833036892409175e-05
2.305	-0.000448109285365756	0.0	-1.2453759887919076e-07	-0.018241265766556602	0.0	-0.4993328081138187	0.0	9.66840254891585e-06	0.0	0.9998476187173833	0.0	0.017456785075533585	0.0	0.0	2.0005018314340197	0.0	0.0	2.0005351954786614	0.0	-0.0004478405196950079	0.0	1.551824925445719e-05	-0.00033994416152450727	0.0	1.1833044458365239e-05
2.31	-0.00044981003542704794	0.0	-1.2476466309097818e-07	-0.018243509218504567	0.0	-0.49933273037454734	0.0	9.669550304723533e-06	0.0	0.9998476182954095	0.0	0.017456809244313413	0.0	0.0	2.0005046013942707	0.0	0.0	2.0005379656007727	0.0	-0.0004495402403587057	0.0	1.557741426991318e-05	-0.00033994406914949105	0.0	1.1832903698846862e-05
2.315	-0.0004515107848561395	0.0	-1.249928068353211e-07	-0.01824576116917334	0.0	-0.49933265233916063	0.0	9.670697103794883e-06	0.0	0.999847617873384	0.0	0.017456833416012802	0.0	0.0	2.000507371689131	0.0	0.0	2.0005407360514176	0.0	-0.0004512399604224621	0.0	1.5636578351406535e-05	-0.0003399440060670308	0.0	1.1832811781495457e-05
2.32	-0.0004532115343295911	0.0	-1.25220986520693e-07	-0.018248021618445017	0.0	-0.4993325740079421	0.0	9.671843923902936e-06	0.0	0.9998476174513079	0.0	0.01745685759057889	0.0	0.0	2.0005101423125415	0.0	0.0	2.0005435068306023	0.0	-0.0004529396805259957	0.0	1.5695742565492163e-05	-0.0003399440246844346	0.0	1.183285607830429e-05
2.325	-0.00045491228384740307	0.0	-1.2544920214709383e-07	-0.018250290566319598	0.0	-0.49933249538089186	0.0	9.67299076504769e-06	0.0	0.9998476170291811	0.0	0.017456881768011683	0.0	0.0	2.000512913264503	0.0	0.0	2.000546277938333	0.0	-0.00045463940066930606	0.0	1.5754906912199326e-05	-0.0003399440326396298	0.0	1.1832882605533733e-05
2.33	-0.0004566130334095749	0.0	-1.2567745371452356e-07	-0.01825256801279708	0.0	-0.49933241645800974	0.0	9.674137627229145e-06	0.0	0.9998476166070037	0.0	0.01745690594831117	0.0	0.0	2.0005156845450154	0.0	0.0	2.0005490493746154	0.0	-0.0004563391208523916	0.0	1.581407139155725e-05	-0.0003399440405945874	0.0	1.1832909138611542e-05
2.335	-0.0004583137830161068	0.0	-1.2590574122298225e-07	-0.018254853957877463	0.0	-0.4993323372392959	0.0	9.675284510447302e-06	0.0	0.9998476161847757	0.0	0.017456930131477363	0.0	0.0	2.000518456154079	0.0	0.0	2.0005518211394557	0.0	-0.0004580388410752516	0.0	1.587323600359519e-05	-0.000339944048549385	0.0	1.1832935677540203e-05
2.34	-0.0004600145326669988	0.0	-1.2613406467246986e-07	-0.01825714840156075	0.0	-0.49933225772475015	0.0	9.67643141470216e-06	0.0	0.999847615762497	0.0	0.01745695431751025	0.0	0.0	2.000521228091693	0.0	0.0	2.0005545932328594	0.0	-0.0004597385613378851	0.0	1.5932400748342398e-05	-0.00033994405650393967	0.0	1.1832962222317119e-05
2.345	-0.000461715282362251	0.0	-1.2636242406298646e-07	-0.01825945134384694	0.0	-0.4993321779143727	0.0	9.677578339993721e-06	0.0	0.9998476153401676	0.0	0.017456978506409843	0.0	0.0	2.000524000357858	0.0	0.0	2.0005573656548337	0.0	-0.00046143828164029073	0.0	1.5991565625828113e-05	-0.0003399440644583181	0.0	1.1832988772944094e-05
2.35	-0.0004634160321018632	0.0	-1.2659081939453194e-07	-0.018261762784736034	0.0	-0.49933209780816334	0.0	9.67872528632198e-06	0.0	0.9998476149177877	0.0	0.017457002698176134	0.0	0.0	2.0005267729525746	0.0	0.0	2.0005601384053833	0.0	-0.00046313800198246794	0.0	1.6050730636081588e-05	-0.00033994407241249685	0.0	1.1833015329420172e-05
2.355	-0.0004651167818858355	0.0	-1.2681925066710637e-07	-0.01826408272422803	0.0	-0.49933201740612226	0.0	9.679872253686944e-06	0.0	0.9998476144953571	0.0	0.017457026892809126	0.0	0.0	2.000529545875841	0.0	0.0	2.0005629114845154	0.0	-0.0004648377223644153	0.0	1.610989577913206e-05	-0.00033994408036640365	0.0	1.183304189174377e-05
2.36	-0.0004668175317141678	0.0	-1.2704771788070973e-07	-0.018266411162322926	0.0	-0.4993319367082494	0.0	9.68101924208861e-06	0.0	0.9998476140728758	0.0	0.017457051090308817	0.0	0.0	2.000532319127659	0.0	0.0	2.000565684892235	0.0	-0.00046653744278613176	0.0	1.6169061055008777e-05	-0.0003399440883202093	0.0	1.1833068459919012e-05
2.365	-0.00046851828158686045	0.0	-1.2727622103534207e-07	-0.018268748099020727	0.0	-0.4993318557145447	0.0	9.682166251526975e-06	0.0	0.999847613650344	0.0	0.01745707529067521	0.0	0.0	2.0005350927080277	0.0	0.0	2.000568458628549	0.0	-0.000468237163247617	0.0	1.6228226463741e-05	-0.00033994409627377455	0.0	1.1833095033943522e-05
2.37	-0.000470219031503913	0.0	-1.2750476013100329e-07	-0.018271093534321433	0.0	-0.4993317744250082	0.0	9.683313282002042e-06	0.0	0.9998476132277615	0.0	0.0174570994939083	0.0	0.0	2.0005378666169475	0.0	0.0	2.0005712326934626	0.0	-0.00046993688374886907	0.0	1.628739200535796e-05	-0.000339944104227067	0.0	1.1833121613814537e-05
2.375	-0.0004719197814653256	0.0	-1.2773333516769346e-07	-0.01827344746822504	0.0	-0.4993316928396399	0.0	9.68446033351381e-06	0.0	0.9998476128051283	0.0	0.01745712370000809	0.0	0.0	2.000540640854418	0.0	0.0	2.0005740070869824	0.0	-0.00047163660428988744	0.0	1.6346557679888897e-05	-0.0003399441121802266	0.0	1.1833148199536461e-05
2.38	-0.0004736205314710983	0.0	-1.2796194614541256e-07	-0.01827580990073155	0.0	-0.4993316109584398	0.0	9.68560740606228e-06	0.0	0.9998476123824446	0.0	0.017457147908974582	0.0	0.0	2.000543415420439	0.0	0.0	2.0005767818091145	0.0	-0.000473336324870671	0.0	1.6405723487363074e-05	-0.0003399441201331405	0.0	1.1833174791108728e-05
2.3850000000000002	-0.00047532128152123125	0.0	-1.2819059306416065e-07	-0.018278180831840962	0.0	-0.4993315287814079	0.0	9.686754499647452e-06	0.0	0.9998476119597101	0.0	0.017457172120807773	0.0	0.0	2.0005461903150112	0.0	0.0	2.0005795568598645	0.0	-0.00047503604549121856	0.0	1.6464889427809733e-05	-0.0003399441280858872	0.0	1.1833201388529983e-05
2.39	-0.00047702203161572416	0.0	-1.284192759239376e-07	-0.018280560261553277	0.0	-0.49933144630854426	0.0	9.687901614269325e-06	0.0	0.999847611536925	0.0	0.017457196335507668	0.0	0.0	2.0005489655381345	0.0	0.0	2.0005823322392384	0.0	-0.0004767357661515295	0.0	1.652405550125812e-05	-0.0003399441360384044	0.0	1.1833227991799041e-05
2.395	-0.00047872278175457714	0.0	-1.2864799472474352e-07	-0.018282948189868493	0.0	-0.49933136353984875	0.0	9.689048749927899e-06	0.0	0.9998476111140893	0.0	0.01745722055307426	0.0	0.0	2.0005517410898084	0.0	0.0	2.0005851079472428	0.0	-0.00047843548685160225	0.0	1.6583221707737473e-05	-0.00033994414399072376	0.0	1.1833254600917934e-05
2.4	-0.0004804235319377902	0.0	-1.288767494665784e-07	-0.018285344616786613	0.0	-0.49933128047532144	0.0	9.690195906623176e-06	0.0	0.999847610691203	0.0	0.017457244773507553	0.0	0.0	2.0005545169700336	0.0	0.0	2.0005878839838833	0.0	-0.0004801352075914364	0.0	1.6642388047277048e-05	-0.00033994415194286965	0.0	1.183328121588638e-05
2.4050000000000002	-0.00048212428216536356	0.0	-1.291055401494422e-07	-0.018287749542307635	0.0	-0.4993311971149624	0.0	9.691343084355153e-06	0.0	0.999847610268266	0.0	0.017457268996807544	0.0	0.0	2.0005572931788085	0.0	0.0	2.0005906603491663	0.0	-0.00048183492837103054	0.0	1.6701554519906086e-05	-0.0003399441598947454	0.0	1.1833307836704266e-05
2.41	-0.0004838250324372968	0.0	-1.2933436677333493e-07	-0.018290162966431562	0.0	-0.49933111345877146	0.0	9.692490283123832e-06	0.0	0.9998476098452783	0.0	0.01745729322297424	0.0	0.0	2.0005600697161356	0.0	0.0	2.000593437043097	0.0	-0.00048353464919038356	0.0	1.676072112565384e-05	-0.00033994416784643685	0.0	1.1833334463370858e-05
2.415	-0.00048552578275359013	0.0	-1.295632293382566e-07	-0.01829258488915839	0.0	-0.4993310295067488	0.0	9.693637502929212e-06	0.0	0.99984760942224	0.0	0.017457317452007633	0.0	0.0	2.000562846582013	0.0	0.0	2.0005962140656823	0.0	-0.0004852343700494946	0.0	1.6819887864549544e-05	-0.00033994417579794934	0.0	1.1833361095886722e-05
2.42	-0.00048722653311424356	0.0	-1.2979212784420718e-07	-0.018295015310488123	0.0	-0.4993309452588943	0.0	9.694784743771295e-06	0.0	0.9998476089991511	0.0	0.017457341683907723	0.0	0.0	2.000565623776441	0.0	0.0	2.0005989914169278	0.0	-0.00048693409094836273	0.0	1.6879054736622457e-05	-0.00033994418374927216	0.0	1.1833387734253325e-05
2.4250000000000003	-0.0004889272835192572	0.0	-1.3002106229118672e-07	-0.018297454230420757	0.0	-0.499330860715208	0.0	9.695932005650078e-06	0.0	0.9998476085760116	0.0	0.017457365918674517	0.0	0.0	2.0005684012994203	0.0	0.0	2.0006017690968396	0.0	-0.0004886338118869869	0.0	1.6938221741901824e-05	-0.0003399441917003691	0.0	1.1833414378467784e-05
2.43	-0.0004906280339686309	0.0	-1.302500326791952e-07	-0.018299901648956295	0.0	-0.4993307758756899	0.0	9.697079288565561e-06	0.0	0.9998476081528215	0.0	0.01745739015630801	0.0	0.0	2.0005711791509504	0.0	0.0	2.000604547105424	0.0	-0.000490333532865366	0.0	1.6997388880416882e-05	-0.00033994419965122476	0.0	1.1833441028530726e-05
2.435	-0.0004923287844623645	0.0	-1.304790390082326e-07	-0.018302357566094735	0.0	-0.49933069074034003	0.0	9.698226592517749e-06	0.0	0.9998476077295807	0.0	0.017457414396808205	0.0	0.0	2.000573957331032	0.0	0.0	2.0006073254426866	0.0	-0.0004920332538834989	0.0	1.705655615219688e-05	-0.0003399442076018871	0.0	1.1833467684444181e-05
2.44	-0.0004940295350004583	0.0	-1.3070808127829893e-07	-0.018304821981836077	0.0	-0.49933060530915835	0.0	9.699373917506636e-06	0.0	0.9998476073062892	0.0	0.0174574386401751	0.0	0.0	2.0005767358396636	0.0	0.0	2.0006101041086337	0.0	-0.0004937329749413845	0.0	1.7115723557271073e-05	-0.0003399442155523579	0.0	1.18334943462073e-05
2.445	-0.0004957302855829122	0.0	-1.3093715948939422e-07	-0.018307294896180323	0.0	-0.49933051958214486	0.0	9.700521263532225e-06	0.0	0.999847606882947	0.0	0.017457462886408696	0.0	0.0	2.0005795146768466	0.0	0.0	2.000612883103271	0.0	-0.0004954326960390222	0.0	1.71748910956687e-05	-0.00033994422350268414	0.0	1.183352101381924e-05
2.45	-0.0004974310362097263	0.0	-1.3116627364151844e-07	-0.01830977630912747	0.0	-0.49933043355929957	0.0	9.701668630594516e-06	0.0	0.9998476064595544	0.0	0.01745748713550899	0.0	0.0	2.0005822938425806	0.0	0.0	2.000615662426605	0.0	-0.000497132417176411	0.0	1.7234058767419013e-05	-0.00033994423145274836	0.0	1.183354768727966e-05
2.455	-0.0004991317868809004	0.0	-1.3139542373467158e-07	-0.018312266220677522	0.0	-0.4993303472406225	0.0	9.702816018693509e-06	0.0	0.999847606036111	0.0	0.017457511387475984	0.0	0.0	2.000585073336865	0.0	0.0	2.000618442078641	0.0	-0.0004988321383535493	0.0	1.7293226572551247e-05	-0.000339944239402565	0.0	1.183357436658918e-05
2.46	-0.0005008325375964345	0.0	-1.3162460976885369e-07	-0.018314764630830475	0.0	-0.4993302606261136	0.0	9.703963427829202e-06	0.0	0.999847605612617	0.0	0.017457535642309677	0.0	0.0	2.0005878531597	0.0	0.0	2.0006212220593858	0.0	-0.0005005318595704363	0.0	1.7352394511094656e-05	-0.00033994424735221543	0.0	1.1833601051750061e-05
2.465	-0.0005025332883563287	0.0	-1.318538317440647e-07	-0.01831727153958633	0.0	-0.49933017371577293	0.0	9.705110858001597e-06	0.0	0.9998476051890723	0.0	0.017457559900010074	0.0	0.0	2.000590633311087	0.0	0.0	2.0006240023688453	0.0	-0.0005022315808270711	0.0	1.7411562583078494e-05	-0.00033994425530169234	0.0	1.18336277427588e-05
2.47	-0.0005042340391605832	0.0	-1.3208308966030468e-07	-0.01831978694694509	0.0	-0.4993300865096004	0.0	9.706258309210694e-06	0.0	0.9998476047654771	0.0	0.017457584160577168	0.0	0.0	2.0005934137910244	0.0	0.0	2.000626783007025	0.0	-0.0005039313021234529	0.0	1.7470730788531994e-05	-0.0003399442632509561	0.0	1.1833654439616641e-05
2.475	-0.0005059347900091976	0.0	-1.3231238351757357e-07	-0.01832231085290675	0.0	-0.4993299990075961	0.0	9.707405781456492e-06	0.0	0.9998476043418312	0.0	0.017457608424010965	0.0	0.0	2.0005961945995128	0.0	0.0	2.0006295639739315	0.0	-0.0005056310234595803	0.0	1.752989912748441e-05	-0.0003399442711999596	0.0	1.1833681142323696e-05
2.48	-0.0005076355409021721	0.0	-1.3254171331587139e-07	-0.018324843257471315	0.0	-0.49932991120976006	0.0	9.70855327473899e-06	0.0	0.9998476039181345	0.0	0.01745763269031146	0.0	0.0	2.000598975736552	0.0	0.0	2.0006323452695707	0.0	-0.0005073307448354522	0.0	1.758906759996498e-05	-0.0003399442791488131	0.0	1.1833707850880192e-05
2.485	-0.0005093362918395068	0.0	-1.3277107905519816e-07	-0.018327384160638782	0.0	-0.49932982311609214	0.0	9.709700789058192e-06	0.0	0.9998476034943874	0.0	0.017457656959478655	0.0	0.0	2.000601757202142	0.0	0.0	2.0006351268939486	0.0	-0.0005090304662510681	0.0	1.764823620600296e-05	-0.00033994428709746604	0.0	1.1833734565286693e-05
2.49	-0.0005110370428212015	0.0	-1.3300048073555386e-07	-0.018329933562409154	0.0	-0.4993297347265925	0.0	9.710848324414095e-06	0.0	0.9998476030705895	0.0	0.01745768123151255	0.0	0.0	2.0006045389962823	0.0	0.0	2.0006379088470707	0.0	-0.0005107301877064264	0.0	1.7707404945627596e-05	-0.00033994429504584074	0.0	1.1833761285541334e-05
2.495	-0.0005127377938472562	0.0	-1.332299183569385e-07	-0.018332491462782426	0.0	-0.499329646041261	0.0	9.711995880806698e-06	0.0	0.999847602646741	0.0	0.017457705506413148	0.0	0.0	2.0006073211189745	0.0	0.0	2.000640691128944	0.0	-0.0005124299092015263	0.0	1.7766573818868122e-05	-0.0003399443029941106	0.0	1.183378801164598e-05
2.5	-0.0005144385449176712	0.0	-1.3345939191935208e-07	-0.0183350578617586	0.0	-0.4993295570600977	0.0	9.713143458236005e-06	0.0	0.999847602222842	0.0	0.017457729784180444	0.0	0.0	2.0006101035702173	0.0	0.0	2.000643473739574	0.0	-0.0005141296307363671	0.0	1.7825742825753805e-05	-0.0003399443109421184	0.0	1.1833814743599786e-05
2.505	-0.000516139296032446	0.0	-1.3368890142279458e-07	-0.01833763275933768	0.0	-0.4993294677831026	0.0	9.71429105670201e-06	0.0	0.9998476017988922	0.0	0.01745775406481444	0.0	0.0	2.000612886350011	0.0	0.0	2.0006462566789662	0.0	-0.0005158293523109471	0.0	1.7884911966313867e-05	-0.00033994431888991486	0.0	1.1833841481402069e-05
2.5100000000000002	-0.0005178400471915813	0.0	-1.3391844686726605e-07	-0.018340216155519663	0.0	-0.49932937821027573	0.0	9.715438676204719e-06	0.0	0.9998476013748918	0.0	0.017457778348315137	0.0	0.0	2.0006156694583552	0.0	0.0	2.0006490399471275	0.0	-0.0005175290739252659	0.0	1.7944081240577575e-05	-0.000339944326837527	0.0	1.183386822505498e-05
2.515	-0.0005195407983950764	0.0	-1.3414802825276642e-07	-0.018342808050304544	0.0	-0.49932928834161705	0.0	9.71658631674413e-06	0.0	0.9998476009508407	0.0	0.017457802634682534	0.0	0.0	2.0006184528952504	0.0	0.0	2.0006518235440636	0.0	-0.000519228795579322	0.0	1.8003250648574165e-05	-0.0003399443347849024	0.0	1.1833894974556765e-05
2.52	-0.0005212415496429316	0.0	-1.3437764557929573e-07	-0.018345408443692333	0.0	-0.49932919817712657	0.0	9.71773397832024e-06	0.0	0.999847600526739	0.0	0.017457826923916633	0.0	0.0	2.0006212366606975	0.0	0.0	2.0006546074697806	0.0	-0.0005209285172731147	0.0	1.806242019033289e-05	-0.00033994434273213684	0.0	1.1833921729907314e-05
2.525	-0.0005229423009351469	0.0	-1.34607298846854e-07	-0.01834801733568302	0.0	-0.4993291077168043	0.0	9.718881660933054e-06	0.0	0.9998476001025868	0.0	0.01745785121601743	0.0	0.0	2.0006240207546946	0.0	0.0	2.0006573917242845	0.0	-0.000522628239006643	0.0	1.8121589865882987e-05	-0.0003399443506791165	0.0	1.1833948491107358e-05
2.5300000000000002	-0.0005246430522717224	0.0	-1.348369880554412e-07	-0.018350634726276613	0.0	-0.4993290169606502	0.0	9.720029364582567e-06	0.0	0.9998475996783838	0.0	0.017457875510984926	0.0	0.0	2.0006268051772427	0.0	0.0	2.0006601763075813	0.0	-0.0005243279607799055	0.0	1.8180759675253712e-05	-0.00033994435862591906	0.0	1.1833975258157013e-05
2.535	-0.000526343803652658	0.0	-1.3506671320505732e-07	-0.01835326061547311	0.0	-0.49932892590866435	0.0	9.721177089268783e-06	0.0	0.9998475992541302	0.0	0.017457899808819125	0.0	0.0	2.000629589928342	0.0	0.0	2.000662961219677	0.0	-0.0005260276825929018	0.0	1.8239929618474304e-05	-0.0003399443665725048	0.0	1.18340020310543e-05
2.54	-0.0005280445550779535	0.0	-1.3529647429570237e-07	-0.018355895003272504	0.0	-0.49932883456084665	0.0	9.7223248349917e-06	0.0	0.999847598829826	0.0	0.01745792410952002	0.0	0.0	2.0006323750079917	0.0	0.0	2.000665746460577	0.0	-0.0005277274044456302	0.0	1.8299099695574006e-05	-0.00033994437451885203	0.0	1.1834028809802553e-05
2.545	-0.0005297453065476092	0.0	-1.3552627132737638e-07	-0.018358537889674807	0.0	-0.49932874291719714	0.0	9.723472601751318e-06	0.0	0.9998475984054711	0.0	0.01745794841308762	0.0	0.0	2.0006351604161927	0.0	0.0	2.000668532030289	0.0	-0.00052942712633809	0.0	1.835826990658208e-05	-0.00033994438246503117	0.0	1.1834055594400301e-05
2.5500000000000003	-0.000531446058061625	0.0	-1.357561043000793e-07	-0.01836118927468001	0.0	-0.4993286509777159	0.0	9.724620389547638e-06	0.0	0.9998475979810656	0.0	0.01745797271952192	0.0	0.0	2.0006379461529447	0.0	0.0	2.000671317928817	0.0	-0.0005311268482702801	0.0	1.841744025152776e-05	-0.0003399443904109935	0.0	1.1834082384846587e-05
2.555	-0.0005331468096200009	0.0	-1.359859732138112e-07	-0.018363849158288117	0.0	-0.4993285587424028	0.0	9.72576819838066e-06	0.0	0.9998475975566095	0.0	0.017457997028822916	0.0	0.0	2.000640732218247	0.0	0.0	2.0006741041561686	0.0	-0.0005328265702421996	0.0	1.8476610730440295e-05	-0.0003399443983567932	0.0	1.1834109181142087e-05
2.56	-0.0005348475612227369	0.0	-1.36215878068572e-07	-0.018366517540499123	0.0	-0.4993284662112579	0.0	9.726916028250382e-06	0.0	0.9998475971321027	0.0	0.017458021340990615	0.0	0.0	2.000643518612101	0.0	0.0	2.000676890712349	0.0	-0.0005345262922538477	0.0	1.853578134334893e-05	-0.0003399444063023453	0.0	1.1834135983287084e-05
2.565	-0.0005365483128698329	0.0	-1.3644581886436174e-07	-0.018369194421313035	0.0	-0.4993283733842812	0.0	9.728063879156807e-06	0.0	0.9998475967075453	0.0	0.017458045656025014	0.0	0.0	2.0006463053345054	0.0	0.0	2.0006796775973648	0.0	-0.0005362260143052227	0.0	1.8594952090282914e-05	-0.00033994441424764265	0.0	1.1834162791280729e-05
2.57	-0.0005382490645612889	0.0	-1.3667579560118041e-07	-0.01837187980072985	0.0	-0.49932828026147275	0.0	9.729211751099934e-06	0.0	0.9998475962829372	0.0	0.017458069973926113	0.0	0.0	2.0006490923854607	0.0	0.0	2.0006824648112214	0.0	-0.0005379257363963239	0.0	1.8654122971271486e-05	-0.00033994442219285144	0.0	1.1834189605124775e-05
2.575	-0.0005399498162971053	0.0	-1.3690580827902802e-07	-0.01837457367874957	0.0	-0.4993281868428325	0.0	9.73035964407976e-06	0.0	0.9998475958582785	0.0	0.017458094294693912	0.0	0.0	2.000651879764967	0.0	0.0	2.000685252353925	0.0	-0.0005396254585271508	0.0	1.871329398634391e-05	-0.00033994443013778017	0.0	1.1834216424818375e-05
2.58	-0.0005416505680772816	0.0	-1.3713585689790458e-07	-0.018377276055372187	0.0	-0.4993280931283604	0.0	9.73150755809629e-06	0.0	0.9998475954335692	0.0	0.01745811861832841	0.0	0.0	2.0006546674730243	0.0	0.0	2.000688040225482	0.0	-0.0005413251806977013	0.0	1.8772465135529416e-05	-0.0003399444380824577	0.0	1.1834243250359155e-05
2.585	-0.0005433513199018179	0.0	-1.3736594145781007e-07	-0.01837998693059771	0.0	-0.49932799911805653	0.0	9.73265549314952e-06	0.0	0.9998475950088092	0.0	0.017458142944829613	0.0	0.0	2.0006574555096326	0.0	0.0	2.000690828425898	0.0	-0.0005430249029079752	0.0	1.8831636418857253e-05	-0.00033994443340635877	0.0	1.1834251566768624e-05
2.59	-0.0005450520717707145	0.0	-1.375960619587445e-07	-0.018382706304426136	0.0	-0.49932790481192085	0.0	9.733803449239451e-06	0.0	0.9998475945839986	0.0	0.017458167274197512	0.0	0.0	2.000660243874792	0.0	0.0	2.000693616955179	0.0	-0.0005447246251579716	0.0	1.889080783635667e-05	-0.00033994451736246836	0.0	1.1834389915597918e-05
2.595	-0.0005467528244795352	0.0	-1.3782513478266558e-07	-0.018385434177141228	0.0	-0.49932781020929645	0.0	9.734952596739442e-06	0.0	0.9998475941591346	0.0	0.017458191606585287	0.0	0.0	2.000663032586057	0.0	0.0	2.000696405813667	0.0	-0.0005464243482049318	0.0	1.8949980498955818e-05	-0.00033994469913532506	0.0	1.1834671771210952e-05
2.6	-0.0005484535780101587	0.0	-1.380531846117068e-07	-0.01838817054873652	0.0	-0.4993277153101984	0.0	9.736102908991287e-06	0.0	0.999847593734217	0.0	0.017458215941989447	0.0	0.0	2.000665821643028	0.0	0.0	2.000699195001695	0.0	-0.0005481240720316059	0.0	1.900915438138206e-05	-0.00033994478588425086	0.0	1.183481423016129e-05
2.605	-0.0005501543316386511	0.0	-1.3828119749885234e-07	-0.018390915418953806	0.0	-0.4993276201152243	0.0	9.737253320997823e-06	0.0	0.9998475933092488	0.0	0.017458240280270612	0.0	0.0	2.000668611029731	0.0	0.0	2.0007019845192917	0.0	-0.0005498237959489302	0.0	1.906832847278771e-05	-0.00033994479252983555	0.0	1.1834839181027802e-05
2.61	-0.0005518550853650123	0.0	-1.385091734441023e-07	-0.018393668787793076	0.0	-0.49932752462437424	0.0	9.73840383275905e-06	0.0	0.9998475928842298	0.0	0.01745826462142878	0.0	0.0	2.0006714007461657	0.0	0.0	2.000704774366486	0.0	-0.0005515235199569039	0.0	1.9127502773202125e-05	-0.0003399448106595354	0.0	1.183488098571612e-05
2.615	-0.0005535558391892425	0.0	-1.387371124474566e-07	-0.018396430655254335	0.0	-0.49932742883764825	0.0	9.739554444274964e-06	0.0	0.9998475924591598	0.0	0.01745828896546395	0.0	0.0	2.0006741907923313	0.0	0.0	2.0007075645433057	0.0	-0.0005532232440555252	0.0	1.9186677282654658e-05	-0.00033994482878897507	0.0	1.1834922796276406e-05
2.62	-0.0005552565931113414	0.0	-1.3896501450891526e-07	-0.018399201021337585	0.0	-0.49932733275504626	0.0	9.740705155545571e-06	0.0	0.999847592034039	0.0	0.017458313312376125	0.0	0.0	2.0006769811682297	0.0	0.0	2.00071035504978	0.0	-0.0005549229682447934	0.0	1.9245852001174676e-05	-0.00033994484691829364	0.0	1.1834964612707819e-05
2.625	-0.000556957347131309	0.0	-1.3919287962847828e-07	-0.01840197988604282	0.0	-0.4993272363765683	0.0	9.74185596657087e-06	0.0	0.9998475916088674	0.0	0.0174583376621653	0.0	0.0	2.000679771873859	0.0	0.0	2.0007131458859377	0.0	-0.0005566226925247077	0.0	1.9305026928791522e-05	-0.0003399448650473683	0.0	1.1835006435010356e-05
2.63	-0.0005586581012491455	0.0	-1.3942070780614567e-07	-0.018404767249370044	0.0	-0.4993271397022143	0.0	9.743006877350856e-06	0.0	0.999847591183645	0.0	0.017458362014831478	0.0	0.0	2.0006825629092195	0.0	0.0	2.000715937051807	0.0	-0.0005583224168952668	0.0	1.936420206553457e-05	-0.0003399448831762658	0.0	1.1835048263187347e-05
2.6350000000000002	-0.000560358855464851	0.0	-1.3964849904191745e-07	-0.018407563111319258	0.0	-0.49932704273198436	0.0	9.744157887885534e-06	0.0	0.9998475907583717	0.0	0.017458386370374657	0.0	0.0	2.0006853542743124	0.0	0.0	2.000718728547416	0.0	-0.00056002214135647	0.0	1.942337741143318e-05	-0.0003399449013049302	0.0	1.1835090097235012e-05
2.64	-0.0005620596097784252	0.0	-1.3987625333579358e-07	-0.018410367471890458	0.0	-0.4993269454658784	0.0	9.745308998174902e-06	0.0	0.9998475903330476	0.0	0.01745841072879484	0.0	0.0	2.0006881459691366	0.0	0.0	2.0007215203727946	0.0	-0.0005617218659083157	0.0	1.9482552966516703e-05	-0.00033994491943333807	0.0	1.1835131937152727e-05
2.645	-0.0005637603641898681	0.0	-1.4010397068777404e-07	-0.018413180331083648	0.0	-0.49932684790389653	0.0	9.746460208218962e-06	0.0	0.9998475899076728	0.0	0.017458435090092025	0.0	0.0	2.000690937993693	0.0	0.0	2.00072431252797	0.0	-0.0005634215905508032	0.0	1.9541728730814497e-05	-0.00033994493756159597	0.0	1.1835173782943374e-05
2.65	-0.0005654611186991799	0.0	-1.403316510978589e-07	-0.018416001688898828	0.0	-0.4993267500460386	0.0	9.747611518017712e-06	0.0	0.999847589482247	0.0	0.017458459454266214	0.0	0.0	2.0006937303479804	0.0	0.0	2.0007271050129716	0.0	-0.0005651213152839314	0.0	1.9600904704355924e-05	-0.00033994495568966045	0.0	1.1835215634606783e-05
2.6550000000000002	-0.0005671618733063607	0.0	-1.4055929456604815e-07	-0.01841883154533599	0.0	-0.49932665189230474	0.0	9.748762927571152e-06	0.0	0.9998475890567704	0.0	0.017458483821317403	0.0	0.0	2.000696523032	0.0	0.0	2.000729897827828	0.0	-0.0005668210401076994	0.0	1.966008088717035e-05	-0.0003399449738174919	0.0	1.183525749214126e-05
2.66	-0.0005688626280114101	0.0	-1.4078690109234172e-07	-0.01842166990039515	0.0	-0.4993265534426949	0.0	9.749914436879282e-06	0.0	0.999847588631243	0.0	0.017458508191245597	0.0	0.0	2.000699316045751	0.0	0.0	2.000732690972567	0.0	-0.0005685207650221059	0.0	1.971925727928712e-05	-0.00033994499194510105	0.0	1.1835299355546012e-05
2.665	-0.0005705633828143284	0.0	-1.4101447067673968e-07	-0.018424516754076293	0.0	-0.4993264546972091	0.0	9.751066045942102e-06	0.0	0.9998475882056648	0.0	0.01745853256405079	0.0	0.0	2.0007021093892328	0.0	0.0	2.000735484447218	0.0	-0.00057022049002715	0.0	1.97784338807356e-05	-0.0003399450100725024	0.0	1.1835341224824374e-05
2.67	-0.0005722641377151154	0.0	-1.41242003319242e-07	-0.018427372106379424	0.0	-0.49932635565584726	0.0	9.752217754759613e-06	0.0	0.9998475877800357	0.0	0.01745855693973299	0.0	0.0	2.0007049030624473	0.0	0.0	2.0007382782518093	0.0	-0.0005719202151228306	0.0	1.983761069154515e-05	-0.00033994502819973023	0.0	1.1835383099975782e-05
2.6750000000000003	-0.0005739648927137714	0.0	-1.414694990198487e-07	-0.018430235957304544	0.0	-0.4993262563186095	0.0	9.753369563331815e-06	0.0	0.9998475873543559	0.0	0.017458581318292192	0.0	0.0	2.0007076970653936	0.0	0.0	2.0007410723863694	0.0	-0.000573619940309147	0.0	1.989678771174514e-05	-0.0003399450463267286	0.0	1.1835424980996279e-05
2.68	-0.0005756656478102961	0.0	-1.4169695777855973e-07	-0.018433108306851652	0.0	-0.49932615668549574	0.0	9.754521471658708e-06	0.0	0.9998475869286251	0.0	0.017458605699728395	0.0	0.0	2.000710491398071	0.0	0.0	2.0007438668509265	0.0	-0.0005753196655860975	0.0	1.99559649413649e-05	-0.0003399450644534921	0.0	1.1835466867888747e-05
2.685	-0.0005773664030046897	0.0	-1.4192437959537516e-07	-0.01843598915502075	0.0	-0.49932605675650593	0.0	9.755673479740291e-06	0.0	0.9998475865028436	0.0	0.017458630084041603	0.0	0.0	2.0007132860604804	0.0	0.0	2.0007466616455103	0.0	-0.0005770193909536817	0.0	2.0015142380433816e-05	-0.0003399450825801092	0.0	1.1835508760655164e-05
2.69	-0.0005790671582969521	0.0	-1.4215176447029493e-07	-0.018438878501811834	0.0	-0.49932595653164025	0.0	9.756825587576564e-06	0.0	0.9998475860770112	0.0	0.01745865447123181	0.0	0.0	2.000716081052621	0.0	0.0	2.0007494567701483	0.0	-0.0005787191164118982	0.0	2.007432002898124e-05	-0.00033994510070648235	0.0	1.183555065929248e-05
2.695	-0.0005807679136870833	0.0	-1.4237911240331907e-07	-0.018441776347224905	0.0	-0.4993258560108985	0.0	9.757977795167527e-06	0.0	0.9998475856511281	0.0	0.017458678861299023	0.0	0.0	2.0007188763744943	0.0	0.0	2.0007522522248697	0.0	-0.0005804188419607462	0.0	2.0133497887036526e-05	-0.000339945118832673	0.0	1.1835592563800241e-05
2.7	-0.0005824686691750833	0.0	-1.426064233944476e-07	-0.01844468269125997	0.0	-0.4993257551942808	0.0	9.759130102513182e-06	0.0	0.999847585225194	0.0	0.017458703254243237	0.0	0.0	2.0007216720260983	0.0	0.0	2.0007550480097023	0.0	-0.0005821185676002246	0.0	2.019267595462903e-05	-0.0003399451369586197	0.0	1.1835634474181158e-05
2.705	-0.0005841694247609523	0.0	-1.4283369744368047e-07	-0.018447597533917018	0.0	-0.49932565408178714	0.0	9.760282509613527e-06	0.0	0.9998475847992092	0.0	0.017458727650064454	0.0	0.0	2.0007244680074345	0.0	0.0	2.0007578441246756	0.0	-0.0005838182933303321	0.0	2.0251854231788122e-05	-0.0003399451550843478	0.0	1.1835676390432524e-05
2.71	-0.0005858701804446898	0.0	-1.430609345510177e-07	-0.018450520875196056	0.0	-0.4993255526734175	0.0	9.76143501646856e-06	0.0	0.9998475843731734	0.0	0.017458752048762672	0.0	0.0	2.0007272643185017	0.0	0.0	2.000760640569818	0.0	-0.0005855180191510677	0.0	2.0311032718543145e-05	-0.0003399451732098843	0.0	1.1835718312556142e-05
2.715	-0.0005875709362262963	0.0	-1.432881347164593e-07	-0.018453452715097084	0.0	-0.49932545096917186	0.0	9.762587623078286e-06	0.0	0.999847583947087	0.0	0.017458776450337894	0.0	0.0	2.000730060959301	0.0	0.0	2.0007634373451575	0.0	-0.0005872177450624306	0.0	2.0370211414923474e-05	-0.00033994519133525095	0.0	1.1835760240553144e-05
2.72	-0.0005892716921057717	0.0	-1.435152979400053e-07	-0.0184563930536201	0.0	-0.49932534896905023	0.0	9.763740329442703e-06	0.0	0.9998475835209496	0.0	0.017458800854790117	0.0	0.0	2.000732857929832	0.0	0.0	2.0007662344507233	0.0	-0.0005889174710644199	0.0	2.0429390320958464e-05	-0.0003399452094604026	0.0	1.1835802174421551e-05
2.725	-0.0005909724480831159	0.0	-1.4374242422165565e-07	-0.018459341890765105	0.0	-0.4993252466730526	0.0	9.764893135561809e-06	0.0	0.9998475830947615	0.0	0.017458825262119344	0.0	0.0	2.0007356552300943	0.0	0.0	2.0007690318865436	0.0	-0.0005906171971570343	0.0	2.0488569436677476e-05	-0.0003399452275852958	0.0	1.1835844114160802e-05
2.73	-0.0005926732041583289	0.0	-1.4396951356141036e-07	-0.018462299226532097	0.0	-0.49932514408117906	0.0	9.766046041435605e-06	0.0	0.9998475826685225	0.0	0.017458849672325576	0.0	0.0	2.000738452860089	0.0	0.0	2.0007718296526473	0.0	-0.0005923169233402726	0.0	2.054774876210986e-05	-0.00033994524570998846	0.0	1.1835886059771345e-05
2.735	-0.0005943739603314106	0.0	-1.441965659592694e-07	-0.018465265060921075	0.0	-0.49932504119342946	0.0	9.767199047064092e-06	0.0	0.9998475822422327	0.0	0.017458874085408808	0.0	0.0	2.0007412508198152	0.0	0.0	2.0007746277490623	0.0	-0.0005940166496141339	0.0	2.0606928297284977e-05	-0.0003399452638345311	0.0	1.1835928011255102e-05
2.74	-0.0005960747166023613	0.0	-1.4442358141523287e-07	-0.018468239393932044	0.0	-0.49932493800980393	0.0	9.76835215244727e-06	0.0	0.9998475818158921	0.0	0.01745889850136904	0.0	0.0	2.0007440491092723	0.0	0.0	2.000777426175818	0.0	-0.0005957163759786175	0.0	2.0666108042232196e-05	-0.0003399452819588172	0.0	1.1835969968610153e-05
2.745	-0.0005977754729711807	0.0	-1.4465055992930066e-07	-0.018471222225565003	0.0	-0.4993248345303024	0.0	9.769505357585139e-06	0.0	0.9998475813895006	0.0	0.017458922920206277	0.0	0.0	2.000746847728462	0.0	0.0	2.0007802249329427	0.0	-0.0005974161024337218	0.0	2.0725287996980863e-05	-0.0003399453000829045	0.0	1.1836011931835762e-05
2.75	-0.0005994762294378689	0.0	-1.4487750150147283e-07	-0.01847421355581995	0.0	-0.4993247307549249	0.0	9.770658662477697e-06	0.0	0.9998475809630583	0.0	0.01745894734192052	0.0	0.0	2.0007496466773826	0.0	0.0	2.000783024020465	0.0	-0.0005991158289794462	0.0	2.0784468161560343e-05	-0.0003399453182067659	0.0	1.1836053900934812e-05
2.755	-0.0006011769860024259	0.0	-1.4510440613174935e-07	-0.01847721338469688	0.0	-0.49932462668367145	0.0	9.771812067124947e-06	0.0	0.9998475805365651	0.0	0.01745897176651176	0.0	0.0	2.0007524459560355	0.0	0.0	2.000785823438413	0.0	-0.0006008155556157891	0.0	2.0843648536e-05	-0.00033994533633047554	0.0	1.1836095875906284e-05
2.7600000000000002	-0.000602877742664852	0.0	-1.4533127382013028e-07	-0.018480221712195804	0.0	-0.49932452231654195	0.0	9.772965571526886e-06	0.0	0.9998475801100212	0.0	0.017458996193980007	0.0	0.0	2.0007552455644197	0.0	0.0	2.000788623186816	0.0	-0.0006025152823427506	0.0	2.090282912032919e-05	-0.00033994535445396653	0.0	1.1836137856747637e-05
2.765	-0.0006045784994251466	0.0	-1.4555810456661554e-07	-0.018483238538316717	0.0	-0.4993244176535365	0.0	9.774119175683516e-06	0.0	0.9998475796834264	0.0	0.017459020624325253	0.0	0.0	2.0007580455025358	0.0	0.0	2.000791423265702	0.0	-0.0006042150091603284	0.0	2.0962009914577264e-05	-0.0003399453725771847	0.0	1.1836179843461697e-05
2.77	-0.0006062792562833102	0.0	-1.4578489837120515e-07	-0.018486263863059613	0.0	-0.4993243126946551	0.0	9.775272879594836e-06	0.0	0.9998475792567808	0.0	0.017459045057547504	0.0	0.0	2.0007608457703836	0.0	0.0	2.0007942236751	0.0	-0.0006059147360685221	0.0	2.1021190918773593e-05	-0.00033994539070022936	0.0	1.1836221836047219e-05
2.775	-0.0006079800132393424	0.0	-1.4601165523389917e-07	-0.018489297686424502	0.0	-0.4993242074398977	0.0	9.776426683260848e-06	0.0	0.9998475788300843	0.0	0.01745906949364676	0.0	0.0	2.000763646367963	0.0	0.0	2.0007970244150384	0.0	-0.0006076144630673304	0.0	2.1080372132947522e-05	-0.0003399454088230644	0.0	1.183626383450494e-05
2.7800000000000002	-0.0006096807702932437	0.0	-1.4623837515469754e-07	-0.01849234000841138	0.0	-0.4993241018892643	0.0	9.77758058668155e-06	0.0	0.999847578403337	0.0	0.017459093932623012	0.0	0.0	2.0007664472952738	0.0	0.0	2.0007998254855455	0.0	-0.0006093141901567526	0.0	2.1139553557128428e-05	-0.00033994542694575666	0.0	1.1836305838834743e-05
2.785	-0.0006113815274450137	0.0	-1.4646505813360026e-07	-0.018495390829020242	0.0	-0.4993239960427549	0.0	9.77873458985694e-06	0.0	0.999847577976539	0.0	0.017459118374476272	0.0	0.0	2.000769248552317	0.0	0.0	2.0008026268866503	0.0	-0.0006110139173367875	0.0	2.1198735191345654e-05	-0.00033994544506813634	0.0	1.1836347849035105e-05
2.79	-0.0006130822846946524	0.0	-1.4669170417060735e-07	-0.018498450148251095	0.0	-0.4993238899003696	0.0	9.779888692787023e-06	0.0	0.99984757754969	0.0	0.017459142819206533	0.0	0.0	2.0007720501390915	0.0	0.0	2.0008054286183814	0.0	-0.0006127136446074336	0.0	2.1257917035628566e-05	-0.000339945463190339	0.0	1.183638986510727e-05
2.795	-0.00061478304204216	0.0	-1.469183132657188e-07	-0.018501517966103935	0.0	-0.49932378346210826	0.0	9.781042895471795e-06	0.0	0.9998475771227903	0.0	0.017459167266813794	0.0	0.0	2.000774852055597	0.0	0.0	2.000808230680767	0.0	-0.0006144133719686906	0.0	2.1317099090006517e-05	-0.000339945481312388	0.0	1.1836431887053327e-05
2.8000000000000003	-0.0006164837994875366	0.0	-1.4714488541893463e-07	-0.018504594282578765	0.0	-0.49932367672797096	0.0	9.782197197911258e-06	0.0	0.9998475766958397	0.0	0.01745919171729806	0.0	0.0	2.000777654301835	0.0	0.0	2.0008110330738362	0.0	-0.0006161130994205571	0.0	2.1376281354508884e-05	-0.00033994549943417135	0.0	1.183647391486983e-05
2.805	-0.0006181845570307819	0.0	-1.4737142063025481e-07	-0.018507679097675582	0.0	-0.49932356969795766	0.0	9.783351600105412e-06	0.0	0.9998475762688382	0.0	0.01745921617065933	0.0	0.0	2.0007804568778043	0.0	0.0	2.0008138357976173	0.0	-0.000617812826963032	0.0	2.1435463829165e-05	-0.0003399455175557848	0.0	1.1836515948557681e-05
2.81	-0.000619885314671896	0.0	-1.4759791889967937e-07	-0.01851077241139439	0.0	-0.49932346237206837	0.0	9.784506102054257e-06	0.0	0.9998475758417861	0.0	0.0174592406268976	0.0	0.0	2.000783259783506	0.0	0.0	2.0008166388521387	0.0	-0.0006195125545961146	0.0	2.149464651400425e-05	-0.0003399455356771761	0.0	1.1836557988118579e-05
2.815	-0.0006215860724108789	0.0	-1.478243802272083e-07	-0.018513874223735183	0.0	-0.4993233547503031	0.0	9.785660703757791e-06	0.0	0.9998475754146829	0.0	0.017459265086012875	0.0	0.0	2.0007860630189382	0.0	0.0	2.000819442237429	0.0	-0.0006212122823198034	0.0	2.155382940905597e-05	-0.00033994555379834147	0.0	1.1836600033549922e-05
2.82	-0.0006232868302477306	0.0	-1.4805080461284158e-07	-0.018516984534697967	0.0	-0.4993232468326619	0.0	9.786815405216017e-06	0.0	0.9998475749875291	0.0	0.01745928954800515	0.0	0.0	2.000788866584103	0.0	0.0	2.000822245953517	0.0	-0.0006229120101340978	0.0	2.1613012514349536e-05	-0.00033994557191935505	0.0	1.1836642084854874e-05
2.825	-0.0006249875881824513	0.0	-1.4827719205657924e-07	-0.018520103344282737	0.0	-0.4993231386191447	0.0	9.787970206428932e-06	0.0	0.9998475745603244	0.0	0.01745931401287443	0.0	0.0	2.0007916704789994	0.0	0.0	2.000825050000431	0.0	-0.0006246117380389965	0.0	2.1672195829914305e-05	-0.0003399455900400633	0.0	1.1836684142030047e-05
2.83	-0.0006266883462150406	0.0	-1.4850354255842124e-07	-0.018523230652489498	0.0	-0.4993230301097515	0.0	9.789125107396538e-06	0.0	0.9998475741330688	0.0	0.01745933848062071	0.0	0.0	2.000794474703627	0.0	0.0	2.0008278543782	0.0	-0.0006263114660344982	0.0	2.1731379355779624e-05	-0.0003399456081606576	0.0	1.183672620507753e-05
2.835	-0.0006283891043454989	0.0	-1.4872985611836763e-07	-0.018526366459318246	0.0	-0.4993229213044823	0.0	9.790280108118835e-06	0.0	0.9998475737057625	0.0	0.017459362951243996	0.0	0.0	2.000797279257987	0.0	0.0	2.0008306590868523	0.0	-0.0006280111941206027	0.0	2.1790563091974866e-05	-0.0003399456262810026	0.0	1.1836768273996928e-05
2.84	-0.0006300898625738259	0.0	-1.4895613273641836e-07	-0.01852951076476898	0.0	-0.49932281220333713	0.0	9.791435208595822e-06	0.0	0.9998475732784052	0.0	0.01745938742474428	0.0	0.0	2.000800084142078	0.0	0.0	2.0008334641264165	0.0	-0.0006297109222973079	0.0	2.1849747038529378e-05	-0.0003399456444011452	0.0	1.1836810348787675e-05
2.845	-0.0006317906209000218	0.0	-1.491823724125735e-07	-0.018532663568841704	0.0	-0.499322702806316	0.0	9.792590408827499e-06	0.0	0.9998475728509972	0.0	0.01745941190112157	0.0	0.0	2.000802889355901	0.0	0.0	2.000836269496921	0.0	-0.0006314106505646138	0.0	2.190893119547253e-05	-0.0003399456625210999	0.0	1.1836852429450958e-05
2.85	-0.0006334913793240865	0.0	-1.4940857514683298e-07	-0.01853582487153642	0.0	-0.49932259311341887	0.0	9.793745708813868e-06	0.0	0.9998475724235384	0.0	0.017459436380375865	0.0	0.0	2.000805694899456	0.0	0.0	2.0008390751983947	0.0	-0.0006331103789225185	0.0	2.1968115562833673e-05	-0.0003399456806407727	0.0	1.1836894515984406e-05
2.855	-0.0006351921378460199	0.0	-1.4963474093919681e-07	-0.01853899467285312	0.0	-0.4993224831246458	0.0	9.794901108554925e-06	0.0	0.9998475719960287	0.0	0.01745946086250716	0.0	0.0	2.000808500772742	0.0	0.0	2.000841881230866	0.0	-0.0006348101073710212	0.0	2.2027300140642162e-05	-0.0003399456987602937	0.0	1.1836936608390954e-05
2.86	-0.0006368928964658222	0.0	-1.4986086978966502e-07	-0.01854217297279181	0.0	-0.4993223728399967	0.0	9.796056608050674e-06	0.0	0.9998475715684682	0.0	0.017459485347515454	0.0	0.0	2.00081130697576	0.0	0.0	2.0008446875943635	0.0	-0.000636509835910121	0.0	2.208648492892737e-05	-0.0003399457168796159	0.0	1.1836978706670603e-05
2.865	-0.0006385936551834934	0.0	-1.500869616982376e-07	-0.01854535977135249	0.0	-0.4993222622594716	0.0	9.797212207301113e-06	0.0	0.9998475711408568	0.0	0.017459509835400754	0.0	0.0	2.00081411350851	0.0	0.0	2.000847494288916	0.0	-0.0006382095645398171	0.0	2.2145669927718652e-05	-0.00033994573499875747	0.0	1.1837020810821037e-05
2.87	-0.0006402944139990334	0.0	-1.5031301666491455e-07	-0.018548555068535155	0.0	-0.49932215138307057	0.0	9.798367906306243e-06	0.0	0.9998475707131946	0.0	0.017459534326163057	0.0	0.0	2.0008169203709913	0.0	0.0	2.0008503013145518	0.0	-0.0006399092932601082	0.0	2.2204855137045365e-05	-0.00033994575869613725	0.0	1.183707205405192e-05
2.875	-0.0006419951729124421	0.0	-1.5053903468969585e-07	-0.01855175886433981	0.0	-0.49932204021079357	0.0	9.799523705066062e-06	0.0	0.9998475702854817	0.0	0.01745955881980236	0.0	0.0	2.0008197275632047	0.0	0.0	2.0008531086712993	0.0	-0.0006416090220709929	0.0	2.226404055693686e-05	-0.00033994573972082835	0.0	1.1837053439285944e-05
2.88	-0.0006436959315700807	0.0	-1.5076555210294564e-07	-0.018554971159218905	0.0	-0.4993219287415466	0.0	9.800679556428249e-06	0.0	0.9998475698577126	0.0	0.01745958331659664	0.0	0.0	2.0008225351170066	0.0	0.0	2.000855916359174	0.0	-0.0006433087506377595	0.0	2.2323225639429924e-05	-0.0003399457053542288	0.0	1.1837009632026071e-05
2.8850000000000002	-0.0006453966902016122	0.0	-1.5099222059656412e-07	-0.018558191952878604	0.0	-0.4993218169760401	0.0	9.801835491014856e-06	0.0	0.9998475694298912	0.0	0.01745960781636537	0.0	0.0	2.0008253430117096	0.0	0.0	2.0008587243781997	0.0	-0.0006450084791777782	0.0	2.2382410740437973e-05	-0.00033994571383621526	0.0	1.1837035983590536e-05
2.89	-0.0006470974489148992	0.0	-1.5121887658568736e-07	-0.018561421245180912	0.0	-0.49932170491460776	0.0	9.8029915232077e-06	0.0	0.9998475690020185	0.0	0.01745963231902377	0.0	0.0	2.000828151237595	0.0	0.0	2.000861532728404	0.0	-0.0006467082077931362	0.0	2.2441596027132692e-05	-0.00033994573060553774	0.0	1.1837075909577168e-05
2.895	-0.0006487982077099417	0.0	-1.5144552007031538e-07	-0.01856465903612582	0.0	-0.4993215925572496	0.0	9.804147653006783e-06	0.0	0.9998475685740948	0.0	0.01745965682457183	0.0	0.0	2.0008309597946634	0.0	0.0	2.000864341409815	0.0	-0.0006484079364838332	0.0	2.2500781499543577e-05	-0.00033994574567322296	0.0	1.183711305575995e-05
2.9	-0.0006504989665867399	0.0	-1.5167215105044815e-07	-0.018567905325713334	0.0	-0.49932147990396564	0.0	9.805303880412102e-06	0.0	0.9998475681461201	0.0	0.01745968133300957	0.0	0.0	2.0008337686829156	0.0	0.0	2.000867150422461	0.0	-0.0006501076652498681	0.0	2.255996715770012e-05	-0.0003399457607407546	0.0	1.1837150207840339e-05
2.9050000000000002	-0.0006521997255452938	0.0	-1.5189876952608574e-07	-0.01857116011394345	0.0	-0.4993213669547558	0.0	9.806460205423661e-06	0.0	0.9998475677180944	0.0	0.01745970584433697	0.0	0.0	2.000836577902351	0.0	0.0	2.0008699597663697	0.0	-0.0006518073940912403	0.0	2.261915300163181e-05	-0.0003399457758080405	0.0	1.1837187365817489e-05
2.91	-0.0006539004845856031	0.0	-1.5212537549722806e-07	-0.01857442340081617	0.0	-0.4993212537096202	0.0	9.807616628041459e-06	0.0	0.9998475672900174	0.0	0.01745973035855404	0.0	0.0	2.00083938745297	0.0	0.0	2.0008727694415693	0.0	-0.0006535071230079481	0.0	2.267833903136812e-05	-0.0003399457908750608	0.0	1.1837224529689199e-05
2.915	-0.000655601243707668	0.0	-1.5235196896387516e-07	-0.018577695186331497	0.0	-0.4993211401685588	0.0	9.808773148265494e-06	0.0	0.9998475668618896	0.0	0.017459754875660777	0.0	0.0	2.0008421973347716	0.0	0.0	2.000875579448087	0.0	-0.0006552068519999907	0.0	2.2737525246938533e-05	-0.0003399458059419365	0.0	1.183726169946038e-05
2.92	-0.0006573020029114884	0.0	-1.5257854992602704e-07	-0.018580975470489425	0.0	-0.4993210263315715	0.0	9.809929766095766e-06	0.0	0.9998475664337106	0.0	0.017459779395657186	0.0	0.0	2.000845007547757	0.0	0.0	2.0008783897859517	0.0	-0.0006569065810673671	0.0	2.2796711648372552e-05	-0.0003399458210085664	0.0	1.1837298875128546e-05
2.9250000000000003	-0.0006590027621970646	0.0	-1.5280511838368372e-07	-0.018584264253289958	0.0	-0.4993209121986584	0.0	9.811086481532278e-06	0.0	0.9998475660054805	0.0	0.017459803918543258	0.0	0.0	2.000847818091925	0.0	0.0	2.000881200455191	0.0	-0.0006586063102100761	0.0	2.2855898235699647e-05	-0.00033994583607501025	0.0	1.1837336056693983e-05
2.93	-0.0006607035215643963	0.0	-1.5303167433684515e-07	-0.018587561534733097	0.0	-0.4993207977698194	0.0	9.812243294575028e-06	0.0	0.9998475655771994	0.0	0.017459828444319002	0.0	0.0	2.0008506289672767	0.0	0.0	2.0008840114558324	0.0	-0.000660306039428117	0.0	2.291508500894932e-05	-0.0003399458511412517	0.0	1.1837373244156916e-05
2.935	-0.0006624042810134834	0.0	-1.5325821778551136e-07	-0.018590867314818838	0.0	-0.49932068304505467	0.0	9.813400205224015e-06	0.0	0.9998475651488673	0.0	0.017459852972984413	0.0	0.0	2.000853440173812	0.0	0.0	2.000886822787905	0.0	-0.0006620057687214883	0.0	2.2974271968151044e-05	-0.0003399458662072835	0.0	1.18374104375161e-05
2.94	-0.0006641050405443263	0.0	-1.5348474872968232e-07	-0.01859418159354718	0.0	-0.49932056802436403	0.0	9.814557213479242e-06	0.0	0.9998475647204841	0.0	0.017459877504539492	0.0	0.0	2.00085625171153	0.0	0.0	2.0008896344514353	0.0	-0.0006637054980901894	0.0	2.303345911333431e-05	-0.0003399458812730804	0.0	1.1837447636772612e-05
2.945	-0.0006658058001569246	0.0	-1.5371126716935808e-07	-0.01859750437091813	0.0	-0.4993204527077476	0.0	9.815714319340704e-06	0.0	0.9998475642920498	0.0	0.01745990203898424	0.0	0.0	2.0008590635804318	0.0	0.0	2.0008924464464526	0.0	-0.0006654052275342188	0.0	2.3092646444528602e-05	-0.000339945896338749	0.0	1.1837484841928028e-05
2.95	-0.0006675065598512787	0.0	-1.5393777310453862e-07	-0.018600835646931685	0.0	-0.4993203370952054	0.0	9.816871522808406e-06	0.0	0.9998475638635645	0.0	0.017459926576318653	0.0	0.0	2.000861875780517	0.0	0.0	2.000895258772984	0.0	-0.0006671049570535764	0.0	2.3151833961763415e-05	-0.00033994591140413394	0.0	1.1837522052979134e-05
2.955	-0.0006692073196273881	0.0	-1.541642665352239e-07	-0.01860417542158784	0.0	-0.4993202211867373	0.0	9.818028823882347e-06	0.0	0.9998475634350281	0.0	0.01745995111654274	0.0	0.0	2.000864688311785	0.0	0.0	2.0008980714310574	0.0	-0.0006688046866482597	0.0	2.321102166506822e-05	-0.00033994592646923697	0.0	1.1837559269926776e-05
2.96	-0.0006709080794852533	0.0	-1.54390747461414e-07	-0.0186075236948866	0.0	-0.4993201049823434	0.0	9.819186222562526e-06	0.0	0.9998475630064406	0.0	0.017459975659656488	0.0	0.0	2.000867501174236	0.0	0.0	2.0009008844207017	0.0	-0.0006705044163182686	0.0	2.327020955447251e-05	-0.0003399459415342768	0.0	1.1837596492773266e-05
2.965	-0.000672608839424874	0.0	-1.5461721588310882e-07	-0.018610880466827965	0.0	-0.4993199884820237	0.0	9.820343718848942e-06	0.0	0.9998475625778022	0.0	0.01746000020565991	0.0	0.0	2.0008703143678703	0.0	0.0	2.000903697741944	0.0	-0.0006722041460636021	0.0	2.332939763000578e-05	-0.000339945956599078	0.0	1.183763372151601e-05
2.97	-0.0006743095994462504	0.0	-1.5484367180030847e-07	-0.018614245737411935	0.0	-0.4993198716857781	0.0	9.821501312741596e-06	0.0	0.9998475621491125	0.0	0.017460024754552994	0.0	0.0	2.000873127892688	0.0	0.0	2.0009065113948123	0.0	-0.000673903875884259	0.0	2.33885858916975e-05	-0.0003399459716636281	0.0	1.1837670956156474e-05
2.975	-0.0006760103595493822	0.0	-1.5507011521301287e-07	-0.018617619506638507	0.0	-0.4993197545936067	0.0	9.82265900424049e-06	0.0	0.9998475617203719	0.0	0.01746004930633575	0.0	0.0	2.000875941748689	0.0	0.0	2.000909325379335	0.0	-0.000675603605780238	0.0	2.344777433957717e-05	-0.00033994598672800835	0.0	1.1837708196694153e-05
2.98	-0.0006777111197342697	0.0	-1.5529654612122205e-07	-0.018621001774507685	0.0	-0.4993196372055095	0.0	9.82381679334562e-06	0.0	0.9998475612915803	0.0	0.017460073861008174	0.0	0.0	2.000878755935874	0.0	0.0	2.00091213969554	0.0	-0.0006773033357515386	0.0	2.350696297367427e-05	-0.0003399460017921428	0.0	1.183774544312797e-05
2.985	-0.0006794118800009126	0.0	-1.5552296452493597e-07	-0.018624392541019465	0.0	-0.49931951952148645	0.0	9.82497468005699e-06	0.0	0.9998475608627375	0.0	0.017460098418570266	0.0	0.0	2.0008815704542413	0.0	0.0	2.000914954343455	0.0	-0.0006790030657981591	0.0	2.356615179401828e-05	-0.0003399460168560677	0.0	1.1837782695460243e-05
2.99	-0.0006811126403493114	0.0	-1.557493704241547e-07	-0.018627791806173848	0.0	-0.4993194015415376	0.0	9.826132664374597e-06	0.0	0.9998475604338436	0.0	0.017460122979022025	0.0	0.0	2.000884385303792	0.0	0.0	2.0009177693231077	0.0	-0.000680702795920099	0.0	2.36253408006387e-05	-0.0003399460319198028	0.0	1.1837819953689898e-05
2.995	-0.0006828134007794656	0.0	-1.5597576381887821e-07	-0.01863119956997084	0.0	-0.4993192832656629	0.0	9.827290746298444e-06	0.0	0.9998475600048987	0.0	0.017460147542363455	0.0	0.0	2.0008872004845264	0.0	0.0	2.000920584634527	0.0	-0.0006824025261173569	0.0	2.3684529993565005e-05	-0.00033994604698336266	0.0	1.1837857217815015e-05
3.0	-0.0006845141612913753	0.0	-1.5620214470910647e-07	-0.01863461583241043	0.0	-0.4993191646938624	0.0	9.828448925828526e-06	0.0	0.9998475595759029	0.0	0.01746017210859455	0.0	0.0	2.000890015996444	0.0	0.0	2.00092340027774	0.0	-0.0006841022563899322	0.0	2.374371937282668e-05	-0.0003399460620466822	0.0	1.1837894487839774e-05
3.005	-0.0006862149218850406	0.0	-1.564285130948395e-07	-0.018638040593492625	0.0	-0.499319045826136	0.0	9.829607202964848e-06	0.0	0.9998475591468559	0.0	0.017460196677715315	0.0	0.0	2.000892831839545	0.0	0.0	2.000926216252775	0.0	-0.0006858019867378233	0.0	2.3802908938453227e-05	-0.0003399460771097812	0.0	1.1837931763760276e-05
3.0100000000000002	-0.0006879156825604617	0.0	-1.5665486897607732e-07	-0.018641473853217426	0.0	-0.49931892666248384	0.0	9.830765577707409e-06	0.0	0.9998475587177578	0.0	0.017460221249725745	0.0	0.0	2.0008956480138282	0.0	0.0	2.00092903255966	0.0	-0.0006875017171610296	0.0	2.386209869047411e-05	-0.00033994609217266527	0.0	1.1837969045576975e-05
3.015	-0.0006896164433176381	0.0	-1.5688121235281992e-07	-0.01864491561158483	0.0	-0.49931880720290583	0.0	9.831924050056207e-06	0.0	0.9998475582886086	0.0	0.017460245824625846	0.0	0.0	2.0008984645192958	0.0	0.0	2.0009318491984227	0.0	-0.0006892014476595496	0.0	2.3921288628918827e-05	-0.00033994610723536315	0.0	1.1838006333292693e-05
3.02	-0.0006913172041565702	0.0	-1.5710754322506728e-07	-0.01864836586859484	0.0	-0.499318687447402	0.0	9.833082620011243e-06	0.0	0.9998475578594085	0.0	0.017460270402415615	0.0	0.0	2.0009012813559464	0.0	0.0	2.0009346661690914	0.0	-0.000690901178233383	0.0	2.3980478753816868e-05	-0.00033994612229785326	0.0	1.1838043626906133e-05
3.025	-0.0006930179650772579	0.0	-1.573338615928194e-07	-0.01865182462424745	0.0	-0.49931856739597236	0.0	9.834241287572517e-06	0.0	0.9998475574301572	0.0	0.01746029498309505	0.0	0.0	2.0009040985237805	0.0	0.0	2.0009374834716938	0.0	-0.0006926009088825278	0.0	2.4039669065197716e-05	-0.00033994613736013557	0.0	1.1838080926415148e-05
3.0300000000000002	-0.0006947187260797012	0.0	-1.5756016745607635e-07	-0.018655291878542667	0.0	-0.4993184470486169	0.0	9.83540005274003e-06	0.0	0.9998475570008549	0.0	0.017460319566664155	0.0	0.0	2.0009069160227972	0.0	0.0	2.000940301106258	0.0	-0.000694300639606984	0.0	2.409885956309085e-05	-0.00033994615242226604	0.0	1.1838118231822449e-05
3.035	-0.0006964194871639	0.0	-1.5778646081483803e-07	-0.01865876763148049	0.0	-0.4993183264053355	0.0	9.83655891551378e-06	0.0	0.9998475565715016	0.0	0.01746034415312293	0.0	0.0	2.000909733852998	0.0	0.0	2.000943119072812	0.0	-0.00069600037040675	0.0	2.4158050247525767e-05	-0.00033994616748408036	0.0	1.1838155543125664e-05
3.04	-0.0006981202483298544	0.0	-1.5801274166910448e-07	-0.01866225188306091	0.0	-0.49931820546612843	0.0	9.83771787589377e-06	0.0	0.9998475561420972	0.0	0.01746036874247137	0.0	0.0	2.0009125520143813	0.0	0.0	2.000945937371384	0.0	-0.0006977001012818245	0.0	2.4217241118531935e-05	-0.00033994618254569583	0.0	1.1838192860325923e-05
3.045	-0.0006998210095775644	0.0	-1.582390100188757e-07	-0.01866574463328394	0.0	-0.49931808423099544	0.0	9.838876933879997e-06	0.0	0.9998475557126416	0.0	0.017460393334709477	0.0	0.0	2.0009153705069482	0.0	0.0	2.0009487560020007	0.0	-0.0006993998322322067	0.0	2.427643217613886e-05	-0.00033994619760718305	0.0	1.1838230183426555e-05
3.0500000000000003	-0.00070152177090703	0.0	-1.5846526586415174e-07	-0.018669245882149573	0.0	-0.49931796269993667	0.0	9.840036089472462e-06	0.0	0.9998475552831351	0.0	0.017460417929837255	0.0	0.0	2.000918189330699	0.0	0.0	2.000951574964692	0.0	-0.0007010995632578959	0.0	2.433562342037603e-05	-0.00033994621266840826	0.0	1.1838267512422198e-05
3.055	-0.0007032225323182512	0.0	-1.5869150920493252e-07	-0.018672755629657808	0.0	-0.499317840872952	0.0	9.841195342671164e-06	0.0	0.9998475548535775	0.0	0.0174604425278547	0.0	0.0	2.000921008485632	0.0	0.0	2.0009543942594843	0.0	-0.0007027992943588905	0.0	2.439481485127291e-05	-0.00033994622772947264	0.0	1.1838304847314886e-05
3.06	-0.0007049232938112279	0.0	-1.5891774004121806e-07	-0.018676273875808648	0.0	-0.49931771875004155	0.0	9.842354693476106e-06	0.0	0.9998475544239689	0.0	0.017460467128761814	0.0	0.0	2.000923827971749	0.0	0.0	2.0009572138864065	0.0	-0.0007044990255351902	0.0	2.4454006468859004e-05	-0.0003399462427902913	0.0	1.1838342188104616e-05
3.065	-0.0007066240553859601	0.0	-1.591439583730084e-07	-0.01867980062060209	0.0	-0.49931759633120526	0.0	9.843514141887287e-06	0.0	0.9998475539943091	0.0	0.017460491732558595	0.0	0.0	2.0009266477890497	0.0	0.0	2.000960033845486	0.0	-0.0007061987567867931	0.0	2.4513198273163784e-05	-0.00033994625785086776	0.0	1.1838379534791898e-05
3.0700000000000003	-0.0007083248170424482	0.0	-1.593701642003035e-07	-0.01868333586403814	0.0	-0.4993174736164432	0.0	9.844673687904705e-06	0.0	0.9998475535645983	0.0	0.017460516339245044	0.0	0.0	2.000929467937533	0.0	0.0	2.000962854136751	0.0	-0.0007078984881136986	0.0	2.4572390264216754e-05	-0.0003399462729113123	0.0	1.1838416887377805e-05
3.075	-0.0007100255787806916	0.0	-1.5959635752310337e-07	-0.018686879606116792	0.0	-0.4993173506057553	0.0	9.84583333152836e-06	0.0	0.9998475531348365	0.0	0.01746054094882116	0.0	0.0	2.0009322884171996	0.0	0.0	2.0009656747602294	0.0	-0.0007095982195159058	0.0	2.4631582442047387e-05	-0.00033994628797149126	0.0	1.1838454245857987e-05
3.08	-0.0007117263406006906	0.0	-1.5982253834140802e-07	-0.018690431846838048	0.0	-0.49931722729914146	0.0	9.846993072758255e-06	0.0	0.9998475527050236	0.0	0.017460565561286945	0.0	0.0	2.0009351092280494	0.0	0.0	2.000968495715949	0.0	-0.0007112979509934132	0.0	2.4690774806685166e-05	-0.00033994630303148406	0.0	1.1838491610237642e-05
3.085	-0.0007134271025024452	0.0	-1.6004870665521746e-07	-0.018693992586201906	0.0	-0.49931710369660187	0.0	9.848152911594387e-06	0.0	0.9998475522751596	0.0	0.0174605901766424	0.0	0.0	2.0009379303700827	0.0	0.0	2.0009713170039385	0.0	-0.0007129976825462202	0.0	2.4749967358159593e-05	-0.00033994631809125645	0.0	1.1838528980514679e-05
3.09	-0.0007151278644859554	0.0	-1.6027486246453164e-07	-0.01869756182420837	0.0	-0.4993169797981365	0.0	9.849312848036758e-06	0.0	0.9998475518452445	0.0	0.017460614794887523	0.0	0.0	2.000940751843299	0.0	0.0	2.000974138624225	0.0	-0.0007146974141743254	0.0	2.480916009650014e-05	-0.0003399463331508463	0.0	1.183856635668808e-05
3.095	-0.0007168286265512214	0.0	-1.6050100576935064e-07	-0.01870113956085744	0.0	-0.4993168556037452	0.0	9.850472882085366e-06	0.0	0.9998475514152785	0.0	0.01746063941602231	0.0	0.0	2.000943573647699	0.0	0.0	2.0009769605768364	0.0	-0.0007163971458777283	0.0	2.48683530217363e-05	-0.0003399463482102555	0.0	1.1838603738758921e-05
3.1	-0.0007185293886982427	0.0	-1.607271365696744e-07	-0.01870472579614911	0.0	-0.49931673111342817	0.0	9.851633013740212e-06	0.0	0.9998475509852613	0.0	0.01746066404004677	0.0	0.0	2.000946395783282	0.0	0.0	2.0009797828618017	0.0	-0.0007180968776564275	0.0	2.4927546133897556e-05	-0.00033994636326935924	0.0	1.1838641126726016e-05
3.105	-0.0007202301509270196	0.0	-1.609532548655029e-07	-0.018708320530083387	0.0	-0.4993166063271853	0.0	9.852793243001297e-06	0.0	0.9998475505551931	0.0	0.017460688666960895	0.0	0.0	2.000949218250049	0.0	0.0	2.0009826054791477	0.0	-0.0007197966095104216	0.0	2.4986739433013393e-05	-0.00033994637832828053	0.0	1.1838678520591678e-05
3.11	-0.0007219309132375521	0.0	-1.611793606568362e-07	-0.018711923762660267	0.0	-0.49931648124501654	0.0	9.853953569868621e-06	0.0	0.9998475501250739	0.0	0.01746071329676469	0.0	0.0	2.000952041047998	0.0	0.0	2.000985428428903	0.0	-0.00072149634143971	0.0	2.50459329191133e-05	-0.00033994639338706624	0.0	1.1838715920354835e-05
3.115	-0.0007236316756298403	0.0	-1.6140545394367428e-07	-0.018715535493879748	0.0	-0.49931635586692197	0.0	9.855113994342182e-06	0.0	0.9998475496949035	0.0	0.01746073792945815	0.0	0.0	2.0009548641771313	0.0	0.0	2.0009882517110955	0.0	-0.0007231960734442918	0.0	2.510512659222677e-05	-0.0003399464084455954	0.0	1.183875332601498e-05
3.12	-0.000725332438103884	0.0	-1.6163153472601712e-07	-0.018719155723741835	0.0	-0.4993162301929016	0.0	9.856274516421981e-06	0.0	0.9998475492646821	0.0	0.017460762565041282	0.0	0.0	2.000957687637448	0.0	0.0	2.000991075325753	0.0	-0.0007248958055241656	0.0	2.516432045238328e-05	-0.00033994642350391313	0.0	1.1838790737570754e-05
3.125	-0.0007270332006596832	0.0	-1.6185760300386473e-07	-0.018722784452246528	0.0	-0.4993161042229554	0.0	9.857435136108019e-06	0.0	0.9998475488344097	0.0	0.01746078720351408	0.0	0.0	2.0009605114289473	0.0	0.0	2.000993899272904	0.0	-0.0007265955376793307	0.0	2.522351449961231e-05	-0.0003399464385620194	0.0	1.1838828155024872e-05
3.13	-0.0007287339632972381	0.0	-1.6208365877721712e-07	-0.018726421679393822	0.0	-0.4993159779570834	0.0	9.858595853400294e-06	0.0	0.9998475484040862	0.0	0.017460811844876547	0.0	0.0	2.0009633355516305	0.0	0.0	2.0009967235525754	0.0	-0.0007282952699097856	0.0	2.528270873394336e-05	-0.00033994645361999203	0.0	1.1838865578377106e-05
3.1350000000000002	-0.0007304347260165486	0.0	-1.623097020460743e-07	-0.018730067405183723	0.0	-0.4993158513952855	0.0	9.859756668298809e-06	0.0	0.9998475479737117	0.0	0.01746083648912868	0.0	0.0	2.0009661600054964	0.0	0.0	2.000999548164796	0.0	-0.0007299950022155302	0.0	2.5341903155405908e-05	-0.0003399464686776737	0.0	1.183890300762644e-05
3.14	-0.0007321354888176146	0.0	-1.6253573281043623e-07	-0.018733721629616226	0.0	-0.49931572453756184	0.0	9.86091758080356e-06	0.0	0.999847547543286	0.0	0.017460861136270482	0.0	0.0	2.0009689847905463	0.0	0.0	2.0010023731095936	0.0	-0.000731694734596562	0.0	2.540109776402945e-05	-0.00033994648373512947	0.0	1.1838940442771632e-05
3.145	-0.0007338362517004362	0.0	-1.6276175107030295e-07	-0.018737384352691334	0.0	-0.4993155973839123	0.0	9.862078590914551e-06	0.0	0.9998475471128093	0.0	0.017460885786301953	0.0	0.0	2.000971809906779	0.0	0.0	2.001005198386996	0.0	-0.0007333944670528812	0.0	2.546029255984345e-05	-0.0003399464987924552	0.0	1.1838977883813866e-05
3.15	-0.0007355370146650133	0.0	-1.6298775682567442e-07	-0.018741055574409044	0.0	-0.49931546993433695	0.0	9.86323969863178e-06	0.0	0.9998475466822816	0.0	0.01746091043922309	0.0	0.0	2.0009746353541953	0.0	0.0	2.001008023997031	0.0	-0.0007350941995844861	0.0	2.551948754287742e-05	-0.0003399465142132253	0.0	1.1839014898437975e-05
3.1550000000000002	-0.0007372377777113461	0.0	-1.632137500765507e-07	-0.01874473529476936	0.0	-0.4993153421888358	0.0	9.864400903955245e-06	0.0	0.9998475462517027	0.0	0.017460935095033898	0.0	0.0	2.0009774611327944	0.0	0.0	2.0010108499397274	0.0	-0.0007367939321913757	0.0	2.557868271316083e-05	-0.0003399465801415735	0.0	1.1838991891715648e-05
3.16	-0.0007389385408185282	0.0	-1.6343970413953676e-07	-0.018748423513771983	0.0	-0.4993152141474037	0.0	9.865562219053349e-06	0.0	0.9998475458210728	0.0	0.017460959753735655	0.0	0.0	2.0009802872427236	0.0	0.0	2.001013676215116	0.0	-0.0007384936648517241	0.0	2.5637878096662215e-05	-0.000339946223383029	0.0	1.1839471244542147e-05
3.165	-0.000740639300937359	0.0	-1.6366172724205966e-07	-0.018752120231373584	0.0	-0.4993150858092926	0.0	9.866725418686715e-06	0.0	0.9998475453903884	0.0	0.01746098441551489	0.0	0.0	2.0009831137053613	0.0	0.0	2.0010165028237363	0.0	-0.0007401933943822911	0.0	2.569707747661887e-05	-0.0003399458369479375	0.0	1.1839985872896953e-05
3.17	-0.0007423400608703955	0.0	-1.6388339635939083e-07	-0.01875582544761399	0.0	-0.49931495717519003	0.0	9.867888871651373e-06	0.0	0.9998475449596528	0.0	0.017461009080200155	0.0	0.0	2.000985940501057	0.0	0.0	2.0010193297656613	0.0	-0.0007418931237088286	0.0	2.575627737586919e-05	-0.0003399458449044835	0.0	1.1840031781406988e-05
3.1750000000000003	-0.000744040820617638	0.0	-1.641047114915303e-07	-0.018759539162493198	0.0	-0.49931482824509604	0.0	9.869052577947325e-06	0.0	0.9998475445288657	0.0	0.017461033747791458	0.0	0.0	2.0009887676298126	0.0	0.0	2.001022157040964	0.0	-0.0007435928528313356	0.0	2.5815477794442807e-05	-0.00033994580409822174	0.0	1.1840135649025602e-05
3.18	-0.0007457415801790862	0.0	-1.64325672638478e-07	-0.01876326137601121	0.0	-0.49931469901901054	0.0	9.870216537574569e-06	0.0	0.9998475440980272	0.0	0.017461058418288794	0.0	0.0	2.0009915950916266	0.0	0.0	2.0010249846497166	0.0	-0.0007452925817498105	0.0	2.5874678732369316e-05	-0.00033994576329172873	0.0	1.1840239522565654e-05
3.185	-0.00074744233955474	0.0	-1.6454627980023398e-07	-0.018766992088168025	0.0	-0.4993145694969336	0.0	9.871380750533105e-06	0.0	0.9998475436671375	0.0	0.017461083091692167	0.0	0.0	2.000994422886501	0.0	0.0	2.001027812591991	0.0	-0.0007469923104642525	0.0	2.5933880189678335e-05	-0.0003399457224850731	0.0	1.184034340202946e-05
3.19	-0.0007491430987445997	0.0	-1.6476653297679821e-07	-0.018770731298963637	0.0	-0.49931443967886524	0.0	9.872545216822934e-06	0.0	0.9998475432361964	0.0	0.017461107768001576	0.0	0.0	2.000997251014433	0.0	0.0	2.001030640867861	0.0	-0.0007486920389746609	0.0	2.599308216639948e-05	-0.00033994568167815904	0.0	1.1840447287415155e-05
3.1950000000000003	-0.0007508438577486652	0.0	-1.6498643216817077e-07	-0.018774479008398057	0.0	-0.4993143095648054	0.0	9.873709936444054e-06	0.0	0.9998475428052038	0.0	0.017461132447217018	0.0	0.0	2.001000079475425	0.0	0.0	2.001033469477399	0.0	-0.0007503917672810338	0.0	2.605228466256236e-05	-0.0003399456408710733	0.0	1.1840551178723981e-05
3.2	-0.0007525446165669365	0.0	-1.6520597737435156e-07	-0.018778235216471276	0.0	-0.49931417915475407	0.0	9.874874909396468e-06	0.0	0.9998475423741601	0.0	0.017461157129338496	0.0	0.0	2.001002908269476	0.0	0.0	2.001036298420676	0.0	-0.0007520914953833711	0.0	2.6111487678196587e-05	-0.0003399456000637147	0.0	1.184065507595261e-05
3.205	-0.0007542453751994134	0.0	-1.6542516859534064e-07	-0.018781999923183298	0.0	-0.49931404844871125	0.0	9.876040135680175e-06	0.0	0.9998475419430648	0.0	0.017461181814366008	0.0	0.0	2.0010057373965853	0.0	0.0	2.0010391276977666	0.0	-0.0007537912232816706	0.0	2.617069121333176e-05	-0.0003399455592560851	0.0	1.1840758979105216e-05
3.21	-0.0007559461336460961	0.0	-1.6564400583113797e-07	-0.018785773128534123	0.0	-0.499313917446677	0.0	9.877205615295171e-06	0.0	0.9998475415119182	0.0	0.017461206502299556	0.0	0.0	2.001008566856754	0.0	0.0	2.0010419573087423	0.0	-0.0007554909509759317	0.0	2.6229895267997512e-05	-0.00033994551844835247	0.0	1.1840862888181689e-05
3.215	-0.0007576468919069846	0.0	-1.6586248908174358e-07	-0.01878955483252375	0.0	-0.49931378614865135	0.0	9.878371348241463e-06	0.0	0.9998475410807204	0.0	0.01746123119313914	0.0	0.0	2.0010113966499827	0.0	0.0	2.001044787253676	0.0	-0.0007571906784661537	0.0	2.6289099842223443e-05	-0.0003399454776404084	0.0	1.1840966803178753e-05
3.22	-0.0007593476499820791	0.0	-1.6608061834715747e-07	-0.018793345035152183	0.0	-0.49931365455463417	0.0	9.879537334519046e-06	0.0	0.9998475406494711	0.0	0.01746125588688476	0.0	0.0	2.0010142267762703	0.0	0.0	2.00104761753264	0.0	-0.0007588904057523353	0.0	2.634830493603917e-05	-0.00033994543683214454	0.0	1.1841070724097535e-05
3.225	-0.0007610484078713791	0.0	-1.6629839362737962e-07	-0.018797143736419414	0.0	-0.49931352266462553	0.0	9.88070357412792e-06	0.0	0.9998475402181705	0.0	0.01746128058353641	0.0	0.0	2.001017057235616	0.0	0.0	2.001050448145707	0.0	-0.0007605901328344749	0.0	2.640751054947429e-05	-0.0003399453960236909	0.0	1.1841174650938435e-05
3.23	-0.0007627491655748848	0.0	-1.6651581492241003e-07	-0.018800950936325448	0.0	-0.49931339047862544	0.0	9.88187006706809e-06	0.0	0.9998475397868185	0.0	0.0174613052830941	0.0	0.0	2.001019888028021	0.0	0.0	2.00105327909295	0.0	-0.0007622898597125718	0.0	2.6466716682558426e-05	-0.00033994535521504035	0.0	1.1841278583704047e-05
3.235	-0.0007644499230925964	0.0	-1.6673288223224872e-07	-0.018804766634870285	0.0	-0.4993132579966339	0.0	9.883036813339549e-06	0.0	0.9998475393554151	0.0	0.017461329985557824	0.0	0.0	2.001022719153486	0.0	0.0	2.001056110374441	0.0	-0.0007639895863866249	0.0	2.65259233353212e-05	-0.00033994531440618194	0.0	1.1841382522391154e-05
3.24	-0.0007661506804245139	0.0	-1.669495955568957e-07	-0.018808590832053926	0.0	-0.4993131252186509	0.0	9.884203812942301e-06	0.0	0.9998475389239605	0.0	0.01746135469092758	0.0	0.0	2.001025550612009	0.0	0.0	2.0010589419902525	0.0	-0.0007656893128566332	0.0	2.6585130507792206e-05	-0.00033994527359709043	0.0	1.1841486466999755e-05
3.245	-0.000767851437570637	0.0	-1.6716595489635093e-07	-0.018812423527876366	0.0	-0.49931299214467645	0.0	9.885371065876347e-06	0.0	0.9998475384924544	0.0	0.017461379399203378	0.0	0.0	2.001028382403592	0.0	0.0	2.0010617739404575	0.0	-0.0007673890391225954	0.0	2.6644338200001066e-05	-0.0003399452327877586	0.0	1.1841590417530642e-05
3.25	-0.0007695521945309658	0.0	-1.6738196025061444e-07	-0.01881626472233761	0.0	-0.4993128587747105	0.0	9.886538572141684e-06	0.0	0.9998475380608971	0.0	0.017461404110385204	0.0	0.0	2.001031214528234	0.0	0.0	2.0010646062251283	0.0	-0.0007690887651845105	0.0	2.6703546411977383e-05	-0.00033994519197820273	0.0	1.1841694373983756e-05
3.255	-0.0007712529513055005	0.0	-1.6759761161968622e-07	-0.018820114415437655	0.0	-0.49931272510875313	0.0	9.887706331738314e-06	0.0	0.9998475376292884	0.0	0.01746142882447307	0.0	0.0	2.001034046985935	0.0	0.0	2.0010674388443377	0.0	-0.0007707884910423771	0.0	2.6762755143750776e-05	-0.0003399451511684553	0.0	1.184179833636085e-05
3.2600000000000002	-0.000772953707894241	0.0	-1.6781290900356626e-07	-0.018823972607176505	0.0	-0.49931259114680426	0.0	9.888874344666236e-06	0.0	0.9998475371976282	0.0	0.01746145354146697	0.0	0.0	2.001036879776695	0.0	0.0	2.001070271798158	0.0	-0.0007724882166961947	0.0	2.682196439535086e-05	-0.00033994511035853077	0.0	1.1841902304658816e-05
3.265	-0.0007746544642971872	0.0	-1.680278524022546e-07	-0.018827839297554157	0.0	-0.49931245688886394	0.0	9.89004261092545e-06	0.0	0.9998475367659168	0.0	0.017461478261366903	0.0	0.0	2.001039712900514	0.0	0.0	2.001073105086662	0.0	-0.000774187942145962	0.0	2.6881174166807233e-05	-0.00033994498492480703	0.0	1.1842097599941752e-05
3.27	-0.0007763552205143392	0.0	-1.6824244181575116e-07	-0.01883171448657061	0.0	-0.49931232233493217	0.0	9.891211130515959e-06	0.0	0.9998475363341539	0.0	0.017461502984172872	0.0	0.0	2.001042546357392	0.0	0.0	2.0010759387099224	0.0	-0.0007758876673916776	0.0	2.6940384458149516e-05	-0.00033994550112481295	0.0	1.1841600484881614e-05
3.275	-0.0007780559814286884	0.0	-1.684623304869349e-07	-0.018835598174287944	0.0	-0.49931218748497486	0.0	9.892378297003135e-06	0.0	0.9998475359023393	0.0	0.01746152770990334	0.0	0.0	2.001045380149445	0.0	0.0	2.001078772667551	0.0	-0.0007775873975107515	0.0	2.699958979014354e-05	-0.00033994627143197085	0.0	1.1840829157278102e-05
3.2800000000000002	-0.000779756744197267	0.0	-1.6868422699323224e-07	-0.01883949036067001	0.0	-0.49931205233901194	0.0	9.893545045682934e-06	0.0	0.9998475354704733	0.0	0.017461552438547547	0.0	0.0	2.001048214275441	0.0	0.0	2.0010816069594286	0.0	-0.0007792871295470213	0.0	2.70587933529484e-05	-0.00033994656583240696	0.0	1.1840571408018048e-05
3.285	-0.0007814575084376107	0.0	-1.6890768854000754e-07	-0.018843391045711953	0.0	-0.49931191689704596	0.0	9.894711502380591e-06	0.0	0.9998475350385558	0.0	0.01746157717010406	0.0	0.0	2.001051048735214	0.0	0.0	2.001084441585472	0.0	-0.0007809868631027932	0.0	2.7117995575761633e-05	-0.0003399468631045856	0.0	1.1840310565479389e-05
3.29	-0.0007831582741497196	0.0	-1.691327151272608e-07	-0.01884730022941377	0.0	-0.499311781159077	0.0	9.89587766709611e-06	0.0	0.9998475346065869	0.0	0.017461601904572868	0.0	0.0	2.001053883528764	0.0	0.0	2.0010872765455963	0.0	-0.0007826865981780669	0.0	2.7177196458613172e-05	-0.0003399471963879666	0.0	1.1840021332012083e-05
3.295	-0.0007848590413335937	0.0	-1.6935930675499202e-07	-0.01885121791177546	0.0	-0.49931164512510495	0.0	9.897043539829489e-06	0.0	0.9998475341745665	0.0	0.01746162664195398	0.0	0.0	2.0010567186560917	0.0	0.0	2.001090111839719	0.0	-0.0007843863347728415	0.0	2.7236396001532958e-05	-0.00033994735778443246	0.0	1.183985637941274e-05
3.3000000000000003	-0.0007865598082718292	0.0	-1.6958612799396397e-07	-0.018855144092805164	0.0	-0.4993115087951306	0.0	9.898209249143995e-06	0.0	0.9998475337424946	0.0	0.017461651382247877	0.0	0.0	2.001059554117252	0.0	0.0	2.001092947467792	0.0	-0.0007860860711241289	0.0	2.7295595479198268e-05	-0.00033994703908903686	0.0	1.1840038541057087e-05
3.305	-0.000788260572989149	0.0	-1.6981164289679834e-07	-0.018859078772512222	0.0	-0.49931137216915467	0.0	9.899374942907002e-06	0.0	0.9998475333103711	0.0	0.01746167612545513	0.0	0.0	2.00106238991231	0.0	0.0	2.0010957834298124	0.0	-0.0007877858052042233	0.0	2.735479635767764e-05	-0.00033994677812084937	0.0	1.1840178971462e-05
3.31	-0.0007899613376974994	0.0	-1.7003757144152808e-07	-0.018863021950886166	0.0	-0.49931123524717635	0.0	9.9005404555343e-06	0.0	0.9998475328781963	0.0	0.017461700871575107	0.0	0.0	2.0010652260411934	0.0	0.0	2.0010986197257274	0.0	-0.0007894855392837797	0.0	2.7413996995307194e-05	-0.00033994681585733356	0.0	1.1840103442911255e-05
3.315	-0.0007916621023968801	0.0	-1.7026391362815317e-07	-0.018866973627926997	0.0	-0.4993110980291956	0.0	9.901705787025887e-06	0.0	0.9998475324459699	0.0	0.017461725620607806	0.0	0.0	2.001068062503903	0.0	0.0	2.001101456355485	0.0	-0.0007911852733627963	0.0	2.7473197392116652e-05	-0.00033994681574930365	0.0	1.1840055281861318e-05
3.3200000000000003	-0.0007933628670872913	0.0	-1.704906694566736e-07	-0.018870933803634717	0.0	-0.4993109605152124	0.0	9.902870937381763e-06	0.0	0.999847532013692	0.0	0.017461750372553226	0.0	0.0	2.001070899300438	0.0	0.0	2.001104293319034	0.0	-0.0007928850074412724	0.0	2.7532397548135707e-05	-0.0003399468182056956	0.0	1.183998816785474e-05
3.325	-0.0007950636317687327	0.0	-1.707178389270894e-07	-0.018874902478009322	0.0	-0.49931082270522675	0.0	9.904035906601931e-06	0.0	0.9998475315813627	0.0	0.01746177512741137	0.0	0.0	2.0010737364307984	0.0	0.0	2.0011071306163224	0.0	-0.000794584741519207	0.0	2.7591597463394077e-05	-0.0003399468013939754	0.0	1.1840063498974415e-05
3.33	-0.0007967643963271438	0.0	-1.7094427982123267e-07	-0.018878879651054455	0.0	-0.49931068459923056	0.0	9.905200817422356e-06	0.0	0.999847531148982	0.0	0.01746179988517912	0.0	0.0	2.001076573894627	0.0	0.0	2.0011099682473326	0.0	-0.0007962844754427237	0.0	2.765079827545531e-05	-0.00033994677551470924	0.0	1.1840205867217067e-05
3.335	-0.0007984651608210435	0.0	-1.7117057815650341e-07	-0.01888286532276824	0.0	-0.49931054619722803	0.0	9.906365606873094e-06	0.0	0.9998475307165497	0.0	0.017461824645858083	0.0	0.0	2.0010794116921082	0.0	0.0	2.0011128062120305	0.0	-0.0007979842092907677	0.0	2.7709999400734985e-05	-0.0003399467636895745	0.0	1.1840244343689543e-05
3.34	-0.0008001659252649141	0.0	-1.713968789604927e-07	-0.018886859493150228	0.0	-0.4993104074992202	0.0	9.907530259370343e-06	0.0	0.9998475302840661	0.0	0.017461849409448647	0.0	0.0	2.0010822498232868	0.0	0.0	2.0011156445103766	0.0	-0.0007996839430828753	0.0	2.776920069482996e-05	-0.0003399467528277643	0.0	1.18402757025052e-05
3.345	-0.0008018666896587559	0.0	-1.7162318223320056e-07	-0.01889086216220041	0.0	-0.49931026850520693	0.0	9.908694774914107e-06	0.0	0.9998475298515309	0.0	0.01746187417595081	0.0	0.0	2.001085088288162	0.0	0.0	2.0011184831423323	0.0	-0.0008013836768190451	0.0	2.7828402157769934e-05	-0.00033301189849102054	0.0	1.1564530901849426e-05
3.35	-0.0008035674540025687	0.0	-1.718494879746269e-07	-0.01889487332991879	0.0	-0.49931012921518836	0.0	9.909859153504382e-06	0.0	0.9998475294189444	0.0	0.01746189894536458	0.0	0.0	2.0010879270867346	0.0	0.0	2.0011213221078576	0.0	-0.0008030834104992768	0.0	2.7887603789584586e-05	0.02149903776386027	0.0	-0.0009402426311403931
3.355	-0.0008056846329244832	0.0	-1.7006829241231704e-07	-0.01889889318265989	0.0	-0.49930998962180306	0.0	9.485443177182091e-06	0.0	0.9998475289879193	0.0	0.017461923625335	0.0	0.0	2.0010907556342925	0.0	0.0	2.001124039487162	0.0	-0.0008051992347125191	0.0	2.796335230466102e-05	-0.09666666123419942	0.0	0.004385906007826647
3.36	-0.0021218349822060495	0.0	1.1181281128421193e-05	-0.018904212890267412	0.0	-0.4993097958530807	0.0	-0.0010743789676827477	0.0	0.9998475390561841	0.0	0.017461347119787324	0.0	0.0	2.0010246828909524	0.0	0.0	2.0008162525849325	0.0	-0.002120150672062284	0.0	8.526335973838222e-05	-0.49483823226992635	0.0	0.02108974751902246
3.365	-0.005542355184893167	0.0	3.0214568118125497e-05	-0.01892335060961601	0.0	-0.49930900070502965	0.0	-0.001512958672943301	0.0	0.999847602930531	0.0	0.017457689251896905	0.0	0.0	2.000605458204675	0.0	0.0	2.000382821852246	0.0	-0.005537922095271138	0.0	0.00022368008927855216	-0.7201437292568664	0.0	0.02557973467992553
3.37	-0.008980560646931927	0.0	1.4791450894160624e-05	-0.01895962346467578	0.0	-0.49930761766183474	0.0	-0.0010292107728625674	0.0	0.9998476590212445	0.0	0.017454476494128807	0.0	0.0	2.0002372471793026	0.0	0.0	2.0000879746846736	0.0	-0.00897457235877265	0.0	0.00032823664843936615	-0.689366641078428	0.0	0.02061869814931055
3.375	-0.012439625644902952	0.0	2.828542202044247e-06	-0.019013130988955216	0.0	-0.4993057089691675	0.0	-0.000587345033265663	0.0	0.9998476936908897	0.0	0.01745249039410431	0.0	0.0	2.000009622208449	0.0	0.0	1.9999197127270534	0.0	-0.01243194897298347	0.0	0.00043696558111700043	-0.6935765181748539	0.0	0.022617354438712312
3.38	-0.015920024233175848	0.0	-1.1440245614244461e-06	-0.01908397803967126	0.0	-0.4993032331597633	0.0	-0.00031231217751896847	0.0	0.9998477127614784	0.0	0.017451397811854452	0.0	0.0	1.9998844024345066	0.0	0.0	1.9998302418787415	0.0	-0.015910367229055256	0.0	0.0005544254054873354	-0.6977777823840456	0.0	0.02403694807276674
3.3850000000000002	-0.019421463369055838	0.0	-1.5900239322572653e-06	-0.019172269496794854	0.0	-0.49930015776010916	0.0	-0.00016109282900578196	0.0	0.999847722742289	0.0	0.017450825969165213	0.0	0.0	1.9998188641089047	0.0	0.0	1.9997840921826822	0.0	-0.019409689967040743	0.0	0.0006761488793395677	-0.7019483431408801	0.0	0.02456469385044857
3.39	-0.022943766801984948	0.0	-1.1545244250417417e-06	-0.01927810963692466	0.0	-0.49929646907937386	0.0	-8.224378420531168e-05	0.0	0.9998477278611282	0.0	0.017450532682008642	0.0	0.0	1.9997852507579275	0.0	0.0	1.9997605310740514	0.0	-0.022929833368188098	0.0	0.0007994861498539006	-0.7061090415574054	0.0	0.02475930628433205
3.395	-0.026486884343075518	0.0	-7.023188050042559e-07	-0.01940160249728434	0.0	-0.49929216168732027	0.0	-4.1872085297385245e-05	0.0	0.9998477304724158	0.0	0.01745038306474178	0.0	0.0	1.999768103270999	0.0	0.0	1.9997485356052167	0.0	-0.026470777497593422	0.0	0.0009235699050226085	-0.7102690142675712	0.0	0.0248773305386673
3.4	-0.030050812861290577	0.0	-3.9714336923918936e-07	-0.01954285208407913	0.0	-0.49928723241540957	0.0	-2.1006447410148337e-05	0.0	0.9998477317962048	0.0	0.017450307215977477	0.0	0.0	1.9997594103191818	0.0	0.0	1.9997425177013208	0.0	-0.030032524980032366	0.0	0.0010482352338917382	-0.7144302657485839	0.0	0.024992102925582745
3.4050000000000002	-0.03363555922666158	0.0	-2.1885565560244094e-07	-0.019701962429685676	0.0	-0.49928167833416376	0.0	-9.752413716514557e-06	0.0	0.999847732443596	0.0	0.01745027012245875	0.0	0.0	1.9997551590677123	0.0	0.0	1.9997397238405907	0.0	-0.03361508200574063	0.0	0.001173501719322231	-0.7185927156344356	0.0	0.025116624670465822
3.41	-0.037241129924732955	0.0	-1.2208570225471676e-07	-0.01987903759493218	0.0	-0.49927549632340745	0.0	-3.156182284493496e-06	0.0	0.9998477327122725	0.0	0.01745025472810561	0.0	0.0	1.9997533947361354	0.0	0.0	1.9997388196609693	0.0	-0.03721845348845072	0.0	0.0012994144887159172	-0.722755973213945	0.0	0.02524954136407137
3.415	-0.04086752930108547	0.0	-7.382665479842358e-08	-0.0200741816607017	0.0	-0.49926868305944366	0.0	1.2507188314056652e-06	0.0	0.9998477327484351	0.0	0.017450252656104254	0.0	0.0	1.9997531572661114	0.0	0.0	1.9997391779655214	0.0	-0.04084264262687415	0.0	0.00142600646338809	-0.7269197484890361	0.0	0.025388045071207396
3.42	-0.04451476029440326	0.0	-5.106043642689423e-08	-0.020287498720936478	0.0	-0.49926123508728415	0.0	4.603001127869891e-06	0.0	0.9998477326177561	0.0	0.01745026014362049	0.0	0.0	1.9997540154029358	0.0	0.0	1.99974049662821	0.0	-0.04448765155626384	0.0	0.0015533007045743271	-0.7310838613559341	0.0	0.025529920188686796
3.4250000000000003	-0.04818282466847023	0.0	-4.2343262326737945e-08	-0.020519092878245188	0.0	-0.4992531488629047	0.0	7.466075202828128e-06	0.0	0.9998477323526249	0.0	0.017450275334840913	0.0	0.0	1.9997557564536739	0.0	0.0	1.9997426355012031	0.0	-0.0481534816389034	0.0	0.0016813087419170663	-0.7352482034888854	0.0	0.025673490267638183
3.43	-0.05187172369302676	0.0	-4.0864413357759874e-08	-0.020769068241046018	0.0	-0.49924442079788955	0.0	1.0115158522558941e-05	0.0	0.9998477319685316	0.0	0.017450297342213126	0.0	0.0	1.999758278696822	0.0	0.0	1.9997455332806653	0.0	-0.05184013390332872	0.0	0.00181003750562652	-0.7394127296128439	0.0	0.025818164280301606
3.435	-0.05558145836771282	0.0	-4.2312002409576054e-08	-0.021037528922377594	0.0	-0.49923504727810664	0.0	1.2665048584341909e-05	0.0	0.9998477314713886	0.0	0.01745032582693801	0.0	0.0	1.9997615433029514	0.0	0.0	1.9997491615498215	0.0	-0.055547609194060085	0.0	0.0019394914557473426	-0.7435774088180742	0.0	0.025963454693198443
3.44	-0.059312029470353536	0.0	-4.4876647746775754e-08	-0.02132457903921969	0.0	-0.4992250246718154	0.0	1.516972960946876e-05	0.0	0.9998477308636937	0.0	0.017450360645872506	0.0	0.0	1.9997655338665772	0.0	0.0	1.9997535073572363	0.0	-0.059275908220746694	0.0	0.0020696725583984423	-0.7477422233739154	0.0	0.02610900628202296
3.4450000000000003	-0.06306343770361797	0.0	-4.764847253841095e-08	-0.02163032271196088	0.0	-0.4992143493391405	0.0	1.7664776859614783e-05	0.0	0.9998477301469677	0.0	0.01745040171184609	0.0	0.0	1.999770240397174	0.0	0.0	1.9997585679430367	0.0	-0.06302503164916273	0.0	0.002200581882500539	-0.7519071703438543	0.0	0.026254766601527695
3.45	-0.06683568376840686	0.0	-4.9679139834821094e-08	-0.021954864064234445	0.0	-0.4992030176363814	0.0	2.0167885301043447e-05	0.0	0.9998477293216304	0.0	0.017450449000763302	0.0	0.0	1.9997756601331869	0.0	0.0	1.9997643456165841	0.0	-0.06679498014171496	0.0	0.0023322205427307127	-0.7560722481310068	0.0	0.0264007272386959
3.455	-0.0706287683348507	0.0	-5.034773052712403e-08	-0.02229830722293813	0.0	-0.49919102591574704	0.0	2.2680712333817996e-05	0.0	0.9998477283871113	0.0	0.017450502545253866	0.0	0.0	1.9997817968142777	0.0	0.0	1.9997708431620496	0.0	-0.070585754341175	0.0	0.002464589334313843	-0.7602374519814733	0.0	0.02654679124384162
3.46	-0.07444269203383079	0.0	-4.954993756654552e-08	-0.02266075631818495	0.0	-0.4991783705256962	0.0	2.5201673550915327e-05	0.0	0.9998477273426963	0.0	0.01745056238617621	0.0	0.0	1.9997886551231916	0.0	0.0	1.999778062909705	0.0	-0.07439735486898445	0.0	0.002597688538583122	-0.7644027797976505	0.0	0.02669289460824849
3.465	-0.0782774554959029	0.0	-4.724529280734795e-08	-0.02304231548322541	0.0	-0.49916504781274296	0.0	2.773096080799639e-05	0.0	0.9998477261878038	0.0	0.017450628556798048	0.0	0.0	1.9997962388727124	0.0	0.0	1.9997860072447857	0.0	-0.07822978234843027	0.0	0.002731518374689316	-0.7685682328289243	0.0	0.02683904930604041
3.47	-0.08213305936516394	0.0	-4.32689467581909e-08	-0.023443088854441477	0.0	-0.499151054122159	0.0	3.0268856426171123e-05	0.0	0.9998477249218434	0.0	0.017450701090864693	0.0	0.0	1.9998045519303578	0.0	0.0	1.9997946786334053	0.0	-0.08208303741189799	0.0	0.0028660791892395855	-0.772733815007261	0.0	0.02698530365155183
3.475	-0.0860095043174782	0.0	-3.7198680629469615e-08	-0.023863180571262278	0.0	-0.49913638579913844	0.0	3.282936406132739e-05	0.0	0.9998477235450964	0.0	0.017450779972175826	0.0	0.0	1.9998135924394291	0.0	0.0	1.9998040835534294	0.0	-0.08595712071474777	0.0	0.0030013715812031265	-0.7768995275439952	0.0	0.027131669227348387
3.48	-0.08990679100925794	0.0	-2.8800458378574845e-08	-0.024302694776407518	0.0	-0.49912103918610456	0.0	3.541202111177607e-05	0.0	0.9998477220569012	0.0	0.01745086523856757	0.0	0.0	1.9998233647362897	0.0	0.0	1.999814228350198	0.0	-0.08985203289908887	0.0	0.0031373959716004965	-0.7810653669796802	0.0	0.027278087635587107
3.485	-0.09382492007268939	0.0	-1.814793577981481e-08	-0.02476173561587329	0.0	-0.4991050106226526	0.0	3.801041269382698e-05	0.0	0.9998477204562177	0.0	0.017450956949525677	0.0	0.0	1.999833875638546	0.0	0.0	1.9998251175313226	0.0	-0.09376777459331762	0.0	0.003274152479935701	-0.7852313312475391	0.0	0.027424513100392005
3.49	-0.09776389213215188	0.0	-5.425812786618977e-09	-0.02524040723890507	0.0	-0.4990882964463123	0.0	4.061372069162206e-05	0.0	0.9998477187417353	0.0	0.017451055180043966	0.0	0.0	1.999845133741169	0.0	0.0	1.9998367525052525	0.0	-0.09770434642167591	0.0	0.003411641120964957	-0.7893974208942748	0.0	0.02757093782211098
3.495	-0.10172370782701796	0.0	9.264668275371887e-09	-0.025738813797905987	0.0	-0.4990708929936348	0.0	4.3219944828505765e-05	0.0	0.9998477169127667	0.0	0.017451159969388334	0.0	0.0	1.9998571435443888	0.0	0.0	1.9998491341073996	0.0	-0.10166174902059173	0.0	0.0035498619900952914	-0.7935636416368256	0.0	0.027717442225277368
3.5	-0.105704367854737	0.0	2.6426669643169983e-08	-0.026257059448383642	0.0	-0.4990527966019661	0.0	4.583757504504068e-05	0.0	0.9998477149692959	0.0	0.0174512713183667	0.0	0.0	1.9998699051408035	0.0	0.0	1.9998622656053657	0.0	-0.10563998306362528	0.0	0.003688815783550559	-0.7977299984007665	0.0	0.027864102034206105
3.505	-0.10970587292085071	0.0	4.661181238573638e-08	-0.02679524834909989	0.0	-0.49903400360722405	0.0	4.847660504386175e-05	0.0	0.9998477129113723	0.0	0.01745138922400828	0.0	0.0	1.9998834181899392	0.0	0.0	1.9998761531297364	0.0	-0.10963904923070301	0.0	0.003828503247103871	-0.8018964918007089	0.0	0.028010921298048448
3.5100000000000002	-0.11372822372517566	0.0	7.029345018780487e-08	-0.027353484662153312	0.0	-0.4990145103432041	0.0	5.114214383079064e-05	0.0	0.9998477107386365	0.0	0.017451513706773968	0.0	0.0	1.9998976850368038	0.0	0.0	1.99989080427472	0.0	-0.1136589481985202	0.0	0.003968925054981228	-0.8060631150896588	0.0	0.028157772166653015
3.515	-0.11777142088067809	0.0	9.693376278230159e-08	-0.027931872553168764	0.0	-0.49899431313821196	0.0	5.3824088394973475e-05	0.0	0.9998477084497254	0.0	0.017451644844620216	0.0	0.0	1.999912714615913	0.0	0.0	1.999906223740226	0.0	-0.11769968059170859	0.0	0.004110080883657736	-0.8102298634928269	0.0	0.028304554897236295
3.52	-0.12183546501646686	0.0	1.2612963168315917e-07	-0.02853051619104413	0.0	-0.49897340831944625	0.0	5.651427476620169e-05	0.0	0.9998477060434898	0.0	0.017451782703235986	0.0	0.0	1.9999285144558205	0.0	0.0	1.9999224138873577	0.0	-0.12176124704629034	0.0	0.0042519705459822974	-0.8143967382507651	0.0	0.028451277659069837
3.525	-0.12592035676757865	0.0	1.5750149027328433e-07	-0.029149519747994162	0.0	-0.49895179221250996	0.0	5.920390265695369e-05	0.0	0.9998477035188554	0.0	0.017451927344018226	0.0	0.0	1.9999450915931751	0.0	0.0	1.9999393745561225	0.0	-0.12584364820329455	0.0	0.0043945938812782505	-0.8185637509066338	0.0	0.02859814124313859
3.5300000000000002	-0.13002609691890263	0.0	1.9232978834485888e-07	-0.02978898739923911	0.0	-0.49892946114732895	0.0	6.190403713159165e-05	0.0	0.9998477008761176	0.0	0.017452078749883457	0.0	0.0	1.999962444070062	0.0	0.0	1.9999571087564347	0.0	-0.12994688479616207	0.0	0.004537952376401154	-0.822730909655456	0.0	0.02874528600332123
3.535	-0.1341526862170386	0.0	2.3142245416083472e-07	-0.030449023323487024	0.0	-0.49890641145027187	0.0	6.462213256904166e-05	0.0	0.9998476981151383	0.0	0.017452236928546683	0.0	0.0	1.9999805727706963	0.0	0.0	1.9999756216337314	0.0	-0.13407095753628434	0.0	0.004682047052420272	-0.8268982117678371	0.0	0.028892646304967164
3.54	-0.1383001253982947	0.0	2.754113005054386e-07	-0.031129731702870443	0.0	-0.4988826394453582	0.0	6.736884222170264e-05	0.0	0.9998476952358469	0.0	0.017452401883864238	0.0	0.0	1.9999994781370551	0.0	0.0	1.9999949213853814	0.0	-0.13821586713088135	0.0	0.004826878754919197	-0.8310656432019402	0.0	0.02903993750307097
3.545	-0.14246841501013227	0.0	3.2270990425184675e-07	-0.03183121672336133	0.0	-0.49885814144690716	0.0	7.013535526094924e-05	0.0	0.999847692236745	0.0	0.017452573701485345	0.0	0.0	2.000019169985317	0.0	0.0	2.000015013684637	0.0	-0.14238161417497863	0.0	0.0049724461311245645	-0.8352331957003828	0.0	0.029186993767068677
3.5500000000000003	-0.14665755568235178	0.0	3.7265870427064875e-07	-0.03255358257416487	0.0	-0.4988329137706518	0.0	7.291210381103421e-05	0.0	0.9998476891167003	0.0	0.01745275244609124	0.0	0.0	2.000039655728544	0.0	0.0	2.0000359014637556	0.0	-0.14656819931360002	0.0	0.005118748755851235	-0.8394008838094168	0.0	0.029334091792915372
3.555	-0.15086754815188128	0.0	4.2582817284433317e-07	-0.033296933447712486	0.0	-0.49880695273475756	0.0	7.569421739817335e-05	0.0	0.999847685874984	0.0	0.017452938159222692	0.0	0.0	2.000060940127689	0.0	0.0	2.0000575862597083	0.0	-0.15077562325601077	0.0	0.0052657874338524575	-0.8435687187219043	0.0	0.029481442665078447
3.56	-0.15509839321912947	0.0	4.834895072087616e-07	-0.03406137353975478	0.0	-0.49878025465802395	0.0	7.848136452698233e-05	0.0	0.9998476825112255	0.0	0.01745313086188688	0.0	0.0	2.0000830255903717	0.0	0.0	2.0000800695144973	0.0	-0.1550038867505734	0.0	0.005413563669167416	-0.8477367057353788	0.0	0.029629131528485904
3.565	-0.15935009168323347	0.0	5.468293517128187e-07	-0.034847007049330914	0.0	-0.4987528158572925	0.0	8.128294932357083e-05	0.0	0.9998476790253829	0.0	0.017453330556260565	0.0	0.0	2.0001059123660774	0.0	0.0	2.0001033553642102	0.0	-0.15925299054745146	0.0	0.0055620788777493	-0.8519048328046744	0.0	0.0297768868343184
3.5700000000000003	-0.16362264417568018	0.0	6.149682108592563e-07	-0.035653938180157975	0.0	-0.4987246326397286	0.0	8.410585020321039e-05	0.0	0.9998476754169505	0.0	0.01745353727103895	0.0	0.0	2.0001296037435434	0.0	0.0	2.0001274499154555	0.0	-0.16352293530100281	0.0	0.005711332415316826	-0.8560730918991487	0.0	0.029924545525994845
3.575	-0.167916051372905	0.0	6.875701729940021e-07	-0.03648227113888684	0.0	-0.49869570131241364	0.0	8.694435474664371e-05	0.0	0.9998476716850156	0.0	0.01745375105828305	0.0	0.0	2.000154105689439	0.0	0.0	2.0001523576383526	0.0	-0.16781372169116573	0.0	0.005861324192988636	-0.8601949897502681	0.0	0.02906011724151701
3.58	-0.1722303139166933	0.0	7.636373715093971e-07	-0.03733211243883507	0.0	-0.4986660180973331	0.0	8.9800355225731e-05	0.0	0.9998476678288243	0.0	0.017453971960895674	0.0	0.0	2.000179423120822	0.0	0.0	2.000178083545119	0.0	-0.17212535038633867	0.0	0.006012053459522407	-0.8646359527246721	0.0	0.035118797970241984
3.585	-0.17657033987711107	0.0	6.143672605804311e-05	-0.03820356961915844	0.0	-0.4986355608811933	0.0	-6.216581795739489e-05	0.0	0.9998476642525899	0.0	0.017454176823623702	0.0	0.0	2.0002029022368797	0.0	0.0	2.000160274350124	0.0	-0.17646061184512213	0.0	0.00622424019690293	-0.8696523947061889	0.0	0.05379966480039416
3.59	-0.18093685871040313	0.0	0.00019273822962770902	-0.039096771119180126	0.0	-0.49860353896387505	0.0	-0.0004800723323671656	0.0	0.9998476803672143	0.0	0.017453253686681085	0.0	0.0	2.00009710241919	0.0	0.0	2.000022743757596	0.0	-0.1808198993691737	0.0	0.0065075325684166635	-0.8732297002616014	0.0	0.04148940423043588
3.595	-0.18530839464903545	0.0	0.00013015849813637051	-0.04001179020290477	0.0	-0.4985707656675695	0.0	-0.0003268311759605034	0.0	0.9998476985367846	0.0	0.0174522127721961	0.0	0.0	1.9999778042351701	0.0	0.0	1.9999291135226167	0.0	-0.18519096987147468	0.0	0.006597177176119042	-0.8751185168895087	0.0	-0.007435124717636762
3.6	-0.18968601185183886	0.0	-0.00011331417413735346	-0.04094869545780085	0.0	-0.49853800144452093	0.0	-0.0006643652221814411	0.0	0.9998477189145138	0.0	0.017451045280839524	0.0	0.0	1.9998439992031318	0.0	0.0	1.9997387869061853	0.0	-0.189574432581463	0.0	0.0065061850394251474	-0.8797084509741306	0.0	0.0025020814351751994
3.605	-0.194104009421663	0.0	-0.00011350518389119306	-0.04190759497241851	0.0	-0.49850513896738907	0.0	-0.0005190945623490989	0.0	0.9998477459264384	0.0	0.01744949757932669	0.0	0.0	1.9996666186645635	0.0	0.0	1.9995900772682313	0.0	-0.19398976653006603	0.0	0.006659567448029006	-0.8855273449145167	0.0	0.039285616225296326
3.61	-0.19854617874613503	0.0	-7.113268774913246e-05	-0.04288863024650006	0.0	-0.49847134729661785	0.0	-0.00026991952934878955	0.0	0.999847762982799	0.0	0.01744852023076814	0.0	0.0	1.9995546057160551	0.0	0.0	1.9995127510190323	0.0	-0.19842776557945652	0.0	0.006856529857585862	-0.8896632975040619	0.0	0.039243858888665994
3.615	-0.20300819098351383	0.0	-4.035537083383545e-05	-0.04389190625893954	0.0	-0.4984365933308924	0.0	-9.311937018526283e-05	0.0	0.9998477705939686	0.0	0.017448084084552493	0.0	0.0	1.9995046194316684	0.0	0.0	1.9994860742845195	0.0	-0.20288599316055173	0.0	0.007042798747886979	-0.8936644654595459	0.0	0.036030646189510525
3.62	-0.20749001092310587	0.0	-2.2075768453090885e-05	-0.044917523884679525	0.0	-0.4984009388826267	0.0	9.989406958701766e-06	0.0	0.999847772186323	0.0	0.017447992835783473	0.0	0.0	1.9994941615009711	0.0	0.0	1.9994889360388124	0.0	-0.20736444777510496	0.0	0.0072174039049689685	-0.8977296776142656	0.0	0.034062496743886485
3.625	-0.21199201789390532	0.0	-1.187363942894387e-05	-0.045965584830769395	0.0	-0.49836443135559017	0.0	6.566314159347133e-05	0.0	0.9998477704083577	0.0	0.017448094720836606	0.0	0.0	1.9995058384456175	0.0	0.0	1.9995077471432268	0.0	-0.21186335616768084	0.0	0.00738472105572323	-0.9018395588451402	0.0	0.032983949044173344
3.63	-0.21651450136257086	0.0	-6.314751406335083e-06	-0.04703619182197503	0.0	-0.4983270981068223	0.0	9.504361726564567e-05	0.0	0.9998477668385662	0.0	0.017448299283416138	0.0	0.0	1.999529283159546	0.0	0.0	1.9995349751339218	0.0	-0.2163828889796336	0.0	0.007548158515642678	-0.90597662992413	0.0	0.03245356812550781
3.6350000000000002	-0.2210576369786578	0.0	-3.303122360046932e-06	-0.0481294482650592	0.0	-0.49828895279138524	0.0	0.00011084953513323785	0.0	0.9998477623156047	0.0	0.017448558462802948	0.0	0.0	1.9995589874515936	0.0	0.0	1.9995667311865424	0.0	-0.2209231492660723	0.0	0.007709798690626254	-0.9101290808345102	0.0	0.03223492601911844
3.64	-0.22562152324422302	0.0	-1.6626429062369672e-06	-0.04924545795608294	0.0	-0.4982500011789311	0.0	0.00011991480091977591	0.0	0.9998477572663781	0.0	0.01744884779422095	0.0	0.0	1.9995921474381408	0.0	0.0	1.9996010842465115	0.0	-0.22548419476678863	0.0	0.007870810896662691	-0.9142900169985063	0.0	0.03218814602648925
3.645	-0.2302062149305702	0.0	-7.40757010995246e-07	-0.05038432490836227	0.0	-0.49821024464533165	0.0	0.00012577347782681314	0.0	0.9998477519002725	0.0	0.017449155278209557	0.0	0.0	1.999627387872966	0.0	0.0	1.9996371156937824	0.0	-0.2300660576148506	0.0	0.008031844542736227	-0.9184555573144335	0.0	0.03223388838753207
3.65	-0.23481174072301017	0.0	-1.992194581407719e-07	-0.0515461532559363	0.0	-0.49816968213836266	0.0	0.00013011654745882412	0.0	0.9998477463152606	0.0	0.017449475300030493	0.0	0.0	1.9996640652565136	0.0	0.0	1.9996743913388533	0.0	-0.23466875474994964	0.0	0.008193236570933111	-0.9226235598294742	0.0	0.03232794525690342
3.6550000000000002	-0.2394381165490625	0.0	1.4620158376915194e-07	-0.05273104719630646	0.0	-0.49812831136000496	0.0	0.0001337613006586116	0.0	0.999847740557324	0.0	0.01744980522430798	0.0	0.0	1.9997018775510016	0.0	0.0	1.9997127111288029	0.0	-0.23929229569249438	0.0	0.00835517078153769	-0.9267929643904115	0.0	0.03244831627918973
3.66	-0.24408535114271762	0.0	3.9247208121550636e-07	-0.053939110962197126	0.0	-0.4980861293505447	0.0	0.0001371072941931721	0.0	0.9998477346482922	0.0	0.017450143799695905	0.0	0.0	1.9997406813409095	0.0	0.0	1.9997519894752915	0.0	-0.24393668579817043	0.0	0.008517744091660192	-0.9309631592143949	0.0	0.03258221541825911
3.665	-0.24875344929007656	0.0	5.886416192951942e-07	-0.05517044880814688	0.0	-0.49804313276915146	0.0	0.00014031482309130664	0.0	0.9998477285965697	0.0	0.017450490544175745	0.0	0.0	1.9997804213825903	0.0	0.0	1.9997921867111228	0.0	-0.24860192813719237	0.0	0.008681005731801493	-0.9351338371081754	0.0	0.032723203532476305
3.67	-0.25344241399617834	0.0	7.620055837804573e-07	-0.05642516500102369	0.0	-0.497999318093293	0.0	0.0001434661479703153	0.0	0.9998477224059277	0.0	0.017450845241171485	0.0	0.0	1.9998210728544963	0.0	0.0	1.9998332867350315	0.0	-0.25328802475466977	0.0	0.008844983247947986	-0.9393048551584113	0.0	0.032868229626887284
3.6750000000000003	-0.25815224725723107	0.0	9.274699985895472e-07	-0.05770336381568962	0.0	-0.49795468170967727	0.0	0.0001466063790995993	0.0	0.9998477160782121	0.0	0.017451207784426628	0.0	0.0	1.9998626235786936	0.0	0.0	1.999875286368892	0.0	-0.2579949771179986	0.0	0.00900969181989146	-0.9434761234974641	0.0	0.03301537657525225
3.68	-0.26288295044471927	0.0	1.0922990839208638e-06	-0.059005149533741426	0.0	-0.49790921994177395	0.0	0.00014974829203388566	0.0	0.9998477096135316	0.0	0.01745157816723864	0.0	0.0	1.9999050727870273	0.0	0.0	1.9999181860945061	0.0	-0.2627227863351159	0.0	0.00917513901876669	-0.9476475945464701	0.0	0.03316363183908337
3.685	-0.26763452467859233	0.0	1.2606336888638246e-06	-0.06033062644207533	0.0	-0.49786292908087554	0.0	0.0001528962018532348	0.0	0.9998477030114509	0.0	0.017451956414046725	0.0	0.0	1.9999484232804692	0.0	0.0	1.9999619876298549	0.0	-0.2674714533709137	0.0	0.009341329303835992	-0.9518192479299535	0.0	0.0333125420837017
3.69	-0.2724069709265948	0.0	1.4346893970965012e-06	-0.06167989883212161	0.0	-0.49781580540239206	0.0	0.00015605352344153707	0.0	0.9998476962714927	0.0	0.017452342551684555	0.0	0.0	1.9999926781344173	0.0	0.0	2.0000066936712115	0.0	-0.2722409791052023	0.0	0.009508265209159239	-0.9558417426847359	0.0	0.030199487441278195
3.6950000000000003	-0.2772002901258566	0.0	1.6162375610297807e-06	-0.06305307099925159	0.0	-0.4977678451789295	0.0	0.00015922790942705532	0.0	0.9998476893934555	0.0	0.01745273659118242	0.0	0.0	2.0000378386130606	0.0	0.0	2.000052309107166	0.0	-0.27703136440289233	0.0	0.009675948818009742	-0.9613712887203179	0.0	0.05993367568619352
3.7	-0.28203026891860583	0.0	0.00019766084983446284	-0.06445027947551846	0.0	-0.49771835255250924	0.0	-0.00041546827787834317	0.0	0.9998476991500516	0.0	0.017452177637794736	0.0	0.0	1.999973777516071	0.0	0.0	1.999933286212946	0.0	-0.2818515700298608	0.0	0.010040125885679993	-0.9643096273953915	0.0	0.03358115677881028
3.705	-0.2868482712209057	0.0	-9.874190340606246e-06	-0.06587159498662623	0.0	-0.4976680339302925	0.0	-0.0006840733119402323	0.0	0.9998477194444426	0.0	0.017451014918874144	0.0	0.0	1.9998405194482847	0.0	0.0	1.9997373136446874	0.0	-0.2866739034449625	0.0	0.010000194174830418	-0.9667229445070962	0.0	-0.003817085313566193
3.71	-0.2916971703613048	0.0	-9.09289469221151e-05	-0.06731707306022013	0.0	-0.49761792127982335	0.0	-0.0006374263398798337	0.0	0.9998477505942516	0.0	0.017449230113866367	0.0	0.0	1.999635964713363	0.0	0.0	1.9995547044495594	0.0	-0.2915227137980402	0.0	0.010087358656996025	-0.9724181150148069	0.0	0.030348718008664424
3.715	-0.29657544713691353	0.0	-6.493211332746636e-05	-0.0687868636879807	0.0	-0.4975670042666579	0.0	-0.00033743714411732707	0.0	0.9998477718454206	0.0	0.017448012371028384	0.0	0.0	1.9994964004159677	0.0	0.0	1.9994580358285152	0.0	-0.2963971378779018	0.0	0.010282836107351968	-0.977051988436542	0.0	0.041246994801084444
3.72	-0.301474578348387	0.0	-3.80270823424643e-05	-0.07028107894467635	0.0	-0.4975150929477441	0.0	-0.000105098760849391	0.0	0.9998477811303838	0.0	0.01744748029373609	0.0	0.0	1.9994354195668023	0.0	0.0	1.9994279272513715	0.0	-0.30129235859248654	0.0	0.010480338265332527	-0.981085485813806	0.0	0.03877975853280533
3.725	-0.3063937592182453	0.0	-2.0728054874549232e-05	-0.07179982119350979	0.0	-0.4974622157077939	0.0	3.4462540809276454e-05	0.0	0.9998477823810942	0.0	0.01744740862019931	0.0	0.0	1.9994272051340953	0.0	0.0	1.9994378000420698	0.0	-0.3062079424943409	0.0	0.01066921135345738	-0.9851615957436592	0.0	0.03704082163606826
3.73	-0.3113331956778796	0.0	-1.0811857087599578e-05	-0.07334319252929322	0.0	-0.49740841167920913	0.0	0.00011068347111228664	0.0	0.9998477790417056	0.0	0.01744759998741045	0.0	0.0	1.9994491375397017	0.0	0.0	1.9994695085208527	0.0	-0.31114402158072485	0.0	0.010851575113871005	-0.9892761818466924	0.0	0.036026830281955136
3.735	-0.31629313734240144	0.0	-5.363900908704448e-06	-0.07491129582054067	0.0	-0.49735370601063716	0.0	0.00015088569433211943	0.0	0.9998477732450914	0.0	0.017447932163575187	0.0	0.0	1.999487207919511	0.0	0.0	1.9995127340882235	0.0	-0.3161007460391886	0.0	0.011030281597495702	-0.9934168158566145	0.0	0.035519907043327664
3.74	-0.3212737526910012	0.0	-2.3907286184580844e-06	-0.0765042345653246	0.0	-0.4972981116972172	0.0	0.00017225756032570615	0.0	0.9998477661528437	0.0	0.017448338577665336	0.0	0.0	1.9995337866344025	0.0	0.0	1.9995620822442028	0.0	-0.32107821604046644	0.0	0.011207290400721803	-0.9975728232368105	0.0	0.035316275665638865
3.745	-0.32627513901743527	0.0	-7.375199745197157e-07	-0.07812211265219203	0.0	-0.4972416340539298	0.0	0.00018418356856946945	0.0	0.9998477583555784	0.0	0.017448785381156028	0.0	0.0	1.9995849943387252	0.0	0.0	1.9996148469498762	0.0	-0.32607648922087684	0.0	0.011383739225664108	-1.0017373431378116	0.0	0.03528091134863953
3.75	-0.33129735039473435	0.0	2.3573661662196668e-07	-0.07976503418318555	0.0	-0.49718427418101047	0.0	0.00019156424098494874	0.0	0.9998477501496588	0.0	0.017449255589227365	0.0	0.0	1.9996388844192217	0.0	0.0	1.9996697260624468	0.0	-0.3310955976400221	0.0	0.011560259599279919	-1.0059064666208881	0.0	0.03533577323701339
3.755	-0.3363404152399092	0.0	8.618316640106371e-07	-0.08143310338189166	0.0	-0.4971260307975074	0.0	0.0001967871189460658	0.0	0.9998477416741701	0.0	0.01744974123059535	0.0	0.0	1.9996945432949984	0.0	0.0	1.9997261014193375	0.0	-0.33613555824736535	0.0	0.011737180505042265	-1.0100780222244607	0.0	0.03543710218270656
3.7600000000000002	-0.34140434877103215	0.0	1.3146960243922996e-06	-0.08312642453440858	0.0	-0.49706690142651117	0.0	0.00020100581775360954	0.0	0.999847732995192	0.0	0.01745023851779432	0.0	0.0	1.9997515368884087	0.0	0.0	1.9997836853444118	0.0	-0.3411963802551212	0.0	0.011914674241526252	-1.0142509205338555	0.0	0.03556273007190924
3.765	-0.3464891592499827	0.0	1.6843190304059703e-06	-0.08484510196157845	0.0	-0.49700688296035356	0.0	0.00020477117415913527	0.0	0.999847724143318	0.0	0.017450745696972168	0.0	0.0	1.9998096641922314	0.0	0.0	1.999842347964638	0.0	-0.34627806880820217	0.0	0.012092830232672377	-1.0183711717608614	0.0	0.034546901576097806
3.77	-0.3515948512379933	0.0	2.0158767291099608e-06	-0.08658924000450005	0.0	-0.4969459719564211	0.0	0.00020833058492067508	0.0	0.9998477151318268	0.0	0.017451262006474545	0.0	0.0	1.999868837914045	0.0	0.0	1.9999020302809352	0.0	-0.3513806268946854	0.0	0.012271693616006258	-1.022880018236879	0.0	0.04188871486282498
3.775	-0.3567270462702957	0.0	7.143402014354958e-05	-0.08835897309034875	0.0	-0.496884139681976	0.0	3.447562324723505e-05	0.0	0.9998477065005565	0.0	0.017451756517030077	0.0	0.0	1.9999255132806033	0.0	0.0	1.999911906819476	0.0	-0.35650726105822705	0.0	0.012520521406316442	-1.0279949435668392	0.0	0.06258042643502525
3.7800000000000002	-0.36188431699435414	0.0	0.0001943637867589474	-0.09015438406481661	0.0	-0.4968205926745486	0.0	-0.00036591965657042284	0.0	0.9998477179610479	0.0	0.017451099909126917	0.0	0.0	1.9998502600971724	0.0	0.0	1.9998070785596642	0.0	-0.36165711716110766	0.0	0.012822880738909283	-1.03015610844913	0.0	0.01944220388165026
3.785	-0.36703172514880184	0.0	-5.962660638715689e-05	-0.09197553689869137	0.0	-0.49675682140590177	0.0	-0.0007516123899767304	0.0	0.9998477458371349	0.0	0.01744950269646028	0.0	0.0	1.9996672051341748	0.0	0.0	1.999591757470787	0.0	-0.3668102943255699	0.0	0.012747501629795061	-1.0335275254149143	0.0	0.0029891483947667883
3.79	-0.37221985401667307	0.0	-6.598855095321828e-05	-0.09382254128976772	0.0	-0.49669268417507434	0.0	-0.000476556548929021	0.0	0.9998477733557467	0.0	0.017447925822553875	0.0	0.0	1.9994864811813648	0.0	0.0	1.9994552340760223	0.0	-0.37199552652648044	0.0	0.012921003170936203	-1.0394506891487771	0.0	0.04208082238719771
3.795	-0.37743119921317586	0.0	-4.20468835762083e-05	-0.09569552865518115	0.0	-0.4966275670057206	0.0	-0.00017976045581419834	0.0	0.9998477873466891	0.0	0.017447124057682135	0.0	0.0	1.9993945917073568	0.0	0.0	1.9994037364988149	0.0	-0.37720288445631445	0.0	0.013126151958845802	-1.0435541500206	0.0	0.0412558519787996
3.8000000000000003	-0.38266294438784093	0.0	-2.334189647197296e-05	-0.09759460433737491	0.0	-0.49656143064842606	0.0	1.4809771980536784e-05	0.0	0.9998477905756991	0.0	0.017446939010821404	0.0	0.0	1.999373383670996	0.0	0.0	1.999407979185965	0.0	-0.38243079685813736	0.0	0.013327234028083348	-1.0476311350533238	0.0	0.03958532890647934
3.805	-0.3879149553292734	0.0	-1.19529492894571e-05	-0.09951987078256688	0.0	-0.49649430534615857	0.0	0.00012488924313550065	0.0	0.9998477872861095	0.0	0.017447127529339513	0.0	0.0	1.9993949895905512	0.0	0.0	1.9994437573186563	0.0	-0.38767920797758915	0.0	0.013521997368244245	-1.0517410118717023	0.0	0.03847038007348753
3.81	-0.39318743768060865	0.0	-5.56021866860842e-06	-0.10147143079806897	0.0	-0.49642621750776794	0.0	0.00018359045702766435	0.0	0.9998477804224842	0.0	0.017447520860735075	0.0	0.0	1.9994400689101823	0.0	0.0	1.999496352110389	0.0	-0.39294824659347866	0.0	0.01371264671173499	-1.0558784199769606	0.0	0.037867406683389275
3.815	-0.3984805717696442	0.0	-2.0496261345271247e-06	-0.10344938780980881	0.0	-0.49635718231061693	0.0	0.00021452623277135824	0.0	0.9998477716723234	0.0	0.01744802229030746	0.0	0.0	1.999497537254682	0.0	0.0	1.9995578093490523	0.0	-0.39823802162674293	0.0	0.013901230623649685	-1.0600336639048635	0.0	0.0376069016322586
3.8200000000000003	-0.40379447091300963	0.0	-8.057898719210187e-08	-0.10545384568741259	0.0	-0.4962872064760047	0.0	0.00023129381594032066	0.0	0.9998477619144425	0.0	0.017448581450474256	0.0	0.0	1.9995616220457737	0.0	0.0	1.9996240701464565	0.0	-0.40354860085274985	0.0	0.014089055670323501	-1.0641990851880825	0.0	0.037543674173436674
3.825	-0.4091291986088662	0.0	1.0972307354198662e-06	-0.10748490855531476	0.0	-0.496216291795499	0.0	0.000241102980600827	0.0	0.9998477515944703	0.0	0.017449172800905292	0.0	0.0	1.9996293961317433	0.0	0.0	1.9996931410625387	0.0	-0.4088800222174667	0.0	0.014276854939016813	-1.068370016305653	0.0	0.03758668667007941
3.83	-0.4144847890202433	0.0	1.8843247136974851e-06	-0.10954268068053219	0.0	-0.49614443731711916	0.0	0.0002475956076638107	0.0	0.999847740927594	0.0	0.017449784008411445	0.0	0.0	1.9996994460181194	0.0	0.0	1.9997640719792644	0.0	-0.4142323062079839	0.0	0.014465020784265816	-1.0724475702580736	0.0	0.035597117388362284
3.835	-0.41986125968424914	0.0	2.4815063814541944e-06	-0.11162726640595587	0.0	-0.49607164065307685	0.0	0.00025251974496121586	0.0	0.9998477300152199	0.0	0.01745040926068358	0.0	0.0	1.9997711055619745	0.0	0.0	1.9998364135574143	0.0	-0.4196054634902761	0.0	0.01465375033498343	-1.0774382319454203	0.0	0.05337565868686076
3.84	-0.4252687640486291	0.0	0.0001280708052212576	-0.11373880421899413	0.0	-0.49599779764467933	0.0	-7.427877546702562e-05	0.0	0.999847721165628	0.0	0.017450916304110182	0.0	0.0	1.9998292173076537	0.0	0.0	1.999815134255706	0.0	-0.4250052768197403	0.0	0.014968391794754711	-1.0813618273198138	0.0	0.04813231112204093
3.845	-0.430682321356572	0.0	7.268039078605732e-05	-0.11587736822613691	0.0	-0.495922283180608	0.0	-0.0005980146576167571	0.0	0.9998477346647937	0.0	0.017450142854192417	0.0	0.0	1.99974057297769	0.0	0.0	1.999643815675864	0.0	-0.43041749319479283	0.0	0.015101283501716332	-1.08390959144986	0.0	0.01349390233980422
3.85	-0.436110312381132	0.0	-5.918675346556691e-05	-0.11804301439758444	0.0	-0.4958467684684571	0.0	-0.0006747054059296412	0.0	0.9998477658684587	0.0	0.017448354873826195	0.0	0.0	1.999535654321206	0.0	0.0	1.9994505268149918	0.0	-0.43584683420492887	0.0	0.015157347450806572	-1.088516208102519	0.0	0.023959373235684853
3.855	-0.44157042591549445	0.0	-5.0145613919071404e-05	-0.12023588053900781	0.0	-0.49577050098148073	0.0	-0.0003447070932410629	0.0	0.9998477882587864	0.0	0.01744707178767447	0.0	0.0	1.9993886010938404	0.0	0.0	1.9993517755069372	0.0	-0.4413033470847928	0.0	0.015355761443010069	-1.0935403567896649	0.0	0.04337921253086136
3.86	-0.447052237191054	0.0	-3.0053010513437538e-05	-0.12245608314258037	0.0	-0.49569319410355694	0.0	-7.01907273818679e-05	0.0	0.9998477969059749	0.0	0.01744657623202868	0.0	0.0	1.9993318059551641	0.0	0.0	1.9993316673447377	0.0	-0.4467811354535889	0.0	0.015566652930963518	-1.0976249253373964	0.0	0.042009584589000816
3.865	-0.4525544344233005	0.0	-1.5731887521519672e-05	-0.12470372612927555	0.0	-0.49561484269925143	0.0	9.82541089965522e-05	0.0	0.9998477959518307	0.0	0.01744663091310463	0.0	0.0	1.9993380728987582	0.0	0.0	1.999359815073564	0.0	-0.45227948177669314	0.0	0.01577297459112022	-1.1017256940363318	0.0	0.040754125550187634
3.87	-0.458077039125966	0.0	-7.2382499819841756e-06	-0.12697891227168942	0.0	-0.4955354724587504	0.0	0.00019106188790724937	0.0	0.9998477894322991	0.0	0.017447004536505772	0.0	0.0	1.999380893504393	0.0	0.0	1.9994145502725786	0.0	-0.45779841621988787	0.0	0.01597447756034774	-1.1058536700497539	0.0	0.039954516024715066
3.875	-0.46362023202928676	0.0	-2.502291477902656e-06	-0.12928174479495286	0.0	-0.49545510267625253	0.0	0.00024013580706932821	0.0	0.9998477799143317	0.0	0.017447549980854297	0.0	0.0	1.9994434063380642	0.0	0.0	1.9994833441138538	0.0	-0.4633380515730049	0.0	0.016173110945072598	-1.1100034516693327	0.0	0.03955657981822598
3.88	-0.469184154617298	0.0	1.404953460446681e-07	-0.1316123274338264	0.0	-0.4953737434333817	0.0	0.0002661320982503945	0.0	0.9998477688145381	0.0	0.01744818605307411	0.0	0.0	1.9995163059425747	0.0	0.0	1.9995595853439674	0.0	-0.46889847362109754	0.0	0.01637047280109963	-1.114166905327227	0.0	0.039417911784581094
3.8850000000000002	-0.4747688925201209	0.0	1.7029276099716147e-06	-0.13397076426270513	0.0	-0.49529139841397585	0.0	0.00028055177291646627	0.0	0.9998477568625778	0.0	0.017448870932649393	0.0	0.0	1.9995947993104592	0.0	0.0	1.9996399575065824	0.0	-0.47447973388621034	0.0	0.016567541728041778	-1.1182480102929753	0.0	0.03746636799478413
3.89	-0.4803744922966639	0.0	2.73321736618002e-06	-0.13635715955033637	0.0	-0.49520806760793123	0.0	0.0002893363347784952	0.0	0.9998477444187694	0.0	0.017449583967873824	0.0	0.0	1.9996765195703246	0.0	0.0	1.9997228462607954	0.0	-0.48008186040589773	0.0	0.01676484911702632	-1.1232004422912807	0.0	0.05444108127838499
3.895	-0.48601047140518105	0.0	0.00012082942636505653	-0.13877162155215966	0.0	-0.4951236649630544	0.0	-1.3582332238151222e-05	0.0	0.9998477335518784	0.0	0.01745020662129001	0.0	0.0	1.9997478812616227	0.0	0.0	1.9997189552092294	0.0	-0.4857102652338279	0.0	0.017080139392799065	-1.1270003871420002	0.0	0.046458705432302655
3.9	-0.49165181849897954	0.0	4.931085027905978e-05	-0.14121428138326503	0.0	-0.4950376037484443	0.0	-0.0006347503623643392	0.0	0.9998477465233051	0.0	0.017449463379199132	0.0	0.0	1.99966269902185	0.0	0.0	1.9995371126251902	0.0	-0.491350697864561	0.0	0.017204789242454825	-1.1297853656832355	0.0	0.0168998602891551
3.9050000000000002	-0.49731139077511205	0.0	-5.173994196457798e-05	-0.14368517083220422	0.0	-0.49495144590577744	0.0	-0.0006304617135066189	0.0	0.9998477771104894	0.0	0.017447710656887695	0.0	0.0	1.9994618212583772	0.0	0.0	1.9993564986485475	0.0	-0.4970104103269963	0.0	0.017299540405531652	-1.1344885400103553	0.0	0.02946244976631448
3.91	-0.5030006238617327	0.0	-4.2548818234186826e-05	-0.14618442742917628	0.0	-0.49486444412268915	0.0	-0.00028899597172145434	0.0	0.9998477972110713	0.0	0.017446558747284752	0.0	0.0	1.9993298020461003	0.0	0.0	1.999273707401168	0.0	-0.5026958992102506	0.0	0.017506065601537713	-1.1393015464985428	0.0	0.04423352000590744
3.915	-0.5087113687763324	0.0	-2.4869927237945193e-05	-0.14871216497203676	0.0	-0.4947763717363713	0.0	-1.79548867037422e-05	0.0	0.9998478034877429	0.0	0.017446199032749573	0.0	0.0	1.9992885755220478	0.0	0.0	1.9992685637050192	0.0	-0.5084025635987234	0.0	0.017722603279483308	-1.1434022245064763	0.0	0.043156208085513154
3.92	-0.514442569713811	0.0	-1.2313905907732217e-05	-0.15126848738124002	0.0	-0.49468722504877427	0.0	0.0001459752647474961	0.0	0.999847800357921	0.0	0.01744637840302456	0.0	0.0	1.999309132970305	0.0	0.0	1.9993103825379357	0.0	-0.514129831248465	0.0	0.017935281033713626	-1.147514759646499	0.0	0.04210385981631733
3.9250000000000003	-0.5201942504571431	0.0	-4.868802478079635e-06	-0.15385349767289633	0.0	-0.4945970257714036	0.0	0.00023578257788547385	0.0	0.999847791828531	0.0	0.01744686721349463	0.0	0.0	1.9993651550509186	0.0	0.0	1.9993779292709135	0.0	-0.519877733162323	0.0	0.018143891377808176	-1.1516509343673451	0.0	0.04143395939266356
3.93	-0.5259665712145061	0.0	-6.946814935214981e-07	-0.15646729927308062	0.0	-0.49450579004683	0.0	0.0002832195747552142	0.0	0.9998477803993796	0.0	0.017447522184797767	0.0	0.0	1.9994402206596908	0.0	0.0	1.9994590657024585	0.0	-0.5256463701402575	0.0	0.018350138799157624	-1.1558065172832386	0.0	0.0411160261386404
3.935	-0.5317596574262193	0.0	1.687110797185864e-06	-0.159109996062048	0.0	-0.49441352594740867	0.0	0.0003084444512847163	0.0	0.9998477674396119	0.0	0.01744826484149344	0.0	0.0	1.9995253358050142	0.0	0.0	1.9995474285288226	0.0	-0.5314358186710224	0.0	0.01855542783947547	-1.1598436582658689	0.0	0.038181654125407756
3.94	-0.5375735843362256	0.0	3.1671573788191348e-06	-0.16178169222245084	0.0	-0.49432023592864077	0.0	0.0003225627024897532	0.0	0.9998477536496849	0.0	0.01744905503555684	0.0	0.0	1.9996158991619883	0.0	0.0	1.9996398359362275	0.0	-0.537246124281066	0.0	0.018760611158733554	-1.165205798370537	0.0	0.06403764348733589
3.9450000000000003	-0.5434221766761921	0.0	0.0001748374442112617	-0.16448250383123225	0.0	-0.4942256643462914	0.0	-0.00013875605885140996	0.0	0.9998477452902286	0.0	0.01744953403393144	0.0	0.0	1.9996707966906833	0.0	0.0	1.9996000852534572	0.0	-0.5430851467928387	0.0	0.019136771006891148	-1.16827896621029	0.0	0.040301039602261224
3.95	-0.5492628811659693	0.0	-6.007341218216114e-06	-0.16721253552913562	0.0	-0.49412979969463144	0.0	-0.0007118121671845901	0.0	0.9998477645999316	0.0	0.0174484275645443	0.0	0.0	1.999543985332194	0.0	0.0	1.9993961660885287	0.0	-0.5489286472125556	0.0	0.01915862552924287	-1.1710994081387391	0.0	0.011640836869122699
3.955	-0.5551356059235685	0.0	-4.629873391848178e-05	-0.16997184433473866	0.0	-0.49403365115888404	0.0	-0.0005036123943942209	0.0	0.9998477926939824	0.0	0.01744681761602278	0.0	0.0	1.9993594707340994	0.0	0.0	1.9992518917649822	0.0	-0.5547992641503219	0.0	0.019321480427414318	-1.1765489076663769	0.0	0.04041843004761175
3.96	-0.5610334704856049	0.0	-3.2781809857908975e-05	-0.17276056635802217	0.0	-0.49393650342476025	0.0	-0.00016275281765609493	0.0	0.9998478069982619	0.0	0.01744599784255851	0.0	0.0	1.9992655173150562	0.0	0.0	1.9992052665172044	0.0	-0.5606930986526072	0.0	0.019539836310771552	-1.18089911707151	0.0	0.04497559675727241
3.9650000000000003	-0.5669523231732769	0.0	-1.7652040421971657e-05	-0.17557881006303458	0.0	-0.49383824921700664	0.0	7.668018904031929e-05	0.0	0.9998478084541067	0.0	0.017445914406431902	0.0	0.0	1.9992559547838864	0.0	0.0	1.999227233773226	0.0	-0.5666078238532686	0.0	0.019761351456263895	-1.18501122616409	0.0	0.044027851565109646
3.97	-0.5728916591801878	0.0	-7.580247898817831e-06	-0.17842667896543404	0.0	-0.4937388965570443	0.0	0.00021567650932405476	0.0	0.9998478017796721	0.0	0.01744629692267367	0.0	0.0	1.9992997945885773	0.0	0.0	1.9992890205418479	0.0	-0.5725431778118384	0.0	0.019979057954603145	-1.1891374496247165	0.0	0.04318695124959453
3.975	-0.5788515636764746	0.0	-1.7206280631792857e-06	-0.18130427632754484	0.0	-0.4936384639673955	0.0	0.00029060021375644984	0.0	0.9998477905667684	0.0	0.0174469395226861	0.0	0.0	1.999373442335301	0.0	0.0	1.999372271370717	0.0	-0.5784992238543261	0.0	0.020193582484160484	-1.1932848510048277	0.0	0.042696156358327554
3.98	-0.5848321801194694	0.0	1.5984603108975606e-06	-0.18421170584050767	0.0	-0.49353696345997367	0.0	0.0003301485644781189	0.0	0.9998477769431973	0.0	0.017447720243674247	0.0	0.0	1.9994629199904481	0.0	0.0	1.9994668519675014	0.0	-0.5844760516835836	0.0	0.0204064674589686	-1.1973035190090002	0.0	0.03934645417007736
3.985	-0.5908336108889852	0.0	3.590472275889797e-06	-0.18714907158434957	0.0	-0.49343440012095213	0.0	0.0003514443522924049	0.0	0.9998477620331545	0.0	0.01744857464800598	0.0	0.0	1.9995608424216416	0.0	0.0	1.9995675333581018	0.0	-0.5904737237669409	0.0	0.02061885810968789	-1.2028074491706362	0.0	0.06822464218494846
3.99	-0.5968711963828971	0.0	0.00019425066305028577	-0.19011651755658504	0.0	-0.49333036805626035	0.0	-0.00017412361887446297	0.0	0.9998477560210898	0.0	0.017448919151178015	0.0	0.0	1.9996003255881682	0.0	0.0	1.9995176506157266	0.0	-0.5965009659722166	0.0	0.021020475708617748	-1.2056318298080702	0.0	0.03913799473713921
3.995	-0.6028963605659355	0.0	-2.279834040470577e-05	-0.193114081613793	0.0	-0.4932253954686616	0.0	-0.0006897969713110505	0.0	0.9998477795079542	0.0	0.01744757326869452	0.0	0.0	1.9994460753342582	0.0	0.0	1.9993200383398415	0.0	-0.6025300912131512	0.0	0.021012169950256745	-1.2084726620083568	0.0	0.011035504737786327
4.0	-0.6089583787349064	0.0	-4.008323999370111e-05	-0.19614186950422666	0.0	-0.4931198846119004	0.0	-0.0003970211663779237	0.0	0.9998478041032552	0.0	0.017446163757450693	0.0	0.0	1.9992845326552435	0.0	0.0	1.9992063001537874	0.0	-0.6085890814647817	0.0	0.02120468249929107	-1.2141707702976976	0.0	0.045156859498212146
4.005	-0.6150437574172996	0.0	-2.5984272924300473e-05	-0.1992000091524822	0.0	-0.4930132999225679	0.0	-6.871049264151912e-05	0.0	0.9998478139156952	0.0	0.017445601392874713	0.0	0.0	1.9992200806127216	0.0	0.0	1.9991866160476042	0.0	-0.6146702879869604	0.0	0.021430382150807295	-1.2183471521654536	0.0	0.045818779367136124
4.01	-0.6211499465473396	0.0	-1.2768410711631573e-05	-0.20228860700128823	0.0	-0.492905580747321	0.0	0.0001479107683050311	0.0	0.9998478117810496	0.0	0.017445723733923314	0.0	0.0	1.999234101998088	0.0	0.0	1.9992289893614463	0.0	-0.6207722939448288	0.0	0.021656761743129412	-1.2224684808513817	0.0	0.04498348702258806
4.015	-0.6272766642708889	0.0	-4.26096255943777e-06	-0.20540776652065748	0.0	-0.49279673828002307	0.0	0.0002707790589244335	0.0	0.9998478023802044	0.0	0.0174462625060303	0.0	0.0	1.9992958501314164	0.0	0.0	1.9993065618477308	0.0	-0.6268949619236004	0.0	0.021879677138935332	-1.226604474390323	0.0	0.04428891422153733
4.0200000000000005	-0.6334240143042893	0.0	6.621978564624651e-07	-0.20855759117778339	0.0	-0.4926867882513485	0.0	0.00033645352920565186	0.0	0.99984778898649	0.0	0.017447030084833243	0.0	0.0	1.9993838215727535	0.0	0.0	1.9994029486838596	0.0	-0.6330383641068182	0.0	0.022100033182960097	-1.2306220466936673	0.0	0.04092524862710356
4.025	-0.6395921253756462	0.0	3.5156024776007863e-06	-0.21173818485299578	0.0	-0.49257573989136366	0.0	0.0003711877389248554	0.0	0.9998477734786175	0.0	0.017447918781426642	0.0	0.0	1.9994856742047729	0.0	0.0	1.9995092861380965	0.0	-0.6392025808194566	0.0	0.02231921881616052	-1.2360505549203982	0.0	0.06811938524243286
4.03	-0.6457955952291585	0.0	0.00018484929688221722	-0.2149496977913633	0.0	-0.4924632860110991	0.0	-0.00011089606155442023	0.0	0.9998477640729663	0.0	0.017448457761072594	0.0	0.0	1.9995474461262992	0.0	0.0	1.999477516756638	0.0	-0.6453959223100587	0.0	0.022717580243304683	-1.2389864499542047	0.0	0.04138828743462872
4.035	-0.6519888283945254	0.0	-1.4480324605124869e-05	-0.21819215802021497	0.0	-0.492349704055942	0.0	-0.0006730566288479403	0.0	0.9998477851375419	0.0	0.01744725065739594	0.0	0.0	1.9994091011744706	0.0	0.0	1.9992847002356067	0.0	-0.6515923942542999	0.0	0.022732890507146043	-1.2418554234094437	0.0	0.013857173016737327
4.04	-0.6582170700480552	0.0	-3.673906114873699e-05	-0.22146567306110276	0.0	-0.4922355903186285	0.0	-0.00039350079085670323	0.0	0.9998478094602542	0.0	0.017445856742550767	0.0	0.0	1.9992493459840412	0.0	0.0	1.999171970562851	0.0	-0.6578176845883125	0.0	0.022926109464766548	-1.2474286120020588	0.0	0.04524682273764879
4.045	-0.6644689569009415	0.0	-2.4202212081643252e-05	-0.22477037184394266	0.0	-0.49212038875820735	0.0	-5.6502156650467265e-05	0.0	0.9998478189482699	0.0	0.01744531296188239	0.0	0.0	1.999187023824936	0.0	0.0	1.9991557838873035	0.0	-0.6640653536409203	0.0	0.0231560222068512	-1.2516478205974217	0.0	0.04683391247605039
4.05	-0.6707417549208726	0.0	-1.1441304513700488e-05	-0.22810636130910594	0.0	-0.49200402810684496	0.0	0.00016896674940580298	0.0	0.9998478160778894	0.0	0.01744547747198953	0.0	0.0	1.9992058781638895	0.0	0.0	1.9992041892953987	0.0	-0.6703338806828986	0.0	0.02338782447668702	-1.2557758590983163	0.0	0.046127107156433526
4.055	-0.6770351199721741	0.0	-3.0438472117317702e-06	-0.2314737451181613	0.0	-0.4918865158302768	0.0	0.0002975404035656796	0.0	0.9998478056235215	0.0	0.01744607663000062	0.0	0.0	1.9992745470651452	0.0	0.0	1.9992894283421934	0.0	-0.6766230937751432	0.0	0.023616575853946803	-1.2599000382615875	0.0	0.0451500998690906
4.0600000000000005	-0.6833491354086957	0.0	1.8733651987105894e-06	-0.23487262682582563	0.0	-0.49176786638672343	0.0	0.00036640448962383103	0.0	0.9998477909844691	0.0	0.017446915584974194	0.0	0.0	1.9993706988579862	0.0	0.0	1.9993943954964437	0.0	-0.6829330541161961	0.0	0.02384291221214534	-1.264157732893954	0.0	0.04695975349173204
4.065	-0.6896855064027084	0.0	2.4297080754682355e-05	-0.23830311044551244	0.0	-0.49164808690605877	0.0	0.0003536942603064787	0.0	0.9998477741612126	0.0	0.0174478796654696	0.0	0.0	1.9994811911638366	0.0	0.0	1.9994957214382116	0.0	-0.6892647388116052	0.0	0.02408771809837232	-1.2685601192455025	0.0	0.05192218868187992
4.07	-0.6960432570913084	0.0	5.453513842695858e-05	-0.24176532752057683	0.0	-0.4915265857137659	0.0	-0.0005482362960919998	0.0	0.9998477789931834	0.0	0.01744760276801614	0.0	0.0	1.9994494562221532	0.0	0.0	1.9993386633085017	0.0	-0.6956175770009573	0.0	0.024339377222587253	-1.272030824752407	0.0	0.03710588040985481
4.075	-0.7024121336058741	0.0	-3.197683373019602e-05	-0.24525932329432834	0.0	-0.4914046363532385	0.0	-0.000540324785361801	0.0	0.9998478058689454	0.0	0.017446062564595695	0.0	0.0	1.9992729350431269	0.0	0.0	1.9991838716596642	0.0	-0.701985669698503	0.0	0.0244729646165693	-1.276007208093242	0.0	0.033755829169002625
4.08	-0.7088090933959188	0.0	-2.8297004519274132e-05	-0.24878522493665367	0.0	-0.4912817192840366	0.0	-0.00018060533652981923	0.0	0.9998478216333159	0.0	0.017445159072510926	0.0	0.0	1.9991693867179348	0.0	0.0	1.9991321320419606	0.0	-0.7083786517262332	0.0	0.02469853153312988	-1.2807926636598226	0.0	0.04782365716206981
4.085	-0.7152277118896243	0.0	-1.5030152239618615e-05	-0.2523431451492586	0.0	-0.4911576343469573	0.0	0.00010387294316099457	0.0	0.9998478228662875	0.0	0.017445088406116787	0.0	0.0	1.9991612877131713	0.0	0.0	1.9991618894482042	0.0	-0.7147929041282177	0.0	0.024935602832573168	-1.2849331253972585	0.0	0.04749003171303946
4.09	-0.7216669976564855	0.0	-4.910610907797413e-06	-0.2559331885167435	0.0	-0.49103236643800713	0.0	0.0002756751313322193	0.0	0.9998478142349451	0.0	0.017445583095876134	0.0	0.0	1.9992179836119932	0.0	0.0	1.9992408645559145	0.0	-0.7212278926190859	0.0	0.025171063520894012	-1.2890684187534474	0.0	0.04679981082968057
4.095	-0.7281269046450746	0.0	1.296808719066615e-06	-0.25955545861942675	0.0	-0.49090592830965446	0.0	0.00036980521093043	0.0	0.9998477999452217	0.0	0.017446402054645056	0.0	0.0	1.9993118436589357	0.0	0.0	1.9993468059450556	0.0	-0.7276836093174894	0.0	0.02540381861589998	-1.293194888057044	0.0	0.045763783073876
4.1	-0.7346076504304898	0.0	6.1947486831014405e-06	-0.2632100593194615	0.0	-0.49077833083640277	0.0	0.00041650506879251363	0.0	0.9998477826138255	0.0	0.017447395283192974	0.0	0.0	1.9994256765930751	0.0	0.0	1.9994661258579938	0.0	-0.7341601881152	0.0	0.025636269149963524	-1.297701742841582	0.0	0.052980297275178646
4.105	-0.7411126800311424	0.0	5.470324248961993e-05	-0.26689712068996835	0.0	-0.4906490138553078	0.0	-0.0005291898374525332	0.0	0.9998477859626484	0.0	0.01744720337305118	0.0	0.0	1.9994036819628052	0.0	0.0	1.9993145241367576	0.0	-0.7406595748137077	0.0	0.025911420880696704	-1.3013004332599665	0.0	0.04091960804988605
4.11	-0.7476275933693709	0.0	-2.8777815371590076e-05	-0.2706166912449714	0.0	-0.4905191801549356	0.0	-0.0005182909113150225	0.0	0.9998478119543653	0.0	0.01744571380074168	0.0	0.0	1.9992329635660584	0.0	0.0	1.9991660447278659	0.0	-0.747173512018337	0.0	0.026053063802757088	-1.3051477159879088	0.0	0.03473755962766165
4.115	-0.7541702973791861	0.0	-2.5817878414246446e-05	-0.2743688963037749	0.0	-0.4903883515364176	0.0	-0.00015504123070489987	0.0	0.9998478266765456	0.0	0.01744487002353248	0.0	0.0	1.999136259103634	0.0	0.0	1.9991216286870164	0.0	-0.753712174546988	0.0	0.02628299935525533	-1.3099272078080335	0.0	0.04865051907017449
4.12	-0.7607346827754903	0.0	-1.3155423880083655e-05	-0.27815384836003193	0.0	-0.4902563330008518	0.0	0.00013170889137986702	0.0	0.9998478267405855	0.0	0.01744486635311136	0.0	0.0	1.9991358384403421	0.0	0.0	1.9991593605050184	0.0	-0.7602721230221677	0.0	0.026524643368772832	-1.314074599235817	0.0	0.04843939791166514
4.125	-0.7673197704186401	0.0	-3.351781822266812e-06	-0.281971652110981	0.0	-0.49012310769863726	0.0	0.0003047823217108475	0.0	0.9998478168648371	0.0	0.017445432369786518	0.0	0.0	1.9992007090454749	0.0	0.0	1.9992466742085395	0.0	-0.7668528303758715	0.0	0.026765026264612204	-1.3180980957115638	0.0	0.0452855445614039
4.13	-0.773925503418666	0.0	2.7151037690956292e-06	-0.28582241123550634	0.0	-0.48998868698784104	0.0	0.0003995994759349185	0.0	0.9998478012891112	0.0	0.017446325036526447	0.0	0.0	1.9993030166891899	0.0	0.0	1.999361151025873	0.0	-0.7734542826952555	0.0	0.027002915202912176	-1.3233166413709474	0.0	0.06796511007668242
4.135	-0.7805643271913133	0.0	0.00015901009963916162	-0.28970623753350017	0.0	-0.4898529096932562	0.0	3.626455311433666e-05	0.0	0.9998477865794827	0.0	0.017447168024064343	0.0	0.0	1.9993996306506283	0.0	0.0	1.99937154005507	0.0	-0.7800835661889964	0.0	0.027392041354685853	-1.3264914353238288	0.0	0.04631866247941074
4.14	-0.7871982030472203	0.0	-2.4928074466093464e-07	-0.29362323724063244	0.0	-0.48971573301042304	0.0	-0.0006155082647428067	0.0	0.9998478028892829	0.0	0.01744623333053994	0.0	0.0	1.9992925063575733	0.0	0.0	1.999195209925944	0.0	-0.7867190110449108	0.0	0.027462857484761072	-1.3294877676041725	0.0	0.021374811579969826
4.1450000000000005	-0.7938633752876894	0.0	-2.817507757629606e-05	-0.2975734774944991	0.0	-0.48957794690085926	0.0	-0.00034999020247992557	0.0	0.9998478252390558	0.0	0.017444952412695006	0.0	0.0	1.9991457016431253	0.0	0.0	1.9990949451185789	0.0	-0.7933811710536847	0.0	0.02766544477063873	-1.3347802336541648	0.0	0.04660950928506962
4.15	-0.8005524405201379	0.0	-1.8637693952185735e-05	-0.3015570861893496	0.0	-0.4894390190939385	0.0	2.1151423475586155e-06	0.0	0.9998478325199825	0.0	0.017444535105416402	0.0	0.0	1.9990978744735637	0.0	0.0	1.9990955510622268	0.0	-0.800065855556511	0.0	0.027907653835737012	-1.3390633461023482	0.0	0.04953513428675449
4.155	-0.8072625999585186	0.0	-7.050313852393838e-06	-0.30557417094488754	0.0	-0.48929886490138835	0.0	0.00024157235158022257	0.0	0.9998478267700099	0.0	0.017444864666702795	0.0	0.0	1.9991356451627458	0.0	0.0	1.9991647564431898	0.0	-0.8067715082625476	0.0	0.028153841605389196	-1.3431587591920424	0.0	0.04804926001298153
4.16	-0.8139934203242889	0.0	9.464023443820331e-07	-0.3096248358391784	0.0	-0.48915748445825147	0.0	0.00037897673453213466	0.0	0.9998478129393652	0.0	0.017445657348453842	0.0	0.0	1.9992264936257422	0.0	0.0	1.9992733252803017	0.0	-0.813497907949674	0.0	0.028397924105559514	-1.3477411996706787	0.0	0.05693937290769391
4.165	-0.820750168821823	0.0	7.031986044650283e-05	-0.31370918564597877	0.0	-0.4890148690129121	0.0	0.0002873765754349059	0.0	0.9998477950727364	0.0	0.01744668129296365	0.0	0.0	1.9993438468841724	0.0	0.0	1.9993556526048184	0.0	-0.8202480646474661	0.0	0.028704651328439867	-1.351652957766708	0.0	0.05122387891175797
4.17	-0.8275185574933877	0.0	2.7988739844393293e-05	-0.31782734610245883	0.0	-0.48887055071096813	0.0	-0.0005650666983989922	0.0	0.9998478025894181	0.0	0.017446250515837407	0.0	0.0	1.9992944759473676	0.0	0.0	1.99919377292001	0.0	-0.8270138346556187	0.0	0.02889776924568075	-1.3550367918183204	0.0	0.034544663790851984
4.175	-0.8343066650386929	0.0	-2.5191489139105057e-05	-0.32197936904064883	0.0	-0.48872566067248613	0.0	-0.0004194347474831612	0.0	0.999847826330708	0.0	0.01744488984508869	0.0	0.0	1.999138530832359	0.0	0.0	1.9990736137159504	0.0	-0.8337997444441029	0.0	0.029079169991653612	-1.3595135012965387	0.0	0.042028686169128145
4.18	-0.8411203647466141	0.0	-1.9683013402592364e-05	-0.3261653822291084	0.0	-0.4885796675670034	0.0	-5.046623480402034e-05	0.0	0.999847836435398	0.0	0.01744431068867494	0.0	0.0	1.999072154295562	0.0	0.0	1.9990591562046396	0.0	-0.8406091388136687	0.0	0.02932139358381835	-1.3640394447694513	0.0	0.05031101479973342
4.1850000000000005	-0.8479554959978093	0.0	-7.980753019036736e-06	-0.33038549561200675	0.0	-0.48843243454340546	0.0	0.00022036832076246103	0.0	0.9998478322760085	0.0	0.017444549088934534	0.0	0.0	1.999099477110575	0.0	0.0	1.99912228707823	0.0	-0.8474396878340733	0.0	0.029571924863392964	-1.3681296264886327	0.0	0.048751475325939896
4.19	-0.8548113471929843	0.0	7.736150954525118e-07	-0.3346398137214833	0.0	-0.4882839508886523	0.0	0.00038002971681841494	0.0	0.9998478188459388	0.0	0.017445318826787935	0.0	0.0	1.9991876959958965	0.0	0.0	1.999231157572546	0.0	-0.8542910150892153	0.0	0.02982114733161156	-1.3728505855182593	0.0	0.06066273033304831
4.195	-0.8616946698919752	0.0	8.990149898433183e-05	-0.33892844217290313	0.0	-0.48813419063545094	0.0	0.00025013113405197634	0.0	0.999847800982934	0.0	0.017446342583482613	0.0	0.0	1.9993050277283293	0.0	0.0	1.9993028148640761	0.0	-0.8611669770591575	0.0	0.030152111454442906	-1.3765883144856237	0.0	0.05117081306885516
4.2	-0.868585882475768	0.0	2.134186601459029e-05	-0.34325150357731976	0.0	-0.4879827526213306	0.0	-0.0005643384310761912	0.0	0.9998478099001518	0.0	0.017445831531292505	0.0	0.0	1.9992464565469055	0.0	0.0	1.9991411438124875	0.0	-0.8680564174832466	0.0	0.03032312249223499	-1.3799021767107087	0.0	0.03298759188813064
4.205	-0.8754996465662714	0.0	-2.3269720203402626e-05	-0.3476090529614432	0.0	-0.4878306961917196	0.0	-0.0003762217168552661	0.0	0.9998478323974149	0.0	0.017444542130386462	0.0	0.0	1.9990986795983456	0.0	0.0	1.9990333642298028	0.0	-0.8749676081171857	0.0	0.030517477364249097	-1.3845620043935858	0.0	0.04443565950860654
4.21	-0.8824383792324858	0.0	-1.7149843517338668e-05	-0.3520012178314388	0.0	-0.4876774978493346	0.0	-6.464241678439479e-06	0.0	0.9998478405430573	0.0	0.017444075250158304	0.0	0.0	1.9990451709230537	0.0	0.0	1.9990315123609732	0.0	-0.8819019329507987	0.0	0.030764819096773248	-1.3890163239694497	0.0	0.051111024088794484
4.215	-0.8893984793411102	0.0	-5.812105396712567e-06	-0.3564281074302326	0.0	-0.48752303714804146	0.0	0.0002585646376554067	0.0	0.9998478345895389	0.0	0.017444416486622837	0.0	0.0	1.999084279692407	0.0	0.0	1.999105585673318	0.0	-0.888857380535959	0.0	0.031019544720232578	-1.393043291882514	0.0	0.04813043032566867
4.22	-0.8963793117711654	0.0	2.592984304207742e-06	-0.36088982627061533	0.0	-0.48736730487776936	0.0	0.00041353686366636693	0.0	0.9998478196032303	0.0	0.017445275423876118	0.0	0.0	1.9991827216315623	0.0	0.0	1.9992240552581237	0.0	-0.8958336173952662	0.0	0.03127299989477517	-1.3983882942581831	0.0	0.0735728328257957
4.225	-0.9033946421317601	0.0	0.00017858371507250678	-0.36538648976576144	0.0	-0.48721006395297417	0.0	2.582471751057635e-05	0.0	0.9998478052757629	0.0	0.017446096560229073	0.0	0.0	1.9992768312487332	0.0	0.0	1.9992314534947262	0.0	-0.9028384861599751	0.0	0.03169509792872439	-1.401390991335753	0.0	0.04821313974815491
4.23	-0.9104014550956897	0.0	-4.298673527571519e-06	-0.36991818981715824	0.0	-0.4870515750087529	0.0	-0.0005530169430659214	0.0	0.9998478234714177	0.0	0.01744505372350887	0.0	0.0	1.9991573127741602	0.0	0.0	1.9990730258105416	0.0	-0.9098474802874362	0.0	0.031754874795159996	-1.404334961563116	0.0	0.022146966822100014
4.235	-0.9174424303873164	0.0	-2.1172094036753637e-05	-0.3744850108366056	0.0	-0.4868922578469289	0.0	-0.00022818730678268465	0.0	0.9998478413472525	0.0	0.01744402915575935	0.0	0.0	1.9990398880901838	0.0	0.0	1.9990076549624562	0.0	-0.9168848241931739	0.0	0.031981755538421856	-1.4097976357880442	0.0	0.05099101496736751
4.24	-0.9245064529692435	0.0	-1.1679726880822418e-05	-0.37908707462456304	0.0	-0.48673171367008367	0.0	0.00011877829571964932	0.0	0.9998478433475575	0.0	0.01744391450294479	0.0	0.0	1.9990267478460284	0.0	0.0	1.9990416824376687	0.0	-0.9239442239670698	0.0	0.03223744276302893	-1.4139826875555948	0.0	0.05165250325981895
4.245	-0.9315915229214478	0.0	-1.2064099569322556e-06	-0.3837244879601429	0.0	-0.4865698792193754	0.0	0.00034521698970926357	0.0	0.9998478327991532	0.0	0.017444519104432007	0.0	0.0	1.9990960406167602	0.0	0.0	1.9991405798203015	0.0	-0.931024577449761	0.0	0.03249618077363382	-1.418245032238776	0.0	0.05366253905551416
4.25	-0.9386987593244274	0.0	2.3881027365073868e-05	-0.3883973555992462	0.0	-0.4864067536150418	0.0	0.0004281993123617839	0.0	0.9998478146997771	0.0	0.01744555645512897	0.0	0.0	1.9992149303425752	0.0	0.0	1.9992632498872451	0.0	-0.9381265450867978	0.0	0.032771126481266594	-1.4224788079932198	0.0	0.05493257545379181
4.255	-0.9458256526206942	0.0	3.600416885835405e-05	-0.39310580204112905	0.0	-0.4862418773240437	0.0	-0.0005090480203766718	0.0	0.9998478183604942	0.0	0.017445346649172862	0.0	0.0	1.9991908846916215	0.0	0.0	1.9991174183715597	0.0	-0.9452486912166715	0.0	0.03303147294099231	-1.4261311138333215	0.0	0.044020478901922226
4.26	-0.9529677315680742	0.0	-1.845710055880227e-05	-0.3978498838580911	0.0	-0.48607628944881676	0.0	-0.00037523414640088957	0.0	0.9998478400971528	0.0	0.017444100808224332	0.0	0.0	1.9990481001073905	0.0	0.0	1.99900992170697	0.0	-0.952388405622761	0.0	0.033223825574669325	-1.430229261129847	0.0	0.04321130350886798
4.265	-0.9601353769749456	0.0	-1.4889123383132478e-05	-0.4026297248031848	0.0	-0.4859095475126484	0.0	4.8217519197248416e-06	0.0	0.999847848048747	0.0	0.01744364503878862	0.0	0.0	1.998995864829289	0.0	0.0	1.9990113030371441	0.0	-0.9595515949074664	0.0	0.033476544786740337	-1.4348054296603205	0.0	0.05253498558839496
4.2700000000000005	-0.9673245846077348	0.0	-3.933034836614766e-06	-0.40744543512676684	0.0	-0.48574150932655114	0.0	0.00028611416604629555	0.0	0.9998478412369504	0.0	0.0174440354780597	0.0	0.0	1.9990406126826927	0.0	0.0	1.999093268708011	0.0	-0.9667360189453661	0.0	0.03373902303671872	-1.4389288695182227	0.0	0.05162651079010141
4.275	-0.9745345895130422	0.0	4.660435333252898e-06	-0.41229711969014105	0.0	-0.48557215861137154	0.0	0.00045240606183767016	0.0	0.9998478247824499	0.0	0.017444978582772924	0.0	0.0	1.9991487009695756	0.0	0.0	1.999222873497858	0.0	-0.9739412720178938	0.0	0.03400095350208378	-1.4435282086882015	0.0	0.06083500257612525
4.28	-0.9817701903371024	0.0	7.221665017643237e-05	-0.4171849016532968	0.0	-0.48540108941572185	0.0	-0.0003820875758086467	0.0	0.9998478192291971	0.0	0.017445296861023474	0.0	0.0	1.9991851785215913	0.0	0.0	1.999113413470367	0.0	-0.9811700903350871	0.0	0.03432150465001078	-1.4471025188243818	0.0	0.048085083121006865
4.285	-0.9890139141181828	0.0	-1.3300891716587832e-05	-0.42210884617205224	0.0	-0.4852291412947891	0.0	-0.0004337474611015094	0.0	0.9998478407698923	0.0	0.01744406224869363	0.0	0.0	1.999043680838221	0.0	0.0	1.9989891539758888	0.0	-0.9884124735039419	0.0	0.034486297538509306	-1.4508071918119259	0.0	0.03866801573113657
4.29	-0.9962852314147317	0.0	-1.5351027418648514e-05	-0.4270690668194045	0.0	-0.4850560969096595	0.0	-5.164858068931163e-05	0.0	0.999847851477189	0.0	0.01744344852376714	0.0	0.0	1.9989733424398215	0.0	0.0	1.9989743577474322	0.0	-0.9956794797042875	0.0	0.03473667034086253	-1.4556106049654702	0.0	0.0530051561613108
4.295	-1.0035785338144683	0.0	-4.792794298467261e-06	-0.43206567665435275	0.0	-0.48488175147562446	0.0	0.00025914142630867137	0.0	0.9998478464860487	0.0	0.01744373461053494	0.0	0.0	1.9990061305573055	0.0	0.0	1.9990485962975546	0.0	-1.0029679554627815	0.0	0.035002198085029614	-1.459745018503178	0.0	0.0523836644562202
4.3	-1.010892725517918	0.0	4.4476731299754085e-06	-0.43709878114772804	0.0	-0.48470607435917573	0.0	0.0004484189911567545	0.0	0.9998478306704898	0.0	0.017444641110314678	0.0	0.0	1.9991100235888342	0.0	0.0	1.9991770588757887	0.0	-1.0102773097078757	0.0	0.0352683996524946	-1.4643724464997974	0.0	0.062205509493001854
4.305	-1.0182328319372842	0.0	7.635581827848898e-05	-0.4421685075888249	0.0	-0.4845286773786445	0.0	-0.000354429450568758	0.0	0.9998478238471109	0.0	0.017445032191088505	0.0	0.0	1.9991548449650032	0.0	0.0	1.999075522317525	0.0	-1.017610412422456	0.0	0.035597112164192646	-1.4679325181956249	0.0	0.049124455807457564
4.3100000000000005	-1.0255805464185614	0.0	-1.1024381194817687e-05	-0.447274913685261	0.0	-0.48435034715173114	0.0	-0.0004248548218128903	0.0	0.9998478447469669	0.0	0.017443834291660937	0.0	0.0	1.9990175549112021	0.0	0.0	1.9989538103765465	0.0	-1.0249567885916968	0.0	0.03576365240458668	-1.471605061123634	0.0	0.03899574976881613
4.315	-1.0329559361905227	0.0	-1.3979805092994018e-05	-0.4524181159891109	0.0	-0.4841709095994087	0.0	-3.9896940615062495e-05	0.0	0.9998478550292105	0.0	0.0174432449227979	0.0	0.0	1.998950007937066	0.0	0.0	1.9989423807449829	0.0	-1.0323278354416132	0.0	0.03601675275331879	-1.4764230492146777	0.0	0.05363875959310168
4.32	-1.0403533762893498	0.0	-3.647941275061982e-06	-0.4575982277890155	0.0	-0.48399015521854977	0.0	0.00027594442644248975	0.0	0.9998478494123092	0.0	0.017443566880949564	0.0	0.0	1.9989869072377529	0.0	0.0	1.9990214330000595	0.0	-1.039720390193715	0.0	0.036285779379374744	-1.4805854778695857	0.0	0.05360569826051894
4.325	-1.0477717357883205	0.0	5.6179693437725335e-06	-0.46281535469540963	0.0	-0.48380805071552013	0.0	0.00046878982191853947	0.0	0.9998478327800076	0.0	0.017444520201818203	0.0	0.0	1.9990961663870945	0.0	0.0	1.9991557313914325	0.0	-1.047133842285722	0.0	0.03655580238691108	-1.4850184459697622	0.0	0.05921294915871856
4.33	-1.055213683890813	0.0	4.976670510416979e-05	-0.4680696211585504	0.0	-0.483624181937473	0.0	-0.00044056622203102365	0.0	0.9998478312878809	0.0	0.017444605724150766	0.0	0.0	1.9991059680160086	0.0	0.0	1.9990295184658406	0.0	-1.0545697146723916	0.0	0.036859707577693857	-1.488726742879698	0.0	0.04943574873866828
4.335	-1.0626675850637637	0.0	-1.213166769808483e-05	-0.47336108770249824	0.0	-0.4834394472679636	0.0	-0.0003554885011080978	0.0	0.9998478515456117	0.0	0.017443444601764977	0.0	0.0	1.9989728929430868	0.0	0.0	1.998927678511946	0.0	-1.0620213245128391	0.0	0.03705540139034859	-1.4925992771317935	0.0	0.04366552272286317
4.34	-1.0701474598791223	0.0	-1.1170901492525979e-05	-0.4786898734960722	0.0	-0.48325352815910655	0.0	3.6763105141455045e-05	0.0	0.9998478584360846	0.0	0.01744304963949173	0.0	0.0	1.9989276267134077	0.0	0.0	1.998938210365778	0.0	-1.0694966434378705	0.0	0.03731642648255476	-1.4971654774146712	0.0	0.0527477716344695
4.345	-1.0776490996330526	0.0	-6.922188565920992e-07	-0.48405608965130664	0.0	-0.4830662643722555	0.0	0.0003349441940229676	0.0	0.9998478498492944	0.0	0.017443541833383945	0.0	0.0	1.9989840365613847	0.0	0.0	1.9990341648092276	0.0	-1.0769933157816465	0.0	0.037589622262426535	-1.5020801617458854	0.0	0.06899069322711417
4.3500000000000005	-1.0851801421742726	0.0	0.0001134935709638496	-0.4894598443515417	0.0	-0.48287757060339237	0.0	0.00023660253024796805	0.0	0.9998478323688615	0.0	0.017444543767024406	0.0	0.0	1.9990988671717846	0.0	0.0	1.9991019464412543	0.0	-1.0845157161779704	0.0	0.037968608256249266	-1.505610570117392	0.0	0.05502194907188035
4.355	-1.092714686755605	0.0	1.665713630753375e-05	-0.4949012528839026	0.0	-0.4826872054416793	0.0	-0.0004982133823965086	0.0	0.9998478423537877	0.0	0.017443971463671642	0.0	0.0	1.9990332760578378	0.0	0.0	1.998959218820713	0.0	-1.0920490967288845	0.0	0.038133413986277793	-1.5088618202013349	0.0	0.035469004568931706
4.36	-1.100275341488627	0.0	-1.292561862055337e-05	-0.5003803812309364	0.0	-0.4824959890906588	0.0	-0.00021527409780127522	0.0	0.9998478593392073	0.0	0.01744299787177633	0.0	0.0	1.9989216936675325	0.0	0.0	1.9988975473345005	0.0	-1.0996062568087315	0.0	0.03836544332905203	-1.5137276436452352	0.0	0.05128443646042769
4.365	-1.1078598468135479	0.0	-6.657621690238345e-06	-0.505897352755943	0.0	-0.4823034913046326	0.0	0.0001650486782930979	0.0	0.9998478601088554	0.0	0.017442953754817973	0.0	0.0	1.998916637467243	0.0	0.0	1.9989448302979025	0.0	-1.107185931615655	0.0	0.03863616257071272	-1.5180172970924481	0.0	0.05419086278685807
4.37	-1.115465701435852	0.0	3.717946417267291e-06	-0.5114522757163151	0.0	-0.48210961746119435	0.0	0.00042409835823975473	0.0	0.9998478467919092	0.0	0.017443717079028316	0.0	0.0	1.9990041212889107	0.0	0.0	1.9990663255280303	0.0	-1.1147867366534199	0.0	0.03891353074410302	-1.5227430598565905	0.0	0.06620831914233699
4.375	-1.1230985400820808	0.0	8.935783934872124e-05	-0.5170452715024069	0.0	-0.4819140224301772	0.0	-0.00026772835256295627	0.0	0.9998478367413441	0.0	0.01744429315291992	0.0	0.0	1.9990701445402455	0.0	0.0	1.9989896270047411	0.0	-1.1224118976608453	0.0	0.03926666153947421	-1.526258326694082	0.0	0.052099458105877086
4.38	-1.130737335505042	0.0	-4.421822745076165e-06	-0.5226764127729033	0.0	-0.4817173365862665	0.0	-0.00040318734929786613	0.0	0.9998478557992904	0.0	0.017443200781673288	0.0	0.0	1.9989449489670827	0.0	0.0	1.998874122337402	0.0	-1.1300494015788585	0.0	0.039436935930603705	-1.5298306228940204	0.0	0.039723543796121634
4.385	-1.138404109128929	0.0	-1.0143453632214115e-05	-0.5283458063334315	0.0	-0.4815195154938433	0.0	-1.0231100309229744e-05	0.0	0.9998478650492638	0.0	0.01744267056323511	0.0	0.0	1.99888418116444	0.0	0.0	1.9988711913430646	0.0	-1.1377117514175188	0.0	0.03969743657636558	-1.5346053293245825	0.0	0.05340026833947516
4.39	-1.146093138801772	0.0	-4.037483552892789e-07	-0.5340535662367891	0.0	-0.48132033371965827	0.0	0.0003215912582699095	0.0	0.9998478577818191	0.0	0.017443087142364967	0.0	0.0	1.99893192488005	0.0	0.0	1.9989633204522004	0.0	-1.145395729333167	0.0	0.03997631841146671	-1.5396484418527738	0.0	0.07246865405955139
4.3950000000000005	-1.1538129183851225	0.0	0.00012954733073543913	-0.5397998026094266	0.0	-0.4811196641549802	0.0	0.00020707124552739792	0.0	0.9998478408218777	0.0	0.017444059268938814	0.0	0.0	1.9990433393315046	0.0	0.0	1.9990226419943364	0.0	-1.1531061999358387	0.0	0.04037770528600975	-1.5430630683199424	0.0	0.05600590458436153
4.4	-1.161533449575673	0.0	1.490207774258937e-05	-0.5455846264588837	0.0	-0.480917354714082	0.0	-0.0004744530097859941	0.0	0.9998478519213007	0.0	0.017443423067417082	0.0	0.0	1.9989704249130804	0.0	0.0	1.9988867212191463	0.0	-1.1608260832142512	0.0	0.04053096636418395	-1.5462442935030594	0.0	0.0349419702049613
4.405	-1.1692819383947612	0.0	-1.0085206609587992e-05	-0.5514081087920998	0.0	-0.48071411870876674	0.0	-0.000157582063409263	0.0	0.9998478669045836	0.0	0.017442564212386064	0.0	0.0	1.9988719924005192	0.0	0.0	1.9988415772833448	0.0	-1.1685707983669966	0.0	0.04077426592304178	-1.5512393893242216	0.0	0.05352899244146492
4.41	-1.1770539703168623	0.0	-3.3932094025993707e-06	-0.5572703715044103	0.0	-0.4805095581132005	0.0	0.0002236686586996514	0.0	0.9998478650928887	0.0	0.017442668062590948	0.0	0.0	1.9988838945681264	0.0	0.0	1.998905653634109	0.0	-1.1763378591722464	0.0	0.04105228529542528	-1.5555332155080537	0.0	0.05645070022668337
4.415	-1.1848473303572638	0.0	6.869901740384057e-06	-0.5631715225477802	0.0	-0.4803035864789441	0.0	0.0004783544200013597	0.0	0.9998478493132237	0.0	0.017443572560418584	0.0	0.0	1.9989875581559993	0.0	0.0	1.9990426920809965	0.0	-1.1841260442403472	0.0	0.04133651718945253	-1.559889316964591	0.0	0.06043067823337696
4.42	-1.1926632440653624	0.0	3.981069402134084e-05	-0.5691116847721707	0.0	-0.4800958031441558	0.0	-0.0004402350495664893	0.0	0.9998478503148293	0.0	0.017443515149277902	0.0	0.0	1.9989809783227592	0.0	0.0	1.998916574029327	0.0	-1.1919360572705733	0.0	0.04164193448186899	-1.563676190484061	0.0	0.052390362566014904
4.425	-1.2004932503192092	0.0	-7.245881624641357e-06	-0.5750909219841256	0.0	-0.47988707498188987	0.0	-0.0002568140985495611	0.0	0.9998478678479777	0.0	0.017442510134763535	0.0	0.0	1.9988657946185597	0.0	0.0	1.9988430022094954	0.0	-1.1997630241357364	0.0	0.04186561872058878	-1.5676341862322438	0.0	0.048430661326634546
4.43	-1.2083482052337127	0.0	-4.863471487182684e-06	-0.5811093532859071	0.0	-0.4796770658696391	0.0	0.00014793751209843598	0.0	0.9998478700323379	0.0	0.017442384921392495	0.0	0.0	1.9988514440399925	0.0	0.0	1.9988853831848699	0.0	-1.2076131269063173	0.0	0.0421416757905544	-1.5721564309039742	0.0	0.05643159591356429
4.4350000000000005	-1.2162248469770744	0.0	5.482304009518794e-06	-0.5871670887279495	0.0	-0.47946564142547077	0.0	0.00044116150232503815	0.0	0.9998478566887347	0.0	0.017443149798485543	0.0	0.0	1.9989391058351198	0.0	0.0	1.9990117666457043	0.0	-1.215484550152365	0.0	0.04242860797933777	-1.576678620385663	0.0	0.06404345197602544
4.44	-1.224125930134504	0.0	6.052526583935679e-05	-0.5932642503215184	0.0	-0.47925242251288774	0.0	-0.0003684376747047465	0.0	0.9998478514293221	0.0	0.01744345126735604	0.0	0.0	1.9989736568797882	0.0	0.0	1.9989062170268332	0.0	-1.223378879549364	0.0	0.04275995279704706	-1.5803639132363712	0.0	0.05370725103224713
4.445	-1.232037865214062	0.0	-3.6876633995849315e-06	-0.5994009073727341	0.0	-0.4790381506719151	0.0	-0.0003058269732320301	0.0	0.9998478693654305	0.0	0.01744242315039764	0.0	0.0	1.998855825427834	0.0	0.0	1.998818604052696	0.0	-1.2312883280569706	0.0	0.0429692276539685	-1.5841576291527457	0.0	0.04614877225421176
4.45	-1.2399758161959893	0.0	-4.975552395336596e-06	-0.6055771727949889	0.0	-0.4788226287430426	0.0	0.00010623537623219937	0.0	0.9998478736900084	0.0	0.017442175251903527	0.0	0.0	1.9988274140307314	0.0	0.0	1.9988490382461614	0.0	-1.2392215153489794	0.0	0.04324419812566541	-1.5887922068103077	0.0	0.05664988403022107
4.455	-1.2479357351740024	0.0	5.118914650529395e-06	-0.6117931582486942	0.0	-0.4786056861429855	0.0	0.0004233126637433561	0.0	0.9998478616381836	0.0	0.017442866091934503	0.0	0.0	1.9989065905122223	0.0	0.0	1.9989703083913961	0.0	-1.247176178800123	0.0	0.043533644273031906	-1.5933802125961258	0.0	0.06571638582381842
4.46	-1.2559208065844834	0.0	6.82584400367395e-05	-0.6180489852384985	0.0	-0.47838695314073443	0.0	-0.00033219457846382037	0.0	0.9998478545183395	0.0	0.017443274205951403	0.0	0.0	1.9989533640498964	0.0	0.0	1.9988751416547808	0.0	-1.2551541530859651	0.0	0.04387629270774099	-1.5970336598530237	0.0	0.0546609560315581
4.465	-1.26391561724911	0.0	-1.3951452306089177e-06	-0.6243447260671635	0.0	-0.47816710881398955	0.0	-0.0003118613795788522	0.0	0.9998478721196986	0.0	0.017442265267467647	0.0	0.0	1.9988377306239948	0.0	0.0	1.9987857999505656	0.0	-1.2631466171970898	0.0	0.044083001161143984	-1.6007674855034812	0.0	0.045780140477622834
4.47	-1.271936765728656	0.0	-4.1080050824389375e-06	-0.6306804908902828	0.0	-0.4779460153603673	0.0	0.00010380488340411636	0.0	0.9998478766855962	0.0	0.01744200353328539	0.0	0.0	1.9988077335326744	0.0	0.0	1.9988155378591252	0.0	-1.2711630029335321	0.0	0.04435939586866854	-1.605447589395385	0.0	0.057276359676175045
4.4750000000000005	-1.2799799944360442	0.0	5.843970121116424e-06	-0.637056391922165	0.0	-0.4777234900433289	0.0	0.00043003455578286725	0.0	0.9998478645366442	0.0	0.017442699947624186	0.0	0.0	1.9988875488797455	0.0	0.0	1.998938733684581	0.0	-1.2792009284504504	0.0	0.04465166113179498	-1.6099839154568734	0.0	0.06522529129764343
4.48	-1.2880477148695852	0.0	6.099312334307389e-05	-0.643472550978181	0.0	-0.4774991536555373	0.0	-0.0003569832093542863	0.0	0.9998478590397406	0.0	0.017443015037467948	0.0	0.0	1.9989236610102104	0.0	0.0	1.9988364655283157	0.0	-1.2872617877491266	0.0	0.04498899089237847	-1.613681352185825	0.0	0.05515010145043231
4.485	-1.296126451428189	0.0	-1.0469564286134763e-06	-0.6499290392513597	0.0	-0.4772737140323432	0.0	-0.00027940727245509523	0.0	0.9998478761199363	0.0	0.017442035959252027	0.0	0.0	1.998811449840083	0.0	0.0	1.998756421240931	0.0	-1.2953378607944328	0.0	0.045206243872964805	-1.617474530921148	0.0	0.047558374227756633
4.49	-1.3042310371512664	0.0	-2.473570732275748e-06	-0.6564259686630514	0.0	-0.4770469924785084	0.0	0.00014090150695109736	0.0	0.9998478790930269	0.0	0.01744186552887614	0.0	0.0	1.9987919169862207	0.0	0.0	1.9987967865493077	0.0	-1.3034375805542422	0.0	0.045487051711001175	-1.6221212268191176	0.0	0.05828264434619354
4.495	-1.3123576242302115	0.0	7.628353509703182e-06	-0.6629634508203258	0.0	-0.47681882037928147	0.0	0.0004622008509303717	0.0	0.9998478654272075	0.0	0.017442648898851616	0.0	0.0	1.9988816982312232	0.0	0.0	1.998929197339536	0.0	-1.3115587990361062	0.0	0.04578264522711124	-1.626521300550036	0.0	0.06326555591851363
4.5	-1.3205070726336579	0.0	4.395062083290673e-05	-0.6695416082562704	0.0	-0.47658880365634826	0.0	-0.0004080485719034317	0.0	0.9998478651298939	0.0	0.01744266594137612	0.0	0.0	1.9988836514578263	0.0	0.0	1.998812300034504	0.0	-1.319702020073366	0.0	0.046103243064778386	-1.6303120454843538	0.0	0.05528851856549065
4.505	-1.3286704386817036	0.0	-1.8207070538686008e-06	-0.6761605081813434	0.0	-0.476357733981885	0.0	-0.00020623279605486974	0.0	0.9998478808705595	0.0	0.017441763632138566	0.0	0.0	1.9987802387036984	0.0	0.0	1.9987532186904484	0.0	-1.3278620989144219	0.0	0.04633984134807166	-1.6341804492467582	0.0	0.04933328951297357
4.51	-1.3368586441182035	0.0	-1.3849626787204894e-10	-0.6828202674700091	0.0	-0.4761253256411561	0.0	0.0002140533987775753	0.0	0.9998478804872807	0.0	0.017441785603553847	0.0	0.0	1.9987827568254843	0.0	0.0	1.9988145404721502	0.0	-1.3360452568517063	0.0	0.04662730956475509	-1.6393491849417594	0.0	0.07131684059367648
4.515	-1.3450757876171973	0.0	9.893090901193157e-05	-0.6895209981461112	0.0	-0.47589140288296444	0.0	0.00028690888914925905	0.0	0.9998478649185505	0.0	0.017442678055965836	0.0	0.0	1.9988850398987783	0.0	0.0	1.9988967338144155	0.0	-1.3442538663080223	0.0	0.04701517985614643	-1.6430383379021696	0.0	0.0608564899375226
4.5200000000000005	-1.3532995130032734	0.0	2.50467379871342e-05	-0.6962628171867621	0.0	-0.4756556914627695	0.0	-0.0004218035001485528	0.0	0.9998478729395955	0.0	0.017442218268158192	0.0	0.0	1.9988323440804077	0.0	0.0	1.9987758960127038	0.0	-1.352475208125665	0.0	0.047226940693755964	-1.6463924323340393	0.0	0.04348958192004031
4.525	-1.3615477157894345	0.0	-2.15595579985135e-06	-0.7030457938630916	0.0	-0.47541893720418815	0.0	-8.936151170268686e-05	0.0	0.9998478853968993	0.0	0.01744150415809874	0.0	0.0	1.9987505006452873	0.0	0.0	1.9987502958253462	0.0	-1.360719408831962	0.0	0.04748550098382728	-1.6510375901195677	0.0	0.054393642243231205
4.53	-1.3698196175534267	0.0	3.508244410295771e-06	-0.70987004852657	0.0	-0.47518077899021877	0.0	0.0003160927819235189	0.0	0.9998478800649243	0.0	0.01744180981507096	0.0	0.0	1.998785531683088	0.0	0.0	1.9988408497370402	0.0	-1.3689860511031815	0.0	0.047780503670999515	-1.6560858034036952	0.0	0.07362086313144843
4.535	-1.3781208120594464	0.0	0.00011148444572029426	-0.7167357002389483	0.0	-0.4749408951682911	0.0	-8.785209527094833e-05	0.0	0.9998478666452408	0.0	0.017442579078478456	0.0	0.0	1.9988736961884248	0.0	0.0	1.9988156819656382	0.0	-1.3772783547209801	0.0	0.048180065139500974	-1.6595691931272343	0.0	0.0587711917948916
4.54	-1.386425524353237	0.0	1.0287779801164017e-05	-0.7236428383219836	0.0	-0.47469960014270546	0.0	-0.0003501933214377946	0.0	0.999847881719921	0.0	0.01744171494245352	0.0	0.0	1.9987746584279151	0.0	0.0	1.998715358968978	0.0	-1.3855816270335872	0.0	0.04836620215125858	-1.6629691302720815	0.0	0.042527057317698465
4.545	-1.3947584124590127	0.0	-6.868913569168787e-07	-0.7305915576040601	0.0	-0.47445709002385794	0.0	6.685651679702576e-05	0.0	0.9998478883037066	0.0	0.01744133752228438	0.0	0.0	1.998731402682479	0.0	0.0	1.998734511950205	0.0	-1.393909864687573	0.0	0.04864481731820632	-1.667879133422782	0.0	0.05906688404725992
4.55	-1.4031139863543123	0.0	8.132743129112899e-06	-0.7375819733463764	0.0	-0.4742131148441025	0.0	0.0004364027557847745	0.0	0.9998478768254309	0.0	0.017441995517300895	0.0	0.0	1.998806814828755	0.0	0.0	1.9988595321305767	0.0	-1.4022599830195983	0.0	0.04894689766158036	-1.672348962684515	0.0	0.06560996208463481
4.555	-1.4114930382920718	0.0	5.027848199652546e-05	-0.7446142082201861	0.0	-0.4739672770267609	0.0	-0.00037923103296087	0.0	0.9998478746732655	0.0	0.017442118887988193	0.0	0.0	1.998820954219096	0.0	0.0	1.9987508904423315	0.0	-1.4106324546037015	0.0	0.049281616179239644	-1.676129275089163	0.0	0.05738205077764659
4.5600000000000005	-1.4198853419119457	0.0	2.330239100823106e-06	-0.7516883325019934	0.0	-0.4737203010732881	0.0	-0.00018595034645039107	0.0	0.9998478895235259	0.0	0.017441267594407565	0.0	0.0	1.9987233883189828	0.0	0.0	1.9986976195920785	0.0	-1.4190214086015451	0.0	0.049523995314447046	-1.6799284460423485	0.0	0.049889061188002536
4.565	-1.4283026058895039	0.0	3.186468546611652e-06	-0.7588044606667518	0.0	-0.4734719547027475	0.0	0.00024784433165017845	0.0	0.9998478879740382	0.0	0.017441356420974913	0.0	0.0	1.9987335686423595	0.0	0.0	1.9987686217629774	0.0	-1.4274335128377977	0.0	0.04981867549448102	-1.685370795406027	0.0	0.07778790765540304
4.57	-1.436751745446225	0.0	0.00013753020659352443	-0.7659627104314085	0.0	-0.47322194376568677	0.0	9.543382560165286e-05	0.0	0.9998478733553113	0.0	0.017442194437913627	0.0	0.0	1.9988296129200491	0.0	0.0	1.9987959615401263	0.0	-1.4358727421298267	0.0	0.05025002851223121	-1.6887621013199148	0.0	0.06090954103944319
4.575	-1.4452007574344374	0.0	1.744405676726283e-05	-0.7731631821467686	0.0	-0.4729703426384214	0.0	-0.0003653674305778096	0.0	0.9998478860467989	0.0	0.017441466902075632	0.0	0.0	1.9987462307700086	0.0	0.0	1.998691291481408	0.0	-1.4443208751055936	0.0	0.050422607302188775	-1.6919642381152105	0.0	0.040306411882649884
4.58	-1.4536790129075678	0.0	1.2895626147734842e-06	-0.780405961212844	0.0	-0.47271755415983513	0.0	4.183183733622568e-05	0.0	0.9998478937707748	0.0	0.017441024112559475	0.0	0.0	1.9986954831098012	0.0	0.0	1.998703275420051	0.0	-1.4527945806647178	0.0	0.050700877313742496	-1.6970039001424464	0.0	0.05968697469750199
4.585	-1.4621803098244017	0.0	9.183032682396835e-06	-0.7876911646556356	0.0	-0.4724632894689617	0.0	0.00043323379160817337	0.0	0.9998478829233168	0.0	0.017441645957638672	0.0	0.0	1.998766752147751	0.0	0.0	1.9988273877590592	0.0	-1.4612903668300135	0.0	0.051007081193612296	-1.7014752018523094	0.0	0.06628511024694868
4.59	-1.4707049743511373	0.0	4.916440706478698e-05	-0.7950189153288828	0.0	-0.47220714338593744	0.0	-0.00037568627556004084	0.0	0.9998478815005478	0.0	0.017441727518092073	0.0	0.0	1.9987760997091901	0.0	0.0	1.9987197615690062	0.0	-1.4698084419166382	0.0	0.05134460116176924	-1.7052759976194303	0.0	0.05851191588262227
4.595	-1.4792433362374848	0.0	4.374399154439029e-06	-0.8023892843032951	0.0	-0.47194982921279177	0.0	-0.00015121331386809328	0.0	0.9998478953582817	0.0	0.01744093310471829	0.0	0.0	1.9986850527928872	0.0	0.0	1.998676442145552	0.0	-1.4783432530098186	0.0	0.0515952914715858	-1.7091243614245264	0.0	0.05206848347462274
4.6000000000000005	-1.4878064693714788	0.0	5.722199199889974e-06	-0.8098023860774102	0.0	-0.47169111148855253	0.0	0.0002890581970777639	0.0	0.9998478921120529	0.0	0.017441119202420443	0.0	0.0	1.998706381262902	0.0	0.0	1.9987592512191832	0.0	-1.486901110245993	0.0	0.05189584458457317	-1.7142811902723376	0.0	0.0737146889379349
4.605	-1.4963982379480496	0.0	0.00010111115912192468	-0.817258341597759	0.0	-0.4714306233717081	0.0	-0.00013140950836266823	0.0	0.9998478799272531	0.0	0.017441817707053945	0.0	0.0	1.9987864361753136	0.0	0.0	1.9987216051680978	0.0	-1.4954842517793814	0.0	0.05229291956756635	-1.7178590049186242	0.0	0.06094967946947393
4.61	-1.5049956354731806	0.0	1.3510619841032406e-05	-0.8247572397859054	0.0	-0.4711686933203967	0.0	-0.0002978600998751635	0.0	0.9998478943677903	0.0	0.017440989887150624	0.0	0.0	1.998691560570199	0.0	0.0	1.998636274535057	0.0	-1.5040795606567998	0.0	0.052502744593337536	-1.7212702757213059	0.0	0.04493839911927147
4.615	-1.5136202877187477	0.0	4.104438257497499e-06	-0.8322991775671146	0.0	-0.4709054691619811	0.0	0.0001434510356785054	0.0	0.9998478980143042	0.0	0.017440780840486732	0.0	0.0	1.998667601942877	0.0	0.0	1.9986773702296128	0.0	-1.512699316001155	0.0	0.052793510773532275	-1.726792406490981	0.0	0.0747057373653423
4.62	-1.5222754451754887	0.0	0.00011065205834355945	-0.8398842718857263	0.0	-0.47064067316560976	0.0	0.00026385318321716343	0.0	0.9998478841584075	0.0	0.017441575155499107	0.0	0.0	1.9987586375858362	0.0	0.0	1.9987529585986599	0.0	-1.5213454074769035	0.0	0.05320427028514428	-1.7304650027855715	0.0	0.06394285659864773
4.625	-1.530935873079984	0.0	2.8522899623546162e-05	-0.8475126379861887	0.0	-0.47037405446103364	0.0	-0.0003727932139087618	0.0	0.999847892521616	0.0	0.017441095723375294	0.0	0.0	1.9987036903532063	0.0	0.0	1.9986461612097195	0.0	-1.5300034819507515	0.0	0.053422780860099786	-1.7337850231004723	0.0	0.045831033258854695
4.63	-1.5396217777105992	0.0	4.7105390440092375e-06	-0.8551843494157438	0.0	-0.4701062707200717	0.0	1.0456724299409904e-05	0.0	0.9998479015124507	0.0	0.017440580297043373	0.0	0.0	1.998644617861166	0.0	0.0	1.9986491568405689	0.0	-1.5386849880864368	0.0	0.05370033388995878	-1.7385581602761417	0.0	0.05942751973852685
4.635	-1.5483312292684361	0.0	1.1002077281814771e-05	-0.8628995250345499	0.0	-0.4698369963499973	0.0	0.00043046267334976174	0.0	0.9998478914448012	0.0	0.01744115745397287	0.0	0.0	1.9987107652347686	0.0	0.0	1.9987724753126732	0.0	-1.5473888594913932	0.0	0.054012157616517	-1.7430829293326142	0.0	0.06721999658302637
4.64	-1.5570639087680755	0.0	4.788713257901198e-05	-0.870658288607903	0.0	-0.4695658135119487	0.0	-0.0003688121364450473	0.0	0.9998478912028219	0.0	0.017441171325899986	0.0	0.0	1.9987123550823531	0.0	0.0	1.9986668184184158	0.0	-1.5561149381854682	0.0	0.05435363315217043	-1.7469129449810348	0.0	0.06009661033962386
4.6450000000000005	-1.5658109080217955	0.0	7.348382610539054e-06	-0.8784607110988113	0.0	-0.4692934219046418	0.0	-9.89330026922495e-05	0.0	0.999847903536867	0.0	0.017440464239279082	0.0	0.0	1.9986313165979313	0.0	0.0	1.9986384762008715	0.0	-1.5648581069830456	0.0	0.05461597516281135	-1.7508180661199155	0.0	0.05485498210466925
4.65	-1.5745824397515933	0.0	9.49694937170406e-06	-0.8863069077170002	0.0	-0.4690195791202462	0.0	0.00035015726664193995	0.0	0.9998478977593495	0.0	0.017440795456615716	0.0	0.0	1.998669277082678	0.0	0.0	1.9987387888685937	0.0	-1.5736241913207942	0.0	0.054925077639936135	-1.7556975696235453	0.0	0.07042600447728319
4.655	-1.5833795131682138	0.0	6.886232881099523e-05	-0.8941970025279239	0.0	-0.46874386482427255	0.0	-0.00030123409257663223	0.0	0.9998478911548577	0.0	0.017441174075559365	0.0	0.0	1.998712670218044	0.0	0.0	1.9986524916578432	0.0	-1.5824138006068063	0.0	0.0552924145923625	-1.7594452988607994	0.0	0.06143998871069948
4.66	-1.5921876094681198	0.0	1.1310521403282671e-05	-0.9021310731090102	0.0	-0.4684668255990596	0.0	-0.00017923396532660752	0.0	0.9998479049095093	0.0	0.017440385546611935	0.0	0.0	1.998622297710784	0.0	0.0	1.9986011449090502	0.0	-1.5912186329981413	0.0	0.05553958831994263	-1.7631542766126551	0.0	0.05192423661798558
4.665	-1.6010212028302178	0.0	8.871173540688112e-06	-0.9101092277460164	0.0	-0.4681883751950168	0.0	0.00028331743464720744	0.0	0.9998479025380036	0.0	0.017440521503234305	0.0	0.0	1.998637879562043	0.0	0.0	1.998682309375389	0.0	-1.6000469224701743	0.0	0.05584566128022135	-1.768291624424819	0.0	0.07317332306211999
4.67	-1.609882403730124	0.0	8.79491912107311e-05	-0.9181315897837914	0.0	-0.4679080988660244	0.0	-0.00020364406410571965	0.0	0.9998478924303961	0.0	0.01744110095275653	0.0	0.0	1.9987042896873184	0.0	0.0	1.9986239696484083	0.0	-1.608899909630979	0.0	0.05623559694572785	-1.7719723851992275	0.0	0.0626881118393564
4.675	-1.6187517941669711	0.0	1.5616757702233202e-05	-0.9261982450171544	0.0	-0.46762638259957345	0.0	-0.00023069553287626086	0.0	0.9998479062357233	0.0	0.017440309515282436	0.0	0.0	1.9986135838368688	0.0	0.0	1.9985578802464765	0.0	-1.6177665162040202	0.0	0.05647008421491706	-1.7755141652804711	0.0	0.04950869669650439
4.68	-1.627647497534165	0.0	8.974600504497686e-06	-0.9343092945504357	0.0	-0.467343288300542	0.0	0.000234755843674827	0.0	0.9998479062435425	0.0	0.01744030906702849	0.0	0.0	1.998613532462938	0.0	0.0	1.9986251328417695	0.0	-1.6266570397569553	0.0	0.05677368508714692	-1.7808496481734364	0.0	0.07512104082590988
4.6850000000000005	-1.6365723125117637	0.0	0.00010175546653191095	-0.9424648613682113	0.0	-0.46705840566371193	0.0	-0.00011625019343478439	0.0	0.9998478946238173	0.0	0.01744097520980996	0.0	0.0	1.9986898784149862	0.0	0.0	1.9985918296145126	0.0	-1.635573113561156	0.0	0.05717984460978367	-1.784489094275099	0.0	0.06371792016536908
4.69	-1.6455033786917446	0.0	1.9293338789251274e-05	-0.9506650373800348	0.0	-0.4667719925980638	0.0	-0.0002572600101563234	0.0	0.9998479078838346	0.0	0.017440215029263722	0.0	0.0	1.9986027548896714	0.0	0.0	1.9985181300504153	0.0	-1.644501709597659	0.0	0.057406417655106144	-1.7879175614779141	0.0	0.048048783441385454
4.695	-1.6544613002144168	0.0	9.584003037392583e-06	-0.9589099185474523	0.0	-0.46648422116340205	0.0	0.0002073458650273135	0.0	0.9998479092197566	0.0	0.017440138440647752	0.0	0.0	1.9985939771457437	0.0	0.0	1.998577530265243	0.0	-1.653454529273144	0.0	0.05770886954866872	-1.7933625286490045	0.0	0.07607223025425879
4.7	-1.6634490622195388	0.0	0.00010799982176405479	-0.9671996280746548	0.0	-0.4661946783392548	0.0	-7.173325714675682e-05	0.0	0.9998478972383479	0.0	0.017440825324560944	0.0	0.0	1.9986727002177518	0.0	0.0	1.998556980200817	0.0	-1.6624333117641843	0.0	0.058122957591744184	-1.7969921488105611	0.0	0.0644520842674175
4.705	-1.6724423026105701	0.0	2.161927035774033e-05	-0.9755342606945642	0.0	-0.4659035552736359	0.0	-0.0002634224914960089	0.0	0.9998479100240344	0.0	0.01744009233111263	0.0	0.0	1.9985886925784961	0.0	0.0	1.9984815152158593	0.0	-1.6714241791744175	0.0	0.05834783028763246	-1.8003765875674131	0.0	0.04781074451084
4.71	-1.6814625915016768	0.0	1.049623651622039e-05	-0.9839139101280896	0.0	-0.4656110757981488	0.0	0.00020242847493066605	0.0	0.999847911668987	0.0	0.017439998025014752	0.0	0.0	1.998577884251885	0.0	0.0	1.9985395067021932	0.0	-1.6804393798792134	0.0	0.058650978510771036	-1.8058299665684472	0.0	0.07602364533675632
4.715	-1.6905126086167364	0.0	0.0001060897707498336	-0.9923386998649312	0.0	-0.46531681569987876	0.0	-8.422501698211797e-05	0.0	0.9998478999949106	0.0	0.01744066729556627	0.0	0.0	1.9986545886740894	0.0	0.0	1.9985153780121807	0.0	-1.6894804789393318	0.0	0.05906439223023315	-1.8094808070136934	0.0	0.06487278214927136
4.72	-1.699568542853679	0.0	2.2316608399319813e-05	-1.0008087248291329	0.0	-0.4650209714736154	0.0	-0.00025153222722275364	0.0	0.9998479126790278	0.0	0.017439940118478745	0.0	0.0	1.9985712476422963	0.0	0.0	1.9984433193370237	0.0	-1.6985339118893925	0.0	0.05929403441234433	-1.8128928980071939	0.0	0.04882994893471218
4.7250000000000005	-1.7086513631221165	0.0	1.1615776872517593e-05	-1.0093240791179754	0.0	-0.464723753989644	0.0	0.00022024542480400977	0.0	0.9998479136442607	0.0	0.017439884780689193	0.0	0.0	1.9985649054341525	0.0	0.0	1.9985064150035154	0.0	-1.707611586835029	0.0	0.05959991057126251	-1.818260347956587	0.0	0.07515883145187362
4.73	-1.7177630469009604	0.0	9.721631102427944e-05	-1.0178848871233417	0.0	-0.46442472231611565	0.0	-0.00014547255003383538	0.0	0.9998479029560622	0.0	0.01744049753619593	0.0	0.0	1.9986351327239595	0.0	0.0	1.9984647401877558	0.0	-1.7167146691643589	0.0	0.06000532830292316	-1.8219565740185093	0.0	0.06501244260967166
4.735	-1.726882114333935	0.0	2.1554119883664144e-05	-1.0264912402889004	0.0	-0.46412414312800915	0.0	-0.00022078271653163049	0.0	0.9998479157516592	0.0	0.01743976396078197	0.0	0.0	1.9985510583866894	0.0	0.0	1.9984014905985221	0.0	-1.725830916261668	0.0	0.060245213467751406	-1.8254578825954124	0.0	0.05091659245492012
4.74	-1.7360276193747126	0.0	1.2965273087236745e-05	-1.0351432360452368	0.0	-0.4638221572077203	0.0	0.0002601919534060873	0.0	0.9998479150540698	0.0	0.0174398039545765	0.0	0.0	1.9985556420350585	0.0	0.0	1.9984760301024893	0.0	-1.7349711528613938	0.0	0.060555711027675214	-1.8306664792175575	0.0	0.0737583248570087
4.745	-1.7452005551416618	0.0	8.364926467962517e-05	-1.0438409994272868	0.0	-0.4635183069643643	0.0	-0.00022954731027037792	0.0	0.9998479064294378	0.0	0.01744029840952816	0.0	0.0	1.9986123110175795	0.0	0.0	1.998410269642104	0.0	-1.744135983455584	0.0	0.06094797682198374	-1.8344225006690011	0.0	0.06494084807096556
4.75	-1.7543830625243624	0.0	1.9860899548539596e-05	-1.0525846169126034	0.0	-0.4632129732449213	0.0	-0.00016804132267681676	0.0	0.9998479190332672	0.0	0.017439575820143147	0.0	0.0	1.9985294957782698	0.0	0.0	1.9983621293492382	0.0	-1.753315217962633	0.0	0.0612019356453613	-1.838057383748341	0.0	0.05375800918049542
4.755	-1.7635913755925368	0.0	1.4674995733904313e-05	-1.061374190828338	0.0	-0.46290618674628486	0.0	0.0003208506497059311	0.0	0.9998479156822813	0.0	0.01743976793822248	0.0	0.0	1.9985515142371233	0.0	0.0	1.998454046289649	0.0	-1.7625180870314414	0.0	0.06151855952498215	-1.8430615660362564	0.0	0.07211057870721976
4.76	-1.7728253389852242	0.0	6.800500858678868e-05	-1.0702098470211299	0.0	-0.462597480159794	0.0	-0.00030255617435521044	0.0	0.999847910723059	0.0	0.017440052255518902	0.0	0.0	1.9985840995551747	0.0	0.0	1.9983673703303682	0.0	-1.7717445384433517	0.0	0.061894892100832745	-1.846882426565899	0.0	0.0647450042518241
4.765	-1.7820714513992437	0.0	1.7960005159092043e-05	-1.0790916652753775	0.0	-0.46228736506490536	0.0	-9.001324954151997e-05	0.0	0.9998479221804584	0.0	0.017439395384057085	0.0	0.0	1.998508816180923	0.0	0.0	1.9983415834338731	0.0	-1.7809868533391586	0.0	0.062164993743322135	-1.8506760763628116	0.0	0.05701217469765164
4.7700000000000005	-1.7913426540793402	0.0	1.6923964126597525e-05	-1.0880197541582433	0.0	-0.46197574342323494	0.0	0.0003997651789737442	0.0	0.9998479152073418	0.0	0.017439795167196633	0.0	0.0	1.99855463492233	0.0	0.0	1.9984561077216307	0.0	-1.790252402830417	0.0	0.06248870913697172	-1.8554558347824157	0.0	0.07044354776384563
4.775	-1.8006375816982778	0.0	5.2587106814059737e-05	-1.0969942390770895	0.0	-0.4616621519843084	0.0	-0.0003338158992763507	0.0	0.9998479158819251	0.0	0.017439756492387774	0.0	0.0	1.998550202441578	0.0	0.0	1.9983604765108163	0.0	-1.7995404375461952	0.0	0.06284836533223485	-1.8592719963754445	0.0	0.0630316320298577
4.78	-1.8099473506938264	0.0	1.6611280032617697e-05	-1.106015194874525	0.0	-0.4613472214632617	0.0	1.4488597006372318e-05	0.0	0.9998479247049384	0.0	0.0174392506481928	0.0	0.0	1.998492228149938	0.0	0.0	1.998364627188114	0.0	-1.8088458620126986	0.0	0.06313525194630379	-1.8638466198482382	0.0	0.0722517624299966
4.785	-1.8192886726263604	0.0	0.0001088809248106905	-1.1150827375777885	0.0	-0.4610306886036764	0.0	0.0002621531151197401	0.0	0.9998479141009097	0.0	0.017439858600420067	0.0	0.0	1.9985619049399617	0.0	0.0	1.9984397285235267	0.0	-1.8181782070148849	0.0	0.0635554382961872	-1.8678558543551382	0.0	0.06890591445329122
4.79	-1.8286374263069274	0.0	3.9114938936951584e-05	-1.1241969859761987	0.0	-0.460712230401501	0.0	-0.00030427005272959357	0.0	0.9998479215439777	0.0	0.01743943187522355	0.0	0.0	1.9985129983966037	0.0	0.0	1.9983525615742586	0.0	-1.8275237613890396	0.0	0.06381018710279077	-1.8711904267583068	0.0	0.051085812217806226
4.795	-1.8380108249499876	0.0	1.6461657400298593e-05	-1.1333580163771844	0.0	-0.46039244415342917	0.0	0.00014320749656966377	0.0	0.9998479260044963	0.0	0.017439176140223576	0.0	0.0	1.9984836888669764	0.0	0.0	1.998393587499999	0.0	-1.8368922812956145	0.0	0.06411349171693319	-1.8764965130255717	0.0	0.07614134192348854
4.8	-1.84741454299528	0.0	0.00010735461347842469	-1.142565954146642	0.0	-0.46007086563063004	0.0	-7.602347991076885e-05	0.0	0.9998479153078059	0.0	0.017439789407478652	0.0	0.0	1.9985539748068744	0.0	0.0	1.998371808377285	0.0	-1.8462870306530377	0.0	0.06453453057920326	-1.8802655560521928	0.0	0.06759344450743508
4.805	-1.8568249801641525	0.0	2.8771060963733522e-05	-1.1518208974371238	0.0	-0.459747620280575	0.0	-0.00020961136999657256	0.0	0.9998479269206844	0.0	0.017439123611909406	0.0	0.0	1.9984776686500456	0.0	0.0	1.9983117591430912	0.0	-1.8556945703453347	0.0	0.06478170559207788	-1.883726153774945	0.0	0.05257333216299338
4.8100000000000005	-1.8662619235562017	0.0	1.7931521790229705e-05	-1.1611229397286964	0.0	-0.4594229331362667	0.0	0.00029027999681699625	0.0	0.9998479254022388	0.0	0.017439210669661958	0.0	0.0	1.998487646250968	0.0	0.0	1.9983949182365646	0.0	-1.8651261404236694	0.0	0.0651002914335022	-1.888838042189119	0.0	0.07330780892698743
4.815	-1.8757250443264786	0.0	7.177214805339641e-05	-1.1704722076792597	0.0	-0.4590963123752227	0.0	-0.00028990324303197344	0.0	0.9998479204214212	0.0	0.01743949623411629	0.0	0.0	1.998520374504209	0.0	0.0	1.9983118670751001	0.0	-1.874581590234172	0.0	0.06548517862154508	-1.892653805046026	0.0	0.06583822237234092
4.82	-1.885200318330718	0.0	2.224592652341958e-05	-1.1798687837587718	0.0	-0.45876822305710097	0.0	-5.891119802049929e-05	0.0	0.9998479309457177	0.0	0.017438892840633075	0.0	0.0	1.9984512201876647	0.0	0.0	1.998294990260037	0.0	-1.8840529072323884	0.0	0.06576384627932166	-1.896754575228336	0.0	0.06475209534852733
4.825	-1.8947042237955225	0.0	6.49986746824656e-05	-1.1893127757591007	0.0	-0.4584385786321851	0.0	0.0003359435410386018	0.0	0.9998479224118547	0.0	0.017439382117428102	0.0	0.0	1.9985072957059924	0.0	0.0	1.998391230995318	0.0	-1.8935494765123255	0.0	0.06613985101629313	-1.9011863767365709	0.0	0.07062733481327638
4.83	-1.9042238207921034	0.0	4.6792265229626675e-05	-1.198804308200073	0.0	-0.45810693634339994	0.0	-0.0003063371313338409	0.0	0.9998479274157092	0.0	0.017439095230284897	0.0	0.0	1.9984744158607832	0.0	0.0	1.9983034718716501	0.0	-1.9030639561351979	0.0	0.06645254487057498	-1.904794773094413	0.0	0.05873496823241703
4.835	-1.913763485653688	0.0	1.979211469393056e-05	-1.2083434553051355	0.0	-0.457773936812048	0.0	0.00013016467543810358	0.0	0.9998479324740179	0.0	0.017438805216335323	0.0	0.0	1.998441177655628	0.0	0.0	1.9983407613043715	0.0	-1.9125987988524535	0.0	0.06675712726277498	-1.9097022602553193	0.0	0.0751223613566096
4.84	-1.9233333466051272	0.0	0.0001047573129109598	-1.217930342080962	0.0	-0.4574391253578765	0.0	-0.00010177498586198594	0.0	0.9998479225201911	0.0	0.01743937590623872	0.0	0.0	1.9985065838478613	0.0	0.0	1.998311604918622	0.0	-1.9221597995677484	0.0	0.06717795815723145	-1.9135669930643862	0.0	0.06867475564428654
4.845	-1.9329108040433312	0.0	3.1063139514715716e-05	-1.2275650662650621	0.0	-0.45710263230694165	0.0	-0.00017861270160575947	0.0	0.9998479337693004	0.0	0.017438730951584408	0.0	0.0	1.998432666247736	0.0	0.0	1.9982604361487748	0.0	-1.9317340883574117	0.0	0.06743581562814832	-1.9170795667820726	0.0	0.054773233020622564
4.8500000000000005	-1.942514490136683	0.0	2.1175005854299213e-05	-1.2372477226355478	0.0	-0.45676465653485077	0.0	0.00033697830276163725	0.0	0.9998479304829664	0.0	0.01743891937220753	0.0	0.0	1.998454260944552	0.0	0.0	1.9983569733214535	0.0	-1.9413322525910004	0.0	0.06776156645490453	-1.922072053188295	0.0	0.0728973897975468
4.855	-1.9521432175242701	0.0	6.313950934094616e-05	-1.246978438226841	0.0	-0.45642469702776167	0.0	-0.000309194760764699	0.0	0.9998479290702214	0.0	0.01743900037076274	0.0	0.0	1.9984635441069658	0.0	0.0	1.9982683955472567	0.0	-1.9509536490315442	0.0	0.06813959966292227	-1.9258986292307898	0.0	0.06569813032534881
4.86	-1.9617859478893818	0.0	2.3461639671534696e-05	-1.2567572922746242	0.0	-0.45608329115364343	0.0	3.504426395121061e-05	0.0	0.9998479371949972	0.0	0.017438534538513333	0.0	0.0	1.9984101555446303	0.0	0.0	1.9982784349893594	0.0	-1.960591961769511	0.0	0.06843438704757021	-1.930503643720105	0.0	0.07553900922924416
4.865	-1.9714613684619562	0.0	0.0001259255062761942	-1.2665844012811702	0.0	-0.4557401668297975	0.0	8.445346811993047e-05	0.0	0.9998479269943675	0.0	0.017439119387405864	0.0	0.0	1.9984771844839706	0.0	0.0	1.998302629125802	0.0	-1.970257844031649	0.0	0.06887649254995284	-1.934419368297998	0.0	0.07020143105644269
4.87	-1.981141876085833	0.0	3.838303852598439e-05	-1.2764598741745345	0.0	-0.45539520961038443	0.0	-0.00022593056353113284	0.0	0.9998479367799993	0.0	0.017438558332573306	0.0	0.0	1.9984128825577336	0.0	0.0	1.9982379047870351	0.0	-1.9799355939686327	0.0	0.0691243689973945	-1.9377701451476548	0.0	0.052750072416859105
4.875	-1.9908491894648324	0.0	2.2682168720792306e-05	-1.2863837974231238	0.0	-0.455048800593562	0.0	0.0002839402216796012	0.0	0.9998479359907251	0.0	0.01743860358592901	0.0	0.0	1.9984180689989848	0.0	0.0	1.9983192476687164	0.0	-1.989637544526639	0.0	0.06944736939813008	-1.9429074468473566	0.0	0.07405629147698295
4.88	-2.0005826528035517	0.0	7.150609323389966e-05	-1.296356299087853	0.0	-0.45470042422952656	0.0	-0.00029168199201448267	0.0	0.9998479324605953	0.0	0.017438805985893417	0.0	0.0	1.9984412658539012	0.0	0.0	1.9982356869332045	0.0	-1.999363357020572	0.0	0.06983639748797656	-1.946730029151622	0.0	0.06675609740983714
4.885	-2.0103290876740343	0.0	2.656383313471616e-05	-1.3063774611923125	0.0	-0.45435054037680966	0.0	8.267538265390953e-06	0.0	0.9998479412282716	0.0	0.017438303286927984	0.0	0.0	1.9983836520347913	0.0	0.0	1.9982380554084522	0.0	-2.009105501636322	0.0	0.07012934298599026	-1.9512833814076795	0.0	0.07547068350315309
4.89	-2.0201086266890615	0.0	0.00012880019884177482	-1.3164473971211046	0.0	-0.45399895067950186	0.0	0.00011273888328341076	0.0	0.9998479315133201	0.0	0.017438860297509837	0.0	0.0	1.9984474904532625	0.0	0.0	1.998270352719448	0.0	-2.0188754490970013	0.0	0.07057479185568573	-1.9552382266228168	0.0	0.07099574543480171
4.8950000000000005	-2.0298932763389423	0.0	4.118989346669849e-05	-1.326566218315553	0.0	-0.45364549121380265	0.0	-0.00022182357780448124	0.0	0.9998479408224442	0.0	0.017438326555516224	0.0	0.0	1.9983863188241018	0.0	0.0	1.9982068049454247	0.0	-2.028657278253613	0.0	0.07082628332961424	-1.9585855169960587	0.0	0.05345828974913994
4.9	-2.039704674835632	0.0	2.468174875968168e-05	-1.3367340100821035	0.0	-0.4532905658668918	0.0	0.0002948657134888693	0.0	0.9998479397378125	0.0	0.017438388744115817	0.0	0.0	1.9983934461964694	0.0	0.0	1.9982912777499549	0.0	-2.0384632763615285	0.0	0.07115217551088031	-1.9636961668532942	0.0	0.07418440425644088
4.905	-2.0495419647597695	0.0	6.984307777227923e-05	-1.3469509014210699	0.0	-0.4529336527819353	0.0	-0.0002939574775016756	0.0	0.9998479373341157	0.0	0.017438526561987376	0.0	0.0	1.9984092413630696	0.0	0.0	1.998207065135869	0.0	-2.048292988732776	0.0	0.0715409148425985	-1.9675544582338076	0.0	0.06767201113857305
4.91	-2.0593928071262684	0.0	2.7985515110546645e-05	-1.357216972313782	0.0	-0.4525752277750532	0.0	4.756095522368671e-05	0.0	0.999847945040776	0.0	0.017438084690611998	0.0	0.0	1.9983585989326484	0.0	0.0	1.9982206903458886	0.0	-2.0581393629191087	0.0	0.07184077970417341	-1.972030959201628	0.0	0.07469702567294174
4.915	-2.0692752773790697	0.0	0.00011522110863382415	-1.3675323399348136	0.0	-0.45221502352163967	0.0	-2.947851182728222e-05	0.0	0.999847935665334	0.0	0.017438622242288954	0.0	0.0	1.9984202071854966	0.0	0.0	1.9982122453743185	0.0	-2.0680127032202273	0.0	0.07227479620764468	-1.976028629659695	0.0	0.07116692628367968
4.92	-2.079164992948658	0.0	3.9319025666101976e-05	-1.3778971091370973	0.0	-0.4518530212362796	0.0	-0.00016914473129046005	0.0	0.9998479457737433	0.0	0.017438042664375278	0.0	0.0	1.9983537823482784	0.0	0.0	1.9981637889781694	0.0	-2.0778991347090408	0.0	0.07254140489087328	-1.979510854296566	0.0	0.05656931009163739
4.925	-2.089080940497699	0.0	2.7045706922051905e-05	-1.3883113710283927	0.0	-0.4514894972838826	0.0	0.0003693186584894586	0.0	0.9998479416607233	0.0	0.01743827849169274	0.0	0.0	1.9983808102780138	0.0	0.0	1.9982695909803039	0.0	-2.0878094452726508	0.0	0.07287590075917677	-1.984453776834346	0.0	0.07362840460816006
4.93	-2.099021337666509	0.0	6.044435298802857e-05	-1.3987752533424538	0.0	-0.4511239354855912	0.0	-0.0002883537295114171	0.0	0.9998479435547798	0.0	0.0174381698930361	0.0	0.0	1.9983683638960785	0.0	0.0	1.9981869837217645	0.0	-2.097742648080702	0.0	0.07325545751093186	-1.988372172840188	0.0	0.06845232729451103
4.9350000000000005	-2.108977172636245	0.0	2.8395015768704286e-05	-1.4092888340669083	0.0	-0.45075689925446427	0.0	0.00015311669224784928	0.0	0.99984794804341	0.0	0.0174379125276816	0.0	0.0	1.9983388675138185	0.0	0.0	1.9982308484229585	0.0	-2.1076935835834587	0.0	0.07356951289162375	-1.9927711695314563	0.0	0.07375499033430988
4.94	-2.118961856904167	0.0	9.222821847990413e-05	-1.419852237017313	0.0	-0.4503879573725347	0.0	-0.00021450212376844904	0.0	0.9998479411103692	0.0	0.017438310047064656	0.0	0.0	1.9983844268072049	0.0	0.0	1.9981693980910158	0.0	-2.117669910825093	0.0	0.07398316231277849	-1.9967217175495064	0.0	0.06922505962433725
4.945	-2.1289572269664623	0.0	3.506409733004545e-05	-1.430465554852269	0.0	-0.45001735143245625	0.0	-5.150316124180261e-05	0.0	0.9998479507196995	0.0	0.017437759075024036	0.0	0.0	1.9983212804604296	0.0	0.0	1.9981546435221622	0.0	-2.1276612770558883	0.0	0.07427223975389115	-2.001148101314961	0.0	0.07515880326119616
4.95	-2.138986494326192	0.0	0.00013487943260723939	-1.4411288921796677	0.0	-0.4496450687916826	0.0	0.00017711079842999084	0.0	0.9998479423512596	0.0	0.017438238898875087	0.0	0.0	1.9983762725853231	0.0	0.0	1.9982053820284433	0.0	-2.1376808928071687	0.0	0.07472376883161085	-2.005197478805047	0.0	0.07276862091595329
4.955	-2.1490211574853024	0.0	4.79966119953397e-05	-1.4518423653913533	0.0	-0.4492708356593417	0.0	-0.00021141298934430666	0.0	0.9998479505619227	0.0	0.01743776812163814	0.0	0.0	1.9983223172836917	0.0	0.0	1.9981448166683249	0.0	-2.147712553361166	0.0	0.0749848368466108	-2.008548469609665	0.0	0.05529006146133946
4.96	-2.15908237253167	0.0	2.9677189820231772e-05	-1.4626060577851037	0.0	-0.44889510088469514	0.0	0.0003225777300528062	0.0	0.99984794871808	0.0	0.01743787384370449	0.0	0.0	1.998334433982447	0.0	0.0	1.9982372283808096	0.0	-2.1577682725390126	0.0	0.07531782179957844	-2.0135971922916536	0.0	0.07467354933476829
4.965	-2.1691689568870705	0.0	6.745443794665978e-05	-1.4734200978399805	0.0	-0.4485173319577886	0.0	-0.0002840865631538911	0.0	0.9998479488787397	0.0	0.017437864631813703	0.0	0.0	1.9983333782169885	0.0	0.0	1.9981558435753841	0.0	-2.1678474067340603	0.0	0.07570725980995158	-2.0175280140183256	0.0	0.06975852157289099
4.97	-2.1792702990438837	0.0	3.189248555700826e-05	-1.4842845661834474	0.0	-0.44813803403034447	0.0	0.0001432253629707236	0.0	0.9998479537547611	0.0	0.01743758504946481	0.0	0.0	1.99830133556771	0.0	0.0	1.9981968746194714	0.0	-2.177943888252824	0.0	0.07602273957825101	-2.0218740058576934	0.0	0.07390546563339438
4.9750000000000005	-2.189400556926047	0.0	9.301415240652326e-05	-1.4951995847306556	0.0	-0.4477568170880425	0.0	-0.00021987059367910573	0.0	0.999847947367385	0.0	0.0174379512892584	0.0	0.0	1.9983433099388141	0.0	0.0	1.9981338863341873	0.0	-2.1880657982305594	0.0	0.07643866778161794	-2.025872526001756	0.0	0.07043040468030042
4.98	-2.199541882585826	0.0	3.769661119253859e-05	-1.5061652465624287	0.0	-0.4473739147387043	0.0	-2.2628936121716532e-05	0.0	0.9998479563327467	0.0	0.0174374372305933	0.0	0.0	1.9982843941969213	0.0	0.0	1.998127403621514	0.0	-2.198202964159544	0.0	0.07673475763490568	-2.0302217454885993	0.0	0.0746691483908583
4.985	-2.2097158405570743	0.0	0.00012369587773170438	-1.5171816586012308	0.0	-0.44698926380335774	0.0	3.364084661994365e-05	0.0	0.9998479479871917	0.0	0.01743791575112105	0.0	0.0	1.9983392369489439	0.0	0.0	1.9981370410141668	0.0	-2.2083676624277135	0.0	0.07717757998237099	-2.034290216183421	0.0	0.07270735694650417
4.99	-2.2198971204281905	0.0	4.723969222783821e-05	-1.528248931299068	0.0	-0.4466027191363067	0.0	-0.0001585811608427241	0.0	0.9998479570600269	0.0	0.01743739552889841	0.0	0.0	1.998279614808015	0.0	0.0	1.998091610858034	0.0	-2.2185454971007412	0.0	0.07745388828082386	-2.0379900745400565	0.0	0.06280998300356283
4.995	-2.230107156778725	0.0	6.536134896575736e-05	-1.5393671535017344	0.0	-0.4462146089477429	0.0	0.00032057831108059034	0.0	0.9998479521549466	0.0	0.017437676780475954	0.0	0.0	1.9983118487657894	0.0	0.0	1.9981834497791757	0.0	-2.228748648789133	0.0	0.07782927153217307	-2.042859224693583	0.0	0.07456361633774769
5.0	-2.2403359607365494	0.0	6.025396438555097e-05	-1.5505364527225216	0.0	-0.4458244215603857	0.0	-0.0002477082554441587	0.0	0.9998479566530764	0.0	0.0174374188631803	0.0	0.0	1.9982822891263687	0.0	0.0	1.9981124865912383	0.0	-2.2389714505784966	0.0	0.07817969105310861	-2.0457830741801297	0.0	0.06651757604835043
5.005	-2.2505735485692733	0.0	3.391638434450539e-05	-1.5617568896463592	0.0	-0.44543272135303524	0.0	0.0002693795389135465	0.0	0.9998479572897239	0.0	0.017437382358259517	0.0	0.0	1.9982781053344676	0.0	0.0	1.9981896581445728	0.0	-2.2492037367681417	0.0	0.07851018518038415	-2.0469992197475437	0.0	0.07410542586406578
5.01	-2.2608167501628724	0.0	7.625005923142669e-05	-1.573028505049706	0.0	-0.44503899820358767	0.0	-0.00026408540241360277	0.0	0.9998479554573309	0.0	0.01743748742611596	0.0	0.0	1.9982901470548065	0.0	0.0	1.9981140032496263	0.0	-2.259439216482002	0.0	0.0789101429036114	-2.04668519364614	0.0	0.0711369626485249
5.015	-2.271053167715165	0.0	3.690826448011974e-05	-1.5843512788947034	0.0	-0.44464368395491977	0.0	0.0001492904093873057	0.0	0.9998479600853347	0.0	0.01743722205901202	0.0	0.0	1.998259733600522	0.0	0.0	1.9981567718015247	0.0	-2.269670822832324	0.0	0.07922656078435138	-2.0468039325218568	0.0	0.07373521469731133
5.0200000000000005	-2.281297650332003	0.0	9.399267676957115e-05	-1.5957252267720248	0.0	-0.4442464405441039	0.0	-0.00021076633207704122	0.0	0.9998479537704195	0.0	0.017437584151596595	0.0	0.0	1.998301232663944	0.0	0.0	1.9980963916950674	0.0	-2.279907027473188	0.0	0.079642478125935	-2.046694684137311	0.0	0.0713377270033506
5.025	-2.2915329300500042	0.0	4.124583460250213e-05	-1.6071503379695269	0.0	-0.4438475020725651	0.0	3.6160695525577744e-05	0.0	0.9998479610499434	0.0	0.01743716674833152	0.0	0.0	1.9982533944996175	0.0	0.0	1.9981067509712567	0.0	-2.2901379887463174	0.0	0.07994475407713426	-2.046804669231972	0.0	0.07376059461670198
5.03	-2.301778596116783	0.0	0.00011250250072052276	-1.6186266180067097	0.0	-0.4434467479400468	0.0	-8.200262531752177e-05	0.0	0.9998479527049872	0.0	0.017437645241937992	0.0	0.0	1.998308234165961	0.0	0.0	1.9980832589495583	0.0	-2.300374862745709	0.0	0.08037542562567349	-2.0467039148807764	0.0	0.0715410393711378
5.035	-2.3120128168618552	0.0	4.685550421984406e-05	-1.6301540668372478	0.0	-0.44304417877367375	0.0	-6.127090228642707e-05	0.0	0.9998479609331344	0.0	0.017437173446158156	0.0	0.0	1.9982541621307235	0.0	0.0	1.9980657061290183	0.0	-2.3106052248585716	0.0	0.08066450510525712	-2.046800396096371	0.0	0.07366813484215792
5.04	-2.322259513182944	0.0	0.00013099503530626037	-1.6417326794024152	0.0	-0.4426399181990703	0.0	0.00012378742642791765	0.0	0.9998479529012911	0.0	0.01743763398620063	0.0	0.0	1.9983069441573276	0.0	0.0	1.9981011686144738	0.0	-2.320842681478374	0.0	0.08110802398864958	-2.046751140885239	0.0	0.07257176171609342
5.045	-2.3324927992457374	0.0	5.349240898606708e-05	-1.6533624660021522	0.0	-0.44223371519596527	0.0	-0.00013800956307517196	0.0	0.9998479601944648	0.0	0.01743721580146495	0.0	0.0	1.9982590164294074	0.0	0.0	1.9980616317869906	0.0	-2.3310725148418583	0.0	0.08138545289041352	-2.0464808321370915	0.0	0.06671365033718915
5.05	-2.3427362351801597	0.0	9.802910437810956e-05	-1.665043410321364	0.0	-0.4418259372588561	0.0	0.0002843336673530186	0.0	0.9998479543852163	0.0	0.017437548899914408	0.0	0.0	1.9982971925044337	0.0	0.0	1.9981430873825548	0.0	-2.34130811415889	0.0	0.08178870220395905	-2.0468161442689445	0.0	0.07398988340617993
5.055	-2.352972837959671	0.0	6.0752429787642206e-05	-1.6767755342938506	0.0	-0.44141611105194706	0.0	-0.00019239778309075443	0.0	0.9998479591481982	0.0	0.017437275794130486	0.0	0.0	1.9982658921278635	0.0	0.0	1.998087969477761	0.0	-2.3515398363744757	0.0	0.08210711180750155	-2.046311942841232	0.0	0.0630348784733406
5.0600000000000005	-2.3632107380468566	0.0	3.7772007788539484e-05	-1.6885588134981215	0.0	-0.441004762292445	0.0	0.0003614939417046955	0.0	0.9998479563091092	0.0	0.017437438585863368	0.0	0.0	1.9982845495230444	0.0	0.0	1.998191529863657	0.0	-2.361772285083176	0.0	0.08244190232098297	-2.046791106999013	0.0	0.07344932518845138
5.065	-2.3734528910687507	0.0	6.817633459222118e-05	-1.700393272434687	0.0	-0.4405913652931024	0.0	-0.00022534533831208858	0.0	0.999847958024023	0.0	0.017437340253855887	0.0	0.0	1.9982732797915221	0.0	0.0	1.998126973179566	0.0	-2.3720071656656714	0.0	0.0828289611182045	-2.0466888532566436	0.0	0.07122777688955279
5.07	-2.383690207473998	0.0	3.872697916759698e-05	-1.712278887385235	0.0	-0.4401764269727559	0.0	0.0002923829717223553	0.0	0.9998479578825683	0.0	0.017437348364804782	0.0	0.0	1.998274209379138	0.0	0.0	1.9982107347309717	0.0	-2.382239282068515	0.0	0.08315653717827558	-2.0467417576076103	0.0	0.07237887614099658
5.075	-2.393932920306656	0.0	7.533124729142917e-05	-1.7242156803191013	0.0	-0.43975947646408553	0.0	-0.00023977100914770037	0.0	0.9998479569799935	0.0	0.01743740011786418	0.0	0.0	1.9982801407447186	0.0	0.0	1.998142045396603	0.0	-2.3924744810617886	0.0	0.08355052405246924	-2.0466927921619416	0.0	0.07131100453308509
5.08	-2.4041697181068353	0.0	4.00421320595971e-05	-1.736203631060613	0.0	-0.4393409475785712	0.0	0.00023355590141963347	0.0	0.9998479589219543	0.0	0.017437288766869122	0.0	0.0	1.998267378920262	0.0	0.0	1.9982089542337615	0.0	-2.402706302795659	0.0	0.08387167322664116	-2.046736799079585	0.0	0.0722725973065004
5.085	-2.414412892729247	0.0	8.183322939999454e-05	-1.7482427581934168	0.0	-0.43892044309540873	0.0	-0.00024010340446436847	0.0	0.9998479561099076	0.0	0.017437450007867325	0.0	0.0	1.9982858585873187	0.0	0.0	1.9981401696751488	0.0	-2.4129417639531057	0.0	0.084271389233144	-2.046695934179832	0.0	0.07137844120268014
5.09	-2.4246492526988255	0.0	4.1546845848143865e-05	-1.7603330446972965	0.0	-0.4384983242285451	0.0	0.00018561100808397982	0.0	0.9998479595723583	0.0	0.017437251472887157	0.0	0.0	1.9982631046948693	0.0	0.0	1.9981933433121208	0.0	-2.4231733372542754	0.0	0.08458710278528371	-2.0467303438406566	0.0	0.07213276613810225
5.095	-2.4348927841322285	0.0	8.739172255170262e-05	-1.7724745059293139	0.0	-0.43807426368061514	0.0	-0.00023155589757725166	0.0	0.9998479554501705	0.0	0.017437487836561134	0.0	0.0	1.998290194095507	0.0	0.0	1.9981270074338582	0.0	-2.4334090006799305	0.0	0.08499125404944886	-2.046698210608707	0.0	0.07142799113289365
5.1000000000000005	-2.4451287948146265	0.0	4.307146598898385e-05	-1.7846671281051678	0.0	-0.4376485567625938	0.0	0.000148744774866681	0.0	0.999847959950382	0.0	0.01743722979706205	0.0	0.0	1.9982606204505713	0.0	0.0	1.9981696196729806	0.0	-2.4436403759798186	0.0	0.08530262578879386	-2.0467228292395223	0.0	0.07196913704175731
5.105	-2.4553725765642778	0.0	9.178412107430419e-05	-1.7969109236024627	0.0	-0.4372209369363198	0.0	-0.00021940771583535664	0.0	0.9998479550012469	0.0	0.01743751357736518	0.0	0.0	1.9982931442229248	0.0	0.0	1.9981067639924306	0.0	-2.4538761811209295	0.0	0.0857098937932516	-2.0466996995761453	0.0	0.07146094743074617
5.11	-2.4656083305962198	0.0	4.446983385398305e-05	-1.8092058813110146	0.0	-0.4367916449688173	0.0	0.00012283179776661484	0.0	0.9998479601447988	0.0	0.017437218649228568	0.0	0.0	1.9982593428087003	0.0	0.0	1.9981419527104407	0.0	-2.4641074110278973	0.0	0.08601807251320015	-2.0467147193742914	0.0	0.07179210198171351
5.115	-2.4758522590493848	0.0	9.486838964045049e-05	-1.8215520118226143	0.0	-0.4363604619057364	0.0	-0.00020821852159928666	0.0	0.9998479547407606	0.0	0.017437528513384166	0.0	0.0	1.9982948560248979	0.0	0.0	1.9980823024979204	0.0	-2.4743432990899925	0.0	0.08642717099885444	-2.046700548529823	0.0	0.0714802122821367
5.12	-2.4860878498371948	0.0	4.5632376186091093e-05	-1.8339493048911002	0.0	-0.43592758862703745	0.0	0.0001076048001542142	0.0	0.9998479602155246	0.0	0.01743721459384114	0.0	0.0	1.9982588780248676	0.0	0.0	1.9981131290024412	0.0	-2.4845744365698654	0.0	0.08673331731471379	-2.046706499919493	0.0	0.07161241788415744
5.125	-2.4963318279355877	0.0	9.659321800801826e-05	-1.8463977696025318	0.0	-0.4354928379981867	0.0	-0.0002013685637713497	0.0	0.9998479546458708	0.0	0.017437533954262233	0.0	0.0	1.99829547959841	0.0	0.0	1.9980554411582878	0.0	-2.4948103525448833	0.0	0.08714303946843249	-2.0467009096872824	0.0	0.07148897452917691
5.13	-2.506567345642164	0.0	4.6484707366781067e-05	-1.8588973978393437	0.0	-0.4350563875627458	0.0	0.000102809871917906	0.0	0.999847960201842	0.0	0.017437215378417283	0.0	0.0	1.9982589679443432	0.0	0.0	1.9980848940170537	0.0	-2.5050414486718524	0.0	0.0874482751967751	-2.046698349655318	0.0	0.07143421463488195
5.135	-2.516811282935909	0.0	9.695100682714927e-05	-1.87144819802138	0.0	-0.43461806491841526	0.0	-0.00020027548122983054	0.0	0.9998479546987178	0.0	0.017437530924094242	0.0	0.0	1.9982951323139329	0.0	0.0	1.9980275193179815	0.0	-2.5152773413246505	0.0	0.08785749558359436	-2.046701027376023	0.0	0.07149242711052736
5.14	-2.527046815363082	0.0	4.699652315225536e-05	-1.8840501612286182	0.0	-0.4341780416187785	0.0	0.00010828446320843779	0.0	0.9998479601141687	0.0	0.01743722040559078	0.0	0.0	1.9982595441035904	0.0	0.0	1.998058540531625	0.0	-2.5255084458286836	0.0	0.08816291335791583	-2.046690573252715	0.0	0.07126421608076283
5.1450000000000005	-2.5372906288612023	0.0	9.600026109786956e-05	-1.8967032960815438	0.0	-0.43373614289050105	0.0	-0.00020472750959730422	0.0	0.9998479548917719	0.0	0.017437519854606922	0.0	0.0	1.9982938636512302	0.0	0.0	1.9979998904203742	0.0	-2.5357442681569715	0.0	0.08857059913092664	-2.046701136202763	0.0	0.07149557244564217
5.15	-2.547526260550325	0.0	4.718327814053327e-05	-1.9094075940690718	0.0	-0.43329255085084	0.0	0.00012397110713352943	0.0	0.9998479599429438	0.0	0.017437230223616863	0.0	0.0	1.998260669337587	0.0	0.0	1.9980354055264757	0.0	-2.545975428935259	0.0	0.08887725061058764	-2.046683401192384	0.0	0.07110755331362836
5.155	-2.5577698744777377	0.0	9.385238434520422e-05	-1.9221630642074243	0.0	-0.43284707224866137	0.0	-0.00021261674760756393	0.0	0.9998479552301692	0.0	0.0174375004512164	0.0	0.0	1.99829163984834	0.0	0.0	1.9979744953150171	0.0	-2.5562111380050903	0.0	0.08928245925823027	-2.046701410263315	0.0	0.07150209331909357
5.16	-2.5680056856437306	0.0	4.708912908109381e-05	-1.9349696968029348	0.0	-0.4323999152042399	0.0	0.00014995509924986056	0.0	0.9998479596564036	0.0	0.01743724665373065	0.0	0.0	1.998262552376237	0.0	0.0	1.9980174542865345	0.0	-2.5664424005420905	0.0	0.08959134117752705	-2.0466768454750968	0.0	0.0709646033957019
5.165	-2.5782490295667673	0.0	9.063269419782613e-05	-1.9478275022925462	0.0	-0.431950853686906	0.0	-0.00022058589019694342	0.0	0.999847955722225	0.0	0.017437472237192324	0.0	0.0	1.998288406267685	0.0	0.0	1.9979542610838925	0.0	-2.576677956395824	0.0	0.08999319806729629	-2.046702082502246	0.0	0.07151692286915187
5.17	-2.5884850988047954	0.0	4.679809313676247e-05	-1.9607364693504892	0.0	-0.4315001347882659	0.0	0.00018638773774082973	0.0	0.9998479592048104	0.0	0.01743727254791475	0.0	0.0	1.9982655200823725	0.0	0.0	1.9980076572375203	0.0	-2.5869093653326223	0.0	0.09030528487937371	-2.046671181801507	0.0	0.0708415244792438
5.175	-2.5987281083785705	0.0	8.651969829930654e-05	-1.9736966104842018	0.0	-0.43104748806859206	0.0	-0.0002243368270896711	0.0	0.9998479563675069	0.0	0.017437435237336988	0.0	0.0	1.9982841657518344	0.0	0.0	1.9979433894706122	0.0	-2.5971447313792093	0.0	0.09070299350085445	-2.046703302931456	0.0	0.07154313798739288
5.18	-2.60896451080827	0.0	4.641820304718929e-05	-1.9867079118963495	0.0	-0.43059320965214665	0.0	0.0002333406017086124	0.0	0.999847958514748	0.0	0.017437312115887508	0.0	0.0	1.998270054927543	0.0	0.0	1.998010236628947	0.0	-2.6073763295010832	0.0	0.09101921317723771	-2.046666432125048	0.0	0.07073889799958724
5.1850000000000005	-2.6192071261674164	0.0	8.170009822684527e-05	-1.9997703886920004	0.0	-0.43013697650313915	0.0	-0.00021938610516199778	0.0	0.9998479571507867	0.0	0.017437390324674746	0.0	0.0	1.9982790183572214	0.0	0.0	1.997947387139399	0.0	-2.617611471567623	0.0	0.09141203617096468	-2.04670522737207	0.0	0.07158390326892777
5.19	-2.629443935313182	0.0	4.608746525539483e-05	-2.012884024394903	0.0	-0.42967913993190576	0.0	0.0002907932143162569	0.0	0.9998479574992496	0.0	0.017437370344048637	0.0	0.0	1.9982767283979543	0.0	0.0	1.9980306932588558	0.0	-2.6278433009124273	0.0	0.0917332923602803	-2.0466543593627247	0.0	0.0704777751076006
5.195	-2.6396861042927915	0.0	7.642535499505759e-05	-2.026048836678816	0.0	-0.42921931995993834	0.0	-0.00020143774656276636	0.0	0.9998479580204716	0.0	0.017437340457420708	0.0	0.0	1.9982733031218776	0.0	0.0	1.9979729855952924	0.0	-2.638078189027638	0.0	0.09212059276905948	-2.0466339506017914	0.0	0.07003926679945173
5.2	-2.6499243002511212	0.0	5.722465976457391e-05	-2.039264806701173	0.0	-0.4287579249695663	0.0	0.0003301598142159854	0.0	0.9998479560577596	0.0	0.01743745299796588	0.0	0.0	1.9982862012794775	0.0	0.0	1.9980675694148895	0.0	-2.6483108076194406	0.0	0.09245899945554015	-2.047620880725328	0.0	0.09149250957048115
5.205	-2.660180151479985	0.0	0.00025324217577966896	-2.0525319795475148	0.0	-0.42829397540351694	0.0	0.00032962033603389134	0.0	0.9998479468038799	0.0	0.017437983599063546	0.0	0.0	1.9983470129328043	0.0	0.0	1.9981619986853716	0.0	-2.65855348818762	0.0	0.09301533692507631	-2.0478925306395133	0.0	0.09711891993382886
5.21	-2.670422353475059	0.0	0.00027454426583967194	-2.06585032718184	0.0	-0.42782808830932556	0.0	0.0006884115171894149	0.0	0.9998479209391115	0.0	0.017439466553555844	0.0	0.0	1.9985169728451886	0.0	0.0	1.9983592140578874	0.0	-2.6687884413487613	0.0	0.09340169503418605	-2.0471157934266313	0.0	0.07969216741536833
5.215	-2.680668504862982	0.0	0.0003425255271865094	-2.079219871334809	0.0	-0.42735980421875464	0.0	0.0006968100038980676	0.0	0.9998478946821088	0.0	0.017440971867716957	0.0	0.0	1.9986894953810639	0.0	0.0	1.9985588354196167	0.0	-2.6790257070238317	0.0	0.09383502220219697	-2.0473851990904532	0.0	0.08482749153045667
5.22	-2.690912131114761	0.0	0.0003735415537318194	-2.0926405793332785	0.0	-0.4268898525740556	0.0	0.000803145905549099	0.0	0.9998478568405408	0.0	0.017443141096528017	0.0	0.0	1.9989381085124913	0.0	0.0	1.9987889197732225	0.0	-2.6892616107035345	0.0	0.09423495162758332	-2.046923198446186	0.0	0.07396305915075008
5.2250000000000005	-2.7011524703089007	0.0	0.00036273619044681425	-2.1061124785034866	0.0	-0.4264176576695377	0.0	0.0008789014304929181	0.0	0.9998478232565337	0.0	0.017445066039068598	0.0	0.0	1.999158724248132	0.0	0.0	1.9990407064860987	0.0	-2.6994957310803795	0.0	0.09459174018042708	-2.047216174174915	0.0	0.07943220492963403
5.23	-2.711398610006953	0.0	0.00041797419005487786	-2.1196355414516463	0.0	-0.42594384421613285	0.0	0.0008459942090318612	0.0	0.9998477805186188	0.0	0.017447515351126285	0.0	0.0	1.9994394374593842	0.0	0.0	1.999283065974449	0.0	-2.709733241894371	0.0	0.0950176553109819	-2.0469546172951087	0.0	0.07280011318177548
5.235	-2.7216358486510384	0.0	0.0003618708225425544	-2.1332097925482953	0.0	-0.4254678946403499	0.0	0.0010180673979646834	0.0	0.9998477421603977	0.0	0.017449713369857688	0.0	0.0	1.9996913502034426	0.0	0.0	1.9995747208002652	0.0	-2.7199657861000284	0.0	0.09533071937360754	-2.047188013789921	0.0	0.07687636364304765
5.24	-2.7318842379321593	0.0	0.00043810286076419305	-2.1468352130582535	0.0	-0.42499025078065034	0.0	0.0009021072638752403	0.0	0.9998476965708265	0.0	0.01745232540231027	0.0	0.0	1.9999907126615162	0.0	0.0	1.999833155494706	0.0	-2.7302047738230186	0.0	0.09577877838212044	-2.0470633130253253	0.0	0.07312711049246695
5.245	-2.7421200372687715	0.0	0.0003565773417542102	-2.1605118185490464	0.0	-0.42451059231545096	0.0	0.0011596244513872869	0.0	0.9998476532055683	0.0	0.01745480963093193	0.0	0.0	2.0002754276614927	0.0	0.0	2.000165363429129	0.0	-2.740436705682165	0.0	0.09606814293095253	-2.0472194382052575	0.0	0.07543811027902747
5.25	-2.75236999458992	0.0	0.0004450270609560139	-2.174239602214541	0.0	-0.42402910043687253	0.0	0.0009909034622358154	0.0	0.9998476052579665	0.0	0.017457555952797136	0.0	0.0	2.0005901809248114	0.0	0.0	2.000449236360584	0.0	-2.7506767997699435	0.0	0.09652941714019378	-2.0472012022352715	0.0	0.0739087766636779
5.255	-2.7626055666080447	0.0	0.0003522094676830154	-2.1880185668074157	0.0	-0.4235457391491187	0.0	0.0013128088764336426	0.0	0.9998475560442629	0.0	0.01746037434449886	0.0	0.0	2.000913194057309	0.0	0.0	2.000825328400219	0.0	-2.760908827383113	0.0	0.09680954282145265	-2.047247061610606	0.0	0.0737314044322974
5.26	-2.772856440358037	0.0	0.00044431047859077064	-2.2018487201246786	0.0	-0.42306037307996747	0.0	0.00111293147243197	0.0	0.9998475057927074	0.0	0.017463251702831004	0.0	0.0	2.0012429653143857	0.0	0.0	2.001144159781507	0.0	-2.771149675296484	0.0	0.09727545090630078	-2.04769276660212	0.0	0.08219743226649859
5.265	-2.7830971822910198	0.0	0.00040604583712317976	-2.2157300513160716	0.0	-0.42257327903961306	0.0	0.0013338704472369682	0.0	0.9998474502205517	0.0	0.017466433161784912	0.0	0.0	2.0016075892690632	0.0	0.0	2.001526285516727	0.0	-2.7813848861978534	0.0	0.0976125287938707	-2.0473067695069513	0.0	0.07251889672120668
5.2700000000000005	-2.7933440387945656	0.0	0.0004401337998510461	-2.2296625801774104	0.0	-0.4220840306193488	0.0	0.0012646957671187259	0.0	0.9998473971414761	0.0	0.017469471352867555	0.0	0.0	2.001955793449554	0.0	0.0	2.0018885941658464	0.0	-2.7916237042917427	0.0	0.09802145898354821	-2.047877248931984	0.0	0.08359197027399101
5.275	-2.8035908901386057	0.0	0.0004676557724353032	-2.2436462872405007	0.0	-0.42159310417216805	0.0	0.001326821093570749	0.0	0.9998473361888932	0.0	0.017472959563476	0.0	0.0	2.0023555739612195	0.0	0.0	2.0022687004099993	0.0	-2.801862653174765	0.0	0.09842647363615963	-2.0474691415863555	0.0	0.07331562345099195
5.28	-2.8138332207114876	0.0	0.00043610826525440865	-2.2576811956256426	0.0	-0.421100023341633	0.0	0.0014422055693415392	0.0	0.9998472781710378	0.0	0.01747627917778532	0.0	0.0	2.0027360318334746	0.0	0.0	2.002681861871567	0.0	-2.8120991761758543	0.0	0.09877149142817279	-2.0478368546294297	0.0	0.07985584461131165
5.285	-2.824083764549226	0.0	0.0004990841217020313	-2.271767289063584	0.0	-0.4206051826829986	0.0	0.0014000669650822925	0.0	0.9998472125457221	0.0	0.017480033308964568	0.0	0.0	2.0031662893019186	0.0	0.0	2.0030829515122415	0.0	-2.822340512775566	0.0	0.09921385094380791	-2.047683508868111	0.0	0.07499469552072827
5.29	-2.834324390119233	0.0	0.00043533601660119886	-2.2859045827231386	0.0	-0.420108290338293	0.0	0.0016417939345229134	0.0	0.9998471476601386	0.0	0.017483744330600962	0.0	0.0	2.003591606053675	0.0	0.0	2.0035532908286333	0.0	-2.8325763698203863	0.0	0.09952912676805585	-2.0478815470540646	0.0	0.0777117827838426
5.295	-2.844576993027629	0.0	0.0005129056573230259	-2.3000930725799384	0.0	-0.4196094756393628	0.0	0.0015374858232287336	0.0	0.9998470776245681	0.0	0.017487749013064414	0.0	0.0	2.004050579031732	0.0	0.0	2.0039937480722942	0.0	-2.842819191798933	0.0	0.09998787462398037	-2.0479326055798204	0.0	0.07715372933586503
5.3	-2.8548182086244056	0.0	0.00044390021649374166	-2.314332759443157	0.0	-0.41910875878271114	0.0	0.0018515218098569106	0.0	0.9998470042898201	0.0	0.017491941361817528	0.0	0.0	2.004531060305287	0.0	0.0	2.0045241699992005	0.0	-2.8530557155395475	0.0	0.10030097390252193	-2.0479446317272685	0.0	0.07567646616440638
5.305	-2.8650715865994143	0.0	0.0005193136356162079	-2.3286236552419073	0.0	-0.4186059252694758	0.0	0.0017257014401548133	0.0	0.9998469297049515	0.0	0.017496204145871306	0.0	0.0	2.00501961414066	0.0	0.0	2.005018547045303	0.0	-2.863299322194067	0.0	0.10075940425938469	-2.048631763407527	0.0	0.0888226438333542
5.3100000000000005	-2.875320777268548	0.0	0.0005352929709800667	-2.3429657482195863	0.0	-0.4181012831896349	0.0	0.0018577134177788863	0.0	0.999846848065255	0.0	0.017500868947178748	0.0	0.0	2.005554242852624	0.0	0.0	2.0055507427372206	0.0	-2.8735407350778197	0.0	0.10116077588142597	-2.04811513266238	0.0	0.07565713504766175
5.315	-2.885568380528242	0.0	0.0005260988945284376	-2.3573590573701146	0.0	-0.41759445402958234	0.0	0.001954104577075366	0.0	0.9998467669903751	0.0	0.01750550024495257	0.0	0.0	2.00608503179771	0.0	0.0	2.0061105524621885	0.0	-2.8837814423006587	0.0	0.10153693182521142	-2.048559610093596	0.0	0.0833408743765513
5.32	-2.895822005857442	0.0	0.0005825878983200065	-2.371803570448917	0.0	-0.41708576358054333	0.0	0.001976787521412368	0.0	0.9998466779220493	0.0	0.017510586745547032	0.0	0.0	2.006667991185399	0.0	0.0	2.006676860372044	0.0	-2.89402576843254	0.0	0.10198176632627613	-2.0484195379857573	0.0	0.07819446036342603
5.325	-2.9060680600955733	0.0	0.0005389329888256267	-2.3862993009628535	0.0	-0.4165749642973694	0.0	0.0022146660970301644	0.0	0.9998465875803143	0.0	0.01751574445840135	0.0	0.0	2.007259112200987	0.0	0.0	2.0073113154739968	0.0	-2.904266012426212	0.0	0.10232687535559289	-2.0486276902323817	0.0	0.08053550879412036
5.33	-2.916324065714956	0.0	0.000609454685786481	-2.4008462476652017	0.0	-0.41606214103834505	0.0	0.0021797905589270206	0.0	0.9998464911833462	0.0	0.01752124619658926	0.0	0.0	2.0078896617218103	0.0	0.0	2.0079357794702415	0.0	-2.914512123803098	0.0	0.10278865650267213	-2.048897505667835	0.0	0.08411638358368478
5.335	-2.926573292099171	0.0	0.0005876787621989966	-2.415444411585639	0.0	-0.4155473325170434	0.0	0.0024335685259132224	0.0	0.9998463895484088	0.0	0.01752704501456111	0.0	0.0	2.0085542593690837	0.0	0.0	2.008632945498695	0.0	-2.924754623851181	0.0	0.10315992270873216	-2.0487981170288423	0.0	0.07953379122490913
5.34	-2.936828585054642	0.0	0.0006325532988380442	-2.4300938053105456	0.0	-0.4150303173392723	0.0	0.002446641291264021	0.0	0.9998462851515914	0.0	0.017532999415220143	0.0	0.0	2.009236688287503	0.0	0.0	2.0093338565985546	0.0	-2.9350008094922226	0.0	0.1035991621363692	-2.0493865162952707	0.0	0.08983462334762374
5.345	-2.947084512779302	0.0	0.0006748336699499292	-2.4447944205691856	0.0	-0.41451134336542067	0.0	0.0025753879890167606	0.0	0.9998461723297852	0.0	0.01753943207200996	0.0	0.0	2.009973929824285	0.0	0.0	2.0100716509104513	0.0	-2.945247610917476	0.0	0.10403889295167491	-2.0491408127349584	0.0	0.08180669226451077
5.3500000000000005	-2.957337166223575	0.0	0.0006676669383849753	-2.45954627326962	0.0	-0.413990129552518	0.0	0.002774010379521194	0.0	0.9998460565424488	0.0	0.017546031358878993	0.0	0.0	2.010730268784714	0.0	0.0	2.010866346345811	0.0	-2.9554928293557428	0.0	0.10443034104535671	-2.049497240171931	0.0	0.08677588805445571
5.355	-2.9675968829052075	0.0	0.0007362398025134837	-2.4743493597632753	0.0	-0.41346682610417623	0.0	0.0028455438781326064	0.0	0.999845931975909	0.0	0.017553128244233142	0.0	0.0	2.011543637205079	0.0	0.0	2.011681534618993	0.0	-2.9657423339952436	0.0	0.10490095244476166	-2.0495812017242416	0.0	0.08564308596468197
5.36	-2.9778506293469715	0.0	0.0007201128930700256	-2.4892036873026475	0.0	-0.4129413487407332	0.0	0.0031517631976775433	0.0	0.9998458012012912	0.0	0.01756057573322289	0.0	0.0	2.012397188139959	0.0	0.0	2.0125844482652506	0.0	-2.975988759704048	0.0	0.1052890847977958	-2.049739506306055	0.0	0.0859712365852317
5.365	-2.9881126382578	0.0	0.0007941847433835139	-2.5041092641115226	0.0	-0.412413596234564	0.0	0.003205541427958656	0.0	0.9998456635997933	0.0	0.017568408596797258	0.0	0.0	2.0132949066774652	0.0	0.0	2.0135027682396327	0.0	-2.9862401816004662	0.0	0.10577025781330675	-2.0503335921022123	0.0	0.09564439841574976
5.37	-2.9983734117776204	0.0	0.0008397882951719764	-2.519066088285912	0.0	-0.4118836964776354	0.0	0.0034115418001360556	0.0	0.9998455163997981	0.0	0.01757678398213944	0.0	0.0	2.014254803358911	0.0	0.0	2.014480102973534	0.0	-2.9964912398191617	0.0	0.10622650979860344	-2.0501376916951015	0.0	0.08786314227007541
5.375	-3.0086333086785766	0.0	0.0008618405205029254	-2.5340741730570224	0.0	-0.41135144046290784	0.0	0.0036310154230279165	0.0	0.9998453628399058	0.0	0.0175855169804891	0.0	0.0	2.015255685951559	0.0	0.0	2.0155203122689658	0.0	-3.006742159390018	0.0	0.10666168854627775	-2.050529010250579	0.0	0.09271679611194152
5.38	-3.0188982730630847	0.0	0.0009315910600690631	-2.5491335176789156	0.0	-0.4108169412646885	0.0	0.0037950684956892054	0.0	0.9998451985035705	0.0	0.017594858035507373	0.0	0.0	2.0163262576471777	0.0	0.0	2.0166075193077964	0.0	-3.0169963205187575	0.0	0.10714874212535931	-2.0506810931068062	0.0	0.09212547376926047
5.385	-3.029160063525922	0.0	0.0009472910255487327	-2.5642441308116104	0.0	-0.41028010642501606	0.0	0.004112007859876502	0.0	0.999845025186801	0.0	0.017604704176453666	0.0	0.0	2.017454717073595	0.0	0.0	2.0177855227862738	0.0	-3.0272490865821977	0.0	0.10758510866063718	-2.050914809083489	0.0	0.09309343586697874
5.39	-3.03942807847817	0.0	0.00102381022870128	-2.579406020550487	0.0	-0.4097408636026564	0.0	0.004279233342715964	0.0	0.9998448417335289	0.0	0.017615120175294745	0.0	0.0	2.0186484877334845	0.0	0.0	2.01901143283672	0.0	-3.0375057917701906	0.0	0.10808634228732326	-2.0514489089656918	0.0	0.10039276785024388
5.3950000000000005	-3.0496962661177456	0.0	0.0010850403266646545	-2.5946191900602376	0.0	-0.40919926247117644	0.0	0.004551997265570168	0.0	0.9998446461604447	0.0	0.017626217524697493	0.0	0.0	2.019920347766556	0.0	0.0	2.0203154839950814	0.0	-3.0477630408564744	0.0	0.1085768836899707	-2.0514846222563055	0.0	0.09651381938367543
5.4	-3.059964905268717	0.0	0.0011339819945614248	-2.6098836504401706	0.0	-0.40865515654336093	0.0	0.004851495171594131	0.0	0.9998444396192057	0.0	0.01763792965430711	0.0	0.0	2.0212626676311913	0.0	0.0	2.021705334983384	0.0	-3.0580210201750284	0.0	0.10905937628901285	-2.0518808076491464	0.0	0.10024545858062761
5.405	-3.070237680187799	0.0	0.0012141728865571987	-2.625199406691251	0.0	-0.4081085714902924	0.0	0.005133461932036378	0.0	0.9998442190596272	0.0	0.017650428124481823	0.0	0.0	2.0226951098031534	0.0	0.0	2.0231759634983675	0.0	-3.068281836485521	0.0	0.10957855151113342	-2.052231693274894	0.0	0.10267728111389338
5.41	-3.0805106671627858	0.0	0.0012761971171462599	-2.640566468534734	0.0	-0.40755942971539166	0.0	0.005503063364531384	0.0	0.9998439843862865	0.0	0.01766371666684291	0.0	0.0	2.024218102021334	0.0	0.0	2.0247524750242714	0.0	-3.078543308343614	0.0	0.1100849573417874	-2.0525400113658554	0.0	0.1038393591855887
5.415	-3.0907873686137037	0.0	0.0013617471909716532	-2.655984845727406	0.0	-0.4070076458199884	0.0	0.005849287484933892	0.0	0.999843734244229	0.0	0.0176778701343449	0.0	0.0	2.0258402232070987	0.0	0.0	2.0264281724544984	0.0	-3.0888074446086673	0.0	0.1106208952453335	-2.053030140811581	0.0	0.10862329162283427
5.42	-3.1010663693990903	0.0	0.0014514370313531036	-2.67145454646571	0.0	-0.406453195730784	0.0	0.006256798241828456	0.0	0.9998434663990611	0.0	0.017693012718041433	0.0	0.0	2.0275757069096283	0.0	0.0	2.0282206131171066	0.0	-3.0990734844782484	0.0	0.11116776461147812	-2.0533857296273217	0.0	0.1100496143942612
5.425	-3.111347611196035	0.0	0.0015428472290414548	-2.686975582912296	0.0	-0.4058959718917104	0.0	0.006716256608912515	0.0	0.999843179650918	0.0	0.01770920962303319	0.0	0.0	2.0294320263465044	0.0	0.0	2.030144678906194	0.0	-3.1093414371139025	0.0	0.11172361217128914	-2.053852506445105	0.0	0.11346967602678625
5.43	-3.1216324390678785	0.0	0.0016502059150154916	-2.702547965946374	0.0	-0.4053359087729936	0.0	0.007218572629867897	0.0	0.9998428712610716	0.0	0.017726612432834344	0.0	0.0	2.0314265545431556	0.0	0.0	2.0322126476351947	0.0	-3.1196121046078575	0.0	0.11230371588577677	-2.0543794922088727	0.0	0.11771469764937509
5.4350000000000005	-3.1319203501811046	0.0	0.0017648140134090132	-2.7181717081525574	0.0	-0.4047729084476339	0.0	0.007796077926548678	0.0	0.9998425386551215	0.0	0.01774536265085722	0.0	0.0	2.0335755092783403	0.0	0.0	2.0344460594449263	0.0	-3.129885255258833	0.0	0.11290032487811552	-2.0549037359630504	0.0	0.12133536585587751
5.44	-3.1422119016236634	0.0	0.0018904427657285355	-2.733846823230283	0.0	-0.40420687011895673	0.0	0.008464893327433208	0.0	0.999842178155536	0.0	0.017765662976230678	0.0	0.0	2.0359021219823403	0.0	0.0	2.036871072753378	0.0	-3.140161260105159	0.0	0.11351858440712669	-2.055504754373194	0.0	0.12599856290454206
5.445	-3.1525075760877184	0.0	0.0020292245358308862	-2.749573326084797	0.0	-0.4036376799215721	0.0	0.009256260999891899	0.0	0.9998417848694969	0.0	0.017787783128854928	0.0	0.0	2.038437305363056	0.0	0.0	2.0395227962002047	0.0	-3.1504404569345335	0.0	0.11416243839073584	-2.0561976832458972	0.0	0.13193025092946473
5.45	-3.162808280768386	0.0	0.0021877341127080744	-2.7653512341146818	0.0	-0.4030651880790844	0.0	0.010190986465303822	0.0	0.9998413527373856	0.0	0.01781205647671021	0.0	0.0	2.041219266885926	0.0	0.0	2.042442298767889	0.0	-3.1607234327510696	0.0	0.11484071021246678	-2.057012423243691	0.0	0.13965449842888514
5.455	-3.173114901464732	0.0	0.002371510101478986	-2.7811805677009778	0.0	-0.40248920165274554	0.0	0.01128680323583819	0.0	0.9998408748060346	0.0	0.017838863942127255	0.0	0.0	2.044291664303045	0.0	0.0	2.0456757297159296	0.0	-3.1710107754313626	0.0	0.11556151626506843	-2.0579432543095098	0.0	0.14889109881466903
5.46	-3.183428280241976	0.0	0.002584744070475945	-2.797061350115987	0.0	-0.40190949004231286	0.0	0.01256181186689147	0.0	0.9998403432758054	0.0	0.01786863055071033	0.0	0.0	2.0477032101568096	0.0	0.0	2.049274423730981	0.0	-3.18130306268517	0.0	0.11633193749605433	-2.058991287271302	0.0	0.1594933500345915
5.465	-3.1937492825490987	0.0	0.0028310230386775354	-2.8129936075785333	0.0	-0.40132578819887565	0.0	0.014036217623208813	0.0	0.999839749420298	0.0	0.01790182892281617	0.0	0.0	2.051508071974728	0.0	0.0	2.053295503881666	0.0	-3.191600901148768	0.0	0.1171587907305561	-2.0601659876401612	0.0	0.17148051203885625
5.47	-3.2040788571114778	0.0	0.0031139566944998766	-2.8289773694915885	0.0	-0.4007377961003113	0.0	0.01573334128175769	0.0	0.9998390834456014	0.0	0.017938985876005377	0.0	0.0	2.055766629023104	0.0	0.0	2.0578027741470843	0.0	-3.2019049612540322	0.0	0.11804930493429262	-2.061482653041928	0.0	0.18498106782318716
5.4750000000000005	-3.2144180827480016	0.0	0.003437618233743268	-2.845012668812611	0.0	-0.40014517578463393	0.0	0.017680250327817906	0.0	0.99983833430535	0.0	0.01798069111917734	0.0	0.0	2.060546468802804	0.0	0.0	2.062867792769678	0.0	-3.212216004723848	0.0	0.11901162504864335	-2.062964741655793	0.0	0.20028201212515762
5.48	-3.2247682513447202	0.0	0.003807411594289041	-2.8610995426595656	0.0	-0.39954754385109065	0.0	0.01990758379770087	0.0	0.9998374894968375	0.0	0.01802760650372877	0.0	0.0	2.065923447404086	0.0	0.0	2.0685708954292346	0.0	-3.222534932103297	0.0	0.12005574797136105	-2.0646412633507456	0.0	0.21776947510022798
5.485	-3.2351308672466867	0.0	0.004229899514868987	-2.8772380330123046	0.0	-0.3989444622021633	0.0	0.022449490337939536	0.0	0.9998365348573199	0.0	0.018080474663826635	0.0	0.0	2.0719826798722085	0.0	0.0	2.0750022006721527	0.0	-3.2328627834435353	0.0	0.12119341429959403	-2.0665354013130153	0.0	0.23767282933638603
5.49	-3.2455076035722072	0.0	0.004712068399815604	-2.89342818729346	0.0	-0.3983354323833901	0.0	0.02534478452093546	0.0	0.999835454308363	0.0	0.018140129752934504	0.0	0.0	2.0788197708547496	0.0	0.0	2.082262946600743	0.0	-3.2432007152104845	0.0	0.12243745043588443	-2.068687581657784	0.0	0.2605786513968915
5.495	-3.2559005640276157	0.0	0.005264367929675796	-2.9096700593706353	0.0	-0.3977198810606025	0.0	0.02863378771116593	0.0	0.9998342296399262	0.0	0.018207505035550367	0.0	0.0	2.0865416848624894	0.0	0.0	2.0904659225373603	0.0	-3.2535501455025693	0.0	0.12380487500464717	-2.071130329185104	0.0	0.2868670149018956
5.5	-3.266311956414944	0.0	0.005896476447672794	-2.9259637103973124	0.0	-0.39709714984492595	0.0	0.032361513222727505	0.0	0.9998328402768433	0.0	0.0182836403166287	0.0	0.0	2.095267597973421	0.0	0.0	2.0997368131689558	0.0	-3.263912573676101	0.0	0.12531271452797266	-2.073906361952875	0.0	0.317120474727055
5.505	-3.2767445506719097	0.0	0.006622735654851858	-2.94230920982005	0.0	-0.3964664822684324	0.0	0.036572900001255806	0.0	0.9998312630351425	0.0	0.018369688534265387	0.0	0.0	2.1051296536936728	0.0	0.0	2.1102141772420855	0.0	-3.274289831417363	0.0	0.1269835061421861	-2.077053561724903	0.0	0.35178262135034877
5.51	-3.287201205723609	0.0	0.007456111345659602	-2.9587066365248496	0.0	-0.3958270080375035	0.0	0.041316292954554086	0.0	0.9998294719334058	0.0	0.01846691778406959	0.0	0.0	2.11627319530966	0.0	0.0	2.1220504232991955	0.0	-3.284683820811661	0.0	0.1288392710525726	-2.0806296575641925	0.0	0.3917309852557338
5.515	-3.2976856002350314	0.0	0.008417002710382347	-2.9751560799682375	0.0	-0.39517772809497137	0.0	0.046635396880364104	0.0	0.9998274379749948	0.0	0.018576713146106687	0.0	0.0	2.1288569756917304	0.0	0.0	2.1354104803850076	0.0	-3.2950969088835547	0.0	0.1309103699204257	-2.084673202400289	0.0	0.4373873494057374
5.5200000000000005	-3.308201299965714	0.0	0.009521518175654624	-2.9916576411974183	0.0	-0.39451750294249344	0.0	0.0525795886172761	0.0	0.9998251289260752	0.0	0.01870057664377437	0.0	0.0	2.1430531530885784	0.0	0.0	2.150473422966528	0.0	-3.3055314139517846	0.0	0.13322376563854557	-2.089230556266893	0.0	0.4893498689074174
5.525	-3.3187528416309218	0.0	0.010794690362261305	-3.0082114345956543	0.0	-0.3938450241472647	0.0	0.059188372319180026	0.0	0.9998225092252934	0.0	0.01884011797361094	0.0	0.0	2.1590462292720716	0.0	0.0	2.167429642617218	0.0	-3.315990184394335	0.0	0.13581622186562567	-2.0943781097033285	0.0	0.5489110676594855
5.53	-3.3293450054955573	0.0	0.012261282210879552	-3.024817588435357	0.0	-0.393158813258482	0.0	0.06650184148592664	0.0	0.9998195396977995	0.0	0.018997053380544637	0.0	0.0	2.1770329213597943	0.0	0.0	2.1864810168521758	0.0	-3.326476191521892	0.0	0.13872509447972725	-2.100113500111278	0.0	0.6155632963405364
5.535	-3.339982672330053	0.0	0.013943891681448047	-3.041476246645283	0.0	-0.392457192179639	0.0	0.07455840184269309	0.0	0.9998161775097765	0.0	0.019173189298931453	0.0	0.0	2.197220287750555	0.0	0.0	2.2078404256163093	0.0	-3.3369924428622135	0.0	0.14198633659030999	-2.106528187035199	0.0	0.6910164621958718
5.54	-3.350672166138168	0.0	0.01587937174639053	-3.0581875698937826	0.0	-0.39173826820732044	0.0	0.08337975211896093	0.0	0.9998123760113872	0.0	0.019370409698942426	0.0	0.0	2.2198242788719127	0.0	0.0	2.231726965082627	0.0	-3.3475426716881356	0.0	0.1456508856555879	-2.1136703698998156	0.0	0.7760349613436024
5.545	-3.361419404068559	0.0	0.01809584219109495	-3.0749517359445684	0.0	-0.39099993520294846	0.0	0.09299101921196745	0.0	0.9998080844912229	0.0	0.0195906657108652	0.0	0.0	2.2450685491592237	0.0	0.0	2.258366929749955	0.0	-3.3581303345021714	0.0	0.14976156354075865	-2.1215109997106074	0.0	0.8696214010203555
5.55	-3.3722308656559496	0.0	0.020624611136072907	-3.0917689420375427	0.0	-0.3902398247290415	0.0	0.10340726072106804	0.0	0.9998032483394889	0.0	0.01983594224184605	0.0	0.0	2.2731806322151686	0.0	0.0	2.2879909278015855	0.0	-3.3687591024475645	0.0	0.15436481240270034	-2.1301633200735712	0.0	0.9742831374008605
5.555	-3.383114395481666	0.0	0.02350990178892976	-3.1086394033891964	0.0	-0.3894553465172257	0.0	0.11462627993983297	0.0	0.9997978085010593	0.0	0.020108259799299727	0.0	0.0	2.3043921512929195	0.0	0.0	2.320828938110773	0.0	-3.3794332289550075	0.0	0.15952046650598825	-2.1395565443697326	0.0	1.0881698088523037
5.5600000000000005	-3.3940762637064426	0.0	0.026772589248029315	-3.1255633556180147	0.0	-0.38864363414049896	0.0	0.12665766982253326	0.0	0.9997917017653665	0.0	0.020409631949483174	0.0	0.0	2.338933945093172	0.0	0.0	2.3571136877297367	0.0	-3.3901560281064107	0.0	0.16526512113337313	-2.149787552207013	0.0	1.2137498322324498
5.565	-3.4051261661837575	0.0	0.030471813129459888	-3.142541053717219	0.0	-0.3878015675841748	0.0	0.13946876248125573	0.0	0.999784860389098	0.0	0.020742056992331174	0.0	0.0	2.3770351153956586	0.0	0.0	2.397068545050179	0.0	-3.4009323471107575	0.0	0.1716738448550029	-2.1607526109002224	0.0	1.3485275643131822
5.57	-3.4162696921002715	0.0	0.034612006678703455	-3.1595727713708848	0.0	-0.386925787684891	0.0	0.15306799368807947	0.0	0.9997772119356769	0.0	0.02110749834171383	0.0	0.0	2.4189207803341097	0.0	0.0	2.4409192951344894	0.0	-3.411764794561145	0.0	0.17876684926087055	-2.1724589176188287	0.0	1.4930910544708156
5.575	-3.427517490514752	0.0	0.03925611218919517	-3.176658803468558	0.0	-0.3860126222619597	0.0	0.16739946857975352	0.0	0.9997686797971076	0.0	0.021507833257928675	0.0	0.0	2.464806200379953	0.0	0.0	2.488875710346253	0.0	-3.4226582039388678	0.0	0.18662263766717666	-2.184941092305996	0.0	1.6487130504822474
5.58	-3.438876532618517	0.0	0.04441759223810766	-3.193799460133333	0.0	-0.38505822885022334	0.0	0.1824448686873502	0.0	0.9997591818961833	0.0	0.021944890261203078	0.0	0.0	2.5149010688232663	0.0	0.0	2.5411423151942714	0.0	-3.4336153476741615	0.0	0.19527000036251432	-2.198113286565436	0.0	1.8141097607445247
5.585	-3.4503572637719615	0.0	0.050148924306065025	-3.2109950699186234	0.0	-0.3840584924875628	0.0	0.19814126509961155	0.0	0.9997486316446852	0.0	0.022420381782147787	0.0	0.0	2.569401794744774	0.0	0.0	2.597905606382224	0.0	-3.4446403064765287	0.0	0.2047762706392183	-2.2118546209385137	0.0	1.9865946585741623
5.59	-3.461965688539507	0.0	0.05644408753837685	-3.2282459791312936	0.0	-0.3830090209761659	0.0	0.21446849071625584	0.0	0.9997369382908081	0.0	0.02293587160087917	0.0	0.0	2.6284877732207916	0.0	0.0	2.6593463031651345	0.0	-3.455734817668508	0.0	0.2151493273925323	-2.226137451980607	0.0	2.1667634160454443
5.595	-3.4737133477391446	0.0	0.06336135678064617	-3.245552540321442	0.0	-0.38190543635467356	0.0	0.23134362286876642	0.0	0.9997240037186276	0.0	0.023492900594470886	0.0	0.0	2.692335801262558	0.0	0.0	2.725621369203367	0.0	-3.4669026866373285	0.0	0.22646157439287076	-2.2411096988861274	0.0	2.360031371423378
5.6000000000000005	-3.485609061271577	0.0	0.07092254661225521	-3.262915132802762	0.0	-0.380742758465565	0.0	0.248700196665019	0.0	0.9997097298096999	0.0	0.02409265684925763	0.0	0.0	2.761082267882761	0.0	0.0	2.796868727368263	0.0	-3.4781461418417243	0.0	0.2387466254290073	-2.256059791710367	0.0	2.5465853415667663
5.605	-3.4976549906773786	0.0	0.07906321734654423	-3.280334126028123	0.0	-0.3795164438293158	0.0	0.2665639496068538	0.0	0.9996940067586616	0.0	0.024736467867674916	0.0	0.0	2.8348795749708664	0.0	0.0	2.873233673782316	0.0	-3.4894643179290923	0.0	0.25195277264561544	-2.271784625263888	0.0	2.753391631546452
5.61	-3.5098743503171175	0.0	0.08797621620581066	-3.2978099130063954	0.0	-0.37822133450968265	0.0	0.28468445498668904	0.0	0.999676725518674	0.0	0.025425271688854802	0.0	0.0	2.9138355177816666	0.0	0.0	2.954789762600913	0.0	-3.500864280499995	0.0	0.26628379292048376	-2.2876974593610306	0.0	2.9623879108458637
5.615	-3.5222593062301155	0.0	0.09746873962210814	-3.3153428942587087	0.0	-0.37685210486585613	0.0	0.3032008256946619	0.0	0.99965777405691	0.0	0.02615979258706784	0.0	0.0	2.9980334257233516	0.0	0.0	3.041650400886842	0.0	-3.512340718387662	0.0	0.2815554164318954	-2.3030138949456935	0.0	3.150161238640444
5.62	-3.5348216434409054	0.0	0.10758654354380494	-3.332933450953911	0.0	-0.3754041134482387	0.0	0.3220132917573326	0.0	0.9996370253417899	0.0	0.026941001057825063	0.0	0.0	3.087584893615457	0.0	0.0	3.133900413710892	0.0	-3.52389549794862	0.0	0.29782450106849523	-2.3192349886553165	0.0	3.3703089978808483
5.625	-3.5475833194140023	0.0	0.11849963310071364	-3.350581987680668	0.0	-0.3738718957996971	0.0	0.340870528969044	0.0	0.9996143583821755	0.0	0.027769308446358356	0.0	0.0	3.1825374647121287	0.0	0.0	3.2315526270624826	0.0	-3.53553322382135	0.0	0.3152687635112806	-2.335612515398104	0.0	3.5995073366718295
5.63	-3.5605428223147837	0.0	0.1300874193629247	-3.368288916047892	0.0	-0.37224962914361587	0.0	0.35982929476234143	0.0	0.9995896546361355	0.0	0.028644760469233657	0.0	0.0	3.282896812789362	0.0	0.0	3.334636126737738	0.0	-3.5472502246501825	0.0	0.33377202968271436	-2.3508834994154277	0.0	3.789659551827984
5.635	-3.57369430093616	0.0	0.14217280825311782	-3.3860546142121613	0.0	-0.37053269446705284	0.0	0.37902744106154973	0.0	0.9995627735478618	0.0	0.029567916578348792	0.0	0.0	3.3887275526023397	0.0	0.0	3.4432194902000894	0.0	-3.559041781076273	0.0	0.3531652051453387	-2.3660080876005907	0.0	3.979741258973891
5.64	-3.5870593859555195	0.0	0.15491677853180758	-3.4038794633410334	0.0	-0.3687162102320898	0.0	0.3982165937918732	0.0	0.9995335741518443	0.0	0.030539058586422155	0.0	0.0	3.50006252464043	0.0	0.0	3.5573001409818388	0.0	-3.5709109460230803	0.0	0.3736164610312812	-2.3817010118142896	0.0	4.205940315971874
5.6450000000000005	-3.6006556076661655	0.0	0.16843024585845576	-3.4217638544554663	0.0	-0.36679457268528554	0.0	0.4171890628390845	0.0	0.9995019258318824	0.0	0.031557886748551	0.0	0.0	3.616867951425652	0.0	0.0	3.676816003780327	0.0	-3.582858509548499	0.0	0.3952397387613821	-2.3972719403234795	0.0	4.445857587200095
5.65	-3.614489554622435	0.0	0.18269024858069982	-3.439708175897826	0.0	-0.36476183986031435	0.0	0.43588902739467605	0.0	0.9994677054336915	0.0	0.032623699464650234	0.0	0.0	3.7390640341529227	0.0	0.0	3.8016890118092133	0.0	-3.5948819917191326	0.0	0.4180118796527486	-2.4116649385649875	0.0	4.638651139181454
5.655	-3.62854075484622	0.0	0.1973386402796198	-3.457712787242379	0.0	-0.362613194563092	0.0	0.4546897788513007	0.0	0.9994307692774526	0.0	0.033736291692686944	0.0	0.0	3.866627956366005	0.0	0.0	3.9319480383887946	0.0	-3.606973830225282	0.0	0.44157709888507224	-2.425176560532531	0.0	4.795461028401466
5.66	-3.642822285459797	0.0	0.21242987347767497	-3.475778027525505	0.0	-0.36034464258896803	0.0	0.47346444778201746	0.0	0.9993909550806532	0.0	0.03489582839125366	0.0	0.0	3.9995793861675257	0.0	0.0	4.0675856114258035	0.0	-3.6191336151234452	0.0	0.4659962736699154	-2.4387455430107785	0.0	4.977733498779832
5.665	-3.657351983574191	0.0	0.22807869174381362	-3.493904235976786	0.0	-0.3579516086600278	0.0	0.49200127069883914	0.0	0.9993481113911442	0.0	0.036101969405743436	0.0	0.0	4.137880142667663	0.0	0.0	4.208533593056389	0.0	-3.631360903151047	0.0	0.49138722919462885	-2.4521035720703375	0.0	5.181461636846104
5.67	-3.6721446130355426	0.0	0.2443645859278261	-3.5120917460381555	0.0	-0.3554290163475433	0.0	0.5101245236380505	0.0	0.9993021001700764	0.0	0.037353882458192524	0.0	0.0	4.281435677148676	0.0	0.0	4.354673504209298	0.0	-3.643653842544608	0.0	0.5178289122024117	-2.4649643346762673	0.0	5.3962040344428335
5.675	-3.687210863812093	0.0	0.2613201435424831	-3.530340878860032	0.0	-0.3527715170491227	0.0	0.5277151503784733	0.0	0.9992527954986374	0.0	0.038650363886107826	0.0	0.0	4.430108908541186	0.0	0.0	4.505852758718288	0.0	-3.656009435270361	0.0	0.5453505089342763	-2.4771376513717858	0.0	5.6153415711819346
5.68	-3.7025571455320763	0.0	0.27892879637332485	-3.548651938703272	0.0	-0.3499737453131898	0.0	0.5447203507538627	0.0	0.9992000802056364	0.0	0.039989994461162116	0.0	0.0	4.583738083366887	0.0	0.0	4.661903644283699	0.0	-3.66842401199738	0.0	0.5739302695205247	-2.4885478186027488	0.0	5.801126836416258
5.6850000000000005	-3.7181678669974874	0.0	0.29690437470746234	-3.567025211138837	0.0	-0.34703093983270183	0.0	0.5614838195691522	0.0	0.999143829467737	0.0	0.041371584207341563	0.0	0.0	4.7421877845985385	0.0	0.0	4.822756909914686	0.0	-3.680893999690918	0.0	0.6032775934686172	-2.4994124773279522	0.0	5.926919154195243
5.69	-3.734033223431919	0.0	0.3150285509513359	-3.585460967909451	0.0	-0.34394004857562427	0.0	0.5782720927336127	0.0	0.9990838731138453	0.0	0.042795028125321655	0.0	0.0	4.905447086778921	0.0	0.0	4.988419661533856	0.0	-3.693417488792895	0.0	0.6331779782921635	-2.5099311084411102	0.0	6.041090006130125
5.695	-3.7501675849599256	0.0	0.3333823636749146	-3.6039594719447527	0.0	-0.3406980956465715	0.0	0.5949193133785493	0.0	0.9990200382656766	0.0	0.04426017508663273	0.0	0.0	5.073499852663848	0.0	0.0	5.158851490570914	0.0	-3.7059925009948063	0.0	0.6637170298556717	-2.5199756230104065	0.0	6.177634156544302
5.7	-3.766585273391989	0.0	0.3520499926000318	-3.6225209740365596	0.0	-0.33730167046571913	0.0	0.6112493463028565	0.0	0.9989521674105655	0.0	0.04576644159861265	0.0	0.0	5.2462804295973235	0.0	0.0	5.333961529437334	0.0	-3.718616155922021	0.0	0.6949803602491537	-2.529359391972763	0.0	6.330238595858971
5.705	-3.78329926082939	0.0	0.3711038739487618	-3.641145708519556	0.0	-0.3337469659659334	0.0	0.627098737982884	0.0	0.9988801216993041	0.0	0.04731281457471529	0.0	0.0	5.423673953299496	0.0	0.0	5.513612084559332	0.0	-3.731284799343298	0.0	0.7270385997318803	-2.537953753259707	0.0	6.494643453119762
5.71	-3.800320174138966	0.0	0.39059319852726276	-3.659833890154046	0.0	-0.33002988381008547	0.0	0.6423367527878784	0.0	0.9988037817195667	0.0	0.048897909659479794	0.0	0.0	5.605523022134634	0.0	0.0	5.69762800936375	0.0	-3.7439943120624624	0.0	0.7599362215502942	-2.5457053477164613	0.0	6.664818287393439
5.715	-3.8176557097161634	0.0	0.410537005773646	-3.6785857127901647	0.0	-0.32614618281215396	0.0	0.6568796960929828	0.0	0.9987230458197313	0.0	0.05052007218299207	0.0	0.0	5.791639262600365	0.0	0.0	5.88581018053357	0.0	-3.7567405249227535	0.0	0.7936853130776097	-2.5526476443453148	0.0	6.834047221847919
5.72	-3.835310526980145	0.0	0.4309226603503564	-3.6974013502013445	0.0	-0.3220916447629372	0.0	0.670697211027466	0.0	0.9986378262253119	0.0	0.05217750449382195	0.0	0.0	5.981817924380723	0.0	0.0	6.077950778148915	0.0	-3.7695196396946775	0.0	0.8282649697713823	-2.5588921619264777	0.0	6.996031605460886
5.7250000000000005	-3.8532865829741656	0.0	0.4517093111361604	-3.7162809588166077	0.0	-0.31786223003445385	0.0	0.6838101178844139	0.0	0.9985480437248152	0.0	0.053868398111884944	0.0	0.0	6.175853033926633	0.0	0.0	6.273847946864516	0.0	-3.782328561740299	0.0	0.8636257521897104	-2.5646029028271773	0.0	7.1457881635903
5.73	-3.8715837992223023	0.0	0.47283511937806794	-3.735224681756658	0.0	-0.3134542010001754	0.0	0.6962809261701592	0.0	0.9984536218516759	0.0	0.05559105097959581	0.0	0.0	6.373550844786624	0.0	0.0	6.473317738989566	0.0	-3.795165076887238	0.0	0.8996978381194468	-2.5699600447515625	0.0	7.280241124097947
5.735	-3.890200901686485	0.0	0.49422648514502127	-3.754232653300645	0.0	-0.3088641995922122	0.0	0.7081994972299928	0.0	0.9983544815464579	0.0	0.05734395443794731	0.0	0.0	6.574739820483814	0.0	0.0	6.676201950212393	0.0	-3.8080278482936047	0.0	0.9364009700467082	-2.5750614776166136	0.0	7.399947609938037
5.74	-3.9091361044444293	0.0	0.5158054014536978	-3.7733050029492112	0.0	-0.3040892749912069	0.0	0.7196707139812798	0.0	0.9982505370689388	0.0	0.05912584185227532	0.0	0.0	6.779276221708943	0.0	0.0	6.882372422963863	0.0	-3.8209163294360318	0.0	0.973652245181488	-2.5805726893513903	0.0	7.491514140129458
5.745	-3.928379000366056	0.0	0.5373859035075712	-3.792441867431494	0.0	-0.2991270981108015	0.0	0.7310103586288268	0.0	0.9981416802242454	0.0	0.060935918257408996	0.0	0.0	6.987070480350874	0.0	0.0	7.091791464612745	0.0	-3.8338348934736524	0.0	1.0112641520897574	-2.587005882957579	0.0	7.548636401281199
5.75	-3.947924349699863	0.0	0.5588390410457571	-3.8116434075794654	0.0	-0.29397623256503463	0.0	0.7424359218544712	0.0	0.9980277574717317	0.0	0.06277416061361825	0.0	0.0	7.198121700645675	0.0	0.0	7.304483689018574	0.0	-3.8467870769665358	0.0	1.0491124460560735	-2.593914651503419	0.0	7.5894779869725895
5.755	-3.967774375555828	0.0	0.5801243048484191	-3.8309097953952223	0.0	-0.2886356372882421	0.0	0.7540007263316556	0.0	0.9979085906373052	0.0	0.06464089002513465	0.0	0.0	7.41246858739333	0.0	0.0	7.520488985861586	0.0	-3.859773475560181	0.0	1.0871643929665205	-2.600461158208704	0.0	7.634891437118811
5.76	-3.9879391671351483	0.0	0.6013002672051276	-3.850241192795208	0.0	-0.2831041406373646	0.0	0.7655644249994924	0.0	0.9977840067928887	0.0	0.06653627376097848	0.0	0.0	7.630132281922627	0.0	0.0	7.739807038350739	0.0	-3.8727901070380577	0.0	1.1254854929772375	-2.606000440857422	0.0	7.696390720683488
5.765	-4.008429694218261	0.0	0.6224423841348986	-3.869637737738235	0.0	-0.2773802017748537	0.0	0.7769503366738879	0.0	0.9976538567473464	0.0	0.0684600763529748	0.0	0.0	7.851087766415281	0.0	0.0	7.96238691426415	0.0	-3.885831464553305	0.0	1.1641550412319415	-2.6103133378647523	0.0	7.774307447683456
5.7700000000000005	-4.029256713301287	0.0	0.643631667059311	-3.8890995377153055	0.0	-0.27146187393317145	0.0	0.7879676064922678	0.0	0.9975180232547427	0.0	0.07041159861101742	0.0	0.0	8.075256830678263	0.0	0.0	8.188123005489311	0.0	-3.8988909624600843	0.0	1.203254188938432	-2.613238058076872	0.0	7.867921564021882
5.775	-4.050429809995638	0.0	0.6649444414819602	-3.9086266657911897	0.0	-0.2653468220637069	0.0	0.7984327488322545	0.0	0.997376426242742	0.0	0.07238966992235976	0.0	0.0	8.302507150797263	0.0	0.0	8.416857139154896	0.0	-3.9119615186645103	0.0	1.2428555137950692	-2.6147433696546374	0.0	7.974547383117929
5.78	-4.071956582972857	0.0	0.6864430617716905	-3.928219159825756	0.0	-0.25903238894730934	0.0	0.8081904653601816	0.0	0.9972290244174494	0.0	0.07439269316055769	0.0	0.0	8.532657407714543	0.0	0.0	8.648386652694159	0.0	-3.9250362564430876	0.0	1.2830139796409465	-2.6149429867764327	0.0	8.08992016430032
5.785	-4.0938420840140894	0.0	0.7081688380108442	-3.9478770253113815	0.0	-0.2525157007335712	0.0	0.817130727440814	0.0	0.9970758127877158	0.0	0.07641873783990982	0.0	0.0	8.765487950226325	0.0	0.0	8.882477362658225	0.0	-3.9381092142380525	0.0	1.3237605238649817	-2.6140854094185726	0.0	8.208817410997801
5.79	-4.1160885845052935	0.0	0.7301380567609007	-3.9676002415097766	0.0	-0.24579379589504505	0.0	0.8251996694641812	0.0	0.996916816422129	0.0	0.0784656681440986	0.0	0.0	9.00075547222764	0.0	0.0	9.118879654237666	0.0	-3.951175947841838	0.0	1.3650990596397126	-2.612521308338926	0.0	8.325784846531578
5.795	-4.138695686399462	0.0	0.7523414377195793	-3.9873887701683284	0.0	-0.23886376072996843	0.0	0.8324029480272057	0.0	0.9967520811872544	0.0	0.08053128952264943	0.0	0.0	9.238209835588236	0.0	0.0	9.3573455331187	0.0	-3.964233925289397	0.0	1.407007109125329	-2.6106562027146194	0.0	8.43582670026235
5.8	-4.161660727253575	0.0	0.7747467163269524	-4.00724256537116	0.0	-0.23172285099944107	0.0	0.8388016296557484	0.0	0.9965816629969918	0.0	0.08261349104588099	0.0	0.0	9.477610420223268	0.0	0.0	9.597644499258548	0.0	-3.9772826663535112	0.0	1.4494395709318302	-2.608894005636812	0.0	8.534984483153115
5.805	-4.184979422541574	0.0	0.7973038205487132	-4.027161583773463	0.0	-0.22436859328539874	0.0	0.8445014849280661	0.0	0.9964056163511258	0.0	0.08471037488806424	0.0	0.0	9.71874101077547	0.0	0.0	9.839576353653094	0.0	-3.990323590168563	0.0	1.4923350121861825	-2.6075823621020495	0.0	8.620725274837616
5.8100000000000005	-4.208646617693836	0.0	0.8199515921580078	-4.04714579310325	0.0	-0.2167988463183542	0.0	0.8496377234926764	0.0	0.9962239844276354	0.0	0.08682034752018729	0.0	0.0	9.961420295320067	0.0	0.0	10.08297963200926	0.0	-4.003359626536957	0.0	1.5356232151373548	-2.617084369923621	0.0	8.59109221356084
5.815	-4.232657032232382	0.0	0.8426248438533078	-4.067195178361668	0.0	-0.20901182586092606	0.0	0.8543580249472058	0.0	0.996036791488859	0.0	0.08894217163625069	0.0	0.0	10.205507860995988	0.0	0.0	10.3277351771223	0.0	-4.016394665030841	0.0	1.5792327462792695	-2.5490347423631654	0.0	9.334964486401587
5.82	-4.257480978847774	0.0	0.8714616144506397	-4.0873085148319195	0.0	-0.20099365097338084	0.0	0.8435401447120506	0.0	0.9958454593104636	0.0	0.09105943211936472	0.0	0.0	10.449116722274917	0.0	0.0	10.569391627831576	0.0	-4.02882620305632	0.0	1.629155910862876	-2.4620471168560996	0.0	10.23097473107837
5.825	-4.282685506256919	0.0	0.9018226839227426	-4.107483369629721	0.0	-0.19271953583560922	0.0	0.8291901305480502	0.0	0.9956528829774081	0.0	0.09314148176115385	0.0	0.0	10.688720464019724	0.0	0.0	10.806937102303102	0.0	-4.041114117781675	0.0	1.6804987088062562	-2.4543889405118575	0.0	10.296479333584578
5.83	-4.308151105651464	0.0	0.9323495290964492	-4.127719639991323	0.0	-0.18418857901067756	0.0	0.8147248170100512	0.0	0.9954593828914585	0.0	0.09518726817162047	0.0	0.0	10.924196660423716	0.0	0.0	11.040338569699324	0.0	-4.0533924215322665	0.0	1.7318924314885462	-2.4546969194310395	0.0	10.283775262052483
5.835	-4.333869889076701	0.0	0.9630470800036605	-4.1480172777624675	0.0	-0.17540052819172927	0.0	0.8001464576506306	0.0	0.9952652086769078	0.0	0.0971965195361956	0.0	0.0	11.155512603292498	0.0	0.0	11.269563644777946	0.0	-4.065661076407705	0.0	1.7833361512695565	-2.452764182394551	0.0	10.29368153624208
5.84	-4.359833888110903	0.0	0.9939203975293134	-4.16837623463024	0.0	-0.1663551357243018	0.0	0.7854573107010301	0.0	0.9950706077088161	0.0	0.09916897039844362	0.0	0.0	11.382636230712123	0.0	0.0	11.494580589232271	0.0	-4.07792005689869	0.0	1.83482893484613	-2.4508275751656003	0.0	10.3034006007013
5.845	-4.386035054564975	0.0	1.0249746705223584	-4.188796462184512	0.0	-0.15705215863423863	0.0	0.7706596386583728	0.0	0.9948758249541567	0.0	0.10110436162724767	0.0	0.0	11.605536128370002	0.0	0.0	11.71535831291328	0.0	-4.090169349769388	0.0	1.8863698434924019	-2.4488895387462537	0.0	10.312931388618008
5.8500000000000005	-4.412465261091423	0.0	1.056215212723169	-4.209277911979294	0.0	-0.14749135865382715	0.0	0.7557557078870343	0.0	0.9946811028143536	0.0	0.10300244038175896	0.0	0.0	11.824181530672487	0.0	0.0	11.931866374937524	0.0	-4.102408953915798	0.0	1.9379579332292316	-2.4469524849592825	0.0	10.322272867878379
5.855	-4.439116301723318	0.0	1.0876474595895518	-4.229820535593172	0.0	-0.13767250224812322	0.0	0.740747788234234	0.0	0.9944866809702709	0.0	0.10486296007517257	0.0	0.0	12.03854232178371	0.0	0.0	12.144074984684885	0.0	-4.114638880219797	0.0	1.9895922550172882	-2.4450187966714942	0.0	10.331424053914022
5.86	-4.465979892330054	0.0	1.1192769650201744	-4.250424284688839	0.0	-0.1275953606396049	0.0	0.7256381526633804	0.0	0.9942927962307987	0.0	0.106685680337359	0.0	0.0	12.248589036593327	0.0	0.0	12.351955002691291	0.0	-4.126859151404404	0.0	2.0412718549725186	-2.4430908266155646	0.0	10.340383962426596
5.865	-4.493047670766729	0.0	1.1511093976097964	-4.271089111069743	0.0	-0.11725970983022188	0.0	0.710429076947594	0.0	0.9940996823918502	0.0	0.10847036697301697	0.0	0.0	12.4542928613025	0.0	0.0	12.55547794145365	0.0	-4.139069801877945	0.0	2.0929957742038567	-2.4411708971415536	0.0	10.349151583894594
5.87	-4.5203111971449195	0.0	1.1831505370878912	-4.2918149667378565	0.0	-0.10666533062474004	0.0	0.6951228393393624	0.0	0.9939075700912189	0.0	0.11021679192171191	0.0	0.0	12.65562563418282	0.0	0.0	12.75461596614013	0.0	-4.151270877584047	0.0	2.1447630489761833	-2.4392612989044014	0.0	10.357726081541108
5.875	-4.547761954743664	0.0	1.2154062717126386	-4.3126018039577625	0.0	-0.0958120086592653	0.0	0.67972172011257	0.0	0.9937166866407086	0.0	0.11192473322661421	0.0	0.0	12.852559847040174	0.0	0.0	12.949341895169246	0.0	-4.163462435828444	0.0	2.1965727120129306	-2.437364284658372	0.0	10.36610676798017
5.88	-4.5753913500781875	0.0	1.2478825944028764	-4.333449575312598	0.0	-0.08469953442227979	0.0	0.6642280012716649	0.0	0.993527255887776	0.0	0.11359397499125985	0.0	0.0	13.045068645622967	0.0	0.0	13.13962920070563	0.0	-4.175644545074139	0.0	2.248423792552642	-2.435482061943617	0.0	10.374293006094886
5.885	-4.603190713110511	0.0	1.2805855990797266	-4.354358233761454	0.0	-0.0733277032765696	0.0	0.6486439662322362	0.0	0.9933394980719835	0.0	0.11522430733802795	0.0	0.0	13.233125830130298	0.0	0.0	13.325452009064296	0.0	-4.1878172847191815	0.0	2.3003153167367167	-2.4336168043241755	0.0	10.382284087757721
5.89	-4.631151296335216	0.0	1.3135214753356923	-4.3753277326827265	0.0	-0.06169631546383	0.0	0.6329718997395133	0.0	0.9931536297268916	0.0	0.11681552635601394	0.0	0.0	13.416705855055447	0.0	0.0	13.506785101091555	0.0	-4.1999807449933275	0.0	2.352246306400779	-2.4317706820144855	0.0	10.390078914077868
5.8950000000000005	-4.659264273570569	0.0	1.3466965026629496	-4.396358025914054	0.0	-0.04980517610493619	0.0	0.6172140878479935	0.0	0.9929698635933398	0.0	0.11836743404559788	0.0	0.0	13.595783828788102	0.0	0.0	13.68360391254009	0.0	-4.212135026922504	0.0	2.4042157775325643	-2.4299458008347026	0.0	10.39767669667832
5.9	-4.687520742263327	0.0	1.3801170498912052	-4.417449067837466	0.0	-0.03765409525540565	0.0	0.601372817151456	0.0	0.9927884083880002	0.0	0.11987983829326096	0.0	0.0	13.770335514694592	0.0	0.0	13.855884534223444	0.0	-4.2242802417798515	0.0	2.4562227440747506	-2.4281441927748246	0.0	10.405076933756867
5.905	-4.715911722147423	0.0	1.4137895692121847	-4.438600813418316	0.0	-0.02524288790413761	0.0	0.5854503747875895	0.0	0.99260946872071	0.0	0.12135255281356934	0.0	0.0	13.940337330298753	0.0	0.0	14.02360371217185	0.0	-4.236416510961291	0.0	2.5082662163277907	-2.4263678554370247	0.0	10.412278825752308
5.91	-4.744428154771735	0.0	1.447720591489927	-4.459813218255629	0.0	-0.012571373986031144	0.0	0.5694490482560254	0.0	0.992433244975487	0.0	0.12278539709810343	0.0	0.0	14.105766346711778	0.0	0.0	14.186738847735908	0.0	-4.248543965737136	0.0	2.5603452007371765	-2.4246187576340006	0.0	10.41928169649739
5.915	-4.773060903759883	0.0	1.4819167226763028	-4.4810862386287456	0.0	0.00036062158706776093	0.0	0.5533711251427422	0.0	0.9922599331876029	0.0	0.12417819639587357	0.0	0.0	14.266600291607778	0.0	0.0	14.345267997611332	0.0	-4.260662747254561	0.0	2.6124587012868328	-2.422898905859346	0.0	10.426085405563816
5.92	-4.801800755524128	0.0	1.516384640912396	-4.502419831540828	0.0	0.013553268883459466	0.0	0.5372188927904095	0.0	0.9920897249198879	0.0	0.12553078171486118	0.0	0.0	14.42281755457246	0.0	0.0	14.49916987376924	0.0	-4.272773006667973	0.0	2.664605721957244	-2.4212101950189377	0.0	10.432689468628668
5.925	-4.830638416284096	0.0	1.5511310880422478	-4.523813954775223	0.0	0.0270067329956832	0.0	0.520994638469336	0.0	0.991922807170551	0.0	0.126842989675529	0.0	0.0	14.57439717543886	0.0	0.0	14.648423843435426	0.0	-4.284874904056422	0.0	2.716785261754501	-2.419554399450119	0.0	10.439092974872162
5.93	-4.8595645122759805	0.0	1.5861628659497387	-4.545268566938138	0.0	0.040721174007388575	0.0	0.504700649128564	0.0	0.9917593622589389	0.0	0.12811466249701292	0.0	0.0	14.721318847743577	0.0	0.0	14.793009928998325	0.0	-4.296968608450887	0.0	2.768996316360803	-2.4179332809168397	0.0	10.445295250406755
5.9350000000000005	-4.888569589042083	0.0	1.6214868315042745	-4.566783627503461	0.0	0.05469674698101185	0.0	0.48833921127654184	0.0	0.9915995677212132	0.0	0.12934564794843412	0.0	0.0	14.863562918113626	0.0	0.0	14.932908807882791	0.0	-4.309054297550865	0.0	2.8212378780229734	-2.41634856552501	0.0	10.45129569602723
5.94	-4.9176441116595635	0.0	1.6571098926466434	-4.58835909685687	0.0	0.06893360194059954	0.0	0.4719126107439032	0.0	0.9914435961984064	0.0	0.130535799330236	0.0	0.0	15.001110388931263	0.0	0.0	15.06810181235592	0.0	-4.321132157768511	0.0	2.8735089370806186	-2.414802067741103	0.0	10.457094442457024
5.945	-4.946778466260628	0.0	1.6930390060686227	-4.609994936339147	0.0	0.08343188384670751	0.0	0.4554231322815127	0.0	0.9912916153132446	0.0	0.13168497549682856	0.0	0.0	15.133942925540643	0.0	0.0	15.198570929217714	0.0	-4.3332023846659125	0.0	2.925808485751392	-2.4132954578938977	0.0	10.462691243249544
5.95	-4.975962955408762	0.0	1.729281167175356	-4.631691108287445	0.0	0.09819173261136818	0.0	0.43887305998083886	0.0	0.9911437876148796	0.0	0.13279304069265735	0.0	0.0	15.262042842410164	0.0	0.0	15.324298799612183	0.0	-4.3452651813067975	0.0	2.9781355116407293	-2.411830226937199	0.0	10.46808528241711
5.955	-5.0051877985865065	0.0	1.765843406425206	-4.653447576076336	0.0	0.11321328308043543	0.0	0.4222646770225061	0.0	0.9910002704717265	0.0	0.13385986454665957	0.0	0.0	15.385393106960487	0.0	0.0	15.445268718766405	0.0	-4.357320758383525	0.0	3.030488999908887	-2.4104078691770634	0.0	10.473276108673629
5.96	-5.034443131432454	0.0	1.8027327840798697	-4.675264304157624	0.0	0.1284966650244	0.0	0.4056002655976084	0.0	0.9908612159801263	0.0	0.13488532203011255	0.0	0.0	15.50397733916599	0.0	0.0	15.561464635707045	0.0	-4.369369333893181	0.0	3.082867933395553	-2.4090298312655785	0.0	10.47826328897478
5.965	-5.063719005394024	0.0	1.839956385117152	-4.697141258092862	0.0	0.14404200312740437	0.0	0.38888210681177227	0.0	0.9907267708809677	0.0	0.13586929342932133	0.0	0.0	15.617779812858668	0.0	0.0	15.672871152949396	0.0	-4.38141113320636	0.0	3.135271293269566	-2.407697722970766	0.0	10.483046771139716
5.97	-5.093005388507474	0.0	1.8775213148624323	-4.71907840457238	0.0	0.1598494169703575	0.0	0.37211248050877166	0.0	0.9905970764865701	0.0	0.13681166435532047	0.0	0.0	15.726785461389483	0.0	0.0	15.77947352613588	0.0	-4.393446390013535	0.0	3.1876980611876737	-2.4064129842159776	0.0	10.487626340802485
5.9750000000000005	-5.12229216193823	0.0	1.9154346916394922	-4.7410757114769915	0.0	0.17591902103836715	0.0	0.35529366544419855	0.0	0.9904722685858214	0.0	0.13771232562276534	0.0	0.0	15.830979867332998	0.0	0.0	15.881257663724307	0.0	-4.405475343968111	0.0	3.240147215977468	-2.4051767983926573	0.0	10.492001473135463
5.98	-5.151569119827943	0.0	1.953703641642311	-4.763133147903379	0.0	0.19225092470998625	0.0	0.33842793920387226	0.0	0.9903524773725794	0.0	0.13857117323399104	0.0	0.0	15.930349264759487	0.0	0.0	15.978210126652767	0.0	-4.417498240934233	0.0	3.29261773461062	-2.4039903794656743	0.0	10.49617181135442
5.985	-5.180825968421699	0.0	1.9923352932524043	-4.785250684195351	0.0	0.2088452322509831	0.0	0.32151757818994386	0.0	0.9902378273733198	0.0	0.13938810834232607	0.0	0.0	16.02488053885423	0.0	0.0	16.070318128000523	0.0	-4.429515332668382	0.0	3.345108592265008	-2.4028548812858506	0.0	10.50013700915924
5.99	-5.2100523256241935	0.0	2.031336771489638	-4.80742829197295	0.0	0.22570204280356904	0.0	0.3045648575831755	0.0	0.9901284373796495	0.0	0.1401630372258939	0.0	0.0	16.114561226650768	0.0	0.0	16.157569532638117	0.0	-4.441526876847764	0.0	3.39761876280673	-2.401771668010196	0.0	10.503897085360007
5.995	-5.239237722196347	0.0	2.07071519323513	-4.82966594415455	0.0	0.24282145035950145	0.0	0.2875720511852846	0.0	0.9900244203905774	0.0	0.1408958713009115	0.0	0.0	16.19937952238545	0.0	0.0	16.239952856832303	0.0	-4.453533138399207	0.0	3.4501472209967945	-2.4007419275331605	0.0	10.507451927763693
6.0	-5.268371597826958	0.0	2.1104776597685833	-4.851963614995261	0.0	0.260203543784634	0.0	0.27054143167726685	0.0	0.9899258835385114	0.0	0.14158652701737973	0.0	0.0	16.27932426847554	0.0	0.0	16.317457267924972	0.0	-4.465534386700219	0.0	3.5026929393433117	-2.3997665340002547	0.0	10.510801110874791
6.005	-5.297443301005682	0.0	2.1506312511820713	-4.874321280110825	0.0	0.27784840680573925	0.0	0.253475270586628	0.0	0.9898329280333281	0.0	0.14223492584445066	0.0	0.0	16.354384957159407	0.0	0.0	16.390072584002723	0.0	-4.477530895836036	0.0	3.5552548888918434	-2.3988464044875535	0.0	10.513944358803403
6.01	-5.326442088233002	0.0	2.191183020388655	-4.896738916502415	0.0	0.29575611800420026	0.0	0.2363758383171567	0.0	0.9897456491073351	0.0	0.1428409942418013	0.0	0.0	16.42455173027522	0.0	0.0	16.457789273574924	0.0	-4.489522944302382	0.0	3.607832039314632	-2.3979823797500632	0.0	10.516881390235426
6.015000000000001	-5.355357123554224	0.0	2.2321399871880887	-4.919216502578652	0.0	0.3139267508109629	0.0	0.2192454041610825	0.0	0.9896641359638814	0.0	0.14340466363654478	0.0	0.0	16.48981537952552	0.0	0.0	16.520598455255275	0.0	-4.501510814947257	0.0	3.6604233592391546	-2.3971755693474135	0.0	10.519612303659809
6.0200000000000005	-5.38417748049906	0.0	2.2735091332991275	-4.94175401816653	0.0	0.33236037349746395	0.0	0.2020862361215627	0.0	0.9895884717338036	0.0	0.14392587044161853	0.0	0.0	16.55016735154795	0.0	0.0	16.578491897392524	0.0	-4.513494796804981	0.0	3.7130278187076775	-2.396426893815222	0.0	10.5221370722456
6.025	-5.412892137529412	0.0	2.315297394530545	-4.9643514445470736	0.0	0.3510570491790827	0.0	0.1849006012837405	0.0	0.9895187334232844	0.0	0.14440455596682777	0.0	0.0	16.60559973990434	0.0	0.0	16.631462017807472	0.0	-4.525475181695979	0.0	3.7656443858166186	-2.3957369030936855	0.0	10.524455338681287
6.03	-5.441489978299999	0.0	2.3575116549544095	-4.987008764470226	0.0	0.37001683581008876	0.0	0.16769076579639675	0.0	0.98945499187399	0.0	0.14484066641163088	0.0	0.0	16.656105286698754	0.0	0.0	16.679501883524722	0.0	-4.537452264663249	0.0	3.818272027599609	-2.3951062142819763	0.0	10.526566901425209
6.035	-5.469959790996943	0.0	2.4001587406143474	-5.00972596217206	0.0	0.3892397861807658	0.0	0.15045899494002457	0.0	0.9893973117249003	0.0	0.14523415284374272	0.0	0.0	16.701677382301845	0.0	0.0	16.72260521052394	0.0	-4.549426343627781	0.0	3.8709097100537297	-2.3945353569321703	0.0	10.528471542742576
6.04	-5.498290268177663	0.0	2.443245413364172	-5.0325030233896	0.0	0.4087259479137665	0.0	0.13320755316149452	0.0	0.9893457513777525	0.0	0.14558497118435276	0.0	0.0	16.742310065670203	0.0	0.0	16.760766363501034	0.0	-4.561397719402474	0.0	3.9235563985190556	-2.394025233929827	0.0	10.530169499369668
6.045	-5.526470009794294	0.0	2.486778365922772	-5.05533993536662	0.0	0.42847536345357706	0.0	0.11593870384574802	0.0	0.989300362968203	0.0	0.14589308223272873	0.0	0.0	16.777998029175762	0.0	0.0	16.793980355563924	0.0	-4.573366698193852	0.0	3.976211060607635	-2.393576513920248	0.0	10.531660847757534
6.05	-5.554487517589802	0.0	2.5307642133786876	-5.078236686878775	0.0	0.448488070076323	0.0	0.09865470983688591	0.0	0.9892611923340567	0.0	0.14615845158855673	0.0	0.0	16.808736611021327	0.0	0.0	16.82224284807763	0.0	-4.585333587156031	0.0	4.028872662068673	-2.3931893565972917	0.0	10.532945221166983
6.055	-5.582331195646682	0.0	2.575209487109458	-5.101193268242563	0.0	0.4687640998858443	0.0	0.08135783344182007	0.0	0.9892282789914028	0.0	0.1463810496493242	0.0	0.0	16.834521796416233	0.0	0.0	16.845550150510356	0.0	-4.597298694821021	0.0	4.081540167585214	-2.392864045422642	0.0	10.534022451284143
6.0600000000000005	-5.609989350385579	0.0	2.6201206284107577	-5.124209671324198	0.0	0.48930347981149325	0.0	0.06405033649101405	0.0	0.9892016561137459	0.0	0.14656085160236978	0.0	0.0	16.855350217913408	0.0	0.0	16.863899220296993	0.0	-4.609262331023981	0.0	4.134212541069665	-2.3926007992896166	0.0	10.534892378862198
[truncated: 1,787 more rows]
