# Supplementary material for: An Efficient Contact Model for the Simulation of Cargo Airdrop Extraction Phase
Source: Hindawi journal article supplement (doi:10.1155/2018/9895451), 2018-10-17
Supplement: f1 [file 9895451.f1.zip › case3_aircraft_coupling/m4000/df_aft.csv]

t	u	v	w	x_g	y_g	z_g	p	q	r	e0	e1	e2	e3	yaw(deg)	pitch(deg)	roll(deg)	yaw_fix(deg)	pitch_fix(deg)	roll_fix(deg)	h_g	alpha(deg)	beta(deg)	vx_g	vy_g	vz_g	ax_g	ay_g	az_g	g-force
2.485	88.88888888888889	0.0	0.0	220.88888888888886	0.0	-800.0	0.0	0.0	0.0	1.0	0.0	0.0	0.0	0.0	-0.0	0.0	0.0	0.0	0.0	800.0	0.0	0.0	88.88888888888889	0.0	0.0	2.842170943040209e-12	0.0	4.632211430296642e-21	2.842170943040209e-13
2.49	88.88888888888889	0.0	-5.485516708210834e-09	221.3333333333337	0.0	-800.0	0.0	-1.027517297799252e-07	0.0	1.0	0.0	-3.0856031483685934e-11	0.0	0.0	-3.5358407530759914e-09	0.0	0.0	-2.9436202270294035e-08	0.0	800.0	-3.535840753075992e-09	0.0	88.88888888888889	0.0	-1.6543612251060553e-24	-1.8947806286934726e-12	0.0	3.694740069403274e-21	1.8947806286934726e-13
2.495	88.88888888888889	0.0	-3.2440123292374575e-07	221.77777777777823	0.0	-800.0	0.0	-1.6098930946855203e-06	0.0	1.0	0.0	-1.8247569351960696e-09	0.0	0.0	-2.091017420479237e-07	0.0	0.0	-4.906366012340019e-07	0.0	800.0	-2.0910174204792373e-07	0.0	88.88888888888889	0.0	-5.293955920339377e-23	1.4210854715201044e-12	0.0	-1.3896634290889926e-20	1.4210854715201047e-13
2.5	88.88888888888889	0.0	-1.5489499086641146e-06	222.22222222222277	0.0	-800.0	0.0	-3.881255064456298e-06	0.0	1.0	0.0	-8.712843236235642e-09	0.0	0.0	-9.98418289990816e-07	0.0	0.0	-1.602534273269688e-06	0.0	800.0	-9.984182899908162e-07	0.0	88.88888888888891	0.0	-4.235164736271502e-22	1.4684549872374414e-11	0.0	-2.5470153323072506e-19	1.4684549872374418e-12
2.505	88.88888888888884	0.0	-3.724363459232074e-06	222.66666666666725	0.0	-800.0	0.0	-5.8465886793500975e-06	0.0	1.0	0.0	-2.0949544458180413e-08	0.0	0.0	-2.400640960350842e-06	0.0	0.0	-3.2774585526484325e-06	0.0	800.0	-2.4006409603508413e-06	0.0	88.888888888889	0.0	-2.541098841762901e-21	7.105427357600522e-12	0.0	-4.692665397847056e-19	7.105427357600537e-13
2.51	88.88888888888867	0.0	-6.690962459551046e-06	223.11111111111177	0.0	-800.0	0.0	-7.441685291844483e-06	0.0	0.9999999999999994	0.0	-3.7636663834974636e-08	0.0	0.0	-4.312843985393414e-06	0.0	0.0	-5.409344351084922e-06	0.0	800.0	-4.312843985393415e-06	0.0	88.88888888888897	0.0	-4.62483662785663e-21	-7.57912251477389e-12	0.0	-2.715319374411226e-19	7.579122514773895e-13
2.515	88.88888888888832	0.0	-1.0285770106301829e-05	223.55555555555625	0.0	-800.0	0.0	-8.676679494420321e-06	0.0	0.9999999999999984	0.0	-5.785745684794786e-08	0.0	0.0	-6.629976181495396e-06	0.0	0.0	-7.895029927175036e-06	0.0	800.0	-6.629976181495396e-06	0.0	88.88888888888896	0.0	-5.507508405954996e-21	-4.736951571733681e-13	0.0	-3.043297974340258e-19	4.736951571734659e-14
2.52	88.88888888888776	0.0	-1.4353966958536497e-05	224.00000000000074	0.0	-800.0	0.0	-9.57721706567902e-06	0.0	0.9999999999999969	0.0	-8.074106414176803e-08	0.0	0.0	-9.252244417436769e-06	0.0	0.0	-1.0638700513895594e-05	0.0	800.0	-9.252244417436767e-06	0.0	88.88888888888897	0.0	-7.86287674069545e-21	2.842170943040209e-12	0.0	-6.297431855942277e-19	2.842170943040279e-13
2.525	88.88888888888692	0.0	-1.8754598630627027e-05	224.4444444444452	0.0	-800.0	0.0	-1.0179235923757234e-05	0.0	0.9999999999999947	0.0	-1.054946172972776e-07	0.0	0.0	-1.2088792664963662e-05	0.0	0.0	-1.3554836799391997e-05	0.0	800.0	-1.2088792664963657e-05	0.0	88.88888888888899	0.0	-1.018563189843068e-20	7.105427357600522e-13	0.0	3.5912452411327096e-19	7.105427357601431e-14
2.53	88.88888888888584	0.0	-2.3364129848223487e-05	224.88888888888968	0.0	-800.0	0.0	-1.052450851054767e-05	0.0	0.9999999999999916	0.0	-1.3142323039625828e-07	0.0	0.0	-1.505999286336211e-05	0.0	0.0	-1.656988639491169e-05	0.0	800.0	-1.5059992863362102e-05	0.0	88.88888888888899	0.0	-4.2652334320058904e-21	-9.473903143467363e-13	0.0	1.4735569336226242e-18	9.473903143478822e-14
2.535	88.88888888888448	0.0	-2.807819775149566e-05	225.3333333333342	0.0	-800.0	0.0	-1.0656999592918976e-05	0.0	0.9999999999999877	0.0	-1.5793986235216512e-07	0.0	0.0	-1.8098575059312525e-05	0.0	0.0	-1.9622891889646365e-05	0.0	800.0	-1.809857505931251e-05	0.0	88.88888888888897	0.0	1.7261666167637663e-21	-7.105427357600522e-13	0.0	6.010202225605739e-19	7.105427357603064e-14
2.54	88.88888888888286	0.0	-3.28119274392103e-05	225.77777777777868	0.0	-800.0	0.0	-1.0620033533777516e-05	0.0	0.9999999999999831	0.0	-1.845670918455611e-07	0.0	0.0	-2.1149830799508287e-05	0.0	0.0	-2.2665307388510856e-05	0.0	800.0	-2.1149830799508274e-05	0.0	88.88888888888897	0.0	-9.819046365033017e-22	-7.105427357600522e-13	0.0	-2.837583782500634e-18	7.105427357657183e-14
2.545	88.88888888888101	0.0	-3.7499159671295e-05	226.22222222222317	0.0	-800.0	0.0	-1.045421977720825e-05	0.0	0.9999999999999779	0.0	-2.1093277315103897e-07	0.0	0.0	-2.417111532509006e-05	0.0	0.0	-2.56602207451922e-05	0.0	800.0	-2.417111532509006e-05	0.0	88.88888888888897	0.0	-1.998021488804684e-20	8.526512829120627e-12	0.0	-9.475349194015429e-20	8.526512829120629e-13
2.55	88.88888888887897	0.0	-4.209154720679147e-05	226.66666666666754	0.0	-800.0	0.0	-1.020759010761664e-05	0.0	0.9999999999999724	0.0	-2.3676495303820876e-07	0.0	0.0	-2.7131265091405263e-05	0.0	0.0	-2.8584479906022015e-05	0.0	800.0	-2.7131265091405226e-05	0.0	88.88888888888907	0.0	-7.66125852044121e-21	2.936909974474883e-11	0.0	-3.2181772082411313e-18	2.9369099744749005e-12
2.555	88.88888888887675	0.0	-4.659259339602217e-05	227.11111111111188	0.0	-800.0	0.0	-1.0083950048789195e-05	0.0	0.9999999999999664	0.0	-2.620833378526338e-07	0.0	0.0	-3.0032538279314703e-05	0.0	0.0	-3.147331879910402e-05	0.0	800.0	-3.0032538279314645e-05	0.0	88.88888888888921	0.0	-4.602345493832986e-20	4.736951571733682e-12	0.0	9.704708097668898e-19	4.736951571733781e-13
2.56	88.88888888887428	0.0	-5.108176138635287e-05	227.5555555555561	0.0	-800.0	0.0	-1.0131262543668905e-05	0.0	0.9999999999999593	0.0	-2.873349077982469e-07	0.0	0.0	-3.292615504724086e-05	0.0	0.0	-3.437571172356023e-05	0.0	800.0	-3.2926155047240796e-05	0.0	88.88888888888916	0.0	-1.623719254428657e-20	1.397400713661436e-11	0.0	-1.1005502503586535e-17	1.3974007136618696e-12
2.565	88.88888888887159	0.0	-5.559487724112278e-05	228.00000000000054	0.0	-800.0	0.0	-1.016585656507632e-05	0.0	0.9999999999999521	0.0	-3.127211844813308e-07	0.0	0.0	-3.583520807022516e-05	0.0	0.0	-3.7288015105131595e-05	0.0	800.0	-3.5835208070225103e-05	0.0	88.88888888888935	0.0	-1.4681593566482703e-19	2.3921605437255093e-11	0.0	-1.666007184704097e-17	2.3921605437260896e-12
2.57	88.88888888886865	0.0	-6.010821260970316e-05	228.444444444445	0.0	-800.0	0.0	-1.0134032701233714e-05	0.0	0.9999999999999439	0.0	-3.3810869592959953e-07	0.0	0.0	-3.8744402586877044e-05	0.0	0.0	-4.019120162127306e-05	0.0	800.0	-3.874440258687697e-05	0.0	88.88888888888935	0.0	-1.5367095411718186e-19	-3.552713678800261e-12	0.0	2.6579683229213604e-18	3.5527136788012557e-13
2.575	88.88888888886551	0.0	-6.459477217454288e-05	228.88888888888948	0.0	-800.0	0.0	-1.004728499416089e-05	0.0	0.999999999999935	0.0	-3.6334559348182763e-07	0.0	0.0	-4.163633802237063e-05	0.0	0.0	-4.306953674992597e-05	0.0	800.0	-4.163633802237056e-05	0.0	88.88888888888935	0.0	-1.4588923669896647e-19	-2.1316282072801568e-12	0.0	-1.0070082105260381e-18	2.1316282072803947e-13
2.58	88.88888888886217	0.0	-6.903265319084057e-05	229.3333333333339	0.0	-800.0	0.0	-9.91676867811534e-06	0.0	0.9999999999999256	0.0	-3.8830867419850733e-07	0.0	0.0	-4.449689635979115e-05	0.0	0.0	-4.591048170824385e-05	0.0	800.0	-4.449689635979108e-05	0.0	88.88888888888934	0.0	-1.6830170019269454e-19	7.342274936187207e-12	0.0	-7.778319951009418e-18	7.342274936191328e-13
2.585	88.88888888885867	0.0	-7.341104901542817e-05	229.77777777777843	0.0	-800.0	0.0	-9.802574365663819e-06	0.0	0.999999999999916	0.0	-4.129371507118186e-07	0.0	0.0	-4.731911187989101e-05	0.0	0.0	-4.871871240582237e-05	0.0	800.0	-4.731911187989091e-05	0.0	88.88888888888941	0.0	-2.0344141163736204e-19	7.342274936187207e-12	0.0	2.79272302814522e-18	7.342274936187739e-13
2.59	88.88888888885499	0.0	-7.77669772223715e-05	230.222222222223	0.0	-800.0	0.0	-9.822263745039833e-06	0.0	0.9999999999999054	0.0	-4.3743924687588156e-07	0.0	0.0	-5.012684527874024e-05	0.0	0.0	-5.1532583695098285e-05	0.0	800.0	-5.012684527874012e-05	0.0	88.8888888888894	0.0	-1.4738915656374978e-19	-1.1842378929334204e-11	0.0	4.866067578336697e-18	1.1842378929335202e-12
2.595	88.88888888885104	0.0	-8.21548515004918e-05	230.66666666666745	0.0	-800.0	0.0	-9.926918767428346e-06	0.0	0.9999999999998941	0.0	-4.6212103969031557e-07	0.0	0.0	-5.29551703969073e-05	0.0	0.0	-5.4376436439812746e-05	0.0	800.0	-5.295517039690721e-05	0.0	88.88888888888931	0.0	-1.4615226935613296e-19	-2.202682480856162e-11	0.0	1.7046296269979692e-17	2.202682480856822e-12
2.6	88.88888888884688	0.0	-8.658662730975743e-05	231.11111111111202	0.0	-800.0	0.0	-1.0006667888471935e-05	0.0	0.9999999999998819	0.0	-4.870497786174431e-07	0.0	0.0	-5.581179345512339e-05	0.0	0.0	-5.724313562480558e-05	0.0	800.0	-5.5811793455123285e-05	0.0	88.88888888888921	0.0	-1.9526166430833502e-21	4.736951571733681e-13	0.0	9.257564190521607e-18	4.7369515726382986e-14
2.605	88.88888888884243	0.0	-9.104293690894826e-05	231.55555555555654	0.0	-800.0	0.0	-1.0044065781784138e-05	0.0	0.9999999999998695	0.0	-5.121165201129008e-07	0.0	0.0	-5.868423044279412e-05	0.0	0.0	-6.012054851704577e-05	0.0	800.0	-5.8684230442794e-05	0.0	88.8888888888893	0.0	-6.272686847088119e-20	-9.473903143467363e-13	0.0	-6.09910970707863e-18	9.473903143663687e-14
2.61	88.88888888883771	0.0	-9.551778261750147e-05	232.00000000000108	0.0	-800.0	0.0	-1.0101028114346314e-05	0.0	0.9999999999998561	0.0	-5.37287527223523e-07	0.0	0.0	-6.156861538985937e-05	0.0	0.0	-6.301427991552113e-05	0.0	800.0	-6.156861538985927e-05	0.0	88.8888888888892	0.0	-3.54398009130696e-20	-2.6053233644535247e-12	0.0	1.9747960839826617e-18	2.605323364454273e-13
2.615	88.88888888883277	0.0	-0.00010002997198384999	232.44444444444585	0.0	-800.0	0.0	-1.0211762497455088e-05	0.0	0.9999999999998423	0.0	-5.62668592409245e-07	0.0	0.0	-6.447707121923643e-05	0.0	0.0	-6.593973437799207e-05	0.0	800.0	-6.447707121923629e-05	0.0	88.88888888888928	0.0	-4.810316109128043e-20	2.6053233644535247e-12	0.0	4.078397829756542e-18	2.6053233644567166e-13
2.62	88.88888888882751	0.0	-0.00010459866306729283	232.88888888889056	0.0	-800.0	0.0	-1.0347743450109588e-05	0.0	0.9999999999998274	0.0	-5.883674797536237e-07	0.0	0.0	-6.742194678526701e-05	0.0	0.0	-6.890414451386938e-05	0.0	800.0	-6.74219467852669e-05	0.0	88.88888888888921	0.0	-3.450722645244914e-21	-1.0421293457814099e-11	0.0	1.5927810300742606e-18	1.042129345781422e-12
2.625	88.88888888882194	0.0	-0.00010922627420754185	233.33333333333516	0.0	-800.0	0.0	-1.0473913242622083e-05	0.0	0.9999999999998117	0.0	-6.143977924175384e-07	0.0	0.0	-7.040480089536405e-05	0.0	0.0	-7.190469963281172e-05	0.0	800.0	-7.040480089536396e-05	0.0	88.88888888888921	0.0	-5.1518112113692766e-20	1.3737159558027676e-11	0.0	-2.1522117946978062e-17	1.3737159558044536e-12
2.63	88.88888888881606	0.0	-0.00011390773153071012	233.77777777777976	0.0	-800.0	0.0	-1.0593531427764917e-05	0.0	0.9999999999997955	0.0	-6.407309898603754e-07	0.0	0.0	-7.342236304448319e-05	0.0	0.0	-7.493952283756256e-05	0.0	800.0	-7.342236304448307e-05	0.0	88.88888888888931	0.0	-1.583262708968304e-19	-7.105427357600522e-13	0.0	7.406386586143132e-18	7.105427357986526e-14
2.635	88.88888888880987	0.0	-0.00011864526078076955	234.22222222222425	0.0	-800.0	0.0	-1.0729386636168338e-05	0.0	0.9999999999997777	0.0	-6.67379591891977e-07	0.0	0.0	-7.647606789715287e-05	0.0	0.0	-7.801326569264533e-05	0.0	800.0	-7.647606789715273e-05	0.0	88.88888888888921	0.0	4.21952971480652e-21	-8.289665250533942e-12	0.0	1.8546307553789744e-17	8.28966525055469e-13
2.64	88.88888888880334	0.0	-0.00012344842528977027	234.6666666666687	0.0	-800.0	0.0	-1.0887887729927853e-05	0.0	0.9999999999997594	0.0	-6.943973922551249e-07	0.0	0.0	-7.957207976222438e-05	0.0	0.0	-8.113241576633124e-05	0.0	800.0	-7.957207976222423e-05	0.0	88.88888888888924	0.0	-1.9327831858684618e-21	-4.736951571733682e-12	0.0	5.870509997397063e-18	4.73695157173732e-13
2.645	88.88888888879643	0.0	-0.00012832496431495455	235.1111111111132	0.0	-800.0	0.0	-1.1057261185455956e-05	0.0	0.9999999999997398	0.0	-7.21827924271807e-07	0.0	0.0	-8.271538719093389e-05	0.0	0.0	-8.430008776083369e-05	0.0	800.0	-8.271538719093374e-05	0.0	88.88888888888916	0.0	8.685133634654311e-20	-1.7763568394001306e-11	0.0	1.828008284743336e-17	1.7763568394010712e-12
2.65	88.88888888878914	0.0	-0.00013327743785437272	235.55555555555776	0.0	-800.0	0.0	-1.1229434396721402e-05	0.0	0.9999999999997191	0.0	-7.496855879310569e-07	0.0	0.0	-8.590764030047471e-05	0.0	0.0	-8.751708374708977e-05	0.0	800.0	-8.590764030047458e-05	0.0	88.8888888888891	0.0	1.5049758231321478e-19	-2.1316282072801568e-12	0.0	4.1213201094491166e-18	2.1316282072841409e-13
2.655	88.88888888878147	0.0	-0.00013830781989951243	236.0000000000023	0.0	-800.0	0.0	-1.1409360068671406e-05	0.0	0.9999999999996976	0.0	-7.779814869349924e-07	0.0	0.0	-8.915011148138354e-05	0.0	0.0	-9.078562464148981e-05	0.0	800.0	-8.91501114813834e-05	0.0	88.88888888888913	0.0	1.2685748286139664e-19	7.815970093360574e-12	0.0	-9.973763902325451e-18	7.815970093366936e-13
2.66	88.88888888877337	0.0	-0.00014342143603757383	236.44444444444676	0.0	-800.0	0.0	-1.16048171714717e-05	0.0	0.9999999999996748	0.0	-8.067455777116146e-07	0.0	0.0	-9.244623348744783e-05	0.0	0.0	-9.411015987122141e-05	0.0	800.0	-9.244623348744771e-05	0.0	88.88888888888916	0.0	7.083718236599597e-20	1.1842378929334205e-12	0.0	-8.70570311474422e-18	1.1842378929654196e-13
2.665	88.88888888876482	0.0	-0.00014862566259806086	236.8888888888912	0.0	-800.0	0.0	-1.1816643222666838e-05	0.0	0.9999999999996507	0.0	-8.360193521143835e-07	0.0	0.0	-9.580076093484248e-05	0.0	0.0	-9.749537879457503e-05	0.0	800.0	-9.580076093484237e-05	0.0	88.88888888888914	0.0	4.7993970908360114e-20	-2.3684757858668407e-13	0.0	-3.860846898713458e-18	2.368475786181519e-14
2.67	88.88888888875582	0.0	-0.0001539269930139972	237.33333333333556	0.0	-800.0	0.0	-1.2041236042145211e-05	0.0	0.9999999999996253	0.0	-8.658393357040575e-07	0.0	0.0	-9.92178793445191e-05	0.0	0.0	-0.00010094493882125392	0.0	800.0	-9.921787934451902e-05	0.0	88.88888888888914	0.0	4.193167357361104e-20	-9.237055564880679e-12	0.0	1.1427016095291844e-17	9.237055564887747e-13
2.675	88.8888888887463	0.0	-0.0001593306933558314	237.77777777777985	0.0	-800.0	0.0	-1.227751647169106e-05	0.0	0.9999999999995983	0.0	-8.9623515012691e-07	0.0	0.0	-0.00010270098310710509	0.0	0.0	-0.0001044621882049054	0.0	800.0	-0.00010270098310710503	0.0	88.88888888888907	0.0	1.2726422644514034e-19	-3.789561257386945e-12	0.0	-2.6084607254718916e-18	3.789561257387843e-13
2.68	88.88888888873623	0.0	-0.00016484245915832608	238.2222222222243	0.0	-800.0	0.0	-1.252807761054043e-05	0.0	0.9999999999995702	0.0	-9.272388327659812e-07	0.0	0.0	-0.00010625374343627019	0.0	0.0	-0.00010805121806738719	0.0	800.0	-0.00010625374343627013	0.0	88.88888888888911	0.0	1.9378260942680852e-20	7.57912251477389e-12	0.0	-1.2473852662487852e-17	7.579122514784156e-13
2.685	88.88888888872562	0.0	-0.00017046924809103973	238.66666666666873	0.0	-800.0	0.0	-1.2795315985232116e-05	0.0	0.9999999999995404	0.0	-9.588895205125377e-07	0.0	0.0	-0.00010988064508940004	0.0	0.0	-0.00011171680608483782	0.0	800.0	-0.00010988064508939996	0.0	88.88888888888911	0.0	2.4074313389242688e-20	-8.76336040770731e-12	0.0	-6.4893960696836474e-18	8.763360407709713e-13
2.69	88.88888888871439	0.0	-0.00017621853696522544	239.11111111111313	0.0	-800.0	0.0	-1.307914791288856e-05	0.0	0.9999999999995087	0.0	-9.91229270429878e-07	0.0	0.0	-0.00011358650745094606	0.0	0.0	-0.00011546370596001735	0.0	800.0	-0.00011358650745094611	0.0	88.88888888888906	0.0	-3.5156471124248526e-20	-4.736951571733681e-13	0.0	6.594984875846842e-18	4.736951572192773e-14
2.695	88.88888888870257	0.0	-0.00018209744436073548	239.55555555555748	0.0	-800.0	0.0	-1.3378460853724036e-05	0.0	0.9999999999994754	0.0	-1.0242981245296724e-06	0.0	0.0	-0.00011737591899745223	0.0	0.0	-0.00011929635267651449	0.0	800.0	-0.00011737591899745219	0.0	88.8888888888891	0.0	8.035013409075041e-20	3.3158661002135772e-12	0.0	1.318975357137773e-17	3.3158661002398106e-13
2.7	88.88888888869003	0.0	-0.00018811277097106167	240.00000000000182	0.0	-800.0	0.0	-1.3693124858139157e-05	0.0	0.9999999999994401	0.0	-1.0581343367128122e-06	0.0	0.0	-0.00012125326330306041	0.0	0.0	-0.0001232191439901	0.0	800.0	-0.00012125326330306038	0.0	88.88888888888907	0.0	7.388573400390537e-20	-3.3158661002135772e-12	0.0	6.872691693687612e-19	3.3158661002136487e-13
2.705	88.88888888867679	0.0	-0.00019427150674160667	240.44444444444616	0.0	-800.0	0.0	-1.4023946094144031e-05	0.0	0.9999999999994029	0.0	-1.0927772254221881e-06	0.0	0.0	-0.00012522304592944	0.0	0.0	-0.0001272367086066674	0.0	800.0	-0.00012522304592943996	0.0	88.88888888888908	0.0	1.050267401317566e-19	3.079018521626893e-12	0.0	5.158460212419663e-18	3.0790185216312147e-13
2.71	88.88888888866279	0.0	-0.0002005809726931283	240.88888888889053	0.0	-800.0	0.0	-1.4371420654152714e-05	0.0	0.9999999999993635	0.0	-1.1282679713995628e-06	0.0	0.0	-0.0001292899858419915	0.0	0.0	-0.00013135381735211813	0.0	800.0	-0.0001292899858419914	0.0	88.8888888888891	0.0	1.210202270416725e-19	2.6053233644535247e-12	0.0	2.33653002743404e-18	2.6053233644545724e-13
2.715	88.88888888864797	0.0	-0.00020704852675738845	241.3333333333349	0.0	-800.0	0.0	-1.4735249588938235e-05	0.0	0.9999999999993218	0.0	-1.1646479630110977e-06	0.0	0.0	-0.00013345882579811878	0.0	0.0	-0.00013557515540970862	0.0	800.0	-0.0001334588257981187	0.0	88.8888888888891	0.0	1.4791846564768683e-19	-8.526512829120627e-12	0.0	1.9344449116677806e-17	8.526512829142572e-13
2.72	88.88888888863227	0.0	-0.00021368131669989866	241.77777777777936	0.0	-800.0	0.0	-1.5114918127342734e-05	0.0	0.9999999999992775	0.0	-1.2019574064377961e-06	0.0	0.0	-0.00013773417308678563	0.0	0.0	-0.00013990526049162153	0.0	800.0	-0.00013773417308678555	0.0	88.88888888888903	0.0	2.7682773648529537e-19	-6.39488462184047e-12	0.0	4.905529039142324e-18	6.394884621842352e-13
2.725	88.88888888861563	0.0	-0.00022048633047340373	242.2222222222238	0.0	-800.0	0.0	-1.5510262733873136e-05	0.0	0.9999999999992308	0.0	-1.240235608913848e-06	0.0	0.0	-0.00014212053198523888	0.0	0.0	-0.0001443486234605717	0.0	800.0	-0.00014212053198523882	0.0	88.88888888888906	0.0	1.90819868679993e-19	6.868579779013838e-12	0.0	-1.4497402888769846e-17	6.868579779029138e-13
2.73	88.88888888859803	0.0	-0.00022747055372751421	242.66666666666828	0.0	-800.0	0.0	-1.592137532336421e-05	0.0	0.9999999999991814	0.0	-1.279521864718313e-06	0.0	0.0	-0.00014662240528617683	0.0	0.0	-0.00014890976151093454	0.0	800.0	-0.00014662240528617672	0.0	88.88888888888908	0.0	1.6989970895156262e-19	5.684341886080418e-12	0.0	-2.760954351543314e-18	5.684341886081088e-13
2.735	88.8888888885794	0.0	-0.00023464099681672936	243.11111111111276	0.0	-800.0	0.0	-1.6348225005501986e-05	0.0	0.999999999999129	0.0	-1.3198556070952504e-06	0.0	0.0	-0.00015124431170651366	0.0	0.0	-0.00015359318298766237	0.0	800.0	-0.00015124431170651352	0.0	88.8888888888891	0.0	1.623384187040742e-19	-1.4210854715201044e-12	0.0	5.886984950590344e-18	1.421085471532298e-13
2.74	88.88888888855966	0.0	-0.00024200460350109158	243.55555555555728	0.0	-800.0	0.0	-1.6790560017944558e-05	0.0	0.9999999999990734	0.0	-1.3612758946948993e-06	0.0	0.0	-0.0001559907270378738	0.0	0.0	-0.00015840332411110934	0.0	800.0	-0.0001559907270378737	0.0	88.88888888888908	0.0	2.14633397770555e-19	9.473903143467363e-13	0.0	4.268915741588268e-18	9.473903143563541e-14
2.745	88.88888888853874	0.0	-0.0002495681914374683	244.00000000000165	0.0	-800.0	0.0	-1.72481037201821e-05	0.0	0.9999999999990147	0.0	-1.4038210768371403e-06	0.0	0.0	-0.00016086604578861003	0.0	0.0	-0.0001633445418499613	0.0	800.0	-0.00016086604578860987	0.0	88.8888888888891	0.0	1.9547028219648752e-19	-2.6053233644535247e-12	0.0	-1.6806730915504197e-18	2.605323364454067e-13
2.75	88.88888888851659	0.0	-0.0002573384817253877	244.44444444444608	0.0	-800.0	0.0	-1.7720705828052784e-05	0.0	0.9999999999989523	0.0	-1.4475289597068196e-06	0.0	0.0	-0.00016587460022838465	0.0	0.0	-0.00016842115011966318	0.0	800.0	-0.00016587460022838456	0.0	88.88888888888907	0.0	1.7881967239555565e-19	-9.473903143467363e-13	0.0	-2.591664078664922e-17	9.473903147012219e-14
2.755	88.88888888849311	0.0	-0.0002653221500048592	244.8888888888905	0.0	-800.0	0.0	-1.8208291612835183e-05	0.0	0.9999999999988863	0.0	-1.4924370937789917e-06	0.0	0.0	-0.00017102069332467642	0.0	0.0	-0.0001736374414274581	0.0	800.0	-0.00017102069332467642	0.0	88.8888888888891	0.0	-2.333099880288847e-20	3.079018521626893e-12	0.0	-1.3439281642166626e-17	3.079018521656223e-13
2.76	88.88888888846826	0.0	-0.00027352583324158017	245.33333333333493	0.0	-800.0	0.0	-1.8710748189169557e-05	0.0	0.9999999999988164	0.0	-1.5385828119857062e-06	0.0	0.0	-0.000176308603116372	0.0	0.0	-0.00017899767594131577	0.0	800.0	-0.00017630860311637194	0.0	88.8888888888891	0.0	1.9221596974605224e-20	4.500103993146998e-12	0.0	-2.8203955305632785e-17	4.50010399323538e-13
2.765	88.8888888884419	0.0	-0.0002819561038604154	245.7777777777794	0.0	-800.0	0.0	-1.922790427443909e-05	0.0	0.9999999999987425	0.0	-1.5860030842168274e-06	0.0	0.0	-0.00018174256604078798	0.0	0.0	-0.00018450606476035073	0.0	800.0	-0.00018174256604078804	0.0	88.88888888888913	0.0	-2.749574226410639e-19	-4.500103993146998e-12	0.0	-1.8697299567246503e-17	4.5001039931858397e-13
2.77	88.88888888841399	0.0	-0.0002906194559032897	246.22222222222388	0.0	-800.0	0.0	-1.9759589156761163e-05	0.0	0.9999999999986638	0.0	-1.634734439458185e-06	0.0	0.0	-0.0001873267680113602	0.0	0.0	-0.0001901667700783255	0.0	800.0	-0.00018732676801136027	0.0	88.88888888888907	0.0	-1.4195439997176657e-19	-7.105427357600522e-13	0.0	1.4486374922915676e-17	7.105427359077246e-14
2.775	88.88888888838444	0.0	-0.00029952231572991507	246.66666666666828	0.0	-800.0	0.0	-2.0305669834599272e-05	0.0	0.9999999999985808	0.0	-1.6848130259831593e-06	0.0	0.0	-0.0001930653513150916	0.0	0.0	-0.00019598391598686914	0.0	800.0	-0.00019306535131509168	0.0	88.88888888888913	0.0	-1.9090100033899687e-19	5.447494307493734e-12	0.0	-5.1525860603724554e-18	5.44749430749617e-13
2.78	88.88888888835314	0.0	-0.00030867105574881946	247.1111111111127	0.0	-800.0	0.0	-2.0866029920941934e-05	0.0	0.9999999999984928	0.0	-1.7362746885897224e-06	0.0	0.0	-0.00019896242346326482	0.0	0.0	-0.00020196159323518787	0.0	800.0	-0.00019896242346326484	0.0	88.88888888888911	0.0	-1.775095199838578e-19	7.105427357600522e-13	0.0	-7.106025792428497e-18	7.105427357955854e-14
2.785	88.88888888832	0.0	-0.0003180719938555893	247.5555555555572	0.0	-800.0	0.0	-2.1440537115999323e-05	0.0	0.9999999999983996	0.0	-1.7891549654405492e-06	0.0	0.0	-0.00020502205682934566	0.0	0.0	-0.00020810385467139007	0.0	800.0	-0.0002050220568293457	0.0	88.88888888888913	0.0	-2.5024321911542534e-19	-4.026408835973629e-12	0.0	4.46766444330196e-19	4.0264088359736545e-13
2.79	88.88888888828491	0.0	-0.0003277313842181929	248.00000000000162	0.0	-800.0	0.0	-2.2029038726017986e-05	0.0	0.9999999999983008	0.0	-1.8434890362304627e-06	0.0	0.0	-0.0002112482827094101	0.0	0.0	-0.00021441470940004588	0.0	800.0	-0.0002112482827094102	0.0	88.88888888888908	0.0	-1.9033060263745588e-19	7.105427357600522e-12	0.0	-1.1175836754484374e-17	7.105427357609312e-13
2.795	88.88888888824778	0.0	-0.0003376554116276775	248.44444444444602	0.0	-800.0	0.0	-2.263137806673792e-05	0.0	0.9999999999981966	0.0	-1.8993116904091072e-06	0.0	0.0	-0.00021764508768073066	0.0	0.0	-0.00022089812163899144	0.0	800.0	-0.00021764508768073063	0.0	88.88888888888918	0.0	-3.202756482275953e-19	5.447494307493734e-12	0.0	1.3482000943555585e-17	5.447494307510417e-13
2.8	88.88888888820847	0.0	-0.00034785019200012475	248.88888888889045	0.0	-800.0	0.0	-2.3247401452778467e-05	0.0	0.9999999999980859	0.0	-1.956657330004443e-06	0.0	0.0	-0.00022421641392532496	0.0	0.0	-0.0002275580115784444	0.0	800.0	-0.0002242164139253249	0.0	88.88888888888913	0.0	-6.72187476121096e-20	-8.526512829120627e-12	0.0	3.181142464067086e-17	8.526512829179969e-13
2.805	88.88888888816687	0.0	-0.00035832177233401037	249.3333333333349	0.0	-800.0	0.0	-2.3876950480182166e-05	0.0	0.9999999999979688	0.0	-2.0155599693828976e-06	0.0	0.0	-0.00023096615920247134	0.0	0.0	-0.00023439825402923138	0.0	800.0	-0.00023096615920247134	0.0	88.88888888888913	0.0	-7.426843552604496e-20	-3.079018521626893e-12	0.0	-1.3682186033626663e-17	3.079018521657293e-13
2.81	88.88888888812286	0.0	-0.0003690761261177496	249.77777777777933	0.0	-800.0	0.0	-2.4519851435676223e-05	0.0	0.9999999999978451	0.0	-2.07605320941681e-06	0.0	0.0	-0.00023789817388851587	0.0	0.0	-0.00024142267403699205	0.0	800.0	-0.00023789817388851592	0.0	88.8888888888891	0.0	-1.3095837946543365e-19	-4.026408835973629e-12	0.0	1.1381292903731077e-17	4.026408835989715e-13
2.815	88.88888888807632	0.0	-0.0003801191456688581	250.22222222222376	0.0	-800.0	0.0	-2.5175913283990086e-05	0.0	0.9999999999977142	0.0	-2.13817019439221e-06	0.0	0.0	-0.00024501625603886754	0.0	0.0	-0.00024863504191979243	0.0	800.0	-0.00024501625603886754	0.0	88.8888888888891	0.0	-9.261541036532434e-21	1.6579330501067886e-12	0.0	-1.3224605475120212e-17	1.6579330501595321e-13
2.82	88.88888888802711	0.0	-0.0003914566350427269	250.6666666666682	0.0	-800.0	0.0	-2.584493014942569e-05	0.0	0.9999999999975758	0.0	-2.201943572120672e-06	0.0	0.0	-0.0002523241468171537	0.0	0.0	-0.00025603906901665546	0.0	800.0	-0.0002523241468171537	0.0	88.88888888888911	0.0	-2.3004116591992016e-19	-7.105427357600522e-13	0.0	-1.0504608181499913e-17	7.105427358377019e-14
2.825	88.8888888879751	0.0	-0.00040309430345522373	251.11111111111268	0.0	-800.0	0.0	-2.6526680574860743e-05	0.0	0.9999999999974295	0.0	-2.267405456941457e-06	0.0	0.0	-0.00025982552625557746	0.0	0.0	-0.0002636384032238119	0.0	800.0	-0.0002598255262555774	0.0	88.8888888888891	0.0	-7.345439865467098e-20	-7.105427357600522e-13	0.0	3.6402095504526816e-17	7.105427366925174e-14
2.83	88.88888888792015	0.0	-0.00041503775749742025	251.5555555555571	0.0	-800.0	0.0	-2.7220923395502514e-05	0.0	0.999999999997275	0.0	-2.3345873859293463e-06	0.0	0.0	-0.00026752400823670515	0.0	0.0	-0.0002714366233488685	0.0	800.0	-0.00026752400823670504	0.0	88.88888888888911	0.0	-1.4224749520504657e-20	7.105427357600522e-12	0.0	-5.011315033832608e-17	7.105427357777241e-13
2.835	88.88888888786208	0.0	-0.0004272924913922174	252.00000000000153	0.0	-800.0	0.0	-2.7927393608487148e-05	0.0	0.9999999999971118	0.0	-2.403520264088159e-06	0.0	0.0	-0.00027542313421310635	0.0	0.0	-0.0002794372322817038	0.0	800.0	-0.0002754231342131064	0.0	88.88888888888916	0.0	-4.668559401129648e-19	1.1842378929334205e-12	0.0	-4.491732425308547e-17	1.1842378937852622e-13
2.84	88.88888888780076	0.0	-0.0004398638758899151	252.44444444444596	0.0	-800.0	0.0	-2.8645800458403036e-05	0.0	0.9999999999969392	0.0	-2.474234301888339e-06	0.0	0.0	-0.0002835263660496882	0.0	0.0	-0.0002876436496169064	0.0	800.0	-0.0002835263660496883	0.0	88.88888888888913	0.0	-3.704644772865032e-19	-2.368475785866841e-12	0.0	3.531237847289064e-17	2.368475786130083e-13
2.845	88.88888888773603	0.0	-0.00045275714665243485	252.88888888889042	0.0	-800.0	0.0	-2.9375826661529048e-05	0.0	0.9999999999967571	0.0	-2.546758949928199e-06	0.0	0.0	-0.0002918370785364259	0.0	0.0	-0.00029605920405397445	0.0	800.0	-0.0002918370785364258	0.0	88.88888888888914	0.0	-2.283327655973491e-19	2.1316282072801568e-12	0.0	1.8635694049753547e-17	2.131628207361618e-13
2.85	88.8888888876677	0.0	-0.00046597739222633124	253.33333333333485	0.0	-800.0	0.0	-3.0117127215207742e-05	0.0	0.999999999996565	0.0	-2.621122831282111e-06	0.0	0.0	-0.00030035855163603576	0.0	0.0	-0.00030468712545642497	0.0	800.0	-0.00030035855163603576	0.0	88.88888888888914	0.0	-2.2478206176916047e-19	-2.3684757858668407e-13	0.0	-2.210637494236559e-17	2.3684757961834296e-14
2.855	88.88888888759595	0.0	-0.0004794649564034571	253.7777777777793	0.0	-800.0	0.0	-3.00618170693014e-05	0.0	0.9999999999963634	0.0	-2.696990379779249e-06	0.0	0.0	-0.00030905233229784677	0.0	0.0	-0.0003132992016692521	0.0	800.0	-0.00030905233229784677	0.0	88.88888888888914	0.0	-4.195382589595113e-19	3.789561257386945e-12	0.0	-4.415914020874663e-17	3.789561257644235e-13
2.86	88.88888888752436	0.0	-0.0004925590134857251	254.22222222222368	0.0	-800.0	0.0	-2.896390358818025e-05	0.0	0.9999999999961621	0.0	-2.7706444508678317e-06	0.0	0.0	-0.000317492467132543	0.0	0.0	-0.0003215967488383854	0.0	800.0	-0.00031749246713254294	0.0	88.88888888888917	0.0	-5.737259276417759e-19	-1.8947806286934726e-12	0.0	7.97259005678546e-18	1.8947806287102454e-13
2.865	88.88888888745285	0.0	-0.0005052967010860167	254.6666666666681	0.0	-800.0	0.0	-2.844653485886063e-05	0.0	0.9999999999959609	0.0	-2.8422939436203195e-06	0.0	0.0	-0.00032570289421051676	0.0	0.0	-0.0003297460807843084	0.0	800.0	-0.0003257028942105167	0.0	88.88888888888913	0.0	-3.7033528005329587e-19	-7.57912251477389e-12	0.0	3.2603150989332034e-17	7.579122514844015e-13
2.87	88.88888888738019	0.0	-0.000517919886364706	255.11111111111256	0.0	-800.0	0.0	-2.8435706453567098e-05	0.0	0.9999999999957565	0.0	-2.9132993608138283e-06	0.0	0.0	-0.00033383951566605787	0.0	0.0	-0.0003378923106206205	0.0	800.0	-0.00033383951566605787	0.0	88.88888888888911	0.0	-3.0951363392659695e-19	-1.4210854715201044e-12	0.0	9.890335410962204e-18	1.4210854715545215e-13
2.875	88.8888888873052	0.0	-0.0005306360960967133	255.55555555555705	0.0	-800.0	0.0	-2.8851600784749646e-05	0.0	0.9999999999955456	0.0	-2.9848280405573026e-06	0.0	0.0	-0.0003420360985929814	0.0	0.0	-0.00034615768540643347	0.0	800.0	-0.00034203609859298137	0.0	88.88888888888911	0.0	-2.620289685981335e-19	-2.3684757858668407e-13	0.0	6.928053328868233e-19	2.3684757858769735e-14
2.88	88.88888888722676	0.0	-0.0005436170081673166	256.00000000000153	0.0	-800.0	0.0	-2.96135567757885e-05	0.0	0.999999999995325	0.0	-3.057845670955446e-06	0.0	0.0	-0.0003504033026967392	0.0	0.0	-0.00035464134450455265	0.0	800.0	-0.0003504033026967391	0.0	88.88888888888911	0.0	-3.006955606582491e-19	5.2106467289070494e-12	0.0	-9.282461755765383e-18	5.210646728915317e-13
2.885	88.88888888714392	0.0	-0.00055699899937422	256.44444444444605	0.0	-800.0	0.0	-3.0643930123726484e-05	0.0	0.999999999995092	0.0	-3.13311937149536e-06	0.0	0.0	-0.00035902903339531795	0.0	0.0	-0.0003634201838234699	0.0	800.0	-0.0003590290333953178	0.0	88.88888888888916	0.0	-3.4135901387972524e-19	5.2106467289070494e-12	0.0	-6.7931649220921536e-18	5.210646728911478e-13
2.89	88.88888888705583	0.0	-0.0005708851422338217	256.88888888889056	0.0	-800.0	0.0	-3.1870848436683483e-05	0.0	0.9999999999948442	0.0	-3.2112289250817976e-06	0.0	0.0	-0.00036797972891567055	0.0	0.0	-0.00037255050934808593	0.0	800.0	-0.0003679797289156705	0.0	88.88888888888916	0.0	-3.872062908333702e-19	-4.2632564145603135e-12	0.0	-2.4754670087479638e-17	4.263256414632183e-13
2.895	88.88888888696175	0.0	-0.000585348222067899	257.3333333333351	0.0	-800.0	0.0	-3.323017865545954e-05	0.0	0.9999999999945797	0.0	-3.2925837491497722e-06	0.0	0.0	-0.0003773023050399684	0.0	0.0	-0.0003820702542952043	0.0	800.0	-0.0003773023050399684	0.0	88.88888888888913	0.0	-5.465249146735456e-19	2.3684757858668407e-13	0.0	-5.46570650108277e-18	2.3684757864974984e-14
2.9	88.88888888686114	0.0	-0.0006004344624945889	257.7777777777796	0.0	-800.0	0.0	-3.4666634770640514e-05	0.0	0.9999999999942967	0.0	-3.3774438515513193e-06	0.0	0.0	-0.00038702655647333573	0.0	0.0	-0.00039200151360660083	0.0	800.0	-0.0003870265564733357	0.0	88.88888888888916	0.0	-4.567425617599337e-19	5.921189464667102e-12	0.0	-2.801039707071334e-18	5.921189464667765e-13
2.905	88.88888888675346	0.0	-0.000616167583482359	258.2222222222241	0.0	-800.0	0.0	-3.613426985675386e-05	0.0	0.9999999999939939	0.0	-3.4659426571090802e-06	0.0	0.0	-0.00039716777257421237	0.0	0.0	-0.00040235321939949547	0.0	800.0	-0.00039716777257421226	0.0	88.88888888888917	0.0	-5.697067912272445e-19	-5.921189464667102e-12	0.0	9.097514220748789e-18	5.921189464674092e-13
2.91	88.88888888663837	0.0	-0.000632552957870305	258.6666666666686	0.0	-800.0	0.0	-3.7596424486915227e-05	0.0	0.9999999999936701	0.0	-3.558110388042981e-06	0.0	0.0	-0.0004077294165538972	0.0	0.0	-0.0004131238016389089	0.0	800.0	-0.00040772941655389724	0.0	88.88888888888911	0.0	-4.0459892083866988e-19	-3.552713678800261e-12	0.0	-1.0408952607074013e-17	3.5527136788155097e-13
2.915	88.88888888651555	0.0	-0.0006495816501002348	259.1111111111131	0.0	-800.0	0.0	-3.9025261838990126e-05	0.0	0.9999999999933248	0.0	-3.653896781838205e-06	0.0	0.0	-0.0004187057287524575	0.0	0.0	-0.00042430371562774506	0.0	800.0	-0.0004187057287524575	0.0	88.88888888888914	0.0	-6.752266405483993e-19	6.158037043253786e-12	0.0	-2.2635829529631533e-17	6.158037043295388e-13
2.92	88.88888888638479	0.0	-0.0006672341754038758	259.5555555555576	0.0	-800.0	0.0	-4.040100143630107e-05	0.0	0.9999999999929571	0.0	-3.7531922366732287e-06	0.0	0.0	-0.00043008414972629306	0.0	0.0	-0.00043587774997975597	0.0	800.0	-0.000430084149726293	0.0	88.88888888888916	0.0	-6.763641999046892e-19	-4.736951571733681e-13	0.0	-7.702494228776929e-17	4.736951634356674e-14
2.925	88.88888888624594	0.0	-0.0006854833534589436	260.000000000002	0.0	-800.0	0.0	-4.1694617044289834e-05	0.0	0.9999999999925665	0.0	-3.85584386323521e-06	0.0	0.0	-0.00044184715965068724	0.0	0.0	-0.00044782237790501697	0.0	800.0	-0.0004418471596506876	0.0	88.88888888888916	0.0	-1.3856792519774154e-18	5.684341886080418e-12	0.0	-8.764850374130752e-17	5.684341886756157e-13
2.93	88.88888888609911	0.0	-0.0007042657894677263	260.44444444444645	0.0	-800.0	0.0	-4.2813209628315776e-05	0.0	0.9999999999921537	0.0	-3.9614950657870345e-06	0.0	0.0	-0.0004539538956641825	0.0	0.0	-0.00046008745900057456	0.0	800.0	-0.00045395389566418263	0.0	88.88888888888921	0.0	-1.466723275004329e-18	1.3500311979440992e-11	0.0	-2.92385096400816e-17	1.3500311979472656e-12
2.935	88.88888888594441	0.0	-0.0007235288432182952	260.88888888889085	0.0	-800.0	0.0	-4.385961305354793e-05	0.0	0.9999999999917187	0.0	-4.069849743136605e-06	0.0	0.0	-0.00046637042706954707	0.0	0.0	-0.00047265231259580135	0.0	800.0	-0.0004663704270695472	0.0	88.88888888888927	0.0	-1.739189016866712e-18	9.710750722054047e-12	0.0	-3.631887531169734e-17	9.710750722121965e-13
2.94	88.88888888578177	0.0	-0.0007432433858980646	261.33333333333536	0.0	-800.0	0.0	-4.4847099936157724e-05	0.0	0.9999999999912613	0.0	-4.180744045713139e-06	0.0	0.0	-0.00047907797808901945	0.0	0.0	-0.00048550006034451854	0.0	800.0	-0.00047907797808901945	0.0	88.8888888888893	0.0	-1.7501317406140474e-18	-7.105427357600522e-13	0.0	3.830503710308903e-17	7.105427367925558e-14
2.945	88.88888888561107	0.0	-0.0007633860851679118	261.7777777777798	0.0	-800.0	0.0	-4.578833141774856e-05	0.0	0.9999999999907812	0.0	-4.294046729109082e-06	0.0	0.0	-0.0004920615092213251	0.0	0.0	-0.0004986174510504357	0.0	800.0	-0.000492061509221325	0.0	88.88888888888928	0.0	-1.4738144581531735e-18	2.1316282072801568e-12	0.0	8.802895360933994e-18	2.1316282072983335e-13
2.95	88.88888888543218	0.0	-0.0007839389425877653	262.2222222222242	0.0	-800.0	0.0	-4.669452242759111e-05	0.0	0.9999999999902781	0.0	-4.409656552099042e-06	0.0	0.0	-0.000505309419076609	0.0	0.0	-0.0005119944463578363	0.0	800.0	-0.0005053094190766088	0.0	88.88888888888931	0.0	-1.6420290314815177e-18	7.105427357600522e-13	0.0	7.675693357204501e-18	7.105427358015108e-14
2.955	88.88888888524495	0.0	-0.0008048885226521228	262.6666666666686	0.0	-800.0	0.0	-4.75749620001471e-05	0.0	0.9999999999897514	0.0	-4.527497939964583e-06	0.0	0.0	-0.0005188130474300632	0.0	0.0	-0.0005256236690233557	0.0	800.0	-0.0005188130474300629	0.0	88.88888888888928	0.0	-1.4025410654625501e-18	-3.3158661002135772e-12	0.0	-5.528888483659793e-18	3.315866100218187e-13
2.96	88.88888888504918	0.0	-0.0008262250583142728	263.111111111113	0.0	-800.0	0.0	-4.8436843451514946e-05	0.0	0.9999999999892009	0.0	-4.647515953067965e-06	0.0	0.0	-0.000532566098662947	0.0	0.0	-0.000539499802536895	0.0	800.0	-0.0005325660986629469	0.0	88.88888888888928	0.0	-1.6404862005213616e-18	9.473903143467363e-13	0.0	2.861159909257235e-17	9.473903147787776e-14
2.965	88.88888888484469	0.0	-0.0008479415140413751	263.5555555555575	0.0	-800.0	0.0	-4.928528696367655e-05	0.0	0.9999999999886257	0.0	-4.769671016536979e-06	0.0	0.0	-0.0005465640378289567	0.0	0.0	-0.000553618997212445	0.0	800.0	-0.0005465640378289563	0.0	88.88888888888928	0.0	-1.1297385014523152e-18	4.736951571733681e-13	0.0	6.060162609030007e-17	4.736951610498666e-14
2.97	88.8888888846312	0.0	-0.0008700327006295254	264.00000000000193	0.0	-800.0	0.0	-5.0123526814969437e-05	0.0	0.9999999999880252	0.0	-4.893933941099677e-06	0.0	0.0	-0.0005608035200839131	0.0	0.0	-0.0005679783299164887	0.0	800.0	-0.0005608035200839127	0.0	88.88888888888928	0.0	-1.1763044649540958e-18	-5.2106467289070494e-12	0.0	-3.6557039672065276e-17	5.210646729035289e-13
2.975	88.8888888844085	0.0	-0.000892494496985578	264.4444444444465	0.0	-800.0	0.0	-5.095318710033646e-05	0.0	0.9999999999873989	0.0	-5.020281545607129e-06	0.0	0.0	-0.0005752818890638211	0.0	0.0	-0.0005825753427844382	0.0	800.0	-0.000575281889063821	0.0	88.88888888888924	0.0	-1.3251847463426731e-18	-5.2106467289070494e-12	0.0	2.3975863615885815e-17	5.21064672896221e-13
2.98	88.88888888417637	0.0	-0.000915323205173678	264.8888888888908	0.0	-800.0	0.0	-5.1774596679111443e-05	0.0	0.9999999999867459	0.0	-5.148693029170172e-06	0.0	0.0	-0.0005899967611623632	0.0	0.0	-0.0005974076721629648	0.0	800.0	-0.0005899967611623627	0.0	88.88888888888924	0.0	-1.0106337793201606e-18	4.2632564145603135e-12	0.0	1.3392121388578764e-17	4.263256414581348e-13
2.985	88.88888888393453	0.0	-0.0009385150468065133	265.33333333333513	0.0	-800.0	0.0	-5.2587118988916346e-05	0.0	0.9999999999860658	0.0	-5.27914713836019e-06	0.0	0.0	-0.0006049457009160202	0.0	0.0	-0.0006124727720370517	0.0	800.0	-0.0006049457009160197	0.0	88.88888888888927	0.0	-1.2429248333340797e-18	1.6579330501067886e-12	0.0	-4.1875416943953316e-17	1.6579330506356252e-13
2.99	88.88888888368274	0.0	-0.0009620657992980105	265.77777777777965	0.0	-800.0	0.0	-5.3389433886705624e-05	0.0	0.9999999999853577	0.0	-5.41162012113054e-06	0.0	0.0	-0.0006201259865407378	0.0	0.0	-0.0006277677181985576	0.0	800.0	-0.0006201259865407372	0.0	88.88888888888926	0.0	-1.3217524442001283e-18	-2.1316282072801568e-12	0.0	6.301660893525223e-19	2.13162820728025e-13
2.995	88.8888888834208	0.0	-0.0009859705462362408	266.2222222222241	0.0	-800.0	0.0	-5.417977056210973e-05	0.0	0.999999999984621	0.0	-5.54608432266414e-06	0.0	0.0	-0.0006355344490279125	0.0	0.0	-0.0006432890791395388	0.0	800.0	-0.0006355344490279121	0.0	88.88888888888926	0.0	-1.3016090487450464e-18	2.3684757858668407e-13	0.0	-2.5148601918954533e-17	2.3684757992183002e-14
3.0	88.88888888314848	0.0	-0.0010102235218175397	266.66666666666856	0.0	-800.0	0.0	-5.495611441304636e-05	0.0	0.999999999983855	0.0	-5.682507310315394e-06	0.0	0.0	-0.0006511673718701234	0.0	0.0	-0.0006590328462110681	0.0	800.0	-0.0006511673718701231	0.0	88.88888888888926	0.0	-1.5179174679690492e-18	-5.684341886080418e-12	0.0	4.2158744664133165e-18	5.684341886081981e-13
3.005	88.88888888286556	0.0	-0.0010348180427190493	267.111111111113	0.0	-800.0	0.0	-5.5716375622011495e-05	0.0	0.9999999999830592	0.0	-5.820851490393251e-06	0.0	0.0	-0.0006670204471477036	0.0	0.0	-0.0006749944120756034	0.0	800.0	-0.0006670204471477035	0.0	88.88888888888921	0.0	-1.3033289083480734e-18	-3.789561257386945e-12	0.0	8.043738562276716e-19	3.78956125738703e-13
3.01	88.88888888257185	0.0	-0.0010597465028059656	267.5555555555574	0.0	-800.0	0.0	-5.645850646694091e-05	0.0	0.9999999999822332	0.0	-5.961074078389454e-06	0.0	0.0	-0.0006830887721171509	0.0	0.0	-0.0006911685827664434	0.0	800.0	-0.0006830887721171509	0.0	88.88888888888923	0.0	-1.5884637890091595e-18	7.57912251477389e-12	0.0	-8.310816962285863e-17	7.579122515229548e-13
3.015	88.88888888226718	0.0	-0.0010850004087883584	268.0000000000019	0.0	-800.0	0.0	-5.7180569073901085e-05	0.0	0.9999999999813765	0.0	-6.103127299548168e-06	0.0	0.0	-0.0006993668721947128	0.0	0.0	-0.0007075496091568986	0.0	800.0	-0.0006993668721947125	0.0	88.88888888888927	0.0	-1.9142420484395922e-18	-7.105427357600522e-13	0.0	2.3012723638851587e-17	7.105427361327149e-14
3.02	88.88888888195139	0.0	-0.001110570436400738	268.44444444444633	0.0	-800.0	0.0	-5.788076578926585e-05	0.0	0.9999999999804882	0.0	-6.24695870487603e-06	0.0	0.0	-0.0007158487371684708	0.0	0.0	-0.0007241312271304503	0.0	800.0	-0.0007158487371684706	0.0	88.88888888888923	0.0	-1.4187324113293442e-18	-4.2632564145603135e-12	0.0	8.283579960341461e-17	4.2632564153650706e-13
3.025	88.88888888162434	0.0	-0.0011364464950800728	268.88888888889073	0.0	-800.0	0.0	-5.8557445585155086e-05	0.0	0.9999999999795683	0.0	-6.392511534956009e-06	0.0	0.0	-0.0007325278628883392	0.0	0.0	-0.0007409066995859333	0.0	800.0	-0.0007325278628883388	0.0	88.88888888888924	0.0	-1.32624130524074e-18	2.1316282072801568e-12	0.0	-4.674813703029303e-17	2.1316282077927668e-13
3.03	88.88888888128585	0.0	-0.001162617790712655	269.3333333333351	0.0	-800.0	0.0	-5.9209091353375136e-05	0.0	0.9999999999786165	0.0	-6.539725072898518e-06	0.0	0.0	-0.0007493972917112815	0.0	0.0	-0.0007578688548026991	0.0	800.0	-0.0007493972917112811	0.0	88.88888888888924	0.0	-1.8546058196235547e-18	1.4210854715201044e-12	0.0	-1.5618317793151599e-16	1.4210854801026935e-13
3.035	88.8888888809359	0.0	-0.0011890728790123124	269.77777777777953	0.0	-800.0	0.0	-5.983429506350914e-05	0.0	0.9999999999776323	0.0	-6.688534944593853e-06	0.0	0.0	-0.0007664496469077065	0.0	0.0	-0.0007750101176890979	0.0	800.0	-0.0007664496469077063	0.0	88.88888888888926	0.0	-2.5963410929755047e-18	-2.1316282072801568e-12	0.0	-3.427777398538119e-17	2.13162820755576e-13
3.04	88.88888888057436	0.0	-0.0012157997151282128	270.2222222222239	0.0	-800.0	0.0	-6.0431731542936096e-05	0.0	0.9999999999766154	0.0	-6.838873397756109e-06	0.0	0.0	-0.0007836771646375454	0.0	0.0	-0.0007923225335194883	0.0	800.0	-0.0007836771646375454	0.0	88.88888888888923	0.0	-2.2085400373158695e-18	-2.1316282072801568e-12	0.0	7.018062803189009e-17	2.1316282084354524e-13
3.045	88.88888888020115	0.0	-0.0012427856705411876	270.6666666666683	0.0	-800.0	0.0	-6.100011974213363e-05	0.0	0.9999999999755658	0.0	-6.990669396964982e-06	0.0	0.0	-0.0008010717048412406	0.0	0.0	-0.000809797780574574	0.0	800.0	-0.0008010717048412403	0.0	88.88888888888924	0.0	-2.101048607656248e-18	5.684341886080418e-12	0.0	-4.803726252747518e-18	5.684341886082448e-13
3.05	88.88888887981625	0.0	-0.0012700175494070182	271.1111111111127	0.0	-800.0	0.0	-6.15381698297285e-05	0.0	0.9999999999744833	0.0	-7.143848715596756e-06	0.0	0.0	-0.0008186247617742597	0.0	0.0	-0.0008274271676255888	0.0	800.0	-0.000818624761774259	0.0	88.88888888888927	0.0	-2.1031036189831907e-18	-2.368475785866841e-12	0.0	6.916530720326433e-17	2.368475786876739e-13
3.055	88.88888887941962	0.0	-0.0012974815733818599	271.5555555555572	0.0	-800.0	0.0	-6.204454466795302e-05	0.0	0.9999999999733676	0.0	-7.298333850467324e-06	0.0	0.0	-0.0008363274542259069	0.0	0.0	-0.0008452016203820131	0.0	800.0	-0.0008363274542259062	0.0	88.88888888888924	0.0	-1.4646261711492027e-18	7.342274936187207e-12	0.0	1.018782148851068e-16	7.342274936894015e-13
3.06	88.88888887901638	0.0	-0.0013248202600312864	272.0000000000015	0.0	-800.0	0.0	-6.068777667688628e-05	0.0	0.9999999999722337	0.0	-7.4521139628829e-06	0.0	0.0	-0.000853949357055306	0.0	0.0	-0.0008625873877401045	0.0	800.0	-0.0008539493570553046	0.0	88.88888888888933	0.0	-1.267078977455647e-18	5.921189464667102e-12	0.0	-1.0637600544190775e-17	5.921189464676658e-13
3.065	88.88888887861476	0.0	-0.001351496531853242	272.4444444444458	0.0	-800.0	0.0	-5.945187531048093e-05	0.0	0.9999999999711041	0.0	-7.602167991894152e-06	0.0	0.0	-0.0008711442821783498	0.0	0.0	-0.0008796190954372486	0.0	800.0	-0.0008711442821783486	0.0	88.88888888888928	0.0	-1.52554436854272e-18	-7.815970093360574e-12	0.0	-8.208597392153686e-17	7.815970093791621e-13
3.07	88.88888887821177	0.0	-0.0013777463421114082	272.8888888888902	0.0	-800.0	0.0	-5.8755524294098244e-05	0.0	0.9999999999699707	0.0	-7.749823174609385e-06	0.0	0.0	-0.00088806431976448	0.0	0.0	-0.0008964513132629008	0.0	800.0	-0.0008880643197644793	0.0	88.88888888888927	0.0	-1.952193165479839e-18	-7.105427357600522e-13	0.0	-4.2286643048853814e-17	7.105427370183582e-14
3.075	88.88888887780426	0.0	-0.0014037913052243035	273.3333333333347	0.0	-800.0	0.0	-5.851568927923878e-05	0.0	0.9999999999688246	0.0	-7.89632609213287e-06	0.0	0.0	-0.0009048523174858915	0.0	0.0	-0.0009132148234178984	0.0	800.0	-0.0009048523174858907	0.0	88.88888888888927	0.0	-2.020381240050192e-18	4.2632564145603135e-12	0.0	-9.856161892718723e-17	4.26325641569963e-13
3.08	88.88888887738948	0.0	-0.0014298148759752994	273.7777777777791	0.0	-800.0	0.0	-5.864443612177292e-05	0.0	0.999999999967658	0.0	-8.042708677621164e-06	0.0	0.0	-0.0009216265261718087	0.0	0.0	-0.0009300152168264102	0.0	800.0	-0.0009216265261718083	0.0	88.88888888888927	0.0	-2.6885753665840235e-18	-2.0605739337041516e-11	0.0	4.3257125519555803e-17	2.0605739337086922e-12
3.085	88.88888887696511	0.0	-0.0014559564688366986	274.2222222222235	0.0	-800.0	0.0	-5.8996774746634565e-05	0.0	0.999999999966464	0.0	-8.189755137481061e-06	0.0	0.0	-0.0009384768092569873	0.0	0.0	-0.0009469165478157421	0.0	800.0	-0.000938476809256988	0.0	88.88888888888908	0.0	-1.5029048417445657e-18	-3.197442310920235e-11	0.0	2.830135552729685e-16	3.1974423110454864e-12
3.09	88.88888887653016	0.0	-0.0014822737516836297	274.6666666666678	0.0	-800.0	0.0	-5.94594666947382e-05	0.0	0.9999999999652405	0.0	-8.337789853510212e-06	0.0	0.0	-0.0009554403381573421	0.0	0.0	-0.0009639504302842792	0.0	800.0	-0.0009554403381573431	0.0	88.888888888889	0.0	-4.0780951020835127e-19	-5.447494307493734e-12	0.0	8.683408630615998e-17	5.447494308185809e-13
3.095	88.88888887608334	0.0	-0.0015088299395427664	275.11111111111234	0.0	-800.0	0.0	-6.0061463966792875e-05	0.0	0.9999999999639839	0.0	-8.487168410233714e-06	0.0	0.0	-0.0009725578598579726	0.0	0.0	-0.000981156772267652	0.0	800.0	-0.0009725578598579733	0.0	88.88888888888901	0.0	-7.550677054240705e-19	6.6317322004271545e-12	0.0	-1.983460484344317e-16	6.631732203393285e-13
3.1	88.88888887562364	0.0	-0.0015356736776263949	275.55555555555674	0.0	-800.0	0.0	-6.0744235223033305e-05	0.0	0.9999999999626911	0.0	-8.638164436970728e-06	0.0	0.0	-0.0009898607299691578	0.0	0.0	-0.0009985587138078018	0.0	800.0	-0.0009898607299691589	0.0	88.88888888888904	0.0	-1.915923454390012e-18	1.4210854715201044e-12	0.0	-1.0747562772310013e-16	1.4210854755842552e-13
3.105	88.88888887515034	0.0	-0.0015628290086686083	276.00000000000114	0.0	-800.0	0.0	-6.145544726942008e-05	0.0	0.9999999999613599	0.0	-8.79091317410058e-06	0.0	0.0	-0.0010073644458968097	0.0	0.0	-0.0010161644025909358	0.0	800.0	-0.001007364445896811	0.0	88.88888888888903	0.0	-1.6670534891311447e-18	-4.026408835973629e-12	0.0	8.818583803114328e-17	4.026408836939346e-13
3.11	88.88888887466315	0.0	-0.0015902982097231193	276.4444444444456	0.0	-800.0	0.0	-6.214971636030722e-05	0.0	0.9999999999599896	0.0	-8.94542743005043e-06	0.0	0.0	-0.0010250704753785671	0.0	0.0	-0.001033968984817841	0.0	800.0	-0.0010250704753785684	0.0	88.88888888888901	0.0	-1.2551581164785016e-18	-3.552713678800261e-12	-1.2063255413356036e-55	8.936311407192315e-17	3.552713679924158e-13
3.115	88.88888887416203	0.0	-0.0016180650085607826	276.88888888889005	0.0	-800.0	0.0	-6.278897222285766e-05	0.0	0.9999999999585801	0.0	-9.101615673531364e-06	0.0	0.0	-0.0010429683297013342	0.0	0.0	-0.0010519567003595116	0.0	800.0	-0.0010429683297013355	0.0	88.88888888888899	0.0	-7.600952840009421e-19	-5.684341886080418e-12	-9.054507894316822e-54	1.3450767826291178e-16	5.684341887671836e-13
3.12	88.88888887364733	1.692776789654974e-51	-0.0016460978826135445	277.3333333333345	3.679996455884865e-60	-800.0	-4.528155459400669e-49	-6.334247828524814e-05	-1.3383176391924635e-50	0.9999999999571324	-3.2196585195587216e-52	-9.259300590098086e-06	-9.518847550127225e-54	-1.0904379631378313e-51	-0.0010610376901263867	-3.689455883369944e-50	-3.833997618682272e-51	-0.0010701029837077319	-1.297220984013991e-49	800.0	-0.001061037690126388	1.0911258641805136e-51	88.88888888888896	7.23795324801411e-57	-2.2044657664142054e-20	-2.1316282072801568e-12	2.0054582664327765e-51	9.698800257705455e-17	2.1316282094866095e-13
3.125	88.8888888731196	7.047372804038536e-47	-0.0016743531887434783	277.7777777777789	-3.659223407438416e-58	-800.0	7.015338397529898e-47	-6.378655252777585e-05	-5.572753468215821e-46	0.9999999999556481	4.394933007237075e-50	-9.418236687099755e-06	-3.964151307883368e-49	-4.542587529697381e-47	-0.0010792504252681362	5.036650083017119e-48	-1.5965146099545872e-46	-0.0010883764849553886	1.9967742003326624e-47	800.0	-0.0010792504252681372	4.542578081175194e-47	88.88888888888896	6.011740996431589e-55	1.2739348560847914e-19	-7.105427357600522e-13	-1.0775283550024498e-50	3.980467361551868e-18	7.105427357712015e-14
3.13	88.88888887257963	1.2596172675096817e-45	-0.0017027782548620712	278.22222222222337	-4.023842339525737e-56	-800.0	2.139025213223309e-45	-6.410408189592663e-05	-5.855568227390432e-45	0.9999999999541295	2.0684188521285425e-48	-9.578127684038476e-06	-7.085367591436148e-48	-8.119255889276839e-46	-0.0010975725838824183	2.3703111772235317e-46	-1.8371481913974348e-45	-0.0011067409516663778	6.32753326952201e-46	800.0	-0.0010975725838824194	8.119209738386904e-46	88.88888888888896	-1.1551810318882944e-52	2.547188577320273e-20	6.39488462184047e-12	-4.691884541007504e-50	-1.0169095355590219e-16	6.394884622649011e-13
3.135	88.88888887202842	4.4933428487415784e-45	-0.0017313141429070222	278.6666666666678	-7.287613901884091e-55	-800.0	-1.2272265646367868e-46	-6.428382223105548e-05	-8.828575135279469e-45	0.9999999999525793	5.860451097061125e-48	-9.738642054313786e-06	-2.5275112160187536e-47	-2.896321047474299e-45	-0.0011159661758192272	6.715864340746342e-46	-4.3663486632258724e-45	-0.0011251569101904228	5.975958756221852e-46	800.0	-0.0011159661758192282	2.896307787804549e-45	88.888888888889	-2.776857161351061e-52	-6.187909781953121e-19	2.6053233644535247e-12	1.1097546904219146e-49	1.018106138870415e-17	2.6053233644734177e-13
3.14	88.88888887146707	1.272914744701578e-44	-0.0017598980658436241	279.11111111111234	-1.429066364911038e-54	-800.0	3.1924500962318286e-46	-6.431958307208662e-05	-3.404198616418315e-44	0.9999999999510004	3.9188134017646196e-48	-9.899426620855425e-06	-7.160148987473672e-47	-8.204930800013934e-45	-0.0011343907299674679	4.491441613732276e-46	-1.4118659330478715e-44	-0.0011435831134407823	6.8905283403230006e-46	800.0	-0.0011343907299674692	8.204922287029456e-45	88.88888888888897	5.888428406799464e-52	1.099368452600706e-19	-8.76336040770731e-12	3.48829019782913e-50	1.1381454553007936e-16	8.763360408446397e-13
3.145	88.88888887089688	5.434162488417597e-44	-0.001788465446289528	279.55555555555674	-4.348847120963843e-54	-800.0	6.890602036084239e-44	-6.420935130223772e-05	-1.797353163064412e-43	0.9999999999493967	6.968577388128313e-47	-1.006011813588764e-05	-3.0567234679067126e-46	-3.5027551109329164e-44	-0.0011528046211982028	7.9857538527073e-45	-6.560903459952202e-44	-0.0011619777376152389	2.042917358262757e-44	800.0	-0.001152804621198204	3.502738977464664e-44	88.88888888888894	-1.0230394174820872e-51	1.922494781811319e-19	1.4210854715201044e-12	-1.3248740410014638e-48	-1.2856318774456792e-17	1.421085471578259e-13
3.15	88.88888887031916	1.7277002630502752e-43	-0.0018169515759648256	280.0000000000012	-8.013839497136298e-54	-800.0	1.604678185349585e-43	-6.395439154613718e-05	-3.42024476942908e-43	0.999999999947772	3.605769845241042e-46	-1.0220352615335904e-05	-9.718351292041463e-46	-1.1136452488490148e-43	-0.0011711661400088695	4.132021699244159e-44	-1.6359182969451947e-43	-0.0011802993211998442	6.63998173312521e-44	800.0	-0.0011711661400088703	1.1136367500347556e-43	88.88888888888899	-8.171321832662298e-51	-3.1507719502046776e-19	1.2316074086507572e-11	1.2117831221862006e-48	-4.015881546912134e-16	1.2316074093054832e-12
3.155	88.88888886973535	3.4499964939124585e-43	-0.0018452908595430275	280.44444444444594	-4.273505174259945e-54	-800.0	2.086214208769038e-43	-6.340464063147336e-05	-4.2691097825745806e-43	0.9999999999461303	8.271125599645652e-46	-1.0379761085488652e-05	-1.940631561785463e-45	-2.2238097999129355e-43	-0.0011894330051266178	9.478242600300976e-44	-2.858928161042957e-43	-0.001198463412748481	1.2616545199260129e-43	800.0	-0.0011894330051266198	2.2237901824062934e-43	88.88888888888906	9.133439357220137e-51	-3.2475241739721593e-18	1.1842378929334204e-11	2.1380616319386836e-48	-3.4730369633071395e-16	1.1842378934426925e-12
3.16	88.88888886915932	5.587464826362275e-43	-0.0018728339702156634	280.8888888888905	4.139298186396877e-53	-800.0	2.698885401347396e-43	-6.063373842653941e-05	-5.347280398840735e-43	0.9999999999445103	1.4254627991476475e-45	-1.0534691083047643e-05	-3.1429639304364356e-45	-3.601588576113655e-43	-0.0012071866750877932	1.6334979865949945e-43	-4.390811154676088e-43	-0.0012158336992881867	2.0348282343594505e-43	800.0	-0.0012071866750877948	3.6015542181939956e-43	88.88888888888908	9.133685707120786e-51	-3.3129630904918302e-18	-7.105427357600522e-13	-2.8841776482897897e-49	7.976070331283408e-17	7.105427402367498e-14
3.165	88.88888886859846	8.200978001630453e-43	-0.0018992669590174305	281.33333333333485	8.706178794847894e-53	-800.0	3.301905890113081e-43	-5.839859475749695e-05	-6.411228717419371e-43	0.9999999999429328	2.1757784624877056e-45	-1.0683376645082684e-05	-4.613073319466247e-45	-5.286219273120642e-43	-0.001224224785447029	2.4933149359339865e-43	-6.227492889682222e-43	-0.0012325636643336847	2.980754593623849e-43	800.0	-0.0012242247854470307	5.286166057946882e-43	88.88888888888906	9.133322984452932e-51	-2.952615905745524e-18	-5.2106467289070494e-12	-2.6625048420268847e-53	1.1339307470676718e-16	5.210646730140868e-13
3.17	88.88888886804897	1.1284052006810118e-42	-0.001924812683407339	281.77777777777925	1.3272673645409701e-52	-800.0	3.895181948342163e-43	-5.662797411654983e-05	-7.460189039520147e-43	0.9999999999413873	3.075636693195448e-45	-1.0827071344800854e-05	-6.34731250296855e-45	-7.273522513840485e-43	-0.001240690985112483	3.5244987878672053e-43	-8.364679621353664e-43	-0.0012487863839299577	4.096642024001679e-43	800.0	-0.0012406909851124844	7.273446252708886e-43	88.88888888888907	9.132813074939972e-51	-2.741453247977751e-18	2.1789977229974934e-11	-6.082820837016085e-52	-2.949863754447553e-16	2.1789977231971657e-12
3.175	88.88888886750766	1.4829719043808812e-42	-0.0019496504611695952	282.22222222222376	1.7837805139461566e-52	-800.0	4.482490001391287e-43	-5.5153741354950965e-05	-8.49189890154869e-43	0.9999999999398653	4.1228327848235034e-45	-1.0966783844738428e-05	-8.34176212551475e-45	-9.55900708328096e-43	-0.0012567008582967235	4.724523196019649e-43	-1.0797429456906427e-42	-0.0012645867669499329	5.380780817948323e-43	800.0	-0.0012567008582967246	9.558903516469044e-43	88.88888888888924	9.128055802678839e-51	-5.479029916266016e-18	1.752672081541462e-11	-5.492374591737812e-52	-3.523554012202302e-16	1.752672081895648e-12
3.18	88.88888886697308	1.8829691867502785e-42	-0.0019738731242749494	282.6666666666682	2.2401829601013528e-52	-800.0	5.062060433109713e-43	-5.3894263700871614e-05	-9.505342681343529e-43	0.9999999999383617	5.316190889159835e-45	-1.1103036324730928e-05	-1.059176065063847e-44	-1.2137331298784674e-42	-0.001272314242401196	6.092040782300972e-43	-1.3520509549239359e-42	-0.0012800263362000592	6.830954310235181e-43	800.0	-0.0012723142424011975	1.2137196077321814e-42	88.88888888888923	9.128045177950139e-51	-5.825092647969258e-18	-1.1842378929334205e-12	8.40117151119879e-53	-7.610824106419158e-17	1.1842378953790712e-13
3.185	88.88888886644321	2.3276236600505964e-42	-0.0019975917444217508	283.1111111111127	2.6965866803945105e-52	-800.0	5.62907437636843e-43	-5.287285798556702e-05	-1.0501399085010758e-42	0.9999999999368716	6.652866539577362e-45	-1.1236453563081655e-05	-1.3092957791891326e-44	-1.500351012169872e-42	-0.001287602731745725	7.623792074357784e-43	-1.6528938782007865e-42	-0.0012951732942668981	8.443565331891024e-43	800.0	-0.0012876027317457266	1.5003338851765396e-42	88.88888888888926	9.128134056084692e-51	-6.480407032462343e-18	3.552713678800261e-12	3.427425721053416e-53	-4.828436212059264e-17	3.5527136791283737e-13
3.19	88.88888886591646	2.816149362928216e-42	-0.002020895297001207	283.55555555555713	3.153000248942817e-52	-800.0	6.1839289915169415e-43	-5.201404016422332e-05	-1.1479483498833177e-42	0.9999999999353901	8.129770345991623e-45	-1.1367536046366214e-05	-1.5840932531604916e-44	-1.8152477456080942e-42	-0.0013026236778672833	9.316236934262344e-43	-1.981756855937415e-42	-0.0013100742191510689	1.0215130492003704e-42	800.0	-0.0013026236778672844	1.8152265709602227e-42	88.88888888888926	9.128398399280072e-51	-6.185975713696558e-18	-4.736951571733681e-13	6.56926574149536e-53	1.3154671774193988e-16	4.736951754388479e-14
3.195	88.88888886539186	3.347735862211281e-42	-0.0020438398168787114	284.0000000000016	3.609431959305206e-52	-800.0	6.727013824495556e-43	-5.1245572038921163e-05	-1.243908601528569e-42	0.9999999999339146	9.743911357291032e-45	-1.1496598970702479e-05	-1.8831126196674555e-44	-2.1579009462806432e-42	-0.0013174131995804183	1.1165948020403186e-42	-2.3381104207754765e-42	-0.001324754994133889	1.2142277996352604e-42	800.0	-0.001317413199580419	2.1578752780795765e-42	88.88888888888926	9.128825117885671e-51	-5.4690327148486606e-18	1.8947806286934726e-12	1.269835509201865e-52	7.571585865002748e-17	1.894780630206284e-13
3.2	88.8888888648691	3.921552333872064e-42	-0.002066450438189296	284.44444444444605	4.065894574935453e-52	-800.0	7.258707349614187e-43	-5.050096590735432e-05	-1.3379802564528696e-42	0.9999999999324444	1.1492394668403622e-44	-1.1623783715600011e-05	-2.2058865413276384e-44	-2.527775086293997e-42	-0.0013319874977835455	1.316960804396205e-42	-2.721413529608407e-42	-0.0013392224551730173	1.4221744475620169e-42	800.0	-0.0013319874977835463	2.5277444760436504e-42	88.88888888888927	9.129632112913074e-51	-5.626901171576725e-18	1.8947806286934726e-12	1.590930238822844e-52	-1.563130402330717e-16	1.894780635141123e-13
3.205	88.88888886434849	4.5367526885132444e-42	-0.002088724349430757	284.88888888889045	4.522398951120097e-52	-800.0	7.779375325487772e-43	-4.9721240090554914e-05	-1.4301353198488957e-42	0.9999999999309802	1.337241843401866e-44	-1.1749074466358895e-05	-2.551939093682991e-44	-2.924324797340516e-42	-0.001346344760245545	1.5324006345199938e-42	-3.1311171194081036e-42	-0.0013534665412197455	1.645037134261362e-42	800.0	-0.001346344760245546	2.924288794647425e-42	88.88888888888927	9.130384752093488e-51	-6.550762214505638e-18	0.0	1.7148400927134975e-52	2.916485127997157e-17	2.9164851279971572e-18
3.21	88.88888886383094	5.192481329563437e-42	-0.0021106344176112053	285.3333333333349	4.978946230146659e-52	-800.0	8.289370304207209e-43	-4.885600869480296e-05	-1.5203589685187255e-42	0.9999999999295246	1.5381270590342014e-44	-1.1872318599899708e-05	-2.920789004083397e-44	-3.3469985820703064e-42	-0.0013604674976498007	1.762603513508325e-42	-3.5666678806130636e-42	-0.0013674627567300797	1.8825101008874522e-42	800.0	-0.0013604674976498013	3.3469567355752045e-42	88.88888888888927	9.131329891509669e-51	-5.461029296967442e-18	4.026408835973629e-12	1.7827800149354625e-52	8.569300585861058e-17	4.02640883688552e-13
3.215	88.88888886331787	5.887878972934441e-42	-0.0021321331125906387	285.7777777777793	5.4355359752690824e-52	-800.0	8.789031764543488e-43	-4.786394454358643e-05	-1.6086494066232056e-42	0.9999999999280816	1.7516325582318955e-44	-1.199324875918485e-05	-3.3119529251420043e-44	-3.795242565077167e-42	-0.0013743250731365541	2.007268574320362e-42	-4.027511989191764e-42	-0.0013811747667960594	2.1342973139448495e-42	800.0	-0.0013743250731365543	3.795194423620852e-42	88.88888888888931	9.132118306102146e-51	-5.891948794772804e-18	9.710750722054047e-12	2.429476548421205e-52	1.2986104758154293e-17	9.71075072206273e-13
3.22	88.88888886281113	6.622088298411937e-42	-0.0021531565555467577	286.2222222222238	5.8921654182011014e-52	-800.0	9.27868644485239e-43	-4.671272761253516e-05	-1.6950170323989426e-42	0.9999999999266564	1.9775041123450863e-44	-1.2111505625838788e-05	-3.724948613544898e-44	-4.2685041354349474e-42	-0.0013878763118529626	2.2661044903208042e-42	-4.513098599988042e-42	-0.0013945569775047728	2.4001121003025115e-42	800.0	-0.0013878763118529622	4.268449249447184e-42	88.88888888888935	9.132803864892723e-51	-5.4979741652310365e-18	2.1316282072801568e-12	-5.407981858568347e-52	-2.0344441993532467e-16	2.1316282169886118e-13
3.225	88.88888886231328	7.394238933559455e-42	-0.002173610846691239	286.6666666666682	6.3487590656609656e-52	-800.0	9.757069648745841e-43	-4.4922629327602205e-05	-1.7789083041192552e-42	0.9999999999252563	2.2154927217252197e-44	-1.2226561013552047e-05	-4.159286483160741e-44	-4.766222266884736e-42	-0.0014010606881063611	2.5388259246332446e-42	-5.0227182898221164e-42	-0.0014074263628302847	2.679631555946695e-42	800.0	-0.0014010606881063618	4.7661601905480446e-42	88.88888888888933	9.127599679867387e-51	-7.625487446103703e-18	-6.6317322004271545e-12	-6.192866145762289e-52	-1.9407655262430007e-16	6.631732203266964e-13
3.23	88.88888886184391	8.202620870467456e-42	-0.0021927216068496768	287.1111111111127	6.805136349675722e-52	-800.0	1.0220010704765536e-42	-4.116143806241779e-05	-1.858702854659842e-42	0.9999999999239362	2.4652251624784216e-44	-1.2334059039467577e-05	-4.614004641087315e-44	-5.2872946959441556e-42	-0.0014133790544891855	2.8250051612091393e-42	-5.555197434526788e-42	-0.001419218246228614	2.972413295927508e-42	800.0	-0.001413379054489186	5.287225014266735e-42	88.88888888888931	9.127628772783008e-51	-7.122673311494328e-18	1.6579330501067886e-12	1.4049759735797748e-52	4.8860921148298395e-17	1.6579330508267785e-13
3.235	88.88888886140931	9.046252421718923e-42	-0.002210269340308254	287.55555555555713	7.261524087429159e-52	-800.0	1.067629231074625e-42	-3.787599520088322e-05	-1.9375221407566617e-42	0.9999999999227139	2.7264482922440485e-44	-1.243276504019478e-05	-5.088550879766755e-44	-5.831088629750569e-42	-0.0014246899289986207	3.124352100921024e-42	-6.11025664141937e-42	-0.0014300689195779566	3.278266541054395e-42	800.0	-0.0014246899289986211	5.83101094696305e-42	88.88888888888934	9.127874766099011e-51	-7.244948807420345e-18	1.1842378929334205e-12	-1.2739788281076635e-52	1.9429396062814506e-16	1.1842379088720016e-13
3.24	88.88888886100577	9.924673446228705e-42	-0.0022264387105639613	288.0000000000017	7.717891709380375e-52	-800.0	1.112843758414986e-42	-3.489330503806223e-05	-2.0151803073787796e-42	0.999999999921579	2.9990090351071667e-44	-1.2523717747904387e-05	-5.58266636755043e-44	-6.397307466459233e-42	-0.001435112341573527	3.4366913270074e-42	-6.687563274272809e-42	-0.001440065115137675	3.5970727941276913e-42	800.0	-0.0014351123415735265	6.397221392037694e-42	88.88888888888931	9.126574698904229e-51	-5.385320324662275e-18	-4.736951571733682e-12	-1.3367507367411688e-52	2.2068207227709975e-16	4.73695157687418e-13
3.245	88.88888886063182	1.0837315176931443e-41	-0.0022413181938605075	288.4444444444461	8.174222801944219e-52	-800.0	1.1575794002839982e-42	-3.211218244304809e-05	-2.0915729452709007e-42	0.9999999999205272	3.282836332934787e-44	-1.2607414841467284e-05	-6.096031170454084e-44	-6.98558458585534e-42	-0.0014447033220116154	3.761941404649096e-42	-7.286754785811698e-42	-0.0014492645777623794	3.928694864565504e-42	800.0	-0.0014447033220116145	6.98548973502649e-42	88.8888888888893	9.126810961805801e-51	-5.384301189136771e-18	-4.2632564145603135e-12	8.203396123543822e-53	-5.407551371648866e-17	4.263256414903263e-13
3.25	88.88888886028529	1.1783648202921143e-41	-0.002255019084874803	288.88888888889056	8.630572738760174e-52	-800.0	1.2014420266578739e-42	-2.9575434648812e-05	-2.1667826733204885e-42	0.9999999999195526	3.577738192420804e-44	-1.268448235344118e-05	-6.628347491299335e-44	-7.595578733447541e-42	-0.0014535346083596778	4.09988231888375e-42	-7.907492297328428e-42	-0.0014577373156755896	4.2728826518512284e-42	800.0	-0.0014535346083596778	7.595474729560846e-42	88.88888888888927	9.127138842857775e-51	-5.4784167018526096e-18	-2.842170943040209e-12	7.82619985460251e-53	6.853897957090267e-17	2.842170943866618e-13
3.255	88.88888885996445	1.276313229601612e-41	-0.0022676310495647663	289.333333333335	9.086941249356923e-52	-800.0	1.2444549600540735e-42	-2.7197925036551855e-05	-2.2407449493095907e-42	0.9999999999186502	3.8834993030965375e-44	-1.2755424654839442e-05	-7.179311447641668e-44	-8.226941680915429e-42	-0.0014616639972784664	4.450267334685335e-42	-8.549418440131947e-42	-0.0014655289472561282	4.629392736877352e-42	800.0	-0.001461663997278466	8.226828156699431e-42	88.88888888888927	9.127465880053254e-51	-4.745189001953482e-18	-6.868579779013838e-12	-7.500199132761259e-54	1.2176415329697702e-16	6.868579780093138e-13
3.26	88.8888888596684	1.3775199802461166e-41	-0.0022792063730026854	289.77777777777936	9.543301253090227e-52	-800.0	1.2866402290606439e-42	-2.4897236816111204e-05	-2.3134015891881756e-42	0.9999999999178174	4.1999100174858596e-44	-1.2820535849193707e-05	-7.748603729484145e-44	-8.879307520500643e-42	-0.0014691251905501871	4.812856204609022e-42	-9.212159177028691e-42	-0.0014726614802116332	4.997988011261979e-42	800.0	-0.0014691251905501871	8.879184119592774e-42	88.88888888888921	9.127118324971085e-51	-4.384761601450402e-18	-5.447494307493734e-12	-4.773131016552997e-53	1.0965595550429957e-16	5.447494308597399e-13
3.265	88.88888885939711	1.481925925724447e-41	-0.0022897619491559222	290.2222222222238	9.99965887899283e-52	-800.0	1.328018925178629e-42	-2.259696565072706e-05	-2.3847039911323003e-42	0.9999999999170545	4.526766070436549e-44	-1.2879910965070374e-05	-8.335891632101399e-44	-9.552294994190269e-42	-0.0014759290776464153	5.187414846719998e-42	-9.895326547428156e-42	-0.0014791350340195774	5.378437408893181e-42	800.0	-0.0014759290776464149	9.552161373190672e-42	88.88888888888923	9.127096830660251e-51	-3.940909583738226e-18	4.026408835973629e-12	-4.240455873822451e-55	-1.6544995540467037e-16	4.026408839372898e-13
3.27	88.88888885915135	1.5894700091658028e-41	-0.0022992824931160945	290.66666666666816	1.0456013074917222e-51	-800.0	1.3686115317647856e-42	-2.022903238714155e-05	-2.4546150452500693e-42	0.9999999999163633	4.863868389733463e-44	-1.2933464024859721e-05	-8.940831703838303e-44	-1.0245510527634879e-41	-0.0014820658062588091	5.57371512718437e-42	-1.0598521959538916e-41	-0.0014849302249166612	5.770515731708492e-42	800.0	-0.0014820658062588094	1.024536635862982e-41	88.88888888888924	9.127050326323682e-51	-5.623538686388981e-18	-6.39488462184047e-12	4.27210079398196e-53	-4.872750299041526e-17	6.394884622026117e-13
3.275	88.88888885893257	1.7000897980624893e-41	-0.002307724603947873	291.11111111111256	1.0912363198500584e-51	-800.0	1.408438196535476e-42	-1.7735172663069225e-05	-2.523110013556505e-42	0.999999999915748	5.211022978287988e-44	-1.2980950898300436e-05	-9.563072753806715e-44	-1.0958551676515812e-41	-0.0014875074011201155	5.971534724956221e-42	-1.1321339734658884e-41	-0.00149001097762931	6.174003553541019e-42	800.0	-0.0014875074011201155	1.0958396650000747e-41	88.88888888888921	9.126947333609275e-51	-4.728408357181219e-18	2.2263672387148304e-11	-4.348918744013712e-52	-2.412449917228669e-16	2.226367238845535e-12
3.28	88.88888885874364	1.8137192298488078e-41	-0.0023149915167121385	291.5555555555572	1.1368666309644723e-51	-800.0	1.4473481519906085e-42	-1.4471812588289954e-05	-2.589566375404866e-42	0.999999999915217	5.568036837776566e-44	-1.3021827282609793e-05	-1.0202243169646656e-43	-1.1690992592483933e-41	-0.0014921914897258741	6.380652458186584e-42	-1.2063195855057378e-41	-0.0014941568465453767	6.588638256516652e-42	800.0	-0.001492191489725873	1.169082642285614e-41	88.88888888888944	9.123359088086887e-51	-7.76110160956923e-18	2.439530059442846e-11	-4.1823084298117405e-52	-2.2524122464733945e-16	2.439530059546828e-12
3.285	88.88888885860602	1.9302198635005433e-41	-0.0023202693332772914	292.00000000000176	1.1824831430357014e-51	-800.0	1.485072067100358e-42	-9.362350961514671e-06	-2.6529265674265877e-42	0.99999999991483	5.934607909666269e-44	-1.3051515000796355e-05	-1.0857564183607415e-43	-1.2441940831048526e-41	-0.001495593451637091	6.800722112533257e-42	-1.282320333341579e-41	-0.0014968389625274522	7.014080065104779e-42	800.0	-0.0014955934516370888	1.2441763317476112e-41	88.88888888888943	9.123660437229975e-51	-6.566713465807224e-18	-4.500103993146998e-12	3.47411335064749e-52	1.5078331733547219e-16	4.500103995673118e-13
3.29	88.88888885852474	2.0495209510662987e-41	-0.0023233814939472163	292.4444444444463	1.2281036050766708e-51	-800.0	1.522296962522261e-42	-4.710641393213618e-06	-2.715576000064994e-42	0.9999999999146014	6.310548092692809e-44	-1.306902090456916e-05	-1.1528637818284141e-43	-1.3210940320571854e-41	-0.0014975994804427497	7.231528097185352e-42	-1.3601158552169553e-41	-0.0014981884618806062	7.45018602069536e-42	800.0	-0.0014975994804427475	1.3210751308470438e-41	88.88888888888944	9.125849005868153e-51	-6.815506076555745e-18	1.1842378929334205e-12	2.6305865076594396e-52	3.2503042433984507e-17	1.184237893379466e-13
3.295	88.8888888584965	2.1715843693332034e-41	-0.0023244620785102437	292.8888888888907	1.2737330102341924e-51	-800.0	1.5594375158689114e-42	-2.0144404995849836e-07	-2.7772163973237445e-42	0.9999999999145219	6.695785738433216e-44	-1.3075099192737748e-05	-1.2215249621472745e-43	-1.399774530646275e-41	-0.0014982960009602578	7.672988289286425e-42	-1.4396772443975498e-41	-0.0014982461713499593	7.896931961063659e-42	800.0	-0.0014982960009602556	1.3997544662179226e-41	88.88888888888944	9.126021995755527e-51	-6.210643133202285e-18	9.473903143467363e-13	2.9050694948447746e-53	2.6276575461873182e-18	9.473903143503803e-14
3.3	88.88888885851892	2.296368560056029e-41	-0.002323604615048439	293.333333333335	1.3193644577871387e-51	-800.0	1.595925366114262e-42	4.018549510595587e-06	-2.8380087008453634e-42	0.999999999914585	7.090229155123734e-44	-1.3070275960763857e-05	-1.2917165817536551e-43	-1.4802087889535003e-41	-0.0014977432992887777	8.12499759545144e-42	-1.5209802047874777e-41	-0.0014970949417163518	8.35413090054478e-42	800.0	-0.0014977432992887758	1.4801875503496236e-41	88.88888888888945	9.126468037245338e-51	-6.862721494768916e-18	1.1842378929334205e-12	1.0202208707609851e-52	-1.1891311133670286e-16	1.1842378989036431e-13
3.305	88.88888885858907	2.423834600349234e-41	-0.0023209195977952003	293.77777777777953	1.364998172069353e-51	-800.0	1.6317569710159013e-42	8.038968375071083e-06	-2.8978897938021936e-42	0.9999999999147823	7.493712543637398e-44	-1.3055172738710522e-05	-1.3634167454704184e-43	-1.562371715746141e-41	-0.0014960125975272199	8.587366003751443e-42	-1.6039986321269343e-41	-0.001494791946918698	8.821594838696122e-42	800.0	-0.0014960125975272181	1.5623492944251312e-41	88.88888888888945	9.126869646550537e-51	-7.10209626428384e-18	-7.105427357600522e-13	-1.9975691880533985e-54	-3.916913621688478e-18	7.105427357708484e-14
3.31	88.88888885870503	2.5539404849208007e-41	-0.002316474031271846	294.22222222222405	1.410631093611194e-51	-800.0	1.6669456291041764e-42	1.1956845739400949e-05	-2.956792914276032e-42	0.9999999999151085	7.906073528532306e-44	-1.3030166427010276e-05	-1.4366018241219293e-43	-1.646236232609539e-41	-0.0014931470852837508	9.059907422190056e-42	-1.6887045095680418e-41	-0.0014913665629329145	9.2991395848234e-42	800.0	-0.0014931470852837488	1.64621262277751e-41	88.88888888888945	9.12650888700367e-51	-6.812344445005537e-18	1.4210854715201044e-12	-5.214068002293787e-53	1.703862980622974e-16	1.421085481734652e-13
3.315	88.88888885886591	2.6866414191865364e-41	-0.002310292886614497	294.6666666666685	1.4562636897035774e-51	-800.0	1.7015037981903053e-42	1.5863666304542628e-05	-3.014659782325662e-42	0.9999999999155609	8.327152942155791e-44	-1.2995397488303858e-05	-1.5112466193729175e-43	-1.731773462795201e-41	-0.0014891628583913602	9.542439430560281e-42	-1.7750681506655916e-41	-0.0014868219572986433	9.786584517132353e-42	800.0	-0.0014891628583913574	1.7317486618247926e-41	88.88888888888945	9.12646864797347e-51	-5.5726119177939216e-18	-4.736951571733681e-13	-2.8991802730699614e-53	2.3999826230350823e-16	4.7369521797107886e-14
3.32	88.88888885907167	2.8218902528933545e-41	-0.0023023623307938785	295.111111111113	1.501895897083112e-51	-800.0	1.7354436819839287e-42	1.9842106652278505e-05	-3.071442988924926e-42	0.9999999999161395	8.756794692461247e-44	-1.295078811180162e-05	-1.5873246076115293e-43	-1.8189530106555409e-41	-0.0014840510003903532	1.0034783128403547e-41	-1.8630585108058202e-41	-0.0014811376124595228	1.0283752509934e-41	800.0	-0.0014840510003903506	1.8189270195738012e-41	88.88888888888943	9.126388489430179e-51	-4.8500246065881e-18	-2.1316282072801568e-11	1.3197877124357884e-52	-6.59211307002134e-17	2.13162820729035e-12
3.325	88.88888885932313	2.9596377543989764e-41	-0.002292630954462658	295.55555555555736	1.5475282919785678e-51	-800.0	1.768728199442808e-42	2.416303714820706e-05	-3.126934075324346e-42	0.9999999999168466	9.194845433090425e-44	-1.2896049119924787e-05	-1.6648080941922663e-43	-1.9077431383483373e-41	-0.001477778373971142	1.0536762756192775e-41	-1.95263857347169e-41	-0.001474215412215472	1.0790455814603265e-41	800.0	-0.0014777783739711415	1.907715962414673e-41	88.88888888888926	9.127645974126444e-51	-5.803433295155814e-18	-2.7000623958881985e-11	-8.634755988016494e-53	7.590813567037124e-18	2.7000623958883056e-12
3.33	88.88888885963813	3.099778375013337e-41	-0.0022803852203163847	296.0000000000017	1.5931654186035663e-51	-800.0	1.8008882736386956e-42	3.085618702026699e-05	-3.1794038839203166e-42	0.9999999999177324	9.64106689522249e-44	-1.2827166865334905e-05	-1.7436377023323798e-43	-1.9980757986238876e-41	-0.001469885049027797	1.1048105159416574e-41	-2.0437217854297643e-41	-0.001465375765774833	1.1306372301873791e-41	800.0	-0.0014698850490277974	1.998047456034576e-41	88.88888888888918	9.128008769952842e-51	-4.703647621887604e-18	-1.0421293457814099e-11	1.9578761851149982e-51	1.1113177010192975e-16	1.0421293458406648e-12
3.335	88.8888888600246	3.2422396285100646e-41	-0.00226527102917116	296.44444444444616	1.638821347230106e-51	-800.0	1.832713872147708e-42	3.71192903052248e-05	-3.231312112655726e-42	0.9999999999188192	1.0095281817036421e-43	-1.2742149540122167e-05	-1.8237726542296386e-43	-2.0899042586364564e-41	-0.0014601427811866386	1.1568607121891978e-41	-2.136292058602108e-41	-0.001454741872409781	1.1831406151519537e-41	800.0	-0.0014601427811866395	2.0898747774415163e-41	88.88888888888914	9.14461174574759e-51	-4.8570448542122154e-18	-7.57912251477389e-12	1.9198597899728046e-51	8.240854690978074e-17	7.579122515221909e-13
3.34	88.88888886047816	3.386989762600597e-41	-0.002247403117736354	296.88888888889056	1.6845439564811745e-51	-800.0	1.8644197460729444e-42	4.3228514917860236e-05	-3.282434772765352e-42	0.9999999999200947	1.0557446970545442e-43	-1.2641642538277096e-05	-1.9051950874477555e-43	-2.1832080475068175e-41	-0.0014486255271512385	1.209821907123255e-41	-2.2303268881053333e-41	-0.0014423578151127217	1.2365523064973734e-41	800.0	-0.0014486255271512394	2.1831774598240937e-41	88.88888888888911	9.144642091292442e-51	-3.946823285155544e-18	7.105427357600522e-13	-1.7987772666421014e-52	1.8787785722313013e-17	7.105427360084405e-14
3.345	88.88888886099446	3.533997696032693e-41	-0.002226888836477056	297.3333333333351	1.7302698580214194e-51	-800.0	1.8955909690154505e-42	4.904656632986681e-05	-3.3329011427181215e-42	0.9999999999215469	1.1027472005736787e-43	-1.2526249706166135e-05	-1.987887516946707e-43	-2.2779671267525804e-41	-0.001435402482618152	1.2636837437389564e-41	-2.3258074726113787e-41	-0.0014283070088611717	1.2908569876012267e-41	800.0	-0.0014354024826181532	2.2779354689058353e-41	88.88888888888914	9.145520957444869e-51	-4.693351415886511e-18	3.789561257386945e-12	1.7676806001119663e-52	-6.882729282262095e-17	3.7895612580119775e-13
3.35	88.88888886156909	3.6832325921988605e-41	-0.0022038327200825467	297.77777777777953	1.7759989349705712e-51	-800.0	1.9262361046255784e-42	5.4685355351314315e-05	-3.382636671597113e-42	0.999999999923163	1.1505224366443676e-43	-1.2396559051416811e-05	-2.071832595275911e-43	-2.374161615529438e-41	-0.0014205410282981492	1.3184310286325662e-41	-2.4227128750657326e-41	-0.0014126408085471534	1.3460395871716134e-41	800.0	-0.00142054102829815	2.374128928102773e-41	88.88888888888916	9.146075127130926e-51	-4.521367258620827e-18	7.105427357600522e-12	-1.9493861192747044e-53	-6.231792113226433e-17	7.105427357873802e-13
3.355	88.88888886219871	3.8346604191918124e-41	-0.00217828997180343	298.222222222224	1.8217271501302698e-51	-800.0	1.9563623903775895e-42	6.025410871583858e-05	-3.431572756867634e-42	0.9999999999249339	1.1990573454729556e-43	-1.2252881092314044e-05	-2.157011177349957e-43	-2.471769572735955e-41	-0.0014040767469656152	1.3740487921970102e-41	-2.521020193096033e-41	-0.0013953792779084523	1.4020852412549976e-41	800.0	-0.0014040767469656159	2.4717359012125223e-41	88.88888888888921	9.145469948854799e-51	-5.323759072576944e-18	3.789561257386945e-12	-8.136236428295387e-53	-1.0286135213896963e-16	3.7895612587829453e-13
3.36	88.88888886288098	3.988244293943491e-41	-0.0021502687688635725	298.66666666666845	1.867454584731423e-51	-800.0	1.9859766276945338e-42	6.585452092136512e-05	-3.479650126674905e-42	0.9999999999268527	1.2483390415405355e-43	-1.2095261825742302e-05	-2.2434025139804384e-43	-2.5707672187317266e-41	-0.0013860149094752602	1.430522263840822e-41	-2.620704826316357e-41	-0.0013765133473552	1.458979280744262e-41	800.0	-0.001386014909475261	2.5707326142385635e-41	88.8888888888892	9.145403654243453e-51	-5.251009270742896e-18	5.921189464667102e-12	-4.888882265342699e-53	1.4299869603787088e-16	5.921189466393836e-13
3.365	88.88888886361477	4.1439438764073186e-41	-0.002119720325565853	299.11111111111296	1.9131814112873412e-51	-800.0	2.014993657974423e-42	7.1994611844889e-05	-3.526504293728455e-42	0.9999999999289164	1.2983546367683373e-43	-1.1923426832155455e-05	-2.330983910966916e-43	-2.6711285445275874e-41	-0.0013663240696634724	1.4878366690728542e-41	-2.7217317325490654e-41	-0.001355888410323225	1.5167045969180467e-41	800.0	-0.0013663240696634724	2.6710930648937345e-41	88.88888888888927	9.14503091620206e-51	-4.358806384524469e-18	3.079018521626893e-12	-7.324939357902152e-52	-1.758075655606155e-17	3.079018521677085e-13
3.37	88.88888886441552	4.301664884680511e-41	-0.0020858704720233896	299.5555555555574	1.9589064637869264e-51	-800.0	2.0430990765587837e-42	8.024379662628368e-05	-3.5709736013838624e-42	0.9999999999311685	1.349082955655922e-43	-1.1733021405939132e-05	-2.4197023261041013e-43	-2.7727927583383207e-41	-0.0013445052150247762	1.5459677247855803e-41	-2.824032590605036e-41	-0.0013329002559292625	1.5752350740249978e-41	800.0	-0.0013445052150247775	2.7727564811830053e-41	88.88888888888923	9.145496195268219e-51	-5.3816675164738656e-18	-2.842170943040209e-12	5.266338567765101e-51	-1.2244059376684989e-16	2.8421709456775766e-13
3.375	88.88888886528582	4.461352514559584e-41	-0.0020484467779831876	300.00000000000165	2.004741079771796e-51	-800.0	2.071034926973361e-42	8.816412157811744e-05	-3.614927109993291e-42	0.9999999999336163	1.4005109361779906e-43	-1.1522513126920304e-05	-2.509526926495057e-43	-2.8757245219295e-41	-0.001320382743142463	1.6049004517783844e-41	-2.927592623930063e-41	-0.001307643095574739	1.634565854294881e-41	800.0	-0.0013203827431424642	2.875687537548834e-41	88.88888888888926	9.190159913200346e-51	-5.314179645060932e-18	2.1316282072801568e-12	5.2414879812069014e-51	-2.1069184708201795e-17	2.1316282073842818e-13
3.38	88.88888886621913	4.62297930516707e-41	-0.0020075388598682817	300.4444444444461	2.0506921200256098e-51	-800.0	2.0987430126002185e-42	9.58674259461834e-05	-3.658289131406892e-42	0.9999999999362412	1.4526357083502037e-43	-1.129240608747904e-05	-2.6004422625576295e-43	-2.9799061281255617e-41	-0.0012940144187482778	1.6646315555855032e-41	-3.032394887664167e-41	-0.0012801791010772408	1.694690412747167e-41	800.0	-0.001294014418748279	2.9798685333269373e-41	88.88888888888924	9.190455316163812e-51	-5.547559729023109e-18	-4.2632564145603135e-12	-7.379882734025942e-52	1.094974589997558e-16	4.2632564159664795e-13
3.385	88.88888886720792	4.786521467330889e-41	-0.001963270062736401	300.8888888888906	2.0966435729223162e-51	-800.0	2.1260106237960422e-42	0.000103309044230162	-3.701105072599931e-42	0.9999999999390221	1.505447728663456e-43	-1.1043394103565626e-05	-2.692434950273422e-43	-3.0853222369841774e-41	-0.0012654797472936618	1.7251500951340333e-41	-3.138423737761392e-41	-0.0012505832399776456	1.7555961307189155e-41	800.0	-0.0012654797472936628	3.085284134551785e-41	88.88888888888923	9.190214604494367e-51	-4.421793002426224e-18	5.684341886080418e-12	-3.276508511174415e-53	8.27027238808997e-17	5.684341886682048e-13
3.39	88.88888886824526	4.951953040891263e-41	-0.0019157288365226615	301.33333333333513	2.142594891248686e-51	-800.0	2.1528415112666094e-42	0.00011061389644260994	-3.743299610409102e-42	0.9999999999419397	1.558936034968003e-43	-1.0775974706065596e-05	-2.7854903842013916e-43	-3.191956108635606e-41	-0.001234835741618472	1.786443503232519e-41	-3.245661372326103e-41	-0.0012188946928693499	1.8172704969969909e-41	800.0	-0.0012348357416184727	3.19191760788798e-41	88.88888888888928	9.190213022024556e-51	-4.8124219153819914e-18	7.342274936187207e-12	-2.4876499851043048e-52	-6.75342562931881e-17	7.342274936497797e-13
3.395	88.88888886932516	5.119244872436023e-41	-0.0018649491037413058	301.77777777777965	2.1885459175112033e-51	-800.0	2.1792385747336734e-42	0.00011790150993706001	-3.784804947246171e-42	0.9999999999449769	1.6130897468376963e-43	-1.0490338709122027e-05	-2.8795921622445712e-43	-3.299788943876677e-41	-0.0012021042674128651	1.848499305397927e-41	-3.35408804720483e-41	-0.0011851183982812812	1.8797010834391673e-41	800.0	-0.0012021042674128656	3.2997501617014226e-41	88.88888888888928	9.190187465192996e-51	-4.395240568786308e-18	-9.94759830064073e-12	1.8242182197899577e-51	4.087364784821999e-16	9.94759830903801e-13
3.4	88.8888888704427	5.288364357976707e-41	-0.0018109032902980562	302.2222222222242	2.234507828523138e-51	-800.0	2.2051324361230745e-42	0.00012564140144659676	-3.8253202168072266e-42	0.9999999999481195	1.6678979550471378e-43	-1.0186331008455007e-05	-2.9747219407590894e-43	-3.4087997179713874e-41	-0.0011672675510356095	1.9113049929154617e-41	-3.463675399059399e-41	-0.0011491247881062845	1.9428734743677985e-41	800.0	-0.0011672675510356095	3.408760780194101e-41	88.88888888888921	9.205164101663462e-51	-1.2830848823122185e-18	-7.105427357600522e-12	8.90886183217445e-52	4.449013081508615e-16	7.105427371529113e-13
3.405	88.88888887160667	5.459230652405249e-41	-0.001752838948387238	302.6666666666687	2.2805261346898102e-51	-800.0	2.230206292517933e-42	0.00013556058596131176	-3.86370288223454e-42	0.9999999999513931	1.7233421855866455e-43	-9.859719085157433e-06	-3.070834233279525e-43	-3.5189362945566836e-41	-0.0011298405815465264	1.97483937363865e-41	-3.574362333281692e-41	-0.0011102895408867642	2.0067641783702009e-41	800.0	-0.0011298405815465264	3.518897352426796e-41	88.88888888888923	9.200370148418215e-51	-7.112854468016911e-19	6.158037043253786e-12	1.2648910577812391e-51	-1.3018693482925568e-16	6.158037044629926e-13
3.41	88.8888888728151	5.631794100966989e-41	-0.0016904478420913607	303.1111111111132	2.326584918641572e-51	-800.0	2.2551834841304556e-42	0.00014520293149668627	-3.901629251929363e-42	0.9999999999547919	1.7794113743062746e-43	-9.508769112193745e-06	-3.167901101430529e-43	-3.630166649934063e-41	-0.001089624677002541	2.0390897538151575e-41	-3.686135777961868e-41	-0.0010686919651483246	2.071370426204347e-41	800.0	-0.0010896246770025412	3.6301278720609137e-41	88.88888888888927	9.218221316833262e-51	-2.0348594285585497e-18	1.2552921665094256e-11	2.2320327970308333e-51	-2.3655009717134674e-16	1.255292166732306e-12
3.415	88.88888887405733	5.806031976802758e-41	-0.0016238151047314182	303.5555555555576	2.3726765963231907e-51	-800.0	2.2799176737211005e-42	0.00015459197936503908	-3.9390895224274115e-42	0.9999999999582858	1.8361030371656517e-43	-9.133959964495213e-06	-3.2659097574608583e-43	-3.7424761259565576e-41	-0.0010466747124286322	2.104053279329749e-41	-3.7989823803415224e-41	-0.0010244046253273704	2.1366852563751033e-41	800.0	-0.0010466747124286322	3.742437689873947e-41	88.88888888888934	9.218751723084505e-51	-2.598220849001089e-18	3.3158661002135772e-12	-2.8842664860461215e-52	4.703469005589685e-18	3.3158661002169137e-13
3.42	88.88888887532156	5.981924860867774e-41	-0.001553069025242182	304.000000000002	2.418768995927305e-51	-800.0	2.3042786123002637e-42	0.00016373615300935708	-3.976088846952877e-42	0.9999999999618414	1.8934084714022638e-43	-8.7360132673206e-06	-3.3648492746895112e-43	-3.855852197596888e-41	-0.0010010733799882595	2.1697199709720737e-41	-3.912888935291249e-41	-0.000977497672721645	2.2026979760286413e-41	800.0	-0.0010010733799882595	3.855814288786175e-41	88.88888888888931	9.218294731171915e-51	-2.1855622696256403e-18	2.1316282072801568e-12	-6.776850986111293e-53	5.23611895961116e-17	2.1316282079232555e-13
3.425	88.8888888765967	6.159450564778028e-41	-0.0014782877696670191	304.44444444444633	2.4648606686552377e-51	-800.0	2.3282665640802873e-42	0.00017277269941836946	-4.012551461367812e-42	0.9999999999654278	1.9513183515334924e-43	-8.315368704664436e-06	-3.4647071682204434e-43	-3.970280553714805e-41	-0.0009528710637558585	2.2360791350098545e-41	-4.02784006719897e-41	-0.0009280019402628669	2.2693978998802587e-41	800.0	-0.0009528710637558583	3.970243366664075e-41	88.88888888888937	9.218263062043715e-51	-2.199116315673817e-18	7.105427357600522e-12	-5.471386016251196e-52	1.897857065037445e-17	7.105427357625868e-13
3.43	88.88888887787225	6.338583707279457e-41	-0.0013994899516574088	304.8888888888908	2.510952018281658e-51	-800.0	2.351881305708685e-42	0.00018183139494458485	-4.0484099703768866e-42	0.9999999999690152	2.009823351376531e-43	-7.872130978316816e-06	-3.565469156529295e-43	-4.0857448236534477e-41	-0.000902079761672808	2.3031200756040333e-41	-4.143818469719617e-41	-0.0008759110826963578	2.336774336246676e-41	800.0	-0.0009020797616728077	4.085708563321857e-41	88.88888888888937	9.218378139098604e-51	-1.983694537707281e-18	2.842170943040209e-12	3.636956667285439e-51	1.7342042092332706e-17	2.842170943093117e-13
3.435	88.88888887914356	6.519273501583859e-41	-0.0013162666755871663	305.3333333333355	2.5571835512660257e-51	-800.0	2.3747524173738756e-42	0.0001930478603323987	-4.082378137525221e-42	0.9999999999725909	2.0689103124396684e-43	-7.404000050380724e-06	-3.6671066624330465e-43	-4.2022122493579286e-41	-0.000848435908810681	2.3708276951223955e-41	-4.260769988547961e-41	-0.000820606944490967	2.404805981698687e-41	800.0	-0.0008484359088106806	4.2021771427375606e-41	88.8888888888894	9.252247302595533e-51	-2.1219932326767584e-18	-7.57912251477389e-12	6.109591541878758e-51	-6.771820375577554e-17	7.579122515076416e-13
3.44	88.88888888040776	6.701452715039982e-41	-0.0012279277067976891	305.77777777778005	2.6034842532505915e-51	-800.0	2.397396335351483e-42	0.00020448258876453772	-4.115659159792157e-42	0.9999999999761464	2.128564476190298e-43	-6.9070933509017345e-06	-3.7695818539718944e-43	-4.319639463015701e-41	-0.0007914945954253793	2.4391850543547724e-41	-4.3786749384331937e-41	-0.0007620269978903768	2.4734863276165767e-41	800.0	-0.0007914945954253796	4.3196057682556106e-41	88.88888888888931	9.271951255549322e-51	-2.6091001311892035e-18	-5.684341886080418e-12	2.705370119102526e-51	-1.2866772000486347e-16	5.684341887536644e-13
3.445	88.88888888164875	6.88510104983855e-41	-0.0011345403690286187	306.2222222222246	2.6498721267306178e-51	-800.0	2.419896811419174e-42	0.00021570173698570564	-4.14852420050169e-42	0.999999999979637	2.188784008207328e-43	-6.381789575915911e-06	-3.872883308449998e-43	-4.4380133692483833e-41	-0.0007312992168860947	2.508190041238682e-41	-4.497521402381517e-41	-0.0007002330020757634	2.542811264692323e-41	800.0	-0.0007312992168860951	4.437981356364451e-41	88.88888888888935	9.280272501136713e-51	-3.139268838182391e-18	6.158037043253786e-12	6.3980308222305536e-52	3.860101213706581e-17	6.15803704337477e-13
3.45	88.88888888284916	7.070202141806076e-41	-0.0010362327424887035	306.66666666666913	2.696273354344992e-51	-800.0	2.442075508849569e-42	0.00022665204600376017	-4.1810145820395575e-42	0.999999999983013	2.249562140432534e-43	-5.828809176597952e-06	-3.977001816579905e-43	-4.5573234099028854e-41	-0.0006679323308161569	2.577834891796299e-41	-4.617298647198285e-41	-0.0006353019738056568	2.6127715746469994e-41	800.0	-0.000667932330816157	4.557293359085723e-41	88.88888888888935	9.280257520281883e-51	-2.4018361814600107e-18	2.842170943040209e-12	-1.752697597231716e-52	4.197361837202001e-17	2.842170943350145e-13
3.455	88.88888888399175	7.256737407997861e-41	-0.000933085516906712	307.1111111111137	2.742674787806755e-51	-800.0	2.4639307996379765e-42	0.00023751045780862014	-4.213042424486085e-42	0.9999999999862267	2.3108908146600304e-43	-5.248606032672528e-06	-4.081926920488471e-43	-4.677557595448895e-41	-0.0006014459480008397	2.6481103626048493e-41	-4.737993422114602e-41	-0.0005672602396923825	2.6833579925627794e-41	800.0	-0.00060144594800084	4.677529798271034e-41	88.88888888888938	9.280309235522626e-51	-2.779942363067321e-18	5.447494307493734e-12	2.918959204225552e-52	1.1360413974339084e-17	5.44749430750558e-13
3.46	88.88888888505973	7.444684403152383e-41	-0.0008250989202297497	307.55555555555793	2.7890768071165433e-51	-800.0	2.4854539700836483e-42	0.0002484967985004973	-4.2445024315084784e-42	0.9999999999892304	2.3727619224366854e-43	-4.641181426342311e-06	-4.187645988714721e-43	-4.798701444422004e-41	-0.0005318402153697537	2.7190071505726866e-41	-4.859589459843836e-41	-0.000496071150809421	2.754561003892698e-41	800.0	-0.0005318402153697538	4.79867620620938e-41	88.8888888888894	9.282761316220018e-51	-2.2529054325900147e-18	3.552713678800261e-12	2.711900281374243e-52	2.579141655465121e-17	3.55271367889388e-13
3.465	88.8888888860407	7.63398462562953e-41	-0.0007116112743436257	308.00000000000244	2.835491542831046e-51	-800.0	2.50624227951951e-42	0.00026212574236204194	-4.274014538751471e-42	0.9999999999919895	2.435161676139777e-43	-4.002813418214945e-06	-4.2941260989266855e-43	-4.920717213237498e-41	-0.00045868863008532697	2.79050942623149e-41	-4.98203095716785e-41	-0.00042097765711402303	2.82635955641956e-41	800.0	-0.00045868863008532724	4.920694874058697e-41	88.88888888888943	9.282789113416446e-51	-2.6294476856828125e-18	5.921189464667102e-12	8.160099043985592e-53	-6.736314649574147e-17	5.921189465050285e-13
3.47	88.88888888691709	7.824588854310587e-41	-0.000592107015308132	308.44444444444696	2.881910197283091e-51	-800.0	2.5270024942916084e-42	0.0002756619403744367	-4.3031285177148436e-42	0.9999999999944543	2.4980804925790008e-43	-3.3306019611266977e-06	-4.4013395501636866e-43	-5.04357314279747e-41	-0.00038165887122181566	2.8626061803252415e-41	-5.105306508551582e-41	-0.00034200632833480683	2.8987528452905353e-41	800.0	-0.00038165887122181615	5.043554074992368e-41	88.88888888888944	9.283825141744199e-51	-2.7453637556631184e-18	-1.4210854715201044e-12	1.2804789516304416e-52	-2.3844451699737216e-18	1.421085471522105e-13
3.475	88.88888888766446	8.016478536963026e-41	-0.00046660707111813597	308.88888888889136	2.928329353005941e-51	-800.0	2.5475574729101153e-42	0.00028906429169744865	-4.331878624509875e-42	0.9999999999965563	2.561516528895994e-43	-2.6246647750485386e-06	-4.509275899657215e-43	-5.167257258392247e-41	-0.00030076442849421534	2.9352952875030306e-41	-5.229405689825267e-41	-0.0002591955087237896	2.9717349909229217e-41	800.0	-0.0003007644284942161	5.167241850658376e-41	88.88888888888941	9.283923780289684e-51	-2.6778201579073905e-18	-2.842170943040209e-12	1.7767177996095275e-53	2.6362963252273223e-17	2.842170943162476e-13
3.48	88.88888888825724	8.20963770266868e-41	-0.0003351684274930611	309.33333333333576	2.9747494634431054e-51	-800.0	2.5678380478334246e-42	0.0003024159159173187	-4.3602346008297827e-42	0.9999999999982235	2.6254631664431433e-43	-1.8853224046518039e-06	-4.617926157081634e-43	-5.291759250209116e-41	-0.000216042033616136	3.0085691507625205e-41	-5.354317209982503e-41	-0.00017255973052555606	3.0452981322299105e-41	800.0	-0.00021604203361613698	5.291747906561899e-41	88.88888888888941	9.284155777496137e-51	-2.4968185001882052e-18	1.1842378929334205e-12	-1.6463414040660893e-53	4.8124503664867224e-17	1.184237893911251e-13
3.485	88.88888888866913	8.404047120954711e-41	-0.00019777485592472078	309.7777777777801	3.0211707803775594e-51	-800.0	2.5878419837556858e-42	0.00031588899603372556	-4.388120612027176e-42	0.9999999999993819	2.689913521019614e-43	-1.1124835645772295e-06	-4.727279497502284e-43	-5.41706670485689e-41	-0.00012748122605591605	3.0824198665915524e-41	-5.480027605514273e-41	-8.206419918876358e-05	3.119434344087897e-41	800.0	-0.00012748122605591708	5.417059847172458e-41	88.88888888888941	9.284368168752186e-51	-2.2228634370200074e-18	-3.079018521626893e-12	3.7128926396008315e-52	4.732415932175651e-17	3.0790185219905763e-13
3.49	88.8888888888727	8.59967150103871e-41	-5.408734021020564e-05	310.2222222222246	3.0676083434687495e-51	-800.0	2.607298776669361e-42	0.0003312871400649701	-4.4146189926766054e-42	0.9999999999999544	2.7548583668654188e-43	-3.042412886824093e-07	-4.837316056953682e-43	-5.543156845126572e-41	-3.486348359024726e-05	3.156836838011143e-41	-5.606497123733613e-41	1.284257547465355e-05	3.1941279520042903e-41	800.0	-3.4863483590248454e-05	5.543154924845064e-41	88.88888888888938	9.288368054286648e-51	-1.9931802084562828e-18	-1.1842378929334205e-12	1.262417295405097e-51	7.582358499609227e-17	1.184237895360811e-13
3.495	88.88888888883648	8.796449852631652e-41	9.674571485117018e-05	310.6666666666689	3.114067052693117e-51	-800.0	2.626546902165536e-42	0.0003475134670754366	-4.440318452287484e-42	0.9999999999998527	2.8202852417882586e-43	5.44194646037921e-07	-4.948001506799044e-43	-5.669990308548587e-41	6.236011290318033e-05	3.2318057419721047e-41	-5.733702877238689e-41	0.0001123978504115653	3.2693729780979185e-41	800.0	6.236011290317918e-05	5.669993826610507e-41	88.8888888888894	9.295344638776169e-51	-1.4881633833575921e-18	7.105427357600522e-13	8.41889153120939e-52	8.541229526583942e-17	7.105427408936352e-14
3.5	88.88888888852392	8.994361917978727e-41	0.0002548035556198969	311.11111111111336	3.1605453413666586e-51	-800.0	2.6457014781437928e-42	0.00036372089049261947	-4.4656682910476135e-42	0.9999999999989736	2.886193159906424e-43	1.433270000363398e-06	-5.059324441651245e-43	-5.797554013595585e-41	0.0001642406438471297	3.3073254289864434e-41	-5.861634850129911e-41	0.00021659621014140777	3.345166742372505e-41	800.0	0.00016424064384712848	5.797563494775435e-41	88.88888888888938	9.296222499963695e-51	-1.1686331706547258e-18	2.1316282072801568e-12	5.076867819603514e-53	7.024486628316919e-17	2.1316282084375683e-13
3.505	88.88888888789667	9.193394193848234e-41	0.0004200427974249432	311.5555555555578	3.2070283778944224e-51	-800.0	2.664627490322594e-42	0.00037985813937741484	-4.490705797850255e-42	0.9999999999972096	2.9525772933170933e-43	2.3627407355219043e-06	-5.171277257356482e-43	-5.925839236712602e-41	0.0002707501444583341	3.38339035065227e-41	-5.990284094755794e-41	0.0003254175511415054	3.4215026969575203e-41	800.0	0.0002707501444583327	5.925855225460255e-41	88.88888888888941	9.2966903849813e-51	-7.512248505582614e-19	2.368475785866841e-12	-1.3560308946425383e-51	9.537577026166917e-17	2.3684757877871766e-13
3.51	88.88888888691463	9.393531207391535e-41	0.0005924695311829907	312.0000000000023	3.2535093909280225e-51	-800.0	2.683322311519636e-42	0.0003960914745744715	-4.515360008193937e-42	0.9999999999944476	3.019431900851932e-43	3.3326411129228307e-06	-5.283851240981284e-43	-6.054835982779454e-41	0.0003818925408052268	3.4599939103434643e-41	-6.119639630481638e-41	0.00043888940011266596	3.498374218719207e-41	800.0	0.0003818925408052254	6.054859045214573e-41	88.88888888888941	9.29608790323594e-51	-3.123639230520737e-19	9.710750722054047e-12	9.09570110481546e-51	3.350391904579205e-17	9.710750722111845e-13
3.515	88.88888888553332	9.59474336084909e-41	0.0007723915280087052	312.44444444444673	3.300249513775444e-51	-800.0	2.7015390510763555e-42	0.0004141337871472132	-4.538810648928373e-42	0.9999999999905628	3.086749163059982e-43	4.3447023450899765e-06	-5.397029728994846e-43	-6.184525139854646e-41	0.0004978662152300608	3.537127119290018e-41	-6.249666977577962e-41	0.0005575299908991964	3.5757676116274384e-41	800.0	0.0004978662152300585	6.184555875987958e-41	88.88888888888948	9.37562971863268e-51	-3.605556182369126e-19	-4.973799150320365e-12	1.0011062120111183e-50	1.4865171668534525e-17	4.973799150342579e-13
3.52	88.88888888369816	9.796976002033598e-41	0.0009606424933416309	312.88888888889124	3.3471442870850357e-51	-800.0	2.719589330498577e-42	0.00043305369076609306	-4.561526708358765e-42	0.9999999999854012	3.154518127604678e-43	5.403614025125564e-06	-5.51078195489822e-43	-6.31487142388086e-41	0.0006192085555178011	3.614777379110151e-41	-6.38034509184055e-41	0.0006815907348165078	3.6536781069506325e-41	800.0	0.0006192085555177992	6.314910490209088e-41	88.88888888888937	9.381995102885764e-51	-5.351445483159401e-20	-1.0658141036400784e-11	-4.615839097488929e-52	9.160991550296348e-17	1.0658141036794492e-12
3.525	88.88888888135513	1.0000211291425975e-40	0.001157313288877341	313.3333333333357	3.3940570114627056e-51	-800.0	2.7375637926270718e-42	0.000451936952040654	-4.5839603913378936e-42	0.9999999999788115	3.222738417748881e-43	6.509887250072981e-06	-5.625097871354756e-43	-6.445863307018998e-41	0.0007459781290756842	3.692944234468477e-41	-6.511665883779958e-41	0.0008110611346061954	3.732103532683317e-41	800.0	0.000745978129075682	6.445911388924996e-41	88.8888888888894	9.383284254973184e-51	4.2766059509344454e-19	3.789561257386945e-12	2.1219344641984893e-52	3.9619580609162735e-17	3.789561257594055e-13
3.53	88.8888888784491	1.020443857617092e-40	0.0013623522829511237	313.7777777777801	3.440977047602577e-51	-800.0	2.755346185919066e-42	0.00047073948196097994	-4.606141425690339e-42	0.9999999999706383	3.2914059371822132e-43	7.66323159182508e-06	-5.739971475930815e-43	-6.577493899299073e-41	0.0008781416552943887	3.7716229725485347e-41	-6.643622115546182e-41	0.000945918062438899	3.811038386458638e-41	800.0	0.0008781416552943862	6.577551705544641e-41	88.8888888888894	9.38501922854491e-51	4.96770853412604e-19	7.57912251477389e-12	-3.486650915009409e-51	1.4418839669464544e-16	7.57912251614544e-13
3.535	88.88888887492212	1.0409645054733135e-40	0.0015757616295556179	314.2222222222246	3.487909149020046e-51	-800.0	2.7729324113691865e-42	0.0004896310587989988	-4.6279994526661464e-42	0.9999999999607188	3.3605158396292096e-43	8.863659166598529e-06	-5.8553955565223536e-43	-6.709754923381491e-41	0.0010157005225903811	3.850808019122843e-41	-6.776204533659504e-41	0.0010861870283774308	3.8904770484818877e-41	800.0	0.0010157005225903783	6.709823188486154e-41	88.88888888888947	9.387091117120655e-51	1.6645520111667467e-18	9.94759830064073e-12	2.7324005099840944e-50	1.4518904326874867e-16	9.947598301700277e-13
3.54	88.8888888707037	1.0615795427446104e-40	0.0017980431926751196	314.6666666666693	3.5359174605559024e-51	-800.0	2.790010668430549e-42	0.0005108053203332672	-4.648535301651419e-42	0.9999999999488546	3.4300595849923953e-43	1.0113992959314843e-05	-5.9713502361041395e-43	-6.842623577870639e-41	0.0011589782212073007	3.930489547923508e-41	-6.909375260510613e-41	0.0012325219734170621	3.970404966530665e-41	800.0	0.0011589782212072968	6.842703084378055e-41	88.88888888888945	9.621649054966117e-51	1.1903130720755122e-18	-2.4158453015841775e-11	2.9107309179502716e-50	-5.597194040760517e-16	2.4158453022325756e-12
3.545	88.88888886571266	1.0822848095110056e-40	0.0020298409509633096	315.1111111111139	3.584094205376066e-51	-800.0	2.8071099599873607e-42	0.0005322987899982477	-4.6686649298754017e-42	0.9999999999348168	3.5000301618397576e-43	1.1417855349912883e-05	-6.087812090516047e-43	-6.976072992430629e-41	0.0013083898453101813	4.010659477307257e-41	-7.043122658731923e-41	0.001385014343951173	4.050822743198877e-41	800.0	0.0013083898453101765	6.976164579311334e-41	88.88888888888928	9.636882560352273e-51	-2.735344251728798e-18	-1.3500311979440992e-11	-2.1270953865062543e-51	-2.3423070961405797e-16	1.3500311981472947e-12
3.55	88.8888888598742	1.1030791160506725e-40	0.0022711678114205936	315.5555555555584	3.63227862419145e-51	-800.0	2.824082893763575e-42	0.0005536500998157515	-4.6886049562143116e-42	0.9999999999183963	3.5704273439098497e-43	1.2775318940283362e-05	-6.204774414401219e-43	-7.110095468212883e-41	0.0014639437144633827	4.091317523879337e-41	-7.177441296629532e-41	0.0015436234141833803	4.131726758602755e-41	800.0	0.0014639437144633779	7.110200004606556e-41	88.88888888888933	9.636912223627572e-51	-1.1192350051863886e-18	-4.736951571733681e-13	-2.6194992032819847e-52	8.278695539656868e-17	4.7369516440764094e-14
3.555	88.8888888531123	1.123961603791897e-40	0.0025219676749506366	316.0000000000029	3.680462758972059e-51	-800.0	2.8408890706291637e-42	0.0005749557718596872	-4.708318318562711e-42	0.9999999998993782	3.641247100276078e-43	1.4186068173024762e-05	-6.3222323664439e-43	-7.244685443905324e-41	0.0016256036684528874	4.172459047019608e-41	-7.312324680758429e-41	0.001708336109854625	4.213112235508707e-41	800.0	0.0016256036684528829	7.24480382610346e-41	88.88888888888927	9.636822189602674e-51	-2.7579900300840324e-18	2.368475785866841e-12	-1.403743807938322e-52	-3.1984893340811577e-16	2.3684758074637137e-13
3.56	88.88888884534379	1.1449307707239586e-40	0.0027823362876023836	316.4444444444472	3.7286470566646925e-51	-800.0	2.8573876204038667e-42	0.0005972911527636944	-4.72733939329238e-42	0.9999999998775293	3.712484540283001e-43	1.5650641619680167e-05	-6.440177482803863e-43	-7.379833203444066e-41	0.0017934314230321445	4.254078414711947e-41	-7.447752978539232e-41	0.0018794474208239536	4.294970361049748e-41	800.0	0.001793431423032138	7.379966362178606e-41	88.88888888888934	9.636883084189019e-51	-3.9580704785608186e-18	-4.500103993146998e-12	9.635113291312026e-52	-3.7000619936161043e-16	4.500104008358267e-13
3.565	88.88888883645717	1.1659820750486842e-40	0.0030530702313809124	316.8888888888917	3.776846734847106e-51	-800.0	2.8736351288421845e-42	0.00062106638550689	-4.745497528805783e-42	0.9999999998525354	3.7841298934859775e-43	1.7173520054050127e-05	-6.55858418574285e-43	-7.51550940238866e-41	0.001967940437057442	4.3361643734087155e-41	-7.583701468584408e-41	0.0020573698342589144	4.3772939434213485e-41	800.0	0.0019679404370574354	7.515658337421987e-41	88.88888888888924	9.645071907691478e-51	-6.255092034235994e-18	-3.552713678800261e-12	9.57289001898521e-52	-3.721810343165505e-16	3.552713698295038e-13
3.57	88.88888882634954	1.1871135379170109e-40	0.00333438957047096	317.3333333333361	3.825072276764609e-51	-800.0	2.8898830551191316e-42	0.0006448263818885733	-4.763435401769961e-42	0.9999999998241078	3.856182504953681e-43	1.8755941337198192e-05	-6.677441325082302e-43	-7.651701241634409e-41	0.002149272558958843	4.4187161372382277e-41	-7.720163840836729e-41	0.0022420989852634586	4.460082994593703e-41	800.0	0.0021492725589588343	7.651866996617394e-41	88.88888888888933	9.645099288590132e-51	-6.895679076703957e-18	1.0894988614987467e-11	-1.3357282205676635e-52	3.01303076495597e-16	1.0894988619153767e-12
3.575	88.88888881492322	1.2083244687264967e-40	0.0036262234672488473	317.7777777777805	3.87329781903915e-51	-800.0	2.905986156783169e-42	0.0006684123909503825	-4.781225858114318e-42	0.9999999997919714	3.928639902886608e-43	2.0397507007518042e-05	-6.79674500299797e-43	-7.788404239501956e-41	0.002337382128400693	4.5017308501481964e-41	-7.857135872121121e-41	0.002433585030141998	4.543333365647268e-41	800.0	0.0023373821284006853	7.788587888296743e-41	88.88888888888934	9.645114484697665e-51	-3.9279967562346026e-18	1.4921397450961096e-11	1.071214213061238e-53	3.9991695565300826e-16	1.49213974563203e-12
3.58	88.88888880207627	1.2296140437652446e-40	0.003928536974724627	318.22222222222484	3.921523614345427e-51	-800.0	2.921916128678066e-42	0.0006921542672317527	-4.798734209910873e-42	0.9999999997558395	4.001498376215063e-43	2.2098020488221516e-05	-6.91649057213259e-43	-7.925613054502422e-41	0.0025322466193435254	4.5852042344713616e-41	-7.994609480737599e-41	0.002631872621563759	4.627040096779502e-41	800.0	0.0025322466193435154	7.925815702998315e-41	88.88888888888944	9.645238069561916e-51	-3.4194928442867226e-18	-6.39488462184047e-12	4.784100950196585e-53	2.8310437384836945e-17	6.394884621903136e-13
3.585	88.88888878767345	1.2509788355476493e-40	0.004241921246434985	318.6666666666691	3.969750556569268e-51	-800.0	2.937426397789658e-42	0.0007180483400696601	-4.815129850912638e-42	0.9999999997153315	4.074749633965058e-43	2.386080701798922e-05	-7.036658724601416e-43	-8.063305529034758e-41	0.0027342470760732887	4.669126736325491e-41	-8.132552789869985e-41	0.002837578318425603	4.71119116439134e-41	800.0	0.002734247076073281	8.06352834792042e-41	88.8888888888893	9.645539426937918e-51	-2.440619514080234e-18	-9.94759830064073e-12	4.2302371187805875e-53	7.26259139875846e-16	9.947598327152273e-13
3.59	88.88888877157376	1.27241597013225e-40	0.004566843676008936	319.11111111111353	4.0179786196655825e-51	-800.0	2.9530143424873547e-42	0.0007440465821645457	-4.831278438949603e-42	0.9999999996700514	4.148390390066359e-43	2.5688495686026142e-05	-7.157233267904224e-43	-8.201463077412807e-41	0.0029436847700223985	4.753494540788151e-41	-8.270958721972176e-41	0.0030507319630214288	4.795788793724409e-41	800.0	0.0029436847700223916	8.20170729828247e-41	88.88888888888938	9.645628365942041e-51	3.304712617440662e-18	1.8237263551174673e-11	1.401261129480447e-53	9.771545489164797e-16	1.82372635773527e-12
3.595	88.88888875365306	1.2939247311403095e-40	0.004903260663083251	319.55555555555804	4.066206758601121e-51	-800.0	2.96847361559625e-42	0.0007698063813540651	-4.847325265729551e-42	0.9999999996196495	4.222419701589649e-43	2.7580841240333667e-05	-7.27821015700251e-43	-8.340081046717426e-41	0.0031605315973836784	4.83830654006847e-41	-8.409824361798902e-41	0.003271265246490575	4.880829298609217e-41	800.0	0.0031605315973836715	8.340347936468172e-41	88.88888888888944	9.645698713467393e-51	6.290098545030775e-18	4.500103993146998e-12	-1.9505575211468926e-54	4.525869026764763e-16	4.5001040159059056e-13
3.6	88.88888873378453	1.315504499481406e-40	0.005251109334955242	320.00000000000244	4.114435226792297e-51	-800.0	2.983797158165872e-42	0.0007955207460191622	-4.863195109360245e-42	0.9999999995637693	4.296834271407719e-43	2.9537490022008388e-05	-7.399585894568856e-43	-8.479155412192722e-41	0.0033847470318339045	4.923558929556064e-41	-8.549144639156414e-41	0.0034991651528005737	4.966308790652239e-41	800.0	0.0033847470318338966	8.479446271959844e-41	88.88888888888944	9.645671605120026e-51	7.796978693608608e-18	2.1316282072801568e-12	2.523222514307678e-53	-1.0953939971566529e-16	2.1316282100946443e-13
3.605	88.88888871180703	1.3371527019842206e-40	0.005610816327961496	320.4444444444466	4.162669685691087e-51	-800.0	2.998705429545055e-42	0.0008232893875477706	-4.878047774908118e-42	0.9999999995019576	4.371627383641992e-43	3.1560841860502055e-05	-7.521345979624084e-43	-8.61866952613886e-41	0.003616606073573582	5.009243963758935e-41	-8.688890414039133e-41	0.003735020188922578	5.052215373210194e-41	800.0	0.003616606073573572	8.618985718673623e-41	88.88888888888947	9.646002373813065e-51	6.34229493467292e-18	4.973799150320365e-12	1.0235176204443078e-52	2.1554632719219756e-16	4.973799154990862e-13
3.61	88.88888868753598	1.3588660825174421e-40	0.005982985331574045	320.8888888888911	4.210902606896974e-51	-800.0	3.0136802468574934e-42	0.0008514279724414364	-4.892568236429487e-42	0.9999999994336953	4.446794263892495e-43	3.3654292509162576e-05	-7.643472064231654e-43	-8.758602326487408e-41	0.0038564978472755036	5.095356112001319e-41	-8.829052169502729e-41	0.003978936335823971	5.138550952683638e-41	800.0	0.0038564978472754945	8.758945288319071e-41	88.88888888888948	9.646543715198834e-51	1.0294647717518184e-17	3.079018521626893e-12	5.418792466235626e-53	8.039784682544445e-16	3.0790186265923817e-13
3.615	88.8888886608158	1.3806438842170257e-40	0.006367603200656815	321.33333333333564	4.259135520883833e-51	-800.0	3.028544690003313e-42	0.0008793264689383215	-4.90700328243037e-42	0.9999999993585448	4.522334739652374e-43	3.581776802667006e-05	-7.765959873223033e-43	-8.898948893862637e-41	0.00410441387989124	5.181895145386281e-41	-8.96962745857279e-41	0.004230844813245524	5.225312367085617e-41	800.0	0.004104413879891231	8.899320102320705e-41	88.8888888888895	9.646534488375192e-51	1.3338671104774655e-17	3.552713678800261e-12	-1.0923146424346053e-52	4.857761667503829e-16	3.55271371201128e-13
3.62	88.88888863149013	1.4024855896495967e-40	0.006764600503709587	321.77777777778016	4.307368527222046e-51	-800.0	3.043285632230138e-42	0.0009071681991806499	-4.921283999706552e-42	0.9999999992760665	4.598245827793748e-43	3.805087786091272e-05	-7.888806479656977e-43	-9.039705855482498e-41	0.00436030941744836	5.268857616995311e-41	-9.110611860057023e-41	0.004490729358853214	5.312496078375417e-41	800.0	0.004360309417448349	9.040106825419311e-41	88.88888888888954	9.646677246137295e-51	1.5529279959152564e-17	3.031649005909556e-11	8.288472781077714e-52	6.424335087023001e-16	3.0316490065902434e-12
3.625	88.88888859935982	1.4243888222502886e-40	0.007174391098278029	322.2222222222246	4.355607508863361e-51	-800.0	3.0576328905841065e-42	0.000937017457555981	-4.934614725584023e-42	0.9999999991857003	4.674521228998443e-43	4.035594996067578e-05	-8.011998486394244e-43	-9.180857826185517e-41	0.004624451223230965	5.356236255440882e-41	-9.251978158706568e-41	0.004759165087093415	5.40009080834085e-41	800.0	0.0046244512232309475	9.181290138812018e-41	88.88888888888975	9.653624509175359e-51	1.9072782862723014e-17	2.2974215122908356e-11	7.991525910377287e-52	1.4203517788523706e-16	2.2974215123347418e-12
3.63	88.8888885641959	1.4463504822074519e-40	0.007597582232475441	322.66666666666913	4.403874537369623e-51	-800.0	3.072052796258822e-42	0.0009672845778783475	-4.9476178394645094e-42	0.9999999990868016	4.751156601749315e-43	4.273640009670118e-05	-8.135518421973814e-43	-9.322384745039589e-41	0.004897230715737646	5.444026021526225e-41	-9.393716969129053e-41	0.0050362717065960474	5.488098638174353e-41	800.0	0.004897230715737627	9.322850061809793e-41	88.88888888888975	9.653533044913709e-51	1.7621531258964435e-17	9.473903143467363e-13	-1.4532888328334232e-52	2.626020829857005e-16	9.473903507413731e-14
3.635	88.88888852580796	1.4683698785383816e-40	0.008034163382976708	323.11111111111353	4.452141906986401e-51	-800.0	3.086367025607228e-42	0.0009973070952327974	-4.96055108245546e-42	0.9999999989788355	4.828151764610819e-43	4.519216907539262e-05	-8.259362380018712e-43	-9.464282113225348e-41	0.005178641111886025	5.532226673428673e-41	-9.535826289670937e-41	0.005321979143772522	5.576516540472179e-41	800.0	0.005178641111886005	9.464782140493455e-41	88.8888888888898	9.65343172312424e-51	2.1554570830154837e-17	1.0184445879227416e-11	-6.094645453358931e-53	4.532409470151485e-16	1.0184445889312764e-12
3.64	88.88888848400464	1.490446531706643e-40	0.008484072528208497	323.5555555555582	4.500409202292366e-51	-800.0	3.100553310070746e-42	0.0010273913243998153	-4.973301603456728e-42	0.9999999988612637	4.905503977605681e-43	4.772290802551661e-05	-8.383527644938344e-43	-9.606546798070001e-41	0.005468642433982006	5.620835040080212e-41	-9.678300885732805e-41	0.005616305077754869	5.665340849883371e-41	800.0	0.005468642433981982	9.607083283878945e-41	88.88888888888984	9.653854690725338e-51	1.9627458719464063e-17	4.500103993146998e-12	7.51587746996916e-52	-1.6414976567014233e-15	4.500104292530576e-13
3.645	88.88888843853029	1.512577761644712e-40	0.00894783930114127	324.0000000000026	4.548683076235803e-51	-800.0	3.114388674523962e-42	0.001059580727408957	-4.9851092856238944e-42	0.9999999987333666	4.983206469144567e-43	5.033159613267132e-05	-8.507999106749209e-43	-9.749161445177768e-41	0.005767576071553231	5.709843298861222e-41	-9.821113746971678e-41	0.005919852596424564	5.75456151329016e-41	800.0	0.005767576071553204	9.74973621685349e-41	88.88888888888982	9.659854462940412e-51	7.925745725809292e-18	-1.1842378929334204e-11	6.885294218835812e-52	-1.4274171246748161e-15	1.1842379015360823e-12
3.65	88.88888838911508	1.534761031565082e-40	0.009425961545197885	324.4444444444469	4.5969826958388313e-51	-800.0	3.128292329615944e-42	0.00109191747328576	-4.996711405489755e-42	0.9999999985943863	5.0612567796206635e-43	5.302103376626518e-05	-8.632762461077942e-43	-9.89210962292501e-41	0.006075762923301981	5.799248568357926e-41	-9.96425898446141e-41	0.006232663910403899	5.844180487075237e-41	800.0	0.006075762923301954	9.892724587855122e-41	88.88888888888975	9.659819698623271e-51	7.080789826292131e-18	-3.552713678800261e-12	-1.0558332613551813e-52	1.3104044929280104e-16	3.5527136812169487e-13
3.655	88.88888833553162	1.5569958163883624e-40	0.009918402137372079	324.8888888888913	4.645282051407143e-51	-800.0	3.1420987765694976e-42	0.0011240483874614441	-5.008241329613555e-42	0.9999999984436828	5.139654162402743e-43	5.579101210954645e-05	-8.757814733763502e-43	-1.003538789960345e-40	0.006393179060597174	5.889049957967851e-41	-1.0107734529946342e-40	0.006554680053254054	5.934194986430569e-41	800.0	0.006393179060597144	1.0036045012340114e-40	88.88888888888978	9.659840020994685e-51	6.826247165274142e-18	-1.8947806286934726e-12	-1.0051683439092151e-51	-6.441924991020903e-16	1.8947807382005992e-13
3.66	88.88888827754205	1.5792814753479641e-40	0.010425159697593958	325.3333333333354	4.6935819022986966e-51	-800.0	3.1557097009425596e-42	0.0011568256914864306	-5.019392393361627e-42	0.999999998280587	5.218395748936022e-43	5.8641523399795e-05	-8.883152298886307e-43	-1.0178992095478914e-40	0.006719823593903219	5.97924414353851e-41	-1.0251529529876197e-40	0.006886086202026454	6.024599410046825e-41	800.0	0.0067198235939031885	1.0179693360071087e-40	88.88888888888972	9.66007415472766e-51	2.969043277614271e-18	-3.079018521626893e-12	7.275540095946817e-51	8.780989086995834e-16	3.0790186468384946e-13
3.665	88.88888821481747	1.6016149070247648e-40	0.010946916662107375	325.77777777777976	4.742020848186083e-51	-800.0	3.169125104628739e-42	0.0011911769876063335	-5.029833628975737e-42	0.9999999981041745	5.2974744970299145e-43	6.157640634109212e-05	-9.008757669104263e-43	-1.0322902123599937e-40	0.007056136406313438	6.069822979451578e-41	-1.0395623649172846e-40	0.007227333272241228	6.115388156668922e-41	800.0	0.007056136406313407	1.0323649639997593e-40	88.88888888888975	9.722200212410078e-51	1.3683323282514438e-17	1.1842378929334205e-12	7.241467911515612e-51	8.327832064979289e-16	1.1842381857494957e-13
3.67	88.88888814705467	1.6239944024303338e-40	0.011483976010005618	326.22222222222416	4.790631636890986e-51	-800.0	3.182554066242948e-42	0.0012255484133760963	-5.040130289218604e-42	0.9999999979135915	5.376890132981668e-43	6.45973651910581e-05	-9.134621199246803e-43	-1.0467106894640788e-40	0.007402312791373944	6.160786095835044e-41	-1.0540012746056994e-40	0.007578427030618275	6.206561614702888e-41	800.0	0.007402312791373911	1.0467902836364388e-40	88.88888888888972	9.722168824189577e-51	9.251464242235938e-18	-7.342274936187207e-12	-1.5032382952459205e-51	-1.026580794326802e-15	7.342275007954346e-13
3.675	88.88888807398517	1.6464195969057624e-40	0.012036271756297134	326.6666666666686	4.839242334823595e-51	-800.0	3.195892096391534e-42	0.0012597760066239934	-5.050343603432931e-42	0.9999999977080835	5.456641140668343e-43	6.770402878434336e-05	-9.260740816684042e-43	-1.0611604009025598e-40	0.007758310216677379	6.252131719541022e-41	-1.0684694432840803e-40	0.007939326272175298	6.29811717915412e-41	800.0	0.0077583102166773445	1.061245059866213e-40	88.8888888888897	9.722109301999049e-51	7.11862249236837e-18	-3.079018521626893e-12	3.175008873529602e-51	3.1728645116457304e-16	3.0790185379747476e-13
3.68	88.88888799529867	1.6688892517371518e-40	0.012603989480504391	327.1111111111134	4.8879461313076967e-51	-800.0	3.2089478196302985e-42	0.0012953892982077492	-5.059938932714024e-42	0.9999999974867776	5.536723575144501e-43	7.089744100601818e-05	-9.387109524531926e-43	-1.0756385415582464e-40	0.008124248302651186	6.34385527947035e-41	-1.0829651005560035e-40	0.008310427970243912	6.390046762525388e-41	800.0	0.008124248302651156	1.0757284942419493e-40	88.88888888888968	9.749541169154187e-51	1.2046284616058008e-17	-9.237055564880679e-12	3.3329400842850167e-51	1.2022595127795355e-15	9.237055643121409e-13
3.685	88.88888791059507	1.6914003218217037e-40	0.013187833849149493	327.555555555558	4.9366975679912387e-51	-800.0	3.22199204613346e-42	0.0013319380155446677	-5.069079121454181e-42	0.9999999972485487	5.617132064118118e-43	7.41815656055728e-05	-9.51371014822439e-43	-1.0901431381188485e-40	0.008500581261540624	6.435950537292527e-41	-1.0974869425398649e-40	0.008692000104562636	6.482350035459479e-41	800.0	0.008500581261540598	1.09023862395884e-40	88.88888888888961	9.750678439715169e-51	1.7004699203215326e-17	-2.1316282072801568e-12	-7.431073937399112e-52	4.4428643557713815e-16	2.131628253580547e-13
3.69	88.88888781954232	1.7139519251875633e-40	0.013787897535623001	328.0000000000025	4.9854513254634014e-51	-800.0	3.2349834970685455e-42	0.0013683210244671404	-5.0781516944745233e-42	0.9999999969924629	5.697867134241938e-43	7.755692387113465e-05	-9.640537698578285e-43	-1.10467361565078e-40	0.008887368828576594	6.528418049126617e-41	-1.1120347755308958e-40	0.009083995203167584	6.575025486047734e-41	800.0	0.008887368828576565	1.1047748805176534e-40	88.88888888888964	9.750745520861429e-51	1.6204507162234575e-17	-8.052817671947259e-12	2.3343071497725568e-51	-6.891833931910106e-16	8.052817701438411e-13
3.695	88.88888772182177	1.736543727573619e-40	0.014404119245667106	328.4444444444471	5.0342219230856634e-51	-800.0	3.247848432135892e-42	0.0014049299368473944	-5.087024804764745e-42	0.9999999967176239	5.778926714669838e-43	8.102317102282595e-05	-9.767590272145067e-43	-1.1192297533767387e-40	0.00928457149490769	6.621255403615906e-41	-1.1266080281104659e-40	0.009486477982632297	6.668069489877525e-41	800.0	0.009284571494907664	1.1193370484611929e-40	88.88888888888954	9.776330559281386e-51	1.3727216727150819e-17	-7.342274936187207e-12	7.461110408585971e-51	1.1574804504291316e-15	7.342275027423302e-13
3.7	88.88888761700338	1.7591732976139083e-40	0.015037055080750728	328.8888888888916	5.0831711978264376e-51	-800.0	3.2604654635204527e-42	0.001443375541955682	-5.09515251701474e-42	0.9999999964228224	5.860304741386733e-43	8.458343513179281e-05	-9.894854149215882e-43	-1.1338099741792377e-40	0.009692547711097942	6.714455575434059e-41	-1.141204564870487e-40	0.009899974616664666	6.761474945031474e-41	800.0	0.009692547711097912	1.1339235605856164e-40	88.88888888888958	9.814699696697558e-51	2.717742839900537e-17	1.0184445879227416e-11	4.042051069040794e-51	2.4949513886729784e-15	1.0184446184829823e-12
3.705	88.88888750465411	1.7818386490193683e-40	0.015687135755584874	329.33333333333593	5.13224456253011e-51	-800.0	3.273127185663109e-42	0.0014819414121664655	-5.103123045344479e-42	0.9999999961068402	5.942000199154987e-43	8.824013896869786e-05	-1.0022318116277053e-42	-1.148412988431776e-40	0.010111575106230522	6.808017330837263e-41	-1.1558239355121975e-40	0.010324519558678674	6.855243131805496e-41	800.0	0.010111575106230494	1.1485331365736465e-40	88.88888888888961	9.814645221889017e-51	3.53392420716291e-17	2.842170943040209e-12	-1.192356678778018e-51	1.3751138911586951e-15	2.8421712756975585e-13
3.71	88.88888738440689	1.8045394400232162e-40	0.01635431163764335	329.77777777778033	5.1813178943075095e-51	-800.0	3.285713413815758e-42	0.0015203403883047222	-5.111035421690924e-42	0.999999995768645	6.024012221399222e-43	9.19930033509989e-05	-1.0149980225550238e-42	-1.1630385700361684e-40	0.01054162168835862	6.901939635521895e-41	-1.1704659734424364e-40	0.01076006499704441	6.949371887456084e-41	800.0	0.010541621688358592	1.1631655561300982e-40	88.8888888888896	9.81473975758002e-51	3.940362659767204e-17	-1.5395092608134466e-11	3.884419415997536e-51	-6.205701281326462e-16	1.5395092620641935e-12
3.715	88.88888725584177	1.8272745664293209e-40	0.017038765411275785	330.2222222222248	5.230506490573167e-51	-800.0	3.2980353266850064e-42	0.0015600876374921196	-5.118388489174593e-42	0.9999999954070553	6.1063372008964416e-43	9.584305587862812e-05	-1.027783423279895e-42	-1.1776859996638162e-40	0.010982805211778298	6.996218299784393e-41	-1.1851290763593396e-40	0.011206997183538611	7.043853639908141e-41	800.0	0.010982805211778272	1.1778201075149687e-40	88.88888888888947	9.848192447067775e-51	2.902996884695688e-17	-2.0605739337041516e-11	4.1148844384239514e-51	-3.1617649505410598e-15	2.060573957961368e-12
3.72	88.88888711842337	1.850041277521521e-40	0.017741179756490873	330.66666666666947	5.279754671352563e-51	-800.0	3.31037133971984e-42	0.0016007734907763742	-5.1253221516978534e-42	0.999999995020566	6.1889706028525e-43	9.979413662717951e-05	-1.0405864614341898e-42	-1.1923534926040913e-40	0.011435565716759475	7.09084803791461e-41	-1.1998120427562004e-40	0.011665585008428193	7.138688793101655e-41	800.0	0.011435565716759445	1.1924950176784572e-40	88.88888888888941	9.850012333167752e-51	1.393745028958886e-17	-5.684341886080418e-12	-4.6877092727261605e-52	-4.723569967086783e-16	5.68434190570636e-13
3.725	88.88888697170863	1.8728388229418814e-40	0.018461638003559756	331.11111111111404	5.3290045620517025e-51	-800.0	3.322654523217169e-42	0.0016412641091594743	-5.132213245141316e-42	0.9999999946079309	6.2719129489249264e-43	0.00010384671432997232	-1.0534067117742145e-42	-1.207040557939525e-40	0.01189995691620476	7.185829395723396e-41	-1.2145147506815884e-40	0.012135772541033908	7.233875833581859e-41	800.0	0.01189995691620473	1.2071898029567071e-40	88.88888888888941	9.849932760285412e-51	2.1315728639440065e-17	5.447494307493734e-12	6.988196027951682e-52	-5.832139831690267e-16	5.447494338713458e-13
3.73	88.88888681526174	1.8956667832978507e-40	0.01920012659450161	331.55555555555827	5.378264918412072e-51	-800.0	3.334771225441062e-42	0.0016823727238705415	-5.138799864248463e-42	0.999999994167924	6.35516210577768e-43	0.00010800071272394002	-1.0662439355643235e-42	-1.2217469188647322e-40	0.012375970071032439	7.281159882734887e-41	-1.2292363278807812e-40	0.012617736824262493	7.329409992011587e-41	800.0	0.012375970071032397	1.221904193018708e-40	88.88888888888944	9.856788518957472e-51	6.031124740060146e-18	-3.079018521626893e-12	1.2306300435594347e-51	-2.6674364157799484e-15	3.07901967706257e-13
3.735	88.88888664849037	1.91852264489502e-40	0.019957282017826525	332.0000000000028	5.427559266298696e-51	-800.0	3.346759748256902e-42	0.0017249493580531506	-5.144810317482085e-42	0.9999999936988793	6.438712412246221e-43	0.00011225971205763624	-1.079096713697361e-42	-1.2364709433030912e-40	0.012864015447532122	7.376832922165794e-41	-1.2439751237601364e-40	0.013111898414713757	7.425287596321286e-41	800.0	0.012864015447532084	1.2366365675935537e-40	88.88888888888938	9.860472757217824e-51	7.722034408711191e-19	-4.973799150320365e-12	-1.3044825057873863e-52	-5.916438600309114e-17	4.973799150672252e-13
3.74	88.8888864708494	1.941405021920305e-40	0.020733396255128815	332.44444444444724	5.476861547828692e-51	-800.0	3.3587551300142256e-42	0.0017675279707546241	-5.1507202090248084e-42	0.9999999931992641	6.522564140413965e-43	0.00011662535472823786	-1.0919642625652062e-42	-1.2512117286274706e-40	0.013364281250583922	7.472848757685862e-41	-1.2587308502316306e-40	0.013618257879191605	7.521508843005157e-41	800.0	0.013364281250583884	1.251386033417283e-40	88.8888888888894	9.860494506013478e-51	9.635433647845003e-18	4.973799150320365e-12	2.835878226714631e-51	6.094401278451653e-15	4.973802884057081e-13
3.745	88.88888628185802	1.964313688119757e-40	0.021528403915475208	332.88888888889153	5.526173776713927e-51	-800.0	3.370664984294865e-42	0.0018101324192782641	-5.156524236115916e-42	0.9999999926677263	6.606716069798802e-43	0.0001210972729124664	-1.1048464520828902e-42	-1.2659691225496602e-40	0.013876725330772466	7.569205946230751e-41	-1.2735032040159497e-40	0.014136822619113889	7.618071281881476e-41	800.0	0.01387672533077244	1.2661524446516882e-40	88.88888888888943	9.887407551768186e-51	5.370006306190463e-17	1.5395092608134466e-11	4.8565113707127094e-51	6.2749849682923646e-15	1.5395093886965186e-12
3.75	88.8888860808944	1.9872467723423995e-40	0.022342762557948773	333.333333333336	5.575636061753985e-51	-800.0	3.382333247615248e-42	0.001854594552867898	-5.161646414943112e-42	0.9999999921025164	6.691163187341251e-43	0.00012567804038100225	-1.1177422249865303e-42	-1.2807419081082733e-40	0.014401642620524598	7.665898662567986e-41	-1.2882902317617043e-40	0.014668124822050337	7.714967991879049e-41	800.0	0.014401642620524555	1.2809345951949124e-40	88.88888888888953	9.902114181757477e-51	6.378992500120428e-17	8.052817671947259e-12	1.2567247895390555e-51	-4.735678549438617e-16	8.052817685871982e-13
3.755	88.88888586729963	2.010202323900467e-40	0.0231769592175361	333.77777777778056	5.625146913136033e-51	-800.0	3.3940559438080804e-42	0.0018992441196482065	-5.1666162254846374e-42	0.9999999915017811	6.775904389871673e-43	0.0001303703967065569	-1.130650479012498e-42	-1.2955288164784388e-40	0.014939347051783219	7.762925558389809e-41	-1.3030914969659095e-40	0.015212218183654782	7.812200532384803e-41	800.0	0.014939347051783179	1.295731227677475e-40	88.8888888888895	9.902039480927029e-51	5.750903617017803e-17	-9.473903143467363e-13	-2.9702648284867922e-52	9.708529501604557e-16	9.473908117949311e-14
3.76	88.88888564052569	2.033180055868013e-40	0.024030955125778592	334.22222222222507	5.674657441135763e-51	-800.0	3.4057195879154534e-42	0.001943728773534841	-5.171545526921814e-42	0.9999999908639795	6.860939185031777e-43	0.00013517412381745835	-1.1435710496734611e-42	-1.3103296556363034e-40	0.015489813635410146	7.860286021145533e-41	-1.3179068835785295e-40	0.01576905545986325	7.909767211681103e-41	800.0	0.015489813635410103	1.3105421571533615e-40	88.88888888888953	9.902146451911877e-51	6.852128981066587e-17	-3.079018521626893e-12	4.007229280678695e-52	-2.7317472113080493e-15	3.0790197334483397e-13
3.765	88.888885399926	2.056178732412362e-40	0.024905021332610296	334.6666666666697	5.724174622890475e-51	-800.0	3.4171303269828615e-42	0.0019898249072167564	-5.1758878151953897e-42	0.9999999901872925	6.946263731600346e-43	0.00014009074637060263	-1.1565032375476016e-42	-1.3251436192232681e-40	0.016053217084254903	7.957975578612495e-41	-1.3327347099307247e-40	0.01633909830563094	8.007660784572248e-41	800.0	0.01605321708425485	1.3253665870326102e-40	88.88888888888947	9.905487301974311e-51	3.329980452796603e-17	-7.342274936187207e-12	4.082121411850701e-52	-4.304424589132465e-15	7.342276197926219e-13
3.77	88.88888514472902	2.079196058564543e-40	0.025799775928792398	335.11111111111416	5.773703869269293e-51	-800.0	3.428595065311069e-42	0.0020365174650271906	-5.1799588681200404e-42	0.999999989469551	7.031875473021852e-43	0.00014512374112767563	-1.1694457459940496e-42	-1.3399692148520054e-40	0.01662995580590354	8.055991204692863e-41	-1.3475741989904577e-40	0.016922517583884675	8.105882798023107e-41	800.0	0.01662995580590348	1.3402030380298158e-40	88.88888888888948	9.90565337445166e-51	3.402090454200227e-17	1.965834902269478e-11	-7.642815920376904e-51	2.5103489396897446e-15	1.965834918297914e-12
3.775	88.88888487430711	2.1022316211244943e-40	0.026715228644156378	335.55555555555856	5.82323186429086e-51	-800.0	3.440007053156743e-42	0.0020830047089176614	-5.1840062133881774e-42	0.9999999887089895	7.11777454013181e-43	0.00015027316282011576	-1.1823983391280464e-42	-1.3548061682624407e-40	0.017220036072160314	8.154332995495969e-41	-1.3624252828402955e-40	0.017519254476519006	8.204431740843673e-41	800.0	0.017220036072160248	1.3550512438055072e-40	88.88888888888954	9.905602132774182e-51	3.9771429368834595e-17	-6.276460832547128e-11	5.327773462129249e-50	-7.668900397906184e-15	6.2764608793983994e-12
3.78	88.88888458796917	2.1252845486770388e-40	0.027651544681285754	336.0000000000026	5.873137807015039e-51	-800.0	3.4511874679179e-42	0.002130738719613476	-5.187592547419274e-42	0.9999999879036636	7.203957880573506e-43	0.0001555399407136962	-1.19536052271387e-42	-1.3696539084564859e-40	0.017823564369086286	8.252997387891261e-41	-1.3772866407803288e-40	0.018129666155913854	8.303300978953748e-41	800.0	0.017823564369086248	1.3699106426650538e-40	88.88888888888894	1.036163405353349e-50	-3.032664784378045e-17	-7.010688326165848e-11	5.262430323831449e-50	-7.356603861919701e-15	7.0106883647637855e-12
3.785	88.8888842848469	2.148352507311096e-40	0.028609374774314567	336.4444444444471	5.924925538417948e-51	-800.0	3.462408501959178e-42	0.002179438941041574	-5.1908052948546623e-42	0.9999999870511322	7.29042214632773e-43	0.00016092773518935183	-1.2083309778382973e-42	-1.3845109170991463e-40	0.018440960145494126	8.351980443152067e-41	-1.3921572025637965e-40	0.018754029421054613	8.402491676009993e-41	800.0	0.018440960145494092	1.3847797302218348e-40	88.88888888888896	1.0356668657351188e-50	-2.1346590683893627e-17	1.800041597258799e-11	-8.18962142697284e-51	3.427552335211331e-15	1.8000416298916975e-12
3.79	88.8888839642211	2.1714349265009157e-40	0.02958878953282073	336.88888888889164	5.976709147539074e-51	-800.0	3.4735821099845986e-42	0.002227908528957018	-5.194005649963534e-42	0.9999999861493722	7.377167818748031e-43	0.00016643694342737317	-1.2213093796881226e-42	-1.3993768175343735e-40	0.01907226891494657	8.451282652533299e-41	-1.4070369326892983e-40	0.01939227820030684	8.502002473357132e-41	800.0	0.019072268914946528	1.3996581387277796e-40	88.888888888889	1.0356727376768626e-50	-1.3527024164611614e-17	6.158037043253786e-12	-1.0514229379356478e-50	-5.957577467316312e-16	6.158037072072003e-13
3.795	88.88888362533926	2.1945311187969672e-40	0.0305899022006458	337.33333333333627	6.028499240665541e-51	-800.0	3.484544087092796e-42	0.0022774487557111946	-5.1968096196861263e-42	0.999999985196267	7.464192275471807e-43	0.0001720682024258848	-1.2342953375224723e-42	-1.414251157374947e-40	0.019717563672109684	8.550900947214666e-41	-1.4219246955963494e-40	0.020044719209104746	8.60182730821598e-41	800.0	0.019717563672109646	1.414545425068376e-40	88.8888888888889	1.0357726004273678e-50	-3.1484721310508413e-17	-1.0918673372846136e-10	7.51569636946801e-50	-7.427898171805031e-15	1.0918673398111876e-11
3.8	88.88888326723675	2.2176388213419144e-40	0.03161336270845694	337.77777777778056	6.083463256967482e-51	-800.0	3.495530755781524e-42	0.002328088941683104	-5.1992111033537654e-42	0.9999999841891039	7.5514919466773e-43	0.0001778251680466464	-1.2472875721312419e-42	-1.429132463490694e-40	0.02037726334794917	8.650831131005382e-41	-1.4368193382473368e-40	0.020711667562552393	8.701966887948216e-41	800.0	0.02037726334794919	1.4294401306566618e-40	88.88888888888808	1.1000946591674844e-50	-7.568622805279846e-17	-9.5212726591847e-11	7.48861709931896e-50	-4.5328914385948825e-15	9.521272669974804e-12
3.805	88.88888288910252	2.2407573683625345e-40	0.03265927980976235	338.222222222225	6.13846802584805e-51	-800.0	3.5064788315140475e-42	0.0023785175302402056	-5.201597730042062e-42	0.9999999831256013	7.63906742994642e-43	0.00018370845202988378	-1.260285704783361e-42	-1.4440202970395475e-40	0.021051438042797858	8.751073823370003e-41	-1.4517208180801497e-40	0.02139306264245566	8.802420106947082e-41	800.0	0.02105143804279788	1.4443418263501703e-40	88.88888888888806	1.1001004554919816e-50	-7.294633148105646e-17	1.1131836193574152e-11	-1.0079450216255918e-50	1.6151810573911762e-15	1.113183631075203e-12
3.81	88.88888249010522	2.263886137999176e-40	0.03372775426459377	338.6666666666696	6.193505451609173e-51	-800.0	3.5172242129348405e-42	0.0024299607758205303	-5.203614786410117e-42	0.9999999820034213	7.726916280563984e-43	0.00018971862115262688	-1.2732893814872109e-42	-1.458914247585309e-40	0.02174015270458991	8.851626157849487e-41	-1.4666280763538093e-40	0.022089195126639965	8.903181158448284e-41	800.0	0.02174015270458994	1.4592501113121566e-40	88.88888888888803	1.1009785522346043e-50	-7.324641921328467e-17	-1.397400713661436e-11	3.755206833823955e-51	-4.380999975404298e-15	1.3974007823359407e-12
3.815	88.88888206917993	2.2870229453069378e-40	0.03481942781629067	339.1111111111141	6.248664878483097e-51	-800.0	3.52799482204638e-42	0.0024825358557989063	-5.2052306903535247e-42	0.999999980819569	7.81503505255371e-43	0.00019585928522330157	-1.2862973666268927e-42	-1.473812891685388e-40	0.022443820986982402	8.952484077479882e-41	-1.4815399638512715e-40	0.02280038926177589	9.004250765171924e-41	800.0	0.022443820986982426	1.474163577176257e-40	88.88888888888793	1.1033204462618669e-50	-1.0887711403787516e-16	-6.6317322004271545e-12	9.062333471910439e-52	-1.1653085258419399e-15	6.631732302809452e-13
3.82	88.88888162542467	2.310167130644363e-40	0.03593441759015312	339.5555555555586	6.303831441313098e-51	-800.0	3.538729611247293e-42	0.0025348983117680184	-5.2068348923481306e-42	0.9999999795715073	7.903424384510707e-43	0.00020213110307384615	-1.2993092846794356e-42	-1.488715793907416e-40	0.02316251838663549	9.053648245961423e-41	-1.4964564470489226e-40	0.023526584135571665	9.10562790095315e-41	800.0	0.023162518386635522	1.4890817987524166e-40	88.88888888888792	1.1033233443236215e-50	-1.0027248998307245e-16	-3.931669804538956e-11	1.1390866799155498e-50	-1.2705480913015741e-14	3.931670009832444e-12
3.825	88.88888115791259	2.333318042691844e-40	0.03707284208187448	340.0000000000031	6.359094138635486e-51	-800.0	3.549262446764197e-42	0.0025883397403336918	-5.2080607211724165e-42	0.9999999782566287	7.992081754151284e-43	0.00020853474124479327	-1.3123247648158346e-42	-1.5036225242142927e-40	0.023896321283554168	9.155115704450549e-41	-1.5113764419874756e-40	0.024268088850907255	9.20730678024509e-41	800.0	0.023896321283554213	1.5040043562146578e-40	88.88888888888759	1.1134213921209722e-50	-2.192363860888376e-16	-2.7711166694642036e-11	1.1806491804338563e-50	-1.0802279566481619e-14	2.7711168800097227e-12
3.83	88.88888066546956	2.3564735636707857e-40	0.03823533760938365	340.44444444444775	6.414767693030028e-51	-800.0	3.559832208470923e-42	0.002642833778442317	-5.2089178090609895e-42	0.9999999768716328	8.081004164168601e-43	0.0002150737790270894	-1.3253426089448041e-42	-1.518531701870172e-40	0.02464563983436742	9.25688290726977e-41	-1.526298892301963e-40	0.02502520495820409	9.309288460905156e-41	800.0	0.024645639834367464	1.518929884490508e-40	88.88888888888768	1.1134409183125087e-50	-1.9379174083998828e-16	1.3737159558027676e-11	-3.0007429573557365e-51	3.052245345527551e-15	1.3737159897115298e-12
3.835	88.88888014711101	2.3796331329377484e-40	0.0394219946609286	340.8888888888921	6.470439360920302e-51	-800.0	3.570365322736491e-42	0.0026971059902384147	-5.209768290041565e-42	0.9999999754137493	8.17019217719519e-43	0.0002217487254196942	-1.3383624971499958e-42	-1.5334429550743693e-40	0.02541053236615751	9.358950431175332e-41	-1.5412237790649875e-40	0.025797868908904713	9.411571893061496e-41	800.0	0.025410532366157555	1.533858022201809e-40	88.88888888888765	1.1134220873469284e-50	-2.08894346904261e-16	-1.2552921665094256e-11	9.201700639741612e-51	-1.2386361912556335e-15	1.2552921726204316e-12
3.84	88.88887960179025	2.4027959691744124e-40	0.04063298608250981	341.33333333333627	6.526176566623412e-51	-800.0	3.580696178246554e-42	0.0027526730267265426	-5.210189262103874e-42	0.9999999738800347	8.259642982331274e-43	0.00022856055268411245	-1.351383985039133e-42	-1.5483557689911624e-40	0.026191110291991185	9.46131498007474e-41	-1.5561498718241351e-40	0.026586451642959433	9.514151282427578e-41	800.0	0.02619111029199125	1.5487882657283371e-40	88.88888888888759	1.121333363875407e-50	-2.0067089723812512e-16	-5.447494307493734e-12	9.23152075469422e-51	1.106851681098078e-15	5.447494419941821e-13
3.845	88.88887902822121	2.425960051426292e-40	0.04186893090627604	341.7777777777806	6.582240825446028e-51	-800.0	3.5910731985655487e-42	0.0028090274157207356	-5.210324148632926e-42	0.9999999722668718	8.349354341049775e-43	0.00023551274287930894	-1.3644059287692446e-42	-1.5632688248044036e-40	0.02698777262655332	9.56397387597877e-41	-1.5710763510047242e-40	0.02739117872024618	9.61702795152776e-41	800.0	0.02698777262655339	1.5637193124082616e-40	88.8888888888876	1.1213507527857047e-50	-1.999514657985893e-16	1.4921397450961096e-11	-7.546263595039999e-51	2.8305294770625896e-15	1.4921397719431159e-12
3.85	88.88887842534282	2.4491249747762084e-40	0.04312987062335362	342.22222222222507	6.638308512732811e-51	-800.0	3.601415565859249e-42	0.0028651892235083704	-5.2104463898712345e-42	0.9999999705712764	8.439326630952175e-43	0.0002426055293959364	-1.3774280960539809e-42	-1.5781818511705244e-40	0.027800546114559836	9.6669274857689e-41	-1.586003180380665e-40	0.028211994970313212	9.720200907625995e-41	800.0	0.0278005461145599	1.5786509012410723e-40	88.88888888888764	1.1214811172945508e-50	-1.8865979286050367e-16	-5.80276567537376e-11	4.495032410665981e-50	-9.217941030945876e-15	5.802765748589225e-12
3.855	88.88887779195372	2.472289700932329e-40	0.04441608023713673	342.6666666666694	6.696248801294324e-51	-800.0	3.611551557037139e-42	0.002922966824952405	-5.2100605467060154e-42	0.9999999687898696	8.529556541912785e-43	0.0002498404591314493	-1.3904498972730538e-42	-1.5930941660594892e-40	0.028629608017530058	9.770171930545585e-41	-1.6009289043973599e-40	0.029049363283945907	9.823664238482067e-41	800.0	0.028629608017530145	1.5935823629672004e-40	88.88888888888711	1.159881696270322e-50	-2.826372805070562e-16	-6.536993168992481e-11	4.470362952564356e-50	-1.3900699905082987e-14	6.536993316789374e-12
3.86	88.88887712667082	2.4954524205342255e-40	0.04572811699704997	343.1111111111138	6.754243358415062e-51	-800.0	3.621746789080551e-42	0.0029811544736934067	-5.209498711912899e-42	0.9999999669187614	8.620042907733175e-43	0.00025722066661758633	-1.4034703075954964e-42	-1.608004587019939e-40	0.029475317526485134	9.873705763212272e-41	-1.6158530188759334e-40	0.029903401131041847	9.92741964122176e-41	800.0	0.02947531752648522	1.6085125313135785e-40	88.88888888888708	1.1598789671123673e-50	-3.0908095304907057e-16	9.000207986293995e-12	-5.918400292902006e-51	-4.1924412014385255e-15	9.000208962747111e-13
3.865	88.88887642835009	2.518612857644929e-40	0.047065981186317475	343.5555555555583	6.812241120109536e-51	-800.0	3.631871229956086e-42	0.003039425172155033	-5.2088516432497255e-42	0.999999964954734	8.710785723772828e-43	0.000264746153451137	-1.4164891672998539e-42	-1.6229129258809592e-40	0.030337674824543203	9.977528914419938e-41	-1.630775279639334e-40	0.03077413230359344	1.0031465087827503e-40	800.0	0.030337674824543297	1.6234412284174441e-40	88.88888888888711	1.160311774174358e-50	-3.2927875300208914e-16	4.026408835973629e-12	6.460520591207408e-52	5.193965640133158e-16	4.026408869474052e-13
3.87	88.88887569560036	2.5417696263196156e-40	0.04843008551532607	344.0000000000028	6.870263844150656e-51	-800.0	3.6418570544842813e-42	0.003099244098450873	-5.207724966670694e-42	0.9999999628938754	8.80178117912983e-43	0.00027241924113213323	-1.4295056903279828e-42	-1.6378182744998345e-40	0.03121694593616902	1.0081636917212422e-40	-1.6456943127120918e-40	0.03166200033620382	1.0135796607233457e-40	800.0	0.03121694593616913	1.638367560929923e-40	88.88888888888711	1.1604321422842534e-50	-3.1024510073443863e-16	1.6579330501067886e-12	-3.300812317538025e-51	3.2146061049664295e-15	1.6579361665422494e-13
3.875	88.88887492696784	2.5649212773064393e-40	0.04982086852312944	344.4444444444473	6.928285965697381e-51	-800.0	3.6518806264269884e-42	0.003159244349551059	-5.2064882619118205e-42	0.9999999607320963	8.89302932655749e-43	0.00028024239644713634	-1.442519054679282e-42	-1.652719683167183e-40	0.032113413534447896	1.0186029728693686e-40	-1.6606098028866904e-40	0.03256705717460302	1.0240415280823393e-40	800.0	0.032113413534448014	1.6532905946958533e-40	88.88888888888707	1.1604307852906864e-50	-3.231142558308018e-16	-5.092222939613708e-11	1.6459273593791242e-50	-1.5151417971600674e-14	5.092223165021614e-12
3.88	88.88887412119557	2.58806752642794e-40	0.05123833807391884	344.88888888889176	6.986726212678903e-51	-800.0	3.6617828597538534e-42	0.0032196884347198205	-5.205073191131598e-42	0.9999999584658613	8.984529387923447e-43	0.00028821566363658495	-1.4555290957934507e-42	-1.6676169579350232e-40	0.03302708268912727	1.0290706390918873e-40	-1.6755212391821179e-40	0.033489429967885724	1.034531763250202e-40	800.0	0.03302708268912743	1.6682101465408362e-40	88.88888888888658	1.1806359299482236e-50	-4.526413419767708e-16	-1.3429257705864986e-10	7.321316675184839e-50	-2.663044335704514e-14	1.3429257969908065e-11
3.885	88.88887327669258	2.6112067045211924e-40	0.052683024489884614	345.3333333333362	7.047424205173933e-51	-800.0	3.671639894419442e-42	0.003281521298664506	-5.2032300398446276e-42	0.9999999560906966	9.076277736131708e-43	0.0002963420257677756	-1.468534867453632e-42	-1.682509006163318e-40	0.03395829523472943	1.0395662634571814e-40	-1.690427395238058e-40	0.03442951657186461	1.0450502367423074e-40	800.0	0.03395829523472966	1.6831251405599731e-40	88.88888888888592	1.2231864339233648e-50	-5.593636046446449e-16	-4.973799150320365e-11	3.6465319401855574e-50	-1.2099658248278897e-14	4.973799297493304e-12
3.89	88.88887239195593	2.6343377854899206e-40	0.05415521728500484	345.77777777778067	7.108584226856909e-51	-800.0	3.6815011182054475e-42	0.003343321934265056	-5.2013363872977686e-42	0.9999999536023746	9.168275124663869e-43	0.00030462311136194415	-1.4815357861595854e-42	-1.6973951519863653e-40	0.03490723778623693	1.050089923045316e-40	-1.7053281263790583e-40	0.03538730775379919	1.0555969605596014e-40	800.0	0.034907237786237146	1.6980349153546626e-40	88.88888888888593	1.2231983308345618e-50	-6.024132898223671e-16	-1.1084466677856815e-10	6.168812492985159e-50	-2.5061656444814416e-14	1.1084466961175188e-11
3.895	88.88887146556664	2.6574603035352335e-40	0.05565499852454941	346.2222222222257	7.171742286957213e-51	-800.0	3.691195776835867e-42	0.0034060170912907526	-5.199150354744197e-42	0.9999999509969046	9.260519695502325e-43	0.00031305938204147324	-1.494531584645795e-42	-1.7122750831503913e-40	0.03587396324187825	1.0606413974954225e-40	-1.7202225949980986e-40	0.03636305977520118	1.0661714575280625e-40	800.0	0.03587396324187857	1.7129391706814276e-40	88.88888888888486	1.2821380759702429e-50	-7.953103436987895e-16	-1.219765029721423e-10	6.814845084405647e-50	-2.5326800665150327e-14	1.2197650560152915e-11
3.9	88.88887049574066	2.6805724252581506e-40	0.057182972428716505	346.6666666666701	7.235849000534589e-51	-800.0	3.700926170872039e-42	0.0034698137104053743	-5.1966191422536546e-42	0.9999999482692689	9.353009027519622e-43	0.0003216542365509433	-1.5075212236229427e-42	-1.7271475995674586e-40	0.03685886106932167	1.0712203971217428e-40	-1.735109812227501e-40	0.03735708818171553	1.0767738300220874e-40	800.0	0.036858861069322	1.7278367247724803e-40	88.88888888888486	1.2821203167441137e-50	-8.365158677209606e-16	1.4210854715201044e-12	-5.942066976271874e-51	-1.0202552563830868e-14	1.4211220951925052e-13
3.905	88.88886948095177	2.703673620708125e-40	0.05873924759704588	347.11111111111444	7.299960806859437e-51	-800.0	3.7106274522442176e-42	0.0035334458453024375	-5.194073759544245e-42	0.9999999454151747	9.445743770773402e-43	0.00033040828576866586	-1.5205043993717534e-42	-1.7420123467881746e-40	0.037862001270290546	1.0818269885926678e-40	-1.7499897374725787e-40	0.03836934585208492	1.0874039946400368e-40	800.0	0.0378620012702909	1.7427272360336223e-40	88.88888888888474	1.2856716161354146e-50	-9.125761879242705e-16	2.6053233644535247e-12	5.827763198311999e-51	-9.61525507053344e-15	2.605341107513085e-13
3.91	88.88886841952514	2.7267629285941193e-40	0.06032410165280436	347.5555555555591	7.364274916030386e-51	-800.0	3.720155302454575e-42	0.0035986185545959664	-5.191074869457335e-42	0.9999999424299123	9.538720846379913e-43	0.0003393230913318892	-1.5334805647199045e-42	-1.7568686904397784e-40	0.038883562795475245	1.092460809680024e-40	-1.7648610715303963e-40	0.03940027412836408	1.0980614545382306e-40	800.0	0.03888356279547556	1.7576100848382602e-40	88.88888888888488	1.2871190540135693e-50	-9.283868897963223e-16	1.397400713661436e-11	-7.803016000257815e-52	-3.63265933937671e-15	1.3974007608784353e-12
3.915	88.88886730956928	2.749838765913295e-40	0.061938055165027206	348.00000000000364	7.428631594166793e-51	-800.0	3.729740694729401e-42	0.003664135090616298	-5.1879317926989594e-42	0.9999999393081612	9.631939777474364e-43	0.00034840158144841527	-1.5464488213055562e-42	-1.7717155920269277e-40	0.039923881193039454	1.103121793983281e-40	-1.7797234013365668e-40	0.04044997150965465	1.1087463745625406e-40	800.0	0.0399238811930398	1.7724842508183521e-40	88.88888888888484	1.2871613949360132e-50	-9.533632160696374e-16	9.94759830064073e-12	3.208051160231848e-51	1.7210160204748188e-15	9.947598449515667e-13
3.92	88.88886614948075	2.772900827577945e-40	0.06358113376800009	348.4444444444483	7.49321976922822e-51	-800.0	3.739219715414618e-42	0.003729994430136343	-5.1846462669273824e-42	0.9999999360454124	9.725400209062636e-43	0.00035764390031797376	-1.5594089921646068e-42	-1.7865528426593303e-40	0.04098297298731756	1.1138098936163676e-40	-1.7945763188047276e-40	0.04151853620192531	1.1194584499808097e-40	800.0	0.040982972987317914	1.7873495373212217e-40	88.8888888888848	1.2987203567490572e-50	-9.448525325212784e-16	-1.5252984060982453e-10	8.408123032406631e-50	-2.2057914028859608e-14	1.5252984220476348e-11
3.925	88.88886493728444	2.795947631085646e-40	0.06525382721070008	348.8888888888928	7.560574972968282e-51	-800.0	3.748659189465025e-42	0.003797255041427816	-5.180949972734748e-42	0.9999999326361101	9.819098866438335e-43	0.0003670528027862988	-1.5723602355535438e-42	-1.8013794688253314e-40	0.04206115386067256	1.1245247217066775e-40	-1.8094186471700347e-40	0.042606369639968326	1.1301975675002744e-40	800.0	0.0420611538606731	1.8022049887591438e-40	88.88888888888351	1.3592337310579253e-50	-1.1475622909524159e-15	-8.313350008392611e-11	3.646588716473371e-50	-9.931142111955051e-15	8.313350067711409e-12
3.93	88.88886367107736	2.818978156042087e-40	0.06695644394556471	349.3333333333373	7.628535772301566e-51	-800.0	3.7581069796075886e-42	0.0038644987909731625	-5.1772035516114194e-42	0.9999999290749024	9.913036547475344e-43	0.000376630023906329	-1.5853019704157285e-42	-1.8161947965895226e-40	0.04315862263583064	1.1352663596877849e-40	-1.8242502428294093e-40	0.04371346699324926	1.1409637509447838e-40	800.0	0.04315862263583121	1.8170499474088611e-40	88.88888888888351	1.359210361044434e-50	-1.1585046471268845e-15	-4.3248367849928514e-10	2.151384205484536e-49	-1.0360573241079018e-13	4.324836909091727e-11
3.935	88.88886234904814	2.841991883959202e-40	0.06868909947788392	349.7777777777815	7.70014109613179e-51	-800.0	3.7673962806659887e-42	0.003932785134846035	-5.173141505705884e-42	0.999999925356695	1.000721129388928e-42	0.00038637621340350604	-1.598233899096549e-42	-1.830998478031719e-40	0.04427545376615515	1.1460345749561636e-40	-1.839070201584455e-40	0.04484012694304167	1.1517565462765568e-40	800.0	0.04427545376615613	1.8318840790646735e-40	88.88888888887963	1.5522861063106107e-50	-2.0667116061971423e-15	-4.5001039931469974e-10	2.2523088420016343e-49	-1.0628182790352402e-13	4.500104118653284e-11
3.94	88.88886096897957	2.864987106615645e-40	0.07045237989577309	350.22222222222604	7.777756110131915e-51	-800.0	3.7767307077705834e-42	0.004001932982585252	-5.168810156125503e-42	0.999999921475252	1.01016214748391e-42	0.0003962946680326743	-1.611155052026631e-42	-1.8457893921552862e-40	0.045412025032275684	1.1568291678393238e-40	-1.8538777519369733e-40	0.045986596292023424	1.162576082772193e-40	800.0	0.0454120250322767	1.8467062826454246e-40	88.88888888887966	1.5523088354797316e-50	-2.0817031098312584e-15	6.726471231861828e-11	-3.2559791194712126e-50	5.689080893415604e-15	6.726471255920239e-12
3.945	88.88885952898421	2.8879634037661316e-40	0.07224636274099436	350.6666666666702	7.855379081175793e-51	-800.0	3.785997211968394e-42	0.004071181038772495	-5.164400968291214e-42	0.9999999174252646	1.0196267487859704e-42	0.0004063858239753071	-1.6240651867814128e-42	-1.8605672542910455e-40	0.04656838641725288	1.1676501759433769e-40	-1.8686726708967924e-40	0.047152903747800255	1.1734221658468982e-40	800.0	0.04656838641725393	1.8615162872704902e-40	88.88888888887966	1.552636221339234e-50	-2.1562403183755343e-15	2.6053233644535247e-12	5.900410032708304e-51	-1.4832114188241195e-14	2.6053655837480323e-13
3.95	88.88885802688289	2.9109195948932564e-40	0.07407143225069747	351.1111111111144	7.933166335104491e-51	-800.0	3.795179957972311e-42	0.004141850312818979	-5.1595869936619574e-42	0.9999999132006043	1.029114616947669e-42	0.00041665184257531386	-1.636963631625936e-42	-1.875331285908561e-40	0.0477447855932347	1.178497225783641e-40	-1.8834537988351647e-40	0.04833945645929767	1.1842945555511215e-40	800.0	0.047744785593235736	1.87631333200489e-40	88.88888888887969	1.5573700284417068e-50	-2.2160791981589797e-15	3.529028920941593e-11	-7.579942580813408e-51	-2.831962876747159e-15	3.5290289323045114e-12
3.955	88.88885646041226	2.933854443691602e-40	0.0759279964581116	351.5555555555587	8.011035203185858e-51	-800.0	3.804391841908036e-42	0.004212663819402704	-5.1546848011312824e-42	0.9999999087949053	1.038625807642004e-42	0.00042709501903013213	-1.6498496830545406e-42	-1.89008067162472e-40	0.04894148557087574	1.1893703698613182e-40	-1.8982208830264184e-40	0.049546295746093934	1.1951933353588888e-40	800.0	0.04894148557087681	1.8910966199539445e-40	88.88888888887972	1.5573731898101603e-50	-2.2517934615243806e-15	-1.9966250874857468e-10	9.057506290470502e-50	-5.149378724508907e-14	1.9966251538880498e-11
3.96	88.88885482753146	2.9567675400727123e-40	0.077816131364451	352.00000000000347	8.090455169910182e-51	-800.0	3.8134609913430074e-42	0.004284271938784232	-5.149535712171507e-42	0.9999999042024277	1.048160178602903e-42	0.00043771578085716114	-1.66272310423269e-42	-1.904815133031308e-40	0.05015853534046475	1.20026943709209e-40	-1.9129732161643854e-40	0.05077364924798735	1.206118096365976e-40	800.0	0.050158535340466104	1.9058658867838724e-40	88.88888888887799	1.6356842387320253e-50	-2.6762104824171898e-15	-1.8971491044793395e-10	8.519996253562513e-50	-5.2461266396101503e-14	1.8971491770140817e-11
3.965	88.88885312571362	2.9796572476993643e-40	0.07973641310354904	352.4444444444478	8.172236439105418e-51	-800.0	3.8225686437300826e-42	0.0043569515485014565	-5.144072676804119e-42	0.9999998994160646	1.0577175446283226e-42	0.00044851736882112094	-1.675582965585541e-42	-1.9195335944789363e-40	0.05139630626673875	1.2111942021524208e-40	-1.9277098988588586e-40	0.052021823924348044	1.2170689488752157e-40	800.0	0.05139630626674013	1.9206200777484487e-40	88.88888888887799	1.6356995262335163e-50	-2.7476633577356627e-15	-6.229091316829791e-11	2.899325924262143e-50	-3.459590802712963e-14	6.229092277545166e-12
3.97	88.88885135276342	3.0025230513256653e-40	0.08168896204900988	352.8888888888925	8.254451057532054e-51	-800.0	3.831617439241273e-42	0.004429678846492468	-5.1385464283256895e-42	0.9999998944296417	1.0672979630169194e-42	0.000459500460035326	-1.688428970619644e-42	-1.9342357086184587e-40	0.05265487594161811	1.2221447220999555e-40	-1.942430750017614e-40	0.05329083343686011	1.228045724274079e-40	800.0	0.05265487594161961	1.9353588607317806e-40	88.88888888887719	1.672780944614769e-50	-3.035362384082933e-15	-1.025550015280342e-10	5.189534179540376e-50	-3.3557948885381446e-14	1.0255500701843394e-11
3.975	88.88884950622595	3.0253638810484963e-40	0.08367412795990087	353.33333333333684	8.338334054370616e-51	-800.0	3.8405839531477895e-42	0.004503802787717145	-5.132630716482125e-42	0.9999998892362547	1.0769011373437351e-42	0.0004706670219073024	-1.701260509582055e-42	-1.948920767674129e-40	0.05393446981388656	1.2331206463041317e-40	-1.9571346539102967e-40	0.054581077894337436	1.2390481868431315e-40	800.0	0.05393446981388813	1.9500815460983543e-40	88.8888888888771	1.6801872814163683e-50	-3.049254193222409e-15	5.4711790653524024e-11	-2.0507211094187146e-50	1.3931864564174436e-14	5.4711792427335896e-12
3.98	88.88884758350801	3.0481784940310197e-40	0.08569233370113938	353.7777777777813	8.422343507076089e-51	-800.0	3.849582616506104e-42	0.004578100473075226	-5.126621489480056e-42	0.9999998838286099	1.0865271247482666e-42	0.00048201943306579474	-1.714076874735951e-42	-1.9635879507848628e-40	0.055235360454839115	1.2441220284718136e-40	-1.9718213426357117e-40	0.05589260707080781	1.2500764286837688e-40	800.0	0.055235360454840746	1.964787332743489e-40	88.88888888887709	1.6802142294223986e-50	-3.0754602331881376e-15	-3.735086314312008e-10	1.597847316861944e-49	-9.882331502363866e-14	3.7350864450459e-11
3.985	88.88884558227086	3.0709664614062878e-40	0.08774366696679031	354.222222222226	8.51030560064898e-51	-800.0	3.8584433464956263e-42	0.0046532411754791276	-5.120359002274876e-42	0.9999998782001298	1.0961757818236871e-42	0.0004935581868035414	-1.726877818240965e-42	-1.9782369664339177e-40	0.05655760439217955	1.2551486958857918e-40	-1.986490090656821e-40	0.05722566247286514	1.261130054645996e-40	800.0	0.05655760439218175	1.9794759442292284e-40	88.8888888888739	1.8182090712596838e-50	-3.9043580244278216e-15	-3.730349362740274e-10	1.6083884610597397e-49	-1.0214631356897234e-13	3.730349502591374e-11
3.99	88.8888434996495	3.093726198940846e-40	0.08982869644888453	354.66666666667044	8.601217731643463e-51	-800.0	3.86734714169135e-42	0.004729352353779528	-5.1138132612118314e-42	0.9999998723427566	1.1058469594432984e-42	0.0005052864820284782	-1.7396624393626658e-42	-1.992866771484113e-40	0.05790156819433937	1.2662004642691133e-40	-2.0011400865110956e-40	0.05858052212137437	1.2722091881025416e-40	800.0	0.057901568194341654	1.994146359394231e-40	88.8888888888739	1.8182468732440612e-50	-3.946794132307516e-15	7.579122514773891e-11	-2.970101417010998e-50	2.374747429661839e-14	7.579122886810707e-12
3.995	88.88884133315646	3.1164572242739468e-40	0.09194753291571972	355.1111111111145	8.692152721077948e-51	-800.0	3.876175455428063e-42	0.004805594761543161	-5.1071852076700295e-42	0.9999998662494946	1.1155406973158304e-42	0.0005172049418273696	-1.752430459778758e-42	-2.0074770390429512e-40	0.05926732326237828	1.277277370416907e-40	-2.0157710943906536e-40	0.059957223610807464	1.2833136128149537e-40	800.0	0.05926732326238067	2.00879826731964e-40	88.88888888887392	1.8194153553537608e-50	-3.8911465720386855e-15	-1.3287149158712977e-10	5.812325109305383e-50	-4.98620999636941e-14	1.3287150094289486e-11
4.0	88.88883907995974	3.139158391880605e-40	0.09410056745322475	355.55555555555884	8.785042642408745e-51	-800.0	3.8849623851696136e-42	0.004883237798744472	-5.100174429011879e-42	0.9999998599123778	1.1252567199236352e-42	0.0005293157660750028	-1.765181226485071e-42	-2.0220670109696655e-40	0.06065512168400539	1.2883790869442304e-40	-2.0303820178688007e-40	0.061356168191941625	1.2944432102268193e-40	800.0	0.060655121684007954	2.0234309296258107e-40	88.88888888887276	1.8680705871956858e-50	-4.394617071872247e-15	-7.815970093360574e-12	6.386875977833516e-51	-3.415063130178314e-14	7.816044700865342e-13
4.005	88.88883673717922	3.1618286163308526e-40	0.0962881657852865	356.00000000000335	8.878445252641638e-51	-800.0	3.893769150444042e-42	0.004960939390739876	-5.0930984373098017e-42	0.9999998533233068	1.1349951119508802e-42	0.000541621011985443	-1.777914120158464e-42	-2.036635967571016e-40	0.06206519919924517	1.299505699428731e-40	-2.044972670123928e-40	0.06277737263948971	1.3055980371627542e-40	800.0	0.06206519919924778	2.038043646668964e-40	88.88888888887278	1.8680592763143332e-50	-4.495215543123816e-15	-8.580987772195564e-10	3.430600328408149e-49	-2.6245246007795864e-13	8.580988173555489e-11
4.01	88.888834302095	3.1844673357900704e-40	0.09851047551607461	356.44444444444775	8.985535877569571e-51	-800.0	3.902433481300879e-42	0.005039779323622774	-5.085704239084219e-42	0.9999998464746318	1.1447556792342627e-42	0.0005541215098496694	-1.7906288174214762e-42	-2.0511835299413497e-40	0.06349765095310324	1.3106569761796926e-40	-2.059542139561495e-40	0.06422116306409421	1.3167776855782091e-40	800.0	0.06349765095310715	2.052636056303235e-40	88.88888888886522	2.1690769850616377e-50	-6.730308022881434e-15	-7.600438796846691e-10	3.0411241458975845e-49	-2.3247538981208174e-13	7.600439152384096e-11
4.015	88.88883177149478	3.207073049692364e-40	0.10076804049449949	356.8888888888922	9.093990448610787e-51	-800.0	3.9111547295079804e-42	0.005119234268437775	-5.078114692450808e-42	0.9999998393573176	1.1545383628635379e-42	0.0005668203188371378	-1.803324464217884e-42	-2.0657087079789423e-40	0.06495282750131803	1.3218328362348635e-40	-2.074089866549536e-40	0.06568771565369544	1.3279823185293819e-40	800.0	0.06495282750132209	2.067207191297406e-40	88.88888888886521	2.169106341236349e-50	-6.829526575433601e-15	-7.444119394979481e-10	2.796473920267935e-49	-2.385565546447025e-13	7.444119777222332e-11
4.02	88.8888291425923	3.2296453582192157e-40	0.10306094052305147	357.33333333333627	9.209106518424995e-51	-800.0	3.919765170500991e-42	0.00519900103456339	-5.070401130297217e-42	0.999999831963528	1.1643431366775917e-42	0.0005797178878559674	-1.816000828470844e-42	-2.0802112276093848e-40	0.06643078028569813	1.3330332410721533e-40	-2.088615495809757e-40	0.0671771197385187	1.3392116185769868e-40	800.0	0.0664307802857037	2.0817567939376217e-40	88.88888888885776	2.451772619033137e-50	-9.120581941624679e-15	-8.685200706773705e-10	3.269822546781127e-49	-2.834513775802684e-13	8.685201169311555e-11
4.025	88.88882641207991	3.252182897938167e-40	0.10538966529577881	357.77777777778067	9.331693994790637e-51	-800.0	3.928402645551506e-42	0.005280218510674907	-5.062299476953697e-42	0.9999998242839605	1.1741697899789862e-42	0.0005928169714562614	-1.8286571334978354e-42	-2.0946901876705546e-40	0.0679318249552422	1.3442579362657663e-40	-2.1031179155427945e-40	0.06868979091636143	1.350465663167894e-40	800.0	0.06793182495524797	2.096283985385799e-40	88.88888888885772	2.4517399959254505e-50	-9.304013614386657e-15	8.6212518605553e-11	-3.1678959867482407e-50	-2.3376421303727394e-15	8.621251863724544e-12
4.03	88.88882357685837	3.2746849163197866e-40	0.10775444553934997	358.22222222222484	9.454470785368509e-51	-800.0	3.936995655696449e-42	0.005361400995686955	-5.0541541936699606e-42	0.9999998163098988	1.1840184069974308e-42	0.0006061188674969368	-1.841292947622395e-42	-2.1091450839759486e-40	0.06945611023444329	1.3555070080987669e-40	-2.1175970007580773e-40	0.07022571916301204	1.3617443249195322e-40	800.0	0.06945611023444927	2.1107882805784732e-40	88.88888888885737	2.468252694505644e-50	-9.519121679688632e-15	-1.0610771520683447e-10	4.582871915016735e-50	-5.985009074007304e-14	1.0610773208606455e-11
4.035	88.88882063369593	3.2971505334560417e-40	0.11015556711260781	358.6666666666692	9.578669746551679e-51	-800.0	3.945517761056658e-42	0.005443912089597904	-5.045651408559443e-42	0.999999808032253	1.1938887341973426e-42	0.000619625183956529	-1.853907767292862e-42	-2.123575329701131e-40	0.07100382038492974	1.3667801551779944e-40	-2.132051727288313e-40	0.07178528509688317	1.3730474007046556e-40	800.0	0.07100382038493595	2.1252691123467054e-40	88.88888888885681	2.4910207042213136e-50	-9.87758595212286e-15	1.2552921665094256e-11	-1.2843300393471432e-51	-4.269789604785627e-14	1.2552994281856407e-12
4.04	88.88881757908895	3.3195785126604293e-40	0.11259347131431048	359.1111111111133	9.703222051317017e-51	-800.0	3.954075812295928e-42	0.005526642578961399	-5.0370459427740735e-42	0.9999997994411691	1.2037808390063903e-42	0.000633338403164667	-1.866500886940281e-42	-2.1379801050063863e-40	0.07257523986164499	1.378077442155688e-40	-2.1464818009750364e-40	0.0733685515701422	1.3843749935006223e-40	800.0	0.07257523986165133	2.1397256835501666e-40	88.88888888885683	2.491045970499019e-50	-1.0118155199109675e-14	-4.746425474877149e-10	1.7210065319691704e-49	-1.8468269506093515e-13	4.746425834175918e-11
4.045	88.88881440985755	3.3419683655973674e-40	0.11506827473891545	359.5555555555581	9.834548472530744e-51	-800.0	3.9625046449126394e-42	0.005610335410634695	-5.0281685089940267e-42	0.9999997905277045	1.213694566801217e-42	0.0006472591809893361	-1.8790720241621853e-42	-2.1523590775182847e-40	0.074170443822446	1.3893986827803308e-40	-2.160886442687335e-40	0.07497579427355312	1.395726733123347e-40	800.0	0.07417044382245339	2.1541576794187796e-40	88.88888888885268	2.6417921841085363e-50	-1.1534408006883448e-14	-4.1377271979093706e-10	1.5238193186059512e-49	-1.5599387782904518e-13	4.1377274919607655e-11
4.05	88.88881112220169	3.3643186204432557e-40	0.11758052348552807	360.0000000000024	9.966639493359575e-51	-800.0	3.9709881978914397e-42	0.005694759823920145	-5.0190717157200865e-42	0.9999997812811705	1.2236298557270783e-42	0.0006613905892647425	-1.8916203403124106e-42	-2.166711273958597e-40	0.07578978427462657	1.4007437923102006e-40	-2.175265024006548e-40	0.07660722278980968	1.4071027763351197e-40	800.0	0.07578978427463412	2.168564151248034e-40	88.8888888888527	2.6418206144218526e-50	-1.1692736414116481e-14	-3.9458806592541564e-10	1.3953299617075105e-49	-1.566124604582561e-13	3.9458809700524794e-11
4.055	88.88880771281592	3.3866288414416822e-40	0.12013031099622745	360.44444444444696	1.0101262900128183e-50	-800.0	3.9793676694948796e-42	0.005779509113362339	-5.0098482593146386e-42	0.9999997716922713	1.2335866838390974e-42	0.0006757331536289615	-1.904145582465434e-42	-2.1810363956298108e-40	0.07743332145287916	1.4121127367449958e-40	-2.1896171820695335e-40	0.07826293018907508	1.4185028249647637e-40	800.0	0.07743332145288782	2.182944818159245e-40	88.88888888884871	2.78292626444035e-50	-1.3114603002433962e-14	-3.746928693241342e-10	1.3500652435363449e-49	-1.549487033059952e-13	3.74692901362507e-11
4.06	88.88880417779919	3.4088976938237356e-40	0.12271812602111595	360.88888888889113	1.0240406718003183e-50	-800.0	3.987778815614651e-42	0.005865625029093685	-5.0002626864529495e-42	0.9999997617500345	1.2435648761263552e-42	0.0006902896233303386	-1.916646989330483e-42	-2.1953335582013497e-40	0.079101370398968	1.4235053022302547e-40	-2.2039418794890596e-40	0.07994330798094204	1.4299269697530845e-40	800.0	0.07910137039897683	2.197298819790278e-40	88.88888888884875	2.7829206361289644e-50	-1.3362967536017797e-14	-5.35275527605906e-10	1.822521895327135e-49	-2.5866450492937183e-13	5.352755901039269e-11
4.065	88.88880051351967	3.4311244620206623e-40	0.12534418544520184	361.3333333333354	1.0382676995876385e-50	-800.0	3.996130226897324e-42	0.005951747597864509	-4.9906218314588375e-42	0.9999997514442458	1.2535645037668949e-42	0.0007050612183763783	-1.92912414949868e-42	-2.2096022801270126e-40	0.08079407091657344	1.4349215600475258e-40	-2.2182389578934825e-40	0.08164835807136597	1.4413750395723789e-40	800.0	0.0807940709165836	2.2116256949017156e-40	88.88888888884352	2.9605532116435675e-50	-1.559933478373364e-14	-6.378305291339402e-10	2.173144024983607e-49	-3.047052921672968e-13	6.378306019160551e-11
4.07	88.88879671613263	3.4533081953553354e-40	0.12800880887146449	361.77777777777965	1.0531046000745994e-50	-800.0	4.0044520523203735e-42	0.0060392536261422766	-4.980616636708621e-42	0.999999740764092	1.2635853346615527e-42	0.0007200497365648327	-1.9415765187593732e-42	-2.223841927007627e-40	0.0825116290193289	1.446361232769899e-40	-2.232507373526286e-40	0.08337847679230125	1.4528469496654025e-40	800.0	0.0825116290193393	2.225924830708327e-40	88.8888888888433	2.969323054851236e-50	-1.605072036875054e-14	6.39488462184047e-11	-1.872172852571046e-50	-4.185920049988484e-14	6.3948859918358515e-12
4.075	88.88879278159153	3.475447785683976e-40	0.1307123879960368	362.2222222222237	1.0679516421881443e-50	-800.0	4.012783022881623e-42	0.006126881655038007	-4.9705294062436176e-42	0.9999997296981925	1.2736274641941905e-42	0.0007352573812192064	-1.954003463456877e-42	-2.2380517609868046e-40	0.08425429719075997	1.4578244173814715e-40	-2.2467468913724583e-40	0.0851336990943504	1.4643427262310465e-40	800.0	0.08425429719077054	2.240195512925604e-40	88.88888888884333	2.9702591992282716e-50	-1.633430813425685e-14	1.4210854715201044e-12	2.7053797181128306e-51	-6.601387270672248e-14	1.4226179208611344e-13
4.08	88.88878870607903	3.4975426089165625e-40	0.13345509776694509	362.66666666666754	1.082811116791854e-50	-800.0	4.021012172547648e-42	0.006215660954550353	-4.960130834802804e-42	0.9999997182358107	1.2836906899634271e-42	0.0007506851364553585	-1.9664046238900086e-42	-2.2522313600440604e-40	0.08602218820350568	1.469310872096348e-40	-2.2609566195058044e-40	0.08691435479225047	1.4758620775739327e-40	800.0	0.08602218820351643	2.2544373392791507e-40	88.88888888884328	2.9728989079608673e-50	-1.6731202310210226e-14	1.7763568394001305e-10	-5.096043483952605e-50	-8.352784846641075e-15	1.776356841363954e-11
4.085	88.88878448520097	3.519591308813574e-40	0.13623744191838943	363.11111111111177	1.097675700177798e-50	-800.0	4.029294992832064e-42	0.006304878011895631	-4.949579303610455e-42	0.9999997063645879	1.2937750474374453e-42	0.0007663358358143857	-1.978779225897754e-42	-2.2663798242212613e-40	0.08781562675884153	1.4808206238947612e-40	-2.2751361197289145e-40	0.08872056929438286	1.487405157449057e-40	800.0	0.0878156267588524	2.268649435567459e-40	88.88888888884338	2.9729277582119406e-50	-1.7082357953007534e-14	-1.1842378929334204e-09	3.770200663543048e-49	-5.457481668220881e-13	1.1842380186856227e-10
4.09	88.88878011507167	3.5415934244394395e-40	0.13905952187545012	363.5555555555557	1.113819940575325e-50	-800.0	4.037463315066291e-42	0.00639486133751675	-4.938802218263541e-42	0.9999996940735952	1.3038804283828958e-42	0.0007822100498482457	-1.9911270018252275e-42	-2.2804968373103068e-40	0.08963467823857371	1.4923535397267862e-40	-2.2892847458767328e-40	0.09055256212043845	1.4989716378436677e-40	800.0	0.08963467823858741	2.282831504681953e-40	88.88888888883314	3.2964341357577647e-50	-2.153395182795753e-14	-8.097818711878728e-10	2.6111455320292733e-49	-4.0808472883994423e-13	8.09781974013795e-11
4.095	88.88877559106524	3.5635475328454175e-40	0.14192187088950783	363.9999999999998	1.1303020732464606e-50	-800.0	4.0456848626341634e-42	0.0064856940942348345	-4.9277809553071604e-42	0.9999996813498232	1.3140067706899971e-42	0.0007983107781354856	-2.003447139671348e-42	-2.2945814555930212e-40	0.09147968637059951	1.5039095343569882e-40	-2.303401798431936e-40	0.09241057661450147	1.5105616712371135e-40	800.0	0.0914796863706134	2.2969826294216027e-40	88.88888888883324	3.296420623477471e-50	-2.201141426690777e-14	-2.44710918195762e-09	7.60085515085505e-49	-1.0991857571550215e-12	2.447109428822222e-10
4.1	88.88877090908531	3.585453141105884e-40	0.14482460542744274	364.4444444444439	1.147577225142445e-50	-800.0	4.053809504787277e-42	0.00657686778730854	-4.916627459658106e-42	0.9999996681817505	1.3241540586542578e-42	0.000814638675841533	-2.0157393533975648e-42	-2.308633341398839e-40	0.09335072623283656	1.5154885805790047e-40	-2.3174868985757637e-40	0.09429471044764322	1.5221749800158307e-40	800.0	0.09335072623285663	2.311102492058056e-40	88.88888888881071	3.99415451086744e-50	-3.167856909101382e-14	-2.597033699202991e-09	8.0577371531459e-49	-1.1759238929337265e-12	2.597033965429211e-10
4.105	88.88876606440304	3.607308944871627e-40	0.1477682036819275	364.8888888888879	1.1675485321126106e-50	-800.0	4.06197215200586e-42	0.006669304541294453	-4.905139159936546e-42	0.9999996545560771	1.334322155009457e-42	0.000831196432842791	-2.0280028980114136e-42	-2.322651628090899e-40	0.09524810606405515	1.527090507633315e-40	-2.3315390871652003e-40	0.09620532546016138	1.5338116730563119e-40	800.0	0.09524810606407558	2.325190251836548e-40	88.88888888881078	3.9941776685760057e-50	-3.2288150628152116e-14	2.1837346745692271e-10	-5.995348139849651e-50	-4.167279976760274e-15	2.183734674966854e-11
4.11	88.8887610526113	3.629114267653947e-40	0.15075286335797722	365.333333333332	1.1876382867100732e-50	-800.0	4.070057646793955e-42	0.006761742445784153	-4.893591977538836e-42	0.9999996404604087	1.3445111095166025e-42	0.0008479851612730604	-2.0402373834039893e-42	-2.3366358577961624e-40	0.09717195330704116	1.5387153623697802e-40	-2.3455581955138038e-40	0.098142421981651	1.5454715293331247e-40	800.0	0.09717195330706246	2.3392454727079848e-40	88.88888888880935	4.043848204658175e-50	-3.319240914188393e-14	-1.8924121529076057e-10	6.931503375328695e-50	-1.6142203448860066e-13	1.8924128413693777e-11
4.115	88.88875586892543	3.650868038249755e-40	0.15377896015856365	365.7777777777762	1.207905279445174e-50	-800.0	4.0781609062202554e-42	0.006855718364518218	-4.881650513075866e-42	0.9999996258812871	1.3547207397853984e-42	0.000865006974507422	-2.0524421962561112e-42	-2.3505853154573577e-40	0.09912251013849244	1.5503629234989565e-40	-2.3595430940866607e-40	0.10010644062073726	1.557154599738209e-40	800.0	0.09912251013851418	2.3532674641988962e-40	88.88888888880918	4.0536910621943554e-50	-3.387209787526302e-14	5.2580162446243866e-11	-8.774795114788741e-51	-1.2571813701180067e-13	5.258031274082884e-12
4.12	88.88875050855829	3.6725693185993656e-40	0.15684680836159265	366.2222222222204	1.2281743637641237e-50	-800.0	4.0862205792711086e-42	0.006949654627268646	-4.869657671057551e-42	0.9999996108052489	1.3649511346035928e-42	0.0008822636404065472	-2.0646167982651497e-42	-2.3644993721302768e-40	0.1010999791421317	1.562033281199283e-40	-2.3734936356979167e-40	0.10209737001681768	1.5688607594057965e-40	800.0	0.10109997914215375	2.3672556216571096e-40	88.88888888880923	4.0543714572944883e-50	-3.466482499858439e-14	1.7289873236827936e-11	3.4231054875922214e-51	-1.4810942906311986e-13	1.7290507596613708e-12
4.125	88.88874496671572	3.69421728575369e-40	0.15995666900930716	366.6666666666645	1.2487597403711555e-50	-800.0	4.094255103140729e-42	0.007044943251518949	-4.8573112921006935e-42	0.9999995952188107	1.3752020931240223e-42	0.0008997566273821326	-2.0767607164405145e-42	-2.378377474362045e-40	0.10310452858741853	1.5737261943914093e-40	-2.387408807538848e-40	0.10411559759292385	1.5805899362887906e-40	800.0	0.10310452858744165	2.381209414628182e-40	88.88888888880678	4.1310124603552508e-50	-3.6524389261047204e-14	-2.346448961058279e-09	6.8343336944621476e-49	-1.2395487879705965e-12	2.3464492884638855e-10
4.13	88.88873923821316	3.7158107748408175e-40	0.16310896102739572	367.11111111110847	1.2699565176522282e-50	-800.0	4.102288721010928e-42	0.007140386646979948	-4.8448699074005653e-42	0.9999995791073903	1.3854737136398249e-42	0.0009174882919434148	-2.088873283867159e-42	-2.392218844677315e-40	0.10513642851241177	1.585441762876977e-40	-2.4012883374380485e-40	0.10616116768774159	1.5923421277916937e-40	800.0	0.10513642851244051	2.395128092262035e-40	88.8888888887891	4.641880757019783e-50	-4.552417448436962e-14	-2.023388863866042e-09	5.888042235811302e-49	-1.0907701133640932e-12	2.0233891578726405e-10
4.135	88.88873331823373	3.737349149050324e-40	0.1663038547596005	367.5555555555523	1.2932022255894064e-50	-800.0	4.110258655376039e-42	0.0072369857609984765	-4.832117415050087e-42	0.9999995624574417	1.3957658047458017e-42	0.0009354595923264157	-2.1009541328252644e-42	-2.4060230508424275e-40	0.10719578872488497	1.5971797575045974e-40	-2.415131334137751e-40	0.10823441139024916	1.6041171514747027e-40	800.0	0.10719578872491431	2.4090112440845535e-40	88.88888888878886	4.653165243319146e-50	-4.637396648330406e-14	1.8663589192630704e-10	-4.708427214727959e-50	-7.403503600353212e-14	1.8663590661047708e-11
4.14	88.88872720124826	3.7588310992024935e-40	0.16954183586269114	367.99999999999636	1.316479798090344e-50	-800.0	4.1182657756310566e-42	0.007333940970876573	-4.8192251858673784e-42	0.9999995452534125	1.406078445304942e-42	0.0009536732604075883	-2.1130025145025008e-42	-2.419789220723268e-40	0.10928292227699643	1.6089402549907068e-40	-2.4289373973214195e-40	0.11033543071439582	1.615915113867545e-40	800.0	0.1092829222770268	2.422858026228168e-40	88.88888888878729	4.698768379518634e-50	-4.8015235974789236e-14	-8.98126018000706e-10	2.4947824080356164e-49	-6.294083655474744e-13	8.981262385459492e-11
4.145	88.88872088229897	3.780256081306826e-40	0.1728230315778244	368.4444444444408	1.3404548604807405e-50	-800.0	4.1261753993456133e-42	0.007431850413863149	-4.80606463504248e-42	0.9999995274813593	1.4164114826351695e-42	0.0009721300119751265	-2.1250181134603682e-42	-2.4335169821469666e-40	0.11139791119419547	1.6207230711066037e-40	-2.442705758304171e-40	0.11246449902783053	1.6277357356632064e-40	800.0	0.1113979111942283	2.4366680880488774e-40	88.88888888878115	4.868619073229757e-50	-5.2010779024191905e-14	-6.539361644778347e-10	1.869124860320978e-49	-5.10941580471151e-13	6.539363640854364e-11
4.15	88.88871435558644	3.801622718604106e-40	0.17614795615753467	368.88888888888476	1.3647979249312698e-50	-800.0	4.134145146022899e-42	0.007530319291505706	-4.792719535498122e-42	0.999999509124972	1.4267649559714216e-42	0.0009908327397615008	-2.1370001425106807e-42	-2.447205418541493e-40	0.11354108696157603	1.6325282368048403e-40	-2.456435888392869e-40	0.11462177659677678	1.6395791891012875e-40	800.0	0.11354108696160937	2.4504405421184963e-40	88.88888888878135	4.868641951483195e-50	-5.285417287862135e-14	3.0553337637682247e-11	-2.5703107415684462e-51	-1.9741408658153654e-13	3.055397540621828e-12
4.155	88.88870761598444	3.822930504851226e-40	0.1795167163923557	369.3333333333284	1.3892091701843743e-50	-800.0	4.1420091516352205e-42	0.007629540517446654	-4.7791483335360973e-42	0.9999994901698317	1.4371387592670967e-42	0.0010097820445246785	-2.148948307387839e-42	-2.4608541819390462e-40	0.11571251842326606	1.6443556215889264e-40	-2.4701271398517998e-40	0.11680747895314568	1.6514451712559514e-40	800.0	0.11571251842330026	2.464175062124192e-40	88.88888888878056	4.890678902842975e-50	-5.4428966885689875e-14	1.442401753592906e-10	-3.7307234064648086e-50	-1.570639933464778e-13	1.4424026087322814e-11
4.16	88.88870065743029	3.844178040274146e-40	0.18292983679634248	369.7777777777725	1.4136626152264383e-50	-800.0	4.1499352897360406e-42	0.0077295111677499915	-4.765350913287516e-42	0.999999470598888	1.4475328919730365e-42	0.0010289808767233815	-2.1608618076775297e-42	-2.474462340312763e-40	0.1179125436794965	1.6562052106974523e-40	-2.48377886461331e-40	0.11902182079120238	1.6633338601236659e-40	800.0	0.11791254367953123	2.477870745803065e-40	88.88888888878064	4.8906688808737925e-50	-5.5515893671880016e-14	-1.597536917567184e-09	4.3733749495157266e-49	-1.0603263367540558e-12	1.5975372694500746e-10
4.165	88.88869347457977	3.86536480945872e-40	0.18638742550461682	370.2222222222161	1.4393806597371466e-50	-800.0	4.157763679788799e-42	0.007830057307859727	-4.751363699161213e-42	0.9999994503971107	1.4579472895066586e-42	0.0010484298446839266	-2.1727403437182965e-42	-2.4880295392589114e-40	0.1201412324418541	1.6680769211824349e-40	-2.4973905189579915e-40	0.12126496697663218	1.6752449756769007e-40	800.0	0.12014123244189395	2.4915272609309526e-40	88.88888888876677	5.268677912742441e-50	-6.388070576947192e-14	-1.5463778405924603e-09	4.244019297293513e-49	-1.0195655726661963e-12	1.5463781767049606e-10
4.17	88.88868606116478	3.886489433427253e-40	0.18988999413912405	370.66666666666	1.4657240029192142e-50	-800.0	4.1656486559386395e-42	0.007931513069467416	-4.737115131592309e-42	0.9999994295468697	1.4683819185099897e-42	0.0010681318263521093	-2.1845831267484097e-42	-2.50155486001125e-40	0.1223989145014075	1.6799707008626716e-40	-2.5109613541633825e-40	0.12353717809679901	1.687178680022883e-40	800.0	0.1223989145014481	2.5051437186494383e-40	88.88888888876687	5.26860906096931e-50	-6.484850374363009e-14	-1.8829382497641383e-10	5.264397650484579e-50	-3.102042339761399e-13	1.8829408049887055e-11
4.175	88.88867841159498	3.907551361265879e-40	0.19343766410747887	371.1111111111038	1.492229481982227e-50	-800.0	4.173442691732333e-42	0.008033400318768386	-4.722705650286828e-42	0.9999994080324425	1.478836745618518e-42	0.0010880875047174826	-2.1963898368172808e-42	-2.5150379245601604e-40	0.1246856681257279	1.6918865024589598e-40	-2.5244909092455843e-40	0.12583857776382157	1.6991347126366827e-40	800.0	0.12468566812577062	2.518719763852078e-40	88.88888888876319	5.367788765230836e-50	-6.791591309971454e-14	-2.6053233644535247e-12	7.907164410361043e-51	-2.325869332748458e-13	2.6156847124410145e-13
4.18	88.88867051937083	3.928549241854856e-40	0.1970309330673712	371.5555555555478	1.5190677194031341e-50	-800.0	4.1812889761680053e-42	0.008136324126794717	-4.70800681057249e-42	0.9999993858355488	1.4893117176476267e-42	0.001108299679182647	-2.2081597007158035e-42	-2.52847783186874e-40	0.1270018141057092	1.703824251270764e-40	-2.537978355253818e-40	0.12816946292990072	1.7111132231996338e-40	800.0	0.1270018141057526	2.532254525637353e-40	88.88888888876329	5.367691841751857e-50	-6.91852982752513e-14	-2.8431183333545555e-09	7.372568931163192e-49	-1.8764098978782757e-12	2.8431189525538487e-10
4.185	88.88866237862912	3.949482475345431e-40	0.20066994219931478	371.99999999999204	1.547636928644517e-50	-800.0	4.1890499244910675e-42	0.008239567801214515	-4.6931687091284726e-42	0.9999993629396988	1.4998068243484446e-42	0.0011287691439656657	-2.219892370583657e-42	-2.5418741715291298e-40	0.12934744345499397	1.715783926327568e-40	-2.551423293232615e-40	0.13052992523000828	1.7231139672417814e-40	800.0	0.12934744345504706	2.5457476173566555e-40	88.88888888873832	6.013897172540649e-50	-8.461984602594988e-14	-2.7945645797442854e-09	7.291584069343197e-49	-1.8450018223587466e-12	2.794565188789319e-10
4.19	88.88865398269387	3.970349756448675e-40	0.2043551627395471	372.44444444443593	1.5777068148174048e-50	-800.0	4.1968599804642183e-42	0.008343942324378673	-4.6780201452977814e-42	0.9999993393261162	1.5103219959697928e-42	0.0011494985498541434	-2.231587099071303e-42	-2.5552260721635192e-40	0.1317228599346844	1.72776543432259e-40	-2.564824833772753e-40	0.13292028862844582	1.73513708544618e-40	800.0	0.13172285993473837	2.5591981976493685e-40	88.8888888887385	6.013934960749606e-50	-8.589537328080864e-14	-2.557953848736188e-10	6.599402937124182e-50	-4.5272882297435505e-13	2.5579578551264276e-11
4.195	88.88864532542863	3.991150438561319e-40	0.20808675410587402	372.88888888888005	1.6079873923071605e-50	-800.0	4.2045890344421856e-42	0.008448556235674937	-4.662747125728307e-42	0.9999993149775417	1.5208572376048683e-42	0.0011704887936572024	-2.243243511662976e-42	-2.568533092421003e-40	0.13412816631473182	1.7397687717142958e-40	-2.5781826203348036e-40	0.13534062170486152	1.747182345759207e-40	800.0	0.1341281663147889	2.5726058497300047e-40	88.8888888887326	6.162783275606614e-50	-9.089640380264102e-14	-5.866714521592165e-10	1.5209860768767122e-49	-6.453594140710654e-13	5.866718071182365e-11
4.2	88.88863639990392	4.011883238625805e-40	0.2118651758913045	373.33333333332376	1.6388010572141803e-50	-800.0	4.212365318866538e-42	0.008554363996578636	-4.647149039386863e-42	0.9999992898744865	1.531412475020735e-42	0.0011917424606758757	-2.2548608733433814e-42	-2.581794374932552e-40	0.13656365885226812	1.751793840260349e-40	-2.5914957216710617e-40	0.1377912664719748	1.7592498834861245e-40	800.0	0.13656365885232616	2.585969746568333e-40	88.8888888887328	6.162816490052103e-50	-9.22340311103173e-14	-4.566421315151269e-10	1.2636949971160518e-49	-5.54974984273668e-13	4.566424687563692e-11
4.205	88.88862719972927	4.032547476338064e-40	0.21569059822810557	373.7777777777679	1.669932243679306e-50	-800.0	4.220063693735938e-42	0.008660360533482844	-4.631434799822352e-42	0.9999992639989774	1.5419877210666682e-42	0.0012132605079946588	-2.266438790381788e-42	-2.5950094560057122e-40	0.13902944722455016	1.7638406452607796e-40	-2.6047638050270543e-40	0.14027227701012612	1.7713394754324982e-40	800.0	0.13902944722461114	2.5992894496558053e-40	88.88888888872785	6.292357760834535e-50	-9.660754381775256e-14	-5.362229179202528e-10	1.4346576496212373e-49	-6.316545876306908e-13	5.362232899552465e-11
4.21	88.88861771773617	4.0531418867452745e-40	0.21956346867508597	374.2222222222115	1.7013939247443127e-50	-800.0	4.227808637447577e-42	0.008767584120704759	-4.615387006048581e-42	0.999999237330852	1.5525829001241928e-42	0.001235045453229024	-2.27797653783123e-42	-2.6081774896853342e-40	0.14152581993277552	1.7759090871079612e-40	-2.6179859148403603e-40	0.1427840048433378	1.7834512550082342e-40	800.0	0.14152581993283747	2.6125641436321185e-40	88.88888888872796	6.292313844303297e-50	-9.828599434527857e-14	-1.2742399727963604e-10	3.162403011672638e-50	-4.581638064038127e-13	1.274248209604165e-11
4.215	88.88860794727441	4.073665765540738e-40	0.2234839640057206	374.6666666666548	1.7330033344451472e-50	-800.0	4.235477522592417e-42	0.00887497398024075	-4.5992253062168756e-42	0.9999992098514078	1.5631980284726186e-42	0.0012570982908272474	-2.2894737082148624e-42	-2.6212979962466957e-40	0.14405289093604326	1.7879991750480444e-40	-2.631161724794161e-40	0.14532649760511906	1.7955850043215885e-40	800.0	0.14405289093610674	2.625793374517117e-40	88.88888888872606	6.337967519843363e-50	-1.0141283442448717e-13	-1.605826582817718e-10	4.0511434343483245e-50	-4.85979387480913e-13	1.6058339365203786e-11
4.22	88.88859788090994	4.094117849064951e-40	0.22745252761243273	375.11111111109847	1.7646935431768612e-50	-800.0	4.243193530259746e-42	0.008983596300694126	-4.58272718447472e-42	0.9999991815397352	1.573833034528013e-42	0.0012794215149762424	-2.3009295771167014e-42	-2.634370130135548e-40	0.14661094605111485	1.800110814231519e-40	-2.6442902711106755e-40	0.1479001083695148	1.8077408583686444e-40	800.0	0.14661094605117933	2.6389763277842262e-40	88.88888888872617	6.337950381422353e-50	-1.031865275799635e-13	-3.1027032794855613e-10	8.153798078752524e-50	-5.324985522416007e-13	3.1027078489605285e-11
4.225	88.88858751174274	4.114497423529361e-40	0.23146933573976056	375.55555555554275	1.7966528762309248e-50	-800.0	4.250834129192385e-42	0.009092388615447705	-4.566111800034216e-42	0.9999991523764289	1.584487933163497e-42	0.0013020161171563645	-2.312343731545197e-42	-2.6473934051033072e-40	0.14920009889727198	1.8122440124131735e-40	-2.6573712178570186e-40	0.15050488583630475	1.8199186011192898e-40	800.0	0.14920009889733885	2.6521125433414742e-40	88.88888888872316	6.414381451726069e-50	-1.0665304644637521e-13	-2.7758536210359374e-10	7.647181152510863e-50	-4.928538345645443e-13	2.7758579963514973e-11
4.23	88.88857683205593	4.134803212401279e-40	0.23553483357591262	375.9999999999864	1.8287247448577676e-50	-800.0	4.258523569732403e-42	0.009202393060803914	-4.549162262846792e-42	0.9999991223397843	1.5951626610422744e-42	0.0013248846016636869	-2.3237154396008527e-42	-2.660366966745687e-40	0.1518206364500019	1.8243986842655522e-40	-2.6704036077560847e-40	0.15314117725532764	1.8321183724944232e-40	800.0	0.1518206364500698	2.6652011983644876e-40	88.88888888872336	6.414397414639752e-50	-1.0825777738588474e-13	-2.9274360713314153e-10	7.631786664518531e-50	-5.835293078743795e-13	2.9274418871051264e-11
4.235	88.88856583471018	4.155034506273366e-40	0.23964918996025003	376.44444444443	1.8610778884594435e-50	-800.0	4.266137084281521e-42	0.009312595090283479	-4.532087042217154e-42	0.9999990914097219	1.6058572269748105e-42	0.001348027918332166	-2.3350442906375047e-42	-2.6732903313737557e-40	0.15447266755655484	1.8365748308191585e-40	-2.683387080751334e-40	0.1558090392302653	1.844339954982103e-40	800.0	0.15447266755662517	2.678241835585343e-40	88.88888888872023	6.490712916431873e-50	-1.1241160279798251e-13	-3.259022681352773e-10	8.140182950990728e-50	-6.217335762280964e-13	3.259028611846757e-11
4.24	88.88855451167828	4.175190000369194e-40	0.24381285908643405	376.8888888888737	1.8935305323424467e-50	-800.0	4.273802284816641e-42	0.009423965658123108	-4.5146845132832014e-42	0.9999990595636655	1.6165715808688324e-42	0.0013714486221220181	-2.3463295365490927e-42	-2.6861626256533713e-40	0.15715648499842505	1.84877238191334e-40	-2.696320699173545e-40	0.1585088065226989	1.8565834966517717e-40	800.0	0.15715648499849647	2.6912336139743877e-40	88.88888888872036	6.49069489919765e-50	-1.1424321992035678e-13	-1.293187779083295e-10	4.05236966285751e-50	-4.649439841033501e-13	1.2931961371969918e-11
4.245	88.88854285559582	4.195269002212367e-40	0.24802599581126814	377.3333333333176	1.9261230063387444e-50	-800.0	4.281389976583988e-42	0.009535583508081789	-4.4971432206959184e-42	0.9999990267809028	1.6273057203950202e-42	0.0013951475842233884	-2.357570776165211e-42	-2.6989833767034665e-40	0.15987218861125488	1.8609913261379126e-40	-2.7092040654941334e-40	0.16124054997373727	1.8688487754571664e-40	800.0	0.15987218861132815	2.704176087176982e-40	88.88888888871871	6.53635035112978e-50	-1.1723257214846328e-13	-7.105427357600522e-12	1.7313806930370772e-50	-3.55407579059236e-13	7.114310400972866e-13
4.25	88.88853085809976	4.215270166593445e-40	0.2522890690018143	377.77777777776123	1.958805123943162e-50	-800.0	4.2890332008015284e-42	0.009648304655672367	-4.479285669148178e-42	0.9999989930379123	1.6380596138796696e-42	0.0014191274421434842	-2.3687672382501532e-42	-2.7117516842548356e-40	0.16262008063607375	1.873231614365371e-40	-2.7220362736979155e-40	0.1640045856548697	1.881135950487038e-40	800.0	0.1626200806361481	2.7170683881013058e-40	88.8888888887189	6.536354712451541e-50	-1.18928893143528e-13	-1.105841344421228e-09	2.4380687933140217e-49	-1.2377471192294172e-12	1.1058420371143792e-10
4.255	88.88851851160341	4.235192825235858e-40	0.2566022157772714	378.22222222220535	1.9921218128374661e-50	-800.0	4.296596292853282e-42	0.009761341984147142	-4.461272242838877e-42	0.999998958313356	1.648833242777838e-42	0.0014433889673069647	-2.3799185352332938e-42	-2.724467091011475e-40	0.1654002494765642	1.885493216993865e-40	-2.734816877236593e-40	0.16680100414524732	1.8934447921796414e-40	800.0	0.16540024947664408	2.7299100859914844e-40	88.88888888870899	6.752108580880766e-50	-1.285725338397967e-13	-9.608906263261773e-10	2.091276376800399e-49	-1.1590158994717071e-12	9.608913253221557e-11
4.26	88.88850580740477	4.255035588822381e-40	0.2609659206830475	378.6666666666488	2.025883188136837e-50	-800.0	4.304219755007026e-42	0.0098753989455541	-4.442957123673063e-42	0.9999989225827598	1.6596265985727425e-42	0.0014679348854213146	-2.3910238706823408e-42	-2.737128667375021e-40	0.16821300748113677	1.8977761113583216e-40	-2.7475450118237963e-40	0.16963009754818847	1.9057754734825788e-40	800.0	0.16821300748121792	2.742700285324567e-40	88.88888888870896	6.753919461217028e-50	-1.3069808629725412e-13	-1.2552921665094257e-09	2.79044575976205e-49	-1.353070108890504e-12	1.2552928957413275e-10
4.265	88.88849273769443	4.274797815508245e-40	0.2653803016922381	379.1111111110924	2.0607746654680068e-50	-800.0	4.311759535060911e-42	0.009989858008992325	-4.424465462704248e-42	0.9999988858241602	1.670439640817018e-42	0.0014927658602233843	-2.402082871903867e-42	-2.7497359731286297e-40	0.17105843071369983	1.9100802431842357e-40	-2.7602201717045147e-40	0.1724919810574398	1.9181277546642935e-40	800.0	0.17105843071378793	2.755438572382182e-40	88.88888888869685	7.022102515173358e-50	-1.4184516340996512e-13	-1.2953194072905752e-09	2.9429726621394636e-49	-1.4066604455593173e-12	1.2953201710763314e-10
4.27	88.88847929341127	4.2944780685728785e-40	0.26984586060256405	379.5555555555359	2.0958852590059685e-50	-800.0	4.3193638333126435e-42	0.010105230631152541	-4.405690978505915e-42	0.9999988480120716	1.6812723907827647e-42	0.001517884714475197	-2.4130947153705526e-42	-2.762288047133561e-40	0.17393684264468973	1.9224056238598e-40	-2.772841546649878e-40	0.1753869163882968	1.9305018205558073e-40	800.0	0.173936842644779	2.7681240210861656e-40	88.88888888869717	7.022038730934935e-50	-1.4392572317143964e-13	-3.2756020118538406e-10	8.177928430876513e-50	-7.210798924295543e-13	3.275609948648046e-11
4.275	88.88846546653048	4.314075732558756e-40	0.27436269543482644	379.9999999999797	2.1313095637585844e-50	-800.0	4.32688318567485e-42	0.010221118206353099	-4.386713722278045e-42	0.9999988091239247	1.6921247789231184e-42	0.001543291999691366	-2.4240590432834575e-42	-2.7747844662996573e-40	0.1768483064786556	1.934752166219441e-40	-2.7854085557608116e-40	0.17831505106393877	1.9428974278050724e-40	800.0	0.17684830647874852	2.7807562347267066e-40	88.88888888869229	7.131279141340217e-50	-1.4999400209971603e-13	-5.066169705969172e-10	1.1560493371828763e-49	-8.751715491890249e-13	5.0661772651777414e-11
4.28	88.88845124761887	4.3335893285255414e-40	0.2789313228740553	380.4444444444233	2.1669702963179315e-50	-800.0	4.334454471143733e-42	0.010337724496630077	-4.367490365995871e-42	0.999998769133188	1.7029968614000783e-42	0.0015689906223860142	-2.4349750079187856e-42	-2.7872242412772816e-40	0.1797931552837302	1.9471199215942873e-40	-2.797920494012593e-40	0.18127659098106852	1.9553147251894807e-40	800.0	0.17979315528382453	2.793334260011955e-40	88.88888888869215	7.136656764699281e-50	-1.526240022694852e-13	-4.502472468932864e-10	1.006680601227755e-49	-8.404870464716901e-13	4.5024803137099813e-11
4.285	88.88843662840479	4.353018246271039e-40	0.2835518308912071	380.8888888888662	2.2030223366943393e-50	-800.0	4.341970675821822e-42	0.010455108876790537	-4.348007230868925e-42	0.9999987280165974	1.7138885399508498e-42	0.0015949810775535062	-2.4458422544005752e-42	-2.7996069522835787e-40	0.18277144578810978	1.959508770250682e-40	-2.8103766171936514e-40	0.18427175904601803	1.9677535549141894e-40	800.0	0.1827714457882082	2.805857703619444e-40	88.88888888868715	7.245417182978356e-50	-1.5892110324298464e-13	-1.0620245423826915e-09	2.2508780514545033e-49	-1.3519433812750282e-12	1.0620254028854825e-10
4.29	88.88842159913547	4.372361000088204e-40	0.2882247329929899	381.33333333330944	2.239349595637317e-50	-800.0	4.3495093543647026e-42	0.010572917617485305	-4.328334721789826e-42	0.999998685746723	1.724799899389934e-42	0.0016212662538411004	-2.456659930939272e-42	-2.8119316050261146e-40	0.1857835090129608	1.971918796575155e-40	-2.8227763827875765e-40	0.18730067682912535	1.9802139813620786e-40	800.0	0.1857835090130629	2.818325607895722e-40	88.88888888868303	7.331134703303353e-50	-1.6491330952928372e-13	-3.9364067561106893e-10	8.71467088407027e-50	-7.979572567072342e-13	3.936414843881706e-11
4.295	88.88840615121552	4.39161693676848e-40	0.292950130360396	381.77777777775276	2.276028485820203e-50	-800.0	4.3570253752058524e-42	0.010691814771084638	-4.308335820781519e-42	0.9999986422993912	1.7357308237546643e-42	0.0016478467205607902	-2.4674276582021102e-42	-2.824197751382956e-40	0.18882941020308594	1.984349860589456e-40	-2.835118855750368e-40	0.19036365613771947	1.992695939623614e-40	800.0	0.18882941020318963	2.8307375517971913e-40	88.888888888683	7.336575819299999e-50	-1.6719185730159703e-13	4.594843024581671e-11	-8.062988588139318e-51	-5.374639502332455e-13	4.5951573526403695e-12
4.3	88.88839027466312	4.410784625040258e-40	0.29772850293534453	382.22222222219625	2.3127221493831507e-50	-800.0	4.364532036701266e-42	0.010810795524829345	-4.288213377871138e-42	0.9999985976465259	1.7466814112613843e-42	0.0016747251775690738	-2.4781446150703685e-42	-2.8364044322862733e-40	0.1919094587462459	1.996802062691549e-40	-2.8474036821605464e-40	0.19346072092147787	2.005199402886246e-40	800.0	0.19190945874635112	2.8430926127584103e-40	88.88888888868253	7.343045602228177e-50	-1.7091259933594708e-13	-2.197945529284428e-10	4.427682119864874e-50	-7.21809446078868e-13	2.1979573814314623e-11
4.305	88.88837396040965	4.429863288416322e-40	0.302560004693232	382.6666666666393	2.349650374836918e-50	-800.0	4.372050645182184e-42	0.010931220822055278	-4.2676885919875184e-42	0.9999985517626235	1.757651547329195e-42	0.0017019024911593481	-2.488810352159931e-42	-2.848551118547237e-40	0.19502375391929516	2.0092752639958574e-40	-2.859629709390398e-40	0.19659228501162454	2.0177244053755663e-40	800.0	0.19502375391940338	2.8553902902732053e-40	88.88888888868046	7.389082305905779e-50	-1.746675846822946e-13	-7.754389722928036e-10	1.6515493464586334e-49	-1.1179443662220327e-12	7.754397781582562e-11
4.31	88.8883571984	4.448851638173789e-40	0.30744503784465677	383.1111111110823	2.3868322197884135e-50	-800.0	4.379531388285552e-42	0.011051477997722261	-4.2470876698973936e-42	0.9999985046194025	1.7686413222108382e-42	0.001729380923960037	-2.4994241290782907e-42	-2.860636944224974e-40	0.19817255500775435	2.021769557056794e-40	-2.8717967193257574e-40	0.19975830024488064	2.0302708386152586e-40	800.0	0.1981725550078667	2.8676297536597856e-40	88.88888888867584	7.485525668957687e-50	-1.814105618101292e-13	-4.763004805378216e-10	1.0273843652393937e-49	-9.874750606448257e-13	4.7630150416259997e-11
4.315	88.8883399789295	4.4677486836353256e-40	0.3123838534426926	383.55555555552576	2.424259857051518e-50	-800.0	4.387049775106725e-42	0.011173310824362315	-4.226054180920422e-42	0.9999984561895686	1.779650644857251e-42	0.0017571618883411824	-2.509985374777923e-42	-2.8726612393614806e-40	0.20135602386481868	2.034284828864513e-40	-2.883903472753776e-40	0.20295921801199984	2.042838810446631e-40	800.0	0.20135602386493262	2.8798103643496953e-40	88.88888888867602	7.485486745260839e-50	-1.8409889512172765e-13	4.4290497195709924e-11	-1.7019608090156013e-51	-5.137505237918012e-13	4.429347673691788e-12
4.32	88.88832229199213	4.4865533462685826e-40	0.3173767422179635	383.9999999999689	2.4617151713400645e-50	-800.0	4.3945129444108464e-42	0.011295008616117649	-4.2049338211895954e-42	0.9999984064449806	1.7906795767110043e-42	0.001785247019866607	-2.5204934680217082e-42	-2.8846232756245937e-40	0.20457434792008797	2.0468211407333066e-40	-2.8959497208080757e-40	0.20619499962833726	2.0554281626831493e-40	800.0	0.2045743479202036	2.891931427145322e-40	88.8888888886756	7.497850497924979e-50	-1.8711457921271808e-13	4.713266813875013e-10	-8.388905075889679e-50	-8.818079643978896e-14	4.713266896364008e-11
4.325	88.88830412717722	4.505264401087316e-40	0.32242406239324556	384.4444444444122	2.499206498513767e-50	-800.0	4.402026021012921e-42	0.011418068233888178	-4.18342059399087e-42	0.9999983553563567	1.801728066878645e-42	0.0018136383337519974	-2.5309477046080597e-42	-2.8965222289415724e-40	0.20782775810839	2.0593784244440686e-40	-2.907934338006266e-40	0.20946603522830842	2.0680390382986905e-40	800.0	0.20782775810850732	2.90399215244804e-40	88.88888888867582	7.4978927024982065e-50	-1.8947469247549543e-13	-3.4477902014863602e-09	6.851311627028525e-49	-3.6110313773989088e-12	3.447792092486577e-10
4.33	88.88828547449783	4.523880957872815e-40	0.3275260036157181	384.88888888885543	2.5388877117520668e-50	-800.0	4.40947305666485e-42	0.011541198102678236	-4.1617746492561676e-42	0.9999983028956094	1.8127961354493014e-42	0.001842336896977863	-2.541347570073832e-42	-2.9083574943401336e-40	0.21111637670488384	2.071956695584167e-40	-2.9198569441406125e-40	0.21277234493734792	2.080671248099869e-40	800.0	0.21111637670502087	2.9159919664433926e-40	88.88888888864591	8.088107631410044e-50	-2.191260928538837e-13	-3.453000848215267e-09	6.7799927007847085e-49	-3.783645825810335e-12	3.4530029211906394e-10
4.335	88.88826632292327	4.542401602045882e-40	0.3326830080739277	385.3333333332988	2.5793313449679083e-50	-800.0	4.416982545248017e-42	0.011665475722447591	-4.139775282110382e-42	0.9999982490317137	1.8238837818173984e-42	0.0018713451970833806	-2.5516922524726892e-42	-2.920128122960619e-40	0.21444048876932856	2.0845559426648837e-40	-2.9317165267304884e-40	0.216114257561891	2.093324971001153e-40	800.0	0.2144404887694675	2.927929957324451e-40	88.88888888864535	8.096756836923967e-50	-2.2352912160710355e-13	-3.057702239554091e-10	5.612925436152669e-50	-1.011455654125811e-12	3.0577189684515046e-11
4.34	88.88824666243968	4.56082558985232e-40	0.337895184168112	385.7777777777419	2.6201764360801325e-50	-800.0	4.424414998838057e-42	0.011790029032666707	-4.1175973077007726e-42	0.9999981937365063	1.8349909716179606e-42	0.001900663844046851	-2.561981320449203e-42	-2.9318336059014276e-40	0.21780016420873774	2.0971761202889776e-40	-2.9435125741037733e-40	0.2194918520814338	2.1059999863135437e-40	800.0	0.21780016420888265	2.939805645684559e-40	88.88888888863904	8.220767952859959e-50	-2.325312627169477e-13	-4.5758952182947366e-10	9.839581593860084e-50	-1.0859958658674372e-12	4.575908105230557e-11
4.345	88.88822648139688	4.579151362116389e-40	0.3431630371870728	386.22222222218534	2.661281850434588e-50	-800.0	4.431892991846144e-42	0.011915319576775472	-4.0951449344453364e-42	0.9999981369772201	1.846117764777851e-42	0.0019302956803636435	-2.572213879674494e-42	-2.9434728987724396e-40	0.22119572875848573	2.109817285735248e-40	-2.955244300165679e-40	0.22290533969792822	2.1186964244978643e-40	800.0	0.22119572875863236	2.951618026513879e-40	88.88888888863924	8.222399747928345e-50	-2.360287121324545e-13	-1.5828523676948097e-09	3.0653354172240133e-49	-2.2853974279975257e-12	1.582854017576627e-10
4.35	88.88820576959822	4.597378226673615e-40	0.34848664024262777	386.6666666666286	2.7034638164280296e-50	-800.0	4.439341950667582e-42	0.012041482829808412	-4.07238846875798e-42	0.999998078725177	1.857264077621432e-42	0.0019602411175283327	-2.5823895280948295e-42	-2.9550455265597116e-40	0.22462722958155437	2.122479337901623e-40	-2.9669108337555586e-40	0.2263549704240648	2.1314142023772964e-40	800.0	0.22462722958171225	2.9633666536591104e-40	88.88888888862452	8.502876023813431e-50	-2.539630651046408e-13	-1.6576962025282019e-09	3.1999756276552204e-49	-2.3099724893519155e-12	1.6576978119818227e-10
4.355	88.88818451508513	4.615504633392007e-40	0.3538664846763583	387.1111111110722	2.7459982995085816e-50	-800.0	4.446787521195102e-42	0.012167743744488816	-4.049482909390379e-42	0.9999980189467432	1.8684300064637987e-42	0.001990502919598485	-2.5925073763166143e-42	-2.9665504503423234e-40	0.22809498342560375	2.1351623762589057e-40	-2.9785117477514807e-40	0.22984077223784463	2.144153310245093e-40	800.0	0.2280949834257642	2.9750505279395316e-40	88.88888888862412	8.514420154217206e-50	-2.578596950287875e-13	-4.90985030410196e-10	9.648527564224726e-50	-1.2732861368234762e-12	4.909866814328952e-11
4.36	88.88816270707525	4.633529737483442e-40	0.35930270903485595	387.55555555551524	2.7891600234014947e-50	-800.0	4.454257056309833e-42	0.012295541606750624	-4.0261339746841856e-42	0.9999979576115925	1.879615460323712e-42	0.002021081866156984	-2.6025669355792408e-42	-2.9779870947770836e-40	0.23159907963410567	2.147866290745654e-40	-2.990045771976663e-40	0.23336318544231643	2.15691381675474e-40	800.0	0.2315990796342725	2.986669104824048e-40	88.8888888886176	8.636945826577583e-50	-2.6858077652648735e-13	-1.2574237947167058e-09	2.3330122737761187e-49	-2.0593556831593214e-12	1.257425481078537e-10
4.365	88.88814033368328	4.651452202398634e-40	0.36479568968499365	387.9999999999586	2.8325748987894024e-50	-800.0	4.461686006443781e-42	0.012423133172955963	-4.0026929703179666e-42	0.9999978946862983	1.890820523477261e-42	0.00205198007454166	-2.6125674375945838e-42	-2.9893545608529466e-40	0.23513976084658086	2.1605911689684763e-40	-3.001512642670959e-40	0.2369221509380134	2.169695605638831e-40	800.0	0.2351397608467528	2.9982215228029034e-40	88.88888888861334	8.716046516188042e-50	-2.765732352978133e-13	-1.6129320101753186e-10	3.7742711951965675e-50	-8.9049894331878e-13	1.612956592188705e-11
4.37	88.88811738318898	4.669270859857617e-40	0.3703457144403866	388.44444444440177	2.8761554171061883e-50	-800.0	4.4691633444292845e-42	0.012552185993538564	-3.978819260141411e-42	0.9999978301378959	1.9020451430401094e-42	0.00208319916398393	-2.6225082098092974e-42	-3.0006520605108266e-40	0.23871721262397255	2.1733369427703326e-40	-3.0129111202235335e-40	0.24051808734347857	2.1824988155183504e-40	800.0	0.23871721262414672	3.0097070288290477e-40	88.88888888861365	8.716079555314344e-50	-2.8011004626727987e-13	-1.2136069926781692e-09	2.222204793464518e-49	-2.1190255117276035e-12	1.2136088426451372e-10
4.375	88.88809384399632	4.686984683357693e-40	0.37595299660700204	388.8888888888444	2.920231014277507e-50	-800.0	4.476580953290765e-42	0.012681191470439827	-3.9548164311171e-42	0.999997763933771	1.913289352913323e-42	0.002114740334615766	-2.632388659916213e-42	-3.0118788982359454e-40	0.24233157250218396	2.186103644670149e-40	-3.0242408347361343e-40	0.24415098109574632	2.195323275281962e-40	800.0	0.2423315725023684	3.021124961242197e-40	88.88888888860215	8.921033712399479e-50	-2.966639163559974e-13	-1.4665602066087477e-09	2.6061363851097835e-49	-2.4266591076718586e-12	1.4665622142557465e-10
4.38	88.88806970344122	4.704592198489659e-40	0.38161796445025237	389.3333333332872	2.964842332198689e-50	-800.0	4.484057344073499e-42	0.012811344648166542	-3.930439611828729e-42	0.9999976960383068	1.9245531644707374e-42	0.0021466059957326324	-2.642207941331627e-42	-3.0230340844396738e-40	0.24598311657770902	2.1988912785264298e-40	-3.0355007148055762e-40	0.24782116098688384	2.2081691533274656e-40	800.0	0.24598311657789668	3.032474369670954e-40	88.88888888860096	8.943520520190278e-50	-3.021646942882953e-13	-3.836930773104282e-11	1.8035063903916656e-50	-8.499844302048251e-13	3.8378721308702465e-12
4.385	88.8880449501074	4.722092611820059e-40	0.3873407055314648	389.7777777777303	3.009650052390799e-50	-800.0	4.4914717736638134e-42	0.012941801677538379	-3.9058575222009e-42	0.9999976264193937	1.9358365408551428e-42	0.0021787966401659617	-2.6519655941474484e-42	-3.0341170768061052e-40	0.24967190133628284	2.2116997979207455e-40	-3.0466901723756537e-40	0.2515287140639755	2.2210362721491204e-40	800.0	0.24967190133647393	3.043754742686122e-40	88.88888888859981	8.971892404129538e-50	-3.0741087300561514e-13	-3.720875459596807e-10	7.170078424848038e-50	-1.288942203440213e-12	3.7208977845447647e-11
4.39	88.88801957059827	4.739484270294637e-40	0.3931217256203732	390.22222222217323	3.054576918390492e-50	-800.0	4.4989145344013935e-42	0.013072764104170662	-3.8810267881099215e-42	0.9999975550393533	1.9471395621447296e-42	0.0022113151131951067	-2.6616606700483457e-42	-3.045126767785116e-40	0.2533982528353	2.224529284721995e-40	-3.05780849513245e-40	0.25527378511267124	2.2339247129096845e-40	800.0	0.25339825283549505	3.0549650147661114e-40	88.88888888859724	9.01473870573131e-50	-3.1508663365192903e-13	-5.587234378859878e-10	9.65645261143077e-50	-1.5971587617291403e-12	5.5872572068882556e-11
4.395	88.8879935532026	4.756766381530896e-40	0.3989611005773038	390.6666666666164	3.0998517099025513e-50	-800.0	4.506361421714905e-42	0.013204944349677332	-3.8557999738663226e-42	0.9999974818652474	1.95846214900605e-42	0.002244161841851393	-2.67129270975335e-42	-3.0560626158148485e-40	0.2571622200210552	2.2373796443998544e-40	-3.0688545483899103e-40	0.25905672301237964	2.2468344874309274e-40	800.0	0.2571622200212544	3.066104675158954e-40	88.88888888859472	9.060574491236824e-50	-3.227028990586495e-13	-3.581135388230663e-10	6.152548128611148e-50	-1.385730204238069e-12	3.5811621987363093e-11
4.4	88.88796688444404	4.773937415808787e-40	0.4048592642407247	391.11111111105936	3.1451682781379107e-50	-800.0	4.51378362453979e-42	0.01333700547577735	-3.8304462271011117e-42	0.9999974068591729	1.9698043971803013e-42	0.0022773392668176853	-2.680860834830477e-42	-3.066923594008503e-40	0.2609640825882479	2.250250978185361e-40	-3.079827968513146e-40	0.26287749363790447	2.259765524996998e-40	800.0	0.2609640825884503	3.077172737841466e-40	88.88888888859384	9.073590060362686e-50	-3.2867137700881533e-13	1.082630281719733e-09	-1.8044716308742447e-49	2.978410253093968e-13	1.0826303226890631e-10
4.405	88.88793955155202	4.790996242842758e-40	0.41081644745116086	391.5555555555022	3.1905348055989403e-50	-800.0	4.5212527677268826e-42	0.01347059981725304	-3.8046268626347067e-42	0.9999973299852125	1.9811662537504327e-42	0.0023108486869151596	-2.6903643939657387e-42	-3.0777089385226526e-40	0.2648039893839315	2.2631432200412522e-40	-3.0907274216057004e-40	0.26673653622309623	2.2727179600821286e-40	800.0	0.26480398938413646	3.0881684742569993e-40	88.8888888885941	9.073550353463856e-50	-3.3294500760641586e-13	-7.745389514941743e-09	1.3119568132004584e-48	-9.848740410321086e-12	7.745395776579604e-10
4.41	88.88791154149298	4.807941700642461e-40	0.41683289170380994	391.99999999994503	3.240127168789224e-50	-800.0	4.528667149912529e-42	0.013604049633537339	-3.77868039952386e-42	0.9999972512067091	1.9925477657652458e-42	0.0023446914609087785	-2.6998027175057312e-42	-3.088417863996792e-40	0.26868209612459	2.2760564185488233e-40	-3.1015525435567774e-40	0.2706338093645374	2.2856916358076057e-40	800.0	0.26868209612484867	3.09909113541389e-40	88.88888888852726	1.0201228582072181e-49	-4.14893963552625e-13	-7.735441916641102e-09	1.3047112953695359e-48	-1.0022819633526064e-11	7.735448409926964e-10
4.415	88.88788284038971	4.824772287137241e-40	0.4229089984464468	392.44444444438733	3.291139614086754e-50	-800.0	4.536136828552749e-42	0.01373863737200298	-3.7523431825687504e-42	0.999997170484632	2.003948947224735e-42	0.0023788698473127972	-2.7091749428668408e-42	-3.0990493619109783e-40	0.2725986616311457	2.2889905823671327e-40	-3.112302214939072e-40	0.27456963905292003	2.2986867105861033e-40	800.0	0.2725986616314079	3.1099397531088363e-40	88.88888888852678	1.0209941785709507e-49	-4.215591667898219e-13	3.3111291486418435e-10	-5.200797077566658e-50	-8.550347195145302e-13	3.311140188427971e-11
4.42	88.88785343558607	4.8414871454967825e-40	0.42904484719120234	392.88888888882997	3.342620675887745e-50	-800.0	4.543556987539261e-42	0.013873568192283572	-3.7257741827611686e-42	0.9999970877833853	2.015369765290272e-42	0.0024133842937511907	-2.718480573827591e-42	-3.1096028476845128e-40	0.2765537372115389	2.3019456712824097e-40	-3.1229757717436237e-40	0.27854412357394426	2.3117030425542626e-40	800.0	0.27655373721181037	3.120713775049552e-40	88.88888888851943	1.033645374611014e-49	-4.3621547246445943e-13	-1.4781657379594953e-09	2.5173939146111096e-49	-3.010253589469929e-12	1.478168803115535e-10
4.425	88.88782331227512	4.858084554116247e-40	0.43524093576070366	393.3333333332724	3.3945435744136413e-50	-800.0	4.5509933094841807e-42	0.014008805434843275	-3.698978242270981e-42	0.999997003061324	2.0268103088302356e-42	0.002448237600874858	-2.727718622699565e-42	-3.1200771677395595e-40	0.2805476438119536	2.3149217788328788e-40	-3.1335725638332666e-40	0.28255735071112675	2.3247406780155494e-40	800.0	0.28054764381223446	3.1314120915281507e-40	88.8888888885116	1.0467399490421547e-49	-4.52214995730216e-13	-2.4923470694676766e-09	4.153152625484944e-49	-4.343134861212919e-12	2.492350853612817e-10
4.43	88.88779245738999	4.874563601888444e-40	0.44149735766166315	393.77777777771473	3.448244638519825e-50	-800.0	4.558455909035226e-42	0.014145542311326146	-3.6717087812645995e-42	0.9999969162816966	2.0382705107560042e-42	0.002483430295049425	-2.7368885625154335e-42	-3.1304717019549675e-40	0.2845804417643517	2.327918825831829e-40	-3.1440912346716464e-40	0.28660975007794065	2.3377996922497595e-40	800.0	0.28458044176464997	3.1420341152655705e-40	88.88888888849458	1.075045387100173e-49	-4.795253797075698e-13	-3.844509895619056e-09	6.336637938123311e-49	-6.054655033151785e-12	3.8445146633041234e-10
4.435	88.88776085629763	4.890922788975288e-40	0.44781448943376756	394.22222222215737	3.5026171257276556e-50	-800.0	4.5658823005854987e-42	0.014282031599171368	-3.644319679939378e-42	0.9999968274033475	2.0497504572505233e-42	0.002518964494726555	-2.7459895314709655e-42	-3.1407854423087857e-40	0.28865237384130626	2.340936904945788e-40	-3.1545314415144967e-40	0.29070125074546593	2.350879981528612e-40	800.0	0.28865237384162223	3.152578879499741e-40	88.8888888884775	1.1030051209551094e-49	-5.074503330619123e-13	-1.718329182646393e-09	2.822438628252217e-49	-3.51744637151161e-12	1.7183327827761413e-10
4.44	88.88772849456359	4.907160770884832e-40	0.45419262432947016	394.6666666665997	3.5577703399109157e-50	-800.0	4.573366485626846e-42	0.014419950743719922	-3.616465187965834e-42	0.9999967363856788	2.0612501291404496e-42	0.0025548418498750674	-2.7550207562346565e-42	-3.1510174834013287e-40	0.2927636291315174	2.353975989546973e-40	-3.1648918511158186e-40	0.2948322623374746	2.3639817114182626e-40	800.0	0.2927636291318375	3.163045517601078e-40	88.88888888847727	1.1035684736272267e-49	-5.148188691288981e-13	1.8260948309033342e-10	-2.415328469242914e-50	-1.2011733046456728e-12	1.826134336017659e-11
4.445	88.88769535829492	4.923276494392996e-40	0.4606319073247554	395.11111111104213	3.6130219441525635e-50	-800.0	4.58078892980064e-42	0.014557789839944385	-3.588451049876155e-42	0.9999966431896166	2.0727695382455827e-42	0.002591063176412948	-2.7639816288131767e-42	-3.161167111043557e-40	0.29691430114863604	2.36703609089311e-40	-3.175172006123179e-40	0.29900276192181113	2.377104705044155e-40	800.0	0.2969143011489604	3.173433350685332e-40	88.88888888847619	1.1055783235634396e-49	-5.23516128810131e-13	-4.431418195356859e-10	6.995461766627512e-50	-2.195893396654786e-12	4.431472601395702e-11
4.45	88.88766143175263	4.9392682357691585e-40	0.4671328043612975	395.5555555554844	3.668363561050872e-50	-800.0	4.58824825215585e-42	0.014696315423293867	-3.56011754684809e-42	0.9999965477708924	2.0843087475907927e-42	0.002627631095720361	-2.7728711601045096e-42	-3.171233169815458e-40	0.30110469029820536	2.380117274607044e-40	-3.1853709916234228e-40	0.3032129461625502	2.390249068054496e-40	800.0	0.3011046902985356	3.1837412676745034e-40	88.88888888847319	1.1101229787822729e-49	-5.359813474145741e-13	-3.2945498181407754e-10	5.702230495183754e-50	-1.9777504214211453e-12	3.2946091807503296e-11
4.455	88.88762670114536	4.955135106461462e-40	0.4736953667002706	395.9999999999262	3.724014747736951e-50	-800.0	4.595711788645193e-42	0.01483594329023213	-3.5313760279593386e-42	0.9999964500907188	2.0958677015002125e-42	0.002664545896588812	-2.7816888358179765e-42	-3.1812150541133553e-40	0.3053348296903866	2.393219476471067e-40	-3.1954876387372107e-40	0.3074631308406791	2.4034148125218915e-40	800.0	0.3053348296907227	3.1939686958279916e-40	88.88888888847148	1.1134683915957098e-49	-5.44996555548024e-13	-1.5563254388931011e-09	2.5190422432947573e-49	-3.3839818953145798e-12	1.5563291178536985e-10
4.46	88.88759115045914	4.970875419480432e-40	0.48032002905216314	396.44444444436834	3.7800887807426213e-50	-800.0	4.603155302096133e-42	0.014975451672307788	-3.502474226395371e-42	0.9999963501040549	2.107446498071156e-42	0.0027018100247476005	-2.7904336875387716e-42	-3.1911116322621848e-40	0.3096049996035447	2.4063428032875524e-40	-3.2055214882885016e-40	0.31175328172630623	2.416601881084561e-40	800.0	0.3096049996038961	3.2041145477505116e-40	88.88888888845935	1.1324756349142832e-49	-5.679972577467655e-13	-1.4016639700759964e-09	2.1819893525996617e-49	-3.32847004356239e-12	1.401667922056446e-10
4.465	88.88755476455496	4.986487890429563e-40	0.4870070221800114	396.88888888881064	3.8367136950763994e-50	-800.0	4.6106532962638257e-42	0.015116471841176008	-3.4730737263135184e-42	0.9999962477683217	2.1190451096075128e-42	0.002739424778722796	-2.799104975939611e-42	-3.200922038068201e-40	0.31391534885631245	2.4194872209005143e-40	-3.215471111611279e-40	0.3160838319144452	2.429810429818262e-40	800.0	0.3139153488566684	3.2141779955485566e-40	88.88888888845885	1.133257038021827e-49	-5.766044977487738e-13	-1.7005656142523916e-10	2.68056569504215e-50	-1.96072914215757e-12	1.700678645204468e-11
4.47	88.88751752835559	5.001971326195777e-40	0.49375652646193885	397.3333333332529	3.893502508077487e-50	-800.0	4.618095023948114e-42	0.015257302678588257	-3.443521129898635e-42	0.9999961430411135	2.13066356682378e-42	0.00277739117363586	-2.8077020133526008e-42	-3.2106454649283264e-40	0.31826599379191794	2.4326527630944288e-40	-3.2253360729816455e-40	0.3204547271656293	2.4430402975313923e-40	800.0	0.3182659937922801	3.224158270168503e-40	88.8888888884562	1.1375127890352213e-49	-5.891366824068155e-13	-9.758120237771384e-11	2.3969696851261643e-50	-1.795277248875163e-12	9.759771553617776e-12
4.475	88.88747942514448	5.017323984231163e-40	0.5005689819173013	397.77777777769495	3.9503800669869775e-50	-800.0	4.625574949252286e-42	0.015398881366681333	-3.4136205287416656e-42	0.9999960358754141	2.142301925445592e-42	0.002815711685120683	-2.816223799788145e-42	-3.2202807446121078e-40	0.32265721811716763	2.4458394889089823e-40	-3.2351153754394517e-40	0.324866181723297	2.456291593652073e-40	800.0	0.3226572181175342	3.2340542484030506e-40	88.88888888845646	1.1376822303929594e-49	-5.964682042989618e-13	-9.566273699116169e-10	1.5307216683464815e-49	-2.926847646202481e-12	9.566318473170135e-11
4.48	88.88744044019057	5.03254492380735e-40	0.5074444321941162	398.22222222213713	4.007946600871775e-50	-800.0	4.63305784286207e-42	0.015541488009658416	-3.383310448395661e-42	0.9999959262297916	2.1539601393623e-42	0.0028543865592109245	-2.8246697911781713e-42	-3.2298272369352955e-40	0.3270890500450463	2.4590473466404898e-40	-3.2448078459132315e-40	0.32931849007483033	2.469564326683873e-40	800.0	0.3270890500454268	3.243865323880086e-40	88.88888888844616	1.153495355772585e-49	-6.191902752157526e-13	-2.401160751711803e-09	3.679449755545466e-49	-4.987228187128636e-12	2.4011659309606616e-10
4.485	88.88740055636681	5.04763238527943e-40	0.5143833115997102	398.6666666665796	4.0660885731164695e-50	-800.0	4.640523293004686e-42	0.015683980142281017	-3.352823695937348e-42	0.9999958140560751	2.1656383075578974e-42	0.00289341823943911	-2.833038977625763e-42	-3.2392837619838083e-40	0.33156176960491945	2.4722764455923924e-40	-3.254412978274665e-40	0.3338116194154291	2.48285844665494e-40	800.0	0.33156176960531464	3.253590362371864e-40	88.88888888843594	1.1692742718199421e-49	-6.414223814481105e-13	-5.757764635442289e-10	9.863159423784704e-50	-2.3737265760613336e-12	5.757813565489566e-11
4.49	88.88735975747781	5.062585015395582e-40	0.521385849394734	399.1111111110219	4.1245524613082034e-50	-800.0	4.648045977045821e-42	0.015827987855356315	-3.3218196327082955e-42	0.9999956993087139	2.1773364117235022e-42	0.002932808015951562	-2.841330580506757e-42	-3.2486494079150037e-40	0.336075524657881	2.4855267639000964e-40	-3.26392929053756e-40	0.3383460039269106	2.4961741175283155e-40	800.0	0.33607552465828083	3.2632284916024947e-40	88.88888888843616	1.1694821351183403e-49	-6.495364083722673e-13	-2.536163871506213e-09	3.7529387233798335e-49	-5.61675099668747e-12	2.536170091106892e-10
4.495	88.88731802751397	5.077401593071411e-40	0.5284522045945873	399.5555555554642	4.1843314352957533e-50	-800.0	4.655511964639254e-42	0.015971770026506214	-3.2906553614718706e-42	0.9999955819426803	2.189054477957759e-42	0.002972556783775407	-2.8495438961344816e-42	-3.257923349478921e-40	0.3406304177880513	2.4987983319078413e-40	-3.2733563237397825e-40	0.3429215789962727	2.5095111768806406e-40	800.0	0.34063041778847913	3.2727789244890867e-40	88.88888888841095	1.2063975086162898e-49	-6.968136749873895e-13	-4.402285943190697e-09	6.492329316113942e-49	-8.499491106778629e-12	4.402294148164509e-10
4.5	88.88727534860865	5.092080294812283e-40	0.5355828193806118	399.99999999990604	4.2449426915575145e-50	-800.0	4.6630101269085274e-42	0.016116139641961208	-3.259159299600056e-42	0.999995461907723	2.2007925730085083e-42	0.0030126670307817098	-2.857677878322962e-42	-3.267104364736147e-40	0.3452267341074483	2.5120912228418382e-40	-3.282693127371178e-40	0.34753851291391225	2.5228697168855726e-40	800.0	0.34522673410789306	3.2822404856472928e-40	88.88888888839836	1.225304926740562e-49	-7.253155637287128e-13	-9.293898983741483e-10	1.4248326499183978e-49	-3.4740664109186733e-12	9.293963913946177e-11
4.505	88.88723170498221	5.106620092279904e-40	0.5427777450229412	400.4444444443477	4.306252064057033e-50	-800.0	4.670530307418843e-42	0.016261834796326924	-3.2271740305006635e-42	0.9999953391594604	2.2125506549164718e-42	0.0030531390459531604	-2.8657319331422228e-42	-3.2761917557031064e-40	0.3498645067535156	2.5254053912562126e-40	-3.291938299956274e-40	0.35219718541875517	2.5362498006207253e-40	800.0	0.34986450675396513	3.291612512233374e-40	88.88888888839767	1.2263168458308527e-49	-7.376861578929225e-13	-1.2567132519809457e-09	1.7751260619315376e-49	-4.338384699952365e-12	1.2567207403740613e-10
4.51	88.88718707858675	5.1210192378474216e-40	0.5500373722723279	400.88888888878915	4.368130097334988e-50	-800.0	4.6780224067483805e-42	0.016407263098660172	-3.195027557418162e-42	0.9999952136471318	2.2243288172168665e-42	0.0030939750278931705	-2.873705057342649e-42	-3.2851843500003223e-40	0.35454398769170425	2.5387409424895724e-40	-3.3010913796796775e-40	0.3568975200633253	2.5496513476394418e-40	800.0	0.35454398769216927	3.3008938777667827e-40	88.88888888838572	1.2433468738397347e-49	-7.680722869613973e-13	-1.422980252148798e-09	2.0530609757937885e-49	-4.357267610354753e-12	1.4229869232661574e-10
4.515	88.88714145180246	5.135276189506504e-40	0.5573619844864827	401.3333333332309	4.430302815581059e-50	-800.0	4.6855713144090534e-42	0.01655403706261108	-3.1623802276289824e-42	0.9999950853211799	2.2361270668812378e-42	0.0031351765711275198	-2.881596364828726e-42	-3.294081111158745e-40	0.3592653596656275	2.5520978845670486e-40	-3.3101509316926163e-40	0.3616399023512794	2.563074520685603e-40	800.0	0.35926535966609857	3.310083588303186e-40	88.88888888838525	1.2442255216937725e-49	-7.785643788517057e-13	1.7431981783979948e-10	-2.334275915627738e-50	-1.7679409874460642e-12	1.7432878278424353e-11
4.52	88.88709480805477	5.149389817085412e-40	0.564751660706731	401.77777777767307	4.492557641171727e-50	-800.0	4.693075443324063e-42	0.01670083830866794	-3.1295035372884714e-42	0.9999949541349871	2.2479454016833587e-42	0.0031767441209026312	-2.889405203620464e-42	-3.302881273815797e-40	0.3640286737211619	2.565476218227489e-40	-3.3191162989255113e-40	0.3664243400983651	2.5765191914775516e-40	800.0	0.3640286737216389	3.319180915359507e-40	88.88888888838441	1.2453906750962853e-49	-7.909052747776752e-13	-9.949966776426598e-10	1.4375562371347573e-49	-3.840343010575992e-12	9.950040888128904e-11
4.525	88.88704712813096	5.163358172478552e-40	0.5722068638862889	402.2222222221153	4.554987251064803e-50	-800.0	4.700595501828043e-42	0.016847906734965473	-3.0963442361628e-42	0.9999948200345173	2.2597839140257845e-42	0.003218680282018554	-2.8971304564231294e-42	-3.311583533445964e-40	0.36883422837268703	2.578876047575743e-40	-3.327986671758101e-40	0.3712509098460832	2.589985405650199e-40	800.0	0.36883422837317675	3.3281846032308034e-40	88.88888888837673	1.2566729113770254e-49	-8.142736011763748e-13	-4.4385236227144597e-10	7.303799211208727e-50	-2.8046359138529182e-12	4.4386122321796954e-11
4.53	88.88699839479118	5.17718001543291e-40	0.579727710260106	402.6666666665572	4.617820911831655e-50	-800.0	4.7081642923496685e-42	0.01699663066734249	-3.062607087306333e-42	0.9999946829712811	2.271642575283197e-42	0.00326098570897326	-2.904771408754016e-42	-3.3201870523820375e-40	0.3736820986459982	2.592297343313191e-40	-3.336760394778577e-40	0.3761200858619903	2.6034733028104915e-40	800.0	0.3736820986464935	3.337093852477575e-40	88.8888888883772	1.2566726170776668e-49	-8.233254849241751e-13	-2.489031203367463e-09	3.7525763058818886e-49	-5.824788396233957e-12	2.489038018893392e-10
4.535	88.88694858962488	5.190853786199031e-40	0.5873144617220503	403.1111111109987	4.6815678388698445e-50	-800.0	4.715687742217687e-42	0.0171449379503074	-3.028723427819793e-42	0.9999945428934975	2.283521450084678e-42	0.003303661875627021	-2.912327164134433e-42	-3.328690781854215e-40	0.378572453460024	2.605740181322598e-40	-3.3454370482649012e-40	0.3810317487848221	2.616982753067025e-40	800.0	0.3785724534605511	3.345907657720985e-40	88.88888888835412	1.2906582622775684e-49	-8.696479051925184e-13	-2.833170735053915e-09	4.1172188520114856e-49	-6.724838413366705e-12	2.8331787161098096e-10
4.54	88.88689769326913	5.20437766987008e-40	0.5949674929869295	403.5555555554404	4.746123857261619e-50	-800.0	4.723249788454699e-42	0.017294050241959204	-2.994433109487505e-42	0.9999943997467071	2.2954205854813846e-42	0.003346710890486063	-2.919796681105214e-42	-3.3370935052331105e-40	0.3835055344599187	2.619204616147161e-40	-3.354015467225295e-40	0.38598612923257974	2.6305138669902515e-40	800.0	0.3835055344604519	3.354624849112037e-40	88.88888888835287	1.2921189039476995e-49	-8.844124031327627e-13	1.873464346620671e-10	-3.231385901787134e-50	-2.4161871150292586e-12	1.8736201466883038e-11
4.545	88.88684568838612	5.217750560216028e-40	0.6026868343716472	403.99999999988205	4.81077433963473e-50	-800.0	4.730819872828956e-42	0.017444148362868336	-2.959693611986009e-42	0.9999942534821451	2.3073399544213457e-42	0.003390132924805912	-2.927179321334943e-42	-3.345394473022398e-40	0.3884813612977128	2.6326906226630356e-40	-3.3624943648562273e-40	0.3909835096245421	2.6440666676077384e-40	800.0	0.38848136129825145	3.3632447136001217e-40	88.88888888835206	1.293210075216582e-49	-8.994786420430465e-13	1.2102911265779555e-10	-1.8539471916552182e-50	-2.48020507887514e-12	1.2105452295542967e-11
4.55	88.88679255482253	5.230970517287881e-40	0.6104729043677678	404.4444444443239	4.875525436322903e-50	-800.0	4.738373273027512e-42	0.01759407224735911	-2.924746445696781e-42	0.9999941040431289	2.319279657586997e-42	0.0034339303333799807	-2.93447397201021e-42	-3.3535923857153512e-40	0.39350020384258433	2.646198317061524e-40	-3.3708731462304438e-40	0.39602384004565205	2.6576411071228428e-40	800.0	0.3935002038431308	3.3717660007377708e-40	88.8888888883495	1.2964754360005e-49	-9.17000152826635e-13	-3.731059905476035e-09	5.040845041132432e-49	-9.089279933052493e-12	3.7310709767117186e-10
4.555	88.88673827328138	5.244035934752951e-40	0.6183259541103375	404.8888888887655	4.940484986215618e-50	-800.0	4.745982739316598e-42	0.01774536541714251	-2.889261054094652e-42	0.999993951375384	2.331239705570027e-42	0.003478104529625861	-2.941679710284264e-42	-3.361686164140563e-40	0.3985622240901373	2.6597277150735954e-40	-3.3791502694460017e-40	0.40110751276725076	2.6712373461530827e-40	800.0	0.39856222409072195	3.380187675119525e-40	88.88888888831995	1.3366342018499037e-49	-9.815375980109783e-13	-3.390236239889796e-09	4.652499089402194e-49	-8.5659560989669e-12	3.390247061478852e-10
4.56	88.88668282768343	5.256946221614023e-40	0.6262457497660123	405.3333333332071	5.007325483306033e-50	-800.0	4.753496306075072e-42	0.017894741736424153	-2.8539315513965602e-42	0.999993795433686	2.343220044720565e-42	0.0035226541989820514	-2.948796190978515e-42	-3.369675398455938e-40	0.40366727143147135	2.6732787660067865e-40	-3.3873261810917147e-40	0.40623397865211963	2.68485510996654e-40	800.0	0.4036672714320613	3.3885093558007957e-40	88.88888888831985	1.3370612145463064e-49	-9.955272548930307e-13	3.3206030517853107e-10	-4.534957839215739e-50	-2.354332815929957e-12	3.320686512729971e-11
4.565	88.88662620236195	5.269700924820397e-40	0.6342319841278249	405.7777777776488	5.074225757118079e-50	-800.0	4.7610059253535356e-42	0.018043726827185726	-2.8184291317448583e-42	0.99999363617397	2.3552206291520473e-42	0.0035675776141690886	-2.955823147410626e-42	-3.3775597698696152e-40	0.4088151479639254	2.686851429484861e-40	-3.3954003857970004e-40	0.4114031256215436	2.6984943872545177e-40	800.0	0.4088151479645219	3.3967307507558684e-40	88.88888888831829	1.3387463582188826e-49	-1.0137380926361635e-12	-2.9487523534042167e-10	2.418155836335514e-50	-3.726811017269755e-12	2.948987852423735e-11
4.57	88.88656838232993	5.282299770821588e-40	0.6422842527080429	406.22222222209024	5.141177132986744e-50	-800.0	4.7685208484409266e-42	0.018192624686645627	-2.7826813463169102e-42	0.9999934735540831	2.367241347254598e-42	0.0036128725007066533	-2.962760415463571e-42	-3.3853390789099063e-40	0.41400559308040646	2.7004455915835307e-40	-3.403372180640688e-40	0.41661492868559546	2.712155193211309e-40	800.0	0.41400559308100976	3.4048516836602327e-40	88.8888888883163	1.3405824339876268e-49	-1.03334414087231e-12	-8.687569182559572e-10	1.1200915140996202e-49	-4.538695651757051e-12	8.687687740565997e-11
4.575	88.88650935016742	5.2947417428799015e-40	0.6504024829273327	406.6666666665317	5.208639790074026e-50	-800.0	4.7759715347869396e-42	0.01834045569597615	-2.746888220276413e-42	0.9999933075250306	2.379282202531584e-42	0.0036585384511503816	-2.969607408210499e-42	-3.3930126361814694e-40	0.4192385601223323	2.7140612661096196e-40	-3.4112414357314906e-40	0.42186908221422637	2.7258373438122055e-40	800.0	0.4192385601229493	3.412871499147721e-40	88.88888888830918	1.3502950223624522e-49	-1.060464024809012e-12	-1.9843090133992393e-09	2.4979695575805907e-49	-6.921911197506977e-12	1.9843210862942746e-10
4.58	88.88644908841623	5.307025800490949e-40	0.6585865916097361	407.1111111109731	5.276396514884393e-50	-800.0	4.783449767885029e-42	0.01848865882013202	-2.7107310943504943e-42	0.9999931380377081	2.3913431804236612e-42	0.0037045749984660793	-2.976363525546191e-42	-3.4005797373954166e-40	0.42451399560325387	2.7276984468061075e-40	-3.419007108286549e-40	0.42716569281048117	2.739540917972839e-40	800.0	0.4245139956038866	3.4207895265325484e-40	88.8888888882991	1.3622450368488817e-49	-1.097012973170377e-12	-9.620748642191107e-10	1.2013557617607245e-49	-4.8066525395155194e-12	9.620868714782756e-11
4.585	88.88638758012296	5.319151029469977e-40	0.6668364135453841	407.5555555554146	5.344507669915013e-50	-800.0	4.7909271786901814e-42	0.018636853521943414	-2.6742792107656314e-42	0.9999929650444328	2.4034242308467667e-42	0.003750981214186427	-2.983028239643124e-42	-3.40803976247174e-40	0.429831793160689	2.741357088343331e-40	-3.426668353887372e-40	0.43250475806153593	2.753265913337513e-40	800.0	0.4298317931613285	3.4286051765515144e-40	88.88888888829977	1.3621690076540762e-49	-1.1077740791702516e-12	3.9719338928986917e-10	-4.1572746569314303e-50	-1.750044425564679e-12	3.9719724464183414e-11
4.59	88.88632480604504	5.3311158404448064e-40	0.6751520720455043	407.9999999998561	5.412675128871495e-50	-800.0	4.798375058991895e-42	0.018784568830537036	-2.637621461564027e-42	0.9999927884910826	2.4155254125076752e-42	0.003797757792827744	-2.989600638556787e-42	-3.415391646262325e-40	0.43519203241435045	2.7550372666057662e-40	-3.4342245827724098e-40	0.4378861406313501	2.7670122453075675e-40	800.0	0.435192032414998	3.4363174247312784e-40	88.88888888829874	1.3634929706149699e-49	-1.1234254233912765e-12	-2.044468298360257e-09	2.6920175409039912e-49	-6.513284091090536e-12	2.0444786733712182e-10
4.595	88.88626074797614	5.3429189279537975e-40	0.6835335305755967	408.4444444442977	5.481133543316323e-50	-800.0	4.805860081000871e-42	0.018932851211396838	-2.6005180941602476e-42	0.99999260832645	2.4276467212420214e-42	0.003844904529774725	-2.9960799723657424e-42	-3.4226345119296515e-40	0.4405946899510793	2.7687389881993733e-40	-3.4416745183395496e-40	0.4433100029741614	2.780780020286156e-40	800.0	0.4405946899517549	3.443925429600881e-40	88.88888888828244	1.3852221404327476e-49	-1.1667609610423205e-12	-1.6145899432254254e-09	2.2486394200584712e-49	-5.5075367114661615e-12	1.6145993365926146e-10
4.6	88.8861953877944	5.354558981957441e-40	0.6919807276726869	408.88888888873925	5.5503941513388015e-50	-800.0	4.813336718955988e-42	0.019080983262442657	-2.5631102854975334e-42	0.9999924244995647	2.4397881486930294e-42	0.003892421080204434	-3.0024654889303776e-42	-3.429767480459013e-40	0.44603972629173555	2.7824622558303543e-40	-3.449017288428829e-40	0.44877630202365043	2.794569214254733e-40	800.0	0.44603972629241845	3.451428346737678e-40	88.88888888828309	1.385149046624003e-49	-1.178110982681469e-12	-1.0122865508794878e-09	1.4147084923421148e-49	-4.6800887526417045e-12	1.0122973695126459e-10
4.605	88.88612870534658	5.366034109926002e-40	0.7004938401674811	409.3333333331808	5.620201651787737e-50	-800.0	4.8208094706550806e-42	0.019228976180480375	-2.5253815965822165e-42	0.9999922369537435	2.451949778306557e-42	0.003940308439746995	-3.008756104754186e-42	-3.436789288962685e-40	0.4515272555636615	2.7962071747494097e-40	-3.4562519737860383e-40	0.4542849979211464	2.808379816079996e-40	800.0	0.4515272555643665	3.458824956260117e-40	88.88888888827148	1.4004992505228232e-49	-1.2148063508038001e-12	-1.3370045811218316e-09	1.8317332426515714e-49	-5.31853289425223e-12	1.337015159500038e-10
4.61	88.88606068200876	5.377342822144801e-40	0.7090728296747691	409.7777777776224	5.690227658214341e-50	-800.0	4.8283253202202375e-42	0.019377574546117646	-2.4871537915771715e-42	0.999992045636604	2.464131617011513e-42	0.003988566393435443	-3.0149509661285725e-42	-3.4436989414698126e-40	0.45705725316977036	2.8099737660801916e-40	-3.4633771445489054e-40	0.45983626411461015	2.822211949228235e-40	800.0	0.4570572531704833	3.466114297931132e-40	88.88888888827182	1.4008273417950426e-49	-1.2269832163245927e-12	3.621399476590399e-10	-2.901853186722886e-50	-1.8111068928014187e-12	3.6214447641606983e-11
4.615	88.88599129875874	5.388483497439287e-40	0.7177176885946044	410.22222222206375	5.760269034057381e-50	-800.0	4.835829133565901e-42	0.019525859005359854	-2.4486136135572167e-42	0.9999918504946438	2.4763336910855553e-42	0.0040371948994945605	-3.021049144831888e-42	-3.450495356005742e-40	0.4626297143601833	2.8237620733219093e-40	-3.470391905834661e-40	0.4654300106764837	2.8360655792182227e-40	800.0	0.46262971436090383	3.473295326778277e-40	88.88888888827252	1.4007445072419637e-49	-1.2386268565321548e-12	2.9369099744748824e-10	-2.693871585291252e-50	-2.2465049780886034e-12	2.936995893192858e-11
4.62	88.88592053498482	5.399454054164768e-40	0.7264285867049971	410.6666666665053	5.830430154298516e-50	-800.0	4.843348143094182e-42	0.019674201883078477	-2.409664002923701e-42	0.9999916514698898	2.4885560963828153e-42	0.0040861949139455065	-3.027049450828159e-42	-3.4571771473851427e-40	0.4682447487258058	2.8375722179712794e-40	-3.477295084705268e-40	0.47106625434242777	2.849940749583815e-40	800.0	0.4682447487265367	3.4803667010202615e-40	88.8888888882696	1.404522219497465e-49	-1.260008614940214e-12	-4.272730317703781e-09	5.307889154421097e-49	-1.1917359450113506e-11	4.272746937425772e-10
4.625	88.88584837164017	5.410252818305753e-40	0.7352054773950782	411.1111111109466	5.900926957822792e-50	-800.0	4.850914479578055e-42	0.0198231130979154	-2.3701750171104695e-42	0.9999914485087692	2.500798855996092e-42	0.004135566175614337	-3.0329509265770274e-42	-3.4637432005036473e-40	0.47390232637693647	2.8514042417367526e-40	-3.484085135964657e-40	0.47674515792903344	2.8638375959067517e-40	800.0	0.47390232637772	3.487327341624855e-40	88.8888888882361	1.4462215016539511e-49	-1.3442192410434445e-12	-3.764692261635343e-09	4.77765881715037e-49	-1.0632261829582863e-11	3.7647072754476746e-10
4.63	88.88577478913639	5.420877928206779e-40	0.744048368810353	411.55555555538785	5.973239405845197e-50	-800.0	4.858469624636146e-42	0.019971580114285077	-2.330356864798248e-42	0.999991241556188	2.5130620222845414e-42	0.0041853087313588515	-3.038752508122816e-42	-3.47019227724981e-40	0.4796024527228704	2.865258219800977e-40	-3.4907611166202718e-40	0.4824665941828135	2.8777560861259606e-40	800.0	0.479602452723662	3.494176048609533e-40	88.88888888823682	1.446169947825654e-49	-1.3566807254080511e-12	5.731711401797754e-10	-5.90737698284317e-50	-1.8010223766407908e-12	5.731739697653627e-11
4.635	88.88569976659691	5.4313271585875565e-40	0.7529573975222847	411.9999999998291	6.045582782654935e-50	-800.0	4.8660527486105794e-42	0.02012017833931313	-2.2900647090511315e-42	0.9999910305534271	2.525345699442518e-42	0.0042354233504757095	-3.0444529248070326e-42	-3.4765229002634267e-40	0.48534521595980024	2.8791342857673233e-40	-3.4973216687522966e-40	0.4882306006922798	2.8916963003951327e-40	800.0	0.48534521596060076	3.500911387609342e-40	88.88888888823614	1.4472668048384335e-49	-1.374068030499838e-12	-1.710039517395859e-10	2.529832066636438e-50	-3.5510363770966158e-12	1.7104081784739595e-11
4.64	88.8856232847186	5.441598671968919e-40	0.7619324950908927	412.4444444442703	6.117950365339202e-50	-800.0	4.8736856005685566e-42	0.020269244247741142	-2.2492045424046223e-42	0.9999908154461934	2.5376499262701855e-42	0.004285909649063597	-3.050051127222807e-42	-3.482733849227933e-40	0.4911305721368869	2.893032501747525e-40	-3.503765165129369e-40	0.49403731143885715	2.9056583811744468e-40	800.0	0.49113057213769684	3.507532174226488e-40	88.88888888823554	1.4483289068703855e-49	-1.3907375879929066e-12	2.8658557008988773e-11	8.475464372855971e-51	-2.8391250158014178e-12	2.8798845822234075e-12
4.645	88.88554532352883	5.451690416226654e-40	0.7709736564152122	412.8888888887113	6.1903652785640985e-50	-800.0	4.881311689587279e-42	0.02041776919572536	-2.2079891706719326e-42	0.9999905961783111	2.5499747741980587e-42	0.004336767599534449	-3.05554594414292e-42	-3.4888237629954755e-40	0.4969585181349761	2.9069529671440593e-40	-3.510090588163874e-40	0.49988657144879395	2.9196423090895088e-40	800.0	0.4969585181357945	3.5140370857078168e-40	88.88888888823617	1.4483141816119836e-49	-1.4036119590964772e-12	1.442401753592906e-10	-8.796244066677636e-51	-2.8049797164130565e-12	1.4426744642811279e-11
4.65	88.88546586216235	5.461600065780526e-40	0.7800809613309149	413.3333333331523	6.262819470630522e-50	-800.0	4.888972292556107e-42	0.02056637062858375	-2.1662607046238967e-42	0.9999903726910927	2.5623203519908036e-42	0.004387997652105099	-3.060936049075912e-42	-3.4947911008526e-40	0.5028291055887032	2.920895823817308e-40	-3.5162964679488736e-40	0.5057784026333927	2.9336481830155028e-40	800.0	0.5028291055895306	3.520424623036638e-40	88.88888888823527	1.4494636833903402e-49	-1.4226846532330686e-12	-1.2886876750901481e-09	1.5551257566965896e-49	-6.313844107103092e-12	1.2887031421381187e-10
4.655	88.88538488122832	5.471325645275391e-40	0.7892543030154588	413.7777777775934	6.335355888742143e-50	-800.0	4.8966828644919764e-42	0.020715271270344303	-2.123948597424908e-42	0.9999901449299988	2.574686711873909e-42	0.00443959920703301	-3.0662203153779975e-42	-3.5006345543299984e-40	0.5087422658159518	2.934861152051585e-40	-3.522381132475633e-40	0.5117128907096897	2.9476761461029746e-40	800.0	0.5087422658168015	3.5266935129435885e-40	88.88888888822534	1.4616227634380779e-49	-1.4613457694363398e-12	-1.0471031449317304e-09	1.3740945304879383e-49	-5.3981181266496766e-12	1.0471170592656914e-10
4.66	88.88530236081509	5.480864993029294e-40	0.7984936226530179	414.22222222203465	6.40843370373195e-50	-800.0	4.904393496091356e-42	0.020863551617367665	-2.0812488259914346e-42	0.9999899128390243	2.5870739339601954e-42	0.004491571934642582	-3.0713975107647054e-42	-3.5063526929298108e-40	0.5146979610831501	2.948849064256407e-40	-3.528343471167927e-40	0.5176898579763327	2.9617261985228477e-40	800.0	0.5146979610840083	3.532842362056678e-40	88.88888888822619	1.4614900160773375e-49	-1.4737774242855972e-12	6.963318810448511e-10	-6.3716552058670485e-50	-1.2935454090633986e-12	6.963330825252998e-11
4.665	88.8852182803042	5.490215716344739e-40	0.8077989239681408	414.66666666647586	6.481522677807464e-50	-800.0	4.91213956547985e-42	0.021011730972907334	-2.0380222835982556e-42	0.9999896763601761	2.599482129057278e-42	0.00454391585708185	-3.0764662718861455e-42	-3.5119439347091403e-40	0.5206961939739994	2.9628597080608647e-40	-3.534181974938117e-40	0.5237092755013927	2.9757984417969097e-40	800.0	0.5206961939748667	3.538869628097121e-40	88.88888888822638	1.46207917127868e-49	-1.4884670399177039e-12	-2.8741453661494113e-09	3.485616024626653e-49	-9.851627710028366e-12	2.8741622501742437e-10
4.67	88.88513262050874	5.499375744054735e-40	0.8171700381329384	415.11111111091674	6.554818221846853e-50	-800.0	4.91993360631283e-42	0.021159971014962878	-1.994210512760649e-42	0.9999894354394868	2.611911358317381e-42	0.004596630025884671	-3.0814254189239965e-42	-3.517406911075819e-40	0.5267368558477334	2.976893177230219e-40	-3.5398949672302077e-40	0.5297711606702757	2.9898930133532256e-40	800.0	0.5267368558486456	3.5447739760377107e-40	88.88888888820178	1.491344877350361e-49	-1.5620420925401717e-12	-2.174023923847173e-09	2.6687334622435452e-49	-8.28050031521871e-12	2.1740396933233142e-10
4.675	88.88504536201347	5.508342877324579e-40	0.8266068167283702	415.5555555553576	6.629383217506203e-50	-800.0	4.9277355772429697e-42	0.02130750571138051	-1.9499768138432556e-42	0.9999891900223478	2.6243617020490256e-42	0.004649713607408231	-3.0862736998905514e-42	-3.5227401702693367e-40	0.5328198512223806	2.9909495880621764e-40	-3.5454812393092873e-40	0.5358753114163411	3.0040099359098506e-40	800.0	0.5328198512233018	3.550553988558034e-40	88.88888888820244	1.491324692144652e-49	-1.5763654528711933e-12	-3.838351858575802e-09	4.616261495910384e-49	-1.2182453874599508e-11	3.838371191327739e-10
4.68	88.88495648476713	5.517114699367492e-40	0.8361091641349022	415.9999999997987	6.70537435954431e-50	-800.0	4.935569487985615e-42	0.02145465630553424	-1.905225442981279e-42	0.9999889400523605	2.6368332692942102e-42	0.004703166065040844	-3.091009739186564e-42	-3.5279421178056967e-40	0.5389451186543547	3.005029090027126e-40	-3.5509393081544763e-40	0.5420216177023959	3.0181493009676076e-40	800.0	0.5389451186553424	3.556208107852923e-40	88.8888888881652	1.5353301752704905e-49	-1.6801347090003569e-12	-4.507919963240358e-09	5.329251019142967e-49	-1.4195642326540061e-11	4.507942314542414e-10
4.685	88.88486597024713	5.525689103052247e-40	0.8456768202660618	416.44444444423925	6.782157496675654e-50	-800.0	4.943447326932443e-42	0.02160156268508815	-1.8599013296343584e-42	0.9999886854774269	2.6493261239465858e-42	0.004756985937033146	-3.095632338091519e-42	-3.5330113648433488e-40	0.5451124906868812	3.0191317837804694e-40	-3.556267532979418e-40	0.5482100095661104	3.0323112343715315e-40	800.0	0.5451124906878801	3.561734975711485e-40	88.88888888816402	1.5369858648850744e-49	-1.7022607391231657e-12	6.077508866534314e-10	-5.856884557689562e-50	-2.2632686214741397e-12	6.077551008530369e-11
4.69	88.88477379987935	5.534063902365236e-40	0.8553095214183449	416.88888888868	6.859007260406195e-50	-800.0	4.9513405676315864e-42	0.02174764691789061	-1.8141252322413093e-42	0.9999884262453027	2.6618403415753846e-42	0.004811171741311662	-3.1001402534489716e-42	-3.5379464716203434e-40	0.5513217975348812	3.0332577842994674e-40	-3.561464618945199e-40	0.5544402514797899	3.0464957802443923e-40	800.0	0.5513217975358895	3.5671331830791672e-40	88.88888888816489	1.5368791981251407e-49	-1.7174658429634904e-12	7.013056801951715e-10	-6.744454252208403e-50	-1.816509731488267e-12	7.013080327371254e-11
4.695	88.88467995472044	5.542236727953301e-40	0.8650070403653443	417.3333333331213	6.935922376670545e-50	-800.0	4.959259486488464e-42	0.021892987198332912	-1.767858148516682e-42	0.9999881623027055	2.674376022511244e-42	0.004865722201013712	-3.104532138334724e-42	-3.5427458787052454e-40	0.5575728929297803	3.0474072354332726e-40	-3.5665291594795903e-40	0.5607121303167825	3.0607030121486937e-40	800.0	0.5575728929308008	3.5724012027242744e-40	88.88888888816346	1.5388581823279929e-49	-1.7392184072878027e-12	-5.417651512591811e-09	6.2905374960328445e-49	-1.6893433720533137e-11	5.417677851256128e-10
4.7	88.88458441716637	5.550205468103643e-40	0.874769007539519	417.77777777756216	7.0134956978124315e-50	-800.0	4.967216484901407e-42	0.022037718077704452	-1.721044695567214e-42	0.9999878936001196	2.686933230771151e-42	0.004920635238600555	-3.1088067930340976e-42	-3.5474081979736235e-40	0.5638655388519532	3.0615802420690784e-40	-3.5714595893500597e-40	0.567025471496541	3.0749330391743275e-40	800.0	0.5638655388530556	3.5775376734850342e-40	88.88888888811869	1.5907754403270922e-49	-1.8668054704281493e-12	-3.675163876929577e-09	4.377429589124596e-49	-1.2545086636654323e-11	3.675185288048313e-10
4.705	88.88448717008185	5.557968019197347e-40	0.8845950149571401	418.22222222200276	7.093033731751655e-50	-800.0	4.975194135099135e-42	0.02218144608746188	-1.673762144310729e-42	0.9999876200893477	2.6995120311255345e-42	0.00497590856045036	-3.1129630230846474e-42	-3.5519320480062696e-40	0.5701994725209864	3.075776911331481e-40	-3.5762545646889487e-40	0.5733799877180842	3.0891859204842997e-40	800.0	0.5701994725220992	3.5825412394141996e-40	88.88888888811947	1.59072355273869e-49	-1.8833717356083806e-12	-8.517275773555745e-09	9.840811820411278e-49	-2.5053668793057484e-11	8.517312621309589e-10
4.71	88.88438819602557	5.5655221163904465e-40	0.8944846781485986	418.66666666644295	7.1764567140467525e-50	-800.0	4.983190370460101e-42	0.02232403002625465	-1.6260257310595504e-42	0.9999873417213319	2.7121125100070012e-42	0.005031540005235833	-3.116999542777076e-42	-3.556315942340233e-40	0.5765744463170054	3.0899973758804794e-40	-3.5809127852774183e-40	0.5797753512292232	3.1034617093211807e-40	800.0	0.5765744463182694	3.5874104406469325e-40	88.88888888803345	1.689156386063224e-49	-2.1179872713288036e-12	-1.482476363889773e-08	1.688886025721565e-48	-4.164675047430063e-11	1.482482213724702e-09
4.715	88.88428747902614	5.572865729755456e-40	0.9044374844894264	419.1111111108829	7.261695451860085e-50	-800.0	4.991217170045994e-42	0.022465585628802732	-1.5777836803651215e-42	0.9999870584511474	2.7247347235620013e-42	0.005087526690743472	-3.1209152008580804e-42	-3.5605585510118986e-40	0.5829901300125079	3.104241736098275e-40	-3.5854328025708956e-40	0.5862112674333244	3.117760493245025e-40	800.0	0.5829901300138501	3.592143968734945e-40	88.88888888799265	1.735457038992332e-49	-2.2454526869094854e-12	-2.9636737508551777e-09	3.454504254803039e-49	-1.2219652703754598e-11	2.963698942440038e-10
4.72	88.88418500365906	5.57999686345966e-40	0.914452870759144	419.5555555553229	7.348465180475826e-50	-800.0	4.999265460753643e-42	0.022605857353184253	-1.529079902531508e-42	0.9999867702354084	2.7373787251976094e-42	0.005143865450164609	-3.124708866035744e-42	-3.5646585679095133e-40	0.5894461607678567	3.1185100907672544e-40	-3.5898132938185623e-40	0.592687368526386	3.1320823338233613e-40	800.0	0.5894461607692113	3.5967405372094027e-40	88.88888888799367	1.7353117149232186e-49	-2.2646480523787813e-12	-8.692306134131306e-10	1.1806917204781824e-49	-6.490134277621133e-12	8.692548424584753e-11
4.725	88.88408075473944	5.5869134588844555e-40	0.9245302597022023	419.9999999997626	7.436002368898671e-50	-800.0	5.007326393139176e-42	0.02274458414220703	-1.4799618541109953e-42	0.9999864770314025	2.7500445782419588e-42	0.005200553037756148	-3.1283793719289585e-42	-3.568614646994621e-40	0.5959421666985936	3.1328025511771318e-40	-3.5940530722226083e-40	0.5992032119170297	3.146427267271929e-40	800.0	0.595942166699987	3.6011988191321936e-40	88.88888888797905	1.7526959283304497e-49	-2.3234788217828767e-12	-2.1839715221478138e-09	2.640011803324739e-49	-1.0119285878900225e-11	2.1839949655389175e-10
4.73	88.88397471827335	5.593613616439514e-40	0.9346689773481671	420.4444444442028	7.523715885895906e-50	-800.0	5.0154087564289684e-42	0.022881816977242193	-1.4303942222279495e-42	0.9999861787997666	2.7627323273577988e-42	0.005257585663743729	-3.1319256433554134e-42	-3.572425548642043e-40	0.6024777135786267	3.1471192092622543e-40	-3.5981508498212864e-40	0.605758369618964	3.160795354985747e-40	800.0	0.6024777135800379	3.6055175900695272e-40	88.88888888797679	1.7562259975394698e-49	-2.352788293658641e-12	2.6363503972483804e-09	-2.7227601433393667e-49	2.3403127743296543e-12	2.6363514360068866e-10
4.735	88.88386688112291	5.60009551452954e-40	0.9448682848192735	420.8888888886429	7.611524506572833e-50	-800.0	5.023506518773526e-42	0.02301734736884878	-1.3804111166728521e-42	0.9999858755035457	2.7754420100739387e-42	0.005314959173246532	-3.135346650164789e-42	-3.5760900861513513e-40	0.6090523253435999	3.1614601504434015e-40	-3.6021054363702015e-40	0.6123523539180724	3.1751866410798568e-40	800.0	0.6090523253450055	3.6096956758619945e-40	88.88888888798857	1.7443705917228463e-49	-2.343417464414308e-12	-7.638334409420561e-09	8.83126009599117e-49	-2.4109875988149773e-11	7.638372459906515e-10
4.74	88.8837572308122	5.6063573595531876e-40	0.9551273967131408	421.33333333308246	7.703165203364695e-50	-800.0	5.031614111757689e-42	0.023150971738155526	-1.330046991628849e-42	0.999985567107646	2.788173663175826e-42	0.005372669149684362	-3.138641378768957e-42	-3.5796070927871224e-40	0.6156654959404986	3.1758254607500375e-40	-3.6059157403289223e-40	0.6189846187791876	3.189601153716967e-40	800.0	0.6156654959420566	3.613731920396575e-40	88.8888888879116	1.8320746306627645e-49	-2.5645759598900203e-12	-8.695385152652933e-09	1.0143523800850516e-48	-2.6345608043936205e-11	8.695425064023051e-10
4.745	88.88364575612582	5.6123974929501214e-40	0.9654454462884619	421.77777777752186	7.794694679120045e-50	-800.0	5.039733907030782e-42	0.02328262466072398	-1.2792990251581984e-42	0.9999852535805184	2.800927310504521e-42	0.005430710718928513	-3.141808893220871e-42	-3.5829754924797156e-40	0.6223166668849263	3.190215213144181e-40	-3.6095806620727608e-40	0.6256545994244216	3.2040389278540598e-40	800.0	0.6223166668864971	3.6176252545991046e-40	88.88888888791587	1.829609387557302e-49	-2.5711875923448274e-12	1.8805697739782717e-09	-1.759994686601026e-49	6.022057201704665e-13	1.8805698703989747e-10
4.75	88.8835324463378	5.618214241154863e-40	0.9758215364765299	422.22222222196143	7.886171738959564e-50	-800.0	5.047866929822258e-42	0.02341221106550417	-1.2281726543253502e-42	0.9999849348919917	2.813702981584405e-42	0.0054890788362638	-3.1448482496131453e-42	-3.5861942007483714e-40	0.6290052601444752	3.2046294883709035e-40	-3.6130991175530723e-40	0.6323617038400364	3.2185000013851846e-40	800.0	0.6290052601460595	3.6213745997286207e-40	88.88888888791686	1.8295249361640433e-49	-2.59421283446652e-12	8.052817671947258e-11	8.13693793477155e-51	-5.134329990501605e-12	8.06916884828541e-12
4.755	88.88341729164082	5.623805984197219e-40	0.9862547187622689	422.66666666640106	7.977647951282767e-50	-800.0	5.0560117911070405e-42	0.023539588808557967	-1.1766871635747603e-42	0.9999846110144774	2.826500704834735e-42	0.0055477681675797814	-3.1477585352582816e-42	-3.589262170026878e-40	0.6357306645242774	3.2190683673485496e-40	-3.6164700779670753e-40	0.6391052992910556	3.2329844082251263e-40	800.0	0.6357306645258751	3.6249789115886884e-40	88.88888888791783	1.8295727169291464e-49	-2.6166448042365356e-12	4.983273053463833e-10	-2.1809550897450132e-50	-2.9139892095724205e-12	4.983358251088327e-11
4.76	88.8833002833402	5.629171207473994e-40	0.9967439752249799	423.1111111108409	8.069031188526785e-50	-800.0	5.064165633144126e-42	0.023664587556145433	-1.124870919988998e-42	0.9999842819235157	2.839320501919699e-42	0.005606772988345284	-3.1505388980943466e-42	-3.592178423743316e-40	0.6424922240900081	3.2335319248542096e-40	-3.6196925957776938e-40	0.6458847042454808	3.247492174101845e-40	800.0	0.6424922240916187	3.628437213900057e-40	88.88888888792243	1.826899102876655e-49	-2.620173855593568e-12	1.388400505675142e-09	-8.794194009462035e-50	1.8875476282398106e-12	1.388401788746701e-10
4.765	88.88318141406408	5.6343085490209485e-40	1.0072882039369906	423.55555555528065	8.16024535932807e-50	-800.0	5.072323808647942e-42	0.0237870055239477	-1.072762993055955e-42	0.9999839475983682	2.8521623828575485e-42	0.005666087101469515	-3.15318857356212e-42	-3.5949420874465288e-40	0.6492892287552098	3.248020224015516e-40	-3.6227658353736905e-40	0.6526991793643642	3.2620233114298083e-40	800.0	0.6492892287568333	3.6317486287712022e-40	88.88888888793053	1.8216884517966672e-49	-2.6040364087868563e-12	1.3874531153607952e-09	-8.491652052733693e-50	2.007982956969111e-12	1.3874545683805044e-10
4.77	88.88306067796191	5.639216844182311e-40	1.0178862064465635	423.9999999997203	8.251291557579565e-50	-800.0	5.080479967867172e-42	0.023906613660808904	-1.0204127741736633e-42	0.9999836080225751	2.8650263414832086e-42	0.005725703766887038	-3.1557069099919855e-42	-3.597552418194057e-40	0.656120906212076	3.2625333111641495e-40	-3.62568910263976e-40	0.6595479196904354	3.276577814432787e-40	800.0	0.6561209062137114	3.634912405491341e-40	88.88888888793515	1.8192159791609855e-49	-2.6065985285634838e-12	4.58063216986647e-10	-1.72019558906154e-50	-3.1013988505855217e-12	4.580737161538375e-11
4.775	88.88293807085893	5.643895160148455e-40	1.0285366806383756	424.44444444415984	8.342247235477357e-50	-800.0	5.0886267904849546e-42	0.02402317102439599	-9.67876189309116e-43	0.9999832631843883	2.877912352199083e-42	0.005785615661391834	-3.158093388212023e-42	-3.6000088272193157e-40	0.6629864173285709	3.2770712120845234e-40	-3.628461863676691e-40	0.6664300512415301	3.2911556563633874e-40	800.0	0.6629864173302193	3.63792794279235e-40	88.88888888793632	1.819057639520196e-49	-2.6285211654140144e-12	6.082245818106047e-10	-3.116566114996731e-50	-2.3232775510271273e-12	6.082290189864869e-11
4.78	88.88281359038372	5.648342825373254e-40	1.0392382157258462	424.8888888885997	8.433144868802706e-50	-800.0	5.096756116899414e-42	0.0241364295543583	-9.152149395846805e-43	0.999982913077133	2.8908203672670166e-42	0.005845814850463872	-3.1603476382362304e-42	-3.6023108992154598e-40	0.6698848529197919	3.291633928849899e-40	-3.6310837613459674e-40	0.6733446289714283	3.3057567870986794e-40	800.0	0.6698848529214531	3.640794807810548e-40	88.88888888794119	1.816173778199255e-49	-2.62996797757569e-12	6.719365804504227e-10	-3.4756827096914006e-50	-1.9573100038799354e-12	6.719394312063095e-11
4.785	88.88268723605538	5.652559450566182e-40	1.0499892901892618	425.33333333303943	8.52394852459162e-50	-800.0	5.104859161267537e-42	0.024246140019616155	-8.62495298721193e-43	0.9999825576994515	2.903750314977444e-42	0.005906292776667097	-3.1624694511560664e-42	-3.604458406066693e-40	0.6768152324182719	3.306221437628583e-40	-3.6335546283692977e-40	0.6802906364344651	3.3203811313461467e-40	800.0	0.676815232419946	3.6435127496181696e-40	88.88888888794237	1.816050240792805e-49	-2.651595347822869e-12	1.1534477077171514e-10	5.116284342724709e-51	-4.8812053626655776e-12	1.1544800695625729e-11
4.79	88.88255900937631	5.656544953273819e-40	1.060788271380353	425.77777777747906	8.614750905497917e-50	-800.0	5.112926498184482e-42	0.02435205421626352	-8.097880746778794e-43	0.9999821970555636	2.916702097568929e-42	0.005967040257419619	-3.1644587930460905e-42	-3.6064513228601808e-40	0.6837765036183134	3.320833686149085e-40	-3.6358745003182513e-40	0.6872669860797939	3.3350285868114763e-40	800.0	0.6837765036200013	3.6460817150675205e-40	88.88888888794328	1.8160108856000084e-49	-2.6737533876015153e-12	3.9932501749714937e-10	-1.565563424332938e-50	-3.2961133656632987e-12	3.9933862067475764e-11
4.795	88.88242891387254	5.660299571252489e-40	1.071633417976864	426.2222222219189	8.705611124457662e-50	-800.0	5.120948342377934e-42	0.0244539318154423	-7.571669898976183e-43	0.9999818311553806	2.929675590231145e-42	0.006028047498797374	-3.166315812496933e-42	-3.6082898365368584e-40	0.6907675442576133	3.3354705923860536e-40	-3.638043623963639e-40	0.694272521507422	3.349699023167616e-40	800.0	0.6907675442593139	3.648501857410939e-40	88.8888888879461	1.814684728120587e-49	-2.6859321238606606e-12	3.791929733172812e-10	-1.3789928740731184e-50	-3.3015874472539643e-12	3.792073463065717e-11
4.8	88.88229695512192	5.663823875449839e-40	1.0825228836665084	426.6666666663588	8.79634379844849e-50	-800.0	5.128914481690662e-42	0.024551541020895025	-7.047089484670562e-43	0.999981460014585	2.942670640142936e-42	0.006089304116252984	-3.168040847911282e-42	-3.6099743542471392e-40	0.6977871643913315	3.3501320432577037e-40	-3.6400624663902524e-40	0.7013060199126205	3.364392280831837e-40	800.0	0.6977871643930461	3.65077354466852e-40	88.88888888794705	1.814643057367507e-49	-2.7068953839382127e-12	3.109808706843162e-10	-9.185308592981143e-51	-3.5568214064067156e-12	3.110012104640309e-11
4.805	88.88216314077246	5.667118782681845e-40	1.0934547221568125	427.1111111107988	8.887145314759795e-50	-800.0	5.136814433697132e-42	0.024644663021946744	-6.524930372282033e-43	0.9999810836546811	2.955687065566843e-42	0.006150799162792561	-3.169634434611847e-42	-3.611505511464809e-40	0.7048341096208091	3.364817893356973e-40	-3.641931721249995e-40	0.7083661958060193	3.3791081701914743e-40	800.0	0.7048341096225369	3.6528973677991564e-40	88.88888888794975	1.8133815721772327e-49	-2.7186360716811975e-12	7.500962813840285e-10	-4.0516769243217786e-50	-1.0793010815087483e-12	7.500970578778271e-11
4.81	88.88202748051769	5.6701855594664305e-40	1.1044268944049984	427.5555555552385	8.977767030279597e-50	-800.0	5.144637604449323e-42	0.024733095932621844	-6.005995034566107e-43	0.9999807021029266	2.9687246557578585e-42	0.0062125211696418756	-3.171097306922064e-42	-3.6128841742910823e-40	0.7119070657534678	3.3795279646019916e-40	-3.643652312086281e-40	0.7154517058621769	3.393846471284437e-40	800.0	0.7119070657552083	3.654874143171837e-40	88.88888888795387	1.8110968232089654e-49	-2.721975685781392e-12	6.219617413686323e-10	-2.9732429904531203e-50	-2.1538707875570266e-12	6.219654708146353e-11
4.815	88.8818899860602	5.673025824865608e-40	1.115437276836694	427.99999999967855	9.068305351314468e-50	-800.0	5.1523735018104396e-42	0.024816659279735108	-5.491083546100889e-43	0.9999803153922299	2.9817831709593774e-42	0.006274458192474771	-3.1724303996735796e-42	-3.6141114410792665e-40	0.7190046641001255	3.394262045967568e-40	-3.6452253916470076e-40	0.7225611550538923	3.4086069340908773e-40	800.0	0.7190046641018777	3.6567049143976154e-40	88.88888888795563	1.810624916398187e-49	-2.741816473715566e-12	2.5200582361623184e-10	-3.6224819901057057e-51	-4.394351340312638e-12	2.52044133953158e-11
4.82	88.88175067105938	5.675641551542128e-40	1.1264836706898087	428.4444444441185	9.158831742889584e-50	-800.0	5.160012131396875e-42	0.024895201042106962	-4.980967965240334e-43	0.9999799235610026	2.9948623425481875e-42	0.006336597863970742	-3.17363484869014e-42	-3.6151886428602663e-40	0.7261254874976121	3.409019893369594e-40	-3.6466523338584985e-40	0.7296931048031049	3.4233892799591453e-40	800.0	0.726125487499377	3.658390953010518e-40	88.8888888879568	1.8104292690778612e-49	-2.7631063529597316e-12	1.7289873236827938e-10	4.719123024690089e-52	-4.631699360331506e-12	1.7296075940375142e-11
4.825	88.88160955107986	5.678035068483365e-40	1.1375638101292864	428.88888888855865	9.249350358382487e-50	-800.0	5.167544129153116e-42	0.024968599643185044	-4.476381460682649e-43	0.9999795266530154	3.007961872928645e-42	0.006398927439459359	-3.174711992220639e-42	-3.6161173448769596e-40	0.7332680755391722	3.4238012292780877e-40	-3.6479347226844374e-40	0.7368460817026372	3.4381932034115503e-40	800.0	0.73326807554095	3.6599337602234358e-40	88.888888887958	1.810214628322462e-49	-2.784020328689139e-12	6.096456672821248e-10	-3.2617342864669766e-50	-1.4845296709396833e-12	6.096474747460299e-11
4.83	88.88146664346525	5.680209044857882e-40	1.148675376085233	429.33333333299845	9.33980417907714e-50	-800.0	5.1749577165464124e-42	0.02503671474660832	-3.9782031396229315e-43	0.9999791247170418	3.0210814373319673e-42	0.006461433874760304	-3.175663361651849e-42	-3.6168993357061387e-40	0.7404309334943128	3.4386057444757153e-40	-3.649074393934168e-40	0.7440185721419057	3.45301836522739e-40	800.0	0.7404309334961052	3.661335056522355e-40	88.88888888796242	1.807531371221684e-49	-2.781704563950068e-12	6.555940975279416e-10	-3.6236194538937285e-50	-1.3772816442164282e-12	6.555955442330307e-11
4.835	88.8813219671758	5.682166461904556e-40	1.1598160114254088	429.77777777743825	9.43016051699598e-50	-800.0	5.1822437151739664e-42	0.02509946804470559	-3.4871552141292946e-43	0.9999787178064026	3.034220686641086e-42	0.006524103911531048	-3.176490665446393e-42	-3.6175366085762873e-40	0.747612542088982	3.4534331010185265e-40	-3.6500733903155513e-40	0.7512090400768318	3.4678643998917742e-40	800.0	0.7476125420907865	3.66259676354696e-40	88.88888888796403	1.8070121392675718e-49	-2.8015303813818704e-12	2.854013321969543e-10	-6.910954163772293e-51	-4.214736187368774e-12	2.854324515904339e-11
4.84	88.88117554276415	5.683910628731744e-40	1.1709833259007383	430.2222222218781	9.520504608038257e-50	-800.0	5.189396400023641e-42	0.025156853406400056	-3.003740623415996e-43	0.9999783059788978	3.047379245813092e-42	0.006586924105083032	-3.1771957979889494e-42	-3.6180313714509995e-40	0.7548113606930339	3.468282930174928e-40	-3.65093389861792e-40	0.7584159477069125	3.482730925488862e-40	800.0	0.7548113606948504	3.663721014274052e-40	88.88888888796563	1.8065510733621034e-49	-2.820549875848592e-12	2.4916365267319165e-10	-5.025641001979239e-51	-3.974430194859269e-12	2.491953488908264e-11
4.845	88.88102739225036	5.685445168115768e-40	1.1821749072124101	430.666666666318	9.610830479003643e-50	-800.0	5.1964043343633497e-42	0.02520879279787591	-2.5288093132691875e-43	0.9999778892964538	3.0605567153306585e-42	0.006649880886635784	-3.1777808314175563e-42	-3.6183860374709992e-40	0.7620258344540533	3.4831548338386926e-40	-3.6516583491221386e-40	0.7656377348766034	3.4976175273389883e-40	800.0	0.7620258344558835	3.6647101438638193e-40	88.88888888796656	1.8065188179440816e-49	-2.8418986526351857e-12	1.205554175006222e-10	7.4233396284259e-51	-5.26966275399834e-12	1.2067053507087058e-11
4.85	88.88087753870717	5.686773911451651e-40	1.1933883536207366	431.1111111107579	9.701151962471124e-50	-800.0	5.203260825873624e-42	0.02525529798159419	-2.0629173682535495e-43	0.9999774678239584	3.073752681390296e-42	0.006712960746751282	-3.1782479559248757e-42	-3.6186031558515335e-40	0.769254415317761	3.49804839592108e-40	-3.6522493314155643e-40	0.7728728448000569	3.512523771590405e-40	800.0	0.7692544153196011	3.665566621947345e-40	88.8888888879677	1.806600185234949e-49	-2.8661849222850198e-12	7.517542144341352e-10	-4.1402588436597975e-50	-3.0830959583457693e-13	7.517542776561306e-11
4.855	88.88072600655917	5.687901014164925e-40	1.2046212519257333	431.5555555551979	9.79135225051232e-50	-800.0	5.2099635438786336e-42	0.025296458794264207	-1.6063325077579987e-43	0.9999770416301007	3.086966704383951e-42	0.00677615011146436	-3.1785995451422456e-42	-3.6186854873363844e-40	0.7764955478332215	3.5129631690201077e-40	-3.6527095117815103e-40	0.7801197464277471	3.527449217714469e-40	800.0	0.7764955478350785	3.6662931270184215e-40	88.88888888797327	1.8029510304732823e-49	-2.85043098763337e-12	7.235693525823199e-10	-4.354157259937803e-50	2.4315269853809567e-13	7.235693934375834e-11
4.86	88.8805728209061	5.6888307651446524e-40	1.215871227250679	431.99999999963785	9.881491985455133e-50	-800.0	5.216500185397988e-42	0.02533222905490917	-1.1599504430700414e-43	0.9999766107854694	3.100198337412448e-42	0.006839435622333692	-3.17883804796217e-42	-3.618635879127007e-40	0.783747701244966	3.5278986953960666e-40	-3.6530418131056714e-40	0.7873768954802725	3.542393389937096e-40	800.0	0.7837477012468368	3.666892423598708e-40	88.88888888797423	1.80285032665767e-49	-2.8703099800839903e-12	1.2481867391518251e-10	4.578158547650182e-51	-4.7326650250448e-12	1.249083643163417e-11
4.865	88.88041800780177	5.689567694737436e-40	1.2271359224243032	432.44444444407776	9.971628551353158e-50	-800.0	5.2228757900861644e-42	0.025362825642483447	-7.235549856075291e-44	0.999976175363337	3.113447115368135e-42	0.006902804020456261	-3.178966049724054e-42	-3.6184573354837647e-40	0.7910093562017252	3.542854494341796e-40	-3.653249096340276e-40	0.7946428098094753	3.5573558269217464e-40	800.0	0.7910093562036086	3.6673674318476817e-40	88.88888888797545	1.8026448928854787e-49	-2.8894882769392376e-12	3.180862980419167e-10	-1.3141852983818318e-50	-2.437858252610196e-12	3.1809563994948264e-11
4.87	88.88026159369949	5.690116418423334e-40	1.238413036647811	432.8888888885175	1.0061756045920107e-49	-800.0	5.229076902712728e-42	0.025388206305316	-2.9810401891037285e-44	0.9999757354380991	3.126712569990753e-42	0.006966242363984957	-3.178986183494402e-42	-3.6181529151743052e-40	0.79827902968265	3.5578300792990453e-40	-3.6533344968509735e-40	0.801915995162986	3.5723360287854865e-40	800.0	0.7982790296845504	3.6677211268000166e-40	88.88888888797767	1.8014041894039293e-49	-2.8946833352292505e-12	6.847263496941037e-10	-3.880539092976559e-50	-4.969015550379598e-13	6.847265299932283e-11
4.875	88.88010360573355	5.690481739204555e-40	1.2497003033296814	433.33333333295747	1.015176499650918e-49	-800.0	5.235113040866246e-42	0.025408658732426728	1.169293759411474e-44	0.9999752910860665	3.139994219424959e-42	0.007029737903440395	-3.178901188108099e-42	-3.617725798494195e-40	0.8055552607087617	3.572824945833107e-40	-3.653300999052261e-40	0.8091950397052678	3.5873335229112643e-40	800.0	0.8055552607106717	3.667956604362943e-40	88.88888888798165	1.7992670442336476e-49	-2.8991463336388305e-12	5.440388880136133e-10	-2.4639907860638703e-50	-2.253229852032822e-12	5.440435540614878e-11
4.88	88.87994407083379	5.690668376245181e-40	1.2609955509632949	433.7777777773973	1.0241726251010822e-49	-800.0	5.240974221989458e-42	0.025424200852798243	5.208200697162468e-44	0.9999748423829758	3.15329159408289e-42	0.00709327842417291	-3.178713754262412e-42	-3.6171791094640677e-40	0.8128366495871722	3.5878386012449814e-40	-3.6531517950928586e-40	0.8164785367370596	3.602347808084108e-40	800.0	0.8128366495890953	3.6680769064036366e-40	88.88888888798277	1.7991107720008815e-49	-2.917760340378453e-12	1.489771269310243e-10	1.3341869248380855e-51	-4.234689359912998e-12	1.4903730050761618e-11
4.885	88.87978301680242	5.690681333410773e-40	1.2722966243048006	434.2222222218369	1.0331678097786703e-49	-800.0	5.2466652842394895e-42	0.025435055958214544	9.138179183351461e-44	0.9999743894070164	3.166604201066164e-42	0.007156851802955643	-3.178426733442027e-42	-3.6165161570843007e-40	0.8201218070991809	3.6028705236695245e-40	-3.6528900055430382e-40	0.823765143527484	3.6173783969493456e-40	800.0	0.8201218071011168	3.6680852583012922e-40	88.88888888798361	1.79908149837748e-49	-2.9389105270108784e-12	1.5845103007449164e-10	3.676829771583543e-52	-4.114621879560591e-12	1.5850444487420286e-11
4.89	88.87962047042406	5.6905252696609325e-40	1.2836015142825066	434.6666666662768	1.0421633431429223e-49	-800.0	5.252192677437256e-42	0.02544146328275884	1.2962783682690705e-43	0.9999739322335167	3.1799315834555646e-42	0.0072204467387813965	-3.17804278102078e-42	-3.615740023237256e-40	0.8274094382455626	3.617920230296282e-40	-3.6525186491451586e-40	0.8310535858811802	3.6324248206296803e-40	800.0	0.8274094382475122	3.6679846631165333e-40	88.88888888798441	1.7991193103996867e-49	-2.958715520610836e-12	1.5821418249590497e-10	8.310183656164514e-52	-4.097905587880931e-12	1.582672435251676e-11
4.895	88.87945645907425	5.690205060078133e-40	1.2949082413904176	435.1111111107166	1.05115891603149e-49	-800.0	5.257545707576734e-42	0.02544343743062392	1.6674517870903947e-43	0.9999734709394663	3.1932732671503516e-42	0.007284052096903151	-3.1775646742527287e-42	-3.6148539298279406e-40	0.8346982670773142	3.6329872161920586e-40	-3.6520409593954493e-40	0.8383425937865804	3.647486579611745e-40	800.0	0.8346982670792764	3.667778263217923e-40	88.88888888798525	1.799114741637794e-49	-2.9799104627242405e-12	2.1576814409246919e-10	-3.5848602202816366e-51	-4.114291066019174e-12	2.158073664082959e-11
4.9	88.87929100988487	5.689725509456653e-40	1.306214911233716	435.5555555551567	1.060154251493272e-49	-800.0	5.262743901873597e-42	0.02544137685322918	2.0285773461435595e-43	0.99997300560117	3.206628787199114e-42	0.007347657221302421	-3.176995149970144e-42	-3.6138610514370534e-40	0.8419870725028482	3.6480709846735343e-40	-3.6514598147937e-40	0.8456310113800402	3.662563230323524e-40	800.0	0.8419870725048226	3.6674691556678347e-40	88.88888888798638	1.798878107064023e-49	-2.9998854908124774e-12	1.2292389328648903e-10	2.0970300907713347e-51	-4.145684500171928e-12	1.2299378130898778e-11
4.905	88.87912414865971	5.689090973240108e-40	1.3175197839881485	435.9999999995966	1.0691484720152487e-49	-800.0	5.2677896398293495e-42	0.025435451350675486	2.3797706741884945e-43	0.9999725362911978	3.219997723065208e-42	0.0074112523254325794	-3.176336689811221e-42	-3.6127642674434037e-40	0.8492747330651839	3.6631710881617075e-40	-3.6507780607144997e-40	0.8529177314420608	3.677654336009773e-40	800.0	0.8492747330671736	3.6670601478873397e-40	88.88888888798651	1.7993027878243404e-49	-3.0214128246628425e-12	5.921189464667101e-11	6.19080631870071e-51	-4.275433156522603e-12	5.936604918911449e-12
4.91	88.87895590155863	5.6883059606854406e-40	1.3288211553304794	436.44444444403644	1.0781453083708596e-49	-800.0	5.2726774052123533e-42	0.025425731403462066	2.72063684219697e-43	0.9999720630831201	3.233379642048036e-42	0.0074748278224012685	-3.175591862013388e-42	-3.611566556555826e-40	0.8565601501845534	3.678287062886579e-40	-3.649998655671271e-40	0.8602016669443194	3.692759444112407e-40	800.0	0.8565601501865566	3.666554146442058e-40	88.88888888798719	1.7993654618375943e-49	-3.04199334610932e-12	1.842674161404402e-10	-1.041762719899883e-51	-3.834231762043423e-12	1.8430730312247323e-11
4.915	88.87878629462071	5.687374965358871e-40	1.3401173863546396	436.8888888884762	1.0871421518291955e-49	-800.0	5.277419983861259e-42	0.025412503896173742	3.0520007363532778e-43	0.9999715860501691	3.2467741146286454e-42	0.007538374493263496	-3.17476322539704e-42	-3.6102708860247607e-40	0.863842267443923	3.693418446664976e-40	-3.649124321864952e-40	0.8674818130448725	3.707878138702071e-40	800.0	0.8638422674459391	3.6659540477837647e-40	88.88888888798819	1.7992990960351427e-49	-3.0602473157076074e-12	1.6176689617470522e-10	1.0478905745884663e-51	-3.834506739993275e-12	1.6181233617971443e-11
4.92	88.87861535204713	5.6863018274398205e-40	1.3514070137807277	437.3333333329162	1.0961392307214314e-49	-800.0	5.28203732075158e-42	0.02539612498058474	3.3751642597178276e-43	0.9999711052604067	3.2601807732038045e-42	0.0076018841070025185	-3.1738529681748496e-42	-3.608879794908683e-40	0.8711201416356817	3.708564847152643e-40	-3.6481574085287256e-40	0.8747572669317443	3.723010060987554e-40	800.0	0.871120141637711	3.6652623272058003e-40	88.88888888798878	1.7994736303823816e-49	-3.0805075134479764e-12	2.354028083573053e-09	-2.3309505196554727e-49	4.704854609775962e-12	2.3540327852235874e-10
4.925	88.8784430974999	5.6850902132420725e-40	1.3626886579523334	437.7777777773561	1.105136729448064e-49	-800.0	5.286528152865075e-42	0.02537669171714467	3.690026775649267e-43	0.9999706207803787	3.2735992676044563e-42	0.007665348902975244	-3.17286317962883e-42	-3.6073957076135426e-40	0.878392883452748	3.723725890456474e-40	-3.6471002937260507e-40	0.8820271535987296	3.738154848559368e-40	800.0	0.8783928834547903	3.6644813479315943e-40	88.8888888879896	1.7995394018378858e-49	-3.0994557589724804e-12	-1.535127580609593e-08	1.6489263708297466e-48	-6.419362792343124e-11	1.535141002307906e-09
4.93	88.87826955506125	5.683743997031989e-40	1.3739609528870993	438.22222222179556	1.1145957336528606e-49	-800.0	5.290874218089146e-42	0.025354110030776953	3.9953533811788035e-43	0.9999701326778133	3.287029229708553e-42	0.007728761197418361	-3.17179606633124e-42	-3.6058211834105466e-40	0.8856596123960747	3.738901180097816e-40	-3.6459557092940264e-40	0.8892905710890993	3.753312086690924e-40	800.0	0.8856596123984586	3.663613607228901e-40	88.88888888785716	1.941144939438876e-49	-3.6379521688148825e-12	-7.085769008577827e-09	7.700560880532225e-49	-3.2022956772713034e-11	7.085841369426957e-10
4.935	88.87809474973976	5.682267394571356e-40	1.3852225302471988	438.66666666623485	1.1243046741777914e-49	-800.0	5.2950508764230717e-42	0.025328221695931016	4.2894424120085804e-43	0.999969641023044	3.300470261418332e-42	0.007792113293256352	-3.17065402797085e-42	-3.6041590037706766e-40	0.892919446439746	3.7540902828203925e-40	-3.6447268745606637e-40	0.8965465721178424	3.768481290067229e-40	800.0	0.8929194464421492	3.662661822477539e-40	88.88888888785625	1.943313745989183e-49	-3.668186883236722e-12	-7.35430679317941e-08	5.415701381716186e-48	-4.616689462873869e-11	7.354308242250008e-09
4.94	88.87791871193	5.680666903062843e-40	1.396471694033825	439.1111111106744	1.1342057030062442e-49	-800.0	5.299031238448683e-42	0.025298850743419247	4.570458332465062e-43	0.9999691459015532	3.313921759589094e-42	0.007855395650130582	-3.169440755238529e-42	-3.6024134389712276e-40	0.9001712923236234	3.769292524500174e-40	-3.6434175346962105e-40	0.9037941589884895	3.783661896340785e-40	800.0	0.9001712923273217	3.661630181641466e-40	88.8888888873472	2.4876347307607938e-49	-5.708979101198996e-12	9.926045170989343e-09	1.3833654498363404e-47	-1.485029220486439e-09	1.0036517549539753e-09
4.945	88.87774161883475	5.679007455868756e-40	1.4076976162656725	439.5555555551081	1.1530582713608804e-49	-800.0000000000001	5.2989752623515114e-42	0.02522419534435284	4.569870853014488e-43	0.9999686478117358	3.327377989255477e-42	0.00791854735538463	-3.1681930218930964e-42	-3.600626912074774e-40	0.9074081697722997	3.784501230269167e-40	-3.6421083631322225e-40	0.9110203586627148	3.7988423422546345e-40	800.0000000000001	0.9074081697638564	3.6605605392652726e-40	88.88888888832253	2.922036903383298e-49	-1.689765754032088e-11	3.9695014682666066e-07	-1.0765131811833027e-47	-1.632939589632326e-09	3.969535055361155e-08
4.95	88.8775636388224	5.677351237332362e-40	1.4188903085117424	439.99999999955503	1.1648053536087892e-49	-800.0000000000002	5.298919458997736e-42	0.025149298251808058	4.5692851175737715e-43	0.9999681472271293	3.3408334730355477e-42	0.007981512218796722	-3.166946043003345e-42	-3.598840045360819e-40	0.9146236396623605	3.799710006700098e-40	-3.640799359369078e-40	0.918225101900437	3.814022628303652e-40	800.0000000000002	0.9146236396379669	3.659492977974335e-40	88.88888889099178	1.4707374995731932e-49	-2.0371964196295772e-11	5.461496736339778e-07	-3.133277440094479e-47	-5.345855520654901e-10	5.461499352670593e-08
4.955	88.87738478540692	5.675698240040954e-40	1.4300496436985304	440.4444444440153	1.1692870199395303e-49	-800.0000000000003	5.298863828962558e-42	0.025074161496110997	4.568701132742248e-43	0.999967644185739	3.35428820924153e-42	0.008044289525478795	-3.165699823165669e-42	-3.597052855210772e-40	0.921817620064728	3.8149188533533e-40	-3.639490522905264e-40	0.9254083200432205	3.829202754984357e-40	800.0000000000003	0.9218176200271426	3.6584274930350492e-40	88.8888888931958	2.67214983588631e-50	-2.2995692266064756e-11	3.4320351005587736e-07	-1.8792259361358852e-47	-3.8650322722141205e-10	3.432037276887e-08
4.96	88.87720507208287	5.67404845485588e-40	1.4411755218876088	440.88888888848584	1.1681362243577904e-49	-800.0000000000005	5.298808372683895e-42	0.024998787168862717	4.56811890369839e-43	0.9999671387255178	3.3677421967440754e-42	0.00810687871311752	-3.16445436631084e-42	-3.595265356694283e-40	0.9289900465350409	3.830127769871199e-40	-3.6381818532377846e-40	0.9325699450318291	3.8443827227945264e-40	800.0000000000005	0.9289900464957525	3.6573640785850426e-40	88.88888889356437	4.8724012971599337e-51	-2.2418123783218426e-11	-4.965613698004409e-07	2.603028022827633e-47	1.2665086155694137e-09	4.965629849497077e-08
4.965	88.87702451094373	5.6724018735219e-40	1.4522678556038577	441.33333333294814	1.171259288344208e-49	-800.0000000000006	5.298753090543666e-42	0.02492317713926073	4.567538434974067e-43	0.9999666308804871	3.381195434575373e-42	0.008169279289492098	-3.163209675956365e-42	-3.5934775642115174e-40	0.9361408626574466	3.845336755866123e-40	-3.6368733498623457e-40	0.9397099093425124	3.85956253223303e-40	800.0000000000006	0.9361408626536061	3.6563027293810926e-40	88.88888888831102	2.821284627386619e-49	-1.007674060241583e-11	-1.316698690819281e-06	6.93261031705356e-47	3.217046581869348e-09	1.31670262086544e-07
4.97	88.87684311870106	5.670758484691972e-40	1.463326522035555	441.77777777739146	1.1844568520241748e-49	-800.0000000000006	5.2986979830793823e-42	0.02484733399513718	4.566959732932605e-43	0.9999661206976515	3.3946479213570266e-42	0.008231490563575118	-3.161965756967709e-42	-3.5916894943758033e-40	0.9432699892437761	3.860545811028603e-40	-3.6355650122728296e-40	0.9468281461928794	3.874742183800278e-40	800.0000000000006	0.9432699892859973	3.655243438021266e-40	88.88888888170725	6.285126512990246e-49	6.989132178725683e-12	-1.1892652196365013e-06	6.222101931393621e-47	3.1935382564498118e-09	1.1892695074387686e-07
4.975	88.87666091170672	5.669118277268963e-40	1.4743514008335823	442.2222222218064	1.2126666671716496e-49	-800.0000000000006	5.2986430508179005e-42	0.024771260269076868	4.5663828038098036e-43	0.9999656082230032	3.4080996557364705e-42	0.008293511858198481	-3.1607226141060576e-42	-3.5899011636806588e-40	0.9503773486927676	3.8757549350284395e-40	-3.6342568399613324e-40	0.9539245895260708	3.889921677998189e-40	800.0000000000006	0.9503773487664834	3.6541861972788712e-40	88.88888887734068	8.562773081413635e-49	1.923956051731418e-11	-4.301838885112084e-07	2.2386753103941436e-47	1.257284502771477e-09	4.3018572581961006e-08
4.98	88.87647790537126	5.667481240741924e-40	1.4853423801860455	442.6666666661913	1.2568405205682645e-49	-800.0000000000006	5.298588294247626e-42	0.024694958344143477	4.5658076533984804e-43	0.9999650934998828	3.42155063647294e-42	0.0083553425442053	-3.159480251851151e-42	-3.5881125881784896e-40	0.9574628689023997	3.89096412751075e-40	-3.632948832418291e-40	0.9609991739679253	3.90510101533008e-40	800.0000000000006	0.9574628689783089	3.6531310003388388e-40	88.88888887715754	8.648020056823474e-49	2.0499989787620015e-11	1.0932007891520566e-07	-6.417036756281078e-48	1.4440684211165488e-10	1.0932017429259268e-08
4.985	88.87629411195266	5.665847366563102e-40	1.4962993768727915	443.11111111056886	1.3045809261074298e-49	-800.0000000000005	5.2985337137281824e-42	0.024618430102644168	4.56523428600787e-43	0.9999645765627521	3.435000862700088e-42	0.008416982153231521	-3.158238673740158e-42	-3.586323782339361e-40	0.9645264961890319	3.906173388068933e-40	-3.6316409891329076e-40	0.9680518346835224	3.920280196300301e-40	800.0000000000005	0.9645264962635927	3.652077841761998e-40	88.88888887772441	8.292381115686684e-49	2.257305010244513e-11	1.2562892948152756e-07	-7.941661334228829e-48	4.894703696988255e-10	1.2562988300526847e-08
4.99	88.87610954525269	5.664216645223382e-40	1.507222293672532	443.55555555494993	1.3500274255987395e-49	-800.0000000000002	5.2984793096822586e-42	0.02454167767210239	4.564662706673705e-43	0.9999640574504202	3.4484503333682194e-42	0.008478430138174195	-3.1569978837718165e-42	-3.5845347614576888e-40	0.9715681678488117	3.921382716306762e-40	-3.6303333095929417e-40	0.9750825074474324	3.935459221414411e-40	800.0000000000002	0.9715681679226046	3.651026715435863e-40	88.88888887821794	7.972212840943544e-49	2.4992638333073392e-11	5.5512809164304186e-08	-3.6104817123512144e-48	2.8913811419480257e-10	5.551356214621374e-09
4.995	88.87592421934127	5.662589067010988e-40	1.518111031946239	443.9999999993405	1.3899362721986369e-49	-800.0000000000001	5.298425082538377e-42	0.024464703220667183	4.5640929205049634e-43	0.9999635362024538	3.4618990474174334e-42	0.00853968594394407	-3.1557578860218606e-42	-3.582745540973815e-40	0.9785878202627859	3.936592111825281e-40	-3.6290257932846893e-40	0.9820911286553546	3.950638091179197e-40	800.0000000000001	0.978587820337089	3.649977615107646e-40	88.8888888782862	7.921312154911812e-49	2.5812526699009675e-11	3.1775471143189534e-09	-8.02360613247563e-49	3.748839529078012e-10	3.1995849171204207e-10
5.0	88.87573814865372	5.6609646218405e-40	1.5289654938950592	444.4444444437328	1.4286772212556211e-49	-800.0	5.298371032719018e-42	0.0243875089664622	4.563524932565727e-43	0.9999630128594543	3.4753470038330724e-42	0.008600749020122403	-3.154518684662253e-42	-3.5809561364427674e-40	0.9855853903477204	3.951801574236888e-40	-3.6277184396929955e-40	0.9890776353384338	3.9658168061026565e-40	800.0	0.9855853904242837	3.648930534268488e-40	88.88888887832101	7.845757398035377e-49	2.9067515708447068e-11	6.988187806200114e-09	-1.7301954613898254e-48	7.716925383733104e-10	7.030666980344397e-10
5.005	88.87555134746265	5.659343299792889e-40	1.5397855813459957	444.88888888812517	1.467229621665178e-49	-799.9999999999999	5.2983171606493535e-42	0.024310097105356653	4.5629587479400685e-43	0.9999624874615625	3.488794201580331e-42	0.0086616188142106	-3.1532802838221024e-42	-3.5791665634181496e-40	0.992560814781037	3.967011103133689e-40	-3.6264112483012493e-40	0.996041965156885	3.980995366694005e-40	799.9999999999999	0.9925608148600717	3.6478854665240733e-40	88.88888887835834	7.762153940369918e-49	3.2679031930964954e-11	5.363176569516874e-09	-1.0235724383630652e-48	4.2592518830003866e-10	5.380062748876003e-10
5.01	88.87536383000617	5.657725090952606e-40	1.550571196901626	445.3333333325171	1.5058947410921248e-49	-799.9999999999997	5.298263466750811e-42	0.02423246982709936	4.562394371671676e-43	0.9999619600488215	3.502240639638441e-42	0.008722294778065649	-3.152042687618636e-42	-3.577376837457735e-40	0.9995140307386934	3.9822206980989155e-40	-3.625104218591394e-40	1.00298405639824	3.996173773463665e-40	799.9999999999997	0.9995140308185861	3.646842405483525e-40	88.88888887837585	7.737064401442357e-49	3.362312788631387e-11	4.1112002691076626e-09	-8.453045034066852e-49	3.4881559635724003e-10	4.1259713974981667e-10
5.015	88.87517561048209	5.656109985285875e-40	1.5613222473631179	445.77777777690915	1.544334829068625e-49	-799.9999999999995	5.298209951423822e-42	0.02415462930886357	4.56183180858517e-43	0.9999614306611612	3.51568631707354e-42	0.008782776387106247	-3.150805900144361e-42	-3.575586974030458e-40	1.0064449780962832	3.997430358721472e-40	-3.6237973500439917e-40	1.0099038479737448	4.0113520269232056e-40	799.9999999999995	1.0064449781783518	3.645801344678686e-40	88.88888887840316	7.665911645185537e-49	3.6701912823940066e-11	5.821002938924935e-09	-1.5713008767092413e-48	6.837953172972191e-10	5.86102817353153e-10
5.02	88.87498670310434	5.65449797280618e-40	1.5720386378532498	446.22222222130125	1.582467583068768e-49	-799.9999999999993	5.298156615077214e-42	0.024076577732849633	4.561271063592746e-43	0.9999608993385564	3.5291312329170253e-42	0.00884306310733228	-3.149569925501669e-42	-3.573796988687143e-40	1.0133535956494866	4.0126400845735265e-40	-3.6224906421381968e-40	1.0168012794198	4.026530127585369e-40	799.9999999999993	1.013353595734061	3.6447622776726228e-40	88.88888887843292	7.58300173860437e-49	4.032162707081213e-11	6.755129788870817e-09	-2.1514747622674203e-48	9.533551816770294e-10	6.822071867616196e-10
5.025	88.87479712206114	5.652889043473139e-40	1.5827202754587655	446.6666666656936	1.6202926084021185e-49	-799.9999999999991	5.298103458110026e-42	0.023998317275161662	4.560712141504147e-43	0.99996036612091	3.542575386240705e-42	0.008903154415765741	-3.1483347677799005e-42	-3.5720068969524487e-40	1.0202398234565806	4.027849875224468e-40	-3.6211840943517853e-40	1.0236762908962138	4.041708075964038e-40	799.9999999999991	1.020239823544477	3.6437251979935217e-40	88.88888887846562	7.472433163691636e-49	4.5239306369115135e-11	3.528792073363006e-09	-9.449370093964846e-49	4.0133372872766073e-10	3.551540828829655e-10
5.03	88.87460688156796	5.65128318730626e-40	1.5933670650921503	447.111111110086	1.6577867767370473e-49	-799.9999999999989	5.2980504809321377e-42	0.023919850118614635	4.560155047242541e-43	0.9999598310482015	3.556018776071602e-42	0.008963049777226442	-3.147100431082579e-42	-3.570216714449155e-40	1.027103600176976	4.04305973022506e-40	-3.6198777061611237e-40	1.0305288231881249	4.056885872574273e-40	799.9999999999989	1.0271036002648481	3.6426900992088215e-40	88.88888887847014	7.480121406851692e-49	4.47209653470888e-11	2.0409155846814566e-09	-5.113134635402327e-49	2.0529940065306048e-10	2.0512153148083112e-10
5.035	88.87441599574538	5.649680394116496e-40	1.6039789192369525	447.5555555544784	1.6950061214821291e-49	-799.9999999999986	5.297997683915682e-42	0.02384117842265547	4.55959978533614e-43	0.999959294160144	3.569461401592671e-42	0.009022748699023846	-3.14586691946385e-42	-3.568426456604111e-40	1.0339448693388449	4.0582696491450235e-40	-3.618571477041281e-40	1.037358817699308	4.072063517932197e-40	799.9999999999986	1.0339448694289355	3.641656974750012e-40	88.88888887848923	7.409831196802037e-49	4.781659531049216e-11	3.5882408155882636e-09	-1.0500176475687834e-48	4.5091068439885233e-10	3.6164613361625436e-10
5.04	88.87422447877778	5.648080653861464e-40	1.6145557450776742	447.99999999887086	1.7319571257726984e-49	-799.9999999999983	5.2979450674592246e-42	0.023762304362982708	4.559046360589597e-43	0.9999587554966295	3.5829032618776315e-42	0.00908225065872886	-3.144634237011876e-42	-3.566636139035072e-40	1.04076357106185	4.073479631523538e-40	-3.6172654064659498e-40	1.0441662164568295	4.087241012555076e-40	799.9999999999983	1.0407635711527323	3.640625818144485e-40	88.88888887849927	7.388974081611733e-49	4.862197456264383e-11	-1.847411112976136e-10	-3.0883073902143603e-49	1.2714209623510126e-10	2.2426410956399823e-11
5.045	88.87403234477397	5.6464839563805345e-40	1.6250974542770955	448.4444444432634	1.7687362747967552e-49	-799.9999999999981	5.2978926319390997e-42	0.02368323010070683	4.5584947775740085e-43	0.9999582150973378	3.596344356091705e-42	0.00914155515904706	-3.143402387781615e-42	-3.564845777251885e-40	1.0475596483455152	4.088689676906855e-40	-3.6159594939075127e-40	1.0509509621068684	4.102418356961256e-40	799.9999999999981	1.0475596484373173	3.639596622843273e-40	88.88888887848334	7.373265150313282e-49	4.939273902962238e-11	-6.447227936708127e-09	-2.0359723888455423e-49	1.2784896968951736e-10	6.448495439009042e-10
5.05	88.87383960785223	5.6448902915176216e-40	1.6356039582696154	448.8888888876558	1.805422893177643e-49	-799.9999999999978	5.297840377732749e-42	0.023603957797905268	4.557945040872363e-43	0.9999576730019759	3.6097846833956566e-42	0.009200661701401611	-3.142171375830883e-42	-3.5630553868035976e-40	1.0543330440419387	4.103899784830393e-40	-3.61465373883704e-40	1.0577129979149933	4.117595551670161e-40	799.9999999999978	1.0543330441345582	3.6385693823001405e-40	88.88888887843422	7.372891478354526e-49	4.970158932602399e-11	-1.3118039987602085e-08	2.828419812824021e-49	-4.9834865022131884e-11	1.3118134647506066e-09
5.055	88.8736462821222	5.64329964909484e-40	1.64607516927077	449.3333333320481	1.8421021299326418e-49	-799.9999999999976	5.2977883052137123e-42	0.023524489614286027	4.557397155026899e-43	0.9999571292502256	3.6232242429663786e-42	0.009259569791599396	-3.140941205212618e-42	-3.561264983246485e-40	1.061083701505114	4.119109954822644e-40	-3.6133481407243e-40	1.0644522677654833	4.1327725972022875e-40	799.9999999999976	1.0610837015979373	3.6375440899545712e-40	88.88888887835564	7.403328714075122e-49	4.878257523616186e-11	-1.7768068497994452e-08	9.201763047147058e-49	-3.149278230338015e-10	1.7770859227486547e-09
5.06	88.87345238167546	5.641712018899171e-40	1.656511000788679	449.7777777764402	1.878876603272135e-49	-799.9999999999973	5.2977364147490955e-42	0.023444827705497422	4.55685112451243e-43	0.9999565838817189	3.636663034007319e-42	0.009318278942701614	-3.139711879970963e-42	-3.559474582127412e-40	1.0678115649199027	4.134320186407205e-40	-3.61204269903778e-40	1.0711687161601657	4.147949494079183e-40	799.9999999999973	1.067811565012277	3.636520739223136e-40	88.88888887826478	7.459777402937003e-49	4.6730756116287803e-11	-1.7355243168517864e-08	1.2340907523150733e-48	-4.662818050983167e-10	1.7361505814881144e-09
5.065	88.87325792058566	5.640127390682456e-40	1.666911367624048	450.22222222083207	1.9158664005996173e-49	-799.999999999997	5.2976847066995684e-42	0.023364974223128075	4.556306953736346e-43	0.999956036936037	3.650101055748479e-42	0.009376788675023786	-3.1384834041412644e-42	-3.5576841989832636e-40	1.0745165793020406	4.1495304791028635e-40	-3.6107374132447036e-40	1.0778622882172522	4.163126242823428e-40	799.999999999997	1.074516579393748	3.6354993234994377e-40	88.88888887819394	7.516246764144238e-49	4.452174273376223e-11	-7.623886707126774e-09	6.979312244287343e-49	-2.8953842177176567e-10	7.62938274179415e-10
5.07	88.87306291290568	5.638545754166836e-40	1.6772761857176404	450.6666666652234	1.9531985285955628e-49	-799.9999999999969	5.297633181420149e-42	0.02328493131499272	4.555764647046584e-43	0.9999554884527027	3.66353830744309e-42	0.00943509851528028	-3.137255781750093e-42	-3.5558938493440974e-40	1.0811986904000979	4.164740832423031e-40	-3.60943228281105e-40	1.0845329296702582	4.178302843958621e-40	799.9999999999969	1.0811986904916078	3.634479836157808e-40	88.88888887818192	7.535781427518363e-49	4.3591837612727843e-11	-2.620244761904486e-09	6.059424720955768e-49	-2.8706494286836584e-10	2.635922778404541e-10
5.075	88.87286737263685	5.6369670991048426e-40	1.6876053704644434	451.11111110961446	1.990890300970787e-49	-799.9999999999967	5.297581839268865e-42	0.023204701128290678	4.555224208819722e-43	0.9999549384710941	3.676974788330942e-42	0.009493207987128984	-3.1360290168154565e-42	-3.5541035487740523e-40	1.0878578436117452	4.17995124586886e-40	-3.608127307201544e-40	1.0911805868678262	4.193479298009385e-40	799.9999999999967	1.0878578437021331	3.6334622705945664e-40	88.88888887815021	7.592602176068728e-49	4.10435325139893e-11	-1.0732037480919829e-08	1.7100990288516432e-48	-7.472589806166853e-10	1.0758021401539426e-09
5.08	88.87267131377027	5.635391415198701e-40	1.6978988389775866	451.555555554005	2.029005937364409e-49	-799.9999999999966	5.2975306805951207e-42	0.023124285805364284	4.554685643342677e-43	0.9999543870305603	3.690410497687635e-42	0.00955111662386893	-3.1348031133465126e-42	-3.5523133128157755e-40	1.094493985439117	4.195161718938645e-40	-3.606822485879682e-40	1.097805206772335	4.208655605501344e-40	799.9999999999966	1.0944939855271432	3.6324466201725414e-40	88.88888887807212	7.707055215075544e-49	3.6128970930207504e-11	-1.9665454450052378e-08	2.7610236985730326e-48	-1.1738427874192066e-09	1.970045699004622e-09
5.085	88.87247475028289	5.6338186921080765e-40	1.7081565098710134	451.9999999983952	2.0676415300388992e-49	-799.9999999999964	5.2974797057408174e-42	0.023043687484106047	4.554148954824065e-43	0.9999538341704113	3.7038454348198526e-42	0.00960882396722136	-3.1335780753435977e-42	-3.5505231569950203e-40	1.1011070633491147	4.2103722511269996e-40	-3.6055178183077553e-40	1.104406736958624	4.223831766961103e-40	799.9999999999964	1.1011070634339906	3.631432878226347e-40	88.88888887795949	7.860377647290631e-49	2.9654348110603675e-11	-2.4639016752794158e-08	3.269119390565021e-48	-1.3734688136463816e-09	2.467726814553285e-09
5.09	88.87227769613058	5.632248919463567e-40	1.7183783028809831	452.4444444427848	2.1068988628836243e-49	-799.9999999999962	5.297428915042295e-42	0.022962908298667803	4.553614147413967e-43	0.9999532799298971	3.71727959905713e-42	0.00966632956520685	-3.1323539067982716e-42	-3.548733096829401e-40	1.107697025530098	4.225582841923389e-40	-3.604213303946866e-40	1.1109851256129224	4.239007782916229e-40	799.9999999999962	1.1076970256117218	3.63042103807161e-40	88.88888887783607	8.021370978149658e-49	2.290892963079999e-11	-2.337875078713441e-08	3.014163125395621e-48	-1.2611283520953075e-09	2.341274082817722e-09
5.095	88.87208016524812	5.630682086866701e-40	1.7285641388660726	452.88888888717383	2.146885411414846e-49	-799.9999999999961	5.297378308830332e-42	0.022881950379460704	4.553081225203946e-43	0.9999527243482093	3.730712989751849e-42	0.009723632972145325	-3.1311306116933235e-42	-3.54694314782788e-40	1.1142638208918947	4.2407934908121864e-40	-3.6029089422569433e-40	1.1175403215317772	4.2541836538952365e-40	799.9999999999961	1.1142638209710858	3.6294110930049323e-40	88.88888887774006	8.145656646322494e-49	1.7691330937517628e-11	-1.1297155803427656e-08	1.5744830510154455e-48	-6.745818069708115e-10	1.131727837694272e-09
5.1	88.87188217154771	5.629118183892792e-40	1.7387139397280185	453.33333333156224	2.1876993138877803e-49	-799.999999999996	5.297327887430554e-42	0.022800815853298486	4.552550192231172e-43	0.9999521674644752	3.744145606277515e-42	0.00978073374821211	-3.129908194002755e-42	-3.5451533254922315e-40	1.1208073990149259	4.256004197272426e-40	-3.6016047326967616e-40	1.1240722741210225	4.269359380427574e-40	799.999999999996	1.1208073990935459	3.6284030363058145e-40	88.88888887771944	8.180789332092956e-49	1.6092534671242684e-11	-1.7600143564776495e-09	2.837994763596075e-49	-1.4275253500011055e-10	1.7657941050010312e-10
5.105	88.87168372888704	5.627557200151576e-40	1.748827626730345	453.77777777595026	2.229110137700626e-49	-799.999999999996	5.2972776511720743e-42	0.022719506846440436	4.5520210525662806e-43	0.9999516093176696	3.7575774479920716e-42	0.009837631450008323	-3.1286866576915566e-42	-3.5433636453582907e-40	1.1273277090694027	4.271214960770792e-40	-3.6003006747239276e-40	1.130580933395621	4.2845349630436315e-40	799.999999999996	1.1273277091481282	3.6273968612783556e-40	88.88888887770425	8.191034648227685e-49	1.5598096852396644e-11	-5.882109614200299e-09	2.7464914224766595e-49	-1.1301980880169857e-10	5.883195304479461e-10
5.11	88.87148485110576	5.625999125217922e-40	1.7589051224197592	454.22222222033776	2.2709236858294913e-49	-799.9999999999959	5.2972276003776205e-42	0.022638025481114054	4.551493810212983e-43	0.999951049946716	3.771008514279815e-42	0.0098943256413366	-3.127466006715969e-42	-3.5415741229483895e-40	1.133824701050428	4.286425780769731e-40	-3.5989967677949017e-40	1.1370662499785087	4.299710402274725e-40	799.9999999999959	1.133824701129231	3.6263925612035522e-40	88.8888888776552	8.21411530757541e-49	1.4728209049839326e-11	-1.2893508483101908e-08	5.787279216718206e-49	-2.0823571050064025e-10	1.2895189921631577e-09
5.115	88.8712855520288	5.6244439486256354e-40	1.768946350797844	454.6666666647249	2.3130145931408416e-49	-799.9999999999959	5.2971777353626503e-42	0.02255637387520426	4.550968469099079e-43	0.9999504893904969	3.784438804555152e-42	0.00995081589416401	-3.1262462450235016e-42	-3.5397847737664973e-40	1.1402983258883752	4.301636656728277e-40	-3.5976930113650193e-40	1.143528175099351	4.314885698653074e-40	799.9999999999959	1.1402983259672361	3.6253901293349906e-40	88.88888887757912	8.247474964833515e-49	1.3557914494393135e-11	-1.7032893614061386e-08	7.366480997108525e-49	-2.5424340577100674e-10	1.7034791004802823e-09
5.12	88.87108584545669	5.6228916598856224e-40	1.7789512368174103	455.11111110911185	2.355230702527397e-49	-799.9999999999959	5.297128056437938e-42	0.022474554143164953	4.550445033102788e-43	0.9999499276878263	3.797868318251603e-42	0.01000710178579744	-3.125027376552866e-42	-3.5379956133101986e-40	1.1467485351251443	4.3168475880999944e-40	-3.596389404888504e-40	1.1499666605935595	4.3300608527117866e-40	799.9999999999959	1.1467485352040583	3.6243895589113086e-40	88.88888887749202	8.285075111936484e-49	1.2265218437253863e-11	-1.6906653854674682e-08	7.332794106496747e-49	-2.5285681298464586e-10	1.6908544618909668e-09
5.125	88.8708857451657	5.621342248485892e-40	1.7889197063824966	455.55555555349855	2.397393064908144e-49	-799.9999999999958	5.297078563909578e-42	0.02239256839601898	4.549923506052741e-43	0.9999493648774497	3.8112970548218054e-42	0.010063182898883602	-3.123809405233978e-42	-3.5362066570702825e-40	1.1531752809141698	4.332058574333042e-40	-3.595085947818483e-40	1.1563816589013094	4.345235864984849e-40	799.9999999999958	1.153175280993152	3.6233908431561647e-40	88.88888887742078	8.316724223289734e-49	1.1148776297974386e-11	-8.767149968964698e-09	4.248392435340808e-49	-1.6196459103123925e-10	8.768645910690294e-10
5.13	88.87068526490683	5.619795703891839e-40	1.7988516863466744	455.99999999788525	2.439302759077679e-49	-799.9999999999958	5.297029258078997e-42	0.022310418741327814	4.549403891728073e-43	0.9999488009980418	3.8247250137374395e-42	0.01011905882139964	-3.122592334987768e-42	-3.534417920530156e-40	1.159578516019352	4.347269614870234e-40	-3.593782639607001e-40	1.1627731230665481	4.360410736007112e-40	799.9999999999958	1.15957851609844	3.6223939752784244e-40	88.8888888774029	8.328141728835334e-49	1.0626512257569112e-11	-1.4213223190986912e-09	1.4850292553519304e-49	-8.173182761201341e-11	1.423670336283257e-10
5.135	88.87048441835957	5.6182520155612505e-40	1.8087471044234371	456.4444444422718	2.4811014307775157e-49	-799.9999999999958	5.2969801392436326e-42	0.022228107281586813	4.548886193863225e-43	0.9999482360880767	3.838152194485508e-42	0.010174729146156513	-3.121376169716287e-42	-3.5326294191576974e-40	1.1659581937579937	4.362480709148433e-40	-3.5924794797050324e-40	1.1691410067355432	4.375585466314277e-40	799.9999999999958	1.1659581938371797	3.621398948483759e-40	88.88888887739218	8.337104353903849e-49	1.0166140518790143e-11	-4.878586423728519e-09	2.8685616877727667e-49	-1.253800156281871e-10	4.880197295407957e-10
5.14	88.87028321917447	5.616711172930517e-40	1.8186058892685553	456.88888888665815	2.522939943213137e-49	-799.9999999999957	5.296931207696308e-42	0.02214563611570005	4.548370416143534e-43	0.9999476701859467	3.8515785965717525e-42	0.010230193471255396	-3.1201609133117977e-42	-3.5308411684119646e-40	1.1723142680532554	4.377691856599255e-40	-3.5911764675624963e-40	1.1754852641558542	4.390760056442884e-40	799.9999999999957	1.1723142681324992	3.620405755963919e-40	88.8888888773484	8.359014401528281e-49	9.308041860501057e-12	-1.1808272878017721e-08	5.581294557436343e-49	-2.083317933554626e-10	1.1810110520137044e-09
5.145	88.87008168099149	5.6151731654086635e-40	1.8284279705156812	457.3333333310443	2.564835133967782e-49	-799.9999999999957	5.296882463724964e-42	0.022063007339617826	4.5478565622033186e-43	0.9999471033300145	3.865004219522141e-42	0.010285451400285004	-3.1189465696607116e-42	-3.5290531837458526e-40	1.1786466934568371	4.39290305664942e-40	-3.5898736026282707e-40	1.181805850175486	4.4059345069303e-40	799.9999999999957	1.1786466935361088	3.619414390892082e-40	88.88888887727751	8.391591903566933e-49	8.123814059121666e-12	-1.6091187641600728e-08	7.271696473858518e-49	-2.5988814144202624e-10	1.6093286226351227e-09
5.15	88.86987981742128	5.613637982383443e-40	1.8382132787400023	457.77777777543037	2.6068160529351594e-49	-799.9999999999957	5.296833907612933e-42	0.021980223045685785	4.547344635627835e-43	0.9999465355585606	3.878429062881357e-42	0.010340502542120161	-3.117733142639571e-42	-3.527265480602521e-40	1.1849554251258423	4.408114308720538e-40	-3.588570884350206e-40	1.1881027202418564	4.421108818314702e-40	799.9999999999957	1.1849554252051302	3.6184248464275347e-40	88.88888887719405	8.429164452693803e-49	6.7878081815498945e-12	-1.8321344441572946e-08	8.164873971943156e-49	-2.8750392795552724e-10	1.8323600100835691e-09
5.155	88.86967764204515	5.612105613221331e-40	1.847961745458235	458.2222222198161	2.6489239623194175e-49	-799.9999999999956	5.2967855396389415e-42	0.021897285322644983	4.54683463995327e-43	0.9999459669097828	3.891853126212788e-42	0.010395346510921765	-3.116520636115051e-42	-3.525478074414988e-40	1.1912404188227799	4.423325612229177e-40	-3.5872683121751397e-40	1.1943758304007634	4.436282991135064e-40	799.9999999999956	1.1912404189021	3.617437115715642e-40	88.88888887712275	8.462002974796483e-49	5.597559573703476e-12	4.40347018108363e-09	-8.041939156780411e-50	-8.566701058031334e-12	4.403478514090845e-10
5.16	88.86947516846737	5.6105760472494326e-40	1.8576733032408161	458.66666666420156	2.691333696231809e-49	-799.9999999999957	5.296737360076284e-42	0.02181419625753927	4.5463265786607564e-43	0.9999453974219438	3.905276409103046e-42	0.01044998292675876	-3.115309053955156e-42	-3.5236909806141395e-40	1.1975016309870359	4.438536966587785e-40	-3.5859658855489126e-40	1.2006251372958991	4.4514570259311475e-40	799.9999999999957	1.1975016310665765	3.6164511918739248e-40	88.88888887720964	8.432410533048058e-49	6.348241654488336e-12	4.096278871656701e-09	-6.384000953087786e-50	-1.573239774628282e-11	4.0963090829086544e-10
5.165	88.869272410035	5.609049273852386e-40	1.8673478851112464	459.1111111085869	2.733703869159409e-49	-799.9999999999956	5.296689369197229e-42	0.02173095792550218	4.545820455208434e-43	0.9999448271325827	3.918698911137843e-42	0.01050441141227817	-3.114098399969265e-42	-3.5219042145831077e-40	1.2037390183522876	4.453748371200218e-40	-3.584663603916374e-40	1.2068505981654378	4.466630923243489e-40	799.9999999999956	1.2037390184318384	3.6154670680664048e-40	88.88888887713802	8.465812181341653e-49	5.121283906111114e-12	-1.643201130718697e-08	7.54403929846195e-49	-2.735796595802356e-10	1.6434288589094948e-09
5.17	88.86906938028791	5.607525282316711e-40	1.876985425510846	459.55555555297195	2.776220561251001e-49	-799.9999999999956	5.2966415672659456e-42	0.02164757240616117	4.5453162729799525e-43	0.9999442560797814	3.932120631940725e-42	0.010558631598053595	-3.112888678004432e-42	-3.52011779172952e-40	1.2099525385610175	4.468959825469148e-40	-3.5833614667214046e-40	1.2130521708433226	4.4818046836133845e-40	799.9999999999956	1.2099525386405712	3.6144847373841063e-40	88.88888887707036	8.49794211077369e-49	3.921546705588026e-12	-1.4195696470171496e-08	6.717773852137964e-49	-2.504443915095855e-10	1.4197905502801393e-09
5.175	88.86886609264519	5.606004061939305e-40	1.8865858596262755	459.99999999735684	2.818869819589085e-49	-799.9999999999956	5.296593954543434e-42	0.02156404177220306	4.544814035320368e-43	0.9999436843012817	3.945541571146073e-42	0.01061264311885706	-3.1116798918782586e-42	-3.5183317274344205e-40	1.2161421497361826	4.484171328791016e-40	-3.582059473406926e-40	1.2192298137572783	4.4969783075828774e-40	799.9999999999956	1.2161421498157197	3.613504192928299e-40	88.88888887699444	8.533613238693786e-49	2.5987795573162426e-12	-1.6082897976350195e-08	7.515402490740923e-49	-2.7714373634335e-10	1.6085285697440487e-09
5.18	88.86866256049487	5.604485601996354e-40	1.8961491235822572	460.44444444174144	2.861646147963384e-49	-799.9999999999956	5.296546531286111e-42	0.021480368092650998	4.544313745525854e-43	0.9999431118347384	3.958961728406841e-42	0.010666445614727441	-3.110472045398131e-42	-3.51654603706638e-40	1.2223078106039797	4.499382880557573e-40	-3.5807576234149163e-40	1.2253834859277606	4.512151795694746e-40	799.9999999999956	1.222307810683489	3.612525427786602e-40	88.88888887691279	8.571752560736823e-49	1.1948703547055114e-12	-1.6007343598781043e-08	7.506730959036905e-49	-2.769735197190443e-10	1.6009739642482073e-09
5.185	88.86845879719328	5.602969891743597e-40	1.9056751544398935	460.88888888612587	2.9045506873174832e-49	-799.9999999999956	5.296499297745825e-42	0.02139655343283587	4.543815406843793e-43	0.9999425387177172	3.9723811033944914e-42	0.010720038730961145	-3.1092651423610554e-42	-3.5147607359809533e-40	1.2284494804927801	4.514594480155945e-40	-3.5794559161864226e-40	1.2315131469668992	4.527325148492489e-40	799.9999999999956	1.22844948057228	3.61154843503316e-40	88.88888887684247	8.605371631602238e-49	-6.350272034688502e-14	-8.721438386297467e-09	4.528633596047372e-49	-1.7915134096400977e-10	8.723278209993774e-10
5.19	88.86825481606422	5.601456920416606e-40	1.915163890194988	461.3333333305101	2.9475893961954796e-49	-799.9999999999956	5.296452254169867e-42	0.021312599854367675	4.543319022472867e-43	0.9999419649876923	3.985799695798924e-42	0.010773422118102796	-3.108059186553486e-42	-3.512975839520138e-40	1.2345671193320693	4.529806126968699e-40	-3.5781543511615765e-40	1.2376187570774315	4.542498366520314e-40	799.9999999999956	1.2345671194116281	3.610573207728821e-40	88.88888887681507	8.621605396499056e-49	-7.583003325732117e-13	-6.633863828634434e-09	3.829386666006188e-49	-1.6287318326344458e-10	6.63586294092115e-10
5.195	88.86805063033141	5.599946677255599e-40	1.9246152696082979	461.7777777748935	2.9910123324750085e-49	-799.9999999999956	5.296405400802154e-42	0.021228509412630422	4.542824595572068e-43	0.9999413906818568	3.999217505321993e-42	0.010826595431003767	-3.106854181736212e-42	-3.5111913630010114e-40	1.2406606875443185	4.545017820372583e-40	-3.5768529277796037e-40	1.2437002770509193	4.5576714503231274e-40	799.9999999999956	1.2406606876237634	3.609599738939999e-40	88.88888887673598	8.660717909028794e-49	-2.2775054830722293e-12	-3.319963563323127e-08	1.527731733896593e-48	-5.627442979220124e-10	3.3204404637399587e-09
5.2	88.86784625315327	5.598439151492633e-40	1.9340292322934447	462.2222222192754	3.0351833154715366e-49	-799.9999999999957	5.2963587378826193e-42	0.021144284158073588	4.5423321292560336e-43	0.9999408158372205	4.012634531680869e-42	0.010879558329309758	-3.105650131652155e-42	-3.5094073217210265e-40	1.2467301461009885	4.560229559739351e-40	-3.5755516454788383e-40	1.2497576682663345	4.572844400446524e-40	799.9999999999957	1.246730146179809	3.60862802172889e-40	88.88888887645889	8.784759580188893e-49	-6.744760751289909e-12	-7.525808124834028e-08	3.336761658524256e-48	-1.1920047955546957e-09	7.526752067535115e-09
5.205	88.86764169771676	5.596934332317094e-40	1.9434057189532665	462.6666666636555	3.080236605034022e-49	-799.9999999999957	5.2963122656455613e-42	0.0210599261396914	4.541841626582497e-43	0.9999402404908729	4.026050774617042e-42	0.010932310478771703	-3.104447040047377e-42	-3.507623730972774e-40	1.2527754566731142	4.575441344437628e-40	-3.5742505036967384e-40	1.2557908926896426	4.588017217436769e-40	799.9999999999957	1.2527754567507905	3.6076580491271897e-40	88.88888887598503	8.993966060782917e-49	-1.4190528194757439e-11	-1.139831340424203e-07	5.021816178114105e-48	-1.7837319502942205e-09	1.1399709007603157e-08
5.21	88.86743697717002	5.595432208900431e-40	1.95274467121071	463.11111110803364	3.126315279436864e-49	-799.9999999999958	5.296265984320826e-42	0.020975437402526984	4.541353090561263e-43	0.999939664679795	4.039466233889871e-42	0.010984851550307841	-3.103244910656018e-42	-3.505840606032648e-40	1.2587965815235795	4.590653173831672e-40	-3.5729495018698992e-40	1.2617999128726713	4.603189901840784e-40	799.9999999999958	1.2587965815995976	3.606689814154881e-40	88.88888887532299	9.285533615417352e-49	-2.4542194292768306e-11	-1.5033307931843306e-07	6.621843711500744e-48	-2.351454729376667e-09	1.503514684886935e-08
5.215	88.86723210462138	5.593932770396507e-40	1.9620460316066057	463.5555555524094	3.1735701935908298e-49	-799.999999999996	5.296219894133821e-42	0.020890819987635745	4.540866524154335e-43	0.9999390884408553	4.0528809092764945e-42	0.01103718121999137	-3.1020437472000825e-42	-3.5040579621602852e-40	1.2647934835057122	4.605865047281443e-40	-3.5716486394340676e-40	1.267784691951967	4.618362454206139e-40	799.999999999996	1.2647934835795773	3.6057233098204816e-40	88.88888887448778	9.653820483987796e-49	-3.763305679723895e-11	-1.8302017679160272e-07	8.081660305617474e-48	-2.8758725497909126e-09	1.8304277029085896e-08
5.22	88.86702709313849	5.592436005941912e-40	1.971309743597683	463.9999999967824	3.2221585959041783e-49	-799.9999999999961	5.2961739953055324e-42	0.02080607593205231	4.54038193027601e-43	0.9999385118108086	4.066294800571753e-42	0.01108929916903946	-3.100843553389242e-42	-3.5022758145979953e-40	1.2707661260620247	4.621076964142652e-40	-3.5703479158241563e-40	1.273745193647644	4.633534875081038e-40	799.9999999999961	1.2707661261332757	3.604758529121245e-40	88.88888887350086	1.009048873892722e-48	-5.319770580853247e-11	-2.1084574086670213e-07	9.34839130665291e-48	-3.3382871828616875e-09	2.108721664965383e-08
5.225	88.8668219557474	5.59094190465628e-40	1.980535751554583	464.4444444411523	3.2722427451437838e-49	-799.9999999999964	5.296128288052536e-42	0.020721207268757424	4.539899311792993e-43	0.9999379348262922	4.0797079075881066e-42	0.011141205083802215	-3.0996443329206394e-42	-3.500494178570224e-40	1.2767144732229583	4.6362889237668444e-40	-3.5690473304742557e-40	1.2796813822622224	4.648707165014302e-40	799.9999999999964	1.2767144732911835	3.6037954650433835e-40	88.88888887238922	1.0584610865491054e-48	-7.088226733340435e-11	-2.3272216746286121e-07	1.037174450058461e-47	-3.72048293875692e-09	2.3275190487278423e-08
5.23	88.86661670543162	5.589450455642608e-40	1.9897240007598749	464.88888888551884	3.3239885272962646e-49	-799.9999999999967	5.296082772587015e-42	0.020636216026644873	4.539418671524502e-43	0.9999373575238243	4.093120230155562e-42	0.01119289865575169	-3.098446089478699e-42	-3.4987130692829938e-40	1.2826384896056273	4.651500925501443e-40	-3.5677468828176493e-40	1.2855932226794577	4.6638793245553614e-40	799.9999999999967	1.282638489670481	3.6028341105622776e-40	88.88888887118522	1.1122821883451291e-48	-9.023864761037677e-11	-2.4763598579130756e-07	1.110418143868328e-47	-4.004248696561497e-09	2.476683578224247e-08
5.235	88.86641135513126	5.587961647987566e-40	1.9988744374060625	465.33333332988144	3.3775640724290697e-49	-799.999999999997	5.296037449116774e-42	0.02055110423048844	4.538940012242368e-43	0.9999367799398008	4.106531768121581e-42	0.011244379581470837	-3.097248826734926e-42	-3.49693250192336e-40	1.288538140412557	4.666712968689821e-40	-3.5664465722868265e-40	1.2914806803631604	4.679051354254243e-40	799.999999999997	1.2885381404737786	3.601874458642689e-40	88.88888886992594	1.1689438939829184e-48	-1.1073161488656314e-10	-2.5468291179699715e-07	1.1500768549367084e-47	-4.172088018427844e-09	2.5471708203383325e-08
5.24	88.8662059177421	5.586475470761818e-40	2.0079870085936085	465.77777777423967	3.433138371551656e-49	-799.9999999999975	5.295992317845251e-42	0.020465873900908756	4.5384633366711474e-43	0.9999362021104934	4.1199425213510186e-42	0.011295647562642544	-3.0960525483477135e-42	-3.4951524916588535e-40	1.2944133914304345	4.681925052671374e-40	-3.5651463983134957e-40	1.297343721356006	4.694223254661556e-40	799.9999999999975	1.2944133914878673	3.6009165022389757e-40	88.8888888686528	1.2266604470421843e-48	-1.3173756444009678e-10	-2.530638217497786e-07	1.1519235737695786e-47	-4.206712034774168e-09	2.530987836887946e-08
5.245	88.86600040611471	5.584991913020335e-40	2.0170616623289415	466.2222222185931	3.490879893476575e-49	-799.9999999999981	5.295947378971535e-42	0.020380527054340267	4.537988647488225e-43	0.9999356240720463	4.1333524897260306e-42	0.01134670230603859	-3.09485725796215e-42	-3.493373053636944e-40	1.3002642090288454	4.697137176781578e-40	-3.563846360328599e-40	1.3031823122783357	4.7093950263284794e-40	799.9999999999981	1.3002642090824599	3.5999602342953064e-40	88.88888886741087	1.283441043163476e-48	-1.5254832086547695e-10	-2.420849890919714e-07	1.112011452676674e-47	-4.091021375580639e-09	2.421195539388659e-08
5.25	88.86579483305347	5.58351096380271e-40	2.0260983475224714	466.6666666629412	3.550955201680602e-49	-799.9999999999986	5.295902632690376e-42	0.020295065702998133	4.537515947323921e-43	0.9999350458604742	4.146761673146e-42	0.011397543523508642	-3.0936629592098195e-42	-3.4915942029844794e-40	1.3060905601590185	4.712349340352057e-40	-3.562546457762324e-40	1.3089964203269486	4.72456666980675e-40	799.9999999999986	1.3060905602089374	3.599005647745873e-40	88.88888886624851	1.3371052375277961e-48	-1.723695733552201e-10	-2.2115074216343017e-07	1.0266727184763667e-47	-3.808355085180583e-09	2.2118353086948134e-08
5.255	88.86558921131578	5.58203261213348e-40	2.0350970139866043	467.1111111072835	3.613527571165859e-49	-799.9999999999993	5.2958580791922076e-42	0.020209491854845153	4.5370452387615965e-43	0.9999344675116596	4.1601700715274563e-42	0.011448170931969244	-3.0924696557086114e-42	-3.4898159548071566e-40	1.3118924123525695	4.727561542710651e-40	-3.561246690044119e-40	1.3147860132738822	4.7397381856486494e-40	799.9999999999993	1.3118924123990947	3.5980527355151083e-40	88.88888886521671	1.3852953462617635e-48	-1.9032640367269463e-10	-1.89784780483617e-07	8.925060808433381e-48	-3.342424956684014e-09	1.898142110270086e-08
5.26	88.86538355361105	5.58055684702243e-40	2.0440576124337535	467.55555555161936	3.678755605320939e-49	-800.0000000000001	5.295813718663151e-42	0.020123807513558686	4.5365765243377584e-43	0.9999338890613503	4.1735776848039965e-42	0.011498584253392802	-3.091277351062523e-42	-3.4880383241889632e-40	1.3176697337202425	4.74277378318148e-40	-3.5599470566027057e-40	1.3205510594651855	4.754909574406994e-40	800.0000000000001	1.317669733763884	3.597101490517897e-40	88.88888886436864	1.425491240742623e-48	-2.0546092178698784e-10	-1.476074373840575e-07	7.064157989065986e-48	-2.6766354833420306e-09	1.4763170373804923e-08
5.265	88.86517787259987	5.579083657464922e-40	2.0529800944743575	467.99999999594826	3.746791852782026e-49	-800.0000000000009	5.2957695512850374e-42	0.02003801467849756	4.536109806542167e-43	0.9999333105451567	4.186984512926207e-42	0.01154878321479658	-3.090086048861465e-42	-3.4862613261916382e-40	1.323422492950653	4.757986061085016e-40	-3.5586475568660916e-40	1.3262915278196814	4.770080836635122e-40	800.0000000000009	1.323422492992165	3.5961519056597945e-40	88.88888886375904	1.455025420376052e-48	-2.167336109185645e-10	-9.396951365184549e-08	4.630399956241166e-48	-1.7832770136642017e-09	9.39864329191817e-09
5.27	88.86497218089305	5.577613032442203e-40	2.0618644126148897	468.44444444026954	3.817781424294015e-49	-800.0000000000019	5.2957255772354196e-42	0.019952115344668994	4.53564508781794e-43	0.9999327319985493	4.200390555861583e-42	0.011598767548231676	-3.088895752681065e-42	-3.484484975854131e-40	1.3291506593090312	4.7731983757381494e-40	-3.5573481902615855e-40	1.3320073878277205	4.785251972886876e-40	800.0000000000019	1.3291506593494458	3.5952039738372402e-40	88.88888886344357	1.4710963510981158e-48	-2.2302910232164628e-10	-2.9453654330304272e-08	1.6442000032197614e-48	-6.68383707386781e-10	2.9461237078394244e-09
5.275	88.86476649104031	5.576144960928152e-40	2.0707105201916822	468.8888888845834	3.8916723056594406e-49	-800.000000000003	5.295681796687959e-42	0.019866111502186284	4.535182370565012e-43	0.9999321534568266	4.213795813592426e-42	0.011648536990415312	-3.087706466079136e-42	-3.4827092881902895e-40	1.3348542025950396	4.788410726453675e-40	-3.5560489562158077e-40	1.3376986095497787	4.800422983716601e-40	800.000000000003	1.3348542026354238	3.594257687942398e-40	88.88888886345435	1.4723122317312178e-48	-2.2387522713010266e-10	2.7141311420562474e-08	-7.174283698912264e-49	1.1571548549616988e-10	2.7141558092739234e-09
5.28	88.86456081548566	5.5746794319166075e-40	2.079518371099265	469.3333333288938	3.96742298476683e-49	-800.0000000000041	5.2956382098140046e-42	0.01978000513409673	4.534721657154315e-43	0.9999315749549872	4.227200286107232e-42	0.011698091281221295	-3.086518192581447e-42	-3.4809342781809407e-40	1.3405330929695949	4.803623112537871e-40	-3.5547498541547002e-40	1.3433651636144333	4.8155938696791295e-40	800.0000000000041	1.340533093009616	3.5933130408828133e-40	88.88888886369843	1.465133731390758e-48	-2.2249082903608372e-10	7.149457322459787e-08	-2.204118079264773e-48	4.58062450091823e-10	7.149604060208908e-09
5.285	88.86435516665864	5.5732164343647765e-40	2.0882879203565343	469.7777777732019	4.0446675697107836e-49	-800.0000000000052	5.295594816779311e-42	0.01969379822085512	4.534262949898227e-43	0.9999309965279909	4.240603973418582e-42	0.011747430166826141	-3.0853309357110915e-42	-3.4791599607890476e-40	1.3461873013158123	4.8188355332958295e-40	-3.5534508835035416e-40	1.34900702121762	4.830764631329771e-40	800.0000000000052	1.3461873013548482	3.5923700255406763e-40	88.88888886416939	1.4503701649106657e-48	-2.1937035376383463e-10	1.1745034574535076e-07	-3.72908912137742e-48	8.012623281061741e-10	1.1745307887416522e-08
5.29	88.86414955694191	5.571755957212986e-40	2.097019123910709	470.2222222175084	4.123145208046796e-49	-800.0000000000065	5.2955516177451797e-42	0.019607492738751453	4.53380625106081e-43	0.9999304182106662	4.2540068755569145e-42	0.011796553398619696	-3.084144698978194e-42	-3.477386350953774e-40	1.3518167991140366	4.8340479880297085e-40	-3.5521520436869623e-40	1.3546241541214397	4.845935269224296e-40	800.0000000000065	1.351816799151416	3.5914286347870326e-40	88.88888886487416	1.4278069012895938e-48	-2.1447386239701333e-10	1.6449182756634502e-07	-5.2967500313764837e-48	1.1568478293748744e-09	1.6449589548987695e-08
5.295	88.86394399866205	5.570297989390151e-40	2.1057119385839127	470.6666666618142	4.202547836926395e-49	-800.0000000000077	5.2955086128687696e-42	0.01952109065946986	4.533351562860596e-43	0.9999298400376836	4.267408992568829e-42	0.011845460732908349	-3.0829594858770405e-42	-3.4756134635885413e-40	1.3574215584077953	4.849260476038356e-40	-3.5508533341289573e-40	1.3602165346528394	4.861105783918924e-40	800.0000000000077	1.3574215584428155	3.5904888614856985e-40	88.88888886581327	1.3974429382045643e-48	-2.078152337039133e-10	2.1094166413602974e-07	-6.841133206881137e-48	1.5045238721093004e-09	2.1094702951347605e-08
5.3	88.86373850408856	5.5688425198141295e-40	2.114366322070774	471.1111111061202	4.282517591273291e-49	-800.0000000000091	5.2954658023031174e-42	0.019434593950052245	4.532898887470722e-43	0.9999292620435534	4.280810324516994e-42	0.011894151930901726	-3.081775299885861e-42	-3.473841313580465e-40	1.3630015518022802	4.8644729966173544e-40	-3.549554754252899e-40	1.3657841357022822	4.876276175970317e-40	800.0000000000091	1.3630015518342253	3.589550698493509e-40	88.88888886698	1.3595209196245575e-48	-1.994607383192101e-10	2.552762149813568e-07	-8.311163986838505e-48	1.8331479104457722e-09	2.5528279684786726e-08
5.305	88.86353308543288	5.567389537392084e-40	2.1229822329360304	471.5555555504274	4.362644211959505e-49	-800.0000000000103	5.295423186197152e-42	0.019348004572861947	4.532448227019049e-43	0.9999286842626223	4.2942108714800525e-42	0.011942626758699384	-3.080592144466616e-42	-3.4720699157898334e-40	1.3685567524628235	4.879685549059104e-40	-3.5482563034815504e-40	1.3713269307224065	4.891446445935559e-40	800.0000000000103	1.3685567524909914	3.5886141386605697e-40	88.8888888683596	1.3145503040032708e-48	-1.8953679346797301e-10	2.957818878712515e-07	-9.650696085898239e-48	2.130100816400618e-09	2.9578955783152596e-08
5.31	88.86332775484743	5.565939031020835e-40	2.1315596306121303	471.99999999473704	4.442462453981516e-49	-800.0000000000117	5.2953807646957103e-42	0.019261324485547383	4.531999583588293e-43	0.9999281067290712	4.307610633552531e-42	0.011990884987277517	-3.079410023064774e-42	-3.4702992850495557e-40	1.374087134113381	4.89489813265289e-40	-3.546957981237077e-40	1.3768448937266762	4.906616594372151e-40	800.0000000000117	1.374087134137111	3.5876791748304985e-40	88.88888886992828	1.2633356668895905e-48	-1.7823521513624477e-10	3.305920870388722e-07	-1.0798088920464117e-47	2.3819487184972735e-09	3.3060066801568144e-08
5.315	88.86312252442464	5.5644909895872204e-40	2.1400984753968344	472.4444444390504	4.521449494636413e-49	-800.0000000000131	5.2953385379395586e-42	0.01917455564100568	4.5315529592161566e-43	0.9999275294769122	4.32100961084475e-42	0.012038926392475656	-3.0782289391091024e-42	-3.4685294361646264e-40	1.3795926710350082	4.910110746684956e-40	-3.5456597869410616e-40	1.3823379992880185	4.921786621837997e-40	800.0000000000131	1.3795926710537179	3.5867457998406735e-40	88.88888887165257	1.207002681478761e-48	-1.658170972242363e-10	3.5765737038670837e-07	-1.1686441818980854e-47	2.5740397222215424e-09	3.576666328754008e-08
5.32	88.86291740619596	5.563045401968449e-40	2.148598728450813	472.8888888833688	4.599022341697975e-49	-800.0000000000144	5.295296506065404e-42	0.019087699987346385	4.531108355895449e-43	0.999926952539986	4.334407803482723e-42	0.012086750754983342	-3.077048896011445e-42	-3.4667603839115872e-40	1.3850733380643396	4.925323390438562e-40	-3.544361720014515e-40	1.3878062225374532	4.9369565288913944e-40	800.0000000000144	1.3850733380775608	3.585814006522484e-40	88.88888887348818	1.1470252746563698e-48	-1.5262009147916243e-10	3.7475255491393806e-07	-1.2243267723739882e-47	2.6911609146115598e-09	3.747622176281815e-08
5.325	88.8627124121309	5.561602257032463e-40	2.157060351795255	473.3333333276937	4.674535241592898e-49	-800.0000000000157	5.295254669205914e-42	0.01900075946785503	4.5306657755742195e-43	0.999926375951959	4.347805211608076e-42	0.012134357860326864	-3.07586989716651e-42	-3.4649921430379885e-40	1.3905291105920703	4.940536063194077e-40	-3.543063779877891e-40	1.3932495391627102	4.952126316091017e-40	800.0000000000157	1.3905291105994975	3.584883787701576e-40	88.88888887537942	1.0852536752764029e-48	-1.3905818754461732e-10	3.7947813780189956e-07	-1.23908125598143e-47	2.716818757128284e-09	3.794878630124507e-08
5.33	88.8625075541361	5.56016154363829e-40	2.165483308309467	473.77777777202687	4.747277087576878e-49	-800.0000000000169	5.295213027489735e-42	0.018913736020956848	4.53022522015588e-43	0.9999257997463207	4.361201835377949e-42	0.012181747498855932	-3.0746919459516505e-42	-3.4632247282618595e-40	1.3959599645614327	4.955748764229042e-40	-3.541765965951098e-40	1.3986679254068375	4.967295983995911e-40	800.0000000000169	1.3959599645629714	3.5839551361980987e-40	88.88888887725797	1.0239396806951685e-48	-1.2563359257599739e-10	3.6923353263771113e-07	-1.2045780199269811e-47	2.6335842219670666e-09	3.692429246308965e-08
5.335	88.86230284405424	5.558723250636402e-40	2.173867561728473	474.22222221637	4.816468827910761e-49	-800.000000000018	5.295171581041504e-42	0.01882663158018038	4.5297866914993355e-43	0.9999252239563808	4.374597674964904e-42	0.012228919465730383	-3.0735150457266506e-42	-3.4614581542711664e-40	1.401365876466676	4.970961492818237e-40	-3.5404682776535106e-40	1.404061358066798	4.9824655331654765e-40	800.000000000018	1.4013658764625019	3.583028044826958e-40	88.88888887904214	9.657666833780593e-49	-1.1293423142662401e-10	3.412523597034803e-07	-1.1119170191612378e-47	2.4234247397651398e-09	3.412609646453324e-08
5.34	88.8620982936632	5.557287366869075e-40	2.182213076640619	474.6666666607251	4.881260874036686e-49	-800.000000000019	5.295130329981871e-42	0.018739448074121156	4.529350191419113e-43	0.9999246486152669	4.387992730556834e-42	0.012275873560906878	-3.072339199833506e-42	-3.4596924357232854e-40	1.4067468233515457	4.9861742482337614e-40	-3.539170714403985e-40	1.409429814492057	4.997634964159462e-40	800.000000000019	1.4067468233421654	3.5821025063980605e-40	88.88888888063595	9.138761514258587e-49	-1.0164349585325056e-10	2.925752085047664e-07	-9.516608549118903e-48	2.066894733912292e-09	2.9258250919261836e-08
5.345	88.861893914675	5.555853881170743e-40	2.1905198184851717	475.11111110509427	4.940730508754224e-49	-800.0000000000199	5.295089274427514e-42	0.01865218742640533	4.528915721685484e-43	0.999924073755921	4.401387002356871e-42	0.012322609589125599	-3.0711644115962125e-42	-3.45792758724447e-40	1.412102782807761	5.001387029745108e-40	-3.53787327562087e-40	1.4147732725831574	5.012804277537947e-40	800.0000000000199	1.412102782794083	3.5811785137165643e-40	88.88888888192808	8.718956526187119e-49	-9.254289814856085e-11	2.2000653151127791e-07	-7.136719718304232e-48	1.5436774831251309e-09	2.200119470569606e-08
5.35	88.86168971873485	5.554422782368353e-40	2.198787753549924	475.5555555494797	4.9938792943965155e-49	-800.0000000000206	5.295048414491153e-42	0.01856485155565332	4.528483284024597e-43	0.9999234994110975	4.414780490583293e-42	0.012369127359896953	-3.069990684320543e-42	-3.4561636234293177e-40	1.417433732973495	5.0165998366192396e-40	-3.536575960722019e-40	1.4200917107902868	5.0279734738613375e-40	800.0000000000206	1.4174337329569073	3.580256059583127e-40	88.88888888279101	8.439679475675623e-49	-8.651661038623805e-11	1.1232283251652764e-07	-3.623794784883862e-48	7.801628229649508e-10	1.1232554187969118e-08
5.355	88.86148571742136	5.552994059281428e-40	2.2070168489698156	475.9999999938838	5.039646608434532e-49	-800.0000000000211	5.295007750281559e-42	0.018477442375481126	4.5280528801185455e-43	0.9999229256133632	4.428173195469495e-42	0.012415426687493883	-3.068818021294048e-42	-3.454400558840422e-40	1.422739652532501	5.0318126681206586e-40	-3.535278769124805e-40	1.4253851081118434	5.043142553690348e-40	800.0000000000211	1.4227396525149445	3.579335136793916e-40	88.88888888308227	8.347042356099716e-49	-8.4539796678038e-11	2.307819120990791e-08	-6.783301083191608e-49	1.3688558995626733e-10	2.307859716676489e-09
5.36	88.86128192248287	5.551567700659632e-40	2.2152070729373077	476.4444444383016	5.080271097409988e-49	-800.0000000000215	5.2949672819013245e-42	0.0183899618023197	4.527624511593647e-43	0.9999223523957665	4.4415651172765515e-42	0.012461507392109003	-3.06764642583e-42	-3.4526384080454123e-40	1.4280205208477035	5.047025523511102e-40	-3.5339817002461335e-40	1.4306534440952423	5.05831151758599e-40	800.0000000000215	1.428020520829936	3.5784157380906197e-40	88.88888888313012	8.337725024489829e-49	-8.442845346696791e-11	1.1971697707242533e-08	-1.97068900137461e-49	1.3353679415686794e-11	1.197170515483697e-09
5.365	88.86107834560416	5.550143695244591e-40	2.223358394491698	476.8888888827283	5.117994905806769e-49	-800.0000000000218	5.2949270094490736e-42	0.018302411747688305	4.527198180032172e-43	0.999921779791177	4.4549562562807413e-42	0.012507369298695538	-3.066475901223941e-42	-3.450877185579584e-40	1.4332763178274286	5.062238402049877e-40	-3.5326847535024577e-40	1.4358966988355086	5.073480366109553e-40	800.0000000000218	1.4332763178090018	3.5774978562098838e-40	88.88888888325624	8.31031898169229e-49	-8.405077819177633e-11	3.334292841827621e-08	-7.344315542184069e-49	1.0232959692688901e-10	3.3343085442902533e-09
5.37	88.86087499825399	5.548722031810307e-40	2.231470783380978	477.3333333271637	5.1529150243486465e-49	-800.000000000022	5.294886933020923e-42	0.018214794113146797	4.5267738869800266e-43	0.9999212078318543	4.468346612765368e-42	0.012553012236207304	-3.0653064507253026e-42	-3.449116905921444e-40	1.438507023837678	5.077451302994196e-40	-3.5313879283097876e-40	1.4411148529724243	5.088649099822607e-40	800.000000000022	1.4385070238181061	3.576581483915607e-40	88.88888888346447	8.264133820498704e-49	-8.340568326108592e-11	5.00129715419428e-08	-1.113671964129761e-48	1.5561783537893454e-10	5.001321364765384e-09
5.375	88.86067189183882	5.547302699122617e-40	2.239544210198033	477.7777777716074	5.1851719629150464e-49	-800.0000000000222	5.294847052709027e-42	0.018127110795376274	4.526351633939162e-43	0.9999206365498828	4.481736187028918e-42	0.01259843603834782	-3.064138077565947e-42	-3.4473575835166547e-40	1.4437126197886136	5.0926642255990505e-40	-3.5300912240837033e-40	1.44630788768913	5.103817719286984e-40	800.0000000000222	1.4437126197673877	3.575666613966468e-40	88.88888888375655	8.198971656701797e-49	-8.249741084659581e-11	6.680143845490273e-08	-1.4919280518640373e-48	2.0722628386744784e-10	6.6801759874848235e-09
5.38	88.86046903770212	5.545885685939454e-40	2.247578646378558	478.22222221605904	5.214952102403657e-49	-800.0000000000223	5.2948073686015936e-42	0.018039363686154247	4.525931422367687e-43	0.9999200659771701	4.4951249793849884e-42	0.01264364054355874	-3.0629707849600204e-42	-3.445599232777577e-40	1.4488930871332386	5.107877169117283e-40	-3.528794640239367e-40	1.4514757847107214	5.118986225064767e-40	800.0000000000223	1.4488930871098384	3.5747532391160995e-40	88.88888888413182	8.115149603043782e-49	-8.133858482826047e-11	8.320005425350897e-08	-1.857901719587507e-48	2.5577898001182576e-10	8.320044741870955e-09
5.385	88.86026644712378	5.544470981011118e-40	2.2555740641989717	478.666666660518	5.2424900465930375e-49	-800.0000000000224	5.294767880782901e-42	0.017951554672329856	4.5255132536799766e-43	0.9999194961454448	4.5085129901622117e-42	0.012688625595008262	-3.061804576103801e-42	-3.4438418680827874e-40	1.4540484078660716	5.123090132799655e-40	-3.5274981761915347e-40	1.456618526302836	5.134154617718282e-40	800.0000000000224	1.454048407839985	3.5738413521132694e-40	88.8888888845869	8.013602073171401e-49	-7.994756776122038e-11	9.862570019928112e-08	-2.1988510738102218e-48	2.995324510237286e-10	9.862615504767332e-09
5.39	88.86006413131949	5.5430585730805356e-40	2.263530436774331	479.11111110498354	5.268070974005226e-49	-800.0000000000224	5.2947285893333036e-42	0.017863685635799043	4.525097129246782e-43	0.9999189270862554	4.521900219704182e-42	0.01273339104057955	-3.0606394541755455e-42	-3.4420855037766237e-40	1.459178564521826	5.13830311589493e-40	-3.5262018313545715e-40	1.4617360952702352	5.149322897810086e-40	800.0000000000224	1.4591785644925668	3.5729309457020533e-40	88.88888888511535	7.895918184008123e-49	-7.83536773787931e-11	1.1242894023173448e-07	-2.5008231954672688e-48	3.370975969268025e-10	1.1242944559331767e-08
5.395	88.8598621014401	5.541648450883526e-40	2.2714477380562474	479.5555555494548	5.292032989768346e-49	-800.0000000000224	5.294689494329255e-42	0.01777575845347977	4.524683050395343e-43	0.9999183588309679	4.535286668369384e-42	0.012777936732859154	-3.0594754223353386e-42	-3.4403301541687037e-40	1.4642835401740864	5.153516117649929e-40	-3.5249056051424612e-40	1.4668284749553775	5.1644910659029534e-40	800.0000000000224	1.4642835401412206	3.5720220126220186e-40	88.88888888570727	7.764430948702739e-49	-7.659009831228176e-11	1.2389425781595869e-07	-2.74834222070695e-48	3.666399265324621e-10	1.2389480031301947e-08
5.4	88.859660368571	5.540240603149067e-40	2.2793259428307984	479.99999999393094	5.314769477479222e-49	-800.0000000000224	5.294650595843313e-42	0.01768777499728718	4.524271018409493e-43	0.9999177914107646	4.548672336531121e-42	0.012822262529125434	-3.0583124837249434e-42	-3.438575833533467e-40	1.4693633184339872	5.168729137309616e-40	-3.52360949696882e-40	1.4718956492369857	5.179659122559867e-40	800.0000000000224	1.4693633183971566	3.5711145456083973e-40	88.88888888634902	7.62227452457495e-49	-7.470468505236097e-11	1.3220902890982282e-07	-2.924671010888956e-48	3.856382014856139e-10	1.3220959133928527e-08
5.405	88.8594589437315	5.538835018599562e-40	2.2871650267164405	480.4444444384105	5.33673145106597e-49	-800.0000000000224	5.294611893944159e-42	0.017599737134108857	4.523861034529773e-43	0.9999172248566418	4.562057224577429e-42	0.012866368291336947	-3.057150641467646e-42	-3.4368225561097126e-40	1.4744178834488846	5.183942174117168e-40	-3.5223135062469088e-40	1.4769376025286065	5.194827068344006e-40	800.0000000000224	1.4744178834078387	3.5702085373922687e-40	88.88888888702263	7.473458130130303e-49	-7.275402474171257e-11	1.3649999649107778e-07	-3.011611592138664e-48	3.9252574985735795e-10	1.3650056087257864e-08
5.41	88.85925783787421	5.537431685951097e-40	2.2949649661619316	480.88888888289245	5.3584299066506254e-49	-800.0000000000224	5.294573388696607e-42	0.017511646725779925	4.523453099953543e-43	0.9999166591994086	4.5754413329110214e-42	0.012910253886120916	-3.0559898986681075e-42	-3.435070336100129e-40	1.479447219901043	5.199155227314045e-40	-3.521017632389645e-40	1.4819543197771632	5.209994903818737e-40	800.0000000000224	1.4794472198556698	3.569303980700732e-40	88.8888888877057	7.322938241962127e-49	-7.080338090337796e-11	1.3581384905591215e-07	-2.9892982748758424e-48	3.8511019501070224e-10	1.3581439505900836e-08
5.415	88.8590570618844	5.536030593913716e-40	2.302725738444237	481.3333333273751	5.3804381744117426e-49	-800.0000000000224	5.294535080161623e-42	0.017423505629058318	4.5230472158350855e-43	0.9999160944696848	4.588824661949203e-42	0.012953919184761613	-3.054830258412211e-42	-3.43331918767083e-40	1.484451313006304	5.214368296140068e-40	-3.519721874809616e-40	1.486945786461501	5.225162629547599e-40	800.0000000000224	1.4844513129566679	3.568400868257093e-40	88.8888888883707	7.176707643083472e-49	-6.893121011186076e-11	1.2909519379414367e-07	-2.8364868504588105e-48	3.606891595071504e-10	1.2909569767198788e-08
5.42	88.85885662657941	5.534631731191676e-40	2.310447321666449	481.77777777185696	5.403394270447001e-49	-800.0000000000225	5.2944969683963327e-42	0.017335315695599936	4.522643383285724e-43	0.999915530697899	4.6022072121238014e-42	0.012997364063188788	-3.05367172376691e-42	-3.431569124950902e-40	1.4894301485127666	5.229581379833491e-40	-3.518426232919091e-40	1.491911988590925	5.2403302460942954e-40	800.0000000000225	1.4894301484591488	3.5674991927810376e-40	88.88888888898472	7.041849593125931e-49	-6.722877971419018e-11	1.152317944767293e-07	-2.5303482834143797e-48	3.1693874617870284e-10	1.1523223033724554e-08
5.425	88.85865654270798	5.53323508648372e-40	2.318129694755698	482.22222221633615	5.4280032486358165e-49	-800.0000000000226	5.294459053454037e-42	0.017247078771933856	4.522241603373925e-43	0.9999149679142875	4.6155889838810906e-42	0.01304058840196609	-3.0525142977800776e-42	-3.429820162031933e-40	1.4943837126994644	5.244794477631072e-40	-3.517130706130032e-40	1.4968529127037329	5.255497754022683e-40	800.0000000000226	1.4943837126424062	3.5665989469888134e-40	88.88888888950905	6.926641049716138e-49	-6.579856479864083e-11	9.299725434174716e-08	-2.046362982063274e-48	2.5119769822499553e-10	9.299759359998088e-09
5.43	88.85845682094964	5.531840648483334e-40	2.3257728374610704	482.6666666608107	5.455039552501946e-49	-800.0000000000229	5.294421335384228e-42	0.017158796699437522	4.521841877125415e-43	0.9999144061488918	4.62896997768172e-42	0.013083592086279473	-3.051357983480354e-42	-3.4280723129675583e-40	1.4993119923750418	5.2600075887681486e-40	-3.5158352938541076e-40	1.501768545865737	5.270665153896761e-40	800.0000000000229	1.4993119923153937	3.565700123593408e-40	88.88888888989854	6.840614465072185e-49	-6.4758543168342e-11	5.997312276424862e-08	-1.3360840383917738e-48	1.5750410753859342e-10	5.997332958607124e-09
5.435	88.85825747191416	5.530448405879019e-40	2.3333767303515196	483.11111110527827	5.485349367076102e-49	-800.0000000000233	5.2943838142325975e-42	0.017070471314311938	4.521444205523285e-43	0.9999138454315575	4.6423501940006394e-42	0.013126375005925636	-3.050202783876997e-42	-3.4263255917730087e-40	1.50421497487643	5.275220712478721e-40	-3.5145399955027057e-40	1.5066588756687835	5.285832446280657e-40	800.0000000000233	1.5042149748154028	3.5648027153047287e-40	88.88888889010138	6.794644407891555e-49	-6.42411796385761e-11	1.902880815881137e-08	-4.5840978049801855e-49	4.405194891547514e-11	1.9028859149172595e-09
5.44	88.85805850617483	5.5290583473496585e-40	2.34094135479536	483.55555554973904	5.51897152977467e-49	-800.0000000000236	5.2943464900409804e-42	0.016982104448413457	4.521048589508949e-43	0.9999132857920262	4.6557296333275247e-42	0.013168937055194485	-3.0490487019647795e-42	-3.4245800124300194e-40	1.5090926480555253	5.2904338479948846e-40	-3.5132448104869435e-40	1.511523890229506	5.3009996317386206e-40	800.0000000000236	1.5090926479943	3.563906714825286e-40	88.888888890125	6.787526881564383e-49	-6.421994488598856e-11	3.862984006748817e-09	-9.823147667014425e-50	4.148758795787157e-13	3.86298402902719e-10
5.445	88.85785993434108	5.52767046155427e-40	2.348466692918578	483.99999999419936	5.553245620246615e-49	-800.0000000000242	5.2943093628471976e-42	0.016893697931070005	4.5206550299840695e-43	0.9999127272601379	4.6691082961677634e-42	0.01321127813262982	-3.0478957407346996e-42	-3.422835588897985e-40	1.5139450002520716	5.305646994545509e-40	-3.51194973821768e-40	1.5163635781886025	5.316166710835009e-40	800.0000000000242	1.5139450001904309	3.56301211484071e-40	88.888888890179	6.776986249952549e-49	-6.413289547474193e-11	1.5827102591476575e-08	-2.839513374870746e-49	2.9029234239342564e-11	1.5827129213397009e-09
5.45	88.85766176686035	5.526284737160662e-40	2.355952727709675	484.4444444386599	5.587929402691106e-49	-800.0000000000248	5.294272432685519e-42	0.016805253584085064	4.520263527805761e-43	0.9999121698652798	4.68248618303951e-42	0.013253398141632667	-3.046743903144508e-42	-3.4210923350822488e-40	1.51877202036199	5.320860151359979e-40	-3.5106547781055288e-40	1.5211779287086786	5.3313336841342765e-40	800.0000000000248	1.5187720202995487	3.5621189080460307e-40	88.88888889028776	6.758288087562227e-49	-6.391716241044341e-11	2.741889678266607e-08	-4.580735989724575e-49	5.695411140433137e-11	2.741895593470513e-09
5.455	88.85746401410093	5.5249011628336865e-40	2.363399442972339	484.88888888312067	5.6230367814925195e-49	-800.0000000000252	5.294235699586484e-42	0.016716773223816407	4.51987408378878e-43	0.9999116136366175	4.6958632944748276e-42	0.013295296990189472	-3.045593192130961e-42	-3.419350264846858e-40	1.5235736978065813	5.336073317666733e-40	-3.5093599295608704e-40	1.525966931472689	5.3465005522009674e-40	800.0000000000252	1.5235736977429346	3.5612270871348225e-40	88.88888889045376	6.731104858366565e-49	-6.356067388857563e-11	3.9007375107755346e-08	-6.297338343251746e-49	8.570235753145425e-11	3.900746925514673e-09
5.46	88.8572666863622	5.52351972723396e-40	2.3708068233175443	485.3333333275815	5.658562160569167e-49	-800.0000000000258	5.294199163576894e-42	0.01662825866142143	4.519486698705896e-43	0.9999110586031226	4.7092396310197683e-42	0.013336974590827133	-3.044443610611266e-42	-3.4176093920158224e-40	1.528350022527416	5.351286492693144e-40	-3.5080651919938637e-40	1.5307305766824457	5.3616673155997e-40	800.0000000000258	1.5283500224621505	3.5603366447979555e-40	88.88888889067783	6.695319908260006e-49	-6.305941888091823e-11	5.060272201262364e-08	-8.012403014388372e-49	1.1477863448971385e-10	5.0602852184652606e-09
5.465	88.85706979387408	5.522140419018107e-40	2.378174854161388	485.7777777720424	5.694479022005922e-49	-800.0000000000265	5.2941628246798273e-42	0.016539711702836035	4.51910137328801e-43	0.9999105047935712	4.722615193234305e-42	0.013378430860600959	-3.043295161482947e-42	-3.4158697303726763e-40	1.5331009849849608	5.366499675665588e-40	-3.5067705648144575e-40	1.5354688550571243	5.376833974895162e-40	800.0000000000265	1.533100984917666	3.5594475737237637e-40	88.88888889095914	6.651081116129908e-49	-6.24130886904281e-11	6.182195496269628e-08	-9.668544035429008e-49	1.4380134815469096e-10	6.182212220748635e-09
5.47	88.85687334679655	5.520763226839004e-40	2.3855035217229275	486.2222222165034	5.730738504686856e-49	-800.0000000000271	5.294126682914647e-42	0.01645113414875347	4.518718108224265e-43	0.9999099522365431	4.7359899816922575e-42	0.013419665721082625	-3.042147847623721e-42	-3.414131293660057e-40	1.537826576157203	5.381712865809515e-40	-3.5054760474324047e-40	1.5401817578317603	5.392000530652094e-40	800.0000000000271	1.537826576087488	3.558559866598206e-40	88.8888888912947	6.598842330532309e-49	-6.162319889464645e-11	7.224135363988168e-08	-1.120128081366972e-48	1.718667988813485e-10	7.2241558080643615e-09
5.475	88.85667735521923	5.519388139346022e-40	2.3927928130220155	486.66666666096455	5.76726798292787e-49	-800.0000000000276	5.2940907382970196e-42	0.016362527794603194	4.5183369041621604e-43	0.99990940096042	4.749363996981225e-42	0.013460679098348157	-3.0410016718913623e-42	-3.4123940955792735e-40	1.5425267875382769	5.396926062349516e-40	-3.504181639257271e-40	1.544869276755742	5.407166983435281e-40	800.0000000000276	1.5425267874657858	3.557673516105029e-40	88.88888889167936	6.539396878670768e-49	-6.069899488768338e-11	8.135027466474697e-08	-1.2538409821610662e-48	1.9714477148728905e-10	8.135051354534093e-09
5.48	88.85648182916083	5.518015145185273e-40	2.400042715877135	487.1111111054262	5.8039696451093336e-49	-800.0000000000283	5.294054990838924e-42	0.016273894430529734	4.517957761707667e-43	0.9999088509933841	4.7627372397025114e-42	0.013501470922965888	-3.039856637123575e-42	-3.4106581497898958e-40	1.547201611137088	5.41213926450941e-40	-3.50288733969845e-40	1.5495314040912962	5.422333333809544e-40	800.0000000000283	1.5472016110615188	3.5567885149259314e-40	88.88888889210507	6.473922857407116e-49	-5.965867639184209e-11	8.858952090424897e-08	-1.3598407512659893e-48	2.1829164689391704e-10	8.858978984785702e-09
5.485	88.85628677856872	5.516644232999853e-40	2.4072532189032323	487.55555554988814	5.840719072308687e-49	-800.0000000000289	5.294019440548668e-42	0.016185235841371593	4.517580681425338e-43	0.9999083023634171	4.7761097104710504e-42	0.0135420411299844	-3.0387127461378646e-42	-3.408923469909322e-40	1.5518510394759362	5.4273524715122905e-40	-3.5015931481651723e-40	1.5541681326119687	5.437499582339727e-40	800.0000000000289	1.5518510393970635	3.555904855740723e-40	88.88888889256111	6.4040299204250544e-49	-5.852559495723135e-11	9.335584157572739e-08	-1.428968948924977e-48	2.338095318669612e-10	9.335613436303747e-09
5.49	88.85609221331842	5.515275391430085e-40	2.4144243115095594	487.9999999943509	5.877363816933117e-49	-800.0000000000296	5.2939840874308994e-42	0.016096553806640025	4.5172056638384265e-43	0.9999077550982987	4.7894814099153446e-42	0.013582389658920531	-3.037570001731405e-42	-3.4071900695123546e-40	1.5564750655891444	5.442565682580624e-40	-3.5002990640665197e-40	1.5587794556010977	5.4526657295906886e-40	800.0000000000296	1.5564750655068427	3.5550225312274962e-40	88.88888889303334	6.331811115326249e-49	-5.733349826466615e-11	9.4960010225495e-08	-1.4511443742043166e-48	2.4161313570359245e-10	9.49603176012668e-09
5.495	88.85589814321318	5.513908609113762e-40	2.4215559838975036	488.4444444388148	5.91372198135216e-49	-800.0000000000301	5.293948931486621e-42	0.016007850100497965	4.5168327094289946e-43	0.9999072092256052	4.8028523386773844e-42	0.013622516453747319	-3.03642840668091e-42	-3.405457962130789e-40	1.561073683021682	5.457778896936295e-40	-3.499005086811435e-40	1.563365366850281	5.467831776127288e-40	800.0000000000301	1.5610736829359504	3.5541415340627767e-40	88.88888889350416	6.2598843113788775e-49	-5.6126141782294496e-11	9.264529883996734e-08	-1.4153668860639558e-48	2.3944657494990096e-10	9.264560827049014e-09
5.5	88.8557045779834	5.512543874686395e-40	2.428648227058425	488.8888888832801	5.9495807965303404e-49	-800.0000000000307	5.2939139727132005e-42	0.015919126491738853	4.5164618186380304e-43	0.9999066647727081	4.8162224974125814e-42	0.013662421462881956	-3.0352879637425065e-42	-3.4037271612529913e-40	1.5656468858277879	5.4729921138007045e-40	-3.497711215808735e-40	1.567925860657839	5.48299772251438e-40	800.0000000000307	1.5656468857387815	3.5532618569217056e-40	88.88888889395187	6.191444609560347e-49	-5.49598391345638e-11	8.558487252229828e-08	-1.3095724732952693e-48	2.2484004623297884e-10	8.558516786046774e-09
5.505	88.85551152728628	5.511181176781452e-40	2.4357010327714934	489.33333332774737	5.9846952006598065e-49	-800.0000000000313	5.293879211104388e-42	0.015830384743765528	4.51609299186556e-43	0.9999061217667728	4.8295918867896956e-42	0.013702104639173773	-3.0341486756515985e-42	-3.4019976803234783e-40	1.5701946685695967	5.4882053323948224e-40	-3.4964174504671225e-40	1.5724609318272695	5.498163569316797e-40	800.0000000000313	1.570194668477658	3.5523834924781853e-40	88.8888888943506	6.130318005936272e-49	-5.3903116413407556e-11	7.289434241404518e-08	-1.1204903195850461e-48	1.9509463359347446e-10	7.2894603489504785e-09
5.51	88.85531900070521	5.509820504030603e-40	2.442714393601521	489.7777777722171	6.0187864177929564e-49	-800.0000000000317	5.2938446466503274e-42	0.01574162661456905	4.515726229470762e-43	0.9999055802347577	4.842960507490763e-42	0.013741565939892194	-3.033010545122742e-42	-3.4002695327425008e-40	1.574717026315764	5.503418551939265e-40	-3.4951237901951965e-40	1.576970575665698	5.5133293170993475e-40	800.0000000000317	1.5747170262214556	3.5515064334050555e-40	88.88888889466979	6.0810241557626165e-49	-5.303969808755026e-11	5.3528026455747774e-08	-8.328019460365814e-49	1.4660958273833477e-10	5.35282272321528e-09
5.515	88.85512700774942	5.508461845063969e-40	2.4496883028968015	490.22222221668994	6.051540536475076e-49	-800.0000000000322	5.293810279337568e-42	0.015652853856707602	4.515361531772082e-43	0.999905040203412	4.856328360211026e-42	0.013780805326714704	-3.031873574849515e-42	-3.398542731865632e-40	1.5792139546400892	5.518631771654375e-40	-3.4938302344014653e-40	1.5814547879823204	5.528494966426799e-40	800.0000000000322	1.579213954544233	3.5506306723742564e-40	88.88888889487383	6.048814872748104e-49	-5.247069142179548e-11	2.414803172238396e-08	-3.968183619362892e-49	6.852000730285194e-11	2.4148128934902246e-09
5.52	88.85493555785565	5.507105188510121e-40	2.456622754784068	490.6666666611665	6.0826396480335944e-49	-800.0000000000324	5.2937761091490824e-42	0.015564068217340648	4.514998899047485e-43	0.9999045016992814	4.869695445658855e-42	0.013819822765698469	-3.030737767504685e-42	-3.396817291003719e-40	1.5836854496182786	5.533844990760217e-40	-3.492536782494357e-40	1.5859135650868574	5.543660517863872e-40	800.0000000000324	1.583685449521967	3.549756202056752e-40	88.88888889492607	6.039100711676988e-49	-5.229701416596785e-11	4.420760054320459e-09	-1.0694055346705826e-49	2.7733479645514905e-11	4.4208470459594813e-10
5.525	88.85474466047246	5.505750522987672e-40	2.463517744059774	491.111111105645	6.1129672106086595e-49	-800.0000000000327	5.293742136064398e-42	0.015475271440258915	4.514638331539869e-43	0.9999039647489455	4.88306176455546e-42	0.013858618226662485	-3.029603125751246e-42	-3.3950932234362504e-40	1.5881315077575069	5.549058208474375e-40	-3.4912434338822305e-40	1.5903469037885887	5.558825971975226e-40	800.0000000000327	1.5881315076610072	3.548883015113848e-40	88.88888889495199	6.033021470413031e-49	-5.207284547891964e-11	9.026498067517116e-09	-1.8226490705556162e-49	7.263981124483027e-11	9.026790343475798e-10
5.53	88.85455432495152	5.504397837116579e-40	2.4703732663240854	491.5555555501244	6.143064579272875e-49	-800.0000000000331	5.293708360059461e-42	0.015386465263242362	4.51427982945041e-43	0.9999034293787114	4.896427317635089e-42	0.013897191683949654	-3.028469652228025e-42	-3.393370542393382e-40	1.592552126083292	5.5642714240148845e-40	-3.489950187973388e-40	1.594754801394631	5.573991329325453e-40	800.0000000000331	1.5925521259863513	3.5480111042086678e-40	88.88888889502984	6.018841269162275e-49	-5.152093932327452e-11	2.0968352979857728e-08	-3.680374543323466e-49	1.4469250073706933e-10	2.096885220053015e-09
5.535	88.85436456053287	5.5030471195198546e-40	2.4771893179966016	491.99999999460454	6.1729270870650716e-49	-800.0000000000333	5.293674781106625e-42	0.015297651417694794	4.513923392937788e-43	0.9999028956145715	4.9097921056450116e-42	0.013935543116516425	-3.027337349547673e-42	-3.3916492610531953e-40	1.596947302149711	5.579484636600736e-40	-3.488657044176084e-40	1.5991372557081125	5.589156590479067e-40	800.0000000000333	1.59694730205206	3.5471404620078062e-40	88.88888889516242	5.99609827686374e-49	-5.062048135493894e-11	3.213240044411967e-08	-5.4260730791901455e-49	2.159370298116583e-10	3.213312600887293e-09
5.54	88.85417537638298	5.501698358819869e-40	2.483965896265797	492.44444443908566	6.202550631993553e-49	-800.0000000000335	5.293641399174722e-42	0.015208831629554198	4.513569022120704e-43	0.9999023634823119	4.923156129345334e-42	0.01397367250764564	-3.026206220301611e-42	-3.389929392547541e-40	1.6013170340066565	5.594697845450895e-40	-3.4873640018985417e-40	1.6034942650266055	5.60432175600049e-40	800.0000000000335	1.6013170339080156	3.546271081177466e-40	88.88888889535139	5.96453763588208e-49	-4.9359651218347025e-11	4.3441872321633834e-08	-7.198953658469531e-49	2.8830089442690764e-10	4.3442828961922626e-09
5.545	88.85398678159436	5.500351543638585e-40	2.4907029990867215	492.88888888356774	6.2319318496915736e-49	-800.0000000000338	5.293608214229074e-42	0.015120007619274293	4.513216717078002e-43	0.9999018330075099	4.936519389508932e-42	0.0140115798449337	-3.0250762670599127e-42	-3.388210949961648e-40	1.605661320198374	5.609911049784384e-40	-3.486071060548959e-40	1.6078258281405562	5.6194868264540465e-40	800.0000000000338	1.6056613200984613	3.5454029543836226e-40	88.8888888955965	5.9241567889229044e-49	-4.773876242820004e-11	5.455523440407822e-08	-8.94444636446622e-49	3.600154365320785e-10	5.455642228004382e-09
5.55	88.85379878518512	5.4990066625977865e-40	2.4974006251786913	493.33333332805086	6.26106828607282e-49	-800.000000000034	5.293575226231507e-42	0.015031181101806106	4.512866477848791e-43	0.9999013042155345	4.9498818869213787e-42	0.014049265120277737	-3.023947492371188e-42	-3.3864939463337305e-40	1.6099801597619932	5.625124248820335e-40	-3.484778219535525e-40	1.612131944331708	5.634651802403951e-40	800.000000000034	1.6099801596605339	3.5445360742921734e-40	88.88888889589595	5.875246585143789e-49	-4.576524157497895e-11	6.508287242467774e-08	-1.0599240185185561e-48	4.2835217486118896e-10	6.508428203977199e-09
5.555	88.85361139609871	5.497663704319316e-40	2.5040587740229845	493.777777772535	6.289958569986893e-49	-800.0000000000342	5.2935424351403635e-42	0.014942353786579536	4.512518304432561e-43	0.9999007771315439	4.963243622380873e-42	0.014086728329862765	-3.0228198987624676e-42	-3.384778394654611e-40	1.6142735522260605	5.640337441778077e-40	-3.4834854782664274e-40	1.61641261337152	5.6498166844143e-40	800.0000000000342	1.6142735521227978	3.5436704335690964e-40	88.88888889624555	5.818436652825417e-49	-4.346613039992052e-11	7.454730166500164e-08	-1.2092227767730842e-48	4.901343393039607e-10	7.454891291764972e-09
5.56	88.8534246232035	5.496322657425302e-40	2.510677445860538	494.2222222170203	6.318602585874787e-49	-800.0000000000343	5.293509840910518e-42	0.014853527377484927	4.512172196789308e-43	0.9999002517804856	4.976604596698166e-42	0.014123969474148857	-3.0216934887390913e-42	-3.3830643078673314e-40	1.6185414976090724	5.655550627877187e-40	-3.4821928361498657e-40	1.6206678355195798	5.664981473049057e-40	800.0000000000343	1.6185414975037802	3.542806024880601e-40	88.88888889663879	5.7547309582133556e-49	-4.0879725483783956e-11	8.244853688665341e-08	-1.3342892431733372e-48	5.426060032604579e-10	8.245032235246036e-09
5.565	88.85323847529237	5.494983510538395e-40	2.5172566416896416	494.66666666150695	6.347001646424375e-49	-800.0000000000346	5.2934774434933873e-42	0.014764703572854624	4.511828154839653e-43	0.9998997281870947	4.989964810696498e-42	0.014160988557858316	-3.02056826478459e-42	-3.38135169886677e-40	1.622783996418009	5.670763806337571e-40	-3.4809002925940626e-40	1.6248976115220115	5.680146168872052e-40	800.0000000000346	1.6227839963105066	3.5419428408932885e-40	88.88888889706645	5.685565439543338e-49	-3.8062694056879705e-11	8.821080162608885e-08	-1.426049351679942e-48	5.814932898791233e-10	8.821271823248262e-09
5.57	88.85305296108247	5.493646252282001e-40	2.523796363263628	495.1111111059948	6.3751586652258694e-49	-800.0000000000347	5.293445242836947e-42	0.014675884065444605	4.511486178464962e-43	0.9998992063758934	5.0033242652115064e-42	0.014197785589962805	-3.0194442293605705e-42	-3.3796405804992587e-40	1.6270010496468645	5.685976976379516e-40	-3.4796078470072742e-40	1.629101942609878	5.695310772446961e-40	800.0000000000347	1.6270010495370306	3.541080874274305e-40	88.88888889751625	5.6128504247912156e-49	-3.5094111026282094e-11	9.119887067753846e-08	-1.4745166145697786e-48	6.029179383609205e-10	9.120086360829477e-09
5.575	88.85286808921471	5.492310871280508e-40	2.530296613088577	495.5555555504841	6.4030783294273316e-49	-800.0000000000348	5.293413238885741e-42	0.014587070542415958	4.511146267507469e-43	0.9998986863711893	5.0166829610911796e-42	0.01423436058367056	-3.0183213849066025e-42	-3.3779309655622063e-40	1.6311926587751826	5.7011901372237765e-40	-3.478315498797802e-40	1.6332808304975786	5.710475284337303e-40	800.0000000000348	1.6311926586629748	3.540220117691497e-40	88.88888889797263	5.539021996456323e-49	-3.207081213265538e-11	9.071143836080706e-08	-1.4686766522117515e-48	6.020600620625482e-10	9.071343630248404e-09
5.58	88.85268386825348	5.490977356159525e-40	2.536757394421003	495.9999999949749	6.430767272390133e-49	-800.0000000000349	5.2933814315809006e-42	0.014498264685316509	4.510808421770393e-43	0.9998981681970749	5.0300408991957694e-42	0.014270713556413524	-3.0171997338401014e-42	-3.376222866803711e-40	1.6353588257665872	5.716403288091637e-40	-3.4770232473740046e-40	1.6374342773812398	5.72563970510643e-40	800.0000000000349	1.6353588256520604	3.539360563813572e-40	88.88888889841627	5.467093382259163e-49	-2.911974639164701e-11	8.597543417938773e-08	-1.396379815855086e-48	5.73433421724351e-10	8.597734648279967e-09
5.585	88.8525003066863	5.4896456955461095e-40	2.543178711265552	496.4444444394675	6.458234246344437e-49	-800.000000000035	5.2933498208601514e-42	0.014409468170062383	4.5104726410180625e-43	0.9998976518774264	5.043398080397721e-42	0.014306844529834517	-3.016079278556213e-42	-3.374516296922191e-40	1.6394995530673153	5.7316164282049736e-40	-3.4757310921443065e-40	1.6415622859371035	5.740804035317512e-40	800.000000000035	1.6394995529506424	3.5385022053102474e-40	88.88888889882391	5.400715090614029e-49	-2.6391380703554364e-11	7.61611810654913e-08	-1.2444190983956794e-48	5.121118287036197e-10	7.616290277960557e-09
5.59	88.85231741292333	5.488315878069003e-40	2.5495605683726974	496.8888888839618	6.485490295044686e-49	-800.0000000000351	5.293318406657831e-42	0.014320682666919571	4.510138924976032e-43	0.9998971374359028	5.0567545055816054e-42	0.014342753529774408	-3.014960021427701e-42	-3.3728112685660012e-40	1.6436148436047504	5.746829556786327e-40	-3.4744390325172125e-40	1.645664859319907	5.7559682755335335e-40	800.0000000000351	1.6436148434862476	3.5376450348524163e-40	88.88888889916788	5.344223067565969e-49	-2.4064664896937383e-11	6.03610790979736e-08	-9.983567952276089e-49	4.111799237598329e-10	6.0362479561409085e-09
5.595	88.8521351952972	5.486987892358864e-40	2.555902971236433	497.333333328458	6.512548926425074e-49	-800.0000000000354	5.293287188904901e-42	0.014231909840485503	4.509807273331208e-43	0.9998966248959446	5.070110175644046e-42	0.014378440586259271	-3.0138419648048297e-42	-3.3711077943330595e-40	1.6477047007859529	5.7620426730589744e-40	-3.473147067901316e-40	1.64974200116126	5.77113242631728e-40	800.0000000000354	1.6477047006661023	3.536789045112297e-40	88.88888889941587	5.302710937948227e-49	-2.2356869897197638e-11	3.644065789861145e-08	-6.242715006438008e-49	2.558405125031459e-10	3.644155598285385e-09
5.6	88.85195366206243	5.485661727048496e-40	2.5622059260919703	497.77777777295637	6.5394262852550326e-49	-800.0000000000355	5.2932561675289616e-42	0.014143151349670615	4.509477685731963e-43	0.9998961142807727	5.0834650914936445e-42	0.014413905733487557	-3.0127251110152493e-42	-3.369405886770474e-40	1.6517691284961937	5.777255776246994e-40	-3.4718551977053114e-40	1.6537937155680147	5.786296488231331e-40	800.0000000000355	1.6517691283756737	3.5359342287635937e-40	88.88888889953033	5.282074238069354e-49	-2.1514455366384858e-11	9.208160160293104e-09	-1.9942189640461535e-49	8.052868456192573e-11	9.208512279768454e-10
5.605	88.85177282143081	5.4843373707695095e-40	2.56846943987101	498.2222222174568	6.566109462643769e-49	-800.0000000000355	5.2932253424543006e-42	0.014054408848518465	4.509150161790384e-43	0.9998956056134883	5.0968192540509503e-42	0.014449149009574435	-3.011609462368992e-42	-3.367705558380442e-40	1.655808131069819	5.7924688655743915e-40	-3.4705634213380045e-40	1.6578200071208722	5.801460461838049e-40	800.0000000000355	1.6558081309492052	3.5350805784779853e-40	88.88888889953704	5.278087355027414e-49	-2.1340135209323946e-11	2.776090468614524e-09	-1.0918854635215343e-49	5.596329878370609e-11	2.776654494304821e-10
5.61	88.85159268160203	5.483014812149425e-40	2.574693520162304	498.6666666619588	6.592528778903553e-49	-800.0000000000356	5.2931947136019486e-42	0.01396568398692138	4.5088247010842456e-43	0.999895098917159	5.1101726642484017e-42	0.014484170456326387	-3.0104950211628353e-42	-3.366006821625388e-40	1.659821713264562	5.8076819402642954e-40	-3.469271738208322e-40	1.6618208808731927	5.816624347699567e-40	800.0000000000356	1.6598217131437374	3.5342280869220723e-40	88.88888889958463	5.266887542042237e-49	-2.0762508467663718e-11	1.4453149788095222e-08	-3.1006486273396745e-49	1.623443686302451e-10	1.4454061522324545e-09
5.615	88.85141325062851	5.481694039825457e-40	2.5808781753702235	499.1111111064624	6.618678787006477e-49	-800.0000000000357	5.293164280889535e-42	0.013876978407421914	4.5085013031490885e-43	0.9998945942144375	5.1235253230301477e-42	0.014518970120149252	-3.0093817896607964e-42	-3.3643096889038266e-40	1.663809880365005	5.822894999542631e-40	-3.4679801477253236e-40	1.6657963423488902	5.831788146377787e-40	800.0000000000357	1.6638098802438048	3.53337674677145e-40	88.88888889968368	5.246730497542592e-49	-1.969909263445111e-11	2.5120764727639472e-08	-4.954973196737785e-49	2.6306074813680157e-10	2.5122142055537895e-09
5.62	88.85123453648231	5.4803750424379926e-40	2.587023414632223	499.55555555096754	6.644558183229538e-49	-800.0000000000358	5.293134044231379e-42	0.013788293746780462	4.5081799674823485e-43	0.9998940915277507	5.1368772313520275e-42	0.014553548051576114	-3.0082697701036856e-42	-3.3626141725618194e-40	1.6677726381287776	5.8381080426363956e-40	-3.466688649298213e-40	1.6697463975407763	5.846951858434362e-40	800.0000000000358	1.6677726380070284	3.5325265507039275e-40	88.88888889983629	5.217258295831168e-49	-1.8126776885217527e-11	3.594493591662952e-08	-6.838877780651009e-49	3.6613766452340493e-10	3.5946800620361e-09
5.625	88.8510565470586	5.47905780863043e-40	2.5931292478119	499.99999999547424	6.670166500712749e-49	-800.0000000000359	5.2931040035385086e-42	0.013699631636048367	4.507860693543716e-43	0.9998935908793092	5.150228390181504e-42	0.014587904305227956	-3.007158964709554e-42	-3.3609202848933142e-40	1.6717099927820687	5.853321068773639e-40	-3.465397242336348e-40	1.6736710529089238	5.862115484430691e-40	800.0000000000359	1.671709992659592	3.5316774913992815e-40	88.88888890004306	5.17835177714315e-49	-1.6037927437963573e-11	4.6736185292196024e-08	-8.718296263669214e-49	4.691201845659567e-10	4.67385396585521e-09
5.63	88.85087929017548	5.477742327049398e-40	2.5991956854965634	500.4444444399825	6.695504184957854e-49	-800.000000000036	5.293074158718673e-42	0.013610993700552045	4.507543480755255e-43	0.9998930922911068	5.163578800497593e-42	0.014622038939800089	-3.0060493756735894e-42	-3.3592280381397835e-40	1.6756219510180734	5.86853407718351e-40	-3.464105926249253e-40	1.677570315379028	5.877279024927909e-40	800.000000000036	1.6756219508946921	3.5308295615394052e-40	88.88888890030297	5.1301904456857905e-49	-1.3441446767169209e-11	5.712787280268679e-08	-1.0530187686758175e-48	5.686454841066888e-10	5.713070285447709e-09
5.635	88.85070277357362	5.4764285863449815e-40	2.605222738994797	500.8888888844923	6.720572669327028e-49	-800.0000000000362	5.2930445096763546e-42	0.013522381559877119	4.507228328501534e-43	0.9998925957849194	5.1769284632907925e-42	0.014655952018048571	-3.004941005168017e-42	-3.3575374444898883e-40	1.67950851999544	5.8837470670963414e-40	-3.462814700446628e-40	1.6814441923407608	5.892442480486878e-40	800.0000000000362	1.6795085198709858	3.5299827538084616e-40	88.88888890061297	5.07328547219976e-49	-1.036366276402387e-11	6.67093047468325e-08	-1.220210097775981e-48	6.609881456429829e-10	6.6712579362024745e-09
5.64	88.85052700491605	5.47511657517094e-40	2.611210420334026	501.33333332900355	6.745374450541588e-49	-800.0000000000362	5.2930150563127856e-42	0.013433796827852543	4.5069152361297554e-43	0.9998921013823051	5.19027737956301e-42	0.014689643606776642	-3.0038338553420026e-42	-3.355848516079128e-40	1.6833697073367206	5.898960037743693e-40	-3.4615235643383608e-40	1.685292691646122	5.907605851668175e-40	800.0000000000362	1.6833697072110392	3.529137060893022e-40	88.88888890096791	5.008539117489579e-49	-6.8513885401035315e-12	7.501081237629578e-08	-1.3654025120992076e-48	7.415302810913209e-10	7.501447753940318e-09
5.645	88.85035199178795	5.473806282184932e-40	2.6171587422580838	501.7777777735163	6.769913164180698e-49	-800.0000000000362	5.292985798525959e-42	0.013345241112534727	4.5066042029498774e-43	0.9998916091046024	5.203625550327491e-42	0.014723113776821131	-3.0027279283215515e-42	-3.354161264989509e-40	1.687205521126814	5.91417298835843e-40	-3.460232517334536e-40	1.6891158216077857	5.9227691390320875e-40	800.0000000000362	1.6872055209997756	3.5282924754822212e-40	88.88888890136006	4.937267210239096e-49	-2.9767503600198064e-12	8.150943623755722e-08	-1.4794367309027227e-48	8.051172643714308e-10	8.151341245202409e-09
5.65	88.85017774169629	5.472497696048732e-40	2.6230677182247755	502.2222222180305	6.794193660180087e-49	-800.0000000000363	5.292956736210643e-42	0.013256716016191652	4.5062952282347456e-43	0.9998911189729304	5.2169729766087497e-42	0.014756362603038907	-3.001623226209409e-42	-3.3524757032491897e-40	1.691015969911417	5.92938591817478e-40	-3.458941558845447e-40	1.6929135909974422	5.937932343138599e-40	800.0000000000363	1.6910159697829252	3.5274489902679036e-40	88.88888890177901	4.8612858572600625e-49	1.162035599381041e-12	8.562513661065803e-08	-1.5522258169960533e-48	8.461508255679553e-10	8.562931735576e-09
5.655	88.85000426206969	5.471190805428459e-40	2.628937362403443	502.66666666254594	6.8182220783307315e-49	-800.0000000000363	5.292927869258394e-42	0.01316822313528706	4.505988311220218e-43	0.9998906310081872	5.230319659442489e-42	0.014789390164293263	-3.0005197510849603e-42	-3.350791842832157e-40	1.6948010626954662	5.9445988264283925e-40	-3.457650688281606e-40	1.696686009044135	5.953095464547384e-40	800.0000000000363	1.69480106256547	3.5266065979447704e-40	88.88888890221124	4.7829214289053215e-49	5.436694489563607e-12	8.670587211174906e-08	-1.5726015281101992e-48	8.584940456872772e-10	8.671012207744529e-09
5.66	88.84983156025802	5.4698855989947894e-40	2.6347676896725325	503.11111110706264	6.842005923777593e-49	-800.0000000000363	5.292899197557571e-42	0.013079764060464485	4.505683451105291e-43	0.9998901452310502	5.2436655998755425e-42	0.014822196543440382	-2.999417505004133e-42	-3.3491096956578737e-40	1.698560808941592	5.959811712356413e-40	-3.4563599050537544e-40	1.7004330854325926	5.968258503817797e-40	800.0000000000363	1.698560808810096	3.5257652912105325e-40	88.88888890263983	4.705108357017076e-49	9.687120722483032e-12	8.405531085978549e-08	-1.5281942229814097e-48	8.350337368499126e-10	8.405945851049035e-09
5.665	88.84965964353233	5.468582065423187e-40	2.6405587156171597	503.55555555158054	6.865554142518306e-49	-800.0000000000363	5.292870720993349e-42	0.012991340376531438	4.50538064705223e-43	0.9998896616619746	5.2570107989657917e-42	0.014854781827315743	-2.998316489999295e-42	-3.3474292735909525e-40	1.7022952185685607	5.975024575197535e-40	-3.4550692085728743e-40	1.7041548303015586	5.9834214615088616e-40	800.0000000000363	1.7022952184356397	3.5249250627660557e-40	88.88888890304426	4.6314081251613916e-49	1.3714287883556022e-11	7.689659279700295e-08	-1.4056383490378723e-48	7.679772758661036e-10	7.690042765085467e-09
5.67	88.84948851908439	5.467280193394118e-40	2.646310456526674	503.9999999960995	6.888877196901894e-49	-800.0000000000362	5.2928424394477315e-42	0.012902953662443536	4.5050798981866935e-43	0.9998891803211927	5.2703552577821e-42	0.014887146106720543	-2.9972167080791565e-42	-3.3457505884408145e-40	1.7060043019497235	5.990237414192075e-40	-3.4537785982501977e-40	1.7078512542421131	5.9985843381792665e-40	800.0000000000362	1.706004301815536	3.524085905315512e-40	88.88888890339989	4.566095961097534e-49	1.7280758540322227e-11	6.439861977014082e-08	-1.1901926164939929e-48	6.49447761643234e-10	6.440189446510309e-09
5.675	88.84931819402655	5.465979971593275e-40	2.652022929392225	504.44444444061946	6.911987141127471e-49	-800.0000000000362	5.292814352799564e-42	0.012814605491288603	4.504781203597861e-43	0.9998887012287138	5.283698977404238e-42	0.01491928947640812	-2.99611816122867e-42	-3.3440736519613547e-40	1.709688069911462	6.005450228582021e-40	-3.4524880734972174e-40	1.7115223682959935	6.013747134387352e-40	800.0000000000362	1.7096880697762673	3.523247811566527e-40	88.88888890367781	4.514205270971763e-49	2.010716048030783e-11	4.544583968405577e-08	-8.623150612293034e-49	4.679532988064548e-10	4.544824886482165e-09
5.68	88.8491486753915	5.464681388711801e-40	2.657696151904328	504.8888888851403	6.934897696742952e-49	-800.000000000036	5.29278646092455e-42	0.012726297430270825	4.50448456233856e-43	0.9998882244043227	5.297041958922814e-42	0.014951212035070391	-2.995020851408931e-42	-3.342398475850615e-40	1.7133465337316363	6.020663017611112e-40	-3.451197633725698e-40	1.7151681839539072	6.028909850691101e-40	800.000000000036	1.7133465335958107	3.522410774230332e-40	88.88888890384432	4.4816010933964965e-49	2.1863235797900816e-11	1.726689902170503e-08	-3.735487075291627e-49	1.953658106466981e-10	1.7268004216635108e-09
5.685	88.84897997013832	5.463384433445759e-40	2.66333014244429	505.33333332966185	6.957616924066061e-49	-800.000000000036	5.29275876369526e-42	0.012638031040851292	4.5041899734257026e-43	0.9998877498675973	5.3103842034392544e-42	0.014982913885288742	-2.993924780558023e-42	-3.3407250717515707e-40	1.716979705133989	6.035875780524731e-40	-3.4499072783476857e-40	1.718788713153888	6.044072487648133e-40	800.000000000036	1.7169797049980084	3.5215747860211877e-40	88.88888890387297	4.472838220290705e-49	2.2296908015795542e-11	4.292625514305062e-09	-1.5588867588555892e-49	8.214925402701503e-11	4.2934114997283916e-10
5.69	88.8488120852455	5.4620890944854465e-40	2.6689249199922083	505.77777777418504	6.980039254092304e-49	-800.0000000000359	5.292731260981148e-42	0.012549807881014865	4.503897435844879e-43	0.9998872776381696	5.32372571206648e-42	0.015014395133002203	-2.992829950604685e-42	-3.3390534512681324e-40	1.720587596227638	6.05108851656763e-40	-3.448617006775517e-40	1.722383968280299	6.059235045815693e-40	800.0000000000359	1.7205875960915027	3.5207398396459106e-40	88.88888890392509	4.4592887801665805e-49	2.3076790185421266e-11	1.8192025663664618e-08	-4.1527935267605294e-49	2.467253973416717e-10	1.8193698666547314e-09
5.695	88.8486450275649	5.460795360532682e-40	2.6744805042646234	506.22222221871	7.002114550665098e-49	-800.0000000000358	5.2927039526485644e-42	0.012461629501684012	4.503606948543494e-43	0.9998868077353156	5.337066485927657e-42	0.015045655888304445	-2.991736363446681e-42	-3.337383625939315e-40	1.7241702195977349	6.066301224987591e-40	-3.4473268184218304e-40	1.7259539621618103	6.074397525750642e-40	800.0000000000358	1.7241702194612478	3.5199059278206424e-40	88.88888890406646	4.4292399706637785e-49	2.4886640338850195e-11	3.7475208121878085e-08	-7.712230167455847e-49	4.688026813246474e-10	3.747814029180336e-09
5.7	88.84847880383877	5.459503220298984e-40	2.6799969156953756	506.6666666632368	7.023828023247563e-49	-800.0000000000357	5.2926768385607705e-42	0.012373497447128835	4.503318510431729e-43	0.9998863401780033	5.350406526156276e-42	0.015076696265333527	-2.9906440209532624e-42	-3.3357156072419225e-40	1.7277275882929124	6.0815139050350955e-40	-3.446036712699576e-40	1.7294987080694924	6.089559928009452e-40	800.0000000000357	1.727727588155867	3.5190730432690114e-40	88.8888889043008	4.381982707986736e-49	2.7777570541836747e-11	5.6333012328949873e-08	-1.1204671147081938e-48	6.883552806526877e-10	5.633721781421249e-09
5.705	88.84831342073099	5.458212662502134e-40	2.6854741754030624	507.1111111077657	7.045163988605206e-49	-800.0000000000355	5.2926499185779505e-42	0.012285413255718497	4.503032120384169e-43	0.9998858749849802	5.3637458338963274e-42	0.0151075163820841	-2.9895529249697e-42	-3.33404940659572e-40	1.7312597158039116	6.096726555962599e-40	-3.4447466890220267e-40	1.7330182197151263	6.104722253148192e-40	800.0000000000355	1.7312597156660943	3.518241178718712e-40	88.8888889046301	4.317123452899328e-49	3.177498998763864e-11	7.5380294598891e-08	-1.474097823917599e-48	9.107437776827166e-10	7.538579619559765e-09
5.71	88.84814888482674	5.456923675866382e-40	2.690912305188524	507.5555555522966	7.066105849122681e-49	-800.0000000000354	5.2926231925572263e-42	0.012197378459907395	4.502747777239936e-43	0.9998854121747723	5.3770844103022276e-42	0.015138116360393382	-2.9884630773172e-42	-3.3323850353631233e-40	1.734766616061976	6.1119391770245935e-40	-3.443456746802788e-40	1.7365125112495088	6.119884501722522e-40	800.0000000000354	1.7347666159231712	3.5174103269016544e-40	88.8888889050542	4.2346369068759355e-49	3.6882270536564784e-11	9.420162427886045e-08	-1.8240327855430753e-48	1.1317193091033264e-09	9.420842215731132e-09
5.715	88.84798520263243	5.45563624912266e-40	2.6963113275323285	507.99999999682973	7.086636071120511e-49	-800.0000000000351	5.292596660352669e-42	0.012109394586221333	4.50246547980282e-43	0.9998849517656847	5.3904222565387527e-42	0.0151684963259271	-2.987374479792811e-42	-3.3307225048488853e-40	1.7382483034372447	6.1271517674776586e-40	-3.4421668854558076e-40	1.7399815972607542	6.135046674287685e-40	800.0000000000351	1.7382483032972404	3.516580480554097e-40	88.8888889055709	4.134932256127996e-49	4.3079613635707795e-11	1.1230720057634092e-07	-2.161428863829123e-48	1.3452503550563315e-09	1.123152571995998e-08
5.72	88.8478223805755	5.454350371008796e-40	2.7016712655922555	508.44444444136514	7.106736163171831e-49	-800.0000000000349	5.292570321815315e-42	0.012021463155243705	4.50218522684141e-43	0.9998844937757995	5.4037593737809627e-42	0.015198656408165463	-2.9862871341693416e-42	-3.3290618262997983e-40	1.7417047927371447	6.142364326580536e-40	-3.440877104395387e-40	1.7434254927725918	6.150208771398497e-40	800.0000000000349	1.7417047925957376	3.515751632416794e-40	88.88888890617515	4.018872805142002e-49	5.0311401180185825e-11	1.2915274775574024e-07	-2.4763099070776067e-48	1.5448321503106067e-09	1.291619865100816e-08
5.725	88.84766042500422	5.453066030269723e-40	2.706992143200783	508.88888888590293	7.126386654419132e-49	-800.0000000000346	5.292544176793177e-42	0.011933585681601678	4.5019070170892234e-43	0.9998840382229768	5.417095763214136e-42	0.015228596740389112	-2.985201042195271e-42	-3.327403010904382e-40	1.7451360992047862	6.157576853594166e-40	-3.439587403036189e-40	1.7468442132426598	6.165370793609338e-40	800.0000000000346	1.7451360990617888	3.514923775235137e-40	88.88888890685932	3.887867957325421e-49	5.849301383322167e-11	1.4414969958427049e-07	-2.7573383402711216e-48	1.723644167624403e-09	1.4416000429887625e-08
5.73	88.84749934218755	5.451783215657691e-40	2.712273984862571	509.3333333304433	7.145567072890996e-49	-800.0000000000343	5.2925182251312607e-42	0.011845763673952354	4.501630849244841e-43	0.9998835851248532	5.4304314260336965e-42	0.015258317459665084	-2.9841162055946623e-42	-3.325746069792585e-40	1.7485422385173544	6.172789347781772e-40	-3.4382977807932507e-40	1.7502377745607942	6.180532741474143e-40	800.0000000000343	1.748542238372602	3.5140969017592953e-40	88.88888890761241	3.7439084607020016e-49	6.749954309803305e-11	1.5661190862676604e-07	-2.99243255543222e-48	1.8735622598729786e-09	1.5662311502220907e-08
5.735	88.84733913831494	5.450501915932481e-40	2.7175168157519467	509.77777777498625	7.164255923818823e-49	-800.000000000034	5.2924924666715734e-42	0.011757998634969019	4.501356721972035e-43	0.9998831344988419	5.443766363445135e-42	0.01528781870683275	-2.9830326260670756e-42	-3.324091014035486e-40	1.7519232267844989	6.188001808408889e-40	-3.4370082370819916e-40	1.753606193047316	6.195694615546397e-40	800.000000000034	1.75192322663786	3.513271004744363e-40	88.88888890842003	3.5896205047707776e-49	7.716609892101444e-11	1.6584327984976065e-07	-3.167988556638061e-48	1.9861340152116853e-09	1.6585517236327726e-08
5.74	88.84717981949619	5.4492221198616135e-40	2.7227206617103903	510.2222222195319	7.182430667953583e-49	-800.0000000000337	5.2924669012531416e-42	0.011670292061327216	4.501084633899899e-43	0.9998826863621321	5.457100576663953e-42	0.01531710062648981	-2.9819503052874814e-42	-3.322437854644981e-40	1.7552790805467344	6.20321423474345e-40	-3.435718771318223e-40	1.7569494854513115	6.210856416379123e-40	800.0000000000337	1.755279080398117	3.5124460769504932e-40	88.8888889092641	3.428352717964308e-49	8.728234629014171e-11	1.7104113680942402e-07	-3.269151993727112e-48	2.0517138185179436e-09	1.7105344197254026e-08
5.745	88.84702139176123	5.447943816220563e-40	2.727885549244018	510.6666666640805	7.200067699882552e-49	-800.0000000000332	5.292441528712024e-42	0.011582645443691005	4.500814583622985e-43	0.9998822407316881	5.470434066915581e-42	0.01534616336697822	-2.9808692449061706e-42	-3.320786602573498e-40	1.7586098167738269	6.218426626055825e-40	-3.4344293829181602e-40	1.7602676689489114	6.226018144524872e-40	800.0000000000332	1.7586098166231916	3.5116221111430518e-40	88.88888891012225	3.264215149406839e-49	9.758739845738173e-11	1.713345909592929e-07	-3.2799580380105703e-48	2.0599626032314555e-09	1.713469740179701e-08
5.75	88.84686386105996	5.4466669937929676e-40	2.7330115055210698	511.11111110863214	7.217142326346045e-49	-800.0000000000327	5.292416348881324e-42	0.011495060266699112	4.500546569701428e-43	0.9998817976242493	5.483766835435311e-42	0.015375007080370163	-2.979789446548672e-42	-3.3191372687136946e-40	1.7619154528631902	6.23363898161889e-40	-3.4331400712984304e-40	1.7635607611415636	6.241179800535719e-40	800.0000000000327	1.761915452710559	3.5107991000927514e-40	88.88888891096772	3.102156814026893e-49	1.0776711027788642e-10	1.6581035803633708e-07	-3.182997488919115e-48	1.9994444806604106e-09	1.658224128710276e-08
5.755	88.84670723326214	5.445391641370842e-40	2.738098558369392	511.55555555318693	7.233628744554156e-49	-800.0000000000323	5.292391361591201e-42	0.011407538008951123	4.500280590661079e-43	0.9998813570563296	5.497098883468224e-42	0.01540363192245401	-2.978710911815661e-42	-3.3174898638981545e-40	1.765196006638276	6.248851300708077e-40	-3.4318508358760826e-40	1.7668287800543037	6.256341384963254e-40	800.0000000000323	1.7651960064837444	3.509977036575799e-40	88.88888891176896	2.9480280960779325e-49	1.1744645462907644e-10	1.5346278322187748e-07	-2.9595379719586517e-48	1.8577831501068378e-09	1.5347402774553675e-08
5.76	88.8465515141571	5.444117747754789e-40	2.7431467362739226	511.9999999977451	7.249500020503496e-49	-800.0000000000318	5.29236656666889e-42	0.011320080142993658	4.500016644993639e-43	0.9998809190442167	5.5104302122691224e-42	0.015432038052720263	-2.9776336422828754e-42	-3.315844398899108e-40	1.7684514963469675	6.264063582601439e-40	-3.4305616760685988e-40	1.7700717441340208	6.271502898358568e-40	800.0000000000318	1.7684514961907196	3.509155913374041e-40	88.88888891248916	2.808654784684654e-49	1.2618812682406666e-10	1.3322060491796655e-07	-2.5891822472617388e-48	1.6222596041969006e-09	1.3323048187607946e-08
5.765	88.84639670945364	5.442845301754211e-40	2.7481560683741773	512.4444444423068	7.26472806729393e-49	-800.0000000000313	5.292341963938708e-42	0.011232688135306548	4.499754731156788e-43	0.999880483603972	5.523760823102454e-42	0.015460225634347534	-2.976557639501025e-42	-3.314200884428118e-40	1.7716819406599742	6.279275826579697e-40	-3.429272591293902e-40	1.7732896722477196	6.2866643412722525e-40	800.0000000000313	1.7716819405022937	3.508335723275102e-40	88.88888891308608	2.691921697844237e-49	1.3348854182040587e-10	1.0394008616760913e-07	-2.050366164831323e-48	1.2786420200320675e-09	1.0394795061926619e-08
5.77	88.84624282477989	5.44157429218752e-40	2.753126584461733	512.8888888868721	7.279283623445321e-49	-800.0000000000307	5.292317553222074e-42	0.011145363446289023	4.499494847574314e-43	0.9998800507514295	5.537090717242246e-42	0.015488194834188488	-2.975482904995709e-42	-3.312559331135809e-40	1.7748873586692198	6.294488031926306e-40	-3.4279835809703676e-40	1.7764825836807785	6.301825714254385e-40	800.0000000000307	1.7748873585105067	3.5075164590725334e-40	88.88888891351142	2.606814976514476e-49	1.3876823155670129e-10	6.285745257627725e-08	-1.2910218335291477e-48	7.922773599916187e-10	6.2862445448726385e-09
5.775	88.84608986568306	5.440304707882355e-40	2.758058314977716	513.3333333314414	7.293136231214257e-49	-800.00000000003	5.292293334337516e-42	0.011058107530245874	4.499236992636248e-43	0.9998796205021959	5.550419895972034e-42	0.01551594582275581	-2.9744094402673244e-42	-3.310919749611563e-40	1.7780677698862388	6.309700197927518e-40	-3.4266946445168314e-40	1.7796504981352033	6.3169870178545235e-40	800.00000000003	1.7780677697270255	3.5066981135659544e-40	88.8888889137106	2.5635293296153863e-49	1.4136877128822425e-10	1.5687836215267605e-08	-4.1954197275731676e-49	2.349087315599293e-10	1.5689594871417968e-09
5.78	88.8459378376764	5.439036537669903e-40	2.7629512909680596	513.7777777760144	7.306295590004778e-49	-800.0000000000293	5.292269307100675e-42	0.01097092183656562	4.498981164701111e-43	0.9998791928717827	5.563748360585328e-42	0.015543478773962149	-2.973337246798408e-42	-3.3092821503919973e-40	1.7812231942126024	6.3249123238712306e-40	-3.4254057813526e-40	1.7827934357282191	6.332148252621699e-40	800.0000000000293	1.7812231940533878	3.505880679555601e-40	88.88888891371396	2.5561289389713893e-49	1.416933209671133e-10	1.0229446919158884e-09	-1.6921908234542504e-49	8.695556976587188e-11	1.0266338752604062e-10
5.785	88.84578674630542	5.437769770376843e-40	2.7678055440216616	514.2222222205904	7.318869684839607e-49	-800.0000000000286	5.292245471324297e-42	0.010883807811381752	4.4987273620990195e-43	0.9998787678757921	5.577076112386327e-42	0.015570793864760363	-2.9722663260639885e-42	-3.3076465439730387e-40	1.7843536518990153	6.340124409045388e-40	-3.4241169908974586e-40	1.7859114169913377	6.347309419104405e-40	800.0000000000286	1.7843536517398324	3.5050641498345936e-40	88.88888891376506	2.538158581153951e-49	1.4279473321010518e-10	1.6762887374472564e-08	-4.9929646230302225e-49	3.209606619073007e-10	1.6765959825662942e-09
5.79	88.84563659692401	5.4365043948534625e-40	2.772621106468069	514.6666666651695	7.330868562826481e-49	-800.0000000000279	5.292221826818313e-42	0.010796766891906878	4.4984755831217775e-43	0.9998783455292872	5.5904031526872417e-42	0.015597891276295997	-2.971196679496277e-42	-3.3060129407680557e-40	1.78745916367631	6.355336452743576e-40	-3.422828272571681e-40	1.7890044628678021	6.362470517850591e-40	800.0000000000279	1.787459163517152	3.5042485172156506e-40	88.88888891388574	2.5053804382302554e-49	1.4495859274579602e-10	3.132711867692494e-08	-8.086646907310543e-49	5.425910853662934e-10	3.1331817210051166e-09
5.795	88.84548739479895	5.435240399960805e-40	2.777398011281246	515.1111111097515	7.34229615801597e-49	-800.0000000000271	5.2921983733898244e-42	0.010709800509064754	4.498225826027707e-43	0.9998779258470861	5.603729482809442e-42	0.015624771193347162	-2.97012830850107e-42	-3.3043813511270275e-40	1.7905397506917615	6.3705484542625165e-40	-3.4215396257960403e-40	1.7920725947107847	6.377631549407654e-40	800.0000000000271	1.7905397505326184	3.5034337745187925e-40	88.88888891407913	2.457119201068148e-49	1.4823330580324674e-10	4.609030194539013e-08	-1.123066510281119e-48	7.683488597419851e-10	4.6096705884341676e-09
5.8	88.8453391451189	5.433977774569746e-40	2.7821362920689	515.5555555543363	7.353158262452746e-49	-800.0000000000261	5.2921751108431085e-42	0.010622910087706723	4.497978089042192e-43	0.9998775088437871	5.6170551040834926e-42	0.015651433804262968	-2.969061214459096e-42	-3.3027517853379497e-40	1.7935954345020788	6.385760412901882e-40	-3.420251049991818e-40	1.7951158342816476	6.39279251432243e-40	800.0000000000261	1.7935954343429377	3.502619914570402e-40	88.88888891434691	2.3930127127236284e-49	1.5264643659026595e-10	6.101643634792297e-08	-1.4412879082367866e-48	9.967970972131483e-10	6.1024577909668065e-09
5.805	88.84519185299429	5.432716507561191e-40	2.7868359830698624	515.999999998924	7.363462607807274e-49	-800.0000000000254	5.292152038979637e-42	0.010536097046600875	4.497732370357808e-43	0.9998770945337683	5.6303800178490796e-42	0.01567787930094888	-2.967995398725945e-42	-3.301124253626572e-40	1.796626237071727	6.400972327964358e-40	-3.418962544580814e-40	1.7981342037482002	6.407953413141185e-40	800.0000000000254	1.7966262369125705	3.501806930203364e-40	88.88888891468896	2.3130566832696523e-49	1.5819655238134237e-10	7.57485925835933e-08	-1.75568888053622e-48	1.2225650850348425e-09	7.575845790261543e-09
5.81	88.84504552345727	5.43145658782627e-40	2.791497119151469	516.4444444435144	7.373218947007503e-49	-800.0000000000244	5.2921291575980856e-42	0.010449362798421201	4.497488668134463e-43	0.9998766829311879	5.643704225454946e-42	0.01570410787885205	-2.9669308626320037e-42	-3.2994987661561462e-40	1.7996321807712492	6.4161841987556804e-40	-3.4176741089853537e-40	1.8011277256829532	6.423114246409611e-40	800.0000000000244	1.799632180612059	3.500994814257192e-40	88.88888891510337	2.2176530407844198e-49	1.6485673953776803e-10	8.987299793261021e-08	-2.0577359698184873e-48	1.4391943363967408e-09	8.988452056796473e-09
5.815	88.8449001614617	5.430198004266537e-40	2.796119735806937	516.8888888881074	7.382439135870564e-49	-800.0000000000234	5.2921064664943494e-42	0.010362708749736731	4.497246980499536e-43	0.9998762740499836	5.6570277282588214e-42	0.015730119736946668	-2.965867607482383e-42	-3.2978753330271667e-40	1.8026132883755885	6.4313960245847075e-40	-3.416385742628301e-40	1.8040964230613694	6.438275014672812e-40	800.0000000000234	1.8026132882163441	3.5001835595781583e-40	88.88888891558591	2.1076551538762817e-49	1.7256182428116796e-10	1.0293703667229453e-07	-2.3376364399437215e-48	1.6399741259730414e-09	1.0295009972800983e-08
5.82	88.84475577188303	5.428940745794165e-40	2.800703869152747	517.3333333327031	7.39113721473445e-49	-800.0000000000224	5.292083965461557e-42	0.010276136301000762	4.497007305548006e-43	0.9998758679038728	5.670350527627344e-42	0.01575591507771929	-2.964805634556852e-42	-3.2962539642771157e-40	1.8055695830624092	6.446607804763436e-40	-3.4150974449330638e-40	1.8070403192601123	6.4534357184753035e-40	800.0000000000224	1.8055695829030898	3.4993731590194305e-40	88.88888891613011	1.98444205946784e-49	1.8121695160506036e-10	1.1443859193604249e-07	-2.5845708054072577e-48	1.8172711355114363e-09	1.1445302005051686e-08
5.825	88.8446123595183	5.427684801332144e-40	2.8052495559260215	517.777777777301	7.399329490089725e-49	-800.0000000000214	5.292061654290083e-42	0.010189646846539913	4.4967696413425966e-43	0.9998754645063523	5.683672624936003e-42	0.015781494107154216	-2.963744945109768e-42	-3.294634669880213e-40	1.808501088410421	6.461819538607083e-40	-3.4138092153236063e-40	1.8099594380552901	6.468596358360997e-40	800.0000000000214	1.8085010882510055	3.4985636054412e-40	88.88888891672671	1.8499506967033416e-49	1.90679801361292e-10	1.237940712902165e-07	-2.786563867248225e-48	1.961751244274826e-09	1.2380961414426435e-08
5.83	88.844469929086	5.42643015981448e-40	2.8097568334819036	518.2222222219012	7.407034616211206e-49	-800.0000000000203	5.292039532767559e-42	0.010103241774543347	4.4965339859139055e-43	0.9998750638706979	5.696994021569063e-42	0.015806857034718798	-2.962685540370009e-42	-3.293017459747162e-40	1.811407828397698	6.477031225434124e-40	-3.412521053224456e-40	1.8128538036206983	6.483756934873196e-40	800.0000000000203	1.811407828238169	3.4977548917108185e-40	88.88888891736343	1.7067598666453573e-49	2.0076428804806696e-10	1.303895658111199e-07	-2.930289236324717e-48	2.0643420461393477e-09	1.3040590623317576e-08
5.835	88.84432848522616	5.425176810186387e-40	2.8142257397909396	518.6666666665036	7.414273676789655e-49	-800.0000000000192	5.2920176006788914e-42	0.010016922467051912	4.496300337260548e-43	0.9998746660099647	5.710314718919497e-42	0.015832004073348806	-2.961627421540903e-42	-3.2914023437249005e-40	1.8142898274000037	6.492242864566338e-40	-3.4112329580607145e-40	1.8157234405260576	6.498917448554589e-40	800.0000000000192	1.8142898272403463	3.4969470107029227e-40	88.88888891802486	1.5581359316454681e-49	2.112354411687232e-10	1.3354579664336604e-07	-3.001411274022547e-48	2.1144169583631427e-09	1.3356253426835346e-08
5.84	88.84418803250011	5.42392474140449e-40	2.8186563134364535	519.111111111108	7.421070266563481e-49	-800.0000000000181	5.291995857806273e-42	0.009930690299947297	4.496068693349285e-43	0.9998742709369863	5.7236347183889115e-42	0.015856935439433763	-2.960570589800164e-42	-3.289789331596351e-40	1.8171471101891088	6.507454455328868e-40	-3.409944929258065e-40	1.8185683737352503	6.514077899947241e-40	800.0000000000181	1.8171471100293137	3.4961399552995796e-40	88.88888891869192	1.4080974807998019e-49	2.2180154729614053e-10	1.325294836836506e-07	-2.984016429606613e-48	2.100481015412418e-09	1.3254612806849968e-08
5.845	88.8440485753906	5.422673942437016e-40	2.8230485936119316	519.555555555714	7.42745057295042e-49	-800.0000000000169	5.291974303929196e-42	0.009844546642941192	4.495839052115169e-43	0.9998738786643757	5.736954021387482e-42	0.01588165135280229	-2.959515046299817e-42	-3.2881784330801713e-40	1.8199797019311157	6.522665997050254e-40	-3.4086569662427835e-40	1.8213886286045515	6.529238289592583e-40	800.0000000000169	1.8199797017711818	3.495333718390403e-40	88.88888891934187	1.261498374352547e-49	2.3211285784408338e-10	1.2654576645823662e-07	-2.8610055571461056e-48	2.0103274897520685e-09	1.2656173365246946e-08
5.85	88.84391011830161	5.421424402263996e-40	2.8274026201183986	520.0000000003217	7.433443457679238e-49	-800.0000000000157	5.291952938824466e-42	0.009758492859564443	4.495611411461671e-43	0.9998734892045239	5.750272629333883e-42	0.015906152036707453	-2.9584607921661356e-42	-3.286569657830516e-40	1.8227876281847795	6.5378774890624965e-40	-3.4073690684417454e-40	1.8241842308808596	6.544398618031408e-40	800.0000000000157	1.8227876280247153	3.494528292872703e-40	88.88888891994765	1.1240692660660784e-49	2.417547605261949e-10	1.1473086184801847e-07	-2.6139042078582534e-48	1.8302415811955102e-09	1.1474545936390963e-08
5.855	88.84377266555838	5.420176109877461e-40	2.8317184333617993	520.4444444449308	7.439080538421418e-49	-800.0000000000146	5.2919317622662134e-42	0.009672530307156188	4.495385769260824e-43	0.9998731025696006	5.763590543655219e-42	0.01593043771781211	-2.957407828499567e-42	-3.284963015436779e-40	1.8255709148998291	6.553088930701102e-40	-3.406081235282436e-40	1.826955206699922	6.559558885803863e-40	800.0000000000146	1.8255709147396553	3.493723671651605e-40	88.8888889204779	1.0025135480634594e-49	2.502414976240258e-10	9.615632734493635e-08	-2.222704809291133e-48	1.5461537818788568e-09	9.616875729665937e-09
5.86	88.84363622140727	5.4189290542816366e-40	2.835996074350375	520.8888888895409	7.44439627042285e-49	-800.0000000000133	5.291910774025912e-42	0.009586660336853082	4.495162123353355e-43	0.9998727187715537	5.776907765786947e-42	0.015954508626174233	-2.956356156374671e-42	-3.2833585154233676e-40	1.828329588415287	6.568300321305124e-40	-3.40479346619296e-40	1.829701582584558	6.574719093449439e-40	800.0000000000133	1.8283295882550403	3.4929198476401966e-40	88.88888892089626	9.045613952021583e-50	2.57016170663942e-10	6.980466575138188e-08	-1.66570015792522e-48	1.1419342233321031e-09	6.981400557504608e-09
5.865	88.8435007900158	5.417683224493142e-40	2.8402355846920466	521.3333333341519	7.449428028135533e-49	-800.000000000012	5.291889973872387e-42	0.009500884293578364	4.494940471548825e-43	0.9998723378221092	5.790224297172817e-42	0.015978364995232284	-2.955305776840045e-42	-3.2817561672494456e-40	1.831063675457795	6.583511660217219e-40	-3.4035057606020487e-40	1.832423385442879	6.589879241506964e-40	800.000000000012	1.8310636752975291	3.4921168137596476e-40	88.88888892116138	8.390582930159559e-50	2.6143491203332255e-10	3.16231781501583e-08	-8.546190989868978e-49	5.531959254217257e-10	3.1628016410273858e-09
5.87	88.84336637547297	5.416438609541124e-40	2.8444370065914817	521.7777777787634	7.454215556736607e-49	-800.0000000000108	5.29186936157183e-42	0.009415203516042716	4.494720811625779e-43	0.9998719597327721	5.80354013926481e-42	0.016002007061788694	-2.9542566909183316e-42	-3.280155980308786e-40	1.8337732031397196	6.598722946783686e-40	-3.40221811793907e-40	1.8351206425665092	6.605039330514598e-40	800.0000000000108	1.8337732029795126	3.4913145629392967e-40	88.88888892122722	8.158473204412499e-50	2.627860224006378e-10	2.301447921126809e-09	-2.392644856334883e-49	1.0769947324639857e-10	2.303966516726418e-10
5.875	88.84323298188427	5.415195198453778e-40	2.8486003827787862	522.2222222233761	7.458662031714952e-49	-800.0000000000094	5.291848936887706e-42	0.00932961933930286	4.49450314133534e-43	0.9998715845150937	5.816855293524865e-42	0.016025435065587998	-2.9532088996225745e-42	-3.27855796394844e-40	1.8364581989112896	6.613934180352364e-40	-3.400930537634036e-40	1.8377933816295378	6.620199361009822e-40	800.0000000000094	1.8364581987512187	3.490513088104321e-40	88.88888892122817	8.055724093683659e-50	2.632085559922865e-10	4.336442316343599e-09	-3.0805277919958642e-49	1.6071319309104646e-10	4.3394193958879984e-10
5.88	88.84310061327619	5.413952980272273e-40	2.8527257565758317	522.6666666679904	7.46267369051087e-49	-800.0000000000081	5.291828699580871e-42	0.009244133092171513	4.494287458397872e-43	0.9998712121804031	5.830169761423001e-42	0.01604864924971093	-2.952162403939663e-42	-3.2769621274495487e-40	1.8391186906052805	6.629145360274779e-40	-3.399643019117612e-40	1.8404416306867313	6.635359333529432e-40	800.0000000000081	1.8391186904454144	3.4897123821883827e-40	88.88888892129255	7.802330174015409e-50	2.647433539408695e-10	1.9468397264668256e-08	-6.636091401056043e-49	4.2251051318051785e-10	1.9472981466346917e-09
5.885	88.84296927353553	5.4127119440596785e-40	2.8568131719374725	523.1111111126065	7.466248639343324e-49	-800.0000000000067	5.291808649409661e-42	0.009158746095566675	4.4940737605009174e-43	0.9998708427396364	5.843483544436105e-42	0.01607164986081968	-2.9511172048197826e-42	-3.2753684800150307e-40	1.8417547064648179	6.644356485907583e-40	-3.398355561821126e-40	1.843065418171271	6.650519248609533e-40	800.0000000000067	1.841754706305226	3.4889124381417153e-40	88.88888892142381	7.389755362180481e-50	2.6745077276971234e-10	3.3117212675883104e-08	-9.886486652040919e-49	6.620135682057398e-10	3.312382884547258e-09
5.89	88.84283896647284	5.411472078892022e-40	2.860862673403026	523.5555555572241	7.469384033992319e-49	-800.0000000000052	5.2917887861298273e-42	0.009073459664217817	4.493862045301637e-43	0.9998704762035155	5.856796644049053e-42	0.016094437148871085	-2.950073303187321e-42	-3.273777030781974e-40	1.844366275110827	6.659567556611182e-40	-3.3970681651765767e-40	1.8456647728929805	6.665679106785529e-40	800.0000000000052	1.8443662749515797	3.4881132489229265e-40	88.88888892162423	6.81237819302097e-50	2.7137312582921173e-10	4.708032482388247e-08	-1.3216803172673268e-48	9.074707141247415e-10	4.708906973618483e-09
5.895	88.84270969582248	5.41023337385847e-40	2.8648743060935784	524.0000000018434	7.472076018821532e-49	-800.0000000000039	5.2917691094945516e-42	0.008988275106657674	4.493652310426952e-43	0.9998701125825478	5.870109061754659e-42	0.016117011367101582	-2.949030699940818e-42	-3.2721877888214256e-40	1.8469534255403082	6.6747785717497674e-40	-3.395780828616643e-40	1.8482397240365507	6.680838908592116e-40	800.0000000000039	1.8469534253814746	3.487314807499125e-40	88.8888889218946	6.068000236953104e-50	2.765259170066773e-10	6.103846317273153e-08	-1.6553359493760427e-48	1.153297949019584e-09	6.104935775786766e-09
5.9	88.8425814652426	5.408995818061514e-40	2.8688481157092998	524.4444444464644	7.474319665800952e-49	-800.0000000000023	5.2917496192544616e-42	0.00890319372521403	4.493444553473687e-43	0.9998697518870263	5.883420799053592e-42	0.01613937277201213	-2.947989395952911e-42	-3.2706007631381757e-40	1.8495161871246126	6.689989530691378e-40	-3.3944935515746927e-40	1.8507903011597615	6.69599865456328e-40	800.0000000000023	1.84951618696626	3.486517106846041e-40	88.88888892223402	5.158371075800889e-50	2.82896264989101e-10	7.464275123917207e-08	-1.981201626447485e-48	1.393399263503755e-09	7.465575579994122e-09
5.905	88.8424542783153	5.4077594006171505e-40	2.872784148526746	524.888888891087	7.476108913529505e-49	-800.0000000000008	5.2917303151576405e-42	0.008818216816001558	4.493238772008703e-43	0.9998693941270304	5.896731857454313e-42	0.016161521623353114	-2.946949392070285e-42	-3.269015962670551e-40	1.8520545896077116	6.70520043280792e-40	-3.3932063334847893e-40	1.8533165341917026	6.711158345232279e-40	800.0000000000008	1.852054589449902	3.485720139948143e-40	88.88888892263977	4.0897141206767545e-50	2.904380091076469e-10	8.748983759687099e-08	-2.2897567249090534e-48	1.6204463643404822e-09	8.75048428896742e-09
5.91	88.84232813854658	5.406524110655067e-40	2.876682451396173	525.3333333357114	7.477436506257694e-49	-799.9999999999992	5.291711196949644e-42	0.008733345668913534	4.493034963569046e-43	0.9998690393124248	5.910042238473017e-42	0.016183458184109302	-2.945910689113619e-42	-3.2674333962902105e-40	1.8545686631044722	6.720411277475234e-40	-3.391919173781703e-40	1.8558184534309907	6.7263179811316465e-40	799.9999999999992	1.8545686629472629	3.4849238997987713e-40	88.8888889231069	2.8732990214958854e-50	2.9906590682673795e-10	9.913610673113542e-08	-2.5703984663595265e-48	1.8267312753005246e-09	9.915293543289193e-09
5.915	88.84220304936638	5.405289937318822e-40	2.8805430717388445	525.7777777803371	7.478293932910238e-49	-799.9999999999976	5.2916922643735116e-42	0.008648581567613688	4.492833125662078e-43	0.9998686874528607	5.923351943633551e-42	0.016205182720484757	-2.944873287877537e-42	-3.265853072801929e-40	1.8570584380989306	6.7356220640731065e-40	-3.390632071900918e-40	1.8582960895439855	6.741477562793179e-40	799.9999999999976	1.8570584379423714	3.484128379400247e-40	88.88888892362829	1.5259641519683249e-50	3.086562698473374e-10	1.0908749459303354e-07	-2.811362045525154e-48	2.0038094401492717e-09	1.0910589685648323e-08
5.92	88.84207901412864	5.4040568697660295e-40	2.88436605754434	526.2222222249648	7.478671366108694e-49	-799.999999999996	5.2916735171697796e-42	0.00856392578952797	4.492633255765625e-43	0.9998683385577757	5.936660974467357e-42	0.016226695501887756	-2.943837189130554e-42	-3.2642750009434024e-40	1.8595239454425656	6.750832791985343e-40	-3.3893450272786407e-40	1.8607494735630017	6.756637090747929e-40	799.999999999996	1.8595239452866956	3.483333571764007e-40	88.88888892419405	7.076212429165198e-52	3.190384743885857e-10	1.1681251521621682e-07	-2.999581621866507e-48	2.1416677608866397e-09	1.168321464834782e-08
5.925	88.84195603611143	5.402824897168542e-40	2.888151457367865	526.6666666695941	7.478557601194101e-49	-799.9999999999944	5.291654955076496e-42	0.008479379605836362	4.492435351328113e-43	0.9998679926363934	5.949969332513397e-42	0.016247996800915734	-2.942802393615026e-42	-3.2626991893850386e-40	1.8619652163525706	6.766043460599778e-40	-3.3880580393518084e-40	1.8631786368845205	6.771796565526199e-40	799.9999999999944	1.8619652161974176	3.482539469910718e-40	88.88888892479169	-1.4624087838050515e-50	3.2998998319346474e-10	1.2170886520833936e-07	-3.1207588046052877e-48	2.229931295604378e-09	1.217292917250603e-08
5.93	88.84183411851679	5.401594008712633e-40	2.891899320327559	527.1111111142251	7.477939995249612e-49	-799.9999999999927	5.2916365778292325e-42	0.00839494428146465	4.492239409768707e-43	0.9998676496977238	5.96327701931809e-42	0.01626908689334019	-2.941768902047095e-42	-3.2611256467297575e-40	1.8643822824101264	6.781254069308348e-40	-3.3867711075580978e-40	1.8655836112673976	6.786955987657534e-40	799.9999999999927	1.8643822822557037	3.4817460668704033e-40	88.88888892540533	-3.036194733490866e-50	3.4123554794254976e-10	1.2312331894765903e-07	-3.1593581651923077e-48	2.257038150749717e-09	1.2314400468516898e-08
5.935	88.84171326447097	5.400364193599182e-40	2.8956096961018063	527.5555555588579	7.476804406123129e-49	-799.9999999999909	5.2916183851610997e-42	0.008310621075076234	4.492045428477453e-43	0.9998673097505638	5.976584036435241e-42	0.01628996605809163	-2.9407367151166426e-42	-3.2595543815127873e-40	1.8667751755586772	6.796464617507097e-40	-3.385484231335934e-40	1.8679644288310695	6.802115357670713e-40	799.9999999999909	1.8667751754049804	3.480953355682567e-40	88.88888892601595	-4.605137882658827e-50	3.5243698054277804e-10	1.2036996584658883e-07	-3.0984246353355655e-48	2.2102162574957853e-09	1.203902559753648e-08
5.94	88.84159347702436	5.399135441043854e-40	2.8992826349265433	528.0000000034927	7.475135131449932e-49	-799.9999999999892	5.2916003768027564e-42	0.008226411239063891	4.491853404815417e-43	0.9998669728034967	5.989890385425978e-42	0.016310634577244493	-2.9397058334872325e-42	-3.257985402201469e-40	1.8691439281021993	6.8116751045962474e-40	-3.384197410124497e-40	1.8703211220537563	6.817274676093746e-40	799.9999999999892	1.8691439279492053	3.4801613293963136e-40	88.8888889266008	-6.11492167538343e-50	3.6319216413809987e-10	1.1268591985450103e-07	-2.919537553489798e-48	2.076268396220524e-09	1.1270504613329509e-08
5.945	88.84147475915157	5.397907740277285e-40	2.902918187592567	528.4444444481293	7.472914847675318e-49	-799.9999999999874	5.2915825524824295e-42	0.008142316019541641	4.491663336114827e-43	0.9998666388648927	6.003196067858673e-42	0.01633109273600205	-2.938676257796064e-42	-3.2564187171950596e-40	1.8714885727034767	6.826885529980214e-40	-3.382910643363732e-40	1.872653723770664	6.8324339434538626e-40	799.9999999999874	1.8714885725511392	3.479369981070475e-40	88.88888892713324	-7.501676506930909e-50	3.7302993730810954e-10	9.927489941218722e-08	-2.6029027032742188e-48	1.8407682099750166e-09	9.929196382841236e-09
5.95	88.84135711375147	5.396681080545264e-40	2.906516405442847	528.8888888927679	7.470124549077237e-49	-799.9999999999856	5.291564911925919e-42	0.008058336656336436	4.49147521967921e-43	0.999866307942909	6.016501085308894e-42	0.01635134082268137	-2.937647988653915e-42	-3.254854334824526e-40	1.8738091423823737	6.842095893067662e-40	-3.3816239304943557e-40	1.8749622671721824	6.8475931602775075e-40	799.9999999999856	1.8738091422306211	3.4785793037737308e-40	88.8888889275825	-8.691278406727545e-50	3.814030982919618e-10	7.924398914837559e-08	-2.1272504916566058e-48	1.4872826026355757e-09	7.925794487423938e-09
5.955	88.8412405436472	5.395455451108917e-40	2.9100773403698326	529.3333333374085	7.466743486788923e-49	-799.9999999999836	5.291547454856621e-42	0.007974474382980025	4.491289052783533e-43	0.9998659800454895	6.029805439359316e-42	0.016371379128698224	-2.9366210266450953e-42	-3.2532922633523675e-40	1.876105670514108	6.857306193271544e-40	-3.3803372709578668e-40	1.8772467858020823	6.862752327090332e-40	799.9999999999836	1.8761056703628387	3.477789290584734e-40	88.88888892791309	-9.59857551376538e-50	3.8767836117516483e-10	5.1162155993245384e-08	-1.4572672055944048e-48	9.901466760179108e-10	5.1171736303522125e-09
5.96	88.84112505158627	5.394230841244888e-40	2.9136010448127614	529.7777777820513	7.462749107821524e-49	-799.9999999999817	5.29153018099553e-42	0.007890730426700724	4.491104832674343e-43	0.9998656551803657	6.04310913159967e-42	0.016391207948552013	-2.9355953723273905e-42	-3.2517325109724046e-40	1.8783781908275206	6.872516430009125e-40	-3.3790506641965514e-40	1.8795073135557094	6.87791144441719e-40	799.9999999999817	1.8783781906766013	3.4769999345922367e-40	88.88888892808495	-1.0126610780118697e-49	3.911425989164015e-10	1.414903749718992e-08	-5.7113766842889576e-49	3.334984999774632e-10	1.415296729828673e-09
5.965	88.84101064025609	5.393007240242973e-40	2.9170875717457694	530.2222222266963	7.458131242284934e-49	-799.9999999999798	5.291513090061236e-42	0.007807106008870111	4.4909225565703734e-43	0.9998653333550998	6.056412163627059e-42	0.016410827579755104	-2.934571026234977e-42	-3.250175085812955e-40	1.8806267373970629	6.887726602701715e-40	-3.3777641096534936e-40	1.881743884678307	6.893070512782128e-40	799.9999999999798	1.8806267372463574	3.476211228892967e-40	88.88888892808319	-1.0240732260493099e-49	3.9153714174254897e-10	-2.889066763600372e-09	-1.8029449621611596e-49	4.211984562377966e-11	2.8893737809317265e-10
5.97	88.84089731237395	5.391784637391524e-40	2.9205369746219496	530.6666666713431	7.45297451077562e-49	-799.9999999999778	5.291496181769772e-42	0.007723602347627747	4.4907422216653704e-43	0.9998650145773385	6.069714537048207e-42	0.016430238322496033	-2.9335479888955207e-42	-3.2486199959560542e-40	1.88285134460466	6.902936710772866e-40	-3.3764776067725803e-40	1.8839565337640891	6.908229532708379e-40	799.9999999999778	1.8828513444542543	3.4754231665787905e-40	88.88888892809439	-1.04017063699757e-49	3.9226343283238597e-10	7.105427357600522e-09	-4.575541294435776e-49	2.43921290280369e-10	7.109612895931113e-10
5.975	88.8407850705116	5.3905630220064704e-40	2.9239493074745897	531.1111111159915	7.447297308070436e-49	-799.9999999999758	5.291479455834937e-42	0.007640220652734226	4.490563825122985e-43	0.9998646988543188	6.083016253474883e-42	0.016449440480252354	-2.9325262607966485e-42	-3.2470672493994004e-40	1.8850520472090404	6.918146753651933e-40	-3.375191154998512e-40	1.8861452957538412	6.923388504718356e-40	799.9999999999758	1.8850520470590726	3.4746357407621487e-40	88.8888889281619	-1.071757325532465e-49	3.941178417656136e-10	1.9327709802987766e-08	-7.922986308615163e-49	4.875249280948097e-10	1.933385752466443e-09
[truncated: 3,793 more rows]
