# Supplementary material for: An Efficient Contact Model for the Simulation of Cargo Airdrop Extraction Phase
Source: Hindawi journal article supplement (doi:10.1155/2018/9895451), 2018-10-17
Supplement: f1 [file 9895451.f1.zip › case3_aircraft_coupling/m4000/df_cargo.csv]

t	u	v	w	x_g	y_g	z_g	p	q	r	e0	e1	e2	e3	yaw(deg)	pitch(deg)	roll(deg)	yaw_fix(deg)	pitch_fix(deg)	roll_fix(deg)	h_g	vx_g	vy_g	vz_g	ax_g	ay_g	az_g	g-force
0.0	88.88888859781834	0.0	0.00021283858412721898	7.899994202763537	0.0	-800.6437003915348	0.0	4.3191446912223866e-10	0.0	0.9999999999992834	0.0	1.1972170330795237e-06	0.0	0.0	0.00013719096631329471	0.0	0.0	0.00013719109004767566	0.0	800.6437003915348	88.88888859807315	0.0	1.1651286615137575e-12	0.0	0.0	0.0	0.0
0.005	88.88888859781834	0.0	0.00021283858412721898	8.344438647207982	0.0	-800.6437003915348	0.0	4.3191446912223866e-10	0.0	0.9999999999992834	0.0	1.1972170330795237e-06	0.0	0.0	0.00013719096631329471	0.0	0.0	0.00013719121378205664	0.0	800.6437003915348	88.88888859807315	0.0	1.1651286615137575e-12	0.0	0.0	1.3463226115771936e-26	1.3463226115771937e-27
0.01	88.88888859781834	0.0	0.00021283858412721898	8.788883091652426	0.0	-800.6437003915348	0.0	4.3191446912223866e-10	0.0	0.9999999999992834	0.0	1.1972170330795237e-06	0.0	0.0	0.00013719096631329471	0.0	0.0	0.0001371913375164376	0.0	800.6437003915348	88.88888859807315	0.0	1.1651286615137575e-12	-9.473903143468003e-13	0.0	-6.731613057885968e-27	9.473903143468004e-14
0.015	88.88888859781834	0.0	0.00021283858412721898	9.233327536096871	0.0	-800.6437003915348	0.0	4.3191446912223866e-10	0.0	0.9999999999992834	0.0	1.1972170330795237e-06	0.0	0.0	0.00013719096631329471	0.0	0.0	0.00013719146125081854	0.0	800.6437003915348	88.88888859807315	0.0	1.1651286615137575e-12	-9.473903143468003e-13	0.0	-6.731613057885968e-27	9.473903143468004e-14
0.02	88.88888859781834	0.0	0.00021283858412721898	9.677771980541316	0.0	-800.6437003915348	0.0	4.3191446912223866e-10	0.0	0.9999999999992834	0.0	1.1972170330795237e-06	0.0	0.0	0.00013719096631329471	0.0	0.0	0.0001371915849851995	0.0	800.6437003915348	88.88888859807315	0.0	1.1651286615137575e-12	-9.473903143468003e-13	0.0	-6.731613057885968e-27	9.473903143468004e-14
0.025	88.88888859781834	0.0	0.00021283858412721898	10.122216424985758	0.0	-800.6437003915348	0.0	4.3191446912223866e-10	0.0	0.9999999999992834	0.0	1.1972170330795237e-06	0.0	0.0	0.00013719096631329471	0.0	0.0	0.00013719170871958047	0.0	800.6437003915348	88.88888859807315	0.0	1.1651286615137575e-12	-9.473903143468003e-13	0.0	-6.731613057885968e-27	9.473903143468004e-14
0.03	88.88888859781834	0.0	0.00021283858412721898	10.566660869430203	0.0	-800.6437003915348	0.0	4.3191446912223866e-10	0.0	0.9999999999992834	0.0	1.1972170330795237e-06	0.0	0.0	0.00013719096631329471	0.0	0.0	0.00013719183245396142	0.0	800.6437003915348	88.88888859807315	0.0	1.1651286615137575e-12	-9.473903143468003e-13	0.0	-6.731613057885968e-27	9.473903143468004e-14
0.035	88.88888859781834	0.0	0.00021283858412721898	11.011105313874648	0.0	-800.6437003915348	0.0	4.3191446912223866e-10	0.0	0.9999999999992834	0.0	1.1972170330795237e-06	0.0	0.0	0.00013719096631329471	0.0	0.0	0.00013719195618834237	0.0	800.6437003915348	88.88888859807315	0.0	1.1651286615137575e-12	-9.473903143468003e-13	0.0	-6.731613057885968e-27	9.473903143468004e-14
0.04	88.88888859781834	0.0	0.00021283858412721898	11.455549758319092	0.0	-800.6437003915348	0.0	4.3191446912223866e-10	0.0	0.9999999999992834	0.0	1.1972170330795237e-06	0.0	0.0	0.00013719096631329471	0.0	0.0	0.00013719207992272332	0.0	800.6437003915348	88.88888859807315	0.0	1.1651286615137575e-12	-9.473903143468003e-13	0.0	-6.731613057885968e-27	9.473903143468004e-14
0.045	88.88888859781834	0.0	0.00021283858412721898	11.899994202763537	0.0	-800.6437003915348	0.0	4.3191446912223866e-10	0.0	0.9999999999992834	0.0	1.1972170330795237e-06	0.0	0.0	0.00013719096631329471	0.0	0.0	0.0001371922036571043	0.0	800.6437003915348	88.88888859807315	0.0	1.1651286615137575e-12	-9.473903143468003e-13	0.0	-6.731613057885968e-27	9.473903143468004e-14
0.05	88.88888859781834	0.0	0.00021283858412721898	12.344438647207982	0.0	-800.6437003915348	0.0	4.3191446912223866e-10	0.0	0.9999999999992834	0.0	1.1972170330795237e-06	0.0	0.0	0.00013719096631329471	0.0	0.0	0.00013719232739148524	0.0	800.6437003915348	88.88888859807315	0.0	1.1651286615137575e-12	-9.473903143468003e-13	0.0	-6.731613057885968e-27	9.473903143468004e-14
0.055	88.88888859781834	0.0	0.00021283858412721898	12.788883091652426	0.0	-800.6437003915348	0.0	4.3191446912223866e-10	0.0	0.9999999999992834	0.0	1.1972170330795237e-06	0.0	0.0	0.00013719096631329471	0.0	0.0	0.0001371924511258662	0.0	800.6437003915348	88.88888859807315	0.0	1.1651286615137575e-12	-9.473903143468003e-13	0.0	-6.731613057885968e-27	9.473903143468004e-14
0.06	88.88888859781834	0.0	0.00021283858412721898	13.23332753609687	0.0	-800.6437003915348	0.0	4.3191446912223866e-10	0.0	0.9999999999992834	0.0	1.1972170330795237e-06	0.0	0.0	0.00013719096631329471	0.0	0.0	0.00013719257486024714	0.0	800.6437003915348	88.88888859807315	0.0	1.1651286615137575e-12	-9.473903143468003e-13	0.0	-6.731613057885968e-27	9.473903143468004e-14
0.065	88.88888859781834	0.0	0.00021283858412721898	13.677771980541316	0.0	-800.6437003915348	0.0	4.3191446912223866e-10	0.0	0.9999999999992834	0.0	1.1972170330795237e-06	0.0	0.0	0.00013719096631329471	0.0	0.0	0.00013719269859462812	0.0	800.6437003915348	88.88888859807315	0.0	1.1651286615137575e-12	-9.473903143468003e-13	0.0	-6.731613057885968e-27	9.473903143468004e-14
0.07	88.88888859781834	0.0	0.00021283858412721898	14.122216424985758	0.0	-800.6437003915348	0.0	4.3191446912223866e-10	0.0	0.9999999999992834	0.0	1.1972170330795237e-06	0.0	0.0	0.00013719096631329471	0.0	0.0	0.00013719282232900907	0.0	800.6437003915348	88.88888859807315	0.0	1.1651286615137575e-12	-9.473903143468003e-13	0.0	-6.731613057885968e-27	9.473903143468004e-14
0.075	88.88888859781834	0.0	0.00021283858412721898	14.566660869430203	0.0	-800.6437003915348	0.0	4.3191446912223866e-10	0.0	0.9999999999992834	0.0	1.1972170330795237e-06	0.0	0.0	0.00013719096631329471	0.0	0.0	0.00013719294606339002	0.0	800.6437003915348	88.88888859807315	0.0	1.1651286615137575e-12	-9.473903143468003e-13	0.0	-6.731613057885968e-27	9.473903143468004e-14
0.08	88.88888859781834	0.0	0.00021283858412721898	15.011105313874648	0.0	-800.6437003915348	0.0	4.3191446912223866e-10	0.0	0.9999999999992834	0.0	1.1972170330795237e-06	0.0	0.0	0.00013719096631329471	0.0	0.0	0.00013719306979777097	0.0	800.6437003915348	88.88888859807315	0.0	1.1651286615137575e-12	-9.473903143468003e-13	0.0	-6.731613057885968e-27	9.473903143468004e-14
0.085	88.88888859781834	0.0	0.00021283858412721898	15.455549758319094	0.0	-800.6437003915348	0.0	4.3191446912223866e-10	0.0	0.9999999999992834	0.0	1.1972170330795237e-06	0.0	0.0	0.00013719096631329471	0.0	0.0	0.00013719319353215195	0.0	800.6437003915348	88.88888859807315	0.0	1.1651286615137575e-12	-9.473903143468003e-13	0.0	-6.731613057885968e-27	9.473903143468004e-14
0.09	88.88888859781834	0.0	0.00021283858412721898	15.899994202763537	0.0	-800.6437003915348	0.0	4.3191446912223866e-10	0.0	0.9999999999992834	0.0	1.1972170330795237e-06	0.0	0.0	0.00013719096631329471	0.0	0.0	0.0001371933172665329	0.0	800.6437003915348	88.88888859807315	0.0	1.1651286615137575e-12	-9.473903143468003e-13	0.0	-6.731613057885968e-27	9.473903143468004e-14
0.095	88.88888859781834	0.0	0.00021283858412721898	16.34443864720798	0.0	-800.6437003915348	0.0	4.3191446912223866e-10	0.0	0.9999999999992834	0.0	1.1972170330795237e-06	0.0	0.0	0.00013719096631329471	0.0	0.0	0.00013719344100091385	0.0	800.6437003915348	88.88888859807315	0.0	1.1651286615137575e-12	-9.473903143468003e-13	0.0	-6.731613057885968e-27	9.473903143468004e-14
0.1	88.88888859781834	0.0	0.00021283858412721898	16.788883091652426	0.0	-800.6437003915348	0.0	4.3191446912223866e-10	0.0	0.9999999999992834	0.0	1.1972170330795237e-06	0.0	0.0	0.00013719096631329471	0.0	0.0	0.0001371935647352948	0.0	800.6437003915348	88.88888859807315	0.0	1.1651286615137575e-12	-9.473903143468003e-13	0.0	-6.731613057885968e-27	9.473903143468004e-14
0.105	88.88888859781834	0.0	0.00021283858412721898	17.23332753609687	0.0	-800.6437003915348	0.0	4.3191446912223866e-10	0.0	0.9999999999992834	0.0	1.1972170330795237e-06	0.0	0.0	0.00013719096631329471	0.0	0.0	0.00013719368846967577	0.0	800.6437003915348	88.88888859807315	0.0	1.1651286615137575e-12	-9.473903143468003e-13	0.0	-6.731613057885968e-27	9.473903143468004e-14
0.11	88.88888859781834	0.0	0.00021283858412721898	17.677771980541316	0.0	-800.6437003915348	0.0	4.3191446912223866e-10	0.0	0.9999999999992834	0.0	1.1972170330795237e-06	0.0	0.0	0.00013719096631329471	0.0	0.0	0.00013719381220405672	0.0	800.6437003915348	88.88888859807315	0.0	1.1651286615137575e-12	-9.473903143468003e-13	0.0	-6.731613057885968e-27	9.473903143468004e-14
0.115	88.88888859781834	0.0	0.00021283858412721898	18.12221642498576	0.0	-800.6437003915348	0.0	4.3191446912223866e-10	0.0	0.9999999999992834	0.0	1.1972170330795237e-06	0.0	0.0	0.00013719096631329471	0.0	0.0	0.00013719393593843767	0.0	800.6437003915348	88.88888859807315	0.0	1.1651286615137575e-12	-9.473903143468003e-13	0.0	-6.731613057885968e-27	9.473903143468004e-14
0.12	88.88888859781834	0.0	0.00021283858412721898	18.5666608694302	0.0	-800.6437003915348	0.0	4.3191446912223866e-10	0.0	0.9999999999992834	0.0	1.1972170330795237e-06	0.0	0.0	0.00013719096631329471	0.0	0.0	0.00013719405967281862	0.0	800.6437003915348	88.88888859807315	0.0	1.1651286615137575e-12	-9.473903143468003e-13	0.0	-6.731613057885968e-27	9.473903143468004e-14
0.125	88.88888859781834	0.0	0.00021283858412721898	19.011105313874648	0.0	-800.6437003915348	0.0	4.3191446912223866e-10	0.0	0.9999999999992834	0.0	1.1972170330795237e-06	0.0	0.0	0.00013719096631329471	0.0	0.0	0.0001371941834071996	0.0	800.6437003915348	88.88888859807315	0.0	1.1651286615137575e-12	-9.473903143468003e-13	0.0	-6.731613057885968e-27	9.473903143468004e-14
0.13	88.88888859781834	0.0	0.00021283858412721898	19.455549758319094	0.0	-800.6437003915348	0.0	4.3191446912223866e-10	0.0	0.9999999999992834	0.0	1.1972170330795237e-06	0.0	0.0	0.00013719096631329471	0.0	0.0	0.00013719430714158055	0.0	800.6437003915348	88.88888859807315	0.0	1.1651286615137575e-12	-9.473903143468003e-13	0.0	-6.731613057885968e-27	9.473903143468004e-14
0.135	88.88888859781834	0.0	0.00021283858412721898	19.899994202763537	0.0	-800.6437003915348	0.0	4.3191446912223866e-10	0.0	0.9999999999992834	0.0	1.1972170330795237e-06	0.0	0.0	0.00013719096631329471	0.0	0.0	0.0001371944308759615	0.0	800.6437003915348	88.88888859807315	0.0	1.1651286615137575e-12	-9.473903143468003e-13	0.0	-6.731613057885968e-27	9.473903143468004e-14
0.14	88.88888859781834	0.0	0.00021283858412721898	20.34443864720798	0.0	-800.6437003915348	0.0	4.3191446912223866e-10	0.0	0.9999999999992834	0.0	1.1972170330795237e-06	0.0	0.0	0.00013719096631329471	0.0	0.0	0.00013719455461034245	0.0	800.6437003915348	88.88888859807315	0.0	1.1651286615137575e-12	-9.473903143468003e-13	0.0	-6.731613057885968e-27	9.473903143468004e-14
0.145	88.88888859781834	0.0	0.00021283858412721898	20.788883091652423	0.0	-800.6437003915348	0.0	4.3191446912223866e-10	0.0	0.9999999999992834	0.0	1.1972170330795237e-06	0.0	0.0	0.00013719096631329471	0.0	0.0	0.00013719467834472343	0.0	800.6437003915348	88.88888859807315	0.0	1.1651286615137575e-12	-9.473903143468003e-13	0.0	-6.731613057885968e-27	9.473903143468004e-14
0.15	88.88888859781834	0.0	0.00021283858412721898	21.23332753609687	0.0	-800.6437003915348	0.0	4.3191446912223866e-10	0.0	0.9999999999992834	0.0	1.1972170330795237e-06	0.0	0.0	0.00013719096631329471	0.0	0.0	0.00013719480207910437	0.0	800.6437003915348	88.88888859807315	0.0	1.1651286615137575e-12	-9.473903143468003e-13	0.0	-6.731613057885968e-27	9.473903143468004e-14
0.155	88.88888859781834	0.0	0.00021283858412721898	21.677771980541316	0.0	-800.6437003915348	0.0	4.3191446912223866e-10	0.0	0.9999999999992834	0.0	1.1972170330795237e-06	0.0	0.0	0.00013719096631329471	0.0	0.0	0.00013719492581348532	0.0	800.6437003915348	88.88888859807315	0.0	1.1651286615137575e-12	-9.473903143468003e-13	0.0	-6.731613057885968e-27	9.473903143468004e-14
0.16	88.88888859781834	0.0	0.00021283858412721898	22.12221642498576	0.0	-800.6437003915348	0.0	4.3191446912223866e-10	0.0	0.9999999999992834	0.0	1.1972170330795237e-06	0.0	0.0	0.00013719096631329471	0.0	0.0	0.00013719504954786627	0.0	800.6437003915348	88.88888859807315	0.0	1.1651286615137575e-12	-9.473903143468003e-13	0.0	-6.731613057885968e-27	9.473903143468004e-14
0.165	88.88888859781834	0.0	0.00021283858412721898	22.5666608694302	0.0	-800.6437003915348	0.0	4.3191446912223866e-10	0.0	0.9999999999992834	0.0	1.1972170330795237e-06	0.0	0.0	0.00013719096631329471	0.0	0.0	0.00013719517328224725	0.0	800.6437003915348	88.88888859807315	0.0	1.1651286615137575e-12	-9.473903143468003e-13	0.0	-6.731613057885968e-27	9.473903143468004e-14
0.17	88.88888859781834	0.0	0.00021283858412721898	23.01110531387465	0.0	-800.6437003915348	0.0	4.3191446912223866e-10	0.0	0.9999999999992834	0.0	1.1972170330795237e-06	0.0	0.0	0.00013719096631329471	0.0	0.0	0.0001371952970166282	0.0	800.6437003915348	88.88888859807315	0.0	1.1651286615137575e-12	-9.473903143468003e-13	0.0	-6.731613057885968e-27	9.473903143468004e-14
0.175	88.88888859781834	0.0	0.00021283858412721898	23.45554975831909	0.0	-800.6437003915348	0.0	4.3191446912223866e-10	0.0	0.9999999999992834	0.0	1.1972170330795237e-06	0.0	0.0	0.00013719096631329471	0.0	0.0	0.00013719542075100915	0.0	800.6437003915348	88.88888859807315	0.0	1.1651286615137575e-12	-9.473903143468003e-13	0.0	-6.731613057885968e-27	9.473903143468004e-14
0.18	88.88888859781834	0.0	0.00021283858412721898	23.899994202763537	0.0	-800.6437003915348	0.0	4.3191446912223866e-10	0.0	0.9999999999992834	0.0	1.1972170330795237e-06	0.0	0.0	0.00013719096631329471	0.0	0.0	0.0001371955444853901	0.0	800.6437003915348	88.88888859807315	0.0	1.1651286615137575e-12	-9.473903143468003e-13	0.0	-6.731613057885968e-27	9.473903143468004e-14
0.185	88.88888859781834	0.0	0.00021283858412721898	24.34443864720798	0.0	-800.6437003915348	0.0	4.3191446912223866e-10	0.0	0.9999999999992834	0.0	1.1972170330795237e-06	0.0	0.0	0.00013719096631329471	0.0	0.0	0.00013719566821977108	0.0	800.6437003915348	88.88888859807315	0.0	1.1651286615137575e-12	-9.473903143468003e-13	0.0	-6.731613057885968e-27	9.473903143468004e-14
0.19	88.88888859781834	0.0	0.00021283858412721898	24.788883091652426	0.0	-800.6437003915348	0.0	4.3191446912223866e-10	0.0	0.9999999999992834	0.0	1.1972170330795237e-06	0.0	0.0	0.00013719096631329471	0.0	0.0	0.00013719579195415203	0.0	800.6437003915348	88.88888859807315	0.0	1.1651286615137575e-12	-9.473903143468003e-13	0.0	-6.731613057885968e-27	9.473903143468004e-14
0.195	88.88888859781834	0.0	0.00021283858412721898	25.23332753609687	0.0	-800.6437003915348	0.0	4.3191446912223866e-10	0.0	0.9999999999992834	0.0	1.1972170330795237e-06	0.0	0.0	0.00013719096631329471	0.0	0.0	0.00013719591568853298	0.0	800.6437003915348	88.88888859807315	0.0	1.1651286615137575e-12	-9.473903143468003e-13	0.0	-6.731613057885968e-27	9.473903143468004e-14
0.2	88.88888859781834	0.0	0.00021283858412721898	25.677771980541316	0.0	-800.6437003915348	0.0	4.3191446912223866e-10	0.0	0.9999999999992834	0.0	1.1972170330795237e-06	0.0	0.0	0.00013719096631329471	0.0	0.0	0.00013719603942291393	0.0	800.6437003915348	88.88888859807315	0.0	1.1651286615137575e-12	-9.473903143468003e-13	0.0	-6.731613057885968e-27	9.473903143468004e-14
0.205	88.88888859781834	0.0	0.00021283858412721898	26.12221642498576	0.0	-800.6437003915348	0.0	4.3191446912223866e-10	0.0	0.9999999999992834	0.0	1.1972170330795237e-06	0.0	0.0	0.00013719096631329471	0.0	0.0	0.0001371961631572949	0.0	800.6437003915348	88.88888859807315	0.0	1.1651286615137575e-12	-9.473903143468003e-13	0.0	-6.731613057885968e-27	9.473903143468004e-14
0.21	88.88888859781834	0.0	0.00021283858412721898	26.5666608694302	0.0	-800.6437003915348	0.0	4.3191446912223866e-10	0.0	0.9999999999992834	0.0	1.1972170330795237e-06	0.0	0.0	0.00013719096631329471	0.0	0.0	0.00013719628689167585	0.0	800.6437003915348	88.88888859807315	0.0	1.1651286615137575e-12	-9.473903143468003e-13	0.0	-6.731613057885968e-27	9.473903143468004e-14
0.215	88.88888859781834	0.0	0.00021283858412721898	27.011105313874648	0.0	-800.6437003915348	0.0	4.3191446912223866e-10	0.0	0.9999999999992834	0.0	1.1972170330795237e-06	0.0	0.0	0.00013719096631329471	0.0	0.0	0.0001371964106260568	0.0	800.6437003915348	88.88888859807315	0.0	1.1651286615137575e-12	-9.473903143468003e-13	0.0	-6.731613057885968e-27	9.473903143468004e-14
0.22	88.88888859781834	0.0	0.00021283858412721898	27.45554975831909	0.0	-800.6437003915348	0.0	4.3191446912223866e-10	0.0	0.9999999999992834	0.0	1.1972170330795237e-06	0.0	0.0	0.00013719096631329471	0.0	0.0	0.00013719653436043775	0.0	800.6437003915348	88.88888859807315	0.0	1.1651286615137575e-12	-9.473903143468003e-13	0.0	-6.731613057885968e-27	9.473903143468004e-14
0.225	88.88888859781834	0.0	0.00021283858412721898	27.899994202763537	0.0	-800.6437003915348	0.0	4.3191446912223866e-10	0.0	0.9999999999992834	0.0	1.1972170330795237e-06	0.0	0.0	0.00013719096631329471	0.0	0.0	0.00013719665809481873	0.0	800.6437003915348	88.88888859807315	0.0	1.1651286615137575e-12	-9.473903143468003e-13	0.0	-6.731613057885968e-27	9.473903143468004e-14
0.23	88.88888859781834	0.0	0.00021283858412721898	28.34443864720798	0.0	-800.6437003915348	0.0	4.3191446912223866e-10	0.0	0.9999999999992834	0.0	1.1972170330795237e-06	0.0	0.0	0.00013719096631329471	0.0	0.0	0.00013719678182919968	0.0	800.6437003915348	88.88888859807315	0.0	1.1651286615137575e-12	-9.473903143468003e-13	0.0	-6.731613057885968e-27	9.473903143468004e-14
0.235	88.88888859781834	0.0	0.00021283858412721898	28.788883091652423	0.0	-800.6437003915348	0.0	4.3191446912223866e-10	0.0	0.9999999999992834	0.0	1.1972170330795237e-06	0.0	0.0	0.00013719096631329471	0.0	0.0	0.00013719690556358063	0.0	800.6437003915348	88.88888859807315	0.0	1.1651286615137575e-12	-9.473903143468003e-13	0.0	-6.731613057885968e-27	9.473903143468004e-14
0.24	88.88888859781834	0.0	0.00021283858412721898	29.23332753609687	0.0	-800.6437003915348	0.0	4.3191446912223866e-10	0.0	0.9999999999992834	0.0	1.1972170330795237e-06	0.0	0.0	0.00013719096631329471	0.0	0.0	0.00013719702929796158	0.0	800.6437003915348	88.88888859807315	0.0	1.1651286615137575e-12	-9.473903143468003e-13	0.0	-6.731613057885968e-27	9.473903143468004e-14
0.245	88.88888859781834	0.0	0.00021283858412721898	29.677771980541312	0.0	-800.6437003915348	0.0	4.3191446912223866e-10	0.0	0.9999999999992834	0.0	1.1972170330795237e-06	0.0	0.0	0.00013719096631329471	0.0	0.0	0.00013719715303234256	0.0	800.6437003915348	88.88888859807315	0.0	1.1651286615137575e-12	-9.473903143468003e-13	0.0	-6.731613057885968e-27	9.473903143468004e-14
0.25	88.88888859781834	0.0	0.00021283858412721898	30.12221642498576	0.0	-800.6437003915348	0.0	4.3191446912223866e-10	0.0	0.9999999999992834	0.0	1.1972170330795237e-06	0.0	0.0	0.00013719096631329471	0.0	0.0	0.0001371972767667235	0.0	800.6437003915348	88.88888859807315	0.0	1.1651286615137575e-12	-9.473903143468003e-13	0.0	-6.731613057885968e-27	9.473903143468004e-14
0.255	88.88888859781834	0.0	0.00021283858412721898	30.566660869430205	0.0	-800.6437003915348	0.0	4.3191446912223866e-10	0.0	0.9999999999992834	0.0	1.1972170330795237e-06	0.0	0.0	0.00013719096631329471	0.0	0.0	0.00013719740050110446	0.0	800.6437003915348	88.88888859807315	0.0	1.1651286615137575e-12	-9.473903143468003e-13	0.0	-6.731613057885968e-27	9.473903143468004e-14
0.26	88.88888859781834	0.0	0.00021283858412721898	31.011105313874648	0.0	-800.6437003915348	0.0	4.3191446912223866e-10	0.0	0.9999999999992834	0.0	1.1972170330795237e-06	0.0	0.0	0.00013719096631329471	0.0	0.0	0.0001371975242354854	0.0	800.6437003915348	88.88888859807315	0.0	1.1651286615137575e-12	-9.473903143468003e-13	0.0	-6.731613057885968e-27	9.473903143468004e-14
0.265	88.88888859781834	0.0	0.00021283858412721898	31.455549758319094	0.0	-800.6437003915348	0.0	4.3191446912223866e-10	0.0	0.9999999999992834	0.0	1.1972170330795237e-06	0.0	0.0	0.00013719096631329471	0.0	0.0	0.00013719764796986638	0.0	800.6437003915348	88.88888859807315	0.0	1.1651286615137575e-12	-9.473903143468003e-13	0.0	-6.731613057885968e-27	9.473903143468004e-14
0.27	88.88888859781834	0.0	0.00021283858412721898	31.899994202763537	0.0	-800.6437003915348	0.0	4.3191446912223866e-10	0.0	0.9999999999992834	0.0	1.1972170330795237e-06	0.0	0.0	0.00013719096631329471	0.0	0.0	0.00013719777170424733	0.0	800.6437003915348	88.88888859807315	0.0	1.1651286615137575e-12	-9.473903143468003e-13	0.0	-6.731613057885968e-27	9.473903143468004e-14
0.275	88.88888859781834	0.0	0.00021283858412721898	32.34443864720798	0.0	-800.6437003915348	0.0	4.3191446912223866e-10	0.0	0.9999999999992834	0.0	1.1972170330795237e-06	0.0	0.0	0.00013719096631329471	0.0	0.0	0.00013719789543862828	0.0	800.6437003915348	88.88888859807315	0.0	1.1651286615137575e-12	-9.473903143468003e-13	0.0	-6.731613057885968e-27	9.473903143468004e-14
0.28	88.88888859781834	0.0	0.00021283858412721898	32.78888309165242	0.0	-800.6437003915348	0.0	4.3191446912223866e-10	0.0	0.9999999999992834	0.0	1.1972170330795237e-06	0.0	0.0	0.00013719096631329471	0.0	0.0	0.00013719801917300923	0.0	800.6437003915348	88.88888859807315	0.0	1.1651286615137575e-12	-9.473903143468003e-13	0.0	-6.731613057885968e-27	9.473903143468004e-14
0.285	88.88888859781834	0.0	0.00021283858412721898	33.233327536096866	0.0	-800.6437003915348	0.0	4.3191446912223866e-10	0.0	0.9999999999992834	0.0	1.1972170330795237e-06	0.0	0.0	0.00013719096631329471	0.0	0.0	0.0001371981429073902	0.0	800.6437003915348	88.88888859807315	0.0	1.1651286615137575e-12	-9.473903143468003e-13	0.0	-6.731613057885968e-27	9.473903143468004e-14
0.29	88.88888859781834	0.0	0.00021283858412721898	33.67777198054131	0.0	-800.6437003915348	0.0	4.3191446912223866e-10	0.0	0.9999999999992834	0.0	1.1972170330795237e-06	0.0	0.0	0.00013719096631329471	0.0	0.0	0.00013719826664177116	0.0	800.6437003915348	88.88888859807315	0.0	1.1651286615137575e-12	-9.473903143468003e-13	0.0	-6.731613057885968e-27	9.473903143468004e-14
0.295	88.88888859781834	0.0	0.00021283858412721898	34.12221642498576	0.0	-800.6437003915348	0.0	4.3191446912223866e-10	0.0	0.9999999999992834	0.0	1.1972170330795237e-06	0.0	0.0	0.00013719096631329471	0.0	0.0	0.0001371983903761521	0.0	800.6437003915348	88.88888859807315	0.0	1.1651286615137575e-12	-9.473903143468003e-13	0.0	-6.731613057885968e-27	9.473903143468004e-14
0.3	88.88888859781834	0.0	0.00021283858412721898	34.5666608694302	0.0	-800.6437003915348	0.0	4.3191446912223866e-10	0.0	0.9999999999992834	0.0	1.1972170330795237e-06	0.0	0.0	0.00013719096631329471	0.0	0.0	0.00013719851411053306	0.0	800.6437003915348	88.88888859807315	0.0	1.1651286615137575e-12	-9.473903143468003e-13	0.0	-6.731613057885968e-27	9.473903143468004e-14
0.305	88.88888859781834	0.0	0.00021283858412721898	35.01110531387465	0.0	-800.6437003915348	0.0	4.3191446912223866e-10	0.0	0.9999999999992834	0.0	1.1972170330795237e-06	0.0	0.0	0.00013719096631329471	0.0	0.0	0.00013719863784491404	0.0	800.6437003915348	88.88888859807315	0.0	1.1651286615137575e-12	-9.473903143468003e-13	0.0	-6.731613057885968e-27	9.473903143468004e-14
0.31	88.88888859781834	0.0	0.00021283858412721898	35.455549758319094	0.0	-800.6437003915348	0.0	4.3191446912223866e-10	0.0	0.9999999999992834	0.0	1.1972170330795237e-06	0.0	0.0	0.00013719096631329471	0.0	0.0	0.00013719876157929499	0.0	800.6437003915348	88.88888859807315	0.0	1.1651286615137575e-12	-9.473903143468003e-13	0.0	-6.731613057885968e-27	9.473903143468004e-14
0.315	88.88888859781834	0.0	0.00021283858412721898	35.89999420276354	0.0	-800.6437003915348	0.0	4.3191446912223866e-10	0.0	0.9999999999992834	0.0	1.1972170330795237e-06	0.0	0.0	0.00013719096631329471	0.0	0.0	0.00013719888531367594	0.0	800.6437003915348	88.88888859807315	0.0	1.1651286615137575e-12	-9.473903143468003e-13	0.0	-6.731613057885968e-27	9.473903143468004e-14
0.32	88.88888859781834	0.0	0.00021283858412721898	36.34443864720798	0.0	-800.6437003915348	0.0	4.3191446912223866e-10	0.0	0.9999999999992834	0.0	1.1972170330795237e-06	0.0	0.0	0.00013719096631329471	0.0	0.0	0.00013719900904805689	0.0	800.6437003915348	88.88888859807315	0.0	1.1651286615137575e-12	-9.473903143468003e-13	0.0	-6.731613057885968e-27	9.473903143468004e-14
0.325	88.88888859781834	0.0	0.00021283858412721898	36.78888309165242	0.0	-800.6437003915348	0.0	4.3191446912223866e-10	0.0	0.9999999999992834	0.0	1.1972170330795237e-06	0.0	0.0	0.00013719096631329471	0.0	0.0	0.00013719913278243786	0.0	800.6437003915348	88.88888859807315	0.0	1.1651286615137575e-12	-9.473903143468003e-13	0.0	-6.731613057885968e-27	9.473903143468004e-14
0.33	88.88888859781834	0.0	0.00021283858412721898	37.233327536096866	0.0	-800.6437003915348	0.0	4.3191446912223866e-10	0.0	0.9999999999992834	0.0	1.1972170330795237e-06	0.0	0.0	0.00013719096631329471	0.0	0.0	0.0001371992565168188	0.0	800.6437003915348	88.88888859807315	0.0	1.1651286615137575e-12	-9.473903143468003e-13	0.0	-6.731613057885968e-27	9.473903143468004e-14
0.335	88.88888859781834	0.0	0.00021283858412721898	37.677771980541316	0.0	-800.6437003915348	0.0	4.3191446912223866e-10	0.0	0.9999999999992834	0.0	1.1972170330795237e-06	0.0	0.0	0.00013719096631329471	0.0	0.0	0.00013719938025119976	0.0	800.6437003915348	88.88888859807315	0.0	1.1651286615137575e-12	-9.473903143468003e-13	0.0	-6.731613057885968e-27	9.473903143468004e-14
0.34	88.88888859781834	0.0	0.00021283858412721898	38.122216424985766	0.0	-800.6437003915348	0.0	4.3191446912223866e-10	0.0	0.9999999999992834	0.0	1.1972170330795237e-06	0.0	0.0	0.00013719096631329471	0.0	0.0	0.00013719950398558074	0.0	800.6437003915348	88.88888859807315	0.0	1.1651286615137575e-12	-9.473903143468003e-13	0.0	-6.731613057885968e-27	9.473903143468004e-14
0.345	88.88888859781834	0.0	0.00021283858412721898	38.5666608694302	0.0	-800.6437003915348	0.0	4.3191446912223866e-10	0.0	0.9999999999992834	0.0	1.1972170330795237e-06	0.0	0.0	0.00013719096631329471	0.0	0.0	0.0001371996277199617	0.0	800.6437003915348	88.88888859807315	0.0	1.1651286615137575e-12	-9.473903143468003e-13	0.0	-6.731613057885968e-27	9.473903143468004e-14
0.35	88.88888859781834	0.0	0.00021283858412721898	39.011105313874644	0.0	-800.6437003915348	0.0	4.3191446912223866e-10	0.0	0.9999999999992834	0.0	1.1972170330795237e-06	0.0	0.0	0.00013719096631329471	0.0	0.0	0.00013719975145434264	0.0	800.6437003915348	88.88888859807315	0.0	1.1651286615137575e-12	-9.473903143468003e-13	0.0	-6.731613057885968e-27	9.473903143468004e-14
0.355	88.88888859781834	0.0	0.00021283858412721898	39.455549758319094	0.0	-800.6437003915348	0.0	4.3191446912223866e-10	0.0	0.9999999999992834	0.0	1.1972170330795237e-06	0.0	0.0	0.00013719096631329471	0.0	0.0	0.0001371998751887236	0.0	800.6437003915348	88.88888859807315	0.0	1.1651286615137575e-12	-9.473903143468003e-13	0.0	-6.731613057885968e-27	9.473903143468004e-14
0.36	88.88888859781834	0.0	0.00021283858412721898	39.89999420276354	0.0	-800.6437003915348	0.0	4.3191446912223866e-10	0.0	0.9999999999992834	0.0	1.1972170330795237e-06	0.0	0.0	0.00013719096631329471	0.0	0.0	0.00013719999892310457	0.0	800.6437003915348	88.88888859807315	0.0	1.1651286615137575e-12	-9.473903143468003e-13	0.0	-6.731613057885968e-27	9.473903143468004e-14
0.365	88.88888859781834	0.0	0.00021283858412721898	40.34443864720798	0.0	-800.6437003915348	0.0	4.3191446912223866e-10	0.0	0.9999999999992834	0.0	1.1972170330795237e-06	0.0	0.0	0.00013719096631329471	0.0	0.0	0.00013720012265748551	0.0	800.6437003915348	88.88888859807315	0.0	1.1651286615137575e-12	-9.473903143468003e-13	0.0	-6.731613057885968e-27	9.473903143468004e-14
0.37	88.88888859781834	0.0	0.00021283858412721898	40.78888309165242	0.0	-800.6437003915348	0.0	4.3191446912223866e-10	0.0	0.9999999999992834	0.0	1.1972170330795237e-06	0.0	0.0	0.00013719096631329471	0.0	0.0	0.00013720024639186646	0.0	800.6437003915348	88.88888859807315	0.0	1.1651286615137575e-12	-9.473903143468003e-13	0.0	-6.731613057885968e-27	9.473903143468004e-14
0.375	88.88888859781834	0.0	0.00021283858412721898	41.233327536096866	0.0	-800.6437003915348	0.0	4.3191446912223866e-10	0.0	0.9999999999992834	0.0	1.1972170330795237e-06	0.0	0.0	0.00013719096631329471	0.0	0.0	0.00013720037012624741	0.0	800.6437003915348	88.88888859807315	0.0	1.1651286615137575e-12	-9.473903143468003e-13	0.0	-6.731613057885968e-27	9.473903143468004e-14
0.38	88.88888859781834	0.0	0.00021283858412721898	41.677771980541316	0.0	-800.6437003915348	0.0	4.3191446912223866e-10	0.0	0.9999999999992834	0.0	1.1972170330795237e-06	0.0	0.0	0.00013719096631329471	0.0	0.0	0.0001372004938606284	0.0	800.6437003915348	88.88888859807315	0.0	1.1651286615137575e-12	-9.473903143468003e-13	0.0	-6.731613057885968e-27	9.473903143468004e-14
0.385	88.88888859781834	0.0	0.00021283858412721898	42.12221642498576	0.0	-800.6437003915348	0.0	4.3191446912223866e-10	0.0	0.9999999999992834	0.0	1.1972170330795237e-06	0.0	0.0	0.00013719096631329471	0.0	0.0	0.00013720061759500934	0.0	800.6437003915348	88.88888859807315	0.0	1.1651286615137575e-12	-9.473903143468003e-13	0.0	-6.731613057885968e-27	9.473903143468004e-14
0.39	88.88888859781834	0.0	0.00021283858412721898	42.5666608694302	0.0	-800.6437003915348	0.0	4.3191446912223866e-10	0.0	0.9999999999992834	0.0	1.1972170330795237e-06	0.0	0.0	0.00013719096631329471	0.0	0.0	0.0001372007413293903	0.0	800.6437003915348	88.88888859807315	0.0	1.1651286615137575e-12	-9.473903143468003e-13	0.0	-6.731613057885968e-27	9.473903143468004e-14
0.395	88.88888859781834	0.0	0.00021283858412721898	43.01110531387465	0.0	-800.6437003915348	0.0	4.3191446912223866e-10	0.0	0.9999999999992834	0.0	1.1972170330795237e-06	0.0	0.0	0.00013719096631329471	0.0	0.0	0.00013720086506377124	0.0	800.6437003915348	88.88888859807315	0.0	1.1651286615137575e-12	-9.473903143468003e-13	0.0	-6.731613057885968e-27	9.473903143468004e-14
0.4	88.88888859781834	0.0	0.00021283858412721898	43.455549758319094	0.0	-800.6437003915348	0.0	4.3191446912223866e-10	0.0	0.9999999999992834	0.0	1.1972170330795237e-06	0.0	0.0	0.00013719096631329471	0.0	0.0	0.00013720098879815222	0.0	800.6437003915348	88.88888859807315	0.0	1.1651286615137575e-12	-9.473903143468003e-13	0.0	-6.731613057885968e-27	9.473903143468004e-14
0.405	88.88888859781834	0.0	0.00021283858412721898	43.89999420276354	0.0	-800.6437003915348	0.0	4.3191446912223866e-10	0.0	0.9999999999992834	0.0	1.1972170330795237e-06	0.0	0.0	0.00013719096631329471	0.0	0.0	0.00013720111253253317	0.0	800.6437003915348	88.88888859807315	0.0	1.1651286615137575e-12	-9.473903143468003e-13	0.0	-6.731613057885968e-27	9.473903143468004e-14
0.41	88.88888859781834	0.0	0.00021283858412721898	44.34443864720798	0.0	-800.6437003915348	0.0	4.3191446912223866e-10	0.0	0.9999999999992834	0.0	1.1972170330795237e-06	0.0	0.0	0.00013719096631329471	0.0	0.0	0.00013720123626691412	0.0	800.6437003915348	88.88888859807315	0.0	1.1651286615137575e-12	-9.473903143468003e-13	0.0	-6.731613057885968e-27	9.473903143468004e-14
0.415	88.88888859781834	0.0	0.00021283858412721898	44.78888309165242	0.0	-800.6437003915348	0.0	4.3191446912223866e-10	0.0	0.9999999999992834	0.0	1.1972170330795237e-06	0.0	0.0	0.00013719096631329471	0.0	0.0	0.00013720136000129507	0.0	800.6437003915348	88.88888859807315	0.0	1.1651286615137575e-12	-9.473903143468003e-13	0.0	-6.731613057885968e-27	9.473903143468004e-14
0.42	88.88888859781834	0.0	0.00021283858412721898	45.233327536096866	0.0	-800.6437003915348	0.0	4.3191446912223866e-10	0.0	0.9999999999992834	0.0	1.1972170330795237e-06	0.0	0.0	0.00013719096631329471	0.0	0.0	0.00013720148373567604	0.0	800.6437003915348	88.88888859807315	0.0	1.1651286615137575e-12	-9.473903143468003e-13	0.0	-6.731613057885968e-27	9.473903143468004e-14
0.425	88.88888859781834	0.0	0.00021283858412721898	45.677771980541316	0.0	-800.6437003915348	0.0	4.3191446912223866e-10	0.0	0.9999999999992834	0.0	1.1972170330795237e-06	0.0	0.0	0.00013719096631329471	0.0	0.0	0.000137201607470057	0.0	800.6437003915348	88.88888859807315	0.0	1.1651286615137575e-12	-9.473903143468003e-13	0.0	-6.731613057885968e-27	9.473903143468004e-14
0.43	88.88888859781834	0.0	0.00021283858412721898	46.12221642498576	0.0	-800.6437003915348	0.0	4.3191446912223866e-10	0.0	0.9999999999992834	0.0	1.1972170330795237e-06	0.0	0.0	0.00013719096631329471	0.0	0.0	0.00013720173120443794	0.0	800.6437003915348	88.88888859807315	0.0	1.1651286615137575e-12	-9.473903143468003e-13	0.0	-6.731613057885968e-27	9.473903143468004e-14
0.435	88.88888859781834	0.0	0.00021283858412721898	46.5666608694302	0.0	-800.6437003915348	0.0	4.3191446912223866e-10	0.0	0.9999999999992834	0.0	1.1972170330795237e-06	0.0	0.0	0.00013719096631329471	0.0	0.0	0.0001372018549388189	0.0	800.6437003915348	88.88888859807315	0.0	1.1651286615137575e-12	-9.473903143468003e-13	0.0	-6.731613057885968e-27	9.473903143468004e-14
0.44	88.88888859781834	0.0	0.00021283858412721898	47.011105313874644	0.0	-800.6437003915348	0.0	4.3191446912223866e-10	0.0	0.9999999999992834	0.0	1.1972170330795237e-06	0.0	0.0	0.00013719096631329471	0.0	0.0	0.00013720197867319987	0.0	800.6437003915348	88.88888859807315	0.0	1.1651286615137575e-12	-9.473903143468003e-13	0.0	-6.731613057885968e-27	9.473903143468004e-14
0.445	88.88888859781834	0.0	0.00021283858412721898	47.455549758319094	0.0	-800.6437003915348	0.0	4.3191446912223866e-10	0.0	0.9999999999992834	0.0	1.1972170330795237e-06	0.0	0.0	0.00013719096631329471	0.0	0.0	0.00013720210240758082	0.0	800.6437003915348	88.88888859807315	0.0	1.1651286615137575e-12	-9.473903143468003e-13	0.0	-6.731613057885968e-27	9.473903143468004e-14
0.45	88.88888859781834	0.0	0.00021283858412721898	47.89999420276354	0.0	-800.6437003915348	0.0	4.3191446912223866e-10	0.0	0.9999999999992834	0.0	1.1972170330795237e-06	0.0	0.0	0.00013719096631329471	0.0	0.0	0.00013720222614196177	0.0	800.6437003915348	88.88888859807315	0.0	1.1651286615137575e-12	-9.473903143468003e-13	0.0	-6.731613057885968e-27	9.473903143468004e-14
0.455	88.88888859781834	0.0	0.00021283858412721898	48.34443864720798	0.0	-800.6437003915348	0.0	4.3191446912223866e-10	0.0	0.9999999999992834	0.0	1.1972170330795237e-06	0.0	0.0	0.00013719096631329471	0.0	0.0	0.00013720234987634272	0.0	800.6437003915348	88.88888859807315	0.0	1.1651286615137575e-12	-9.473903143468003e-13	0.0	-6.731613057885968e-27	9.473903143468004e-14
0.46	88.88888859781834	0.0	0.00021283858412721898	48.78888309165242	0.0	-800.6437003915348	0.0	4.3191446912223866e-10	0.0	0.9999999999992834	0.0	1.1972170330795237e-06	0.0	0.0	0.00013719096631329471	0.0	0.0	0.0001372024736107237	0.0	800.6437003915348	88.88888859807315	0.0	1.1651286615137575e-12	-9.473903143468003e-13	0.0	-6.731613057885968e-27	9.473903143468004e-14
0.465	88.88888859781834	0.0	0.00021283858412721898	49.23332753609687	0.0	-800.6437003915348	0.0	4.3191446912223866e-10	0.0	0.9999999999992834	0.0	1.1972170330795237e-06	0.0	0.0	0.00013719096631329471	0.0	0.0	0.00013720259734510465	0.0	800.6437003915348	88.88888859807315	0.0	1.1651286615137575e-12	-9.473903143468003e-13	0.0	-6.731613057885968e-27	9.473903143468004e-14
0.47	88.88888859781834	0.0	0.00021283858412721898	49.67777198054131	0.0	-800.6437003915348	0.0	4.3191446912223866e-10	0.0	0.9999999999992834	0.0	1.1972170330795237e-06	0.0	0.0	0.00013719096631329471	0.0	0.0	0.0001372027210794856	0.0	800.6437003915348	88.88888859807315	0.0	1.1651286615137575e-12	-9.473903143468003e-13	0.0	-6.731613057885968e-27	9.473903143468004e-14
0.475	88.88888859781834	0.0	0.00021283858412721898	50.12221642498576	0.0	-800.6437003915348	0.0	4.3191446912223866e-10	0.0	0.9999999999992834	0.0	1.1972170330795237e-06	0.0	0.0	0.00013719096631329471	0.0	0.0	0.00013720284481386655	0.0	800.6437003915348	88.88888859807315	0.0	1.1651286615137575e-12	-9.473903143468003e-13	0.0	-6.731613057885968e-27	9.473903143468004e-14
0.48	88.88888859781834	0.0	0.00021283858412721898	50.5666608694302	0.0	-800.6437003915348	0.0	4.3191446912223866e-10	0.0	0.9999999999992834	0.0	1.1972170330795237e-06	0.0	0.0	0.00013719096631329471	0.0	0.0	0.00013720296854824752	0.0	800.6437003915348	88.88888859807315	0.0	1.1651286615137575e-12	-9.473903143468003e-13	0.0	-6.731613057885968e-27	9.473903143468004e-14
0.485	88.88888859781834	0.0	0.00021283858412721898	51.011105313874644	0.0	-800.6437003915348	0.0	4.3191446912223866e-10	0.0	0.9999999999992834	0.0	1.1972170330795237e-06	0.0	0.0	0.00013719096631329471	0.0	0.0	0.00013720309228262847	0.0	800.6437003915348	88.88888859807315	0.0	1.1651286615137575e-12	-9.473903143468003e-13	0.0	-6.731613057885968e-27	9.473903143468004e-14
0.49	88.88888859781834	0.0	0.00021283858412721898	51.45554975831909	0.0	-800.6437003915348	0.0	4.3191446912223866e-10	0.0	0.9999999999992834	0.0	1.1972170330795237e-06	0.0	0.0	0.00013719096631329471	0.0	0.0	0.00013720321601700942	0.0	800.6437003915348	88.88888859807315	0.0	1.1651286615137575e-12	-9.473903143468003e-13	0.0	-6.731613057885968e-27	9.473903143468004e-14
0.495	88.88888859781834	0.0	0.00021283858412721898	51.89999420276354	0.0	-800.6437003915348	0.0	4.3191446912223866e-10	0.0	0.9999999999992834	0.0	1.1972170330795237e-06	0.0	0.0	0.00013719096631329471	0.0	0.0	0.00013720333975139037	0.0	800.6437003915348	88.88888859807315	0.0	1.1651286615137575e-12	-9.473903143468003e-13	0.0	-6.731613057885968e-27	9.473903143468004e-14
0.5	88.88888859781834	0.0	0.00021283858412721898	52.34443864720798	0.0	-800.6437003915348	0.0	4.3191446912223866e-10	0.0	0.9999999999992834	0.0	1.1972170330795237e-06	0.0	0.0	0.00013719096631329471	0.0	0.0	0.00013720346348577135	0.0	800.6437003915348	88.88888859807315	0.0	1.1651286615137575e-12	-9.473903143468003e-13	0.0	-6.731613057885968e-27	9.473903143468004e-14
0.505	88.88888859781834	0.0	0.00021283858412721898	52.78888309165242	0.0	-800.6437003915348	0.0	4.3191446912223866e-10	0.0	0.9999999999992834	0.0	1.1972170330795237e-06	0.0	0.0	0.00013719096631329471	0.0	0.0	0.0001372035872201523	0.0	800.6437003915348	88.88888859807315	0.0	1.1651286615137575e-12	-9.473903143468003e-13	0.0	-6.731613057885968e-27	9.473903143468004e-14
0.51	88.88888859781834	0.0	0.00021283858412721898	53.23332753609687	0.0	-800.6437003915348	0.0	4.3191446912223866e-10	0.0	0.9999999999992834	0.0	1.1972170330795237e-06	0.0	0.0	0.00013719096631329471	0.0	0.0	0.00013720371095453325	0.0	800.6437003915348	88.88888859807315	0.0	1.1651286615137575e-12	-9.473903143468003e-13	0.0	-6.731613057885968e-27	9.473903143468004e-14
0.515	88.88888859781834	0.0	0.00021283858412721898	53.677771980541316	0.0	-800.6437003915348	0.0	4.3191446912223866e-10	0.0	0.9999999999992834	0.0	1.1972170330795237e-06	0.0	0.0	0.00013719096631329471	0.0	0.0	0.0001372038346889142	0.0	800.6437003915348	88.88888859807315	0.0	1.1651286615137575e-12	-9.473903143468003e-13	0.0	-6.731613057885968e-27	9.473903143468004e-14
0.52	88.88888859781834	0.0	0.00021283858412721898	54.12221642498576	0.0	-800.6437003915348	0.0	4.3191446912223866e-10	0.0	0.9999999999992834	0.0	1.1972170330795237e-06	0.0	0.0	0.00013719096631329471	0.0	0.0	0.00013720395842329518	0.0	800.6437003915348	88.88888859807315	0.0	1.1651286615137575e-12	-9.473903143468003e-13	0.0	-6.731613057885968e-27	9.473903143468004e-14
0.525	88.88888859781834	0.0	0.00021283858412721898	54.5666608694302	0.0	-800.6437003915348	0.0	4.3191446912223866e-10	0.0	0.9999999999992834	0.0	1.1972170330795237e-06	0.0	0.0	0.00013719096631329471	0.0	0.0	0.00013720408215767613	0.0	800.6437003915348	88.88888859807315	0.0	1.1651286615137575e-12	-9.473903143468003e-13	0.0	-6.731613057885968e-27	9.473903143468004e-14
0.53	88.88888859781834	0.0	0.00021283858412721898	55.01110531387465	0.0	-800.6437003915348	0.0	4.3191446912223866e-10	0.0	0.9999999999992834	0.0	1.1972170330795237e-06	0.0	0.0	0.00013719096631329471	0.0	0.0	0.00013720420589205708	0.0	800.6437003915348	88.88888859807315	0.0	1.1651286615137575e-12	-9.473903143468003e-13	0.0	-6.731613057885968e-27	9.473903143468004e-14
0.535	88.88888859781834	0.0	0.00021283858412721898	55.455549758319094	0.0	-800.6437003915348	0.0	4.3191446912223866e-10	0.0	0.9999999999992834	0.0	1.1972170330795237e-06	0.0	0.0	0.00013719096631329471	0.0	0.0	0.00013720432962643803	0.0	800.6437003915348	88.88888859807315	0.0	1.1651286615137575e-12	-9.473903143468003e-13	0.0	-6.731613057885968e-27	9.473903143468004e-14
0.54	88.88888859781834	0.0	0.00021283858412721898	55.89999420276354	0.0	-800.6437003915348	0.0	4.3191446912223866e-10	0.0	0.9999999999992834	0.0	1.1972170330795237e-06	0.0	0.0	0.00013719096631329471	0.0	0.0	0.000137204453360819	0.0	800.6437003915348	88.88888859807315	0.0	1.1651286615137575e-12	-9.473903143468003e-13	0.0	-6.731613057885968e-27	9.473903143468004e-14
0.545	88.88888859781834	0.0	0.00021283858412721898	56.34443864720798	0.0	-800.6437003915348	0.0	4.3191446912223866e-10	0.0	0.9999999999992834	0.0	1.1972170330795237e-06	0.0	0.0	0.00013719096631329471	0.0	0.0	0.00013720457709519995	0.0	800.6437003915348	88.88888859807315	0.0	1.1651286615137575e-12	-9.473903143468003e-13	0.0	-6.731613057885968e-27	9.473903143468004e-14
0.55	88.88888859781834	0.0	0.00021283858412721898	56.78888309165243	0.0	-800.6437003915348	0.0	4.3191446912223866e-10	0.0	0.9999999999992834	0.0	1.1972170330795237e-06	0.0	0.0	0.00013719096631329471	0.0	0.0	0.0001372047008295809	0.0	800.6437003915348	88.88888859807315	0.0	1.1651286615137575e-12	-9.473903143468003e-13	0.0	-6.731613057885968e-27	9.473903143468004e-14
0.555	88.88888859781834	0.0	0.00021283858412721898	57.23332753609687	0.0	-800.6437003915348	0.0	4.3191446912223866e-10	0.0	0.9999999999992834	0.0	1.1972170330795237e-06	0.0	0.0	0.00013719096631329471	0.0	0.0	0.00013720482456396185	0.0	800.6437003915348	88.88888859807315	0.0	1.1651286615137575e-12	-9.473903143468003e-13	0.0	-6.731613057885968e-27	9.473903143468004e-14
0.56	88.88888859781834	0.0	0.00021283858412721898	57.677771980541316	0.0	-800.6437003915348	0.0	4.3191446912223866e-10	0.0	0.9999999999992834	0.0	1.1972170330795237e-06	0.0	0.0	0.00013719096631329471	0.0	0.0	0.00013720494829834283	0.0	800.6437003915348	88.88888859807315	0.0	1.1651286615137575e-12	-9.473903143468003e-13	0.0	-6.731613057885968e-27	9.473903143468004e-14
0.565	88.88888859781834	0.0	0.00021283858412721898	58.12221642498575	0.0	-800.6437003915348	0.0	4.3191446912223866e-10	0.0	0.9999999999992834	0.0	1.1972170330795237e-06	0.0	0.0	0.00013719096631329471	0.0	0.0	0.00013720507203272378	0.0	800.6437003915348	88.88888859807315	0.0	1.1651286615137575e-12	-9.473903143468003e-13	0.0	-6.731613057885968e-27	9.473903143468004e-14
0.57	88.88888859781834	0.0	0.00021283858412721898	58.566660869430194	0.0	-800.6437003915348	0.0	4.3191446912223866e-10	0.0	0.9999999999992834	0.0	1.1972170330795237e-06	0.0	0.0	0.00013719096631329471	0.0	0.0	0.00013720519576710473	0.0	800.6437003915348	88.88888859807315	0.0	1.1651286615137575e-12	-9.473903143468003e-13	0.0	-6.731613057885968e-27	9.473903143468004e-14
0.575	88.88888859781834	0.0	0.00021283858412721898	59.011105313874644	0.0	-800.6437003915348	0.0	4.3191446912223866e-10	0.0	0.9999999999992834	0.0	1.1972170330795237e-06	0.0	0.0	0.00013719096631329471	0.0	0.0	0.00013720531950148568	0.0	800.6437003915348	88.88888859807315	0.0	1.1651286615137575e-12	-9.473903143468003e-13	0.0	-6.731613057885968e-27	9.473903143468004e-14
0.58	88.88888859781834	0.0	0.00021283858412721898	59.45554975831909	0.0	-800.6437003915348	0.0	4.3191446912223866e-10	0.0	0.9999999999992834	0.0	1.1972170330795237e-06	0.0	0.0	0.00013719096631329471	0.0	0.0	0.00013720544323586665	0.0	800.6437003915348	88.88888859807315	0.0	1.1651286615137575e-12	-9.473903143468003e-13	0.0	-6.731613057885968e-27	9.473903143468004e-14
0.585	88.88888859781834	0.0	0.00021283858412721898	59.89999420276353	0.0	-800.6437003915348	0.0	4.3191446912223866e-10	0.0	0.9999999999992834	0.0	1.1972170330795237e-06	0.0	0.0	0.00013719096631329471	0.0	0.0	0.0001372055669702476	0.0	800.6437003915348	88.88888859807315	0.0	1.1651286615137575e-12	-9.473903143468003e-13	0.0	-6.731613057885968e-27	9.473903143468004e-14
0.59	88.88888859781834	0.0	0.00021283858412721898	60.34443864720798	0.0	-800.6437003915348	0.0	4.3191446912223866e-10	0.0	0.9999999999992834	0.0	1.1972170330795237e-06	0.0	0.0	0.00013719096631329471	0.0	0.0	0.00013720569070462855	0.0	800.6437003915348	88.88888859807315	0.0	1.1651286615137575e-12	-9.473903143468003e-13	0.0	-6.731613057885968e-27	9.473903143468004e-14
0.595	88.88888859781834	0.0	0.00021283858412721898	60.78888309165242	0.0	-800.6437003915348	0.0	4.3191446912223866e-10	0.0	0.9999999999992834	0.0	1.1972170330795237e-06	0.0	0.0	0.00013719096631329471	0.0	0.0	0.0001372058144390095	0.0	800.6437003915348	88.88888859807315	0.0	1.1651286615137575e-12	-9.473903143468003e-13	0.0	-6.731613057885968e-27	9.473903143468004e-14
0.6	88.88888859781834	0.0	0.00021283858412721898	61.233327536096866	0.0	-800.6437003915348	0.0	4.3191446912223866e-10	0.0	0.9999999999992834	0.0	1.1972170330795237e-06	0.0	0.0	0.00013719096631329471	0.0	0.0	0.00013720593817339048	0.0	800.6437003915348	88.88888859807315	0.0	1.1651286615137575e-12	-9.473903143468003e-13	0.0	-6.731613057885968e-27	9.473903143468004e-14
0.605	88.88888859781834	0.0	0.00021283858412721898	61.67777198054131	0.0	-800.6437003915348	0.0	4.3191446912223866e-10	0.0	0.9999999999992834	0.0	1.1972170330795237e-06	0.0	0.0	0.00013719096631329471	0.0	0.0	0.00013720606190777143	0.0	800.6437003915348	88.88888859807315	0.0	1.1651286615137575e-12	-9.473903143468003e-13	0.0	-6.731613057885968e-27	9.473903143468004e-14
0.61	88.88888859781834	0.0	0.00021283858412721898	62.12221642498576	0.0	-800.6437003915348	0.0	4.3191446912223866e-10	0.0	0.9999999999992834	0.0	1.1972170330795237e-06	0.0	0.0	0.00013719096631329471	0.0	0.0	0.00013720618564215238	0.0	800.6437003915348	88.88888859807315	0.0	1.1651286615137575e-12	-9.473903143468003e-13	0.0	-6.731613057885968e-27	9.473903143468004e-14
0.615	88.88888859781834	0.0	0.00021283858412721898	62.5666608694302	0.0	-800.6437003915348	0.0	4.3191446912223866e-10	0.0	0.9999999999992834	0.0	1.1972170330795237e-06	0.0	0.0	0.00013719096631329471	0.0	0.0	0.00013720630937653333	0.0	800.6437003915348	88.88888859807315	0.0	1.1651286615137575e-12	-9.473903143468003e-13	0.0	-6.731613057885968e-27	9.473903143468004e-14
0.62	88.88888859781834	0.0	0.00021283858412721898	63.011105313874644	0.0	-800.6437003915348	0.0	4.3191446912223866e-10	0.0	0.9999999999992834	0.0	1.1972170330795237e-06	0.0	0.0	0.00013719096631329471	0.0	0.0	0.0001372064331109143	0.0	800.6437003915348	88.88888859807315	0.0	1.1651286615137575e-12	-9.473903143468003e-13	0.0	-6.731613057885968e-27	9.473903143468004e-14
0.625	88.88888859781834	0.0	0.00021283858412721898	63.455549758319094	0.0	-800.6437003915348	0.0	4.3191446912223866e-10	0.0	0.9999999999992834	0.0	1.1972170330795237e-06	0.0	0.0	0.00013719096631329471	0.0	0.0	0.00013720655684529526	0.0	800.6437003915348	88.88888859807315	0.0	1.1651286615137575e-12	-9.473903143468003e-13	0.0	-6.731613057885968e-27	9.473903143468004e-14
0.63	88.88888859781834	0.0	0.00021283858412721898	63.89999420276354	0.0	-800.6437003915348	0.0	4.3191446912223866e-10	0.0	0.9999999999992834	0.0	1.1972170330795237e-06	0.0	0.0	0.00013719096631329471	0.0	0.0	0.0001372066805796762	0.0	800.6437003915348	88.88888859807315	0.0	1.1651286615137575e-12	-9.473903143468003e-13	0.0	-6.731613057885968e-27	9.473903143468004e-14
0.635	88.88888859781834	0.0	0.00021283858412721898	64.34443864720798	0.0	-800.6437003915348	0.0	4.3191446912223866e-10	0.0	0.9999999999992834	0.0	1.1972170330795237e-06	0.0	0.0	0.00013719096631329471	0.0	0.0	0.00013720680431405716	0.0	800.6437003915348	88.88888859807315	0.0	1.1651286615137575e-12	-9.473903143468003e-13	0.0	-6.731613057885968e-27	9.473903143468004e-14
0.64	88.88888859781834	0.0	0.00021283858412721898	64.78888309165242	0.0	-800.6437003915348	0.0	4.3191446912223866e-10	0.0	0.9999999999992834	0.0	1.1972170330795237e-06	0.0	0.0	0.00013719096631329471	0.0	0.0	0.00013720692804843813	0.0	800.6437003915348	88.88888859807315	0.0	1.1651286615137575e-12	-9.473903143468003e-13	0.0	-6.731613057885968e-27	9.473903143468004e-14
0.645	88.88888859781834	0.0	0.00021283858412721898	65.23332753609688	0.0	-800.6437003915348	0.0	4.3191446912223866e-10	0.0	0.9999999999992834	0.0	1.1972170330795237e-06	0.0	0.0	0.00013719096631329471	0.0	0.0	0.00013720705178281908	0.0	800.6437003915348	88.88888859807315	0.0	1.1651286615137575e-12	-9.473903143468003e-13	0.0	-6.731613057885968e-27	9.473903143468004e-14
0.65	88.88888859781834	0.0	0.00021283858412721898	65.67777198054131	0.0	-800.6437003915348	0.0	4.3191446912223866e-10	0.0	0.9999999999992834	0.0	1.1972170330795237e-06	0.0	0.0	0.00013719096631329471	0.0	0.0	0.00013720717551720003	0.0	800.6437003915348	88.88888859807315	0.0	1.1651286615137575e-12	-9.473903143468003e-13	0.0	-6.731613057885968e-27	9.473903143468004e-14
0.655	88.88888859781834	0.0	0.00021283858412721898	66.12221642498577	0.0	-800.6437003915348	0.0	4.3191446912223866e-10	0.0	0.9999999999992834	0.0	1.1972170330795237e-06	0.0	0.0	0.00013719096631329471	0.0	0.0	0.000137207299251581	0.0	800.6437003915348	88.88888859807315	0.0	1.1651286615137575e-12	-9.473903143468003e-13	0.0	-6.731613057885968e-27	9.473903143468004e-14
0.66	88.88888859781834	0.0	0.00021283858412721898	66.5666608694302	0.0	-800.6437003915348	0.0	4.3191446912223866e-10	0.0	0.9999999999992834	0.0	1.1972170330795237e-06	0.0	0.0	0.00013719096631329471	0.0	0.0	0.00013720742298596196	0.0	800.6437003915348	88.88888859807315	0.0	1.1651286615137575e-12	-9.473903143468003e-13	0.0	-6.731613057885968e-27	9.473903143468004e-14
0.665	88.88888859781834	0.0	0.00021283858412721898	67.01110531387465	0.0	-800.6437003915348	0.0	4.3191446912223866e-10	0.0	0.9999999999992834	0.0	1.1972170330795237e-06	0.0	0.0	0.00013719096631329471	0.0	0.0	0.0001372075467203429	0.0	800.6437003915348	88.88888859807315	0.0	1.1651286615137575e-12	-9.473903143468003e-13	0.0	-6.731613057885968e-27	9.473903143468004e-14
0.67	88.88888859781834	0.0	0.00021283858412721898	67.4555497583191	0.0	-800.6437003915348	0.0	4.3191446912223866e-10	0.0	0.9999999999992834	0.0	1.1972170330795237e-06	0.0	0.0	0.00013719096631329471	0.0	0.0	0.00013720767045472386	0.0	800.6437003915348	88.88888859807315	0.0	1.1651286615137575e-12	-9.473903143468003e-13	0.0	-6.731613057885968e-27	9.473903143468004e-14
0.675	88.88888859781834	0.0	0.00021283858412721898	67.89999420276354	0.0	-800.6437003915348	0.0	4.3191446912223866e-10	0.0	0.9999999999992834	0.0	1.1972170330795237e-06	0.0	0.0	0.00013719096631329471	0.0	0.0	0.00013720779418910484	0.0	800.6437003915348	88.88888859807315	0.0	1.1651286615137575e-12	-9.473903143468003e-13	0.0	-6.731613057885968e-27	9.473903143468004e-14
0.68	88.88888859781834	0.0	0.00021283858412721898	68.344438647208	0.0	-800.6437003915348	0.0	4.3191446912223866e-10	0.0	0.9999999999992834	0.0	1.1972170330795237e-06	0.0	0.0	0.00013719096631329471	0.0	0.0	0.0001372079179234858	0.0	800.6437003915348	88.88888859807315	0.0	1.1651286615137575e-12	-9.473903143468003e-13	0.0	-6.731613057885968e-27	9.473903143468004e-14
0.685	88.88888859781834	0.0	0.00021283858412721898	68.78888309165242	0.0	-800.6437003915348	0.0	4.3191446912223866e-10	0.0	0.9999999999992834	0.0	1.1972170330795237e-06	0.0	0.0	0.00013719096631329471	0.0	0.0	0.00013720804165786674	0.0	800.6437003915348	88.88888859807315	0.0	1.1651286615137575e-12	-9.473903143468003e-13	0.0	-6.731613057885968e-27	9.473903143468004e-14
0.69	88.88888859781834	0.0	0.00021283858412721898	69.23332753609687	0.0	-800.6437003915348	0.0	4.3191446912223866e-10	0.0	0.9999999999992834	0.0	1.1972170330795237e-06	0.0	0.0	0.00013719096631329471	0.0	0.0	0.00013720816539224769	0.0	800.6437003915348	88.88888859807315	0.0	1.1651286615137575e-12	-9.473903143468003e-13	0.0	-6.731613057885968e-27	9.473903143468004e-14
0.695	88.88888859781834	0.0	0.00021283858412721898	69.67777198054131	0.0	-800.6437003915348	0.0	4.3191446912223866e-10	0.0	0.9999999999992834	0.0	1.1972170330795237e-06	0.0	0.0	0.00013719096631329471	0.0	0.0	0.00013720828912662866	0.0	800.6437003915348	88.88888859807315	0.0	1.1651286615137575e-12	-9.473903143468003e-13	0.0	-6.731613057885968e-27	9.473903143468004e-14
0.7	88.88888859781834	0.0	0.00021283858412721898	70.12221642498575	0.0	-800.6437003915348	0.0	4.3191446912223866e-10	0.0	0.9999999999992834	0.0	1.1972170330795237e-06	0.0	0.0	0.00013719096631329471	0.0	0.0	0.0001372084128610096	0.0	800.6437003915348	88.88888859807315	0.0	1.1651286615137575e-12	-9.473903143468003e-13	0.0	-6.731613057885968e-27	9.473903143468004e-14
0.705	88.88888859781834	0.0	0.00021283858412721898	70.5666608694302	0.0	-800.6437003915348	0.0	4.3191446912223866e-10	0.0	0.9999999999992834	0.0	1.1972170330795237e-06	0.0	0.0	0.00013719096631329471	0.0	0.0	0.00013720853659539056	0.0	800.6437003915348	88.88888859807315	0.0	1.1651286615137575e-12	-9.473903143468003e-13	0.0	-6.731613057885968e-27	9.473903143468004e-14
0.71	88.88888859781834	0.0	0.00021283858412721898	71.01110531387465	0.0	-800.6437003915348	0.0	4.3191446912223866e-10	0.0	0.9999999999992834	0.0	1.1972170330795237e-06	0.0	0.0	0.00013719096631329471	0.0	0.0	0.0001372086603297715	0.0	800.6437003915348	88.88888859807315	0.0	1.1651286615137575e-12	-9.473903143468003e-13	0.0	-6.731613057885968e-27	9.473903143468004e-14
0.715	88.88888859781834	0.0	0.00021283858412721898	71.45554975831908	0.0	-800.6437003915348	0.0	4.3191446912223866e-10	0.0	0.9999999999992834	0.0	1.1972170330795237e-06	0.0	0.0	0.00013719096631329471	0.0	0.0	0.0001372087840641525	0.0	800.6437003915348	88.88888859807315	0.0	1.1651286615137575e-12	-9.473903143468003e-13	0.0	-6.731613057885968e-27	9.473903143468004e-14
0.72	88.88888859781834	0.0	0.00021283858412721898	71.89999420276354	0.0	-800.6437003915348	0.0	4.3191446912223866e-10	0.0	0.9999999999992834	0.0	1.1972170330795237e-06	0.0	0.0	0.00013719096631329471	0.0	0.0	0.00013720890779853344	0.0	800.6437003915348	88.88888859807315	0.0	1.1651286615137575e-12	-9.473903143468003e-13	0.0	-6.731613057885968e-27	9.473903143468004e-14
0.725	88.88888859781834	0.0	0.00021283858412721898	72.34443864720798	0.0	-800.6437003915348	0.0	4.3191446912223866e-10	0.0	0.9999999999992834	0.0	1.1972170330795237e-06	0.0	0.0	0.00013719096631329471	0.0	0.0	0.0001372090315329144	0.0	800.6437003915348	88.88888859807315	0.0	1.1651286615137575e-12	-9.473903143468003e-13	0.0	-6.731613057885968e-27	9.473903143468004e-14
0.73	88.88888859781834	0.0	0.00021283858412721898	72.78888309165242	0.0	-800.6437003915348	0.0	4.3191446912223866e-10	0.0	0.9999999999992834	0.0	1.1972170330795237e-06	0.0	0.0	0.00013719096631329471	0.0	0.0	0.00013720915526729534	0.0	800.6437003915348	88.88888859807315	0.0	1.1651286615137575e-12	-9.473903143468003e-13	0.0	-6.731613057885968e-27	9.473903143468004e-14
0.735	88.88888859781834	0.0	0.00021283858412721898	73.23332753609687	0.0	-800.6437003915348	0.0	4.3191446912223866e-10	0.0	0.9999999999992834	0.0	1.1972170330795237e-06	0.0	0.0	0.00013719096631329471	0.0	0.0	0.00013720927900167632	0.0	800.6437003915348	88.88888859807315	0.0	1.1651286615137575e-12	-9.473903143468003e-13	0.0	-6.731613057885968e-27	9.473903143468004e-14
0.74	88.88888859781834	0.0	0.00021283858412721898	73.67777198054131	0.0	-800.6437003915348	0.0	4.3191446912223866e-10	0.0	0.9999999999992834	0.0	1.1972170330795237e-06	0.0	0.0	0.00013719096631329471	0.0	0.0	0.00013720940273605727	0.0	800.6437003915348	88.88888859807315	0.0	1.1651286615137575e-12	-9.473903143468003e-13	0.0	-6.731613057885968e-27	9.473903143468004e-14
0.745	88.88888859781834	0.0	0.00021283858412721898	74.12221642498575	0.0	-800.6437003915348	0.0	4.3191446912223866e-10	0.0	0.9999999999992834	0.0	1.1972170330795237e-06	0.0	0.0	0.00013719096631329471	0.0	0.0	0.00013720952647043822	0.0	800.6437003915348	88.88888859807315	0.0	1.1651286615137575e-12	-9.473903143468003e-13	0.0	-6.731613057885968e-27	9.473903143468004e-14
0.75	88.88888859781834	0.0	0.00021283858412721898	74.5666608694302	0.0	-800.6437003915348	0.0	4.3191446912223866e-10	0.0	0.9999999999992834	0.0	1.1972170330795237e-06	0.0	0.0	0.00013719096631329471	0.0	0.0	0.00013720965020481917	0.0	800.6437003915348	88.88888859807315	0.0	1.1651286615137575e-12	-9.473903143468003e-13	0.0	-6.731613057885968e-27	9.473903143468004e-14
0.755	88.88888859781834	0.0	0.00021283858412721898	75.01110531387465	0.0	-800.6437003915348	0.0	4.3191446912223866e-10	0.0	0.9999999999992834	0.0	1.1972170330795237e-06	0.0	0.0	0.00013719096631329471	0.0	0.0	0.00013720977393920014	0.0	800.6437003915348	88.88888859807315	0.0	1.1651286615137575e-12	-9.473903143468003e-13	0.0	-6.731613057885968e-27	9.473903143468004e-14
0.76	88.88888859781834	0.0	0.00021283858412721898	75.4555497583191	0.0	-800.6437003915348	0.0	4.3191446912223866e-10	0.0	0.9999999999992834	0.0	1.1972170330795237e-06	0.0	0.0	0.00013719096631329471	0.0	0.0	0.0001372098976735811	0.0	800.6437003915348	88.88888859807315	0.0	1.1651286615137575e-12	-9.473903143468003e-13	0.0	-6.731613057885968e-27	9.473903143468004e-14
0.765	88.88888859781834	0.0	0.00021283858412721898	75.89999420276354	0.0	-800.6437003915348	0.0	4.3191446912223866e-10	0.0	0.9999999999992834	0.0	1.1972170330795237e-06	0.0	0.0	0.00013719096631329471	0.0	0.0	0.00013721002140796204	0.0	800.6437003915348	88.88888859807315	0.0	1.1651286615137575e-12	-9.473903143468003e-13	0.0	-6.731613057885968e-27	9.473903143468004e-14
0.77	88.88888859781834	0.0	0.00021283858412721898	76.34443864720798	0.0	-800.6437003915348	0.0	4.3191446912223866e-10	0.0	0.9999999999992834	0.0	1.1972170330795237e-06	0.0	0.0	0.00013719096631329471	0.0	0.0	0.000137210145142343	0.0	800.6437003915348	88.88888859807315	0.0	1.1651286615137575e-12	-9.473903143468003e-13	0.0	-6.731613057885968e-27	9.473903143468004e-14
0.775	88.88888859781834	0.0	0.00021283858412721898	76.78888309165242	0.0	-800.6437003915348	0.0	4.3191446912223866e-10	0.0	0.9999999999992834	0.0	1.1972170330795237e-06	0.0	0.0	0.00013719096631329471	0.0	0.0	0.00013721026887672397	0.0	800.6437003915348	88.88888859807315	0.0	1.1651286615137575e-12	-9.473903143468003e-13	0.0	-6.731613057885968e-27	9.473903143468004e-14
0.78	88.88888859781834	0.0	0.00021283858412721898	77.23332753609687	0.0	-800.6437003915348	0.0	4.3191446912223866e-10	0.0	0.9999999999992834	0.0	1.1972170330795237e-06	0.0	0.0	0.00013719096631329471	0.0	0.0	0.00013721039261110492	0.0	800.6437003915348	88.88888859807315	0.0	1.1651286615137575e-12	-9.473903143468003e-13	0.0	-6.731613057885968e-27	9.473903143468004e-14
0.785	88.88888859781834	0.0	0.00021283858412721898	77.67777198054131	0.0	-800.6437003915348	0.0	4.3191446912223866e-10	0.0	0.9999999999992834	0.0	1.1972170330795237e-06	0.0	0.0	0.00013719096631329471	0.0	0.0	0.00013721051634548587	0.0	800.6437003915348	88.88888859807315	0.0	1.1651286615137575e-12	-9.473903143468003e-13	0.0	-6.731613057885968e-27	9.473903143468004e-14
0.79	88.88888859781834	0.0	0.00021283858412721898	78.12221642498577	0.0	-800.6437003915348	0.0	4.3191446912223866e-10	0.0	0.9999999999992834	0.0	1.1972170330795237e-06	0.0	0.0	0.00013719096631329471	0.0	0.0	0.00013721064007986682	0.0	800.6437003915348	88.88888859807315	0.0	1.1651286615137575e-12	-9.473903143468003e-13	0.0	-6.731613057885968e-27	9.473903143468004e-14
0.795	88.88888859781834	0.0	0.00021283858412721898	78.56666086943021	0.0	-800.6437003915348	0.0	4.3191446912223866e-10	0.0	0.9999999999992834	0.0	1.1972170330795237e-06	0.0	0.0	0.00013719096631329471	0.0	0.0	0.0001372107638142478	0.0	800.6437003915348	88.88888859807315	0.0	1.1651286615137575e-12	-9.473903143468003e-13	0.0	-6.731613057885968e-27	9.473903143468004e-14
0.8	88.88888859781834	0.0	0.00021283858412721898	79.01110531387465	0.0	-800.6437003915348	0.0	4.3191446912223866e-10	0.0	0.9999999999992834	0.0	1.1972170330795237e-06	0.0	0.0	0.00013719096631329471	0.0	0.0	0.00013721088754862874	0.0	800.6437003915348	88.88888859807315	0.0	1.1651286615137575e-12	-9.473903143468003e-13	0.0	-6.731613057885968e-27	9.473903143468004e-14
0.805	88.88888859781834	0.0	0.00021283858412721898	79.4555497583191	0.0	-800.6437003915348	0.0	4.3191446912223866e-10	0.0	0.9999999999992834	0.0	1.1972170330795237e-06	0.0	0.0	0.00013719096631329471	0.0	0.0	0.0001372110112830097	0.0	800.6437003915348	88.88888859807315	0.0	1.1651286615137575e-12	-9.473903143468003e-13	0.0	-6.731613057885968e-27	9.473903143468004e-14
0.81	88.88888859781834	0.0	0.00021283858412721898	79.89999420276354	0.0	-800.6437003915348	0.0	4.3191446912223866e-10	0.0	0.9999999999992834	0.0	1.1972170330795237e-06	0.0	0.0	0.00013719096631329471	0.0	0.0	0.00013721113501739064	0.0	800.6437003915348	88.88888859807315	0.0	1.1651286615137575e-12	-9.473903143468003e-13	0.0	-6.731613057885968e-27	9.473903143468004e-14
0.815	88.88888859781834	0.0	0.00021283858412721898	80.34443864720798	0.0	-800.6437003915348	0.0	4.3191446912223866e-10	0.0	0.9999999999992834	0.0	1.1972170330795237e-06	0.0	0.0	0.00013719096631329471	0.0	0.0	0.00013721125875177162	0.0	800.6437003915348	88.88888859807315	0.0	1.1651286615137575e-12	-9.473903143468003e-13	0.0	-6.731613057885968e-27	9.473903143468004e-14
0.82	88.88888859781834	0.0	0.00021283858412721898	80.78888309165242	0.0	-800.6437003915348	0.0	4.3191446912223866e-10	0.0	0.9999999999992834	0.0	1.1972170330795237e-06	0.0	0.0	0.00013719096631329471	0.0	0.0	0.00013721138248615257	0.0	800.6437003915348	88.88888859807315	0.0	1.1651286615137575e-12	-9.473903143468003e-13	0.0	-6.731613057885968e-27	9.473903143468004e-14
0.825	88.88888859781834	0.0	0.00021283858412721898	81.23332753609687	0.0	-800.6437003915348	0.0	4.3191446912223866e-10	0.0	0.9999999999992834	0.0	1.1972170330795237e-06	0.0	0.0	0.00013719096631329471	0.0	0.0	0.00013721150622053352	0.0	800.6437003915348	88.88888859807315	0.0	1.1651286615137575e-12	-9.473903143468003e-13	0.0	-6.731613057885968e-27	9.473903143468004e-14
0.83	88.88888859781834	0.0	0.00021283858412721898	81.67777198054131	0.0	-800.6437003915348	0.0	4.3191446912223866e-10	0.0	0.9999999999992834	0.0	1.1972170330795237e-06	0.0	0.0	0.00013719096631329471	0.0	0.0	0.00013721162995491447	0.0	800.6437003915348	88.88888859807315	0.0	1.1651286615137575e-12	-9.473903143468003e-13	0.0	-6.731613057885968e-27	9.473903143468004e-14
0.835	88.88888859781834	0.0	0.00021283858412721898	82.12221642498575	0.0	-800.6437003915348	0.0	4.3191446912223866e-10	0.0	0.9999999999992834	0.0	1.1972170330795237e-06	0.0	0.0	0.00013719096631329471	0.0	0.0	0.00013721175368929545	0.0	800.6437003915348	88.88888859807315	0.0	1.1651286615137575e-12	-9.473903143468003e-13	0.0	-6.731613057885968e-27	9.473903143468004e-14
0.84	88.88888859781834	0.0	0.00021283858412721898	82.5666608694302	0.0	-800.6437003915348	0.0	4.3191446912223866e-10	0.0	0.9999999999992834	0.0	1.1972170330795237e-06	0.0	0.0	0.00013719096631329471	0.0	0.0	0.0001372118774236764	0.0	800.6437003915348	88.88888859807315	0.0	1.1651286615137575e-12	-9.473903143468003e-13	0.0	-6.731613057885968e-27	9.473903143468004e-14
0.845	88.88888859781834	0.0	0.00021283858412721898	83.01110531387464	0.0	-800.6437003915348	0.0	4.3191446912223866e-10	0.0	0.9999999999992834	0.0	1.1972170330795237e-06	0.0	0.0	0.00013719096631329471	0.0	0.0	0.00013721200115805735	0.0	800.6437003915348	88.88888859807315	0.0	1.1651286615137575e-12	-9.473903143468003e-13	0.0	-6.731613057885968e-27	9.473903143468004e-14
0.85	88.88888859781834	0.0	0.00021283858412721898	83.4555497583191	0.0	-800.6437003915348	0.0	4.3191446912223866e-10	0.0	0.9999999999992834	0.0	1.1972170330795237e-06	0.0	0.0	0.00013719096631329471	0.0	0.0	0.0001372121248924383	0.0	800.6437003915348	88.88888859807315	0.0	1.1651286615137575e-12	-9.473903143468003e-13	0.0	-6.731613057885968e-27	9.473903143468004e-14
0.855	88.88888859781834	0.0	0.00021283858412721898	83.89999420276354	0.0	-800.6437003915348	0.0	4.3191446912223866e-10	0.0	0.9999999999992834	0.0	1.1972170330795237e-06	0.0	0.0	0.00013719096631329471	0.0	0.0	0.00013721224862681927	0.0	800.6437003915348	88.88888859807315	0.0	1.1651286615137575e-12	-9.473903143468003e-13	0.0	-6.731613057885968e-27	9.473903143468004e-14
0.86	88.88888859781834	0.0	0.00021283858412721898	84.34443864720798	0.0	-800.6437003915348	0.0	4.3191446912223866e-10	0.0	0.9999999999992834	0.0	1.1972170330795237e-06	0.0	0.0	0.00013719096631329471	0.0	0.0	0.00013721237236120022	0.0	800.6437003915348	88.88888859807315	0.0	1.1651286615137575e-12	-9.473903143468003e-13	0.0	-6.731613057885968e-27	9.473903143468004e-14
0.865	88.88888859781834	0.0	0.00021283858412721898	84.78888309165242	0.0	-800.6437003915348	0.0	4.3191446912223866e-10	0.0	0.9999999999992834	0.0	1.1972170330795237e-06	0.0	0.0	0.00013719096631329471	0.0	0.0	0.00013721249609558117	0.0	800.6437003915348	88.88888859807315	0.0	1.1651286615137575e-12	-9.473903143468003e-13	0.0	-6.731613057885968e-27	9.473903143468004e-14
0.87	88.88888859781834	0.0	0.00021283858412721898	85.23332753609687	0.0	-800.6437003915348	0.0	4.3191446912223866e-10	0.0	0.9999999999992834	0.0	1.1972170330795237e-06	0.0	0.0	0.00013719096631329471	0.0	0.0	0.00013721261982996212	0.0	800.6437003915348	88.88888859807315	0.0	1.1651286615137575e-12	-9.473903143468003e-13	0.0	-6.731613057885968e-27	9.473903143468004e-14
0.875	88.88888859781834	0.0	0.00021283858412721898	85.67777198054131	0.0	-800.6437003915348	0.0	4.3191446912223866e-10	0.0	0.9999999999992834	0.0	1.1972170330795237e-06	0.0	0.0	0.00013719096631329471	0.0	0.0	0.0001372127435643431	0.0	800.6437003915348	88.88888859807315	0.0	1.1651286615137575e-12	-9.473903143468003e-13	0.0	-6.731613057885968e-27	9.473903143468004e-14
0.88	88.88888859781834	0.0	0.00021283858412721898	86.12221642498575	0.0	-800.6437003915348	0.0	4.3191446912223866e-10	0.0	0.9999999999992834	0.0	1.1972170330795237e-06	0.0	0.0	0.00013719096631329471	0.0	0.0	0.00013721286729872405	0.0	800.6437003915348	88.88888859807315	0.0	1.1651286615137575e-12	-9.473903143468003e-13	0.0	-6.731613057885968e-27	9.473903143468004e-14
0.885	88.88888859781834	0.0	0.00021283858412721898	86.56666086943021	0.0	-800.6437003915348	0.0	4.3191446912223866e-10	0.0	0.9999999999992834	0.0	1.1972170330795237e-06	0.0	0.0	0.00013719096631329471	0.0	0.0	0.000137212991033105	0.0	800.6437003915348	88.88888859807315	0.0	1.1651286615137575e-12	-9.473903143468003e-13	0.0	-6.731613057885968e-27	9.473903143468004e-14
0.89	88.88888859781834	0.0	0.00021283858412721898	87.01110531387465	0.0	-800.6437003915348	0.0	4.3191446912223866e-10	0.0	0.9999999999992834	0.0	1.1972170330795237e-06	0.0	0.0	0.00013719096631329471	0.0	0.0	0.00013721311476748595	0.0	800.6437003915348	88.88888859807315	0.0	1.1651286615137575e-12	-9.473903143468003e-13	0.0	-6.731613057885968e-27	9.473903143468004e-14
0.895	88.88888859781834	0.0	0.00021283858412721898	87.4555497583191	0.0	-800.6437003915348	0.0	4.3191446912223866e-10	0.0	0.9999999999992834	0.0	1.1972170330795237e-06	0.0	0.0	0.00013719096631329471	0.0	0.0	0.00013721323850186693	0.0	800.6437003915348	88.88888859807315	0.0	1.1651286615137575e-12	-9.473903143468003e-13	0.0	-6.731613057885968e-27	9.473903143468004e-14
0.9	88.88888859781834	0.0	0.00021283858412721898	87.89999420276354	0.0	-800.6437003915348	0.0	4.3191446912223866e-10	0.0	0.9999999999992834	0.0	1.1972170330795237e-06	0.0	0.0	0.00013719096631329471	0.0	0.0	0.00013721336223624788	0.0	800.6437003915348	88.88888859807315	0.0	1.1651286615137575e-12	-9.473903143468003e-13	0.0	-6.731613057885968e-27	9.473903143468004e-14
0.905	88.88888859781834	0.0	0.00021283858412721898	88.34443864720798	0.0	-800.6437003915348	0.0	4.3191446912223866e-10	0.0	0.9999999999992834	0.0	1.1972170330795237e-06	0.0	0.0	0.00013719096631329471	0.0	0.0	0.00013721348597062883	0.0	800.6437003915348	88.88888859807315	0.0	1.1651286615137575e-12	-9.473903143468003e-13	0.0	-6.731613057885968e-27	9.473903143468004e-14
0.91	88.88888859781834	0.0	0.00021283858412721898	88.78888309165242	0.0	-800.6437003915348	0.0	4.3191446912223866e-10	0.0	0.9999999999992834	0.0	1.1972170330795237e-06	0.0	0.0	0.00013719096631329471	0.0	0.0	0.00013721360970500978	0.0	800.6437003915348	88.88888859807315	0.0	1.1651286615137575e-12	-9.473903143468003e-13	0.0	-6.731613057885968e-27	9.473903143468004e-14
0.915	88.88888859781834	0.0	0.00021283858412721898	89.23332753609687	0.0	-800.6437003915348	0.0	4.3191446912223866e-10	0.0	0.9999999999992834	0.0	1.1972170330795237e-06	0.0	0.0	0.00013719096631329471	0.0	0.0	0.00013721373343939075	0.0	800.6437003915348	88.88888859807315	0.0	1.1651286615137575e-12	-9.473903143468003e-13	0.0	-6.731613057885968e-27	9.473903143468004e-14
0.92	88.88888859781834	0.0	0.00021283858412721898	89.67777198054131	0.0	-800.6437003915348	0.0	4.3191446912223866e-10	0.0	0.9999999999992834	0.0	1.1972170330795237e-06	0.0	0.0	0.00013719096631329471	0.0	0.0	0.0001372138571737717	0.0	800.6437003915348	88.88888859807315	0.0	1.1651286615137575e-12	-9.473903143468003e-13	0.0	-6.731613057885968e-27	9.473903143468004e-14
0.925	88.88888859781834	0.0	0.00021283858412721898	90.12221642498577	0.0	-800.6437003915348	0.0	4.3191446912223866e-10	0.0	0.9999999999992834	0.0	1.1972170330795237e-06	0.0	0.0	0.00013719096631329471	0.0	0.0	0.00013721398090815265	0.0	800.6437003915348	88.88888859807315	0.0	1.1651286615137575e-12	-9.473903143468003e-13	0.0	-6.731613057885968e-27	9.473903143468004e-14
0.93	88.88888859781834	0.0	0.00021283858412721898	90.56666086943021	0.0	-800.6437003915348	0.0	4.3191446912223866e-10	0.0	0.9999999999992834	0.0	1.1972170330795237e-06	0.0	0.0	0.00013719096631329471	0.0	0.0	0.0001372141046425336	0.0	800.6437003915348	88.88888859807315	0.0	1.1651286615137575e-12	-9.473903143468003e-13	0.0	-6.731613057885968e-27	9.473903143468004e-14
0.935	88.88888859781834	0.0	0.00021283858412721898	91.01110531387465	0.0	-800.6437003915348	0.0	4.3191446912223866e-10	0.0	0.9999999999992834	0.0	1.1972170330795237e-06	0.0	0.0	0.00013719096631329471	0.0	0.0	0.00013721422837691458	0.0	800.6437003915348	88.88888859807315	0.0	1.1651286615137575e-12	-9.473903143468003e-13	0.0	-6.731613057885968e-27	9.473903143468004e-14
0.94	88.88888859781834	0.0	0.00021283858412721898	91.45554975831908	0.0	-800.6437003915348	0.0	4.3191446912223866e-10	0.0	0.9999999999992834	0.0	1.1972170330795237e-06	0.0	0.0	0.00013719096631329471	0.0	0.0	0.00013721435211129553	0.0	800.6437003915348	88.88888859807315	0.0	1.1651286615137575e-12	-9.473903143468003e-13	0.0	-6.731613057885968e-27	9.473903143468004e-14
0.945	88.88888859781834	0.0	0.00021283858412721898	91.89999420276352	0.0	-800.6437003915348	0.0	4.3191446912223866e-10	0.0	0.9999999999992834	0.0	1.1972170330795237e-06	0.0	0.0	0.00013719096631329471	0.0	0.0	0.00013721447584567648	0.0	800.6437003915348	88.88888859807315	0.0	1.1651286615137575e-12	-9.473903143468003e-13	0.0	-6.731613057885968e-27	9.473903143468004e-14
0.95	88.88888859781834	0.0	0.00021283858412721898	92.34443864720798	0.0	-800.6437003915348	0.0	4.3191446912223866e-10	0.0	0.9999999999992834	0.0	1.1972170330795237e-06	0.0	0.0	0.00013719096631329471	0.0	0.0	0.00013721459958005743	0.0	800.6437003915348	88.88888859807315	0.0	1.1651286615137575e-12	-9.473903143468003e-13	0.0	-6.731613057885968e-27	9.473903143468004e-14
0.955	88.88888859781834	0.0	0.00021283858412721898	92.78888309165242	0.0	-800.6437003915348	0.0	4.3191446912223866e-10	0.0	0.9999999999992834	0.0	1.1972170330795237e-06	0.0	0.0	0.00013719096631329471	0.0	0.0	0.0001372147233144384	0.0	800.6437003915348	88.88888859807315	0.0	1.1651286615137575e-12	-9.473903143468003e-13	0.0	-6.731613057885968e-27	9.473903143468004e-14
0.96	88.88888859781834	0.0	0.00021283858412721898	93.23332753609687	0.0	-800.6437003915348	0.0	4.3191446912223866e-10	0.0	0.9999999999992834	0.0	1.1972170330795237e-06	0.0	0.0	0.00013719096631329471	0.0	0.0	0.00013721484704881936	0.0	800.6437003915348	88.88888859807315	0.0	1.1651286615137575e-12	-9.473903143468003e-13	0.0	-6.731613057885968e-27	9.473903143468004e-14
0.965	88.88888859781834	0.0	0.00021283858412721898	93.67777198054131	0.0	-800.6437003915348	0.0	4.3191446912223866e-10	0.0	0.9999999999992834	0.0	1.1972170330795237e-06	0.0	0.0	0.00013719096631329471	0.0	0.0	0.0001372149707832003	0.0	800.6437003915348	88.88888859807315	0.0	1.1651286615137575e-12	-9.473903143468003e-13	0.0	-6.731613057885968e-27	9.473903143468004e-14
0.97	88.88888859781834	0.0	0.00021283858412721898	94.12221642498575	0.0	-800.6437003915348	0.0	4.3191446912223866e-10	0.0	0.9999999999992834	0.0	1.1972170330795237e-06	0.0	0.0	0.00013719096631329471	0.0	0.0	0.00013721509451758125	0.0	800.6437003915348	88.88888859807315	0.0	1.1651286615137575e-12	-9.473903143468003e-13	0.0	-6.731613057885968e-27	9.473903143468004e-14
0.975	88.88888859781834	0.0	0.00021283858412721898	94.5666608694302	0.0	-800.6437003915348	0.0	4.3191446912223866e-10	0.0	0.9999999999992834	0.0	1.1972170330795237e-06	0.0	0.0	0.00013719096631329471	0.0	0.0	0.00013721521825196223	0.0	800.6437003915348	88.88888859807315	0.0	1.1651286615137575e-12	-9.473903143468003e-13	0.0	-6.731613057885968e-27	9.473903143468004e-14
0.98	88.88888859781834	0.0	0.00021283858412721898	95.01110531387464	0.0	-800.6437003915348	0.0	4.3191446912223866e-10	0.0	0.9999999999992834	0.0	1.1972170330795237e-06	0.0	0.0	0.00013719096631329471	0.0	0.0	0.00013721534198634318	0.0	800.6437003915348	88.88888859807315	0.0	1.1651286615137575e-12	-9.473903143468003e-13	0.0	-6.731613057885968e-27	9.473903143468004e-14
0.985	88.88888859781834	0.0	0.00021283858412721898	95.4555497583191	0.0	-800.6437003915348	0.0	4.3191446912223866e-10	0.0	0.9999999999992834	0.0	1.1972170330795237e-06	0.0	0.0	0.00013719096631329471	0.0	0.0	0.00013721546572072413	0.0	800.6437003915348	88.88888859807315	0.0	1.1651286615137575e-12	-9.473903143468003e-13	0.0	-6.731613057885968e-27	9.473903143468004e-14
0.99	88.88888859781834	0.0	0.00021283858412721898	95.89999420276354	0.0	-800.6437003915348	0.0	4.3191446912223866e-10	0.0	0.9999999999992834	0.0	1.1972170330795237e-06	0.0	0.0	0.00013719096631329471	0.0	0.0	0.0001372155894551051	0.0	800.6437003915348	88.88888859807315	0.0	1.1651286615137575e-12	-9.473903143468003e-13	0.0	-6.731613057885968e-27	9.473903143468004e-14
0.995	88.88888859781834	0.0	0.00021283858412721898	96.34443864720798	0.0	-800.6437003915348	0.0	4.3191446912223866e-10	0.0	0.9999999999992834	0.0	1.1972170330795237e-06	0.0	0.0	0.00013719096631329471	0.0	0.0	0.00013721571318948606	0.0	800.6437003915348	88.88888859807315	0.0	1.1651286615137575e-12	-9.473903143468003e-13	0.0	-6.731613057885968e-27	9.473903143468004e-14
1.0	88.88888859781834	0.0	0.00021283858412721898	96.78888309165242	0.0	-800.6437003915348	0.0	4.3191446912223866e-10	0.0	0.9999999999992834	0.0	1.1972170330795237e-06	0.0	0.0	0.00013719096631329471	0.0	0.0	0.000137215836923867	0.0	800.6437003915348	88.88888859807315	0.0	1.1651286615137575e-12	-9.473903143468003e-13	0.0	-6.731613057885968e-27	9.473903143468004e-14
1.005	88.88888859781834	0.0	0.00021283858412721898	97.23332753609685	0.0	-800.6437003915348	0.0	4.3191446912223866e-10	0.0	0.9999999999992834	0.0	1.1972170330795237e-06	0.0	0.0	0.00013719096631329471	0.0	0.0	0.00013721596065824796	0.0	800.6437003915348	88.88888859807315	0.0	1.1651286615137575e-12	-9.473903143468003e-13	0.0	-6.731613057885968e-27	9.473903143468004e-14
1.01	88.88888859781834	0.0	0.00021283858412721898	97.67777198054131	0.0	-800.6437003915348	0.0	4.3191446912223866e-10	0.0	0.9999999999992834	0.0	1.1972170330795237e-06	0.0	0.0	0.00013719096631329471	0.0	0.0	0.00013721608439262893	0.0	800.6437003915348	88.88888859807315	0.0	1.1651286615137575e-12	-9.473903143468003e-13	0.0	-6.731613057885968e-27	9.473903143468004e-14
1.015	88.88888859781834	0.0	0.00021283858412721898	98.12221642498575	0.0	-800.6437003915348	0.0	4.3191446912223866e-10	0.0	0.9999999999992834	0.0	1.1972170330795237e-06	0.0	0.0	0.00013719096631329471	0.0	0.0	0.00013721620812700988	0.0	800.6437003915348	88.88888859807315	0.0	1.1651286615137575e-12	-9.473903143468003e-13	0.0	-6.731613057885968e-27	9.473903143468004e-14
1.02	88.88888859781834	0.0	0.00021283858412721898	98.56666086943021	0.0	-800.6437003915348	0.0	4.3191446912223866e-10	0.0	0.9999999999992834	0.0	1.1972170330795237e-06	0.0	0.0	0.00013719096631329471	0.0	0.0	0.00013721633186139083	0.0	800.6437003915348	88.88888859807315	0.0	1.1651286615137575e-12	-9.473903143468003e-13	0.0	-6.731613057885968e-27	9.473903143468004e-14
1.025	88.88888859781834	0.0	0.00021283858412721898	99.01110531387464	0.0	-800.6437003915348	0.0	4.3191446912223866e-10	0.0	0.9999999999992834	0.0	1.1972170330795237e-06	0.0	0.0	0.00013719096631329471	0.0	0.0	0.00013721645559577178	0.0	800.6437003915348	88.88888859807315	0.0	1.1651286615137575e-12	-9.473903143468003e-13	0.0	-6.731613057885968e-27	9.473903143468004e-14
1.03	88.88888859781834	0.0	0.00021283858412721898	99.4555497583191	0.0	-800.6437003915348	0.0	4.3191446912223866e-10	0.0	0.9999999999992834	0.0	1.1972170330795237e-06	0.0	0.0	0.00013719096631329471	0.0	0.0	0.00013721657933015276	0.0	800.6437003915348	88.88888859807315	0.0	1.1651286615137575e-12	-9.473903143468003e-13	0.0	-6.731613057885968e-27	9.473903143468004e-14
1.035	88.88888859781834	0.0	0.00021283858412721898	99.89999420276352	0.0	-800.6437003915348	0.0	4.3191446912223866e-10	0.0	0.9999999999992834	0.0	1.1972170330795237e-06	0.0	0.0	0.00013719096631329471	0.0	0.0	0.0001372167030645337	0.0	800.6437003915348	88.88888859807315	0.0	1.1651286615137575e-12	-9.473903143468003e-13	0.0	-6.731613057885968e-27	9.473903143468004e-14
1.04	88.88888859781834	0.0	0.00021283858412721898	100.34443864720798	0.0	-800.6437003915348	0.0	4.3191446912223866e-10	0.0	0.9999999999992834	0.0	1.1972170330795237e-06	0.0	0.0	0.00013719096631329471	0.0	0.0	0.00013721682679891466	0.0	800.6437003915348	88.88888859807315	0.0	1.1651286615137575e-12	-9.473903143468003e-13	0.0	-6.731613057885968e-27	9.473903143468004e-14
1.045	88.88888859781834	0.0	0.00021283858412721898	100.78888309165242	0.0	-800.6437003915348	0.0	4.3191446912223866e-10	0.0	0.9999999999992834	0.0	1.1972170330795237e-06	0.0	0.0	0.00013719096631329471	0.0	0.0	0.0001372169505332956	0.0	800.6437003915348	88.88888859807315	0.0	1.1651286615137575e-12	-9.473903143468003e-13	0.0	-6.731613057885968e-27	9.473903143468004e-14
1.05	88.88888859781834	0.0	0.00021283858412721898	101.23332753609687	0.0	-800.6437003915348	0.0	4.3191446912223866e-10	0.0	0.9999999999992834	0.0	1.1972170330795237e-06	0.0	0.0	0.00013719096631329471	0.0	0.0	0.0001372170742676766	0.0	800.6437003915348	88.88888859807315	0.0	1.1651286615137575e-12	-9.473903143468003e-13	0.0	-6.731613057885968e-27	9.473903143468004e-14
1.055	88.88888859781834	0.0	0.00021283858412721898	101.67777198054131	0.0	-800.6437003915348	0.0	4.3191446912223866e-10	0.0	0.9999999999992834	0.0	1.1972170330795237e-06	0.0	0.0	0.00013719096631329471	0.0	0.0	0.00013721719800205754	0.0	800.6437003915348	88.88888859807315	0.0	1.1651286615137575e-12	-9.473903143468003e-13	0.0	-6.731613057885968e-27	9.473903143468004e-14
1.06	88.88888859781834	0.0	0.00021283858412721898	102.12221642498577	0.0	-800.6437003915348	0.0	4.3191446912223866e-10	0.0	0.9999999999992834	0.0	1.1972170330795237e-06	0.0	0.0	0.00013719096631329471	0.0	0.0	0.0001372173217364385	0.0	800.6437003915348	88.88888859807315	0.0	1.1651286615137575e-12	-9.473903143468003e-13	0.0	-6.731613057885968e-27	9.473903143468004e-14
1.065	88.88888859781834	0.0	0.00021283858412721898	102.5666608694302	0.0	-800.6437003915348	0.0	4.3191446912223866e-10	0.0	0.9999999999992834	0.0	1.1972170330795237e-06	0.0	0.0	0.00013719096631329471	0.0	0.0	0.00013721744547081944	0.0	800.6437003915348	88.88888859807315	0.0	1.1651286615137575e-12	-9.473903143468003e-13	0.0	-6.731613057885968e-27	9.473903143468004e-14
1.07	88.88888859781834	0.0	0.00021283858412721898	103.01110531387465	0.0	-800.6437003915348	0.0	4.3191446912223866e-10	0.0	0.9999999999992834	0.0	1.1972170330795237e-06	0.0	0.0	0.00013719096631329471	0.0	0.0	0.00013721756920520041	0.0	800.6437003915348	88.88888859807315	0.0	1.1651286615137575e-12	-9.473903143468003e-13	0.0	-6.731613057885968e-27	9.473903143468004e-14
1.075	88.88888859781834	0.0	0.00021283858412721898	103.45554975831908	0.0	-800.6437003915348	0.0	4.3191446912223866e-10	0.0	0.9999999999992834	0.0	1.1972170330795237e-06	0.0	0.0	0.00013719096631329471	0.0	0.0	0.00013721769293958136	0.0	800.6437003915348	88.88888859807315	0.0	1.1651286615137575e-12	-9.473903143468003e-13	0.0	-6.731613057885968e-27	9.473903143468004e-14
1.08	88.88888859781834	0.0	0.00021283858412721898	103.89999420276354	0.0	-800.6437003915348	0.0	4.3191446912223866e-10	0.0	0.9999999999992834	0.0	1.1972170330795237e-06	0.0	0.0	0.00013719096631329471	0.0	0.0	0.0001372178166739623	0.0	800.6437003915348	88.88888859807315	0.0	1.1651286615137575e-12	-9.473903143468003e-13	0.0	-6.731613057885968e-27	9.473903143468004e-14
1.085	88.88888859781834	0.0	0.00021283858412721898	104.34443864720798	0.0	-800.6437003915348	0.0	4.3191446912223866e-10	0.0	0.9999999999992834	0.0	1.1972170330795237e-06	0.0	0.0	0.00013719096631329471	0.0	0.0	0.00013721794040834326	0.0	800.6437003915348	88.88888859807315	0.0	1.1651286615137575e-12	-9.473903143468003e-13	0.0	-6.731613057885968e-27	9.473903143468004e-14
1.09	88.88888859781834	0.0	0.00021283858412721898	104.78888309165242	0.0	-800.6437003915348	0.0	4.3191446912223866e-10	0.0	0.9999999999992834	0.0	1.1972170330795237e-06	0.0	0.0	0.00013719096631329471	0.0	0.0	0.00013721806414272424	0.0	800.6437003915348	88.88888859807315	0.0	1.1651286615137575e-12	-9.473903143468003e-13	0.0	-6.731613057885968e-27	9.473903143468004e-14
1.095	88.88888859781834	0.0	0.00021283858412721898	105.23332753609687	0.0	-800.6437003915348	0.0	4.3191446912223866e-10	0.0	0.9999999999992834	0.0	1.1972170330795237e-06	0.0	0.0	0.00013719096631329471	0.0	0.0	0.0001372181878771052	0.0	800.6437003915348	88.88888859807315	0.0	1.1651286615137575e-12	-9.473903143468003e-13	0.0	-6.731613057885968e-27	9.473903143468004e-14
1.1	88.88888859781834	0.0	0.00021283858412721898	105.67777198054132	0.0	-800.6437003915348	0.0	4.3191446912223866e-10	0.0	0.9999999999992834	0.0	1.1972170330795237e-06	0.0	0.0	0.00013719096631329471	0.0	0.0	0.00013721831161148614	0.0	800.6437003915348	88.88888859807315	0.0	1.1651286615137575e-12	-9.473903143468003e-13	0.0	-6.731613057885968e-27	9.473903143468004e-14
1.105	88.88888859781834	0.0	0.00021283858412721898	106.12221642498575	0.0	-800.6437003915348	0.0	4.3191446912223866e-10	0.0	0.9999999999992834	0.0	1.1972170330795237e-06	0.0	0.0	0.00013719096631329471	0.0	0.0	0.0001372184353458671	0.0	800.6437003915348	88.88888859807315	0.0	1.1651286615137575e-12	-9.473903143468003e-13	0.0	-6.731613057885968e-27	9.473903143468004e-14
1.11	88.88888859781834	0.0	0.00021283858412721898	106.56666086943021	0.0	-800.6437003915348	0.0	4.3191446912223866e-10	0.0	0.9999999999992834	0.0	1.1972170330795237e-06	0.0	0.0	0.00013719096631329471	0.0	0.0	0.00013721855908024807	0.0	800.6437003915348	88.88888859807315	0.0	1.1651286615137575e-12	-9.473903143468003e-13	0.0	-6.731613057885968e-27	9.473903143468004e-14
1.115	88.88888859781834	0.0	0.00021283858412721898	107.01110531387464	0.0	-800.6437003915348	0.0	4.3191446912223866e-10	0.0	0.9999999999992834	0.0	1.1972170330795237e-06	0.0	0.0	0.00013719096631329471	0.0	0.0	0.00013721868281462902	0.0	800.6437003915348	88.88888859807315	0.0	1.1651286615137575e-12	-9.473903143468003e-13	0.0	-6.731613057885968e-27	9.473903143468004e-14
1.12	88.88888859781834	0.0	0.00021283858412721898	107.4555497583191	0.0	-800.6437003915348	0.0	4.3191446912223866e-10	0.0	0.9999999999992834	0.0	1.1972170330795237e-06	0.0	0.0	0.00013719096631329471	0.0	0.0	0.00013721880654900997	0.0	800.6437003915348	88.88888859807315	0.0	1.1651286615137575e-12	-9.473903143468003e-13	0.0	-6.731613057885968e-27	9.473903143468004e-14
1.125	88.88888859781834	0.0	0.00021283858412721898	107.89999420276354	0.0	-800.6437003915348	0.0	4.3191446912223866e-10	0.0	0.9999999999992834	0.0	1.1972170330795237e-06	0.0	0.0	0.00013719096631329471	0.0	0.0	0.00013721893028339092	0.0	800.6437003915348	88.88888859807315	0.0	1.1651286615137575e-12	-9.473903143468003e-13	0.0	-6.731613057885968e-27	9.473903143468004e-14
1.13	88.88888859781834	0.0	0.00021283858412721898	108.34443864720797	0.0	-800.6437003915348	0.0	4.3191446912223866e-10	0.0	0.9999999999992834	0.0	1.1972170330795237e-06	0.0	0.0	0.00013719096631329471	0.0	0.0	0.0001372190540177719	0.0	800.6437003915348	88.88888859807315	0.0	1.1651286615137575e-12	-9.473903143468003e-13	0.0	-6.731613057885968e-27	9.473903143468004e-14
1.135	88.88888859781834	0.0	0.00021283858412721898	108.78888309165242	0.0	-800.6437003915348	0.0	4.3191446912223866e-10	0.0	0.9999999999992834	0.0	1.1972170330795237e-06	0.0	0.0	0.00013719096631329471	0.0	0.0	0.00013721917775215284	0.0	800.6437003915348	88.88888859807315	0.0	1.1651286615137575e-12	-9.473903143468003e-13	0.0	-6.731613057885968e-27	9.473903143468004e-14
1.14	88.88888859781834	0.0	0.00021283858412721898	109.23332753609685	0.0	-800.6437003915348	0.0	4.3191446912223866e-10	0.0	0.9999999999992834	0.0	1.1972170330795237e-06	0.0	0.0	0.00013719096631329471	0.0	0.0	0.0001372193014865338	0.0	800.6437003915348	88.88888859807315	0.0	1.1651286615137575e-12	-9.473903143468003e-13	0.0	-6.731613057885968e-27	9.473903143468004e-14
1.145	88.88888859781834	0.0	0.00021283858412721898	109.67777198054131	0.0	-800.6437003915348	0.0	4.3191446912223866e-10	0.0	0.9999999999992834	0.0	1.1972170330795237e-06	0.0	0.0	0.00013719096631329471	0.0	0.0	0.00013721942522091474	0.0	800.6437003915348	88.88888859807315	0.0	1.1651286615137575e-12	-9.473903143468003e-13	0.0	-6.731613057885968e-27	9.473903143468004e-14
1.15	88.88888859781834	0.0	0.00021283858412721898	110.12221642498575	0.0	-800.6437003915348	0.0	4.3191446912223866e-10	0.0	0.9999999999992834	0.0	1.1972170330795237e-06	0.0	0.0	0.00013719096631329471	0.0	0.0	0.00013721954895529572	0.0	800.6437003915348	88.88888859807315	0.0	1.1651286615137575e-12	-9.473903143468003e-13	0.0	-6.731613057885968e-27	9.473903143468004e-14
1.155	88.88888859781834	0.0	0.00021283858412721898	110.56666086943021	0.0	-800.6437003915348	0.0	4.3191446912223866e-10	0.0	0.9999999999992834	0.0	1.1972170330795237e-06	0.0	0.0	0.00013719096631329471	0.0	0.0	0.00013721967268967667	0.0	800.6437003915348	88.88888859807315	0.0	1.1651286615137575e-12	-9.473903143468003e-13	0.0	-6.731613057885968e-27	9.473903143468004e-14
1.16	88.88888859781834	0.0	0.00021283858412721898	111.01110531387464	0.0	-800.6437003915348	0.0	4.3191446912223866e-10	0.0	0.9999999999992834	0.0	1.1972170330795237e-06	0.0	0.0	0.00013719096631329471	0.0	0.0	0.00013721979642405762	0.0	800.6437003915348	88.88888859807315	0.0	1.1651286615137575e-12	-9.473903143468003e-13	0.0	-6.731613057885968e-27	9.473903143468004e-14
1.165	88.88888859781834	0.0	0.00021283858412721898	111.4555497583191	0.0	-800.6437003915348	0.0	4.3191446912223866e-10	0.0	0.9999999999992834	0.0	1.1972170330795237e-06	0.0	0.0	0.00013719096631329471	0.0	0.0	0.00013721992015843857	0.0	800.6437003915348	88.88888859807315	0.0	1.1651286615137575e-12	-9.473903143468003e-13	0.0	-6.731613057885968e-27	9.473903143468004e-14
1.17	88.88888859781834	0.0	0.00021283858412721898	111.89999420276352	0.0	-800.6437003915348	0.0	4.3191446912223866e-10	0.0	0.9999999999992834	0.0	1.1972170330795237e-06	0.0	0.0	0.00013719096631329471	0.0	0.0	0.00013722004389281955	0.0	800.6437003915348	88.88888859807315	0.0	1.1651286615137575e-12	-9.473903143468003e-13	0.0	-6.731613057885968e-27	9.473903143468004e-14
1.175	88.88888859781834	0.0	0.00021283858412721898	112.34443864720798	0.0	-800.6437003915348	0.0	4.3191446912223866e-10	0.0	0.9999999999992834	0.0	1.1972170330795237e-06	0.0	0.0	0.00013719096631329471	0.0	0.0	0.0001372201676272005	0.0	800.6437003915348	88.88888859807315	0.0	1.1651286615137575e-12	-9.473903143468003e-13	0.0	-6.731613057885968e-27	9.473903143468004e-14
1.18	88.88888859781834	0.0	0.00021283858412721898	112.78888309165242	0.0	-800.6437003915348	0.0	4.3191446912223866e-10	0.0	0.9999999999992834	0.0	1.1972170330795237e-06	0.0	0.0	0.00013719096631329471	0.0	0.0	0.00013722029136158145	0.0	800.6437003915348	88.88888859807315	0.0	1.1651286615137575e-12	-9.473903143468003e-13	0.0	-6.731613057885968e-27	9.473903143468004e-14
1.185	88.88888859781834	0.0	0.00021283858412721898	113.23332753609687	0.0	-800.6437003915348	0.0	4.3191446912223866e-10	0.0	0.9999999999992834	0.0	1.1972170330795237e-06	0.0	0.0	0.00013719096631329471	0.0	0.0	0.0001372204150959624	0.0	800.6437003915348	88.88888859807315	0.0	1.1651286615137575e-12	-9.473903143468003e-13	0.0	-6.731613057885968e-27	9.473903143468004e-14
1.19	88.88888859781834	0.0	0.00021283858412721898	113.67777198054131	0.0	-800.6437003915348	0.0	4.3191446912223866e-10	0.0	0.9999999999992834	0.0	1.1972170330795237e-06	0.0	0.0	0.00013719096631329471	0.0	0.0	0.00013722053883034337	0.0	800.6437003915348	88.88888859807315	0.0	1.1651286615137575e-12	-9.473903143468003e-13	0.0	-6.731613057885968e-27	9.473903143468004e-14
1.195	88.88888859781834	0.0	0.00021283858412721898	114.12221642498577	0.0	-800.6437003915348	0.0	4.3191446912223866e-10	0.0	0.9999999999992834	0.0	1.1972170330795237e-06	0.0	0.0	0.00013719096631329471	0.0	0.0	0.00013722066256472432	0.0	800.6437003915348	88.88888859807315	0.0	1.1651286615137575e-12	-9.473903143468003e-13	0.0	-6.731613057885968e-27	9.473903143468004e-14
1.2	88.88888859781834	0.0	0.00021283858412721898	114.5666608694302	0.0	-800.6437003915348	0.0	4.3191446912223866e-10	0.0	0.9999999999992834	0.0	1.1972170330795237e-06	0.0	0.0	0.00013719096631329471	0.0	0.0	0.00013722078629910527	0.0	800.6437003915348	88.88888859807315	0.0	1.1651286615137575e-12	-9.473903143468003e-13	0.0	-6.731613057885968e-27	9.473903143468004e-14
1.205	88.88888859781834	0.0	0.00021283858412721898	115.01110531387465	0.0	-800.6437003915348	0.0	4.3191446912223866e-10	0.0	0.9999999999992834	0.0	1.1972170330795237e-06	0.0	0.0	0.00013719096631329471	0.0	0.0	0.00013722091003348622	0.0	800.6437003915348	88.88888859807315	0.0	1.1651286615137575e-12	-9.473903143468003e-13	0.0	-6.731613057885968e-27	9.473903143468004e-14
1.21	88.88888859781834	0.0	0.00021283858412721898	115.45554975831908	0.0	-800.6437003915348	0.0	4.3191446912223866e-10	0.0	0.9999999999992834	0.0	1.1972170330795237e-06	0.0	0.0	0.00013719096631329471	0.0	0.0	0.0001372210337678672	0.0	800.6437003915348	88.88888859807315	0.0	1.1651286615137575e-12	-9.473903143468003e-13	0.0	-6.731613057885968e-27	9.473903143468004e-14
1.215	88.88888859781834	0.0	0.00021283858412721898	115.89999420276354	0.0	-800.6437003915348	0.0	4.3191446912223866e-10	0.0	0.9999999999992834	0.0	1.1972170330795237e-06	0.0	0.0	0.00013719096631329471	0.0	0.0	0.00013722115750224815	0.0	800.6437003915348	88.88888859807315	0.0	1.1651286615137575e-12	-9.473903143468003e-13	0.0	-6.731613057885968e-27	9.473903143468004e-14
1.22	88.88888859781834	0.0	0.00021283858412721898	116.34443864720798	0.0	-800.6437003915348	0.0	4.3191446912223866e-10	0.0	0.9999999999992834	0.0	1.1972170330795237e-06	0.0	0.0	0.00013719096631329471	0.0	0.0	0.0001372212812366291	0.0	800.6437003915348	88.88888859807315	0.0	1.1651286615137575e-12	-9.473903143468003e-13	0.0	-6.731613057885968e-27	9.473903143468004e-14
1.225	88.88888859781834	0.0	0.00021283858412721898	116.78888309165244	0.0	-800.6437003915348	0.0	4.3191446912223866e-10	0.0	0.9999999999992834	0.0	1.1972170330795237e-06	0.0	0.0	0.00013719096631329471	0.0	0.0	0.00013722140497101005	0.0	800.6437003915348	88.88888859807315	0.0	1.1651286615137575e-12	-9.473903143468003e-13	0.0	-6.731613057885968e-27	9.473903143468004e-14
1.23	88.88888859781834	0.0	0.00021283858412721898	117.23332753609687	0.0	-800.6437003915348	0.0	4.3191446912223866e-10	0.0	0.9999999999992834	0.0	1.1972170330795237e-06	0.0	0.0	0.00013719096631329471	0.0	0.0	0.00013722152870539102	0.0	800.6437003915348	88.88888859807315	0.0	1.1651286615137575e-12	-9.473903143468003e-13	0.0	-6.731613057885968e-27	9.473903143468004e-14
1.235	88.88888859781834	0.0	0.00021283858412721898	117.67777198054132	0.0	-800.6437003915348	0.0	4.3191446912223866e-10	0.0	0.9999999999992834	0.0	1.1972170330795237e-06	0.0	0.0	0.00013719096631329471	0.0	0.0	0.00013722165243977197	0.0	800.6437003915348	88.88888859807315	0.0	1.1651286615137575e-12	-9.473903143468003e-13	0.0	-6.731613057885968e-27	9.473903143468004e-14
1.24	88.88888859781834	0.0	0.00021283858412721898	118.12221642498575	0.0	-800.6437003915348	0.0	4.3191446912223866e-10	0.0	0.9999999999992834	0.0	1.1972170330795237e-06	0.0	0.0	0.00013719096631329471	0.0	0.0	0.00013722177617415292	0.0	800.6437003915348	88.88888859807315	0.0	1.1651286615137575e-12	-9.473903143468003e-13	0.0	-6.731613057885968e-27	9.473903143468004e-14
1.245	88.88888859781834	0.0	0.00021283858412721898	118.56666086943021	0.0	-800.6437003915348	0.0	4.3191446912223866e-10	0.0	0.9999999999992834	0.0	1.1972170330795237e-06	0.0	0.0	0.00013719096631329471	0.0	0.0	0.00013722189990853387	0.0	800.6437003915348	88.88888859807315	0.0	1.1651286615137575e-12	-9.473903143468003e-13	0.0	-6.731613057885968e-27	9.473903143468004e-14
1.25	88.88888859781834	0.0	0.00021283858412721898	119.01110531387465	0.0	-800.6437003915348	0.0	4.3191446912223866e-10	0.0	0.9999999999992834	0.0	1.1972170330795237e-06	0.0	0.0	0.00013719096631329471	0.0	0.0	0.00013722202364291485	0.0	800.6437003915348	88.88888859807315	0.0	1.1651286615137575e-12	-9.473903143468003e-13	0.0	-6.731613057885968e-27	9.473903143468004e-14
1.255	88.88888859781834	0.0	0.00021283858412721898	119.45554975831908	0.0	-800.6437003915348	0.0	4.3191446912223866e-10	0.0	0.9999999999992834	0.0	1.1972170330795237e-06	0.0	0.0	0.00013719096631329471	0.0	0.0	0.0001372221473772958	0.0	800.6437003915348	88.88888859807315	0.0	1.1651286615137575e-12	-9.473903143468003e-13	0.0	-6.731613057885968e-27	9.473903143468004e-14
1.26	88.88888859781834	0.0	0.00021283858412721898	119.89999420276354	0.0	-800.6437003915348	0.0	4.3191446912223866e-10	0.0	0.9999999999992834	0.0	1.1972170330795237e-06	0.0	0.0	0.00013719096631329471	0.0	0.0	0.00013722227111167675	0.0	800.6437003915348	88.88888859807315	0.0	1.1651286615137575e-12	-9.473903143468003e-13	0.0	-6.731613057885968e-27	9.473903143468004e-14
1.265	88.88888859781834	0.0	0.00021283858412721898	120.34443864720797	0.0	-800.6437003915348	0.0	4.3191446912223866e-10	0.0	0.9999999999992834	0.0	1.1972170330795237e-06	0.0	0.0	0.00013719096631329471	0.0	0.0	0.0001372223948460577	0.0	800.6437003915348	88.88888859807315	0.0	1.1651286615137575e-12	-9.473903143468003e-13	0.0	-6.731613057885968e-27	9.473903143468004e-14
1.27	88.88888859781834	0.0	0.00021283858412721898	120.78888309165242	0.0	-800.6437003915348	0.0	4.3191446912223866e-10	0.0	0.9999999999992834	0.0	1.1972170330795237e-06	0.0	0.0	0.00013719096631329471	0.0	0.0	0.00013722251858043868	0.0	800.6437003915348	88.88888859807315	0.0	1.1651286615137575e-12	-9.473903143468003e-13	0.0	-6.731613057885968e-27	9.473903143468004e-14
1.275	88.88888859781834	0.0	0.00021283858412721898	121.23332753609685	0.0	-800.6437003915348	0.0	4.3191446912223866e-10	0.0	0.9999999999992834	0.0	1.1972170330795237e-06	0.0	0.0	0.00013719096631329471	0.0	0.0	0.00013722264231481963	0.0	800.6437003915348	88.88888859807315	0.0	1.1651286615137575e-12	-9.473903143468003e-13	0.0	-6.731613057885968e-27	9.473903143468004e-14
1.28	88.88888859781834	0.0	0.00021283858412721898	121.67777198054131	0.0	-800.6437003915348	0.0	4.3191446912223866e-10	0.0	0.9999999999992834	0.0	1.1972170330795237e-06	0.0	0.0	0.00013719096631329471	0.0	0.0	0.00013722276604920058	0.0	800.6437003915348	88.88888859807315	0.0	1.1651286615137575e-12	-9.473903143468003e-13	0.0	-6.731613057885968e-27	9.473903143468004e-14
1.285	88.88888859781834	0.0	0.00021283858412721898	122.12221642498575	0.0	-800.6437003915348	0.0	4.3191446912223866e-10	0.0	0.9999999999992834	0.0	1.1972170330795237e-06	0.0	0.0	0.00013719096631329471	0.0	0.0	0.00013722288978358153	0.0	800.6437003915348	88.88888859807315	0.0	1.1651286615137575e-12	-9.473903143468003e-13	0.0	-6.731613057885968e-27	9.473903143468004e-14
1.29	88.88888859781834	0.0	0.00021283858412721898	122.56666086943021	0.0	-800.6437003915348	0.0	4.3191446912223866e-10	0.0	0.9999999999992834	0.0	1.1972170330795237e-06	0.0	0.0	0.00013719096631329471	0.0	0.0	0.0001372230135179625	0.0	800.6437003915348	88.88888859807315	0.0	1.1651286615137575e-12	-9.473903143468003e-13	0.0	-6.731613057885968e-27	9.473903143468004e-14
1.295	88.88888859781834	0.0	0.00021283858412721898	123.01110531387464	0.0	-800.6437003915348	0.0	4.3191446912223866e-10	0.0	0.9999999999992834	0.0	1.1972170330795237e-06	0.0	0.0	0.00013719096631329471	0.0	0.0	0.00013722313725234345	0.0	800.6437003915348	88.88888859807315	0.0	1.1651286615137575e-12	-9.473903143468003e-13	0.0	-6.731613057885968e-27	9.473903143468004e-14
1.3	88.88888859781834	0.0	0.00021283858412721898	123.4555497583191	0.0	-800.6437003915348	0.0	4.3191446912223866e-10	0.0	0.9999999999992834	0.0	1.1972170330795237e-06	0.0	0.0	0.00013719096631329471	0.0	0.0	0.0001372232609867244	0.0	800.6437003915348	88.88888859807315	0.0	1.1651286615137575e-12	-9.473903143468003e-13	0.0	-6.731613057885968e-27	9.473903143468004e-14
1.305	88.88888859781834	0.0	0.00021283858412721898	123.89999420276352	0.0	-800.6437003915348	0.0	4.3191446912223866e-10	0.0	0.9999999999992834	0.0	1.1972170330795237e-06	0.0	0.0	0.00013719096631329471	0.0	0.0	0.00013722338472110538	0.0	800.6437003915348	88.88888859807315	0.0	1.1651286615137575e-12	-9.473903143468003e-13	0.0	-6.731613057885968e-27	9.473903143468004e-14
1.31	88.88888859781834	0.0	0.00021283858412721898	124.34443864720798	0.0	-800.6437003915348	0.0	4.3191446912223866e-10	0.0	0.9999999999992834	0.0	1.1972170330795237e-06	0.0	0.0	0.00013719096631329471	0.0	0.0	0.00013722350845548633	0.0	800.6437003915348	88.88888859807315	0.0	1.1651286615137575e-12	-9.473903143468003e-13	0.0	-6.731613057885968e-27	9.473903143468004e-14
1.315	88.88888859781834	0.0	0.00021283858412721898	124.78888309165242	0.0	-800.6437003915348	0.0	4.3191446912223866e-10	0.0	0.9999999999992834	0.0	1.1972170330795237e-06	0.0	0.0	0.00013719096631329471	0.0	0.0	0.00013722363218986728	0.0	800.6437003915348	88.88888859807315	0.0	1.1651286615137575e-12	-9.473903143468003e-13	0.0	-6.731613057885968e-27	9.473903143468004e-14
1.32	88.88888859781834	0.0	0.00021283858412721898	125.23332753609687	0.0	-800.6437003915348	0.0	4.3191446912223866e-10	0.0	0.9999999999992834	0.0	1.1972170330795237e-06	0.0	0.0	0.00013719096631329471	0.0	0.0	0.00013722375592424823	0.0	800.6437003915348	88.88888859807315	0.0	1.1651286615137575e-12	-9.473903143468003e-13	0.0	-6.731613057885968e-27	9.473903143468004e-14
1.325	88.88888859781834	0.0	0.00021283858412721898	125.67777198054131	0.0	-800.6437003915348	0.0	4.3191446912223866e-10	0.0	0.9999999999992834	0.0	1.1972170330795237e-06	0.0	0.0	0.00013719096631329471	0.0	0.0	0.0001372238796586292	0.0	800.6437003915348	88.88888859807315	0.0	1.1651286615137575e-12	-9.473903143468003e-13	0.0	-6.731613057885968e-27	9.473903143468004e-14
1.33	88.88888859781834	0.0	0.00021283858412721898	126.12221642498577	0.0	-800.6437003915348	0.0	4.3191446912223866e-10	0.0	0.9999999999992834	0.0	1.1972170330795237e-06	0.0	0.0	0.00013719096631329471	0.0	0.0	0.00013722400339301016	0.0	800.6437003915348	88.88888859807315	0.0	1.1651286615137575e-12	-9.473903143468003e-13	0.0	-6.731613057885968e-27	9.473903143468004e-14
1.335	88.88888859781834	0.0	0.00021283858412721898	126.5666608694302	0.0	-800.6437003915348	0.0	4.3191446912223866e-10	0.0	0.9999999999992834	0.0	1.1972170330795237e-06	0.0	0.0	0.00013719096631329471	0.0	0.0	0.0001372241271273911	0.0	800.6437003915348	88.88888859807315	0.0	1.1651286615137575e-12	-9.473903143468003e-13	0.0	-6.731613057885968e-27	9.473903143468004e-14
1.34	88.88888859781834	0.0	0.00021283858412721898	127.01110531387465	0.0	-800.6437003915348	0.0	4.3191446912223866e-10	0.0	0.9999999999992834	0.0	1.1972170330795237e-06	0.0	0.0	0.00013719096631329471	0.0	0.0	0.00013722425086177206	0.0	800.6437003915348	88.88888859807315	0.0	1.1651286615137575e-12	-9.473903143468003e-13	0.0	-6.731613057885968e-27	9.473903143468004e-14
1.345	88.88888859781834	0.0	0.00021283858412721898	127.45554975831908	0.0	-800.6437003915348	0.0	4.3191446912223866e-10	0.0	0.9999999999992834	0.0	1.1972170330795237e-06	0.0	0.0	0.00013719096631329471	0.0	0.0	0.00013722437459615303	0.0	800.6437003915348	88.88888859807315	0.0	1.1651286615137575e-12	-9.473903143468003e-13	0.0	-6.731613057885968e-27	9.473903143468004e-14
1.35	88.88888859781834	0.0	0.00021283858412721898	127.89999420276354	0.0	-800.6437003915348	0.0	4.3191446912223866e-10	0.0	0.9999999999992834	0.0	1.1972170330795237e-06	0.0	0.0	0.00013719096631329471	0.0	0.0	0.00013722449833053398	0.0	800.6437003915348	88.88888859807315	0.0	1.1651286615137575e-12	-9.473903143468003e-13	0.0	-6.731613057885968e-27	9.473903143468004e-14
1.355	88.88888859781834	0.0	0.00021283858412721898	128.344438647208	0.0	-800.6437003915348	0.0	4.3191446912223866e-10	0.0	0.9999999999992834	0.0	1.1972170330795237e-06	0.0	0.0	0.00013719096631329471	0.0	0.0	0.00013722462206491493	0.0	800.6437003915348	88.88888859807315	0.0	1.1651286615137575e-12	-9.473903143468003e-13	0.0	-6.731613057885968e-27	9.473903143468004e-14
1.36	88.88888859781834	0.0	0.00021283858412721898	128.78888309165245	0.0	-800.6437003915348	0.0	4.3191446912223866e-10	0.0	0.9999999999992834	0.0	1.1972170330795237e-06	0.0	0.0	0.00013719096631329471	0.0	0.0	0.00013722474579929588	0.0	800.6437003915348	88.88888859807315	0.0	1.1651286615137575e-12	-9.473903143468003e-13	0.0	-6.731613057885968e-27	9.473903143468004e-14
1.365	88.88888859781834	0.0	0.00021283858412721898	129.23332753609685	0.0	-800.6437003915348	0.0	4.3191446912223866e-10	0.0	0.9999999999992834	0.0	1.1972170330795237e-06	0.0	0.0	0.00013719096631329471	0.0	0.0	0.00013722486953367686	0.0	800.6437003915348	88.88888859807315	0.0	1.1651286615137575e-12	-9.473903143468003e-13	0.0	-6.731613057885968e-27	9.473903143468004e-14
1.37	88.88888859781834	0.0	0.00021283858412721898	129.6777719805413	0.0	-800.6437003915348	0.0	4.3191446912223866e-10	0.0	0.9999999999992834	0.0	1.1972170330795237e-06	0.0	0.0	0.00013719096631329471	0.0	0.0	0.0001372249932680578	0.0	800.6437003915348	88.88888859807315	0.0	1.1651286615137575e-12	-9.473903143468003e-13	0.0	-6.731613057885968e-27	9.473903143468004e-14
1.375	88.88888859781834	0.0	0.00021283858412721898	130.12221642498577	0.0	-800.6437003915348	0.0	4.3191446912223866e-10	0.0	0.9999999999992834	0.0	1.1972170330795237e-06	0.0	0.0	0.00013719096631329471	0.0	0.0	0.00013722511700243876	0.0	800.6437003915348	88.88888859807315	0.0	1.1651286615137575e-12	-9.473903143468003e-13	0.0	-6.731613057885968e-27	9.473903143468004e-14
1.38	88.88888859781834	0.0	0.00021283858412721898	130.5666608694302	0.0	-800.6437003915348	0.0	4.3191446912223866e-10	0.0	0.9999999999992834	0.0	1.1972170330795237e-06	0.0	0.0	0.00013719096631329471	0.0	0.0	0.0001372252407368197	0.0	800.6437003915348	88.88888859807315	0.0	1.1651286615137575e-12	-9.473903143468003e-13	0.0	-6.731613057885968e-27	9.473903143468004e-14
1.385	88.88888859781834	0.0	0.00021283858412721898	131.01110531387465	0.0	-800.6437003915348	0.0	4.3191446912223866e-10	0.0	0.9999999999992834	0.0	1.1972170330795237e-06	0.0	0.0	0.00013719096631329471	0.0	0.0	0.00013722536447120069	0.0	800.6437003915348	88.88888859807315	0.0	1.1651286615137575e-12	-9.473903143468003e-13	0.0	-6.731613057885968e-27	9.473903143468004e-14
1.39	88.88888859781834	0.0	0.00021283858412721898	131.45554975831908	0.0	-800.6437003915348	0.0	4.3191446912223866e-10	0.0	0.9999999999992834	0.0	1.1972170330795237e-06	0.0	0.0	0.00013719096631329471	0.0	0.0	0.00013722548820558164	0.0	800.6437003915348	88.88888859807315	0.0	1.1651286615137575e-12	-9.473903143468003e-13	0.0	-6.731613057885968e-27	9.473903143468004e-14
1.395	88.88888859781834	0.0	0.00021283858412721898	131.89999420276354	0.0	-800.6437003915348	0.0	4.3191446912223866e-10	0.0	0.9999999999992834	0.0	1.1972170330795237e-06	0.0	0.0	0.00013719096631329471	0.0	0.0	0.00013722561193996258	0.0	800.6437003915348	88.88888859807315	0.0	1.1651286615137575e-12	-9.473903143468003e-13	0.0	-6.731613057885968e-27	9.473903143468004e-14
1.4	88.88888859781834	0.0	0.00021283858412721898	132.34443864720797	0.0	-800.6437003915348	0.0	4.3191446912223866e-10	0.0	0.9999999999992834	0.0	1.1972170330795237e-06	0.0	0.0	0.00013719096631329471	0.0	0.0	0.00013722573567434353	0.0	800.6437003915348	88.88888859807315	0.0	1.1651286615137575e-12	-9.473903143468003e-13	0.0	-6.731613057885968e-27	9.473903143468004e-14
1.405	88.88888859781834	0.0	0.00021283858412721898	132.78888309165242	0.0	-800.6437003915348	0.0	4.3191446912223866e-10	0.0	0.9999999999992834	0.0	1.1972170330795237e-06	0.0	0.0	0.00013719096631329471	0.0	0.0	0.0001372258594087245	0.0	800.6437003915348	88.88888859807315	0.0	1.1651286615137575e-12	-9.473903143468003e-13	0.0	-6.731613057885968e-27	9.473903143468004e-14
1.41	88.88888859781834	0.0	0.00021283858412721898	133.23332753609685	0.0	-800.6437003915348	0.0	4.3191446912223866e-10	0.0	0.9999999999992834	0.0	1.1972170330795237e-06	0.0	0.0	0.00013719096631329471	0.0	0.0	0.00013722598314310546	0.0	800.6437003915348	88.88888859807315	0.0	1.1651286615137575e-12	-9.473903143468003e-13	0.0	-6.731613057885968e-27	9.473903143468004e-14
1.415	88.88888859781834	0.0	0.00021283858412721898	133.6777719805413	0.0	-800.6437003915348	0.0	4.3191446912223866e-10	0.0	0.9999999999992834	0.0	1.1972170330795237e-06	0.0	0.0	0.00013719096631329471	0.0	0.0	0.0001372261068774864	0.0	800.6437003915348	88.88888859807315	0.0	1.1651286615137575e-12	-9.473903143468003e-13	0.0	-6.731613057885968e-27	9.473903143468004e-14
1.42	88.88888859781834	0.0	0.00021283858412721898	134.12221642498577	0.0	-800.6437003915348	0.0	4.3191446912223866e-10	0.0	0.9999999999992834	0.0	1.1972170330795237e-06	0.0	0.0	0.00013719096631329471	0.0	0.0	0.00013722623061186736	0.0	800.6437003915348	88.88888859807315	0.0	1.1651286615137575e-12	-9.473903143468003e-13	0.0	-6.731613057885968e-27	9.473903143468004e-14
1.425	88.88888859781834	0.0	0.00021283858412721898	134.56666086943022	0.0	-800.6437003915348	0.0	4.3191446912223866e-10	0.0	0.9999999999992834	0.0	1.1972170330795237e-06	0.0	0.0	0.00013719096631329471	0.0	0.0	0.00013722635434624834	0.0	800.6437003915348	88.88888859807315	0.0	1.1651286615137575e-12	-9.473903143468003e-13	0.0	-6.731613057885968e-27	9.473903143468004e-14
1.43	88.88888859781834	0.0	0.00021283858412721898	135.01110531387462	0.0	-800.6437003915348	0.0	4.3191446912223866e-10	0.0	0.9999999999992834	0.0	1.1972170330795237e-06	0.0	0.0	0.00013719096631329471	0.0	0.0	0.0001372264780806293	0.0	800.6437003915348	88.88888859807315	0.0	1.1651286615137575e-12	-9.473903143468003e-13	0.0	-6.731613057885968e-27	9.473903143468004e-14
1.435	88.88888859781834	0.0	0.00021283858412721898	135.45554975831908	0.0	-800.6437003915348	0.0	4.3191446912223866e-10	0.0	0.9999999999992834	0.0	1.1972170330795237e-06	0.0	0.0	0.00013719096631329471	0.0	0.0	0.00013722660181501024	0.0	800.6437003915348	88.88888859807315	0.0	1.1651286615137575e-12	-9.473903143468003e-13	0.0	-6.731613057885968e-27	9.473903143468004e-14
1.44	88.88888859781834	0.0	0.00021283858412721898	135.89999420276354	0.0	-800.6437003915348	0.0	4.3191446912223866e-10	0.0	0.9999999999992834	0.0	1.1972170330795237e-06	0.0	0.0	0.00013719096631329471	0.0	0.0	0.0001372267255493912	0.0	800.6437003915348	88.88888859807315	0.0	1.1651286615137575e-12	-9.473903143468003e-13	0.0	-6.731613057885968e-27	9.473903143468004e-14
1.445	88.88888859781834	0.0	0.00021283858412721898	136.344438647208	0.0	-800.6437003915348	0.0	4.3191446912223866e-10	0.0	0.9999999999992834	0.0	1.1972170330795237e-06	0.0	0.0	0.00013719096631329471	0.0	0.0	0.00013722684928377216	0.0	800.6437003915348	88.88888859807315	0.0	1.1651286615137575e-12	-9.473903143468003e-13	0.0	-6.731613057885968e-27	9.473903143468004e-14
1.45	88.88888859781834	0.0	0.00021283858412721898	136.78888309165242	0.0	-800.6437003915348	0.0	4.3191446912223866e-10	0.0	0.9999999999992834	0.0	1.1972170330795237e-06	0.0	0.0	0.00013719096631329471	0.0	0.0	0.00013722697301815311	0.0	800.6437003915348	88.88888859807315	0.0	1.1651286615137575e-12	-9.473903143468003e-13	0.0	-6.731613057885968e-27	9.473903143468004e-14
1.455	88.88888859781834	0.0	0.00021283858412721898	137.23332753609688	0.0	-800.6437003915348	0.0	4.3191446912223866e-10	0.0	0.9999999999992834	0.0	1.1972170330795237e-06	0.0	0.0	0.00013719096631329471	0.0	0.0	0.00013722709675253406	0.0	800.6437003915348	88.88888859807315	0.0	1.1651286615137575e-12	-9.473903143468003e-13	0.0	-6.731613057885968e-27	9.473903143468004e-14
1.46	88.88888859781834	0.0	0.00021283858412721898	137.6777719805413	0.0	-800.6437003915348	0.0	4.3191446912223866e-10	0.0	0.9999999999992834	0.0	1.1972170330795237e-06	0.0	0.0	0.00013719096631329471	0.0	0.0	0.00013722722048691501	0.0	800.6437003915348	88.88888859807315	0.0	1.1651286615137575e-12	-9.473903143468003e-13	0.0	-6.731613057885968e-27	9.473903143468004e-14
1.465	88.88888859781834	0.0	0.00021283858412721898	138.12221642498577	0.0	-800.6437003915348	0.0	4.3191446912223866e-10	0.0	0.9999999999992834	0.0	1.1972170330795237e-06	0.0	0.0	0.00013719096631329471	0.0	0.0	0.000137227344221296	0.0	800.6437003915348	88.88888859807315	0.0	1.1651286615137575e-12	-9.473903143468003e-13	0.0	-6.731613057885968e-27	9.473903143468004e-14
1.47	88.88888859781834	0.0	0.00021283858412721898	138.5666608694302	0.0	-800.6437003915348	0.0	4.3191446912223866e-10	0.0	0.9999999999992834	0.0	1.1972170330795237e-06	0.0	0.0	0.00013719096631329471	0.0	0.0	0.00013722746795567694	0.0	800.6437003915348	88.88888859807315	0.0	1.1651286615137575e-12	-9.473903143468003e-13	0.0	-6.731613057885968e-27	9.473903143468004e-14
1.475	88.88888859781834	0.0	0.00021283858412721898	139.01110531387465	0.0	-800.6437003915348	0.0	4.3191446912223866e-10	0.0	0.9999999999992834	0.0	1.1972170330795237e-06	0.0	0.0	0.00013719096631329471	0.0	0.0	0.0001372275916900579	0.0	800.6437003915348	88.88888859807315	0.0	1.1651286615137575e-12	-9.473903143468003e-13	0.0	-6.731613057885968e-27	9.473903143468004e-14
1.48	88.88888859781834	0.0	0.00021283858412721898	139.45554975831908	0.0	-800.6437003915348	0.0	4.3191446912223866e-10	0.0	0.9999999999992834	0.0	1.1972170330795237e-06	0.0	0.0	0.00013719096631329471	0.0	0.0	0.00013722771542443884	0.0	800.6437003915348	88.88888859807315	0.0	1.1651286615137575e-12	-9.473903143468003e-13	0.0	-6.731613057885968e-27	9.473903143468004e-14
1.485	88.88888859781834	0.0	0.00021283858412721898	139.89999420276354	0.0	-800.6437003915348	0.0	4.3191446912223866e-10	0.0	0.9999999999992834	0.0	1.1972170330795237e-06	0.0	0.0	0.00013719096631329471	0.0	0.0	0.00013722783915881982	0.0	800.6437003915348	88.88888859807315	0.0	1.1651286615137575e-12	-9.473903143468003e-13	0.0	-6.731613057885968e-27	9.473903143468004e-14
1.49	88.88888859781834	0.0	0.00021283858412721898	140.34443864720797	0.0	-800.6437003915348	0.0	4.3191446912223866e-10	0.0	0.9999999999992834	0.0	1.1972170330795237e-06	0.0	0.0	0.00013719096631329471	0.0	0.0	0.00013722796289320077	0.0	800.6437003915348	88.88888859807315	0.0	1.1651286615137575e-12	-9.473903143468003e-13	0.0	-6.731613057885968e-27	9.473903143468004e-14
1.495	88.88888859781834	0.0	0.00021283858412721898	140.78888309165242	0.0	-800.6437003915348	0.0	4.3191446912223866e-10	0.0	0.9999999999992834	0.0	1.1972170330795237e-06	0.0	0.0	0.00013719096631329471	0.0	0.0	0.00013722808662758172	0.0	800.6437003915348	88.88888859807315	0.0	1.1651286615137575e-12	-9.473903143468003e-13	0.0	-6.731613057885968e-27	9.473903143468004e-14
1.5	88.88888859781834	0.0	0.00021283858412721898	141.23332753609685	0.0	-800.6437003915348	0.0	4.3191446912223866e-10	0.0	0.9999999999992834	0.0	1.1972170330795237e-06	0.0	0.0	0.00013719096631329471	0.0	0.0	0.00013722821036196267	0.0	800.6437003915348	88.88888859807315	0.0	1.1651286615137575e-12	-9.473903143468003e-13	0.0	-6.731613057885968e-27	9.473903143468004e-14
1.505	88.88888859781834	0.0	0.00021283858412721898	141.6777719805413	0.0	-800.6437003915348	0.0	4.3191446912223866e-10	0.0	0.9999999999992834	0.0	1.1972170330795237e-06	0.0	0.0	0.00013719096631329471	0.0	0.0	0.00013722833409634364	0.0	800.6437003915348	88.88888859807315	0.0	1.1651286615137575e-12	-9.473903143468003e-13	0.0	-6.731613057885968e-27	9.473903143468004e-14
1.51	88.88888859781834	0.0	0.00021283858412721898	142.12221642498577	0.0	-800.6437003915348	0.0	4.3191446912223866e-10	0.0	0.9999999999992834	0.0	1.1972170330795237e-06	0.0	0.0	0.00013719096631329471	0.0	0.0	0.0001372284578307246	0.0	800.6437003915348	88.88888859807315	0.0	1.1651286615137575e-12	-9.473903143468003e-13	0.0	-6.731613057885968e-27	9.473903143468004e-14
1.515	88.88888859781834	0.0	0.00021283858412721898	142.5666608694302	0.0	-800.6437003915348	0.0	4.3191446912223866e-10	0.0	0.9999999999992834	0.0	1.1972170330795237e-06	0.0	0.0	0.00013719096631329471	0.0	0.0	0.00013722858156510554	0.0	800.6437003915348	88.88888859807315	0.0	1.1651286615137575e-12	-9.473903143468003e-13	0.0	-6.731613057885968e-27	9.473903143468004e-14
1.52	88.88888859781834	0.0	0.00021283858412721898	143.01110531387465	0.0	-800.6437003915348	0.0	4.3191446912223866e-10	0.0	0.9999999999992834	0.0	1.1972170330795237e-06	0.0	0.0	0.00013719096631329471	0.0	0.0	0.0001372287052994865	0.0	800.6437003915348	88.88888859807315	0.0	1.1651286615137575e-12	-9.473903143468003e-13	0.0	-6.731613057885968e-27	9.473903143468004e-14
1.525	88.88888859781834	0.0	0.00021283858412721898	143.45554975831908	0.0	-800.6437003915348	0.0	4.3191446912223866e-10	0.0	0.9999999999992834	0.0	1.1972170330795237e-06	0.0	0.0	0.00013719096631329471	0.0	0.0	0.00013722882903386747	0.0	800.6437003915348	88.88888859807315	0.0	1.1651286615137575e-12	-9.473903143468003e-13	0.0	-6.731613057885968e-27	9.473903143468004e-14
1.53	88.88888859781834	0.0	0.00021283858412721898	143.89999420276354	0.0	-800.6437003915348	0.0	4.3191446912223866e-10	0.0	0.9999999999992834	0.0	1.1972170330795237e-06	0.0	0.0	0.00013719096631329471	0.0	0.0	0.00013722895276824842	0.0	800.6437003915348	88.88888859807315	0.0	1.1651286615137575e-12	-9.473903143468003e-13	0.0	-6.731613057885968e-27	9.473903143468004e-14
1.535	88.88888859781834	0.0	0.00021283858412721898	144.34443864720797	0.0	-800.6437003915348	0.0	4.3191446912223866e-10	0.0	0.9999999999992834	0.0	1.1972170330795237e-06	0.0	0.0	0.00013719096631329471	0.0	0.0	0.00013722907650262937	0.0	800.6437003915348	88.88888859807315	0.0	1.1651286615137575e-12	-9.473903143468003e-13	0.0	-6.731613057885968e-27	9.473903143468004e-14
1.54	88.88888859781834	0.0	0.00021283858412721898	144.78888309165242	0.0	-800.6437003915348	0.0	4.3191446912223866e-10	0.0	0.9999999999992834	0.0	1.1972170330795237e-06	0.0	0.0	0.00013719096631329471	0.0	0.0	0.00013722920023701032	0.0	800.6437003915348	88.88888859807315	0.0	1.1651286615137575e-12	-9.473903143468003e-13	0.0	-6.731613057885968e-27	9.473903143468004e-14
1.545	88.88888859781834	0.0	0.00021283858412721898	145.23332753609685	0.0	-800.6437003915348	0.0	4.3191446912223866e-10	0.0	0.9999999999992834	0.0	1.1972170330795237e-06	0.0	0.0	0.00013719096631329471	0.0	0.0	0.0001372293239713913	0.0	800.6437003915348	88.88888859807315	0.0	1.1651286615137575e-12	-9.473903143468003e-13	0.0	-6.731613057885968e-27	9.473903143468004e-14
1.55	88.88888859781834	0.0	0.00021283858412721898	145.6777719805413	0.0	-800.6437003915348	0.0	4.3191446912223866e-10	0.0	0.9999999999992834	0.0	1.1972170330795237e-06	0.0	0.0	0.00013719096631329471	0.0	0.0	0.00013722944770577225	0.0	800.6437003915348	88.88888859807315	0.0	1.1651286615137575e-12	-9.473903143468003e-13	0.0	-6.731613057885968e-27	9.473903143468004e-14
1.555	88.88888859781834	0.0	0.00021283858412721898	146.12221642498574	0.0	-800.6437003915348	0.0	4.3191446912223866e-10	0.0	0.9999999999992834	0.0	1.1972170330795237e-06	0.0	0.0	0.00013719096631329471	0.0	0.0	0.0001372295714401532	0.0	800.6437003915348	88.88888859807315	0.0	1.1651286615137575e-12	-9.473903143468003e-13	0.0	-6.731613057885968e-27	9.473903143468004e-14
1.56	88.88888859781834	0.0	0.00021283858412721898	146.5666608694302	0.0	-800.6437003915348	0.0	4.3191446912223866e-10	0.0	0.9999999999992834	0.0	1.1972170330795237e-06	0.0	0.0	0.00013719096631329471	0.0	0.0	0.00013722969517453415	0.0	800.6437003915348	88.88888859807315	0.0	1.1651286615137575e-12	-9.473903143468003e-13	0.0	-6.731613057885968e-27	9.473903143468004e-14
1.565	88.88888859781834	0.0	0.00021283858412721898	147.01110531387465	0.0	-800.6437003915348	0.0	4.3191446912223866e-10	0.0	0.9999999999992834	0.0	1.1972170330795237e-06	0.0	0.0	0.00013719096631329471	0.0	0.0	0.00013722981890891512	0.0	800.6437003915348	88.88888859807315	0.0	1.1651286615137575e-12	-9.473903143468003e-13	0.0	-6.731613057885968e-27	9.473903143468004e-14
1.57	88.88888859781834	0.0	0.00021283858412721898	147.45554975831908	0.0	-800.6437003915348	0.0	4.3191446912223866e-10	0.0	0.9999999999992834	0.0	1.1972170330795237e-06	0.0	0.0	0.00013719096631329471	0.0	0.0	0.00013722994264329607	0.0	800.6437003915348	88.88888859807315	0.0	1.1651286615137575e-12	-9.473903143468003e-13	0.0	-6.731613057885968e-27	9.473903143468004e-14
1.575	88.88888859781834	0.0	0.00021283858412721898	147.89999420276354	0.0	-800.6437003915348	0.0	4.3191446912223866e-10	0.0	0.9999999999992834	0.0	1.1972170330795237e-06	0.0	0.0	0.00013719096631329471	0.0	0.0	0.00013723006637767702	0.0	800.6437003915348	88.88888859807315	0.0	1.1651286615137575e-12	-9.473903143468003e-13	0.0	-6.731613057885968e-27	9.473903143468004e-14
1.58	88.88888859781834	0.0	0.00021283858412721898	148.344438647208	0.0	-800.6437003915348	0.0	4.3191446912223866e-10	0.0	0.9999999999992834	0.0	1.1972170330795237e-06	0.0	0.0	0.00013719096631329471	0.0	0.0	0.00013723019011205797	0.0	800.6437003915348	88.88888859807315	0.0	1.1651286615137575e-12	-9.473903143468003e-13	0.0	-6.731613057885968e-27	9.473903143468004e-14
1.585	88.88888859781834	0.0	0.00021283858412721898	148.78888309165242	0.0	-800.6437003915348	0.0	4.3191446912223866e-10	0.0	0.9999999999992834	0.0	1.1972170330795237e-06	0.0	0.0	0.00013719096631329471	0.0	0.0	0.00013723031384643895	0.0	800.6437003915348	88.88888859807315	0.0	1.1651286615137575e-12	-9.473903143468003e-13	0.0	-6.731613057885968e-27	9.473903143468004e-14
1.59	88.88888859781834	0.0	0.00021283858412721898	149.23332753609688	0.0	-800.6437003915348	0.0	4.3191446912223866e-10	0.0	0.9999999999992834	0.0	1.1972170330795237e-06	0.0	0.0	0.00013719096631329471	0.0	0.0	0.0001372304375808199	0.0	800.6437003915348	88.88888859807315	0.0	1.1651286615137575e-12	-9.473903143468003e-13	0.0	-6.731613057885968e-27	9.473903143468004e-14
1.595	88.88888859781834	0.0	0.00021283858412721898	149.6777719805413	0.0	-800.6437003915348	0.0	4.3191446912223866e-10	0.0	0.9999999999992834	0.0	1.1972170330795237e-06	0.0	0.0	0.00013719096631329471	0.0	0.0	0.00013723056131520085	0.0	800.6437003915348	88.88888859807315	0.0	1.1651286615137575e-12	-9.473903143468003e-13	0.0	-6.731613057885968e-27	9.473903143468004e-14
1.6	88.88888859781834	0.0	0.00021283858412721898	150.12221642498577	0.0	-800.6437003915348	0.0	4.3191446912223866e-10	0.0	0.9999999999992834	0.0	1.1972170330795237e-06	0.0	0.0	0.00013719096631329471	0.0	0.0	0.0001372306850495818	0.0	800.6437003915348	88.88888859807315	0.0	1.1651286615137575e-12	-9.473903143468003e-13	0.0	-6.731613057885968e-27	9.473903143468004e-14
1.605	88.88888859781834	0.0	0.00021283858412721898	150.5666608694302	0.0	-800.6437003915348	0.0	4.3191446912223866e-10	0.0	0.9999999999992834	0.0	1.1972170330795237e-06	0.0	0.0	0.00013719096631329471	0.0	0.0	0.00013723080878396278	0.0	800.6437003915348	88.88888859807315	0.0	1.1651286615137575e-12	-9.473903143468003e-13	0.0	-6.731613057885968e-27	9.473903143468004e-14
1.61	88.88888859781834	0.0	0.00021283858412721898	151.01110531387465	0.0	-800.6437003915348	0.0	4.3191446912223866e-10	0.0	0.9999999999992834	0.0	1.1972170330795237e-06	0.0	0.0	0.00013719096631329471	0.0	0.0	0.00013723093251834372	0.0	800.6437003915348	88.88888859807315	0.0	1.1651286615137575e-12	-9.473903143468003e-13	0.0	-6.731613057885968e-27	9.473903143468004e-14
1.615	88.88888859781834	0.0	0.00021283858412721898	151.45554975831908	0.0	-800.6437003915348	0.0	4.3191446912223866e-10	0.0	0.9999999999992834	0.0	1.1972170330795237e-06	0.0	0.0	0.00013719096631329471	0.0	0.0	0.00013723105625272467	0.0	800.6437003915348	88.88888859807315	0.0	1.1651286615137575e-12	-9.473903143468003e-13	0.0	-6.731613057885968e-27	9.473903143468004e-14
1.62	88.88888859781834	0.0	0.00021283858412721898	151.89999420276354	0.0	-800.6437003915348	0.0	4.3191446912223866e-10	0.0	0.9999999999992834	0.0	1.1972170330795237e-06	0.0	0.0	0.00013719096631329471	0.0	0.0	0.00013723117998710562	0.0	800.6437003915348	88.88888859807315	0.0	1.1651286615137575e-12	-9.473903143468003e-13	0.0	-6.731613057885968e-27	9.473903143468004e-14
1.625	88.88888859781834	0.0	0.00021283858412721898	152.34443864720797	0.0	-800.6437003915348	0.0	4.3191446912223866e-10	0.0	0.9999999999992834	0.0	1.1972170330795237e-06	0.0	0.0	0.00013719096631329471	0.0	0.0	0.0001372313037214866	0.0	800.6437003915348	88.88888859807315	0.0	1.1651286615137575e-12	-9.473903143468003e-13	0.0	-6.731613057885968e-27	9.473903143468004e-14
1.63	88.88888859781834	0.0	0.00021283858412721898	152.78888309165242	0.0	-800.6437003915348	0.0	4.3191446912223866e-10	0.0	0.9999999999992834	0.0	1.1972170330795237e-06	0.0	0.0	0.00013719096631329471	0.0	0.0	0.00013723142745586755	0.0	800.6437003915348	88.88888859807315	0.0	1.1651286615137575e-12	-9.473903143468003e-13	0.0	-6.731613057885968e-27	9.473903143468004e-14
1.635	88.88888859781834	0.0	0.00021283858412721898	153.23332753609688	0.0	-800.6437003915348	0.0	4.3191446912223866e-10	0.0	0.9999999999992834	0.0	1.1972170330795237e-06	0.0	0.0	0.00013719096631329471	0.0	0.0	0.0001372315511902485	0.0	800.6437003915348	88.88888859807315	0.0	1.1651286615137575e-12	-9.473903143468003e-13	0.0	-6.731613057885968e-27	9.473903143468004e-14
1.64	88.88888859781834	0.0	0.00021283858412721898	153.6777719805413	0.0	-800.6437003915348	0.0	4.3191446912223866e-10	0.0	0.9999999999992834	0.0	1.1972170330795237e-06	0.0	0.0	0.00013719096631329471	0.0	0.0	0.00013723167492462948	0.0	800.6437003915348	88.88888859807315	0.0	1.1651286615137575e-12	-9.473903143468003e-13	0.0	-6.731613057885968e-27	9.473903143468004e-14
1.645	88.88888859781834	0.0	0.00021283858412721898	154.12221642498577	0.0	-800.6437003915348	0.0	4.3191446912223866e-10	0.0	0.9999999999992834	0.0	1.1972170330795237e-06	0.0	0.0	0.00013719096631329471	0.0	0.0	0.00013723179865901043	0.0	800.6437003915348	88.88888859807315	0.0	1.1651286615137575e-12	-9.473903143468003e-13	0.0	-6.731613057885968e-27	9.473903143468004e-14
1.65	88.88888859781834	0.0	0.00021283858412721898	154.5666608694302	0.0	-800.6437003915348	0.0	4.3191446912223866e-10	0.0	0.9999999999992834	0.0	1.1972170330795237e-06	0.0	0.0	0.00013719096631329471	0.0	0.0	0.00013723192239339138	0.0	800.6437003915348	88.88888859807315	0.0	1.1651286615137575e-12	-9.473903143468003e-13	0.0	-6.731613057885968e-27	9.473903143468004e-14
1.655	88.88888859781834	0.0	0.00021283858412721898	155.01110531387465	0.0	-800.6437003915348	0.0	4.3191446912223866e-10	0.0	0.9999999999992834	0.0	1.1972170330795237e-06	0.0	0.0	0.00013719096631329471	0.0	0.0	0.00013723204612777233	0.0	800.6437003915348	88.88888859807315	0.0	1.1651286615137575e-12	-9.473903143468003e-13	0.0	-6.731613057885968e-27	9.473903143468004e-14
1.66	88.88888859781834	0.0	0.00021283858412721898	155.45554975831908	0.0	-800.6437003915348	0.0	4.3191446912223866e-10	0.0	0.9999999999992834	0.0	1.1972170330795237e-06	0.0	0.0	0.00013719096631329471	0.0	0.0	0.0001372321698621533	0.0	800.6437003915348	88.88888859807315	0.0	1.1651286615137575e-12	-9.473903143468003e-13	0.0	-6.731613057885968e-27	9.473903143468004e-14
1.665	88.88888859781834	0.0	0.00021283858412721898	155.89999420276354	0.0	-800.6437003915348	0.0	4.3191446912223866e-10	0.0	0.9999999999992834	0.0	1.1972170330795237e-06	0.0	0.0	0.00013719096631329471	0.0	0.0	0.00013723229359653425	0.0	800.6437003915348	88.88888859807315	0.0	1.1651286615137575e-12	-9.473903143468003e-13	0.0	-6.731613057885968e-27	9.473903143468004e-14
1.67	88.88888859781834	0.0	0.00021283858412721898	156.34443864720797	0.0	-800.6437003915348	0.0	4.3191446912223866e-10	0.0	0.9999999999992834	0.0	1.1972170330795237e-06	0.0	0.0	0.00013719096631329471	0.0	0.0	0.0001372324173309152	0.0	800.6437003915348	88.88888859807315	0.0	1.1651286615137575e-12	-9.473903143468003e-13	0.0	-6.731613057885968e-27	9.473903143468004e-14
1.675	88.88888859781834	0.0	0.00021283858412721898	156.78888309165242	0.0	-800.6437003915348	0.0	4.3191446912223866e-10	0.0	0.9999999999992834	0.0	1.1972170330795237e-06	0.0	0.0	0.00013719096631329471	0.0	0.0	0.00013723254106529615	0.0	800.6437003915348	88.88888859807315	0.0	1.1651286615137575e-12	-9.473903143468003e-13	0.0	-6.731613057885968e-27	9.473903143468004e-14
1.68	88.88888859781834	0.0	0.00021283858412721898	157.23332753609685	0.0	-800.6437003915348	0.0	4.3191446912223866e-10	0.0	0.9999999999992834	0.0	1.1972170330795237e-06	0.0	0.0	0.00013719096631329471	0.0	0.0	0.00013723266479967713	0.0	800.6437003915348	88.88888859807315	0.0	1.1651286615137575e-12	-9.473903143468003e-13	0.0	-6.731613057885968e-27	9.473903143468004e-14
1.685	88.88888859781834	0.0	0.00021283858412721898	157.6777719805413	0.0	-800.6437003915348	0.0	4.3191446912223866e-10	0.0	0.9999999999992834	0.0	1.1972170330795237e-06	0.0	0.0	0.00013719096631329471	0.0	0.0	0.00013723278853405808	0.0	800.6437003915348	88.88888859807315	0.0	1.1651286615137575e-12	-9.473903143468003e-13	0.0	-6.731613057885968e-27	9.473903143468004e-14
1.69	88.88888859781834	0.0	0.00021283858412721898	158.12221642498574	0.0	-800.6437003915348	0.0	4.3191446912223866e-10	0.0	0.9999999999992834	0.0	1.1972170330795237e-06	0.0	0.0	0.00013719096631329471	0.0	0.0	0.00013723291226843903	0.0	800.6437003915348	88.88888859807315	0.0	1.1651286615137575e-12	-9.473903143468003e-13	0.0	-6.731613057885968e-27	9.473903143468004e-14
1.695	88.88888859781834	0.0	0.00021283858412721898	158.5666608694302	0.0	-800.6437003915348	0.0	4.3191446912223866e-10	0.0	0.9999999999992834	0.0	1.1972170330795237e-06	0.0	0.0	0.00013719096631329471	0.0	0.0	0.00013723303600281998	0.0	800.6437003915348	88.88888859807315	0.0	1.1651286615137575e-12	-9.473903143468003e-13	0.0	-6.731613057885968e-27	9.473903143468004e-14
1.7	88.88888859781834	0.0	0.00021283858412721898	159.01110531387465	0.0	-800.6437003915348	0.0	4.3191446912223866e-10	0.0	0.9999999999992834	0.0	1.1972170330795237e-06	0.0	0.0	0.00013719096631329471	0.0	0.0	0.00013723315973720096	0.0	800.6437003915348	88.88888859807315	0.0	1.1651286615137575e-12	-9.473903143468003e-13	0.0	-6.731613057885968e-27	9.473903143468004e-14
1.705	88.88888859781834	0.0	0.00021283858412721898	159.45554975831908	0.0	-800.6437003915348	0.0	4.3191446912223866e-10	0.0	0.9999999999992834	0.0	1.1972170330795237e-06	0.0	0.0	0.00013719096631329471	0.0	0.0	0.0001372332834715819	0.0	800.6437003915348	88.88888859807315	0.0	1.1651286615137575e-12	-9.473903143468003e-13	0.0	-6.731613057885968e-27	9.473903143468004e-14
1.71	88.88888859781834	0.0	0.00021283858412721898	159.89999420276354	0.0	-800.6437003915348	0.0	4.3191446912223866e-10	0.0	0.9999999999992834	0.0	1.1972170330795237e-06	0.0	0.0	0.00013719096631329471	0.0	0.0	0.00013723340720596286	0.0	800.6437003915348	88.88888859807315	0.0	1.1651286615137575e-12	-9.473903143468003e-13	0.0	-6.731613057885968e-27	9.473903143468004e-14
1.715	88.88888859781834	0.0	0.00021283858412721898	160.344438647208	0.0	-800.6437003915348	0.0	4.3191446912223866e-10	0.0	0.9999999999992834	0.0	1.1972170330795237e-06	0.0	0.0	0.00013719096631329471	0.0	0.0	0.0001372335309403438	0.0	800.6437003915348	88.88888859807315	0.0	1.1651286615137575e-12	-9.473903143468003e-13	0.0	-6.731613057885968e-27	9.473903143468004e-14
1.72	88.88888859781834	0.0	0.00021283858412721898	160.78888309165242	0.0	-800.6437003915348	0.0	4.3191446912223866e-10	0.0	0.9999999999992834	0.0	1.1972170330795237e-06	0.0	0.0	0.00013719096631329471	0.0	0.0	0.00013723365467472478	0.0	800.6437003915348	88.88888859807315	0.0	1.1651286615137575e-12	-9.473903143468003e-13	0.0	-6.731613057885968e-27	9.473903143468004e-14
1.725	88.88888859781834	0.0	0.00021283858412721898	161.23332753609688	0.0	-800.6437003915348	0.0	4.3191446912223866e-10	0.0	0.9999999999992834	0.0	1.1972170330795237e-06	0.0	0.0	0.00013719096631329471	0.0	0.0	0.00013723377840910573	0.0	800.6437003915348	88.88888859807315	0.0	1.1651286615137575e-12	-9.473903143468003e-13	0.0	-6.731613057885968e-27	9.473903143468004e-14
1.73	88.88888859781834	0.0	0.00021283858412721898	161.6777719805413	0.0	-800.6437003915348	0.0	4.3191446912223866e-10	0.0	0.9999999999992834	0.0	1.1972170330795237e-06	0.0	0.0	0.00013719096631329471	0.0	0.0	0.00013723390214348668	0.0	800.6437003915348	88.88888859807315	0.0	1.1651286615137575e-12	-9.473903143468003e-13	0.0	-6.731613057885968e-27	9.473903143468004e-14
1.735	88.88888859781834	0.0	0.00021283858412721898	162.12221642498577	0.0	-800.6437003915348	0.0	4.3191446912223866e-10	0.0	0.9999999999992834	0.0	1.1972170330795237e-06	0.0	0.0	0.00013719096631329471	0.0	0.0	0.00013723402587786763	0.0	800.6437003915348	88.88888859807315	0.0	1.1651286615137575e-12	-9.473903143468003e-13	0.0	-6.731613057885968e-27	9.473903143468004e-14
1.74	88.88888859781834	0.0	0.00021283858412721898	162.5666608694302	0.0	-800.6437003915348	0.0	4.3191446912223866e-10	0.0	0.9999999999992834	0.0	1.1972170330795237e-06	0.0	0.0	0.00013719096631329471	0.0	0.0	0.0001372341496122486	0.0	800.6437003915348	88.88888859807315	0.0	1.1651286615137575e-12	-9.473903143468003e-13	0.0	-6.731613057885968e-27	9.473903143468004e-14
1.745	88.88888859781834	0.0	0.00021283858412721898	163.01110531387465	0.0	-800.6437003915348	0.0	4.3191446912223866e-10	0.0	0.9999999999992834	0.0	1.1972170330795237e-06	0.0	0.0	0.00013719096631329471	0.0	0.0	0.00013723427334662956	0.0	800.6437003915348	88.88888859807315	0.0	1.1651286615137575e-12	-9.473903143468003e-13	0.0	-6.731613057885968e-27	9.473903143468004e-14
1.75	88.88888859781834	0.0	0.00021283858412721898	163.45554975831908	0.0	-800.6437003915348	0.0	4.3191446912223866e-10	0.0	0.9999999999992834	0.0	1.1972170330795237e-06	0.0	0.0	0.00013719096631329471	0.0	0.0	0.0001372343970810105	0.0	800.6437003915348	88.88888859807315	0.0	1.1651286615137575e-12	-9.473903143468003e-13	0.0	-6.731613057885968e-27	9.473903143468004e-14
1.755	88.88888859781834	0.0	0.00021283858412721898	163.8999942027635	0.0	-800.6437003915348	0.0	4.3191446912223866e-10	0.0	0.9999999999992834	0.0	1.1972170330795237e-06	0.0	0.0	0.00013719096631329471	0.0	0.0	0.00013723452081539146	0.0	800.6437003915348	88.88888859807315	0.0	1.1651286615137575e-12	-9.473903143468003e-13	0.0	-6.731613057885968e-27	9.473903143468004e-14
1.76	88.88888859781834	0.0	0.00021283858412721898	164.34443864720797	0.0	-800.6437003915348	0.0	4.3191446912223866e-10	0.0	0.9999999999992834	0.0	1.1972170330795237e-06	0.0	0.0	0.00013719096631329471	0.0	0.0	0.00013723464454977244	0.0	800.6437003915348	88.88888859807315	0.0	1.1651286615137575e-12	-9.473903143468003e-13	0.0	-6.731613057885968e-27	9.473903143468004e-14
1.765	88.88888859781834	0.0	0.00021283858412721898	164.78888309165242	0.0	-800.6437003915348	0.0	4.3191446912223866e-10	0.0	0.9999999999992834	0.0	1.1972170330795237e-06	0.0	0.0	0.00013719096631329471	0.0	0.0	0.00013723476828415339	0.0	800.6437003915348	88.88888859807315	0.0	1.1651286615137575e-12	-9.473903143468003e-13	0.0	-6.731613057885968e-27	9.473903143468004e-14
1.77	88.88888859781834	0.0	0.00021283858412721898	165.23332753609688	0.0	-800.6437003915348	0.0	4.3191446912223866e-10	0.0	0.9999999999992834	0.0	1.1972170330795237e-06	0.0	0.0	0.00013719096631329471	0.0	0.0	0.00013723489201853434	0.0	800.6437003915348	88.88888859807315	0.0	1.1651286615137575e-12	-9.473903143468003e-13	0.0	-6.731613057885968e-27	9.473903143468004e-14
1.775	88.88888859781834	0.0	0.00021283858412721898	165.6777719805413	0.0	-800.6437003915348	0.0	4.3191446912223866e-10	0.0	0.9999999999992834	0.0	1.1972170330795237e-06	0.0	0.0	0.00013719096631329471	0.0	0.0	0.00013723501575291529	0.0	800.6437003915348	88.88888859807315	0.0	1.1651286615137575e-12	-9.473903143468003e-13	0.0	-6.731613057885968e-27	9.473903143468004e-14
1.78	88.88888859781834	0.0	0.00021283858412721898	166.12221642498577	0.0	-800.6437003915348	0.0	4.3191446912223866e-10	0.0	0.9999999999992834	0.0	1.1972170330795237e-06	0.0	0.0	0.00013719096631329471	0.0	0.0	0.00013723513948729626	0.0	800.6437003915348	88.88888859807315	0.0	1.1651286615137575e-12	-9.473903143468003e-13	0.0	-6.731613057885968e-27	9.473903143468004e-14
1.785	88.88888859781834	0.0	0.00021283858412721898	166.5666608694302	0.0	-800.6437003915348	0.0	4.3191446912223866e-10	0.0	0.9999999999992834	0.0	1.1972170330795237e-06	0.0	0.0	0.00013719096631329471	0.0	0.0	0.0001372352632216772	0.0	800.6437003915348	88.88888859807315	0.0	1.1651286615137575e-12	-9.473903143468003e-13	0.0	-6.731613057885968e-27	9.473903143468004e-14
1.79	88.88888859781834	0.0	0.00021283858412721898	167.01110531387465	0.0	-800.6437003915348	0.0	4.3191446912223866e-10	0.0	0.9999999999992834	0.0	1.1972170330795237e-06	0.0	0.0	0.00013719096631329471	0.0	0.0	0.00013723538695605816	0.0	800.6437003915348	88.88888859807315	0.0	1.1651286615137575e-12	-9.473903143468003e-13	0.0	-6.731613057885968e-27	9.473903143468004e-14
1.795	88.88888859781834	0.0	0.00021283858412721898	167.45554975831908	0.0	-800.6437003915348	0.0	4.3191446912223866e-10	0.0	0.9999999999992834	0.0	1.1972170330795237e-06	0.0	0.0	0.00013719096631329471	0.0	0.0	0.0001372355106904391	0.0	800.6437003915348	88.88888859807315	0.0	1.1651286615137575e-12	-9.473903143468003e-13	0.0	-6.731613057885968e-27	9.473903143468004e-14
1.8	88.88888859781834	0.0	0.00021283858412721898	167.89999420276354	0.0	-800.6437003915348	0.0	4.3191446912223866e-10	0.0	0.9999999999992834	0.0	1.1972170330795237e-06	0.0	0.0	0.00013719096631329471	0.0	0.0	0.0001372356344248201	0.0	800.6437003915348	88.88888859807315	0.0	1.1651286615137575e-12	-9.473903143468003e-13	0.0	-6.731613057885968e-27	9.473903143468004e-14
1.805	88.88888859781834	0.0	0.00021283858412721898	168.34443864720797	0.0	-800.6437003915348	0.0	4.3191446912223866e-10	0.0	0.9999999999992834	0.0	1.1972170330795237e-06	0.0	0.0	0.00013719096631329471	0.0	0.0	0.00013723575815920104	0.0	800.6437003915348	88.88888859807315	0.0	1.1651286615137575e-12	-9.473903143468003e-13	0.0	-6.731613057885968e-27	9.473903143468004e-14
1.81	88.88888859781834	0.0	0.00021283858412721898	168.78888309165242	0.0	-800.6437003915348	0.0	4.3191446912223866e-10	0.0	0.9999999999992834	0.0	1.1972170330795237e-06	0.0	0.0	0.00013719096631329471	0.0	0.0	0.000137235881893582	0.0	800.6437003915348	88.88888859807315	0.0	1.1651286615137575e-12	-9.473903143468003e-13	0.0	-6.731613057885968e-27	9.473903143468004e-14
1.815	88.88888859781834	0.0	0.00021283858412721898	169.23332753609685	0.0	-800.6437003915348	0.0	4.3191446912223866e-10	0.0	0.9999999999992834	0.0	1.1972170330795237e-06	0.0	0.0	0.00013719096631329471	0.0	0.0	0.00013723600562796294	0.0	800.6437003915348	88.88888859807315	0.0	1.1651286615137575e-12	-9.473903143468003e-13	0.0	-6.731613057885968e-27	9.473903143468004e-14
1.82	88.88888859781834	0.0	0.00021283858412721898	169.6777719805413	0.0	-800.6437003915348	0.0	4.3191446912223866e-10	0.0	0.9999999999992834	0.0	1.1972170330795237e-06	0.0	0.0	0.00013719096631329471	0.0	0.0	0.00013723612936234391	0.0	800.6437003915348	88.88888859807315	0.0	1.1651286615137575e-12	-9.473903143468003e-13	0.0	-6.731613057885968e-27	9.473903143468004e-14
1.825	88.88888859781834	0.0	0.00021283858412721898	170.12221642498574	0.0	-800.6437003915348	0.0	4.3191446912223866e-10	0.0	0.9999999999992834	0.0	1.1972170330795237e-06	0.0	0.0	0.00013719096631329471	0.0	0.0	0.00013723625309672486	0.0	800.6437003915348	88.88888859807315	0.0	1.1651286615137575e-12	-9.473903143468003e-13	0.0	-6.731613057885968e-27	9.473903143468004e-14
1.83	88.88888859781834	0.0	0.00021283858412721898	170.5666608694302	0.0	-800.6437003915348	0.0	4.3191446912223866e-10	0.0	0.9999999999992834	0.0	1.1972170330795237e-06	0.0	0.0	0.00013719096631329471	0.0	0.0	0.00013723637683110581	0.0	800.6437003915348	88.88888859807315	0.0	1.1651286615137575e-12	-9.473903143468003e-13	0.0	-6.731613057885968e-27	9.473903143468004e-14
1.835	88.88888859781834	0.0	0.00021283858412721898	171.01110531387465	0.0	-800.6437003915348	0.0	4.3191446912223866e-10	0.0	0.9999999999992834	0.0	1.1972170330795237e-06	0.0	0.0	0.00013719096631329471	0.0	0.0	0.00013723650056548676	0.0	800.6437003915348	88.88888859807315	0.0	1.1651286615137575e-12	-9.473903143468003e-13	0.0	-6.731613057885968e-27	9.473903143468004e-14
1.84	88.88888859781834	0.0	0.00021283858412721898	171.45554975831908	0.0	-800.6437003915348	0.0	4.3191446912223866e-10	0.0	0.9999999999992834	0.0	1.1972170330795237e-06	0.0	0.0	0.00013719096631329471	0.0	0.0	0.00013723662429986774	0.0	800.6437003915348	88.88888859807315	0.0	1.1651286615137575e-12	-9.473903143468003e-13	0.0	-6.731613057885968e-27	9.473903143468004e-14
1.845	88.88888859781834	0.0	0.00021283858412721898	171.89999420276354	0.0	-800.6437003915348	0.0	4.3191446912223866e-10	0.0	0.9999999999992834	0.0	1.1972170330795237e-06	0.0	0.0	0.00013719096631329471	0.0	0.0	0.0001372367480342487	0.0	800.6437003915348	88.88888859807315	0.0	1.1651286615137575e-12	-9.473903143468003e-13	0.0	-6.731613057885968e-27	9.473903143468004e-14
1.85	88.88888859781834	0.0	0.00021283858412721898	172.344438647208	0.0	-800.6437003915348	0.0	4.3191446912223866e-10	0.0	0.9999999999992834	0.0	1.1972170330795237e-06	0.0	0.0	0.00013719096631329471	0.0	0.0	0.00013723687176862964	0.0	800.6437003915348	88.88888859807315	0.0	1.1651286615137575e-12	-9.473903143468003e-13	0.0	-6.731613057885968e-27	9.473903143468004e-14
1.855	88.88888859781834	0.0	0.00021283858412721898	172.78888309165242	0.0	-800.6437003915348	0.0	4.3191446912223866e-10	0.0	0.9999999999992834	0.0	1.1972170330795237e-06	0.0	0.0	0.00013719096631329471	0.0	0.0	0.0001372369955030106	0.0	800.6437003915348	88.88888859807315	0.0	1.1651286615137575e-12	-9.473903143468003e-13	0.0	-6.731613057885968e-27	9.473903143468004e-14
1.86	88.88888859781834	0.0	0.00021283858412721898	173.23332753609688	0.0	-800.6437003915348	0.0	4.3191446912223866e-10	0.0	0.9999999999992834	0.0	1.1972170330795237e-06	0.0	0.0	0.00013719096631329471	0.0	0.0	0.00013723711923739157	0.0	800.6437003915348	88.88888859807315	0.0	1.1651286615137575e-12	-9.473903143468003e-13	0.0	-6.731613057885968e-27	9.473903143468004e-14
1.865	88.88888859781834	0.0	0.00021283858412721898	173.6777719805413	0.0	-800.6437003915348	0.0	4.3191446912223866e-10	0.0	0.9999999999992834	0.0	1.1972170330795237e-06	0.0	0.0	0.00013719096631329471	0.0	0.0	0.00013723724297177252	0.0	800.6437003915348	88.88888859807315	0.0	1.1651286615137575e-12	-9.473903143468003e-13	0.0	-6.731613057885968e-27	9.473903143468004e-14
1.87	88.88888859781834	0.0	0.00021283858412721898	174.12221642498577	0.0	-800.6437003915348	0.0	4.3191446912223866e-10	0.0	0.9999999999992834	0.0	1.1972170330795237e-06	0.0	0.0	0.00013719096631329471	0.0	0.0	0.00013723736670615347	0.0	800.6437003915348	88.88888859807315	0.0	1.1651286615137575e-12	-9.473903143468003e-13	0.0	-6.731613057885968e-27	9.473903143468004e-14
1.875	88.88888859781834	0.0	0.00021283858412721898	174.5666608694302	0.0	-800.6437003915348	0.0	4.3191446912223866e-10	0.0	0.9999999999992834	0.0	1.1972170330795237e-06	0.0	0.0	0.00013719096631329471	0.0	0.0	0.00013723749044053442	0.0	800.6437003915348	88.88888859807315	0.0	1.1651286615137575e-12	-9.473903143468003e-13	0.0	-6.731613057885968e-27	9.473903143468004e-14
1.88	88.88888859781834	0.0	0.00021283858412721898	175.01110531387462	0.0	-800.6437003915348	0.0	4.3191446912223866e-10	0.0	0.9999999999992834	0.0	1.1972170330795237e-06	0.0	0.0	0.00013719096631329471	0.0	0.0	0.0001372376141749154	0.0	800.6437003915348	88.88888859807315	0.0	1.1651286615137575e-12	-9.473903143468003e-13	0.0	-6.731613057885968e-27	9.473903143468004e-14
1.885	88.88888859781834	0.0	0.00021283858412721898	175.45554975831908	0.0	-800.6437003915348	0.0	4.3191446912223866e-10	0.0	0.9999999999992834	0.0	1.1972170330795237e-06	0.0	0.0	0.00013719096631329471	0.0	0.0	0.00013723773790929634	0.0	800.6437003915348	88.88888859807315	0.0	1.1651286615137575e-12	-9.473903143468003e-13	0.0	-6.731613057885968e-27	9.473903143468004e-14
1.89	88.88888859781834	0.0	0.00021283858412721898	175.8999942027635	0.0	-800.6437003915348	0.0	4.3191446912223866e-10	0.0	0.9999999999992834	0.0	1.1972170330795237e-06	0.0	0.0	0.00013719096631329471	0.0	0.0	0.0001372378616436773	0.0	800.6437003915348	88.88888859807315	0.0	1.1651286615137575e-12	-9.473903143468003e-13	0.0	-6.731613057885968e-27	9.473903143468004e-14
1.895	88.88888859781834	0.0	0.00021283858412721898	176.34443864720797	0.0	-800.6437003915348	0.0	4.3191446912223866e-10	0.0	0.9999999999992834	0.0	1.1972170330795237e-06	0.0	0.0	0.00013719096631329471	0.0	0.0	0.00013723798537805824	0.0	800.6437003915348	88.88888859807315	0.0	1.1651286615137575e-12	-9.473903143468003e-13	0.0	-6.731613057885968e-27	9.473903143468004e-14
1.9	88.88888859781834	0.0	0.00021283858412721898	176.78888309165242	0.0	-800.6437003915348	0.0	4.3191446912223866e-10	0.0	0.9999999999992834	0.0	1.1972170330795237e-06	0.0	0.0	0.00013719096631329471	0.0	0.0	0.00013723810911243922	0.0	800.6437003915348	88.88888859807315	0.0	1.1651286615137575e-12	-9.473903143468003e-13	0.0	-6.731613057885968e-27	9.473903143468004e-14
1.905	88.88888859781834	0.0	0.00021283858412721898	177.23332753609688	0.0	-800.6437003915348	0.0	4.3191446912223866e-10	0.0	0.9999999999992834	0.0	1.1972170330795237e-06	0.0	0.0	0.00013719096631329471	0.0	0.0	0.00013723823284682017	0.0	800.6437003915348	88.88888859807315	0.0	1.1651286615137575e-12	-9.473903143468003e-13	0.0	-6.731613057885968e-27	9.473903143468004e-14
1.91	88.88888859781834	0.0	0.00021283858412721898	177.6777719805413	0.0	-800.6437003915348	0.0	4.3191446912223866e-10	0.0	0.9999999999992834	0.0	1.1972170330795237e-06	0.0	0.0	0.00013719096631329471	0.0	0.0	0.00013723835658120112	0.0	800.6437003915348	88.88888859807315	0.0	1.1651286615137575e-12	-9.473903143468003e-13	0.0	-6.731613057885968e-27	9.473903143468004e-14
1.915	88.88888859781834	0.0	0.00021283858412721898	178.12221642498577	0.0	-800.6437003915348	0.0	4.3191446912223866e-10	0.0	0.9999999999992834	0.0	1.1972170330795237e-06	0.0	0.0	0.00013719096631329471	0.0	0.0	0.00013723848031558207	0.0	800.6437003915348	88.88888859807315	0.0	1.1651286615137575e-12	-9.473903143468003e-13	0.0	-6.731613057885968e-27	9.473903143468004e-14
1.92	88.88888859781834	0.0	0.00021283858412721898	178.5666608694302	0.0	-800.6437003915348	0.0	4.3191446912223866e-10	0.0	0.9999999999992834	0.0	1.1972170330795237e-06	0.0	0.0	0.00013719096631329471	0.0	0.0	0.00013723860404996305	0.0	800.6437003915348	88.88888859807315	0.0	1.1651286615137575e-12	-9.473903143468003e-13	0.0	-6.731613057885968e-27	9.473903143468004e-14
1.925	88.88888859781834	0.0	0.00021283858412721898	179.01110531387465	0.0	-800.6437003915348	0.0	4.3191446912223866e-10	0.0	0.9999999999992834	0.0	1.1972170330795237e-06	0.0	0.0	0.00013719096631329471	0.0	0.0	0.000137238727784344	0.0	800.6437003915348	88.88888859807315	0.0	1.1651286615137575e-12	-9.473903143468003e-13	0.0	-6.731613057885968e-27	9.473903143468004e-14
1.93	88.88888859781834	0.0	0.00021283858412721898	179.45554975831908	0.0	-800.6437003915348	0.0	4.3191446912223866e-10	0.0	0.9999999999992834	0.0	1.1972170330795237e-06	0.0	0.0	0.00013719096631329471	0.0	0.0	0.00013723885151872495	0.0	800.6437003915348	88.88888859807315	0.0	1.1651286615137575e-12	-9.473903143468003e-13	0.0	-6.731613057885968e-27	9.473903143468004e-14
1.935	88.88888859781834	0.0	0.00021283858412721898	179.89999420276354	0.0	-800.6437003915348	0.0	4.3191446912223866e-10	0.0	0.9999999999992834	0.0	1.1972170330795237e-06	0.0	0.0	0.00013719096631329471	0.0	0.0	0.0001372389752531059	0.0	800.6437003915348	88.88888859807315	0.0	1.1651286615137575e-12	-9.473903143468003e-13	0.0	-6.731613057885968e-27	9.473903143468004e-14
1.94	88.88888859781834	0.0	0.00021283858412721898	180.34443864720797	0.0	-800.6437003915348	0.0	4.3191446912223866e-10	0.0	0.9999999999992834	0.0	1.1972170330795237e-06	0.0	0.0	0.00013719096631329471	0.0	0.0	0.00013723909898748687	0.0	800.6437003915348	88.88888859807315	0.0	1.1651286615137575e-12	-9.473903143468003e-13	0.0	-6.731613057885968e-27	9.473903143468004e-14
1.945	88.88888859781834	0.0	0.00021283858412721898	180.78888309165242	0.0	-800.6437003915348	0.0	4.3191446912223866e-10	0.0	0.9999999999992834	0.0	1.1972170330795237e-06	0.0	0.0	0.00013719096631329471	0.0	0.0	0.00013723922272186782	0.0	800.6437003915348	88.88888859807315	0.0	1.1651286615137575e-12	-9.473903143468003e-13	0.0	-6.731613057885968e-27	9.473903143468004e-14
1.95	88.88888859781834	0.0	0.00021283858412721898	181.23332753609685	0.0	-800.6437003915348	0.0	4.3191446912223866e-10	0.0	0.9999999999992834	0.0	1.1972170330795237e-06	0.0	0.0	0.00013719096631329471	0.0	0.0	0.00013723934645624877	0.0	800.6437003915348	88.88888859807315	0.0	1.1651286615137575e-12	-9.473903143468003e-13	0.0	-6.731613057885968e-27	9.473903143468004e-14
1.955	88.88888859781834	0.0	0.00021283858412721898	181.6777719805413	0.0	-800.6437003915348	0.0	4.3191446912223866e-10	0.0	0.9999999999992834	0.0	1.1972170330795237e-06	0.0	0.0	0.00013719096631329471	0.0	0.0	0.00013723947019062975	0.0	800.6437003915348	88.88888859807315	0.0	1.1651286615137575e-12	-9.473903143468003e-13	0.0	-6.731613057885968e-27	9.473903143468004e-14
1.96	88.88888859781834	0.0	0.00021283858412721898	182.12221642498574	0.0	-800.6437003915348	0.0	4.3191446912223866e-10	0.0	0.9999999999992834	0.0	1.1972170330795237e-06	0.0	0.0	0.00013719096631329471	0.0	0.0	0.0001372395939250107	0.0	800.6437003915348	88.88888859807315	0.0	1.1651286615137575e-12	-9.473903143468003e-13	0.0	-6.731613057885968e-27	9.473903143468004e-14
1.965	88.88888859781834	0.0	0.00021283858412721898	182.5666608694302	0.0	-800.6437003915348	0.0	4.3191446912223866e-10	0.0	0.9999999999992834	0.0	1.1972170330795237e-06	0.0	0.0	0.00013719096631329471	0.0	0.0	0.00013723971765939165	0.0	800.6437003915348	88.88888859807315	0.0	1.1651286615137575e-12	-9.473903143468003e-13	0.0	-6.731613057885968e-27	9.473903143468004e-14
1.97	88.88888859781834	0.0	0.00021283858412721898	183.01110531387465	0.0	-800.6437003915348	0.0	4.3191446912223866e-10	0.0	0.9999999999992834	0.0	1.1972170330795237e-06	0.0	0.0	0.00013719096631329471	0.0	0.0	0.0001372398413937726	0.0	800.6437003915348	88.88888859807315	0.0	1.1651286615137575e-12	-9.473903143468003e-13	0.0	-6.731613057885968e-27	9.473903143468004e-14
1.975	88.88888859781834	0.0	0.00021283858412721898	183.4555497583191	0.0	-800.6437003915348	0.0	4.3191446912223866e-10	0.0	0.9999999999992834	0.0	1.1972170330795237e-06	0.0	0.0	0.00013719096631329471	0.0	0.0	0.00013723996512815358	0.0	800.6437003915348	88.88888859807315	0.0	1.1651286615137575e-12	-9.473903143468003e-13	0.0	-6.731613057885968e-27	9.473903143468004e-14
1.98	88.88888859781834	0.0	0.00021283858412721898	183.89999420276354	0.0	-800.6437003915348	0.0	4.3191446912223866e-10	0.0	0.9999999999992834	0.0	1.1972170330795237e-06	0.0	0.0	0.00013719096631329471	0.0	0.0	0.00013724008886253453	0.0	800.6437003915348	88.88888859807315	0.0	1.1651286615137575e-12	-9.473903143468003e-13	0.0	-6.731613057885968e-27	9.473903143468004e-14
1.985	88.88888859781834	0.0	0.00021283858412721898	184.344438647208	0.0	-800.6437003915348	0.0	4.3191446912223866e-10	0.0	0.9999999999992834	0.0	1.1972170330795237e-06	0.0	0.0	0.00013719096631329471	0.0	0.0	0.00013724021259691548	0.0	800.6437003915348	88.88888859807315	0.0	1.1651286615137575e-12	-9.473903143468003e-13	0.0	-6.731613057885968e-27	9.473903143468004e-14
1.99	88.88888859781834	0.0	0.00021283858412721898	184.78888309165242	0.0	-800.6437003915348	0.0	4.3191446912223866e-10	0.0	0.9999999999992834	0.0	1.1972170330795237e-06	0.0	0.0	0.00013719096631329471	0.0	0.0	0.00013724033633129643	0.0	800.6437003915348	88.88888859807315	0.0	1.1651286615137575e-12	-9.473903143468003e-13	0.0	-6.731613057885968e-27	9.473903143468004e-14
1.995	88.88888859781834	0.0	0.00021283858412721898	185.23332753609688	0.0	-800.6437003915348	0.0	4.3191446912223866e-10	0.0	0.9999999999992834	0.0	1.1972170330795237e-06	0.0	0.0	0.00013719096631329471	0.0	0.0	0.0001372404600656774	0.0	800.6437003915348	88.88888859807315	0.0	1.1651286615137575e-12	-9.473903143468003e-13	0.0	-6.731613057885968e-27	9.473903143468004e-14
2.0	88.88888859781834	0.0	0.00021283858412721898	185.6777719805413	0.0	-800.6437003915348	0.0	4.3191446912223866e-10	0.0	0.9999999999992834	0.0	1.1972170330795237e-06	0.0	0.0	0.00013719096631329471	0.0	0.0	0.00013724058380005835	0.0	800.6437003915348	88.88888859807315	0.0	1.1651286615137575e-12	-9.473903143468003e-13	0.0	-6.731613057885968e-27	9.473903143468004e-14
2.005	88.88888859781834	0.0	0.00021283858412721898	186.12221642498574	0.0	-800.6437003915348	0.0	4.3191446912223866e-10	0.0	0.9999999999992834	0.0	1.1972170330795237e-06	0.0	0.0	0.00013719096631329471	0.0	0.0	0.0001372407075344393	0.0	800.6437003915348	88.88888859807315	0.0	1.1651286615137575e-12	-9.473903143468003e-13	0.0	-6.731613057885968e-27	9.473903143468004e-14
2.01	88.88888859781834	0.0	0.00021283858412721898	186.56666086943017	0.0	-800.6437003915348	0.0	4.3191446912223866e-10	0.0	0.9999999999992834	0.0	1.1972170330795237e-06	0.0	0.0	0.00013719096631329471	0.0	0.0	0.00013724083126882025	0.0	800.6437003915348	88.88888859807315	0.0	1.1651286615137575e-12	-9.473903143468003e-13	0.0	-6.731613057885968e-27	9.473903143468004e-14
2.015	88.88888859781834	0.0	0.00021283858412721898	187.01110531387465	0.0	-800.6437003915348	0.0	4.3191446912223866e-10	0.0	0.9999999999992834	0.0	1.1972170330795237e-06	0.0	0.0	0.00013719096631329471	0.0	0.0	0.00013724095500320123	0.0	800.6437003915348	88.88888859807315	0.0	1.1651286615137575e-12	-9.473903143468003e-13	0.0	-6.731613057885968e-27	9.473903143468004e-14
2.02	88.88888859781834	0.0	0.00021283858412721898	187.45554975831908	0.0	-800.6437003915348	0.0	4.3191446912223866e-10	0.0	0.9999999999992834	0.0	1.1972170330795237e-06	0.0	0.0	0.00013719096631329471	0.0	0.0	0.00013724107873758218	0.0	800.6437003915348	88.88888859807315	0.0	1.1651286615137575e-12	-9.473903143468003e-13	0.0	-6.731613057885968e-27	9.473903143468004e-14
2.025	88.88888859781834	0.0	0.00021283858412721898	187.8999942027635	0.0	-800.6437003915348	0.0	4.3191446912223866e-10	0.0	0.9999999999992834	0.0	1.1972170330795237e-06	0.0	0.0	0.00013719096631329471	0.0	0.0	0.00013724120247196313	0.0	800.6437003915348	88.88888859807315	0.0	1.1651286615137575e-12	-9.473903143468003e-13	0.0	-6.731613057885968e-27	9.473903143468004e-14
2.03	88.88888859781834	0.0	0.00021283858412721898	188.34443864720797	0.0	-800.6437003915348	0.0	4.3191446912223866e-10	0.0	0.9999999999992834	0.0	1.1972170330795237e-06	0.0	0.0	0.00013719096631329471	0.0	0.0	0.00013724132620634408	0.0	800.6437003915348	88.88888859807315	0.0	1.1651286615137575e-12	-9.473903143468003e-13	0.0	-6.731613057885968e-27	9.473903143468004e-14
2.035	88.88888859781834	0.0	0.00021283858412721898	188.78888309165242	0.0	-800.6437003915348	0.0	4.3191446912223866e-10	0.0	0.9999999999992834	0.0	1.1972170330795237e-06	0.0	0.0	0.00013719096631329471	0.0	0.0	0.00013724144994072505	0.0	800.6437003915348	88.88888859807315	0.0	1.1651286615137575e-12	-9.473903143468003e-13	0.0	-6.731613057885968e-27	9.473903143468004e-14
2.04	88.88888859781834	0.0	0.00021283858412721898	189.23332753609688	0.0	-800.6437003915348	0.0	4.3191446912223866e-10	0.0	0.9999999999992834	0.0	1.1972170330795237e-06	0.0	0.0	0.00013719096631329471	0.0	0.0	0.000137241573675106	0.0	800.6437003915348	88.88888859807315	0.0	1.1651286615137575e-12	-9.473903143468003e-13	0.0	-6.731613057885968e-27	9.473903143468004e-14
2.045	88.88888859781834	0.0	0.00021283858412721898	189.6777719805413	0.0	-800.6437003915348	0.0	4.3191446912223866e-10	0.0	0.9999999999992834	0.0	1.1972170330795237e-06	0.0	0.0	0.00013719096631329471	0.0	0.0	0.00013724169740948695	0.0	800.6437003915348	88.88888859807315	0.0	1.1651286615137575e-12	-9.473903143468003e-13	0.0	-6.731613057885968e-27	9.473903143468004e-14
2.05	88.88888859781834	0.0	0.00021283858412721898	190.12221642498574	0.0	-800.6437003915348	0.0	4.3191446912223866e-10	0.0	0.9999999999992834	0.0	1.1972170330795237e-06	0.0	0.0	0.00013719096631329471	0.0	0.0	0.0001372418211438679	0.0	800.6437003915348	88.88888859807315	0.0	1.1651286615137575e-12	-9.473903143468003e-13	0.0	-6.731613057885968e-27	9.473903143468004e-14
2.055	88.88888859781834	0.0	0.00021283858412721898	190.56666086943022	0.0	-800.6437003915348	0.0	4.3191446912223866e-10	0.0	0.9999999999992834	0.0	1.1972170330795237e-06	0.0	0.0	0.00013719096631329471	0.0	0.0	0.00013724194487824888	0.0	800.6437003915348	88.88888859807315	0.0	1.1651286615137575e-12	-9.473903143468003e-13	0.0	-6.731613057885968e-27	9.473903143468004e-14
2.06	88.88888859781834	0.0	0.00021283858412721898	191.01110531387465	0.0	-800.6437003915348	0.0	4.3191446912223866e-10	0.0	0.9999999999992834	0.0	1.1972170330795237e-06	0.0	0.0	0.00013719096631329471	0.0	0.0	0.00013724206861262983	0.0	800.6437003915348	88.88888859807315	0.0	1.1651286615137575e-12	-9.473903143468003e-13	0.0	-6.731613057885968e-27	9.473903143468004e-14
2.065	88.88888859781834	0.0	0.00021283858412721898	191.45554975831908	0.0	-800.6437003915348	0.0	4.3191446912223866e-10	0.0	0.9999999999992834	0.0	1.1972170330795237e-06	0.0	0.0	0.00013719096631329471	0.0	0.0	0.00013724219234701078	0.0	800.6437003915348	88.88888859807315	0.0	1.1651286615137575e-12	-9.473903143468003e-13	0.0	-6.731613057885968e-27	9.473903143468004e-14
2.07	88.88888859781834	0.0	0.00021283858412721898	191.8999942027635	0.0	-800.6437003915348	0.0	4.3191446912223866e-10	0.0	0.9999999999992834	0.0	1.1972170330795237e-06	0.0	0.0	0.00013719096631329471	0.0	0.0	0.00013724231608139173	0.0	800.6437003915348	88.88888859807315	0.0	1.1651286615137575e-12	-9.473903143468003e-13	0.0	-6.731613057885968e-27	9.473903143468004e-14
2.075	88.88888859781834	0.0	0.00021283858412721898	192.344438647208	0.0	-800.6437003915348	0.0	4.3191446912223866e-10	0.0	0.9999999999992834	0.0	1.1972170330795237e-06	0.0	0.0	0.00013719096631329471	0.0	0.0	0.0001372424398157727	0.0	800.6437003915348	88.88888859807315	0.0	1.1651286615137575e-12	-9.473903143468003e-13	0.0	-6.731613057885968e-27	9.473903143468004e-14
2.08	88.88888859781834	0.0	0.00021283858412721898	192.78888309165242	0.0	-800.6437003915348	0.0	4.3191446912223866e-10	0.0	0.9999999999992834	0.0	1.1972170330795237e-06	0.0	0.0	0.00013719096631329471	0.0	0.0	0.00013724256355015366	0.0	800.6437003915348	88.88888859807315	0.0	1.1651286615137575e-12	-9.473903143468003e-13	0.0	-6.731613057885968e-27	9.473903143468004e-14
2.085	88.88888859781834	0.0	0.00021283858412721898	193.23332753609685	0.0	-800.6437003915348	0.0	4.3191446912223866e-10	0.0	0.9999999999992834	0.0	1.1972170330795237e-06	0.0	0.0	0.00013719096631329471	0.0	0.0	0.0001372426872845346	0.0	800.6437003915348	88.88888859807315	0.0	1.1651286615137575e-12	-9.473903143468003e-13	0.0	-6.731613057885968e-27	9.473903143468004e-14
2.09	88.88888859781834	0.0	0.00021283858412721898	193.6777719805413	0.0	-800.6437003915348	0.0	4.3191446912223866e-10	0.0	0.9999999999992834	0.0	1.1972170330795237e-06	0.0	0.0	0.00013719096631329471	0.0	0.0	0.00013724281101891556	0.0	800.6437003915348	88.88888859807315	0.0	1.1651286615137575e-12	-9.473903143468003e-13	0.0	-6.731613057885968e-27	9.473903143468004e-14
2.095	88.88888859781834	0.0	0.00021283858412721898	194.12221642498577	0.0	-800.6437003915348	0.0	4.3191446912223866e-10	0.0	0.9999999999992834	0.0	1.1972170330795237e-06	0.0	0.0	0.00013719096631329471	0.0	0.0	0.00013724293475329653	0.0	800.6437003915348	88.88888859807315	0.0	1.1651286615137575e-12	-9.473903143468003e-13	0.0	-6.731613057885968e-27	9.473903143468004e-14
2.1	88.88888859781834	0.0	0.00021283858412721898	194.5666608694302	0.0	-800.6437003915348	0.0	4.3191446912223866e-10	0.0	0.9999999999992834	0.0	1.1972170330795237e-06	0.0	0.0	0.00013719096631329471	0.0	0.0	0.00013724305848767748	0.0	800.6437003915348	88.88888859807315	0.0	1.1651286615137575e-12	-9.473903143468003e-13	0.0	-6.731613057885968e-27	9.473903143468004e-14
2.105	88.88888859781834	0.0	0.00021283858412721898	195.01110531387465	0.0	-800.6437003915348	0.0	4.3191446912223866e-10	0.0	0.9999999999992834	0.0	1.1972170330795237e-06	0.0	0.0	0.00013719096631329471	0.0	0.0	0.00013724318222205843	0.0	800.6437003915348	88.88888859807315	0.0	1.1651286615137575e-12	-9.473903143468003e-13	0.0	-6.731613057885968e-27	9.473903143468004e-14
2.11	88.88888859781834	0.0	0.00021283858412721898	195.45554975831908	0.0	-800.6437003915348	0.0	4.3191446912223866e-10	0.0	0.9999999999992834	0.0	1.1972170330795237e-06	0.0	0.0	0.00013719096631329471	0.0	0.0	0.00013724330595643938	0.0	800.6437003915348	88.88888859807315	0.0	1.1651286615137575e-12	-9.473903143468003e-13	0.0	-6.731613057885968e-27	9.473903143468004e-14
2.115	88.88888859781834	0.0	0.00021283858412721898	195.89999420276354	0.0	-800.6437003915348	0.0	4.3191446912223866e-10	0.0	0.9999999999992834	0.0	1.1972170330795237e-06	0.0	0.0	0.00013719096631329471	0.0	0.0	0.00013724342969082036	0.0	800.6437003915348	88.88888859807315	0.0	1.1651286615137575e-12	-9.473903143468003e-13	0.0	-6.731613057885968e-27	9.473903143468004e-14
2.12	88.88888859781834	0.0	0.00021283858412721898	196.344438647208	0.0	-800.6437003915348	0.0	4.3191446912223866e-10	0.0	0.9999999999992834	0.0	1.1972170330795237e-06	0.0	0.0	0.00013719096631329471	0.0	0.0	0.0001372435534252013	0.0	800.6437003915348	88.88888859807315	0.0	1.1651286615137575e-12	-9.473903143468003e-13	0.0	-6.731613057885968e-27	9.473903143468004e-14
2.125	88.88888859781834	0.0	0.00021283858412721898	196.78888309165242	0.0	-800.6437003915348	0.0	4.3191446912223866e-10	0.0	0.9999999999992834	0.0	1.1972170330795237e-06	0.0	0.0	0.00013719096631329471	0.0	0.0	0.00013724367715958226	0.0	800.6437003915348	88.88888859807315	0.0	1.1651286615137575e-12	-9.473903143468003e-13	0.0	-6.731613057885968e-27	9.473903143468004e-14
2.13	88.88888859781834	0.0	0.00021283858412721898	197.23332753609685	0.0	-800.6437003915348	0.0	4.3191446912223866e-10	0.0	0.9999999999992834	0.0	1.1972170330795237e-06	0.0	0.0	0.00013719096631329471	0.0	0.0	0.0001372438008939632	0.0	800.6437003915348	88.88888859807315	0.0	1.1651286615137575e-12	-9.473903143468003e-13	0.0	-6.731613057885968e-27	9.473903143468004e-14
2.135	88.88888859781834	0.0	0.00021283858412721898	197.67777198054128	0.0	-800.6437003915348	0.0	4.3191446912223866e-10	0.0	0.9999999999992834	0.0	1.1972170330795237e-06	0.0	0.0	0.00013719096631329471	0.0	0.0	0.0001372439246283442	0.0	800.6437003915348	88.88888859807315	0.0	1.1651286615137575e-12	-9.473903143468003e-13	0.0	-6.731613057885968e-27	9.473903143468004e-14
2.14	88.88888859781834	0.0	0.00021283858412721898	198.12221642498577	0.0	-800.6437003915348	0.0	4.3191446912223866e-10	0.0	0.9999999999992834	0.0	1.1972170330795237e-06	0.0	0.0	0.00013719096631329471	0.0	0.0	0.00013724404836272514	0.0	800.6437003915348	88.88888859807315	0.0	1.1651286615137575e-12	-9.473903143468003e-13	0.0	-6.731613057885968e-27	9.473903143468004e-14
2.145	88.88888859781834	0.0	0.00021283858412721898	198.5666608694302	0.0	-800.6437003915348	0.0	4.3191446912223866e-10	0.0	0.9999999999992834	0.0	1.1972170330795237e-06	0.0	0.0	0.00013719096631329471	0.0	0.0	0.00013724417209710609	0.0	800.6437003915348	88.88888859807315	0.0	1.1651286615137575e-12	-9.473903143468003e-13	0.0	-6.731613057885968e-27	9.473903143468004e-14
2.15	88.88888859781834	0.0	0.00021283858412721898	199.01110531387462	0.0	-800.6437003915348	0.0	4.3191446912223866e-10	0.0	0.9999999999992834	0.0	1.1972170330795237e-06	0.0	0.0	0.00013719096631329471	0.0	0.0	0.00013724429583148704	0.0	800.6437003915348	88.88888859807315	0.0	1.1651286615137575e-12	-9.473903143468003e-13	0.0	-6.731613057885968e-27	9.473903143468004e-14
2.155	88.88888859781834	0.0	0.00021283858412721898	199.45554975831908	0.0	-800.6437003915348	0.0	4.3191446912223866e-10	0.0	0.9999999999992834	0.0	1.1972170330795237e-06	0.0	0.0	0.00013719096631329471	0.0	0.0	0.000137244419565868	0.0	800.6437003915348	88.88888859807315	0.0	1.1651286615137575e-12	-9.473903143468003e-13	0.0	-6.731613057885968e-27	9.473903143468004e-14
2.16	88.88888859781834	0.0	0.00021283858412721898	199.89999420276354	0.0	-800.6437003915348	0.0	4.3191446912223866e-10	0.0	0.9999999999992834	0.0	1.1972170330795237e-06	0.0	0.0	0.00013719096631329471	0.0	0.0	0.00013724454330024896	0.0	800.6437003915348	88.88888859807315	0.0	1.1651286615137575e-12	-9.473903143468003e-13	0.0	-6.731613057885968e-27	9.473903143468004e-14
2.165	88.88888859781834	0.0	0.00021283858412721898	200.34443864720797	0.0	-800.6437003915348	0.0	4.3191446912223866e-10	0.0	0.9999999999992834	0.0	1.1972170330795237e-06	0.0	0.0	0.00013719096631329471	0.0	0.0	0.0001372446670346299	0.0	800.6437003915348	88.88888859807315	0.0	1.1651286615137575e-12	-9.473903143468003e-13	0.0	-6.731613057885968e-27	9.473903143468004e-14
2.17	88.88888859781834	0.0	0.00021283858412721898	200.78888309165242	0.0	-800.6437003915348	0.0	4.3191446912223866e-10	0.0	0.9999999999992834	0.0	1.1972170330795237e-06	0.0	0.0	0.00013719096631329471	0.0	0.0	0.00013724479076901086	0.0	800.6437003915348	88.88888859807315	0.0	1.1651286615137575e-12	-9.473903143468003e-13	0.0	-6.731613057885968e-27	9.473903143468004e-14
2.175	88.88888859781834	0.0	0.00021283858412721898	201.23332753609685	0.0	-800.6437003915348	0.0	4.3191446912223866e-10	0.0	0.9999999999992834	0.0	1.1972170330795237e-06	0.0	0.0	0.00013719096631329471	0.0	0.0	0.00013724491450339184	0.0	800.6437003915348	88.88888859807315	0.0	1.1651286615137575e-12	-9.473903143468003e-13	0.0	-6.731613057885968e-27	9.473903143468004e-14
2.18	88.88888859781834	0.0	0.00021283858412721898	201.6777719805413	0.0	-800.6437003915348	0.0	4.3191446912223866e-10	0.0	0.9999999999992834	0.0	1.1972170330795237e-06	0.0	0.0	0.00013719096631329471	0.0	0.0	0.0001372450382377728	0.0	800.6437003915348	88.88888859807315	0.0	1.1651286615137575e-12	-9.473903143468003e-13	0.0	-6.731613057885968e-27	9.473903143468004e-14
2.185	88.88888859781834	0.0	0.00021283858412721898	202.12221642498577	0.0	-800.6437003915348	0.0	4.3191446912223866e-10	0.0	0.9999999999992834	0.0	1.1972170330795237e-06	0.0	0.0	0.00013719096631329471	0.0	0.0	0.00013724516197215374	0.0	800.6437003915348	88.88888859807315	0.0	1.1651286615137575e-12	-9.473903143468003e-13	0.0	-6.731613057885968e-27	9.473903143468004e-14
2.19	88.88888859781834	0.0	0.00021283858412721898	202.5666608694302	0.0	-800.6437003915348	0.0	4.3191446912223866e-10	0.0	0.9999999999992834	0.0	1.1972170330795237e-06	0.0	0.0	0.00013719096631329471	0.0	0.0	0.0001372452857065347	0.0	800.6437003915348	88.88888859807315	0.0	1.1651286615137575e-12	-9.473903143468003e-13	0.0	-6.731613057885968e-27	9.473903143468004e-14
2.195	88.88888859781834	0.0	0.00021283858412721898	203.01110531387462	0.0	-800.6437003915348	0.0	4.3191446912223866e-10	0.0	0.9999999999992834	0.0	1.1972170330795237e-06	0.0	0.0	0.00013719096631329471	0.0	0.0	0.00013724540944091567	0.0	800.6437003915348	88.88888859807315	0.0	1.1651286615137575e-12	-9.473903143468003e-13	0.0	-6.731613057885968e-27	9.473903143468004e-14
2.2	88.88888859781834	0.0	0.00021283858412721898	203.4555497583191	0.0	-800.6437003915348	0.0	4.3191446912223866e-10	0.0	0.9999999999992834	0.0	1.1972170330795237e-06	0.0	0.0	0.00013719096631329471	0.0	0.0	0.00013724553317529662	0.0	800.6437003915348	88.88888859807315	0.0	1.1651286615137575e-12	-9.473903143468003e-13	0.0	-6.731613057885968e-27	9.473903143468004e-14
2.205	88.88888859781834	0.0	0.00021283858412721898	203.89999420276354	0.0	-800.6437003915348	0.0	4.3191446912223866e-10	0.0	0.9999999999992834	0.0	1.1972170330795237e-06	0.0	0.0	0.00013719096631329471	0.0	0.0	0.00013724565690967757	0.0	800.6437003915348	88.88888859807315	0.0	1.1651286615137575e-12	-9.473903143468003e-13	0.0	-6.731613057885968e-27	9.473903143468004e-14
2.21	88.88888859781834	0.0	0.00021283858412721898	204.34443864720797	0.0	-800.6437003915348	0.0	4.3191446912223866e-10	0.0	0.9999999999992834	0.0	1.1972170330795237e-06	0.0	0.0	0.00013719096631329471	0.0	0.0	0.00013724578064405852	0.0	800.6437003915348	88.88888859807315	0.0	1.1651286615137575e-12	-9.473903143468003e-13	0.0	-6.731613057885968e-27	9.473903143468004e-14
2.215	88.88888859781834	0.0	0.00021283858412721898	204.7888830916524	0.0	-800.6437003915348	0.0	4.3191446912223866e-10	0.0	0.9999999999992834	0.0	1.1972170330795237e-06	0.0	0.0	0.00013719096631329471	0.0	0.0	0.0001372459043784395	0.0	800.6437003915348	88.88888859807315	0.0	1.1651286615137575e-12	-9.473903143468003e-13	0.0	-6.731613057885968e-27	9.473903143468004e-14
2.22	88.88888859781834	0.0	0.00021283858412721898	205.23332753609688	0.0	-800.6437003915348	0.0	4.3191446912223866e-10	0.0	0.9999999999992834	0.0	1.1972170330795237e-06	0.0	0.0	0.00013719096631329471	0.0	0.0	0.00013724602811282044	0.0	800.6437003915348	88.88888859807315	0.0	1.1651286615137575e-12	-9.473903143468003e-13	0.0	-6.731613057885968e-27	9.473903143468004e-14
2.225	88.88888859781834	0.0	0.00021283858412721898	205.6777719805413	0.0	-800.6437003915348	0.0	4.3191446912223866e-10	0.0	0.9999999999992834	0.0	1.1972170330795237e-06	0.0	0.0	0.00013719096631329471	0.0	0.0	0.0001372461518472014	0.0	800.6437003915348	88.88888859807315	0.0	1.1651286615137575e-12	-9.473903143468003e-13	0.0	-6.731613057885968e-27	9.473903143468004e-14
2.23	88.88888859781834	0.0	0.00021283858412721898	206.12221642498574	0.0	-800.6437003915348	0.0	4.3191446912223866e-10	0.0	0.9999999999992834	0.0	1.1972170330795237e-06	0.0	0.0	0.00013719096631329471	0.0	0.0	0.00013724627558158234	0.0	800.6437003915348	88.88888859807315	0.0	1.1651286615137575e-12	-9.473903143468003e-13	0.0	-6.731613057885968e-27	9.473903143468004e-14
2.235	88.88888859781834	0.0	0.00021283858412721898	206.5666608694302	0.0	-800.6437003915348	0.0	4.3191446912223866e-10	0.0	0.9999999999992834	0.0	1.1972170330795237e-06	0.0	0.0	0.00013719096631329471	0.0	0.0	0.00013724639931596332	0.0	800.6437003915348	88.88888859807315	0.0	1.1651286615137575e-12	-9.473903143468003e-13	0.0	-6.731613057885968e-27	9.473903143468004e-14
2.24	88.88888859781834	0.0	0.00021283858412721898	207.01110531387465	0.0	-800.6437003915348	0.0	4.3191446912223866e-10	0.0	0.9999999999992834	0.0	1.1972170330795237e-06	0.0	0.0	0.00013719096631329471	0.0	0.0	0.00013724652305034427	0.0	800.6437003915348	88.88888859807315	0.0	1.1651286615137575e-12	-9.473903143468003e-13	0.0	-6.731613057885968e-27	9.473903143468004e-14
2.245	88.88888859781834	0.0	0.00021283858412721898	207.4555497583191	0.0	-800.6437003915348	0.0	4.3191446912223866e-10	0.0	0.9999999999992834	0.0	1.1972170330795237e-06	0.0	0.0	0.00013719096631329471	0.0	0.0	0.00013724664678472522	0.0	800.6437003915348	88.88888859807315	0.0	1.1651286615137575e-12	-9.473903143468003e-13	0.0	-6.731613057885968e-27	9.473903143468004e-14
2.25	88.88888859781834	0.0	0.00021283858412721898	207.89999420276354	0.0	-800.6437003915348	0.0	4.3191446912223866e-10	0.0	0.9999999999992834	0.0	1.1972170330795237e-06	0.0	0.0	0.00013719096631329471	0.0	0.0	0.00013724677051910617	0.0	800.6437003915348	88.88888859807315	0.0	1.1651286615137575e-12	-9.473903143468003e-13	0.0	-6.731613057885968e-27	9.473903143468004e-14
2.255	88.88888859781834	0.0	0.00021283858412721898	208.34443864720797	0.0	-800.6437003915348	0.0	4.3191446912223866e-10	0.0	0.9999999999992834	0.0	1.1972170330795237e-06	0.0	0.0	0.00013719096631329471	0.0	0.0	0.00013724689425348714	0.0	800.6437003915348	88.88888859807315	0.0	1.1651286615137575e-12	-9.473903143468003e-13	0.0	-6.731613057885968e-27	9.473903143468004e-14
2.26	88.88888859781834	0.0	0.00021283858412721898	208.7888830916524	0.0	-800.6437003915348	0.0	4.3191446912223866e-10	0.0	0.9999999999992834	0.0	1.1972170330795237e-06	0.0	0.0	0.00013719096631329471	0.0	0.0	0.0001372470179878681	0.0	800.6437003915348	88.88888859807315	0.0	1.1651286615137575e-12	-9.473903143468003e-13	0.0	-6.731613057885968e-27	9.473903143468004e-14
2.265	88.88888859781834	0.0	0.00021283858412721898	209.23332753609688	0.0	-800.6437003915348	0.0	4.3191446912223866e-10	0.0	0.9999999999992834	0.0	1.1972170330795237e-06	0.0	0.0	0.00013719096631329471	0.0	0.0	0.00013724714172224904	0.0	800.6437003915348	88.88888859807315	0.0	1.1651286615137575e-12	-9.473903143468003e-13	0.0	-6.731613057885968e-27	9.473903143468004e-14
2.27	88.88888859781834	0.0	0.00021283858412721898	209.6777719805413	0.0	-800.6437003915348	0.0	4.3191446912223866e-10	0.0	0.9999999999992834	0.0	1.1972170330795237e-06	0.0	0.0	0.00013719096631329471	0.0	0.0	0.00013724726545663002	0.0	800.6437003915348	88.88888859807315	0.0	1.1651286615137575e-12	-9.473903143468003e-13	0.0	-6.731613057885968e-27	9.473903143468004e-14
2.275	88.88888859781834	0.0	0.00021283858412721898	210.12221642498574	0.0	-800.6437003915348	0.0	4.3191446912223866e-10	0.0	0.9999999999992834	0.0	1.1972170330795237e-06	0.0	0.0	0.00013719096631329471	0.0	0.0	0.00013724738919101097	0.0	800.6437003915348	88.88888859807315	0.0	1.1651286615137575e-12	-9.473903143468003e-13	0.0	-6.731613057885968e-27	9.473903143468004e-14
2.28	88.88888859781834	0.0	0.00021283858412721898	210.56666086943017	0.0	-800.6437003915348	0.0	4.3191446912223866e-10	0.0	0.9999999999992834	0.0	1.1972170330795237e-06	0.0	0.0	0.00013719096631329471	0.0	0.0	0.00013724751292539192	0.0	800.6437003915348	88.88888859807315	0.0	1.1651286615137575e-12	-9.473903143468003e-13	0.0	-6.731613057885968e-27	9.473903143468004e-14
2.285	88.88888859781834	0.0	0.00021283858412721898	211.01110531387465	0.0	-800.6437003915348	0.0	4.3191446912223866e-10	0.0	0.9999999999992834	0.0	1.1972170330795237e-06	0.0	0.0	0.00013719096631329471	0.0	0.0	0.00013724763665977287	0.0	800.6437003915348	88.88888859807315	0.0	1.1651286615137575e-12	-9.473903143468003e-13	0.0	-6.731613057885968e-27	9.473903143468004e-14
2.29	88.88888859781834	0.0	0.00021283858412721898	211.45554975831908	0.0	-800.6437003915348	0.0	4.3191446912223866e-10	0.0	0.9999999999992834	0.0	1.1972170330795237e-06	0.0	0.0	0.00013719096631329471	0.0	0.0	0.00013724776039415385	0.0	800.6437003915348	88.88888859807315	0.0	1.1651286615137575e-12	-9.473903143468003e-13	0.0	-6.731613057885968e-27	9.473903143468004e-14
2.295	88.88888859781834	0.0	0.00021283858412721898	211.89999420276354	0.0	-800.6437003915348	0.0	4.3191446912223866e-10	0.0	0.9999999999992834	0.0	1.1972170330795237e-06	0.0	0.0	0.00013719096631329471	0.0	0.0	0.0001372478841285348	0.0	800.6437003915348	88.88888859807315	0.0	1.1651286615137575e-12	-9.473903143468003e-13	0.0	-6.731613057885968e-27	9.473903143468004e-14
2.3	88.88888859781834	0.0	0.00021283858412721898	212.34443864720797	0.0	-800.6437003915348	0.0	4.3191446912223866e-10	0.0	0.9999999999992834	0.0	1.1972170330795237e-06	0.0	0.0	0.00013719096631329471	0.0	0.0	0.00013724800786291575	0.0	800.6437003915348	88.88888859807315	0.0	1.1651286615137575e-12	-9.473903143468003e-13	0.0	-6.731613057885968e-27	9.473903143468004e-14
2.305	88.88888859781834	0.0	0.00021283858412721898	212.78888309165242	0.0	-800.6437003915348	0.0	4.3191446912223866e-10	0.0	0.9999999999992834	0.0	1.1972170330795237e-06	0.0	0.0	0.00013719096631329471	0.0	0.0	0.0001372481315972967	0.0	800.6437003915348	88.88888859807315	0.0	1.1651286615137575e-12	-9.473903143468003e-13	0.0	-6.731613057885968e-27	9.473903143468004e-14
2.31	88.88888859781834	0.0	0.00021283858412721898	213.23332753609688	0.0	-800.6437003915348	0.0	4.3191446912223866e-10	0.0	0.9999999999992834	0.0	1.1972170330795237e-06	0.0	0.0	0.00013719096631329471	0.0	0.0	0.00013724825533167767	0.0	800.6437003915348	88.88888859807315	0.0	1.1651286615137575e-12	-9.473903143468003e-13	0.0	-6.731613057885968e-27	9.473903143468004e-14
2.315	88.88888859781834	0.0	0.00021283858412721898	213.6777719805413	0.0	-800.6437003915348	0.0	4.3191446912223866e-10	0.0	0.9999999999992834	0.0	1.1972170330795237e-06	0.0	0.0	0.00013719096631329471	0.0	0.0	0.00013724837906605862	0.0	800.6437003915348	88.88888859807315	0.0	1.1651286615137575e-12	-9.473903143468003e-13	0.0	-6.731613057885968e-27	9.473903143468004e-14
2.32	88.88888859781834	0.0	0.00021283858412721898	214.12221642498574	0.0	-800.6437003915348	0.0	4.3191446912223866e-10	0.0	0.9999999999992834	0.0	1.1972170330795237e-06	0.0	0.0	0.00013719096631329471	0.0	0.0	0.00013724850280043957	0.0	800.6437003915348	88.88888859807315	0.0	1.1651286615137575e-12	-9.473903143468003e-13	0.0	-6.731613057885968e-27	9.473903143468004e-14
2.325	88.88888859781834	0.0	0.00021283858412721898	214.56666086943022	0.0	-800.6437003915348	0.0	4.3191446912223866e-10	0.0	0.9999999999992834	0.0	1.1972170330795237e-06	0.0	0.0	0.00013719096631329471	0.0	0.0	0.00013724862653482052	0.0	800.6437003915348	88.88888859807315	0.0	1.1651286615137575e-12	-9.473903143468003e-13	0.0	-6.731613057885968e-27	9.473903143468004e-14
2.33	88.88888859781834	0.0	0.00021283858412721898	215.01110531387465	0.0	-800.6437003915348	0.0	4.3191446912223866e-10	0.0	0.9999999999992834	0.0	1.1972170330795237e-06	0.0	0.0	0.00013719096631329471	0.0	0.0	0.0001372487502692015	0.0	800.6437003915348	88.88888859807315	0.0	1.1651286615137575e-12	-9.473903143468003e-13	0.0	-6.731613057885968e-27	9.473903143468004e-14
2.335	88.88888859781834	0.0	0.00021283858412721898	215.45554975831908	0.0	-800.6437003915348	0.0	4.3191446912223866e-10	0.0	0.9999999999992834	0.0	1.1972170330795237e-06	0.0	0.0	0.00013719096631329471	0.0	0.0	0.00013724887400358245	0.0	800.6437003915348	88.88888859807315	0.0	1.1651286615137575e-12	-9.473903143468003e-13	0.0	-6.731613057885968e-27	9.473903143468004e-14
2.34	88.88888859781834	0.0	0.00021283858412721898	215.8999942027635	0.0	-800.6437003915348	0.0	4.3191446912223866e-10	0.0	0.9999999999992834	0.0	1.1972170330795237e-06	0.0	0.0	0.00013719096631329471	0.0	0.0	0.0001372489977379634	0.0	800.6437003915348	88.88888859807315	0.0	1.1651286615137575e-12	-9.473903143468003e-13	0.0	-6.731613057885968e-27	9.473903143468004e-14
2.345	88.88888859781834	0.0	0.00021283858412721898	216.344438647208	0.0	-800.6437003915348	0.0	4.3191446912223866e-10	0.0	0.9999999999992834	0.0	1.1972170330795237e-06	0.0	0.0	0.00013719096631329471	0.0	0.0	0.00013724912147234435	0.0	800.6437003915348	88.88888859807315	0.0	1.1651286615137575e-12	-9.473903143468003e-13	0.0	-6.731613057885968e-27	9.473903143468004e-14
2.35	88.88888859781834	0.0	0.00021283858412721898	216.78888309165242	0.0	-800.6437003915348	0.0	4.3191446912223866e-10	0.0	0.9999999999992834	0.0	1.1972170330795237e-06	0.0	0.0	0.00013719096631329471	0.0	0.0	0.00013724924520672533	0.0	800.6437003915348	88.88888859807315	0.0	1.1651286615137575e-12	-9.473903143468003e-13	0.0	-6.731613057885968e-27	9.473903143468004e-14
2.355	88.88888859781834	0.0	0.00021283858412721898	217.23332753609685	0.0	-800.6437003915348	0.0	4.3191446912223866e-10	0.0	0.9999999999992834	0.0	1.1972170330795237e-06	0.0	0.0	0.00013719096631329471	0.0	0.0	0.00013724936894110628	0.0	800.6437003915348	88.88888859807315	0.0	1.1651286615137575e-12	-9.473903143468003e-13	0.0	-6.731613057885968e-27	9.473903143468004e-14
2.36	88.88888859781834	0.0	0.00021283858412721898	217.6777719805413	0.0	-800.6437003915348	0.0	4.3191446912223866e-10	0.0	0.9999999999992834	0.0	1.1972170330795237e-06	0.0	0.0	0.00013719096631329471	0.0	0.0	0.00013724949267548723	0.0	800.6437003915348	88.88888859807315	0.0	1.1651286615137575e-12	-9.473903143468003e-13	0.0	-6.731613057885968e-27	9.473903143468004e-14
2.365	88.88888859781834	0.0	0.00021283858412721898	218.12221642498577	0.0	-800.6437003915348	0.0	4.3191446912223866e-10	0.0	0.9999999999992834	0.0	1.1972170330795237e-06	0.0	0.0	0.00013719096631329471	0.0	0.0	0.00013724961640986818	0.0	800.6437003915348	88.88888859807315	0.0	1.1651286615137575e-12	-9.473903143468003e-13	0.0	-6.731613057885968e-27	9.473903143468004e-14
2.37	88.88888859781834	0.0	0.00021283858412721898	218.5666608694302	0.0	-800.6437003915348	0.0	4.3191446912223866e-10	0.0	0.9999999999992834	0.0	1.1972170330795237e-06	0.0	0.0	0.00013719096631329471	0.0	0.0	0.00013724974014424915	0.0	800.6437003915348	88.88888859807315	0.0	1.1651286615137575e-12	-9.473903143468003e-13	0.0	-6.731613057885968e-27	9.473903143468004e-14
2.375	88.88888859781834	0.0	0.00021283858412721898	219.01110531387465	0.0	-800.6437003915348	0.0	4.3191446912223866e-10	0.0	0.9999999999992834	0.0	1.1972170330795237e-06	0.0	0.0	0.00013719096631329471	0.0	0.0	0.0001372498638786301	0.0	800.6437003915348	88.88888859807315	0.0	1.1651286615137575e-12	-9.473903143468003e-13	0.0	-6.731613057885968e-27	9.473903143468004e-14
2.38	88.88888859781834	0.0	0.00021283858412721898	219.45554975831908	0.0	-800.6437003915348	0.0	4.3191446912223866e-10	0.0	0.9999999999992834	0.0	1.1972170330795237e-06	0.0	0.0	0.00013719096631329471	0.0	0.0	0.00013724998761301105	0.0	800.6437003915348	88.88888859807315	0.0	1.1651286615137575e-12	-9.473903143468003e-13	0.0	-6.731613057885968e-27	9.473903143468004e-14
2.385	88.88888859781834	0.0	0.00021283858412721898	219.8999942027635	0.0	-800.6437003915348	0.0	4.3191446912223866e-10	0.0	0.9999999999992834	0.0	1.1972170330795237e-06	0.0	0.0	0.00013719096631329471	0.0	0.0	0.000137250111347392	0.0	800.6437003915348	88.88888859807315	0.0	1.1651286615137575e-12	-9.473903143468003e-13	0.0	-6.731613057885968e-27	9.473903143468004e-14
2.39	88.88888859781834	0.0	0.00021283858412721898	220.344438647208	0.0	-800.6437003915348	0.0	4.3191446912223866e-10	0.0	0.9999999999992834	0.0	1.1972170330795237e-06	0.0	0.0	0.00013719096631329471	0.0	0.0	0.00013725023508177298	0.0	800.6437003915348	88.88888859807315	0.0	1.1651286615137575e-12	-9.473903143468003e-13	0.0	-6.731613057885968e-27	9.473903143468004e-14
2.395	88.88888859781834	0.0	0.00021283858412721898	220.78888309165242	0.0	-800.6437003915348	0.0	4.3191446912223866e-10	0.0	0.9999999999992834	0.0	1.1972170330795237e-06	0.0	0.0	0.00013719096631329471	0.0	0.0	0.00013725035881615393	0.0	800.6437003915348	88.88888859807315	0.0	1.1651286615137575e-12	-9.473903143468003e-13	0.0	-6.731613057885968e-27	9.473903143468004e-14
2.4	88.88888859781834	0.0	0.00021283858412721898	221.23332753609685	0.0	-800.6437003915348	0.0	4.3191446912223866e-10	0.0	0.9999999999992834	0.0	1.1972170330795237e-06	0.0	0.0	0.00013719096631329471	0.0	0.0	0.00013725048255053488	0.0	800.6437003915348	88.88888859807315	0.0	1.1651286615137575e-12	-9.473903143468003e-13	0.0	-6.731613057885968e-27	9.473903143468004e-14
2.405	88.88888859781834	0.0	0.00021283858412721898	221.67777198054128	0.0	-800.6437003915348	0.0	4.3191446912223866e-10	0.0	0.9999999999992834	0.0	1.1972170330795237e-06	0.0	0.0	0.00013719096631329471	0.0	0.0	0.00013725060628491583	0.0	800.6437003915348	88.88888859807315	0.0	1.1651286615137575e-12	-9.473903143468003e-13	0.0	-6.731613057885968e-27	9.473903143468004e-14
2.41	88.88888859781834	0.0	0.00021283858412721898	222.12221642498577	0.0	-800.6437003915348	0.0	4.3191446912223866e-10	0.0	0.9999999999992834	0.0	1.1972170330795237e-06	0.0	0.0	0.00013719096631329471	0.0	0.0	0.0001372507300192968	0.0	800.6437003915348	88.88888859807315	0.0	1.1651286615137575e-12	-9.473903143468003e-13	0.0	-6.731613057885968e-27	9.473903143468004e-14
2.415	88.88888859781834	0.0	0.00021283858412721898	222.5666608694302	0.0	-800.6437003915348	0.0	4.3191446912223866e-10	0.0	0.9999999999992834	0.0	1.1972170330795237e-06	0.0	0.0	0.00013719096631329471	0.0	0.0	0.00013725085375367776	0.0	800.6437003915348	88.88888859807315	0.0	1.1651286615137575e-12	-9.473903143468003e-13	0.0	-6.731613057885968e-27	9.473903143468004e-14
2.42	88.88888859781834	0.0	0.00021283858412721898	223.01110531387462	0.0	-800.6437003915348	0.0	4.3191446912223866e-10	0.0	0.9999999999992834	0.0	1.1972170330795237e-06	0.0	0.0	0.00013719096631329471	0.0	0.0	0.0001372509774880587	0.0	800.6437003915348	88.88888859807315	0.0	1.1651286615137575e-12	-9.473903143468003e-13	0.0	-6.731613057885968e-27	9.473903143468004e-14
2.425	88.88888859781834	0.0	0.00021283858412721898	223.45554975831908	0.0	-800.6437003915348	0.0	4.3191446912223866e-10	0.0	0.9999999999992834	0.0	1.1972170330795237e-06	0.0	0.0	0.00013719096631329471	0.0	0.0	0.00013725110122243965	0.0	800.6437003915348	88.88888859807315	0.0	1.1651286615137575e-12	-9.473903143468003e-13	0.0	-6.731613057885968e-27	9.473903143468004e-14
2.43	88.88888859781834	0.0	0.00021283858412721898	223.89999420276354	0.0	-800.6437003915348	0.0	4.3191446912223866e-10	0.0	0.9999999999992834	0.0	1.1972170330795237e-06	0.0	0.0	0.00013719096631329471	0.0	0.0	0.00013725122495682063	0.0	800.6437003915348	88.88888859807315	0.0	1.1651286615137575e-12	-9.473903143468003e-13	0.0	-6.731613057885968e-27	9.473903143468004e-14
2.435	88.88888859781834	0.0	0.00021283858412721898	224.34443864720797	0.0	-800.6437003915348	0.0	4.3191446912223866e-10	0.0	0.9999999999992834	0.0	1.1972170330795237e-06	0.0	0.0	0.00013719096631329471	0.0	0.0	0.00013725134869120158	0.0	800.6437003915348	88.88888859807315	0.0	1.1651286615137575e-12	-9.473903143468003e-13	0.0	-6.731613057885968e-27	9.473903143468004e-14
2.44	88.88888859781834	0.0	0.00021283858412721898	224.78888309165242	0.0	-800.6437003915348	0.0	4.3191446912223866e-10	0.0	0.9999999999992834	0.0	1.1972170330795237e-06	0.0	0.0	0.00013719096631329471	0.0	0.0	0.00013725147242558253	0.0	800.6437003915348	88.88888859807315	0.0	1.1651286615137575e-12	-9.473903143468003e-13	0.0	-6.731613057885968e-27	9.473903143468004e-14
2.445	88.88888859781834	0.0	0.00021283858412721898	225.23332753609685	0.0	-800.6437003915348	0.0	4.3191446912223866e-10	0.0	0.9999999999992834	0.0	1.1972170330795237e-06	0.0	0.0	0.00013719096631329471	0.0	0.0	0.00013725159615996348	0.0	800.6437003915348	88.88888859807315	0.0	1.1651286615137575e-12	-9.473903143468003e-13	0.0	-6.731613057885968e-27	9.473903143468004e-14
2.45	88.88888859781834	0.0	0.00021283858412721898	225.67777198054134	0.0	-800.6437003915348	0.0	4.3191446912223866e-10	0.0	0.9999999999992834	0.0	1.1972170330795237e-06	0.0	0.0	0.00013719096631329471	0.0	0.0	0.00013725171989434446	0.0	800.6437003915348	88.88888859807315	0.0	1.1651286615137575e-12	-9.473903143468003e-13	0.0	-6.731613057885968e-27	9.473903143468004e-14
2.455	88.88888859781834	0.0	0.00021283858412721898	226.12221642498577	0.0	-800.6437003915348	0.0	4.3191446912223866e-10	0.0	0.9999999999992834	0.0	1.1972170330795237e-06	0.0	0.0	0.00013719096631329471	0.0	0.0	0.0001372518436287254	0.0	800.6437003915348	88.88888859807315	0.0	1.1651286615137575e-12	-9.473903143468003e-13	0.0	-6.731613057885968e-27	9.473903143468004e-14
2.46	88.88888859781834	0.0	0.00021283858412721898	226.5666608694302	0.0	-800.6437003915348	0.0	4.3191446912223866e-10	0.0	0.9999999999992834	0.0	1.1972170330795237e-06	0.0	0.0	0.00013719096631329471	0.0	0.0	0.00013725196736310636	0.0	800.6437003915348	88.88888859807315	0.0	1.1651286615137575e-12	-9.473903143468003e-13	0.0	-6.731613057885968e-27	9.473903143468004e-14
2.465	88.88888859781834	0.0	0.00021283858412721898	227.01110531387462	0.0	-800.6437003915348	0.0	4.3191446912223866e-10	0.0	0.9999999999992834	0.0	1.1972170330795237e-06	0.0	0.0	0.00013719096631329471	0.0	0.0	0.0001372520910974873	0.0	800.6437003915348	88.88888859807315	0.0	1.1651286615137575e-12	-9.473903143468003e-13	0.0	-6.731613057885968e-27	9.473903143468004e-14
2.47	88.88888859781834	0.0	0.00021283858412721898	227.4555497583191	0.0	-800.6437003915348	0.0	4.3191446912223866e-10	0.0	0.9999999999992834	0.0	1.1972170330795237e-06	0.0	0.0	0.00013719096631329471	0.0	0.0	0.00013725221483186828	0.0	800.6437003915348	88.88888859807315	0.0	1.1651286615137575e-12	-9.473903143468003e-13	0.0	-6.731613057885968e-27	9.473903143468004e-14
2.475	88.88888859781834	0.0	0.00021283858412721898	227.89999420276354	0.0	-800.6437003915348	0.0	4.3191446912223866e-10	0.0	0.9999999999992834	0.0	1.1972170330795237e-06	0.0	0.0	0.00013719096631329471	0.0	0.0	0.00013725233856624923	0.0	800.6437003915348	88.88888859807315	0.0	1.1651286615137575e-12	-9.473903143468003e-13	0.0	-6.731613057885968e-27	9.473903143468004e-14
2.48	88.88888859781834	0.0	0.00021283858412721898	228.34443864720797	0.0	-800.6437003915348	0.0	4.3191446912223866e-10	0.0	0.9999999999992834	0.0	1.1972170330795237e-06	0.0	0.0	0.00013719096631329471	0.0	0.0	0.00013725246230063018	0.0	800.6437003915348	88.88888859807315	0.0	1.1651286615137575e-12	0.14908511541401975	0.0	-0.023134453329415477	0.015086939573307269
2.485	88.88888859781834	0.0	0.00021283858412721898	228.7888830916524	0.0	-800.6437003915348	0.0	4.3191446912223866e-10	0.0	0.9999999999992834	0.0	1.1972170330795237e-06	0.0	0.0	0.00013719096631329471	0.0	0.0	0.00013725258603501113	0.0	800.6437003915348	88.88888859807315	0.0	1.1651286615137575e-12	-0.5746319403982625	0.0	0.10504449953929441	0.05841542722683222
2.49	88.87994348748768	0.0	0.0016054485128163892	229.2333204294182	0.0	-800.6436992711331	0.0	6.18789237664491e-05	0.0	0.999999999999252	0.0	1.2228929461025907e-06	0.0	0.0	0.0001401332092160303	0.0	0.0	0.00015497959189815762	0.0	800.6436992711331	88.87994349114835	0.0	0.0013880672009300573	-4.253831317459837	0.0	0.576808961609102	0.42927601209006155
2.495	88.85180564360529	0.0	0.005080469374461174	229.67764284653484	0.0	-800.6436821123095	0.0	0.000177962634346426	0.0	0.9999999999987708	0.0	1.5677888901163448e-06	0.0	0.0	0.00017965537314240584	0.0	0.0	0.0002059621311935582	0.0	800.6436821123095	88.85180565909862	0.0	0.004801867626926894	-3.6429217914313012	0.0	0.283603805351897	0.36539444846487634
2.5	88.84745494951586	0.0	0.004159061592103841	230.12188396886293	0.0	-800.643659521629	0.0	0.00015169627212051464	0.0	0.9999999999980308	0.0	1.9846279308677526e-06	0.0	0.0	0.0002274216086851564	0.0	0.0	0.0002494199119954259	0.0	800.643659521629	88.84745496532442	0.0	0.0038064033107131283	-0.028534410416843535	0.0	-0.32502897434327077	0.03262790933242206
2.505	88.84755568715708	0.0	0.0027440284237639162	230.56612149575636	0.0	-800.6436442888481	0.0	0.00012304481951576877	0.0	0.9999999999972918	0.0	2.32740148122734e-06	0.0	0.0	0.0002667005642138866	0.0	0.0	0.0002846696562414384	0.0	800.6436442888481	88.84755569896754	0.0	0.002330460558315875	0.0942903811896656	0.0	-0.2810920084596651	0.029648506405008143
2.51	88.8476558676986	0.0	0.0015810278938215047	231.01035952492117	0.0	-800.6436357760986	0.0	9.774358828876325e-05	0.0	0.9999999999966134	0.0	2.6026504393777436e-06	0.0	0.0	0.0002982417714487648	0.0	0.0	0.0003126711316584908	0.0	800.6436357760986	88.84765587472475	0.0	0.0011185491126381568	0.019980252514765578	0.0	-0.21619487406507512	0.021711617641844996
2.515	88.84775550908978	0.0	0.0006655063859883302	231.45459805360417	0.0	-800.6436326728589	0.0	7.60827078411869e-05	0.0	0.9999999999960264	0.0	2.8191586450457286e-06	0.0	0.0	0.00032305178427830797	0.0	0.0	0.0003344672219246253	0.0	800.6436326728589	88.84775551142994	0.0	0.00016455454990702356	0.01987591541023903	0.0	-0.16605376250928042	0.016723906259269537
2.52	88.84785465156784	0.0	-1.8521608534434182e-05	231.8988370792044	0.0	-800.6436337296481	0.0	5.815103260649843e-05	0.0	0.9999999999955417	0.0	2.9861762346564127e-06	0.0	0.0	0.00034219059025666904	0.0	0.0	0.00035112626563802525	0.0	800.6436337296481	88.84785464987277	0.0	-0.0005491523126531765	0.019781408245004666	0.0	-0.12032828755484903	0.01219434331894833
2.525	88.84795335002933	0.0	-0.0004947645714851003	232.34307659936405	0.0	-800.6436378059141	0.0	4.3872332530196666e-05	0.0	0.999999999995155	0.0	3.112961532191289e-06	0.0	0.0	0.00035671911516285427	0.0	0.0	0.00036369476309489914	0.0	800.6436378059141	88.8479533452271	0.0	-0.0010479250934579667	0.01969892476883691	0.0	-0.08021953712670575	0.008260279519405635
2.53	88.84805166751512	0.0	-0.0007914681836439663	232.78731661202332	0.0	-800.643643900291	0.0	3.304135010121799e-05	0.0	0.9999999999948533	0.0	3.2084136155263353e-06	0.0	0.0	0.0003676571182045673	0.0	0.0	0.0003731604126459689	0.0	800.643643900291	88.84805166060733	0.0	-0.001361590780990824	0.019629488664918426	0.0	-0.046335911220968105	0.005032229619088937
2.535	88.84814966989273	0.0	-0.00093879616400506	233.23155711544672	0.0	-800.6436511660492	0.0	2.535813888035521e-05	0.0	0.9999999999946185	0.0	3.2807931700104354e-06	0.0	0.0	0.0003759512041945632	0.0	0.0	0.00038042498431672364	0.0	800.6436511660492	88.8481496618202	0.0	-0.0015217809691918122	0.019573193636309348	0.0	-0.018810793109190073	0.0027146930701668903
2.54	88.84824742173032	0.0	-0.0009667780201284262	233.67579810822568	0.0	-800.6436589146613	0.0	2.0459471947424227e-05	0.0	0.9999999999944308	0.0	3.337525738392989e-06	0.0	0.0	0.0003824522776531141	0.0	0.0	0.0003862861912849922	0.0	800.6436589146613	88.84824741329777	0.0	-0.0015598446452658535	0.03708154071470442	0.0	0.00026432980086781905	0.0037082482818979476
2.545	88.8483449832874	0.0	-0.0009037910997192908	234.12003958926408	0.0	-800.6436666103248	0.0	1.7946499263950997e-05	0.0	0.9999999999942709	0.0	3.385078931547971e-06	0.0	0.0	0.0003879014721934466	0.0	0.0	0.00039142748460928734	0.0	800.6436666103248	88.84834497513252	0.0	-0.0015053084211067971	-0.02891825980337141	0.0	0.026273306762179267	0.003907111974687776
2.55	88.847389281108	0.0	-0.0006375276351735466	234.56428063663958	0.0	-800.6436737344787	0.0	2.811217301122568e-06	0.0	0.9999999999941438	0.0	3.4223996570320873e-06	0.0	0.0	0.00039217811231068373	0.0	0.0	0.00039223283904252974	0.0	800.6436737344787	88.847389274663	0.0	-0.001245670184362772	-0.5823266669845377	0.0	0.10180840564349218	0.05911592835615377
2.555	88.84301965025382	0.0	1.3210810398581778e-05	235.00850692051844	0.0	-800.6436782895332	0.0	-4.615446552719928e-05	0.0	0.999999999994337	0.0	3.3654557243421913e-06	0.0	0.0	0.00038565281828662997	0.0	0.0	0.0003790105586405769	0.0	800.6436782895332	88.84301964833026	0.0	-0.000584783687697916	-0.7787098711818412	0.0	0.1065580572842056	0.07859667187917208
2.56	88.84058439900963	0.0	0.00026981585721566056	235.45271436993218	0.0	-800.6436802694061	0.0	-5.220205140399486e-05	0.0	0.9999999999947826	0.0	3.230319665838207e-06	0.0	0.0	0.0003701673666619232	0.0	0.0	0.0003640557725037075	0.0	800.6436802694061	88.84058439889876	0.0	-0.0003041511166043354	-0.20776228150012344	0.0	0.014930033231519837	0.02082980352918165
2.565	88.84062856184204	0.0	0.000190253367989804	235.89691728394786	0.0	-800.6436819480973	0.0	-2.448511359511267e-05	0.0	0.9999999999950889	0.0	3.1342230075105124e-06	0.0	0.0	0.0003591555007668924	0.0	0.0	0.00035704130415421576	0.0	800.6436819480973	88.84062856128942	0.0	-0.0003666393160916402	0.055516217357383844	0.0	-0.015462234840411966	0.00576292555559443
2.57	88.84072631597401	0.0	0.00015550854293934203	236.3411206711679	0.0	-800.6436838704846	0.0	1.1598943078493537e-06	0.0	0.999999999995178	0.0	3.105702593988913e-06	0.0	0.0	0.0003558873021173655	0.0	0.0	0.00035737358939682087	0.0	800.6436838704846	88.84072631522636	0.0	-0.00039631720540375556	0.02043852560452327	0.0	-0.0026164004369300374	0.002060531193971887
2.575	88.84082400663516	0.0	0.00016306177981601365	236.78532454699476	0.0	-800.6436858586133	0.0	2.3543364343087785e-05	0.0	0.9999999999950794	0.0	3.1372969224287783e-06	0.0	0.0	0.000359507745469692	0.0	0.0	0.0003641182664588094	0.0	800.6436858586133	88.84082400590971	0.0	-0.00039437830766855933	0.05352832303178919	0.0	-0.00145790420325571	0.005354817318323235
2.58	88.84092164485891	0.0	0.00020314262578902638	237.22952891113994	0.0	-800.6436877753858	0.0	4.2412465378667494e-05	0.0	0.9999999999948149	0.0	3.2204846494001896e-06	0.0	0.0	0.0003690403567952372	0.0	0.0	0.0003762685427835213	0.0	800.6436877753858	88.84092164432475	0.0	-0.0003690790230038862	-0.17041770869496986	0.0	0.033254813049078034	0.01736320190165764
2.585	88.8389794931288	0.0	0.0005309346186653635	237.6737297138242	0.0	-800.6436889752981	0.0	4.4989357696798124e-05	0.0	0.9999999999944467	0.0	3.3329639012794158e-06	0.0	0.0	0.00038192952962624367	0.0	0.0	0.000389157044378676	0.0	800.6436889752981	88.83897949469457	0.0	-6.125960469734289e-05	-0.532846105412214	0.0	0.07393896586169275	0.053795161745798376
2.59	88.83619528403598	0.0	0.0008852792249481301	238.11791732811164	0.0	-800.6436883549634	0.0	4.54160627366163e-05	0.0	0.99999999999407	0.0	3.444179411066202e-06	0.0	0.0	0.00039467388828067445	0.0	0.0	0.00040216778796322336	0.0	800.6436883549634	88.8361952880269	0.0	0.0002733436354212937	-0.4333695052714859	0.0	0.040233457623877186	0.04352331090480419
2.595	88.83498391738395	0.0	0.0009428518826911339	238.56209448115646	0.0	-800.6436867717979	0.0	5.6376958200126324e-05	0.0	0.9999999999936308	0.0	3.5694658043143656e-06	0.0	0.0	0.000409030651407835	0.0	0.0	0.00041831859679648684	0.0	800.6436867717979	88.83498392185166	0.0	0.000308665008031315	-0.08776591074119248	0.0	-0.016507506151277523	0.008930483104270135
2.6	88.83495922811174	0.0	0.000838855569721275	239.0062692299408	0.0	-800.6436855561261	0.0	7.093131443773831e-05	0.0	0.9999999999930482	0.0	3.7290789238081104e-06	0.0	0.0	0.0004273209676117745	0.0	0.0	0.0004386389215594757	0.0	800.6436855561261	88.83495923189781	0.0	0.00017631042139274622	-0.025091738373580107	0.0	-0.020713413226955694	0.0032536761088326166
2.605	88.83435699637799	0.0	0.0008492607459959764	239.4504430176755	0.0	-800.6436848096014	0.0	8.00821261979343e-05	0.0	0.9999999999923208	0.0	3.919292700304569e-06	0.0	0.0	0.0004491178608089176	0.0	0.0	0.0004615807607873541	0.0	800.6436848096014	88.8343570003063	0.0	0.0001529250521509284	-0.23497462010813783	0.0	0.011650714462224803	0.02352632806930227
2.61	88.83268541471348	0.0	0.0010031076077666875	239.89461092283602	0.0	-800.6436837795246	0.0	8.404538899622405e-05	0.0	0.9999999999914931	0.0	4.1250516199179225e-06	0.0	0.0	0.0004726960961911418	0.0	0.0	0.0004856579911724485	0.0	800.6436837795246	88.83268541996648	0.0	0.0002702287819955426	-0.3738115354044188	0.0	0.025011292524490945	0.03746473391806683
2.615	88.83089189712987	0.0	0.0011318340098145116	240.33876969216948	0.0	-800.6436821580644	0.0	8.718666667840415e-05	0.0	0.999999999990588	0.0	4.3389465544917265e-06	0.0	0.0	0.0004972066502119732	0.0	0.0	0.0005106351313248807	0.0	800.6436821580644	88.8308919036075	0.0	0.00036096902512019807	-0.307521961927885	0.0	0.007096432535911084	0.03076038303121603
2.62	88.82966714363259	0.0	0.0011503982579381862	240.7829208609648	0.0	-800.6436803670431	0.0	9.097643436429608e-05	0.0	0.9999999999895972	0.0	4.561615675711735e-06	0.0	0.0	0.0005227226519598128	0.0	0.0	0.0005366979599459962	0.0	800.6436803670431	88.82966715043165	0.0	0.00033998465367744707	-0.20737093448227978	0.0	-0.010336021481848146	0.020762836465215248
2.625	88.8286621549274	0.0	0.0011367290833818745	241.22706674222576	0.0	-800.6436788145835	0.0	9.400788485554711e-05	0.0	0.999999999988514	0.0	4.793177051359511e-06	0.0	0.0	0.0005492576310058251	0.0	0.0	0.0005636292351618695	0.0	800.6436788145835	88.82866216174332	0.0	0.0002851860734514991	-0.2277565276680586	0.0	-0.006807406364131856	0.022785823811488047
2.63	88.82728973376837	0.0	0.0011777448331411837	241.67120682923763	0.0	-800.6436774185063	0.0	9.522298846377873e-05	0.0	0.9999999999873502	0.0	5.030089166372142e-06	0.0	0.0	0.0005764057596176359	0.0	0.0	0.0005909086119198568	0.0	800.6436774185063	88.82728974112212	0.0	0.0002841264575568397	-0.3182090487674335	0.0	0.004967782444378943	0.0318247824155782
2.635	88.82553801246205	0.0	0.001258445247685588	242.11533898408598	0.0	-800.643675904792	0.0	9.51128261577721e-05	0.0	0.9999999999861242	0.0	5.268177545370856e-06	0.0	0.0	0.0006036886781534727	0.0	0.0	0.000618156429501866	0.0	800.643675904792	88.82553802079137	0.0	0.0003225478380032505	-0.36059048985966535	0.0	0.006871967457926761	0.036065596531039974
2.64	88.8237665566049	0.0	0.0013188200225855554	242.55946219362423	0.0	-800.6436742300921	0.0	9.458771637885692e-05	0.0	0.9999999999848467	0.0	5.505329468709585e-06	0.0	0.0	0.0006308642867753054	0.0	0.0	0.0006452538142133107	0.0	800.6436742300921	88.82376656574208	0.0	0.0003408118234287218	-0.3418623554002428	0.0	3.372777758388638e-05	0.03418623570640162
2.645	88.82211217849202	0.0	0.0013462106314316208	243.003576865924	0.0	-800.6436725542059	0.0	9.393086206414068e-05	0.0	0.9999999999835214	0.0	5.741023566064764e-06	0.0	0.0	0.0006578728408449272	0.0	0.0	0.0006721630240248145	0.0	800.6436725542059	88.82211218809462	0.0	0.0003263509529509505	-0.33150427482956013	0.0	-0.0037333563348339025	0.033152529644024965
2.65	88.82039481079609	0.0	0.0013738693600006166	243.44768320777538	0.0	-800.6436709644601	0.0	9.287947065594891e-05	0.0	0.999999999982153	0.0	5.974650595164146e-06	0.0	0.0	0.000684644526340536	0.0	0.0	0.0006987710323847898	0.0	800.6436709644601	88.82039482087218	0.0	0.0003125277104834063	-0.36387173370992326	0.0	-0.0007467195578322063	0.036387249989957106
2.655	88.81845430750768	0.0	0.0014225035041550474	243.89178042808695	0.0	-800.6436693907059	0.0	9.127315774074857e-05	0.0	0.9999999999807505	0.0	6.204944671294537e-06	0.0	0.0	0.0007110342835592972	0.0	0.0	0.0007249188659916733	0.0	800.6436693907059	88.81845431832194	0.0	0.0003202763145307607	-0.4085128342310895	0.0	0.0029558016632499646	0.0408523527468113
2.66	88.8163358999024	0.0	0.001479330368485848	244.33586745071082	0.0	-800.6436677464915	0.0	8.935907030754494e-05	0.0	0.9999999999793238	0.0	6.430756612935428e-06	0.0	0.0	0.0007369104259991686	0.0	0.0	0.0007505183539408489	0.0	800.6436677464915	88.81633591158328	0.0	0.00033701788953713574	-0.43232044463863417	0.0	0.0027499503671298644	0.0432329190640151
2.665	88.8141516713887	0.0	0.0015264703773131547	244.77994368476897	0.0	-800.6436660365603	0.0	8.749294932899257e-05	0.0	0.999999999977878	0.0	6.65178954807865e-06	0.0	0.0	0.0007622389346339017	0.0	0.0	0.0007755832376093651	0.0	800.6436660365603	88.81415168383725	0.0	0.0003449242855857881	-0.44133578065341794	0.0	0.0005732031757804531	0.04413361528889771
2.67	88.81191295855808	0.0	0.0015646942254910333	245.2240088818576	0.0	-800.6436643114116	0.0	8.575259068866877e-05	0.0	0.9999999999764142	0.0	6.868334032201451e-06	0.0	0.0	0.000787053104668617	0.0	0.0	0.0008001495452532329	0.0	800.6436643114116	88.81191297167297	0.0	0.0003447144568958342	-0.4582941415407049	0.0	7.071292117620409e-06	0.04582941415952585
2.675	88.80955093205317	0.0	0.0016050921342351608	245.66806260648747	0.0	-800.6436625839419	0.0	8.397660334391987e-05	0.0	0.9999999999749343	0.0	7.080519257520115e-06	0.0	0.0	0.0008113677404407921	0.0	0.0	0.0008242070700004869	0.0	800.6436625839419	88.80955094587863	0.0	0.00034745666285352126	-0.48830219916501016	0.0	0.0012451088882443797	0.04883037865975738
2.68	88.80702764177046	0.0	0.0016513257917670978	246.11210411838655	0.0	-800.6436608251462	0.0	8.209736515086598e-05	0.0	0.9999999999734428	0.0	7.288123450633634e-06	0.0	0.0	0.0008351574285906532	0.0	0.0	0.0008477262326619321	0.0	800.6436608251462	88.80702765640673	0.0	0.0003568526301519437	-0.5192786213404096	0.0	0.002159254713605124	0.05192831106074169
2.685	88.80436727818696	0.0	0.001697798593079385	246.55613265441718	0.0	-800.6436590137197	0.0	8.02680990506345e-05	0.0	0.9999999999719432	0.0	7.491047430237016e-06	0.0	0.0	0.0008584108037778335	0.0	0.0	0.0008707213491876291	0.0	800.6436590137197	88.80436729365728	0.0	0.00036732313834000164	-0.5431475786094117	0.0	0.0017822148600281217	0.054315050256726664
2.69	88.8016004549272	0.0	0.0017397977716686838	247.00014761636203	0.0	-800.643657158499	0.0	7.865714139630896e-05	0.0	0.9999999999704356	0.0	7.689651912440106e-06	0.0	0.0	0.000881169201023725	0.0	0.0	0.0008932549603404904	0.0	800.643657158499	88.80160047118262	0.0	0.0003740909779713699	-0.564025760270918	0.0	0.0010340657014305062	0.05640267081806162
2.695	88.79872230179409	0.0	0.0017786997715372333	247.4441484747125	0.0	-800.6436552769725	0.0	7.725727238937558e-05	0.0	0.9999999999689182	0.0	7.884512193730523e-06	0.0	0.0	0.0009034985444497481	0.0	0.0	0.0009153875385635095	0.0	800.6436552769725	88.79872231880235	0.0	0.00037843055380724347	-0.5885616611083815	0.0	0.0008934460083248303	0.058856233924065096
2.7	88.79570938540328	0.0	0.0018179004383591022	247.88813461389643	0.0	-800.6436533724958	0.0	7.596304325141065e-05	0.0	0.99999999996739	0.0	8.07602324645916e-06	0.0	0.0	0.0009254440945533637	0.0	0.0	0.0009371493474498873	0.0	800.6436533724958	88.79570940318358	0.0	0.0003836680118040478	-0.6169688977135953	0.0	0.0012122858245425818	0.06169700887262276
2.705	88.79255243075032	0.0	0.001857966019970192	248.33210532753597	0.0	-800.6436514377608	0.0	7.475372754895073e-05	0.0	0.9999999999658508	0.0	8.264394541474614e-06	0.0	0.0	0.0009470298549256823	0.0	0.0	0.0009585647129070158	0.0	800.6436514377608	88.79255244933145	0.0	0.0003903326485019352	-0.6452268528332658	0.0	0.0013396652689472068	0.06452282435852863
2.71	88.78925962989658	0.0	0.001897097744651404	248.7760599121371	0.0	-800.6436494699408	0.0	7.371666117382783e-05	0.0	0.9999999999643002	0.0	8.449936200799625e-06	0.0	0.0	0.0009682913629327796	0.0	0.0	0.000979682980732297	0.0	800.6436494699408	88.78925964927826	0.0	0.0003965705860563491	-0.671495056443187	0.0	0.0011006973446732013	0.06714959585599033
2.715	88.78583787856621	0.0	0.001934279747988399	249.21999770988631	0.0	-800.6436474747379	0.0	7.29202589401988e-05	0.0	0.9999999999627351	0.0	8.633181556303507e-06	0.0	0.0	0.0009892897339050391	0.0	0.0	0.0010005730961236696	0.0	800.6436474747379	88.78583789872982	0.0	0.0004012712316888216	-0.6974747134198841	0.0	0.0008272415082065747	0.06974752039955703
2.72	88.78228268081784	0.0	0.001970316474314647	249.66391806896033	0.0	-800.6436454586407	0.0	7.233969974074733e-05	0.0	0.9999999999611514	0.0	8.814718377300184e-06	0.0	0.0	0.0010100923212444939	0.0	0.0	0.0010212968935556115	0.0	800.6436454586407	88.78228270175714	0.0	0.00040513483661874664	-0.7250495799347334	0.0	0.0007747161684179234	0.07250499938270981
2.725	88.77858533023934	0.0	0.002006340638544124	250.10782029961922	0.0	-800.6436434229681	0.0	7.191675751664478e-05	0.0	0.999999999959546	0.0	8.995009719034965e-06	0.0	0.0	0.0010307521871736208	0.0	0.0	0.0010418995269654591	0.0	800.6436434229681	88.77858535196766	0.0	0.00040921216250872067	-0.7540045303623326	0.0	0.0008545989570322	0.0754005014669199
2.73	88.77474222744296	0.0	0.0020425291904885203	250.551703679251	0.0	-800.6436413659374	0.0	7.164083656122613e-05	0.0	0.9999999999579162	0.0	9.174423303474423e-06	0.0	0.0	0.0010513114695258593	0.0	0.0	0.001062423114844183	0.0	800.6436413659374	88.77474224997711	0.0	0.0004136150625104666	-0.7830997509643112	0.0	0.0008744055892027607	0.07831002391427938
2.735	88.77075453296226	0.0	0.002078447249354636	250.99556748122387	0.0	-800.6436392871416	0.0	7.154278687732388e-05	0.0	0.9999999999562585	0.0	9.353362807377916e-06	0.0	0.0	0.0010718164262504088	0.0	0.0	0.0010829186135575559	0.0	800.6436392871416	88.77075455631135	0.0	0.00041783710140064906	-0.8119367317758494	0.0	0.0008041456312420702	0.08119371299903977
2.74	88.76662229739361	0.0	0.00211396958195289	251.4394109841437	0.0	-800.6436371882479	0.0	7.163448002296948e-05	0.0	0.9999999999545688	0.0	9.532296743104159e-06	0.0	0.0	0.0010923207449088806	0.0	0.0	0.0011034403804222079	0.0	800.6436371882479	88.76662232156448	0.0	0.0004216700124020081	-0.8411137089934092	0.0	0.0007465203353669698	0.08411140402759074
2.745	88.76234210356658	0.0	0.002149463921457087	251.8832334578952	0.0	-800.6436350706086	0.0	7.188587555887584e-05	0.0	0.9999999999528429	0.0	9.711668577620462e-06	0.0	0.0	0.0011128752430724386	0.0	0.0	0.0011240341668028388	0.0	800.6436350706086	88.76234212857325	0.0	0.00042540302376652865	-0.8711506267573554	0.0	0.0007626739838572149	0.0871150960609778
2.75	88.75790962474778	0.0	0.0021853066944298653	252.32703415150735	0.0	-800.643632933839	0.0	7.225717202095566e-05	0.0	0.9999999999510771	0.0	9.891825304339071e-06	0.0	0.0	0.0011335196832571665	0.0	0.0	0.0011447343217845965	0.0	800.643632933839	88.75790965061196	0.0	0.00042935122131548505	-0.9019222523908373	0.0	0.0008146671999117413	0.09019226203175126
2.755	88.75332219955139	0.0	0.0022215576136791247	252.77081229607745	0.0	-800.6436307767082	0.0	7.273001941295589e-05	0.0	0.9999999999492682	0.0	1.007303859354026e-05	0.0	0.0	0.0011542851965840248	0.0	0.0	0.0011655699375659311	0.0	800.6436307767082	88.75332222629662	0.0	0.00043352633367703164	-0.9330655358186373	0.0	0.0008459726008612761	0.09330659193230467
2.76	88.74857841084653	0.0	0.0022581086760364703	253.21456711320096	0.0	-800.6436285984573	0.0	7.330044459058969e-05	0.0	0.9999999999474132	0.0	1.025555703855312e-05	0.0	0.0	0.0011752002697501603	0.0	0.0	0.0011865689681232977	0.0	800.6436285984573	88.74857843849485	0.0	0.00043777645969132766	-0.96450501949145	0.0	0.0008517017271396883	0.09645053955370257
2.765	88.74367633521182	0.0	0.002294945589569023	253.6582978167172	0.0	-800.6436263989183	0.0	7.395516600983521e-05	0.0	0.9999999999455087	0.0	1.0439611536089716e-05	0.0	0.0	0.0011962913615697858	0.0	0.0	0.0012077555625510624	0.0	800.6436263989183	88.74367636378547	0.0	0.00044204657472159305	-0.996436942055586	0.0	0.000861140964775849	0.09964373141632385
2.77	88.73861302216821	0.0	0.002332174017189412	254.10200360812405	0.0	-800.6436241778338	0.0	7.466643675592295e-05	0.0	0.999999999943552	0.0	1.0625380014980554e-05	0.0	0.0	0.0012175788611849866	0.0	0.0	0.0012291459210380367	0.0	800.6436241778338	88.73861305169223	0.0	0.0004464110460435951	-1.0290042575228142	0.0	0.000888096905471818	0.10290046407651386
2.775	88.73338531789709	0.0	0.002369876974250593	254.5456836732184	0.0	-800.6436219345371	0.0	7.540654640912391e-05	0.0	0.9999999999415413	0.0	1.0812967409758854e-05	0.0	0.0	0.0012390747932075237	0.0	0.0	0.0012507483053225375	0.0	800.6436219345371	88.73338534839895	0.0	0.00045093456660862016	-1.0621631780104224	0.0	0.0009197208264692533	0.10621635762007653
2.78	88.72799053934664	0.0	0.002408040290767381	254.98933718313154	0.0	-800.643619668258	0.0	7.615886277182418e-05	0.0	0.9999999999394749	0.0	1.1002422673922232e-05	0.0	0.0	0.0012607847672950106	0.0	0.0	0.0012725662123692452	0.0	800.643619668258	88.72799057085409	0.0	0.00045559458045923567	-1.095820116395411	0.0	0.0009411373639077491	0.10958205205399241
2.785	88.72242627522088	0.0	0.0024466074563827584	255.43296329645972	0.0	-800.6436173784646	0.0	7.69142859234386e-05	0.0	0.9999999999373512	0.0	1.1193764298521383e-05	0.0	0.0	0.0012827109023657768	0.0	0.0	0.0012946005322076227	0.0	800.6436173784646	88.72242630776097	0.0	0.00046033160045856207	-1.129971026652991	0.0	0.0009527464403487342	0.11299714283117933
2.79	88.71668989997235	0.0	0.0024855509895695994	255.8765611593736	0.0	-800.6436150648595	0.0	7.766335779666643e-05	0.0	0.9999999999351696	0.0	1.1386988831106017e-05	0.0	0.0	0.0013048528027981632	0.0	0.0	0.0013168494453304398	0.0	800.6436150648595	88.7166899335721	0.0	0.0004651190750086657	-1.164680689252625	0.0	0.0009631673166851606	0.11646810875124786
2.795	88.71077847705521	0.0	0.002524874107207164	256.3201299040542	0.0	-800.6436127271749	0.0	7.839573352935981e-05	0.0	0.9999999999329294	0.0	1.1582067057476949e-05	0.0	0.0	0.001327207120891542	0.0	0.0	0.0013393081686457625	0.0	800.6436127271749	88.7107785117422	0.0	0.00046996573658313637	-1.199990814841101	0.0	0.000975990487707836	0.11999912117430034
2.8	88.70468900825706	0.0	0.002564573587664983	256.7636686477441	0.0	-800.6436103650925	0.0	7.910575151981737e-05	0.0	0.9999999999306296	0.0	1.1778948666676939e-05	0.0	0.0	0.0013497680914348875	0.0	0.0	0.0013619702971322432	0.0	800.6436103650925	88.7046890440591	0.0	0.0004748776304547202	-1.2358915574334144	0.0	0.0009880444862259497	0.12358919523838229
2.805	88.6984186036024	0.0	0.0026046252452983864	257.20717649293493	0.0	-800.6436079783135	0.0	7.97957634260131e-05	0.0	0.9999999999282703	0.0	1.1977578988384898e-05	0.0	0.0	0.001372529449670877	0.0	0.0	0.0013848300994689178	0.0	800.6436079783135	88.69841864054736	0.0	0.00047984061476452795	-1.2723625378403844	0.0	0.0009962166262591184	0.12723629278422058
2.81	88.6919644193439	0.0	0.002645002357262712	257.650652527853	0.0	-800.6436055666338	0.0	8.047443393898781e-05	0.0	0.9999999999258505	0.0	1.217791791789994e-05	0.0	0.0	0.001395486599939313	0.0	0.0	0.0014078843265859595	0.0	800.6436055666338	88.6919644574593	0.0	0.0004848354312862412	-1.3094081475010455	0.0	0.001001518090625725	0.13094085305131495
2.815	88.68532353190062	0.0	0.0026856951753761295	258.09409582634055	0.0	-800.643603129918	0.0	8.115378571027771e-05	0.0	0.9999999999233699	0.0	1.2379951617764369e-05	0.0	0.0	0.0014186379565843477	0.0	0.0	0.0014311331736494995	0.0	800.643603129918	88.6853235712143	0.0	0.0004898551456597572	-1.3470476499347703	0.0	0.0010066293246605148	0.13470480260545223
2.82	88.67849293770432	0.0	0.002726709888779301	258.5375054473893	0.0	-800.643600668036	0.0	8.184900290789255e-05	0.0	0.9999999999208267	0.0	1.2583699959139355e-05	0.0	0.0	0.0014419857966733215	0.0	0.0	0.0014545811857693807	0.0	800.643600668036	88.67849297824463	0.0	0.0004949027921790107	-1.385290604560415	0.0	0.0010125975059927807	0.1385290974646507
2.825	88.67146962402981	0.0	0.0027680606644692953	258.9808804349237	0.0	-800.6435981808379	0.0	8.25795449525748e-05	0.0	0.9999999999182193	0.0	1.2789225953618264e-05	0.0	0.0	0.001465537340802958	0.0	0.0	0.0014782384827688477	0.0	800.6435981808379	88.67146966582607	0.0	0.0004999817424270535	-1.4241335302306388	0.0	0.0010189345253278515	0.14241338947426077
2.83	88.66425060754445	0.0	0.002809768261333418	259.4242198178757	0.0	-800.6435956681659	0.0	8.336918855401902e-05	0.0	0.9999999999155451	0.0	1.2996646843128652e-05	0.0	0.0	0.0014893060239085227	0.0	0.0	0.001502121995996726	0.0	800.6435956681659	88.66425065062705	0.0	0.0005050923550650443	-1.463571143262262	0.0	0.0010252888826299653	0.14635715023897186
2.835	88.65683291768657	0.0	0.0028518652578919503	259.86752261030784	0.0	-800.6435931298603	0.0	8.424458243920762e-05	0.0	0.9999999999128005	0.0	1.3206143298887893e-05	0.0	0.0	0.0015133125493864907	0.0	0.0	0.0015262562910997686	0.0	800.6435931298603	88.65683296208753	0.0	0.0005102355772283546	-1.5036037434091063	0.0	0.0010321745283018518	0.15036040976860016
2.84	88.64921357117882	0.0	0.002894400127634625	260.3107878114027	0.0	-800.6435905657481	0.0	8.523361986179632e-05	0.0	0.9999999999099807	0.0	1.3417964431600969e-05	0.0	0.0	0.001537585463220921	0.0	0.0	0.0015506739245532853	0.0	800.6435905657481	88.64921361693217	0.0	0.0005154161376316215	-1.5442343901293991	0.0	0.0010403401425837298	0.15442347405643775
2.845	88.64138957372901	0.0	0.0029374365459952172	260.7540144053924	0.0	-800.6435879756244	0.0	8.636456031209687e-05	0.0	0.99999999990708	0.0	1.3632429644259065e-05	0.0	0.0	0.0015621613662985378	0.0	0.0	0.0015754155485802163	0.0	800.6435879756244	88.64138962087158	0.0	0.0005206415312615599	-1.5854545987520416	0.0	-0.0036654991896462557	0.15854588359803945
2.85	88.6333579357353	0.0	0.002981050999847233	261.1972013615436	0.0	-800.643585359245	0.0	8.76655456631278e-05	0.0	0.9999999999040913	0.0	1.3849928950810632e-05	0.0	0.0	0.001587084950925745	0.0	0.0	0.0016005298774562594	0.0	800.643585359245	88.63335798430714	0.0	0.0005259195787756628	-1.627336219154548	0.0	0.023345147413802697	0.16275036608499507
2.855	88.62511511977772	0.0	0.0032875055342917203	261.64034763357034	0.0	-800.6435824614823	0.0	-0.00017153939774204407	0.0	0.9999999999026471	0.0	1.3953789916944787e-05	0.0	0.0	0.0015989865409581708	0.0	0.0	0.0015513874599020839	0.0	800.6435824614823	88.6251151770124	0.0	0.0008141930577594609	-1.6698967292822906	0.0	0.10191565551328302	0.16730038515515722
2.86	88.61665817326801	0.0	0.0037185345464854874	262.08345215641594	0.0	-800.643576675329	0.0	-0.0007806295787747834	0.0	0.9999999999190282	0.0	1.2725683224632276e-05	0.0	0.0	0.0014582558804230815	0.0	0.0	0.0013277535587677323	0.0	800.643576675329	88.61665823920801	0.0	0.001463119504786668	-1.7128918822137962	0.0	0.11790186612594017	0.17169448011482202
2.865	88.60798540660315	0.0	0.0037100718902077874	262.5265138562418	0.0	-800.6435681783557	0.0	-0.0012162446677690228	0.0	0.9999999999480342	0.0	1.0195301657559348e-05	0.0	0.0	0.0011682955117020132	0.0	0.0	0.0009793251271754523	0.0	800.6435681783557	88.60798546383542	0.0	0.0019033016085526196	-1.7563432088193074	0.0	0.06913328643689212	0.1757703296480742
2.87	88.5990937543668	0.0	0.0033648809936160794	262.96953164622573	0.0	-800.6435579403882	0.0	-0.001497388574032171	0.0	0.9999999999770737	0.0	6.773235057561424e-06	0.0	0.0	0.0007761555649025815	0.0	0.0	0.0005503548992596722	0.0	800.6435579403882	88.59909379182405	0.0	0.002164676017564521	-1.800427417955793	0.0	0.03649490903198573	0.18007972583587017
2.875	88.58998017620948	0.0	0.0027781463113785614	263.4125044242724	0.0	-800.6435467772087	0.0	-0.0016455783300433138	0.0	0.9999999999960387	0.0	2.81915819697802e-06	0.0	0.0	0.00032305173293353465	0.0	0.0	7.893143341133256e-05	0.0	800.6435467772087	88.58998019046983	0.0	0.0022786479737687574	-1.8451102934295232	0.0	0.010149756385362921	0.18451382095860092
2.88	88.58064170323175	0.0	0.0020347844415424922	263.85543107331176	0.0	-800.6435353478515	0.0	-0.0016833744265220465	0.0	0.9999999999990811	0.0	-1.3626647900713313e-06	0.0	0.0	-0.00015614988272438503	0.0	0.0	-0.00040331981648851034	0.0	800.6435353478515	88.58064169736069	0.0	0.0022761958845966272	-1.8903856423063323	0.0	-0.01014298311220366	0.1890412853517543
2.885	88.57107534448296	0.0	0.0012078693741369596	264.29831046145176	0.0	-800.6435241605586	0.0	-0.001633182151552565	0.0	0.9999999999847494	0.0	-5.5244095424675115e-06	0.0	0.0	-0.0006330507021735988	0.0	0.0	-0.0008711920387887962	0.0	800.6435241605586	88.5710753257344	0.0	0.0021864751616876934	-1.9362656843163961	0.0	-0.02485517514572099	0.19364252064029652
2.89	88.5612780351534	0.0	0.0003579774722225746	264.74114144166936	0.0	-800.6435135844014	0.0	-0.0015163416132495386	0.0	0.999999999955138	0.0	-9.473073745046588e-06	0.0	0.0	-0.0010855342892309606	0.0	0.0	-0.001305591912485082	0.0	800.6435135844014	88.56127801247897	0.0	0.002035872507648228	-1.9827639421798438	0.0	-0.03461477108570567	0.19830660686890567
2.895	88.55124667051174	0.0	-0.0004668153135926263	265.18392285149935	0.0	-800.6435038648154	0.0	-0.0013524245792095526	0.0	0.9999999999146358	0.0	-1.3066935066235726e-05	0.0	0.0	-0.0014973604609762351	0.0	0.0	-0.0016930330149774002	0.0	800.6435038648154	88.55124665247503	0.0	0.0018473714669248215	-2.0298835098543577	0.0	-0.04014191184044876	0.2030280383756109
2.9	88.54097815445826	0.0	-0.0012303309007037006	265.6266535129536	0.0	-800.6434951415189	0.0	-0.0011587743058574232	0.0	0.9999999998686195	0.0	-1.621047989250006e-05	0.0	0.0	-0.0018575841635252491	0.0	0.0	-0.00202499740064656	0.0	800.6434951415189	88.54097814781655	0.0	0.0016402525916359917	-2.077620745059979	0.0	-0.04219078045820036	0.20780490904353668
2.905	88.53046941002674	0.0	-0.0019072957371110949	266.0693322326046	0.0	-800.6434874672625	0.0	-0.0009502293459163458	0.0	0.9999999998223787	0.0	-1.8848461454037667e-05	0.0	0.0	-0.002159874583390658	0.0	0.0	-0.0022972180560989768	0.0	800.6434874672625	88.53046941902635	0.0	0.0014300305440167298	-2.1259732434882515	0.0	-0.04150647588494045	0.21263783810903325
2.91	88.51971736331666	0.0	-0.002482061381218217	266.51195780164255	0.0	-800.6434808263831	0.0	-0.0007390172239562579	0.0	0.9999999997803627	0.0	-2.095947344984319e-05	0.0	0.0	-0.0024017787391609167	0.0	0.0	-0.0025089308956998163	0.0	800.6434808263831	88.51971738959313	0.0	0.001228591951875516	-2.17494134528593	0.0	-0.03879060692734052	0.217528723772746
2.915	88.50871893838759	0.0	-0.0029471677168319615	266.95452899586815	0.0	-800.6434751522971	0.0	-0.000534783635751247	0.0	0.999999999745775	0.0	-2.254943165297564e-05	0.0	0.0	-0.00258397452848744	0.0	0.0	-0.002662135122105856	0.0	800.6434751522971	88.508718981297	0.0	0.001044474901937441	-2.2245284984812486	0.0	-0.03268357191833953	0.2224768584915874
2.92	88.4974710695052	0.0	-0.0033018494424956546	267.3970445757106	0.0	-800.6434703433345	0.0	-0.0003447270542692909	0.0	0.9999999997204649	0.0	-2.3645270650326154e-05	0.0	0.0	-0.002709548427669011	0.0	0.0	-0.0027608921485738945	0.0	800.6434703433345	88.49747112669885	0.0	0.000883243870642114	-2.274715112360563	0.0	-0.0320717335549921	0.2274941194513553
2.925	88.48597095174499	0.0	-0.0036737041703939623	267.83950328611235	0.0	-800.6434663194443	0.0	-0.0002835059968488675	0.0	0.9999999997045572	0.0	-2.430873691220155e-05	0.0	0.0	-0.0027855760610004314	0.0	0.0	-0.0028421106340043413	0.0	800.6434663194443	88.48597102578104	0.0	0.0006282602092498861	-2.3253390096684257	0.0	-0.11174056704355537	0.23280222215883054
2.93	88.47421652638755	0.0	-0.004721646764268301	268.28190386255835	0.0	-800.643465302611	0.0	-0.0007878692154137208	0.0	0.9999999996701685	0.0	-2.5684461313410096e-05	0.0	0.0	-0.0029432224649745204	0.0	0.0	-0.0030678185382617897	0.0	800.643465302611	88.47421665220713	0.0	-0.00017682157632539764	-2.3766289794522777	0.0	-0.14870133730328627	0.23812764211002807
2.935	88.46220334499391	0.0	-0.005705134131909538	268.72424502140404	0.0	-800.6434676703344	0.0	-0.0011277936042888798	0.0	0.9999999996049035	0.0	-2.8110985740840496e-05	0.0	0.0	-0.0032212816822295093	0.0	0.0	-0.00339090760669979	0.0	800.6434676703344	88.46220352594337	0.0	-0.0007316146511893312	-2.4286855447809805	0.0	-0.08841591718091503	0.2430294395714032
2.94	88.44992862748701	0.0	-0.006593912672376878	269.16652546193853	0.0	-800.6434722641527	0.0	-0.0013261617262551317	0.0	0.9999999995131303	0.0	-3.120544003374737e-05	0.0	0.0	-0.003575880024145029	0.0	0.0	-0.003770824956030803	0.0	800.6434722641527	88.44992886676455	0.0	-0.001073674774674448	-2.4812716967157185	0.0	-0.049733540964082945	0.24817700655015018
2.945	88.43738957660716	0.0	-0.007369236931786251	269.60874386951565	0.0	-800.6434781169522	0.0	-0.0014070015360512095	0.0	0.9999999993999211	0.0	-3.464386839335225e-05	0.0	0.0	-0.0039698948906856935	0.0	0.0	-0.004173901204951595	0.0	800.6434781169522	88.43738987492726	0.0	-0.001241610346687616	-2.5344185750547865	0.0	-0.01871340149385595	0.25344876612400785
2.95	88.42458339117401	0.0	-0.008021753336586857	270.0508989154588	0.0	-800.6434844524453	0.0	-0.0013940792163840417	0.0	0.9999999992718356	0.0	-3.816234341650029e-05	0.0	0.0	-0.004373082429250204	0.0	0.0	-0.0045732754819801475	0.0	800.6434844524453	88.42458374588128	0.0	-0.0012727746824666999	-2.5881265347803626	0.0	0.005082891142872635	0.25881315259886967
2.955	88.4115072681696	0.0	-0.00854946672278096	270.49298925706864	0.0	-800.6434906743416	0.0	-0.001309824235487952	0.0	0.999999999136614	0.0	-4.1554867136330706e-05	0.0	0.0	-0.004761837011647815	0.0	0.0	-0.004948512484967194	0.0	800.6434906743416	88.41150767338046	0.0	-0.0012016098238959883	-2.6423961785721892	0.0	0.022355869272530547	0.264249074727308
2.96	88.3981583991274	0.0	-0.008955968961799225	270.93501353760206	0.0	-800.6434963490905	0.0	-0.001174612220430069	0.0	0.9999999990023551	0.0	-4.466905768199023e-05	0.0	0.0	-0.00511869696171127	0.0	0.0	-0.005285014098942861	0.0	800.6434963490905	88.39815884647692	0.0	-0.0010586440609137832	-2.6972284907927246	0.0	0.033960018768889745	0.26974422726758734
2.965	88.38453397076671	0.0	-0.009248840852973514	271.37697038625146	0.0	-800.6435011847354	0.0	-0.0010062871967593712	0.0	0.9999999988766208	0.0	-4.7400392997385855e-05	0.0	0.0	-0.00543168493405743	0.0	0.0	-0.005573294145704674	0.0	800.6435011847354	88.38453445040672	0.0	-0.0008699175306161158	-2.7526236417412995	0.0	0.04081945822162436	0.2752926286924995
2.97	88.37063116994736	0.0	-0.009438323180424906	271.818858418135	0.0	-800.6435050079194	0.0	-0.0008199397752322371	0.0	0.9999999987656962	0.0	-4.9685543523028244e-05	0.0	0.0	-0.0056935438957088575	0.0	0.0	-0.005808189588583237	0.0	800.6435050079194	88.37063167153897	0.0	-0.000656837462361105	-2.8085785740017855	0.0	0.0438538444061526	0.28089209255532815
2.975	88.3564471788325	0.0	-0.009536225831448503	272.26067623430913	0.0	-800.6435077409651	0.0	-0.0006278734077741106	0.0	0.9999999986741358	0.0	-5.149540047569278e-05	0.0	0.0	-0.005900938225794472	0.0	0.0	-0.005988062070253002	0.0	800.6435077409651	88.35644769238144	0.0	-0.0004363245287720238	-2.8651155221493716	0.0	0.04393434270166954	0.2865452352025749
2.98	88.34197898024885	0.0	-0.009555032180485073	272.7024224213718	0.0	-800.6435093802355	0.0	-0.000439712800070075	0.0	0.9999999986046129	0.0	-5.2828233742274644e-05	0.0	0.0	-0.006053669667941818	0.0	0.0	-0.006114030508462477	0.0	800.6435093802355	88.34197949671476	0.0	-0.00022113071053020335	-2.92227391402425	0.0	0.04185044090937702	0.29225735727250596
2.985	88.32722347147276	0.0	-0.009507236886671275	273.14409555039117	0.0	-800.6435099763916	0.0	-0.00026259876156175925	0.0	0.9999999985580061	0.0	-5.370322078848528e-05	0.0	0.0	-0.00615393579783704	0.0	0.0	-0.006189259512176732	0.0	800.6435099763916	88.32722398314199	0.0	-2.0324078069074917e-05	-2.9800200076437022	0.0	0.03828241963585422	0.29802658924347586
2.99	88.31217793181202	0.0	-0.009404870612635022	273.58569417780643	0.0	-800.6435096174279	0.0	-0.00010143513718625459	0.0	0.9999999985336677	0.0	-5.415453725749514e-05	0.0	0.0	-0.006205652855710274	0.0	0.0	-0.006218318538452247	0.0	800.6435096174279	88.31217843246486	0.0	0.0001601396886998651	-3.038276968821426	0.0	0.03379924112252408	0.3038464962439286
2.995	88.29683989392997	0.0	-0.009259105404271191	274.0272168472247	0.0	-800.6435084145	0.0	4.0796312980981335e-05	0.0	0.9999999985297868	0.0	-5.422616971524309e-05	0.0	0.0	-0.006213861330732546	0.0	0.0	-0.0062066312556847214	0.0	800.6435084145	88.2968403788409	0.0	0.00031689348691727105	-3.097028072679346	0.0	0.02886773638391824	0.3097162609416541
3.0	88.28120681461516	0.0	-0.009079975757048591	274.46866208985637	0.0	-800.6435064901336	0.0	0.00016269702268548468	0.0	0.9999999985437813	0.0	-5.3967494350486565e-05	0.0	0.0	-0.006184219317360066	0.0	0.0	-0.006160021991988609	0.0	800.6435064901336	88.28120728043525	0.0	0.00044865534200911976	-3.1563030511942243	0.0	0.023854954329348914	0.3156393196327737
3.005	88.2652760066939	0.0	-0.00887624329695634	274.9100284238055	0.0	-800.6435039690685	0.0	0.0002641359503783627	0.0	0.999999998572659	0.0	-5.342973279999628e-05	0.0	0.0	-0.006122596382816212	0.0	0.0	-0.006084352616116824	0.0	800.6435039690685	88.26527645126592	0.0	0.0005557369653698682	-3.216119817559123	0.0	0.019032513097802187	0.32161761328402627
3.01	88.2490447727914	0.0	-0.008655355957408063	275.3513143536537	0.0	-800.6435009714662	0.0	0.0003459623565915942	0.0	0.9999999986133237	0.0	-5.26631546141898e-05	0.0	0.0	-0.0060347529932656034	0.0	0.0	-0.005985241701601332	0.0	800.6435009714662	88.24904519493664	0.0	0.0006395902565597072	-3.27646984862587	0.0	0.01458744441099811	0.32765023214533023
3.015	88.23251048460256	0.0	-0.00842345835018589	275.7925183706665	0.0	-800.6434976081802	0.0	0.00040973860521871514	0.0	0.9999999986628099	0.0	-5.1714953392266115e-05	0.0	0.0	-0.005926097136826877	0.0	0.0	-0.005867860237688286	0.0	800.6434976081802	88.2325108839055	0.0	0.0007024220174538394	-3.337340009903282	0.0	0.01063796935563654	0.33373569644395623
3.02	88.21567055586216	0.0	-0.008185439420056447	276.23363895309717	0.0	-800.6434939778186	0.0	0.000457503322122837	0.0	0.9999999987184419	0.0	-5.062778771209322e-05	0.0	0.0	-0.0058015171264530095	0.0	0.0	-0.005736795190334022	0.0	800.6434939778186	88.21567093246951	0.0	0.0007468890940210029	-3.3987266529727833	0.0	0.007247338470787576	0.3398734379963002
3.025	88.19852239767778	0.0	-0.007945016261740712	276.67467456627804	0.0	-800.6434901651073	0.0	0.0004915644968844017	0.0	0.9999999987779288	0.0	-4.943884262573761e-05	0.0	0.0	-0.005665274055240479	0.0	0.0	-0.0055959723351842825	0.0	800.6434901651073	88.1985227521231	0.0	0.0007758495037220421	-3.4606304958484677	0.0	0.00443464550698506	0.3460633337248716
3.03	88.18106340679746	0.0	-0.007704846202666723	277.11562366256715	0.0	-800.6434862403762	0.0	0.0005143322575763887	0.0	0.9999999988394024	0.0	-4.8179369169200296e-05	0.0	0.0	-0.005520949028131867	0.0	0.0	-0.005448626997051469	0.0	800.6434862403762	88.1810637398558	0.0	0.0007921698384580737	-3.5230648576276264	0.0	0.00218635484528781	0.35230655360350993
3.035	88.16329086017416	0.0	-0.007466647509659637	277.5564846810498	0.0	-800.6434822598571	0.0	0.0005281788279808213	0.0	0.9999999989014148	0.0	-4.687459285956425e-05	0.0	0.0	-0.005371432676461388	0.0	0.0	-0.005297314908694132	0.0	800.6434822598571	88.16329117274674	0.0	0.0007985892425313022	-3.586062721286491	0.0	0.0004668752971584921	0.3586062751678116
3.04	88.14520189588869	0.0	-0.007231348231111166	277.9972560468785	0.0	-800.6434782667345	0.0	0.0005353439555797801	0.0	0.9999999989628996	0.0	-4.5544021401758156e-05	0.0	0.0	-0.005218960418552869	0.0	0.0	-0.00514395016248133	0.0	800.6434782667345	88.14520218891634	0.0	0.0007976257137778153	-3.64962038236835	0.0	-0.000778437523923878	0.3649620465385885
3.045	88.12679383348157	0.0	-0.006999229198888443	278.43793617110697	0.0	-800.6434742922224	0.0	0.0005378798878483988	0.0	0.9999999990231321	0.0	-4.420172815046989e-05	0.0	0.0	-0.005065144942062572	0.0	0.0	-0.004989858925187914	0.0	800.6434742922224	88.12679410788466	0.0	0.0007914839884504658	-3.7136918744546206	0.0	-0.0016161301988583641	0.37136922261096295
3.05	88.10806418726297	0.0	-0.00677005381785399	278.87852345198917	0.0	-800.6434703574013	0.0	0.0005376041676809769	0.0	0.9999999990816688	0.0	-4.285696165742828e-05	0.0	0.0	-0.0049110460529527755	0.0	0.0	-0.004835846675904097	0.0	800.6434703574013	88.10806444390131	0.0	0.0007820340572468158	-3.778233404873059	0.0	-0.012948357685093547	0.37782555924216416
3.055	88.08901048544654	0.0	-0.006543164357126118	279.31901627545614	0.0	-800.6434664748119	0.0	0.0005360634565582409	0.0	0.9999999991382906	0.0	-4.151475934843542e-05	0.0	0.0	-0.00475724099769989	0.0	0.0	-0.004682275807844188	0.0	800.6434664748119	88.08901072509383	0.0	0.000770823802214808	-3.843454751687858	0.0	0.06381627574920708	0.3843984514188692
3.06	88.06962895251259	0.0	-0.0057794553644386565	279.7594130114524	0.0	-800.6434612752449	0.0	-7.052710016753102e-05	0.0	0.9999999991671936	0.0	-4.081259976720873e-05	0.0	0.0	-0.00467677943653379	0.0	0.0	-0.004702480333748668	0.0	800.6434612752449	88.06962913088199	0.0	0.001409245684998166	-3.90913496143502	0.0	0.13532141808706005	0.391147645178987
3.065	88.0499187473228	0.0	-0.005370188970883077	280.19971201880276	0.0	-800.643452706025	0.0	-0.0006395978327102367	0.0	0.9999999991289209	0.0	-4.173989896104671e-05	0.0	0.0	-0.004783040096929929	0.0	0.0	-0.004885711615748723	0.0	800.643452706025	88.04991888883131	0.0	0.0019802004655088425	-3.9750490549456194	0.0	0.0947239390025285	0.3976177512868888
3.07	88.02987771785611	0.0	-0.005384214889835995	280.63991164903115	0.0	-800.643441829026	0.0	-0.001028035480813033	0.0	0.9999999990381904	0.0	-4.385997887940869e-05	0.0	0.0	-0.005025983360257705	0.0	0.0	-0.005180222086950168	0.0	800.643441829026	88.02987785148727	0.0	0.0023377622783754895	-4.041460524148496	0.0	0.05239344936253578	0.404180012392829
3.075	88.00950328374721	0.0	-0.005712898097404009	281.08001024168146	0.0	-800.6434296280897	0.0	-0.001257208295924498	0.0	0.999999998907391	0.0	-4.6747328319644277e-05	0.0	0.0	-0.005356849234407333	0.0	0.0	-0.005540385733576708	0.0	800.6434296280897	88.00950343323275	0.0	0.0025155202090816867	-4.1083996487155146	0.0	0.02481246703266723	0.410847457483748
3.08	87.98879293198708	0.0	-0.006256507025591411	281.5200061235327	0.0	-800.6434169155328	0.0	-0.0013508531483064148	0.0	0.9999999987483931	0.0	-5.0033097305490116e-05	0.0	0.0	-0.005733370625536256	0.0	0.0	-0.005927376654276295	0.0	800.6434169155328	87.98879311754239	0.0	0.0025481966718287727	-4.1757749928085754	0.0	-0.02987541392135308	0.41758818626635535
3.085	87.96774472473659	0.0	-0.007244785754447387	281.95989759145607	0.0	-800.6434046181581	0.0	-0.0016048390664138064	0.0	0.9999999985667374	0.0	-5.35407230631197e-05	0.0	0.0	-0.00613531493012253	0.0	0.0	-0.006387129180792427	0.0	800.6434046181581	87.96774499619521	0.0	0.002174927591175073	-4.243530546537263	0.0	-0.12359356614429366	0.4245330007076848
3.09	87.9463564225582	0.0	-0.008831362264839677	282.3996829887701	0.0	-800.643395733032	0.0	-0.0020785950816146407	0.0	0.9999999983064435	0.0	-5.8199729978403174e-05	0.0	0.0	-0.006669197796892344	0.0	0.0	-0.006982602808258276	0.0	800.643395733032	87.94635685475549	0.0	0.0014055461704037663	-4.311884521180076	0.0	-0.1474622902820154	0.43144053183547276
3.095	87.92462455010707	0.0	-0.010417589144814476	282.83936058748617	0.0	-800.6433903062153	0.0	-0.0023123136250093553	0.0	0.9999999979690567	0.0	-6.373367703662141e-05	0.0	0.0	-0.007303341419041202	0.0	0.0	-0.007645031866376437	0.0	800.6433903062153	87.92462516372989	0.0	0.0007899301663392549	-4.380852715808459	0.0	-0.10850464982131457	0.4382196227536963
3.1	87.90254672146706	0.0	-0.011919793492249264	283.27892866385815	0.0	-800.6433875975785	0.0	-0.0023505221916181734	0.0	0.9999999975780768	0.0	-6.959837088248443e-05	0.0	0.0	-0.007975385831544165	0.0	0.0	-0.008318406872534247	0.0	800.6433875975785	87.9025475290906	0.0	0.00031595469006315166	-4.450281379756879	0.0	-0.08161551633186208	0.44510297068787247
3.105	87.88012055091258	0.0	-0.013276711186455464	283.7183854822051	0.0	-800.6433869358376	0.0	-0.002236380968248092	0.0	0.9999999971605127	0.0	-7.53593971421804e-05	0.0	0.0	-0.00863555081396823	0.0	0.0	-0.008959082826854228	0.0	800.6433869358376	87.88012155382452	0.0	-3.1525262270970316e-05	-4.520187684859186	0.0	-0.057951287850418795	0.4520559153259271
3.11	87.85734367088659	0.0	-0.014447023224015077	284.15772929486275	0.0	-800.6433877297661	0.0	-0.0020099835108647484	0.0	0.9999999967448456	0.0	-8.068680551395302e-05	0.0	0.0	-0.00924602684671755	0.0	0.0	-0.009534900687171416	0.0	800.6433877297661	87.85734485829802	0.0	-0.0002691662785663108	-4.590569816362944	-9.041521379750485e-40	-0.037685439810463156	0.45907244996052876
3.115	87.83421370825572	0.0	-0.015406518515070342	284.59695834227915	0.0	-800.6433894727289	0.0	-0.001707174774109898	0.0	0.9999999963580893	0.0	-8.534577473057485e-05	0.0	0.0	-0.009779905394545454	0.0	0.0	-0.010023970234409898	0.0	800.6433894727289	87.83421505848078	0.0	-0.0004139603116713175	-4.661430309852696	5.161450781463993e-37	-0.0207906265006523	0.46614766741627794
3.12	87.81072827237799	0.0	-0.0161451830382163	285.0360708529415	7.713494949531679e-44	-800.6433917421172	0.0	-0.0013588576592641754	0.0	0.9999999960230689	2.572820082763742e-49	-8.918490846914024e-05	3.0889806216005372e-43	3.539711094276791e-41	-0.010219837716633023	-3.127405765502466e-45	0.0	-0.010413254278584215	0.0	800.6433917421172	87.81072975532246	5.424912827850291e-41	-0.00048239931651183643	-4.732771162798363	-2.107136983788268e-36	-0.007106862627616379	0.47327764987280113
3.125	87.78688496826331	0.0	-0.01666445531298169	285.4750650433278	-4.2006708586542526e-41	-800.643394195282	0.0	-0.0009907347851408855	0.0	0.9999999957566716	-1.4278211283112248e-46	-9.212368754635593e-05	-1.7391385550775783e-40	-1.9929060091074445e-38	-0.01055659699410872	1.81957688773339e-42	0.0	-0.01069707888761108	0.0	800.643394195282	87.78688654861114	-3.0534711662555936e-38	-0.0004899519757960375	-4.80459124398441	-1.9469006467986464e-35	0.003613908470264092	0.480459260313568
3.13	87.76268140868363	0.0	-0.016974522031245318	285.9139391179404	-4.514121486202972e-40	-800.6433965636287	0.0	-0.0006232985232414015	0.0	0.9999999955689768	-1.301616400233001e-45	-9.413929533870632e-05	-6.71409936064342e-40	-7.693791232797023e-38	-0.010787568634421388	7.093726630262051e-42	0.0	-0.010875640761403429	0.0	800.6433965636287	87.76268304910879	-1.1784947427315143e-37	-0.0004506878339070879	-4.8768877114255815	6.35419026953607e-35	0.01167411352596413	0.48769016839362744
3.135	87.73811521938741	0.0	-0.017091895604475722	286.352691269375	-2.3543344313265644e-40	-800.643398645013	0.0	-0.00027211794709507093	0.0	0.9999999954634433	-4.4421853294249216e-45	-9.525388349923938e-05	1.2817154621445915e-39	1.468737750824812e-37	-0.01091529102998182	-1.449933446895907e-41	0.0	-0.010953596810894986	0.0	800.643398645013	87.73811688341053	2.249106008677484e-37	-0.00037710295904917437	-4.949657094134352	-1.7840950395235748e-34	0.017397946552524995	0.4949687670758506
3.14	87.71318404216679	0.0	-0.017037277222190148	286.7913196784051	-2.6399759925332437e-39	-800.6434002956378	0.0	5.171422781636304e-05	0.0	0.9999999954377968	-1.1116354358232427e-45	-9.552282918825157e-05	-1.0083417942796838e-38	-1.1554745981798532e-36	-0.010946109935919393	1.1024681913860644e-40	0.0	-0.01093878177592171	0.0	800.6434002956378	87.71318569640316	-1.768897412350928e-36	-0.0002800539940947793	-5.022895575840636	-3.3920169504947798e-34	0.021115396788314342	0.5022939958408916
3.145	87.68788553693119	0.0	-0.01683370220375845	287.2298225140769	-1.4196585482460374e-38	-800.6434014218961	0.0	0.0003410425890852438	0.0	0.9999999954853073	1.779121516777586e-44	-9.502420900280346e-05	-1.4450958243191202e-38	-1.6559578571314362e-36	-0.010888972271247705	1.5939480931855565e-40	0.0	-0.010841080270977715	0.0	800.6434014218961	87.68788715261421	-2.5343479791433206e-36	-0.00016875805044906889	-5.09659707431022	2.6010326904208933e-35	0.022216368752985983	0.5096645495314351
3.15	87.66221738348963	0.0	-0.0165049960129491	287.668197933811	-2.594736207724477e-38	-800.6434019722942	0.0	0.0005920463354249791	0.0	0.999999995596226	-1.63751984631875e-44	-9.384968754718165e-05	-1.0493781937240091e-38	-1.2024988479794427e-36	-0.010754382025938146	1.1097768212617812e-40	0.0	-0.010671471489497524	0.0	800.6434019722942	87.66221893728869	-1.8398164113930252e-36	-5.085237240510442e-05	-5.170750852726513	8.639809576895355e-35	0.016886820427556043	0.5170778427439733
3.155	87.63617717091473	0.0	-0.01601918331759938	288.10644408314477	-3.505244045831178e-38	-800.6434019215175	0.0	0.0007523008212339971	0.0	0.9999999957588342	4.730721624771363e-44	-9.210072554916203e-05	-1.0857736176663129e-38	-1.244204932308533e-36	-0.010553965743041255	1.2001318516947e-40	0.0	-0.010455953179592855	0.0	800.6434019215175	87.63617863495331	-1.9030610057215637e-36	0.0001235278892890659	-5.24557649201564	-1.889683457934135e-35	0.11492723032060645	0.5246835332069825
3.16	87.6097613458228	0.0	-0.014897734564138981	288.5445590922173	-4.4566314787591307e-38	-800.6433988849459	0.0	0.00016811894079672026	0.0	0.999999995860753	5.939603832505497e-44	-9.098734225912526e-05	-1.0857736176603677e-38	-1.2442049320413035e-36	-0.010426381415507594	1.200131851205425e-40	0.0	-0.010407790650773546	0.0	800.6433988849459	87.60976260627959	-1.902487371114085e-36	0.0010450242981569365	-5.320720331972477	1.1790427801551558e-36	0.1742616128910801	0.5323573232406286
3.165	87.58296995000867	0.0	-0.014258031759146923	288.98254108338915	-5.407730057858577e-38	-800.6433919114899	0.0	-0.0002448396396307288	0.0	0.9999999958489248	5.798464509155831e-44	-9.11173319001238e-05	-1.085773617661139e-38	-1.2442049320724856e-36	-0.010441277131188698	1.2001318512622248e-40	0.0	-0.01047793204081527	0.0	800.6433919114899	87.58297109406233	-1.9019055821513195e-36	0.0017026214948108714	-5.396013509274885	1.1717674539864538e-37	0.1127854490288885	0.539719208012738
3.17	87.5558007367937	0.0	-0.013998590474844867	289.42038817358434	-6.358535693679926e-38	-800.6433822489271	0.0	-0.0005035349678712893	0.0	0.9999999957604835	4.750039448999847e-44	-9.208293378867787e-05	-1.0857736176662403e-38	-1.2442049323042359e-36	-0.010551926957461025	1.2001318516868077e-40	0.0	-0.010622184183296673	0.0	800.6433822489271	87.55580183007919	-1.9013155896403804e-36	0.002126199698304535	-5.471721148275321	1.1882093998783824e-37	0.032838433208751586	0.5471819687012631
3.175	87.5282520743699	0.0	-0.014399673237609576	289.8580984586677	-7.30904425098865e-38	-800.6433713990123	0.0	-0.0009462560798269387	0.0	0.9999999956088367	2.9776319703788246e-44	-9.371532514736375e-05	-1.0857736176725489e-38	-1.2442049326960508e-36	-0.010738985229000911	1.2001318524147953e-40	0.0	-0.010893266581860062	0.0	800.6433713990123	87.5282532359066	-1.9007173586558434e-36	0.0020058041487365443	-5.547793621891847	1.2047311087425447e-37	-0.07276479179442219	0.5548270792420711
3.18	87.50032165967404	0.0	-0.015444704539525091	290.29567005911963	-8.259251647628524e-38	-800.6433626612347	0.0	-0.001497282067871947	0.0	0.9999999953123326	-4.015417008830908e-45	-9.682755185918975e-05	-1.0857736176765598e-38	-1.2442049334430615e-36	-0.011095620141570662	1.2001318538381765e-40	0.0	-0.011322206298008477	0.0	800.6433626612347	87.50032300993028	-1.9001108395495456e-36	0.0015001795370372243	-5.624423442139914	1.2213722497638491e-37	-0.10206052770408411	0.562534935873393
3.185	87.47200658010085	0.0	-0.016607027465442282	290.73310104771605	-9.209153698488759e-38	-800.6433562874633	0.0	-0.0017927646188237503	0.0	0.9999999949007637	-4.919646732231538e-44	-0.00010098873696786025	-1.0857736176654954e-38	-1.2442049344418402e-36	-0.01157245683290255	1.2001318558139392e-40	0.0	-0.011835795529603382	0.0	800.6433562874633	87.47200815018458	-1.8994959680770978e-36	0.0010603477123377171	-5.7015751957694745	1.238125683993824e-37	-0.0813687723841606	0.5702155784449687
3.19	87.44330474493293	0.0	-0.017784560004751884	291.1703894960553	-1.0158746216022603e-37	-800.6433519482639	0.0	-0.001877201128178737	0.0	0.9999999944228075	-9.943281848680347e-44	-0.00010561551644378116	-1.0857736176311116e-38	-1.2442049355523895e-36	-0.012102646709148044	1.2001318581083814e-40	0.0	-0.012373574039312572	0.0	800.6433519482639	87.44330655083132	-1.8988726985089984e-36	0.0006861798693589637	-5.779136450383031	1.2549682042490903e-37	-0.06836337882649982	0.57795407831168
3.195	87.4142140332113	0.0	-0.018896360447600718	291.6075334650971	-1.110802498958104e-37	-800.643349319095	0.0	-0.0017944608298231832	0.0	0.9999999939241906	-1.495950133164424e-43	-0.00011023546610217608	-1.0857736175735797e-38	-1.2442049366613157e-36	-0.012632053946209613	1.2001318605019897e-40	0.0	-0.012887649199564633	0.0	800.643349319095	87.41421607486106	-1.8982409844354286e-36	0.0003759331503600953	-5.857124758133381	1.271903471167182e-37	-0.05583830028752491	0.5857390916450601
3.2	87.38473233273895	0.0	-0.019881467871781276	292.04453100513217	-1.2056985785343495e-37	-800.6433480872815	0.0	-0.0015858936979419784	0.0	0.999999993446927	-1.9571365515995927e-43	-0.00011448300360054617	-1.0857736175002295e-38	-1.2442049376808706e-36	-0.013118785893242581	1.2001318627930745e-40	0.0	-0.013341974277806985	0.0	800.6433480872815	87.38473459436513	-1.897600779641686e-36	0.00012666577080623848	-5.935538202685583	1.288931072985922e-37	-0.04400032014261582	0.5935701288282006
3.205	87.35485753202076	0.0	-0.020697176148780087	292.4813801558249	-1.3005624346410677e-37	-800.6433479572033	0.0	-0.001288997443699482	0.0	0.9999999930273102	-2.3489228691602597e-43	-0.00011809136457570947	-1.0857736174225287e-38	-1.2442049385469987e-36	-0.013532273605711579	1.2001318648074307e-40	0.0	-0.013711244844442645	0.0	800.6433479572033	87.35485998394299	-1.896952037965604e-36	-6.546705883259014e-05	-6.01437703898237	1.3060510683464912e-37	-0.03300660429371157	0.6014467607607954
3.21	87.32458751401303	0.0	-0.02131689943673997	292.91807894620723	-1.3953936392789608e-37	-800.6433486542829	0.0	-0.0009365592811197687	0.0	0.9999999926938877	-2.6518946008690448e-43	-0.00012088174117626265	-1.085773617352747e-38	-1.2442049392167877e-36	-0.013852027212921659	1.2001318664080106e-40	0.0	-0.01397954931480249	0.0	800.6433486542829	87.32459011564788	-1.8962947131883176e-36	-0.00020500259562557086	-6.09364119523903	1.323263444187089e-37	-0.022979022886032468	0.609368452184776
3.215	87.29392016386159	0.0	-0.021727841178484097	293.3546253946803	-1.4901917621397536e-37	-800.6433499280253	0.0	-0.0005562264670221709	0.0	0.9999999924661828	-2.8548483046699163e-43	-0.00012275094944450688	-1.0857736173012755e-38	-1.2442049396654587e-36	-0.01406622270411359	1.2001318675011026e-40	0.0	-0.014138896459871708	0.0	800.6433499280253	87.29392286746207	-1.8956287592185592e-36	-0.0002970175234716855	-6.17332168986735	1.3405663111384158e-37	-0.01683074605644532	0.6173344633227558
3.22	87.26285337964653	0.0	-0.021928557512970372	293.791017509073	-1.58495637061877e-37	-800.6433515543961	0.0	-0.0001704112951682461	0.0	0.9999999923543852	-2.9533711550412777e-43	-0.000123658347156653	-1.0857736172749215e-38	-1.244204939883263e-36	-0.014170202823394352	1.2001318680377855e-40	0.0	-0.0141877156998442	0.0	800.6433515543961	87.26285613423221	-1.8949541303304502e-36	-0.00034699657314457626	-6.253453858298978	1.357967038366139e-37	-4.52909356885209e-05	0.625345385846299
3.225	87.23138471934044	0.0	-0.02176328485473408	294.2272532781888	-1.6796870279807645e-37	-800.6433532643326	0.0	4.8219982277113354e-05	0.0	0.9999999923558515	-2.9520844593025874e-43	-0.00012364649665938207	-1.085773617275273e-38	-1.244204939880417e-36	-0.01416884485642647	1.2001318680307508e-40	0.0	-0.014173901692480829	0.0	800.6433532643326	87.23138743400962	-1.8942707729694938e-36	-0.00019157411559791413	-6.334182365192002	1.375495386829398e-37	0.10632542102785941	0.6335074690220006
3.23	87.19951135304676	0.0	-0.021000518964942188	294.66333069963514	-1.774383299460174e-37	-800.6433520333521	0.0	-0.0003730543315651068	0.0	0.9999999923004865	-3.000616091588699e-43	-0.0001240934741060794	-1.0857736172619719e-38	-1.244204939987698e-36	-0.014220064699286042	1.2001318682965366e-40	0.0	-0.014280773886119601	0.0	800.6433520333521	87.19951387952621	-1.893578625425992e-36	0.0006412621235059113	-6.415148163954617	1.3930763269032115e-37	0.1619677894714912	0.6417192495968669
3.235	87.16723334033895	0.0	-0.020624769112949737	295.0992477427422	-1.8690447441000235e-37	-800.6433472597691	0.0	-0.0006104198527667016	0.0	0.9999999921427162	-3.13796190705147e-43	-0.0001253584322171751	-1.0857736172231498e-38	-1.2442049402913148e-36	-0.014365018222466844	1.2001318690539247e-40	0.0	-0.014455646292592248	0.0	800.6433472597691	87.1672357717256	-1.8928776923038687e-36	0.0012295267880606516	-6.496158524802572	1.4106700471140324e-37	0.06945520542594778	0.6496529812517288
3.24	87.13454923933158	0.0	-0.02085686348317384	295.5350023779089	-1.963670921131859e-37	-800.6433404224834	0.0	-0.0009647072061443176	0.0	0.9999999919148521	-3.3339126349412023e-43	-0.0001271631429158398	-1.0857736171647508e-38	-1.244204940724493e-36	-0.014571822836666491	1.2001318701477939e-40	0.0	-0.014732014549481878	0.0	800.6433404224834	87.13455172579731	-1.8921679429668686e-36	0.0013037432878344778	-6.57752399538533	1.4283411936090416e-37	-0.03797682417307377	0.6577633628368494
3.245	87.10145700653628	0.0	-0.021744388238414382	295.9705925773083	-2.058261390134324e-37	-800.643334824199	0.0	-0.001436585844758107	0.0	0.999999991520981	-3.6662214426119896e-43	-0.0001302237146564091	-1.0857736170576335e-38	-1.2442049414591e-36	-0.014922538526834256	1.2001318720385936e-40	0.0	-0.015143566078546257	0.0	800.643334824199	87.10145971566662	-1.8914493335791905e-36	0.0009409628734737511	-6.6594061314065796	1.4461231057409361e-37	-0.07710525641194636	0.6659852494130925
3.25	87.06795390187696	0.0	-0.022745559225002432	296.40601629034546	-2.1528157058007273e-37	-800.6433309575783	0.0	-0.0016496889104530368	0.0	0.9999999910046086	-4.09039897517497e-43	-0.0001341303994590474	-1.0857736169061221e-38	-1.2442049423968035e-36	-0.015370211632903353	1.2001318745174577e-40	0.0	-0.015616167138938729	0.0	800.6433309575783	87.06795687077751	-1.8907218027902213e-36	0.0006113602571951331	-6.741778149882313	1.4640102722114192e-37	-0.062481616679152155	0.674206767799415
3.255	87.03403805780611	0.0	-0.02375630537205408	296.8412714581398	-2.2473334210389867e-37	-800.6433286522357	0.0	-0.0016524906894901453	0.0	0.9999999904370652	-4.54279117243142e-43	-0.00013829694196894132	-1.0857736167262657e-38	-1.2442049433968916e-36	-0.015847662239290572	1.2001318772419573e-40	0.0	-0.016089570849900973	0.0	800.6433286522357	87.03404129945153	-1.8899853095251365e-36	0.000316777927662675	-6.82451468144644	1.4819767499159736e-37	-0.0552810245359254	0.6824738575868805
3.26	86.9997075806481	0.0	-0.024693435181694166	297.27635601226893	-2.3418140866851874e-37	-800.6433277281834	0.0	-0.001491895601519768	0.0	0.9999999898815887	-4.972739089095007e-43	-0.00014225677213838502	-1.0857736165378618e-38	-1.2442049443473652e-36	-0.01630142535635072	1.200131879908528e-40	0.0	-0.016516967457107044	0.0	800.6433277281834	86.99971108506952	-1.889239812167705e-36	5.916072209499812e-05	-6.907634978797954	1.500026556311958e-37	-0.04770328782558215	0.6907799693388799
3.265	86.96496057424388	0.0	-0.025493822764882733	297.71126787472343	-2.4362572514937434e-37	-800.6433279961307	0.0	-0.0012114311189420162	0.0	0.9999999893921528	-5.3418890904400045e-43	-0.000145656652112687	-1.0857736163625192e-38	-1.2442049451634272e-36	-0.016691022907144956	1.2001318822580779e-40	0.0	-0.016864016908537987	0.0	800.6433279961307	86.96496431088951	-1.888485269098555e-36	-0.00015977193517180464	-6.991138680383339	1.5181596144813802e-37	-0.03982601346635089	0.699125211673136
3.27	86.92979513959273	0.0	-0.02611293985778899	298.1460049579163	-2.530662462139379e-37	-800.643329259423	0.0	-0.0008500283617757856	0.0	0.9999999890115527	-5.623101600285015e-43	-0.00014824662577376136	-1.0857736162205248e-38	-1.244204945785087e-36	-0.01698781203000884	1.200131884085161e-40	0.0	-0.017107532096518847	0.0	800.643329259423	86.92979906100923	-1.8877216387154407e-36	-0.00033884137594577504	-7.075015899463703	1.536373858942242e-37	-0.03553962609981189	0.707510516124584
3.275	86.89420938125186	0.0	-0.026522912344515096	298.5805651646947	-2.625029263219663e-37	-800.6433313174373	0.0	-0.0004412674038938314	0.0	0.9999999887699539	-5.799090317320144e-43	-0.0001498674858909941	-1.0857736161279578e-38	-1.2442049461741319e-36	-0.017173548919869292	1.2001318852449669e-40	0.0	-0.017233945895917903	0.0	800.6433313174373	86.89421342779225	-1.8869488795939118e-36	-0.00047767804868245676	-7.159327327036635	1.5546819770041498e-37	-0.011354129556869815	0.7159336330408813
3.28	86.85820093391985	0.0	-0.026495126286357036	299.014946373465	-2.7193571940272995e-37	-800.6433338438283	0.0	-0.00022008656005348986	0.0	0.9999999886757444	-5.86720218295983e-43	-0.00015049479773446698	-1.0857736160913667e-38	-1.244204946324701e-36	-0.017245433562819105	1.2001318856972255e-40	0.0	-0.01729699605101099	0.0	800.6433338438283	86.85820497425922	-1.8861669392842112e-36	-0.00035171062000150525	-7.244184315186668	1.5731067797688036e-37	0.09811447902691608	0.7244848710869762
3.285	86.82176739547421	0.0	-0.02589621510845804	299.4491464906763	-2.813645800006415e-37	-800.6433335693332	0.0	-0.0005827820362307019	0.0	0.99999998851721	-5.98118449613807e-43	-0.000151544577450906	-1.0857736160291787e-38	-1.244204946576668e-36	-0.017365729458531754	1.2001318864582812e-40	0.0	-0.017463950806271285	0.0	800.6433335693332	86.82177125651158	-1.8853757655107435e-36	0.00041852188579454247	-7.329223440171736	1.5915722614384801e-37	0.15377720901721006	0.7330836491559196
3.29	86.78490896319286	0.0	-0.0256535468943546	299.8831633778923	-2.9078946167943433e-37	-800.6433300672458	0.0	-0.000740350787361476	0.0	0.9999999882591987	-6.165016569899264e-43	-0.00015323767506279667	-1.0857736159263569e-38	-1.2442049469830516e-36	-0.017559744155714662	1.2001318876968745e-40	0.0	-0.017676045683646283	0.0	800.6433300672458	86.78491274967506	-1.884575366728707e-36	0.0009438893582552545	-7.4141575848505195	1.610018906033839e-37	0.020389136930418845	0.7414185620140709
3.295	86.74762503183995	0.0	-0.026370413237406184	300.3169949105002	-3.002103182965685e-37	-800.6433259983997	0.0	-0.001279520432029891	0.0	0.9999999878629667	-6.443440811658759e-43	-0.00015580196870902446	-1.0857736157647004e-38	-1.2442049475985442e-36	-0.017853590565944936	1.2001318895990036e-40	0.0	-0.018042601286426624	0.0	800.6433259983997	86.74762903752922	-1.8837657327185082e-36	0.0006604892363390183	-7.499520599820879	1.628557823533008e-37	-0.07202187549024869	0.749986642398962
3.3	86.70991238669924	0.0	-0.027280629818004627	300.75063895376354	-3.096271034908542e-37	-800.6433234499406	0.0	-0.0015457313910382298	0.0	0.9999999872975806	-6.832971503360742e-43	-0.0001593895553039752	-1.0857736155265515e-38	-1.2442049484596539e-36	-0.018264697712107224	1.2001318923131616e-40	0.0	-0.018485420711263505	0.0	800.6433234499406	86.70991667749135	-1.8829467903825327e-36	0.00036067996852917085	-7.585454176707884	1.6472184375169378e-37	-0.059225128622358514	0.7585685379897813
3.305	86.67176931504298	0.0	-0.028237884094945185	301.18409335993954	-3.190397706231562e-37	-800.6433223695237	0.0	-0.0015700620784129319	0.0	0.9999999866618983	-7.260715692687764e-43	-0.00016332908908611547	-1.0857736152489369e-38	-1.2442049494052503e-36	-0.018716135035916223	1.2001318953647673e-40	0.0	-0.0189352103645965	0.0	800.6433223695237	86.67177391503117	-1.8821185016825476e-36	7.415929740079448e-05	-7.6717080370601805	1.6659487945486539e-37	-0.05559421628718486	0.7671909470449867
3.31	86.63319411869311	0.0	-0.02914299958393387	301.6173559726937	-3.2844827286782305e-37	-800.6433226765143	0.0	-0.0014052674400387858	0.0	0.9999999860418344	-7.668235242750006e-43	-0.00016708235347594384	-1.0857736149687721e-38	-1.2442049503061409e-36	-0.019146227459653515	1.2001318983413939e-40	0.0	-0.01933778983160338	0.0	800.6433226765143	86.63319902029305	-1.8812808290661245e-36	-0.00019324243590902618	-7.758307609511898	1.6847542074493395e-37	-0.05114312795223799	0.7758476176630755
3.315	86.59418509471855	0.0	-0.02991865472893313	302.05042462703614	-3.3785256321130927e-37	-800.6433242595933	0.0	-0.001100609101906616	0.0	0.9999999855094305	-8.010976505765784e-43	-0.00017023900835735217	-1.0857736147213026e-38	-1.2442049510638223e-36	-0.01950795346896673	1.200131900897213e-40	0.0	-0.019653091113768045	0.0	800.6433242595933	86.59419026216644	-1.8804337349545346e-36	-0.00043523702193546624	-7.845250309875004	1.7036341329526729e-37	-0.04672759796372047	0.7845389467260712
3.32	86.55474053682467	0.0	-0.03050831717655547	302.4832971493258	-3.4725259445227058e-37	-800.6433269766169	0.0	-0.0007004004857112937	0.0	0.9999999851209423	-8.257113426719223e-43	-0.00017250593503546132	-1.0857736145369103e-38	-1.2442049516079425e-36	-0.0197677241350239	1.2001319027621622e-40	0.0	-0.019853741072768896	0.0	800.6433269766169	86.55474591114422	-1.8795771818031246e-36	-0.0006459029090266355	-7.932534020197816	1.7225881611316077e-37	-0.04473600686919143	0.7932660164907251
3.325	86.51485858152589	0.0	-0.03079871852664518	302.91597135433756	-3.566483191378958e-37	-800.6433306443563	0.0	-0.00031354990478989057	0.0	0.9999999849142598	-8.386753468808623e-43	-0.00017369992279144783	-1.0857736144375472e-38	-1.2442049518945302e-36	-0.019904545055490462	1.200131903754349e-40	0.0	-0.019943566503824842	0.0	800.6433306443563	86.5148640604331	-1.878711128376264e-36	-0.0007434686097168527	-8.020416865468624	1.7416698324300078e-37	0.07478851811902552	0.8020765550640162
3.33	86.47453616004972	0.0	-0.030240346113793653	303.3484450508993	-3.6603968969199097e-37	-800.6433323286278	0.0	-0.0006809773543990777	0.0	0.9999999846882799	-8.527486991148163e-43	-0.00017499608175438784	-1.0857736143279325e-38	-1.2442049522056354e-36	-0.02005307393405701	1.2001319048391785e-40	0.0	-0.0201386521455801	0.0	800.6433323286278	86.47454144763819	-1.877835505406747e-36	2.506527399136775e-05	-8.108464941035958	1.7607884211262568e-37	0.14481182652389502	0.8109757959711896
3.335	86.43377431239236	0.0	-0.030139323282583133	303.7807160140479	-3.7542665780090356e-37	-800.64333085088	0.0	-0.0009002144093753234	0.0	0.999999984348941	-8.736878743748377e-43	-0.00017692458458970684	-1.0857736141614616e-38	-1.2442049526685238e-36	-0.02027406408396382	1.2001319064681858e-40	0.0	-0.02039654457715044	0.0	800.64333085088	86.43377956604633	-1.876950342778094e-36	0.00044519735506702915	-8.196298523911594	1.779864736341658e-37	0.009326750261389571	0.8196303830468086
3.34	86.39257232788331	0.0	-0.0308965788246259	304.2127820918325	-3.848091767275433e-37	-800.6433292955655	0.0	-0.0013656522407397315	0.0	0.9999999838313692	-9.05192633634708e-43	-0.00017982618012964922	-1.0857736139033836e-38	-1.24420495336498e-36	-0.020606562445839045	1.2001319089528067e-40	0.0	-0.020787775125535292	0.0	800.6433292955655	86.39257785251226	-1.876055627544525e-36	0.00017471521781071845	-8.284558001551073	1.7990322888240693e-37	-0.06658678153644797	0.8284825591437595
3.345	86.35092735664738	0.0	-0.03179683735595425	304.6446410543653	-3.941871980457862e-37	-800.6433291207592	0.0	-0.0015288718192968597	0.0	0.9999999831637905	-9.450927727645295e-43	-0.00018350099207632917	-1.0857736135634117e-38	-1.2442049542470294e-36	-0.021027664882885908	1.2001319121575387e-40	0.0	-0.021225764638846283	0.0	800.6433291207592	86.3509332108604	-1.875151293896536e-36	-0.00010587407484542117	-8.373324510126661	1.8183081463651028e-37	-0.05660981118103959	0.8373515869848808
3.35	86.30883788715711	0.0	-0.03271417258611291	305.0762906831376	-4.035606735796043e-37	-800.6433303574668	0.0	-0.001449710931998345	0.0	0.9999999824653296	-9.860005358381165e-43	-0.0001872686064175143	-1.0857736131996282e-38	-1.2442049551513622e-36	-0.02145940169147076	1.200131915510513e-40	0.0	-0.021641076228433694	0.0	800.6433303574668	86.30884408624388	-1.8742373080872275e-36	-0.00038829927312135696	-8.462378128273448	1.8376465472145317e-37	-0.055994792892282014	0.8462563382493029
3.355	86.266302386478	0.0	-0.033546246590898054	305.5077287518021	-4.1292955498284864e-37	-800.6433329897959	0.0	-0.0011853819085128733	0.0	0.9999999818367977	-1.0221216076400425e-42	-0.0001905953653959642	-1.0857736128656003e-38	-1.244204955949874e-36	-0.021840620196119674	1.2001319185277954e-40	0.0	-0.021980663130778445	0.0	800.6433329897959	86.26630890650688	-1.8733136359979046e-36	-0.0006623299015271987	-8.551739479292547	1.8570517862292817e-37	-0.05597652852705757	0.8551922678172243
3.36	86.2233193219983	0.0	-0.034214137558841944	305.9389530261657	-4.222937937391043e-37	-800.6433369488776	0.0	-0.0007884604997611357	0.0	0.9999999813591495	-1.0491554552863352e-42	-0.00019308518894957562	-1.085773612607745e-38	-1.2442049565474972e-36	-0.02212593296407831	1.20013192082076e-40	0.0	-0.022206540425523887	0.0	800.6433369488776	86.22332610538051	-1.8723802436387606e-36	-0.0009172438221065811	-8.641440044154555	1.876530442235879e-37	-0.044267137474509013	0.8641553426102165
3.365	86.17988683185312	0.0	-0.03450192526249422	306.3699612640787	-4.316533411594231e-37	-800.6433420511784	0.0	-0.00045629495224537873	0.0	0.9999999810859754	-1.0644609443096511e-42	-0.00019449482799027847	-1.085773612458773e-38	-1.2442049568858478e-36	-0.022287465702449775	1.2001319221321405e-40	0.0	-0.022337259300407804	0.0	800.6433420511784	86.17989373271098	-1.8714370890261765e-36	-0.0009788387551037607	-8.731688629287268	1.8961257979700573e-37	0.07750814786733932	0.8732032628879166
3.37	86.13600237012595	0.0	-0.03404672045836573	306.8007512087617	-4.410081482435757e-37	-800.6433450441724	0.0	-0.0007808325610481556	0.0	0.9999999807726772	-1.0818791743053448e-42	-0.00019609905095766615	-1.0857736122866142e-38	-1.2442049572708999e-36	-0.022471296116814105	1.200131923636141e-40	0.0	-0.022560951351680056	0.0	800.6433450441724	86.13600909852599	-1.8704841149668186e-36	-0.0002643418532633117	-8.821965744451415	1.9157292392149463e-37	0.10904815344411597	0.8822639689800541
3.375	86.0916673606743	0.0	-0.034239689231137176	307.23132057884084	-4.503581654514586e-37	-800.6433454509895	0.0	-0.0011090590971673704	0.0	0.9999999803315914	-1.1061629826633484e-42	-0.0001983355952624527	-1.0857736120419318e-38	-1.2442049578077313e-36	-0.0227275852205149	1.200131925753586e-40	0.0	-0.022878673379171453	0.0	800.6433454509895	86.09167416942802	-1.86952136141019e-36	-8.960302282140273e-05	-8.912093052242653	1.9353034451300002e-37	-0.01676916053429935	0.8912108828811327
3.38	86.04688041106638	0.0	-0.035037272014969034	307.6616671720152	-4.597033449522426e-37	-800.6433465278508	0.0	-0.0014330304152455613	0.0	0.9999999796824233	-1.1414127381071117e-42	-0.0002015821058014817	-1.0857736116770931e-38	-1.2442049585869784e-36	-0.023099607932014706	1.2001319288699358e-40	0.0	-0.023289206352708706	0.0	800.6433465278508	86.04688754378394	-1.8685487981461574e-36	-0.0003462471704946757	-9.002666325088645	1.9549727818834374e-37	-0.060826886029728744	0.9002871812424588
3.385	86.0016393738346	0.0	-0.03593208104274702	308.09178869755004	-4.690436370001128e-37	-800.643348955426	0.0	-0.001459364514645285	0.0	0.9999999789357429	-1.1812676960889337e-42	-0.00020525275654638644	-1.0857736112507992e-38	-1.2442049594680468e-36	-0.023520233532216488	1.2001319324543816e-40	0.0	-0.023707283490010368	0.0	800.643348955426	86.00164687790915	-1.8675663751316678e-36	-0.0006279316608967118	-9.093632226318013	1.9747263973936473e-37	-0.05798553067320871	0.9093817096758487
3.39	85.95594287464725	0.0	-0.0367967701302013	308.52168288168525	-4.78378992219105e-37	-800.6433528268592	0.0	-0.0012527023359581234	0.0	0.9999999782253998	-1.2185327031503761e-42	-0.0002086848722180303	-1.0857736108389774e-38	-1.2442049602918508e-36	-0.023913525026212	1.2001319358643992e-40	0.0	-0.024066156274193267	0.0	800.6433528268592	85.95595074588037	-1.866574061429941e-36	-0.0009213577960820603	-9.184862414699307	1.9945375322511726e-37	-0.06125981104178749	0.9185066703154903
3.395	85.90978953102211	0.0	-0.03752933457549681	308.95134744351753	-4.877093610782792e-37	-800.6433581632983	0.0	-0.0008736170911651044	0.0	0.999999977660869	-1.2477169029372312e-42	-0.00021137274369107585	-1.0857736105075289e-38	-1.2442049609370118e-36	-0.024221532415563782	1.2001319385744442e-40	0.0	-0.024316429135364546	0.0	800.6433581632983	85.90979771977851	-1.8655718260648196e-36	-0.001211356187127958	-9.276397466665525	2.0144146754926104e-37	-0.0552647263366949	0.9276562086761218
3.4	85.86317766429993	0.0	-0.03791175260327411	309.3807800890762	-4.970346937631967e-37	-800.6433648622786	0.0	-0.0005095832431681765	0.0	0.9999999773205713	-1.2651311510813349e-42	-0.00021297659992640988	-1.0857736103060162e-38	-1.244204961321979e-36	-0.02440532080616148	1.2001319402080505e-40	0.0	-0.024462413981085174	0.0	800.6433648622786	85.86318602362074	-1.864559630804877e-36	-0.0013380547178373952	-9.368474493317319	2.034407019114017e-37	0.06970151975754771	0.9368733779641394
3.405	85.8161047585651	0.0	-0.03749604528242487	309.80997852779944	-5.063549405399733e-37	-800.6433697013509	0.0	-0.0008229158628567768	0.0	0.9999999769508165	-1.2839056138380633e-42	-0.00021470573223826282	-1.0857736100856405e-38	-1.2442049617370045e-36	-0.024603464778069756	1.2001319419830804e-40	0.0	-0.02469816201026547	0.0	800.6433697013509	85.81611294783198	-1.863537418184112e-36	-0.0006456234547376964	-9.46051120969571	2.054392695293885e-37	0.09507303633673618	0.9460988914009807
3.41	85.76857270301947	0.0	-0.03782081434481861	310.2389404494154	-5.156700512407143e-37	-800.6433723221919	0.0	-0.0011858470858510748	0.0	0.9999999764307126	-1.310060833580084e-42	-0.00021711463395526675	-1.0857736097732131e-38	-1.2442049623151988e-36	-0.024879504587796298	1.2001319444798621e-40	0.0	-0.025037882176101242	0.0	800.6433723221919	85.76858103990715	-1.862505240498964e-36	-0.0005775871224128302	-9.552381429785111	2.0743453336437725e-37	-0.028396272653079112	0.9552423636355543
3.415	85.72057982460367	0.0	-0.038624993636954	310.6676635657614	-5.249799761703948e-37	-800.6433758265957	0.0	-0.0014206629229012574	0.0	0.9999999757025497	-1.3461986985167778e-42	-0.00022044293957568952	-1.0857736093311709e-38	-1.2442049631140807e-36	-0.02526090032688389	1.2001319479754284e-40	0.0	-0.02544487212406605	0.0	800.6433758265957	85.72058852265152	-1.8614630597892778e-36	-0.0008319976039356082	-9.644700030767694	2.094393411606193e-37	-0.05980144880834089	0.9644885426834782
3.42	85.6721244090397	0.0	-0.03950075341767861	311.0961455638173	-5.3428466509965195e-37	-800.6433807071978	0.0	-0.00135440869434856	0.0	0.9999999749194514	-1.3844633792996561e-42	-0.00022396712542049047	-1.0857736088499956e-38	-1.2442049639599944e-36	-0.025664742287107516	1.2001319517346975e-40	0.0	-0.025832881633676034	0.0	800.6433807071978	85.67213350796423	-1.860410835648066e-36	-0.0011252715522359433	-9.737339530479735	2.1145105487592015e-37	-0.06134372490303951	0.9737532756526589
3.425	85.62320521486443	0.0	-0.04031571389440068	311.52438412784306	-5.435840677407872e-37	-800.6433871135472	0.0	-0.001056386223643024	0.0	0.999999974230597	-1.4176321603556981e-42	-0.00022702197773490554	-1.0857736084219944e-38	-1.2442049646932441e-36	-0.026014802585311043	1.2001319550415584e-40	0.0	-0.026135513994428577	0.0	800.6433871135472	85.62321469413476	-1.8593485398465652e-36	-0.001439011964822149	-9.83019725630309	2.1346753731496976e-37	-0.07713063222989197	0.9830499846511215
3.43	85.57382099652955	0.0	-0.04096465179763654	311.95237693559534	-5.528781336650797e-37	-800.6433950978422	0.0	-0.0005908090486429341	0.0	0.9999999737544781	-1.440299152928993e-42	-0.0002291096129298556	-1.0857736081236776e-38	-1.2442049651943336e-36	-0.026254027963199842	1.2001319573271787e-40	0.0	-0.026304768319355475	0.0	800.6433950978422	85.57383078360185	-1.8582761442498182e-36	-0.0017530785153227859	-9.923593697195326	2.154954689239272e-37	0.026091739432516567	0.9923627998160823
3.435	85.52396889544524	0.0	-0.040683378708151564	312.38012164529573	-5.621668120233938e-37	-800.6434029021293	0.0	-0.000781333375260346	0.0	0.9999999733942343	-1.4573132966066887e-42	-0.00023067661944968325	-1.0857736078966487e-38	-1.2442049655704559e-36	-0.026433593688056197	1.2001319590565401e-40	0.0	-0.02652860384333112	0.0	800.6434029021293	85.52397856313068	-1.8571935808421926e-36	-0.0012266153748368305	-10.017428389897514	2.1753298278801288e-37	0.0980871624589061	1.001790859601763
3.44	85.47365034545602	0.0	-0.04080898903267492	312.80761593111737	-5.714500523146093e-37	-800.6434079850778	0.0	-0.0010950588247229784	0.0	0.9999999728737665	-1.4816927490993857e-42	-0.0002329219725936646	-1.0857736075666977e-38	-1.2442049661093916e-36	-0.02669089221230193	1.2001319615550706e-40	0.0	-0.026842315088207034	0.0	800.6434079850778	85.47366008176331	-1.8561008917485217e-36	-0.0009916031983043887	-10.113319254495206	2.1961551261029807e-37	-0.004276396990387079	1.011332015862816
3.445	85.42288467971115	0.0	-0.041564254594559674	313.2348574779542	-5.807278042584824e-37	-800.6434135155225	0.0	-0.001361897902762684	0.0	0.9999999721352192	-1.515889161228879e-42	-0.00023607146996202624	-1.0857736070946536e-38	-1.2442049668653557e-36	-0.027051798035814336	1.2001319651004874e-40	0.0	-0.027232470097987134	0.0	800.6434135155225	85.42289478282026	-1.854998498803475e-36	-0.0012324391762093376	-10.180801892550306	2.210810511438554e-37	-0.06212966214462906	1.0180991467940346
3.45	85.37194916884273	0.0	-0.04242511272213565	313.66184459213963	-5.900000310742758e-37	-800.6434204264414	0.0	-0.0012728535943600898	0.0	0.999999971335587	-1.5524068525566846e-42	-0.00023943475767372884	-1.0857736065786753e-38	-1.2442049676726336e-36	-0.027437202429044887	1.2001319689391435e-40	0.0	-0.027597115792461584	0.0	800.6434204264414	85.37195969638823	-1.8538924186966942e-36	-0.0015430851068796172	-10.175518666949776	2.209663373874923e-37	-0.06880494312246699	1.0175751287332127
3.455	85.32121265976802	0.0	-0.04323696882056295	314.0885774224002	-5.992667359909861e-37	-800.6434290423725	0.0	-0.0008785071806140008	0.0	0.9999999706743823	-1.5822197909027393e-42	-0.00024218053610367964	-1.0857736061483256e-38	-1.2442049683316938e-36	-0.027751845469196294	1.2001319721132751e-40	0.0	-0.02784878956106718	0.0	800.6434290423725	85.32122359368307	-1.852790659496205e-36	-0.0019106909147609142	-10.11591076766744	2.1967197268127845e-37	-0.09218714981579623	1.011633081359053
3.46	85.27081045016827	0.0	-0.04383914286880462	314.51505739238996	-6.0852794992347706e-37	-800.6434395785742	0.0	-0.0002675351315703619	0.0	0.999999970321209	-1.5980062828063537e-42	-0.00024363447561281544	-1.0857736059171326e-38	-1.2442049686806792e-36	-0.027918454669193224	1.2001319738086944e-40	0.0	-0.027925432730619475	0.0	800.6434395785742	85.27082168868272	-1.8516961575336112e-36	-0.0022893205193689837	-10.04726630937185	2.1818105864710297e-37	0.035379752515166125	1.0047328601092265
3.465	85.22073435309385	0.0	-0.04335959133973599	314.94128617984484	-6.177837093102104e-37	-800.6434493462666	0.0	-0.00043413957249372387	0.0	0.999999970087645	-1.6083948161294255e-42	-0.00024459126190395935	-1.08577360576374e-38	-1.2442049689103333e-36	-0.02802809430521705	1.200131974929925e-40	0.0	-0.028049804556736994	0.0	800.6434493462666	85.22074536723623	-1.850608727859687e-36	-0.0016710934871764964	-9.984530039599331	2.1681862850206654e-37	0.07472792014859006	0.9984809681396595
3.47	85.17095870534834	0.0	-0.04363180188319739	315.36726534647477	-6.270340480661296e-37	-800.643457549932	0.0	-0.0006299366446460962	0.0	0.9999999697729912	-1.622326172933282e-42	-0.00024587434304650313	-1.085773605556476e-38	-1.2442049692183071e-36	-0.02817512457811937	1.2001319764404266e-40	0.0	-0.028230268112231262	0.0	800.643457549932	85.17096986337582	-1.8495278291233772e-36	-0.0017490908371142423	-9.926184877801111	2.155518989546637e-37	-0.050924201586053125	0.9926315504888742
3.475	85.12146934310232	0.0	-0.044200196346644384	315.7929963547398	-6.362789979431824e-37	-800.6434670768377	0.0	-0.0005763772440357571	0.0	0.9999999693828137	-1.6395011042239507e-42	-0.00024745615813966067	-1.0857736052984973e-38	-1.2442049695979819e-36	-0.028356387241249833	1.200131978313489e-40	0.0	-0.028395388029684415	0.0	800.6434670768377	85.1214807936038	-1.8484531499244555e-36	-0.002072528665638386	-9.86935157766619	2.1431778415877296e-37	-0.07343719920346943	0.9869624794581047
3.48	85.07226447026764	0.0	-0.04472597614347348	316.21848062842844	-6.4551858985871645e-37	-800.6434783576635	0.0	-0.0002129842108495516	0.0	0.9999999691243914	-1.6508161427260964e-42	-0.00024849827576896424	-1.0857736051270512e-38	-1.2442049698481192e-36	-0.028475805128752033	1.2001319795540486e-40	0.0	-0.028456403511607435	0.0	800.6434783576635	85.07227619229127	-1.847384647989039e-36	-0.0024453498519009143	-9.812358904838685	2.1308019395048106e-37	-0.08899993230385246	0.9812762519561815
3.485	85.02334519845091	0.0	-0.04506326688440548	316.6437195925794	-6.547528547577703e-37	-800.6434915582543	0.0	0.00037549254915337886	0.0	0.9999999691652662	-1.649029552917359e-42	-0.0002483337304397027	-1.085773605154199e-38	-1.244204969808626e-36	-0.028456949622359663	1.200131979357824e-40	0.0	-0.028348832820081948	0.0	800.6434915582543	85.02335709321989	-1.846322345834508e-36	-0.0028349336532617073	-9.755438915609934	2.1184397175330674e-37	-0.0041395233170948755	0.975543979387142
3.49	84.97471018246895	0.0	-0.0444945041529394	317.0687146722952	-6.639818235896206e-37	-800.64350548308	0.0	0.0004610632400614848	0.0	0.999999969483002	-1.6351014259175332e-42	-0.0002470509467631516	-1.0857736053648401e-38	-1.2442049695007236e-36	-0.02830995343646112	1.200131977832523e-40	0.0	-0.028216747931361197	0.0	800.64350548308	84.97472179459493	-1.8452662080408273e-36	-0.002508334799869666	-9.698540178493431	2.1060823376803555e-37	0.06987804382645238	0.9698791911102145
3.495	84.92636051880724	0.0	-0.044119375252311875	317.49346728683776	-6.73205527180548e-37	-800.6435171105242	0.0	0.00026777208350803523	0.0	0.9999999697311306	-1.6241741080306268e-42	-0.0002460445382908904	-1.0857736055288488e-38	-1.2442049692591565e-36	-0.02819462751710249	1.2001319766413745e-40	0.0	-0.02814003688007902	0.0	800.6435171105242	84.9263719469697	-1.8442162686439615e-36	-0.002328036850362705	-9.641401550664835	2.0936760653934414e-37	-0.008922561734695907	0.9641405679322399
3.5	84.87829592727452	0.0	-0.04427006580847549	317.9179788669772	-6.8242399659427865e-37	-800.6435293578567	0.0	0.00017382113751756692	0.0	0.9999999698476653	-1.619026647302329e-42	-0.0002455704559825349	-1.0857736056057281e-38	-1.2442049691453602e-36	-0.028140301684640132	1.2001319760819514e-40	0.0	-0.028090240792229423	0.0	800.6435293578567	84.87830743299935	-1.8431725244907474e-36	-0.002582858058296037	-9.584513569998876	2.0813237161025916e-37	-0.06355645735244185	0.9584724294248833
3.505	84.8305146995058	0.0	-0.04444579448240101	318.34225083346126	-6.916372626813275e-37	-800.6435430362106	0.0	0.00041026413144937604	0.0	0.9999999700120282	-1.6117494628197246e-42	-0.0002449002256301073	-1.0857736057139948e-38	-1.2442049689844898e-36	-0.02806349894133928	1.2001319752929185e-40	0.0	-0.027972708776141175	0.0	800.6435430362106	84.83052629349517	-1.8421349338262304e-36	-0.0028957660165909237	-9.52794044840483	2.0690388921438677e-37	-0.07771535385043617	0.9528257388661001
3.51	84.783015767287	0.0	-0.04449452583907724	318.7662846002886	-7.0084535614688895e-37	-800.6435583624416	0.0	0.0008934571116193627	0.0	0.9999999703993054	-1.594523550745683e-42	-0.00024331371519477002	-1.0857736059683331e-38	-1.2442049686036883e-36	-0.027881698231726048	1.2001319734337814e-40	0.0	-0.027716752167782483	0.0	800.6435583624416	84.78302738099867	-1.8411034717955948e-36	-0.0032367806885489022	-9.471813091458142	2.0568488963288033e-37	0.0022605528508156635	0.9471813361211097
3.515	84.73579673500156	0.0	-0.04370745904330406	319.19008156529134	-7.100483073477872e-37	-800.6435742696616	0.0	0.0009166109087815233	0.0	0.9999999710046424	-1.5673711661984952e-42	-0.00024081297437757932	-1.0857736063636863e-38	-1.2442049680034458e-36	-0.02759513443436813	1.2001319705278423e-40	0.0	-0.027454162485138323	0.0	800.6435742696616	84.73580795786863	-1.8400780804356048e-36	-0.002896496661359455	-9.41580977157983	2.0446861037252525e-37	0.06944254388267587	0.9416065840969843
3.52	84.68885857505349	0.0	-0.04316861742359769	319.61364314046943	-7.1924614695233455e-37	-800.6435878558681	0.0	0.0006355930310379237	0.0	0.9999999714917666	-1.5453147157048e-42	-0.00023878157024995536	-1.0857736066798411e-38	-1.244204967515858e-36	-0.027362352661678625	1.2001319681893854e-40	0.0	-0.02727207849430632	0.0	800.6435878558681	84.68886953347453	-1.839058790743714e-36	-0.00272433638749323	-9.35955677312516	2.0324721282896776e-37	-0.008318911516578903	0.9359560470109796
3.525	84.64220114861563	0.0	-0.043157887085340865	320.0369707279764	-7.28438905402851e-37	-800.6436020399083	0.0	0.0005016304496814587	0.0	0.9999999718108897	-1.530763091953443e-42	-0.00023744136237900248	-1.0857736068859748e-38	-1.2442049671941618e-36	-0.027208776147973422	1.200131966657435e-40	0.0	-0.027128371956096332	0.0	800.6436020399083	84.64221209959682	-1.8380456020335366e-36	-0.0029627642411061018	-9.30351405875669	2.02030328343434e-37	-0.060606517901657005	0.9303711463254626
3.53	84.59582295674639	0.0	-0.043194552356013445	320.4600657268972	-7.376266130795097e-37	-800.6436175948215	0.0	0.0007133850736791431	0.0	0.9999999721555293	-1.5149548790908663e-42	-0.00023598542236371635	-1.0857736071076931e-38	-1.2442049668447003e-36	-0.027041937707098906	1.2001319650029814e-40	0.0	-0.026924002186649112	0.0	800.6436175948215	84.59583392121165	-1.8370384773487874e-36	-0.0032677866355273395	-9.247748694684788	2.00819399037339e-37	-0.08061667386947294	0.9248100073428595
3.535	84.54972298514375	0.0	-0.04311917653832478	320.88292953079014	-7.468093002435467e-37	-800.6436347760183	0.0	0.00118488615866525	0.0	0.9999999727020182	-1.489686073682097e-42	-0.00023365815961367368	-1.0857736074573195e-38	-1.2442049662861035e-36	-0.026775253032955162	1.200131962379539e-40	0.0	-0.026584557306174175	0.0	800.6436347760183	84.54973390329101	-1.8360373929767965e-36	-0.00360770757153291	-9.192484003640544	1.996190637921845e-37	0.032234248733407016	0.9192540519572306
3.54	84.50389846692522	0.0	-0.04207095707611176	321.3055635054713	-7.55986996558582e-37	-800.6436515409646	0.0	0.0009922602360553443	0.0	0.999999973342447	-1.4597496714410455e-42	-0.0002309010101285307	-1.0857736078639205e-38	-1.2442049656243174e-36	-0.026459306966461045	1.2001319593051442e-40	0.0	-0.026300295687651045	0.0	800.6436515409646	84.50390888470916	-1.8350422822320338e-36	-0.00304688259873932	-9.136437169108785	1.9840190939002835e-37	0.06609413942130016	0.9136676232653667
3.545	84.45835056799496	0.0	-0.04178779107990742	321.72796906679406	-7.651597327730054e-37	-800.6436667169958	0.0	0.0006393647905453749	0.0	0.999999973811738	-1.437584076354631e-42	-0.00022885955375703864	-1.08577360815966e-38	-1.2442049651343124e-36	-0.026225373291986716	1.2001319570522984e-40	0.0	-0.026117131167313467	0.0	800.6436667169958	84.45836084779535	-1.8340531849270396e-36	-0.003129586870806368	-9.084465540691156	1.972735556081867e-37	-0.04594144193009829	0.9084581706170719
3.55	84.41302542954323	0.0	-0.04179451688588464	322.15014748955815	-7.74327536563974e-37	-800.6436830311707	0.0	0.0006138881786859673	0.0	0.9999999741514396	-1.4214150732975546e-42	-0.00022737038488119854	-1.0857736083725362e-38	-1.2442049647768724e-36	-0.026054727104411014	1.20013195542155e-40	0.0	-0.025941265158655073	0.0	800.6436830311707	84.4130357073929	-1.833068927514134e-36	-0.003408469394993015	-9.051138710585604	1.965499008624364e-37	-0.07129640136860455	0.9051419509397924
3.555	84.36780614649767	0.0	-0.04179767659351189	322.572099597543	-7.834904258193841e-37	-800.6437008960586	0.0	0.0009094251360742533	0.0	0.9999999745697785	-1.4013564231694611e-42	-0.0002255229786211164	-1.0857736086332764e-38	-1.2442049643334464e-36	-0.025843029935485744	1.2001319534133016e-40	0.0	-0.025680734048254248	0.0	800.6437008960586	84.36781641720236	-1.832086968570091e-36	-0.0037439154257565724	-9.03975380840052	1.9630259077439545e-37	-0.03235825153914089	0.9039811722206075
3.56	84.32261174792657	0.0	-0.04126126455096489	322.99382569167	-7.92648407074337e-37	-800.6437200976983	0.0	0.0010496293022345267	0.0	0.9999999751757019	-1.3720085628923763e-42	-0.00022282003398318872	-1.0857736090080884e-38	-1.2442049636846665e-36	-0.025533295287681557	1.200131950504548e-40	0.0	-0.025380037402897748	0.0	800.6437200976983	84.32262176260038	-1.8311055454281896e-36	-0.0036837269562246823	-9.038220379675721	1.9626911706169366e-37	0.05099022542839002	0.9038364212327074
3.565	84.27742482387895	0.0	-0.04056442510748628	323.41532582504396	-8.018014814889808e-37	-800.6437373169372	0.0	0.0007073056762579035	0.0	0.9999999756795916	-1.3473287763711731e-42	-0.0002205470200043541	-1.085773609317143e-38	-1.2442049631390839e-36	-0.025272827065758383	1.2001319480856114e-40	0.0	-0.025177409252521626	0.0	800.6437373169372	84.27743451795921	-1.8301242836859468e-36	-0.003390152268311253	-9.035426592467863	1.9620853484309853e-37	0.00984186693919615	0.9035431952608589
3.57	84.23226404830696	0.0	-0.04056229443495239	323.83660008034894	-8.1094965085403e-37	-800.6437548468886	0.0	0.0004573220032893932	0.0	0.9999999759795528	-1.3325155841261309e-42	-0.00021918272161299145	-1.0857736094999484e-38	-1.2442049628116164e-36	-0.025116489982336506	1.2001319466456392e-40	0.0	-0.025046396149186877	0.0	800.6437548468886	84.23227373622821	-1.829143595464684e-36	-0.00363777766113386	-9.028103349175609	1.960496682395994e-37	-0.06706117838903225	0.9028352412541438
3.575	84.18714807576352	0.0	-0.04066129633526443	324.25764863791784	-8.200929190831101e-37	-800.6437738309726	0.0	0.0005992665745584874	0.0	0.9999999762525016	-1.3189557725554958e-42	-0.00021793385986804777	-1.085773609665514e-38	-1.2442049625118574e-36	-0.024973380964557246	1.2001319453353405e-40	0.0	-0.024874718921559562	0.0	800.6437738309726	84.18715780177304	-1.8281638809526305e-36	-0.003966833081381764	-9.018014693173154	1.9583061284280197e-37	-0.07877329978976136	0.9018358733109182
3.58	84.14208454113343	0.0	-0.04061310661204936	324.6784717464667	-8.29231291576544e-37	-800.643794584312	0.0	0.0009764324568336478	0.0	0.999999976684636	-1.2973274492585688e-42	-0.00021594188634862783	-1.085773609926092e-38	-1.2442049620337308e-36	-0.02474511760805675	1.2001319432608653e-40	0.0	-0.024594991627778773	0.0	800.643794584312	84.14209423406152	-1.8271853036560334e-36	-0.004273502757446832	-9.007783423551768	1.956081977946679e-37	0.03494462748165174	0.9007851205065714
3.585	84.09707008165687	0.0	-0.03972850371140147	325.0990696595842	-8.383647738468283e-37	-800.6438143868783	0.0	0.0006756603046731834	0.0	0.9999999771206572	-1.2753004498861403e-42	-0.00021391319467113195	-1.0857736101870455e-38	-1.2442049615467932e-36	-0.024512646660579656	1.2001319411677326e-40	0.0	-0.02440142920856729	0.0	800.6438143868783	84.09707938221611	-1.8262077859873102e-36	-0.00374955505142935	-8.998031611191237	1.953964153976419e-37	0.04314947892969919	0.8998135070864889
3.59	84.05210407538162	0.0	-0.039761569894855034	325.5194426223852	-8.474933712157748e-37	-800.6438337056968	0.0	0.0003309420469722635	0.0	0.9999999773673278	-1.2627460838346569e-42	-0.00021275693468772845	-1.0857736103337771e-38	-1.2442049612692605e-36	-0.024380149023426754	1.2001319399835823e-40	0.0	-0.024306621295792637	0.0	800.6438337056968	84.05211338518592	-1.825231327609802e-36	-0.003996231070413652	-8.988602652191465	1.9519189949742267e-37	-0.07066425159990303	0.8988880412789885
3.595	84.00718352549515	0.0	-0.039938851038014415	325.93959086915424	-8.56617088766854e-37	-800.6438545076742	0.0	0.00042384564050078707	0.0	0.9999999775505712	-1.2533755091351725e-42	-0.0002118939026156087	-1.0857736104423515e-38	-1.2442049610621105e-36	-0.024281252830563725	1.200131939103917e-40	0.0	-0.024185198463964067	0.0	800.6438545076742	84.00719290743976	-1.8242558575066374e-36	-0.004337628320898273	-8.979479847961377	1.9499383536494378e-37	-0.09065332822278374	0.8979937436634086
3.6	83.96230917081208	0.0	-0.040062405727965135	326.3595146283571	-8.657359314604983e-37	-800.6438771809301	0.0	0.00085347281850314	0.0	0.9999999778749875	-1.236691472001771e-42	-0.00021035729898114626	-1.0857736106336639e-38	-1.2442049606932859e-36	-0.024105171020561034	1.2001319375465479e-40	0.0	-0.023940696511817242	0.0	800.6438771809301	83.96231859498215	-1.8232813897804967e-36	-0.004738233817204036	-8.970381658257528	1.9479603171381587e-37	0.02018501810136077	0.8970404368241089
3.605	83.9174807894147	0.0	-0.03922952607943851	326.77921412944573	-8.74849904283522e-37	-800.6438997408383	0.0	0.0006713469303006836	0.0	0.9999999782769305	-1.2158497957334e-42	-0.00020843777583147096	-1.0857736108690497e-38	-1.2442049602325513e-36	-0.023885209865430513	1.2001319356170097e-40	0.0	-0.02374836978334078	0.0	800.6438997408383	83.9174898514637	-1.8223079134747645e-36	-0.0042463773323853996	-8.960729785530457	1.945863890201221e-37	0.042966894574874376	0.8960832798536201
3.61	83.87270277432626	0.0	-0.03924592128452894	327.1986896129567	-8.839590124608254e-37	-800.6439214554804	0.0	0.00033153260414111647	0.0	0.9999999785196522	-1.203170665685986e-42	-0.00020727002505490258	-1.0857736110102905e-38	-1.2442049599522603e-36	-0.023751395480498903	1.2001319344518187e-40	0.0	-0.023653392688399444	0.0	800.6439214554804	83.87271183687284	-1.8213355372576473e-36	-0.004477324248392313	-8.950655467340123	1.943678553501923e-37	-0.06918069775699519	0.8950922816333956
3.615	83.82797349431667	0.0	-0.03943233900163947	327.61794132915884	-8.930632614221707e-37	-800.6439446846497	0.0	0.00043291681576786275	0.0	0.9999999786998699	-1.1937101404791068e-42	-0.00020639870852002582	-1.0857736111147124e-38	-1.2442049597431227e-36	-0.023651549958226357	1.2001319335866787e-40	0.0	-0.02352937115628074	0.0	800.6439446846497	83.82798262969712	-1.8203642206650486e-36	-0.004828365444896954	-8.941061959295856	1.941595786230959e-37	-0.0934479456753201	0.894155028384443
3.62	83.78329097199493	0.0	-0.03956296861256103	328.03696951714306	-9.021626563586561e-37	-800.6439698459378	0.0	0.0008865212020001604	0.0	0.9999999790260781	-1.1764835278792348e-42	-0.0002048121335602075	-1.0857736113027367e-38	-1.2442049593623035e-36	-0.02346974185622602	1.2001319320207072e-40	0.0	-0.02327540153966337	0.0	800.6439698459378	83.78330014888986	-1.819393918623781e-36	-0.005243296851876757	-8.93223675953531	1.9396770334693992e-37	0.017262014163460026	0.8932253439391812
3.625	83.73865124583146	0.0	-0.038726726469164946	328.4557743993579	-9.112572021049887e-37	-800.6439949684922	0.0	0.0007361328789390265	0.0	0.9999999794421619	-1.1543151141892406e-42	-0.00020277041758954398	-1.0857736115406778e-38	-1.2442049588722377e-36	-0.023235778435200652	1.200131930023285e-40	0.0	-0.023064515004043266	0.0	800.6439949684922	83.73866006515767	-1.818424539121219e-36	-0.004767281419741743	-8.923494237241414	1.9377781096409646e-37	0.03845090308694718	0.8923577078393449
3.63	83.69405671067676	0.0	-0.038740698496113106	328.87435619497234	-9.203469034218876e-37	-800.6440193980699	0.0	0.0004255826718876493	0.0	0.9999999797138603	-1.139718107160316e-42	-0.00020142602990369155	-1.0857736116948815e-38	-1.244204958549549e-36	-0.023081722951197124	1.200131928718989e-40	0.0	-0.02294259454937795	0.0	800.6440193980699	83.6940655261294	-1.8174561471078267e-36	-0.005024372896958231	-8.914467015719415	1.935820155073901e-37	-0.0737037490215755	0.8914771697411509
3.635	83.64950643616825	0.0	-0.03888705003180738	329.29271512844565	-9.294317651788805e-37	-800.6440453838716	0.0	0.000576194408153111	0.0	0.999999979948385	-1.127039442868438e-42	-0.00020025832202252467	-1.0857736118272264e-38	-1.2442049582692688e-36	-0.02294791348190827	1.2001319275931458e-40	0.0	-0.022777527010546892	0.0	800.6440453838716	83.64951530184798	-1.816488717195259e-36	-0.005384027990765572	-8.905547212742468	1.933883481426018e-37	-0.08820247726879094	0.8905983990294474
3.64	83.60500120925724	0.0	-0.038905138196621836	329.71085142313643	-9.3851179222545e-37	-800.6440733379624	0.0	0.0010318872326216977	0.0	0.9999999803477116	-1.1052796071902967e-42	-0.00019825423617931607	-1.0857736120509145e-38	-1.2442049577882358e-36	-0.022718262156153742	1.200131925676168e-40	0.0	-0.022481913093733603	0.0	800.6440733379624	83.60501006335554	-1.8155222641465455e-36	-0.005755044478772858	-8.896684964201995	1.9319567788236186e-37	0.01794917953290955	0.8896703070537072
3.645	83.56054069024268	0.0	-0.03807557844024208	330.12876530062766	-9.475869893787768e-37	-800.6441006807332	0.0	0.0007771482477454543	0.0	0.999999980792858	-1.0807607445364222e-42	-0.00019599604332009018	-1.0857736122977399e-38	-1.2442049572462112e-36	-0.022459492310805535	1.2001319235392316e-40	0.0	-0.022259276520474595	0.0	800.6441006807332	83.56054919573121	-1.8145567763195252e-36	-0.005320505438131305	-8.887296346501946	1.9299177166949638e-37	0.03129074888228112	0.8887351431192111
3.65	83.51612928656954	0.0	-0.03806741848006985	330.546456997841	-9.566573617826698e-37	-800.6441279153864	0.0	0.0005689040145809228	0.0	0.9999999811006756	-1.0636394628539203e-42	-0.0001944191693602671	-1.0857736124668125e-38	-1.2442049568677206e-36	-0.022278795861918797	1.200131922061545e-40	0.0	-0.022096297525556915	0.0	800.6441279153864	83.51613777504737	-1.8135923607748987e-36	-0.005593143247858669	-8.877395760225209	1.9277701093023685e-37	-0.08098098728945388	0.8877765113133309
3.655	83.47176627173639	0.0	-0.03814908178055487	330.9639267591582	-9.657229147403516e-37	-800.6441567803107	0.0	0.0008106641711339597	0.0	0.9999999814186619	-1.0458055198319573e-42	-0.00019277665912778786	-1.0857736126400515e-38	-1.2442049564734757e-36	-0.02209057805013531	1.2001319205350418e-40	0.0	-0.02186405934751468	0.0	800.6441567803107	83.47177477617278	-1.812628996522254e-36	-0.00596626307638893	-8.867881690009227	1.925703505404208e-37	-0.053356805855784194	0.8868042208781601
3.66	83.4274501101487	0.0	-0.03779826426131563	331.381174824144	-9.747836534537893e-37	-800.644187417978	0.0	0.0010829908160264743	0.0	0.9999999819118183	-1.0178427425318358e-42	-0.00019020128094043094	-1.0857736129057847e-38	-1.2442049558553166e-36	-0.021795461443153325	1.2001319181676296e-40	0.0	-0.02155380533246595	0.0	800.644187417978	83.42745845250154	-1.8116666464241887e-36	-0.006062246347466622	-8.858716957003548	1.9237117563187983e-37	0.02226687552614523	0.8858744941471557
3.665	83.3831794321841	0.0	-0.03718482346247445	331.7982014173044	-9.838395828046332e-37	-800.6442167722702	0.0	0.0008139733392968049	0.0	0.9999999823722185	-9.913911668732986e-43	-0.00018776508476944507	-1.0857736131505293e-38	-1.2442049552705648e-36	-0.021516293920841208	1.2001319159574637e-40	0.0	-0.021320619147576565	0.0	800.6442167722702	83.3831875167651	-1.81070528254627e-36	-0.00587192188364787	-8.849553453624281	1.9217224272530592e-37	-0.004896366460682252	0.8849554808178657
3.67	83.33895466125861	0.0	-0.03716002606424175	332.21500677426815	-9.928907079054939e-37	-800.6442468406636	0.0	0.0007576464712694477	0.0	0.9999999827204823	-9.71151932298552e-43	-0.00018590104663344115	-1.0857736133334417e-38	-1.2442049548231469e-36	-0.021302690881024162	1.200131914285613e-40	0.0	-0.02110356942174297	0.0	800.6442468406636	83.33896271720614	-1.8097449195049417e-36	-0.006174426237498899	-8.840472317890876	1.91975217582583e-37	-0.08892496304106415	0.8840919547900361
3.675	83.29477407123511	0.0	-0.037159639275067616	332.63159111808665	-1.0019370335978383e-36	-800.6442786720933	0.0	0.0011258433849655248	0.0	0.9999999831413295	-9.464204015099194e-43	-0.0001836232669876389	-1.0857736135518318e-38	-1.24420495427642e-36	-0.021041676555838402	1.2001319122653232e-40	0.0	-0.020781039049986735	0.0	800.6442786720933	83.29478210102708	-1.808785515731796e-36	-0.006569920209006216	-8.83194223727107	1.917898149985908e-37	-0.008789111845539635	0.8831946610514567
3.68	83.25063575750438	0.0	-0.03637637199788578	333.04795466437014	-1.0109785645655565e-36	-800.6443114015001	0.0	0.00115510222121376	0.0	0.999999983696776	-9.1330146207571e-43	-0.0001805730050852152	-1.0857736138354635e-38	-1.2442049535442789e-36	-0.02069214228320615	1.2001319095988873e-40	0.0	-0.020450126639078057	0.0	800.6443114015001	83.25064346567076	-1.807827024963351e-36	-0.00631073516786954	-8.82327444295162	1.9160151254802227e-37	0.028068911476543737	0.8823319089743649
3.685	83.20654247114847	0.0	-0.036065884693319075	333.4640976287721	-1.0200153054959081e-36	-800.6443430003724	0.0	0.0008771443659824975	0.0	0.9999999841481242	-8.859717021205862e-43	-0.0001780559279372141	-1.0857736140619084e-38	-1.2442049529401136e-36	-0.02040370648399033	1.2001319074321766e-40	0.0	-0.02019884328810568	0.0	800.6443430003724	83.20655003871832	-1.8068695151134612e-36	-0.006435046615880615	-8.814094340347605	1.9140233541317402e-37	-0.054584683613938506	0.8814263357095302
3.69	83.16249516236294	0.0	-0.03601684068222824	333.88002024128355	-1.0290472613779798e-36	-800.6443759944149	0.0	0.0010146509300580306	0.0	0.9999999845500789	-8.613033569599006e-43	-0.0001757839677004881	-1.085773614260395e-38	-1.2442049523947843e-36	-0.020143359014343835	1.2001319055025815e-40	0.0	-0.019908167208248936	0.0	800.6443759944149	83.16250268531314	-1.805913005311144e-36	-0.0067795721810867205	-8.804841545962699	1.9120144770238535e-37	-0.07420107473406046	0.8805154197911726
3.695	83.11849412805333	0.0	-0.035752135900903946	334.2957227325679	-1.0380744372197048e-36	-800.6444108724615	0.0	0.0013958866107526304	0.0	0.9999999850900627	-8.27653269503058e-43	-0.00017268478694125558	-1.085773614522114e-38	-1.244204951650899e-36	-0.019788219054048716	1.200131902910373e-40	0.0	-0.019508275150874204	0.0	800.6444108724615	83.11850151858698	-1.8049574986389314e-36	-0.007045535297907352	-8.795722948504666	1.910032465503118e-37	0.014837297088733341	0.8795735462838599
3.7	83.07453873897109	0.0	-0.03490280478210825	334.7112053294071	-1.047096837951528e-36	-800.6444448831534	0.0	0.0011269974732638782	0.0	0.999999985637042	-7.929400146243358e-43	-0.0001694876882180764	-1.0857736147811734e-38	-1.2442049508835117e-36	-0.019421858521637084	1.2001319002845826e-40	0.0	-0.019185414157174563	0.0	800.6444448831534	83.07454579737788	-1.804002980029255e-36	-0.006742580140039802	-8.786334337653065	1.90799372581819e-37	0.012855972745593016	0.8786343742937478
3.705	83.03063134030768	0.0	-0.034744204448460804	335.12646827013475	-1.0561144687463854e-36	-800.6444792598803	0.0	0.0010328292730751739	0.0	0.9999999860730486	-7.647932356237389e-43	-0.00016689536342617971	-1.0857736149830806e-38	-1.2442049502612862e-36	-0.0191247999780297	1.2001318981915198e-40	0.0	-0.018889530365650702	0.0	800.6444792598803	83.03063831214655	-1.8030495076513668e-36	-0.007029348112829274	-8.776784792507897	1.905922129257025e-37	-0.08894101063339063	0.8777235430212088
3.71	82.98677019959588	0.0	-0.03463192317412065	335.5415117896766	-1.0651273347029765e-36	-800.6445153528516	0.0	0.001393438561250355	0.0	0.9999999865611409	-7.327561239573797e-43	-0.00016394473810404583	-1.0857736152040157e-38	-1.2442049495530596e-36	-0.018786683217638062	1.200131895848419e-40	0.0	-0.018490339622798568	0.0	800.6445153528516	82.98677709404885	-1.802097039765536e-36	-0.007421433065197679	-8.767911529964561	1.9039935041763972e-37	-0.005192641393088077	0.8767913067589694
3.715	82.9429524305623	0.0	-0.03372463731477083	335.9563361119497	-1.0741354406856912e-36	-800.6445522445395	0.0	0.0014121102092208913	0.0	0.9999999871585777	-6.927392258519118e-43	-0.00016025917262202943	-1.085773615466703e-38	-1.2442049486684279e-36	-0.01836434851761165	1.2001318929804048e-40	0.0	-0.018085799846820103	0.0	800.6445522445395	82.94295897950522	-1.801145509304719e-36	-0.007139898061166928	-8.759142562158218	1.9020886525807497e-37	0.02482809381583469	0.8759177750134663
3.72	82.89917943572615	0.0	-0.03336685651506008	336.3709414552871	-1.0831387914393673e-36	-800.6445882006276	0.0	0.0011455991797749046	0.0	0.9999999876555977	-6.587332274175625e-43	-0.00015712721237558485	-1.0857736156783413e-38	-1.244204947916678e-36	-0.01800545230564427	1.2001318905944474e-40	0.0	-0.017757609856746348	0.0	800.6445882006276	82.89918582804506	-1.8001949542811305e-36	-0.007315421243155747	-8.750190567592142	1.900146582220058e-37	-0.06576267139022964	0.8750437686089015
3.725	82.85545043803435	0.0	-0.0332082296106419	336.78532804344246	-1.0921373918178792e-36	-800.6446256227669	0.0	0.0013455535576533623	0.0	0.9999999881255202	-6.259457583874248e-43	-0.00015410747896553258	-1.0857736158723104e-38	-1.2442049471918639e-36	-0.01765941634215288	1.2001318883385707e-40	0.0	-0.017372137156934597	0.0	800.6446256227669	82.85545673784583	-1.7992453556916075e-36	-0.007670939165443906	-8.741522184508218	1.898263795245144e-37	-0.046348345495459145	0.8741645055215838
3.73	82.81176453627963	0.0	-0.032605127412000716	337.1994960947767	-1.1011312465626349e-36	-800.6446647068582	0.0	0.0015857030949718548	0.0	0.999999988716003	-5.8381245609801184e-43	-0.0001502269921696605	-1.0857736161070329e-38	-1.244204946260445e-36	-0.017214745305284985	1.200131885503941e-40	0.0	-0.016917866682421	0.0	800.6446647068582	82.81177059482918	-1.7982966903539646e-36	-0.007724001615999725	-8.73288620880146	1.896387140809362e-37	0.01626579432854361	0.8732901357048521
3.735	82.76812265404214	0.0	-0.03188675325758288	337.61344582256635	-1.110120360310963e-36	-800.6447026226373	0.0	0.0013186685377345768	0.0	0.9999999892618258	-5.438738923031284e-43	-0.00014654864129072685	-1.0857736163144345e-38	-1.2442049453775429e-36	-0.016793237338781873	1.2001318828837033e-40	0.0	-0.016540095973476603	0.0	800.6447026226373	82.7681284448487	-1.7973489806588636e-36	-0.007627640314191197	-8.723825668551893	1.8944203471998133e-37	-0.019325075354279356	0.8723847073041935
3.74	82.7245269828429	0.0	-0.03165178597756289	338.0271774561222	-1.1191047380379914e-36	-800.6447415025417	0.0	0.001373884663416782	0.0	0.9999999897344017	-5.084669542054477e-43	-0.0001432876541760068	-1.0857736164860178e-38	-1.2442049445948206e-36	-0.01641955573741777	1.2001318806150884e-40	0.0	-0.016146507009718935	0.0	800.6447415025417	82.72453265659611	-1.7964022768640356e-36	-0.007944978092846696	-8.714532719895137	1.8924036743413737e-37	-0.08305156238677079	0.8714928461446935
3.745	82.6809772554792	0.0	-0.031317407173712584	338.44069122553435	-1.1280843847383979e-36	-800.6447822225163	0.0	0.0017942074989849258	0.0	0.9999999902951032	-4.653827610803343e-43	-0.00013931959011210827	-1.0857736166792323e-38	-1.2442049436423814e-36	-0.015964849085480102	1.2001318779234258e-40	0.0	-0.01563250442340614	0.0	800.6447822225163	82.68098277209441	-1.795456569855373e-36	-0.008279246458962917	-8.705565577722751	1.890454489816535e-37	0.008957939191530194	0.8705570186536079
3.75	82.63747200791245	0.0	-0.030288802477322713	338.85398735506317	-1.1370593052872055e-36	-800.6448223461075	0.0	0.0015243267231917538	0.0	0.9999999908688402	-4.199879866431408e-43	-0.00013513872097802195	-1.085773616864313e-38	-1.2442049426388628e-36	-0.015485756768809297	1.200131875169186e-40	0.0	-0.01519581698421667	0.0	800.6448223461075	82.63747717598858	-1.7945118259720877e-36	-0.007953757030967238	-8.696435377385352	1.888471649224455e-37	0.01728735266432593	0.8696452559843103
3.755	82.59401351080807	0.0	-0.029961569277781177	339.2670660753442	-1.1460295046909133e-36	-800.6448627610189	0.0	0.0014579826282029977	0.0	0.9999999913507712	-3.8074228412739614e-43	-0.00013152418277644282	-1.0857736170090262e-38	-1.24420494177128e-36	-0.015071561197448815	1.2001318728556615e-40	0.0	-0.014778135728219555	0.0	800.6448627610189	82.59401853465177	-1.7935681004621808e-36	-0.00823534817064735	-8.68714700205923	1.8864568871428794e-37	-0.09024905120262958	0.8687615779178408
3.76	82.55059999781044	0.0	-0.02967315455663419	339.6799276154088	-1.154994987920068e-36	-800.6449048905197	0.0	0.0018706351951573584	0.0	0.9999999918783459	-3.3650409839868874e-43	-0.0001274498357245558	-1.0857736171551412e-38	-1.2442049407933298e-36	-0.014604675412844948	1.2001318703230238e-40	0.0	-0.014242238219763816	0.0	800.6449048905197	82.55060487969806	-1.7926253516138433e-36	-0.008631032946181718	-8.678526409751916	1.8845829237818613e-37	0.003372921030402448	0.8678527065197053
3.765	82.50722869786196	0.0	-0.028550420879482417	340.0925721925509	-1.1639557596965621e-36	-800.6449471817202	0.0	0.0017358495593052254	0.0	0.999999992457079	-2.8628942647470427e-43	-0.00012282505292140312	-1.0857736172991558e-38	-1.2442049396832618e-36	-0.014074714337124337	1.2001318675447985e-40	0.0	-0.01374495395167465	0.0	800.6449471817202	82.50723322189383	-1.7916835163122765e-36	-0.008282510708520983	-8.669889003191383	1.882706832580237e-37	0.02426345178321524	0.8669922954833642
3.77	82.46390190292038	0.0	-0.02812780129429454	340.50500002305574	-1.1729118247181248e-36	-800.6449891590448	0.0	0.001575820554675119	0.0	0.9999999929426754	-2.4264867263874626e-43	-0.00011880572948050073	-1.0857736174054546e-38	-1.2442049387185177e-36	-0.013614133794439185	1.2001318652136804e-40	0.0	-0.013293514616410408	0.0	800.6449891590448	82.46390625851014	-1.790742650315545e-36	-0.008533432595780443	-8.660986078780772	1.880775791806866e-37	-0.08417145609538401	0.86613950776336
3.775	82.4206187025831	0.0	-0.027788089467805928	340.9172113278179	-1.1818631877775967e-36	-800.6450327269483	0.0	0.0019262813036467336	0.0	0.9999999934425785	-1.961231168512839e-43	-0.00011452071511628098	-1.0857736174994614e-38	-1.2442049376900026e-36	-0.013123107314651803	1.2001318628138806e-40	0.0	-0.012741675672140827	0.0	800.6450327269483	82.42062290533987	-1.7898027310712764e-36	-0.008910352474430065	-8.65250532010696	1.8789323963312512e-37	-0.00021021023726185487	0.865250532266046
3.78	82.37737765034328	0.0	-0.026650347388488035	341.3292063154553	-1.1908098534072551e-36	-800.6450769105834	0.0	0.0019326494357266792	0.0	0.999999994000814	-1.4201952455344945e-43	-0.00010953776184830066	-1.0857736175837082e-38	-1.2442049364939653e-36	-0.01255210292753556	1.2001318601340545e-40	0.0	-0.012188012392413433	0.0	800.6450769105834	82.3773815119932	-1.7888637244366847e-36	-0.008603479707731326	-8.643787853957246	1.8770388995445444e-37	0.021647868887277218	0.8643814961835207
3.785	82.33418189351404	0.0	-0.026138098542800456	341.7409852143766	-1.1997518265697955e-36	-800.6451204289847	0.0	0.0017122536890078924	0.0	0.9999999944763175	-9.391315312709064e-44	-0.00010510715399699777	-1.0857736176359741e-38	-1.2442049354305028e-36	-0.012044392663496809	1.2001318578513864e-40	0.0	-0.011697487843234145	0.0	800.6451204289847	82.33418556896478	-1.78792570365938e-36	-0.008830274989892334	-8.634635680783969	1.875053551875e-37	-0.07812902870307463	0.8634989142146834
3.79	82.29103132724572	0.0	-0.025737388691107824	342.1525482465433	-1.2086891120806875e-36	-800.6451654386909	0.0	0.002025900688576869	0.0	0.9999999949467696	-4.4233345132476763e-44	-0.0001005316322745849	-1.0857736176675782e-38	-1.2442049343322572e-36	-0.011520076493195449	1.2001318555929664e-40	0.0	-0.011117110047393634	0.0	800.6451654386909	82.29103483874692	-1.786988664417641e-36	-0.00919168485271523	-8.62580176289735	1.8731336821643995e-37	-0.004477494153435196	0.8625802924989472
3.795	82.2479244690495	0.0	-0.024589498521009313	342.5638956352111	-1.2176217147894694e-36	-800.6452112568971	0.0	0.002086241586258206	0.0	0.9999999954678355	1.357417074737176e-44	-9.520754678733967e-05	-1.0857736176757395e-38	-1.2442049330543369e-36	-0.010909981233900787	1.2001318530915756e-40	0.0	-0.010519445857707269	0.0	800.6452112568971	82.24792766021663	-1.7860525722301765e-36	-0.008928251912116828	-8.616869558216441	1.8711934907947176e-37	0.020392620936243028	0.861689368869698
3.8	82.20486335639696	0.0	-0.023978293435271407	342.9750275934673	-1.2265496393268437e-36	-800.6452562567727	0.0	0.0018595519078752885	0.0	0.9999999959156374	6.59708148339612e-44	-9.03818038324244e-05	-1.0857736176565446e-38	-1.244204931896034e-36	-0.010356991822856067	1.2001318509418862e-40	0.0	-0.009986723477173498	0.0	800.6452562567727	82.20486634778187	-1.7851174750960442e-36	-0.009118645436321168	-8.60772318120695	1.8692092451530035e-37	-0.07190650436802877	0.8608023519348559
3.805	82.1618469963696	0.0	-0.023511538999114137	343.38594436544133	-1.2354728909894962e-36	-800.6453026797897	0.0	0.002163105670531596	0.0	0.9999999963489286	1.19481896334097e-43	-8.545342093343745e-05	-1.0857736176108451e-38	-1.2442049307130938e-36	-0.009792240740800023	1.2001318488618586e-40	0.0	-0.009367039349362116	0.0	800.6453026797897	82.16184981473738	-1.7841833500313747e-36	-0.009469516914914418	-8.599075747719336	1.8673299934273784e-37	-0.004080153623454118	0.859907671571015
3.81	82.11887295157116	0.0	-0.02230922449246331	343.79664616169936	-1.2443914743512778e-36	-800.6453498982638	0.0	0.002232142474673593	0.0	0.9999999968181709	1.8115365290776052e-43	-7.977343798256285e-05	-1.0857736175254647e-38	-1.2442049293497499e-36	-0.009141362636995226	1.2001318466092472e-40	0.0	-0.008727577634008693	0.0	800.6453498982638	82.11887546578534	-1.7832501422981464e-36	-0.009207414613014225	-8.590484330175485	1.865463812319451e-37	0.020469223081561832	0.859050871695525
3.815	82.07594283492892	0.0	-0.02163590913382706	344.2071331948123	-1.253305394031686e-36	-800.6453962899242	0.0	0.0020126196593058046	0.0	0.9999999972190449	2.3755154974890627e-43	-7.457917872211415e-05	-1.085773617416722e-38	-1.2442049281029902e-36	-0.008546144368580992	1.2001318446848417e-40	0.0	-0.008151004572792293	0.0	800.6453962899242	82.07594514910753	-1.782317889807557e-36	-0.009393596108254033	-8.581695173428965	1.863557127814598e-37	-0.07130794296759665	0.8581991428123443
3.82	82.03305594690299	0.0	-0.021100725223694532	344.6174056849554	-1.262214654807262e-36	-800.6454440744244	0.0	0.002332985866921451	0.0	0.9999999976024105	2.9543326509845987e-43	-6.924825943332337e-05	-1.0857736172746562e-38	-1.24420492682343e-36	-0.00793526601465543	1.2001318428444824e-40	0.0	-0.00748265335360095	0.0	800.6454440744244	82.03305808255361	-1.781386576179418e-36	-0.009739432367931802	-8.573288204932084	1.861730016025789e-37	0.0002501657181754567	0.8573288208581961
3.825	81.99021061017118	0.0	-0.019810719228266944	345.027463843272	-1.2711192612647638e-36	-800.6454924587395	0.0	0.002362350526794727	0.0	0.9999999980029611	3.611053858385354e-43	-6.319984201398893e-05	-1.0857736170761055e-38	-1.2442049253716512e-36	-0.007242168431411944	1.2001318409216283e-40	0.0	-0.006805889779021727	0.0	800.6454924587395	81.99021245928927	-1.7804561638484357e-36	-0.009447182376199232	-8.564730024520392	1.859871114614401e-37	0.02183506915910801	0.8564757857824485
3.83	81.94740958159869	0.0	-0.019101502254430226	345.4373078841544	-1.2800192180625369e-36	-800.645540134405	0.0	0.0021728265949608706	0.0	0.999999998337659	4.212414730444808e-43	-5.766129455288416e-05	-1.0857736168594525e-38	-1.244204924042253e-36	-0.006607497641943826	1.2001318393149034e-40	0.0	-0.00618342081149653	0.0	800.645540134405	81.94741123953521	-1.7795267147213302e-36	-0.009651114699666341	-8.55579501057496	1.857932849755314e-37	-0.07439294158389764	0.8556118429097209
3.835	81.90465272842283	0.0	-0.018494620345952804	345.846938029348	-1.288914530011489e-36	-800.6455892078363	0.0	0.0025374306136891826	0.0	0.9999999986546093	4.840772348822509e-43	-5.187410643418555e-05	-1.0857736165974896e-38	-1.244204922653177e-36	-0.005944334732048899	1.200131837793373e-40	0.0	-0.005456500486638127	0.0	800.6455892078363	81.90465420643162	-1.778598224830539e-36	-0.009997158911676825	-8.547166441411965	1.8560574714589404e-37	0.0040817265081784645	0.8547167416032645
3.84	81.86193854211834	0.0	-0.017119129754777106	346.256354495367	-1.2978052018157924e-36	-800.6456385040312	0.0	0.0024592801651752033	0.0	0.9999999989666053	5.536818387026076e-43	-4.5463506408154995e-05	-1.0857736162648566e-38	-1.2442049211144648e-36	-0.005209734079901569	1.2001318362956273e-40	0.0	-0.004751968616114251	0.0	800.6456385040312	81.86193976032689	-1.7776706611347744e-36	-0.009675668156718692	-8.538385787928132	1.854150287738714e-37	0.024293200472689607	0.8538420347059654
3.845	81.81926957288681	0.0	-0.01636567910827597	346.6655575027461	-1.3066912382658708e-36	-800.6456873452398	0.0	0.0023486872542403457	0.0	0.9999999992166976	6.175400392022455e-43	-3.958215144657131e-05	-1.0857736159204385e-38	-1.2442049197027835e-36	-0.004535780445057089	1.2001318350950538e-40	0.0	-0.004079119280793544	0.0	800.6456873452398	81.81927061210746	-1.7767440799847445e-36	-0.009888513623108745	-8.529352935882173	1.8521908873749391e-37	-0.07721026059847225	0.8529702393939869
3.85	81.77664476992943	0.0	-0.01568038854019452	347.0745472751391	-1.3155726442145248e-36	-800.6457376205241	0.0	0.002782615417459883	0.0	0.9999999994467405	6.861138104155235e-43	-3.3266491333360644e-05	-1.0857736155087657e-38	-1.2442049181868605e-36	-0.0038120591059235672	1.200131833990725e-40	0.0	-0.003281958683651119	0.0	800.6457376205241	81.77664563221761	-1.7758184576814076e-36	-0.010239544419483082	-8.520823847775699	1.8503369523909762e-37	0.008877510372662378	0.8520828472338444
3.855	81.73406171840583	0.0	-0.014213681629928499	347.48332402292675	-1.3244494242339916e-36	-800.6457875490414	0.0	0.002552592515005631	0.0	0.9999999996479351	7.59169251876022e-43	-2.6538068354546984e-05	-1.0857736150225421e-38	-1.2442049165718637e-36	-0.003041038626647626	1.200131833024883e-40	0.0	-0.0025506947940185844	0.0	800.6457875490414	81.73406235771034	-1.7748937425278522e-36	-0.009875553377883614	-8.5122576656327	1.8484764389276127e-37	0.024467873717314275	0.8512292831133508
3.86	81.69152267882711	0.0	-0.013418816444098697	347.8918879687899	-1.3333215831592687e-36	-800.6458374325204	0.0	0.0025501438721095334	0.0	0.9999999997943343	8.270664391870262e-43	-2.028472176662424e-05	-1.0857736145265777e-38	-1.2442049150708966e-36	-0.002324457891809017	1.2001318323220888e-40	0.0	-0.0018201323889034554	0.0	800.6458374325204	81.69152315601644	-1.773969983193982e-36	-0.010104636817277385	-8.503565232191809	1.8465905375636234e-37	-0.05676890249616109	0.85037547216763
3.865	81.64902595806369	0.0	-0.012462871126209247	348.3002393254458	-1.3421891256065379e-36	-800.6458887364461	0.0	0.0029031112995397653	0.0	0.9999999999105061	9.019949980109323e-43	-1.3383784238675108e-05	-1.0857736139299699e-38	-1.2442049134144901e-36	-0.001533668701625483	1.2001318317644016e-40	0.0	-0.000988452264301614	0.0	800.6458887364461	81.6490262624361	-1.773047142718904e-36	-0.010277325228502023	-8.495258622363622	1.8447852219318684e-37	0.014655918210034995	0.8495271264461309
3.87	81.60657064863241	0.0	-0.011092192239604929	348.7083782993956	-1.3510520560650988e-36	-800.6459390615207	0.0	0.002658469807005042	0.0	0.9999999999795874	9.778202199639259e-43	-6.400263825308645e-06	-1.0857736132735834e-38	-1.2442049117382604e-36	-0.0007334162099259399	1.2001318314327752e-40	0.0	-0.000226856764779877	0.0	800.6459390615207	81.60657078395512	-1.7721252024352015e-36	-0.010047585074660699	-8.48674872896614	1.8429375845459054e-37	-0.0009150231396679032	0.8486748778294061
3.875	81.56415890449667	0.0	-0.010251201963260927	349.11630510565163	-1.3599103792009943e-36	-800.6459898636396	0.0	0.002789666067378863	0.0	1.0000000000000269	1.0504603643937637e-42	2.899102186879465e-07	-1.0857736125951058e-38	-1.2442049101324432e-36	3.3221263937070874e-05	1.2001318313346544e-40	0.0	0.0005723236947784569	0.0	800.6459898636396	81.56415889856157	-1.7712042077892015e-36	-0.010298494529552232	-8.478155491709316	1.8410720119144136e-37	-0.02428078181733248	0.8478190260778918
3.88	81.52178931734545	0.0	-0.008955445516458273	349.524019957532	-1.3687640996451992e-36	-800.6460417754035	0.0	0.003008144231828635	0.0	0.9999999999700339	1.1314638190803702e-42	7.750347069989712e-06	-1.0857736117811987e-38	-1.2442049083417434e-36	0.0008881243537529398	1.200131831478634e-40	0.0	0.0014340935380304763	0.0	800.6460417754035	81.52178916875826	-1.770284129263637e-36	-0.010219089837298979	-8.469653659028847	1.8392248471839485e-37	0.02114989785300496	0.8469680066099307
3.885	81.47946293919662	0.0	-0.007750819294569549	349.93152306490754	-1.3776132219600609e-36	-800.6460924588325	0.0	0.0027978630274211333	0.0	0.9999999998878125	1.2099996223808616e-42	1.4983512664859885e-05	-1.0857736109343866e-38	-1.2442049066055995e-36	0.0017169840760189348	1.2001318318733346e-40	0.0	0.0022356222536651076	0.0	800.6460924588325	81.47946267036372	-1.7693649894178758e-36	-0.01019251642056831	-8.460877769924007	1.8373203098591584e-37	-0.03558715658483535	0.8460952610865283
3.89	81.43718056273651	0.0	-0.0068493498623614394	350.33881465386486	-1.3864577510506676e-36	-800.6461440547292	0.0	0.0030836401863914356	0.0	0.999999999753156	1.2885938853990171e-42	2.2222062418260063e-05	-1.0857736100300774e-38	-1.2442049048681546e-36	0.0025464607774949135	1.2001318325197588e-40	0.0	0.0031190200947509264	0.0	800.6461440547292	81.43718017791404	-1.7684468045477e-36	-0.01046875407396962	-8.452299268264579	1.8354565807829392e-37	0.005800839955934252	0.8452301258831829
3.895	81.39494010297007	0.0	-0.005248063207539947	350.7458949316988	-1.3952976914197031e-36	-800.6461960025281	0.0	0.0031188485177973614	0.0	0.9999999995447357	1.3749668729930355e-42	3.017703450525397e-05	-1.0857736089706461e-38	-1.2442049029587609e-36	0.0034580334312684785	1.200131833520278e-40	0.0	0.004012504379803033	0.0	800.6461960025281	81.39493963800327	-1.7675295319208615e-36	-0.010160579027827247	-8.443743463903768	1.8335981940022062e-37	0.027449344129363742	0.8443788080637195
3.9	81.35274341202047	0.0	-0.004181062729480712	351.1527641199917	-1.40413304788143e-36	-800.646247107485	0.0	0.0029924491478329636	0.0	0.9999999992902099	1.456421123815902e-42	3.767898980627436e-05	-1.0857736079085997e-38	-1.2442049011580926e-36	0.004317694185453858	1.2001318347421376e-40	0.0	0.004869777912694775	0.0	800.646247107485	81.35274286597054	-1.766613208772219e-36	-0.010311641092726526	-8.43503412206251	1.831708762969494e-37	-0.06056952144226129	0.843525158529884
3.905	81.3105894097541	0.0	-0.0031634094662501286	351.55942243137696	-1.4129638250490956e-36	-800.6462993702854	0.0	0.003418329819000795	0.0	0.9999999989593614	1.5426682617873677e-42	4.562237112583128e-05	-1.085773606717453e-38	-1.2442048992514749e-36	0.005227938635593179	1.2001318363303816e-40	0.0	0.005849057270757096	0.0	800.6462993702854	81.31058878264987	-1.765697812378043e-36	-0.010582573218385372	-8.426753003906859	1.8299088423527296e-37	0.01756837298867228	0.8426771317449093
3.91	81.26847601080652	0.0	-0.0014540448323185154	351.9658700733809	-1.421790027433279e-36	-800.6463508595768	0.0	0.0031650802089953005	0.0	0.9999999985488657	1.632260650179006e-42	5.387385078786855e-05	-1.0857736054075593e-38	-1.2442048972709021e-36	0.00617348855551152	1.2001318383009775e-40	0.0	0.006755785959736172	0.0	800.6463508595768	81.26847538241064	-1.764783300782967e-36	-0.010210536311898943	-8.418392119975948	1.8280931163911867e-37	0.023323238795011494	0.8418424428546057
3.915	81.22640561543928	0.0	-0.00036953987906373923	352.3721072566345	-1.4306116596063433e-36	-800.6464023318042	0.0	0.003261717028325481	0.0	0.9999999980916903	1.7181014346726973e-42	6.177980687064082e-05	-1.0857736040831698e-38	-1.2442048953732622e-36	0.007079444390145939	1.2001318404956623e-40	0.0	0.007690199058181186	0.0	800.6464023318042	81.22640494975852	-1.763869721060961e-36	-0.010405843160526927	-8.409949918610238	1.8262607041682892e-37	-0.01733691872901613	0.8409967788421272
3.92	81.1843763750785	0.0	0.0011378066942681927	352.7781341912948	-1.4394287261300444e-36	-800.646454697929	0.0	0.003491616618101204	0.0	0.999999997520142	1.8119808474777546e-42	7.042612248487307e-05	-1.0857736025570585e-38	-1.2442048932979215e-36	0.008070239178380909	1.2001318432393926e-40	0.0	0.00869047353765589	0.0	800.646454697929	81.18437573003824	-1.7629570369339125e-36	-0.01029719495755965	-8.401667197997398	1.8244611416970403e-37	0.027089381447487765	0.8401710869846252
3.925	81.14238916381306	0.0	0.0025648439682103724	353.18395107972253	-1.4482412314034785e-36	-800.6465056945779	0.0	0.003296771771557623	0.0	0.9999999968893012	1.9037338810636385e-42	7.887659808859575e-05	-1.0857736009870795e-38	-1.2442048912695881e-36	0.009038592355025223	1.2001318462677584e-40	0.0	0.009634929080296489	0.0	800.6465056945779	81.14238855878726	-1.7620452658106173e-36	-0.010235627259930066	-8.39313095531935	1.8226086214317716e-37	-0.02853601068833299	0.8393179465318605
3.93	81.10044487828418	0.0	0.0037041337338196787	353.5895581440722	-1.4570491802464598e-36	-800.6465574099716	0.0	0.0036247837554285664	0.0	0.9999999961796286	1.9964091257599184e-42	8.741200955576495e-05	-1.0857735993226114e-38	-1.2442048892208684e-36	0.010016678465361698	1.2001318496745565e-40	0.0	0.010673353134464676	0.0	800.6465574099716	81.10044428652046	-1.7611344256304e-36	-0.010474171993973325	-8.38473828975855	1.820785185400884e-37	0.015818098424400222	0.8384753210439823
3.935	81.05854169955148	0.0	0.005546871516116196	353.99495557803243	-1.4658525768669121e-36	-800.6466089457936	0.0	0.003557576125831645	0.0	0.9999999953367397	2.0958926282378545e-42	9.657446314681769e-05	-1.0857735974478289e-38	-1.2442048870216503e-36	0.01106661831131168	1.200131853720858e-40	0.0	0.011692523620997954	0.0	800.6466089457936	81.05854125893542	-1.7602244823614527e-36	-0.010109498810536337	-8.376279370365344	1.8189479590458085e-37	0.03167171141741565	0.8376339247410659
3.94	81.01668198781606	0.0	0.006826052031793108	354.4001436173967	-1.4746514263863864e-36	-800.6466597367777	0.0	0.0035385448402030966	0.0	0.9999999944552347	2.1907120801554786e-42	0.00010530735660989957	-1.0857735955761073e-38	-1.2442048849255227e-36	0.012067334193157062	1.2001318579525506e-40	0.0	0.012706242045805113	0.0	800.6466597367777	81.01668162860909	-1.759315480452999e-36	-0.010237253267873843	-8.367688438482428	1.8170835828759355e-37	-0.02491310683854058	0.8367725525278948
3.945	80.97486427672372	0.0	0.008330593444270515	354.80512246492975	-1.4834457332046304e-36	-800.6467113994081	0.0	0.0038471283231470794	0.0	0.9999999934251673	2.292395881300691e-42	0.00011467245823344522	-1.0857735934768683e-38	-1.2442048826776527e-36	0.013140495795133033	1.2001318628974151e-40	0.0	0.013808363126612957	0.0	800.6467113994081	80.97486405771824	-1.758407392145685e-36	-0.010240580136179152	-8.359369896784823	1.8152760293429661e-37	0.029651028562841717	0.835942248332785
3.95	80.93308798052897	0.0	0.010048557212786186	355.20989232653955	-1.4922355017978546e-36	-800.6467616301496	0.0	0.0036384962839173967	0.0	0.9999999923080801	2.3940198320726753e-42	0.0001240320476322145	-1.0857735912837229e-38	-1.2442048804311021e-36	0.014213025743825826	1.2001318682600243e-40	0.0	0.01485071553082546	0.0	800.6467616301496	80.93308798309191	-1.757500205401515e-36	-0.010028036188803406	-8.350956437846929	1.813449691926481e-37	-0.0030478608280113074	0.8350956994038031
3.955	80.89135413616914	0.0	0.011357872550420544	355.6144534148327	-1.5010207367792612e-36	-800.6468121726804	0.0	0.003909484411531703	0.0	0.9999999911097903	2.4951227121151778e-42	0.00013334364630452115	-1.0857735890074358e-38	-1.244204878196073e-36	0.015280056361550632	1.2001318740124474e-40	0.0	0.015970700315090226	0.0	800.6468121726804	80.89135428860502	-1.7565939381256403e-36	-0.010214823891743339	-8.342705608679069	1.81165752883205e-37	0.018748598837843317	0.8342726675556593
3.96	80.84966036276884	0.0	0.01333072096015613	356.0188059315212	-1.5098014425300055e-36	-800.6468626030361	0.0	0.003922393415230985	0.0	0.9999999897259231	2.6037324421786847e-42	0.00014334662761203554	-1.0857735864572443e-38	-1.2442048757951018e-36	0.0164263135954624	1.200131880655735e-40	0.0	0.017094383256503427	0.0	800.6468626030361	80.84966086197409	-1.7556885464442005e-36	-0.009848331662706659	-8.334499966975056	1.8098752678574008e-37	0.036276243531925344	0.833457891349959
3.965	80.80800868148279	0.0	0.014790937609808192	356.42295008989174	-1.5185776236837227e-36	-800.6469119639835	0.0	0.0038723111679644516	0.0	0.9999999883035542	2.7079782790376815e-42	0.00015294769335322554	-1.0857735839073417e-38	-1.2442048734905883e-36	0.01752651469913575	1.2001318874838606e-40	0.0	0.018203718690932114	0.0	800.6469119639835	80.80800942529635	-1.75478406566016e-36	-0.009927859857675768	-8.326161133903062	1.808065575111713e-37	-0.017396089651521385	0.8326179306960251
3.97	80.76639800849871	0.0	0.016443863256991296	356.8268860926457	-1.5273492846385134e-36	-800.6469619980302	0.0	0.004188465469513608	0.0	0.9999999866924157	2.818663880240896e-42	0.00016314186289312962	-1.0857735810903622e-38	-1.2442048710437263e-36	0.01869468049428477	1.2001318952181686e-40	0.0	0.019403625661129166	0.0	800.6469619980302	80.76639907464106	-1.753880477284816e-36	-0.00990889852817836	-8.317997316840813	1.80629165349505e-37	0.03560497065529331	0.8318073519566074
3.975	80.72482815362741	0.0	0.018333148586796175	357.23061414606167	-1.5361164298785e-36	-800.647010466359	0.0	0.0039857944283003145	0.0	0.9999999849733877	2.9295982097554015e-42	0.00017335894037824378	-1.0857735781538394e-38	-1.2442048685913598e-36	0.019865471348571757	1.2001319034704108e-40	0.0	0.020545471654871	0.0	800.647010466359	80.72482965797501	-1.752977778301233e-36	-0.00965559343642566	-8.309646559051961	1.8044788920561552e-37	0.004810526502410073	0.8309647951479614
3.98	80.68330072541187	0.0	0.019814025364504752	357.63413445914864	-1.5448790639388863e-36	-800.6470590555016	0.0	0.004276031641005224	0.0	0.9999999831528333	3.0403633111392205e-42	0.00018356043192330676	-1.0857735751087142e-38	-1.2442048661427303e-36	0.021034476187733048	1.200131912210034e-40	0.0	0.021770464485340996	0.0	800.6470590555016	80.68330256241384	-1.752075997493755e-36	-0.009806498532023401	-8.30135472839994	1.8026778216979772e-37	0.02677830552774525	0.8301397918686647
3.985	80.64181367890868	0.0	0.021958590848339878	358.03744723153056	-1.5536371911557743e-36	-800.6471072050957	0.0	0.0042444865502364445	0.0	0.9999999811015373	3.1582142855612416e-42	0.00019441453403078055	-1.0857735717447076e-38	-1.2442048635374761e-36	0.022278264692275413	1.2001319220573183e-40	0.0	0.02298642031298395	0.0	800.6471072050957	80.64181612102176	-1.7511751006840088e-36	-0.009397291478580703	-8.293056420104724	1.8008754974710921e-37	0.04145381953784376	0.8293160025357914
3.99	80.60036916753606	0.0	0.023579447425506293	358.4405526845166	-1.5623908163364066e-36	-800.647154241402	0.0	0.004251177497125797	0.0	0.9999999790098243	3.2719681425319956e-42	0.00020489129068048122	-1.0857735683763372e-38	-1.244204861022773e-36	0.023478812594235635	1.2001319320986495e-40	0.0	0.024204292955715436	0.0	800.647154241402	80.60037206271912	-1.75027512327721e-36	-0.009449181197083427	-8.284684742774573	1.7990583499643913e-37	0.0031782090185574164	0.828468535239416
3.995	80.55896553800075	0.0	0.025521295946365128	358.8434510210161	-1.5711399438839574e-36	-800.6472016392831	0.0	0.004516024183311075	0.0	0.9999999766665403	3.3928602235143685e-42	0.00021602547943132058	-1.0857735646659632e-38	-1.2442048583502746e-36	0.024754696669948728	1.2001319433476502e-40	0.0	0.02549803858512913	0.0	800.6472016392831	80.55896904562346	-1.7493760375536987e-36	-0.009284283929176497	-8.27650758772786	1.797281774792624e-37	0.044584873567375935	0.8276627674401444
4.0	80.51760287070944	0.0	0.02747173744007397	359.24614244116816	-1.5798845781490956e-36	-800.6472472293489	0.0	0.004344353041891564	0.0	0.9999999742216206	3.5126844553786185e-42	0.00022706131904203902	-1.0857735608555366e-38	-1.2442048557013874e-36	0.026019310767144636	1.2001319550845484e-40	0.0	0.026742604055205167	0.0	800.6472472293489	80.51760704379383	-1.7484778425510616e-36	-0.009093130677903192	-8.268238287888135	1.7954870715016657e-37	-0.003835303927393503	0.8268239177409875
4.005	80.47628168226095	0.0	0.029127597620719772	359.64862715780174	-1.588624723749423e-36	-800.6472929587087	0.0	0.004728556538820777	0.0	0.999999971611659	3.6344803265185085e-42	0.00023827874710043772	-1.0857735568468936e-38	-1.2442048530089134e-36	0.02730473337142052	1.2001319676137384e-40	0.0	0.02809723571952226	0.0	800.6472929587087	80.4762864248831	-1.7475805455235767e-36	-0.009223979739181373	-8.260165522972803	1.7937331324671861e-37	0.039130200065607204	0.8260258206585661
4.01	80.43499971050811	0.0	0.03147446186912715	360.0509053555414	-1.597360384696831e-36	-800.6473375461904	0.0	0.004548157511226885	0.0	0.9999999687599911	3.761313876541456e-42	0.00024996014656849505	-1.0857735525272203e-38	-1.2442048502050963e-36	0.028643323187966134	1.2001319813032248e-40	0.0	0.029400186869292383	0.0	800.6473375461904	80.43500539406955	-1.746684109465245e-36	-0.008736629441478827	-8.252069681970653	1.7919749126961634e-37	0.047231500688708065	0.8252204847842578
4.015	80.3937593846569	0.0	0.03324533419279901	360.4529772664295	-1.6060915660296674e-36	-800.6473812614629	0.0	0.0046926909353206874	0.0	0.9999999658422696	3.885224938118481e-42	0.0002613723841834037	-1.085773548164017e-38	-1.2442048474658503e-36	0.029951069330983338	1.2001319953098365e-40	0.0	0.030744543795058255	0.0	800.6473812614629	80.39376577920758	-1.7457885716619706e-36	-0.008780086041718009	-8.243930406707278	1.7902077264593769e-37	0.03310873343714705	0.8243996891002727
4.02	80.35255861930963	0.0	0.035578081877168745	360.8548430670648	-1.6148182715815714e-36	-800.6474247203464	0.0	0.004853009811648029	0.0	0.9999999625970251	4.016977691173542e-42	0.0002735068434225878	-1.0857735433695592e-38	-1.2442048445532824e-36	0.03134157598287644	1.2001320108886973e-40	0.0	0.03213482869577331	0.0	800.6474247203464	80.35256605930793	-1.74489390113439e-36	-0.008375871139518763	-8.235834948048176	1.7884493662085092e-37	0.05187869593623274	0.823599834207024
4.025	80.31139924302988	0.0	0.03750983696545222	361.25650298397676	-1.6235405062749475e-36	-800.6474663837745	0.0	0.004747015431722484	0.0	0.9999999592867271	4.14560503998053e-42	0.0002853534522163749	-1.0857735385346147e-38	-1.2442048417097783e-36	0.032699097406736065	1.2001320267798818e-40	0.0	0.033494748443379165	0.0	800.6474663837745	80.31140757119256	-1.7440001252354943e-36	-0.008324437329729685	-8.22761026770209	1.7866642681444015e-37	0.007475987677112653	0.8227613664215684
4.03	80.2702804818599	0.0	0.03959235071317713	361.65795721037034	-1.632258274301416e-36	-800.6475081242552	0.0	0.005066964565891349	0.0	0.9999999556807347	4.279902874541437e-42	0.0002977223140837002	-1.0857735333239165e-38	-1.2442048387409251e-36	0.034116464631735295	1.2001320440905518e-40	0.0	0.03494632686621872	0.0	800.6475081242552	80.27028982683231	-1.743107234250687e-36	-0.0082041615017462	-8.219513835920841	1.7849050998920946e-37	0.05473244840065823	0.8219696061278792
4.035	80.22920197310914	0.0	0.041910834642724396	362.05920594765723	-1.6409715800391328e-36	-800.647547838699	0.0	0.004884416977443252	0.0	0.9999999519042411	4.414813907299663e-42	0.0003101476516627905	-1.0857735279221786e-38	-1.2442048357585127e-36	0.0355403035021235	1.2001320622197202e-40	0.0	0.03634560925716644	0.0	800.647547838699	80.22921253546473	-1.7422152222012116e-36	-0.007854968200164262	-8.211309176159176	1.7831240614006003e-37	0.024077363117489675	0.8211344476143391
4.04	80.18816500694575	0.0	0.04384413702181256	362.46024940347814	-1.649680427993682e-36	-800.6475871676619	0.0	0.005235714653066144	0.0	0.9999999479429357	4.550748819572526e-42	0.00032266728879901563	-1.0857735223099004e-38	-1.2442048327534647e-36	0.03697494831182865	1.2001320812360863e-40	0.0	0.037845531018943904	0.0	800.6475871676619	80.1881766036405	-1.741324107459482e-36	-0.007904065007034876	-8.203214409325218	1.781365692170301e-37	0.05044683922595351	0.8203369522881971
4.045	80.14716721865699	0.0	0.04644311999200804	362.86108777237024	-1.6583848223915672e-36	-800.647625136517	0.0	0.005096143748517161	0.0	0.9999999436514914	4.692295984821314e-42	0.00033570381575982527	-1.0857735162850318e-38	-1.2442048296243726e-36	0.038468824341505316	1.2001321018372684e-40	0.0	0.039305468661853964	0.0	800.647625136517	80.14718033622756	-1.7404338552742594e-36	-0.0073683071590884735	-8.195146803977357	1.7796135956901437e-37	0.058939494106805254	0.8195358747651373
4.05	80.10621075442948	0.0	0.04849513246079336	363.2617212690829	-1.6670847678960153e-36	-800.647661822033	0.0	0.005249207673657285	0.0	0.9999999392765515	4.831150803764439e-42	0.0003484923770133356	-1.0857735101954752e-38	-1.2442048265547718e-36	0.03993428559900908	1.200132122839302e-40	0.0	0.0408092558892952	0.0	800.647661822033	80.10622509749453	-1.7395444929880923e-36	-0.007337683526697099	-8.187093619007632	1.7778650285902734e-37	0.04843483877637481	0.8187236887986251
4.055	80.06529327822773	0.0	0.05110541746951717	363.66215008340777	-1.675780268627263e-36	-800.6476977849823	0.0	0.005371998429576995	0.0	0.999999934481583	4.9777059768365365e-42	0.000361990142697616	-1.0857735035755869e-38	-1.2442048233149625e-36	0.041481015709748055	1.2001321458576779e-40	0.0	0.04234822007712354	0.0	800.6476977849823	80.06530929453562	-1.738655988004235e-36	-0.006860286003870359	-8.17912446806209	1.776134175267363e-37	0.06345197473892204	0.8179370588080128
4.06	80.02441641797964	0.0	0.05330519039251854	364.06237442458996	-1.684471329131919e-36	-800.6477317120763	0.0	0.005324226445345693	0.0	0.9999999296105175	5.121192348084119e-42	0.00037520527103382183	-1.085773496902676e-38	-1.2442048201429795e-36	0.04299535797140831	1.2001321692413715e-40	0.0	0.04387349859957479	0.0	800.6477317120763	80.02443388724542	-1.7377683594708273e-36	-0.006745986091872447	-8.171108259485512	1.774394001230677e-37	0.03559306582089189	0.8171185780201482
4.065	79.98357892575017	0.0	0.05578815176017869	364.46239448182604	-1.6931579535150604e-36	-800.647765232801	0.0	0.005595494801172376	0.0	0.9999999243327888	5.271159295243442e-42	0.0003890172619445354	-1.0857734897257104e-38	-1.2442048168277626e-36	0.044578095658681316	1.2001321945772421e-40	0.0	0.04547648978154764	0.0	800.647765232801	79.98359812231847	-1.7368815921877437e-36	-0.0064418461648265745	-8.163178133859361	1.7726712405301468e-37	0.06884331956538062	0.8163468420210149
4.07	79.94278121274478	0.0	0.05827121442407459	364.8622104652799	-1.701840146344745e-36	-800.64779632117	0.0	0.005453577719253859	0.0	0.9999999188885672	5.420472128554484e-42	0.00040276900883510515	-1.08577348237428e-38	-1.2442048135269759e-36	0.04615392989770872	1.200132220712394e-40	0.0	0.047038824714346776	0.0	800.64779632117	79.94280221532647	-1.735995690463545e-36	-0.006125748763600336	-8.155144377451744	1.7709274056855373e-37	0.03383721729384903	0.8155214575617062
4.075	79.90202386648231	0.0	0.06058390878358403	365.26182257083315	-1.7105179118706897e-36	-800.6478268564707	0.0	0.005828538574584017	0.0	0.9999999131217921	5.573262157819233e-42	0.00041684100630563824	-1.0857734746390902e-38	-1.2442048101493223e-36	0.04776646216188715	1.2001322483959673e-40	0.0	0.04870857801961108	0.0	800.6478268564707	79.9020466072156	-1.7351106633891586e-36	-0.006028986551616312	-8.147184220878264	1.769198069563027e-37	0.06966826664777247	0.8147482089351622
4.08	79.86130545635213	0.0	0.06339294302947032	365.6612309960979	-1.719191254387736e-36	-800.6478551238071	0.0	0.005629499673815935	0.0	0.9999999070498116	5.728752168033058e-42	0.00043116167267338173	-1.0857734665464721e-38	-1.2442048067119771e-36	0.049407489794784196	1.200132277544703e-40	0.0	0.05032131088001071	0.0	800.6478551238071	79.86133042906957	-1.7342264935162604e-36	-0.005473342223821289	-8.13916863923249	1.7674576264468117e-37	0.06115734946185702	0.8139398402784992
4.085	79.82062801674458	0.0	0.06571570238304832	366.06043594264344	-1.7278601782707132e-36	-800.6478822390453	0.0	0.005943189754051432	0.0	0.9999999007699236	5.884311079387757e-42	0.0004454886848721364	-1.0857734582274494e-38	-1.2442048032731062e-36	0.051049244616554905	1.2001323076915028e-40	0.0	0.05202390932877342	0.0	800.6478822390453	79.82065488551595	-1.7333432050268463e-36	-0.005402689845460542	-8.131181087756545	1.7657229330256959e-37	0.06873989634100676	0.8131471641421293
4.09	79.77998914777467	0.0	0.06867257586136209	366.4594375979889	-1.7365246875929832e-36	-800.6479075864017	0.0	0.005843981208478911	0.0	0.9999998940275806	6.045939052779063e-42	0.00046037465912802434	-1.0857734493477639e-38	-1.244204799700109e-36	0.05275505178914624	1.2001323400582974e-40	0.0	0.05369808662277144	0.0	800.6479075864017	79.78001856008329	-1.7324607693237286e-36	-0.004784816082065603	-8.123232574590608	1.7639966949140601e-37	0.07737917151330664	0.8123601110165002
4.095	79.73939094418199	0.0	0.07111501714151414	366.8582361840731	-1.7451847871742267e-36	-800.6479310785106	0.0	0.006013752771422109	0.0	0.9999998871644323	6.205264328210348e-42	0.00047504855438266136	-1.0857734403591234e-38	-1.2442047961779751e-36	0.05443655650729509	1.2001323730050627e-40	0.0	0.055420899886959384	0.0	800.6479310785106	79.73942252059081	-1.7315792074470593e-36	-0.004645171198031234	-8.115300312600482	1.76227429507218e-37	0.07125029982717246	0.8115613086447564
4.1	79.69883110699516	0.0	0.07411411649284953	367.25683186407025	-1.753840480556906e-36	-800.6479531656674	0.0	0.006088710580776099	0.0	0.9999998797495196	6.372042994652452e-42	0.0004904089087206674	-1.0857734306994977e-38	-1.2442047924911496e-36	0.05619672366318055	1.2001324086005158e-40	0.0	0.05716518698173498	0.0	800.6479531656674	79.69886546414381	-1.7306984930474478e-36	-0.004055943335185219	-8.107436229609041	1.760566352909313e-37	0.08172482331291248	0.8107848121661061
4.105	79.65831131368358	0.0	0.0766898116278179	367.65522488159024	-1.7624917730332592e-36	-800.6479728326166	0.0	0.006119630844215689	0.0	0.9999998722286413	6.536031368361888e-42	0.0005055122764650371	-1.0857734209517318e-38	-1.244204788865928e-36	0.05792744233414866	1.2001324447047379e-40	0.0	0.05891833207949318	0.0	800.6479728326166	79.65834813675612	-1.7298186405870313e-36	-0.0038467258600478173	-8.099574554898464	1.7588593288522603e-37	0.07334027571080383	0.8099906589979912
4.11	79.61782983585474	0.0	0.07970463266073002	368.05341540876054	-1.7711386683385355e-36	-800.6479913072833	0.0	0.006338610289024112	0.0	0.9999998641368912	6.707163504134648e-42	0.000521273586397183	-1.0857734105152217e-38	-1.2442047850828036e-36	0.059733555649607	1.2001324835494272e-40	0.0	0.060734210167189585	0.0	800.6479913072833	79.61786966318232	-1.7289396325609597e-36	-0.0033007427769730195	-8.091758770777346	1.7571617953183003e-37	0.08761850767594724	0.8092233128583202
4.115	79.57738793848206	0.0	0.08244157725927562	368.45140364257554	-1.7797811707540477e-36	-800.648006928844	0.0	0.006254809429880234	0.0	0.9999998558849298	6.876512115532703e-42	0.0005368706333387592	-1.0857733999219616e-38	-1.2442047813390912e-36	0.06152084582501144	1.2001325231632376e-40	0.0	0.06252608107714341	0.0	800.648006928844	79.5774305861928	-1.728061479528269e-36	-0.003003983274981866	-8.083903944247814	1.7554564852758558e-37	0.06839748936172314	0.8084193292863324
4.12	79.5369847824905	0.0	0.08539754902138261	368.84918977967374	-1.7884192845463342e-36	-800.6480213954759	0.0	0.006535253564143145	0.0	0.999999847092971	7.051689533888221e-42	0.0005530045147967786	-1.0857733886861636e-38	-1.2442047774665279e-36	0.06336965272895734	1.2001325653693227e-40	0.0	0.06439829331350956	0.0	800.6480213954759	79.53703058588395	-1.72718417534926e-36	-0.002571113115214441	-8.07608827947964	1.7537587535301103e-37	0.09337691992522847	0.807662808027726
4.125	79.4966206628616	0.0	0.08837303107773946	369.2467740114227	-1.797053013875066e-36	-800.6480327796357	0.0	0.00641385623152034	0.0	0.9999998380501289	7.226687213177406e-42	0.0005691218422695579	-1.0857733771796959e-38	-1.2442047735979427e-36	0.06521656270211436	1.2001326087797781e-40	0.0	0.06623572777585855	0.0	800.6480327796357	79.49666975502412	-1.726307721805089e-36	-0.00211353792768258	-8.06822307284468	1.7520511720927562e-37	0.07497536716541088	0.8068571426148797
4.13	79.45629589525598	0.0	0.09128324723900982	369.64415652470564	-1.8056823627948118e-36	-800.6480428431349	0.0	0.006747882628652019	0.0	0.9999998285223206	7.405861099446135e-42	0.0005856237994145723	-1.0857733651063822e-38	-1.2442047696370941e-36	0.06710754801355309	1.2001326545182742e-40	0.0	0.06816885375221557	0.0	800.6480428431349	79.45634831060153	-1.7254321232967013e-36	-0.0017797951940924399	-8.060399004350671	1.7503516552219382e-37	0.09805662635867837	0.8060995423104403
4.135	79.4160095668397	0.0	0.09448794101312998	370.0413375428793	-1.8143073361596493e-36	-800.6480497840868	0.0	0.006591436042196822	0.0	0.9999998186350146	7.586607403465783e-42	0.0006022705766315731	-1.0857733526275682e-38	-1.2442047656414168e-36	0.06901512850410428	1.2001327019826315e-40	0.0	0.07005716108295704	0.0	800.6480497840868	79.41606576830407	-1.7245573701403552e-36	-0.001171961935930508	-8.05256040686236	1.7486498013366633e-37	0.08208923157603737	0.8052978812098543
4.14	79.37576291832106	0.0	0.09736813857903914	370.43831724633526	-1.8229279378837758e-36	-800.6480550754295	0.0	0.006970840286237308	0.0	0.9999998083305608	7.769809839509166e-42	0.0006191435642143508	-1.0857733396721353e-38	-1.2442047615914463e-36	0.07094863081722937	1.200132751449508e-40	0.0	0.07205415972326286	0.0	800.6480550754295	79.37582263238464	-1.7236834719627208e-36	-0.0009219027627185673	-8.044777052607326	1.7469591929528275e-37	0.10195894914943725	0.8045423137005852
4.145	79.33555392990188	0.0	0.10079069706057493	370.8350958262625	-1.8315441721218628e-36	-800.6480573260538	0.0	0.006782554064884836	0.0	0.9999997975451943	7.95636101917557e-42	0.0006363249719031014	-1.0857733261622385e-38	-1.2442047574674629e-36	0.0729174754984831	1.2001328032250146e-40	0.0	0.07399721833444886	0.0	800.6480573260538	79.33561795370073	-1.722810409941265e-36	-0.0001757523712538419	-8.037015810530573	1.7452738772482207e-37	0.09839511115042385	0.8037618100943631
4.15	79.2953845770455	0.0	0.10372459611226509	371.231673486043	-1.840156043288412e-36	-800.6480575062053	0.0	0.007139653623600961	0.0	0.999999786414749	8.143741013318932e-42	0.000653582713629512	-1.08577331226967e-38	-1.2442047533251331e-36	0.07489506743951313	1.2001328566571052e-40	0.0	0.07604257843353696	0.0	800.6480575062053	79.29545241693128	-1.721938196861698e-36	7.234437435465456e-05	-8.029291416099465	1.7435963387029164e-37	0.10554850077395309	0.8029985126428578
4.155	79.25525238317218	0.0	0.10728582622145441	371.62805041265034	-1.8487635554454038e-36	-800.6480547739131	0.0	0.006982607525099835	0.0	0.9999997746808644	8.336065628852507e-42	0.0006712958561839328	-1.085773297674209e-38	-1.2442047490735058e-36	0.07692484450546264	1.2001329129860091e-40	0.0	0.0780429481394595	0.0	800.6480547739131	79.25532499330909	-1.7210668125956615e-36	0.0008783084916298371	-8.021597215429685	1.741925387801533e-37	0.11122488787218063	0.8022368282637706
4.16	79.21515960762625	0.0	0.11033157458339453	372.0242268001437	-1.8573667128060553e-36	-800.6480495513784	0.0	0.007277075092584129	0.0	0.9999997626597305	8.527972605481172e-42	0.0006889705341266496	-1.0857732827708874e-38	-1.2442047448310979e-36	0.07895021387467942	1.2001329706938964e-40	0.0	0.08012767658948372	0.0	800.6480495513784	79.2152364342175	-1.7201962712301094e-36	0.0011776740939136799	-8.013905157996248	1.7402550290436539e-37	0.11084698799588057	0.8014671729778247
4.165	79.1751039104501	0.0	0.11397802929658374	372.4202028294269	-1.8659655192995142e-36	-800.6480414793917	0.0	0.0071879225530567985	0.0	0.9999997499371845	8.725854242088194e-42	0.000707195479698224	-1.0857732670483615e-38	-1.244204740456666e-36	0.08103863930978616	1.200133031768886e-40	0.0	0.082186864718269	0.0	800.6480414793917	79.1751859249163	-1.7193265572153666e-36	0.0019933921128875223	-8.006226771748715	1.7385875016902068e-37	0.11702918325292037	0.8007082049685684
4.17	79.13508751865406	0.0	0.11713789829463356	372.81597871360634	-1.8745599795535088e-36	-800.6480305543857	0.0	0.007430414584546683	0.0	0.9999997369595313	8.922582909467949e-42	0.000725314236562808	-1.0857732510599679e-38	-1.2442047361076825e-36	0.08311489643912479	1.2001330940685727e-40	0.0	0.08431552169690389	0.0	800.6480305543857	79.13517417926879	-1.718457683993601e-36	0.0023421940646633026	-7.998535482053626	1.7369172942274596e-37	0.11739308497615786	0.7999396914397425
4.175	79.09510826597783	0.0	0.12087221984681579	373.2115546317945	-1.8831500974575496e-36	-800.6480167762729	0.0	0.007395386664072647	0.0	0.9999997232042314	9.12587158678583e-42	0.0007440371719298252	-1.0857732341639499e-38	-1.2442047316136999e-36	0.08526038737142043	1.2001331601013509e-40	0.0	0.08643414391549736	0.0	800.6480167762729	79.09520056002425	-1.7175896397137346e-36	0.003172717262451598	-7.9908531552644515	1.735248921000277e-37	0.12310764811588014	0.7991801401563009
4.18	79.0551682454577	0.0	0.12414695238012961	373.60693078123694	-1.8917358772955585e-36	-800.6479998338815	0.0	0.007597293254762249	0.0	0.9999997092050185	9.327642314229282e-42	0.0007626203037870376	-1.0857732170177391e-38	-1.2442047271532507e-36	0.08738985802679937	1.2001332273050856e-40	0.0	0.08861060811160279	0.0	800.6479998338815	79.05526564400432	-1.7167224349824177e-36	0.0035686901918568163	-7.983168879699795	1.733580221225393e-37	0.12420209829066764	0.7984134989028373
4.185	79.01526532352025	0.0	0.12797289307720297	374.0021073346333	-1.900317322817267e-36	-800.647979979146	0.0	0.007602805265978236	0.0	0.999999694366501	9.536275361650009e-42	0.0007818354569769193	-1.0857731988940413e-38	-1.2442047225411847e-36	0.0895917530443196	1.2001332985378567e-40	0.0	0.09078865138260474	0.0	800.647979979146	79.01536883211648	-1.7158560586519028e-36	0.004418902243482822	-7.975511802935624	1.7319173416999152e-37	0.12941458570505876	0.7976561706259074
4.19	78.97540138901823	0.0	0.13136220392860767	374.3970845169661	-1.908894438909371e-36	-800.6479566919119	0.0	0.007775925119997666	0.0	0.9999996792808084	9.743254564496252e-42	0.0008008982907241121	-1.0857731805179197e-38	-1.2442047179655714e-36	0.09177619356691613	1.2001333709573143e-40	0.0	0.09301628983853286	0.0	800.6479566919119	78.97551048878859	-1.7149905168262987e-36	0.0048595480154730395	-7.967874762974722	1.7302588831139717e-37	0.13129672359256273	0.7968956460420374
4.195	78.93557430543483	0.0	0.1352845859343628	374.7918624987465	-1.917467229273734e-36	-800.6479303850924	0.0	0.007808176376032173	0.0	0.9999996633041283	9.957217144939899e-42	0.0008206042952436787	-1.0857731611070271e-38	-1.2442047132356117e-36	0.09403433608918424	1.200133447653961e-40	0.0	0.09525316759873484	0.0	800.6479303850924	78.93569002647456	-1.7141257985149813e-36	0.005734704709077861	-7.960276299717843	1.7286087429119946e-37	0.13597643546910682	0.796143758116915
4.2	78.89578585795988	0.0	0.13878724448680624	375.18644147718817	-1.9260356981942893e-36	-800.6479004123299	0.0	0.007964683321390546	0.0	0.9999996470674377	1.0169521796153648e-41	0.0008401576041240888	-1.0857731414298142e-38	-1.2442047085422618e-36	0.09627498101044592	1.2001335255988506e-40	0.0	0.09753488129610442	0.0	800.6479004123299	78.89590768464743	-1.7132619071857294e-36	0.006217306501063361	-7.952700696601293	1.7269636096526577e-37	0.13861358254788306	0.7953908604892909
4.205	78.85603398068571	0.0	0.14281113881794175	375.5808216350206	-1.9345998496380572e-36	-800.6478672710147	0.0	0.008010526615331207	0.0	0.9999996298932159	1.0388835427401933e-41	0.0008603564417717228	-1.0857731206670473e-38	-1.244204703694022e-36	0.09858959814370395	1.2001336080443555e-40	0.0	0.0998297281297829	0.0	800.6478672710147	78.85616297697027	-1.7123988339848206e-36	0.007122384000058985	-7.945153442452124	1.7253246009828714e-37	0.14275648872391464	0.7946435845030251
4.21	78.81632049022956	0.0	0.14642550796712306	375.9750031670432	-1.9431596878366705e-36	-800.6478302608775	0.0	0.008162799190461907	0.0	0.999999612439976	1.0606558835736692e-41	0.0008804088195493789	-1.0857730996166694e-38	-1.2442046988808864e-36	0.10088743224584681	1.2001336918293487e-40	0.0	0.10216819784291425	0.0	800.6478302608775	78.81645613455032	-1.7115365822429283e-36	0.0076441673904490475	-7.937613024171716	1.7236870923263277e-37	0.14615838243937843	0.7938958545946551
4.215	78.77664343008313	0.0	0.150556289631728	376.3689862579591	-1.9517152167999614e-36	-800.6477898950551	0.0	0.008209532471736	0.0	0.9999995940055821	1.0831261850058105e-41	0.0009011040207418858	-1.0857730774336569e-38	-1.2442046939134834e-36	0.10325892855572656	1.2001337803243943e-40	0.0	0.10452005565494463	0.0	800.6477898950551	78.77678683224485	-1.7106751465784704e-36	0.008584202500728479	-7.930082790486874	1.7220517910432366e-37	0.14976162991545375	0.793149680765056
4.22	78.73700468733934	0.0	0.1542805752478437	376.7627710975756	-1.9602664406511367e-36	-800.6477454844388	0.0	0.008370032594125271	0.0	0.9999995752681439	1.1054489616440446e-41	0.0009216633512883818	-1.0857730549358364e-38	-1.2442046889786637e-36	0.10561485527406625	1.2001338702742595e-40	0.0	0.1069178933650962	0.0	800.6477454844388	78.73715530829442	-1.709814530488886e-36	0.009142351560056602	-7.922548571250824	1.72041561306186e-37	0.15389916358253716	0.7924043211415488
4.225	78.69740232545944	0.0	0.15852338126110044	377.1563578717967	-1.968813363426208e-36	-800.647697494544	0.0	0.008405648013098437	0.0	0.9999995555088583	1.1284619299050672e-41	0.0009428583500089636	-1.0857730312619465e-38	-1.2442046838913086e-36	0.10804362427649379	1.2001339651295132e-40	0.0	0.10932593414121154	0.0	800.647697494544	78.69756133435223	-1.7089547306987402e-36	0.010122159561992201	-7.915023038994681	1.7187813438712049e-37	0.15697085384631532	0.7916579410122395
4.23	78.65783823783414	0.0	0.1623559545044461	377.54974677210106	-1.977355989284522e-36	-800.6476453103246	0.0	0.008586696748431778	0.0	0.9999995354159054	1.1513447595165025e-41	0.0009639334907654828	-1.0857730072383224e-38	-1.2442046788326754e-36	0.11045865861011427	1.2001340615866134e-40	0.0	0.11178584155943078	0.0	800.6476453103246	78.65800506568436	-1.708095748883459e-36	0.010713874065606597	-7.907502507229225	1.7171481231491267e-37	0.16182426650196488	0.7909158172338279
4.235	78.6183103841586	0.0	0.16671562194579215	377.9429379831311	-1.9858943222349268e-36	-800.6475892870266	0.0	0.008599896523496818	0.0	0.9999995142658101	1.1749030242084845e-41	0.0009856307088900733	-1.0857729820017299e-38	-1.2442046736248113e-36	0.11294497784283826	1.2001341631184953e-40	0.0	0.11424953043465876	0.0	800.6475892870266	78.61848627370414	-1.7072375817982804e-36	0.011738131314349523	-7.900005643459451	1.7155200901620641e-37	0.16438376603982857	0.7901715711744419
4.24	78.57882063388593	0.0	0.17065524209235597	378.3359316956585	-1.994428366421117e-36	-800.6475289465894	0.0	0.00881347897582879	0.0	0.9999994927409552	1.1983578330454413e-41	0.0010072326439698616	-1.0857729563682124e-38	-1.2442046684397338e-36	0.11542037849054532	1.200134266449526e-40	0.0	0.11677440617537012	0.0	800.6475289465894	78.5790049735434	-1.7063802280241028e-36	0.012360669588797283	-7.8925286592763655	1.7138963128030919e-37	0.16987442384843424	0.789435658919564
4.245	78.5393668166662	0.0	0.17513564896606415	378.72872809389867	-2.0029581258430418e-36	-800.6474644702714	0.0	0.008793720093764267	0.0	0.9999994701346725	1.2224612417090025e-41	0.0010294319410893257	-1.0857729294979472e-38	-1.2442046631113172e-36	0.11796423187578968	1.2001343749719645e-40	0.0	0.11929362141333051	0.0	800.6474644702714	78.5395609358321	-1.7055236843648633e-36	0.013433497785127986	-7.88508551906304	1.712279956037622e-37	0.17195897173886476	0.7886960347998406
4.25	78.49995084844335	0.0	0.17918176882482315	379.12132736598227	-2.0114836045866215e-36	-800.6473955835517	0.0	0.009051396379751232	0.0	0.9999994470950506	1.2465032550117762e-41	0.0010515746929817837	-1.0857729021630953e-38	-1.2442046577964534e-36	0.12050160570986784	1.2001344855747076e-40	0.0	0.12188665546962921	0.0	800.6473955835517	78.50015408226467	-1.704667947292941e-36	0.014084340400928253	-7.877662119422979	1.7106678012150908e-37	0.17809369453250518	0.7879674982626123
4.255	78.4605704985222	0.0	0.18378624712177277	379.51372969203965	-2.0200048065636096e-36	-800.6473222225824	0.0	0.008989034979360714	0.0	0.9999994229697095	1.2711472006707686e-41	0.0010742718260665345	-1.0857728735913372e-38	-1.2442046523485574e-36	0.12310250704478441	1.2001346013894786e-40	0.0	0.12446182430069339	0.0	800.6473222225824	78.46078427461804	-1.7038130156852113e-36	0.015209959507065395	-7.870265706447318	1.7090616009715562e-37	0.17973194724374847	0.7872317693217211
4.26	78.4212278192725	0.0	0.18793913922563607	379.90593526588003	-2.02852173598265e-36	-800.6472443906899	0.0	0.009301888303439889	0.0	0.9999993983240388	1.2957962927963114e-41	0.0010969736991090307	-1.0857728444541227e-38	-1.2442046468994455e-36	0.1257039516025969	1.2001347197022082e-40	0.0	0.12712661900713945	0.0	800.6472443906899	78.42145141099623	-1.702958885394177e-36	0.01588674169234624	-7.8628746164684555	1.7074564542419983e-37	0.18625527501204883	0.7865080308666517
4.265	78.38192056727453	0.0	0.19266973778528865	380.29794426236083	-2.0370343966416705e-36	-800.6471617011282	0.0	0.009188412582528335	0.0	0.999999372620522	1.3209712867557076e-41	0.0011201599290547792	-1.0857728141175997e-38	-1.2442046413341487e-36	0.12836089947266563	1.200134843093113e-40	0.0	0.12975890531415832	0.0	800.6471617011282	78.38215550807139	-1.7021055587805817e-36	0.01706879128184696	-7.855498387954422	1.7058546129773539e-37	0.1890395935084762	0.7857772641853948
4.27	78.34265090551261	0.0	0.19694104242664998	380.68975687686094	-2.045542792782646e-36	-800.6470745178751	0.0	0.00955756813931779	0.0	0.9999993462668268	1.3462531944540027e-41	0.0011434446268632102	-1.0857727830648164e-38	-1.2442046357451847e-36	0.13102913100501754	1.200134969605302e-40	0.0	0.1324969468981164	0.0	800.6470745178751	78.3428964268796	-1.7012530307813567e-36	0.017779678098457832	-7.848118907701244	1.704252046238783e-37	0.19275399109784225	0.7850485621316806
4.275	78.30341660817568	0.0	0.20178843576626102	381.0813732863411	-2.0540469282500415e-36	-800.6469820441604	0.0	0.009395009016860535	0.0	0.9999993189302051	1.3719452002572492e-41	0.001167107026066411	-1.085772750905241e-38	-1.2442046300655649e-36	0.13374064402955152	1.2001351008361057e-40	0.0	0.1351884187238837	0.0	800.6469820441604	78.30367430496229	-1.7004013064605112e-36	0.019011075145449568	-7.840748343316051	1.702651107171379e-37	0.21119435660805896	0.7843592138776498
4.28	78.26421958561006	0.0	0.2062839638516822	381.4727936789859	-2.062546807128726e-36	-800.6468850627193	0.0	0.009733326341347106	0.0	0.9999992907715272	1.3978762281976754e-41	0.0011909895652882092	-1.0857727178300431e-38	-1.244204624333068e-36	0.13647738333479312	1.200135236013281e-40	0.0	0.13797681132379722	0.0	800.6468850627193	78.26448892058545	-1.6995503791110456e-36	0.019859773135296584	-7.8333923400601675	1.7010539646543234e-37	0.19933861878012998	0.7835928243561862
4.285	78.22505822697933	0.0	0.21114488088209485	381.86401823494884	-2.071042433333342e-36	-800.6467823704859	0.0	0.009611902249840727	0.0	0.9999992617347242	1.424082258113415e-41	0.0012151253820478678	-1.0857726837748745e-38	-1.2442046185398163e-36	0.13924314620722836	1.200135375405936e-40	0.0	0.14073041848383808	0.0	800.6467823704859	78.22534035831713	-1.6987002520611205e-36	0.021037890180073425	-7.826047881903028	1.699458629317104e-37	0.22089271966358107	0.782916464531429
4.29	78.1859334807266	0.0	0.21587437359725115	382.25504713979177	-2.0795338108910807e-36	-800.6466750982125	0.0	0.009917555269301473	0.0	0.9999992316842702	1.4506659505002964e-41	0.0012396090269117558	-1.0857726485826819e-38	-1.2442046126630781e-36	0.14204876735612976	1.2001355196647133e-40	0.0	0.14357158878393161	0.0	800.6466750982125	78.18622839412193	-1.6978509193741564e-36	0.02203388124864089	-7.818736444935818	1.6978711940634227e-37	0.20763237745851754	0.7821492875374667
4.295	78.1468446305605	0.0	0.2207418233033097	382.6458805781065	-2.0880209438135204e-36	-800.6465617795242	0.0	0.009842660452605163	0.0	0.9999992008629739	1.4773968602139067e-41	0.0012642282593472616	-1.085772612539328e-38	-1.2442046067537612e-36	0.14486992579381533	1.200135667624003e-40	0.0	0.14639130329950462	0.0	800.6465617795242	78.14715296616828	-1.6970023803412996e-36	0.02315037687238916	-7.811436857701656	1.6962855748347579e-37	0.23052036058167116	0.7814837517089055
4.3	78.10779162220611	0.0	0.22571319951711827	383.03651873002923	-2.0965038360097097e-36	-800.646443695207	0.0	0.010114226451126683	0.0	0.9999991688345768	1.504633972263893e-41	0.0012893137054178288	-1.0857725751365096e-38	-1.2442046007325523e-36	0.14774450851097615	1.2001358213780728e-40	0.0	0.1492888157429503	0.0	800.646443695207	78.10811397009081	-1.6961546325168592e-36	0.024301724026311422	-7.804177442924972	1.6947094492114959e-37	0.21664677335550414	0.7807183959986106
4.305	78.06877477316223	0.0	0.23058201879484397	383.42696177707313	-2.1049824914244318e-36	-800.6463193512013	0.0	0.01009079891666583	0.0	0.999999136135432	1.5319053388426947e-41	0.0013144307000530922	-1.0857725370021062e-38	-1.2442045947037649e-36	0.15062270652344653	1.200135978352148e-40	0.0	0.152179616692151	0.0	800.6463193512013	78.0691111775303	-1.695307670651751e-36	0.025349410766537402	-7.796919880451014	1.693133044070278e-37	0.23532176584923997	0.7800470239392922
4.31	78.0297930952793	0.0	0.23576548710890466	383.8172098997446	-2.1134569139750254e-36	-800.6461899113873	0.0	0.010294987521011068	0.0	0.9999991020479903	1.559790511746505e-41	0.0013401130118624606	-1.0857724973011207e-38	-1.2442045885392895e-36	0.15356568526540945	1.2001361419908469e-40	0.0	0.15512891336761991	0.0	800.6461899113873	78.03014473159364	-1.694461498553037e-36	0.026627346000496557	-7.7896925374489	1.691563774335561e-37	0.22663814277223185	0.7792988815322804
4.315	77.99084781358451	0.0	0.2406687042241212	384.2072632821946	-2.1219271076629958e-36	-800.6460541468311	0.0	0.010360125726639526	0.0	0.9999990673632487	1.5876261779363665e-41	0.0013657497279317805	-1.0857724569563784e-38	-1.2442045823857323e-36	0.15650343921685297	1.2001363084969778e-40	0.0	0.15809687076442666	0.0	800.6460541468311	77.99121425101798	-1.693616106895144e-36	0.027636046714915843	-7.782459742479139	1.6899928966598594e-37	0.23819254177839944	0.7786103989176314
4.32	77.95193729355861	0.0	0.24601535932846313	384.5971221028289	-2.130393076360882e-36	-800.6459128301914	0.0	0.010451624829990918	0.0	0.9999990311682536	1.616127328498588e-41	0.0013919993567876987	-1.0857724149076513e-38	-1.2442045760851148e-36	0.15951142797093257	1.2001364822531712e-40	0.0	0.16109104072348973	0.0	800.6459128301914	77.95232011023911	-1.6927715051100163e-36	0.028996523047005028	-7.775245896076655	1.6884264172003475e-37	0.2362216495211555	0.7778833422317216
4.325	77.91306325104229	0.0	0.25100561498530793	384.9867865426284	-2.138854824000349e-36	-800.6457652098678	0.0	0.010654567186813908	0.0	0.9999989943451602	1.6445818434915831e-41	0.0014182060342374484	-1.0857723721814497e-38	-1.2442045697947255e-36	0.16251449496138265	1.200136659024697e-40	0.0	0.16414334938520478	0.0	800.6457652098678	77.91346179124291	-1.6919276804875454e-36	0.03001127463190121	-7.768026569246682	1.6868584753014308e-37	0.24724029160188468	0.777196014801374
4.33	77.87422370100079	0.0	0.25651031824350967	385.37625677137095	-2.1473123542677783e-36	-800.6456114886398	0.0	0.010631270161307117	0.0	0.999998956013595	1.6736538396184069e-41	0.001444981413380288	-1.0857723277578296e-38	-1.2442045633680223e-36	0.16558273054507394	1.2001368430375764e-40	0.0	0.16718898394073609	0.0	800.6456114886398	77.87463980715766	-1.691084645795449e-36	0.03145587036511016	-7.760836056188462	1.6852970640011164e-37	0.24519788580344462	0.7764708513153432
4.335	77.83542059559029	0.0	0.26159728112249986	385.7655329895841	-2.1557656715179343e-36	-800.6454515635183	0.0	0.010977815544132494	0.0	0.9999989168670919	1.7027981659643334e-41	0.0014718234089002536	-1.0857722824423936e-38	-1.2442045569252503e-36	0.1686585999302595	1.2001370309627577e-40	0.0	0.1703338964354956	0.0	800.6454515635183	77.83585342052112	-1.6902423832304146e-36	0.03247640776364383	-7.7536477461831534	1.683735925018163e-37	0.2530165842348332	0.7757774859055203
4.34	77.79665169797423	0.0	0.2672528302065208	386.15461536485645	-2.1642147793912053e-36	-800.6452848969566	0.0	0.010838811223938195	0.0	0.9999988763847889	1.7323882313099685e-41	0.0014990759311952527	-1.0857722356335883e-38	-1.2442045503838837e-36	0.17178151239298314	1.200137225300619e-40	0.0	0.17343898712584901	0.0	800.6452848969566	77.79710330783608	-1.6894009094369764e-36	0.03400571495273929	-7.746467714740154	1.682176171591034e-37	0.2805033792695385	0.7751544633251697
4.345	77.75791867313028	0.0	0.27263885403387433	386.54350407958816	-2.1726596818471696e-36	-800.6451121279144	0.0	0.011152733549785049	0.0	0.9999988347615025	1.762261589146495e-41	0.0015265893666374262	-1.0857721875586057e-38	-1.2442045437799043e-36	0.174934323462426	1.2001374251159028e-40	0.0	0.17663400993803222	0.0	800.6451121279144	77.75838866144119	-1.688560205169874e-36	0.035229036278844245	-7.739352700670565	1.680631571929017e-37	0.2585723181390392	0.7743670955631093
4.35	77.71922035779198	0.0	0.27824623015792704	386.9321993067181	-2.1811003826438e-36	-800.644932047283	0.0	0.011079195400861186	0.0	0.9999987920695842	1.7923526457355276e-41	0.0015543033032355445	-1.0857721383023318e-38	-1.2442045371278461e-36	0.1781101104320847	1.200137630061238e-40	0.0	0.17980796562238271	0.0	800.644932047283	77.71970979740261	-1.6877202783406704e-36	0.03664669573054118	-7.732207183901826	1.6790791913703928e-37	0.29188893637595476	0.7737714590624398
4.355	77.68055688486379	0.0	0.2839460355345426	387.3207012319079	-2.1895368858105165e-36	-800.6447457597504	0.0	0.011346671094228922	0.0	0.9999987478860686	1.8229402217187935e-41	0.0015824745354841342	-1.0857720873786277e-38	-1.2442045303659645e-36	0.18133829982566546	1.2001378421672005e-40	0.0	0.18305854744849473	0.0	800.6447457597504	77.68106649909357	-1.6868811238915408e-36	0.03808991489771664	-7.725138005000076	1.6775445643685434e-37	0.2690468134157099	0.7729821691611374
4.36	77.64192872590449	0.0	0.2894945526604209	387.7090100277235	-2.197969195097492e-36	-800.6445519155657	0.0	0.011356812921489524	0.0	0.9999987028396561	1.853574501867471e-41	0.0016106887824599578	-1.0857720355135078e-38	-1.2442045235937379e-36	0.18457141849420985	1.2001380584156374e-40	0.0	0.18631203469409968	0.0	800.6445519155657	77.64245844008931	-1.6860427343585334e-36	0.03937940772116115	-7.718036608471124	1.6760020565998388e-37	0.2884302244801646	0.7723424181287348
4.365	77.60333463287378	0.0	0.2954078975414262	388.0971258727413	-2.2063973143806458e-36	-800.6443514474704	0.0	0.011493204258427807	0.0	0.9999986560461778	1.8848387246558842e-41	0.0016394832082275497	-1.0857719816907063e-38	-1.2442045166822296e-36	0.187871020991265	1.2001382830511028e-40	0.0	0.18960459517954817	0.0	800.6443514474704	77.60388608323473	-1.685205120698989e-36	0.0409479233988614	-7.7109787727377945	1.6744695838682847e-37	0.2803381478732531	0.7716073036899397
4.37	77.5647761055197	0.0	0.3010030106711046	388.4850489450277	-2.214821247528648e-36	-800.6441434600493	0.0	0.011676052556501204	0.0	0.9999986084495933	1.9160860287655758e-41	0.0016682620519305061	-1.0857719269975464e-38	-1.2442045097744069e-36	0.19116883806852797	1.200138511542047e-40	0.0	0.19294953784385044	0.0	800.6441434600493	77.56534866704007	-1.6843682651398536e-36	0.042204950270889406	-7.703900695169352	1.6729322664984513e-37	0.293672267525761	0.7709496048493998
4.375	77.5262512381938	0.0	0.3070928543901524	388.87277941660597	-2.223240998276521e-36	-800.6439282137572	0.0	0.011662383182131541	0.0	0.9999985590717229	1.9479429777506873e-41	0.0016976023801408104	-1.0857718703115081e-38	-1.2442045027319072e-36	0.19453099678186098	1.20013874858417e-40	0.0	0.1962905645208529	0.0	800.6439282137572	77.52684704106389	-1.683532187645312e-36	0.04387396642314752	-7.696851246084672	1.671401398324496e-37	0.29591632276295343	0.770253760616803
4.38	77.48776187850694	0.0	0.31282036029702776	389.2603174696463	-2.2316565705803694e-36	-800.6437056169707	0.0	0.012001701000180531	0.0	0.9999985086366013	1.979923421420348e-41	0.001727056447342226	-1.085771812465622e-38	-1.244204495662016e-36	0.1979061892104144	1.200138990701898e-40	0.0	0.1997287985922943	0.0	800.6437056169707	77.48838014443277	-1.6826968635281084e-36	0.04516741586390442	-7.689808195460065	1.6698719145260612e-37	0.29840366096575643	0.769559580720314
4.385	77.44930610191409	0.0	0.31902951494676457	389.64766327808377	-2.240067968218699e-36	-800.6434749894959	0.0	0.01188156784332313	0.0	0.9999984567185911	2.012284174526136e-41	0.001756860780553987	-1.0857717529729716e-38	-1.2442044885081335e-36	0.20132151940078416	1.2001392399383251e-40	0.0	0.20313261704939817	0.0	800.6434749894959	77.44994897714137	-1.6818623161949746e-36	0.0468926687772043	-7.682736191581323	1.668335417569875e-37	0.33554426514858354	0.7690060165129242
4.39	77.41088506803916	0.0	0.32512107418657493	390.03481701644193	-2.2484751949797623e-36	-800.6432371017378	0.0	0.012168379211610004	0.0	0.9999984032840666	2.0450266792533862e-41	0.0017870167080353543	-1.085771691796907e-38	-1.244204481269775e-36	0.20477713956981228	1.2001394964550713e-40	0.0	0.20661860091109807	0.0	800.6432371017378	77.41155264738751	-1.6810285250243104e-36	0.04845034944539829	-7.6757794318761325	1.6668253586471331e-37	0.3052443714067208	0.7681846393484328
4.395	77.37249843076152	0.0	0.33122371974068743	390.42177886140814	-2.2568782547030566e-36	-800.6429906867086	0.0	0.012155285581252747	0.0	0.999998348718746	2.0779013991661743e-41	0.001817294406116442	-1.0857716293803006e-38	-1.2442044740024977e-36	0.20824671383094107	1.2001397584000637e-40	0.0	0.2101008337240081	0.0	800.6429906867086	77.37319123619675	-1.6801954921203482e-36	0.050004779166183455	-7.668755731807408	1.6652995138309366e-37	0.33459391841008984	0.7676051560819924
4.4	77.33414542509372	0.0	0.3375963930544866	390.80854898674767	-2.2652771511599554e-36	-800.6427367130917	0.0	0.012326875479898403	0.0	0.9999982922317385	2.111366634039951e-41	0.00184811597002313	-1.0857715648202178e-38	-1.2442044666045791e-36	0.21177861082224345	1.2001400295705055e-40	0.0	0.21363222342191548	0.0	800.6427367130917	77.3348649827883	-1.679363223082981e-36	0.05174963669133442	-7.661826042562818	1.6637950632017352e-37	0.31724002764011927	0.7668390935628603
4.405	77.29582726103123	0.0	0.34368256188835533	391.1951275674247	-2.2736718881519332e-36	-800.6424742018647	0.0	0.012487469615127292	0.0	0.9999982347796014	2.1448406775182973e-41	0.0018789456467680258	-1.0857714992113726e-38	-1.244204459204491e-36	0.2153114376791676	1.2001403053744534e-40	0.0	0.21720961995063873	0.0	800.6424742018647	77.29657300425613	-1.6785316977473243e-36	0.05321133164008793	-7.65485862120201	1.6622817304846157e-37	0.3327148911102529	0.7662085858913175
4.41	77.25754206901554	0.0	0.3502455208555889	391.58151476063597	-2.282062469091933e-36	-800.6422034694109	0.0	0.012484756297017858	0.0	0.999998175313288	2.1789193268406814e-41	0.0019103321670832162	-1.0857714313572684e-38	-1.2442044516709853e-36	0.2189080744299704	1.2001405908475065e-40	0.0	0.22078623917098122	0.0	800.6422034694109	77.25831635441634	-1.677700940419329e-36	0.055068367578226925	-7.64792551610943	1.6607760518437567e-37	0.33854570133515877	0.7655414939234202
4.415	77.21929157632106	0.0	0.35649155517433573	391.9677107712766	-2.290448898429578e-36	-800.6419244022952	0.0	0.012810209210515776	0.0	0.9999981145926923	2.2131485425308004e-41	0.0019418573594911408	-1.0857713621267743e-38	-1.2442044441039193e-36	0.2225206020777053	1.2001408823422292e-40	0.0	0.22445609378319206	0.0	800.6419244022952	77.22009372649316	-1.6768709211940393e-36	0.056591732794708305	-7.641012451442701	1.6592748848963249e-37	0.3367641744234831	0.7648429995252459
4.42	77.18107412483896	0.0	0.36314693595617636	392.3537157560793	-2.2988311795699388e-36	-800.6416362651627	0.0	0.012713027533658694	0.0	0.9999980522514188	2.2477226053580547e-41	0.0019737001570635853	-1.0857712911033283e-38	-1.2442044364606797e-36	0.2261695248884188	1.200141181617231e-40	0.0	0.22809810789575333	0.0	800.6416362651627	77.18190629165107	-1.6760416669677644e-36	0.05848010384818793	-7.634030371300564	1.6577578070886536e-37	0.3790625833529359	0.7643435624903087
4.425	77.14289051180177	0.0	0.36979034601864175	392.7395298878641	-2.3072093162642313e-36	-800.6413398491932	0.0	0.012984438760812131	0.0	0.9999979880919841	2.2827320046809891e-41	0.0020059439007274037	-1.0857712180637789e-38	-1.2442044287211832e-36	0.22986439305857714	1.2001414896206363e-40	0.0	0.2318178755974564	0.0	800.6413398491932	77.14375324922064	-1.675213159444187e-36	0.06029937133436698	-7.627202368912833	1.6562757939624908e-37	0.3446975006296297	0.7634987383309148
4.43	77.10474099197064	0.0	0.3763092409784983	393.1251533390972	-2.315583312260145e-36	-800.6410339557771	0.0	0.013015264606146881	0.0	0.9999979227185997	2.3178342409114995e-41	0.0020382731475141885	-1.0857711436972004e-38	-1.244204420961182e-36	0.23356905942422987	1.2001418034518376e-40	0.0	0.2355464742533475	0.0	800.6410339557771	77.10563435851417	-1.6743853932630414e-36	0.06198572089432022	-7.62027488027807	1.6547709490524962e-37	0.36894184463107316	0.7629200963122988
4.435	77.06662428611766	0.0	0.383192627066386	393.5105862826226	-2.323953171309471e-36	-800.6407193438631	0.0	0.013112619044495732	0.0	0.9999978551373822	2.353546038223624e-41	0.0020711638016751746	-1.0857710668746182e-38	-1.2442044130665077e-36	0.23733805871820327	1.2001421278820433e-40	0.0	0.23930296290140984	0.0	800.6407193438631	77.06755040353261	-1.6735583863200302e-36	0.06395481912598888	-7.613437423482358	1.6532864078414953e-37	0.3572607791873704	0.7621815050604892
4.44	77.02854195130733	0.0	0.38974316013731175	393.89582889464816	-2.3323188972399833e-36	-800.6403953832746	0.0	0.013394185274674786	0.0	0.9999977863548174	2.3893195560170077e-41	0.0021041113006575506	-1.0857709887416912e-38	-1.2442044051580315e-36	0.24111357222006854	1.200142458079726e-40	0.0	0.24314011433268554	0.0	800.6403953832746	77.02950001896353	-1.6727321076688257e-36	0.06558717550329875	-7.606564309825833	1.6517936187598518e-37	0.3696738170906613	0.7615541959083316
4.445	76.99049192682108	0.0	0.3968138159825651	394.280881343086	-2.3406804936983846e-36	-800.6400618709151	0.0	0.013304862748612244	0.0	0.9999977155266296	2.4255807721563623e-41	0.0021375079711380544	-1.0857709083406387e-38	-1.244204397141907e-36	0.24494055736345724	1.2001427980976306e-40	0.0	0.24695167674516708	0.0	800.6400618709151	76.99148477822446	-1.67190659313751e-36	0.06767536145495295	-7.59966170010955	1.6502939349821774e-37	0.4054301044201366	0.7610468548366921
4.45	76.9524755838824	0.0	0.4037307066320311	394.6657437974836	-2.3490379643656844e-36	-800.6397191912937	0.0	0.013591035404257388	0.0	0.999997642947071	2.462160051325656e-41	0.0021711975785712236	-1.0857708260073144e-38	-1.2442043890555705e-36	0.24880111096124152	1.200143146523188e-40	0.0	0.25084522158455125	0.0	800.6397191912937	76.95350321463857	-1.6710818095154404e-36	0.06956963050059313	-7.592922045180472	1.6488310247237529e-37	0.3749985685873094	0.7602176603488644
4.455	76.91449244099029	0.0	0.4106913373090285	395.05041643079363	-2.3573913129999094e-36	-800.6393662533817	0.0	0.01358830791378682	0.0	0.9999975688891924	2.4989084317810134e-41	0.0022050429288212373	-1.0857707420525583e-38	-1.2442043809316318e-36	0.2526795116970093	1.2001435020460044e-40	0.0	0.25473798505547224	0.0	800.6393662533817	76.91555567093947	-1.6702577647028402e-36	0.07148865283913573	-7.586057805643757	1.6473397351405106e-37	0.4078377310293156	0.7597012876481106
4.46	76.8765417888151	0.0	0.41791440210347974	395.434899408968	-2.3657405432030515e-36	-800.6390038846195	0.0	0.013729407013670064	0.0	0.9999974924988084	2.536232381556114e-41	0.0022394183799664467	-1.0857706555097111e-38	-1.2442043726804695e-36	0.2566186579625271	1.2001438687664107e-40	0.0	0.25867117044097526	0.0	800.6390038846195	76.87764248339445	-1.6694344663398086e-36	0.07359359246152243	-7.579335389493262	1.6458803720042408e-37	0.38677298140059535	0.7589197473090715
4.465	76.83862493717307	0.0	0.42483837055022333	395.81919290735357	-2.374085658784501e-36	-800.6386312991035	0.0	0.013964400056791825	0.0	0.9999974148127727	2.573610767415211e-41	0.0022738439669954687	-1.0857705675548281e-38	-1.2442043644171938e-36	0.2605635496952346	1.200144241707042e-40	0.0	0.26267167637440736	0.0	800.6386312991035	76.8397623966101	-1.6686118861432988e-36	0.07539679328062845	-7.572536688319313	1.6444036908619265e-37	0.40162289203746	0.7583179599834793
4.47	76.80073993916488	0.0	0.43225905721598745	396.2032970923809	-2.3824266633584218e-36	-800.638248474104	0.0	0.013903266422811046	0.0	0.9999973348384317	2.6115079979262595e-41	0.002308747411365631	-1.0857704770653173e-38	-1.2442043560392974e-36	0.26456320030035807	1.200144625633054e-40	0.0	0.26665466881177247	0.0	800.638248474104	76.80191714337315	-1.6677900632711338e-36	0.07762837514849913	-7.565706461345201	1.6429198031431223e-37	0.4336862079743877	0.7578126284658215
4.475	76.76288819879565	0.0	0.4395252509805516	396.58721213299106	-2.390763560592963e-36	-800.6378556400965	0.0	0.014188176076019623	0.0	0.9999972530191331	2.649695558355083e-41	0.002343918250437251	-1.0857703845445958e-38	-1.2442043475971622e-36	0.26859349248767	1.2001450184162787e-40	0.0	0.2707192818524945	0.0	800.6378556400965	76.76410515206811	-1.666968962298612e-36	0.07966954081270178	-7.559036608918272	1.6414719836848743e-37	0.40645305775206764	0.7569956310516108
4.48	76.72506921093161	0.0	0.44685592877316993	396.97093819812875	-2.399096354158977e-36	-800.6374517766058	0.0	0.014185995251682272	0.0	0.9999971695604425	2.6880667527247854e-41	0.0023792582169498435	-1.085770290226152e-38	-1.244204339114447e-36	0.27264316563921565	1.200145419069772e-40	0.0	0.2747832701330646	0.0	800.6374517766058	76.72632691473925	-1.6661485944011748e-36	0.08175440023964571	-7.552220438298226	1.63999110321069e-37	0.4406722200846027	0.7565066130193692
4.485	76.68728232254314	0.0	0.4544396237532839	397.3544754556615	-2.4074250477001657e-36	-800.6370376603742	0.0	0.014318131642038044	0.0	0.9999970835987938	2.727001786215013e-41	0.0024151174808335453	-1.0857701931356763e-38	-1.2442043305070802e-36	0.27675234640013435	1.2001458317393275e-40	0.0	0.2788851127010721	0.0	800.6370376603742	76.68858276407396	-1.6653289670857362e-36	0.08401781054467701	-7.545574423480161	1.6385483722924728e-37	0.41764425992665744	0.7557123798650361
4.49	76.64952883624412	0.0	0.46172131366268343	397.73782407710365	-2.4157496449425462e-36	-800.636612570276	0.0	0.01457772303052212	0.0	0.999996996187091	2.766009555446715e-41	0.002451043734642677	-1.0857700944637538e-38	-1.2442043218835337e-36	0.28086920401999066	1.200146251370372e-40	0.0	0.28306132272386997	0.0	800.636612570276	76.65087126571777	-1.6645100481873908e-36	0.08597419979922477	-7.538838872326418	1.6370854069399037e-37	0.43235653656300116	0.755122663662061
4.495	76.61180676169363	0.0	0.4695039167511944	398.1209842243632	-2.4240701494023306e-36	-800.6361763653686	0.0	0.014497813641426823	0.0	0.9999969063892166	2.8054954725586456e-41	0.002487410363981821	-1.0857699931548674e-38	-1.2442043131546814e-36	0.28503652547694797	1.200146682456447e-40	0.0	0.28721464039297473	0.0	800.6361763653686	76.61319442530508	-1.6636918828220957e-36	0.08836928169373481	-7.5320453687830025	1.6356093020447143e-37	0.47354008554471144	0.7546916433221131
4.5	76.57411732312069	0.0	0.4771887657710901	398.5039560693472	-2.4323865648118873e-36	-800.6357293643224	0.0	0.014769788355681341	0.0	0.9999968144916969	2.8453156570711074e-41	0.0025240848545698877	-1.0857698895339994e-38	-1.24420430435212e-36	0.2892391257236982	1.2001471236222124e-40	0.0	0.29144587307838477	0.0	800.6357293643224	76.57555053692784	-1.6628744327336907e-36	0.09062477723832804	-7.525493651205295	1.6341873201703444e-37	0.43747465137409886	0.7538198641912145
4.505	76.53646041123754	0.0	0.4848177526796642	398.8867397816256	-2.440698894855642e-36	-800.6352705518785	0.0	0.0148035467079464	0.0	0.9999967209187333	2.885275872532972e-41	0.0025608883141467484	-1.0857697840804723e-38	-1.244204295518956e-36	0.2934565051653897	1.2001475728310392e-40	0.0	0.2956867768193353	0.0	800.6352705518785	76.53793965588149	-1.662057699268403e-36	0.09281002492482053	-7.518766924395711	1.6327259743483692e-37	0.466385535029427	0.753321787356981
4.51	76.49883489808823	0.0	0.49277775680506397	399.26933552151536	-2.4490071430135967e-36	-800.6348005730018	0.0	0.01487993355142875	0.0	0.9999966246332095	2.9258037542584347e-41	0.0025982145959225315	-1.0857696756269628e-38	-1.2442042865597415e-36	0.2977337962176818	1.2001480350627539e-40	0.0	0.2999495637789952	0.0	800.6348005730018	76.50036272940135	-1.6612417036788718e-36	0.09525166656546462	-7.512171602354556	1.6312939616074199e-37	0.4572661276581435	0.7526075637058512
4.515	76.46124221919965	0.0	0.5004586919595255	399.651743459413	-2.457311312986954e-36	-800.6343189709727	0.0	0.015180457522249027	0.0	0.9999965266371883	2.966462390537375e-41	0.0026356613031084533	-1.0857695653036284e-38	-1.2442042775712098e-36	0.30202488746826706	1.2001485055066666e-40	0.0	0.30429844451450766	0.0	800.6343189709727	76.46281798055689	-1.6604264062296347e-36	0.09740126420906184	-7.505542315718827	1.6298542770459478e-37	0.46223749829623884	0.7519762559940115
4.52	76.42368072299672	0.0	0.508551289280212	400.03396376064575	-2.4656114083669853e-36	-800.6338252092978	0.0	0.015093809959920391	0.0	0.9999964263775101	3.007470881188759e-41	0.0026734302271961795	-1.0857694524887285e-38	-1.2442042685053534e-36	0.30635290261142617	1.2001489868178919e-40	0.0	0.3086225025518875	0.0	800.6338252092978	76.42530743047239	-1.6596118521931883e-36	0.09991872385276986	-7.498782952021799	1.628385425606261e-37	0.5111015286634368	0.7516180581527753
4.525	76.38615107122754	0.0	0.5166768156726027	400.4159965873008	-2.4739074326722922e-36	-800.6333198644212	0.0	0.015312220213455569	0.0	0.9999963235843438	3.0489226533777486e-41	0.0027116074148462047	-1.0857693368802756e-38	-1.2442042593415158e-36	0.3107277019216642	1.2001494802918349e-40	0.0	0.31300913051791707	0.0	800.6333198644212	76.38782980339298	-1.6587980130452113e-36	0.10241223332548807	-7.492334243890516	1.626985943991946e-37	0.4688160865529335	0.750698747469218
4.53	76.3486539423082	0.0	0.5245749549889877	400.79784210922315	-2.4821993895930295e-36	-800.6328020325583	0.0	0.015449269754409968	0.0	0.9999962191432286	3.0904496228069646e-41	0.002749853859486771	-1.0857692194752702e-38	-1.2442042501610217e-36	0.3151104379813193	1.200149981677372e-40	0.0	0.3174350202853511	0.0	800.6328020325583	76.35038428921133	-1.6579848707571208e-36	0.10467332777706827	-7.485691582674056	1.625543044914454e-37	0.4885461505894503	0.7501616879858167
4.535	76.31118757524555	0.0	0.5329163127438915	401.1795004851949	-2.49048728257672e-36	-800.6322719578089	0.0	0.015430842745873906	0.0	0.9999961118861339	3.1325034521660955e-41	0.0027885855436088547	-1.0857690989619287e-38	-1.2442042408644251e-36	0.3195487790667182	1.2001504965814617e-40	0.0	0.32185563110369425	0.0	800.6322719578089	76.31297290510184	-1.6571724704050453e-36	0.10730913041027311	-7.479032706725756	1.6240964538409926e-37	0.5164403734112436	0.7496842060998934
4.54	76.27375327210011	0.0	0.5411229241066825	401.5609718867298	-2.4987711153478744e-36	-800.6317296304063	0.0	0.015701612290048485	0.0	0.9999960024862644	3.174804056019654e-41	0.002827544507815822	-1.0857689760982153e-38	-1.244204231513246e-36	0.3240131651148592	1.2001510217727217e-40	0.0	0.32635381168254685	0.0	800.6317296304063	76.2755937391038	-1.6563607693413467e-36	0.10978113149568311	-7.472572530521641	1.622694108177376e-37	0.49194808877236645	0.7488748436551558
4.545	76.2363505626032	0.0	0.5493841296237689	401.94225647692673	-2.507050891450149e-36	-800.6311741575208	0.0	0.01570911386105059	0.0	0.999995891095906	3.217283600823884e-41	0.0028666682772428252	-1.085768851056022e-38	-1.2442042221230953e-36	0.3284964370194063	1.2001515565194534e-40	0.0	0.33085414130319013	0.0	800.6311741575208	76.23824736493626	-1.6555497804420655e-36	0.1122882406697322	-7.465920627552691	1.6212489051470806e-37	0.5258822823329324	0.7484418680952347
4.55	76.19897868799897	0.0	0.5579074806861161	402.3233544165923	-2.5153266143741938e-36	-800.6306061767801	0.0	0.01579661407062478	0.0	0.9999957767672043	3.2602891507634494e-41	0.0029062764988953675	-1.0857687227727167e-38	-1.2442042126161884e-36	0.3330352237970457	1.2001521053730836e-40	0.0	0.335379537887409	0.0	800.6306061767801	76.2009343197179	-1.654739515702346e-36	0.11498932452639903	-7.459487560077823	1.6198523738652602e-37	0.5048918238348739	0.7476554715424152
4.555	76.16163891099035	0.0	0.5661734222632966	402.7042658666782	-2.5235982876161702e-36	-800.6300251989063	0.0	0.016079041374238073	0.0	0.9999956605409079	3.303415789661827e-41	0.002945996243941136	-1.0857685924173718e-38	-1.2442042030830504e-36	0.33758679079203663	1.2001526633363179e-40	0.0	0.33998584393420933	0.0	800.6300251989063	76.16365278766784	-1.6539299347239217e-36	0.11742173771602446	-7.45281299396036	1.618402011152731e-37	0.5501445743291127	0.7473090430043527
4.56	76.12432855400591	0.0	0.5752247451942476	403.08499100188214	-2.5318659149721732e-36	-800.6294300562193	0.0	0.016328378233592233	0.0	0.9999955409783047	3.3471818781047164e-41	0.00298630492381318	-1.0857684583778734e-38	-1.2442041934086735e-36	0.3422058455803829	1.2001532373164276e-40	0.0	0.3446635797295999	0.0	800.6294300562193	76.12640637456116	-1.653121117839388e-36	0.12055559843592875	-7.445970132884838	1.616913974906358e-37	0.6493237147675086	0.7474228555936228
4.565	76.08704745051931	0.0	0.5846086380572484	403.46552998387267	-2.5401294999551788e-36	-800.6288196639244	0.0	0.01694397465931892	0.0	0.9999954154525045	3.392504030861011e-41	0.0030280467430798858	-1.0857683177135981e-38	-1.2442041833897313e-36	0.34698912735490306	1.2001538399249686e-40	0.0	0.34951767091037783	0.0	800.6288196639244	76.08919258331994	-1.6523130096053174e-36	0.12380975748622329	-7.439565829740029	1.6155232116893263e-37	0.6512007694949821	0.7468011929370916
4.57	76.04979507733069	0.0	0.5943002544959298	403.84588298019537	-2.5483890462075445e-36	-800.6281921038935	0.0	0.017861103612260152	0.0	0.9999952832663734	3.4395651626098356e-41	0.003071390166649602	-1.0857681696499736e-38	-1.2442041729864221e-36	0.35195594093324273	1.2001544745080952e-40	0.0	0.3546345001825197	0.0	800.6281921038935	76.0520108929078	-1.65150559860295e-36	0.12713405980193912	-7.432953577919458	1.6140859141711772e-37	0.718769692530694	0.7467625376410252
4.575	76.01256942327929	0.0	0.6048340603547477	404.22605015083343	-2.556644557204608e-36	-800.6275467870671	0.0	0.01860213059190789	0.0	0.9999951424498664	3.4889790405974775e-41	0.003116900475760953	-1.085768011988775e-38	-1.2442041620630818e-36	0.35717106317055003	1.20015515052342e-40	0.0	0.3599636180468573	0.0	800.6275467870671	76.0148628842254	-1.6506989201025526e-36	0.1309773824744085	-7.426456278388116	1.6126739234001092e-37	0.7699305676896295	0.7466260505358298
4.58	75.97537092541864	0.0	0.6156806905068616	404.60603165737797	-2.5648960364572195e-36	-800.6268828446472	0.0	0.019635148203554036	0.0	0.9999949918653667	3.5410345158804854e-41	0.0031648437030125697	-1.085767843466944e-38	-1.2442041505554613e-36	0.3626649794255069	1.200155873432903e-40	0.0	0.3655886736577449	0.0	800.6268828446472	75.97774599647992	-1.6498929173022968e-36	0.1347704167895687	-7.420228927757222	1.6113217010912113e-37	0.7663569008331738	0.7459698401395309
4.585	75.93819884035304	0.0	0.6270224102217025	404.985827662433	-2.573143487499226e-36	-800.6261989280484	0.0	0.020735532973187278	0.0	0.9999948313497347	3.595668555551317e-41	0.0032151617949670508	-1.0857676639134293e-38	-1.244204138477149e-36	0.3684310373685063	1.2001566440201093e-40	0.0	0.37152896628433485	0.0	800.6261989280484	75.94066078860017	-1.649087602740493e-36	0.1387047793258821	-7.413789095615897	1.6099220610650833e-37	0.8236862766479003	0.7459405327277187
4.59	75.90105178100868	0.0	0.6391137456542317	405.3654383204614	-2.5813869136851167e-36	-800.6254949137824	0.0	0.021713176931956086	0.0	0.9999946591728959	3.6533367478765147e-41	0.003268274349634919	-1.0857674714058162e-38	-1.2442041257281467e-36	0.37451731979209907	1.2001574705900915e-40	0.0	0.3777493332744444	0.0	800.6254949137824	75.90360786357142	-1.6482829899130212e-36	0.14297182056373758	-7.4075454224936745	1.608565707157686e-37	0.8480438216488067	0.7455931029036127
4.595	75.86393010321088	0.0	0.6515463165625298	405.74486378704097	-2.5896263183953058e-36	-800.6247698626534	0.0	0.022912994658904347	0.0	0.9999944749696956	3.7140129171673414e-41	0.003324157259181728	-1.0857672655501548e-38	-1.2442041123142932e-36	0.38092106430932593	1.200158354896037e-40	0.0	0.38431342272424945	0.0	800.6247698626534	75.86658516669429	-1.6474790333547383e-36	0.14716743606888563	-7.401423628742758	1.6072361425144716e-37	0.8570397686485542	0.745087839768955
4.6	75.82683279072762	0.0	0.6646022362628513	406.12410422286547	-2.597861705121499e-36	-800.6240227379761	0.0	0.024040318532422097	0.0	0.9999942786036494	3.777591848435733e-41	0.0033827136203741118	-1.0857670462084019e-38	-1.2442040982584244e-36	0.38763116675963655	1.2001592975938015e-40	0.0	0.39120046667453906	0.0	800.6240227379761	75.82959374658255	-1.646675756459205e-36	0.1515890414346685	-7.395157186376622	1.605874242649757e-37	0.9101528881477194	0.7450954844247913
4.605	75.78975889793664	0.0	0.6783134906426147	406.503159775272	-2.606093077063279e-36	-800.6232535003686	0.0	0.025115936653946052	0.0	0.9999940684904788	3.844424879907441e-41	0.003444267016680659	-1.085766811626501e-38	-1.2442040834832718e-36	0.3946847075005855	1.200160306288882e-40	0.0	0.39839565251848424	0.0	800.6232535003686	75.79263327041367	-1.645873151965051e-36	0.15622016017441623	-7.3891593703296605	1.6045716181188378e-37	0.9182761789522547	0.7445999418544282
4.61	75.75270861941385	0.0	0.6923821441384814	406.8820306006117	-2.614320437617957e-36	-800.6224611582606	0.0	0.026377599122067216	0.0	0.9999938445613642	3.91436206587761e-41	0.0035086793477682003	-1.0857665617441928e-38	-1.2442040680218221e-36	0.4020658615456062	1.200161381312158e-40	0.0	0.4059522780353964	0.0	800.6224611582606	75.75570212450911	-1.6450711842514207e-36	0.16078444011911916	-7.383158825247686	1.603268156273211e-37	0.9381124901270438	0.7442519014618987
4.615	75.71568074969008	0.0	0.7071508008243295	407.26071684926086	-2.6225437900527624e-36	-800.6216448852127	0.0	0.02749455258591481	0.0	0.999993606475163	3.9873392582642083e-41	0.0035758915331382283	-1.0857662961972613e-38	-1.2442040518881193e-36	0.4097678589758054	1.2001625243017615e-40	0.0	0.4138288871492635	0.0	800.6216448852127	75.71880175232657	-1.6442698854011757e-36	0.16563405480735555	-7.377061643153364	1.6019430683114868e-37	0.9885128760029009	0.7442996452565871
4.62	75.67867466315799	0.0	0.7225027028556289	407.6392186674904	-2.630763137544225e-36	-800.6208045896619	0.0	0.028622916611035092	0.0	0.9999933527177307	4.0636391739995875e-41	0.003646163955883169	-1.0857660133144177e-38	-1.2442040350201674e-36	0.4178205379579818	1.2001637425265713e-40	0.0	0.42202874874509955	0.0	800.6208045896619	75.68193113140056	-1.6434692328858417e-36	0.17061344909056037	-7.371280141618068	1.6006876055505084e-37	0.9876519891470384	0.743715183238039
4.625	75.64169036192506	0.0	0.7382327998854543	408.0175362020256	-2.6389784832806344e-36	-800.6199392781491	0.0	0.029918515629163537	0.0	0.9999930832148651	4.1430951972061537e-41	0.003719343162402855	-1.085765713031167e-38	-1.2442040174542916e-36	0.42620631419014804	1.2001650363437178e-40	0.0	0.43059977211933587	0.0	800.6199392781491	75.64508902413449	-1.6426691994502875e-36	0.17554145938577173	-7.365405865145884	1.5994114116701335e-37	1.0147515563346763	0.7434979776664429
4.63	75.60472649219064	0.0	0.7547068693860725	408.39566960668003	-2.647189830603591e-36	-800.6190482525569	0.0	0.031046790545187407	0.0	0.9999927973300317	4.225706868794735e-41	0.003795428729936497	-1.0857653946564213e-38	-1.244203999190522e-36	0.43492513954147854	1.2001664088095667e-40	0.0	0.4394940224476654	0.0	800.6190482525569	75.6082771074696	-1.6418698222776188e-36	0.1807845573976263	-7.359470473947502	1.5981214964020192e-37	1.0633089678308885	0.7435888085358376
4.635	75.567782548814	0.0	0.7717337065871719	408.77361902069265	-2.6553971825371393e-36	-800.6181313190802	0.0	0.03223110973168582	0.0	0.9999924935191554	4.311720940309246e-41	0.0038746479173737557	-1.0857650564898634e-38	-1.2442039801746247e-36	0.4440030564940873	1.2001678673370376e-40	0.0	0.44872755523090857	0.0	800.6181313190802	75.57149391278767	-1.6410710690054132e-36	0.18611782788380252	-7.353876508899523	1.5969068043076443e-37	1.0602633977742735	0.7429916431616448
4.64	75.53085830207948	0.0	0.789179194176645	409.1513845898614	-2.6636005422494104e-36	-800.6171874933975	0.0	0.033572109969239525	0.0	0.9999921715096194	4.401007892401653e-41	0.003956881437122843	-1.085764698247986e-38	-1.244203960434938e-36	0.45342639597429074	1.2001694132356784e-40	0.0	0.4583452562838411	0.0	800.6171874933975	75.53473846906284	-1.6402729183052593e-36	0.1914258590049534	-7.3481420557352335	1.5956608779186427e-37	1.091915471664839	0.742882703180831
4.645	75.49395228807883	0.0	0.8073981597075485	409.5289664569513	-2.6717999128420186e-36	-800.6162161046335	0.0	0.03475946096042959	0.0	0.9999918303418467	4.4936256961288637e-41	0.004042182680753351	-1.0857643188833139e-38	-1.2442039399588792e-36	0.463201276652772	1.2001710511126675e-40	0.0	0.4683031083397529	0.0	800.6162161046335	75.49801250741437	-1.6394754084972575e-36	0.19705606837793208	-7.342367343973896	1.5944058621306772e-37	1.140114701680721	0.7430357982415303
4.65	75.45706392935111	0.0	0.8261903081346601	409.9063647610151	-2.6799952973352407e-36	-800.6152168284822	0.0	0.0360266812314049	0.0	0.9999914683198765	4.5898137822380655e-41	0.004130772164698935	-1.0857639165313236e-38	-1.2442039186935216e-36	0.47335296849810143	1.2001727891105384e-40	0.0	0.4786239922618663	0.0	800.6152168284822	75.46131438782733	-1.6386785034798847e-36	0.20277555305077244	-7.336933834057173	1.5932259210091244e-37	1.14147207687716	0.7425197410683648
4.655	75.42019275084678	0.0	0.8454696258971036	410.2835796429183	-2.6881866987901463e-36	-800.6141886593748	0.0	0.0374436324027181	0.0	0.9999910848351659	4.689503906208139e-41	0.004222587035657026	-1.0857634905378574e-38	-1.2442038966539684e-36	0.48387426947721235	1.2001746301516616e-40	0.0	0.4893508027934415	0.0	800.6141886593748	75.42464330354203	-1.637882185575201e-36	0.20850849814951156	-7.3313535178085	1.5920133990637172e-37	1.1763315283120204	0.7425126279571544
4.66	75.38333721932264	0.0	0.8655515387798103	410.6606112432581	-2.6963741202614337e-36	-800.6131308491429	0.0	0.03874624480704296	0.0	0.9999906785969525	4.792797274282776e-41	0.004317720504935865	-1.0857630394916767e-38	-1.2442038738174707e-36	0.4947758614329506	1.2001765804338618e-40	0.0	0.5004507842905627	0.0	800.6131308491429	75.38800086812745	-1.637086490454862e-36	0.21455697256495962	-7.32573677600854	1.5907926552973232e-37	1.2260794052101085	0.7427630175179993
4.665	75.34649653087912	0.0	0.886277221118952	411.03745969655984	-2.7045575646714005e-36	-800.612042911963	0.0	0.0401348494440979	0.0	0.9999902476221324	4.899948538585303e-41	0.004416407107919306	-1.0857625612150175e-38	-1.2442038501280957e-36	0.5060846209649328	1.2001786494783153e-40	0.0	0.5119485717132616	0.0	800.612042911963	75.35138556088381	-1.636291384691459e-36	0.22072753279270835	-7.320431792191329	1.58964041159384e-37	1.2375686843560978	0.7424304537976902
4.67	75.30966995982007	0.0	0.9075890506385129	411.4141251385291	-2.7127370349692173e-36	-800.6109237693298	0.0	0.0416677970037696	0.0	0.9999897908507018	5.010959611736556e-41	0.004518648606237791	-1.0857620545567698e-38	-1.2442038255855587e-36	0.5178007505799606	1.2001808423749735e-40	0.0	0.5238855162628808	0.0	800.6109237693298	75.31479665312219	-1.635496852341733e-36	0.2269630658837402	-7.315010174677165	1.588462284659611e-37	1.2756373102569454	0.7425403989208266
4.675	75.2728559190809	0.0	0.9297442355894392	411.7906077089776	-2.7209125341928866e-36	-800.6097725050852	0.0	0.04314142152798167	0.0	0.9999893066265344	5.125963373607532e-41	0.004624567382718554	-1.0857615177059392e-38	-1.2442038001598217e-36	0.5299382751480284	1.2001831670764133e-40	0.0	0.5362446231416217	0.0	800.6097725050852	75.27823549103138	-1.6347029231397317e-36	0.23350312363839046	-7.309541872886882	1.5872736991274124e-37	1.3289869473180125	0.742937471780959
4.68	75.23605325976973	0.0	0.9526566663660861	412.1669075343987	-2.729084065090722e-36	-800.6085884271088	0.0	0.044695475666809294	0.0	0.9999887925555897	5.24524078940983e-41	0.00473442220720004	-1.085760948036038e-38	-1.2442037737897559e-36	0.5425268485890304	1.2001856350766216e-40	0.0	0.5490489337368109	0.0	800.6085884271088	75.24170091978858	-1.6339095717490023e-36	0.24022346071499984	-7.30433218764972	1.5861418492384704e-37	1.3548705995509345	0.7428926103351902
4.685	75.1992609699025	0.0	0.9762832265198723	412.54302475579436	-2.7372516307271712e-36	-800.6073703303038	0.0	0.04638958289612145	0.0	0.9999882470077137	5.368866535064001e-41	0.00484828185653444	-1.0857603437698848e-38	-1.2442037464574912e-36	0.5555743530904391	1.2001882542048606e-40	0.0	0.562338570303411	0.0	800.6073703303038	75.20519220658818	-1.6331167821443774e-36	0.24707147460370463	-7.299066297956358	1.5849974484021502e-37	1.3973292064966563	0.7431614746021952
4.69	75.16247736465522	0.0	1.0008160270398208	412.91895950225484	-2.745415233907885e-36	-800.6061170656835	0.0	0.0480856556232734	0.0	0.9999876678710979	5.49700316224206e-41	0.004966296041390092	-1.085759702598855e-38	-1.2442037181277468e-36	0.5690979453631423	1.200191034600503e-40	0.0	0.5761140959150763	0.0	800.6061170656835	75.16871030883554	-1.632324575474329e-36	0.2542176376331975	-7.293738764296857	1.5838393163940452e-37	1.4561766009132662	0.74376794401785
4.695	75.1257008620759	0.0	1.0262514331340504	413.2947119028002	-2.753574877436602e-36	-800.6048276792118	0.0	0.04985304356775993	0.0	0.9999870522375764	5.629957306963894e-41	0.005088747174528628	-1.0857590213357613e-38	-1.2442036887329583e-36	0.5831299889605983	1.2001939902274818e-40	0.0	0.5903959408766486	0.0	800.6048276792118	75.13225458128443	-1.6315329376327567e-36	0.26161678659417226	-7.288602332200848	1.5827230197423525e-37	1.4988867968757726	0.744112797812349
4.7	75.0889300946638	0.0	1.0525555293069917	413.6702820846386	-2.7617305640786086e-36	-800.6035007848751	0.0	0.051757338409660555	0.0	0.9999863977610457	5.767877998883891e-41	0.005215772512831563	-1.0857582974188902e-38	-1.244203658240614e-36	0.5976862137265646	1.200197132351272e-40	0.0	0.605223326125168	0.0	800.6035007848751	75.09582424321634	-1.6307418515544016e-36	0.269215360583945	-7.2834826978599665	1.581610235215745e-37	1.5481774688307952	0.7446205321170027
4.705	75.05216318560683	0.0	1.0798614987902027	414.0456701849606	-2.7698822968160263e-36	-800.6021349688589	0.0	0.053721071418664314	0.0	0.9999857017197278	5.910964048791386e-41	0.005347555161756684	-1.0857575278738314e-38	-1.2442036266052252e-36	0.6127876035658214	1.200200474043022e-40	0.0	0.6206132794412198	0.0	800.6021349688589	75.05941982156666	-1.6299513289034133e-36	0.2771200503971385	-7.278289853580115	1.580481199166772e-37	1.6142395846116016	0.7455150744904779
4.71	75.01539809314	0.0	1.1082352707282788	414.42087631937915	-2.7780300781621384e-36	-800.6007289467775	0.0	0.0557526233826934	0.0	0.9999849605969059	6.059539094775611e-41	0.005484393193069388	-1.0857567088510079e-38	-1.2442035937579113e-36	0.6284683169008436	1.2002040321870911e-40	0.0	0.6365852295242734	0.0	800.6007289467775	75.02304119296505	-1.6291613670508764e-36	0.2853530999270796	-7.273215077286703	1.5793779285449367e-37	1.6742613279839706	0.7463431419585316
4.715	74.9786330078574	0.0	1.1376561773257212	414.7959006268326	-2.786173911137431e-36	-800.5992811099682	0.0	0.05791905396539487	0.0	0.999984171169462	6.213824831411566e-41	0.005626490788295167	-1.08575583682946e-38	-1.2442035596467814e-36	0.6447517531643041	1.2002078222638812e-40	0.0	0.6531778162523113	0.0	800.5992811099682	74.98668757048895	-1.6283719487995556e-36	0.2938643262625527	-7.268211949668787	1.5782902252748318e-37	1.7341323836912226	0.7472223234719019
4.72	74.94186573237893	0.0	1.168217279301441	415.1707432336339	-2.794313798488407e-36	-800.5977897567627	0.0	0.06018805914547057	0.0	0.9999833298835487	6.374067895231687e-41	0.005774075100591704	-1.0857549079267238e-38	-1.2442035242172377e-36	0.661663944381536	1.2002118613395348e-40	0.0	0.6704204250829076	0.0	800.5977897567627	74.95035913923182	-1.6275830782948094e-36	0.3027138878282204	-7.263138874995908	1.5771870149509025e-37	1.8090138891268335	0.7485032903637139
4.725	74.90509377757937	0.0	1.2000196446048383	415.5454042601896	-2.802449742833236e-36	-800.5962532202165	0.0	0.06253606491729213	0.0	0.9999824325034369	6.540599038693356e-41	0.005927450754143224	-1.0857539175118523e-38	-1.2442034873977679e-36	0.6792398004815683	1.2002161697531416e-40	0.0	0.6883356880184924	0.0	800.5962532202165	74.91405610868091	-1.6267947602065267e-36	0.3119584105847919	-7.258121287527786	1.576095830657506e-37	1.884952710575021	0.7498891341096238
4.73	74.86831478572478	0.0	1.233068667000541	415.91988383405356	-2.8105817469457733e-36	-800.594669612126	0.0	0.06501794680829194	0.0	0.9999814747543062	6.713705499112116e-41	0.006086882295591772	-1.0857528609156527e-38	-1.2442034491238488e-36	0.6975096390394487	1.200220768034789e-40	0.0	0.7069619577420985	0.0	800.594669612126	74.8777778310005	-1.6260069803963512e-36	0.32156494115738304	-7.253175141921275	1.5750201742301394e-37	1.9603784826600321	0.7513430204284935
4.735	74.83152606541776	0.0	1.2674467080260112	416.29418208015926	-2.8187098135432073e-36	-800.5930369264655	0.0	0.06762052621054353	0.0	0.9999804520028157	6.893688866916072e-41	0.0062526474908637395	-1.0857517330782747e-38	-1.2442034093283642e-36	0.7165052927674709	1.2002256784362041e-40	0.0	0.726333811543688	0.0	800.5930369264655	74.8415243818901	-1.625219740595835e-36	0.3315755902613526	-7.248195377554131	1.5739370030466561e-37	2.045747658358325	0.7531362407484826
4.74	74.79472468255145	0.0	1.3032376061400588	416.6682991141477	-2.826833945141092e-36	-800.5913530904485	0.0	0.07033628036366088	0.0	0.9999793590805504	7.08089000852492e-41	0.006425060279215924	-1.0857505283551098e-38	-1.2442033679393316e-36	0.7362627399462021	1.2002309257754404e-40	0.0	0.7464836716011213	0.0	800.5913530904485	74.80529583342059	-1.624433042454657e-36	0.3420286162811039	-7.243242838462768	1.5728596732117174e-37	2.1346579539972015	0.7551247009435309
4.745	74.7579075970044	0.0	1.3404860287598392	417.04223507317016	-2.8349541447223357e-36	-800.5896158966677	0.0	0.07319309619837519	0.0	0.9999781904665205	7.275651602690724e-41	0.0066044362691014035	-1.0857492407185596e-38	-1.2442033248756553e-36	0.7568181505170453	1.2002365365730794e-40	0.0	0.7674519491094309	0.0	800.5896158966677	74.76909185069486	-1.6236468786912533e-36	0.3529229520730593	-7.23836064409061	1.5717976305383524e-37	2.2231910599011777	0.7572083154769522
4.75	74.72107138049543	0.0	1.379253148142791	417.41599007310674	-2.8430704148080014e-36	-800.5878231169701	0.0	0.07621586500486402	0.0	0.9999769398246245	7.47838731440624e-41	0.006791156447543197	-1.0857478632491509e-38	-1.2442032800491061e-36	0.7782151868432019	1.2002425412564014e-40	0.0	0.7892861860930186	0.0	800.5878231169701	74.73291215174645	-1.622861243198967e-36	0.3642643584112046	-7.233523943432374	1.5707454136274449e-37	2.3140280089996543	0.7594642471284896
4.755	74.68421218445968	0.0	1.4196200289209955	417.7895642348932	-2.851182758029033e-36	-800.5859724779281	0.0	0.0794219109750349	0.0	0.999975599980145	7.689572867678784e-41	0.006985658958140679	-1.0857463881108776e-38	-1.2442032333536358e-36	0.800504061613608	1.2002489742846929e-40	0.0	0.8120388875916849	0.0	800.5859724779281	74.69675656714247	-1.6220761323335444e-36	0.3760700637080872	-7.228713632834409	1.5696988432934789e-37	2.409029067733775	0.7619561787577571
4.76	74.64732576897754	0.0	1.4616798278781769	418.1629576787896	-2.859291177001903e-36	-800.5840616038106	0.0	0.08282417683491206	0.0	0.9999741629683899	7.909725366032682e-41	0.007188420055199954	-1.0857448066060075e-38	-1.244203184674012e-36	0.8237393553921012	1.2002558739126232e-40	0.0	0.8357662664631131	0.0	800.5840616038106	74.66062500160741	-1.6212915440747505e-36	0.3883638288213478	-7.2239123190468515	1.5686541133663246e-37	2.5095376572974737	0.7647397495009067
4.765	74.6104075181482	0.0	1.5055366006829312	418.5361705248943	-2.8673956743398727e-36	-800.5820879773495	0.0	0.08642944831877651	0.0	0.9999726200683895	8.139387260721771e-41	0.007399939338417401	-1.0857431092132195e-38	-1.2442031338898698e-36	0.8479783246921854	1.200263282027657e-40	0.0	0.860526479534663	0.0	800.5820879773495	74.62451746755265	-1.6205074787572825e-36	0.4011769712901783	-7.21909648752804	1.5676060808297718e-37	2.617045896147242	0.7678820437982699
4.77	74.57345246195074	0.0	1.5513021246246146	418.9092028936956	-2.8754962526650476e-36	-800.5800489062085	0.0	0.09023837489193702	0.0	0.9999709618462429	8.379110607421386e-41	0.007620725253252494	-1.0857412856361825e-38	-1.2442030808814355e-36	0.873279240495895	1.200271243940919e-40	0.0	0.8863778696917994	0.0	800.5800489062085	74.58843409417065	-1.61972393926907e-36	0.4145473596300851	-7.214245636744702	1.5665502738882004e-37	2.7324785197507993	0.7714387789590922
4.775	74.53645529768704	0.0	1.5990903905789002	419.28205490649435	-2.8835929146175824e-36	-800.577941504161	0.0	0.0942479700904928	0.0	0.9999691781888239	8.629445069450216e-41	0.00785128404186424	-1.0857393248413105e-38	-1.2442030255267725e-36	0.8997001221891354	1.2002798082308574e-40	0.0	0.9133779242611016	0.0	800.577941504161	74.55237509690004	-1.618940930373078e-36	0.4285155564091512	-7.209343134453405	1.5654830813099088e-37	2.856230121120889	0.7754526351434284
4.78	74.49941040345725	0.0	1.6490151324461588	419.65472668585943	-2.891685662865592e-36	-800.5757626779177	0.0	0.09845177899202107	0.0	0.9999672583365633	8.890927343840723e-41	0.008092110004494495	-1.0857372150943788e-38	-1.2442029677047482e-36	0.927297621664039	1.2002890265857244e-40	0.0	0.9415822813700894	0.0	800.5757626779177	74.51634077459116	-1.6181584586444423e-36	0.44312379858808254	-7.204373529476035	1.5644011381871392e-37	2.9884918686022917	0.7799620606216497
4.785	74.46231184857065	0.0	1.7011874140182495	420.0272183560662	-2.899774500114701e-36	-800.5735091217518	0.0	0.10284041701706083	0.0	0.999965190906288	9.164073178566537e-41	0.008343678147313799	-1.0857349439860912e-38	-1.2442029073036451e-36	0.9561261808940807	1.2002989536879616e-40	0.0	0.9710438906623041	0.0	800.5735091217518	74.48033149898394	-1.6173765322481205e-36	0.4584146756869045	-7.199321393140442	1.5633010916444762e-37	3.129304712007208	0.7850017611592993
4.79	74.42515341774485	0.0	1.755713932776382	420.3995300434487	-2.9078594291156846e-36	-800.5711773151626	0.0	0.1074012755631976	0.0	0.9999629639475377	9.44936734625979e-41	0.008606434948186494	-1.085732498494193e-38	-1.2442028442147096e-36	0.9862369738343946	1.2003096469529641e-40	0.0	1.001812089682768	0.0	800.5711773151626	74.44434772261046	-1.6165951610985346e-36	0.4744308017359743	-7.194171991964993	1.5621797506743687e-37	3.2785162654662665	0.7905996430109264
4.795	74.38792863117826	0.0	1.812694632125999	420.7716618767715	-2.915940452672557e-36	-800.568763528123	0.0	0.11211933427573913	0.0	0.9999605649800796	9.747257214854526e-41	0.00888079243521486	-1.0857298650248247e-38	-1.2442027783386497e-36	1.0176772279410424	1.2003211663449651e-40	0.0	1.0339319129618496	0.0	800.568763528123	74.40838996464284	-1.615814356555683e-36	0.4912132988718525	-7.188911297310341	1.5610340709244779e-37	3.4358190152346055	0.7967766182942616
4.8	74.35063077035369	0.0	1.872221782004871	421.14361398759934	-2.9240175736505206e-36	-800.5662638285716	0.0	0.11697684011494064	0.0	0.9999579810504864	1.0058145868596142e-40	0.009167121851167484	-1.0857270294746149e-38	-1.2442027095867951e-36	1.050489498230431	1.200333574106725e-40	0.0	1.0674433091586633	0.0	800.5662638285716	74.37245881938017	-1.6150341316089888e-36	0.5088018081396904	-7.183524532306981	1.5598608537875806e-37	3.600839855451793	0.803548830942254
4.805	74.31325291473567	0.0	1.9343781109778964	421.5153865106108	-2.932090794982845e-36	-800.5636740925748	0.0	0.12195371551425951	0.0	0.9999551988078531	1.0382384959334392e-40	0.009465747069496376	-1.0857239773135846e-38	-1.2442026378798208e-36	1.0847109128630814	1.2003469343990115e-40	0.0	1.1023804751331943	0.0	800.5636740925748	74.3365549509803	-1.6142545007573e-36	0.5272335860025575	-7.1779984336053815	1.5586572310971476e-37	3.773022084744034	0.8109214337086394
4.81	74.27578797633117	0.0	1.999235389848495	421.88697958394323	-2.9401601196782218e-36	-800.5609900198232	0.0	0.12702802296392388	0.0	0.9999522045725882	1.0720270057344427e-40	0.009776940312425758	-1.0857206936602832e-38	-1.2442025631528466e-36	1.1203726825208555	1.200361312968028e-40	0.0	1.138771323111813	0.0	800.5609900198232	74.3006790852486	-1.613475479834195e-36	0.5465427074545071	-7.172321599503088	1.5574207352337963e-37	3.9516504403944444	0.8188878942185442
4.815	74.23822874245236	0.0	2.0668529147058416	422.25839334945675	-2.9482255508265722e-36	-800.5582071509153	0.0	0.1321765418972583	0.0	0.9999489844233818	1.107203599029509e-40	0.010100917858122749	-1.0857171633766694e-38	-1.2442024853557624e-36	1.1574996085207792	1.2003767767291514e-40	0.0	1.176637113118548	0.0	800.5582071509153	74.26483199760668	-1.612697085743917e-36	0.5667591683057434	-7.166486543579491	1.5561497671721046e-37	4.135754068205065	0.8274236586657446
4.82	74.20056792815167	0.0	2.137275464143765	422.62962795300047	-2.956287091604712e-36	-800.5553208866639	0.0	0.1373757831668165	0.0	0.9999455243027662	1.1437852326122824e-40	0.010437835880403628	-1.0857133711831597e-38	-1.244202404448071e-36	1.1961096061013143	1.2003933932672874e-40	0.0	1.2159923760323625	0.0	800.5553208866639	74.22901448836139	-1.6119193359133276e-36	0.5879074401415105	-7.160493712160351	1.554844453474832e-37	4.323995252262192	0.8364783628012975
4.825	74.16279823108094	0.0	2.21053243672567	423.0006835447581	-2.9643447452838442e-36	-800.5523265044062	0.0	0.14260219632847	0.0	0.9999418101360064	1.1817818856679683e-40	0.010787786289151767	-1.085709301788152e-38	-1.2442023204080378e-36	1.2362132277605273	1.2004112302593651e-40	0.0	1.256844896026949	0.0	800.5523265044062	74.19322736849735	-1.6111422479933923e-36	0.6100062034062816	-7.15431375718841	1.5534984179917577e-37	4.5166055496730735	0.8460728752751323
4.83	74.12491235581419	0.0	2.2866488561021843	423.3715602793045	-2.97239851523071e-36	-800.549219188005	0.0	0.14782456252097975	0.0	0.999937827926243	1.2211965993768878e-40	0.011150797095058142	-1.0857049399912917e-38	-1.2442022332254177e-36	1.2778137050541805	1.2004303550250557e-40	0.0	1.2991935137310484	0.0	800.549219188005	74.15747167510357	-1.610365844550847e-36	0.6330792731230815	-7.147932119497824	1.5521085004580829e-37	4.713011897784817	0.8561858135569049
4.835	74.08690308622802	0.0	2.3656277166187905	423.7422583155673	-2.9804484049067197e-36	-800.5459940608854	0.0	0.15301742976720586	0.0	0.9999335638240524	1.2620257886154947e-40	0.011526835280388135	-1.085700270758699e-38	-1.2442021429144115e-36	1.3209072775507016	1.200450834180972e-40	0.0	1.3430297783190503	0.0	800.5459940608854	74.12174831697543	-1.6095901453520226e-36	0.6571374991779273	-7.141398385487937	1.5506855457436865e-37	4.909628449597825	0.8666257693684747
[truncated: 16,521 more rows]
