# Supplementary material for: An Efficient Contact Model for the Simulation of Cargo Airdrop Extraction Phase
Source: Hindawi journal article supplement (doi:10.1155/2018/9895451), 2018-10-17
Supplement: f1 [file 9895451.f1.zip › case3_aircraft_coupling/m4000/hist_contact.csv]

t(s)	cntcNrmForc(N)	cntcFricForc(N)	cntcPitchMoment(N/m)
2.48500000	39200.00000000	0.00000000	-0.00000000
2.48501300	39200.00000000	0.00000000	-0.00000000
2.48502600	39200.00000000	0.00000000	-0.00000000
2.48533400	39200.00000000	0.00000000	-0.00000000
2.48564300	39200.00000000	0.00000000	0.00000100
2.48595100	39200.00000100	0.00000000	-0.00000000
2.48686600	39200.00000300	0.00000000	0.00000200
2.48778100	39200.00000800	0.00000000	0.00000300
2.48783900	39200.00000800	0.00000000	0.00000300
2.48789600	39200.00000800	0.00000000	0.00000300
2.48795300	39200.00000900	0.00000000	0.00000300
2.48796700	39200.00000900	0.00000000	0.00000300
2.48798200	39200.00000900	0.00000000	0.00000300
2.48799600	39200.00000900	0.00000000	0.00000300
2.48799900	39200.00000900	0.00000000	0.00000300
2.48800200	39200.00000900	0.00000000	0.00000300
2.48800700	39200.00000900	0.00000000	0.00000300
2.48800800	39200.00000900	0.00000000	0.00000300
2.48800900	39200.00000900	0.00000000	0.00000300
2.48801000	39200.00000900	0.00000000	0.00000300
2.48801100	39200.00000900	0.00000000	0.00000300
2.48801800	39200.00000900	0.00000000	0.00000300
2.48802600	39200.00000900	0.00000000	0.00000300
2.48803300	39200.00000900	0.00000000	0.00000300
2.48804000	39200.00000900	0.00000000	0.00000300
2.48804700	39200.00000900	0.00000000	0.00000300
2.48807500	39200.00000900	0.00000000	0.00000300
2.48810400	39200.00001000	0.00000000	0.00000400
2.48813200	39200.00001000	0.00000000	0.00000400
2.48816000	39200.00001000	0.00000000	0.00000400
2.48821700	39200.00001000	0.00000000	0.00000400
2.48824800	39200.00001100	0.00000000	0.00000400
2.48825700	39200.00001100	0.00000000	0.00000400
2.48826400	39200.00001100	0.00000000	0.00000400
2.48826500	39200.00001100	0.00000000	0.00000400
2.48826600	39200.00001100	0.00000000	0.00000400
2.48826700	39200.00001100	0.00000000	0.00000400
2.48826900	39200.28391500	0.00000000	-0.03099000
2.48827000	39200.48333500	0.00000000	-0.05276100
2.48827200	39200.68291200	0.00000000	-0.07454900
2.48827300	39200.88264400	0.00000000	-0.09635500
2.48828700	39202.88853800	0.00000000	-0.31535100
2.48830100	39204.90994800	0.00000000	-0.53605300
2.48831500	39206.94679200	0.00000000	-0.75845200
2.48832900	39208.99898900	21.65182700	12.95475200
2.48834300	39211.06644000	56.48798800	35.12559900
2.48837300	39215.54586700	131.80009900	83.01658200
2.48840300	39220.09412600	207.97159800	131.38528400
2.48843300	39224.71039000	284.90532600	180.15363200
2.48846200	39229.39384000	362.60894800	229.33036200
2.48847200	39230.93646500	388.12912100	245.46452900
2.48848200	39232.48612900	369.85253500	233.39744600
2.48849200	39234.04282200	299.01878000	187.52411200
2.48850100	39235.60651500	206.78662000	127.90441700
2.48851900	39238.48401900	82.61639500	47.59632900
2.48853700	39241.38461700	78.48276900	44.57412900
2.48855500	39244.30809200	78.48861600	44.15893100
2.48857300	39247.25434200	78.49450900	43.82181900
2.48861700	39254.57121500	78.50914200	42.91725300
2.48866000	39262.02095800	78.52404200	41.99744500
2.48870400	39269.60092800	78.53920200	41.06380300
2.48874800	39277.30847500	78.55461700	40.11666100
2.48882500	39291.20949200	78.58241900	38.41376900
2.48890200	39305.48454800	78.61096900	36.67180000
2.48897900	39320.11890900	78.64023800	34.89264200
2.48905700	39335.09767300	78.67019500	33.07824900
2.48913400	39350.40588900	78.70081200	31.23059900
2.48927000	39378.06802000	78.75613600	27.90822800
2.48940500	39406.62027500	78.81324100	24.50028600
2.48954100	39435.98097000	78.87196200	21.01795900
2.48967700	39466.06845400	78.93213700	17.47256900
2.48981200	39496.80165900	78.99360300	13.87545200
2.48994800	39528.09995500	79.05620000	10.23797800
2.49008400	39559.88351900	79.11976700	6.57146100
2.49021900	39592.07350900	79.18414700	2.88711100
2.49035500	39624.59225300	79.24918500	-0.80401900
2.49056000	39674.18607100	79.34837200	-6.37055200
2.49076500	39724.10008600	79.44820000	-11.89163900
2.49097000	39774.08680100	79.54817400	-17.33275500
2.49117500	39823.90901400	79.64781800	-22.66144900
2.49138000	39873.34069500	79.74668100	-27.84762300
2.49158500	39922.16783200	79.84433600	-32.86379300
2.49183100	39979.47864900	79.95895700	-38.60443200
2.49207600	40035.31853000	80.07063700	-44.03034100
2.49232100	40089.39618700	80.17879200	-49.11136400
2.49256600	40141.44912600	80.28289800	-53.82392300
2.49281100	40191.24320200	80.38248600	-58.15079000
2.49305700	40238.57320200	80.47714600	-62.08118300
2.49330200	40283.26223800	80.56652400	-65.61045500
2.49359200	40332.57438400	80.66514900	-69.27370700
2.49388300	40377.77406700	80.75554800	-72.38771900
2.49417300	40418.71231900	80.83742500	-74.97359600
2.49446300	40455.28762500	80.91057500	-77.06062000
2.49475400	40487.44301600	80.97488600	-78.68499600
2.49504400	40515.16262300	81.03032500	-79.88842800
2.49533500	40538.46826000	81.07693700	-80.71676000
2.49562500	40557.41598000	81.11483200	-81.21865600
2.49611200	40579.66397800	81.15932800	-81.46602900
2.49651500	40589.40002800	81.17880000	-81.25287600
2.49691800	40591.73227500	81.18346500	-80.80044900
2.49732100	40587.14576500	81.17429200	-80.22975600
2.49772400	40576.17711700	81.15235400	-79.64917500
2.49779600	40573.58014700	81.14716000	-79.55155500
2.49781100	40573.03865000	81.14607700	-79.53239900
2.49782500	40572.48985200	81.14498000	-79.51337500
2.49783900	40571.93378200	81.14386800	-79.49448900
2.49785400	40571.37046500	81.14274100	-79.47574400
2.49785700	40571.25693500	81.14251400	-79.47201200
2.49785900	40571.16491400	81.14233000	-79.46899800
2.49786100	40571.07287200	81.14214600	-79.46598500
2.49786400	40570.98088300	81.14196200	-79.46296900
2.49786800	40570.79678900	81.14159400	-79.45693900
2.49787300	40570.61267700	81.14122500	-79.45090700
2.49787800	40570.42854500	81.14085700	-79.44487400
2.49792400	40568.58617200	81.13717200	-79.38444600
2.49797100	40566.74188300	81.13348400	-79.32384900
2.49801800	40564.89569200	81.12979100	-79.26308200
2.49806500	40563.04761300	81.12609500	-79.20214800
2.49848900	40546.18966100	81.09237900	-78.64147000
2.49891300	40529.18807200	81.05837600	-78.06739500
2.49933700	40512.05332900	81.02410700	-77.48034600
2.49976100	40494.79573500	80.98959100	-76.88074600
2.50018500	40477.42537000	80.95485100	-76.26901200
2.50060400	40460.15703100	80.92031400	-75.65291500
2.50064400	40458.50286800	80.91700600	-75.59348900
2.50068400	40456.84788200	80.91369600	-75.53396300
2.50069000	40456.59909500	80.91319800	-75.52500900
2.50069700	40456.35029000	80.91270100	-75.51605200
2.50070300	40456.10146700	80.91220300	-75.50709300
2.50071500	40455.60376700	80.91120800	-75.48916800
2.50072700	40455.10599400	80.91021200	-75.47123400
2.50073900	40454.60814700	80.90921600	-75.45329200
2.50085900	40449.62571800	80.89925100	-75.27337000
2.50097900	40444.63626100	80.88927300	-75.09255900
2.50110000	40439.63996300	80.87928000	-74.91086500
2.50122000	40434.63705600	80.86927400	-74.72829900
2.50156200	40420.39196000	80.84078400	-74.20503700
2.50190300	40406.10006400	80.81220000	-73.67502000
2.50224500	40391.76615400	80.78353200	-73.13845600
2.50258700	40377.39492000	80.75479000	-72.59555300
2.50292900	40362.99095600	80.72598200	-72.04651400
2.50365600	40332.24865000	80.66449700	-70.85857600
2.50438400	40301.42096700	80.60284200	-69.64570400
2.50511100	40270.54873200	80.54109700	-68.40979100
2.50583800	40239.67115800	80.47934200	-67.15269800
2.50656600	40208.82588100	80.41765200	-65.87624600
2.50729300	40178.04896200	80.35609800	-64.58221600
2.50831000	40135.20794700	80.27041600	-62.74723200
2.50932700	40092.65692000	80.18531400	-60.88593600
2.51034300	40050.47937100	80.10095900	-59.00280700
2.51136000	40008.75316100	80.01750600	-57.10217000
2.51237700	39967.55065900	79.93510100	-55.18819300
2.51339300	39926.93886600	79.85387800	-53.26488500
2.51441000	39886.97955100	79.77395900	-51.33609900
2.51597500	39826.88076700	79.65376200	-48.36518700
2.51754000	39768.64466400	79.53728900	-45.40272600
2.51910500	39712.42892500	79.42485800	-42.46055300
2.52067000	39658.36625700	79.31673300	-39.54961600
2.52223500	39606.56578400	79.21313200	-36.67999300
2.52380000	39557.11447500	79.11422900	-33.86089600
2.52536400	39510.07857700	79.02015700	-31.10069600
2.52692900	39465.50503900	78.93101000	-28.40693600
2.52849400	39423.42293400	78.84684600	-25.78636000
2.53005900	39383.84486400	78.76769000	-23.24493100
2.53202400	39337.68522200	78.67537000	-20.17351600
2.53398900	39295.43408800	78.59086800	-17.24379800
2.53558400	39263.98858600	78.52797700	-14.97629700
2.53717800	39235.02444700	78.47004900	-12.80964200
2.53877200	39208.48383800	78.41696800	-10.74613600
2.54036600	39184.30010200	78.36860000	-8.78746400
2.54196000	39162.39898800	78.32479800	-6.93472200
2.54355400	39142.69975100	78.28540000	-5.18845800
2.54514800	39125.11622400	78.25023200	-3.54870900
2.54702600	39106.98652700	78.21397300	-1.75236900
2.54749600	39102.87557800	78.20575100	-1.32614200
2.54796600	39098.92831900	78.19785700	-0.90900000
2.54796800	39098.90898800	78.19781800	-0.90693700
2.54797000	39098.88966500	78.19777900	-0.90487400
2.54797300	39098.87034500	78.19774100	-0.90281200
2.54797500	39098.85045300	78.19770100	-0.90068800
2.54797600	39098.84146400	78.19768300	-0.89972800
2.54797700	39098.83947400	78.19767900	-0.89951600
2.54797800	39098.84011900	78.19768000	-0.89461200
2.54797900	39098.84169500	78.19768300	-0.89068500
2.54798000	39098.84328100	78.19768700	-0.88675400
2.54799000	39098.85963500	78.19771900	-0.84731400
2.54800000	39098.87689600	78.19775400	-0.80762600
2.54801100	39098.89506100	78.19779000	-0.76769100
2.54802100	39098.91412900	78.19782800	-0.72751000
2.54812300	39099.15419900	78.19830800	-0.31222400
2.54822500	39099.48314500	78.19896600	0.12725200
2.54832600	39099.89961600	78.19979900	0.59047200
2.54842800	39100.40222000	78.20080400	1.07697900
2.54853000	39100.98951500	78.20197900	1.58630200
2.54893000	39104.07686500	78.20815400	3.79177400
2.54932900	39108.34502500	78.21669000	6.30895600
2.54972800	39113.69045300	78.22738100	9.10480900
2.55012700	39120.00179300	78.24000400	12.14419400
2.55052700	39127.16255300	78.25432500	15.39079000
2.55092600	39135.05152800	78.27010300	18.80721500
2.55128800	39142.72659700	78.28545300	22.01858300
2.55165000	39150.80428500	78.30160900	25.31013300
2.55201200	39159.19079900	78.31838200	28.65389300
2.55237300	39167.79294700	78.33558600	32.02238200
2.55273500	39176.51892000	78.35303800	35.38885700
2.55309700	39185.27905300	78.37055800	38.72753300
2.55363000	39198.05888800	78.39611800	43.54172800
2.55416300	39210.46254800	78.42092500	48.16935800
2.55469600	39222.24785600	78.44449600	52.54462000
2.55522900	39233.19732300	78.46639500	56.61019500
2.55576200	39243.12029000	78.48624100	60.31750500
2.55629400	39251.85588900	78.50371200	63.62743800
2.55682700	39259.27462000	78.51854900	66.51049300
2.55743700	39266.02697900	78.53205400	69.26157100
2.55804700	39270.83475700	78.54167000	71.41279500
2.55865700	39273.66079800	78.54732200	72.96483700
2.55926700	39274.52184200	78.54904400	73.93267100
2.55987700	39273.48544200	78.54697100	74.34420300
2.56048700	39270.66580600	78.54133200	74.23863900
2.56059400	39270.00030000	78.54000100	74.17054600
2.56070000	39269.28580000	78.53857200	74.08836500
2.56080700	39268.52333900	78.53704700	73.99241000
2.56082900	39268.36517900	78.53673000	73.97159200
2.56085000	39268.20515000	78.53641000	73.95023800
2.56087100	39268.04326200	78.53608700	73.92835000
2.56088000	39267.97799200	78.53595600	73.91944700
2.56088800	39267.91242100	78.53582500	73.91045800
2.56089700	39267.84655500	78.53569300	73.90138400
2.56090500	39267.78086600	78.53556200	73.89234100
2.56091400	39267.71516100	78.53543000	73.88328200
2.56092200	39267.64943800	78.53529900	73.87420600
2.56094000	39267.51805700	78.53503600	73.85603200
2.56095700	39267.38676200	78.53477400	73.83783000
2.56097400	39267.25555400	78.53451100	73.81960000
2.56099100	39267.12443300	78.53424900	73.80134100
2.56116100	39265.81800800	78.53163600	73.61720300
2.56133200	39264.52027900	78.52904100	73.43027400
2.56150300	39263.23124700	78.52646200	73.24058900
2.56167400	39261.95091400	78.52390200	73.04818700
2.56268400	39254.55640500	78.50911300	71.85664900
2.56369300	39247.46566000	78.49493100	70.57873700
2.56470300	39240.67768100	78.48135500	69.22170700
2.56571300	39234.19078600	78.46838200	67.79258500
2.56672300	39228.00259100	78.45600500	66.29815300
2.56851600	39217.74217100	78.43548400	63.50414200
2.57030900	39208.39405600	78.41678800	60.55989800
2.57180200	39201.28681700	78.40257400	58.01670000
2.57329600	39194.77881700	78.38955800	55.40982000
2.57478900	39188.85239300	78.37770500	52.75587700
2.57628200	39183.48799200	78.36697600	50.07045900
2.57777600	39178.66509800	78.35733000	47.36805900
2.57926900	39174.36212900	78.34872400	44.66213100
2.57993500	39172.60558200	78.34521100	43.45800200
2.58010100	39172.18166100	78.34436300	43.15737000
2.58010400	39172.17324200	78.34434600	43.15135900
2.58010800	39172.16483000	78.34433000	43.14534800
2.58011100	39172.15642000	78.34431300	43.13933800
2.58011400	39172.14801100	78.34429600	43.13332700
2.58011800	39172.13960600	78.34427900	43.12731700
2.58012400	39172.12280200	78.34424600	43.11529600
2.58012500	39172.12226200	78.34424500	43.11491000
2.58012600	39172.11956500	78.34423900	43.11298000
2.58012700	39172.12212400	78.34424400	43.11183500
2.58012800	39172.12415500	78.34424800	43.11104900
2.58013600	39172.14669400	78.34429300	43.10242200
2.58014400	39172.16749000	78.34433500	43.09462400
2.58015200	39172.18857600	78.34437700	43.08686900
2.58015900	39172.20995200	78.34442000	43.07915500
2.58023700	39172.43963300	78.34487900	43.00432600
2.58031400	39172.69815900	78.34539600	42.93366600
2.58039200	39172.98536500	78.34597100	42.86713900
2.58046900	39173.30108500	78.34660200	42.80470500
2.58054600	39173.64513700	78.34729000	42.74632500
2.58097400	39176.04710500	78.35209400	42.49491800
2.58140200	39179.26914800	78.35853800	42.35807600
2.58183000	39183.26479300	78.36653000	42.32698000
2.58225800	39187.97939400	78.37595900	42.39182100
2.58268500	39193.35112200	78.38670200	42.54200800
2.58311300	39199.31209500	78.39862400	42.76638300
2.58354100	39205.78934700	78.41157900	43.05339000
2.58388900	39211.39222800	78.42278400	43.32524200
2.58423800	39217.24331800	78.43448700	43.62440400
2.58458600	39223.29858200	78.44659700	43.94450300
2.58493400	39229.51368600	78.45902700	44.27928700
2.58528300	39235.84394200	78.47168800	44.62260500
2.58566100	39242.80522200	78.48561000	44.99860000
2.58604000	39249.79407700	78.49958800	45.37031700
2.58641900	39256.75516600	78.51351000	45.73072300
2.58679800	39263.63544200	78.52727100	46.07327300
2.58717600	39270.38433000	78.54076900	46.39191200
2.58755500	39276.95371400	78.55390700	46.68106300
2.58790000	39282.74446800	78.56548900	46.91456300
2.58824500	39288.31744300	78.57663500	47.11601400
2.58859000	39293.64377400	78.58728800	47.28242400
2.58893500	39298.69734400	78.59739500	47.41121000
2.58928000	39303.45493900	78.60691000	47.50020100
2.58962500	39307.89634800	78.61579300	47.54764100
2.59021700	39314.73075600	78.62946200	47.52857700
2.59080900	39320.52128200	78.64104300	47.37942300
2.59140100	39325.23045700	78.65046100	47.09942400
2.59199300	39328.84869700	78.65769700	46.69103300
2.59258500	39331.39175600	78.66278400	46.15944200
2.59317700	39332.90020200	78.66580000	45.51239300
2.59376900	39333.43704200	78.66687400	44.75978300
2.59408700	39333.35256700	78.66670500	44.31598300
2.59440400	39333.02636200	78.66605300	43.84705000
2.59472200	39332.47467200	78.66494900	43.35505900
2.59504000	39331.71487000	78.66343000	42.84216600
2.59535800	39330.76530100	78.66153100	42.31058000
2.59567600	39329.64513700	78.65929000	41.76255200
2.59608900	39327.96795800	78.65593600	41.02984300
2.59650200	39326.08120200	78.65216200	40.27822200
2.59691500	39324.03051300	78.64806100	39.51263700
2.59732800	39321.86186400	78.64372400	38.73793600
2.59774100	39319.62100200	78.63924200	37.95881400
2.59828100	39316.65590200	78.63331200	36.94056800
2.59882100	39313.74127700	78.62748300	35.93180600
2.59925700	39311.48949200	78.62297900	35.13075600
2.59969300	39309.37528500	78.61875100	34.34548700
2.60012800	39307.43994700	78.61488000	33.57956800
2.60056400	39305.72093700	78.61144200	32.83611800
2.60100000	39304.25140600	78.60850300	32.11777600
2.60136200	39303.23950100	78.60647900	31.54074900
2.60172500	39302.43411800	78.60486800	30.98358200
2.60208800	39301.84682600	78.60369400	30.44702900
2.60245000	39301.48679700	78.60297400	29.93161600
2.60281300	39301.36080300	78.60272200	29.43765700
2.60317500	39301.47319200	78.60294600	28.96525400
2.60353800	39301.82593000	78.60365200	28.51431000
2.60390000	39302.41865300	78.60483700	28.08454400
2.60426300	39303.24875100	78.60649800	27.67550200
2.60462600	39304.31144200	78.60862300	27.28657100
2.60498800	39305.59988700	78.61120000	26.91699700
2.60535100	39307.10530800	78.61421100	26.56589600
2.60571300	39308.81713400	78.61763400	26.23227200
2.60607600	39310.72314400	78.62144600	25.91503500
2.60643900	39312.80963400	78.62561900	25.61301400
2.60680100	39315.06159100	78.63012300	25.32497600
2.60716400	39317.46286000	78.63492600	25.04964000
2.60752600	39319.99634100	78.63999300	24.78569200
2.60788900	39322.64417100	78.64528800	24.53180000
2.60825100	39325.38790800	78.65077600	24.28662900
2.60861400	39328.20873400	78.65641700	24.04885200
2.60905800	39331.73621600	78.66347200	23.76615400
2.60950100	39335.31579100	78.67063200	23.49025300
2.60994500	39338.91311300	78.67782600	23.21893400
2.61038800	39342.49476700	78.68499000	22.95011000
2.61083200	39346.02868000	78.69205700	22.68184100
2.61127500	39349.48454800	78.69896900	22.41235700
2.61164300	39352.27239900	78.70454500	22.18669400
2.61201100	39354.97220500	78.70994400	21.95828800
2.61237900	39357.57037400	78.71514100	21.72642700
2.61274700	39360.05465400	78.72010900	21.49049400
2.61311500	39362.41422700	78.72482800	21.24997000
2.61348300	39364.63976400	78.72928000	21.00443400
2.61385100	39366.72347900	78.73344700	20.75356400
2.61421900	39368.65914100	78.73731800	20.49713400
2.61458700	39370.44209600	78.74088400	20.23501200
2.61495500	39372.06925300	78.74413900	19.96715600
2.61532300	39373.53908200	78.74707800	19.69361000
2.61569100	39374.85156700	78.74970300	19.41450300
2.61605900	39376.00816300	78.75201600	19.13004200
2.61642700	39377.01173900	78.75402300	18.84050600
2.61679500	39377.86650200	78.75573300	18.54624100
2.61716300	39378.57791700	78.75715600	18.24765300
2.61753100	39379.15262100	78.75830500	17.94520400
2.61789900	39379.59830900	78.75919700	17.63940300
2.61826700	39379.92363800	78.75984700	17.33080100
2.61863500	39380.13811400	78.76027600	17.01998300
2.61900300	39380.25196500	78.76050400	16.70756000
2.61941200	39380.27362800	78.76054700	16.35902600
2.61982100	39380.19986500	78.76040000	16.01018200
2.62023100	39380.04680100	78.76009400	15.66192900
2.62064000	39379.83087300	78.75966200	15.31516600
2.62104900	39379.56863800	78.75913700	14.97078400
2.62145800	39379.27656200	78.75855300	14.62965300
2.62186700	39378.97083000	78.75794200	14.29261200
2.62227700	39378.66716800	78.75733400	13.96046700
2.62268600	39378.38066700	78.75676100	13.63397700
2.62309500	39378.12563600	78.75625100	13.31385200
2.62350400	39377.91545200	78.75583100	13.00074400
2.62391300	39377.76243800	78.75552500	12.69524600
2.62432300	39377.67775600	78.75535600	12.39788700
2.62473200	39377.67131700	78.75534300	12.10912900
2.62514100	39377.75170300	78.75550300	11.82936500
2.62555000	39377.92612200	78.75585200	11.55892100
2.62596000	39378.20037000	78.75640100	11.29805100
2.62636900	39378.57880800	78.75715800	11.04694300
2.62677800	39379.06437300	78.75812900	10.80571600
2.62718700	39379.65858600	78.75931700	10.57442500
2.62759600	39380.36159500	78.76072300	10.35306600
2.62800600	39381.17221700	78.76234400	10.14157200
2.62841500	39382.08800600	78.76417600	9.93982500
2.62882400	39383.10533000	78.76621100	9.74765600
2.62923300	39384.21945600	78.76843900	9.56484900
2.62964200	39385.42465400	78.77084900	9.39114900
2.63005200	39386.71429600	78.77342900	9.22626300
2.63046100	39388.08097300	78.77616200	9.06986900
2.63087000	39389.51661600	78.77903300	8.92161700
2.63127900	39391.01261700	78.78202500	8.78114000
2.63168900	39392.55995000	78.78512000	8.64805200
2.63209800	39394.14930100	78.78829900	8.52195700
2.63250700	39395.77119000	78.79154200	8.40245700
2.63301500	39397.81557900	78.79563100	8.26267800
2.63352300	39399.87739400	78.79975500	8.13168100
2.63392000	39401.48896400	78.80297800	8.03497200
2.63431700	39403.09240100	78.80618500	7.94283100
2.63471400	39404.68005600	78.80936000	7.85493400
2.63511000	39406.24471600	78.81248900	7.77097300
2.63550700	39407.77969400	78.81555900	7.69065900
2.63590400	39409.27888000	78.81855800	7.61372700
2.63630100	39410.73679200	78.82147400	7.53993600
2.63669800	39412.14861500	78.82429700	7.46906800
2.63709500	39413.51022600	78.82702000	7.40093400
2.63749200	39414.81822400	78.82963600	7.33537300
2.63788900	39416.06994100	78.83214000	7.27224900
2.63828600	39417.26344500	78.83452700	7.21145900
2.63868200	39418.39753200	78.83679500	7.15292500
2.63907900	39419.47172500	78.83894300	7.09660100
2.63947600	39420.48623600	78.84097200	7.04246800
2.63987300	39421.44195600	78.84288400	6.99053200
2.64027000	39422.34041300	78.84468100	6.94082800
2.64066700	39423.18373000	78.84636700	6.89341600
2.64106400	39423.97458500	78.84794900	6.84838000
2.64146100	39424.71615800	78.84943200	6.80582500
2.64185700	39425.41207800	78.85082400	6.76587700
2.64230600	39426.14900200	78.85229800	6.72403200
2.64275500	39426.83903300	78.85367800	6.68594000
2.64320400	39427.48891900	78.85497800	6.65185600
2.64365200	39428.10573300	78.85621100	6.62205700
2.64410100	39428.69674400	78.85739300	6.59683100
2.64455000	39429.26932100	78.85853900	6.57647800
2.64504400	39429.88778600	78.85977600	6.56005600
2.64553900	39430.50244500	78.86100500	6.55033100
2.64603300	39431.12262900	78.86224500	6.54770600
2.64652800	39431.75717900	78.86351400	6.55257300
2.64702200	39432.41433900	78.86482900	6.56530600
2.64751700	39433.10161900	78.86620300	6.58625400
2.64801200	39433.82571300	78.86765100	6.61574000
2.64850600	39434.59241900	78.86918500	6.65405100
2.64900100	39435.40658500	78.87081300	6.70143800
2.64949500	39436.27205800	78.87254400	6.75811300
2.64999000	39437.19167600	78.87438300	6.82424500
2.65048400	39438.16726200	78.87633500	6.89995800
2.65097900	39439.19964100	78.87839900	6.98533200
2.65147300	39440.28867400	78.88057700	7.08040200
2.65196800	39441.43330000	78.88286700	7.18515900
2.65246200	39442.63161000	78.88526300	7.29955100
2.65295700	39443.88090700	78.88776200	7.42348400
2.65345100	39445.17779900	78.89035600	7.55682600
2.65394600	39446.51828400	78.89303700	7.69941100
2.65444100	39447.89785300	78.89579600	7.85103800
2.65493500	39449.31158800	78.89862300	8.01148100
2.65557700	39451.18809300	78.90237600	8.23236300
2.65621800	39453.10145500	78.90620300	8.46706800
2.65686000	39455.03963300	78.91007900	8.71496600
2.65738900	39456.64950700	78.91329900	8.92904000
2.65791900	39458.26175900	78.91652400	9.15129300
2.65844800	39459.87032900	78.91974100	9.38136700
2.65897800	39461.46958400	78.92293900	9.61891500
2.65950700	39463.05445000	78.92610900	9.86361100
2.66003700	39464.62045600	78.92924100	10.11515100
2.66056700	39466.16381200	78.93232800	10.37326000
2.66109600	39467.68142900	78.93536300	10.63769500
2.66162600	39469.17096000	78.93834200	10.90825300
2.66215500	39470.63080200	78.94126200	11.18476600
2.66268500	39472.06009600	78.94412000	11.46711000
2.66321400	39473.45869500	78.94691700	11.75520100
2.66374400	39474.82713800	78.94965400	12.04899900
2.66427300	39476.16660700	78.95233300	12.34850300
2.66480300	39477.47886600	78.95495800	12.65375600
2.66533200	39478.76619600	78.95753200	12.96483500
2.66586200	39480.03132900	78.96006300	13.28185500
2.66639100	39481.27736400	78.96255500	13.60496200
2.66706800	39482.84728600	78.96569500	14.02699500
2.66774500	39484.39913500	78.96879800	14.45967200
2.66842100	39485.94074400	78.97188100	14.90345800
2.66909800	39487.47996200	78.97496000	15.35884800
2.66977500	39489.02440500	78.97804900	15.82634900
2.67033600	39490.31468700	78.98062900	16.22371000
2.67089700	39491.61723100	78.98323400	16.63002700
2.67145900	39492.93538900	78.98587100	17.04556000
2.67202000	39494.27208800	78.98854400	17.47054800
2.67258100	39495.62977700	78.99126000	17.90520300
2.67314300	39497.01039600	78.99402100	18.34970600
2.67370400	39498.41535600	78.99683100	18.80420400
2.67426500	39499.84555200	78.99969100	19.26880900
2.67482700	39501.30134900	79.00260300	19.74359300
2.67538800	39502.78261700	79.00556500	20.22859000
2.67594900	39504.28875200	79.00857800	20.72379300
2.67651100	39505.81871400	79.01163700	21.22916100
2.67712900	39507.52970600	79.01505900	21.79745600
2.67774700	39509.26546900	79.01853100	22.37783200
2.67836500	39511.02320000	79.02204600	22.97009100
2.67898400	39512.79978200	79.02560000	23.57399700
2.67960200	39514.59187600	79.02918400	24.18928400
2.68022000	39516.39602100	79.03279200	24.81566000
2.68093800	39518.50198200	79.03700400	25.55668200
2.68165600	39520.61417000	79.04122800	26.31175900
2.68237400	39522.72753200	79.04545500	27.08039900
2.68309300	39524.83745800	79.04967500	27.86213400
2.68381100	39526.93991200	79.05388000	28.65652600
2.68452900	39529.03152000	79.05806300	29.46318700
2.68524700	39531.10964400	79.06221900	30.28178600
2.68596500	39533.17241700	79.06634500	31.11205900
2.68668300	39535.21875000	79.07043700	31.95381400
2.68740100	39537.24830800	79.07449700	32.80693600
2.68811900	39539.26147700	79.07852300	33.67138500
2.68883700	39541.25928500	79.08251900	34.54719500
2.68955500	39543.24332200	79.08648700	35.43446600
2.69027300	39545.21564500	79.09043100	36.33336400
2.69099200	39547.17866500	79.09435700	37.24410500
2.69197100	39549.84474400	79.09968900	38.50529500
2.69295000	39552.50554900	79.10501100	39.78972200
2.69371800	39554.59462300	79.10918900	40.81453000
2.69448600	39556.68796700	79.11337600	41.85451900
2.69525400	39558.78841900	79.11757700	42.91004800
2.69602300	39560.89846500	79.12179700	43.98144900
2.69679100	39563.02006400	79.12604000	45.06900200
2.69755900	39565.15464600	79.13030900	46.17293000
2.69832800	39567.30310300	79.13460600	47.29339600
2.69909600	39569.46578200	79.13893200	48.43049800
2.69986400	39571.64247800	79.14328500	49.58425800
2.70063300	39573.83250100	79.14766500	50.75463400
2.70140100	39576.03473100	79.15206900	51.94151800
2.70216900	39578.24769500	79.15649500	53.14474500
2.70304200	39580.77197000	79.16154400	54.53092700
2.70391500	39583.30495600	79.16661000	55.93754200
2.70478700	39585.84362300	79.17168700	57.36417400
2.70566000	39588.38495500	79.17677000	58.81038500
2.70653300	39590.92606700	79.18185200	60.27573600
2.70740500	39593.46436600	79.18692900	61.75981100
2.70827800	39595.99762800	79.19199500	63.26223800
2.70915100	39598.52409200	79.19704800	64.78269700
2.71002300	39601.04249000	79.20208500	66.32094200
2.71089600	39603.55208100	79.20710400	67.87680300
2.71176800	39606.05263300	79.21210500	69.45019000
2.71264100	39608.54439000	79.21708900	71.04109500
2.71351400	39611.02802100	79.22205600	72.64958700
2.71438600	39613.50454700	79.22700900	74.27580400
2.71525900	39615.97526200	79.23195100	75.91994100
2.71647100	39619.39950800	79.23879900	78.23334600
2.71768300	39622.81958400	79.24563900	80.58251200
2.71864200	39625.52713100	79.25105400	82.46830600
2.71960200	39628.23647700	79.25647300	84.37736800
2.72056100	39630.94913400	79.26189800	86.31002900
2.72152100	39633.66634000	79.26733300	88.26657800
2.72248000	39636.38887600	79.27277800	90.24722900
2.72344000	39639.11712700	79.27823400	92.25212700
2.72439900	39641.85111200	79.28370200	94.28135100
2.72535900	39644.59050100	79.28918100	96.33491100
2.72631800	39647.33464200	79.29466900	98.41274900
2.72742800	39650.51239300	79.30102500	100.84543600
2.72853700	39653.69370100	79.30738700	103.31020800
2.72964600	39656.87683900	79.31375400	105.80680000
2.73075600	39660.06011500	79.32012000	108.33494400
2.73186500	39663.24199100	79.32648400	110.89439300
2.73297500	39666.42120700	79.33284200	113.48495900
2.73408400	39669.59686700	79.33919400	116.10652900
2.73519400	39672.76847000	79.34553700	118.75908300
2.73630300	39675.93590700	79.35187200	121.44269900
2.73741200	39679.09943100	79.35819900	124.15755200
2.73852200	39682.25961600	79.36451900	126.90390900
2.73963100	39685.41727700	79.37083500	129.68211100
2.74099800	39689.30393000	79.37860800	133.14783300
2.74236400	39693.19016300	79.38638000	136.66329400
2.74373000	39697.07785900	79.39415600	140.22936000
2.74486500	39700.30818400	79.40061600	143.22943600
2.74599900	39703.54135900	79.40708300	146.26544400
2.74713300	39706.77779300	79.41355600	149.33777100
2.74826800	39710.01774300	79.42003500	152.44678100
2.74940200	39713.26121800	79.42652200	155.59278100
2.75053700	39716.50802100	79.43301600	158.77603100
2.75182100	39720.18823400	79.44037600	162.42596400
2.75310600	39723.87160400	79.44774300	166.12424300
2.75439100	39727.55738200	79.45511500	169.87114500
2.75567500	39731.24483300	79.46249000	173.66695300
2.75696000	39734.93330800	79.46986700	177.51198700
2.75824500	39738.62231200	79.47724500	181.40662100
2.75952900	39742.31153900	79.48462300	185.35130000
2.76081400	39746.00088300	79.49200200	189.34654400
2.76209900	39749.69041700	79.49938100	193.39295000
2.76338300	39753.38037200	79.50676100	197.49118000
2.76466800	39757.07108500	79.51414200	201.64195100
2.76595300	39760.76295200	79.52152600	205.84602200
2.76783200	39766.16738200	79.53233500	212.09460200
2.76971200	39771.57622400	79.54315200	218.46141300
2.77118800	39775.82931600	79.55165900	223.54805800
2.77266500	39780.08571100	79.56017100	228.71028200
2.77414200	39784.34528100	79.56869100	233.94913400
2.77561800	39788.60784300	79.57721600	239.26564300
2.77709500	39792.87302700	79.58574600	244.66077800
2.77857200	39797.14037000	79.59428100	250.13548100
2.78059600	39802.99338900	79.60598700	257.77205900
2.78262100	39808.84867000	79.61769700	265.56247200
2.78464500	39814.70542400	79.62941100	273.50929200
2.78630700	39819.51509300	79.63903000	280.15318600
2.78797000	39824.32530300	79.64865100	286.90586400
2.78963200	39829.13609800	79.65827200	293.76892700
2.79129400	39833.94748600	79.66789500	300.74394300
2.79295600	39838.75949600	79.67751900	307.83248900
2.79461900	39843.57212300	79.68714400	315.03609900
2.79684900	39850.03013600	79.70006000	324.88469000
2.79907900	39856.48865200	79.71297700	334.94646100
2.80131000	39862.94708700	79.72589400	345.22461400
2.80354000	39869.40468800	79.73880900	355.72213900
2.80577000	39875.86063300	79.75172100	366.44184000
2.80800100	39882.31420500	79.76462800	377.38643500
2.81023100	39888.76479100	79.77753000	388.55851300
2.81246100	39895.21193900	79.79042400	399.96056000
2.81469100	39901.65530900	79.80331100	411.59495900
2.81692200	39908.09462300	79.81618900	423.46395100
2.81915200	39914.52960100	79.82905900	435.56958800
2.82138200	39920.95992300	79.84192000	447.91372100
2.82361300	39927.38523400	79.85477000	460.49798800
2.82584300	39933.80514500	79.86761000	473.32382000
2.82807300	39940.21926100	79.88043900	486.39245400
2.83030400	39946.62719800	79.89325400	499.70494700
2.83253400	39953.02860300	79.90605700	513.26219500
2.83476400	39959.42317300	79.91884600	527.06494700
2.83699500	39965.81065100	79.93162100	541.11382200
2.83922500	39972.19082900	79.94438200	555.40930900
2.84145500	39978.56352200	79.95712700	569.95177400
2.84368500	39984.92856900	79.96985700	584.74146000
2.84591600	39991.28580800	79.98257200	599.77849600
2.84814600	39997.63508900	79.99527000	615.06290300
2.85037600	40003.97626800	80.00795300	630.59460900
2.85260700	40010.30920100	80.02061800	646.37346300
2.85287100	40011.06053100	80.02212100	648.26322000
2.85313600	40011.81174000	80.02362300	650.15645500
2.85316200	40011.88374200	80.02376700	650.33812100
2.85318700	40011.95574500	80.02391100	650.51981800
2.85321200	40012.02774700	80.02405500	650.70154800
2.85322500	40012.06303900	80.02412600	650.79063100
2.85322600	40012.06655500	80.02413300	650.79951500
2.85322700	40012.07007100	80.02414000	650.80839200
2.85322800	40012.07147600	80.02414300	650.81194300
2.85322900	40012.07626000	80.02415300	650.82401500
2.85323000	40012.07682300	80.02415400	650.82543600
2.85323100	39338.69362000	78.67738700	-1302.87023700
2.85323200	39338.72265100	78.67744500	-1302.79738500
2.85324000	39339.06710200	78.67813400	-1301.93287800
2.85324700	39339.38020100	78.67876000	-1301.14701800
2.85325500	39339.69326200	78.67938700	-1300.36121000
2.85333000	39342.82182300	78.68564400	-1292.50606400
2.85340500	39345.94662700	78.69189300	-1284.65630700
2.85348000	39349.06765000	78.69813500	-1276.81201300
2.85377600	39361.33938600	78.72267900	-1245.92916700
2.85407200	39373.55036300	78.74710100	-1215.13661500
2.85436800	39385.69989200	78.77140000	-1184.43631100
2.85466400	39397.78657900	78.79557300	-1153.83217200
2.85539400	39427.33902800	78.85467800	-1078.73669300
2.85612400	39456.48396400	78.91296800	-1004.29790900
2.85685500	39485.20559900	78.97041100	-930.56255600
2.85758500	39513.48900900	79.02697800	-857.57548400
2.85884200	39561.09096000	79.12218200	-733.85924700
2.86009800	39607.29827600	79.21459700	-612.67134900
2.86135500	39652.05185200	79.30410400	-494.20385900
2.86261200	39695.30610000	79.39061200	-378.61974600
2.86386800	39737.02782600	79.47405600	-266.05496200
2.86550100	39788.89463100	79.57778900	-124.53432500
2.86713300	39838.08856100	79.67617700	11.46273800
2.86876600	39884.58542700	79.76917100	141.75395200
2.87039800	39928.37838000	79.85675700	266.19971000
2.87203100	39969.47726300	79.93895500	384.70226300
2.87391900	40013.68389000	80.02736800	514.26965400
2.87580700	40054.37724900	80.10875400	635.77087100
2.87769500	40091.63841000	80.18327700	749.23145700
2.87958300	40125.56638000	80.25113300	854.72900900
2.88147100	40156.27296500	80.31254600	952.38392200
2.88335900	40183.88237000	80.36776500	1042.35777000
2.88573400	40214.42787900	80.42885600	1144.95077200
2.88811000	40240.58061500	80.48116100	1236.18589200
2.89048500	40262.64929100	80.52529900	1316.60950500
2.89286000	40280.95206500	80.56190400	1386.82229200
2.89523500	40295.81246500	80.59162500	1447.46865700
2.89761000	40307.55561800	80.61511100	1499.22595200
2.89998600	40316.50454500	80.63300900	1542.79472900
2.90236100	40322.97627200	80.64595300	1578.88823200
2.90473600	40327.27866100	80.65455700	1608.22326800
2.90711100	40329.70798500	80.65941600	1631.51249100
2.90948600	40330.54697000	80.66109400	1649.45762000
2.91186100	40330.06304900	80.66012600	1662.74321600
2.91423700	40328.50692300	80.65701400	1672.03116300
2.91661200	40326.11150800	80.65222300	1677.95601200
2.91898700	40323.09125300	80.64618300	1681.12120300
2.92136200	40319.64176200	80.63928400	1682.09599800
2.92373700	40315.93976000	80.63188000	1681.41321800
2.92403700	40315.46409400	80.63092800	1681.23569000
2.92424700	40315.12912400	80.63025800	1681.09999000
2.92426800	40315.09477600	80.63019000	1681.08571000
2.92428000	40315.07509700	80.63015000	1681.07745400
2.92428200	40315.07314500	80.63014600	1681.07660400
2.92428300	40315.07119400	80.63014200	1681.07578200
2.92428500	40315.06729300	80.63013500	1681.07413700
2.92428600	40315.06573100	80.63013100	1681.07347900
2.92428700	41000.69238200	82.00138500	-306.36393000
2.92428900	41000.57084400	82.00114200	-306.06893300
2.92429200	41000.46936400	82.00093900	-305.82259800
2.92429400	41000.36788900	82.00073600	-305.57627100
2.92431700	40999.35342100	81.99870700	-303.11352100
2.92434100	40998.33946800	81.99667900	-300.65170500
2.92436400	40997.32602800	81.99465200	-298.19082400
2.92459500	40987.31524100	81.97463000	-273.86533900
2.92482700	40977.35561300	81.95471100	-249.63316300
2.92505800	40967.44790600	81.93489600	-225.49583600
2.92538800	40953.40474300	81.90680900	-191.22861000
2.92571800	40939.47072600	81.87894100	-157.16148400
2.92604800	40925.64578500	81.85129200	-123.29436600
2.92637700	40911.93222100	81.82386400	-89.63196600
2.92687800	40891.36342100	81.78272700	-39.00962600
2.92737800	40871.05948400	81.74211900	11.12371000
2.92787800	40851.02532100	81.70205100	60.75769700
2.92837800	40831.26546300	81.66253100	109.88270100
2.92957400	40785.11522300	81.57023000	225.32831400
2.93077100	40740.60788700	81.48121600	337.70004600
2.93196800	40697.78900100	81.39557800	446.89542300
2.93316400	40656.69424200	81.31338800	552.82980500
2.93436100	40617.34770900	81.23469500	655.43954300
2.93595400	40567.71800800	81.13543600	786.76901200
2.93754700	40521.23618500	81.04247200	912.03725300
2.93914000	40477.90394000	80.95580800	1031.19852200
2.94073200	40437.70415200	80.87540800	1144.24347700
2.94232500	40400.60201200	80.80120400	1251.19751600
2.94436000	40357.61505300	80.71523000	1379.10383100
2.94639600	40319.47052600	80.63894100	1497.33561800
2.94843100	40285.99999900	80.57200000	1606.14340000
2.95046700	40257.00824300	80.51401600	1705.83601900
2.95250200	40232.28453300	80.46456900	1796.76194800
2.95453800	40211.60419600	80.42320800	1879.30570800
2.95739300	40188.95062700	80.37790100	1981.77855900
2.96024800	40173.09974900	80.34619900	2069.82381600
2.96310300	40163.35352300	80.32670700	2144.74234000
2.96595900	40159.01861500	80.31803700	2207.86170300
2.96881400	40159.41962200	80.31883900	2260.50896000
2.97166900	40163.90640100	80.32781300	2303.99248200
2.97203500	40164.74373900	80.32948700	2308.97595600
2.97240200	40165.63855100	80.33127700	2313.82941000
2.97276800	40166.58787700	80.33317600	2318.55831100
2.97313400	40167.59045900	80.33518100	2323.16530400
2.97350000	40168.64506200	80.33729000	2327.65299000
2.97423300	40170.90551200	80.34181100	2336.28068800
2.97496500	40173.35966700	80.34671900	2344.46180000
2.97569800	40175.99816300	80.35199600	2352.21642100
2.97643100	40178.81182700	80.35762400	2359.56437300
2.97716300	40181.79167400	80.36358300	2366.52518800
2.97813700	40185.99475400	80.37199000	2375.21140200
2.97911000	40190.45582400	80.38091200	2383.29176200
2.98008400	40195.15537600	80.39031100	2390.80945700
2.98105800	40200.07452600	80.40014900	2397.80660100
2.98203100	40205.19500900	80.41039000	2404.32420600
2.98404300	40216.33336800	80.43266700	2416.43767200
2.98605400	40228.10903700	80.45621800	2427.01005300
2.98806500	40240.38644200	80.48077300	2436.35551700
2.99007600	40253.04131000	80.50608300	2444.76707300
2.99208700	40265.96054600	80.53192100	2452.51654000
2.99409800	40279.04202800	80.55808400	2459.85447300
2.99610900	40292.19424400	80.58438800	2467.01041800
2.99812000	40305.33586100	80.61067200	2474.19336600
3.00013100	40318.39520700	80.63679000	2481.59227400
3.00214200	40331.30971400	80.66261900	2489.37661400
3.00415300	40344.02535200	80.68805100	2497.69698700
3.00616400	40356.49606000	80.71299200	2506.68583100
3.00817600	40368.68317700	80.73736600	2516.45821500
3.01018700	40380.55490400	80.76111000	2527.11272500
3.01257300	40394.20032100	80.78840100	2541.01505500
3.01496000	40407.33380700	80.81466800	2556.38845400
3.01734700	40419.93357100	80.83986700	2573.31891500
3.01973400	40431.98716600	80.86397400	2591.86765200
3.02212000	40443.49026000	80.88698100	2612.07385100
3.02450700	40454.44547800	80.90889100	2633.95695200
3.02689400	40464.86137300	80.92972300	2657.51879600
3.02719800	40466.14832500	80.93229700	2660.64009200
3.02750100	40467.42772000	80.93485500	2663.78630000
3.02780500	40468.69867000	80.93739700	2666.95938300
3.02810900	40469.96120100	80.93992200	2670.15931800
3.02841300	40471.21534600	80.94243100	2673.38606000
3.02889100	40473.17260800	80.94634500	2678.51945900
3.02936900	40475.10934300	80.95021900	2683.71889200
3.02984800	40477.02571600	80.95405100	2688.98409300
3.03032600	40478.92189700	80.95784400	2694.31478700
3.03158300	40483.81034300	80.96762100	2708.63504600
3.03284000	40488.56379400	80.97712800	2723.39985500
3.03409700	40493.18581500	80.98637200	2738.60240000
3.03535400	40497.68003300	80.99536000	2754.23546500
3.03689800	40503.03352800	81.00606700	2774.02562700
3.03844300	40508.20719500	81.01641400	2794.43697200
3.03998800	40513.20797800	81.02641600	2815.45407800
3.04153200	40518.04342300	81.03608700	2837.05868400
3.04307700	40522.72127300	81.04544300	2859.23106500
3.04494600	40528.18236100	81.05636500	2886.79310100
3.04681500	40533.43740600	81.06687500	2915.12131600
3.04868500	40538.49983200	81.07700000	2944.17917600
3.05055400	40543.38293500	81.08676600	2973.92975600
3.05242300	40548.09984600	81.09620000	3004.33595400
3.05465400	40553.52943700	81.10705900	3041.42939800
3.05591400	40556.50745700	81.11301500	3062.74636200
3.05592400	40556.53158500	81.11306300	3062.92187200
3.05593500	40556.55570600	81.11311100	3063.09741600
3.05593600	40556.55825100	81.11311700	3063.11598100
3.05593700	40556.56080000	81.11312200	3063.13453100
3.05593900	40556.56589600	81.11313200	3063.17163000
3.05594100	40556.57099300	81.11314200	3063.20873000
3.05594300	40556.57608900	81.11315200	3063.24583100
3.05594400	40556.57646000	81.11315300	3063.24853000
3.05594500	39831.91655500	79.66383300	960.80663100
3.05594800	39832.07187300	79.66414400	961.23421700
3.05595100	39832.21306400	79.66442600	961.62292400
3.05595500	39832.35424900	79.66470800	962.01162200
3.05598600	39833.76573300	79.66753100	965.89814300
3.05601800	39835.17654800	79.67035300	969.78382100
3.05605000	39836.58669200	79.67317300	973.66864800
3.05636400	39850.49266400	79.70098500	1012.03222600
3.05667800	39864.33075200	79.72866200	1050.30666400
3.05699300	39878.09868800	79.75619700	1088.48587600
3.05744000	39897.58563500	79.79517100	1142.69581400
3.05788800	39916.91998700	79.83384000	1196.68465000
3.05833600	39936.10187300	79.87220400	1250.45248400
3.05878300	39955.12457000	79.91024900	1303.98075000
3.05946700	39983.87747100	79.96775500	1385.29195100
3.06015100	40012.23181100	80.02446400	1465.96755600
3.06083500	40040.17307100	80.08034600	1545.96520600
3.06151900	40067.68795000	80.13537600	1625.24530300
3.06291900	40122.61435700	80.24522900	1785.09412200
3.06431900	40175.61749500	80.35123500	1941.49890100
3.06571900	40226.61138800	80.45322300	2094.18001400
3.06711900	40275.52899500	80.55105800	2242.89846000
3.06851900	40322.32352300	80.64464700	2387.45903800
3.07032300	40379.44221800	80.75888400	2567.35510800
3.07212800	40432.92840300	80.86585700	2739.77015800
3.07393200	40482.76201100	80.96552400	2904.47555400
3.07573600	40528.95042000	81.05790100	3061.30978800
3.07754000	40571.52710500	81.14305400	3210.17639500
3.07971300	40618.10007700	81.23620000	3378.86847600
3.08188600	40659.64695900	81.31929400	3535.97763100
3.08223800	40665.90939700	81.33181900	3560.32256000
3.08259000	40672.04645300	81.34409300	3584.37036100
3.08294100	40678.05800100	81.35611600	3608.12001800
3.08300600	40679.15340400	81.35830700	3612.46549800
3.08307100	40680.24024000	81.36048000	3616.79061700
3.08307400	40680.28511600	81.36057000	3616.97618200
3.08307700	40680.33430400	81.36066900	3617.17194500
3.08308300	40680.43265200	81.36086500	3617.56340900
3.08308800	40680.53097600	81.36106200	3617.95481200
3.08308900	40680.54544300	81.36109100	3618.01241000
3.08309000	40680.55990900	81.36112000	3618.07000500
3.08309200	40680.59462500	81.36118900	3618.20822400
3.08309300	40680.60041000	81.36120100	3618.23126000
3.08309600	41336.60192700	82.67320400	1717.03445300
3.08309900	41336.53613700	82.67307200	1717.50436200
3.08310200	41336.47034600	82.67294100	1717.97423900
3.08312900	41335.81245600	82.67162500	1722.67129600
3.08315700	41335.15459200	82.67030900	1727.36522700
3.08318500	41334.49675800	82.66899400	1732.05603100
3.08346100	41327.91997400	82.65584000	1778.79207000
3.08373700	41321.34734200	82.64269500	1825.21291800
3.08401300	41314.78016400	82.62956000	1871.31616300
3.08444000	41304.64525900	82.60929100	1941.92243100
3.08486600	41294.53089900	82.58906200	2011.75702100
3.08529300	41284.43688800	82.56887400	2080.82066100
3.08571900	41274.36827800	82.54873700	2149.10475500
3.08634100	41259.74328600	82.51948700	2247.24377100
3.08696300	41245.19052700	82.49038100	2343.69866500
3.08758500	41230.72001700	82.46144000	2438.45593900
3.08820700	41216.34115100	82.43268200	2531.50406900
3.08971000	41182.04498100	82.36409000	2749.13387700
3.09121200	41148.44647100	82.29689300	2956.66404400
3.09271400	41115.65247700	82.23130500	3154.03299700
3.09421600	41083.75492200	82.16751000	3341.23775800
3.09571900	41052.82832600	82.10565700	3518.34371700
3.09748000	41017.89565700	82.03579100	3713.24241400
3.09924000	40984.46879300	81.96893800	3894.64224100
3.10100100	40952.61452900	81.90522900	4062.83742800
3.10276200	40922.38251000	81.84476500	4218.18091700
3.10452300	40893.80633900	81.78761300	4361.07940200
3.10698800	40856.62098200	81.71324200	4541.07509700
3.10945300	40822.73340700	81.64546700	4698.91402900
3.11191800	40792.11631000	81.58423300	4836.06358800
3.11438300	40764.70631500	81.52941300	4954.08474400
3.11684800	40740.41761600	81.48083500	5054.55960100
3.11931300	40719.14540100	81.43829100	5139.07693200
3.12256000	40695.51635500	81.39103300	5228.75319300
3.12580700	40676.58638300	81.35317300	5297.12088000
3.12905400	40662.00980300	81.32402000	5347.67049500
3.13230100	40651.42846400	81.30285700	5383.70060200
3.13554800	40644.48065300	81.28896100	5408.27619300
3.13879500	40640.80529100	81.28161100	5424.21449200
3.14204200	40640.04661900	81.28009300	5434.07186800
3.14528900	40641.85879400	81.28371800	5440.12914600
3.14853700	40645.90975300	81.29182000	5444.38438100
3.15178400	40651.88344800	81.30376700	5448.55736200
3.15401200	40656.94077400	81.31388200	5452.14064300
3.15433700	40657.73445500	81.31546900	5452.74155100
3.15466100	40658.54226600	81.31708500	5453.36429500
3.15466400	40658.54923000	81.31709800	5453.37075000
3.15466600	40658.55640500	81.31711300	5453.37634500
3.15467200	40658.57076000	81.31714200	5453.38754100
3.15467800	40658.58511700	81.31717000	5453.39874300
3.15468400	40658.59947800	81.31719900	5453.40995300
3.15468600	40658.60578800	81.31721200	5453.41487900
3.15468900	40658.61210000	81.31722400	5453.41980800
3.15469400	40658.62472500	81.31724900	5453.42967100
3.15469900	40658.63735200	81.31727500	5453.43953800
3.15470400	40658.64998300	81.31730000	5453.44941000
3.15470600	39889.79769700	79.77959500	3222.77329500
3.15470700	39889.82539400	79.77965100	3222.84188300
3.15470900	39889.94160100	79.77988300	3223.12173700
3.15471100	39890.03843600	79.78007700	3223.35494500
3.15471300	39890.13527100	79.78027100	3223.58815000
3.15473300	39891.10350600	79.78220700	3225.92001500
3.15475400	39892.07154500	79.78414300	3228.25154800
3.15477400	39893.03938500	79.78607900	3230.58274700
3.15497700	39902.70690300	79.80541400	3253.87639400
3.15518000	39912.35379400	79.82470800	3277.13523200
3.15538200	39921.97921900	79.84395800	3300.35779600
3.15580000	39941.73439800	79.88346900	3348.06940800
3.15621800	39961.38789800	79.92277600	3395.60855900
3.15663600	39980.93859200	79.96187700	3442.97326900
3.15705400	40000.37948200	80.00075900	3490.15119100
3.15785100	40037.18834600	80.07437700	3579.71230200
3.15864900	40073.54069900	80.14708100	3668.49234700
3.15944700	40109.40319300	80.21880600	3756.43116900
3.16024500	40144.74464000	80.28948900	3843.47208300
3.16181700	40212.69274400	80.42538500	4012.01978400
3.16338800	40278.32696000	80.55665400	4176.53529000
3.16495900	40341.46328200	80.68292700	4336.67144500
3.16653100	40401.95573200	80.80391100	4492.14154800
3.16810200	40459.69754900	80.91939500	4642.72161100
3.16985500	40520.76289800	81.04152600	4804.70165900
3.17160700	40578.21278300	81.15642600	4960.15527500
3.17185200	40585.92496900	81.17185000	4981.28483100
3.17209600	40593.56722100	81.18713400	5002.28599600
3.17234000	40601.13793300	81.20227600	5023.15661900
3.17238300	40602.46454300	81.20492900	5026.81950100
3.17242600	40603.78668900	81.20757300	5030.47434600
3.17251200	40606.42432000	81.21284900	5037.77186400
3.17259800	40609.05534700	81.21811100	5045.05736400
3.17260000	40609.12899300	81.21825800	5045.26140600
3.17260300	40609.20262400	81.21840500	5045.46542900
3.17260800	40609.34986700	81.21870000	5045.87343600
3.17261200	40609.49708900	81.21899400	5046.28140500
3.17261700	40609.64428300	81.21928900	5046.68932400
3.17262000	40609.71800500	81.21943600	5046.89363300
3.17262200	40609.79171100	81.21958300	5047.09791700
3.17262700	40609.93910400	81.21987800	5047.50644600
3.17263200	40610.08647600	81.22017300	5047.91493700
3.17263700	40610.26140700	81.22052300	5048.39984500
3.17263800	41239.02665900	82.47805300	3225.82169300
3.17264000	41239.00452400	82.47800900	3226.17988400
3.17264100	41238.99186400	82.47798400	3226.46371400
3.17264300	41238.97920400	82.47795800	3226.74753500
3.17265800	41238.85258100	82.47770500	3229.58523900
3.17267400	41238.72592100	82.47745200	3232.42201600
3.17268900	41238.59922400	82.47719800	3235.25786800
3.17284400	41237.33023100	82.47466000	3263.56537800
3.17299900	41236.05762400	82.47211500	3291.77975100
3.17315400	41234.78146300	82.46956300	3319.90058100
3.17330800	41233.50183200	82.46700400	3347.92736300
3.17485700	41220.53061600	82.44106100	3622.92542800
3.17640500	41207.28967800	82.41457900	3888.07448300
3.17795400	41193.84450700	82.38768900	4143.03879400
3.17950200	41180.25523600	82.36051000	4387.55968000
3.18105100	41166.57648700	82.33315300	4621.45703700
3.18380700	41142.16144600	82.28432300	5011.16689600
3.18656300	41117.86874800	82.23573700	5366.68408700
3.18931900	41093.91074500	82.18782100	5688.32491000
3.19207600	41070.46527300	82.14093100	5976.91575100
3.19483200	41047.68400500	82.09536800	6233.65663500
3.19788400	41023.38392600	82.04676800	6482.69247200
3.20093700	41000.20769800	82.00041500	6696.95631700
3.20398900	40978.28392300	81.95656800	6879.14733200
3.20704200	40957.72290100	81.91544600	7032.17900000
3.21009500	40938.61966200	81.87723900	7159.05809700
3.21314700	40921.05481600	81.84211000	7262.83123500
3.21620000	40905.09519900	81.81019000	7346.52009400
3.21925200	40890.79343300	81.78158700	7413.06925800
3.22288000	40876.00631900	81.75201300	7473.76437300
3.22378600	40872.68807100	81.74537600	7486.28608600
3.22396800	40872.04274500	81.74408500	7488.68262900
3.22400400	40871.91424700	81.74382800	7489.15824900
3.22404000	40871.78631600	81.74357300	7489.63100500
3.22411300	40871.53118500	81.74306200	7490.57220900
3.22411500	40871.52325300	81.74304700	7490.60145200
3.22411700	40871.51532500	81.74303100	7490.63067500
3.22412200	40871.49946900	81.74299900	7490.68910400
3.22412600	40871.48361600	81.74296700	7490.74751600
3.22413100	40871.46776600	81.74293600	7490.80590700
3.22413300	40871.46011800	81.74292000	7490.83407600
3.22413500	40871.45247300	81.74290500	7490.86223600
3.22414000	40871.43481600	81.74287000	7490.92726600
3.22414100	40871.43149900	81.74286300	7490.93948200
3.22414200	40871.43055100	81.74286100	7490.94297200
3.22414300	40062.75203900	80.12550400	5144.73995300
3.22414900	40063.00208500	80.12600400	5145.49188600
3.22415400	40063.24085600	80.12648200	5146.20421400
3.22415900	40063.47961600	80.12695900	5146.91648300
3.22421300	40065.86663500	80.13173300	5154.03588000
3.22426700	40068.25257400	80.13650500	5161.14927800
3.22432100	40070.63742100	80.14127500	5168.25665500
3.22486200	40094.42306200	80.18884600	5238.99601700
3.22540200	40118.08338200	80.23616700	5309.11324600
3.22594200	40141.60704100	80.28321400	5378.59436500
3.22648200	40164.98003500	80.32996000	5447.42191000
3.22862900	40256.17555400	80.51235100	5714.30467200
3.23077700	40344.12746100	80.68825500	5969.83786300
3.23292400	40428.23078000	80.85646200	6213.33812800
3.23507200	40508.00814300	81.01601600	6444.32227000
3.23721900	40583.09880400	81.16619800	6662.48909300
3.23779500	40602.38824100	81.20477600	6718.75764700
3.23780600	40602.77048400	81.20554100	6719.87376000
3.23781800	40603.15243300	81.20630500	6720.98910700
3.23782900	40603.53423700	81.20706800	6722.10408000
3.23784100	40603.91589400	81.20783200	6723.21867800
3.23785200	40604.29740800	81.20859500	6724.33290100
3.23785400	40604.35696600	81.20871400	6724.50688900
3.23785600	40604.41666700	81.20883300	6724.68125000
3.23785900	40604.53605700	81.20907200	6725.02994300
3.23786300	40604.65543800	81.20931100	6725.37860900
3.23786700	40604.77480400	81.20955000	6725.72723900
3.23786900	40604.84942500	81.20969900	6725.94518500
3.23787100	40604.92403500	81.20984800	6726.16310200
3.23787200	40604.95044400	81.20990100	6726.24023900
3.23787300	40604.98742200	81.20997500	6726.34824600
3.23787400	40605.01911700	81.21003800	6726.44082200
3.23787500	41203.20775300	82.40641600	4992.58781000
3.23788200	41203.17107900	82.40634200	4993.95504500
3.23788800	41203.14839600	82.40629700	4995.17061000
3.23795200	41202.92153700	82.40584300	5007.31691600
3.23801600	41202.69454500	82.40538900	5019.44506800
3.23807900	41202.46741300	82.40493500	5031.55484800
3.23871700	41200.18814400	82.40037600	5151.63733100
3.23935600	41197.89370800	82.39578700	5269.85294000
3.23999400	41195.58293400	82.39116600	5386.18300600
3.24063200	41193.25481800	82.38651000	5500.60381900
3.24269700	41185.58873000	82.37117700	5857.59618400
3.24476200	41177.70008600	82.35540000	6193.98458400
3.24682700	41169.56067100	82.33912100	6509.45215500
3.24889200	41161.14993800	82.32230000	6803.94820800
3.25095700	41152.45515900	82.30491000	7077.63748500
3.25396600	41139.26250000	82.27852500	7439.89916500
3.25697600	41125.46166900	82.25092300	7760.02053000
3.25998500	41111.09691600	82.22219400	8040.01740400
3.26299500	41096.24873500	82.19249700	8282.35825400
3.26600400	41081.02621500	82.16205200	8489.71373300
3.26901400	41065.56845800	82.13113700	8665.06737000
3.27202300	41050.03636600	82.10007300	8811.52440900
3.27503300	41034.60815500	82.06921600	8932.26102300
3.27804300	41019.47054500	82.03894100	9030.44791300
3.27837500	41017.82418500	82.03564800	9040.05331200
3.27870800	41016.18352400	82.03236700	9049.42185900
3.27875300	41015.96315700	82.03192600	9050.67021300
3.27879700	41015.74294700	82.03148600	9051.90825000
3.27888700	41015.30287800	82.03060600	9054.37195100
3.27888900	41015.29239300	82.03058500	9054.43057800
3.27889000	41015.28691200	82.03057400	9054.46120200
3.27889100	40176.01679100	80.35203400	6619.52200900
3.27889500	40176.22491000	80.35245000	6620.21687800
3.27889900	40176.39082300	80.35278200	6620.77701200
3.27890300	40176.55673000	80.35311300	6621.33710500
3.27894000	40178.21548400	80.35643100	6626.93581800
3.27897700	40179.87364900	80.35974700	6632.53048400
3.27901400	40181.53121800	80.36306200	6638.12109700
3.27938600	40198.07327200	80.39614700	6693.80333900
3.27975800	40214.55036400	80.42910100	6749.07424000
3.28013000	40230.95849800	80.46191700	6803.92951800
3.28050200	40247.29278000	80.49458600	6858.36382700
3.28263400	40339.28474400	80.67856900	7162.04124900
3.28476700	40427.97900600	80.85595800	7451.01546700
3.28689900	40512.73127100	81.02546300	7724.70102300
3.28903100	40593.02148600	81.18604300	7982.71223200
3.28937700	40605.57531400	81.21115100	8023.00658700
3.28972200	40618.00281400	81.23600600	8062.88938100
3.29006700	40630.29938000	81.26059900	8102.35461200
3.29012100	40632.19665800	81.26439300	8108.44577800
3.29017500	40634.09124400	81.26818200	8114.52691800
3.29017600	41207.79612800	82.41559200	6451.70998600
3.29018000	41207.79679200	82.41559400	6452.65501400
3.29018400	41207.79734600	82.41559500	6453.44245300
3.29018800	41207.79789800	82.41559600	6454.22981300
3.29022700	41207.80340000	82.41560700	6462.09913200
3.29026500	41207.80885700	82.41561800	6469.96065400
3.29030400	41207.81426600	82.41562900	6477.81437300
3.29069100	41207.86553600	82.41573100	6555.92142900
3.29107800	41207.91075500	82.41582200	6633.24232800
3.29146500	41207.94884200	82.41589800	6709.77320600
3.29185200	41207.97860100	82.41595700	6785.50918000
3.29379800	41207.96274900	82.41592500	7154.01829000
3.29574400	41207.58081100	82.41516200	7501.98938600
3.29769000	41206.71680600	82.41343400	7829.19096800
3.29963500	41205.27441300	82.41054900	8135.58785400
3.30158100	41203.17795200	82.40635600	8421.33190600
3.30425700	41199.11918900	82.39823800	8781.07326200
3.30693300	41193.60776200	82.38721600	9103.35095500
3.30960800	41186.60250500	82.37320500	9389.66494100
3.31228400	41178.11949700	82.35623900	9641.83742200
3.31496000	41168.22087300	82.33644200	9861.87280200
3.31763600	41157.01763600	82.31403500	10052.01865200
3.32031100	41144.65857000	82.28931700	10214.64615300
3.32298700	41131.32453900	82.26264900	10352.21379900
3.32365600	41127.86237200	82.25572500	10382.98403500
3.32432500	41124.35523400	82.24871000	10412.38162500
3.32445900	41123.64871500	82.24729700	10418.09995800
3.32459200	41122.94057700	82.24588100	10423.76540900
3.32461900	41122.79875500	82.24559800	10424.89321300
3.32462100	41122.79013800	82.24558000	10424.95953200
3.32462200	41122.78151900	82.24556300	10425.02792000
3.32462600	41122.76427800	82.24552900	10425.16467200
3.32462900	41122.74703600	82.24549400	10425.30140000
3.32463200	41122.72979400	82.24546000	10425.43809800
3.32463400	41122.72028600	82.24544100	10425.51345800
3.32463600	41122.71077900	82.24542200	10425.58879900
3.32463900	41122.69176300	82.24538400	10425.73945200
3.32464000	41122.68861100	82.24537700	10425.76443100
3.32464100	41122.68419600	82.24536800	10425.79939700
3.32464200	40256.80186000	80.51360400	7913.66311000
3.32464400	40256.91426400	80.51382900	7914.07747100
3.32464700	40257.02666300	80.51405300	7914.49180900
3.32464900	40257.13906200	80.51427800	7914.90612600
3.32467400	40258.26286900	80.51652600	7919.04805700
3.32469800	40259.38637500	80.51877300	7923.18774900
3.32472300	40260.50957500	80.52101900	7927.32519900
3.32496800	40271.72452100	80.54344900	7968.57614000
3.32521400	40282.90729900	80.56581500	8009.60125100
3.32546000	40294.05666100	80.58811300	8050.39933000
3.32570500	40305.17109100	80.61034200	8090.96887800
3.32779200	40397.98149800	80.79596300	8426.18103100
3.32987900	40487.41834600	80.97483700	8744.14669500
3.33196600	40572.82160600	81.14564300	9044.35679600
3.33405300	40653.64830100	81.30729700	9326.49154400
3.33408600	40654.89027600	81.30978100	9330.81733600
3.33411900	40656.12967700	81.31225900	9335.13378100
3.33415200	40657.36782000	81.31473600	9339.44565700
3.33418500	40658.60470100	81.31720900	9343.75296500
3.33421800	40659.84031900	81.31968100	9348.05570400
3.33428400	40662.30776700	81.32461600	9356.64747300
3.33428700	40662.40307900	81.32480600	9356.97935500
3.33428900	40662.49837800	81.32499700	9357.31118100
3.33429400	40662.68895100	81.32537800	9357.97475000
3.33429900	40662.87950300	81.32575900	9358.63823900
3.33430000	40662.91262400	81.32582500	9358.75356300
3.33430100	40662.94574400	81.32589100	9358.86888000
3.33430300	40663.02522600	81.32605000	9359.14562800
3.33430400	40663.03847100	81.32607700	9359.19175100
3.33430500	41215.00741000	82.43001500	7759.51515200
3.33430600	41215.02192700	82.43004400	7759.63864500
3.33431300	41215.04648600	82.43009300	7761.17876800
3.33432000	41215.07104200	82.43014200	7762.71859200
3.33432700	41215.09559600	82.43019100	7764.25811900
3.33439800	41215.34096000	82.43068200	7779.63696900
3.33446900	41215.58600300	82.43117200	7794.98595700
3.33454000	41215.83071500	82.43166100	7810.30506000
3.33461100	41216.07508300	82.43215000	7825.59424700
3.33532200	41218.49706500	82.43699400	7976.83482700
3.33603300	41220.87117300	82.44174200	8125.05615400
3.33674300	41223.18611300	82.44637200	8270.23915500
3.33745400	41225.43076600	82.45086200	8412.36611500
3.33937200	41231.05656100	82.46211300	8780.67100800
3.34129100	41235.91728200	82.47183500	9126.52936300
3.34320900	41239.84628000	82.47969300	9449.91565600
3.34512800	41242.71682600	82.48543400	9751.03459900
3.34704600	41244.43362600	82.48886700	10030.25408800
3.34967200	41244.78371800	82.48956700	10377.74832400
3.35229700	41242.72638000	82.48545300	10686.60682400
3.35492300	41238.24050600	82.47648100	10958.71019800
3.35754800	41231.38334700	82.46276700	11196.20854800
3.36017400	41222.27080200	82.44454200	11401.38921700
3.36279900	41211.08374800	82.42216700	11576.73891800
3.36345600	41207.98865300	82.41597700	11616.21672500
3.36411200	41204.78186300	82.40956400	11654.03010200
3.36424300	41204.12745300	82.40825500	11661.39671900
3.36424400	41204.12613900	82.40825200	11661.41138800
3.36424500	41204.12088700	82.40824200	11661.47005900
3.36424600	40314.34727800	80.62869500	9080.03473400
3.36425200	40314.60772100	80.62921500	9081.07290000
3.36425700	40314.85673500	80.62971300	9082.04738300
3.36426200	40315.10573500	80.63021100	9083.02174400
3.36431500	40317.59483400	80.63519000	9092.75864700
3.36436700	40320.08229100	80.64016500	9102.48334100
3.36442000	40322.56808800	80.64513600	9112.19580800
3.36494500	40347.33196700	80.69466400	9208.64550800
3.36547000	40371.91295400	80.74382600	9303.85717800
3.36599500	40396.29872800	80.79259700	9397.82062900
3.36652000	40420.47437800	80.84094900	9490.52306900
3.36852900	40510.80949500	81.02161900	9833.41989400
3.37053900	40597.24042300	81.19448100	10157.27604800
3.37254800	40679.18359000	81.35836700	10461.74701000
3.37258200	40680.52027900	81.36104100	10466.69947300
3.37261600	40681.85411000	81.36370800	10471.64066900
3.37264900	40683.18654500	81.36637300	10476.57636200
3.37268300	40684.51758100	81.36903500	10481.50655200
3.37271700	40685.84721700	81.37169400	10486.43123800
3.37271900	40685.94716300	81.37189400	10486.80110400
3.37272200	40686.04856400	81.37209700	10487.17666900
3.37272700	40686.25134100	81.37250300	10487.92770300
3.37273200	40686.45409400	81.37290800	10488.67864100
3.37273700	40686.65681500	81.37331400	10489.42945200
3.37273800	40686.69735600	81.37339500	10489.57960200
3.37273900	40686.73789500	81.37347600	10489.72974100
3.37274000	40686.77843200	81.37355700	10489.87987500
3.37274200	40686.81896800	81.37363800	10490.03000300
3.37274300	40686.85950300	81.37371900	10490.18012700
3.37274500	40686.95678100	81.37391400	10490.54040500
3.37274600	41219.34145000	82.43868300	8947.63297900
3.37274700	41219.32002200	82.43864000	8947.89059700
3.37274800	41219.33905300	82.43867800	8948.04577000
3.37275600	41219.39448800	82.43878900	8949.93872700
3.37276400	41219.44991600	82.43890000	8951.83123700
3.37277300	41219.50533600	82.43901100	8953.72330000
3.37285500	41220.05909400	82.44011800	8972.61935500
3.37293700	41220.61202900	82.44122400	8991.47069400
3.37302000	41221.16411500	82.44232800	9010.27728400
3.37310200	41221.71532400	82.44343100	9029.03908700
3.37392600	41227.17349300	82.45434700	9214.18623600
3.37475000	41232.51602800	82.46503200	9394.82064400
3.37557400	41237.71865400	82.47543700	9570.91777200
3.37639800	41242.75866100	82.48551700	9742.46024200
3.37722200	41247.61484900	82.49523000	9909.43819400
3.37971100	41260.97098700	82.52194200	10386.01679700
3.38219900	41272.00895000	82.54401800	10821.19479800
3.38468800	41280.37231500	82.56074500	11215.65597300
3.38717700	41285.81801400	82.57163600	11570.52457600
3.38966500	41288.20076100	82.57640200	11887.22026000
3.39215400	41287.47300500	82.57494600	12167.47775500
3.39464200	41283.67292000	82.56734600	12413.26399900
3.39713100	41276.91619100	82.55383200	12626.73451900
3.39775300	41274.78506100	82.54957000	12675.32046700
3.39837500	41272.48367600	82.54496700	12722.06551000
3.39899700	41270.01567000	82.54003100	12767.00793000
3.39912200	41269.50241200	82.53900500	12775.78347100
3.39924600	41268.98267300	82.53796500	12784.48868800
3.39927100	41268.87804100	82.53775600	12786.22271400
3.39929600	41268.77297200	82.53754600	12787.95116200
3.39934600	41268.56205800	82.53712400	12791.39967900
3.39934800	41268.55358900	82.53710700	12791.53784000
3.39935000	41268.54251000	82.53708500	12791.71840100
3.39935100	41268.53990600	82.53708000	12791.76085700
3.39935200	41268.53469600	82.53706900	12791.84576300
3.39935300	41268.53365400	82.53706700	12791.86274400
3.39935400	40356.94641900	80.71389300	10147.17595300
3.39935500	40356.97648600	80.71395300	10147.29866400
3.39936100	40357.27713700	80.71455400	10148.52567600
3.39936700	40357.57776400	80.71515600	10149.75249900
3.39937300	40357.87836400	80.71575700	10150.97913400
3.39943400	40360.88296900	80.72176600	10163.23513600
3.39949500	40363.88500700	80.72777000	10175.47230100
3.39955500	40366.88445800	80.73376900	10187.69060900
3.39961600	40369.88129200	80.73976300	10199.89003900
3.40022500	40399.70028700	80.79940100	10320.84134000
3.40083300	40429.23080000	80.85846200	10439.88242500
3.40144100	40458.45005800	80.91690000	10556.99592400
3.40205000	40487.33570200	80.97467100	10672.16507800
3.40398000	40576.52361300	81.15304700	11024.50349200
3.40591000	40661.53461000	81.32306900	11356.76356200
3.40631500	40678.85099300	81.35770200	11424.02602900
3.40672000	40695.91480700	81.39183000	11490.32201000
3.40677100	40698.06810400	81.39613600	11498.68857100
3.40682300	40700.21922300	81.40043800	11507.04070300
3.40687400	40702.36687700	81.40473400	11515.37837100
3.40689500	40703.22525600	81.40645100	11518.71060300
3.40691600	40704.08249000	81.40816500	11522.03809100
3.40695700	40705.79528400	81.41159100	11528.68612400
3.40695900	40705.90278000	81.41180600	11529.10335700
3.40696200	40706.01026000	81.41202100	11529.52051600
3.40696700	40706.22519300	81.41245000	11530.35472400
3.40697200	40706.44010100	81.41288000	11531.18882400
3.40697300	40706.47868800	81.41295700	11531.33858700
3.40697400	40706.51727200	81.41303500	11531.48834000
3.40697500	40706.53270500	81.41306500	11531.54823600
3.40697600	41220.92380500	82.44184800	10040.85649000
3.40697700	41220.93376700	82.44186800	10041.09812900
3.40697800	41220.94372900	82.44188700	10041.33976000
3.40698800	41221.04333200	82.44208700	10043.75568100
3.40699800	41221.14291600	82.44228600	10046.17088400
3.40700800	41221.24248200	82.44248500	10048.58537000
3.40710800	41222.23707900	82.44447400	10072.69076900
3.40720700	41223.22970800	82.44645900	10096.72437300
3.40730700	41224.22031400	82.44844100	10120.68613400
3.40740700	41225.20883800	82.45041800	10144.57599300
3.40840300	41234.96677900	82.46993400	10379.50886500
3.40940000	41244.45501800	82.48891000	10607.20454700
3.41039600	41253.62130400	82.50724300	10827.63415700
3.41139300	41262.41754700	82.52483500	11040.78450000
3.41238900	41270.80000500	82.54160000	11246.65863100
3.41495400	41290.20448900	82.58040900	11743.29093300
3.41751900	41306.04698800	82.61209400	12192.51376900
3.42008500	41317.92198500	82.63584400	12595.49045700
3.42265000	41325.58532500	82.65117100	12953.87324500
3.42521500	41328.92435900	82.65784900	13269.61616100
3.42778000	41327.96077700	82.65592200	13545.01579600
3.43004000	41323.65131300	82.64730300	13756.23401800
3.43060500	41322.08537000	82.64417100	13804.66806900
3.43071800	41321.74928100	82.64349900	13814.15092400
3.43083100	41321.40566600	82.64281100	13823.56655200
3.43094400	41321.05452300	82.64210900	13832.91515200
3.43098600	41320.92188400	82.64184400	13836.39399300
3.43098800	41320.91482300	82.64183000	13836.54745700
3.43099000	41320.90855300	82.64181700	13836.71015200
3.43099400	41320.89600500	82.64179200	13837.03548100
3.43099800	41320.88345100	82.64176700	13837.36074900
3.43100200	41320.87088600	82.64174200	13837.68593500
3.43100400	41320.86479900	82.64173000	13837.84337900
3.43100600	41320.85870900	82.64171700	13838.00078400
3.43101000	40388.98957700	80.77797900	11134.78685400
3.43101100	40389.06128400	80.77812300	11135.05585700
3.43101200	40389.11348000	80.77822700	11135.27533900
3.43101400	40389.16567500	80.77833100	11135.49481500
3.43102400	40389.68758100	80.77937500	11137.68925600
3.43103400	40390.20940500	80.78041900	11139.88311400
3.43104400	40390.73114900	80.78146200	11142.07638900
3.43114500	40395.94413100	80.79188800	11163.97704000
3.43124600	40401.14891300	80.80229800	11185.81925600
3.43134700	40406.34538600	80.81269100	11207.60295200
3.43144800	40411.53341800	80.82306700	11229.32802300
3.43245900	40462.92292100	80.92584600	11443.33349300
3.43347000	40513.33973500	81.02667900	11651.37958600
3.43448100	40562.68099900	81.12536200	11853.40187900
3.43549200	40610.84704600	81.22169400	12049.34028600
3.43729700	40693.64058700	81.38728100	12383.92825600
3.43769100	40711.17485100	81.42235000	12454.46540700
3.43774200	40713.43344700	81.42686700	12463.55344300
3.43779400	40715.68825600	81.43137700	12472.62437300
3.43784500	40717.93938500	81.43587900	12481.67943900
3.43786500	40718.83911200	81.43767800	12485.29835900
3.43788600	40719.73762200	81.43947500	12488.91207000
3.43792700	40721.53286200	81.44306600	12496.13187700
3.43792900	40721.64666400	81.44329300	12496.58954200
3.43793200	40721.76044700	81.44352100	12497.04712300
3.43793700	40721.98798500	81.44397600	12497.96216200
3.43793800	40722.02949200	81.44405900	12498.12908400
3.43793900	40722.07099700	81.44414200	12498.29599500
3.43794100	40722.17060500	81.44434100	12498.69656000
3.43794200	40722.18720500	81.44437400	12498.76331800
3.43794300	41219.98757300	82.43997500	11056.01464300
3.43794400	41219.99609800	82.43999200	11056.43070400
3.43795200	41220.09674600	82.44019300	11058.36379300
3.43795900	41220.19738000	82.44039500	11060.29643100
3.43796700	41220.29799700	82.44059600	11062.22861800
3.43804300	41221.30328400	82.44260700	11081.52567300
3.43811800	41222.30693300	82.44461400	11100.77759700
3.43819400	41223.30891600	82.44661800	11119.98437200
3.43827000	41224.30920100	82.44861800	11139.14597200
3.43902900	41234.21189300	82.46842400	11328.27306500
3.43978700	41243.91186200	82.48782400	11512.86391400
3.44054600	41253.38069600	82.50676100	11692.90621000
3.44130400	41262.59169400	82.52518300	11868.39324200
3.44149400	41264.85120200	82.52970200	11911.55297200
3.44153200	41265.30095100	82.53060200	11920.15076000
3.44157000	41265.74997700	82.53150000	11928.73715800
3.44160700	41266.19827400	82.53239700	11937.31216600
3.44162300	41266.37746700	82.53275500	11940.73990300
3.44163100	41266.47497500	82.53295000	11942.60667300
3.44163900	41266.57256100	82.53314500	11944.47419700
3.44165500	41266.75668200	82.53351300	11947.99809400
3.44167000	41266.94072800	82.53388100	11951.52060700
3.44168600	41267.12464600	82.53424900	11955.04118700
3.44184200	41268.95690000	82.53791400	11990.14052800
3.44199800	41270.77630100	82.54155300	12025.04583900
3.44215500	41272.58256600	82.54516500	12059.75654800
3.44231100	41274.37536600	82.54875100	12094.27196000
3.44283300	41280.26338400	82.56052700	12208.16150700
3.44335400	41285.98561600	82.57197100	12319.83525100
3.44387600	41291.53005900	82.58306000	12429.26491000
3.44439800	41296.88453900	82.59376900	12536.42017500
3.44492000	41302.03690800	82.60407400	12641.27007600
3.44507700	41303.55146600	82.60710300	12672.47768000
3.44523500	41305.04614200	82.61009200	12703.47125000
3.44539300	41306.52067000	82.61304100	12734.25029600
3.44555000	41307.97473600	82.61594900	12764.81408000
3.44583900	41310.58511600	82.62117000	12820.25961900
3.44612800	41313.12389000	82.62624800	12874.97542700
3.44641700	41315.58925300	82.63117900	12928.95737000
3.44670500	41317.97943100	82.63595900	12982.20148100
3.44725300	41322.30127500	82.64460300	13081.17448200
3.44780100	41326.33559000	82.65267100	13177.45767700
3.44834900	41330.07174800	82.66014300	13271.03115900
3.44889700	41333.50050400	82.66700100	13361.88130800
3.44944500	41336.61347800	82.67322700	13449.99848500
3.45045200	41341.48870500	82.68297700	13604.87714700
3.45146000	41345.23235200	82.69046500	13750.49951200
3.45223800	41347.33196600	82.69466400	13856.74029300
3.45301700	41348.72890400	82.69745800	13957.51516800
3.45379600	41349.41750400	82.69883500	14052.87723600
3.45457400	41349.39471500	82.69878900	14142.88867400
3.45535300	41348.66067400	82.69732100	14227.62408200
3.45613200	41347.21812400	82.69443600	14307.16706100
3.45644300	41346.44426700	82.69288900	14337.53271200
3.45675400	41345.55840700	82.69111700	14367.08920100
3.45706500	41344.56101700	82.68912200	14395.84278800
3.45737700	41343.45263300	82.68690500	14423.79991900
3.45768800	41342.23383700	82.68446800	14450.96716400
3.45815800	41340.18687700	82.68037400	14490.48537600
3.45862800	41337.89222500	82.67578400	14528.24328300
3.45909700	41335.35253600	82.67070500	14564.26510700
3.45956700	41332.57056400	82.66514100	14598.57517400
3.45967800	41331.88111900	82.66376200	14606.40224100
3.45978800	41331.17840600	82.66235700	14614.13607600
3.45989900	41330.46258700	82.66092500	14621.77741800
3.45990200	41330.43741200	82.66087500	14622.04205400
3.45990600	41330.41221000	82.66082400	14622.30646700
3.45991000	41330.38699100	82.66077400	14622.57076800
3.45991400	41330.36175600	82.66072400	14622.83495700
3.45991800	41330.33650700	82.66067300	14623.09903400
3.45992600	41330.28045100	82.66056100	14623.68431100
3.45992700	41330.27494400	82.66055000	14623.74176100
3.45992900	41330.26392600	82.66052800	14623.85664500
3.45993100	41330.25070200	82.66050100	14623.99448400
3.45993200	40383.50725400	80.76701500	11877.28853800
3.45993300	40383.54198300	80.76708400	11877.43330100
3.45994000	40383.88923600	80.76777800	11878.88073100
3.45994700	40384.23643000	80.76847300	11880.32777800
3.45995400	40384.58356700	80.76916700	11881.77443700
3.46002400	40388.05168200	80.77610300	11896.21969300
3.46009400	40391.51387200	80.78302800	11910.62615300
3.46016400	40394.97010100	80.78994000	11924.99380600
3.46023400	40398.42032500	80.79684100	11939.32263800
3.46093400	40432.58365900	80.86516700	12080.47338300
3.46163400	40466.10443400	80.93220900	12217.73187500
3.46233400	40498.94648000	80.99789300	12351.09198700
3.46303400	40531.07607400	81.06215200	12480.55122100
3.46373400	40562.46205900	81.12492400	12606.11083000
3.46441800	40592.40471400	81.18480900	12725.11761200
3.46510200	40621.58351100	81.24316700	12840.40624800
3.46578700	40649.97535300	81.29995100	12951.98589000
3.46592000	40655.38683800	81.31077400	12973.18972400
3.46605200	40660.76781500	81.32153600	12994.25472000
3.46618500	40666.11810900	81.33223600	13015.18096900
3.46622500	40667.70990100	81.33542000	13021.40344900
3.46626400	40669.29896700	81.33859800	13027.61349800
3.46630400	40670.88528000	81.34177100	13033.81118400
3.46630500	40670.94867700	81.34189700	13034.05884500
3.46630700	40671.01206700	81.34202400	13034.30646500
3.46630900	40671.07545100	81.34215100	13034.55406600
3.46631000	40671.13883000	81.34227800	13034.80164600
3.46631200	40671.22755300	81.34245500	13035.14821200
3.46631300	40671.25290100	81.34250600	13035.24723000
3.46631400	41159.25847000	82.31851700	11621.00716800
3.46631600	41159.23384700	82.31846800	11621.39787400
3.46631700	41159.26629700	82.31853300	11621.64406200
3.46632900	41159.40048900	82.31880100	11624.58676200
3.46634200	41159.53458300	82.31906900	11627.52790800
3.46635500	41159.66857700	82.31933700	11630.46750100
3.46648200	41161.00305800	82.32200600	11659.77797200
3.46660800	41162.32749300	82.32465500	11688.93309200
3.46673500	41163.64174300	82.32728300	11717.93288700
3.46686200	41164.94566000	82.32989100	11746.77739000
3.46782100	41174.45823300	82.34891600	11959.90780900
3.46878000	41183.31383200	82.36662800	12164.18235600
3.46973900	41191.45886600	82.38291800	12359.63591700
3.47069800	41198.84509700	82.39769000	12546.31646900
3.47165700	41205.43007100	82.41086000	12724.28571300
3.47275100	41211.91280800	82.42382600	12916.69019000
3.47384500	41217.25482600	82.43451000	13097.98200200
3.47493800	41221.41967200	82.44283900	13268.31328700
3.47603200	41224.37434200	82.44874900	13427.84190600
3.47728200	41226.23784900	82.45247600	13597.23135200
3.47853300	41226.46935700	82.45293900	13753.03326800
3.47978300	41225.04410600	82.45008800	13895.52942600
3.48103400	41221.97030100	82.44394100	14025.07687500
3.48228400	41217.25925700	82.43451900	14142.03309900
3.48350100	41211.12305700	82.42224600	14244.10826300
3.48471800	41203.48505800	82.40697000	14334.97587900
3.48593500	41194.38218700	82.38876400	14415.00981900
3.48617000	41192.45598800	82.38491200	14429.26814700
3.48640500	41190.47728800	82.38095500	14443.13925900
3.48664000	41188.44634600	82.37689300	14456.62600100
3.48668800	41188.03315700	82.37606600	14459.28588300
3.48669000	41188.01688300	82.37603400	14459.39001800
3.48669100	41188.00059500	82.37600100	14459.49407000
3.48669500	41187.96801000	82.37593600	14459.70210300
3.48669900	41187.93027900	82.37586100	14459.94279700
3.48670000	41187.92309300	82.37584600	14459.98861500
3.48670100	40245.85040600	80.49170100	11726.79332600
3.48670300	40245.98280400	80.49196600	11727.33559800
3.48670600	40246.09313000	80.49218600	11727.78744800
3.48670800	40246.20345000	80.49240700	11728.23925900
3.48673100	40247.30633500	80.49461300	11732.75520600
3.48675400	40248.40864800	80.49681700	11737.26722400
3.48677800	40249.51038900	80.49902100	11741.77531200
3.48700900	40260.49597600	80.52099200	11786.63987400
3.48724100	40271.42252900	80.54284500	11831.11057000
3.48747300	40282.28870900	80.56457700	11875.18683300
3.48770500	40293.09295600	80.58618600	11918.86797400
3.48936100	40368.31854300	80.73663700	12219.25020200
3.49101700	40439.84613000	80.87969200	12499.32675100
3.49219800	40488.35274800	80.97670500	12686.58022100
3.49258100	40503.61813900	81.00723600	12745.10318400
3.49263200	40505.61394700	81.01122800	12752.74291300
3.49263400	40505.71531000	81.01143100	12753.13079900
3.49263700	40505.81666000	81.01163300	12753.51857400
3.49264200	40506.01933100	81.01203900	12754.29397900
3.49264700	40506.22197000	81.01244400	12755.06923800
3.49265200	40506.42456600	81.01284900	12755.84430300
3.49265300	40506.46508100	81.01293000	12755.99929600
3.49265400	40506.50559200	81.01301100	12756.15427400
3.49265500	40506.54610300	81.01309200	12756.30924400
3.49265600	40506.58996400	81.01318000	12756.47703000
3.49265700	40997.25715400	81.99451400	11334.24302600
3.49265900	40997.27523800	81.99455000	11334.71232800
3.49266000	40997.29244600	81.99458500	11335.09796700
3.49266200	40997.30965200	81.99461900	11335.48358100
3.49267900	40997.48164200	81.99496300	11339.33825200
3.49269600	40997.65349400	81.99530700	11343.19026600
3.49271300	40997.82521100	81.99565000	11347.03962400
3.49288300	40999.53479200	81.99907000	11385.38707800
3.49305300	41001.23028400	82.00246100	11423.46882100
3.49322400	41002.91131800	82.00582300	11461.28483700
3.49339400	41004.57748300	82.00915500	11498.83510500
3.49507400	41020.14693100	82.04029400	11855.24754800
3.49675300	41033.89677800	82.06779400	12185.85973800
3.49843300	41045.53625200	82.09107300	12490.86539000
3.50011300	41054.82699000	82.10965400	12770.58024500
3.50179300	41061.58522800	82.12317000	13025.44387400
3.50405800	41066.44869800	82.13289700	13330.75739100
3.50632400	41066.23539500	82.13247100	13593.37261100
3.50858900	41060.87041700	82.12174100	13815.10871500
3.51085400	41050.40381000	82.10080800	13998.00233600
3.51140600	41047.09551900	82.09419100	14036.91349300
3.51151700	41046.39876100	82.09279800	14044.43716900
3.51162700	41045.69038000	82.09138100	14051.87536200
3.51173700	41044.97042000	82.08994100	14059.22843000
3.51177800	41044.70424000	82.08940800	14061.90736300
3.51178000	41044.69040400	82.08938100	14062.02404200
3.51178200	41044.67359600	82.08934700	14062.19144400
3.51178300	41044.66803800	82.08933600	14062.24679600
3.51178400	40111.95568700	80.22391100	11356.24369700
3.51178500	40112.01581000	80.22403200	11356.47103700
3.51179000	40112.25179000	80.22450400	11357.44524800
3.51179400	40112.48774600	80.22497500	11358.41929000
3.51179900	40112.72368000	80.22544700	11359.39316400
3.51184700	40115.08169700	80.23016300	11369.12261700
3.51189500	40117.43732100	80.23487500	11378.83518400
3.51194300	40119.79053500	80.23958100	11388.53085600
3.51199100	40122.14132800	80.24428300	11398.20962400
3.51247100	40145.51276700	80.29102600	11494.06583100
3.51295100	40168.62617800	80.33725200	11588.22313700
3.51343100	40191.46815500	80.38293600	11680.67510300
3.51391100	40214.02551500	80.42805100	11771.41555400
3.51585400	40302.21744500	80.60443500	12121.31523200
3.51737100	40367.21136200	80.73442300	12374.76375500
3.51737600	40367.41914700	80.73483800	12375.56887300
3.51738100	40367.62685400	80.73525400	12376.37360800
3.51738600	40367.83452100	80.73566900	12377.17815600
3.51739100	40368.04214800	80.73608400	12377.98251700
3.51739600	40368.24973500	80.73649900	12378.78669100
3.51739700	40368.30455500	80.73660900	12378.99902000
3.51739800	40368.32450200	80.73664900	12379.07629200
3.51739900	40863.46580400	81.72693200	10944.13126600
3.51740400	40863.52516800	81.72705000	10945.30622300
3.51740800	40863.57912400	81.72715800	10946.37417000
3.51741300	40863.63307200	81.72726600	10947.44193000
3.51745800	40864.17207500	81.72834400	10958.10916500
3.51750300	40864.71019900	81.72942000	10968.75756200
3.51754800	40865.24743700	81.73049500	10979.38712200
3.51759300	40865.78377900	81.73156800	10989.99784100
3.51804200	40871.09604800	81.74219200	11095.06829400
3.51849100	40876.30954900	81.75261900	11198.25267500
3.51894000	40881.41640900	81.76283300	11299.55038500
3.51938900	40886.40887800	81.77281800	11398.96106500
3.52124900	40905.69969800	81.81139900	11790.44200800
3.52310900	40922.45071100	81.84490100	12149.79544500
3.52496800	40936.26157300	81.87252300	12477.32887200
3.52682800	40946.82653600	81.89365300	12773.55834600
3.52868800	40953.92965100	81.90785900	13039.18975200
3.53096300	40957.69189000	81.91538400	13323.82232700
3.53323900	40955.90159600	81.91180300	13565.61306100
3.53380800	40954.57555000	81.90915100	13619.57464800
3.53437700	40952.91030100	81.90582100	13671.03480000
3.53494600	40950.90113700	81.90180200	13720.01020900
3.53506000	40950.45801500	81.90091600	13729.50959500
3.53517400	40950.00128800	81.90000300	13738.91138100
3.53528700	40949.53092500	81.89906200	13748.21574200
3.53533100	40949.34930500	81.89869900	13751.73318600
3.53537400	40949.16434500	81.89832900	13755.22255100
3.53546000	40948.78852700	81.89757700	13762.15928400
3.53546200	40948.77976600	81.89756000	13762.31975500
3.53546400	40948.77098900	81.89754200	13762.48013300
3.53546800	40948.75342100	81.89750700	13762.80079700
3.53547200	40948.73583900	81.89747200	13763.12137100
3.53547600	40948.71824100	81.89743600	13763.44182500
3.53547800	40948.70973000	81.89741900	13763.59667000
3.53548000	40948.70121400	81.89740200	13763.75145900
3.53548400	40948.68416800	81.89736800	13764.06095200
3.53548800	40948.66711000	81.89733400	13764.37036200
3.53549200	40948.65003600	81.89730000	13764.67965900
3.53549400	40948.64163800	81.89728300	13764.83166700
3.53549600	40948.63323500	81.89726600	13764.98362200
3.53549900	40948.61641500	81.89723300	13765.28744900
3.53550000	40948.61378200	81.89722800	13765.33499900
3.53550100	40022.91662700	80.04583300	11079.70142400
3.53550200	40022.96890000	80.04593800	11079.91836700
3.53550700	40023.21143200	80.04642300	11080.94526200
3.53551100	40023.45394000	80.04690800	11081.97198300
3.53551600	40023.69642300	80.04739300	11082.99852700
3.53556400	40026.11988800	80.05224000	11093.25426200
3.53561200	40028.54086400	80.05708200	11103.49234800
3.53565900	40030.95933300	80.06191900	11113.71277600
3.53570700	40033.37528200	80.06675100	11123.91553700
3.53618400	40057.39283900	80.11478600	11224.96958100
3.53666100	40081.14212400	80.16228400	11324.24792200
3.53713800	40104.60929200	80.20921900	11421.74376900
3.53761500	40127.78072800	80.25556100	11517.45059300
3.53956000	40218.94429400	80.43788900	11889.11582800
3.53986000	40232.49584100	80.46499200	11943.73871400
3.54016000	40245.89605100	80.49179200	11997.63309600
3.54045900	40259.15041800	80.51830100	12050.81249700
3.54083100	40275.37855300	80.55075700	12115.75790900
3.54083200	40275.42124900	80.55084200	12115.92853500
3.54083300	40275.46394200	80.55092800	12116.09914600
3.54083400	40773.63839600	81.54727700	10672.45437300
3.54083600	40773.64922900	81.54729800	10672.92097800
3.54083800	40773.67159100	81.54734300	10673.33484000
3.54083900	40773.69395200	81.54738800	10673.74867400
3.54085600	40773.91749300	81.54783500	10677.88554100
3.54087200	40774.14091000	81.54828200	10682.01972600
3.54088900	40774.36419800	81.54872800	10686.15122800
3.54105400	40776.59006300	81.55318000	10727.31869700
3.54121900	40778.80279800	81.55760600	10768.21779500
3.54138400	40781.00198100	81.56200400	10808.84844400
3.54155000	40783.18714000	81.56637400	10849.21055400
3.54155200	40783.21436600	81.56642900	10849.71340200
3.54155400	40783.24158600	81.56648300	10850.21616500
3.54155600	40783.26880500	81.56653800	10850.71888700
3.54155800	40783.29602100	81.56659200	10851.22156600
3.54156000	40783.32323400	81.56664600	10851.72420300
3.54156400	40783.37765300	81.56675500	10852.72935100
3.54156800	40783.43206700	81.56686400	10853.73437300
3.54157200	40783.48647200	81.56697300	10854.73922700
3.54161400	40784.03001400	81.56806000	10864.77851700
3.54165500	40784.57263800	81.56914500	10874.80098300
3.54169600	40785.11433700	81.57022900	10884.80662600
3.54173800	40785.65510300	81.57131000	10894.79544600
3.54186100	40787.26308200	81.57452600	10924.50066200
3.54198400	40788.86252800	81.57772500	10954.05611600
3.54210700	40790.45325100	81.58090700	10983.46184100
3.54246500	40795.01811000	81.59003600	11067.93654600
3.54275900	40798.71221200	81.59742400	11136.44843600
3.54305300	40802.35130800	81.60470300	11204.11026000
3.54334700	40805.93286700	81.61186600	11270.92334700
3.54364000	40809.45502300	81.61891000	11336.88925200
3.54422800	40816.31339600	81.63262700	11466.28648300
3.54481600	40822.91242900	81.64582500	11592.32052200
3.54540400	40829.23824300	81.65847600	11715.00951500
3.54599200	40835.27876400	81.67055800	11834.37711800
3.54658000	40841.02296200	81.68204600	11950.44954100
3.54773600	40851.41315700	81.70282600	12169.13984400
3.54889100	40860.55213900	81.72110400	12375.43438700
3.55004700	40868.38571400	81.73677100	12569.58629800
3.55120300	40874.87232500	81.74974500	12751.86883900
3.55235900	40879.97930300	81.75995900	12922.55511900
3.55351400	40883.68463900	81.76736900	13081.93022600
3.55485900	40886.21448200	81.77242900	13253.53671100
3.55620400	40886.82095800	81.77364200	13410.66894900
3.55754900	40885.51007000	81.77102000	13553.78139300
3.55776300	40885.12564300	81.77025100	13575.28857600
3.55797700	40884.69333000	81.76938700	13596.45493700
3.55802000	40884.60111900	81.76920200	13600.64738400
3.55806300	40884.50699300	81.76901400	13604.82625700
3.55807200	40884.48582600	81.76897200	13605.75276500
3.55808200	40884.46456100	81.76892900	13606.67859700
3.55808300	39962.81398300	79.92562800	10932.82995600
3.55808400	39962.89322200	79.92578600	10933.14977300
3.55808500	39962.95403100	79.92590800	10933.41752200
3.55808700	39963.01484100	79.92603000	10933.68526100
3.55809800	39963.62284900	79.92724600	10936.36209100
3.55811000	39964.23071600	79.92846100	10939.03790100
3.55812100	39964.83844500	79.92967700	10941.71269100
3.55823700	39970.90798200	79.94181600	10968.40444500
3.55835300	39976.96326600	79.95392700	10994.99401200
3.55846800	39983.00409500	79.96600800	11021.48127900
3.55858400	39989.03023800	79.97806000	11047.86610800
3.55929500	40025.78192000	80.05156400	11207.98853900
3.56000700	40061.92078700	80.12384200	11364.19916500
3.56071900	40097.40041000	80.19480100	11516.47328800
3.56143100	40132.17722800	80.26435400	11664.78960800
3.56214200	40166.21066700	80.33242100	11809.13051400
3.56287100	40200.25752900	80.40051500	11952.82963600
3.56295500	40204.09999500	80.40820000	11969.00785400
3.56303800	40207.93118200	80.41586200	11985.13106200
3.56312100	40211.75101100	80.42350200	12001.19926000
3.56314500	40212.84125400	80.42568300	12005.78414100
3.56316900	40213.93057700	80.42786100	12010.36452300
3.56317700	40214.30774800	80.42861500	12011.95026700
3.56317800	40214.31849000	80.42863700	12011.99543200
3.56317900	40713.12494700	81.42625000	10566.40625700
3.56318400	40713.19865700	81.42639700	10567.82215200
3.56318800	40713.27220800	81.42654400	10569.09227100
3.56323600	40714.00728300	81.42801500	10581.78236100
3.56328300	40714.74147400	81.42948300	10594.45088500
3.56333000	40715.47475400	81.43095000	10607.09761600
3.56371700	40721.47379800	81.44294800	10710.35295600
3.56410500	40727.40373800	81.45480700	10812.12908000
3.56449200	40733.25894400	81.46651800	10912.42451600
3.56488000	40739.03291500	81.47806600	11011.23716900
3.56554200	40748.69985800	81.49740000	11176.74166200
3.56620500	40758.08471700	81.51616900	11337.90610200
3.56686700	40767.15985400	81.53432000	11494.72801000
3.56753000	40775.90054700	81.55180100	11647.21171000
3.56819300	40784.28350800	81.56856700	11795.36464200
3.56935100	40798.02121300	81.59604200	12044.12531900
3.57051000	40810.49196600	81.62098400	12279.74888900
3.57166900	40821.60420300	81.64320800	12502.34595800
3.57282800	40831.28058700	81.66256100	12712.05677300
3.57398700	40839.45693600	81.67891400	12909.04792500
3.57514600	40846.08247700	81.69216500	13093.51233400
3.57651800	40851.86955100	81.70373900	13295.98281900
3.57789000	40855.38914900	81.71077800	13481.60341500
3.57926100	40856.62236900	81.71324500	13650.81225600
3.57947500	40856.60850700	81.71321700	13675.75271800
3.57968900	40856.53906700	81.71307800	13700.30719300
3.57969000	40856.53887200	81.71307800	13700.35591700
3.57969100	40856.53848200	81.71307700	13700.45335800
3.57969200	40856.53809200	81.71307600	13700.55079300
3.57969300	39933.77084500	79.86754200	11023.53567900
3.57969400	39933.81694200	79.86763400	11023.70860200
3.57969700	39934.00263300	79.86800500	11024.55573700
3.57970100	39934.18831200	79.86837700	11025.40277300
3.57970400	39934.37397600	79.86874800	11026.24970900
3.57973800	39936.22987700	79.87246000	11034.71359100
3.57977300	39938.08442100	79.87616900	11043.16750500
3.57980700	39939.93760000	79.87987500	11051.61144800
3.57984100	39941.78941000	79.88357900	11060.04541600
3.58018300	39960.23082200	79.92046200	11143.83578100
3.58052600	39978.52867700	79.95705700	11226.62524200
3.58086800	39996.67715900	79.99335400	11308.41087700
3.58121000	40014.67062500	80.02934100	11389.19001500
3.58155300	40032.50361500	80.06500700	11468.96025300
3.58263100	40087.56409500	80.17512800	11713.59265900
3.58370900	40140.82584700	80.28165200	11948.14342900
3.58443700	40175.70455900	80.35140900	12100.81451400
3.58452200	40179.72507600	80.35945000	12118.37240800
3.58454100	40180.59481300	80.36119000	12122.16962500
3.58455900	40181.46395900	80.36292800	12125.96387300
3.58457800	40182.33250900	80.36466500	12129.75515400
3.58457900	40182.40196700	80.36480400	12130.05832800
3.58458000	40182.46524800	80.36493000	12130.33454000
3.58458100	40678.44652400	81.35689300	10692.71423300
3.58458200	40678.45555400	81.35691100	10693.00850300
3.58458500	40678.51099200	81.35702200	10693.92517900
3.58458800	40678.56642300	81.35713300	10694.84174300
3.58459100	40678.62185000	81.35724400	10695.75819500
3.58462400	40679.17583800	81.35835200	10704.91655400
3.58465600	40679.72931400	81.35945900	10714.06371400
3.58468900	40680.28227600	81.36056500	10723.19967400
3.58472100	40680.83471700	81.36166900	10732.32443300
3.58504500	40686.32965000	81.37265900	10822.95580400
3.58536900	40691.76821300	81.38353600	10912.46638600
3.58569200	40697.14648200	81.39429300	11000.85573700
3.58601600	40702.46069000	81.40492100	11088.12364400
3.58634000	40707.70714700	81.41541400	11174.27012000
3.58741700	40724.62688600	81.44925400	11452.77146700
3.58849400	40740.63398900	81.48126800	11718.89146500
3.58957100	40755.61641300	81.51123300	11972.67793300
3.59064800	40769.47420300	81.53894800	12214.20257300
3.59172500	40782.11877200	81.56423800	12443.55818100
3.59280200	40793.47300000	81.58694600	12660.85908400
3.59423000	40806.42248600	81.61284500	12930.53470300
3.59565800	40816.86518600	81.63373000	13179.63431500
3.59708500	40824.70786500	81.64941600	13408.57644000
3.59851300	40829.88764200	81.65977500	13617.83014100
3.59994100	40832.37026700	81.66474100	13807.91119100
3.60016500	40832.51456100	81.66502900	13836.12593700
3.60039000	40832.59180300	81.66518400	13863.88149900
3.60043500	40832.59920900	81.66519800	13869.37770700
3.60044500	40832.60047100	81.66520100	13870.57423000
3.60044600	40832.60058000	81.66520100	13870.68391900
3.60044700	40832.60068800	81.66520100	13870.79359300
3.60044800	40832.60089900	81.66520200	13871.01291800
3.60044900	40832.60094100	81.66520200	13871.05678200
3.60045000	39907.14479100	79.81429000	11186.17615200
3.60045100	39907.22277100	79.81444600	11186.45673200
3.60045800	39907.63834500	79.81527700	11188.43162900
3.60046600	39908.03355000	79.81606700	11190.27041600
3.60047300	39908.42869200	79.81685700	11192.10873400
3.60054500	39912.37660600	79.82475300	11210.46608100
3.60061700	39916.31811600	79.83263600	11228.77643500
3.60068900	39920.25317000	79.84050600	11247.03977400
3.60076100	39924.18170500	79.84836300	11265.25606600
3.60147800	39962.98575500	79.92597200	11444.31902100
3.60219500	40001.08120600	80.00216200	11618.67829700
3.60291300	40038.41591500	80.07683200	11788.31447200
3.60363000	40074.94120900	80.14988200	11953.21298700
3.60434700	40110.61191000	80.22122400	12113.36443500
3.60451100	40118.63834400	80.23727700	12149.29260900
3.60467500	40126.61748300	80.25323500	12184.97264800
3.60483900	40134.54883700	80.26909800	12220.40449000
3.60500300	40142.43194000	80.28486400	12255.58812700
3.60506900	40145.57157400	80.29114300	12269.59208900
3.60513400	40148.70338200	80.29740700	12283.55633500
3.60515000	40149.44446000	80.29888900	12286.86002800
3.60515100	40149.50905200	80.29901800	12287.14796400
3.60515200	40149.57363800	80.29914700	12287.43586600
3.60515300	40149.59946800	80.29919900	12287.55100900
3.60515500	40642.27054600	81.28454100	10860.01147900
3.60515600	40642.25721600	81.28451400	10860.40875000
3.60515700	40642.29312800	81.28458600	10860.68132500
3.60516800	40642.48806300	81.28497600	10863.82196300
3.60517800	40642.68293400	81.28536600	10866.96128100
3.60518900	40642.87774200	81.28575500	10870.09927900
3.60529800	40644.82227400	81.28964500	10901.40664700
3.60540600	40646.76024500	81.29352000	10932.58198700
3.60551400	40648.69150500	81.29738300	10963.62529300
3.60562300	40650.61588700	81.30123200	10994.53655300
3.60636100	40663.52442600	81.32704900	11201.50680400
3.60709900	40676.05944600	81.35211900	11402.35710600
3.60783700	40688.17574700	81.37635100	11597.09447400
3.60857500	40699.83122800	81.39966200	11785.73202000
3.60931300	40710.98698400	81.42197400	11968.28922300
3.61041700	40726.66087500	81.45332200	12230.03064700
3.61152000	40741.02664300	81.48205300	12478.32934100
3.61262400	40753.98858300	81.50797700	12713.31365200
3.61372800	40765.46461200	81.53092900	12935.13602200
3.61483200	40775.38522900	81.55077000	13143.96955500
3.61593500	40783.69393900	81.56738800	13340.00941500
3.61734800	40791.90567300	81.58381100	13572.55292800
3.61876000	40797.34153900	81.59468300	13784.99325300
3.62017300	40799.96659000	81.59993300	13977.86820100
3.62040100	40800.12611300	81.60025200	14007.22496700
3.62044600	40800.14918700	81.60029800	14013.03708700
3.62044800	40800.15012500	81.60030000	14013.28875000
3.62045000	40800.15104800	81.60030200	14013.54029700
3.62045100	40800.15116300	81.60030200	14013.57111700
3.62045200	39872.63730400	79.74527500	11322.75984000
3.62045300	39872.70451800	79.74540900	11323.07632400
3.62046600	39873.37655000	79.74675300	11326.24045700
3.62047800	39874.04839800	79.74809700	11329.40321700
3.62049000	39874.72005800	79.74944000	11332.56458800
3.62061100	39881.42628600	79.76285300	11364.10193500
3.62073200	39888.11343800	79.77622700	11395.50033500
3.62085300	39894.78125100	79.78956300	11426.75968600
3.62097500	39901.42943000	79.80285900	11457.87986700
3.62171800	39941.77981000	79.88356000	11645.79583200
3.62246200	39981.31909600	79.96263800	11828.44623600
3.62320600	40019.98893400	80.03997800	12005.81414900
3.62395000	40057.73514300	80.11547000	12177.88839000
3.62469400	40094.50792400	80.18901600	12344.66381100
3.62486000	40102.57765000	80.20515500	12381.16330000
3.62488800	40103.94362400	80.20788700	12387.33837000
3.62491600	40105.30811600	80.21061600	12393.50582000
3.62494500	40106.67112100	80.21334200	12399.66565100
3.62495600	40107.21590600	80.21443200	12402.12745000
3.62496700	40107.76045400	80.21552100	12404.58802900
3.62497800	40108.30476200	80.21661000	12407.04738900
3.62498300	40108.52243800	80.21704500	12408.03089500
3.62498700	40108.74003700	80.21748000	12409.01400000
3.62498900	40108.80066000	80.21760100	12409.28785900
3.62499000	40108.88557200	80.21777100	12409.67148900
3.62499100	40108.90983300	80.21782000	12409.78109800
3.62499200	40598.76169600	81.19752300	10990.20288700
3.62499300	40598.75024400	81.19750000	10990.57623400
3.62499400	40598.78426200	81.19756900	10990.83443700
3.62500400	40598.97284400	81.19794600	10993.79959600
3.62501400	40599.16136600	81.19832300	10996.76358000
3.62502400	40599.34983000	81.19870000	10999.72639000
3.62512500	40601.23121800	81.20246200	11029.28989300
3.62522500	40603.10659200	81.20621300	11058.73594200
3.62532600	40604.97583000	81.20995200	11088.06453700
3.62542700	40606.83879100	81.21367800	11117.27567900
3.62618300	40620.62023500	81.24124000	11332.96682100
3.62693900	40633.98670100	81.26797300	11542.03515100
3.62769500	40646.88748200	81.29377500	11744.49123700
3.62845100	40659.27540900	81.31855100	11940.35218300
3.62920700	40671.10703300	81.34221400	12129.64196000
3.63035500	40687.91242800	81.37582500	12404.45581700
3.63150300	40703.21691000	81.40643400	12664.32711700
3.63265000	40716.91063700	81.43382100	12909.41219500
3.63379800	40728.90046400	81.45780100	13139.89532200
3.63494600	40739.10852900	81.47821700	13355.98465100
3.63609300	40747.47283100	81.49494600	13557.91399300
3.63751600	40755.21029600	81.51042100	13788.88298400
3.63893800	40759.98527900	81.51997100	13999.03659400
3.63916100	40760.46301800	81.52092600	14030.13344300
3.63938400	40760.86715700	81.52173400	14060.73515100
3.63960700	40761.19767600	81.52239500	14090.84408700
3.63965100	40761.25494500	81.52251000	14096.80694600
3.63969600	40761.30926800	81.52261900	14102.75020900
3.63974000	40761.36064700	81.52272100	14108.67390000
3.63975600	40761.37779100	81.52275600	14110.72484600
3.63977100	40761.39457600	81.52278900	14112.77342800
3.63977200	40761.39564500	81.52279100	14112.90528100
3.63977300	40761.39671100	81.52279300	14113.03711400
3.63977500	40761.39884100	81.52279800	14113.30075100
3.63977600	40761.39926600	81.52279900	14113.35347600
3.63977700	39832.56873800	79.66513700	11418.66281900
3.63977800	39832.61112800	79.66522200	11418.86390300
3.63978600	39833.07737000	79.66615500	11421.07546500
3.63979300	39833.50114800	79.66700200	11423.08539100
3.63980100	39833.92485300	79.66785000	11425.09476200
3.63987700	39838.15777800	79.67631600	11445.15784400
3.63995200	39842.38316500	79.68476600	11465.16523700
3.64002800	39846.60094600	79.69320200	11485.11691400
3.64010300	39850.81104800	79.70162200	11505.01284600
3.64085500	39892.32321900	79.78464600	11700.19325000
3.64160800	39932.99916200	79.86599800	11889.81456300
3.64236000	39972.77557300	79.94555100	12073.85883700
3.64311200	40011.59347800	80.02318700	12252.31411900
3.64386400	40049.39854300	80.09879700	12425.17478000
3.64403200	40057.66431500	80.11532900	12462.86195500
3.64406000	40059.04623900	80.11809200	12469.15926800
3.64408800	40060.42666200	80.12085300	12475.44878600
3.64411600	40061.80558500	80.12361100	12481.73051100
3.64412700	40062.35673200	80.12471300	12484.24101800
3.64413800	40062.90763900	80.12581500	12486.75027800
3.64415000	40063.45830600	80.12691700	12489.25829200
3.64415400	40063.67852300	80.12735700	12490.26125300
3.64415900	40063.89866400	80.12779700	12491.26380400
3.64416800	40064.33883300	80.12867800	12493.26830900
3.64416900	40064.42349000	80.12884700	12493.65383500
3.64417000	40064.44654600	80.12889300	12493.75883100
3.64417100	40552.15834200	81.10431700	11080.36935300
3.64417200	40552.14864000	81.10429700	11080.72285100
3.64417300	40552.18128500	81.10436300	11080.96911700
3.64418200	40552.36655100	81.10473300	11083.78859800
3.64419100	40552.55176200	81.10510400	11086.60702300
3.64420100	40552.73692000	81.10547400	11089.42439200
3.64429500	40554.58553000	81.10917100	11117.53997000
3.64438900	40556.42865200	81.11285700	11145.54990000
3.64448300	40558.26617800	81.11653200	11173.45418500
3.64457800	40560.09799000	81.12019600	11201.25282700
3.64534000	40574.70914200	81.14941800	11422.50041100
3.64610200	40588.88014700	81.17776000	11636.82669800
3.64686500	40602.55614500	81.20511200	11844.24464200
3.64762700	40615.68609000	81.23137200	12044.77409700
3.64839000	40628.22299000	81.25644600	12238.44219400
3.64949300	40645.21786200	81.29043600	12506.47074000
3.65059600	40660.76260600	81.32152500	12760.33780000
3.65169800	40674.75381800	81.34950800	13000.19052200
3.65280100	40687.10311300	81.37420600	13226.20045300
3.65390400	40697.73601400	81.39547200	13438.56029500
3.65500700	40706.59242800	81.41318500	13637.48533400
3.65644100	40715.37737000	81.43075500	13876.47256700
3.65787500	40721.01039200	81.44202100	14093.70335500
3.65810000	40721.60584600	81.44321200	14125.87609900
3.65832500	40722.12260900	81.44424500	14157.52995100
3.65837000	40722.21651400	81.44443300	14163.79867100
3.65841500	40722.30727000	81.44461500	14170.04675800
3.65846000	40722.39487800	81.44479000	14176.27423600
3.65847600	40722.42443200	81.44484900	14178.42217600
3.65849200	40722.45360700	81.44490700	14180.56764700
3.65849300	39792.91445100	79.58582900	11483.83336000
3.65849500	39793.03123300	79.58606200	11484.39024600
3.65849700	39793.14801000	79.58629600	11484.94708900
3.65849900	39793.26478100	79.58653000	11485.50389100
3.65851900	39794.43218200	79.58886400	11491.06958800
3.65854000	39795.59901700	79.59119800	11496.63107200
3.65856000	39796.76528400	79.59353100	11502.18834100
3.65858100	39797.93098300	79.59586200	11507.74139700
3.65878600	39809.55632300	79.61911300	11563.04002900
3.65899100	39821.12311700	79.64224600	11617.91662700
3.65919600	39832.62991200	79.66526000	11672.37069000
3.65940100	39844.07529000	79.68815100	11726.40175400
3.65960500	39855.45785300	79.71091600	11780.00939000
3.66075400	39918.00140300	79.83600300	12072.48601600
3.66190200	39978.30560900	79.95661100	12351.61218700
3.66270700	40019.17849400	80.03835700	12539.51289500
3.66271700	40019.65937900	80.03931900	12541.71854400
3.66272700	40020.13991000	80.04028000	12543.92226300
3.66273600	40020.62025900	80.04124100	12546.12504200
3.66274600	40021.10042800	80.04220100	12548.32688200
3.66274700	40021.16526500	80.04233100	12548.62400500
3.66274900	40021.23026800	80.04246100	12548.92208300
3.66275100	40021.36026500	80.04272100	12549.51818700
3.66275200	40021.38626400	80.04277300	12549.63740400
3.66275300	40507.51688200	81.01503400	11141.07033000
3.66275400	40507.50730100	81.01501500	11141.46714400
3.66275500	40507.54446400	81.01508900	11141.74559200
3.66276600	40507.76022900	81.01552000	11144.92385100
3.66277600	40507.97592600	81.01595200	11148.10078500
3.66278700	40508.19155400	81.01638300	11151.27639300
3.66289100	40510.34400200	81.02068800	11182.95958100
3.66299500	40512.48936000	81.02497900	11214.51023400
3.66309900	40514.62747400	81.02925500	11245.92836100
3.66320400	40516.75817400	81.03351600	11277.21397200
3.66398100	40532.40121200	81.06480200	11506.39330600
3.66475900	40547.55885800	81.09511800	11728.21128200
3.66553700	40562.17047500	81.12434100	11942.68403900
3.66631500	40576.17982400	81.15236000	12149.83518500
3.66709200	40589.53529900	81.17907100	12349.69618100
3.66822100	40607.66332700	81.21532700	12626.94671400
3.66935000	40624.18199700	81.24836400	12889.05115200
3.67047900	40638.97803300	81.27795600	13136.17611800
3.67160800	40651.95546300	81.30391100	13368.51470700
3.67273700	40663.03422900	81.32606800	13586.28279200
3.67386600	40672.15077900	81.34430200	13789.72076500
3.67529600	40680.80601100	81.36161200	14027.19280700
3.67645300	40685.40619300	81.37081200	14203.26332500
3.67661900	40685.88632100	81.37177300	14227.25542400
3.67664100	40685.94905900	81.37189800	14230.54168400
3.67665400	40685.98310500	81.37196600	14232.34531600
3.67665500	39755.92371800	79.51184700	11534.06585300
3.67666000	39756.23146100	79.51246300	11535.51744500
3.67666400	39756.47833600	79.51295700	11536.70289700
3.67666800	39756.72518500	79.51345000	11537.88816000
3.67671100	39759.19228300	79.51838500	11549.73047800
3.67675400	39761.65685100	79.52331400	11561.55403300
3.67679600	39764.11887200	79.52823800	11573.35882100
3.67683900	39766.57833300	79.53315700	11585.14483500
3.67726600	39791.02917200	79.58205800	11701.97138800
3.67769300	39815.20926700	79.63041900	11816.91557200
3.67811900	39839.10560300	79.67821100	11929.97331000
[truncated: 4,852 more rows]
