# Supplementary material for: An Efficient Contact Model for the Simulation of Cargo Airdrop Extraction Phase
Source: Hindawi journal article supplement (doi:10.1155/2018/9895451), 2018-10-17
Supplement: f1 [file 9895451.f1.zip › case3_aircraft_coupling/m4000_nocouple/df_cargo.csv]

t	u	v	w	x_g	y_g	z_g	p	q	r	e0	e1	e2	e3	yaw(deg)	pitch(deg)	roll(deg)	yaw_fix(deg)	pitch_fix(deg)	roll_fix(deg)	h_g	vx_g	vy_g	vz_g	ax_g	ay_g	az_g	g-force
0.0	88.88888859781834	0.0	0.00021283858412721898	7.899994202763537	0.0	-800.6437003915348	0.0	4.3191446912223866e-10	0.0	0.9999999999992834	0.0	1.1972170330795237e-06	0.0	0.0	0.00013719096631329471	0.0	0.0	0.00013719109004767566	0.0	800.6437003915348	88.88888859807315	0.0	1.1651286615137575e-12	0.0	0.0	0.0	0.0
0.005	88.88888859781834	0.0	0.00021283858412721898	8.344438647207982	0.0	-800.6437003915348	0.0	4.3191446912223866e-10	0.0	0.9999999999992834	0.0	1.1972170330795237e-06	0.0	0.0	0.00013719096631329471	0.0	0.0	0.00013719121378205664	0.0	800.6437003915348	88.88888859807315	0.0	1.1651286615137575e-12	0.0	0.0	1.3463226115771936e-26	1.3463226115771937e-27
0.01	88.88888859781834	0.0	0.00021283858412721898	8.788883091652426	0.0	-800.6437003915348	0.0	4.3191446912223866e-10	0.0	0.9999999999992834	0.0	1.1972170330795237e-06	0.0	0.0	0.00013719096631329471	0.0	0.0	0.0001371913375164376	0.0	800.6437003915348	88.88888859807315	0.0	1.1651286615137575e-12	-9.473903143468003e-13	0.0	-6.731613057885968e-27	9.473903143468004e-14
0.015	88.88888859781834	0.0	0.00021283858412721898	9.233327536096871	0.0	-800.6437003915348	0.0	4.3191446912223866e-10	0.0	0.9999999999992834	0.0	1.1972170330795237e-06	0.0	0.0	0.00013719096631329471	0.0	0.0	0.00013719146125081854	0.0	800.6437003915348	88.88888859807315	0.0	1.1651286615137575e-12	-9.473903143468003e-13	0.0	-6.731613057885968e-27	9.473903143468004e-14
0.02	88.88888859781834	0.0	0.00021283858412721898	9.677771980541316	0.0	-800.6437003915348	0.0	4.3191446912223866e-10	0.0	0.9999999999992834	0.0	1.1972170330795237e-06	0.0	0.0	0.00013719096631329471	0.0	0.0	0.0001371915849851995	0.0	800.6437003915348	88.88888859807315	0.0	1.1651286615137575e-12	-9.473903143468003e-13	0.0	-6.731613057885968e-27	9.473903143468004e-14
0.025	88.88888859781834	0.0	0.00021283858412721898	10.122216424985758	0.0	-800.6437003915348	0.0	4.3191446912223866e-10	0.0	0.9999999999992834	0.0	1.1972170330795237e-06	0.0	0.0	0.00013719096631329471	0.0	0.0	0.00013719170871958047	0.0	800.6437003915348	88.88888859807315	0.0	1.1651286615137575e-12	-9.473903143468003e-13	0.0	-6.731613057885968e-27	9.473903143468004e-14
0.03	88.88888859781834	0.0	0.00021283858412721898	10.566660869430203	0.0	-800.6437003915348	0.0	4.3191446912223866e-10	0.0	0.9999999999992834	0.0	1.1972170330795237e-06	0.0	0.0	0.00013719096631329471	0.0	0.0	0.00013719183245396142	0.0	800.6437003915348	88.88888859807315	0.0	1.1651286615137575e-12	-9.473903143468003e-13	0.0	-6.731613057885968e-27	9.473903143468004e-14
0.035	88.88888859781834	0.0	0.00021283858412721898	11.011105313874648	0.0	-800.6437003915348	0.0	4.3191446912223866e-10	0.0	0.9999999999992834	0.0	1.1972170330795237e-06	0.0	0.0	0.00013719096631329471	0.0	0.0	0.00013719195618834237	0.0	800.6437003915348	88.88888859807315	0.0	1.1651286615137575e-12	-9.473903143468003e-13	0.0	-6.731613057885968e-27	9.473903143468004e-14
0.04	88.88888859781834	0.0	0.00021283858412721898	11.455549758319092	0.0	-800.6437003915348	0.0	4.3191446912223866e-10	0.0	0.9999999999992834	0.0	1.1972170330795237e-06	0.0	0.0	0.00013719096631329471	0.0	0.0	0.00013719207992272332	0.0	800.6437003915348	88.88888859807315	0.0	1.1651286615137575e-12	-9.473903143468003e-13	0.0	-6.731613057885968e-27	9.473903143468004e-14
0.045	88.88888859781834	0.0	0.00021283858412721898	11.899994202763537	0.0	-800.6437003915348	0.0	4.3191446912223866e-10	0.0	0.9999999999992834	0.0	1.1972170330795237e-06	0.0	0.0	0.00013719096631329471	0.0	0.0	0.0001371922036571043	0.0	800.6437003915348	88.88888859807315	0.0	1.1651286615137575e-12	-9.473903143468003e-13	0.0	-6.731613057885968e-27	9.473903143468004e-14
0.05	88.88888859781834	0.0	0.00021283858412721898	12.344438647207982	0.0	-800.6437003915348	0.0	4.3191446912223866e-10	0.0	0.9999999999992834	0.0	1.1972170330795237e-06	0.0	0.0	0.00013719096631329471	0.0	0.0	0.00013719232739148524	0.0	800.6437003915348	88.88888859807315	0.0	1.1651286615137575e-12	-9.473903143468003e-13	0.0	-6.731613057885968e-27	9.473903143468004e-14
0.055	88.88888859781834	0.0	0.00021283858412721898	12.788883091652426	0.0	-800.6437003915348	0.0	4.3191446912223866e-10	0.0	0.9999999999992834	0.0	1.1972170330795237e-06	0.0	0.0	0.00013719096631329471	0.0	0.0	0.0001371924511258662	0.0	800.6437003915348	88.88888859807315	0.0	1.1651286615137575e-12	-9.473903143468003e-13	0.0	-6.731613057885968e-27	9.473903143468004e-14
0.06	88.88888859781834	0.0	0.00021283858412721898	13.23332753609687	0.0	-800.6437003915348	0.0	4.3191446912223866e-10	0.0	0.9999999999992834	0.0	1.1972170330795237e-06	0.0	0.0	0.00013719096631329471	0.0	0.0	0.00013719257486024714	0.0	800.6437003915348	88.88888859807315	0.0	1.1651286615137575e-12	-9.473903143468003e-13	0.0	-6.731613057885968e-27	9.473903143468004e-14
0.065	88.88888859781834	0.0	0.00021283858412721898	13.677771980541316	0.0	-800.6437003915348	0.0	4.3191446912223866e-10	0.0	0.9999999999992834	0.0	1.1972170330795237e-06	0.0	0.0	0.00013719096631329471	0.0	0.0	0.00013719269859462812	0.0	800.6437003915348	88.88888859807315	0.0	1.1651286615137575e-12	-9.473903143468003e-13	0.0	-6.731613057885968e-27	9.473903143468004e-14
0.07	88.88888859781834	0.0	0.00021283858412721898	14.122216424985758	0.0	-800.6437003915348	0.0	4.3191446912223866e-10	0.0	0.9999999999992834	0.0	1.1972170330795237e-06	0.0	0.0	0.00013719096631329471	0.0	0.0	0.00013719282232900907	0.0	800.6437003915348	88.88888859807315	0.0	1.1651286615137575e-12	-9.473903143468003e-13	0.0	-6.731613057885968e-27	9.473903143468004e-14
0.075	88.88888859781834	0.0	0.00021283858412721898	14.566660869430203	0.0	-800.6437003915348	0.0	4.3191446912223866e-10	0.0	0.9999999999992834	0.0	1.1972170330795237e-06	0.0	0.0	0.00013719096631329471	0.0	0.0	0.00013719294606339002	0.0	800.6437003915348	88.88888859807315	0.0	1.1651286615137575e-12	-9.473903143468003e-13	0.0	-6.731613057885968e-27	9.473903143468004e-14
0.08	88.88888859781834	0.0	0.00021283858412721898	15.011105313874648	0.0	-800.6437003915348	0.0	4.3191446912223866e-10	0.0	0.9999999999992834	0.0	1.1972170330795237e-06	0.0	0.0	0.00013719096631329471	0.0	0.0	0.00013719306979777097	0.0	800.6437003915348	88.88888859807315	0.0	1.1651286615137575e-12	-9.473903143468003e-13	0.0	-6.731613057885968e-27	9.473903143468004e-14
0.085	88.88888859781834	0.0	0.00021283858412721898	15.455549758319094	0.0	-800.6437003915348	0.0	4.3191446912223866e-10	0.0	0.9999999999992834	0.0	1.1972170330795237e-06	0.0	0.0	0.00013719096631329471	0.0	0.0	0.00013719319353215195	0.0	800.6437003915348	88.88888859807315	0.0	1.1651286615137575e-12	-9.473903143468003e-13	0.0	-6.731613057885968e-27	9.473903143468004e-14
0.09	88.88888859781834	0.0	0.00021283858412721898	15.899994202763537	0.0	-800.6437003915348	0.0	4.3191446912223866e-10	0.0	0.9999999999992834	0.0	1.1972170330795237e-06	0.0	0.0	0.00013719096631329471	0.0	0.0	0.0001371933172665329	0.0	800.6437003915348	88.88888859807315	0.0	1.1651286615137575e-12	-9.473903143468003e-13	0.0	-6.731613057885968e-27	9.473903143468004e-14
0.095	88.88888859781834	0.0	0.00021283858412721898	16.34443864720798	0.0	-800.6437003915348	0.0	4.3191446912223866e-10	0.0	0.9999999999992834	0.0	1.1972170330795237e-06	0.0	0.0	0.00013719096631329471	0.0	0.0	0.00013719344100091385	0.0	800.6437003915348	88.88888859807315	0.0	1.1651286615137575e-12	-9.473903143468003e-13	0.0	-6.731613057885968e-27	9.473903143468004e-14
0.1	88.88888859781834	0.0	0.00021283858412721898	16.788883091652426	0.0	-800.6437003915348	0.0	4.3191446912223866e-10	0.0	0.9999999999992834	0.0	1.1972170330795237e-06	0.0	0.0	0.00013719096631329471	0.0	0.0	0.0001371935647352948	0.0	800.6437003915348	88.88888859807315	0.0	1.1651286615137575e-12	-9.473903143468003e-13	0.0	-6.731613057885968e-27	9.473903143468004e-14
0.105	88.88888859781834	0.0	0.00021283858412721898	17.23332753609687	0.0	-800.6437003915348	0.0	4.3191446912223866e-10	0.0	0.9999999999992834	0.0	1.1972170330795237e-06	0.0	0.0	0.00013719096631329471	0.0	0.0	0.00013719368846967577	0.0	800.6437003915348	88.88888859807315	0.0	1.1651286615137575e-12	-9.473903143468003e-13	0.0	-6.731613057885968e-27	9.473903143468004e-14
0.11	88.88888859781834	0.0	0.00021283858412721898	17.677771980541316	0.0	-800.6437003915348	0.0	4.3191446912223866e-10	0.0	0.9999999999992834	0.0	1.1972170330795237e-06	0.0	0.0	0.00013719096631329471	0.0	0.0	0.00013719381220405672	0.0	800.6437003915348	88.88888859807315	0.0	1.1651286615137575e-12	-9.473903143468003e-13	0.0	-6.731613057885968e-27	9.473903143468004e-14
0.115	88.88888859781834	0.0	0.00021283858412721898	18.12221642498576	0.0	-800.6437003915348	0.0	4.3191446912223866e-10	0.0	0.9999999999992834	0.0	1.1972170330795237e-06	0.0	0.0	0.00013719096631329471	0.0	0.0	0.00013719393593843767	0.0	800.6437003915348	88.88888859807315	0.0	1.1651286615137575e-12	-9.473903143468003e-13	0.0	-6.731613057885968e-27	9.473903143468004e-14
0.12	88.88888859781834	0.0	0.00021283858412721898	18.5666608694302	0.0	-800.6437003915348	0.0	4.3191446912223866e-10	0.0	0.9999999999992834	0.0	1.1972170330795237e-06	0.0	0.0	0.00013719096631329471	0.0	0.0	0.00013719405967281862	0.0	800.6437003915348	88.88888859807315	0.0	1.1651286615137575e-12	-9.473903143468003e-13	0.0	-6.731613057885968e-27	9.473903143468004e-14
0.125	88.88888859781834	0.0	0.00021283858412721898	19.011105313874648	0.0	-800.6437003915348	0.0	4.3191446912223866e-10	0.0	0.9999999999992834	0.0	1.1972170330795237e-06	0.0	0.0	0.00013719096631329471	0.0	0.0	0.0001371941834071996	0.0	800.6437003915348	88.88888859807315	0.0	1.1651286615137575e-12	-9.473903143468003e-13	0.0	-6.731613057885968e-27	9.473903143468004e-14
0.13	88.88888859781834	0.0	0.00021283858412721898	19.455549758319094	0.0	-800.6437003915348	0.0	4.3191446912223866e-10	0.0	0.9999999999992834	0.0	1.1972170330795237e-06	0.0	0.0	0.00013719096631329471	0.0	0.0	0.00013719430714158055	0.0	800.6437003915348	88.88888859807315	0.0	1.1651286615137575e-12	-9.473903143468003e-13	0.0	-6.731613057885968e-27	9.473903143468004e-14
0.135	88.88888859781834	0.0	0.00021283858412721898	19.899994202763537	0.0	-800.6437003915348	0.0	4.3191446912223866e-10	0.0	0.9999999999992834	0.0	1.1972170330795237e-06	0.0	0.0	0.00013719096631329471	0.0	0.0	0.0001371944308759615	0.0	800.6437003915348	88.88888859807315	0.0	1.1651286615137575e-12	-9.473903143468003e-13	0.0	-6.731613057885968e-27	9.473903143468004e-14
0.14	88.88888859781834	0.0	0.00021283858412721898	20.34443864720798	0.0	-800.6437003915348	0.0	4.3191446912223866e-10	0.0	0.9999999999992834	0.0	1.1972170330795237e-06	0.0	0.0	0.00013719096631329471	0.0	0.0	0.00013719455461034245	0.0	800.6437003915348	88.88888859807315	0.0	1.1651286615137575e-12	-9.473903143468003e-13	0.0	-6.731613057885968e-27	9.473903143468004e-14
0.145	88.88888859781834	0.0	0.00021283858412721898	20.788883091652423	0.0	-800.6437003915348	0.0	4.3191446912223866e-10	0.0	0.9999999999992834	0.0	1.1972170330795237e-06	0.0	0.0	0.00013719096631329471	0.0	0.0	0.00013719467834472343	0.0	800.6437003915348	88.88888859807315	0.0	1.1651286615137575e-12	-9.473903143468003e-13	0.0	-6.731613057885968e-27	9.473903143468004e-14
0.15	88.88888859781834	0.0	0.00021283858412721898	21.23332753609687	0.0	-800.6437003915348	0.0	4.3191446912223866e-10	0.0	0.9999999999992834	0.0	1.1972170330795237e-06	0.0	0.0	0.00013719096631329471	0.0	0.0	0.00013719480207910437	0.0	800.6437003915348	88.88888859807315	0.0	1.1651286615137575e-12	-9.473903143468003e-13	0.0	-6.731613057885968e-27	9.473903143468004e-14
0.155	88.88888859781834	0.0	0.00021283858412721898	21.677771980541316	0.0	-800.6437003915348	0.0	4.3191446912223866e-10	0.0	0.9999999999992834	0.0	1.1972170330795237e-06	0.0	0.0	0.00013719096631329471	0.0	0.0	0.00013719492581348532	0.0	800.6437003915348	88.88888859807315	0.0	1.1651286615137575e-12	-9.473903143468003e-13	0.0	-6.731613057885968e-27	9.473903143468004e-14
0.16	88.88888859781834	0.0	0.00021283858412721898	22.12221642498576	0.0	-800.6437003915348	0.0	4.3191446912223866e-10	0.0	0.9999999999992834	0.0	1.1972170330795237e-06	0.0	0.0	0.00013719096631329471	0.0	0.0	0.00013719504954786627	0.0	800.6437003915348	88.88888859807315	0.0	1.1651286615137575e-12	-9.473903143468003e-13	0.0	-6.731613057885968e-27	9.473903143468004e-14
0.165	88.88888859781834	0.0	0.00021283858412721898	22.5666608694302	0.0	-800.6437003915348	0.0	4.3191446912223866e-10	0.0	0.9999999999992834	0.0	1.1972170330795237e-06	0.0	0.0	0.00013719096631329471	0.0	0.0	0.00013719517328224725	0.0	800.6437003915348	88.88888859807315	0.0	1.1651286615137575e-12	-9.473903143468003e-13	0.0	-6.731613057885968e-27	9.473903143468004e-14
0.17	88.88888859781834	0.0	0.00021283858412721898	23.01110531387465	0.0	-800.6437003915348	0.0	4.3191446912223866e-10	0.0	0.9999999999992834	0.0	1.1972170330795237e-06	0.0	0.0	0.00013719096631329471	0.0	0.0	0.0001371952970166282	0.0	800.6437003915348	88.88888859807315	0.0	1.1651286615137575e-12	-9.473903143468003e-13	0.0	-6.731613057885968e-27	9.473903143468004e-14
0.175	88.88888859781834	0.0	0.00021283858412721898	23.45554975831909	0.0	-800.6437003915348	0.0	4.3191446912223866e-10	0.0	0.9999999999992834	0.0	1.1972170330795237e-06	0.0	0.0	0.00013719096631329471	0.0	0.0	0.00013719542075100915	0.0	800.6437003915348	88.88888859807315	0.0	1.1651286615137575e-12	-9.473903143468003e-13	0.0	-6.731613057885968e-27	9.473903143468004e-14
0.18	88.88888859781834	0.0	0.00021283858412721898	23.899994202763537	0.0	-800.6437003915348	0.0	4.3191446912223866e-10	0.0	0.9999999999992834	0.0	1.1972170330795237e-06	0.0	0.0	0.00013719096631329471	0.0	0.0	0.0001371955444853901	0.0	800.6437003915348	88.88888859807315	0.0	1.1651286615137575e-12	-9.473903143468003e-13	0.0	-6.731613057885968e-27	9.473903143468004e-14
0.185	88.88888859781834	0.0	0.00021283858412721898	24.34443864720798	0.0	-800.6437003915348	0.0	4.3191446912223866e-10	0.0	0.9999999999992834	0.0	1.1972170330795237e-06	0.0	0.0	0.00013719096631329471	0.0	0.0	0.00013719566821977108	0.0	800.6437003915348	88.88888859807315	0.0	1.1651286615137575e-12	-9.473903143468003e-13	0.0	-6.731613057885968e-27	9.473903143468004e-14
0.19	88.88888859781834	0.0	0.00021283858412721898	24.788883091652426	0.0	-800.6437003915348	0.0	4.3191446912223866e-10	0.0	0.9999999999992834	0.0	1.1972170330795237e-06	0.0	0.0	0.00013719096631329471	0.0	0.0	0.00013719579195415203	0.0	800.6437003915348	88.88888859807315	0.0	1.1651286615137575e-12	-9.473903143468003e-13	0.0	-6.731613057885968e-27	9.473903143468004e-14
0.195	88.88888859781834	0.0	0.00021283858412721898	25.23332753609687	0.0	-800.6437003915348	0.0	4.3191446912223866e-10	0.0	0.9999999999992834	0.0	1.1972170330795237e-06	0.0	0.0	0.00013719096631329471	0.0	0.0	0.00013719591568853298	0.0	800.6437003915348	88.88888859807315	0.0	1.1651286615137575e-12	-9.473903143468003e-13	0.0	-6.731613057885968e-27	9.473903143468004e-14
0.2	88.88888859781834	0.0	0.00021283858412721898	25.677771980541316	0.0	-800.6437003915348	0.0	4.3191446912223866e-10	0.0	0.9999999999992834	0.0	1.1972170330795237e-06	0.0	0.0	0.00013719096631329471	0.0	0.0	0.00013719603942291393	0.0	800.6437003915348	88.88888859807315	0.0	1.1651286615137575e-12	-9.473903143468003e-13	0.0	-6.731613057885968e-27	9.473903143468004e-14
0.205	88.88888859781834	0.0	0.00021283858412721898	26.12221642498576	0.0	-800.6437003915348	0.0	4.3191446912223866e-10	0.0	0.9999999999992834	0.0	1.1972170330795237e-06	0.0	0.0	0.00013719096631329471	0.0	0.0	0.0001371961631572949	0.0	800.6437003915348	88.88888859807315	0.0	1.1651286615137575e-12	-9.473903143468003e-13	0.0	-6.731613057885968e-27	9.473903143468004e-14
0.21	88.88888859781834	0.0	0.00021283858412721898	26.5666608694302	0.0	-800.6437003915348	0.0	4.3191446912223866e-10	0.0	0.9999999999992834	0.0	1.1972170330795237e-06	0.0	0.0	0.00013719096631329471	0.0	0.0	0.00013719628689167585	0.0	800.6437003915348	88.88888859807315	0.0	1.1651286615137575e-12	-9.473903143468003e-13	0.0	-6.731613057885968e-27	9.473903143468004e-14
0.215	88.88888859781834	0.0	0.00021283858412721898	27.011105313874648	0.0	-800.6437003915348	0.0	4.3191446912223866e-10	0.0	0.9999999999992834	0.0	1.1972170330795237e-06	0.0	0.0	0.00013719096631329471	0.0	0.0	0.0001371964106260568	0.0	800.6437003915348	88.88888859807315	0.0	1.1651286615137575e-12	-9.473903143468003e-13	0.0	-6.731613057885968e-27	9.473903143468004e-14
0.22	88.88888859781834	0.0	0.00021283858412721898	27.45554975831909	0.0	-800.6437003915348	0.0	4.3191446912223866e-10	0.0	0.9999999999992834	0.0	1.1972170330795237e-06	0.0	0.0	0.00013719096631329471	0.0	0.0	0.00013719653436043775	0.0	800.6437003915348	88.88888859807315	0.0	1.1651286615137575e-12	-9.473903143468003e-13	0.0	-6.731613057885968e-27	9.473903143468004e-14
0.225	88.88888859781834	0.0	0.00021283858412721898	27.899994202763537	0.0	-800.6437003915348	0.0	4.3191446912223866e-10	0.0	0.9999999999992834	0.0	1.1972170330795237e-06	0.0	0.0	0.00013719096631329471	0.0	0.0	0.00013719665809481873	0.0	800.6437003915348	88.88888859807315	0.0	1.1651286615137575e-12	-9.473903143468003e-13	0.0	-6.731613057885968e-27	9.473903143468004e-14
0.23	88.88888859781834	0.0	0.00021283858412721898	28.34443864720798	0.0	-800.6437003915348	0.0	4.3191446912223866e-10	0.0	0.9999999999992834	0.0	1.1972170330795237e-06	0.0	0.0	0.00013719096631329471	0.0	0.0	0.00013719678182919968	0.0	800.6437003915348	88.88888859807315	0.0	1.1651286615137575e-12	-9.473903143468003e-13	0.0	-6.731613057885968e-27	9.473903143468004e-14
0.235	88.88888859781834	0.0	0.00021283858412721898	28.788883091652423	0.0	-800.6437003915348	0.0	4.3191446912223866e-10	0.0	0.9999999999992834	0.0	1.1972170330795237e-06	0.0	0.0	0.00013719096631329471	0.0	0.0	0.00013719690556358063	0.0	800.6437003915348	88.88888859807315	0.0	1.1651286615137575e-12	-9.473903143468003e-13	0.0	-6.731613057885968e-27	9.473903143468004e-14
0.24	88.88888859781834	0.0	0.00021283858412721898	29.23332753609687	0.0	-800.6437003915348	0.0	4.3191446912223866e-10	0.0	0.9999999999992834	0.0	1.1972170330795237e-06	0.0	0.0	0.00013719096631329471	0.0	0.0	0.00013719702929796158	0.0	800.6437003915348	88.88888859807315	0.0	1.1651286615137575e-12	-9.473903143468003e-13	0.0	-6.731613057885968e-27	9.473903143468004e-14
0.245	88.88888859781834	0.0	0.00021283858412721898	29.677771980541312	0.0	-800.6437003915348	0.0	4.3191446912223866e-10	0.0	0.9999999999992834	0.0	1.1972170330795237e-06	0.0	0.0	0.00013719096631329471	0.0	0.0	0.00013719715303234256	0.0	800.6437003915348	88.88888859807315	0.0	1.1651286615137575e-12	-9.473903143468003e-13	0.0	-6.731613057885968e-27	9.473903143468004e-14
0.25	88.88888859781834	0.0	0.00021283858412721898	30.12221642498576	0.0	-800.6437003915348	0.0	4.3191446912223866e-10	0.0	0.9999999999992834	0.0	1.1972170330795237e-06	0.0	0.0	0.00013719096631329471	0.0	0.0	0.0001371972767667235	0.0	800.6437003915348	88.88888859807315	0.0	1.1651286615137575e-12	-9.473903143468003e-13	0.0	-6.731613057885968e-27	9.473903143468004e-14
0.255	88.88888859781834	0.0	0.00021283858412721898	30.566660869430205	0.0	-800.6437003915348	0.0	4.3191446912223866e-10	0.0	0.9999999999992834	0.0	1.1972170330795237e-06	0.0	0.0	0.00013719096631329471	0.0	0.0	0.00013719740050110446	0.0	800.6437003915348	88.88888859807315	0.0	1.1651286615137575e-12	-9.473903143468003e-13	0.0	-6.731613057885968e-27	9.473903143468004e-14
0.26	88.88888859781834	0.0	0.00021283858412721898	31.011105313874648	0.0	-800.6437003915348	0.0	4.3191446912223866e-10	0.0	0.9999999999992834	0.0	1.1972170330795237e-06	0.0	0.0	0.00013719096631329471	0.0	0.0	0.0001371975242354854	0.0	800.6437003915348	88.88888859807315	0.0	1.1651286615137575e-12	-9.473903143468003e-13	0.0	-6.731613057885968e-27	9.473903143468004e-14
0.265	88.88888859781834	0.0	0.00021283858412721898	31.455549758319094	0.0	-800.6437003915348	0.0	4.3191446912223866e-10	0.0	0.9999999999992834	0.0	1.1972170330795237e-06	0.0	0.0	0.00013719096631329471	0.0	0.0	0.00013719764796986638	0.0	800.6437003915348	88.88888859807315	0.0	1.1651286615137575e-12	-9.473903143468003e-13	0.0	-6.731613057885968e-27	9.473903143468004e-14
0.27	88.88888859781834	0.0	0.00021283858412721898	31.899994202763537	0.0	-800.6437003915348	0.0	4.3191446912223866e-10	0.0	0.9999999999992834	0.0	1.1972170330795237e-06	0.0	0.0	0.00013719096631329471	0.0	0.0	0.00013719777170424733	0.0	800.6437003915348	88.88888859807315	0.0	1.1651286615137575e-12	-9.473903143468003e-13	0.0	-6.731613057885968e-27	9.473903143468004e-14
0.275	88.88888859781834	0.0	0.00021283858412721898	32.34443864720798	0.0	-800.6437003915348	0.0	4.3191446912223866e-10	0.0	0.9999999999992834	0.0	1.1972170330795237e-06	0.0	0.0	0.00013719096631329471	0.0	0.0	0.00013719789543862828	0.0	800.6437003915348	88.88888859807315	0.0	1.1651286615137575e-12	-9.473903143468003e-13	0.0	-6.731613057885968e-27	9.473903143468004e-14
0.28	88.88888859781834	0.0	0.00021283858412721898	32.78888309165242	0.0	-800.6437003915348	0.0	4.3191446912223866e-10	0.0	0.9999999999992834	0.0	1.1972170330795237e-06	0.0	0.0	0.00013719096631329471	0.0	0.0	0.00013719801917300923	0.0	800.6437003915348	88.88888859807315	0.0	1.1651286615137575e-12	-9.473903143468003e-13	0.0	-6.731613057885968e-27	9.473903143468004e-14
0.285	88.88888859781834	0.0	0.00021283858412721898	33.233327536096866	0.0	-800.6437003915348	0.0	4.3191446912223866e-10	0.0	0.9999999999992834	0.0	1.1972170330795237e-06	0.0	0.0	0.00013719096631329471	0.0	0.0	0.0001371981429073902	0.0	800.6437003915348	88.88888859807315	0.0	1.1651286615137575e-12	-9.473903143468003e-13	0.0	-6.731613057885968e-27	9.473903143468004e-14
0.29	88.88888859781834	0.0	0.00021283858412721898	33.67777198054131	0.0	-800.6437003915348	0.0	4.3191446912223866e-10	0.0	0.9999999999992834	0.0	1.1972170330795237e-06	0.0	0.0	0.00013719096631329471	0.0	0.0	0.00013719826664177116	0.0	800.6437003915348	88.88888859807315	0.0	1.1651286615137575e-12	-9.473903143468003e-13	0.0	-6.731613057885968e-27	9.473903143468004e-14
0.295	88.88888859781834	0.0	0.00021283858412721898	34.12221642498576	0.0	-800.6437003915348	0.0	4.3191446912223866e-10	0.0	0.9999999999992834	0.0	1.1972170330795237e-06	0.0	0.0	0.00013719096631329471	0.0	0.0	0.0001371983903761521	0.0	800.6437003915348	88.88888859807315	0.0	1.1651286615137575e-12	-9.473903143468003e-13	0.0	-6.731613057885968e-27	9.473903143468004e-14
0.3	88.88888859781834	0.0	0.00021283858412721898	34.5666608694302	0.0	-800.6437003915348	0.0	4.3191446912223866e-10	0.0	0.9999999999992834	0.0	1.1972170330795237e-06	0.0	0.0	0.00013719096631329471	0.0	0.0	0.00013719851411053306	0.0	800.6437003915348	88.88888859807315	0.0	1.1651286615137575e-12	-9.473903143468003e-13	0.0	-6.731613057885968e-27	9.473903143468004e-14
0.305	88.88888859781834	0.0	0.00021283858412721898	35.01110531387465	0.0	-800.6437003915348	0.0	4.3191446912223866e-10	0.0	0.9999999999992834	0.0	1.1972170330795237e-06	0.0	0.0	0.00013719096631329471	0.0	0.0	0.00013719863784491404	0.0	800.6437003915348	88.88888859807315	0.0	1.1651286615137575e-12	-9.473903143468003e-13	0.0	-6.731613057885968e-27	9.473903143468004e-14
0.31	88.88888859781834	0.0	0.00021283858412721898	35.455549758319094	0.0	-800.6437003915348	0.0	4.3191446912223866e-10	0.0	0.9999999999992834	0.0	1.1972170330795237e-06	0.0	0.0	0.00013719096631329471	0.0	0.0	0.00013719876157929499	0.0	800.6437003915348	88.88888859807315	0.0	1.1651286615137575e-12	-9.473903143468003e-13	0.0	-6.731613057885968e-27	9.473903143468004e-14
0.315	88.88888859781834	0.0	0.00021283858412721898	35.89999420276354	0.0	-800.6437003915348	0.0	4.3191446912223866e-10	0.0	0.9999999999992834	0.0	1.1972170330795237e-06	0.0	0.0	0.00013719096631329471	0.0	0.0	0.00013719888531367594	0.0	800.6437003915348	88.88888859807315	0.0	1.1651286615137575e-12	-9.473903143468003e-13	0.0	-6.731613057885968e-27	9.473903143468004e-14
0.32	88.88888859781834	0.0	0.00021283858412721898	36.34443864720798	0.0	-800.6437003915348	0.0	4.3191446912223866e-10	0.0	0.9999999999992834	0.0	1.1972170330795237e-06	0.0	0.0	0.00013719096631329471	0.0	0.0	0.00013719900904805689	0.0	800.6437003915348	88.88888859807315	0.0	1.1651286615137575e-12	-9.473903143468003e-13	0.0	-6.731613057885968e-27	9.473903143468004e-14
0.325	88.88888859781834	0.0	0.00021283858412721898	36.78888309165242	0.0	-800.6437003915348	0.0	4.3191446912223866e-10	0.0	0.9999999999992834	0.0	1.1972170330795237e-06	0.0	0.0	0.00013719096631329471	0.0	0.0	0.00013719913278243786	0.0	800.6437003915348	88.88888859807315	0.0	1.1651286615137575e-12	-9.473903143468003e-13	0.0	-6.731613057885968e-27	9.473903143468004e-14
0.33	88.88888859781834	0.0	0.00021283858412721898	37.233327536096866	0.0	-800.6437003915348	0.0	4.3191446912223866e-10	0.0	0.9999999999992834	0.0	1.1972170330795237e-06	0.0	0.0	0.00013719096631329471	0.0	0.0	0.0001371992565168188	0.0	800.6437003915348	88.88888859807315	0.0	1.1651286615137575e-12	-9.473903143468003e-13	0.0	-6.731613057885968e-27	9.473903143468004e-14
0.335	88.88888859781834	0.0	0.00021283858412721898	37.677771980541316	0.0	-800.6437003915348	0.0	4.3191446912223866e-10	0.0	0.9999999999992834	0.0	1.1972170330795237e-06	0.0	0.0	0.00013719096631329471	0.0	0.0	0.00013719938025119976	0.0	800.6437003915348	88.88888859807315	0.0	1.1651286615137575e-12	-9.473903143468003e-13	0.0	-6.731613057885968e-27	9.473903143468004e-14
0.34	88.88888859781834	0.0	0.00021283858412721898	38.122216424985766	0.0	-800.6437003915348	0.0	4.3191446912223866e-10	0.0	0.9999999999992834	0.0	1.1972170330795237e-06	0.0	0.0	0.00013719096631329471	0.0	0.0	0.00013719950398558074	0.0	800.6437003915348	88.88888859807315	0.0	1.1651286615137575e-12	-9.473903143468003e-13	0.0	-6.731613057885968e-27	9.473903143468004e-14
0.345	88.88888859781834	0.0	0.00021283858412721898	38.5666608694302	0.0	-800.6437003915348	0.0	4.3191446912223866e-10	0.0	0.9999999999992834	0.0	1.1972170330795237e-06	0.0	0.0	0.00013719096631329471	0.0	0.0	0.0001371996277199617	0.0	800.6437003915348	88.88888859807315	0.0	1.1651286615137575e-12	-9.473903143468003e-13	0.0	-6.731613057885968e-27	9.473903143468004e-14
0.35	88.88888859781834	0.0	0.00021283858412721898	39.011105313874644	0.0	-800.6437003915348	0.0	4.3191446912223866e-10	0.0	0.9999999999992834	0.0	1.1972170330795237e-06	0.0	0.0	0.00013719096631329471	0.0	0.0	0.00013719975145434264	0.0	800.6437003915348	88.88888859807315	0.0	1.1651286615137575e-12	-9.473903143468003e-13	0.0	-6.731613057885968e-27	9.473903143468004e-14
0.355	88.88888859781834	0.0	0.00021283858412721898	39.455549758319094	0.0	-800.6437003915348	0.0	4.3191446912223866e-10	0.0	0.9999999999992834	0.0	1.1972170330795237e-06	0.0	0.0	0.00013719096631329471	0.0	0.0	0.0001371998751887236	0.0	800.6437003915348	88.88888859807315	0.0	1.1651286615137575e-12	-9.473903143468003e-13	0.0	-6.731613057885968e-27	9.473903143468004e-14
0.36	88.88888859781834	0.0	0.00021283858412721898	39.89999420276354	0.0	-800.6437003915348	0.0	4.3191446912223866e-10	0.0	0.9999999999992834	0.0	1.1972170330795237e-06	0.0	0.0	0.00013719096631329471	0.0	0.0	0.00013719999892310457	0.0	800.6437003915348	88.88888859807315	0.0	1.1651286615137575e-12	-9.473903143468003e-13	0.0	-6.731613057885968e-27	9.473903143468004e-14
0.365	88.88888859781834	0.0	0.00021283858412721898	40.34443864720798	0.0	-800.6437003915348	0.0	4.3191446912223866e-10	0.0	0.9999999999992834	0.0	1.1972170330795237e-06	0.0	0.0	0.00013719096631329471	0.0	0.0	0.00013720012265748551	0.0	800.6437003915348	88.88888859807315	0.0	1.1651286615137575e-12	-9.473903143468003e-13	0.0	-6.731613057885968e-27	9.473903143468004e-14
0.37	88.88888859781834	0.0	0.00021283858412721898	40.78888309165242	0.0	-800.6437003915348	0.0	4.3191446912223866e-10	0.0	0.9999999999992834	0.0	1.1972170330795237e-06	0.0	0.0	0.00013719096631329471	0.0	0.0	0.00013720024639186646	0.0	800.6437003915348	88.88888859807315	0.0	1.1651286615137575e-12	-9.473903143468003e-13	0.0	-6.731613057885968e-27	9.473903143468004e-14
0.375	88.88888859781834	0.0	0.00021283858412721898	41.233327536096866	0.0	-800.6437003915348	0.0	4.3191446912223866e-10	0.0	0.9999999999992834	0.0	1.1972170330795237e-06	0.0	0.0	0.00013719096631329471	0.0	0.0	0.00013720037012624741	0.0	800.6437003915348	88.88888859807315	0.0	1.1651286615137575e-12	-9.473903143468003e-13	0.0	-6.731613057885968e-27	9.473903143468004e-14
0.38	88.88888859781834	0.0	0.00021283858412721898	41.677771980541316	0.0	-800.6437003915348	0.0	4.3191446912223866e-10	0.0	0.9999999999992834	0.0	1.1972170330795237e-06	0.0	0.0	0.00013719096631329471	0.0	0.0	0.0001372004938606284	0.0	800.6437003915348	88.88888859807315	0.0	1.1651286615137575e-12	-9.473903143468003e-13	0.0	-6.731613057885968e-27	9.473903143468004e-14
0.385	88.88888859781834	0.0	0.00021283858412721898	42.12221642498576	0.0	-800.6437003915348	0.0	4.3191446912223866e-10	0.0	0.9999999999992834	0.0	1.1972170330795237e-06	0.0	0.0	0.00013719096631329471	0.0	0.0	0.00013720061759500934	0.0	800.6437003915348	88.88888859807315	0.0	1.1651286615137575e-12	-9.473903143468003e-13	0.0	-6.731613057885968e-27	9.473903143468004e-14
0.39	88.88888859781834	0.0	0.00021283858412721898	42.5666608694302	0.0	-800.6437003915348	0.0	4.3191446912223866e-10	0.0	0.9999999999992834	0.0	1.1972170330795237e-06	0.0	0.0	0.00013719096631329471	0.0	0.0	0.0001372007413293903	0.0	800.6437003915348	88.88888859807315	0.0	1.1651286615137575e-12	-9.473903143468003e-13	0.0	-6.731613057885968e-27	9.473903143468004e-14
0.395	88.88888859781834	0.0	0.00021283858412721898	43.01110531387465	0.0	-800.6437003915348	0.0	4.3191446912223866e-10	0.0	0.9999999999992834	0.0	1.1972170330795237e-06	0.0	0.0	0.00013719096631329471	0.0	0.0	0.00013720086506377124	0.0	800.6437003915348	88.88888859807315	0.0	1.1651286615137575e-12	-9.473903143468003e-13	0.0	-6.731613057885968e-27	9.473903143468004e-14
0.4	88.88888859781834	0.0	0.00021283858412721898	43.455549758319094	0.0	-800.6437003915348	0.0	4.3191446912223866e-10	0.0	0.9999999999992834	0.0	1.1972170330795237e-06	0.0	0.0	0.00013719096631329471	0.0	0.0	0.00013720098879815222	0.0	800.6437003915348	88.88888859807315	0.0	1.1651286615137575e-12	-9.473903143468003e-13	0.0	-6.731613057885968e-27	9.473903143468004e-14
0.405	88.88888859781834	0.0	0.00021283858412721898	43.89999420276354	0.0	-800.6437003915348	0.0	4.3191446912223866e-10	0.0	0.9999999999992834	0.0	1.1972170330795237e-06	0.0	0.0	0.00013719096631329471	0.0	0.0	0.00013720111253253317	0.0	800.6437003915348	88.88888859807315	0.0	1.1651286615137575e-12	-9.473903143468003e-13	0.0	-6.731613057885968e-27	9.473903143468004e-14
0.41	88.88888859781834	0.0	0.00021283858412721898	44.34443864720798	0.0	-800.6437003915348	0.0	4.3191446912223866e-10	0.0	0.9999999999992834	0.0	1.1972170330795237e-06	0.0	0.0	0.00013719096631329471	0.0	0.0	0.00013720123626691412	0.0	800.6437003915348	88.88888859807315	0.0	1.1651286615137575e-12	-9.473903143468003e-13	0.0	-6.731613057885968e-27	9.473903143468004e-14
0.415	88.88888859781834	0.0	0.00021283858412721898	44.78888309165242	0.0	-800.6437003915348	0.0	4.3191446912223866e-10	0.0	0.9999999999992834	0.0	1.1972170330795237e-06	0.0	0.0	0.00013719096631329471	0.0	0.0	0.00013720136000129507	0.0	800.6437003915348	88.88888859807315	0.0	1.1651286615137575e-12	-9.473903143468003e-13	0.0	-6.731613057885968e-27	9.473903143468004e-14
0.42	88.88888859781834	0.0	0.00021283858412721898	45.233327536096866	0.0	-800.6437003915348	0.0	4.3191446912223866e-10	0.0	0.9999999999992834	0.0	1.1972170330795237e-06	0.0	0.0	0.00013719096631329471	0.0	0.0	0.00013720148373567604	0.0	800.6437003915348	88.88888859807315	0.0	1.1651286615137575e-12	-9.473903143468003e-13	0.0	-6.731613057885968e-27	9.473903143468004e-14
0.425	88.88888859781834	0.0	0.00021283858412721898	45.677771980541316	0.0	-800.6437003915348	0.0	4.3191446912223866e-10	0.0	0.9999999999992834	0.0	1.1972170330795237e-06	0.0	0.0	0.00013719096631329471	0.0	0.0	0.000137201607470057	0.0	800.6437003915348	88.88888859807315	0.0	1.1651286615137575e-12	-9.473903143468003e-13	0.0	-6.731613057885968e-27	9.473903143468004e-14
0.43	88.88888859781834	0.0	0.00021283858412721898	46.12221642498576	0.0	-800.6437003915348	0.0	4.3191446912223866e-10	0.0	0.9999999999992834	0.0	1.1972170330795237e-06	0.0	0.0	0.00013719096631329471	0.0	0.0	0.00013720173120443794	0.0	800.6437003915348	88.88888859807315	0.0	1.1651286615137575e-12	-9.473903143468003e-13	0.0	-6.731613057885968e-27	9.473903143468004e-14
0.435	88.88888859781834	0.0	0.00021283858412721898	46.5666608694302	0.0	-800.6437003915348	0.0	4.3191446912223866e-10	0.0	0.9999999999992834	0.0	1.1972170330795237e-06	0.0	0.0	0.00013719096631329471	0.0	0.0	0.0001372018549388189	0.0	800.6437003915348	88.88888859807315	0.0	1.1651286615137575e-12	-9.473903143468003e-13	0.0	-6.731613057885968e-27	9.473903143468004e-14
0.44	88.88888859781834	0.0	0.00021283858412721898	47.011105313874644	0.0	-800.6437003915348	0.0	4.3191446912223866e-10	0.0	0.9999999999992834	0.0	1.1972170330795237e-06	0.0	0.0	0.00013719096631329471	0.0	0.0	0.00013720197867319987	0.0	800.6437003915348	88.88888859807315	0.0	1.1651286615137575e-12	-9.473903143468003e-13	0.0	-6.731613057885968e-27	9.473903143468004e-14
0.445	88.88888859781834	0.0	0.00021283858412721898	47.455549758319094	0.0	-800.6437003915348	0.0	4.3191446912223866e-10	0.0	0.9999999999992834	0.0	1.1972170330795237e-06	0.0	0.0	0.00013719096631329471	0.0	0.0	0.00013720210240758082	0.0	800.6437003915348	88.88888859807315	0.0	1.1651286615137575e-12	-9.473903143468003e-13	0.0	-6.731613057885968e-27	9.473903143468004e-14
0.45	88.88888859781834	0.0	0.00021283858412721898	47.89999420276354	0.0	-800.6437003915348	0.0	4.3191446912223866e-10	0.0	0.9999999999992834	0.0	1.1972170330795237e-06	0.0	0.0	0.00013719096631329471	0.0	0.0	0.00013720222614196177	0.0	800.6437003915348	88.88888859807315	0.0	1.1651286615137575e-12	-9.473903143468003e-13	0.0	-6.731613057885968e-27	9.473903143468004e-14
0.455	88.88888859781834	0.0	0.00021283858412721898	48.34443864720798	0.0	-800.6437003915348	0.0	4.3191446912223866e-10	0.0	0.9999999999992834	0.0	1.1972170330795237e-06	0.0	0.0	0.00013719096631329471	0.0	0.0	0.00013720234987634272	0.0	800.6437003915348	88.88888859807315	0.0	1.1651286615137575e-12	-9.473903143468003e-13	0.0	-6.731613057885968e-27	9.473903143468004e-14
0.46	88.88888859781834	0.0	0.00021283858412721898	48.78888309165242	0.0	-800.6437003915348	0.0	4.3191446912223866e-10	0.0	0.9999999999992834	0.0	1.1972170330795237e-06	0.0	0.0	0.00013719096631329471	0.0	0.0	0.0001372024736107237	0.0	800.6437003915348	88.88888859807315	0.0	1.1651286615137575e-12	-9.473903143468003e-13	0.0	-6.731613057885968e-27	9.473903143468004e-14
0.465	88.88888859781834	0.0	0.00021283858412721898	49.23332753609687	0.0	-800.6437003915348	0.0	4.3191446912223866e-10	0.0	0.9999999999992834	0.0	1.1972170330795237e-06	0.0	0.0	0.00013719096631329471	0.0	0.0	0.00013720259734510465	0.0	800.6437003915348	88.88888859807315	0.0	1.1651286615137575e-12	-9.473903143468003e-13	0.0	-6.731613057885968e-27	9.473903143468004e-14
0.47	88.88888859781834	0.0	0.00021283858412721898	49.67777198054131	0.0	-800.6437003915348	0.0	4.3191446912223866e-10	0.0	0.9999999999992834	0.0	1.1972170330795237e-06	0.0	0.0	0.00013719096631329471	0.0	0.0	0.0001372027210794856	0.0	800.6437003915348	88.88888859807315	0.0	1.1651286615137575e-12	-9.473903143468003e-13	0.0	-6.731613057885968e-27	9.473903143468004e-14
0.475	88.88888859781834	0.0	0.00021283858412721898	50.12221642498576	0.0	-800.6437003915348	0.0	4.3191446912223866e-10	0.0	0.9999999999992834	0.0	1.1972170330795237e-06	0.0	0.0	0.00013719096631329471	0.0	0.0	0.00013720284481386655	0.0	800.6437003915348	88.88888859807315	0.0	1.1651286615137575e-12	-9.473903143468003e-13	0.0	-6.731613057885968e-27	9.473903143468004e-14
0.48	88.88888859781834	0.0	0.00021283858412721898	50.5666608694302	0.0	-800.6437003915348	0.0	4.3191446912223866e-10	0.0	0.9999999999992834	0.0	1.1972170330795237e-06	0.0	0.0	0.00013719096631329471	0.0	0.0	0.00013720296854824752	0.0	800.6437003915348	88.88888859807315	0.0	1.1651286615137575e-12	-9.473903143468003e-13	0.0	-6.731613057885968e-27	9.473903143468004e-14
0.485	88.88888859781834	0.0	0.00021283858412721898	51.011105313874644	0.0	-800.6437003915348	0.0	4.3191446912223866e-10	0.0	0.9999999999992834	0.0	1.1972170330795237e-06	0.0	0.0	0.00013719096631329471	0.0	0.0	0.00013720309228262847	0.0	800.6437003915348	88.88888859807315	0.0	1.1651286615137575e-12	-9.473903143468003e-13	0.0	-6.731613057885968e-27	9.473903143468004e-14
0.49	88.88888859781834	0.0	0.00021283858412721898	51.45554975831909	0.0	-800.6437003915348	0.0	4.3191446912223866e-10	0.0	0.9999999999992834	0.0	1.1972170330795237e-06	0.0	0.0	0.00013719096631329471	0.0	0.0	0.00013720321601700942	0.0	800.6437003915348	88.88888859807315	0.0	1.1651286615137575e-12	-9.473903143468003e-13	0.0	-6.731613057885968e-27	9.473903143468004e-14
0.495	88.88888859781834	0.0	0.00021283858412721898	51.89999420276354	0.0	-800.6437003915348	0.0	4.3191446912223866e-10	0.0	0.9999999999992834	0.0	1.1972170330795237e-06	0.0	0.0	0.00013719096631329471	0.0	0.0	0.00013720333975139037	0.0	800.6437003915348	88.88888859807315	0.0	1.1651286615137575e-12	-9.473903143468003e-13	0.0	-6.731613057885968e-27	9.473903143468004e-14
0.5	88.88888859781834	0.0	0.00021283858412721898	52.34443864720798	0.0	-800.6437003915348	0.0	4.3191446912223866e-10	0.0	0.9999999999992834	0.0	1.1972170330795237e-06	0.0	0.0	0.00013719096631329471	0.0	0.0	0.00013720346348577135	0.0	800.6437003915348	88.88888859807315	0.0	1.1651286615137575e-12	-9.473903143468003e-13	0.0	-6.731613057885968e-27	9.473903143468004e-14
0.505	88.88888859781834	0.0	0.00021283858412721898	52.78888309165242	0.0	-800.6437003915348	0.0	4.3191446912223866e-10	0.0	0.9999999999992834	0.0	1.1972170330795237e-06	0.0	0.0	0.00013719096631329471	0.0	0.0	0.0001372035872201523	0.0	800.6437003915348	88.88888859807315	0.0	1.1651286615137575e-12	-9.473903143468003e-13	0.0	-6.731613057885968e-27	9.473903143468004e-14
0.51	88.88888859781834	0.0	0.00021283858412721898	53.23332753609687	0.0	-800.6437003915348	0.0	4.3191446912223866e-10	0.0	0.9999999999992834	0.0	1.1972170330795237e-06	0.0	0.0	0.00013719096631329471	0.0	0.0	0.00013720371095453325	0.0	800.6437003915348	88.88888859807315	0.0	1.1651286615137575e-12	-9.473903143468003e-13	0.0	-6.731613057885968e-27	9.473903143468004e-14
0.515	88.88888859781834	0.0	0.00021283858412721898	53.677771980541316	0.0	-800.6437003915348	0.0	4.3191446912223866e-10	0.0	0.9999999999992834	0.0	1.1972170330795237e-06	0.0	0.0	0.00013719096631329471	0.0	0.0	0.0001372038346889142	0.0	800.6437003915348	88.88888859807315	0.0	1.1651286615137575e-12	-9.473903143468003e-13	0.0	-6.731613057885968e-27	9.473903143468004e-14
0.52	88.88888859781834	0.0	0.00021283858412721898	54.12221642498576	0.0	-800.6437003915348	0.0	4.3191446912223866e-10	0.0	0.9999999999992834	0.0	1.1972170330795237e-06	0.0	0.0	0.00013719096631329471	0.0	0.0	0.00013720395842329518	0.0	800.6437003915348	88.88888859807315	0.0	1.1651286615137575e-12	-9.473903143468003e-13	0.0	-6.731613057885968e-27	9.473903143468004e-14
0.525	88.88888859781834	0.0	0.00021283858412721898	54.5666608694302	0.0	-800.6437003915348	0.0	4.3191446912223866e-10	0.0	0.9999999999992834	0.0	1.1972170330795237e-06	0.0	0.0	0.00013719096631329471	0.0	0.0	0.00013720408215767613	0.0	800.6437003915348	88.88888859807315	0.0	1.1651286615137575e-12	-9.473903143468003e-13	0.0	-6.731613057885968e-27	9.473903143468004e-14
0.53	88.88888859781834	0.0	0.00021283858412721898	55.01110531387465	0.0	-800.6437003915348	0.0	4.3191446912223866e-10	0.0	0.9999999999992834	0.0	1.1972170330795237e-06	0.0	0.0	0.00013719096631329471	0.0	0.0	0.00013720420589205708	0.0	800.6437003915348	88.88888859807315	0.0	1.1651286615137575e-12	-9.473903143468003e-13	0.0	-6.731613057885968e-27	9.473903143468004e-14
0.535	88.88888859781834	0.0	0.00021283858412721898	55.455549758319094	0.0	-800.6437003915348	0.0	4.3191446912223866e-10	0.0	0.9999999999992834	0.0	1.1972170330795237e-06	0.0	0.0	0.00013719096631329471	0.0	0.0	0.00013720432962643803	0.0	800.6437003915348	88.88888859807315	0.0	1.1651286615137575e-12	-9.473903143468003e-13	0.0	-6.731613057885968e-27	9.473903143468004e-14
0.54	88.88888859781834	0.0	0.00021283858412721898	55.89999420276354	0.0	-800.6437003915348	0.0	4.3191446912223866e-10	0.0	0.9999999999992834	0.0	1.1972170330795237e-06	0.0	0.0	0.00013719096631329471	0.0	0.0	0.000137204453360819	0.0	800.6437003915348	88.88888859807315	0.0	1.1651286615137575e-12	-9.473903143468003e-13	0.0	-6.731613057885968e-27	9.473903143468004e-14
0.545	88.88888859781834	0.0	0.00021283858412721898	56.34443864720798	0.0	-800.6437003915348	0.0	4.3191446912223866e-10	0.0	0.9999999999992834	0.0	1.1972170330795237e-06	0.0	0.0	0.00013719096631329471	0.0	0.0	0.00013720457709519995	0.0	800.6437003915348	88.88888859807315	0.0	1.1651286615137575e-12	-9.473903143468003e-13	0.0	-6.731613057885968e-27	9.473903143468004e-14
0.55	88.88888859781834	0.0	0.00021283858412721898	56.78888309165243	0.0	-800.6437003915348	0.0	4.3191446912223866e-10	0.0	0.9999999999992834	0.0	1.1972170330795237e-06	0.0	0.0	0.00013719096631329471	0.0	0.0	0.0001372047008295809	0.0	800.6437003915348	88.88888859807315	0.0	1.1651286615137575e-12	-9.473903143468003e-13	0.0	-6.731613057885968e-27	9.473903143468004e-14
0.555	88.88888859781834	0.0	0.00021283858412721898	57.23332753609687	0.0	-800.6437003915348	0.0	4.3191446912223866e-10	0.0	0.9999999999992834	0.0	1.1972170330795237e-06	0.0	0.0	0.00013719096631329471	0.0	0.0	0.00013720482456396185	0.0	800.6437003915348	88.88888859807315	0.0	1.1651286615137575e-12	-9.473903143468003e-13	0.0	-6.731613057885968e-27	9.473903143468004e-14
0.56	88.88888859781834	0.0	0.00021283858412721898	57.677771980541316	0.0	-800.6437003915348	0.0	4.3191446912223866e-10	0.0	0.9999999999992834	0.0	1.1972170330795237e-06	0.0	0.0	0.00013719096631329471	0.0	0.0	0.00013720494829834283	0.0	800.6437003915348	88.88888859807315	0.0	1.1651286615137575e-12	-9.473903143468003e-13	0.0	-6.731613057885968e-27	9.473903143468004e-14
0.565	88.88888859781834	0.0	0.00021283858412721898	58.12221642498575	0.0	-800.6437003915348	0.0	4.3191446912223866e-10	0.0	0.9999999999992834	0.0	1.1972170330795237e-06	0.0	0.0	0.00013719096631329471	0.0	0.0	0.00013720507203272378	0.0	800.6437003915348	88.88888859807315	0.0	1.1651286615137575e-12	-9.473903143468003e-13	0.0	-6.731613057885968e-27	9.473903143468004e-14
0.57	88.88888859781834	0.0	0.00021283858412721898	58.566660869430194	0.0	-800.6437003915348	0.0	4.3191446912223866e-10	0.0	0.9999999999992834	0.0	1.1972170330795237e-06	0.0	0.0	0.00013719096631329471	0.0	0.0	0.00013720519576710473	0.0	800.6437003915348	88.88888859807315	0.0	1.1651286615137575e-12	-9.473903143468003e-13	0.0	-6.731613057885968e-27	9.473903143468004e-14
0.575	88.88888859781834	0.0	0.00021283858412721898	59.011105313874644	0.0	-800.6437003915348	0.0	4.3191446912223866e-10	0.0	0.9999999999992834	0.0	1.1972170330795237e-06	0.0	0.0	0.00013719096631329471	0.0	0.0	0.00013720531950148568	0.0	800.6437003915348	88.88888859807315	0.0	1.1651286615137575e-12	-9.473903143468003e-13	0.0	-6.731613057885968e-27	9.473903143468004e-14
0.58	88.88888859781834	0.0	0.00021283858412721898	59.45554975831909	0.0	-800.6437003915348	0.0	4.3191446912223866e-10	0.0	0.9999999999992834	0.0	1.1972170330795237e-06	0.0	0.0	0.00013719096631329471	0.0	0.0	0.00013720544323586665	0.0	800.6437003915348	88.88888859807315	0.0	1.1651286615137575e-12	-9.473903143468003e-13	0.0	-6.731613057885968e-27	9.473903143468004e-14
0.585	88.88888859781834	0.0	0.00021283858412721898	59.89999420276353	0.0	-800.6437003915348	0.0	4.3191446912223866e-10	0.0	0.9999999999992834	0.0	1.1972170330795237e-06	0.0	0.0	0.00013719096631329471	0.0	0.0	0.0001372055669702476	0.0	800.6437003915348	88.88888859807315	0.0	1.1651286615137575e-12	-9.473903143468003e-13	0.0	-6.731613057885968e-27	9.473903143468004e-14
0.59	88.88888859781834	0.0	0.00021283858412721898	60.34443864720798	0.0	-800.6437003915348	0.0	4.3191446912223866e-10	0.0	0.9999999999992834	0.0	1.1972170330795237e-06	0.0	0.0	0.00013719096631329471	0.0	0.0	0.00013720569070462855	0.0	800.6437003915348	88.88888859807315	0.0	1.1651286615137575e-12	-9.473903143468003e-13	0.0	-6.731613057885968e-27	9.473903143468004e-14
0.595	88.88888859781834	0.0	0.00021283858412721898	60.78888309165242	0.0	-800.6437003915348	0.0	4.3191446912223866e-10	0.0	0.9999999999992834	0.0	1.1972170330795237e-06	0.0	0.0	0.00013719096631329471	0.0	0.0	0.0001372058144390095	0.0	800.6437003915348	88.88888859807315	0.0	1.1651286615137575e-12	-9.473903143468003e-13	0.0	-6.731613057885968e-27	9.473903143468004e-14
0.6	88.88888859781834	0.0	0.00021283858412721898	61.233327536096866	0.0	-800.6437003915348	0.0	4.3191446912223866e-10	0.0	0.9999999999992834	0.0	1.1972170330795237e-06	0.0	0.0	0.00013719096631329471	0.0	0.0	0.00013720593817339048	0.0	800.6437003915348	88.88888859807315	0.0	1.1651286615137575e-12	-9.473903143468003e-13	0.0	-6.731613057885968e-27	9.473903143468004e-14
0.605	88.88888859781834	0.0	0.00021283858412721898	61.67777198054131	0.0	-800.6437003915348	0.0	4.3191446912223866e-10	0.0	0.9999999999992834	0.0	1.1972170330795237e-06	0.0	0.0	0.00013719096631329471	0.0	0.0	0.00013720606190777143	0.0	800.6437003915348	88.88888859807315	0.0	1.1651286615137575e-12	-9.473903143468003e-13	0.0	-6.731613057885968e-27	9.473903143468004e-14
0.61	88.88888859781834	0.0	0.00021283858412721898	62.12221642498576	0.0	-800.6437003915348	0.0	4.3191446912223866e-10	0.0	0.9999999999992834	0.0	1.1972170330795237e-06	0.0	0.0	0.00013719096631329471	0.0	0.0	0.00013720618564215238	0.0	800.6437003915348	88.88888859807315	0.0	1.1651286615137575e-12	-9.473903143468003e-13	0.0	-6.731613057885968e-27	9.473903143468004e-14
0.615	88.88888859781834	0.0	0.00021283858412721898	62.5666608694302	0.0	-800.6437003915348	0.0	4.3191446912223866e-10	0.0	0.9999999999992834	0.0	1.1972170330795237e-06	0.0	0.0	0.00013719096631329471	0.0	0.0	0.00013720630937653333	0.0	800.6437003915348	88.88888859807315	0.0	1.1651286615137575e-12	-9.473903143468003e-13	0.0	-6.731613057885968e-27	9.473903143468004e-14
0.62	88.88888859781834	0.0	0.00021283858412721898	63.011105313874644	0.0	-800.6437003915348	0.0	4.3191446912223866e-10	0.0	0.9999999999992834	0.0	1.1972170330795237e-06	0.0	0.0	0.00013719096631329471	0.0	0.0	0.0001372064331109143	0.0	800.6437003915348	88.88888859807315	0.0	1.1651286615137575e-12	-9.473903143468003e-13	0.0	-6.731613057885968e-27	9.473903143468004e-14
0.625	88.88888859781834	0.0	0.00021283858412721898	63.455549758319094	0.0	-800.6437003915348	0.0	4.3191446912223866e-10	0.0	0.9999999999992834	0.0	1.1972170330795237e-06	0.0	0.0	0.00013719096631329471	0.0	0.0	0.00013720655684529526	0.0	800.6437003915348	88.88888859807315	0.0	1.1651286615137575e-12	-9.473903143468003e-13	0.0	-6.731613057885968e-27	9.473903143468004e-14
0.63	88.88888859781834	0.0	0.00021283858412721898	63.89999420276354	0.0	-800.6437003915348	0.0	4.3191446912223866e-10	0.0	0.9999999999992834	0.0	1.1972170330795237e-06	0.0	0.0	0.00013719096631329471	0.0	0.0	0.0001372066805796762	0.0	800.6437003915348	88.88888859807315	0.0	1.1651286615137575e-12	-9.473903143468003e-13	0.0	-6.731613057885968e-27	9.473903143468004e-14
0.635	88.88888859781834	0.0	0.00021283858412721898	64.34443864720798	0.0	-800.6437003915348	0.0	4.3191446912223866e-10	0.0	0.9999999999992834	0.0	1.1972170330795237e-06	0.0	0.0	0.00013719096631329471	0.0	0.0	0.00013720680431405716	0.0	800.6437003915348	88.88888859807315	0.0	1.1651286615137575e-12	-9.473903143468003e-13	0.0	-6.731613057885968e-27	9.473903143468004e-14
0.64	88.88888859781834	0.0	0.00021283858412721898	64.78888309165242	0.0	-800.6437003915348	0.0	4.3191446912223866e-10	0.0	0.9999999999992834	0.0	1.1972170330795237e-06	0.0	0.0	0.00013719096631329471	0.0	0.0	0.00013720692804843813	0.0	800.6437003915348	88.88888859807315	0.0	1.1651286615137575e-12	-9.473903143468003e-13	0.0	-6.731613057885968e-27	9.473903143468004e-14
0.645	88.88888859781834	0.0	0.00021283858412721898	65.23332753609688	0.0	-800.6437003915348	0.0	4.3191446912223866e-10	0.0	0.9999999999992834	0.0	1.1972170330795237e-06	0.0	0.0	0.00013719096631329471	0.0	0.0	0.00013720705178281908	0.0	800.6437003915348	88.88888859807315	0.0	1.1651286615137575e-12	-9.473903143468003e-13	0.0	-6.731613057885968e-27	9.473903143468004e-14
0.65	88.88888859781834	0.0	0.00021283858412721898	65.67777198054131	0.0	-800.6437003915348	0.0	4.3191446912223866e-10	0.0	0.9999999999992834	0.0	1.1972170330795237e-06	0.0	0.0	0.00013719096631329471	0.0	0.0	0.00013720717551720003	0.0	800.6437003915348	88.88888859807315	0.0	1.1651286615137575e-12	-9.473903143468003e-13	0.0	-6.731613057885968e-27	9.473903143468004e-14
0.655	88.88888859781834	0.0	0.00021283858412721898	66.12221642498577	0.0	-800.6437003915348	0.0	4.3191446912223866e-10	0.0	0.9999999999992834	0.0	1.1972170330795237e-06	0.0	0.0	0.00013719096631329471	0.0	0.0	0.000137207299251581	0.0	800.6437003915348	88.88888859807315	0.0	1.1651286615137575e-12	-9.473903143468003e-13	0.0	-6.731613057885968e-27	9.473903143468004e-14
0.66	88.88888859781834	0.0	0.00021283858412721898	66.5666608694302	0.0	-800.6437003915348	0.0	4.3191446912223866e-10	0.0	0.9999999999992834	0.0	1.1972170330795237e-06	0.0	0.0	0.00013719096631329471	0.0	0.0	0.00013720742298596196	0.0	800.6437003915348	88.88888859807315	0.0	1.1651286615137575e-12	-9.473903143468003e-13	0.0	-6.731613057885968e-27	9.473903143468004e-14
0.665	88.88888859781834	0.0	0.00021283858412721898	67.01110531387465	0.0	-800.6437003915348	0.0	4.3191446912223866e-10	0.0	0.9999999999992834	0.0	1.1972170330795237e-06	0.0	0.0	0.00013719096631329471	0.0	0.0	0.0001372075467203429	0.0	800.6437003915348	88.88888859807315	0.0	1.1651286615137575e-12	-9.473903143468003e-13	0.0	-6.731613057885968e-27	9.473903143468004e-14
0.67	88.88888859781834	0.0	0.00021283858412721898	67.4555497583191	0.0	-800.6437003915348	0.0	4.3191446912223866e-10	0.0	0.9999999999992834	0.0	1.1972170330795237e-06	0.0	0.0	0.00013719096631329471	0.0	0.0	0.00013720767045472386	0.0	800.6437003915348	88.88888859807315	0.0	1.1651286615137575e-12	-9.473903143468003e-13	0.0	-6.731613057885968e-27	9.473903143468004e-14
0.675	88.88888859781834	0.0	0.00021283858412721898	67.89999420276354	0.0	-800.6437003915348	0.0	4.3191446912223866e-10	0.0	0.9999999999992834	0.0	1.1972170330795237e-06	0.0	0.0	0.00013719096631329471	0.0	0.0	0.00013720779418910484	0.0	800.6437003915348	88.88888859807315	0.0	1.1651286615137575e-12	-9.473903143468003e-13	0.0	-6.731613057885968e-27	9.473903143468004e-14
0.68	88.88888859781834	0.0	0.00021283858412721898	68.344438647208	0.0	-800.6437003915348	0.0	4.3191446912223866e-10	0.0	0.9999999999992834	0.0	1.1972170330795237e-06	0.0	0.0	0.00013719096631329471	0.0	0.0	0.0001372079179234858	0.0	800.6437003915348	88.88888859807315	0.0	1.1651286615137575e-12	-9.473903143468003e-13	0.0	-6.731613057885968e-27	9.473903143468004e-14
0.685	88.88888859781834	0.0	0.00021283858412721898	68.78888309165242	0.0	-800.6437003915348	0.0	4.3191446912223866e-10	0.0	0.9999999999992834	0.0	1.1972170330795237e-06	0.0	0.0	0.00013719096631329471	0.0	0.0	0.00013720804165786674	0.0	800.6437003915348	88.88888859807315	0.0	1.1651286615137575e-12	-9.473903143468003e-13	0.0	-6.731613057885968e-27	9.473903143468004e-14
0.69	88.88888859781834	0.0	0.00021283858412721898	69.23332753609687	0.0	-800.6437003915348	0.0	4.3191446912223866e-10	0.0	0.9999999999992834	0.0	1.1972170330795237e-06	0.0	0.0	0.00013719096631329471	0.0	0.0	0.00013720816539224769	0.0	800.6437003915348	88.88888859807315	0.0	1.1651286615137575e-12	-9.473903143468003e-13	0.0	-6.731613057885968e-27	9.473903143468004e-14
0.695	88.88888859781834	0.0	0.00021283858412721898	69.67777198054131	0.0	-800.6437003915348	0.0	4.3191446912223866e-10	0.0	0.9999999999992834	0.0	1.1972170330795237e-06	0.0	0.0	0.00013719096631329471	0.0	0.0	0.00013720828912662866	0.0	800.6437003915348	88.88888859807315	0.0	1.1651286615137575e-12	-9.473903143468003e-13	0.0	-6.731613057885968e-27	9.473903143468004e-14
0.7	88.88888859781834	0.0	0.00021283858412721898	70.12221642498575	0.0	-800.6437003915348	0.0	4.3191446912223866e-10	0.0	0.9999999999992834	0.0	1.1972170330795237e-06	0.0	0.0	0.00013719096631329471	0.0	0.0	0.0001372084128610096	0.0	800.6437003915348	88.88888859807315	0.0	1.1651286615137575e-12	-9.473903143468003e-13	0.0	-6.731613057885968e-27	9.473903143468004e-14
0.705	88.88888859781834	0.0	0.00021283858412721898	70.5666608694302	0.0	-800.6437003915348	0.0	4.3191446912223866e-10	0.0	0.9999999999992834	0.0	1.1972170330795237e-06	0.0	0.0	0.00013719096631329471	0.0	0.0	0.00013720853659539056	0.0	800.6437003915348	88.88888859807315	0.0	1.1651286615137575e-12	-9.473903143468003e-13	0.0	-6.731613057885968e-27	9.473903143468004e-14
0.71	88.88888859781834	0.0	0.00021283858412721898	71.01110531387465	0.0	-800.6437003915348	0.0	4.3191446912223866e-10	0.0	0.9999999999992834	0.0	1.1972170330795237e-06	0.0	0.0	0.00013719096631329471	0.0	0.0	0.0001372086603297715	0.0	800.6437003915348	88.88888859807315	0.0	1.1651286615137575e-12	-9.473903143468003e-13	0.0	-6.731613057885968e-27	9.473903143468004e-14
0.715	88.88888859781834	0.0	0.00021283858412721898	71.45554975831908	0.0	-800.6437003915348	0.0	4.3191446912223866e-10	0.0	0.9999999999992834	0.0	1.1972170330795237e-06	0.0	0.0	0.00013719096631329471	0.0	0.0	0.0001372087840641525	0.0	800.6437003915348	88.88888859807315	0.0	1.1651286615137575e-12	-9.473903143468003e-13	0.0	-6.731613057885968e-27	9.473903143468004e-14
0.72	88.88888859781834	0.0	0.00021283858412721898	71.89999420276354	0.0	-800.6437003915348	0.0	4.3191446912223866e-10	0.0	0.9999999999992834	0.0	1.1972170330795237e-06	0.0	0.0	0.00013719096631329471	0.0	0.0	0.00013720890779853344	0.0	800.6437003915348	88.88888859807315	0.0	1.1651286615137575e-12	-9.473903143468003e-13	0.0	-6.731613057885968e-27	9.473903143468004e-14
0.725	88.88888859781834	0.0	0.00021283858412721898	72.34443864720798	0.0	-800.6437003915348	0.0	4.3191446912223866e-10	0.0	0.9999999999992834	0.0	1.1972170330795237e-06	0.0	0.0	0.00013719096631329471	0.0	0.0	0.0001372090315329144	0.0	800.6437003915348	88.88888859807315	0.0	1.1651286615137575e-12	-9.473903143468003e-13	0.0	-6.731613057885968e-27	9.473903143468004e-14
0.73	88.88888859781834	0.0	0.00021283858412721898	72.78888309165242	0.0	-800.6437003915348	0.0	4.3191446912223866e-10	0.0	0.9999999999992834	0.0	1.1972170330795237e-06	0.0	0.0	0.00013719096631329471	0.0	0.0	0.00013720915526729534	0.0	800.6437003915348	88.88888859807315	0.0	1.1651286615137575e-12	-9.473903143468003e-13	0.0	-6.731613057885968e-27	9.473903143468004e-14
0.735	88.88888859781834	0.0	0.00021283858412721898	73.23332753609687	0.0	-800.6437003915348	0.0	4.3191446912223866e-10	0.0	0.9999999999992834	0.0	1.1972170330795237e-06	0.0	0.0	0.00013719096631329471	0.0	0.0	0.00013720927900167632	0.0	800.6437003915348	88.88888859807315	0.0	1.1651286615137575e-12	-9.473903143468003e-13	0.0	-6.731613057885968e-27	9.473903143468004e-14
0.74	88.88888859781834	0.0	0.00021283858412721898	73.67777198054131	0.0	-800.6437003915348	0.0	4.3191446912223866e-10	0.0	0.9999999999992834	0.0	1.1972170330795237e-06	0.0	0.0	0.00013719096631329471	0.0	0.0	0.00013720940273605727	0.0	800.6437003915348	88.88888859807315	0.0	1.1651286615137575e-12	-9.473903143468003e-13	0.0	-6.731613057885968e-27	9.473903143468004e-14
0.745	88.88888859781834	0.0	0.00021283858412721898	74.12221642498575	0.0	-800.6437003915348	0.0	4.3191446912223866e-10	0.0	0.9999999999992834	0.0	1.1972170330795237e-06	0.0	0.0	0.00013719096631329471	0.0	0.0	0.00013720952647043822	0.0	800.6437003915348	88.88888859807315	0.0	1.1651286615137575e-12	-9.473903143468003e-13	0.0	-6.731613057885968e-27	9.473903143468004e-14
0.75	88.88888859781834	0.0	0.00021283858412721898	74.5666608694302	0.0	-800.6437003915348	0.0	4.3191446912223866e-10	0.0	0.9999999999992834	0.0	1.1972170330795237e-06	0.0	0.0	0.00013719096631329471	0.0	0.0	0.00013720965020481917	0.0	800.6437003915348	88.88888859807315	0.0	1.1651286615137575e-12	-9.473903143468003e-13	0.0	-6.731613057885968e-27	9.473903143468004e-14
0.755	88.88888859781834	0.0	0.00021283858412721898	75.01110531387465	0.0	-800.6437003915348	0.0	4.3191446912223866e-10	0.0	0.9999999999992834	0.0	1.1972170330795237e-06	0.0	0.0	0.00013719096631329471	0.0	0.0	0.00013720977393920014	0.0	800.6437003915348	88.88888859807315	0.0	1.1651286615137575e-12	-9.473903143468003e-13	0.0	-6.731613057885968e-27	9.473903143468004e-14
0.76	88.88888859781834	0.0	0.00021283858412721898	75.4555497583191	0.0	-800.6437003915348	0.0	4.3191446912223866e-10	0.0	0.9999999999992834	0.0	1.1972170330795237e-06	0.0	0.0	0.00013719096631329471	0.0	0.0	0.0001372098976735811	0.0	800.6437003915348	88.88888859807315	0.0	1.1651286615137575e-12	-9.473903143468003e-13	0.0	-6.731613057885968e-27	9.473903143468004e-14
0.765	88.88888859781834	0.0	0.00021283858412721898	75.89999420276354	0.0	-800.6437003915348	0.0	4.3191446912223866e-10	0.0	0.9999999999992834	0.0	1.1972170330795237e-06	0.0	0.0	0.00013719096631329471	0.0	0.0	0.00013721002140796204	0.0	800.6437003915348	88.88888859807315	0.0	1.1651286615137575e-12	-9.473903143468003e-13	0.0	-6.731613057885968e-27	9.473903143468004e-14
0.77	88.88888859781834	0.0	0.00021283858412721898	76.34443864720798	0.0	-800.6437003915348	0.0	4.3191446912223866e-10	0.0	0.9999999999992834	0.0	1.1972170330795237e-06	0.0	0.0	0.00013719096631329471	0.0	0.0	0.000137210145142343	0.0	800.6437003915348	88.88888859807315	0.0	1.1651286615137575e-12	-9.473903143468003e-13	0.0	-6.731613057885968e-27	9.473903143468004e-14
0.775	88.88888859781834	0.0	0.00021283858412721898	76.78888309165242	0.0	-800.6437003915348	0.0	4.3191446912223866e-10	0.0	0.9999999999992834	0.0	1.1972170330795237e-06	0.0	0.0	0.00013719096631329471	0.0	0.0	0.00013721026887672397	0.0	800.6437003915348	88.88888859807315	0.0	1.1651286615137575e-12	-9.473903143468003e-13	0.0	-6.731613057885968e-27	9.473903143468004e-14
0.78	88.88888859781834	0.0	0.00021283858412721898	77.23332753609687	0.0	-800.6437003915348	0.0	4.3191446912223866e-10	0.0	0.9999999999992834	0.0	1.1972170330795237e-06	0.0	0.0	0.00013719096631329471	0.0	0.0	0.00013721039261110492	0.0	800.6437003915348	88.88888859807315	0.0	1.1651286615137575e-12	-9.473903143468003e-13	0.0	-6.731613057885968e-27	9.473903143468004e-14
0.785	88.88888859781834	0.0	0.00021283858412721898	77.67777198054131	0.0	-800.6437003915348	0.0	4.3191446912223866e-10	0.0	0.9999999999992834	0.0	1.1972170330795237e-06	0.0	0.0	0.00013719096631329471	0.0	0.0	0.00013721051634548587	0.0	800.6437003915348	88.88888859807315	0.0	1.1651286615137575e-12	-9.473903143468003e-13	0.0	-6.731613057885968e-27	9.473903143468004e-14
0.79	88.88888859781834	0.0	0.00021283858412721898	78.12221642498577	0.0	-800.6437003915348	0.0	4.3191446912223866e-10	0.0	0.9999999999992834	0.0	1.1972170330795237e-06	0.0	0.0	0.00013719096631329471	0.0	0.0	0.00013721064007986682	0.0	800.6437003915348	88.88888859807315	0.0	1.1651286615137575e-12	-9.473903143468003e-13	0.0	-6.731613057885968e-27	9.473903143468004e-14
0.795	88.88888859781834	0.0	0.00021283858412721898	78.56666086943021	0.0	-800.6437003915348	0.0	4.3191446912223866e-10	0.0	0.9999999999992834	0.0	1.1972170330795237e-06	0.0	0.0	0.00013719096631329471	0.0	0.0	0.0001372107638142478	0.0	800.6437003915348	88.88888859807315	0.0	1.1651286615137575e-12	-9.473903143468003e-13	0.0	-6.731613057885968e-27	9.473903143468004e-14
0.8	88.88888859781834	0.0	0.00021283858412721898	79.01110531387465	0.0	-800.6437003915348	0.0	4.3191446912223866e-10	0.0	0.9999999999992834	0.0	1.1972170330795237e-06	0.0	0.0	0.00013719096631329471	0.0	0.0	0.00013721088754862874	0.0	800.6437003915348	88.88888859807315	0.0	1.1651286615137575e-12	-9.473903143468003e-13	0.0	-6.731613057885968e-27	9.473903143468004e-14
0.805	88.88888859781834	0.0	0.00021283858412721898	79.4555497583191	0.0	-800.6437003915348	0.0	4.3191446912223866e-10	0.0	0.9999999999992834	0.0	1.1972170330795237e-06	0.0	0.0	0.00013719096631329471	0.0	0.0	0.0001372110112830097	0.0	800.6437003915348	88.88888859807315	0.0	1.1651286615137575e-12	-9.473903143468003e-13	0.0	-6.731613057885968e-27	9.473903143468004e-14
0.81	88.88888859781834	0.0	0.00021283858412721898	79.89999420276354	0.0	-800.6437003915348	0.0	4.3191446912223866e-10	0.0	0.9999999999992834	0.0	1.1972170330795237e-06	0.0	0.0	0.00013719096631329471	0.0	0.0	0.00013721113501739064	0.0	800.6437003915348	88.88888859807315	0.0	1.1651286615137575e-12	-9.473903143468003e-13	0.0	-6.731613057885968e-27	9.473903143468004e-14
0.815	88.88888859781834	0.0	0.00021283858412721898	80.34443864720798	0.0	-800.6437003915348	0.0	4.3191446912223866e-10	0.0	0.9999999999992834	0.0	1.1972170330795237e-06	0.0	0.0	0.00013719096631329471	0.0	0.0	0.00013721125875177162	0.0	800.6437003915348	88.88888859807315	0.0	1.1651286615137575e-12	-9.473903143468003e-13	0.0	-6.731613057885968e-27	9.473903143468004e-14
0.82	88.88888859781834	0.0	0.00021283858412721898	80.78888309165242	0.0	-800.6437003915348	0.0	4.3191446912223866e-10	0.0	0.9999999999992834	0.0	1.1972170330795237e-06	0.0	0.0	0.00013719096631329471	0.0	0.0	0.00013721138248615257	0.0	800.6437003915348	88.88888859807315	0.0	1.1651286615137575e-12	-9.473903143468003e-13	0.0	-6.731613057885968e-27	9.473903143468004e-14
0.825	88.88888859781834	0.0	0.00021283858412721898	81.23332753609687	0.0	-800.6437003915348	0.0	4.3191446912223866e-10	0.0	0.9999999999992834	0.0	1.1972170330795237e-06	0.0	0.0	0.00013719096631329471	0.0	0.0	0.00013721150622053352	0.0	800.6437003915348	88.88888859807315	0.0	1.1651286615137575e-12	-9.473903143468003e-13	0.0	-6.731613057885968e-27	9.473903143468004e-14
0.83	88.88888859781834	0.0	0.00021283858412721898	81.67777198054131	0.0	-800.6437003915348	0.0	4.3191446912223866e-10	0.0	0.9999999999992834	0.0	1.1972170330795237e-06	0.0	0.0	0.00013719096631329471	0.0	0.0	0.00013721162995491447	0.0	800.6437003915348	88.88888859807315	0.0	1.1651286615137575e-12	-9.473903143468003e-13	0.0	-6.731613057885968e-27	9.473903143468004e-14
0.835	88.88888859781834	0.0	0.00021283858412721898	82.12221642498575	0.0	-800.6437003915348	0.0	4.3191446912223866e-10	0.0	0.9999999999992834	0.0	1.1972170330795237e-06	0.0	0.0	0.00013719096631329471	0.0	0.0	0.00013721175368929545	0.0	800.6437003915348	88.88888859807315	0.0	1.1651286615137575e-12	-9.473903143468003e-13	0.0	-6.731613057885968e-27	9.473903143468004e-14
0.84	88.88888859781834	0.0	0.00021283858412721898	82.5666608694302	0.0	-800.6437003915348	0.0	4.3191446912223866e-10	0.0	0.9999999999992834	0.0	1.1972170330795237e-06	0.0	0.0	0.00013719096631329471	0.0	0.0	0.0001372118774236764	0.0	800.6437003915348	88.88888859807315	0.0	1.1651286615137575e-12	-9.473903143468003e-13	0.0	-6.731613057885968e-27	9.473903143468004e-14
0.845	88.88888859781834	0.0	0.00021283858412721898	83.01110531387464	0.0	-800.6437003915348	0.0	4.3191446912223866e-10	0.0	0.9999999999992834	0.0	1.1972170330795237e-06	0.0	0.0	0.00013719096631329471	0.0	0.0	0.00013721200115805735	0.0	800.6437003915348	88.88888859807315	0.0	1.1651286615137575e-12	-9.473903143468003e-13	0.0	-6.731613057885968e-27	9.473903143468004e-14
0.85	88.88888859781834	0.0	0.00021283858412721898	83.4555497583191	0.0	-800.6437003915348	0.0	4.3191446912223866e-10	0.0	0.9999999999992834	0.0	1.1972170330795237e-06	0.0	0.0	0.00013719096631329471	0.0	0.0	0.0001372121248924383	0.0	800.6437003915348	88.88888859807315	0.0	1.1651286615137575e-12	-9.473903143468003e-13	0.0	-6.731613057885968e-27	9.473903143468004e-14
0.855	88.88888859781834	0.0	0.00021283858412721898	83.89999420276354	0.0	-800.6437003915348	0.0	4.3191446912223866e-10	0.0	0.9999999999992834	0.0	1.1972170330795237e-06	0.0	0.0	0.00013719096631329471	0.0	0.0	0.00013721224862681927	0.0	800.6437003915348	88.88888859807315	0.0	1.1651286615137575e-12	-9.473903143468003e-13	0.0	-6.731613057885968e-27	9.473903143468004e-14
0.86	88.88888859781834	0.0	0.00021283858412721898	84.34443864720798	0.0	-800.6437003915348	0.0	4.3191446912223866e-10	0.0	0.9999999999992834	0.0	1.1972170330795237e-06	0.0	0.0	0.00013719096631329471	0.0	0.0	0.00013721237236120022	0.0	800.6437003915348	88.88888859807315	0.0	1.1651286615137575e-12	-9.473903143468003e-13	0.0	-6.731613057885968e-27	9.473903143468004e-14
0.865	88.88888859781834	0.0	0.00021283858412721898	84.78888309165242	0.0	-800.6437003915348	0.0	4.3191446912223866e-10	0.0	0.9999999999992834	0.0	1.1972170330795237e-06	0.0	0.0	0.00013719096631329471	0.0	0.0	0.00013721249609558117	0.0	800.6437003915348	88.88888859807315	0.0	1.1651286615137575e-12	-9.473903143468003e-13	0.0	-6.731613057885968e-27	9.473903143468004e-14
0.87	88.88888859781834	0.0	0.00021283858412721898	85.23332753609687	0.0	-800.6437003915348	0.0	4.3191446912223866e-10	0.0	0.9999999999992834	0.0	1.1972170330795237e-06	0.0	0.0	0.00013719096631329471	0.0	0.0	0.00013721261982996212	0.0	800.6437003915348	88.88888859807315	0.0	1.1651286615137575e-12	-9.473903143468003e-13	0.0	-6.731613057885968e-27	9.473903143468004e-14
0.875	88.88888859781834	0.0	0.00021283858412721898	85.67777198054131	0.0	-800.6437003915348	0.0	4.3191446912223866e-10	0.0	0.9999999999992834	0.0	1.1972170330795237e-06	0.0	0.0	0.00013719096631329471	0.0	0.0	0.0001372127435643431	0.0	800.6437003915348	88.88888859807315	0.0	1.1651286615137575e-12	-9.473903143468003e-13	0.0	-6.731613057885968e-27	9.473903143468004e-14
0.88	88.88888859781834	0.0	0.00021283858412721898	86.12221642498575	0.0	-800.6437003915348	0.0	4.3191446912223866e-10	0.0	0.9999999999992834	0.0	1.1972170330795237e-06	0.0	0.0	0.00013719096631329471	0.0	0.0	0.00013721286729872405	0.0	800.6437003915348	88.88888859807315	0.0	1.1651286615137575e-12	-9.473903143468003e-13	0.0	-6.731613057885968e-27	9.473903143468004e-14
0.885	88.88888859781834	0.0	0.00021283858412721898	86.56666086943021	0.0	-800.6437003915348	0.0	4.3191446912223866e-10	0.0	0.9999999999992834	0.0	1.1972170330795237e-06	0.0	0.0	0.00013719096631329471	0.0	0.0	0.000137212991033105	0.0	800.6437003915348	88.88888859807315	0.0	1.1651286615137575e-12	-9.473903143468003e-13	0.0	-6.731613057885968e-27	9.473903143468004e-14
0.89	88.88888859781834	0.0	0.00021283858412721898	87.01110531387465	0.0	-800.6437003915348	0.0	4.3191446912223866e-10	0.0	0.9999999999992834	0.0	1.1972170330795237e-06	0.0	0.0	0.00013719096631329471	0.0	0.0	0.00013721311476748595	0.0	800.6437003915348	88.88888859807315	0.0	1.1651286615137575e-12	-9.473903143468003e-13	0.0	-6.731613057885968e-27	9.473903143468004e-14
0.895	88.88888859781834	0.0	0.00021283858412721898	87.4555497583191	0.0	-800.6437003915348	0.0	4.3191446912223866e-10	0.0	0.9999999999992834	0.0	1.1972170330795237e-06	0.0	0.0	0.00013719096631329471	0.0	0.0	0.00013721323850186693	0.0	800.6437003915348	88.88888859807315	0.0	1.1651286615137575e-12	-9.473903143468003e-13	0.0	-6.731613057885968e-27	9.473903143468004e-14
0.9	88.88888859781834	0.0	0.00021283858412721898	87.89999420276354	0.0	-800.6437003915348	0.0	4.3191446912223866e-10	0.0	0.9999999999992834	0.0	1.1972170330795237e-06	0.0	0.0	0.00013719096631329471	0.0	0.0	0.00013721336223624788	0.0	800.6437003915348	88.88888859807315	0.0	1.1651286615137575e-12	-9.473903143468003e-13	0.0	-6.731613057885968e-27	9.473903143468004e-14
0.905	88.88888859781834	0.0	0.00021283858412721898	88.34443864720798	0.0	-800.6437003915348	0.0	4.3191446912223866e-10	0.0	0.9999999999992834	0.0	1.1972170330795237e-06	0.0	0.0	0.00013719096631329471	0.0	0.0	0.00013721348597062883	0.0	800.6437003915348	88.88888859807315	0.0	1.1651286615137575e-12	-9.473903143468003e-13	0.0	-6.731613057885968e-27	9.473903143468004e-14
0.91	88.88888859781834	0.0	0.00021283858412721898	88.78888309165242	0.0	-800.6437003915348	0.0	4.3191446912223866e-10	0.0	0.9999999999992834	0.0	1.1972170330795237e-06	0.0	0.0	0.00013719096631329471	0.0	0.0	0.00013721360970500978	0.0	800.6437003915348	88.88888859807315	0.0	1.1651286615137575e-12	-9.473903143468003e-13	0.0	-6.731613057885968e-27	9.473903143468004e-14
0.915	88.88888859781834	0.0	0.00021283858412721898	89.23332753609687	0.0	-800.6437003915348	0.0	4.3191446912223866e-10	0.0	0.9999999999992834	0.0	1.1972170330795237e-06	0.0	0.0	0.00013719096631329471	0.0	0.0	0.00013721373343939075	0.0	800.6437003915348	88.88888859807315	0.0	1.1651286615137575e-12	-9.473903143468003e-13	0.0	-6.731613057885968e-27	9.473903143468004e-14
0.92	88.88888859781834	0.0	0.00021283858412721898	89.67777198054131	0.0	-800.6437003915348	0.0	4.3191446912223866e-10	0.0	0.9999999999992834	0.0	1.1972170330795237e-06	0.0	0.0	0.00013719096631329471	0.0	0.0	0.0001372138571737717	0.0	800.6437003915348	88.88888859807315	0.0	1.1651286615137575e-12	-9.473903143468003e-13	0.0	-6.731613057885968e-27	9.473903143468004e-14
0.925	88.88888859781834	0.0	0.00021283858412721898	90.12221642498577	0.0	-800.6437003915348	0.0	4.3191446912223866e-10	0.0	0.9999999999992834	0.0	1.1972170330795237e-06	0.0	0.0	0.00013719096631329471	0.0	0.0	0.00013721398090815265	0.0	800.6437003915348	88.88888859807315	0.0	1.1651286615137575e-12	-9.473903143468003e-13	0.0	-6.731613057885968e-27	9.473903143468004e-14
0.93	88.88888859781834	0.0	0.00021283858412721898	90.56666086943021	0.0	-800.6437003915348	0.0	4.3191446912223866e-10	0.0	0.9999999999992834	0.0	1.1972170330795237e-06	0.0	0.0	0.00013719096631329471	0.0	0.0	0.0001372141046425336	0.0	800.6437003915348	88.88888859807315	0.0	1.1651286615137575e-12	-9.473903143468003e-13	0.0	-6.731613057885968e-27	9.473903143468004e-14
0.935	88.88888859781834	0.0	0.00021283858412721898	91.01110531387465	0.0	-800.6437003915348	0.0	4.3191446912223866e-10	0.0	0.9999999999992834	0.0	1.1972170330795237e-06	0.0	0.0	0.00013719096631329471	0.0	0.0	0.00013721422837691458	0.0	800.6437003915348	88.88888859807315	0.0	1.1651286615137575e-12	-9.473903143468003e-13	0.0	-6.731613057885968e-27	9.473903143468004e-14
0.94	88.88888859781834	0.0	0.00021283858412721898	91.45554975831908	0.0	-800.6437003915348	0.0	4.3191446912223866e-10	0.0	0.9999999999992834	0.0	1.1972170330795237e-06	0.0	0.0	0.00013719096631329471	0.0	0.0	0.00013721435211129553	0.0	800.6437003915348	88.88888859807315	0.0	1.1651286615137575e-12	-9.473903143468003e-13	0.0	-6.731613057885968e-27	9.473903143468004e-14
0.945	88.88888859781834	0.0	0.00021283858412721898	91.89999420276352	0.0	-800.6437003915348	0.0	4.3191446912223866e-10	0.0	0.9999999999992834	0.0	1.1972170330795237e-06	0.0	0.0	0.00013719096631329471	0.0	0.0	0.00013721447584567648	0.0	800.6437003915348	88.88888859807315	0.0	1.1651286615137575e-12	-9.473903143468003e-13	0.0	-6.731613057885968e-27	9.473903143468004e-14
0.95	88.88888859781834	0.0	0.00021283858412721898	92.34443864720798	0.0	-800.6437003915348	0.0	4.3191446912223866e-10	0.0	0.9999999999992834	0.0	1.1972170330795237e-06	0.0	0.0	0.00013719096631329471	0.0	0.0	0.00013721459958005743	0.0	800.6437003915348	88.88888859807315	0.0	1.1651286615137575e-12	-9.473903143468003e-13	0.0	-6.731613057885968e-27	9.473903143468004e-14
0.955	88.88888859781834	0.0	0.00021283858412721898	92.78888309165242	0.0	-800.6437003915348	0.0	4.3191446912223866e-10	0.0	0.9999999999992834	0.0	1.1972170330795237e-06	0.0	0.0	0.00013719096631329471	0.0	0.0	0.0001372147233144384	0.0	800.6437003915348	88.88888859807315	0.0	1.1651286615137575e-12	-9.473903143468003e-13	0.0	-6.731613057885968e-27	9.473903143468004e-14
0.96	88.88888859781834	0.0	0.00021283858412721898	93.23332753609687	0.0	-800.6437003915348	0.0	4.3191446912223866e-10	0.0	0.9999999999992834	0.0	1.1972170330795237e-06	0.0	0.0	0.00013719096631329471	0.0	0.0	0.00013721484704881936	0.0	800.6437003915348	88.88888859807315	0.0	1.1651286615137575e-12	-9.473903143468003e-13	0.0	-6.731613057885968e-27	9.473903143468004e-14
0.965	88.88888859781834	0.0	0.00021283858412721898	93.67777198054131	0.0	-800.6437003915348	0.0	4.3191446912223866e-10	0.0	0.9999999999992834	0.0	1.1972170330795237e-06	0.0	0.0	0.00013719096631329471	0.0	0.0	0.0001372149707832003	0.0	800.6437003915348	88.88888859807315	0.0	1.1651286615137575e-12	-9.473903143468003e-13	0.0	-6.731613057885968e-27	9.473903143468004e-14
0.97	88.88888859781834	0.0	0.00021283858412721898	94.12221642498575	0.0	-800.6437003915348	0.0	4.3191446912223866e-10	0.0	0.9999999999992834	0.0	1.1972170330795237e-06	0.0	0.0	0.00013719096631329471	0.0	0.0	0.00013721509451758125	0.0	800.6437003915348	88.88888859807315	0.0	1.1651286615137575e-12	-9.473903143468003e-13	0.0	-6.731613057885968e-27	9.473903143468004e-14
0.975	88.88888859781834	0.0	0.00021283858412721898	94.5666608694302	0.0	-800.6437003915348	0.0	4.3191446912223866e-10	0.0	0.9999999999992834	0.0	1.1972170330795237e-06	0.0	0.0	0.00013719096631329471	0.0	0.0	0.00013721521825196223	0.0	800.6437003915348	88.88888859807315	0.0	1.1651286615137575e-12	-9.473903143468003e-13	0.0	-6.731613057885968e-27	9.473903143468004e-14
0.98	88.88888859781834	0.0	0.00021283858412721898	95.01110531387464	0.0	-800.6437003915348	0.0	4.3191446912223866e-10	0.0	0.9999999999992834	0.0	1.1972170330795237e-06	0.0	0.0	0.00013719096631329471	0.0	0.0	0.00013721534198634318	0.0	800.6437003915348	88.88888859807315	0.0	1.1651286615137575e-12	-9.473903143468003e-13	0.0	-6.731613057885968e-27	9.473903143468004e-14
0.985	88.88888859781834	0.0	0.00021283858412721898	95.4555497583191	0.0	-800.6437003915348	0.0	4.3191446912223866e-10	0.0	0.9999999999992834	0.0	1.1972170330795237e-06	0.0	0.0	0.00013719096631329471	0.0	0.0	0.00013721546572072413	0.0	800.6437003915348	88.88888859807315	0.0	1.1651286615137575e-12	-9.473903143468003e-13	0.0	-6.731613057885968e-27	9.473903143468004e-14
0.99	88.88888859781834	0.0	0.00021283858412721898	95.89999420276354	0.0	-800.6437003915348	0.0	4.3191446912223866e-10	0.0	0.9999999999992834	0.0	1.1972170330795237e-06	0.0	0.0	0.00013719096631329471	0.0	0.0	0.0001372155894551051	0.0	800.6437003915348	88.88888859807315	0.0	1.1651286615137575e-12	-9.473903143468003e-13	0.0	-6.731613057885968e-27	9.473903143468004e-14
0.995	88.88888859781834	0.0	0.00021283858412721898	96.34443864720798	0.0	-800.6437003915348	0.0	4.3191446912223866e-10	0.0	0.9999999999992834	0.0	1.1972170330795237e-06	0.0	0.0	0.00013719096631329471	0.0	0.0	0.00013721571318948606	0.0	800.6437003915348	88.88888859807315	0.0	1.1651286615137575e-12	-9.473903143468003e-13	0.0	-6.731613057885968e-27	9.473903143468004e-14
1.0	88.88888859781834	0.0	0.00021283858412721898	96.78888309165242	0.0	-800.6437003915348	0.0	4.3191446912223866e-10	0.0	0.9999999999992834	0.0	1.1972170330795237e-06	0.0	0.0	0.00013719096631329471	0.0	0.0	0.000137215836923867	0.0	800.6437003915348	88.88888859807315	0.0	1.1651286615137575e-12	-9.473903143468003e-13	0.0	-6.731613057885968e-27	9.473903143468004e-14
1.005	88.88888859781834	0.0	0.00021283858412721898	97.23332753609685	0.0	-800.6437003915348	0.0	4.3191446912223866e-10	0.0	0.9999999999992834	0.0	1.1972170330795237e-06	0.0	0.0	0.00013719096631329471	0.0	0.0	0.00013721596065824796	0.0	800.6437003915348	88.88888859807315	0.0	1.1651286615137575e-12	-9.473903143468003e-13	0.0	-6.731613057885968e-27	9.473903143468004e-14
1.01	88.88888859781834	0.0	0.00021283858412721898	97.67777198054131	0.0	-800.6437003915348	0.0	4.3191446912223866e-10	0.0	0.9999999999992834	0.0	1.1972170330795237e-06	0.0	0.0	0.00013719096631329471	0.0	0.0	0.00013721608439262893	0.0	800.6437003915348	88.88888859807315	0.0	1.1651286615137575e-12	-9.473903143468003e-13	0.0	-6.731613057885968e-27	9.473903143468004e-14
1.015	88.88888859781834	0.0	0.00021283858412721898	98.12221642498575	0.0	-800.6437003915348	0.0	4.3191446912223866e-10	0.0	0.9999999999992834	0.0	1.1972170330795237e-06	0.0	0.0	0.00013719096631329471	0.0	0.0	0.00013721620812700988	0.0	800.6437003915348	88.88888859807315	0.0	1.1651286615137575e-12	-9.473903143468003e-13	0.0	-6.731613057885968e-27	9.473903143468004e-14
1.02	88.88888859781834	0.0	0.00021283858412721898	98.56666086943021	0.0	-800.6437003915348	0.0	4.3191446912223866e-10	0.0	0.9999999999992834	0.0	1.1972170330795237e-06	0.0	0.0	0.00013719096631329471	0.0	0.0	0.00013721633186139083	0.0	800.6437003915348	88.88888859807315	0.0	1.1651286615137575e-12	-9.473903143468003e-13	0.0	-6.731613057885968e-27	9.473903143468004e-14
1.025	88.88888859781834	0.0	0.00021283858412721898	99.01110531387464	0.0	-800.6437003915348	0.0	4.3191446912223866e-10	0.0	0.9999999999992834	0.0	1.1972170330795237e-06	0.0	0.0	0.00013719096631329471	0.0	0.0	0.00013721645559577178	0.0	800.6437003915348	88.88888859807315	0.0	1.1651286615137575e-12	-9.473903143468003e-13	0.0	-6.731613057885968e-27	9.473903143468004e-14
1.03	88.88888859781834	0.0	0.00021283858412721898	99.4555497583191	0.0	-800.6437003915348	0.0	4.3191446912223866e-10	0.0	0.9999999999992834	0.0	1.1972170330795237e-06	0.0	0.0	0.00013719096631329471	0.0	0.0	0.00013721657933015276	0.0	800.6437003915348	88.88888859807315	0.0	1.1651286615137575e-12	-9.473903143468003e-13	0.0	-6.731613057885968e-27	9.473903143468004e-14
1.035	88.88888859781834	0.0	0.00021283858412721898	99.89999420276352	0.0	-800.6437003915348	0.0	4.3191446912223866e-10	0.0	0.9999999999992834	0.0	1.1972170330795237e-06	0.0	0.0	0.00013719096631329471	0.0	0.0	0.0001372167030645337	0.0	800.6437003915348	88.88888859807315	0.0	1.1651286615137575e-12	-9.473903143468003e-13	0.0	-6.731613057885968e-27	9.473903143468004e-14
1.04	88.88888859781834	0.0	0.00021283858412721898	100.34443864720798	0.0	-800.6437003915348	0.0	4.3191446912223866e-10	0.0	0.9999999999992834	0.0	1.1972170330795237e-06	0.0	0.0	0.00013719096631329471	0.0	0.0	0.00013721682679891466	0.0	800.6437003915348	88.88888859807315	0.0	1.1651286615137575e-12	-9.473903143468003e-13	0.0	-6.731613057885968e-27	9.473903143468004e-14
1.045	88.88888859781834	0.0	0.00021283858412721898	100.78888309165242	0.0	-800.6437003915348	0.0	4.3191446912223866e-10	0.0	0.9999999999992834	0.0	1.1972170330795237e-06	0.0	0.0	0.00013719096631329471	0.0	0.0	0.0001372169505332956	0.0	800.6437003915348	88.88888859807315	0.0	1.1651286615137575e-12	-9.473903143468003e-13	0.0	-6.731613057885968e-27	9.473903143468004e-14
1.05	88.88888859781834	0.0	0.00021283858412721898	101.23332753609687	0.0	-800.6437003915348	0.0	4.3191446912223866e-10	0.0	0.9999999999992834	0.0	1.1972170330795237e-06	0.0	0.0	0.00013719096631329471	0.0	0.0	0.0001372170742676766	0.0	800.6437003915348	88.88888859807315	0.0	1.1651286615137575e-12	-9.473903143468003e-13	0.0	-6.731613057885968e-27	9.473903143468004e-14
1.055	88.88888859781834	0.0	0.00021283858412721898	101.67777198054131	0.0	-800.6437003915348	0.0	4.3191446912223866e-10	0.0	0.9999999999992834	0.0	1.1972170330795237e-06	0.0	0.0	0.00013719096631329471	0.0	0.0	0.00013721719800205754	0.0	800.6437003915348	88.88888859807315	0.0	1.1651286615137575e-12	-9.473903143468003e-13	0.0	-6.731613057885968e-27	9.473903143468004e-14
1.06	88.88888859781834	0.0	0.00021283858412721898	102.12221642498577	0.0	-800.6437003915348	0.0	4.3191446912223866e-10	0.0	0.9999999999992834	0.0	1.1972170330795237e-06	0.0	0.0	0.00013719096631329471	0.0	0.0	0.0001372173217364385	0.0	800.6437003915348	88.88888859807315	0.0	1.1651286615137575e-12	-9.473903143468003e-13	0.0	-6.731613057885968e-27	9.473903143468004e-14
1.065	88.88888859781834	0.0	0.00021283858412721898	102.5666608694302	0.0	-800.6437003915348	0.0	4.3191446912223866e-10	0.0	0.9999999999992834	0.0	1.1972170330795237e-06	0.0	0.0	0.00013719096631329471	0.0	0.0	0.00013721744547081944	0.0	800.6437003915348	88.88888859807315	0.0	1.1651286615137575e-12	-9.473903143468003e-13	0.0	-6.731613057885968e-27	9.473903143468004e-14
1.07	88.88888859781834	0.0	0.00021283858412721898	103.01110531387465	0.0	-800.6437003915348	0.0	4.3191446912223866e-10	0.0	0.9999999999992834	0.0	1.1972170330795237e-06	0.0	0.0	0.00013719096631329471	0.0	0.0	0.00013721756920520041	0.0	800.6437003915348	88.88888859807315	0.0	1.1651286615137575e-12	-9.473903143468003e-13	0.0	-6.731613057885968e-27	9.473903143468004e-14
1.075	88.88888859781834	0.0	0.00021283858412721898	103.45554975831908	0.0	-800.6437003915348	0.0	4.3191446912223866e-10	0.0	0.9999999999992834	0.0	1.1972170330795237e-06	0.0	0.0	0.00013719096631329471	0.0	0.0	0.00013721769293958136	0.0	800.6437003915348	88.88888859807315	0.0	1.1651286615137575e-12	-9.473903143468003e-13	0.0	-6.731613057885968e-27	9.473903143468004e-14
1.08	88.88888859781834	0.0	0.00021283858412721898	103.89999420276354	0.0	-800.6437003915348	0.0	4.3191446912223866e-10	0.0	0.9999999999992834	0.0	1.1972170330795237e-06	0.0	0.0	0.00013719096631329471	0.0	0.0	0.0001372178166739623	0.0	800.6437003915348	88.88888859807315	0.0	1.1651286615137575e-12	-9.473903143468003e-13	0.0	-6.731613057885968e-27	9.473903143468004e-14
1.085	88.88888859781834	0.0	0.00021283858412721898	104.34443864720798	0.0	-800.6437003915348	0.0	4.3191446912223866e-10	0.0	0.9999999999992834	0.0	1.1972170330795237e-06	0.0	0.0	0.00013719096631329471	0.0	0.0	0.00013721794040834326	0.0	800.6437003915348	88.88888859807315	0.0	1.1651286615137575e-12	-9.473903143468003e-13	0.0	-6.731613057885968e-27	9.473903143468004e-14
1.09	88.88888859781834	0.0	0.00021283858412721898	104.78888309165242	0.0	-800.6437003915348	0.0	4.3191446912223866e-10	0.0	0.9999999999992834	0.0	1.1972170330795237e-06	0.0	0.0	0.00013719096631329471	0.0	0.0	0.00013721806414272424	0.0	800.6437003915348	88.88888859807315	0.0	1.1651286615137575e-12	-9.473903143468003e-13	0.0	-6.731613057885968e-27	9.473903143468004e-14
1.095	88.88888859781834	0.0	0.00021283858412721898	105.23332753609687	0.0	-800.6437003915348	0.0	4.3191446912223866e-10	0.0	0.9999999999992834	0.0	1.1972170330795237e-06	0.0	0.0	0.00013719096631329471	0.0	0.0	0.0001372181878771052	0.0	800.6437003915348	88.88888859807315	0.0	1.1651286615137575e-12	-9.473903143468003e-13	0.0	-6.731613057885968e-27	9.473903143468004e-14
1.1	88.88888859781834	0.0	0.00021283858412721898	105.67777198054132	0.0	-800.6437003915348	0.0	4.3191446912223866e-10	0.0	0.9999999999992834	0.0	1.1972170330795237e-06	0.0	0.0	0.00013719096631329471	0.0	0.0	0.00013721831161148614	0.0	800.6437003915348	88.88888859807315	0.0	1.1651286615137575e-12	-9.473903143468003e-13	0.0	-6.731613057885968e-27	9.473903143468004e-14
1.105	88.88888859781834	0.0	0.00021283858412721898	106.12221642498575	0.0	-800.6437003915348	0.0	4.3191446912223866e-10	0.0	0.9999999999992834	0.0	1.1972170330795237e-06	0.0	0.0	0.00013719096631329471	0.0	0.0	0.0001372184353458671	0.0	800.6437003915348	88.88888859807315	0.0	1.1651286615137575e-12	-9.473903143468003e-13	0.0	-6.731613057885968e-27	9.473903143468004e-14
1.11	88.88888859781834	0.0	0.00021283858412721898	106.56666086943021	0.0	-800.6437003915348	0.0	4.3191446912223866e-10	0.0	0.9999999999992834	0.0	1.1972170330795237e-06	0.0	0.0	0.00013719096631329471	0.0	0.0	0.00013721855908024807	0.0	800.6437003915348	88.88888859807315	0.0	1.1651286615137575e-12	-9.473903143468003e-13	0.0	-6.731613057885968e-27	9.473903143468004e-14
1.115	88.88888859781834	0.0	0.00021283858412721898	107.01110531387464	0.0	-800.6437003915348	0.0	4.3191446912223866e-10	0.0	0.9999999999992834	0.0	1.1972170330795237e-06	0.0	0.0	0.00013719096631329471	0.0	0.0	0.00013721868281462902	0.0	800.6437003915348	88.88888859807315	0.0	1.1651286615137575e-12	-9.473903143468003e-13	0.0	-6.731613057885968e-27	9.473903143468004e-14
1.12	88.88888859781834	0.0	0.00021283858412721898	107.4555497583191	0.0	-800.6437003915348	0.0	4.3191446912223866e-10	0.0	0.9999999999992834	0.0	1.1972170330795237e-06	0.0	0.0	0.00013719096631329471	0.0	0.0	0.00013721880654900997	0.0	800.6437003915348	88.88888859807315	0.0	1.1651286615137575e-12	-9.473903143468003e-13	0.0	-6.731613057885968e-27	9.473903143468004e-14
1.125	88.88888859781834	0.0	0.00021283858412721898	107.89999420276354	0.0	-800.6437003915348	0.0	4.3191446912223866e-10	0.0	0.9999999999992834	0.0	1.1972170330795237e-06	0.0	0.0	0.00013719096631329471	0.0	0.0	0.00013721893028339092	0.0	800.6437003915348	88.88888859807315	0.0	1.1651286615137575e-12	-9.473903143468003e-13	0.0	-6.731613057885968e-27	9.473903143468004e-14
1.13	88.88888859781834	0.0	0.00021283858412721898	108.34443864720797	0.0	-800.6437003915348	0.0	4.3191446912223866e-10	0.0	0.9999999999992834	0.0	1.1972170330795237e-06	0.0	0.0	0.00013719096631329471	0.0	0.0	0.0001372190540177719	0.0	800.6437003915348	88.88888859807315	0.0	1.1651286615137575e-12	-9.473903143468003e-13	0.0	-6.731613057885968e-27	9.473903143468004e-14
1.135	88.88888859781834	0.0	0.00021283858412721898	108.78888309165242	0.0	-800.6437003915348	0.0	4.3191446912223866e-10	0.0	0.9999999999992834	0.0	1.1972170330795237e-06	0.0	0.0	0.00013719096631329471	0.0	0.0	0.00013721917775215284	0.0	800.6437003915348	88.88888859807315	0.0	1.1651286615137575e-12	-9.473903143468003e-13	0.0	-6.731613057885968e-27	9.473903143468004e-14
1.14	88.88888859781834	0.0	0.00021283858412721898	109.23332753609685	0.0	-800.6437003915348	0.0	4.3191446912223866e-10	0.0	0.9999999999992834	0.0	1.1972170330795237e-06	0.0	0.0	0.00013719096631329471	0.0	0.0	0.0001372193014865338	0.0	800.6437003915348	88.88888859807315	0.0	1.1651286615137575e-12	-9.473903143468003e-13	0.0	-6.731613057885968e-27	9.473903143468004e-14
1.145	88.88888859781834	0.0	0.00021283858412721898	109.67777198054131	0.0	-800.6437003915348	0.0	4.3191446912223866e-10	0.0	0.9999999999992834	0.0	1.1972170330795237e-06	0.0	0.0	0.00013719096631329471	0.0	0.0	0.00013721942522091474	0.0	800.6437003915348	88.88888859807315	0.0	1.1651286615137575e-12	-9.473903143468003e-13	0.0	-6.731613057885968e-27	9.473903143468004e-14
1.15	88.88888859781834	0.0	0.00021283858412721898	110.12221642498575	0.0	-800.6437003915348	0.0	4.3191446912223866e-10	0.0	0.9999999999992834	0.0	1.1972170330795237e-06	0.0	0.0	0.00013719096631329471	0.0	0.0	0.00013721954895529572	0.0	800.6437003915348	88.88888859807315	0.0	1.1651286615137575e-12	-9.473903143468003e-13	0.0	-6.731613057885968e-27	9.473903143468004e-14
1.155	88.88888859781834	0.0	0.00021283858412721898	110.56666086943021	0.0	-800.6437003915348	0.0	4.3191446912223866e-10	0.0	0.9999999999992834	0.0	1.1972170330795237e-06	0.0	0.0	0.00013719096631329471	0.0	0.0	0.00013721967268967667	0.0	800.6437003915348	88.88888859807315	0.0	1.1651286615137575e-12	-9.473903143468003e-13	0.0	-6.731613057885968e-27	9.473903143468004e-14
1.16	88.88888859781834	0.0	0.00021283858412721898	111.01110531387464	0.0	-800.6437003915348	0.0	4.3191446912223866e-10	0.0	0.9999999999992834	0.0	1.1972170330795237e-06	0.0	0.0	0.00013719096631329471	0.0	0.0	0.00013721979642405762	0.0	800.6437003915348	88.88888859807315	0.0	1.1651286615137575e-12	-9.473903143468003e-13	0.0	-6.731613057885968e-27	9.473903143468004e-14
1.165	88.88888859781834	0.0	0.00021283858412721898	111.4555497583191	0.0	-800.6437003915348	0.0	4.3191446912223866e-10	0.0	0.9999999999992834	0.0	1.1972170330795237e-06	0.0	0.0	0.00013719096631329471	0.0	0.0	0.00013721992015843857	0.0	800.6437003915348	88.88888859807315	0.0	1.1651286615137575e-12	-9.473903143468003e-13	0.0	-6.731613057885968e-27	9.473903143468004e-14
1.17	88.88888859781834	0.0	0.00021283858412721898	111.89999420276352	0.0	-800.6437003915348	0.0	4.3191446912223866e-10	0.0	0.9999999999992834	0.0	1.1972170330795237e-06	0.0	0.0	0.00013719096631329471	0.0	0.0	0.00013722004389281955	0.0	800.6437003915348	88.88888859807315	0.0	1.1651286615137575e-12	-9.473903143468003e-13	0.0	-6.731613057885968e-27	9.473903143468004e-14
1.175	88.88888859781834	0.0	0.00021283858412721898	112.34443864720798	0.0	-800.6437003915348	0.0	4.3191446912223866e-10	0.0	0.9999999999992834	0.0	1.1972170330795237e-06	0.0	0.0	0.00013719096631329471	0.0	0.0	0.0001372201676272005	0.0	800.6437003915348	88.88888859807315	0.0	1.1651286615137575e-12	-9.473903143468003e-13	0.0	-6.731613057885968e-27	9.473903143468004e-14
1.18	88.88888859781834	0.0	0.00021283858412721898	112.78888309165242	0.0	-800.6437003915348	0.0	4.3191446912223866e-10	0.0	0.9999999999992834	0.0	1.1972170330795237e-06	0.0	0.0	0.00013719096631329471	0.0	0.0	0.00013722029136158145	0.0	800.6437003915348	88.88888859807315	0.0	1.1651286615137575e-12	-9.473903143468003e-13	0.0	-6.731613057885968e-27	9.473903143468004e-14
1.185	88.88888859781834	0.0	0.00021283858412721898	113.23332753609687	0.0	-800.6437003915348	0.0	4.3191446912223866e-10	0.0	0.9999999999992834	0.0	1.1972170330795237e-06	0.0	0.0	0.00013719096631329471	0.0	0.0	0.0001372204150959624	0.0	800.6437003915348	88.88888859807315	0.0	1.1651286615137575e-12	-9.473903143468003e-13	0.0	-6.731613057885968e-27	9.473903143468004e-14
1.19	88.88888859781834	0.0	0.00021283858412721898	113.67777198054131	0.0	-800.6437003915348	0.0	4.3191446912223866e-10	0.0	0.9999999999992834	0.0	1.1972170330795237e-06	0.0	0.0	0.00013719096631329471	0.0	0.0	0.00013722053883034337	0.0	800.6437003915348	88.88888859807315	0.0	1.1651286615137575e-12	-9.473903143468003e-13	0.0	-6.731613057885968e-27	9.473903143468004e-14
1.195	88.88888859781834	0.0	0.00021283858412721898	114.12221642498577	0.0	-800.6437003915348	0.0	4.3191446912223866e-10	0.0	0.9999999999992834	0.0	1.1972170330795237e-06	0.0	0.0	0.00013719096631329471	0.0	0.0	0.00013722066256472432	0.0	800.6437003915348	88.88888859807315	0.0	1.1651286615137575e-12	-9.473903143468003e-13	0.0	-6.731613057885968e-27	9.473903143468004e-14
1.2	88.88888859781834	0.0	0.00021283858412721898	114.5666608694302	0.0	-800.6437003915348	0.0	4.3191446912223866e-10	0.0	0.9999999999992834	0.0	1.1972170330795237e-06	0.0	0.0	0.00013719096631329471	0.0	0.0	0.00013722078629910527	0.0	800.6437003915348	88.88888859807315	0.0	1.1651286615137575e-12	-9.473903143468003e-13	0.0	-6.731613057885968e-27	9.473903143468004e-14
1.205	88.88888859781834	0.0	0.00021283858412721898	115.01110531387465	0.0	-800.6437003915348	0.0	4.3191446912223866e-10	0.0	0.9999999999992834	0.0	1.1972170330795237e-06	0.0	0.0	0.00013719096631329471	0.0	0.0	0.00013722091003348622	0.0	800.6437003915348	88.88888859807315	0.0	1.1651286615137575e-12	-9.473903143468003e-13	0.0	-6.731613057885968e-27	9.473903143468004e-14
1.21	88.88888859781834	0.0	0.00021283858412721898	115.45554975831908	0.0	-800.6437003915348	0.0	4.3191446912223866e-10	0.0	0.9999999999992834	0.0	1.1972170330795237e-06	0.0	0.0	0.00013719096631329471	0.0	0.0	0.0001372210337678672	0.0	800.6437003915348	88.88888859807315	0.0	1.1651286615137575e-12	-9.473903143468003e-13	0.0	-6.731613057885968e-27	9.473903143468004e-14
1.215	88.88888859781834	0.0	0.00021283858412721898	115.89999420276354	0.0	-800.6437003915348	0.0	4.3191446912223866e-10	0.0	0.9999999999992834	0.0	1.1972170330795237e-06	0.0	0.0	0.00013719096631329471	0.0	0.0	0.00013722115750224815	0.0	800.6437003915348	88.88888859807315	0.0	1.1651286615137575e-12	-9.473903143468003e-13	0.0	-6.731613057885968e-27	9.473903143468004e-14
1.22	88.88888859781834	0.0	0.00021283858412721898	116.34443864720798	0.0	-800.6437003915348	0.0	4.3191446912223866e-10	0.0	0.9999999999992834	0.0	1.1972170330795237e-06	0.0	0.0	0.00013719096631329471	0.0	0.0	0.0001372212812366291	0.0	800.6437003915348	88.88888859807315	0.0	1.1651286615137575e-12	-9.473903143468003e-13	0.0	-6.731613057885968e-27	9.473903143468004e-14
1.225	88.88888859781834	0.0	0.00021283858412721898	116.78888309165244	0.0	-800.6437003915348	0.0	4.3191446912223866e-10	0.0	0.9999999999992834	0.0	1.1972170330795237e-06	0.0	0.0	0.00013719096631329471	0.0	0.0	0.00013722140497101005	0.0	800.6437003915348	88.88888859807315	0.0	1.1651286615137575e-12	-9.473903143468003e-13	0.0	-6.731613057885968e-27	9.473903143468004e-14
1.23	88.88888859781834	0.0	0.00021283858412721898	117.23332753609687	0.0	-800.6437003915348	0.0	4.3191446912223866e-10	0.0	0.9999999999992834	0.0	1.1972170330795237e-06	0.0	0.0	0.00013719096631329471	0.0	0.0	0.00013722152870539102	0.0	800.6437003915348	88.88888859807315	0.0	1.1651286615137575e-12	-9.473903143468003e-13	0.0	-6.731613057885968e-27	9.473903143468004e-14
1.235	88.88888859781834	0.0	0.00021283858412721898	117.67777198054132	0.0	-800.6437003915348	0.0	4.3191446912223866e-10	0.0	0.9999999999992834	0.0	1.1972170330795237e-06	0.0	0.0	0.00013719096631329471	0.0	0.0	0.00013722165243977197	0.0	800.6437003915348	88.88888859807315	0.0	1.1651286615137575e-12	-9.473903143468003e-13	0.0	-6.731613057885968e-27	9.473903143468004e-14
1.24	88.88888859781834	0.0	0.00021283858412721898	118.12221642498575	0.0	-800.6437003915348	0.0	4.3191446912223866e-10	0.0	0.9999999999992834	0.0	1.1972170330795237e-06	0.0	0.0	0.00013719096631329471	0.0	0.0	0.00013722177617415292	0.0	800.6437003915348	88.88888859807315	0.0	1.1651286615137575e-12	-9.473903143468003e-13	0.0	-6.731613057885968e-27	9.473903143468004e-14
1.245	88.88888859781834	0.0	0.00021283858412721898	118.56666086943021	0.0	-800.6437003915348	0.0	4.3191446912223866e-10	0.0	0.9999999999992834	0.0	1.1972170330795237e-06	0.0	0.0	0.00013719096631329471	0.0	0.0	0.00013722189990853387	0.0	800.6437003915348	88.88888859807315	0.0	1.1651286615137575e-12	-9.473903143468003e-13	0.0	-6.731613057885968e-27	9.473903143468004e-14
1.25	88.88888859781834	0.0	0.00021283858412721898	119.01110531387465	0.0	-800.6437003915348	0.0	4.3191446912223866e-10	0.0	0.9999999999992834	0.0	1.1972170330795237e-06	0.0	0.0	0.00013719096631329471	0.0	0.0	0.00013722202364291485	0.0	800.6437003915348	88.88888859807315	0.0	1.1651286615137575e-12	-9.473903143468003e-13	0.0	-6.731613057885968e-27	9.473903143468004e-14
1.255	88.88888859781834	0.0	0.00021283858412721898	119.45554975831908	0.0	-800.6437003915348	0.0	4.3191446912223866e-10	0.0	0.9999999999992834	0.0	1.1972170330795237e-06	0.0	0.0	0.00013719096631329471	0.0	0.0	0.0001372221473772958	0.0	800.6437003915348	88.88888859807315	0.0	1.1651286615137575e-12	-9.473903143468003e-13	0.0	-6.731613057885968e-27	9.473903143468004e-14
1.26	88.88888859781834	0.0	0.00021283858412721898	119.89999420276354	0.0	-800.6437003915348	0.0	4.3191446912223866e-10	0.0	0.9999999999992834	0.0	1.1972170330795237e-06	0.0	0.0	0.00013719096631329471	0.0	0.0	0.00013722227111167675	0.0	800.6437003915348	88.88888859807315	0.0	1.1651286615137575e-12	-9.473903143468003e-13	0.0	-6.731613057885968e-27	9.473903143468004e-14
1.265	88.88888859781834	0.0	0.00021283858412721898	120.34443864720797	0.0	-800.6437003915348	0.0	4.3191446912223866e-10	0.0	0.9999999999992834	0.0	1.1972170330795237e-06	0.0	0.0	0.00013719096631329471	0.0	0.0	0.0001372223948460577	0.0	800.6437003915348	88.88888859807315	0.0	1.1651286615137575e-12	-9.473903143468003e-13	0.0	-6.731613057885968e-27	9.473903143468004e-14
1.27	88.88888859781834	0.0	0.00021283858412721898	120.78888309165242	0.0	-800.6437003915348	0.0	4.3191446912223866e-10	0.0	0.9999999999992834	0.0	1.1972170330795237e-06	0.0	0.0	0.00013719096631329471	0.0	0.0	0.00013722251858043868	0.0	800.6437003915348	88.88888859807315	0.0	1.1651286615137575e-12	-9.473903143468003e-13	0.0	-6.731613057885968e-27	9.473903143468004e-14
1.275	88.88888859781834	0.0	0.00021283858412721898	121.23332753609685	0.0	-800.6437003915348	0.0	4.3191446912223866e-10	0.0	0.9999999999992834	0.0	1.1972170330795237e-06	0.0	0.0	0.00013719096631329471	0.0	0.0	0.00013722264231481963	0.0	800.6437003915348	88.88888859807315	0.0	1.1651286615137575e-12	-9.473903143468003e-13	0.0	-6.731613057885968e-27	9.473903143468004e-14
1.28	88.88888859781834	0.0	0.00021283858412721898	121.67777198054131	0.0	-800.6437003915348	0.0	4.3191446912223866e-10	0.0	0.9999999999992834	0.0	1.1972170330795237e-06	0.0	0.0	0.00013719096631329471	0.0	0.0	0.00013722276604920058	0.0	800.6437003915348	88.88888859807315	0.0	1.1651286615137575e-12	-9.473903143468003e-13	0.0	-6.731613057885968e-27	9.473903143468004e-14
1.285	88.88888859781834	0.0	0.00021283858412721898	122.12221642498575	0.0	-800.6437003915348	0.0	4.3191446912223866e-10	0.0	0.9999999999992834	0.0	1.1972170330795237e-06	0.0	0.0	0.00013719096631329471	0.0	0.0	0.00013722288978358153	0.0	800.6437003915348	88.88888859807315	0.0	1.1651286615137575e-12	-9.473903143468003e-13	0.0	-6.731613057885968e-27	9.473903143468004e-14
1.29	88.88888859781834	0.0	0.00021283858412721898	122.56666086943021	0.0	-800.6437003915348	0.0	4.3191446912223866e-10	0.0	0.9999999999992834	0.0	1.1972170330795237e-06	0.0	0.0	0.00013719096631329471	0.0	0.0	0.0001372230135179625	0.0	800.6437003915348	88.88888859807315	0.0	1.1651286615137575e-12	-9.473903143468003e-13	0.0	-6.731613057885968e-27	9.473903143468004e-14
1.295	88.88888859781834	0.0	0.00021283858412721898	123.01110531387464	0.0	-800.6437003915348	0.0	4.3191446912223866e-10	0.0	0.9999999999992834	0.0	1.1972170330795237e-06	0.0	0.0	0.00013719096631329471	0.0	0.0	0.00013722313725234345	0.0	800.6437003915348	88.88888859807315	0.0	1.1651286615137575e-12	-9.473903143468003e-13	0.0	-6.731613057885968e-27	9.473903143468004e-14
1.3	88.88888859781834	0.0	0.00021283858412721898	123.4555497583191	0.0	-800.6437003915348	0.0	4.3191446912223866e-10	0.0	0.9999999999992834	0.0	1.1972170330795237e-06	0.0	0.0	0.00013719096631329471	0.0	0.0	0.0001372232609867244	0.0	800.6437003915348	88.88888859807315	0.0	1.1651286615137575e-12	-9.473903143468003e-13	0.0	-6.731613057885968e-27	9.473903143468004e-14
1.305	88.88888859781834	0.0	0.00021283858412721898	123.89999420276352	0.0	-800.6437003915348	0.0	4.3191446912223866e-10	0.0	0.9999999999992834	0.0	1.1972170330795237e-06	0.0	0.0	0.00013719096631329471	0.0	0.0	0.00013722338472110538	0.0	800.6437003915348	88.88888859807315	0.0	1.1651286615137575e-12	-9.473903143468003e-13	0.0	-6.731613057885968e-27	9.473903143468004e-14
1.31	88.88888859781834	0.0	0.00021283858412721898	124.34443864720798	0.0	-800.6437003915348	0.0	4.3191446912223866e-10	0.0	0.9999999999992834	0.0	1.1972170330795237e-06	0.0	0.0	0.00013719096631329471	0.0	0.0	0.00013722350845548633	0.0	800.6437003915348	88.88888859807315	0.0	1.1651286615137575e-12	-9.473903143468003e-13	0.0	-6.731613057885968e-27	9.473903143468004e-14
1.315	88.88888859781834	0.0	0.00021283858412721898	124.78888309165242	0.0	-800.6437003915348	0.0	4.3191446912223866e-10	0.0	0.9999999999992834	0.0	1.1972170330795237e-06	0.0	0.0	0.00013719096631329471	0.0	0.0	0.00013722363218986728	0.0	800.6437003915348	88.88888859807315	0.0	1.1651286615137575e-12	-9.473903143468003e-13	0.0	-6.731613057885968e-27	9.473903143468004e-14
1.32	88.88888859781834	0.0	0.00021283858412721898	125.23332753609687	0.0	-800.6437003915348	0.0	4.3191446912223866e-10	0.0	0.9999999999992834	0.0	1.1972170330795237e-06	0.0	0.0	0.00013719096631329471	0.0	0.0	0.00013722375592424823	0.0	800.6437003915348	88.88888859807315	0.0	1.1651286615137575e-12	-9.473903143468003e-13	0.0	-6.731613057885968e-27	9.473903143468004e-14
1.325	88.88888859781834	0.0	0.00021283858412721898	125.67777198054131	0.0	-800.6437003915348	0.0	4.3191446912223866e-10	0.0	0.9999999999992834	0.0	1.1972170330795237e-06	0.0	0.0	0.00013719096631329471	0.0	0.0	0.0001372238796586292	0.0	800.6437003915348	88.88888859807315	0.0	1.1651286615137575e-12	-9.473903143468003e-13	0.0	-6.731613057885968e-27	9.473903143468004e-14
1.33	88.88888859781834	0.0	0.00021283858412721898	126.12221642498577	0.0	-800.6437003915348	0.0	4.3191446912223866e-10	0.0	0.9999999999992834	0.0	1.1972170330795237e-06	0.0	0.0	0.00013719096631329471	0.0	0.0	0.00013722400339301016	0.0	800.6437003915348	88.88888859807315	0.0	1.1651286615137575e-12	-9.473903143468003e-13	0.0	-6.731613057885968e-27	9.473903143468004e-14
1.335	88.88888859781834	0.0	0.00021283858412721898	126.5666608694302	0.0	-800.6437003915348	0.0	4.3191446912223866e-10	0.0	0.9999999999992834	0.0	1.1972170330795237e-06	0.0	0.0	0.00013719096631329471	0.0	0.0	0.0001372241271273911	0.0	800.6437003915348	88.88888859807315	0.0	1.1651286615137575e-12	-9.473903143468003e-13	0.0	-6.731613057885968e-27	9.473903143468004e-14
1.34	88.88888859781834	0.0	0.00021283858412721898	127.01110531387465	0.0	-800.6437003915348	0.0	4.3191446912223866e-10	0.0	0.9999999999992834	0.0	1.1972170330795237e-06	0.0	0.0	0.00013719096631329471	0.0	0.0	0.00013722425086177206	0.0	800.6437003915348	88.88888859807315	0.0	1.1651286615137575e-12	-9.473903143468003e-13	0.0	-6.731613057885968e-27	9.473903143468004e-14
1.345	88.88888859781834	0.0	0.00021283858412721898	127.45554975831908	0.0	-800.6437003915348	0.0	4.3191446912223866e-10	0.0	0.9999999999992834	0.0	1.1972170330795237e-06	0.0	0.0	0.00013719096631329471	0.0	0.0	0.00013722437459615303	0.0	800.6437003915348	88.88888859807315	0.0	1.1651286615137575e-12	-9.473903143468003e-13	0.0	-6.731613057885968e-27	9.473903143468004e-14
1.35	88.88888859781834	0.0	0.00021283858412721898	127.89999420276354	0.0	-800.6437003915348	0.0	4.3191446912223866e-10	0.0	0.9999999999992834	0.0	1.1972170330795237e-06	0.0	0.0	0.00013719096631329471	0.0	0.0	0.00013722449833053398	0.0	800.6437003915348	88.88888859807315	0.0	1.1651286615137575e-12	-9.473903143468003e-13	0.0	-6.731613057885968e-27	9.473903143468004e-14
1.355	88.88888859781834	0.0	0.00021283858412721898	128.344438647208	0.0	-800.6437003915348	0.0	4.3191446912223866e-10	0.0	0.9999999999992834	0.0	1.1972170330795237e-06	0.0	0.0	0.00013719096631329471	0.0	0.0	0.00013722462206491493	0.0	800.6437003915348	88.88888859807315	0.0	1.1651286615137575e-12	-9.473903143468003e-13	0.0	-6.731613057885968e-27	9.473903143468004e-14
1.36	88.88888859781834	0.0	0.00021283858412721898	128.78888309165245	0.0	-800.6437003915348	0.0	4.3191446912223866e-10	0.0	0.9999999999992834	0.0	1.1972170330795237e-06	0.0	0.0	0.00013719096631329471	0.0	0.0	0.00013722474579929588	0.0	800.6437003915348	88.88888859807315	0.0	1.1651286615137575e-12	-9.473903143468003e-13	0.0	-6.731613057885968e-27	9.473903143468004e-14
1.365	88.88888859781834	0.0	0.00021283858412721898	129.23332753609685	0.0	-800.6437003915348	0.0	4.3191446912223866e-10	0.0	0.9999999999992834	0.0	1.1972170330795237e-06	0.0	0.0	0.00013719096631329471	0.0	0.0	0.00013722486953367686	0.0	800.6437003915348	88.88888859807315	0.0	1.1651286615137575e-12	-9.473903143468003e-13	0.0	-6.731613057885968e-27	9.473903143468004e-14
1.37	88.88888859781834	0.0	0.00021283858412721898	129.6777719805413	0.0	-800.6437003915348	0.0	4.3191446912223866e-10	0.0	0.9999999999992834	0.0	1.1972170330795237e-06	0.0	0.0	0.00013719096631329471	0.0	0.0	0.0001372249932680578	0.0	800.6437003915348	88.88888859807315	0.0	1.1651286615137575e-12	-9.473903143468003e-13	0.0	-6.731613057885968e-27	9.473903143468004e-14
1.375	88.88888859781834	0.0	0.00021283858412721898	130.12221642498577	0.0	-800.6437003915348	0.0	4.3191446912223866e-10	0.0	0.9999999999992834	0.0	1.1972170330795237e-06	0.0	0.0	0.00013719096631329471	0.0	0.0	0.00013722511700243876	0.0	800.6437003915348	88.88888859807315	0.0	1.1651286615137575e-12	-9.473903143468003e-13	0.0	-6.731613057885968e-27	9.473903143468004e-14
1.38	88.88888859781834	0.0	0.00021283858412721898	130.5666608694302	0.0	-800.6437003915348	0.0	4.3191446912223866e-10	0.0	0.9999999999992834	0.0	1.1972170330795237e-06	0.0	0.0	0.00013719096631329471	0.0	0.0	0.0001372252407368197	0.0	800.6437003915348	88.88888859807315	0.0	1.1651286615137575e-12	-9.473903143468003e-13	0.0	-6.731613057885968e-27	9.473903143468004e-14
1.385	88.88888859781834	0.0	0.00021283858412721898	131.01110531387465	0.0	-800.6437003915348	0.0	4.3191446912223866e-10	0.0	0.9999999999992834	0.0	1.1972170330795237e-06	0.0	0.0	0.00013719096631329471	0.0	0.0	0.00013722536447120069	0.0	800.6437003915348	88.88888859807315	0.0	1.1651286615137575e-12	-9.473903143468003e-13	0.0	-6.731613057885968e-27	9.473903143468004e-14
1.39	88.88888859781834	0.0	0.00021283858412721898	131.45554975831908	0.0	-800.6437003915348	0.0	4.3191446912223866e-10	0.0	0.9999999999992834	0.0	1.1972170330795237e-06	0.0	0.0	0.00013719096631329471	0.0	0.0	0.00013722548820558164	0.0	800.6437003915348	88.88888859807315	0.0	1.1651286615137575e-12	-9.473903143468003e-13	0.0	-6.731613057885968e-27	9.473903143468004e-14
1.395	88.88888859781834	0.0	0.00021283858412721898	131.89999420276354	0.0	-800.6437003915348	0.0	4.3191446912223866e-10	0.0	0.9999999999992834	0.0	1.1972170330795237e-06	0.0	0.0	0.00013719096631329471	0.0	0.0	0.00013722561193996258	0.0	800.6437003915348	88.88888859807315	0.0	1.1651286615137575e-12	-9.473903143468003e-13	0.0	-6.731613057885968e-27	9.473903143468004e-14
1.4	88.88888859781834	0.0	0.00021283858412721898	132.34443864720797	0.0	-800.6437003915348	0.0	4.3191446912223866e-10	0.0	0.9999999999992834	0.0	1.1972170330795237e-06	0.0	0.0	0.00013719096631329471	0.0	0.0	0.00013722573567434353	0.0	800.6437003915348	88.88888859807315	0.0	1.1651286615137575e-12	-9.473903143468003e-13	0.0	-6.731613057885968e-27	9.473903143468004e-14
1.405	88.88888859781834	0.0	0.00021283858412721898	132.78888309165242	0.0	-800.6437003915348	0.0	4.3191446912223866e-10	0.0	0.9999999999992834	0.0	1.1972170330795237e-06	0.0	0.0	0.00013719096631329471	0.0	0.0	0.0001372258594087245	0.0	800.6437003915348	88.88888859807315	0.0	1.1651286615137575e-12	-9.473903143468003e-13	0.0	-6.731613057885968e-27	9.473903143468004e-14
1.41	88.88888859781834	0.0	0.00021283858412721898	133.23332753609685	0.0	-800.6437003915348	0.0	4.3191446912223866e-10	0.0	0.9999999999992834	0.0	1.1972170330795237e-06	0.0	0.0	0.00013719096631329471	0.0	0.0	0.00013722598314310546	0.0	800.6437003915348	88.88888859807315	0.0	1.1651286615137575e-12	-9.473903143468003e-13	0.0	-6.731613057885968e-27	9.473903143468004e-14
1.415	88.88888859781834	0.0	0.00021283858412721898	133.6777719805413	0.0	-800.6437003915348	0.0	4.3191446912223866e-10	0.0	0.9999999999992834	0.0	1.1972170330795237e-06	0.0	0.0	0.00013719096631329471	0.0	0.0	0.0001372261068774864	0.0	800.6437003915348	88.88888859807315	0.0	1.1651286615137575e-12	-9.473903143468003e-13	0.0	-6.731613057885968e-27	9.473903143468004e-14
1.42	88.88888859781834	0.0	0.00021283858412721898	134.12221642498577	0.0	-800.6437003915348	0.0	4.3191446912223866e-10	0.0	0.9999999999992834	0.0	1.1972170330795237e-06	0.0	0.0	0.00013719096631329471	0.0	0.0	0.00013722623061186736	0.0	800.6437003915348	88.88888859807315	0.0	1.1651286615137575e-12	-9.473903143468003e-13	0.0	-6.731613057885968e-27	9.473903143468004e-14
1.425	88.88888859781834	0.0	0.00021283858412721898	134.56666086943022	0.0	-800.6437003915348	0.0	4.3191446912223866e-10	0.0	0.9999999999992834	0.0	1.1972170330795237e-06	0.0	0.0	0.00013719096631329471	0.0	0.0	0.00013722635434624834	0.0	800.6437003915348	88.88888859807315	0.0	1.1651286615137575e-12	-9.473903143468003e-13	0.0	-6.731613057885968e-27	9.473903143468004e-14
1.43	88.88888859781834	0.0	0.00021283858412721898	135.01110531387462	0.0	-800.6437003915348	0.0	4.3191446912223866e-10	0.0	0.9999999999992834	0.0	1.1972170330795237e-06	0.0	0.0	0.00013719096631329471	0.0	0.0	0.0001372264780806293	0.0	800.6437003915348	88.88888859807315	0.0	1.1651286615137575e-12	-9.473903143468003e-13	0.0	-6.731613057885968e-27	9.473903143468004e-14
1.435	88.88888859781834	0.0	0.00021283858412721898	135.45554975831908	0.0	-800.6437003915348	0.0	4.3191446912223866e-10	0.0	0.9999999999992834	0.0	1.1972170330795237e-06	0.0	0.0	0.00013719096631329471	0.0	0.0	0.00013722660181501024	0.0	800.6437003915348	88.88888859807315	0.0	1.1651286615137575e-12	-9.473903143468003e-13	0.0	-6.731613057885968e-27	9.473903143468004e-14
1.44	88.88888859781834	0.0	0.00021283858412721898	135.89999420276354	0.0	-800.6437003915348	0.0	4.3191446912223866e-10	0.0	0.9999999999992834	0.0	1.1972170330795237e-06	0.0	0.0	0.00013719096631329471	0.0	0.0	0.0001372267255493912	0.0	800.6437003915348	88.88888859807315	0.0	1.1651286615137575e-12	-9.473903143468003e-13	0.0	-6.731613057885968e-27	9.473903143468004e-14
1.445	88.88888859781834	0.0	0.00021283858412721898	136.344438647208	0.0	-800.6437003915348	0.0	4.3191446912223866e-10	0.0	0.9999999999992834	0.0	1.1972170330795237e-06	0.0	0.0	0.00013719096631329471	0.0	0.0	0.00013722684928377216	0.0	800.6437003915348	88.88888859807315	0.0	1.1651286615137575e-12	-9.473903143468003e-13	0.0	-6.731613057885968e-27	9.473903143468004e-14
1.45	88.88888859781834	0.0	0.00021283858412721898	136.78888309165242	0.0	-800.6437003915348	0.0	4.3191446912223866e-10	0.0	0.9999999999992834	0.0	1.1972170330795237e-06	0.0	0.0	0.00013719096631329471	0.0	0.0	0.00013722697301815311	0.0	800.6437003915348	88.88888859807315	0.0	1.1651286615137575e-12	-9.473903143468003e-13	0.0	-6.731613057885968e-27	9.473903143468004e-14
1.455	88.88888859781834	0.0	0.00021283858412721898	137.23332753609688	0.0	-800.6437003915348	0.0	4.3191446912223866e-10	0.0	0.9999999999992834	0.0	1.1972170330795237e-06	0.0	0.0	0.00013719096631329471	0.0	0.0	0.00013722709675253406	0.0	800.6437003915348	88.88888859807315	0.0	1.1651286615137575e-12	-9.473903143468003e-13	0.0	-6.731613057885968e-27	9.473903143468004e-14
1.46	88.88888859781834	0.0	0.00021283858412721898	137.6777719805413	0.0	-800.6437003915348	0.0	4.3191446912223866e-10	0.0	0.9999999999992834	0.0	1.1972170330795237e-06	0.0	0.0	0.00013719096631329471	0.0	0.0	0.00013722722048691501	0.0	800.6437003915348	88.88888859807315	0.0	1.1651286615137575e-12	-9.473903143468003e-13	0.0	-6.731613057885968e-27	9.473903143468004e-14
1.465	88.88888859781834	0.0	0.00021283858412721898	138.12221642498577	0.0	-800.6437003915348	0.0	4.3191446912223866e-10	0.0	0.9999999999992834	0.0	1.1972170330795237e-06	0.0	0.0	0.00013719096631329471	0.0	0.0	0.000137227344221296	0.0	800.6437003915348	88.88888859807315	0.0	1.1651286615137575e-12	-9.473903143468003e-13	0.0	-6.731613057885968e-27	9.473903143468004e-14
1.47	88.88888859781834	0.0	0.00021283858412721898	138.5666608694302	0.0	-800.6437003915348	0.0	4.3191446912223866e-10	0.0	0.9999999999992834	0.0	1.1972170330795237e-06	0.0	0.0	0.00013719096631329471	0.0	0.0	0.00013722746795567694	0.0	800.6437003915348	88.88888859807315	0.0	1.1651286615137575e-12	-9.473903143468003e-13	0.0	-6.731613057885968e-27	9.473903143468004e-14
1.475	88.88888859781834	0.0	0.00021283858412721898	139.01110531387465	0.0	-800.6437003915348	0.0	4.3191446912223866e-10	0.0	0.9999999999992834	0.0	1.1972170330795237e-06	0.0	0.0	0.00013719096631329471	0.0	0.0	0.0001372275916900579	0.0	800.6437003915348	88.88888859807315	0.0	1.1651286615137575e-12	-9.473903143468003e-13	0.0	-6.731613057885968e-27	9.473903143468004e-14
1.48	88.88888859781834	0.0	0.00021283858412721898	139.45554975831908	0.0	-800.6437003915348	0.0	4.3191446912223866e-10	0.0	0.9999999999992834	0.0	1.1972170330795237e-06	0.0	0.0	0.00013719096631329471	0.0	0.0	0.00013722771542443884	0.0	800.6437003915348	88.88888859807315	0.0	1.1651286615137575e-12	-9.473903143468003e-13	0.0	-6.731613057885968e-27	9.473903143468004e-14
1.485	88.88888859781834	0.0	0.00021283858412721898	139.89999420276354	0.0	-800.6437003915348	0.0	4.3191446912223866e-10	0.0	0.9999999999992834	0.0	1.1972170330795237e-06	0.0	0.0	0.00013719096631329471	0.0	0.0	0.00013722783915881982	0.0	800.6437003915348	88.88888859807315	0.0	1.1651286615137575e-12	-9.473903143468003e-13	0.0	-6.731613057885968e-27	9.473903143468004e-14
1.49	88.88888859781834	0.0	0.00021283858412721898	140.34443864720797	0.0	-800.6437003915348	0.0	4.3191446912223866e-10	0.0	0.9999999999992834	0.0	1.1972170330795237e-06	0.0	0.0	0.00013719096631329471	0.0	0.0	0.00013722796289320077	0.0	800.6437003915348	88.88888859807315	0.0	1.1651286615137575e-12	-9.473903143468003e-13	0.0	-6.731613057885968e-27	9.473903143468004e-14
1.495	88.88888859781834	0.0	0.00021283858412721898	140.78888309165242	0.0	-800.6437003915348	0.0	4.3191446912223866e-10	0.0	0.9999999999992834	0.0	1.1972170330795237e-06	0.0	0.0	0.00013719096631329471	0.0	0.0	0.00013722808662758172	0.0	800.6437003915348	88.88888859807315	0.0	1.1651286615137575e-12	-9.473903143468003e-13	0.0	-6.731613057885968e-27	9.473903143468004e-14
1.5	88.88888859781834	0.0	0.00021283858412721898	141.23332753609685	0.0	-800.6437003915348	0.0	4.3191446912223866e-10	0.0	0.9999999999992834	0.0	1.1972170330795237e-06	0.0	0.0	0.00013719096631329471	0.0	0.0	0.00013722821036196267	0.0	800.6437003915348	88.88888859807315	0.0	1.1651286615137575e-12	-9.473903143468003e-13	0.0	-6.731613057885968e-27	9.473903143468004e-14
1.505	88.88888859781834	0.0	0.00021283858412721898	141.6777719805413	0.0	-800.6437003915348	0.0	4.3191446912223866e-10	0.0	0.9999999999992834	0.0	1.1972170330795237e-06	0.0	0.0	0.00013719096631329471	0.0	0.0	0.00013722833409634364	0.0	800.6437003915348	88.88888859807315	0.0	1.1651286615137575e-12	-9.473903143468003e-13	0.0	-6.731613057885968e-27	9.473903143468004e-14
1.51	88.88888859781834	0.0	0.00021283858412721898	142.12221642498577	0.0	-800.6437003915348	0.0	4.3191446912223866e-10	0.0	0.9999999999992834	0.0	1.1972170330795237e-06	0.0	0.0	0.00013719096631329471	0.0	0.0	0.0001372284578307246	0.0	800.6437003915348	88.88888859807315	0.0	1.1651286615137575e-12	-9.473903143468003e-13	0.0	-6.731613057885968e-27	9.473903143468004e-14
1.515	88.88888859781834	0.0	0.00021283858412721898	142.5666608694302	0.0	-800.6437003915348	0.0	4.3191446912223866e-10	0.0	0.9999999999992834	0.0	1.1972170330795237e-06	0.0	0.0	0.00013719096631329471	0.0	0.0	0.00013722858156510554	0.0	800.6437003915348	88.88888859807315	0.0	1.1651286615137575e-12	-9.473903143468003e-13	0.0	-6.731613057885968e-27	9.473903143468004e-14
1.52	88.88888859781834	0.0	0.00021283858412721898	143.01110531387465	0.0	-800.6437003915348	0.0	4.3191446912223866e-10	0.0	0.9999999999992834	0.0	1.1972170330795237e-06	0.0	0.0	0.00013719096631329471	0.0	0.0	0.0001372287052994865	0.0	800.6437003915348	88.88888859807315	0.0	1.1651286615137575e-12	-9.473903143468003e-13	0.0	-6.731613057885968e-27	9.473903143468004e-14
1.525	88.88888859781834	0.0	0.00021283858412721898	143.45554975831908	0.0	-800.6437003915348	0.0	4.3191446912223866e-10	0.0	0.9999999999992834	0.0	1.1972170330795237e-06	0.0	0.0	0.00013719096631329471	0.0	0.0	0.00013722882903386747	0.0	800.6437003915348	88.88888859807315	0.0	1.1651286615137575e-12	-9.473903143468003e-13	0.0	-6.731613057885968e-27	9.473903143468004e-14
1.53	88.88888859781834	0.0	0.00021283858412721898	143.89999420276354	0.0	-800.6437003915348	0.0	4.3191446912223866e-10	0.0	0.9999999999992834	0.0	1.1972170330795237e-06	0.0	0.0	0.00013719096631329471	0.0	0.0	0.00013722895276824842	0.0	800.6437003915348	88.88888859807315	0.0	1.1651286615137575e-12	-9.473903143468003e-13	0.0	-6.731613057885968e-27	9.473903143468004e-14
1.535	88.88888859781834	0.0	0.00021283858412721898	144.34443864720797	0.0	-800.6437003915348	0.0	4.3191446912223866e-10	0.0	0.9999999999992834	0.0	1.1972170330795237e-06	0.0	0.0	0.00013719096631329471	0.0	0.0	0.00013722907650262937	0.0	800.6437003915348	88.88888859807315	0.0	1.1651286615137575e-12	-9.473903143468003e-13	0.0	-6.731613057885968e-27	9.473903143468004e-14
1.54	88.88888859781834	0.0	0.00021283858412721898	144.78888309165242	0.0	-800.6437003915348	0.0	4.3191446912223866e-10	0.0	0.9999999999992834	0.0	1.1972170330795237e-06	0.0	0.0	0.00013719096631329471	0.0	0.0	0.00013722920023701032	0.0	800.6437003915348	88.88888859807315	0.0	1.1651286615137575e-12	-9.473903143468003e-13	0.0	-6.731613057885968e-27	9.473903143468004e-14
1.545	88.88888859781834	0.0	0.00021283858412721898	145.23332753609685	0.0	-800.6437003915348	0.0	4.3191446912223866e-10	0.0	0.9999999999992834	0.0	1.1972170330795237e-06	0.0	0.0	0.00013719096631329471	0.0	0.0	0.0001372293239713913	0.0	800.6437003915348	88.88888859807315	0.0	1.1651286615137575e-12	-9.473903143468003e-13	0.0	-6.731613057885968e-27	9.473903143468004e-14
1.55	88.88888859781834	0.0	0.00021283858412721898	145.6777719805413	0.0	-800.6437003915348	0.0	4.3191446912223866e-10	0.0	0.9999999999992834	0.0	1.1972170330795237e-06	0.0	0.0	0.00013719096631329471	0.0	0.0	0.00013722944770577225	0.0	800.6437003915348	88.88888859807315	0.0	1.1651286615137575e-12	-9.473903143468003e-13	0.0	-6.731613057885968e-27	9.473903143468004e-14
1.555	88.88888859781834	0.0	0.00021283858412721898	146.12221642498574	0.0	-800.6437003915348	0.0	4.3191446912223866e-10	0.0	0.9999999999992834	0.0	1.1972170330795237e-06	0.0	0.0	0.00013719096631329471	0.0	0.0	0.0001372295714401532	0.0	800.6437003915348	88.88888859807315	0.0	1.1651286615137575e-12	-9.473903143468003e-13	0.0	-6.731613057885968e-27	9.473903143468004e-14
1.56	88.88888859781834	0.0	0.00021283858412721898	146.5666608694302	0.0	-800.6437003915348	0.0	4.3191446912223866e-10	0.0	0.9999999999992834	0.0	1.1972170330795237e-06	0.0	0.0	0.00013719096631329471	0.0	0.0	0.00013722969517453415	0.0	800.6437003915348	88.88888859807315	0.0	1.1651286615137575e-12	-9.473903143468003e-13	0.0	-6.731613057885968e-27	9.473903143468004e-14
1.565	88.88888859781834	0.0	0.00021283858412721898	147.01110531387465	0.0	-800.6437003915348	0.0	4.3191446912223866e-10	0.0	0.9999999999992834	0.0	1.1972170330795237e-06	0.0	0.0	0.00013719096631329471	0.0	0.0	0.00013722981890891512	0.0	800.6437003915348	88.88888859807315	0.0	1.1651286615137575e-12	-9.473903143468003e-13	0.0	-6.731613057885968e-27	9.473903143468004e-14
1.57	88.88888859781834	0.0	0.00021283858412721898	147.45554975831908	0.0	-800.6437003915348	0.0	4.3191446912223866e-10	0.0	0.9999999999992834	0.0	1.1972170330795237e-06	0.0	0.0	0.00013719096631329471	0.0	0.0	0.00013722994264329607	0.0	800.6437003915348	88.88888859807315	0.0	1.1651286615137575e-12	-9.473903143468003e-13	0.0	-6.731613057885968e-27	9.473903143468004e-14
1.575	88.88888859781834	0.0	0.00021283858412721898	147.89999420276354	0.0	-800.6437003915348	0.0	4.3191446912223866e-10	0.0	0.9999999999992834	0.0	1.1972170330795237e-06	0.0	0.0	0.00013719096631329471	0.0	0.0	0.00013723006637767702	0.0	800.6437003915348	88.88888859807315	0.0	1.1651286615137575e-12	-9.473903143468003e-13	0.0	-6.731613057885968e-27	9.473903143468004e-14
1.58	88.88888859781834	0.0	0.00021283858412721898	148.344438647208	0.0	-800.6437003915348	0.0	4.3191446912223866e-10	0.0	0.9999999999992834	0.0	1.1972170330795237e-06	0.0	0.0	0.00013719096631329471	0.0	0.0	0.00013723019011205797	0.0	800.6437003915348	88.88888859807315	0.0	1.1651286615137575e-12	-9.473903143468003e-13	0.0	-6.731613057885968e-27	9.473903143468004e-14
1.585	88.88888859781834	0.0	0.00021283858412721898	148.78888309165242	0.0	-800.6437003915348	0.0	4.3191446912223866e-10	0.0	0.9999999999992834	0.0	1.1972170330795237e-06	0.0	0.0	0.00013719096631329471	0.0	0.0	0.00013723031384643895	0.0	800.6437003915348	88.88888859807315	0.0	1.1651286615137575e-12	-9.473903143468003e-13	0.0	-6.731613057885968e-27	9.473903143468004e-14
1.59	88.88888859781834	0.0	0.00021283858412721898	149.23332753609688	0.0	-800.6437003915348	0.0	4.3191446912223866e-10	0.0	0.9999999999992834	0.0	1.1972170330795237e-06	0.0	0.0	0.00013719096631329471	0.0	0.0	0.0001372304375808199	0.0	800.6437003915348	88.88888859807315	0.0	1.1651286615137575e-12	-9.473903143468003e-13	0.0	-6.731613057885968e-27	9.473903143468004e-14
1.595	88.88888859781834	0.0	0.00021283858412721898	149.6777719805413	0.0	-800.6437003915348	0.0	4.3191446912223866e-10	0.0	0.9999999999992834	0.0	1.1972170330795237e-06	0.0	0.0	0.00013719096631329471	0.0	0.0	0.00013723056131520085	0.0	800.6437003915348	88.88888859807315	0.0	1.1651286615137575e-12	-9.473903143468003e-13	0.0	-6.731613057885968e-27	9.473903143468004e-14
1.6	88.88888859781834	0.0	0.00021283858412721898	150.12221642498577	0.0	-800.6437003915348	0.0	4.3191446912223866e-10	0.0	0.9999999999992834	0.0	1.1972170330795237e-06	0.0	0.0	0.00013719096631329471	0.0	0.0	0.0001372306850495818	0.0	800.6437003915348	88.88888859807315	0.0	1.1651286615137575e-12	-9.473903143468003e-13	0.0	-6.731613057885968e-27	9.473903143468004e-14
1.605	88.88888859781834	0.0	0.00021283858412721898	150.5666608694302	0.0	-800.6437003915348	0.0	4.3191446912223866e-10	0.0	0.9999999999992834	0.0	1.1972170330795237e-06	0.0	0.0	0.00013719096631329471	0.0	0.0	0.00013723080878396278	0.0	800.6437003915348	88.88888859807315	0.0	1.1651286615137575e-12	-9.473903143468003e-13	0.0	-6.731613057885968e-27	9.473903143468004e-14
1.61	88.88888859781834	0.0	0.00021283858412721898	151.01110531387465	0.0	-800.6437003915348	0.0	4.3191446912223866e-10	0.0	0.9999999999992834	0.0	1.1972170330795237e-06	0.0	0.0	0.00013719096631329471	0.0	0.0	0.00013723093251834372	0.0	800.6437003915348	88.88888859807315	0.0	1.1651286615137575e-12	-9.473903143468003e-13	0.0	-6.731613057885968e-27	9.473903143468004e-14
1.615	88.88888859781834	0.0	0.00021283858412721898	151.45554975831908	0.0	-800.6437003915348	0.0	4.3191446912223866e-10	0.0	0.9999999999992834	0.0	1.1972170330795237e-06	0.0	0.0	0.00013719096631329471	0.0	0.0	0.00013723105625272467	0.0	800.6437003915348	88.88888859807315	0.0	1.1651286615137575e-12	-9.473903143468003e-13	0.0	-6.731613057885968e-27	9.473903143468004e-14
1.62	88.88888859781834	0.0	0.00021283858412721898	151.89999420276354	0.0	-800.6437003915348	0.0	4.3191446912223866e-10	0.0	0.9999999999992834	0.0	1.1972170330795237e-06	0.0	0.0	0.00013719096631329471	0.0	0.0	0.00013723117998710562	0.0	800.6437003915348	88.88888859807315	0.0	1.1651286615137575e-12	-9.473903143468003e-13	0.0	-6.731613057885968e-27	9.473903143468004e-14
1.625	88.88888859781834	0.0	0.00021283858412721898	152.34443864720797	0.0	-800.6437003915348	0.0	4.3191446912223866e-10	0.0	0.9999999999992834	0.0	1.1972170330795237e-06	0.0	0.0	0.00013719096631329471	0.0	0.0	0.0001372313037214866	0.0	800.6437003915348	88.88888859807315	0.0	1.1651286615137575e-12	-9.473903143468003e-13	0.0	-6.731613057885968e-27	9.473903143468004e-14
1.63	88.88888859781834	0.0	0.00021283858412721898	152.78888309165242	0.0	-800.6437003915348	0.0	4.3191446912223866e-10	0.0	0.9999999999992834	0.0	1.1972170330795237e-06	0.0	0.0	0.00013719096631329471	0.0	0.0	0.00013723142745586755	0.0	800.6437003915348	88.88888859807315	0.0	1.1651286615137575e-12	-9.473903143468003e-13	0.0	-6.731613057885968e-27	9.473903143468004e-14
1.635	88.88888859781834	0.0	0.00021283858412721898	153.23332753609688	0.0	-800.6437003915348	0.0	4.3191446912223866e-10	0.0	0.9999999999992834	0.0	1.1972170330795237e-06	0.0	0.0	0.00013719096631329471	0.0	0.0	0.0001372315511902485	0.0	800.6437003915348	88.88888859807315	0.0	1.1651286615137575e-12	-9.473903143468003e-13	0.0	-6.731613057885968e-27	9.473903143468004e-14
1.64	88.88888859781834	0.0	0.00021283858412721898	153.6777719805413	0.0	-800.6437003915348	0.0	4.3191446912223866e-10	0.0	0.9999999999992834	0.0	1.1972170330795237e-06	0.0	0.0	0.00013719096631329471	0.0	0.0	0.00013723167492462948	0.0	800.6437003915348	88.88888859807315	0.0	1.1651286615137575e-12	-9.473903143468003e-13	0.0	-6.731613057885968e-27	9.473903143468004e-14
1.645	88.88888859781834	0.0	0.00021283858412721898	154.12221642498577	0.0	-800.6437003915348	0.0	4.3191446912223866e-10	0.0	0.9999999999992834	0.0	1.1972170330795237e-06	0.0	0.0	0.00013719096631329471	0.0	0.0	0.00013723179865901043	0.0	800.6437003915348	88.88888859807315	0.0	1.1651286615137575e-12	-9.473903143468003e-13	0.0	-6.731613057885968e-27	9.473903143468004e-14
1.65	88.88888859781834	0.0	0.00021283858412721898	154.5666608694302	0.0	-800.6437003915348	0.0	4.3191446912223866e-10	0.0	0.9999999999992834	0.0	1.1972170330795237e-06	0.0	0.0	0.00013719096631329471	0.0	0.0	0.00013723192239339138	0.0	800.6437003915348	88.88888859807315	0.0	1.1651286615137575e-12	-9.473903143468003e-13	0.0	-6.731613057885968e-27	9.473903143468004e-14
1.655	88.88888859781834	0.0	0.00021283858412721898	155.01110531387465	0.0	-800.6437003915348	0.0	4.3191446912223866e-10	0.0	0.9999999999992834	0.0	1.1972170330795237e-06	0.0	0.0	0.00013719096631329471	0.0	0.0	0.00013723204612777233	0.0	800.6437003915348	88.88888859807315	0.0	1.1651286615137575e-12	-9.473903143468003e-13	0.0	-6.731613057885968e-27	9.473903143468004e-14
1.66	88.88888859781834	0.0	0.00021283858412721898	155.45554975831908	0.0	-800.6437003915348	0.0	4.3191446912223866e-10	0.0	0.9999999999992834	0.0	1.1972170330795237e-06	0.0	0.0	0.00013719096631329471	0.0	0.0	0.0001372321698621533	0.0	800.6437003915348	88.88888859807315	0.0	1.1651286615137575e-12	-9.473903143468003e-13	0.0	-6.731613057885968e-27	9.473903143468004e-14
1.665	88.88888859781834	0.0	0.00021283858412721898	155.89999420276354	0.0	-800.6437003915348	0.0	4.3191446912223866e-10	0.0	0.9999999999992834	0.0	1.1972170330795237e-06	0.0	0.0	0.00013719096631329471	0.0	0.0	0.00013723229359653425	0.0	800.6437003915348	88.88888859807315	0.0	1.1651286615137575e-12	-9.473903143468003e-13	0.0	-6.731613057885968e-27	9.473903143468004e-14
1.67	88.88888859781834	0.0	0.00021283858412721898	156.34443864720797	0.0	-800.6437003915348	0.0	4.3191446912223866e-10	0.0	0.9999999999992834	0.0	1.1972170330795237e-06	0.0	0.0	0.00013719096631329471	0.0	0.0	0.0001372324173309152	0.0	800.6437003915348	88.88888859807315	0.0	1.1651286615137575e-12	-9.473903143468003e-13	0.0	-6.731613057885968e-27	9.473903143468004e-14
1.675	88.88888859781834	0.0	0.00021283858412721898	156.78888309165242	0.0	-800.6437003915348	0.0	4.3191446912223866e-10	0.0	0.9999999999992834	0.0	1.1972170330795237e-06	0.0	0.0	0.00013719096631329471	0.0	0.0	0.00013723254106529615	0.0	800.6437003915348	88.88888859807315	0.0	1.1651286615137575e-12	-9.473903143468003e-13	0.0	-6.731613057885968e-27	9.473903143468004e-14
1.68	88.88888859781834	0.0	0.00021283858412721898	157.23332753609685	0.0	-800.6437003915348	0.0	4.3191446912223866e-10	0.0	0.9999999999992834	0.0	1.1972170330795237e-06	0.0	0.0	0.00013719096631329471	0.0	0.0	0.00013723266479967713	0.0	800.6437003915348	88.88888859807315	0.0	1.1651286615137575e-12	-9.473903143468003e-13	0.0	-6.731613057885968e-27	9.473903143468004e-14
1.685	88.88888859781834	0.0	0.00021283858412721898	157.6777719805413	0.0	-800.6437003915348	0.0	4.3191446912223866e-10	0.0	0.9999999999992834	0.0	1.1972170330795237e-06	0.0	0.0	0.00013719096631329471	0.0	0.0	0.00013723278853405808	0.0	800.6437003915348	88.88888859807315	0.0	1.1651286615137575e-12	-9.473903143468003e-13	0.0	-6.731613057885968e-27	9.473903143468004e-14
1.69	88.88888859781834	0.0	0.00021283858412721898	158.12221642498574	0.0	-800.6437003915348	0.0	4.3191446912223866e-10	0.0	0.9999999999992834	0.0	1.1972170330795237e-06	0.0	0.0	0.00013719096631329471	0.0	0.0	0.00013723291226843903	0.0	800.6437003915348	88.88888859807315	0.0	1.1651286615137575e-12	-9.473903143468003e-13	0.0	-6.731613057885968e-27	9.473903143468004e-14
1.695	88.88888859781834	0.0	0.00021283858412721898	158.5666608694302	0.0	-800.6437003915348	0.0	4.3191446912223866e-10	0.0	0.9999999999992834	0.0	1.1972170330795237e-06	0.0	0.0	0.00013719096631329471	0.0	0.0	0.00013723303600281998	0.0	800.6437003915348	88.88888859807315	0.0	1.1651286615137575e-12	-9.473903143468003e-13	0.0	-6.731613057885968e-27	9.473903143468004e-14
1.7	88.88888859781834	0.0	0.00021283858412721898	159.01110531387465	0.0	-800.6437003915348	0.0	4.3191446912223866e-10	0.0	0.9999999999992834	0.0	1.1972170330795237e-06	0.0	0.0	0.00013719096631329471	0.0	0.0	0.00013723315973720096	0.0	800.6437003915348	88.88888859807315	0.0	1.1651286615137575e-12	-9.473903143468003e-13	0.0	-6.731613057885968e-27	9.473903143468004e-14
1.705	88.88888859781834	0.0	0.00021283858412721898	159.45554975831908	0.0	-800.6437003915348	0.0	4.3191446912223866e-10	0.0	0.9999999999992834	0.0	1.1972170330795237e-06	0.0	0.0	0.00013719096631329471	0.0	0.0	0.0001372332834715819	0.0	800.6437003915348	88.88888859807315	0.0	1.1651286615137575e-12	-9.473903143468003e-13	0.0	-6.731613057885968e-27	9.473903143468004e-14
1.71	88.88888859781834	0.0	0.00021283858412721898	159.89999420276354	0.0	-800.6437003915348	0.0	4.3191446912223866e-10	0.0	0.9999999999992834	0.0	1.1972170330795237e-06	0.0	0.0	0.00013719096631329471	0.0	0.0	0.00013723340720596286	0.0	800.6437003915348	88.88888859807315	0.0	1.1651286615137575e-12	-9.473903143468003e-13	0.0	-6.731613057885968e-27	9.473903143468004e-14
1.715	88.88888859781834	0.0	0.00021283858412721898	160.344438647208	0.0	-800.6437003915348	0.0	4.3191446912223866e-10	0.0	0.9999999999992834	0.0	1.1972170330795237e-06	0.0	0.0	0.00013719096631329471	0.0	0.0	0.0001372335309403438	0.0	800.6437003915348	88.88888859807315	0.0	1.1651286615137575e-12	-9.473903143468003e-13	0.0	-6.731613057885968e-27	9.473903143468004e-14
1.72	88.88888859781834	0.0	0.00021283858412721898	160.78888309165242	0.0	-800.6437003915348	0.0	4.3191446912223866e-10	0.0	0.9999999999992834	0.0	1.1972170330795237e-06	0.0	0.0	0.00013719096631329471	0.0	0.0	0.00013723365467472478	0.0	800.6437003915348	88.88888859807315	0.0	1.1651286615137575e-12	-9.473903143468003e-13	0.0	-6.731613057885968e-27	9.473903143468004e-14
1.725	88.88888859781834	0.0	0.00021283858412721898	161.23332753609688	0.0	-800.6437003915348	0.0	4.3191446912223866e-10	0.0	0.9999999999992834	0.0	1.1972170330795237e-06	0.0	0.0	0.00013719096631329471	0.0	0.0	0.00013723377840910573	0.0	800.6437003915348	88.88888859807315	0.0	1.1651286615137575e-12	-9.473903143468003e-13	0.0	-6.731613057885968e-27	9.473903143468004e-14
1.73	88.88888859781834	0.0	0.00021283858412721898	161.6777719805413	0.0	-800.6437003915348	0.0	4.3191446912223866e-10	0.0	0.9999999999992834	0.0	1.1972170330795237e-06	0.0	0.0	0.00013719096631329471	0.0	0.0	0.00013723390214348668	0.0	800.6437003915348	88.88888859807315	0.0	1.1651286615137575e-12	-9.473903143468003e-13	0.0	-6.731613057885968e-27	9.473903143468004e-14
1.735	88.88888859781834	0.0	0.00021283858412721898	162.12221642498577	0.0	-800.6437003915348	0.0	4.3191446912223866e-10	0.0	0.9999999999992834	0.0	1.1972170330795237e-06	0.0	0.0	0.00013719096631329471	0.0	0.0	0.00013723402587786763	0.0	800.6437003915348	88.88888859807315	0.0	1.1651286615137575e-12	-9.473903143468003e-13	0.0	-6.731613057885968e-27	9.473903143468004e-14
1.74	88.88888859781834	0.0	0.00021283858412721898	162.5666608694302	0.0	-800.6437003915348	0.0	4.3191446912223866e-10	0.0	0.9999999999992834	0.0	1.1972170330795237e-06	0.0	0.0	0.00013719096631329471	0.0	0.0	0.0001372341496122486	0.0	800.6437003915348	88.88888859807315	0.0	1.1651286615137575e-12	-9.473903143468003e-13	0.0	-6.731613057885968e-27	9.473903143468004e-14
1.745	88.88888859781834	0.0	0.00021283858412721898	163.01110531387465	0.0	-800.6437003915348	0.0	4.3191446912223866e-10	0.0	0.9999999999992834	0.0	1.1972170330795237e-06	0.0	0.0	0.00013719096631329471	0.0	0.0	0.00013723427334662956	0.0	800.6437003915348	88.88888859807315	0.0	1.1651286615137575e-12	-9.473903143468003e-13	0.0	-6.731613057885968e-27	9.473903143468004e-14
1.75	88.88888859781834	0.0	0.00021283858412721898	163.45554975831908	0.0	-800.6437003915348	0.0	4.3191446912223866e-10	0.0	0.9999999999992834	0.0	1.1972170330795237e-06	0.0	0.0	0.00013719096631329471	0.0	0.0	0.0001372343970810105	0.0	800.6437003915348	88.88888859807315	0.0	1.1651286615137575e-12	-9.473903143468003e-13	0.0	-6.731613057885968e-27	9.473903143468004e-14
1.755	88.88888859781834	0.0	0.00021283858412721898	163.8999942027635	0.0	-800.6437003915348	0.0	4.3191446912223866e-10	0.0	0.9999999999992834	0.0	1.1972170330795237e-06	0.0	0.0	0.00013719096631329471	0.0	0.0	0.00013723452081539146	0.0	800.6437003915348	88.88888859807315	0.0	1.1651286615137575e-12	-9.473903143468003e-13	0.0	-6.731613057885968e-27	9.473903143468004e-14
1.76	88.88888859781834	0.0	0.00021283858412721898	164.34443864720797	0.0	-800.6437003915348	0.0	4.3191446912223866e-10	0.0	0.9999999999992834	0.0	1.1972170330795237e-06	0.0	0.0	0.00013719096631329471	0.0	0.0	0.00013723464454977244	0.0	800.6437003915348	88.88888859807315	0.0	1.1651286615137575e-12	-9.473903143468003e-13	0.0	-6.731613057885968e-27	9.473903143468004e-14
1.765	88.88888859781834	0.0	0.00021283858412721898	164.78888309165242	0.0	-800.6437003915348	0.0	4.3191446912223866e-10	0.0	0.9999999999992834	0.0	1.1972170330795237e-06	0.0	0.0	0.00013719096631329471	0.0	0.0	0.00013723476828415339	0.0	800.6437003915348	88.88888859807315	0.0	1.1651286615137575e-12	-9.473903143468003e-13	0.0	-6.731613057885968e-27	9.473903143468004e-14
1.77	88.88888859781834	0.0	0.00021283858412721898	165.23332753609688	0.0	-800.6437003915348	0.0	4.3191446912223866e-10	0.0	0.9999999999992834	0.0	1.1972170330795237e-06	0.0	0.0	0.00013719096631329471	0.0	0.0	0.00013723489201853434	0.0	800.6437003915348	88.88888859807315	0.0	1.1651286615137575e-12	-9.473903143468003e-13	0.0	-6.731613057885968e-27	9.473903143468004e-14
1.775	88.88888859781834	0.0	0.00021283858412721898	165.6777719805413	0.0	-800.6437003915348	0.0	4.3191446912223866e-10	0.0	0.9999999999992834	0.0	1.1972170330795237e-06	0.0	0.0	0.00013719096631329471	0.0	0.0	0.00013723501575291529	0.0	800.6437003915348	88.88888859807315	0.0	1.1651286615137575e-12	-9.473903143468003e-13	0.0	-6.731613057885968e-27	9.473903143468004e-14
1.78	88.88888859781834	0.0	0.00021283858412721898	166.12221642498577	0.0	-800.6437003915348	0.0	4.3191446912223866e-10	0.0	0.9999999999992834	0.0	1.1972170330795237e-06	0.0	0.0	0.00013719096631329471	0.0	0.0	0.00013723513948729626	0.0	800.6437003915348	88.88888859807315	0.0	1.1651286615137575e-12	-9.473903143468003e-13	0.0	-6.731613057885968e-27	9.473903143468004e-14
1.785	88.88888859781834	0.0	0.00021283858412721898	166.5666608694302	0.0	-800.6437003915348	0.0	4.3191446912223866e-10	0.0	0.9999999999992834	0.0	1.1972170330795237e-06	0.0	0.0	0.00013719096631329471	0.0	0.0	0.0001372352632216772	0.0	800.6437003915348	88.88888859807315	0.0	1.1651286615137575e-12	-9.473903143468003e-13	0.0	-6.731613057885968e-27	9.473903143468004e-14
1.79	88.88888859781834	0.0	0.00021283858412721898	167.01110531387465	0.0	-800.6437003915348	0.0	4.3191446912223866e-10	0.0	0.9999999999992834	0.0	1.1972170330795237e-06	0.0	0.0	0.00013719096631329471	0.0	0.0	0.00013723538695605816	0.0	800.6437003915348	88.88888859807315	0.0	1.1651286615137575e-12	-9.473903143468003e-13	0.0	-6.731613057885968e-27	9.473903143468004e-14
1.795	88.88888859781834	0.0	0.00021283858412721898	167.45554975831908	0.0	-800.6437003915348	0.0	4.3191446912223866e-10	0.0	0.9999999999992834	0.0	1.1972170330795237e-06	0.0	0.0	0.00013719096631329471	0.0	0.0	0.0001372355106904391	0.0	800.6437003915348	88.88888859807315	0.0	1.1651286615137575e-12	-9.473903143468003e-13	0.0	-6.731613057885968e-27	9.473903143468004e-14
1.8	88.88888859781834	0.0	0.00021283858412721898	167.89999420276354	0.0	-800.6437003915348	0.0	4.3191446912223866e-10	0.0	0.9999999999992834	0.0	1.1972170330795237e-06	0.0	0.0	0.00013719096631329471	0.0	0.0	0.0001372356344248201	0.0	800.6437003915348	88.88888859807315	0.0	1.1651286615137575e-12	-9.473903143468003e-13	0.0	-6.731613057885968e-27	9.473903143468004e-14
1.805	88.88888859781834	0.0	0.00021283858412721898	168.34443864720797	0.0	-800.6437003915348	0.0	4.3191446912223866e-10	0.0	0.9999999999992834	0.0	1.1972170330795237e-06	0.0	0.0	0.00013719096631329471	0.0	0.0	0.00013723575815920104	0.0	800.6437003915348	88.88888859807315	0.0	1.1651286615137575e-12	-9.473903143468003e-13	0.0	-6.731613057885968e-27	9.473903143468004e-14
1.81	88.88888859781834	0.0	0.00021283858412721898	168.78888309165242	0.0	-800.6437003915348	0.0	4.3191446912223866e-10	0.0	0.9999999999992834	0.0	1.1972170330795237e-06	0.0	0.0	0.00013719096631329471	0.0	0.0	0.000137235881893582	0.0	800.6437003915348	88.88888859807315	0.0	1.1651286615137575e-12	-9.473903143468003e-13	0.0	-6.731613057885968e-27	9.473903143468004e-14
1.815	88.88888859781834	0.0	0.00021283858412721898	169.23332753609685	0.0	-800.6437003915348	0.0	4.3191446912223866e-10	0.0	0.9999999999992834	0.0	1.1972170330795237e-06	0.0	0.0	0.00013719096631329471	0.0	0.0	0.00013723600562796294	0.0	800.6437003915348	88.88888859807315	0.0	1.1651286615137575e-12	-9.473903143468003e-13	0.0	-6.731613057885968e-27	9.473903143468004e-14
1.82	88.88888859781834	0.0	0.00021283858412721898	169.6777719805413	0.0	-800.6437003915348	0.0	4.3191446912223866e-10	0.0	0.9999999999992834	0.0	1.1972170330795237e-06	0.0	0.0	0.00013719096631329471	0.0	0.0	0.00013723612936234391	0.0	800.6437003915348	88.88888859807315	0.0	1.1651286615137575e-12	-9.473903143468003e-13	0.0	-6.731613057885968e-27	9.473903143468004e-14
1.825	88.88888859781834	0.0	0.00021283858412721898	170.12221642498574	0.0	-800.6437003915348	0.0	4.3191446912223866e-10	0.0	0.9999999999992834	0.0	1.1972170330795237e-06	0.0	0.0	0.00013719096631329471	0.0	0.0	0.00013723625309672486	0.0	800.6437003915348	88.88888859807315	0.0	1.1651286615137575e-12	-9.473903143468003e-13	0.0	-6.731613057885968e-27	9.473903143468004e-14
1.83	88.88888859781834	0.0	0.00021283858412721898	170.5666608694302	0.0	-800.6437003915348	0.0	4.3191446912223866e-10	0.0	0.9999999999992834	0.0	1.1972170330795237e-06	0.0	0.0	0.00013719096631329471	0.0	0.0	0.00013723637683110581	0.0	800.6437003915348	88.88888859807315	0.0	1.1651286615137575e-12	-9.473903143468003e-13	0.0	-6.731613057885968e-27	9.473903143468004e-14
1.835	88.88888859781834	0.0	0.00021283858412721898	171.01110531387465	0.0	-800.6437003915348	0.0	4.3191446912223866e-10	0.0	0.9999999999992834	0.0	1.1972170330795237e-06	0.0	0.0	0.00013719096631329471	0.0	0.0	0.00013723650056548676	0.0	800.6437003915348	88.88888859807315	0.0	1.1651286615137575e-12	-9.473903143468003e-13	0.0	-6.731613057885968e-27	9.473903143468004e-14
1.84	88.88888859781834	0.0	0.00021283858412721898	171.45554975831908	0.0	-800.6437003915348	0.0	4.3191446912223866e-10	0.0	0.9999999999992834	0.0	1.1972170330795237e-06	0.0	0.0	0.00013719096631329471	0.0	0.0	0.00013723662429986774	0.0	800.6437003915348	88.88888859807315	0.0	1.1651286615137575e-12	-9.473903143468003e-13	0.0	-6.731613057885968e-27	9.473903143468004e-14
1.845	88.88888859781834	0.0	0.00021283858412721898	171.89999420276354	0.0	-800.6437003915348	0.0	4.3191446912223866e-10	0.0	0.9999999999992834	0.0	1.1972170330795237e-06	0.0	0.0	0.00013719096631329471	0.0	0.0	0.0001372367480342487	0.0	800.6437003915348	88.88888859807315	0.0	1.1651286615137575e-12	-9.473903143468003e-13	0.0	-6.731613057885968e-27	9.473903143468004e-14
1.85	88.88888859781834	0.0	0.00021283858412721898	172.344438647208	0.0	-800.6437003915348	0.0	4.3191446912223866e-10	0.0	0.9999999999992834	0.0	1.1972170330795237e-06	0.0	0.0	0.00013719096631329471	0.0	0.0	0.00013723687176862964	0.0	800.6437003915348	88.88888859807315	0.0	1.1651286615137575e-12	-9.473903143468003e-13	0.0	-6.731613057885968e-27	9.473903143468004e-14
1.855	88.88888859781834	0.0	0.00021283858412721898	172.78888309165242	0.0	-800.6437003915348	0.0	4.3191446912223866e-10	0.0	0.9999999999992834	0.0	1.1972170330795237e-06	0.0	0.0	0.00013719096631329471	0.0	0.0	0.0001372369955030106	0.0	800.6437003915348	88.88888859807315	0.0	1.1651286615137575e-12	-9.473903143468003e-13	0.0	-6.731613057885968e-27	9.473903143468004e-14
1.86	88.88888859781834	0.0	0.00021283858412721898	173.23332753609688	0.0	-800.6437003915348	0.0	4.3191446912223866e-10	0.0	0.9999999999992834	0.0	1.1972170330795237e-06	0.0	0.0	0.00013719096631329471	0.0	0.0	0.00013723711923739157	0.0	800.6437003915348	88.88888859807315	0.0	1.1651286615137575e-12	-9.473903143468003e-13	0.0	-6.731613057885968e-27	9.473903143468004e-14
1.865	88.88888859781834	0.0	0.00021283858412721898	173.6777719805413	0.0	-800.6437003915348	0.0	4.3191446912223866e-10	0.0	0.9999999999992834	0.0	1.1972170330795237e-06	0.0	0.0	0.00013719096631329471	0.0	0.0	0.00013723724297177252	0.0	800.6437003915348	88.88888859807315	0.0	1.1651286615137575e-12	-9.473903143468003e-13	0.0	-6.731613057885968e-27	9.473903143468004e-14
1.87	88.88888859781834	0.0	0.00021283858412721898	174.12221642498577	0.0	-800.6437003915348	0.0	4.3191446912223866e-10	0.0	0.9999999999992834	0.0	1.1972170330795237e-06	0.0	0.0	0.00013719096631329471	0.0	0.0	0.00013723736670615347	0.0	800.6437003915348	88.88888859807315	0.0	1.1651286615137575e-12	-9.473903143468003e-13	0.0	-6.731613057885968e-27	9.473903143468004e-14
1.875	88.88888859781834	0.0	0.00021283858412721898	174.5666608694302	0.0	-800.6437003915348	0.0	4.3191446912223866e-10	0.0	0.9999999999992834	0.0	1.1972170330795237e-06	0.0	0.0	0.00013719096631329471	0.0	0.0	0.00013723749044053442	0.0	800.6437003915348	88.88888859807315	0.0	1.1651286615137575e-12	-9.473903143468003e-13	0.0	-6.731613057885968e-27	9.473903143468004e-14
1.88	88.88888859781834	0.0	0.00021283858412721898	175.01110531387462	0.0	-800.6437003915348	0.0	4.3191446912223866e-10	0.0	0.9999999999992834	0.0	1.1972170330795237e-06	0.0	0.0	0.00013719096631329471	0.0	0.0	0.0001372376141749154	0.0	800.6437003915348	88.88888859807315	0.0	1.1651286615137575e-12	-9.473903143468003e-13	0.0	-6.731613057885968e-27	9.473903143468004e-14
1.885	88.88888859781834	0.0	0.00021283858412721898	175.45554975831908	0.0	-800.6437003915348	0.0	4.3191446912223866e-10	0.0	0.9999999999992834	0.0	1.1972170330795237e-06	0.0	0.0	0.00013719096631329471	0.0	0.0	0.00013723773790929634	0.0	800.6437003915348	88.88888859807315	0.0	1.1651286615137575e-12	-9.473903143468003e-13	0.0	-6.731613057885968e-27	9.473903143468004e-14
1.89	88.88888859781834	0.0	0.00021283858412721898	175.8999942027635	0.0	-800.6437003915348	0.0	4.3191446912223866e-10	0.0	0.9999999999992834	0.0	1.1972170330795237e-06	0.0	0.0	0.00013719096631329471	0.0	0.0	0.0001372378616436773	0.0	800.6437003915348	88.88888859807315	0.0	1.1651286615137575e-12	-9.473903143468003e-13	0.0	-6.731613057885968e-27	9.473903143468004e-14
1.895	88.88888859781834	0.0	0.00021283858412721898	176.34443864720797	0.0	-800.6437003915348	0.0	4.3191446912223866e-10	0.0	0.9999999999992834	0.0	1.1972170330795237e-06	0.0	0.0	0.00013719096631329471	0.0	0.0	0.00013723798537805824	0.0	800.6437003915348	88.88888859807315	0.0	1.1651286615137575e-12	-9.473903143468003e-13	0.0	-6.731613057885968e-27	9.473903143468004e-14
1.9	88.88888859781834	0.0	0.00021283858412721898	176.78888309165242	0.0	-800.6437003915348	0.0	4.3191446912223866e-10	0.0	0.9999999999992834	0.0	1.1972170330795237e-06	0.0	0.0	0.00013719096631329471	0.0	0.0	0.00013723810911243922	0.0	800.6437003915348	88.88888859807315	0.0	1.1651286615137575e-12	-9.473903143468003e-13	0.0	-6.731613057885968e-27	9.473903143468004e-14
1.905	88.88888859781834	0.0	0.00021283858412721898	177.23332753609688	0.0	-800.6437003915348	0.0	4.3191446912223866e-10	0.0	0.9999999999992834	0.0	1.1972170330795237e-06	0.0	0.0	0.00013719096631329471	0.0	0.0	0.00013723823284682017	0.0	800.6437003915348	88.88888859807315	0.0	1.1651286615137575e-12	-9.473903143468003e-13	0.0	-6.731613057885968e-27	9.473903143468004e-14
1.91	88.88888859781834	0.0	0.00021283858412721898	177.6777719805413	0.0	-800.6437003915348	0.0	4.3191446912223866e-10	0.0	0.9999999999992834	0.0	1.1972170330795237e-06	0.0	0.0	0.00013719096631329471	0.0	0.0	0.00013723835658120112	0.0	800.6437003915348	88.88888859807315	0.0	1.1651286615137575e-12	-9.473903143468003e-13	0.0	-6.731613057885968e-27	9.473903143468004e-14
1.915	88.88888859781834	0.0	0.00021283858412721898	178.12221642498577	0.0	-800.6437003915348	0.0	4.3191446912223866e-10	0.0	0.9999999999992834	0.0	1.1972170330795237e-06	0.0	0.0	0.00013719096631329471	0.0	0.0	0.00013723848031558207	0.0	800.6437003915348	88.88888859807315	0.0	1.1651286615137575e-12	-9.473903143468003e-13	0.0	-6.731613057885968e-27	9.473903143468004e-14
1.92	88.88888859781834	0.0	0.00021283858412721898	178.5666608694302	0.0	-800.6437003915348	0.0	4.3191446912223866e-10	0.0	0.9999999999992834	0.0	1.1972170330795237e-06	0.0	0.0	0.00013719096631329471	0.0	0.0	0.00013723860404996305	0.0	800.6437003915348	88.88888859807315	0.0	1.1651286615137575e-12	-9.473903143468003e-13	0.0	-6.731613057885968e-27	9.473903143468004e-14
1.925	88.88888859781834	0.0	0.00021283858412721898	179.01110531387465	0.0	-800.6437003915348	0.0	4.3191446912223866e-10	0.0	0.9999999999992834	0.0	1.1972170330795237e-06	0.0	0.0	0.00013719096631329471	0.0	0.0	0.000137238727784344	0.0	800.6437003915348	88.88888859807315	0.0	1.1651286615137575e-12	-9.473903143468003e-13	0.0	-6.731613057885968e-27	9.473903143468004e-14
1.93	88.88888859781834	0.0	0.00021283858412721898	179.45554975831908	0.0	-800.6437003915348	0.0	4.3191446912223866e-10	0.0	0.9999999999992834	0.0	1.1972170330795237e-06	0.0	0.0	0.00013719096631329471	0.0	0.0	0.00013723885151872495	0.0	800.6437003915348	88.88888859807315	0.0	1.1651286615137575e-12	-9.473903143468003e-13	0.0	-6.731613057885968e-27	9.473903143468004e-14
1.935	88.88888859781834	0.0	0.00021283858412721898	179.89999420276354	0.0	-800.6437003915348	0.0	4.3191446912223866e-10	0.0	0.9999999999992834	0.0	1.1972170330795237e-06	0.0	0.0	0.00013719096631329471	0.0	0.0	0.0001372389752531059	0.0	800.6437003915348	88.88888859807315	0.0	1.1651286615137575e-12	-9.473903143468003e-13	0.0	-6.731613057885968e-27	9.473903143468004e-14
1.94	88.88888859781834	0.0	0.00021283858412721898	180.34443864720797	0.0	-800.6437003915348	0.0	4.3191446912223866e-10	0.0	0.9999999999992834	0.0	1.1972170330795237e-06	0.0	0.0	0.00013719096631329471	0.0	0.0	0.00013723909898748687	0.0	800.6437003915348	88.88888859807315	0.0	1.1651286615137575e-12	-9.473903143468003e-13	0.0	-6.731613057885968e-27	9.473903143468004e-14
1.945	88.88888859781834	0.0	0.00021283858412721898	180.78888309165242	0.0	-800.6437003915348	0.0	4.3191446912223866e-10	0.0	0.9999999999992834	0.0	1.1972170330795237e-06	0.0	0.0	0.00013719096631329471	0.0	0.0	0.00013723922272186782	0.0	800.6437003915348	88.88888859807315	0.0	1.1651286615137575e-12	-9.473903143468003e-13	0.0	-6.731613057885968e-27	9.473903143468004e-14
1.95	88.88888859781834	0.0	0.00021283858412721898	181.23332753609685	0.0	-800.6437003915348	0.0	4.3191446912223866e-10	0.0	0.9999999999992834	0.0	1.1972170330795237e-06	0.0	0.0	0.00013719096631329471	0.0	0.0	0.00013723934645624877	0.0	800.6437003915348	88.88888859807315	0.0	1.1651286615137575e-12	-9.473903143468003e-13	0.0	-6.731613057885968e-27	9.473903143468004e-14
1.955	88.88888859781834	0.0	0.00021283858412721898	181.6777719805413	0.0	-800.6437003915348	0.0	4.3191446912223866e-10	0.0	0.9999999999992834	0.0	1.1972170330795237e-06	0.0	0.0	0.00013719096631329471	0.0	0.0	0.00013723947019062975	0.0	800.6437003915348	88.88888859807315	0.0	1.1651286615137575e-12	-9.473903143468003e-13	0.0	-6.731613057885968e-27	9.473903143468004e-14
1.96	88.88888859781834	0.0	0.00021283858412721898	182.12221642498574	0.0	-800.6437003915348	0.0	4.3191446912223866e-10	0.0	0.9999999999992834	0.0	1.1972170330795237e-06	0.0	0.0	0.00013719096631329471	0.0	0.0	0.0001372395939250107	0.0	800.6437003915348	88.88888859807315	0.0	1.1651286615137575e-12	-9.473903143468003e-13	0.0	-6.731613057885968e-27	9.473903143468004e-14
1.965	88.88888859781834	0.0	0.00021283858412721898	182.5666608694302	0.0	-800.6437003915348	0.0	4.3191446912223866e-10	0.0	0.9999999999992834	0.0	1.1972170330795237e-06	0.0	0.0	0.00013719096631329471	0.0	0.0	0.00013723971765939165	0.0	800.6437003915348	88.88888859807315	0.0	1.1651286615137575e-12	-9.473903143468003e-13	0.0	-6.731613057885968e-27	9.473903143468004e-14
1.97	88.88888859781834	0.0	0.00021283858412721898	183.01110531387465	0.0	-800.6437003915348	0.0	4.3191446912223866e-10	0.0	0.9999999999992834	0.0	1.1972170330795237e-06	0.0	0.0	0.00013719096631329471	0.0	0.0	0.0001372398413937726	0.0	800.6437003915348	88.88888859807315	0.0	1.1651286615137575e-12	-9.473903143468003e-13	0.0	-6.731613057885968e-27	9.473903143468004e-14
1.975	88.88888859781834	0.0	0.00021283858412721898	183.4555497583191	0.0	-800.6437003915348	0.0	4.3191446912223866e-10	0.0	0.9999999999992834	0.0	1.1972170330795237e-06	0.0	0.0	0.00013719096631329471	0.0	0.0	0.00013723996512815358	0.0	800.6437003915348	88.88888859807315	0.0	1.1651286615137575e-12	-9.473903143468003e-13	0.0	-6.731613057885968e-27	9.473903143468004e-14
1.98	88.88888859781834	0.0	0.00021283858412721898	183.89999420276354	0.0	-800.6437003915348	0.0	4.3191446912223866e-10	0.0	0.9999999999992834	0.0	1.1972170330795237e-06	0.0	0.0	0.00013719096631329471	0.0	0.0	0.00013724008886253453	0.0	800.6437003915348	88.88888859807315	0.0	1.1651286615137575e-12	-9.473903143468003e-13	0.0	-6.731613057885968e-27	9.473903143468004e-14
1.985	88.88888859781834	0.0	0.00021283858412721898	184.344438647208	0.0	-800.6437003915348	0.0	4.3191446912223866e-10	0.0	0.9999999999992834	0.0	1.1972170330795237e-06	0.0	0.0	0.00013719096631329471	0.0	0.0	0.00013724021259691548	0.0	800.6437003915348	88.88888859807315	0.0	1.1651286615137575e-12	-9.473903143468003e-13	0.0	-6.731613057885968e-27	9.473903143468004e-14
1.99	88.88888859781834	0.0	0.00021283858412721898	184.78888309165242	0.0	-800.6437003915348	0.0	4.3191446912223866e-10	0.0	0.9999999999992834	0.0	1.1972170330795237e-06	0.0	0.0	0.00013719096631329471	0.0	0.0	0.00013724033633129643	0.0	800.6437003915348	88.88888859807315	0.0	1.1651286615137575e-12	-9.473903143468003e-13	0.0	-6.731613057885968e-27	9.473903143468004e-14
1.995	88.88888859781834	0.0	0.00021283858412721898	185.23332753609688	0.0	-800.6437003915348	0.0	4.3191446912223866e-10	0.0	0.9999999999992834	0.0	1.1972170330795237e-06	0.0	0.0	0.00013719096631329471	0.0	0.0	0.0001372404600656774	0.0	800.6437003915348	88.88888859807315	0.0	1.1651286615137575e-12	-9.473903143468003e-13	0.0	-6.731613057885968e-27	9.473903143468004e-14
2.0	88.88888859781834	0.0	0.00021283858412721898	185.6777719805413	0.0	-800.6437003915348	0.0	4.3191446912223866e-10	0.0	0.9999999999992834	0.0	1.1972170330795237e-06	0.0	0.0	0.00013719096631329471	0.0	0.0	0.00013724058380005835	0.0	800.6437003915348	88.88888859807315	0.0	1.1651286615137575e-12	-9.473903143468003e-13	0.0	-6.731613057885968e-27	9.473903143468004e-14
2.005	88.88888859781834	0.0	0.00021283858412721898	186.12221642498574	0.0	-800.6437003915348	0.0	4.3191446912223866e-10	0.0	0.9999999999992834	0.0	1.1972170330795237e-06	0.0	0.0	0.00013719096631329471	0.0	0.0	0.0001372407075344393	0.0	800.6437003915348	88.88888859807315	0.0	1.1651286615137575e-12	-9.473903143468003e-13	0.0	-6.731613057885968e-27	9.473903143468004e-14
2.01	88.88888859781834	0.0	0.00021283858412721898	186.56666086943017	0.0	-800.6437003915348	0.0	4.3191446912223866e-10	0.0	0.9999999999992834	0.0	1.1972170330795237e-06	0.0	0.0	0.00013719096631329471	0.0	0.0	0.00013724083126882025	0.0	800.6437003915348	88.88888859807315	0.0	1.1651286615137575e-12	-9.473903143468003e-13	0.0	-6.731613057885968e-27	9.473903143468004e-14
2.015	88.88888859781834	0.0	0.00021283858412721898	187.01110531387465	0.0	-800.6437003915348	0.0	4.3191446912223866e-10	0.0	0.9999999999992834	0.0	1.1972170330795237e-06	0.0	0.0	0.00013719096631329471	0.0	0.0	0.00013724095500320123	0.0	800.6437003915348	88.88888859807315	0.0	1.1651286615137575e-12	-9.473903143468003e-13	0.0	-6.731613057885968e-27	9.473903143468004e-14
2.02	88.88888859781834	0.0	0.00021283858412721898	187.45554975831908	0.0	-800.6437003915348	0.0	4.3191446912223866e-10	0.0	0.9999999999992834	0.0	1.1972170330795237e-06	0.0	0.0	0.00013719096631329471	0.0	0.0	0.00013724107873758218	0.0	800.6437003915348	88.88888859807315	0.0	1.1651286615137575e-12	-9.473903143468003e-13	0.0	-6.731613057885968e-27	9.473903143468004e-14
2.025	88.88888859781834	0.0	0.00021283858412721898	187.8999942027635	0.0	-800.6437003915348	0.0	4.3191446912223866e-10	0.0	0.9999999999992834	0.0	1.1972170330795237e-06	0.0	0.0	0.00013719096631329471	0.0	0.0	0.00013724120247196313	0.0	800.6437003915348	88.88888859807315	0.0	1.1651286615137575e-12	-9.473903143468003e-13	0.0	-6.731613057885968e-27	9.473903143468004e-14
2.03	88.88888859781834	0.0	0.00021283858412721898	188.34443864720797	0.0	-800.6437003915348	0.0	4.3191446912223866e-10	0.0	0.9999999999992834	0.0	1.1972170330795237e-06	0.0	0.0	0.00013719096631329471	0.0	0.0	0.00013724132620634408	0.0	800.6437003915348	88.88888859807315	0.0	1.1651286615137575e-12	-9.473903143468003e-13	0.0	-6.731613057885968e-27	9.473903143468004e-14
2.035	88.88888859781834	0.0	0.00021283858412721898	188.78888309165242	0.0	-800.6437003915348	0.0	4.3191446912223866e-10	0.0	0.9999999999992834	0.0	1.1972170330795237e-06	0.0	0.0	0.00013719096631329471	0.0	0.0	0.00013724144994072505	0.0	800.6437003915348	88.88888859807315	0.0	1.1651286615137575e-12	-9.473903143468003e-13	0.0	-6.731613057885968e-27	9.473903143468004e-14
2.04	88.88888859781834	0.0	0.00021283858412721898	189.23332753609688	0.0	-800.6437003915348	0.0	4.3191446912223866e-10	0.0	0.9999999999992834	0.0	1.1972170330795237e-06	0.0	0.0	0.00013719096631329471	0.0	0.0	0.000137241573675106	0.0	800.6437003915348	88.88888859807315	0.0	1.1651286615137575e-12	-9.473903143468003e-13	0.0	-6.731613057885968e-27	9.473903143468004e-14
2.045	88.88888859781834	0.0	0.00021283858412721898	189.6777719805413	0.0	-800.6437003915348	0.0	4.3191446912223866e-10	0.0	0.9999999999992834	0.0	1.1972170330795237e-06	0.0	0.0	0.00013719096631329471	0.0	0.0	0.00013724169740948695	0.0	800.6437003915348	88.88888859807315	0.0	1.1651286615137575e-12	-9.473903143468003e-13	0.0	-6.731613057885968e-27	9.473903143468004e-14
2.05	88.88888859781834	0.0	0.00021283858412721898	190.12221642498574	0.0	-800.6437003915348	0.0	4.3191446912223866e-10	0.0	0.9999999999992834	0.0	1.1972170330795237e-06	0.0	0.0	0.00013719096631329471	0.0	0.0	0.0001372418211438679	0.0	800.6437003915348	88.88888859807315	0.0	1.1651286615137575e-12	-9.473903143468003e-13	0.0	-6.731613057885968e-27	9.473903143468004e-14
2.055	88.88888859781834	0.0	0.00021283858412721898	190.56666086943022	0.0	-800.6437003915348	0.0	4.3191446912223866e-10	0.0	0.9999999999992834	0.0	1.1972170330795237e-06	0.0	0.0	0.00013719096631329471	0.0	0.0	0.00013724194487824888	0.0	800.6437003915348	88.88888859807315	0.0	1.1651286615137575e-12	-9.473903143468003e-13	0.0	-6.731613057885968e-27	9.473903143468004e-14
2.06	88.88888859781834	0.0	0.00021283858412721898	191.01110531387465	0.0	-800.6437003915348	0.0	4.3191446912223866e-10	0.0	0.9999999999992834	0.0	1.1972170330795237e-06	0.0	0.0	0.00013719096631329471	0.0	0.0	0.00013724206861262983	0.0	800.6437003915348	88.88888859807315	0.0	1.1651286615137575e-12	-9.473903143468003e-13	0.0	-6.731613057885968e-27	9.473903143468004e-14
2.065	88.88888859781834	0.0	0.00021283858412721898	191.45554975831908	0.0	-800.6437003915348	0.0	4.3191446912223866e-10	0.0	0.9999999999992834	0.0	1.1972170330795237e-06	0.0	0.0	0.00013719096631329471	0.0	0.0	0.00013724219234701078	0.0	800.6437003915348	88.88888859807315	0.0	1.1651286615137575e-12	-9.473903143468003e-13	0.0	-6.731613057885968e-27	9.473903143468004e-14
2.07	88.88888859781834	0.0	0.00021283858412721898	191.8999942027635	0.0	-800.6437003915348	0.0	4.3191446912223866e-10	0.0	0.9999999999992834	0.0	1.1972170330795237e-06	0.0	0.0	0.00013719096631329471	0.0	0.0	0.00013724231608139173	0.0	800.6437003915348	88.88888859807315	0.0	1.1651286615137575e-12	-9.473903143468003e-13	0.0	-6.731613057885968e-27	9.473903143468004e-14
2.075	88.88888859781834	0.0	0.00021283858412721898	192.344438647208	0.0	-800.6437003915348	0.0	4.3191446912223866e-10	0.0	0.9999999999992834	0.0	1.1972170330795237e-06	0.0	0.0	0.00013719096631329471	0.0	0.0	0.0001372424398157727	0.0	800.6437003915348	88.88888859807315	0.0	1.1651286615137575e-12	-9.473903143468003e-13	0.0	-6.731613057885968e-27	9.473903143468004e-14
2.08	88.88888859781834	0.0	0.00021283858412721898	192.78888309165242	0.0	-800.6437003915348	0.0	4.3191446912223866e-10	0.0	0.9999999999992834	0.0	1.1972170330795237e-06	0.0	0.0	0.00013719096631329471	0.0	0.0	0.00013724256355015366	0.0	800.6437003915348	88.88888859807315	0.0	1.1651286615137575e-12	-9.473903143468003e-13	0.0	-6.731613057885968e-27	9.473903143468004e-14
2.085	88.88888859781834	0.0	0.00021283858412721898	193.23332753609685	0.0	-800.6437003915348	0.0	4.3191446912223866e-10	0.0	0.9999999999992834	0.0	1.1972170330795237e-06	0.0	0.0	0.00013719096631329471	0.0	0.0	0.0001372426872845346	0.0	800.6437003915348	88.88888859807315	0.0	1.1651286615137575e-12	-9.473903143468003e-13	0.0	-6.731613057885968e-27	9.473903143468004e-14
2.09	88.88888859781834	0.0	0.00021283858412721898	193.6777719805413	0.0	-800.6437003915348	0.0	4.3191446912223866e-10	0.0	0.9999999999992834	0.0	1.1972170330795237e-06	0.0	0.0	0.00013719096631329471	0.0	0.0	0.00013724281101891556	0.0	800.6437003915348	88.88888859807315	0.0	1.1651286615137575e-12	-9.473903143468003e-13	0.0	-6.731613057885968e-27	9.473903143468004e-14
2.095	88.88888859781834	0.0	0.00021283858412721898	194.12221642498577	0.0	-800.6437003915348	0.0	4.3191446912223866e-10	0.0	0.9999999999992834	0.0	1.1972170330795237e-06	0.0	0.0	0.00013719096631329471	0.0	0.0	0.00013724293475329653	0.0	800.6437003915348	88.88888859807315	0.0	1.1651286615137575e-12	-9.473903143468003e-13	0.0	-6.731613057885968e-27	9.473903143468004e-14
2.1	88.88888859781834	0.0	0.00021283858412721898	194.5666608694302	0.0	-800.6437003915348	0.0	4.3191446912223866e-10	0.0	0.9999999999992834	0.0	1.1972170330795237e-06	0.0	0.0	0.00013719096631329471	0.0	0.0	0.00013724305848767748	0.0	800.6437003915348	88.88888859807315	0.0	1.1651286615137575e-12	-9.473903143468003e-13	0.0	-6.731613057885968e-27	9.473903143468004e-14
2.105	88.88888859781834	0.0	0.00021283858412721898	195.01110531387465	0.0	-800.6437003915348	0.0	4.3191446912223866e-10	0.0	0.9999999999992834	0.0	1.1972170330795237e-06	0.0	0.0	0.00013719096631329471	0.0	0.0	0.00013724318222205843	0.0	800.6437003915348	88.88888859807315	0.0	1.1651286615137575e-12	-9.473903143468003e-13	0.0	-6.731613057885968e-27	9.473903143468004e-14
2.11	88.88888859781834	0.0	0.00021283858412721898	195.45554975831908	0.0	-800.6437003915348	0.0	4.3191446912223866e-10	0.0	0.9999999999992834	0.0	1.1972170330795237e-06	0.0	0.0	0.00013719096631329471	0.0	0.0	0.00013724330595643938	0.0	800.6437003915348	88.88888859807315	0.0	1.1651286615137575e-12	-9.473903143468003e-13	0.0	-6.731613057885968e-27	9.473903143468004e-14
2.115	88.88888859781834	0.0	0.00021283858412721898	195.89999420276354	0.0	-800.6437003915348	0.0	4.3191446912223866e-10	0.0	0.9999999999992834	0.0	1.1972170330795237e-06	0.0	0.0	0.00013719096631329471	0.0	0.0	0.00013724342969082036	0.0	800.6437003915348	88.88888859807315	0.0	1.1651286615137575e-12	-9.473903143468003e-13	0.0	-6.731613057885968e-27	9.473903143468004e-14
2.12	88.88888859781834	0.0	0.00021283858412721898	196.344438647208	0.0	-800.6437003915348	0.0	4.3191446912223866e-10	0.0	0.9999999999992834	0.0	1.1972170330795237e-06	0.0	0.0	0.00013719096631329471	0.0	0.0	0.0001372435534252013	0.0	800.6437003915348	88.88888859807315	0.0	1.1651286615137575e-12	-9.473903143468003e-13	0.0	-6.731613057885968e-27	9.473903143468004e-14
2.125	88.88888859781834	0.0	0.00021283858412721898	196.78888309165242	0.0	-800.6437003915348	0.0	4.3191446912223866e-10	0.0	0.9999999999992834	0.0	1.1972170330795237e-06	0.0	0.0	0.00013719096631329471	0.0	0.0	0.00013724367715958226	0.0	800.6437003915348	88.88888859807315	0.0	1.1651286615137575e-12	-9.473903143468003e-13	0.0	-6.731613057885968e-27	9.473903143468004e-14
2.13	88.88888859781834	0.0	0.00021283858412721898	197.23332753609685	0.0	-800.6437003915348	0.0	4.3191446912223866e-10	0.0	0.9999999999992834	0.0	1.1972170330795237e-06	0.0	0.0	0.00013719096631329471	0.0	0.0	0.0001372438008939632	0.0	800.6437003915348	88.88888859807315	0.0	1.1651286615137575e-12	-9.473903143468003e-13	0.0	-6.731613057885968e-27	9.473903143468004e-14
2.135	88.88888859781834	0.0	0.00021283858412721898	197.67777198054128	0.0	-800.6437003915348	0.0	4.3191446912223866e-10	0.0	0.9999999999992834	0.0	1.1972170330795237e-06	0.0	0.0	0.00013719096631329471	0.0	0.0	0.0001372439246283442	0.0	800.6437003915348	88.88888859807315	0.0	1.1651286615137575e-12	-9.473903143468003e-13	0.0	-6.731613057885968e-27	9.473903143468004e-14
2.14	88.88888859781834	0.0	0.00021283858412721898	198.12221642498577	0.0	-800.6437003915348	0.0	4.3191446912223866e-10	0.0	0.9999999999992834	0.0	1.1972170330795237e-06	0.0	0.0	0.00013719096631329471	0.0	0.0	0.00013724404836272514	0.0	800.6437003915348	88.88888859807315	0.0	1.1651286615137575e-12	-9.473903143468003e-13	0.0	-6.731613057885968e-27	9.473903143468004e-14
2.145	88.88888859781834	0.0	0.00021283858412721898	198.5666608694302	0.0	-800.6437003915348	0.0	4.3191446912223866e-10	0.0	0.9999999999992834	0.0	1.1972170330795237e-06	0.0	0.0	0.00013719096631329471	0.0	0.0	0.00013724417209710609	0.0	800.6437003915348	88.88888859807315	0.0	1.1651286615137575e-12	-9.473903143468003e-13	0.0	-6.731613057885968e-27	9.473903143468004e-14
2.15	88.88888859781834	0.0	0.00021283858412721898	199.01110531387462	0.0	-800.6437003915348	0.0	4.3191446912223866e-10	0.0	0.9999999999992834	0.0	1.1972170330795237e-06	0.0	0.0	0.00013719096631329471	0.0	0.0	0.00013724429583148704	0.0	800.6437003915348	88.88888859807315	0.0	1.1651286615137575e-12	-9.473903143468003e-13	0.0	-6.731613057885968e-27	9.473903143468004e-14
2.155	88.88888859781834	0.0	0.00021283858412721898	199.45554975831908	0.0	-800.6437003915348	0.0	4.3191446912223866e-10	0.0	0.9999999999992834	0.0	1.1972170330795237e-06	0.0	0.0	0.00013719096631329471	0.0	0.0	0.000137244419565868	0.0	800.6437003915348	88.88888859807315	0.0	1.1651286615137575e-12	-9.473903143468003e-13	0.0	-6.731613057885968e-27	9.473903143468004e-14
2.16	88.88888859781834	0.0	0.00021283858412721898	199.89999420276354	0.0	-800.6437003915348	0.0	4.3191446912223866e-10	0.0	0.9999999999992834	0.0	1.1972170330795237e-06	0.0	0.0	0.00013719096631329471	0.0	0.0	0.00013724454330024896	0.0	800.6437003915348	88.88888859807315	0.0	1.1651286615137575e-12	-9.473903143468003e-13	0.0	-6.731613057885968e-27	9.473903143468004e-14
2.165	88.88888859781834	0.0	0.00021283858412721898	200.34443864720797	0.0	-800.6437003915348	0.0	4.3191446912223866e-10	0.0	0.9999999999992834	0.0	1.1972170330795237e-06	0.0	0.0	0.00013719096631329471	0.0	0.0	0.0001372446670346299	0.0	800.6437003915348	88.88888859807315	0.0	1.1651286615137575e-12	-9.473903143468003e-13	0.0	-6.731613057885968e-27	9.473903143468004e-14
2.17	88.88888859781834	0.0	0.00021283858412721898	200.78888309165242	0.0	-800.6437003915348	0.0	4.3191446912223866e-10	0.0	0.9999999999992834	0.0	1.1972170330795237e-06	0.0	0.0	0.00013719096631329471	0.0	0.0	0.00013724479076901086	0.0	800.6437003915348	88.88888859807315	0.0	1.1651286615137575e-12	-9.473903143468003e-13	0.0	-6.731613057885968e-27	9.473903143468004e-14
2.175	88.88888859781834	0.0	0.00021283858412721898	201.23332753609685	0.0	-800.6437003915348	0.0	4.3191446912223866e-10	0.0	0.9999999999992834	0.0	1.1972170330795237e-06	0.0	0.0	0.00013719096631329471	0.0	0.0	0.00013724491450339184	0.0	800.6437003915348	88.88888859807315	0.0	1.1651286615137575e-12	-9.473903143468003e-13	0.0	-6.731613057885968e-27	9.473903143468004e-14
2.18	88.88888859781834	0.0	0.00021283858412721898	201.6777719805413	0.0	-800.6437003915348	0.0	4.3191446912223866e-10	0.0	0.9999999999992834	0.0	1.1972170330795237e-06	0.0	0.0	0.00013719096631329471	0.0	0.0	0.0001372450382377728	0.0	800.6437003915348	88.88888859807315	0.0	1.1651286615137575e-12	-9.473903143468003e-13	0.0	-6.731613057885968e-27	9.473903143468004e-14
2.185	88.88888859781834	0.0	0.00021283858412721898	202.12221642498577	0.0	-800.6437003915348	0.0	4.3191446912223866e-10	0.0	0.9999999999992834	0.0	1.1972170330795237e-06	0.0	0.0	0.00013719096631329471	0.0	0.0	0.00013724516197215374	0.0	800.6437003915348	88.88888859807315	0.0	1.1651286615137575e-12	-9.473903143468003e-13	0.0	-6.731613057885968e-27	9.473903143468004e-14
2.19	88.88888859781834	0.0	0.00021283858412721898	202.5666608694302	0.0	-800.6437003915348	0.0	4.3191446912223866e-10	0.0	0.9999999999992834	0.0	1.1972170330795237e-06	0.0	0.0	0.00013719096631329471	0.0	0.0	0.0001372452857065347	0.0	800.6437003915348	88.88888859807315	0.0	1.1651286615137575e-12	-9.473903143468003e-13	0.0	-6.731613057885968e-27	9.473903143468004e-14
2.195	88.88888859781834	0.0	0.00021283858412721898	203.01110531387462	0.0	-800.6437003915348	0.0	4.3191446912223866e-10	0.0	0.9999999999992834	0.0	1.1972170330795237e-06	0.0	0.0	0.00013719096631329471	0.0	0.0	0.00013724540944091567	0.0	800.6437003915348	88.88888859807315	0.0	1.1651286615137575e-12	-9.473903143468003e-13	0.0	-6.731613057885968e-27	9.473903143468004e-14
2.2	88.88888859781834	0.0	0.00021283858412721898	203.4555497583191	0.0	-800.6437003915348	0.0	4.3191446912223866e-10	0.0	0.9999999999992834	0.0	1.1972170330795237e-06	0.0	0.0	0.00013719096631329471	0.0	0.0	0.00013724553317529662	0.0	800.6437003915348	88.88888859807315	0.0	1.1651286615137575e-12	-9.473903143468003e-13	0.0	-6.731613057885968e-27	9.473903143468004e-14
2.205	88.88888859781834	0.0	0.00021283858412721898	203.89999420276354	0.0	-800.6437003915348	0.0	4.3191446912223866e-10	0.0	0.9999999999992834	0.0	1.1972170330795237e-06	0.0	0.0	0.00013719096631329471	0.0	0.0	0.00013724565690967757	0.0	800.6437003915348	88.88888859807315	0.0	1.1651286615137575e-12	-9.473903143468003e-13	0.0	-6.731613057885968e-27	9.473903143468004e-14
2.21	88.88888859781834	0.0	0.00021283858412721898	204.34443864720797	0.0	-800.6437003915348	0.0	4.3191446912223866e-10	0.0	0.9999999999992834	0.0	1.1972170330795237e-06	0.0	0.0	0.00013719096631329471	0.0	0.0	0.00013724578064405852	0.0	800.6437003915348	88.88888859807315	0.0	1.1651286615137575e-12	-9.473903143468003e-13	0.0	-6.731613057885968e-27	9.473903143468004e-14
2.215	88.88888859781834	0.0	0.00021283858412721898	204.7888830916524	0.0	-800.6437003915348	0.0	4.3191446912223866e-10	0.0	0.9999999999992834	0.0	1.1972170330795237e-06	0.0	0.0	0.00013719096631329471	0.0	0.0	0.0001372459043784395	0.0	800.6437003915348	88.88888859807315	0.0	1.1651286615137575e-12	-9.473903143468003e-13	0.0	-6.731613057885968e-27	9.473903143468004e-14
2.22	88.88888859781834	0.0	0.00021283858412721898	205.23332753609688	0.0	-800.6437003915348	0.0	4.3191446912223866e-10	0.0	0.9999999999992834	0.0	1.1972170330795237e-06	0.0	0.0	0.00013719096631329471	0.0	0.0	0.00013724602811282044	0.0	800.6437003915348	88.88888859807315	0.0	1.1651286615137575e-12	-9.473903143468003e-13	0.0	-6.731613057885968e-27	9.473903143468004e-14
2.225	88.88888859781834	0.0	0.00021283858412721898	205.6777719805413	0.0	-800.6437003915348	0.0	4.3191446912223866e-10	0.0	0.9999999999992834	0.0	1.1972170330795237e-06	0.0	0.0	0.00013719096631329471	0.0	0.0	0.0001372461518472014	0.0	800.6437003915348	88.88888859807315	0.0	1.1651286615137575e-12	-9.473903143468003e-13	0.0	-6.731613057885968e-27	9.473903143468004e-14
2.23	88.88888859781834	0.0	0.00021283858412721898	206.12221642498574	0.0	-800.6437003915348	0.0	4.3191446912223866e-10	0.0	0.9999999999992834	0.0	1.1972170330795237e-06	0.0	0.0	0.00013719096631329471	0.0	0.0	0.00013724627558158234	0.0	800.6437003915348	88.88888859807315	0.0	1.1651286615137575e-12	-9.473903143468003e-13	0.0	-6.731613057885968e-27	9.473903143468004e-14
2.235	88.88888859781834	0.0	0.00021283858412721898	206.5666608694302	0.0	-800.6437003915348	0.0	4.3191446912223866e-10	0.0	0.9999999999992834	0.0	1.1972170330795237e-06	0.0	0.0	0.00013719096631329471	0.0	0.0	0.00013724639931596332	0.0	800.6437003915348	88.88888859807315	0.0	1.1651286615137575e-12	-9.473903143468003e-13	0.0	-6.731613057885968e-27	9.473903143468004e-14
2.24	88.88888859781834	0.0	0.00021283858412721898	207.01110531387465	0.0	-800.6437003915348	0.0	4.3191446912223866e-10	0.0	0.9999999999992834	0.0	1.1972170330795237e-06	0.0	0.0	0.00013719096631329471	0.0	0.0	0.00013724652305034427	0.0	800.6437003915348	88.88888859807315	0.0	1.1651286615137575e-12	-9.473903143468003e-13	0.0	-6.731613057885968e-27	9.473903143468004e-14
2.245	88.88888859781834	0.0	0.00021283858412721898	207.4555497583191	0.0	-800.6437003915348	0.0	4.3191446912223866e-10	0.0	0.9999999999992834	0.0	1.1972170330795237e-06	0.0	0.0	0.00013719096631329471	0.0	0.0	0.00013724664678472522	0.0	800.6437003915348	88.88888859807315	0.0	1.1651286615137575e-12	-9.473903143468003e-13	0.0	-6.731613057885968e-27	9.473903143468004e-14
2.25	88.88888859781834	0.0	0.00021283858412721898	207.89999420276354	0.0	-800.6437003915348	0.0	4.3191446912223866e-10	0.0	0.9999999999992834	0.0	1.1972170330795237e-06	0.0	0.0	0.00013719096631329471	0.0	0.0	0.00013724677051910617	0.0	800.6437003915348	88.88888859807315	0.0	1.1651286615137575e-12	-9.473903143468003e-13	0.0	-6.731613057885968e-27	9.473903143468004e-14
2.255	88.88888859781834	0.0	0.00021283858412721898	208.34443864720797	0.0	-800.6437003915348	0.0	4.3191446912223866e-10	0.0	0.9999999999992834	0.0	1.1972170330795237e-06	0.0	0.0	0.00013719096631329471	0.0	0.0	0.00013724689425348714	0.0	800.6437003915348	88.88888859807315	0.0	1.1651286615137575e-12	-9.473903143468003e-13	0.0	-6.731613057885968e-27	9.473903143468004e-14
2.26	88.88888859781834	0.0	0.00021283858412721898	208.7888830916524	0.0	-800.6437003915348	0.0	4.3191446912223866e-10	0.0	0.9999999999992834	0.0	1.1972170330795237e-06	0.0	0.0	0.00013719096631329471	0.0	0.0	0.0001372470179878681	0.0	800.6437003915348	88.88888859807315	0.0	1.1651286615137575e-12	-9.473903143468003e-13	0.0	-6.731613057885968e-27	9.473903143468004e-14
2.265	88.88888859781834	0.0	0.00021283858412721898	209.23332753609688	0.0	-800.6437003915348	0.0	4.3191446912223866e-10	0.0	0.9999999999992834	0.0	1.1972170330795237e-06	0.0	0.0	0.00013719096631329471	0.0	0.0	0.00013724714172224904	0.0	800.6437003915348	88.88888859807315	0.0	1.1651286615137575e-12	-9.473903143468003e-13	0.0	-6.731613057885968e-27	9.473903143468004e-14
2.27	88.88888859781834	0.0	0.00021283858412721898	209.6777719805413	0.0	-800.6437003915348	0.0	4.3191446912223866e-10	0.0	0.9999999999992834	0.0	1.1972170330795237e-06	0.0	0.0	0.00013719096631329471	0.0	0.0	0.00013724726545663002	0.0	800.6437003915348	88.88888859807315	0.0	1.1651286615137575e-12	-9.473903143468003e-13	0.0	-6.731613057885968e-27	9.473903143468004e-14
2.275	88.88888859781834	0.0	0.00021283858412721898	210.12221642498574	0.0	-800.6437003915348	0.0	4.3191446912223866e-10	0.0	0.9999999999992834	0.0	1.1972170330795237e-06	0.0	0.0	0.00013719096631329471	0.0	0.0	0.00013724738919101097	0.0	800.6437003915348	88.88888859807315	0.0	1.1651286615137575e-12	-9.473903143468003e-13	0.0	-6.731613057885968e-27	9.473903143468004e-14
2.28	88.88888859781834	0.0	0.00021283858412721898	210.56666086943017	0.0	-800.6437003915348	0.0	4.3191446912223866e-10	0.0	0.9999999999992834	0.0	1.1972170330795237e-06	0.0	0.0	0.00013719096631329471	0.0	0.0	0.00013724751292539192	0.0	800.6437003915348	88.88888859807315	0.0	1.1651286615137575e-12	-9.473903143468003e-13	0.0	-6.731613057885968e-27	9.473903143468004e-14
2.285	88.88888859781834	0.0	0.00021283858412721898	211.01110531387465	0.0	-800.6437003915348	0.0	4.3191446912223866e-10	0.0	0.9999999999992834	0.0	1.1972170330795237e-06	0.0	0.0	0.00013719096631329471	0.0	0.0	0.00013724763665977287	0.0	800.6437003915348	88.88888859807315	0.0	1.1651286615137575e-12	-9.473903143468003e-13	0.0	-6.731613057885968e-27	9.473903143468004e-14
2.29	88.88888859781834	0.0	0.00021283858412721898	211.45554975831908	0.0	-800.6437003915348	0.0	4.3191446912223866e-10	0.0	0.9999999999992834	0.0	1.1972170330795237e-06	0.0	0.0	0.00013719096631329471	0.0	0.0	0.00013724776039415385	0.0	800.6437003915348	88.88888859807315	0.0	1.1651286615137575e-12	-9.473903143468003e-13	0.0	-6.731613057885968e-27	9.473903143468004e-14
2.295	88.88888859781834	0.0	0.00021283858412721898	211.89999420276354	0.0	-800.6437003915348	0.0	4.3191446912223866e-10	0.0	0.9999999999992834	0.0	1.1972170330795237e-06	0.0	0.0	0.00013719096631329471	0.0	0.0	0.0001372478841285348	0.0	800.6437003915348	88.88888859807315	0.0	1.1651286615137575e-12	-9.473903143468003e-13	0.0	-6.731613057885968e-27	9.473903143468004e-14
2.3	88.88888859781834	0.0	0.00021283858412721898	212.34443864720797	0.0	-800.6437003915348	0.0	4.3191446912223866e-10	0.0	0.9999999999992834	0.0	1.1972170330795237e-06	0.0	0.0	0.00013719096631329471	0.0	0.0	0.00013724800786291575	0.0	800.6437003915348	88.88888859807315	0.0	1.1651286615137575e-12	-9.473903143468003e-13	0.0	-6.731613057885968e-27	9.473903143468004e-14
2.305	88.88888859781834	0.0	0.00021283858412721898	212.78888309165242	0.0	-800.6437003915348	0.0	4.3191446912223866e-10	0.0	0.9999999999992834	0.0	1.1972170330795237e-06	0.0	0.0	0.00013719096631329471	0.0	0.0	0.0001372481315972967	0.0	800.6437003915348	88.88888859807315	0.0	1.1651286615137575e-12	-9.473903143468003e-13	0.0	-6.731613057885968e-27	9.473903143468004e-14
2.31	88.88888859781834	0.0	0.00021283858412721898	213.23332753609688	0.0	-800.6437003915348	0.0	4.3191446912223866e-10	0.0	0.9999999999992834	0.0	1.1972170330795237e-06	0.0	0.0	0.00013719096631329471	0.0	0.0	0.00013724825533167767	0.0	800.6437003915348	88.88888859807315	0.0	1.1651286615137575e-12	-9.473903143468003e-13	0.0	-6.731613057885968e-27	9.473903143468004e-14
2.315	88.88888859781834	0.0	0.00021283858412721898	213.6777719805413	0.0	-800.6437003915348	0.0	4.3191446912223866e-10	0.0	0.9999999999992834	0.0	1.1972170330795237e-06	0.0	0.0	0.00013719096631329471	0.0	0.0	0.00013724837906605862	0.0	800.6437003915348	88.88888859807315	0.0	1.1651286615137575e-12	-9.473903143468003e-13	0.0	-6.731613057885968e-27	9.473903143468004e-14
2.32	88.88888859781834	0.0	0.00021283858412721898	214.12221642498574	0.0	-800.6437003915348	0.0	4.3191446912223866e-10	0.0	0.9999999999992834	0.0	1.1972170330795237e-06	0.0	0.0	0.00013719096631329471	0.0	0.0	0.00013724850280043957	0.0	800.6437003915348	88.88888859807315	0.0	1.1651286615137575e-12	-9.473903143468003e-13	0.0	-6.731613057885968e-27	9.473903143468004e-14
2.325	88.88888859781834	0.0	0.00021283858412721898	214.56666086943022	0.0	-800.6437003915348	0.0	4.3191446912223866e-10	0.0	0.9999999999992834	0.0	1.1972170330795237e-06	0.0	0.0	0.00013719096631329471	0.0	0.0	0.00013724862653482052	0.0	800.6437003915348	88.88888859807315	0.0	1.1651286615137575e-12	-9.473903143468003e-13	0.0	-6.731613057885968e-27	9.473903143468004e-14
2.33	88.88888859781834	0.0	0.00021283858412721898	215.01110531387465	0.0	-800.6437003915348	0.0	4.3191446912223866e-10	0.0	0.9999999999992834	0.0	1.1972170330795237e-06	0.0	0.0	0.00013719096631329471	0.0	0.0	0.0001372487502692015	0.0	800.6437003915348	88.88888859807315	0.0	1.1651286615137575e-12	-9.473903143468003e-13	0.0	-6.731613057885968e-27	9.473903143468004e-14
2.335	88.88888859781834	0.0	0.00021283858412721898	215.45554975831908	0.0	-800.6437003915348	0.0	4.3191446912223866e-10	0.0	0.9999999999992834	0.0	1.1972170330795237e-06	0.0	0.0	0.00013719096631329471	0.0	0.0	0.00013724887400358245	0.0	800.6437003915348	88.88888859807315	0.0	1.1651286615137575e-12	-9.473903143468003e-13	0.0	-6.731613057885968e-27	9.473903143468004e-14
2.34	88.88888859781834	0.0	0.00021283858412721898	215.8999942027635	0.0	-800.6437003915348	0.0	4.3191446912223866e-10	0.0	0.9999999999992834	0.0	1.1972170330795237e-06	0.0	0.0	0.00013719096631329471	0.0	0.0	0.0001372489977379634	0.0	800.6437003915348	88.88888859807315	0.0	1.1651286615137575e-12	-9.473903143468003e-13	0.0	-6.731613057885968e-27	9.473903143468004e-14
2.345	88.88888859781834	0.0	0.00021283858412721898	216.344438647208	0.0	-800.6437003915348	0.0	4.3191446912223866e-10	0.0	0.9999999999992834	0.0	1.1972170330795237e-06	0.0	0.0	0.00013719096631329471	0.0	0.0	0.00013724912147234435	0.0	800.6437003915348	88.88888859807315	0.0	1.1651286615137575e-12	-9.473903143468003e-13	0.0	-6.731613057885968e-27	9.473903143468004e-14
2.35	88.88888859781834	0.0	0.00021283858412721898	216.78888309165242	0.0	-800.6437003915348	0.0	4.3191446912223866e-10	0.0	0.9999999999992834	0.0	1.1972170330795237e-06	0.0	0.0	0.00013719096631329471	0.0	0.0	0.00013724924520672533	0.0	800.6437003915348	88.88888859807315	0.0	1.1651286615137575e-12	-9.473903143468003e-13	0.0	-6.731613057885968e-27	9.473903143468004e-14
2.355	88.88888859781834	0.0	0.00021283858412721898	217.23332753609685	0.0	-800.6437003915348	0.0	4.3191446912223866e-10	0.0	0.9999999999992834	0.0	1.1972170330795237e-06	0.0	0.0	0.00013719096631329471	0.0	0.0	0.00013724936894110628	0.0	800.6437003915348	88.88888859807315	0.0	1.1651286615137575e-12	-9.473903143468003e-13	0.0	-6.731613057885968e-27	9.473903143468004e-14
2.36	88.88888859781834	0.0	0.00021283858412721898	217.6777719805413	0.0	-800.6437003915348	0.0	4.3191446912223866e-10	0.0	0.9999999999992834	0.0	1.1972170330795237e-06	0.0	0.0	0.00013719096631329471	0.0	0.0	0.00013724949267548723	0.0	800.6437003915348	88.88888859807315	0.0	1.1651286615137575e-12	-9.473903143468003e-13	0.0	-6.731613057885968e-27	9.473903143468004e-14
2.365	88.88888859781834	0.0	0.00021283858412721898	218.12221642498577	0.0	-800.6437003915348	0.0	4.3191446912223866e-10	0.0	0.9999999999992834	0.0	1.1972170330795237e-06	0.0	0.0	0.00013719096631329471	0.0	0.0	0.00013724961640986818	0.0	800.6437003915348	88.88888859807315	0.0	1.1651286615137575e-12	-9.473903143468003e-13	0.0	-6.731613057885968e-27	9.473903143468004e-14
2.37	88.88888859781834	0.0	0.00021283858412721898	218.5666608694302	0.0	-800.6437003915348	0.0	4.3191446912223866e-10	0.0	0.9999999999992834	0.0	1.1972170330795237e-06	0.0	0.0	0.00013719096631329471	0.0	0.0	0.00013724974014424915	0.0	800.6437003915348	88.88888859807315	0.0	1.1651286615137575e-12	-9.473903143468003e-13	0.0	-6.731613057885968e-27	9.473903143468004e-14
2.375	88.88888859781834	0.0	0.00021283858412721898	219.01110531387465	0.0	-800.6437003915348	0.0	4.3191446912223866e-10	0.0	0.9999999999992834	0.0	1.1972170330795237e-06	0.0	0.0	0.00013719096631329471	0.0	0.0	0.0001372498638786301	0.0	800.6437003915348	88.88888859807315	0.0	1.1651286615137575e-12	-9.473903143468003e-13	0.0	-6.731613057885968e-27	9.473903143468004e-14
2.38	88.88888859781834	0.0	0.00021283858412721898	219.45554975831908	0.0	-800.6437003915348	0.0	4.3191446912223866e-10	0.0	0.9999999999992834	0.0	1.1972170330795237e-06	0.0	0.0	0.00013719096631329471	0.0	0.0	0.00013724998761301105	0.0	800.6437003915348	88.88888859807315	0.0	1.1651286615137575e-12	-9.473903143468003e-13	0.0	-6.731613057885968e-27	9.473903143468004e-14
2.385	88.88888859781834	0.0	0.00021283858412721898	219.8999942027635	0.0	-800.6437003915348	0.0	4.3191446912223866e-10	0.0	0.9999999999992834	0.0	1.1972170330795237e-06	0.0	0.0	0.00013719096631329471	0.0	0.0	0.000137250111347392	0.0	800.6437003915348	88.88888859807315	0.0	1.1651286615137575e-12	-9.473903143468003e-13	0.0	-6.731613057885968e-27	9.473903143468004e-14
2.39	88.88888859781834	0.0	0.00021283858412721898	220.344438647208	0.0	-800.6437003915348	0.0	4.3191446912223866e-10	0.0	0.9999999999992834	0.0	1.1972170330795237e-06	0.0	0.0	0.00013719096631329471	0.0	0.0	0.00013725023508177298	0.0	800.6437003915348	88.88888859807315	0.0	1.1651286615137575e-12	-9.473903143468003e-13	0.0	-6.731613057885968e-27	9.473903143468004e-14
2.395	88.88888859781834	0.0	0.00021283858412721898	220.78888309165242	0.0	-800.6437003915348	0.0	4.3191446912223866e-10	0.0	0.9999999999992834	0.0	1.1972170330795237e-06	0.0	0.0	0.00013719096631329471	0.0	0.0	0.00013725035881615393	0.0	800.6437003915348	88.88888859807315	0.0	1.1651286615137575e-12	-9.473903143468003e-13	0.0	-6.731613057885968e-27	9.473903143468004e-14
2.4	88.88888859781834	0.0	0.00021283858412721898	221.23332753609685	0.0	-800.6437003915348	0.0	4.3191446912223866e-10	0.0	0.9999999999992834	0.0	1.1972170330795237e-06	0.0	0.0	0.00013719096631329471	0.0	0.0	0.00013725048255053488	0.0	800.6437003915348	88.88888859807315	0.0	1.1651286615137575e-12	-9.473903143468003e-13	0.0	-6.731613057885968e-27	9.473903143468004e-14
2.405	88.88888859781834	0.0	0.00021283858412721898	221.67777198054128	0.0	-800.6437003915348	0.0	4.3191446912223866e-10	0.0	0.9999999999992834	0.0	1.1972170330795237e-06	0.0	0.0	0.00013719096631329471	0.0	0.0	0.00013725060628491583	0.0	800.6437003915348	88.88888859807315	0.0	1.1651286615137575e-12	-9.473903143468003e-13	0.0	-6.731613057885968e-27	9.473903143468004e-14
2.41	88.88888859781834	0.0	0.00021283858412721898	222.12221642498577	0.0	-800.6437003915348	0.0	4.3191446912223866e-10	0.0	0.9999999999992834	0.0	1.1972170330795237e-06	0.0	0.0	0.00013719096631329471	0.0	0.0	0.0001372507300192968	0.0	800.6437003915348	88.88888859807315	0.0	1.1651286615137575e-12	-9.473903143468003e-13	0.0	-6.731613057885968e-27	9.473903143468004e-14
2.415	88.88888859781834	0.0	0.00021283858412721898	222.5666608694302	0.0	-800.6437003915348	0.0	4.3191446912223866e-10	0.0	0.9999999999992834	0.0	1.1972170330795237e-06	0.0	0.0	0.00013719096631329471	0.0	0.0	0.00013725085375367776	0.0	800.6437003915348	88.88888859807315	0.0	1.1651286615137575e-12	-9.473903143468003e-13	0.0	-6.731613057885968e-27	9.473903143468004e-14
2.42	88.88888859781834	0.0	0.00021283858412721898	223.01110531387462	0.0	-800.6437003915348	0.0	4.3191446912223866e-10	0.0	0.9999999999992834	0.0	1.1972170330795237e-06	0.0	0.0	0.00013719096631329471	0.0	0.0	0.0001372509774880587	0.0	800.6437003915348	88.88888859807315	0.0	1.1651286615137575e-12	-9.473903143468003e-13	0.0	-6.731613057885968e-27	9.473903143468004e-14
2.425	88.88888859781834	0.0	0.00021283858412721898	223.45554975831908	0.0	-800.6437003915348	0.0	4.3191446912223866e-10	0.0	0.9999999999992834	0.0	1.1972170330795237e-06	0.0	0.0	0.00013719096631329471	0.0	0.0	0.00013725110122243965	0.0	800.6437003915348	88.88888859807315	0.0	1.1651286615137575e-12	-9.473903143468003e-13	0.0	-6.731613057885968e-27	9.473903143468004e-14
2.43	88.88888859781834	0.0	0.00021283858412721898	223.89999420276354	0.0	-800.6437003915348	0.0	4.3191446912223866e-10	0.0	0.9999999999992834	0.0	1.1972170330795237e-06	0.0	0.0	0.00013719096631329471	0.0	0.0	0.00013725122495682063	0.0	800.6437003915348	88.88888859807315	0.0	1.1651286615137575e-12	-9.473903143468003e-13	0.0	-6.731613057885968e-27	9.473903143468004e-14
2.435	88.88888859781834	0.0	0.00021283858412721898	224.34443864720797	0.0	-800.6437003915348	0.0	4.3191446912223866e-10	0.0	0.9999999999992834	0.0	1.1972170330795237e-06	0.0	0.0	0.00013719096631329471	0.0	0.0	0.00013725134869120158	0.0	800.6437003915348	88.88888859807315	0.0	1.1651286615137575e-12	-9.473903143468003e-13	0.0	-6.731613057885968e-27	9.473903143468004e-14
2.44	88.88888859781834	0.0	0.00021283858412721898	224.78888309165242	0.0	-800.6437003915348	0.0	4.3191446912223866e-10	0.0	0.9999999999992834	0.0	1.1972170330795237e-06	0.0	0.0	0.00013719096631329471	0.0	0.0	0.00013725147242558253	0.0	800.6437003915348	88.88888859807315	0.0	1.1651286615137575e-12	-9.473903143468003e-13	0.0	-6.731613057885968e-27	9.473903143468004e-14
2.445	88.88888859781834	0.0	0.00021283858412721898	225.23332753609685	0.0	-800.6437003915348	0.0	4.3191446912223866e-10	0.0	0.9999999999992834	0.0	1.1972170330795237e-06	0.0	0.0	0.00013719096631329471	0.0	0.0	0.00013725159615996348	0.0	800.6437003915348	88.88888859807315	0.0	1.1651286615137575e-12	-9.473903143468003e-13	0.0	-6.731613057885968e-27	9.473903143468004e-14
2.45	88.88888859781834	0.0	0.00021283858412721898	225.67777198054134	0.0	-800.6437003915348	0.0	4.3191446912223866e-10	0.0	0.9999999999992834	0.0	1.1972170330795237e-06	0.0	0.0	0.00013719096631329471	0.0	0.0	0.00013725171989434446	0.0	800.6437003915348	88.88888859807315	0.0	1.1651286615137575e-12	-9.473903143468003e-13	0.0	-6.731613057885968e-27	9.473903143468004e-14
2.455	88.88888859781834	0.0	0.00021283858412721898	226.12221642498577	0.0	-800.6437003915348	0.0	4.3191446912223866e-10	0.0	0.9999999999992834	0.0	1.1972170330795237e-06	0.0	0.0	0.00013719096631329471	0.0	0.0	0.0001372518436287254	0.0	800.6437003915348	88.88888859807315	0.0	1.1651286615137575e-12	-9.473903143468003e-13	0.0	-6.731613057885968e-27	9.473903143468004e-14
2.46	88.88888859781834	0.0	0.00021283858412721898	226.5666608694302	0.0	-800.6437003915348	0.0	4.3191446912223866e-10	0.0	0.9999999999992834	0.0	1.1972170330795237e-06	0.0	0.0	0.00013719096631329471	0.0	0.0	0.00013725196736310636	0.0	800.6437003915348	88.88888859807315	0.0	1.1651286615137575e-12	-9.473903143468003e-13	0.0	-6.731613057885968e-27	9.473903143468004e-14
2.465	88.88888859781834	0.0	0.00021283858412721898	227.01110531387462	0.0	-800.6437003915348	0.0	4.3191446912223866e-10	0.0	0.9999999999992834	0.0	1.1972170330795237e-06	0.0	0.0	0.00013719096631329471	0.0	0.0	0.0001372520910974873	0.0	800.6437003915348	88.88888859807315	0.0	1.1651286615137575e-12	-9.473903143468003e-13	0.0	-6.731613057885968e-27	9.473903143468004e-14
2.47	88.88888859781834	0.0	0.00021283858412721898	227.4555497583191	0.0	-800.6437003915348	0.0	4.3191446912223866e-10	0.0	0.9999999999992834	0.0	1.1972170330795237e-06	0.0	0.0	0.00013719096631329471	0.0	0.0	0.00013725221483186828	0.0	800.6437003915348	88.88888859807315	0.0	1.1651286615137575e-12	-9.473903143468003e-13	0.0	-6.731613057885968e-27	9.473903143468004e-14
2.475	88.88888859781834	0.0	0.00021283858412721898	227.89999420276354	0.0	-800.6437003915348	0.0	4.3191446912223866e-10	0.0	0.9999999999992834	0.0	1.1972170330795237e-06	0.0	0.0	0.00013719096631329471	0.0	0.0	0.00013725233856624923	0.0	800.6437003915348	88.88888859807315	0.0	1.1651286615137575e-12	-9.473903143468003e-13	0.0	-6.731613057885968e-27	9.473903143468004e-14
2.48	88.88888859781834	0.0	0.00021283858412721898	228.34443864720797	0.0	-800.6437003915348	0.0	4.3191446912223866e-10	0.0	0.9999999999992834	0.0	1.1972170330795237e-06	0.0	0.0	0.00013719096631329471	0.0	0.0	0.00013725246230063018	0.0	800.6437003915348	88.88888859807315	0.0	1.1651286615137575e-12	0.14908508188208697	0.0	-0.023134440010355986	0.015086936055535377
2.485	88.88888859781834	0.0	0.00021283858412721898	228.7888830916524	0.0	-800.6437003915348	0.0	4.3191446912223866e-10	0.0	0.9999999999992834	0.0	1.1972170330795237e-06	0.0	0.0	0.00013719096631329471	0.0	0.0	0.00013725258603501113	0.0	800.6437003915348	88.88888859807315	0.0	1.1651286615137575e-12	-0.5746317090569164	0.0	0.10504613240608188	0.058415433832776475
2.49	88.87994348949955	0.0	0.0016054477131782542	229.23332042942167	0.0	-800.643699271134	0.0	6.187896722713956e-05	0.0	0.999999999999252	0.0	1.2228929432926991e-06	0.0	0.0	0.00014013320889404043	0.0	0.0	0.0001549796043487283	0.0	800.643699271134	88.87994349316023	0.0	0.0013880664017864878	-4.253831078562106	0.0	0.5768094179097939	0.42927599454814946
2.495	88.85180564582018	0.0	0.005080366436918146	229.6776428465484	0.0	-800.6436821124526	0.0	0.00017797454027107868	0.0	0.9999999999987707	0.0	1.5677969237506597e-06	0.0	0.0	0.0001796562937290866	0.0	0.0	0.00020596555444029788	0.0	800.6436821124526	88.85180566131322	0.0	0.00480176326177109	-3.6429217335059625	0.0	0.28353791819963353	0.3653939313604848
2.5	88.84745495290143	0.0	0.004158220985295659	230.12188396888976	0.0	-800.643659523759	0.0	0.00015179552375869164	0.0	0.9999999999980302	0.0	1.9847500078947832e-06	0.0	0.0	0.00022743559768200508	0.0	0.0	0.00024945176874205215	0.0	800.643659523759	88.84745496870747	0.0	0.003805541011425186	-0.0285339199573779	0.0	-0.3252957171714752	0.032654477211898285
2.505	88.84755569466122	0.0	0.002741202283747638	230.5661214958091	0.0	-800.6436442998336	0.0	0.00012338545590646443	0.0	0.9999999999972901	0.0	2.328035330786275e-06	0.0	0.0	0.0002667731980230331	0.0	0.0	0.00028479909812574177	0.0	800.6436442998336	88.84755570646138	0.0	0.0023275217862967	0.09429152137177729	0.0	-0.28166697522412226	0.029703059764022738
2.51	88.84765588254534	0.0	0.0015747100844382253	231.0103595250283	0.0	-800.6436358103941	0.0	9.852250251765837e-05	0.0	0.9999999999966079	0.0	2.6046407839414634e-06	0.0	0.0	0.00029846984813532146	0.0	0.0	0.000313023716032386	0.0	800.6436358103941	88.84765588954293	0.0	0.0011118776282798806	0.019982042589106186	0.0	-0.21711224616121716	0.02180298361674425
2.515	88.84775553443657	0.0	0.0006542615145839568	231.45459805381023	0.0	-800.6436327533648	0.0	7.750351811322277e-05	0.0	0.999999999996013	0.0	2.8238575161589023e-06	0.0	0.0	0.00032359023524483165	0.0	0.0	0.000335226838458903	0.0	800.6436327533648	88.8477555367147	0.0	0.00015247471005598828	0.019878289563735052	0.0	-0.1672911945839378	0.016846806872906402
2.52	88.84785468998777	0.0	-3.582694388572452e-05	231.8988370795685	0.0	-800.6436338871845	0.0	6.039642392016696e-05	0.0	0.9999999999955136	0.0	2.9954233943071525e-06	0.0	0.0	0.0003432502366976158	0.0	0.0	0.0003525291394004457	0.0	800.6436338871845	88.8478546881787	0.0	-0.0005681008288274772	0.01978420880869673	0.0	-0.12182482687866895	0.012342083844393448
2.525	88.84795340316026	0.0	-0.0005188225298695373	232.34307659995577	0.0	-800.6436380777294	0.0	4.7085034531759844e-05	0.0	0.9999999999951046	0.0	3.1290066026971793e-06	0.0	0.0	0.0003585577448068178	0.0	0.0	0.0003660180081849336	0.0	800.6436380777294	88.84795339817367	0.0	-0.0010748341955258956	0.019701940644030934	0.0	-0.08189127233115025	0.00842279463667228
2.53	88.84805173586388	0.0	-0.0008224701878202465	232.78731661291755	0.0	-800.6436443279921	0.0	3.7313147931605564e-05	0.0	0.9999999999947713	0.0	3.2338008804252695e-06	0.0	0.0	0.0003705662844687614	0.0	0.0	0.0003767074376690751	0.0	800.6436443279921	88.84805172868623	0.0	-0.0013971040036550532	0.01963248439741013	0.0	-0.048089459952872005	0.005194257023072147
2.535	88.84814975277287	0.0	-0.0009764375396259931	233.2315571167179	0.0	-800.6436517932883	0.0	3.072582939704767e-05	0.0	0.9999999999944948	0.0	3.3182278456842963e-06	0.0	0.0	0.00038024090204169303	0.0	0.0	0.0003855097394015242	0.0	800.6436517932883	88.8481497443363	0.0	-0.0015660743486956038	0.019575933477729755	0.0	-0.020554101541148458	0.0028384648345335228
2.54	88.84824751730694	0.0	-0.0010103099981762672	233.67579810994192	0.0	-800.643659784853	0.0	2.6906409279287778e-05	0.0	0.9999999999942549	0.0	3.3897374213593893e-06	0.0	0.0	0.00038843529580364754	0.0	0.0	0.0003932178578692983	0.0	800.643659784853	88.84824750841581	0.0	-0.001612654457012823	0.03708433024366779	0.0	-0.0013860284977586141	0.0037110222643067133
2.545	88.84834508870092	0.0	-0.0009521039711911863	234.1200395914817	0.0	-800.6436677645861	0.0	2.5408285652749282e-05	0.0	0.9999999999940327	0.0	3.4546943904328282e-06	0.0	0.0	0.0003958788161594308	0.0	0.0	0.00040049679553212495	0.0	800.6436677645861	88.8483450800017	0.0	-0.0015659917299191473	-0.02892019343410842	0.0	0.024785000121431082	0.003808771218235071
2.55	88.8473893612274	0.0	-0.0006892469234399587	234.5642806393514	0.0	-800.6436752099227	0.0	1.1183587721868385e-05	0.0	0.9999999999938336	0.0	3.5118331818486677e-06	0.0	0.0	0.00040242643934868243	0.0	0.0	0.00040370065741351187	0.0	800.6436752099227	88.84738935419489	0.0	-0.0013132813435778835	-0.5823308921916256	0.0	0.10053235900252742	0.059094502553732345
2.555	88.84301972460395	0.0	-4.040650628625661e-05	235.0085069235938	0.0	-800.6436801180118	0.0	-3.7002852785083505e-05	0.0	0.9999999999939555	0.0	3.4768231884475232e-06	0.0	0.0	0.00039841458962332487	0.0	0.0	0.0003931001209408659	0.0	800.6436801180118	88.84301972217493	0.0	-0.0006581894485019528	-0.7787069764001824	0.0	0.10551711112309003	0.07858233999023424
2.56	88.84058449989308	0.0	0.00021578944309835833	235.45271437343817	0.0	-800.6436824769436	0.0	-4.2411075800914297e-05	0.0	0.999999999994337	0.0	3.3653942749807576e-06	0.0	0.0	0.000385645776708502	0.0	0.0	0.0003809502427008568	0.0	800.6436824769436	88.84058449933309	0.0	-0.00038217774582691226	-0.2077591231113729	0.0	0.014118828386545977	0.02082383119193376
2.565	88.84062866071595	0.0	0.00013716931294391734	235.89691728796367	0.0	-800.64368455501	0.0	-1.4189906083446419e-05	0.0	0.9999999999945733	0.0	3.294432609636258e-06	0.0	0.0	0.0003775141688455377	0.0	0.0	0.0003768851340495144	0.0	800.64368455501	88.84062865969132	0.0	-0.00044818961529677993	0.05551441772245388	0.0	-0.01606527058395717	0.005779224423743086
2.57	88.84072640295008	0.0	0.00010454136024781601	236.34112067564772	0.0	-800.6436868918951	0.0	1.1833720876451372e-05	0.0	0.9999999999945809	0.0	3.292148573419108e-06	0.0	0.0	0.0003772524375745409	0.0	0.0	0.000380275245360297	0.0	800.6436868918951	88.84072640171266	0.0	-0.000480412381129259	0.0204356143702474	0.0	-0.003034990354766473	0.0020659755592527893
2.575	88.84082407737097	0.0	0.00011522174976925592	236.7853245518682	0.0	-800.6436893050313	0.0	3.44806144602369e-05	0.0	0.999999999994386	0.0	3.3507796209476917e-06	0.0	0.0	0.0003839710607182155	0.0	0.0	0.00039015321377824366	0.0	800.6436893050313	88.84082407614814	0.0	-0.00048015029588329637	0.05352505445609761	0.0	-0.0017135059244123062	0.0053552474798847635
2.58	88.84092169515169	0.0	0.00015928723248589705	237.22952891631516	0.0	-800.6436916532431	0.0	5.350873508284082e-05	0.0	0.9999999999940088	0.0	3.46152983322991e-06	0.0	0.0	0.0003966621002061872	0.0	0.0	0.0004054823372148956	0.0	800.6436916532431	88.84092169412538	0.0	-0.00045576376923305527	-0.17042512873265045	0.0	0.03314268693010739	0.01736178625616834
2.585	88.83897949448813	0.0	0.0004917788476902609	237.67372971910137	0.0	-800.6436932874454	0.0	5.6150646328188475e-05	0.0	0.9999999999935136	0.0	3.6018491881920487e-06	0.0	0.0	0.0004127415138529449	0.0	0.0	0.00042156831247258035	0.0	800.6436932874454	88.83897949572578	0.0	-0.0001481903646624118	-0.5328538480074012	0.0	0.07394846205661727	0.053796059184370894
2.59	88.83619526217423	0.0	0.0008513721067254737	238.11791733332464	0.0	-800.6436931012252	0.0	5.6563853630601935e-05	0.0	0.9999999999930029	0.0	3.7409653346440187e-06	0.0	0.0	0.00042868304996069586	0.0	0.0	0.0004377726629027265	0.0	800.6436931012252	88.83619526605776	0.0	0.00018670585283137394	-0.43337288860693474	0.0	0.040335379729877247	0.04352459114540561
2.595	88.8349838780589	0.0	0.0009145533133165551	238.56209448622027	0.0	-800.6436919496906	0.0	6.745385063450403e-05	0.0	0.9999999999924186	0.0	3.8940422221984805e-06	0.0	0.0	0.0004462243691565624	0.0	0.0	0.0004570967676690411	0.0	800.6436919496906	88.83498388248756	0.0	0.0002226989572351007	-0.08777041718772693	0.0	-0.016347053668338666	0.008927974180598406
2.6	88.83495915783193	0.0	0.0008163378858143615	239.00626923472407	0.0	-800.6436911616954	0.0	8.190087777520585e-05	0.0	0.9999999999916722	0.0	4.081219097261607e-06	0.0	0.0	0.0004676732590838623	0.0	0.0	0.0004805596408437216	0.0	800.6436911616954	88.83495916153605	0.0	9.122802215440972e-05	-0.02509954004305352	0.0	-0.020524694522471965	0.0032422985606104164
2.605	88.83435688070847	0.0	0.000832554712455284	239.4504430219958	0.0	-800.6436908381783	0.0	9.092395271740589e-05	0.0	0.9999999999907611	0.0	4.29870001442671e-06	0.0	0.0	0.0004925947364404704	0.0	0.0	0.0005066074345804936	0.0	800.6436908381783	88.83435688458333	0.0	6.88102100221945e-05	-0.234984374405182	0.0	0.011846514480716348	0.023528280030621997
2.61	88.83268524988286	0.0	0.0009921493780966264	239.89461092645823	0.0	-800.6436902262503	0.0	9.47513875007478e-05	0.0	0.9999999999897335	0.0	4.53139421218142e-06	0.0	0.0	0.0005192595273377853	0.0	0.0	0.000533751707614501	0.0	800.6436902262503	88.83268525522651	0.0	0.00018707754647644226	-0.37382105055433124	0.0	0.025198666959292317	0.037466938846677775
2.615	88.83089168777008	0.0	0.0011264862017909324	240.33876969485775	0.0	-800.6436890182836	0.0	9.776032489090607e-05	0.0	0.9999999999886148	0.0	4.771886799024572e-06	0.0	0.0	0.0005468179477986755	0.0	0.0	0.0005617579777148843	0.0	800.6436890182836	88.83089169447557	0.0	0.0002787042829683801	-0.30752999497731065	0.0	0.007261135244070521	0.03076157048913098
2.62	88.82966689663323	0.0	0.0011504594186436284	240.78292086251054	0.0	-800.6436876366606	0.0	0.00010143202789056289	0.0	0.9999999999873956	0.0	5.020838541860616e-06	0.0	0.0	0.0005753457161328805	0.0	0.0	0.0005908161132427968	0.0	800.6436876366606	88.8296669037072	0.0	0.0002584605881663558	-0.20737869185841382	0.0	-0.010206245622017412	0.020762969269014466
2.625	88.82866186502194	0.0	0.0011419553077262074	241.22706674243267	0.0	-800.643686490371	0.0	0.0001043676060962611	0.0	0.9999999999860693	0.0	5.27841385364617e-06	0.0	0.0	0.000604861672677429	0.0	0.0	0.0006207152299787949	0.0	800.643686490371	88.82866187212757	0.0	0.0002042064288972717	-0.22776619072881016	0.0	-0.006720142780678094	0.022786530661359012
2.63	88.8272893902444	0.0	0.0011878770908722977	241.6712068278664	0.0	-800.6436854982906	0.0	0.00010551354068821331	0.0	0.999999999984648	0.0	5.541132946548967e-06	0.0	0.0	0.000634967063119541	0.0	0.0	0.0006509426327933774	0.0	800.6436854982906	88.82728939795405	0.0	0.00020346945122861945	-0.31822042420254587	0.0	0.005009485515856592	0.0318259851889587
2.635	88.82553761109828	0.0	0.0012732289597425141	242.11533898085395	0.0	-800.6436843875331	0.0	0.00010536337751950942	0.0	0.9999999999831518	0.0	5.804891437201157e-06	0.0	0.0	0.0006651915597702501	0.0	0.0	0.0006811270170289348	0.0	800.6436843875331	88.825537619894	0.0	0.0002419837543071749	-0.36060169967200295	0.0	0.006867434127036653	0.036066708674042686
2.64	88.82376610159392	0.0	0.0013380134013061846	242.55946218825233	0.0	-800.6436831159016	0.0	0.00010482899849257862	0.0	0.999999999981592	0.0	6.067651643482707e-06	0.0	0.0	0.00069530166145862	0.0	0.0	0.0007111583129499749	0.0	800.6436831159016	88.82376611129082	0.0	0.00026011006049418597	-0.34187284708337984	0.0	-1.6684286916923317e-05	0.03418728474904982
2.645	88.82211167058159	0.0	0.001369590212912105	243.00357685815058	0.0	-800.6436818443414	0.0	0.00010419416231393928	0.0	0.9999999999799722	0.0	6.328969984383262e-06	0.0	0.0	0.0007252465375451209	0.0	0.0	0.0007410077417024238	0.0	800.6436818443414	88.82211168080215	0.0	0.00024528525539960477	-0.33151522628169044	0.0	-0.003828154798111644	0.033153732825393696
2.65	88.82039424529123	0.0	0.001401235935892658	243.44768319732273	0.0	-800.6436806612858	0.0	0.00010319527051021471	0.0	0.9999999999782972	0.0	6.588314702709098e-06	0.0	0.0	0.0007549652531438999	0.0	0.0	0.0007705710090321545	0.0	800.6436806612858	88.82039425604421	0.0	0.0002308825171830737	-0.3638837239812176	0.0	-0.000883101264757544	0.036388479556898605
2.655	88.81845367992021	0.0	0.0014536874373763465	243.89178041465652	0.0	-800.6436794976245	0.0	0.00010167010971397762	0.0	0.9999999999765767	0.0	6.844493971631267e-06	0.0	0.0	0.0007843212349605365	0.0	0.0	0.0007996973499783692	0.0	800.6436794976245	88.81845369149805	0.0	0.00023785269570497528	-0.4085255416337456	0.0	0.00278150201813956	0.040853501064244443
2.66	88.81633520775151	0.0	0.0015141930390757804	244.335867433986	0.0	-800.6436782678534	0.0	9.986368874215416e-05	0.0	0.9999999999748207	0.0	7.0964275726071405e-06	0.0	0.0	0.000813190699068139	0.0	0.0	0.000828306189436037	0.0	800.6436782678534	88.81633522029689	0.0	0.0002536356588226028	-0.432333434400789	0.0	0.0025413787434161346	0.04323409038093653
2.665	88.81415091391655	0.0	0.001564901609262937	244.77994366442465	0.0	-800.6436769775731	0.0	9.8129664134728e-05	0.0	0.9999999999730341	0.0	7.343882299602387e-06	0.0	0.0	0.0008415469220236575	0.0	0.0	0.0008564182674358179	0.0	800.6436769775731	88.81415092732165	0.0	0.000260420267427464	-0.44134890233375285	0.0	0.00033353890004132064	0.04413490283657667
2.67	88.81191213454262	0.0	0.0016066091219820338	245.22400885756412	0.0	-800.6436756780605	0.0	9.654374285581638e-05	0.0	0.9999999999712176	0.0	7.587207183627764e-06	0.0	0.0	0.0008694298998347634	0.0	0.0	0.0008840760124559908	0.0	800.6436756780605	88.81191214869709	0.0	0.0002589403663580153	-0.45830776028097375	0.0	-0.00026081818499593796	0.04583078344954275
2.675	88.80955003788522	0.0	0.0016504289379098355	245.66806257790788	0.0	-800.6436743829194	0.0	9.494240876659711e-05	0.0	0.9999999999693726	0.0	7.826584613768447e-06	0.0	0.0	0.0008968605327510755	0.0	0.0	0.0009112750090516502	0.0	800.6436743829194	88.80955005283964	0.0	0.00026027802198579607	-0.48831655858497436	0.0	0.0009515818861063462	0.048831748575732845
2.68	88.80702667419027	0.0	0.0017000430138803355	246.1121040851591	0.0	-800.6436730637854	0.0	9.325607512344566e-05	0.0	0.9999999999675038	0.0	8.061840830287694e-06	0.0	0.0	0.0009238189093734639	0.0	0.0	0.0009379909066442921	0.0	800.6436730637854	88.80702669005764	0.0	0.0002681467863890157	-0.519293524281513	0.0	0.0018422187501311524	0.051929679195103606
2.685	88.80436623491255	0.0	0.0017498717597566773	246.5561326161707	0.0	-800.6436716999439	0.0	9.163636170054637e-05	0.0	0.999999999965614	0.0	8.292920199223828e-06	0.0	0.0	0.0009502986545195229	0.0	0.0	0.0009642427905211699	0.0	800.6436716999439	88.80436625172112	0.0	0.00027697671450908613	-0.5431629523800534	0.0	0.0014432200061948622	0.05431648697423302
2.69	88.80159933350738	0.0	0.0017952157201037726	247.00014757271157	0.0	-800.6436703007811	0.0	9.0250380997933e-05	0.0	0.9999999999637031	0.0	8.520223451598396e-06	0.0	0.0	0.000976345688581763	0.0	0.0	0.000990097620174316	0.0	800.6436703007811	88.8015993512058	0.0	0.0002819967815364668	-0.5640415071513398	0.0	0.0006740389589267944	0.056404190989506546
2.695	88.79872110061251	0.0	0.0018374613259686033	247.44414842526086	0.0	-800.6436688843116	0.0	8.908998710601127e-05	0.0	0.9999999999617684	0.0	8.744363227898754e-06	0.0	0.0	0.001002030214988754	0.0	0.0	0.001015620021464563	0.0	800.6436688843116	88.7987211191677	0.0	0.00028448478279371325	-0.5885779300707366	0.0	0.0005129234172572693	0.058857815356737876
2.7	88.79570810062339	0.0	0.0018800127588798577	247.8881345582405	0.0	-800.643667454405	0.0	8.804903081153489e-05	0.0	0.9999999999598078	0.0	8.965769841639468e-06	0.0	0.0	0.001027401544037001	0.0	0.0	0.0010408442107431547	0.0	800.643667454405	88.79570812005934	0.0	0.0002877689951304249	-0.6169860731219501	0.0	0.0008115189166375092	0.06169866068152505
2.705	88.79255105800198	0.0	0.0019234425339666281	248.33210526524653	0.0	-800.6436660042592	0.0	8.710635044217876e-05	0.0	0.9999999999578212	0.0	9.184686643478323e-06	0.0	0.0	0.0010524875616577706	0.0	0.0	0.0010657983419887765	0.0	800.6436660042592	88.79255107835375	0.0	0.0002923790182253146	-0.6452445930238564	0.0	0.0009185162608894897	0.06452452467850063
2.71	88.78925816781141	0.0	0.001965956299727497	248.77605984276923	0.0	-800.6436645315575	0.0	8.634912333362953e-05	0.0	0.9999999999558068	0.0	9.401456909952888e-06	0.0	0.0	0.0010773276044446808	0.0	0.0	0.0010905355436471344	0.0	800.6436645315575	88.78925818908158	0.0	0.0002964595299910269	-0.671513101379162	0.0	0.0006588188081419208	0.06715134245613283
2.715	88.78583632475618	0.0	0.0020065421742705316	249.21999763298993	0.0	-800.6436630425213	0.0	8.584577041333204e-05	0.0	0.9999999999537605	0.0	9.616646971185109e-06	0.0	0.0	0.0011019865690493316	0.0	0.0	0.001115128545315799	0.0	800.6436630425213	88.78583634692696	0.0	0.00029889808602516	-0.6974933711587047	0.0	0.0003641924997353707	0.06974934662392986
2.72	88.78228103166029	0.0	0.0020460079121102535	249.66391798406735	0.0	-800.6436615441676	0.0	8.557159859597904e-05	0.0	0.9999999999516775	0.0	9.830877752149461e-06	0.0	0.0	0.0011265356082325905	0.0	0.0	0.0011396430025444849	0.0	800.6436615441676	88.78228105472768	0.0	0.0003003924090406729	-0.7250690311082053	0.0	0.00028995811696521084	0.07250690890859307
2.725	88.77858358181041	0.0	0.002085489373884832	250.10782020624467	0.0	-800.6436600383589	0.0	8.546859038608358e-05	0.0	0.9999999999495531	0.0	1.0044645909855643e-05	0.0	0.0	0.0011510316346955024	0.0	0.0	0.0011641279500947599	0.0	800.6436600383589	88.77858360579201	0.0	0.00030199050063835984	-0.7540246510859088	0.0	0.0003475592981797706	0.0754024731187706
2.73	88.77474037695113	0.0	0.00212516667316011	250.55170357689212	0.0	-800.6436585238691	0.0	8.552642530227267e-05	0.0	0.9999999999473835	0.0	1.0258353362657891e-05	0.0	0.0	0.0011755207048888842	0.0	0.0	0.0011886294661280655	0.0	800.6436585238691	88.7747404018685	0.0	0.000303801359878713	-0.7831204428865609	0.0	0.0003445509045118915	0.07831205186828967
2.735	88.77075257725242	0.0	0.0021646086644923103	250.99556736936248	0.0	-800.6436570008613	0.0	8.577624321044996e-05	0.0	0.9999999999451645	0.0	1.0472438699124122e-05	0.0	0.0	0.0012000530773605088	0.0	0.0	0.0012132025497202977	0.0	800.6436570008613	88.77075260311874	0.0	0.00030531613483869476	-0.8119580847020321	0.0	0.0002510223258500185	0.0811958123504655
2.74	88.7666202330889	0.0	0.0022036942634231092	251.43941086224615	0.0	-800.6436554715843	0.0	8.623021036351431e-05	0.0	0.9999999999428902	0.0	1.0687406086168357e-05	0.0	0.0	0.0012246865253830674	0.0	0.0	0.0012379056853220709	0.0	800.6436554715843	88.76662025991469	0.0	0.00030632442837263876	-0.8411357114556022	0.0	0.0001697324439303054	0.08411357285807236
2.745	88.7623399274399	0.0	0.0022427958343364733	251.88323332541	0.0	-800.6436539379821	0.0	8.685854983506611e-05	0.0	0.999999999940555	0.0	1.0903735336753377e-05	0.0	0.0	0.0012494760314720114	0.0	0.0	0.001262788826922951	0.0	800.6436539379821	88.76233995524369	0.0	0.0003071137090387648	-0.8711733563181667	0.0	0.00016194152816453747	0.08711733713697395
2.75	88.7579073327465	0.0	0.0022822952443795597	252.32703400786912	0.0	-800.6436524002687	0.0	8.762167253047052e-05	0.0	0.9999999999381534	0.0	1.1121810419054341e-05	0.0	0.0	0.0012744655951391535	0.0	0.0	0.0012878905870723177	0.0	800.6436524002687	88.7579073615555	0.0	0.00030799800684345487	-0.9019458083043238	0.0	0.00018981132328619218	0.09019458282768864
2.755	88.75331978778058	0.0	0.0023222579998571076	252.77081214069554	0.0	-800.6436508578153	0.0	8.850140870019428e-05	0.0	0.9999999999356809	0.0	1.1341940410160126e-05	0.0	0.0	0.0012996906340099724	0.0	0.0	0.0013132443730697353	0.0	800.6436508578153	88.75331981762426	0.0	0.00030898827091535135	-0.9330897082987141	0.0	0.00019686916634744657	0.09330897290670648
2.76	88.74857587655124	0.0	0.0023625823941894274	253.21456694546998	0.0	-800.6436493104699	0.0	8.949392721783405e-05	0.0	0.9999999999331328	0.0	1.1564411763417086e-05	0.0	0.0	0.00132518397322002	0.0	0.0	0.0013388824946778996	0.0	800.6436493104699	88.74857590745752	0.0	0.00030993224398815966	-0.9645300238761461	0.0	0.00017838296845605498	0.09645300403714767
2.765	88.74367367296048	0.0	0.0024032613777544526	253.6582976360142	0.0	-800.643647758669	0.0	9.058598662771024e-05	0.0	0.9999999999305047	0.0	1.1789493461401617e-05	0.0	0.0	0.0013509764359020825	0.0	0.0	0.001364833468261881	0.0	800.643647758669	88.74367370495787	0.0	0.0003107754562155564	-0.9964628642237017	0.0	0.0001636891889325867	0.09964628776683324
2.77	88.73861022853671	0.0	0.0024444075489947277	254.10200341380153	0.0	-800.6436462027589	0.0	9.174990671626563e-05	0.0	0.9999999999277918	0.0	1.2017401623781024e-05	0.0	0.0	0.0013770927875457772	0.0	0.0	0.0013911178803896862	0.0	800.6436462027589	88.73861026165693	0.0	0.0003115925111377319	-1.029030897802604	0.0	0.00016662296456887348	0.10290309112925838
2.775	88.73338238879508	0.0	0.002486111580547025	254.54568346460962	0.0	-800.6436446426729	0.0	9.295793630905669e-05	0.0	0.9999999999249907	0.0	1.2248279422416403e-05	0.0	0.0	0.0014035494344378817	0.0	0.0	0.0014177483675034605	0.0	800.6436446426729	88.73338242307292	0.0	0.00031244905677597397	-1.0621906320740968	0.0	0.0001744416374307503	0.10621906463982134
2.78	88.72798747077526	0.0	0.002528367112278447	254.98933695954958	0.0	-800.6436430782356	0.0	9.419339323289236e-05	0.0	0.999999999922098	0.0	1.2482213922610129e-05	0.0	0.0	0.0014303563535271366	0.0	0.0	0.0014447327869547648	0.0	800.6436430782356	88.72798750624615	0.0	0.0003133236705973681	-1.0958483934610779	0.0	0.00017230382252942376	0.10958484070070243
2.785	88.72242306289715	0.0	0.002571125644996052	255.4329630571975	0.0	-800.6436415095044	0.0	9.544708029557697e-05	0.0	0.999999999919111	0.0	1.2719261561983611e-05	0.0	0.0	0.0014575200120885729	0.0	0.0	0.0014720763612936791	0.0	800.6436415095044	88.72242309959613	0.0	0.0003141582336468012	-1.1300001606727506	0.0	0.00016064660626113173	0.11300001720919224
2.79	88.7166865394879	0.0	0.0026143677890385257	255.8765609037023	0.0	-800.6436399367633	0.0	9.670943223423035e-05	0.0	0.9999999999160271	0.0	1.2959456565013866e-05	0.0	0.0	0.001485044331958373	0.0	0.0	0.0014997815728243183	0.0	800.6436399367633	88.71668657745026	0.0	0.0003149276967525846	-1.1647108074093637	0.0	0.00014812375081332861	0.11647108168282878
2.795	88.71077496308413	0.0	0.0026581049627853533	256.3201296312215	0.0	-800.6436383603183	0.0	9.79699411546923e-05	0.0	0.9999999999128437	0.0	1.3202807062589518e-05	0.0	0.0	0.0015129302448677457	0.0	0.0	0.0015278478935608628	0.0	800.6436383603183	88.71077500234622	0.0	0.0003156424696420382	-1.2000219509476533	0.0	0.00013832453545366475	0.1200021958919873
2.8	88.70468533609238	0.0	0.0027023419277512903	256.7636683569699	0.0	-800.643636780416	0.0	9.92228082514832e-05	0.0	0.999999999909559	0.0	1.3449299687150666e-05	0.0	0.0	0.0015411762190071668	0.0	0.0	0.001556273134282092	0.0	800.643636780416	88.70468537669144	0.0	0.00031631013351046417	-1.2359235953863865	0.0	0.00012807570409984083	0.12359236020224706
2.805	88.69841476860896	0.0	0.0027470625900876166	257.2071761834193	0.0	-800.6436351973159	0.0	0.00010047021227710101	0.0	0.9999999999061706	0.0	1.3698916378841775e-05	0.0	0.0	0.0015697801848696398	0.0	0.0	0.0015850557299333986	0.0	800.6436351973159	88.69841481058243	0.0	0.00031691825558261775	-1.2723956383003574	0.0	0.00011431021948025959	0.12723956434350914
2.81	88.69196041567741	0.0	0.0027922483780893066	257.6506521987697	0.0	-800.643633611362	0.0	0.00010172061660699839	0.0	0.9999999999026764	0.0	1.3951653135262495e-05	0.0	0.0	0.001598741683813874	0.0	0.0	0.0016141965400386453	0.0	800.643633611362	88.6919604590631	0.0	0.00031744944203123044	-1.309442326277832	0.0	9.801577857533202e-05	0.1309442329946223
2.815	88.68531935478117	0.0	0.0028378973071487806	258.0940954768336	0.0	-800.6436320229591	0.0	0.0001029858919810094	0.0	0.9999999998990737	0.0	1.4207531753575578e-05	0.0	0.0	0.0016280632136107373	0.0	0.0	0.0016436998248381554	0.0	800.6436320229591	88.68531939961748	0.0	0.00031789832463935267	-1.3470827593951167	0.0	8.186115793705568e-05	0.13470827618824358
2.82	88.67848858222195	0.0	0.0028840234904885073	258.5375050765811	0.0	-800.6436304325082	0.0	0.00010428101807211179	0.0	0.9999999998953594	0.0	1.4466607354956645e-05	0.0	0.0	0.0016577510906816862	0.0	0.0	0.0016735741359324527	0.0	800.6436304325082	88.67848862854852	0.0	0.00031826973924982367	-1.3853268054755101	0.0	6.694026190859825e-05	0.13853268070928176
2.825	88.67146508417163	0.0	0.002930649016326713	258.98088004190924	0.0	-800.6436288403819	0.0	0.00010562523149094933	0.0	0.9999999998915294	0.0	1.4728977631100521e-05	0.0	0.0	0.0016878165096703421	0.0	0.0	0.0017038335358050714	0.0	800.6436288403819	88.67146513202958	0.0	0.0003185689638551402	-1.4241709566341854	0.0	5.27583066859121e-05	0.1424170957611399
2.83	88.6642458772563	0.0	0.002977802341263527	259.42421940171954	0.0	-800.6436272469352	0.0	0.00010704211039066919	0.0	0.9999999998875788	0.0	1.4994793977390849e-05	0.0	0.0	0.0017182768192097533	0.0	0.0	0.0017344988415828654	0.0	800.6436272469352	88.66424592668842	0.0	0.0003187981400430147	-1.4636097637849825	0.0	3.895040389515895e-05	0.14636097643032675
2.835	88.65682799108339	0.0	0.0030255236818636294	259.8675221700444	0.0	-800.6436256525128	0.0	0.00010855810077009817	0.0	0.9999999998835016	0.0	1.5264270725191917e-05	0.0	0.0	0.0017491565798651127	0.0	0.0	0.001765598446613278	0.0	800.6436256525128	88.65682804213472	0.0	0.00031896003258372627	-1.5036435166216222	0.0	2.6042878129090126e-05	0.15036435168471518
2.84	88.64920844249818	0.0	0.0030738691254312118	260.31078734603744	0.0	-800.6436240574361	0.0	0.00011020087783315322	0.0	0.9999999998792908	0.0	1.5537690114975213e-05	0.0	0.0	0.0017804881340120792	0.0	0.0	0.0017971686726056604	0.0	800.6436240574361	88.64920849521673	0.0	0.0003190612648448026	-1.5442753408817587	0.0	1.4810024794708652e-05	0.15442753409527749
2.845	88.64138423681612	0.0	0.0031229100170374275	260.7540139139015	0.0	-800.6436224619854	0.0	0.00011199846425349212	0.0	0.9999999998749373	0.0	1.581540411617138e-05	0.0	0.0	0.001812311814376453	0.0	0.0	0.00182925386917402	0.0	800.6436224619854	88.64138429125335	0.0	0.0003191113895816979	-1.585496883695233	0.0	-0.004687901394114903	0.1585503814131892
2.85	88.63335238387883	0.0	0.003172730506243968	261.197200842871	0.0	-800.6436208663908	0.0	0.00011397874788193958	0.0	0.9999999998704305	0.0	1.6097834695854737e-05	0.0	0.0	0.001844675974823152	0.0	0.0	0.001861906375213124	0.0	800.6436208663908	88.6333524400903	0.0	0.0003191203945391055	-1.6273795157549862	0.0	0.02211313303958832	0.16275297474859748
2.855	88.62510934767998	0.0	0.003484494281306969	261.6403470863071	0.0	-800.6436190187059	0.0	-0.00014329543330868596	0.0	0.9999999998676518	0.0	1.626958289408539e-05	0.0	0.0	0.0018643568686209163	0.0	0.0	0.0018208552574526936	0.0	800.6436190187059	88.62510941414502	0.0	0.0006007071537850435	-1.6699412068109136	0.0	0.10075168409454385	0.16729777452354164
2.86	88.61665217118724	0.0	0.003923457474240765	262.0834515798071	0.0	-800.6436143116669	0.0	-0.0007521393647137932	0.0	0.9999999998858076	0.0	1.5112385827237862e-05	0.0	0.0	0.0017317518526140184	0.0	0.0	0.0016053832014339372	0.0	800.6436143116669	88.61665224929544	0.0	0.0012450393960962683	-1.7129382282258614	0.0	0.11707586217870394	0.17169345157059546
2.865	88.60797916637678	0.0	0.00392376884731992	262.5265132491004	0.0	-800.6436069151152	0.0	-0.0011875236311290882	0.0	0.9999999999199488	0.0	1.2653524609031789e-05	0.0	0.0	0.0014499871121635933	0.0	0.0	0.0012651827407552014	0.0	800.6436069151152	88.6079792373031	0.0	0.0016813623563663688	-1.7563914986311602	0.0	0.06845291156088022	0.17577249209034318
2.87	88.59908726761351	0.0	0.003588376906634384	262.96953100734	0.0	-800.6435977945595	0.0	-0.0014684695071350898	0.0	0.9999999999567319	0.0	9.303519214806927e-06	0.0	0.0	0.001066104771269995	0.0	0.0	0.0008444972152427176	0.0	800.6435977945595	88.59908731904854	0.0	0.0019398102844674701	-1.800477610149187	0.0	0.035999955291945884	0.18008374777945815
2.875	88.58997343462677	0.0	0.003012361770589811	263.41250375238764	0.0	-800.6435877612267	0.0	-0.001616489754515285	0.0	0.9999999999853117	0.0	5.4219578473741895e-06	0.0	0.0	0.0006213106027078069	0.0	0.0	0.00038140701244339587	0.0	800.6435877612267	88.58997346208764	0.0	0.002051699567101845	-1.8451623470921183	0.0	0.009801209042260542	0.1845188378140613
2.88	88.58063469849492	0.0	0.002280362293155774	263.855430367127	0.0	-800.6435774705477	0.0	-0.0016541259503136667	0.0	0.9999999999991458	0.0	1.3130552150401888e-06	0.0	0.0	0.0001504650441789355	0.0	0.0	-9.246516623680217e-05	0.0	800.6435774705477	88.58063470418074	0.0	0.002047739764463324	-1.890439486523358	0.0	-0.010410689199380522	0.18904681522459732
2.885	88.5710680686803	0.0	0.0014650938117116133	264.2983097196209	0.0	-800.6435674287773	0.0	-0.0016037550652133782	0.0	0.9999999999961562	0.0	-2.775352340389221e-06	0.0	0.0	-0.0003180319515325263	0.0	0.0	-0.0005519071492840756	0.0	800.6435674287773	88.5710680591862	0.0	0.001956725653797567	-1.936321141708201	0.0	-0.02511851014601958	0.19364840570937078
2.89	88.56127048119555	0.0	0.0006267640925532355	264.7411406628067	0.0	-800.6435580048726	0.0	-0.0014866849738700786	0.0	0.999999999977894	0.0	-6.650176940350074e-06	0.0	0.0	-0.0007620541434001863	0.0	0.0	-0.0009778110216254385	0.0	800.6435580048726	88.56127046502843	0.0	0.0018046603299960806	-1.982820828095555	0.0	-0.03494881457782057	0.19831288046846424
2.895	88.55123883188413	0.0	-0.00018687412924032733	265.183922034183	0.0	-800.6435494460208	0.0	-0.0013224566929595709	0.0	0.9999999999482974	0.0	-1.016952926451537e-05	0.0	0.0	-0.0011653422130031162	0.0	0.0	-0.0013566669571024965	0.0	800.6435494460208	88.55123881737165	0.0	0.0016141747001250722	-2.0299416237252883	0.0	-0.04061164575967448	0.20303478277141998
2.9	88.54097002549442	0.0	-0.0009398888412638363	265.62665265573	0.0	-800.6435418953051	0.0	-0.001128387242479001	0.0	0.9999999999123904	0.0	-1.3237656252339782e-05	0.0	0.0	-0.0015169236678523872	0.0	0.0	-0.0016799260903547556	0.0	800.6435418953051	88.54097001935011	0.0	0.0014042610097525978	-2.0776800067020913	0.0	-0.04284589077471985	0.2078121743451495
2.905	88.53046098459278	0.0	-0.0016071585958986443	266.0693313339926	0.0	-800.6435354100736	0.0	-0.0009192961612709783	0.0	0.9999999998752049	0.0	-1.5799016529251406e-05	0.0	0.0	-0.0018104339352423974	0.0	0.0	-0.0019432850411717803	0.0	800.6435354100736	88.53046099118316	0.0	0.0011902298374301735	-2.126033768551376	0.0	-0.04237872469940255	0.2126456099083147
2.91	88.51970863471256	0.0	-0.002173089192577919	266.51195686012977	0.0	-800.6435299800561	0.0	-0.0007074005583271241	0.0	0.9999999998410231	0.0	-1.783187109011799e-05	0.0	0.0	-0.0020433819086785278	0.0	0.0	-0.0021459403732584916	0.0	800.6435299800561	88.51970865592267	0.0	0.0009838548749200812	-2.17500309758852	0.0	-0.039893582485573044	0.21753689278931954
2.915	88.50870990053912	0.0	-0.002630184416939111	266.9545280099105	0.0	-800.6435255444023	0.0	-0.0005023444868697084	0.0	0.9999999998129595	0.0	-1.9341788638023863e-05	0.0	0.0	-0.0022164057145239334	0.0	0.0	-0.0022898514680549883	0.0	800.6435255444023	88.50870993606522	0.0	0.0007936491034290926	-2.224591319797753	0.0	-0.03403587143197391	0.22248516761041942
2.92	88.49746171637481	0.0	-0.002977565820673682	267.3970435437363	0.0	-800.6435220071008	0.0	-0.0003113332044933711	0.0	0.9999999997928422	0.0	-2.0355362944632496e-05	0.0	0.0	-0.0023325527745299674	0.0	0.0	-0.002379041861253756	0.0	800.6435220071008	88.4974617642619	0.0	0.0006252300868783326	-2.2747794008608935	0.0	-0.033452285148475654	0.22750253576526794
2.925	88.48596127474234	0.0	-0.003341280018670057	267.8395022068054	0.0	-800.6435192924833	0.0	-0.0002478373360122222	0.0	0.9999999997809041	0.0	-2.0933624849626733e-05	0.0	0.0	-0.002398816707762819	0.0	0.0	-0.002450042028050086	0.0	800.6435192924833	88.48596133708492	0.0	0.00036338381901461893	-2.3254052076535934	0.0	-0.11335644132659159	0.23281664593779974
2.93	88.47420652072076	0.0	-0.004382783515608568	268.28190273396	0.0	-800.6435196233101	0.0	-0.0007514110674552152	0.0	0.9999999997531687	0.0	-2.221920588710691e-05	0.0	0.0	-0.0025461334431364567	0.0	0.0	-0.002665305442273105	0.0	800.6435196233101	88.47420662813187	0.0	-0.00045113029148716855	-2.3766967791149325	0.0	-0.1506757204155023	0.23814681926446185
2.935	88.46219300292987	0.0	-0.00535995431077771	268.72424384182244	0.0	-800.643523387259	0.0	-0.0010904130464635797	0.0	0.9999999996985814	0.0	-2.4553465804207723e-05	0.0	0.0	-0.0028136199262825436	0.0	0.0	-0.002977685769714933	0.0	800.643523387259	88.46219315948419	0.0	-0.0010158474438994214	-2.4287547609948965	0.0	-0.09043284824795494	0.24304377772528174
2.94	88.4499179405085	0.0	-0.006242229282878665	269.1665242296544	0.0	-800.6435294275764	0.0	-0.0012877378344078587	0.0	0.9999999996204291	0.0	-2.7553176968608284e-05	0.0	0.0	-0.0031573615053561927	0.0	0.0	-0.0033465954848693673	0.0	800.6435294275764	88.44991815020293	0.0	-0.0013680767915038533	-2.481342582023179	0.0	-0.051777678227778526	0.2481882740446075
2.945	88.4373785349538	0.0	-0.007010608715285487	269.60874258275624	0.0	-800.643536777901	0.0	-0.0013674389746024676	0.0	0.9999999995227868	0.0	-3.0894128188736684e-05	0.0	0.0	-0.00354020631446471	0.0	0.0	-0.003738337894801459	0.0	800.643536777901	88.43737879931315	0.0	-0.0015462172862415625	-2.5344913263436317	0.0	-0.02074373774301938	0.25345762142746175
2.95	88.42457198453636	0.0	-0.007655509968248629	270.0508975724052	0.0	-800.6435446616488	0.0	-0.001353299235094151	0.0	0.9999999994113457	0.0	-3.431219106323994e-05	0.0	0.0	-0.003931887468311853	0.0	0.0	-0.004126029567747346	0.0	800.6435446616488	88.42457230168496	0.0	-0.0015874283365575849	-2.588201193362257	0.0	0.003097371765252313	0.2588203046716711
2.955	88.41149548615532	0.0	-0.008174792271655315	270.4929878558517	0.0	-800.643552481386	0.0	-0.0012677879545753218	0.0	0.9999999992930831	0.0	-3.7601200369542906e-05	0.0	0.0	-0.0043087801726164835	0.0	0.0	-0.004489224063320793	0.0	800.643552481386	88.41149585092101	0.0	-0.0015260355397481108	-2.6424728840896234	0.0	0.02043648932095399	0.26425519092810074
2.96	88.398146230023	0.0	-0.008571935972956564	270.9350120763036	0.0	-800.6435598019426	0.0	-0.0011313047126336685	0.0	0.9999999991754746	0.0	-4.060871823291319e-05	0.0	0.0	-0.004653416333642767	0.0	0.0	-0.004813318990206641	0.0	800.6435598019426	88.39814663466758	0.0	-0.0013924651254713794	-2.6973076697707654	0.0	0.03212295125564264	0.2697498943355042
2.965	88.38452140101037	0.0	-0.008854464322395377	271.37696886289575	0.0	-800.6435663293056	0.0	-0.000961719582526183	0.0	0.9999999990655839	0.0	-4.323021281611212e-05	0.0	0.0	-0.004953817485174211	0.0	0.0	-0.00508883135597581	0.0	800.6435663293056	88.38452183621945	0.0	-0.0012127009568091579	-2.7527051746159734	0.0	0.039072021120788024	0.2752982455663679
2.97	88.37061818838141	0.0	-0.009032605991009779	271.8188568306775	0.0	-800.6435718878698	0.0	-0.0007741464287191774	0.0	0.9999999989693215	0.0	-4.5402405110209386e-05	0.0	0.0	-0.00520273238690392	0.0	0.0	-0.0053106079714294804	0.0	800.6435718878698	88.3706186442587	0.0	-0.0010081287483845198	-2.808662621178115	0.0	0.04219828055618705	0.28089796037858694
2.975	88.35643377121733	0.0	-0.00911818786647585	272.26067458065035	0.0	-800.643576397689	0.0	-0.0005809033956578833	0.0	0.99999999889098	0.0	-4.7096298988853496e-05	0.0	0.0	-0.005396838327490248	0.0	0.0	-0.005477024535809555	0.0	800.643576397689	88.35643423812692	0.0	-0.0007956657903005153	-2.8652017432487282	0.0	0.04236933210749781	0.2865514995566903
2.98	88.34196513801358	0.0	-0.009123737129884913	272.70242069934005	0.0	-800.6435798529162	0.0	-0.00039162395126418956	0.0	0.9999999988330667	0.0	-4.831031581168622e-05	0.0	0.0	-0.005535954408060934	0.0	0.0	-0.005589216533627931	0.0	800.6435798529162	88.34196560719809	0.0	-0.0005880806267734624	-2.9223621910278537	0.0	0.04037067148658282	0.29226410259669927
2.985	88.32720918036523	0.0	-0.009061807784788004	273.14409375777825	0.0	-800.6435823020375	0.0	-0.00021345759755338374	0.0	0.9999999987963826	0.0	-4.906377050543391e-05	0.0	0.0	-0.005622293956175393	0.0	0.0	-0.005650367630851986	0.0	800.6435823020375	88.32720964432947	0.0	-0.0003944759103705673	-2.980111777984481	0.0	0.0368797657578411	0.2980339968259355
2.99	88.31216317265132	0.0	-0.008944502143650387	273.58569231234725	0.0	-800.6435838310932	0.0	-5.131302613072262e-05	0.0	0.9999999987802746	0.0	-4.9391000056564984e-05	0.0	0.0	-0.005659791700644374	0.0	0.0	-0.0056650677300086605	0.0	800.6435838310932	88.31216362534077	0.0	-0.00022084999813990483	-3.038372125344324	0.0	0.03246575685104318	0.3038545572710289
2.995	88.29682465313748	0.0	-0.008783063444129918	274.0272149065305	0.0	-800.6435845495575	0.0	9.183473938184872e-05	0.0	0.9999999987829808	0.0	-4.9336183602863094e-05	0.0	0.0	-0.005653510197746737	0.0	0.0	-0.005638759015112341	0.0	800.6435845495575	88.29682508994743	0.0	-7.060670670252092e-05	-3.097125414200974	0.0	0.027595304197756573	0.3097248348470514
3.0	88.28119108199434	0.0	-0.008587597191296198	274.46866007149436	0.0	-800.6435845784048	0.0	0.0002145897702599969	0.0	0.9999999988020158	0.0	-4.8948845422689455e-05	0.0	0.0	-0.005609124511756688	0.0	0.0	-0.005577283574299442	0.0	800.6435845784048	88.2811914996624	0.0	5.492759150831796e-05	-3.156402849941505	0.0	0.022635098641250934	0.31564840089582835
3.005	88.2652597673254	0.0	-0.008366929931629472	274.91002632528523	0.0	-800.6435840410613	0.0	0.0003168263722485966	0.0	0.9999999988345143	0.0	-4.82803567336331e-05	0.0	0.0	-0.00553252135059584	0.0	0.0	-0.005486519504458015	0.0	800.6435840410613	88.26526016375453	0.0	0.00015602655494982055	-3.2162225576620074	0.0	0.017858241420167297	0.3216272136682555
3.01	88.24902801274226	0.0	-0.00812856424679026	275.35131217238893	0.0	-800.6435830565301	0.0	0.0003994017464115463	0.0	0.9999999988775258	0.0	-4.738111333689147e-05	0.0	0.0	-0.005429475647701356	0.0	0.0	-0.005372099332460335	0.0	800.6435830565301	88.24902838679407	0.0	0.00023411017660377085	-3.276575415673004	0.0	0.013453005740588315	0.3276603033319138
3.015	88.2324931891751	0.0	-0.007878691717715243	275.79251610400706	0.0	-800.64358173468	0.0	0.00046388568389280006	0.0	0.9999999989282387	0.0	-4.629842638601022e-05	0.0	0.0	-0.005305408861926483	0.0	0.0	-0.005239205873142349	0.0	800.64358173468	88.23249354046045	0.0	0.0002913594888510643	-3.3374486158000614	0.0	0.00953869556441914	0.33374622469503407
3.02	88.2156527095667	0.0	-0.007622238979877573	276.23363659833217	0.0	-800.6435801732366	0.0	0.0005123226624541852	0.0	0.999999998984131	0.0	-4.5075048650658403e-05	0.0	0.0	-0.005165220099808304	0.0	0.0	-0.005092436241604697	0.0	800.6435801732366	88.21565303825011	0.0	0.0003304107182829694	-3.3988383143025658	0.0	0.006179847222137645	0.3398843932469215
3.025	88.19850398572233	0.0	-0.007362952601841705	276.67467212065014	0.0	-800.6435784561584	0.0	0.0005470267275133722	0.0	0.9999999990430558	0.0	-4.374825754873502e-05	0.0	0.0	-0.005013181038786906	0.0	0.0	-0.004935724627767851	0.0	800.6435784561584	88.19850429235085	0.0	0.00035410915451826073	-3.46074497217496	0.0	0.0033972329369299356	0.34607466396178
3.03	88.18104441541375	0.0	-0.007103503328574264	277.11562112319757	0.0	-800.6435766529768	0.0	0.0005704149407566592	0.0	0.9999999991032771	0.0	-4.2349350860601664e-05	0.0	0.0	-0.004852878140313025	0.0	0.0	-0.004772312784385044	0.0	800.6435766529768	88.1810447007754	0.0	0.0003653166686130833	-3.523182244682725	0.0	0.0011787140006757663	0.3523182441857688
3.035	88.16327127398117	0.0	-0.006845620892511756	277.5564820450283	0.0	-800.6435748192159	0.0	0.0005848645107059084	0.0	0.9999999991634577	0.0	-4.0903620559298214e-05	0.0	0.0	-0.004687209651011747	0.0	0.0	-0.004604761444132881	0.0	800.6435748192159	88.16327153899331	0.0	0.0003667731152761798	-3.5861830715634353	0.0	-0.0005106503106212074	0.358618310792016
3.04	88.14518170044468	0.0	-0.006590232039110442	277.9972533111305	0.0	-800.6435729972302	0.0	0.0005926179393587792	0.0	0.9999999992226256	0.0	-3.943058176424718e-05	0.0	0.0	-0.00451841183884464	0.0	0.0	-0.004434988910187892	0.0	800.6435729972302	88.14518194607082	0.0	0.00036099956430577586	-3.649743879994105	0.0	-0.0017244260110789208	0.36497442873713076
3.045	88.12677301181562	0.0	-0.006337620943747787	278.4379333326006	0.0	-800.643571217544	0.0	0.000595730801200454	0.0	0.9999999992801227	0.0	-3.794438421178414e-05	0.0	0.0	-0.004348106144159563	0.0	0.0	-0.004264324607014227	0.0	800.643571217544	88.12677323900802	0.0	0.0003502113386970733	-3.7138186721425845	0.0	-0.0025284956178730686	0.3713819532885921
3.05	88.108042724031	0.0	-0.006087542438316194	278.8785205075414	0.0	-800.643569500341	0.0	0.000596020989707902	0.0	0.9999999993355536	0.0	-3.645427956656903e-05	0.0	0.0	-0.0041773527296340715	0.0	0.0	-0.004093577170956862	0.0	800.643569500341	88.10804293369267	0.0	0.0003362880166449662	-3.7783631077746334	0.0	-0.013812450312903887	0.377838835457342
3.055	88.08898836733523	0.0	-0.005839331839057042	279.3190132218271	0.0	-800.6435678572749	0.0	0.0005950351294986375	0.0	0.9999999993887233	0.0	-3.4965336835966815e-05	0.0	0.0	-0.004006732460724885	0.0	0.0	-0.0039231121630454	0.0	800.6435678572749	88.08898856029666	0.0	0.0003207904710620865	-3.8435864587007984	0.0	0.06287300384151648	0.3844100659467725
3.06	88.06960616298058	0.0	-0.005054304489351421	279.75940984476296	0.0	-800.6435649219445	0.0	-1.0230996608449743e-05	0.0	0.9999999994181538	0.0	-3.411326781662197e-05	0.0	0.0	-0.003909092543342022	0.0	0.0	-0.0039260431276747845	0.0	800.6435649219445	88.06960630284638	0.0	0.0009543796420001151	-3.90926917925943	0.0	0.1345317192394655	0.3911583349410981
3.065	88.04989527163279	0.0	-0.00462148839619489	280.1997087362691	0.0	-800.6435586345009	0.0	-0.0005791485788088142	0.0	0.9999999993913765	0.0	-3.488960708457559e-05	0.0	0.0	-0.00399805447044304	0.0	0.0	-0.004091956974058508	0.0	800.6435586345009	88.04989537975969	0.0	0.001522564111047276	-3.9751873418258774	0.0	0.09430479343649642	0.39763057976817867
3.07	88.02985353944197	0.0	-0.004610710669720678	280.63990824720105	0.0	-800.6435500500952	0.0	-0.0009674908176286572	0.0	0.9999999993207515	0.0	-3.685843144594268e-05	0.0	0.0	-0.004223665123606021	0.0	0.0	-0.004369122676897425	0.0	800.6435500500952	88.0298536401525	0.0	0.0018785739821585519	-4.041603063748293	0.0	0.05221291788262689	0.4041940315454127
3.075	88.0094783861153	0.0	-0.0049132976801229255	281.08000671699904	0.0	-800.64354014634	0.0	-0.0011966327021873864	0.0	0.9999999992161701	0.0	-3.9594344746282825e-05	0.0	0.0	-0.004537177694281597	0.0	0.0	-0.004711932694210787	0.0	800.64354014634	88.00947849925507	0.0	0.0020560575861397964	-4.108546656287852	0.0	0.02485931148667927	0.4108621862895353
3.08	87.98876729990326	0.0	-0.00542973636749938	281.5200024723356	0.0	-800.6435297294544	0.0	-0.0012903007366899793	0.0	0.9999999990871563	0.0	-4.272868546215129e-05	0.0	0.0	-0.004896346683736572	0.0	0.0	-0.005081576626785571	0.0	800.6435297294544	87.98876744263428	0.0	0.0020895523697826647	-4.175920563807504	0.0	-0.02950730741981912	0.41760248127162214
3.085	87.9677183837602	0.0	-0.006389015078215805	281.95989382365536	0.0	-800.6435197196962	0.0	-0.0015434638712261658	0.0	0.9999999989381488	0.0	-4.608422118644276e-05	0.0	0.0	-0.0052808627541304325	0.0	0.0	-0.005523746455046486	0.0	800.6435197196962	87.96771859899127	0.0	0.001718832522839423	-4.24368080678903	0.0	-0.12313607321815766	0.4245466909827137
3.09	87.94632931793316	0.0	-0.00794720613735745	282.39967908699356	0.0	-800.6435131107352	0.0	-0.0020174840281782474	0.0	0.9999999987203512	0.0	-5.0590047919123336e-05	0.0	0.0	-0.005797192464733723	0.0	0.0	-0.006101713055294816	0.0	800.6435131107352	87.94632967187057	0.0	0.000951211920944712	-4.3120438678407425	0.0	-0.14710679375219285	0.43145524364586185
3.095	87.92459666842062	0.0	-0.009505052054347337	282.8393565477737	0.0	-800.6435099508102	0.0	-0.002251412781280842	0.0	0.9999999984336216	0.0	-5.597154136432445e-05	0.0	0.0	-0.006413866189384491	0.0	0.0	-0.006746695306840829	0.0	800.6435099508102	87.92459718155271	0.0	0.0003374983885256334	-4.381013830821227	0.0	-0.10812911405628899	0.4382348011186866
3.1	87.90251804964204	0.0	-0.010979095156046725	283.2789244822158	0.0	-800.6435094997895	0.0	-0.0022897379839231804	0.0	0.9999999980975579	0.0	-6.16841374635527e-05	0.0	0.0	-0.00706848148361544	0.0	0.0	-0.00740265692018879	0.0	800.6435094997895	87.90251873519627	0.0	-0.0001347130795960816	-4.450445002216223	0.0	-0.08129475793667776	0.44511874320701594
3.105	87.88009107482122	0.0	-0.012308290374289594	283.718381154539	0.0	-800.6435110877322	0.0	-0.0021756079015819193	0.0	0.9999999977358233	0.0	-6.729322595613258e-05	0.0	0.0	-0.007711235680033196	0.0	0.0	-0.008025922673368577	0.0	800.6435110877322	87.88009193544612	0.0	-0.00048082063810958646	-4.520353830162094	0.0	-0.057728878522615906	0.4520722439309517
3.11	87.85731337633584	0.0	-0.013451444193674512	284.1577248170205	0.0	-800.6435141258683	0.0	-0.001949107527113215	0.0	0.9999999973741538	0.0	-7.246857877012674e-05	0.0	0.0	-0.008304287428947848	0.0	0.0	-0.008584300848972416	0.0	800.6435141258683	87.85731440315075	0.0	-0.0007176548159363827	-4.590738329941976	0.0	-0.03758810104285405	0.45908922095098736
3.115	87.83418258138717	0.0	-0.014384383981453929	284.5969537100453	0.0	-800.6435181106458	0.0	-0.0016460862482461879	0.0	0.9999999970374116	0.0	-7.697504925081344e-05	0.0	0.0	-0.008820690908477102	0.0	0.0	-0.009055869822667567	0.0	800.6435181106458	87.83418375499836	0.0	-0.00086230279083982	-4.661601146149745	0.0	-0.02083088018246228	0.46616476884631464
3.12	87.81069629855106	0.0	-0.015097092750540414	285.0360660620429	0.0	-800.6435226228042	0.0	-0.001297471865253618	0.0	0.9999999967468786	0.0	-8.066106384775269e-05	0.0	0.0	-0.00924307706904572	0.0	0.0	-0.009427568132247564	0.0	800.6435226228042	87.81069759141074	0.0	-0.0009312842388667072	-4.732944600704533	0.0	-0.007280730400390074	0.4732950200707098
3.125	87.786852130864	0.0	-0.015590909859191641	285.4750600894291	0.0	-800.643527323079	0.0	-0.0009289767229740477	0.0	0.9999999965183735	0.0	-8.344590406675676e-05	0.0	0.0	-0.009562196252454544	0.0	0.0	-0.009693700359709099	0.0	800.643527323079	87.78685351029499	0.0	-0.0009400032106044462	-4.804767629318245	0.0	0.003325106570191438	0.4804768779876735
3.13	87.76264769026639	0.0	-0.015875887607421424	285.91393399663406	0.0	-800.6435319457383	0.0	-0.0005611203933511056	0.0	0.9999999963613861	0.0	-8.530663941255448e-05	0.0	0.0	-0.009775420817423774	0.0	0.0	-0.009854449511397793	0.0	800.6435319457383	87.76264912156607	0.0	-0.000902414350029988	-4.877066821414408	0.0	0.011298582809830319	0.4877079908973683
3.135	87.7380806048128	0.0	-0.01596834351739285	286.3526859761785	0.0	-800.6435362907209	0.0	-0.0002095037929055832	0.0	0.9999999962791564	0.0	-8.626524057369425e-05	0.0	0.0	-0.00988526841936732	0.0	0.0	-0.009914467927025158	0.0	800.6435362907209	87.73808205400006	0.0	-0.0008308500743575525	-4.949838902487377	0.0	0.01697188405374257	0.4949867998788026
3.14	87.7131485143356	0.0	-0.01588879003369856	286.7913142087771	0.0	-800.6435402154949	0.0	0.00011474818266611888	0.0	0.9999999962695023	0.0	-8.637710532746305e-05	0.0	0.0	-0.009898087175949545	0.0	0.0	-0.009881594994157333	0.0	800.6435402154949	87.71314995033617	0.0	-0.0007359741174813764	-5.0230803872554	0.0	0.02067949761944464	0.5023122954741568
3.145	87.68784907848658	0.0	-0.015660069920412988	287.22981686339244	0.0	-800.6435436267161	0.0	0.00040445125663360776	0.0	0.9999999963260117	0.0	-8.572040202861801e-05	0.0	0.0	-0.009822834520838675	0.0	0.0	-0.009765728244037993	0.0	800.6435436267161	87.68785047460501	0.0	-0.0006267943934401073	-5.096783916921529	0.0	0.02182925836572889	0.509683066349185
3.15	87.662179974928	0.0	-0.015305824354797604	287.6681920973655	0.0	-800.6435464720747	0.0	0.0006557548009535764	0.0	0.9999999964394275	0.0	-8.438693535719158e-05	0.0	0.0	-0.009670030495497771	0.0	0.0	-0.009577868331587584	0.0	800.6435464720747	87.66218130964101	0.0	-0.000510738759857104	-5.170951764447788	0.0	0.016434248690089148	0.5170977879934868
3.155	87.63613871526235	0.0	-0.014794859816430006	288.10643802787655	0.0	-800.6435487245718	0.0	0.0008170995350405477	0.0	0.9999999965986799	0.0	-8.247817145375331e-05	0.0	0.0	-0.009451302263228588	0.0	0.0	-0.009343786557587958	0.0	800.6435487245718	87.63613996345407	0.0	-0.0003387227153071064	-5.24577881416306	0.0	0.11463336281499759	0.524703117724607
3.16	87.60972190621719	0.0	-0.013645803821486474	288.544552841227	0.0	-800.6435480003189	0.0	0.00023271411287922742	0.0	0.9999999967030411	0.0	-8.120302042418483e-05	0.0	0.0	-0.009305180718267175	0.0	0.0	-0.009277118875082403	0.0	800.6435480003189	87.60972296699553	0.0	0.0005825443861772817	-5.320914672539109	0.0	0.17437394961845298	0.5323771147104983
3.165	87.58292950968463	0.0	-0.012977081526019294	288.9825346317196	0.0	-800.6435433367765	0.0	-0.00018061433533426204	0.0	0.9999999967055706	0.0	-8.117192749424917e-05	0.0	0.0	-0.00930161773093946	0.0	0.0	-0.009328861070753473	0.0	800.6435433367765	87.58293046229096	0.0	0.0012414690059351244	-5.396214867605901	0.0	0.11322933333692334	0.5397402688265801
3.17	87.55575927741219	0.0	-0.01268686971112705	289.42038151622046	0.0	-800.6435359725796	0.0	-0.00043988233141448456	0.0	0.9999999966398476	0.0	-8.197763197012497e-05	0.0	0.0	-0.009393944663251644	0.0	0.0	-0.009454878076115596	0.0	800.6435359725796	87.5557601806885	0.0	0.001668358032973563	-5.471924598509048	0.0	0.03379141236071522	0.5472028935533669
3.175	87.52820960531395	0.0	-0.01305460819662564	289.8580916005055	0.0	-800.643527397657	0.0	-0.0008827451547021027	0.0	0.9999999965179789	0.0	-8.345100734031446e-05	0.0	0.0	-0.009562781044529992	0.0	0.0	-0.009707765934865865	0.0	800.643527397657	87.52821056505405	0.0	0.0015540264588477437	-5.548002956745298	0.0	-0.0714284777992949	0.5548462745256141
3.18	87.50027814086191	0.0	-0.01406553998381318	290.29566298492523	0.0	-800.6435209017501	0.0	-0.0014348508515834855	0.0	0.9999999962670436	0.0	-8.640577732637605e-05	0.0	0.0	-0.009901372745017826	0.0	0.0	-0.010118820424998294	0.0	800.6435209017501	87.50027926501085	0.0	0.0010555192678353234	-5.6246405487056474	0.0	-0.10047456815545415	0.5625537880148865
3.185	87.47196199712296	0.0	-0.015192628459421613	290.73309375207646	0.0	-800.643516729939	0.0	-0.0017315519175314274	0.0	0.9999999959128282	0.0	-9.041237596223354e-05	0.0	0.0	-0.01036049513088749	0.0	0.0	-0.01061487350940997	0.0	800.643516729939	87.47196331427446	0.0	0.000624467552786901	-5.701795099147944	0.0	-0.07947135915353974	0.5702348906336162
3.19	87.44325908215215	0.0	-0.016334228271319338	291.1703819734743	0.0	-800.6435145454238	0.0	-0.001817303407753353	0.0	0.9999999954981822	0.0	-9.48877540698356e-05	0.0	0.0	-0.010873335687670717	0.0	0.0	-0.011135492586205015	0.0	800.6435145454238	87.44326060737413	0.0	0.00026036087381407005	-5.779359422874583	0.0	-0.06625120315420988	0.5779739142962129
3.195	87.41416727619387	0.0	-0.01740984850221227	291.60752570999995	0.0	-800.6435140182838	0.0	-0.0017359408368037522	0.0	0.9999999950638466	0.0	-9.935968986132386e-05	0.0	0.0	-0.011385781784299607	0.0	0.0	-0.011632803003371332	0.0	800.6435140182838	87.41416900990919	0.0	-3.8959144109898735e-05	-5.857350316323107	0.0	-0.053593307776840994	0.5857595493952178
3.2	87.38468446734782	0.0	-0.018358937170534103	292.0445230118785	0.0	-800.6435148325277	0.0	-0.0015287751991363337	0.0	0.9999999946477522	0.0	-0.00010346272270936577	0.0	0.0	-0.011855954717510308	0.0	0.0	-0.01207076483704525	0.0	800.6435148325277	87.38468639546113	0.0	-0.00027682211808648116	-5.935766309442651	0.0	-0.04169479607671683	0.5935912746691473
3.205	87.35480854248618	0.0	-0.01913911257305762	292.4813719187155	0.0	-800.6435166909907	0.0	-0.0012332787871961657	0.0	0.9999999942829988	0.0	-0.00010693008569353415	0.0	0.0	-0.012253285249774478	0.0	0.0	-0.012424073184392016	0.0	800.6435166909907	87.35481063794988	0.0	-0.0004573979158070491	-6.014607742927562	0.0	-0.030697409225614616	0.6014686079274408
3.21	87.32453738468575	0.0	-0.019724023877541966	292.9180704594737	0.0	-800.6435193189609	0.0	-0.0008822215634008261	0.0	0.9999999939958081	0.0	-0.00010958295661662734	0.0	0.0	-0.01255728186652834	0.0	0.0	-0.01267681104528352	0.0	800.6435193189609	87.3245396102663	0.0	-0.0005854615351601233	-6.093874086121787	0.0	-0.02070408993431172	0.6093909257352513
3.215	87.2938688811522	0.0	-0.020100997658679714	293.3546166525006	0.0	-800.643522466765	0.0	-0.000503242873474309	0.0	0.9999999938041642	0.0	-0.00011131805476637807	0.0	0.0	-0.012756109469784482	0.0	0.0	-0.01282097950888409	0.0	800.643522466765	87.29387119292616	0.0	-0.0006662299271621586	-6.17355602611814	0.0	-0.014596504695339322	0.6173573281784945
3.22	87.26280092937408	0.0	-0.020268626049472587	293.7910085055764	0.0	-800.6435259116432	0.0	-0.00011875696471990804	0.0	0.9999999937174088	0.0	-0.00011209468778104169	0.0	0.0	-0.01284510505828123	0.0	0.0	-0.012855000873215262	0.0	800.6435259116432	87.26280328043865	0.0	-0.0007052328128686547	-6.253694512227526	0.0	0.0020360277493235253	0.6253694843664318
3.225	87.23133105332678	0.0	-0.02007174251256483	294.22724399351245	0.0	-800.6435293864309	0.0	9.921861549294662e-05	0.0	0.9999999937330598	0.0	-0.00011195498245992317	0.0	0.0	-0.012829096007629562	0.0	0.0	-0.012826576833630879	0.0	800.6435293864309	87.23133336089579	0.0	-0.0005397778557549418	-6.334422806755906	0.0	0.10839022035554602	0.6335350087770848
3.23	87.19945649455197	0.0	-0.01927684300168922	294.663321141648	0.0	-800.643529869414	0.0	-0.0003234168620365812	0.0	0.9999999936970542	0.0	-0.0001122761356400435	0.0	0.0	-0.012865897451457066	0.0	0.0	-0.012919228939721184	0.0	800.643529869414	87.19945862475701	0.0	0.0003039933711381999	-6.415385488623334	0.0	0.1642353149562276	0.6417487374846766
3.235	87.16717727836175	0.0	-0.018868636440462962	295.099237905488	0.0	-800.6435267529475	0.0	-0.0005622943944974985	0.0	0.9999999935681024	0.0	-0.00011341885227401614	0.0	0.0	-0.01299684313290291	0.0	0.0	-0.013080314417964038	0.0	800.6435267529475	87.16717931587847	0.0	0.0009041663235599182	-6.496400503623789	0.0	0.07202503043399804	0.6496799758996151
3.24	87.1344919691128	0.0	-0.019067004887042868	295.53499225763926	0.0	-800.6435215088399	0.0	-0.0009178649573331533	0.0	0.9999999933754565	0.0	-0.00011510485564127834	0.0	0.0	-0.013190044888542075	0.0	0.0	-0.013343263359054763	0.0	800.6435215088399	87.13449404961754	0.0	0.0009922017242765706	-6.5777710868088	0.0	-0.03509289780164043	0.6577864697752147
3.245	87.10139851444704	0.0	-0.01992037125936507	295.97058216553916	0.0	-800.6435174315296	0.0	-0.0013916634429543533	0.0	0.9999999930320402	0.0	-0.00011805067623192795	0.0	0.0	-0.013527611064929959	0.0	0.0	-0.013741945567974409	0.0	800.6435174315296	87.10140078999744	0.0	0.0006443871433121424	-6.659657606746569	0.0	-0.07395786757532163	0.6660068258304395
3.25	87.06789417828772	0.0	-0.02088671035106063	296.4060055807994	0.0	-800.643515007047	0.0	-0.001606917441142987	0.0	0.9999999925765827	0.0	-0.0001218476907353156	0.0	0.0	-0.013962716879648365	0.0	0.0	-0.014202293504991685	0.0	800.643515007047	87.06789668291728	0.0	0.00033133379725441885	-6.742031732249387	0.0	-0.05902455947567645	0.6742290098866925
3.255	87.03397709288546	0.0	-0.021862239078027725	296.84126044447703	0.0	-800.6435140575052	0.0	-0.001612075531689421	0.0	0.9999999920733178	0.0	-0.0001259102149100216	0.0	0.0	-0.014428247861981703	0.0	0.0	-0.014664119126102243	0.0	800.6435140575052	87.03397983868118	0.0	5.469496190200119e-05	-6.824770131538808	0.0	-0.05157109345900984	0.6824964976175688
3.26	86.99964536501072	0.0	-0.022764122237295757	297.2763446881018	0.0	-800.6435143966177	0.0	-0.0014540094663814905	0.0	0.9999999915796041	0.0	-0.00012977213532019806	0.0	0.0	-0.01487079134623537	0.0	0.0	-0.015080662155080887	0.0	800.6435143966177	86.99964834302236	0.0	-0.00018386215846397168	-6.907892148176131	0.0	-0.043799857684644235	0.6908031004444511
3.265	86.96489709643569	0.0	-0.023529599297839623	297.71125623362514	0.0	-800.6435158302604	0.0	-0.001176216458838508	0.0	0.9999999911447826	0.0	-0.00013308061382978376	0.0	0.0	-0.015249915059927814	0.0	0.0	-0.015417623349507234	0.0	800.6435158302604	86.9649002787304	0.0	-0.00038291489489439154	-6.991397430982242	0.0	-0.035787006068906294	0.6991489022214686
3.27	86.9297303891886	0.0	-0.024114462525455647	298.14599299341756	0.0	-800.6435181583718	0.0	-0.000817588598946425	0.0	0.9999999908082257	0.0	-0.00013558599660863204	0.0	0.0	-0.015537010781103793	0.0	0.0	-0.015651845229995454	0.0	800.6435181583718	86.92973373220157	0.0	-0.0005415535960380688	-7.0752760916344455	0.0	-0.03140558333781124	0.7075345792505041
3.275	86.89414334907482	0.0	-0.024491080923698685	298.58055287029975	0.0	-800.6435211781261	0.0	-0.00041167446382642334	0.0	0.9999999905977842	0.0	-0.0001371292881983564	0.0	0.0	-0.01571385897204637	0.0	0.0	-0.01576978127654828	0.0	800.6435211781261	86.89414679797382	0.0	-0.0006596161745563978	-7.159585604548132	0.0	-0.007231503545155109	0.7159589256619152
3.28	86.85813362794568	0.0	-0.024431442839520198	299.0149337501352	0.0	-800.6435245622927	0.0	-0.00019294736553019735	0.0	0.999999990521282	0.0	-0.00013768603897754735	0.0	0.0	-0.01577765791242518	0.0	0.0	-0.015825056625113524	0.0	800.6435245622927	86.85813706246778	0.0	-0.0005131373954913472	-7.2444407440824445	0.0	0.10226125409570692	0.7245162459090274
3.285	86.82169879519982	0.0	-0.02380105484490786	299.4491335245743	0.0	-800.6435250423237	0.0	-0.0005583581054204275	0.0	0.9999999903851392	0.0	-0.00013867131959742428	0.0	0.0	-0.015890562755813045	0.0	0.0	-0.01598501443960108	0.0	800.6435250423237	86.82170205713295	0.0	0.0002783049221886876	-7.329481857832576	0.0	0.15812260274333786	0.7331187288686274
3.29	86.7848390650397	0.0	-0.0235269073659655	299.883150062718	0.0	-800.6435221857004	0.0	-0.00071888438284636	0.0	0.9999999901569756	0.0	-0.00014030703331314925	0.0	0.0	-0.016078001742442005	0.0	0.0	-0.016190959645075897	0.0	800.6435221857004	86.78484225011965	0.0	0.0008261399321801985	-7.414420455948564	0.0	0.025083327957716818	0.7414462884857538
3.295	86.7475538337646	0.0	-0.024211483659356756	300.316981239462	0.0	-800.64351864448	0.0	-0.0012609169572843826	0.0	0.9999999898011013	0.0	-0.00014282091028209343	0.0	0.0	-0.016366070826399872	0.0	0.0	-0.01655218574492026	0.0	800.64351864448	86.74755721065875	0.0	0.0005672462822156966	-7.499786983835814	0.0	-0.06696799596332606	0.7500085967200406
3.3	86.70983988873463	0.0	-0.025089386561973036	300.750624920262	0.0	-800.643516498048	0.0	-0.001530554423674665	0.0	0.9999999892884712	0.0	-0.00014636620018392007	0.0	0.0	-0.01677233112769696	0.0	0.0	-0.016990657288878445	0.0	800.643516498048	86.70984351803115	0.0	0.00029339380726171584	-7.5857211173845	0.0	-0.05387338913268493	0.7585912417948799
3.305	86.67169551539253	0.0	-0.026014315984088578	301.18407895730184	0.0	-800.643515685827	0.0	-0.0015586366562126868	0.0	0.9999999887091	0.0	-0.00015027241955429545	0.0	0.0	-0.01721995090017021	0.0	0.0	-0.017437173799855293	0.0	800.643515685827	86.67169941945508	0.0	3.441568064038923e-05	-7.671975423381147	0.0	-0.049942475741082716	0.767213797763358
3.31	86.63311901537476	0.0	-0.026887468407028842	301.6173411942353	0.0	-800.6435161198178	0.0	-0.0013978767176299263	0.0	0.9999999881416741	0.0	-0.0001540021080788445	0.0	0.0	-0.017647341727826647	0.0	0.0	-0.01783763598085427	0.0	800.6435161198178	86.63312318753329	0.0	-0.00020410153246116505	-7.758575124672737	0.0	-0.04525199006916711	0.7758707089960014
3.315	86.59410868444424	0.0	-0.027631931743363092	302.0504094660708	0.0	-800.643517682742	0.0	-0.0010974867399163885	0.0	0.9999999876526319	0.0	-0.0001571455797458093	0.0	0.0	-0.01800755705125805	0.0	0.0	-0.018152042772198174	0.0	800.643517682742	86.59411309207867	0.0	-0.0004161678911023874	-7.8455174517709265	0.0	-0.04065570049826168	0.7845622790577251
3.32	86.5546628174455	0.0	-0.028191552596349503	302.4832815991721	0.0	-800.64352022798	0.0	-0.0007017197128904923	0.0	0.9999999872941895	0.0	-0.00015941022270433262	0.0	0.0	-0.018267066021763523	0.0	0.0	-0.018353070661946958	0.0	800.64352022798	86.55466740650019	0.0	-0.0005961553625304712	-7.932801813697429	0.0	-0.03855273543598386	0.7932895494635664
3.325	86.51477954185724	0.0	-0.028453495147402353	302.9159554037109	0.0	-800.6435235692386	0.0	-0.0003192991860526021	0.0	0.9999999871017092	0.0	-0.00016061314179496134	0.0	0.0	-0.01840491039750569	0.0	0.0	-0.01844454314076084	0.0	800.6435235692386	86.5147842182965	0.0	-0.0006626729300183588	-8.020681228643175	0.0	0.08099157385494671	0.8021090138288218
3.33	86.474455815593	0.0	-0.027868380334745084	303.34842869781534	0.0	-800.6435247720793	0.0	-0.0006908321693395411	0.0	0.9999999868895407	0.0	-0.00016192875259331724	0.0	0.0	-0.018555668291921467	0.0	0.0	-0.018642451979035954	0.0	800.6435247720793	86.47446030609774	0.0	0.00013702228237009588	-8.108719492689906	0.0	0.1511573438119118	0.8110128257538071
3.335	86.43369271282991	0.0	-0.027741014959701417	303.78069927178814	0.0	-800.6435226541163	0.0	-0.0009144742995793883	0.0	0.9999999865704761	0.0	-0.0001638873210063357	0.0	0.0	-0.018780103702806875	0.0	0.0	-0.018904429568231358	0.0	800.6435226541163	86.43369716257769	0.0	0.0005897588368053468	-8.196556054045109	0.0	0.016040521432537355	0.8196571749544521
3.34	86.39248943937731	0.0	-0.028471876706496126	304.21276493425717	0.0	-800.6435202902624	0.0	-0.001384419297446748	0.0	0.9999999860838664	0.0	-0.00016683009051577904	0.0	0.0	-0.019117320253359167	0.0	0.0	-0.019301036482332185	0.0	800.6435202902624	86.39249413031106	0.0	0.000353858143344466	-8.284822289531729	0.0	-0.05949093956567191	0.828503588049033
3.345	86.35084318872869	0.0	-0.029346065444216748	304.64462347489206	0.0	-800.6435191296649	0.0	-0.0015526112857524028	0.0	0.999999985454998	0.0	-0.0001705579572207586	0.0	0.0	-0.019544502317003068	0.0	0.0	-0.01974582685182215	0.0	800.6435191296649	86.3508481752458	0.0	0.00010958267182436092	-8.373586515530937	0.0	-0.0491804844536912	0.8373730939857851
3.35	86.30875244803404	0.0	-0.03023797386770644	305.07627267521815	0.0	-800.6435191949358	0.0	-0.0014788547902931768	0.0	0.9999999847937894	0.0	-0.0001743915939511872	0.0	0.0	-0.019983804733217144	0.0	0.0	-0.020169487541804667	0.0	800.6435191949358	86.30875774481457	0.0	-0.00013493066353747698	-8.46263834478549	0.0	-0.04826998520066525	0.8462776007085676
3.355	86.26621568392515	0.0	-0.03104570615310909	305.5077103089316	0.0	-800.6435204628056	0.0	-0.0012202940963815798	0.0	0.9999999841938754	0.0	-0.00017779835292934808	0.0	0.0	-0.020374190561803982	0.0	0.0	-0.020519076049241643	0.0	800.6435204628056	86.26622126953762	0.0	-0.00036972255102872515	-8.551997454907223	0.0	-0.04801804523193312	0.8552132260518865
3.36	86.22323136343924	0.0	-0.03169079232396229	305.93893414189745	0.0	-800.6435228585758	0.0	-0.0008294287097935973	0.0	0.9999999837309936	0.0	-0.00018038297653891563	0.0	0.0	-0.020670366615469945	0.0	0.0	-0.020756689871632414	0.0	800.6435228585758	86.22323718533279	0.0	-0.0005843845274403074	-8.641695421279632	0.0	-0.03612063236445965	0.8641770909613826
3.365	86.17979762344837	0.0	-0.0319576695685777	306.36994193068995	0.0	-800.6435261943236	0.0	-0.0005035622822536493	0.0	0.9999999834556791	0.0	-0.00018190285491226412	0.0	0.0	-0.02084453185065955	0.0	0.0	-0.020900949839107962	0.0	800.6435261943236	86.17980354668596	0.0	-0.0006049655254822958	-8.731937681206148	0.0	0.08567829402920105	0.8732358011358419
3.37	86.13591193336143	0.0	-0.031484283212122106	306.8007314213769	0.0	-800.6435272164455	0.0	-0.0008336932775103595	0.0	0.9999999831396214	0.0	-0.00018363214828051033	0.0	0.0	-0.02104269427705024	0.0	0.0	-0.021139785370156823	0.0	800.6435272164455	86.13591768727805	0.0	0.00015036348270153704	-8.822208717505713	0.0	0.11733633002451851	0.8822988975941058
3.375	86.09157572532268	0.0	-0.03165995197936306	307.23130033672277	0.0	-800.6435254446249	0.0	-0.001167949298249658	0.0	0.9999999827004411	0.0	-0.00018600841000489225	0.0	0.0	-0.02131499381735213	0.0	0.0	-0.02147437819753168	0.0	800.6435254446249	86.09158154597205	0.0	0.00036756388835396765	-8.912336129724235	0.0	-0.00805021389258095	0.891233976546741
3.38	86.04678758760564	0.0	-0.03244052107532417	307.6616464637285	0.0	-800.6435241245266	0.0	-0.0014980583179953547	0.0	0.9999999820619928	0.0	-0.0001894096876129958	0.0	0.0	-0.02170475152801224	0.0	0.0	-0.021903540292959683	0.0	800.6435241245266	86.04679370267182	0.0	0.00015567098177869017	-9.002908442467355	0.0	-0.0516876133829487	0.9003056816039051
3.385	86.00154538326082	0.0	-0.03331929811227149	308.09176751705036	0.0	-800.6435239268992	0.0	-0.0015311190168356167	0.0	0.9999999813269935	0.0	-0.00019325119913154616	0.0	0.0	-0.022144956329997505	0.0	0.0	-0.02234217358094419	0.0	800.6435239268992	86.0015518376196	0.0	-7.949269931021368e-05	-9.093870111163465	0.0	-0.04851602614614755	0.9093999527353476
3.39	85.95584773607223	0.0	-0.034169377287778975	308.5216612230286	0.0	-800.6435249365167	0.0	-0.0013317116160374448	0.0	0.9999999806207764	0.0	-0.0001968716717403612	0.0	0.0	-0.02255983193854611	0.0	0.0	-0.02272368085658165	0.0	800.6435249365167	85.95585452700652	0.0	-0.00032483241563499154	-9.185095163616335	0.0	-0.0515140538867496	0.9185239619217129
3.395	85.90969326463811	0.0	-0.034889276154787964	308.95132530087096	0.0	-800.6435271674508	0.0	-0.0009603037030006076	0.0	0.999999980046659	0.0	-0.00019976658644975658	0.0	0.0	-0.022891564734867215	0.0	0.0	-0.022998787602745246	0.0	800.6435271674508	85.9097003473195	0.0	-0.000565501722186633	-9.276630021663598	0.0	-0.04523364648657724	0.9276740302584999
3.4	85.86308025222188	0.0	-0.03526106051265081	309.38075743739853	0.0	-800.6435305116462	0.0	-0.000604624877134085	0.0	0.9999999796793029	0.0	-0.0002015971257978621	0.0	0.0	-0.023101329096849334	0.0	0.0	-0.02317199987098724	0.0	800.6435305116462	85.86308749008798	0.0	-0.000641557968027689	-9.368698054421051	0.0	0.07974290074840969	0.9369037419347441
3.405	85.81600627183583	0.0	-0.03483885437975921	309.809955380768	0.0	-800.6435317442397	0.0	-0.0009250342574858637	0.0	0.999999979279109	0.0	-0.00020357259330057914	0.0	0.0	-0.023327701002436606	0.0	0.0	-0.02343700266528203	0.0	800.6435317442397	85.81601334357103	0.0	0.00010072167074284164	-9.460722690107087	0.0	0.10516495616205741	0.9461307176448277
3.41	85.76847317441205	0.0	-0.03515851485263807	310.23891680173597	0.0	-800.6435305056804	0.0	-0.0012956154819775223	0.0	0.9999999787312044	0.0	-0.00020624649120743916	0.0	0.0	-0.023634107138693326	0.0	0.0	-0.02380816916022763	0.0	800.6435305056804	85.76848038028396	0.0	0.00022038068289622495	-9.552590533733726	0.0	-0.0178203701735315	0.9552607155681234
3.415	85.72047928834694	0.0	-0.03595828637597569	310.6676394121891	0.0	-800.6435298856749	0.0	-0.0015382237758676909	0.0	0.9999999779796536	0.0	-0.00020985880162565165	0.0	0.0	-0.02404804743016187	0.0	0.0	-0.024248837811747113	0.0	800.6435298856749	85.72048683029385	0.0	2.011011548123427e-05	-9.64490351006333	0.0	-0.04877747839105762	0.9645026851223906
3.42	85.6720228990908	0.0	-0.03683129254690552	311.0961208992694	0.0	-800.6435303666037	0.0	-0.0014804825631939168	0.0	0.9999999771688552	0.0	-0.00021368738930480029	0.0	0.0	-0.024486771271021907	0.0	0.0	-0.024672964824315722	0.0	800.6435303666037	85.67203081589462	0.0	-0.0002172281997086578	-9.737535931656302	0.0	-0.04999286766757337	0.9737664263421449
3.425	85.62310276457231	0.0	-0.03764569913359416	311.52435894741126	0.0	-800.6435320896322	0.0	-0.0011915925447257734	0.0	0.9999999764405877	0.0	-0.0002170687266337586	0.0	0.0	-0.024874243996127737	0.0	0.0	-0.025014330942875924	0.0	800.6435320896322	85.62311103906005	0.0	-0.00047350068663276303	-9.830386178438744	0.0	-0.06550287574967538	0.9830604408884073
3.43	85.57371763989983	0.0	-0.0382968777440262	311.9523512345648	0.0	-800.6435351001916	0.0	-0.0007356241147309661	0.0	0.9999999759084939	0.0	-0.00021950630591219513	0.0	0.0	-0.02515357001254857	0.0	0.0	-0.025225071728286582	0.0	800.6435351001916	85.57372620631287	0.0	-0.0007289336739613519	-9.923772238722725	0.0	0.037882169376178706	0.9923844542555091
3.435	85.52386467278518	0.0	-0.038021580326441325	312.3800954190941	0.0	-800.6435376343367	0.0	-0.0009357188654207886	0.0	0.9999999754803474	0.0	-0.00022144822698004117	0.0	0.0	-0.025376097780627473	0.0	0.0	-0.025493135437283487	0.0	800.6435376343367	85.52387312434615	0.0	-0.0001433611335597962	-10.01759510661889	0.0	0.10988731226722641	1.0018197789101195
3.44	85.47354531574494	0.0	-0.038156754770378755	312.80758917962896	0.0	-800.6435371540347	0.0	-0.0012587599205430146	0.0	0.9999999748916145	0.0	-0.00022409103203101415	0.0	0.0	-0.025678940939135374	0.0	0.0	-0.025853743591620175	0.0	800.6435371540347	85.47355383250685	0.0	0.00015095806230435452	-10.113478030167283	0.0	0.00785398510701069	1.0113481079814128
3.445	85.42277888758174	0.0	-0.038922497822655666	313.23483019510775	0.0	-800.6435368167834	0.0	-0.0015348207640145993	0.0	0.999999974085219	0.0	-0.00022766110965894744	0.0	0.0	-0.026088041710801053	0.0	0.0	-0.02629343735205558	0.0	800.6435368167834	85.42278775500907	0.0	-2.7605532540696115e-05	-10.180953515760887	0.0	-0.04946702630439667	1.01810736897822
3.45	85.37184265841782	0.0	-0.03979602715079281	313.66181677229076	0.0	-800.6435375439554	0.0	-0.0014558719440630984	0.0	0.9999999732110254	0.0	-0.0002314691515507471	0.0	0.0	-0.026524411179517957	0.0	0.0	-0.02671051394158719	0.0	800.6435375439554	85.37185193342623	0.0	-0.00027412797222919265	-10.175661141423358	0.0	-0.05583218000624171	1.0175814311267555
3.455	85.32110547373024	0.0	-0.040623350826525705	314.0885490619902	0.0	-800.6435396514174	0.0	-0.0010723692399964174	0.0	0.9999999724612753	0.0	-0.00023468589278465623	0.0	0.0	-0.026893022582507947	0.0	0.0	-0.02701772509924442	0.0	800.6435396514174	85.3211151426468	0.0	-0.0005760278315643736	-10.116043658310048	0.0	-0.078735641425702	1.0116350063044757
3.46	85.270702632579	0.0	-0.041243187612400256	314.5150284880992	0.0	-800.6435433473857	0.0	-0.0004739677203611319	0.0	0.9999999720010747	0.0	-0.00023663868918534755	0.0	0.0	-0.027116796572737724	0.0	0.0	-0.02715350684925507	0.0	800.6435433473857	85.27071260209416	0.0	-0.0008864895295105627	-10.047385869656486	0.0	0.04879561311105796	1.0047504358079757
3.465	85.22062596294732	0.0	-0.040788492860455536	314.94125672874003	0.0	-800.6435459369303	0.0	-0.0006505700094633735	0.0	0.9999999716485216	0.0	-0.00023812386626843602	0.0	0.0	-0.02728698533491384	0.0	0.0	-0.027339881428355257	0.0	800.6435459369303	85.2206357238512	0.0	-0.00020235950524953716	-9.984633343290028	0.0	0.08801254560516084	0.9985021242246955
3.47	85.17084982466488	0.0	-0.04108806372931985	315.3672353254753	0.0	-800.6435466293706	0.0	-0.0008572636922735722	0.0	0.9999999712091197	0.0	-0.0002399620416497558	0.0	0.0	-0.027497624723640975	0.0	0.0	-0.027585469385840646	0.0	800.6435466293706	85.17085973524078	0.0	-0.00021251814837397944	-9.92627890643642	0.0	-0.03704739405309889	0.9926348041337797
3.475	85.12136000277233	0.0	-0.04168515777368603	315.7929657819297	0.0	-800.6435482969533	0.0	-0.0008147632931939516	0.0	0.9999999706875743	0.0	-0.000242125740085992	0.0	0.0	-0.0277455663079148	0.0	0.0	-0.027818881875851614	0.0	800.6435482969533	85.12137020841709	0.0	-0.0004650095187813573	-9.869437365431821	0.0	-0.059022196223047003	0.9869613849073773
3.48	85.07215472875235	0.0	-0.04224240553513062	316.2184495016832	0.0	-800.6435513585163	0.0	-0.0004633960930894121	0.0	0.9999999702859869	0.0	-0.00024377868342761127	0.0	0.0	-0.027934979668003002	0.0	0.0	-0.027951635077735987	0.0	800.6435513585163	85.07216521300741	0.0	-0.0007648459945791904	-9.812431102533026	0.0	-0.0742149975207183	0.9812711756075102
3.485	85.0232351153386	0.0	-0.04261453268657794	316.6436879100882	0.0	-800.6435559703267	0.0	0.00011225778017925031	0.0	0.9999999701695	0.0	-0.0002442560453203188	0.0	0.0	-0.027989681313136568	0.0	0.0	-0.027919475592627096	0.0	800.6435559703267	85.02324578791013	0.0	-0.001079650501508405	-9.755496959300558	0.0	0.01100625918138024	0.9755503167990036
3.49	84.97459981852909	0.0	-0.04208474456387559	317.06868243257367	0.0	-800.6435609259914	0.0	0.0001843954578118934	0.0	0.9999999703175292	0.0	-0.00024364924769127298	0.0	0.0	-0.02792014742474172	0.0	0.0	-0.027866650185157077	0.0	800.6435609259914	84.97461023733702	0.0	-0.0006767461589472645	-9.698582081480586	0.0	0.0850494851044388	0.9698954985261703
3.495	84.92624995736277	0.0	-0.04175422224266927	317.4934344843986	0.0	-800.6435632075012	0.0	-2.1415700795293938e-05	0.0	0.9999999703903586	0.0	-0.0002433501547364682	0.0	0.0	-0.027885873895740834	0.0	0.0	-0.027872785331511503	0.0	800.6435632075012	84.92626022061198	0.0	-0.0004205863846087649	-9.641429069929094	0.0	0.0066211337877532675	0.9641431343420251
3.5	84.87818523476717	0.0	-0.04195039037037982	317.9179455056073	0.0	-800.6435657184788	0.0	-0.00012781937382506654	0.0	0.9999999703260383	0.0	-0.00024361432998466146	0.0	0.0	-0.027916146150184794	0.0	0.0	-0.02790940288481241	0.0	800.6435657184788	84.87819559951112	0.0	-0.0005953021656483972	-9.584527654516961	0.0	-0.04723244604230261	0.9584644034295668
3.505	84.83040394983419	0.0	-0.04217427171801205	318.34221691281465	0.0	-800.643569253047	0.0	9.490012908183786e-05	0.0	0.9999999703014821	0.0	-0.00024371510347887435	0.0	0.0	-0.02792769394233794	0.0	0.0	-0.027882216000454232	0.0	800.643569253047	84.83041442949866	0.0	-0.0008253665823826624	-9.5279385364717	0.0	-0.06088871024128042	0.9528133090475663
3.51	84.78290503508873	0.0	-0.04227457046750195	318.76625012041393	0.0	-800.6435740148958	0.0	0.000563269629990611	0.0	0.9999999704912207	0.0	-0.0002429353281627937	0.0	0.0	-0.027838338270532878	0.0	0.0	-0.027720851137822446	0.0	800.6435740148958	84.78291556770144	0.0	-0.0010810409786002882	-9.471794950844508	0.0	0.0196012646694415	0.9471815232595079
3.515	84.73568609708515	0.0	-0.041543406358903044	319.1900465293771	0.0	-800.6435789222937	0.0	0.00057062529918995	0.0	0.9999999708917379	0.0	-0.0002412810370799646	0.0	0.0	-0.02764877047071249	0.0	0.0	-0.027557379031187577	0.0	800.6435789222937	84.7356962783228	0.0	-0.0006531742737470684	-9.415773142266442	0.0	0.0868753805982373	0.9416173915045333
3.52	84.68874813103744	0.0	-0.041066982626699285	319.6136075466872	0.0	-800.6435810762027	0.0	0.0002749174728927538	0.0	0.9999999711680589	0.0	-0.00024013307779422263	0.0	0.0	-0.02751722402264983	0.0	0.0	-0.02747862097663179	0.0	800.6435810762027	84.6887580871549	0.0	-0.00039383957673013527	-9.359501342416129	0.0	0.009540098131259257	0.9359506204504685
3.525	84.64209098719364	0.0	-0.04111985696049353	320.0369345777252	0.0	-800.6435833791053	0.0	0.00012613308685591846	0.0	0.9999999712689103	0.0	-0.00023971274057690652	0.0	0.0	-0.02746905692421461	0.0	0.0	-0.027442486508962787	0.0	800.6435833791053	84.64210097366237	0.0	-0.0005402782033156764	-9.30344068169949	0.0	-0.04186885672121605	0.9303534893741422
3.53	84.59571317016511	0.0	-0.04122352970752277	320.4600290220151	0.0	-800.6435865852351	0.0	0.00032151013158844804	0.0	0.9999999713879297	0.0	-0.0002392157139401797	0.0	0.0	-0.027412101865401547	0.0	0.0	-0.02735038064090922	0.0	800.6435865852351	84.5957232109629	0.0	-0.0007502783030247076	-9.247655722825243	0.0	-0.061324924693121154	0.9247859055710738
3.535	84.54961366784462	0.0	-0.0412195718664531	320.88289227360445	0.0	-800.6435909357585	0.0	0.0007753217916299009	0.0	0.9999999717041774	0.0	-0.0002378900027653887	0.0	0.0	-0.027260186550741146	0.0	0.0	-0.027128267308784645	0.0	800.6435909357585	84.54962370968886	0.0	-0.000992552680830684	-9.192417073280506	0.0	0.05195507252625122	0.9192563895818193
3.54	84.50378973412174	0.0	-0.04024901181067215	321.3055256899911	0.0	-800.643594372791	0.0	0.000564573785248712	0.0	0.9999999721091464	0.0	-0.00023618152892306693	0.0	0.0	-0.027064409864094082	0.0	0.0	-0.026966528833192262	0.0	800.643594372791	84.50379931873631	0.0	-0.0003325399152629272	-9.136047894164061	0.0	0.08591952985038796	0.9136451898306547
3.545	84.45824536490758	0.0	-0.04005020380268964	321.7279307097728	0.0	-800.6435957319663	0.0	0.00019445236600738064	0.0	0.9999999723330112	0.0	-0.00023523176952870608	0.0	0.0	-0.026955575451371235	0.0	0.0	-0.02691082233374948	0.0	800.6435957319663	84.4582548602465	0.0	-0.00031567545279650663	-9.083479429041574	0.0	-0.0256124436395709	0.9083515538330446
3.55	84.41292574507872	0.0	-0.04014366058208182	322.15010861665576	0.0	-800.6435977175272	0.0	0.00015135342314753756	0.0	0.9999999724165188	0.0	-0.00023487649922610023	0.0	0.0	-0.02691486447239528	0.0	0.0	-0.026867462771943424	0.0	800.6435977175272	84.41293528907387	0.0	-0.000490432269774566	-9.050093739391468	0.0	-0.05016910905341218	0.905023279431396
3.555	84.36771064553493	0.0	-0.04023838494381606	322.572060233965	0.0	-800.6436007259571	0.0	0.0004273399713579771	0.0	0.9999999725729614	0.0	-0.0002342094885134842	0.0	0.0	-0.026838430672847125	0.0	0.0	-0.026745038888063156	0.0	800.6436007259571	84.36772023813182	0.0	-0.0007189448985495409	-9.039095223052367	0.0	-0.010540919129217617	0.9039101369184008
3.56	84.32251857573009	0.0	-0.03979891895125077	322.9937858538139	0.0	-800.6436045271593	0.0	0.0005453948285436171	0.0	0.999999972916159	0.0	-0.00023273953048104175	0.0	0.0	-0.0266699858856155	0.0	0.0	-0.026588794778844103	0.0	800.6436045271593	84.32252796618242	0.0	-0.0005485489380824704	-9.037879834941265	0.0	0.07265920310719763	0.9038171898710167
3.565	84.27733286893854	0.0	-0.03921100879516436	323.4152855221451	0.0	-800.6436058046131	0.0	0.0001829092746942375	0.0	0.9999999731455487	0.0	-0.00023175182846291623	0.0	0.0	-0.026556803568452785	0.0	0.0	-0.02653639513147521	0.0	800.6436058046131	84.277341990498	0.0	-0.00014815365150668418	-9.035229006053669	0.0	0.03163810233204375	0.9035284398476494
3.57	84.23217292084647	0.0	-0.039320736445218406	323.83655931709353	0.0	-800.6436068453834	0.0	-8.70748209182823e-05	0.0	0.9999999731522081	0.0	-0.00023172309010357519	0.0	0.0	-0.02655351039496361	0.0	0.0	-0.026561340230177585	0.0	800.6436068453834	84.23218209809981	0.0	-0.0002836544798635702	-9.027935709942152	0.0	-0.044374858922116324	0.9028044766778301
3.575	84.18705775105127	0.0	-0.03953768231687742	324.25760741861836	0.0	-800.6436087732143	0.0	3.2941431868134294e-05	0.0	0.9999999731199483	0.0	-0.00023186226473127813	0.0	0.0	-0.026569458632957406	0.0	0.0	-0.026551903205091775	0.0	800.6436087732143	84.18706703383417	0.0	-0.0004980753727209641	-9.017833532920369	0.0	-0.05522293671123529	0.901800261699907
3.58	84.14199513401076	0.0	-0.039612141957180706	324.6784300757359	0.0	-800.6436118910591	0.0	0.00038414718702083945	0.0	0.9999999732465559	0.0	-0.00023131557271189058	0.0	0.0	-0.026506812340468647	0.0	0.0	-0.02644185314245119	0.0	800.6436118910591	84.14200445546832	0.0	-0.0006854311724697308	-9.007564633432946	0.0	0.0581086062085145	0.900775206339448
3.585	84.09698187983818	0.0	-0.03886708588910966	325.0990275429187	0.0	-800.6436134700702	0.0	6.111907633632647e-05	0.0	0.9999999733671582	0.0	-0.00023079360831382338	0.0	0.0	-0.02644699962474139	0.0	0.0	-0.026424343816842145	0.0	800.6436134700702	84.09699086142135	0.0	-4.8990989681851794e-05	-8.997737886166846	0.0	0.06606578132698834	0.899798042649708
3.59	84.05201752898161	0.0	-0.039043165865697664	325.519400067219	0.0	-800.6436139916174	0.0	-0.00030506752257944273	0.0	0.9999999732732637	0.0	-0.0002312000835018738	0.0	0.0	-0.026493578251488244	0.0	0.0	-0.026511739224393715	0.0	800.6436139916174	84.05202659680323	0.0	-0.0001774957880615418	-8.988198749035567	0.0	-0.046744233754654606	0.8988320297783888
3.595	84.00709921302	0.0	-0.03937046056519572	325.93954788559194	0.0	-800.6436153998518	0.0	-0.00023570752817987	0.0	0.9999999730981868	0.0	-0.00023195609993130825	0.0	0.0	-0.02658021135510953	0.0	0.0	-0.026579264457214553	0.0	800.6436153998518	84.00710843768344	0.0	-0.00039853917707475265	-8.97895663015665	0.0	-0.06638619536051357	0.8979202041003895
3.6	83.96222763003321	0.0	-0.03965237639739336	326.3594712294145	0.0	-800.6436180732345	0.0	0.00016863419466518135	0.0	0.9999999730648748	0.0	-0.00023209966927291027	0.0	0.0	-0.02659666319023493	0.0	0.0	-0.02653095431903504	0.0	800.6436180732345	83.96223699050728	0.0	-0.0006771626463336619	-8.969771227481024	0.0	0.044654702906310906	0.8969882380267764
3.605	83.91740235165503	0.0	-0.03898869886434321	326.77917032986534	0.0	-800.6436200154984	0.0	-3.9365021574789074e-05	0.0	0.999999973104772	0.0	-0.00023192770803050905	0.0	0.0	-0.02657695788284572	0.0	0.0	-0.026542231567018425	0.0	800.6436200154984	83.9174114088631	0.0	-6.315413422799775e-05	-8.960081019576432	0.0	0.06716302555847926	0.89603327365325
3.61	83.87262748599966	0.0	-0.0391861152422521	327.1986454293004	0.0	-800.6436205182677	0.0	-0.00040410981003842614	0.0	0.9999999729557385	0.0	-0.00023256940677768712	0.0	0.0	-0.02665049114469317	0.0	0.0	-0.0266580004998936	0.0	800.6436205182677	83.87263663988936	0.0	-0.00017369761966615682	-8.95001945375403	0.0	-0.04477818894019	0.8950131468798675
3.615	83.827901160426	0.0	-0.03955975127449443	327.61789677727313	0.0	-800.643621919653	0.0	-0.000328292956727071	0.0	0.9999999727228344	0.0	-0.00023356869841074183	0.0	0.0	-0.02676500153395688	0.0	0.0	-0.02675204950421526	0.0	800.643621919653	83.82791049391467	0.0	-0.0004006004972434675	-8.940474020549516	0.0	-0.06839067076561048	0.8940735595909802
3.62	83.78322134638346	0.0	-0.039887050461664436	328.03692461172363	0.0	-800.6436246288088	0.0	9.781146414332993e-05	0.0	0.9999999726409114	0.0	-0.0002339191805055332	0.0	0.0	-0.026805163824706938	0.0	0.0	-0.02672402858379822	0.0	800.6436246288088	83.7832308381451	0.0	-0.00069004221404602	-8.931693562956156	0.0	0.0421650179558483	0.8931793089368543
3.625	83.7385842322062	0.0	-0.03926139510828208	328.4557291538037	0.0	-800.6436266633976	0.0	-8.259162146681519e-05	0.0	0.9999999726481756	0.0	-0.00023388812696095	0.0	0.0	-0.026801605350522534	0.0	0.0	-0.026747689340464172	0.0	800.6436266633976	83.73859343614197	0.0	-9.047064333027496e-05	-8.922946460795583	0.0	0.06324672285160919	0.8923170607478931
3.63	83.69399247280282	0.0	-0.03949537732000201	328.87431062337487	0.0	-800.6436273971718	0.0	-0.0004182828846099446	0.0	0.9999999724763879	0.0	-0.00023462146461563873	0.0	0.0	-0.02688563965797162	0.0	0.0	-0.02686751856011771	0.0	800.6436273971718	83.69400179148506	0.0	-0.0002225598657115147	-8.913849864938566	0.0	-0.048595534467394175	0.8913982327817094
3.635	83.64944540752249	0.0	-0.03987071540795426	329.2926692462957	0.0	-800.6436290578405	0.0	-0.00029513150891698973	0.0	0.9999999722469596	0.0	-0.00023559730014959673	0.0	0.0	-0.026997462176251572	0.0	0.0	-0.026952067509429065	0.0	800.6436290578405	83.64945490828215	0.0	-0.00045554508166397627	-8.904821385158357	0.0	-0.06216793773659598	0.8905038391498152
3.64	83.60494398163337	0.0	-0.04012438783546074	329.7108052486246	0.0	-800.6436320494362	0.0	0.00012767051041602016	0.0	0.9999999721972269	0.0	-0.00023580829636954656	0.0	0.0	-0.027021640562715863	0.0	0.0	-0.02691549260235347	0.0	800.6436320494362	83.6049536071629	0.0	-0.0006949056526719803	-8.895838829752497	0.0	0.043224717649561685	0.8895943843187646
3.645	83.56048788340038	0.0	-0.03955356458360568	330.12871885495747	0.0	-800.6436337862086	0.0	-0.0001549222921195306	0.0	0.9999999721889179	0.0	-0.0002358435284618816	0.0	0.0	-0.027025677863216545	0.0	0.0	-0.026959874569808178	0.0	800.6436337862086	83.56049724467411	0.0	-0.0001391606748182407	-8.886341065616204	0.0	0.05589599891561018	0.888651685966733
3.65	83.51608132477982	0.0	-0.03980979561603292	330.5464103047474	0.0	-800.6436347977499	0.0	-0.0003901681388936442	0.0	0.9999999720031187	0.0	-0.00023663002362850143	0.0	0.0	-0.027115803573040918	0.0	0.0	-0.027071649508103576	0.0	800.6436347977499	83.51609081240592	0.0	-0.0002849676699193312	-8.87636830927529	0.0	-0.05543384187402153	0.8876541402637154
3.655	83.47172335214886	0.0	-0.04016578895191418	330.96387984421335	0.0	-800.6436368015793	0.0	-0.00017794118436285605	0.0	0.9999999718154887	0.0	-0.0002374216249197807	0.0	0.0	-0.027206514401683857	0.0	0.0	-0.027122625902431332	0.0	800.6436368015793	83.4717330141633	0.0	-0.0005298011545793942	-8.866839568594761	0.0	-0.027176194236121477	0.8866881214989344
3.66	83.42741222660851	0.0	-0.040098557151005014	331.3811277130138	0.0	-800.6436399288989	0.0	6.0330244611944104e-05	0.0	0.9999999718302691	0.0	-0.00023735936254679248	0.0	0.0	-0.02719937965909343	0.0	0.0	-0.02710534256046505	0.0	800.6436399288989	83.42742186163302	0.0	-0.0004939989783199162	-8.857692007547987	0.0	0.04770241516673065	0.8857820455450215
3.665	83.3831465187014	0.0	-0.03979065221693505	331.79815413634236	0.0	-800.6436411362251	0.0	-0.00023859176434912847	0.0	0.9999999717928688	0.0	-0.00023751687847348255	0.0	0.0	-0.027217429655213093	0.0	0.0	-0.027173694066083977	0.0	800.6436411362251	83.38315601260659	0.0	-0.0001808394878556327	-8.848538413851278	0.0	0.02001013304294946	0.8848561039334367
3.67	83.33892668423236	0.0	-0.04007820918009659	332.21495934852464	0.0	-800.643642430022	0.0	-0.0003245570922292792	0.0	0.9999999716016189	0.0	-0.00023832072291925062	0.0	0.0	-0.02730954344607525	0.0	0.0	-0.027266672824062855	0.0	800.643642430022	83.33893632040513	0.0	-0.00035541924613307767	-8.839438055170728	0.0	-0.06315462226641973	0.8839663660881792
3.675	83.29475119332703	0.0	-0.04040137815729546	332.6315435734504	0.0	-800.6436448439251	0.0	1.1493243129272255e-05	0.0	0.9999999714901057	0.0	-0.00023878817593236848	0.0	0.0	-0.027363109617144075	0.0	0.0	-0.02726338025244173	0.0	800.6436448439251	83.29476098917118	0.0	-0.0006217712796616534	-8.830860808482774	0.0	0.017294411303815392	0.8830877743206469
3.68	83.25061837012463	0.0	-0.039954437133369554	333.0479070280397	0.0	-800.6436474992414	0.0	5.942789817963393e-06	0.0	0.9999999715420972	0.0	-0.00023857034648270954	0.0	0.0	-0.027338148200194846	0.0	0.0	-0.02726167776856622	0.0	800.6436474992414	83.25062795746001	0.0	-0.00023217597678289891	-8.822096468194001	0.0	0.053452006911223024	0.8822258396304424
3.685	83.20653114326369	0.0	-0.039999970326424675	333.464049930022	0.0	-800.6436484013141	0.0	-0.00030415863725449506	0.0	0.9999999714471323	0.0	-0.00023896807339371493	0.0	0.0	-0.02738372434829278	0.0	0.0	-0.027348812799651886	0.0	800.6436484013141	83.20654075755463	0.0	-0.00023255801128312613	-8.812784502413725	0.0	-0.029559837821956952	0.8812834077071665
3.69	83.16249048487377	0.0	-0.0403151503420942	333.8799725130066	0.0	-800.6436500627601	0.0	-0.00019902893378799424	0.0	0.9999999712745289	0.0	-0.00023968927041969178	0.0	0.0	-0.027466367442231323	0.0	0.0	-0.02740583038918709	0.0	800.6436500627601	83.16250025556441	0.0	-0.0004488335137782405	-8.80341576375514	0.0	-0.0477594904062695	0.8803545313023404
3.695	83.11849661659107	0.0	-0.04042328625026174	334.29567501055755	0.0	-800.6436529613916	0.0	0.0001433610909638592	0.0	0.9999999712794053	0.0	-0.00023966892488500692	0.0	0.0	-0.0274640360156256	0.0	0.0	-0.02736476046189399	0.0	800.6436529613916	83.11850644415115	0.0	-0.0005814413063069688	-8.794215974503317	0.0	0.04024657726598736	0.8794308067903407
3.7	83.074548778708	0.0	-0.03997422586778837	334.711157651534	0.0	-800.6436543489775	0.0	-0.00015881900047796227	0.0	0.9999999712855013	0.0	-0.0002396434894470879	0.0	0.0	-0.02746112132905625	0.0	0.0	-0.027410258754063357	0.0	800.6436543489775	83.07455839605745	0.0	-0.00015767291259747	-8.784770425726407	0.0	0.03735040718233226	0.8784849827153223
3.705	83.03064909756127	0.0	-0.04022360024352475	335.12642067502276	0.0	-800.6436554857476	0.0	-0.00028577079479862977	0.0	0.9999999711265116	0.0	-0.00024030601558629696	0.0	0.0	-0.027537041234429835	0.0	0.0	-0.02749212605631366	0.0	800.6436554857476	83.03065883996913	0.0	-0.00031806783779620416	-8.77518478289474	0.0	-0.06350096945391512	0.8775414539898899
3.71	82.98679575145242	0.0	-0.04053205459652654	335.54146431723603	0.0	-800.6436577043287	0.0	3.910778048734937e-05	0.0	0.9999999710327181	0.0	-0.0002406960077139787	0.0	0.0	-0.02758173104164126	0.0	0.0	-0.027480922502473415	0.0	800.6436577043287	82.98680564765182	0.0	-0.0005828701966320591	-8.766311300468033	0.0	0.020521288986011483	0.8766335319848036
3.715	82.94298586990165	0.0	-0.040060043632911456	335.95628880243373	0.0	-800.643660073017	0.0	1.879870512100163e-05	0.0	0.9999999710921958	0.0	-0.00024044877528874478	0.0	0.0	-0.027553400291772077	0.0	0.0	-0.027475537070154692	0.0	800.643660073017	82.94299554387973	0.0	-0.00017296141134877483	-8.757517113985122	0.0	0.04965250043133331	0.8757657870260825
3.72	82.89922097792201	0.0	-0.040160275315435076	336.37089434910655	0.0	-800.6436609006757	0.0	-0.00028391677445237007	0.0	0.9999999709961961	0.0	-0.00024084769737988974	0.0	0.0	-0.027599113397450015	0.0	0.0	-0.027556873234700133	0.0	800.6436609006757	82.89923070537027	0.0	-0.0002280988401787242	-8.748490834243466	0.0	-0.04146325181864062	0.8748589090710189
3.725	82.85550044650553	0.0	-0.04046943403639574	336.78528118322964	0.0	-800.643662575054	0.0	-0.00012045776908766996	0.0	0.9999999708517349	0.0	-0.00024144675523356783	0.0	0.0	-0.027667760372845834	0.0	0.0	-0.02759138184359156	0.0	800.643662575054	82.8555103285558	0.0	-0.00045904701204952335	-8.739735662304327	0.0	-0.02077761504044105	0.8739760360344031
3.73	82.81182354768355	0.0	-0.04034603089145698	337.19944952375494	0.0	-800.6436652791978	0.0	7.725839625613667e-05	0.0	0.9999999708911185	0.0	-0.00024128358579661335	0.0	0.0	-0.027649062532135164	0.0	0.0	-0.02756924894340443	0.0	800.6436652791978	82.81183337511489	0.0	-0.00038375989311961045	-8.730988758229568	0.0	0.040660927787003726	0.8731083438347134
3.735	82.76819131037938	0.0	-0.04013597191646741	337.61339958932206	0.0	-800.643666207221	0.0	-0.00022720010667809888	0.0	0.9999999708573463	0.0	-0.00024142351570874214	0.0	0.0	-0.027665097319387436	0.0	0.0	-0.027634336979492313	0.0	800.643666207221	82.76820104157488	0.0	-0.0001715929324494017	-8.721793477664619	0.0	0.004022767765753712	0.8721794405378609
3.74	82.7246058615753	0.0	-0.040418913013013036	338.02713161182334	0.0	-800.6436675051411	0.0	-0.00020918221025354906	0.0	0.9999999707003336	0.0	-0.0002420730033205897	0.0	0.0	-0.027739523119572028	0.0	0.0	-0.027694263268476047	0.0	800.6436675051411	82.72461573501678	0.0	-0.00036812187059797436	-8.712381316065176	0.0	-0.057900496593684125	0.8712573710679719
3.745	82.68106684450696	0.0	-0.04061169177158134	338.44064582112463	0.0	-800.6436700358437	0.0	0.0001653980696809235	0.0	0.9999999706905671	0.0	-0.00024211334477138878	0.0	0.0	-0.02774414590944794	0.0	0.0	-0.02764688021181441	0.0	800.6436700358437	82.68107681643087	0.0	-0.0005753088978216576	-8.703343775805195	0.0	0.032712859603572675	0.8703405253751573
3.75	82.63757270213621	0.0	-0.040144522265671105	338.85394244891677	0.0	-800.6436713622137	0.0	-0.00014329300853812644	0.0	0.9999999707055914	0.0	-0.00024205128251573676	0.0	0.0	-0.027737034098607706	0.0	0.0	-0.02768793063492924	0.0	800.6436713622137	82.63758245292672	0.0	-0.00013945782047661057	-8.694151813674486	0.0	0.039641188359113615	0.8694242185667126
3.755	82.59412553701458	0.0	-0.04038843739695839	339.26702172447784	0.0	-800.6436724158856	0.0	-0.0002478002466772401	0.0	0.999999970559827	0.0	-0.00024265273984403163	0.0	0.0	-0.027805956033568772	0.0	0.0	-0.027758920176413772	0.0	800.6436724158856	82.59413541140276	0.0	-0.00030505210769285154	-8.684798174834423	0.0	-0.06687260749006436	0.8685055629254187
3.76	82.55072357907027	0.0	-0.04068670565609284	339.6798838784366	0.0	-800.6436746032953	0.0	0.00012339065919354965	0.0	0.9999999705012371	0.0	-0.0002428940743850746	0.0	0.0	-0.02783361093568872	0.0	0.0	-0.027723571356398136	0.0	800.6436746032953	82.55073360361237	0.0	-0.0005845388511143426	-8.676150154114264	0.0	0.026274543974574516	0.8676189938469424
3.765	82.50736413246489	0.0	-0.04017274620409846	340.0925291284605	0.0	-800.6436763597304	0.0	-5.8991672872329766e-05	0.0	0.9999999705482588	0.0	-0.00024270040849425263	0.0	0.0	-0.027811418458675116	0.0	0.0	-0.02774047122580814	0.0	800.6436763597304	82.50737391240615	0.0	-0.00012360069351965226	-8.667447815659557	0.0	0.04646020600047409	0.8667572335315307
3.77	82.46404958542796	0.0	-0.040377550188021756	340.504957693507	0.0	-800.6436772672065	0.0	-0.0002582611106664187	0.0	0.9999999704228811	0.0	-0.00024321645403994294	0.0	0.0	-0.027870552924029592	0.0	0.0	-0.027814457584075872	0.0	800.6436772672065	82.4640594702007	0.0	-0.0002643191455654875	-8.658422965801549	0.0	-0.062101242724823265	0.8658645668871527
3.775	82.42077917502357	0.0	-0.0406812676553495	340.9171697968046	0.0	-800.6436792135739	0.0	4.9489802367352504e-05	0.0	0.9999999703369796	0.0	-0.00024356938625162792	0.0	0.0	-0.027910995977595044	0.0	0.0	-0.02780027980005294	0.0	800.6436792135739	82.4207892130489	0.0	-0.0005309068233304562	-8.64984311215622	0.0	0.021599002672485323	0.8649870078899037
3.78	82.37755157372668	0.0	-0.040208847692285325	341.32916565534424	0.0	-800.643681209723	0.0	5.328378035772488e-06	0.0	0.9999999703921987	0.0	-0.0002433425734639853	0.0	0.0	-0.02788500514588176	0.0	0.0	-0.02779875333218744	0.0	800.643681209723	82.37756138670247	0.0	-0.00011691332611137846	-8.640995441465076	0.0	0.042648170048316406	0.8641100687171092
3.785	82.33436992795298	0.0	-0.040383221617446556	341.74094548931964	0.0	-800.6436820369013	0.0	-0.0002554166470996469	0.0	0.9999999702856907	0.0	-0.00024377986828173366	0.0	0.0	-0.027935115442287932	0.0	0.0	-0.027871924811668402	0.0	800.6436820369013	82.33437983114968	0.0	-0.00024029429823589936	-8.63168478005439	0.0	-0.05753115241080535	0.8631876503734303
3.79	82.29123408526813	0.0	-0.0406857082348449	342.15250953014686	0.0	-800.6436838380228	0.0	1.4201765986288262e-05	0.0	0.9999999701885879	0.0	-0.00024417786341583556	0.0	0.0	-0.02798072232654688	0.0	0.0	-0.02786785630540517	0.0	800.6436838380228	82.29124414149473	0.0	-0.0004983091477080174	-8.622759162995427	0.0	0.01655059396136481	0.8622775046653026
3.795	82.24814248529628	0.0	-0.04025892844721178	342.5638580035929	0.0	-800.6436859157542	0.0	2.5375522131356207e-05	0.0	0.9999999702444213	0.0	-0.00024394909955123288	0.0	0.0	-0.027954507917872466	0.0	0.0	-0.02786058675379983	0.0	800.6436859157542	82.24815233819024	0.0	-0.00013020425145524706	-8.613736619685616	0.0	0.0399509481496672	0.861382926645119
3.8	82.20509706546059	0.0	-0.04040061080754301	342.9749911299215	0.0	-800.6436867069915	0.0	-0.000246979120092594	0.0	0.9999999701498892	0.0	-0.0002443363004685433	0.0	0.0	-0.02799887787596578	0.0	0.0	-0.027931341059845634	0.0	800.6436867069915	82.20510699280668	0.0	-0.00022922858954804883	-8.604481828115714	0.0	-0.05347416415552065	0.8604647989116444
3.805	82.1620967597019	0.0	-0.04069986344421924	343.3859091458998	0.0	-800.643688444171	0.0	1.0935540067229405e-05	0.0	0.9999999700534774	0.0	-0.0002447305669968853	0.0	0.0	-0.0280440574934711	0.0	0.0	-0.02792820825838289	0.0	800.643688444171	82.1621068388264	0.0	-0.0004847067219361828	-8.595785196665418	0.0	0.015436743982831687	0.85957990576954
3.81	82.11913917653885	0.0	-0.04028208021014625	343.79661226865403	0.0	-800.6436904845626	0.0	2.8824204349333035e-05	0.0	0.9999999701099691	0.0	-0.0002444996253902162	0.0	0.0	-0.028017593533927132	0.0	0.0	-0.027919950732097694	0.0	800.6436904845626	82.11914905627103	0.0	-0.0001258790622242645	-8.587113128351358	0.0	0.038343708142998104	0.8587198735272081
3.815	82.07622600190744	0.0	-0.040426739094062816	344.2071007128022	0.0	-800.6436912726746	0.0	-0.0002381341665233294	0.0	0.9999999700176857	0.0	-0.00024487677331891345	0.0	0.0	-0.028060811504353817	0.0	0.0	-0.027988171145595955	0.0	800.6436912726746	82.07623595770502	0.0	-0.00022961267183487362	-8.578186124488479	0.0	-0.054606162000508024	0.8578359925958756
3.82	82.03335662494699	0.0	-0.04072338557236586	344.6173747013074	0.0	-800.6436930210067	0.0	3.484698847034556e-05	0.0	0.9999999699308223	0.0	-0.00024523123801172025	0.0	0.0	-0.028101430167341877	0.0	0.0	-0.027978188218755494	0.0	800.6436930210067	82.03336673153673	0.0	-0.0004890986773174618	-8.569679223046005	0.0	0.017322694454835707	0.856969673101969
3.825	81.99052950953792	0.0	-0.04028948203844986	345.0274344479468	0.0	-800.6436949219822	0.0	7.363344918884246e-06	0.0	0.9999999699874647	0.0	-0.00024500015260989504	0.0	0.0	-0.028074949730083034	0.0	0.0	-0.02797607877582074	0.0	800.6436949219822	81.9905394084213	0.0	-0.00011409392265127958	-8.560982653798987	0.0	0.037755995615232026	0.8561065909911689
3.83	81.94774742668686	0.0	-0.040461840583686126	345.43728017130564	0.0	-800.6436957397385	0.0	-0.00022745871971276697	0.0	0.9999999698882367	0.0	-0.00024540483081143545	0.0	0.0	-0.02812132243749552	0.0	0.0	-0.028041240899085693	0.0	800.6436957397385	81.94775741538399	0.0	-0.0002410907360456547	-8.551863330307915	0.0	-0.05909667736156577	0.855206751829874
3.835	81.9050102493825	0.0	-0.04075562301255567	345.8469120970801	0.0	-800.6436975719633	0.0	8.790114167974173e-05	0.0	0.9999999698208738	0.0	-0.00024567917338706794	0.0	0.0	-0.028152759781892186	0.0	0.0	-0.02801605907692254	0.0	800.6436975719633	81.90502038771103	0.0	-0.0005109088785743385	-8.543124159765844	0.0	0.018945924714157552	0.8543145167749295
3.84	81.86231644258358	0.0	-0.04030717150091429	346.2563304443551	0.0	-800.6436992315021	0.0	-4.862725980565144e-05	0.0	0.9999999698724439	0.0	-0.0002454691726166515	0.0	0.0	-0.02812869546548783	0.0	0.0	-0.02802998976070329	0.0	800.6436992315021	81.86232636567307	0.0	-0.00011781768300798735	-8.534222008269884	0.0	0.03799381396573614	0.8534306580873324
3.845	81.81966843411871	0.0	-0.04050618484490349	346.6655354376079	0.0	-800.6437001182319	0.0	-0.00020660014143258717	0.0	0.9999999697626836	0.0	-0.0002459159084328778	0.0	0.0	-0.028179887620687114	0.0	0.0	-0.028089176341457755	0.0	800.6437001182319	81.81967846031992	0.0	-0.000264664981199394	-8.525035264699454	0.0	-0.06410954989406002	0.8525276318029635
3.85	81.77706514389423	0.0	-0.040793580393424955	347.074527303596	0.0	-800.6437021112515	0.0	0.00017598190122674264	0.0	0.9999999697292257	0.0	-0.00024605192303240377	0.0	0.0	-0.028195473746168646	0.0	0.0	-0.028038761240402853	0.0	800.6437021112515	81.77707531675124	0.0	-0.0005507683949902669	-8.516437190002318	0.0	0.02131743336565711	0.8516463869718458
3.855	81.73450416303119	0.0	-0.040328651974877935	347.483306251454	0.0	-800.6437034211418	0.0	-0.00011361114876496379	0.0	0.9999999697610632	0.0	-0.00024592249713503706	0.0	0.0	-0.028180642630362334	0.0	0.0	-0.02807130843705218	0.0	800.6437034211418	81.73451411221832	0.0	-0.00012794158078897457	-8.507766569267972	0.0	0.03553132119167507	0.8507840764373727
3.86	81.69198774371048	0.0	-0.04056022194719953	347.891872513064	0.0	-800.6437044313084	0.0	-0.00016577109489367245	0.0	0.9999999696445308	0.0	-0.0002463959004704296	0.0	0.0	-0.028234890658256715	0.0	0.0	-0.02811879835756553	0.0	800.6437044313084	81.69199781226035	0.0	-0.00030307648166405846	-8.498921355835165	0.0	-0.04496914138848369	0.8499040324433592
3.865	81.64951430335721	0.0	-0.04064447440350032	348.30022630162637	0.0	-800.6437065876794	0.0	0.00012595219084902544	0.0	0.9999999696547132	0.0	-0.0002463545685969724	0.0	0.0	-0.02823015437429601	0.0	0.0	-0.02808271571278515	0.0	800.6437065876794	81.64952441854894	0.0	-0.0004150089460902302	-8.49050473902769	0.0	0.0243783989866663	0.8490539737248087
3.87	81.6070830676775	0.0	-0.04036179074180407	348.7083678260553	0.0	-800.6437075118847	0.0	-0.00017147678199449333	0.0	0.9999999696485655	0.0	-0.00024637952195106713	0.0	0.0	-0.028233013818131446	0.0	0.0	-0.028131840192249	0.0	800.6437075118847	81.60709304874631	0.0	-0.0001491588340912913	-8.48182599020125	0.0	0.006292261067367253	0.8481828324164712
3.875	81.56469617252664	0.0	-0.04062429362447161	349.1162973060737	0.0	-800.6437087193951	0.0	-9.242304377054888e-05	0.0	0.999999969537842	0.0	-0.0002468285143638593	0.0	0.0	-0.02828446456026866	0.0	0.0	-0.028158317443938027	0.0	800.6437087193951	81.5647062884476	0.0	-0.00035930433940681517	-8.473063665475896	0.0	-0.015255159850452268	0.8473077398390144
3.88	81.5223522958902	0.0	-0.04045002199457529	349.5240149609512	0.0	-800.6437108200583	0.0	6.436715812753127e-05	0.0	0.9999999695817874	0.0	-0.00024665040857735533	0.0	0.0	-0.028264055139900313	0.0	0.0	-0.028139877611438234	0.0	800.6437108200583	81.52236233086167	0.0	-0.00023497529223877312	-8.464414384717855	0.0	0.027859464902882995	0.8464460232407216
3.885	81.4800524736124	0.0	-0.040412700893156114	349.93152100241065	0.0	-800.6437115349922	0.0	-0.00020132805422939367	0.0	0.9999999695328955	0.0	-0.00024684855343271126	0.0	0.0	-0.0282867608684798	0.0	0.0	-0.02819755385046286	0.0	800.6437115349922	81.48006249540036	0.0	-0.00018623102024294862	-8.45544677069583	0.0	-0.031041872652439947	0.845550375139934
3.89	81.43779740083465	0.0	-0.040695013334385424	350.33881565906967	0.0	-800.6437130328364	0.0	2.9699956550943897e-05	0.0	0.9999999694521157	0.0	-0.00024717557879491833	0.0	0.0	-0.028324235215719435	0.0	0.0	-0.028189045439652404	0.0	800.6437130328364	81.43780756745147	0.0	-0.00043614017495333845	-8.446747716177802	0.0	0.010843823647110427	0.8446754676754038
3.895	81.39558500805927	0.0	-0.040305845676878095	350.7458991470614	0.0	-800.6437147339624	0.0	-2.049205948206465e-06	0.0	0.999999969510197	0.0	-0.00024694048787126234	0.0	0.0	-0.028297295779442632	0.0	0.0	-0.02818963249391333	0.0	800.6437147339624	81.39559498740778	0.0	-0.00010611104197694097	-8.438061691091292	0.0	0.03066389223355451	0.8438117407156014
3.9	81.35341705766047	0.0	-0.04048309270026778	351.1527716840627	0.0	-800.6437155346772	0.0	-0.00018172893115780508	0.0	0.999999969419768	0.0	-0.0002473064165539746	0.0	0.0	-0.028339228118967445	0.0	0.0	-0.02824169399776716	0.0	800.6437155346772	81.35342712989168	0.0	-0.00024464488493733757	-8.429169070977593	0.0	-0.05682768111922782	0.842936062892475
3.905	81.31129250072023	0.0	-0.04072210769119626	351.55943348018434	0.0	-800.6437174333004	0.0	0.00017665422403913652	0.0	0.9999999694039601	0.0	-0.00024737032499998944	0.0	0.0	-0.02834655148765521	0.0	0.0	-0.028191086290414155	0.0	800.6437174333004	81.31130269638757	0.0	-0.0004941022341282121	-8.420785950174075	0.0	0.018956521842646224	0.84208072872124
3.91	81.26920937925117	0.0	-0.04032492779284378	351.96588475507053	0.0	-800.6437184982601	0.0	-0.00013365981823756736	0.0	0.9999999694232343	0.0	-0.00024729239740266793	0.0	0.0	-0.028337621642513845	0.0	0.0	-0.028229377007791646	0.0	800.6437184982601	81.26921938354855	0.0	-0.0001304088450098389	-8.412265089098033	0.0	0.02152612891443391	0.8412292630637833
3.915	81.22717004272124	0.0	-0.04057001239319676	352.37212573598964	0.0	-800.6437195787936	0.0	-9.336361907074468e-05	0.0	0.9999999693216602	0.0	-0.0002477027981828172	0.0	0.0	-0.02838465010917705	0.0	0.0	-0.02825612371445575	0.0	800.6437195787936	81.22718017367306	0.0	-0.00032961403311572467	-8.403635802380432	0.0	-0.017150202180319794	0.840365330249202
3.92	81.18517279604636	0.0	-0.04041143935925206	352.77815662512904	0.0	-800.6437215599377	0.0	6.94660919427573e-05	0.0	0.9999999693650619	0.0	-0.0002475275179111948	0.0	0.0	-0.028364564468969535	0.0	0.0	-0.02823622314501781	0.0	800.6437215599377	81.18518285352145	0.0	-0.00022030701170347292	-8.395192409728718	0.0	0.024613802783163434	0.8395228492164709
3.925	81.14321855501238	0.0	-0.040384395954813884	353.18397763396814	0.0	-800.6437222441509	0.0	-0.000185740366888401	0.0	0.9999999693196572	0.0	-0.0002477108839848794	0.0	0.0	-0.028385576673869754	0.0	0.0	-0.028289433840557397	0.0	800.6437222441509	81.14322860431369	0.0	-0.00018427543685809684	-8.386426223255466	0.0	-0.03359334622574727	0.8386493505096011
3.93	81.1013081803071	0.0	-0.040663509752052615	353.58958898322	0.0	-800.6437237559111	0.0	8.285298265811524e-05	0.0	0.9999999692591134	0.0	-0.0002479551726646356	0.0	0.0	-0.028413570095395125	0.0	0.0	-0.028265698209425493	0.0	800.6437237559111	81.10131837325733	0.0	-0.0004445282419386221	-8.377880253537977	0.0	0.011088400027786011	0.8377887591465808
3.935	81.05943990124142	0.0	-0.040271612140965835	353.99499088402575	0.0	-800.6437251806309	0.0	-5.64573239328931e-05	0.0	0.9999999693116884	0.0	-0.00024774304743245323	0.0	0.0	-0.028389262333583958	0.0	0.0	-0.02828187204134528	0.0	800.6437251806309	81.05944990495539	0.0	-0.00010778310145208235	-8.369247156477874	0.0	0.024851959438334938	0.8369284054571269
3.94	81.01761596282503	0.0	-0.04047740372818276	354.4001835557068	0.0	-800.6437260574713	0.0	-0.0001338273389682021	0.0	0.999999969218925	0.0	-0.0002481171975627484	0.0	0.0	-0.02843213678164205	0.0	0.0	-0.028320210749877003	0.0	800.6437260574713	81.01762607386728	0.0	-0.00027367233012251773	-8.36044695292486	0.0	-0.031546528118230104	0.8360506470071469
3.945	80.97583492352305	0.0	-0.040475254340680805	354.8051672127262	0.0	-800.643727989749	0.0	0.0001034223235105206	0.0	0.9999999692438746	0.0	-0.00024801661462281216	0.0	0.0	-0.028420610825388635	0.0	0.0	-0.028290582436654055	0.0	800.643727989749	80.97584503858198	0.0	-0.000308545708629358	-8.351993635632956	0.0	0.020359699671575898	0.8352018451070622
3.95	80.93409621787383	0.0	-0.040316699742978516	355.2099420674302	0.0	-800.6437287188578	0.0	-0.00016807053704617322	0.0	0.9999999692241716	0.0	-0.00024809604653773553	0.0	0.0	-0.028429713052636193	0.0	0.0	-0.02833873109882027	0.0	800.6437287188578	80.93410625944557	0.0	-0.00015783741226302127	-8.343378353765967	0.0	-0.015446396143541775	0.8343392651987819
3.955	80.89240082697313	0.0	-0.040586359066777426	355.6145083427911	0.0	-800.6437300542815	0.0	4.106772297895385e-05	0.0	0.9999999691543578	0.0	-0.0002483772835825493	0.0	0.0	-0.028461940445050255	0.0	0.0	-0.028326966062815737	0.0	800.6437300542815	80.8924110077197	0.0	-0.0004026857388706645	-8.334970119657234	0.0	0.006832079086577273	0.8334972919745065
3.96	80.85074652177154	0.0	-0.04022516550423387	356.0188662361471	0.0	-800.643731550233	0.0	-2.219875387530567e-05	0.0	0.9999999692124297	0.0	-0.0002481433673070915	0.0	0.0	-0.02843513561353791	0.0	0.0	-0.028333325537353262	0.0	800.643731550233	80.85075652819496	0.0	-0.0001000088034404629	-8.326581928717285	0.0	0.022050186136476187	0.832661112496254
3.965	80.80913529000598	0.0	-0.04041459754057575	356.4230159731241	0.0	-800.6437323592643	0.0	-0.00013325833560490964	0.0	0.9999999691290796	0.0	-0.0002484790368218014	0.0	0.0	-0.028473600507731924	0.0	0.0	-0.02837150123842876	0.0	800.6437323592643	80.80914539575653	0.0	-0.00025584158324352745	-8.318000534526249	0.0	-0.031610301841117065	0.8318060597492751
3.97	80.76756616141449	0.0	-0.04042912776004553	356.8269577580661	0.0	-800.6437342168815	0.0	0.00010806165491536292	0.0	0.9999999691522489	0.0	-0.0002483857727837156	0.0	0.0	-0.02846291323587678	0.0	0.0	-0.028340543854659513	0.0	800.6437342168815	80.7675762794632	0.0	-0.0003060953354344964	-8.309662849215965	0.0	0.018546765948877632	0.8309683546932889
3.975	80.72603900676373	0.0	-0.04026804586717157	357.2306918000865	0.0	-800.6437349298673	0.0	-0.00016046726716415315	0.0	0.9999999691355035	0.0	-0.0002484531803060424	0.0	0.0	-0.02847063756918864	0.0	0.0	-0.028386514340452033	0.0	800.6437349298673	80.72604904993719	0.0	-0.00015475988435590895	-8.301063680940029	0.0	-0.015668780603311002	0.830107846883206
3.98	80.68455535083136	0.0	-0.040536225752586925	357.634218318579	0.0	-800.6437362596215	0.0	6.510494977852253e-05	0.0	0.9999999690748225	0.0	-0.0002486972917898872	0.0	0.0	-0.028498610685562805	0.0	0.0	-0.02836786314621343	0.0	800.6437362596215	80.68456553259323	0.0	-0.00040416116927217277	-8.292583044899734	0.0	0.006678828380285605	0.8292585734456236
3.985	80.6431132340786	0.0	-0.040175793744926316	358.03753752292425	0.0	-800.6437376253565	0.0	-4.584262315804918e-05	0.0	0.9999999691301523	0.0	-0.0002484747115795148	0.0	0.0	-0.028473104871459785	0.0	0.0	-0.028380996090357255	0.0	800.6437376253565	80.64312324165317	0.0	-0.0001002414177462781	-8.284083767937982	0.0	0.018861538696575135	0.8284105240269197
3.99	80.60171468223412	0.0	-0.04037856977997866	358.4406496250497	0.0	-800.6437384714992	0.0	-0.00010325313096672573	0.0	0.9999999690485394	0.0	-0.0002488029496333994	0.0	0.0	-0.028510718182948775	0.0	0.0	-0.02841057593348678	0.0	800.6437384714992	80.60172479588499	0.0	-0.0002706773053745858	-8.275476681011895	0.0	-0.019619342065193057	0.827549993755995
3.995	80.56035811218223	0.0	-0.04028101878237042	358.8435548339678	0.0	-800.6437402610635	0.0	8.432692903995577e-05	0.0	0.9999999690869402	0.0	-0.00024864855794972464	0.0	0.0	-0.02849302619866855	0.0	0.0	-0.028386418047820338	0.0	800.6437402610635	80.56036818234757	0.0	-0.00021858129496972117	-8.26712857804021	0.0	0.018718149043157512	0.8267149768508658
4.0	80.51904360550445	0.0	-0.04023714422344271	359.2462533701464	0.0	-800.6437408964396	0.0	-0.00015700566312010876	0.0	0.9999999690536844	0.0	-0.0002487822695437831	0.0	0.0	-0.028508348419165497	0.0	0.0	-0.02843139685710251	0.0	800.6437408964396	80.51905365900917	0.0	-0.00017371966314813398	-8.258598975842801	0.0	-0.033172003771247224	0.8258665595943813
4.005	80.47777166689539	0.0	-0.04050989356192809	359.6487454413977	0.0	-800.6437423847088	0.0	0.00015919786201674702	0.0	0.9999999690237908	0.0	-0.0002489023970918896	0.0	0.0	-0.028522114022611195	0.0	0.0	-0.028385790029097184	0.0	800.6437423847088	80.477781861329	0.0	-0.00044766922252411425	-8.250355862031949	0.0	0.009801189369128507	0.8250361683797748
4.01	80.4365401550489	0.0	-0.04013168264909052	360.05103124929826	0.0	-800.6437434331018	0.0	-0.00010339400824122891	0.0	0.9999999690594852	0.0	-0.00024875894925262244	0.0	0.0	-0.028505676110561748	0.0	0.0	-0.028415410230593	0.0	800.6437434331018	80.43655016628702	0.0	-0.00011306049953489704	-8.242035687466636	0.0	0.015385757149512022	0.8242050048076431
4.015	80.39535145827679	0.0	-0.04036780021795021	360.4531110110808	0.0	-800.6437444411179	0.0	-2.653873319730051e-05	0.0	0.9999999689847281	0.0	-0.0002490592825164722	0.0	0.0	-0.028540091768559792	0.0	0.0	-0.028423013017622147	0.0	800.6437444411179	80.3953615922923	0.0	-0.0003213793482115361	-8.233647484637412	0.0	-0.00021277582136208372	0.8233647487386714
4.02	80.35420365469153	0.0	-0.040075065407764135	360.85498492802753	0.0	-800.6437459978607	0.0	4.828622394362976e-05	0.0	0.9999999690426694	0.0	-0.0002488265315742491	0.0	0.0	-0.028513420474399188	0.0	0.0	-0.02840918003341918	0.0	800.6437459978607	80.35421364796353	0.0	-8.654609761823028e-05	-8.22532331831288	0.0	0.01597116044344102	0.8225338823948075
4.025	80.3130984878499	0.0	-0.04023076936254583	361.25665321579055	0.0	-800.6437466823805	0.0	-0.00012511381371068132	0.0	0.999999968980801	0.0	-0.0002490750506905166	0.0	0.0	-0.02854189866826259	0.0	0.0	-0.02844502250084122	0.0	800.6437466823805	80.31310856381934	0.0	-0.00022278745790905514	-8.2168083799381	0.0	-0.028971691585065695	0.8216859455505754
4.03	80.27203524442847	0.0	-0.0402551810156111	361.6581160841076	0.0	-800.6437483776846	0.0	0.00011220603321641915	0.0	0.9999999690039747	0.0	-0.00024898199066562734	0.0	0.0	-0.028531234774596834	0.0	0.0	-0.028412877840145193	0.0	800.6437483776846	80.27204533760207	0.0	-0.00028259500372151047	-8.208513876650397	0.0	0.015000843992848753	0.8208527583463591
4.035	80.23101358502309	0.0	-0.040112393675343944	362.05937373521164	0.0	-800.6437490333665	0.0	-0.00014361660660932782	0.0	0.9999999689903716	0.0	-0.00024903661970289133	0.0	0.0	-0.028537494801339082	0.0	0.0	-0.02845402096727872	0.0	800.6437490333665	80.23102361219681	0.0	-0.00015146910193383615	-8.200025401322602	0.0	-0.01974252560630088	0.8200049167514376
4.04	80.1900347024799	0.0	-0.0403788752080629	362.4604263888091	0.0	-800.6437503815488	0.0	0.00013608020382243095	0.0	0.9999999689557159	0.0	-0.00024917573420082207	0.0	0.0	-0.028553436149034685	0.0	0.0	-0.02841503686050719	0.0	800.6437503815488	80.19004486758232	0.0	-0.0004160498893874035	-8.19172631391562	0.0	0.0066230900451979225	0.81917289913314
4.045	80.14909633568607	0.0	-0.04002149617390898	362.86127424093746	0.0	-800.643751432917	0.0	-9.08757395065151e-05	0.0	0.9999999689973647	0.0	-0.00024900853076543404	0.0	0.0	-0.028534276046104617	0.0	0.0	-0.02844107084217646	0.0	800.643751432917	80.1491063277407	0.0	-0.0001058750068581465	-8.183421659383566	0.0	0.012307342547740482	0.8183430914106178
4.05	80.10820052800719	0.0	-0.04025336466502518	363.261917515882	0.0	-800.6437524043573	0.0	-9.447237081438594e-06	0.0	0.999999968930681	0.0	-0.0002492761851734919	0.0	0.0	-0.028564946982956106	0.0	0.0	-0.02844377727624059	0.0	800.6437524043573	80.10821064078814	0.0	-0.0003152276458278685	-8.175111694941489	0.0	-1.9535902206314426e-05	0.8175111694964831
4.055	80.06734512449707	0.0	-0.03996268687899211	363.66235641290166	0.0	-800.6437538340286	0.0	2.3172009174713656e-05	0.0	0.9999999689904483	0.0	-0.00024903630431608807	0.0	0.0	-0.02853745866067243	0.0	0.0	-0.02843713898459784	0.0	800.6437538340286	80.0673550974064	0.0	-8.333170632198493e-05	-8.166900817964992	0.0	0.012157378518899684	0.8166909866793542
4.06	80.02653166373707	0.0	-0.04013288522649741	364.06259113753237	0.0	-800.6437545383486	0.0	-9.632535353037053e-05	0.0	0.999999968929226	0.0	-0.00024928201508853185	0.0	0.0	-0.028565615042030233	0.0	0.0	-0.028464734165684822	0.0	800.6437545383486	80.02654172660452	0.0	-0.00023453133096573212	-8.158588947014305	0.0	-0.01656342386055706	0.8158605760382959
4.065	79.98575904040536	0.0	-0.040042756790346745	364.46262189540516	0.0	-800.6437561533628	0.0	8.874549683773128e-05	0.0	0.9999999689681958	0.0	-0.00024912563396088097	0.0	0.0	-0.02854769508425398	0.0	0.0	-0.028439310453586854	0.0	800.6437561533628	79.98576906334957	0.0	-0.00018974719909503637	-8.150422252277423	0.0	0.012818858390651262	0.8150432332922556
4.07	79.94502768634985	0.0	-0.04002421499015865	364.8624488942549	0.0	-800.6437567381137	0.0	-0.00013163202536375728	0.0	0.9999999689389689	0.0	-0.0002492429251208974	0.0	0.0	-0.02856113566155754	0.0	0.0	-0.028477020251097367	0.0	800.6437567381137	79.94503770515426	0.0	-0.0001727461563788564	-8.142063620550033	0.0	-0.024233526775858376	0.8142099684043688
4.075	79.90433815570312	0.0	-0.04018748319150934	365.26207234234573	0.0	-800.6437582413446	0.0	0.00015397581075901203	0.0	0.9999999689419065	0.0	-0.0002492311340171972	0.0	0.0	-0.028559784500559883	0.0	0.0	-0.028432909430579384	0.0	800.6437582413446	79.90434826094103	0.0	-0.00035818181306605486	-8.133870469868754	0.0	0.009159198224781485	0.8133875626754756
4.08	79.86368914211789	0.0	-0.039931039970870094	365.66149244227734	0.0	-800.6437589668802	0.0	-0.0001230212446329266	0.0	0.9999999689512624	0.0	-0.0002491935949794322	0.0	0.0	-0.0285554828435645	0.0	0.0	-0.02846815242111895	0.0	800.6437589668802	79.86369912456932	0.0	-0.00012799663618237762	-8.12555381627765	0.0	-0.0043264620031630355	0.8125554968092811
4.085	79.82308253124843	0.0	-0.040187873113988	366.06070940428486	0.0	-800.6437601629755	0.0	0.00011438531209296625	0.0	0.9999999689141562	0.0	-0.0002493424530913084	0.0	0.0	-0.02857254072720801	0.0	0.0	-0.02843538344301288	0.0	800.6437601629755	79.82309264686221	0.0	-0.0003813029310100951	-8.117305691359178	0.0	0.003188365202378667	0.8117306317531991
4.09	79.78251606702756	0.0	-0.03985468849822411	366.45972342192897	0.0	-800.6437611967282	0.0	-7.852371038178098e-05	0.0	0.9999999689606729	0.0	-0.00024915582613895074	0.0	0.0	-0.02855115485311675	0.0	0.0	-0.028457878828995798	0.0	800.6437611967282	79.78252602150033	0.0	-9.812737974139614e-05	-8.109085005817226	0.0	0.008647692733385674	0.8109089616853385
4.095	79.74199170435692	0.0	-0.040083180949797716	366.8585347241087	0.0	-800.6437621333118	0.0	1.4502563486192444e-05	0.0	0.9999999689039606	0.0	-0.0002493833341574468	0.0	0.0	-0.02857722535245707	0.0	0.0	-0.0284537241505964	0.0	800.6437621333118	79.74200177787061	0.0	-0.0003105296736809231	-8.100864861960844	0.0	0.00018134538781282555	0.8100864863990636
4.1	79.70150733836402	0.0	-0.039794673249300194	367.25714349846737	0.0	-800.6437634078288	0.0	-6.4317762573691985e-06	0.0	0.9999999689640982	0.0	-0.0002491420722537413	0.0	0.0	-0.028549578773918966	0.0	0.0	-0.028455566718767998	0.0	800.6437634078288	79.70151727298564	0.0	-8.067214155214186e-05	-8.092723766059844	0.0	0.00749099265318556	0.8092727233060606
4.105	79.6610645168123	0.0	-0.03998308583319109	367.6555499607982	0.0	-800.6437641489688	0.0	-5.2785617397589e-05	0.0	0.9999999689066893	0.0	-0.00024937239156884027	0.0	0.0	-0.028575971424129865	0.0	0.0	-0.028470688684247368	0.0	800.6437641489688	79.66107455046239	0.0	-0.0002525417487648304	-8.084558122119034	0.0	-0.002143230484690951	0.8084558406206104
4.11	79.62066170091687	0.0	-0.03975979482345308	368.0537543087847	0.0	-800.643765586254	0.0	7.579117940172806e-05	0.0	0.9999999689603518	0.0	-0.00024915710778628664	0.0	0.0	-0.028551301719087596	0.0	0.0	-0.028448976110727178	0.0	800.643765586254	79.62067162819807	0.0	-8.368353960378833e-05	-8.07645369992282	0.0	0.007822274621979803	0.8076457487969417
4.115	79.58030010973224	0.0	-0.03988982400570266	368.4517567446198	0.0	-800.6437661873541	0.0	-9.331181967167933e-05	0.0	0.9999999689168204	0.0	-0.00024933176424227384	0.0	0.0	-0.028571315875294847	0.0	0.0	-0.028475707977956545	0.0	800.6437661873541	79.58031010689713	0.0	-0.00020602702901263782	-8.068258166522924	0.0	-0.013946195857137791	0.8068270219696583
4.12	79.53997898044997	0.0	-0.0398173933394369	368.8495574701501	0.0	-800.6437676810916	0.0	9.425408440587798e-05	0.0	0.9999999689547184	0.0	-0.0002491797161172068	0.0	0.0	-0.028553892443055135	0.0	0.0	-0.028448706171764912	0.0	800.6437676810916	79.53998894645889	0.0	-0.00017789086085338924	-8.060164403482872	0.0	0.00796995691305466	0.8060168343861411
4.125	79.49969862209042	0.0	-0.039804159293582685	369.24715669611453	0.0	-800.6437682310756	0.0	-0.00011249040838005219	0.0	0.9999999689307328	0.0	-0.00024927595763183096	0.0	0.0	-0.028564920908601483	0.0	0.0	-0.028480932299944313	0.0	800.6437682310756	79.49970858654031	0.0	-0.00016942856733337017	-8.051950535645602	0.0	-0.01324104775507905	0.8051961422773284
4.13	79.45945932661927	0.0	-0.03987140115021535	369.6445546233239	0.0	-800.6437696768794	0.0	0.00012618885001100817	0.0	0.9999999689501193	0.0	-0.0002491981728954037	0.0	0.0	-0.028556007434108983	0.0	0.0	-0.028444781857308112	0.0	800.6437696768794	79.45946932955252	0.0	-0.0002690932609529268	-8.043845481244224	0.0	0.006708071895815909	0.8043848278303222
4.135	79.41926026836107	0.0	-0.03972592098290432	370.0417514536866	0.0	-800.6437702663484	0.0	-0.00011565851018332095	0.0	0.999999968946253	0.0	-0.0002492136906044026	0.0	0.0	-0.02855778563263092	0.0	0.0	-0.02847791557979949	0.0	800.6437702663484	79.4192702037849	0.0	-0.00014118336450419524	-8.03565774500683	0.0	-0.012202356958335717	0.8035667009800966
4.14	79.37910257660548	0.0	-0.039919075456896755	370.4387473938985	0.0	-800.6437715949256	0.0	0.00016619551585984012	0.0	0.999999968946346	0.0	-0.0002492133123881078	0.0	0.0	-0.028557742292234675	0.0	0.0	-0.02843030407163565	0.0	800.6437715949256	79.37911261329032	0.0	-0.0003544135519689442	-8.027589735969325	0.0	0.004753801310833246	0.8027591143529108
4.145	79.33898441142784	0.0	-0.03965436561766033	370.8355426431121	0.0	-800.6437722837417	0.0	-0.0001077338429891656	0.0	0.9999999689622856	0.0	-0.00024914934780751976	0.0	0.0	-0.0285504124909951	0.0	0.0	-0.02846116754420567	0.0	800.6437722837417	79.33899432114309	0.0	-0.00011984947796136646	-8.019487443811832	0.0	-0.004516576878001899	0.8019488715680216
4.15	79.2989076106541	0.0	-0.03990958526860958	371.23213740607724	0.0	-800.6437734612422	0.0	0.00016580300848130625	0.0	0.9999999689443905	0.0	-0.00024922115879106276	0.0	0.0	-0.028558641423809945	0.0	0.0	-0.028413668481122915	0.0	800.6437734612422	79.29891765257618	0.0	-0.0003836502472602912	-8.01145378670564	0.0	0.0020283881466244993	0.8011454043485404
4.155	79.25886987788166	0.0	-0.039588481764097	371.6285318758392	0.0	-800.6437742768563	0.0	-9.32205672181262e-05	0.0	0.999999968978308	0.0	-0.0002490850287371239	0.0	0.0	-0.02854304206821461	0.0	0.0	-0.028440374206449986	0.0	800.6437742768563	79.25887976470045	0.0	-0.00010408231415485728	-8.00342699531053	0.0	0.004035612980212872	0.8003428012760374
4.16	79.21887337505143	0.0	-0.0398334424560571	372.024726266781	0.0	-800.6437753265649	0.0	0.00011680247120295518	0.0	0.9999999689484484	0.0	-0.00024920487708323904	0.0	0.0	-0.02855677567746889	0.0	0.0	-0.02840691276326685	0.0	800.6437753265649	79.21888338895151	0.0	-0.0003499795303143407	-7.995392136910814	0.0	0.000523127419082802	0.7995392154024565
4.165	79.17891596571462	0.0	-0.039527098872178014	372.420720771134	0.0	-800.6437762416849	0.0	-7.587623488106562e-05	0.0	0.9999999689941776	0.0	-0.00024902130946364957	0.0	0.0	-0.02853574037710072	0.0	0.0	-0.02842864970338699	0.0	800.6437762416849	79.1789258318644	0.0	-9.262052120653471e-05	-7.9873695723913825	0.0	0.0032257813774135254	0.7987370223773854
4.17	79.13899973031816	0.0	-0.03976118634961793	372.8165155930257	0.0	-800.6437771926486	0.0	8.125787826678119e-05	0.0	0.999999968957596	0.0	-0.00024916816754258763	0.0	0.0	-0.028552569073843917	0.0	0.0	-0.02840537103600262	0.0	800.6437771926486	79.13900971810239	0.0	-0.0003233435488186788	-7.97932492500569	0.0	0.0002966306329870449	0.7979324930519298
4.175	79.09912272510404	0.0	-0.03946909443392811	373.2121109209572	0.0	-800.6437781759813	0.0	-5.848414254104788e-05	0.0	0.9999999690102069	0.0	-0.0002489569293576813	0.0	0.0	-0.028528362960158843	0.0	0.0	-0.02842212550868284	0.0	800.6437781759813	79.09913257225092	0.0	-8.454134483437331e-05	-7.971291139915119	0.0	0.0024638140864264	0.7971291520680268
4.18	79.05928684387183	0.0	-0.03969300221513765	373.60750697741685	0.0	-800.6437790533922	0.0	5.702923252094743e-05	0.0	0.9999999689706118	0.0	-0.0002491159237956084	0.0	0.0	-0.028546582381242386	0.0	0.0	-0.028405787837021235	0.0	800.6437790533922	79.059296807544	0.0	-0.00030314395731627223	-7.96325185038711	0.0	0.0001813167659053086	0.7963251852451327
4.185	79.01949018662893	0.0	-0.03941317118525238	374.0027039512673	0.0	-800.6437800783457	0.0	-4.361703690913391e-05	0.0	0.9999999690268784	0.0	-0.00024888995609368146	0.0	0.0	-0.028520688389186265	0.0	0.0	-0.028418283197670036	0.0	800.6437800783457	79.01950001579225	0.0	-7.885263437286635e-05	-7.955239848490929	0.0	0.0017663269336823766	0.795524004458249
4.19	78.97973443591633	0.0	-0.039628836324359706	374.3977020453406	0.0	-800.6437809032354	0.0	4.2061446848213355e-05	0.0	0.999999968986536	0.0	-0.00024905198807146284	0.0	0.0	-0.028539255886707766	0.0	0.0	-0.028406233480746952	0.0	800.6437809032354	78.97974437745621	0.0	-0.00028871287108094164	-7.947244173281358	0.0	0.00011372695803907564	0.7947244174095087
4.195	78.94001771061454	0.0	-0.03935861841192835	374.79250145718225	0.0	-800.6437819479734	0.0	-3.2991363393447796e-05	0.0	0.9999999690445498	0.0	-0.00024881893634448913	0.0	0.0	-0.02851255012515262	0.0	0.0	-0.028415684810161088	0.0	800.6437819479734	78.94002752245808	0.0	-7.5072270972671e-05	-7.9392833173715855	0.0	0.001098250517700114	0.7939283393332737
4.2	78.90034158984933	0.0	-0.03956874802561719	375.1871023879578	0.0	-800.643782739241	0.0	3.497119581311657e-05	0.0	0.999999969004768	0.0	-0.0002489787678883572	0.0	0.0	-0.02853086547151334	0.0	0.0	-0.028405666300538	0.0	800.643782739241	78.90035151126756	0.0	-0.0002797246675970539	-7.931340782459747	0.0	8.354369166905094e-05	0.7931340782899746
4.205	78.86070429037207	0.0	-0.03930496299893843	375.5815050346672	0.0	-800.6437837853874	0.0	-2.762651502631874e-05	0.0	0.9999999690634083	0.0	-0.000248743132998028	0.0	0.0	-0.02850386370123343	0.0	0.0	-0.028413580714106313	0.0	800.6437837853874	78.86071408532524	0.0	-7.284203756377112e-05	-7.923417536382734	0.0	0.00046069982850600725	0.7923417549776218
4.21	78.82110742405693	0.0	-0.039512690784784574	375.97570959643167	0.0	-800.6437845603742	0.0	3.4975438857119275e-05	0.0	0.9999999690249198	0.0	-0.00024889781913434145	0.0	0.0	-0.028521589427302048	0.0	0.0	-0.02840356098894066	0.0	800.6437845603742	78.82111732734113	0.0	-0.00027588362530988573	-7.91549819151669	0.0	6.928830389340472e-05	0.7915498191819949
4.215	78.78154932483035	0.0	-0.039252019971703356	376.3697162713815	0.0	-800.6437855917002	0.0	-2.7744531353383623e-05	0.0	0.9999999690834674	0.0	-0.0002486624770790987	0.0	0.0	-0.028494621213452788	0.0	0.0	-0.028411509211696245	0.0	800.6437855917002	78.7815591032296	0.0	-7.1985922385686e-05	-7.907578409321067	0.0	-0.00016121121518151852	0.7907578410964368
4.22	78.74203165890525	0.0	-0.039460570408630456	376.76352525622923	0.0	-800.643786366892	0.0	4.19246716798105e-05	0.0	0.9999999690468923	0.0	-0.0002488095167591229	0.0	0.0	-0.028511470720146672	0.0	0.0	-0.02839949867797262	0.0	800.643786366892	78.74204154599336	0.0	-0.0002770330444059772	-7.899656418204634	0.0	6.911769374178984e-05	0.7899656418507006
4.225	78.70255277699238	0.0	-0.03919964729888435	377.15713673022753	0.0	-800.6437873677652	0.0	-3.299054808571366e-05	0.0	0.9999999691047311	0.0	-0.00024857693661376617	0.0	0.0	-0.028484818997867468	0.0	0.0	-0.028408949773818293	0.0	800.6437873677652	78.7025625391023	0.0	-7.236471742161178e-05	-7.891732785520844	0.0	-0.0007648376192858233	0.7891732822583464
4.23	78.66311432670248	0.0	-0.039412154341565246	377.5505509303189	0.0	-800.6437881589535	0.0	5.6057737541734915e-05	0.0	0.9999999690708821	0.0	-0.00024871307196234766	0.0	0.0	-0.028500418960182225	0.0	0.0	-0.028392890414967325	0.0	800.6437881589535	78.66312419941504	0.0	-0.00028306104722179937	-7.8838221204901995	0.0	2.5444516848666054e-05	0.7883822120531261
4.235	78.62371455140475	0.0	-0.039148333295743104	377.94376803368897	0.0	-800.6437891137157	0.0	-4.234578328771982e-05	0.0	0.9999999691269749	0.0	-0.0002484874328486743	0.0	0.0	-0.028474562621570092	0.0	0.0	-0.028405021588280135	0.0	800.6437891137157	78.62372429773431	0.0	-7.431968775511386e-05	-7.875921390515828	0.0	-0.0013871390528404468	0.7875921512670091
4.24	78.58435508210214	0.0	-0.03936748713372407	378.33678824012077	0.0	-800.6437899382137	0.0	7.808195464292054e-05	0.0	0.9999999690971892	0.0	-0.0002486072702131814	0.0	0.0	-0.028488294972422702	0.0	0.0	-0.02838265275599428	0.0	800.6437899382137	78.5843649422789	0.0	-0.0002941994780849138	-7.868050261546244	0.0	-6.270875554959812e-05	0.7868050261796141
4.245	78.54503403412025	0.0	-0.03909861494965866	378.7296117443635	0.0	-800.6437908313652	0.0	-5.427969992866799e-05	0.0	0.9999999691499697	0.0	-0.0002483948730008682	0.0	0.0	-0.028463956043979402	0.0	0.0	-0.028398202744590026	0.0	800.6437908313652	78.54504376544408	0.0	-7.824382115610064e-05	-7.8601942603116965	0.0	-0.0020255776758851805	0.7860194521308099
4.25	78.50575310737268	0.0	-0.039326441146051626	379.1222387446022	0.0	-800.643791708055	0.0	0.00010910997272540019	0.0	0.999999969126405	0.0	-0.0002484897243871722	0.0	0.0	-0.028474825212547236	0.0	0.0	-0.028366945039890262	0.0	800.643791708055	78.50576295678596	0.0	-0.0003106915890967177	-7.8523683850555415	0.0	-0.00021912007767410467	0.7852368388112811
4.255	78.4665103519189	0.0	-0.03905129421703467	379.514669430465	0.0	-800.6437925227038	0.0	-6.67300269679448e-05	0.0	0.9999999691733733	0.0	-0.00024830063496454814	0.0	0.0	-0.028453157160144904	0.0	0.0	-0.02838606178445055	0.0	800.6437925227038	78.46652006940947	0.0	-8.472191529643405e-05	-7.844545657840504	0.0	-0.002687481483260925	0.7844546118195815
4.26	78.42730763676457	0.0	-0.03928886683848542	379.9069040078221	0.0	-800.6437934729286	0.0	0.0001507119977612337	0.0	0.9999999691593032	0.0	-0.0002483572835816852	0.0	0.0	-0.028459648613699394	0.0	0.0	-0.02834288597748203	0.0	800.6437934729286	78.42731747710535	0.0	-0.00033287702654713486	-7.836739988656424	0.0	-0.0009063630149135554	0.7836740041069412
4.265	78.38814296221588	0.0	-0.03900722930662411	380.29894265556635	0.0	-800.64379419088	0.0	-7.715310683029427e-05	0.0	0.9999999691969712	0.0	-0.0002482055690876879	0.0	0.0	-0.028442263412769536	0.0	0.0	-0.02836498871447052	0.0	800.64379419088	78.38815266746964	0.0	-9.447843176378235e-05	-7.828934365866521	0.0	0.0001945022291788063	0.7828934368282631
4.27	78.34901832105179	0.0	-0.03922773464986254	380.69078558379204	0.0	-800.64379523729	0.0	0.0001802881473368289	0.0	0.9999999691968989	0.0	-0.0002482058480633474	0.0	0.0	-0.028442295381026193	0.0	0.0	-0.028313339964777355	0.0	800.64379523729	78.34902814058673	0.0	-0.0003343619399406907	-7.8211177369498825	0.0	-0.003134593343918431	0.7821118365100191
4.275	78.30993174421276	0.0	-0.03896720103606723	381.08243299016823	0.0	-800.6437958393914	0.0	-8.247150318950079e-05	0.0	0.9999999692207294	0.0	-0.0002481098196159821	0.0	0.0	-0.02843129133119292	0.0	0.0	-0.028336966310091645	0.0	800.6437958393914	78.30994143921245	0.0	-0.00010827135619560912	-7.813349139871425	0.0	0.011106224471900012	0.7813357033295711
4.28	78.27088495709025	0.0	-0.03908488950687329	381.4738850640905	0.0	-800.6437969679777	0.0	0.0001443640061767859	0.0	0.9999999692362734	0.0	-0.00024804715758454843	0.0	0.0	-0.028424110791098203	0.0	0.0	-0.02829560906875399	0.0	800.6437969679777	78.27089471526489	0.0	-0.00025514482136664317	-7.805511594369582	0.0	-0.005212351099864489	0.7805513334716813
4.285	78.2318765261667	0.0	-0.03893200362111898	381.86514199857277	0.0	-800.6437974727464	0.0	-7.947326299274386e-05	0.0	0.9999999692449995	0.0	-0.0002480119792389451	0.0	0.0	-0.028420079649507584	0.0	0.0	-0.02831837648152208	0.0	800.6437974727464	78.2318862132872	0.0	-0.00012711495148540292	-7.797774362048908	0.0	0.011763172961846462	0.7797783234590803
4.29	78.19290733373074	0.0	-0.03893854010896164	382.25620399155	0.0	-800.6437986407096	0.0	0.00011499762612388185	0.0	0.999999969275739	0.0	-0.0002478880003327489	0.0	0.0	-0.02840587271292345	0.0	0.0	-0.02828543208836747	0.0	800.6437986407096	78.19291702884682	0.0	-0.00017236963626717178	-7.789967760431675	0.0	-0.006075663111394552	0.7789970129740366
4.295	78.15397672776052	0.0	-0.03890207796352661	382.6470712326265	0.0	-800.6437990967531	0.0	-6.471244912382588e-05	0.0	0.9999999692704298	0.0	-0.00024790942023589154	0.0	0.0	-0.028408327253094202	0.0	0.0	-0.02830397083945122	0.0	800.6437990967531	78.1539864095908	0.0	-0.00015186025311062577	-7.782274407992892	0.0	0.012115412020480245	0.7782283838598381
4.3	78.11508471969931	0.0	-0.038791224029194014	383.0377439182772	0.0	-800.6438002432765	0.0	9.6349230436171e-05	0.0	0.9999999693152847	0.0	-0.00024772841984858267	0.0	0.0	-0.028387586135891225	0.0	0.0	-0.02827636881813459	0.0	800.6438002432765	78.11509435131958	0.0	-8.856744768475287e-05	-7.774505013748723	0.0	-0.006265520335077942	0.7774507538458568
4.305	78.07623157823639	0.0	-0.038877805456487356	383.4282222389496	0.0	-800.6438007188527	0.0	-3.432636431481508e-05	0.0	0.9999999692981855	0.0	-0.00024779743414718886	0.0	0.0	-0.028395494592206343	0.0	0.0	-0.028286202597140927	0.0	800.6438007188527	78.07624125754889	0.0	-0.0001836221640548663	-7.766828998847094	0.0	0.006265212795285875	0.7766831525804041
4.31	78.03741652238578	0.0	-0.03868992400991144	383.8185063917301	0.0	-800.6438017744003	0.0	5.206651636040338e-05	0.0	0.9999999693546101	0.0	-0.0002475696176881948	0.0	0.0	-0.02836938874819759	0.0	0.0	-0.028271286638933926	0.0	800.6438017744003	78.0374261133365	0.0	-5.053370371641945e-05	-7.7590956165281	0.0	-0.005818332140190501	0.7759097798031319
4.315	77.99864056620372	0.0	-0.038858975113015407	384.20859656628244	0.0	-800.6438023497101	0.0	1.5426106631896412e-05	0.0	0.9999999693303544	0.0	-0.00024766757587854036	0.0	0.0	-0.02838061393029282	0.0	0.0	-0.028266867384912294	0.0	800.6438023497101	77.99865024565695	0.0	-0.0002235030690811109	-7.7514148200423945	0.0	0.0004131126876407493	0.7751414831050842
4.32	77.95990241864303	0.0	-0.0386376028142889	384.5984929563803	0.0	-800.643803278664	0.0	-1.187730546806787e-05	0.0	0.9999999693894076	0.0	-0.0002474290199703292	0.0	0.0	-0.028353277436018374	0.0	0.0	-0.028270269982288834	0.0	800.643803278664	77.9599119931758	0.0	-5.851475948327971e-05	-7.743701888175755	0.0	-0.006091007368809637	0.7743704283694434
4.325	77.92120350364192	0.0	-0.03884474894226615	384.9881957530221	0.0	-800.6438040008251	0.0	8.841877692167347e-05	0.0	0.9999999693694724	0.0	-0.00024750957543392054	0.0	0.0	-0.028362508412462045	0.0	0.0	-0.02824493986855223	0.0	800.6438040008251	77.92121318546582	0.0	-0.0002722573714481933	-7.736026445854094	0.0	-0.00042580364042580385	0.7736026457572561
4.33	77.88254218127675	0.0	-0.0385968492855372	385.3777051471017	0.0	-800.6438047696374	0.0	-5.4546725203358996e-05	0.0	0.9999999694196816	0.0	-0.0002473066298487159	0.0	0.0	-0.028339252560744176	0.0	0.0	-0.028260566354254293	0.0	800.6438047696374	77.88255174509798	0.0	-7.510768052450067e-05	-7.728328380668141	0.0	-0.00706874398885505	0.7728331613393814
4.335	77.84392016211343	0.0	-0.03883365188796245	385.76702133335704	0.0	-800.6438056855045	0.0	0.00018855944931496	0.0	0.9999999694191803	0.0	-0.00024730865310987186	0.0	0.0	-0.028339484409401417	0.0	0.0	-0.028206548051089003	0.0	800.6438056855045	77.84392984778574	0.0	-0.00033069821898533034	-7.720666430435823	0.0	-0.00493557591665116	0.7720668008013831
4.34	77.80533543559902	0.0	-0.03856800289506389	386.15614450099446	0.0	-800.6438062576025	0.0	-7.097005704536253e-05	0.0	0.9999999694474361	0.0	-0.00024719437453158945	0.0	0.0	-0.02832638904855247	0.0	0.0	-0.02822687947479151	0.0	800.6438062576025	77.80534499457535	0.0	-0.00010191690044907296	-7.7130796708087725	0.0	0.01976624013308489	0.7713104998150393
4.345	77.76678957696103	0.0	-0.03862160591576258	386.54507484484645	0.0	-800.6438073213384	0.0	0.00012710316192279773	0.0	0.999999969472891	0.0	-0.0002470913741337345	0.0	0.0	-0.02831458607202147	0.0	0.0	-0.028190467101086792	0.0	800.6438073213384	77.76679916711092	0.0	-0.00019059657584570206	-7.705374032801634	0.0	-0.00960498028293351	0.7705380019247589
4.35	77.72828152022298	0.0	-0.038550529952435623	386.9338125535602	0.0	-800.6438077564228	0.0	-5.628236670905867e-05	0.0	0.9999999694756239	0.0	-0.0002470803208519113	0.0	0.0	-0.02831331945918638	0.0	0.0	-0.028206590811453977	0.0	800.6438077564228	77.72829107994795	0.0	-0.00014026894339256785	-7.697832256651557	0.0	0.01874221345301549	0.7697855072818034
4.355	77.68981147143501	0.0	-0.038422829557077265	387.32235781908366	0.0	-800.6438088105728	0.0	9.718554307453848e-05	0.0	0.9999999695227324	0.0	-0.0002468895828810866	0.0	0.0	-0.028291462497077403	0.0	0.0	-0.028178749204214686	0.0	800.6438088105728	77.6898209727346	0.0	-6.121574555727881e-05	-7.69015854521958	0.0	-0.009160785246214656	0.7690164001541193
4.36	77.65137980957556	0.0	-0.03854308619878427	387.710710826478	0.0	-800.6438092826148	0.0	-5.76184432449714e-06	0.0	0.9999999695083515	0.0	-0.00024694783077872226	0.0	0.0	-0.028298137214680993	0.0	0.0	-0.02818039985102471	0.0	800.6438092826148	77.65138937496384	0.0	-0.00019140306532261655	-7.682598528967333	0.0	0.0034251033080793876	0.7682599292467601
4.365	77.61298556735343	0.0	-0.038345760762983246	388.0988717710066	0.0	-800.6438102002254	0.0	9.68564249519231e-06	0.0	0.999999969567157	0.0	-0.0002467095843826459	0.0	0.0	-0.02827083618789057	0.0	0.0	-0.028177625118840477	0.0	800.6438102002254	77.61299503995117	0.0	-5.002243651321226e-05	-7.6749784757292145	0.0	-0.008467991438273512	0.767498314719881
4.37	77.5746299547497	0.0	-0.03854309433258051	388.4868408413347	0.0	-800.6438108564292	0.0	8.499562527477847e-05	0.0	0.9999999695511699	0.0	-0.0002467743781492135	0.0	0.0	-0.02827826100684276	0.0	0.0	-0.028153275665813875	0.0	800.6438108564292	77.57463952941862	0.0	-0.00025622866952479867	-7.667413306876607	0.0	-0.0014222497558153665	0.7667413438785131
4.375	77.53631145362654	0.0	-0.03830801510035662	388.874618225093	0.0	-800.6438115833085	0.0	-5.052926777459069e-05	0.0	0.9999999696015621	0.0	-0.00024657008951641066	0.0	0.0	-0.028254851253206353	0.0	0.0	-0.028167751234740728	0.0	800.6438115833085	77.53632091691654	0.0	-7.174109287832499e-05	-7.6598330758322675	0.0	-0.002139794017319117	0.7659833374710736
4.38	77.49803163056124	0.0	-0.03849176252881662	389.2622041131703	0.0	-800.6438124933374	0.0	0.00016913803063222548	0.0	0.9999999696102331	0.0	-0.00024653491757255485	0.0	0.0	-0.028250820845203407	0.0	0.0	-0.028119296758188823	0.0	800.6438124933374	77.49804118909933	0.0	-0.0002798173308945964	-7.6522497730460755	0.0	-0.0075906294357720346	0.7652253537797801
4.385	77.45978883822146	0.0	-0.03829007963533123	389.64959868107906	0.0	-800.6438129816255	0.0	-6.20234785265844e-05	0.0	0.9999999696314796	0.0	-0.0002464487228131282	0.0	0.0	-0.028240943653040772	0.0	0.0	-0.02813706517594029	0.0	800.6438129816255	77.45979830194676	0.0	-0.0001103440864324471	-7.644775159548564	0.0	0.024278604496135718	0.7644813711967549
4.39	77.4215841490886	0.0	-0.03824670111097864	390.0368021463077	0.0	-800.6438140035194	0.0	0.00010784429563624272	0.0	0.9999999696693758	0.0	-0.00024629490080094445	0.0	0.0	-0.028223316948317093	0.0	0.0	-0.0281061700610177	0.0	800.6438140035194	77.42159359604318	0.0	-0.00010961485181145346	-7.637144338281606	0.0	-0.011468482134359357	0.7637152949223243
4.395	77.38341720989119	0.0	-0.038288433219977006	390.4238146765682	0.0	-800.6438144205817	0.0	-2.0206646754422264e-05	0.0	0.999999969664108	0.0	-0.00024631628826234125	0.0	0.0	-0.028225767770936504	0.0	0.0	-0.0281119588389034	0.0	800.6438144205817	77.38342668204031	0.0	-0.0001668375299813243	-7.629679537162323	0.0	0.010989644395496462	0.7629687451794958
4.4	77.34528750109736	0.0	-0.03811037635738569	390.81063646719895	0.0	-800.6438153276645	0.0	2.9672666833670655e-05	0.0	0.999999969721549	0.0	-0.00024608297527195955	0.0	0.0	-0.028199032070817313	0.0	0.0	-0.028103458246021066	0.0	800.6438153276645	77.34529689014455	0.0	-4.365595122405257e-05	-7.622115059454397	0.0	-0.01071809089922388	0.7622122595250882
4.405	77.30719594085625	0.0	-0.03829820860219152	391.1972677070692	0.0	-800.6438159286506	0.0	7.903807592148192e-05	0.0	0.9999999697085217	0.0	-0.0002461359069224493	0.0	0.0	-0.028205097591352448	0.0	0.0	-0.028080815505165387	0.0	800.6438159286506	77.30720542698742	0.0	-0.00024205154546302768	-7.614643137149102	0.0	-0.0019223075488274434	0.7614643379791218
4.41	77.26914107903922	0.0	-0.03807359261064114	391.5837085788539	0.0	-800.6438166305095	0.0	-4.631382380833767e-05	0.0	0.9999999697595823	0.0	-0.00024592836869964554	0.0	0.0	-0.028181315462124042	0.0	0.0	-0.028094083438352038	0.0	800.6438166305095	77.26915045918741	0.0	-6.824152171164776e-05	-7.607161859075736	0.0	0.00038564786316821293	0.7607161868851017
4.415	77.23112436284505	0.0	-0.03822617324365205	391.9699592725829	0.0	-800.6438175215848	0.0	0.00015844085342276026	0.0	0.9999999697733728	0.0	-0.00024587228557249713	0.0	0.0	-0.02817488880895474	0.0	0.0	-0.02804869347733416	0.0	800.6438175215848	77.23113382261216	0.0	-0.0002481836409524392	-7.599656399375476	0.0	-0.009408330306829362	0.7599662223102275
4.42	77.19314438212221	0.0	-0.038063937134624116	392.3560199718693	0.0	-800.6438179645312	0.0	-5.266729482310637e-05	0.0	0.9999999697912522	0.0	-0.0002457995615954723	0.0	0.0	-0.028166555254797096	0.0	0.0	-0.028063781545892837	0.0	800.6438179645312	77.19315376668698	0.0	-0.00011585158692943756	-7.592275177255678	0.0	0.027284668312893372	0.759232420410889
4.425	77.15520193309716	0.0	-0.03795961684612606	392.7418908680574	0.0	-800.6438189280623	0.0	0.00010165061304396718	0.0	0.9999999698362313	0.0	-0.0002456164990237306	0.0	0.0	-0.028145577828668618	0.0	0.0	-0.028034660790331154	0.0	800.6438189280623	77.15521127094645	0.0	-5.843224879558432e-05	-7.584704722174962	0.0	-0.012847987004952583	0.75847156039863
4.43	77.11729715756552	0.0	-0.03807462728117258	393.12757214486675	0.0	-800.643819367531	0.0	1.424680114815434e-05	0.0	0.9999999698286637	0.0	-0.0002456473109307273	0.0	0.0	-0.028149108613234476	0.0	0.0	-0.028030579382444396	0.0	800.643819367531	77.11730655649707	0.0	-0.00018731048323041106	-7.577290808718355	0.0	0.004036685539366892	0.7577291883959454
4.435	77.07942911587449	0.0	-0.03788138694201904	393.51306398947486	0.0	-800.6438201631235	0.0	-1.0364729496391826e-05	0.0	0.9999999698864798	0.0	-0.00024541183271078353	0.0	0.0	-0.028122124796081036	0.0	0.0	-0.028033548658724084	0.0	800.6438201631235	77.07943842442346	0.0	-4.8975591063072134e-05	-7.569802145248398	0.0	-0.012145324145874228	0.7569811888488767
4.44	77.04159902423513	0.0	-0.03809670657683214	393.89836659087575	0.0	-800.6438208810073	0.0	0.00015733059101964592	0.0	0.99999996988574	0.0	-0.0002454148417742394	0.0	0.0	-0.028122469609364004	0.0	0.0	-0.027988476764455462	0.0	800.6438208810073	77.04160844302616	0.0	-0.0002823994574313536	-7.562384176997957	0.0	-0.006774111185964965	0.7562387210999675
4.445	77.00380518286967	0.0	-0.037863843525604395	394.2834801317146	0.0	-800.6438214195794	0.0	-5.461512850953371e-05	0.0	0.999999969921325	0.0	-0.00024526979817975417	0.0	0.0	-0.028105848837244946	0.0	0.0	-0.028004122846261265	0.0	800.6438214195794	77.00381449189405	0.0	-9.042459365067109e-05	-7.555046410206738	0.0	0.024526140069712484	0.7555086220019229
4.45	76.96604884250128	0.0	-0.03784517576359109	394.6684047988137	0.0	-800.6438223583876	0.0	0.00011292901708290123	0.0	0.9999999699566516	0.0	-0.0002451257215611118	0.0	0.0	-0.02808933887239918	0.0	0.0	-0.02797177106594421	0.0	800.6438223583876	76.96605814688162	0.0	-0.00011245583277330474	-7.547546777331841	0.0	-0.013427921978521263	0.7547558722202891
4.455	76.92832951629255	0.0	-0.03787510670499353	395.05314077332326	0.0	-800.6438227476998	0.0	-7.86720468975659e-06	0.0	0.9999999699568382	0.0	-0.0002451249658328013	0.0	0.0	-0.028089252272311308	0.0	0.0	-0.027974024854070655	0.0	800.6438227476998	76.92833883987959	0.0	-0.00016099499798143002	-7.540223222757922	0.0	0.01232037318417824	0.7540233288208877
4.46	76.89064679088372	0.0	-0.03770083298228273	395.43768824567167	0.0	-800.6438235605415	0.0	1.2433849187144886e-05	0.0	0.9999999700143402	0.0	-0.0002448902681144466	0.0	0.0	-0.028062357894057924	0.0	0.0	-0.027970462818663028	0.0	800.6438235605415	76.89065603355037	0.0	-4.1287373366149256e-05	-7.532774962490171	0.0	-0.013750490775459378	0.7532787512701747
4.465	76.85300163225679	0.0	-0.03790329997715806	395.822047397541	0.0	-800.6438241999211	0.0	0.00013158001326164627	0.0	0.9999999700113242	0.0	-0.0002449025831809476	0.0	0.0	-0.028063769096770108	0.0	0.0	-0.02793276792152219	0.0	800.6438241999211	76.85301097860953	0.0	-0.0002602993094441216	-7.525421621288805	0.0	-0.006141003506701432	0.7525424126923684
4.47	76.81539251258535	0.0	-0.03768085256064871	396.206218412112	0.0	-800.6438247592565	0.0	-5.0711415842373214e-05	0.0	0.9999999700520997	0.0	-0.00024473602923204756	0.0	0.0	-0.028044683419531716	0.0	0.0	-0.02794729567202669	0.0	800.6438247592565	76.81540175447054	0.0	-8.186087794727471e-05	-7.518123191926189	0.0	0.021022298507815833	0.7518152583315464
4.475	76.77782066032104	0.0	-0.03767644147120922	396.59020147554935	0.0	-800.643825663911	0.0	0.00011586900726191499	0.0	0.9999999700860099	0.0	-0.0002445974302167832	0.0	0.0	-0.0280288011418177	0.0	0.0	-0.0279141016465643	0.0	800.643825663911	76.7778299045183	0.0	-0.00011712282422834783	-7.510674761482269	0.0	-0.013715494607150977	0.7510687284633748
4.48	76.74028557383627	0.0	-0.03769650345038608	396.97399676959213	0.0	-800.6438260410968	0.0	-4.538561810960847e-06	0.0	0.9999999700886674	0.0	-0.00024458657131786404	0.0	0.0	-0.028027556803624065	0.0	0.0	-0.027915401848748436	0.0	800.6438260410968	76.74029483233609	0.0	-0.000157213402108909	-7.503394422874976	0.0	0.01332755060685187	0.7503406259082369
4.485	76.70278690804437	0.0	-0.03752519964375282	397.35760448053645	0.0	-800.6438268209721	0.0	8.617927347043335e-06	0.0	0.999999970145936	0.0	-0.0002443523108250605	0.0	0.0	-0.028000712527733267	0.0	0.0	-0.027912932994422757	0.0	800.6438268209721	76.70279608722282	0.0	-4.018982630813734e-05	-7.495982315765323	0.0	-0.015002885136888168	0.7495997329563884
4.49	76.66532559680816	0.0	-0.0377319143376372	397.7410247923964	0.0	-800.6438274711048	0.0	0.0001511288088906174	0.0	0.9999999701472702	0.0	-0.0002443468460339784	0.0	0.0	-0.02800008630878469	0.0	0.0	-0.0278696377798614	0.0	800.6438274711048	76.66533488147927	0.0	-0.000266049930996703	-7.488675323069316	0.0	-0.00772306898004835	0.7488679305467807
4.495	76.62790005488458	0.0	-0.0375121611720352	398.12425788454254	0.0	-800.6438279813257	0.0	-4.761042978179613e-05	0.0	0.9999999701840173	0.0	-0.00024419640783652916	0.0	0.0	-0.027982847360687572	0.0	0.0	-0.027883277163297904	0.0	800.6438279813257	76.62790923660961	0.0	-8.764194711740956e-05	-7.481453214950781	0.0	0.027925040409588615	0.7481505330839461
4.5	76.59051138876531	0.0	-0.03745459541578603	398.5073039450054	0.0	-800.6438288588416	0.0	0.00010813663566503681	0.0	0.9999999702240323	0.0	-0.0002440324862719331	0.0	0.0	-0.027964063332482792	0.0	0.0	-0.027852298299126152	0.0	800.6438288588416	76.59052054681462	0.0	-7.344622978018577e-05	-7.474044492806087	0.0	-0.015289417478267495	0.747406013132968
4.505	76.5531593997492	0.0	-0.0375376903171685	398.89016315036224	0.0	-800.6438292494759	0.0	2.338189815548896e-05	0.0	0.9999999702241774	0.0	-0.00024403188980457713	0.0	0.0	-0.02796399498235651	0.0	0.0	-0.027845599878719582	0.0	800.6438292494759	76.55316860280264	0.0	-0.00017486264115131636	-7.466814027843327	0.0	0.006154054639948668	0.7466816563890291
4.51	76.51584336189296	0.0	-0.03735577632417069	399.2728356880457	0.0	-800.6438299514411	0.0	-1.6324755720814755e-05	0.0	0.9999999702804245	0.0	-0.0002438012895000378	0.0	0.0	-0.027937570133161362	0.0	0.0	-0.027850276576741505	0.0	800.6438299514411	76.51585248059192	0.0	-4.6450434571907774e-05	-7.4594998981268645	0.0	-0.00819877841439608	0.7459504403787305
4.515	76.47856434382649	0.0	-0.03752306219107434	399.65532173725273	0.0	-800.6438306969937	0.0	0.00016568894918102007	0.0	0.9999999702947776	0.0	-0.00024374241525093704	0.0	0.0	-0.027930823640969996	0.0	0.0	-0.027802810189241356	0.0	800.6438306969937	76.47857354849864	0.0	-0.00024091886384810572	-7.452224575951287	0.0	-0.010910718693713082	0.7452232563077642
4.52	76.44132097681243	0.0	-0.03735973247532548	400.03762148002903	0.0	-800.6438310985488	0.0	-3.505081123515774e-05	0.0	0.9999999703174526	0.0	-0.00024364937289658898	0.0	0.0	-0.027920161772213223	0.0	0.0	-0.027812851507002776	0.0	800.6438310985488	76.44133010627027	0.0	-0.00010996930649073587	-7.4450705499235905	0.0	0.031192924723156386	0.7445135894790124
4.525	76.4041140132216	0.0	-0.037227769602034076	400.4197350962536	0.0	-800.6438319084938	0.0	7.019107006176823e-05	0.0	0.9999999703688255	0.0	-0.0002434384344183962	0.0	0.0	-0.02789599000242165	0.0	0.0	-0.027792743246632542	0.0	800.6438319084938	76.40412308278655	0.0	-2.8370494879156156e-05	-7.43769365494084	0.0	-0.017257986840557307	0.7437713677122629
4.53	76.36694383017834	0.0	-0.03739976186154673	400.8016627710088	0.0	-800.6438323999768	0.0	8.985155908731252e-05	0.0	0.9999999703675178	0.0	-0.0002434438102356731	0.0	0.0	-0.027896606025722727	0.0	0.0	-0.027767002671040677	0.0	800.6438323999768	76.36695298789057	0.0	-0.0002176389662096944	-7.430481455783422	0.0	-0.005123558123911617	0.743048322221302
4.535	76.32980915548791	0.0	-0.037200899407958087	401.1834046783992	0.0	-800.6438329718279	0.0	-4.016679755842967e-05	0.0	0.9999999704152427	0.0	-0.00024324768779018338	0.0	0.0	-0.027874132048268597	0.0	0.0	-0.02777850961092395	0.0	800.6438329718279	76.32981822075753	0.0	-6.679693116633558e-05	-7.423301489918307	0.0	0.01648268028930097	0.742331978894705
4.54	76.2927110257176	0.0	-0.03720508303008984	401.56496101008713	0.0	-800.6438337969755	0.0	0.00011826993942872662	0.0	0.9999999704486123	0.0	-0.00024311046180149976	0.0	0.0	-0.027858407107821455	0.0	0.0	-0.02774462776906128	0.0	800.6438337969755	76.2927200973851	0.0	-0.00010996730935347423	-7.415999890522803	0.0	-0.014836363883930328	0.7416014731237226
4.545	76.25564896047364	0.0	-0.037228989604579134	401.94633193959135	0.0	-800.6438341513528	0.0	1.215224660208151e-05	0.0	0.9999999704550901	0.0	-0.0002430838157447122	0.0	0.0	-0.02785535369454206	0.0	0.0	-0.027741146406851772	0.0	800.6438341513528	76.25565804813783	0.0	-0.00015595805738745307	-7.408860529137703	0.0	0.011921259409096609	0.7408870120108768
4.55	76.21862259021921	0.0	-0.03706056182114574	402.32751764751407	0.0	-800.643834836692	0.0	-7.64437698597714e-06	0.0	0.9999999705112187	0.0	-0.00024285280381818077	0.0	0.0	-0.027828881676945808	0.0	0.0	-0.027743336359543288	0.0	800.643834836692	76.21863160036433	0.0	-4.0746142942814675e-05	-7.401593199659592	0.0	-0.01575185252176049	0.7401609960954778
4.555	76.18163278438156	0.0	-0.03722008119661999	402.7085183149705	0.0	-800.6438355437415	0.0	0.0001632045851731201	0.0	0.9999999705272691	0.0	-0.0002427867018762295	0.0	0.0	-0.027821306952139635	0.0	0.0	-0.027696581689905273	0.0	800.6438355437415	76.18164187633963	0.0	-0.00022830316442685563	-7.394505658244081	0.0	0.023228644384618885	0.7394542142670071
4.56	76.14467749155335	0.0	-0.03665762551262202	403.08933412002676	0.0	-800.6438352676347	0.0	0.00031024087326458926	0.0	0.9999999706225658	0.0	-0.0002423938644901654	0.0	0.0	-0.027776291102302144	0.0	0.0	-0.027607704226552704	0.0	800.6438352676347	76.14468631497898	0.0	0.0002563829856369345	-7.38759411319568	0.0	0.1161272103482571	0.7388506771351485
4.565	76.1077576753301	0.0	-0.035829384673088854	403.4699652375464	0.0	-800.6438330577467	0.0	0.0008294874378392247	0.0	0.9999999710025032	0.0	-0.0002408212973816739	0.0	0.0	-0.027596088180407034	0.0	0.0	-0.027370073579816166	0.0	800.6438330577467	76.1077661045497	0.0	0.0008273563081734075	-7.380498769021434	0.0	0.11178159119764462	0.7381345216399081
4.57	76.07087314659562	0.0	-0.03475600621488219	403.8504118403255	0.0	-800.6438271841897	0.0	0.0016440798273110577	0.0	0.9999999717042629	0.0	-0.0002378893446668909	0.0	0.0	-0.027260111138204215	0.0	0.0	-0.026899079403378563	0.0	800.6438271841897	76.07088107283664	0.0	0.0014368970169638638	-7.373620970250036	0.0	0.17044335637253213	0.7375590630630378
4.575	76.0340227766684	0.0	-0.032928093624396276	404.23067410047656	0.0	-800.6438172751054	0.0	0.0022892007436409187	0.0	0.9999999728475242	0.0	-0.0002330338664882906	0.0	0.0	-0.026703714308475984	0.0	0.0	-0.026243271698034393	0.0	800.6438172751054	76.03402986534218	0.0	0.0025089136143299005	-7.366749139229256	0.0	0.21070649981375233	0.7369761876030918
4.58	75.9972074697487	0.0	-0.030869788468035893	404.6107521958504	0.0	-800.6438026903285	0.0	0.0032165262483785915	0.0	0.9999999744599748	0.0	-0.00022600847707422603	0.0	0.0	-0.025898663961545162	0.0	0.0	-0.025321804804408685	0.0	800.6438026903285	75.99721365953383	0.0	0.00348224005253695	-7.359788580492932	0.0	0.19787830976341983	0.7362448218835159
4.585	75.96042657302527	0.0	-0.028401492914248604	404.99064629441654	0.0	-800.6437823675631	0.0	0.004195338671407144	0.0	0.9999999764805079	0.0	-0.00021688399544135854	0.0	0.0	-0.02485307536028752	0.0	0.0	-0.024119928806910426	0.0	800.6437823675631	75.96043174648096	0.0	0.004547710603932957	-7.353022493121368	0.0	0.2429390499097758	0.7357034672089009
4.59	75.92367945045775	0.0	-0.02529489377299132	405.37035656785656	0.0	-800.6437564720878	0.0	0.005050558070610726	0.0	0.9999999789322427	0.0	-0.000205268414752985	0.0	0.0	-0.023522027830553235	0.0	0.0	-0.022673050498751773	0.0	800.6437564720878	75.92368343677649	0.0	0.005874574347983128	-7.3462259950588304	0.0	0.25388371124602943	0.7350611764289702
4.595	75.88696658769567	0.0	-0.021950827696775668	405.74988317703395	0.0	-800.6437243614779	0.0	0.00611240129195334	0.0	0.9999999817173516	0.0	-0.0001912190782581457	0.0	0.0	-0.02191209242667594	0.0	0.0	-0.020921976515155583	0.0	800.6437243614779	75.88696943287073	0.0	0.007071244983312777	-7.339452151146494	0.0	0.2518777991036777	0.7343772893046885
4.6	75.85028702304398	0.0	-0.018087980793335845	406.1292263077925	0.0	-800.6436853350232	0.0	0.007083261431323465	0.0	0.9999999847126325	0.0	-0.00017485413402275676	0.0	0.0	-0.020036807921930744	0.0	0.0	-0.01889277158914244	0.0	800.6436853350232	75.8502887103555	0.0	0.00843749241281374	-7.332839193492665	0.0	0.2916318771941486	0.733863609871875
4.605	75.81364047821195	0.0	-0.013698271041626926	406.5083861189893	0.0	-800.6436396583509	0.0	0.008000847558651243	0.0	0.9999999878492077	0.0	-0.00015588657720639189	0.0	0.0	-0.01786328598567263	0.0	0.0	-0.016600697600951116	0.0	800.6436396583509	75.81364106418191	0.0	0.009938387176357186	-7.326174352499493	0.0	0.2860217582902231	0.7331755525754852
4.61	75.77702714109039	0.0	-0.009067892233083706	406.88736277190253	0.0	-800.643586650727	0.0	0.009089693556124188	0.0	0.9999999909563648	0.0	-0.00013448463286981396	0.0	0.0	-0.01541080379205808	0.0	0.0	-0.013996692211785233	0.0	800.643586650727	75.77702683887554	0.0	0.011313799260689487	-7.319597756470841	0.0	0.2951145108446378	0.7325544613954927
4.615	75.74044592648117	0.0	-0.003851872588969661	407.26615643710545	0.0	-800.6435258195479	0.0	0.010018495145227301	0.0	0.9999999938696089	0.0	-0.00011072199708542742	0.0	0.0	-0.012687806290424633	0.0	0.0	-0.011126604767316087	0.0	800.6435258195479	75.740444922181	0.0	0.012920394268905368	-7.3131434637097925	0.0	0.33285122120568106	0.7320714258612979
4.62	75.7038968235594	0.0	0.0018123779948643129	407.64476727162	0.0	-800.6434573514808	0.0	0.0109610776502491	0.0	0.999999996440072	0.0	-8.437016530808579e-05	0.0	0.0	-0.009668108789411501	0.0	0.0	-0.007986487325943852	0.0	800.6434573514808	75.70389543973646	0.0	0.014586678502520937	-7.306627696722027	0.0	0.319507963696393	0.7313610164438002
4.625	75.66737980721601	0.0	0.0077361503430777604	408.0231954415316	0.0	-800.6433805388879	0.0	0.01206043643057112	0.0	0.9999999984535417	0.0	-5.559990036588059e-05	0.0	0.0	-0.006371279267903327	0.0	0.0	-0.004531426793156111	0.0	800.6433805388879	75.66737847889183	0.0	0.01615034783866793	-7.300234407094072	0.0	0.3374222403943421	0.7308028199646802
4.63	75.63089374244223	0.0	0.014290423398781787	408.40144110634816	0.0	-800.6432949818283	0.0	0.012983152935166078	0.0	0.9999999997012615	0.0	-2.4411496636406534e-05	0.0	0.0	-0.0027973514580034568	0.0	0.0	-0.000812027453366595	0.0	800.6432949818283	75.63089295436555	0.0	0.017982949997006385	-7.293939803255256	0.0	0.3750623414038766	0.730357649466689
4.635	75.59443871738664	0.0	0.02126654715529787	408.7795044239166	0.0	-800.6432007116365	0.0	0.0139699916287384	0.0	0.9999999999550309	0.0	9.400925349294864e-06	0.0	0.0	0.001077266692079317	0.0	0.0	0.0031900803474324106	0.0	800.6432007116365	75.59443910363942	0.0	0.019845231801128436	-7.287594663407523	0.0	0.3616260736945821	0.7296561477524984
4.64	75.55801453144593	0.0	0.028550712476919933	409.1573855494017	0.0	-800.6430969837033	0.0	0.0151085821542081	0.0	0.9999999989541515	0.0	4.5717867850132825e-05	0.0	0.0	0.0052388817541197535	0.0	0.0	0.007518370306746399	0.0	800.6430969837033	75.55801682591239	0.0	0.021642009717972387	-7.281383809258084	0.0	0.38624443581085716	0.7291620872064085
4.645	75.5216200353502	0.0	0.036504765813072104	409.5350846410058	0.0	-800.642983373938	0.0	0.01609083954854906	0.0	0.9999999964199398	0.0	8.460824956723396e-05	0.0	0.0	0.009695391235944074	0.0	0.0	0.012128056281516659	0.0	800.642983373938	75.52162513107105	0.0	0.023725261184721003	-7.275261655302738	0.0	0.4256684200646016	0.7287703736909084
4.65	75.48525526643863	0.0	0.0449137554153993	409.91260185014755	0.0	-800.6428597228701	0.0	0.01716693440068135	0.0	0.999999992025308	0.0	0.00012628449854448784	0.0	0.0	0.014471137607502377	0.0	0.0	0.01704602072320159	0.0	800.6428597228701	75.48526420237405	0.0	0.025848518917095494	-7.269113824517367	0.0	0.41901557526907107	0.728118052558152
4.655	75.44891987346034	0.0	0.053715343564283466	410.2899373304723	0.0	-800.6427252106361	0.0	0.018392791687890393	0.0	0.999999985430071	0.0	0.00017069920061165897	0.0	0.0	0.01956068761758792	0.0	0.0	0.022315167409098696	0.0	800.6427252106361	75.44893381465089	0.0	0.027957200190237216	-7.263094352219213	0.0	0.44916353065902176	0.7276969660958654
4.66	75.41261272416432	0.0	0.06323268862814978	410.66709123505376	0.0	-800.642579278091	0.0	0.019507517510444362	0.0	0.999999976242684	0.0	0.00021797478542836342	0.0	0.0	0.024978070688406802	0.0	0.0	0.02790365951972876	0.0	800.642579278091	75.41263312402214	0.0	0.03035658724595782	-7.257160631567198	0.0	0.4923111782737211	0.7273840163807703
4.665	75.37633368453338	0.0	0.07329439649971835	411.0440637109478	0.0	-800.6424215452704	0.0	0.020727136816105187	0.0	0.999999963993468	0.0	0.00026834942379437706	0.0	0.0	0.03075057920541072	0.0	0.0	0.03384154682449403	0.0	800.6424215452704	75.37636216538881	0.0	0.032839995976078305	-7.251231492968913	0.0	0.49813759934451535	0.7268321624178782
4.67	75.34008226829026	0.0	0.08386905051464127	411.4208549053649	0.0	-800.6422510650563	0.0	0.02209487076782381	0.0	0.9999999482045931	0.0	0.00032185272223573565	0.0	0.0	0.03688160585453378	0.0	0.0	0.04017126104391043	0.0	800.6422510650563	75.34012064617146	0.0	0.03537221450740093	-7.245414513804842	0.0	0.5336755022450387	0.7265042396197723
4.675	75.30385736440137	0.0	0.09522117333591579	411.7974649644742	0.0	-800.6420670555943	0.0	0.023411404659233713	0.0	0.999999928312329	0.0	0.000378647188830289	0.0	0.0	0.04338977272572709	0.0	0.0	0.04687813444114545	0.0	800.6420670555943	75.30390788142356	0.0	0.038193962321111184	-7.239684164989768	0.0	0.5823379364652995	0.7263067140062128
4.68	75.26765856567542	0.0	0.10725357036424135	412.1738940299514	0.0	-800.6418688790322	0.0	0.024831369549296826	0.0	0.999999903636456	0.0	0.0004390049377049599	0.0	0.0	0.050306261847633746	0.0	0.0	0.053991797814667335	0.0	800.6418688790322	75.26772372312837	0.0	0.04116778787151854	-7.233990001305557	0.0	0.6047031125686501	0.7259220150494059
4.685	75.23148522513769	0.0	0.1199520381301214	412.55014224449314	0.0	-800.6416554102639	0.0	0.02639735987867109	0.0	0.9999998734785218	0.0	0.0005030319424945661	0.0	0.0	0.05764321696137799	0.0	0.0	0.061554084371346456	0.0	800.6416554102639	75.23156783094345	0.0	0.04426430670110118	-7.228393446570655	0.0	0.6466665113823908	0.7257261838694333
4.69	75.19533620949471	0.0	0.13351473293096983	412.92620975155774	0.0	-800.6414255872911	0.0	0.027977062790967736	0.0	0.9999998370211122	0.0	0.0005709255481743293	0.0	0.0	0.06542325220728998	0.0	0.0	0.06956892247682119	0.0	800.6414255872911	75.19543964240897	0.0	0.0476527827932019	-7.222887129944411	0.0	0.702415050235016	0.7256961168058795
4.695	75.15921075852863	0.0	0.1479271730810309	413.30209668589475	0.0	-800.6411784640112	0.0	0.029654938876014097	0.0	0.9999997932814303	0.0	0.000642989320648671	0.0	0.0	0.07368115376730343	0.0	0.0	0.07806443667339137	0.0	800.6411784640112	75.15933884246259	0.0	0.05127393101163458	-7.217445294568847	0.0	0.7434378483579599	0.7255633426136212
4.7	75.12310800649185	0.0	0.16318766945987145	413.6778031844806	0.0	-800.6409126905726	0.0	0.031476688823737005	0.0	0.999999741228377	0.0	0.0007194034701381905	0.0	0.0	0.08243757232270268	0.0	0.0	0.08708184378662506	0.0	800.6409126905726	75.12326504307819	0.0	0.055099879341684734	-7.21209377619445	0.0	0.7942785390610265	0.725569948621328
4.705	75.08702672144321	0.0	0.1794351363585295	414.05332938046473	0.0	-800.6406268955386	0.0	0.033371388479551754	0.0	0.9999996796745861	0.0	0.0008004054895502663	0.0	0.0	0.09171972269394311	0.0	0.0	0.09664204236847412	0.0	800.6406268955386	75.08721775397129	0.0	0.05923480818748626	-7.2068341538153415	0.0	0.8585782793140706	0.7257796854577098
4.71	75.05096575919802	0.0	0.19672171568606223	414.42867540543796	0.0	-800.6403197643663	0.0	0.035365636505294465	0.0	0.9999996072172896	0.0	0.0008863201803174772	0.0	0.0	0.10156482455644493	0.0	0.0	0.10677355092620996	0.0	800.6403197643663	75.05119656105028	0.0	0.06368308785635379	-7.20165705883602	0.0	0.9183488477379086	0.7259974448937422
4.715	75.01492395391158	0.0	0.2150641485955622	414.8038413888366	0.0	-800.6399896756925	0.0	0.03750197327030856	0.0	0.9999995223453593	0.0	0.0009773982138061629	0.0	0.0	0.11200160294199922	0.0	0.0	0.1175170748852155	0.0	800.6399896756925	75.01520103546818	0.0	0.06842490237014283	-7.196569260977981	0.0	0.982192166409068	0.7263285109357095
4.72	74.9788998592118	0.0	0.23456393280516075	415.17882745780963	0.0	-800.6396349345117	0.0	0.03975295881581189	0.0	0.9999994233389855	0.0	0.00107392735143631	0.0	0.0	0.12306303313700256	0.0	0.0	0.1289054587017325	0.0	800.6396349345117	74.9792307185835	0.0	0.07351970193866272	-7.19157164529752	0.0	1.0565536581051898	0.7268769384283886
4.725	74.94289195700341	0.0	0.2552991105605036	415.55363372856675	0.0	-800.6392538019131	0.0	0.04212250956470218	0.0	0.999999308222804	0.0	0.0011762445417906142	0.0	0.0	0.13478772692058802	0.0	0.0	0.1409726688045169	0.0	800.6392538019131	74.94328516989567	0.0	0.07899619086141368	-7.1866629937896205	0.0	1.1337343829877233	0.7275539748875939
4.73	74.90689865577846	0.0	0.27732076109261755	415.9282603412952	0.0	-800.6388443307212	0.0	0.04463307148662555	0.0	0.9999991748222865	0.0	0.0012846602362695343	0.0	0.0	0.14721125978458902	0.0	0.0	0.15375910191896358	0.0	800.6388443307212	74.90736393518802	0.0	0.08486017630020921	-7.181845863669878	0.0	1.2127260388088734	0.7283516626926666
4.735	74.87091817833365	0.0	0.3006957521968033	416.3027074076669	0.0	-800.6384045324314	0.0	0.04730393615945933	0.0	0.9999990206377056	0.0	0.0013995430421978306	0.0	0.0	0.1603758714847243	0.0	0.0	0.1673106814004301	0.0	800.6384045324314	74.87146654793175	0.0	0.09112463428325134	-7.177126470697459	0.0	1.2921549055729056	0.7292517307239132
4.74	74.83494855543259	0.0	0.3254849406319496	416.6769750456538	0.0	-800.6379324284235	0.0	0.050176225955260556	0.0	0.9999988427480079	0.0	0.0015213480791881101	0.0	0.0	0.17433371546466828	0.0	0.0	0.18168511129608614	0.0	800.6379324284235	74.83559249469224	0.0	0.09778368698483153	-7.172512986855395	0.0	1.3723261287071864	0.7302617445145388
4.745	74.79898749857936	0.0	0.3517847573089588	417.0510633705967	0.0	-800.637426007941	0.0	0.053274567913388166	0.0	0.9999986377379002	0.0	0.0016506118802723693	0.0	0.0	0.18914627459611275	0.0	0.0	0.19694715078018724	0.0	800.637426007941	74.7997412341713	0.0	0.10485498200401784	-7.16801045671005	0.0	1.4568995742563224	0.731456972603125
4.75	74.76303241688719	0.0	0.37970714346477746	417.4249724950397	0.0	-800.6368831526042	0.0	0.0566200155159964	0.0	0.9999984016551959	0.0	0.0017879274299938879	0.0	0.0	0.2048815007853997	0.0	0.0	0.21316759040534639	0.0	800.6368831526042	74.76391220431572	0.0	0.1123633903439101	-7.163620136178395	0.0	1.5478997222250879	0.7328945831804535
4.755	74.72708038760804	0.0	0.40938408821818206	417.798702528764	0.0	-800.6363015796526	0.0	0.06022294232902085	0.0	0.9999981299621655	0.0	0.0019339259493985827	0.0	0.0	0.22161172772314494	0.0	0.0	0.23042019253190965	0.0	800.6363015796526	74.72810485232223	0.0	0.1203482867005006	-7.159338405267354	0.0	1.6476887207711597	0.7346496071032271
4.76	74.69112815750246	0.0	0.4409575330782058	418.17225357880574	0.0	-800.6356787953965	0.0	0.064088152831229	0.0	0.9999978174947698	0.0	0.0020892590000020314	0.0	0.0	0.2394116201916714	0.0	0.0	0.24878009590200376	0.0	800.6356787953965	74.69231864807043	0.0	0.12885614122318836	-7.155160348846342	0.0	1.7570372282535556	0.7367733670483201
4.765	74.65517213170288	0.0	0.4745728066843457	418.5456257496388	0.0	-800.6350120673371	0.0	0.06821787144691836	0.0	0.9999974584140967	0.0	0.0022545870714525515	0.0	0.0	0.25835686635631516	0.0	0.0	0.26832307650837595	0.0	800.6350120673371	74.65655308852499	0.0	0.1379356657919744	-7.151078998391588	0.0	1.876579009380897	0.7393204962645513
4.77	74.61920835016545	0.0	0.5103791909786303	418.91881914332663	0.0	-800.6342984022075	0.0	0.07260899023022684	0.0	0.9999970461647191	0.0	0.0024305674824183147	0.0	0.0	0.27852279136482544	0.0	0.0	0.2891240199828691	0.0	800.6342984022075	74.62080771486859	0.0	0.1476401893804871	-7.147083853118849	0.0	2.0071439125186945	0.7423572878949396
4.775	74.58323247648171	0.0	0.5485265952024928	419.2918338597433	0.0	-800.633534533873	0.0	0.07725369733340862	0.0	0.9999965734405719	0.0	0.0026178436537939043	0.0	0.0	0.2999831282114012	0.0	0.0	0.31125557402779597	0.0	800.633534533873	74.58508212661103	0.0	0.1580259313960366	-7.143163060433248	0.0	2.149064832848695	0.7459440874738876
4.78	74.54723978458523	0.0	0.5891618851379946	419.66466999697667	0.0	-800.6327169130825	0.0	0.08214066612678174	0.0	0.9999960321444493	0.0	0.0028170363567187858	0.0	0.0	0.3228090149027584	0.0	0.0	0.33478714150508493	0.0	800.6327169130825	74.54937598394591	0.0	0.16914963130456434	-7.139302864471612	0.0	2.3022938676133813	0.750134670865857
4.785	74.5112251583634	0.0	0.632426184942829	420.03732765155405	0.0	-800.631841710679	0.0	0.0872553295650476	0.0	0.999995413374444	0.0	0.0030287338596198094	0.0	0.0	0.3470678654724795	0.0	0.0	0.35978395212558645	0.0	800.631841710679	74.5136890247695	0.0	0.18106731121367073	-7.135486895428519	0.0	2.466613715907895	0.754979181556267
4.79	74.47518308643144	0.0	0.6784530524901429	420.4098069189135	0.0	-800.6309048202355	0.0	0.09257990393853824	0.0	0.9999947074055386	0.0	0.0032534841695207734	0.0	0.0	0.37282248098488163	0.0	0.0	0.38630614094261057	0.0	800.6309048202355	74.47802107200474	0.0	0.19383359586475718	-7.131697019146088	0.0	2.6416577029691424	0.760522568978419
4.795	74.4391076677149	0.0	0.727366423933939	420.7821078938291	0.0	-800.6299018684335	0.0	0.09809361783679882	0.0	0.9999939036921676	0.0	0.003491787096366338	0.0	0.0	0.40013014026553	0.0	0.0	0.41440789243869947	0.0	800.6299018684335	74.44237204480743	0.0	0.20750082492310562	-7.127913166770602	0.0	2.8268956899773126	0.7668017041910772
4.8	74.40299262094278	0.0	0.7792788282284685	421.1542306709272	0.0	-800.628828228186	0.0	0.10377296295444224	0.0	0.9999929908802038	0.0	0.0037440873459634438	0.0	0.0	0.4290418085062482	0.0	0.0	0.4441366564629844	0.0	800.628828228186	74.40674196539804	0.0	0.22211827880189497	-7.124114398981855	0.0	3.021616197709079	0.7738421700582004
4.805	74.36683130276758	0.0	0.8342893111191203	421.5261753452234	0.0	-800.627679035325	0.0	0.10959227683993661	0.0	0.9999919568355679	0.0	0.004010768135466477	0.0	0.0	0.45960140575182706	0.0	0.0	0.4755325311137728	0.0	800.627679035325	74.37113096192213	0.0	0.23773103331213427	-7.120278943493949	0.0	3.2247796346219992	0.7816493838354643
4.81	74.33061674177348	0.0	0.8924808660045995	421.8979420126183	0.0	-800.6264492123923	0.0	0.115524749770066	0.0	0.9999907887031091	0.0	0.004292144992802219	0.0	0.0	0.4918450964694526	0.0	0.0	0.5086279340694213	0.0	800.6264492123923	74.33553927286127	0.0	0.25437829111444155	-7.11638659633825	0.0	3.435120818609983	0.7902089168504138
4.815	74.29434166224469	0.0	0.9539204560158991	422.2695307706242	0.0	-800.6251334828794	0.0	0.12154185293201002	0.0	0.9999894729590567	0.0	0.0045884606085354945	0.0	0.0	0.5258006997052432	0.0	0.0	0.5434471101054409	0.0	800.6251334828794	74.29996724112289	0.0	0.2720941453461583	-7.112406477582786	0.0	3.6527435945894577	0.7995552618185681
4.82	74.25799851533355	0.0	1.0186670108665459	422.6409417187925	0.0	-800.6237264095009	0.0	0.12760790536066116	0.0	0.9999879955051335	0.0	0.004899882310473407	0.0	0.0	0.5614873997949271	0.0	0.0	0.5800040821537945	0.0	800.6237264095009	74.26441539478438	0.0	0.29091592595748805	-7.108311648547764	0.0	3.8767940040163653	0.8096766406563616
4.825	74.22157954997496	0.0	1.0867547914309084	423.0121749593015	0.0	-800.6222224260551	0.0	0.13369164111991624	0.0	0.9999863417435049	0.0	0.005226502346474492	0.0	0.0	0.5989157788541455	0.0	0.0	0.6183039161155388	0.0	800.6222224260551	74.228884325962	0.0	0.31086749638113903	-7.104098383581459	0.0	4.103734426670114	0.8204197101986408
4.83	74.18507688390194	0.0	1.158190624726486	423.38323059754316	0.0	-800.620615855911	0.0	0.13976741774512333	0.0	0.9999844967235698	0.0	0.005568331167408953	0.0	0.0	0.6380870471305221	0.0	0.0	0.6583443318667261	0.0	800.620615855911	74.19337465048706	0.0	0.3319574591533055	-7.099743683169872	0.0	4.33293843300003	0.8317494564523579
4.835	74.1484825272559	0.0	1.2329763436068801	423.7541087428321	0.0	-800.6189009264024	0.0	0.14579979546597313	0.0	0.9999824453020629	0.0	0.005925292172940008	0.0	0.0	0.6789924409562753	0.0	0.0	0.7001128965370806	0.0	800.6189009264024	74.15788718975925	0.0	0.3542023453124909	-7.095200091761693	0.0	4.566269599686012	0.8437575623314543
4.84	74.11178842194468	0.0	1.3111037934010508	424.124809508293	0.0	-800.6170718618084	0.0	0.15175014298542128	0.0	0.9999801721643738	0.0	0.00629724315642841	0.0	0.0	0.7216156802240711	0.0	0.0	0.7435861102049377	0.0	800.6170718618084	74.12242292615264	0.0	0.37761841142830105	-7.090498309014256	0.0	4.797726325464732	0.8561153202938923
4.845	74.07498665265709	0.0	1.392509135613456	424.4953330116708	0.0	-800.615122856302	0.0	0.15760545370900708	0.0	0.9999776621174469	0.0	0.006683955947361524	0.0	0.0	0.7659306355688834	0.0	0.0	0.7887367468337906	0.0	800.615122856302	74.08698253679236	0.0	0.4021789385999427	-7.085593304630086	0.0	5.029145051123137	0.8688954622039123
4.85	74.03806930817885	0.0	1.477166360216382	424.86567937586983	0.0	-800.613048104849	0.0	0.16331592818526974	0.0	0.9999749001975903	0.0	0.007085123726019148	0.0	0.0	0.811902166532325	0.0	0.0	0.8355233138951785	0.0	800.613048104849	74.05156732529282	0.0	0.42790662592503587	-7.080489197457496	0.0	5.258654974019588	0.8819681366755447
4.855	74.0010287371341	0.0	1.564977561657576	425.23584872792577	0.0	-800.610841923067	0.0	0.1688746045240196	0.0	0.9999718716713497	0.0	0.007500391336135905	0.0	0.0	0.8594895952002132	0.0	0.0	0.8839023244260146	0.0	800.610841923067	74.01617798115855	0.0	0.4547593582189812	-7.075182308501837	0.0	5.484368562800085	0.8951899420299988
4.86	73.96385752932865	0.0	1.655877661720882	425.6058412012569	0.0	-800.6084986087221	0.0	0.17423896659896518	0.0	0.999968562577143	0.0	0.007929304143207612	0.0	0.0	0.9086408455623541	0.0	0.0	0.9338181114902226	0.0	800.6084986087221	73.98081583292957	0.0	0.4827424699394342	-7.069680275332976	0.0	5.705206009586993	0.9084588862863288
4.865	73.92654857598914	0.0	1.749742273959846	425.9756569326211	0.0	-800.6060127046795	0.0	0.17940680029372086	0.0	0.9999649592545592	0.0	0.00837139598207959	0.0	0.0	0.959302521734768	0.0	0.0	0.9852143738541057	0.0	800.6060127046795	73.94548153639643	0.0	0.5118035769471244	-7.063953178603081	0.0	5.921860217917022	0.9217801416283864
4.87	73.88909518002977	0.0	1.8464895240849442	426.3452960658642	0.0	-800.6033787445232	0.0	0.1843330902335197	0.0	0.9999610492526745	0.0	0.008826096911779735	0.0	0.0	1.011409336993674	0.0	0.0	1.03802191432903	0.0	800.6033787445232	73.91017658371581	0.0	0.5419480151749619	-7.058070230018387	0.0	6.129880607791696	0.9348357697352649
4.875	73.85149110478838	0.0	1.945949644670989	426.7147587475669	0.0	-800.6005915666661	0.0	0.18903763923675473	0.0	0.9999568206019057	0.0	0.009292843596231637	0.0	0.0	1.0648967627303985	0.0	0.0	1.0921772088159434	0.0	800.6005915666661	73.87490117816466	0.0	0.5730921070281818	-7.051967832851602	0.0	6.332318214727227	0.947779005296804
4.88	73.81373045841451	0.0	2.0480491331520447	427.0840451301722	0.0	-800.597646110105	0.0	0.19346306157464677	0.0	0.9999522625706724	0.0	0.009771007675463968	0.0	0.0	1.119692819938723	0.0	0.0	1.1476002934154776	0.0	800.597646110105	73.8396571808765	0.0	0.6052578741203914	-7.045694785827076	0.0	6.5271696161422605	0.9604465534995769
4.885	73.7758081899241	0.0	2.152584183882222	427.4531553710078	0.0	-800.5945374773659	0.0	0.1976438976257118	0.0	0.9999473656737252	0.0	0.010259916898494066	0.0	0.0	1.1757205007117248	0.0	0.0	1.2042210993178226	0.0	800.5945374773659	73.80444438365303	0.0	0.6383433556269272	-7.039368912153066	0.0	6.707458874314491	0.9723308039551523
4.89	73.73771933694918	0.0	2.2594401798335415	427.82208962789747	0.0	-800.5912611775265	0.0	0.201556833513829	0.0	0.9999421208120709	0.0	0.010758951590892858	0.0	0.0	1.232908822977466	0.0	0.0	1.2619628787796395	0.0	800.5912611775265	73.76926391477241	0.0	0.67232782699639	-7.0327277026163895	0.0	6.888233551013636	0.9844136345686092
4.895	73.69945983557804	0.0	2.3685004146997546	428.190848066682	0.0	-800.5878126971048	0.0	0.2051671531881023	0.0	0.9999365210212277	0.0	0.011267384224186928	0.0	0.0	1.2911744453403595	0.0	0.0	1.320738938641601	0.0	800.5878126971048	73.73411718406113	0.0	0.7072041975773009	-7.0260669528449196	0.0	7.0546607990201275	0.9956598606707554
4.9	73.66102627365011	0.0	2.4795391333712624	428.5594308539961	0.0	-800.5841878720186	0.0	0.2085320437786431	0.0	0.9999305600867907	0.0	0.01178452492836769	0.0	0.0	1.3504383421971087	0.0	0.0	1.380478968650369	0.0	800.5841878720186	73.69900324629828	0.0	0.7428505966625625	-7.019450333539605	0.0	7.204623250917728	1.0058791138734993
4.905	73.62241526831721	0.0	2.5924415576961826	428.9278381553945	0.0	-800.5803829426379	0.0	0.21163337593198797	0.0	0.9999242321431249	0.0	0.012309752089128228	0.0	0.0	1.4106293101074279	0.0	0.0	1.4411074648754112	0.0	800.5803829426379	73.6639230530307	0.0	0.7792458650150994	-7.0125501002713975	0.0	7.354733101061609	1.0162084328358414
4.91	73.58362432431511	0.0	2.7070966130344436	429.29607014290536	0.0	-800.5763941753178	0.0	0.2144408244024737	0.0	0.9999175334216946	0.0	0.01284236659732791	0.0	0.0	1.4716672646738345	0.0	0.0	1.5025402358432498	0.0	800.5763941753178	73.62887788654129	0.0	0.816383771443714	-7.005549178632009	0.0	7.496875877296546	1.026064653001079
4.915	73.54465186108361	0.0	2.8233173933070734	429.6641269921025	0.0	-800.5722179914144	0.0	0.216985154737738	0.0	0.9999104617882997	0.0	0.013381645283692846	0.0	0.0	1.5334693637262704	0.0	0.0	1.5647019037605772	0.0	800.5722179914144	73.59386731202153	0.0	0.8541856097628162	-6.998757398854849	0.0	7.61902801709826	1.034563642572818
4.92	73.50549615591689	0.0	2.9409230075589576	430.03200887190127	0.0	-800.5678513721481	0.0	0.2193165490537744	0.0	0.9999030143957044	0.0	0.013927017909511797	0.0	0.0	1.5959702905780115	0.0	0.0	1.627531466951353	0.0	800.5678513721481	73.55889026894289	0.0	0.8925560020065043	-6.991999327880668	0.0	7.730175294592273	1.0423227172340075
4.925	73.46615573780491	0.0	3.059817568429729	430.39971595200956	0.0	-800.5632915052806	0.0	0.22141837987283472	0.0	0.9998951892878816	0.0	0.01447793028269027	0.0	0.0	1.6591065670466711	0.0	0.0	1.6909631603180422	0.0	800.5632915052806	73.52394755617479	0.0	0.9314820284915267	-6.985064173860186	0.0	7.839615459016861	1.0500032955100724
4.93	73.42662989066959	0.0	3.179894082572089	430.767248405725	0.0	-800.5585356576204	0.0	0.22327993763213275	0.0	0.9998869861543562	0.0	0.015033793481192685	0.0	0.0	1.7228107340963843	0.0	0.0	1.7549281506993695	0.0	800.5585356576204	73.48903979944026	0.0	0.9709446035978622	-6.977992333636962	0.0	7.9456009611483305	1.057473175272534
4.935	73.38691862339569	0.0	3.301035886843603	431.1346064089828	0.0	-800.5535812075859	0.0	0.2248979378127516	0.0	0.9998784061997252	0.0	0.015594000220129918	0.0	0.0	1.7870132272086257	0.0	0.0	1.819356663988701	0.0	800.5535812075859	73.45416740643213	0.0	1.0109174949526676	-7.1028820695156965	0.0	8.082201585652662	1.0759782347453595
4.94	73.34702232408094	0.0	3.4230642287120574	431.50179013551974	0.0	-800.5484258038432	0.0	0.2263369091947102	0.0	0.9998694509855361	0.0	0.016158001522558016	0.0	0.0	1.8516511630302663	0.0	0.0	1.8841974122131644	0.0	800.5484258038432	73.41932861101992	0.0	1.0513036760267314	-6.173959730003276	0.0	7.835203510501029	0.9975379331066553
4.945	73.31488733957208	0.0	3.544440623920013	431.86881951900284	0.0	-800.5430743572151	0.0	0.23264378491724633	0.0	0.9998600139995144	0.0	0.016731779105477088	0.0	0.0	1.9174101240392578	0.0	0.0	1.9508449472417018	0.0	800.5430743572151	73.39243097298302	0.0	1.0894225127833201	-5.242931264617331	0.0	7.69423551725548	0.9310724377861134
4.95	73.28246855228858	0.0	3.669244097959679	432.2357145250647	0.0	-800.537529602315	0.0	0.23793421460520237	0.0	0.9998499921077159	0.0	0.017320314926619916	0.0	0.0	1.9848611395724611	0.0	0.0	2.0190080787348923	0.0	800.537529602315	73.36558591564753	0.0	1.1288725356130207	-5.363263524864692	0.0	8.032238306423864	0.9658232128517462
4.955	73.24977505193921	0.0	3.797203873176997	432.6024754473575	0.0	-800.5317841221387	0.0	0.24202475470113638	0.0	0.9998394116440453	0.0	0.01792068497048167	0.0	0.0	2.053669162582378	0.0	0.0	2.088343063645213	0.0	800.5317841221387	73.33880171933	0.0	1.1698142406076533	-5.350756994088121	0.0	8.332818286612705	0.9902851155474874
4.96	73.21682611899156	0.0	3.9279936782647384	432.9691026706047	0.0	-800.5258283503173	0.0	0.24464460914074088	0.0	0.9998283246208756	0.0	0.018528931763116093	0.0	0.0	2.123380689981463	0.0	0.0	2.1584285815671738	0.0	800.5258283503173	73.31209039328753	0.0	1.2125032002359653	-5.328041685825251	0.0	8.89796922902405	1.0371204588019196
4.965	73.18364909099924	0.0	4.06246534213656	433.335596664065	0.0	-800.5196509874281	0.0	0.24441463169691502	0.0	0.9998168090949703	0.0	0.01914022667723676	0.0	0.0	2.193442356296243	0.0	0.0	2.228448215804562	0.0	800.5196509874281	73.2855122137483	0.0	1.258498732570114	-5.311842730527161	0.0	9.253465100141774	1.0669690227621234
4.97	73.15027821696734	0.0	4.1967298810457505	433.701957819011	0.0	-800.5132435236451	0.0	0.24411291591156523	0.0	0.999804934483499	0.0	0.01975077235193512	0.0	0.0	2.263418969395856	0.0	0.0	2.2983814148363853	0.0	800.5132435236451	73.2589523721435	0.0	1.3044703175712644	-5.310362022910672	0.0	9.185693785193157	1.061022691226291
4.975	73.11671479588308	0.0	4.330709183529116	434.06818621375885	0.0	-800.5066064486347	0.0	0.24380300069678593	0.0	0.9997927026047161	0.0	0.020360546268645405	0.0	0.0	2.3333079713721374	0.0	0.0	2.36822582969914	0.0	800.5066064486347	73.23240811400935	0.0	1.3503432732815404	-5.307301467535079	0.0	9.164748126064586	1.0590564530821969
4.98	73.08295998235805	0.0	4.46440045099946	434.43428192591927	0.0	-800.4997402547959	0.0	0.24348494672424806	0.0	0.9997801152900411	0.0	0.020969527810143367	0.0	0.0	2.4031070219273887	0.0	0.0	2.4379791288104755	0.0	800.4997402547959	73.20587931675045	0.0	1.3961178988157874	-5.304221493193259	0.0	9.145112114383332	1.0572031083642068
4.985	73.04901494898161	0.0	4.597800916691161	434.8002450324916	0.0	-800.4926454330289	0.0	0.24315881569394523	0.0	0.9997671744156281	0.0	0.02157769651486555	0.0	0.0	2.472813798292778	0.0	0.0	2.507638998263788	0.0	800.4926454330289	73.17936585865613	0.0	1.4417944949624226	-5.301165771923166	0.0	9.125536425873818	1.0553566866294999
4.99	73.0148808859767	0.0	4.73090784602047	435.1660756098696	0.0	-800.4853224727248	0.0	0.24282467031535168	0.0	0.9997538819016787	0.0	0.022185032079513164	0.0	0.0	2.5424259955203174	0.0	0.0	2.5772031421174146	0.0	800.4853224727248	73.15286761890935	0.0	1.487373364155322	-5.2981341240635995	0.0	9.106021386793891	1.0535172077062382
4.995	72.98055900085234	0.0	4.863718536935651	435.5317737338448	0.0	-800.4777718617589	0.0	0.24248257428843342	0.0	0.9997402397117453	0.0	0.022791514361605723	0.0	0.0	2.6119413267692853	0.0	0.0	2.646669282678388	0.0	800.4777718617589	73.12638447759595	0.0	1.532854810445388	-5.29512636821039	0.0	9.086567317688573	1.0516846907424442
5.0	72.94605051805307	0.0	4.99623032025728	435.89733947961133	0.0	-800.4699940864825	0.0	0.24213259228452116	0.0	0.9997262498520232	0.0	0.02339712338198584	0.0	0.0	2.6813575235872285	0.0	0.0	2.716035160780713	0.0	800.4699940864825	73.09991631571283	0.0	1.5782391394718776	-5.292142321285335	0.0	9.067174533351578	1.0498591542059283
5.005	72.91135667860536	0.0	5.128440560008643	436.2627729217708	0.0	-800.4619896317145	0.0	0.24177478992705362	0.0	0.9997119143706341	0.0	0.024001839327274614	0.0	0.0	2.7506723361855197	0.0	0.0	2.785298536058124	0.0	800.4619896317145	73.07346301517659	0.0	1.6235266584335535	-5.2891817985328755	0.0	9.047843342777885	1.04804061587985
5.01	72.87647873976132	0.0	5.260346653736017	436.62807413433666	0.0	-800.4537589807339	0.0	0.24140923377220083	0.0	0.9996972353568997	0.0	0.02460564255227647	0.0	0.0	2.819883533709311	0.0	0.0	2.854457187211295	0.0	800.4537589807339	73.04702445883159	0.0	1.6687176760595497	-5.286244613590204	0.0	9.028574049120794	1.046229092862404
5.015	72.84141797463988	0.0	5.39194603281908	436.9932431907389	0.0	-800.4453026152725	0.0	0.2410359912893756	0.0	0.9996822149406065	0.0	0.0252085135823344	0.0	0.0	2.8889889045020043	0.0	0.0	2.9235089122694613	0.0	800.4453026152725	73.02060053045793	0.0	1.7138125025800928	-5.283330578553347	0.0	9.00936694965014	1.0444246015664562
5.02	72.80617567186533	0.0	5.523236162771094	437.35828016382885	0.0	-800.4366210155072	0.0	0.24065513084164292	0.0	0.9996668552912615	0.0	0.025810433115633677	0.0	0.0	2.957986256364023	0.0	0.0	2.992451528846435	0.0	800.4366210155072	72.99419111477897	0.0	1.758811449696945	-5.280439504009138	0.0	8.990222335709749	1.04262715771744
5.025	72.77075313520376	0.0	5.654214543529169	437.7231851258839	0.0	-800.4277146600526	0.0	0.2402667216660353	0.0	0.9996511586173404	0.0	0.02641138202545543	0.0	0.0	3.026873416806042	0.0	0.0	3.0612828743909763	0.0	800.4277146600526	72.96779609746886	0.0	1.8037148305537063	-5.277571199087087	0.0	8.971140492677817	1.0408367763525515
5.03	72.73515168319729	0.0	5.784878709734263	438.0879581486118	0.0	-800.4185840259545	0.0	0.2398708338537839	0.0	0.9996351271655272	0.0	0.027011341362378243	0.0	0.0	3.0956482332964614	0.0	0.0	3.1300008064315046	0.0	800.4185840259545	72.9414153651596	0.0	1.8485229597058728	-5.274725471490646	0.0	8.952121699940651	1.039053471820101
5.035	72.69937264879631	0.0	5.915226231001451	438.4525993031564	0.0	-800.4092295886819	0.0	0.23946753833047266	0.0	0.9996187632199469	0.0	0.027610292356429884	0.0	0.0	3.1643085735033827	0.0	0.0	3.1986032028151214	0.0	800.4092295886819	72.91504880544817	0.0	1.893236153090846	-5.271902127590996	0.0	8.93316623085435	1.037277257781038
5.04	72.66341737898995	0.0	6.045254712179734	438.8171086601015	0.0	-800.3996518221211	0.0	0.23905690683612607	0.0	0.9996020691013906	0.0	0.028208216419185958	0.0	0.0	3.2328523255306942	0.0	0.0	3.2670879619409323	0.0	800.3996518221211	72.88869630690282	0.0	1.9378547279976237	-5.269100972427529	0.0	8.914274352707585	1.0355081472058874
5.045	72.6272872344349	0.0	6.174961793602019	439.1814862894765	0.0	-800.3898511985684	0.0	0.23863901190523795	0.0	0.9995850471665343	0.0	0.028805095145817947	0.0	0.0	3.3012773981485815	0.0	0.0	3.335453002987644	0.0	800.3898511985684	72.86235775907004	0.0	1.9823790030364536	-5.266321809776524	0.0	8.895446326699997	1.0337461523765317
5.05	72.59098358908271	0.0	6.304345151324924	439.5457322607609	0.0	-800.379828188724	0.0	0.23821392684675063	0.0	0.9995676998071508	0.0	0.029400910317088857	0.0	0.0	3.369581721018232	0.0	0.0	3.403696266135429	0.0	800.379828188724	72.8360330524802	0.0	2.0268092981082795	-5.263564442230262	0.0	8.876682407910227	1.031991284887686
5.055	72.55450782980574	0.0	6.433402497358563	439.90984664288914	0.0	-800.3695832616854	0.0	0.23778172572399245	0.0	0.9995500294493158	0.0	0.029995643901297265	0.0	0.0	3.4377632449108373	0.0	0.0	3.4718157127820395	0.0	800.3695832616854	72.80972207865385	0.0	2.0711459343740923	-5.260828671200339	0.0	8.857982845270174	1.0302435556450922
5.06	72.51786135602197	0.0	6.562131579886289	440.2738295042561	0.0	-800.359116884941	0.0	0.2373424833345829	0.0	0.9995320385526086	0.0	0.030589278056169192	0.0	0.0	3.505819941920831	0.0	0.0	3.539809325753168	0.0	800.359116884941	72.78342473010711	0.0	2.1153892342241196	-5.258114297003402	0.0	8.839347881545361	1.0285029748684835
5.065	72.4810455793187	0.0	6.690530183474442	440.6376809127215	0.0	-800.3484295243645	0.0	0.23689627519031334	0.0	0.9995137296093075	0.0	0.031181795130698034	0.0	0.0	3.5737498056733794	0.0	0.0	3.607675109507041	0.0	800.3484295243645	72.75714090035734	0.0	2.1595395212469644	-5.2554211188542865	0.0	8.820777753306935	1.0267695520891442
5.07	72.44406192307555	0.0	6.818596129271955	441.0014009356152	0.0	-800.3375216442087	0.0	0.23644317749701205	0.0	0.9994951051435802	0.0	0.031773177666931704	0.0	0.0	3.6415508515260373	0.0	0.0	3.675411090333248	0.0	800.3375216442087	72.73087048392836	0.0	2.203597120198534	-5.252748934992013	0.0	8.802272690912865	1.025043296155095
5.075	72.40691182208646	0.0	6.946327275200273	441.3649896397422	0.0	-800.3263937070996	0.0	0.23598326713440132	0.0	0.9994761677106688	0.0	0.03236340840170871	0.0	0.0	3.7092211167647573	0.0	0.0	3.743015316545795	0.0	800.3263937070996	72.70461337635504	0.0	2.247562356970991	-5.250097542715556	0.0	8.783832918498558	1.0233242152325273
5.08	72.36959672218127	0.0	7.073721516133128	441.7284470913877	0.0	-800.315046174031	0.0	0.23551662163595538	0.0	0.9994569198960728	0.0	0.03295247026834127	0.0	0.0	3.776758660794041	0.0	0.0	3.810485858670394	0.0	800.315046174031	72.67836947418824	0.0	2.291435558561559	-5.247466738353523	0.0	8.765458653951264	1.0216123168024926
5.085	72.332118079847	0.0	7.200776784066443	442.09177335632234	0.0	-800.3034795043592	0.0	0.23504331916876733	0.0	0.9994373643147262	0.0	0.03354034639824618	0.0	0.0	3.844161565321322	0.0	0.0	3.8778208096259776	0.0	800.3034795043592	72.65213867499936	0.0	2.3352170530412506	-5.244856317412427	0.0	8.747150108897417	1.0199076076678961
5.09	72.29447736184852	0.0	7.327491048278464	442.45496849980697	0.0	-800.2916941557974	0.0	0.23456343851343278	0.0	0.999417503610172	0.0	0.03412702012252398	0.0	0.0	3.911427934535614	0.0	0.0	3.945018284900458	0.0	800.2916941557974	72.62592087738415	0.0	2.3789071695235373	-5.242266074584023	0.0	8.728907488692817	1.0182100939535619
5.095	72.25667604484939	0.0	7.453862315480032	442.8180325865982	0.0	-800.2796905844106	0.0	0.23407705904395815	0.0	0.9993973404537341	0.0	0.03471247497348581	0.0	0.0	3.978555895280392	0.0	0.0	4.012076422720725	0.0	800.2796905844106	72.59971598096699	0.0	2.4225062381329723	-5.239695803793865	0.0	8.710730992412552	1.0165197811084228
5.1	72.21871561503248	0.0	7.579888629955118	443.1809656809531	0.0	-800.2674692446108	0.0	0.23358426070770194	0.0	0.9993768775436854	0.0	0.03529669468612828	0.0	0.0	4.045543597220712	0.0	0.0	4.078993384216899	0.0	800.2674692446108	72.5735238864043	0.0	2.4660145899737644	-5.237145298259331	0.0	8.692620812843204	1.0148366739084407
5.105	72.18059756772095	0.0	7.705568073691673	443.5437678466348	0.0	-800.255030589152	0.0	0.23308512400535591	0.0	0.9993561176044149	0.0	0.03587966319955658	0.0	0.0	4.112389213004612	0.0	0.0	4.14576735358085	0.0	800.255030589152	72.54734449538824	0.0	2.509432557098313	-5.234614350516391	0.0	8.674577136468953	1.0131607764574289
5.11	72.14232340699938	0.0	7.830898766502722	443.9064391469175	0.0	-800.2423750691261	0.0	0.23257972997097512	0.0	0.9993350633855913	0.0	0.03646136465835522	0.0	0.0	4.179090938418711	0.0	0.0	4.2123965382189965	0.0	800.2423750691261	72.52117771064974	0.0	2.552760472475674	-5.232102752509604	0.0	8.656600143477075	1.011492092192845
5.115	72.10389464533526	0.0	7.955878866138103	444.2689796445914	0.0	-800.2295031339571	0.0	0.23206816015206233	0.0	0.9993137176613265	0.0	0.0370417834139083	0.0	0.0	4.245646992538245	0.0	0.0	4.278879168899393	0.0	800.2295031339571	72.49502343596144	0.0	2.5959986699601085	-5.2296102955807555	0.0	8.638690007770792	1.009830623887012
5.12	72.06531280320125	0.0	8.08050656838644	444.6313894019685	0.0	-800.2164152313984	0.0	0.23155049658971646	0.0	0.9992920832293363	0.0	0.03762090402566702	0.0	0.0	4.312055617871234	0.0	0.0	4.345213499893139	0.0	800.2164152313984	72.46888157614045	0.0	2.6391474842595013	-5.227136770920993	0.0	8.620846896728581	1.008176373650708
5.125	72.02657940869692	0.0	8.204780107165199	444.99366848088613	0.0	-800.2031118075259	0.0	0.2310268217988079	0.0	0.9992701629100995	0.0	0.0381987112623569	0.0	0.0	4.378315080495955	0.0	0.0	4.411397809110102	0.0	800.2031118075259	72.44275203704875	0.0	2.6822072509026853	-5.224681968352011	0.0	8.603070971948856	1.0065293429344804
5.13	71.98769599717671	0.0	8.328697754614293	445.3558169427167	0.0	-800.1895933067402	0.0	0.2304972187484453	0.0	0.9992479595460254	0.0	0.038775190103182054	0.0	0.0	4.444423670198325	0.0	0.0	4.47743039822905	0.0	800.1895933067402	72.41663472560346	0.0	2.725178306212573	-5.22224567779522	0.0	8.58536238844255	1.0048895325364615
5.135	71.94866411086805	0.0	8.452257821154737	445.7178348483675	0.0	-800.175860171754	0.0	0.2299617708420976	0.0	0.9992254760006013	0.0	0.03935032573888318	0.0	0.0	4.510379700592601	0.0	0.0	4.543309592822084	0.0	800.175860171754	72.39052954976667	0.0	2.768060987267754	-5.219827690061389	0.0	8.567721294212246	1.00325694260857
5.14	71.90948529849949	0.0	8.575458655558704	446.07972225828695	0.0	-800.161912843592	0.0	0.2294205618981636	0.0	0.9992027151575565	0.0	0.039924103572820946	0.0	0.0	4.576181509245291	0.0	0.0	4.609033742473507	0.0	800.161912843592	72.3644364185515	0.0	2.8108556318734985	-5.217427793015143	0.0	8.550147832397078	1.0016315726412148
5.145	71.8701611149345	0.0	8.698298645021085	446.4414792324759	0.0	-800.1477517615957	0.0	0.22887367613079693	0.0	0.9991796799200363	0.0	0.040496509222050524	0.0	0.0	4.641827457798293	0.0	0.0	4.674601220893201	0.0	800.1477517615957	72.33835524203681	0.0	2.8535625785373533	-5.215045775702976	0.0	8.532642139073737	1.0000134214908032
5.15	71.83069312078779	0.0	8.820776215178501	446.80310583048384	0.0	-800.1333773634046	0.0	0.22832119813013055	0.0	0.9991563732097383	0.0	0.041067528518181254	0.0	0.0	4.70731593206739	0.0	0.0	4.740010426024335	0.0	800.1333773634046	72.31228593134553	0.0	2.896182166425543	-5.212681427978557	0.0	8.515204343477079	0.9984024873805327
5.155	71.79108288206305	0.0	8.942889830164978	447.16460211141964	0.0	-800.1187900849633	0.0	0.22776321284336257	0.0	0.9991327979660903	0.0	0.0416371475083588	0.0	0.0	4.7726453421552	0.0	0.0	4.805259780145658	0.0	800.1187900849633	72.28622839866101	0.0	2.938714735339685	-5.210334537824224	0.0	8.497834569491818	0.9967987678889565
5.16	71.75133196978221	0.0	9.064637992636206	447.525968133956	0.0	-800.1039903605156	0.0	0.22719980555558322	0.0	0.9991089571454097	0.0	0.042205352456112906	0.0	0.0	4.837814122548808	0.0	0.0	4.870347729968297	0.0	800.1039903605156	72.26018255722379	0.0	2.98116062568353	-5.208004893784117	0.0	8.480532934388012	0.9952022599698971
5.165	71.71144195961841	0.0	9.186019243789385	447.8872039563344	0.0	-800.0889786226023	0.0	0.2266310618708011	0.0	0.9990848537200677	0.0	0.042772129842172414	0.0	0.0	4.902820732213844	0.0	0.0	4.935272746727123	0.0	800.0889786226023	72.23414832133234	0.0	3.023520178431739	-5.2056922842479505	0.0	8.463299549226466	0.9936129599507826
5.17	71.67141443153092	0.0	9.307032163374297	448.2483096363707	0.0	-800.073755302058	0.0	0.22605706769310016	0.0	0.9990604906776561	0.0	0.0433374663652309	0.0	0.0	4.967663654683096	0.0	0.0	5.0000333262667125	0.0	800.073755302058	72.20812560634322	0.0	3.065793735098695	-5.203396497564702	0.0	8.446134518839518	0.9920308635380306
5.175	71.63125096940178	0.0	9.427675369695823	448.6092852314598	0.0	-800.058320828008	0.0	0.22547790920793162	0.0	0.9990358710201567	0.0	0.043901348942664196	0.0	0.0	5.032341398139788	0.0	0.0	5.064627989121955	0.0	800.058320828008	72.18211432867132	0.0	3.107981637707418	-5.201117322096849	0.0	8.429037941852865	0.9904559658228683
5.18	71.59095316067469	0.0	9.547947519608094	448.9701307985818	0.0	-800.0426756278664	0.0	0.2248936728635471	0.0	0.9990109977631115	0.0	0.0444637647112002	0.0	0.0	5.096852495495568	0.0	0.0	5.12905528059334	0.0	800.0426756278664	72.1561144057895	0.0	3.150084228758591	-5.198854546267029	0.0	8.412009910714202	0.9888882612873676
5.185	71.55052259599569	0.0	9.667847308500114	449.3308463943065	0.0	-800.0268201273344	0.0	0.22430444535257932	0.0	0.9989858739347984	0.0	0.04502470102754023	0.0	0.0	5.1611955044631275	0.0	0.0	5.193313770816967	0.0	800.0268201273344	72.13012575622837	0.0	3.192101851199735	-5.196607958581249	0.0	8.395050511707918	0.9873277438080902
5.19	71.5099608688565	0.0	9.787373470273126	449.69143207479925	0.0	-800.0107547503962	0.0	0.22371031359377713	0.0	0.9989605025754079	0.0	0.045584145468933364	0.0	0.0	5.225369007623601	0.0	0.0	5.257402054829325	0.0	800.0107547503962	72.10414829957566	0.0	3.234034848394379	-5.194377347674836	0.0	8.37815982494537	0.9857744066588771
5.195	71.46926957524002	0.0	9.906524777309535	450.0518878958252	0.0	-799.9944799193195	0.0	0.22311136471389084	0.0	0.9989348867362238	0.0	0.046142085833703	0.0	0.0	5.2893716124886625	0.0	0.0	5.321318752626875	0.0	799.9944799193195	72.07818195647549	0.0	3.2758835640912474	-5.192162502403383	0.0	8.361337924432359	0.9842282425226103
5.2	71.42845031326812	0.0	10.025300040434447	450.4122139127561	0.0	-799.977996054651	0.0	0.22250768602973456	0.0	0.9989090294788072	0.0	0.046698510141728745	0.0	0.0	5.353201951557676	0.0	0.0	5.3850625092205044	0.0	799.977996054651	72.052226648627	0.0	3.317648342393967	-5.189963211865253	0.0	8.34458487809191	0.9826892434955969
5.205	71.38750468285211	0.0	10.143698108868545	450.77241018057475	0.0	-799.9613035752172	0.0	0.2218993650304028	0.0	0.9988829338741857	0.0	0.0472534066348804	0.0	0.0	5.416858682369516	0.0	0.0	5.448631994684879	0.0	799.9613035752172	72.02628229878333	0.0	3.3593295277304964	-5.1877792633744	0.0	8.327900748946877	0.9811574010820456
5.21	71.34643428534599	0.0	10.261717870173424	451.13247675388016	0.0	-799.944402898121	0.0	0.22128648935966733	0.0	0.9988566030020455	0.0	0.047806763777407044	0.0	0.0	5.480340487549412	0.0	0.0	5.512025904202757	0.0	799.944402898121	72.00034883075028	0.0	3.4009274648228565	-5.1856104666129	0.0	8.311285580883306	0.9796327062651798
5.215	71.30524072314498	0.0	10.379358250010954	451.492413686832	0.0	-799.9272944386445	0.0	0.2206691467964749	0.0	0.9988300399498204	0.0	0.04835857025554965	0.0	0.0	5.543646074766084	0.0	0.0	5.57524295810371	0.0	799.9272944386445	71.97442616926422	0.0	3.442442498585549	-5.183456577564272	0.0	8.294739443933501	0.9781151493267066
5.22	71.26392559957308	0.0	10.496618212785412	451.85222103339987	0.0	-799.9099786106348	0.0	0.22004742524600873	0.0	0.9988032478123268	0.0	0.048908814980759704	0.0	0.0	5.606774177106704	0.0	0.0	5.638281901900294	0.0	799.9099786106348	71.94851424047093	0.0	3.4838749743813904	-5.1695124433573865	-5.203860445778309e-23	8.278689414494574	0.9760151501062438
5.225	71.22249051820077	0.0	10.613496760498558	452.21189884700283	0.0	-799.8924558259216	0.0	0.2194214127101582	0.0	0.9987762296903183	0.0	0.04945748708558252	0.0	0.0	5.669723552602545	0.0	0.0	5.701141506315746	0.0	799.8924558259216	71.92261297120233	0.0	3.5252252375627586	-5.241728880000333	2.7474027765840544e-22	8.25954227687445	0.978242098229809
5.23	71.18023084247064	3.379974533900122e-24	10.729923526006324	452.5714461979059	4.3279745839281016e-27	-799.8747265305075	5.5833350178041705e-24	0.21906296371914405	-1.771325175410776e-24	0.9987489792645786	3.8036142262215144e-27	0.050004764184162914	-1.4185301882388256e-27	-1.4125948166390835e-25	5.732514584321779	4.293355447061808e-25	-5.0744728348153845e-25	5.763898422659418	1.5995076606388968e-24	799.8747265305075	71.89601399285657	3.1223162674669854e-24	3.5664680117708567	-5.380106182798746	8.993207520612012e-22	8.238408540836424	0.9839558822625935
5.235	71.13733781459439	1.0481568383114563e-23	10.846052248036386	452.9308585605902	3.328431741970459e-26	-799.8567912920846	1.519102295775578e-23	0.2188927018387065	-4.82559571165447e-24	0.9987214548629498	2.925189710544701e-26	0.05055151451278789	-1.0923414292424994e-26	-1.0862326047192732e-24	5.795246898073567	3.3013306907269773e-24	-1.889878623052689e-24	5.826606562567285	5.951415170467631e-24	799.8567912920846	71.86892792114935	8.494113480231558e-24	3.6076142610888113	-5.4250561078269754	1.1204574690086076e-21	8.221159922819407	0.9849807320432353
5.24	71.09429142589096	1.934981968571199e-23	10.9619622404446	453.2901354848227	8.943496943771777e-26	-799.8386505173206	2.5028929973029172e-23	0.21872477819985575	-7.960708715101685e-24	0.998693652712993	7.859908143666522e-26	0.05109782826928055	-2.9389186985787767e-26	-2.9183654610391055e-24	5.85793085723333	8.869255470309416e-24	-4.170453679594384e-24	5.889266595896219	1.3121675436382915e-23	799.8386505173206	71.84184021101503	1.3993662718180385e-23	3.648682650139628	-5.419632692062019	1.1218370234527345e-21	8.205852831922922	0.9834044906143395
5.245	71.05106741634438	3.017370634537014e-23	11.077652544055592	453.64927691560223	1.7365067687586012e-25	-799.8203045961702	3.5315291283088016e-23	0.21856882224639837	-1.1246109477512244e-23	0.9986655727424492	1.52607764883782e-25	0.05164372025723134	-5.713653064250282e-26	-5.66572621835568e-24	5.920568175153637	1.7217938603843377e-23	-7.392226724612018e-24	5.951881951135538	2.3238761150363363e-23	799.8203045961702	71.81472608293964	1.9743323465190732e-23	3.689672749143762	-5.426393416450992	1.1807165094763095e-21	8.190193912521433	0.982471484750605
5.25	71.00765737617522	4.311862455436483e-23	11.19312750137619	454.00828268679504	2.8739375134811026e-25	-799.8017539200225	4.6161632948909456e-23	0.21842815049591732	-1.4717588037344028e-23	0.9986372137143629	2.5255833489998412e-25	0.0521892269321818	-9.468206850034522e-26	-9.375641888813518e-24	5.983163049814205	2.8490572399739286e-23	-1.1608505120372227e-23	6.01445700688686	3.6463094867386127e-23	799.8017539200225	71.7875772487026	2.58057747399763e-23	3.730584746295088	-5.432399248820019	1.2421337601275963e-21	8.174639615356606	0.9815074856542761
5.255	70.96407517332021	5.825825187414185e-23	11.308393792641187	454.3671526532424	4.321776416656132e-25	-799.782998877622	5.7508354271878e-23	0.2182973875529942	-1.8356700853041636e-23	0.9986085745112483	3.797740697733456e-25	0.052734380962816234	-1.4256124733217742e-25	-1.4097047807743633e-23	6.045719245048643	4.283510550009774e-23	-1.6867312543689646e-23	6.076994601814452	5.2938024799994863e-23	799.782998877622	71.76040782763705	3.214801908602031e-23	3.7714193955812054	-5.4342935570772966	1.290678670756852e-21	8.15925275611269	0.9803313317579131
5.26	70.92034120709921	7.561557516469518e-23	11.423456182521903	454.7258867658574	6.09223345629652e-25	-799.7640398537003	6.923523866862048e-23	0.2181686931827268	-2.2125705603559908e-23	0.9985796549272399	5.35319324663614e-25	0.05327919658053582	-2.0121482975948987e-25	-1.9869266290570036e-23	6.108238409290402	6.037020396576401e-23	-2.3205860292854337e-23	6.139495328520725	7.277245964645941e-23	799.7640398537003	71.73323812352353	3.8703202077161255e-23	3.81217744471778	-5.433545089442286	1.3318068474692108e-21	8.143972338786499	0.979018374158126
5.265	70.87645854260563	9.528119426524023e-23	11.538315400792099	455.08448503926985	8.19577430969774e-25	-799.7448772303651	8.136066487846203e-23	0.2180410996527012	-2.6030750431997254e-23	0.998550455387062	7.201030695625596e-25	0.053823675730276854	-2.710272737026908e-25	-2.672585995960396e-23	6.170720781129174	8.119694797725472e-23	-3.0663120979413275e-23	6.201959502373182	9.608057322603012e-23	799.7448772303651	71.70607069493171	4.548202191725926e-23	3.852859171158537	-5.434218266796384	1.3843266526683848e-21	8.128712515546322	0.9777867627022924
5.27	70.83241499562907	1.174371254274128e-22	11.652971225255817	455.4429474549964	1.0645601450317873e-24	-799.7255113891474	9.4035658703063e-23	0.21791959321668067	-3.0120118906301827e-23	0.9985209759544947	9.352720443970009e-25	0.05436782689848888	-3.524748447162756e-25	-3.4709261926547976e-23	6.233167349830625	1.0544316751457597e-22	-3.9291899438229733e-23	6.264388867195799	1.230198050631209e-22	799.7255113891474	71.6788928924264	5.256938654173522e-23	3.8934646105865522	-5.437226927211233	1.4531764534431868e-21	8.113470213061976	0.9766874400555935
5.275	70.78820507453057	1.4225744083204947e-22	11.767425833346417	455.8012739404829	1.3458786080526964e-24	-799.7059427110681	1.0735344857188285e-22	0.2178064412281463	-3.4423887620442635e-23	0.9984912160863729	1.18230983461436e-24	0.05491166926156355	-4.461637405603836e-25	-4.3874465512465683e-23	6.2955803315422765	1.3327458961498546e-22	-4.915361681364976e-23	6.326785816361484	1.5377430265983902e-22	799.7059427110681	71.65169907486782	6.001789564250894e-23	3.933993971598604	-5.439762287042764	1.5242389802353039e-21	8.098290834464784	0.9755681840809951
5.28	70.74383838774291	1.6984005204795964e-22	11.88168291962124	456.1594644348395	1.6652954863629305e-24	-799.6861715755883	1.2126320047177772e-22	0.2176979440291555	-3.8926481358909624e-23	0.9984611753168686	1.4627459583859623e-24	0.05545521984040114	-5.527207503094252e-25	-5.427819731627114e-23	6.357961695234059	1.6486202421429948e-22	-6.030523227945073e-23	6.389151683369214	1.885136506462474e-22	799.6861715755883	71.6244987786451	6.779960467256749e-23	3.974447635454594	-5.439745232516202	1.585655632215467e-21	8.083186480732259	0.9743137681310654
5.285	70.69932678022654	2.0025302669855953e-22	11.995744709446956	456.5175189374644	2.0243507294721167e-24	-799.6661983603369	1.3568335317394594e-22	0.21758958967453199	-4.3602521821635666e-23	0.9984308538016496	1.777911654052426e-24	0.05599848390406588	-6.72700697083177e-25	-6.596982651615197e-23	6.4203120612787625	2.00353842445892e-22	-7.279643466198472e-23	6.451486509140884	2.2738406808149785e-22	799.6661983603369	71.59730352190385	7.586942814979916e-23	4.014825920034982	-5.438423180404565	1.6429997954364483e-21	8.068131494422863	0.972991225553755
5.29	70.65467068111599	2.3361955452042813e-22	12.109611172167074	456.87543747877396	2.424491761829996e-24	-799.6460234417137	1.5063958318049176e-22	0.21748144051899873	-4.846060424856516e-23	0.9984002520276262	2.12905392107433e-24	0.05654146066182983	-8.066292901607671e-25	-7.899561545100034e-23	6.4826313545562515	2.3988884226665833e-22	-8.667937514246737e-23	6.5137903524617045	2.7053912980075827e-22	799.6460234417137	71.57011318266562	8.424230866712896e-23	4.0551290092336405	-5.438203333678142	1.7094711226983836e-21	8.053108757860842	0.9717335857340892
5.295	70.60986250701254	2.7012332054768705e-22	12.22328207649011	457.2332200636642	2.8673831691632764e-24	-799.6256471952923	1.662403676943614e-22	0.217376708312856	-5.35356414706713e-23	0.9983693701925838	2.5176068174060856e-24	0.057084154402238456	-9.55106227825741e-25	-9.340882991707167e-23	6.544920082875408	2.836268164865412e-22	-1.0201620669144242e-22	6.576064192215569	3.181634870687076e-22	799.6256471952923	71.54291969785625	9.297953987281381e-23	4.095357072165603	-5.439343955084061	1.7869379544933926e-21	8.0381247159381	0.9705560860181367
5.3	70.56489985782838	3.0993486063289397e-22	12.336758716469706	457.59086666542095	3.354950228195831e-24	-799.6050699956711	1.8254016675770175e-22	0.21727648567745741	-5.88455023365544e-23	0.9983382081200456	2.9452293425838613e-24	0.05762657572827163	-1.1188201543239405e-24	-1.0927115359800013e-22	6.607179478839598	3.317528037563465e-22	-1.1887420132750138e-22	6.638309320299334	3.704573928028604e-22	799.6050699956711	71.51572038628495	1.0211223109478163e-22	4.135510327027914	-5.440011875289249	1.8643316866309425e-21	8.023184651455958	0.9693565966900236
5.305	70.51978953885673	3.531668108554464e-22	12.45004312113028	457.94837726872066	3.8891185016144994e-24	-799.5842922163562	1.9948796735961273e-22	0.21717819887945633	-6.437462242872464e-23	0.9983067657375575	3.4135770120260614e-24	0.058168733053784005	-1.2984620077080433e-24	-1.2664417630420443e-22	6.6694105238733785	3.844513465630829e-22	-1.3731617219207204e-22	6.700526291289562	4.276064857696071e-22	799.5842922163562	71.48852178816354	1.1161253030141696e-22	4.175588979432884	-5.439071331817284	1.9337451412353967e-21	8.00828062288715	0.9680705319732983
5.31	70.47453870987664	3.999149935087756e-22	12.563136262298608	458.3057518962071	4.4716280946038655e-24	-799.5633142299505	2.170214845236589e-22	0.2170791884194572	-7.010381349920945e-23	0.9982750433944102	3.924138965902276e-24	0.058710627302966445	-1.4946627039333126e-24	-1.455833237989888e-22	6.73161333973959	4.418881515487684e-22	-1.573994353984568e-22	6.762714897872363	4.897785614039539e-22	799.5633142299505	71.46133061764131	1.2144633089809762e-22	4.215593188284532	-5.437483672445373	2.000499978382127e-21	7.993408004561164	0.9667512617808809
5.315	70.42914689471043	4.503203950011247e-22	12.6760378098474	458.6629905858301	5.1041588379077416e-24	-799.542136408264	2.351643234064273e-22	0.21697988019333173	-7.6041103427004e-23	0.9982430416166015	4.478347444261697e-24	0.05925225638244213	-1.7080346718290548e-24	-1.6614194379919036e-22	6.793787701770798	5.042224282597861e-22	-1.7918360687788234e-22	6.824875054744024	5.571481775201431e-22	799.542136408264	71.43414582861612	1.3162762982521793e-22	4.255523124845319	-5.436758230572281	2.0745047923826354e-21	7.97857493098532	0.9654843239900006
5.32	70.38360889742086	5.04568176648734e-22	12.78874749555974	459.02009335539464	5.788562835223592e-24	-799.5207591221206	2.539982843210762e-22	0.21688256150167348	-8.221302531875125e-23	0.9982107606922158	5.0777811742542104e-24	0.05979362224014983	-1.9392497890112e-24	-1.8837889603489393e-22	6.855933849151996	5.716297870754211e-22	-2.0273590373671547e-22	6.8870073318641865	6.29913325995951e-22	799.5207591221206	71.40696173025236	1.4220302858226178e-22	4.29537901005372	-5.436990762696563	2.1567701367953343e-21	7.963787291792028	0.9642757727048624
5.325	70.33792293153238	5.628333783266471e-22	12.90126608279158	459.3770602003322	6.526887659508894e-24	-799.4991827412214	2.735634388180518e-22	0.2167881079572625	-8.863294637917075e-23	0.9981782006322811	5.724185386302238e-24	0.060334731331027264	-2.189047481518751e-24	-2.1235930205316324e-22	6.9180525384564655	6.443044796149955e-22	-2.2812737250339455e-22	6.949112550037074	7.082834783627493e-22	799.4991827412214	71.37977618288633	1.5319582423177208e-22	4.335161057727271	-5.437019905988905	2.2390967377637825e-21	7.94903609682384	0.9630595014158159
5.33	70.29209304432331	6.252485805875208e-22	13.013594837282318	459.7338911209541	7.321183375533927e-24	-799.4774076343601	2.9382178521183987e-22	0.2166950504044469	-9.528948884765011e-23	0.998145361490005	6.4193026597080144e-24	0.06087558918177474	-2.4581700498141444e-24	-2.3814823521432767e-22	6.980144419742113	7.224403511854748e-22	-2.5542580021804093e-22	7.011191109184821	7.924572194709384e-22	799.4774076343601	71.35259289756475	1.6458567794281073e-22	4.374869413832628	-5.433403102281886	2.2936227878413884e-21	7.934260598875031	0.9616359005504486
5.335	70.24612417117827	6.919289361104897e-22	13.125734449944598	460.09058614083824	8.173354903768536e-24	-799.4554341697207	3.147187254646089e-22	0.21660160040932547	-1.0216597599156136e-22	0.9981122435904105	7.164743542741535e-24	0.06141619670016672	-2.747312786797193e-24	-2.6580589417513113e-22	7.042209612814362	8.062162854466801e-22	-2.8469419638879776e-22	7.073242896880989	8.826174929852309e-22	799.4554341697207	71.32541636147455	1.7634302044378248e-22	4.414504189267153	-5.3623353579889494	1.786463250900883e-21	7.918196554378939	0.956307885386903
5.34	70.19985810908028	7.643457474302657e-22	13.237669947556379	460.4471452250689	9.0858033002912e-24	-799.4332627133987	3.385667551926024e-22	0.2165718736338379	-1.0999632108859477e-22	0.99807884652578	7.962546968083203e-24	0.061956566556293675	-3.0573402046175905e-24	-2.9540854210285217e-22	7.104249587902855	8.9585925499183e-22	-3.162058211905094e-22	7.135286168483286	9.796097237651062e-22	799.4332627133987	71.29808734509507	1.8976323100786162e-22	4.454068426440274	-5.843845610531892	5.8111772943077615e-21	7.9125197600440496	0.983658988027967
5.345	70.14813276999415	8.906811744351004e-22	13.349155173487773	460.8035579111315	1.0146821654585977e-23	-799.4108934339646	4.41443977852744e-22	0.2186742966252715	-1.4292611898505302e-22	0.9980450386021148	8.889820282730061e-24	0.06249880753532388	-3.418170092970646e-24	-3.298370146571363e-22	7.166506482969058	1.0000389831496007e-21	-3.5715113819065025e-22	7.197931739906386	1.1060741078772503e-21	799.4108934339646	71.26547188460823	2.474284536981262e-22	4.493661365325698	-7.422662376551396	1.9228521324849825e-20	7.9298435162480665	1.0861783230595845
5.35	70.08684949458433	1.127840733175731e-21	13.460901893180637	461.15978426840144	1.1695647574884124e-23	-799.3883258899103	6.863465161302717e-22	0.22448395114070724	-2.210323140585446e-22	0.9980103090364244	1.0242945054997695e-23	0.0630509562069916	-3.94485151647774e-24	-3.801634958426521e-22	7.2299030972592515	1.1520776494064686e-21	-4.2047223184847395e-22	7.262241654750303	1.3026979011661115e-21	799.3883258899103	71.22366781926608	3.8459850631909466e-22	4.533375636698347	-9.118346243072988	3.427668386964463e-20	7.953013660280636	1.2099366284610682
5.355	70.01851097767387	1.4791172221518925e-21	13.574329190993067	461.51578380061284	1.4092618904502348e-23	-799.365559540051	1.0375951106653854e-21	0.2328954800639866	-3.3312684314584225e-22	0.997974121463282	1.233658795457625e-23	0.06362116716269159	-4.760163547688463e-24	-4.581390103055797e-22	7.295375913191812	1.387332074462131e-21	-5.1590604262234065e-22	7.328961295127002	1.5999470045887923e-21	799.365559540051	71.17541989743577	5.8131394344265745e-22	4.573171260356855	-10.007987675597718	4.296907053357839e-20	7.961653848809262	1.278857886253102
5.36	69.94700731744302	1.9253297258856342e-21	13.690465768809847	461.8715345340763	1.7552029790722366e-23	-799.3425941783261	1.4356044907250866e-21	0.2422771005481848	-4.604106286321444e-22	0.9979361599319372	1.5357613362945302e-23	0.06421386705208874	-5.93791922482853e-24	-5.707308810502104e-22	7.363433483713449	1.7267677937856135e-21	-6.478039719402755e-22	7.3983685717973895	2.0112173964316694e-21	799.3425941783261	71.12477222229977	8.0424611678543385e-22	4.612966767072688	-10.14200736393723	4.522629900838542e-20	7.953915544668326	1.2888952085482879
5.365	69.87534810884034	2.4439059537839533e-21	13.809725518113488	462.2270327076775	2.2133234533293788e-23	-799.3194299924515	1.832219047351082e-21	0.25139291645612355	-5.876635369848464e-22	0.9978963349127413	1.9357364616007405e-23	0.06482981404516627	-7.499640208884065e-24	-7.198334831291319e-22	7.434163190897765	2.1761017082735763e-21	-8.161571741550848e-22	7.470387337359494	2.536109489215156e-21	799.3194299924515	71.07478636941359	1.0264651054141363e-21	4.652691177391869	-9.801474867785961	4.315899720677399e-20	7.934386865114422	1.2610448227923545
5.37	69.8052111099423	3.0166444123827424e-21	13.93204801433604	462.58228632748455	2.778870272912056e-23	-799.2960674605671	2.1992833382762602e-21	0.25957395960411717	-7.059667511061158e-22	0.9978547088890084	2.4293727387164044e-23	0.06546739623175976	-9.430587543575102e-24	-9.038432848792839e-22	7.507380273270521	2.730541636029216e-21	-1.0184017507298002e-21	7.54474979914357	3.1661577553985173e-21	799.2960674605671	71.02712003692481	1.2322298615878002e-21	4.692300040298361	-9.254357465494206	3.899860089511893e-20	7.908631383478297	1.2173314358008103
5.375	69.73717089585286	3.631751864078178e-21	14.057108691125263	462.93730867777117	3.44178975686788e-23	-799.2725072175365	2.526239444422689e-21	0.26661161421683227	-8.119543310181581e-22	0.9978114173696855	3.007825629986196e-23	0.06612393959778151	-1.1697890273663841e-23	-1.1194244948274635e-21	7.582777980510038	3.380091133178622e-21	-1.2510095323533434e-21	7.621128400462544	3.889872046422987e-21	799.2725072175365	70.98229090650328	1.4156440694551494e-21	4.73177423425537	-8.93670361718814	3.688764350346826e-20	7.887424366881805	1.1919569400139607
5.38	69.67106476898184	4.283616575637189e-21	14.18449092985643	463.2921136054324	4.1909421953489436e-23	-799.2487499440078	2.814946602023442e-21	0.2725983409560097	-9.06185801571878e-22	0.9977666092509985	3.6613006387943976e-23	0.06679665773762428	-1.4264801382320022e-23	-1.3628887794495067e-21	7.660036615835452	4.113692550090153e-21	-1.5106126417770839e-21	7.699222072657782	4.696294845676164e-21	799.2487499440078	70.94006996694696	1.5777617754064037e-21	4.771113338972003	-6.726907408338671	1.5825598156630212e-20	7.816956149873826	1.031290874241656
5.385	69.62121333869484	4.801935663399033e-21	14.314366457005557	463.6467502481225	4.979745035342117e-23	-799.2247972447319	2.813908855485063e-21	0.27187176523829154	-9.087368373361079e-22	0.9977209171678112	4.34915414742356e-23	0.067475710197155	-1.6973460838886153e-23	-1.6190424118198332e-21	7.7380262559255275	4.885652311609774e-21	-1.770946569114211e-21	7.77710759624241	5.502420352445074e-21	799.2247972447319	70.91458802662208	1.577461805754869e-21	4.8099521047681	-4.816956973413511	-2.760809347528918e-21	7.752304494453958	0.9126954555515662
5.39	69.57120691768142	5.32307848992558e-21	14.443795727871164	464.0012594945812	5.768416339027071e-23	-799.2006505649513	2.8127690372333874e-21	0.27114348107325303	-9.112600011392946e-22	0.9976748868850032	5.0366882331935575e-23	0.06815291703033784	-1.968833622174181e-23	-1.874936187561154e-21	7.8158074997890274	5.65699034158962e-21	-2.032003329636052e-21	7.854784481782324	6.308219325337819e-21	799.2006505649513	70.88911144237554	1.5772358625877439e-21	4.848705635407766	-5.094786990022726	-3.7693499795449895e-23	7.742209632623369	0.9268153239410261
5.395	69.5210474430432	5.847016026639632e-21	14.572778806581837	464.3556413713299	6.556993466103182e-23	-799.176310329761	2.811524955966902e-21	0.27041361287838966	-9.137551016192246e-22	0.997628522401634	5.72387641665179e-23	0.06882827406987505	-2.2409349567759788e-23	-2.130568852117424e-21	7.893379875745239	6.427678942177733e-21	-2.293774883792698e-21	7.932252275486404	7.113661895200859e-21	799.176310329761	70.86364012833667	1.5770853277576056e-21	4.887374336074241	-5.093741437913954	-2.2475104543531e-23	7.72528412547732	0.9253443502592621
[truncated: 16,434 more rows]
