# Supplementary material for: An Efficient Contact Model for the Simulation of Cargo Airdrop Extraction Phase
Source: Hindawi journal article supplement (doi:10.1155/2018/9895451), 2018-10-17
Supplement: f1 [file 9895451.f1.zip › case3_aircraft_coupling/m4000_nocouple/hist_contact.csv]

t(s)	cntcNrmForc(N)	cntcFricForc(N)	cntcPitchMoment(N/m)
2.48500000	39200.00000000	0.00000000	-0.00000000
2.48501300	39200.00000000	0.00000000	-0.00000000
2.48502600	39200.00000000	0.00000000	-0.00000000
2.48533400	39200.00000000	0.00000000	-0.00000000
2.48564300	39200.00000000	0.00000000	-0.00000000
2.48595100	39200.00000000	0.00000000	-0.00000000
2.48686600	39200.00000000	0.00000000	-0.00000000
2.48778100	39200.00000000	0.00000000	-0.00000000
2.48783900	39200.00000000	0.00000000	-0.00000000
2.48789600	39200.00000000	0.00000000	0.00000000
2.48795300	39200.00000000	0.00000000	0.00000000
2.48796700	39200.00000000	0.00000000	0.00000000
2.48798200	39200.00000000	0.00000000	0.00000000
2.48799600	39200.00000000	0.00000000	0.00000000
2.48799900	39200.00000000	0.00000000	0.00000000
2.48800200	39200.00000000	0.00000000	0.00000000
2.48800700	39200.00000000	0.00000000	0.00000000
2.48800800	39200.00000000	0.00000000	0.00000000
2.48800900	39200.00000000	0.00000000	0.00000000
2.48801000	39200.00000000	0.00000000	0.00000000
2.48801100	39200.00000000	0.00000000	0.00000000
2.48801800	39200.00000000	0.00000000	0.00000000
2.48802600	39200.00000000	0.00000000	0.00000000
2.48803300	39200.00000000	0.00000000	0.00000000
2.48804000	39200.00000000	0.00000000	0.00000000
2.48804700	39200.00000000	0.00000000	0.00000000
2.48807500	39200.00000000	0.00000000	0.00000000
2.48810400	39200.00000000	0.00000000	0.00000000
2.48813200	39200.00000000	0.00000000	0.00000000
2.48816000	39200.00000000	0.00000000	0.00000000
2.48821700	39200.00000000	0.00000000	0.00000000
2.48824800	39200.00000000	0.00000000	0.00000000
2.48825700	39200.00000000	0.00000000	0.00000000
2.48826400	39200.00000000	0.00000000	0.00000000
2.48826500	39200.00000000	0.00000000	0.00000000
2.48826600	39200.00000000	0.00000000	0.00000000
2.48826700	39200.00000000	0.00000000	0.00000000
2.48826900	39200.28390400	0.00000000	-0.03099400
2.48827000	39200.48332500	0.00000000	-0.05276500
2.48827200	39200.68290100	0.00000000	-0.07455300
2.48827300	39200.88263300	0.00000000	-0.09635900
2.48828700	39202.88852700	0.00000000	-0.31535500
2.48830100	39204.90993700	0.00000000	-0.53605700
2.48831500	39206.94678100	0.00000000	-0.75845600
2.48832900	39208.99897800	21.65184200	12.95475800
2.48834300	39211.06643000	56.48800600	35.12560700
2.48837300	39215.54585400	131.80006600	83.01655700
2.48840300	39220.09411100	207.97151100	131.38522500
2.48843300	39224.71037500	284.90518400	180.15353900
2.48846200	39229.39382600	362.60874800	229.33023600
2.48847200	39230.93646000	388.12902100	245.46446600
2.48848200	39232.48613300	369.85253500	233.39744800
2.48849200	39234.04283500	299.01844200	187.52389700
2.48850100	39235.60653700	206.78588800	127.90394800
2.48851900	39238.48404700	82.61620800	47.59621400
2.48853700	39241.38465200	78.48276900	44.57413600
2.48855500	39244.30813400	78.48861600	44.15894100
2.48857300	39247.25439100	78.49450900	43.82183200
2.48861700	39254.57128700	78.50914300	42.91727400
2.48866000	39262.02105800	78.52404200	41.99747300
2.48870400	39269.60105800	78.53920200	41.06384200
2.48874800	39277.30863900	78.55461700	40.11671100
2.48882500	39291.20978900	78.58242000	38.41383600
2.48890200	39305.48499700	78.61097000	36.67188900
2.48897900	39320.11953000	78.64023900	34.89276000
2.48905700	39335.09848900	78.67019700	33.07840200
2.48913400	39350.40692300	78.70081400	31.23079400
2.48927000	39378.06954800	78.75613900	27.90851400
2.48940500	39406.62239200	78.81324500	24.50069300
2.48954100	39435.98378000	78.87196800	21.01852100
2.48967700	39466.07207500	78.93214400	17.47332600
2.48981200	39496.80621600	78.99361200	13.87644800
2.48994800	39528.10558600	79.05621100	10.23926200
2.49008400	39559.89037500	79.11978100	6.57308700
2.49021900	39592.08175000	79.18416400	2.88913800
2.49035500	39624.60205300	79.24920400	-0.80152700
2.49056000	39674.19828900	79.34839700	-6.36719500
2.49076500	39724.11518200	79.44823000	-11.88724200
2.49097000	39774.10528100	79.54821100	-17.32713100
2.49117500	39823.93143000	79.64786300	-22.65439200
2.49138000	39873.36764100	79.74673500	-27.83891100
2.49158500	39922.19994600	79.84440000	-32.85319000
2.49183100	39979.51805500	79.95903600	-38.59125800
2.49207600	40035.36625700	80.07073300	-44.01420700
2.49232100	40089.45333000	80.17890700	-49.09186000
2.49256600	40141.51683800	80.28303400	-53.80061400
2.49281100	40191.32269300	80.38264500	-58.12322000
2.49305700	40238.66573600	80.47733100	-62.04887600
2.49330200	40283.36912900	80.56673800	-65.57291900
2.49359200	40332.69981800	80.66540000	-69.22930000
2.49388300	40377.92005200	80.75584000	-72.33570800
2.49417300	40418.88092200	80.83776200	-74.91322600
2.49446300	40455.48096300	80.91096200	-76.99111800
2.49475400	40487.66324100	80.97532600	-78.60557600
2.49504400	40515.41191400	81.03082400	-79.79829500
2.49533500	40538.74881600	81.07749800	-80.61511000
2.49562500	40557.73000600	81.11546000	-81.10468400
2.49611200	40580.03327000	81.16006700	-81.32961100
2.49651500	40589.82718700	81.17965400	-81.09633100
2.49691800	40592.22246400	81.18444500	-80.62224500
2.49732100	40587.70388100	81.17540800	-80.02836700
2.49772400	40576.80774900	81.15361500	-79.42310400
2.49779600	40574.22456200	81.14844900	-79.32091700
2.49781000	40573.68584200	81.14737200	-79.30084100
2.49782500	40573.13983000	81.14628000	-79.28089700
2.49783900	40572.58655200	81.14517300	-79.26108800
2.49785400	40572.02603500	81.14405200	-79.24141800
2.49785600	40571.91306600	81.14382600	-79.23750000
2.49785900	40571.79980800	81.14360000	-79.23358900
2.49786200	40571.68651500	81.14337300	-79.22967800
2.49786400	40571.61518400	81.14323000	-79.22721000
2.49786600	40571.52283100	81.14304600	-79.22402000
2.49787100	40571.33811400	81.14267600	-79.21763900
2.49787600	40571.15337800	81.14230700	-79.21125700
2.49788000	40570.96862300	81.14193700	-79.20487200
2.49788500	40570.78384800	81.14156800	-79.19848600
2.49793200	40568.93505800	81.13787000	-79.13451600
2.49797900	40567.08437200	81.13416900	-79.07035500
2.49802600	40565.23180600	81.13046400	-79.00600500
2.49807400	40563.37737400	81.12675500	-78.94146500
2.49853000	40545.29999100	81.09060000	-78.30591600
2.49898700	40527.06152800	81.05412300	-77.65326700
2.49944400	40508.67479100	81.01735000	-76.98413600
2.49990000	40490.15233300	80.98030500	-76.29913600
2.50035700	40471.50642600	80.94301300	-75.59887400
2.50043600	40468.27540700	80.93655100	-75.47646500
2.50051500	40465.04112700	80.93008200	-75.35362200
2.50059300	40461.80364900	80.92360700	-75.23034800
2.50067200	40458.56303300	80.91712600	-75.10664700
2.50067300	40458.55006400	80.91710000	-75.10615100
2.50067400	40458.51115800	80.91702200	-75.10466400
2.50067500	40458.47225200	80.91694500	-75.10317700
2.50067600	40458.42037500	80.91684100	-75.10119400
2.50068200	40458.16098100	80.91632200	-75.09127800
2.50068800	40457.90156700	80.91580300	-75.08135900
2.50069500	40457.64213400	80.91528400	-75.07143800
2.50070100	40457.38268200	80.91476500	-75.06151300
2.50071500	40456.80400000	80.91360800	-75.03937200
2.50072900	40456.22522100	80.91245000	-75.01721600
2.50074300	40455.64634600	80.91129300	-74.99504700
2.50075700	40455.06737500	80.91013500	-74.97286500
2.50089800	40449.27243800	80.89854500	-74.75030700
2.50103900	40443.46825500	80.88693700	-74.52642500
2.50117900	40437.65516000	80.87531000	-74.30123500
2.50132000	40431.83349100	80.86366700	-74.07475500
2.50165900	40417.78620500	80.83557200	-73.52437500
2.50199700	40403.69574000	80.80739100	-72.96685300
2.50233600	40389.56664600	80.77913300	-72.40242400
2.50267500	40375.40336500	80.75080700	-71.83132200
2.50301300	40361.21025700	80.72242100	-71.25377600
2.50375500	40330.04002600	80.66008000	-69.96739000
2.50449700	40298.79110500	80.59758200	-68.65355500
2.50523800	40267.50565700	80.53501100	-67.31458800
2.50598000	40236.22414300	80.47244800	-65.95275600
2.50672200	40204.98535200	80.40997100	-64.57027500
2.50746300	40173.82640500	80.34765300	-63.16930900
2.50848400	40131.15514600	80.26231000	-61.21560200
2.50950400	40088.78931600	80.17757900	-59.23622700
2.51052500	40046.81061300	80.09362100	-57.23631900
2.51154500	40005.29516000	80.01059000	-55.22081600
2.51256600	39964.31365500	79.92862700	-53.19446200
2.51358600	39923.93148300	79.84786300	-51.16179800
2.51460600	39884.20887000	79.76841800	-49.12716800
2.51619500	39823.81331400	79.64762700	-45.96562600
2.51778300	39765.33352200	79.53066700	-42.82397200
2.51937200	39708.92735500	79.41785500	-39.71571500
2.52096000	39654.72698500	79.30945400	-36.65321700
2.52254900	39602.84037200	79.20568100	-33.64771500
2.52413700	39553.35276900	79.10670600	-30.70934100
2.52572600	39506.32822800	79.01265600	-27.84715600
2.52731400	39461.81110300	78.92362200	-25.06918100
2.52890300	39419.82753700	78.83965500	-22.38243100
2.53049100	39380.38693800	78.76077400	-19.79295600
2.53246700	39334.87065600	78.66974100	-16.71567300
2.53444300	39293.23703900	78.58647400	-13.80471200
2.53600900	39262.93415000	78.52586800	-11.61844400
2.53757600	39234.98295900	78.46996600	-9.54275800
2.53914300	39209.32800800	78.41865600	-7.57913900
2.54071000	39185.90604900	78.37181200	-5.72842900
2.54227700	39164.64710600	78.32929400	-3.99088100
2.54384300	39145.47546100	78.29095100	-2.36619100
2.54541000	39128.31058800	78.25662100	-0.85355200
2.54713000	39111.67649100	78.22335300	0.67960300
2.54756000	39107.86647000	78.21573300	1.04228500
2.54766800	39106.93524400	78.21387000	1.13167900
2.54777600	39106.01247200	78.21202500	1.22056300
2.54788300	39105.09812600	78.21019600	1.30893800
2.54790500	39104.91626500	78.20983300	1.32655200
2.54792600	39104.73473900	78.20946900	1.34414500
2.54794800	39104.55354900	78.20910700	1.36171900
2.54796900	39104.37269400	78.20874500	1.37927200
2.54797300	39104.33656400	78.20867300	1.38278000
2.54797600	39104.31008100	78.20862000	1.38535100
2.54797700	39104.30963100	78.20861900	1.38539500
2.54797800	39104.31074600	78.20862100	1.39034900
2.54798400	39104.31919800	78.20863800	1.41334500
2.54798900	39104.32715800	78.20865400	1.43432600
2.54799500	39104.33538200	78.20867100	1.45537900
2.54800000	39104.34387000	78.20868800	1.47650400
2.54805600	39104.44321900	78.20888600	1.69170600
2.54811100	39104.56873000	78.20913700	1.91403900
2.54816600	39104.72019700	78.20944000	2.14343600
2.54822100	39104.89741000	78.20979500	2.37982800
2.54827600	39105.10015600	78.21020000	2.62314400
2.54864900	39107.13213400	78.21426400	4.45073000
2.54902300	39110.25568300	78.22051100	6.56979300
2.54939600	39114.39115900	78.22878200	8.95468100
2.54977000	39119.45227200	78.23890500	11.57792100
2.55014300	39125.34762800	78.25069500	14.41074900
2.55051600	39131.98143900	78.26396300	17.42331000
2.55089000	39139.25458500	78.27850900	20.58504000
2.55126300	39147.06564500	78.29413100	23.86499600
2.55163700	39155.31190400	78.31062400	27.23217900
2.55212000	39166.46769500	78.33293500	31.67151200
2.55260400	39177.95871900	78.35591700	36.14033300
2.55308700	39189.56839800	78.37913700	40.57593000
2.55357100	39201.08848100	78.40217700	44.91910000
2.55405500	39212.32179400	78.42464400	49.11484800
2.55453800	39223.08489200	78.44617000	53.11315200
2.55502200	39233.21036000	78.46642100	56.86951500
2.55539900	39240.57806100	78.48115600	59.60998200
2.55577700	39247.40225200	78.49480500	62.16351700
2.55615500	39253.62759200	78.50725500	64.51680500
2.55653200	39259.20664300	78.51841300	66.65894600
2.55691000	39264.10012700	78.52820000	68.58148300
2.55728800	39268.27701100	78.53655400	70.27837000
2.55779700	39272.73894600	78.54547800	72.20453900
2.55830700	39275.82308900	78.55164600	73.71083300
2.55881700	39277.52393400	78.55504800	74.80199700
2.55932600	39277.86214100	78.55572400	75.48961300
2.55983600	39276.88205200	78.55376400	75.79118400
2.56034600	39274.65083100	78.54930200	75.72972500
2.56085500	39271.25607800	78.54251200	75.33295000
2.56085600	39271.24707400	78.54249400	75.33168400
2.56085800	39271.23805900	78.54247600	75.33041500
2.56085900	39271.22903900	78.54245800	75.32914500
2.56086000	39271.22001200	78.54244000	75.32787300
2.56086100	39271.21098100	78.54242200	75.32659900
2.56086300	39271.19290100	78.54238600	75.32404700
2.56086600	39271.17480400	78.54235000	75.32149100
2.56086800	39271.15668400	78.54231300	75.31892800
2.56089100	39270.97428500	78.54194900	75.29295100
2.56089600	39270.93760300	78.54187500	75.28769500
2.56090100	39270.90097700	78.54180200	75.28244900
2.56090500	39270.86431300	78.54172900	75.27719000
2.56091500	39270.79100400	78.54158200	75.26666600
2.56092400	39270.71772200	78.54143500	75.25613300
2.56093300	39270.64446600	78.54128900	75.24559200
2.56094300	39270.57123600	78.54114200	75.23504300
2.56103600	39269.84037700	78.53968100	75.12909100
2.56112900	39269.11213700	78.53822400	75.02230900
2.56122200	39268.38651800	78.53677300	74.91470300
2.56131500	39267.66351700	78.53532700	74.80627900
2.56224600	39260.57760400	78.52115500	73.67837200
2.56317700	39253.75348700	78.50750700	72.47517700
2.56410900	39247.19052000	78.49438100	71.20246000
2.56504000	39240.88766900	78.48177500	69.86583100
2.56597100	39234.84333600	78.46968700	68.47073300
2.56772000	39224.18499500	78.44837000	65.71152200
2.56946800	39214.41407000	78.42882800	62.79813200
2.57121700	39205.50935700	78.41101900	59.76197300
2.57296500	39197.44552000	78.39489100	56.63242200
2.57471400	39190.19459700	78.38038900	53.43675700
2.57646200	39183.72551200	78.36745100	50.20025000
2.57887800	39176.01298400	78.35202600	45.70481300
2.57948200	39174.29719400	78.34859400	44.58229200
2.58008500	39172.66340000	78.34532700	43.46192100
2.58011600	39172.58383800	78.34516800	43.40597200
2.58012200	39172.56741200	78.34513500	43.39440500
2.58012300	39172.56473000	78.34512900	43.39251600
2.58012400	39172.56151300	78.34512300	43.39024800
2.58012500	39172.55908900	78.34511800	43.38854000
2.58012600	39172.55769500	78.34511500	43.38755800
2.58012700	39172.55987400	78.34512000	43.38627300
2.58013000	39172.56759700	78.34513500	43.38302100
2.58013300	39172.57536400	78.34515100	43.37977600
2.58013600	39172.58317800	78.34516600	43.37653700
2.58016600	39172.66380600	78.34532800	43.34451500
2.58019700	39172.74896400	78.34549800	43.31315000
2.58022800	39172.83864400	78.34567700	43.28244100
2.58025800	39172.93283600	78.34586600	43.25238500
2.58049900	39173.82814500	78.34765600	43.03882300
2.58073900	39174.99574200	78.34999100	42.86421100
2.58097900	39176.42953400	78.35285900	42.72725900
2.58122000	39178.12246900	78.35624500	42.62655000
2.58146000	39180.06651000	78.36013300	42.56053900
2.58187200	39183.95776200	78.36791600	42.52333400
2.58228400	39188.51113500	78.37702200	42.57440000
2.58269600	39193.67119700	78.38734200	42.70429100
2.58310800	39199.37695000	78.39875400	42.90299800
2.58352000	39205.56317800	78.41112600	43.16020000
2.58393200	39212.16118900	78.42432200	43.46538100
2.58427000	39217.82059500	78.43564100	43.74361400
2.58460700	39223.66824400	78.44733600	44.04114000
2.58494400	39229.66365300	78.45932700	44.35226400
2.58528200	39235.76641400	78.47153300	44.67143800
2.58561900	39241.93615800	78.48387200	44.99324700
2.58600700	39249.05758900	78.49811500	45.35958500
2.58639500	39256.15607700	78.51231200	45.71504000
2.58678200	39263.17415500	78.52634800	46.05250900
2.58717000	39270.05718600	78.54011400	46.36544600
2.58755800	39276.75381800	78.55350800	46.64789700
2.58794600	39283.21577800	78.56643200	46.89446100
2.58851600	39292.19775800	78.58439600	47.18193800
2.58908600	39300.45317800	78.60090600	47.36905600
2.58965600	39307.87880800	78.61575800	47.44621900
2.59022600	39314.39432200	78.62878900	47.40693400
2.59079600	39319.94270500	78.63988500	47.24767900
2.59136600	39324.49061600	78.64898100	46.96779700
2.59190200	39327.84474700	78.65568900	46.59640300
2.59243700	39330.31517400	78.66063000	46.12379700
2.59297300	39331.92883200	78.66385800	45.55540700
2.59350900	39332.72756000	78.66545500	44.89811200
2.59404500	39332.76739600	78.66553500	44.16009000
2.59458100	39332.11661400	78.66423300	43.35054300
2.59511700	39330.85405100	78.66170800	42.47947300
2.59580400	39328.48121100	78.65696200	41.28980400
2.59649100	39325.44538900	78.65089100	40.03917700
2.59717800	39321.95490000	78.64391000	38.75039000
2.59786500	39318.22048500	78.63644100	37.44545800
2.59855200	39314.44883600	78.62889800	36.14501100
2.59923900	39310.83585500	78.62167200	34.86771400
2.59992600	39307.56095600	78.61512200	33.62982500
2.60061300	39304.78208800	78.60956400	32.44487700
2.60080000	39304.12814500	78.60825600	32.13224400
2.60098800	39303.52350500	78.60704700	31.82453900
2.60117500	39302.97034000	78.60594100	31.52192000
2.60136300	39302.47065800	78.60494100	31.22453200
2.60155000	39302.02630900	78.60405300	30.93250100
2.60173800	39301.63896600	78.60327800	30.64593900
2.60192500	39301.31013700	78.60262000	30.36494100
2.60208800	39301.07210800	78.60214400	30.12440800
2.60225200	39300.88041000	78.60176100	29.88821200
2.60241500	39300.73571900	78.60147100	29.65638600
2.60257900	39300.63861500	78.60127700	29.42895500
2.60274300	39300.58957700	78.60117900	29.20593400
2.60290600	39300.58898500	78.60117800	28.98733200
2.60369600	39301.27441000	78.60254900	27.99328100
2.60448600	39303.09281600	78.60618600	27.09937600
2.60527600	39305.99508800	78.61199000	26.29933200
2.60606600	39309.88663600	78.61977300	25.58378700
2.60685500	39314.63601000	78.62927200	24.94120700
2.60764500	39320.08221700	78.64016400	24.35862600
2.60843500	39326.04331200	78.65208700	23.82237800
2.60909200	39331.25587000	78.66251200	23.40170600
2.60974900	39336.57791400	78.67315600	22.99606600
2.61040700	39341.89889200	78.68379800	22.59839300
2.61106400	39347.11354500	78.69422700	22.20227700
2.61172100	39352.12534900	78.70425100	21.80212900
2.61237800	39356.84859600	78.71369700	21.39325100
2.61303500	39361.21060000	78.72242100	20.97191100
2.61369200	39365.15310400	78.73030600	20.53536900
2.61434900	39368.63332000	78.73726700	20.08187400
2.61500600	39371.62435500	78.74324900	19.61063600
2.61509300	39371.98201900	78.74396400	19.54707600
2.61518000	39372.33093100	78.74466200	19.48320800
2.61526700	39372.67109000	78.74534200	19.41903400
2.61535400	39373.00250500	78.74600500	19.35455700
2.61544000	39373.32518100	78.74665000	19.28977800
2.61552700	39373.63913400	78.74727800	19.22470000
2.61566500	39374.12076400	78.74824200	19.12053500
2.61580300	39374.58044700	78.74916100	19.01563200
2.61594100	39375.01830500	78.75003700	18.91000300
2.61607900	39375.43448900	78.75086900	18.80366400
2.61621800	39375.82917800	78.75165800	18.69662900
2.61665500	39376.94064600	78.75388100	18.35298200
2.61709300	39377.84660700	78.75569300	18.00316800
2.61753100	39378.55763200	78.75711500	17.64793000
2.61796800	39379.08654500	78.75817300	17.28811600
2.61840600	39379.44798900	78.75889600	16.92464800
2.61884400	39379.65830200	78.75931700	16.55852000
2.61902900	39379.70608600	78.75941200	16.40287700
2.61921400	39379.73132700	78.75946300	16.24702400
2.61940000	39379.73545900	78.75947100	16.09104300
2.61958500	39379.71994400	78.75944000	15.93501800
2.61977100	39379.68627000	78.75937300	15.77903100
2.62023700	39379.53139200	78.75906300	15.38745000
2.62070300	39379.29547600	78.75859100	14.99796300
2.62117000	39379.00293200	78.75800600	14.61187500
2.62163600	39378.67820700	78.75735600	14.23046600
2.62210200	39378.34485500	78.75669000	13.85494600
2.62256800	39378.02570700	78.75605100	13.48646800
2.62313400	39377.68859400	78.75537700	13.05055400
2.62369900	39377.43951900	78.75487900	12.62829100
2.62426500	39377.31011600	78.75462000	12.22118500
2.62483000	39377.32759400	78.75465500	11.83050000
2.62539600	39377.51439500	78.75502900	11.45725800
2.62596100	39377.88790600	78.75577600	11.10222600
2.62657400	39378.51740500	78.75703500	10.73868000
2.62718700	39379.38904600	78.75877800	10.39746100
2.62780000	39380.50439000	78.76100900	10.07858700
2.62841300	39381.85835000	78.76371700	9.78178500
2.62902500	39383.43982900	78.76688000	9.50652800
2.62963800	39385.23213300	78.77046400	9.25205500
2.63025100	39387.21378800	78.77442800	9.01741100
2.63032200	39387.45592500	78.77491200	8.99130400
2.63039400	39387.70025800	78.77540100	8.96545000
2.63046500	39387.94673500	78.77589300	8.93984600
2.63053700	39388.19531200	78.77639100	8.91449200
2.63060800	39388.44594200	78.77689200	8.88938400
2.63067900	39388.69858200	78.77739700	8.86452100
2.63082200	39389.20970600	78.77841900	8.81552200
2.63096500	39389.72831300	78.77945700	8.76747900
2.63110800	39390.25402600	78.78050800	8.72037500
2.63125100	39390.78646200	78.78157300	8.67419400
2.63139400	39391.32523200	78.78265000	8.62892000
2.63153600	39391.86994500	78.78374000	8.58453500
2.63208900	39394.02774100	78.78805500	8.42076100
2.63264200	39396.24530600	78.79249100	8.26908400
2.63319500	39398.49917100	78.79699800	8.12851300
2.63362000	39400.23814100	78.80047600	8.02760000
2.63404400	39401.97472400	78.80394900	7.93221800
2.63446800	39403.69923500	78.80739800	7.84195700
2.63489200	39405.40249500	78.81080500	7.75642500
2.63531700	39407.07596200	78.81415200	7.67525400
2.63574100	39408.71180800	78.81742400	7.59810600
2.63616500	39410.30298600	78.82060600	7.52467000
2.63658900	39411.84329900	78.82368700	7.45466900
2.63701300	39413.32745000	78.82665500	7.38786000
2.63743800	39414.75107200	78.82950200	7.32403600
2.63786200	39416.11075200	78.83222200	7.26302700
2.63828600	39417.40403300	78.83480800	7.20469800
2.63871000	39418.62941700	78.83725900	7.14895400
2.63913400	39419.78634300	78.83957300	7.09573600
2.63955900	39420.87516300	78.84175000	7.04502400
2.63998300	39421.89709500	78.84379400	6.99683100
2.64040700	39422.85418200	78.84570800	6.95120300
2.64083100	39423.74923100	78.84749800	6.90822300
2.64125600	39424.58574600	78.84917100	6.86800000
2.64168000	39425.36786400	78.85073600	6.83067300
2.64210400	39426.10026400	78.85220100	6.79640600
2.64252800	39426.78810000	78.85357600	6.76538600
2.64295200	39427.43691100	78.85487400	6.73781900
2.64337700	39428.05253600	78.85610500	6.71392700
2.64398700	39428.89238700	78.85778500	6.68647500
2.64459800	39429.69450700	78.85938900	6.66786300
2.64509000	39430.32717400	78.86065400	6.65980300
2.64558300	39430.95683800	78.86191400	6.65840100
2.64607600	39431.59267200	78.86318500	6.66405100
2.64656900	39432.24339200	78.86448700	6.67714000
2.64706200	39432.91708500	78.86583400	6.69803100
2.64755500	39433.62111400	78.86724200	6.72706700
2.64804700	39434.36203800	78.86872400	6.76456000
2.64854000	39435.14552600	78.87029100	6.81079300
2.64903300	39435.97629700	78.87195300	6.86600900
2.64952600	39436.85809200	78.87371600	6.93041300
2.65001900	39437.79365100	78.87558700	7.00416600
2.65051100	39438.78471800	78.87756900	7.08739000
2.65100400	39439.83205400	78.87966400	7.18015900
2.65149700	39440.93546900	78.88187100	7.28250500
2.65199000	39442.09387000	78.88418800	7.39441500
2.65248300	39443.30532600	78.88661100	7.51583600
2.65297600	39444.56714100	78.88913400	7.64667200
2.65346800	39445.87592900	78.89175200	7.78679100
2.65396100	39447.22771200	78.89445500	7.93602700
2.65445400	39448.61801700	78.89723600	8.09418000
2.65494700	39450.04196400	78.90008400	8.26102700
2.65557100	39451.88474900	78.90376900	8.48432000
2.65619500	39453.76225600	78.90752500	8.72060000
2.65681900	39455.66341800	78.91132700	8.96928700
2.65744200	39457.57730500	78.91515500	9.22978800
2.65793900	39459.10149000	78.91820300	9.44499900
2.65843500	39460.62209300	78.92124400	9.66700900
2.65893100	39462.13451800	78.92426900	9.89553500
2.65942700	39463.63454900	78.92726900	10.13030600
2.65992300	39465.11844800	78.93023700	10.37107100
2.66041900	39466.58298800	78.93316600	10.61759900
2.66091600	39468.02549100	78.93605100	10.86968400
2.66141200	39469.44383800	78.93888800	11.12714900
2.66190800	39470.83648400	78.94167300	11.38984400
2.66240400	39472.20245700	78.94440500	11.65765300
2.66290000	39473.54134900	78.94708300	11.93049000
2.66339600	39474.85329500	78.94970700	12.20830100
2.66389300	39476.13894100	78.95227800	12.49106600
2.66438900	39477.39941800	78.95479900	12.77879600
2.66488500	39478.63629000	78.95727300	13.07153400
2.66544400	39480.00385500	78.96000800	13.40740100
2.66600300	39481.34725000	78.96269400	13.74985500
2.66656200	39482.67021100	78.96534000	14.09907500
2.66712100	39483.97681200	78.96795400	14.45527600
2.66768000	39485.27135600	78.97054300	14.81869800
2.66823900	39486.55826700	78.97311700	15.18960300
2.66887400	39488.01801900	78.97603600	15.62082000
2.66951000	39489.48002800	78.97896000	16.06249100
2.67014600	39490.95038200	78.98190100	16.51503700
2.67078100	39492.43469900	78.98486900	16.97886400
2.67141700	39493.93802900	78.98787600	17.45436100
2.67205200	39495.46469700	78.99092900	17.94187700
2.67268800	39497.01826300	78.99403700	18.44172200
2.67332400	39498.60145300	78.99720300	18.95415300
2.67395900	39500.21613000	79.00043200	19.47937300
2.67459500	39501.86329300	79.00372700	20.01752200
2.67523000	39503.54310200	79.00708600	20.56867800
2.67586600	39505.25491500	79.01051000	21.13285300
2.67650200	39506.99736200	79.01399500	21.71000000
2.67713700	39508.76840900	79.01753700	22.30000700
2.67777300	39510.56547100	79.02113100	22.90271200
2.67840800	39512.38549500	79.02477100	23.51790000
2.67904400	39514.22508500	79.02845000	24.14531400
2.67968000	39516.08060800	79.03216100	24.78466500
2.68048100	39518.43633000	79.03687300	25.60706800
2.68128200	39520.80386200	79.04160800	26.44726500
2.68193400	39522.73365700	79.04546700	27.14347300
2.68258600	39524.66280500	79.04932600	27.85064800
2.68323700	39526.58801300	79.05317600	28.56844900
2.68388900	39528.50637300	79.05701300	29.29655700
2.68454100	39530.41544900	79.06083100	30.03469200
2.68519300	39532.31331000	79.06462700	30.78261100
2.68584500	39534.19854600	79.06839700	31.54011700
2.68649600	39536.07027800	79.07214100	32.30706100
2.68714800	39537.92814000	79.07585600	33.08334700
2.68780000	39539.77226700	79.07954500	33.86892800
2.68845200	39541.60324700	79.08320600	34.66381100
2.68910400	39543.42207800	79.08684400	35.46805000
2.68982800	39545.43211600	79.09086400	36.37351700
2.69055300	39547.43107200	79.09486200	37.29086800
2.69127800	39549.42154100	79.09884300	38.22034400
2.69200300	39551.40632300	79.10281300	39.16222700
2.69272800	39553.38831600	79.10677700	40.11682700
2.69345300	39555.37038500	79.11074100	41.08446600
2.69417700	39557.35527100	79.11471100	42.06546800
2.69490200	39559.34549400	79.11869100	43.06014600
2.69562700	39561.34327500	79.12268700	44.06879100
2.69635200	39563.35048400	79.12670100	45.09166300
2.69707700	39565.36857700	79.13073700	46.12897900
2.69780200	39567.39858500	79.13479700	47.18091000
2.69852700	39569.44109300	79.13888200	48.24757500
2.69925100	39571.49625600	79.14299300	49.32903800
2.69997600	39573.56380900	79.14712800	50.42530900
2.70070100	39575.64311400	79.15128600	51.53634300
2.70142600	39577.73319300	79.15546600	52.66204600
2.70215100	39579.83279300	79.15966600	53.80227900
2.70306600	39582.49517300	79.16499000	55.26248500
2.70398100	39585.16707300	79.17033400	56.74514400
2.70489600	39587.84500800	79.17569000	58.24977500
2.70581200	39590.52550200	79.18105100	59.77587300
2.70672700	39593.20529500	79.18641100	61.32294400
2.70764200	39595.88145400	79.19176300	62.89051300
2.70855700	39598.55155300	79.19710300	64.47816900
2.70947300	39601.21372900	79.20242700	66.08557100
2.71038800	39603.86674100	79.20773300	67.71246600
2.71130300	39606.50996200	79.21302000	69.35869600
2.71221800	39609.14337700	79.21828700	71.02420300
2.71313400	39611.76752000	79.22353500	72.70902200
2.71404900	39614.38339500	79.22876700	74.41327900
2.71496400	39616.99237600	79.23398500	76.13717500
2.71587900	39619.59609700	79.23919200	77.88097200
2.71710600	39623.08173600	79.24616300	80.25061200
2.71811100	39625.93302800	79.25186600	82.21768000
2.71911500	39628.78528500	79.25757100	84.21004300
2.72011900	39631.64046700	79.26328100	86.22811100
2.72112300	39634.50013700	79.26900000	88.27223800
2.72212800	39637.36543000	79.27473100	90.34271100
2.72313200	39640.23697100	79.28047400	92.43973100
2.72413600	39643.11491800	79.28623000	94.56341300
2.72514100	39645.99899500	79.29199800	96.71379200
2.72614500	39648.88854500	79.29777700	98.89082100
2.72714900	39651.78260500	79.30356500	101.09438800
2.72815400	39654.68000600	79.30936000	103.32433000
2.72915800	39657.57947600	79.31515900	105.58045700
2.73035900	39661.04719900	79.32209400	108.31212200
2.73155900	39664.51400900	79.32902800	111.08060900
2.73276000	39667.97818300	79.33595600	113.88565100
2.73376000	39670.85968600	79.34171900	116.24903500
2.73476000	39673.73803800	79.34747600	118.63761000
2.73576000	39676.61307400	79.35322600	121.05141300
2.73676000	39679.48485400	79.35897000	123.49053700
2.73776000	39682.35367600	79.36470700	125.95514300
2.73875900	39685.22002600	79.37044000	128.44544700
2.73995300	39688.64013800	79.37728000	131.45293000
2.74114700	39692.05885800	79.38411800	134.49793900
2.74234100	39695.47748600	79.39095500	137.58103500
2.74353500	39698.89726000	79.39779500	140.70279200
2.74472900	39702.31926600	79.40463900	143.86377500
2.74592200	39705.74433600	79.41148900	147.06450900
2.74711600	39709.17306400	79.41834600	150.30547600
2.74831000	39712.60570900	79.42521100	153.58708900
2.74950400	39716.04227200	79.43208500	156.90970300
2.75069800	39719.48251900	79.43896500	160.27362100
2.75189200	39722.92602000	79.44585200	163.67910100
2.75308500	39726.37222100	79.45274400	167.12637000
2.75477100	39731.24184500	79.46248400	172.06566900
2.75645700	39736.11400500	79.47222800	177.08937900
2.75779400	39739.97858900	79.47995700	181.13374900
2.75913000	39743.84348100	79.48768700	185.23215000
2.76046700	39747.70853200	79.49541700	189.38514900
2.76180400	39751.57370800	79.50314700	193.59337400
2.76314100	39755.43923600	79.51087800	197.85756100
2.76447800	39759.30549400	79.51861100	202.17851000
2.76627700	39764.51032000	79.52902100	208.08439600
2.76807600	39769.71827600	79.53943700	214.09673200
2.76987500	39774.93025700	79.54986100	220.21766000
2.77131900	39779.11672100	79.55823300	225.21028500
2.77276200	39783.30629000	79.56661300	230.27526800
2.77420600	39787.49881700	79.57499800	235.41357100
2.77565000	39791.69410100	79.58338800	240.62615200
2.77709400	39795.89178600	79.59178400	245.91391000
2.77853800	39800.09145500	79.60018300	251.27773200
2.78057000	39806.00538300	79.61201100	258.95831400
2.78260300	39811.92141300	79.62384300	266.79387200
2.78463500	39817.83873000	79.63567700	274.78700200
2.78628500	39822.64412800	79.64528800	281.39516500
2.78793500	39827.44993100	79.65490000	288.11050000
2.78958600	39832.25618300	79.66451200	294.93458500
2.79123600	39837.06287500	79.67412600	301.86893500
2.79288600	39841.87003400	79.68374000	308.91509300
2.79453600	39846.67765800	79.69335500	316.07457000
2.79665700	39852.85670800	79.70571300	325.44427700
2.79877800	39859.03602200	79.71807200	335.00644300
2.80089900	39865.21509000	79.73043000	344.76382800
2.80302000	39871.39327500	79.74278700	354.71902900
2.80514100	39877.56988800	79.75514000	364.87450700
2.80726100	39883.74427300	79.76748900	375.23259700
2.80938200	39889.91587200	79.77983200	385.79555300
2.81150300	39896.08425400	79.79216900	396.56555400
2.81362400	39902.24909400	79.80449800	407.54469100
2.81574500	39908.41013400	79.81682000	418.73494500
2.81786600	39914.56712800	79.82913400	430.13816200
2.81998600	39920.71982400	79.84144000	441.75603100
2.82210700	39926.86793600	79.85373600	453.59007400
2.82422800	39933.01115000	79.86602200	465.64163700
2.82634900	39939.14912200	79.87829800	477.91189700
2.82847000	39945.28151000	79.89056300	490.40187400
2.83059100	39951.40797800	79.90281600	503.11244600
2.83271100	39957.52822900	79.91505600	516.04436300
2.83483200	39963.64199800	79.92728400	529.19825500
2.83695300	39969.74907000	79.93949800	542.57464700
2.83907400	39975.84925200	79.95169900	556.17395800
2.84140700	39982.55279800	79.96510600	571.39446600
2.84374100	39989.24760800	79.97849500	586.88549000
2.84607400	39995.93349900	79.99186700	602.64717400
2.84840800	40002.61028300	80.00522100	618.67953400
2.85074100	40009.27778400	80.01855600	634.98247700
2.85307400	40015.93583700	80.03187200	651.55581700
2.85307700	40015.94339500	80.03188700	651.57479800
2.85308000	40015.95095400	80.03190200	651.59378000
2.85308200	40015.95851300	80.03191700	651.61276200
2.85308500	40015.96607100	80.03193200	651.63174500
2.85308800	40015.97362900	80.03194700	651.65072800
2.85309300	40015.98874500	80.03197700	651.68869500
2.85309800	40016.00386100	80.03200800	651.72666300
2.85310400	40016.01897700	80.03203800	651.76463300
2.85315700	40016.17013800	80.03234000	652.14440500
2.85321000	40016.32129400	80.03264300	652.52431700
2.85322200	40016.35676300	80.03271400	652.61347900
2.85323400	40016.39222900	80.03278400	652.70265700
2.85323600	40016.39576400	80.03279200	652.71155100
2.85323700	40016.40071200	80.03280100	652.72399300
2.85323800	40016.40212600	80.03280400	652.72754800
2.85323900	39342.87455800	78.68574900	-1301.37086200
2.85324000	39342.89889700	78.68579800	-1301.30976900
2.85324400	39343.09767800	78.68619500	-1300.81101100
2.85324800	39343.26331700	78.68652700	-1300.39539700
2.85325200	39343.42894500	78.68685800	-1299.97979700
2.85329200	39345.08462200	78.69016900	-1295.82462600
2.85333200	39346.73920100	78.69347800	-1291.67096600
2.85337100	39348.39267800	78.69678500	-1287.51882600
2.85366200	39360.45697100	78.72091400	-1257.18550900
2.85395200	39372.46082000	78.74492200	-1226.93782700
2.85424200	39384.40291900	78.76880600	-1196.77968600
2.85466200	39401.57064900	78.80314100	-1153.30801900
2.85508200	39418.60266100	78.83720500	-1110.04335000
2.85550200	39435.49909100	78.87099800	-1066.98558400
2.85592200	39452.25574400	78.90451100	-1024.14767600
2.85654000	39476.64284600	78.95328600	-961.55683700
2.85715700	39500.71248100	79.00142500	-899.48994800
2.85777500	39524.45665300	79.04891300	-837.97348900
2.85839300	39547.86805500	79.09573600	-777.03225800
2.85957800	39591.82088800	79.18364200	-661.82754600
2.86076300	39634.48549300	79.26897100	-548.97377700
2.86194800	39675.82249600	79.35164500	-438.61859800
2.86313300	39715.80123000	79.43160200	-330.88989900
2.86431800	39754.39988900	79.50880000	-225.89515800
2.86592300	39804.46738200	79.60893500	-88.16491900
2.86752900	39851.94332700	79.70388700	44.17177100
2.86913500	39896.81576100	79.79363200	170.95413500
2.87074000	39939.08761700	79.87817500	292.06030500
2.87234600	39978.77609100	79.95755200	407.40655500
2.87421600	40021.78231900	80.04356500	534.41822500
2.87608600	40061.38937500	80.12277900	653.52666800
2.87795500	40097.68236900	80.19536500	764.76576600
2.87982500	40130.76206200	80.26152400	868.21857800
2.88169500	40160.74034400	80.32148100	964.00852000
2.88356500	40187.73984500	80.37548000	1052.29775900
2.88592100	40217.72679900	80.43545400	1153.18127600
2.88827700	40243.48025400	80.48696100	1242.94581300
2.89063400	40265.29827700	80.53059700	1322.12835100
2.89299000	40283.48677700	80.56697400	1391.31758100
2.89534600	40298.35545100	80.59671100	1451.14300300
2.89770200	40310.21467600	80.62042900	1502.26551100
2.90005800	40319.37212100	80.63874400	1545.36758000
2.90241500	40326.12931600	80.65225900	1581.14349200
2.90477100	40330.77880400	80.66155800	1610.29066300
2.90712700	40333.60198000	80.66720400	1633.50228700
2.90948300	40334.86735700	80.66973500	1651.46086200
2.91183900	40334.82902700	80.66965800	1664.83229000
2.91419600	40333.72537700	80.66745100	1674.26062400
2.91655200	40331.77814800	80.66355600	1680.36364100
2.91890800	40329.19184600	80.65838400	1683.72922300
2.92126400	40326.15342300	80.65230700	1684.91244700
2.92362000	40322.83217400	80.64566400	1684.43330200
2.92392000	40322.39807100	80.64479600	1684.27899800
2.92421900	40321.96190500	80.64392400	1684.10598400
2.92424100	40321.93047100	80.64386100	1684.09286400
2.92426200	40321.89903300	80.64379800	1684.07966200
2.92428400	40321.86758800	80.64373500	1684.06637300
2.92428500	40321.86580200	80.64373200	1684.06561600
2.92428600	40321.86401700	80.64372800	1684.06485900
2.92428900	40321.86044600	80.64372100	1684.06334300
2.92429100	40321.85687600	80.64371400	1684.06182600
2.92429400	40321.85330400	80.64370700	1684.06030900
2.92429500	41007.55070100	82.01510100	-303.58477100
2.92429600	41007.50421200	82.01500800	-303.47085900
2.92429900	41007.37216300	82.01474400	-303.14916200
2.92430200	41007.24012300	82.01448000	-302.82748200
2.92430500	41007.10809200	82.01421600	-302.50581700
2.92433500	41005.78825600	82.01157700	-299.29004300
2.92436600	41004.46928600	82.00893900	-296.07586100
2.92439600	41003.15118500	82.00630200	-292.86327300
2.92442700	41001.83395400	82.00366800	-289.65228300
2.92473100	40988.70979800	81.97742000	-257.63092200
2.92503600	40975.67422600	81.95134800	-225.77260400
2.92534100	40962.72863900	81.92545700	-194.08018100
2.92564500	40949.87441600	81.89974900	-162.55647100
2.92771000	40865.27670100	81.73055300	46.40888100
2.92977500	40785.28220400	81.57056400	246.77095000
2.93184000	40710.17451800	81.42034900	437.91326200
2.93390500	40640.15224500	81.28030400	619.37304700
2.93597000	40575.32997400	81.15066000	790.84097000
2.93923000	40483.68837200	80.96737700	1040.77517200
2.94249100	40405.08945900	80.81017900	1265.07793200
2.94575100	40339.16518600	80.67833000	1464.11977900
2.94901100	40285.28789900	80.57057600	1638.79613700
2.95227100	40242.72126100	80.48544300	1790.28743300
2.95553100	40210.55748700	80.42111500	1920.13911200
2.95918500	40185.66591700	80.37133200	2042.10622700
2.96283900	40171.17566300	80.34235100	2141.75068800
2.96649200	40165.64328300	80.33128700	2221.84372300
2.97014600	40167.66347800	80.33532700	2285.16666300
2.97070700	40168.55391500	80.33710800	2293.59089400
2.97126900	40169.58950700	80.33917900	2301.68734500
2.97183000	40170.76259400	80.34152500	2309.47177600
2.97239100	40172.06832700	80.34413700	2316.95369100
2.97295300	40173.50238400	80.34700500	2324.14262900
2.97398000	40176.44312000	80.35288600	2336.56620800
2.97500700	40179.77175200	80.35954400	2348.09740100
2.97603400	40183.46270900	80.36692500	2358.79144400
2.97706100	40187.49088000	80.37498200	2368.70303800
2.97869300	40194.52582800	80.38905200	2382.97685600
2.98032500	40202.25739300	80.40451500	2395.61637600
2.98195700	40210.59728300	80.42119500	2406.81962600
2.98358900	40219.46060100	80.43892100	2416.77814600
2.98618000	40234.41230300	80.46882500	2430.48100100
2.98877100	40250.20419900	80.50040800	2442.15773100
2.99136200	40266.55664700	80.53311300	2452.46240700
2.99395300	40283.24648400	80.56649300	2461.93951700
2.99654500	40300.07600400	80.60015200	2471.08735300
2.99854500	40313.05026100	80.62610100	2478.20755000
3.00054500	40325.93446100	80.65186900	2485.58144200
3.00254500	40338.66811100	80.67733600	2493.37119100
3.00454500	40351.19966900	80.70239900	2501.72217200
3.00654600	40363.48463000	80.72696900	2510.76075500
3.00771900	40370.56330700	80.74112700	2516.42998200
3.00889300	40377.53776400	80.75507600	2522.39401400
3.01006700	40384.40262200	80.76880500	2528.67011000
3.01124000	40391.15277000	80.78230600	2535.27460000
3.01300600	40401.07948000	80.80215900	2545.85918000
3.01477100	40410.72538000	80.82145100	2557.26056900
3.01653600	40420.08209200	80.84016400	2569.51172900
3.01830100	40429.14299500	80.85828600	2582.64087100
3.02137200	40444.18986900	80.88838000	2607.63599800
3.02444300	40458.33805500	80.91667600	2635.38294900
3.02751500	40471.58766900	80.94317500	2665.93085500
3.02788200	40473.11198500	80.94622400	2669.77884800
3.02825000	40474.62682900	80.94925400	2673.65911000
3.02861700	40476.12943900	80.95225900	2677.57858800
3.02898500	40477.61987000	80.95524000	2681.53720600
3.02972000	40480.56447400	80.96112900	2689.57141300
3.03045500	40483.46123300	80.96692200	2697.76074600
3.03119000	40486.31077100	80.97262200	2706.10411700
3.03192500	40489.11372200	80.97822700	2714.60038800
3.03388600	40496.37138900	80.99274300	2738.01525500
3.03584800	40503.31542700	81.00663100	2762.48357400
3.03781000	40509.96048200	81.01992100	2787.97323100
3.03977200	40516.32103700	81.03264200	2814.45119600
3.04219600	40523.80967600	81.04761900	2848.47726800
3.04461900	40530.91681300	81.06183400	2883.87768400
3.04704300	40537.67056400	81.07534100	2920.58184700
3.04946700	40544.10060000	81.08820100	2958.50489300
3.05189100	40550.23615300	81.10047200	2997.56599100
3.05417500	40555.77338600	81.11154700	3035.34507900
3.05474600	40557.12336200	81.11424700	3044.92910500
3.05531700	40558.46036700	81.11692100	3054.56627000
3.05588800	40559.78470900	81.11956900	3064.25589900
3.05590000	40559.81107200	81.11962200	3064.45021000
3.05591100	40559.83742400	81.11967500	3064.64456100
3.05592300	40559.86377200	81.11972800	3064.83893300
3.05593400	40559.89011500	81.11978000	3065.03332600
3.05594600	40559.91645200	81.11983300	3065.22773900
3.05594700	40559.92019000	81.11984000	3065.25537800
3.05594900	40559.92533900	81.11985100	3065.29339300
3.05595000	40559.92731100	81.11985500	3065.30794800
3.05595100	40559.92787500	81.11985600	3065.31210600
3.05595200	39835.18864700	79.67037700	962.62970900
3.05595700	39835.41701500	79.67083400	963.26133500
3.05596200	39835.63390100	79.67126800	963.85887900
3.05596700	39835.85077000	79.67170200	964.45640300
3.05601600	39838.01855500	79.67603700	970.43054200
3.05606400	39840.18467300	79.68036900	976.40265800
3.05611300	39842.34911600	79.68469800	982.37272600
3.05660200	39863.90016300	79.72780000	1041.95727600
3.05709000	39885.27596400	79.77055200	1101.31518700
3.05757900	39906.47106000	79.81294200	1160.43066400
3.05806700	39927.47865000	79.85495700	1219.28403900
3.06018500	40016.24082000	80.03248200	1470.97656300
3.06230300	40100.96511500	80.20193000	1716.16556600
3.06442100	40181.29933000	80.36259900	1953.71248300
3.06653900	40256.98464600	80.51396900	2182.68223300
3.06865700	40327.84808400	80.65569600	2402.33165000
3.07100900	40400.73841900	80.80147700	2634.55963200
3.07336100	40467.46245900	80.93492500	2853.92074400
3.07571300	40528.02539700	81.05605100	3059.99429200
3.07806400	40582.50532700	81.16501100	3252.54846200
3.08041600	40631.04014200	81.26208000	3431.51690200
3.08267200	40672.18288000	81.34436600	3590.48811600
3.08278500	40674.10156300	81.34820300	3598.10770300
3.08289700	40676.01061800	81.35202100	3605.70264900
3.08301000	40677.90701600	81.35581400	3613.26707000
3.08305500	40678.66308600	81.35732600	3616.28679500
3.08305800	40678.70097300	81.35740200	3616.44160100
3.08306000	40678.74092000	81.35748200	3616.60134300
3.08306500	40678.82079700	81.35764200	3616.92078700
3.08307000	40678.90065900	81.35780100	3617.24018900
3.08307400	40678.98049700	81.35796100	3617.55953700
3.08307700	40679.02158700	81.35804300	3617.72390300
3.08307900	40679.06266400	81.35812500	3617.88824000
3.08308400	40679.14480200	81.35829000	3618.21687000
3.08308900	40679.22692100	81.35845400	3618.54545700
3.08309400	40679.30901700	81.35861800	3618.87398600
3.08309500	40679.32543400	81.35865100	3618.93968600
3.08309600	40679.34184800	81.35868400	3619.00538100
3.08309700	40679.35826400	81.35871700	3619.07107400
3.08309800	40679.37467600	81.35874900	3619.13676500
3.08309900	41335.45424500	82.67090800	1717.50952600
3.08310000	41335.42016500	82.67084000	1717.68646500
3.08310100	41335.40132600	82.67080300	1717.82049700
3.08310200	41335.38248700	82.67076500	1717.95452800
3.08311000	41335.19409700	82.67038800	1719.29469000
3.08311800	41335.00571000	82.67001100	1720.63459900
3.08312500	41334.81732500	82.66963500	1721.97425400
3.08320400	41332.93363500	82.66586700	1735.35683100
3.08328300	41331.05025400	82.66210100	1748.71396600
3.08336200	41329.16720100	82.65833400	1762.04561600
3.08344100	41327.28450300	82.65456900	1775.35172800
3.08422800	41308.48261100	82.61696500	1906.99797600
3.08501600	41289.74321400	82.57948600	2036.04151100
3.08580300	41271.08962900	82.54217900	2162.44230100
3.08659100	41252.54394700	82.50508800	2286.16545500
3.08737900	41234.12690300	82.46825400	2407.18143500
3.08924100	41191.19221400	82.38238400	2682.48485000
3.09110400	41149.31774900	82.29863500	2942.28392000
3.09296700	41108.70353100	82.21740700	3186.47458400
3.09483000	41069.51637400	82.13903300	3415.07974400
3.09669200	41031.89354500	82.06378700	3628.23069700
3.09964200	40975.77652100	81.95155300	3934.74041300
3.10259200	40924.16029200	81.84832100	4204.45827900
3.10554100	40877.22930400	81.75445900	4439.14665600
3.10849100	40835.04531100	81.67009100	4640.97912500
3.11144000	40797.58348000	81.59516700	4812.36544500
3.11439000	40764.74519300	81.52949000	4955.89921000
3.11734000	40736.37465100	81.47274900	5074.28201800
3.12028900	40712.27237700	81.42454500	5170.26099100
3.12421400	40686.41599300	81.37283200	5267.95238200
3.12813800	40667.11413800	81.33422800	5337.02529400
3.13206300	40653.71352500	81.30742700	5383.49973400
3.13598700	40645.55102700	81.29110200	5412.94007800
3.13991200	40642.00289300	81.28400600	5430.19366800
3.14383600	40642.43527800	81.28487100	5439.69396100
3.14445900	40642.82935100	81.28565900	5440.75867900
3.14508200	40643.30678700	81.28661400	5441.72874600
3.14570400	40643.86486200	81.28773000	5442.62787700
3.14632700	40644.50105900	81.28900200	5443.46898500
3.14695000	40645.21329200	81.29042700	5444.26496500
3.14819500	40646.85683300	81.29371400	5445.77031900
3.14944100	40648.77797400	81.29755600	5447.23893200
3.15068600	40650.95970200	81.30191900	5448.75676900
3.15193100	40653.38533600	81.30677100	5450.40725700
3.15322500	40656.14543100	81.31229100	5452.34510700
3.15451800	40659.13339800	81.31826700	5454.58943600
3.15459200	40659.30995300	81.31862000	5454.72501600
3.15466600	40659.48796700	81.31897600	5454.86566000
3.15466900	40659.49576200	81.31899200	5454.87234800
3.15467200	40659.50265500	81.31900500	5454.87780100
3.15467700	40659.51644300	81.31903300	5454.88871100
3.15468300	40659.53023500	81.31906000	5454.89962700
3.15468900	40659.54403100	81.31908800	5454.91055100
3.15469100	40659.55008600	81.31910000	5454.91534600
3.15469400	40659.55614200	81.31911200	5454.92014400
3.15469900	40659.56825700	81.31913700	5454.92974500
3.15470400	40659.58037600	81.31916100	5454.93935100
3.15470900	40659.59249600	81.31918500	5454.94896200
3.15471000	40659.59419900	81.31918800	5454.95031300
3.15471100	40659.59647000	81.31919300	5454.95211400
3.15471200	39890.72489800	79.78145000	3224.21152400
3.15471300	39890.75922100	79.78151800	3224.29327200
3.15471800	39890.98296200	79.78196600	3224.83301200
3.15472200	39891.20669100	79.78241300	3225.37273400
3.15472700	39891.43040900	79.78286100	3225.91243800
3.15477400	39893.66695800	79.78733400	3231.30848700
3.15482100	39895.90235300	79.79180500	3236.70271900
3.15486800	39898.13658700	79.79627300	3242.09511500
3.15533700	39920.41340100	79.84082700	3295.91534600
3.15580700	39942.56443900	79.88512900	3349.53482800
3.15627700	39964.58292600	79.92916600	3402.94113500
3.15674600	39986.46044800	79.97292100	3456.11881400
3.15885400	40082.73578200	80.16547200	3691.65197000
3.16096200	40175.44277600	80.35088600	3921.20776000
3.16307000	40264.06430700	80.52812900	4143.79180900
3.16517800	40348.19309800	80.69638600	4358.58709000
3.16728600	40427.52518700	80.85505000	4564.94573300
3.16939400	40501.82262700	81.00364500	4762.33404400
3.17150200	40570.92650500	81.14185300	4950.35365400
3.17187500	40582.61218900	81.16522400	4982.64690600
3.17224900	40594.13430400	81.18826900	5014.63967600
3.17262200	40605.48997200	81.21098000	5046.32674500
3.17262700	40605.65212100	81.21130400	5046.78035700
3.17263300	40605.81420000	81.21162800	5047.23384100
3.17263800	40605.97624500	81.21195200	5047.68726100
3.17263900	40606.00173900	81.21200300	5047.75863200
3.17264000	40606.02726700	81.21205500	5047.83006500
3.17264100	40606.07832100	81.21215700	5047.97292600
3.17264200	40606.08853200	81.21217700	5048.00149800
3.17264300	41234.82799700	82.46965600	3225.64185000
3.17264400	41234.80341000	82.46960700	3225.92294600
3.17265100	41234.74587600	82.46949200	3227.16270000
3.17265800	41234.68833600	82.46937700	3228.40227700
3.17266400	41234.63079000	82.46926200	3229.64167800
3.17273200	41234.05494000	82.46811000	3242.02596700
3.17280000	41233.47840100	82.46695700	3254.39255100
3.17286700	41232.90118100	82.46580200	3266.74139400
3.17293500	41232.32328700	82.46464700	3279.07245300
3.17361200	41226.50876000	82.45301800	3401.39625500
3.17428900	41220.63413400	82.44126800	3521.89968800
3.17496500	41214.70571100	82.42941100	3640.54920500
3.17564200	41208.72968400	82.41745900	3757.31238500
3.17794600	41188.10666200	82.37621300	4140.30638600
3.18025100	41167.20901800	82.33441800	4500.28425600
3.18255500	41146.22939000	82.29245900	4836.59671300
3.18485900	41125.32899100	82.25065800	5148.99792600
3.18716300	41104.64330100	82.20928700	5437.57461700
3.19013000	41078.51285900	82.15702600	5774.55960200
3.19309700	41053.14834500	82.10629700	6073.60938500
3.19606500	41028.72024800	82.05744000	6336.40232900
3.19903200	41005.36868400	82.01073700	6565.00152900
3.20199900	40983.21257500	81.96642500	6761.68832300
3.20496600	40962.34768600	81.92469500	6929.03606700
3.20594400	40955.76636300	81.91153300	6978.23235400
3.20692200	40949.33693000	81.89867400	7024.63012300
3.20790000	40943.06157100	81.88612300	7068.33076900
3.20887800	40936.94252800	81.87388500	7109.43495100
3.20985700	40930.98187100	81.86196400	7148.04269300
3.21225400	40917.05424000	81.83410800	7232.74149400
3.21465100	40904.11474900	81.80822900	7304.51415200
3.21704900	40892.18361700	81.78436700	7364.79687100
3.21944600	40881.27626500	81.76255300	7414.99729000
3.22184300	40871.40303600	81.74280600	7456.47121400
3.22263400	40868.37501100	81.73675000	7468.45328700
3.22342400	40865.46010300	81.73092000	7479.67616500
3.22358300	40864.89069300	81.72978100	7481.83328000
3.22374100	40864.32580700	81.72865200	7483.96185000
3.22389900	40863.76544500	81.72753100	7486.06246300
3.22394700	40863.59454100	81.72718900	7486.70135400
3.22399600	40863.42462800	81.72684900	7487.33493400
3.22409200	40863.08607000	81.72617200	7488.59438800
3.22414100	40862.91654300	81.72583300	7489.22399800
3.22414300	40862.90925200	81.72581900	7489.25065100
3.22414500	40862.90139100	81.72580300	7489.27981100
3.22414600	40054.33685800	80.10867400	5143.40360500
3.22414800	40054.42492200	80.10885000	5143.66622600
3.22414900	40054.48565700	80.10897100	5143.84733900
3.22415000	40054.54639000	80.10909300	5144.02844700
3.22416400	40055.15368500	80.11030700	5145.83932200
3.22417800	40055.76090400	80.11152200	5147.64980800
3.22419100	40056.36804600	80.11273600	5149.45990400
3.22432900	40062.43520600	80.12487000	5167.53939300
3.22446600	40068.49443800	80.13698900	5185.57960100
3.22460300	40074.54555100	80.14909100	5203.58027900
3.22474100	40080.58831100	80.16117700	5221.54111600
3.22611400	40140.50976300	80.28102000	5398.89752700
3.22748800	40199.37258800	80.39874500	5571.98270400
3.22886100	40256.99115900	80.51398200	5740.56350100
3.23023400	40313.19944900	80.62639900	5904.43867900
3.23160800	40367.85183900	80.73570400	6063.43990400
3.23343300	40437.87616200	80.87575200	6267.02378400
3.23525900	40504.66736200	81.00933500	6461.48726300
3.23708500	40568.01764000	81.13603500	6646.64972400
3.23745000	40580.25882800	81.16051800	6682.55365000
3.23781500	40592.35604100	81.18471200	6718.08277100
3.23786100	40593.85053600	81.18770100	6722.47668700
3.23786300	40593.93271000	81.18786500	6722.71826200
3.23786600	40594.01487500	81.18803000	6722.95980200
3.23787100	40594.17918200	81.18835800	6723.44282900
3.23787600	40594.37105500	81.18874200	6724.00690600
3.23787700	40594.39863800	81.18879700	6724.08800100
3.23787800	41192.44225300	82.38488500	4990.60081100
3.23787900	41192.43714600	82.38487400	4990.85658900
3.23788000	41192.43459100	82.38486900	4990.98447400
3.23788600	41192.40905300	82.38481800	4992.26322200
3.23789300	41192.38351300	82.38476700	4993.54176700
3.23790000	41192.35797100	82.38471600	4994.82010900
3.23796700	41192.10244800	82.38420500	5007.59236400
3.23803400	41191.84674100	82.38369300	5020.34429500
3.23810100	41191.59084800	82.38318200	5033.07587300
3.23816800	41191.33476800	82.38267000	5045.78706500
3.23884000	41188.76357400	82.37752700	5171.77107200
3.23951100	41186.17297700	82.37234600	5295.68448900
3.24018300	41183.56226100	82.36712500	5417.50075100
3.24085500	41180.93074800	82.36186100	5537.19619200
3.24152600	41178.27776600	82.35655600	5654.75017500
3.24427900	41167.16590700	82.33433200	6113.86736000
3.24703100	41155.64395300	82.31128800	6535.95338800
3.24978400	41143.68408200	82.28736800	6920.84544400
3.25253600	41131.27223600	82.26254400	7268.99399500
3.25528900	41118.41349900	82.23682700	7581.29212700
3.25804100	41105.13191300	82.21026400	7859.06956800
3.26079400	41091.47178700	82.18294400	8103.99104000
3.26354700	41077.49792400	82.15499600	8317.99220700
3.26629900	41063.29378200	82.12658800	8503.21205100
3.26851700	41051.75141200	82.10350300	8633.04590300
3.27073400	41040.18406600	82.08036800	8746.92601300
3.27295200	41028.65556600	82.05731100	8846.11476600
3.27516900	41017.23290400	82.03446600	8931.88050800
3.27738600	41005.98606000	82.01197200	9005.49259700
3.27794100	41003.20947800	82.00641900	9022.13902900
3.27849500	41000.44996200	82.00090000	9038.12771700
3.27860600	40999.90015300	81.99980000	9041.24782500
3.27871700	40999.35104000	81.99870200	9044.34224300
3.27882800	40998.80265100	81.99760500	9047.41128500
3.27887200	40998.58337100	81.99716700	9048.63388800
3.27887400	40998.57316000	81.99714600	9048.68820500
3.27887600	40998.56267700	81.99712500	9048.74649200
3.27888100	40998.54171200	81.99708300	9048.86303800
3.27888500	40998.52074800	81.99704100	9048.97955600
3.27888900	40998.49978500	81.99700000	9049.09603700
3.27889100	40998.48953300	81.99697900	9049.15299800
3.27889200	40998.48343000	81.99696700	9049.18689200
3.27889300	40159.57826700	80.31915700	6615.28904800
3.27889500	40159.68953100	80.31937900	6615.65921900
3.27889700	40159.77004100	80.31954000	6615.93120500
3.27889900	40159.85055200	80.31970100	6616.20318300
3.27891700	40160.65556900	80.32131100	6618.92242700
3.27893500	40161.46043600	80.32292100	6621.64071400
3.27895300	40162.26515200	80.32453000	6624.35804200
3.27913300	40170.30390000	80.34060800	6651.47847100
3.27931400	40178.32694200	80.35665400	6678.50231800
3.27949500	40186.33382400	80.37266800	6705.42907100
3.27967600	40194.32398700	80.38864800	6732.25809200
3.28148300	40273.19704200	80.54639400	6995.05107700
3.28328900	40349.88479000	80.69977000	7247.51629300
3.28509600	40423.97398000	80.84794800	7489.23931900
3.28690300	40495.11268800	80.99022500	7719.90744200
3.28871000	40563.01157800	81.12602300	7939.31152800
3.28936800	40586.88350100	81.17376700	8016.38312000
3.29002600	40610.28455500	81.22056900	8091.94128000
3.29015800	40614.90741700	81.22981500	8106.87100100
3.29016100	40614.99592000	81.22999200	8107.15688000
3.29016300	40615.08442000	81.23016900	8107.44271400
3.29016800	40615.26140000	81.23052300	8108.01431500
3.29017300	40615.43835900	81.23087700	8108.58585000
3.29017400	40615.46861800	81.23093700	8108.68357800
3.29017500	40615.49887500	81.23099800	8108.78130100
3.29017700	41189.03861200	82.37807700	6446.70036200
3.29017800	41189.03366000	82.37806700	6446.86017400
3.29017900	41189.03350700	82.37806700	6447.14107200
3.29018600	41189.03274000	82.37806500	6448.54541100
3.29019300	41189.03197200	82.37806400	6449.94950200
3.29020000	41189.03120200	82.37806200	6451.35334500
3.29026900	41189.02339800	82.37804700	6465.37810500
3.29033800	41189.01540200	82.37803100	6479.37799300
3.29040700	41189.00721000	82.37801400	6493.35298500
3.29047600	41188.99881300	82.37799800	6507.30304800
3.29116700	41188.90231300	82.37780500	6645.42643800
3.29185800	41188.77891500	82.37755800	6781.02777800
3.29254900	41188.62286900	82.37724600	6914.08342600
3.29324000	41188.42871200	82.37685700	7044.57309400
3.29393100	41188.19121700	82.37638200	7172.47998500
3.29646600	41186.87076100	82.37374200	7619.42066600
3.29900000	41184.68596600	82.36937200	8031.09888800
3.30153500	41181.46491800	82.36293000	8407.63571300
3.30407000	41177.08245800	82.35416500	8749.60884400
3.30660500	41171.45867900	82.34291700	9057.92376800
3.30914000	41164.55819100	82.32911600	9333.81695200
3.31167400	41156.38733600	82.31277500	9578.78054600
3.31420900	41146.99167500	82.29398300	9794.51688800
3.31674400	41136.45161500	82.27290300	9982.88997800
3.31927900	41124.87851200	82.24975700	10145.88485800
3.32181400	41112.40941500	82.22481900	10285.56663400
3.32434800	41099.20224200	82.19840400	10404.04604600
3.32446700	41098.57115900	82.19714200	10409.09161600
3.32458500	41097.93872000	82.19587700	10414.09452400
3.32462800	41097.70705700	82.19541400	10415.91739400
3.32463000	41097.69599500	82.19539200	10415.99880800
3.32463200	41097.68491900	82.19537000	10416.08563300
3.32463600	41097.66276600	82.19532600	10416.25924500
3.32464000	41097.64061200	82.19528100	10416.43281800
3.32464100	40232.30447600	80.46460900	7905.90589700
3.32464200	40232.31061700	80.46462100	7905.92302100
3.32464300	40232.36927600	80.46473900	7906.14138800
3.32465000	40232.68474700	80.46536900	7907.30576600
3.32465600	40232.97151900	80.46594300	7908.36413800
3.32466200	40233.25827000	80.46651700	7909.42236200
3.32472500	40236.12460300	80.47224900	7919.99652700
3.32478800	40238.98879700	80.47797800	7930.55597900
3.32485100	40241.85082900	80.48370200	7941.10069700
3.32491400	40244.71067400	80.48942100	7951.63065400
3.32554200	40273.18375200	80.54636800	8056.11317600
3.32617000	40301.41310300	80.60282600	8159.09431000
3.32679800	40329.37751000	80.65875500	8260.55376100
3.32742600	40357.05614000	80.71411200	8360.47185700
3.32951500	40446.81688100	80.89363400	8681.51664200
3.33160400	40532.58131000	81.06516300	8984.84425300
3.33369300	40613.78859600	81.22757700	9270.07453200
3.33402200	40626.10257100	81.25220500	9313.23916700
3.33406500	40627.72961700	81.25545900	9318.94036600
3.33410900	40629.35472600	81.25870900	9324.63364500
3.33415200	40630.97763400	81.26195500	9330.31896500
3.33424000	40634.21683100	81.26843400	9341.66572800
3.33425700	40634.86379300	81.26972800	9343.93192500
3.33427500	40635.51003100	81.27102000	9346.19551800
3.33427700	40635.59544900	81.27119100	9346.49467900
3.33427900	40635.68122300	81.27136200	9346.79512500
3.33428400	40635.85275400	81.27170600	9347.39594900
3.33428800	40636.02426800	81.27204900	9347.99670600
3.33429300	40636.19575600	81.27239200	9348.59737400
3.33429600	40636.29027200	81.27258100	9348.92842900
3.33429800	40636.38477100	81.27277000	9349.25942800
3.33430300	40636.57374600	81.27314700	9349.92134500
3.33430400	40636.58359600	81.27316700	9349.95584400
3.33430600	41188.26032500	82.37652100	7751.37025300
3.33430800	41188.26600000	82.37653200	7751.75441100
3.33432600	41188.32273600	82.37664500	7755.59503400
3.33434300	41188.37945200	82.37675900	7759.43381400
3.33436100	41188.43614400	82.37687200	7763.27073300
3.33453800	41189.00179400	82.37800400	7801.53745700
3.33471600	41189.56499000	82.37913000	7839.61753400
3.33489300	41190.12556800	82.38025100	7877.51062100
3.33507100	41190.68334400	82.38136700	7915.21628400
3.33684500	41196.06900400	82.39213800	8281.88700400
3.33862000	41200.99537000	82.40199100	8629.50440900
3.34039400	41205.31710000	82.41063400	8957.90658900
3.34216800	41208.90885900	82.41781800	9267.06704200
3.34394300	41211.66709300	82.42333400	9557.09542300
3.34639900	41213.95408900	82.42790800	9927.42889700
3.34885600	41214.31335500	82.42862700	10262.35776400
3.35131200	41212.64537900	82.42529100	10563.07505100
3.35376900	41208.91437500	82.41782900	10831.04453300
3.35622500	41203.13727200	82.40627500	11067.89817800
3.35868100	41195.38680000	82.39077400	11275.47914500
3.36113800	41185.78090700	82.37156200	11455.75479700
3.36359400	41174.47734900	82.34895500	11610.78816900
3.36420800	41171.40793600	82.34281600	11645.85126300
3.36422100	41171.34561600	82.34269100	11646.53827100
3.36423300	41171.28323900	82.34256600	11647.22415500
3.36423400	41171.27769600	82.34255500	11647.28430100
3.36423500	41171.27217500	82.34254400	11647.34499900
3.36423700	41171.26113000	82.34252200	11647.46638000
3.36423900	41171.25008500	82.34250000	11647.58774800
3.36424200	41171.23903700	82.34247800	11647.70909900
3.36424300	41171.22978900	82.34246000	11647.81066000
3.36424400	41171.22789400	82.34245600	11647.83147100
3.36424500	40282.28578800	80.56457200	9068.82981300
3.36424600	40282.30192100	80.56460400	9068.92000900
3.36425300	40282.65470100	80.56530900	9070.30300400
3.36426100	40283.00744700	80.56601500	9071.68575200
3.36426800	40283.36015800	80.56672000	9073.06825400
3.36434300	40286.88535600	80.57377100	9086.87968500
3.36441800	40290.40703700	80.58081400	9100.66638700
3.36449200	40293.92516300	80.58785000	9114.42832600
3.36456700	40297.43969100	80.59487900	9128.16546000
3.36531300	40332.37807900	80.66475600	9264.16424300
3.36605800	40366.91276400	80.73382600	9397.64303500
3.36680400	40401.00577700	80.80201200	9528.56922400
3.36755000	40434.62136300	80.86924300	9656.91402100
3.36829600	40467.72611700	80.93545200	9782.65263800
3.37045100	40560.21254900	81.12042500	10131.07109900
3.37260500	40647.51995900	81.29504000	10457.21520800
3.37263900	40648.83600700	81.29767200	10462.11842500
3.37267200	40650.14920500	81.30029800	10467.01051500
3.37270600	40651.46101400	81.30292200	10471.89717100
3.37274000	40652.77143300	81.30554300	10476.77839100
3.37274200	40652.86046900	81.30572100	10477.10981700
3.37274400	40652.95095100	81.30590200	10477.44685300
3.37274500	41184.89606000	82.36979200	8935.57819900
3.37274700	41184.91110100	82.36982200	8936.11237000
3.37274900	41184.92224000	82.36984400	8936.50803000
3.37275000	41184.93338000	82.36986700	8936.90367000
3.37276800	41185.04475700	82.37009000	8940.85899500
3.37278500	41185.15609600	82.37031200	8944.81236200
3.37280200	41185.26739800	82.37053500	8948.76377000
3.37297400	41186.37825900	82.37275700	8988.17008100
3.37314700	41187.48503900	82.37497000	9027.38017100
3.37331900	41188.58752800	82.37717500	9066.39377200
3.37349200	41189.68548600	82.37937100	9105.21055000
3.37521600	41200.36774100	82.40073500	9482.49412100
3.37694000	41210.36956700	82.42073900	9839.87273900
3.37866500	41219.50650500	82.43901300	10177.25587700
3.38038900	41227.62053100	82.45524100	10494.67847300
3.38211400	41234.58132100	82.46916300	10792.30190200
3.38455700	41242.26705100	82.48453400	11180.73100300
3.38700100	41247.19773900	82.49439500	11530.92850500
3.38944500	41249.24226600	82.49848500	11844.26393600
3.39188900	41248.35641600	82.49671300	12122.38668500
3.39433300	41244.56578100	82.48913200	12367.11435800
3.39677700	41237.97082200	82.47594200	12580.48039900
3.39889200	41230.12183400	82.46024400	12741.47754300
3.39899800	41229.67967900	82.45935900	12748.97969500
3.39910400	41229.23293400	82.45846600	12756.43045900
3.39921000	41228.78161500	82.45756300	12763.83059900
3.39925200	41228.60008800	82.45720000	12766.78061000
3.39929400	41228.41729300	82.45683500	12769.71444100
3.39933700	41228.23384400	82.45646800	12772.63908200
3.39933900	41228.22465200	82.45644900	12772.76934900
3.39934100	41228.21597300	82.45643200	12772.90756800
3.39934500	41228.19860800	82.45639700	12773.18395200
3.39934900	41228.17857100	82.45635700	12773.50268500
3.39935000	41228.17483700	82.45635000	12773.56204300
3.39935100	40317.60321700	80.63520600	10131.78507400
3.39935200	40317.66311900	80.63532600	10132.03005200
3.39935800	40317.96261800	80.63592500	10133.25483000
3.39936400	40318.26208900	80.63652400	10134.47941900
3.39937000	40318.56153500	80.63712300	10135.70382000
3.39943100	40321.55452000	80.64310900	10147.93746300
3.39949200	40324.54482200	80.64909000	10160.15223700
3.39955300	40327.53241800	80.65506500	10172.34812500
3.39961300	40330.51728200	80.66103500	10184.52510400
3.40022100	40360.21041100	80.72042100	10305.25036900
3.40082900	40389.60452100	80.77920900	10424.06296900
3.40143700	40418.67775700	80.83735600	10540.94599900
3.40204500	40447.40866400	80.89481700	10655.88316600
3.40397600	40536.13857100	81.07227700	11007.79845600
3.40590600	40620.62987000	81.24126000	11339.60083300
3.40631100	40637.80073900	81.27560100	11406.64907800
3.40671600	40654.71933900	81.30943900	11472.73360100
3.40676700	40656.85406600	81.31370800	11481.07292500
3.40681800	40658.98651900	81.31797300	11489.39780200
3.40687000	40661.11549400	81.32223100	11497.70825300
3.40689000	40661.96640100	81.32393300	11501.02960600
3.40691100	40662.81615800	81.32563200	11504.34622900
3.40695200	40664.51399300	81.32902800	11510.97255100
3.40695500	40664.62041800	81.32924100	11511.38790700
3.40695700	40664.72682600	81.32945400	11511.80318800
3.40696200	40664.93961800	81.32987900	11512.63364200
3.40696800	40665.15238300	81.33030500	11513.46398900
3.40696900	40665.19060700	81.33038100	11513.61315900
3.40697000	40665.22882800	81.33045800	11513.76232000
3.40697100	40665.30526500	81.33061100	11514.06062800
3.40697200	40665.32055300	81.33064100	11514.12028800
3.40697300	41179.23269400	82.35846500	10024.78717300
3.40697400	41179.24235900	82.35848500	10025.02799000
3.40697500	41179.25202500	82.35850400	10025.26880000
3.40698500	41179.34867800	82.35869700	10027.67650900
3.40699500	41179.44531100	82.35889100	10030.08350200
3.40700500	41179.54192400	82.35908400	10032.48978100
3.40710400	41180.50693500	82.36101400	10056.51322000
3.40720400	41181.46988400	82.36294000	10080.46507800
3.40730300	41182.43071500	82.36486100	10104.34530800
3.40740300	41183.38937300	82.36677900	10128.15385300
3.40839700	41192.84437200	82.38568900	10362.28603600
3.40939200	41202.02387900	82.40404800	10589.20511700
3.41038700	41210.87846900	82.42175700	10808.88417300
3.41138100	41219.36250600	82.43872500	11021.31178300
3.41237600	41227.43454100	82.45486900	11226.49255500
3.41494200	41246.10229600	82.49220500	11722.59612100
3.41750800	41261.24516200	82.52249000	12171.29091800
3.42007500	41272.47669600	82.54495300	12573.76054100
3.42264100	41279.56522600	82.55913000	12931.67420700
3.42520700	41282.40537900	82.56481100	13246.99922800
3.42777400	41281.02102500	82.56204200	13522.04188900
3.43002900	41276.41892000	82.55283800	13732.52751200
3.43059300	41274.79094200	82.54958200	13780.80726800
3.43070600	41274.44296300	82.54888600	13790.26060800
3.43081900	41274.08762500	82.54817500	13799.64716200
3.43093100	41273.72492900	82.54745000	13808.96712900
3.43097400	41273.58696100	82.54717400	13812.46209400
3.43097600	41273.57966000	82.54715900	13812.61566900
3.43097800	41273.57316200	82.54714600	13812.77855600
3.43098200	41273.56015900	82.54712000	13813.10426800
3.43098600	41273.54714900	82.54709400	13813.42991900
3.43099000	41273.53412900	82.54706800	13813.75548800
3.43099200	41273.52783300	82.54705600	13813.91284600
3.43099400	41273.52153300	82.54704300	13814.07016500
3.43099700	41273.50892700	82.54701800	13814.38474700
3.43100100	41273.49631500	82.54699300	13814.69927100
3.43100500	41273.48369400	82.54696700	13815.01371800
3.43100600	41273.48183300	82.54696400	13815.06008600
3.43100700	40342.94122100	80.68588200	11115.38280100
3.43101100	40343.14454400	80.68628900	11116.25682900
3.43101500	40343.33858300	80.68667700	11117.07446700
3.43101800	40343.53261100	80.68706500	11117.89202400
3.43105600	40345.47224900	80.69094400	11126.06311900
3.43109400	40347.41071500	80.69482100	11134.22606800
3.43113200	40349.34800000	80.69869600	11142.38086700
3.43150900	40368.65480600	80.73731000	11223.47963200
3.43188600	40387.83671100	80.77567300	11303.75774300
3.43226300	40406.88852400	80.81377700	11383.21142200
3.43264000	40425.80406200	80.85160800	11461.83596500
3.43447200	40515.56338500	81.03112700	11831.81902100
3.43630400	40601.39079400	81.20278200	12181.77553500
3.43669600	40619.24116500	81.23848200	12254.11284700
3.43708800	40636.84890500	81.27369800	12325.45969700
3.43748000	40654.24469400	81.30848900	12395.87682800
3.43787800	40671.66345100	81.34332700	12466.32459800
3.43792900	40673.90109900	81.34780200	12475.37547500
3.43793200	40674.01371000	81.34802700	12475.83074000
3.43793500	40674.16741700	81.34833500	12476.45207900
3.43793600	40674.20852800	81.34841700	12476.61827000
3.43793700	40674.22497200	81.34845000	12476.68474100
3.43793800	41171.49262400	82.34298500	11035.59267500
3.43793900	41171.47931400	82.34295900	11035.84383900
3.43794700	41171.59898100	82.34319800	11037.93262500
3.43795500	41171.69723400	82.34339400	11039.85767800
3.43796200	41171.79547000	82.34359100	11041.78228300
3.43803800	41172.77691400	82.34555400	11061.00359900
3.43811400	41173.75667000	82.34751300	11080.17994200
3.43818900	41174.73470700	82.34946900	11099.31129500
3.43826500	41175.71099500	82.35142200	11118.39763600
3.43902200	41185.37129100	82.37074300	11306.78126600
3.43977800	41194.82545200	82.38965100	11490.64607900
3.44053500	41204.04642100	82.40809300	11669.98089000
3.44129200	41213.00883100	82.42601800	11844.78001800
3.44144300	41214.76818300	82.42953600	11879.19541800
3.44159500	41216.51606800	82.43303200	11913.42946700
3.44163200	41216.94771500	82.43389500	11921.89164500
3.44165500	41217.21393200	82.43442800	11927.11171600
3.44167900	41217.47987700	82.43496000	11932.32752900
3.44170200	41217.74554400	82.43549100	11937.53908400
3.44174800	41218.27604500	82.43655200	11947.94941100
3.44179500	41218.80542900	82.43761100	11958.34267700
3.44184100	41219.33368800	82.43866700	11968.71887600
3.44188700	41219.86081400	82.43972200	11979.07798600
3.44228100	41224.28889500	82.44857800	12066.32634900
3.44267400	41228.62993000	82.45726000	12152.33156500
3.44306800	41232.87897100	82.46575800	12237.08233700
3.44346200	41237.03097300	82.47406200	12320.56653100
3.44385500	41241.08081500	82.48216200	12402.77131200
3.44402500	41242.79560300	82.48559100	12437.84642500
3.44419500	41244.48999500	82.48898000	12472.67976800
3.44436500	41246.16359300	82.49232700	12507.27037200
3.44453400	41247.81599300	82.49563200	12541.61721600
3.44514800	41253.60454600	82.50720900	12663.69429200
3.44576200	41259.09243700	82.51818500	12782.52778700
3.44637600	41264.26174000	82.52852300	12898.07443400
3.44698900	41269.09552300	82.53819100	13010.29534100
3.44760300	41273.57796800	82.54715600	13119.15673000
3.44845100	41279.16590500	82.55833200	13263.97944300
3.44929900	41284.02143500	82.56804300	13402.28618700
3.45014700	41288.11513500	82.57623000	13534.04703000
3.45099500	41291.42271000	82.58284500	13659.25577900
3.45184300	41293.92556700	82.58785100	13777.93281000
3.45269100	41295.60953700	82.59121900	13890.11700000
3.45310300	41296.12932500	82.59225900	13942.32005300
3.45351500	41296.45269500	82.59290500	13993.01128900
3.45392700	41296.57917000	82.59315800	14042.19984400
3.45434000	41296.50851300	82.59301700	14089.89583900
3.45475200	41296.24072300	82.59248100	14136.11026900
3.45564400	41294.98757000	82.58997500	14231.10606800
3.45653600	41292.81755600	82.58563500	14319.34842100
3.45669400	41292.33612500	82.58467200	14334.34764900
3.45685300	41291.82606200	82.58365200	14349.13866500
3.45701200	41291.28739700	82.58257500	14363.72214500
3.45717000	41290.72020300	82.58144000	14378.09895800
3.45732900	41290.12455500	82.58024900	14392.26997300
3.45748800	41289.50052800	82.57900100	14406.23606000
3.45780500	41288.16766300	82.57633500	14433.55698100
3.45812200	41286.72227800	82.57344500	14460.06885300
3.45844000	41285.16509200	82.57033000	14485.77891400
3.45875700	41283.49687600	82.56699400	14510.69454400
3.45907400	41281.71844200	82.56343700	14534.82320900
3.45939200	41279.83063700	82.55966100	14558.17244700
3.45952000	41279.03529800	82.55807100	14567.40730000
3.45964900	41278.22223000	82.55644400	14576.51610500
3.45977700	41277.39149500	82.55478300	14585.49937500
3.45990600	41276.54316200	82.55308600	14594.35762400
3.45991100	41276.50887400	82.55301800	14594.70946000
3.45991600	41276.47453600	82.55294900	14595.06089800
3.45992100	41276.44017100	82.55288000	14595.41213800
3.45992200	41276.43556900	82.55287100	14595.45873500
3.45992400	41276.42182900	82.55284400	14595.59908900
3.45992500	41276.41083400	82.55282200	14595.71135300
3.45992600	41276.40900100	82.55281800	14595.73006100
3.45992800	40331.27753100	80.66255500	11853.81468900
3.45993100	40331.38579000	80.66277200	11854.26701300
3.45993300	40331.49404100	80.66298800	11854.71929800
3.45995500	40332.57623700	80.66515200	11859.24005800
3.45997700	40333.65783800	80.66731600	11863.75700900
3.45999900	40334.73884600	80.66947800	11868.27015200
3.46016800	40343.09044800	80.68618100	11903.09275300
3.46033800	40351.40575000	80.70281200	11937.68672700
3.46050800	40359.68414700	80.71936800	11972.05190800
3.46077000	40372.42625600	80.74485300	12024.80092600
3.46103300	40385.07627200	80.77015300	12077.00076400
3.46129600	40397.63357400	80.79526700	12128.65140600
3.46155900	40410.09583300	80.82019200	12179.75243200
3.46188500	40425.44177900	80.85088400	12242.46696400
3.46221100	40440.63474400	80.88126900	12304.33270400
3.46253800	40455.67146100	80.91134300	12365.34953800
3.46286400	40470.54880500	80.94109800	12425.51750400
3.46356800	40502.09436700	81.00418900	12552.45960500
3.46427200	40532.85592900	81.06571200	12675.45601000
3.46497700	40562.80600700	81.12561200	12794.51255500
3.46568100	40591.91970700	81.18383900	12909.63876200
3.46609200	40608.50586900	81.21701200	12974.97948400
3.46612800	40609.98295800	81.21996600	12980.79097400
3.46616500	40611.45526600	81.22291100	12986.58065100
3.46623900	40614.39268800	81.22878500	12998.12782400
3.46627600	40615.86373600	81.23172700	13003.91030400
3.46627900	40615.96264400	81.23192500	13004.29739400
3.46628100	40616.06396500	81.23212800	13004.69556200
3.46628600	40616.26657400	81.23253300	13005.49174400
3.46629100	40616.46914900	81.23293800	13006.28777500
3.46629700	40616.67167800	81.23334300	13007.08360100
3.46629900	40616.77305700	81.23354600	13007.48195600
3.46630200	40616.87441200	81.23374900	13007.88020600
3.46630700	40617.07708700	81.23415400	13008.67655100
3.46630800	41104.44702800	82.20889400	11596.16417100
3.46630900	41104.45302900	82.20890600	11596.39445400
3.46631200	41104.48568400	82.20897100	11597.12995100
3.46631500	41104.51833200	82.20903700	11597.86535000
3.46631800	41104.55097300	82.20910200	11598.60065100
3.46635000	41104.87704300	82.20975400	11605.94830100
3.46638200	41105.20247900	82.21040500	11613.28620100
3.46641300	41105.52727800	82.21105500	11620.61435200
3.46673100	41108.73984200	82.21748000	11693.35968500
3.46704800	41111.88635400	82.22377300	11765.13062900
3.46736600	41114.96484500	82.22993000	11835.92789500
3.46768400	41117.97316100	82.23594600	11905.75236400
3.46855900	41125.88919400	82.25177800	12093.27736200
3.46943500	41133.21699500	82.26643400	12273.43913400
3.47031100	41139.92178000	82.27984400	12446.27699600
3.47118600	41145.97028600	82.29194100	12611.83337500
3.47183500	41150.01373200	82.30002700	12729.88771800
3.47248400	41153.66934800	82.30733900	12843.99271100
3.47313400	41156.92780900	82.31385600	12954.17577800
3.47378300	41159.78081700	82.31956200	13060.46668300
3.47460800	41162.81067000	82.32562100	13190.04701600
3.47543300	41165.15931500	82.33031900	13313.45406600
3.47625900	41166.81590300	82.33363200	13430.76250900
3.47708400	41167.77154200	82.33554300	13542.05101000
3.47870100	41167.58687400	82.33517400	13742.97899300
3.48031900	41164.67653800	82.32935300	13921.83057300
3.48193600	41159.03407400	82.31806800	14079.31145700
3.48355300	41150.70264500	82.30140500	14216.23250800
3.48517000	41139.75185700	82.27950400	14333.44913900
3.48633900	41130.25184900	82.26050400	14406.40900500
3.48638800	41129.83009300	82.25966000	14409.22454300
3.48643600	41129.40630500	82.25881300	14412.02436900
3.48648500	41128.98032500	82.25796100	14414.80794600
3.48658200	41128.12177200	82.25624400	14420.32638500
3.48667900	41127.25448300	82.25450900	14425.78014600
3.48668000	41127.23779100	82.25447600	14425.88423300
3.48668200	41127.22106700	82.25444200	14425.98816600
3.48668600	41127.18761000	82.25437500	14426.19596100
3.48669000	41127.15414300	82.25430800	14426.40368500
3.48669300	41127.12066300	82.25424100	14426.61131400
3.48669400	40186.79599900	80.37359200	11698.47050900
3.48669500	40186.85196100	80.37370400	11698.70065500
3.48669800	40187.02682900	80.37405400	11699.41979300
3.48670200	40187.20168300	80.37440300	11700.13883200
3.48670600	40187.37652100	80.37475300	11700.85777100
3.48674300	40189.12408800	80.37824800	11708.04164100
3.48678000	40190.87014800	80.38174000	11715.21548300
3.48681700	40192.61469500	80.38522900	11722.37929300
3.48718700	40209.97580300	80.41995200	11793.46511600
3.48755700	40227.17893800	80.45435800	11863.54470800
3.48792700	40244.21902900	80.48843800	11932.61615200
3.48829700	40261.09017300	80.52218000	12000.67712500
3.48995500	40334.47906800	80.66895800	12293.21715000
3.49161300	40403.94921200	80.80789800	12565.35999400
3.49185000	40413.53668500	80.82707300	12602.59856600
3.49208700	40423.03733500	80.84607500	12639.42382000
3.49232400	40432.44818200	80.86489600	12675.83245600
3.49237400	40434.44873100	80.86889700	12683.56450200
3.49242500	40436.44533400	80.87289100	12691.27726300
3.49247600	40438.43778100	80.87687600	12698.97097800
3.49257700	40442.41016300	80.88482000	12714.30129500
3.49259800	40443.20295900	80.88640600	12717.35981300
3.49261800	40443.99442800	80.88798900	12720.41211200
3.49262000	40444.09407400	80.88818800	12720.79578500
3.49262300	40444.19435900	80.88838900	12721.18252700
3.49262800	40444.39489600	80.88879000	12721.95586700
3.49263300	40444.59540000	80.88919100	12722.72906100
3.49263800	40444.79586300	80.88959200	12723.50206000
3.49264900	40445.20705300	80.89041400	12725.08747700
3.49265000	40935.17088900	81.87034200	11305.01020000
3.49265300	40935.21160800	81.87042300	11305.80051600
3.49265600	40935.24044100	81.87048100	11306.47192000
3.49265900	40935.26927000	81.87053900	11307.14324400
3.49268900	40935.55733400	81.87111500	11313.85201800
3.49271900	40935.84496900	81.87169000	11320.55268400
3.49274800	40936.13217400	81.87226400	11327.24524100
3.49304500	40938.98010700	81.87796000	11393.72477800
3.49334300	40941.78267100	81.88356500	11459.39329000
3.49364000	40944.53803500	81.88907600	11524.25091200
3.49393700	40947.24417400	81.89448800	11588.29779400
3.49562700	40961.61550800	81.92323100	11937.32654000
3.49731800	40974.02648800	81.94805300	12260.27662800
3.49900900	40984.20812900	81.96841600	12557.39440600
3.50069900	40991.94570800	81.98389100	12829.05455900
3.50239000	40997.07949300	81.99415900	13075.75801100
3.50467900	40999.67577400	81.99935200	13371.07331200
3.50696800	40997.11006400	81.99422000	13623.38689500
3.50925700	40989.35166900	81.97870300	13834.65827700
3.51154700	40976.49210900	81.95298400	14007.05743800
3.51166100	40975.71822800	81.95143600	14014.69849800
3.51168400	40975.56209400	81.95112400	14016.21727200
3.51170700	40975.40513500	81.95081000	14017.72879800
3.51175300	40975.08974500	81.95017900	14020.74093000
3.51175500	40975.07631800	81.95015300	14020.86875300
3.51175700	40975.06288500	81.95012600	14020.99651900
3.51176000	40975.03600700	81.95007200	14021.25197300
3.51176400	40975.00911600	81.95001800	14021.50734700
3.51176800	40974.98221300	81.94996400	14021.76261600
3.51177000	40974.96905300	81.94993800	14021.88742400
3.51177200	40974.95588600	81.94991200	14022.01218100
3.51177300	40974.95177100	81.94990400	14022.05111100
3.51177400	40974.93943500	81.94987900	14022.16795400
3.51177500	40974.93778900	81.94987600	14022.18353200
3.51177600	40044.33295900	80.08866600	11322.31391500
3.51178100	40044.57509700	80.08915000	11323.33988200
3.51178600	40044.80680800	80.08961400	11324.30158100
3.51179100	40045.03849500	80.09007700	11325.26311400
3.51183800	40047.35404100	80.09470800	11334.86931500
3.51188600	40049.66716400	80.09933400	11344.45890900
3.51193300	40051.97785100	80.10395600	11354.03188900
3.51198100	40054.28608900	80.10857200	11363.58824800
3.51245600	40077.23076300	80.15446200	11458.23599000
3.51293100	40099.91582800	80.19983200	11551.21371000
3.51340600	40122.32876700	80.24465800	11642.51556400
3.51388200	40144.45726900	80.28891500	11732.13596100
3.51582600	40231.78683800	80.46357400	12081.20503000
3.51733100	40295.54337800	80.59108700	12331.92970600
3.51738100	40297.59623200	80.59519200	12339.94823400
3.51738300	40297.69960400	80.59539900	12340.35216900
3.51738600	40297.80295000	80.59560600	12340.75599500
3.51738700	40297.84140300	80.59568300	12340.90624400
3.51738800	40297.89524800	80.59579000	12341.11663700
3.51738900	40297.91063300	80.59582100	12341.17674900
3.51739000	40792.30389200	81.58460800	10908.49415600
3.51739100	40792.28975800	81.58458000	10908.72936300
3.51739800	40792.38752100	81.58477500	10910.47605200
3.51740600	40792.47383600	81.58494800	10912.25051400
3.51748100	40793.33577000	81.58667200	10929.96841000
3.51755600	40794.19521700	81.58839000	10947.63438200
3.51763100	40795.05209900	81.59010400	10965.24789200
3.51838000	40803.47229000	81.60694500	11138.49612800
3.51912900	40811.59474500	81.62318900	11306.49205200
3.51987800	40819.38882900	81.63877800	11469.24053900
3.52062700	40826.82059900	81.65364100	11626.74631500
3.52247200	40843.39307700	81.68678600	11992.43465500
3.52431800	40857.22650700	81.71445300	12326.74951700
3.52616300	40867.98227800	81.73596500	12630.08696400
3.52800800	40875.42973900	81.75085900	12903.08851900
3.52985300	40879.41520700	81.75883000	13146.55348500
3.53214100	40879.40334000	81.75880700	13408.68591500
3.53442800	40873.86042400	81.74772100	13628.73078300
3.53500000	40871.60823100	81.74321600	13677.39237000
3.53511400	40871.11830600	81.74223700	13686.83165500
3.53522900	40870.61501100	81.74123000	13696.17323400
3.53534300	40870.09819700	81.74019600	13705.41699900
3.53538700	40869.89841100	81.73979700	13708.92133300
3.53543000	40869.69523500	81.73939000	13712.39731100
3.53547400	40869.49136000	81.73898300	13715.83769300
3.53547600	40869.48049400	81.73896100	13715.98390700
3.53547800	40869.47099000	81.73894200	13716.14389400
3.53548200	40869.45196900	81.73890400	13716.46377700
3.53548600	40869.43293500	81.73886600	13716.78357000
3.53549000	40869.41388500	81.73882800	13717.10324200
3.53549100	40869.41007300	81.73882000	13717.16716400
3.53549200	39946.15857700	79.89231700	11038.64118200
3.53549300	39946.22311400	79.89244600	11038.91586800
3.53549900	39946.54577000	79.89309200	11040.28910600
3.53550600	39946.86838100	79.89373700	11041.66202700
3.53551200	39947.19094700	79.89438200	11043.03462900
3.53557600	39950.41407500	79.90082800	11056.74313200
3.53564000	39953.63258300	79.90726500	11070.41976800
3.53570400	39956.84644200	79.91369300	11084.06451900
3.53576800	39960.05561200	79.92011100	11097.67736600
3.53640800	39991.88186900	79.98376400	11232.04680900
3.53704900	40023.20209100	80.04640400	11363.20595000
3.53768900	40053.98520500	80.10797000	11491.14127200
3.53832900	40084.20083900	80.16840200	11615.84008500
3.54029000	40172.93225100	80.34586500	11977.56492300
3.54029200	40173.03936600	80.34607900	11977.99798100
3.54029400	40173.14646000	80.34629300	11978.43094000
3.54029700	40173.25354500	80.34650700	11978.86385200
3.54029900	40173.36062000	80.34672100	11979.29671600
3.54030200	40173.46768500	80.34693500	11979.72953200
3.54030700	40173.68178600	80.34736400	11980.59502100
3.54031200	40173.89585800	80.34779200	11981.46036800
3.54031600	40174.10988900	80.34822000	11982.32552400
3.54036500	40176.24803600	80.35249600	11990.96654500
3.54041500	40178.38222300	80.35676400	11999.58841000
3.54046400	40180.51243900	80.36102500	12008.19111700
3.54051300	40182.63867600	80.36527700	12016.77466500
3.54058900	40185.92812700	80.37185600	12030.04804300
3.54066500	40189.20794900	80.37841600	12043.27533700
3.54074100	40192.47809600	80.38495600	12056.45654100
3.54076400	40193.49376800	80.38698800	12060.54908400
3.54078800	40194.50850700	80.38901700	12064.63716100
3.54081200	40195.52230500	80.39104500	12068.72077300
3.54082100	40195.92763300	80.39185500	12070.35334200
3.54082200	40195.98226400	80.39196500	12070.57322100
3.54082400	40693.31404400	81.38662800	10629.48449300
3.54082500	40693.31555400	81.38663100	10629.78447300
3.54082600	40693.32891600	81.38665800	10630.03997500
3.54082700	40693.34227700	81.38668500	10630.29546600
3.54083700	40693.47586700	81.38695200	10632.84981400
3.54084800	40693.60940500	81.38721900	10635.40312900
3.54085800	40693.74289500	81.38748600	10637.95540900
3.54096000	40695.07505500	81.39015000	10663.42136800
3.54106300	40696.40215700	81.39280400	10688.78393300
3.54116500	40697.72410300	81.39544800	10714.04307900
3.54126700	40699.04078100	81.39808200	10739.19877100
3.54134400	40700.02537500	81.40005100	10758.00917800
3.54142100	40701.00689900	81.40201400	10776.76129400
3.54149800	40701.98531000	81.40397100	10795.45510900
3.54157500	40702.96056300	81.40592100	10814.09061300
3.54160500	40703.34977100	81.40670000	10821.52848600
3.54163600	40703.73846400	81.40747700	10828.95702700
3.54166700	40704.12663900	81.40825300	10836.37623600
3.54171100	40704.68936400	81.40937900	10847.13270800
3.54175600	40705.25098300	81.41050200	10857.86950600
3.54180100	40705.81149100	81.41162300	10868.58663200
3.54184500	40706.37087800	81.41274200	10879.28408700
3.54227200	40711.66170500	81.42332300	10980.58193800
3.54269800	40716.84260000	81.43368500	11080.08346400
3.54312500	40721.90733800	81.44381500	11177.79270900
3.54355100	40726.84982600	81.45370000	11273.71405300
3.54425000	40734.66823000	81.46933600	11427.02105500
3.54494900	40742.12086200	81.48424200	11575.57828700
3.54564800	40749.18517400	81.49837000	11719.41728800
3.54634700	40755.84279400	81.51168600	11858.58291200
3.54704600	40762.07701800	81.52415400	11993.12350600
3.54822700	40771.61182300	81.54322400	12210.19873200
3.54940900	40779.83155000	81.55966300	12414.46751300
3.55059100	40786.68743700	81.57337500	12606.21688900
3.55177200	40792.14322100	81.58428600	12785.75054100
3.55295400	40796.17129600	81.59234300	12953.36850600
3.55413500	40798.75487300	81.59751000	13109.38176800
3.55549000	40799.92915800	81.59985800	13274.43392800
3.55684500	40799.19307700	81.59838600	13425.09821100
3.55785000	40797.42172500	81.59484300	13527.77208200
3.55799800	40797.07356700	81.59414700	13542.24536400
3.55801800	40797.02453600	81.59404900	13544.19979400
3.55803800	40796.97509100	81.59395000	13546.15125400
3.55805800	40796.92523500	81.59385000	13548.09974600
3.55806600	40796.90517800	81.59381000	13548.87831300
3.55806700	40796.90300700	81.59380600	13548.96240500
3.55806800	40796.90083600	81.59380200	13549.04648500
3.55807000	40796.89648900	81.59379300	13549.21463000
3.55807100	40796.89214100	81.59378400	13549.38275800
3.55807200	39878.00439800	79.75600900	10883.43904800
3.55807300	39878.08954500	79.75617900	10883.81552700
3.55807400	39878.12577600	79.75625200	10883.97572400
3.55808100	39878.48806800	79.75697600	10885.57749800
3.55808800	39878.85030900	79.75770100	10887.17890300
3.55809500	39879.21249800	79.75842500	10888.77994000
3.55816400	39882.83152900	79.76566300	10904.77003800
3.55823400	39886.44533500	79.77289100	10920.72326300
3.55830300	39890.05387200	79.78010800	10936.63959100
3.55837200	39893.65709100	79.78731400	10952.51899200
3.55906700	39929.38688000	79.85877400	11109.27639200
3.55976100	39964.53628900	79.92907300	11262.31418100
3.56045600	39999.06317200	79.99812600	11411.61020400
3.56115000	40032.92781800	80.06585600	11557.14518600
3.56184500	40066.09308300	80.13218600	11698.90300700
3.56289600	40114.87602200	80.22975200	11906.21793400
3.56303100	40121.01264100	80.24202500	11932.20891800
3.56316600	40127.11951500	80.25423900	11958.05611300
3.56316700	40625.02889600	81.25005800	10515.07006000
3.56316800	40625.03975600	81.25008000	10515.41073500
3.56317300	40625.11253700	81.25022500	10516.69900500
3.56317700	40625.18530800	81.25037100	10517.98705100
3.56318200	40625.25807000	81.25051600	10519.27487100
3.56323000	40625.98517400	81.25197000	10532.14065700
3.56327800	40626.71133400	81.25342300	10544.98386100
3.56332600	40627.43654100	81.25487300	10557.80447900
3.56337400	40628.16077900	81.25632200	10570.60250700
3.56385300	40635.34738800	81.27069500	10697.33933400
3.56433200	40642.42445300	81.28484900	10821.81279200
3.56481200	40649.38062800	81.29876100	10944.01981500
3.56529100	40656.20504800	81.31241000	11063.95832600
3.56577000	40662.88727800	81.32577500	11181.62729700
3.56682700	40677.07655600	81.35415300	11433.18381600
3.56788400	40690.42526800	81.38085100	11673.71129200
3.56894200	40702.84293900	81.40568600	11903.24691200
3.56999900	40714.24904200	81.42849800	12121.84979300
3.57105600	40724.57255300	81.44914500	12329.59969100
3.57211300	40733.75201400	81.46750400	12526.59661800
3.57352500	40744.13525700	81.48827100	12773.06056000
3.57493600	40752.28775000	81.50457600	13000.90454600
3.57634800	40758.13749700	81.51627500	13210.51497700
3.57775900	40761.63869500	81.52327700	13402.32674100
3.57917000	40762.76984800	81.52554000	13576.81681200
3.57939400	40762.73128200	81.52546300	13602.94399700
3.57961800	40762.63308900	81.52526600	13628.65009100
3.57966300	40762.60630200	81.52521300	13633.74097300
3.57967300	40762.60012400	81.52520000	13634.85276700
3.57967400	40762.59952100	81.52519900	13634.96025600
3.57967500	40762.59891700	81.52519800	13635.06772900
3.57967700	40762.59770400	81.52519500	13635.28265400
3.57967900	40762.59624300	81.52519200	13635.54053400
3.57968000	39842.87856900	79.68575700	10967.30729400
3.57968100	39842.95971800	79.68591900	10967.59550700
3.57968200	39842.98044600	79.68596100	10967.73187700
3.57968900	39843.38909200	79.68677800	10969.60143700
3.57969700	39843.79767200	79.68759500	10971.47050800
3.57970400	39844.20618200	79.68841200	10973.33908800
3.57978000	39848.28753800	79.69657500	10991.99793900
3.57985600	39852.36202900	79.70472400	11010.60775500
3.57993200	39856.42959700	79.71285900	11029.16850700
3.58000800	39860.49017500	79.72098000	11047.68016000
3.58074400	39899.55390200	79.79910800	11224.92113200
3.58148100	39937.89733600	79.87579500	11397.50151100
3.58221800	39975.46829700	79.95093700	11565.39976300
3.58295400	40012.21807100	80.02443600	11728.59947900
3.58369100	40048.10163900	80.09620300	11887.08966100
3.58443900	40083.64423700	80.16728800	12043.35234000
3.58452400	40087.61870400	80.17523700	12060.78681000
3.58454300	40088.47931400	80.17695900	12064.56103100
3.58456100	40089.33933200	80.17867900	12068.33229100
3.58456300	40089.39854800	80.17879700	12068.59194400
3.58456400	40089.45775700	80.17891600	12068.85156700
3.58456600	40089.57616800	80.17915200	12069.37077200
3.58456700	40089.59984900	80.17920000	12069.47461000
3.58456900	40584.67169800	81.16934300	10634.95765300
3.58457000	40584.69160800	81.16938300	10635.29284400
3.58458200	40584.89067500	81.16978100	10638.64397500
3.58459400	40585.08967200	81.17017900	10641.99361200
3.58460500	40585.28860200	81.17057700	10645.34174000
3.58472400	40587.27404300	81.17454800	10678.73995000
3.58484300	40589.25234200	81.17850500	10711.98712100
3.58496200	40591.22331800	81.18244700	10745.08323600
3.58508100	40593.18677000	81.18637400	10778.02827100
3.58576100	40604.26787400	81.20853600	10963.63635000
3.58644100	40615.06263700	81.23012500	11144.29761100
3.58712100	40625.53855400	81.25107700	11320.01518600
3.58780100	40635.66514100	81.27133000	11490.79645600
3.58848100	40645.41402800	81.29082800	11656.65317300
3.58957000	40660.17948700	81.32035900	11912.15009200
3.59066000	40673.80739200	81.34761500	12155.12675200
3.59174900	40686.20958400	81.37241900	12385.68677300
3.59283900	40697.30960900	81.39461900	12603.95585700
3.59392800	40707.04175500	81.41408400	12810.07868400
3.59501800	40715.35147100	81.43070300	13004.22024100
3.59644400	40724.00518400	81.44801000	13240.49376800
3.59786900	40730.07573900	81.46015100	13457.01823600
3.59929500	40733.51883300	81.46703800	13654.29487200
3.60038600	40734.36720000	81.46873400	13792.55568000
3.60038700	40734.36731000	81.46873500	13792.75131900
3.60038900	40734.36741200	81.46873500	13792.94691200
3.60039100	40734.36751200	81.46873500	13793.14248100
3.60039200	40734.36760900	81.46873500	13793.33802800
3.60039400	40734.36770200	81.46873500	13793.53355100
3.60039700	40734.36787800	81.46873600	13793.92452700
3.60040000	40734.36804300	81.46873600	13794.31543500
3.60040400	40734.36819400	81.46873600	13794.70624900
3.60041000	40734.36847800	81.46873700	13795.48778500
3.60041600	40734.36866600	81.46873700	13796.26858100
3.60042900	40734.36888100	81.46873800	13797.82906000
3.60043000	40734.36889200	81.46873800	13797.94048000
3.60043100	40734.36890100	81.46873800	13798.05188600
3.60043300	40734.36891500	81.46873800	13798.27467300
3.60043500	40734.36892700	81.46873800	13798.54198800
3.60043600	39812.28252000	79.62456500	11123.40733300
3.60043700	39812.32287800	79.62464600	11123.59541800
3.60043800	39812.36323600	79.62472600	11123.78349800
3.60044500	39812.76677700	79.62553400	11125.66402500
3.60045200	39813.17024900	79.62634000	11127.54405600
3.60046000	39813.57365200	79.62714700	11129.42359200
3.60053400	39817.60392100	79.63520800	11148.19169200
3.60060700	39821.62728900	79.64325500	11166.91020400
3.60068100	39825.64369900	79.65128700	11185.57910500
3.60075500	39829.65308800	79.65930600	11204.19836700
3.60147900	39868.54958400	79.73709900	11383.98120500
3.60220200	39906.71250200	79.81342500	11558.97593500
3.60292600	39944.09057500	79.88818100	11729.16536300
3.60364900	39980.63589500	79.96127200	11894.53723800
3.60437300	40016.30415800	80.03260800	12055.08453800
3.60453200	40024.02471500	80.04804900	12089.73658800
3.60469100	40031.70047400	80.06340100	12124.15530400
3.60485000	40039.33099600	80.07866200	12158.34064900
3.60500900	40046.91587900	80.09383200	12192.29263900
3.60507200	40049.93696800	80.09987400	12205.80810600
3.60513600	40052.95066400	80.10590100	12219.28623900
3.60513900	40544.75420700	81.08950800	10794.80404400
3.60514000	40544.75753700	81.08951500	10794.94169500
3.60514300	40544.81432300	81.08962900	10795.86910200
3.60514600	40544.86594200	81.08973200	10796.71210000
3.60514900	40544.91755800	81.08983500	10797.55500300
3.60517800	40545.43344400	81.09086700	10805.97875200
3.60520700	40545.94886100	81.09189800	10814.39291200
3.60523600	40546.46380600	81.09292800	10822.79748300
3.60526600	40546.97827800	81.09395700	10831.19246500
3.60555800	40552.09619400	81.10419200	10914.61486300
3.60585000	40557.16330900	81.11432700	10997.07836400
3.60614200	40562.17669200	81.12435300	11078.58312600
3.60643400	40567.13346300	81.13426700	11159.12945500
3.60672600	40572.03083600	81.14406200	11238.71781300
3.60783200	40589.99200300	81.17998400	11531.44767000
3.60893800	40606.92445900	81.21384900	11810.49981500
3.61004400	40622.70344800	81.24540700	12075.95160200
3.61114900	40637.21834400	81.27443700	12327.90734900
3.61225500	40650.37185600	81.30074400	12566.49516100
3.61336100	40662.08009800	81.32416000	12791.86708800
3.61482400	40675.22268000	81.35044500	13069.85687100
3.61628600	40685.58527000	81.37117100	13325.50807600
3.61774800	40693.07364700	81.38614700	13559.33674600
3.61921000	40697.62835100	81.39525700	13771.91196400
3.62037300	40699.13753900	81.39827500	13926.24165700
3.62037500	40699.13833100	81.39827700	13926.44672800
3.62037700	40699.13911600	81.39827800	13926.65175000
3.62037800	40699.13989800	81.39828000	13926.85674800
3.62038000	40699.14067800	81.39828100	13927.06172100
3.62038100	40699.14145200	81.39828300	13927.26667000
3.62038500	40699.14299100	81.39828600	13927.67649400
3.62038800	40699.14451700	81.39828900	13928.08624400
3.62039100	40699.14603000	81.39829200	13928.49589700
3.62042300	40699.16035900	81.39832100	13932.58704100
3.62043000	40699.16307500	81.39832600	13933.40429200
3.62043100	40699.16335000	81.39832700	13933.50210000
3.62043300	40699.16430500	81.39832900	13933.79664300
3.62043400	40699.16493700	81.39833000	13933.99298300
3.62043500	40699.16498600	81.39833000	13934.00868900
3.62043600	39775.20102200	79.55040200	11253.47350300
3.62043700	39775.23525900	79.55047100	11253.63484500
3.62044300	39775.57760300	79.55115500	11255.24806800
3.62044900	39775.91989700	79.55184000	11256.86092600
3.62045500	39776.26214000	79.55252400	11258.47342100
3.62051700	39779.68180800	79.55936400	11274.57834000
3.62057900	39783.09641700	79.56619300	11290.64683500
3.62064100	39786.50593600	79.57301200	11306.67889300
3.62070300	39789.91032300	79.57982100	11322.67449900
3.62132400	39823.66406600	79.64732800	11480.62278600
3.62194400	39856.86587700	79.71373200	11634.91265500
3.62256400	39889.48204100	79.77896400	11785.53432000
3.62318500	39921.48076500	79.84296200	11932.48063700
3.62380500	39952.83227400	79.90566500	12075.74726600
3.62488300	40005.67436700	80.01134900	12315.87297900
3.62488500	40005.75048800	80.01150100	12316.21783600
3.62488600	40005.82660000	80.01165300	12316.56264400
3.62488800	40005.90270600	80.01180500	12316.90742800
3.62488900	40005.97880800	80.01195800	12317.25218700
3.62489100	40006.05490500	80.01211000	12317.59692300
3.62489400	40006.20708500	80.01241400	12318.28632300
3.62489700	40006.35925100	80.01271900	12318.97565100
3.62490000	40006.51140100	80.01302300	12319.66488400
3.62493200	40008.03184800	80.01606400	12326.55193200
3.62496400	40009.55041200	80.01910100	12333.42938100
3.62497000	40009.85393700	80.01970800	12334.80392000
3.62497100	40009.90440800	80.01980900	12335.03241800
3.62497200	40009.95495100	80.01991000	12335.26129700
3.62497400	40010.05603300	80.02011200	12335.71902300
3.62497500	40010.07624900	80.02015200	12335.81056700
3.62497600	40498.99669600	80.99799300	10919.02436200
3.62497700	40498.98690100	80.99797400	10919.33651800
3.62497800	40499.01518700	80.99803000	10919.55224700
3.62498600	40499.17108300	80.99834200	10922.03047900
3.62499500	40499.32693900	80.99865400	10924.50788500
3.62500300	40499.48275300	80.99896600	10926.98446200
3.62508700	40501.03859000	81.00207700	10951.70472200
3.62517200	40502.59018200	81.00518000	10976.34222900
3.62525600	40504.13745900	81.00827500	11000.89698600
3.62534100	40505.68034100	81.01136100	11025.36899900
3.62610300	40519.38663600	81.03877300	11242.37731200
3.62686400	40532.67602600	81.06535200	11452.66226100
3.62762600	40545.49818900	81.09099600	11656.23779100
3.62838800	40557.80622900	81.11561200	11853.12432000
3.62915000	40569.55698300	81.13911400	12043.34908600
3.63030000	40586.15968000	81.17231900	12318.08979800
3.63145100	40601.27646500	81.20255300	12577.84727000
3.63260200	40614.80012100	81.22960000	12822.78704800
3.63375200	40626.63979700	81.25328000	13053.10207000
3.63490300	40636.71961100	81.27343900	13269.00863800
3.63605300	40644.97922900	81.28995800	13470.74817000
3.63748600	40652.65256900	81.30530500	13702.58334500
3.63891900	40657.37416100	81.31474800	13913.40981600
3.63914500	40657.84721300	81.31569400	13944.78426200
3.63937100	40658.24606700	81.31649200	13975.65330600
3.63959700	40658.57070400	81.31714100	14006.01943700
3.63964200	40658.62672500	81.31725300	14012.03253000
3.63968700	40658.67977600	81.31736000	14018.02562600
3.63973300	40658.72986200	81.31746000	14023.99875200
3.63974800	40658.74650500	81.31749300	14026.06108200
3.63974900	40658.74752700	81.31749500	14026.18912100
3.63975000	40658.74854700	81.31749700	14026.31714100
3.63975200	40658.75058200	81.31750100	14026.57315400
3.63975400	40658.75261300	81.31750500	14026.82913800
3.63975600	40658.75463900	81.31750900	14027.08508600
3.63975700	40658.75544700	81.31751100	14027.18745500
3.63975800	40658.75625600	81.31751300	14027.28981700
3.63975900	39733.66642100	79.46733300	11343.45006200
3.63976000	39733.76320300	79.46752600	11343.90921000
3.63976200	39733.85998000	79.46772000	11344.36832800
3.63976400	39733.95675100	79.46791400	11344.82741600
3.63978100	39734.92425600	79.46984900	11349.41669000
3.63979800	39735.89135900	79.47178300	11354.00303200
3.63981600	39736.85806000	79.47371600	11358.58644300
3.63983300	39737.82435700	79.47564900	11363.16692100
3.64000600	39747.46497700	79.49493000	11408.81036800
3.64017900	39757.06437100	79.51412900	11454.16027700
3.64035200	39766.62172200	79.53324300	11499.21636900
3.64052600	39776.13622900	79.55227200	11543.97838400
3.64069900	39785.60710200	79.57121400	11588.44607900
3.64181900	39845.76791100	79.69153600	11868.98301900
3.64293900	39903.87275100	79.80774600	12137.15086700
3.64405800	39959.74309300	79.91948600	12392.93214800
3.64406000	39959.82425000	79.91964800	12393.30246400
3.64406200	39959.90539600	79.91981100	12393.67272500
3.64406300	39959.98653700	79.91997300	12394.04295800
3.64406500	39960.06767200	79.92013500	12394.41316300
3.64406700	39960.14880300	79.92029800	12394.78334200
3.64407000	39960.31104700	79.92062200	12395.52361700
3.64407300	39960.47327600	79.92094700	12396.26381100
3.64407700	39960.63548200	79.92127100	12397.00389700
3.64411000	39962.25639300	79.92451300	12404.39875900
3.64414300	39963.87518800	79.92775000	12411.78272100
3.64415000	39964.19869300	79.92839700	12413.25820600
3.64415100	39964.27272500	79.92854500	12413.59584900
3.64415200	40451.02395300	80.90204800	11002.80432800
3.64415300	40451.03331300	80.90206700	11003.03344600
3.64415700	40451.12807600	80.90225600	11004.48864200
3.64416200	40451.21421300	80.90242800	11005.81130500
3.64416600	40451.30033700	80.90260100	11007.13373300
3.64421100	40452.16092400	80.90432200	11020.34510300
3.64425500	40453.02030100	80.90604100	11033.53300300
3.64429900	40453.87845700	80.90775700	11046.69743400
3.64434400	40454.73538100	80.90947100	11059.83839800
3.64478700	40463.23427600	80.92646900	11189.95758300
3.64523100	40471.59734100	80.94319500	11317.73174100
3.64567400	40479.81350500	80.95962700	11443.16312200
3.64611800	40487.87212700	80.97574400	11566.25475300
3.64656100	40495.76301600	80.99152600	11687.01048700
3.64766100	40514.54093900	81.02908200	11976.35033900
3.64876100	40532.09015600	81.06418000	12251.44993500
3.64986000	40548.28732900	81.09657500	12512.42328700
3.65096000	40563.02434900	81.12604900	12759.41031900
3.65206000	40576.20718700	81.15241400	12992.57322400
3.65315900	40587.75618700	81.17551200	13212.09737100
3.65462000	40600.45724200	81.20091400	13482.91825900
3.65608000	40610.04298700	81.22008600	13730.58632200
3.65754100	40616.43408400	81.23286800	13955.69577500
3.65778000	40617.17391000	81.23434800	13990.50375200
3.65802000	40617.82648400	81.23565300	14024.72524800
3.65825900	40618.39176300	81.23678400	14058.36327900
3.65830700	40618.49433900	81.23698900	14065.02113100
3.65835500	40618.59342100	81.23718700	14071.65579100
3.65840300	40618.68901000	81.23737800	14078.26729000
3.65841900	40618.72066400	81.23744100	14080.50605900
3.65843500	40618.75191100	81.23750400	14082.74215000
3.65845200	40618.78275700	81.23756600	14084.97557600
3.65845800	40618.79500700	81.23759000	14085.86841500
3.65846500	40618.80714200	81.23761400	14086.76040000
3.65846600	40618.80904300	81.23761800	14086.90353600
3.65846700	40618.81099200	81.23762200	14087.04707600
3.65846900	40618.81488500	81.23763000	14087.33412200
3.65847100	40618.81954900	81.23763900	14087.67853300
3.65847200	40618.82032600	81.23764100	14087.73592800
3.65847300	39693.23133000	79.38646300	11402.45456200
3.65847600	39693.43147100	79.38686300	11403.42885100
3.65848000	39693.62154000	79.38724300	11404.33490200
3.65848300	39693.81159200	79.38762300	11405.24084000
3.65851700	39695.71127200	79.39142300	11414.29402400
3.65855000	39697.60940000	79.39521900	11423.33593300
3.65858400	39699.50597200	79.39901200	11432.36656800
3.65861700	39701.40098100	79.40280200	11441.38592400
3.65895200	39720.26374000	79.44052700	11530.95879400
3.65928700	39738.96348700	79.47792700	11619.40186500
3.65962200	39757.49428300	79.51498900	11706.71348000
3.65995700	39775.85036500	79.55170100	11792.89221700
3.66029200	39794.02615800	79.58805200	11877.93690500
3.66147400	39856.66849300	79.71333700	12169.07197900
3.66265600	39916.77749700	79.83355500	12446.04549700
3.66265800	39916.85945200	79.83371900	12446.42183200
3.66266000	39916.94139700	79.83388300	12446.79811100
3.66266100	39917.02333600	79.83404700	12447.17436200
3.66266300	39917.10527000	79.83421100	12447.55058500
3.66266500	39917.18719900	79.83437400	12447.92678200
3.66266800	39917.35104000	79.83470200	12448.67909100
3.66267100	39917.51486400	79.83503000	12449.43132000
3.66267500	39917.67866700	79.83535700	12450.18343800
3.66270800	39919.31552800	79.83863100	12457.69857000
3.66271400	39919.64268800	79.83928500	12459.20050800
3.66272100	39919.96967600	79.83993900	12460.70154200
3.66273200	39920.52146100	79.84104300	12463.23428000
3.66273300	39920.56270400	79.84112500	12463.42360000
3.66273400	40405.72240900	80.81144500	11057.48850500
3.66273900	40405.84414400	80.81168800	11059.15179400
3.66274500	40405.95755500	80.81191500	11060.83527800
[truncated: 4,893 more rows]
