# Supplementary material for: An Efficient Contact Model for the Simulation of Cargo Airdrop Extraction Phase
Source: Hindawi journal article supplement (doi:10.1155/2018/9895451), 2018-10-17
Supplement: f1 [file 9895451.f1.zip › case3_aircraft_coupling/m8000/df_aft.csv]

t	u	v	w	x_g	y_g	z_g	p	q	r	e0	e1	e2	e3	yaw(deg)	pitch(deg)	roll(deg)	yaw_fix(deg)	pitch_fix(deg)	roll_fix(deg)	h_g	alpha(deg)	beta(deg)	vx_g	vy_g	vz_g	ax_g	ay_g	az_g	g-force
2.485	88.88888888888889	0.0	0.0	220.88888888888886	0.0	-800.0	0.0	0.0	0.0	1.0	0.0	0.0	0.0	0.0	-0.0	0.0	0.0	0.0	0.0	800.0	0.0	0.0	88.88888888888889	0.0	0.0	2.842170943040209e-12	0.0	-2.316105715148321e-21	2.842170943040209e-13
2.49	88.88888888888889	0.0	-5.7568455893568435e-09	221.33333333333323	0.0	-800.0	0.0	-9.472285008075418e-08	0.0	1.0	0.0	-3.238225644013221e-11	0.0	0.0	-3.7107332502598107e-09	0.0	0.0	-2.713609766539005e-08	0.0	800.0	-3.7107332502598144e-09	0.0	88.88888888888889	0.0	-5.790264287871194e-24	-1.8947806286934726e-12	0.0	-2.7655405146354356e-20	1.8947806286934726e-13
2.495	88.88888888888889	0.0	-2.5475220289107545e-07	221.77777777777763	0.0	-800.0	0.0	-1.2333450056240327e-06	0.0	1.0	0.0	-1.4329811412622994e-09	0.0	0.0	-1.6420754303233955e-07	0.0	0.0	-3.8046341519439317e-07	0.0	800.0	-1.6420754303233955e-07	0.0	88.88888888888889	0.0	0.0	1.4210854715201044e-12	0.0	9.253393785759245e-20	1.4210854715201075e-13
2.5	88.88888888888889	0.0	-1.1960932542372486e-06	222.22222222222206	0.0	-800.0	0.0	-3.0067895826474917e-06	0.0	1.0	0.0	-6.728024555084528e-09	0.0	0.0	-7.709748229334539e-07	0.0	0.0	-1.2418451800424689e-06	0.0	800.0	-7.709748229334532e-07	0.0	88.8888888888889	0.0	8.470329472543003e-22	9.000207986293995e-12	0.0	2.0665340053612162e-19	9.000207986293998e-13
2.505	88.88888888888886	0.0	-2.906510425080096e-06	222.66666666666652	0.0	-800.0	0.0	-4.661178997692299e-06	0.0	1.0	0.0	-1.6349121141075553e-08	0.0	0.0	-1.8734712802634759e-06	0.0	0.0	-2.577174600656499e-06	0.0	800.0	-1.873471280263474e-06	0.0	88.88888888888896	0.0	1.2705494208814505e-21	3.3158661002135772e-12	0.0	-3.3480367821978385e-19	3.315866100213594e-13
2.51	88.88888888888874	0.0	-5.311818236387101e-06	223.11111111111097	0.0	-800.0	0.0	-6.130022629405795e-06	0.0	0.9999999999999997	0.0	-2.9878977579677455e-08	0.0	0.0	-3.42387862296306e-06	0.0	0.0	-4.333296725579816e-06	0.0	800.0	-3.423878622963059e-06	0.0	88.88888888888894	0.0	-2.2405989294044013e-21	5.447494307493734e-12	0.0	-5.961656588273977e-19	5.447494307493767e-13
2.515	88.8888888888885	0.0	-8.325338759818597e-06	223.55555555555551	0.0	-800.0	0.0	-7.396153739831845e-06	0.0	0.9999999999999992	0.0	-4.683003052397967e-08	0.0	0.0	-5.366326206985712e-06	0.0	0.0	-6.452138695191282e-06	0.0	800.0	-5.366326206985709e-06	0.0	88.88888888888901	0.0	-4.612834320081227e-21	8.289665250533942e-12	0.0	-8.686526291031245e-19	8.289665250533988e-13
2.52	88.8888888888881	0.0	-1.1855035951715823e-05	224.00000000000006	0.0	-800.0	0.0	-8.45235977793379e-06	0.0	0.9999999999999981	0.0	-6.668457722840166e-08	0.0	0.0	-7.641489667603232e-06	0.0	0.0	-8.873561406200145e-06	0.0	800.0	-7.641489667603228e-06	0.0	88.88888888888901	0.0	-1.0450097450800838e-20	-3.3158661002135772e-12	0.0	-9.949793988732523e-19	3.315866100213727e-13
2.525	88.8888888888875	0.0	-1.5807580635578337e-05	224.44444444444457	0.0	-800.0	0.0	-9.299763957790302e-06	0.0	0.9999999999999963	0.0	-8.891764107512851e-08	0.0	0.0	-1.0189211115727925e-05	0.0	0.0	-1.153774753244664e-05	0.0	800.0	-1.0189211115727922e-05	0.0	88.888888888889	0.0	-1.228628100409906e-20	-2.3684757858668407e-13	0.0	7.882342390101843e-19	2.368475785879957e-14
2.53	88.88888888888664	0.0	-2.0091697460068718e-05	224.88888888888908	0.0	-800.0	0.0	-9.946222402123677e-06	0.0	0.9999999999999939	0.0	-1.1301579821288731e-07	0.0	0.0	-1.2950656511801221e-05	0.0	0.0	-1.4387130361147624e-05	0.0	800.0	-1.2950656511801207e-05	0.0	88.88888888888901	0.0	-3.929408469147914e-21	3.552713678800261e-12	0.0	1.6630483912437515e-18	3.5527136788006504e-13
2.535	88.88888888888552	0.0	-2.4620812924113084e-05	225.3333333333336	0.0	-800.0	0.0	-1.040478956210306e-05	0.0	0.9999999999999907	0.0	-1.384920726981375e-07	0.0	0.0	-1.5870022523244563e-05	0.0	0.0	-1.736788300429921e-05	0.0	800.0	-1.5870022523244543e-05	0.0	88.88888888888903	0.0	2.586231925279083e-22	-4.736951571733681e-13	0.0	-8.314817838802241e-19	4.7369515717409794e-14
2.54	88.88888888888407	0.0	-2.9315044291795468e-05	225.77777777777797	0.0	-800.0	0.0	-1.0692292665199604e-05	0.0	0.9999999999999867	0.0	-1.648971241413518e-07	0.0	0.0	-1.8895818534288605e-05	0.0	0.0	-2.0430999219472537e-05	0.0	800.0	-1.889581853428859e-05	0.0	88.888888888889	0.0	-9.87376735241691e-21	-9.710750722054047e-12	0.0	-1.2862138743422374e-18	9.710750722054132e-13
2.545	88.88888888888235	0.0	-3.410258482609119e-05	226.22222222222237	0.0	-800.0	0.0	-1.0828044633185482e-05	0.0	0.9999999999999818	0.0	-1.9182703964676656e-07	0.0	0.0	-2.1981759536497016e-05	0.0	0.0	-2.3533005508776794e-05	0.0	800.0	-2.1981759536497002e-05	0.0	88.88888888888896	0.0	-9.952245037434215e-21	5.684341886080418e-12	0.0	6.133869741785157e-19	5.684341886080451e-13
2.55	88.88888888888039	0.0	-3.8920993164859144e-05	226.66666666666683	0.0	-800.0	0.0	-1.084078790601343e-05	0.0	0.9999999999999765	0.0	-2.189305865523381e-07	0.0	0.0	-2.508759723154531e-05	0.0	0.0	-2.663866247683218e-05	0.0	800.0	-2.5087597231545274e-05	0.0	88.88888888888906	0.0	-8.443521848305449e-21	1.8474111129761358e-11	0.0	-2.0313299402273114e-18	1.847411112976147e-12
2.555	88.88888888887814	0.0	-4.374350394005177e-05	227.1111111111114	0.0	-800.0	0.0	-1.0876988438275489e-05	0.0	0.9999999999999702	0.0	-2.4605720966279884e-07	0.0	0.0	-2.8196079264888285e-05	0.0	0.0	-2.975469013346128e-05	0.0	800.0	-2.8196079264888238e-05	0.0	88.8888888888891	0.0	-2.5102631225293833e-20	-4.973799150320365e-12	0.0	4.1483755821992544e-19	4.973799150320383e-13
2.56	88.88888888887561	0.0	-4.860097310926741e-05	227.5555555555558	0.0	-800.0	0.0	-1.0984356361309026e-05	0.0	0.999999999999963	0.0	-2.7338047373963965e-07	0.0	0.0	-3.132709469313717e-05	0.0	0.0	-3.290147643431492e-05	0.0	800.0	-3.132709469313713e-05	0.0	88.88888888888904	0.0	-9.197060441646913e-21	4.736951571733681e-13	0.0	-1.4619136748660227e-18	4.7369515717562404e-14
2.565	88.88888888887281	0.0	-5.349922780018652e-05	228.00000000000003	0.0	-800.0	0.0	-1.1043105114731507e-05	0.0	0.9999999999999553	0.0	-3.00933156376063e-07	0.0	0.0	-3.44843995517982e-05	0.0	0.0	-3.606509301328237e-05	0.0	800.0	-3.4484399551798145e-05	0.0	88.88888888888911	0.0	-4.087080727736314e-20	8.76336040770731e-12	0.0	-4.227288943888072e-18	8.76336040770833e-13
2.57	88.88888888886973	0.0	-5.840476315144852e-05	228.4444444444445	0.0	-800.0	0.0	-1.1018951931105135e-05	0.0	0.9999999999999466	0.0	-3.2852679272691584e-07	0.0	0.0	-3.764639736044364e-05	0.0	0.0	-3.922179021483185e-05	0.0	800.0	-3.764639736044358e-05	0.0	88.88888888888911	0.0	-4.6874109772892593e-20	2.3684757858668407e-13	0.0	-3.742028540423366e-18	2.3684757861624484e-14
2.575	88.88888888886638	0.0	-6.328331766171485e-05	228.88888888888894	0.0	-800.0	0.0	-1.0923692088758605e-05	0.0	0.9999999999999373	0.0	-3.5596866184716883e-07	0.0	0.0	-4.079100392552558e-05	0.0	0.0	-4.235119748176364e-05	0.0	800.0	-4.079100392552552e-05	0.0	88.88888888888913	0.0	-7.28816892419579e-20	-4.736951571733681e-13	0.0	1.7158664252640043e-18	4.736951571764759e-14
2.58	88.88888888886281	0.0	-6.810594258573734e-05	229.3333333333333	0.0	-800.0	0.0	-1.0769226090194697e-05	0.0	0.9999999999999272	0.0	-3.83095927044801e-07	0.0	0.0	-4.3899559536638676e-05	0.0	0.0	-4.543635349971549e-05	0.0	800.0	-4.389955953663861e-05	0.0	88.8888888888891	0.0	-4.076240373298792e-20	-1.5631940186721147e-11	0.0	-3.281025002084965e-18	1.5631940186721491e-12
2.585	88.88888888885903	0.0	-7.285345124938356e-05	229.77777777777789	0.0	-800.0	0.0	-1.0603014688463197e-05	0.0	0.9999999999999163	0.0	-4.0980066327781675e-07	0.0	0.0	-4.695969689496269e-05	0.0	0.0	-4.84738934585365e-05	0.0	800.0	-4.69596968949627e-05	0.0	88.88888888888899	0.0	-9.492914447397294e-20	-1.918465386552141e-11	0.0	9.438581203648198e-19	1.9184653865521433e-12
2.59	88.88888888885508	0.0	-7.75436185877404e-05	230.22222222222229	0.0	-800.0	0.0	-1.0517888316624946e-05	0.0	0.999999999999905	0.0	-4.361828545560811e-07	0.0	0.0	-4.9982873324065744e-05	0.0	0.0	-5.1487046508199544e-05	0.0	800.0	-4.9982873324065744e-05	0.0	88.88888888888893	0.0	-2.6392251503901724e-20	-1.0184445879227416e-11	0.0	9.031371191389522e-18	1.0184445879231421e-12
2.595	88.88888888885089	0.0	-8.221151438902033e-05	230.66666666666657	0.0	-800.0	0.0	-1.0490648336925104e-05	0.0	0.999999999999893	0.0	-4.624397684382885e-07	0.0	0.0	-5.299169402104393e-05	0.0	0.0	-5.449239587850847e-05	0.0	800.0	-5.2991694021043964e-05	0.0	88.88888888888887	0.0	-1.4551958631161355e-20	-1.2079226507920887e-11	0.0	8.678908049376903e-18	1.2079226507924005e-12
2.6	88.88888888884645	0.0	-8.686624013056226e-05	231.11111111111092	0.0	-800.0	0.0	-1.0449850877899519e-05	0.0	0.9999999999998803	0.0	-4.886226007344708e-07	0.0	0.0	-5.5992025593584417e-05	0.0	0.0	-5.748605763773227e-05	0.0	800.0	-5.5992025593584444e-05	0.0	88.8888888888888	0.0	6.037281152609681e-20	-1.4921397450961096e-11	0.0	1.1833847116915681e-17	1.4921397450965787e-12
2.605	88.88888888884182	0.0	-9.149636725350305e-05	231.55555555555537	0.0	-800.0	0.0	-1.0384913269798842e-05	0.0	0.9999999999998671	0.0	-5.146670658010224e-07	0.0	0.0	-5.89765014495634e-05	0.0	0.0	-6.046111614257686e-05	0.0	800.0	-5.897650144956346e-05	0.0	88.88888888888874	0.0	7.845687680336609e-20	-7.105427357600522e-13	0.0	-8.145061898873931e-18	7.105427358067364e-14
2.61	88.88888888883696	0.0	-9.610062382755349e-05	231.9999999999998	0.0	-800.0	0.0	-1.0341723883692478e-05	0.0	0.9999999999998536	0.0	-5.405660090300668e-07	0.0	0.0	-6.194430173131015e-05	0.0	0.0	-6.342380179970318e-05	0.0	800.0	-6.194430173131023e-05	0.0	88.88888888888879	0.0	7.647604957329068e-21	7.57912251477389e-12	0.0	-2.9976816741131543e-18	7.579122514774484e-13
2.615	88.88888888883189	0.0	-0.00010069668502788086	232.4444444444442	0.0	-800.0	0.0	-1.034851170899508e-05	0.0	0.9999999999998392	0.0	-5.664188532819202e-07	0.0	0.0	-6.49068194593911e-05	0.0	0.0	-6.638843202553904e-05	0.0	800.0	-6.490681945939115e-05	0.0	88.8888888888888	0.0	5.2350102751165584e-20	6.6317322004271545e-12	0.0	2.0084046528011245e-18	6.631732200427459e-13
2.62	88.88888888882654	0.0	-0.00010530425581730142	232.88888888888866	0.0	-800.0	0.0	-1.038855931429471e-05	0.0	0.9999999999998243	0.0	-5.923364389724238e-07	0.0	0.0	-6.787675600986063e-05	0.0	0.0	-6.936453504519128e-05	0.0	800.0	-6.787675600986068e-05	0.0	88.88888888888881	0.0	3.137951955529416e-20	-2.1079434494214883e-11	0.0	8.038265997012241e-18	2.1079434494216416e-12
2.625	88.88888888882094	0.0	-0.00010993218921952308	233.33333333333306	0.0	-800.0	0.0	-1.0437988039897786e-05	0.0	0.9999999999998079	0.0	-6.183685643599346e-07	0.0	0.0	-7.085981784278058e-05	0.0	0.0	-7.235479835166235e-05	0.0	800.0	-7.085981784278074e-05	0.0	88.8888888888886	0.0	1.4780791441901122e-19	-3.7895612573869455e-11	0.0	3.050931028169373e-17	3.789561257388174e-12
2.63	88.88888888881509	0.0	-0.00011458402756312707	233.77777777777754	0.0	-800.0	0.0	-1.0498471010721987e-05	0.0	0.9999999999997911	0.0	-6.445351550427225e-07	0.0	0.0	-7.385828826352134e-05	0.0	0.0	-7.536238875293662e-05	0.0	800.0	-7.385828826352153e-05	0.0	88.8888888888885	0.0	2.890141384793272e-19	-5.447494307493734e-12	0.0	1.2378039256431313e-17	5.447494307507797e-13
2.635	88.88888888880894	0.0	-0.00011926820594665273	234.22222222222211	0.0	-800.0	0.0	-1.0585741905056705e-05	0.0	0.9999999999997737	0.0	-6.708836584500713e-07	0.0	0.0	-7.687760434697629e-05	0.0	0.0	-7.839498042380945e-05	0.0	800.0	-7.687760434697649e-05	0.0	88.88888888888852	0.0	2.8286843724168268e-19	-3.3158661002135772e-12	0.0	7.928986653945635e-18	3.3158661002230575e-13
2.64	88.88888888880247	0.0	-0.0001239983030797774	234.66666666666674	0.0	-800.0	0.0	-1.0704394010577706e-05	0.0	0.9999999999997553	0.0	-6.97490454823916e-07	0.0	0.0	-7.992651862414757e-05	0.0	0.0	-8.146156341906575e-05	0.0	800.0	-7.992651862414778e-05	0.0	88.88888888888845	0.0	3.6918134675073683e-19	-1.4447702293787729e-11	0.0	2.0548943639065145e-18	1.4447702293787876e-12
2.645	88.88888888879563	0.0	-0.00012878655881621355	235.11111111111128	0.0	-800.0	0.0	-1.084567293476036e-05	0.0	0.9999999999997361	0.0	-7.244243933413895e-07	0.0	0.0	-8.301292062958049e-05	0.0	0.0	-8.456861984477114e-05	0.0	800.0	-8.301292062958077e-05	0.0	88.88888888888839	0.0	3.134063813535181e-19	-4.736951571733682e-12	0.0	4.239338070836835e-18	4.73695157173558e-13
2.65	88.88888888878849	0.0	-0.00013364116653314723	235.5555555555559	0.0	-800.0	0.0	-1.1002611251383113e-05	0.0	0.9999999999997159	0.0	-7.517315617491639e-07	0.0	0.0	-8.614209163001823e-05	0.0	0.0	-8.772063578640838e-05	0.0	800.0	-8.614209163001849e-05	0.0	88.8888888888884	0.0	4.1002402953961137e-19	5.447494307493734e-12	0.0	5.131540302907127e-18	5.447494307496151e-13
2.655	88.88888888878093	0.0	-0.00013856926305658415	236.00000000000048	0.0	-800.0	0.0	-1.1177208065113027e-05	0.0	0.9999999999996948	0.0	-7.794521046935208e-07	0.0	0.0	-8.931863186306477e-05	0.0	0.0	-9.09226700307614e-05	0.0	800.0	-8.931863186306506e-05	0.0	88.88888888888843	0.0	3.5524961530245175e-19	6.39488462184047e-12	0.0	-3.2716228794353914e-18	6.394884621841308e-13
2.66	88.88888888877298	0.0	-0.00014357974512558665	236.44444444444494	0.0	-800.0	0.0	-1.1373761282558622e-05	0.0	0.9999999999996725	0.0	-8.076360663316866e-07	0.0	0.0	-9.254827596671683e-05	0.0	0.0	-9.418101262416118e-05	0.0	800.0	-9.25482759667171e-05	0.0	88.88888888888846	0.0	3.960348001677575e-19	8.526512829120627e-12	0.0	6.6191291899901635e-18	8.526512829123196e-13
2.665	88.88888888876461	0.0	-0.0001486824871966528	236.8888888888894	0.0	-800.0	0.0	-1.1591888225132328e-05	0.0	0.999999999999649	0.0	-8.363389904814628e-07	0.0	0.0	-9.583738879365054e-05	0.0	0.0	-9.750184398359879e-05	0.0	800.0	-9.583738879365078e-05	0.0	88.8888888888885	0.0	3.9778991914482376e-19	1.4210854715201044e-12	0.0	-4.4436576257558194e-18	1.4210854715270522e-13
2.67	88.88888888875574	0.0	-0.00015388629789186295	237.3333333333338	0.0	-800.0	0.0	-1.1827995279647062e-05	0.0	0.9999999999996241	0.0	-8.656104256420513e-07	0.0	0.0	-9.91916481836369e-05	0.0	0.0	-0.0001008903150317212	0.0	800.0	-9.919164818363718e-05	0.0	88.88888888888849	0.0	3.5319870887915064e-19	5.684341886080418e-12	0.0	-1.514350510798501e-17	5.68434188610059e-13
2.675	88.8888888887464	0.0	-0.0001591986272155063	237.77777777777834	0.0	-800.0	0.0	-1.208018413542421e-05	0.0	0.9999999999995979	0.0	-8.954922780875797e-07	0.0	0.0	-0.00010261585624196113	0.0	0.0	-0.00010435103286522494	0.0	800.0	-0.00010261585624196144	0.0	88.88888888888854	0.0	2.7918034253896417e-19	-4.973799150320365e-12	0.0	1.738864905682181e-18	4.97379915032067e-13
2.68	88.88888888873647	0.0	-0.00016462674498013785	238.2222222222228	0.0	-800.0	0.0	-1.234928345038366e-05	0.0	0.9999999999995699	0.0	-9.260254405136704e-07	0.0	0.0	-0.0001061146989263674	0.0	0.0	-0.00010788884197381387	0.0	800.0	-0.00010611469892636774	0.0	88.88888888888845	0.0	3.557684938000431e-19	-5.2106467289070494e-12	0.0	5.268792719985427e-18	5.210646728909713e-13
2.685	88.88888888872603	0.0	-0.00017017842261786526	238.66666666666742	0.0	-800.0	0.0	-1.2636235158119632e-05	0.0	0.9999999999995406	0.0	-9.572536272259284e-07	0.0	0.0	-0.0001096931855272868	0.0	0.0	-0.00011150885669128951	0.0	800.0	-0.00010969318552728715	0.0	88.8888888888885	0.0	3.140163041710254e-19	9.000207986293995e-12	0.0	-7.973393430925503e-18	9.000207986297528e-13
2.69	88.88888888871496	0.0	-0.00017586150812171487	239.11111111111202	0.0	-800.0	0.0	-1.2940403668540758e-05	0.0	0.9999999999995095	0.0	-9.89220983185128e-07	0.0	0.0	-0.00011335637468459757	0.0	0.0	-0.00011521600926830473	0.0	800.0	-0.00011335637468459791	0.0	88.8888888888885	0.0	3.157588387364932e-19	-5.921189464667102e-12	0.0	1.4028042683696062e-17	5.921189464683719e-13
2.695	88.88888888870324	0.0	-0.00018168335800467742	239.55555555555642	0.0	-800.0	0.0	-1.326049699492814e-05	0.0	0.9999999999994765	0.0	-1.0219688887768424e-06	0.0	0.0	-0.00011710900824119567	0.0	0.0	-0.00011901486182858145	0.0	800.0	-0.00011710900824119598	0.0	88.88888888888846	0.0	4.37506707886128e-19	-1.1842378929334205e-12	0.0	2.1945493426044913e-17	1.18423789313676e-13
2.7	88.88888888869086	0.0	-0.00018765089324067084	240.00000000000082	0.0	-800.0	0.0	-1.3595988249838616e-05	0.0	0.9999999999994417	0.0	-1.0555362744793598e-06	0.0	0.0	-0.00012095554730128179	0.0	0.0	-0.00012290982555370776	0.0	800.0	-0.00012095554730128208	0.0	88.88888888888849	0.0	5.020091624990437e-19	2.6053233644535247e-12	0.0	4.951740645051318e-18	2.60532336445823e-13
2.705	88.88888888867773	0.0	-0.00019377100148466523	240.4444444444453	0.0	-800.0	0.0	-1.394713789720558e-05	0.0	0.9999999999994047	0.0	-1.0899618833518874e-06	0.0	0.0	-0.00012490043149241198	0.0	0.0	-0.00012690538624269225	0.0	800.0	-0.00012490043149241228	0.0	88.88888888888847	0.0	4.872892887086459e-19	0.0	0.0	-1.0749239919423105e-17	1.0749239919423107e-18
2.71	88.88888888866381	0.0	-0.00020005069795774185	240.88888888888985	0.0	-800.0	0.0	-1.4314122499175394e-05	0.0	0.9999999999993656	0.0	-1.125285176013008e-06	0.0	0.0	-0.00012894818266838973	0.0	0.0	-0.00013100608027587256	0.0	800.0	-0.0001289481826683901	0.0	88.88888888888849	0.0	4.169150466135372e-19	4.2632564145603135e-12	0.0	-8.563163550400615e-18	4.2632564145689133e-13
2.715	88.88888888864908	0.0	-0.00020649696843511573	241.3333333333344	0.0	-800.0	0.0	-1.4696645566702524e-05	0.0	0.9999999999993242	0.0	-1.161545447448307e-06	0.0	0.0	-0.00013310330370287527	0.0	0.0	-0.00013521635909573138	0.0	800.0	-0.00013310330370287565	0.0	88.88888888888852	0.0	4.017081759675056e-19	5.921189464667102e-12	0.0	-9.937335072536713e-18	5.921189464675441e-13
2.72	88.88888888863346	0.0	-0.00021311662345036575	241.77777777777882	0.0	-800.0	0.0	-1.509430424492083e-05	0.0	0.9999999999992804	0.0	-1.198781006909166e-06	0.0	0.0	-0.00013737018451270955	0.0	0.0	-0.0001395405587353335	0.0	800.0	-0.00013737018451270993	0.0	88.88888888888854	0.0	3.3115007359399226e-19	4.736951571733681e-13	0.0	3.6007368147532155e-19	4.73695157173505e-14
2.725	88.88888888861689	0.0	-0.00021991635182856968	242.22222222222325	0.0	-800.0	0.0	-1.550698394006384e-05	0.0	0.9999999999992337	0.0	-1.2370294790366482e-06	0.0	0.0	-0.00014175313656416977	0.0	0.0	-0.00014398298239904784	0.0	800.0	-0.00014175313656417018	0.0	88.88888888888853	0.0	3.974096089045294e-19	-9.473903143467363e-13	0.0	4.926991864582569e-18	9.473903143595479e-14
2.73	88.88888888859933	0.0	-0.0002269028517959792	242.66666666666765	0.0	-800.0	0.0	-1.5934798854938556e-05	0.0	0.9999999999991844	0.0	-1.27632854135342e-06	0.0	0.0	-0.00014625647738331863	0.0	0.0	-0.00014854796600793753	0.0	800.0	-0.00014625647738331898	0.0	88.88888888888854	0.0	3.6092208922120683e-19	-4.736951571733681e-13	0.0	-5.681653542286222e-18	4.736951572074419e-14
2.735	88.88888888858071	0.0	-0.00023408287072866805	243.11111111111205	0.0	-800.0	0.0	-1.6377817662501647e-05	0.0	0.999999999999132	0.0	-1.3167161478498962e-06	0.0	0.0	-0.00015088455617708895	0.0	0.0	-0.00015323986515641865	0.0	800.0	-0.00015088455617708938	0.0	88.88888888888853	0.0	3.4426478911024817e-19	-4.500103993146998e-12	0.0	-1.1178304098632467e-17	4.5001039931608814e-13
2.74	88.88888888856094	0.0	-0.00024146315446108544	243.5555555555565	0.0	-800.0	0.0	-1.683597313500465e-05	0.0	0.9999999999990765	0.0	-1.3582302438448551e-06	0.0	0.0	-0.0001556417211587174	0.0	0.0	-0.000158063016179576	0.0	800.0	-0.00015564172115871793	0.0	88.88888888888852	0.0	2.468907277769386e-19	-4.736951571733681e-13	0.0	-2.256282110482509e-17	4.736951577107189e-14
2.745	88.88888888854001	0.0	-0.0002490504101484346	244.000000000001	0.0	-800.0	0.0	-1.7309184484813266e-05	0.0	0.9999999999990177	0.0	-1.4009085570863156e-06	0.0	0.0	-0.00016053229560966802	0.0	0.0	-0.00016302173226854196	0.0	800.0	-0.0001605322956096686	0.0	88.88888888888853	0.0	1.5585696326837663e-19	6.868579779013838e-12	0.0	-3.791491934346566e-18	6.868579779014885e-13
2.75	88.88888888851783	0.0	-0.0002568513277649146	244.44444444444534	0.0	-800.0	0.0	-1.7797460690909797e-05	0.0	0.9999999999989553	0.0	-1.4447887186791488e-06	0.0	0.0	-0.0001655605917369159	0.0	0.0	-0.00016812032918673788	0.0	800.0	-0.00016556059173691645	0.0	88.88888888888856	0.0	2.0742874877583133e-19	-6.6317322004271545e-12	0.0	9.116547510147127e-18	6.631732200433422e-13
2.755	88.88888888849426	0.0	-0.0002648726166176718	244.88888888888982	0.0	-800.0	0.0	-1.830086516984528e-05	0.0	0.9999999999988889	0.0	-1.4899084684760534e-06	0.0	0.0	-0.00017073093420901918	0.0	0.0	-0.00017336314086508875	0.0	800.0	-0.00017073093420901984	0.0	88.88888888888847	0.0	2.560584731621995e-19	-1.2079226507920887e-11	0.0	3.6138520671961144e-17	1.2079226507974949e-12
2.76	88.88888888846931	0.0	-0.00027312100998155245	245.33333333333428	0.0	-800.0	0.0	-1.8819431695707665e-05	0.0	0.9999999999988186	0.0	-1.536305681148042e-06	0.0	0.0	-0.00017604766314357697	0.0	0.0	-0.000178754510910083	0.0	800.0	-0.00017604766314357757	0.0	88.88888888888846	0.0	5.015099563186571e-19	1.6579330501067886e-12	0.0	7.867461371745074e-18	1.6579330501254559e-13
2.765	88.88888888844284	0.0	-0.00028160324410646416	245.7777777777788	0.0	-800.0	0.0	-1.9353143212638362e-05	0.0	0.9999999999987442	0.0	-1.5840182481008443e-06	0.0	0.0	-0.0001815151205758455	0.0	0.0	-0.00018429877804206554	0.0	800.0	-0.00018151512057584614	0.0	88.88888888888847	0.0	3.401953832931681e-19	2.3684757858668407e-13	0.0	-1.5524769124199596e-17	2.3684757909548907e-14
2.77	88.88888888841477	0.0	-0.0002903260430690183	246.22222222222317	0.0	-800.0	0.0	-1.9901969324940835e-05	0.0	0.9999999999986653	0.0	-1.6330839922654017e-06	0.0	0.0	-0.00018713764069444835	0.0	0.0	-0.00019000027227365562	0.0	800.0	-0.00018713764069444897	0.0	88.88888888888846	0.0	4.084763475188435e-19	1.8947806286934726e-12	0.0	1.587626910945764e-17	1.894780628759986e-13
2.775	88.88888888838503	0.0	-0.0002992961200686299	246.66666666666757	0.0	-800.0	0.0	-2.0465892218299613e-05	0.0	0.9999999999985817	0.0	-1.6835406753884255e-06	0.0	0.0	-0.00019291955067681274	0.0	0.0	-0.000195863318514047	0.0	800.0	-0.00019291955067681337	0.0	88.88888888888849	0.0	4.432757502157294e-19	2.1316282072801568e-12	0.0	-2.1353143005355406e-18	2.1316282072812265e-13
2.78	88.88888888835348	0.0	-0.0003085201811400534	247.11111111111197	0.0	-800.0	0.0	-2.104489295753783e-05	0.0	0.999999999998493	0.0	-1.7354260189154096e-06	0.0	0.0	-0.00019886517308218669	0.0	0.0	-0.00020189223624790496	0.0	800.0	-0.00019886517308218734	0.0	88.88888888888847	0.0	3.735767451316245e-19	0.0	0.0	-3.3048002407049183e-17	3.3048002407049184e-18
2.785	88.88888888832004	0.0	-0.0003180049190500095	247.55555555555645	0.0	-800.0	0.0	-2.163892811902251e-05	0.0	0.9999999999983991	0.0	-1.7887776696591607e-06	0.0	0.0	-0.00020497882191754203	0.0	0.0	-0.00020809133251994014	0.0	800.0	-0.0002049788219175428	0.0	88.88888888888849	0.0	1.8911742222755685e-19	2.368475785866841e-12	0.0	3.6393741055885594e-19	2.368475785866869e-13
2.79	88.88888888828463	0.0	-0.000327757000739204	248.0000000000009	0.0	-800.0	0.0	-2.2247926265187546e-05	0.0	0.9999999999982994	0.0	-1.8436331291611514e-06	0.0	0.0	-0.00021126479454298215	0.0	0.0	-0.00021446489390950806	0.0	800.0	-0.0002112647945429829	0.0	88.88888888888849	0.0	3.580898680365483e-19	4.026408835973629e-12	0.0	1.3103756865093945e-17	4.026408835994952e-13
2.795	88.8888888882471	0.0	-0.00033778305730572237	248.4444444444454	0.0	-800.0	0.0	-2.2871799644038717e-05	0.0	0.9999999999981939	0.0	-1.9000296973481137e-06	0.0	0.0	-0.0002177273652152629	0.0	0.0	-0.00022101718185686968	0.0	800.0	-0.0002177273652152636	0.0	88.88888888888852	0.0	2.9754448882158713e-19	-1.4210854715201044e-12	0.0	9.780131568273477e-18	1.421085471553759e-13
2.8	88.88888888820733	0.0	-0.0003480896786515038	248.88888888888988	0.0	-800.0	0.0	-2.3510450578827016e-05	0.0	0.999999999998082	0.0	-1.958004442418458e-06	0.0	0.0	-0.00022437078163703043	0.0	0.0	-0.00022775242981995858	0.0	800.0	-0.00022437078163703116	0.0	88.88888888888849	0.0	4.547678659781768e-19	4.736951571733681e-13	0.0	1.2861142159724165e-17	4.7369515734796257e-14
2.805	88.88888888816521	0.0	-0.0003586834083879381	249.3333333333344	0.0	-800.0	0.0	-2.4163767232287744e-05	0.0	0.9999999999979636	0.0	-2.017594172186254e-06	0.0	0.0	-0.00023119926167308353	0.0	0.0	-0.00023467483921769207	0.0	800.0	-0.00023119926167308426	0.0	88.88888888888853	0.0	3.757335116641369e-19	8.526512829120627e-12	0.0	-3.284964777855787e-17	8.526512829183907e-13
2.81	88.8888888881206	0.0	-0.0003695707360780667	249.77777777777888	0.0	-800.0	0.0	-2.483161751580579e-05	0.0	0.9999999999978383	0.0	-2.078835390443613e-06	0.0	0.0	-0.00023821698834987067	0.0	0.0	-0.00024178857362838657	0.0	800.0	-0.0002382169883498714	0.0	88.88888888888854	0.0	2.119335211934446e-19	-1.4210854715201044e-12	0.0	-5.497592158950932e-18	1.4210854715307385e-13
2.815	88.88888888807338	0.0	-0.0003807580878591588	250.22222222222337	0.0	-800.0	0.0	-2.5513848540192464e-05	0.0	0.9999999999977054	0.0	-2.141764244212676e-06	0.0	0.0	-0.0002454281038110131	0.0	0.0	-0.0002490977528308323	0.0	800.0	-0.00024542810381101394	0.0	88.88888888888852	0.0	3.2584859725733427e-19	-4.500103993146998e-12	0.0	2.1014854026467983e-17	4.500103993196066e-13
2.82	88.8888888880234	0.0	-0.00039225181778121176	250.66666666666785	0.0	-800.0	0.0	-2.6210289204652093e-05	0.0	0.9999999999975648	0.0	-2.206416475024683e-06	0.0	0.0	-0.00025283670373429793	0.0	0.0	-0.0002566064475870521	0.0	800.0	-0.00025283670373429874	0.0	88.8888888888885	0.0	3.855440802608341e-19	-6.158037043253786e-12	0.0	2.0674425093002713e-17	6.158037043288492e-13
2.825	88.88888888797052	0.0	-0.0004040581999692876	251.11111111111236	0.0	-800.0	0.0	-2.6920750726041716e-05	0.0	0.999999999997416	0.0	-2.272827374833108e-06	0.0	0.0	-0.00026044683227969493	0.0	0.0	-0.0002643186745766823	0.0	800.0	-0.0002604468322796958	0.0	88.88888888888846	0.0	5.037267426150884e-19	-4.736951571733682e-12	0.0	-1.6806783560568822e-18	4.73695157173398e-13
2.83	88.88888888791458	0.0	-0.000416183420337692	251.55555555555685	0.0	-800.0	0.0	-2.7645024443372054e-05	0.0	0.9999999999972586	0.0	-2.3410317394059267e-06	0.0	0.0	-0.00026826247674850386	0.0	0.0	-0.00027223839070238896	0.0	800.0	-0.00026826247674850484	0.0	88.88888888888846	0.0	3.944931784752307e-19	7.105427357600522e-13	0.0	-9.000119861377276e-19	7.105427357606222e-14
2.835	88.88888888785542	0.0	-0.00042863356718213013	252.0000000000013	0.0	-800.0	0.0	-2.8382879445886585e-05	0.0	0.9999999999970922	0.0	-2.4110638154064846e-06	0.0	0.0	-0.0002762875615192693	0.0	0.0	-0.0002803694867157791	0.0	800.0	-0.00027628756151927027	0.0	88.88888888888846	0.0	4.982820843359272e-19	3.789561257386945e-12	0.0	-1.0507525375743022e-18	3.7895612573870906e-13
2.84	88.88888888779287	0.0	-0.0004414146210158766	252.4444444444458	0.0	-800.0	0.0	-2.9134061575824388e-05	0.0	0.9999999999969164	0.0	-2.4829572432219538e-06	0.0	0.0	-0.00028452594149640356	0.0	0.0	-0.00028871578055762466	0.0	800.0	-0.0002845259414964046	0.0	88.88888888888849	0.0	3.959875331958125e-19	-1.8947806286934726e-12	0.0	6.4868142136640125e-18	1.8947806287045767e-13
2.845	88.88888888772676	0.0	-0.0004545324441508343	252.88888888889034	0.0	-800.0	0.0	-2.9898292987321644e-05	0.0	0.9999999999967303	0.0	-2.556744998356793e-06	0.0	0.0	-0.00029298139539437256	0.0	0.0	-0.00029728101057172084	0.0	800.0	-0.0002929813953943736	0.0	88.88888888888845	0.0	5.787267326342052e-19	-5.684341886080418e-12	0.0	3.169209100028997e-17	5.684341886168765e-13
2.85	88.88888888765693	0.0	-0.00046799276999882856	253.3333333333348	0.0	-800.0	0.0	-3.067527127320535e-05	0.0	0.9999999999965338	0.0	-2.632459331252525e-06	0.0	0.0	-0.0003016576188415496	0.0	0.0	-0.00030606882846858925	0.0	800.0	-0.0003016576188415508	0.0	88.88888888888845	0.0	6.488415120415876e-19	-3.3158661002135772e-12	0.0	7.367887035927836e-19	3.3158661002136593e-13
2.855	88.88888888758315	0.0	-0.0004818011918757244	253.77777777777928	0.0	-800.0	0.0	-3.1464668189426555e-05	0.0	0.9999999999963263	0.0	-2.7101317043108953e-06	0.0	0.0	-0.0003105582171636019	0.0	0.0	-0.00031508279192375824	0.0	800.0	-0.00031055821716360313	0.0	88.88888888888842	0.0	6.195884550846019e-19	-4.026408835973629e-12	0.0	2.6970513487581134e-18	4.0264088359745325e-13
2.86	88.88888888750525	0.0	-0.0004959631512517625	254.22222222222376	0.0	-800.0	0.0	-3.226612852482505e-05	0.0	0.9999999999961072	0.0	-2.7897927258020137e-06	0.0	0.0	-0.0003196866978099205	0.0	0.0	-0.0003243263568522546	0.0	800.0	-0.0003196866978099217	0.0	88.88888888888842	0.0	6.786739905834159e-19	1.6579330501067886e-12	0.0	7.592351545748348e-18	1.657933050124173e-13
2.865	88.88888888742304	0.0	-0.0005104839256016212	254.66666666666828	0.0	-800.0	0.0	-3.3079269440574784e-05	0.0	0.9999999999958761	0.0	-2.871472081520951e-06	0.0	0.0	-0.00032904646252204366	0.0	0.0	-0.00033380286949386033	0.0	800.0	-0.0003290464625220449	0.0	88.88888888888843	0.0	6.555634800433336e-19	3.079018521626893e-12	0.0	-2.5414322443087283e-17	3.0790185217317784e-13
2.87	88.88888888733631	0.0	-0.0005253686160409779	255.11111111111276	0.0	-800.0	0.0	-3.3903680105605084e-05	0.0	0.9999999999956322	0.0	-2.9551984652433974e-06	0.0	0.0	-0.0003386407993644624	0.0	0.0	-0.00034351555839392514	0.0	800.0	-0.00033864079936446375	0.0	88.88888888888845	0.0	4.811006189665093e-19	1.1842378929334205e-12	0.0	-1.0985426454795756e-17	1.184237892984373e-13
2.875	88.88888888724485	0.0	-0.0005406221348138239	255.55555555555725	0.0	-800.0	0.0	-3.473892137594825e-05	0.0	0.9999999999953749	0.0	-3.040999508341813e-06	0.0	0.0	-0.0003484728746592252	0.0	0.0	-0.00035346752629231897	0.0	800.0	-0.0003484728746592265	0.0	88.88888888888845	0.0	5.638608287346895e-19	1.4210854715201044e-12	0.0	1.0393670467549477e-17	1.4210854715581137e-13
2.88	88.88888888714844	0.0	-0.000556249192648356	256.0000000000017	0.0	-800.0	0.0	-3.558452554082503e-05	0.0	0.9999999999951038	0.0	-3.1289017086623112e-06	0.0	0.0	-0.00035854572483582926	0.0	0.0	-0.00036366174193964344	0.0	800.0	-0.0003585457248358305	0.0	88.88888888888846	0.0	6.041783674020538e-19	-4.026408835973629e-12	0.0	5.06211930886864e-17	4.0264088362918414e-13
2.885	88.88888888704685	0.0	-0.0005722542860258344	256.44444444444616	0.0	-800.0	0.0	-3.643999619051135e-05	0.0	0.9999999999948179	0.0	-3.2189303589119877e-06	0.0	0.0	-0.00036886224822501294	0.0	0.0	-0.0003741010318755896	0.0	800.0	-0.00036886224822501424	0.0	88.88888888888842	0.0	1.0165652394746789e-18	-5.921189464667102e-12	0.0	5.234820759767988e-17	5.921189464898503e-13
2.89	88.88888888693984	0.0	-0.0005886416844231536	256.8888888888907	0.0	-800.0	0.0	-3.730480822626929e-05	0.0	0.9999999999945169	0.0	-3.311109474898382e-06	0.0	0.0	-0.00037942519683560377	0.0	0.0	-0.0003847880722101411	0.0	800.0	-0.0003794251968356051	0.0	88.88888888888842	0.0	1.0654643195650356e-18	0.0	0.0	3.3070085932287384e-18	3.307008593228739e-19
2.895	88.88888888682717	0.0	-0.0006054154175768317	257.3333333333352	0.0	-800.0	0.0	-3.8178407924471884e-05	0.0	0.9999999999942001	0.0	-3.405461723889418e-06	0.0	0.0	-0.0003902371681451724	0.0	0.0	-0.0003957253804231471	0.0	800.0	-0.00039023716814517377	0.0	88.88888888888842	0.0	1.113255990177539e-18	1.1842378929334205e-12	0.0	1.283941739496425e-17	1.1842378930030224e-13
2.9	88.88888888670861	0.0	-0.0006225792627691776	257.77777777777965	0.0	-800.0	0.0	-3.906021296244504e-05	0.0	0.9999999999938667	0.0	-3.5020083530980913e-06	0.0	0.0	-0.00040130059690498133	0.0	0.0	-0.00040691530717129934	0.0	800.0	-0.00040130059690498263	0.0	88.88888888888843	0.0	1.1792838574311978e-18	1.1842378929334205e-12	0.0	4.455072845692273e-18	1.1842378929418005e-13
2.905	88.8888888865839	0.0	-0.0006401367321082524	258.2222222222241	0.0	-800.0	0.0	-3.994961236028197e-05	0.0	0.999999999993516	0.0	-3.6007691181322556e-06	0.0	0.0	-0.0004126177469409343	0.0	0.0	-0.00041836002807843926	0.0	800.0	-0.0004126177469409357	0.0	88.88888888888843	0.0	1.1567564987060703e-18	1.1842378929334205e-12	0.0	-7.005663061926033e-18	1.1842378929541425e-13
2.91	88.88888888645279	0.0	-0.0006580910597586846	258.6666666666686	0.0	-800.0	0.0	-4.0845966317049814e-05	0.0	0.9999999999931473	0.0	-3.7017622111679566e-06	0.0	0.0	-0.0004241907029228469	0.0	0.0	-0.0004300615354789424	0.0	800.0	-0.00042419070292284825	0.0	88.88888888888845	0.0	1.1461640170517305e-18	5.2106467289070494e-12	0.0	7.748833288652894e-18	5.210646728912811e-13
2.915	88.88888888631502	0.0	-0.0006764451890763449	259.11111111111313	0.0	-800.0	0.0	-4.174860593595453e-05	0.0	0.9999999999927598	0.0	-3.8050041885819776e-06	0.0	0.0	-0.000436021362071747	0.0	0.0	-0.0004420216300823683	0.0	800.0	-0.00043602136207174827	0.0	88.88888888888847	0.0	1.2686370508573907e-18	-4.736951571733681e-13	0.0	5.348432481968272e-17	4.736951601927921e-14
2.92	88.8888888861703	0.0	-0.0006952017595870562	259.55555555555765	0.0	-800.0	0.0	-4.265683279523915e-05	0.0	0.9999999999923527	0.0	-3.910509897707085e-06	0.0	0.0	-0.000448111425766644	0.0	0.0	-0.00045424191251518134	0.0	800.0	-0.00044811142576664525	0.0	88.88888888888845	0.0	1.6093982773225556e-18	-5.921189464667102e-12	0.0	4.767792805216995e-17	5.921189464859055e-13
2.925	88.88888888601838	0.0	-0.0007143630937433134	260.0000000000021	0.0	-800.0	0.0	-4.356991837932885e-05	0.0	0.9999999999919253	0.0	-4.018292402338572e-06	0.0	0.0	-0.00046046239100820793	0.0	0.0	-0.0004667237746995073	0.0	800.0	-0.0004604623910082093	0.0	88.88888888888843	0.0	1.6535710916914921e-18	2.3684757858668407e-13	0.0	-3.446372468271527e-17	2.368475810940948e-14
2.93	88.88888888585896	0.0	-0.0007339311833955712	260.4444444444466	0.0	-800.0	0.0	-4.448710336507866e-05	0.0	0.999999999991477	0.0	-4.12836290663526e-06	0.0	0.0	-0.00047307554169846635	0.0	0.0	-0.00047946839102741437	0.0	800.0	-0.0004730755416984678	0.0	88.88888888888845	0.0	1.3649606605941523e-18	3.552713678800261e-12	0.0	-3.293764886036802e-17	3.5527136789529457e-13
2.935	88.88888888569177	0.0	-0.0007539076759217618	260.8888888888911	0.0	-800.0	0.0	-4.5407596808077425e-05	0.0	0.9999999999910069	0.0	-4.240730677098034e-06	0.0	0.0	-0.00048595193970020245	0.0	0.0	-0.0004924767093020879	0.0	800.0	-0.000485951939700204	0.0	88.88888888888846	0.0	1.3809595979932195e-18	3.3158661002135772e-12	0.0	7.406424568881698e-18	3.315866100221849e-13
2.94	88.88888888551654	0.0	-0.0007742938599813241	261.3333333333356	0.0	-800.0	0.0	-4.6330575270794514e-05	0.0	0.999999999990514	0.0	-4.355402962436249e-06	0.0	0.0	-0.0004990924156543232	0.0	0.0	-0.0005057494414292373	0.0	800.0	-0.0004990924156543248	0.0	88.88888888888847	0.0	1.4047652593585886e-18	3.552713678800261e-12	0.0	1.630156772214378e-17	3.552713678837661e-13
2.945	88.88888888533296	0.0	-0.0007950906508744074	261.77777777778005	0.0	-800.0	0.0	-4.725518192698289e-05	0.0	0.9999999999899977	0.0	-4.4723849112132615e-06	0.0	0.0	-0.0005124975595427305	0.0	0.0	-0.0005192870538519333	0.0	800.0	-0.0005124975595427319	0.0	88.88888888888849	0.0	1.5276224076740505e-18	0.0	0.0	1.5533116882289028e-17	1.5533116882289029e-18
2.95	88.88888888514073	0.0	-0.0008162985755076372	262.22222222222456	0.0	-800.0	0.0	-4.818052569224179e-05	0.0	0.999999999989457	0.0	-4.5916794872788545e-06	0.0	0.0	-0.0005261677109975924	0.0	0.0	-0.0005330897577363697	0.0	800.0	-0.000526167710997594	0.0	88.88888888888847	0.0	1.5601690747121078e-18	-3.552713678800261e-12	0.0	2.1193065064944104e-17	3.552713678863473e-13
2.955	88.88888888493956	0.0	-0.000837917756987308	262.666666666669	0.0	-800.0	0.0	-4.91056804144991e-05	0.0	0.9999999999888912	0.0	-4.713287383105951e-06	0.0	0.0	-0.0005401029493704618	0.0	0.0	-0.0005471574989257158	0.0	800.0	-0.0005401029493704633	0.0	88.88888888888846	0.0	1.6922031078839684e-18	2.368475785866841e-12	0.0	-8.77841330327579e-18	2.368475785883109e-13
2.96	88.88888888472923	0.0	-0.0008599383461659341	263.11111111111364	0.0	-800.0	0.0	-4.957855658502657e-05	0.0	0.9999999999882999	0.0	-4.837153197239963e-06	0.0	0.0	-0.0005542969261222853	0.0	0.0	-0.0005613607091590796	0.0	800.0	-0.0005542969261222866	0.0	88.8888888888885	0.0	1.4498269571411996e-18	9.710750722054047e-12	0.0	-6.156280393401911e-17	9.71075072224919e-13
2.965	88.88888888452098	0.0	-0.0008812025000496216	263.5555555555581	0.0	-800.0	0.0	-4.6261874196292276e-05	0.0	0.9999999999877143	0.0	-4.956764062840006e-06	0.0	0.0	-0.0005680033216880275	0.0	0.0	-0.000574613759878144	0.0	800.0	-0.0005680033216880291	0.0	88.88888888888854	0.0	1.171590265303368e-18	3.789561257386945e-12	0.0	-4.3821927302793674e-17	3.78956125764032e-13
2.97	88.88888888432056	0.0	-0.0009011921892985136	264.00000000000256	0.0	-800.0	0.0	-4.383672910986273e-05	0.0	0.9999999999871506	0.0	-5.069206064869261e-06	0.0	0.0	-0.0005808882260007451	0.0	0.0	-0.0005871720577064119	0.0	800.0	-0.0005808882260007465	0.0	88.88888888888854	0.0	1.0890345701087e-18	2.6053233644535247e-12	0.0	4.0536215601984396e-17	2.6053233647688763e-13
2.975	88.8888888841249	0.0	-0.0009202930108156345	264.44444444444684	0.0	-800.0	0.0	-4.225177126740183e-05	0.0	0.9999999999866002	0.0	-5.1766481859072954e-06	0.0	0.0	-0.0005932001861557329	0.0	0.0	-0.0005992762985592839	0.0	800.0	-0.0005932001861557342	0.0	88.88888888888857	0.0	1.43517964979177e-18	7.105427357600522e-12	0.0	6.626545148517136e-18	7.105427357603612e-13
2.98	88.88888888393069	0.0	-0.0009388636706366138	264.8888888888912	0.0	-800.0	0.0	-4.1438323373412404e-05	0.0	0.999999999986054	0.0	-5.281108147404588e-06	0.0	0.0	-0.0006051704159996844	0.0	0.0	-0.0006111475037562589	0.0	800.0	-0.0006051704159996858	0.0	88.8888888888886	0.0	1.126369096929187e-18	5.2106467289070494e-12	0.0	-4.690912669403014e-17	5.210646729118201e-13
2.985	88.88888888373481	0.0	-0.0009572293911426877	265.3333333333356	0.0	-800.0	0.0	-4.131531078063832e-05	0.0	0.9999999999855032	0.0	-5.38441532525566e-06	0.0	0.0	-0.0006170085465684003	0.0	0.0	-0.0006229834684412693	0.0	800.0	-0.0006170085465684017	0.0	88.88888888888862	0.0	1.0726737709562076e-18	1.8947806286934726e-12	0.0	-3.6724328931703345e-18	1.8947806286970314e-13
2.99	88.88888888353422	0.0	-0.0009756775129158	265.77777777778005	0.0	-800.0	0.0	-4.179385471866026e-05	0.0	0.999999999984939	0.0	-5.4881860102340175e-06	0.0	0.0	-0.0006288997911414589	0.0	0.0	-0.0006349565258660809	0.0	800.0	-0.0006288997911414605	0.0	88.88888888888862	0.0	1.0035351410661995e-18	2.368475785866841e-12	0.0	-5.280989047039955e-17	2.368475786455592e-13
2.995	88.88888888332613	0.0	-0.0009944548610901231	266.22222222222456	0.0	-800.0	0.0	-4.2781200239543224e-05	0.0	0.9999999999843538	0.0	-5.593808593719448e-06	0.0	0.0	-0.0006410032476516116	0.0	0.0	-0.0006472124369472312	0.0	800.0	-0.0006410032476516131	0.0	88.88888888888863	0.0	6.728539764781059e-19	7.105427357600522e-13	0.0	7.32486936428367e-18	7.105427357978077e-14
3.0	88.88888888310798	0.0	-0.001013766814944551	266.666666666669	0.0	-800.0	0.0	-4.418419039281737e-05	0.0	0.9999999999837402	0.0	-5.702438334155803e-06	0.0	0.0	-0.0006534512989650196	0.0	0.0	-0.0006598702751007867	0.0	800.0	-0.0006534512989650212	0.0	88.88888888888862	0.0	1.0964041693285594e-18	-3.079018521626893e-12	0.0	8.52412682788493e-17	3.079018522806827e-13
3.005	88.88888888287751	0.0	-0.0010337778072127839	267.1111111111135	0.0	-800.0	0.0	-4.591207205721615e-05	0.0	0.999999999983092	0.0	-5.815000165670213e-06	0.0	0.0	-0.0006663499347253102	0.0	0.0	-0.0006730231148886826	0.0	800.0	-0.0006663499347253117	0.0	88.8888888888886	0.0	1.3761338351980357e-18	-4.736951571733682e-12	0.0	4.9993937299163815e-17	4.736951571997501e-13
3.01	88.88888888263276	0.0	-0.0010546129094612488	267.5555555555579	0.0	-800.0	0.0	-4.787884299210322e-05	0.0	0.9999999999824035	0.0	-5.932197615823893e-06	0.0	0.0	-0.0006797797732525432	0.0	0.0	-0.0006867393930457687	0.0	800.0	-0.0006797797732525448	0.0	88.88888888888857	0.0	1.515297914094335e-18	7.105427357600522e-13	0.0	-5.3269027486165854e-17	7.105427377568282e-14
3.015	88.88888888237207	0.0	-0.0010763603640852007	268.00000000000233	0.0	-800.0	0.0	-5.000503368137301e-05	0.0	0.9999999999816704	0.0	-6.0545270480902125e-06	0.0	0.0	-0.0006937976936109781	0.0	0.0	-0.0007010647799675307	0.0	800.0	-0.00069379769361098	0.0	88.8888888888886	0.0	1.0243676966542803e-18	-1.4210854715201044e-12	0.0	-3.464568142769908e-18	1.421085471524328e-13
3.02	88.88888888209411	0.0	-0.0010990747957968657	268.4444444444468	0.0	-800.0	0.0	-5.221901098117354e-05	0.0	0.9999999999808886	0.0	-6.182295726475503e-06	0.0	0.0	-0.0007084389056621352	0.0	0.0	-0.0007160244246653745	0.0	800.0	-0.0007084389056621371	0.0	88.88888888888856	0.0	1.4784167101486835e-18	-9.473903143467364e-12	0.0	4.3963165198107324e-17	9.47390314356937e-13
3.025	88.88888888179783	0.0	-0.0011227809012643879	268.8888888888912	0.0	-800.0	0.0	-5.4457832085570324e-05	0.0	0.9999999999800553	0.0	-6.315642569738125e-06	0.0	0.0	-0.000723719328323115	0.0	0.0	-0.000731625444365052	0.0	800.0	-0.0007237193283231171	0.0	88.88888888888853	0.0	1.2889582921990318e-18	4.736951571733681e-13	0.0	-6.337544184064576e-17	4.736951614128527e-14
3.03	88.88888888148243	0.0	-0.0011474774232587658	269.33333333333564	0.0	-800.0	0.0	-5.6667692363641345e-05	0.0	0.9999999999791683	0.0	-6.454560505964996e-06	0.0	0.0	-0.000739638151212374	0.0	0.0	-0.000747859542400965	0.0	800.0	-0.0007396381512123763	0.0	88.88888888888854	0.0	9.942327665657288e-19	-2.3684757858668407e-13	0.0	-3.167079532668074e-17	2.368475807041625e-14
3.035	88.88888888114742	0.0	-0.001173141244088958	269.7777777777802	0.0	-800.0	0.0	-5.880402622876867e-05	0.0	0.9999999999782261	0.0	-6.598919498144051e-06	0.0	0.0	-0.0007561804731859701	0.0	0.0	-0.0007647056550073913	0.0	800.0	-0.0007561804731859726	0.0	88.88888888888852	0.0	9.534226584296452e-19	-1.397400713661436e-11	0.0	-3.8584845727079414e-17	1.3974007136667632e-12
3.04	88.88888888079272	0.0	-0.001199715099700952	270.2222222222244	0.0	-800.0	0.0	-6.070132396636587e-05	0.0	0.9999999999772283	0.0	-6.748397435971499e-06	0.0	0.0	-0.0007733093831220148	0.0	0.0	-0.0007820953033780379	0.0	800.0	-0.0007733093831220181	0.0	88.88888888888843	0.0	6.943793595945636e-19	-9.94759830064073e-12	0.0	3.878348855058688e-17	9.947598300716336e-13
3.045	88.88888888041936	0.0	-0.001227067106986735	270.6666666666687	0.0	-800.0	0.0	-6.235768715764646e-05	0.0	0.9999999999761782	0.0	-6.902252476964781e-06	0.0	0.0	-0.00079093987213388	0.0	0.0	-0.0007999594648496905	0.0	800.0	-0.0007909398721338833	0.0	88.88888888888843	0.0	1.2052217800546315e-18	6.6317322004271545e-12	0.0	-1.3882889654085748e-17	6.631732200441686e-13
3.05	88.88888888002765	0.0	-0.0012551217294812342	271.11111111111313	0.0	-800.0	0.0	-6.386280703551047e-05	0.0	0.9999999999750766	0.0	-7.060059728507874e-06	0.0	0.0	-0.000809023251114278	0.0	0.0	-0.0008182548114046574	0.0	800.0	-0.0008090232511142812	0.0	88.88888888888847	0.0	6.816164265302488e-19	-4.736951571733681e-13	0.0	4.8340656226263846e-17	4.736951596399535e-14
3.055	88.88888887961791	0.0	-0.001283811794036737	271.55555555555765	0.0	-800.0	0.0	-6.521774095717315e-05	0.0	0.9999999999739241	0.0	-7.221441341644922e-06	0.0	0.0	-0.000827516221762281	0.0	0.0	-0.0008369383179357762	0.0	800.0	-0.0008275162217622845	0.0	88.88888888888842	0.0	1.684292573160328e-18	-9.94759830064073e-12	0.0	1.208901066908253e-16	9.947598301375301e-13
3.06	88.8888888791905	0.0	-0.0013130715297392452	272.0000000000021	0.0	-800.0	0.0	-6.642741295907969e-05	0.0	0.9999999999727219	0.0	-7.3860273549847e-06	0.0	0.0	-0.0008463763896252903	0.0	0.0	-0.0008559683699684169	0.0	800.0	-0.0008463763896252938	0.0	88.8888888888884	0.0	1.6265063308641094e-18	-1.6579330501067886e-12	0.0	-4.176019151515635e-17	1.6579330506327187e-13
3.065	88.8888888787458	0.0	-0.0013428379831796698	272.44444444444656	0.0	-800.0	0.0	-6.749943935617674e-05	0.0	0.9999999999714713	0.0	-7.553463655601103e-06	0.0	0.0	-0.0008655631763510327	0.0	0.0	-0.0008753055349414591	0.0	800.0	-0.0008655631763510363	0.0	88.8888888888884	0.0	1.5109346132755086e-18	1.1842378929334205e-12	9.262292670503174e-52	1.5330534468748763e-17	1.184237893032651e-13
3.07	88.88888887828423	0.0	-0.0013730519979838847	272.88888888889096	0.0	-800.0	0.0	-6.844305397578992e-05	0.0	0.9999999999701731	0.0	-7.723417488889687e-06	0.0	0.0	-0.0008850384510706126	0.0	0.0	-0.0008949130255904547	0.0	800.0	-0.0008850384510706161	0.0	88.88888888888842	0.0	1.8003642383612435e-18	9.473903143467363e-13	3.603334569949833e-51	7.372266069595191e-17	9.473903172151584e-14
3.075	88.88888887780618	2.5752170175804026e-47	-0.0014036587090502177	273.3333333333354	-1.118848457926441e-57	-800.0	1.0089914242645661e-46	-6.926827151768961e-05	-1.865142421861965e-46	0.9999999999688286	7.317621494916679e-50	-7.895580238653562e-06	-1.448568476144666e-49	-1.6599438212722988e-47	-0.0009047668489728882	8.385507617116493e-48	-5.343239448175336e-47	-0.0009147569236511053	2.890547508762869e-47	800.0	-0.0009047668489728917	1.6599269974232723e-47	88.88888888888842	-5.55737560230228e-53	2.155323765012412e-18	9.473903143467363e-13	-6.478695629040885e-51	6.708459619188752e-17	9.473903167218624e-14
3.08	88.88888887731208	4.5560845230980183e-45	-0.0014346077448112076	273.7777777777799	-1.2305299712698798e-54	-800.0	1.7581768555902632e-44	-6.998519157053617e-05	-3.4929251446769237e-44	0.9999999999674389	1.3199774941710983e-47	-8.06966856482577e-06	-2.5628085678014044e-47	-2.9367744990284124e-45	-0.0009247159016778527	1.5126064882112758e-45	-1.0059925841737939e-44	-0.000934806204178138	5.0657111482331736e-45	800.0	-0.000924715901677856	2.9367496606318976e-45	88.88888888888843	-6.607901223811869e-52	2.3582599030019253e-18	-7.105427357600522e-13	-7.877182223425165e-49	-2.966501879158692e-17	7.105427363793066e-14
3.085	88.8888888768023	3.1430645988569406e-44	-0.0014658531501666825	274.2222222222243	-7.920440156752713e-54	-800.0	8.865314121760693e-45	-7.0603476929455e-05	-6.882808918614738e-44	0.9999999999660052	6.598579657624771e-47	-8.24542396996786e-06	-1.7679795532157674e-46	-2.0259615682078835e-44	-0.00094485598756103	7.561582352633425e-45	-2.97777209533206e-44	-0.0009550326104131746	7.605436564406423e-45	800.0	-0.0009448559875610337	2.0259487828291703e-44	88.88888888888842	-4.897599241307016e-51	1.9490241588874393e-18	3.079018521626893e-12	1.5011734449280477e-48	-5.75310736023752e-17	3.0790185221643736e-13
3.09	88.88888887627726	3.5198608471015764e-44	-0.001497353092456969	274.6666666666687	-6.464093201845817e-54	-800.0	-6.55808498038691e-44	-7.113199646738436e-05	8.214455856633456e-44	0.9999999999645286	1.94652472717184e-48	-8.422611145369183e-06	-1.9799214108755343e-46	-2.268823000327353e-44	-0.0009651601422304153	2.2324639731641462e-46	-6.245038374238097e-45	-0.000975410426342779	-1.1182092988810104e-44	800.0	-0.0009651601422304186	2.2688231738879596e-44	88.88888888888846	8.526889458282246e-51	1.9298685168567974e-18	3.3158661002135772e-12	-1.5791681660559118e-48	3.281196501758159e-17	3.3158661003759223e-13
3.095	88.88888887573734	-3.207643215376623e-44	-0.0015290694557520757	275.11111111111313	-1.628255878554493e-53	-800.0	-1.4648731122534294e-43	-7.157858262939771e-05	2.0131010699170758e-43	0.99999999996301	-2.6363983486354155e-46	-8.601015688923547e-06	1.804321049289053e-46	2.067625604889252e-44	-0.0009856037970144018	-3.021107753633407e-44	5.142605914552525e-44	-0.000995916179783745	-5.314761641597053e-44	800.0	-0.0009856037970144053	-2.067574707279601e-44	88.88888888888845	-1.6624543806404492e-50	2.1800570919941344e-18	1.1842378929334205e-12	-1.595161693639563e-48	4.073894398118009e-17	1.1842378936341502e-13
3.1	88.88888887518291	-2.096020503090918e-43	-0.001560967350934083	275.55555555555753	-1.735064792185534e-53	-800.0	-5.05053066414399e-43	-7.194989355523425e-05	7.198352312440355e-43	0.9999999999614507	-9.917335579983598e-46	-8.780441349342666e-06	1.1790202424322323e-45	1.3510676556640392e-43	-0.0010061644631719042	-1.1364548085100952e-43	2.576436626210736e-43	-0.0010165283059693987	-1.978346620944079e-43	800.0	-0.0010061644631719077	-1.3510476967499675e-43	88.88888888888847	2.7374332020009464e-52	2.237805466800459e-18	1.8947806286934726e-12	5.729847439884795e-48	-2.7083038355380904e-17	1.894780628887028e-13
3.105	88.88888887461435	-8.535280817369118e-43	-0.0015930145760462025	276.00000000000193	4.9309225654525837e-54	-800.0	-1.449573058832293e-42	-7.225136855928221e-05	2.439776838919662e-42	0.9999999999598517	-3.2848839300062915e-45	-8.960706990619615e-06	4.801125034271758e-45	5.501717758120779e-43	-0.001026821384045494	-3.764249007026069e-43	9.565882417404503e-43	-0.0010372267983818555	-6.131067539292328e-43	800.0	-0.0010268213840454975	-5.5016501376849985e-43	88.88888888888846	2.4786933272416015e-50	1.96818311956576e-18	-2.1316282072801568e-12	6.283425847857871e-49	-4.9009645072499765e-17	2.1316282078435634e-13
3.11	88.88888887403206	-2.3482416742050054e-42	-0.001625181077048122	276.4444444444464	-1.3347297925469626e-53	-800.0	-2.43287771285058e-42	-7.248724234122273e-05	4.210676627068002e-42	0.999999999958214	-8.1833684759211e-45	-9.141643558777647e-06	1.3208934205049468e-44	1.5136409363504965e-42	-0.0010475551874764158	-9.377587889464711e-43	2.1628582398674187e-42	-0.0010579928636553272	-1.310074879018174e-42	800.0	-0.0010475551874764197	-1.5136237935976644e-42	88.88888888888846	-3.972140304264639e-51	1.8598590387527642e-18	-1.6579330501067886e-12	-1.5647756626743126e-47	2.0146001281324428e-17	1.6579330502291887e-13
3.115	88.88888887343643	-4.5820722104915945e-42	-0.0016574384262037175	276.88888888889085	-6.327645198640524e-53	-800.0	-3.264937031845897e-42	-7.266060887996394e-05	5.7044899883231406e-42	0.9999999999565388	-1.5381514272595623e-44	-9.323091147801072e-06	2.577429909175139e-44	2.9535335489186264e-42	-0.0010683475495850351	-1.7626192368190297e-42	3.79707424289527e-42	-0.0010788085947836922	-2.2454104405219367e-42	800.0	-0.001068347549585039	-2.9535007397101666e-42	88.88888888888845	-8.829216788927213e-50	2.097064371962762e-18	3.789561257386945e-12	3.787326767821986e-48	1.7606377104626643e-17	3.789561257427845e-13
3.12	88.88888887282789	-7.526301672162585e-42	-0.0016897593342030638	277.33333333333525	-3.139850243992861e-53	-800.0	-4.4548655049446053e-42	-7.277351627186375e-05	7.811317229109123e-42	0.9999999999548274	-2.486631565857858e-44	-9.504896255321565e-06	4.2335683453675473e-44	4.851339053967899e-42	-0.0010891808802956512	-2.849515990156383e-42	6.034851791224309e-42	-0.0010996566714972158	-3.521635399180734e-42	800.0	-0.0010891808802956547	-4.851284863018166e-42	88.88888888888849	3.4506331631345903e-50	2.0600954090969265e-18	0.0	2.868190043031733e-47	4.447495366265426e-17	4.447495366265426e-18
3.125	88.88888887220689	-1.1507574669078585e-41	-0.0017221172106121037	277.77777777777965	-1.451339936364292e-53	-800.0	-5.703223399158441e-42	-7.282708134650027e-05	1.0131623937396799e-41	0.9999999999530806	-3.7560842136581566e-44	-9.686909310147554e-06	6.473047195781017e-44	7.417607393152575e-42	-0.0011100380400122362	-4.304227312658617e-42	8.937348247357274e-42	-0.0011205200934742692	-5.155488551141014e-42	800.0	-0.0011100380400122399	-7.417523935910901e-42	88.88888888888845	1.0537510268796587e-49	2.5136914560413896e-18	-4.026408835973629e-12	-3.0014785292800444e-47	4.7483281100002953e-17	4.026408836253614e-13
3.13	88.88888887157388	-1.6428267281204168e-41	-0.0017544857771197959	278.22222222222405	-9.077566414604507e-53	-800.0	-6.618834850049239e-42	-7.282161187330188e-05	1.1784706942937696e-41	0.9999999999513004	-5.310184616209833e-44	-9.868982496779435e-06	9.240952653500615e-44	1.0589411769052012e-41	-0.0011309020903262428	-6.085127845898163e-42	1.2313418100501747e-41	-0.0011413819485626704	-7.051645062150774e-42	800.0	-0.0011309020903262465	-1.058929177416591e-41	88.88888888888845	-1.7554800150551607e-49	2.524378491622351e-18	-5.2106467289070494e-12	-1.2820157515477403e-47	4.055515562933646e-17	5.210646729064873e-13
3.135	88.8888888709294	-2.2055679711687215e-41	-0.001786838735120622	278.6666666666685	-5.901429914489801e-53	-800.0	-7.679141690138038e-42	-7.275672971664999e-05	1.364081998975928e-41	0.9999999999494877	-7.090437349282697e-44	-1.0050967885561163e-05	1.2406391122298924e-43	1.421675867262364e-41	-0.001151756079747758	-8.125185592911804e-42	1.6221225173056478e-41	-0.0011622252162823623	-9.251557107790259e-42	800.0	-0.0011517560797477619	-1.4216595319934932e-41	88.8888888888884	3.216028458398016e-50	2.9623321661657895e-18	-4.026408835973629e-12	5.200854903284137e-47	7.401019368010904e-17	4.0264088366538273e-13
3.14	88.88888887027403	-2.85488420277272e-41	-0.0018191494877734383	279.11111111111296	6.104176239946512e-52	-800.0	-8.763250360887041e-42	-7.263148821086361e-05	1.5658432257941909e-41	0.9999999999476444	-9.143099244392387e-44	-1.0232715869261296e-05	1.6058817322797416e-43	1.840215634466275e-41	-0.0011725828645508891	-1.047740827204455e-41	2.0707035583914658e-41	-0.001183032604953547	-1.1762043410267044e-41	800.0	-0.0011725828645508935	-1.8401941779462856e-41	88.8888888888884	2.1799723772815635e-49	3.2159117523317758e-18	-4.026408835973629e-12	7.97068845291065e-48	7.969149508238239e-17	4.0264088367622645e-13
3.145	88.88888886960835	-3.589982868574496e-41	-0.0018513909108618502	279.55555555555736	1.637307395113704e-51	-800.0	-9.623013550519119e-42	-7.244447994139575e-05	1.7283492768265828e-41	0.9999999999457722	-1.1450215083214488e-43	-1.0414073874162605e-05	2.019377295515079e-43	2.3140495902130644e-41	-0.0011933649610755123	-1.3121220963249921e-41	2.565839153824755e-41	-0.001203786419701859	-1.4518833723476965e-41	800.0	-0.0011933649610755166	-2.3140222525528554e-41	88.88888888888837	1.3322407458665243e-49	3.605345920909947e-18	9.473903143467363e-13	-1.1042976170855144e-47	-3.8781221189919775e-17	9.473903151404869e-14
3.15	88.88888886893304	-4.39600712535467e-41	-0.0018835351706334817	280.00000000000176	2.3290047317081135e-51	-800.0	-1.0599893693911484e-41	-7.219393187921978e-05	1.9048729782397324e-41	0.9999999999438729	-1.3972043125720989e-43	-1.0594885335407957e-05	2.472768820073317e-43	2.833601305752027e-41	-0.0012140844283105594	-1.601108226327965e-41	3.1115450646330527e-41	-0.0012244684577175319	-1.7555479583219491e-41	800.0	-0.001214084428310564	-2.8335673686629255e-41	88.88888888888842	1.5472101134119076e-49	2.8869988246323433e-18	6.6317322004271545e-12	8.626306192768848e-48	-1.1940702108384612e-16	6.631732201502141e-13
3.155	88.88888886824881	-5.287383936729617e-41	-0.0019155535791141088	280.44444444444616	3.0762562438283506e-51	-800.0	-1.175532527421091e-41	-7.187778732887591e-05	2.1189031036737536e-41	0.9999999999419485	-1.6758992212081283e-43	-1.0774988883142328e-05	2.974171532983286e-43	3.408170221060841e-41	-0.0012347227746327624	-1.920475768397481e-41	3.7185660898214796e-41	-0.0012450599269909508	-2.092313220829848e-41	800.0	-0.0012347227746327667	-3.408128822698576e-41	88.88888888888843	1.8852904373960875e-49	2.6579020159656724e-18	-1.4210854715201044e-12	-1.7699398476255627e-48	-1.551454756160133e-17	1.4210854716047938e-13
3.16	88.88888886755645	-6.278852291303101e-41	-0.001947416484243091	280.8888888888907	3.940140125332748e-51	-800.0	-1.2935324605770966e-41	-7.149377332407868e-05	2.337092391071494e-41	0.9999999999400012	-1.9849511354578978e-43	-1.0954217724524586e-05	3.5318761656925927e-43	4.0472568781843896e-41	-0.0012552608869904204	-2.274630786698274e-41	4.3880937415241985e-41	-0.0012655413843556257	-2.462882974101074e-41	800.0	-0.0012552608869904256	-4.047207035374286e-41	88.8888888888884	1.428586193856411e-49	2.800781777808832e-18	-8.289665250533942e-12	-6.293626445414868e-48	1.38263331124638e-16	8.289665251686991e-13
3.165	88.88888886685682	-7.363862756681279e-41	-0.0019790931858134565	281.3333333333351	4.7323216912604746e-51	-800.0	-1.4052141687047267e-41	-7.103945493005688e-05	2.539557327846497e-41	0.9999999999380335	-2.3225746485384047e-43	-1.113239917089049e-05	4.142198664847291e-43	4.746639657488398e-41	-0.0012756789767202714	-2.6615273409589426e-41	5.115623325109875e-41	-0.0012858926890876375	-2.8654471799949276e-41	800.0	-0.0012756789767202762	-4.746580389803354e-41	88.88888888888837	1.4452132979979608e-49	3.846482400017999e-18	-4.736951571733681e-13	4.961322095586145e-48	1.7440930144922964e-16	4.73695189281152e-14
3.17	88.88888886615084	-8.534803332743921e-41	-0.0020105518735142125	281.7777777777795	5.494136038690378e-51	-800.0	-1.5123658898667296e-41	-7.05122765932445e-05	2.7322763195970995e-41	0.9999999999360479	-2.6871480875018017e-43	-1.1309354289240665e-05	4.800857275025779e-43	5.501412023399936e-41	-0.001295956539610954	-3.079307104424681e-41	5.898362832992184e-41	-0.0013060929683508988	-3.2987080928395105e-41	800.0	-0.0012959565396109586	-5.501342361829679e-41	88.8888888888884	1.802768865476069e-49	4.099842029572118e-18	6.6317322004271545e-12	5.3798283932165486e-48	-1.715948651631522e-16	6.631732202647149e-13
3.175	88.88888886543947	-9.789826529773472e-41	-0.002041759580143855	282.22222222222393	6.3343658077563e-51	-800.0	-1.612390165530327e-41	-6.990959272221205e-05	2.916336248422175e-41	0.9999999999340473	-3.0778413527501933e-43	-1.1484897639066603e-05	5.506812782752143e-43	6.310383128274639e-41	-0.0013160723257454904	-3.527018864805359e-41	6.733831626370274e-41	-0.0013261205914032064	-3.7606238499059813e-41	800.0	-0.0013160723257454952	-6.31030210111378e-41	88.88888888888843	1.9019585530014636e-49	2.585825943117475e-18	-1.4210854715201044e-12	-1.6157575370474456e-49	-1.4749240279913615e-16	1.421085479174116e-13
3.18	88.88888886472381	-1.1124724786696235e-40	-0.0020726821465522527	282.66666666666845	7.333014127228944e-51	-800.0	-1.7094041450391836e-41	-6.922868849851323e-05	3.0881900089959807e-41	0.9999999999320345	-3.493249848004576e-43	-1.1658837075148779e-05	6.257698430605163e-43	7.170840862217175e-41	-0.0013360043169036132	-4.0030530654449553e-41	7.618532895620021e-41	-0.0013459531497641611	-4.2503320648705845e-41	800.0	-0.0013360043169036184	-7.17074750837553e-41	88.88888888888842	1.854651197954286e-49	3.0112220323944674e-18	1.2316074086507572e-11	4.7972897947390774e-49	2.0819806374400144e-16	1.2316074088267322e-12
3.185	88.88888886400505	-1.2535967936408903e-40	-0.002103282864508104	283.11111111111285	8.350699895704756e-51	-800.0	-1.806696574888091e-41	-6.829479382400247e-05	3.2626450765302086e-41	0.9999999999300131	-3.932842231249681e-43	-1.1830966113686066e-05	7.051528505056008e-43	8.080509769491498e-41	-0.0013557288517846366	-4.506800827381099e-41	8.553211860291676e-41	-0.0013655181670083197	-4.767912507879765e-41	800.0	-0.0013557288517846396	-8.080403117259981e-41	88.88888888888856	1.957217410046549e-49	3.987066590545559e-18	2.6053233644535248e-11	1.27238257977303e-48	-3.537894139010098e-17	2.605323364455927e-12
3.19	88.88888886331074	-1.4021784451187652e-40	-0.0021324243689502184	283.5555555555573	9.329130940431312e-51	-800.0	-1.8965499853172276e-41	-6.298742188757441e-05	3.4232284359672155e-41	0.9999999999280605	-4.395789057012801e-43	-1.1994887076207858e-05	7.887306492361921e-43	9.038247897403759e-41	-0.0013745128104384113	-5.037311625057796e-41	9.5338945687422e-41	-0.0013835627341911608	-5.311234056851179e-41	800.0	-0.0013745128104384137	-9.038127040821151e-41	88.88888888888864	1.957002334152388e-49	2.817883384355856e-18	8.76336040770731e-12	-1.6919023239422312e-49	-1.2939322420130329e-16	8.763360408662572e-13
3.195	88.88888886265954	-1.55784522192976e-40	-0.002159398848214429	284.0000000000017	1.0307745518678475e-50	-800.0	-1.98486592249278e-41	-5.85370276960855e-05	3.5814838672034713e-41	0.999999999926229	-4.881007076087597e-43	-1.2146618522102204e-05	8.7629386727423e-43	1.0041655982559671e-40	-0.0013918999533780053	-5.593344077243378e-41	1.0559914118667028e-40	-0.0014003323573522925	-5.879856258142102e-41	800.0	-0.0013918999533780077	-1.0041520089509584e-40	88.88888888888864	1.95733809472241e-49	3.1618532422147874e-18	-4.026408835973629e-12	1.8310408060558808e-51	1.7387174916703394e-16	4.026408839727767e-13
3.2	88.88888886204433	-1.7204939377873938e-40	-0.0021845765598794632	284.4444444444461	1.1286336318329776e-50	-800.0	-2.0716712885133592e-41	-5.4891319290214934e-05	3.7374204888460657e-41	0.9999999999244986	-5.388115341536145e-43	-1.2288243150249731e-05	9.677844622265039e-43	1.1090068906906755e-40	-0.0014081289403151424	-6.174461649923697e-41	1.1630606220050103e-40	-0.0014160575619884654	-6.473346364993366e-41	800.0	-0.0014081289403151448	-1.108991714771939e-40	88.88888888888862	1.957130814797714e-49	4.173108697827015e-18	-6.39488462184047e-12	-2.4206046182004546e-51	1.3912031728387651e-16	6.394884623353748e-13
3.205	88.88888886145811	-1.890021284965469e-40	-0.002208299656978541	284.8888888888906	1.2264876703368378e-50	-800.0	-2.1569852614989736e-41	-5.197798109871179e-05	3.891023778613249e-41	0.9999999999228499	-5.916738742482065e-43	-1.24216855714626e-05	1.0631443235628153e-42	1.2182820773569015e-40	-0.0014234203154033182	-6.780234500207418e-41	1.2745302422548103e-40	-0.001430948156711301	-7.091277124772474e-41	800.0	-0.0014234203154033208	-1.2182652317071577e-40	88.88888888888859	1.9571466307255243e-49	4.396564148292089e-18	-6.39488462184047e-12	-1.8331420338223075e-51	8.187008766350898e-18	6.394884621845711e-13
3.21	88.8888888608944	-2.0663229383685997e-40	-0.00223087485792508	285.3333333333351	1.3243403296820817e-50	-800.0	-2.2408218098794058e-41	-4.971037012492212e-05	4.0422635567752746e-41	0.9999999999212644	-6.466506248996585e-43	-1.2548671076816572e-05	1.1623147686306106e-42	1.331923913133302e-40	-0.0014379717824366894	-7.410237464583864e-41	1.3903325629962e-40	-0.0014451891287422583	-7.7332252865073e-41	800.0	-0.001437971782436692	-1.331905314145406e-40	88.88888888888856	1.956922984948222e-49	4.348351595941113e-18	-3.079018521626893e-12	-1.421267317831478e-50	-7.388494426018909e-17	3.0790185225133747e-13
3.215	88.88888886034731	-2.2492929149688466e-40	-0.0022525680834976688	285.77777777777953	1.4221819300263081e-50	-800.0	-2.323219718356257e-41	-4.7992429899928695e-05	4.1911142323598265e-41	0.9999999999197258	-7.037051302123111e-43	-1.267069547069149e-05	1.2652361823056292e-42	1.449864084496358e-40	-0.0014519547479711504	-8.064050505084129e-41	1.510399141481923e-40	-0.0014589379471514762	-8.398778710224272e-41	800.0	-0.0014519547479711534	-1.4498436478094238e-40	88.88888888888857	1.956775341146768e-49	4.072575901146483e-18	7.815970093360574e-12	6.78504086798394e-50	2.137717854559872e-16	7.815970096283971e-13
3.22	88.88888885981306	-2.438825552868185e-40	-0.0022735527870204214	286.2222222222235	1.520281475992586e-50	-800.0	-2.4052731307208833e-41	-4.646888879144791e-05	4.3374423187315427e-41	0.9999999999182233	-7.628145952435641e-43	-1.2788734428035675e-05	1.3718491301378225e-42	1.5720344850005587e-40	-0.0014654810161201398	-8.741412415717541e-41	1.634657710854309e-40	-0.0014722503031835408	-9.087838705056943e-41	800.0	-0.0014654810161201408	-1.5720121254150738e-40	88.88888888888863	1.9626881020746523e-49	6.0142993762738106e-18	9.237055564880679e-12	6.820605372641642e-50	1.0915332986832331e-16	9.237055565525605e-13
3.225	88.88888885928964	-2.6348015748704526e-40	-0.002293925557775201	286.666666666668	1.618418929820595e-50	-800.0	-2.485744874342796e-41	-4.5261503028716506e-05	4.4811801055394114e-41	0.9999999999167513	-8.239572305332044e-43	-1.2903331263559677e-05	1.4820865188850373e-42	1.6983582316685932e-40	-0.0014786128461633835	-9.442073507342812e-41	1.7630340644970162e-40	-0.0014852167686733619	-9.799952156287588e-41	800.0	-0.001478612846163385	-1.698333863563119e-40	88.88888888888866	1.9625573225290586e-49	4.897839263593571e-18	9.473903143467364e-12	-1.4379328807892843e-50	-2.4595975202179395e-16	9.473903146660145e-13
3.23	88.88888885877385	-2.837109217971404e-40	-0.0023138259444562786	287.1111111111125	1.716539157867573e-50	-800.0	-2.5644887402048045e-41	-4.432891512878733e-05	4.622369551679948e-41	0.9999999999153008	-8.87089994896952e-43	-1.3015270938668939e-05	1.5958854820644795e-42	1.8287632850512838e-40	-0.001491440188052114	-1.016554057053282e-40	1.895455197827545e-40	-0.0014979160674097284	-1.0534624063400422e-40	800.0	-0.0014914401880521146	-1.8287368223335078e-40	88.88888888888872	1.9622552037706963e-49	4.401258703417973e-18	-9.473903143467363e-13	-6.455996275510565e-51	1.3334283770883379e-16	9.473903237305731e-14
3.235	88.8888888582633	-3.0456351085029714e-40	-0.0023333573363357933	287.55555555555696	1.814647454432386e-50	-800.0	-2.641560668054682e-41	-4.3587372756289954e-05	4.761005782593597e-41	0.9999999999138647	-9.521703885576044e-43	-1.3125135018019364e-05	1.7131822471489823e-42	1.963176567400085e-40	-0.0015040296841869283	-1.0911326598851464e-40	2.0318479666175504e-40	-0.0015104029299047239	-1.129137545143693e-40	800.0	-0.001504029684186929	-1.9631479236084985e-40	88.88888888888866	1.961939751999855e-49	5.925835639608412e-18	1.4210854715201044e-12	-7.265616806335246e-51	2.220249393060576e-16	1.4210854888642666e-13
3.24	88.88888885775646	-3.26026570807081e-40	-0.002352586722117511	288.0000000000015	1.91274281660492e-50	-800.0	-2.717016925649862e-41	-4.2956954131953066e-05	4.897086521758606e-41	0.9999999999124393	-1.0191573154518165e-42	-1.3233300313069712e-05	1.8339129488686376e-42	2.101524894594683e-40	-0.0015164245139803495	-1.1678960669177522e-40	2.172139161421144e-40	-0.0015227091907672147	-1.206974346496372e-40	800.0	-0.001516424513980349	-2.1014939830914927e-40	88.88888888888873	1.9616211356063312e-49	6.237700121861974e-18	2.368475785866841e-12	-6.608113717103712e-52	1.8065921975915713e-17	2.3684757859357415e-13
3.245	88.88888885725261	-3.48088746012135e-40	-0.0023715466752987115	288.44444444444594	2.0108287459905436e-50	-800.0	-2.7909131853239427e-41	-4.2363046629586335e-05	5.030613466626387e-41	0.9999999999110222	-1.0880110813591993e-42	-1.3339950049742204e-05	1.9580137116094894e-42	2.2437350705126374e-40	-0.001528645673576459	-1.2467987919316438e-40	2.316255621420838e-40	-0.0015348453096631716	-1.2869281197496147e-40	800.0	-0.0015286456735764593	-2.2437018047808665e-40	88.88888888888867	1.9618441472979407e-49	6.267874252781229e-18	-9.94759830064073e-12	3.6157847025346936e-51	-2.3149719376800106e-17	9.947598300667668e-13
3.25	88.88888885675196	-3.7073869933244316e-40	-0.002390238041085298	288.8888888888904	2.1089164164272805e-50	-800.0	-2.8633038086940877e-41	-4.173751856196709e-05	5.161593316524353e-41	0.9999999999096141	-1.1586933687728452e-42	-1.344508898232004e-05	2.0854207637724865e-42	2.3897340180260637e-40	-0.0015406937077759803	-1.327796925916123e-40	2.4641243777207373e-40	-0.0015468022279679207	-1.3689557316005728e-40	800.0	-0.0015406937077759807	-2.3896983120658397e-40	88.88888888888866	1.9618868529784088e-49	6.0536122902454906e-18	-1.1842378929334205e-12	-2.51778817006298e-52	-5.1065451055016026e-17	1.1842378940344157e-13
3.255	88.8888888562554	-3.939651347644801e-40	-0.0024086329586030975	289.33333333333474	2.2070154390130547e-50	-800.0	-2.934241217874039e-41	-4.1019522255574725e-05	5.290037789224569e-41	0.9999999999082175	-1.2311671968884656e-42	-1.3548560393385933e-05	2.216070564900278e-42	2.5394489246328113e-40	-0.001552550658085738	-1.4108480911398371e-40	2.6156727971143895e-40	-0.0015585534554823585	-1.453015550529333e-40	800.0	-0.0015525506580857389	-2.539410693447084e-40	88.88888888888866	1.961896020154956e-49	5.842116149284645e-18	1.6579330501067886e-12	2.971477908400796e-51	-2.431123524692146e-18	1.6579330501085712e-13
3.26	88.88888885576459	-4.177567270216805e-40	-0.0024266782503833914	289.77777777777914	2.305115105005984e-50	-800.0	-3.003758509081512e-41	-4.015604329069514e-05	5.415888459567179e-41	0.9999999999068372	-1.3053967531465445e-42	-1.3650065159678248e-05	2.3498994095703394e-42	2.692806788510172e-40	-0.0015641822475048366	-1.4959112480350503e-40	2.770826572637804e-40	-0.0015700573144948665	-1.5390668931527784e-40	800.0	-0.0015641822475048373	-2.692765948673376e-40	88.88888888888867	1.9621871857526584e-49	5.895562357190475e-18	3.3158661002135772e-12	9.163362241242761e-51	-9.714414272155197e-17	3.315866101636582e-13
3.265	88.8888888552818	-4.421009793651511e-40	-0.002444298974354515	290.22222222222354	2.4032239502020563e-50	-800.0	-3.071618378642722e-41	-3.910216354093893e-05	5.538615671011545e-41	0.9999999999054794	-1.3813445002114901e-42	-1.374918173204372e-05	2.4868370026244792e-42	2.8497270561924967e-40	-0.0015755401700585918	-1.582943379879334e-40	2.929496223784805e-40	-0.001581259259198498	-1.6270622778383067e-40	800.0	-0.001575540170058592	-2.849683526575138e-40	88.88888888888869	1.9624639227468976e-49	5.149342199822643e-18	-2.368475785866841e-12	-1.9558354056478076e-50	4.288057063659836e-17	2.3684757862550113e-13
3.27	88.88888885480985	-4.669823741719852e-40	-0.0024614020241459727	290.6666666666679	2.501331696174426e-50	-800.0	-3.1373317177633214e-41	-3.7821040630388996e-05	5.65757300677775e-41	0.9999999999041519	-1.4589625414917962e-42	-1.3845386387148141e-05	2.6267960559723177e-42	3.0101097012224846e-40	-0.001586564411473631	-1.6718895981953343e-40	3.091573751572568e-40	-0.0015920941892230691	-1.7169402110184962e-40	800.0	-0.0015865644114736314	-3.010063404043549e-40	88.88888888888866	1.9609320563691946e-49	6.340069257842984e-18	-7.815970093360574e-12	1.135084853978815e-50	2.0738044091545257e-16	7.815970096111776e-13
3.275	88.88888885435205	-4.923848013907286e-40	-0.002477879674899616	291.1111111111123	2.59946587972041e-50	-800.0	-3.20133235433029e-41	-3.628367877588088e-05	5.773171150089016e-41	0.9999999999028643	-1.538200657813129e-42	-1.3938073172664215e-05	2.7696859487497167e-42	3.173850877644206e-40	-0.001597185534728066	-1.7626923522757795e-40	3.2569629222259732e-40	-0.0016024886975184018	-1.808651627379405e-40	800.0	-0.0015971855347280668	-3.173801739308551e-40	88.88888888888863	1.9635899975211315e-49	6.8253371163086394e-18	0.0	4.581972762371456e-50	3.5446074030069626e-17	3.544607403006963e-18
3.28	88.88888885391206	-5.182939102953339e-40	-0.002493612985135701	291.5555555555566	2.6976326337903965e-50	-800.0	-3.26382615166708e-41	-3.4468505592191996e-05	5.88568460332811e-41	0.9999999999016269	-1.6190193285908893e-42	-1.402657304276815e-05	2.9154259560958804e-42	3.3408580792624334e-40	-0.0016073268728178808	-1.855306350539633e-40	3.4255753658839e-40	-0.001612363197001181	-1.9021533591568856e-40	800.0	-0.001607326872817881	-3.3408060308161554e-40	88.88888888888866	1.964385274822655e-49	6.860695234150449e-18	7.105427357600522e-12	-1.8734128459420093e-50	3.861125028845867e-17	7.105427357705429e-13
3.285	88.8888888534939	-5.4469803785452585e-40	-0.0025084749651248066	292.0000000000011	2.7957840950762357e-50	-800.0	-3.325153613601195e-41	-3.236077574954712e-05	5.996055932394211e-41	0.9999999999004509	-1.7013857873085233e-42	-1.411017168023169e-05	3.063950471186227e-42	3.5110561235889788e-40	-0.001616906571018239	-1.9496940405251985e-40	3.5973497152091956e-40	-0.0016216338763622733	-1.9974119933029035e-40	800.0	-0.0016169065710182388	-3.5110011012886656e-40	88.88888888888867	1.962597833800352e-49	7.187585568478046e-18	-4.736951571733682e-12	1.1598813420402317e-51	2.937561972063318e-17	4.736951571824767e-13
3.29	88.8888888531017	-5.715879735000276e-40	-0.0025223334617716178	292.4444444444454	2.8939571153877763e-50	-800.0	-3.3853136949686786e-41	-2.995186210449032e-05	6.104233096896396e-41	0.9999999998993478	-1.785271018347488e-42	-1.4188125723893414e-05	3.215207682015805e-42	3.684385635503889e-40	-0.0016258394464147238	-2.0458221674992035e-40	3.772223112017325e-40	-0.0016302144527979995	-2.0943940868276817e-40	800.0	-0.001625839446414724	-3.6843275814735515e-40	88.88888888888863	1.9642352236786123e-49	6.921381857890565e-18	-2.368475785866841e-12	-1.1207568285133531e-50	-1.4494417183760603e-16	2.3684757903019324e-13
3.295	88.88888885273984	-5.989542374646812e-40	-0.002535053698452619	292.8888888888898	2.9921343222748477e-50	-800.0	-3.444442442726926e-41	-2.723845720133286e-05	6.210458453329207e-41	0.9999999998983302	-1.8706467705163384e-42	-1.4259677055245758e-05	3.3691442620036485e-42	3.860785503938896e-40	-0.0016340386250256159	-2.143658351979686e-40	3.9501396411258915e-40	-0.0016380176959884204	-2.1930700941996808e-40	800.0	-0.0016340386250256163	-3.860724366922806e-40	88.88888888888867	1.9616936595635657e-49	5.548292922991459e-18	2.439530059442846e-11	-1.0183668989509457e-50	-5.324389502987576e-16	2.4395300600238827e-12
3.3	88.88888885241884	-6.267880222472606e-40	-0.0025462830129683845	293.3333333333343	3.090298504999005e-50	-800.0	-3.5026639324290996e-41	-2.2042095999570388e-05	6.313830362882662e-41	0.999999999897428	-1.957491363170356e-42	-1.43228419494163e-05	3.525710663446573e-42	4.040198945089781e-40	-0.0016412767887250812	-2.243177738220456e-40	4.131017557303268e-40	-0.0016443322913504087	-2.2934140243901294e-40	800.0	-0.0016412767887250801	-4.040134686463499e-40	88.88888888888883	1.963876421899446e-49	2.443004380514695e-18	1.6105635343894517e-11	5.311788302954888e-50	-2.346659159332141e-16	1.610563534560411e-12
3.305	88.88888885218647	-6.550717658240151e-40	-0.00255438273969861	293.77777777777885	3.18853505556632e-50	-800.0	-3.5596453764708217e-41	-1.4524412656426303e-05	6.41384290825079e-41	0.9999999998967743	-2.0457740348539042e-42	-1.4368402912287883e-05	3.6848080787518336e-42	4.222512709493645e-40	-0.0016464976904918061	-2.3443450316974713e-40	4.3147606218546226e-40	-0.001648493229076007	-2.3953903527076538e-40	800.0	-0.001646497690491805	-4.222445339238555e-40	88.88888888888881	1.9658376209607265e-49	3.3069027673986993e-18	-5.921189464667102e-12	1.589080449651132e-50	1.289582981560189e-16	5.921189466071401e-13
3.31	88.88888885204516	-6.837971514330308e-40	-0.0025592953940287893	294.22222222222314	3.2868304976959223e-50	-800.0	-3.6158246361251997e-41	-7.69331435439279e-06	6.512573146738436e-41	0.9999999998963769	-2.135471289143243e-42	-1.4396036592903713e-05	3.846389720637796e-42	4.4076731765782055e-40	-0.0016496642770355327	-2.447133296063298e-40	4.501332099393808e-40	-0.0016506972012908779	-2.498976098262361e-40	800.0	-0.001649664277035532	-4.4076027172703295e-40	88.8888888888888	1.9655161850381664e-49	3.0702155691422865e-18	4.736951571733681e-13	-6.74107198875669e-51	-9.771044715919144e-17	4.736951672508739e-14
3.315	88.88888885198698	-7.129584674001951e-40	-0.0025613152170035195	294.66666666666754	3.385105919959579e-50	-800.0	-3.6712108543994683e-41	-1.4962491089121215e-06	6.610012473175355e-41	0.9999999998962132	-2.226563196939984e-42	-1.4407398097140103e-05	4.010423459630159e-42	4.595643527178166e-40	-0.0016509662095189979	-2.551519691606964e-40	4.6906950080147106e-40	-0.0016511258450860823	-2.6041485420922215e-40	800.0	-0.0016509662095189974	-4.595570004391501e-40	88.8888888888888	1.9652772819754214e-49	2.8284845426505335e-18	-1.3026616822267624e-11	-2.5149369122873763e-50	1.5912554949238861e-16	1.3026616823239518e-12
3.32	88.88888885200463	-7.425499484254142e-40	-0.0025607008708998327	295.1111111111119	3.48335237066191e-50	-800.0	-3.726071967392521e-41	4.2508489222403094e-06	6.70607806410485e-41	0.9999999998962629	-2.3190311481729797e-42	-1.4403942400305798e-05	4.176876864621767e-42	4.786386596500275e-40	-0.0016505702158311918	-2.657482890106307e-40	4.882809993093958e-40	-0.0016499080665731216	-2.710892641039028e-40	800.0	-0.0016505702158311915	-4.786310038773737e-40	88.88888888888869	1.963438353210258e-49	4.478285412081251e-18	-1.7053025658241254e-11	-1.0335366544747782e-50	2.6832242629613505e-16	1.7053025660352226e-12
3.325	88.88888885209471	-7.725648551542965e-40	-0.002557571406450767	295.55555555555645	3.5815492344067533e-50	-800.0	-3.780588812984519e-41	9.754103248407858e-06	6.800618248217351e-41	0.9999999998965162	-2.412868985396926e-42	-1.4386339162774337e-05	4.345712024149127e-42	4.9798589382308386e-40	-0.001648553033398345	-2.7650158298509427e-40	5.077633354945224e-40	-0.0016471137218277783	-2.8191985325682285e-40	800.0	-0.001648553033398344	-4.979779380053663e-40	88.88888888888866	1.9643045878111843e-49	5.023928541366452e-18	1.8947806286934726e-12	9.403074292074546e-51	-1.471615462036518e-17	1.8947806287506205e-13
3.33	88.88888885225217	-8.029968976493463e-40	-0.0025520934930779457	296.0000000000009	3.6797600411748585e-50	-800.0	-3.8341332100380806e-41	1.4832582297800396e-05	6.893793794599947e-41	0.9999999998969591	-2.5080575733298088e-42	-1.4355525900042668e-05	4.516893555333163e-42	5.176020004309857e-40	-0.0016450220935828755	-2.8740965793378026e-40	5.2751259995772645e-40	-0.0016428645000030558	-2.9290383580813e-40	800.0	-0.001645022093582875	-5.175937484708189e-40	88.88888888888869	1.9639358516511188e-49	4.534421981100443e-18	1.8947806286934726e-12	-8.727722465710006e-51	-1.065281390988216e-16	1.894780631688079e-13
3.335	88.88888885247165	-8.338399626326983e-40	-0.00254443737124551	296.44444444444537	3.777949964009265e-50	-800.0	-3.886716990718708e-41	1.9570437736120457e-05	6.985554323827468e-41	0.9999999998975764	-2.6045729643682396e-42	-1.4312460214721944e-05	4.6903870692407934e-42	5.374830385922158e-40	-0.0016400871295609366	-2.9846976931953227e-40	5.475247389734617e-40	-0.0016372579825755392	-3.0403845979462923e-40	800.0	-0.0016400871295609361	-5.374744947922492e-40	88.88888888888867	1.9636154249270653e-49	4.160546372026043e-18	3.3158661002135772e-12	-8.220517081019433e-51	-6.008103875574755e-17	3.3158661007578896e-13
3.34	88.88888885274886	-8.650872854610915e-40	-0.002534734965429112	296.8888888888898	3.8761234553338395e-50	-800.0	-3.9382596672802624e-41	2.4055708615280602e-05	7.075700174629256e-41	0.9999999998983561	-2.7023900380492348e-42	-1.4257884181987999e-05	4.8661545126817085e-42	5.576246474949422e-40	-0.0016338331768838527	-3.0967903813595638e-40	5.677951268287748e-40	-0.0016303665296912783	-3.1532074267271773e-40	800.0	-0.001633833176883852	-5.576158166326835e-40	88.88888888888872	1.963161683616733e-49	3.962916403287702e-18	7.57912251477389e-12	-6.38320704047877e-51	7.685539383471026e-18	7.579122514777788e-13
3.345	88.88888885308049	-8.967319771001167e-40	-0.0025230787629479663	297.3333333333343	3.974280229063202e-50	-800.0	-3.9888504166158034e-41	2.8377264426953037e-05	7.164369297844501e-41	0.9999999998992888	-2.8014838660365373e-42	-1.4192318043011654e-05	5.044157132350389e-42	5.7802238605244235e-40	-0.0016263198507984673	-3.210346073056446e-40	5.88319533010756e-40	-0.001622237042262322	-3.2674795737177277e-40	800.0	-0.0016263198507984662	-5.780132734754105e-40	88.88888888888873	1.96304355378471e-49	4.0567462442096195e-18	-2.3684757858668407e-13	1.433907270466725e-51	-1.0031910336265168e-16	2.3684759983225076e-14
3.35	88.88888885346424	-9.287673379997451e-40	-0.0025095220813573767	297.77777777777874	4.072434517032116e-50	-800.0	-4.0385347274326675e-41	3.262208278926426e-05	7.251556000436115e-41	0.9999999999003681	-2.901830708764531e-42	-1.4116061709041672e-05	5.224357240294727e-42	5.986719352016692e-40	-0.0016175815186023515	-3.3253375587043987e-40	6.090937106971452e-40	-0.0016128915039485654	-3.3831750713671894e-40	800.0	-0.001617581518602351	-5.986625469410908e-40	88.88888888888872	1.9631908067365633e-49	3.242888595560763e-18	-3.3158661002135772e-12	-1.0600346699921158e-51	4.807821582183692e-17	3.315866100562131e-13
3.355	88.88888885389886	-9.61187734664195e-40	-0.002494080427475307	298.2222222222232	4.1705916471840697e-50	-800.0	-4.0875883722161357e-41	3.687300148217634e-05	7.337677993406685e-41	0.9999999999015904	-3.003411545290695e-42	-1.4029202405929225e-05	5.406723144590826e-42	6.195696629134485e-40	-0.0016076281756417846	-3.44174303474119e-40	6.301146097195579e-40	-0.001602328167134023	-3.500275852424565e-40	800.0	-0.001607628175641784	-6.19560005804987e-40	88.8888888888887	1.962988065523427e-49	4.4194701119700366e-18	-4.973799150320365e-12	1.731105507357269e-51	1.01340712729961e-16	4.97379915135277e-13
3.36	88.88888885438388	-9.939878735567501e-40	-0.0024767337563787032	298.6666666666676	4.268746738869617e-50	-800.0	-4.135805964133506e-41	4.120691542310321e-05	7.422313756134755e-41	0.9999999999029545	-3.1062091727613634e-42	-1.3931627380982222e-05	5.591225064952468e-42	6.407121561436159e-40	-0.0015964469014099977	-3.559542779656597e-40	6.513779723419801e-40	-0.0015905232554315404	-3.618757965739515e-40	800.0	-0.0015964469014099975	-6.40702237972333e-40	88.88888888888867	1.963353798328467e-49	3.980014396060631e-18	-3.3158661002135772e-12	4.858357318958548e-51	-8.169053580210304e-17	3.315866101219852e-13
3.365	88.88888885491966	-1.0271605166004068e-39	-0.0024574294298529125	299.1111111111121	4.366909591447072e-50	-800.0	-4.183160035152265e-41	4.569336220562884e-05	7.505357817262989e-41	0.9999999999044614	-3.21020115426991e-42	-1.3823040544243282e-05	5.777822282274364e-42	6.620947482624187e-40	-0.0015840037664971648	-3.678711072530778e-40	6.72879238675216e-40	-0.001577433071400814	-3.738596673260534e-40	800.0	-0.0015840037664971646	-6.620845779414079e-40	88.88888888888867	1.963308823215525e-49	3.873309884410496e-18	2.3684757858668407e-13	-9.115729836272214e-51	-1.4055037067402085e-17	2.3684757900371192e-14
3.37	88.88888885550716	-1.0606990645273705e-39	-0.0024360857258741704	299.5555555555565	4.465070230033208e-50	-800.0	-4.229736859704695e-41	5.0393586052947284e-05	7.58698095908341e-41	0.9999999999061138	-3.315367306057183e-42	-1.3702982209328743e-05	5.966477670049936e-42	6.837131842409596e-40	-0.0015702460947239194	-3.799224772907379e-40	6.9461433808529726e-40	-0.001562996372423997	-3.859769708516541e-40	800.0	-0.0015702460947239194	-6.8370277197254585e-40	88.88888888888867	1.962841853881971e-49	3.775038923210952e-18	1.6579330501067886e-12	1.7844459260869797e-50	-2.4046830452012816e-17	1.6579330502811775e-13
3.375	88.88888885614783	-1.0945966695611646e-39	-0.0024125956581962055	300.00000000000097	4.563253326590087e-50	-800.0	-4.275366235561188e-41	5.535997139259219e-05	7.666873465113136e-41	0.9999999999079157	-3.421686574358308e-42	-1.3570850578603333e-05	6.157152703150707e-42	7.055630486927618e-40	-0.0015551049251610173	-3.9210597418142995e-40	7.165783126658899e-40	-0.0015471369088501932	-3.982249929101745e-40	800.0	-0.001555104925161017	-7.0555240614297124e-40	88.88888888888869	1.964361947853223e-49	3.622968553216785e-18	3.552713678800261e-12	-2.256976388278612e-50	-1.321438785749393e-17	3.5527136788248367e-13
3.38	88.88888885684844	-1.128844956876881e-39	-0.0023866430409673254	300.44444444444525	4.661385372768622e-50	-800.0	-4.3199508114446395e-41	6.268889169553052e-05	7.744131679253683e-41	0.9999999999098862	-3.529135358409387e-42	-1.3424867106650988e-05	6.34980026228095e-42	7.2763894089496415e-40	-0.001538376451516422	-4.044188912270211e-40	7.387636157266311e-40	-0.001529177864267659	-4.1060074037017e-40	800.0	-0.0015383764515164216	-7.2762808222881856e-40	88.88888888888872	1.9610721198735302e-49	3.420093573631811e-18	9.237055564880679e-12	-2.060905877747406e-50	-2.1679880324320244e-16	9.237055567424873e-13
3.385	88.88888885765145	-1.163428595759217e-39	-0.002356545686163235	300.88888888888965	4.759475475487903e-50	-800.0	-4.3634659655627886e-41	7.263763478599665e-05	7.81859448708456e-41	0.9999999999121448	-3.6376829372652884e-42	-1.3255569485832783e-05	6.544334072383508e-42	7.499309698945665e-40	-0.0015189763732057174	-4.168576998228114e-40	7.611622390183425e-40	-0.0015083687147324062	-4.231011495639571e-40	800.0	-0.001518976373205717	-7.499199183956453e-40	88.88888888888877	1.9626928094776707e-49	1.826610359227056e-18	5.684341886080418e-12	2.038617590044829e-50	-9.647354242386638e-17	5.684341886899084e-13
3.39	88.88888885855613	-1.1983412531372717e-39	-0.0023221705677461107	301.3333333333341	4.857599430405163e-50	-800.0	-4.406412853511957e-41	8.195022834191016e-05	7.892179713714543e-41	0.9999999999146892	-3.747311499182386e-42	-1.3062209444686239e-05	6.740718498743411e-42	7.724350509720504e-40	-0.0014968189446354532	-4.2942035659303645e-40	7.837716684560745e-40	-0.0014848917036617804	-4.357245925288796e-40	800.0	-0.0014968189446354523	-7.724238324883195e-40	88.88888888888877	1.961854182144036e-49	2.4121015658861425e-18	4.2632564145603135e-12	-5.471082411361743e-50	-2.6225683517324795e-18	4.2632564145611206e-13
3.395	88.88888885955079	-1.2335788571837418e-39	-0.0022837792389506393	301.7777777777785	4.955664617262237e-50	-800.0	-4.448916645133994e-41	9.079913217744738e-05	7.964775587004618e-41	0.9999999999174869	-3.858006996461638e-42	-1.2846258220157354e-05	6.938930634286793e-42	7.951485588211645e-40	-0.0014720727571410025	-4.4210525117857944e-40	8.065890697512859e-40	-0.0014588796683756874	-4.484697998874644e-40	800.0	-0.0014720727571410014	-7.951371998984978e-40	88.88888888888883	1.9583867404769997e-49	1.3474450366838123e-18	1.0894988614987467e-11	-2.6144507716948086e-50	-3.0964698294621697e-16	1.0894988619387714e-12
3.4	88.88888886062757	-1.2691365518902975e-39	-0.002241476203058999	302.22222222222297	5.053613127250402e-50	-800.0	-4.4912511438775525e-41	9.948722922751574e-05	8.036259209071636e-41	0.9999999999205156	-3.969764785488617e-42	-1.2608303643209057e-05	7.138943158052372e-42	8.180683620121544e-40	-0.0014448051711888777	-4.549118502267761e-40	8.296112565389348e-40	-0.0014303786766247494	-4.6133628665133965e-40	800.0	-0.0014448051711888766	-8.180568905523765e-40	88.88888888888887	1.959450062336335e-49	-2.55874905610179e-19	7.105427357600522e-12	1.5411303154099582e-50	-2.5276276326739914e-16	7.105427362096312e-13
3.405	88.88888886177732	-1.3050098536089423e-39	-0.0021954080457889874	302.66666666666737	5.151582854187167e-50	-800.0	-4.5328820634818897e-41	0.00010775762573199976	8.106790287445394e-41	0.9999999999237493	-4.0825723191975406e-42	-1.2349170258504713e-05	7.340730844592736e-42	8.411915693574213e-40	-0.001415110672637568	-4.678387149474935e-40	8.528354999823497e-40	-0.0013995083908007779	-4.7432203721474376e-40	800.0	-0.0014151106726375668	-8.411800143912512e-40	88.8888888888889	1.9591465556462325e-49	-9.383824359692443e-19	4.2632564145603135e-12	-9.721472944732573e-51	-3.111020601252507e-17	4.263256414673824e-13
3.41	88.88888886299017	-1.3411945253895955e-39	-0.0021457394286427483	303.1111111111119	5.249531856309766e-50	-800.0	-4.5738460991700483e-41	0.00011570563865378764	8.176379763020523e-41	0.9999999999271605	-4.19641231867832e-42	-1.2069784286994643e-05	7.544269856759242e-42	8.645154488276228e-40	-0.001383095398589803	-4.808838644639583e-40	8.762591025882139e-40	-0.0013663611669971366	-4.874251410959856e-40	800.0	-0.0013830953985898018	-8.645038403723488e-40	88.88888888888891	1.958685921605437e-49	-7.087524192933384e-19	1.1842378929334205e-12	-1.1421882260398938e-50	9.760133281325865e-17	1.184237896955425e-13
3.415	88.88888886425725	-1.377686350789421e-39	-0.0020925915377997747	303.55555555555634	5.34745818004364e-50	-800.0	-4.614160894411473e-41	0.00012343122559958978	8.244994069231692e-41	0.9999999999307242	-4.3112684981044475e-42	-1.1770827400939195e-05	7.749536472026173e-42	8.880372814446247e-40	-0.001348837462932668	-4.940454315459705e-40	8.99879270702084e-40	-0.0013310007255622161	-5.006437383581908e-40	800.0	-0.0013488374629326662	-8.880256506714047e-40	88.88888888888891	1.9581064983966537e-49	-4.0896271202983276e-19	5.447494307493734e-12	-7.84792039715251e-51	-1.2894224303491975e-16	5.447494309019765e-13
3.42	88.88888886557056	-1.4144809559826562e-39	-0.0020360407669864035	304.0000000000007	5.445362489303695e-50	-800.0	-4.653858922465218e-41	0.0001310353417136752	8.312629337694854e-41	0.999999999934418	-4.427124873224349e-42	-1.1452729315049638e-05	7.956506081688454e-42	9.117542465784037e-40	-0.0013123861073448873	-5.0732158333414825e-40	9.236931995874127e-40	-0.0012934618653259729	-5.139760620935196e-40	800.0	-0.0013123861073448858	-9.11742626018658e-40	88.88888888888897	1.9579827336959437e-49	-1.876597082890802e-18	9.473903143467364e-12	2.0229146199685736e-51	-2.5568119819322673e-16	9.47390314691752e-13
3.425	88.8888888669229	-1.4515739431042113e-39	-0.00197611903057694	304.4444444444451	5.543265920856642e-50	-800.0	-4.692954461093807e-41	0.00013861668922400202	8.379247869759932e-41	0.9999999999382215	-4.543966441435399e-42	-1.1115669547682022e-05	8.16515394079655e-42	9.356635078692626e-40	-0.0012737619031147767	-5.207105992451852e-40	9.476979765089758e-40	-0.001253751109012911	-5.2742038629690886e-40	800.0	-0.0012737619031147752	-9.35651931649138e-40	88.888888888889	1.958229804608577e-49	-2.5446051626532458e-18	0.0	5.628516959496917e-51	-5.486672789522097e-17	5.486672789522097e-18
3.43	88.88888886830769	-1.488960625806301e-39	-0.0019128153819012225	304.8888888888895	5.641183055672e-50	-800.0	-4.731416239118972e-41	0.00014626904993543264	8.444785976287748e-41	0.9999999999421162	-4.661777599083673e-42	-1.0759586523817204e-05	8.375453680546339e-42	9.597620427469237e-40	-0.0012329577942649151	-5.342106895859116e-40	9.71890506275605e-40	-0.0012118481128394652	-5.409748953779687e-40	800.0	-0.0012329577942649138	-9.597505468484136e-40	88.88888888888899	1.9584586225288425e-49	-2.453020132686003e-18	-2.842170943040209e-12	2.7333397081934147e-51	1.145476662758706e-16	2.8421709453485093e-13
3.435	88.88888886971876	-1.526636203222628e-39	-0.0018460786975373412	305.3333333333338	5.739110225018151e-50	-800.0	-4.769283536800707e-41	0.00015407912412457488	8.509243792347257e-41	0.9999999999460848	-4.7805429579047707e-42	-1.0384192674207432e-05	8.587378286771141e-42	9.840467545509499e-40	-0.0011899408277868937	-5.478200890984952e-40	9.962676940830762e-40	-0.0011677076952224098	-5.5463788627596494e-40	800.0	-0.0011899408277868924	-9.840353770859955e-40	88.88888888888899	1.958536498884144e-49	-1.7283434366779616e-18	1.4210854715201044e-12	1.948390649492523e-50	2.6648842612745798e-17	1.4210854717699701e-13
3.44	88.88888887115012	-1.5645959013642584e-39	-0.0017758212042481005	305.7777777777783	5.837047861435202e-50	-800.0	-4.806584583917234e-41	0.00016212488208192528	8.572641759642234e-41	0.9999999999501106	-4.900248093337579e-42	-9.988994274393934e-06	8.800900895265025e-42	1.0085145636648037e-39	-0.0011446544270252695	-5.615371427047602e-40	1.020826503688333e-39	-0.0011212623377356544	-5.68407736802521e-40	800.0	-0.0011446544270252682	-1.008503345155938e-39	88.888888888889	1.958796284075565e-49	-2.2193632516412287e-18	4.973799150320365e-12	-1.0859100687136315e-49	-8.030985867520533e-17	4.97379915096873e-13
3.445	88.88888887260637	-1.6028322993513214e-39	-0.0017013678865652022	306.2222222222225	5.934644189596097e-50	-800.0	-4.842842568391811e-41	0.00017394739950423946	8.63325126240462e-41	0.9999999999542063	-5.020874694168943e-42	-9.570194362367538e-06	9.015979736107227e-42	1.0331606804607485e-39	-0.001096663492183849	-5.753597464547036e-40	1.0455589467289235e-39	-0.0010714300784913063	-5.822814588032793e-40	800.0	-0.0010966634921838476	-1.0331496677259018e-39	88.88888888888901	1.9492407530854016e-49	-2.2742806710599057e-18	-6.39488462184047e-12	-1.0907616140968553e-49	2.7134823058391004e-17	6.39488462189804e-13
3.45	88.88888887410478	-1.6413336577547674e-39	-0.0016211936807267488	306.66666666666697	6.032106328246003e-50	-800.0	-4.878449208014122e-41	0.00018673146985340752	8.692436957354229e-41	0.9999999999584204	-5.142397861392581e-42	-9.11921445446715e-06	9.232548720979838e-42	1.0579775255827099e-39	-0.00104498500144581	-5.892850360182364e-40	1.0704609442959221e-39	-0.0010179354528669297	-5.962571863126876e-40	800.0	-0.0010449850014458096	-1.0579667778238297e-39	88.88888888888894	1.949247260261725e-49	-2.0019264872289115e-18	-1.5631940186721147e-11	-3.385554721062321e-51	6.232346199217315e-17	1.5631940186845387e-12
3.455	88.88888887562688	-1.6800966601882117e-39	-0.0015354685572001262	307.11111111111154	6.129561758168876e-50	-800.0	-4.913675868566208e-41	0.00019898110746139683	8.750960509623594e-41	0.9999999999627014	-5.264806289741335e-42	-8.637010634572877e-06	9.450589187194646e-42	1.0829629595265332e-39	-0.0009897285139535753	-6.0331171429731745e-40	1.095530599490278e-39	-0.0009609315645650402	-6.103338307708947e-40	800.0	-0.0009897285139535748	-1.0829525377816119e-39	88.88888888888887	1.947590005219239e-49	-1.6169387048829943e-18	-1.3500311979440992e-11	-1.8897472557119578e-50	1.4250001181910797e-16	1.3500311980193059e-12
3.46	88.888888877155	-1.7191177837453022e-39	-0.001444298326043994	307.55555555555605	6.22694261217468e-50	-800.0	-4.948892847050862e-41	0.00021121377238728708	8.808596777627244e-41	0.9999999999669991	-5.3880962455564877e-42	-8.12417808426559e-06	9.670081308835443e-42	1.1081147093130443e-39	-0.0009309622324924346	-6.1743935150295455e-40	1.1207653704298086e-39	-0.0009004232759008943	-6.2451136444082046e-40	800.0	-0.0009309622324924342	-1.1081046768130097e-39	88.88888888888881	1.9476216339789026e-49	-7.000352417565787e-19	-9.000207986293995e-12	2.5875520216779677e-51	1.4007390460056752e-16	9.000207987384008e-13
3.465	88.88888887867091	-1.7583935491445685e-39	-0.001347776362467999	308.00000000000074	6.324322572178366e-50	-800.0	-4.983588179152322e-41	0.00022308634612547493	8.865534425968162e-41	0.9999999999712625	-5.5122603749547174e-42	-7.581242039100375e-06	9.891005505098058e-42	1.1334305300193308e-39	-0.0008687463446235335	-6.316671029535469e-40	1.1461632557166059e-39	-0.000836513745400968	-6.387882929156572e-40	800.0	-0.0008687463446235333	-1.1334209522514037e-39	88.88888888888879	1.9475742263570934e-49	-4.09151416428299e-19	1.1842378929334205e-12	-5.921338417543981e-52	-3.26933672532278e-17	1.1842378933847049e-13
3.47	88.88888888015538	-1.7979207774741722e-39	-0.0012460323779777934	308.44444444444514	6.421700952462788e-50	-800.0	-5.017775567086399e-41	0.00023473605585646595	8.921736008641029e-41	0.9999999999754376	-5.6372858294689356e-42	-7.008932126297258e-06	1.0113343885989917e-41	1.1589083706163376e-39	-0.00080316445946755	-6.459934946009281e-40	1.1717221466778587e-39	-0.0007692668189003503	-6.531631610425539e-40	800.0	-0.0008031644594675498	-1.1588993150416863e-39	88.88888888888881	1.947568498151553e-49	-7.440624556259674e-19	4.026408835973629e-12	-5.072585251902369e-52	4.630879401223839e-17	4.026408836239934e-13
3.475	88.8888888815896	-1.8376960542507618e-39	-0.0011391344547448275	308.88888888888954	6.5190781885681665e-50	-800.0	-5.051461076743484e-41	0.00024630223757475766	8.977158347113984e-41	0.9999999999794713	-5.763159843507529e-42	-6.407631308071209e-06	1.0337077234671695e-41	1.184546027828261e-39	-0.0007342604612617672	-6.604170615322858e-40	1.1974398109433739e-39	-0.0006987064254120349	-6.676345310461554e-40	800.0	-0.0007342604612617667	-1.1845375642846485e-39	88.88888888888881	1.947520198905496e-49	-7.554380644303429e-21	1.6579330501067886e-12	-1.8174121561348408e-51	6.046358293731598e-17	1.6579330512093197e-13
3.48	88.88888888295487	-1.8777159475298595e-39	-0.0010270890776567976	309.33333333333394	6.616456414586224e-50	-800.0	-5.084666654177829e-41	0.00025792207300411263	9.031781298489129e-41	0.9999999999833112	-5.889870369648466e-42	-5.777376061915917e-06	1.0562186234123302e-41	1.210341286674603e-39	-0.0006620385300190716	-6.7493642072807024e-40	1.2233139584378063e-39	-0.0006248171942800262	-6.822010280219211e-40	800.0	-0.000662038530019071	-1.2103334878260313e-39	88.88888888888884	1.947493769481239e-49	-2.65786596219105e-19	7.815970093360574e-12	7.138681172213785e-51	-4.0842274133968794e-17	7.815970093467285e-13
3.485	88.8888888842323	-1.9179768024233697e-39	-0.0009098429600409295	309.77777777777834	6.71384916788546e-50	-800.0	-5.117399433215477e-41	0.0002697267510898027	9.085566366293473e-41	0.999999999986904	-6.017405500469784e-42	-5.117866650297264e-06	1.0788650311147493e-41	1.2362917879846939e-39	-0.000586464318348139	-6.895502047769929e-40	1.2493421888015395e-39	-0.0005475461719839141	-6.968612975022164e-40	800.0	-0.0005864643183481382	-1.2362847298071323e-39	88.88888888888887	1.948066844288262e-49	-2.107595174126038e-19	2.3684757858668407e-13	3.52615420755588e-50	4.0561967997723095e-17	2.3684758205995843e-14
3.49	88.88888888540228	-1.9584747728843394e-39	-0.0007872864696997311	310.22222222222285	6.811236070197555e-50	-800.0	-5.149666989905781e-41	0.00028183813188993855	9.138480053216141e-41	0.9999999999901945	-6.14575331986608e-42	-4.428486392104422e-06	1.101644781506296e-41	1.262395048863567e-39	-0.0005074671597990597	-7.042570448198817e-40	1.27552200571223e-39	-0.00046680549466818395	-7.1161400672318946e-40	800.0	-0.0005074671597990591	-1.2623888111525464e-39	88.88888888888886	1.9476584525103523e-49	8.083289826592275e-20	2.6053233644535247e-12	-2.401364173932376e-49	6.855933681869359e-17	2.6053233653555975e-13
3.495	88.88888888644404	-1.9992059531003995e-39	-0.0006592575836919389	310.6666666666676	6.908603536060673e-50	-800.0	-5.181436791203194e-41	0.0002944704298473517	9.19041092760457e-41	0.9999999999931245	-6.274902357367069e-42	-3.708323908292664e-06	1.1245556756721848e-41	1.2886485473699924e-39	-0.00042494261802623044	-7.190556225988091e-40	1.3018505936193645e-39	-0.0003824459305598961	-7.26457729720678e-40	800.0	-0.00042494261802622973	-1.2886432142634252e-39	88.8888888888889	1.9276807378930665e-49	3.316834953723687e-19	4.973799150320365e-12	-2.2233614350952503e-49	-1.9126060059613904e-17	4.973799150357139e-13
3.5	88.8888888873418	-2.0401612947736563e-39	-0.0005244209462666683	311.11111111111217	7.004996239319124e-50	-800.0	-5.212214481202619e-41	0.0003122123376882681	9.23948759277604e-41	0.9999999999956495	-6.404832993591827e-42	-2.9498678227628496e-06	1.1475926177647304e-41	1.3150464370083365e-39	-0.0003380299527320032	-7.3394367725426715e-40	1.3283197758158441e-39	-0.00029300368425263503	-7.41389624305173e-40	800.0	-0.0003380299527320028	-1.315042106810356e-39	88.8888888888889	1.9284867687556267e-49	-3.980270306121814e-20	-2.842170943040209e-12	1.1928685869668147e-49	-4.066954226582529e-17	2.842170943331186e-13
3.505	88.8888888880688	-2.0813337784608223e-39	-0.0003818009445553443	311.5555555555567	7.101421176855217e-50	-800.0	-5.242702594801368e-41	0.00032951293082983336	9.288104590054096e-41	0.9999999999976942	-6.535529945759599e-42	-2.1476303131287695e-06	1.170751654085593e-41	1.3415841811464896e-39	-0.0002461003057934651	-7.489194467753591e-40	1.3549282354501552e-39	-0.00019860518309495025	-7.564088609013942e-40	800.0	-0.0002461003057934648	-1.341580964217997e-39	88.88888888888889	1.9280950603561815e-49	-2.828072445281918e-20	5.447494307493734e-12	-5.737388567614432e-49	-3.1440030172273466e-17	5.447494307584462e-13
3.51	88.88888888858726	-2.122721047179758e-39	-0.00023150141268421314	312.000000000001	7.195910901465436e-50	-800.0	-5.273205499336287e-41	0.0003468849773444791	9.336065159437927e-41	0.9999999999991528	-6.666988995624179e-42	-1.302195446349806e-06	1.1940314573176185e-41	1.3682602570587107e-39	-0.00014922060635403888	-7.639824447617808e-40	1.3816740919949033e-39	-9.922995720329439e-05	-7.715154818822526e-40	800.0	-0.00014922060635403874	-1.3682582672286473e-39	88.88888888888896	1.8794009169972585e-49	-3.587083243858982e-19	1.3026616822267624e-11	-5.6651239181980866e-49	-4.1265495063703317e-17	1.3026616822332984e-12
3.515	88.88888888885835	-2.164320197520589e-39	-7.349085399400597e-05	312.4444444444455	7.289883098174404e-50	-800.0	-5.30345017987145e-41	0.00036412537625391526	9.383516590550952e-41	0.9999999999999153	-6.799208847682396e-42	-4.1338605371631866e-07	1.2174303922809589e-41	1.395072788655736e-39	-4.7370552375028187e-05	-7.791325187041178e-40	1.408555886876383e-39	5.084279161524999e-06	-7.8670874749048e-40	800.0	-4.737055237502826e-05	-1.39507214436957e-39	88.888888888889	1.87923723788301e-49	-3.3315966488853703e-19	3.3158661002135772e-12	6.051847277367504e-50	4.166676153730671e-17	3.3158661004753673e-13
3.52	88.88888888884098	-2.2061296405614785e-39	9.214163271299259e-05	312.8888888888899	7.383811689784332e-50	-800.0	-5.333451350506258e-41	0.0003812042073013006	9.43066128608706e-41	0.9999999999998664	-6.932182132128125e-42	5.182966840106551e-07	1.2409475636289132e-41	1.4220207481410403e-39	5.939242505887509e-05	-7.943688209453506e-40	1.4355727413618951e-39	0.0001142912402165056	-8.01987960121599e-40	800.0	5.939242505887491e-05	-1.4220215714574702e-39	88.888888888889	1.8775316240621614e-49	-2.9045227245952324e-21	2.6053233644535247e-12	-2.4444036786394254e-50	7.419292062592512e-17	2.6053233655099365e-13
3.525	88.88888888849267	-2.2481474926507206e-39	0.0002653517271003125	313.33333333333434	7.477700993254222e-50	-800.0	-5.363132355143515e-41	0.000398245306895661	9.477243669135815e-41	0.9999999999988869	-7.06590215307988e-42	1.4926034649409248e-06	1.264581910064012e-41	1.4491029173598469e-39	0.0001710397580554995	-8.096905807126215e-40	1.462723044544825e-39	0.00022838011669658128	-8.173522025675891e-40	800.0	0.00017103975805549918	-1.4491053343328037e-39	88.88888888888903	1.876829633211197e-49	3.181439965990336e-19	1.4210854715201044e-12	-4.2151554122046173e-50	3.8051885457167565e-17	1.4210854720295554e-13
3.53	88.8888888877691	-2.2903707537374813e-39	0.00044615032735629564	313.77777777777874	7.571529222717103e-50	-800.0	-5.392460464051539e-41	0.0004153731093048421	9.523029483352079e-41	0.9999999999968516	-7.200360323249814e-42	2.5095955913870723e-06	1.2883317420876002e-41	1.4763173580324568e-39	0.0002875784713425363	-8.250968100343984e-40	1.490004514423563e-39	0.0003473757471285577	-8.328004638566557e-40	800.0	0.0002875784713425358	-1.476321499230245e-39	88.888888888889	1.874806501694594e-49	4.0014572995885875e-19	-9.94759830064073e-12	7.258543186521604e-50	3.8300107837199075e-17	9.947598300714463e-13
3.535	88.88888888662345	-2.332795244066747e-39	0.0006346030560371047	314.22222222222325	7.665348651374657e-50	-800.0	-5.421083682240549e-41	0.00043270852480508407	9.567731291326547e-41	0.9999999999936294	-7.335544558159852e-42	3.5696421902314653e-06	1.3121947063748786e-41	1.5036613709116768e-39	0.00040905086374506554	-8.405861196977202e-40	1.5174140455489783e-39	0.00047133760828188217	-8.48330724625638e-40	800.0	0.000409050863745065	-1.5036673719736755e-39	88.88888888888896	1.8827271914157006e-49	6.081292291488869e-19	-3.789561257386945e-12	7.796704522002549e-50	-6.323363133560282e-17	3.789561257914511e-13
3.54	88.88888888500598	-2.3754170263188856e-39	0.0008308278080757265	314.6666666666675	7.75943108365631e-50	-800.0	-5.449277937041687e-41	0.000450365392691822	9.611969579486661e-41	0.9999999999890802	-7.47143757690424e-42	4.67340642047701e-06	1.3361685857183496e-41	1.5311324124418313e-39	0.0005355329276872978	-8.56156524509428e-40	1.5449503100346163e-39	0.0006003577894818577	-8.639417559849513e-40	800.0	0.0005355329276872967	-1.531140414655373e-39	88.88888888888897	1.8811608305790564e-49	1.897086744213217e-20	1.278976924368094e-11	-3.4681499555738667e-50	4.757282023661455e-17	1.2789769243769417e-12
3.545	88.8888888828586	-2.4182333000145278e-39	0.0010353887627937081	315.1111111111122	7.8534807917148975e-50	-800.0	-5.477123258251393e-41	0.0004713439202525348	9.654706716171642e-41	0.999999999983041	-7.608034047005234e-42	5.824061790813401e-06	1.3602518004210073e-41	1.5587286673501443e-39	0.0006673883204777975	-8.718074044531801e-40	1.5726090073982805e-39	0.0007353878761299723	-8.796325583134898e-40	800.0	0.0006673883204777959	-1.5587388221492928e-39	88.88888888888907	1.880884037154877e-49	1.0627629766016458e-18	1.397400713661436e-11	-2.8744958088720598e-52	1.2344714126134282e-16	1.3974007137159633e-12
3.55	88.888888880101	-2.4612360773227977e-39	0.001249907755144567	315.5555555555566	7.947524861630283e-50	-800.0	-5.504530201131684e-41	0.0004939171085177818	9.696349670337598e-41	0.9999999999752853	-7.745320148920189e-42	7.03073112286198e-06	1.3844398481077526e-41	1.5864449657302314e-39	0.0008056624404691697	-8.875371571754683e-40	1.600387003037953e-39	0.0008768847048668517	-8.95401875749848e-40	800.0	0.0008056624404691675	-1.5864574456792218e-39	88.8888888888891	1.8808701673414505e-49	1.1828464953838635e-18	6.6317322004271545e-12	-3.1699018976431737e-51	1.4454920811417007e-16	6.631732202002495e-13
3.555	88.88888887666063	-2.504423115480061e-39	0.001474411034145794	316.0000000000012	8.041559701850035e-50	-800.0	-5.531941127334061e-41	0.0005164429791441824	9.737534002125748e-41	0.9999999999656095	-7.883291114878742e-42	8.293562067355346e-06	1.4087314645553564e-41	1.6142798558318757e-39	0.000950372207189406	-9.033452310119528e-40	1.6282829830973018e-39	0.001024834720187484	-9.112497197054034e-40	800.0	0.0009503722071894035	-1.6142948396101408e-39	88.88888888888914	1.8805743552633865e-49	2.5123057770016688e-18	7.105427357600522e-13	-3.2661334432361094e-51	1.8708478010299213e-16	7.105427603896155e-14
3.56	88.88888887246101	-2.5477921457291887e-39	0.0017089432273051975	316.44444444444576	8.1355885741524595e-50	-800.0	-5.559245138956212e-41	0.0005389002684374063	9.778272402929575e-41	0.999999999953798	-8.021948116136097e-42	9.612805654035903e-06	1.433125370801852e-41	1.6422318688810084e-39	0.0011015463865284704	-9.192317546417138e-40	1.6562956700781593e-39	0.0011792182749871469	-9.27175783892445e-40	800.0	0.0011015463865284682	-1.6422495415522057e-39	88.8888888888891	1.880585316585718e-49	2.942360783791526e-18	-1.0184445879227416e-11	3.7594271120349535e-52	1.1917497949264523e-16	1.0184445879924688e-12
3.565	88.8888888674251	-2.591341497367555e-39	0.0019533961613379795	316.8888888888903	8.229617461729504e-50	-800.0	-5.586259403694414e-41	0.0005611058594176219	9.818642060100543e-41	0.9999999999396345	-8.161284874398954e-42	1.0987853408189463e-05	1.4576206249628478e-41	1.6702999231360722e-39	0.0012591152524207246	-9.351960044597811e-40	1.684424007607831e-39	0.001339963263010611	-9.43179238247294e-40	800.0	0.0012591152524207222	-1.6703204746080635e-39	88.88888888888907	1.880564911174958e-49	3.913790477682661e-18	3.789561257386945e-12	-2.4671086161688313e-52	2.805650578000772e-16	3.7895612677729435e-13
3.57	88.8888888614732	-2.6350694595520103e-39	0.002207684607533864	317.33333333333456	8.323645897678841e-50	-800.0	-5.612988961600715e-41	0.0005831807607647959	9.858608856004134e-41	0.9999999999228949	-8.301294216120712e-42	1.241822591833554e-05	1.4822162624833842e-41	1.6984829107721355e-39	0.001423023868357771	-9.512371540889945e-40	1.7126668415737995e-39	0.001507032244435879	-9.59259267144957e-40	800.0	0.0014230238683577681	-1.698506536006679e-39	88.88888888888911	1.880569049007301e-49	5.244225331272605e-18	-7.105427357600522e-13	3.5887805254817735e-52	-9.742636466458852e-18	7.105427358268456e-14
3.575	88.88888885452175	-2.67897416841482e-39	0.0024717782851443474	317.77777777777914	8.417674456287776e-50	-800.0	-5.639438176426742e-41	0.0006052504163298739	9.898138326785903e-41	0.9999999999033438	-8.441969089091734e-42	1.390375285528089e-05	1.5069112324795972e-41	1.7267796247492937e-39	0.0015932527160524598	-9.673543905460739e-40	1.7410229191318773e-39	0.0016804237164570793	-9.754150674616684e-40	800.0	0.0015932527160524566	-1.726806524340812e-39	88.88888888888907	1.8805922411530193e-49	4.093318688844531e-18	7.105427357600522e-13	4.3710289708066404e-51	1.386925773294861e-17	7.10542735895411e-14
3.58	88.88888884648253	-2.7230536091987434e-39	0.002745702738257025	318.2222222222235	8.51170365610652e-50	-800.0	-5.665610985911154e-41	0.0006274397895131399	9.937197272063173e-41	0.9999999998807335	-8.583302549089591e-42	1.5444577904537846e-05	1.531704398914276e-41	1.7551887601306292e-39	0.001769818260652409	-9.835469126611884e-40	1.769490892325786e-39	0.0018601719756454896	-9.916458473544526e-40	800.0	0.001769818260652405	-1.755219140943238e-39	88.88888888888911	1.8805886295786792e-49	4.963144661074054e-18	-6.158037043253786e-12	-2.9191744064588266e-50	-4.0312336439093313e-16	6.158037056448611e-13
3.585	88.88888883726185	-2.7673056133122925e-39	0.003029541632213622	318.66666666666765	8.605725601482204e-50	-800.0	-5.69148229114057e-41	0.0006501481732352954	9.975658202041585e-41	0.9999999998547999	-8.725287733947782e-42	1.7041171683676066e-05	1.5565945389072047e-41	1.7837089121080974e-39	0.0019527744309594875	-9.998139280403144e-40	1.79806904796789e-39	0.002046425707568116	-1.007950743077244e-39	800.0	0.0019527744309594827	-1.7837429879886338e-39	88.88888888888903	1.8780989383635015e-49	8.329896521172777e-19	7.105427357600522e-13	-2.706970965295993e-50	-1.6905780313396556e-16	7.105427558718197e-14
3.59	88.88888882671712	-2.8117239421917453e-39	0.0033245659747363006	319.11111111111194	8.69963242411404e-50	-800.0	-5.716658295416843e-41	0.0006773641378113097	1.001214901225666e-40	0.9999999998251431	-8.867911401851522e-42	1.8700683611161704e-05	1.5815781342645176e-41	1.8123360388149302e-39	0.002142940489982971	-1.0161539010988878e-39	1.8267517420808112e-39	0.0022404762390186585	-1.0243277627395369e-39	800.0	0.0021429404899829664	-1.812374044239072e-39	88.8888888888891	1.8781376731299134e-49	3.3489949009122e-18	-8.052817671947259e-12	-6.02661620065936e-51	1.406853727651252e-16	8.052817673176168e-13
3.595	88.88888881470459	-2.8563040598334897e-39	0.0036315698960205593	319.55555555555617	8.793531065301886e-50	-800.0	-5.741736151525512e-41	0.0007041771624354526	1.0048382142917786e-40	0.9999999997913575	-9.011163651616737e-42	2.0427580669377767e-05	1.6066526264699112e-41	1.841067200372027e-39	0.0023408283161995428	-1.0325656831453515e-39	1.8555382364670038e-39	0.0024422081362039205	-1.040776625167543e-39	800.0	0.002340828316199539	-1.8411093858885948e-39	88.88888888888894	1.877226415354669e-49	1.3235887955883173e-18	-2.0842586915628198e-11	-1.0697431981123763e-50	-3.8039869569688664e-16	2.0842586919099534e-12
3.6	88.88888880110069	-2.9010442649400592e-39	0.003950540908292633	320.0000000000005	8.88739251165992e-50	-800.0	-5.766901708831831e-41	0.0007311200744907378	1.0084179092724476e-40	0.9999999997530964	-9.155045823219289e-42	2.222179261463276e-05	1.6318170553843173e-41	1.869901292922738e-39	0.002546429860276455	-1.0490494215389474e-39	1.8844272815603645e-39	0.002651658609131983	-1.0572975816066865e-39	800.0	0.002546429860276451	-1.8699479163191e-39	88.88888888888894	1.8772244152284155e-49	4.468154429342882e-19	6.868579779013838e-12	1.3334811926661256e-51	-9.683039767757195e-17	6.868579779696376e-13
3.605	88.88888878578038	-2.9459430998105174e-39	0.004281400007901422	320.44444444444497	8.98125358559754e-50	-800.0	-5.791824592643719e-41	0.0007576961812504102	1.011971469152108e-40	0.9999999997100081	-9.299555163455666e-42	2.4082875051429406e-05	1.657070598227048e-41	1.8988373703960736e-39	0.0027596941982423857	-1.0656047952760856e-39	1.9134181286454012e-39	0.0028687225758261374	-1.0738899368486157e-39	800.0	0.0027596941982423804	-1.8988886959293356e-39	88.88888888888899	1.8772113343401935e-49	4.394757301087241e-19	4.2632564145603135e-12	-7.823034721272927e-53	1.9025316066290238e-16	4.2632564188054574e-13
3.61	88.88888876861776	-2.990999319532062e-39	0.004624015041502259	320.88888888888937	9.075114544503911e-50	-800.0	-5.816508201704657e-41	0.0007840457746929664	1.015494929826545e-40	0.9999999996617382	-9.444685653212544e-42	2.601008461724849e-05	1.682412552204177e-41	1.927874624552038e-39	0.0029805361470290367	-1.0822311096976358e-39	1.9425099154434004e-39	0.0030933351450010125	-1.090553005421662e-39	800.0	0.0029805361470290324	-1.9279309222764956e-39	88.88888888888897	1.8772169362985083e-49	2.085914237730164e-18	-9.000207986293995e-12	7.455391760260834e-53	3.1648349168012767e-16	9.000207991858412e-13
3.615	88.88888874948077	-3.036211501185918e-39	0.004978317580018206	321.3333333333338	9.168975549493456e-50	-800.0	-5.840955070241038e-41	0.0008103143192826497	1.018984277048221e-40	0.9999999996079154	-9.590431352548972e-42	2.8003036398582034e-05	1.7078421140724714e-41	1.9570121316765842e-39	0.0032089115987993405	-1.0989276785709114e-39	1.9717016646759285e-39	0.0033254730978705886	-1.1072861091141807e-39	800.0	0.0032089115987993366	-1.9570736781791242e-39	88.88888888888893	1.877213522123738e-49	3.0211895141804114e-18	1.1842378929334205e-12	7.082396517812872e-51	1.6075199061086434e-17	1.1842378930425253e-13
3.62	88.88888872822987	-3.0815780456712337e-39	0.005344303936142634	321.7777777777783	9.262835700939345e-50	-800.0	-5.865167202584908e-41	0.0008366468153614172	1.0224356225540153e-40	0.9999999995481473	-9.736786383647992e-42	3.0061709654385866e-05	1.7333583811343667e-41	1.986248853686307e-39	0.003444818176806834	-1.1156938220747422e-39	2.0009922876740183e-39	0.003565154755186956	-1.1240885754565152e-39	800.0	0.0034448181768068284	-1.9863159328927614e-39	88.88888888888897	1.877197185146211e-49	2.1115162146988428e-18	9.473903143467363e-13	-5.140512357799626e-50	-3.692412204871107e-16	9.473903863018068e-14
3.625	88.88888870471504	-3.1270970947601684e-39	0.005722062666981358	322.22222222222285	9.35665842571505e-50	-800.0	-5.889069443550811e-41	0.0008639713118879765	1.0258200066952926e-40	0.9999999994820117	-9.883744769037904e-42	3.218660251844251e-05	1.7589603044026372e-41	2.0155835842545327e-39	0.0036883129629806406	-1.1325288478997198e-39	2.0303798661358813e-39	0.0038126643041447826	-1.1409595166752621e-39	800.0	0.003688312962980634	-2.0156564886455148e-39	88.88888888888893	1.8728038872111266e-49	-3.202203978070965e-19	-5.447494307493734e-12	-5.135184792958676e-50	-3.897196318241244e-16	5.447494321434216e-13
3.63	88.88888867869017	-3.172762626011253e-39	0.006112989732843075	322.6666666666672	9.45029867032834e-50	-800.0	-5.912404351896859e-41	0.0008951048392814755	1.029047792233495e-40	0.9999999994088168	-1.003129387827655e-41	3.4385567267570574e-05	1.7846444851186877e-41	2.0450124159341332e-39	0.00394029576196645	-1.1494312863288638e-39	2.0598599138420006e-39	0.004069092951707622	-1.1578973074821868e-39	800.0	0.003940295761966442	-2.0450914635070015e-39	88.88888888888893	1.8727829311444153e-49	-2.4908918289417616e-18	-4.736951571733682e-12	6.233709241796205e-51	-1.1331158939331795e-15	4.736951707258776e-13
3.635	88.88888864993906	-3.2185712780850775e-39	0.006517665160639735	323.1111111111115	9.543933384689572e-50	-800.0	-5.935740481710358e-41	0.0009260452682163923	1.0322483498719188e-40	0.9999999993279539	-1.017942676529211e-41	3.666186655323708e-05	1.8104090255663107e-41	2.074533166127856e-39	0.0042011404460857585	-1.1664003275532686e-39	2.089431650770505e-39	0.004334385379241938	-1.1749019513765356e-39	800.0	0.004201140446085749	-2.0746186908334006e-39	88.88888888888889	1.8727105988671266e-49	-1.041489692549538e-17	-7.342274936187207e-12	-8.041536510248196e-52	-9.635046163321837e-16	7.342274999406111e-13
3.64	88.88888861827044	-3.264521441155625e-39	0.006936132479488669	323.55555555555594	9.637567577840347e-50	-800.0	-5.959079915968888e-41	0.0009569895835174401	1.0354156603219879e-40	0.9999999992388859	-1.0328145597858567e-41	3.90157452268193e-05	1.836253016123248e-41	2.1041447877963534e-39	0.0044708750732431485	-1.1834362120316011e-39	2.1190941244596076e-39	0.004608542700109615	-1.1919734578248464e-39	800.0	0.004470875073243139	-2.1042371329670545e-39	88.88888888888887	1.872710652849133e-49	-1.0658942370812061e-17	2.3684757858668407e-13	9.945249092950555e-53	4.900060587696282e-16	2.368480854647407e-14
3.645	88.88888858349942	-3.3106120338199705e-39	0.007368273102305442	324.0000000000003	9.73120270681531e-50	-800.0	-5.982211623250761e-41	0.0009876003189970223	1.0385609251989227e-40	0.9999999991410925	-1.0477446696068252e-41	4.144653623606696e-05	1.862175845341098e-41	2.1338465766548606e-39	0.0047494232048851115	-1.2005385119976885e-39	2.1488467033501596e-39	0.00489146935073115	-1.2091112317331663e-39	800.0	0.004749423204885103	-2.1339460928599452e-39	88.88888888888889	1.8727081530394828e-49	-7.85434775283457e-18	1.4210854715201044e-12	-4.600108624337732e-53	-4.481519362780376e-17	1.421085472226748e-13
3.65	88.8888885454366	-3.3568419883740327e-39	0.007813972860218473	324.4444444444447	9.824838111378372e-50	-800.0	-6.005137553623348e-41	0.0010180318116497847	1.0416799565041825e-40	0.9999999990340408	-1.0627324899317463e-41	4.3953597381186426e-05	1.888176909473651e-41	2.163637837240952e-39	0.005036711250340254	-1.217706630000244e-39	2.178688635905692e-39	0.005183113981819119	-1.2263146835940741e-39	800.0	0.005036711250340243	-2.1637448822940254e-39	88.88888888888887	1.872703693028707e-49	-1.1406861973834967e-17	-2.6053233644535247e-12	-2.948354240426083e-52	-7.220293861203848e-16	2.605323464503759e-13
3.655	88.88888850388219	-3.403210051278199e-39	0.008273186964321631	324.8888888888891	9.918472927321863e-50	-800.0	-6.027858936503388e-41	0.0010484409175853652	1.0447686087311088e-40	0.999999998917169	-1.0777775093118168e-41	4.653667672470067e-05	1.9142554998386113e-41	2.193517753382073e-39	0.0053327103397048875	-1.2349399730644298e-39	2.2086190518297178e-39	0.005483470180051463	-1.2435832274221683e-39	800.0	0.005332710339704877	-2.1936326932658413e-39	88.88888888888886	1.8726825209554627e-49	-1.370934213201022e-17	-4.2632564145603135e-12	-8.595091998017228e-53	-3.304429343885381e-16	4.2632564273665495e-13
3.66	88.88888845862432	-3.4497147887662116e-39	0.008745939831182685	325.3333333333336	1.0012107652007415e-49	-800.0	-6.050376629056e-41	0.0010789813305523213	1.0478229400025994e-40	0.9999999987898812	-1.0928792195760417e-41	4.9195911609935636e-05	1.9404108059449763e-41	2.223485391747638e-39	0.005637436211369908	-1.2522379511097253e-39	2.238636967899289e-39	0.005792575562121774	-1.2609162796876444e-39	800.0	0.005637436211369897	-2.2236086016018944e-39	88.88888888888884	1.8726824974313972e-49	-1.4177134236991248e-17	3.079018521626893e-12	2.95407096066511e-51	5.980916131176674e-16	3.0790185797157893e-13
3.665	88.88888840937128	-3.496352680155498e-39	0.009232960439369392	325.77777777777806	1.010572814767701e-49	-800.0	-6.072364124064489e-41	0.001113320386194813	1.050733401499022e-40	0.9999999986513572	-1.108036788336174e-41	5.1935402541495305e-05	1.9666408390084673e-41	2.253538463738303e-39	0.005951358748556802	-1.2695995936228445e-39	2.2687382625489506e-39	0.006111518358995984	-1.2783123214864231e-39	800.0	0.005951358748556788	-2.2536703379493457e-39	88.88888888888889	1.8725901588129943e-49	-1.0189949794771201e-17	6.6317322004271545e-12	-2.9028639043396067e-50	-5.517293219230891e-16	6.631732223377814e-13
3.67	88.88888835574838	-3.543118579696525e-39	0.009735528809660998	326.22222222222246	1.0199339429942024e-49	-800.0	-6.094192998757332e-41	0.0011482650731651674	1.0535966819664387e-40	0.9999999985005428	-1.1232491528762868e-41	5.4762349636457124e-05	1.9929426924099905e-41	2.2836736247153153e-39	0.006275303023914061	-1.2870236586254685e-39	2.2989215841417848e-39	0.00644047207126923	-1.2957708984047728e-39	800.0	0.006275303023914042	-2.2838145854737237e-39	88.8888888888889	1.8701923533125605e-49	-1.9137220062985277e-17	2.6053233644535247e-12	-2.796614604579409e-50	-1.3051055657974134e-15	2.6053236913420127e-13
3.675	88.88888829748463	-3.5900110293640805e-39	0.010253707786244588	326.66666666666697	1.0292848441315797e-49	-800.0	-6.116135555478174e-41	0.0011834656278370667	1.0564237568107224e-40	0.999999998336676	-1.1385164664671795e-41	5.7677106393561736e-05	2.019315541145905e-41	2.313889923725394e-39	0.006609309545420684	-1.3045103123888508e-39	2.3291858954630915e-39	0.006779509999638574	-1.313292336117714e-39	800.0	0.006609309545420665	-2.3140404043647548e-39	88.88888888888891	1.8701785514308066e-49	-2.0286269424574866e-17	1.4210854715201044e-12	3.740886111770598e-51	4.3686095159468877e-16	1.4210855386685945e-13
3.68	88.88888823431357	-3.637028930726374e-39	0.010787443221708652	327.1111111111115	1.0386357240497165e-49	-800.0	-6.137896738555823e-41	0.00121829509250093	1.0592335776530493e-40	0.9999999981590074	-1.1538385819542928e-41	6.0679368233821656e-05	2.045758763208817e-41	2.3441866432631487e-39	0.0069533434109033745	-1.3220593783761797e-39	2.3595307022221247e-39	0.007128525834647615	-1.3308761150280333e-39	800.0	0.0069533434109033555	-2.3443470865980008e-39	88.88888888888891	1.8701693260013726e-49	-1.6641357327570466e-17	-2.1316282072801568e-12	-2.0201449252876846e-52	5.797627279122196e-16	2.131628286122427e-13
3.685	88.88888816597155	-3.684171429917396e-39	0.011336605407581	327.5555555555558	1.0479866338493296e-49	-800.0	-6.159477950330083e-41	0.0012529131203164537	1.062021954173965e-40	0.9999999979667955	-1.1692150485027224e-41	6.376840554729756e-05	2.0722718746677042e-41	2.374563224629324e-39	0.007307321013229981	-1.339670333060914e-39	2.389955390084329e-39	0.007487459004101137	-1.3485217195559247e-39	800.0	0.007307321013229963	-2.3747340817906264e-39	88.8888888888889	1.870161408656429e-49	-1.6434705007135817e-17	-1.8947806286934726e-12	4.843953712248448e-53	-7.950401040279872e-16	1.894780795490813e-13
3.69	88.8888880921804	-3.731437486469679e-39	0.01190113665046518	328.0000000000002	1.0573375294330972e-49	-800.0	-6.180879792361309e-41	0.001287483048836409	1.0647847089818183e-40	0.9999999977592577	-1.184645418514445e-41	6.694389380887087e-05	2.0988542861702888e-41	2.4050189877964336e-39	0.007671205164570258	-1.3573426557134625e-39	2.420459225041693e-39	0.00785629572856597	-1.3662286358449258e-39	800.0	0.007671205164570237	-2.405200719280691e-39	88.8888888888889	1.8701764198130563e-49	-2.3110468398208416e-17	-1.8947806286934726e-12	6.599075355479895e-51	-8.298990248734031e-16	1.8947808104380894e-13
3.695	88.88888801264518	-3.778825877643816e-39	0.01248105153233927	328.4444444444446	1.0666884439305319e-49	-800.0	-6.2021024350109e-41	0.0013221658402873743	1.0675178405678725e-40	0.9999999975355649	-1.2001292461280074e-41	7.020591504242654e-05	2.1255053053461243e-41	2.4355531341255666e-39	0.008045005264178921	-1.3750758266194092e-39	2.4510413584514243e-39	0.00823506834089017	-1.3839963505266237e-39	800.0	0.0080450052641789	-2.435746210917863e-39	88.88888888888887	1.8702062382020026e-49	-2.433675174799601e-17	-1.3500311979440992e-11	-3.638875436968237e-50	-6.517273208737956e-16	1.3500311995172056e-12
3.7	88.88888792694682	-3.8263331740154e-39	0.013077152206007279	328.8888888888893	1.0760232979258033e-49	-800.0	-6.222816248433154e-41	0.001360797621772343	1.0701131684328001e-40	0.999999997294538	-1.215665733374817e-41	7.355898135780217e-05	2.1522229931783967e-41	2.4661634302565106e-39	0.008429238361768792	-1.3928689117196232e-39	2.4816978425277123e-39	0.00862490814338517	-1.4018234059126575e-39	800.0	0.008429238361768775	-2.466368346172264e-39	88.88888888888879	1.8665685171526746e-49	-3.0063789762044475e-17	-2.1316282072801568e-12	-8.259630599504724e-50	-9.29122871323621e-16	2.131628409770738e-13
3.705	88.88888783457885	-3.873954916184366e-39	0.013690613133312645	329.33333333333337	1.0853508551206469e-49	-800.0	-6.243459284965998e-41	0.0013998892861177203	1.0726702204657168e-40	0.9999999970347531	-1.2312539795520092e-41	7.70096991032366e-05	2.1790048284213098e-41	2.496846972358705e-39	0.008824661489098147	-1.4107208534894296e-39	2.512427580748741e-39	0.009025946882785834	-1.4197095992421746e-39	800.0	0.00882466148909813	-2.497064250614859e-39	88.88888888888884	1.8631314399951854e-49	-3.2957636665393923e-17	3.079018521626893e-12	-3.397387576540026e-50	-6.929189188021577e-16	3.0790185995959954e-13
3.71	88.88888773516656	-3.921689730998101e-39	0.014321528679911232	329.7777777777777	1.094666517761671e-49	-800.0	-6.264169424439152e-41	0.0014391579324217287	1.0751973010291668e-40	0.9999999967551559	-1.24689421455944e-41	8.055859908590096e-05	2.2058500328977393e-41	2.5276028620935382e-39	0.009231335472201901	-1.4286319043607853e-39	2.5432297144951572e-39	0.009438235260688555	-1.4376551227509388e-39	800.0	0.009231335472201882	-2.527833039142347e-39	88.8888888888888	1.8631358177555503e-49	-3.633017545797067e-17	-2.1316282072801568e-12	5.669440992108074e-51	9.275670076661382e-17	2.131628209298287e-13
3.715	88.88888762835296	-3.9695367636555754e-39	0.014969811910523542	330.2222222222222	1.1039821475577564e-49	-800.0	-6.284720405382126e-41	0.0014780711544180362	1.0777096503114173e-40	0.9999999964547427	-1.2625862361415038e-41	8.420519229522418e-05	2.2327581212599605e-41	2.55843053812062e-39	0.009649204274610695	-1.4466018240374612e-39	2.5741038217468412e-39	0.009861671455529498	-1.4556595204833471e-39	800.0	0.009649204274610678	-2.5586741607691984e-39	88.88888888888883	1.86312896848425e-49	-3.28927021872733e-17	2.6053233644535247e-12	9.329188348485406e-53	2.0457193713113301e-16	2.6053233724850957e-13
3.72	88.88888751377934	-4.01749527273124e-39	0.015635341771311997	330.66666666666674	1.113297816598638e-49	-800.0	-6.305112814915693e-41	0.0015167960224562278	1.0802030613481383e-40	0.9999999961325043	-1.278329648249091e-41	8.794879780377177e-05	2.2597286721998543e-41	2.5893295127883054e-39	0.010078189867803582	-1.4646301506690036e-39	2.605049359963023e-39	0.01029620150787439	-1.4737223381657742e-39	800.0	0.010078189867803565	-2.589587137589172e-39	88.8888888888888	1.863147080469928e-49	-3.510971598307668e-17	-9.473903143467364e-12	8.734202743146957e-51	-3.414806375618444e-17	9.473903143528907e-13
3.725	88.88888739106675	-4.065564330249015e-39	0.01631807224982679	331.11111111111126	1.1226136034808899e-49	-800.0	-6.325346488653269e-41	0.0015555020634401616	1.0826733739823817e-40	0.9999999957873751	-1.2941240562075706e-41	9.178915679194915e-05	2.2867611589472357e-41	2.6202991769905445e-39	0.01051826259325635	-1.482716422935025e-39	2.636065667423215e-39	0.01074182002416948	-1.4918431210536617e-39	800.0	0.010518262593256339	-2.6205713714497485e-39	88.88888888888874	1.8631655665801158e-49	-3.546827709411085e-17	-9.000207986293995e-12	-5.790569520925581e-50	-2.2714671586371772e-15	9.000208272929759e-13
3.73	88.88888725979936	-4.11374263040712e-39	0.017018105352447167	331.55555555555566	1.1319226286517268e-49	-800.0	-6.345315130559177e-41	0.0015955682460812798	1.085083974259285e-40	0.9999999954181854	-1.3099690304961469e-41	9.572684304611816e-05	2.3138548411104024e-41	2.6513386755759318e-39	0.010969488202061029	-1.5008601374008742e-39	2.6671510334943866e-39	0.011198916656297252	-1.51002110988674e-39	800.0	0.01096948820206101	-2.651626020660454e-39	88.88888888888873	1.8581880808765864e-49	-5.488589088729989e-17	5.684341886080418e-12	-4.793081115914543e-50	-1.9697787837387412e-15	5.684342227371321e-13
3.735	88.88888711928908	-4.16202539706051e-39	0.017736840670479204	332.0000000000001	1.1412136258886664e-49	-800.0	-6.36489049538928e-41	0.0016386517308286485	1.0873907670163598e-40	0.9999999950230003	-1.3258635587950723e-41	9.976972926799964e-05	2.341007016553942e-41	2.682444894316343e-39	0.011432768839405406	-1.519060103342543e-39	2.6983024843101543e-39	0.01166835579763873	-1.528255178009178e-39	800.0	0.011432768839405383	-2.682748006625564e-39	88.88888888888879	1.858200388863074e-49	-5.4814071902819134e-17	1.2316074086507572e-11	-6.172135982403646e-50	-1.824408837270775e-15	1.2316074221634545e-12
3.74	88.88888696898437	-4.21041037677276e-39	0.018474749264596132	332.44444444444446	1.1504808906968777e-49	-800.0	-6.384591247594404e-41	0.0016820177715761507	1.0896678228363688e-40	0.9999999946002682	-1.341807382410333e-41	0.00010392046517449617	2.3682164085792387e-41	2.7136163597626645e-39	0.01190840814050383	-1.537316006658855e-39	2.7295191679700228e-39	0.012150218394525328	-1.5465456846293454e-39	800.0	0.011908408140503795	-2.7139358768306162e-39	88.88888888888883	1.8521841454290825e-49	-7.168934742841051e-17	4.500103993146998e-12	-7.035732982107348e-50	-7.582765661758224e-16	4.50010405703256e-13
3.745	88.88888680839045	-4.258896379945117e-39	0.019231910606413598	332.8888888888889	1.1597417600221221e-49	-800.0	-6.404211633473689e-41	0.001725146852606336	1.091929123403618e-40	0.999999994148598	-1.3578006681851987e-41	0.00010817949779407848	2.395482341645852e-41	2.7448522904910314e-39	0.012396457331069874	-1.5556280265014014e-39	2.7608006331192484e-39	0.012644436562998464	-1.564892399514678e-39	800.0	0.012396457331069845	-2.745188864486998e-39	88.88888888888884	1.8521668988945094e-49	-6.043139918674189e-17	3.552713678800261e-12	9.419734554526358e-51	2.2816382418970567e-15	3.5527144114616855e-13
3.75	88.88888663704996	-4.3074828495836416e-39	0.020008171281663854	333.3333333333333	1.1690025646911652e-49	-800.0	-6.423690866761437e-41	0.001767993861973964	1.0941762172492685e-40	0.9999999936667029	-1.3738430797126648e-41	0.00011254596417214645	2.422804497845293e-41	2.7761523169477512e-39	0.01289681752381559	-1.5739957688451998e-39	2.792146472765237e-39	0.013150929495479214	-1.5832949182927874e-39	800.0	0.012896817523815558	-2.7765066105689377e-39	88.88888888888887	1.8521345590207153e-49	-5.432791518812956e-17	9.94759830064073e-12	9.701136253251897e-50	1.2059398841794013e-15	9.947598373738325e-13
3.755	88.88888645448269	-4.356169067713559e-39	0.020803444956066494	333.7777777777777	1.1782633255108632e-49	-800.0	-6.443028543683461e-41	0.001810734788548242	1.0964048818989578e-40	0.9999999931532324	-1.389934265324429e-41	0.00011701937867907875	2.450182468224756e-41	2.8075159646858647e-39	0.01340943306971252	-1.5924188212032338e-39	2.8235561589504138e-39	0.013669666801485889	-1.6017528354345577e-39	800.0	0.013409433069712493	-2.8078886522860354e-39	88.88888888888887	1.85215185686342e-49	-5.282090849440416e-17	-4.8553753610270234e-11	-6.784442778165375e-49	-3.678729758696903e-15	4.855375374963178e-12
3.76	88.88888626018002	-4.4049541332739874e-39	0.021617723913296912	334.222222222222	1.1875220159410009e-49	-800.0	-6.462223701125501e-41	0.0018535444964354996	1.0986110281512102e-40	0.999999992606756	-1.4060738736822527e-41	0.0001215996979113117	2.477615740226856e-41	2.8389426398319748e-39	0.01393429899510774	-1.6108967702544426e-39	2.855029046570212e-39	0.014200668185413202	-1.620265742651754e-39	800.0	0.013934298995107728	-2.8393344088347092e-39	88.88888888888846	1.7938569916608535e-49	-8.31618149404776e-17	-5.755396159656423e-11	-6.894110172606406e-49	-1.5629712647724548e-15	5.755396161778674e-12
3.765	88.88888605336706	-4.453834564550753e-39	0.02245200952004191	334.66666666666646	1.1964870741921088e-49	-800.0	-6.48093073018391e-41	0.001900661756447589	1.1006862953103498e-40	0.9999999920250944	-1.4222611162644137e-41	0.00012629255455740715	2.505102341648986e-41	2.8704300666767706e-39	0.014472060758601328	-1.6294286855990673e-39	2.8865613862148008e-39	0.014745167670045082	-1.6388322415595643e-39	800.0	0.014472060758601335	-2.870841635980261e-39	88.8888888888884	1.7930129267055638e-49	-7.037881168369709e-17	1.6342482922481202e-11	8.329617366712007e-50	-1.3928823748209809e-15	1.634248298183942e-12
3.77	88.88888583324353	-4.5028071605886986e-39	0.02330720509435688	335.11111111111063	1.2054510701715598e-49	-800.0	-6.499717473539148e-41	0.0019478921082724287	1.1027387753511224e-40	0.999999991405997	-1.4384954389221658e-41	0.00013110302978245768	2.5326404585871263e-41	2.9019761513457525e-39	0.015023300618862267	-1.6480139062784206e-39	2.918152525081325e-39	0.01530319765379937	-1.657452560522627e-39	800.0	0.015023300618862246	-2.9024082704589604e-39	88.88888888888853	1.7926697281142765e-49	-1.0101286481611937e-16	1.1368683772160836e-11	-2.4935760093493497e-51	-5.2260984668253616e-15	1.1368684973359862e-12
3.775	88.88888559917135	-4.551870724730438e-39	0.024183437298266698	335.55555555555515	1.2144144001375694e-49	-800.0	-6.518495552006867e-41	0.0019950833647502885	1.104772434914194e-40	0.999999990747669	-1.4547770971611256e-41	0.00013603183606136218	2.560229410450209e-41	2.933580105395366e-39	0.015588100219538544	-1.666652711124971e-39	2.9498019240028146e-39	0.015874746936684163	-1.6761266747178678e-39	800.0	0.015588100219538515	-2.9340335409323606e-39	88.88888888888849	1.7926760442905285e-49	-1.1205636501027388e-16	-2.842170943040209e-12	4.6702904886091965e-52	1.2828826169471272e-16	2.8421709459355097e-13
3.78	88.88888535056859	-4.601024751839234e-39	0.025080563848287434	335.9999999999996	1.2233777560496701e-49	-800.0	-6.53714703075932e-41	0.00204194669637494	1.1067948833979214e-40	0.9999999900484738	-1.4711058363646243e-41	0.00014107817305056037	2.5878689078398906e-41	2.96524159119063e-39	0.016166367848053424	-1.685344798720538e-39	2.981509261805504e-39	0.01645972157514903	-1.6948542214638185e-39	800.0	0.0161663678480534	-2.9657171218006746e-39	88.88888888888852	1.792658077946181e-49	-1.0301633354354905e-16	1.1842378929334205e-12	3.3234158426745224e-51	2.249477856193236e-15	1.1842400293901626e-13
3.785	88.88888508683343	-4.650268657470787e-39	0.025998479368022066	336.4444444444441	1.2323410477686096e-49	-800.0	-6.555671212636794e-41	0.0020886642994493135	1.1088018740044102e-40	0.9999999893067187	-1.487481340844486e-41	0.00014624144800892545	2.615558616471884e-41	2.996960219346189e-39	0.01675803558131935	-1.704089797117206e-39	3.013274095653831e-39	0.017058079821039542	-1.713634836081795e-39	800.0	0.016758035581319334	-2.9974586363442454e-39	88.8888888888885	1.7926395079314814e-49	-9.410385720481778e-17	-3.3158661002135772e-12	-2.5838086562157413e-50	1.0359984057624506e-15	3.3158662620555574e-13
3.79	88.88888480732919	-4.699601670364424e-39	0.02693715967814356	336.8888888888885	1.241303979886501e-49	-800.0	-6.574066765269415e-41	0.002135418172267587	1.1107892688882482e-40	0.999999988520613	-1.503903293501484e-41	0.00015152152492893208	2.64329809630376e-41	3.028735478515701e-39	0.017363087834067387	-1.722887331428569e-39	3.0450958641716924e-39	0.017669832064871948	-1.732468150076154e-39	800.0	0.017363087834067373	-3.0292575874257804e-39	88.88888888888852	1.790383387736295e-49	-9.236147374407379e-17	1.6105635343894517e-11	2.824869496206982e-50	-2.0488076497675498e-16	1.610563534519767e-12
3.795	88.8888845110966	-4.749020614518377e-39	0.027897565291022546	337.3333333333332	1.2502534679060483e-49	-800.0	-6.592003229433209e-41	0.002186349575184338	1.1126556399570673e-40	0.9999999876874589	-1.520370965037698e-41	0.00015692380669413296	2.6710855462557e-41	3.060565288132537e-39	0.01798214373120314	-1.7417365377073973e-39	3.076971100282178e-39	0.018296175080863404	-1.7513528482553118e-39	800.0	0.017982143731203118	-3.061111927865939e-39	88.88888888888863	1.789981374548737e-49	-8.897739096022297e-17	4.500103993146998e-12	-4.155034664415073e-49	4.957107153149523e-15	4.5001067234065553e-13
3.8	88.88888419713544	-4.798522455908776e-39	0.028880606677046766	337.77777777777766	1.2590893690843356e-49	-800.0	-6.610032814190327e-41	0.0022375109955371265	1.114498411830252e-40	0.9999999868044436	-1.5368838576989865e-41	0.0001624534147020517	2.698919245130434e-41	3.092447659195674e-39	0.018615790141714054	-1.7606368175092902e-39	3.108899127918134e-39	0.01893717476415541	-1.7702891973901176e-39	800.0	0.018615790141714047	-3.0930197020011476e-39	88.88888888888856	1.7544437939069824e-49	-4.9711757688184546e-17	-1.2316074086507572e-11	-4.141995354749097e-49	4.607185194742157e-15	1.2316074948233254e-12
3.805	88.88888386464805	-4.8481060625879335e-39	0.02988642350327989	338.22222222222206	1.2678614399862856e-49	-800.0	-6.628046559414664e-41	0.002288595046989567	1.1163251671911668e-40	0.9999999858693227	-1.5534422206503684e-41	0.00016811113458147398	2.726798547901691e-41	3.1243818430610986e-39	0.019264117092086815	-1.7795884409842183e-39	3.140879488240281e-39	0.019592808950190686	-1.789277152103652e-39	800.0	0.01926411709208681	-3.124980180203361e-39	88.88888888888854	1.7544248371619023e-49	-5.0332557946695364e-17	-2.842170943040209e-12	5.933024772239594e-50	-1.70884712850498e-15	2.84217145675988e-13
3.81	88.88888351291364	-4.8977710221253027e-39	0.030914864862829756	338.6666666666665	1.2766336457393216e-49	-800.0	-6.645945975827944e-41	0.002339352553562346	1.1181422126002504e-40	0.9999999848800696	-1.5700458145040657e-41	0.00017389611748271498	2.7547232168239827e-41	3.1563675607250795e-39	0.019927027311373136	-1.79859112339567e-39	3.17291190307899e-39	0.0202629840907521	-1.808316384867998e-39	800.0	0.019927027311373136	-3.156993096629128e-39	88.88888888888853	1.7544508099265817e-49	-5.963392132040097e-17	-2.3684757858668407e-13	8.59962135396523e-52	-1.947995613487711e-15	2.368555892717874e-14
3.815	88.88888314118407	-4.94751681751965e-39	0.031965827424732016	339.111111111111	1.285405872641272e-49	-800.0	-6.663729932366357e-41	0.0023899720215689218	1.1199452994279725e-40	0.9999999838345802	-1.586694353936483e-41	0.00017980778217078635	2.7826929549441275e-41	3.188404464892521e-39	0.020604454195013958	-1.817644526603439e-39	3.204995972550362e-39	0.02094766064070339	-1.8274065649149788e-39	800.0	0.020604454195013947	-3.189058118031074e-39	88.88888888888854	1.754439354072091e-49	-6.582387230764861e-17	5.2106467289070494e-12	-4.7677428539459274e-51	2.961455859329487e-16	5.210646737322723e-13
3.82	88.8888827486504	-4.997342634659114e-39	0.033039338417587355	339.5555555555554	1.2941773259421057e-49	-800.0	-6.681319435204683e-41	0.0024415818724227265	1.1217080657502785e-40	0.9999999827305792	-1.603387530394618e-41	0.0001858462818083869	2.810707297022883e-41	3.22049201409761e-39	0.021296415294231243	-1.836748283563479e-39	3.237130541557001e-39	0.021647122323830793	-1.846547135175778e-39	800.0	0.021296415294231236	-3.2211747196509953e-39	88.88888888888857	1.7540439519072537e-49	-5.676253576653998e-17	1.6342482922481202e-11	9.996188511078022e-50	2.5668325610846485e-15	1.6342483124061017e-12
3.825	88.88888233401751	-5.047244795789638e-39	0.034136642980385094	339.99999999999983	1.3029474202292828e-49	-800.0	-6.698564678248413e-41	0.0024961997922723195	1.1233831547548727e-40	0.9999999815644243	-1.6201245284003592e-41	0.00019201862030464035	2.8387641559879243e-41	3.2526277957556456e-39	0.022003713197978926	-1.855901424372176e-39	3.2693130983287764e-39	0.022362230888424026	-1.8657371094187315e-39	800.0	0.022003713197978923	-3.2533405308913034e-39	88.88888888888862	1.7540306187196458e-49	-4.5130208671785574e-17	-5.1632772131897126e-11	-7.324503342415862e-49	8.87127705344441e-16	5.163277213951822e-12
3.83	88.88888189617037	-5.097221191799785e-39	0.03525832997795255	340.44444444444406	1.311428617849909e-49	-800.0	-6.715965418500809e-41	0.002551392054551289	1.125028408506918e-40	0.9999999803329793	-1.6369052035572075e-41	0.00019832811002650668	2.866862332549839e-41	3.2848104208205104e-39	0.022726727475639093	-1.875103759171769e-39	3.301542788148662e-39	0.023093150871469077	-1.8849769331105283e-39	800.0	0.022726727475639145	-3.2855541922661917e-39	88.88888888888813	1.6912037960405485e-49	-4.8094565898585954e-17	-5.6843418860804176e-11	-7.331813941675453e-49	-7.276799482179313e-16	5.6843418865461875e-12
3.835	88.88888143415369	-5.1472709149844256e-39	0.03640447948039397	340.8888888888884	1.3198846190669586e-49	-800.0	-6.733284193305665e-41	0.002606218384078916	1.1266659766109431e-40	0.9999999790335573	-1.6537296881063366e-41	0.00020477520137062412	2.895001307641856e-41	3.317039284787757e-39	0.023465509738952683	-1.8943554240099823e-39	3.33381939083906e-39	0.023839777440954765	-1.9042663714374578e-39	800.0	0.023465509738952738	-3.317815118689319e-39	88.88888888888813	1.6911883076834295e-49	-4.970777568468643e-17	4.500103993146998e-12	1.0486716077889549e-49	-2.838757681906929e-16	4.5001040021007297e-13
3.84	88.88888094709048	-5.197393645308489e-39	0.037574926903237486	341.3333333333328	1.3283406113027113e-49	-800.0	-6.750498910030951e-41	0.0026607650864509226	1.1282940685954533e-40	0.999999977663692	-1.670597727029106e-41	0.00021135896855169035	2.9231808950617776e-41	3.3493141672348464e-39	0.024219953900828387	-1.9136561156145968e-39	3.3661426349291435e-39	0.024602030489601814	-1.923605126295081e-39	800.0	0.024219953900828452	-3.3501231038732835e-39	88.8888888888881	1.69121430011808e-49	-4.9722274976668016e-17	2.4868995751601826e-11	2.8744383064948373e-49	3.857025192338084e-15	2.4868996050702028e-12
3.845	88.88888043405628	-5.247588877350612e-39	0.03876959120071779	341.77777777777726	1.3367965520566464e-49	-800.0	-6.767607900337577e-41	0.0027152266904824666	1.1299084605054227e-40	0.9999999762207834	-1.6875090605521783e-41	0.00021807895568978487	2.9514008035732104e-41	3.3816347265119526e-39	0.024990007721371235	-1.9330055237902043e-39	3.398512127940688e-39	0.025379885638531465	-1.942992894799519e-39	800.0	0.024990007721371294	-3.382477822034836e-39	88.88888888888813	1.6911943548725556e-49	-4.1119335204999354e-17	-1.7029340900382585e-10	-1.9875077778195108e-48	-1.8587044424920455e-14	1.7029341001818753e-11
3.85	88.88887989389383	-5.2978550253416694e-39	0.03998887270380175	342.2222222222217	1.3446549473020093e-49	-800.0	-6.784397143725739e-41	0.002772415151909036	1.1314453709715417e-40	0.9999999747015764	-1.7044632542797263e-41	0.00022493741464944833	2.979660129663046e-41	3.4139999141185276e-39	0.025775929245358487	-1.952403129185677e-39	3.430925650193832e-39	0.02617412407484406	-1.962428760943325e-39	800.0	0.02577592924535866	-3.414878251022875e-39	88.88888888888664	1.5187858751638557e-49	-2.1080855360139e-16	-1.7455666541838617e-10	-2.180822467218707e-48	-2.090638806222262e-14	1.7455666667034943e-11
3.855	88.88887932500538	-5.348188533938911e-39	0.04123403509604032	342.66666666666595	1.3522203164274292e-49	-800.0	-6.801118545758408e-41	0.002831034931012047	1.1329346201880748e-40	0.9999999731015777	-1.721459592966164e-41	0.00023194145365408768	3.007956853494153e-41	3.446407392647616e-39	0.02657853301532358	-1.9718480738844742e-39	3.463381836294351e-39	0.02698515584084962	-1.9819125303753318e-39	800.0	0.02657853301532375	-3.447322099143334e-39	88.88888888888664	1.5042655747414227e-49	-2.2317533918715976e-16	2.2974215122908356e-11	1.1810722630233374e-49	-1.9903770323998647e-15	2.297421520912677e-12
3.86	88.88887872616397	-5.398588093759769e-39	0.04250536829567128	343.1111111111103	1.359741712420424e-49	-800.0	-6.817898645639108e-41	0.002889884154453487	1.1344036919730895e-40	0.9999999714173362	-1.7384983211743213e-41	0.00023909270349705913	3.036290227346119e-41	3.4788562924981427e-39	0.027398005906544426	-1.991340617639134e-39	3.4958801082014114e-39	0.02781304666750926	-2.001444371252487e-39	800.0	0.02739800590654459	-3.479808522397673e-39	88.88888888888663	1.5042775394003293e-49	-2.517870231005093e-16	-3.789561257386945e-12	2.4157034263638825e-50	-2.9649127788424095e-15	3.789562417245019e-13
3.865	88.88887809630039	-5.449053299610947e-39	0.04380276323434823	343.5555555555547	1.3672630587213164e-49	-800.0	-6.834584518268354e-41	0.002948345612025955	1.1358666959951914e-40	0.9999999696458448	-1.7555793183095412e-41	0.0002463905506721876	3.064660015985957e-41	3.511346335773133e-39	0.028234277616516968	-2.010880609273139e-39	3.5284202920864104e-39	0.02865768546808433	-2.0210240136335998e-39	800.0	0.02823427761651715	-3.512337259607402e-39	88.8888888888866	1.5042633329829393e-49	-2.4952446925395387e-16	-5.684341886080418e-12	1.978383038012126e-50	1.8398840729290318e-15	5.684342183843412e-13
3.87	88.88887743433858	-5.4995837981315735e-39	0.04512609166524948	343.9999999999991	1.3747844102555124e-49	-800.0	-6.851174643895447e-41	0.0030066182761166065	1.1373193844560047e-40	0.9999999677840772	-1.7727023488312766e-41	0.00025383427379453553	3.0930660135662375e-41	3.543877278512365e-39	0.029087265480747734	-2.0304677663171966e-39	3.561002092430285e-39	0.029519018157226292	-2.040651183223714e-39	800.0	0.029087265480747932	-3.544908083004047e-39	88.88888888888657	1.5042737205378046e-49	-2.4370682740518636e-16	-9.710750722054047e-12	-1.3077898186269422e-49	-2.0022109574742785e-15	9.710750928466959e-13
3.875	88.88887673910149	-5.5501788826916905e-39	0.04647538953379469	344.4444444444435	1.3822880180594046e-49	-800.0	-6.867573347286443e-41	0.003066063375027139	1.1387319992910205e-40	0.9999999658287227	-1.789867141224585e-41	0.00026142407506079163	3.1215078139020596e-41	3.576448645328875e-39	0.029956992669411972	-2.050101761901797e-39	3.593624361208222e-39	0.030397380612769812	-2.0603253316385174e-39	800.0	0.029956992669412177	-3.5775205371098234e-39	88.88888888888651	1.4923647256131524e-49	-2.6892681800032546e-16	-4.500103993146998e-12	-1.950620563564023e-49	-4.832991362211149e-15	4.500106588397997e-13
3.88	88.88887600874928	-5.600835246328908e-39	0.04785187776517334	344.88888888888766	1.389748867808538e-49	-800.0	-6.883702768447091e-41	0.003128133514150407	1.1400727935468918e-40	0.9999999637746072	-1.807072947465107e-41	0.0002691668221797761	3.1499835361703674e-41	3.609058257342056e-39	0.030844246164147163	-2.0697816994768083e-39	3.626285040912188e-39	0.031293524853341095	-2.0800456874412457e-39	800.0	0.03084424616414735	-3.6101724903311157e-39	88.88888888888653	1.4875560695596564e-49	-2.8687315562301734e-16	7.105427357600522e-13	-3.6257861316529096e-50	-3.495546905653325e-15	7.105513339580393e-14
3.885	88.88887524170092	-5.651551021640788e-39	0.04925612997529204	345.33333333333206	1.3971878974796413e-49	-800.0	-6.899983677555489e-41	0.0031909086842123137	1.1413843028109734e-40	0.9999999616172836	-1.8243197786299614e-41	0.0002770657417455557	3.1784921152431386e-41	3.6417048771961394e-39	0.03174939570557316	-2.0895075644927193e-39	3.658983292588965e-39	0.0322076528554262	-2.0998126846129014e-39	800.0	0.031749395705573356	-3.642862738982291e-39	88.88888888888651	1.4875593589716036e-49	-3.04875613263913e-16	-7.815970093360574e-12	8.308283846986211e-51	-3.603219345733875e-15	7.815970923915757e-13
3.89	88.88887443662583	-5.702325550066188e-39	0.05068817194756802	345.7777777777765	1.4046257246284493e-49	-800.0	-6.916178942602202e-41	0.003253220742015325	1.1426921843090839e-40	0.9999999593530097	-1.8416076928414448e-41	0.000285120978794382	3.2070331713642204e-41	3.6743880590962786e-39	0.032672457913793154	-2.109279406988786e-39	3.691719012310715e-39	0.03313963194713574	-2.1196260778013206e-39	800.0	0.03267245791379337	-3.675590858569645e-39	88.88888888888647	1.487585504195333e-49	-3.2156437517467318e-16	-7.57912251477389e-12	1.6582290522496303e-51	-3.186039262936477e-15	7.579123184432266e-13
3.895	88.8888735922754	-5.7531585878747876e-39	0.05214784267145586	346.22222222222086	1.4120636948778044e-49	-800.0	-6.932287140059646e-41	0.0033152722718444343	1.1439921983995076e-40	0.9999999569782739	-1.8589364757758156e-41	0.0002933316276465744	3.2356065601024987e-41	3.707107629181292e-39	0.03361332900573771	-2.1290969685802604e-39	3.724491974692809e-39	0.034089387492702974	-2.1394856175762337e-39	800.0	0.033613329005737935	-3.7083566919900884e-39	88.88888888888648	1.487615232390372e-49	-3.3026341366952504e-16	2.6290081223121933e-11	-6.742849631084734e-51	2.5859300292251435e-15	2.6290081350299826e-12
3.9	88.88887270732697	-5.804049689532577e-39	0.053635078424928484	346.6666666666654	1.4195014781653876e-49	-800.0	-6.948278363535316e-41	0.0033776122020371955	1.145272803980653e-40	0.9999999544893569	-1.8763059071191976e-41	0.00030169732987066493	3.2642120225199193e-41	3.73986328124008e-39	0.03457196790837461	-2.1489599821024402e-39	3.757301623722414e-39	0.035057002112746136	-2.159390968831867e-39	800.0	0.03457196790837479	-3.7411599520624166e-39	88.8888888888867	1.4870081194784538e-49	-2.988132030917118e-16	3.1263880373442295e-11	1.6478665654967273e-51	7.115045331692676e-15	3.126388118306459e-12
3.905	88.88887177978758	-5.8549961857921283e-39	0.05515086129033668	347.1111111111097	1.4269364546099326e-49	-800.0	-6.963921992308128e-41	0.0034433204423232077	1.146468468625285e-40	0.9999999518806523	-1.893715351706933e-41	0.00031022360968590423	3.2928480378293024e-41	3.7726532504870595e-39	0.03554900765083039	-2.1688676832938415e-39	3.790145526020944e-39	0.0360434407570274	-2.179341135782748e-39	800.0	0.03554900765083058	-3.773998918249744e-39	88.88888888888675	1.4869859910152217e-49	-2.7802203835374097e-16	8.76336040770731e-12	-6.247192038534804e-50	-3.8899886084434845e-15	8.763361271075353e-13
3.91	88.8888708076918	-5.90599582536017e-39	0.05669598303380419	347.5555555555545	1.4343467964363723e-49	-800.0	-6.979718552245119e-41	0.003509754549239888	1.1476358569705317e-40	0.9999999491466329	-1.9111646166624525e-41	0.0003189149207830492	3.321513321846257e-41	3.8054760449877966e-39	0.03654495858871336	-2.1888198180073668e-39	3.8230228715320914e-39	0.0370489113710189	-2.1993365565443897e-39	800.0	0.0365449585887135	-3.806872139419038e-39	88.8888888888868	1.4815628532548318e-49	-3.3053609254999017e-16	4.736951571733682e-12	-6.353076283306539e-50	-8.853506565915272e-15	4.736959845462986e-13
3.915	88.88886978942666	-5.95704778100984e-39	0.05827057032798256	347.99999999999903	1.4417545112564058e-49	-800.0	-6.995459106698995e-41	0.003575822170227325	1.1487982136659026e-40	0.9999999462827621	-1.9286538691291694e-41	0.00032777197570191046	3.3502073981761447e-41	3.8383311061972923e-39	0.037559902373306024	-2.208816558135019e-39	3.855933516109706e-39	0.03807330896423565	-2.2193770706729014e-39	800.0	0.03755990237330617	-3.83977908235846e-39	88.8888888888868	1.4815362548326078e-49	-3.5064721282912736e-16	-3.789561257386945e-12	3.4631122474233337e-50	-3.9763271485994684e-16	3.789561278248433e-13
3.92	88.88886872354541	-6.008151874490862e-39	0.05987444632716087	348.4444444444436	1.4491622340918238e-49	-800.0	-7.011120125306776e-41	0.003641588688207362	1.1499543080419462e-40	0.9999999432849709	-1.9461829162651906e-41	0.00033679377969155226	3.378930158820242e-41	3.871218301554778e-39	0.038593725014784225	-2.2288576694151054e-39	3.888877280351553e-39	0.03911654727702004	-2.2394624503148684e-39	800.0	0.03859372501478438	-3.872719632171887e-39	88.88888888888675	1.4815286877173853e-49	-3.486042049398507e-16	-2.0132044179868146e-11	-1.81998273270846e-49	-5.533325035039179e-15	2.0132044940289815e-12
3.925	88.88886760852216	-6.059307744213522e-39	0.06150752493300076	348.88888888888823	1.4565668216015303e-49	-800.0	-7.026687668512761e-41	0.003707407262962663	1.1510969626728128e-40	0.9999999401489678	-1.9637515588363757e-41	0.0003459798484553839	3.407681391689096e-41	3.904137378121075e-39	0.039646371017097226	-2.2489429084143494e-39	3.921853779237295e-39	0.040178641222539654	-2.25959242768299e-39	800.0	0.0396463710170974	-3.905693555786721e-39	88.88888888888663	1.4659339932311084e-49	-3.9870897458102696e-16	2.3447910280081723e-11	2.0785976647542133e-49	1.1412728308260022e-15	2.3447910307856133e-12
3.93	88.88886644212438	-6.110513038828257e-39	0.06317068289280624	349.3333333333327	1.4638971073199016e-49	-800.0	-7.041903461855954e-41	0.0037767129132958376	1.1521551472548811e-40	0.9999999368684738	-1.981359220407619e-41	0.0003553351137048867	3.436459754868442e-41	3.9370867761573795e-39	0.040718405513053994	-2.2690715786464447e-39	3.954860592878287e-39	0.04126058977436177	-2.2797659950881368e-39	800.0	0.04071840551305419	-3.93869933757589e-39	88.88888888888661	1.465943724405352e-49	-3.830306844628138e-16	-2.709536299031666e-10	-2.701694287171117e-48	-3.2647429995489477e-14	2.7095363187002473e-11
3.935	88.88886522203344	-6.161765453547027e-39	0.06486478203694454	349.77777777777726	1.470173701723174e-49	-800.0	-7.0572693914359e-41	0.0038467779788978716	1.1531856487674844e-40	0.9999999334369684	-1.999005682264616e-41	0.0003648644232443013	3.4652639322926824e-41	3.9700649651748265e-39	0.041810384020421865	-2.289243393243889e-39	3.987896928213005e-39	0.04236261048893541	-2.2999835826389448e-39	800.0	0.04181038402042238	-3.971735491924894e-39	88.88888888888427	1.232140688451079e-49	-6.945354188623967e-16	-2.8634872251130104e-10	-2.72708082446753e-48	-4.3161243769253565e-14	2.8634872576414067e-11
3.94	88.88886394637345	-6.2130641589624e-39	0.06658996833920665	350.2222222222216	1.4763346182185172e-49	-800.0	-7.072588803086929e-41	0.0039164928965920685	1.1542114017286834e-40	0.9999999298491742	-2.016691123468297e-41	0.00037456859818434015	3.494093445432132e-41	4.003071383124016e-39	0.042922400631868834	-2.309458536298639e-39	4.020962649205473e-39	0.04348460305627395	-2.3202450570713642e-39	800.0	0.042922400631869376	-4.004801484216236e-39	88.88888888888415	1.2321988217799302e-49	-7.563699594613075e-16	8.100187187664595e-11	9.001712211249966e-49	5.044368902517267e-15	8.100187203371428e-12
3.945	88.88886261347135	-6.264409014286549e-39	0.0683460619862436	350.66666666666595	1.4824955971422374e-49	-800.0	-7.087835197834875e-41	0.003985896751852139	1.1552317362323088e-40	0.9999999261003867	-2.0344153700695238e-41	0.00038444662708308374	3.5229482068229143e-41	4.0361059203857056e-39	0.0440543394450003	-2.3297167944881404e-39	4.054057600628316e-39	0.04462647836355418	-2.3405502092073763e-39	800.0	0.044054339445000854	-4.0378972237013015e-39	88.88888888888414	1.2322232669083621e-49	-7.957485484135876e-16	-3.938775231896556e-10	-3.564571611181349e-48	-8.548356011790378e-14	3.938775324659389e-11
3.95	88.88886122155326	-6.315799673198559e-39	0.07013298741135048	351.1111111111104	1.4884368132392844e-49	-800.0	-7.102967353062946e-41	0.004055686435767755	1.1562327177019754e-40	0.9999999221856166	-2.052178235359489e-41	0.00039449808488648187	3.5518280122259335e-41	4.069168332201794e-39	0.04520615175254049	-2.350017937645186e-39	4.087181228057951e-39	0.045788346942543995	-2.3608987117748634e-39	800.0	0.04520615175254148	-4.071022487149493e-39	88.88888888888077	9.265016193885825e-50	-1.4953978550233974e-15	-3.881931813035752e-10	-3.5806922712330635e-48	-7.815848190025243e-14	3.88193189171756e-11
3.955	88.88885976798441	-6.367233687087574e-39	0.0719517065310042	351.555555555555	1.4930691574224128e-49	-800.0	-7.117795815324848e-41	0.004128475615690238	1.1571617777393588e-40	0.9999999180974543	-2.0699791182996236e-41	0.0004047283823851941	3.5807314630097315e-41	4.1022569915193106e-39	0.04637845758582771	-2.3703612374779597e-39	4.120331471097113e-39	0.046971068085552695	-2.3812896947575644e-39	800.0	0.046378457585828724	-4.1041756962411466e-39	88.88888888888081	9.253060360292519e-50	-1.4777449762845434e-15	5.873819948949766e-11	4.95230203784085e-49	8.843731315483462e-15	5.873820015526187e-12
3.96	88.88885825016503	-6.418709002127862e-39	0.07380299817093892	351.9999999999993	1.4976960281798944e-49	-800.0	-7.13279083626899e-41	0.004202237335925246	1.1580600255177755e-40	0.9999999138285869	-2.0878179394911004e-41	0.00041514190048490664	3.609657384091002e-41	4.135370529210391e-39	0.04757175896009158	-2.3907465669241538e-39	4.153507447039606e-39	0.04817492040485685	-2.4017236353109558e-39	800.0	0.04757175896009262	-4.13735552712644e-39	88.8888888888808	9.252763374870315e-50	-1.5228324684134904e-15	-1.1842378929334205e-12	1.695210908170024e-51	-7.327184183063459e-15	1.1842605603022674e-13
3.965	88.88885666598344	-6.470224951890165e-39	0.07568695212022758	352.44444444444366	1.5023223683896128e-49	-800.0	-7.147720352485905e-41	0.0042754917520004265	1.1589572238542569e-40	0.9999999093730758	-2.1056948202518344e-41	0.0004257391442597205	3.6386053885350553e-41	4.1685084881373325e-39	0.048786113752964384	-2.4111740441405316e-39	4.186709125821132e-39	0.049399758568520025	-2.4222003457778172e-39	800.0	0.04878611375296546	-4.170561550240055e-39	88.88888888888081	9.252828894254834e-50	-1.545849334463375e-15	1.4210854715201044e-12	1.2227886908063163e-50	-6.840091133585578e-15	1.421101933082998e-13
3.97	88.88885501351794	-6.521781410406109e-39	0.07760339074753538	352.8888888888881	1.5069487705331737e-49	-800.0	-7.16258242402562e-41	0.004348454862585166	1.1598491660257363e-40	0.9999999047255161	-2.123609596117289e-41	0.0004365191145440314	3.667575396651325e-41	4.201670766942281e-39	0.05002140746890872	-2.4316434658908763e-39	4.219936356863655e-39	0.05064549912366646	-2.4427196329433812e-39	800.0	0.050021407468909825	-4.203793684385613e-39	88.8888888888808	9.252993200135326e-50	-1.6006016694702141e-15	-1.2079226507920887e-11	-6.525737038511062e-50	-1.5459343963447123e-14	1.2079236400574933e-12
3.975	88.88885329065218	-6.573377872605958e-39	0.07955233103358385	353.3333333333324	1.5115621576962964e-49	-800.0	-7.177274098783372e-41	0.004422597176505794	1.1607070491717957e-40	0.9999998998799557	-2.1415620564562466e-41	0.0004474819068658296	3.696567113220288e-41	4.23485701467814e-39	0.0512776510550626	-2.4521545716236503e-39	4.2531881644479714e-39	0.05191247988716783	-2.463281008656825e-39	800.0	0.051277651055063725	-4.2370516040065156e-39	88.8888888888807	9.181531640964222e-50	-1.6894931167231712e-15	-2.1316282072801568e-11	-2.0888089184076775e-49	-1.5128011087836654e-14	2.1316287440920874e-12
3.98	88.88885149422391	-6.625011675841205e-39	0.08153488981568972	353.77777777777675	1.5161380907542994e-49	-800.0	-7.191798146781555e-41	0.004499143133470173	1.1615069573715044e-40	0.9999998948275007	-2.1595515856496555e-41	0.00045863380344893066	3.725579016182727e-41	4.2680654594408514e-39	0.05255556440177847	-2.472706610935955e-39	4.286462887714208e-39	0.05320138945203344	-2.483883992702856e-39	800.0	0.05255556440177963	-4.270333592819391e-39	88.88888888888062	9.0739295708561e-50	-1.7444220886849693e-15	-1.0184445879227416e-11	-1.1406112900949965e-49	-9.459977530730994e-15	1.0184450272748508e-12
3.985	88.8888496214109	-6.676681164830885e-39	0.08355167651576527	354.2222222222212	1.5206748058161332e-49	-800.0	-7.206427251904668e-41	0.0045763054994206855	1.1622841491306825e-40	0.9999998895602136	-2.1775783211374712e-41	0.0004699782323054882	3.7546101555167036e-41	4.301294991006328e-39	0.05385554033084423	-2.4932997075502543e-39	4.3197598758842816e-39	0.0545124044064301	-2.5045288860479674e-39	800.0	0.05385554033084542	-4.30363858386734e-39	88.8888888888806	9.07360521106572e-50	-1.7887320229111565e-15	-4.736951571733681e-13	1.7969678286900194e-50	-8.352295058830207e-15	4.7376878618399054e-14
3.99	88.88884766992634	-6.728385970224633e-39	0.08560264645765993	354.66666666666566	1.5252117377320193e-49	-800.0	-7.220995937319571e-41	0.004653004532943157	1.1630598231696594e-40	0.9999998840716626	-2.195642266760114e-41	0.000481514942145577	3.7836603123768183e-41	4.3345453459925844e-39	0.05517755004706824	-2.5139338472025587e-39	4.35307908547871e-39	0.05584539201539461	-2.525215515602445e-39	800.0	0.05517755004706946	-4.33696633907542e-39	88.8888888888806	9.073948535004347e-50	-1.8269142671301977e-15	1.8947806286934726e-12	4.7270935466348115e-50	-2.3641881051266838e-15	1.894782103635515e-13
3.995	88.88884563755884	-6.78012594635024e-39	0.0876876426811788	355.11111111111006	1.5297487099912012e-49	-800.0	-7.235501811700851e-41	0.0047294608636531295	1.1638297932434082e-40	0.9999998783556285	-2.2137432707608003e-41	0.0004932430500818852	3.812729395187178e-41	4.367816408519198e-39	0.05652149237954352	-2.534608840035029e-39	4.386420353090928e-39	0.05720028274969281	-2.5459437014259325e-39	800.0	0.05652149237954477	-4.370316764546604e-39	88.88888888888057	9.073865284428783e-50	-1.8482928407551527e-15	-4.3816802038536554e-11	-3.259577625763199e-49	-2.7842778307977333e-14	4.381681088468905e-12
4.0	88.88884352160571	-6.831900064149913e-39	0.08980697027615117	355.5555555555547	1.5341902704389104e-49	-800.0	-7.249755789187145e-41	0.004808219699710081	1.1645452966147128e-40	0.9999998724045095	-2.2318810205570166e-41	0.0005051642722600484	3.841816809780787e-41	4.4011074802778037e-39	0.05788756398466002	-2.5553243008558623e-39	4.419782118364847e-39	0.05857773622851815	-2.566712721886982e-39	800.0	0.057887563984661314	-4.4036891969733756e-39	88.88888888888023	8.792384544962501e-50	-2.079057345129328e-15	-3.244811826637572e-11	-3.465351836106631e-49	-3.3059772464684414e-14	3.244813510784959e-12
4.005	88.88884131844303	-6.883705716499753e-39	0.09196175871278708	355.9999999999991	1.5385816248093902e-49	-800.0	-7.264023005583305e-41	0.004888629481550613	1.165219014824263e-40	0.999999866208114	-2.2500550464170843e-41	0.0005172849619679739	3.8709210638392284e-41	4.434416821753904e-39	0.059276492896270835	-2.57607964415785e-39	4.45316318424376e-39	0.05997822541299863	-2.587522614912276e-39	800.0	0.05927649289627209	-4.4370819558622664e-39	88.88888888888029	8.776839866189e-50	-2.135309948425444e-15	1.4447702293787729e-11	2.8986259549976193e-50	-3.154611040106922e-15	1.4447702638187501e-12
4.01	88.88883902509713	-6.935541757669058e-39	0.09415238063563199	356.44444444444355	1.5429701789830144e-49	-800.0	-7.278313945561169e-41	0.004969090773968398	1.1658816558346494e-40	0.9999998597580778	-2.2682656028567775e-41	0.00052960721534858	3.9000414958579616e-41	4.467743655528738e-39	0.06068851931532349	-2.5968751320823353e-39	4.486563233389287e-39	0.061401765059827654	-2.6083734484648706e-39	800.0	0.06068851931532481	-4.4704943027010276e-39	88.8888888888803	8.776956290750205e-50	-2.1394647806113283e-15	3.71850698381094e-11	2.382960953873653e-49	8.528647386774313e-15	3.718507081616088e-12
4.015	88.88883663910096	-6.987408077881963e-39	0.09637866792269774	356.888888888888	1.547358549815233e-49	-800.0	-7.292548667371375e-41	0.005049161392398528	1.1665417482748964e-40	0.9999998530474628	-2.2865125901761879e-41	0.0005421300867325832	3.9291780339918603e-41	4.501087887818252e-39	0.062123534876746045	-2.617710633924695e-39	4.519982192790272e-39	0.06284824324915192	-2.6292650614915787e-39	800.0	0.062123534876747384	-4.5039261667306076e-39	88.88888888888033	8.776521693430545e-50	-2.1422756622047283e-15	-2.2334726660724308e-10	-1.6501022876140784e-48	-5.964041928758945e-14	2.2334727457013334e-11
4.02	88.88883415789407	-7.039304460079563e-39	0.0986405121269598	357.33333333333235	1.5516444518072627e-49	-800.0	-7.306685546596221e-41	0.005129544021522752	1.1671861620587618e-40	0.9999998460690676	-2.304795861579849e-41	0.0005548529661232033	3.958330545325598e-41	4.5344493540413304e-39	0.06358146968073344	-2.6385859636411172e-39	4.5534196132862936e-39	0.06431774936545111	-2.6501971736940404e-39	800.0	0.06358146968073519	-4.5373774080397646e-39	88.88888888887838	7.360062590570576e-50	-2.6465018985700985e-15	-2.2689998028604335e-10	-1.6731647550172736e-48	-5.306662604352668e-14	2.2689998649156782e-11
4.025	88.88883157777394	-7.091228844687688e-39	0.10093878518553305	357.777777777777	1.555322935874688e-49	-800.0	-7.320570433192233e-41	0.005212758618041174	1.1677676893151359e-40	0.9999998388124789	-2.323114887400918e-41	0.0005677807581878172	3.987497847980935e-41	4.56782667321849e-39	0.06506288576157372	-2.6595004720282107e-39	4.586873693311047e-39	0.06581109470762224	-2.6711690631665505e-39	800.0	0.06506288576157553	-4.5708466990731906e-39	88.88888888887838	7.342303990437108e-50	-2.613181734839996e-15	3.1263880373442295e-11	2.1520583580715915e-49	7.061526714808611e-16	3.1263880381417177e-12
4.03	88.88882889496794	-7.143179293172413e-39	0.10327430140366634	358.22222222222126	1.5589940058360156e-49	-800.0	-7.334599392103968e-41	0.005296966226273657	1.1683210014372893e-40	0.9999998312670857	-2.3414696629489874e-41	0.0005809180434156389	4.0166788282214304e-41	4.601218542551572e-39	0.0665683080055143	-2.680454112305767e-39	4.6203436245604767e-39	0.06732856375256643	-2.6921811426458907e-39	800.0	0.06656830800551615	-4.604332790295541e-39	88.88888888887837	7.342203196907026e-50	-2.722715799081651e-15	7.105427357600522e-13	3.0201793274031604e-51	-2.102034086607112e-14	7.108535953848059e-14
4.035	88.88882610647033	-7.195155284614253e-39	0.10564711969143645	358.6666666666656	1.5626649618171097e-49	-800.0	-7.348577861269563e-41	0.005380656046086235	1.1688743948189602e-40	0.9999998234244347	-2.3598602825038594e-41	0.000594265153197057	4.045873179306897e-41	4.634624594953522e-39	0.06809777438790648	-2.7014469696750933e-39	4.6538294093624964e-39	0.068870008164828	-2.7132332674895932e-39	800.0	0.06809777438790839	-4.6378353459338296e-39	88.88888888887838	7.342411529279097e-50	-2.7943560265860023e-15	1.7763568394001306e-11	9.768436499190382e-50	-6.320912958807169e-15	1.7763569518604721e-12
4.04	88.88882320951225	-7.247156746647328e-39	0.10805706038487724	359.1111111111099	1.5663362309441512e-49	-800.0	-7.362503340656703e-41	0.005464055445439597	1.1694237081771862e-40	0.9999998152767386	-2.3782866188357197e-41	0.0006078210769436481	4.075080850058749e-41	4.668044759909844e-39	0.06965116910466418	-2.7224788815465717e-39	4.687330930833044e-39	0.07043534474507392	-2.7343252858931245e-39	800.0	0.06965116910466612	-4.671354319342637e-39	88.8888888888784	7.342801825342069e-50	-2.8346757805737974e-15	-8.47914331340329e-11	-5.561003710447947e-49	-3.0689066452184585e-14	8.479143868777067e-12
4.045	88.88882020074156	-7.299182787537504e-39	0.11050439079899418	359.55555555555384	1.5698051300843553e-49	-800.0	-7.376193625184885e-41	0.0055495921451160606	1.1699243779680493e-40	0.9999998068145693	-2.3967483895800213e-41	0.0006215873183259796	4.1043013225149536e-41	4.701478425284614e-39	0.0712286644646456	-2.7435494962015733e-39	4.720846795436565e-39	0.07202518578474454	-2.755456524072846e-39	800.0	0.0712286644646478	-4.704889135730211e-39	88.8888888888775	6.760986827965993e-50	-3.129606809248713e-15	-2.2855791333615014e-10	-1.5346284065037783e-48	-8.387774362225789e-14	2.2855792872716317e-11
4.05	88.88881707567968	-7.351230999066772e-39	0.11299020490544279	359.9999999999982	1.5729338903336873e-49	-800.0	-7.389911720931553e-41	0.005636875593018191	1.1703837248504547e-40	0.9999997980253312	-2.415245179018225e-41	0.0006355700309621886	4.133533214424797e-41	4.734923975655147e-39	0.07283096562160013	-2.7646582875544872e-39	4.754375819358933e-39	0.07364003169034587	-2.7766270617020292e-39	800.0	0.07283096562160257	-4.738438242813344e-39	88.88888888887644	6.027407812671182e-50	-3.5633780732521385e-15	-1.0516032489248773e-10	-7.593919016665827e-49	-4.6844145555992243e-14	1.0516033532595618e-11
4.055	88.88881383058839	-7.403300268065158e-39	0.1155148953474491	360.4444444444425	1.5759473964069564e-49	-800.0	-7.40364879626365e-41	0.005724155732819231	1.1708339063637298e-40	0.9999997888985102	-2.433777238203058e-41	0.0006497714234971437	4.162775880688244e-41	4.768380650245704e-39	0.07445832566860759	-2.7858055110857142e-39	4.787917740031664e-39	0.07527988151417676	-2.7978369531531815e-39	800.0	0.0744583256686101	-4.772000923067659e-39	88.88888888887647	6.027029866935288e-50	-3.591309750676919e-15	7.12911211545919e-11	4.717056627690939e-49	8.639075377481791e-15	7.129112167803452e-12
4.06	88.88881046239572	-7.45539053643121e-39	0.11807828055302877	360.88888888888687	1.578960982374962e-49	-800.0	-7.417338317636391e-41	0.005811041116162256	1.1712821487065787e-40	0.9999997794254661	-2.452344479459364e-41	0.0006641904746143186	4.192029277587675e-41	4.8018483864696056e-39	0.0761106275724035	-2.806991048896566e-39	4.821472501901617e-39	0.07694462216684232	-2.8190860621942445e-39	800.0	0.07611062757240605	-4.805577139042296e-39	88.88888888887644	6.027497547096235e-50	-3.71765057863972e-15	-2.5342690908775194e-10	-1.6224945881674206e-48	-1.0759484322631612e-13	2.534269319279661e-11
4.065	88.88880696780767	-7.507501495202338e-39	0.12068031978727681	361.3333333333316	1.5816088081261748e-49	-800.0	-7.430887531971741e-41	0.005898847567557187	1.171704773795522e-40	0.9999997695969352	-2.4709467477496615e-41	0.0006788269552072776	4.2212932184151146e-41	4.8353269557469526e-39	0.07778784508037029	-2.8282147023073003e-39	4.855039371088526e-39	0.07863451751490264	-2.8403739868751643e-39	800.0	0.0777878450803736	-4.839166691587004e-39	88.8888888888732	3.9314707267516604e-50	-4.882131374998306e-15	-1.2799243146824408e-09	-8.201104701607751e-48	-4.3020106705049926e-13	1.279924386980838e-10
4.07	88.8888033420631	-7.559630987951907e-39	0.12332199757825983	361.7777777777756	1.5827005671253205e-49	-800.0	-7.444307499560368e-41	0.005989040947744198	1.172075456073765e-40	0.9999997593995267	-2.4895835276928286e-41	0.0006936864032790391	4.2505664631626793e-41	4.8688149063794015e-39	0.07949061280215433	-2.849475832526575e-39	4.8886168595404774e-39	0.08035025136308661	-2.8617003569312855e-39	800.0	0.0794906128021595	-4.87276819071769e-39	88.88888888886548	-1.0020977797926605e-50	-7.434260474243838e-15	-8.38914123354035e-10	-5.4077128587103597e-48	-2.857008239831711e-13	8.38914172003209e-11
4.075	88.88879958066973	-7.611777406087467e-39	0.12600399432180057	362.2222222222198	1.5821992156483796e-49	-800.0	-7.457817859858923e-41	0.006079856889781167	1.1724260575293866e-40	0.9999997488206054	-2.508254985115775e-41	0.000708772646089264	4.279848083405399e-41	4.902311147583874e-39	0.0812193693106762	-2.870774588831237e-39	4.9222043919842775e-39	0.08209200206222671	-2.8830654313186473e-39	800.0	0.0812193693106815	-4.90638059957148e-39	88.88888888886555	-1.0031045385260428e-50	-7.512124892478164e-15	4.372206300710188e-10	2.5657968222826803e-48	1.3485172391591666e-13	4.372206508671407e-11
4.08	88.88879568007782	-7.663940506726848e-39	0.12872623832433297	362.6666666666641	1.5816977644576492e-49	-800.0	-7.47128548659476e-41	0.00617019326830492	1.1727764126033754e-40	0.999999737850188	-2.526961127646012e-41	0.0007240852803932461	4.3091379293113156e-41	4.935815492734376e-39	0.08297406839870183	-2.8921109589762133e-39	4.955801961361613e-39	0.08385963222749634	-2.90446908761461e-39	800.0	0.08297406839870718	-4.9400037615922026e-39	88.88888888886562	-1.0028274228610433e-50	-7.615549279487155e-15	-1.9651243595337178e-09	-1.1774631171809434e-47	-7.703272453292986e-13	1.9651245105175574e-10
4.085	88.88879163680726	-7.716120199680463e-39	0.1314885765855671	363.1111111111085	1.5806740582917903e-49	-800.0	-7.484686752450033e-41	0.006260528918654398	1.1731180622120743e-40	0.9999997264784861	-2.54570184906897e-41	0.0007396234455968297	4.338435938138296e-41	4.9693278564143876e-39	0.08475461145064143	-2.9134848025156712e-39	4.989409318279274e-39	0.08565314165028895	-2.9259111357092548e-39	800.0	0.08475461145065107	-4.973637618646164e-39	88.88888888884807	-1.1469147351492523e-49	-1.442354525190039e-14	-2.575954264708776e-09	-1.5259832701516855e-47	-1.0288312370900612e-12	2.575954470165388e-10
4.09	88.88878744608245	-7.768314867403483e-39	0.13429170597923099	363.5555555555523	1.5747925280698696e-49	-800.0	-7.497840901867536e-41	0.006353654035259417	1.1734016921163204e-40	0.9999997146920689	-2.564476696166804e-41	0.0007553910616523365	4.367741176212391e-41	5.002847141530462e-39	0.08656144766138638	-2.9348955583360413e-39	5.023024800595164e-39	0.08747332945382222	-2.947390867666135e-39	800.0	0.0865614476613973	-5.0072811280994834e-39	88.88888888884357	-1.4082653252663135e-49	-1.65059886298606e-14	-2.2334726660724308e-10	-1.3049326836019355e-48	-1.7152564035167208e-13	2.2334733247113614e-11
4.095	88.88878310265515	-7.820522563076117e-39	0.1371365241263882	363.9999999999964	1.5677519674417158e-49	-800.0	-7.511138902002715e-41	0.006447932025934633	1.1736563688568137e-40	0.9999997024761763	-2.5832856554670305e-41	0.0007713931777188855	4.397052520948305e-41	5.036372030448096e-39	0.08839515562350213	-2.9563431632570946e-39	5.056647578862238e-39	0.08932052591218881	-2.968908695587201e-39	800.0	0.0883951556235132	-5.040933035076127e-39	88.88888888884367	-1.4082714967835463e-49	-1.6905765470057888e-14	9.426533627750026e-11	4.3655285822492975e-49	-3.7229554392988416e-14	9.426534362929957e-12
4.1	88.88877860239059	-7.872742780558945e-39	0.14002311349054977	364.44444444444053	1.5607109584018795e-49	-800.0	-7.524398470247982e-41	0.006541664730975519	1.1739120728810386e-40	0.9999996898191785	-2.602128839721696e-41	0.0007876302576922494	4.4263696715516534e-41	5.0699021602644476e-39	0.09025578849699895	-2.9778277206269946e-39	5.090277682510009e-39	0.09119457481256134	-2.9904645093731973e-39	800.0	0.09025578849701021	-5.0745930133301246e-39	88.88888888884374	-1.4081772251992413e-49	-1.718177260364613e-14	9.687065964195379e-11	5.228621837251267e-49	-3.1976511759743535e-14	9.687066491959555e-12
4.105	88.88877394152458	-7.92497549298127e-39	0.1429512842323431	364.88888888888476	1.5536701882725834e-49	-800.0	-7.537616731708967e-41	0.006635088329806368	1.1741646911091435e-40	0.9999996767104887	-2.621006151575748e-41	0.0008041012337645338	4.4556926009213086e-41	5.1034374863854e-39	0.09214322392157893	-2.9993491005415644e-39	5.1239150231369294e-39	0.09309538760253352	-3.012058190688905e-39	800.0	0.09214322392159043	-5.108261045541231e-39	88.88888888884372	-1.4081416495476514e-49	-1.7596043778605166e-14	-4.831690603168356e-10	-2.7427674908537646e-48	-2.6687374609023834e-13	4.831691340193931e-11
4.11	88.88876911521942	-7.977219577044989e-39	0.14592147834060673	365.3333333333287	1.5452103566604739e-49	-800.0	-7.550574541964504e-41	0.006730988993701567	1.1743658026924737e-40	0.9999996631365012	-2.6399172518135e-41	0.0008208085921664912	4.485020656067917e-41	5.1369772365726295e-39	0.09405774679996165	-3.0209068784339094e-39	5.157558125186318e-39	0.0950236739089742	-3.033688993396581e-39	800.0	0.09405774679997485	-5.1419364076569016e-39	88.88888888883825	-1.7209438576142507e-49	-2.010962439265407e-14	-1.7439087211337548e-09	-9.993792111084897e-48	-7.712021170560513e-13	1.7439088916566354e-10
4.115	88.88876411757681	-8.029472928827211e-39	0.14893470231791414	365.77777777777305	1.5340030969391098e-49	-800.0	-7.563663663500694e-41	0.006828522601401783	1.1745302006882514e-40	0.9999996490806272	-2.6588619587393837e-41	0.0008377579945239273	4.5143526236495083e-41	5.170519986451428e-39	0.09600000590854024	-3.0425007940915564e-39	5.191205936891365e-39	0.09697990153582442	-3.0553572936753344e-39	800.0	0.09600000590855626	-5.175617743535698e-39	88.88888888882879	-2.264744061591251e-49	-2.4316155016706028e-14	-1.0013915622645003e-09	-5.822814250716616e-48	-4.827124169552345e-13	1.0013916786082327e-10
4.12	88.88875894383891	-8.081734796942719e-39	0.15199118350386803	366.2222222222173	1.5226793132345447e-49	-800.0	-7.5767287050039e-41	0.006925583642007449	1.1746944304514298e-40	0.9999996345294845	-2.677840463807411e-41	0.0008549507196686915	4.5436880621052957e-41	5.204065208550823e-39	0.09797014779243318	-3.0641310362651914e-39	5.224858453432563e-39	0.0989639351025839	-3.077063022540953e-39	800.0	0.09797014779244947	-5.209304568851198e-39	88.88888888882889	-2.264721254896695e-49	-2.4670535485086817e-14	4.2703618419179136e-10	2.282395022059795e-48	9.177455794433773e-14	4.270361940534491e-11
4.125	88.88875358989903	-8.134005192507789e-39	0.1550907153137872	366.6666666666615	1.5113558411251493e-49	-800.0	-7.589756411897045e-41	0.007022291178949848	1.1748564621868393e-40	0.9999996194715232	-2.6968526815161983e-41	0.0008723856056077759	4.573026965365513e-41	5.23761288205014e-39	0.0999680392987978	-3.0857974885366174e-39	5.2585156118410537e-39	0.10097567333791291	-3.0988060730376575e-39	800.0	0.09996803929881441	-5.242996890768986e-39	88.88888888882894	-2.264672277377e-49	-2.5120587500751102e-14	-1.7126448407603126e-09	-9.418894617455316e-48	-8.246598364824097e-13	1.712645039302296e-10
4.13	88.88874805070374	-8.186283253171356e-39	0.1582336023367663	367.11111111110574	1.4966703465374922e-49	-800.0	-7.602552046249838e-41	0.007121101688637834	1.174974285395282e-40	0.9999996038925312	-2.7158983343681773e-41	0.0008900643657056528	4.602368828439551e-41	5.2711624057525774e-39	0.10199387676667693	-3.107499799999445e-39	5.2921761456358305e-39	0.10301571869912521	-3.1205857803265924e-39	800.0	0.10199387676669823	-5.276694153437406e-39	88.88888888881385	-3.0898065971362127e-49	-3.205155774167531e-14	-2.0615213240184982e-09	-1.1076607795281001e-47	-1.0046350689296095e-12	2.0615215688113968e-10
4.135	88.88874231981366	-8.238566877015982e-39	0.16142086591121146	367.5555555555499	1.4806797772228523e-49	-800.0	-7.615441975510404e-41	0.007221738395664063	1.175052730990437e-40	0.9999995877743958	-2.734977167120656e-41	0.0009079927450486307	4.631712438025626e-41	5.304712354021214e-39	0.104048318536682	-3.12923762443371e-39	5.3258389267313694e-39	0.105084594353221	-3.14240241454277e-39	800.0	0.10404831853670457	-5.310395002006893e-39	88.8888888888113	-3.2140900290338203e-49	-3.3884742880466035e-14	-3.505344163082924e-11	-7.515604491119292e-50	-1.590504224719381e-13	3.5053802464252597e-12
4.14	88.88873639184553	-8.290855169089329e-39	0.16465283229464878	367.999999999994	1.4646092990567704e-49	-800.0	-7.628325646368904e-41	0.007322051383228523	1.175128523950062e-40	0.9999995711019787	-2.7540894057184004e-41	0.0009261725788911989	4.661057269462899e-41	5.3382621015944146e-39	0.10613157491561882	-3.1510111864728517e-39	5.35950387913526e-39	0.10718220756140574	-3.1642559577571887e-39	800.0	0.10613157491564175	-5.3440988596115956e-39	88.88888888881141	-3.214098590982208e-49	-3.450567438702565e-14	1.7195134205393264e-10	7.787209531404785e-49	-6.05343483532593e-14	1.7195135270929354e-11
4.145	88.88873026232415	-8.343148151273382e-39	0.1679292885889222	368.44444444443803	1.4485392129966809e-49	-800.0	-7.641175502455052e-41	0.0074219843884031	1.1752026470506273e-40	0.9999995538626923	-2.7732349757234576e-41	0.000944602669735397	4.69040332231263e-41	5.371811633616317e-39	0.10824350868239743	-3.1728203820441776e-39	5.393170955009564e-39	0.1093084494667433	-3.186146313097662e-39	800.0	0.10824350868242076	-5.3778057403562244e-39	88.88888888881145	-3.213914601198243e-49	-3.521049531523687e-14	-5.755396159656423e-10	-2.979863340307855e-48	-4.0791096568842147e-13	5.755397605181027e-11
4.15	88.88872392583465	-8.39544505701468e-39	0.17125049004468587	368.8888888888823	1.4311157040053358e-49	-800.0	-7.653804653170302e-41	0.007523861198216239	1.1752359523796173e-40	0.9999995360413078	-2.792413620054156e-41	0.0009632844534257938	4.719750145512229e-41	5.4053604107304564e-39	0.11038428437496153	-3.1946648842234805e-39	5.426838985011261e-39	0.11146387692824361	-3.208072848289876e-39	800.0	0.11038428437498736	-5.4115151501378544e-39	88.88888888880483	-3.555635746335913e-49	-3.9025516318646187e-14	-2.136838854009064e-09	-1.1020265491577577e-47	-1.1840133738602158e-12	2.136839182037441e-10
4.155	88.88871737535945	-8.447743831455817e-39	0.17461745620981167	369.3333333333261	1.4107140040899034e-49	-800.0	-7.666521951062973e-41	0.007627655841374106	1.1752289585042655e-40	0.9999995176180879	-2.8116250861680367e-41	0.0009822236649873995	4.749096551141663e-41	5.438907035264168e-39	0.11255455918137465	-3.216544348612657e-39	5.4605068146531885e-39	0.11364903936468898	-3.230035815856893e-39	800.0	0.1125545591814046	-5.445225764441549e-39	88.88888888879316	-4.158469267678627e-49	-4.556882039212339e-14	-1.2361075126439042e-09	-6.462651390688702e-48	-7.7441869709019e-13	1.2361077552297043e-10
4.16	88.88871060501104	-8.50004355104378e-39	0.1780305342936709	369.7777777777701	1.3899216679745279e-49	-800.0	-7.679237005280395e-41	0.007731140694848487	1.1752191422149244e-40	0.999999498576474	-2.830869600098286e-41	0.0010014222575388636	4.778441997425842e-41	5.4724508611071e-39	0.11475455691507179	-3.23845899849516e-39	5.4941743630791406e-39	0.11586384802787242	-3.252035209371057e-39	800.0	0.11475455691510224	-5.478936987965282e-39	88.88888888879329	-4.15837662787829e-49	-4.6331472570500007e-14	5.767238538585757e-10	2.796404410006999e-48	1.2000401246593508e-13	5.7672386634372154e-11
4.165	88.8887036099095	-8.552344244763465e-39	0.18148950989283238	370.22222222221416	1.3691299893595203e-49	-800.0	-7.691921344988395e-41	0.007834236628235946	1.1752078462215043e-40	0.999999478902741	-2.8501470968653217e-41	0.0010208790251247351	4.807786487380319e-41	5.505991876800895e-39	0.11698413938617287	-3.2604087402083254e-39	5.527841587898719e-39	0.11810819150039617	-3.27407094084178e-39	800.0	0.11698413938620386	-5.5126488393924264e-39	88.8888888887933	-4.158250819123774e-49	-4.71930235046529e-14	-2.5356901763490398e-09	-1.2393425732897446e-47	-1.4610302102244354e-12	2.535690597261878e-10
4.17	88.88869638409442	-8.604645114631733e-39	0.18499466711994678	370.666666666658	1.3437503989219319e-49	-800.0	-7.704380639184604e-41	0.007939306109486791	1.1751558285838843e-40	0.9999994585801255	-2.869457310650377e-41	0.0010405955659491817	4.837129551050122e-41	5.539529520030616e-39	0.11924348973807095	-3.282393235162533e-39	5.561507322522749e-39	0.12038263516207644	-3.2961423655611605e-39	800.0	0.11924348973811005	-5.546360804361672e-39	88.88888888877138	-5.231730803901406e-49	-5.921938196683885e-14	-2.7192470497537198e-09	-1.3428276290694653e-47	-1.580867996719113e-12	2.719247509282289e-10
4.175	88.8886889199925	-8.656944149979709e-39	0.18854701072947402	371.1111111111019	1.317230133632999e-49	-800.0	-7.716950162909977e-41	0.008046321502038165	1.1750636215042116e-40	0.9999994375873276	-2.888800038364132e-41	0.0010605775318359074	4.86647002461483e-41	5.573062419780172e-39	0.12153325562512042	-3.30441219476834e-39	5.595170415608526e-39	0.12268773647543735	-3.318249799313539e-39	800.0	0.1215332556251607	-5.580071586839741e-39	88.88888888877001	-5.309247236124585e-49	-6.101028294936207e-14	2.216893335571363e-10	8.829354813851784e-49	-1.0840788738165668e-13	2.216893600633041e-11
4.18	88.88868121127324	-8.709240518335138e-39	0.19214684773121934	371.55555555554594	1.2906833468020916e-49	-800.0	-7.729508927939713e-41	0.0081528983265327	1.1749707609830354e-40	0.9999994159065426	-2.9081754944162097e-41	0.0010808266497922636	4.895807417297447e-41	5.6065899882561154e-39	0.12385363495072854	-3.3264658293626566e-39	5.6288308484363296e-39	0.1250233697999855	-3.3403932112775224e-39	800.0	0.1238536349507695	-5.613780650234325e-39	88.88888888877015	-5.309382189467446e-49	-6.201746832502023e-14	5.364597654988395e-10	2.429923184974225e-48	8.561131943454454e-14	5.364597723300116e-11
4.185	88.88867325265024	-8.761534255119695e-39	0.1957939581123077	371.99999999998977	1.2641364144505362e-49	-800.0	-7.742039664619548e-41	0.008259094162562859	1.1748762972991264e-40	0.9999993935229023	-2.9275836162835967e-41	0.0011013416823206256	4.925141735326905e-41	5.640112217211742e-39	0.1262044859109698	-3.348554047838597e-39	5.6624885750789306e-39	0.12738942599056557	-3.362572521157803e-39	800.0	0.1262044859110115	-5.647488017377484e-39	88.88888888877023	-5.3092231924832375e-49	-6.307324112720413e-14	-3.4198421872131314e-09	-1.6101189022182038e-47	-2.1581358547638902e-12	3.419842868172902e-10
4.19	88.88866503742567	-8.813824408818735e-39	0.19948872695973233	372.4444444444337	1.2312871942268087e-49	-800.0	-7.754335001581123e-41	0.008367556749717172	1.1747368347161597e-40	0.9999993704175689	-2.9470240947897284e-41	0.0011221247956190391	4.954472420023141e-41	5.673628440013373e-39	0.1285860567370422	-3.3706764580626576e-39	5.6961423064128297e-39	0.12978655442354073	-3.384787054583863e-39	800.0	0.12858605673709525	-5.681193074945205e-39	88.88888888874088	-6.689492365755255e-49	-8.085972655564831e-14	-3.411789369541184e-09	-1.6102683859270856e-47	-2.2003053061294807e-12	3.41179007904321e-10
4.195	88.88865655741742	-8.86610901423586e-39	0.20323214642641407	372.88888888887743	1.1978420979149993e-49	-800.0	-7.766771775599463e-41	0.008477752726820765	1.1745611719200305e-40	0.9999993465675306	-2.9664968439022304e-41	0.0011431815706410334	4.983798332185882e-41	5.707137312754057e-39	0.13099898696269835	-3.3928329046810484e-39	5.7297910053783105e-39	0.13221525167855266	-3.407037216743023e-39	800.0	0.13099898696275228	-5.714894556214197e-39	88.88888888874101	-6.689415233117188e-49	-8.226019750854455e-14	8.469669410259822e-10	3.797436860644664e-48	2.082520114840975e-13	8.469669666284571e-11
4.2	88.8886478060413	-8.918387456836536e-39	0.20702439806222134	373.33333333332115	1.164395211257808e-49	-800.0	-7.779186117075027e-41	0.008587345221236881	1.174387527571006e-40	0.9999993219542694	-2.986002030037382e-41	0.0011645130286935899	5.013119104950763e-41	5.7406383912065344e-39	0.13344339362448548	-3.415023546116711e-39	5.763434729799624e-39	0.1346753448705464	-3.429322943370783e-39	800.0	0.1334433936245404	-5.748592065070253e-39	88.88888888874115	-6.689308198975885e-49	-8.34948010079658e-14	-2.26639447949598e-09	-1.0441789945399043e-47	-1.6153048453121297e-12	2.2663950551260028e-10
4.205	88.88863877751804	-8.970659746571957e-39	0.21086527925335383	373.7777777777649	1.1302866070580436e-49	-800.0	-7.791546372702575e-41	0.008696877917236763	1.1742070580908071e-40	0.999999296561531	-3.0055395933542795e-41	0.0011861180301617523	5.042434729360705e-41	5.774131648825236e-39	0.13591914613549028	-3.437248293410386e-39	5.797073284151164e-39	0.13716681686853752	-3.4516440795226007e-39	800.0	0.13591914613555348	-5.7822856079283306e-39	88.88888888872155	-7.586211974635225e-49	-9.664895743479074e-14	-2.324895831406891e-09	-1.0610925632900418e-47	-1.7672888657476518e-12	2.3248965031164452e-10
4.21	88.88862946420741	-9.022924641869475e-39	0.21475535123345624	374.22222222220853	1.0923393795928532e-49	-800.0	-7.803729041029285e-41	0.008808840026468505	1.1739794848176066e-40	0.9999992703678263	-3.0251091556589637e-41	0.001207999732084263	5.071744480082721e-41	5.8076162238472314e-39	0.13842660626951908	-3.45950666903937e-39	5.830705319008662e-39	0.13969036364815046	-3.474000116448335e-39	800.0	0.13842660626958322	-5.815974384497336e-39	88.88888888872127	-7.598792330659694e-49	-9.905151524688352e-14	3.150072795202898e-10	1.349118635695515e-48	-2.225156614888976e-13	3.1500735811087586e-11
4.215	88.88861985736571	-9.075180328982841e-39	0.21869553899578267	374.6666666666521	1.0543457550707994e-49	-800.0	-7.816030592821923e-41	0.008921942681529635	1.173725682786895e-40	0.9999992433485645	-3.0447108034423944e-41	0.0012301633376567468	5.10104730273622e-41	5.8410908694103054e-39	0.14096637027301076	-3.481798716172838e-39	5.864330082973565e-39	0.14224631195169704	-3.496391394724028e-39	800.0	0.14096637027307587	-5.849657225677829e-39	88.88888888872147	-7.598732906846978e-49	-1.0067657947502004e-13	4.144832625266971e-11	3.1735426711668697e-50	-3.146334518558536e-13	4.144952042372476e-12
4.22	88.88860995028594	-9.127426458166222e-39	0.2226858593858785	375.1111111110956	1.016351443086731e-49	-800.0	-7.828311900094074e-41	0.00903448120723791	1.1734731751938366e-40	0.9999992154848816	-3.064344625143809e-41	0.0012526089417368453	5.13034298164488e-41	5.874555317044263e-39	0.143538449019725	-3.504124508408185e-39	5.897947613128779e-39	0.14483450016802216	-3.518817856353401e-39	800.0	0.1435384490197912	-5.88333390603152e-39	88.88888888872158	-7.598946838087278e-49	-1.0236483764046544e-13	4.1187793916224363e-10	1.6545212761952152e-48	-1.0161382516706378e-13	4.1187795169674514e-11
4.225	88.88859973654299	-9.179662913451145e-39	0.2267261843668986	375.55555555553906	9.783426361534467e-50	-800.0	-7.840486207384357e-41	0.009147550843644481	1.1732043986450687e-40	0.999999186758707	-3.0840105333227245e-41	0.0012753358242201997	5.159631435298543e-41	5.908009455072817e-39	0.14614275999571105	-3.52648392244173e-39	5.931557443403054e-39	0.14745508044913316	-3.541279194804085e-39	800.0	0.14614275999577828	-5.917004350807746e-39	88.88888888872157	-7.606489290082899e-49	-1.0427752947209363e-13	-2.836249753575542e-09	-1.2303756653800253e-47	-2.2012822109849773e-12	2.8362506078096655e-10
4.23	88.88858920731849	-9.231888152118397e-39	0.23081727930665025	375.9999999999825	9.376224435020374e-50	-800.0	-7.852591508636313e-41	0.009262929912259089	1.1728909216053128e-40	0.9999991571452395	-3.1037081502677994e-41	0.0012983482904196893	5.188911764408193e-41	5.941452217409073e-39	0.14877979655801774	-3.5488764738742316e-39	5.965158293221653e-39	0.150108714398623	-3.563775212388343e-39	800.0	0.1487797965580962	-5.95066756560519e-39	88.88888888869731	-8.653556162264256e-49	-1.21762285713448e-13	-2.817301947288607e-09	-1.2201190223064993e-47	-2.2095515495902626e-12	2.817302813741226e-10
4.235	88.88857835360444	-9.284100622312342e-39	0.2349599092771958	376.44444444442587	8.94354675786836e-50	-800.0	-7.864769121434658e-41	0.009378863128655882	1.1725607976065237e-40	0.9999991266191429	-3.123437687409159e-41	0.0013216506439893572	5.21818306359436e-41	5.974882529708537e-39	0.1514500518738164	-3.571302352978783e-39	5.998749685684329e-39	0.1527955607681374	-3.5863061162634956e-39	800.0	0.15145005187389612	-5.984322550130966e-39	88.88888888869745	-8.653353507982157e-49	-1.2377923139977287e-13	8.26124354110354e-10	3.340450781453066e-48	1.1487211627784536e-13	8.261243620968049e-11
4.24	88.88856716853904	-9.33630021782434e-39	0.2391539419897316	376.88888888886925	8.510883227377751e-50	-800.0	-7.876928264082765e-41	0.009494287091083081	1.1722309839798531e-40	0.9999990951611191	-3.1431991641679156e-41	0.0013452421409204077	5.24744525615926e-41	6.008300285131292e-39	0.15415344069038941	-3.593761558555608e-39	6.032331629682588e-39	0.1555154736671606	-3.60887185351646e-39	800.0	0.15415344069047032	-6.017969235926188e-39	88.88888888869766	-8.653146447441857e-49	-1.2580536008647465e-13	-2.1872873882480273e-09	-9.268679366349991e-48	-1.9122706518267325e-12	2.1872882241643243e-10
4.245	88.88855564471089	-9.388486549874981e-39	0.2433994226228746	377.33333333331257	8.045856209126739e-50	-800.0	-7.888919018365847e-41	0.00961089667419703	1.1718746225922356e-40	0.9999990627503232	-3.1629924200958095e-41	0.0013691230354646708	5.276698103564771e-41	6.041705188082743e-39	0.1568899921475045	-3.616253877655625e-39	6.065903364679101e-39	0.15826879275099984	-3.631471941750104e-39	800.0	0.15688999214759675	-6.051607372393172e-39	88.88888888867487	-9.607482040375677e-49	-1.435144514329781e-13	-5.817213377667547e-09	-2.41762935258794e-47	-4.48465452988007e-12	5.81721510634088e-10
4.25	88.88854377218664	-9.440657833524349e-39	0.24769727376630546	377.7777777777556	7.520019369320242e-50	-800.0	-7.900964141984238e-41	0.009729770073377022	1.171474675991686e-40	0.9999990293588177	-3.1828171900666457e-41	0.001393298517329393	5.305940566447012e-41	6.075096007521581e-39	0.1596603009471726	-3.638778948741345e-39	6.099463642049493e-39	0.161056166555186	-3.6541065367211006e-39	800.0	0.15966030094727837	-6.085235808999145e-39	88.88888888864786	-1.0725376801602041e-48	-1.6490780686947818e-13	-2.1339966830660235e-09	-8.994672322165757e-48	-2.013033307011608e-12	2.1339976325291195e-10
4.255	88.88853154196177	-9.492812949869777e-39	0.2520479974926465	378.2222222221989	6.983748437521892e-50	-800.0	-7.913028605687916e-41	0.0098484699260856	1.1710696425474822e-40	0.9999989949612769	-3.202673719082382e-41	0.0014177714108123292	5.335171986516119e-41	6.108471956395491e-39	0.16246469073541003	-3.661337008102128e-39	6.133012316066428e-39	0.1638775453623173	-3.676775693834713e-39	800.0	0.16246469073551745	-6.118853824523518e-39	88.88888888864807	-1.0725420225735015e-48	-1.6751953387097878e-13	-3.756876291541983e-09	-1.5097898353420327e-47	-3.301960556765848e-12	3.7568777426067195e-10
4.26	88.88851894687647	-9.544951934322351e-39	0.25645137331169426	378.6666666666422	6.4453820504848395e-50	-800.0	-7.925075779617738e-41	0.009966730917219202	1.1706636796953397e-40	0.9999989595375637	-3.2225619836748503e-41	0.0014425404757886526	5.364392367721966e-41	6.141833021543099e-39	0.16530301940941403	-3.683928007939935e-39	6.166549360104329e-39	0.16673280344781355	-3.699479363559387e-39	800.0	0.16530301940954018	-6.152461441793687e-39	88.88888888861132	-1.2199848537016742e-48	-1.9706402116977546e-13	-4.688397818123411e-09	-1.8889189137120073e-47	-4.004330879923919e-12	4.68839952815992e-10
4.265	88.88850597814672	-9.597073922566556e-39	0.26090773990043004	379.1111111110855	5.834177906587965e-50	-800.0	-7.936913559964673e-41	0.010087266709965402	1.170214264868059e-40	0.9999989230629736	-3.242481678323303e-41	0.0014676076174621351	5.393601198507897e-41	6.175178588004968e-39	0.16817550529505484	-3.7065515589189684e-39	6.200073529355803e-39	0.1696225924943329	-3.722216946026695e-39	800.0	0.16817550529518463	-6.186058103688882e-39	88.88888888860797	-1.2344516911640474e-48	-2.0264653242939205e-13	2.529532139305786e-10	7.686434696560652e-49	-4.578301791157159e-13	2.529536282528519e-11
4.27	88.88849262481243	-9.649177037201374e-39	0.26541809363717117	379.55555555552854	5.216954206736521e-50	-800.0	-7.948887608647512e-41	0.010209291302149193	1.1697337027055442e-40	0.9999988855066806	-3.2624328248933235e-41	0.0014929784406248424	5.422797384531655e-41	6.208507358525281e-39	0.1710827906604452	-3.729207624771737e-39	6.233583931515424e-39	0.17254733901149694	-3.7449888316166636e-39	800.0	0.17108279066057702	-6.219642600079627e-39	88.88888888860828	-1.2344636806572907e-48	-2.0566394254133305e-13	4.135358722123504e-10	1.3816102580355455e-48	-3.501098182258126e-13	4.135360204181907e-11
4.275	88.88847887834838	-9.701260798795717e-39	0.2699825349464112	379.99999999997175	4.599714798333028e-50	-800.0	-7.960849142832232e-41	0.010330707547184875	1.1692547586547925e-40	0.9999988468447074	-3.282415557192391e-41	0.0015186535103181768	5.451980633700641e-41	6.241818973226292e-39	0.1740249402604268	-3.7518963269316756e-39	6.26708061293868e-39	0.17550686872068533	-3.767794984477896e-39	800.0	0.1740249402605606	-6.253214621935548e-39	88.88888888860852	-1.2344912463978e-48	-2.0884909409649474e-13	-2.031678529116576e-09	-8.01052053992919e-48	-2.2270155998387137e-12	2.0316797496829505e-10
4.28	88.88846473083397	-9.75332509812272e-39	0.27460092761169264	380.4444444444151	3.968231684525671e-50	-800.0	-7.972703055993486e-41	0.010452605081639157	1.1687604618468028e-40	0.9999988070547776	-3.3024297988850924e-41	0.0015446320604785922	5.481150866729291e-41	6.275113321342907e-39	0.1770018663164581	-3.774617553982857e-39	6.300563133801473e-39	0.17850131950116013	-3.7906350962988716e-39	800.0	0.1770018663166027	-6.286774098852099e-39	88.88888888859093	-1.3031979110538324e-48	-2.2567792541304678e-13	-2.0416261274172167e-09	-8.07360722096131e-48	-2.2603795269276958e-12	2.0416273787026433e-10
4.285	88.88845017162403	-9.805368491609964e-39	0.27927398885479643	380.8888888888583	3.31649853151894e-50	-800.0	-7.984521440483248e-41	0.010576806335566874	1.168222530342147e-40	0.9999987661069512	-3.3224752123282496e-41	0.0015709181256545986	5.510307238394429e-41	6.30838939676695e-39	0.18001403116048276	-3.797370866370376e-39	6.334030244061825e-39	0.1815313513199364	-3.8135090652974435e-39	800.0	0.18001403116062947	-6.320320100333689e-39	88.8888888885911	-1.3036943019405977e-48	-2.2913745941276997e-13	3.479290929438389e-10	1.0892627891705106e-48	-4.3555061875843195e-13	3.479293655629889e-11
4.29	88.8884351896478	-9.857389473819589e-39	0.2840024822483748	381.3333333333012	2.6646582676350732e-50	-800.0	-7.996401305089231e-41	0.010701414437444916	1.167670340159613e-40	0.999998723970091	-3.3425520375101015e-41	0.0015975160011267454	5.539448866428575e-41	6.341646148522272e-39	0.1830619270024297	-3.8201564844849643e-39	6.367481535238703e-39	0.1845970807303664	-3.836417067601171e-39	800.0	0.18306192700257862	-6.353851656009534e-39	88.88888888859144	-1.3036716917419614e-48	-2.3234809345586396e-13	6.98700356830718e-11	2.854831693632938e-50	-6.892307161113806e-13	6.9873435047475365e-12
4.295	88.88841977662644	-9.909387988534491e-39	0.2887862330339312	381.7777777777441	2.012830941625569e-50	-800.0	-8.008269505404296e-41	0.010825511549500061	1.1671180663367268e-40	0.9999986806209129	-3.362660290007625e-41	0.0016244247040493132	5.568575701433744e-41	6.374883500160736e-39	0.18614544122300047	-3.842974403173587e-39	6.400917004935986e-39	0.187698361344649	-3.859359069794322e-39	800.0	0.1861454412231515	-6.387368729643358e-39	88.88888888859174	-1.303637259253067e-48	-2.360774013135245e-13	3.481659405224256e-11	-9.207308592069044e-50	-7.612293303603884e-13	3.4824914809544803e-12
4.3	88.88840392315304	-9.961363481628605e-39	0.2936253880575161	382.2222222221867	1.360849860118668e-50	-800.0	-8.019945487781446e-41	0.010951080364755832	1.1665351633083883e-40	0.9999986360329601	-3.3827997483233904e-41	0.0016516450606144494	5.597687408248594e-41	6.408101041299481e-39	0.18926466850383578	-3.865824334764293e-39	6.434335775691576e-39	0.1908356147746947	-3.8823345212130665e-39	800.0	0.18926466850398893	-6.42087096405797e-39	88.88888888859182	-1.3044544685697662e-48	-2.398436176523973e-13	2.723747153746867e-11	-9.29377958985323e-50	-7.358743046347714e-13	2.72474102759627e-12
4.305	88.8883876168438	-1.0013314097510173e-38	0.2985209403853222	382.66666666662985	7.086738623173057e-51	-800.0	-8.031748280128404e-41	0.011078896338575775	1.1659096977238454e-40	0.9999985901714025	-3.4029703322411043e-41	0.001679182657028692	5.626782903151416e-41	6.441297484987324e-39	0.19242024898504298	-3.88870612429965e-39	6.467736628178053e-39	0.1940094847840116	-3.9053437851412085e-39	800.0	0.19242024898519844	-6.45435716318062e-39	88.88888888859205	-1.3044321314077949e-48	-2.4342789316341025e-13	1.8947806286934726e-10	4.788530505750515e-49	-5.955978639273033e-13	1.8947899895644328e-11
4.31	88.88837084751545	-1.0065239118070292e-38	0.30347314326827324	383.1111111110727	5.645586668738449e-52	-800.0	-8.043543490852445e-41	0.011206056591147826	1.165286221157839e-40	0.9999985430075997	-3.423172230903195e-41	0.0017070389180283204	5.655861755507656e-41	6.474472307774912e-39	0.19561234593700658	-3.9116199505433614e-39	6.501119619376601e-39	0.19721978352229944	-3.9283868398589986e-39	800.0	0.19561234593716426	-6.487826864134457e-39	88.88888888859235	-1.304454401225873e-48	-2.4699956997686083e-13	-7.337537984615473e-10	-2.7381859554889164e-48	-1.3955466859145671e-12	7.337551255748076e-11
4.315	88.88835360631944	-1.0117138488306592e-38	0.30848181684034615	383.5555555555156	-6.009968323151467e-51	-800.0	-8.055247309104159e-41	0.011333488618196929	1.1646505037618394e-40	0.9999984945166648	-3.443405389018223e-41	0.0017352128320625685	5.684923916264762e-41	6.507625433287825e-39	0.19884084345201467	-3.9345657271352675e-39	6.534484398613273e-39	0.20046658884721086	-3.951463423546289e-39	800.0	0.19884084345217926	-6.521280031466488e-39	88.88888888858455	-1.3323679035364264e-48	-2.575891480735921e-13	-1.935044717053209e-09	-6.905801913013011e-48	-2.4923147648997926e-12	1.9350463220885493e-10
4.32	88.88833588149251	-1.016901091275058e-38	0.31354759061652354	383.9999999999583	-1.2760526899214936e-50	-800.0	-8.06690520646775e-41	0.011463204960817769	1.1639718156359698e-40	0.9999984446655135	-3.463669484099324e-41	0.0017637079403754227	5.71396862341624e-41	6.540755950834984e-39	0.20210614733522814	-3.9575430334429395e-39	6.567829734867335e-39	0.2037505551669525	-3.9745734046494264e-39	800.0	0.2021061473354001	-6.554715830146582e-39	88.88888888857586	-1.363649488269473e-48	-2.694008557789725e-13	-8.424668370328353e-10	-3.184460831217454e-48	-1.5677361419290668e-12	8.424682957219936e-11
4.325	88.8883176603516	-1.0220854813682099e-38	0.31867128053495897	384.44444444440114	-1.9578736787901303e-50	-800.0	-8.078631788781208e-41	0.0115934354761625	1.1632770987678103e-40	0.9999983934184746	-3.4839647498869686e-41	0.0017925288328545757	5.742994951252504e-41	6.57386275651329e-39	0.2054087835580377	-3.9805520793680524e-39	6.601155168949146e-39	0.2070718297811595	-3.9977169799362975e-39	800.0	0.2054087835582121	-6.588133243211433e-39	88.88888888857625	-1.3636447129757857e-48	-2.7309929368630615e-13	1.8223052696459474e-09	6.091610930448215e-48	8.613422933360712e-13	1.8223054732096744e-10
4.33	88.88829893347805	-1.0272670107309913e-38	0.3238527215514054	384.888888888844	-2.639684650995682e-50	-800.0	-8.090351127025358e-41	0.011723133598887145	1.1625822415435787e-40	0.9999983407490576	-3.5042912177144553e-41	0.001821674581343677	5.772002833559632e-41	6.606945753218853e-39	0.20874864576986443	-4.0035928770256816e-39	6.634460696837801e-39	0.21043026017058097	-4.020894128654172e-39	800.0	0.2087486457700413	-6.621532216651424e-39	88.88888888857652	-1.3636012268676865e-48	-2.7701656636282274e-13	-1.118986385032789e-08	-3.894768054051226e-47	-1.1181880856732209e-11	1.1189869437278277e-09
4.335	88.88827969015743	-1.0324456232300183e-38	0.32909206670870284	385.33333333328653	-3.467142584934459e-50	-800.0	-8.101886663619866e-41	0.011854395430236917	1.1618554400366749e-40	0.9999982866271285	-3.5246486653227103e-41	0.0018511460469421653	5.800991929533212e-41	6.640004522594724e-39	0.21212583265429558	-4.026665136847851e-39	6.667745403397012e-39	0.21382629430473993	-4.0441043242501105e-39	800.0	0.21212583265453222	-6.654912388646994e-39	88.88888888848045	-1.6974784681490528e-48	-3.7019537034456176e-13	-1.1166415940047808e-08	-3.8951334656829305e-47	-1.1307889499109736e-11	1.1166421665624073e-09
4.34	88.88825991654664	-1.0376211341913627e-38	0.3343902996107776	385.7777777777289	-4.315878900019711e-50	-800.0	-8.113549308740307e-41	0.011987687902571764	1.1610895907546141e-40	0.9999982310137526	-3.545037060362522e-41	0.0018809487626854525	5.82996115892104e-41	6.673037779613686e-39	0.21554097826065788	-4.049768757359591e-39	6.70100816999042e-39	0.21726051391942713	-4.067347930863217e-39	800.0	0.21554097826089777	-6.688272568824304e-39	88.8888888884809	-1.6974586972247164e-48	-3.7525661764103966e-13	2.8461973518761825e-09	9.430036139034853e-48	1.5540924526320674e-12	2.846197776162146e-10
4.345	88.88823960131455	-1.042793480699335e-38	0.3397476170988296	386.2222222221713	-5.164604480868797e-50	-800.0	-8.125208418939486e-41	0.012120326704952207	1.1603252459433904e-40	0.9999981738770607	-3.565456578655951e-41	0.0019110838360573254	5.858910140634257e-41	6.706045057349834e-39	0.2189942095068154	-4.072903903197635e-39	6.734249039717939e-39	0.2207327317519947	-4.090624938366689e-39	800.0	0.21899420950705864	-6.721612351646561e-39	88.88888888848132	-1.6974243964221088e-48	-3.8054633396541164e-13	-7.866892322756712e-09	-2.666045231493271e-47	-8.785265406654566e-12	7.866897228179403e-10
4.35	88.8882187342688	-1.0479626494108158e-38	0.3451638837927019	386.6666666666133	-6.076695026838964e-50	-800.0	-8.136752136429552e-41	0.012253389716693604	1.1595461026155228e-40	0.9999981151883869	-3.58590714731726e-41	0.0019415505057936869	5.887838779482855e-41	6.739026224475395e-39	0.22248543916780725	-4.0960704658933815e-39	6.767467588633298e-39	0.2242430693294727	-4.113935016184764e-39	800.0	0.2224854391680969	-6.754931651109643e-39	88.88888888841268	-1.9289708213942642e-48	-4.5306982248755194e-13	-8.725227947554855e-09	-2.946148888407155e-47	-9.725792697901633e-12	8.725233368101733e-10
4.355	88.88819730196781	-1.0531285003413702e-38	0.35063979202032364	387.1111111110554	-7.048805252174154e-50	-800.0	-8.148310440441573e-41	0.012388853896559186	1.1587223896643568e-40	0.9999980549099264	-3.606388492141896e-41	0.0019723526665207983	5.916746251969576e-41	6.77198029649964e-39	0.22601511354576895	-4.1192680766430744e-39	6.80066253991084e-39	0.22779221453585816	-4.13727820610475e-39	800.0	0.22601511354606668	-6.788229564900367e-39	88.88888888840665	-1.949948322609365e-48	-4.655850847173506e-13	4.90274487674436e-10	1.4231775136421073e-48	-8.859116280350377e-13	4.902752880819545e-11
4.36	88.88817529050365	-1.0582908921973714e-38	0.3561760547808255	387.55555555549734	-8.023785724813994e-50	-800.0	-8.159913780732442e-41	0.012524419764692735	1.1578886062711584e-40	0.9999979930025625	-3.6269008761328627e-41	0.0020034943291530635	5.9456317250441e-41	6.804906275910472e-39	0.22958369226884198	-4.142496981146379e-39	6.833833605053654e-39	0.23138019650269404	-4.160654637146082e-39	800.0	0.22958369226914382	-6.821505182273888e-39	88.88888888840711	-1.9499607736783532e-48	-4.720190617824143e-13	1.034550223266636e-09	3.028941177713726e-48	-3.5343780789713445e-13	1.0345502836398676e-10
4.365	88.88815268949419	-1.0634498231575496e-38	0.3617724512043706	387.9999999999393	-8.99881563790537e-50	-800.0	-8.171483991724849e-41	0.012659688094342949	1.1570506907296066e-40	0.9999979294370951	-3.647444309124146e-41	0.0020349742515697725	5.974495169479768e-41	6.837804108185917e-39	0.2331910330108677	-4.165757168606816e-39	6.866980665684408e-39	0.23500692999148362	-4.184064214400311e-39	800.0	0.2331910330111736	-6.854758491490967e-39	88.88888888840735	-1.950734665513353e-48	-4.789855506422042e-13	-5.962874638498358e-09	-1.9488075702566896e-47	-7.58895861603883e-12	5.962879467735349e-10
4.37	88.88812948618704	-1.0686052086756362e-38	0.36742931229415104	388.4444444443814	-1.0005277966691965e-49	-800.0	-8.182929166057129e-41	0.012796971040975645	1.1561740214923804e-40	0.9999978641776579	-3.668018503091137e-41	0.0020667942959633773	6.003336079950197e-41	6.870673181078776e-39	0.23683734917478844	-4.189048266989259e-39	6.9001026115915e-39	0.23867299214747906	-4.2075065796637913e-39	800.0	0.23683734917513283	-6.887988947587351e-39	88.88888888835613	-2.1169980352890043e-48	-5.390672814125511e-13	-5.930663367810569e-09	-1.9381245885165496e-47	-7.652180029971522e-12	5.930668304512521e-10
4.375	88.88810566503801	-1.0737568683634677e-38	0.37314760313659423	388.8888888888231	-1.1063763009708976e-49	-800.0	-8.194481401585225e-41	0.012935438456882196	1.155270935425377e-40	0.9999977971805322	-3.6886236074599676e-41	0.0020989598912764555	6.03215339809352e-41	6.903512232446897e-39	0.2405232628843255	-4.212370382208337e-39	6.933198685988505e-39	0.24237872229613214	-4.230982039644257e-39	800.0	0.24052326288467457	-6.9211953878175e-39	88.88888888835662	-2.116961873340481e-48	-5.466333247960848e-13	1.144684347309444e-09	3.371651523570356e-48	-4.376255575003954e-13	1.1446844309640002e-10
4.38	88.88808121431396	-1.0789047720869808e-38	0.3789272888232689	389.33333333326493	-1.21222334450775e-49	-800.0	-8.206033202061843e-41	0.013073300120694879	1.1543680958042726e-40	0.9999977284127184	-3.7092597193885045e-41	0.0021314708414564036	6.060946930834188e-41	6.936321014921438e-39	0.24424875168521065	-4.235723596608576e-39	6.966268895935577e-39	0.2461239469022508	-4.254490593095377e-39	800.0	0.2442487516855644	-6.954377617946012e-39	88.88888888835713	-2.1169036831853673e-48	-5.540704532151366e-13	-1.183053655040487e-09	-4.121472234436744e-48	-2.7968300038742695e-12	1.183056960996691e-10
4.385	88.88805612203916	-1.084048883996398e-38	0.3847683678715767	389.7777777777069	-1.3187405690990296e-49	-800.0	-8.217419117550317e-41	0.013212072545860768	1.1534428698743495e-40	0.9999976578405345	-3.7299266709348473e-41	0.0021643271384805002	6.089716452838697e-41	6.969099243978736e-39	0.24801381467020453	-4.25910768764818e-39	6.999312600112207e-39	0.2499089268797435	-4.278031764791666e-39	800.0	0.24801381467057088	-6.98753540689372e-39	88.88888888834661	-2.152278940098492e-48	-5.727533916128626e-13	-1.184474740512007e-09	-4.1252524740788074e-48	-2.7956294315628154e-12	1.1844780396676441e-10
4.39	88.88803037198234	-1.089189027598573e-38	0.3906717819877398	390.22222222214856	-1.4263515487143716e-49	-800.0	-8.228925067650312e-41	0.013353405648144443	1.1524706775654889e-40	0.999997585418329	-3.750624388873332e-41	0.002197534079810195	6.118460927640901e-41	7.001845682773652e-39	0.25181905889759054	-4.2825225064227544e-39	7.032328453030752e-39	0.25373439580856794	-4.301605898606956e-39	800.0	0.2518190588979619	-7.0206676170246e-39	88.88888888834713	-2.1522462352868704e-48	-5.802180157143059e-13	4.2893096482048484e-10	1.0326288147900019e-48	-1.1739977172689432e-12	4.289325714520549e-11
4.395	88.88800395032091	-1.094325119973027e-38	0.3966378441753647	390.6666666665903	-1.5339620014728514e-49	-800.0	-8.240433662568198e-41	0.01349404328233572	1.1514998107862165e-40	0.9999975111072253	-3.7713530810039467e-41	0.002231093426442445	6.147179857242493e-41	7.034559725376906e-39	0.2556646861761809	-4.305968249042158e-39	7.065316492664836e-39	0.2576001544517917	-4.325213002118092e-39	800.0	0.2556646861765572	-7.053773713852327e-39	88.88888888834764	-2.15218714170776e-48	-5.880760588956591e-13	-8.737307174062775e-10	-2.984477745639628e-48	-2.751343418783163e-12	8.737350493312584e-11
4.4	88.88797684519992	-1.0994571492152253e-38	0.4026663856666996	391.1111111110322	-1.6422519046718635e-49	-800.0	-8.251830055447671e-41	0.013634945460078238	1.1505159628629322e-40	0.9999974348738813	-3.7921126812009767e-41	0.0022650042294005235	6.175873153743843e-41	7.067241247910681e-39	0.2595505877743053	-4.3294448156788684e-39	7.098276347132076e-39	0.2615062785955597	-4.3488527538899114e-39	800.0	0.25955058777469237	-7.086853620643284e-39	88.88888888833961	-2.178127024946917e-48	-6.062119284413677e-13	-1.030050119273489e-09	-3.276124751539997e-48	-2.950475162953793e-12	1.0300543449347787e-10
4.405	88.88794904087099	-1.104584979910124e-38	0.4087580682430031	391.55555555547426	-1.7512476941051275e-49	-800.0	-8.263258284442778e-41	0.01377834011390166	1.1494861205283114e-40	0.9999973566740041	-3.8129029559372923e-41	0.002299270211591519	6.204540017204892e-41	7.099889290851278e-39	0.2634771903205048	-4.352951883688628e-39	7.131206698789647e-39	0.2654534822816718	-4.372525245126167e-39	800.0	0.2634771903208977	-7.119906464541913e-39	88.88888888833895	-2.1802565926404745e-48	-6.156240883023562e-13	1.1953697291269944e-09	3.4072756142558604e-48	-3.0585294419930673e-13	1.1953697682554832e-10
4.41	88.8879205210702	-1.10970847088081e-38	0.41491359430200225	391.9999999999159	-1.86025988046939e-49	-800.0	-8.274728261203955e-41	0.013921717222475623	1.1484473023376338e-40	0.9999972764618508	-3.833724172112407e-41	0.0023338953244056862	6.233179612861527e-41	7.1325028520804e-39	0.2674449466261396	-4.3764897020719834e-39	7.164107290498215e-39	0.2694417604837843	-4.3962305954253994e-39	800.0	0.26744494662653767	-7.152931335553811e-39	88.88888888833948	-2.180234357656173e-48	-6.235737411906429e-13	-7.470646323781189e-09	-2.250345089593983e-47	-1.0535755538869012e-11	7.470653752997134e-10
4.415	88.88789127354886	-1.1148276172602983e-38	0.42113274248663396	392.44444444435766	-1.97207894907517e-49	-800.0	-8.286140575276466e-41	0.014064925535839037	1.1474016637729902e-40	0.9999971942029712	-3.854576334689864e-41	0.0023688783230835482	6.261791892748551e-41	7.165081854032879e-39	0.271453714066516	-4.4000582543653495e-39	7.196977926868459e-39	0.2734710648456314	-4.419968639596173e-39	800.0	0.271453714066969	-7.185928202310165e-39	88.88888888827489	-2.3734823402371745e-48	-7.086193842379011e-13	-7.49480477679703e-09	-2.2575018662458887e-47	-1.0732222624058309e-11	7.494812460822621e-10
4.42	88.88786128319087	-1.1199423238815158e-38	0.4274158925972288	392.8888888887991	-2.0907559912030976e-49	-800.0	-8.297494259921808e-41	0.014210253668142164	1.146315433084226e-40	0.9999971098548508	-3.875459159934431e-41	0.0024042213444126163	6.290376288968446e-41	7.197625609345798e-39	0.2755037375152307	-4.4236571706908286e-39	7.22981744502168e-39	0.27754200265060586	-4.4437392096775516e-39	800.0	0.27550373751568946	-7.218896451380166e-39	88.88888888827539	-2.3737259519640357e-48	-7.180289635935435e-13	1.4118484159552237e-09	3.852819316300769e-48	-3.398517152298316e-13	1.4118484568587603e-10
4.425	88.88783053185861	-1.1250524159600227e-38	0.4337639733900311	393.3333333332404	-2.209441118833042e-49	-800.0	-8.308930297426629e-41	0.014356326182517025	1.1452087584207223e-40	0.9999970233664767	-3.8963728811789417e-41	0.002439929613099829	6.318931772008984e-41	7.23013288641107e-39	0.2795956156968542	-4.4472866526294295e-39	7.262625259281145e-39	0.2816547871484631	-4.4675425415930996e-39	800.0	0.2795956156973189	-7.251834956145224e-39	88.88888888827593	-2.3736882273557502e-48	-7.273325100820195e-13	-1.4040324458618633e-09	-4.435311363940427e-48	-3.686168953975015e-12	1.4040372847166144e-10
4.43	88.88779900637637	-1.130157876687595e-38	0.44017683475477465	393.7777777776819	-2.3282596996231033e-49	-800.0	-8.320357233999912e-41	0.014501886187088494	1.1441000375468662e-40	0.999996934700792	-3.917317563410278e-41	0.0024760022851882456	6.347458224631674e-41	7.262603525835744e-39	0.2837292519168214	-4.4709467497883974e-39	7.295401311027245e-39	0.28580927151595953	-4.491378609270568e-39	800.0	0.2837292519173029	-7.284743608263861e-39	88.88888888826304	-2.4130506135828408e-48	-7.528876450297994e-13	-1.8334371058395214e-09	-5.633062966342861e-48	-4.233213414818865e-12	1.833441992855246e-10
4.435	88.88776669198651	-1.1352586445202653e-38	0.44665462551856133	394.2222222221231	-2.4490581162587808e-49	-800.0	-8.33164602436106e-41	0.014649152189775924	1.1429566458837847e-40	0.9999968438162896	-3.9382929593960996e-41	0.002512440198269631	6.375955272208048e-41	7.295037066689774e-39	0.287904742172878	-4.494637142723698e-39	7.328144607015032e-39	0.2900059444855548	-4.515247016950212e-39	800.0	0.28790474217336837	-7.317622011036528e-39	88.88888888826037	-2.4219609513511706e-48	-7.66318698489432e-13	-4.523788751005666e-11	-3.80027050789904e-49	-2.0992122503878338e-12	4.5286567086109755e-12
4.44	88.88773356935354	-1.1403545321427388e-38	0.45319835297185646	394.6666666665644	-2.570155709759226e-49	-800.0	-8.343052847797566e-41	0.014797869458524762	1.1417822133418283e-40	0.9999967506585877	-3.9592992033833827e-41	0.002549249018852076	6.404421812485563e-41	7.327432191396062e-39	0.2921227358180839	-4.518357916038148e-39	7.36085425798883e-39	0.2942452218143501	-4.5391481027718836e-39	800.0	0.29212273581858056	-7.35046895707123e-39	88.88888888826091	-2.4219239659468047e-48	-7.75925665963694e-13	8.900732003287588e-10	2.1406259982888015e-48	-9.176571885857682e-13	8.90073673376645e-11
4.445	88.88769962389316	-1.145445498940514e-38	0.4598080208811624	395.1111111110057	-2.6912512907081587e-49	-800.0	-8.354466696716983e-41	0.014945942069621432	1.1406073629346012e-40	0.9999966551866674	-3.9803364190353487e-41	0.002586428768583026	6.432857590264683e-41	7.35978857789386e-39	0.2963832353506552	-4.5421091806653775e-39	7.393530251977682e-39	0.29852691882153204	-4.5630818868621094e-39	800.0	0.29638323535115796	-7.383284184576145e-39	88.88888888826159	-2.4218734232200666e-48	-7.856839425298984e-13	-4.855849056184197e-09	-1.3868191378849337e-47	-8.627149555772743e-12	4.855856719895514e-10
4.45	88.88766484101755	-1.1505315083998819e-38	0.4664836017160916	395.5555555554472	-2.8138502366560963e-49	-800.0	-8.365726368333484e-41	0.015095032570776714	1.1394076870141771e-40	0.999996557359499	-4.001404430356552e-41	0.0026239792930758616	6.461262374756835e-41	7.392105933715879e-39	0.300686223097174	-4.565890705513912e-39	7.426171877783022e-39	0.30285132711112245	-4.587047927535452e-39	800.0	0.3006862230977187	-7.416067458193896e-39	88.88888888821945	-2.5407879484313458e-48	-8.527501660383813e-13	-4.865796654484838e-09	-1.387348489151004e-47	-8.713793935537048e-12	4.865804456921855e-10
4.455	88.88762920075564	-1.1556123774338155e-38	0.4732260651187004	395.9999999998882	-2.9408846633678052e-49	-800.0	-8.377108725905284e-41	0.015246338705251921	1.138165578716826e-40	0.9999964571209141	-4.022503250694506e-41	0.0026619060471094994	6.489635087902596e-41	7.424382969367913e-39	0.3050323241500491	-4.589702437695919e-39	7.458777919806794e-39	0.3072190814153122	-4.611046576261283e-39	800.0	0.30503232415060066	-7.448817597783126e-39	88.88888888822008	-2.5407813284964842e-48	-8.632857257405301e-13	1.0326554426379426e-09	2.4563168567792983e-48	-8.617626934089839e-13	1.032655802213257e-10
4.46	88.8875926868029	-1.1606880362149005e-38	0.480035607799337	396.4444444443292	-3.067923800435577e-49	-800.0	-8.388500522817679e-41	0.015396949463972456	1.1369234622885224e-40	0.9999963544250547	-4.0436330650506126e-41	0.002700210137695332	6.517975305053466e-41	7.456619162911627e-39	0.3094216653831039	-4.613544550913178e-39	7.491348377816063e-39	0.3116299825236217	-4.635077860081322e-39	800.0	0.3094216653836623	-7.48153415325378e-39	88.88888888822072	-2.5407781146674878e-48	-8.739122955164897e-13	-1.2233177434002232e-09	-3.3133656792273726e-48	-4.3100063507016136e-12	1.2233253359072384e-10
4.465	88.88755528446998	-1.1657584623293714e-38	0.48691209575535266	396.88888888876994	-3.195929072115335e-49	-800.0	-8.399747902657577e-41	0.015547883959938206	1.1356663617048786e-40	0.9999962492306063	-4.0647937536304045e-41	0.00273889081157752	6.546282876494034e-41	7.488814316777369e-39	0.3138541604990113	-4.637416882651293e-39	7.523882822546399e-39	0.31608412317994	-4.6591413652711305e-39	800.0	0.3138541604995849	-7.51421698013226e-39	88.88888888820978	-2.56917376451597e-48	-9.032752167502234e-13	-1.2223703530858766e-09	-3.308204210928661e-48	-4.3198719751486394e-12	1.2223779863025889e-10
4.47	88.88751697351034	-1.1708234895040078e-38	0.493856378524041	397.33333333321093	-3.324386177889331e-49	-800.0	-8.411110538977986e-41	0.015701718746738164	1.1343566301220823e-40	0.9999961414806242	-4.0859852393182033e-41	0.0027779528479885446	6.574556820739244e-41	7.520967254586639e-39	0.31833035717984715	-4.6613192807085524e-39	7.55637974623074e-39	0.320582334256388	-4.683237422016204e-39	800.0	0.31833035718042796	-7.546865006657786e-39	88.88888888821042	-2.5691254958335745e-48	-9.14065713073814e-13	3.3063921970701097e-10	5.054279448341757e-49	-1.882346454342522e-12	3.3064457781224126e-11
4.475	88.88747773578291	-1.1758830171324294e-38	0.5008688544861986	397.777777777652	-3.452841645562937e-49	-800.0	-8.422484829556914e-41	0.015854815844436588	1.1330471533141435e-40	0.9999960311240857	-4.107207753526454e-41	0.002817398488395888	6.602796534690549e-41	7.553077243866597e-39	0.3228505123008367	-4.685251963992175e-39	7.588839156167848e-39	0.3251244044206051	-4.707366063703534e-39	800.0	0.3228505123014246	-7.579477584344734e-39	88.88888888821104	-2.569068125169446e-48	-9.253207476901894e-13	5.921189464667101e-11	-1.0715652597079202e-49	-2.321613650450989e-12	5.925739074234056e-12
4.48	88.88743755625299	-1.1809370300338154e-38	0.5079493300201156	398.22222222209285	-3.581321643914831e-49	-800.0	-8.433735028863682e-41	0.016007969035755285	1.131726257930838e-40	0.9999959181187046	-4.128461218409559e-41	0.0028572266442292637	6.631001910066166e-41	7.585144135412919e-39	0.32741450114209186	-4.7092148205066465e-39	7.621260725239636e-39	0.3297103497422298	-4.7315269348378127e-39	800.0	0.32741450114268766	-7.612054615340974e-39	88.88888888821101	-2.5702586765853502e-48	-9.373357557756579e-13	-3.0553337637682247e-11	-3.208047249061614e-49	-2.519105071473265e-12	3.0657011125733266e-12
4.485	88.88739641457899	-1.1859853816803275e-38	0.5150985110253278	398.666666666534	-3.709902130008107e-49	-800.0	-8.445070729570928e-41	0.016163986534673092	1.1303530159143503e-40	0.9999958024072696	-4.149745494758322e-41	0.0028974412868021772	6.659172079073306e-41	7.617166886210579e-39	0.33202277880663056	-4.733207632323675e-39	7.653642953825526e-39	0.3343409907849454	-4.7557202803625085e-39	800.0	0.33202277880723363	-7.644595155160983e-39	88.88888888821097	-2.5718098189719265e-48	-9.501387393379052e-13	8.218610976957937e-11	-1.1249532858531811e-49	-2.3779344171076427e-12	8.222050359338245e-12
4.49	88.88735429083164	-1.1910279451687896e-38	0.5223169676974868	399.111111110975	-3.8384928925370376e-49	-800.0	-8.456432062011625e-41	0.016319514946095157	1.1289760414502954e-40	0.9999956839337277	-4.17106084475359e-41	0.0029380456241043127	6.687306285924199e-41	7.649144583439825e-39	0.3366757129274065	-4.75723064669301e-39	7.685985734998772e-39	0.3390161874355053	-4.779946173707129e-39	800.0	0.3366757129280168	-7.677098385815371e-39	88.88888888821164	-2.5718107627590468e-48	-9.614633419671341e-13	3.58350386401653e-10	5.853216423450888e-49	-2.0214214781258878e-12	3.583560876823586e-11
4.495	88.88731116948601	-1.1960647086985896e-38	0.5296044726271194	399.555555555416	-3.967166093285655e-49	-800.0	-8.467686439923291e-41	0.01647494878515943	1.1275894774172181e-40	0.9999955626544142	-4.192407219637216e-41	0.002979038377556781	6.715404441552037e-41	7.681077100200543e-39	0.3413731570129651	-4.781283786462578e-39	7.71828879403846e-39	0.34373591260092473	-4.804204308469519e-39	800.0	0.34137315701358323	-7.709564231240135e-39	88.88888888821107	-2.5747350948438984e-48	-9.756653721955314e-13	-2.509163247547331e-09	-6.646510812428304e-48	-6.473837563558335e-12	2.509171599037234e-10
4.5	88.88726702995086	-1.2010955404458936e-38	0.5369616213031569	399.9999999998568	-4.098229438312907e-49	-800.0	-8.479001569442155e-41	0.016633111638582512	1.1261522466520658e-40	0.9999954385114154	-4.213784447485567e-41	0.003020422897461557	6.743465762743628e-41	7.7129634926182e-39	0.346115495005464	-4.8053668004702764e-39	7.75055067944963e-39	0.3485009480862286	-4.8284948586902126e-39	800.0	0.3461154950061096	-7.741991841729311e-39	88.88888888819032	-2.628780182101832e-48	-1.0202635299491058e-12	-2.3275011547713445e-09	-6.219586170199658e-48	-6.088208374472465e-12	2.3275091174350216e-10
4.505	88.8872218507986	-1.2061202963208297e-38	0.5443890919675703	400.4444444442978	-4.229668579470358e-49	-800.0	-8.490354471659048e-41	0.016791013958439537	1.1247075826634478e-40	0.9999953114444637	-4.235192803478293e-41	0.0030622029996332446	6.771489393725509e-41	7.744802729535163e-39	0.35090316419196094	-4.8294799464138154e-39	7.782771178286121e-39	0.3533112192540481	-4.8528179325800185e-39	800.0	0.35090316419261436	-7.774380288510152e-39	88.88888888819095	-2.628774524968483e-48	-1.032109989380152e-12	3.5929777671599973e-10	6.964482806615391e-49	-2.158868026907919e-12	3.5930426251885466e-11
4.51	88.8871756158708	-1.2111389646084046e-38	0.5518866457589453	400.8888888887389	-4.36116907818488e-49	-800.0	-8.501611415256591e-41	0.016948712534676287	1.1232545273363607e-40	0.9999951814081129	-4.25663225949801e-41	0.003104377341128496	6.799475245605056e-41	7.776594683991747e-39	0.3557360107073704	-4.853623171479707e-39	7.814950050153792e-39	0.3581666677361356	-4.8771732552377425e-39	800.0	0.35573601070803196	-7.806729496071438e-39	88.88888888819027	-2.6309510335437197e-48	-1.0477277769757265e-12	-2.4040029226548435e-10	-5.961445176437091e-49	-3.5416761648081394e-12	2.4042637956635844e-11
4.515	88.88712830416452	-1.2161514229592076e-38	0.5594548018083583	401.3333333331796	-4.492847651930295e-49	-800.0	-8.512915168118926e-41	0.017109055779050274	1.1217516994025509e-40	0.9999950483432904	-4.278102629432903e-41	0.0031469488427894603	6.827422589600213e-41	7.808338475811368e-39	0.360614369283427	-4.877796211257502e-39	7.847085869172491e-39	0.3630680511741034	-4.90156096076205e-39	800.0	0.3606143692840966	-7.839038675776335e-39	88.88888888818907	-2.633888803218696e-48	-1.0658472667940139e-12	-5.186961971048381e-11	-2.9533154952109313e-49	-3.0140245581746232e-12	5.195711494056893e-12
4.52	88.88707989291026	-1.221157516653918e-38	0.5670943022577773	401.7777777776206	-4.624543244967187e-49	-800.0	-8.524264130498716e-41	0.017269273053201188	1.1202390881943892e-40	0.9999949121859565	-4.2996041953804603e-41	0.0031899216799355194	6.855330507708004e-41	7.840032999890069e-39	0.36553871840593455	-4.9019993286733666e-39	7.879178355072054e-39	0.36801533348014087	-4.9259811786686686e-39	800.0	0.3655387184066122	-7.87130683033879e-39	88.88888888818975	-2.6339257370449106e-48	-1.0776611793714978e-12	1.755040557327329e-10	7.048586468477645e-50	-2.282528911768995e-12	1.75518897891e-11
4.525	88.88703036529125	-1.2261572329953812e-38	0.574804902562086	402.2222222220619	-4.756253626956893e-49	-800.0	-8.535522012938657e-41	0.01742920991409115	1.1187187874239518e-40	0.9999947728888118	-4.3211369395402867e-41	0.003233294477708792	6.883198905161408e-41	7.871678122163931e-39	0.3705089005548411	-4.9262324832462274e-39	7.911227287562749e-39	0.37300843432176617	-4.95043364803279e-39	800.0	0.37050890055552677	-7.903533877915897e-39	88.88888888819	-2.634852260006744e-48	-1.0907357350558328e-12	-3.256654205566906e-10	-1.0446149666471605e-48	-3.3525986642450244e-12	3.256826769482369e-11
4.53	88.88697969965318	-1.2311504535876137e-38	0.5825870830651791	402.6666666665026	-4.888331642007166e-49	-800.0	-8.54682345356218e-41	0.01759177297186681	1.1171486112583972e-40	0.9999946303909514	-4.34270067558569e-41	0.0032770699388334937	6.911027075622491e-41	7.903272988480546e-39	0.3755252254696941	-4.9504954118987995e-39	7.943231237819755e-39	0.37804810604896794	-4.974918493639419e-39	800.0	0.375525225470391	-7.935719055353865e-39	88.88888888818714	-2.6428878397291892e-48	-1.1098837883641286e-12	-2.4608463415156473e-10	-8.466462301598525e-49	-3.2029207974124957e-12	2.4610547711732047e-11
4.535	88.88692787211725	-1.236137018796592e-38	0.5904416084013355	403.11111111094345	-5.020477001414117e-49	-800.0	-8.558172921165791e-41	0.017754245540594633	1.1155677179082644e-40	0.9999944846252151	-4.364295688639599e-41	0.0033212523652166375	6.938814072028609e-41	7.93481645889242e-39	0.3805881861447874	-4.9747883800239276e-39	7.97518989881835e-39	0.3831343227385435	-4.9994358530757174e-39	800.0	0.3805881861454926	-7.967861333687389e-39	88.88888888818774	-2.6429087266940904e-48	-1.1224722188803448e-12	3.832193821532548e-10	6.018327082282758e-49	-2.194727428874133e-12	3.8322566678969904e-11
4.54	88.88687486517924	-1.241116914799356e-38	0.5983682291888408	403.55555555538496	-5.152742651309473e-49	-800.0	-8.569430205568854e-41	0.017916384519144037	1.1139794733545865e-40	0.9999943355423705	-4.385921961861941e-41	0.0033658403548550214	6.966559792910113e-41	7.966308391300887e-39	0.3856976219517539	-4.999111348769745e-39	8.007103059962063e-39	0.3882669888239462	-5.02398546225627e-39	800.0	0.3856976219524686	-7.999960623817008e-39	88.8888888881865	-2.6475786967340882e-48	-1.139377802122831e-12	-3.033306938959663e-09	-7.65058169990092e-48	-8.032427232109205e-12	3.033317574179809e-10
4.545	88.88682065626114	-1.246090021441385e-38	0.606367425866594	403.99999999982623	-5.2876559316946724e-49	-800.0	-8.580738213232872e-41	0.018081210564970827	1.1123400625105477e-40	0.9999941830789152	-4.4075793205246597e-41	0.0034108366110750642	6.994263521253331e-41	7.99774791852768e-39	0.3908538427017181	-5.023464068401263e-39	8.038969255444652e-39	0.39344687409324747	-5.048567466492515e-39	800.0	0.3908538427024687	-8.032016151254668e-39	88.88888888816192	-2.7084890785396342e-48	-1.1950041993929967e-12	-2.4473460295362066e-09	-6.245050032838418e-48	-6.923343122669074e-12	2.447355822304274e-10
4.55	88.88676522061216	-1.2510561794178917e-38	0.6144399476369468	404.44444444426705	-5.42308026088527e-49	-800.0	-8.592092570596887e-41	0.01824587866122799	1.1106904671534865e-40	0.9999940271652354	-4.429268050582793e-41	0.0034562453490483954	7.021924311399087e-41	8.02913390172971e-39	0.39605733145252026	-5.047846805870636e-39	8.070788193501309e-39	0.39867393329722867	-5.0731819985665624e-39	800.0	0.39605733145327937	-8.064026889155327e-39	88.88888888816261	-2.7084957524994525e-48	-1.2081939985387586e-12	-1.3197147078850037e-09	-3.4388960378532187e-48	-5.3839430634095315e-12	1.3197256900776427e-10
4.555	88.88670854002608	-1.256015374087972e-38	0.6225855380292855	404.8888888887076	-5.559822825732783e-49	-800.0	-8.603347917941071e-41	0.018410174549270224	1.1090336262584613e-40	0.9999938677501243	-4.4509881262928794e-41	0.0035020651269616907	7.049542056953559e-41	8.060466192922475e-39	0.40130792301632573	-5.072259512800131e-39	8.10255966656266e-39	0.4039480598060908	-5.0978287748355985e-39	800.0	0.40130792301711504	-8.095992743149052e-39	88.88888888814343	-2.755542170846673e-48	-1.257601202847593e-12	-5.257542549467213e-09	-1.2737391286528472e-47	-1.2243535504144257e-11	5.257556805553303e-10
4.56	88.88665059073475	-1.2609674777004725e-38	0.63080471620333	405.33333333314846	-5.700338594133795e-49	-800.0	-8.614671070595687e-41	0.018577308161994203	1.1073229906027533e-40	0.9999937047667321	-4.4727393964225507e-41	0.0035482988660217054	7.07711599645094e-41	8.091743872052769e-39	0.4066059521744371	-5.096701964871065e-39	8.134282133522333e-39	0.40927006656807213	-5.1225079895475294e-39	800.0	0.40660595217526596	-8.127912889780028e-39	88.88888888811775	-2.8176696729191935e-48	-1.3171172459550068e-12	-2.602718041089071e-09	-6.438484703683856e-48	-7.56481575060945e-12	2.602729034657253e-10
4.565	88.88659134732758	-1.2659123366093843e-38	0.6390981791067989	405.7777777775892	-5.841221442703427e-49	-800.0	-8.626034628887822e-41	0.018744112664254988	1.1056041784326928e-40	0.9999935381435886	-4.4945221456070607e-41	0.0035949504875386388	7.104645216464571e-41	8.122965837767287e-39	0.41195186831334707	-5.121174429733045e-39	8.165955360140447e-39	0.41463985929997016	-5.1472197584559794e-39	800.0	0.41195186831418534	-8.159786338679109e-39	88.88888888811842	-2.817636964705802e-48	-1.3317780484742776e-12	5.393019364418796e-10	9.071740629431812e-49	-2.3131484664085783e-12	5.3930689714279466e-11
4.57	88.88653079095793	-1.2708499359470582e-38	0.6474656573050604	406.2222222220297	-5.9821370309763674e-49	-800.0	-8.637286931178043e-41	0.018910512531129384	1.1038781162641413e-40	0.9999933678276861	-4.516336326578683e-41	0.003642018476844254	7.132129609283178e-41	8.154131940559074e-39	0.4173454978992685	-5.1456768353274717e-39	8.197579138719842e-39	0.42005732208228536	-5.1719637628359814e-39	800.0	0.41734549790011627	-8.191612994014e-39	88.8888888881187	-2.818945021151423e-48	-1.3477198185156382e-12	1.278976924368094e-11	-2.969238394766779e-49	-3.2236850672552682e-12	1.318978175404929e-12
4.575	88.88646889623212	-1.2757801330889698e-38	0.6559077590594193	406.6666666664703	-6.1231446164872845e-49	-800.0	-8.648633493444402e-41	0.019079999451008828	1.1020941624249926e-40	0.9999931937476023	-4.5381818307170616e-41	0.0036895062564293616	7.159568326614167e-41	8.185241157382782e-39	0.42278723315975836	-5.1702090025583765e-39	8.229151810786323e-39	0.4255233392905594	-5.1967402727224756e-39	800.0	0.4227872331606163	-8.223391936459066e-39	88.88888888811873	-2.820175400481103e-48	-1.3636328753481198e-12	3.630873379733867e-10	5.40430059286045e-49	-2.5262617469907315e-12	3.630961263839297e-11
4.58	88.88640563744484	-1.2807027872397424e-38	0.6644250784315484	407.1111111109108	-6.264153123703129e-49	-800.0	-8.660010477298878e-41	0.01924888234259036	1.1003055176674019e-40	0.9999930158310384	-4.560058932891157e-41	0.003737417168939908	7.186960529039989e-41	8.216292473770859e-39	0.4282774571738987	-5.1947711923257966e-39	8.260673241954974e-39	0.43103773788343136	-5.221549375266892e-39	800.0	0.42827745717476595	-8.255122258478917e-39	88.88888888811947	-2.820161728753e-48	-1.3785347569104158e-12	-1.866122071684484e-09	-4.601990865781683e-48	-6.829508558395372e-12	1.8661345687316174e-10
4.585	88.88634099506613	-1.2856178825761345e-38	0.673017337447303	407.55555555535153	-6.40551208744879e-49	-800.0	-8.671266193449049e-41	0.019417523587273517	1.0985067710029997e-40	0.9999928340230644	-4.581967552958669e-41	0.0037857496517455574	7.214306103368712e-41	8.247285733867358e-39	0.43381599091463435	-5.2193632957615025e-39	8.292143142827485e-39	0.43660044863416425	-5.2463907230628487e-39	800.0	0.4338159909155318	-8.286803858081344e-39	88.88888888810283	-2.859796429075582e-48	-1.4267218508130443e-12	-1.8940700859577127e-09	-4.6223002476353374e-48	-6.977274676259555e-12	1.894082937170853e-10
4.59	88.88627494164888	-1.2905252541947484e-38	0.68168528315843	407.99999999979195	-6.548501229661813e-49	-800.0	-8.682636793288731e-41	0.01958921202425627	1.0966501739688997e-40	0.9999926482464817	-4.603907648315425e-41	0.0038345079081331043	7.241604071442695e-41	8.278219760683318e-39	0.43940331608600336	-5.2439852036895766e-39	8.32355985611284e-39	0.44221234449904867	-5.271264645227873e-39	800.0	0.43940331608691086	-8.31843567233449e-39	88.88888888810342	-2.8597937979603346e-48	-1.4426611087312842e-12	3.3213135945210707e-09	7.07740804896082e-48	3.1826429117370466e-12	3.3213151194017076e-10
4.595	88.88620745172388	-1.2954247832785339e-38	0.6904293423432736	408.4444444442325	-6.691494790275359e-49	-800.0	-8.694031326411832e-41	0.019760116879428836	1.0947909732779146e-40	0.9999924584296562	-4.625879468603173e-41	0.0038836943398450445	7.268853720999213e-41	8.309093689557108e-39	0.445039707949966	-5.268637155421047e-39	8.354923307221764e-39	0.44787320099843153	-5.2961712103257706e-39	800.0	0.44503970795088377	-8.350016935371175e-39	88.88888888810405	-2.859893939281642e-48	-1.4580072093394652e-12	-2.0263731433562343e-08	-4.500906956578921e-47	-4.340602885965561e-11	2.026377792256133e-09
4.6	88.88613850469186	-1.3003164477241549e-38	0.6992492666008291	408.8888888886729	-6.8492234152232e-49	-800.0	-8.705300741515005e-41	0.019931238213047296	1.092914519066832e-40	0.99999226451465	-4.647882896247721e-41	0.00393330755068477	7.296054902261626e-41	8.339907321574012e-39	0.45072500655440717	-5.293318998486036e-39	8.386233001877316e-39	0.4535830801488193	-5.321110059919818e-39	800.0	0.4507250065555546	-8.381547504726505e-39	88.88888888792994	-3.2455862933391567e-48	-1.8197761998260186e-12	-2.0155255242569642e-08	-4.483091462245622e-47	-4.369679619564413e-11	2.0155302610060926e-09
4.605	88.88606807115266	-1.3052000609833325e-38	0.7081459330639206	409.3333333331124	-7.011502006984815e-49	-800.0	-8.716692091268149e-41	0.020104867902700184	1.0909874423270178e-40	0.9999920664187715	-4.66991796863818e-41	0.003983352475747328	7.323206511161084e-41	8.37065933037768e-39	0.4564597774667162	-5.3180307099805546e-39	8.417487489850874e-39	0.4593427005412835	-5.346081543327056e-39	800.0	0.4564597774678762	-8.413026177935748e-39	88.88888888793076	-3.2455922181586235e-48	-1.8392808479914067e-12	3.973828673527385e-09	8.483756131368318e-48	3.4032888818950814e-12	3.973830130859098e-10
4.61	88.88599612603676	-1.310075529245531e-38	0.7171195812466264	409.77777777755193	-7.173792501693e-49	-800.0	-8.728108180892951e-41	0.02027774021611647	1.0890568499395453e-40	0.9999918640715101	-4.69198490294172e-41	0.004033830463481062	7.350307980123091e-41	8.401349021972807e-39	0.4622441752526015	-5.3427725003628884e-39	8.44868667042655e-39	0.46515184520351477	-5.3710857314219966e-39	800.0	0.4622441752537791	-8.444452350325748e-39	88.8888888879265	-3.255525151628634e-48	-1.8710424462079903e-12	-1.083482933002645e-08	-2.3665164121600156e-47	-2.6501433114196486e-11	1.083486174054651e-09
4.615	88.88592264753962	-1.314942819420632e-38	0.7261700209198986	410.22222222199133	-7.340800099257015e-49	-800.0	-8.739394130196032e-41	0.02045137042751192	1.0871006103625452e-40	0.9999916574115373	-4.714083530650598e-41	0.004084740444996745	7.377359095917344e-41	8.431976122792866e-39	0.4680780774701722	-5.367544156895377e-39	8.479829808866487e-39	0.47101073125729065	-5.39612225138008e-39	800.0	0.46807807747147984	-8.475825808608803e-39	88.88888888783815	-3.448430173479596e-48	-2.072334513308957e-12	-9.648222961307162e-09	-2.129517799461468e-47	-2.4127804257143353e-11	9.648253130076606e-10
4.62	88.88584760407403	-1.319801726110262e-38	0.7352982449365126	410.66666666643033	-7.513221456697017e-49	-800.0	-8.750810335610793e-41	0.020626884086469895	1.08510220075825e-40	0.99999144635001	-4.73621399574705e-41	0.004136088006431019	7.404358643823038e-41	8.462539174785024e-39	0.47396212429493856	-5.392345774010843e-39	8.510915697088391e-39	0.4769198982705925	-5.42119147635758e-39	800.0	0.47396212429626006	-8.50714522882491e-39	88.88888888783916	-3.448380088610828e-48	-2.094119535514524e-12	-1.5887735571594767e-09	-3.808033048357791e-48	-8.085203420108777e-12	1.5887941296604547e-10
4.625	88.88577097126709	-1.324652181616888e-38	0.7445042944987961	411.11111111086944	-7.686176345367117e-49	-800.0	-8.762216698298115e-41	0.020801646178753134	1.0830996397830861e-40	0.9999912308183768	-4.75837646321943e-41	0.004187873380792562	7.431306207972041e-41	8.493037663238687e-39	0.47989634247515117	-5.4171775114145365e-39	8.541944216164249e-39	0.48287913093542784	-5.446293378157159e-39	800.0	0.4798963424765263	-8.538410174616645e-39	88.88888888781098	-3.510721034339206e-48	-2.176229307014976e-12	-4.086331273356061e-09	-8.983149395013815e-48	-1.3607005527810343e-11	4.086353928162268e-10
4.63	88.88569272562377	-1.329494133928717e-38	0.753788091162145	411.5555555553087	-7.862094037873537e-49	-800.0	-8.773557276625695e-41	0.02097783045636771	1.081061195826634e-40	0.9999910107505544	-4.78057072528462e-41	0.004240096128083694	7.458201465581308e-41	8.523471185408292e-39	0.4858806816387276	-5.442039107143955e-39	8.572914338122367e-39	0.4888888366778826	-5.471427768320508e-39	800.0	0.48588068164012566	-8.569620310725254e-39	88.88888888780443	-3.525370055604033e-48	-2.2170885906495853e-12	6.158037043253786e-12	-3.2675424984081338e-49	-5.061988150467212e-12	7.971520824883813e-13
4.635	88.88561283388357	-1.3343273692214266e-38	0.7631506701376237	411.9999999997476	-8.038361629002755e-49	-800.0	-8.785002319093933e-41	0.021155173970148322	1.0789904725458877e-40	0.999990786052993	-4.802797028795425e-41	0.004292762072821455	7.485043151754103e-41	8.553838222940906e-39	0.4919158092817094	-5.466930771884901e-39	8.603825138228222e-39	0.4949493475946556	-5.496594946115346e-39	800.0	0.4919158092831222	-8.600774258887873e-39	88.88888888780544	-3.5253609457243683e-48	-2.239666622720772e-12	3.671137468093603e-11	1.5222524240957628e-49	-5.937420775218182e-12	3.718841212563483e-12
4.64	88.88553127238418	-1.3391518438124137e-38	0.7725918879534313	412.44444444418673	-8.215029924686201e-49	-800.0	-8.796396921868764e-41	0.021331738565001406	1.0769154247743196e-40	0.9999905566591387	-4.825055463973812e-41	0.004345870409289138	7.511830990471151e-41	8.584138426706124e-39	0.4980016331258558	-5.4918525883190296e-39	8.634676492594278e-39	0.5010604405419111	-5.521794767042595e-39	800.0	0.49800163312729456	-8.631871737537212e-39	88.88888888779445	-3.545894124701674e-48	-2.2978987721328367e-12	-8.951417385105138e-09	-1.8512991206632126e-47	-2.5656264031675176e-11	8.951454152608201e-10
4.645	88.88544801492183	-1.343967473395305e-38	0.782111871804458	412.88888888862516	-8.397380403568147e-49	-800.0	-8.80780092420047e-41	0.021510524191727953	1.0747922285102847e-40	0.9999903224952906	-4.847345839476477e-41	0.004399421854342304	7.538564471052275e-41	8.614371171790407e-39	0.5041382353695837	-5.5168043049683614e-39	8.665467021867829e-39	0.5072227517984119	-5.547027258030002e-39	800.0	0.5041382353711319	-8.66291220325544e-39	88.888888887729	-3.684047101664908e-48	-2.4664655123678716e-12	-5.929479129917636e-09	-1.2872298129222943e-47	-1.8015089937396718e-11	5.929506496800071e-10
4.65	88.88536302786953	-1.3487740549644296e-38	0.7917115618886182	413.33333333306393	-8.581586182970969e-49	-800.0	-8.819278634675139e-41	0.02168964667703984	1.0726480814263206e-40	0.9999900834668672	-4.869668456649568e-41	0.004453421698144046	7.565242390916485e-41	8.64453501279738e-39	0.510326222280298	-5.541786199407548e-39	8.696196125852098e-39	0.513436377867034	-5.5722926302358426e-39	800.0	0.5103262222818623	-8.693894347507728e-39	88.88888888773	-3.68407983073035e-48	-2.4921038659257665e-12	-8.416615552656405e-09	-1.7591028075374646e-47	-2.4848864732119925e-11	8.416652233952415e-10
4.655	88.88527628788327	-1.3535715627644966e-38	0.8013906740343754	413.77777777750225	-8.771021198908758e-49	-800.0	-8.830662064171441e-41	0.021867927024746242	1.070499943930778e-40	0.9999898395082104	-4.892023318832587e-41	0.004507868343620735	7.591864578407149e-41	8.674629724425947e-39	0.516565410899768	-5.566798261673168e-39	8.726863690230212e-39	0.5197010774931246	-5.5975906135650096e-39	800.0	0.5165654109014705	-8.724818004288695e-39	88.88888888764563	-3.858508706200346e-48	-2.7124019768203345e-12	-1.1408000470206225e-08	-2.357081568885999e-47	-3.206350457329304e-11	1.1408045529210997e-09
4.66	88.88518776507148	-1.3583598639434538e-38	0.8111496486427625	414.22222222194057	-8.965251949787637e-49	-800.0	-8.842135561336795e-41	0.022049353703154428	1.0682894578568128e-40	0.9999895905352448	-4.914410318198737e-41	0.004562764269567913	7.618430240476073e-41	8.704654347478339e-39	0.5228560853360802	-5.591840322814774e-39	8.757467928846972e-39	0.5260177520340344	-5.6229214660423684e-39	800.0	0.5228560853378198	-8.755682317256197e-39	88.88888888763253	-3.8861252764626255e-48	-2.7744586038252453e-12	2.880303403192665e-09	5.4599686642299703e-48	5.057216118042072e-13	2.8803034475897846e-10
4.665	88.88509742683938	-1.3631387910661256e-38	0.8209891630038068	414.6666666663788	-9.1595595316944e-49	-800.0	-8.853649606029807e-41	0.02223020745450314	1.066070647123882e-40	0.9999893364562935	-4.936829753129227e-41	0.00461811328736807	7.644938380620159e-41	8.734607679811795e-39	0.5291986824035292	-5.61691266900504e-39	8.788008603218464e-39	0.5323862373582513	-5.6482853038280286e-39	800.0	0.529198682405287	-8.78648620716352e-39	88.8888888876337	-3.8861617261914185e-48	-2.8014931411659904e-12	-1.9732245467213824e-08	-3.9997372184396304e-47	-5.2178248091514336e-11	1.973231445492278e-09
4.67	88.88500524955433	-1.367908324264825e-38	0.8309088733308205	415.1111111108166	-9.368797460638095e-49	-800.0	-8.865049077322328e-41	0.022410891089520685	1.063837418096122e-40	0.9999890772048853	-4.959281529324516e-41	0.004673913464706354	7.671388861907396e-41	8.764489537849866e-39	0.5355929807315949	-5.642015181885075e-39	8.818485300290967e-39	0.5388064847310361	-5.673681798693376e-39	800.0	0.5355929807336298	-8.817229545957313e-39	88.88888888746172	-4.2329021105127467e-48	-3.2351764773992684e-12	-1.9895670296438634e-08	-4.037942086093619e-47	-5.316860169473699e-11	1.989574133941223e-09
4.675	88.88491119876922	-1.372668272169913e-38	0.8409096003645844	415.5555555552538	-9.580441395057463e-49	-800.0	-8.876571548863132e-41	0.022594218692461056	1.0615484071895683e-40	0.9999888126841318	-4.981765693192684e-41	0.0047301694199718206	7.697780550343157e-41	8.794298558208316e-39	0.5420395096149826	-5.6671478529449944e-39	8.848896422031368e-39	0.5452792515934046	-5.6991113030081654e-39	800.0	0.5420395096170382	-8.847911100094737e-39	88.88888888746304	-4.232881047537374e-48	-3.267450079921449e-12	3.0202803221373954e-09	5.728871937118889e-48	-4.391205733607199e-13	3.0202803540594124e-10
4.68	88.88481524452509	-1.3774185248641023e-38	0.8509916071295298	415.999999999691	-9.792121457751134e-49	-800.0	-8.888106797179417e-41	0.022776710045178467	1.0592542844036844e-40	0.9999885428097687	-5.004282476424254e-41	0.004786882634350553	7.724112783728393e-41	8.824033934234258e-39	0.5485384388487806	-5.692310910913992e-39	8.879241821995111e-39	0.5518042983773148	-5.724573853375163e-39	800.0	0.5485384388508591	-8.878530161082407e-39	88.88888888746102	-4.237114595573938e-48	-3.311998012184479e-12	-1.9265182042240883e-09	-3.5828276819980324e-48	-1.3182883509257354e-11	1.9265633079721064e-10
4.685	88.88471736146002	-1.382159043928453e-38	0.8611546555295493	416.44444444412824	-1.0004605882299626e-48	-800.0	-8.899553115066196e-41	0.022960100499036344	1.0569294180318695e-40	0.9999882675104604	-5.02683169579135e-41	0.004844051770162989	7.750385318045235e-41	8.85369535639529e-39	0.5550896152077278	-5.717504131744812e-39	8.909520619443336e-39	0.5583818826562702	-5.7500691950274545e-39	800.0	0.5550896152098457	-8.909086481280916e-39	88.88888888744691	-4.263593922908109e-48	-3.3897181850460306e-12	-1.4118484159552237e-09	-2.9343751690793816e-48	-1.1298111260419905e-11	1.411893620976215e-10
4.69	88.88461751162455	-1.3868896037627532e-38	0.8713997817143555	416.8888888885656	-1.0217784937266089e-48	-800.0	-8.911118950863807e-41	0.023145015994868613	1.0545643826771545e-40	0.9999879866794679	-5.049413576339947e-41	0.004901682657651018	7.776596818564708e-41	8.883281222524411e-39	0.5616937068609442	-5.742727702546279e-39	8.939731663619448e-39	0.5650124413226144	-5.775597670358633e-39	800.0	0.5616937068630835	-8.939578606520622e-39	88.88888888744823	-4.263635452558729e-48	-3.422348307840427e-12	1.4045061410190366e-10	-6.189413495849651e-51	-7.527770998622941e-12	1.4065220345877833e-11
4.695	88.8845156676088	-1.3916101442457237e-38	0.8817268860603434	417.33333333300294	-1.0431094644000986e-48	-800.0	-8.922636561700267e-41	0.023328960387476772	1.0521955726250574e-40	0.9999877002396954	-5.072028233975918e-41	0.004959774738153133	7.802746913397453e-41	8.912791070050285e-39	0.5683506498562527	-5.7679817363798813e-39	8.969874846386334e-39	0.5716956961757663	-5.801159141214362e-39	800.0	0.5683506498584157	-8.970006149274263e-39	88.88888888744548	-4.268985393270927e-48	-3.472365769543791e-12	-8.772834310850778e-10	-1.8929900681567563e-48	-1.0465150816091367e-11	8.773458484759645e-11
4.7	88.8844118002865	-1.3963205810555223e-38	0.8921360230216567	417.77777777743984	-1.0644957087810852e-48	-800.0	-8.934175038098995e-41	0.023515176397957496	1.0497750917873315e-40	0.9999874081092195	-5.094675491905179e-41	0.005018328319762577	7.82883509157129e-41	8.942224273711516e-39	0.5750604795668691	-5.793266004379077e-39	8.999948687485022e-39	0.5784322979863098	-5.826753667370074e-39	800.0	0.5750604795690623	-9.000368566022071e-39	88.88888888744108	-4.2798749936667306e-48	-3.5215124282491555e-12	5.4238095496350654e-11	-5.058810505614632e-49	-7.075291987912787e-12	5.469763029405823e-12
4.705	88.88430587118049	-1.401020697820334e-38	0.9026281432036444	418.222222221877	-1.0858951952688885e-48	-800.0	-8.945787631982931e-41	0.02370164065709408	1.0473324523947038e-40	0.9999871101798168	-5.117355667912152e-41	0.005077348751656883	7.854860071159707e-41	8.971579292961022e-39	0.5818238090406512	-5.818580804333831e-39	9.029952552119676e-39	0.5852223178722461	-5.8523814611567236e-39	800.0	0.5818238090428666	-9.030664462079603e-39	88.88888888744233	-4.2799308476827113e-48	-3.5551220993503348e-12	-2.4265034426205784e-09	-4.59945434325084e-48	-1.4739153155626747e-11	2.4265482067507466e-10
4.71	88.88419785454435	-1.405710469000594e-38	0.91320289013696	418.6666666663142	-1.1073400700690885e-48	-800.0	-8.957298008793703e-41	0.02388719721326708	1.0448844498804006e-40	0.9999868063790698	-5.140068736905386e-41	0.005136834030486069	7.880821682271306e-41	9.000855905239473e-39	0.5886404087789288	-5.8439261002877075e-39	9.059886286648176e-39	0.5920654957958309	-5.878042229743966e-39	800.0	0.5886404087811988	-9.06089367282607e-39	88.88888888741985	-4.320846224819314e-48	-3.659881427017979e-12	4.9865889195640464e-09	9.23883001531843e-48	4.548441549358765e-12	4.986590993959646e-10
4.715	88.88408771484126	-1.4103897292971364e-38	0.9238608470673058	419.11111111075115	-1.1289442075575948e-48	-800.0	-8.968924694562825e-41	0.024076009465765554	1.042369397871203e-40	0.9999864966070237	-5.162814670028824e-41	0.0051967874390416125	7.906718941978132e-41	9.03005292589694e-39	0.5955106550396884	-5.869301809910441e-39	9.089747970243984e-39	0.5989627644453583	-5.903736306332423e-39	800.0	0.595510655041981	-9.091055132777772e-39	88.88888888742117	-4.3207879818965265e-48	-3.694968570356717e-12	-5.1777249154835007e-08	-9.727365738417295e-47	-1.4348157271721068e-10	5.177744795761541e-09
4.72	88.88397541654967	-1.4150583242814154e-38	0.934602522218738	419.55555555518845	-1.1507493848363984e-48	-800.0	-8.980586043440984e-41	0.024263981204261778	1.0398475155679371e-40	0.9999861807637677	-5.185593753035695e-41	0.005257211838164714	7.9325509281153e-41	9.059169240108349e-39	0.6024348757298661	-5.894708214990108e-39	9.11953740723359e-39	0.6059138830313036	-5.929463790224588e-39	800.0	0.6024348757329431	-9.12114784654732e-39	88.88888888697264	-5.161061868296394e-48	-4.91319068926176e-12	-5.2536582491783916e-08	-9.852114085568246e-47	-1.4770270852699553e-10	5.253679011898351e-09
4.725	88.88386093384511	-1.4197162286962004e-38	0.9454275313005241	419.9999999996238	-1.176563976416307e-48	-800.0	-8.992131466922189e-41	0.024452269732427305	1.0373014610567195e-40	0.9999858587766649	-5.208405820482097e-41	0.005318105068109432	7.958317474471582e-41	9.088204630854764e-39	0.6094128234344904	-5.920145121117827e-39	9.149253905134243e-39	0.6129189423072219	-5.955224349318661e-39	800.0	0.6094128234375994	-9.151171651286355e-39	88.8888888869713	-5.165236552448579e-48	-4.972701834267361e-12	7.542411140092954e-09	1.3613687279370145e-47	8.811298908445995e-12	7.54241628691938e-10
4.73	88.88374422516631	-1.4243632109176515e-38	0.9563368858658332	420.4444444440589	-1.2023899848700324e-48	-800.0	-9.003811633056818e-41	0.024642488672403807	1.0347070563369633e-40	0.9999855305288151	-5.231251067705539e-41	0.005379472821155208	7.984017210080966e-41	9.117157452603463e-39	0.6164451505275794	-5.945612684236596e-39	9.178896078814502e-39	0.6199784952953608	-5.98101836962391e-39	800.0	0.6164451505307187	-9.181125054022362e-39	88.88888888697306	-5.1651663378943856e-48	-5.019585026682799e-12	1.3310833916571646e-10	-4.790954186546353e-49	-9.877805329798135e-12	1.3347434582566345e-11
4.735	88.88362525974857	-1.4289991919591032e-38	0.9673305579681072	420.8888888884941	-1.2282254677259629e-48	-800.0	-9.015450405100857e-41	0.024831606745289295	1.0321089926302495e-40	0.9999851959336857	-5.254129642995791e-41	0.005441314942191246	8.009649653118735e-41	9.146027112682641e-39	0.6235318393145143	-5.971111053929939e-39	9.20846382345211e-39	0.6270922266205295	-6.006845732555e-39	800.0	0.6235318393176882	-9.211007545625356e-39	88.88888888697204	-5.1704449754427236e-48	-5.074801204231825e-12	-3.4769224536525224e-10	-1.03060972233736e-48	-1.2164318391259748e-11	3.4790496996889064e-11
4.74	88.88350400668854	-1.4336240921629298e-38	0.9784085120699071	421.3333333329288	-1.2540920867288802e-48	-800.0	-9.027108419347376e-41	0.02502290503154165	1.0294582540819893e-40	0.9999848549043525	-5.277041373092513e-41	0.005503631233448584	8.035214319881747e-41	9.174813018448018e-39	0.6306728672139742	-5.996640012110849e-39	9.237955630024014e-39	0.6342607608678501	-6.032706493236783e-39	800.0	0.6306728672171805	-9.240818612640058e-39	88.88888888697059	-5.173983527130271e-48	-5.137317329189547e-12	1.4097167877479436e-09	2.1221351176310285e-48	-7.058556499601098e-12	1.4097344589951114e-10
4.745	88.88338042358015	-1.438237680948262e-38	0.9895717258672516	421.77777777736367	-1.2799619191383128e-48	-800.0	-9.038845098080054e-41	0.02521450212969133	1.0267825482954832e-40	0.9999845073215408	-5.299986584312908e-41	0.005566427196904376	8.060709844950821e-41	9.203513529902385e-39	0.637868864799199	-6.022199867159286e-39	9.267370783271525e-39	0.6414841836406253	-6.05860087702641e-39	800.0	0.6378688648024361	-9.270556768793841e-39	88.88888888697241	-5.1739374829954166e-48	-5.184701150845713e-12	-9.235160784251986e-09	-1.7027504745141294e-47	-3.754674066270177e-11	9.235237109501855e-10
4.75	88.88325448266691	-1.4428399299820392e-38	1.0008198067656762	422.22222222179795	-1.306074751201406e-48	-800.0	-9.050481329641196e-41	0.025405202593102496	1.0240994331796807e-40	0.9999841531071773	-5.32296524495736e-41	0.005629700626355551	8.086136042521589e-41	9.232128406283526e-39	0.6451195793395553	-6.047790580268047e-39	9.296709070932995e-39	0.6487622380719238	-6.08452859616393e-39	800.0	0.6451195793429665	-9.300221831462664e-39	88.8888888868915	-5.3204345053737984e-48	-5.4752712096178025e-12	-4.931640281331936e-09	-9.344642884700818e-48	-2.5604324567057357e-11	4.931706747759063e-10
4.755	88.88312614467611	-1.447430657684281e-38	1.0121533805353893	422.66666666623246	-1.3326767859452895e-48	-800.0	-9.062238166989825e-41	0.025598989171870885	1.0213491612161703e-40	0.9999837921507984	-5.345977363098974e-41	0.005693455044208998	8.111491834541601e-41	9.260656350028553e-39	0.6524254145670085	-6.073412111932743e-39	9.325968569106453e-39	0.6560958082686708	-6.110489996159476e-39	800.0	0.652425414570452	-9.329812630214143e-39	88.88888888689335	-5.320402516682393e-48	-5.525627807895607e-12	-2.6024338239947672e-08	-4.696607362188671e-47	-8.587343450304382e-11	2.6024479919375066e-09
4.76	88.8829953718631	-1.4520097124900726e-38	1.0235728690572719	423.1111111106664	-1.3596040012619903e-48	-800.0	-9.074010105957791e-41	0.025791809236297075	1.0185920131512218e-40	0.9999834243462383	-5.369023213481261e-41	0.005757692826011252	8.136776315458735e-41	9.289096265969385e-39	0.659786642792724	-6.099064737897012e-39	9.355149080806104e-39	0.663484617344903	-6.136485120276e-39	800.0	0.6597866427966842	-9.359328188112978e-39	88.888888886634	-5.785025223543995e-48	-6.3284711115651524e-12	-4.8992395325812775e-08	-8.776961608101984e-47	-1.535496359416818e-10	4.899263594920587e-09
4.765	88.88286213555344	-1.456577058471775e-38	1.0350779056076025	423.55555555509926	-1.389291544843649e-48	-800.0	-9.085709919831394e-41	0.02598537546519967	1.0158020793960833e-40	0.9999830496128423	-5.392102616410451e-41	0.005822411911223394	8.161989256873798e-41	9.31744786424603e-39	0.6672030279841648	-6.124748249902826e-39	9.38424966679111e-39	0.6709288790609973	-6.162513761890326e-39	800.0	0.6672030279884656	-9.388768273558793e-39	88.888888886474	-6.072698811043593e-48	-6.857894296241535e-12	-1.3127277043166964e-08	-2.4094599093724047e-47	-5.162949808182322e-11	1.3127378572020028e-09
4.77	88.88272639019874	-1.4611324471380442e-38	1.046669538842576	423.9999999995316	-1.4196549649882822e-48	-800.0	-9.097529622734988e-41	0.026180406711935566	1.0129682785192679e-40	0.9999826678224943	-5.415215831233221e-41	0.005887618201278353	8.187129189228838e-41	9.345709381792215e-39	0.67467524650059	-6.150462877936554e-39	9.413269070361006e-39	0.6784290131136472	-6.188576264459225e-39	800.0	0.674675246504931	-9.41813128482884e-39	88.88888888647627	-6.072627895401855e-48	-6.9204249598837e-12	-2.7936171894299388e-09	-5.509493880204776e-48	-2.2718170330180454e-11	2.793709561916124e-10
4.775	88.88258810403401	-1.465675814261371e-38	1.0583475808168776	424.4444444439641	-1.45028133832169e-48	-800.0	-9.109276515227554e-41	0.02637405097464771	1.0101331916475327e-40	0.9999822788858457	-5.438362946590035e-41	0.0059533106414391135	8.212195717011165e-41	9.373880329009466e-39	0.6822031775714168	-6.17620871382579e-39	9.44220725467475e-39	0.6859846221611988	-6.214672419396235e-39	800.0	0.68220317757591	-9.44741680793874e-39	88.88888888641911	-6.17554794592173e-48	-7.163488709534383e-12	-1.3338781930844873e-08	-2.384941931118339e-47	-5.4880432203626734e-11	1.333889482905059e-09
4.78	88.88244724085965	-1.4702070385069788e-38	1.0701122108147092	424.8888888883955	-1.481628851890497e-48	-800.0	-9.121106234989306e-41	0.026570784562803977	1.0072290957611657e-40	0.9999818827010752	-5.461543852842794e-41	0.006019490242785168	8.237188113746562e-41	9.401959825801787e-39	0.6897869371574741	-6.201985605705637e-39	9.471062242769698e-39	0.6935965912301995	-6.240802463984005e-39	800.0	0.6897869371621201	-9.476624060788638e-39	88.8888888863624	-6.277248669756785e-48	-7.410136198097016e-12	-5.1289343142946435e-09	-9.516345181192491e-48	-3.0700680105384626e-11	5.129026197253042e-10
4.785	88.88230375666026	-1.4747259057266628e-38	1.0819642214871739	425.33333333282735	-1.5130154013215424e-48	-800.0	-9.132991304729012e-41	0.02676704190483079	1.0043094503544056e-40	0.9999814791443786	-5.484758881750725e-41	0.006086161466832145	8.262105109284981e-41	9.429946344716863e-39	0.6974270366198934	-6.227793879460831e-39	9.499833589184906e-39	0.7012647838861831	-6.26696655678854e-39	800.0	0.6974270366245836	-9.505751663024288e-39	88.88888888636338	-6.27869984721194e-48	-7.48275826973023e-12	-1.9300709179028884e-09	-4.095023513728257e-48	-2.067374774315602e-11	1.9301816370435828e-10
4.79	88.88215762222221	-1.4792323904130508e-38	1.093903141870259	425.77777777725885	-1.544571810391014e-48	-800.0	-9.144767272801091e-41	0.026963045190269347	1.001370627551865e-40	0.9999810681335815	-5.508007916088105e-41	0.006153321666934092	8.286946535437306e-41	9.457839667313312e-39	0.7051231727717405	-6.253633405578377e-39	9.528520744528452e-39	0.7089891273472984	-6.293164385256584e-39	800.0	0.7051231727765301	-9.534799450235364e-39	88.8888888863381	-6.32686239485195e-48	-7.632540635127283e-12	-1.8521480645478695e-09	-4.146176110604898e-48	-2.0382110109104898e-11	1.852260209425479e-10
4.795	88.88200879111201	-1.4837262559162535e-38	1.1059298901960035	426.22222222169063	-1.5762055572678607e-48	-800.0	-9.156678859568258e-41	0.027161313917348467	9.983741636469696e-41	0.9999806495380785	-5.531291116875805e-41	0.006220976011162636	8.311710992078236e-41	9.485638113445952e-39	0.7128759379457277	-6.279504309302001e-39	9.557122057504391e-39	0.716770270614769	-6.319396337907083e-39	800.0	0.7128759379505596	-9.563765897027006e-39	88.88888888634051	-6.326756335859337e-48	-7.702299341187075e-12	-2.934541498689016e-10	-9.944291456864111e-49	-1.717763528486189e-11	2.9395647505925005e-11
4.8	88.88185722721929	-1.4882073987397934e-38	1.118044498618651	426.66666666612247	-1.608009116243195e-48	-800.0	-9.168547913693398e-41	0.027358229615606872	9.953746416577411e-41	0.9999802232562977	-5.554608659277397e-41	0.006289124683189197	8.336397854693485e-41	9.513340921910973e-39	0.7206853532959897	-6.305406773715016e-39	9.585637440505061e-39	0.7246078260743899	-6.345662292892989e-39	800.0	0.7206853533009655	-9.592650336288485e-39	88.88888888629062	-6.412930012299648e-48	-7.94353816320539e-12	-3.968286440188457e-08	-6.776518680453557e-47	-1.4191700423633027e-10	3.968311816849136e-09
4.805	88.88170289572146	-1.4926757326541272e-38	1.1302468718818268	427.1111111105525	-1.6420639724134937e-48	-800.0	-9.180453094413213e-41	0.02755747209028647	9.923157907523993e-41	0.9999797891902893	-5.577960388435197e-41	0.006357767150015533	8.361006601696152e-41	9.54094745616527e-39	0.7285513578527208	-6.331340610223186e-39	9.614065193882213e-39	0.7325024602985053	-6.371962353709376e-39	800.0	0.7285513578583397	-9.621452212213724e-39	88.8888888860011	-6.907575038052326e-48	-8.940080377263301e-12	-3.0919030299020084e-08	-5.336841053199481e-47	-1.1435317762048161e-10	3.0919241764327818e-09
4.81	88.88154574840206	-1.4971310106016617e-38	1.1425379684729906	427.5555555549825	-1.676601672759722e-48	-800.0	-9.19243592613274e-41	0.027756846916120802	9.89230709620798e-41	0.9999793472044307	-5.601346644155108e-41	0.00642690880635323	8.385535771440902e-41	9.568455961761419e-39	0.7364745699284017	-6.35730614830754e-39	9.642404566195216e-39	0.740454211202928	-6.39829674280997e-39	800.0	0.7364745699340701	-9.65016993229625e-39	88.88888888600377	-6.90750080412346e-48	-9.019768669556694e-12	-6.9138176665238944e-09	-1.2015051987345844e-47	-4.163201055900614e-11	6.913943010340851e-10
4.815	88.88138575440408	-1.5015732019804553e-38	1.1549173139686058	427.9999999994121	-1.7114076247046404e-48	-800.0	-9.20431699968999e-41	0.027955492733204315	9.861322519496213e-41	0.9999788972119246	-5.624767360710886e-41	0.006496546986389346	8.40998516585624e-41	9.595866185083902e-39	0.7444546841502556	-6.383303320236208e-39	9.670655174234441e-39	0.7484628699420348	-6.424665168679109e-39	800.0	0.7444546841561895	-9.678803299304348e-39	88.88888888590088	-7.081218038529932e-48	-9.450952734768142e-12	-1.1697428211239152e-08	-2.0163535109917743e-47	-5.692004297709209e-11	1.1697566697753261e-09
4.82	88.88122286677506	-1.506002084058838e-38	1.1673856826029598	428.44444444384146	-1.7468135664908243e-48	-800.0	-9.216329227116272e-41	0.0281567965695408	9.829682711064856e-41	0.9999784390807034	-5.648222638459095e-41	0.006566686048492016	8.43435346647484e-41	9.623176543344958e-39	0.7524922000769936	-6.409332190675972e-39	9.698815140899279e-39	0.7565291979822509	-6.451068007044952e-39	800.0	0.7524922000829801	-9.707350877548251e-39	88.88888888590375	-7.08117089687969e-48	-9.532596389703583e-12	3.4257633766777984e-09	4.7194487312088073e-48	-6.9139024047388434e-12	3.425770353516612e-10
4.825	88.88105704553297	-1.51041752346553e-38	1.1799432586632617	428.8888888882713	-1.7822290024980853e-48	-800.0	-9.228314587734966e-41	0.028356742673939537	9.797999892413987e-41	0.9999779726983037	-5.67171270010246e-41	0.00663732703244912	8.458639874506558e-41	9.650386068775169e-39	0.7605872369804796	-6.435392992599872e-39	9.726884342974528e-39	0.7646528063620277	-6.477505180939765e-39	800.0	0.7605872369865271	-9.735811807352612e-39	88.88888888590286	-7.087123673507021e-48	-9.627499559812662e-12	-1.0508453366734e-08	-1.8230139275293122e-47	-5.3417365780252174e-11	1.0508589133456024e-09
4.83	88.88088825601156	-1.5148194494262528e-38	1.1925898033981777	429.33333333270036	-1.8182214036975823e-48	-800.0	-9.240314358316615e-41	0.028558605871434755	9.76576756338179e-41	0.9999774979672135	-5.695237377721268e-41	0.006708468598360888	8.482843959087584e-41	9.677494233059545e-39	0.7687396414368468	-6.461485531811795e-39	9.754861206228907e-39	0.772834244288082	-6.503976731645051e-39	800.0	0.7687396414431454	-9.764185632526984e-39	88.888888885814	-7.237912807812724e-48	-1.0017309125628489e-11	-9.363532171845968e-09	-1.618661304690194e-47	-5.062553717185347e-11	9.36366902865583e-10
4.835	88.88071644637239	-1.5192075960232502e-38	1.205326344195695	429.7777777771292	-1.854412067382809e-48	-800.0	-9.252403356024663e-41	0.028760902525450098	9.733210714151158e-41	0.9999770147416213	-5.718797015252155e-41	0.006780116528897752	8.506964148170286e-41	9.70449915093187e-39	0.7769500762297055	-6.487610141671007e-39	9.782744800980528e-39	0.7810736359365598	-6.530482914777698e-39	800.0	0.7769500762360618	-9.792470639015616e-39	88.88888888581334	-7.241344969476542e-48	-1.0123612675352042e-11	-6.1023778622859154e-09	-9.834632416683526e-48	-4.412415566930762e-11	6.102537383353809e-10
4.84	88.88054158443074	-1.5235819276991236e-38	1.2181523996553596	430.22222222155773	-1.8910149718822365e-48	-800.0	-9.264393994224676e-41	0.028962252432404537	9.70053924422492e-41	0.9999765229309936	-5.742391565384345e-41	0.006852268119301851	8.531000215418085e-41	9.73140053578328e-39	0.7852182315354745	-6.513766778721235e-39	9.810534798865286e-39	0.7893707100844067	-6.55702344855847e-39	800.0	0.7852182315420178	-9.820666597631842e-39	88.88888888574941	-7.343744481821674e-48	-1.0463969083707211e-11	-6.986529873150007e-09	-1.170834381373379e-47	-4.5858429158504267e-11	6.986680375109651e-10
4.845	88.88036362157979	-1.5279422226809322e-38	1.2310686846230585	430.66666666598655	-1.9277335390730424e-48	-800.0	-9.276515391168924e-41	0.02916638715111323	9.667172404226875e-41	0.9999760223986073	-5.766021115570669e-41	0.006924927394223243	8.55495084808487e-41	9.758196811992391e-39	0.7935445686844929	-6.539955498190557e-39	9.838229207794665e-39	0.7977262645214243	-6.583598707583578e-39	800.0	0.7935445686910934	-9.848772078869954e-39	88.8888888857523	-7.343699120577569e-48	-1.0553329884283809e-11	9.322320693171886e-10	1.1964563440199321e-48	-1.9085126274776885e-11	9.324274090288916e-11
4.85	88.88018251529888	-1.5322883342782264e-38	1.2440754224384285	431.1111111104154	-1.9644756867735265e-48	-800.0	-9.288610526610068e-41	0.029369079192476572	9.633762066503692e-41	0.9999755130248578	-5.789685900639775e-41	0.006998095613480499	8.578815169920693e-41	9.784886920254084e-39	0.8019292321761163	-6.566176547884149e-39	9.865827903156861e-39	0.8061398859509967	-6.610208616619357e-39	800.0	0.8019292321827813	-9.876786137200564e-39	88.88888888574478	-7.354245387796863e-48	-1.070354104757219e-11	-3.824377851439188e-09	-6.235886287769851e-48	-3.686957295169176e-11	3.8245555710419827e-10
4.855	88.87999822977135	-1.5366201910387143e-38	1.2571723362170524	431.55555555484403	-2.0014076865194715e-48	-800.0	-9.30072393229191e-41	0.029573699022783773	9.599780893558225e-41	0.999974994708994	-5.81338575494767e-41	0.007071771222990726	8.602592746690589e-41	9.811470328927585e-39	0.8103720440551274	-6.59242974095302e-39	9.893329249629424e-39	0.8146121266439756	-6.636853228006191e-39	800.0	0.810372044061909	-9.904708312058623e-39	88.88888888572035	-7.397139597919248e-48	-1.0895080809785184e-11	-2.1941559680270413e-09	-4.466156636324677e-48	-2.7932183470169325e-11	2.1943337528512146e-10
4.86	88.87981071033695	-1.5409375168990969e-38	1.2703604613547679	431.99999999927275	-2.0383934363138246e-48	-800.0	-9.312927244764608e-41	0.029778721900848876	9.565462751990365e-41	0.999974467297266	-5.837121031372836e-41	0.007145960050867613	8.626281947000912e-41	9.837945082469293e-39	0.8188736723275168	-6.618715423302566e-39	9.920732281868357e-39	0.8231431020650384	-6.663532799308063e-39	800.0	0.8188736723343574	-9.932536823999688e-39	88.88888888572329	-7.397115123288894e-48	-1.0985802110616555e-11	-6.065666487604979e-10	-1.8004562092701935e-48	-2.3331972277511308e-11	6.070152224770807e-11
4.865	88.87961992385763	-1.5452402759543776e-38	1.2836392781643908	432.4444444437013	-2.0754162262878812e-48	-800.0	-9.32503143679818e-41	0.029982816957918428	9.53101223563878e-41	0.9999739306964566	-5.860891669654829e-41	0.0072206591773050985	8.649882543276634e-41	9.86431089364679e-39	0.8274337825392485	-6.64503354156378e-39	9.948036620647842e-39	0.831732546413049	-6.690247046565832e-39	800.0	0.8274337825461763	-9.960271441590544e-39	88.88888888571208	-7.41868760633432e-48	-1.1135487380428452e-11	-9.62548559376284e-10	-2.4116747132950994e-48	-2.448117702568655e-11	9.628598325747746e-11
4.87	88.87942581855869	-1.5495282305311487e-38	1.297009548598576	432.8888888881298	-2.1125094911521723e-48	-800.0	-9.337270237310582e-41	0.030189580951474712	9.495862623610999e-41	0.9999733847609307	-5.884697788083425e-41	0.0072958728923436505	8.673393129939391e-41	9.890566076887012e-39	0.8360528664477829	-6.671384186955156e-39	9.975240263206291e-39	0.8403812242819898	-6.716996355404384e-39	800.0	0.8360528664547702	-9.987910632840253e-39	88.88888888571506	-7.418602082561214e-48	-1.1226875276067552e-11	7.368328169831742e-10	5.5899730465927316e-49	-1.9272975731553878e-11	7.370848307874128e-11
4.875	88.879228351119	-1.553801239790319e-38	1.3104714094420256	433.3333333325586	-2.1496163212879056e-48	-800.0	-9.349468470573728e-41	0.03039470212312914	9.460686955203675e-41	0.9999728293688289	-5.908539599453351e-41	0.007371601969266151	8.696812865407269e-41	9.916709614652174e-39	0.8447310128125507	-6.697767589198319e-39	1.0002343134897674e-38	0.8490886650380535	-6.743780609607111e-39	800.0	0.8447310128196018	-1.0015453489932806e-38	88.88888888571233	-7.424334789300095e-48	-1.1354795511851867e-11	-3.904669180580074e-09	-6.528417247274534e-48	-3.749060701211309e-11	3.904849159107942e-10
4.88	88.87902748293119	-1.5580592139962296e-38	1.3240246563599496	433.77777777698634	-2.186952239421691e-48	-800.0	-9.361714045517978e-41	0.030602229272871144	9.424844345394164e-41	0.999972264411549	-5.932416957697737e-41	0.007447845262473933	8.720141209253364e-41	9.942740849972926e-39	0.8534680905021317	-6.724183583669842e-39	1.0029343325075617e-38	0.8578555579431901	-6.77059994479794e-39	800.0	0.85346809050932	-1.00428994344536e-38	88.88888888568108	-7.475832425294657e-48	-1.1583888618110571e-11	-3.246706607266265e-09	-5.2258815500656e-48	-3.672780374271658e-11	3.246914339066275e-10
4.885	88.87882315739611	-1.5623018759590396e-38	1.3376702724272904	434.2222222214148	-2.2243361500111402e-48	-800.0	-9.374039447312222e-41	0.030809786056899234	9.388705687423505e-41	0.9999716897298859	-5.956330228275273e-41	0.007524608306176613	8.743376523516133e-41	9.968657819652763e-39	0.8622647338589305	-6.750632536185368e-39	1.005623998562461e-38	0.8666819114869974	-6.797454589663949e-39	800.0	0.8622647338661851	-1.0070246679696258e-38	88.8888888856745	-7.484825313365359e-48	-1.1742157696045661e-11	-8.142819751810199e-09	-1.2341818876370816e-47	-5.7347467447763224e-11	8.143021689919105e-10
4.89	88.87861534077678	-1.566529193276451e-38	1.3514076740216463	434.6666666658429	-2.2619669939194988e-48	-800.0	-9.386260892324133e-41	0.03101664616346232	9.35238256835868e-41	0.9999711052289348	-5.980279307394747e-41	0.007601887821262022	8.766518602040687e-41	9.994460263086462e-39	0.8711205672679486	-6.777114349936485e-39	1.0083032588102546e-38	0.8755675260860831	-6.824344246390894e-39	800.0	0.8711205672754241	-1.0097495016807677e-38	88.88888888560726	-7.588973382079371e-48	-1.2122104525054764e-11	-7.1080326809649755e-09	-1.1548680158639134e-47	-4.9945395989453917e-11	7.108208152287515e-10
4.895	88.87840397677722	-1.570740897977009e-38	1.3652377580292323	435.11111111027094	-2.29991175818817e-48	-800.0	-9.398624924864005e-41	0.031225843487540497	9.31539020255701e-41	0.9999705107503408	-6.004264386432024e-41	0.00767968885725941	8.78956586226586e-41	1.0020146284554995e-38	0.8800361695365259	-6.803629196675865e-39	1.0109719215258749e-38	0.8845130713039444	-6.851269323461954e-39	800.0	0.8800361695440647	-1.0124642718496662e-38	88.88888888561029	-7.588953310995515e-48	-1.2219674720539375e-11	9.317583741600152e-10	7.591349403162893e-49	-1.9684178533424816e-11	9.319662733714405e-11
4.9	88.87818902326482	-1.574936875236294e-38	1.3791604468740482	435.5555555546991	-2.3379297590212017e-48	-800.0	-9.410919715530633e-41	0.03143305503221452	9.278412331011377e-41	0.9999699061755849	-6.028285614652497e-41	0.007758010981971261	8.81251761529377e-41	1.0045715048803694e-38	0.8890114912974457	-6.830177246925496e-39	1.0136299908616206e-38	0.8935179782566868	-6.878229622513774e-39	800.0	0.8890114913050873	-1.0151689044635922e-38	88.88888888559383	-7.615935596817516e-48	-1.240730105469284e-11	-1.1608847216847733e-08	-1.8265838423136824e-47	-6.892671323079032e-11	1.1609051838798471e-09
4.905	88.87797043613153	-1.579116990009504e-38	1.3931757749519247	435.99999999912677	-2.376641769410316e-48	-800.0	-9.423315082879073e-41	0.03164364445419761	9.240589535061552e-41	0.9999692913805908	-6.05234290604039e-41	0.007836854393170814	8.83537305647975e-41	1.0071165585713527e-38	0.8980465553778705	-6.85675839702297e-39	1.0162772247644797e-38	0.9025832146348778	-6.905225431677323e-39	800.0	0.8980465553857923	-1.0178633124759698e-38	88.88888888551112	-7.746071127689495e-48	-1.28426792211447e-11	-8.456642793437556e-09	-1.3615140004444742e-47	-5.667969421316732e-11	8.456832735932256e-10
4.91	88.87774815902475	-1.583280985540842e-38	1.4072845364060451	436.4444444435541	-2.4153758649076474e-48	-800.0	-9.435745110673366e-41	0.03185329655262764	9.202607390276475e-41	0.9999686662068433	-6.076436616380261e-41	0.00791622356268417	8.858130667439694e-41	1.0096496074360304e-38	0.9071418743939317	-6.883373014071475e-39	1.0189135775843736e-38	0.9117085119150993	-6.932256850247464e-39	800.0	0.9071418744019225	-1.0205473303869373e-38	88.88888888551043	-7.749965610242927e-48	-1.2970537736049657e-11	-5.756106702392183e-09	-9.289487352087207e-48	-4.723291200702757e-11	5.756300488794941e-10
4.915	88.87752215709332	-1.5874288266937118e-38	1.4214861220523516	436.88888888798135	-2.4543874503117605e-48	-800.0	-9.448111982609408e-41	0.03206316931680823	9.164276888902266e-41	0.9999680305563012	-6.100566583026789e-41	0.007996115067985874	8.880790227302952e-41	1.0121706238172398e-38	0.9162970563107001	-6.910020938744325e-39	1.0215389495244906e-38	0.9208939333134323	-6.95932369729599e-39	800.0	0.9162970563189194	-1.0232209355490441e-38	88.88888888545041	-7.84428501813206e-48	-1.3324786518603648e-11	-5.853687904769897e-09	-9.816791577598568e-48	-4.5849394363908786e-11	5.853867461209976e-10
4.92	88.87729236871762	-1.5915602094413013e-38	1.4357815938662322	437.33333333240853	-2.4936088462477198e-48	-800.0	-9.460608591834145e-41	0.03227461260315202	9.125377182812415e-41	0.9999673842556329	-6.124733107271235e-41	0.008076534887786795	8.903349942479614e-41	1.014679393051288e-38	0.9255127864330792	-6.936702464413378e-39	1.0241531775196914e-38	0.9301399287513347	-6.986426344492857e-39	800.0	0.9255127864413668	-1.0258839319927367e-38	88.88888888545357	-7.844277479232762e-48	-1.343018471394259e-11	-4.105042232064409e-09	-6.312622476133003e-48	-4.431327198973409e-11	4.105281402426243e-10
4.925	88.87705875488436	-1.5956750613422428e-38	1.4501705610894013	437.77777777683593	-2.5329888939468973e-48	-800.0	-9.473017359874256e-41	0.0324843952045416	9.086425380628759e-41	0.9999667271950893	-6.148936225133781e-41	0.008157480828490377	8.925809372960252e-41	1.017175861322854e-38	0.9347888135619206	-6.963417650528312e-39	1.0267562466455446e-38	0.9394460224776116	-7.013564540191607e-39	800.0	0.9347888135703856	-1.0285362730245857e-38	88.88888888540744	-7.911558584952222e-48	-1.3768891382453445e-11	-4.794505533330246e-09	-7.53489780135851e-48	-4.6831713168394426e-11	4.794734248995728e-10
4.93	88.87682126255899	-1.5997731700723307e-38	1.4646534876059762	438.222222221263	-2.572536589403039e-48	-800.0	-9.485555499091327e-41	0.032697368579389846	9.046633014814798e-41	0.999966059225485	-6.173175975394765e-41	0.008238955504409963	8.94816726277201e-41	1.0196598780309847e-38	0.9441254374654138	-6.990166519717328e-39	1.0293479160983078e-38	0.9488131285815257	-7.040738655013361e-39	800.0	0.944125437473944	-1.0311778217845994e-38	88.88888888541291	-7.90939679623622e-48	-1.3864580327463807e-11	1.8272790687962677e-09	1.6043813852011216e-48	-1.600423063741897e-11	1.8273491540095042e-10
4.935	88.87657983949629	-1.60385433663215e-38	1.479230749055328	438.6666666656901	-2.6120905150436337e-48	-800.0	-9.498069580901439e-41	0.03290860804329531	9.006794299394635e-41	0.9999653801998533	-6.197452636667041e-41	0.008320961033540752	8.97042243145894e-41	1.0221313013031442e-38	0.9535229010396788	-7.016949374422472e-39	1.031928172599797e-38	0.9582407503341818	-7.067948620038726e-39	800.0	0.9535229010482849	-1.0338084500025588e-38	88.8888888854128	-7.913145686078182e-48	-1.3990048636669526e-11	-3.191521121455568e-09	-5.1511376430037346e-48	-4.022620854041537e-11	3.1917746186957727e-10
4.94	88.87633444610316	-1.607918486381219e-38	1.4939019369164155	439.1111111101171	-2.651813668424409e-48	-800.0	-9.510612487863783e-41	0.03312179723193702	8.966306262098675e-41	0.9999646900068118	-6.221766048934874e-41	0.008403495122608785	8.992574428535976e-41	1.0245900763360644e-38	0.9629809416727149	-7.043766052741136e-39	1.034496830132997e-38	0.9677294462905728	-7.095194517845678e-39	800.0	0.9629809416814582	-1.036428109567005e-38	88.88888888538679	-7.953237171352517e-48	-1.4239188909426034e-11	1.7237766769538866e-09	1.8312815093185292e-48	-1.929568261378798e-11	1.7238846699758415e-10
4.945	88.87608501790845	-1.6119653056398107e-38	1.508668108698267	439.55555555454407	-2.691579966507428e-48	-800.0	-9.523248394525122e-41	0.03333530863885954	8.925429937623725e-41	0.9999639884650059	-6.246116591342385e-41	0.00848656372571388	9.014621403633844e-41	1.0270359816995165e-38	0.9725002418686183	-7.070616941374127e-39	1.037053777461825e-38	0.9772793087594367	-7.122476614858731e-39	800.0	0.9725002418774306	-1.0390365982867177e-38	88.88888888538995	-7.953213327302354e-48	-1.435218752572617e-11	-2.997400846045922e-08	-4.443256970785309e-47	-1.531062869266314e-10	2.9974399488943514e-09
4.95	88.87583151840026	-1.615994755226676e-38	1.5235286219534128	439.9999999989698	-2.7328243811084188e-48	-800.0	-9.535781186978478e-41	0.033547876811308795	8.884368626882044e-41	0.9999632754717187	-6.2705041648843e-41	0.008570163233797104	9.03656311274577e-41	1.029468987065213e-38	0.982080388238732	-7.097501961192191e-39	1.039598961591619e-38	0.9868900675240013	-7.149794615677438e-39	800.0	0.9820803882483512	-1.041633890908076e-38	88.88888888512666	-8.33981481658871e-48	-1.5603950483089607e-11	-2.3313380855444488e-08	-3.499414434612223e-47	-1.2452473585688653e-10	2.331371341766141e-09
4.955	88.87557388503652	-1.6200065436615464e-38	1.538484369238121	440.4444444433956	-2.7745234834750314e-48	-800.0	-9.548461801854028e-41	0.03376281249704923	8.842575302033551e-41	0.9999625508510194	-6.294928981578053e-41	0.00865429867319307	9.058397837183016e-41	1.031888886818038e-38	0.9917219569779969	-7.124421316926868e-39	1.0421321728157849e-38	0.9965624008268643	-7.177148943781847e-39	800.0	0.9917219569876935	-1.0442197995463308e-38	88.88888888513019	-8.33981266549636e-48	-1.5721764010379607e-11	-4.4575187985171114e-08	-6.432426443111555e-47	-2.2427989300664134e-10	4.457575221332502e-09
4.96	88.87531207236754	-1.624000552124208e-38	1.5535351783524998	440.88888888782145	-2.816459956693524e-48	-800.0	-9.561063005645924e-41	0.033975584055319405	8.800791546454804e-41	0.9999618144750497	-6.319391168080674e-41	0.008738969080474775	9.080124865997025e-41	1.0342955950317244e-38	1.001424837882417	-7.151375167310695e-39	1.0446534138757164e-38	1.0062956886911738	-7.204539371675958e-39	800.0	1.0014248378933785	-1.0467942476167103e-38	88.88888888470754	-8.946383216137094e-48	-1.7724316635239825e-11	-4.740385861623188e-08	-6.859147998444248e-47	-2.377602205439902e-10	4.740445487114239e-09
4.965	88.87504602952355	-1.627976603878764e-38	1.5686812171908262	441.333333332245	-2.861191552374968e-48	-800.0	-9.5737882415878e-41	0.03419193098984014	8.758065542802957e-41	0.999961066200709	-6.34389069264379e-41	0.008824175405493994	9.101743153023515e-41	1.0366889861712399e-38	1.0111891400074449	-7.178363474110926e-39	1.0471624148372243e-38	1.0160909553867765	-7.231966254685708e-39	800.0	1.011189140018493	-1.049357121194217e-38	88.88888888471152	-8.946304657822235e-48	-1.7858323162528532e-11	-2.912514673880454e-09	-4.91021203159593e-48	-4.567885918126449e-11	2.91287285746307e-10
4.97	88.87477569670484	-1.631934448428728e-38	1.5839230925627679	441.77777777666796	-2.9060992559371735e-48	-800.0	-9.58650624540226e-41	0.034406592389554576	8.715263592721334e-41	0.9999603058597754	-6.368427888230766e-41	0.008909921067447079	9.123251217133726e-41	1.0390688827325855e-38	1.0210152553877276	-7.205386597001948e-39	1.0496591539432593e-38	1.0259477180435193	-7.259429572092577e-39	800.0	1.02101525539912	-1.0519082588175057e-38	88.88888888462157	-9.076261956128879e-48	-1.8430810467640647e-11	-1.1140836401560446e-08	-1.609333235309037e-47	-8.581233059308426e-11	1.1141166881544147e-09
4.975	88.87450103490946	-1.6358740273882025e-38	1.599260234568303	442.22222222109133	-2.951514087632287e-48	-800.0	-9.599229214402685e-41	0.03462264357897153	8.671871061119025e-41	0.9999595333425246	-6.393002582240343e-41	0.008996202865833684	9.14464870418673e-41	1.0414352414945453e-38	1.0309028174716148	-7.232444373463717e-39	1.0521434620046783e-38	1.0358663748068238	-7.286929338120777e-39	800.0	1.0309028174831039	-1.05444762285128e-38	88.88888888461716	-9.084229863534867e-48	-1.8632983118710122e-11	5.734079877583621e-09	7.329610649776648e-48	-7.956794493497992e-12	5.734085398133518e-10
4.98	88.87422197462276	-1.6397950029766302e-38	1.6146937503666277	442.6666666655145	-2.9969351927173644e-48	-800.0	-9.612058272853594e-41	0.034839379031580985	8.628000977128994e-41	0.9999587484534097	-6.417615154784324e-41	0.009083027034853633	9.16593362364465e-41	1.0437878244774389e-38	1.040852540891174	-7.259537195103461e-39	1.0546152022127997e-38	1.0458471217036553	-7.314465856694195e-39	800.0	1.0408525409027527	-1.0569749955702399e-38	88.88888888462117	-9.08418492065267e-48	-1.8772856449107145e-11	-2.9494155266242595e-08	-4.2477600550384407e-47	-1.6732051623220822e-10	2.9494629867560265e-09
4.985	88.87393847747802	-1.6436973282487546e-38	1.6302229848178884	443.1111111099364	-3.0440793248094094e-48	-800.0	-9.62478603265511e-41	0.03505492816794426	8.583961938541729e-41	0.9999579510844916	-6.442265524893593e-41	0.009170389894687154	9.18710568727009e-41	1.0461265962263015e-38	1.0508640041733834	-7.286665010365314e-39	1.0570743261656967e-38	1.0558896188794433	-7.342038837613578e-39	800.0	1.0508640041858162	-1.0594903467161342e-38	88.88888888436432	-9.44946501299919e-48	-2.0117283344650608e-11	-2.338680360480636e-08	-3.403690766110859e-47	-1.399876455114803e-10	2.338722256683507e-09
4.99	88.87365047776841	-1.6475807033383117e-38	1.6458487883827229	443.5555555543583	-3.091326659168535e-48	-800.0	-9.637662822351663e-41	0.035272969011933074	8.539133353927131e-41	0.9999571410509314	-6.466953896792885e-41	0.009258296235637824	9.208163128262718e-41	1.0484513455246518e-38	1.0609377564950089	-7.313828023455219e-39	1.059520607675094e-38	1.0659945801558415	-7.369648707818125e-39	800.0	1.0609377565075386	-1.061993482998803e-38	88.88888888436851	-9.44948711882022e-48	-2.0265981301231357e-11	-3.8402466392044956e-08	-5.3991527184923e-47	-2.153950629075159e-10	3.84030704504896e-09
4.995	88.87335792747743	-1.651444998262854e-38	1.6615709855511984	443.99999999878014	-3.1388321735832313e-48	-800.0	-9.650459850229335e-41	0.035488762215134986	8.494307885593794e-41	0.9999563182176459	-6.491680400935767e-41	0.009346745076359266	9.229105171586997e-41	1.050761978958703e-38	1.071073685625413	-7.341026404110709e-39	1.0619540476337402e-38	1.0761613616311951	-7.397295238807056e-39	800.0	1.0710736856391538	-1.0644843206382713e-38	88.88888888399912	-9.964432989208614e-48	-2.217872320501442e-11	-4.1262164055900576e-08	-5.809516557831972e-47	-2.2989368583273792e-10	4.1262804481552624e-09
5.0	88.87306077237251	-1.6552900211548416e-38	1.6773897566486475	444.4444444432001	-3.188654242854375e-48	-800.0	-9.663384387731804e-41	0.0357080920550496	8.448505024103536e-41	0.9999554824320688	-6.51644502219279e-41	0.009435737437382274	9.249930683579314e-41	1.0530583607219295e-38	1.0812719087479357	-7.368260139152326e-39	1.0643743660391215e-38	1.0863909764772908	-7.42497879586854e-39	800.0	1.0812719087617821	-1.0669627359565668e-38	88.88888888400372	-9.964437099232469e-48	-2.234067155756583e-11	9.968914582713534e-10	1.2146203797722989e-49	-3.2927011458223405e-11	9.9743509445876e-11
5.005	88.87275895015343	-1.6591155166098148e-38	1.693305650421645	444.88888888761966	-3.238668643598647e-48	-800.0	-9.676288612133653e-41	0.035925471044258715	8.402648791891721e-41	0.9999546335189388	-6.541248084476387e-41	0.009525276412048991	9.270638155430057e-41	1.0553403101351376e-38	1.0915327805858437	-7.395529587394993e-39	1.0667815476016521e-38	1.0966828658165688	-7.45269932080983e-39	800.0	1.091532780600059	-1.0694285643284693e-38	88.88888888392172	-1.0083354921597762e-47	-2.292118424536118e-11	-3.572443082096532e-08	-5.032953607243242e-47	-2.0928239949376158e-10	3.5725043829289765e-09
5.01	88.8724524189299	-1.6629214103619901e-38	1.709318127731813	445.33333333203814	-3.29038008027956e-48	-800.0	-9.689224184200568e-41	0.03614472805452571	8.356084738457313e-41	0.9999537713604016	-6.566089425373789e-41	0.009615358973619483	9.291227141371133e-41	1.0576077732480795e-38	1.1018559545259856	-7.422834603307669e-39	1.0691753895454886e-38	1.1070375676624316	-7.48045690343537e-39	800.0	1.1018559545410396	-1.0718817578843129e-38	88.8888888836896	-1.0408150300212037e-47	-2.4230048936511906e-11	-3.065873481015332e-08	-4.314930799997261e-47	-1.8827144966212904e-10	3.06593128803968e-09
5.015	88.87214110549037	-1.6667073514123513e-38	1.7254282763394089	445.7777777764565	-3.342436809954075e-48	-800.0	-9.70225112393202e-41	0.036364235779283965	8.30908528520724e-41	0.9999528957505054	-6.59096944399881e-41	0.0097059912480096	9.311695574510628e-41	1.0598605030838804e-38	1.1122421328251093	-7.450175608182871e-39	1.0715557671377719e-38	1.1174551538392903	-7.50825180549424e-39	800.0	1.1122421328404692	-1.0743220903760787e-38	88.8888888836297	-1.0494366432699008e-47	-2.473679826695649e-11	-1.7505641380920407e-08	-2.438622149387512e-47	-1.3135700437757393e-10	1.7506134205471865e-09
5.02	88.87182497133935	-1.6704732993804736e-38	1.7416353416434418	446.22222222087413	-3.3953414316464605e-48	-800.0	-9.715183258937135e-41	0.036582856306623765	8.261840902829003e-41	0.9999520065809409	-6.615888010444184e-41	0.009797168996554192	9.33204320680423e-41	1.0620984691612765e-38	1.1226908299951273	-7.477552506079726e-39	1.0739226102114753e-38	1.1279353701838064	-7.536083755390905e-39	800.0	1.122690830010987	-1.0767495357768691e-38	88.88888888350712	-1.0663570708043906e-47	-2.5569296750599782e-11	-1.084690855653437e-08	-1.570838935416435e-47	-9.714197827654048e-11	1.0847343536449926e-09
5.025	88.87150394364717	-1.6742189121823335e-38	1.757940327184716	446.6666666652917	-3.4486591814422595e-48	-800.0000000000001	-9.728267442811548e-41	0.036803638390542695	8.213824557721996e-41	0.9999511036468284	-6.640845410889438e-41	0.009888897871631299	9.352268024806326e-41	1.0643214310151134e-38	1.1332026940364792	-7.504965595074433e-39	1.0762756976155674e-38	1.1384788359363258	-7.563953188713289e-39	800.0000000000001	1.1332026940524582	-1.0791638735858591e-38	88.88888888351222	-1.0663544894620111e-47	-2.5753746495409208e-11	-1.0477189486360557e-08	-1.532222445299644e-47	-9.588171637462319e-11	1.047762820664291e-09
5.03	88.87117797679284	-1.6779440901681996e-38	1.7743428097369363	447.111111109709	-3.5022657700755484e-48	-800.0000000000001	-9.741262562722751e-41	0.03702245631145809	8.165741459499224e-41	0.9999501868198152	-6.665841691959979e-41	0.009981175499043576	9.372369432890249e-41	1.0665293167442951e-38	1.143777453131827	-7.532414967836142e-39	1.078615010226689e-38	1.1490849884055967	-7.59185985031193e-39	800.0000000000001	1.1437774531482907	-1.0815650395725541e-38	88.88888888340054	-1.0819074634330929e-47	-2.6537116067540837e-11	-1.0686089050674012e-08	-1.572010134355084e-47	-9.655486220450176e-11	1.0686525255682987e-09
5.035	88.87084700703488	-1.6816485747542587e-38	1.7908432766287272	447.55555555412604	-3.556360445112823e-48	-800.0000000000001	-9.754397609064937e-41	0.037244409341521865	8.11670679234791e-41	0.9999492559205813	-6.690876939832427e-41	0.010074004627309122	9.39234590763047e-41	1.0687219443117808e-38	1.1544154225175618	-7.559900720067922e-39	1.0809402754404227e-38	1.1597547257342316	-7.619804141046529e-39	800.0000000000001	1.154415422534148	-1.0839528670582221e-38	88.8888888834057	-1.0819064375815342e-47	-2.6726449820007147e-11	-1.019557771542099e-08	-1.4106442909795574e-47	-1.0161145017119945e-10	1.0196084044278714e-09
5.04	88.87051097590508	-1.6853321586144688e-38	1.8074419107076176	447.9999999985427	-3.6108197782093124e-48	-800.0000000000001	-9.767469542503824e-41	0.03746375257666038	8.067711296097786e-41	0.9999483107846365	-6.715951393365215e-41	0.010167386292137306	9.412196222970967e-41	1.0708991668035344e-38	1.1651167211512155	-7.587423138072058e-39	1.083251504478405e-38	1.1704873002710572	-7.647785880111933e-39	800.0000000000001	1.1651167211682634	-1.0863272224065663e-38	88.88888888329615	-1.096452047699264e-47	-2.755763161511279e-11	-1.3557629093458969e-08	-1.8565617358473846e-47	-1.1970456802068963e-10	1.3558157537785512e-09
5.045	88.87016983286955	-1.6889947004843668e-38	1.8241384966126353	448.4444444429589	-3.6657204932612705e-48	-800.0000000000001	-9.780649053436852e-41	0.03768661678276429	8.017684285197953e-41	0.9999473512698078	-6.741064959146123e-41	0.01026131928906638	9.431919542771703e-41	1.0730608840051396e-38	1.1758812112776311	-7.614982147434141e-39	1.0855484018334561e-38	1.1812837206999545	-7.675805375694962e-39	800.0000000000001	1.1758812112948427	-1.0886880145603682e-38	88.88888888328883	-1.0980725061326002e-47	-2.7821183865712442e-11	4.3816802038536554e-11	-1.1954423714486158e-48	-4.556320599674291e-11	6.321327298586848e-12
5.05	88.86982350504508	-1.6926358734588911e-38	1.840933882219738	448.8888888873752	-3.7206464663425644e-48	-800.0000000000001	-9.793836130127772e-41	0.0379078814767443	7.967513808276707e-41	0.9999463771710567	-6.766218022635454e-41	0.01035580839542038	9.451513941562302e-41	1.075206865850393e-38	1.1867094406439074	-7.642578173143476e-39	1.0878309264055886e-38	1.1921435287944533	-7.703862649469917e-39	800.0000000000001	1.186709440661285	-1.0910350328046083e-38	88.88888888327907	-1.0998423076907704e-47	-2.8112714351941343e-11	-2.547532555278374e-09	-4.113012458891508e-48	-6.339653227766808e-11	2.548321259281882e-10
5.055	88.86947195177531	-1.696255623839597e-38	1.8578273298623564	449.33333333179144	-3.7757137582962646e-48	-800.0000000000001	-9.807022682514717e-41	0.03813024521301145	7.916723310169239e-41	0.9999453883739896	-6.791410405543894e-41	0.010450849468553366	9.470979095672621e-41	1.0773370730938182e-38	1.1976009347948284	-7.670211070614954e-39	1.0900989005718164e-38	1.2030670394069765	-7.731957699934777e-39	800.0000000000001	1.1976009348123744	-1.0933682425264815e-38	88.88888888326639	-1.1018558632848937e-47	-2.8433319354830803e-11	1.0366818514739163e-09	4.1109931671321006e-49	-4.315794615456899e-11	1.0375798135525132e-10
5.06	88.86911509272934	-1.6998535660040494e-38	1.8748199940223886	449.77777777620787	-3.8308074560170595e-48	-800.0000000000001	-9.820324274342258e-41	0.03835344593310246	7.86535390877671e-41	0.9999443846526193	-6.816642510116365e-41	0.010546449010998438	9.49031273698692e-41	1.0794512350161555e-38	1.2085564391933492	-7.697881271940916e-39	1.0923521584885648e-38	1.214054492315727	-7.760090856653264e-39	800.0000000000001	1.2085564392110257	-1.0956873951623198e-38	88.88888888326946	-1.102040830164261e-47	-2.865092359139934e-11	-1.347899569736819e-08	-1.86469576825155e-47	-1.2006152516362991e-10	1.347953039907158e-09
5.065	88.8687528873932	-1.7034296504082652e-38	1.891911098091528	450.22222222062413	-3.8864008033309424e-48	-800.0000000000001	-9.83351927245168e-41	0.0385752796974239	7.813789703245933e-41	0.9999433658929491	-6.841914226782688e-41	0.010642602661266352	9.509514565598135e-41	1.0815493151479702e-38	1.219575454313972	-7.725588715444515e-39	1.0945906443485588e-38	1.2251054959167231	-7.788261814256867e-39	800.0000000000001	1.2195754543321904	-1.0979924587780407e-38	88.88888888314982	-1.118127281820805e-47	-2.9537381012102094e-11	-1.101483348975233e-08	-1.556167685266939e-47	-1.0684147452894037e-10	1.1015351647026482e-09
5.07	88.8683852582216	-1.7069835185910335e-38	1.9091016106891403	450.6666666650398	-3.942307213386247e-48	-800.0000000000003	-9.84687490791082e-41	0.03879954920581394	7.761353980516491e-41	0.999942331876824	-6.86722583269196e-41	0.010739315876522437	9.52858247387414e-41	1.0836310620055438e-38	1.2306586058342783	-7.753333701167233e-39	1.0968141084805122e-38	1.2362207479992404	-7.816471032937696e-39	800.0000000000003	1.230658605852629	-1.1002832023160767e-38	88.88888888315519	-1.1181319098829608e-47	-2.9741516100293396e-11	-1.4048377276290579e-08	-1.9586162323526054e-47	-1.2289576931781403e-10	1.4048914814572468e-09
5.075	88.86801215674085	-1.710515057913868e-38	1.9263910973291187	451.11111110945495	-3.998491137694306e-48	-800.0000000000003	-9.860139594645824e-41	0.0390217093063103	7.708848333196674e-41	0.999941282467857	-6.8925773786448e-41	0.010836586220287913	9.547515791925023e-41	1.0856963950456517e-38	1.2418056148401504	-7.781116337406261e-39	1.0990225308525055e-38	1.2473996442624309	-7.84471825214685e-39	800.0000000000003	1.241805614859146	-1.1025595531738775e-38	88.8888888830131	-1.1372144399184685e-47	-3.0747570954246395e-11	-5.818160767981894e-09	-9.120821865475427e-48	-7.784011085316785e-11	5.818681449000392e-10
5.08	88.8676335141003	-1.7140239857906174e-38	1.9437800683342195	451.55555555386997	-4.0553520975892347e-48	-800.0000000000007	-9.873549544875313e-41	0.03924703500698854	7.655328836708314e-41	0.999940217472345	-6.91796897159189e-41	0.010934416571655201	9.566312857508456e-41	1.0877451158991913e-38	1.2530168115780491	-7.808936753384315e-39	1.1012156210181466e-38	1.2586430915839448	-7.873003888033586e-39	800.0000000000007	1.253016811597182	-1.1048213292009343e-38	88.88888888301852	-1.137221121004404e-47	-3.0958696969484415e-11	-6.86107171077264e-08	-8.887069567976646e-47	-4.2927466108216926e-10	6.8612060009674015e-09
5.085	88.86724926946053	-1.7175100926838565e-38	1.961268613701049	451.99999999828526	-4.112455172356737e-48	-800.0000000000007	-9.886884345024968e-41	0.039469525210299526	7.601863430009976e-41	0.9999391367191167	-6.943400830059356e-41	0.011032807445162546	9.584972433038845e-41	1.089777076478967e-38	1.2642922553243578	-7.836795227378101e-39	1.1033933944730188e-38	1.2699502776536225	-7.901327725308783e-39	800.0000000000007	1.264292255345813	-1.1070683953388972e-38	88.88888888240558	-1.2161160395994952e-47	-3.460442131443986e-11	-5.592302917041632e-08	-7.289755250900309e-47	-3.608343859276842e-10	5.592419327133207e-09
5.09	88.86685936643322	-1.720973198129818e-38	1.9788566502144467	452.44444444269726	-4.17326100129522e-48	-800.0000000000009	-9.900349070003903e-41	0.03969590020813435	7.547241662405423e-41	0.9999380400495216	-6.968872900675172e-41	0.011131758380892427	9.603493455337726e-41	1.0917921497374445e-38	1.275631893692829	-7.864691735353664e-39	1.1055555199441246e-38	1.2813223153831161	-7.929690136179659e-39	800.0000000000009	1.2756318937144364	-1.1093006352571847e-38	88.88888888241173	-1.2161205332525394e-47	-3.4839839316909213e-11	-9.379069373001255e-08	-1.2077923598091069e-46	-5.806019847837502e-10	9.379249079228971e-09
5.095	88.86646372956533	-1.7244129800228247e-38	1.9965448697661317	452.8888888871078	-4.2362361901606355e-48	-800.000000000001	-9.913785075687678e-41	0.039919877014781904	7.492589354694791e-41	0.9999369272512809	-6.99438554786649e-41	0.011231273279981085	9.62187402770802e-41	1.0937901092256966e-38	1.287036174068479	-7.89262669714337e-39	1.1077019886823681e-38	1.2927585177412584	-7.958091038371495e-39	800.000000000001	1.2870361740935106	-1.1115178413432149e-38	88.88888888151416	-1.331024422849503e-47	-4.014664657798227e-11	-1.0466199758714135e-07	-1.3473461255683818e-46	-6.456697520592739e-10	1.0466398916704594e-08
5.1	88.86606231461577	-1.7278293568661493e-38	2.0143326213365786	453.33333333151523	-4.302820412779451e-48	-800.0000000000011	-9.92727440222603e-41	0.04014614854002978	7.437054267044773e-41	0.9999357981999054	-7.019938601254433e-41	0.011331348488260963	9.640113666912539e-41	1.095770896901555e-38	1.2985046780196865	-7.920599983831884e-39	1.1098325477899254e-38	1.3042595421165042	-7.986530584637288e-39	800.0000000000011	1.2985046780449143	-1.113719961054775e-38	88.88888888151466	-1.3318127711189536e-47	-4.046037999079635e-11	1.4241408052838727e-08	1.6603512248781743e-47	1.3757818789509541e-11	1.4241414698162453e-09
5.105	88.865655035413	-1.731221922657107e-38	2.0322210362992177	453.77777777592297	-4.369423687578985e-48	-800.0000000000014	-9.940818593794258e-41	0.04037187966317268	7.381145407749832e-41	0.9999346526529649	-7.045532497658756e-41	0.01143199037970137	9.658209986152526e-41	1.0977342280733306e-38	1.3100381363280666	-7.948612080285789e-39	1.1119470901891078e-38	1.3158252336950542	-8.015008932153769e-39	800.0000000000014	1.3100381363535059	-1.1159067326973029e-38	88.88888888150866	-1.3332462671897257e-47	-4.08285615819779e-11	-2.141102110423624e-10	-1.794122906200365e-48	-6.643710320476177e-11	2.2418088936134843e-11
5.11	88.86524185151652	-1.7345906341687627e-38	2.050209229483124	454.22222222033065	-4.43609501610001e-48	-800.0000000000015	-9.954326469327625e-41	0.04059779098359942	7.324727098102939e-41	0.9999334904966567	-7.071167060469847e-41	0.011533193983124941	9.676162725119958e-41	1.0996800712445564e-38	1.3216359796408774	-7.976662864171883e-39	1.1140454699331399e-38	1.3274556440996275	-8.043525976883162e-39	800.0000000000015	1.3216359796665003	-1.1180781284075818e-38	88.88888888151324	-1.3335163614670192e-47	-4.112062847624489e-11	3.485212118903056e-09	2.847300231321357e-48	-4.5156168391607064e-11	3.4855046396888556e-10
5.115	88.8648226743625	-1.7379350681937897e-38	2.06829839889706	454.6666666647382	-4.502772099752977e-48	-800.0000000000017	-9.967969781256588e-41	0.040825157508139205	7.267561801157997e-41	0.9999323114818198	-7.096842687620758e-41	0.011634966047688537	9.693969397835423e-41	1.1016081300174175e-38	1.3332989817501555	-8.004752775486858e-39	1.1161274730259243e-38	1.3391511902154942	-8.072082106822161e-39	800.0000000000017	1.3332989817759608	-1.1202338753957621e-38	88.88888888151561	-1.3338884081968258e-47	-4.144240826928461e-11	-1.7927230070804705e-08	-2.387960615257407e-47	-1.700657246074577e-10	1.7928036712430358e-09
5.12	88.86439746048985	-1.7412551601736562e-38	2.0864877623612785	455.1111111091454	-4.569968703584842e-48	-800.0000000000018	-9.981506455482596e-41	0.04105085185833023	7.210217974766294e-41	0.9999311154861528	-7.122559292022481e-41	0.011737302181926836	9.711629618567935e-41	1.1035183579255637e-38	1.345026639747392	-8.032881792309978e-39	1.1181930483225417e-38	1.3509113929999905	-8.10067701647625e-39	800.0000000000018	1.345026639773988	-1.1223739320498438e-38	88.88888888136111	-1.3540337005636827e-47	-4.266178338575344e-11	-1.3477811459475257e-08	-1.8638362996234134e-47	-1.42050887732256e-10	1.347856001922565e-09
5.125	88.86396612547367	-1.7445505230598734e-38	2.1047782897464424	455.5555555535523	-4.637670838085774e-48	-800.000000000002	-9.995208615221654e-41	0.041279232442758634	7.151889846768253e-41	0.9999299022721321	-7.148317153561744e-41	0.011840207851784626	9.729141114435153e-41	1.1054104840481833e-38	1.3568195803830714	-8.061050232944447e-39	1.1202419138413533e-38	1.3627370220025392	-8.129311179926502e-39	800.000000000002	1.356819580409852	-1.1244980488850673e-38	88.88888888136732	-1.3541073430475791e-47	-4.295385738159816e-11	-2.3869025274808846e-08	-3.094794057695401e-47	-2.1124781065674484e-10	2.3869960058763627e-09
5.13	88.86352861770496	-1.7478210315424266e-38	2.1231695145224667	455.9999999979583	-4.706248028664438e-48	-800.000000000002	-1.0008815383955477e-40	0.04150535672315809	7.09348461729446e-41	0.9999286716945351	-7.174116319267069e-41	0.011943680441979996	9.746503143470353e-41	1.1072844194922284e-38	1.3686775043083537	-8.089258217201992e-39	1.1222740474944132e-38	1.3746274308396496	-8.157984323897817e-39	800.000000000002	1.3686775043362207	-1.1266061451319367e-38	88.88888888113553	-1.3834376622956341e-47	-4.468916811081732e-11	-2.622802715753222e-08	-3.403128053305077e-47	-2.2609119465778537e-10	2.6229001616617996e-09
5.135	88.86308486279911	-1.7510663803283402e-38	2.1416619350502595	456.4444444423638	-4.7754197376262534e-48	-800.0000000000022	-1.002256131420096e-40	0.041734167648315425	7.034082741232328e-41	0.9999274235440757	-7.199956912850854e-41	0.012047722765985334	9.763713912548894e-41	1.1091399505196342e-38	1.3806007343146411	-8.117505909302867e-39	1.1242891637635055e-38	1.38658338917835	-8.18669684705856e-39	800.0000000000022	1.3806007343426945	-1.1286980240024401e-38	88.88888888114306	-1.3834324585907008e-47	-4.498661743039013e-11	4.3435477437012e-09	3.713751857707582e-48	-4.419507679575125e-11	4.3437725776823036e-10
5.14	88.86263480760962	-1.7542864331702513e-38	2.16025512974805	456.8888888867695	-4.8446091851686287e-48	-800.0000000000022	-1.0036184790866796e-40	0.04195872503804131	6.974971437924675e-41	0.9999261576712026	-7.225839033915232e-41	0.012152332461672974	9.780772615613198e-41	1.1109769805887521e-38	1.392589000075221	-8.145793489963023e-39	1.1262873458915924e-38	1.398603678470499	-8.215448398605064e-39	800.0000000000022	1.3925890001034902	-1.1307735976761678e-38	88.88888888114066	-1.3844469417103375e-47	-4.535839209662116e-11	4.6137908308686056e-10	-1.0238279884349336e-48	-6.705329148805754e-11	4.66226127763615e-11
5.145	88.86217842567696	-1.7574812531882726e-38	2.178947594443376	457.33333333117514	-4.9138317778384235e-48	-800.0000000000024	-1.0049820926223695e-40	0.042182160461328055	6.915565575307949e-41	0.9999248740014245	-7.251762343242434e-41	0.012257501076066437	9.797679617181956e-41	1.1127955527587473e-38	1.4046413332558172	-8.174120688290478e-39	1.1282685094936482e-38	1.4106879772963883	-8.24423901480181e-39	800.0000000000024	1.4046413332842782	-1.1328329068387994e-38	88.88888888114778	-1.3844640895114527e-47	-4.5655944660283604e-11	4.94064048931823e-10	-1.1139263968282504e-48	-6.608210705630863e-11	4.9846376931519136e-11
5.15	88.86171567203249	-1.7606507573259478e-38	2.197738610070985	457.77777777558106	-4.983081324045062e-48	-800.0000000000024	-1.0063367462813843e-40	0.04240163095218621	6.856394095106531e-41	0.9999235724081891	-7.277726895236555e-41	0.012363224573448071	9.814434423809842e-41	1.114595607778702e-38	1.4167572717419405	-8.20248764939227e-39	1.1302327217152884e-38	1.4228351497865468	-8.273068438967237e-39	800.0000000000024	1.416757271770626	-1.1348758979541313e-38	88.88888888114558	-1.3855477417310395e-47	-4.60205884606814e-11	1.3654262905522338e-09	-6.981256915504328e-50	-6.049292964123689e-11	1.3667656527246405e-10
5.155	88.86124653698695	-1.763795122214337e-38	2.216626055103003	458.2222222199865	-5.0523588811284026e-48	-800.0000000000024	-1.0076852433743884e-40	0.042618093556073884	6.797273719367399e-41	0.9999222528641737	-7.303732207856504e-41	0.012469491027487806	9.83103806652875e-41	1.1163772681974103e-38	1.428935449154446	-8.230893969391559e-39	1.1321799971968633e-38	1.4350443342448311	-8.301936494728722e-39	800.0000000000024	1.4289354491833244	-1.136902684874455e-38	88.8888888811528	-1.3855553003753465e-47	-4.6319261919493233e-11	-5.537970082513847e-09	-8.229692367930035e-48	-1.0729944574310432e-10	5.53900946071364e-10
5.16	88.86077096890232	-1.766914198981763e-38	2.235609532581514	458.6666666643918	-5.121764690548992e-48	-800.0000000000024	-1.0090348140281634e-40	0.04283343866258297	6.737838980872675e-41	0.9999209152240641	-7.329778406461399e-41	0.01257629821482385	9.847489668912854e-41	1.1181404294466393e-38	1.4411756110784966	-8.259339862475734e-39	1.1341102458800771e-38	1.4473152105318243	-8.330843212841514e-39	800.0000000000024	1.441175611107794	-1.1389131716408875e-38	88.88888888109885	-1.392757753206557e-47	-4.703535439182375e-11	-1.5387987180776864e-09	-3.4492856043289296e-48	-8.205560124894802e-11	1.5409849501062163e-10
5.165	88.86028893310365	-1.7700079587589554e-38	2.2546879817878627	459.11111110879733	-5.1914029489268944e-48	-800.0000000000024	-1.010380246260461e-40	0.043047316425560284	6.678145588452522e-41	0.9999195593902561	-7.355865254120755e-41	0.01268364017763607	9.8637890613627e-41	1.1198850714901936e-38	1.4534770751319395	-8.287825159573368e-39	1.1360233936660385e-38	1.459647358284569	-8.359788474748573e-39	800.0000000000024	1.4534770751614314	-1.1409073396441599e-38	88.88888888110621	-1.392766027108009e-47	-4.733610536483575e-11	-2.6471269620740746e-08	-3.3534126110533955e-47	-2.390220907908935e-10	2.6472348722654704e-09
5.17	88.85980035913633	-1.7730761003133023e-38	2.2738617553061777	459.5555555532025	-5.2613701269722167e-48	-800.0000000000026	-1.0117348316215845e-40	0.04326221906652819	6.617705616113998e-41	0.9999181851645057	-7.381993029013435e-41	0.012791518909954527	9.879934478101548e-41	1.1216109842554745e-38	1.4658400702229841	-8.316350219007423e-39	1.1379192266753554e-38	1.4720410711089822	-8.388772542667723e-39	800.0000000000026	1.4658400702536913	-1.1428849947184917e-38	88.88888888086525	-1.422537841966364e-47	-4.9231999948484315e-11	-2.7357079564654943e-08	-3.463779364740316e-47	-2.462092049733599e-10	2.7358187463344035e-09
5.175	88.85930519401862	-1.7761184464643615e-38	2.2931305204928414	459.99999999760695	-5.332497981495813e-48	-800.0000000000026	-1.0130858065473403e-40	0.0434765002050417	6.556819299432541e-41	0.9999167923977146	-7.408161684899976e-41	0.012899932550574795	9.895924883534651e-41	1.123318044893418e-38	1.4782643834541875	-8.344915060340137e-39	1.1397976170397926e-38	1.4844961709577258	-8.41779531316761e-39	800.0000000000026	1.4782643834850964	-1.1448460226541663e-38	88.88888888087232	-1.4225912537905842e-47	-4.955110092532315e-11	4.345916219487066e-09	3.80485798587752e-48	-5.070254972585727e-11	4.346211975427505e-10
5.18	88.85880335084669	-1.779134567130203e-38	2.3124952329391797	460.4444444420111	-5.403634515175509e-48	-800.0000000000027	-1.0144544762901978e-40	0.04369415810212008	6.494702283266309e-41	0.9999153808453665	-7.434371612843048e-41	0.013008886486609583	9.911757760304518e-41	1.1250059542103377e-38	1.490750632597191	-8.373520147781904e-39	1.1416582121899185e-38	1.4970136252008708	-8.446857293167402e-39	800.0000000000027	1.4907506326283164	-1.1467901462316958e-38	88.88888888086913	-1.4235328047827253e-47	-4.9982766577320355e-11	2.5224267119481856e-10	-1.113112450381263e-48	-7.674277521245054e-11	2.636585267326017e-11
5.185	88.85829475622681	-1.7821241310527274e-38	2.331956295111688	460.8888888864156	-5.474812000260816e-48	-800.0000000000028	-1.0158180067804493e-40	0.04391117418507101	6.432113969760919e-41	0.9999139503009445	-7.460622974009046e-41	0.013118382993264857	9.927431172141026e-41	1.126674482390101e-38	1.503299078804429	-8.402165709305883e-39	1.1435008771089908e-38	1.5095932499722136	-8.47595833543836e-39	800.0000000000028	1.503299078835757	-1.1487171519294225e-38	88.88888888087655	-1.4235548775541665e-47	-5.030008541197246e-11	4.4456290500720604e-09	3.415251742387581e-48	-4.318896826652278e-11	4.445838833991234e-10
5.19	88.85777932580724	-1.7850867254680162e-38	2.3515144977085236	461.33333333082015	-5.545988549345055e-48	-800.0000000000032	-1.0172016650970283e-40	0.04413186894079621	6.368201656592303e-41	0.999912500527107	-7.486916094659877e-41	0.013228426530315496	9.942942705553427e-41	1.1283233428379836e-38	1.5159102335905876	-8.430852146720355e-39	1.1453252324990457e-38	1.522236099133875	-8.505099016600232e-39	800.0000000000032	1.5159102336221175	-1.150626773689071e-38	88.88888888088397	-1.423568157372735e-47	-5.0619309328931425e-11	-1.7963941445485642e-08	-2.3066084801296687e-47	-1.9304196872147981e-10	1.796497863785328e-09
5.195	88.85725697962685	-1.788021970826673e-38	2.3711704258600834	461.77777777522397	-5.618142355117456e-48	-800.0000000000032	-1.0185783049343081e-40	0.0443514466091834	6.303885453214954e-41	0.9999110312988599	-7.513251226404338e-41	0.013339020401148784	9.958290142588165e-41	1.1299522723473097e-38	1.5285844759547997	-8.459579787769353e-39	1.1471311626540616e-38	1.534941852663906	-8.534279135588396e-39	800.0000000000032	1.5285844759872504	-1.1525187668627182e-38	88.8888888807243	-1.4433655849649884e-47	-5.205210484222017e-11	-1.6709122974133388e-08	-2.1431252178472478e-47	-1.8830431022028355e-10	1.6710183992941542e-09
5.2	88.85672764592516	-1.790929545772971e-38	2.390924337892483	462.2222222196276	-5.690311352078965e-48	-800.0000000000034	-1.0199714802940105e-40	0.04457342051929844	6.23846620831446e-41	0.9999095424142728	-7.539628546244329e-41	0.013450166070565648	9.973471607014529e-41	1.131561048430674e-38	1.5413219741999296	-8.488348891453188e-39	1.1489183515759187e-38	1.547711197034995	-8.563499166110677e-39	800.0000000000034	1.5413219742325899	-1.1543929243095387e-38	88.88888888072887	-1.443621955261511e-47	-5.241640389601246e-11	-7.460225030323375e-09	-1.0711318301053766e-47	-1.245005137669429e-10	7.461263825987635e-10
5.205	88.85619125378263	-1.7938091361348666e-38	2.410776429726167	462.66666666403097	-5.763039494645946e-48	-800.0000000000036	-1.0213569561679605e-40	0.04479338150403004	6.172800754280689e-41	0.9999080336737782	-7.566048260675186e-41	0.013561864652455756	9.988485264458454e-41	1.1331494535987394e-38	1.5541228564194658	-8.517159755454122e-39	1.1506867287308961e-38	1.5605435555864973	-8.592758887593055e-39	800.0000000000036	1.5541228564527823	-1.1562490435229782e-38	88.88888888063836	-1.455397747593531e-47	-5.3378583335402956e-11	-6.951476431519177e-09	-1.0288301026760669e-47	-1.2256900770042226e-10	6.95255692099067e-10
5.21	88.85564775272773	-1.7966605725206446e-38	2.4307261396384097	463.1111111084342	-5.835811991126046e-48	-800.000000000004	-1.0227521266490423e-40	0.045013709908574735	6.106410815029448e-41	0.999906504935322	-7.592510339196032e-41	0.013674112997926447	1.0003330129980863e-40	1.1347173715662407e-38	1.5669867621902294	-8.546012441487657e-39	1.1524360865692674e-38	1.5734390335764359	-8.622058577765566e-39	800.000000000004	1.566986762223741	-1.1580870153157014e-38	88.88888888064416	-1.45555754859475e-47	-5.376110644837663e-11	-1.901317621862465e-08	-2.338249914469948e-47	-2.206851878068373e-10	1.9014456917634836e-09
5.215	88.85509708657669	-1.7994836419514017e-38	2.450773110887049	463.5555555528367	-5.909450766898388e-48	-800.0000000000043	-1.0241386268472314e-40	0.04523110638862833	6.039944506972112e-41	0.9999049560407802	-7.619014893758937e-41	0.013786909111559633	1.0018004962722418e-40	1.1362646555519287e-38	1.579913463282978	-8.574907167187642e-39	1.1541664032129812e-38	1.586396791070315	-8.651397988242903e-39	800.0000000000043	1.5799134633174956	-1.1599067024081354e-38	88.88888888046365	-1.477120525470334e-47	-5.545558479910775e-11	-2.0246915255482688e-08	-2.5056291406912493e-47	-2.2393194013123921e-10	2.024815356709121e-09
5.22	88.85453921574926	-1.8022782441645452e-38	2.4709164014445277	463.999999997239	-5.983307014613209e-48	-800.0000000000045	-1.0255330274460935e-40	0.04544859694212856	5.972789655739942e-41	0.9999033868787298	-7.645561794150947e-41	0.013900247704839067	1.0032509184422271e-40	1.1377912378329522e-38	1.592902354076987	-8.60384390021224e-39	1.1558774814089478e-38	1.5994168550181915	-8.680777345354872e-39	800.0000000000045	1.5929023541117207	-1.1617080401708229e-38	88.88888888047197	-1.4771091834077295e-47	-5.579130433723968e-11	4.26207217666738e-09	3.177980374722431e-48	-5.125130554030418e-11	4.262380313327496e-10
5.225	88.8539740784261	-1.8050441153222154e-38	2.491155871486242	464.4444444416412	-6.057175932660469e-48	-800.0000000000048	-1.0269219944498607e-40	0.04566379759119633	5.905415682993991e-41	0.999901797275191	-7.672151223903926e-41	0.014014128003066392	1.0046841258314624e-40	1.139296936604936e-38	1.6059533462488926	-8.632822934215454e-39	1.1575692583834775e-38	1.6124985694107685	-8.710196493440442e-39	800.0000000000048	1.605953346283847	-1.1634908585410705e-38	88.88888888047562	-1.4774730776558808e-47	-5.6184250038432056e-11	3.2696808223891736e-09	2.0221363926508932e-48	-5.774615710050393e-11	3.2701907129339446e-10
5.23	88.85340163456603	-1.8077811418666174e-38	2.5114906076301926	464.8888888860437	-6.131048793885647e-48	-800.000000000005	-1.0283175688235994e-40	0.04587893910421262	5.837362437956211e-41	0.9999001871174386	-7.69878305613122e-41	0.014128544879114985	1.0061000530292678e-40	1.1407816753499904e-38	1.6190658526801076	-8.66184424292575e-39	1.159241539539393e-38	1.6256419173068148	-8.739655621786817e-39	800.000000000005	1.6190658527152795	-1.165255084322012e-38	88.88888888048417	-1.477445848327461e-47	-5.651535003055265e-11	-1.3091513058800376e-08	-1.6830059847692021e-47	-1.7432415471835356e-10	1.3092673641378947e-09
5.235	88.85282181844956	-1.8104890214776923e-38	2.5319206135428236	465.3333333304458	-6.205388357513732e-48	-800.0000000000051	-1.0297104160875292e-40	0.04609229906297309	5.768968688648793e-41	0.9998985562205188	-7.725457522715967e-41	0.014243498365899132	1.0074985240463533e-40	1.1422452459350013e-38	1.6322398776112819	-8.690908173015808e-39	1.1608942273294067e-38	1.6388463883286315	-8.769154652268056e-39	800.0000000000051	1.6322398776472393	-1.1670005226458048e-38	88.88888888036517	-1.4919466631840933e-47	-5.778318091958108e-11	-1.29719050316141e-08	-1.673067409166319e-47	-1.7431619649483317e-10	1.2973076207498962e-09
5.24	88.8522345900149	-1.8131676283853613e-38	2.552444995577905	465.7777777748477	-6.27998546209285e-48	-800.0000000000053	-1.0311086346490225e-40	0.046305406378197446	5.699910929558012e-41	0.9998969044716449	-7.752174503117812e-41	0.014358983447528274	1.0088794665583856e-40	1.1436875638377984e-38	1.6454748466801663	-8.720014708291094e-39	1.1625271315287277e-38	1.6521119100991768	-8.798693738760501e-39	800.0000000000053	1.6454748467163443	-1.1687270924422085e-38	88.88888888037386	-1.491917508547271e-47	-5.8123302103329943e-11	2.5657698188295485e-09	1.3439841253009395e-48	-6.715802619530558e-11	2.566648585938298e-10
5.245	88.85163988126314	-1.8158166330856356e-38	2.573063835952036	466.22222221924943	-6.35461124470458e-48	-800.0000000000055	-1.03250637296218e-40	0.04651713056205423	5.630409119807139e-41	0.9998952316794467	-7.778934258010226e-41	0.014475000599155043	1.010242688902791e-40	1.1451084025256717e-38	1.658770814819209	-8.749164229189703e-39	1.1641401249262123e-38	1.6654380863805014	-8.82827286750605e-39	800.0000000000055	1.6587708148556295	-1.1704345813212705e-38	88.88888888037141	-1.492862314864374e-47	-5.858889483095969e-11	1.0390503272597831e-09	-4.382142351530789e-49	-7.77689543463076e-11	1.0419566175416233e-10
5.25	88.85103765163102	-1.8184358947656452e-38	2.59377626677125	466.66666666365126	-6.42925411319175e-48	-800.0000000000056	-1.0339083812332604e-40	0.046728395263376236	5.560259769940726e-41	0.9998935377297217	-7.805736680568782e-41	0.014591544950016565	1.011588110175138e-40	1.1465076675149793e-38	1.6721272243058778	-8.778356738067444e-39	1.1657330220152823e-38	1.6788247855405551	-8.857892160829987e-39	800.0000000000056	1.6721272243425183	-1.1721228985180321e-38	88.8888888803801	-1.4928349665215125e-47	-5.893157974986291e-11	-2.2817895721041144e-09	-4.2755121088817937e-48	-1.0252865996054136e-10	2.2840918933957936e-10
5.255	88.85042783222832	-1.8210250657122614e-38	2.614582398867231	467.111111108053	-6.503996501908061e-48	-800.0000000000057	-1.0353117395332151e-40	0.04693857996805904	5.489578648148694e-41	0.999891822428588	-7.832582045196466e-41	0.014708617136540616	1.0129155283205824e-40	1.1478851201759751e-38	1.6855441485658487	-8.80759263428209e-39	1.1673056704545027e-38	1.6922716981830914	-8.88755165740779e-39	800.0000000000057	1.6855441486028517	-1.1737918199047391e-38	88.88888888035275	-1.4966570415671066e-47	-5.958326483106609e-11	-2.381265555110522e-09	-4.3463389949751325e-48	-1.0394809757005679e-10	2.383533270366549e-10
5.26	88.84981038212061	-1.8235839896283244e-38	2.6354813889995423	467.5555555524548	-6.578829893585917e-48	-800.0000000000059	-1.0367184607384674e-40	0.04714810531222807	5.418263986606864e-41	0.9998900856607948	-7.859470261535203e-41	0.014826212426900052	1.0142248536194716e-40	1.1492406557863081e-38	1.6990210458076114	-8.836871942109064e-39	1.1688578887481044e-38	1.7057786354152373	-8.917251453579598e-39	800.0000000000059	1.6990210458448367	-1.1754412447352805e-38	88.88888888036152	-1.4966222495158386e-47	-5.992654250654822e-11	1.820173641438667e-09	1.3877723846060944e-49	-6.83595112827373e-11	1.8214568640983273e-10
5.265	88.84918523246205	-1.8261123066596778e-38	2.6564733422057456	467.9999999968562	-6.653671897210626e-48	-800.0000000000063	-1.0381279843838638e-40	0.04735676941361869	5.346344282859136e-41	0.9998883272325803	-7.886401607918721e-41	0.014944331425194924	1.0155158771911751e-40	1.1505740278822593e-38	1.7125579857624946	-8.866195070301118e-39	1.1703895035642631e-38	1.7193453505091112	-8.946991629629409e-39	800.0000000000063	1.7125579857999587	-1.1770709410560256e-38	88.88888888036567	-1.497082544849131e-47	-6.031171103023828e-11	6.2056434065497095e-09	5.034855972517055e-48	-3.408374063779325e-11	6.20573700624106e-10
5.27	88.84855234183998	-1.8286098438265277e-38	2.6775574409467278	468.44444444125816	-6.728526465405105e-48	-800.0000000000067	-1.0395401783905308e-40	0.0475645915148429	5.273800678871284e-41	0.999886547027343	-7.913376013430719e-41	0.015062969544441416	1.0167884998068288e-40	1.151885120692365e-38	1.7261544432469464	-8.89556206863788e-39	1.171900336168726e-38	1.7329716022494335	-8.976772262057438e-39	800.0000000000067	1.7261544432846339	-1.1786807973680275e-38	88.88888888037418	-1.4970716562084712e-47	-6.065757866627595e-11	-3.335145493110533e-08	-3.886824404357435e-47	-3.4631673812008436e-10	3.335325293437887e-09
5.275	88.8479116420213	-1.8310762329017964e-38	2.698733761434701	468.8888888856596	-6.804115801263281e-48	-800.0000000000069	-1.0409562745834808e-40	0.047771693206644844	5.200592607977582e-41	0.9998847448530394	-7.940393754526589e-41	0.01518212722683664	1.0180425079711522e-40	1.1531736825730503e-38	1.7398104694474334	-8.924973349818386e-39	1.1733901962057464e-38	1.746657184254107	-9.006593462653087e-39	800.0000000000069	1.7398104694867544	-1.1802705763224178e-38	88.88888888008165	-1.530461430943271e-47	-6.338652967062022e-11	-3.031317419299535e-08	-3.5544492333248566e-47	-3.2397936061614124e-10	3.031490544733703e-09
5.28	88.84726309171023	-1.8335112861636944e-38	2.720001502943655	469.33333333005993	-6.880638845048642e-48	-800.0000000000072	-1.0423745679003865e-40	0.047977792952890175	5.126764920973363e-41	0.9998829205933931	-7.967454777748779e-41	0.015301799980185757	1.01927779411673e-40	1.1544395880846089e-38	1.753525550053583	-8.95442898730854e-39	1.174858906168384e-38	1.7604018094868734	-9.036455294359322e-39	800.0000000000072	1.7535255500931366	-1.181840156913955e-38	88.88888888009049	-1.5304438740074963e-47	-6.374608734239726e-11	-1.4715576905169268e-08	-1.8153633300080327e-47	-2.043506910062347e-10	1.471699571437275e-09
5.285	88.84660662397891	-1.8359146307647277e-38	2.74136069337571	469.7777777744601	-6.957572851340151e-48	-800.0000000000074	-1.0437975304348162e-40	0.0481832396775451	5.052227040262555e-41	0.9998810740600262	-7.994559352548118e-41	0.01542198797513319	1.0204941423451652e-40	1.1556825830423926e-38	1.7672997051406434	-8.983929392832186e-39	1.1763062626011286e-38	1.7742052908708275	-9.06635789093937e-39	800.0000000000074	1.7672997051813106	-1.1833892988167527e-38	88.88888887991494	-1.5507933332418257e-47	-6.558101880223895e-11	-1.3774107780287199e-08	-1.712488967206408e-47	-1.9710345315766232e-10	1.3775517954480516e-09
5.29	88.8459421972006	-1.8382860621894692e-38	2.762810550680493	470.22222221885966	-7.035112360194431e-48	-800.0000000000077	-1.0452224232656615e-40	0.04838754759940798	4.977068354629139e-41	0.9998792051357256	-8.021707446024762e-41	0.015542686824806253	1.0216914355316217e-40	1.1569025309283509e-38	1.781132432476528	-9.013474667331685e-39	1.1777320876564705e-38	1.7880673021630007	-9.096301307692152e-39	800.0000000000077	1.7811324325174358	-1.1849178702023104e-38	88.88888887992351	-1.5508050747964185e-47	-6.595245025885085e-11	-3.720354394923916e-08	-4.3054128308547474e-47	-3.865284082785797e-10	3.720555182487388e-09
5.295	88.84526974638149	-1.8406252061098373e-38	2.7843510389281207	470.6666666632582	-7.113428776014827e-48	-800.0000000000078	-1.0466524427945431e-40	0.048591200618836386	4.901167203975981e-41	0.9998773136375487	-8.048899316767328e-41	0.015663896340938302	1.0228694572269669e-40	1.1580991772251194e-38	1.7950237110134726	-9.043065217886155e-39	1.1791361686338493e-38	1.8019876557476657	-9.126285691486746e-39	800.0000000000078	1.7950237110563905	-1.18642562979079e-38	88.8888888795723	-1.5906016992222577e-47	-6.921122581278845e-11	-4.004784652048665e-08	-4.628487446412106e-47	-4.1082203020761533e-10	4.004995362879911e-09
5.3	88.84458923031453	-1.8429318442747044e-38	2.8059813812659167	471.11111110765603	-7.192958332175062e-48	-800.0000000000082	-1.0480843014961936e-40	0.048793597314924365	4.824639447217991e-41	0.9998753994494578	-8.076134948330352e-41	0.01578561216609565	1.0240280825708228e-40	1.1592723764935416e-38	1.8089730419023777	-9.072701168832543e-39	1.180518326023839e-38	1.8159659917146969	-9.156311095011573e-39	800.0000000000082	1.8089730419455454	-1.1879124368976138e-38	88.88888887958163	-1.5905860319996492e-47	-6.959603893007697e-11	6.918791465674215e-09	5.784451134779947e-48	-4.0586909913985183e-11	6.918910509808804e-10
5.305	88.8439005866193	-1.8452056040752274e-38	2.827701464009207	471.555555552054	-7.272502258099457e-48	-800.0000000000084	-1.0495214597000716e-40	0.04899527246981378	4.74735020451778e-41	0.9998734623958553	-8.103414584872854e-41	0.01590783367472563	1.0251670964518718e-40	1.160421876127908e-38	1.822980353990317	-9.10238291913222e-39	1.1818783416767863e-38	1.830002103357767	-9.186377670086188e-39	800.0000000000084	1.8229803540337544	-1.1893780513499575e-38	88.8888888795827	-1.5913317440829263e-47	-7.008040635958934e-11	8.464458763530915e-09	7.43643817151978e-48	-2.6020409465752362e-11	8.464498757825183e-10
5.31	88.84320377409809	-1.8474462520769265e-38	2.8495105138876227	471.9999999964519	-7.352069439554413e-48	-800.0000000000088	-1.0509604995865265e-40	0.049195586164580245	4.669425392497429e-41	0.9998715023607244	-8.130738228296286e-41	0.016030556529806405	1.0262863654014417e-40	1.1615475207777681e-38	1.837045150773649	-9.132110619084465e-39	1.183216033515493e-38	1.844095600647281	-9.216485470616824e-39	800.0000000000088	1.837045150817339	-1.1908223226810948e-38	88.88888887959152	-1.5913521404904497e-47	-7.047068003841873e-11	-5.140492476129674e-08	-5.822840140368983e-47	-5.178031079213215e-10	5.14075326170509e-09
5.315	88.84249873329563	-1.8496534190332984e-38	2.871408330144945	472.4444444408493	-7.432598138524705e-48	-800.0000000000091	-1.0524047519093947e-40	0.04939505117547233	4.5907329741146656e-41	0.9998695191766913	-8.158106106920805e-41	0.016153779616073383	1.0273856766063586e-40	1.1626490609074549e-38	1.8511673049845285	-9.161884658413642e-39	1.1845311816369348e-38	1.8582462404532185	-9.246634645928786e-39	800.0000000000091	1.8511673050307842	-1.192245012886148e-38	88.88888887914361	-1.6413491961777834e-47	-7.464713011157736e-11	-5.1277263916438514e-08	-5.819327442882565e-47	-5.199941769645615e-10	5.127990043574738e-09
5.32	88.84178542471655	-1.8518268635477035e-38	2.893394118113133	472.888888885245	-7.514666456111906e-48	-800.0000000000097	-1.053851020457639e-40	0.049593055146737924	4.5113945408930385e-41	0.9998675127325226	-8.18551823142223e-41	0.01627749847623001	1.0284648922798202e-40	1.1637263363086189e-38	1.8653463063448743	-9.19170520324209e-39	1.1858236009714924e-38	1.8724536042185576	-9.276825253782677e-39	800.0000000000097	1.8653463063913902	-1.193645966360141e-38	88.88888887915323	-1.6413552403363438e-47	-7.506164247069975e-11	8.405720564041418e-09	7.344895896178442e-48	-3.572914778281736e-11	8.405796498414059e-10
5.325	88.84106379243936	-1.8539662226523202e-38	2.915467578452159	473.3333333296411	-7.596752422782019e-48	-800.00000000001	-1.0553021934092021e-40	0.04979003032539343	4.4312944414910867e-41	0.9998654828707775	-8.212974811454319e-41	0.016401711440485585	1.029523803620433e-40	1.1647791025526166e-38	1.8795819640431346	-9.2215726312685e-39	1.1870930733178785e-38	1.8867173972159257	-9.307057434679301e-39	800.00000000001	1.879581964089928	-1.195024949145305e-38	88.88888887915304	-1.6421968962771022e-47	-7.560845519996168e-11	8.559434642544176e-09	7.52385873561037e-48	-3.2839593776136264e-11	8.559497639400617e-10
5.33	88.84033379784145	-1.8560712439713197e-38	2.9376278970348646	473.77777777403685	-7.678863077604585e-48	-800.0000000000105	-1.056755547784409e-40	0.04998543897852348	4.3505389604069997e-41	0.9998634294826723	-8.240475870515772e-41	0.016526413942282638	1.0305622667086476e-40	1.1658071924899121e-38	1.8938737552837113	-9.251487129422046e-39	1.1883394109230714e-38	1.9010371706688172	-9.337331251111844e-39	800.0000000000105	1.893873755330769	-1.1963817985657237e-38	88.88888887916264	-1.6422031166620732e-47	-7.601753187852401e-11	-5.240205306714668e-08	-5.945256564853135e-47	-5.338665819811069e-10	5.240477248475956e-09
5.335	88.83959538917378	-1.8581415740097644e-38	2.9598746628429966	474.2222222184316	-7.761964268348764e-48	-800.0000000000108	-1.0582133200043741e-40	0.05017959372949984	4.2690385167394295e-41	0.999861352422498	-8.268021596274209e-41	0.01665160368359092	1.0315800786285623e-40	1.166810369030567e-38	1.9082214172620946	-9.281449060080806e-39	1.1895624003710113e-38	1.9154125653607255	-9.367646829642235e-39	800.0000000000108	1.9082214173119147	-1.197716286769719e-38	88.88888887870532	-1.693275359197283e-47	-8.03238697476032e-11	-5.216260016519554e-08	-5.927669195615878e-47	-5.339584723439248e-10	5.216533300616651e-09
5.34	88.83884853058623	-1.860176957470109e-38	2.982207016870164	474.66666666282515	-7.846628377349896e-48	-800.0000000000113	-1.059673411901734e-40	0.05037206058015047	4.1868771119469427e-41	0.9998592515892648	-8.295612014915709e-41	0.016777275845398405	1.032577094109976e-40	1.1677884637103006e-38	1.9226243982580677	-9.311458620061372e-39	1.1907618523102838e-38	1.9298430977438261	-9.398004236724336e-39	800.0000000000113	1.9226243983081663	-1.1990282491919398e-38	88.88888887871552	-1.6932675498065766e-47	-8.075296393296337e-11	7.516121058869832e-09	6.435780467040344e-48	-5.298054414271932e-11	7.516307784387508e-10
5.345	88.83809317520154	-1.8621770539231273e-38	3.0046244231896067	475.1111111072188	-7.931332859961973e-48	-800.0000000000114	-1.0611373056433258e-40	0.05056301340629942	4.1039966987953934e-41	0.999857126850961	-8.32324728847245e-41	0.01690342742694638	1.0335531182260007e-40	1.168741249278464e-38	1.937082354935817	-9.341516152666012e-39	1.1919375607601667e-38	1.944328334082049	-9.428403581272961e-39	800.0000000000114	1.9370823549862337	-1.2003174664026392e-38	88.88888887870588	-1.6950522096961528e-47	-8.145440329483881e-11	4.002724078114961e-11	-1.757403981165709e-48	-1.1433382003684502e-10	1.2113794784777307e-11
5.35	88.83732928916523	-1.8641416023560858e-38	3.0271259799888823	475.5555555516123	-8.016085497714162e-48	-800.0000000000118	-1.0626035660542157e-40	0.05075212925331177	4.0204565397696557e-41	0.9998549781122047	-8.350927449928702e-41	0.017030053368530293	1.034508002669279e-40	1.16966855402354e-38	1.9515947079925575	-9.371621869581152e-39	1.1930893367173898e-38	1.958867748119636	-9.458844931088192e-39	800.0000000000118	1.9515947080432523	-1.2015837701586084e-38	88.88888887871624	-1.6950326034552762e-47	-8.188296760784545e-11	3.1619151741322323e-10	-1.803040413223593e-48	-1.0356504684823704e-10	3.327202948615461e-11
5.355	88.83655683158443	-1.8660702808155517e-38	3.049711008839941	475.9999999960059	-8.100876936039421e-48	-800.000000000012	-1.0640729346678249e-40	0.05093944628201455	3.9362306157685524e-41	0.9998528052578135	-8.378652629713993e-41	0.017157149867586572	1.0354415636816133e-40	1.1705701642952297e-38	1.966161022205817	-9.401776088644687e-39	1.1942169837247584e-38	1.973460824533101	-9.489328375213477e-39	800.000000000012	1.9661610222568617	-1.2028269529361595e-38	88.88888887870868	-1.696851364499885e-47	-8.250386994444863e-11	1.4840158731505864e-08	1.3966000458796228e-47	2.0757453436551216e-11	1.4840173248589886e-09
5.36	88.83577577188032	-1.8679628280870404e-38	3.072378547159382	476.44444444039954	-8.185719348215984e-48	-800.0000000000125	-1.0655445676082814e-40	0.051124739773868055	3.8513559911548583e-41	0.9998506082016133	-8.406422861171469e-41	0.01728471152252629	1.0363536531804216e-40	1.1714459089853927e-38	1.980780679093887	-9.431979029502224e-39	1.1953203159432364e-38	1.9881069836218381	-9.519853978517003e-39	800.0000000000125	1.980780679145211	-1.2040468463620638e-38	88.8888888787189	-1.6968425457570923e-47	-8.293479431894723e-11	-1.0232525937680512e-07	-1.126734507359497e-46	-9.948767935359599e-10	1.0233009570192321e-08
5.365	88.83498607496443	-1.8698189408402156e-38	3.09512776964263	476.8888888847913	-8.272749360699055e-48	-800.0000000000127	-1.0670185989412722e-40	0.05130793724998303	3.765833664415451e-41	0.9998483868447451	-8.434238243994014e-41	0.017412733704403213	1.0372440986194398e-40	1.172295588141832e-38	1.995453148725226	-9.462230985757141e-39	1.1963991478198328e-38	2.0028056249215695	-9.550421809707654e-39	800.0000000000127	1.9954531487818463	-1.2052432549225808e-38	88.88888887783678	-1.7933277508634635e-47	-9.111446418984622e-11	-8.488475107999605e-08	-9.522847158057767e-47	-8.198980556571625e-10	8.488871066717036e-09
5.37	88.8341877154855	-1.8716383662422616e-38	3.117957629987474	477.3333333291806	-8.362301829661458e-48	-800.0000000000131	-1.068494579775307e-40	0.05148887676415233	3.679686881469103e-41	0.9998461411157357	-8.462098802080596e-41	0.017541210540429744	1.038112757213738e-40	1.1731190372183205e-38	2.0101777586220333	-9.492532174118327e-39	1.197453300461022e-38	2.017556101573846	-9.581031924634521e-39	800.0000000000131	2.0101777586789202	-1.2064160156350381e-38	88.8888888778805	-1.7908029899481612e-47	-9.107511395886457e-11	-7.236048797191079e-08	-8.194258311436001e-47	-7.135503305316514e-10	7.236400606383846e-09
5.375	88.83338066500099	-1.8734208239255476e-38	3.1408671428009134	477.77777777356806	-8.453968208080842e-48	-800.0000000000133	-1.069972283350196e-40	0.051667421368453426	3.592933278138474e-41	0.999843870934413	-8.49000460013175e-41	0.017670136500868256	1.0389594701652246e-40	1.1739160729681666e-38	2.0249538756136216	-9.522882859288573e-39	1.1984826000255693e-38	2.032357727487529	-9.611684372650494e-39	800.0000000000133	2.02495387567545	-1.2075649477926717e-38	88.8888888770946	-1.8771640885449313e-47	-9.84325437243543e-11	-8.981757559922092e-08	-1.0009904449227966e-46	-8.870311273096187e-10	8.982195561633348e-09
5.38	88.83256490262384	-1.8751660666139e-38	3.16385518068898	478.22222221795374	-8.547756092502728e-48	-800.0000000000139	-1.071451412033973e-40	0.05184342718699395	3.5055930242371904e-41	0.9998415762418573	-8.517955656970674e-41	0.017799505256608488	1.0397840982800846e-40	1.1746865354568638e-38	2.0397807749236656	-9.553283260190446e-39	1.1994868784504658e-38	2.047209775354073	-9.642379194581935e-39	800.0000000000139	2.039780774985805	-1.208689891995655e-38	88.88888887712318	-1.8758777485226416e-47	-9.866641076310989e-11	2.0844481696256893e-08	1.844073899859078e-47	9.962006389158343e-11	2.0844719747281766e-09
5.385	88.83174040770218	-1.8768738400035643e-38	3.1869206022124783	478.66666666233954	-8.641439838521029e-48	-800.0000000000143	-1.0729320382408304e-40	0.05201681145699345	3.417671038122006e-41	0.9998392569798051	-8.545952002432297e-41	0.01792931039966913	1.0405864983633058e-40	1.1754302602653771e-38	2.0546577227291585	-9.583733611906286e-39	1.2004659690817083e-38	2.0621114941551415	-9.673116433329721e-39	800.0000000000143	2.054657722791607	-1.2097906843309232e-38	88.88888887716726	-1.873331552505588e-47	-9.862297098522805e-11	9.530983409906754e-09	5.702144709065713e-48	2.3220693900330767e-11	9.531011696590399e-10
5.39	88.83090716269257	-1.8785438959188617e-38	3.210062217811904	479.11111110672573	-8.734996471224296e-48	-800.0000000000147	-1.0744141468114625e-40	0.05218746999044363	3.329177962969149e-41	0.9998369130987366	-8.573993661106019e-41	0.018059545251188622	1.0413665310019398e-40	1.1761470876079353e-38	2.0695839541630954	-9.614234147513923e-39	1.201419708314339e-38	2.077062103024733	-9.703896131360445e-39	800.0000000000147	2.0695839542258545	-1.2108671648301202e-38	88.8888888772111	-1.8707871356249665e-47	-9.857573587934995e-11	5.9486637837831576e-09	2.7083154750195193e-48	-4.791097813597477e-11	5.948856719935294e-10
5.395	88.83006515311928	-1.8801759933457606e-38	3.2332787819937354	479.55555555111187	-8.828532134224737e-48	-800.0000000000151	-1.0758975322524755e-40	0.0523552587865212	3.240135100961128e-41	0.9998345445577589	-8.602080650929209e-41	0.018190202817496184	1.0421240611428983e-40	1.17683686304613e-38	2.084558668276989	-9.644785096852427e-39	1.2023479386460254e-38	2.0920607798436484	-9.73471832525375e-39	800.0000000000151	2.0845586683400215	-1.211919178141214e-38	88.88888887722617	-1.8706520536179275e-47	-9.910038628829469e-11	2.1662079537538125e-09	-3.039723360389708e-49	-1.1306296819583571e-10	2.1691565489110125e-10
5.4	88.82921436823128	-1.881769902862368e-38	3.2565689785979623	479.9999999954982	-8.922065925517063e-48	-800.0000000000153	-1.0773818162123466e-40	0.0525199985534286	3.150573652650398e-41	0.9998321513264548	-8.630212977539923e-41	0.018321275707174785	1.0428589606739141e-40	1.1774994405412813e-38	2.0995810185350066	-9.675386680410311e-39	1.2032505115127354e-38	2.1071066511293726	-9.765583040750306e-39	800.0000000000153	2.099581018598363	-1.2129465763838406e-38	88.8888888772375	-1.8706916502714758e-47	-9.961107449948437e-11	2.1806556560476002e-09	-1.1842147459164758e-49	-1.0195439006891995e-10	2.1830377431246386e-10
5.405	88.82835480167726	-1.883325410816892e-38	3.279931404300731	480.4444444398844	-9.015601804225145e-48	-800.0000000000158	-1.078866506736808e-40	0.052681487155921636	3.0605318470879485e-41	0.9998297333867805	-8.658390628637449e-41	0.018452756038209308	1.0435711108658357e-40	1.1781346853597564e-38	2.1146501021711908	-9.706039103346904e-39	1.204127289302253e-38	2.1221987854919084	-9.79649028949733e-39	800.0000000000158	2.114650102234875	-1.2139492218428332e-38	88.88888887724856	-1.870743835661428e-47	-1.0012190185455286e-10	2.1929717301341077e-09	-1.1638508818735335e-49	-1.0175643284977333e-10	2.1953312690329203e-10
5.41	88.82748645194187	-1.8848423221689277e-38	3.303364560514722	480.88888888427067	-9.109140631610715e-48	-800.000000000016	-1.08035097214686e-40	0.05283949582387121	2.9700563003755017e-41	0.9998272907342947	-8.686613570665285e-41	0.01858463539237624	1.0442604040251876e-40	1.1787424760256837e-38	2.1297649549612	-9.736742551777122e-39	1.2049781477568918e-38	2.137336186003444	-9.827440065045767e-39	800.000000000016	2.129764955025213	-1.2149269887995322e-38	88.88888887725945	-1.8708108631254205e-47	-1.0063059700527976e-10	1.7017498521453252e-09	-5.446900679498484e-49	-1.1203562852556266e-10	1.7054338278971e-10
5.415	88.82660932282984	-1.8863204635460954e-38	3.326866844183705	481.3333333286571	-9.202685289658789e-48	-800.0000000000164	-1.0818344792090598e-40	0.05299377756615288	2.879200170594886e-41	0.9998248233795183	-8.714881745144088e-41	0.018716904763411084	1.0449267452739338e-40	1.1793227064273638e-38	2.144924545280749	-9.76749718868175e-39	1.205802977847634e-38	2.152517784978423	-9.858432339940974e-39	800.0000000000164	2.1449245453450856	-1.2158797655019976e-38	88.88888887727012	-1.87090744592036e-47	-1.0115118036367096e-10	5.253042445474066e-09	2.4261341636334597e-48	-4.07332559892912e-11	5.253200370449965e-10
5.42	88.8257234238486	-1.8877596857229757e-38	3.3504365419931657	481.7777777730439	-9.296218158720336e-48	-800.0000000000167	-1.0833162353830995e-40	0.0531440763616843	2.788020996443069e-41	0.9998223313490132	-8.743195065938015e-41	0.01884955452439447	1.0455700539884465e-40	1.1798752875141673e-38	2.1601277703667163	-9.798303150721326e-39	1.2066016870290842e-38	2.1677424413866517	-9.889467064023703e-39	800.0000000000167	2.160127770431399	-1.2168074557626933e-38	88.8888888773079	-1.8687323919352337e-47	-1.011231648608949e-10	5.587944921595638e-09	2.634744221823636e-48	-3.7412662661380086e-11	5.588070163671345e-10
5.425	88.82482877062213	-1.8891598661203174e-38	3.374071822271087	482.2222222174306	-9.389647614919087e-48	-800.0000000000172	-1.0847953646145169e-40	0.053290123853716814	2.6965818922839515e-41	0.999819814686545	-8.771553416149521e-41	0.018982574382155372	1.0461902652563663e-40	1.1804001490285696e-38	2.175373451089751	-9.829160544757524e-39	1.2073742008367806e-38	2.1830089373193897	-9.920544162037588e-39	800.0000000000172	2.175373451154739	-1.2177099805701418e-38	88.88888887732108	-1.868672871121735e-47	-1.0161844934011642e-10	1.989519660128146e-09	-3.636711132698165e-49	-1.0879811045030446e-10	1.992492285273389e-10
5.43	88.82392538545271	-1.8905209130189814e-38	3.3977707267740356	482.6666666618174	-9.483082897009122e-48	-800.0000000000174	-1.0862708049742221e-40	0.053431621888696865	2.6049568771340396e-41	0.9998172734546644	-8.79995664336794e-41	0.0191159533309887	1.0467873323149935e-40	1.180897242367731e-38	2.190660326648986	-9.860069442251892e-39	1.2081204660111475e-38	2.1983159694531964	-9.951663528304241e-39	800.0000000000174	2.1906603267143003	-1.218587280804097e-38	88.8888888773319	-1.8687427300673624e-47	-1.0212398905716057e-10	2.1190752856150622e-09	-1.5518090416288309e-49	-1.0135247196594283e-10	2.1214976760953958e-10
5.435	88.82301329768501	-1.8918427678540314e-38	3.42153116476812	483.11111110620425	-9.576521614000604e-48	-800.0000000000175	-1.0877414592141078e-40	0.05356827213176094	2.5132230824383707e-41	0.999814707735731	-8.828404556949566e-41	0.01924967961932209	1.0473612278841243e-40	1.181366542163447e-38	2.2059870507500334	-9.891029876073225e-39	1.2088404513891404e-38	2.2136621489979884	-9.982825025711428e-39	800.0000000000175	2.2059870508156747	-1.2194393187149007e-38	88.88888887734265	-1.8688081242977706e-47	-1.0262988730677758e-10	2.1302071218086364e-09	-1.4237111885092584e-49	-1.0074599998424673e-10	2.1325881314302258e-10
5.44	88.82209254371749	-1.893125405371604e-38	3.4453509179028643	483.555555550591	-9.669963867936955e-48	-800.000000000018	-1.0892062594875484e-40	0.05369978917061519	2.421457230463047e-41	0.9998121176319467	-8.856896928583655e-41	0.0193837407771074	1.0479119442438074e-40	1.1818080463586792e-38	2.2213521947430754	-9.922041840635042e-39	1.2095341477870252e-38	2.2290460053990824	-1.0014028486555365e-38	800.000000000018	2.221352194809044	-1.2202660780244818e-38	88.88888887735334	-1.8688833319185406e-47	-1.0313352027622709e-10	2.1797082657332536e-09	-1.84365033544922e-49	-1.0341249630212373e-10	2.1821600005722096e-10
5.445	88.82116316696518	-1.894368833413711e-38	3.4692276459805638	483.999999994978	-9.763407882293189e-48	-800.0000000000182	-1.0906641892493946e-40	0.053825905498705216	2.329734264474207e-41	0.9998095032652496	-8.885433493276665e-41	0.01951812364825562	1.0484394930963254e-40	1.1822217760306378e-38	2.2367542513389678	-9.953105292498423e-39	1.210201567490732e-38	2.2444659914668126	-1.0045273714010391e-38	800.0000000000182	2.236754251405244	-1.2210675637876174e-38	88.88888887736486	-1.8689434592180546e-47	-1.0364993909359336e-10	3.081292258381325e-08	3.0030011209185757e-47	1.849504789298639e-10	3.081347764916717e-09
5.45	88.82022521784634	-1.8955730930644864e-38	3.4931588918411003	484.444444439365	-9.856843394118845e-48	-800.0000000000184	-1.0921143109268272e-40	0.05394637756922547	2.238125539397322e-41	0.9998068647772781	-8.914013949798302e-41	0.019652814418093613	1.048943905636409e-40	1.1826077754580573e-38	2.2521916377547972	-9.98422015036478e-39	1.2108427432278718e-38	2.259920490240493	-1.0076560484391365e-38	800.0000000000184	2.252191637821406	-1.2218438024862056e-38	88.88888887737882	-1.8687192192283642e-47	-1.0407965357355905e-10	-1.9487629288049496e-07	-2.0847328184319424e-46	-2.0395582715961466e-09	1.9488696550766983e-08
5.455	88.81927875279655	-1.8967382546305808e-38	3.5171420891301266	484.8888888837474	-9.955233860546655e-48	-800.0000000000189	-1.0935556646906252e-40	0.05406096693632075	2.146704149585054e-41	0.9998042023265996	-8.94263796547526e-41	0.019787798657194298	1.049425230155522e-40	1.1829661093436028e-38	2.2676627007306664	-1.0015386300492404e-38	1.211457728666044e-38	2.2754078164497313	-1.0107888546516065e-38	800.0000000000189	2.267662700808401	-1.222594839450017e-38	88.88888887569772	-2.047675290031485e-47	-1.2129598242122583e-10	-1.9552170253214368e-07	-2.092797115466808e-46	-2.0708436551910044e-09	1.9553266876538134e-08
5.46	88.81832383876184	-1.8978644390829342e-38	3.541174538884619	485.33333332812606	-1.0057626268788536e-47	-800.0000000000191	-1.0949870646230935e-40	0.05416940499461537	2.055556739483096e-41	0.9998015161013463	-8.971305152858834e-41	0.019923061188990173	1.049883544672554e-40	1.1832968774553523e-38	2.283165701376615	-1.004660356811016e-38	1.2120466022946543e-38	2.290926207874364	-1.0139257615228228e-38	800.0000000000191	2.2831657014547106	-1.223320752630904e-38	88.88888887570877	-2.047898287366734e-47	-1.2192837060150978e-10	3.2247508367312794e-08	3.0977110974033556e-47	1.925565871075648e-10	3.224808325992643e-09
5.465	88.8173605461112	-1.8989517847196295e-38	3.5652534644029155	485.7777777725046	-1.0160005827132727e-47	-800.0000000000197	-1.0964070793779679e-40	0.054271386635776526	1.9647852139776e-41	0.9997988062992765	-9.000015107856695e-41	0.020058586399407344	1.0503189372557274e-40	1.1836001917457734e-38	2.2986988506273827	-1.007787176226672e-38	1.2126094717967076e-38	2.306473814887129	-1.0170667364366542e-38	800.0000000000197	2.2986988507058714	-1.224021631184221e-38	88.88888887573586	-2.046697735044844e-47	-1.2218905600573052e-10	3.9998819071719204e-09	1.0960828381427224e-48	-8.642681504378722e-11	4.0008155250748435e-10
5.47	88.81638895309032	-1.900000467914408e-38	3.5893759871059916	486.2222222168833	-1.0262343169517986e-47	-800.00000000002	-1.097815121671781e-40	0.05436677721653696	1.8744436853706917e-41	0.9997960731403099	-9.028767386736572e-41	0.02019435810042164	1.0507315182602519e-40	1.183876190543968e-38	2.314260293624139	-1.0109190647779457e-38	1.213146460357241e-38	2.322048749288308	-1.0202117450945262e-38	800.00000000002	2.314260293702983	-1.2246975887967228e-38	88.88888887574906	-2.0467614451794522e-47	-1.227776374760512e-10	4.186044103941054e-09	1.316703371137319e-48	-7.776008839775493e-11	4.186766278583902e-10
5.475	88.81540914600112	-1.901010709178312e-38	3.6135391064064013	486.666666661262	-1.0364615781035082e-47	-800.0000000000206	-1.0992106432016093e-40	0.054455461642417796	1.7845828905896996e-41	0.9997933168670289	-9.057561498370898e-41	0.0203303594168393	1.0511214237734686e-40	1.1841250426546242e-38	2.329848096731487	-1.0140559936671414e-38	1.2136577056963513e-38	2.3376490899060443	-1.023360751627092e-38	800.0000000000206	2.329848096810749	-1.2253487676046513e-38	88.88888887578	-2.0451570495620878e-47	-1.2290450851492957e-10	6.7406820865770285e-09	3.8568608625315755e-48	-4.5417980762057575e-12	6.740683616683861e-10
5.48	88.81442121778929	-1.9019827628623477e-38	3.637739737236822	487.11111110564116	-1.0466846238403146e-47	-800.000000000021	-1.1005911483789217e-40	0.05453697745449806	1.6953685842091217e-41	0.9997905377407064	-9.0863969178701e-41	0.020466572997506552	1.0514888096143285e-40	1.184346940257021e-38	2.3454602717434962	-1.0171979302540615e-38	1.2141433930193224e-38	2.3532727830837596	-1.0265137130156708e-38	800.000000000021	2.345460271823205	-1.22597533155707e-38	88.88888887581072	-2.0434730237315086e-47	-1.2298638537123665e-10	4.12422688592993e-09	1.3151749595219616e-48	-7.675164826526425e-11	4.124940996200881e-10
5.485	88.8134252666107	-1.902916906764552e-38	3.661974748561012	487.5555555500205	-1.0569018384080824e-47	-800.0000000000214	-1.101956412238971e-40	0.054611294517792106	1.6068347683049078e-41	0.9997877360372743	-9.115273099746852e-41	0.020602981232033076	1.0518338452783774e-40	1.1845420917313817e-38	2.361094800722625	-1.0203448394390733e-38	1.2146037172723164e-38	2.3689177665318377	-1.0296705855971045e-38	800.0000000000214	2.3610948008026624	-1.2265774597164645e-38	88.88888887582466	-2.0435315286364855e-47	-1.2358653128264183e-10	4.738372657205202e-09	1.70027182975769e-48	-6.869927017362649e-11	4.738870649033616e-10
5.49	88.8124214004525	-1.903813479915627e-38	3.6862408544962855	487.9999999943998	-1.0671115215617017e-47	-800.0000000000218	-1.1033062292505518e-40	0.05467839927319486	1.5190114635247985e-41	0.9997849120603223	-9.144189431175241e-41	0.020739565637926248	1.052156735850014e-40	1.184710747500524e-38	2.3767495657546776	-1.0234966784663689e-38	1.215038882001776e-38	2.3845819740762653	-1.0328313251194322e-38	800.0000000000218	2.3767495658351288	-1.2271553706141473e-38	88.8888888758589	-2.0416483275317657e-47	-1.236287207218331e-10	6.055718889304338e-09	3.202825496257282e-48	-2.043050207062064e-11	6.055753352943978e-10
5.495	88.81140973118856	-1.9046728365682164e-38	3.7105347604845482	488.4444444387792	-1.0773163181559628e-47	-800.0000000000224	-1.1046370073873736e-40	0.05473767613741853	1.4321336008627436e-41	0.9997820661243747	-9.173145289999907e-41	0.020876307683315592	1.0524576952692415e-40	1.184853168453277e-38	2.3924224432443597	-1.0266534032408562e-38	1.2154491580569176e-38	2.4002631631914064	-1.0359958770402954e-38	800.0000000000224	2.39242244332522	-1.2277092925936318e-38	88.88888887588107	-2.0407611109426916e-47	-1.2392123510928324e-10	3.773692469621637e-09	9.577255034961695e-49	-8.521671498912621e-11	3.7746545197928494e-10
5.5	88.81039037763989	-1.905495371393129e-38	3.7348530923615813	488.88888888315836	-1.08751950049091e-47	-800.0000000000229	-1.1059509368890453e-40	0.054789569467122795	1.3460879917750634e-41	0.9997791985635024	-9.20214001306438e-41	0.0210131883876705	1.0527369609406595e-40	1.1849696431669182e-38	2.4081112581506114	-1.0298149647874751e-38	1.2158347838608273e-38	2.4159592186504324	-1.0391641930919098e-38	800.0000000000229	2.408111258231793	-1.228239480050798e-38	88.88888887589862	-2.040526635158703e-47	-1.2443818586013062e-10	3.5958199381030377e-09	6.148873556304344e-49	-9.684702775884549e-11	3.5971239030710434e-10
5.505	88.80936346706525	-1.9062815337444167e-38	3.759192363459321	489.3333333275378	-1.097721851744558e-47	-800.0000000000234	-1.1072438036526416e-40	0.05483338793392887	1.2611477882202807e-41	0.9997763097355147	-9.23117288003056e-41	0.021150188136599465	1.05299480196907e-40	1.1850604975845962e-38	2.423813762758074	-1.0329813073828294e-38	1.2161960760888636e-38	2.431667827175522	-1.0423362129339754e-38	800.0000000000234	2.4238137628395795	-1.2287462226291357e-38	88.88888887591601	-2.0403043426729602e-47	-1.249492494896742e-10	2.282736962418461e-09	-1.4093283529055734e-48	-1.7022618555378752e-10	2.2890751394044833e-10
5.51	88.80832912749727	-1.90703176605292e-38	3.783549158192611	489.7777777719174	-1.1079260363405573e-47	-800.000000000024	-1.108517435422396e-40	0.054869529317042504	1.1772206908282092e-41	0.9997734000004	-9.260243188089429e-41	0.021287287715194433	1.0532314834176064e-40	1.1851260528446963e-38	2.439527755114905	-1.0361523767825187e-38	1.2165333249745634e-38	2.4473867894442023	-1.045511881462294e-38	800.000000000024	2.4395277551965022	-1.2292298055096894e-38	88.88888887592275	-2.041683505507698e-47	-1.260420140994296e-10	1.968913920791105e-09	-1.469101583288709e-48	-1.668392613971392e-10	1.9759699812063298e-10
5.515	88.80728749967048	-1.9077466036906576e-38	3.807919852285548	490.2222222162968	-1.118134042700638e-47	-800.0000000000246	-1.1097685286131855e-40	0.054897499633123244	1.094525451090234e-41	0.9997704697538834	-9.289350131435223e-41	0.021424466733209	1.0534473241782655e-40	1.1851666934898832e-38	2.45525089853041	-1.0393281067747089e-38	1.216846883419149e-38	2.463113764618198	-1.0486911341085932e-38	800.0000000000246	2.455250898612376	-1.2296905737811028e-38	88.88888887593708	-2.0415601036172176e-47	-1.26538289890447e-10	2.476715129280955e-09	-1.803887892822801e-49	-1.1180574342339244e-10	2.4792374545153266e-10
5.52	88.80623872070903	-1.908426541167703e-38	3.8323009969208632	490.6666666606763	-1.1283424042526331e-47	-800.0000000000251	-1.1109984282528963e-40	0.054917629210729575	1.0129975303854321e-41	0.9997675193815356	-9.318492962782704e-41	0.021561705787365045	1.0536426193952405e-40	1.1851827759924184e-38	2.470980969412115	-1.0425084371011413e-38	1.2171370858348903e-38	2.478846506491395	-1.0518739101578215e-38	800.0000000000251	2.47098096949441	-1.2301288461935217e-38	88.88888887594905	-2.0417581132130287e-47	-1.2714015338248412e-10	4.135121874544917e-09	1.9116545803769248e-48	-4.1380455983444105e-11	4.1353289179311087e-10
5.525	88.805182942546	-1.9090721872572398e-38	3.856688889839056	491.11111110505624	-1.1385475384183982e-47	-800.0000000000256	-1.112203747665682e-40	0.05492944324925559	9.328621045943259e-42	0.9997645493105906	-9.347670807270006e-41	0.021698984047090638	1.0538177303372348e-40	1.1851747346605892e-38	2.4867155805479557	-1.0456932926501932e-38	1.2174043311421951e-38	2.4945826328373246	-1.0550601391928155e-38	800.0000000000256	2.486715580630803	-1.2305450151483197e-38	88.88888887597786	-2.0398188715799106e-47	-1.2702601914870643e-10	5.543180729242754e-09	2.9032093765949684e-48	-2.1454956085452364e-11	5.5432222499363e-10
5.53	88.80412031106933	-1.9096840913074252e-38	3.881080059748482	491.55555554943624	-1.1487446865586645e-47	-800.0000000000259	-1.1133871774633967e-40	0.05493351756854135	8.539682850937845e-42	0.9997615599512807	-9.376882870013e-41	0.021836281981224344	1.05397298375141e-40	1.1851429630180042e-38	2.5024524936349617	-1.0488826066073346e-38	1.2176489750350645e-38	2.5103199263897515	-1.0582497585044475e-38	800.0000000000259	2.502452493718083	-1.2309394347431284e-38	88.88888887600075	-2.0392235766915037e-47	-1.274610208064982e-10	3.140741000606583e-08	3.021039084238514e-47	2.1759245616772528e-10	3.1408163743939334e-09
5.535	88.80305098594614	-1.9102629132367732e-38	3.905470809135491	491.99999999381623	-1.1589395191173028e-47	-800.0000000000266	-1.1145431298080153e-40	0.05492903575834426	7.766809665514528e-42	0.9997585517526046	-9.40612823438985e-41	0.021973578784479995	1.054108770296585e-40	1.1850879297408257e-38	2.5181893243046196	-1.0520762978018282e-38	1.2178714777421221e-38	2.526055935998134	-1.0614426893756128e-38	800.0000000000266	2.5181893243881404	-1.2313125303465827e-38	88.8888888760181	-2.0387030677045894e-47	-1.278179319174323e-10	-1.8893212920070497e-07	-2.0410437581375303e-46	-2.2075855664132205e-09	1.889450260746361e-08
5.54	88.80197512248637	-1.9108092721442222e-38	3.9298576122760367	492.44444443819606	-1.1691819344786654e-47	-800.0000000000273	-1.1156771037817252e-40	0.054917053545356954	7.006684274315016e-42	0.9997555251513082	-9.435406039894933e-41	0.022110854618006222	1.0542254568379411e-40	1.1850100754212751e-38	2.533923798926287	-1.055274290721069e-38	1.2180722044607715e-38	2.5417885129553497	-1.0646388688429166e-38	800.0000000000273	2.533923799021879	-1.2316647010273307e-38	88.88888887438661	-2.214094027264783e-47	-1.4653100290235547e-10	-1.8920616184912973e-07	-2.0476188424753126e-46	-2.2369945937158704e-09	1.8921938544052878e-08
5.545	88.80089288297977	-1.9113238351036342e-38	3.9542369293032746	492.88888888256804	-1.180252521731083e-47	-800.0000000000277	-1.1167818102180563e-40	0.05489650610809133	6.264067792169442e-42	0.9997524806037833	-9.464715381215972e-41	0.02224808956215118	1.0543234379673168e-40	1.184909872910537e-38	2.549653634597853	-1.0584765038026196e-38	1.218251656784309e-38	2.55751520350539	-1.0678382130610405e-38	800.0000000000277	2.5496536346938448	-1.2319963767433712e-38	88.88888887440069	-2.2141562212835447e-47	-1.4713074193076246e-10	3.01272488438048e-08	2.9043200619374433e-47	1.813368993775615e-10	3.01277945752359e-09
5.55	88.79980443631582	-1.9118073310278398e-38	3.978605104753031	493.3333333269401	-1.191323472916779e-47	-800.0000000000283	-1.1178624219442025e-40	0.05486839475919734	5.535792887018917e-42	0.9997494185849811	-9.494055286643298e-41	0.022385263046258985	1.054403143807204e-40	1.1847878369561335e-38	2.565376473753133	-1.0616828474236599e-38	1.2184102455686513e-38	2.5732338407471897	-1.0710406530037245e-38	800.0000000000283	2.5653764738495246	-1.232308027346923e-38	88.8888888744139	-2.214277499837876e-47	-1.4774382529017827e-10	2.782248505657778e-09	-3.4192006199664502e-49	-1.3002530110221498e-10	2.785285142702926e-10
5.555	88.79870994035491	-1.9122603880763126e-38	4.0029588352056	493.77777777131223	-1.2023952666695258e-47	-800.0000000000288	-1.118917025087907e-40	0.054832556251161735	4.8232171410130154e-42	0.9997463395388363	-9.52342491163069e-41	0.022522356480505237	1.0544649460489859e-40	1.1846444132671144e-38	2.581090185846393	-1.0648932454665757e-38	1.218548420561579e-38	2.588942211012717	-1.0742461141618683e-38	800.0000000000288	2.581090185943128	-1.2326000577354446e-38	88.88888887442874	-2.2144300520055914e-47	-1.4840072498266925e-10	3.08138699741276e-09	9.465774782422445e-50	-1.1336431995880143e-10	3.083471630624181e-10
5.56	88.79760957260157	-1.912683806752572e-38	4.027294463983993	494.2222222156845	-1.2134670446024715e-47	-800.0000000000296	-1.119941544459925e-40	0.05478850214637156	4.129064999596699e-42	0.9997432439645509	-9.552823219760892e-41	0.022659349285748812	1.054509315898803e-40	1.1844801644756632e-38	2.596792412287282	-1.0681075991981994e-38	1.2186667095604852e-38	2.604637960706871	-1.0774545103518144e-38	800.0000000000296	2.596792412384456	-1.232872983895517e-38	88.88888887444404	-2.2142331526691757e-47	-1.488893492514762e-10	3.271409809712856e-08	3.229028789585956e-47	2.3578822211559755e-10	3.2714947812800178e-09
5.565	88.79650349892687	-1.913078283558362e-38	4.051608677162292	494.6666666600568	-1.224538203316038e-47	-800.0000000000304	-1.1209425385822955e-40	0.05473743383320305	3.4492289346517596e-42	0.9997401323286054	-9.582249302689047e-41	0.022796222811535583	1.0545366642443687e-40	1.184295582061708e-38	2.6124810155237874	-1.0713258235969942e-38	1.21876552269075e-38	2.6203190804069676	-1.0806657741786868e-38	800.0000000000304	2.6124810156213565	-1.2331272547765275e-38	88.88888887445694	-2.2143693904208874e-47	-1.4949307442361733e-10	-2.0672246137108656e-07	-2.255686936356323e-46	-2.5187658716318065e-09	2.067378054852002e-08
5.57	88.79539188255436	-1.913444495675614e-38	4.075898277901884	495.1111111044228	-1.2362748537723287e-47	-800.0000000000309	-1.1219148411491532e-40	0.054678700578037635	2.7871609754867184e-42	0.9997370050900389	-9.611702281608854e-41	0.0229329590659864	1.0545473905766629e-40	1.1840911439826694e-38	2.6281539334563067	-1.0745478362673925e-38	1.2188453689711096e-38	2.635983374268874	-1.0838798234472339e-38	800.0000000000309	2.6281539335675324	-1.2333633068871606e-38	88.88888887267662	-2.4075339345354143e-47	-1.706299141446998e-10	-2.0623834492045538e-07	-2.251544445889586e-46	-2.5106446794007156e-09	2.0625362603414983e-08
5.575	88.79427490831928	-1.9137833092653693e-38	4.100159735196151	495.5555555487862	-1.2483122879898075e-47	-800.0000000000318	-1.122858051250584e-40	0.054612414110117205	2.1432091504766568e-42	0.9997338627686931	-9.641181070605915e-41	0.02306953817478833	1.0545420035362481e-40	1.183867456102281e-38	2.643808888209303	-1.07777352997152e-38	1.2189067673905777e-38	2.651628678456527	-1.0870965748136812e-38	800.0000000000318	2.6438088883210176	-1.2335816985104394e-38	88.88888887269276	-2.4074241451216153e-47	-1.711992918305394e-10	3.2660333696789386e-08	3.1959019628684963e-47	2.1604546929580297e-10	3.2661048250637016e-09
5.58	88.7931527394693	-1.9140954046572944e-38	4.124390007422468	495.99999999314974	-1.2603496141859208e-47	-800.0000000000326	-1.1237777598277714e-40	0.05453959165152513	1.513829780257093e-42	0.9997307058236806	-9.670684801120877e-41	0.02320594301836464	1.0545209040748668e-40	1.1836249977210494e-38	2.6594439176115277	-1.0810028217698349e-38	1.2189501354192328e-38	2.667253120546525	-1.0903159609511213e-38	800.0000000000326	2.659443917723699	-1.23378286818406e-38	88.88888887270492	-2.4077445227411557e-47	-1.719004077427997e-10	3.0830449304628667e-09	-4.55858021832302e-49	-1.4540328087641457e-10	3.0864717975938817e-10
5.585	88.79202553831985	-1.914381454019318e-38	4.148586162870974	496.44444443751325	-1.272388494045796e-47	-800.0000000000334	-1.1246703979265699e-40	0.05445985076643375	9.014443308855326e-43	0.9997275347114993	-9.700212621502173e-41	0.023342157095028678	1.0544844882809065e-40	1.183364242142441e-38	2.6750571302959676	-1.084235629762686e-38	1.2189759598970458e-38	2.682854718555671	-1.093537904308346e-38	800.0000000000334	2.6750571304084776	-1.2339672491722845e-38	88.88888887272381	-2.407808213838942e-47	-1.7261975136616565e-10	3.6685321447291495e-09	-5.634642508629746e-50	-1.3683196968071802e-10	3.6710830942431363e-10
5.59	88.79089348852987	-1.9146423332234495e-38	4.172744882815968	496.88888888187694	-1.2844277776329834e-47	-800.0000000000339	-1.1255314981853386e-40	0.05437269845809595	3.0905636749993496e-43	0.999724349948698	-9.72976345580488e-41	0.023478161723645308	1.0544332696897511e-40	1.183085800485881e-38	2.6906463850541846	-1.0874718453162595e-38	1.2189848137097904e-38	2.6984313492676035	-1.096762314536099e-38	800.0000000000339	2.6906463851671107	-1.2341354060425861e-38	88.88888887274003	-2.407871336143034e-47	-1.7326939357712437e-10	2.8461973518761825e-09	-3.429672380498501e-49	-1.3216167215664427e-10	2.8492641284047774e-10
5.595	88.78975675600088	-1.914878755287446e-38	4.196863299965319	497.3333333262407	-1.296467782932118e-47	-800.0000000000347	-1.1263704486264824e-40	0.054279682869384914	-2.6942945220230333e-43	0.999721152001874	-9.759336418309023e-41	0.02361394076374636	1.0543676676165984e-40	1.1827901729734007e-38	2.7062098318684304	-1.0907113808860484e-38	1.2189770951245465e-38	2.713981332976226	-1.0999891281798269e-38	800.0000000000347	2.706209831981794	-1.2342877983901818e-38	88.88888887275345	-2.4081005737861226e-47	-1.739412603242931e-10	1.275045254563555e-08	1.0590028261995778e-47	-7.95220554011324e-12	1.2750455025452112e-09
5.6	88.78861549662544	-1.915091343584497e-38	4.220938822237001	497.7777777706046	-1.308508509794709e-47	-800.0000000000355	-1.1271866963048966e-40	0.05418086446604213	-8.33585184747005e-43	0.9997179413094727	-9.788930730292306e-41	0.023749479623547436	1.0542880494431773e-40	1.18247779862874e-38	2.721745798211069	-1.0939541605241839e-38	1.2189532146680711e-38	2.7295030072976	-1.1032182802009054e-38	800.0000000000355	2.7217457983248394	-1.2344248280273672e-38	88.88888887277132	-2.4080255988903025e-47	-1.7454277907842017e-10	-6.359475908841761e-08	-7.51451494811899e-47	-9.640495951023435e-10	6.360206580871167e-09
5.605	88.78746987498306	-1.915280811150144e-38	4.244968727362116	498.2222222149659	-1.3208367331051708e-47	-800.0000000000363	-1.127972020078025e-40	0.05407522128321595	-1.3778989613236409e-42	0.999714718334384	-9.81854551767685e-41	0.023884762977767992	1.05419483410815e-40	1.1821491768728639e-38	2.7372525274517203	-1.09720009646556e-38	1.2189137407705316e-38	2.7449944170764224	-1.1064496820088715e-38	800.0000000000363	2.7372525275701864	-1.234546954564886e-38	88.8888888722091	-2.4725824853890694e-47	-1.8232970304412512e-10	-6.735566178879557e-08	-7.58085284193489e-47	-9.152352515127085e-10	6.736187965438781e-09
5.61	88.78632007304185	-1.9154480438879083e-38	4.268950009379031	498.66666665932684	-1.3332024212006154e-47	-800.0000000000372	-1.1287317743843234e-40	0.05396367565105046	-1.905872209313039e-42	0.9997114835884218	-9.848179719137822e-41	0.024019773903128802	1.0540885401346015e-40	1.1818049237743086e-38	2.752728079771308	-1.1004490781870312e-38	1.218859141553589e-38	2.760453871385514	-1.1096832603525984e-38	800.0000000000372	2.7527280798908675	-1.234654749028352e-38	88.88888887220088	-2.4728557320794384e-47	-1.8253395962963583e-10	1.1910827879545755e-08	1.1740597158014807e-47	7.062487891800039e-11	1.191103726170339e-09
5.615	88.78516624158014	-1.9155936305003148e-38	4.29288035606991	499.11111110368796	-1.3455633308793253e-47	-800.0000000000381	-1.1294716681867162e-40	0.05384716733783346	-2.421244971890134e-42	0.9997082374956588	-9.877832609370635e-41	0.024154499381530817	1.0539695144024607e-40	1.1814454538158643e-38	2.768170962947841	-1.1037010336500569e-38	1.2187897779945606e-38	2.775879948521478	-1.1129189583359336e-38	800.0000000000381	2.7681709630677487	-1.2347485908857568e-38	88.88888887223129	-2.4718904687830853e-47	-1.8295658964325227e-10	3.292655037512082e-09	-2.031008326752025e-49	-1.317432491047157e-10	3.2952895896625473e-10
5.62	88.7840085275173	-1.9157181281333495e-38	4.3167575888839345	499.55555554804914	-1.3579249703876114e-47	-800.0000000000391	-1.1301916296757322e-40	0.053725809612845746	-2.9239261501342626e-42	0.9997049804693176	-9.907503502945884e-41	0.02428892714677765	1.0538380854394441e-40	1.1810711597450707e-38	2.7835797709259276	-1.1069558947628696e-38	1.2187060136805553e-38	2.7912712592301765	-1.1161567188570054e-38	800.0000000000391	2.7835797710463357	-1.2348288392613388e-38	88.88888887223419	-2.472933048990523e-47	-1.8379536460651766e-10	4.686739885073305e-09	-2.4752947216513313e-49	-1.6460754619638855e-10	4.689629664973742e-10
5.625	88.78284708026186	-1.9158221241324347e-38	4.340579525919217	499.9999999924108	-1.370288351859007e-47	-800.0000000000398	-1.1308866098526275e-40	0.05359904548392533	-3.4104903562665704e-42	0.9997017129296276	-9.93719168507962e-41	0.02442304491324058	1.0536945990426195e-40	1.1806824544239615e-38	2.7989530954019886	-1.1102135893302116e-38	1.2186083103288133e-38	2.8066262546909706	-1.1193964703496264e-38	800.0000000000398	2.798953095522323	-1.2348958727442781e-38	88.88888887227797	-2.4719824156816963e-47	-1.8451634791289624e-10	6.616573955397606e-09	1.1905945255889325e-48	-1.312180482879392e-10	6.61787496734733e-10
5.63	88.78168207785612	-1.915906502728534e-38	4.364343447124981	500.4444444367721	-1.3826487855291206e-47	-800.0000000000406	-1.1315517458094511e-40	0.053466365044120216	-3.877640405582757e-42	0.9996984353773816	-9.966896117143093e-41	0.02455683736490875	1.0535395719769185e-40	1.180279951132092e-38	2.8142891806895194	-1.1134740063275229e-38	1.2184972241139586e-38	2.8219432400056412	-1.1226381273164036e-38	800.0000000000406	2.8142891808102846	-1.2349502612904588e-38	88.88888887229318	-2.4721061304353367e-47	-1.851355730150035e-10	2.327738002349931e-09	-6.344637791086972e-49	-1.2775156000752726e-10	2.331241014710492e-10
5.635	88.780513669004	-1.9159718563121559e-38	4.388047283882434	500.8888888811336	-1.3950099380231084e-47	-800.0000000000415	-1.1322010103991372e-40	0.05332976198877566	-4.3347126983256285e-42	0.9996951482308376	-9.996616086537981e-41	0.024690292852744194	1.0533733526612793e-40	1.179864065523867e-38	2.829586691408554	-1.1167370723592325e-38	1.2183730437424508e-38	2.8372210914276126	-1.1258816442892198e-38	800.0000000000415	2.829586691529745	-1.2349923867413006e-38	88.88888887230625	-2.4724186874951286e-47	-1.8580517401386197e-10	2.718299659439373e-09	-5.410490977729645e-49	-1.314787297806776e-10	2.7214774838114963e-10
5.64	88.77934198693374	-1.9160186262621658e-38	4.4116893209742205	501.3333333254952	-1.4073725704202142e-47	-800.0000000000425	-1.13283455645122e-40	0.053189354305934924	-4.7817829325178367e-42	0.9996918518647212	-1.002635105053749e-40	0.0248234017168885	1.0531962023570278e-40	1.1794351108897608e-38	2.844844520171771	-1.1200027334707958e-38	1.2182360557521603e-38	2.852458719011394	-1.1291269762377815e-38	800.0000000000425	2.844844520293379	-1.235022533599674e-38	88.88888887232073	-2.4726164408233285e-47	-1.8644087981379127e-10	2.842881485775969e-09	-4.41483217812896e-49	-1.2717446136279909e-10	2.8457245976711627e-10
5.645	88.77816716367764	-1.9160472471272923e-38	4.435267901241744	501.7777777698568	-1.4197361309509636e-47	-800.0000000000434	-1.1334527651645808e-40	0.05304528622057971	-5.2190831033074943e-42	0.999688546650398	-1.0056100476763046e-40	0.02495615462390376	1.0530083782815099e-40	1.1789933956686065e-38	2.860061596990719	-1.1232709364177493e-38	1.2180865400347864e-38	2.8676550741289084	-1.13237407922385e-38	800.0000000000434	2.8600615971127383	-1.23504098196593e-38	88.88888887233527	-2.472818604198993e-47	-1.870700785163572e-10	3.460579970730041e-09	1.5271592948715026e-51	-1.1747125894583768e-10	3.4625732094060125e-10
5.65	88.77698932954463	-1.9160581411265592e-38	4.458781434427104	502.22222221421873	-1.432099920635913e-47	-800.0000000000441	-1.1340552987074012e-40	0.05289760707499353	-5.6463600592047376e-42	0.9996852329543888	-1.0085863849048588e-40	0.025088542616568274	1.0528101304451307e-40	1.1785392197439324e-38	2.875236894984367	-1.1265416293776626e-38	1.2179247837342846e-38	2.8828091222876018	-1.1356229083413693e-38	800.0000000000441	2.8752368951067595	-1.235048003992925e-38	88.88888887235478	-2.4726565647593746e-47	-1.8762434135319688e-10	3.684874627651631e-09	1.4619257911182588e-49	-1.1398897859957971e-10	3.6866372900996e-10
5.655	88.77580864077639	-1.9160520120354881e-38	4.482227847223342	502.6666666585805	-1.4444634144028788e-47	-800.0000000000447	-1.1346241134902186e-40	0.05274415372180486	-6.051367452379781e-42	0.9996819112161797	-1.0115640346774813e-40	0.025220554017473574	1.052601870867595e-40	1.178073072777467e-38	2.8903690754451454	-1.1298147237568055e-38	1.2177514248266324e-38	2.897919209298846	-1.1388733669932076e-38	800.0000000000447	2.8903690755679228	-1.2350440533185974e-38	88.88888887237103	-2.472748841939268e-47	-1.882245907923561e-10	3.034728024431183e-09	-3.2337339098872795e-49	-1.2229943922195319e-10	3.0371913563524435e-10
5.66	88.7746252564422	-1.9160296000614128e-38	4.505605051088678	503.1111111029423	-1.4568276448558202e-47	-800.0000000000456	-1.1351789587951094e-40	0.05258751581041581	-6.447460819359348e-42	0.999678581883216	-1.0145429112541525e-40	0.025352177062879275	1.0523840324318529e-40	1.1775954687746884e-38	2.905456789748356	-1.1330901259062146e-38	1.2175667186798697e-38	2.912984422853919	-1.1421254151597585e-38	800.0000000000456	2.905456789871529	-1.235029607063941e-38	88.8888888723857	-2.4729354982202e-47	-1.888376393058072e-10	-3.335623925219278e-07	-1.1324541405028401e-46	-7.2619997903749e-10	3.3356318302738714e-08
5.665	88.7734392931711	-1.9159911990588541e-38	4.528911829545176	503.55555554730415	-1.4691927568397277e-47	-800.0000000000466	-1.1357237718335648e-40	0.052428254583218085	-6.837294763627794e-42	0.9996752452835479	-1.0175229777973804e-40	0.02548340489863117	1.0521567909415976e-40	1.1771066203573999e-38	2.920499252027924	-1.1363677999437973e-38	1.2173708446132484e-38	2.928004011428199	-1.1453790241006958e-38	800.0000000000466	2.9204992521514876	-1.235004854640963e-38	88.88888887240059	-2.473109831539664e-47	-1.8943849578392205e-10	1.9794339796891894e-06	5.6175984260620375e-46	2.0142910507704654e-09	1.979435004569895e-07
5.67	88.77225166229141	-1.9159456113178433e-38	4.552131687508926	503.99999999168193	-1.483239136025603e-47	-800.0000000000477	-1.1357064328617936e-40	0.052198116926660404	-6.834687297170342e-42	0.9996719039810323	-1.020503293527656e-40	0.02561414464243496	1.0519252188853735e-40	1.1766124764596903e-38	2.935485815153269	-1.1396466253099998e-38	1.2171750452450385e-38	2.94295767042034	-1.1486325833691379e-38	800.0000000000477	2.9354858149670946	-1.2349754696676197e-38	88.88888889260505	-1.7960719972607964e-47	-1.537635825434721e-10	5.880586684269986e-06	2.9109225010291015e-45	2.3745703243787174e-08	5.880634626435826e-07
5.675	88.77106322239895	-1.9159014539479176e-38	4.575249117075382	504.44444443620347	-1.488735216494148e-47	-800.0000000000483	-1.1356891767140671e-40	0.0519677233033593	-6.832091337681104e-42	0.9996685603911752	-1.023482941977775e-40	0.02574430896784499	1.0516942796867838e-40	1.1761188562829186e-38	2.9504064685567197	-1.1429255030492416e-38	1.21697932024559e-38	2.9578453265012716	-1.1518860932023583e-38	800.0000000000483	2.9504064680732887	-1.2349470066614064e-38	88.88888891535974	-4.283998899014885e-48	-2.8489599739911314e-11	-5.652249749724658e-06	-3.337429407471429e-45	-3.152654368159521e-08	5.652337671814995e-07
5.68	88.76987402233812	-1.915858724458273e-38	4.598263970772914	504.88888888086933	-1.4855869893795344e-47	-800.000000000048	-1.1356720034564765e-40	0.05173707652400962	-6.829506901574856e-42	0.9996652146513727	-1.0264619224702282e-40	0.025873897039505638	1.0514639751483239e-40	1.1756257686207178e-38	2.965261115749754	-1.1462044322048356e-38	1.2167836692847822e-38	2.9726669071471283	-1.1551395538378197e-38	800.000000000048	2.965261115943078	-1.2349194645549242e-38	88.88888886322377	-3.5807909712905788e-47	-3.2598866558104793e-10	6.667063227420087e-06	4.036167035985161e-45	3.835434614928768e-08	6.667173549135021e-07
5.685	88.76868427614933	-1.915817406866048e-38	4.621175980819398	505.3333333256777	-1.4737577992884485e-47	-800.0000000000468	-1.1356549130759946e-40	0.0515061897024954	-6.826934018304243e-42	0.9996618673637703	-1.0294402344914558e-40	0.026002907322294915	1.0512343108476702e-40	1.1751332258032677e-38	2.980049581351954	-1.1494834111447426e-38	1.2165880920316508e-38	2.9874223435908953	-1.1583929655129475e-38	800.0000000000468	2.9800495800680875	-1.2348928313762837e-38	88.88888897648525	3.2737148210520033e-47	3.2435346081131134e-10	1.5412367086278686e-05	9.335773124811954e-45	8.89518359382594e-08	1.5412623775052816e-06
5.69	88.76749392237565	-1.9157775057480447e-38	4.6439852247406135	505.7777777706034	-1.454796857097802e-47	-800.000000000045	-1.1356379055758608e-40	0.051275059077615245	-6.824372679342398e-42	0.9996585183554906	-1.0324178781934462e-40	0.026131340260523658	1.0510052851831948e-40	1.1746412322943987e-38	2.9947719147325063	-1.1527624394617946e-38	1.2163925881554754e-38	3.002111565988053	-1.1616463284651763e-38	800.000000000045	2.994771913384899	-1.2348671119765075e-38	88.88888898158528	3.6038434744545426e-47	3.677201329088927e-10	-5.490088976026763e-06	-3.207609003169303e-45	-2.3514187135142636e-08	5.490139331718934e-07
5.695	88.7663030770767	-1.91573901233161e-38	4.666691562965657	506.2222222154752	-1.4388826434635383e-47	-800.0000000000433	-1.1356209809445934e-40	0.05104369179504106	-6.821822900040124e-42	0.9996551679531414	-1.035394853337565e-40	0.026259195052984984	1.0507769011773963e-40	1.174149797598095e-38	3.0094280238700555	-1.1560415159551982e-38	1.2161971573250963e-38	3.016734506541166	-1.1648996429319082e-38	800.0000000000433	3.009428023144341	-1.2348423002912764e-38	88.88888893750979	1.0340369271839805e-47	1.8407063188368959e-10	-1.1206355073529722e-05	-6.522010414552873e-45	-4.5674256709318994e-08	1.1206448151477403e-06
5.7	88.76511184419208	-1.9157019187892923e-38	4.6892948689646	506.66666666018887	-1.4321885963285477e-47	-800.0000000000424	-1.1356041391731142e-40	0.050812094244623844	-6.819284694313968e-42	0.9996518164491927	-1.0383711596992348e-40	0.026386470973641555	1.0505491615376122e-40	1.1736589308972522e-38	3.0240178252646284	-1.1593206394642165e-38	1.216001799208955e-38	3.0312910992833566	-1.1681529091505186e-38	800.0000000000424	3.024017825357801	-1.2348183910212453e-38	88.88888888082545	-2.2525601032176424e-47	-3.7400068893368667e-11	-1.026099525347421e-05	-5.935708595061321e-45	-3.896414120124938e-08	1.0261069232595587e-06
5.705	88.7639203246042	-1.915666217532054e-38	4.71179501949691	507.11111110465714	-1.4398779383988354e-47	-800.0000000000425	-1.1355873802529503e-40	0.05058027262556954	-6.816758075718699e-42	0.9996484641275036	-1.0413467970574235e-40	0.026513167315416437	1.0503220688916846e-40	1.173168641300743e-38	3.038541237565424	-1.1625998088303654e-38	1.215806513475105e-38	3.0457812800236885	-1.1714061273583595e-38	800.0000000000425	3.0385412382203727	-1.2347953790576448e-38	88.88888884278792	-4.4454513130056e-47	-1.7615275104745514e-10	-3.858518482502144e-06	-2.215196659581244e-45	-1.343041031439259e-08	3.858541856159119e-07
5.71	88.76272861060595	-1.9156319015494433e-38	4.7341919056179025	507.55555554885837	-1.463157351272117e-47	-800.0000000000438	-1.1355707041733618e-40	0.05034823262969531	-6.814243056235894e-42	0.9996451112477381	-1.044321765236498e-40	0.026639283452523997	1.0500956256399595e-40	1.1726789376516473e-38	3.052998188672963	-1.1658790229294387e-38	1.2156112997912556e-38	3.0602049862018115	-1.1746592977927513e-38	800.0000000000438	3.05299818938775	-1.2347732597700616e-38	88.88888883947004	-4.617810876691768e-47	-1.7621845846514415e-10	1.2639323661762677e-07	1.8407561393384698e-46	7.491233663720436e-09	1.2661504193611378e-08
5.715	88.76153676742553	-1.9155989656540645e-38	4.75648546342732	507.99999999297813	-1.4907669520583687e-47	-800.0000000000451	-1.1355541109164646e-40	0.050115978350099906	-6.811739642890192e-42	0.9996417579933237	-1.0472960642038764e-40	0.026764819015317274	1.0498698334659687e-40	1.172189827932715e-38	3.067388635635664	-1.1691582807704635e-38	1.2154161578249158e-38	3.0745621564299612	-1.1779124206909637e-38	800.0000000000451	3.067388636411413	-1.2347520300417226e-38	88.88888883817764	-4.59678930312066e-47	-1.2065186582690441e-10	-2.873598248242876e-07	8.397949636102021e-47	1.4694388657594512e-08	2.877352845604197e-08
5.72	88.76034487653963	-1.9155674035640356e-38	4.778675601982136	508.4444444370778	-1.5189312551578822e-47	-800.000000000046	-1.1355376004686633e-40	0.04988351483968491	-6.809247845682169e-42	0.9996384045934564	-1.0502696938410945e-40	0.026889773480374492	1.0496446944835886e-40	1.1717013206528033e-38	3.081712517998801	-1.1724375812702592e-38	1.2152210872433077e-38	3.0888527307679228	-1.1811654962902273e-38	800.000000000046	3.081712518859061	-1.2347316858411098e-38	88.88888883635953	-4.567717707741281e-47	-4.286700695221936e-11	-3.249321404533862e-07	5.185092966331036e-47	1.3915347961871423e-08	3.2522996911188716e-08
5.725	88.75915302115705	-1.9155372088808027e-38	4.800762227456545	508.88888888120516	-1.544672617883716e-47	-800.0000000000463	-1.1355211728168202e-40	0.04965084725366766	-6.806767674929638e-42	0.9996350512822123	-1.0532426540205338e-40	0.027014146307881355	1.0494202108525714e-40	1.1712134243830194e-38	3.0959697734404097	-1.1757169233282933e-38	1.215026087713358e-38	3.1030766507523433	-1.184418524827735e-38	800.0000000000463	3.095969774358287	-1.2347122230359501e-38	88.88888883514541	-4.548582939567864e-47	8.995541600212926e-12	-1.3728656729956416e-07	2.0465920045396638e-47	5.776697700559137e-09	1.3740804851689513e-08
5.73	88.75796128339448	-1.915508375191101e-38	4.8227452523877945	509.33333332537404	-1.5672123531215766e-47	-800.0000000000456	-1.1355048279439356e-40	0.04941798071254205	-6.804299140249404e-42	0.9996316982906212	-1.0562149446524525e-40	0.02713793699356925	1.0491963847008072e-40	1.1707261476310556e-38	3.1101603437052545	-1.1789963058480545e-38	1.2148311589017177e-38	3.117233859386782	-1.1876715065406312e-38	800.0000000000456	3.110160344644999	-1.2346936374911774e-38	88.88888883470817	-4.5432655462492795e-47	2.6039923239452718e-11	-1.7430915969876308e-07	2.13764902533205e-47	6.657726790823798e-09	1.7443625907737804e-08
5.735	88.75676974348148	-1.9154808960562456e-38	4.844624600309294	509.7777777695382	-1.589571852807212e-47	-800.0000000000448	-1.1354885658263378e-40	0.0491849202767955	-6.801842250046851e-42	0.9996283458444504	-1.059186565712563e-40	0.027261145094597	1.0489732181011263e-40	1.1702394987892986e-38	3.124284177567161	-1.1822757277462893e-38	1.214636300474797e-38	3.131324301124522	-1.190924441665992e-38	800.0000000000448	3.1242841785739452	-1.2346759250694226e-38	88.88888883320396	-4.523967531457033e-47	8.400171367290057e-11	-3.742530433706987e-07	4.838224205060143e-47	1.4399420375462162e-08	3.7452995044372535e-08
5.74	88.75557848307506	-1.91545476505678e-38	4.866400186436771	510.22222221369697	-1.6118980646817066e-47	-800.0000000000438	-1.1354723864454013e-40	0.048951671052305315	-6.799397013643704e-42	0.9996249941734482	-1.062157517127067e-40	0.02738377012165869	1.0487507131680076e-40	1.1697534863475808e-38	3.1383412184807247	-1.1855551879157045e-38	1.2144415120987392e-38	3.145347921881572	-1.1941773304408408e-38	800.0000000000438	3.1383412195722027	-1.234659081628308e-38	88.88888883128655	-4.499053384374563e-47	1.577187621798269e-10	-2.8507140351998305e-07	3.761100778971314e-47	1.103582253939148e-08	2.8528493560644584e-08
5.745	88.75438758388141	-1.9154299757739096e-38	4.888071925699409	510.6666666578509	-1.6342389124072335e-47	-800.0000000000427	-1.1354562897826756e-40	0.04871823814651251	-6.796963440393254e-42	0.9996216435074997	-1.0651277988204605e-40	0.02750581158384767	1.0485288720173648e-40	1.1692681188049262e-38	3.1523314097162043	-1.1888346852404272e-38	1.2142467934394195e-38	3.159304669037115	-1.1974301731021475e-38	800.0000000000427	3.15233141085615	-1.2346431030215894e-38	88.8888888302276	-4.485179096873761e-47	1.9846103059541825e-10	-3.4573872653706924e-07	4.2801568351972537e-47	1.2852864569265955e-08	3.459775471834989e-08
5.75	88.75319712480832	-1.9154065217567976e-38	4.909639748754282	511.111111101999	-1.656536788655003e-47	-800.0000000000417	-1.1354402758102614e-40	0.04848462657784419	-6.794541537915039e-42	0.9996182940686408	-1.068097410810266e-40	0.027627269078176253	1.048307696683324e-40	1.168783404489128e-38	3.166254704604298	-1.1921142186279623e-38	1.214052144162495e-38	3.1731944914080077	-1.2006829698868025e-38	800.0000000000417	3.166254705839653	-1.2346279851052733e-38	88.88888882800158	-4.458624116321407e-47	2.7956510625606053e-10	-2.5302853146056914e-07	2.727962833117878e-47	8.776537235062098e-09	2.531806970109109e-08
5.755	88.75200718804099	-1.915384396592134e-38	4.93110356783857	511.5555555461421	-1.6788576798935562e-47	-800.0000000000405	-1.135424344511325e-40	0.04825084146897709	-6.792131315859099e-42	0.9996149460880999	-1.0710663530050567e-40	0.027748142098689497	1.0480871892957973e-40	1.1682993519406672e-38	3.180111044691263	-1.1953937869413664e-38	1.2138575639333462e-38	3.1870173392786447	-1.2039357210316482e-38	800.0000000000405	3.18011104594134	-1.2346137237242294e-38	88.88888882766857	-4.457342797143637e-47	2.876005921267604e-10	-1.8309525747401472e-07	1.5793276746346936e-47	5.720916238070883e-09	1.8318461232341204e-08
5.76	88.75081785077028	-1.915363593809422e-38	4.952463323258688	511.9999999902782	-1.7010792336833505e-47	-800.0000000000389	-1.13540849585217e-40	0.04801688778372674	-6.789732780781279e-42	0.9996115997830965	-1.074034625479428e-40	0.027868430296339522	1.047867351838733e-40	1.1678159693887442e-38	3.1939003894790328	-1.198673389092054e-38	1.213663052417166e-38	3.2007731643554496	-1.2071884267734298e-38	800.0000000000389	3.1939003907992496	-1.2346003147301767e-38	88.88888882599596	-4.440040756520654e-47	3.442430203268026e-10	-2.959564445366699e-07	3.133359416091072e-47	1.0128728839688702e-08	2.961297151768037e-08
5.765	88.7496291937037	-1.9153441069784386e-38	4.973718935555523	512.4444444344073	-1.7232121882165038e-47	-800.0000000000372	-1.1353927298109746e-40	0.04778277059777121	-6.787345941416267e-42	0.9996082553807147	-1.077002228191067e-40	0.027988133211589217	1.0476481863988575e-40	1.1673332652904371e-38	3.2076226858245596	-1.201953023944317e-38	1.2134686092788967e-38	3.214461919798921	-1.2104410873488304e-38	800.0000000000372	3.2076226871816407	-1.2345877539631672e-38	88.8888888251684	-4.431271878945828e-47	3.7262936887707866e-10	-5.113776069265096e-09	3.388287146784214e-50	1.494257133406088e-10	5.115958730325698e-10
5.77	88.74844129596832	-1.915325929652159e-38	4.994870333924312	512.8888888785326	-1.7453108452907727e-47	-800.0000000000352	-1.1353770463607575e-40	0.04754849493719415	-6.784970805544375e-42	0.9996049131036012	-1.0799691611486528e-40	0.028107250433301853	1.0474296950166465e-40	1.166851248009052e-38	3.221277886122876	-1.2052326903723808e-38	1.213274234183258e-38	3.228083560209424	-1.2136937029944555e-38	800.0000000000352	3.2212778874596535	-1.2345760372636182e-38	88.88888882575763	-4.438058335704411e-47	3.5207158987724346e-10	1.1936691635127422e-07	-1.3657667919534841e-47	-4.151723011209282e-09	1.1943909545527338e-08
5.775	88.74725423462377	-1.915309055361838e-38	5.015917458840708	513.3333333226617	-1.7674930782457396e-47	-800.0000000000334	-1.1353614454678201e-40	0.04731406576330445	-6.78260737970189e-42	0.9996015731685983	-1.0829354244272967e-40	0.028225781613431457	1.0472118796720902e-40	1.1663699257828619e-38	3.234865949988182	-1.2085123872661574e-38	1.2130799267947826e-38	3.241638041608634	-1.2169462739468147e-38	800.0000000000334	3.234865951315899	-1.234565160473681e-38	88.88888882606874	-4.441686727842503e-47	3.412636057298501e-10	2.195174412614964e-08	-2.6893890718821753e-48	-7.591961950027711e-10	2.1964868518669805e-09
5.78	88.74606808747878	-1.9152934776479936e-38	5.03686024654118	513.7777777667936	-1.7897329068794528e-47	-800.0000000000318	-1.1353459271010156e-40	0.0470794880609713	-6.780255670892419e-42	0.9995982357946553	-1.085901018077012e-40	0.028343726380235724	1.0469947423674318e-40	1.1658893069025647e-38	3.2483868343226154	-1.2117921134997213e-38	1.2128856867778018e-38	3.2551253214462856	-1.2201988004423278e-38	800.0000000000318	3.2483868356551953	-1.2345551194301718e-38	88.88888882603666	-4.441413540176834e-47	3.424202958215478e-10	-4.44065525092174e-09	3.933338244023361e-49	1.780174989406976e-10	4.4442220114962666e-10
5.785	88.74488293226541	-1.915279190051392e-38	5.057698633555324	514.222222210924	-1.811945540653936e-47	-800.00000000003	-1.1353304912290458e-40	0.046844766812799844	-6.777915686087084e-42	0.9995949012005083	-1.0888659421494318e-40	0.02846108436362294	1.046778285102882e-40	1.165409399659342e-38	3.2618404962168928	-1.2150718679405574e-38	1.2126915137964475e-38	3.268545358599526	-1.223451282717325e-38	800.00000000003	3.2618404975511734	-1.2345459099666882e-38	88.88888882608353	-4.441977180293911e-47	3.409707881316827e-10	1.1883827255586873e-08	-1.4747932714320587e-48	-3.817612608777507e-10	1.1889957607196772e-09
5.79	88.74369884592893	-1.915266186105328e-38	5.078432560569644	514.6666666550542	-1.8341529229219027e-47	-800.0000000000283	-1.135315137818161e-40	0.046609906977130654	-6.775587431798355e-42	0.9995915696026817	-1.0918301967205459e-40	0.028577855216764425	1.0465625098555985e-40	1.1649302122997977e-38	3.275226895423531	-1.218351649457652e-38	1.2124974075146657e-38	3.281898113365962	-1.2267037210080398e-38	800.0000000000283	3.275226896758947	-1.2345375279154014e-38	88.88888882614242	-4.442741958262088e-47	3.390479991554617e-10	1.2031383297046378e-08	-1.521609604100465e-48	-3.863506963651482e-10	1.203758492809203e-09
5.795	88.74251590501758	-1.915254459340108e-38	5.099061970281397	515.1111110991851	-1.85636761098613e-47	-800.0000000000267	-1.1352998668334427e-40	0.046374913500121594	-6.77327091431673e-42	0.9995882412165856	-1.094793781878048e-40	0.028694038604092104	1.0463474185912823e-40	1.16445175305052e-38	3.288545992983498	-1.221631456917185e-38	1.212303367596221e-38	3.295183547460169	-1.229956115550606e-38	800.0000000000267	3.2885459943200464	-1.23452996910617e-38	88.88888882620182	-4.443465312895943e-47	3.3719090805382814e-10	1.1885958883794154e-08	-1.435668442914292e-48	-3.6737878462650783e-10	1.189163511711652e-09
5.8	88.74133418564885	-1.9152440032830198e-38	5.119586807540394	515.5555555433162	-1.878586397470446e-47	-800.000000000025	-1.1352846782387265e-40	0.04613979131475803	-6.770966139695034e-42	0.9995849162564218	-1.097756697722134e-40	0.02880963420209566	1.0461330132632293e-40	1.16397403011607e-38	3.3017977513174954	-1.2249112891829494e-38	1.2121093937047057e-38	3.3084016240099197	-1.2332084665810536e-38	800.000000000025	3.3017977526551565	-1.2345232293668348e-38	88.88888882626108	-4.44418894336849e-47	3.353622969806221e-10	1.1817746781161189e-08	-1.4567638375760412e-48	-3.6442794281465903e-10	1.182336444118804e-09
5.805	88.74015376349831	-1.915234811458255e-38	5.140007019398569	515.9999999874477	-1.9008095187563986e-47	-800.0000000000233	-1.1352695719965735e-40	0.04590454534055288	-6.768673113742934e-42	0.9995815949351509	-1.1007189443657802e-40	0.028924641699601197	1.0459192958119672e-40	1.1634970516780873e-38	3.314982134257939	-1.2281911451165683e-38	1.211915485503545e-38	3.3215523075523237	-1.2364607743353051e-38	800.0000000000233	3.314982135596683	-1.2345173045232385e-38	88.8888888263197	-4.444939050487638e-47	3.3352789781055796e-10	1.1803535926445987e-08	-1.451282714263111e-48	-3.5864551992570677e-10	1.180898331677473e-09
5.81	88.73897471379627	-1.9152268773870778e-38	5.160322555101954	516.4444444315793	-1.9230365432835051e-47	-800.0000000000216	-1.1352545480682817e-40	0.04566918048348146	-6.766391842027772e-42	0.9995782774644838	-1.1036805219346736e-40	0.02903906079772886	1.0457062681651817e-40	1.16302082589505e-38	3.3280991070441934	-1.2314710235775933e-38	1.2117216426560052e-38	3.334635564029948	-1.2397130390491725e-38	800.0000000000216	3.328099108383964	-1.2345121903993425e-38	88.88888882637642	-4.445791275970192e-47	3.316095937781814e-10	9.799331716445466e-09	-2.5569205317542923e-48	-4.750498380534995e-10	9.810839639784595e-10
5.815	88.73779711131937	-1.9152201945882297e-38	5.180533366070477	516.8888888757114	-1.9452703478928246e-47	-800.0000000000199	-1.1352396064139085e-40	0.04543370163583254	-6.764122329876696e-42	0.9995749640548576	-1.1066414305670324e-40	0.029152891209786466	1.0454939322375075e-40	1.1625453609020263e-38	3.3411486363104133	-1.2347509234236222e-38	1.2115278648251992e-38	3.347651360786898	-1.242965260958353e-38	800.0000000000199	3.3411486376508415	-1.2345078828175783e-38	88.88888882641625	-4.447576277423987e-47	3.286880136298465e-10	6.365278674517134e-09	-4.4586816973928414e-48	-6.800230482722915e-10	6.401500132816069e-10
5.82	88.7366210304033	-1.9152147565773244e-38	5.200639405927909	517.3333333198436	-1.9675127913880804e-47	-800.0000000000183	-1.1352247469922357e-40	0.045198113676433144	-6.761864582373516e-42	0.9995716549154712	-1.1096016704138717e-40	0.029266132661427108	1.0452822899308445e-40	1.1620706648104673e-38	3.3541306901038612	-1.238030843510369e-38	1.2113341516740947e-38	3.36059966656496	-1.2462174402984263e-38	800.0000000000183	3.3541306914447127	-1.2345043775982108e-38	88.88888882644554	-4.449945235668757e-47	3.251462138181421e-10	7.265062625567947e-09	-3.9455675131363504e-48	-6.178887378671873e-10	7.291290794215202e-10
5.825	88.7354465449395	-1.915210556867001e-38	5.220640630494374	517.7777777639759	-1.9897655040560625e-47	-800.0000000000167	-1.1352099697607776e-40	0.04496242147059171	-6.759618604359482e-42	0.9995683502542769	-1.1125612416389381e-40	0.02937878489060975	1.0450713431342782e-40	1.1615967457079615e-38	3.3670452378804865	-1.2413107826917698e-38	1.2111405028655207e-38	3.373480451499727	-1.24946957730485e-38	800.0000000000167	3.3670452392220787	-1.23450167055945e-38	88.8888888264908	-4.451418637891799e-47	3.226222410265834e-10	9.685408031145272e-09	-2.6020236667543053e-48	-4.646996954966471e-10	9.696549620187999e-10
5.83	88.73427372834551	-1.9152075889683823e-38	5.240536997713985	518.2222222081084	-2.0120286107779915e-47	-800.0000000000151	-1.1351952746758676e-40	0.0447266298695549	-6.757384400440893e-42	0.9995650502778954	-1.115520144418066e-40	0.0294908476472182	1.044861093723321e-40	1.1611236116579314e-38	3.3798922504610367	-1.2445907398201352e-38	1.2109469180621744e-38	3.3862936871165745	-1.2527216722129563e-38	800.0000000000151	3.379892251803356	-1.2344997575188154e-38	88.88888882653694	-4.452856754633865e-47	3.201567372241104e-10	7.509489326669405e-09	-3.8661777401760166e-48	-6.000979353464288e-10	7.533428666906507e-10
5.835	88.73310265357937	-1.9152058463903613e-38	5.260328467690225	518.6666666522411	-2.0343015169979393e-47	-800.0000000000135	-1.1351806616926156e-40	0.044490743710773384	-6.755161974985373e-42	0.9995617551916577	-1.1184783789394895e-40	0.02960232069324744	1.0446515435602834e-40	1.1606512706994341e-38	3.3926717000526985	-1.2478707137462217e-38	1.2107533969266274e-38	3.399039346326703	-1.2559737252579494e-38	800.0000000000135	3.392671701395359	-1.2344986342924087e-38	88.88888882656633	-4.455256287144328e-47	3.16654182607394e-10	5.6263142293266806e-09	-4.93967017270525e-48	-7.132620922186521e-10	5.671345044988888e-10
5.84	88.7319333931549	-1.9152053226388583e-38	5.2800150027228385	519.111111096374	-2.056583727869683e-47	-800.0000000000119	-1.1351661307648647e-40	0.04425476781817863	-6.752951332118e-42	0.9995584651996474	-1.1214359454041744e-40	0.02971320380299782	1.04444269449466e-40	1.1601797308469649e-38	3.405383560271644	-1.2511507033193035e-38	1.2105599391213336e-38	3.411717403423269	-1.2592257366749006e-38	800.0000000000119	3.40538356161471	-1.2344982966941503e-38	88.88888882659924	-4.457449363247932e-47	3.134076225854153e-10	8.869941818071318e-09	-3.0663869129327796e-48	-5.008056699505375e-10	8.884068559788636e-10
5.845	88.73076601912074	-1.9152060112178757e-38	5.299596567254902	519.555555540507	-2.078874809382956e-47	-800.0000000000105	-1.135151681845253e-40	0.044018707001793604	-6.750752475726873e-42	0.9995551805046419	-1.1243928440253467e-40	0.029823496762796158	1.0442345483625874e-40	1.1597090000901789e-38	3.418027806110945	-1.254430707387302e-38	1.2103665443086352e-38	3.4243278340773986	-1.2624777066987464e-38	800.0000000000105	3.4180278074548216	-1.234498740536756e-38	88.88888882665167	-4.458521485768102e-47	3.114250494501448e-10	9.259319237267828e-09	-2.87556454942059e-48	-4.754473718275898e-10	9.271517833721501e-10
5.85	88.72960060303708	-1.9152079056306884e-38	5.319073127812726	519.9999999846403	-2.1011752733579697e-47	-800.0000000000089	-1.1351373148852825e-40	0.043782566057297224	-6.748565409469409e-42	0.9995519013080463	-1.1273490750279643e-40	0.029933199370678797	1.0440271069862386e-40	1.1592390863936203e-38	3.430604413904102	-1.2577107247969277e-38	1.21017321215077e-38	3.4368706153340787	-1.2657296355642836e-38	800.0000000000089	3.4306044152483843	-1.234499961632833e-38	88.88888882668746	-4.460580022146459e-47	3.0837201216315123e-10	5.878083205364326e-09	-4.8896808710727435e-48	-6.931029192055617e-10	5.918805101183636e-10
5.855	88.72843721601586	-1.9152109993777872e-38	5.338444653109742	520.444444428774	-2.123485047650207e-47	-800.0000000000074	-1.1351230298351993e-40	0.0435463497667772	-6.746390136761445e-42	0.9995486278100076	-1.1303046386496325e-40	0.03004231143693947	1.0438203721748697e-40	1.1587699976965616e-38	3.4431133613884097	-1.2609907543937093e-38	1.2099799423098776e-38	3.449345725608264	-1.2689815235061668e-38	800.0000000000074	3.4431133627329213	-1.2345019557928768e-38	88.8888888267165	-4.463048171036018e-47	3.0489614153893884e-10	7.74846853346337e-09	-3.7567452047709484e-48	-5.621517535998916e-10	7.768833838366441e-10
5.86	88.72727592870571	-1.9152152859576497e-38	5.35771111400745	520.8888888729075	-2.1458039807623225e-47	-800.0000000000058	-1.1351088266440394e-40	0.04331006289844888	-6.744226660781334e-42	0.9995453602093716	-1.1332595351402587e-40	0.03015083278392326	1.0436143457244295e-40	1.1583017419127533e-38	3.45555462768129	-1.2642707950221203e-38	1.2097867344480063e-38	3.461753144680901	-1.2722333707589046e-38	800.0000000000058	3.45555462902648	-1.2345047188259668e-38	88.88888882676521	-4.464324760164824e-47	3.0276253444810403e-10	9.771857397329412e-09	-2.5570007769272874e-48	-4.248712912578375e-10	9.78108954093953e-10
5.865	88.7261168112603	-1.9152207588684606e-38	5.376872483426783	521.3333333170415	-2.1681320988569091e-47	-800.0000000000043	-1.1350947052597271e-40	0.043073710206036356	-6.742074984479262e-42	0.9995420987035935	-1.1362137647612814e-40	0.03025876324555847	1.0434090294167014e-40	1.1578343269301479e-38	3.4679281932263786	-1.267550845525713e-38	1.2095935882271206e-38	3.474092853694779	-1.2754851775568563e-38	800.0000000000043	3.467928194572087	-1.2345082465413525e-38	88.88888882680877	-4.465938918686396e-47	3.0027833294576286e-10	7.176718478755114e-09	-4.18496530020745e-48	-6.002604656822232e-10	7.201777610421345e-10
5.87	88.72495993336553	-1.9152274116066344e-38	5.395928736424302	521.7777777611755	-2.190469411106778e-47	-800.0000000000028	-1.1350806656289902e-40	0.042837296429303874	-6.739935110569239e-42	0.9995388434888148	-1.139167327786333e-40	0.030366102667759076	1.04320442502004e-40	1.1573677606107113e-38	3.480234039840086	-1.2708309047471899e-38	1.2094005033091066e-38	3.4863648351505296	-1.2787369441342285e-38	800.0000000000028	3.480234041185972	-1.2345125347470235e-38	88.88888882683926	-4.468363998687913e-47	2.969218208932152e-10	6.4633335720520215e-09	-4.616597922986492e-48	-6.426724644365183e-10	6.495206598727993e-10
5.875	88.72380536424254	-1.9152352376666503e-38	5.4148798502006255	522.2222222053098	-2.21281588818078e-47	-800.0000000000014	-1.1350667076973501e-40	0.04260082629411442	-6.737807041528216e-42	0.9995355947598723	-1.1421202245013134e-40	0.030472850908469275	1.0430005342894523e-40	1.1569020507901973e-38	3.4924721507168557	-1.274110971528492e-38	1.20920747935578e-38	3.4985690729026437	-1.281988670725072e-38	800.0000000000014	3.492472152063118	-1.2345175792495175e-38	88.88888882687827	-4.470252287419478e-47	2.9418606104076404e-10	9.961335460198759e-09	-2.4246714207153535e-48	-3.957403894586917e-10	9.969193277615903e-10
5.88	88.72265317262716	-1.9152442305422201e-38	5.43372580403942	522.6666666494442	-2.2351715000883843e-47	-799.9999999999999	-1.1350528314091895e-40	0.04236430451201682	-6.735690779602495e-42	0.999532352710239	-1.1450724552038622e-40	0.03057900783734078	1.042797358966027e-40	1.1564372052779024e-38	3.5046425103920407	-1.2773910447109235e-38	1.209014516028892e-38	3.5107055521553727	-1.2852403575632782e-38	799.9999999999999	3.5046425117390587	-1.2345233758549736e-38	88.8888888269335	-4.471132122491564e-47	2.9258470707430703e-10	8.925364151460602e-09	-3.1259245851952916e-48	-4.687247609019463e-10	8.937663460751955e-10
5.885	88.7215034267534	-1.9152543837272316e-38	5.452466579257773	523.111111093579	-2.257536213729594e-47	-799.9999999999985	-1.135039036707807e-40	0.04212773577991318	-6.733586326812957e-42	0.9995291175319783	-1.148024020202929e-40	0.03068457333547021	1.042594900776475e-40	1.1559732318564377e-38	3.5167451047117195	-1.2806711231352618e-38	1.2088216129901353e-38	3.52277425945853	-1.288492004882576e-38	799.9999999999985	3.516745106058857	-1.234529920369976e-38	88.88888882696499	-4.473535880591314e-47	2.8932584576202036e-10	6.536282626256721e-09	-4.5722000394989734e-48	-6.229009276879621e-10	6.565896445727726e-10
5.89	88.72035619439897	-1.9152656907131355e-38	5.4711021593435625	523.5555555377139	-2.2799099996770106e-47	-799.999999999997	-1.135025323535265e-40	0.041891124780979304	-6.731493684940606e-42	0.9995258894158724	-1.1509749198199611e-40	0.030789547296126023	1.0423931614344013e-40	1.1555101382815226e-38	3.528779920916674	-1.2839512056418188e-38	1.2086287699011523e-38	3.5347751827035605	-1.2917436129165283e-38	799.999999999997	3.5287799222639404	-1.2345372085990882e-38	88.88888882699752	-4.475877196551426e-47	2.861635843173845e-10	9.139237514924378e-09	-2.8780755327847395e-48	-4.310458531329398e-10	9.149396858903008e-10
5.895	88.71921154283268	-1.9152781449922988e-38	5.4896325297725745	523.9999999818484	-2.302321809201122e-47	-799.9999999999957	-1.1350116918325846e-40	0.041654476183528966	-6.729412855545843e-42	0.9995226685512734	-1.1539251543873482e-40	0.030893929623777763	1.0421921426387358e-40	1.1550479322818067e-38	3.5407469475305784	-1.287231291070539e-38	1.2084359864235405e-38	3.5467083111192834	-1.294995181898529e-38	799.9999999999957	3.540746948876761	-1.2345452363478658e-38	88.8888888269982	-4.480779679661378e-47	2.8019113464666435e-10	-2.835089200440467e-08	-3.114602568747274e-47	-3.5513425997120856e-09	2.8572453722177007e-09
5.9	88.7180695387219	-1.9152917400646432e-38	5.508057677632981	524.444444425981	-2.3249461606943945e-47	-799.9999999999945	-1.1349981415401233e-40	0.04141779463885823	-6.727343840008085e-42	0.999519455125842	-1.156874724245281e-40	0.030997720232096907	1.04199184607076e-40	1.1545866215589039e-38	3.5526461741297575	-1.2905113782609984e-38	1.2082432622188575e-38	3.558573635267015	-1.2982467120618013e-38	799.9999999999945	3.552646175463174	-1.2345539994287071e-38	88.88888882665081	-4.511814061855364e-47	2.45369769339437e-10	-1.0954011031571269e-07	-9.240832450596125e-47	-1.0309235095013355e-08	1.1002416142022062e-08
5.905	88.71693024834703	-1.9153064694224474e-38	5.52637759248199	524.8888888701103	-2.3478497472508576e-47	-799.9999999999936	-1.1349846725967062e-40	0.04118108478620198	-6.725286639435392e-42	0.9995162493261535	-1.159823629748928e-40	0.03110091904851609	1.0417922734009453e-40	1.1541262137866535e-38	3.5644775918686324	-1.2937914660527229e-38	1.2080505969486298e-38	3.5703711470371147	-1.301498203639393e-38	799.9999999999936	3.5644775931752903	-1.234563493647321e-38	88.88888882589238	-4.574154648897974e-47	1.7605588192117977e-10	-1.930165656934323e-07	-1.5657749239953123e-46	-1.7372271125998456e-08	1.9379677612427477e-08
5.91	88.7157937375228	-1.9153223265558756e-38	5.544592266034839	525.3333333142361	-2.3710807166402475e-47	-799.9999999999931	-1.1349712849399429e-40	0.040944351250925715	-6.723241254697269e-42	0.9995130513374756	-1.1627718712658307e-40	0.03120352601257415	1.04159342628646e-40	1.1536667166110676e-38	3.576241193289143	-1.2970715532852126e-38	1.2078579902743587e-38	3.582100839645012	-1.3047496568641732e-38	799.9999999999931	3.576241194554724	-1.2345737148076108e-38	88.88888882472337	-4.668427003408387e-47	7.163566821435094e-11	-2.7404046439488684e-07	-2.203705445019747e-46	-2.4376674769179147e-08	2.7512251525196478e-08
5.915	88.71466007157692	-1.915339304954468e-38	5.562701692081369	525.7777777583576	-2.3946911538072584e-47	-799.999999999993	-1.1349579785063117e-40	0.04070759864403639	-6.721207686433465e-42	0.999509861343708	-1.1657194491751993e-40	0.031305541075472336	1.0413953063704917e-40	1.1532081376501462e-38	3.587936972269713	-1.3003516387980152e-38	1.2076654418575268e-38	3.5937627076270915	-1.3080010719688289e-38	799.999999999993	3.587936973480006	-1.234584658712973e-38	88.88888882315958	-4.794218257688306e-47	-6.734540679404641e-11	-3.504688095290239e-07	-2.8231098188139757e-46	-3.116030182050822e-08	3.518513192560693e-08
5.92	88.71352931534761	-1.9153573981072779e-38	5.5807058664787785	526.222222202474	-2.4187372111822325e-47	-799.9999999999934	-1.1349447532311682e-40	0.040470831562134234	-6.719185935054743e-42	0.9995066795273753	-1.1686663638678515e-40	0.03140696420003599	1.0411979152821828e-40	1.1527504844936632e-38	3.599564924020935	-1.303631721430834e-38	1.2074729513596057e-38	3.605356746836568	-1.311252449185862e-38	799.9999999999934	3.599564925162266	-1.2345963211663906e-38	88.88888882123075	-4.950099665166087e-47	-2.3924005423152494e-10	-4.196164600974063e-07	-3.404091564885312e-46	-3.7506332644017e-08	4.212893288146305e-08
5.925	88.71240153318139	-1.9153765995030082e-38	5.5986047871443825	526.6666666465848	-2.4432792389918414e-47	-799.9999999999942	-1.1349316090487536e-40	0.04023405458736463	-6.717176000743637e-42	0.9995035060696205	-1.1716126157461488e-40	0.031507795360676195	1.0410012546365625e-40	1.1522937647029388e-38	3.611125045081253	-1.3069118000236258e-38	1.2072805184420611e-38	3.616882954439344	-1.3145037887475866e-38	799.9999999999942	3.611125046140897	-1.2346086979705333e-38	88.88888881897954	-5.133670051671082e-47	-4.413317884152079e-10	-4.790448334309056e-07	-3.9275094533389596e-46	-4.3204559283027765e-08	4.809891749090459e-08
5.93	88.7112767889305	-1.9153969026301498e-38	5.616398454048369	527.1111110906891	-2.4683819155697704e-47	-799.9999999999957	-1.1349185458922015e-40	0.03999727228736996	-6.715177883455214e-42	0.9995003411501983	-1.1745582052239354e-40	0.03160803454335142	1.0408053260344818e-40	1.1518379858106232e-38	3.622617333312642	-1.310191873416702e-38	1.2070881427663604e-38	3.628341328909854	-1.317755090886124e-38	799.9999999999957	3.6226173342792443	-1.2346217849278522e-38	88.88888881646005	-5.341586416339268e-47	-6.698754261137689e-10	-5.265718527880025e-07	-4.374949394677133e-46	-4.805505562727208e-08	5.287600632800572e-08
5.935	88.71015514595076	-1.9154183009771178e-38	5.634086869206554	527.555555534786	-2.4941143776674044e-47	-799.9999999999978	-1.134905563693547e-40	0.03976048921524156	-6.71319158291784e-42	0.9994971849474686	-1.1775031327264742e-40	0.0317076817455292	1.0406101310625456e-40	1.1513831553204755e-38	3.6340417878962903	-1.313471940450829e-38	1.2068958239939786e-38	3.6397318700268984	-1.321006355833402e-38	799.9999999999978	3.634041788760266	-1.2346355778406804e-38	88.8888888137367	-5.569606595070222e-47	-9.201548248701573e-10	-5.603195537180833e-07	-4.728748475748925e-46	-5.1867499274900216e-08	5.627150608965997e-08
5.94	88.70903666709903	-1.9154407880323893e-38	5.65167003667314	527.9999999788747	-2.5205503507645114e-47	-800.0000000000008	-1.1348926623837336e-40	0.03952370990947142	-6.711217098633933e-42	0.9994940376383896	-1.1804473986903856e-40	0.03180673697614779	1.0404156712930477e-40	1.1509292807071479e-38	3.6453984093282767	-1.3167519999673332e-38	1.2067035617864047e-38	3.6510545788694597	-1.32425758382115e-38	800.0000000000008	3.6453984100822185	-1.23465007251133e-38	88.88888881088236	-5.812622375552749e-47	-1.1865210082346006e-09	-5.787114787380752e-07	-4.972070563013524e-46	-5.4460470918636524e-08	5.812683704760558e-08
5.945	88.70792141473096	-1.9154643572846407e-38	5.6691479625334615	528.4444444229542	-2.547768279379913e-47	-800.0000000000045	-1.1348798418926218e-40	0.03928693889390435	-6.70925442988074e-42	0.9994908993985111	-1.1833910035635831e-40	0.031905200255577734	1.0402219482839033e-40	1.1504763694159665e-38	3.6566871994152397	-1.3200320508081994e-38	1.2065113558051488e-38	3.6623094578125057	-1.3275087750808962e-38	800.0000000000045	3.6566872000543205	-1.2346652647421924e-38	88.88888880797718	-6.064708639929382e-47	-1.4624464888876401e-09	-5.80482861778325e-07	-5.088949591553287e-46	-5.566397244506072e-08	5.8314563416587327e-08
[truncated: 3,944 more rows]
