# Supplementary material for: An Efficient Contact Model for the Simulation of Cargo Airdrop Extraction Phase
Source: Hindawi journal article supplement (doi:10.1155/2018/9895451), 2018-10-17
Supplement: f1 [file 9895451.f1.zip › case3_aircraft_coupling/m8000/df_aft_append.csv]

t	u	v	w	x_g	y_g	z_g	p	q	r	e0	e1	e2	e3	yaw(deg)	pitch(deg)	roll(deg)	yaw_fix(deg)	pitch_fix(deg)	roll_fix(deg)	h_g	alpha(deg)	beta(deg)	vx_g	vy_g	vz_g	ax_g	ay_g	az_g	g-force
0	88.8888888888889	0	0	220.888888888889	0	-800	0	0	0	1	0	0	0	0	0	0	0	0	0	800	0	0	88.8888888888889	0	0	2.84217094304021E-12	0	-2.31610571514832E-21	2.84217094304021E-13
2.485	88.8888888888889	0	0	220.888888888889	0	-800	0	0	0	1	0	0	0	0	0	0	0	0	0	800	0	0	88.8888888888889	0	0	2.84217094304021E-12	0	-2.31610571514832E-21	2.84217094304021E-13
2.49	88.8888888888889	0	-5.75684558935684E-09	221.333333333333	0	-800	0	-9.47228500807542E-08	0	1	0	-3.23822564401322E-11	0	0	-3.71073325025981E-09	0	0	-2.713609766539E-08	0	800	-3.71073325025981E-09	0	88.8888888888889	0	-5.79026428787119E-24	-1.89478062869347E-12	0	-2.76554051463544E-20	1.89478062869347E-13
2.495	88.8888888888889	0	-2.54752202891075E-07	221.777777777778	0	-800	0	-1.23334500562403E-06	0	1	0	-1.4329811412623E-09	0	0	-1.6420754303234E-07	0	0	-3.80463415194393E-07	0	800	-1.6420754303234E-07	0	88.8888888888889	0	0	1.4210854715201E-12	0	9.25339378575925E-20	1.42108547152011E-13
2.5	88.8888888888889	0	-1.19609325423725E-06	222.222222222222	0	-800	0	-3.00678958264749E-06	0	1	0	-6.72802455508453E-09	0	0	-7.70974822933454E-07	0	0	-1.24184518004247E-06	0	800	-7.70974822933453E-07	0	88.8888888888889	0	8.470329472543E-22	9.000207986294E-12	0	2.06653400536122E-19	9.000207986294E-13
2.505	88.8888888888889	0	-2.9065104250801E-06	222.666666666667	0	-800	0	-4.6611789976923E-06	0	1	0	-1.63491211410756E-08	0	0	-1.87347128026348E-06	0	0	-2.5771746006565E-06	0	800	-1.87347128026347E-06	0	88.888888888889	0	1.27054942088145E-21	3.31586610021358E-12	0	-3.34803678219784E-19	3.31586610021359E-13
2.51	88.8888888888888	0	-5.3118182363871E-06	223.111111111111	0	-800	0	-6.1300226294058E-06	0	1	0	-2.98789775796775E-08	0	0	-3.42387862296306E-06	0	0	-4.33329672557982E-06	0	800	-3.42387862296306E-06	0	88.8888888888889	0	-2.2405989294044E-21	5.44749430749373E-12	0	-5.96165658827398E-19	5.44749430749377E-13
2.515	88.8888888888885	0	-8.3253387598186E-06	223.555555555555	0	-800	0	-7.39615373983184E-06	0	0.999999999999999	0	-4.68300305239797E-08	0	0	-5.36632620698571E-06	0	0	-6.45213869519128E-06	0	800	-5.36632620698571E-06	0	88.888888888889	0	-4.61283432008123E-21	8.28966525053394E-12	0	-8.68652629103125E-19	8.28966525053399E-13
2.52	88.8888888888881	0	-1.18550359517158E-05	224	0	-800	0	-8.45235977793379E-06	0	0.999999999999998	0	-6.66845772284017E-08	0	0	-7.64148966760323E-06	0	0	-8.87356140620015E-06	0	800	-7.64148966760323E-06	0	88.888888888889	0	-1.04500974508008E-20	-3.31586610021358E-12	0	-9.94979398873252E-19	3.31586610021373E-13
2.525	88.8888888888875	0	-1.58075806355783E-05	224.444444444445	0	-800	0	-9.2997639577903E-06	0	0.999999999999996	0	-8.89176410751285E-08	0	0	-1.01892111157279E-05	0	0	-1.15377475324466E-05	0	800	-1.01892111157279E-05	0	88.888888888889	0	-1.22862810040991E-20	-2.36847578586684E-13	0	7.88234239010184E-19	2.36847578587996E-14
2.53	88.8888888888866	0	-2.00916974600687E-05	224.888888888889	0	-800	0	-9.94622240212368E-06	0	0.999999999999994	0	-1.13015798212887E-07	0	0	-1.29506565118012E-05	0	0	-1.43871303611476E-05	0	800	-1.29506565118012E-05	0	88.888888888889	0	-3.92940846914791E-21	3.55271367880026E-12	0	1.66304839124375E-18	3.55271367880065E-13
2.535	88.8888888888855	0	-2.46208129241131E-05	225.333333333334	0	-800	0	-1.04047895621031E-05	0	0.999999999999991	0	-1.38492072698138E-07	0	0	-1.58700225232446E-05	0	0	-1.73678830042992E-05	0	800	-1.58700225232445E-05	0	88.888888888889	0	2.58623192527908E-22	-4.73695157173368E-13	0	-8.31481783880224E-19	4.73695157174098E-14
2.54	88.8888888888841	0	-2.93150442917955E-05	225.777777777778	0	-800	0	-1.06922926651996E-05	0	0.999999999999987	0	-1.64897124141352E-07	0	0	-1.88958185342886E-05	0	0	-2.04309992194725E-05	0	800	-1.88958185342886E-05	0	88.888888888889	0	-9.87376735241691E-21	-9.71075072205405E-12	0	-1.28621387434224E-18	9.71075072205413E-13
2.545	88.8888888888824	0	-3.41025848260912E-05	226.222222222222	0	-800	0	-1.08280446331855E-05	0	0.999999999999982	0	-1.91827039646767E-07	0	0	-2.1981759536497E-05	0	0	-2.35330055087768E-05	0	800	-2.1981759536497E-05	0	88.888888888889	0	-9.95224503743422E-21	5.68434188608042E-12	0	6.13386974178516E-19	5.68434188608045E-13
2.55	88.8888888888804	0	-3.89209931648591E-05	226.666666666667	0	-800	0	-1.08407879060134E-05	0	0.999999999999976	0	-2.18930586552338E-07	0	0	-2.50875972315453E-05	0	0	-2.66386624768322E-05	0	800	-2.50875972315453E-05	0	88.8888888888891	0	-8.44352184830545E-21	1.84741111297614E-11	0	-2.03132994022731E-18	1.84741111297615E-12
2.555	88.8888888888781	0	-4.37435039400518E-05	227.111111111111	0	-800	0	-1.08769884382755E-05	0	0.99999999999997	0	-2.46057209662799E-07	0	0	-2.81960792648883E-05	0	0	-2.97546901334613E-05	0	800	-2.81960792648882E-05	0	88.8888888888891	0	-2.51026312252938E-20	-4.97379915032037E-12	0	4.14837558219926E-19	4.97379915032038E-13
2.56	88.8888888888756	0	-4.86009731092674E-05	227.555555555556	0	-800	0	-1.0984356361309E-05	0	0.999999999999963	0	-2.7338047373964E-07	0	0	-3.13270946931372E-05	0	0	-3.29014764343149E-05	0	800	-3.13270946931371E-05	0	88.888888888889	0	-9.19706044164691E-21	4.73695157173368E-13	0	-1.46191367486602E-18	4.73695157175624E-14
2.565	88.8888888888728	0	-5.34992278001865E-05	228	0	-800	0	-1.10431051147315E-05	0	0.999999999999955	0	-3.00933156376063E-07	0	0	-3.44843995517982E-05	0	0	-3.60650930132824E-05	0	800	-3.44843995517981E-05	0	88.8888888888891	0	-4.08708072773631E-20	8.76336040770731E-12	0	-4.22728894388807E-18	8.76336040770833E-13
2.57	88.8888888888697	0	-5.84047631514485E-05	228.444444444444	0	-800	0	-1.10189519311051E-05	0	0.999999999999947	0	-3.28526792726916E-07	0	0	-3.76463973604436E-05	0	0	-3.92217902148318E-05	0	800	-3.76463973604436E-05	0	88.8888888888891	0	-4.68741097728926E-20	2.36847578586684E-13	0	-3.74202854042337E-18	2.36847578616245E-14
2.575	88.8888888888664	0	-6.32833176617149E-05	228.888888888889	0	-800	0	-1.09236920887586E-05	0	0.999999999999937	0	-3.55968661847169E-07	0	0	-4.07910039255256E-05	0	0	-4.23511974817636E-05	0	800	-4.07910039255255E-05	0	88.8888888888891	0	-7.28816892419579E-20	-4.73695157173368E-13	0	1.715866425264E-18	4.73695157176476E-14
2.58	88.8888888888628	0	-6.81059425857373E-05	229.333333333333	0	-800	0	-1.07692260901947E-05	0	0.999999999999927	0	-3.83095927044801E-07	0	0	-4.38995595366387E-05	0	0	-4.54363534997155E-05	0	800	-4.38995595366386E-05	0	88.8888888888891	0	-4.07624037329879E-20	-1.56319401867212E-11	0	-3.28102500208497E-18	1.56319401867215E-12
2.585	88.888888888859	0	-7.28534512493836E-05	229.777777777778	0	-800	0	-1.06030146884632E-05	0	0.999999999999916	0	-4.09800663277817E-07	0	0	-4.69596968949627E-05	0	0	-4.84738934585365E-05	0	800	-4.69596968949627E-05	0	88.888888888889	0	-9.49291444739729E-20	-1.91846538655214E-11	0	9.4385812036482E-19	1.91846538655214E-12
2.59	88.8888888888551	0	-7.75436185877404E-05	230.222222222222	0	-800	0	-1.05178883166249E-05	0	0.999999999999905	0	-4.36182854556081E-07	0	0	-4.99828733240657E-05	0	0	-5.14870465081996E-05	0	800	-4.99828733240657E-05	0	88.8888888888889	0	-2.63922515039017E-20	-1.01844458792274E-11	0	9.03137119138952E-18	1.01844458792314E-12
2.595	88.8888888888509	0	-8.22115143890203E-05	230.666666666667	0	-800	0	-1.04906483369251E-05	0	0.999999999999893	0	-4.62439768438289E-07	0	0	-5.29916940210439E-05	0	0	-5.44923958785085E-05	0	800	-5.2991694021044E-05	0	88.8888888888889	0	-1.45519586311614E-20	-1.20792265079209E-11	0	8.6789080493769E-18	1.2079226507924E-12
2.6	88.8888888888465	0	-8.68662401305623E-05	231.111111111111	0	-800	0	-1.04498508778995E-05	0	0.99999999999988	0	-4.88622600734471E-07	0	0	-5.59920255935844E-05	0	0	-5.74860576377323E-05	0	800	-5.59920255935844E-05	0	88.8888888888888	0	6.03728115260968E-20	-1.49213974509611E-11	0	1.18338471169157E-17	1.49213974509658E-12
2.605	88.8888888888418	0	-9.14963672535031E-05	231.555555555555	0	-800	0	-1.03849132697988E-05	0	0.999999999999867	0	-5.14667065801022E-07	0	0	-5.89765014495634E-05	0	0	-6.04611161425769E-05	0	800	-5.89765014495635E-05	0	88.8888888888888	0	7.84568768033661E-20	-7.10542735760052E-13	0	-8.14506189887393E-18	7.10542735806736E-14
2.61	88.888888888837	0	-9.61006238275535E-05	232	0	-800	0	-1.03417238836925E-05	0	0.999999999999853	0	-5.40566009030067E-07	0	0	-6.19443017313102E-05	0	0	-6.34238017997032E-05	0	800	-6.19443017313102E-05	0	88.8888888888888	0	7.64760495732907E-21	7.57912251477389E-12	0	-2.99768167411315E-18	7.57912251477448E-13
2.615	88.8888888888319	0	-0.000100696685028	232.444444444444	0	-800	0	-1.03485117089951E-05	0	0.999999999999839	0	-5.6641885328192E-07	0	0	-6.49068194593911E-05	0	0	-6.6388432025539E-05	0	800	-6.49068194593911E-05	0	88.8888888888888	0	5.23501027511656E-20	6.63173220042715E-12	0	2.00840465280112E-18	6.63173220042746E-13
2.62	88.8888888888265	0	-0.000105304255817	232.888888888889	0	-800	0	-1.03885593142947E-05	0	0.999999999999824	0	-5.92336438972424E-07	0	0	-6.78767560098606E-05	0	0	-6.93645350451913E-05	0	800	-6.78767560098607E-05	0	88.8888888888888	0	3.13795195552942E-20	-2.10794344942149E-11	0	8.03826599701224E-18	2.10794344942164E-12
2.625	88.888888888821	0	-0.00010993218922	233.333333333333	0	-800	0	-1.04379880398978E-05	0	0.999999999999808	0	-6.18368564359935E-07	0	0	-7.08598178427806E-05	0	0	-7.23547983516624E-05	0	800	-7.08598178427807E-05	0	88.8888888888886	0	1.47807914419011E-19	-3.78956125738695E-11	0	3.05093102816937E-17	3.78956125738817E-12
2.63	88.8888888888151	0	-0.000114584027563	233.777777777778	0	-800	0	-1.0498471010722E-05	0	0.999999999999791	0	-6.44535155042723E-07	0	0	-7.38582882635213E-05	0	0	-7.53623887529366E-05	0	800	-7.38582882635215E-05	0	88.8888888888885	0	2.89014138479327E-19	-5.44749430749373E-12	0	1.23780392564313E-17	5.4474943075078E-13
2.635	88.8888888888089	0	-0.000119268205947	234.222222222222	0	-800	0	-1.05857419050567E-05	0	0.999999999999774	0	-6.70883658450071E-07	0	0	-7.68776043469763E-05	0	0	-7.83949804238094E-05	0	800	-7.68776043469765E-05	0	88.8888888888885	0	2.82868437241683E-19	-3.31586610021358E-12	0	7.92898665394564E-18	3.31586610022306E-13
2.64	88.8888888888025	0	-0.00012399830308	234.666666666667	0	-800	0	-1.07043940105777E-05	0	0.999999999999755	0	-6.97490454823916E-07	0	0	-7.99265186241476E-05	0	0	-8.14615634190658E-05	0	800	-7.99265186241478E-05	0	88.8888888888885	0	3.69181346750737E-19	-1.44477022937877E-11	0	2.05489436390651E-18	1.44477022937879E-12
2.645	88.8888888887956	0	-0.000128786558816	235.111111111111	0	-800	0	-1.08456729347604E-05	0	0.999999999999736	0	-7.24424393341389E-07	0	0	-8.30129206295805E-05	0	0	-8.45686198447712E-05	0	800	-8.30129206295808E-05	0	88.8888888888884	0	3.13406381353518E-19	-4.73695157173368E-12	0	4.23933807083684E-18	4.73695157173558E-13
2.65	88.8888888887885	0	-0.000133641166533	235.555555555556	0	-800	0	-1.10026112513831E-05	0	0.999999999999716	0	-7.51731561749164E-07	0	0	-8.61420916300182E-05	0	0	-8.77206357864084E-05	0	800	-8.61420916300185E-05	0	88.8888888888884	0	4.10024029539611E-19	5.44749430749373E-12	0	5.13154030290713E-18	5.44749430749615E-13
2.655	88.8888888887809	0	-0.000138569263057	236	0	-800	0	-1.1177208065113E-05	0	0.999999999999695	0	-7.79452104693521E-07	0	0	-8.93186318630648E-05	0	0	-9.09226700307614E-05	0	800	-8.93186318630651E-05	0	88.8888888888884	0	3.55249615302452E-19	6.39488462184047E-12	0	-3.27162287943539E-18	6.39488462184131E-13
2.66	88.888888888773	0	-0.000143579745126	236.444444444445	0	-800	0	-1.13737612825586E-05	0	0.999999999999672	0	-8.07636066331687E-07	0	0	-9.25482759667168E-05	0	0	-9.41810126241612E-05	0	800	-9.25482759667171E-05	0	88.8888888888885	0	3.96034800167758E-19	8.52651282912063E-12	0	6.61912918999016E-18	8.5265128291232E-13
2.665	88.8888888887646	0	-0.000148682487197	236.888888888889	0	-800	0	-1.15918882251323E-05	0	0.999999999999649	0	-8.36338990481463E-07	0	0	-9.58373887936505E-05	0	0	-9.75018439835988E-05	0	800	-9.58373887936508E-05	0	88.8888888888885	0	3.97789919144824E-19	1.4210854715201E-12	0	-4.44365762575582E-18	1.42108547152705E-13
2.67	88.8888888887557	0	-0.000153886297892	237.333333333334	0	-800	0	-1.18279952796471E-05	0	0.999999999999624	0	-8.65610425642051E-07	0	0	-9.91916481836369E-05	0	0	-0.000100890315032	0	800	-9.91916481836372E-05	0	88.8888888888885	0	3.53198708879151E-19	5.68434188608042E-12	0	-1.5143505107985E-17	5.68434188610059E-13
2.675	88.8888888887464	0	-0.000159198627216	237.777777777778	0	-800	0	-1.20801841354242E-05	0	0.999999999999598	0	-8.9549227808758E-07	0	0	-0.000102615856242	0	0	-0.000104351032865	0	800	-0.000102615856242	0	88.8888888888885	0	2.79180342538964E-19	-4.97379915032037E-12	0	1.73886490568218E-18	4.97379915032067E-13
2.68	88.8888888887365	0	-0.00016462674498	238.222222222223	0	-800	0	-1.23492834503837E-05	0	0.99999999999957	0	-9.2602544051367E-07	0	0	-0.000106114698926	0	0	-0.000107888841974	0	800	-0.000106114698926	0	88.8888888888885	0	3.55768493800043E-19	-5.21064672890705E-12	0	5.26879271998543E-18	5.21064672890971E-13
2.685	88.888888888726	0	-0.000170178422618	238.666666666667	0	-800	0	-1.26362351581196E-05	0	0.99999999999954	0	-9.57253627225929E-07	0	0	-0.000109693185527	0	0	-0.000111508856691	0	800	-0.000109693185527	0	88.8888888888885	0	3.14016304171025E-19	9.000207986294E-12	0	-7.9733934309255E-18	9.00020798629753E-13
2.69	88.888888888715	0	-0.000175861508122	239.111111111112	0	-800	0	-1.29404036685408E-05	0	0.99999999999951	0	-9.89220983185128E-07	0	0	-0.000113356374685	0	0	-0.000115216009268	0	800	-0.000113356374685	0	88.8888888888885	0	3.15758838736493E-19	-5.9211894646671E-12	0	1.40280426836961E-17	5.92118946468372E-13
2.695	88.8888888887032	0	-0.000181683358005	239.555555555556	0	-800	0	-1.32604969949281E-05	0	0.999999999999476	0	-1.02196888877684E-06	0	0	-0.000117109008241	0	0	-0.000119014861829	0	800	-0.000117109008241	0	88.8888888888885	0	4.37506707886128E-19	-1.18423789293342E-12	0	2.19454934260449E-17	1.18423789313676E-13
2.7	88.8888888886909	0	-0.000187650893241	240.000000000001	0	-800	0	-1.35959882498386E-05	0	0.999999999999442	0	-1.05553627447936E-06	0	0	-0.000120955547301	0	0	-0.000122909825554	0	800	-0.000120955547301	0	88.8888888888885	0	5.02009162499044E-19	2.60532336445352E-12	0	4.95174064505132E-18	2.60532336445823E-13
2.705	88.8888888886777	0	-0.000193771001485	240.444444444445	0	-800	0	-1.39471378972056E-05	0	0.999999999999405	0	-1.08996188335189E-06	0	0	-0.000124900431492	0	0	-0.000126905386243	0	800	-0.000124900431492	0	88.8888888888885	0	4.87289288708646E-19	0	0	-1.07492399194231E-17	1.07492399194231E-18
2.71	88.8888888886638	0	-0.000200050697958	240.88888888889	0	-800	0	-1.43141224991754E-05	0	0.999999999999366	0	-1.12528517601301E-06	0	0	-0.000128948182668	0	0	-0.000131006080276	0	800	-0.000128948182668	0	88.8888888888885	0	4.16915046613537E-19	4.26325641456031E-12	0	-8.56316355040062E-18	4.26325641456891E-13
2.715	88.8888888886491	0	-0.000206496968435	241.333333333334	0	-800	0	-1.46966455667025E-05	0	0.999999999999324	0	-1.16154544744831E-06	0	0	-0.000133103303703	0	0	-0.000135216359096	0	800	-0.000133103303703	0	88.8888888888885	0	4.01708175967506E-19	5.9211894646671E-12	0	-9.93733507253671E-18	5.92118946467544E-13
2.72	88.8888888886335	0	-0.00021311662345	241.777777777779	0	-800	0	-1.50943042449208E-05	0	0.99999999999928	0	-1.19878100690917E-06	0	0	-0.000137370184513	0	0	-0.000139540558735	0	800	-0.000137370184513	0	88.8888888888885	0	3.31150073593992E-19	4.73695157173368E-13	0	3.60073681475322E-19	4.73695157173505E-14
2.725	88.8888888886169	0	-0.000219916351829	242.222222222223	0	-800	0	-1.55069839400638E-05	0	0.999999999999234	0	-1.23702947903665E-06	0	0	-0.000141753136564	0	0	-0.000143982982399	0	800	-0.000141753136564	0	88.8888888888885	0	3.97409608904529E-19	-9.47390314346736E-13	0	4.92699186458257E-18	9.47390314359548E-14
2.73	88.8888888885993	0	-0.000226902851796	242.666666666668	0	-800	0	-1.59347988549386E-05	0	0.999999999999184	0	-1.27632854135342E-06	0	0	-0.000146256477383	0	0	-0.000148547966008	0	800	-0.000146256477383	0	88.8888888888885	0	3.60922089221207E-19	-4.73695157173368E-13	0	-5.68165354228622E-18	4.73695157207442E-14
2.735	88.8888888885807	0	-0.000234082870729	243.111111111112	0	-800	0	-1.63778176625016E-05	0	0.999999999999132	0	-1.3167161478499E-06	0	0	-0.000150884556177	0	0	-0.000153239865156	0	800	-0.000150884556177	0	88.8888888888885	0	3.44264789110248E-19	-4.500103993147E-12	0	-1.11783040986325E-17	4.50010399316088E-13
2.74	88.8888888885609	0	-0.000241463154461	243.555555555556	0	-800	0	-1.68359731350046E-05	0	0.999999999999076	0	-1.35823024384486E-06	0	0	-0.000155641721159	0	0	-0.00015806301618	0	800	-0.000155641721159	0	88.8888888888885	0	2.46890727776939E-19	-4.73695157173368E-13	0	-2.25628211048251E-17	4.73695157710719E-14
2.745	88.88888888854	0	-0.000249050410148	244.000000000001	0	-800	0	-1.73091844848133E-05	0	0.999999999999018	0	-1.40090855708632E-06	0	0	-0.00016053229561	0	0	-0.000163021732269	0	800	-0.00016053229561	0	88.8888888888885	0	1.55856963268377E-19	6.86857977901384E-12	0	-3.79149193434657E-18	6.86857977901488E-13
2.75	88.8888888885178	0	-0.000256851327765	244.444444444445	0	-800	0	-1.77974606909098E-05	0	0.999999999998955	0	-1.44478871867915E-06	0	0	-0.000165560591737	0	0	-0.000168120329187	0	800	-0.000165560591737	0	88.8888888888886	0	2.07428748775831E-19	-6.63173220042715E-12	0	9.11654751014713E-18	6.63173220043342E-13
2.755	88.8888888884943	0	-0.000264872616618	244.88888888889	0	-800	0	-1.83008651698453E-05	0	0.999999999998889	0	-1.48990846847605E-06	0	0	-0.000170730934209	0	0	-0.000173363140865	0	800	-0.000170730934209	0	88.8888888888885	0	2.560584731622E-19	-1.20792265079209E-11	0	3.61385206719611E-17	1.2079226507975E-12
2.76	88.8888888884693	0	-0.000273121009982	245.333333333334	0	-800	0	-1.88194316957077E-05	0	0.999999999998819	0	-1.53630568114804E-06	0	0	-0.000176047663144	0	0	-0.00017875451091	0	800	-0.000176047663144	0	88.8888888888885	0	5.01509956318657E-19	1.65793305010679E-12	0	7.86746137174507E-18	1.65793305012546E-13
2.765	88.8888888884428	0	-0.000281603244106	245.777777777779	0	-800	0	-1.93531432126384E-05	0	0.999999999998744	0	-1.58401824810084E-06	0	0	-0.000181515120576	0	0	-0.000184298778042	0	800	-0.000181515120576	0	88.8888888888885	0	3.40195383293168E-19	2.36847578586684E-13	0	-1.55247691241996E-17	2.36847579095489E-14
2.77	88.8888888884148	0	-0.000290326043069	246.222222222223	0	-800	0	-1.99019693249408E-05	0	0.999999999998665	0	-1.6330839922654E-06	0	0	-0.000187137640694	0	0	-0.000190000272274	0	800	-0.000187137640694	0	88.8888888888885	0	4.08476347518844E-19	1.89478062869347E-12	0	1.58762691094576E-17	1.89478062875999E-13
2.775	88.888888888385	0	-0.000299296120069	246.666666666668	0	-800	0	-2.04658922182996E-05	0	0.999999999998582	0	-1.68354067538843E-06	0	0	-0.000192919550677	0	0	-0.000195863318514	0	800	-0.000192919550677	0	88.8888888888885	0	4.43275750215729E-19	2.13162820728016E-12	0	-2.13531430053554E-18	2.13162820728123E-13
2.78	88.8888888883535	0	-0.00030852018114	247.111111111112	0	-800	0	-2.10448929575378E-05	0	0.999999999998493	0	-1.73542601891541E-06	0	0	-0.000198865173082	0	0	-0.000201892236248	0	800	-0.000198865173082	0	88.8888888888885	0	3.73576745131624E-19	0	0	-3.30480024070492E-17	3.30480024070492E-18
2.785	88.88888888832	0	-0.00031800491905	247.555555555556	0	-800	0	-2.16389281190225E-05	0	0.999999999998399	0	-1.78877766965916E-06	0	0	-0.000204978821918	0	0	-0.00020809133252	0	800	-0.000204978821918	0	88.8888888888885	0	1.89117422227557E-19	2.36847578586684E-12	0	3.63937410558856E-19	2.36847578586687E-13
2.79	88.8888888882846	0	-0.000327757000739	248.000000000001	0	-800	0	-2.22479262651875E-05	0	0.999999999998299	0	-1.84363312916115E-06	0	0	-0.000211264794543	0	0	-0.00021446489391	0	800	-0.000211264794543	0	88.8888888888885	0	3.58089868036548E-19	4.02640883597363E-12	0	1.31037568650939E-17	4.02640883599495E-13
2.795	88.8888888882471	0	-0.000337783057306	248.444444444445	0	-800	0	-2.28717996440387E-05	0	0.999999999998194	0	-1.90002969734811E-06	0	0	-0.000217727365215	0	0	-0.000221017181857	0	800	-0.000217727365215	0	88.8888888888885	0	2.97544488821587E-19	-1.4210854715201E-12	0	9.78013156827348E-18	1.42108547155376E-13
2.8	88.8888888882073	0	-0.000348089678652	248.88888888889	0	-800	0	-2.3510450578827E-05	0	0.999999999998082	0	-1.95800444241846E-06	0	0	-0.000224370781637	0	0	-0.00022775242982	0	800	-0.000224370781637	0	88.8888888888885	0	4.54767865978177E-19	4.73695157173368E-13	0	1.28611421597242E-17	4.73695157347963E-14
2.805	88.8888888881652	0	-0.000358683408388	249.333333333334	0	-800	0	-2.41637672322877E-05	0	0.999999999997964	0	-2.01759417218625E-06	0	0	-0.000231199261673	0	0	-0.000234674839218	0	800	-0.000231199261673	0	88.8888888888885	0	3.75733511664137E-19	8.52651282912063E-12	0	-3.28496477785579E-17	8.52651282918391E-13
2.81	88.8888888881206	0	-0.000369570736078	249.777777777779	0	-800	0	-2.48316175158058E-05	0	0.999999999997838	0	-2.07883539044361E-06	0	0	-0.00023821698835	0	0	-0.000241788573628	0	800	-0.00023821698835	0	88.8888888888885	0	2.11933521193445E-19	-1.4210854715201E-12	0	-5.49759215895093E-18	1.42108547153074E-13
2.815	88.8888888880734	0	-0.000380758087859	250.222222222223	0	-800	0	-2.55138485401925E-05	0	0.999999999997705	0	-2.14176424421268E-06	0	0	-0.000245428103811	0	0	-0.000249097752831	0	800	-0.000245428103811	0	88.8888888888885	0	3.25848597257334E-19	-4.500103993147E-12	0	2.1014854026468E-17	4.50010399319607E-13
2.82	88.8888888880234	0	-0.000392251817781	250.666666666668	0	-800	0	-2.62102892046521E-05	0	0.999999999997565	0	-2.20641647502468E-06	0	0	-0.000252836703734	0	0	-0.000256606447587	0	800	-0.000252836703734	0	88.8888888888885	0	3.85544080260834E-19	-6.15803704325379E-12	0	2.06744250930027E-17	6.15803704328849E-13
2.825	88.8888888879705	0	-0.000404058199969	251.111111111112	0	-800	0	-2.69207507260417E-05	0	0.999999999997416	0	-2.27282737483311E-06	0	0	-0.00026044683228	0	0	-0.000264318674577	0	800	-0.00026044683228	0	88.8888888888885	0	5.03726742615088E-19	-4.73695157173368E-12	0	-1.68067835605688E-18	4.73695157173398E-13
2.83	88.8888888879146	0	-0.000416183420338	251.555555555557	0	-800	0	-2.76450244433721E-05	0	0.999999999997259	0	-2.34103173940593E-06	0	0	-0.000268262476749	0	0	-0.000272238390702	0	800	-0.000268262476749	0	88.8888888888885	0	3.94493178475231E-19	7.10542735760052E-13	0	-9.00011986137728E-19	7.10542735760622E-14
2.835	88.8888888878554	0	-0.000428633567182	252.000000000001	0	-800	0	-2.83828794458866E-05	0	0.999999999997092	0	-2.41106381540648E-06	0	0	-0.000276287561519	0	0	-0.000280369486716	0	800	-0.000276287561519	0	88.8888888888885	0	4.98282084335927E-19	3.78956125738694E-12	0	-1.0507525375743E-18	3.78956125738709E-13
2.84	88.8888888877929	0	-0.000441414621016	252.444444444446	0	-800	0	-2.91340615758244E-05	0	0.999999999996916	0	-2.48295724322195E-06	0	0	-0.000284525941496	0	0	-0.000288715780558	0	800	-0.000284525941496	0	88.8888888888885	0	3.95987533195813E-19	-1.89478062869347E-12	0	6.48681421366401E-18	1.89478062870458E-13
2.845	88.8888888877268	0	-0.000454532444151	252.88888888889	0	-800	0	-2.98982929873216E-05	0	0.99999999999673	0	-2.55674499835679E-06	0	0	-0.000292981395394	0	0	-0.000297281010572	0	800	-0.000292981395394	0	88.8888888888885	0	5.78726732634205E-19	-5.68434188608042E-12	0	3.169209100029E-17	5.68434188616877E-13
2.85	88.8888888876569	0	-0.000467992769999	253.333333333335	0	-800	0	-3.06752712732054E-05	0	0.999999999996534	0	-2.63245933125252E-06	0	0	-0.000301657618842	0	0	-0.000306068828469	0	800	-0.000301657618842	0	88.8888888888885	0	6.48841512041588E-19	-3.31586610021358E-12	0	7.36788703592784E-19	3.31586610021366E-13
2.855	88.8888888875831	0	-0.000481801191876	253.777777777779	0	-800	0	-3.14646681894266E-05	0	0.999999999996326	0	-2.7101317043109E-06	0	0	-0.000310558217164	0	0	-0.000315082791924	0	800	-0.000310558217164	0	88.8888888888884	0	6.19588455084602E-19	-4.02640883597363E-12	0	2.69705134875811E-18	4.02640883597453E-13
2.86	88.8888888875053	0	-0.000495963151252	254.222222222224	0	-800	0	-3.2266128524825E-05	0	0.999999999996107	0	-2.78979272580201E-06	0	0	-0.00031968669781	0	0	-0.000324326356852	0	800	-0.00031968669781	0	88.8888888888884	0	6.78673990583416E-19	1.65793305010679E-12	0	7.59235154574835E-18	1.65793305012417E-13
2.865	88.888888887423	0	-0.000510483925602	254.666666666668	0	-800	0	-3.30792694405748E-05	0	0.999999999995876	0	-2.87147208152095E-06	0	0	-0.000329046462522	0	0	-0.000333802869494	0	800	-0.000329046462522	0	88.8888888888884	0	6.55563480043334E-19	3.07901852162689E-12	0	-2.54143224430873E-17	3.07901852173178E-13
2.87	88.8888888873363	0	-0.000525368616041	255.111111111113	0	-800	0	-3.39036801056051E-05	0	0.999999999995632	0	-2.9551984652434E-06	0	0	-0.000338640799364	0	0	-0.000343515558394	0	800	-0.000338640799364	0	88.8888888888885	0	4.81100618966509E-19	1.18423789293342E-12	0	-1.09854264547958E-17	1.18423789298437E-13
2.875	88.8888888872448	0	-0.000540622134814	255.555555555557	0	-800	0	-3.47389213759482E-05	0	0.999999999995375	0	-3.04099950834181E-06	0	0	-0.000348472874659	0	0	-0.000353467526292	0	800	-0.000348472874659	0	88.8888888888885	0	5.6386082873469E-19	1.4210854715201E-12	0	1.03936704675495E-17	1.42108547155811E-13
2.88	88.8888888871484	0	-0.000556249192648	256.000000000002	0	-800	0	-3.5584525540825E-05	0	0.999999999995104	0	-3.12890170866231E-06	0	0	-0.000358545724836	0	0	-0.00036366174194	0	800	-0.000358545724836	0	88.8888888888885	0	6.04178367402054E-19	-4.02640883597363E-12	0	5.06211930886864E-17	4.02640883629184E-13
2.885	88.8888888870468	0	-0.000572254286026	256.444444444446	0	-800	0	-3.64399961905113E-05	0	0.999999999994818	0	-3.21893035891199E-06	0	0	-0.000368862248225	0	0	-0.000374101031876	0	800	-0.000368862248225	0	88.8888888888884	0	1.01656523947468E-18	-5.9211894646671E-12	0	5.23482075976799E-17	5.9211894648985E-13
2.89	88.8888888869398	0	-0.000588641684423	256.888888888891	0	-800	0	-3.73048082262693E-05	0	0.999999999994517	0	-3.31110947489838E-06	0	0	-0.000379425196836	0	0	-0.00038478807221	0	800	-0.000379425196836	0	88.8888888888884	0	1.06546431956504E-18	0	0	3.30700859322874E-18	3.30700859322874E-19
2.895	88.8888888868272	0	-0.000605415417577	257.333333333335	0	-800	0	-3.81784079244719E-05	0	0.9999999999942	0	-3.40546172388942E-06	0	0	-0.000390237168145	0	0	-0.000395725380423	0	800	-0.000390237168145	0	88.8888888888884	0	1.11325599017754E-18	1.18423789293342E-12	0	1.28394173949643E-17	1.18423789300302E-13
2.9	88.8888888867086	0	-0.000622579262769	257.77777777778	0	-800	0	-3.9060212962445E-05	0	0.999999999993867	0	-3.50200835309809E-06	0	0	-0.000401300596905	0	0	-0.000406915307171	0	800	-0.000401300596905	0	88.8888888888884	0	1.1792838574312E-18	1.18423789293342E-12	0	4.45507284569227E-18	1.1842378929418E-13
2.905	88.8888888865839	0	-0.000640136732108	258.222222222224	0	-800	0	-3.9949612360282E-05	0	0.999999999993516	0	-3.60076911813226E-06	0	0	-0.000412617746941	0	0	-0.000418360028078	0	800	-0.000412617746941	0	88.8888888888884	0	1.15675649870607E-18	1.18423789293342E-12	0	-7.00566306192603E-18	1.18423789295414E-13
2.91	88.8888888864528	0	-0.000658091059759	258.666666666669	0	-800	0	-4.08459663170498E-05	0	0.999999999993147	0	-3.70176221116796E-06	0	0	-0.000424190702923	0	0	-0.000430061535479	0	800	-0.000424190702923	0	88.8888888888885	0	1.14616401705173E-18	5.21064672890705E-12	0	7.74883328865289E-18	5.21064672891281E-13
2.915	88.888888886315	0	-0.000676445189076	259.111111111113	0	-800	0	-4.17486059359545E-05	0	0.99999999999276	0	-3.80500418858198E-06	0	0	-0.000436021362072	0	0	-0.000442021630082	0	800	-0.000436021362072	0	88.8888888888885	0	1.26863705085739E-18	-4.73695157173368E-13	0	5.34843248196827E-17	4.73695160192792E-14
2.92	88.8888888861703	0	-0.000695201759587	259.555555555558	0	-800	0	-4.26568327952392E-05	0	0.999999999992353	0	-3.91050989770708E-06	0	0	-0.000448111425767	0	0	-0.000454241912515	0	800	-0.000448111425767	0	88.8888888888885	0	1.60939827732256E-18	-5.9211894646671E-12	0	4.767792805217E-17	5.92118946485906E-13
2.925	88.8888888860184	0	-0.000714363093743	260.000000000002	0	-800	0	-4.35699183793289E-05	0	0.999999999991925	0	-4.01829240233857E-06	0	0	-0.000460462391008	0	0	-0.0004667237747	0	800	-0.000460462391008	0	88.8888888888884	0	1.65357109169149E-18	2.36847578586684E-13	0	-3.44637246827153E-17	2.36847581094095E-14
2.93	88.888888885859	0	-0.000733931183396	260.444444444447	0	-800	0	-4.44871033650787E-05	0	0.999999999991477	0	-4.12836290663526E-06	0	0	-0.000473075541698	0	0	-0.000479468391027	0	800	-0.000473075541698	0	88.8888888888885	0	1.36496066059415E-18	3.55271367880026E-12	0	-3.2937648860368E-17	3.55271367895295E-13
2.935	88.8888888856918	0	-0.000753907675922	260.888888888891	0	-800	0	-4.54075968080774E-05	0	0.999999999991007	0	-4.24073067709803E-06	0	0	-0.0004859519397	0	0	-0.000492476709302	0	800	-0.0004859519397	0	88.8888888888885	0	1.38095959799322E-18	3.31586610021358E-12	0	7.4064245688817E-18	3.31586610022185E-13
2.94	88.8888888855165	0	-0.000774293859981	261.333333333336	0	-800	0	-4.63305752707945E-05	0	0.999999999990514	0	-4.35540296243625E-06	0	0	-0.000499092415654	0	0	-0.000505749441429	0	800	-0.000499092415654	0	88.8888888888885	0	1.40476525935859E-18	3.55271367880026E-12	0	1.63015677221438E-17	3.55271367883766E-13
2.945	88.888888885333	0	-0.000795090650874	261.77777777778	0	-800	0	-4.72551819269829E-05	0	0.999999999989998	0	-4.47238491121326E-06	0	0	-0.000512497559543	0	0	-0.000519287053852	0	800	-0.000512497559543	0	88.8888888888885	0	1.52762240767405E-18	0	0	1.5533116882289E-17	1.5533116882289E-18
2.95	88.8888888851407	0	-0.000816298575508	262.222222222225	0	-800	0	-4.81805256922418E-05	0	0.999999999989457	0	-4.59167948727885E-06	0	0	-0.000526167710998	0	0	-0.000533089757736	0	800	-0.000526167710998	0	88.8888888888885	0	1.56016907471211E-18	-3.55271367880026E-12	0	2.11930650649441E-17	3.55271367886347E-13
2.955	88.8888888849396	0	-0.000837917756987	262.666666666669	0	-800	0	-4.91056804144991E-05	0	0.999999999988891	0	-4.71328738310595E-06	0	0	-0.00054010294937	0	0	-0.000547157498926	0	800	-0.00054010294937	0	88.8888888888885	0	1.69220310788397E-18	2.36847578586684E-12	0	-8.77841330327579E-18	2.36847578588311E-13
2.96	88.8888888847292	0	-0.000859938346166	263.111111111114	0	-800	0	-4.95785565850266E-05	0	0.9999999999883	0	-4.83715319723996E-06	0	0	-0.000554296926122	0	0	-0.000561360709159	0	800	-0.000554296926122	0	88.8888888888885	0	1.4498269571412E-18	9.71075072205405E-12	0	-6.15628039340191E-17	9.71075072224919E-13
2.965	88.888888884521	0	-0.00088120250005	263.555555555558	0	-800	0	-4.62618741962923E-05	0	0.999999999987714	0	-4.95676406284001E-06	0	0	-0.000568003321688	0	0	-0.000574613759878	0	800	-0.000568003321688	0	88.8888888888885	0	1.17159026530337E-18	3.78956125738694E-12	0	-4.38219273027937E-17	3.78956125764032E-13
2.97	88.8888888843206	0	-0.000901192189299	264.000000000003	0	-800	0	-4.38367291098627E-05	0	0.999999999987151	0	-5.06920606486926E-06	0	0	-0.000580888226001	0	0	-0.000587172057706	0	800	-0.000580888226001	0	88.8888888888885	0	1.0890345701087E-18	2.60532336445352E-12	0	4.05362156019844E-17	2.60532336476888E-13
2.975	88.8888888841249	0	-0.000920293010816	264.444444444447	0	-800	0	-4.22517712674018E-05	0	0.9999999999866	0	-5.1766481859073E-06	0	0	-0.000593200186156	0	0	-0.000599276298559	0	800	-0.000593200186156	0	88.8888888888886	0	1.43517964979177E-18	7.10542735760052E-12	0	6.62654514851714E-18	7.10542735760361E-13
2.98	88.8888888839307	0	-0.000938863670637	264.888888888891	0	-800	0	-4.14383233734124E-05	0	0.999999999986054	0	-5.28110814740459E-06	0	0	-0.000605170416	0	0	-0.000611147503756	0	800	-0.000605170416	0	88.8888888888886	0	1.12636909692919E-18	5.21064672890705E-12	0	-4.69091266940301E-17	5.2106467291182E-13
2.985	88.8888888837348	0	-0.000957229391143	265.333333333336	0	-800	0	-4.13153107806383E-05	0	0.999999999985503	0	-5.38441532525566E-06	0	0	-0.000617008546568	0	0	-0.000622983468441	0	800	-0.000617008546568	0	88.8888888888886	0	1.07267377095621E-18	1.89478062869347E-12	0	-3.67243289317034E-18	1.89478062869703E-13
2.99	88.8888888835342	0	-0.000975677512916	265.77777777778	0	-800	0	-4.17938547186603E-05	0	0.999999999984939	0	-5.48818601023402E-06	0	0	-0.000628899791141	0	0	-0.000634956525866	0	800	-0.000628899791141	0	88.8888888888886	0	1.0035351410662E-18	2.36847578586684E-12	0	-5.28098904703996E-17	2.36847578645559E-13
2.995	88.8888888833261	0	-0.00099445486109	266.222222222225	0	-800	0	-4.27812002395432E-05	0	0.999999999984354	0	-5.59380859371945E-06	0	0	-0.000641003247652	0	0	-0.000647212436947	0	800	-0.000641003247652	0	88.8888888888886	0	6.72853976478106E-19	7.10542735760052E-13	0	7.32486936428367E-18	7.10542735797808E-14
3	88.888888883108	0	-0.001013766814945	266.666666666669	0	-800	0	-4.41841903928174E-05	0	0.99999999998374	0	-5.7024383341558E-06	0	0	-0.000653451298965	0	0	-0.000659870275101	0	800	-0.000653451298965	0	88.8888888888886	0	1.09640416932856E-18	-3.07901852162689E-12	0	8.52412682788493E-17	3.07901852280683E-13
3.005	88.8888888828775	0	-0.001033777807213	267.111111111113	0	-800	0	-4.59120720572161E-05	0	0.999999999983092	0	-5.81500016567021E-06	0	0	-0.000666349934725	0	0	-0.000673023114889	0	800	-0.000666349934725	0	88.8888888888886	0	1.37613383519804E-18	-4.73695157173368E-12	0	4.99939372991638E-17	4.7369515719975E-13
3.01	88.8888888826328	0	-0.001054612909461	267.555555555558	0	-800	0	-4.78788429921032E-05	0	0.999999999982404	0	-5.93219761582389E-06	0	0	-0.000679779773253	0	0	-0.000686739393046	0	800	-0.000679779773253	0	88.8888888888886	0	1.51529791409434E-18	7.10542735760052E-13	0	-5.32690274861659E-17	7.10542737756828E-14
3.015	88.8888888823721	0	-0.001076360364085	268.000000000002	0	-800	0	-5.0005033681373E-05	0	0.99999999998167	0	-6.05452704809021E-06	0	0	-0.000693797693611	0	0	-0.000701064779968	0	800	-0.000693797693611	0	88.8888888888886	0	1.02436769665428E-18	-1.4210854715201E-12	0	-3.46456814276991E-18	1.42108547152433E-13
3.02	88.8888888820941	0	-0.001099074795797	268.444444444447	0	-800	0	-5.22190109811735E-05	0	0.999999999980889	0	-6.1822957264755E-06	0	0	-0.000708438905662	0	0	-0.000716024424665	0	800	-0.000708438905662	0	88.8888888888886	0	1.47841671014868E-18	-9.47390314346736E-12	0	4.39631651981073E-17	9.47390314356937E-13
3.025	88.8888888817978	0	-0.001122780901264	268.888888888891	0	-800	0	-5.44578320855703E-05	0	0.999999999980055	0	-6.31564256973812E-06	0	0	-0.000723719328323	0	0	-0.000731625444365	0	800	-0.000723719328323	0	88.8888888888885	0	1.28895829219903E-18	4.73695157173368E-13	0	-6.33754418406458E-17	4.73695161412853E-14
3.03	88.8888888814824	0	-0.001147477423259	269.333333333336	0	-800	0	-5.66676923636413E-05	0	0.999999999979168	0	-6.454560505965E-06	0	0	-0.000739638151212	0	0	-0.000747859542401	0	800	-0.000739638151212	0	88.8888888888885	0	9.94232766565729E-19	-2.36847578586684E-13	0	-3.16707953266807E-17	2.36847580704163E-14
3.035	88.8888888811474	0	-0.001173141244089	269.77777777778	0	-800	0	-5.88040262287687E-05	0	0.999999999978226	0	-6.59891949814405E-06	0	0	-0.000756180473186	0	0	-0.000764705655007	0	800	-0.000756180473186	0	88.8888888888885	0	9.53422658429645E-19	-1.39740071366144E-11	0	-3.85848457270794E-17	1.39740071366676E-12
3.04	88.8888888807927	0	-0.001199715099701	270.222222222224	0	-800	0	-6.07013239663659E-05	0	0.999999999977228	0	-6.7483974359715E-06	0	0	-0.000773309383122	0	0	-0.000782095303378	0	800	-0.000773309383122	0	88.8888888888884	0	6.94379359594564E-19	-9.94759830064073E-12	0	3.87834885505869E-17	9.94759830071634E-13
3.045	88.8888888804194	0	-0.001227067106987	270.666666666669	0	-800	0	-6.23576871576465E-05	0	0.999999999976178	0	-6.90225247696478E-06	0	0	-0.000790939872134	0	0	-0.00079995946485	0	800	-0.000790939872134	0	88.8888888888884	0	1.20522178005463E-18	6.63173220042715E-12	0	-1.38828896540857E-17	6.63173220044169E-13
3.05	88.8888888800276	0	-0.001255121729481	271.111111111113	0	-800	0	-6.38628070355105E-05	0	0.999999999975077	0	-7.06005972850787E-06	0	0	-0.000809023251114	0	0	-0.000818254811405	0	800	-0.000809023251114	0	88.8888888888885	0	6.81616426530249E-19	-4.73695157173368E-13	0	4.83406562262639E-17	4.73695159639954E-14
3.055	88.8888888796179	0	-0.001283811794037	271.555555555558	0	-800	0	-6.52177409571732E-05	0	0.999999999973924	0	-7.22144134164492E-06	0	0	-0.000827516221762	0	0	-0.000836938317936	0	800	-0.000827516221762	0	88.8888888888884	0	1.68429257316033E-18	-9.94759830064073E-12	0	1.20890106690825E-16	9.9475983013753E-13
3.06	88.8888888791905	0	-0.001313071529739	272.000000000002	0	-800	0	-6.64274129590797E-05	0	0.999999999972722	0	-7.3860273549847E-06	0	0	-0.000846376389625	0	0	-0.000855968369968	0	800	-0.000846376389625	0	88.8888888888884	0	1.62650633086411E-18	-1.65793305010679E-12	0	-4.17601915151564E-17	1.65793305063272E-13
3.065	88.8888888787458	0	-0.00134283798318	272.444444444447	0	-800	0	-6.74994393561768E-05	0	0.999999999971471	0	-7.5534636556011E-06	0	0	-0.000865563176351	0	0	-0.000875305534941	0	800	-0.000865563176351	0	88.8888888888884	0	1.51093461327551E-18	1.18423789293342E-12	9.26229267050317E-52	1.53305344687488E-17	1.18423789303265E-13
3.07	88.8888888782842	0	-0.001373051997984	272.888888888891	0	-800	0	-6.84430539757899E-05	0	0.999999999970173	0	-7.72341748888969E-06	0	0	-0.000885038451071	0	0	-0.00089491302559	0	800	-0.000885038451071	0	88.8888888888884	0	1.80036423836124E-18	9.47390314346736E-13	3.60333456994983E-51	7.37226606959519E-17	9.47390317215158E-14
3.075	88.8888888778062	2.5752170175804E-47	-0.00140365870905	273.333333333335	-1.11884845792644E-57	-800	1.00899142426457E-46	-6.92682715176896E-05	-1.86514242186196E-46	0.999999999968829	7.31762149491668E-50	-7.89558023865356E-06	-1.44856847614467E-49	-1.6599438212723E-47	-0.000904766848973	8.38550761711649E-48	-5.34323944817534E-47	-0.000914756923651	2.89054750876287E-47	800	-0.000904766848973	1.65992699742327E-47	88.8888888888884	-5.55737560230228E-53	2.15532376501241E-18	9.47390314346736E-13	-6.47869562904089E-51	6.70845961918875E-17	9.47390316721863E-14
3.08	88.8888888773121	4.55608452309802E-45	-0.001434607744811	273.77777777778	-1.23052997126988E-54	-800	1.75817685559026E-44	-6.99851915705362E-05	-3.49292514467692E-44	0.999999999967439	1.3199774941711E-47	-8.06966856482577E-06	-2.5628085678014E-47	-2.93677449902841E-45	-0.000924715901678	1.51260648821128E-45	-1.00599258417379E-44	-0.000934806204178	5.06571114823317E-45	800	-0.000924715901678	2.9367496606319E-45	88.8888888888884	-6.60790122381187E-52	2.35825990300193E-18	-7.10542735760052E-13	-7.87718222342517E-49	-2.96650187915869E-17	7.10542736379307E-14
3.085	88.8888888768023	3.14306459885694E-44	-0.001465853150167	274.222222222224	-7.92044015675271E-54	-800	8.86531412176069E-45	-7.0603476929455E-05	-6.88280891861474E-44	0.999999999966005	6.59857965762477E-47	-8.24542396996786E-06	-1.76797955321577E-46	-2.02596156820788E-44	-0.000944855987561	7.56158235263343E-45	-2.97777209533206E-44	-0.000955032610413	7.60543656440642E-45	800	-0.000944855987561	2.02594878282917E-44	88.8888888888884	-4.89759924130702E-51	1.94902415888744E-18	3.07901852162689E-12	1.50117344492805E-48	-5.75310736023752E-17	3.07901852216437E-13
3.09	88.8888888762773	3.51986084710158E-44	-0.001497353092457	274.666666666669	-6.46409320184582E-54	-800	-6.55808498038691E-44	-7.11319964673844E-05	8.21445585663346E-44	0.999999999964528	1.94652472717184E-48	-8.42261114536918E-06	-1.97992141087553E-46	-2.26882300032735E-44	-0.00096516014223	2.23246397316415E-46	-6.2450383742381E-45	-0.000975410426343	-1.11820929888101E-44	800	-0.00096516014223	2.26882317388796E-44	88.8888888888885	8.52688945828225E-51	1.9298685168568E-18	3.31586610021358E-12	-1.57916816605591E-48	3.28119650175816E-17	3.31586610037592E-13
3.095	88.8888888757373	-3.20764321537662E-44	-0.001529069455752	275.111111111113	-1.62825587855449E-53	-800	-1.46487311225343E-43	-7.15785826293977E-05	2.01310106991708E-43	0.99999999996301	-2.63639834863542E-46	-8.60101568892355E-06	1.80432104928905E-46	2.06762560488925E-44	-0.000985603797014	-3.02110775363341E-44	5.14260591455253E-44	-0.000995916179784	-5.31476164159705E-44	800	-0.000985603797014	-2.0675747072796E-44	88.8888888888885	-1.66245438064045E-50	2.18005709199413E-18	1.18423789293342E-12	-1.59516169363956E-48	4.07389439811801E-17	1.18423789363415E-13
3.1	88.8888888751829	-2.09602050309092E-43	-0.001560967350934	275.555555555558	-1.73506479218553E-53	-800	-5.05053066414399E-43	-7.19498935552343E-05	7.19835231244035E-43	0.999999999961451	-9.9173355799836E-46	-8.78044134934267E-06	1.17902024243223E-45	1.35106765566404E-43	-0.001006164463172	-1.1364548085101E-43	2.57643662621074E-43	-0.001016528305969	-1.97834662094408E-43	800	-0.001006164463172	-1.35104769674997E-43	88.8888888888885	2.73743320200095E-52	2.23780546680046E-18	1.89478062869347E-12	5.7298474398848E-48	-2.70830383553809E-17	1.89478062888703E-13
3.105	88.8888888746144	-8.53528081736912E-43	-0.001593014576046	276.000000000002	4.93092256545258E-54	-800	-1.44957305883229E-42	-7.22513685592822E-05	2.43977683891966E-42	0.999999999959852	-3.28488393000629E-45	-8.96070699061962E-06	4.80112503427176E-45	5.50171775812078E-43	-0.001026821384046	-3.76424900702607E-43	9.5658824174045E-43	-0.001037226798382	-6.13106753929233E-43	800	-0.001026821384046	-5.501650137685E-43	88.8888888888885	2.4786933272416E-50	1.96818311956576E-18	-2.13162820728016E-12	6.28342584785787E-49	-4.90096450724998E-17	2.13162820784356E-13
3.11	88.8888888740321	-2.34824167420501E-42	-0.001625181077048	276.444444444446	-1.33472979254696E-53	-800	-2.43287771285058E-42	-7.24872423412227E-05	4.210676627068E-42	0.999999999958214	-8.1833684759211E-45	-9.14164355877765E-06	1.32089342050495E-44	1.5136409363505E-42	-0.001047555187476	-9.37758788946471E-43	2.16285823986742E-42	-0.001057992863655	-1.31007487901817E-42	800	-0.001047555187476	-1.51362379359766E-42	88.8888888888885	-3.97214030426464E-51	1.85985903875276E-18	-1.65793305010679E-12	-1.56477566267431E-47	2.01460012813244E-17	1.65793305022919E-13
3.115	88.8888888734364	-4.58207221049159E-42	-0.001657438426204	276.888888888891	-6.32764519864052E-53	-800	-3.2649370318459E-42	-7.26606088799639E-05	5.70448998832314E-42	0.999999999956539	-1.53815142725956E-44	-9.32309114780107E-06	2.57742990917514E-44	2.95353354891863E-42	-0.001068347549585	-1.76261923681903E-42	3.79707424289527E-42	-0.001078808594784	-2.24541044052194E-42	800	-0.001068347549585	-2.95350073971017E-42	88.8888888888885	-8.82921678892721E-50	2.09706437196276E-18	3.78956125738694E-12	3.78732676782199E-48	1.76063771046266E-17	3.78956125742785E-13
3.12	88.8888888728279	-7.52630167216258E-42	-0.001689759334203	277.333333333335	-3.13985024399286E-53	-800	-4.45486550494461E-42	-7.27735162718638E-05	7.81131722910912E-42	0.999999999954827	-2.48663156585786E-44	-9.50489625532157E-06	4.23356834536755E-44	4.8513390539679E-42	-0.001089180880296	-2.84951599015638E-42	6.03485179122431E-42	-0.001099656671497	-3.52163539918073E-42	800	-0.001089180880296	-4.85128486301817E-42	88.8888888888885	3.45063316313459E-50	2.06009540909693E-18	0	2.86819004303173E-47	4.44749536626543E-17	4.44749536626543E-18
3.125	88.8888888722069	-1.15075746690786E-41	-0.001722117210612	277.77777777778	-1.45133993636429E-53	-800	-5.70322339915844E-42	-7.28270813465003E-05	1.01316239373968E-41	0.999999999953081	-3.75608421365816E-44	-9.68690931014755E-06	6.47304719578102E-44	7.41760739315258E-42	-0.001110038040012	-4.30422731265862E-42	8.93734824735727E-42	-0.001120520093474	-5.15548855114101E-42	800	-0.001110038040012	-7.4175239359109E-42	88.8888888888885	1.05375102687966E-49	2.51369145604139E-18	-4.02640883597363E-12	-3.00147852928004E-47	4.7483281100003E-17	4.02640883625361E-13
3.13	88.8888888715739	-1.64282672812042E-41	-0.00175448577712	278.222222222224	-9.07756641460451E-53	-800	-6.61883485004924E-42	-7.28216118733019E-05	1.17847069429377E-41	0.9999999999513	-5.31018461620983E-44	-9.86898249677943E-06	9.24095265350062E-44	1.0589411769052E-41	-0.001130902090326	-6.08512784589816E-42	1.23134181005017E-41	-0.001141381948563	-7.05164506215077E-42	800	-0.001130902090326	-1.05892917741659E-41	88.8888888888885	-1.75548001505516E-49	2.52437849162235E-18	-5.21064672890705E-12	-1.28201575154774E-47	4.05551556293365E-17	5.21064672906487E-13
3.135	88.8888888709294	-2.20556797116872E-41	-0.001786838735121	278.666666666668	-5.9014299144898E-53	-800	-7.67914169013804E-42	-7.275672971665E-05	1.36408199897593E-41	0.999999999949488	-7.0904373492827E-44	-1.00509678855612E-05	1.24063911222989E-43	1.42167586726236E-41	-0.001151756079748	-8.1251855929118E-42	1.62212251730565E-41	-0.001162225216282	-9.25155710779026E-42	800	-0.001151756079748	-1.42165953199349E-41	88.8888888888884	3.21602845839802E-50	2.96233216616579E-18	-4.02640883597363E-12	5.20085490328414E-47	7.40101936801091E-17	4.02640883665383E-13
3.14	88.888888870274	-2.85488420277272E-41	-0.001819149487773	279.111111111113	6.10417623994651E-52	-800	-8.76325036088704E-42	-7.26314882108636E-05	1.56584322579419E-41	0.999999999947644	-9.14309924439239E-44	-1.02327158692613E-05	1.60588173227974E-43	1.84021563446628E-41	-0.001172582864551	-1.04774082720446E-41	2.07070355839147E-41	-0.001183032604954	-1.1762043410267E-41	800	-0.001172582864551	-1.84019417794629E-41	88.8888888888884	2.17997237728156E-49	3.21591175233178E-18	-4.02640883597363E-12	7.97068845291065E-48	7.96914950823824E-17	4.02640883676227E-13
3.145	88.8888888696084	-3.5899828685745E-41	-0.001851390910862	279.555555555557	1.6373073951137E-51	-800	-9.62301355051912E-42	-7.24444799413958E-05	1.72834927682658E-41	0.999999999945772	-1.14502150832145E-43	-1.04140738741626E-05	2.01937729551508E-43	2.31404959021306E-41	-0.001193364961076	-1.31212209632499E-41	2.56583915382476E-41	-0.001203786419702	-1.4518833723477E-41	800	-0.001193364961076	-2.31402225255286E-41	88.8888888888884	1.33224074586652E-49	3.60534592090995E-18	9.47390314346736E-13	-1.10429761708551E-47	-3.87812211899198E-17	9.47390315140487E-14
3.15	88.888888868933	-4.39600712535467E-41	-0.001883535170633	280.000000000002	2.32900473170811E-51	-800	-1.05998936939115E-41	-7.21939318792198E-05	1.90487297823973E-41	0.999999999943873	-1.3972043125721E-43	-1.0594885335408E-05	2.47276882007332E-43	2.83360130575203E-41	-0.001214084428311	-1.60110822632797E-41	3.11154506463305E-41	-0.001224468457718	-1.75554795832195E-41	800	-0.001214084428311	-2.83356736866293E-41	88.8888888888884	1.54721011341191E-49	2.88699882463234E-18	6.63173220042715E-12	8.62630619276885E-48	-1.19407021083846E-16	6.63173220150214E-13
3.155	88.8888888682488	-5.28738393672962E-41	-0.001915553579114	280.444444444446	3.07625624382835E-51	-800	-1.17553252742109E-41	-7.18777873288759E-05	2.11890310367375E-41	0.999999999941948	-1.67589922120813E-43	-1.07749888831423E-05	2.97417153298329E-43	3.40817022106084E-41	-0.001234722774633	-1.92047576839748E-41	3.71856608982148E-41	-0.001245059926991	-2.09231322082985E-41	800	-0.001234722774633	-3.40812882269858E-41	88.8888888888884	1.88529043739609E-49	2.65790201596567E-18	-1.4210854715201E-12	-1.76993984762556E-48	-1.55145475616013E-17	1.42108547160479E-13
3.16	88.8888888675564	-6.2788522913031E-41	-0.001947416484243	280.888888888891	3.94014012533275E-51	-800	-1.2935324605771E-41	-7.14937733240787E-05	2.33709239107149E-41	0.999999999940001	-1.9849511354579E-43	-1.09542177245246E-05	3.53187616569259E-43	4.04725687818439E-41	-0.00125526088699	-2.27463078669827E-41	4.3880937415242E-41	-0.001265541384356	-2.46288297410107E-41	800	-0.00125526088699	-4.04720703537429E-41	88.8888888888884	1.42858619385641E-49	2.80078177780883E-18	-8.28966525053394E-12	-6.29362644541487E-48	1.38263331124638E-16	8.28966525168699E-13
3.165	88.8888888668568	-7.36386275668128E-41	-0.001979093185813	281.333333333335	4.73232169126047E-51	-800	-1.40521416870473E-41	-7.10394549300569E-05	2.5395573278465E-41	0.999999999938034	-2.3225746485384E-43	-1.11323991708905E-05	4.14219866484729E-43	4.7466396574884E-41	-0.00127567897672	-2.66152734095894E-41	5.11562332510988E-41	-0.001285892689088	-2.86544717999493E-41	800	-0.00127567897672	-4.74658038980335E-41	88.8888888888884	1.44521329799796E-49	3.846482400018E-18	-4.73695157173368E-13	4.96132209558615E-48	1.7440930144923E-16	4.73695189281152E-14
3.17	88.8888888661508	-8.53480333274392E-41	-0.002010551873514	281.777777777779	5.49413603869038E-51	-800	-1.51236588986673E-41	-7.05122765932445E-05	2.7322763195971E-41	0.999999999936048	-2.6871480875018E-43	-1.13093542892407E-05	4.80085727502578E-43	5.50141202339994E-41	-0.001295956539611	-3.07930710442468E-41	5.89836283299218E-41	-0.001306092968351	-3.29870809283951E-41	800	-0.001295956539611	-5.50134236182968E-41	88.8888888888884	1.80276886547607E-49	4.09984202957212E-18	6.63173220042715E-12	5.37982839321655E-48	-1.71594865163152E-16	6.63173220264715E-13
3.175	88.8888888654395	-9.78982652977347E-41	-0.002041759580144	282.222222222224	6.3343658077563E-51	-800	-1.61239016553033E-41	-6.9909592722212E-05	2.91633624842217E-41	0.999999999934047	-3.07784135275019E-43	-1.14848976390666E-05	5.50681278275214E-43	6.31038312827464E-41	-0.001316072325745	-3.52701886480536E-41	6.73383162637028E-41	-0.001326120591403	-3.76062384990598E-41	800	-0.001316072325746	-6.31030210111378E-41	88.8888888888884	1.90195855300146E-49	2.58582594311747E-18	-1.4210854715201E-12	-1.61575753704745E-49	-1.47492402799136E-16	1.42108547917412E-13
3.18	88.8888888647238	-1.11247247866962E-40	-0.002072682146552	282.666666666668	7.33301412722894E-51	-800	-1.70940414503918E-41	-6.92286884985132E-05	3.08819000899598E-41	0.999999999932034	-3.49324984800458E-43	-1.16588370751488E-05	6.25769843060516E-43	7.17084086221718E-41	-0.001336004316904	-4.00305306544496E-41	7.61853289562002E-41	-0.001345953149764	-4.25033206487059E-41	800	-0.001336004316904	-7.17074750837553E-41	88.8888888888884	1.85465119795429E-49	3.01122203239447E-18	1.23160740865076E-11	4.79728979473908E-49	2.08198063744001E-16	1.23160740882673E-12
3.185	88.8888888640051	-1.25359679364089E-40	-0.002103282864508	283.111111111113	8.35069989570476E-51	-800	-1.80669657488809E-41	-6.82947938240025E-05	3.26264507653021E-41	0.999999999930013	-3.93284223124968E-43	-1.18309661136861E-05	7.05152850505601E-43	8.0805097694915E-41	-0.001355728851785	-4.5068008273811E-41	8.55321186029168E-41	-0.001365518167008	-4.76791250787977E-41	800	-0.001355728851785	-8.08040311725998E-41	88.8888888888886	1.95721741004655E-49	3.98706659054556E-18	2.60532336445352E-11	1.27238257977303E-48	-3.5378941390101E-17	2.60532336445593E-12
3.19	88.8888888633107	-1.40217844511877E-40	-0.00213242436895	283.555555555557	9.32913094043131E-51	-800	-1.89654998531723E-41	-6.29874218875744E-05	3.42322843596722E-41	0.99999999992806	-4.3957890570128E-43	-1.19948870762079E-05	7.88730649236192E-43	9.03824789740376E-41	-0.001374512810438	-5.0373116250578E-41	9.5338945687422E-41	-0.001383562734191	-5.31123405685118E-41	800	-0.001374512810438	-9.03812704082115E-41	88.8888888888886	1.95700233415239E-49	2.81788338435586E-18	8.76336040770731E-12	-1.69190232394223E-49	-1.29393224201303E-16	8.76336040866257E-13
3.195	88.8888888626595	-1.55784522192976E-40	-0.002159398848214	284.000000000002	1.03077455186785E-50	-800	-1.98486592249278E-41	-5.85370276960855E-05	3.58148386720347E-41	0.999999999926229	-4.8810070760876E-43	-1.21466185221022E-05	8.7629386727423E-43	1.00416559825597E-40	-0.001391899953378	-5.59334407724338E-41	1.0559914118667E-40	-0.001400332357352	-5.8798562581421E-41	800	-0.001391899953378	-1.00415200895096E-40	88.8888888888886	1.95733809472241E-49	3.16185324221479E-18	-4.02640883597363E-12	1.83104080605588E-51	1.73871749167034E-16	4.02640883972777E-13
3.2	88.8888888620443	-1.72049393778739E-40	-0.002184576559879	284.444444444446	1.12863363183298E-50	-800	-2.07167128851336E-41	-5.48913192902149E-05	3.73742048884607E-41	0.999999999924499	-5.38811534153615E-43	-1.22882431502497E-05	9.67784462226504E-43	1.10900689069068E-40	-0.001408128940315	-6.1744616499237E-41	1.16306062200501E-40	-0.001416057561988	-6.47334636499337E-41	800	-0.001408128940315	-1.10899171477194E-40	88.8888888888886	1.95713081479771E-49	4.17310869782702E-18	-6.39488462184047E-12	-2.42060461820045E-51	1.39120317283876E-16	6.39488462335375E-13
3.205	88.8888888614581	-1.89002128496547E-40	-0.002208299656979	284.888888888891	1.22648767033684E-50	-800	-2.15698526149897E-41	-5.19779810987118E-05	3.89102377861325E-41	0.99999999992285	-5.91673874248207E-43	-1.24216855714626E-05	1.06314432356282E-42	1.2182820773569E-40	-0.001423420315403	-6.78023450020742E-41	1.27453024225481E-40	-0.001430948156711	-7.09127712477247E-41	800	-0.001423420315403	-1.21826523170716E-40	88.8888888888886	1.95714663072552E-49	4.39656414829209E-18	-6.39488462184047E-12	-1.83314203382231E-51	8.1870087663509E-18	6.39488462184571E-13
3.21	88.8888888608944	-2.0663229383686E-40	-0.002230874857925	285.333333333335	1.32434032968208E-50	-800	-2.24082180987941E-41	-4.97103701249221E-05	4.04226355677528E-41	0.999999999921264	-6.46650624899659E-43	-1.25486710768166E-05	1.16231476863061E-42	1.3319239131333E-40	-0.001437971782437	-7.41023746458386E-41	1.3903325629962E-40	-0.001445189128742	-7.7332252865073E-41	800	-0.001437971782437	-1.33190531414541E-40	88.8888888888886	1.95692298494822E-49	4.34835159594111E-18	-3.07901852162689E-12	-1.42126731783148E-50	-7.38849442601891E-17	3.07901852251337E-13
3.215	88.8888888603473	-2.24929291496885E-40	-0.002252568083498	285.77777777778	1.42218193002631E-50	-800	-2.32321971835626E-41	-4.79924298999287E-05	4.19111423235983E-41	0.999999999919726	-7.03705130212311E-43	-1.26706954706915E-05	1.26523618230563E-42	1.44986408449636E-40	-0.001451954747971	-8.06405050508413E-41	1.51039914148192E-40	-0.001458937947151	-8.39877871022427E-41	800	-0.001451954747971	-1.44984364780942E-40	88.8888888888886	1.95677534114677E-49	4.07257590114648E-18	7.81597009336057E-12	6.78504086798394E-50	2.13771785455987E-16	7.81597009628397E-13
3.22	88.8888888598131	-2.43882555286818E-40	-0.00227355278702	286.222222222223	1.52028147599259E-50	-800	-2.40527313072088E-41	-4.64688887914479E-05	4.33744231873154E-41	0.999999999918223	-7.62814595243564E-43	-1.27887344280357E-05	1.37184913013782E-42	1.57203448500056E-40	-0.00146548101612	-8.74141241571754E-41	1.63465771085431E-40	-0.001472250303184	-9.08783870505694E-41	800	-0.00146548101612	-1.57201212541507E-40	88.8888888888886	1.96268810207465E-49	6.01429937627381E-18	9.23705556488068E-12	6.82060537264164E-50	1.09153329868323E-16	9.23705556552561E-13
3.225	88.8888888592896	-2.63480157487045E-40	-0.002293925557775	286.666666666668	1.6184189298206E-50	-800	-2.4857448743428E-41	-4.52615030287165E-05	4.48118010553941E-41	0.999999999916751	-8.23957230533205E-43	-1.29033312635597E-05	1.48208651888504E-42	1.69835823166859E-40	-0.001478612846163	-9.44207350734281E-41	1.76303406449702E-40	-0.001485216768673	-9.79995215628759E-41	800	-0.001478612846163	-1.69833386356312E-40	88.8888888888887	1.96255732252906E-49	4.89783926359357E-18	9.47390314346736E-12	-1.43793288078928E-50	-2.45959752021794E-16	9.47390314666015E-13
3.23	88.8888888587739	-2.8371092179714E-40	-0.002313825944456	287.111111111113	1.71653915786757E-50	-800	-2.5644887402048E-41	-4.43289151287873E-05	4.62236955167995E-41	0.999999999915301	-8.87089994896952E-43	-1.30152709386689E-05	1.59588548206448E-42	1.82876328505128E-40	-0.001491440188052	-1.01655405705328E-40	1.89545519782755E-40	-0.00149791606741	-1.05346240634004E-40	800	-0.001491440188052	-1.82873682233351E-40	88.8888888888887	1.9622552037707E-49	4.40125870341797E-18	-9.47390314346736E-13	-6.45599627551057E-51	1.33342837708834E-16	9.47390323730573E-14
3.235	88.8888888582633	-3.04563510850297E-40	-0.002333357336336	287.555555555557	1.81464745443239E-50	-800	-2.64156066805468E-41	-4.358737275629E-05	4.7610057825936E-41	0.999999999913865	-9.52170388557605E-43	-1.31251350180194E-05	1.71318224714898E-42	1.96317656740008E-40	-0.001504029684187	-1.09113265988515E-40	2.03184796661755E-40	-0.001510402929905	-1.12913754514369E-40	800	-0.001504029684187	-1.9631479236085E-40	88.8888888888887	1.96193975199986E-49	5.92583563960841E-18	1.4210854715201E-12	-7.26561680633525E-51	2.22024939306058E-16	1.42108548886427E-13
3.24	88.8888888577565	-3.26026570807081E-40	-0.002352586722118	288.000000000001	1.91274281660492E-50	-800	-2.71701692564986E-41	-4.29569541319531E-05	4.89708652175861E-41	0.999999999912439	-1.01915731545182E-42	-1.32333003130697E-05	1.83391294886864E-42	2.10152489459468E-40	-0.00151642451398	-1.16789606691775E-40	2.17213916142114E-40	-0.001522709190767	-1.20697434649637E-40	800	-0.00151642451398	-2.10149398309149E-40	88.8888888888887	1.96162113560633E-49	6.23770012186197E-18	2.36847578586684E-12	-6.60811371710371E-52	1.80659219759157E-17	2.36847578593574E-13
3.245	88.8888888572526	-3.48088746012135E-40	-0.002371546675299	288.444444444446	2.01082874599054E-50	-800	-2.79091318532394E-41	-4.23630466295863E-05	5.03061346662639E-41	0.999999999911022	-1.0880110813592E-42	-1.33399500497422E-05	1.95801371160949E-42	2.24373507051264E-40	-0.001528645673576	-1.24679879193164E-40	2.31625562142084E-40	-0.001534845309663	-1.28692811974961E-40	800	-0.001528645673576	-2.24370180478087E-40	88.8888888888887	1.96184414729794E-49	6.26787425278123E-18	-9.94759830064073E-12	3.61578470253469E-51	-2.31497193768001E-17	9.94759830066767E-13
3.25	88.888888856752	-3.70738699332443E-40	-0.002390238041085	288.88888888889	2.10891641642728E-50	-800	-2.86330380869409E-41	-4.17375185619671E-05	5.16159331652435E-41	0.999999999909614	-1.15869336877285E-42	-1.344508898232E-05	2.08542076377249E-42	2.38973401802606E-40	-0.001540693707776	-1.32779692591612E-40	2.46412437772074E-40	-0.001546802227968	-1.36895573160057E-40	800	-0.001540693707776	-2.38969831206584E-40	88.8888888888887	1.96188685297841E-49	6.05361229024549E-18	-1.18423789293342E-12	-2.51778817006298E-52	-5.1065451055016E-17	1.18423789403442E-13
3.255	88.8888888562554	-3.9396513476448E-40	-0.002408632958603	289.333333333335	2.20701543901305E-50	-800	-2.93424121787404E-41	-4.10195222555747E-05	5.29003778922457E-41	0.999999999908217	-1.23116719688847E-42	-1.35485603933859E-05	2.21607056490028E-42	2.53944892463281E-40	-0.001552550658086	-1.41084809113984E-40	2.61567279711439E-40	-0.001558553455482	-1.45301555052933E-40	800	-0.001552550658086	-2.53941069344708E-40	88.8888888888887	1.96189602015496E-49	5.84211614928465E-18	1.65793305010679E-12	2.9714779084008E-51	-2.43112352469215E-18	1.65793305010857E-13
3.26	88.8888888557646	-4.17756727021681E-40	-0.002426678250383	289.777777777779	2.30511510500598E-50	-800	-3.00375850908151E-41	-4.01560432906951E-05	5.41588845956718E-41	0.999999999906837	-1.30539675314654E-42	-1.36500651596782E-05	2.34989940957034E-42	2.69280678851017E-40	-0.001564182247505	-1.49591124803505E-40	2.7708265726378E-40	-0.001570057314495	-1.53906689315278E-40	800	-0.001564182247505	-2.69276594867338E-40	88.8888888888887	1.96218718575266E-49	5.89556235719048E-18	3.31586610021358E-12	9.16336224124276E-51	-9.7144142721552E-17	3.31586610163658E-13
3.265	88.8888888552818	-4.42100979365151E-40	-0.002444298974355	290.222222222224	2.40322395020206E-50	-800	-3.07161837864272E-41	-3.91021635409389E-05	5.53861567101154E-41	0.999999999905479	-1.38134450021149E-42	-1.37491817320437E-05	2.48683700262448E-42	2.8497270561925E-40	-0.001575540170059	-1.58294337987933E-40	2.92949622378481E-40	-0.001581259259199	-1.62706227783831E-40	800	-0.001575540170059	-2.84968352657514E-40	88.8888888888887	1.9624639227469E-49	5.14934219982264E-18	-2.36847578586684E-12	-1.95583540564781E-50	4.28805706365984E-17	2.36847578625501E-13
3.27	88.8888888548098	-4.66982374171985E-40	-0.002461402024146	290.666666666668	2.50133169617443E-50	-800	-3.13733171776332E-41	-3.7821040630389E-05	5.65757300677775E-41	0.999999999904152	-1.4589625414918E-42	-1.38453863871481E-05	2.62679605597232E-42	3.01010970122248E-40	-0.001586564411474	-1.67188959819533E-40	3.09157375157257E-40	-0.001592094189223	-1.7169402110185E-40	800	-0.001586564411474	-3.01006340404355E-40	88.8888888888887	1.96093205636919E-49	6.34006925784298E-18	-7.81597009336057E-12	1.13508485397882E-50	2.07380440915453E-16	7.81597009611178E-13
3.275	88.888888854352	-4.92384801390729E-40	-0.0024778796749	291.111111111112	2.59946587972041E-50	-800	-3.20133235433029E-41	-3.62836787758809E-05	5.77317115008902E-41	0.999999999902864	-1.53820065781313E-42	-1.39380731726642E-05	2.76968594874972E-42	3.17385087764421E-40	-0.001597185534728	-1.76269235227578E-40	3.25696292222597E-40	-0.001602488697518	-1.80865162737941E-40	800	-0.001597185534728	-3.17380173930855E-40	88.8888888888886	1.96358999752113E-49	6.82533711630864E-18	0	4.58197276237146E-50	3.54460740300696E-17	3.54460740300696E-18
3.28	88.8888888539121	-5.18293910295334E-40	-0.002493612985136	291.555555555557	2.6976326337904E-50	-800	-3.26382615166708E-41	-3.4468505592192E-05	5.88568460332811E-41	0.999999999901627	-1.61901932859089E-42	-1.40265730427682E-05	2.91542595609588E-42	3.34085807926243E-40	-0.001607326872818	-1.85530635053963E-40	3.4255753658839E-40	-0.001612363197001	-1.90215335915689E-40	800	-0.001607326872818	-3.34080603081616E-40	88.8888888888887	1.96438527482266E-49	6.86069523415045E-18	7.10542735760052E-12	-1.87341284594201E-50	3.86112502884587E-17	7.10542735770543E-13
3.285	88.8888888534939	-5.44698037854526E-40	-0.002508474965125	292.000000000001	2.79578409507624E-50	-800	-3.32515361360119E-41	-3.23607757495471E-05	5.99605593239421E-41	0.999999999900451	-1.70138578730852E-42	-1.41101716802317E-05	3.06395047118623E-42	3.51105612358898E-40	-0.001616906571018	-1.9496940405252E-40	3.5973497152092E-40	-0.001621633876362	-1.9974119933029E-40	800	-0.001616906571018	-3.51100110128867E-40	88.8888888888887	1.96259783380035E-49	7.18758556847805E-18	-4.73695157173368E-12	1.15988134204023E-51	2.93756197206332E-17	4.73695157182477E-13
3.29	88.8888888531017	-5.71587973500028E-40	-0.002522333461772	292.444444444445	2.89395711538778E-50	-800	-3.38531369496868E-41	-2.99518621044903E-05	6.1042330968964E-41	0.999999999899348	-1.78527101834749E-42	-1.41881257238934E-05	3.21520768201581E-42	3.68438563550389E-40	-0.001625839446415	-2.0458221674992E-40	3.77222311201732E-40	-0.001630214452798	-2.09439408682768E-40	800	-0.001625839446415	-3.68432758147355E-40	88.8888888888886	1.96423522367861E-49	6.92138185789057E-18	-2.36847578586684E-12	-1.12075682851335E-50	-1.44944171837606E-16	2.36847579030193E-13
3.295	88.8888888527398	-5.98954237464681E-40	-0.002535053698453	292.88888888889	2.99213432227485E-50	-800	-3.44444244272693E-41	-2.72384572013329E-05	6.21045845332921E-41	0.99999999989833	-1.87064677051634E-42	-1.42596770552458E-05	3.36914426200365E-42	3.8607855039389E-40	-0.001634038625026	-2.14365835197969E-40	3.95013964112589E-40	-0.001638017695988	-2.19307009419968E-40	800	-0.001634038625026	-3.86072436692281E-40	88.8888888888887	1.96169365956357E-49	5.54829292299146E-18	2.43953005944285E-11	-1.01836689895095E-50	-5.32438950298758E-16	2.43953006002388E-12
3.3	88.8888888524189	-6.26788022247261E-40	-0.002546283012968	293.333333333334	3.090298504999E-50	-800	-3.5026639324291E-41	-2.20420959995704E-05	6.31383036288266E-41	0.999999999897428	-1.95749136317036E-42	-1.43228419494163E-05	3.52571066344657E-42	4.04019894508978E-40	-0.001641276788725	-2.24317773822046E-40	4.13101755730327E-40	-0.00164433229135	-2.29341402439013E-40	800	-0.001641276788725	-4.0401346864635E-40	88.8888888888888	1.96387642189945E-49	2.44300438051469E-18	1.61056353438945E-11	5.31178830295489E-50	-2.34665915933214E-16	1.61056353456041E-12
3.305	88.8888888521865	-6.55071765824015E-40	-0.002554382739699	293.777777777779	3.18853505556632E-50	-800	-3.55964537647082E-41	-1.45244126564263E-05	6.41384290825079E-41	0.999999999896774	-2.0457740348539E-42	-1.43684029122879E-05	3.68480807875183E-42	4.22251270949365E-40	-0.001646497690492	-2.34434503169747E-40	4.31476062185462E-40	-0.001648493229076	-2.39539035270765E-40	800	-0.001646497690492	-4.22244533923856E-40	88.8888888888888	1.96583762096073E-49	3.3069027673987E-18	-5.9211894646671E-12	1.58908044965113E-50	1.28958298156019E-16	5.9211894660714E-13
3.31	88.8888888520452	-6.83797151433031E-40	-0.002559295394029	294.222222222223	3.28683049769592E-50	-800	-3.6158246361252E-41	-7.69331435439279E-06	6.51257314673844E-41	0.999999999896377	-2.13547128914324E-42	-1.43960365929037E-05	3.8463897206378E-42	4.40767317657821E-40	-0.001649664277036	-2.4471332960633E-40	4.50133209939381E-40	-0.001650697201291	-2.49897609826236E-40	800	-0.001649664277036	-4.40760271727033E-40	88.8888888888888	1.96551618503817E-49	3.07021556914229E-18	4.73695157173368E-13	-6.74107198875669E-51	-9.77104471591914E-17	4.73695167250874E-14
3.315	88.888888851987	-7.12958467400195E-40	-0.002561315217004	294.666666666668	3.38510591995958E-50	-800	-3.67121085439947E-41	-1.49624910891212E-06	6.61001247317536E-41	0.999999999896213	-2.22656319693998E-42	-1.44073980971401E-05	4.01042345963016E-42	4.59564352717817E-40	-0.001650966209519	-2.55151969160696E-40	4.69069500801471E-40	-0.001651125845086	-2.60414854209222E-40	800	-0.001650966209519	-4.5955700043915E-40	88.8888888888888	1.96527728197542E-49	2.82848454265053E-18	-1.30266168222676E-11	-2.51493691228738E-50	1.59125549492389E-16	1.30266168232395E-12
3.32	88.8888888520046	-7.42549948425414E-40	-0.0025607008709	295.111111111112	3.48335237066191E-50	-800	-3.72607196739252E-41	4.25084892224031E-06	6.70607806410485E-41	0.999999999896263	-2.31903114817298E-42	-1.44039424003058E-05	4.17687686462177E-42	4.78638659650028E-40	-0.001650570215831	-2.65748289010631E-40	4.88280999309396E-40	-0.001649908066573	-2.71089264103903E-40	800	-0.001650570215831	-4.78631003877374E-40	88.8888888888887	1.96343835321026E-49	4.47828541208125E-18	-1.70530256582413E-11	-1.03353665447478E-50	2.68322426296135E-16	1.70530256603522E-12
3.325	88.8888888520947	-7.72564855154296E-40	-0.002557571406451	295.555555555556	3.58154923440675E-50	-800	-3.78058881298452E-41	9.75410324840786E-06	6.80061824821735E-41	0.999999999896516	-2.41286898539693E-42	-1.43863391627743E-05	4.34571202414913E-42	4.97985893823084E-40	-0.001648553033398	-2.76501582985094E-40	5.07763335494522E-40	-0.001647113721828	-2.81919853256823E-40	800	-0.001648553033398	-4.97977938005366E-40	88.8888888888887	1.96430458781118E-49	5.02392854136645E-18	1.89478062869347E-12	9.40307429207455E-51	-1.47161546203652E-17	1.89478062875062E-13
3.33	88.8888888522522	-8.02996897649346E-40	-0.002552093493078	296.000000000001	3.67976004117486E-50	-800	-3.83413321003808E-41	1.48325822978004E-05	6.89379379459995E-41	0.999999999896959	-2.50805757332981E-42	-1.43555259000427E-05	4.51689355533316E-42	5.17602000430986E-40	-0.001645022093583	-2.8740965793378E-40	5.27512599957726E-40	-0.001642864500003	-2.9290383580813E-40	800	-0.001645022093583	-5.17593748470819E-40	88.8888888888887	1.96393585165112E-49	4.53442198110044E-18	1.89478062869347E-12	-8.72772246571001E-51	-1.06528139098822E-16	1.89478063168808E-13
3.335	88.8888888524717	-8.33839962632698E-40	-0.002544437371246	296.444444444445	3.77794996400926E-50	-800	-3.88671699071871E-41	1.95704377361205E-05	6.98555432382747E-41	0.999999999897576	-2.60457296436824E-42	-1.43124602147219E-05	4.69038706924079E-42	5.37483038592216E-40	-0.001640087129561	-2.98469769319532E-40	5.47524738973462E-40	-0.001637257982576	-3.04038459794629E-40	800	-0.001640087129561	-5.37474494792249E-40	88.8888888888887	1.96361542492707E-49	4.16054637202604E-18	3.31586610021358E-12	-8.22051708101943E-51	-6.00810387557476E-17	3.31586610075789E-13
3.34	88.8888888527489	-8.65087285461092E-40	-0.002534734965429	296.88888888889	3.87612345533384E-50	-800	-3.93825966728026E-41	2.40557086152806E-05	7.07570017462926E-41	0.999999999898356	-2.70239003804923E-42	-1.4257884181988E-05	4.86615451268171E-42	5.57624647494942E-40	-0.001633833176884	-3.09679038135956E-40	5.67795126828775E-40	-0.001630366529691	-3.15320742672718E-40	800	-0.001633833176884	-5.57615816632684E-40	88.8888888888887	1.96316168361673E-49	3.9629164032877E-18	7.57912251477389E-12	-6.38320704047877E-51	7.68553938347103E-18	7.57912251477779E-13
3.345	88.8888888530805	-8.96731977100117E-40	-0.002523078762948	297.333333333334	3.9742802290632E-50	-800	-3.9888504166158E-41	2.8377264426953E-05	7.1643692978445E-41	0.999999999899289	-2.80148386603654E-42	-1.41923180430117E-05	5.04415713235039E-42	5.78022386052442E-40	-0.001626319850798	-3.21034607305645E-40	5.88319533010756E-40	-0.001622237042262	-3.26747957371773E-40	800	-0.001626319850798	-5.78013273475411E-40	88.8888888888887	1.96304355378471E-49	4.05674624420962E-18	-2.36847578586684E-13	1.43390727046673E-51	-1.00319103362652E-16	2.36847599832251E-14
3.35	88.8888888534642	-9.28767337999745E-40	-0.002509522081357	297.777777777779	4.07243451703212E-50	-800	-4.03853472743267E-41	3.26220827892643E-05	7.25155600043612E-41	0.999999999900368	-2.90183070876453E-42	-1.41160617090417E-05	5.22435724029473E-42	5.98671935201669E-40	-0.001617581518602	-3.3253375587044E-40	6.09093710697145E-40	-0.001612891503949	-3.38317507136719E-40	800	-0.001617581518602	-5.98662546941091E-40	88.8888888888887	1.96319080673656E-49	3.24288859556076E-18	-3.31586610021358E-12	-1.06003466999212E-51	4.80782158218369E-17	3.31586610056213E-13
3.355	88.8888888538989	-9.61187734664195E-40	-0.002494080427475	298.222222222223	4.17059164718407E-50	-800	-4.08758837221614E-41	3.68730014821763E-05	7.33767799340669E-41	0.99999999990159	-3.00341154529069E-42	-1.40292024059292E-05	5.40672314459083E-42	6.19569662913449E-40	-0.001607628175642	-3.44174303474119E-40	6.30114609719558E-40	-0.001602328167134	-3.50027585242456E-40	800	-0.001607628175642	-6.19560005804987E-40	88.8888888888887	1.96298806552343E-49	4.41947011197004E-18	-4.97379915032037E-12	1.73110550735727E-51	1.01340712729961E-16	4.97379915135277E-13
3.36	88.8888888543839	-9.9398787355675E-40	-0.002476733756379	298.666666666668	4.26874673886962E-50	-800	-4.13580596413351E-41	4.12069154231032E-05	7.42231375613476E-41	0.999999999902954	-3.10620917276136E-42	-1.39316273809822E-05	5.59122506495247E-42	6.40712156143616E-40	-0.00159644690141	-3.5595427796566E-40	6.5137797234198E-40	-0.001590523255432	-3.61875796573951E-40	800	-0.00159644690141	-6.40702237972333E-40	88.8888888888887	1.96335379832847E-49	3.98001439606063E-18	-3.31586610021358E-12	4.85835731895855E-51	-8.1690535802103E-17	3.31586610121985E-13
3.365	88.8888888549197	-1.02716051660041E-39	-0.002457429429853	299.111111111112	4.36690959144707E-50	-800	-4.18316003515227E-41	4.56933622056288E-05	7.50535781726299E-41	0.999999999904461	-3.21020115426991E-42	-1.38230405442433E-05	5.77782228227436E-42	6.62094748262419E-40	-0.001584003766497	-3.67871107253078E-40	6.72879238675216E-40	-0.001577433071401	-3.73859667326053E-40	800	-0.001584003766497	-6.62084577941408E-40	88.8888888888887	1.96330882321553E-49	3.8733098844105E-18	2.36847578586684E-13	-9.11572983627221E-51	-1.40550370674021E-17	2.36847579003712E-14
3.37	88.8888888555072	-1.06069906452737E-39	-0.002436085725874	299.555555555556	4.46507023003321E-50	-800	-4.2297368597047E-41	5.03935860529473E-05	7.58698095908341E-41	0.999999999906114	-3.31536730605718E-42	-1.37029822093287E-05	5.96647767004994E-42	6.8371318424096E-40	-0.001570246094724	-3.79922477290738E-40	6.94614338085297E-40	-0.001562996372424	-3.85976970851654E-40	800	-0.001570246094724	-6.83702771972546E-40	88.8888888888887	1.96284185388197E-49	3.77503892321095E-18	1.65793305010679E-12	1.78444592608698E-50	-2.40468304520128E-17	1.65793305028118E-13
3.375	88.8888888561478	-1.09459666956116E-39	-0.002412595658196	300.000000000001	4.56325332659009E-50	-800	-4.27536623556119E-41	5.53599713925922E-05	7.66687346511314E-41	0.999999999907915	-3.42168657435831E-42	-1.35708505786033E-05	6.15715270315071E-42	7.05563048692762E-40	-0.001555104925161	-3.9210597418143E-40	7.1657831266589E-40	-0.00154713690885	-3.98224992910175E-40	800	-0.001555104925161	-7.05552406142971E-40	88.8888888888887	1.96436194785322E-49	3.62296855321678E-18	3.55271367880026E-12	-2.25697638827861E-50	-1.32143878574939E-17	3.55271367882484E-13
3.38	88.8888888568484	-1.12884495687688E-39	-0.002386643040967	300.444444444445	4.66138537276862E-50	-800	-4.31995081144464E-41	6.26888916955305E-05	7.74413167925368E-41	0.999999999909886	-3.52913535840939E-42	-1.3424867106651E-05	6.34980026228095E-42	7.27638940894964E-40	-0.001538376451516	-4.04418891227021E-40	7.38763615726631E-40	-0.001529177864268	-4.1060074037017E-40	800	-0.001538376451516	-7.27628082228819E-40	88.8888888888887	1.96107211987353E-49	3.42009357363181E-18	9.23705556488068E-12	-2.06090587774741E-50	-2.16798803243202E-16	9.23705556742487E-13
3.385	88.8888888576514	-1.16342859575922E-39	-0.002356545686163	300.88888888889	4.7594754754879E-50	-800	-4.36346596556279E-41	7.26376347859967E-05	7.81859448708456E-41	0.999999999912145	-3.63768293726529E-42	-1.32555694858328E-05	6.54433407238351E-42	7.49930969894567E-40	-0.001518976373206	-4.16857699822811E-40	7.61162239018343E-40	-0.001508368714732	-4.23101149563957E-40	800	-0.001518976373206	-7.49919918395645E-40	88.8888888888888	1.96269280947767E-49	1.82661035922706E-18	5.68434188608042E-12	2.03861759004483E-50	-9.64735424238664E-17	5.68434188689908E-13
3.39	88.8888888585561	-1.19834125313727E-39	-0.002322170567746	301.333333333334	4.85759943040516E-50	-800	-4.40641285351196E-41	8.19502283419102E-05	7.89217971371454E-41	0.999999999914689	-3.74731149918239E-42	-1.30622094446862E-05	6.74071849874341E-42	7.7243505097205E-40	-0.001496818944635	-4.29420356593036E-40	7.83771668456075E-40	-0.001484891703662	-4.3572459252888E-40	800	-0.001496818944635	-7.7242383248832E-40	88.8888888888888	1.96185418214404E-49	2.41210156588614E-18	4.26325641456031E-12	-5.47108241136174E-50	-2.62256835173248E-18	4.26325641456112E-13
3.395	88.8888888595508	-1.23357885718374E-39	-0.002283779238951	301.777777777778	4.95566461726224E-50	-800	-4.44891664513399E-41	9.07991321774474E-05	7.96477558700462E-41	0.999999999917487	-3.85800699646164E-42	-1.28462582201574E-05	6.93893063428679E-42	7.95148558821165E-40	-0.001472072757141	-4.42105251178579E-40	8.06589069751286E-40	-0.001458879668376	-4.48469799887464E-40	800	-0.001472072757141	-7.95137199898498E-40	88.8888888888888	1.958386740477E-49	1.34744503668381E-18	1.08949886149875E-11	-2.61445077169481E-50	-3.09646982946217E-16	1.08949886193877E-12
3.4	88.8888888606276	-1.2691365518903E-39	-0.002241476203059	302.222222222223	5.0536131272504E-50	-800	-4.49125114387755E-41	9.94872292275158E-05	8.03625920907164E-41	0.999999999920516	-3.96976478548862E-42	-1.26083036432091E-05	7.13894315805237E-42	8.18068362012154E-40	-0.001444805171189	-4.54911850226776E-40	8.29611256538935E-40	-0.001430378676625	-4.6133628665134E-40	800	-0.001444805171189	-8.18056890552377E-40	88.8888888888889	1.95945006233634E-49	-2.55874905610179E-19	7.10542735760052E-12	1.54113031540996E-50	-2.52762763267399E-16	7.10542736209631E-13
3.405	88.8888888617773	-1.30500985360894E-39	-0.002195408045789	302.666666666667	5.15158285418717E-50	-800	-4.53288206348189E-41	0.000107757625732	8.10679028744539E-41	0.999999999923749	-4.08257231919754E-42	-1.23491702585047E-05	7.34073084459274E-42	8.41191569357421E-40	-0.001415110672638	-4.67838714947494E-40	8.5283549998235E-40	-0.001399508390801	-4.74322037214744E-40	800	-0.001415110672638	-8.41180014391251E-40	88.8888888888889	1.95914655564623E-49	-9.38382435969244E-19	4.26325641456031E-12	-9.72147294473257E-51	-3.11102060125251E-17	4.26325641467382E-13
3.41	88.8888888629902	-1.3411945253896E-39	-0.002145739428643	303.111111111112	5.24953185630977E-50	-800	-4.57384609917005E-41	0.000115705638654	8.17637976302052E-41	0.99999999992716	-4.19641231867832E-42	-1.20697842869946E-05	7.54426985675924E-42	8.64515448827623E-40	-0.00138309539859	-4.80883864463958E-40	8.76259102588214E-40	-0.001366361166997	-4.87425141095986E-40	800	-0.00138309539859	-8.64503840372349E-40	88.8888888888889	1.95868592160544E-49	-7.08752419293338E-19	1.18423789293342E-12	-1.14218822603989E-50	9.76013328132587E-17	1.18423789695543E-13
3.415	88.8888888642573	-1.37768635078942E-39	-0.0020925915378	303.555555555556	5.34745818004364E-50	-800	-4.61416089441147E-41	0.0001234312256	8.24499406923169E-41	0.999999999930724	-4.31126849810445E-42	-1.17708274009392E-05	7.74953647202617E-42	8.88037281444625E-40	-0.001348837462933	-4.94045431545971E-40	8.99879270702084E-40	-0.001331000725562	-5.00643738358191E-40	800	-0.001348837462933	-8.88025650671405E-40	88.8888888888889	1.95810649839665E-49	-4.08962712029833E-19	5.44749430749373E-12	-7.84792039715251E-51	-1.2894224303492E-16	5.44749430901977E-13
3.42	88.8888888655706	-1.41448095598266E-39	-0.002036040766986	304.000000000001	5.4453624893037E-50	-800	-4.65385892246522E-41	0.000131035341714	8.31262933769485E-41	0.999999999934418	-4.42712487322435E-42	-1.14527293150496E-05	7.95650608168845E-42	9.11754246578404E-40	-0.001312386107345	-5.07321583334148E-40	9.23693199587413E-40	-0.001293461865326	-5.1397606209352E-40	800	-0.001312386107345	-9.11742626018658E-40	88.888888888889	1.95798273369594E-49	-1.8765970828908E-18	9.47390314346736E-12	2.02291461996857E-51	-2.55681198193227E-16	9.47390314691752E-13
3.425	88.8888888669229	-1.45157394310421E-39	-0.001976119030577	304.444444444445	5.54326592085664E-50	-800	-4.69295446109381E-41	0.000138616689224	8.37924786975993E-41	0.999999999938222	-4.5439664414354E-42	-1.1115669547682E-05	8.16515394079655E-42	9.35663507869263E-40	-0.001273761903115	-5.20710599245185E-40	9.47697976508976E-40	-0.001253751109013	-5.27420386296909E-40	800	-0.001273761903115	-9.35651931649138E-40	88.888888888889	1.95822980460858E-49	-2.54460516265325E-18	0	5.62851695949692E-51	-5.4866727895221E-17	5.4866727895221E-18
3.43	88.8888888683077	-1.4889606258063E-39	-0.001912815381901	304.888888888889	5.641183055672E-50	-800	-4.73141623911897E-41	0.000146269049935	8.44478597628775E-41	0.999999999942116	-4.66177759908367E-42	-1.07595865238172E-05	8.37545368054634E-42	9.59762042746924E-40	-0.001232957794265	-5.34210689585912E-40	9.71890506275605E-40	-0.001211848112839	-5.40974895377969E-40	800	-0.001232957794265	-9.59750546848414E-40	88.888888888889	1.95845862252884E-49	-2.453020132686E-18	-2.84217094304021E-12	2.73333970819341E-51	1.14547666275871E-16	2.84217094534851E-13
3.435	88.8888888697188	-1.52663620322263E-39	-0.001846078697537	305.333333333334	5.73911022501815E-50	-800	-4.76928353680071E-41	0.000154079124125	8.50924379234726E-41	0.999999999946085	-4.78054295790477E-42	-1.03841926742074E-05	8.58737828677114E-42	9.8404675455095E-40	-0.001189940827787	-5.47820089098495E-40	9.96267694083076E-40	-0.001167707695222	-5.54637886275965E-40	800	-0.001189940827787	-9.84035377085996E-40	88.888888888889	1.95853649888414E-49	-1.72834343667796E-18	1.4210854715201E-12	1.94839064949252E-50	2.66488426127458E-17	1.42108547176997E-13
3.44	88.8888888711501	-1.56459590136426E-39	-0.001775821204248	305.777777777778	5.8370478614352E-50	-800	-4.80658458391723E-41	0.000162124882082	8.57264175964223E-41	0.999999999950111	-4.90024809333758E-42	-9.98899427439393E-06	8.80090089526503E-42	1.0085145636648E-39	-0.001144654427025	-5.6153714270476E-40	1.02082650368833E-39	-0.001121262337736	-5.68407736802521E-40	800	-0.001144654427025	-1.00850334515594E-39	88.888888888889	1.95879628407556E-49	-2.21936325164123E-18	4.97379915032037E-12	-1.08591006871363E-49	-8.03098586752053E-17	4.97379915096873E-13
3.445	88.8888888726064	-1.60283229935132E-39	-0.001701367886565	306.222222222223	5.9346441895961E-50	-800	-4.84284256839181E-41	0.000173947399504	8.63325126240462E-41	0.999999999954206	-5.02087469416894E-42	-9.57019436236754E-06	9.01597973610723E-42	1.03316068046075E-39	-0.001096663492184	-5.75359746454704E-40	1.04555894672892E-39	-0.001071430078491	-5.82281458803279E-40	800	-0.001096663492184	-1.0331496677259E-39	88.888888888889	1.9492407530854E-49	-2.27428067105991E-18	-6.39488462184047E-12	-1.09076161409686E-49	2.7134823058391E-17	6.39488462189804E-13
3.45	88.8888888741048	-1.64133365775477E-39	-0.001621193680727	306.666666666667	6.032106328246E-50	-800	-4.87844920801412E-41	0.000186731469853	8.69243695735423E-41	0.99999999995842	-5.14239786139258E-42	-9.11921445446715E-06	9.23254872097984E-42	1.05797752558271E-39	-0.001044985001446	-5.89285036018236E-40	1.07046094429592E-39	-0.001017935452867	-5.96257186312688E-40	800	-0.001044985001446	-1.05796677782383E-39	88.8888888888889	1.94924726026173E-49	-2.00192648722891E-18	-1.56319401867212E-11	-3.38555472106232E-51	6.23234619921732E-17	1.56319401868454E-12
3.455	88.8888888756269	-1.68009666018821E-39	-0.0015354685572	307.111111111112	6.12956175816888E-50	-800	-4.91367586856621E-41	0.000198981107461	8.75096050962359E-41	0.999999999962701	-5.26480628974134E-42	-8.63701063457288E-06	9.45058918719465E-42	1.08296295952653E-39	-0.000989728513954	-6.03311714297317E-40	1.09553059949028E-39	-0.000960931564565	-6.10333830770895E-40	800	-0.000989728513954	-1.08295253778161E-39	88.8888888888889	1.94759000521924E-49	-1.61693870488299E-18	-1.3500311979441E-11	-1.88974725571196E-50	1.42500011819108E-16	1.35003119801931E-12
3.46	88.888888877155	-1.7191177837453E-39	-0.001444298326044	307.555555555556	6.22694261217468E-50	-800	-4.94889284705086E-41	0.000211213772387	8.80859677762724E-41	0.999999999966999	-5.38809624555649E-42	-8.12417808426559E-06	9.67008130883544E-42	1.10811470931304E-39	-0.000930962232492	-6.17439351502955E-40	1.12076537042981E-39	-0.000900423275901	-6.24511364440821E-40	800	-0.000930962232492	-1.10810467681301E-39	88.8888888888888	1.9476216339789E-49	-7.00035241756579E-19	-9.000207986294E-12	2.58755202167797E-51	1.40073904600568E-16	9.00020798738401E-13
3.465	88.8888888786709	-1.75839354914457E-39	-0.001347776362468	308.000000000001	6.32432257217837E-50	-800	-4.98358817915232E-41	0.000223086346125	8.86553442596816E-41	0.999999999971262	-5.51226037495472E-42	-7.58124203910038E-06	9.89100550509806E-42	1.13343053001933E-39	-0.000868746344624	-6.31667102953547E-40	1.14616325571661E-39	-0.000836513745401	-6.38788292915657E-40	800	-0.000868746344624	-1.1334209522514E-39	88.8888888888888	1.94757422635709E-49	-4.09151416428299E-19	1.18423789293342E-12	-5.92133841754398E-52	-3.26933672532278E-17	1.1842378933847E-13
3.47	88.8888888801554	-1.79792077747417E-39	-0.001246032377978	308.444444444445	6.42170095246279E-50	-800	-5.0177755670864E-41	0.000234736055856	8.92173600864103E-41	0.999999999975437	-5.63728582946894E-42	-7.00893212629726E-06	1.01133438859899E-41	1.15890837061634E-39	-0.000803164459468	-6.45993494600928E-40	1.17172214667786E-39	-0.0007692668189	-6.53163161042554E-40	800	-0.000803164459468	-1.15889931504169E-39	88.8888888888888	1.94756849815155E-49	-7.44062455625968E-19	4.02640883597363E-12	-5.07258525190237E-52	4.63087940122384E-17	4.02640883623993E-13
3.475	88.8888888815896	-1.83769605425076E-39	-0.001139134454745	308.88888888889	6.51907818856817E-50	-800	-5.05146107674348E-41	0.000246302237575	8.97715834711399E-41	0.999999999979471	-5.76315984350753E-42	-6.40763130807121E-06	1.03370772346717E-41	1.18454602782826E-39	-0.000734260461262	-6.60417061532286E-40	1.19743981094337E-39	-0.000698706425412	-6.67634531046155E-40	800	-0.000734260461262	-1.18453756428465E-39	88.8888888888888	1.9475201989055E-49	-7.55438064430343E-21	1.65793305010679E-12	-1.81741215613484E-51	6.0463582937316E-17	1.65793305120932E-13
3.48	88.8888888829549	-1.87771594752986E-39	-0.001027089077657	309.333333333334	6.61645641458622E-50	-800	-5.08466665417783E-41	0.000257922073004	9.03178129848913E-41	0.999999999983311	-5.88987036964847E-42	-5.77737606191592E-06	1.05621862341233E-41	1.2103412866746E-39	-0.000662038530019	-6.7493642072807E-40	1.22331395843781E-39	-0.00062481719428	-6.82201028021921E-40	800	-0.000662038530019	-1.21033348782603E-39	88.8888888888888	1.94749376948124E-49	-2.65786596219105E-19	7.81597009336057E-12	7.13868117221378E-51	-4.08422741339688E-17	7.81597009346729E-13
3.485	88.8888888842323	-1.91797680242337E-39	-0.000909842960041	309.777777777778	6.71384916788546E-50	-800	-5.11739943321548E-41	0.00026972675109	9.08556636629347E-41	0.999999999986904	-6.01740550046978E-42	-5.11786665029726E-06	1.07886503111475E-41	1.23629178798469E-39	-0.000586464318348	-6.89550204776993E-40	1.24934218880154E-39	-0.000547546171984	-6.96861297502216E-40	800	-0.000586464318348	-1.23628472980713E-39	88.8888888888889	1.94806684428826E-49	-2.10759517412604E-19	2.36847578586684E-13	3.52615420755588E-50	4.05619679977231E-17	2.36847582059958E-14
3.49	88.8888888854023	-1.95847477288434E-39	-0.0007872864697	310.222222222223	6.81123607019756E-50	-800	-5.14966698990578E-41	0.00028183813189	9.13848005321614E-41	0.999999999990194	-6.14575331986608E-42	-4.42848639210442E-06	1.1016447815063E-41	1.26239504886357E-39	-0.000507467159799	-7.04257044819882E-40	1.27552200571223E-39	-0.000466805494668	-7.11614006723189E-40	800	-0.000507467159799	-1.26238881115255E-39	88.8888888888889	1.94765845251035E-49	8.08328982659227E-20	2.60532336445352E-12	-2.40136417393238E-49	6.85593368186936E-17	2.6053233653556E-13
3.495	88.888888886444	-1.9992059531004E-39	-0.000659257583692	310.666666666668	6.90860353606067E-50	-800	-5.18143679120319E-41	0.000294470429847	9.19041092760457E-41	0.999999999993124	-6.27490235736707E-42	-3.70832390829266E-06	1.12455567567218E-41	1.28864854736999E-39	-0.000424942618026	-7.19055622598809E-40	1.30185059361936E-39	-0.00038244593056	-7.26457729720678E-40	800	-0.000424942618026	-1.28864321426343E-39	88.8888888888889	1.92768073789307E-49	3.31683495372369E-19	4.97379915032037E-12	-2.22336143509525E-49	-1.91260600596139E-17	4.97379915035714E-13
3.5	88.8888888873418	-2.04016129477366E-39	-0.000524420946267	311.111111111112	7.00499623931912E-50	-800	-5.21221448120262E-41	0.000312212337688	9.23948759277604E-41	0.99999999999565	-6.40483299359183E-42	-2.94986782276285E-06	1.14759261776473E-41	1.31504643700834E-39	-0.000338029952732	-7.33943677254267E-40	1.32831977581584E-39	-0.000293003684253	-7.41389624305173E-40	800	-0.000338029952732	-1.31504210681036E-39	88.8888888888889	1.92848676875563E-49	-3.98027030612181E-20	-2.84217094304021E-12	1.19286858696681E-49	-4.06695422658253E-17	2.84217094333119E-13
3.505	88.8888888880688	-2.08133377846082E-39	-0.000381800944555	311.555555555557	7.10142117685522E-50	-800	-5.24270259480137E-41	0.00032951293083	9.2881045900541E-41	0.999999999997694	-6.5355299457596E-42	-2.14763031312877E-06	1.17075165408559E-41	1.34158418114649E-39	-0.000246100305793	-7.48919446775359E-40	1.35492823545016E-39	-0.000198605183095	-7.56408860901394E-40	800	-0.000246100305793	-1.341580964218E-39	88.8888888888889	1.92809506035618E-49	-2.82807244528192E-20	5.44749430749373E-12	-5.73738856761443E-49	-3.14400301722735E-17	5.44749430758446E-13
3.51	88.8888888885873	-2.12272104717976E-39	-0.000231501412684	312.000000000001	7.19591090146544E-50	-800	-5.27320549933629E-41	0.000346884977344	9.33606515943793E-41	0.999999999999153	-6.66698899562418E-42	-1.30219544634981E-06	1.19403145731762E-41	1.36826025705871E-39	-0.000149220606354	-7.63982444761781E-40	1.3816740919949E-39	-9.92299572032944E-05	-7.71515481882253E-40	800	-0.000149220606354	-1.36825826722865E-39	88.888888888889	1.87940091699726E-49	-3.58708324385898E-19	1.30266168222676E-11	-5.66512391819809E-49	-4.12654950637033E-17	1.3026616822333E-12
3.515	88.8888888888583	-2.16432019752059E-39	-7.3490853994006E-05	312.444444444445	7.2898830981744E-50	-800	-5.30345017987145E-41	0.000364125376254	9.38351659055095E-41	0.999999999999915	-6.7992088476824E-42	-4.13386053716319E-07	1.21743039228096E-41	1.39507278865574E-39	-4.73705523750282E-05	-7.79132518704118E-40	1.40855588687638E-39	5.084279161525E-06	-7.8670874749048E-40	800	-4.73705523750283E-05	-1.39507214436957E-39	88.888888888889	1.87923723788301E-49	-3.33159664888537E-19	3.31586610021358E-12	6.0518472773675E-50	4.16667615373067E-17	3.31586610047537E-13
3.52	88.888888888841	-2.20612964056148E-39	9.21416327129926E-05	312.88888888889	7.38381168978433E-50	-800	-5.33345135050626E-41	0.000381204207301	9.43066128608706E-41	0.999999999999866	-6.93218213212813E-42	5.18296684010655E-07	1.24094756362891E-41	1.42202074814104E-39	5.93924250588751E-05	-7.94368820945351E-40	1.4355727413619E-39	0.000114291240217	-8.01987960121599E-40	800	5.93924250588749E-05	-1.42202157145747E-39	88.888888888889	1.87753162406216E-49	-2.90452272459523E-21	2.60532336445352E-12	-2.44440367863943E-50	7.41929206259251E-17	2.60532336550994E-13
3.525	88.8888888884927	-2.24814749265072E-39	0.0002653517271	313.333333333334	7.47770099325422E-50	-800	-5.36313235514352E-41	0.000398245306896	9.47724366913582E-41	0.999999999998887	-7.06590215307988E-42	1.49260346494092E-06	1.26458191006401E-41	1.44910291735985E-39	0.000171039758056	-8.09690580712621E-40	1.46272304454483E-39	0.000228380116697	-8.17352202567589E-40	800	0.000171039758056	-1.4491053343328E-39	88.888888888889	1.8768296332112E-49	3.18143996599034E-19	1.4210854715201E-12	-4.21515541220462E-50	3.80518854571676E-17	1.42108547202956E-13
3.53	88.8888888877691	-2.29037075373748E-39	0.000446150327356	313.777777777779	7.5715292227171E-50	-800	-5.39246046405154E-41	0.000415373109305	9.52302948335208E-41	0.999999999996852	-7.20036032324982E-42	2.50959559138707E-06	1.2883317420876E-41	1.47631735803246E-39	0.000287578471343	-8.25096810034398E-40	1.49000451442356E-39	0.000347375747129	-8.32800463856656E-40	800	0.000287578471343	-1.47632149923025E-39	88.888888888889	1.87480650169459E-49	4.00145729958859E-19	-9.94759830064073E-12	7.2585431865216E-50	3.83001078371991E-17	9.94759830071446E-13
3.535	88.8888888866235	-2.33279524406675E-39	0.000634603056037	314.222222222223	7.66534865137466E-50	-800	-5.42108368224055E-41	0.000432708524805	9.56773129132655E-41	0.999999999993629	-7.33554455815985E-42	3.56964219023147E-06	1.31219470637488E-41	1.50366137091168E-39	0.000409050863745	-8.4058611969772E-40	1.51741404554898E-39	0.000471337608282	-8.48330724625638E-40	800	0.000409050863745	-1.50366737197368E-39	88.888888888889	1.8827271914157E-49	6.08129229148887E-19	-3.78956125738694E-12	7.79670452200255E-50	-6.32336313356028E-17	3.78956125791451E-13
3.54	88.888888885006	-2.37541702631889E-39	0.000830827808076	314.666666666667	7.75943108365631E-50	-800	-5.44927793704169E-41	0.000450365392692	9.61196957948666E-41	0.99999999998908	-7.47143757690424E-42	4.67340642047701E-06	1.33616858571835E-41	1.53113241244183E-39	0.000535532927687	-8.56156524509428E-40	1.54495031003462E-39	0.000600357789482	-8.63941755984951E-40	800	0.000535532927687	-1.53114041465537E-39	88.888888888889	1.88116083057906E-49	1.89708674421322E-20	1.27897692436809E-11	-3.46814995557387E-50	4.75728202366146E-17	1.27897692437694E-12
3.545	88.8888888828586	-2.41823330001453E-39	0.001035388762794	315.111111111112	7.8534807917149E-50	-800	-5.47712325825139E-41	0.000471343920253	9.65470671617164E-41	0.999999999983041	-7.60803404700523E-42	5.8240617908134E-06	1.36025180042101E-41	1.55872866735014E-39	0.000667388320478	-8.7180740445318E-40	1.57260900739828E-39	0.00073538787613	-8.7963255831349E-40	800	0.000667388320478	-1.55873882214929E-39	88.8888888888891	1.88088403715488E-49	1.06276297660165E-18	1.39740071366144E-11	-2.87449580887206E-52	1.23447141261343E-16	1.39740071371596E-12
3.55	88.888888880101	-2.4612360773228E-39	0.001249907755145	315.555555555557	7.94752486163028E-50	-800	-5.50453020113168E-41	0.000493917108518	9.6963496703376E-41	0.999999999975285	-7.74532014892019E-42	7.03073112286198E-06	1.38443984810775E-41	1.58644496573023E-39	0.000805662440469	-8.87537157175468E-40	1.60038700303795E-39	0.000876884704867	-8.95401875749848E-40	800	0.000805662440469	-1.58645744567922E-39	88.8888888888891	1.88087016734145E-49	1.18284649538386E-18	6.63173220042715E-12	-3.16990189764317E-51	1.4454920811417E-16	6.6317322020025E-13
3.555	88.8888888766606	-2.50442311548006E-39	0.001474411034146	316.000000000001	8.04155970185004E-50	-800	-5.53194112733406E-41	0.000516442979144	9.73753400212575E-41	0.99999999996561	-7.88329111487874E-42	8.29356206735535E-06	1.40873146455536E-41	1.61427985583188E-39	0.000950372207189	-9.03345231011953E-40	1.6282829830973E-39	0.001024834720187	-9.11249719705404E-40	800	0.000950372207189	-1.61429483961014E-39	88.8888888888891	1.88057435526339E-49	2.51230577700167E-18	7.10542735760052E-13	-3.26613344323611E-51	1.87084780102992E-16	7.10542760389616E-14
3.56	88.888888872461	-2.54779214572919E-39	0.001708943227305	316.444444444446	8.13558857415246E-50	-800	-5.55924513895621E-41	0.000538900268437	9.77827240292958E-41	0.999999999953798	-8.0219481161361E-42	9.6128056540359E-06	1.43312537080185E-41	1.64223186888101E-39	0.001101546386528	-9.19231754641714E-40	1.65629567007816E-39	0.001179218274987	-9.27175783892445E-40	800	0.001101546386528	-1.64224954155221E-39	88.8888888888891	1.88058531658572E-49	2.94236078379153E-18	-1.01844458792274E-11	3.75942711203495E-52	1.19174979492645E-16	1.01844458799247E-12
3.565	88.8888888674251	-2.59134149736755E-39	0.001953396161338	316.88888888889	8.2296174617295E-50	-800	-5.58625940369441E-41	0.000561105859418	9.81864206010054E-41	0.999999999939634	-8.16128487439895E-42	1.09878534081895E-05	1.45762062496285E-41	1.67029992313607E-39	0.001259115252421	-9.35196004459781E-40	1.68442400760783E-39	0.001339963263011	-9.43179238247294E-40	800	0.001259115252421	-1.67032047460806E-39	88.8888888888891	1.88056491117496E-49	3.91379047768266E-18	3.78956125738694E-12	-2.46710861616883E-52	2.80565057800077E-16	3.78956126777294E-13
3.57	88.8888888614732	-2.63506945955201E-39	0.002207684607534	317.333333333335	8.32364589767884E-50	-800	-5.61298896160072E-41	0.000583180760765	9.85860885600413E-41	0.999999999922895	-8.30129421612071E-42	1.24182259183355E-05	1.48221626248338E-41	1.69848291077214E-39	0.001423023868358	-9.51237154088994E-40	1.7126668415738E-39	0.001507032244436	-9.59259267144957E-40	800	0.001423023868358	-1.69850653600668E-39	88.8888888888891	1.8805690490073E-49	5.24422533127261E-18	-7.10542735760052E-13	3.58878052548177E-52	-9.74263646645885E-18	7.10542735826846E-14
3.575	88.8888888545218	-2.67897416841482E-39	0.002471778285144	317.777777777779	8.41767445628778E-50	-800	-5.63943817642674E-41	0.00060525041633	9.8981383267859E-41	0.999999999903344	-8.44196908909173E-42	1.39037528552809E-05	1.5069112324796E-41	1.72677962474929E-39	0.001593252716052	-9.67354390546074E-40	1.74102291913188E-39	0.001680423716457	-9.75415067461668E-40	800	0.001593252716052	-1.72680652434081E-39	88.8888888888891	1.88059224115302E-49	4.09331868884453E-18	7.10542735760052E-13	4.37102897080664E-51	1.38692577329486E-17	7.10542735895411E-14
3.58	88.8888888464825	-2.72305360919874E-39	0.002745702738257	318.222222222223	8.51170365610652E-50	-800	-5.66561098591115E-41	0.000627439789513	9.93719727206317E-41	0.999999999880734	-8.58330254908959E-42	1.54445779045378E-05	1.53170439891428E-41	1.75518876013063E-39	0.001769818260652	-9.83546912661188E-40	1.76949089232579E-39	0.001860171975645	-9.91645847354453E-40	800	0.001769818260652	-1.75521914094324E-39	88.8888888888891	1.88058862957868E-49	4.96314466107405E-18	-6.15803704325379E-12	-2.91917440645883E-50	-4.03123364390933E-16	6.15803705644861E-13
3.585	88.8888888372619	-2.76730561331229E-39	0.003029541632214	318.666666666668	8.6057256014822E-50	-800	-5.69148229114057E-41	0.000650148173235	9.97565820204158E-41	0.9999999998548	-8.72528773394778E-42	1.70411716836761E-05	1.5565945389072E-41	1.7837089121081E-39	0.001952774430959	-9.99813928040314E-40	1.79806904796789E-39	0.002046425707568	-1.00795074307724E-39	800	0.001952774430959	-1.78374298798863E-39	88.888888888889	1.8780989383635E-49	8.32989652117278E-19	7.10542735760052E-13	-2.70697096529599E-50	-1.69057803133966E-16	7.1054275587182E-14
3.59	88.8888888267171	-2.81172394219175E-39	0.003324565974736	319.111111111112	8.69963242411404E-50	-800	-5.71665829541684E-41	0.000677364137811	1.00121490122567E-40	0.999999999825143	-8.86791140185152E-42	1.87006836111617E-05	1.58157813426452E-41	1.81233603881493E-39	0.002142940489983	-1.01615390109889E-39	1.82675174208081E-39	0.002240476239019	-1.02432776273954E-39	800	0.002142940489983	-1.81237404423907E-39	88.8888888888891	1.87813767312991E-49	3.3489949009122E-18	-8.05281767194726E-12	-6.02661620065936E-51	1.40685372765125E-16	8.05281767317617E-13
3.595	88.8888888147046	-2.85630405983349E-39	0.003631569896021	319.555555555556	8.79353106530189E-50	-800	-5.74173615152551E-41	0.000704177162435	1.00483821429178E-40	0.999999999791358	-9.01116365161674E-42	2.04275806693778E-05	1.60665262646991E-41	1.84106720037203E-39	0.0023408283162	-1.03256568314535E-39	1.855538236467E-39	0.002442208136204	-1.04077662516754E-39	800	0.0023408283162	-1.8411093858886E-39	88.8888888888889	1.87722641535467E-49	1.32358879558832E-18	-2.08425869156282E-11	-1.06974319811238E-50	-3.80398695696887E-16	2.08425869190995E-12
3.6	88.8888888011007	-2.90104426494006E-39	0.003950540908293	320	8.88739251165992E-50	-800	-5.76690170883183E-41	0.000731120074491	1.00841790927245E-40	0.999999999753096	-9.15504582321929E-42	2.22217926146328E-05	1.63181705538432E-41	1.86990129292274E-39	0.002546429860276	-1.04904942153895E-39	1.88442728156036E-39	0.002651658609132	-1.05729758160669E-39	800	0.002546429860276	-1.8699479163191E-39	88.8888888888889	1.87722441522842E-49	4.46815442934288E-19	6.86857977901384E-12	1.33348119266613E-51	-9.6830397677572E-17	6.86857977969638E-13
3.605	88.8888887857804	-2.94594309981052E-39	0.004281400007901	320.444444444445	8.98125358559754E-50	-800	-5.79182459264372E-41	0.00075769618125	1.01197146915211E-40	0.999999999710008	-9.29955516345567E-42	2.40828750514294E-05	1.65707059822705E-41	1.89883737039607E-39	0.002759694198242	-1.06560479527609E-39	1.9134181286454E-39	0.002868722575826	-1.07388993684862E-39	800	0.002759694198242	-1.89888869592934E-39	88.888888888889	1.87721133434019E-49	4.39475730108724E-19	4.26325641456031E-12	-7.82303472127293E-53	1.90253160662902E-16	4.26325641880546E-13
3.61	88.8888887686178	-2.99099931953206E-39	0.004624015041502	320.888888888889	9.07511454450391E-50	-800	-5.81650820170466E-41	0.000784045774693	1.01549492982655E-40	0.999999999661738	-9.44468565321254E-42	2.60100846172485E-05	1.68241255220418E-41	1.92787462455204E-39	0.002980536147029	-1.08223110969764E-39	1.9425099154434E-39	0.003093335145001	-1.09055300542166E-39	800	0.002980536147029	-1.9279309222765E-39	88.888888888889	1.87721693629851E-49	2.08591423773016E-18	-9.000207986294E-12	7.45539176026083E-53	3.16483491680128E-16	9.00020799185841E-13
3.615	88.8888887494808	-3.03621150118592E-39	0.004978317580018	321.333333333334	9.16897554949346E-50	-800	-5.84095507024104E-41	0.000810314319283	1.01898427704822E-40	0.999999999607915	-9.59043135254897E-42	2.8003036398582E-05	1.70784211407247E-41	1.95701213167658E-39	0.003208911598799	-1.09892767857091E-39	1.97170166467593E-39	0.003325473097871	-1.10728610911418E-39	800	0.003208911598799	-1.95707367817912E-39	88.8888888888889	1.87721352212374E-49	3.02118951418041E-18	1.18423789293342E-12	7.08239651781287E-51	1.60751990610864E-17	1.18423789304253E-13
3.62	88.8888887282299	-3.08157804567123E-39	0.005344303936143	321.777777777778	9.26283570093935E-50	-800	-5.86516720258491E-41	0.000836646815361	1.02243562255402E-40	0.999999999548147	-9.73678638364799E-42	3.00617096543859E-05	1.73335838113437E-41	1.98624885368631E-39	0.003444818176807	-1.11569382207474E-39	2.00099228767402E-39	0.003565154755187	-1.12408857545652E-39	800	0.003444818176807	-1.98631593289276E-39	88.888888888889	1.87719718514621E-49	2.11151621469884E-18	9.47390314346736E-13	-5.14051235779963E-50	-3.69241220487111E-16	9.47390386301807E-14
3.625	88.888888704715	-3.12709709476017E-39	0.005722062666981	322.222222222223	9.35665842571505E-50	-800	-5.88906944355081E-41	0.000863971311888	1.02582000669529E-40	0.999999999482012	-9.8837447690379E-42	3.21866025184425E-05	1.75896030440264E-41	2.01558358425453E-39	0.003688312962981	-1.13252884789972E-39	2.03037986613588E-39	0.003812664304145	-1.14095951667526E-39	800	0.003688312962981	-2.01565648864551E-39	88.8888888888889	1.87280388721113E-49	-3.20220397807096E-19	-5.44749430749373E-12	-5.13518479295868E-50	-3.89719631824124E-16	5.44749432143422E-13
3.63	88.8888886786902	-3.17276262601125E-39	0.006112989732843	322.666666666667	9.45029867032834E-50	-800	-5.91240435189686E-41	0.000895104839281	1.0290477922335E-40	0.999999999408817	-1.00312938782766E-41	3.43855672675706E-05	1.78464448511869E-41	2.04501241593413E-39	0.003940295761966	-1.14943128632886E-39	2.059859913842E-39	0.004069092951708	-1.15789730748219E-39	800	0.003940295761966	-2.045091463507E-39	88.8888888888889	1.87278293114442E-49	-2.49089182894176E-18	-4.73695157173368E-12	6.23370924179621E-51	-1.13311589393318E-15	4.73695170725878E-13
3.635	88.8888886499391	-3.21857127808508E-39	0.00651766516064	323.111111111111	9.54393338468957E-50	-800	-5.93574048171036E-41	0.000926045268216	1.03224834987192E-40	0.999999999327954	-1.01794267652921E-41	3.66618665532371E-05	1.81040902556631E-41	2.07453316612786E-39	0.004201140446086	-1.16640032755327E-39	2.0894316507705E-39	0.004334385379242	-1.17490195137654E-39	800	0.004201140446086	-2.0746186908334E-39	88.8888888888889	1.87271059886713E-49	-1.04148969254954E-17	-7.34227493618721E-12	-8.0415365102482E-52	-9.63504616332184E-16	7.34227499940611E-13
3.64	88.8888886182705	-3.26452144115562E-39	0.006936132479489	323.555555555556	9.63756757784035E-50	-800	-5.95907991596889E-41	0.000956989583517	1.03541566032199E-40	0.999999999238886	-1.03281455978586E-41	3.90157452268193E-05	1.83625301612325E-41	2.10414478779635E-39	0.004470875073243	-1.1834362120316E-39	2.11909412445961E-39	0.00460854270011	-1.19197345782485E-39	800	0.004470875073243	-2.10423713296705E-39	88.8888888888889	1.87271065284913E-49	-1.06589423708121E-17	2.36847578586684E-13	9.94524909295055E-53	4.90006058769628E-16	2.36848085464741E-14
3.645	88.8888885834994	-3.31061203381997E-39	0.007368273102305	324	9.73120270681531E-50	-800	-5.98221162325076E-41	0.000987600318997	1.03856092519892E-40	0.999999999141092	-1.04774466960683E-41	4.1446536236067E-05	1.8621758453411E-41	2.13384657665486E-39	0.004749423204885	-1.20053851199769E-39	2.14884670335016E-39	0.004891469350731	-1.20911123173317E-39	800	0.004749423204885	-2.13394609285995E-39	88.8888888888889	1.87270815303948E-49	-7.85434775283457E-18	1.4210854715201E-12	-4.60010862433773E-53	-4.48151936278038E-17	1.42108547222675E-13
3.65	88.8888885454366	-3.35684198837403E-39	0.007813972860218	324.444444444445	9.82483811137837E-50	-800	-6.00513755362335E-41	0.00101803181165	1.04167995650418E-40	0.999999999034041	-1.06273248993175E-41	4.39535973811864E-05	1.88817690947365E-41	2.16363783724095E-39	0.00503671125034	-1.21770663000024E-39	2.17868863590569E-39	0.005183113981819	-1.22631468359407E-39	800	0.00503671125034	-2.16374488229403E-39	88.8888888888889	1.87270369302871E-49	-1.1406861973835E-17	-2.60532336445352E-12	-2.94835424042608E-52	-7.22029386120385E-16	2.60532346450376E-13
3.655	88.8888885038822	-3.4032100512782E-39	0.008273186964322	324.888888888889	9.91847292732186E-50	-800	-6.02785893650339E-41	0.001048440917585	1.04476860873111E-40	0.999999998917169	-1.07777750931182E-41	4.65366767247007E-05	1.91425549983861E-41	2.19351775338207E-39	0.005332710339705	-1.23493997306443E-39	2.20861905182972E-39	0.005483470180051	-1.24358322742217E-39	800	0.005332710339705	-2.19363269326584E-39	88.8888888888889	1.87268252095546E-49	-1.37093421320102E-17	-4.26325641456031E-12	-8.59509199801723E-53	-3.30442934388538E-16	4.26325642736655E-13
3.66	88.8888884586243	-3.44971478876621E-39	0.008745939831183	325.333333333334	1.00121076520074E-49	-800	-6.050376629056E-41	0.001078981330552	1.0478229400026E-40	0.999999998789881	-1.09287921957604E-41	4.91959116099356E-05	1.94041080594498E-41	2.22348539174764E-39	0.00563743621137	-1.25223795110973E-39	2.23863696789929E-39	0.005792575562122	-1.26091627968764E-39	800	0.00563743621137	-2.22360860160189E-39	88.8888888888888	1.8726824974314E-49	-1.41771342369912E-17	3.07901852162689E-12	2.95407096066511E-51	5.98091613117667E-16	3.07901857971579E-13
3.665	88.8888884093713	-3.4963526801555E-39	0.009232960439369	325.777777777778	1.0105728147677E-49	-800	-6.07236412406449E-41	0.001113320386195	1.05073340149902E-40	0.999999998651357	-1.10803678833617E-41	5.19354025414953E-05	1.96664083900847E-41	2.2535384637383E-39	0.005951358748557	-1.26959959362284E-39	2.26873826254895E-39	0.006111518358996	-1.27831232148642E-39	800	0.005951358748557	-2.25367033794935E-39	88.8888888888889	1.87259015881299E-49	-1.01899497947712E-17	6.63173220042715E-12	-2.90286390433961E-50	-5.51729321923089E-16	6.63173222337781E-13
3.67	88.8888883557484	-3.54311857969653E-39	0.009735528809661	326.222222222222	1.0199339429942E-49	-800	-6.09419299875733E-41	0.001148265073165	1.05359668196644E-40	0.999999998500543	-1.12324915287629E-41	5.47623496364571E-05	1.99294269240999E-41	2.28367362471532E-39	0.006275303023914	-1.28702365862547E-39	2.29892158414178E-39	0.006440472071269	-1.29577089840477E-39	800	0.006275303023914	-2.28381458547372E-39	88.8888888888889	1.87019235331256E-49	-1.91372200629853E-17	2.60532336445352E-12	-2.79661460457941E-50	-1.30510556579741E-15	2.60532369134201E-13
3.675	88.8888882974846	-3.59001102936408E-39	0.010253707786245	326.666666666667	1.02928484413158E-49	-800	-6.11613555547817E-41	0.001183465627837	1.05642375681072E-40	0.999999998336676	-1.13851646646718E-41	5.76771063935617E-05	2.01931554114591E-41	2.31388992372539E-39	0.006609309545421	-1.30451031238885E-39	2.32918589546309E-39	0.006779509999639	-1.31329233611771E-39	800	0.006609309545421	-2.31404040436475E-39	88.8888888888889	1.87017855143081E-49	-2.02862694245749E-17	1.4210854715201E-12	3.7408861117706E-51	4.36860951594689E-16	1.42108553866859E-13
3.68	88.8888882343136	-3.63702893072637E-39	0.010787443221709	327.111111111111	1.03863572404972E-49	-800	-6.13789673855582E-41	0.001218295092501	1.05923357765305E-40	0.999999998159007	-1.15383858195429E-41	6.06793682338217E-05	2.04575876320882E-41	2.34418664326315E-39	0.006953343410903	-1.32205937837618E-39	2.35953070222212E-39	0.007128525834648	-1.33087611502803E-39	800	0.006953343410903	-2.344347086598E-39	88.8888888888889	1.87016932600137E-49	-1.66413573275705E-17	-2.13162820728016E-12	-2.02014492528768E-52	5.7976272791222E-16	2.13162828612243E-13
3.685	88.8888881659716	-3.6841714299174E-39	0.011336605407581	327.555555555556	1.04798663384933E-49	-800	-6.15947795033008E-41	0.001252913120316	1.06202195417397E-40	0.999999997966796	-1.16921504850272E-41	6.37684055472976E-05	2.0722718746677E-41	2.37456322462932E-39	0.00730732101323	-1.33967033306091E-39	2.38995539008433E-39	0.007487459004101	-1.34852171955592E-39	800	0.00730732101323	-2.37473408179063E-39	88.8888888888889	1.87016140865643E-49	-1.64347050071358E-17	-1.89478062869347E-12	4.84395371224845E-53	-7.95040104027987E-16	1.89478079549081E-13
3.69	88.8888880921804	-3.73143748646968E-39	0.011901136650465	328	1.0573375294331E-49	-800	-6.18087979236131E-41	0.001287483048836	1.06478470898182E-40	0.999999997759258	-1.18464541851445E-41	6.69438938088709E-05	2.09885428617029E-41	2.40501898779643E-39	0.00767120516457	-1.35734265571346E-39	2.42045922504169E-39	0.007856295728566	-1.36622863584493E-39	800	0.00767120516457	-2.40520071928069E-39	88.8888888888889	1.87017641981306E-49	-2.31104683982084E-17	-1.89478062869347E-12	6.5990753554799E-51	-8.29899024873403E-16	1.89478081043809E-13
3.695	88.8888880126452	-3.77882587764382E-39	0.012481051532339	328.444444444445	1.06668844393053E-49	-800	-6.2021024350109E-41	0.001322165840287	1.06751784056787E-40	0.999999997535565	-1.20012924612801E-41	7.02059150424265E-05	2.12550530534612E-41	2.43555313412557E-39	0.008045005264179	-1.37507582661941E-39	2.45104135845142E-39	0.00823506834089	-1.38399635052662E-39	800	0.008045005264179	-2.43574621091786E-39	88.8888888888889	1.870206238202E-49	-2.4336751747996E-17	-1.3500311979441E-11	-3.63887543696824E-50	-6.51727320873796E-16	1.35003119951721E-12
3.7	88.8888879269468	-3.8263331740154E-39	0.013077152206007	328.888888888889	1.0760232979258E-49	-800	-6.22281624843315E-41	0.001360797621772	1.0701131684328E-40	0.999999997294538	-1.21566573337482E-41	7.35589813578022E-05	2.1522229931784E-41	2.46616343025651E-39	0.008429238361769	-1.39286891171962E-39	2.48169784252771E-39	0.008624908143385	-1.40182340591266E-39	800	0.008429238361769	-2.46636834617226E-39	88.8888888888888	1.86656851715267E-49	-3.00637897620445E-17	-2.13162820728016E-12	-8.25963059950472E-50	-9.29122871323621E-16	2.13162840977074E-13
3.705	88.8888878345789	-3.87395491618437E-39	0.013690613133313	329.333333333333	1.08535085512065E-49	-800	-6.243459284966E-41	0.001399889286118	1.07267022046572E-40	0.999999997034753	-1.23125397955201E-41	7.70096991032366E-05	2.17900482842131E-41	2.49684697235871E-39	0.008824661489098	-1.41072085348943E-39	2.51242758074874E-39	0.009025946882786	-1.41970959924217E-39	800	0.008824661489098	-2.49706425061486E-39	88.8888888888888	1.86313143999519E-49	-3.29576366653939E-17	3.07901852162689E-12	-3.39738757654003E-50	-6.92918918802158E-16	3.07901859959599E-13
3.71	88.8888877351666	-3.9216897309981E-39	0.014321528679911	329.777777777778	1.09466651776167E-49	-800	-6.26416942443915E-41	0.001439157932422	1.07519730102917E-40	0.999999996755156	-1.24689421455944E-41	8.0558599085901E-05	2.20585003289774E-41	2.52760286209354E-39	0.009231335472202	-1.42863190436079E-39	2.54322971449516E-39	0.009438235260689	-1.43765512275094E-39	800	0.009231335472202	-2.52783303914235E-39	88.8888888888888	1.86313581775555E-49	-3.63301754579707E-17	-2.13162820728016E-12	5.66944099210807E-51	9.27567007666138E-17	2.13162820929829E-13
3.715	88.888887628353	-3.96953676365558E-39	0.014969811910524	330.222222222222	1.10398214755776E-49	-800	-6.28472040538213E-41	0.001478071154418	1.07770965031142E-40	0.999999996454743	-1.2625862361415E-41	8.42051922952242E-05	2.23275812125996E-41	2.55843053812062E-39	0.009649204274611	-1.44660182403746E-39	2.57410382174684E-39	0.00986167145553	-1.45565952048335E-39	800	0.009649204274611	-2.5586741607692E-39	88.8888888888888	1.86312896848425E-49	-3.28927021872733E-17	2.60532336445352E-12	9.32918834848541E-53	2.04571937131133E-16	2.6053233724851E-13
3.72	88.8888875137793	-4.01749527273124E-39	0.015635341771312	330.666666666667	1.11329781659864E-49	-800	-6.30511281491569E-41	0.001516796022456	1.08020306134814E-40	0.999999996132504	-1.27832964824909E-41	8.79487978037718E-05	2.25972867219985E-41	2.58932951278831E-39	0.010078189867804	-1.464630150669E-39	2.60504935996302E-39	0.010296201507874	-1.47372233816577E-39	800	0.010078189867804	-2.58958713758917E-39	88.8888888888888	1.86314708046993E-49	-3.51097159830767E-17	-9.47390314346736E-12	8.73420274314696E-51	-3.41480637561844E-17	9.47390314352891E-13
3.725	88.8888873910667	-4.06556433024902E-39	0.016318072249827	331.111111111111	1.12261360348089E-49	-800	-6.32534648865327E-41	0.00155550206344	1.08267337398238E-40	0.999999995787375	-1.29412405620757E-41	9.17891567919492E-05	2.28676115894724E-41	2.62029917699054E-39	0.010518262593256	-1.48271642293503E-39	2.63606566742321E-39	0.01074182002417	-1.49184312105366E-39	800	0.010518262593256	-2.62057137144975E-39	88.8888888888888	1.86316556658012E-49	-3.54682770941108E-17	-9.000207986294E-12	-5.79056952092558E-50	-2.27146715863718E-15	9.00020827292976E-13
3.73	88.8888872597994	-4.11374263040712E-39	0.017018105352447	331.555555555556	1.13192262865173E-49	-800	-6.34531513055918E-41	0.001595568246081	1.08508397425929E-40	0.999999995418185	-1.30996903049615E-41	9.57268430461182E-05	2.3138548411104E-41	2.65133867557593E-39	0.010969488202061	-1.50086013740087E-39	2.66715103349439E-39	0.011198916656297	-1.51002110988674E-39	800	0.010969488202061	-2.65162602066045E-39	88.8888888888887	1.85818808087659E-49	-5.48858908872999E-17	5.68434188608042E-12	-4.79308111591454E-50	-1.96977878373874E-15	5.68434222737132E-13
3.735	88.8888871192891	-4.16202539706051E-39	0.017736840670479	332	1.14121362588867E-49	-800	-6.36489049538928E-41	0.001638651730829	1.08739076701636E-40	0.999999995023	-1.32586355879507E-41	9.97697292679997E-05	2.34100701655394E-41	2.68244489431634E-39	0.011432768839405	-1.51906010334254E-39	2.69830248431015E-39	0.011668355797639	-1.52825517800918E-39	800	0.011432768839405	-2.68274800662556E-39	88.8888888888888	1.85820038886307E-49	-5.48140719028191E-17	1.23160740865076E-11	-6.17213598240365E-50	-1.82440883727077E-15	1.23160742216345E-12
3.74	88.8888869689844	-4.21041037677276E-39	0.018474749264596	332.444444444444	1.15048089069688E-49	-800	-6.3845912475944E-41	0.001682017771576	1.08966782283637E-40	0.999999994600268	-1.34180738241033E-41	0.000103920465174	2.36821640857924E-41	2.71361635976266E-39	0.011908408140504	-1.53731600665885E-39	2.72951916797002E-39	0.012150218394525	-1.54654568462935E-39	800	0.011908408140504	-2.71393587683062E-39	88.8888888888888	1.85218414542908E-49	-7.16893474284105E-17	4.500103993147E-12	-7.03573298210735E-50	-7.58276566175822E-16	4.50010405703256E-13
3.745	88.8888868083905	-4.25889637994512E-39	0.019231910606414	332.888888888889	1.15974176002212E-49	-800	-6.40421163347369E-41	0.001725146852606	1.09192912340362E-40	0.999999994148598	-1.3578006681852E-41	0.000108179497794	2.39548234164585E-41	2.74485229049103E-39	0.01239645733107	-1.5556280265014E-39	2.76080063311925E-39	0.012644436562999	-1.56489239951468E-39	800	0.01239645733107	-2.745188864487E-39	88.8888888888888	1.85216689889451E-49	-6.04313991867419E-17	3.55271367880026E-12	9.41973455452636E-51	2.28163824189706E-15	3.55271441146169E-13
3.75	88.88888663705	-4.30748284958364E-39	0.020008171281664	333.333333333333	1.16900256469117E-49	-800	-6.42369086676144E-41	0.001767993861974	1.09417621724927E-40	0.999999993666703	-1.37384307971266E-41	0.000112545964172	2.42280449784529E-41	2.77615231694775E-39	0.012896817523816	-1.5739957688452E-39	2.79214647276524E-39	0.013150929495479	-1.58329491829279E-39	800	0.012896817523816	-2.77650661056894E-39	88.8888888888889	1.85213455902072E-49	-5.43279151881296E-17	9.94759830064073E-12	9.7011362532519E-50	1.2059398841794E-15	9.94759837373833E-13
3.755	88.8888864544827	-4.35616906771356E-39	0.020803444956067	333.777777777778	1.17826332551086E-49	-800	-6.44302854368346E-41	0.001810734788548	1.09640488189896E-40	0.999999993153232	-1.38993426532443E-41	0.000117019378679	2.45018246822476E-41	2.80751596468586E-39	0.013409433069713	-1.59241882120323E-39	2.82355615895041E-39	0.013669666801486	-1.60175283543456E-39	800	0.013409433069713	-2.80788865228604E-39	88.8888888888889	1.85215185686342E-49	-5.28209084944042E-17	-4.85537536102702E-11	-6.78444277816538E-49	-3.6787297586969E-15	4.85537537496318E-12
3.76	88.88888626018	-4.40495413327399E-39	0.021617723913297	334.222222222222	1.187522015941E-49	-800	-6.4622237011255E-41	0.001853544496436	1.09861102815121E-40	0.999999992606756	-1.40607387368225E-41	0.000121599697911	2.47761574022686E-41	2.83894263983197E-39	0.013934298995108	-1.61089677025444E-39	2.85502904657021E-39	0.014200668185413	-1.62026574265175E-39	800	0.013934298995108	-2.83933440883471E-39	88.8888888888885	1.79385699166085E-49	-8.31618149404776E-17	-5.75539615965642E-11	-6.89411017260641E-49	-1.56297126477245E-15	5.75539616177867E-12
3.765	88.8888860533671	-4.45383456455075E-39	0.022452009520042	334.666666666666	1.19648707419211E-49	-800	-6.48093073018391E-41	0.001900661756448	1.10068629531035E-40	0.999999992025094	-1.42226111626441E-41	0.000126292554557	2.50510234164899E-41	2.87043006667677E-39	0.014472060758601	-1.62942868559907E-39	2.8865613862148E-39	0.014745167670045	-1.63883224155956E-39	800	0.014472060758601	-2.87084163598026E-39	88.8888888888884	1.79301292670556E-49	-7.03788116836971E-17	1.63424829224812E-11	8.32961736671201E-50	-1.39288237482098E-15	1.63424829818394E-12
3.77	88.8888858332435	-4.5028071605887E-39	0.023307205094357	335.111111111111	1.20545107017156E-49	-800	-6.49971747353915E-41	0.001947892108272	1.10273877535112E-40	0.999999991405997	-1.43849543892217E-41	0.000131103029782	2.53264045858713E-41	2.90197615134575E-39	0.015023300618862	-1.64801390627842E-39	2.91815252508133E-39	0.015303197653799	-1.65745256052263E-39	800	0.015023300618862	-2.90240827045896E-39	88.8888888888885	1.79266972811428E-49	-1.01012864816119E-16	1.13686837721608E-11	-2.49357600934935E-51	-5.22609846682536E-15	1.13686849733599E-12
3.775	88.8888855991713	-4.55187072473044E-39	0.024183437298267	335.555555555555	1.21441440013757E-49	-800	-6.51849555200687E-41	0.00199508336475	1.10477243491419E-40	0.999999990747669	-1.45477709716113E-41	0.000136031836061	2.56022941045021E-41	2.93358010539537E-39	0.015588100219539	-1.66665271112497E-39	2.94980192400281E-39	0.015874746936684	-1.67612667471787E-39	800	0.015588100219539	-2.93403354093236E-39	88.8888888888885	1.79267604429053E-49	-1.12056365010274E-16	-2.84217094304021E-12	4.6702904886092E-52	1.28288261694713E-16	2.84217094593551E-13
3.78	88.8888853505686	-4.60102475183923E-39	0.025080563848288	336	1.22337775604967E-49	-800	-6.53714703075932E-41	0.002041946696375	1.10679488339792E-40	0.999999990048474	-1.47110583636462E-41	0.000141078173051	2.58786890783989E-41	2.96524159119063E-39	0.016166367848054	-1.68534479872054E-39	2.9815092618055E-39	0.016459721575149	-1.69485422146382E-39	800	0.016166367848053	-2.96571712180067E-39	88.8888888888885	1.79265807794618E-49	-1.03016333543549E-16	1.18423789293342E-12	3.32341584267452E-51	2.24947785619324E-15	1.18424002939016E-13
3.785	88.8888850868334	-4.65026865747079E-39	0.025998479368022	336.444444444444	1.23234104776861E-49	-800	-6.55567121263679E-41	0.002088664299449	1.10880187400441E-40	0.999999989306719	-1.48748134084449E-41	0.000146241448009	2.61555861647188E-41	2.99696021934619E-39	0.016758035581319	-1.70408979711721E-39	3.01327409565383E-39	0.01705807982104	-1.7136348360818E-39	800	0.016758035581319	-2.99745863634424E-39	88.8888888888885	1.79263950793148E-49	-9.41038572048178E-17	-3.31586610021358E-12	-2.58380865621574E-50	1.03599840576245E-15	3.31586626205556E-13
3.79	88.8888848073292	-4.69960167036442E-39	0.026937159678144	336.888888888889	1.2413039798865E-49	-800	-6.57406676526942E-41	0.002135418172268	1.11078926888825E-40	0.999999988520613	-1.50390329350148E-41	0.000151521524929	2.64329809630376E-41	3.0287354785157E-39	0.017363087834067	-1.72288733142857E-39	3.04509586417169E-39	0.017669832064872	-1.73246815007615E-39	800	0.017363087834067	-3.02925758742578E-39	88.8888888888885	1.7903833877363E-49	-9.23614737440738E-17	1.61056353438945E-11	2.82486949620698E-50	-2.04880764976755E-16	1.61056353451977E-12
3.795	88.8888845110966	-4.74902061451838E-39	0.027897565291023	337.333333333333	1.25025346790605E-49	-800	-6.59200322943321E-41	0.002186349575184	1.11265563995707E-40	0.999999987687459	-1.5203709650377E-41	0.000156923806694	2.6710855462557E-41	3.06056528813254E-39	0.017982143731203	-1.7417365377074E-39	3.07697110028218E-39	0.018296175080863	-1.75135284825531E-39	800	0.017982143731203	-3.06111192786594E-39	88.8888888888886	1.78998137454874E-49	-8.8977390960223E-17	4.500103993147E-12	-4.15503466441507E-49	4.95710715314952E-15	4.50010672340656E-13
3.8	88.8888841971354	-4.79852245590878E-39	0.028880606677047	337.777777777778	1.25908936908434E-49	-800	-6.61003281419033E-41	0.002237510995537	1.11449841183025E-40	0.999999986804444	-1.53688385769899E-41	0.000162453414702	2.69891924513043E-41	3.09244765919567E-39	0.018615790141714	-1.76063681750929E-39	3.10889912791813E-39	0.018937174764155	-1.77028919739012E-39	800	0.018615790141714	-3.09301970200115E-39	88.8888888888886	1.75444379390698E-49	-4.97117576881846E-17	-1.23160740865076E-11	-4.1419953547491E-49	4.60718519474216E-15	1.23160749482333E-12
3.805	88.8888838646481	-4.84810606258793E-39	0.02988642350328	338.222222222222	1.26786143998629E-49	-800	-6.62804655941466E-41	0.00228859504699	1.11632516719117E-40	0.999999985869323	-1.55344222065037E-41	0.000168111134581	2.72679854790169E-41	3.1243818430611E-39	0.019264117092087	-1.77958844098422E-39	3.14087948824028E-39	0.019592808950191	-1.78927715210365E-39	800	0.019264117092087	-3.12498018020336E-39	88.8888888888885	1.7544248371619E-49	-5.03325579466954E-17	-2.84217094304021E-12	5.93302477223959E-50	-1.70884712850498E-15	2.84217145675988E-13
3.81	88.8888835129136	-4.8977710221253E-39	0.03091486486283	338.666666666666	1.27663364573932E-49	-800	-6.64594597582794E-41	0.002339352553562	1.11814221260025E-40	0.999999984880069	-1.57004581450407E-41	0.000173896117483	2.75472321682398E-41	3.15636756072508E-39	0.019927027311373	-1.79859112339567E-39	3.17291190307899E-39	0.020262984090752	-1.808316384868E-39	800	0.019927027311373	-3.15699309662913E-39	88.8888888888885	1.75445080992658E-49	-5.9633921320401E-17	-2.36847578586684E-13	8.59962135396523E-52	-1.94799561348771E-15	2.36855589271787E-14
3.815	88.8888831411841	-4.94751681751965E-39	0.031965827424732	339.111111111111	1.28540587264127E-49	-800	-6.66372993236636E-41	0.002389972021569	1.11994529942797E-40	0.99999998383458	-1.58669435393648E-41	0.000179807782171	2.78269295494413E-41	3.18840446489252E-39	0.020604454195014	-1.81764452660344E-39	3.20499597255036E-39	0.020947660640703	-1.82740656491498E-39	800	0.020604454195014	-3.18905811803107E-39	88.8888888888885	1.75443935407209E-49	-6.58238723076486E-17	5.21064672890705E-12	-4.76774285394593E-51	2.96145585932949E-16	5.21064673732272E-13
3.82	88.8888827486504	-4.99734263465911E-39	0.033039338417587	339.555555555555	1.29417732594211E-49	-800	-6.68131943520468E-41	0.002441581872423	1.12170806575028E-40	0.999999982730579	-1.60338753039462E-41	0.000185846281808	2.81070729702288E-41	3.22049201409761E-39	0.021296415294231	-1.83674828356348E-39	3.237130541557E-39	0.021647122323831	-1.84654713517578E-39	800	0.021296415294231	-3.22117471965099E-39	88.8888888888886	1.75404395190725E-49	-5.676253576654E-17	1.63424829224812E-11	9.99618851107802E-50	2.56683256108465E-15	1.6342483124061E-12
3.825	88.8888823340175	-5.04724479578964E-39	0.034136642980385	340	1.30294742022928E-49	-800	-6.69856467824841E-41	0.002496199792272	1.12338315475487E-40	0.999999981564424	-1.62012452840036E-41	0.000192018620305	2.83876415598792E-41	3.25262779575565E-39	0.022003713197979	-1.85590142437218E-39	3.26931309832878E-39	0.022362230888424	-1.86573710941873E-39	800	0.022003713197979	-3.2533405308913E-39	88.8888888888886	1.75403061871965E-49	-4.51302086717856E-17	-5.16327721318971E-11	-7.32450334241586E-49	8.87127705344441E-16	5.16327721395182E-12
3.83	88.8888818961704	-5.09722119179979E-39	0.035258329977953	340.444444444444	1.31142861784991E-49	-800	-6.71596541850081E-41	0.002551392054551	1.12502840850692E-40	0.999999980332979	-1.63690520355721E-41	0.000198328110027	2.86686233254984E-41	3.28481042082051E-39	0.022726727475639	-1.87510375917177E-39	3.30154278814866E-39	0.023093150871469	-1.88497693311053E-39	800	0.022726727475639	-3.28555419226619E-39	88.8888888888881	1.69120379604055E-49	-4.8094565898586E-17	-5.68434188608042E-11	-7.33181394167545E-49	-7.27679948217931E-16	5.68434188654619E-12
3.835	88.8888814341537	-5.14727091498443E-39	0.036404479480394	340.888888888888	1.31988461906696E-49	-800	-6.73328419330566E-41	0.002606218384079	1.12666597661094E-40	0.999999979033557	-1.65372968810634E-41	0.000204775201371	2.89500130764186E-41	3.31703928478776E-39	0.023465509738953	-1.89435542400998E-39	3.33381939083906E-39	0.023839777440955	-1.90426637143746E-39	800	0.023465509738953	-3.31781511868932E-39	88.8888888888881	1.69118830768343E-49	-4.97077756846864E-17	4.500103993147E-12	1.04867160778895E-49	-2.83875768190693E-16	4.50010400210073E-13
3.84	88.8888809470905	-5.19739364530849E-39	0.037574926903238	341.333333333333	1.32834061130271E-49	-800	-6.75049891003095E-41	0.002660765086451	1.12829406859545E-40	0.999999977663692	-1.67059772702911E-41	0.000211358968552	2.92318089506178E-41	3.34931416723485E-39	0.024219953900828	-1.9136561156146E-39	3.36614263492914E-39	0.024602030489602	-1.92360512629508E-39	800	0.024219953900829	-3.35012310387328E-39	88.8888888888881	1.69121430011808E-49	-4.9722274976668E-17	2.48689957516018E-11	2.87443830649484E-49	3.85702519233808E-15	2.4868996050702E-12
3.845	88.8888804340563	-5.24758887735061E-39	0.038769591200718	341.777777777777	1.33679655205665E-49	-800	-6.76760790033758E-41	0.002715226690482	1.12990846050542E-40	0.999999976220783	-1.68750906055218E-41	0.00021807895569	2.95140080357321E-41	3.38163472651195E-39	0.024990007721371	-1.9330055237902E-39	3.39851212794069E-39	0.025379885638532	-1.94299289479952E-39	800	0.024990007721371	-3.38247782203484E-39	88.8888888888881	1.69119435487256E-49	-4.11193352049994E-17	-1.70293409003826E-10	-1.98750777781951E-48	-1.85870444249205E-14	1.70293410018188E-11
3.85	88.8888798938938	-5.29785502534167E-39	0.039988872703802	342.222222222222	1.34465494730201E-49	-800	-6.78439714372574E-41	0.002772415151909	1.13144537097154E-40	0.999999974701576	-1.70446325427973E-41	0.000224937414649	2.97966012966305E-41	3.41399991411853E-39	0.025775929245359	-1.95240312918568E-39	3.43092565019383E-39	0.026174124074844	-1.96242876094333E-39	800	0.025775929245359	-3.41487825102287E-39	88.8888888888866	1.51878587516386E-49	-2.1080855360139E-16	-1.74556665418386E-10	-2.18082246721871E-48	-2.09063880622226E-14	1.74556666670349E-11
3.855	88.8888793250054	-5.34818853393891E-39	0.04123403509604	342.666666666666	1.35222031642743E-49	-800	-6.80111854575841E-41	0.002831034931012	1.13293462018807E-40	0.999999973101578	-1.72145959296616E-41	0.000231941453654	3.00795685349415E-41	3.44640739264762E-39	0.026578533015324	-1.97184807388447E-39	3.46338183629435E-39	0.02698515584085	-1.98191253037533E-39	800	0.026578533015324	-3.44732209914333E-39	88.8888888888866	1.50426557474142E-49	-2.2317533918716E-16	2.29742151229084E-11	1.18107226302334E-49	-1.99037703239986E-15	2.29742152091268E-12
3.86	88.888878726164	-5.39858809375977E-39	0.042505368295671	343.11111111111	1.35974171242042E-49	-800	-6.81789864563911E-41	0.002889884154453	1.13440369197309E-40	0.999999971417336	-1.73849832117432E-41	0.000239092703497	3.03629022734612E-41	3.47885629249814E-39	0.027398005906545	-1.99134061763913E-39	3.49588010820141E-39	0.027813046667509	-2.00144437125249E-39	800	0.027398005906545	-3.47980852239767E-39	88.8888888888866	1.50427753940033E-49	-2.51787023100509E-16	-3.78956125738694E-12	2.41570342636388E-50	-2.96491277884241E-15	3.78956241724502E-13
3.865	88.8888780963004	-5.44905329961095E-39	0.043802763234348	343.555555555555	1.36726305872132E-49	-800	-6.83458451826835E-41	0.002948345612026	1.13586669599519E-40	0.999999969645845	-1.75557931830954E-41	0.000246390550672	3.06466001598596E-41	3.51134633577313E-39	0.028234277616517	-2.01088060927314E-39	3.52842029208641E-39	0.028657685468084	-2.0210240136336E-39	800	0.028234277616517	-3.5123372596074E-39	88.8888888888866	1.50426333298294E-49	-2.49524469253954E-16	-5.68434188608042E-12	1.97838303801213E-50	1.83988407292903E-15	5.68434218384341E-13
3.87	88.8888774343386	-5.49958379813157E-39	0.04512609166525	343.999999999999	1.37478441025551E-49	-800	-6.85117464389545E-41	0.003006618276117	1.137319384456E-40	0.999999967784077	-1.77270234883128E-41	0.000253834273795	3.09306601356624E-41	3.54387727851236E-39	0.029087265480748	-2.0304677663172E-39	3.56100209243028E-39	0.029519018157226	-2.04065118322371E-39	800	0.029087265480748	-3.54490808300405E-39	88.8888888888866	1.5042737205378E-49	-2.43706827405186E-16	-9.71075072205405E-12	-1.30778981862694E-49	-2.00221095747428E-15	9.71075092846696E-13
3.875	88.8888767391015	-5.55017888269169E-39	0.046475389533795	344.444444444443	1.3822880180594E-49	-800	-6.86757334728644E-41	0.003066063375027	1.13873199929102E-40	0.999999965828723	-1.78986714122459E-41	0.000261424075061	3.12150781390206E-41	3.57644864532887E-39	0.029956992669412	-2.0501017619018E-39	3.59362436120822E-39	0.03039738061277	-2.06032533163852E-39	800	0.029956992669412	-3.57752053710982E-39	88.8888888888865	1.49236472561315E-49	-2.68926818000325E-16	-4.500103993147E-12	-1.95062056356402E-49	-4.83299136221115E-15	4.500106588398E-13
3.88	88.8888760087493	-5.60083524632891E-39	0.047851877765173	344.888888888888	1.38974886780854E-49	-800	-6.88370276844709E-41	0.00312813351415	1.14007279354689E-40	0.999999963774607	-1.80707294746511E-41	0.00026916682218	3.14998353617037E-41	3.60905825734206E-39	0.030844246164147	-2.06978169947681E-39	3.62628504091219E-39	0.031293524853341	-2.08004568744125E-39	800	0.030844246164147	-3.61017249033112E-39	88.8888888888865	1.48755606955966E-49	-2.86873155623017E-16	7.10542735760052E-13	-3.62578613165291E-50	-3.49554690565332E-15	7.10551333958039E-14
3.885	88.8888752417009	-5.65155102164079E-39	0.049256129975292	345.333333333332	1.39718789747964E-49	-800	-6.89998367755549E-41	0.003190908684212	1.14138430281097E-40	0.999999961617283	-1.82431977862996E-41	0.000277065741746	3.17849211524314E-41	3.64170487719614E-39	0.031749395705573	-2.08950756449272E-39	3.65898329258897E-39	0.032207652855426	-2.0998126846129E-39	800	0.031749395705573	-3.64286273898229E-39	88.8888888888865	1.4875593589716E-49	-3.04875613263913E-16	-7.81597009336057E-12	8.30828384698621E-51	-3.60321934573387E-15	7.81597092391576E-13
3.89	88.8888744366258	-5.70232555006619E-39	0.050688171947568	345.777777777777	1.40462572462845E-49	-800	-6.9161789426022E-41	0.003253220742015	1.14269218430908E-40	0.99999995935301	-1.84160769284144E-41	0.000285120978794	3.20703317136422E-41	3.67438805909628E-39	0.032672457913793	-2.10927940698879E-39	3.69171901231071E-39	0.033139631947136	-2.11962607780132E-39	800	0.032672457913793	-3.67559085856965E-39	88.8888888888865	1.48758550419533E-49	-3.21564375174673E-16	-7.57912251477389E-12	1.65822905224963E-51	-3.18603926293648E-15	7.57912318443227E-13
3.895	88.8888735922754	-5.75315858787479E-39	0.052147842671456	346.222222222221	1.4120636948778E-49	-800	-6.93228714005965E-41	0.003315272271844	1.14399219839951E-40	0.999999956978274	-1.85893647577582E-41	0.000293331627647	3.2356065601025E-41	3.70710762918129E-39	0.033613329005738	-2.12909696858026E-39	3.72449197469281E-39	0.034089387492703	-2.13948561757623E-39	800	0.033613329005738	-3.70835669199009E-39	88.8888888888865	1.48761523239037E-49	-3.30263413669525E-16	2.62900812231219E-11	-6.74284963108473E-51	2.58593002922514E-15	2.62900813502998E-12
3.9	88.888872707327	-5.80404968953258E-39	0.053635078424929	346.666666666665	1.41950147816539E-49	-800	-6.94827836353532E-41	0.003377612202037	1.14527280398065E-40	0.999999954489357	-1.8763059071192E-41	0.000301697329871	3.26421202251992E-41	3.73986328124008E-39	0.034571967908375	-2.14895998210244E-39	3.75730162372241E-39	0.035057002112746	-2.15939096883187E-39	800	0.034571967908375	-3.74115995206242E-39	88.8888888888867	1.48700811947845E-49	-2.98813203091712E-16	3.12638803734423E-11	1.64786656549673E-51	7.11504533169268E-15	3.12638811830646E-12
3.905	88.8888717797876	-5.85499618579213E-39	0.055150861290337	347.11111111111	1.42693645460993E-49	-800	-6.96392199230813E-41	0.003443320442323	1.14646846862529E-40	0.999999951880652	-1.89371535170693E-41	0.000310223609686	3.2928480378293E-41	3.77265325048706E-39	0.03554900765083	-2.16886768329384E-39	3.79014552602094E-39	0.036043440757027	-2.17934113578275E-39	800	0.035549007650831	-3.77399891824974E-39	88.8888888888868	1.48698599101522E-49	-2.78022038353741E-16	8.76336040770731E-12	-6.2471920385348E-50	-3.88998860844349E-15	8.76336127107535E-13
3.91	88.8888708076918	-5.90599582536017E-39	0.056695983033804	347.555555555554	1.43434679643637E-49	-800	-6.97971855224512E-41	0.00350975454924	1.14763585697053E-40	0.999999949146633	-1.91116461666245E-41	0.000318914920783	3.32151332184626E-41	3.8054760449878E-39	0.036544958588713	-2.18881981800737E-39	3.82302287153209E-39	0.037048911371019	-2.19933655654439E-39	800	0.036544958588714	-3.80687213941904E-39	88.8888888888868	1.48156285325483E-49	-3.3053609254999E-16	4.73695157173368E-12	-6.35307628330654E-50	-8.85350656591527E-15	4.73695984546299E-13
3.915	88.8888697894267	-5.95704778100984E-39	0.058270570327983	347.999999999999	1.44175451125641E-49	-800	-6.995459106699E-41	0.003575822170227	1.1487982136659E-40	0.999999946282762	-1.92865386912917E-41	0.000327771975702	3.35020739817614E-41	3.83833110619729E-39	0.037559902373306	-2.20881655813502E-39	3.85593351610971E-39	0.038073308964236	-2.2193770706729E-39	800	0.037559902373306	-3.83977908235846E-39	88.8888888888868	1.48153625483261E-49	-3.50647212829127E-16	-3.78956125738694E-12	3.46311224742333E-50	-3.97632714859947E-16	3.78956127824843E-13
3.92	88.8888687235454	-6.00815187449086E-39	0.059874446327161	348.444444444444	1.44916223409182E-49	-800	-7.01112012530678E-41	0.003641588688207	1.14995430804195E-40	0.999999943284971	-1.94618291626519E-41	0.000336793779692	3.37893015882024E-41	3.87121830155478E-39	0.038593725014784	-2.22885766941511E-39	3.88887728035155E-39	0.03911654727702	-2.23946245031487E-39	800	0.038593725014784	-3.87271963217189E-39	88.8888888888868	1.48152868771739E-49	-3.48604204939851E-16	-2.01320441798681E-11	-1.81998273270846E-49	-5.53332503503918E-15	2.01320449402898E-12
3.925	88.8888676085222	-6.05930774421352E-39	0.061507524933001	348.888888888888	1.45656682160153E-49	-800	-7.02668766851276E-41	0.003707407262963	1.15109696267281E-40	0.999999940148968	-1.96375155883638E-41	0.000345979848455	3.4076813916891E-41	3.90413737812108E-39	0.039646371017097	-2.24894290841435E-39	3.9218537792373E-39	0.04017864122254	-2.25959242768299E-39	800	0.039646371017097	-3.90569355578672E-39	88.8888888888866	1.46593399323111E-49	-3.98708974581027E-16	2.34479102800817E-11	2.07859766475421E-49	1.141272830826E-15	2.34479103078561E-12
3.93	88.8888664421244	-6.11051303882826E-39	0.063170682892806	349.333333333333	1.4638971073199E-49	-800	-7.04190346185595E-41	0.003776712913296	1.15215514725488E-40	0.999999936868474	-1.98135922040762E-41	0.000355335113705	3.43645975486844E-41	3.93708677615738E-39	0.040718405513054	-2.26907157864644E-39	3.95486059287829E-39	0.041260589774362	-2.27976599508814E-39	800	0.040718405513054	-3.93869933757589E-39	88.8888888888866	1.46594372440535E-49	-3.83030684462814E-16	-2.70953629903167E-10	-2.70169428717112E-48	-3.26474299954895E-14	2.70953631870025E-11
3.935	88.8888652220335	-6.16176545354703E-39	0.064864782036945	349.777777777777	1.47017370172317E-49	-800	-7.0572693914359E-41	0.003846777978898	1.15318564876748E-40	0.999999933436968	-1.99900568226462E-41	0.000364864423244	3.46526393229268E-41	3.97006496517483E-39	0.041810384020422	-2.28924339324389E-39	3.98789692821301E-39	0.042362610488936	-2.29998358263894E-39	800	0.041810384020422	-3.97173549192489E-39	88.8888888888843	1.23214068845108E-49	-6.94535418862397E-16	-2.86348722511301E-10	-2.72708082446753E-48	-4.31612437692536E-14	2.86348725764141E-11
3.94	88.8888639463734	-6.2130641589624E-39	0.066589968339207	350.222222222222	1.47633461821852E-49	-800	-7.07258880308693E-41	0.003916492896592	1.15421140172868E-40	0.999999929849174	-2.0166911234683E-41	0.000374568598184	3.49409344543213E-41	4.00307138312402E-39	0.042922400631869	-2.30945853629864E-39	4.02096264920547E-39	0.043484603056274	-2.32024505707136E-39	800	0.042922400631869	-4.00480148421624E-39	88.8888888888842	1.23219882177993E-49	-7.56369959461308E-16	8.1001871876646E-11	9.00171221124997E-49	5.04436890251727E-15	8.10018720337143E-12
3.945	88.8888626134714	-6.26440901428655E-39	0.068346061986244	350.666666666666	1.48249559714224E-49	-800	-7.08783519783488E-41	0.003985896751852	1.15523173623231E-40	0.999999926100387	-2.03441537006952E-41	0.000384446627083	3.52294820682291E-41	4.03610592038571E-39	0.044054339445	-2.32971679448814E-39	4.05405760062832E-39	0.044626478363554	-2.34055020920738E-39	800	0.044054339445001	-4.0378972237013E-39	88.8888888888841	1.23222326690836E-49	-7.95748548413588E-16	-3.93877523189656E-10	-3.56457161118135E-48	-8.54835601179038E-14	3.93877532465939E-11
3.95	88.8888612215533	-6.31579967319856E-39	0.070132987411351	351.11111111111	1.48843681323928E-49	-800	-7.10296735306295E-41	0.004055686435768	1.15623271770198E-40	0.999999922185617	-2.05217823535949E-41	0.000394498084886	3.55182801222593E-41	4.06916833220179E-39	0.045206151752541	-2.35001793764519E-39	4.08718122805795E-39	0.045788346942544	-2.36089871177486E-39	800	0.045206151752542	-4.07102248714949E-39	88.8888888888808	9.26501619388583E-50	-1.4953978550234E-15	-3.88193181303575E-10	-3.58069227123306E-48	-7.81584819002524E-14	3.88193189171756E-11
3.955	88.8888597679844	-6.36723368708757E-39	0.071951706531004	351.555555555555	1.49306915742241E-49	-800	-7.11779581532485E-41	0.00412847561569	1.15716177773936E-40	0.999999918097454	-2.06997911829962E-41	0.000404728382385	3.58073146300973E-41	4.10225699151931E-39	0.046378457585828	-2.37036123747796E-39	4.12033147109711E-39	0.046971068085553	-2.38128969475756E-39	800	0.046378457585829	-4.10417569624115E-39	88.8888888888808	9.25306036029252E-50	-1.47774497628454E-15	5.87381994894977E-11	4.95230203784085E-49	8.84373131548346E-15	5.87382001552619E-12
3.96	88.888858250165	-6.41870900212786E-39	0.073802998170939	351.999999999999	1.49769602817989E-49	-800	-7.13279083626899E-41	0.004202237335925	1.15806002551778E-40	0.999999913828587	-2.0878179394911E-41	0.000415141900485	3.609657384091E-41	4.13537052921039E-39	0.047571758960092	-2.39074656692415E-39	4.15350744703961E-39	0.048174920404857	-2.40172363531096E-39	800	0.047571758960093	-4.13735552712644E-39	88.8888888888808	9.25276337487031E-50	-1.52283246841349E-15	-1.18423789293342E-12	1.69521090817002E-51	-7.32718418306346E-15	1.18426056030227E-13
3.965	88.8888566659834	-6.47022495189017E-39	0.075686952120228	352.444444444444	1.50232236838961E-49	-800	-7.14772035248591E-41	0.004275491752	1.15895722385426E-40	0.999999909373076	-2.10569482025183E-41	0.00042573914426	3.63860538853506E-41	4.16850848813733E-39	0.048786113752964	-2.41117404414053E-39	4.18670912582113E-39	0.04939975856852	-2.42220034577782E-39	800	0.048786113752966	-4.17056155024005E-39	88.8888888888808	9.25282889425484E-50	-1.54584933446338E-15	1.4210854715201E-12	1.22278869080632E-50	-6.84009113358558E-15	1.421101933083E-13
3.97	88.8888550135179	-6.52178141040611E-39	0.077603390747535	352.888888888888	1.50694877053317E-49	-800	-7.16258242402562E-41	0.004348454862585	1.15984916602574E-40	0.999999904725516	-2.12360959611729E-41	0.000436519114544	3.66757539665132E-41	4.20167076694228E-39	0.050021407468909	-2.43164346589088E-39	4.21993635686366E-39	0.050645499123667	-2.44271963294338E-39	800	0.05002140746891	-4.20379368438561E-39	88.8888888888808	9.25299320013533E-50	-1.60060166947021E-15	-1.20792265079209E-11	-6.52573703851106E-50	-1.54593439634471E-14	1.20792364005749E-12
3.975	88.8888532906522	-6.57337787260596E-39	0.079552331033584	353.333333333332	1.5115621576963E-49	-800	-7.17727409878337E-41	0.004422597176506	1.1607070491718E-40	0.999999899879956	-2.14156205645625E-41	0.000447481906866	3.69656711322029E-41	4.23485701467814E-39	0.051277651055063	-2.45215457162365E-39	4.25318816444797E-39	0.051912479887168	-2.46328100865682E-39	800	0.051277651055064	-4.23705160400652E-39	88.8888888888807	9.18153164096422E-50	-1.68949311672317E-15	-2.13162820728016E-11	-2.08880891840768E-49	-1.51280110878367E-14	2.13162874409209E-12
3.98	88.8888514942239	-6.62501167584121E-39	0.08153488981569	353.777777777777	1.5161380907543E-49	-800	-7.19179814678156E-41	0.00449914313347	1.1615069573715E-40	0.999999894827501	-2.15955158564966E-41	0.000458633803449	3.72557901618273E-41	4.26806545944085E-39	0.052555564401779	-2.47270661093596E-39	4.28646288771421E-39	0.053201389452034	-2.48388399270286E-39	800	0.05255556440178	-4.27033359281939E-39	88.8888888888806	9.0739295708561E-50	-1.74442208868497E-15	-1.01844458792274E-11	-1.140611290095E-49	-9.45997753073099E-15	1.01844502727485E-12
3.985	88.8888496214109	-6.67668116483089E-39	0.083551676515765	354.222222222221	1.52067480581613E-49	-800	-7.20642725190467E-41	0.004576305499421	1.16228414913068E-40	0.999999889560213	-2.17757832113747E-41	0.000469978232305	3.7546101555167E-41	4.30129499100633E-39	0.053855540330844	-2.49329970755025E-39	4.31975987588428E-39	0.05451240440643	-2.50452888604797E-39	800	0.053855540330846	-4.30363858386734E-39	88.8888888888806	9.07360521106572E-50	-1.78873202291116E-15	-4.73695157173368E-13	1.79696782869002E-50	-8.35229505883021E-15	4.73768786183991E-14
3.99	88.8888476699263	-6.72838597022463E-39	0.08560264645766	354.666666666666	1.52521173773202E-49	-800	-7.22099593731957E-41	0.004653004532943	1.16305982316966E-40	0.999999884071663	-2.19564226676011E-41	0.000481514942146	3.78366031237682E-41	4.33454534599258E-39	0.055177550047068	-2.51393384720256E-39	4.35307908547871E-39	0.055845392015395	-2.52521551560244E-39	800	0.05517755004707	-4.33696633907542E-39	88.8888888888806	9.07394853500435E-50	-1.8269142671302E-15	1.89478062869347E-12	4.72709354663481E-50	-2.36418810512668E-15	1.89478210363552E-13
3.995	88.8888456375588	-6.78012594635024E-39	0.087687642681179	355.11111111111	1.5297487099912E-49	-800	-7.23550181170085E-41	0.004729460863653	1.16382979324341E-40	0.999999878355628	-2.2137432707608E-41	0.000493243050082	3.81272939518718E-41	4.3678164085192E-39	0.056521492379544	-2.53460884003503E-39	4.38642035309093E-39	0.057200282749693	-2.54594370142593E-39	800	0.056521492379545	-4.3703167645466E-39	88.8888888888806	9.07386528442878E-50	-1.84829284075515E-15	-4.38168020385366E-11	-3.2595776257632E-49	-2.78427783079773E-14	4.38168108846891E-12
4	88.8888435216057	-6.83190006414991E-39	0.089806970276151	355.555555555555	1.53419027043891E-49	-800	-7.24975578918715E-41	0.00480821969971	1.16454529661471E-40	0.99999987240451	-2.23188102055702E-41	0.00050516427226	3.84181680978079E-41	4.4011074802778E-39	0.05788756398466	-2.55532430085586E-39	4.41978211836485E-39	0.058577736228518	-2.56671272188698E-39	800	0.057887563984661	-4.40368919697338E-39	88.8888888888802	8.7923845449625E-50	-2.07905734512933E-15	-3.24481182663757E-11	-3.46535183610663E-49	-3.30597724646844E-14	3.24481351078496E-12
4.005	88.888841318443	-6.88370571649975E-39	0.091961758712787	355.999999999999	1.53858162480939E-49	-800	-7.26402300558331E-41	0.004888629481551	1.16521901482426E-40	0.999999866208114	-2.25005504641708E-41	0.000517284961968	3.87092106383923E-41	4.4344168217539E-39	0.059276492896271	-2.57607964415785E-39	4.45316318424376E-39	0.059978225412999	-2.58752261491228E-39	800	0.059276492896272	-4.43708195586227E-39	88.8888888888803	8.776839866189E-50	-2.13530994842544E-15	1.44477022937877E-11	2.89862595499762E-50	-3.15461104010692E-15	1.44477026381875E-12
4.01	88.8888390250971	-6.93554175766906E-39	0.094152380635632	356.444444444444	1.54297017898301E-49	-800	-7.27831394556117E-41	0.004969090773968	1.16588165583465E-40	0.999999859758078	-2.26826560285678E-41	0.000529607215349	3.90004149585796E-41	4.46774365552874E-39	0.060688519315324	-2.59687513208233E-39	4.48656323338929E-39	0.061401765059828	-2.60837344846487E-39	800	0.060688519315325	-4.47049430270103E-39	88.8888888888803	8.7769562907502E-50	-2.13946478061133E-15	3.71850698381094E-11	2.38296095387365E-49	8.52864738677431E-15	3.71850708161609E-12
4.015	88.888836639101	-6.98740807788196E-39	0.096378667922698	356.888888888888	1.54735854981523E-49	-800	-7.29254866737138E-41	0.005049161392399	1.1665417482749E-40	0.999999853047463	-2.28651259017619E-41	0.000542130086733	3.92917803399186E-41	4.50108788781825E-39	0.062123534876746	-2.6177106339247E-39	4.51998219279027E-39	0.062848243249152	-2.62926506149158E-39	800	0.062123534876747	-4.50392616673061E-39	88.8888888888803	8.77652169343055E-50	-2.14227566220473E-15	-2.23347266607243E-10	-1.65010228761408E-48	-5.96404192875894E-14	2.23347274570133E-11
4.02	88.8888341578941	-7.03930446007956E-39	0.09864051212696	357.333333333332	1.55164445180726E-49	-800	-7.30668554659622E-41	0.005129544021523	1.16718616205876E-40	0.999999846069067	-2.30479586157985E-41	0.000554852966123	3.9583305453256E-41	4.53444935404133E-39	0.063581469680734	-2.63858596364112E-39	4.55341961328629E-39	0.064317749365451	-2.65019717369404E-39	800	0.063581469680735	-4.53737740803977E-39	88.8888888888784	7.36006259057058E-50	-2.6465018985701E-15	-2.26899980286043E-10	-1.67316475501727E-48	-5.30666260435267E-14	2.26899986491568E-11
4.025	88.8888315777739	-7.09122884468769E-39	0.100938785185533	357.777777777777	1.55532293587469E-49	-800	-7.32057043319223E-41	0.005212758618041	1.16776768931514E-40	0.999999838812479	-2.32311488740092E-41	0.000567780758188	3.98749784798093E-41	4.56782667321849E-39	0.065062885761574	-2.65950047202821E-39	4.58687369331105E-39	0.065811094707622	-2.67116906316655E-39	800	0.065062885761576	-4.57084669907319E-39	88.8888888888784	7.34230399043711E-50	-2.61318173484E-15	3.12638803734423E-11	2.15205835807159E-49	7.06152671480861E-16	3.12638803814172E-12
4.03	88.888828894968	-7.14317929317241E-39	0.103274301403666	358.222222222221	1.55899400583602E-49	-800	-7.33459939210397E-41	0.005296966226274	1.16832100143729E-40	0.999999831267086	-2.34146966294899E-41	0.000580918043416	4.01667882822143E-41	4.60121854255157E-39	0.066568308005514	-2.68045411230577E-39	4.62034362456048E-39	0.067328563752567	-2.69218114264589E-39	800	0.066568308005516	-4.60433279029554E-39	88.8888888888784	7.34220319690703E-50	-2.72271579908165E-15	7.10542735760052E-13	3.02017932740316E-51	-2.10203408660711E-14	7.10853595384806E-14
4.035	88.8888261064703	-7.19515528461425E-39	0.105647119691436	358.666666666666	1.56266496181711E-49	-800	-7.34857786126956E-41	0.005380656046086	1.16887439481896E-40	0.999999823424435	-2.35986028250386E-41	0.000594265153197	4.0458731793069E-41	4.63462459495352E-39	0.068097774387907	-2.70144696967509E-39	4.6538294093625E-39	0.068870008164828	-2.71323326748959E-39	800	0.068097774387908	-4.63783534593383E-39	88.8888888888784	7.3424115292791E-50	-2.794356026586E-15	1.77635683940013E-11	9.76843649919038E-50	-6.32091295880717E-15	1.77635695186047E-12
4.04	88.8888232095123	-7.24715674664733E-39	0.108057060384877	359.11111111111	1.56633623094415E-49	-800	-7.3625033406567E-41	0.00546405544544	1.16942370817719E-40	0.999999815276738	-2.37828661883572E-41	0.000607821076944	4.07508085005875E-41	4.66804475990984E-39	0.069651169104664	-2.72247888154657E-39	4.68733093083304E-39	0.070435344745074	-2.73432528589312E-39	800	0.069651169104666	-4.67135431934264E-39	88.8888888888784	7.34280182534207E-50	-2.8346757805738E-15	-8.47914331340329E-11	-5.56100371044795E-49	-3.06890664521846E-14	8.47914386877707E-12
4.045	88.8888202007416	-7.2991827875375E-39	0.110504390798994	359.555555555554	1.56980513008436E-49	-800	-7.37619362518489E-41	0.005549592145116	1.16992437796805E-40	0.999999806814569	-2.39674838958002E-41	0.000621587318326	4.10430132251495E-41	4.70147842528461E-39	0.071228664464646	-2.74354949620157E-39	4.72084679543657E-39	0.072025185784745	-2.75545652407285E-39	800	0.071228664464648	-4.70488913573021E-39	88.8888888888775	6.76098682796599E-50	-3.12960680924871E-15	-2.2855791333615E-10	-1.53462840650378E-48	-8.38777436222579E-14	2.28557928727163E-11
4.05	88.8888170756797	-7.35123099906677E-39	0.112990204905443	359.999999999998	1.57293389033369E-49	-800	-7.38991172093155E-41	0.005636875593018	1.17038372485045E-40	0.999999798025331	-2.41524517901823E-41	0.000635570030962	4.1335332144248E-41	4.73492397565515E-39	0.0728309656216	-2.76465828755449E-39	4.75437581935893E-39	0.073640031690346	-2.77662706170203E-39	800	0.072830965621603	-4.73843824281334E-39	88.8888888888764	6.02740781267118E-50	-3.56337807325214E-15	-1.05160324892488E-10	-7.59391901666583E-49	-4.68441455559922E-14	1.05160335325956E-11
4.055	88.8888138305884	-7.40330026806516E-39	0.115514895347449	360.444444444443	1.57594739640696E-49	-800	-7.40364879626365E-41	0.005724155732819	1.17083390636373E-40	0.99999978889851	-2.43377723820306E-41	0.000649771423497	4.16277588068824E-41	4.7683806502457E-39	0.074458325668608	-2.78580551108571E-39	4.78791774003166E-39	0.075279881514177	-2.79783695315318E-39	800	0.07445832566861	-4.77200092306766E-39	88.8888888888765	6.02702986693529E-50	-3.59130975067692E-15	7.12911211545919E-11	4.71705662769094E-49	8.63907537748179E-15	7.12911216780345E-12
4.06	88.8888104623957	-7.45539053643121E-39	0.118078280553029	360.888888888887	1.57896098237496E-49	-800	-7.41733831763639E-41	0.005811041116162	1.17128214870658E-40	0.999999779425466	-2.45234447945936E-41	0.000664190474614	4.19202927758768E-41	4.80184838646961E-39	0.076110627572404	-2.80699104889657E-39	4.82147250190162E-39	0.076944622166842	-2.81908606219424E-39	800	0.076110627572406	-4.8055771390423E-39	88.8888888888764	6.02749754709624E-50	-3.71765057863972E-15	-2.53426909087752E-10	-1.62249458816742E-48	-1.07594843226316E-13	2.53426931927966E-11
4.065	88.8888069678077	-7.50750149520234E-39	0.120680319787277	361.333333333332	1.58160880812617E-49	-800	-7.43088753197174E-41	0.005898847567557	1.17170477379552E-40	0.999999769596935	-2.47094674774966E-41	0.000678826955207	4.22129321841511E-41	4.83532695574695E-39	0.07778784508037	-2.8282147023073E-39	4.85503937108853E-39	0.078634517514903	-2.84037398687516E-39	800	0.077787845080374	-4.839166691587E-39	88.8888888888732	3.93147072675166E-50	-4.88213137499831E-15	-1.27992431468244E-09	-8.20110470160775E-48	-4.30201067050499E-13	1.27992438698084E-10
4.07	88.8888033420631	-7.55963098795191E-39	0.12332199757826	361.777777777776	1.58270056712532E-49	-800	-7.44430749956037E-41	0.005989040947744	1.17207545607377E-40	0.999999759399527	-2.48958352769283E-41	0.000693686403279	4.25056646316268E-41	4.8688149063794E-39	0.079490612802154	-2.84947583252658E-39	4.88861685954048E-39	0.080350251363087	-2.86170035693129E-39	800	0.07949061280216	-4.87276819071769E-39	88.8888888888655	-1.00209777979266E-50	-7.43426047424384E-15	-8.38914123354035E-10	-5.40771285871036E-48	-2.85700823983171E-13	8.38914172003209E-11
4.075	88.8887995806697	-7.61177740608747E-39	0.126003994321801	362.22222222222	1.58219921564838E-49	-800	-7.45781785985892E-41	0.006079856889781	1.17242605752939E-40	0.999999748820605	-2.50825498511578E-41	0.000708772646089	4.2798480834054E-41	4.90231114758387E-39	0.081219369310676	-2.87077458883124E-39	4.92220439198428E-39	0.082092002062227	-2.88306543131865E-39	800	0.081219369310682	-4.90638059957148E-39	88.8888888888656	-1.00310453852604E-50	-7.51212489247816E-15	4.37220630071019E-10	2.56579682228268E-48	1.34851723915917E-13	4.37220650867141E-11
4.08	88.8887956800778	-7.66394050672685E-39	0.128726238324333	362.666666666664	1.58169776445765E-49	-800	-7.47128548659476E-41	0.006170193268305	1.17277641260338E-40	0.999999737850188	-2.52696112764601E-41	0.000724085280393	4.30913792931132E-41	4.93581549273438E-39	0.082974068398702	-2.89211095897621E-39	4.95580196136161E-39	0.083859632227496	-2.90446908761461E-39	800	0.082974068398707	-4.9400037615922E-39	88.8888888888656	-1.00282742286104E-50	-7.61554927948715E-15	-1.96512435953372E-09	-1.17746311718094E-47	-7.70327245329299E-13	1.96512451051756E-10
4.085	88.8887916368073	-7.71612019968046E-39	0.131488576585567	363.111111111109	1.58067405829179E-49	-800	-7.48468675245003E-41	0.006260528918654	1.17311806221207E-40	0.999999726478486	-2.54570184906897E-41	0.000739623445597	4.3384359381383E-41	4.96932785641439E-39	0.084754611450642	-2.91348480251567E-39	4.98940931827927E-39	0.085653141650289	-2.92591113570925E-39	800	0.084754611450651	-4.97363761864616E-39	88.8888888888481	-1.14691473514925E-49	-1.44235452519004E-14	-2.57595426470878E-09	-1.52598327015169E-47	-1.02883123709006E-12	2.57595447016539E-10
4.09	88.8887874460825	-7.76831486740348E-39	0.134291705979231	363.555555555552	1.57479252806987E-49	-800	-7.49784090186754E-41	0.006353654035259	1.17340169211632E-40	0.999999714692069	-2.5644766961668E-41	0.000755391061652	4.36774117621239E-41	5.00284714153046E-39	0.086561447661386	-2.93489555833604E-39	5.02302480059516E-39	0.087473329453822	-2.94739086766614E-39	800	0.086561447661397	-5.00728112809948E-39	88.8888888888436	-1.40826532526631E-49	-1.65059886298606E-14	-2.23347266607243E-10	-1.30493268360194E-48	-1.71525640351672E-13	2.23347332471136E-11
4.095	88.8887831026551	-7.82052256307612E-39	0.137136524126388	363.999999999996	1.56775196744172E-49	-800	-7.51113890200271E-41	0.006447932025935	1.17365636885681E-40	0.999999702476176	-2.58328565546703E-41	0.000771393177719	4.39705252094831E-41	5.0363720304481E-39	0.088395155623502	-2.95634316325709E-39	5.05664757886224E-39	0.089320525912189	-2.9689086955872E-39	800	0.088395155623513	-5.04093303507613E-39	88.8888888888437	-1.40827149678355E-49	-1.69057654700579E-14	9.42653362775003E-11	4.3655285822493E-49	-3.72295543929884E-14	9.42653436292996E-12
4.1	88.8887786023906	-7.87274278055895E-39	0.14002311349055	364.444444444441	1.56071095840188E-49	-800	-7.52439847024798E-41	0.006541664730976	1.17391207288104E-40	0.999999689819178	-2.6021288397217E-41	0.000787630257692	4.42636967155165E-41	5.06990216026445E-39	0.090255788496999	-2.97782772062699E-39	5.09027768251001E-39	0.091194574812561	-2.9904645093732E-39	800	0.09025578849701	-5.07459301333013E-39	88.8888888888437	-1.40817722519924E-49	-1.71817726036461E-14	9.68706596419538E-11	5.22862183725127E-49	-3.19765117597435E-14	9.68706649195956E-12
4.105	88.8887739415246	-7.92497549298127E-39	0.142951284232343	364.888888888885	1.55367018827258E-49	-800	-7.53761673170897E-41	0.006635088329806	1.17416469110914E-40	0.999999676710489	-2.62100615157575E-41	0.000804101233765	4.45569260092131E-41	5.1034374863854E-39	0.092143223921579	-2.99934910054156E-39	5.12391502313693E-39	0.093095387602534	-3.0120581906889E-39	800	0.092143223921591	-5.10826104554123E-39	88.8888888888437	-1.40814164954765E-49	-1.75960437786052E-14	-4.83169060316836E-10	-2.74276749085376E-48	-2.66873746090238E-13	4.83169134019393E-11
4.11	88.8887691152194	-7.97721957704499E-39	0.145921478340607	365.333333333329	1.54521035666047E-49	-800	-7.5505745419645E-41	0.006730988993702	1.17436580269247E-40	0.999999663136501	-2.6399172518135E-41	0.000820808592166	4.48502065606792E-41	5.13697723657263E-39	0.094057746799962	-3.02090687843391E-39	5.15755812518632E-39	0.095023673908974	-3.03368899339658E-39	800	0.094057746799975	-5.1419364076569E-39	88.8888888888383	-1.72094385761425E-49	-2.01096243926541E-14	-1.74390872113375E-09	-9.9937921110849E-48	-7.71202117056051E-13	1.74390889165664E-10
4.115	88.8887641175768	-8.02947292882721E-39	0.148934702317914	365.777777777773	1.53400309693911E-49	-800	-7.56366366350069E-41	0.006828522601402	1.17453020068825E-40	0.999999649080627	-2.65886195873938E-41	0.000837757994524	4.51435262364951E-41	5.17051998645143E-39	0.09600000590854	-3.04250079409156E-39	5.19120593689136E-39	0.096979901535825	-3.05535729367533E-39	800	0.096000005908556	-5.1756177435357E-39	88.8888888888288	-2.26474406159125E-49	-2.4316155016706E-14	-1.0013915622645E-09	-5.82281425071662E-48	-4.82712416955235E-13	1.00139167860823E-10
4.12	88.8887589438389	-8.08173479694272E-39	0.151991183503868	366.222222222217	1.52267931323454E-49	-800	-7.5767287050039E-41	0.006925583642007	1.17469443045143E-40	0.999999634529484	-2.67784046380741E-41	0.000854950719669	4.5436880621053E-41	5.20406520855082E-39	0.097970147792433	-3.06413103626519E-39	5.22485845343256E-39	0.098963935102584	-3.07706302254095E-39	800	0.09797014779245	-5.2093045688512E-39	88.8888888888289	-2.26472125489669E-49	-2.46705354850868E-14	4.27036184191791E-10	2.28239502205979E-48	9.17745579443377E-14	4.27036194053449E-11
4.125	88.888753589899	-8.13400519250779E-39	0.155090715313787	366.666666666661	1.51135584112515E-49	-800	-7.58975641189705E-41	0.00702229117895	1.17485646218684E-40	0.999999619471523	-2.6968526815162E-41	0.000872385605608	4.57302696536551E-41	5.23761288205014E-39	0.099968039298798	-3.08579748853662E-39	5.25851561184105E-39	0.100975673337913	-3.09880607303766E-39	800	0.099968039298814	-5.24299689076899E-39	88.8888888888289	-2.264672277377E-49	-2.51205875007511E-14	-1.71264484076031E-09	-9.41889461745532E-48	-8.2465983648241E-13	1.7126450393023E-10
4.13	88.8887480507037	-8.18628325317136E-39	0.158233602336766	367.111111111106	1.49667034653749E-49	-800	-7.60255204624984E-41	0.007121101688638	1.17497428539528E-40	0.999999603892531	-2.71589833436818E-41	0.000890064365706	4.60236882843955E-41	5.27116240575258E-39	0.101993876766677	-3.10749979999945E-39	5.29217614563583E-39	0.103015718699125	-3.12058578032659E-39	800	0.101993876766698	-5.27669415343741E-39	88.8888888888139	-3.08980659713621E-49	-3.20515577416753E-14	-2.0615213240185E-09	-1.1076607795281E-47	-1.00463506892961E-12	2.0615215688114E-10
4.135	88.8887423198137	-8.23856687701598E-39	0.161420865911211	367.55555555555	1.48067977722285E-49	-800	-7.6154419755104E-41	0.007221738395664	1.17505273099044E-40	0.999999587774396	-2.73497716712066E-41	0.000907992745049	4.63171243802563E-41	5.30471235402121E-39	0.104048318536682	-3.12923762443371E-39	5.32583892673137E-39	0.105084594353221	-3.14240241454277E-39	800	0.104048318536705	-5.31039500200689E-39	88.8888888888113	-3.21409002903382E-49	-3.3884742880466E-14	-3.50534416308292E-11	-7.51560449111929E-50	-1.59050422471938E-13	3.50538024642526E-12
4.14	88.8887363918455	-8.29085516908933E-39	0.164652832294649	367.999999999994	1.46460929905677E-49	-800	-7.6283256463689E-41	0.007322051383229	1.17512852395006E-40	0.999999571101979	-2.7540894057184E-41	0.000926172578891	4.6610572694629E-41	5.33826210159442E-39	0.106131574915619	-3.15101118647285E-39	5.35950387913526E-39	0.107182207561406	-3.16425595775719E-39	800	0.106131574915642	-5.3440988596116E-39	88.8888888888114	-3.21409859098221E-49	-3.45056743870256E-14	1.71951342053933E-10	7.78720953140478E-49	-6.05343483532593E-14	1.71951352709294E-11
4.145	88.8887302623241	-8.34314815127338E-39	0.167929288588922	368.444444444438	1.44853921299668E-49	-800	-7.64117550245505E-41	0.007421984388403	1.17520264705063E-40	0.999999553862692	-2.77323497572346E-41	0.000944602669735	4.69040332231263E-41	5.37181163361632E-39	0.108243508682397	-3.17282038204418E-39	5.39317095500956E-39	0.109308449466743	-3.18614631309766E-39	800	0.108243508682421	-5.37780574035623E-39	88.8888888888114	-3.21391460119824E-49	-3.52104953152369E-14	-5.75539615965642E-10	-2.97986334030785E-48	-4.07910965688421E-13	5.75539760518103E-11
4.15	88.8887239258347	-8.39544505701468E-39	0.171250490044686	368.888888888882	1.43111570400534E-49	-800	-7.6538046531703E-41	0.007523861198216	1.17523595237962E-40	0.999999536041308	-2.79241362005416E-41	0.000963284453426	4.71975014551223E-41	5.40536041073046E-39	0.110384284374962	-3.19466488422348E-39	5.42683898501126E-39	0.111463876928244	-3.20807284828988E-39	800	0.110384284374987	-5.41151515013785E-39	88.8888888888048	-3.55563574633591E-49	-3.90255163186462E-14	-2.13683885400906E-09	-1.10202654915776E-47	-1.18401337386022E-12	2.13683918203744E-10
4.155	88.8887173753595	-8.44774383145582E-39	0.174617456209812	369.333333333326	1.4107140040899E-49	-800	-7.66652195106297E-41	0.007627655841374	1.17522895850427E-40	0.999999517618088	-2.81162508616804E-41	0.000982223664987	4.74909655114166E-41	5.43890703526417E-39	0.112554559181375	-3.21654434861266E-39	5.46050681465319E-39	0.113649039364689	-3.23003581585689E-39	800	0.112554559181405	-5.44522576444155E-39	88.8888888887932	-4.15846926767863E-49	-4.55688203921234E-14	-1.2361075126439E-09	-6.4626513906887E-48	-7.7441869709019E-13	1.2361077552297E-10
4.16	88.888710605011	-8.50004355104378E-39	0.178030534293671	369.77777777777	1.38992166797453E-49	-800	-7.6792370052804E-41	0.007731140694848	1.17521914221492E-40	0.999999498576474	-2.83086960009829E-41	0.001001422257539	4.77844199742584E-41	5.4724508611071E-39	0.114754556915072	-3.23845899849516E-39	5.49417436307914E-39	0.115863848027872	-3.25203520937106E-39	800	0.114754556915102	-5.47893698796528E-39	88.8888888887933	-4.15837662787829E-49	-4.63314725705E-14	5.76723853858576E-10	2.796404410007E-48	1.20004012465935E-13	5.76723866343722E-11
4.165	88.8887036099095	-8.55234424476346E-39	0.181489509892832	370.222222222214	1.36912998935952E-49	-800	-7.6919213449884E-41	0.007834236628236	1.1752078462215E-40	0.999999478902741	-2.85014709686532E-41	0.001020879025125	4.80778648738032E-41	5.5059918768009E-39	0.116984139386173	-3.26040874020832E-39	5.52784158789872E-39	0.118108191500396	-3.27407094084178E-39	800	0.116984139386204	-5.51264883939243E-39	88.8888888887933	-4.15825081912377E-49	-4.71930235046529E-14	-2.53569017634904E-09	-1.23934257328974E-47	-1.46103021022444E-12	2.53569059726188E-10
4.17	88.8886963840944	-8.60464511463173E-39	0.184994667119947	370.666666666658	1.34375039892193E-49	-800	-7.7043806391846E-41	0.007939306109487	1.17515582858388E-40	0.999999458580126	-2.86945731065038E-41	0.001040595565949	4.83712955105012E-41	5.53952952003062E-39	0.119243489738071	-3.28239323516253E-39	5.56150732252275E-39	0.120382635162076	-3.29614236556116E-39	800	0.11924348973811	-5.54636080436167E-39	88.8888888887714	-5.23173080390141E-49	-5.92193819668389E-14	-2.71924704975372E-09	-1.34282762906947E-47	-1.58086799671911E-12	2.71924750928229E-10
4.175	88.8886889199925	-8.65694414997971E-39	0.188547010729474	371.111111111102	1.317230133633E-49	-800	-7.71695016290998E-41	0.008046321502038	1.17506362150421E-40	0.999999437587328	-2.88880003836413E-41	0.001060577531836	4.86647002461483E-41	5.57306241978017E-39	0.12153325562512	-3.30441219476834E-39	5.59517041560853E-39	0.122687736475437	-3.31824979931354E-39	800	0.121533255625161	-5.58007158683974E-39	88.88888888877	-5.30924723612459E-49	-6.10102829493621E-14	2.21689333557136E-10	8.82935481385178E-49	-1.08407887381657E-13	2.21689360063304E-11
4.18	88.8886812112732	-8.70924051833514E-39	0.192146847731219	371.555555555546	1.29068334680209E-49	-800	-7.72950892793971E-41	0.008152898326533	1.17497076098304E-40	0.999999415906543	-2.90817549441621E-41	0.001080826649792	4.89580741729745E-41	5.60658998825612E-39	0.123853634950729	-3.32646582936266E-39	5.62883084843633E-39	0.125023369799985	-3.34039321127752E-39	800	0.123853634950769	-5.61378065023433E-39	88.8888888887702	-5.30938218946745E-49	-6.20174683250202E-14	5.3645976549884E-10	2.42992318497422E-48	8.56113194345445E-14	5.36459772330012E-11
4.185	88.8886732526502	-8.7615342551197E-39	0.195793958112308	371.99999999999	1.26413641445054E-49	-800	-7.74203966461955E-41	0.008259094162563	1.17487629729913E-40	0.999999393522902	-2.9275836162836E-41	0.001101341682321	4.9251417353269E-41	5.64011221721174E-39	0.12620448591097	-3.3485540478386E-39	5.66248857507893E-39	0.127389425990566	-3.3625725211578E-39	800	0.126204485911011	-5.64748801737748E-39	88.8888888887702	-5.30922319248324E-49	-6.30732411272041E-14	-3.41984218721313E-09	-1.6101189022182E-47	-2.15813585476389E-12	3.4198428681729E-10
4.19	88.8886650374257	-8.81382440881874E-39	0.199488726959732	372.444444444434	1.23128719422681E-49	-800	-7.75433500158112E-41	0.008367556749717	1.17473683471616E-40	0.999999370417569	-2.94702409478973E-41	0.001122124795619	4.95447242002314E-41	5.67362844001337E-39	0.128586056737042	-3.37067645806266E-39	5.69614230641283E-39	0.129786554423541	-3.38478705458386E-39	800	0.128586056737095	-5.68119307494521E-39	88.8888888887409	-6.68949236575526E-49	-8.08597265556483E-14	-3.41178936954118E-09	-1.61026838592709E-47	-2.20030530612948E-12	3.41179007904321E-10
4.195	88.8886565574174	-8.86610901423586E-39	0.203232146426414	372.888888888877	1.197842097915E-49	-800	-7.76677177559946E-41	0.008477752726821	1.17456117192003E-40	0.99999934656753	-2.96649684390223E-41	0.001143181570641	4.98379833218588E-41	5.70713731275406E-39	0.130998986962698	-3.39283290468105E-39	5.72979100537831E-39	0.132215251678553	-3.40703721674302E-39	800	0.130998986962752	-5.7148945562142E-39	88.888888888741	-6.68941523311719E-49	-8.22601975085446E-14	8.46966941025982E-10	3.79743686064466E-48	2.08252011484097E-13	8.46966966628457E-11
4.2	88.8886478060413	-8.91838745683654E-39	0.207024398062221	373.333333333321	1.16439521125781E-49	-800	-7.77918611707503E-41	0.008587345221237	1.17438752757101E-40	0.999999321954269	-2.98600203003738E-41	0.001164513028694	5.01311910495076E-41	5.74063839120653E-39	0.133443393624485	-3.41502354611671E-39	5.76343472979962E-39	0.134675344870546	-3.42932294337078E-39	800	0.13344339362454	-5.74859206507025E-39	88.8888888887412	-6.68930819897589E-49	-8.34948010079658E-14	-2.26639447949598E-09	-1.0441789945399E-47	-1.61530484531213E-12	2.266395055126E-10
4.205	88.888638777518	-8.97065974657196E-39	0.210865279253354	373.777777777765	1.13028660705804E-49	-800	-7.79154637270258E-41	0.008696877917237	1.17420705809081E-40	0.999999296561531	-3.00553959335428E-41	0.001186118030162	5.04243472936071E-41	5.77413164882524E-39	0.13591914613549	-3.43724829341039E-39	5.79707328415116E-39	0.137166816868538	-3.4516440795226E-39	800	0.135919146135554	-5.78228560792833E-39	88.8888888887216	-7.58621197463523E-49	-9.66489574347907E-14	-2.32489583140689E-09	-1.06109256329004E-47	-1.76728886574765E-12	2.32489650311645E-10
4.21	88.8886294642074	-9.02292464186947E-39	0.214755351233456	374.222222222209	1.09233937959285E-49	-800	-7.80372904102929E-41	0.008808840026469	1.17397948481761E-40	0.999999270367826	-3.02510915565896E-41	0.001207999732084	5.07174448008272E-41	5.80761622384723E-39	0.138426606269519	-3.45950666903937E-39	5.83070531900866E-39	0.13969036364815	-3.47400011644834E-39	800	0.138426606269583	-5.81597438449734E-39	88.8888888887213	-7.5987923306597E-49	-9.90515152468835E-14	3.1500727952029E-10	1.34911863569552E-48	-2.22515661488898E-13	3.15007358110876E-11
4.215	88.8886198573657	-9.07518032898284E-39	0.218695538995783	374.666666666652	1.0543457550708E-49	-800	-7.81603059282192E-41	0.00892194268153	1.1737256827869E-40	0.999999243348564	-3.04471080344239E-41	0.001230163337657	5.10104730273622E-41	5.84109086941031E-39	0.140966370273011	-3.48179871617284E-39	5.86433008297357E-39	0.142246311951697	-3.49639139472403E-39	800	0.140966370273076	-5.84965722567783E-39	88.8888888887215	-7.59873290684698E-49	-1.0067657947502E-13	4.14483262526697E-11	3.17354267116687E-50	-3.14633451855854E-13	4.14495204237248E-12
4.22	88.8886099502859	-9.12742645816622E-39	0.222685859385878	375.111111111096	1.01635144308673E-49	-800	-7.82831190009407E-41	0.009034481207238	1.17347317519384E-40	0.999999215484882	-3.06434462514381E-41	0.001252608941737	5.13034298164488E-41	5.87455531704426E-39	0.143538449019725	-3.50412450840818E-39	5.89794761312878E-39	0.144834500168022	-3.5188178563534E-39	800	0.143538449019791	-5.88333390603152E-39	88.8888888887216	-7.59894683808728E-49	-1.02364837640465E-13	4.11877939162244E-10	1.65452127619522E-48	-1.01613825167064E-13	4.11877951696745E-11
4.225	88.888599736543	-9.17966291345114E-39	0.226726184366899	375.555555555539	9.78342636153447E-50	-800	-7.84048620738436E-41	0.009147550843644	1.17320439864507E-40	0.999999186758707	-3.08401053332272E-41	0.00127533582422	5.15963143529854E-41	5.90800945507282E-39	0.146142759995711	-3.52648392244173E-39	5.93155744340305E-39	0.147455080449133	-3.54127919480408E-39	800	0.146142759995778	-5.91700435080775E-39	88.8888888887216	-7.6064892900829E-49	-1.04277529472094E-13	-2.83624975357554E-09	-1.23037566538003E-47	-2.20128221098498E-12	2.83625060780967E-10
4.23	88.8885892073185	-9.2318881521184E-39	0.23081727930665	375.999999999982	9.37622443502037E-50	-800	-7.85259150863631E-41	0.009262929912259	1.17289092160531E-40	0.999999157145239	-3.1037081502678E-41	0.00129834829042	5.18891176440819E-41	5.94145221740907E-39	0.148779796558018	-3.54887647387423E-39	5.96515829322165E-39	0.150108714398623	-3.56377521238834E-39	800	0.148779796558096	-5.95066756560519E-39	88.8888888886973	-8.65355616226426E-49	-1.21762285713448E-13	-2.81730194728861E-09	-1.2201190223065E-47	-2.20955154959026E-12	2.81730281374123E-10
4.235	88.8885783536044	-9.28410062231234E-39	0.234959909277196	376.444444444426	8.94354675786836E-50	-800	-7.86476912143466E-41	0.009378863128656	1.17256079760652E-40	0.999999126619143	-3.12343768740916E-41	0.001321650643989	5.21818306359436E-41	5.97488252970854E-39	0.151450051873816	-3.57130235297878E-39	5.99874968568433E-39	0.152795560768137	-3.5863061162635E-39	800	0.151450051873896	-5.98432255013097E-39	88.8888888886975	-8.65335350798216E-49	-1.23779231399773E-13	8.26124354110354E-10	3.34045078145307E-48	1.14872116277845E-13	8.26124362096805E-11
4.24	88.8885671685391	-9.33630021782434E-39	0.239153941989732	376.888888888869	8.51088322737775E-50	-800	-7.87692826408277E-41	0.009494287091083	1.17223098397985E-40	0.999999095161119	-3.14319916416792E-41	0.00134524214092	5.24744525615926E-41	6.00830028513129E-39	0.154153440690389	-3.59376155855561E-39	6.03233162968259E-39	0.155515473667161	-3.60887185351646E-39	800	0.15415344069047	-6.01796923592619E-39	88.8888888886977	-8.65314644744186E-49	-1.25805360086475E-13	-2.18728738824803E-09	-9.26867936634999E-48	-1.91227065182673E-12	2.18728822416432E-10
4.245	88.8885556447109	-9.38848654987498E-39	0.243399422622875	377.333333333313	8.04585620912674E-50	-800	-7.88891901836585E-41	0.009610896674197	1.17187462259224E-40	0.999999062750323	-3.16299242009581E-41	0.001369123035465	5.27669810356477E-41	6.04170518808274E-39	0.156889992147504	-3.61625387765563E-39	6.0659033646791E-39	0.158268792751	-3.6314719417501E-39	800	0.156889992147597	-6.05160737239317E-39	88.8888888886749	-9.60748204037568E-49	-1.43514451432978E-13	-5.81721337766755E-09	-2.41762935258794E-47	-4.48465452988007E-12	5.81721510634088E-10
4.25	88.8885437721866	-9.44065783352435E-39	0.247697273766305	377.777777777756	7.52001936932024E-50	-800	-7.90096414198424E-41	0.009729770073377	1.17147467599169E-40	0.999999029358817	-3.18281719006665E-41	0.001393298517329	5.30594056644701E-41	6.07509600752158E-39	0.159660300947173	-3.63877894874134E-39	6.09946364204949E-39	0.161056166555186	-3.6541065367211E-39	800	0.159660300947278	-6.08523580899914E-39	88.8888888886479	-1.0725376801602E-48	-1.64907806869478E-13	-2.13399668306602E-09	-8.99467232216576E-48	-2.01303330701161E-12	2.13399763252912E-10
4.255	88.8885315419618	-9.49281294986978E-39	0.252047997492646	378.222222222199	6.98374843752189E-50	-800	-7.91302860568792E-41	0.009848469926086	1.17106964254748E-40	0.999998994961277	-3.20267371908238E-41	0.001417771410812	5.33517198651612E-41	6.10847195639549E-39	0.16246469073541	-3.66133700810213E-39	6.13301231606643E-39	0.163877545362317	-3.67677569383471E-39	800	0.162464690735517	-6.11885382452352E-39	88.8888888886481	-1.0725420225735E-48	-1.67519533870979E-13	-3.75687629154198E-09	-1.50978983534203E-47	-3.30196055676585E-12	3.75687774260672E-10
4.26	88.8885189468765	-9.54495193432235E-39	0.256451373311694	378.666666666642	6.44538205048484E-50	-800	-7.92507577961774E-41	0.009966730917219	1.17066367969534E-40	0.999998959537563	-3.22256198367485E-41	0.001442540475789	5.36439236772197E-41	6.1418330215431E-39	0.165303019409414	-3.68392800793993E-39	6.16654936010433E-39	0.166732803447814	-3.69947936355939E-39	800	0.16530301940954	-6.15246144179369E-39	88.8888888886113	-1.21998485370167E-48	-1.97064021169775E-13	-4.68839781812341E-09	-1.88891891371201E-47	-4.00433087992392E-12	4.68839952815992E-10
4.265	88.8885059781467	-9.59707392256656E-39	0.26090773990043	379.111111111085	5.83417790658797E-50	-800	-7.93691355996467E-41	0.010087266709965	1.17021426486806E-40	0.999998923062974	-3.2424816783233E-41	0.001467607617462	5.3936011985079E-41	6.17517858800497E-39	0.168175505295055	-3.70655155891897E-39	6.2000735293558E-39	0.169622592494333	-3.7222169460267E-39	800	0.168175505295185	-6.18605810368888E-39	88.888888888608	-1.23445169116405E-48	-2.02646532429392E-13	2.52953213930579E-10	7.68643469656065E-49	-4.57830179115716E-13	2.52953628252852E-11
4.27	88.8884926248124	-9.64917703720137E-39	0.265418093637171	379.555555555529	5.21695420673652E-50	-800	-7.94888760864751E-41	0.010209291302149	1.16973370270554E-40	0.999998885506681	-3.26243282489332E-41	0.001492978440625	5.42279738453166E-41	6.20850735852528E-39	0.171082790660445	-3.72920762477174E-39	6.23358393151543E-39	0.172547339011497	-3.74498883161666E-39	800	0.171082790660577	-6.21964260007963E-39	88.8888888886083	-1.23446368065729E-48	-2.05663942541333E-13	4.1353587221235E-10	1.38161025803555E-48	-3.50109818225813E-13	4.13536020418191E-11
4.275	88.8884788783484	-9.70126079879572E-39	0.269982534946411	379.999999999972	4.59971479833303E-50	-800	-7.96084914283223E-41	0.010330707547185	1.16925475865479E-40	0.999998846844707	-3.28241555719239E-41	0.001518653510318	5.45198063370064E-41	6.24181897322629E-39	0.174024940260427	-3.75189632693168E-39	6.26708061293868E-39	0.175506868720685	-3.7677949844779E-39	800	0.174024940260561	-6.25321462193555E-39	88.8888888886085	-1.2344912463978E-48	-2.08849094096495E-13	-2.03167852911658E-09	-8.01052053992919E-48	-2.22701559983871E-12	2.03167974968295E-10
4.28	88.888464730834	-9.75332509812272E-39	0.274600927611693	380.444444444415	3.96823168452567E-50	-800	-7.97270305599349E-41	0.010452605081639	1.1687604618468E-40	0.999998807054778	-3.30242979888509E-41	0.001544632060479	5.48115086672929E-41	6.27511332134291E-39	0.177001866316458	-3.77461755398286E-39	6.30056313380147E-39	0.17850131950116	-3.79063509629887E-39	800	0.177001866316603	-6.2867740988521E-39	88.8888888885909	-1.30319791105383E-48	-2.25677925413047E-13	-2.04162612741722E-09	-8.07360722096131E-48	-2.2603795269277E-12	2.04162737870264E-10
4.285	88.888450171624	-9.80536849160997E-39	0.279273988854796	380.888888888858	3.31649853151894E-50	-800	-7.98452144048325E-41	0.010576806335567	1.16822253034215E-40	0.999998766106951	-3.32247521232825E-41	0.001570918125655	5.51030723839443E-41	6.30838939676695E-39	0.180014031160483	-3.79737086637038E-39	6.33403024406183E-39	0.181531351319936	-3.81350906529744E-39	800	0.180014031160629	-6.32032010033369E-39	88.8888888885911	-1.3036943019406E-48	-2.2913745941277E-13	3.47929092943839E-10	1.08926278917051E-48	-4.35550618758432E-13	3.47929365562989E-11
4.29	88.8884351896478	-9.85738947381959E-39	0.284002482248375	381.333333333301	2.66465826763507E-50	-800	-7.99640130508923E-41	0.010701414437445	1.16767034015961E-40	0.999998723970091	-3.3425520375101E-41	0.001597516001127	5.53944886642858E-41	6.34164614852227E-39	0.18306192700243	-3.82015648448496E-39	6.3674815352387E-39	0.184597080730366	-3.83641706760117E-39	800	0.183061927002579	-6.35385165600953E-39	88.8888888885914	-1.30367169174196E-48	-2.32348093455864E-13	6.98700356830718E-11	2.85483169363294E-50	-6.89230716111381E-13	6.98734350474754E-12
4.295	88.8884197766264	-9.90938798853449E-39	0.288786233033931	381.777777777744	2.01283094162557E-50	-800	-8.0082695054043E-41	0.0108255115495	1.16711806633673E-40	0.999998680620913	-3.36266029000762E-41	0.001624424704049	5.56857570143374E-41	6.37488350016074E-39	0.186145441223001	-3.84297440317359E-39	6.40091700493599E-39	0.187698361344649	-3.85935906979432E-39	800	0.186145441223152	-6.38736872964336E-39	88.8888888885917	-1.30363725925307E-48	-2.36077401313524E-13	3.48165940522426E-11	-9.20730859206904E-50	-7.61229330360388E-13	3.48249148095448E-12
4.3	88.888403923153	-9.96136348162861E-39	0.293625388057516	382.222222222187	1.36084986011867E-50	-800	-8.01994548778145E-41	0.010951080364756	1.16653516330839E-40	0.99999863603296	-3.38279974832339E-41	0.001651645060614	5.59768740824859E-41	6.40810104129948E-39	0.189264668503836	-3.86582433476429E-39	6.43433577569158E-39	0.190835614774695	-3.88233452121307E-39	800	0.189264668503989	-6.42087096405797E-39	88.8888888885918	-1.30445446856977E-48	-2.39843617652397E-13	2.72374715374687E-11	-9.29377958985323E-50	-7.35874304634771E-13	2.72474102759627E-12
4.305	88.8883876168438	-1.00133140975102E-38	0.298520940385322	382.66666666663	7.08673862317306E-51	-800	-8.0317482801284E-41	0.011078896338576	1.16590969772385E-40	0.999998590171402	-3.4029703322411E-41	0.001679182657029	5.62678290315142E-41	6.44129748498732E-39	0.192420248985043	-3.88870612429965E-39	6.46773662817805E-39	0.194009484784012	-3.90534378514121E-39	800	0.192420248985198	-6.45435716318062E-39	88.888888888592	-1.3044321314078E-48	-2.4342789316341E-13	1.89478062869347E-10	4.78853050575052E-49	-5.95597863927303E-13	1.89478998956443E-11
4.31	88.8883708475155	-1.00652391180703E-38	0.303473143268273	383.111111111073	5.64558666873845E-52	-800	-8.04354349085244E-41	0.011206056591148	1.16528622115784E-40	0.9999985430076	-3.42317223090319E-41	0.001707038918028	5.65586175550766E-41	6.47447230777491E-39	0.195612345937007	-3.91161995054336E-39	6.5011196193766E-39	0.197219783522299	-3.928386839859E-39	800	0.195612345937164	-6.48782686413446E-39	88.8888888885924	-1.30445440122587E-48	-2.46999569976861E-13	-7.33753798461547E-10	-2.73818595548892E-48	-1.39554668591457E-12	7.33755125574808E-11
4.315	88.8883536063194	-1.01171384883066E-38	0.308481816840346	383.555555555516	-6.00996832315147E-51	-800	-8.05524730910416E-41	0.011333488618197	1.16465050376184E-40	0.999998494516665	-3.44340538901822E-41	0.001735212832063	5.68492391626476E-41	6.50762543328783E-39	0.198840843452015	-3.93456572713527E-39	6.53448439861327E-39	0.200466588847211	-3.95146342354629E-39	800	0.198840843452179	-6.52128003146649E-39	88.8888888885846	-1.33236790353643E-48	-2.57589148073592E-13	-1.93504471705321E-09	-6.90580191301301E-48	-2.49231476489979E-12	1.93504632208855E-10
4.32	88.8883358814925	-1.01690109127506E-38	0.313547590616524	383.999999999958	-1.27605268992149E-50	-800	-8.06690520646775E-41	0.011463204960818	1.16397181563597E-40	0.999998444665514	-3.46366948409932E-41	0.001763707940375	5.71396862341624E-41	6.54075595083499E-39	0.202106147335228	-3.95754303344294E-39	6.56782973486733E-39	0.203750555166952	-3.97457340464943E-39	800	0.2021061473354	-6.55471583014658E-39	88.8888888885759	-1.36364948826947E-48	-2.69400855778972E-13	-8.42466837032835E-10	-3.18446083121745E-48	-1.56773614192907E-12	8.42468295721994E-11
4.325	88.8883176603516	-1.02208548136821E-38	0.318671280534959	384.444444444401	-1.95787367879013E-50	-800	-8.07863178878121E-41	0.011593435476163	1.16327709876781E-40	0.999998393418475	-3.48396474988697E-41	0.001792528832855	5.7429949512525E-41	6.57386275651329E-39	0.205408783558038	-3.98055207936805E-39	6.60115516894915E-39	0.207071829781159	-3.9977169799363E-39	800	0.205408783558212	-6.58813324321143E-39	88.8888888885763	-1.36364471297579E-48	-2.73099293686306E-13	1.82230526964595E-09	6.09161093044822E-48	8.61342293336071E-13	1.82230547320967E-10
4.33	88.8882989334781	-1.02726701073099E-38	0.323852721551405	384.888888888844	-2.63968465099568E-50	-800	-8.09035112702536E-41	0.011723133598887	1.16258224154358E-40	0.999998340749058	-3.50429121771446E-41	0.001821674581344	5.77200283355963E-41	6.60694575321885E-39	0.208748645769864	-4.00359287702568E-39	6.6344606968378E-39	0.210430260170581	-4.02089412865417E-39	800	0.208748645770041	-6.62153221665142E-39	88.8888888885765	-1.36360122686769E-48	-2.77016566362823E-13	-1.11898638503279E-08	-3.89476805405123E-47	-1.11818808567322E-11	1.11898694372783E-09
4.335	88.8882796901574	-1.03244562323002E-38	0.329092066708703	385.333333333287	-3.46714258493446E-50	-800	-8.10188666361987E-41	0.011854395430237	1.16185544003668E-40	0.999998286627128	-3.52464866532271E-41	0.001851146046942	5.80099192953321E-41	6.64000452259473E-39	0.212125832654296	-4.02666513684785E-39	6.66774540339701E-39	0.21382629430474	-4.04410432425011E-39	800	0.212125832654532	-6.65491238864699E-39	88.8888888884805	-1.69747846814905E-48	-3.70195370344562E-13	-1.11664159400478E-08	-3.89513346568293E-47	-1.13078894991097E-11	1.11664216656241E-09
4.34	88.8882599165467	-1.03762113419136E-38	0.334390299610778	385.777777777729	-4.31587890001971E-50	-800	-8.11354930874031E-41	0.011987687902572	1.16108959075461E-40	0.999998231013753	-3.54503706036252E-41	0.001880948762685	5.82996115892104E-41	6.67303777961369E-39	0.215540978260658	-4.04976875735959E-39	6.70100816999042E-39	0.217260513919427	-4.06734793086322E-39	800	0.215540978260898	-6.6882725688243E-39	88.8888888884809	-1.69745869722472E-48	-3.7525661764104E-13	2.84619735187618E-09	9.43003613903485E-48	1.55409245263207E-12	2.84619777616215E-10
4.345	88.8882396013146	-1.04279348069934E-38	0.33974761709883	386.222222222171	-5.1646044808688E-50	-800	-8.12520841893949E-41	0.012120326704952	1.16032524594339E-40	0.999998173877061	-3.56545657865595E-41	0.001911083836057	5.85891014063426E-41	6.70604505734983E-39	0.218994209506815	-4.07290390319764E-39	6.73424903971794E-39	0.220732731751995	-4.09062493836669E-39	800	0.218994209507059	-6.72161235164656E-39	88.8888888884813	-1.69742439642211E-48	-3.80546333965412E-13	-7.86689232275671E-09	-2.66604523149327E-47	-8.78526540665457E-12	7.8668972281794E-10
4.35	88.8882187342688	-1.04796264941082E-38	0.345163883792702	386.666666666613	-6.07669502683896E-50	-800	-8.13675213642955E-41	0.012253389716694	1.15954610261552E-40	0.999998115188387	-3.58590714731726E-41	0.001941550505794	5.88783877948286E-41	6.7390262244754E-39	0.222485439167807	-4.09607046589338E-39	6.7674675886333E-39	0.224243069329473	-4.11393501618476E-39	800	0.222485439168097	-6.75493165110964E-39	88.8888888884127	-1.92897082139426E-48	-4.53069822487552E-13	-8.72522794755485E-09	-2.94614888840715E-47	-9.72579269790163E-12	8.72523336810173E-10
4.355	88.8881973019678	-1.05312850034137E-38	0.350639792020324	387.111111111055	-7.04880525217415E-50	-800	-8.14831044044157E-41	0.012388853896559	1.15872238966436E-40	0.999998054909926	-3.6063884921419E-41	0.001972352666521	5.91674625196958E-41	6.77198029649964E-39	0.226015113545769	-4.11926807664307E-39	6.80066253991084E-39	0.227792214535858	-4.13727820610475E-39	800	0.226015113546067	-6.78822956490037E-39	88.8888888884067	-1.94994832260937E-48	-4.65585084717351E-13	4.90274487674436E-10	1.42317751364211E-48	-8.85911628035038E-13	4.90275288081955E-11
4.36	88.8881752905037	-1.05829089219737E-38	0.356176054780825	387.555555555497	-8.02378572481399E-50	-800	-8.15991378073244E-41	0.012524419764693	1.15788860627116E-40	0.999997993002562	-3.62690087613286E-41	0.002003494329153	5.9456317250441E-41	6.80490627591047E-39	0.229583692268842	-4.14249698114638E-39	6.83383360505365E-39	0.231380196502694	-4.16065463714608E-39	800	0.229583692269144	-6.82150518227389E-39	88.8888888884071	-1.94996077367835E-48	-4.72019061782414E-13	1.03455022326664E-09	3.02894117771373E-48	-3.53437807897134E-13	1.03455028363987E-10
4.365	88.8881526894942	-1.06344982315755E-38	0.361772451204371	387.999999999939	-8.99881563790537E-50	-800	-8.17148399172485E-41	0.012659688094343	1.15705069072961E-40	0.999997929437095	-3.64744430912415E-41	0.00203497425157	5.97449516947977E-41	6.83780410818592E-39	0.233191033010868	-4.16575716860682E-39	6.86698066568441E-39	0.235006929991484	-4.18406421440031E-39	800	0.233191033011174	-6.85475849149097E-39	88.8888888884074	-1.95073466551335E-48	-4.78985550642204E-13	-5.96287463849836E-09	-1.94880757025669E-47	-7.58895861603883E-12	5.96287946773535E-10
4.37	88.888129486187	-1.06860520867564E-38	0.367429312294151	388.444444444381	-1.0005277966692E-49	-800	-8.18292916605713E-41	0.012796971040976	1.15617402149238E-40	0.999997864177658	-3.66801850309114E-41	0.002066794295963	6.0033360799502E-41	6.87067318107878E-39	0.236837349174788	-4.18904826698926E-39	6.9001026115915E-39	0.238672992147479	-4.20750657966379E-39	800	0.236837349175133	-6.88798894758735E-39	88.8888888883561	-2.116998035289E-48	-5.39067281412551E-13	-5.93066336781057E-09	-1.93812458851655E-47	-7.65218002997152E-12	5.93066830451252E-10
4.375	88.888105665038	-1.07375686836347E-38	0.373147603136594	388.888888888823	-1.1063763009709E-49	-800	-8.19448140158523E-41	0.012935438456882	1.15527093542538E-40	0.999997797180532	-3.68862360745997E-41	0.002098959891276	6.03215339809352E-41	6.9035122324469E-39	0.240523262884325	-4.21237038220834E-39	6.93319868598851E-39	0.242378722296132	-4.23098203964426E-39	800	0.240523262884675	-6.9211953878175E-39	88.8888888883566	-2.11696187334048E-48	-5.46633324796085E-13	1.14468434730944E-09	3.37165152357036E-48	-4.37625557500395E-13	1.144684430964E-10
4.38	88.888081214314	-1.07890477208698E-38	0.378927288823269	389.333333333265	-1.21222334450775E-49	-800	-8.20603320206184E-41	0.013073300120695	1.15436809580427E-40	0.999997728412718	-3.7092597193885E-41	0.002131470841456	6.06094693083419E-41	6.93632101492144E-39	0.244248751685211	-4.23572359660858E-39	6.96626889593558E-39	0.246123946902251	-4.25449059309538E-39	800	0.244248751685564	-6.95437761794601E-39	88.8888888883571	-2.11690368318537E-48	-5.54070453215137E-13	-1.18305365504049E-09	-4.12147223443674E-48	-2.79683000387427E-12	1.18305696099669E-10
4.385	88.8880561220392	-1.0840488839964E-38	0.384768367871577	389.777777777707	-1.31874056909903E-49	-800	-8.21741911755032E-41	0.013212072545861	1.15344286987435E-40	0.999997657840534	-3.72992667093485E-41	0.002164327138481	6.0897164528387E-41	6.96909924397874E-39	0.248013814670205	-4.25910768764818E-39	6.99931260011221E-39	0.249908926879743	-4.27803176479167E-39	800	0.248013814670571	-6.98753540689372E-39	88.8888888883466	-2.15227894009849E-48	-5.72753391612863E-13	-1.18447474051201E-09	-4.12525247407881E-48	-2.79562943156282E-12	1.18447803966764E-10
4.39	88.8880303719823	-1.08918902759857E-38	0.39067178198774	390.222222222149	-1.42635154871437E-49	-800	-8.22892506765031E-41	0.013353405648145	1.15247067756549E-40	0.999997585418329	-3.75062438887333E-41	0.00219753407981	6.1184609276409E-41	7.00184568277365E-39	0.25181905889759	-4.28252250642275E-39	7.03232845303075E-39	0.253734395808568	-4.30160589860696E-39	800	0.251819058897962	-7.0206676170246E-39	88.8888888883471	-2.15224623528687E-48	-5.80218015714306E-13	4.28930964820485E-10	1.03262881479E-48	-1.17399771726894E-12	4.28932571452055E-11
4.395	88.8880039503209	-1.09432511997303E-38	0.396637844175365	390.66666666659	-1.53396200147285E-49	-800	-8.2404336625682E-41	0.013494043282336	1.15149981078622E-40	0.999997511107225	-3.77135308100395E-41	0.002231093426442	6.14717985724249E-41	7.03455972537691E-39	0.255664686176181	-4.30596824904216E-39	7.06531649266484E-39	0.257600154451792	-4.32521300211809E-39	800	0.255664686176557	-7.05377371385233E-39	88.8888888883476	-2.15218714170776E-48	-5.88076058895659E-13	-8.73730717406277E-10	-2.98447774563963E-48	-2.75134341878316E-12	8.73735049331259E-11
4.4	88.8879768451999	-1.09945714921523E-38	0.4026663856667	391.111111111032	-1.64225190467186E-49	-800	-8.25183005544767E-41	0.013634945460078	1.15051596286293E-40	0.999997434873881	-3.79211268120098E-41	0.002265004229401	6.17587315374384E-41	7.06724124791068E-39	0.259550587774305	-4.32944481567887E-39	7.09827634713208E-39	0.26150627859556	-4.34885275388991E-39	800	0.259550587774692	-7.08685362064328E-39	88.8888888883396	-2.17812702494692E-48	-6.06211928441368E-13	-1.03005011927349E-09	-3.27612475154E-48	-2.95047516295379E-12	1.03005434493478E-10
4.405	88.887949040871	-1.10458497991012E-38	0.408758068243003	391.555555555474	-1.75124769410513E-49	-800	-8.26325828444278E-41	0.013778340113902	1.14948612052831E-40	0.999997356674004	-3.81290295593729E-41	0.002299270211592	6.20454001720489E-41	7.09988929085128E-39	0.263477190320505	-4.35295188368863E-39	7.13120669878965E-39	0.265453482281672	-4.37252524512617E-39	800	0.263477190320898	-7.11990646454191E-39	88.888888888339	-2.18025659264047E-48	-6.15624088302356E-13	1.19536972912699E-09	3.40727561425586E-48	-3.05852944199307E-13	1.19536976825548E-10
4.41	88.8879205210702	-1.10970847088081E-38	0.414913594302002	391.999999999916	-1.86025988046939E-49	-800	-8.27472826120396E-41	0.013921717222476	1.14844730233763E-40	0.999997276461851	-3.83372417211241E-41	0.002333895324406	6.23317961286153E-41	7.1325028520804E-39	0.26744494662614	-4.37648970207198E-39	7.16410729049822E-39	0.269441760483784	-4.3962305954254E-39	800	0.267444946626538	-7.15293133555381E-39	88.8888888883395	-2.18023435765617E-48	-6.23573741190643E-13	-7.47064632378119E-09	-2.25034508959398E-47	-1.0535755538869E-11	7.47065375299713E-10
4.415	88.8878912735489	-1.1148276172603E-38	0.421132742486634	392.444444444358	-1.97207894907517E-49	-800	-8.28614057527647E-41	0.014064925535839	1.14740166377299E-40	0.999997194202971	-3.85457633468986E-41	0.002368878323084	6.26179189274855E-41	7.16508185403288E-39	0.271453714066516	-4.40005825436535E-39	7.19697792686846E-39	0.273471064845631	-4.41996863959617E-39	800	0.271453714066969	-7.18592820231017E-39	88.8888888882749	-2.37348234023717E-48	-7.08619384237901E-13	-7.49480477679703E-09	-2.25750186624589E-47	-1.07322226240583E-11	7.49481246082262E-10
4.42	88.8878612831909	-1.11994232388152E-38	0.427415892597229	392.888888888799	-2.0907559912031E-49	-800	-8.29749425992181E-41	0.014210253668142	1.14631543308423E-40	0.999997109854851	-3.87545915993443E-41	0.002404221344413	6.29037628896845E-41	7.1976256093458E-39	0.275503737515231	-4.42365717069083E-39	7.22981744502168E-39	0.277542002650606	-4.44373920967755E-39	800	0.275503737515689	-7.21889645138017E-39	88.8888888882754	-2.37372595196404E-48	-7.18028963593544E-13	1.41184841595522E-09	3.85281931630077E-48	-3.39851715229832E-13	1.41184845685876E-10
4.425	88.8878305318586	-1.12505241596002E-38	0.433763973390031	393.33333333324	-2.20944111883304E-49	-800	-8.30893029742663E-41	0.014356326182517	1.14520875842072E-40	0.999997023366477	-3.89637288117894E-41	0.0024399296131	6.31893177200898E-41	7.23013288641107E-39	0.279595615696854	-4.44728665262943E-39	7.26262525928115E-39	0.281654787148463	-4.4675425415931E-39	800	0.279595615697319	-7.25183495614522E-39	88.8888888882759	-2.37368822735575E-48	-7.2733251008202E-13	-1.40403244586186E-09	-4.43531136394043E-48	-3.68616895397501E-12	1.40403728471661E-10
4.43	88.8877990063764	-1.1301578766876E-38	0.440176834754775	393.777777777682	-2.3282596996231E-49	-800	-8.32035723399991E-41	0.014501886187089	1.14410003754687E-40	0.999996934700792	-3.91731756341028E-41	0.002476002285188	6.34745822463167E-41	7.26260352583574E-39	0.283729251916821	-4.4709467497884E-39	7.29540131102725E-39	0.28580927151596	-4.49137860927057E-39	800	0.283729251917303	-7.28474360826386E-39	88.8888888882631	-2.41305061358284E-48	-7.52887645029799E-13	-1.83343710583952E-09	-5.63306296634286E-48	-4.23321341481887E-12	1.83344199285525E-10
4.435	88.8877666919865	-1.13525864452027E-38	0.446654625518561	394.222222222123	-2.44905811625878E-49	-800	-8.33164602436106E-41	0.014649152189776	1.14295664588378E-40	0.99999684381629	-3.9382929593961E-41	0.00251244019827	6.37595527220805E-41	7.29503706668977E-39	0.287904742172878	-4.4946371427237E-39	7.32814460701503E-39	0.290005944485555	-4.51524701695021E-39	800	0.287904742173368	-7.31762201103653E-39	88.8888888882604	-2.42196095135117E-48	-7.66318698489432E-13	-4.52378875100567E-11	-3.80027050789904E-49	-2.09921225038783E-12	4.52865670861098E-12
4.44	88.8877335693535	-1.14035453214274E-38	0.453198352971856	394.666666666564	-2.57015570975923E-49	-800	-8.34305284779757E-41	0.014797869458525	1.14178221334183E-40	0.999996750658588	-3.95929920338338E-41	0.002549249018852	6.40442181248556E-41	7.32743219139606E-39	0.292122735818084	-4.51835791603815E-39	7.36085425798883E-39	0.29424522181435	-4.53914810277188E-39	800	0.292122735818581	-7.35046895707123E-39	88.8888888882609	-2.4219239659468E-48	-7.75925665963694E-13	8.90073200328759E-10	2.1406259982888E-48	-9.17657188585768E-13	8.90073673376645E-11
4.445	88.8876996238932	-1.14544549894051E-38	0.459808020881162	395.111111111006	-2.69125129070816E-49	-800	-8.35446669671698E-41	0.014945942069622	1.1406073629346E-40	0.999996655186667	-3.98033641903535E-41	0.002586428768583	6.43285759026468E-41	7.35978857789386E-39	0.296383235350655	-4.54210918066538E-39	7.39353025197768E-39	0.298526918821532	-4.56308188686211E-39	800	0.296383235351158	-7.38328418457615E-39	88.8888888882616	-2.42187342322007E-48	-7.85683942529898E-13	-4.8558490561842E-09	-1.38681913788493E-47	-8.62714955577274E-12	4.85585671989551E-10
4.45	88.8876648410175	-1.15053150839988E-38	0.466483601716092	395.555555555447	-2.8138502366561E-49	-800	-8.36572636833348E-41	0.015095032570777	1.13940768701418E-40	0.999996557359499	-4.00140443035655E-41	0.002623979293076	6.46126237475684E-41	7.39210593371588E-39	0.300686223097174	-4.56589070551391E-39	7.42617187778302E-39	0.302851327111122	-4.58704792753545E-39	800	0.300686223097719	-7.4160674581939E-39	88.8888888882195	-2.54078794843135E-48	-8.52750166038381E-13	-4.86579665448484E-09	-1.387348489151E-47	-8.71379393553705E-12	4.86580445692186E-10
4.455	88.8876292007556	-1.15561237743382E-38	0.4732260651187	395.999999999888	-2.94088466336781E-49	-800	-8.37710872590528E-41	0.015246338705252	1.13816557871683E-40	0.999996457120914	-4.02250325069451E-41	0.00266190604711	6.4896350879026E-41	7.42438296936791E-39	0.305032324150049	-4.58970243769592E-39	7.4587779198068E-39	0.307219081415312	-4.61104657626128E-39	800	0.305032324150601	-7.44881759778313E-39	88.8888888882201	-2.54078132849648E-48	-8.6328572574053E-13	1.03265544263794E-09	2.4563168567793E-48	-8.61762693408984E-13	1.03265580221326E-10
4.46	88.8875926868029	-1.1606880362149E-38	0.480035607799337	396.444444444329	-3.06792380043558E-49	-800	-8.38850052281768E-41	0.015396949463973	1.13692346228852E-40	0.999996354425055	-4.04363306505061E-41	0.002700210137695	6.51797530505347E-41	7.45661916291163E-39	0.309421665383104	-4.61354455091318E-39	7.49134837781606E-39	0.311629982523622	-4.63507786008132E-39	800	0.309421665383662	-7.48153415325378E-39	88.8888888882207	-2.54077811466749E-48	-8.7391229551649E-13	-1.22331774340022E-09	-3.31336567922737E-48	-4.31000635070161E-12	1.22332533590724E-10
4.465	88.88755528447	-1.16575846232937E-38	0.486912095755353	396.88888888877	-3.19592907211533E-49	-800	-8.39974790265758E-41	0.015547883959938	1.13566636170488E-40	0.999996249230606	-4.0647937536304E-41	0.002738890811578	6.54628287649403E-41	7.48881431677737E-39	0.313854160499011	-4.63741688265129E-39	7.5238828225464E-39	0.31608412317994	-4.65914136527113E-39	800	0.313854160499585	-7.51421698013226E-39	88.8888888882098	-2.56917376451597E-48	-9.03275216750223E-13	-1.22237035308588E-09	-3.30820421092866E-48	-4.31987197514864E-12	1.22237798630259E-10
4.47	88.8875169735104	-1.17082348950401E-38	0.493856378524041	397.333333333211	-3.32438617788933E-49	-800	-8.41111053897799E-41	0.015701718746738	1.13435663012208E-40	0.999996141480624	-4.0859852393182E-41	0.002777952847989	6.57455682073924E-41	7.52096725458664E-39	0.318330357179847	-4.66131928070855E-39	7.55637974623074E-39	0.320582334256388	-4.6832374220162E-39	800	0.318330357180428	-7.54686500665779E-39	88.8888888882104	-2.56912549583357E-48	-9.14065713073814E-13	3.30639219707011E-10	5.05427944834176E-49	-1.88234645434252E-12	3.30644577812241E-11
4.475	88.8874777357829	-1.17588301713243E-38	0.500868854486199	397.777777777652	-3.45284164556294E-49	-800	-8.42248482955691E-41	0.015854815844437	1.13304715331414E-40	0.999996031124086	-4.10720775352645E-41	0.002817398488396	6.60279653469055E-41	7.5530772438666E-39	0.322850512300837	-4.68525196399218E-39	7.58883915616785E-39	0.325124404420605	-4.70736606370353E-39	800	0.322850512301425	-7.57947758434474E-39	88.888888888211	-2.56906812516945E-48	-9.25320747690189E-13	5.9211894646671E-11	-1.07156525970792E-49	-2.32161365045099E-12	5.92573907423406E-12
4.48	88.887437556253	-1.18093703003382E-38	0.507949330020116	398.222222222093	-3.58132164391483E-49	-800	-8.43373502886368E-41	0.016007969035755	1.13172625793084E-40	0.999995918118704	-4.12846121840956E-41	0.002857226644229	6.63100191006617E-41	7.58514413541292E-39	0.327414501142092	-4.70921482050665E-39	7.62126072523964E-39	0.32971034974223	-4.73152693483781E-39	800	0.327414501142688	-7.61205461534098E-39	88.888888888211	-2.57025867658535E-48	-9.37335755775658E-13	-3.05533376376822E-11	-3.20804724906161E-49	-2.51910507147327E-12	3.06570111257333E-12
4.485	88.887396414579	-1.18598538168033E-38	0.515098511025328	398.666666666534	-3.70990213000811E-49	-800	-8.44507072957093E-41	0.016163986534673	1.13035301591435E-40	0.99999580240727	-4.14974549475832E-41	0.002897441286802	6.65917207907331E-41	7.61716688621058E-39	0.332022778806631	-4.73320763232368E-39	7.65364295382553E-39	0.334340990784945	-4.75572028036251E-39	800	0.332022778807234	-7.64459515516098E-39	88.888888888211	-2.57180981897193E-48	-9.50138739337905E-13	8.21861097695794E-11	-1.12495328585318E-49	-2.37793441710764E-12	8.22205035933825E-12
4.49	88.8873542908316	-1.19102794516879E-38	0.522316967697487	399.111111110975	-3.83849289253704E-49	-800	-8.45643206201163E-41	0.016319514946095	1.1289760414503E-40	0.999995683933728	-4.17106084475359E-41	0.002938045624104	6.6873062859242E-41	7.64914458343983E-39	0.336675712927406	-4.75723064669301E-39	7.68598573499877E-39	0.339016187435505	-4.77994617370713E-39	800	0.336675712928017	-7.67709838581537E-39	88.8888888882116	-2.57181076275905E-48	-9.61463341967134E-13	3.58350386401653E-10	5.85321642345089E-49	-2.02142147812589E-12	3.58356087682359E-11
4.495	88.887311169486	-1.19606470869859E-38	0.529604472627119	399.555555555416	-3.96716609328566E-49	-800	-8.46768643992329E-41	0.01647494878516	1.12758947741722E-40	0.999995562654414	-4.19240721963722E-41	0.002979038377557	6.71540444155204E-41	7.68107710020054E-39	0.341373157012965	-4.78128378646258E-39	7.71828879403846E-39	0.343735912600925	-4.80420430846952E-39	800	0.341373157013583	-7.70956423124014E-39	88.8888888882111	-2.5747350948439E-48	-9.75665372195531E-13	-2.50916324754733E-09	-6.6465108124283E-48	-6.47383756355834E-12	2.50917159903723E-10
4.5	88.8872670299509	-1.20109554044589E-38	0.536961621303157	399.999999999857	-4.09822943831291E-49	-800	-8.47900156944216E-41	0.016633111638583	1.12615224665207E-40	0.999995438511415	-4.21378444748557E-41	0.003020422897462	6.74346576274363E-41	7.7129634926182E-39	0.346115495005464	-4.80536680047028E-39	7.75055067944963E-39	0.348500948086229	-4.82849485869021E-39	800	0.34611549500611	-7.74199184172931E-39	88.8888888881903	-2.62878018210183E-48	-1.02026352994911E-12	-2.32750115477134E-09	-6.21958617019966E-48	-6.08820837447247E-12	2.32750911743502E-10
4.505	88.8872218507986	-1.20612029632083E-38	0.54438909196757	400.444444444298	-4.22966857947036E-49	-800	-8.49035447165905E-41	0.01679101395844	1.12470758266345E-40	0.999995311444464	-4.23519280347829E-41	0.003062202999633	6.77148939372551E-41	7.74480272953516E-39	0.350903164191961	-4.82947994641382E-39	7.78277117828612E-39	0.353311219254048	-4.85281793258002E-39	800	0.350903164192614	-7.77438028851015E-39	88.8888888881909	-2.62877452496848E-48	-1.03210998938015E-12	3.59297776716E-10	6.96448280661539E-49	-2.15886802690792E-12	3.59304262518855E-11
4.51	88.8871756158708	-1.2111389646084E-38	0.551886645758945	400.888888888739	-4.36116907818488E-49	-800	-8.50161141525659E-41	0.016948712534676	1.12325452733636E-40	0.999995181408113	-4.25663225949801E-41	0.003104377341129	6.79947524560506E-41	7.77659468399175E-39	0.35573601070737	-4.85362317147971E-39	7.81495005015379E-39	0.358166667736136	-4.87717325523774E-39	800	0.355736010708032	-7.80672949607144E-39	88.8888888881903	-2.63095103354372E-48	-1.04772777697573E-12	-2.40400292265484E-10	-5.96144517643709E-49	-3.54167616480814E-12	2.40426379566358E-11
4.515	88.8871283041645	-1.21615142295921E-38	0.559454801808358	401.33333333318	-4.4928476519303E-49	-800	-8.51291516811893E-41	0.01710905577905	1.12175169940255E-40	0.99999504834329	-4.2781026294329E-41	0.003146948842789	6.82742258960021E-41	7.80833847581137E-39	0.360614369283427	-4.8777962112575E-39	7.84708586917249E-39	0.363068051174103	-4.90156096076205E-39	800	0.360614369284097	-7.83903867577634E-39	88.8888888881891	-2.6338888032187E-48	-1.06584726679401E-12	-5.18696197104838E-11	-2.95331549521093E-49	-3.01402455817462E-12	5.19571149405689E-12
4.52	88.8870798929103	-1.22115751665392E-38	0.567094302257777	401.777777777621	-4.62454324496719E-49	-800	-8.52426413049872E-41	0.017269273053201	1.12023908819439E-40	0.999994912185956	-4.29960419538046E-41	0.003189921679936	6.855330507708E-41	7.84003299989007E-39	0.365538718405935	-4.90199932867337E-39	7.87917835507206E-39	0.368015333480141	-4.92598117866867E-39	800	0.365538718406612	-7.87130683033879E-39	88.8888888881898	-2.63392573704491E-48	-1.0776611793715E-12	1.75504055732733E-10	7.04858646847765E-50	-2.28252891176899E-12	1.75518897891E-11
4.525	88.8870303652913	-1.22615723299538E-38	0.574804902562086	402.222222222062	-4.75625362695689E-49	-800	-8.53552201293866E-41	0.017429209914091	1.11871878742395E-40	0.999994772888812	-4.32113693954029E-41	0.003233294477709	6.88319890516141E-41	7.87167812216393E-39	0.370508900554841	-4.92623248324623E-39	7.91122728756275E-39	0.373008434321766	-4.95043364803279E-39	800	0.370508900555527	-7.9035338779159E-39	88.88888888819	-2.63485226000674E-48	-1.09073573505583E-12	-3.25665420556691E-10	-1.04461496664716E-48	-3.35259866424502E-12	3.25682676948237E-11
4.53	88.8869796996532	-1.23115045358761E-38	0.582587083065179	402.666666666503	-4.88833164200717E-49	-800	-8.54682345356218E-41	0.017591772971867	1.1171486112584E-40	0.999994630390951	-4.34270067558569E-41	0.003277069938834	6.91102707562249E-41	7.90327298848055E-39	0.375525225469694	-4.9504954118988E-39	7.94323123781976E-39	0.378048106048968	-4.97491849363942E-39	800	0.375525225470391	-7.93571905535387E-39	88.8888888881871	-2.64288783972919E-48	-1.10988378836413E-12	-2.46084634151565E-10	-8.46646230159853E-49	-3.2029207974125E-12	2.4610547711732E-11
4.535	88.8869278721173	-1.23613701879659E-38	0.590441608401336	403.111111110943	-5.02047700141412E-49	-800	-8.55817292116579E-41	0.017754245540595	1.11556771790826E-40	0.999994484625215	-4.3642956886396E-41	0.003321252365217	6.93881407202861E-41	7.93481645889242E-39	0.380588186144787	-4.97478838002393E-39	7.97518989881835E-39	0.383134322738543	-4.99943585307572E-39	800	0.380588186145493	-7.96786133368739E-39	88.8888888881877	-2.64290872669409E-48	-1.12247221888034E-12	3.83219382153255E-10	6.01832708228276E-49	-2.19472742887413E-12	3.83225666789699E-11
4.54	88.8868748651792	-1.24111691479936E-38	0.598368229188841	403.555555555385	-5.15274265130947E-49	-800	-8.56943020556885E-41	0.017916384519144	1.11397947335459E-40	0.99999433554237	-4.38592196186194E-41	0.003365840354855	6.96655979291011E-41	7.96630839130089E-39	0.385697621951754	-4.99911134876975E-39	8.00710305996206E-39	0.388266988823946	-5.02398546225627E-39	800	0.385697621952469	-7.99996062381701E-39	88.8888888881865	-2.64757869673409E-48	-1.13937780212283E-12	-3.03330693895966E-09	-7.65058169990092E-48	-8.03242723210921E-12	3.03331757417981E-10
4.545	88.8868206562611	-1.24609002144139E-38	0.606367425866594	403.999999999826	-5.28765593169467E-49	-800	-8.58073821323287E-41	0.018081210564971	1.11234006251055E-40	0.999994183078915	-4.40757932052466E-41	0.003410836611075	6.99426352125333E-41	7.99774791852768E-39	0.390853842701718	-5.02346406840126E-39	8.03896925544465E-39	0.393446874093247	-5.04856746649252E-39	800	0.390853842702469	-8.03201615125467E-39	88.8888888881619	-2.70848907853963E-48	-1.195004199393E-12	-2.44734602953621E-09	-6.24505003283842E-48	-6.92334312266907E-12	2.44735582230427E-10
4.55	88.8867652206122	-1.25105617941789E-38	0.614439947636947	404.444444444267	-5.42308026088527E-49	-800	-8.59209257059689E-41	0.018245878661228	1.11069046715349E-40	0.999994027165235	-4.42926805058279E-41	0.003456245349048	7.02192431139909E-41	8.02913390172971E-39	0.39605733145252	-5.04784680587064E-39	8.07078819350131E-39	0.398673933297229	-5.07318199856656E-39	800	0.396057331453279	-8.06402688915533E-39	88.8888888881626	-2.70849575249945E-48	-1.20819399853876E-12	-1.319714707885E-09	-3.43889603785322E-48	-5.38394306340953E-12	1.31972569007764E-10
4.555	88.8867085400261	-1.25601537408797E-38	0.622585538029286	404.888888888708	-5.55982282573278E-49	-800	-8.60334791794107E-41	0.01841017454927	1.10903362625846E-40	0.999993867750124	-4.45098812629288E-41	0.003502065126962	7.04954205695356E-41	8.06046619292247E-39	0.401307923016326	-5.07225951280013E-39	8.10255966656266E-39	0.403948059806091	-5.0978287748356E-39	800	0.401307923017115	-8.09599274314905E-39	88.8888888881434	-2.75554217084667E-48	-1.25760120284759E-12	-5.25754254946721E-09	-1.27373912865285E-47	-1.22435355041443E-11	5.2575568055533E-10
4.56	88.8866505907347	-1.26096747770047E-38	0.63080471620333	405.333333333148	-5.7003385941338E-49	-800	-8.61467107059569E-41	0.018577308161994	1.10732299060275E-40	0.999993704766732	-4.47273939642255E-41	0.003548298866022	7.07711599645094E-41	8.09174387205277E-39	0.406605952174437	-5.09670196487107E-39	8.13428213352233E-39	0.409270066568072	-5.12250798954753E-39	800	0.406605952175266	-8.12791288978003E-39	88.8888888881177	-2.81766967291919E-48	-1.31711724595501E-12	-2.60271804108907E-09	-6.43848470368386E-48	-7.56481575060945E-12	2.60272903465725E-10
4.565	88.8865913473276	-1.26591233660938E-38	0.639098179106799	405.777777777589	-5.84122144270343E-49	-800	-8.62603462888782E-41	0.018744112664255	1.10560417843269E-40	0.999993538143589	-4.49452214560706E-41	0.003594950487539	7.10464521646457E-41	8.12296583776729E-39	0.411951868313347	-5.12117442973304E-39	8.16595536014045E-39	0.41463985929997	-5.14721975845598E-39	800	0.411951868314185	-8.15978633867911E-39	88.8888888881184	-2.8176369647058E-48	-1.33177804847428E-12	5.3930193644188E-10	9.07174062943181E-49	-2.31314846640858E-12	5.39306897142795E-11
4.57	88.8865307909579	-1.27084993594706E-38	0.64746565730506	406.22222222203	-5.98213703097637E-49	-800	-8.63728693117804E-41	0.018910512531129	1.10387811626414E-40	0.999993367827686	-4.51633632657868E-41	0.003642018476844	7.13212960928318E-41	8.15413194055907E-39	0.417345497899269	-5.14567683532747E-39	8.19757913871984E-39	0.420057322082285	-5.17196376283598E-39	800	0.417345497900116	-8.191612994014E-39	88.8888888881187	-2.81894502115142E-48	-1.34771981851564E-12	1.27897692436809E-11	-2.96923839476678E-49	-3.22368506725527E-12	1.31897817540493E-12
4.575	88.8864688962321	-1.27578013308897E-38	0.655907759059419	406.66666666647	-6.12314461648728E-49	-800	-8.6486334934444E-41	0.019079999451009	1.10209416242499E-40	0.999993193747602	-4.53818183071706E-41	0.003689506256429	7.15956832661417E-41	8.18524115738278E-39	0.422787233159758	-5.17020900255838E-39	8.22915181078632E-39	0.425523339290559	-5.19674027272248E-39	800	0.422787233160616	-8.22339193645907E-39	88.8888888881187	-2.8201754004811E-48	-1.36363287534812E-12	3.63087337973387E-10	5.40430059286045E-49	-2.52626174699073E-12	3.6309612638393E-11
4.58	88.8864056374448	-1.28070278723974E-38	0.664425078431548	407.111111110911	-6.26415312370313E-49	-800	-8.66001047729888E-41	0.01924888234259	1.1003055176674E-40	0.999993015831038	-4.56005893289116E-41	0.00373741716894	7.18696052903999E-41	8.21629247377086E-39	0.428277457173899	-5.1947711923258E-39	8.26067324195497E-39	0.431037737883431	-5.22154937526689E-39	800	0.428277457174766	-8.25512225847892E-39	88.8888888881195	-2.820161728753E-48	-1.37853475691042E-12	-1.86612207168448E-09	-4.60199086578168E-48	-6.82950855839537E-12	1.86613456873162E-10
4.585	88.8863409950661	-1.28561788257613E-38	0.673017337447303	407.555555555352	-6.40551208744879E-49	-800	-8.67126619344905E-41	0.019417523587274	1.098506771003E-40	0.999992834023064	-4.58196755295867E-41	0.003785749651746	7.21430610336871E-41	8.24728573386736E-39	0.433815990914634	-5.2193632957615E-39	8.29214314282748E-39	0.436600448634164	-5.24639072306285E-39	800	0.433815990915532	-8.28680385808134E-39	88.8888888881028	-2.85979642907558E-48	-1.42672185081304E-12	-1.89407008595771E-09	-4.62230024763534E-48	-6.97727467625956E-12	1.89408293717085E-10
4.59	88.8862749416489	-1.29052525419475E-38	0.68168528315843	407.999999999792	-6.54850122966181E-49	-800	-8.68263679328873E-41	0.019589212024256	1.0966501739689E-40	0.999992648246482	-4.60390764831543E-41	0.003834507908133	7.2416040714427E-41	8.27821976068332E-39	0.439403316086003	-5.24398520368958E-39	8.32355985611284E-39	0.442212344499049	-5.27126464522787E-39	800	0.439403316086911	-8.31843567233449E-39	88.8888888881034	-2.85979379796033E-48	-1.44266110873128E-12	3.32131359452107E-09	7.07740804896082E-48	3.18264291173705E-12	3.32131511940171E-10
4.595	88.8862074517239	-1.29542478327853E-38	0.690429342343274	408.444444444233	-6.69149479027536E-49	-800	-8.69403132641183E-41	0.019760116879429	1.09479097327791E-40	0.999992458429656	-4.62587946860317E-41	0.003883694339845	7.26885372099921E-41	8.30909368955711E-39	0.445039707949966	-5.26863715542105E-39	8.35492330722176E-39	0.447873200998431	-5.29617121032577E-39	800	0.445039707950884	-8.35001693537117E-39	88.888888888104	-2.85989393928164E-48	-1.45800720933947E-12	-2.02637314335623E-08	-4.50090695657892E-47	-4.34060288596556E-11	2.02637779225613E-09
4.6	88.8861385046919	-1.30031644772415E-38	0.699249266600829	408.888888888673	-6.8492234152232E-49	-800	-8.70530074151501E-41	0.019931238213047	1.09291451906683E-40	0.99999226451465	-4.64788289624772E-41	0.003933307550685	7.29605490226163E-41	8.33990732157401E-39	0.450725006554407	-5.29331899848604E-39	8.38623300187732E-39	0.453583080148819	-5.32111005991982E-39	800	0.450725006555555	-8.38154750472651E-39	88.8888888879299	-3.24558629333916E-48	-1.81977619982602E-12	-2.01552552425696E-08	-4.48309146224562E-47	-4.36967961956441E-11	2.01553026100609E-09
4.605	88.8860680711527	-1.30520006098333E-38	0.708145933063921	409.333333333112	-7.01150200698481E-49	-800	-8.71669209126815E-41	0.0201048679027	1.09098744232702E-40	0.999992066418772	-4.66991796863818E-41	0.003983352475747	7.32320651116108E-41	8.37065933037768E-39	0.456459777466716	-5.31803070998055E-39	8.41748748985087E-39	0.459342700541284	-5.34608154332706E-39	800	0.456459777467876	-8.41302617793575E-39	88.8888888879308	-3.24559221815862E-48	-1.83928084799141E-12	3.97382867352738E-09	8.48375613136832E-48	3.40328888189508E-12	3.9738301308591E-10
4.61	88.8859961260368	-1.31007552924553E-38	0.717119581246626	409.777777777552	-7.173792501693E-49	-800	-8.72810818089295E-41	0.020277740216117	1.08905684993955E-40	0.99999186407151	-4.69198490294172E-41	0.004033830463481	7.35030798012309E-41	8.40134902197281E-39	0.462244175252601	-5.34277250036289E-39	8.44868667042655E-39	0.465151845203515	-5.371085731422E-39	800	0.462244175253779	-8.44445235032575E-39	88.8888888879265	-3.25552515162863E-48	-1.87104244620799E-12	-1.08348293300265E-08	-2.36651641216002E-47	-2.65014331141965E-11	1.08348617405465E-09
4.615	88.8859226475396	-1.31494281942063E-38	0.726170020919899	410.222222221991	-7.34080009925702E-49	-800	-8.73939413019603E-41	0.020451370427512	1.08710061036255E-40	0.999991657411537	-4.7140835306506E-41	0.004084740444997	7.37735909591734E-41	8.43197612279287E-39	0.468078077470172	-5.36754415689538E-39	8.47982980886649E-39	0.471010731257291	-5.39612225138008E-39	800	0.46807807747148	-8.4758258086088E-39	88.8888888878381	-3.4484301734796E-48	-2.07233451330896E-12	-9.64822296130716E-09	-2.12951779946147E-47	-2.41278042571434E-11	9.64825313007661E-10
4.62	88.885847604074	-1.31980172611026E-38	0.735298244936513	410.66666666643	-7.51322145669702E-49	-800	-8.75081033561079E-41	0.02062688408647	1.08510220075825E-40	0.99999144635001	-4.73621399574705E-41	0.004136088006431	7.40435864382304E-41	8.46253917478502E-39	0.473962124294939	-5.39234577401084E-39	8.51091569708839E-39	0.476919898270593	-5.42119147635758E-39	800	0.47396212429626	-8.50714522882491E-39	88.8888888878392	-3.44838008861083E-48	-2.09411953551452E-12	-1.58877355715948E-09	-3.80803304835779E-48	-8.08520342010878E-12	1.58879412966045E-10
4.625	88.8857709712671	-1.32465218161689E-38	0.744504294498796	411.11111111087	-7.68617634536712E-49	-800	-8.76221669829812E-41	0.020801646178753	1.08309963978309E-40	0.999991230818377	-4.75837646321943E-41	0.004187873380793	7.43130620797204E-41	8.49303766323869E-39	0.479896342475151	-5.41717751141454E-39	8.54194421616425E-39	0.482879130935428	-5.44629337815716E-39	800	0.479896342476526	-8.53841017461665E-39	88.888888887811	-3.51072103433921E-48	-2.17622930701498E-12	-4.08633127335606E-09	-8.98314939501381E-48	-1.36070055278103E-11	4.08635392816227E-10
4.63	88.8856927256238	-1.32949413392872E-38	0.753788091162145	411.555555555309	-7.86209403787354E-49	-800	-8.7735572766257E-41	0.020977830456368	1.08106119582663E-40	0.999991010750554	-4.78057072528462E-41	0.004240096128084	7.45820146558131E-41	8.52347118540829E-39	0.485880681638728	-5.44203910714396E-39	8.57291433812237E-39	0.488888836677883	-5.47142776832051E-39	800	0.485880681640126	-8.56962031072525E-39	88.8888888878044	-3.52537005560403E-48	-2.21708859064959E-12	6.15803704325379E-12	-3.26754249840813E-49	-5.06198815046721E-12	7.97152082488381E-13
4.635	88.8856128338836	-1.33432736922143E-38	0.763150670137624	411.999999999748	-8.03836162900276E-49	-800	-8.78500231909393E-41	0.021155173970148	1.07899047254589E-40	0.999990786052993	-4.80279702879543E-41	0.004292762072821	7.4850431517541E-41	8.55383822294091E-39	0.491915809281709	-5.4669307718849E-39	8.60382513822822E-39	0.494949347594656	-5.49659494611535E-39	800	0.491915809283122	-8.60077425888787E-39	88.8888888878054	-3.52536094572437E-48	-2.23966662272077E-12	3.6711374680936E-11	1.52225242409576E-49	-5.93742077521818E-12	3.71884121256348E-12
4.64	88.8855312723842	-1.33915184381241E-38	0.772591887953431	412.444444444187	-8.2150299246862E-49	-800	-8.79639692186876E-41	0.021331738565001	1.07691542477432E-40	0.999990556659139	-4.82505546397381E-41	0.004345870409289	7.51183099047115E-41	8.58413842670612E-39	0.498001633125856	-5.49185258831903E-39	8.63467649259428E-39	0.501060440541911	-5.52179476704259E-39	800	0.498001633127295	-8.63187173753721E-39	88.8888888877944	-3.54589412470167E-48	-2.29789877213284E-12	-8.95141738510514E-09	-1.85129912066321E-47	-2.56562640316752E-11	8.9514541526082E-10
4.645	88.8854480149218	-1.34396747339531E-38	0.782111871804458	412.888888888625	-8.39738040356815E-49	-800	-8.80780092420047E-41	0.021510524191728	1.07479222851028E-40	0.999990322495291	-4.84734583947648E-41	0.004399421854342	7.53856447105228E-41	8.61437117179041E-39	0.504138235369584	-5.51680430496836E-39	8.66546702186783E-39	0.507222751798412	-5.54702725803E-39	800	0.504138235371132	-8.66291220325544E-39	88.888888887729	-3.68404710166491E-48	-2.46646551236787E-12	-5.92947912991764E-09	-1.28722981292229E-47	-1.80150899373967E-11	5.92950649680007E-10
4.65	88.8853630278695	-1.34877405496443E-38	0.791711561888618	413.333333333064	-8.58158618297097E-49	-800	-8.81927863467514E-41	0.02168964667704	1.07264808142632E-40	0.999990083466867	-4.86966845664957E-41	0.004453421698144	7.56524239091649E-41	8.64453501279738E-39	0.510326222280298	-5.54178619940755E-39	8.6961961258521E-39	0.513436377867034	-5.57229263023584E-39	800	0.510326222281862	-8.69389434750773E-39	88.88888888773	-3.68407983073035E-48	-2.49210386592577E-12	-8.4166155526564E-09	-1.75910280753746E-47	-2.48488647321199E-11	8.41665223395242E-10
4.655	88.8852762878833	-1.3535715627645E-38	0.801390674034375	413.777777777502	-8.77102119890876E-49	-800	-8.83066206417144E-41	0.021867927024746	1.07049994393078E-40	0.99998983950821	-4.89202331883259E-41	0.004507868343621	7.59186457840715E-41	8.67462972442595E-39	0.516565410899768	-5.56679826167317E-39	8.72686369023021E-39	0.519701077493125	-5.59759061356501E-39	800	0.51656541090147	-8.7248180042887E-39	88.8888888876456	-3.85850870620035E-48	-2.71240197682033E-12	-1.14080004702062E-08	-2.357081568886E-47	-3.2063504573293E-11	1.1408045529211E-09
4.66	88.8851877650715	-1.35835986394345E-38	0.811149648642762	414.222222221941	-8.96525194978764E-49	-800	-8.8421355613368E-41	0.022049353703155	1.06828945785681E-40	0.999989590535245	-4.91441031819874E-41	0.004562764269568	7.61843024047607E-41	8.70465434747834E-39	0.52285608533608	-5.59184032281477E-39	8.75746792884697E-39	0.526017752034034	-5.62292146604237E-39	800	0.52285608533782	-8.7556823172562E-39	88.8888888876325	-3.88612527646263E-48	-2.77445860382524E-12	2.88030340319266E-09	5.45996866422997E-48	5.05721611804207E-13	2.88030344758978E-10
4.665	88.8850974268394	-1.36313879106613E-38	0.820989163003807	414.666666666379	-9.1595595316944E-49	-800	-8.85364960602981E-41	0.022230207454503	1.06607064712388E-40	0.999989336456294	-4.93682975312923E-41	0.004618113287368	7.64493838062016E-41	8.7346076798118E-39	0.529198682403529	-5.61691266900504E-39	8.78800860321847E-39	0.532386237358251	-5.64828530382803E-39	800	0.529198682405287	-8.78648620716352E-39	88.8888888876337	-3.88616172619142E-48	-2.80149314116599E-12	-1.97322454672138E-08	-3.99973721843963E-47	-5.21782480915143E-11	1.97323144549228E-09
4.67	88.8850052495543	-1.36790832426483E-38	0.83090887333082	415.111111110817	-9.3687974606381E-49	-800	-8.86504907732233E-41	0.022410891089521	1.06383741809612E-40	0.999989077204885	-4.95928152932452E-41	0.004673913464706	7.6713888619074E-41	8.76448953784987E-39	0.535592980731595	-5.64201518188508E-39	8.81848530029097E-39	0.538806484731036	-5.67368179869338E-39	800	0.53559298073363	-8.81722954595731E-39	88.8888888874617	-4.23290211051275E-48	-3.23517647739927E-12	-1.98956702964386E-08	-4.03794208609362E-47	-5.3168601694737E-11	1.98957413394122E-09
4.675	88.8849111987692	-1.37266827216991E-38	0.840909600364584	415.555555555254	-9.58044139505746E-49	-800	-8.87657154886313E-41	0.022594218692461	1.06154840718957E-40	0.999988812684132	-4.98176569319268E-41	0.004730169419972	7.69778055034316E-41	8.79429855820832E-39	0.542039509614983	-5.66714785294499E-39	8.84889642203137E-39	0.545279251593405	-5.69911130300817E-39	800	0.542039509617038	-8.84791110009474E-39	88.8888888874631	-4.23288104753737E-48	-3.26745007992145E-12	3.0202803221374E-09	5.72887193711889E-48	-4.3912057336072E-13	3.02028035405941E-10
4.68	88.8848152445251	-1.3774185248641E-38	0.85099160712953	415.999999999691	-9.79212145775113E-49	-800	-8.88810679717942E-41	0.022776710045179	1.05925428440368E-40	0.999988542809769	-5.00428247642425E-41	0.004786882634351	7.72411278372839E-41	8.82403393423426E-39	0.548538438848781	-5.69231091091399E-39	8.87924182199511E-39	0.551804298377315	-5.72457385337516E-39	800	0.548538438850859	-8.87853016108241E-39	88.888888887461	-4.23711459557394E-48	-3.31199801218448E-12	-1.92651820422409E-09	-3.58282768199803E-48	-1.31828835092574E-11	1.92656330797211E-10
4.685	88.88471736146	-1.38215904392845E-38	0.861154655529549	416.444444444128	-1.00046058822996E-48	-800	-8.8995531150662E-41	0.022960100499036	1.05692941803187E-40	0.99998826751046	-5.02683169579135E-41	0.004844051770163	7.75038531804524E-41	8.85369535639529E-39	0.555089615207728	-5.71750413174481E-39	8.90952061944334E-39	0.55838188265627	-5.75006919502745E-39	800	0.555089615209846	-8.90908648128092E-39	88.8888888874469	-4.26359392290811E-48	-3.38971818504603E-12	-1.41184841595522E-09	-2.93437516907938E-48	-1.12981112604199E-11	1.41189362097622E-10
4.69	88.8846175116246	-1.38688960376275E-38	0.871399781714355	416.888888888566	-1.02177849372661E-48	-800	-8.91111895086381E-41	0.023145015994869	1.05456438267715E-40	0.999987986679468	-5.04941357633995E-41	0.004901682657651	7.77659681856471E-41	8.88328122252441E-39	0.561693706860944	-5.74272770254628E-39	8.93973166361945E-39	0.565012441322614	-5.77559767035863E-39	800	0.561693706863083	-8.93957860652062E-39	88.8888888874482	-4.26363545255873E-48	-3.42234830784043E-12	1.40450614101904E-10	-6.18941349584965E-51	-7.52777099862294E-12	1.40652203458778E-11
4.695	88.8845156676088	-1.39161014424572E-38	0.881726886060343	417.333333333003	-1.0431094644001E-48	-800	-8.92263656170027E-41	0.023328960387477	1.05219557262506E-40	0.999987700239695	-5.07202823397592E-41	0.004959774738153	7.80274691339745E-41	8.91279107005029E-39	0.568350649856253	-5.76798173637988E-39	8.96987484638633E-39	0.571695696175766	-5.80115914121436E-39	800	0.568350649858416	-8.97000614927426E-39	88.8888888874455	-4.26898539327093E-48	-3.47236576954379E-12	-8.77283431085078E-10	-1.89299006815676E-48	-1.04651508160914E-11	8.77345848475965E-11
4.7	88.8844118002865	-1.39632058105552E-38	0.892136023021657	417.77777777744	-1.06449570878109E-48	-800	-8.934175038099E-41	0.023515176397958	1.04977509178733E-40	0.99998740810922	-5.09467549190518E-41	0.005018328319763	7.82883509157129E-41	8.94222427371152E-39	0.575060479566869	-5.79326600437908E-39	8.99994868748502E-39	0.57843229798631	-5.82675366737007E-39	800	0.575060479569062	-9.00036856602207E-39	88.8888888874411	-4.27987499366673E-48	-3.52151242824916E-12	5.42380954963507E-11	-5.05881050561463E-49	-7.07529198791279E-12	5.46976302940582E-12
4.705	88.8843058711805	-1.40102069782033E-38	0.902628143203644	418.222222221877	-1.08589519526889E-48	-800	-8.94578763198293E-41	0.023701640657094	1.0473324523947E-40	0.999987110179817	-5.11735566791215E-41	0.005077348751657	7.85486007115971E-41	8.97157929296102E-39	0.581823809040651	-5.81858080433383E-39	9.02995255211968E-39	0.585222317872246	-5.85238146115672E-39	800	0.581823809042867	-9.0306644620796E-39	88.8888888874423	-4.27993084768271E-48	-3.55512209935033E-12	-2.42650344262058E-09	-4.59945434325084E-48	-1.47391531556267E-11	2.42654820675075E-10
4.71	88.8841978545444	-1.40571046900059E-38	0.91320289013696	418.666666666314	-1.10734007006909E-48	-800	-8.9572980087937E-41	0.023887197213267	1.0448844498804E-40	0.99998680637907	-5.14006873690539E-41	0.005136834030486	7.88082168227131E-41	9.00085590523947E-39	0.588640408778929	-5.84392610028771E-39	9.05988628664818E-39	0.592065495795831	-5.87804222974397E-39	800	0.588640408781199	-9.06089367282607E-39	88.8888888874198	-4.32084622481931E-48	-3.65988142701798E-12	4.98658891956405E-09	9.23883001531843E-48	4.54844154935877E-12	4.98659099395965E-10
4.715	88.8840877148413	-1.41038972929714E-38	0.923860847067306	419.111111110751	-1.12894420755759E-48	-800	-8.96892469456282E-41	0.024076009465766	1.0423693978712E-40	0.999986496607023	-5.16281467002882E-41	0.005196787439042	7.90671894197813E-41	9.03005292589694E-39	0.595510655039688	-5.86930180991044E-39	9.08974797024398E-39	0.598962764445358	-5.90373630633242E-39	800	0.595510655041981	-9.09105513277777E-39	88.8888888874212	-4.32078798189653E-48	-3.69496857035672E-12	-5.1777249154835E-08	-9.72736573841729E-47	-1.43481572717211E-10	5.17774479576154E-09
4.72	88.8839754165497	-1.41505832428142E-38	0.934602522218738	419.555555555188	-1.1507493848364E-48	-800	-8.98058604344099E-41	0.024263981204262	1.03984751556794E-40	0.999986180763768	-5.1855937530357E-41	0.005257211838165	7.9325509281153E-41	9.05916924010835E-39	0.602434875729866	-5.89470821499011E-39	9.11953740723359E-39	0.605913883031304	-5.92946379022459E-39	800	0.602434875732943	-9.12114784654732E-39	88.8888888869726	-5.16106186829639E-48	-4.91319068926176E-12	-5.25365824917839E-08	-9.85211408556825E-47	-1.47702708526996E-10	5.25367901189835E-09
4.725	88.8838609338451	-1.4197162286962E-38	0.945427531300524	419.999999999624	-1.17656397641631E-48	-800	-8.99213146692219E-41	0.024452269732427	1.03730146105672E-40	0.999985858776665	-5.2084058204821E-41	0.005318105068109	7.95831747447158E-41	9.08820463085476E-39	0.60941282343449	-5.92014512111783E-39	9.14925390513424E-39	0.612918942307222	-5.95522434931866E-39	800	0.609412823437599	-9.15117165128635E-39	88.8888888869713	-5.16523655244858E-48	-4.97270183426736E-12	7.54241114009295E-09	1.36136872793701E-47	8.811298908446E-12	7.54241628691938E-10
4.73	88.8837442251663	-1.42436321091765E-38	0.956336885865833	420.444444444059	-1.20238998487003E-48	-800	-9.00381163305682E-41	0.024642488672404	1.03470705633696E-40	0.999985530528815	-5.23125106770554E-41	0.005379472821155	7.98401721008097E-41	9.11715745260346E-39	0.616445150527579	-5.9456126842366E-39	9.1788960788145E-39	0.619978495295361	-5.98101836962391E-39	800	0.616445150530719	-9.18112505402236E-39	88.8888888869731	-5.16516633789439E-48	-5.0195850266828E-12	1.33108339165716E-10	-4.79095418654635E-49	-9.87780532979814E-12	1.33474345825663E-11
4.735	88.8836252597486	-1.4289991919591E-38	0.967330557968107	420.888888888494	-1.22822546772596E-48	-800	-9.01545040510086E-41	0.024831606745289	1.03210899263025E-40	0.999985195933686	-5.25412964299579E-41	0.005441314942191	8.00964965311874E-41	9.14602711268264E-39	0.623531839314514	-5.97111105392994E-39	9.20846382345211E-39	0.627092226620529	-6.006845732555E-39	800	0.623531839317688	-9.21100754562536E-39	88.888888886972	-5.17044497544272E-48	-5.07480120423183E-12	-3.47692245365252E-10	-1.03060972233736E-48	-1.21643183912597E-11	3.47904969968891E-11
4.74	88.8835040066885	-1.43362409216293E-38	0.978408512069907	421.333333332929	-1.25409208672888E-48	-800	-9.02710841934738E-41	0.025022905031542	1.02945825408199E-40	0.999984854904352	-5.27704137309251E-41	0.005503631233449	8.03521431988175E-41	9.17481301844802E-39	0.630672867213974	-5.99664001211085E-39	9.23795563002401E-39	0.63426076086785	-6.03270649323678E-39	800	0.630672867217181	-9.24081861264006E-39	88.8888888869706	-5.17398352713027E-48	-5.13731732918955E-12	1.40971678774794E-09	2.12213511763103E-48	-7.0585564996011E-12	1.40973445899511E-10
4.745	88.8833804235802	-1.43823768094826E-38	0.989571725867252	421.777777777364	-1.27996191913831E-48	-800	-9.03884509808005E-41	0.025214502129691	1.02678254829548E-40	0.999984507321541	-5.29998658431291E-41	0.005566427196904	8.06070984495082E-41	9.20351352990238E-39	0.637868864799199	-6.02219986715929E-39	9.26737078327153E-39	0.641484183640625	-6.05860087702641E-39	800	0.637868864802436	-9.27055676879384E-39	88.8888888869724	-5.17393748299542E-48	-5.18470115084571E-12	-9.23516078425199E-09	-1.70275047451413E-47	-3.75467406627018E-11	9.23523710950185E-10
4.75	88.8832544826669	-1.44283992998204E-38	1.00081980676568	422.222222221798	-1.30607475120141E-48	-800	-9.0504813296412E-41	0.025405202593103	1.02409943317968E-40	0.999984153107177	-5.32296524495736E-41	0.005629700626356	8.08613604252159E-41	9.23212840628353E-39	0.645119579339555	-6.04779058026805E-39	9.29670907093299E-39	0.648762238071924	-6.08452859616393E-39	800	0.645119579342966	-9.30022183146266E-39	88.8888888868915	-5.3204345053738E-48	-5.4752712096178E-12	-4.93164028133194E-09	-9.34464288470082E-48	-2.56043245670574E-11	4.93170674775906E-10
4.755	88.8831261446761	-1.44743065768428E-38	1.01215338053539	422.666666666232	-1.33267678594529E-48	-800	-9.06223816698983E-41	0.025598989171871	1.02134916121617E-40	0.999983792150798	-5.34597736309897E-41	0.005693455044209	8.1114918345416E-41	9.26065635002855E-39	0.652425414567009	-6.07341211193274E-39	9.32596856910645E-39	0.656095808268671	-6.11048999615948E-39	800	0.652425414570452	-9.32981263021414E-39	88.8888888868934	-5.32040251668239E-48	-5.52562780789561E-12	-2.60243382399477E-08	-4.69660736218867E-47	-8.58734345030438E-11	2.60244799193751E-09
4.76	88.8829953718631	-1.45200971249007E-38	1.02357286905727	423.111111110666	-1.35960400126199E-48	-800	-9.07401010595779E-41	0.025791809236297	1.01859201315122E-40	0.999983424346238	-5.36902321348126E-41	0.005757692826011	8.13677631545874E-41	9.28909626596939E-39	0.659786642792724	-6.09906473789701E-39	9.3551490808061E-39	0.663484617344903	-6.136485120276E-39	800	0.659786642796684	-9.35932818811298E-39	88.888888886634	-5.785025223544E-48	-6.32847111156515E-12	-4.89923953258128E-08	-8.77696160810199E-47	-1.53549635941682E-10	4.89926359492059E-09
4.765	88.8828621355534	-1.45657705847178E-38	1.0350779056076	423.555555555099	-1.38929154484365E-48	-800	-9.08570991983139E-41	0.0259853754652	1.01580207939608E-40	0.999983049612842	-5.39210261641045E-41	0.005822411911223	8.1619892568738E-41	9.31744786424603E-39	0.667203027984165	-6.12474824990283E-39	9.38424966679111E-39	0.670928879060997	-6.16251376189033E-39	800	0.667203027988466	-9.38876827355879E-39	88.888888886474	-6.07269881104359E-48	-6.85789429624154E-12	-1.3127277043167E-08	-2.4094599093724E-47	-5.16294980818232E-11	1.312737857202E-09
4.77	88.8827263901987	-1.46113244713804E-38	1.04666953884258	423.999999999532	-1.41965496498828E-48	-800	-9.09752962273499E-41	0.026180406711936	1.01296827851927E-40	0.999982667822494	-5.41521583123322E-41	0.005887618201278	8.18712918922884E-41	9.34570938179222E-39	0.67467524650059	-6.15046287793655E-39	9.41326907036101E-39	0.678429013113647	-6.18857626445922E-39	800	0.674675246504931	-9.41813128482884E-39	88.8888888864763	-6.07262789540185E-48	-6.9204249598837E-12	-2.79361718942994E-09	-5.50949388020478E-48	-2.27181703301805E-11	2.79370956191612E-10
4.775	88.882588104034	-1.46567581426137E-38	1.05834758081688	424.444444443964	-1.45028133832169E-48	-800	-9.10927651522755E-41	0.026374050974648	1.01013319164753E-40	0.999982278885846	-5.43836294659004E-41	0.005953310641439	8.21219571701116E-41	9.37388032900947E-39	0.682203177571417	-6.17620871382579E-39	9.44220725467475E-39	0.685984622161199	-6.21467241939623E-39	800	0.68220317757591	-9.44741680793874E-39	88.8888888864191	-6.17554794592173E-48	-7.16348870953438E-12	-1.33387819308449E-08	-2.38494193111834E-47	-5.48804322036267E-11	1.33388948290506E-09
4.78	88.8824472408597	-1.47020703850698E-38	1.07011221081471	424.888888888396	-1.4816288518905E-48	-800	-9.12110623498931E-41	0.026570784562804	1.00722909576117E-40	0.999981882701075	-5.46154385284279E-41	0.006019490242785	8.23718811374656E-41	9.40195982580179E-39	0.689786937157474	-6.20198560570564E-39	9.4710622427697E-39	0.693596591230199	-6.24080246398401E-39	800	0.68978693716212	-9.47662406078864E-39	88.8888888863624	-6.27724866975679E-48	-7.41013619809702E-12	-5.12893431429464E-09	-9.51634518119249E-48	-3.07006801053846E-11	5.12902619725304E-10
4.785	88.8823037566603	-1.47472590572666E-38	1.08196422148717	425.333333332827	-1.51301540132154E-48	-800	-9.13299130472901E-41	0.026767041904831	1.00430945035441E-40	0.999981479144379	-5.48475888175073E-41	0.006086161466832	8.26210510928498E-41	9.42994634471686E-39	0.697427036619893	-6.22779387946083E-39	9.49983358918491E-39	0.701264783886183	-6.26696655678854E-39	800	0.697427036624584	-9.50575166302429E-39	88.8888888863634	-6.27869984721194E-48	-7.48275826973023E-12	-1.93007091790289E-09	-4.09502351372826E-48	-2.0673747743156E-11	1.93018163704358E-10
4.79	88.8821576222222	-1.47923239041305E-38	1.09390314187026	425.777777777259	-1.54457181039101E-48	-800	-9.14476727280109E-41	0.026963045190269	1.00137062755187E-40	0.999981068133581	-5.50800791608811E-41	0.006153321666934	8.28694653543731E-41	9.45783966731331E-39	0.705123172771741	-6.25363340557838E-39	9.52852074452845E-39	0.708989127347298	-6.29316438525658E-39	800	0.70512317277653	-9.53479945023536E-39	88.8888888863381	-6.32686239485195E-48	-7.63254063512728E-12	-1.85214806454787E-09	-4.1461761106049E-48	-2.03821101091049E-11	1.85226020942548E-10
4.795	88.882008791112	-1.48372625591625E-38	1.105929890196	426.222222221691	-1.57620555726786E-48	-800	-9.15667885956826E-41	0.027161313917349	9.9837416364697E-41	0.999980649538078	-5.5312911168758E-41	0.006220976011163	8.31171099207824E-41	9.48563811344595E-39	0.712875937945728	-6.279504309302E-39	9.55712205750439E-39	0.716770270614769	-6.31939633790708E-39	800	0.71287593795056	-9.56376589702701E-39	88.8888888863405	-6.32675633585934E-48	-7.70229934118708E-12	-2.93454149868902E-10	-9.94429145686411E-49	-1.71776352848619E-11	2.9395647505925E-11
4.8	88.8818572272193	-1.48820739873979E-38	1.11804449861865	426.666666666123	-1.6080091162432E-48	-800	-9.1685479136934E-41	0.027358229615607	9.95374641657741E-41	0.999980223256297	-5.5546086592774E-41	0.006289124683189	8.33639785469349E-41	9.51334092191097E-39	0.72068535329599	-6.30540677371502E-39	9.58563744050506E-39	0.72460782607439	-6.34566229289299E-39	800	0.720685353300966	-9.59265033628849E-39	88.8888888862906	-6.41293001229965E-48	-7.94353816320539E-12	-3.96828644018846E-08	-6.77651868045356E-47	-1.4191700423633E-10	3.96831181684914E-09
4.805	88.8817028957215	-1.49267573265413E-38	1.13024687188183	427.111111110553	-1.64206397241349E-48	-800	-9.18045309441321E-41	0.027557472090287	9.92315790752399E-41	0.999979789190289	-5.5779603884352E-41	0.006357767150016	8.36100660169615E-41	9.54094745616527E-39	0.728551357852721	-6.33134061022319E-39	9.61406519388221E-39	0.732502460298505	-6.37196235370938E-39	800	0.72855135785834	-9.62145221221372E-39	88.8888888860011	-6.90757503805233E-48	-8.9400803772633E-12	-3.09190302990201E-08	-5.33684105319948E-47	-1.14353177620482E-10	3.09192417643278E-09
4.81	88.8815457484021	-1.49713101060166E-38	1.14253796847299	427.555555554983	-1.67660167275972E-48	-800	-9.19243592613274E-41	0.027756846916121	9.89230709620798E-41	0.999979347204431	-5.60134664415511E-41	0.006426908806353	8.3855357714409E-41	9.56845596176142E-39	0.736474569928402	-6.35730614830754E-39	9.64240456619522E-39	0.740454211202928	-6.39829674280997E-39	800	0.73647456993407	-9.65016993229625E-39	88.8888888860038	-6.90750080412346E-48	-9.01976866955669E-12	-6.91381766652389E-09	-1.20150519873458E-47	-4.16320105590061E-11	6.91394301034085E-10
4.815	88.8813857544041	-1.50157320198046E-38	1.15491731396861	427.999999999412	-1.71140762470464E-48	-800	-9.20431699968999E-41	0.027955492733204	9.86132251949621E-41	0.999978897211924	-5.62476736071089E-41	0.006496546986389	8.40998516585624E-41	9.5958661850839E-39	0.744454684150256	-6.38330332023621E-39	9.67065517423444E-39	0.748462869942035	-6.42466516867911E-39	800	0.74445468415619	-9.67880329930435E-39	88.8888888859009	-7.08121803852993E-48	-9.45095273476814E-12	-1.16974282112392E-08	-2.01635351099177E-47	-5.69200429770921E-11	1.16975666977533E-09
4.82	88.8812228667751	-1.50600208405884E-38	1.16738568260296	428.444444443841	-1.74681356649082E-48	-800	-9.21632922711627E-41	0.028156796569541	9.82968271106486E-41	0.999978439080703	-5.6482226384591E-41	0.006566686048492	8.43435346647484E-41	9.62317654334496E-39	0.752492200076994	-6.40933219067597E-39	9.69881514089928E-39	0.756529197982251	-6.45106800704495E-39	800	0.75249220008298	-9.70735087754825E-39	88.8888888859038	-7.08117089687969E-48	-9.53259638970358E-12	3.4257633766778E-09	4.71944873120881E-48	-6.91390240473884E-12	3.42577035351661E-10
4.825	88.881057045533	-1.51041752346553E-38	1.17994325866326	428.888888888271	-1.78222900249809E-48	-800	-9.22831458773497E-41	0.02835674267394	9.79799989241399E-41	0.999977972698304	-5.67171270010246E-41	0.006637327032449	8.45863987450656E-41	9.65038606877517E-39	0.76058723698048	-6.43539299259987E-39	9.72688434297453E-39	0.764652806362028	-6.47750518093977E-39	800	0.760587236986527	-9.73581180735261E-39	88.8888888859029	-7.08712367350702E-48	-9.62749955981266E-12	-1.0508453366734E-08	-1.82301392752931E-47	-5.34173657802522E-11	1.0508589133456E-09
4.83	88.8808882560116	-1.51481944942625E-38	1.19258980339818	429.3333333327	-1.81822140369758E-48	-800	-9.24031435831662E-41	0.028558605871435	9.76576756338179E-41	0.999977497967214	-5.69523737772127E-41	0.006708468598361	8.48284395908758E-41	9.67749423305954E-39	0.768739641436847	-6.4614855318118E-39	9.75486120622891E-39	0.772834244288082	-6.50397673164505E-39	800	0.768739641443145	-9.76418563252699E-39	88.888888885814	-7.23791280781272E-48	-1.00173091256285E-11	-9.36353217184597E-09	-1.61866130469019E-47	-5.06255371718535E-11	9.36366902865583E-10
4.835	88.8807164463724	-1.51920759602325E-38	1.2053263441957	429.777777777129	-1.85441206738281E-48	-800	-9.25240335602466E-41	0.02876090252545	9.73321071415116E-41	0.999977014741621	-5.71879701525216E-41	0.006780116528898	8.50696414817029E-41	9.70449915093187E-39	0.776950076229705	-6.48761014167101E-39	9.78274480098053E-39	0.78107363593656	-6.5304829147777E-39	800	0.776950076236062	-9.79247063901562E-39	88.8888888858133	-7.24134496947654E-48	-1.0123612675352E-11	-6.10237786228592E-09	-9.83463241668353E-48	-4.41241556693076E-11	6.10253738335381E-10
4.84	88.8805415844307	-1.52358192769912E-38	1.21815239965536	430.222222221558	-1.89101497188224E-48	-800	-9.26439399422468E-41	0.028962252432405	9.70053924422492E-41	0.999976522930993	-5.74239156538435E-41	0.006852268119302	8.53100021541809E-41	9.73140053578328E-39	0.785218231535474	-6.51376677872124E-39	9.81053479886529E-39	0.789370710084407	-6.55702344855847E-39	800	0.785218231542018	-9.82066659763184E-39	88.8888888857494	-7.34374448182167E-48	-1.04639690837072E-11	-6.98652987315001E-09	-1.17083438137338E-47	-4.58584291585043E-11	6.98668037510965E-10
4.845	88.8803636215798	-1.52794222268093E-38	1.23106868462306	430.666666665987	-1.92773353907304E-48	-800	-9.27651539116892E-41	0.029166387151113	9.66717240422688E-41	0.999976022398607	-5.76602111557067E-41	0.006924927394223	8.55495084808487E-41	9.75819681199239E-39	0.793544568684493	-6.53995549819056E-39	9.83822920779467E-39	0.797726264521424	-6.58359870758358E-39	800	0.793544568691093	-9.84877207886995E-39	88.8888888857523	-7.34369912057757E-48	-1.05533298842838E-11	9.32232069317189E-10	1.19645634401993E-48	-1.90851262747769E-11	9.32427409028892E-11
4.85	88.8801825152989	-1.53228833427823E-38	1.24407542243843	431.111111110415	-1.96447568677353E-48	-800	-9.28861052661007E-41	0.029369079192477	9.63376206650369E-41	0.999975513024858	-5.78968590063978E-41	0.006998095613481	8.57881516992069E-41	9.78488692025409E-39	0.801929232176116	-6.56617654788415E-39	9.86582790315686E-39	0.806139885950997	-6.61020861661936E-39	800	0.801929232182781	-9.87678613720057E-39	88.8888888857448	-7.35424538779686E-48	-1.07035410475722E-11	-3.82437785143919E-09	-6.23588628776985E-48	-3.68695729516918E-11	3.82455557104198E-10
4.855	88.8799982297713	-1.53662019103871E-38	1.25717233621705	431.555555554844	-2.00140768651947E-48	-800	-9.30072393229191E-41	0.029573699022784	9.59978089355822E-41	0.999974994708994	-5.81338575494767E-41	0.007071771222991	8.60259274669059E-41	9.81147032892759E-39	0.810372044055127	-6.59242974095302E-39	9.89332924962942E-39	0.814612126643975	-6.63685322800619E-39	800	0.810372044061909	-9.90470831205862E-39	88.8888888857204	-7.39713959791925E-48	-1.08950808097852E-11	-2.19415596802704E-09	-4.46615663632468E-48	-2.79321834701693E-11	2.19433375285121E-10
4.86	88.879810710337	-1.5409375168991E-38	1.27036046135477	431.999999999273	-2.03839343631382E-48	-800	-9.31292724476461E-41	0.029778721900849	9.56546275199037E-41	0.999974467297266	-5.83712103137284E-41	0.007145960050868	8.62628194700091E-41	9.83794508246929E-39	0.818873672327517	-6.61871542330257E-39	9.92073228186836E-39	0.823143102065038	-6.66353279930806E-39	800	0.818873672334357	-9.93253682399969E-39	88.8888888857233	-7.39711512328889E-48	-1.09858021106166E-11	-6.06566648760498E-10	-1.80045620927019E-48	-2.33319722775113E-11	6.07015222477081E-11
4.865	88.8796199238576	-1.54524027595438E-38	1.28363927816439	432.444444443701	-2.07541622628788E-48	-800	-9.32503143679818E-41	0.029982816957919	9.53101223563878E-41	0.999973930696457	-5.86089166965483E-41	0.007220659177305	8.64988254327663E-41	9.86431089364679E-39	0.827433782539248	-6.64503354156378E-39	9.94803662064784E-39	0.831732546413049	-6.69024704656583E-39	800	0.827433782546176	-9.96027144159054E-39	88.8888888857121	-7.41868760633432E-48	-1.11354873804285E-11	-9.62548559376284E-10	-2.4116747132951E-48	-2.44811770256866E-11	9.62859832574775E-11
4.87	88.8794258185587	-1.54952823053115E-38	1.29700954859858	432.88888888813	-2.11250949115217E-48	-800	-9.33727023731058E-41	0.030189580951475	9.495862623611E-41	0.999973384760931	-5.88469778808343E-41	0.007295872892344	8.67339312993939E-41	9.89056607688701E-39	0.836052866447783	-6.67138418695516E-39	9.97524026320629E-39	0.84038122428199	-6.71699635540439E-39	800	0.83605286645477	-9.98791063284025E-39	88.8888888857151	-7.41860208256122E-48	-1.12268752760676E-11	7.36832816983174E-10	5.58997304659273E-49	-1.92729757315539E-11	7.37084830787413E-11
4.875	88.879228351119	-1.55380123979032E-38	1.31047140944203	433.333333332559	-2.14961632128791E-48	-800	-9.34946847057373E-41	0.030394702123129	9.46068695520368E-41	0.999972829368829	-5.90853959945335E-41	0.007371601969266	8.69681286540727E-41	9.91670961465217E-39	0.844731012812551	-6.69776758919832E-39	1.00023431348977E-38	0.849088665038054	-6.74378060960711E-39	800	0.844731012819602	-1.00154534899328E-38	88.8888888857123	-7.42433478930009E-48	-1.13547955118519E-11	-3.90466918058007E-09	-6.52841724727453E-48	-3.74906070121131E-11	3.90484915910794E-10
4.88	88.8790274829312	-1.55805921399623E-38	1.32402465635995	433.777777776986	-2.18695223942169E-48	-800	-9.36171404551798E-41	0.030602229272871	9.42484434539416E-41	0.999972264411549	-5.93241695769774E-41	0.007447845262474	8.72014120925337E-41	9.94274084997293E-39	0.853468090502132	-6.72418358366984E-39	1.00293433250756E-38	0.85785555794319	-6.77059994479794E-39	800	0.85346809050932	-1.00428994344536E-38	88.8888888856811	-7.47583242529466E-48	-1.15838886181106E-11	-3.24670660726626E-09	-5.2258815500656E-48	-3.67278037427166E-11	3.24691433906627E-10
4.885	88.8788231573961	-1.56230187595904E-38	1.33767027242729	434.222222221415	-2.22433615001114E-48	-800	-9.37403944731222E-41	0.030809786056899	9.3887056874235E-41	0.999971689729886	-5.95633022827527E-41	0.007524608306177	8.74337652351613E-41	9.96865781965276E-39	0.86226473385893	-6.75063253618537E-39	1.00562399856246E-38	0.866681911486997	-6.79745458966395E-39	800	0.862264733866185	-1.00702466796963E-38	88.8888888856745	-7.48482531336536E-48	-1.17421576960457E-11	-8.1428197518102E-09	-1.23418188763708E-47	-5.73474674477632E-11	8.14302168991911E-10
4.89	88.8786153407768	-1.56652919327645E-38	1.35140767402165	434.666666665843	-2.2619669939195E-48	-800	-9.38626089232413E-41	0.031016646163462	9.35238256835868E-41	0.999971105228935	-5.98027930739475E-41	0.007601887821262	8.76651860204069E-41	9.99446026308646E-39	0.871120567267949	-6.77711434993649E-39	1.00830325881025E-38	0.875567526086083	-6.82434424639089E-39	800	0.871120567275424	-1.00974950168077E-38	88.8888888856073	-7.58897338207937E-48	-1.21221045250548E-11	-7.10803268096498E-09	-1.15486801586391E-47	-4.99453959894539E-11	7.10820815228752E-10
4.895	88.8784039767772	-1.57074089797701E-38	1.36523775802923	435.111111110271	-2.29991175818817E-48	-800	-9.39862492486401E-41	0.031225843487541	9.31539020255701E-41	0.999970510750341	-6.00426438643202E-41	0.007679688857259	8.78956586226586E-41	1.0020146284555E-38	0.880036169536526	-6.80362919667587E-39	1.01097192152588E-38	0.884513071303944	-6.85126932346195E-39	800	0.880036169544065	-1.01246427184967E-38	88.8888888856103	-7.58895331099552E-48	-1.22196747205394E-11	9.31758374160015E-10	7.59134940316289E-49	-1.96841785334248E-11	9.31966273371441E-11
4.9	88.8781890232648	-1.57493687523629E-38	1.37916044687405	435.555555554699	-2.3379297590212E-48	-800	-9.41091971553063E-41	0.031433055032215	9.27841233101138E-41	0.999969906175585	-6.0282856146525E-41	0.007758010981971	8.81251761529377E-41	1.00457150488037E-38	0.889011491297446	-6.8301772469255E-39	1.01362999086162E-38	0.893517978256687	-6.87822962251377E-39	800	0.889011491305087	-1.01516890446359E-38	88.8888888855938	-7.61593559681752E-48	-1.24073010546928E-11	-1.16088472168477E-08	-1.82658384231368E-47	-6.89267132307903E-11	1.16090518387985E-09
4.905	88.8779704361315	-1.5791169900095E-38	1.39317577495192	435.999999999127	-2.37664176941032E-48	-800	-9.42331508287907E-41	0.031643644454198	9.24058953506155E-41	0.999969291380591	-6.05234290604039E-41	0.007836854393171	8.83537305647975E-41	1.00711655857135E-38	0.89804655537787	-6.85675839702297E-39	1.01627722476448E-38	0.902583214634878	-6.90522543167732E-39	800	0.898046555385792	-1.01786331247597E-38	88.8888888855111	-7.7460711276895E-48	-1.28426792211447E-11	-8.45664279343756E-09	-1.36151400044447E-47	-5.66796942131673E-11	8.45683273593226E-10
4.91	88.8777481590248	-1.58328098554084E-38	1.40728453640605	436.444444443554	-2.41537586490765E-48	-800	-9.43574511067337E-41	0.031853296552628	9.20260739027648E-41	0.999968666206843	-6.07643661638026E-41	0.007916223562684	8.85813066743969E-41	1.00964960743603E-38	0.907141874393932	-6.88337301407148E-39	1.01891357758437E-38	0.911708511915099	-6.93225685024746E-39	800	0.907141874401922	-1.02054733038694E-38	88.8888888855104	-7.74996561024293E-48	-1.29705377360497E-11	-5.75610670239218E-09	-9.28948735208721E-48	-4.72329120070276E-11	5.75630048879494E-10
4.915	88.8775221570933	-1.58742882669371E-38	1.42148612205235	436.888888887981	-2.45438745031176E-48	-800	-9.44811198260941E-41	0.032063169316808	9.16427688890227E-41	0.999968030556301	-6.10056658302679E-41	0.007996115067986	8.88079022730295E-41	1.01217062381724E-38	0.9162970563107	-6.91002093874432E-39	1.02153894952449E-38	0.920893933313432	-6.95932369729599E-39	800	0.916297056318919	-1.02322093554904E-38	88.8888888854504	-7.84428501813206E-48	-1.33247865186036E-11	-5.8536879047699E-09	-9.81679157759857E-48	-4.58493943639088E-11	5.85386746120998E-10
4.92	88.8772923687176	-1.5915602094413E-38	1.43578159386623	437.333333332409	-2.49360884624772E-48	-800	-9.46060859183415E-41	0.032274612603152	9.12537718281241E-41	0.999967384255633	-6.12473310727124E-41	0.008076534887787	8.90334994247962E-41	1.01467939305129E-38	0.925512786433079	-6.93670246441338E-39	1.02415317751969E-38	0.930139928751335	-6.98642634449286E-39	800	0.925512786441367	-1.02588393199274E-38	88.8888888854536	-7.84427747923276E-48	-1.34301847139426E-11	-4.10504223206441E-09	-6.312622476133E-48	-4.43132719897341E-11	4.10528140242624E-10
4.925	88.8770587548844	-1.59567506134224E-38	1.4501705610894	437.777777776836	-2.5329888939469E-48	-800	-9.47301735987425E-41	0.032484395204542	9.08642538062876E-41	0.999966727195089	-6.14893622513378E-41	0.00815748082849	8.92580937296025E-41	1.01717586132285E-38	0.934788813561921	-6.96341765052831E-39	1.02675624664554E-38	0.939446022477611	-7.01356454019161E-39	800	0.934788813570385	-1.02853627302459E-38	88.8888888854074	-7.91155858495222E-48	-1.37688913824534E-11	-4.79450553333025E-09	-7.53489780135851E-48	-4.68317131683944E-11	4.79473424899573E-10
4.93	88.876821262559	-1.59977317007233E-38	1.46465348760598	438.222222221263	-2.57253658940304E-48	-800	-9.48555549909133E-41	0.03269736857939	9.0466330148148E-41	0.999966059225485	-6.17317597539476E-41	0.00823895550441	8.94816726277201E-41	1.01965987803098E-38	0.944125437465414	-6.99016651971733E-39	1.02934791609831E-38	0.948813128581526	-7.04073865501336E-39	800	0.944125437473944	-1.0311778217846E-38	88.8888888854129	-7.90939679623622E-48	-1.38645803274638E-11	1.82727906879627E-09	1.60438138520112E-48	-1.6004230637419E-11	1.8273491540095E-10
4.935	88.8765798394963	-1.60385433663215E-38	1.47923074905533	438.66666666569	-2.61209051504363E-48	-800	-9.49806958090144E-41	0.032908608043295	9.00679429939463E-41	0.999965380199853	-6.19745263666704E-41	0.008320961033541	8.97042243145894E-41	1.02213130130314E-38	0.953522901039679	-7.01694937442247E-39	1.0319281725998E-38	0.958240750334182	-7.06794862003873E-39	800	0.953522901048285	-1.03380845000256E-38	88.8888888854128	-7.91314568607818E-48	-1.39900486366695E-11	-3.19152112145557E-09	-5.15113764300374E-48	-4.02262085404154E-11	3.19177461869577E-10
4.94	88.8763344461032	-1.60791848638122E-38	1.49390193691642	439.111111110117	-2.65181366842441E-48	-800	-9.51061248786378E-41	0.033121797231937	8.96630626209867E-41	0.999964690006812	-6.22176604893487E-41	0.008403495122609	8.99257442853598E-41	1.02459007633606E-38	0.962980941672715	-7.04376605274114E-39	1.034496830133E-38	0.967729446290573	-7.09519451784568E-39	800	0.962980941681458	-1.03642810956701E-38	88.8888888853868	-7.95323717135252E-48	-1.4239188909426E-11	1.72377667695389E-09	1.83128150931853E-48	-1.9295682613788E-11	1.72388466997584E-10
4.945	88.8760850179085	-1.61196530563981E-38	1.50866810869827	439.555555554544	-2.69157996650743E-48	-800	-9.52324839452512E-41	0.03333530863886	8.92542993762373E-41	0.999963988465006	-6.24611659134238E-41	0.008486563725714	9.01462140363384E-41	1.02703598169952E-38	0.972500241868618	-7.07061694137413E-39	1.03705377746183E-38	0.977279308759437	-7.12247661485873E-39	800	0.972500241877431	-1.03903659828672E-38	88.88888888539	-7.95321332730235E-48	-1.43521875257262E-11	-2.99740084604592E-08	-4.44325697078531E-47	-1.53106286926631E-10	2.99743994889435E-09
4.95	88.8758315184003	-1.61599475522668E-38	1.52352862195341	439.99999999897	-2.73282438110842E-48	-800	-9.53578118697848E-41	0.033547876811309	8.88436862688204E-41	0.999963275471719	-6.2705041648843E-41	0.008570163233797	9.03656311274577E-41	1.02946898706521E-38	0.982080388238732	-7.09750196119219E-39	1.03959896159162E-38	0.986890067524001	-7.14979461567744E-39	800	0.982080388248351	-1.04163389090808E-38	88.8888888851267	-8.33981481658871E-48	-1.56039504830896E-11	-2.33133808554445E-08	-3.49941443461222E-47	-1.24524735856887E-10	2.33137134176614E-09
4.955	88.8755738850365	-1.62000654366155E-38	1.53848436923812	440.444444443396	-2.77452348347503E-48	-800	-9.54846180185403E-41	0.033762812497049	8.84257530203355E-41	0.999962550851019	-6.29492898157805E-41	0.008654298673193	9.05839783718302E-41	1.03188888681804E-38	0.991721956977997	-7.12442131692687E-39	1.04213217281578E-38	0.996562400826864	-7.17714894378185E-39	800	0.991721956987694	-1.04421979954633E-38	88.8888888851302	-8.33981266549636E-48	-1.57217640103796E-11	-4.45751879851711E-08	-6.43242644311156E-47	-2.24279893006641E-10	4.4575752213325E-09
4.96	88.8753120723675	-1.62400055212421E-38	1.5535351783525	440.888888887822	-2.81645995669352E-48	-800	-9.56106300564592E-41	0.033975584055319	8.8007915464548E-41	0.99996181447505	-6.31939116808067E-41	0.008738969080475	9.08012486599703E-41	1.03429559503172E-38	1.00142483788242	-7.1513751673107E-39	1.04465341387572E-38	1.00629568869117	-7.20453937167596E-39	800	1.00142483789338	-1.04679424761671E-38	88.8888888847075	-8.9463832161371E-48	-1.77243166352398E-11	-4.74038586162319E-08	-6.85914799844425E-47	-2.3776022054399E-10	4.74044548711424E-09
4.965	88.8750460295235	-1.62797660387876E-38	1.56868121719083	441.333333332245	-2.86119155237497E-48	-800	-9.5737882415878E-41	0.03419193098984	8.75806554280296E-41	0.999961066200709	-6.34389069264379E-41	0.008824175405494	9.10174315302351E-41	1.03668898617124E-38	1.01118914000744	-7.17836347411093E-39	1.04716241483722E-38	1.01609095538678	-7.23196625468571E-39	800	1.01118914001849	-1.04935712119422E-38	88.8888888847115	-8.94630465782224E-48	-1.78583231625285E-11	-2.91251467388045E-09	-4.91021203159593E-48	-4.56788591812645E-11	2.91287285746307E-10
4.97	88.8747756967048	-1.63193444842873E-38	1.58392309256277	441.777777776668	-2.90609925593717E-48	-800	-9.58650624540226E-41	0.034406592389555	8.71526359272133E-41	0.999960305859775	-6.36842788823077E-41	0.008909921067447	9.12325121713373E-41	1.03906888273259E-38	1.02101525538773	-7.20538659700195E-39	1.04965915394326E-38	1.02594771804352	-7.25942957209258E-39	800	1.02101525539912	-1.05190825881751E-38	88.8888888846216	-9.07626195612888E-48	-1.84308104676406E-11	-1.11408364015604E-08	-1.60933323530904E-47	-8.58123305930843E-11	1.11411668815441E-09
4.975	88.8745010349095	-1.6358740273882E-38	1.5992602345683	442.222222221091	-2.95151408763229E-48	-800	-9.59922921440269E-41	0.034622643578972	8.67187106111903E-41	0.999959533342525	-6.39300258224034E-41	0.008996202865834	9.14464870418673E-41	1.04143524149455E-38	1.03090281747161	-7.23244437346372E-39	1.05214346200468E-38	1.03586637480682	-7.28692933812078E-39	800	1.0309028174831	-1.05444762285128E-38	88.8888888846172	-9.08422986353487E-48	-1.86329831187101E-11	5.73407987758362E-09	7.32961064977665E-48	-7.95679449349799E-12	5.73408539813352E-10
4.98	88.8742219746228	-1.63979500297663E-38	1.61469375036663	442.666666665515	-2.99693519271736E-48	-800	-9.61205827285359E-41	0.034839379031581	8.628000977129E-41	0.999958748453409	-6.41761515478432E-41	0.009083027034854	9.16593362364465E-41	1.04378782447744E-38	1.04085254089117	-7.25953719510346E-39	1.0546152022128E-38	1.04584712170366	-7.3144658566942E-39	800	1.04085254090275	-1.05697499557024E-38	88.8888888846212	-9.08418492065267E-48	-1.87728564491071E-11	-2.94941552662426E-08	-4.24776005503844E-47	-1.67320516232208E-10	2.94946298675603E-09
4.985	88.873938477478	-1.64369732824875E-38	1.63022298481789	443.111111109936	-3.04407932480941E-48	-800	-9.62478603265511E-41	0.035054928167944	8.58396193854173E-41	0.999957951084492	-6.44226552489359E-41	0.009170389894687	9.18710568727009E-41	1.0461265962263E-38	1.05086400417338	-7.28666501036531E-39	1.0570743261657E-38	1.05588961887944	-7.34203883761358E-39	800	1.05086400418582	-1.05949034671613E-38	88.8888888843643	-9.44946501299919E-48	-2.01172833446506E-11	-2.33868036048064E-08	-3.40369076611086E-47	-1.3998764551148E-10	2.33872225668351E-09
4.99	88.8736504777684	-1.64758070333831E-38	1.64584878838272	443.555555554358	-3.09132665916853E-48	-800	-9.63766282235166E-41	0.035272969011933	8.53913335392713E-41	0.999957141050931	-6.46695389679289E-41	0.009258296235638	9.20816312826272E-41	1.04845134552465E-38	1.06093775649501	-7.31382802345522E-39	1.05952060767509E-38	1.06599458015584	-7.36964870781813E-39	800	1.06093775650754	-1.0619934829988E-38	88.8888888843685	-9.44948711882022E-48	-2.02659813012314E-11	-3.8402466392045E-08	-5.3991527184923E-47	-2.15395062907516E-10	3.84030704504896E-09
4.995	88.8733579274774	-1.65144499826285E-38	1.6615709855512	443.99999999878	-3.13883217358323E-48	-800	-9.65045985022934E-41	0.035488762215135	8.4943078855938E-41	0.999956318217646	-6.49168040093577E-41	0.009346745076359	9.229105171587E-41	1.0507619789587E-38	1.07107368562541	-7.34102640411071E-39	1.06195404763374E-38	1.0761613616312	-7.39729523880706E-39	800	1.07107368563915	-1.06448432063827E-38	88.8888888839991	-9.96443298920861E-48	-2.21787232050144E-11	-4.12621640559006E-08	-5.80951655783197E-47	-2.29893685832738E-10	4.12628044815526E-09
5	88.8730607723725	-1.65529002115484E-38	1.67738975664865	444.4444444432	-3.18865424285438E-48	-800	-9.6633843877318E-41	0.03570809205505	8.44850502410354E-41	0.999955482432069	-6.51644502219279E-41	0.009435737437382	9.24993068357932E-41	1.05305836072193E-38	1.08127190874794	-7.36826013915233E-39	1.06437436603912E-38	1.08639097647729	-7.42497879586854E-39	800	1.08127190876178	-1.06696273595657E-38	88.8888888840037	-9.96443709923247E-48	-2.23406715575658E-11	9.96891458271353E-10	1.2146203797723E-49	-3.29270114582234E-11	9.9743509445876E-11
5.005	88.8727589501534	-1.65911551660981E-38	1.69330565042165	444.88888888762	-3.23866864359865E-48	-800	-9.67628861213365E-41	0.035925471044259	8.40264879189172E-41	0.999954633518939	-6.54124808447639E-41	0.009525276412049	9.27063815543006E-41	1.05534031013514E-38	1.09153278058584	-7.39552958739499E-39	1.06678154760165E-38	1.09668286581657	-7.45269932080983E-39	800	1.09153278060006	-1.06942856432847E-38	88.8888888839217	-1.00833549215978E-47	-2.29211842453612E-11	-3.57244308209653E-08	-5.03295360724324E-47	-2.09282399493762E-10	3.57250438292898E-09
5.01	88.8724524189299	-1.66292141036199E-38	1.70931812773181	445.333333332038	-3.29038008027956E-48	-800	-9.68922418420057E-41	0.036144728054526	8.35608473845731E-41	0.999953771360402	-6.56608942537379E-41	0.009615358973619	9.29122714137113E-41	1.05760777324808E-38	1.10185595452599	-7.42283460330767E-39	1.06917538954549E-38	1.10703756766243	-7.48045690343537E-39	800	1.10185595454104	-1.07188175788431E-38	88.8888888836896	-1.0408150300212E-47	-2.42300489365119E-11	-3.06587348101533E-08	-4.31493079999726E-47	-1.88271449662129E-10	3.06593128803968E-09
5.015	88.8721411054904	-1.66670735141235E-38	1.72542827633941	445.777777776457	-3.34243680995407E-48	-800	-9.70225112393202E-41	0.036364235779284	8.30908528520724E-41	0.999952895750505	-6.59096944399881E-41	0.00970599124801	9.31169557451063E-41	1.05986050308388E-38	1.11224213282511	-7.45017560818287E-39	1.07155576713777E-38	1.11745515383929	-7.50825180549424E-39	800	1.11224213284047	-1.07432209037608E-38	88.8888888836297	-1.0494366432699E-47	-2.47367982669565E-11	-1.75056413809204E-08	-2.43862214938751E-47	-1.31357004377574E-10	1.75061342054719E-09
5.02	88.8718249713394	-1.67047329938047E-38	1.74163534164344	446.222222220874	-3.39534143164646E-48	-800	-9.71518325893713E-41	0.036582856306624	8.261840902829E-41	0.999952006580941	-6.61588801044418E-41	0.009797168996554	9.33204320680423E-41	1.06209846916128E-38	1.12269082999513	-7.47755250607973E-39	1.07392261021148E-38	1.12793537018381	-7.53608375539091E-39	800	1.12269083001099	-1.07674953577687E-38	88.8888888835071	-1.06635707080439E-47	-2.55692967505998E-11	-1.08469085565344E-08	-1.57083893541644E-47	-9.71419782765405E-11	1.08473435364499E-09
5.025	88.8715039436472	-1.67421891218233E-38	1.75794032718472	446.666666665292	-3.44865918144226E-48	-800	-9.72826744281155E-41	0.036803638390543	8.213824557722E-41	0.999951103646828	-6.64084541088944E-41	0.009888897871631	9.35226802480633E-41	1.06432143101511E-38	1.13320269403648	-7.50496559507443E-39	1.07627569761557E-38	1.13847883593633	-7.56395318871329E-39	800	1.13320269405246	-1.07916387358586E-38	88.8888888835122	-1.06635448946201E-47	-2.57537464954092E-11	-1.04771894863606E-08	-1.53222244529964E-47	-9.58817163746232E-11	1.04776282066429E-09
5.03	88.8711779767928	-1.6779440901682E-38	1.77434280973694	447.111111109709	-3.50226577007555E-48	-800	-9.74126256272275E-41	0.037022456311458	8.16574145949922E-41	0.999950186819815	-6.66584169195998E-41	0.009981175499044	9.37236943289025E-41	1.0665293167443E-38	1.14377745313183	-7.53241496783614E-39	1.07861501022669E-38	1.1490849884056	-7.59185985031193E-39	800	1.14377745314829	-1.08156503957255E-38	88.8888888834005	-1.08190746343309E-47	-2.65371160675408E-11	-1.0686089050674E-08	-1.57201013435508E-47	-9.65548622045018E-11	1.0686525255683E-09
5.035	88.8708470070349	-1.68164857475426E-38	1.79084327662873	447.555555554126	-3.55636044511282E-48	-800	-9.75439760906494E-41	0.037244409341522	8.11670679234791E-41	0.999949255920581	-6.69087693983243E-41	0.010074004627309	9.39234590763047E-41	1.06872194431178E-38	1.15441542251756	-7.55990072006792E-39	1.08094027544042E-38	1.15975472573423	-7.61980414104653E-39	800	1.15441542253415	-1.08395286705822E-38	88.8888888834057	-1.08190643758153E-47	-2.67264498200071E-11	-1.0195577715421E-08	-1.41064429097956E-47	-1.01611450171199E-10	1.01960840442787E-09
5.04	88.8705109759051	-1.68533215861447E-38	1.80744191070762	447.999999998543	-3.61081977820931E-48	-800	-9.76746954250382E-41	0.03746375257666	8.06771129609779E-41	0.999948310784636	-6.71595139336522E-41	0.010167386292137	9.41219622297097E-41	1.07089916680353E-38	1.16511672115122	-7.58742313807206E-39	1.08325150447841E-38	1.17048730027106	-7.64778588011193E-39	800	1.16511672116826	-1.08632722240657E-38	88.8888888832961	-1.09645204769926E-47	-2.75576316151128E-11	-1.3557629093459E-08	-1.85656173584738E-47	-1.1970456802069E-10	1.35581575377855E-09
5.045	88.8701698328696	-1.68899470048437E-38	1.82413849661264	448.444444442959	-3.66572049326127E-48	-800	-9.78064905343685E-41	0.037686616782764	8.01768428519795E-41	0.999947351269808	-6.74106495914612E-41	0.010261319289066	9.4319195427717E-41	1.07306088400514E-38	1.17588121127763	-7.61498214743414E-39	1.08554840183346E-38	1.18128372069995	-7.67580537569496E-39	800	1.17588121129484	-1.08868801456037E-38	88.8888888832888	-1.0980725061326E-47	-2.78211838657124E-11	4.38168020385366E-11	-1.19544237144862E-48	-4.55632059967429E-11	6.32132729858685E-12
5.05	88.8698235050451	-1.69263587345889E-38	1.84093388221974	448.888888887375	-3.72064646634256E-48	-800	-9.79383613012777E-41	0.037907881476744	7.96751380827671E-41	0.999946377171057	-6.76621802263545E-41	0.01035580839542	9.4515139415623E-41	1.07520686585039E-38	1.18670944064391	-7.64257817314348E-39	1.08783092640559E-38	1.19214352879445	-7.70386264946992E-39	800	1.18670944066129	-1.09103503280461E-38	88.8888888832791	-1.09984230769077E-47	-2.81127143519413E-11	-2.54753255527837E-09	-4.11301245889151E-48	-6.33965322776681E-11	2.54832125928188E-10
5.055	88.8694719517753	-1.6962556238396E-38	1.85782732986236	449.333333331791	-3.77571375829626E-48	-800	-9.80702268251472E-41	0.038130245213012	7.91672331016924E-41	0.99994538837399	-6.79141040554389E-41	0.010450849468553	9.47097909567262E-41	1.07733707309382E-38	1.19760093479483	-7.67021107061495E-39	1.09009890057182E-38	1.20306703940698	-7.73195769993478E-39	800	1.19760093481237	-1.09336824252648E-38	88.8888888832664	-1.10185586328489E-47	-2.84333193548308E-11	1.03668185147392E-09	4.1109931671321E-49	-4.3157946154569E-11	1.03757981355251E-10
5.06	88.8691150927293	-1.69985356600405E-38	1.87481999402239	449.777777776208	-3.83080745601706E-48	-800	-9.82032427434226E-41	0.038353445933103	7.86535390877671E-41	0.999944384652619	-6.81664251011637E-41	0.010546449010999	9.49031273698692E-41	1.07945123501616E-38	1.20855643919335	-7.69788127194092E-39	1.09235215848856E-38	1.21405449231573	-7.76009085665326E-39	800	1.20855643921103	-1.09568739516232E-38	88.8888888832695	-1.10204083016426E-47	-2.86509235913993E-11	-1.34789956973682E-08	-1.86469576825155E-47	-1.2006152516363E-10	1.34795303990716E-09
5.065	88.8687528873932	-1.70342965040827E-38	1.89191109809153	450.222222220624	-3.88640080333094E-48	-800	-9.83351927245168E-41	0.038575279697424	7.81378970324593E-41	0.999943365892949	-6.84191422678269E-41	0.010642602661266	9.50951456559814E-41	1.08154931514797E-38	1.21957545431397	-7.72558871544452E-39	1.09459064434856E-38	1.22510549591672	-7.78826181425687E-39	800	1.21957545433219	-1.09799245877804E-38	88.8888888831498	-1.11812728182081E-47	-2.95373810121021E-11	-1.10148334897523E-08	-1.55616768526694E-47	-1.0684147452894E-10	1.10153516470265E-09
5.07	88.8683852582216	-1.70698351859103E-38	1.90910161068914	450.66666666504	-3.94230721338625E-48	-800	-9.84687490791082E-41	0.038799549205814	7.76135398051649E-41	0.999942331876824	-6.86722583269196E-41	0.010739315876523	9.52858247387414E-41	1.08363106200554E-38	1.23065860583428	-7.75333370116723E-39	1.09681410848051E-38	1.23622074799924	-7.8164710329377E-39	800	1.23065860585263	-1.10028320231608E-38	88.8888888831552	-1.11813190988296E-47	-2.97415161002934E-11	-1.40483772762906E-08	-1.95861623235261E-47	-1.22895769317814E-10	1.40489148145725E-09
5.075	88.8680121567409	-1.71051505791387E-38	1.92639109732912	451.111111109455	-3.99849113769431E-48	-800	-9.86013959464582E-41	0.03902170930631	7.70884833319667E-41	0.999941282467857	-6.8925773786448E-41	0.010836586220288	9.54751579192502E-41	1.08569639504565E-38	1.24180561484015	-7.78111633740626E-39	1.09902253085251E-38	1.24739964426243	-7.84471825214685E-39	800	1.24180561485915	-1.10255955317388E-38	88.8888888830131	-1.13721443991847E-47	-3.07475709542464E-11	-5.81816076798189E-09	-9.12082186547543E-48	-7.78401108531679E-11	5.81868144900039E-10
5.08	88.8676335141003	-1.71402398579062E-38	1.94378006833422	451.55555555387	-4.05535209758923E-48	-800.000000000001	-9.87354954487531E-41	0.039247035006989	7.65532883670831E-41	0.999940217472345	-6.91796897159189E-41	0.010934416571655	9.56631285750846E-41	1.08774511589919E-38	1.25301681157805	-7.80893675338432E-39	1.10121562101815E-38	1.25864309158394	-7.87300388803359E-39	800.000000000001	1.25301681159718	-1.10482132920093E-38	88.8888888830185	-1.1372211210044E-47	-3.09586969694844E-11	-6.86107171077264E-08	-8.88706956797665E-47	-4.29274661082169E-10	6.8612060009674E-09
5.085	88.8672492694605	-1.71751009268386E-38	1.96126861370105	451.999999998285	-4.11245517235674E-48	-800.000000000001	-9.88688434502497E-41	0.0394695252103	7.60186343000998E-41	0.999939136719117	-6.94340083005936E-41	0.011032807445163	9.58497243303885E-41	1.08977707647897E-38	1.26429225532436	-7.8367952273781E-39	1.10339339447302E-38	1.26995027765362	-7.90132772530878E-39	800.000000000001	1.26429225534581	-1.1070683953389E-38	88.8888888824056	-1.2161160395995E-47	-3.46044213144399E-11	-5.59230291704163E-08	-7.28975525090031E-47	-3.60834385927684E-10	5.59241932713321E-09
5.09	88.8668593664332	-1.72097319812982E-38	1.97885665021445	452.444444442697	-4.17326100129522E-48	-800.000000000001	-9.9003490700039E-41	0.039695900208134	7.54724166240542E-41	0.999938040049522	-6.96887290067517E-41	0.011131758380893	9.60349345533773E-41	1.09179214973744E-38	1.27563189369283	-7.86469173535366E-39	1.10555551994412E-38	1.28132231538312	-7.92969013617966E-39	800.000000000001	1.27563189371444	-1.10930063525718E-38	88.8888888824117	-1.21612053325254E-47	-3.48398393169092E-11	-9.37906937300125E-08	-1.20779235980911E-46	-5.8060198478375E-10	9.37924907922897E-09
5.095	88.8664637295653	-1.72441298002282E-38	1.99654486976613	452.888888887108	-4.23623619016064E-48	-800.000000000001	-9.91378507568768E-41	0.039919877014782	7.49258935469479E-41	0.999936927251281	-6.99438554786649E-41	0.011231273279981	9.62187402770802E-41	1.0937901092257E-38	1.28703617406848	-7.89262669714337E-39	1.10770198868237E-38	1.29275851774126	-7.9580910383715E-39	800.000000000001	1.28703617409351	-1.11151784134322E-38	88.8888888815142	-1.3310244228495E-47	-4.01466465779823E-11	-1.04661997587141E-07	-1.34734612556838E-46	-6.45669752059274E-10	1.04663989167046E-08
5.1	88.8660623146158	-1.72782935686615E-38	2.01433262133658	453.333333331515	-4.30282041277945E-48	-800.000000000001	-9.92727440222603E-41	0.04014614854003	7.43705426704477E-41	0.999935798199905	-7.01993860125443E-41	0.011331348488261	9.64011366691254E-41	1.09577089690156E-38	1.29850467801969	-7.92059998383188E-39	1.10983254778993E-38	1.3042595421165	-7.98653058463729E-39	800.000000000001	1.29850467804491	-1.11371996105478E-38	88.8888888815147	-1.33181277111895E-47	-4.04603799907964E-11	1.42414080528387E-08	1.66035122487817E-47	1.37578187895095E-11	1.42414146981625E-09
5.105	88.865655035413	-1.73122192265711E-38	2.03222103629922	453.777777775923	-4.36942368757899E-48	-800.000000000001	-9.94081859379426E-41	0.040371879663173	7.38114540774983E-41	0.999934652652965	-7.04553249765876E-41	0.011431990379701	9.65820998615253E-41	1.09773422807333E-38	1.31003813632807	-7.94861208028579E-39	1.11194709018911E-38	1.31582523369505	-8.01500893215377E-39	800.000000000001	1.31003813635351	-1.1159067326973E-38	88.8888888815087	-1.33324626718973E-47	-4.08285615819779E-11	-2.14110211042362E-10	-1.79412290620037E-48	-6.64371032047618E-11	2.24180889361348E-11
5.11	88.8652418515165	-1.73459063416876E-38	2.05020922948312	454.222222220331	-4.43609501610001E-48	-800.000000000001	-9.95432646932763E-41	0.0405977909836	7.32472709810294E-41	0.999933490496657	-7.07116706046985E-41	0.011533193983125	9.67616272511996E-41	1.09968007124456E-38	1.32163597964088	-7.97666286417188E-39	1.11404546993314E-38	1.32745564409963	-8.04352597688316E-39	800.000000000001	1.3216359796665	-1.11807812840758E-38	88.8888888815132	-1.33351636146702E-47	-4.11206284762449E-11	3.48521211890306E-09	2.84730023132136E-48	-4.51561683916071E-11	3.48550463968886E-10
5.115	88.8648226743625	-1.73793506819379E-38	2.06829839889706	454.666666664738	-4.50277209975298E-48	-800.000000000002	-9.96796978125659E-41	0.040825157508139	7.267561801158E-41	0.99993231148182	-7.09684268762076E-41	0.011634966047689	9.69396939783542E-41	1.10160813001742E-38	1.33329898175016	-8.00475277548686E-39	1.11612747302592E-38	1.33915119021549	-8.07208210682216E-39	800.000000000002	1.33329898177596	-1.12023387539576E-38	88.8888888815156	-1.33388840819683E-47	-4.14424082692846E-11	-1.79272300708047E-08	-2.38796061525741E-47	-1.70065724607458E-10	1.79280367124304E-09
5.12	88.8643974604899	-1.74125516017366E-38	2.08648776236128	455.111111109145	-4.56996870358484E-48	-800.000000000002	-9.9815064554826E-41	0.04105085185833	7.21021797476629E-41	0.999931115486153	-7.12255929202248E-41	0.011737302181927	9.71162961856794E-41	1.10351835792556E-38	1.34502663974739	-8.03288179230998E-39	1.11819304832254E-38	1.35091139299999	-8.10067701647625E-39	800.000000000002	1.34502663977399	-1.12237393204984E-38	88.8888888813611	-1.35403370056368E-47	-4.26617833857534E-11	-1.34778114594753E-08	-1.86383629962341E-47	-1.42050887732256E-10	1.34785600192257E-09
5.125	88.8639661254737	-1.74455052305987E-38	2.10477828974644	455.555555553552	-4.63767083808577E-48	-800.000000000002	-9.99520861522166E-41	0.041279232442759	7.15188984676825E-41	0.999929902272132	-7.14831715356175E-41	0.011840207851785	9.72914111443515E-41	1.10541048404818E-38	1.35681958038307	-8.06105023294445E-39	1.12024191384135E-38	1.36273702200254	-8.1293111799265E-39	800.000000000002	1.35681958040985	-1.12449804888507E-38	88.8888888813673	-1.35410734304758E-47	-4.29538573815982E-11	-2.38690252748088E-08	-3.0947940576954E-47	-2.11247810656745E-10	2.38699600587636E-09
5.13	88.863528617705	-1.74782103154243E-38	2.12316951452247	455.999999997958	-4.70624802866444E-48	-800.000000000002	-1.00088153839555E-40	0.041505356723158	7.09348461729446E-41	0.999928671694535	-7.17411631926707E-41	0.01194368044198	9.74650314347035E-41	1.10728441949223E-38	1.36867750430835	-8.08925821720199E-39	1.12227404749441E-38	1.37462743083965	-8.15798432389782E-39	800.000000000002	1.36867750433622	-1.12660614513194E-38	88.8888888811355	-1.38343766229563E-47	-4.46891681108173E-11	-2.62280271575322E-08	-3.40312805330508E-47	-2.26091194657785E-10	2.6229001616618E-09
5.135	88.8630848627991	-1.75106638032834E-38	2.14166193505026	456.444444442364	-4.77541973762625E-48	-800.000000000002	-1.0022561314201E-40	0.041734167648316	7.03408274123233E-41	0.999927423544075	-7.19995691285085E-41	0.012047722765985	9.76371391254889E-41	1.10913995051963E-38	1.38060073431464	-8.11750590930287E-39	1.12428916376351E-38	1.38658338917835	-8.18669684705856E-39	800.000000000002	1.38060073434269	-1.12869802400244E-38	88.8888888811431	-1.3834324585907E-47	-4.49866174303901E-11	4.3435477437012E-09	3.71375185770758E-48	-4.41950767957513E-11	4.3437725776823E-10
5.14	88.8626348076096	-1.75428643317025E-38	2.16025512974805	456.88888888677	-4.84460918516863E-48	-800.000000000002	-1.00361847908668E-40	0.041958725038041	6.97497143792468E-41	0.999926157671203	-7.22583903391523E-41	0.012152332461673	9.7807726156132E-41	1.11097698058875E-38	1.39258900007522	-8.14579348996302E-39	1.12628734589159E-38	1.3986036784705	-8.21544839860506E-39	800.000000000002	1.39258900010349	-1.13077359767617E-38	88.8888888811407	-1.38444694171034E-47	-4.53583920966212E-11	4.61379083086861E-10	-1.02382798843493E-48	-6.70532914880575E-11	4.66226127763615E-11
5.145	88.862178425677	-1.75748125318827E-38	2.17894759444338	457.333333331175	-4.91383177783842E-48	-800.000000000002	-1.00498209262237E-40	0.042182160461328	6.91556557530795E-41	0.999924874001424	-7.25176234324244E-41	0.012257501076067	9.79767961718196E-41	1.11279555275875E-38	1.40464133325582	-8.17412068829048E-39	1.12826850949365E-38	1.41068797729639	-8.24423901480181E-39	800.000000000002	1.40464133328428	-1.1328329068388E-38	88.8888888811478	-1.38446408951145E-47	-4.56559446602836E-11	4.94064048931823E-10	-1.11392639682825E-48	-6.60821070563086E-11	4.98463769315191E-11
5.15	88.8617156720325	-1.76065075732595E-38	2.19773861007098	457.777777775581	-4.98308132404506E-48	-800.000000000002	-1.00633674628138E-40	0.042401630952186	6.85639409510653E-41	0.999923572408189	-7.27772689523655E-41	0.012363224573448	9.81443442380984E-41	1.1145956077787E-38	1.41675727174194	-8.20248764939227E-39	1.13023272171529E-38	1.42283514978655	-8.27306843896724E-39	800.000000000002	1.41675727177063	-1.13487589795413E-38	88.8888888811456	-1.38554774173104E-47	-4.60205884606814E-11	1.36542629055223E-09	-6.98125691550433E-50	-6.04929296412369E-11	1.36676565272464E-10
5.155	88.861246536987	-1.76379512221434E-38	2.216626055103	458.222222219987	-5.0523588811284E-48	-800.000000000002	-1.00768524337439E-40	0.042618093556074	6.7972737193674E-41	0.999922252864173	-7.3037322078565E-41	0.012469491027488	9.83103806652875E-41	1.11637726819741E-38	1.42893544915445	-8.23089396939156E-39	1.13217999719686E-38	1.43504433424483	-8.30193649472872E-39	800.000000000002	1.42893544918332	-1.13690268487446E-38	88.8888888811528	-1.38555530037535E-47	-4.63192619194932E-11	-5.53797008251385E-09	-8.22969236793004E-48	-1.07299445743104E-10	5.53900946071364E-10
5.16	88.8607709689023	-1.76691419898176E-38	2.23560953258151	458.666666664392	-5.12176469054899E-48	-800.000000000002	-1.00903481402816E-40	0.042833438662583	6.73783898087268E-41	0.999920915224064	-7.3297784064614E-41	0.012576298214824	9.84748966891285E-41	1.11814042944664E-38	1.4411756110785	-8.25933986247573E-39	1.13411024588008E-38	1.44731521053182	-8.33084321284152E-39	800.000000000002	1.44117561110779	-1.13891317164089E-38	88.8888888810989	-1.39275775320656E-47	-4.70353543918238E-11	-1.53879871807769E-09	-3.44928560432893E-48	-8.2055601248948E-11	1.54098495010622E-10
5.165	88.8602889331036	-1.77000795875896E-38	2.25468798178786	459.111111108797	-5.19140294892689E-48	-800.000000000002	-1.01038024626046E-40	0.04304731642556	6.67814558845252E-41	0.999919559390256	-7.35586525412076E-41	0.012683640177636	9.8637890613627E-41	1.11988507149019E-38	1.45347707513194	-8.28782515957337E-39	1.13602339366604E-38	1.45964735828457	-8.35978847474857E-39	800.000000000002	1.45347707516143	-1.14090733964416E-38	88.8888888811062	-1.39276602710801E-47	-4.73361053648358E-11	-2.64712696207407E-08	-3.3534126110534E-47	-2.39022090790893E-10	2.64723487226547E-09
5.17	88.8598003591363	-1.7730761003133E-38	2.27386175530618	459.555555553203	-5.26137012697222E-48	-800.000000000003	-1.01173483162158E-40	0.043262219066528	6.617705616114E-41	0.999918185164506	-7.38199302901344E-41	0.012791518909955	9.87993447810155E-41	1.12161098425547E-38	1.46584007022298	-8.31635021900742E-39	1.13791922667536E-38	1.47204107110898	-8.38877254266772E-39	800.000000000003	1.46584007025369	-1.14288499471849E-38	88.8888888808653	-1.42253784196636E-47	-4.92319999484843E-11	-2.73570795646549E-08	-3.46377936474032E-47	-2.4620920497336E-10	2.7358187463344E-09
5.175	88.8593051940186	-1.77611844646436E-38	2.29313052049284	459.999999997607	-5.33249798149581E-48	-800.000000000003	-1.01308580654734E-40	0.043476500205042	6.55681929943254E-41	0.999916792397715	-7.40816168489998E-41	0.012899932550575	9.89592488353465E-41	1.12331804489342E-38	1.47826438345419	-8.34491506034014E-39	1.13979761703979E-38	1.48449617095773	-8.41779531316761E-39	800.000000000003	1.4782643834851	-1.14484602265417E-38	88.8888888808723	-1.42259125379058E-47	-4.95511009253232E-11	4.34591621948707E-09	3.80485798587752E-48	-5.07025497258573E-11	4.34621197542751E-10
5.18	88.8588033508467	-1.7791345671302E-38	2.31249523293918	460.444444442011	-5.40363451517551E-48	-800.000000000003	-1.0144544762902E-40	0.04369415810212	6.49470228326631E-41	0.999915380845366	-7.43437161284305E-41	0.01300888648661	9.91175776030452E-41	1.12500595421034E-38	1.49075063259719	-8.3735201477819E-39	1.14165821218992E-38	1.49701362520087	-8.4468572931674E-39	800.000000000003	1.49075063262832	-1.1467901462317E-38	88.8888888808691	-1.42353280478273E-47	-4.99827665773204E-11	2.52242671194819E-10	-1.11311245038126E-48	-7.67427752124505E-11	2.63658526732602E-11
5.185	88.8582947562268	-1.78212413105273E-38	2.33195629511169	460.888888886416	-5.47481200026082E-48	-800.000000000003	-1.01581800678045E-40	0.043911174185071	6.43211396976092E-41	0.999913950300944	-7.46062297400905E-41	0.013118382993265	9.92743117214103E-41	1.1266744823901E-38	1.50329907880443	-8.40216570930588E-39	1.14350087710899E-38	1.50959324997221	-8.47595833543836E-39	800.000000000003	1.50329907883576	-1.14871715192942E-38	88.8888888808765	-1.42355487755417E-47	-5.03000854119725E-11	4.44562905007206E-09	3.41525174238758E-48	-4.31889682665228E-11	4.44583883399123E-10
5.19	88.8577793258073	-1.78508672546802E-38	2.35151449770852	461.33333333082	-5.54598854934506E-48	-800.000000000003	-1.01720166509703E-40	0.044131868940796	6.3682016565923E-41	0.999912500527107	-7.48691609465988E-41	0.013228426530316	9.94294270555343E-41	1.12832334283798E-38	1.51591023359059	-8.43085214672036E-39	1.14532523249905E-38	1.52223609913388	-8.50509901660023E-39	800.000000000003	1.51591023362212	-1.15062677368907E-38	88.888888880884	-1.42356815737274E-47	-5.06193093289314E-11	-1.79639414454856E-08	-2.30660848012967E-47	-1.9304196872148E-10	1.79649786378533E-09
5.195	88.8572569796269	-1.78802197082667E-38	2.37117042586008	461.777777775224	-5.61814235511746E-48	-800.000000000003	-1.01857830493431E-40	0.044351446609183	6.30388545321495E-41	0.99991103129886	-7.51325122640434E-41	0.013339020401149	9.95829014258817E-41	1.12995227234731E-38	1.5285844759548	-8.45957978776935E-39	1.14713116265406E-38	1.53494185266391	-8.5342791355884E-39	800.000000000003	1.52858447598725	-1.15251876686272E-38	88.8888888807243	-1.44336558496499E-47	-5.20521048422202E-11	-1.67091229741334E-08	-2.14312521784725E-47	-1.88304310220284E-10	1.67101839929415E-09
5.2	88.8567276459252	-1.79092954577297E-38	2.39092433789248	462.222222219628	-5.69031135207897E-48	-800.000000000003	-1.01997148029401E-40	0.044573420519299	6.23846620831446E-41	0.999909542414273	-7.53962854624433E-41	0.013450166070566	9.97347160701453E-41	1.13156104843067E-38	1.54132197419993	-8.48834889145319E-39	1.14891835157592E-38	1.547711197035	-8.56349916611068E-39	800.000000000003	1.54132197423259	-1.15439292430954E-38	88.8888888807289	-1.44362195526151E-47	-5.24164038960125E-11	-7.46022503032337E-09	-1.07113183010538E-47	-1.24500513766943E-10	7.46126382598764E-10
5.205	88.8561912537826	-1.79380913613487E-38	2.41077642972617	462.666666664031	-5.76303949464595E-48	-800.000000000004	-1.02135695616796E-40	0.04479338150403	6.17280075428069E-41	0.999908033673778	-7.56604826067519E-41	0.013561864652456	9.98848526445845E-41	1.13314945359874E-38	1.55412285641947	-8.51715975545412E-39	1.1506867287309E-38	1.5605435555865	-8.59275888759306E-39	800.000000000004	1.55412285645278	-1.15624904352298E-38	88.8888888806384	-1.45539774759353E-47	-5.3378583335403E-11	-6.95147643151918E-09	-1.02883010267607E-47	-1.22569007700422E-10	6.95255692099067E-10
5.21	88.8556477527277	-1.79666057252064E-38	2.43072613963841	463.111111108434	-5.83581199112605E-48	-800.000000000004	-1.02275212664904E-40	0.045013709908575	6.10641081502945E-41	0.999906504935322	-7.59251033919603E-41	0.013674112997927	1.00033301299809E-40	1.13471737156624E-38	1.56698676219023	-8.54601244148766E-39	1.15243608656927E-38	1.57343903357644	-8.62205857776557E-39	800.000000000004	1.56698676222374	-1.1580870153157E-38	88.8888888806442	-1.45555754859475E-47	-5.37611064483766E-11	-1.90131762186247E-08	-2.33824991446995E-47	-2.20685187806837E-10	1.90144569176348E-09
5.215	88.8550970865767	-1.7994836419514E-38	2.45077311088705	463.555555552837	-5.90945076689839E-48	-800.000000000004	-1.02413862684723E-40	0.045231106388628	6.03994450697211E-41	0.99990495604078	-7.61901489375894E-41	0.01378690911156	1.00180049627224E-40	1.13626465555193E-38	1.57991346328298	-8.57490716718764E-39	1.15416640321298E-38	1.58639679107032	-8.6513979882429E-39	800.000000000004	1.5799134633175	-1.15990670240814E-38	88.8888888804637	-1.47712052547033E-47	-5.54555847991078E-11	-2.02469152554827E-08	-2.50562914069125E-47	-2.23931940131239E-10	2.02481535670912E-09
5.22	88.8545392157493	-1.80227824416455E-38	2.47091640144453	463.999999997239	-5.98330701461321E-48	-800.000000000005	-1.02553302744609E-40	0.045448596942129	5.97278965573994E-41	0.99990338687873	-7.64556179415095E-41	0.013900247704839	1.00325091844223E-40	1.13779123783295E-38	1.59290235407699	-8.60384390021224E-39	1.15587748140895E-38	1.59941685501819	-8.68077734535487E-39	800.000000000005	1.59290235411172	-1.16170804017082E-38	88.888888880472	-1.47710918340773E-47	-5.57913043372397E-11	4.26207217666738E-09	3.17798037472243E-48	-5.12513055403042E-11	4.2623803133275E-10
5.225	88.8539740784261	-1.80504411532222E-38	2.49115587148624	464.444444441641	-6.05717593266047E-48	-800.000000000005	-1.02692199444986E-40	0.045663797591196	5.90541568299399E-41	0.999901797275191	-7.67215122390393E-41	0.014014128003066	1.00468412583146E-40	1.13929693660494E-38	1.60595334624889	-8.63282293421545E-39	1.15756925838348E-38	1.61249856941077	-8.71019649344044E-39	800.000000000005	1.60595334628385	-1.16349085854107E-38	88.8888888804756	-1.47747307765588E-47	-5.61842500384321E-11	3.26968082238917E-09	2.02213639265089E-48	-5.77461571005039E-11	3.27019071293394E-10
5.23	88.853401634566	-1.80778114186662E-38	2.51149060763019	464.888888886044	-6.13104879388565E-48	-800.000000000005	-1.0283175688236E-40	0.045878939104213	5.83736243795621E-41	0.999900187117439	-7.69878305613122E-41	0.014128544879115	1.00610005302927E-40	1.14078167534999E-38	1.61906585268011	-8.66184424292575E-39	1.15924153953939E-38	1.62564191730681	-8.73965562178682E-39	800.000000000005	1.61906585271528	-1.16525508432201E-38	88.8888888804842	-1.47744584832746E-47	-5.65153500305527E-11	-1.30915130588004E-08	-1.6830059847692E-47	-1.74324154718354E-10	1.30926736413789E-09
5.235	88.8528218184496	-1.81048902147769E-38	2.53192061354282	465.333333330446	-6.20538835751373E-48	-800.000000000005	-1.02971041608753E-40	0.046092299062973	5.76896868864879E-41	0.999898556220519	-7.72545752271597E-41	0.014243498365899	1.00749852404635E-40	1.142245245935E-38	1.63223987761128	-8.69090817301581E-39	1.16089422732941E-38	1.63884638832863	-8.76915465226806E-39	800.000000000005	1.63223987764724	-1.1670005226458E-38	88.8888888803652	-1.49194666318409E-47	-5.77831809195811E-11	-1.29719050316141E-08	-1.67306740916632E-47	-1.74316196494833E-10	1.2973076207499E-09
5.24	88.8522345900149	-1.81316762838536E-38	2.5524449955779	465.777777774848	-6.27998546209285E-48	-800.000000000005	-1.03110863464902E-40	0.046305406378198	5.69991092955801E-41	0.999896904471645	-7.75217450311781E-41	0.014358983447528	1.00887946655839E-40	1.1436875638378E-38	1.64547484668017	-8.72001470829109E-39	1.16252713152873E-38	1.65211191009918	-8.7986937387605E-39	800.000000000005	1.64547484671634	-1.16872709244221E-38	88.8888888803739	-1.49191750854727E-47	-5.81233021033299E-11	2.56576981882955E-09	1.34398412530094E-48	-6.71580261953056E-11	2.5666485859383E-10
5.245	88.8516398812631	-1.81581663308564E-38	2.57306383595204	466.222222219249	-6.35461124470458E-48	-800.000000000006	-1.03250637296218E-40	0.046517130562054	5.63040911980714E-41	0.999895231679447	-7.77893425801023E-41	0.014475000599155	1.01024268890279E-40	1.14510840252567E-38	1.65877081481921	-8.7491642291897E-39	1.16414012492621E-38	1.6654380863805	-8.82827286750605E-39	800.000000000006	1.65877081485563	-1.17043458132127E-38	88.8888888803714	-1.49286231486437E-47	-5.85888948309597E-11	1.03905032725978E-09	-4.38214235153079E-49	-7.77689543463076E-11	1.04195661754162E-10
5.25	88.851037651631	-1.81843589476565E-38	2.59377626677125	466.666666663651	-6.42925411319175E-48	-800.000000000006	-1.03390838123326E-40	0.046728395263376	5.56025976994073E-41	0.999893537729722	-7.80573668056878E-41	0.014591544950017	1.01158811017514E-40	1.14650766751498E-38	1.67212722430588	-8.77835673806744E-39	1.16573302201528E-38	1.67882478554056	-8.85789216082999E-39	800.000000000006	1.67212722434252	-1.17212289851803E-38	88.8888888803801	-1.49283496652151E-47	-5.89315797498629E-11	-2.28178957210411E-09	-4.27551210888179E-48	-1.02528659960541E-10	2.28409189339579E-10
5.255	88.8504278322283	-1.82102506571226E-38	2.61458239886723	467.111111108053	-6.50399650190806E-48	-800.000000000006	-1.03531173953322E-40	0.046938579968059	5.48957864814869E-41	0.999891822428588	-7.83258204519647E-41	0.014708617136541	1.01291552832058E-40	1.14788512017598E-38	1.68554414856585	-8.80759263428209E-39	1.1673056704545E-38	1.69227169818309	-8.88755165740779E-39	800.000000000006	1.68554414860285	-1.17379181990474E-38	88.8888888803528	-1.49665704156711E-47	-5.95832648310661E-11	-2.38126555511052E-09	-4.34633899497513E-48	-1.03948097570057E-10	2.38353327036655E-10
5.26	88.8498103821206	-1.82358398962832E-38	2.63548138899954	467.555555552455	-6.57882989358592E-48	-800.000000000006	-1.03671846073847E-40	0.047148105312228	5.41826398660686E-41	0.999890085660795	-7.8594702615352E-41	0.0148262124269	1.01422485361947E-40	1.14924065578631E-38	1.69902104580761	-8.83687194210906E-39	1.1688578887481E-38	1.70577863541524	-8.9172514535796E-39	800.000000000006	1.69902104584484	-1.17544124473528E-38	88.8888888803615	-1.49662224951584E-47	-5.99265425065482E-11	1.82017364143867E-09	1.38777238460609E-49	-6.83595112827373E-11	1.82145686409833E-10
5.265	88.849185232462	-1.82611230665968E-38	2.65647334220575	467.999999996856	-6.65367189721063E-48	-800.000000000006	-1.03812798438386E-40	0.047356769413619	5.34634428285914E-41	0.99988832723258	-7.88640160791872E-41	0.014944331425195	1.01551587719118E-40	1.15057402788226E-38	1.71255798576249	-8.86619507030112E-39	1.17038950356426E-38	1.71934535050911	-8.94699162962941E-39	800.000000000006	1.71255798579996	-1.17707094105603E-38	88.8888888803657	-1.49708254484913E-47	-6.03117110302383E-11	6.20564340654971E-09	5.03485597251706E-48	-3.40837406377933E-11	6.20573700624106E-10
5.27	88.84855234184	-1.82860984382653E-38	2.67755744094673	468.444444441258	-6.72852646540511E-48	-800.000000000007	-1.03954017839053E-40	0.047564591514843	5.27380067887128E-41	0.999886547027343	-7.91337601343072E-41	0.015062969544442	1.01678849980683E-40	1.15188512069237E-38	1.72615444324695	-8.89556206863788E-39	1.17190033616873E-38	1.73297160224943	-8.97677226205744E-39	800.000000000007	1.72615444328463	-1.17868079736803E-38	88.8888888803742	-1.49707165620847E-47	-6.0657578666276E-11	-3.33514549311053E-08	-3.88682440435743E-47	-3.46316738120084E-10	3.33532529343789E-09
5.275	88.8479116420213	-1.8310762329018E-38	2.6987337614347	468.88888888566	-6.80411580126328E-48	-800.000000000007	-1.04095627458348E-40	0.047771693206645	5.20059260797758E-41	0.999884744853039	-7.94039375452659E-41	0.015182127226837	1.01804250797115E-40	1.15317368257305E-38	1.73981046944743	-8.92497334981839E-39	1.17339019620575E-38	1.74665718425411	-9.00659346265309E-39	800.000000000007	1.73981046948675	-1.18027057632242E-38	88.8888888800816	-1.53046143094327E-47	-6.33865296706202E-11	-3.03131741929953E-08	-3.55444923332486E-47	-3.23979360616141E-10	3.0314905447337E-09
5.28	88.8472630917102	-1.83351128616369E-38	2.72000150294365	469.33333333006	-6.88063884504864E-48	-800.000000000007	-1.04237456790039E-40	0.04797779295289	5.12676492097336E-41	0.999882920593393	-7.96745477774878E-41	0.015301799980186	1.01927779411673E-40	1.15443958808461E-38	1.75352555005358	-8.95442898730854E-39	1.17485890616838E-38	1.76040180948687	-9.03645529435932E-39	800.000000000007	1.75352555009314	-1.18184015691396E-38	88.8888888800905	-1.5304438740075E-47	-6.37460873423973E-11	-1.47155769051693E-08	-1.81536333000803E-47	-2.04350691006235E-10	1.47169957143727E-09
5.285	88.8466066239789	-1.83591463076473E-38	2.74136069337571	469.77777777446	-6.95757285134015E-48	-800.000000000007	-1.04379753043482E-40	0.048183239677545	5.05222704026256E-41	0.999881074060026	-7.99455935254812E-41	0.015421987975133	1.02049414234517E-40	1.15568258304239E-38	1.76729970514064	-8.98392939283219E-39	1.17630626260113E-38	1.77420529087083	-9.06635789093937E-39	800.000000000007	1.76729970518131	-1.18338929881675E-38	88.888888879915	-1.55079333324183E-47	-6.5581018802239E-11	-1.37741077802872E-08	-1.71248896720641E-47	-1.97103453157662E-10	1.37755179544805E-09
5.29	88.8459421972006	-1.83828606218947E-38	2.76281055068049	470.22222221886	-7.03511236019443E-48	-800.000000000008	-1.04522242326566E-40	0.048387547599408	4.97706835462914E-41	0.999879205135726	-8.02170744602476E-41	0.015542686824806	1.02169143553162E-40	1.15690253092835E-38	1.78113243247653	-9.01347466733169E-39	1.17773208765647E-38	1.788067302163	-9.09630130769215E-39	800.000000000008	1.78113243251744	-1.18491787020231E-38	88.8888888799235	-1.55080507479642E-47	-6.59524502588509E-11	-3.72035439492392E-08	-4.30541283085475E-47	-3.8652840827858E-10	3.72055518248739E-09
5.295	88.8452697463815	-1.84062520610984E-38	2.78435103892812	470.666666663258	-7.11342877601483E-48	-800.000000000008	-1.04665244279454E-40	0.048591200618836	4.90116720397598E-41	0.999877313637549	-8.04889931676733E-41	0.015663896340938	1.02286945722697E-40	1.15809917722512E-38	1.79502371101347	-9.04306521788616E-39	1.17913616863385E-38	1.80198765574767	-9.12628569148675E-39	800.000000000008	1.79502371105639	-1.18642562979079E-38	88.8888888795723	-1.59060169922226E-47	-6.92112258127885E-11	-4.00478465204867E-08	-4.62848744641211E-47	-4.10822030207615E-10	4.00499536287991E-09
5.3	88.8445892303145	-1.8429318442747E-38	2.80598138126592	471.111111107656	-7.19295833217506E-48	-800.000000000008	-1.04808430149619E-40	0.048793597314924	4.82463944721799E-41	0.999875399449458	-8.07613494833035E-41	0.015785612166096	1.02402808257082E-40	1.15927237649354E-38	1.80897304190238	-9.07270116883254E-39	1.18051832602384E-38	1.8159659917147	-9.15631109501157E-39	800.000000000008	1.80897304194555	-1.18791243689761E-38	88.8888888795816	-1.59058603199965E-47	-6.9596038930077E-11	6.91879146567422E-09	5.78445113477995E-48	-4.05869099139852E-11	6.9189105098088E-10
5.305	88.8439005866193	-1.84520560407523E-38	2.82770146400921	471.555555552054	-7.27250225809946E-48	-800.000000000008	-1.04952145970007E-40	0.048995272469814	4.74735020451778E-41	0.999873462395855	-8.10341458487285E-41	0.015907833674726	1.02516709645187E-40	1.16042187612791E-38	1.82298035399032	-9.10238291913222E-39	1.18187834167679E-38	1.83000210335777	-9.18637767008619E-39	800.000000000008	1.82298035403375	-1.18937805134996E-38	88.8888888795827	-1.59133174408293E-47	-7.00804063595894E-11	8.46445876353092E-09	7.43643817151978E-48	-2.60204094657524E-11	8.46449875782518E-10
5.31	88.8432037740981	-1.84744625207693E-38	2.84951051388762	471.999999996452	-7.35206943955441E-48	-800.000000000009	-1.05096049958653E-40	0.04919558616458	4.66942539249743E-41	0.999871502360724	-8.13073822829629E-41	0.016030556529806	1.02628636540144E-40	1.16154752077777E-38	1.83704515077365	-9.13211061908446E-39	1.18321603351549E-38	1.84409560064728	-9.21648547061682E-39	800.000000000009	1.83704515081734	-1.19082232268109E-38	88.8888888795915	-1.59135214049045E-47	-7.04706800384187E-11	-5.14049247612967E-08	-5.82284014036898E-47	-5.17803107921322E-10	5.14075326170509E-09
5.315	88.8424987332956	-1.8496534190333E-38	2.87140833014494	472.444444440849	-7.43259813852471E-48	-800.000000000009	-1.05240475190939E-40	0.049395051175472	4.59073297411467E-41	0.999869519176691	-8.15810610692081E-41	0.016153779616073	1.02738567660636E-40	1.16264906090746E-38	1.85116730498453	-9.16188465841364E-39	1.18453118163693E-38	1.85824624045322	-9.24663464592879E-39	800.000000000009	1.85116730503078	-1.19224501288615E-38	88.8888888791436	-1.64134919617778E-47	-7.46471301115774E-11	-5.12772639164385E-08	-5.81932744288257E-47	-5.19994176964562E-10	5.12799004357474E-09
5.32	88.8417854247166	-1.8518268635477E-38	2.89339411811313	472.888888885245	-7.51466645611191E-48	-800.00000000001	-1.05385102045764E-40	0.049593055146738	4.51139454089304E-41	0.999867512732523	-8.18551823142223E-41	0.01627749847623	1.02846489227982E-40	1.16372633630862E-38	1.86534630634487	-9.19170520324209E-39	1.18582360097149E-38	1.87245360421856	-9.27682525378268E-39	800.00000000001	1.86534630639139	-1.19364596636014E-38	88.8888888791532	-1.64135524033634E-47	-7.50616424706998E-11	8.40572056404142E-09	7.34489589617844E-48	-3.57291477828174E-11	8.40579649841406E-10
5.325	88.8410637924394	-1.85396622265232E-38	2.91546757845216	473.333333329641	-7.59675242278202E-48	-800.00000000001	-1.0553021934092E-40	0.049790030325394	4.43129444149109E-41	0.999865482870777	-8.21297481145432E-41	0.016401711440486	1.02952380362043E-40	1.16477910255262E-38	1.87958196404313	-9.2215726312685E-39	1.18709307331788E-38	1.88671739721593	-9.3070574346793E-39	800.00000000001	1.87958196408993	-1.19502494914531E-38	88.888888879153	-1.6421968962771E-47	-7.56084551999617E-11	8.55943464254418E-09	7.52385873561037E-48	-3.28395937761363E-11	8.55949763940062E-10
5.33	88.8403337978415	-1.85607124397132E-38	2.93762789703486	473.777777774037	-7.67886307760459E-48	-800.000000000011	-1.05675554778441E-40	0.049985438978524	4.350538960407E-41	0.999863429482672	-8.24047587051577E-41	0.016526413942283	1.03056226670865E-40	1.16580719248991E-38	1.89387375528371	-9.25148712942205E-39	1.18833941092307E-38	1.90103717066882	-9.33733125111185E-39	800.000000000011	1.89387375533077	-1.19638179856572E-38	88.8888888791626	-1.64220311666207E-47	-7.6017531878524E-11	-5.24020530671467E-08	-5.94525656485314E-47	-5.33866581981107E-10	5.24047724847596E-09
5.335	88.8395953891738	-1.85814157400976E-38	2.959874662843	474.222222218432	-7.76196426834876E-48	-800.000000000011	-1.05821332000437E-40	0.0501795937295	4.26903851673943E-41	0.999861352422498	-8.26802159627421E-41	0.016651603683591	1.03158007862856E-40	1.16681036903057E-38	1.90822141726209	-9.28144906008081E-39	1.18956240037101E-38	1.91541256536073	-9.36764682964223E-39	800.000000000011	1.90822141731191	-1.19771628676972E-38	88.8888888787053	-1.69327535919728E-47	-8.03238697476032E-11	-5.21626001651955E-08	-5.92766919561588E-47	-5.33958472343925E-10	5.21653330061665E-09
5.34	88.8388485305862	-1.86017695747011E-38	2.98220701687016	474.666666662825	-7.8466283773499E-48	-800.000000000011	-1.05967341190173E-40	0.050372060580151	4.18687711194694E-41	0.999859251589265	-8.29561201491571E-41	0.016777275845398	1.03257709410998E-40	1.1677884637103E-38	1.92262439825807	-9.31145862006137E-39	1.19076185231028E-38	1.92984309774383	-9.39800423672434E-39	800.000000000011	1.92262439830817	-1.19902824919194E-38	88.8888888787155	-1.69326754980658E-47	-8.07529639329634E-11	7.51612105886983E-09	6.43578046704034E-48	-5.29805441427193E-11	7.51630778438751E-10
5.345	88.8380931752015	-1.86217705392313E-38	3.00462442318961	475.111111107219	-7.93133285996197E-48	-800.000000000011	-1.06113730564333E-40	0.0505630134063	4.10399669879539E-41	0.999857126850961	-8.32324728847245E-41	0.016903427426946	1.033553118226E-40	1.16874124927846E-38	1.93708235493582	-9.34151615266601E-39	1.19193756076017E-38	1.94432833408205	-9.42840358127296E-39	800.000000000011	1.93708235498623	-1.20031746640264E-38	88.8888888787059	-1.69505220969615E-47	-8.14544032948388E-11	4.00272407811496E-11	-1.75740398116571E-48	-1.14333820036845E-10	1.21137947847773E-11
5.35	88.8373292891652	-1.86414160235609E-38	3.02712597998888	475.555555551612	-8.01608549771416E-48	-800.000000000012	-1.06260356605422E-40	0.050752129253312	4.02045653976966E-41	0.999854978112205	-8.3509274499287E-41	0.01703005336853	1.03450800266928E-40	1.16966855402354E-38	1.95159470799256	-9.37162186958115E-39	1.19308933671739E-38	1.95886774811964	-9.45884493108819E-39	800.000000000012	1.95159470804325	-1.20158377015861E-38	88.8888888787163	-1.69503260345528E-47	-8.18829676078455E-11	3.16191517413223E-10	-1.80304041322359E-48	-1.03565046848237E-10	3.32720294861546E-11
5.355	88.8365568315844	-1.86607028081555E-38	3.04971100883994	475.999999996006	-8.10087693603942E-48	-800.000000000012	-1.06407293466782E-40	0.050939446282015	3.93623061576855E-41	0.999852805257814	-8.37865262971399E-41	0.017157149867587	1.03544156368161E-40	1.17057016429523E-38	1.96616102220582	-9.40177608864469E-39	1.19421698372476E-38	1.9734608245331	-9.48932837521348E-39	800.000000000012	1.96616102225686	-1.20282695293616E-38	88.8888888787087	-1.69685136449989E-47	-8.25038699444486E-11	1.48401587315059E-08	1.39660004587962E-47	2.07574534365512E-11	1.48401732485899E-09
5.36	88.8357757718803	-1.86796282808704E-38	3.07237854715938	476.4444444404	-8.18571934821599E-48	-800.000000000012	-1.06554456760828E-40	0.051124739773868	3.85135599115486E-41	0.999850608201613	-8.40642286117147E-41	0.017284711522526	1.03635365318042E-40	1.17144590898539E-38	1.98078067909389	-9.43197902950223E-39	1.19532031594324E-38	1.98810698362184	-9.519853978517E-39	800.000000000012	1.98078067914521	-1.20404684636206E-38	88.8888888787189	-1.69684254575709E-47	-8.29347943189472E-11	-1.02325259376805E-07	-1.1267345073595E-46	-9.9487679353596E-10	1.02330095701923E-08
5.365	88.8349860749644	-1.86981894084022E-38	3.09512776964263	476.888888884791	-8.27274936069906E-48	-800.000000000013	-1.06701859894127E-40	0.051307937249983	3.76583366441545E-41	0.999848386844745	-8.43423824399402E-41	0.017412733704403	1.03724409861944E-40	1.17229558814183E-38	1.99545314872523	-9.46223098575714E-39	1.19639914781983E-38	2.00280562492157	-9.55042180970765E-39	800.000000000013	1.99545314878185	-1.20524325492258E-38	88.8888888778368	-1.79332775086346E-47	-9.11144641898462E-11	-8.48847510799961E-08	-9.52284715805777E-47	-8.19898055657163E-10	8.48887106671704E-09
5.37	88.8341877154855	-1.87163836624226E-38	3.11795762998747	477.333333329181	-8.36230182966146E-48	-800.000000000013	-1.06849457977531E-40	0.051488876764152	3.6796868814691E-41	0.999846141115735	-8.4620988020806E-41	0.01754121054043	1.03811275721374E-40	1.17311903721832E-38	2.01017775862203	-9.49253217411833E-39	1.19745330046102E-38	2.01755610157385	-9.58103192463452E-39	800.000000000013	2.01017775867892	-1.20641601563504E-38	88.8888888778805	-1.79080298994816E-47	-9.10751139588646E-11	-7.23604879719108E-08	-8.194258311436E-47	-7.13550330531651E-10	7.23640060638385E-09
5.375	88.833380665001	-1.87342082392555E-38	3.14086714280091	477.777777773568	-8.45396820808084E-48	-800.000000000013	-1.0699722833502E-40	0.051667421368454	3.59293327813847E-41	0.999843870934413	-8.49000460013175E-41	0.017670136500868	1.03895947016522E-40	1.17391607296817E-38	2.02495387561362	-9.52288285928857E-39	1.19848260002557E-38	2.03235772748753	-9.61168437265049E-39	800.000000000013	2.02495387567545	-1.20756494779267E-38	88.8888888770946	-1.87716408854493E-47	-9.84325437243543E-11	-8.98175755992209E-08	-1.0009904449228E-46	-8.87031127309619E-10	8.98219556163335E-09
5.38	88.8325649026239	-1.8751660666139E-38	3.16385518068898	478.222222217954	-8.54775609250273E-48	-800.000000000014	-1.07145141203397E-40	0.051843427186994	3.50559302423719E-41	0.999841576241857	-8.51795565697067E-41	0.017799505256609	1.03978409828008E-40	1.17468653545686E-38	2.03978077492367	-9.55328326019045E-39	1.19948687845047E-38	2.04720977535407	-9.64237919458193E-39	800.000000000014	2.0397807749858	-1.20868989199566E-38	88.8888888771232	-1.87587774852264E-47	-9.86664107631099E-11	2.08444816962569E-08	1.84407389985908E-47	9.96200638915834E-11	2.08447197472818E-09
5.385	88.8317404077022	-1.87687384000356E-38	3.18692060221248	478.66666666234	-8.64143983852103E-48	-800.000000000014	-1.07293203824083E-40	0.052016811456994	3.41767103812201E-41	0.999839256979805	-8.5459520024323E-41	0.017929310399669	1.04058649836331E-40	1.17543026026538E-38	2.05465772272916	-9.58373361190629E-39	1.20046596908171E-38	2.06211149415514	-9.67311643332972E-39	800.000000000014	2.05465772279161	-1.20979068433092E-38	88.8888888771673	-1.87333155250559E-47	-9.86229709852281E-11	9.53098340990676E-09	5.70214470906571E-48	2.32206939003308E-11	9.5310116965904E-10
5.39	88.8309071626926	-1.87854389591886E-38	3.2100622178119	479.111111106726	-8.7349964712243E-48	-800.000000000015	-1.07441414681146E-40	0.052187469990444	3.32917796296915E-41	0.999836913098737	-8.57399366110602E-41	0.018059545251189	1.04136653100194E-40	1.17614708760794E-38	2.0695839541631	-9.61423414751392E-39	1.20141970831434E-38	2.07706210302473	-9.70389613136044E-39	800.000000000015	2.06958395422585	-1.21086716483012E-38	88.8888888772111	-1.87078713562497E-47	-9.857573587935E-11	5.94866378378316E-09	2.70831547501952E-48	-4.79109781359748E-11	5.94885671993529E-10
5.395	88.8300651531193	-1.88017599334576E-38	3.23327878199374	479.555555551112	-8.82853213422474E-48	-800.000000000015	-1.07589753225248E-40	0.052355258786521	3.24013510096113E-41	0.999834544557759	-8.60208065092921E-41	0.018190202817496	1.0421240611429E-40	1.17683686304613E-38	2.08455866827699	-9.64478509685243E-39	1.20234793864603E-38	2.09206077984365	-9.73471832525375E-39	800.000000000015	2.08455866834002	-1.21191917814121E-38	88.8888888772262	-1.87065205361793E-47	-9.91003862882947E-11	2.16620795375381E-09	-3.03972336038971E-49	-1.13062968195836E-10	2.16915654891101E-10
5.4	88.8292143682313	-1.88176990286237E-38	3.25656897859796	479.999999995498	-8.92206592551706E-48	-800.000000000015	-1.07738181621235E-40	0.052519998553429	3.1505736526504E-41	0.999832151326455	-8.63021297753992E-41	0.018321275707175	1.04285896067391E-40	1.17749944054128E-38	2.09958101853501	-9.67538668041031E-39	1.20325051151274E-38	2.10710665112937	-9.76558304075031E-39	800.000000000015	2.09958101859836	-1.21294657638384E-38	88.8888888772375	-1.87069165027148E-47	-9.96110744994844E-11	2.1806556560476E-09	-1.18421474591648E-49	-1.0195439006892E-10	2.18303774312464E-10
5.405	88.8283548016773	-1.88332541081689E-38	3.27993140430073	480.444444439884	-9.01560180422515E-48	-800.000000000016	-1.07886650673681E-40	0.052681487155922	3.06053184708795E-41	0.99982973338678	-8.65839062863745E-41	0.018452756038209	1.04357111086584E-40	1.17813468535976E-38	2.11465010217119	-9.7060391033469E-39	1.20412728930225E-38	2.12219878549191	-9.79649028949733E-39	800.000000000016	2.11465010223487	-1.21394922184283E-38	88.8888888772486	-1.87074383566143E-47	-1.00121901854553E-10	2.19297173013411E-09	-1.16385088187353E-49	-1.01756432849773E-10	2.19533126903292E-10
5.41	88.8274864519419	-1.88484232216893E-38	3.30336456051472	480.888888884271	-9.10914063161072E-48	-800.000000000016	-1.08035097214686E-40	0.052839495823871	2.9700563003755E-41	0.999827290734295	-8.68661357066529E-41	0.018584635392376	1.04426040402519E-40	1.17874247602568E-38	2.1297649549612	-9.73674255177712E-39	1.20497814775689E-38	2.13733618600344	-9.82744006504577E-39	800.000000000016	2.12976495502521	-1.21492698879953E-38	88.8888888772594	-1.87081086312542E-47	-1.0063059700528E-10	1.70174985214533E-09	-5.44690067949848E-49	-1.12035628525563E-10	1.7054338278971E-10
5.415	88.8266093228298	-1.8863204635461E-38	3.3268668441837	481.333333328657	-9.20268528965879E-48	-800.000000000016	-1.08183447920906E-40	0.052993777566153	2.87920017059489E-41	0.999824823379518	-8.71488174514409E-41	0.018716904763411	1.04492674527393E-40	1.17932270642736E-38	2.14492454528075	-9.76749718868175E-39	1.20580297784763E-38	2.15251778497842	-9.85843233994097E-39	800.000000000016	2.14492454534509	-1.215879765502E-38	88.8888888772701	-1.87090744592036E-47	-1.01151180363671E-10	5.25304244547407E-09	2.42613416363346E-48	-4.07332559892912E-11	5.25320037044997E-10
5.42	88.8257234238486	-1.88775968572298E-38	3.35043654199317	481.777777773044	-9.29621815872034E-48	-800.000000000017	-1.0833162353831E-40	0.053144076361684	2.78802099644307E-41	0.999822331349013	-8.74319506593801E-41	0.018849554524395	1.04557005398845E-40	1.17987528751417E-38	2.16012777036672	-9.79830315072133E-39	1.20660168702908E-38	2.16774244138665	-9.8894670640237E-39	800.000000000017	2.1601277704314	-1.21680745576269E-38	88.8888888773079	-1.86873239193523E-47	-1.01123164860895E-10	5.58794492159564E-09	2.63474422182364E-48	-3.74126626613801E-11	5.58807016367135E-10
5.425	88.8248287706221	-1.88915986612032E-38	3.37407182227109	482.222222217431	-9.38964761491909E-48	-800.000000000017	-1.08479536461452E-40	0.053290123853717	2.69658189228395E-41	0.999819814686545	-8.77155341614952E-41	0.018982574382155	1.04619026525637E-40	1.18040014902857E-38	2.17537345108975	-9.82916054475752E-39	1.20737420083678E-38	2.18300893731939	-9.92054416203759E-39	800.000000000017	2.17537345115474	-1.21770998057014E-38	88.8888888773211	-1.86867287112174E-47	-1.01618449340116E-10	1.98951966012815E-09	-3.63671113269816E-49	-1.08798110450304E-10	1.99249228527339E-10
5.43	88.8239253854527	-1.89052091301898E-38	3.39777072677404	482.666666661817	-9.48308289700912E-48	-800.000000000017	-1.08627080497422E-40	0.053431621888697	2.60495687713404E-41	0.999817273454664	-8.79995664336794E-41	0.019115953330989	1.04678733231499E-40	1.18089724236773E-38	2.19066032664899	-9.86006944225189E-39	1.20812046601115E-38	2.1983159694532	-9.95166352830424E-39	800.000000000017	2.1906603267143	-1.2185872808041E-38	88.8888888773319	-1.86874273006736E-47	-1.02123989057161E-10	2.11907528561506E-09	-1.55180904162883E-49	-1.01352471965943E-10	2.1214976760954E-10
5.435	88.823013297685	-1.89184276785403E-38	3.42153116476812	483.111111106204	-9.5765216140006E-48	-800.000000000018	-1.08774145921411E-40	0.053568272131761	2.51322308243837E-41	0.999814707735731	-8.82840455694957E-41	0.019249679619322	1.04736122788412E-40	1.18136654216345E-38	2.20598705075003	-9.89102987607322E-39	1.20884045138914E-38	2.21366214899799	-9.98282502571143E-39	800.000000000018	2.20598705081567	-1.2194393187149E-38	88.8888888773426	-1.86880812429777E-47	-1.02629887306778E-10	2.13020712180864E-09	-1.42371118850926E-49	-1.00745999984247E-10	2.13258813143023E-10
5.44	88.8220925437175	-1.8931254053716E-38	3.44535091790286	483.555555550591	-9.66996386793696E-48	-800.000000000018	-1.08920625948755E-40	0.053699789170615	2.42145723046305E-41	0.999812117631947	-8.85689692858366E-41	0.019383740777107	1.04791194424381E-40	1.18180804635868E-38	2.22135219474308	-9.92204184063504E-39	1.20953414778703E-38	2.22904600539908	-1.00140284865554E-38	800.000000000018	2.22135219480904	-1.22026607802448E-38	88.8888888773533	-1.86888333191854E-47	-1.03133520276227E-10	2.17970826573325E-09	-1.84365033544922E-49	-1.03412496302124E-10	2.18216000057221E-10
5.445	88.8211631669652	-1.89436883341371E-38	3.46922764598056	483.999999994978	-9.76340788229319E-48	-800.000000000018	-1.09066418924939E-40	0.053825905498705	2.32973426447421E-41	0.99980950326525	-8.88543349327667E-41	0.019518123648256	1.04843949309633E-40	1.18222177603064E-38	2.23675425133897	-9.95310529249842E-39	1.21020156749073E-38	2.24446599146681	-1.00452737140104E-38	800.000000000018	2.23675425140524	-1.22106756378762E-38	88.8888888773649	-1.86894345921805E-47	-1.03649939093593E-10	3.08129225838133E-08	3.00300112091858E-47	1.84950478929864E-10	3.08134776491672E-09
5.45	88.8202252178463	-1.89557309306449E-38	3.4931588918411	484.444444439365	-9.85684339411885E-48	-800.000000000019	-1.09211431092683E-40	0.053946377569226	2.23812553939732E-41	0.999806864777278	-8.9140139497983E-41	0.019652814418094	1.04894390563641E-40	1.18260777545806E-38	2.2521916377548	-9.98422015036478E-39	1.21084274322787E-38	2.25992049024049	-1.00765604843914E-38	800.000000000019	2.25219163782141	-1.22184380248621E-38	88.8888888773788	-1.86871921922836E-47	-1.04079653573559E-10	-1.94876292880495E-07	-2.08473281843194E-46	-2.03955827159615E-09	1.9488696550767E-08
5.455	88.8192787527965	-1.89673825463058E-38	3.51714208913013	484.888888883747	-9.95523386054666E-48	-800.000000000019	-1.09355566469063E-40	0.054060966936321	2.14670414958505E-41	0.9998042023266	-8.94263796547526E-41	0.019787798657194	1.04942523015552E-40	1.1829661093436E-38	2.26766270073067	-1.00153863004924E-38	1.21145772866604E-38	2.27540781644973	-1.01078885465161E-38	800.000000000019	2.2676627008084	-1.22259483945002E-38	88.8888888756977	-2.04767529003148E-47	-1.21295982421226E-10	-1.95521702532144E-07	-2.09279711546681E-46	-2.070843655191E-09	1.95532668765381E-08
5.46	88.8183238387618	-1.89786443908293E-38	3.54117453888462	485.333333328126	-1.00576262687885E-47	-800.000000000019	-1.09498706462309E-40	0.054169404994615	2.0555567394831E-41	0.999801516101346	-8.97130515285883E-41	0.01992306118899	1.04988354467255E-40	1.18329687745535E-38	2.28316570137661	-1.00466035681102E-38	1.21204660229465E-38	2.29092620787436	-1.01392576152282E-38	800.000000000019	2.28316570145471	-1.2233207526309E-38	88.8888888757088	-2.04789828736673E-47	-1.2192837060151E-10	3.22475083673128E-08	3.09771109740336E-47	1.92556587107565E-10	3.22480832599264E-09
5.465	88.8173605461112	-1.89895178471963E-38	3.56525346440292	485.777777772505	-1.01600058271327E-47	-800.00000000002	-1.09640707937797E-40	0.054271386635777	1.9647852139776E-41	0.999798806299276	-9.0000151078567E-41	0.020058586399407	1.05031893725573E-40	1.18360019174577E-38	2.29869885062738	-1.00778717622667E-38	1.21260947179671E-38	2.30647381488713	-1.01706673643665E-38	800.00000000002	2.29869885070587	-1.22402163118422E-38	88.8888888757359	-2.04669773504484E-47	-1.22189056005731E-10	3.99988190717192E-09	1.09608283814272E-48	-8.64268150437872E-11	4.00081552507484E-10
5.47	88.8163889530903	-1.90000046791441E-38	3.58937598710599	486.222222216883	-1.0262343169518E-47	-800.00000000002	-1.09781512167178E-40	0.054366777216537	1.87444368537069E-41	0.99979607314031	-9.02876738673657E-41	0.020194358100422	1.05073151826025E-40	1.18387619054397E-38	2.31426029362414	-1.01091906477795E-38	1.21314646035724E-38	2.32204874928831	-1.02021174509453E-38	800.00000000002	2.31426029370298	-1.22469758879672E-38	88.8888888757491	-2.04676144517945E-47	-1.22777637476051E-10	4.18604410394105E-09	1.31670337113732E-48	-7.77600883977549E-11	4.1867662785839E-10
5.475	88.8154091460011	-1.90101070917831E-38	3.6135391064064	486.666666661262	-1.03646157810351E-47	-800.000000000021	-1.09921064320161E-40	0.054455461642418	1.7845828905897E-41	0.999793316867029	-9.0575614983709E-41	0.020330359416839	1.05112142377347E-40	1.18412504265462E-38	2.32984809673149	-1.01405599366714E-38	1.21365770569635E-38	2.33764908990604	-1.02336075162709E-38	800.000000000021	2.32984809681075	-1.22534876760465E-38	88.88888887578	-2.04515704956209E-47	-1.2290450851493E-10	6.74068208657703E-09	3.85686086253157E-48	-4.54179807620576E-12	6.74068361668386E-10
5.48	88.8144212177893	-1.90198276286235E-38	3.63773973723682	487.111111105641	-1.04668462384031E-47	-800.000000000021	-1.10059114837892E-40	0.054536977454498	1.69536858420912E-41	0.999790537740706	-9.0863969178701E-41	0.020466572997507	1.05148880961433E-40	1.18434694025702E-38	2.3454602717435	-1.01719793025406E-38	1.21414339301932E-38	2.35327278308376	-1.02651371301567E-38	800.000000000021	2.3454602718232	-1.22597533155707E-38	88.8888888758107	-2.04347302373151E-47	-1.22986385371237E-10	4.12422688592993E-09	1.31517495952196E-48	-7.67516482652643E-11	4.12494099620088E-10
5.485	88.8134252666107	-1.90291690676455E-38	3.66197474856101	487.55555555002	-1.05690183840808E-47	-800.000000000021	-1.10195641223897E-40	0.054611294517792	1.60683476830491E-41	0.999787736037274	-9.11527309974685E-41	0.020602981232033	1.05183384527838E-40	1.18454209173138E-38	2.36109480072263	-1.02034483943907E-38	1.21460371727232E-38	2.36891776653184	-1.0296705855971E-38	800.000000000021	2.36109480080266	-1.22657745971646E-38	88.8888888758247	-2.04353152863649E-47	-1.23586531282642E-10	4.7383726572052E-09	1.70027182975769E-48	-6.86992701736265E-11	4.73887064903362E-10
5.49	88.8124214004525	-1.90381347991563E-38	3.68624085449629	487.9999999944	-1.0671115215617E-47	-800.000000000022	-1.10330622925055E-40	0.054678399273195	1.5190114635248E-41	0.999784912060322	-9.14418943117524E-41	0.020739565637926	1.05215673585001E-40	1.18471074750052E-38	2.37674956575468	-1.02349667846637E-38	1.21503888200178E-38	2.38458197407627	-1.03283132511943E-38	800.000000000022	2.37674956583513	-1.22715537061415E-38	88.8888888758589	-2.04164832753177E-47	-1.23628720721833E-10	6.05571888930434E-09	3.20282549625728E-48	-2.04305020706206E-11	6.05575335294398E-10
5.495	88.8114097311886	-1.90467283656822E-38	3.71053476048455	488.444444438779	-1.07731631815596E-47	-800.000000000022	-1.10463700738737E-40	0.054737676137419	1.43213360086274E-41	0.999782066124375	-9.17314528999991E-41	0.020876307683316	1.05245769526924E-40	1.18485316845328E-38	2.39242244324436	-1.02665340324086E-38	1.21544915805692E-38	2.40026316319141	-1.0359958770403E-38	800.000000000022	2.39242244332522	-1.22770929259363E-38	88.8888888758811	-2.04076111094269E-47	-1.23921235109283E-10	3.77369246962164E-09	9.5772550349617E-49	-8.52167149891262E-11	3.77465451979285E-10
5.5	88.8103903776399	-1.90549537139313E-38	3.73485309236158	488.888888883158	-1.08751950049091E-47	-800.000000000023	-1.10595093688905E-40	0.054789569467123	1.34608799177506E-41	0.999779198563502	-9.20214001306438E-41	0.021013188387671	1.05273696094066E-40	1.18496964316692E-38	2.40811125815061	-1.02981496478748E-38	1.21583478386083E-38	2.41595921865043	-1.03916419309191E-38	800.000000000023	2.40811125823179	-1.2282394800508E-38	88.8888888758986	-2.0405266351587E-47	-1.24438185860131E-10	3.59581993810304E-09	6.14887355630434E-49	-9.68470277588455E-11	3.59712390307104E-10
5.505	88.8093634670653	-1.90628153374442E-38	3.75919236345932	489.333333327538	-1.09772185174456E-47	-800.000000000023	-1.10724380365264E-40	0.054833387933929	1.26114778822028E-41	0.999776309735515	-9.23117288003056E-41	0.0211501881366	1.05299480196907E-40	1.1850604975846E-38	2.42381376275807	-1.03298130738283E-38	1.21619607608886E-38	2.43166782717552	-1.04233621293398E-38	800.000000000023	2.42381376283958	-1.22874622262914E-38	88.888888875916	-2.04030434267296E-47	-1.24949249489674E-10	2.28273696241846E-09	-1.40932835290557E-48	-1.70226185553788E-10	2.28907513940448E-10
5.51	88.8083291274973	-1.90703176605292E-38	3.78354915819261	489.777777771917	-1.10792603634056E-47	-800.000000000024	-1.1085174354224E-40	0.054869529317043	1.17722069082821E-41	0.9997734000004	-9.26024318808943E-41	0.021287287715195	1.05323148341761E-40	1.1851260528447E-38	2.4395277551149	-1.03615237678252E-38	1.21653332497456E-38	2.4473867894442	-1.04551188146229E-38	800.000000000024	2.4395277551965	-1.22922980550969E-38	88.8888888759228	-2.0416835055077E-47	-1.2604201409943E-10	1.96891392079111E-09	-1.46910158328871E-48	-1.66839261397139E-10	1.97596998120633E-10
5.515	88.8072874996705	-1.90774660369066E-38	3.80791985228555	490.222222216297	-1.11813404270064E-47	-800.000000000025	-1.10976852861319E-40	0.054897499633123	1.09452545109023E-41	0.999770469753883	-9.28935013143522E-41	0.021424466733209	1.05344732417827E-40	1.18516669348988E-38	2.45525089853041	-1.03932810677471E-38	1.21684688341915E-38	2.4631137646182	-1.04869113410859E-38	800.000000000025	2.45525089861238	-1.2296905737811E-38	88.8888888759371	-2.04156010361722E-47	-1.26538289890447E-10	2.47671512928096E-09	-1.8038878928228E-49	-1.11805743423392E-10	2.47923745451533E-10
5.52	88.806238720709	-1.9084265411677E-38	3.83230099692086	490.666666660676	-1.12834240425263E-47	-800.000000000025	-1.1109984282529E-40	0.05491762921073	1.01299753038543E-41	0.999767519381536	-9.3184929627827E-41	0.021561705787365	1.05364261939524E-40	1.18518277599242E-38	2.47098096941211	-1.04250843710114E-38	1.21713708583489E-38	2.47884650649139	-1.05187391015782E-38	800.000000000025	2.47098096949441	-1.23012884619352E-38	88.8888888759491	-2.04175811321303E-47	-1.27140153382484E-10	4.13512187454492E-09	1.91165458037693E-48	-4.13804559834441E-11	4.13532891793111E-10
5.525	88.805182942546	-1.90907218725724E-38	3.85668888983906	491.111111105056	-1.1385475384184E-47	-800.000000000026	-1.11220374766568E-40	0.054929443249256	9.32862104594326E-42	0.999764549310591	-9.34767080727001E-41	0.021698984047091	1.05381773033723E-40	1.18517473466059E-38	2.48671558054796	-1.04569329265019E-38	1.2174043311422E-38	2.49458263283732	-1.05506013919282E-38	800.000000000026	2.4867155806308	-1.23054501514832E-38	88.8888888759779	-2.03981887157991E-47	-1.27026019148706E-10	5.54318072924275E-09	2.90320937659497E-48	-2.14549560854524E-11	5.5432222499363E-10
5.53	88.8041203110693	-1.90968409130743E-38	3.88108005974848	491.555555549436	-1.14874468655866E-47	-800.000000000026	-1.1133871774634E-40	0.054933517568541	8.53968285093785E-42	0.999761559951281	-9.376882870013E-41	0.021836281981224	1.05397298375141E-40	1.185142963018E-38	2.50245249363496	-1.04888260660733E-38	1.21764897503506E-38	2.51031992638975	-1.05824975850445E-38	800.000000000026	2.50245249371808	-1.23093943474313E-38	88.8888888760008	-2.0392235766915E-47	-1.27461020806498E-10	3.14074100060658E-08	3.02103908423851E-47	2.17592456167725E-10	3.14081637439393E-09
5.535	88.8030509859462	-1.91026291323677E-38	3.90547080913549	491.999999993816	-1.1589395191173E-47	-800.000000000027	-1.11454312980802E-40	0.054929035758344	7.76680966551453E-42	0.999758551752604	-9.40612823438985E-41	0.02197357878448	1.05410877029659E-40	1.18508792974083E-38	2.51818932430462	-1.05207629780183E-38	1.21787147774212E-38	2.52605593599813	-1.06144268937561E-38	800.000000000027	2.51818932438814	-1.23131253034658E-38	88.8888888760181	-2.03870306770459E-47	-1.27817931917432E-10	-1.88932129200705E-07	-2.04104375813753E-46	-2.20758556641322E-09	1.88945026074636E-08
5.54	88.8019751224864	-1.91080927214422E-38	3.92985761227604	492.444444438196	-1.16918193447867E-47	-800.000000000027	-1.11567710378173E-40	0.054917053545357	7.00668427431502E-42	0.999755525151308	-9.43540603989493E-41	0.022110854618006	1.05422545683794E-40	1.18501007542128E-38	2.53392379892629	-1.05527429072107E-38	1.21807220446077E-38	2.54178851295535	-1.06463886884292E-38	800.000000000027	2.53392379902188	-1.23166470102733E-38	88.8888888743866	-2.21409402726478E-47	-1.46531002902355E-10	-1.8920616184913E-07	-2.04761884247531E-46	-2.23699459371587E-09	1.89219385440529E-08
5.545	88.8008928829798	-1.91132383510363E-38	3.95423692930327	492.888888882568	-1.18025252173108E-47	-800.000000000028	-1.11678181021806E-40	0.054896506108091	6.26406779216944E-42	0.999752480603783	-9.46471538121597E-41	0.022248089562151	1.05432343796732E-40	1.18490987291054E-38	2.54965363459785	-1.05847650380262E-38	1.21825165678431E-38	2.55751520350539	-1.06783821306104E-38	800.000000000028	2.54965363469384	-1.23199637674337E-38	88.8888888744007	-2.21415622128354E-47	-1.47130741930762E-10	3.01272488438048E-08	2.90432006193744E-47	1.81336899377562E-10	3.01277945752359E-09
5.55	88.7998044363158	-1.91180733102784E-38	3.97860510475303	493.33333332694	-1.19132347291678E-47	-800.000000000028	-1.1178624219442E-40	0.054868394759197	5.53579288701892E-42	0.999749418584981	-9.4940552866433E-41	0.022385263046259	1.0544031438072E-40	1.18478783695613E-38	2.56537647375313	-1.06168284742366E-38	1.21841024556865E-38	2.57323384074719	-1.07104065300372E-38	800.000000000028	2.56537647384952	-1.23230802734692E-38	88.8888888744139	-2.21427749983788E-47	-1.47743825290178E-10	2.78224850565778E-09	-3.41920061996645E-49	-1.30025301102215E-10	2.78528514270293E-10
5.555	88.7987099403549	-1.91226038807631E-38	4.0029588352056	493.777777771312	-1.20239526666953E-47	-800.000000000029	-1.11891702508791E-40	0.054832556251162	4.82321714101302E-42	0.999746339538836	-9.52342491163069E-41	0.022522356480505	1.05446494604899E-40	1.18464441326711E-38	2.58109018584639	-1.06489324546658E-38	1.21854842056158E-38	2.58894221101272	-1.07424611416187E-38	800.000000000029	2.58109018594313	-1.23260005773544E-38	88.8888888744287	-2.21443005200559E-47	-1.48400724982669E-10	3.08138699741276E-09	9.46577478242245E-50	-1.13364319958801E-10	3.08347163062418E-10
5.56	88.7976095726016	-1.91268380675257E-38	4.02729446398399	494.222222215685	-1.21346704460247E-47	-800.00000000003	-1.11994154445993E-40	0.054788502146372	4.1290649995967E-42	0.999743243964551	-9.55282321976089E-41	0.022659349285749	1.0545093158988E-40	1.18448016447566E-38	2.59679241228728	-1.0681075991982E-38	1.21866670956049E-38	2.60463796070687	-1.07745451035181E-38	800.00000000003	2.59679241238446	-1.23287298389552E-38	88.888888874444	-2.21423315266918E-47	-1.48889349251476E-10	3.27140980971286E-08	3.22902878958596E-47	2.35788222115598E-10	3.27149478128002E-09
5.565	88.7965034989269	-1.91307828355836E-38	4.05160867716229	494.666666660057	-1.22453820331604E-47	-800.00000000003	-1.1209425385823E-40	0.054737433833203	3.44922893465176E-42	0.999740132328605	-9.58224930268905E-41	0.022796222811536	1.05453666424437E-40	1.18429558206171E-38	2.61248101552379	-1.07132582359699E-38	1.21876552269075E-38	2.62031908040697	-1.08066577417869E-38	800.00000000003	2.61248101562136	-1.23312725477653E-38	88.8888888744569	-2.21436939042089E-47	-1.49493074423617E-10	-2.06722461371087E-07	-2.25568693635632E-46	-2.51876587163181E-09	2.067378054852E-08
5.57	88.7953918825544	-1.91344449567561E-38	4.07589827790188	495.111111104423	-1.23627485377233E-47	-800.000000000031	-1.12191484114915E-40	0.054678700578038	2.78716097548672E-42	0.999737005090039	-9.61170228160885E-41	0.022932959065986	1.05454739057666E-40	1.18409114398267E-38	2.62815393345631	-1.07454783626739E-38	1.21884536897111E-38	2.63598337426887	-1.08387982344723E-38	800.000000000031	2.62815393356753	-1.23336330688716E-38	88.8888888726766	-2.40753393453541E-47	-1.706299141447E-10	-2.06238344920455E-07	-2.25154444588959E-46	-2.51064467940072E-09	2.0625362603415E-08
5.575	88.7942749083193	-1.91378330926537E-38	4.10015973519615	495.555555548786	-1.24831228798981E-47	-800.000000000032	-1.12285805125058E-40	0.054612414110117	2.14320915047666E-42	0.999733862768693	-9.64118107060592E-41	0.023069538174788	1.05454200353625E-40	1.18386745610228E-38	2.6438088882093	-1.07777352997152E-38	1.21890676739058E-38	2.65162867845653	-1.08709657481368E-38	800.000000000032	2.64380888832102	-1.23358169851044E-38	88.8888888726928	-2.40742414512162E-47	-1.71199291830539E-10	3.26603336967894E-08	3.1959019628685E-47	2.16045469295803E-10	3.2661048250637E-09
5.58	88.7931527394693	-1.91409540465729E-38	4.12439000742247	495.99999999315	-1.26034961418592E-47	-800.000000000033	-1.12377775982777E-40	0.054539591651525	1.51382978025709E-42	0.999730705823681	-9.67068480112088E-41	0.023205943018365	1.05452090407487E-40	1.18362499772105E-38	2.65944391761153	-1.08100282176983E-38	1.21895013541923E-38	2.66725312054653	-1.09031596095112E-38	800.000000000033	2.6594439177237	-1.23378286818406E-38	88.8888888727049	-2.40774452274116E-47	-1.719004077428E-10	3.08304493046287E-09	-4.55858021832302E-49	-1.45403280876415E-10	3.08647179759388E-10
5.585	88.7920255383198	-1.91438145401932E-38	4.14858616287097	496.444444437513	-1.2723884940458E-47	-800.000000000033	-1.12467039792657E-40	0.054459850766434	9.01444330885533E-43	0.999727534711499	-9.70021262150217E-41	0.023342157095029	1.05448448828091E-40	1.18336424214244E-38	2.67505713029597	-1.08423562976269E-38	1.21897595989705E-38	2.68285471855567	-1.09353790430835E-38	800.000000000033	2.67505713040848	-1.23396724917228E-38	88.8888888727238	-2.40780821383894E-47	-1.72619751366166E-10	3.66853214472915E-09	-5.63464250862975E-50	-1.36831969680718E-10	3.67108309424314E-10
5.59	88.7908934885299	-1.91464233322345E-38	4.17274488281597	496.888888881877	-1.28442777763298E-47	-800.000000000034	-1.12553149818534E-40	0.054372698458096	3.09056367499935E-43	0.999724349948698	-9.72976345580488E-41	0.023478161723645	1.05443326968975E-40	1.18308580048588E-38	2.69064638505418	-1.08747184531626E-38	1.21898481370979E-38	2.6984313492676	-1.0967623145361E-38	800.000000000034	2.69064638516711	-1.23413540604259E-38	88.88888887274	-2.40787133614303E-47	-1.73269393577124E-10	2.84619735187618E-09	-3.4296723804985E-49	-1.32161672156644E-10	2.84926412840478E-10
5.595	88.7897567560009	-1.91487875528745E-38	4.19686329996532	497.333333326241	-1.29646778293212E-47	-800.000000000035	-1.12637044862648E-40	0.054279682869385	-2.69429452202303E-43	0.999721152001874	-9.75933641830902E-41	0.023613940763746	1.0543676676166E-40	1.1827901729734E-38	2.70620983186843	-1.09071138088605E-38	1.21897709512455E-38	2.71398133297623	-1.09998912817983E-38	800.000000000035	2.70620983198179	-1.23428779839018E-38	88.8888888727535	-2.40810057378612E-47	-1.73941260324293E-10	1.27504525456356E-08	1.05900282619958E-47	-7.95220554011324E-12	1.27504550254521E-09
5.6	88.7886154966254	-1.9150913435845E-38	4.220938822237	497.777777770605	-1.30850850979471E-47	-800.000000000036	-1.1271866963049E-40	0.054180864466042	-8.33585184747005E-43	0.999717941309473	-9.78893073029231E-41	0.023749479623548	1.05428804944318E-40	1.18247779862874E-38	2.72174579821107	-1.09395416052418E-38	1.21895321466807E-38	2.7295030072976	-1.10321828020091E-38	800.000000000036	2.72174579832484	-1.23442482802737E-38	88.8888888727713	-2.4080255988903E-47	-1.7454277907842E-10	-6.35947590884176E-08	-7.51451494811899E-47	-9.64049595102344E-10	6.36020658087117E-09
5.605	88.7874698749831	-1.91528081115014E-38	4.24496872736212	498.222222214966	-1.32083673310517E-47	-800.000000000036	-1.12797202007803E-40	0.054075221283216	-1.37789896132364E-42	0.999714718334384	-9.81854551767685E-41	0.023884762977768	1.05419483410815E-40	1.18214917687286E-38	2.73725252745172	-1.09720009646556E-38	1.21891374077053E-38	2.74499441707642	-1.10644968200887E-38	800.000000000036	2.73725252757019	-1.23454695456489E-38	88.8888888722091	-2.47258248538907E-47	-1.82329703044125E-10	-6.73556617887956E-08	-7.58085284193489E-47	-9.15235251512708E-10	6.73618796543878E-09
5.61	88.7863200730419	-1.91544804388791E-38	4.26895000937903	498.666666659327	-1.33320242120062E-47	-800.000000000037	-1.12873177438432E-40	0.053963675651051	-1.90587220931304E-42	0.999711483588422	-9.84817971913782E-41	0.024019773903129	1.0540885401346E-40	1.18180492377431E-38	2.75272807977131	-1.10044907818703E-38	1.21885914155359E-38	2.76045387138551	-1.1096832603526E-38	800.000000000037	2.75272807989087	-1.23465474902835E-38	88.8888888722009	-2.47285573207944E-47	-1.82533959629636E-10	1.19108278795458E-08	1.17405971580148E-47	7.06248789180004E-11	1.19110372617034E-09
5.615	88.7851662415801	-1.91559363050031E-38	4.29288035606991	499.111111103688	-1.34556333087933E-47	-800.000000000038	-1.12947166818672E-40	0.053847167337834	-2.42124497189013E-42	0.999708237495659	-9.87783260937064E-41	0.024154499381531	1.05396951440246E-40	1.18144545381586E-38	2.76817096294784	-1.10370103365006E-38	1.21878977799456E-38	2.77587994852148	-1.11291895833593E-38	800.000000000038	2.76817096306775	-1.23474859088576E-38	88.8888888722313	-2.47189046878309E-47	-1.82956589643252E-10	3.29265503751208E-09	-2.03100832675202E-49	-1.31743249104716E-10	3.29528958966255E-10
5.62	88.7840085275173	-1.91571812813335E-38	4.31675758888393	499.555555548049	-1.35792497038761E-47	-800.000000000039	-1.13019162967573E-40	0.053725809612846	-2.92392615013426E-42	0.999704980469318	-9.90750350294588E-41	0.024288927146778	1.05383808543944E-40	1.18107115974507E-38	2.78357977092593	-1.10695589476287E-38	1.21870601368056E-38	2.79127125923018	-1.11615671885701E-38	800.000000000039	2.78357977104634	-1.23482883926134E-38	88.8888888722342	-2.47293304899052E-47	-1.83795364606518E-10	4.6867398850733E-09	-2.47529472165133E-49	-1.64607546196389E-10	4.68962966497374E-10
5.625	88.7828470802619	-1.91582212413243E-38	4.34057952591922	499.999999992411	-1.37028835185901E-47	-800.00000000004	-1.13088660985263E-40	0.053599045483925	-3.41049035626657E-42	0.999701712929628	-9.93719168507962E-41	0.024423044913241	1.05369459904262E-40	1.18068245442396E-38	2.79895309540199	-1.11021358933021E-38	1.21860831032881E-38	2.80662625469097	-1.11939647034963E-38	800.00000000004	2.79895309552232	-1.23489587274428E-38	88.888888872278	-2.4719824156817E-47	-1.84516347912896E-10	6.61657395539761E-09	1.19059452558893E-48	-1.31218048287939E-10	6.61787496734733E-10
5.63	88.7816820778561	-1.91590650272853E-38	4.36434344712498	500.444444436772	-1.38264878552912E-47	-800.000000000041	-1.13155174580945E-40	0.05346636504412	-3.87764040558276E-42	0.999698435377382	-9.9668961171431E-41	0.024556837364909	1.05353957197692E-40	1.18027995113209E-38	2.81428918068952	-1.11347400632752E-38	1.21849722411396E-38	2.82194324000564	-1.1226381273164E-38	800.000000000041	2.81428918081028	-1.23495026129046E-38	88.8888888722932	-2.47210613043534E-47	-1.85135573015004E-10	2.32773800234993E-09	-6.34463779108697E-49	-1.27751560007527E-10	2.33124101471049E-10
5.635	88.780513669004	-1.91597185631216E-38	4.38804728388243	500.888888881134	-1.39500993802311E-47	-800.000000000042	-1.13220101039914E-40	0.053329761988776	-4.33471269832563E-42	0.999695148230838	-9.99661608653798E-41	0.024690292852744	1.05337335266128E-40	1.17986406552387E-38	2.82958669140855	-1.11673707235923E-38	1.21837304374245E-38	2.83722109142761	-1.12588164428922E-38	800.000000000042	2.82958669152974	-1.2349923867413E-38	88.8888888723062	-2.47241868749513E-47	-1.85805174013862E-10	2.71829965943937E-09	-5.41049097772965E-49	-1.31478729780678E-10	2.7214774838115E-10
5.64	88.7793419869337	-1.91601862626217E-38	4.41168932097422	501.333333325495	-1.40737257042021E-47	-800.000000000042	-1.13283455645122E-40	0.053189354305935	-4.78178293251784E-42	0.999691851864721	-1.00263510505375E-40	0.024823401716889	1.05319620235703E-40	1.17943511088976E-38	2.84484452017177	-1.1200027334708E-38	1.21823605575216E-38	2.85245871901139	-1.12912697623778E-38	800.000000000042	2.84484452029338	-1.23502253359967E-38	88.8888888723207	-2.47261644082333E-47	-1.86440879813791E-10	2.84288148577597E-09	-4.41483217812896E-49	-1.27174461362799E-10	2.84572459767116E-10
5.645	88.7781671636776	-1.91604724712729E-38	4.43526790124174	501.777777769857	-1.41973613095096E-47	-800.000000000043	-1.13345276516458E-40	0.05304528622058	-5.21908310330749E-42	0.999688546650398	-1.0056100476763E-40	0.024956154623904	1.05300837828151E-40	1.17899339566861E-38	2.86006159699072	-1.12327093641775E-38	1.21808654003479E-38	2.86765507412891	-1.13237407922385E-38	800.000000000043	2.86006159711274	-1.23504098196593E-38	88.8888888723353	-2.47281860419899E-47	-1.87070078516357E-10	3.46057997073004E-09	1.5271592948715E-51	-1.17471258945838E-10	3.46257320940601E-10
5.65	88.7769893295446	-1.91605814112656E-38	4.4587814344271	502.222222214219	-1.43209992063591E-47	-800.000000000044	-1.1340552987074E-40	0.052897607074994	-5.64636005920474E-42	0.999685232954389	-1.00858638490486E-40	0.025088542616568	1.05281013044513E-40	1.17853921974393E-38	2.87523689498437	-1.12654162937766E-38	1.21792478373428E-38	2.8828091222876	-1.13562290834137E-38	800.000000000044	2.87523689510676	-1.23504800399293E-38	88.8888888723548	-2.47265656475937E-47	-1.87624341353197E-10	3.68487462765163E-09	1.46192579111826E-49	-1.1398897859958E-10	3.6866372900996E-10
5.655	88.7758086407764	-1.91605201203549E-38	4.48222784722334	502.666666658581	-1.44446341440288E-47	-800.000000000045	-1.13462411349022E-40	0.052744153721805	-6.05136745237978E-42	0.99968191121618	-1.01156403467748E-40	0.025220554017474	1.0526018708676E-40	1.17807307277747E-38	2.89036907544515	-1.12981472375681E-38	1.21775142482663E-38	2.89791920929885	-1.13887336699321E-38	800.000000000045	2.89036907556792	-1.2350440533186E-38	88.888888872371	-2.47274884193927E-47	-1.88224590792356E-10	3.03472802443118E-09	-3.23373390988728E-49	-1.22299439221953E-10	3.03719135635244E-10
5.66	88.7746252564422	-1.91602960006141E-38	4.50560505108868	503.111111102942	-1.45682764485582E-47	-800.000000000046	-1.13517895879511E-40	0.052587515810416	-6.44746081935935E-42	0.999678581883216	-1.01454291125415E-40	0.025352177062879	1.05238403243185E-40	1.17759546877469E-38	2.90545678974836	-1.13309012590621E-38	1.21756671867987E-38	2.91298442285392	-1.14212541515976E-38	800.000000000046	2.90545678987153	-1.23502960706394E-38	88.8888888723857	-2.4729354982202E-47	-1.88837639305807E-10	-3.33562392521928E-07	-1.13245414050284E-46	-7.2619997903749E-10	3.33563183027387E-08
5.665	88.7734392931711	-1.91599119905885E-38	4.52891182954518	503.555555547304	-1.46919275683973E-47	-800.000000000047	-1.13572377183356E-40	0.052428254583218	-6.83729476362779E-42	0.999675245283548	-1.01752297779738E-40	0.025483404898631	1.0521567909416E-40	1.1771066203574E-38	2.92049925202792	-1.1363677999438E-38	1.21737084461325E-38	2.9280040114282	-1.1453790241007E-38	800.000000000047	2.92049925215149	-1.23500485464096E-38	88.8888888724006	-2.47310983153966E-47	-1.89438495783922E-10	1.97943397968919E-06	5.61759842606204E-46	2.01429105077047E-09	1.9794350045699E-07
5.67	88.7722516622914	-1.91594561131784E-38	4.55213168750893	503.999999991682	-1.4832391360256E-47	-800.000000000048	-1.13570643286179E-40	0.05219811692666	-6.83468729717034E-42	0.999671903981032	-1.02050329352766E-40	0.025614144642435	1.05192521888537E-40	1.17661247645969E-38	2.93548581515327	-1.13964662531E-38	1.21717504524504E-38	2.94295767042034	-1.14863258336914E-38	800.000000000048	2.93548581496709	-1.23497546966762E-38	88.8888888926051	-1.7960719972608E-47	-1.53763582543472E-10	5.88058668426999E-06	2.9109225010291E-45	2.37457032437872E-08	5.88063462643583E-07
5.675	88.771063222399	-1.91590145394792E-38	4.57524911707538	504.444444436203	-1.48873521649415E-47	-800.000000000048	-1.13568917671407E-40	0.051967723303359	-6.83209133768111E-42	0.999668560391175	-1.02348294197778E-40	0.025744308967845	1.05169427968678E-40	1.17611885628292E-38	2.95040646855672	-1.14292550304924E-38	1.21697932024559E-38	2.95784532650127	-1.15188609320236E-38	800.000000000048	2.95040646807329	-1.23494700666141E-38	88.8888889153597	-4.28399889901489E-48	-2.84895997399113E-11	-5.65224974972466E-06	-3.33742940747143E-45	-3.15265436815952E-08	5.652337671815E-07
5.68	88.7698740223381	-1.91585872445827E-38	4.59826397077291	504.888888880869	-1.48558698937953E-47	-800.000000000048	-1.13567200345648E-40	0.05173707652401	-6.82950690157486E-42	0.999665214651373	-1.02646192247023E-40	0.025873897039506	1.05146397514832E-40	1.17562576862072E-38	2.96526111574975	-1.14620443220484E-38	1.21678366928478E-38	2.97266690714713	-1.15513955383782E-38	800.000000000048	2.96526111594308	-1.23491946455492E-38	88.8888888632238	-3.58079097129058E-47	-3.25988665581048E-10	6.66706322742009E-06	4.03616703598516E-45	3.83543461492877E-08	6.66717354913502E-07
5.685	88.7686842761493	-1.91581740686605E-38	4.6211759808194	505.333333325678	-1.47375779928845E-47	-800.000000000047	-1.13565491307599E-40	0.051506189702495	-6.82693401830424E-42	0.99966186736377	-1.02944023449146E-40	0.026002907322295	1.05123431084767E-40	1.17513322580327E-38	2.98004958135195	-1.14948341114474E-38	1.21658809203165E-38	2.9874223435909	-1.15839296551295E-38	800.000000000047	2.98004958006809	-1.23489283137628E-38	88.8888889764852	3.273714821052E-47	3.24353460811311E-10	1.54123670862787E-05	9.33577312481195E-45	8.89518359382594E-08	1.54126237750528E-06
5.69	88.7674939223757	-1.91577750574804E-38	4.64398522474061	505.777777770603	-1.4547968570978E-47	-800.000000000045	-1.13563790557586E-40	0.051275059077615	-6.8243726793424E-42	0.999658518355491	-1.03241787819345E-40	0.026131340260524	1.05100528518319E-40	1.1746412322944E-38	2.99477191473251	-1.15276243946179E-38	1.21639258815548E-38	3.00211156598805	-1.16164632846518E-38	800.000000000045	2.9947719133849	-1.23486711197651E-38	88.8888889815853	3.60384347445454E-47	3.67720132908893E-10	-5.49008897602676E-06	-3.2076090031693E-45	-2.35141871351426E-08	5.49013933171893E-07
5.695	88.7663030770767	-1.91573901233161E-38	4.66669156296566	506.222222215475	-1.43888264346354E-47	-800.000000000043	-1.13562098094459E-40	0.051043691795041	-6.82182290004012E-42	0.999655167953141	-1.03539485333757E-40	0.026259195052985	1.0507769011774E-40	1.1741497975981E-38	3.00942802387006	-1.1560415159552E-38	1.2161971573251E-38	3.01673450654117	-1.16489964293191E-38	800.000000000043	3.00942802314434	-1.23484230029128E-38	88.8888889375098	1.03403692718398E-47	1.8407063188369E-10	-1.12063550735297E-05	-6.52201041455287E-45	-4.5674256709319E-08	1.12064481514774E-06
5.7	88.7651118441921	-1.91570191878929E-38	4.6892948689646	506.666666660189	-1.43218859632855E-47	-800.000000000042	-1.13560413917311E-40	0.050812094244624	-6.81928469431397E-42	0.999651816449193	-1.03837115969923E-40	0.026386470973642	1.05054916153761E-40	1.17365893089725E-38	3.02401782526463	-1.15932063946422E-38	1.21600179920896E-38	3.03129109928336	-1.16815290915052E-38	800.000000000042	3.0240178253578	-1.23481839102125E-38	88.8888888808254	-2.25256010321764E-47	-3.74000688933687E-11	-1.02609952534742E-05	-5.93570859506132E-45	-3.89641412012494E-08	1.02610692325956E-06
5.705	88.7639203246042	-1.91566621753205E-38	4.71179501949691	507.111111104657	-1.43987793839884E-47	-800.000000000042	-1.13558738025295E-40	0.05058027262557	-6.8167580757187E-42	0.999648464127504	-1.04134679705742E-40	0.026513167315417	1.05032206889168E-40	1.17316864130074E-38	3.03854123756542	-1.16259980883037E-38	1.21580651347511E-38	3.04578128002369	-1.17140612735836E-38	800.000000000042	3.03854123822037	-1.23479537905765E-38	88.8888888427879	-4.4454513130056E-47	-1.76152751047455E-10	-3.85851848250214E-06	-2.21519665958124E-45	-1.34304103143926E-08	3.85854185615912E-07
5.71	88.762728610606	-1.91563190154944E-38	4.7341919056179	507.555555548858	-1.46315735127212E-47	-800.000000000044	-1.13557070417336E-40	0.050348232629695	-6.81424305623589E-42	0.999645111247738	-1.0443217652365E-40	0.026639283452524	1.05009562563996E-40	1.17267893765165E-38	3.05299818867296	-1.16587902292944E-38	1.21561129979126E-38	3.06020498620181	-1.17465929779275E-38	800.000000000044	3.05299818938775	-1.23477325977006E-38	88.88888883947	-4.61781087669177E-47	-1.76218458465144E-10	1.26393236617627E-07	1.84075613933847E-46	7.49123366372044E-09	1.26615041936114E-08
5.715	88.7615367674255	-1.91559896565406E-38	4.75648546342732	507.999999992978	-1.49076695205837E-47	-800.000000000045	-1.13555411091646E-40	0.0501159783501	-6.81173964289019E-42	0.999641757993324	-1.04729606420388E-40	0.026764819015317	1.04986983346597E-40	1.17218982793272E-38	3.06738863563566	-1.16915828077046E-38	1.21541615782492E-38	3.07456215642996	-1.17791242069096E-38	800.000000000045	3.06738863641141	-1.23475203004172E-38	88.8888888381776	-4.59678930312066E-47	-1.20651865826904E-10	-2.87359824824288E-07	8.39794963610202E-47	1.46943886575945E-08	2.8773528456042E-08
5.72	88.7603448765396	-1.91556740356404E-38	4.77867560198214	508.444444437078	-1.51893125515788E-47	-800.000000000046	-1.13553760046866E-40	0.049883514839685	-6.80924784568217E-42	0.999638404593456	-1.05026969384109E-40	0.026889773480375	1.04964469448359E-40	1.1717013206528E-38	3.0817125179988	-1.17243758127026E-38	1.21522108724331E-38	3.08885273076792	-1.18116549629023E-38	800.000000000046	3.08171251885906	-1.23473168584111E-38	88.8888888363595	-4.56771770774128E-47	-4.28670069522194E-11	-3.24932140453386E-07	5.18509296633104E-47	1.39153479618714E-08	3.25229969111887E-08
5.725	88.759153021157	-1.9155372088808E-38	4.80076222745655	508.888888881205	-1.54467261788372E-47	-800.000000000046	-1.13552117281682E-40	0.049650847253668	-6.80676767492964E-42	0.999635051282212	-1.05324265402053E-40	0.027014146307881	1.04942021085257E-40	1.17121342438302E-38	3.09596977344041	-1.17571692332829E-38	1.21502608771336E-38	3.10307665075234	-1.18441852482774E-38	800.000000000046	3.09596977435829	-1.23471222303595E-38	88.8888888351454	-4.54858293956786E-47	8.99554160021293E-12	-1.37286567299564E-07	2.04659200453966E-47	5.77669770055914E-09	1.37408048516895E-08
5.73	88.7579612833945	-1.9155083751911E-38	4.82274525238779	509.333333325374	-1.56721235312158E-47	-800.000000000046	-1.13550482794394E-40	0.049417980712542	-6.8042991402494E-42	0.999631698290621	-1.05621494465245E-40	0.027137936993569	1.04919638470081E-40	1.17072614763106E-38	3.11016034370525	-1.17899630584805E-38	1.21483115890172E-38	3.11723385938678	-1.18767150654063E-38	800.000000000046	3.110160344645	-1.23469363749118E-38	88.8888888347082	-4.54326554624928E-47	2.60399232394527E-11	-1.74309159698763E-07	2.13764902533205E-47	6.6577267908238E-09	1.74436259077378E-08
5.735	88.7567697434815	-1.91548089605625E-38	4.84462460030929	509.777777769538	-1.58957185280721E-47	-800.000000000045	-1.13548856582634E-40	0.049184920276796	-6.80184225004685E-42	0.99962834584445	-1.05918656571256E-40	0.027261145094597	1.04897321810113E-40	1.1702394987893E-38	3.12428417756716	-1.18227572774629E-38	1.2146363004748E-38	3.13132430112452	-1.19092444166599E-38	800.000000000045	3.12428417857395	-1.23467592506942E-38	88.888888833204	-4.52396753145703E-47	8.40017136729006E-11	-3.74253043370699E-07	4.83822420506014E-47	1.43994203754622E-08	3.74529950443725E-08
5.74	88.7555784830751	-1.91545476505678E-38	4.86640018643677	510.222222213697	-1.61189806468171E-47	-800.000000000044	-1.1354723864454E-40	0.048951671052305	-6.7993970136437E-42	0.999624994173448	-1.06215751712707E-40	0.027383770121659	1.04875071316801E-40	1.16975348634758E-38	3.13834121848072	-1.1855551879157E-38	1.21444151209874E-38	3.14534792188157	-1.19417733044084E-38	800.000000000044	3.1383412195722	-1.23465908162831E-38	88.8888888312865	-4.49905338437456E-47	1.57718762179827E-10	-2.85071403519983E-07	3.76110077897131E-47	1.10358225393915E-08	2.85284935606446E-08
5.745	88.7543875838814	-1.91542997577391E-38	4.88807192569941	510.666666657851	-1.63423891240723E-47	-800.000000000043	-1.13545628978268E-40	0.048718238146513	-6.79696344039325E-42	0.9996216435075	-1.06512779882046E-40	0.027505811583848	1.04852887201736E-40	1.16926811880493E-38	3.1523314097162	-1.18883468524043E-38	1.21424679343942E-38	3.15930466903712	-1.19743017310215E-38	800.000000000043	3.15233141085615	-1.23464310302159E-38	88.8888888302276	-4.48517909687376E-47	1.98461030595418E-10	-3.45738726537069E-07	4.28015683519725E-47	1.2852864569266E-08	3.45977547183499E-08
5.75	88.7531971248083	-1.9154065217568E-38	4.90963974875428	511.111111101999	-1.656536788655E-47	-800.000000000042	-1.13544027581026E-40	0.048484626577844	-6.79454153791504E-42	0.999618294068641	-1.06809741081027E-40	0.027627269078176	1.04830769668332E-40	1.16878340448913E-38	3.1662547046043	-1.19211421862796E-38	1.2140521441625E-38	3.17319449140801	-1.2006829698868E-38	800.000000000042	3.16625470583965	-1.23462798510527E-38	88.8888888280016	-4.45862411632141E-47	2.7956510625606E-10	-2.53028531460569E-07	2.72796283311788E-47	8.7765372350621E-09	2.53180697010911E-08
5.755	88.752007188041	-1.91538439659213E-38	4.93110356783857	511.555555546142	-1.67885767989356E-47	-800.000000000041	-1.13542434451133E-40	0.048250841468977	-6.7921313158591E-42	0.9996149460881	-1.07106635300506E-40	0.02774814209869	1.0480871892958E-40	1.16829935194067E-38	3.18011104469126	-1.19539378694137E-38	1.21385756393335E-38	3.18701733927864	-1.20393572103165E-38	800.000000000041	3.18011104594134	-1.23461372372423E-38	88.8888888276686	-4.45734279714364E-47	2.8760059212676E-10	-1.83095257474015E-07	1.57932767463469E-47	5.72091623807088E-09	1.83184612323412E-08
5.76	88.7508178507703	-1.91536359380942E-38	4.95246332325869	511.999999990278	-1.70107923368335E-47	-800.000000000039	-1.13540849585217E-40	0.048016887783727	-6.78973278078128E-42	0.999611599783096	-1.07403462547943E-40	0.02786843029634	1.04786735183873E-40	1.16781596938874E-38	3.19390038947903	-1.19867338909205E-38	1.21366305241717E-38	3.20077316435545	-1.20718842677343E-38	800.000000000039	3.19390039079925	-1.23460031473018E-38	88.888888825996	-4.44004075652065E-47	3.44243020326803E-10	-2.9595644453667E-07	3.13335941609107E-47	1.01287288396887E-08	2.96129715176804E-08
5.765	88.7496291937037	-1.91534410697844E-38	4.97371893555552	512.444444434407	-1.7232121882165E-47	-800.000000000037	-1.13539272981097E-40	0.047782770597771	-6.78734594141627E-42	0.999608255380715	-1.07700222819107E-40	0.027988133211589	1.04764818639886E-40	1.16733326529044E-38	3.20762268582456	-1.20195302394432E-38	1.2134686092789E-38	3.21446191979892	-1.21044108734883E-38	800.000000000037	3.20762268718164	-1.23458775396317E-38	88.8888888251684	-4.43127187894583E-47	3.72629368877079E-10	-5.1137760692651E-09	3.38828714678421E-50	1.49425713340609E-10	5.1159587303257E-10
5.77	88.7484412959683	-1.91532592965216E-38	4.99487033392431	512.888888878533	-1.74531084529077E-47	-800.000000000035	-1.13537704636076E-40	0.047548494937194	-6.78497080554438E-42	0.999604913103601	-1.07996916114865E-40	0.028107250433302	1.04742969501665E-40	1.16685124800905E-38	3.22127788612288	-1.20523269037238E-38	1.21327423418326E-38	3.22808356020942	-1.21369370299446E-38	800.000000000035	3.22127788745965	-1.23457603726362E-38	88.8888888257576	-4.43805833570441E-47	3.52071589877243E-10	1.19366916351274E-07	-1.36576679195348E-47	-4.15172301120928E-09	1.19439095455273E-08
5.775	88.7472542346238	-1.91530905536184E-38	5.01591745884071	513.333333322662	-1.76749307824574E-47	-800.000000000033	-1.13536144546782E-40	0.047314065763305	-6.78260737970189E-42	0.999601573168598	-1.0829354244273E-40	0.028225781613432	1.04721187967209E-40	1.16636992578286E-38	3.23486594998818	-1.20851238726616E-38	1.21307992679478E-38	3.24163804160863	-1.21694627394681E-38	800.000000000033	3.2348659513159	-1.23456516047368E-38	88.8888888260687	-4.4416867278425E-47	3.4126360572985E-10	2.19517441261496E-08	-2.68938907188218E-48	-7.59196195002771E-10	2.19648685186698E-09
5.78	88.7460680874788	-1.91529347764799E-38	5.03686024654118	513.777777766794	-1.78973290687945E-47	-800.000000000032	-1.13534592710102E-40	0.047079488060971	-6.78025567089242E-42	0.999598235794655	-1.08590101807701E-40	0.028343726380236	1.04699474236743E-40	1.16588930690256E-38	3.24838683432262	-1.21179211349972E-38	1.2128856867778E-38	3.25512532144629	-1.22019880044233E-38	800.000000000032	3.2483868356552	-1.23455511943017E-38	88.8888888260367	-4.44141354017683E-47	3.42420295821548E-10	-4.44065525092174E-09	3.93333824402336E-49	1.78017498940698E-10	4.44422201149627E-10
5.785	88.7448829322654	-1.91527919005139E-38	5.05769863355532	514.222222210924	-1.81194554065394E-47	-800.00000000003	-1.13533049122905E-40	0.0468447668128	-6.77791568608708E-42	0.999594901200508	-1.08886594214943E-40	0.028461084363623	1.04677828510288E-40	1.16540939965934E-38	3.26184049621689	-1.21507186794056E-38	1.21269151379645E-38	3.26854535859953	-1.22345128271733E-38	800.00000000003	3.26184049755117	-1.23454590996669E-38	88.8888888260835	-4.44197718029391E-47	3.40970788131683E-10	1.18838272555869E-08	-1.47479327143206E-48	-3.81761260877751E-10	1.18899576071968E-09
5.79	88.7436988459289	-1.91526618610533E-38	5.07843256056964	514.666666655054	-1.8341529229219E-47	-800.000000000028	-1.13531513781816E-40	0.046609906977131	-6.77558743179836E-42	0.999591569602682	-1.09183019672055E-40	0.028577855216765	1.0465625098556E-40	1.1649302122998E-38	3.27522689542353	-1.21835164945765E-38	1.21249740751467E-38	3.28189811336596	-1.22670372100804E-38	800.000000000028	3.27522689675895	-1.2345375279154E-38	88.8888888261424	-4.44274195826209E-47	3.39047999155462E-10	1.20313832970464E-08	-1.52160960410047E-48	-3.86350696365148E-10	1.2037584928092E-09
5.795	88.7425159050176	-1.91525445934011E-38	5.0990619702814	515.111111099185	-1.85636761098613E-47	-800.000000000027	-1.13529986683344E-40	0.046374913500122	-6.77327091431673E-42	0.999588241216586	-1.09479378187805E-40	0.028694038604092	1.04634741859128E-40	1.16445175305052E-38	3.2885459929835	-1.22163145691719E-38	1.21230336759622E-38	3.29518354746017	-1.22995611555061E-38	800.000000000027	3.28854599432005	-1.23452996910617E-38	88.8888888262018	-4.44346531289594E-47	3.37190908053828E-10	1.18859588837942E-08	-1.43566844291429E-48	-3.67378784626508E-10	1.18916351171165E-09
5.8	88.7413341856488	-1.91524400328302E-38	5.11958680754039	515.555555543316	-1.87858639747045E-47	-800.000000000025	-1.13528467823873E-40	0.046139791314758	-6.77096613969503E-42	0.999584916256422	-1.09775669772213E-40	0.028809634202096	1.04613301326323E-40	1.16397403011607E-38	3.3017977513175	-1.22491128918295E-38	1.21210939370471E-38	3.30840162400992	-1.23320846658105E-38	800.000000000025	3.30179775265516	-1.23452322936683E-38	88.8888888262611	-4.44418894336849E-47	3.35362296980622E-10	1.18177467811612E-08	-1.45676383757604E-48	-3.64427942814659E-10	1.1823364441188E-09
5.805	88.7401537634983	-1.91523481145826E-38	5.14000701939857	515.999999987448	-1.9008095187564E-47	-800.000000000023	-1.13526957199657E-40	0.045904545340553	-6.76867311374294E-42	0.999581594935151	-1.10071894436578E-40	0.028924641699601	1.04591929581197E-40	1.16349705167809E-38	3.31498213425794	-1.22819114511657E-38	1.21191548550355E-38	3.32155230755232	-1.23646077433531E-38	800.000000000023	3.31498213559668	-1.23451730452324E-38	88.8888888263197	-4.44493905048764E-47	3.33527897810558E-10	1.1803535926446E-08	-1.45128271426311E-48	-3.58645519925707E-10	1.18089833167747E-09
5.81	88.7389747137963	-1.91522687738708E-38	5.16032255510195	516.444444431579	-1.92303654328351E-47	-800.000000000022	-1.13525454806828E-40	0.045669180483482	-6.76639184202777E-42	0.999578277464484	-1.10368052193467E-40	0.029039060797729	1.04570626816518E-40	1.16302082589505E-38	3.32809910704419	-1.23147102357759E-38	1.21172164265601E-38	3.33463556402995	-1.23971303904917E-38	800.000000000022	3.32809910838396	-1.23451219039934E-38	88.8888888263764	-4.44579127597019E-47	3.31609593778181E-10	9.79933171644547E-09	-2.55692053175429E-48	-4.750498380535E-10	9.8108396397846E-10
5.815	88.7377971113194	-1.91522019458823E-38	5.18053336607048	516.888888875711	-1.94527034789282E-47	-800.00000000002	-1.13523960641391E-40	0.045433701635833	-6.7641223298767E-42	0.999574964054858	-1.10664143056703E-40	0.029152891209787	1.04549393223751E-40	1.16254536090203E-38	3.34114863631041	-1.23475092342362E-38	1.2115278648252E-38	3.3476513607869	-1.24296526095835E-38	800.00000000002	3.34114863765084	-1.23450788281758E-38	88.8888888264163	-4.44757627742399E-47	3.28688013629847E-10	6.36527867451713E-09	-4.45868169739284E-48	-6.80023048272292E-10	6.40150013281607E-10
5.82	88.7366210304033	-1.91521475657732E-38	5.20063940592791	517.333333319844	-1.96751279138808E-47	-800.000000000018	-1.13522474699224E-40	0.045198113676433	-6.76186458237352E-42	0.999571654915471	-1.10960167041387E-40	0.029266132661427	1.04528228993084E-40	1.16207066481047E-38	3.35413069010386	-1.23803084351037E-38	1.21133415167409E-38	3.36059966656496	-1.24621744029843E-38	800.000000000018	3.35413069144471	-1.23450437759821E-38	88.8888888264455	-4.44994523566876E-47	3.25146213818142E-10	7.26506262556795E-09	-3.94556751313635E-48	-6.17888737867187E-10	7.2912907942152E-10
5.825	88.7354465449395	-1.915210556867E-38	5.22064063049437	517.777777763976	-1.98976550405606E-47	-800.000000000017	-1.13520996976078E-40	0.044962421470592	-6.75961860435948E-42	0.999568350254277	-1.11256124163894E-40	0.02937878489061	1.04507134313428E-40	1.16159674570796E-38	3.36704523788049	-1.24131078269177E-38	1.21114050286552E-38	3.37348045149973	-1.24946957730485E-38	800.000000000017	3.36704523922208	-1.23450167055945E-38	88.8888888264908	-4.4514186378918E-47	3.22622241026583E-10	9.68540803114527E-09	-2.6020236667543E-48	-4.64699695496647E-10	9.696549620188E-10
5.83	88.7342737283455	-1.91520758896838E-38	5.24053699771399	518.222222208108	-2.01202861077799E-47	-800.000000000015	-1.13519527467587E-40	0.044726629869555	-6.75738440044089E-42	0.999565050277895	-1.11552014441807E-40	0.029490847647218	1.04486109372332E-40	1.16112361165793E-38	3.37989225046104	-1.24459073982014E-38	1.21094691806217E-38	3.38629368711657	-1.25272167221296E-38	800.000000000015	3.37989225180336	-1.23449975751882E-38	88.8888888265369	-4.45285675463387E-47	3.2015673722411E-10	7.50948932666941E-09	-3.86617774017602E-48	-6.00097935346429E-10	7.53342866690651E-10
5.835	88.7331026535794	-1.91520584639036E-38	5.26032846769022	518.666666652241	-2.03430151699794E-47	-800.000000000014	-1.13518066169262E-40	0.044490743710773	-6.75516197498537E-42	0.999561755191658	-1.11847837893949E-40	0.029602320693248	1.04465154356028E-40	1.16065127069943E-38	3.3926717000527	-1.24787071374622E-38	1.21075339692663E-38	3.3990393463267	-1.25597372525795E-38	800.000000000014	3.39267170139536	-1.23449863429241E-38	88.8888888265663	-4.45525628714433E-47	3.16654182607394E-10	5.62631422932668E-09	-4.93967017270525E-48	-7.13262092218652E-10	5.67134504498889E-10
5.84	88.7319333931549	-1.91520532263886E-38	5.28001500272284	519.111111096374	-2.05658372786968E-47	-800.000000000012	-1.13516613076486E-40	0.044254767818179	-6.752951332118E-42	0.999558465199647	-1.12143594540417E-40	0.029713203802998	1.04444269449466E-40	1.16017973084697E-38	3.40538356027164	-1.2511507033193E-38	1.21055993912133E-38	3.41171740342327	-1.2592257366749E-38	800.000000000012	3.40538356161471	-1.23449829669415E-38	88.8888888265992	-4.45744936324793E-47	3.13407622585415E-10	8.86994181807132E-09	-3.06638691293278E-48	-5.00805669950538E-10	8.88406855978864E-10
5.845	88.7307660191207	-1.91520601121788E-38	5.2995965672549	519.555555540507	-2.07887480938296E-47	-800.000000000011	-1.13515168184525E-40	0.044018707001794	-6.75075247572687E-42	0.999555180504642	-1.12439284402535E-40	0.029823496762796	1.04423454836259E-40	1.15970900009018E-38	3.41802780611094	-1.2544307073873E-38	1.21036654430864E-38	3.4243278340774	-1.26247770669875E-38	800.000000000011	3.41802780745482	-1.23449874053676E-38	88.8888888266517	-4.4585214857681E-47	3.11425049450145E-10	9.25931923726783E-09	-2.87556454942059E-48	-4.7544737182759E-10	9.2715178337215E-10
5.85	88.7296006030371	-1.91520790563069E-38	5.31907312781273	519.99999998464	-2.10117527335797E-47	-800.000000000009	-1.13513731488528E-40	0.043782566057297	-6.74856540946941E-42	0.999551901308046	-1.12734907502796E-40	0.029933199370679	1.04402710698624E-40	1.15923908639362E-38	3.4306044139041	-1.25771072479693E-38	1.21017321215077E-38	3.43687061533408	-1.26572963556428E-38	800.000000000009	3.43060441524838	-1.23449996163283E-38	88.8888888266875	-4.46058002214646E-47	3.08372012163151E-10	5.87808320536433E-09	-4.88968087107274E-48	-6.93102919205562E-10	5.91880510118364E-10
5.855	88.7284372160159	-1.91521099937779E-38	5.33844465310974	520.444444428774	-2.12348504765021E-47	-800.000000000007	-1.1351230298352E-40	0.043546349766777	-6.74639013676145E-42	0.999548627810007	-1.13030463864963E-40	0.03004231143694	1.04382037217487E-40	1.15876999769656E-38	3.44311336138841	-1.26099075439371E-38	1.20997994230988E-38	3.44934572560826	-1.26898152350617E-38	800.000000000007	3.44311336273292	-1.23450195579288E-38	88.8888888267165	-4.46304817103602E-47	3.04896141538939E-10	7.74846853346337E-09	-3.75674520477095E-48	-5.62151753599892E-10	7.76883383836644E-10
5.86	88.7272759287057	-1.91521528595765E-38	5.35771111400745	520.888888872908	-2.14580398076232E-47	-800.000000000006	-1.13510882664404E-40	0.043310062898449	-6.74422666078133E-42	0.999545360209372	-1.13325953514026E-40	0.030150832783923	1.04361434572443E-40	1.15830174191275E-38	3.45555462768129	-1.26427079502212E-38	1.20978673444801E-38	3.4617531446809	-1.2722333707589E-38	800.000000000006	3.45555462902648	-1.23450471882597E-38	88.8888888267652	-4.46432476016482E-47	3.02762534448104E-10	9.77185739732941E-09	-2.55700077692729E-48	-4.24871291257838E-10	9.78108954093953E-10
5.865	88.7261168112603	-1.91522075886846E-38	5.37687248342678	521.333333317041	-2.16813209885691E-47	-800.000000000004	-1.13509470525973E-40	0.043073710206036	-6.74207498447926E-42	0.999542098703594	-1.13621376476128E-40	0.030258763245559	1.0434090294167E-40	1.15783432693015E-38	3.46792819322638	-1.26755084552571E-38	1.20959358822712E-38	3.47409285369478	-1.27548517755686E-38	800.000000000004	3.46792819457209	-1.23450824654135E-38	88.8888888268088	-4.4659389186864E-47	3.00278332945763E-10	7.17671847875511E-09	-4.18496530020745E-48	-6.00260465682223E-10	7.20177761042135E-10
5.87	88.7249599333655	-1.91522741160663E-38	5.3959287364243	521.777777761175	-2.19046941110678E-47	-800.000000000003	-1.13508066562899E-40	0.042837296429304	-6.73993511056924E-42	0.999538843488815	-1.13916732778633E-40	0.030366102667759	1.04320442502004E-40	1.15736776061071E-38	3.48023403984009	-1.27083090474719E-38	1.20940050330911E-38	3.48636483515053	-1.27873694413423E-38	800.000000000003	3.48023404118597	-1.23451253474702E-38	88.8888888268393	-4.46836399868791E-47	2.96921820893215E-10	6.46333357205202E-09	-4.61659792298649E-48	-6.42672464436518E-10	6.49520659872799E-10
5.875	88.7238053642425	-1.91523523766665E-38	5.41487985020063	522.22222220531	-2.21281588818078E-47	-800.000000000001	-1.13506670769735E-40	0.042600826294115	-6.73780704152822E-42	0.999535594759872	-1.14212022450131E-40	0.030472850908469	1.04300053428945E-40	1.1569020507902E-38	3.49247215071686	-1.27411097152849E-38	1.20920747935578E-38	3.49856907290264	-1.28198867072507E-38	800.000000000001	3.49247215206312	-1.23451757924952E-38	88.8888888268783	-4.47025228741948E-47	2.94186061040764E-10	9.96133546019876E-09	-2.42467142071535E-48	-3.95740389458692E-10	9.9691932776159E-10
5.88	88.7226531726272	-1.91524423054222E-38	5.43372580403942	522.666666649444	-2.23517150008838E-47	-800	-1.13505283140919E-40	0.042364304512017	-6.7356907796025E-42	0.999532352710239	-1.14507245520386E-40	0.030579007837341	1.04279735896603E-40	1.1564372052779E-38	3.50464251039204	-1.27739104471092E-38	1.20901451602889E-38	3.51070555215537	-1.28524035756328E-38	800	3.50464251173906	-1.23452337585497E-38	88.8888888269335	-4.47113212249156E-47	2.92584707074307E-10	8.9253641514606E-09	-3.12592458519529E-48	-4.68724760901946E-10	8.93766346075195E-10
5.885	88.7215034267534	-1.91525438372723E-38	5.45246657925777	523.111111093579	-2.25753621372959E-47	-799.999999999999	-1.13503903670781E-40	0.042127735779913	-6.73358632681296E-42	0.999529117531978	-1.14802402020293E-40	0.03068457333547	1.04259490077648E-40	1.15597323185644E-38	3.51674510471172	-1.28067112313526E-38	1.20882161299014E-38	3.52277425945853	-1.28849200488258E-38	799.999999999999	3.51674510605886	-1.23452992036998E-38	88.888888826965	-4.47353588059131E-47	2.8932584576202E-10	6.53628262625672E-09	-4.57220003949897E-48	-6.22900927687962E-10	6.56589644572773E-10
5.89	88.720356194399	-1.91526569071314E-38	5.47110215934356	523.555555537714	-2.27990999967701E-47	-799.999999999997	-1.13502532353527E-40	0.041891124780979	-6.73149368494061E-42	0.999525889415872	-1.15097491981996E-40	0.030789547296126	1.0423931614344E-40	1.15551013828152E-38	3.52877992091667	-1.28395120564182E-38	1.20862876990115E-38	3.53477518270356	-1.29174361291653E-38	799.999999999997	3.52877992226394	-1.23453720859909E-38	88.8888888269975	-4.47587719655143E-47	2.86163584317385E-10	9.13923751492438E-09	-2.87807553278474E-48	-4.3104585313294E-10	9.14939685890301E-10
5.895	88.7192115428327	-1.9152781449923E-38	5.48963252977257	523.999999981848	-2.30232180920112E-47	-799.999999999996	-1.13501169183258E-40	0.041654476183529	-6.72941285554584E-42	0.999522668551273	-1.15392515438735E-40	0.030893929623778	1.04219214263874E-40	1.15504793228181E-38	3.54074694753058	-1.28723129107054E-38	1.20843598642354E-38	3.54670831111928	-1.29499518189853E-38	799.999999999996	3.54074694887676	-1.23454523634787E-38	88.8888888269982	-4.48077967966138E-47	2.80191134646664E-10	-2.83508920044047E-08	-3.11460256874727E-47	-3.55134259971209E-09	2.8572453722177E-09
5.9	88.7180695387219	-1.91529174006464E-38	5.50805767763298	524.444444425981	-2.32494616069439E-47	-799.999999999995	-1.13499814154012E-40	0.041417794638858	-6.72734384000809E-42	0.999519455125842	-1.15687472424528E-40	0.030997720232097	1.04199184607076E-40	1.1545866215589E-38	3.55264617412976	-1.290511378261E-38	1.20824326221886E-38	3.55857363526701	-1.2982467120618E-38	799.999999999995	3.55264617546317	-1.23455399942871E-38	88.8888888266508	-4.51181406185536E-47	2.45369769339437E-10	-1.09540110315713E-07	-9.24083245059613E-47	-1.03092350950134E-08	1.10024161420221E-08
5.905	88.716930248347	-1.91530646942245E-38	5.52637759248199	524.88888887011	-2.34784974725086E-47	-799.999999999994	-1.13498467259671E-40	0.041181084786202	-6.72528663943539E-42	0.999516249326154	-1.15982362974893E-40	0.031100919048516	1.04179227340095E-40	1.15412621378665E-38	3.56447759186863	-1.29379146605272E-38	1.20805059694863E-38	3.57037114703711	-1.30149820363939E-38	799.999999999994	3.56447759317529	-1.23456349364732E-38	88.8888888258924	-4.57415464889797E-47	1.7605588192118E-10	-1.93016565693432E-07	-1.56577492399531E-46	-1.73722711259985E-08	1.93796776124275E-08
5.91	88.7157937375228	-1.91532232655588E-38	5.54459226603484	525.333333314236	-2.37108071664025E-47	-799.999999999993	-1.13497128493994E-40	0.040944351250926	-6.72324125469727E-42	0.999513051337476	-1.16277187126583E-40	0.031203526012574	1.04159342628646E-40	1.15366671661107E-38	3.57624119328914	-1.29707155328521E-38	1.20785799027436E-38	3.58210083964501	-1.30474965686417E-38	799.999999999993	3.57624119455472	-1.23457371480761E-38	88.8888888247234	-4.66842700340839E-47	7.16356682143509E-11	-2.74040464394887E-07	-2.20370544501975E-46	-2.43766747691791E-08	2.75122515251965E-08
5.915	88.7146600715769	-1.91533930495447E-38	5.56270169208137	525.777777758358	-2.39469115380726E-47	-799.999999999993	-1.13495797850631E-40	0.040707598644036	-6.72120768643347E-42	0.999509861343708	-1.1657194491752E-40	0.031305541075472	1.04139530637049E-40	1.15320813765015E-38	3.58793697226971	-1.30035163879802E-38	1.20766544185753E-38	3.59376270762709	-1.30800107196883E-38	799.999999999993	3.58793697348001	-1.23458465871297E-38	88.8888888231596	-4.79421825768831E-47	-6.73454067940464E-11	-3.50468809529024E-07	-2.82310981881398E-46	-3.11603018205082E-08	3.51851319256069E-08
5.92	88.7135293153476	-1.91535739810728E-38	5.58070586647878	526.222222202474	-2.41873721118223E-47	-799.999999999993	-1.13494475323117E-40	0.040470831562134	-6.71918593505474E-42	0.999506679527375	-1.16866636386785E-40	0.031406964200036	1.04119791528218E-40	1.15275048449366E-38	3.59956492402094	-1.30363172143083E-38	1.20747295135961E-38	3.60535674683657	-1.31125244918586E-38	799.999999999993	3.59956492516227	-1.23459632116639E-38	88.8888888212308	-4.95009966516609E-47	-2.39240054231525E-10	-4.19616460097406E-07	-3.40409156488531E-46	-3.7506332644017E-08	4.21289328814631E-08
5.925	88.7124015331814	-1.91537659950301E-38	5.59860478714438	526.666666646585	-2.44327923899184E-47	-799.999999999994	-1.13493160904875E-40	0.040234054587365	-6.71717600074364E-42	0.99950350606962	-1.17161261574615E-40	0.031507795360676	1.04100125463656E-40	1.15229376470294E-38	3.61112504508125	-1.30691180002363E-38	1.20728051844206E-38	3.61688295443934	-1.31450378874759E-38	799.999999999994	3.6111250461409	-1.23460869797053E-38	88.8888888189795	-5.13367005167108E-47	-4.41331788415208E-10	-4.79044833430906E-07	-3.92750945333896E-46	-4.32045592830278E-08	4.80989174909046E-08
5.93	88.7112767889305	-1.91539690263015E-38	5.61639845404837	527.111111090689	-2.46838191556977E-47	-799.999999999996	-1.1349185458922E-40	0.03999727228737	-6.71517788345521E-42	0.999500341150198	-1.17455820522394E-40	0.031608034543352	1.04080532603448E-40	1.15183798581062E-38	3.62261733331264	-1.3101918734167E-38	1.20708814276636E-38	3.62834132890985	-1.31775509088612E-38	799.999999999996	3.62261733427924	-1.23462178492785E-38	88.8888888164601	-5.34158641633927E-47	-6.69875426113769E-10	-5.26571852788003E-07	-4.37494939467713E-46	-4.80550556272721E-08	5.28760063280057E-08
5.935	88.7101551459508	-1.91541830097712E-38	5.63408686920655	527.555555534786	-2.4941143776674E-47	-799.999999999998	-1.13490556369355E-40	0.039760489215242	-6.71319158291784E-42	0.999497184947468	-1.17750313272647E-40	0.031707681745529	1.04061013106255E-40	1.15138315532048E-38	3.63404178789629	-1.31347194045083E-38	1.20689582399398E-38	3.6397318700269	-1.3210063558334E-38	799.999999999998	3.63404178876027	-1.23463557784068E-38	88.8888888137367	-5.56960659507022E-47	-9.20154824870157E-10	-5.60319553718083E-07	-4.72874847574893E-46	-5.18674992749002E-08	5.627150608966E-08
5.94	88.709036667099	-1.91544078803239E-38	5.65167003667314	527.999999978875	-2.52055035076451E-47	-800.000000000001	-1.13489266238373E-40	0.039523709909472	-6.71121709863393E-42	0.99949403763839	-1.18044739869039E-40	0.031806736976148	1.04041567129305E-40	1.15092928070715E-38	3.64539840932828	-1.31675199996733E-38	1.2067035617864E-38	3.65105457886946	-1.32425758382115E-38	800.000000000001	3.64539841008222	-1.23465007251133E-38	88.8888888108824	-5.81262237555275E-47	-1.1865210082346E-09	-5.78711478738075E-07	-4.97207056301352E-46	-5.44604709186365E-08	5.81268370476056E-08
5.945	88.707921414731	-1.91546435728464E-38	5.66914796253346	528.444444422954	-2.54776827937991E-47	-800.000000000005	-1.13487984189262E-40	0.039286938893904	-6.70925442988074E-42	0.999490899398511	-1.18339100356358E-40	0.031905200255578	1.0402219482839E-40	1.15047636941597E-38	3.65668719941524	-1.3200320508082E-38	1.20651135580515E-38	3.66230945781251	-1.3275087750809E-38	800.000000000005	3.65668720005432	-1.23466526474219E-38	88.8888888079772	-6.06470863992938E-47	-1.46244648888764E-09	-5.80482861778325E-07	-5.08894959155329E-46	-5.56639724450607E-08	5.83145634165873E-08
5.95	88.7068094506986	-1.91548900222288E-38	5.68652065489676	528.888888867024	-2.57585145738219E-47	-800.000000000009	-1.134867102149E-40	0.03905018067769	-6.70730357571108E-42	0.999487770401968	-1.18633394780521E-40	0.032003071615584	1.04002896357858E-40	1.15002442886272E-38	3.66790816127007	-1.32331209181617E-38	1.20631920571175E-38	3.67349651052278	-1.33075992984397E-38	800.000000000009	3.66790816179244	-1.23468115033584E-38	88.8888888051067	-6.31916043740423E-47	-1.74058048313522E-09	-5.64723971289481E-07	-5.06426364641337E-46	-5.53175018074851E-08	5.6742681444851E-08
5.955	88.705700836348	-1.91551471633661E-38	5.70378812388891	529.333333311082	-2.60488815830036E-47	-800.000000000015	-1.13485444308058E-40	0.038813439755233	-6.70536453495414E-42	0.999484650821473	-1.18927623188559E-40	0.032100351099286	1.03983671870605E-40	1.14957346643342E-38	3.67906129930756	-1.32659212183487E-38	1.20612711116777E-38	3.68461574195458	-1.33401104834148E-38	800.000000000015	3.67906129971475	-1.23469772509512E-38	88.88888880236	-6.56854133494987E-47	-2.01279227737124E-09	-5.30870399491772E-07	-4.88379789948156E-46	-5.32715103951776E-08	5.33536535652749E-08
5.96	88.7045956325168	-1.91554149311591E-38	5.72095038164523	529.777777755127	-2.63497176563454E-47	-800.000000000022	-1.13484186461402E-40	0.038576720606147	-6.70343730621617E-42	0.999481540828311	-1.19221785628614E-40	0.032197038761122	1.03964521518067E-40	1.14912348948414E-38	3.6901466192401	-1.32987213970886E-38	1.20593507183484E-38	3.69566715834552	-1.33726213080433E-38	800.000000000022	3.69014661953742	-1.23471498482326E-38	88.8888887998283	-6.80472574786843E-47	-2.27023720765408E-09	-4.78740247444843E-07	-4.53429787367877E-46	-4.9388631204215E-08	4.81281062806107E-08
5.965	88.7034938995322	-1.91556932605162E-38	5.73800744230316	530.222222199159	-2.66620090316666E-47	-800.00000000003	-1.13482936667493E-40	0.038340027695208	-6.70152188788134E-42	0.999478440592332	-1.19515882149932E-40	0.032293134666808	1.0394544545022E-40	1.14867450534075E-38	3.70116412807336	-1.33315214428378E-38	1.20574308737459E-38	3.70665076721227	-1.34051317746323E-38	800.00000000003	3.70116412827031	-1.23473292532397E-38	88.8888887976026	-7.01895238395387E-47	-2.50340966132768E-09	-4.08536493523543E-07	-4.00351555543228E-46	-4.35422236620103E-08	4.10850327713079E-08
5.97	88.702395697208	-1.9155982086355E-38	5.7549593219951	530.666666643177	-2.69867956527113E-47	-800.000000000039	-1.13481694918787E-40	0.0381033654723	-6.69961827811242E-42	0.999475350281944	-1.19809912802858E-40	0.032388638893302	1.03926443815566E-40	1.14822652129872E-38	3.71211383410192	-1.33643213440645E-38	1.20555115744875E-38	3.71756657734631	-1.34376418854865E-38	800.000000000039	3.71211383421257	-1.23475154240157E-38	88.8888887957719	-7.20187010522878E-47	-2.70220168253365E-09	-3.20882046859554E-07	-3.28012018991941E-46	-3.56191712836985E-08	3.22852928374073E-08
5.975	88.7013010848428	-1.91562813436027E-38	5.77180603884108	531.111111087178	-2.73251724722552E-47	-800.00000000005	-1.13480461207637E-40	0.037866738372374	-6.69772647485158E-42	0.999472270064106	-1.20103877638829E-40	0.032483551528763	1.0390751676113E-40	1.14777954462292E-38	3.72299574690495	-1.33971210892496E-38	1.20535928171908E-38	3.72841459880963	-1.34701516429085E-38	800.00000000005	3.72299574694841	-1.23477083186102E-38	88.888888794421	-7.34358686057312E-47	-2.85597465668694E-09	-2.16834905586424E-07	-2.35341684140087E-46	-2.55129999011998E-08	2.18330688279573E-08
5.98	88.7002101212174	-1.91565909671987E-38	5.78854761294161	531.555555531161	-2.76782907552127E-47	-800.000000000062	-1.13479235526293E-40	0.037630150815395	-6.69584647582115E-42	0.999469200104323	-1.20397776710366E-40	0.032577872672515	1.03888664432453E-40	1.14733358254739E-38	3.73380987734194	-1.34299206668876E-38	1.20516745984741E-38	3.73919484293044	-1.35026610491986E-38	800.000000000062	3.73380987734272	-1.23479078950811E-38	88.8888887936284	-7.43372944687062E-47	-2.95360689350613E-09	-9.86782803617274E-08	-1.17122547299532E-46	-1.26815781063399E-08	9.94898258035206E-09
5.985	88.6991228645933	-1.91569108920961E-38	5.80518406636102	531.999999975126	-2.80472904690046E-47	-800.000000000076	-1.13478017866903E-40	0.037393607206272	-6.69397827852538E-42	0.99946614056664	-1.20691610071066E-40	0.032671602434955	1.03869886973582E-40	1.1468886422752E-38	3.74455623754241	-1.34627200654877E-38	1.20497569149565E-38	3.74990732229889	-1.3535170106655E-38	800.000000000076	3.74455623753067	-1.2348114111496E-38	88.8888887934644	-7.461777012248E-47	-2.98387135503544E-09	3.77994524569633E-08	-5.80927600550833E-48	-5.52443174187534E-10	3.78034892504241E-09
5.99	88.6980393727963	-1.91572410533838E-38	5.82171542221595	532.444444419081	-2.84266263666304E-47	-800.000000000091	-1.13476808221576E-40	0.037157111932462	-6.69212188034793E-42	0.999463091613865	-1.20985377774932E-40	0.032764740932583	1.0385118452682E-40	1.14644473098173E-38	3.75523484033613	-1.34955192735497E-38	1.20478397632579E-38	3.76055205076201	-1.35676788175736E-38	800.000000000091	3.75523484032821	-1.23483269260065E-38	88.8888887940399	-7.44465603483061E-47	-2.96448058294118E-09	1.95835525573771E-07	6.76551913447529E-47	7.61423458439304E-09	1.95983493297424E-08
5.995	88.6969597031182	-1.91575813861535E-38	5.83814170567843	532.888888863034	-2.88115272526834E-47	-800.000000000107	-1.13475606582313E-40	0.036920669366544	-6.69027727844458E-42	0.999460053407307	-1.21279079877106E-40	0.032857288293474	1.03832557232993E-40	1.14600185581062E-38	3.76584569988059	-1.35283182795928E-38	1.20459231399988E-38	3.77112904341952	-1.36001871842479E-38	800.000000000107	3.76584569988152	-1.23485462967679E-38	88.8888887954455	-7.39614390821995E-47	-2.90981758171611E-09	3.67458596883782E-07	1.29624681998611E-46	1.45957936431184E-08	3.67748361812627E-08
6	88.6958839122761	-1.91579318254476E-38	5.85446294437252	533.333333306987	-2.92009783937199E-47	-800.000000000123	-1.13474412940982E-40	0.036684283867221	-6.68844446970075E-42	0.999457026106668	-1.21572716434153E-40	0.032949244659447	1.0381400523155E-40	1.14556002387193E-38	3.77638883190924	-1.35611170721678E-38	1.20440070418007E-38	3.78163831661978	-1.36326952089691E-38	800.000000000123	3.77638883192417	-1.23487721819067E-38	88.8888887977268	-7.31459576271476E-47	-2.81803078201508E-09	5.46085961635338E-07	1.96906241322322E-46	2.21576088622467E-08	5.46535302725894E-08
6.005	88.6948120564598	-1.91582923063305E-38	5.87067916783936	533.777777750942	-2.95938274920309E-47	-800.00000000014	-1.13473227289355E-40	0.036447959777897	-6.68662345078873E-42	0.999454009870164	-1.21866287503675E-40	0.033040610183144	1.03795528660415E-40	1.14511924224402E-38	3.78686425339716	-1.35939156398435E-38	1.2042091465286E-38	3.79207988795546	-1.36652028940261E-38	800.00000000014	3.78686425343118	-1.23490045395649E-38	88.8888888009124	-7.19904292731292E-47	-2.68802056621384E-09	7.2844604422542E-07	2.65388164975809E-46	2.98555338661194E-08	7.29057605577291E-08
6.01	88.69374419133	-1.91586627638903E-38	5.88679040752896	534.222222194903	-2.99887792481728E-47	-800.000000000156	-1.13472049619106E-40	0.036211701426635	-6.68481421816854E-42	0.999451004854527	-1.22159793144299E-40	0.033131385027988	1.0377712765598E-40	1.14467951797333E-38	3.79727198255613	-1.36267139712079E-38	1.20401764070784E-38	3.80245377625913	-1.36977102417055E-38	800.000000000156	3.79727198261416	-1.23492433279011E-38	88.8888888050102	-7.0492856355084E-47	-2.5195609906579E-09	9.10241245340572E-07	3.33434861250638E-46	3.75057203884456E-08	9.1101361338951E-08
6.015	88.6926803720158	-1.915904313324E-38	5.90279669679211	534.666666638872	-3.03843899234977E-47	-800.000000000173	-1.13470879921817E-40	0.035975513126098	-6.6830167680888E-42	0.999448011214991	-1.22453233415675E-40	0.03322156936814	1.037588023531E-40	1.14424085807418E-38	3.80761203882971	-1.3659512054869E-38	1.20382618638022E-38	3.81276000159885	-1.37302172542913E-38	800.000000000173	3.80761203891637	-1.23494885050917E-38	88.8888888100056	-6.86599188042405E-47	-2.3133912828259E-09	1.08660245246021E-06	3.99211645575919E-46	4.49029133222368E-08	1.08752984387435E-07
6.02	88.6916206531125	-1.91594333495193E-38	5.91869807087218	535.111111082852	-3.07790619026842E-47	-800.00000000019	-1.13469718188972E-40	0.035739399173504	-6.68123109658756E-42	0.999445029105293	-1.22746608378464E-40	0.033311163388453	1.03740552885083E-40	1.14380326952855E-38	3.81788444288831	-1.3692309879456E-38	1.20363478320833E-38	3.82299858527372	-1.37627239340651E-38	800.00000000019	3.81788444300777	-1.23497400293319E-38	88.888888815858	-6.65079655510774E-47	-2.07133973821845E-09	1.25209022409451E-06	4.6068641505845E-46	5.18193081694609E-08	1.25316206851796E-07
6.025	88.6905650886791	-1.91598333478958E-38	5.93449456689699	535.555555526846	-3.11710382562679E-47	-800.000000000206	-1.13468564411962E-40	0.035503363850573	-6.67945719949321E-42	0.999442058677658	-1.23039918094337E-40	0.033400167284433	1.03722379383685E-40	1.14336675928595E-38	3.82808921662432	-1.37251074336203E-38	1.20344343085485E-38	3.8331695498095	-1.37952302833062E-38	800.000000000206	3.82808921678018	-1.23499978588369E-38	88.8888888224981	-6.40640015756334E-47	-1.79642534603261E-09	1.4006673154653E-06	5.15628281086898E-46	5.80032267854799E-08	1.40186779081706E-07
6.03	88.6895137322365	-1.91602430635667E-38	5.95018622387061	535.999999970858	-3.15583973031718E-47	-800.000000000222	-1.13467418582088E-40	0.035267411423476	-6.67769507242528E-42	0.999439100082802	-1.23333162625963E-40	0.033488581262192	1.03704281979103E-40	1.14293133426315E-38	3.83822638314715	-1.37579047060362E-38	1.20325212898258E-38	3.84327291895408	-1.38277363042912E-38	800.000000000222	3.83822638334226	-1.23502619518433E-38	88.8888888298252	-6.13667034297361E-47	-1.4929919864795E-09	1.52567333581515E-06	5.61592227751154E-46	6.31803874988258E-08	1.52698097204314E-07
6.035	88.6884666367647	-1.91606624317601E-38	5.96577308266525	536.444444414892	-3.19390471732374E-47	-800.000000000236	-1.13466280690556E-40	0.035031546142788	-6.67594471079536E-42	0.999436153469916	-1.23626342037005E-40	0.033576405538407	1.03686260799966E-40	1.14249700134405E-38	3.84829596677834	-1.37907016854024E-38	1.20306087725449E-38	3.85330871767308	-1.38602419992943E-38	800.000000000236	3.84829596701469	-1.23505322666101E-38	88.8888888377033	-5.84675186987262E-47	-1.16680287604335E-09	1.6198396698048E-06	5.95927859685241E-46	6.70529219209114E-08	1.62122689658525E-07
6.04	88.6874238547007	-1.91610913877368E-38	5.98125518601309	536.888888858952	-3.23107203697546E-47	-800.00000000025	-1.13465150728482E-40	0.034795772243434	-6.67420610980791E-42	0.999433218986668	-1.23919456392113E-40	0.033663640340276	1.03668315973332E-40	1.14206376737946E-38	3.85829799304662	-1.38234983604426E-38	1.20286967533364E-38	3.86327697214532	-1.38927473705871E-38	800.00000000025	3.85829799332517	-1.23508087614197E-38	88.8888888459588	-5.54316362008917E-47	-8.25183228234164E-10	1.67523002877097E-06	6.15773677529076E-46	6.92971440246539E-08	1.67666268028664E-07
6.045	88.6863854379366	-1.91615298667915E-38	5.9966325784981	537.333333303043	-3.26709683319926E-47	-800.000000000263	-1.13464028686892E-40	0.034560093944639	-6.67247926446114E-42	0.999430296779191	-1.24212505756914E-40	0.033750285905472	1.03650447624679E-40	1.14163163918689E-38	3.86823248868301	-1.38562947199066E-38	1.20267852288327E-38	3.87317770975834	-1.39252524204386E-38	800.000000000263	3.86823248900358	-1.23510913945795E-38	88.8888888543765	-5.23391353259947E-47	-4.77130595324888E-10	1.68326721450273E-06	6.18043420054839E-46	6.95662704640444E-08	1.68470412280794E-07
6.05	88.6853514378166	-1.91619778042543E-38	6.0119053065479	537.77777774717	-3.30171559977307E-47	-800.000000000274	-1.13462914556722E-40	0.034324515449879	-6.67076416954788E-42	0.999427386992077	-1.2450549019801E-40	0.033836342482106	1.03632655877897E-40	1.14120062355039E-38	3.87809948161588	-1.38890907525716E-38	1.20248741956675E-38	3.88301095910388	-1.39577571511154E-38	800.000000000274	3.87809948197697	-1.23513801244229E-38	88.8888888626969	-4.92860570996306E-47	-1.33442382211291E-10	1.63469024982976E-06	5.99438177959493E-46	6.74863780523246E-08	1.63608270698981E-07
6.055	88.6843219051355	-1.91624351354925E-38	6.02707341842562	538.222222191337	-3.33464563657884E-47	-800.000000000283	-1.13461808328821E-40	0.034089040946829	-6.66906081965644E-42	0.999424489768375	-1.24798409782967E-40	0.033921810328676	1.03614940855281E-40	1.14077072722038E-38	3.88789900096602	-1.39218864472427E-38	1.20229636504761E-38	3.89277674997339	-1.39902615648812E-38	800.000000000283	3.88789900136471	-1.23516749093103E-38	88.8888888706122	-4.63854910919301E-47	1.93147664296681E-10	1.51953898352975E-06	5.56428267211273E-46	6.26596738861497E-08	1.52083035122204E-07
6.06	88.6832968901357	-1.91629017959119E-38	6.04213696422171	538.66666663555	-3.36558450585562E-47	-800.00000000029	-1.13460709993949E-40	0.033853674607315	-6.66736920917142E-42	0.99942160524958	-1.25091264580309E-40	0.03400668971403	1.03597302677529E-40	1.1403419569134E-38	3.89763107704175	-1.39546817927545E-38	1.20210535898954E-38	3.90247511335344	-1.40227656639973E-38	800.00000000029	3.89763107747356	-1.23519757076306E-38	88.8888888777633	-4.37687730059468E-47	4.87860165598638E-10	1.32715053761473E-06	4.85256919448319E-46	5.46610155558559E-08	1.32827571539672E-07
6.065	88.6822764425057	-1.91633777209579E-38	6.05709599584581	539.111111079816	-3.39420948845264E-47	-800.000000000294	-1.13459619542779E-40	0.033618420587258	-6.66568933227465E-42	0.999418733575626	-1.25384054659513E-40	0.034090980917318	1.03579741463729E-40	1.13991431931197E-38	3.90729574133395	-1.39874767779716E-38	1.2019144010564E-38	3.91210608142117	-1.40552694507221E-38	800.000000000294	3.90729574179271	-1.23522824778024E-38	88.8888888837358	-4.15865586092033E-47	7.33709353985306E-10	1.04611880639512E-06	3.81943869590409E-46	4.30376150329421E-08	1.0470037217705E-07
6.07	88.6812606113769	-1.91638628461179E-38	6.07195056701855	539.555555524141	-3.4201770400823E-47	-800.000000000296	-1.13458536965899E-40	0.033383283026632	-6.66402118294599E-42	0.999415874884885	-1.25676780090999E-40	0.034174684227954	1.03562257331354E-40	1.13948782106441E-38	3.91689302651115	-1.40202713917899E-38	1.20172349091221E-38	3.92166968753975	-1.40877729273114E-38	800.000000000296	3.91689302698889	-1.2352595178275E-38	88.8888888880564	-4.00100124047176E-47	9.11390201946133E-10	6.49038867095398E-07	2.36927478815183E-46	2.6695222081823E-08	6.49587627562653E-08
6.075	88.6802494453222	-1.91643571069218E-38	6.08670073326347	539.99999996853	-3.44312224757333E-47	-800.000000000294	-1.13457462253811E-40	0.033148266049405	-6.66236475496422E-42	0.999413029314155	-1.25969440946128E-40	0.034257799945566	1.03544850396258E-40	1.13906246878461E-38	3.92642296641462	-1.40530656231375E-38	1.20153262822119E-38	3.93116596625379	-1.41202760960185E-38	800.000000000294	3.92642296690147	-1.23529137675298E-38	88.8888888901894	-3.92320384575222E-47	9.99131053099938E-10	1.95597493757291E-07	7.10814176900703E-47	8.05441857261747E-09	1.95763258101914E-08
6.08	88.6792429927912	-1.91648604388348E-38	6.10134655221593	540.444444412981	-3.46318651454553E-47	-800.000000000289	-1.13456395396866E-40	0.032913373769167	-6.66072004187633E-42	0.999410196999894	-1.26262037297577E-40	0.034340328381492	1.03527520773484E-40	1.13863826905476E-38	3.93588559623447	-1.4085859460947E-38	1.20134181264774E-38	3.94059495328634	-1.41527789590935E-38	800.000000000289	3.93588559672205	-1.23532382039471E-38	88.8888888904496	-3.91482605214098E-47	1.00952043360621E-09	5.4071117953447E-08	1.30810634211591E-47	1.96462644845624E-09	5.41067976673685E-09
6.085	88.6782413026558	-1.91653727771209E-38	6.11588808401166	540.888888857473	-3.48167755156117E-47	-800.000000000282	-1.13455336385177E-40	0.032678610296177	-6.65908703695894E-42	0.999407378079764	-1.26554569219825E-40	0.034422269860655	1.03510268578289E-40	1.13821522842869E-38	3.94528095273128	-1.411865289412E-38	1.20115104385642E-38	3.94995668553796	-1.41852815187841E-38	800.000000000282	3.94528095322012	-1.23535684456392E-38	88.8888888911461	-3.89574286041459E-47	1.03548609290881E-09	1.98114236127354E-07	5.39106029971027E-47	7.34809050593093E-09	1.98250460252702E-08
6.09	88.677244422244	-1.91658940573368E-38	6.13032538985641	541.333333302003	-3.4987003533866E-47	-800.000000000273	-1.13454285208926E-40	0.032443979711865	-6.65746573336061E-42	0.999404572687068	-1.26847036787401E-40	0.034503624714639	1.03493093922454E-40	1.13779335341887E-38	3.95460907341925	-1.41514459116564E-38	1.20096032151203E-38	3.95925120107845	-1.42177837773348E-38	800.000000000273	3.95460907391035	-1.23539044510541E-38	88.888888892466	-3.85979973829771E-47	1.08435293350972E-09	3.2814237253355E-07	8.91653071770523E-47	1.2123978897569E-08	3.28366270369318E-08
6.095	88.6762523982751	-1.9166424215098E-38	6.14465853269663	541.777777746571	-3.5142871814494E-47	-800.000000000263	-1.13453241858222E-40	0.032209486080931	-6.65585612403521E-42	0.999401780953396	-1.27139440075704E-40	0.034584393284927	1.03475996916035E-40	1.13737265050234E-38	3.96386999694875	-1.41842385025945E-38	1.20076964527956E-38	3.96847853914206	-1.42502857369876E-38	800.000000000263	3.96386999744301	-1.23542461786895E-38	88.8888888944332	-3.80645695298864E-47	1.15690562197215E-09	4.59138268145852E-07	1.24276187094805E-46	1.69079478105648E-08	4.59449483594374E-08
6.1	88.6752652769308	-1.91669631860625E-38	6.15888757726463	542.222222191176	-3.52848576644496E-47	-800.000000000251	-1.13452206323087E-40	0.031975133452241	-6.65425820173744E-42	0.999399003008828	-1.27431779161068E-40	0.03466457592312	1.03458977667494E-40	1.13695312612108E-38	3.97306376313182	-1.42170306560074E-38	1.20057901482418E-38	3.97763874012297	-1.42827873999814E-38	800.000000000251	3.97306376362998	-1.23545935870713E-38	88.8888888970582	-3.73553063579573E-47	1.25343793225873E-09	5.90722729990942E-07	1.59361082605216E-46	2.16973797050165E-08	5.91121070521103E-08
6.105	88.6742831038542	-1.91675109059315E-38	6.17301259007113	542.666666635817	-3.54136006927478E-47	-800.000000000238	-1.13451178593455E-40	0.031740925858799	-6.65267195902363E-42	0.999396238981928	-1.2772405412075E-40	0.034744172990892	1.03442036283695E-40	1.13653478668175E-38	3.98219041293767	-1.42498223610038E-38	1.20038842981131E-38	3.9867318455707	-1.43152887685523E-38	800.000000000238	3.98219041344032	-1.23549466347542E-38	88.8888889003359	-3.64724716296768E-47	1.37368921426694E-09	7.19634603759259E-07	1.93553819875815E-46	2.6375182479184E-08	7.20117777296573E-08
6.11	88.6733059241487	-1.9168067310451E-38	6.18703363939797	543.111111080492	-3.55299104198471E-47	-800.000000000223	-1.13450158659181E-40	0.031506867317702	-6.65109738825253E-42	0.999393488999742	-1.28016265032932E-40	0.034823184859957	1.03425172869896E-40	1.13611763855558E-38	3.99124998848821	-1.42826136067288E-38	1.20019788990658E-38	3.99575789818562	-1.43477898449336E-38	800.000000000223	3.99124998899577	-1.23553052803232E-38	88.8888889042439	-3.54228791376137E-47	1.51677888956699E-09	8.42180962005481E-07	2.25897502463139E-46	3.08088505951983E-08	8.42744301695049E-08
6.115	88.6723337823764	-1.91686323354129E-38	6.20095079529067	543.555555525201	-3.5634773887032E-47	-800.000000000208	-1.13449146510031E-40	0.031272961830112	-6.64953448158606E-42	0.999390753187796	-1.28308411976707E-40	0.034901611912025	1.03408387529745E-40	1.13570168807818E-38	4.00024253305353	-1.4315404382365E-38	1.20000739477581E-38	4.00471694181431	-1.43802906313556E-38	800.000000000208	4.00024253356625	-1.23556694823941E-38	88.8888889087401	-3.4218380959687E-47	1.68112233168706E-09	9.54241367404935E-07	2.55328050563418E-46	3.48518545479688E-08	9.54877604215468E-08
6.12	88.6713667225575	-1.91692059166562E-38	6.2147641295511	543.999999969941	-3.57293632657955E-47	-800.00000000019	-1.1344814213569E-40	0.031039213381211	-6.64798323099014E-42	0.999388031670087	-1.28600495032078E-40	0.034979454538762	1.0339168036528E-40	1.13528694154938E-38	4.00916809104743	-1.43481946771332E-38	1.19981694408511E-38	4.01360902144506	-1.44127911300454E-38	800.00000000019	4.00916809156539	-1.23560391996146E-38	88.8888889137611	-3.28764311458281E-47	1.86437183590764E-09	1.0512745044858E-06	2.80677513356191E-46	3.83421418856373E-08	1.05197348047669E-07
6.125	88.6704047881685	-1.91697879900683E-38	6.22847371573008	544.444444414709	-3.58150434672212E-47	-800.000000000172	-1.13447145525761E-40	0.030805625940172	-6.64644362823542E-42	0.999385324569088	-1.2889251427995E-40	0.035056713141754	1.03375051476918E-40	1.13487340523304E-38	4.01802670802294	-1.43809844802934E-38	1.19962653750077E-38	4.02243418320322	-1.44452913432276E-38	800.000000000172	4.01802670854604	-1.23564143906652E-38	88.8888889192194	-3.14205707291985E-47	2.06332151211392E-09	1.12828691574873E-06	3.00666440556238E-46	4.11017419881572E-08	1.12903530389632E-07
6.13	88.6694480221414	-1.9170378491586E-38	6.24207962912002	544.888888859503	-3.58933797513666E-47	-800.000000000153	-1.13446156669763E-40	0.030572203460117	-6.64491566489812E-42	0.999382632005738	-1.29184469802125E-40	0.035133388132465	1.03358500963451E-40	1.13446108535691E-38	4.02681843066779	-1.44137737811456E-38	1.19943617468937E-38	4.03119247434662	-1.44777912731234E-38	800.000000000153	4.02681843119577	-1.23567950142603E-38	88.8888889250013	-2.98810480950781E-47	2.27384381984348E-09	1.17980221148165E-06	3.13904936924457E-46	4.29372088481413E-08	1.18058327199764E-07
6.135	88.6684964668623	-1.91709773571971E-38	6.25558194674754	545.333333304321	-3.59661453366447E-47	-800.000000000133	-1.13445175557137E-40	0.030338949878084	-6.64339933236074E-42	0.99937995409944	-1.29476361681295E-40	0.035209479932198	1.03342028922045E-40	1.13404998811246E-38	4.03554330679996	-1.44465625690311E-38	1.19924585531768E-38	4.03988394326098	-1.45102909219511E-38	800.000000000133	4.03554330733241	-1.23571810291489E-38	88.8888889309648	-2.82953029870625E-47	2.49079368388414E-09	1.19986106975973E-06	3.18896129568132E-46	4.36352505148487E-08	1.20065424740533E-07
6.14	88.6675501641705	-1.91715845229412E-38	6.2689807473661	545.777777749157	-3.60353290092071E-47	-800.000000000113	-1.13444202177241E-40	0.030105869114988	-6.64189462181291E-42	0.999377290968062	-1.29768190001038E-40	0.035284988972054	1.03325635448233E-40	1.13364011965467E-38	4.04420138536314	-1.44793508333326E-38	1.19905557905278E-38	4.04850863945529	-1.4542790291926E-38	800.000000000113	4.04420138589953	-1.23575723941158E-38	88.8888889369366	-2.67085854242095E-47	2.70791667918079E-09	1.18203828947109E-06	3.14007256293755E-46	4.29687445644277E-08	1.18281901860985E-07
6.145	88.6666091553569	-1.91721999249113E-38	6.28227611144862	546.222222194009	-3.61031427323261E-47	-800.000000000093	-1.13443236519354E-40	0.029872965075588	-6.64040152425214E-42	0.999374642727925	-1.30059954845809E-40	0.035359915692896	1.03309320635908E-40	1.13323148610196E-38	4.05279271642226	-1.45121385634759E-38	1.19886534556198E-38	4.05706661355716	-1.45752893852604E-38	800.000000000093	4.05279271696196	-1.23579690679822E-38	88.8888889427103	-2.5174637136339E-47	2.91778935592134E-09	1.11935965681664E-06	2.97494926515456E-46	4.06903712808585E-08	1.12009899010027E-07
6.15	88.6656734811631	-1.91728234992547E-38	6.29546812118013	546.666666638873	-3.61720292557775E-47	-800.000000000073	-1.13442278572676E-40	0.029640241648447	-6.6389200304846E-42	0.999372009493809	-1.30351656300937E-40	0.035434260545306	1.0329308457732E-40	1.13282409353592E-38	4.06131735115899	-1.45449257489304E-38	1.19867515451284E-38	4.06555791730818	-1.46077882041632E-38	800.000000000073	4.06131735170132	-1.23583710096074E-38	88.8888889480429	-2.37561566669161E-47	3.11168452227525E-09	1.00435381492988E-06	2.67492636552244E-46	3.65333431673602E-08	1.00501804497591E-07
6.155	88.6647431817801	-1.91734551821746E-38	6.30855686045033	547.111111083742	-3.62446697252228E-47	-800.000000000053	-1.13441328326328E-40	0.029407702705896	-6.6374501311259E-42	0.999369391378943	-1.30643294452617E-40	0.035508023989548	1.03276927363073E-40	1.13241794800123E-38	4.06977534186724	-1.457771237921E-38	1.19848500557322E-38	4.0739826035593	-1.46402867508405E-38	800.000000000053	4.06977534241149	-1.23587781778888E-38	88.8888889526531	-2.25255685196435E-47	3.27951415178814E-09	8.28998499476503E-07	2.21996912378839E-46	3.02147945891709E-08	8.29548941260466E-08
6.16	88.663818296847	-1.91740949099308E-38	6.32154241484632	547.555555528613	-3.63239912915919E-47	-800.000000000033	-1.13440385769354E-40	0.029175352103999	-6.6359918166019E-42	0.999366788495005	-1.30934869387906E-40	0.035581206495526	1.03260849082117E-40	1.13201305550546E-38	4.07816674194863	-1.4610498443874E-38	1.19829489841123E-38	4.08234072626613	-1.46727850274951E-38	800.000000000033	4.07816674249412	-1.23591905317636E-38	88.8888889562178	-2.15655946837818E-47	3.40971445607339E-09	5.8279638892596E-07	1.58404756246426E-46	2.13600888234158E-08	5.83187692205248E-08
6.165	88.6628988654502	-1.91747426188416E-38	6.33442487164513	547.999999973479	-3.64131747204654E-47	-800.000000000015	-1.13439450890721E-40	0.028943193682517	-6.63454507714946E-42	0.999364200952116	-1.31226381194714E-40	0.035653808542746	1.03244849821745E-40	1.13160942201892E-38	4.08649160590804	-1.46432839325282E-38	1.19810483269528E-38	4.09063234048432	-1.47052830363267E-38	800.000000000015	4.0864916064542	-1.23596080302096E-38	88.8888889583697	-2.09699560139955E-47	3.48914115095606E-09	2.38292585663641E-07	6.98436893772024E-47	8.98137559448202E-09	2.38461782031908E-08
6.17	88.6619849261787	-1.91753982452759E-38	6.34720431980978	548.444444418336	-3.65148777278312E-47	-799.999999999998	-1.13438523679313E-40	0.028711231265451	-6.63310990281728E-42	0.999361628859	-1.31517829961825E-40	0.035725830620267	1.0322892966768E-40	1.13120705347506E-38	4.09474998934856	-1.46760688348209E-38	1.19791480809404E-38	4.098857502365	-1.47377807795318E-38	799.999999999998	4.09474998989501	-1.23600306322329E-38	88.8888889588081	-2.08155419965182E-47	3.5070951862136E-09	3.42711340787574E-08	1.62873795196132E-47	1.72698283593181E-09	3.43146193445268E-09
6.175	88.6610765180167	-1.91760617255246E-38	6.35988085003501	548.888888863201	-3.66189350999018E-47	-799.999999999981	-1.1343760412384E-40	0.02847946867017	-6.63168628346759E-42	0.99935907232548	-1.31809215779252E-40	0.035797273226503	1.03213088705549E-40	1.13080595577895E-38	4.10294194895942	-1.47088531403715E-38	1.19772482427649E-38	4.10701626915287	-1.47702782593036E-38	799.999999999981	4.10294194950664	-1.23604582966599E-38	88.8888889590776	-2.07157683841679E-47	3.51967745724086E-09	9.05089336811155E-08	2.784173772637E-47	3.92127817359709E-09	9.05938380829915E-09
6.18	88.6601736789684	-1.91767329960023E-38	6.37245455465822	549.33333330808	-3.67212945970201E-47	-799.999999999964	-1.13436692212982E-40	0.028247909693282	-6.63027420877553E-42	0.99935653145863	-1.32100538737671E-40	0.035868136869428	1.03197327018609E-40	1.13040613479384E-38	4.11106754252325	-1.47416368388818E-38	1.1975348809119E-38	4.11510869918033	-1.48027754778323E-38	799.999999999964	4.11106754307196	-1.23608909824599E-38	88.888888959825	-2.05093364163379E-47	3.55038593619585E-09	1.99052863081293E-07	5.23493499412523E-47	8.02538188894404E-09	1.9921458042855E-08
6.185	88.6592764461962	-1.91774119932278E-38	6.38492552766043	549.777777752974	-3.68220941487266E-47	-799.999999999946	-1.13435787935373E-40	0.028016558112042	-6.62887366823014E-42	0.999354006363156	-1.32391798928475E-40	0.035938422066505	1.03181644687968E-40	1.13000759634236E-38	4.11912682891035	-1.47744199201259E-38	1.19734497766984E-38	4.12313485186185	-1.48352724373045E-38	799.999999999946	4.11912682946127	-1.23613286487127E-38	88.8888889610747	-2.01908156361349E-47	3.60019046039825E-09	3.01339279455209E-07	7.5178293015816E-47	1.19164722376098E-08	3.01574806065053E-08
6.19	88.6583848563287	-1.91780986537809E-38	6.39729386467723	550.222222197881	-3.69214218005285E-47	-799.999999999928	-1.13434891279571E-40	0.027785417687472	-6.62748465113536E-42	0.999351497142261	-1.32682996443892E-40	0.036008129344601	1.03166041793094E-40	1.12961034620934E-38	4.12711986807152	-1.48072023739261E-38	1.19715511422019E-38	4.13109478768935	-1.48677691399037E-38	799.999999999928	4.12711986862534	-1.23617712545379E-38	88.8888889628414	-1.97568810087297E-47	3.66967629813604E-09	4.05462922496223E-07	9.84225850092149E-47	1.58849992524586E-08	4.05773969988748E-08
6.195	88.6574989454597	-1.91787929143028E-38	6.40955966299145	550.666666642801	-3.70193119037933E-47	-799.99999999991	-1.13434002234058E-40	0.027554492164332	-6.62610714661091E-42	0.999349003897648	-1.32974131376982E-40	0.03607725923994	1.03150518411813E-40	1.12921439014167E-38	4.13504672103358	-1.48399841901541E-38	1.19696529023314E-38	4.13898856822756	-1.49002655878101E-38	799.99999999991	4.13504672159094	-1.23622187590956E-38	88.8888889651282	-1.92068227042519E-47	3.75901201850569E-09	5.0896436694829E-07	1.21539454757891E-46	1.98388691773233E-08	5.09350868805884E-08
6.2	88.6566187491483	-1.91794947114975E-38	6.42172302152586	551.111111087734	-3.71157413056419E-47	-799.999999999892	-1.13433120787242E-40	0.027323785271096	-6.62474114359298E-42	0.999346526729511	-1.33265203821624E-40	0.036145812298067	1.03135074620298E-40	1.12881973384814E-38	4.14290744989481	-1.48727653587315E-38	1.1967755053792E-38	4.14681625610934	-1.49327617832007E-38	799.999999999892	4.1429074504563	-1.23626711215875E-38	88.8888889679252	-1.85427480618269E-47	3.8678584459078E-09	6.09040521718836E-07	1.43912971752799E-46	2.36707384894713E-08	6.09500337125574E-08
6.205	88.6557443024183	-1.91802039821332E-38	6.43378404083583	551.555555532679	-3.72106255388424E-47	-799.999999999873	-1.13432246927455E-40	0.027093300719919	-6.62338663083507E-42	0.999344065736539	-1.33556213872519E-40	0.036213789073809	1.03119710493076E-40	1.12842638299934E-38	4.15070211782046	-1.49055458696305E-38	1.19658575932918E-38	4.15457791503099	-1.49652577282488E-38	799.999999999873	4.15070211838661	-1.23631283012574E-38	88.8888889712076	-1.77701193463864E-47	3.99531549193292E-09	7.02561682904417E-07	1.64842915091769E-46	2.72630431406222E-08	7.03090457769677E-08
6.21	88.6548756397579	-1.91809206630429E-38	6.44574282310199	551.999999977637	-3.73038150117034E-47	-799.999999999853	-1.13431380642957E-40	0.026863042206613	-6.62204359690875E-42	0.999341621015914	-1.3384716162518E-40	0.036281190131233	1.03104426103016E-40	1.12803434322747E-38	4.15843078903823	-1.49383257128751E-38	1.19639605175425E-38	4.1622736097476	-1.49977534251247E-38	799.999999999853	4.15843078960948	-1.23635902573922E-38	88.888888974934	-1.68980324509739E-47	4.1398597761855E-09	7.86016822000064E-07	1.83560357175249E-46	3.04801958106997E-08	7.8660758120154E-08
6.215	88.6540127951194	-1.91816446911258E-38	6.45759947212294	552.444444422607	-3.73950911979676E-47	-799.999999999834	-1.13430521921933E-40	0.026633013410619	-6.62071203020446E-42	0.999339192663309	-1.34138047175926E-40	0.036348016043607	1.03089221521328E-40	1.12764362012623E-38	4.16609352883373	-1.49711048785413E-38	1.1962063823259E-38	4.16990340606832	-1.50302488759952E-38	799.999999999834	4.16609352941042	-1.23640569493226E-38	88.8888889790444	-1.59396727229348E-47	4.29924007228979E-09	8.55519270241169E-07	1.99198055871211E-46	3.3173278947062E-08	8.56162185681009E-08
6.22	88.6531558019187	-1.91823760033482E-38	6.46935409330789	552.888888867588	-3.74841628267053E-47	-799.999999999814	-1.13429670752498E-40	0.026403217994974	-6.61939191893227E-42	0.999336780772888	-1.3442887062188E-40	0.03641426739336	1.03074096817563E-40	1.12725421925066E-38	4.17369040354598	-1.50038833567581E-38	1.19601675071595E-38	4.1774673708517	-1.50627440830236E-38	799.999999999814	4.17369040412835	-1.23645283364244E-38	88.8888889834587	-1.491279650473E-47	4.47044334012063E-09	9.06825192714616E-07	2.10803362435524E-46	3.51798264623052E-08	9.07507327976925E-08
6.225	88.6523046930352	-1.91831145367449E-38	6.48100679366935	553.333333312582	-3.75706620722075E-47	-799.999999999793	-1.13428827122691E-40	0.026173659606291	-6.61808325112268E-42	0.999334385437306	-1.34719632060957E-40	0.036479944772045	1.03059052059605E-40	1.12686614611704E-38	4.18122148056286	-1.50366611377087E-38	1.19582715659658E-38	4.18496557200096	-1.50952390483698E-38	799.999999999793	4.18122148115101	-1.23650043781185E-38	88.8888889880744	-1.38401151287086E-47	4.64958726659017E-09	9.35265613103727E-07	2.17339562215806E-46	3.63183296880285E-08	9.35970506012673E-08
6.23	88.6514595008108	-1.918386022842E-38	6.49255768181584	553.777777757588	-3.765414074388E-47	-799.999999999772	-1.13427991020485E-40	0.025944341874723	-6.6167860146274E-42	0.999332006747704	-1.35010331591866E-40	0.036545048780295	1.03044087313667E-40	1.12647940620269E-38	4.18868682831663	-1.50694382116305E-38	1.19563759964029E-38	4.19239807845929	-1.51277337741904E-38	799.999999999772	4.18868682891053	-1.23654850338726E-38	88.8888889927646	-1.27497734432969E-47	4.83184774285013E-09	9.35751861182565E-07	2.17668486104481E-46	3.63924247165781E-08	9.36459264615064E-08
6.235	88.6506202570504	-1.91846130155483E-38	6.5040068679445	554.222222202606	-3.77340664761363E-47	-799.99999999975	-1.13427162433776E-40	0.025715268413941	-6.61550019712014E-42	0.999329644793713	-1.35300969314098E-40	0.036609580027787	1.03029202644294E-40	1.12609400494589E-38	4.19608651627936	-1.51022145688164E-38	1.19544807951996E-38	4.19976496020512	-1.51602282626384E-38	799.99999999975	4.1960865168788	-1.23659702632017E-38	88.8888889973761	-1.16758619644193E-47	5.01137551284389E-09	9.02792862689178E-07	2.10555246316364E-46	3.51878437095162E-08	9.03478354620323E-08
6.24	88.6497869930211	-1.9185372835376E-38	6.5153544638338	554.666666647637	-3.78098189182915E-47	-799.999999999727	-1.13426341350394E-40	0.025486442821102	-6.61422578609735E-42	0.999327299663448	-1.35591545327924E-40	0.036673539133202	1.03014398114351E-40	1.12570994774572E-38	4.20342061495842	-1.51349901996154E-38	1.19525859590881E-38	4.20706628824737	-1.51927225158634E-38	799.999999999727	4.20342061556303	-1.23664600256687E-38	88.8888890017268	-1.06588803566847E-47	5.18120382715552E-09	8.30447532962297E-07	1.94663116730822E-46	3.24730757850253E-08	8.31082189469914E-08
[truncated: 3,885 more rows]
