# Supplementary material for: An Efficient Contact Model for the Simulation of Cargo Airdrop Extraction Phase
Source: Hindawi journal article supplement (doi:10.1155/2018/9895451), 2018-10-17
Supplement: f1 [file 9895451.f1.zip › case3_aircraft_coupling/m8000/df_cargo.csv]

t	u	v	w	x_g	y_g	z_g	p	q	r	e0	e1	e2	e3	yaw(deg)	pitch(deg)	roll(deg)	yaw_fix(deg)	pitch_fix(deg)	roll_fix(deg)	h_g	vx_g	vy_g	vz_g	ax_g	ay_g	az_g	g-force
0.0	88.88888823778802	0.0	0.00033917069939566537	7.899987043322199	0.0	-800.6399999948537	0.0	1.5326496041222866e-09	0.0	0.99999999999818	0.0	1.9078351748896032e-06	0.0	0.0	0.0002186218070556877	0.0	0.0	0.00021862224612745663	0.0	800.6399999948537	88.88888823843509	0.0	4.120048121731332e-12	-1.4210854715202004e-12	0.0	0.0	1.4210854715202004e-13
0.005	88.88888823778802	0.0	0.00033917069939566537	8.344431487766643	0.0	-800.6399999948537	0.0	1.5326496041222866e-09	0.0	0.99999999999818	0.0	1.9078351748896032e-06	0.0	0.0	0.0002186218070556877	0.0	0.0	0.0002186226851992256	0.0	800.6399999948537	88.88888823843509	0.0	4.120048121731332e-12	9.473903143468003e-13	0.0	5.385290446308774e-26	9.473903143468004e-14
0.01	88.88888823778802	0.0	0.00033917069939566537	8.788875932211088	0.0	-800.6399999948537	0.0	1.5326496041222866e-09	0.0	0.99999999999818	0.0	1.9078351748896032e-06	0.0	0.0	0.0002186218070556877	0.0	0.0	0.00021862312427099452	0.0	800.6399999948537	88.88888823843509	0.0	4.120048121731332e-12	-7.105427357601002e-13	0.0	-2.692645223154387e-26	7.105427357601002e-14
0.015	88.88888823778802	0.0	0.00033917069939566537	9.233320376655533	0.0	-800.6399999948537	0.0	1.5326496041222866e-09	0.0	0.99999999999818	0.0	1.9078351748896032e-06	0.0	0.0	0.0002186218070556877	0.0	0.0	0.00021862356334276345	0.0	800.6399999948537	88.88888823843509	0.0	4.120048121731332e-12	-7.105427357601002e-13	0.0	-2.692645223154387e-26	7.105427357601002e-14
0.02	88.88888823778802	0.0	0.00033917069939566537	9.677764821099977	0.0	-800.6399999948537	0.0	1.5326496041222866e-09	0.0	0.99999999999818	0.0	1.9078351748896032e-06	0.0	0.0	0.0002186218070556877	0.0	0.0	0.0002186240024145324	0.0	800.6399999948537	88.88888823843509	0.0	4.120048121731332e-12	-7.105427357601002e-13	0.0	-2.692645223154387e-26	7.105427357601002e-14
0.025	88.88888823778802	0.0	0.00033917069939566537	10.12220926554442	0.0	-800.6399999948537	0.0	1.5326496041222866e-09	0.0	0.99999999999818	0.0	1.9078351748896032e-06	0.0	0.0	0.0002186218070556877	0.0	0.0	0.00021862444148630135	0.0	800.6399999948537	88.88888823843509	0.0	4.120048121731332e-12	-7.105427357601002e-13	0.0	-2.692645223154387e-26	7.105427357601002e-14
0.03	88.88888823778802	0.0	0.00033917069939566537	10.566653709988865	0.0	-800.6399999948537	0.0	1.5326496041222866e-09	0.0	0.99999999999818	0.0	1.9078351748896032e-06	0.0	0.0	0.0002186218070556877	0.0	0.0	0.0002186248805580703	0.0	800.6399999948537	88.88888823843509	0.0	4.120048121731332e-12	-7.105427357601002e-13	0.0	-2.692645223154387e-26	7.105427357601002e-14
0.035	88.88888823778802	0.0	0.00033917069939566537	11.01109815443331	0.0	-800.6399999948537	0.0	1.5326496041222866e-09	0.0	0.99999999999818	0.0	1.9078351748896032e-06	0.0	0.0	0.0002186218070556877	0.0	0.0	0.00021862531962983924	0.0	800.6399999948537	88.88888823843509	0.0	4.120048121731332e-12	-7.105427357601002e-13	0.0	-2.692645223154387e-26	7.105427357601002e-14
0.04	88.88888823778802	0.0	0.00033917069939566537	11.455542598877754	0.0	-800.6399999948537	0.0	1.5326496041222866e-09	0.0	0.99999999999818	0.0	1.9078351748896032e-06	0.0	0.0	0.0002186218070556877	0.0	0.0	0.00021862575870160817	0.0	800.6399999948537	88.88888823843509	0.0	4.120048121731332e-12	-7.105427357601002e-13	0.0	-2.692645223154387e-26	7.105427357601002e-14
0.045	88.88888823778802	0.0	0.00033917069939566537	11.899987043322199	0.0	-800.6399999948537	0.0	1.5326496041222866e-09	0.0	0.99999999999818	0.0	1.9078351748896032e-06	0.0	0.0	0.0002186218070556877	0.0	0.0	0.00021862619777337713	0.0	800.6399999948537	88.88888823843509	0.0	4.120048121731332e-12	-7.105427357601002e-13	0.0	-2.692645223154387e-26	7.105427357601002e-14
0.05	88.88888823778802	0.0	0.00033917069939566537	12.344431487766643	0.0	-800.6399999948537	0.0	1.5326496041222866e-09	0.0	0.99999999999818	0.0	1.9078351748896032e-06	0.0	0.0	0.0002186218070556877	0.0	0.0	0.00021862663684514607	0.0	800.6399999948537	88.88888823843509	0.0	4.120048121731332e-12	-7.105427357601002e-13	0.0	-2.692645223154387e-26	7.105427357601002e-14
0.055	88.88888823778802	0.0	0.00033917069939566537	12.788875932211088	0.0	-800.6399999948537	0.0	1.5326496041222866e-09	0.0	0.99999999999818	0.0	1.9078351748896032e-06	0.0	0.0	0.0002186218070556877	0.0	0.0	0.000218627075916915	0.0	800.6399999948537	88.88888823843509	0.0	4.120048121731332e-12	-7.105427357601002e-13	0.0	-2.692645223154387e-26	7.105427357601002e-14
0.06	88.88888823778802	0.0	0.00033917069939566537	13.23332037665553	0.0	-800.6399999948537	0.0	1.5326496041222866e-09	0.0	0.99999999999818	0.0	1.9078351748896032e-06	0.0	0.0	0.0002186218070556877	0.0	0.0	0.00021862751498868396	0.0	800.6399999948537	88.88888823843509	0.0	4.120048121731332e-12	-7.105427357601002e-13	0.0	-2.692645223154387e-26	7.105427357601002e-14
0.065	88.88888823778802	0.0	0.00033917069939566537	13.677764821099977	0.0	-800.6399999948537	0.0	1.5326496041222866e-09	0.0	0.99999999999818	0.0	1.9078351748896032e-06	0.0	0.0	0.0002186218070556877	0.0	0.0	0.0002186279540604529	0.0	800.6399999948537	88.88888823843509	0.0	4.120048121731332e-12	-7.105427357601002e-13	0.0	-2.692645223154387e-26	7.105427357601002e-14
0.07	88.88888823778802	0.0	0.00033917069939566537	14.12220926554442	0.0	-800.6399999948537	0.0	1.5326496041222866e-09	0.0	0.99999999999818	0.0	1.9078351748896032e-06	0.0	0.0	0.0002186218070556877	0.0	0.0	0.00021862839313222183	0.0	800.6399999948537	88.88888823843509	0.0	4.120048121731332e-12	-7.105427357601002e-13	0.0	-2.692645223154387e-26	7.105427357601002e-14
0.075	88.88888823778802	0.0	0.00033917069939566537	14.566653709988865	0.0	-800.6399999948537	0.0	1.5326496041222866e-09	0.0	0.99999999999818	0.0	1.9078351748896032e-06	0.0	0.0	0.0002186218070556877	0.0	0.0	0.00021862883220399079	0.0	800.6399999948537	88.88888823843509	0.0	4.120048121731332e-12	-7.105427357601002e-13	0.0	-2.692645223154387e-26	7.105427357601002e-14
0.08	88.88888823778802	0.0	0.00033917069939566537	15.01109815443331	0.0	-800.6399999948537	0.0	1.5326496041222866e-09	0.0	0.99999999999818	0.0	1.9078351748896032e-06	0.0	0.0	0.0002186218070556877	0.0	0.0	0.00021862927127575972	0.0	800.6399999948537	88.88888823843509	0.0	4.120048121731332e-12	-7.105427357601002e-13	0.0	-2.692645223154387e-26	7.105427357601002e-14
0.085	88.88888823778802	0.0	0.00033917069939566537	15.455542598877756	0.0	-800.6399999948537	0.0	1.5326496041222866e-09	0.0	0.99999999999818	0.0	1.9078351748896032e-06	0.0	0.0	0.0002186218070556877	0.0	0.0	0.00021862971034752868	0.0	800.6399999948537	88.88888823843509	0.0	4.120048121731332e-12	-7.105427357601002e-13	0.0	-2.692645223154387e-26	7.105427357601002e-14
0.09	88.88888823778802	0.0	0.00033917069939566537	15.899987043322199	0.0	-800.6399999948537	0.0	1.5326496041222866e-09	0.0	0.99999999999818	0.0	1.9078351748896032e-06	0.0	0.0	0.0002186218070556877	0.0	0.0	0.0002186301494192976	0.0	800.6399999948537	88.88888823843509	0.0	4.120048121731332e-12	-7.105427357601002e-13	0.0	-2.692645223154387e-26	7.105427357601002e-14
0.095	88.88888823778802	0.0	0.00033917069939566537	16.34443148776664	0.0	-800.6399999948537	0.0	1.5326496041222866e-09	0.0	0.99999999999818	0.0	1.9078351748896032e-06	0.0	0.0	0.0002186218070556877	0.0	0.0	0.00021863058849106655	0.0	800.6399999948537	88.88888823843509	0.0	4.120048121731332e-12	-7.105427357601002e-13	0.0	-2.692645223154387e-26	7.105427357601002e-14
0.1	88.88888823778802	0.0	0.00033917069939566537	16.788875932211088	0.0	-800.6399999948537	0.0	1.5326496041222866e-09	0.0	0.99999999999818	0.0	1.9078351748896032e-06	0.0	0.0	0.0002186218070556877	0.0	0.0	0.0002186310275628355	0.0	800.6399999948537	88.88888823843509	0.0	4.120048121731332e-12	-7.105427357601002e-13	0.0	-2.692645223154387e-26	7.105427357601002e-14
0.105	88.88888823778802	0.0	0.00033917069939566537	17.23332037665553	0.0	-800.6399999948537	0.0	1.5326496041222866e-09	0.0	0.99999999999818	0.0	1.9078351748896032e-06	0.0	0.0	0.0002186218070556877	0.0	0.0	0.00021863146663460444	0.0	800.6399999948537	88.88888823843509	0.0	4.120048121731332e-12	-7.105427357601002e-13	0.0	-2.692645223154387e-26	7.105427357601002e-14
0.11	88.88888823778802	0.0	0.00033917069939566537	17.677764821099977	0.0	-800.6399999948537	0.0	1.5326496041222866e-09	0.0	0.99999999999818	0.0	1.9078351748896032e-06	0.0	0.0	0.0002186218070556877	0.0	0.0	0.00021863190570637337	0.0	800.6399999948537	88.88888823843509	0.0	4.120048121731332e-12	-7.105427357601002e-13	0.0	-2.692645223154387e-26	7.105427357601002e-14
0.115	88.88888823778802	0.0	0.00033917069939566537	18.12220926554442	0.0	-800.6399999948537	0.0	1.5326496041222866e-09	0.0	0.99999999999818	0.0	1.9078351748896032e-06	0.0	0.0	0.0002186218070556877	0.0	0.0	0.00021863234477814233	0.0	800.6399999948537	88.88888823843509	0.0	4.120048121731332e-12	-7.105427357601002e-13	0.0	-2.692645223154387e-26	7.105427357601002e-14
0.12	88.88888823778802	0.0	0.00033917069939566537	18.566653709988863	0.0	-800.6399999948537	0.0	1.5326496041222866e-09	0.0	0.99999999999818	0.0	1.9078351748896032e-06	0.0	0.0	0.0002186218070556877	0.0	0.0	0.00021863278384991127	0.0	800.6399999948537	88.88888823843509	0.0	4.120048121731332e-12	-7.105427357601002e-13	0.0	-2.692645223154387e-26	7.105427357601002e-14
0.125	88.88888823778802	0.0	0.00033917069939566537	19.01109815443331	0.0	-800.6399999948537	0.0	1.5326496041222866e-09	0.0	0.99999999999818	0.0	1.9078351748896032e-06	0.0	0.0	0.0002186218070556877	0.0	0.0	0.00021863322292168023	0.0	800.6399999948537	88.88888823843509	0.0	4.120048121731332e-12	-7.105427357601002e-13	0.0	-2.692645223154387e-26	7.105427357601002e-14
0.13	88.88888823778802	0.0	0.00033917069939566537	19.455542598877756	0.0	-800.6399999948537	0.0	1.5326496041222866e-09	0.0	0.99999999999818	0.0	1.9078351748896032e-06	0.0	0.0	0.0002186218070556877	0.0	0.0	0.00021863366199344916	0.0	800.6399999948537	88.88888823843509	0.0	4.120048121731332e-12	-7.105427357601002e-13	0.0	-2.692645223154387e-26	7.105427357601002e-14
0.135	88.88888823778802	0.0	0.00033917069939566537	19.8999870433222	0.0	-800.6399999948537	0.0	1.5326496041222866e-09	0.0	0.99999999999818	0.0	1.9078351748896032e-06	0.0	0.0	0.0002186218070556877	0.0	0.0	0.0002186341010652181	0.0	800.6399999948537	88.88888823843509	0.0	4.120048121731332e-12	-7.105427357601002e-13	0.0	-2.692645223154387e-26	7.105427357601002e-14
0.14	88.88888823778802	0.0	0.00033917069939566537	20.34443148776664	0.0	-800.6399999948537	0.0	1.5326496041222866e-09	0.0	0.99999999999818	0.0	1.9078351748896032e-06	0.0	0.0	0.0002186218070556877	0.0	0.0	0.00021863454013698705	0.0	800.6399999948537	88.88888823843509	0.0	4.120048121731332e-12	-7.105427357601002e-13	0.0	-2.692645223154387e-26	7.105427357601002e-14
0.145	88.88888823778802	0.0	0.00033917069939566537	20.788875932211084	0.0	-800.6399999948537	0.0	1.5326496041222866e-09	0.0	0.99999999999818	0.0	1.9078351748896032e-06	0.0	0.0	0.0002186218070556877	0.0	0.0	0.00021863497920875599	0.0	800.6399999948537	88.88888823843509	0.0	4.120048121731332e-12	-7.105427357601002e-13	0.0	-2.692645223154387e-26	7.105427357601002e-14
0.15	88.88888823778802	0.0	0.00033917069939566537	21.23332037665553	0.0	-800.6399999948537	0.0	1.5326496041222866e-09	0.0	0.99999999999818	0.0	1.9078351748896032e-06	0.0	0.0	0.0002186218070556877	0.0	0.0	0.00021863541828052492	0.0	800.6399999948537	88.88888823843509	0.0	4.120048121731332e-12	-7.105427357601002e-13	0.0	-2.692645223154387e-26	7.105427357601002e-14
0.155	88.88888823778802	0.0	0.00033917069939566537	21.677764821099977	0.0	-800.6399999948537	0.0	1.5326496041222866e-09	0.0	0.99999999999818	0.0	1.9078351748896032e-06	0.0	0.0	0.0002186218070556877	0.0	0.0	0.00021863585735229388	0.0	800.6399999948537	88.88888823843509	0.0	4.120048121731332e-12	-7.105427357601002e-13	0.0	-2.692645223154387e-26	7.105427357601002e-14
0.16	88.88888823778802	0.0	0.00033917069939566537	22.12220926554442	0.0	-800.6399999948537	0.0	1.5326496041222866e-09	0.0	0.99999999999818	0.0	1.9078351748896032e-06	0.0	0.0	0.0002186218070556877	0.0	0.0	0.0002186362964240628	0.0	800.6399999948537	88.88888823843509	0.0	4.120048121731332e-12	-7.105427357601002e-13	0.0	-2.692645223154387e-26	7.105427357601002e-14
0.165	88.88888823778802	0.0	0.00033917069939566537	22.566653709988863	0.0	-800.6399999948537	0.0	1.5326496041222866e-09	0.0	0.99999999999818	0.0	1.9078351748896032e-06	0.0	0.0	0.0002186218070556877	0.0	0.0	0.00021863673549583174	0.0	800.6399999948537	88.88888823843509	0.0	4.120048121731332e-12	-7.105427357601002e-13	0.0	-2.692645223154387e-26	7.105427357601002e-14
0.17	88.88888823778802	0.0	0.00033917069939566537	23.011098154433313	0.0	-800.6399999948537	0.0	1.5326496041222866e-09	0.0	0.99999999999818	0.0	1.9078351748896032e-06	0.0	0.0	0.0002186218070556877	0.0	0.0	0.0002186371745676007	0.0	800.6399999948537	88.88888823843509	0.0	4.120048121731332e-12	-7.105427357601002e-13	0.0	-2.692645223154387e-26	7.105427357601002e-14
0.175	88.88888823778802	0.0	0.00033917069939566537	23.455542598877752	0.0	-800.6399999948537	0.0	1.5326496041222866e-09	0.0	0.99999999999818	0.0	1.9078351748896032e-06	0.0	0.0	0.0002186218070556877	0.0	0.0	0.00021863761363936964	0.0	800.6399999948537	88.88888823843509	0.0	4.120048121731332e-12	-7.105427357601002e-13	0.0	-2.692645223154387e-26	7.105427357601002e-14
0.18	88.88888823778802	0.0	0.00033917069939566537	23.8999870433222	0.0	-800.6399999948537	0.0	1.5326496041222866e-09	0.0	0.99999999999818	0.0	1.9078351748896032e-06	0.0	0.0	0.0002186218070556877	0.0	0.0	0.0002186380527111386	0.0	800.6399999948537	88.88888823843509	0.0	4.120048121731332e-12	-7.105427357601002e-13	0.0	-2.692645223154387e-26	7.105427357601002e-14
0.185	88.88888823778802	0.0	0.00033917069939566537	24.34443148776664	0.0	-800.6399999948537	0.0	1.5326496041222866e-09	0.0	0.99999999999818	0.0	1.9078351748896032e-06	0.0	0.0	0.0002186218070556877	0.0	0.0	0.00021863849178290753	0.0	800.6399999948537	88.88888823843509	0.0	4.120048121731332e-12	-7.105427357601002e-13	0.0	-2.692645223154387e-26	7.105427357601002e-14
0.19	88.88888823778802	0.0	0.00033917069939566537	24.788875932211088	0.0	-800.6399999948537	0.0	1.5326496041222866e-09	0.0	0.99999999999818	0.0	1.9078351748896032e-06	0.0	0.0	0.0002186218070556877	0.0	0.0	0.00021863893085467646	0.0	800.6399999948537	88.88888823843509	0.0	4.120048121731332e-12	-7.105427357601002e-13	0.0	-2.692645223154387e-26	7.105427357601002e-14
0.195	88.88888823778802	0.0	0.00033917069939566537	25.23332037665553	0.0	-800.6399999948537	0.0	1.5326496041222866e-09	0.0	0.99999999999818	0.0	1.9078351748896032e-06	0.0	0.0	0.0002186218070556877	0.0	0.0	0.00021863936992644542	0.0	800.6399999948537	88.88888823843509	0.0	4.120048121731332e-12	-7.105427357601002e-13	0.0	-2.692645223154387e-26	7.105427357601002e-14
0.2	88.88888823778802	0.0	0.00033917069939566537	25.677764821099977	0.0	-800.6399999948537	0.0	1.5326496041222866e-09	0.0	0.99999999999818	0.0	1.9078351748896032e-06	0.0	0.0	0.0002186218070556877	0.0	0.0	0.00021863980899821436	0.0	800.6399999948537	88.88888823843509	0.0	4.120048121731332e-12	-7.105427357601002e-13	0.0	-2.692645223154387e-26	7.105427357601002e-14
0.205	88.88888823778802	0.0	0.00033917069939566537	26.12220926554442	0.0	-800.6399999948537	0.0	1.5326496041222866e-09	0.0	0.99999999999818	0.0	1.9078351748896032e-06	0.0	0.0	0.0002186218070556877	0.0	0.0	0.0002186402480699833	0.0	800.6399999948537	88.88888823843509	0.0	4.120048121731332e-12	-7.105427357601002e-13	0.0	-2.692645223154387e-26	7.105427357601002e-14
0.21	88.88888823778802	0.0	0.00033917069939566537	26.566653709988863	0.0	-800.6399999948537	0.0	1.5326496041222866e-09	0.0	0.99999999999818	0.0	1.9078351748896032e-06	0.0	0.0	0.0002186218070556877	0.0	0.0	0.00021864068714175225	0.0	800.6399999948537	88.88888823843509	0.0	4.120048121731332e-12	-7.105427357601002e-13	0.0	-2.692645223154387e-26	7.105427357601002e-14
0.215	88.88888823778802	0.0	0.00033917069939566537	27.01109815443331	0.0	-800.6399999948537	0.0	1.5326496041222866e-09	0.0	0.99999999999818	0.0	1.9078351748896032e-06	0.0	0.0	0.0002186218070556877	0.0	0.0	0.00021864112621352118	0.0	800.6399999948537	88.88888823843509	0.0	4.120048121731332e-12	-7.105427357601002e-13	0.0	-2.692645223154387e-26	7.105427357601002e-14
0.22	88.88888823778802	0.0	0.00033917069939566537	27.455542598877752	0.0	-800.6399999948537	0.0	1.5326496041222866e-09	0.0	0.99999999999818	0.0	1.9078351748896032e-06	0.0	0.0	0.0002186218070556877	0.0	0.0	0.00021864156528529012	0.0	800.6399999948537	88.88888823843509	0.0	4.120048121731332e-12	-7.105427357601002e-13	0.0	-2.692645223154387e-26	7.105427357601002e-14
0.225	88.88888823778802	0.0	0.00033917069939566537	27.8999870433222	0.0	-800.6399999948537	0.0	1.5326496041222866e-09	0.0	0.99999999999818	0.0	1.9078351748896032e-06	0.0	0.0	0.0002186218070556877	0.0	0.0	0.00021864200435705908	0.0	800.6399999948537	88.88888823843509	0.0	4.120048121731332e-12	-7.105427357601002e-13	0.0	-2.692645223154387e-26	7.105427357601002e-14
0.23	88.88888823778802	0.0	0.00033917069939566537	28.34443148776664	0.0	-800.6399999948537	0.0	1.5326496041222866e-09	0.0	0.99999999999818	0.0	1.9078351748896032e-06	0.0	0.0	0.0002186218070556877	0.0	0.0	0.000218642443428828	0.0	800.6399999948537	88.88888823843509	0.0	4.120048121731332e-12	-7.105427357601002e-13	0.0	-2.692645223154387e-26	7.105427357601002e-14
0.235	88.88888823778802	0.0	0.00033917069939566537	28.788875932211084	0.0	-800.6399999948537	0.0	1.5326496041222866e-09	0.0	0.99999999999818	0.0	1.9078351748896032e-06	0.0	0.0	0.0002186218070556877	0.0	0.0	0.00021864288250059697	0.0	800.6399999948537	88.88888823843509	0.0	4.120048121731332e-12	-7.105427357601002e-13	0.0	-2.692645223154387e-26	7.105427357601002e-14
0.24	88.88888823778802	0.0	0.00033917069939566537	29.23332037665553	0.0	-800.6399999948537	0.0	1.5326496041222866e-09	0.0	0.99999999999818	0.0	1.9078351748896032e-06	0.0	0.0	0.0002186218070556877	0.0	0.0	0.0002186433215723659	0.0	800.6399999948537	88.88888823843509	0.0	4.120048121731332e-12	-7.105427357601002e-13	0.0	-2.692645223154387e-26	7.105427357601002e-14
0.245	88.88888823778802	0.0	0.00033917069939566537	29.677764821099974	0.0	-800.6399999948537	0.0	1.5326496041222866e-09	0.0	0.99999999999818	0.0	1.9078351748896032e-06	0.0	0.0	0.0002186218070556877	0.0	0.0	0.00021864376064413484	0.0	800.6399999948537	88.88888823843509	0.0	4.120048121731332e-12	-7.105427357601002e-13	0.0	-2.692645223154387e-26	7.105427357601002e-14
0.25	88.88888823778802	0.0	0.00033917069939566537	30.12220926554442	0.0	-800.6399999948537	0.0	1.5326496041222866e-09	0.0	0.99999999999818	0.0	1.9078351748896032e-06	0.0	0.0	0.0002186218070556877	0.0	0.0	0.0002186441997159038	0.0	800.6399999948537	88.88888823843509	0.0	4.120048121731332e-12	-7.105427357601002e-13	0.0	-2.692645223154387e-26	7.105427357601002e-14
0.255	88.88888823778802	0.0	0.00033917069939566537	30.566653709988866	0.0	-800.6399999948537	0.0	1.5326496041222866e-09	0.0	0.99999999999818	0.0	1.9078351748896032e-06	0.0	0.0	0.0002186218070556877	0.0	0.0	0.00021864463878767273	0.0	800.6399999948537	88.88888823843509	0.0	4.120048121731332e-12	-7.105427357601002e-13	0.0	-2.692645223154387e-26	7.105427357601002e-14
0.26	88.88888823778802	0.0	0.00033917069939566537	31.01109815443331	0.0	-800.6399999948537	0.0	1.5326496041222866e-09	0.0	0.99999999999818	0.0	1.9078351748896032e-06	0.0	0.0	0.0002186218070556877	0.0	0.0	0.00021864507785944166	0.0	800.6399999948537	88.88888823843509	0.0	4.120048121731332e-12	-7.105427357601002e-13	0.0	-2.692645223154387e-26	7.105427357601002e-14
0.265	88.88888823778802	0.0	0.00033917069939566537	31.455542598877756	0.0	-800.6399999948537	0.0	1.5326496041222866e-09	0.0	0.99999999999818	0.0	1.9078351748896032e-06	0.0	0.0	0.0002186218070556877	0.0	0.0	0.00021864551693121062	0.0	800.6399999948537	88.88888823843509	0.0	4.120048121731332e-12	-7.105427357601002e-13	0.0	-2.692645223154387e-26	7.105427357601002e-14
0.27	88.88888823778802	0.0	0.00033917069939566537	31.8999870433222	0.0	-800.6399999948537	0.0	1.5326496041222866e-09	0.0	0.99999999999818	0.0	1.9078351748896032e-06	0.0	0.0	0.0002186218070556877	0.0	0.0	0.00021864595600297956	0.0	800.6399999948537	88.88888823843509	0.0	4.120048121731332e-12	-7.105427357601002e-13	0.0	-2.692645223154387e-26	7.105427357601002e-14
0.275	88.88888823778802	0.0	0.00033917069939566537	32.34443148776664	0.0	-800.6399999948537	0.0	1.5326496041222866e-09	0.0	0.99999999999818	0.0	1.9078351748896032e-06	0.0	0.0	0.0002186218070556877	0.0	0.0	0.0002186463950747485	0.0	800.6399999948537	88.88888823843509	0.0	4.120048121731332e-12	-7.105427357601002e-13	0.0	-2.692645223154387e-26	7.105427357601002e-14
0.28	88.88888823778802	0.0	0.00033917069939566537	32.788875932211084	0.0	-800.6399999948537	0.0	1.5326496041222866e-09	0.0	0.99999999999818	0.0	1.9078351748896032e-06	0.0	0.0	0.0002186218070556877	0.0	0.0	0.00021864683414651745	0.0	800.6399999948537	88.88888823843509	0.0	4.120048121731332e-12	-7.105427357601002e-13	0.0	-2.692645223154387e-26	7.105427357601002e-14
0.285	88.88888823778802	0.0	0.00033917069939566537	33.23332037665553	0.0	-800.6399999948537	0.0	1.5326496041222866e-09	0.0	0.99999999999818	0.0	1.9078351748896032e-06	0.0	0.0	0.0002186218070556877	0.0	0.0	0.00021864727321828638	0.0	800.6399999948537	88.88888823843509	0.0	4.120048121731332e-12	-7.105427357601002e-13	0.0	-2.692645223154387e-26	7.105427357601002e-14
0.29	88.88888823778802	0.0	0.00033917069939566537	33.67776482109997	0.0	-800.6399999948537	0.0	1.5326496041222866e-09	0.0	0.99999999999818	0.0	1.9078351748896032e-06	0.0	0.0	0.0002186218070556877	0.0	0.0	0.00021864771229005534	0.0	800.6399999948537	88.88888823843509	0.0	4.120048121731332e-12	-7.105427357601002e-13	0.0	-2.692645223154387e-26	7.105427357601002e-14
0.295	88.88888823778802	0.0	0.00033917069939566537	34.12220926554442	0.0	-800.6399999948537	0.0	1.5326496041222866e-09	0.0	0.99999999999818	0.0	1.9078351748896032e-06	0.0	0.0	0.0002186218070556877	0.0	0.0	0.00021864815136182428	0.0	800.6399999948537	88.88888823843509	0.0	4.120048121731332e-12	-7.105427357601002e-13	0.0	-2.692645223154387e-26	7.105427357601002e-14
0.3	88.88888823778802	0.0	0.00033917069939566537	34.56665370998886	0.0	-800.6399999948537	0.0	1.5326496041222866e-09	0.0	0.99999999999818	0.0	1.9078351748896032e-06	0.0	0.0	0.0002186218070556877	0.0	0.0	0.0002186485904335932	0.0	800.6399999948537	88.88888823843509	0.0	4.120048121731332e-12	-7.105427357601002e-13	0.0	-2.692645223154387e-26	7.105427357601002e-14
0.305	88.88888823778802	0.0	0.00033917069939566537	35.01109815443331	0.0	-800.6399999948537	0.0	1.5326496041222866e-09	0.0	0.99999999999818	0.0	1.9078351748896032e-06	0.0	0.0	0.0002186218070556877	0.0	0.0	0.00021864902950536217	0.0	800.6399999948537	88.88888823843509	0.0	4.120048121731332e-12	-7.105427357601002e-13	0.0	-2.692645223154387e-26	7.105427357601002e-14
0.31	88.88888823778802	0.0	0.00033917069939566537	35.455542598877756	0.0	-800.6399999948537	0.0	1.5326496041222866e-09	0.0	0.99999999999818	0.0	1.9078351748896032e-06	0.0	0.0	0.0002186218070556877	0.0	0.0	0.0002186494685771311	0.0	800.6399999948537	88.88888823843509	0.0	4.120048121731332e-12	-7.105427357601002e-13	0.0	-2.692645223154387e-26	7.105427357601002e-14
0.315	88.88888823778802	0.0	0.00033917069939566537	35.8999870433222	0.0	-800.6399999948537	0.0	1.5326496041222866e-09	0.0	0.99999999999818	0.0	1.9078351748896032e-06	0.0	0.0	0.0002186218070556877	0.0	0.0	0.00021864990764890004	0.0	800.6399999948537	88.88888823843509	0.0	4.120048121731332e-12	-7.105427357601002e-13	0.0	-2.692645223154387e-26	7.105427357601002e-14
0.32	88.88888823778802	0.0	0.00033917069939566537	36.34443148776664	0.0	-800.6399999948537	0.0	1.5326496041222866e-09	0.0	0.99999999999818	0.0	1.9078351748896032e-06	0.0	0.0	0.0002186218070556877	0.0	0.0	0.000218650346720669	0.0	800.6399999948537	88.88888823843509	0.0	4.120048121731332e-12	-7.105427357601002e-13	0.0	-2.692645223154387e-26	7.105427357601002e-14
0.325	88.88888823778802	0.0	0.00033917069939566537	36.788875932211084	0.0	-800.6399999948537	0.0	1.5326496041222866e-09	0.0	0.99999999999818	0.0	1.9078351748896032e-06	0.0	0.0	0.0002186218070556877	0.0	0.0	0.00021865078579243793	0.0	800.6399999948537	88.88888823843509	0.0	4.120048121731332e-12	-7.105427357601002e-13	0.0	-2.692645223154387e-26	7.105427357601002e-14
0.33	88.88888823778802	0.0	0.00033917069939566537	37.23332037665553	0.0	-800.6399999948537	0.0	1.5326496041222866e-09	0.0	0.99999999999818	0.0	1.9078351748896032e-06	0.0	0.0	0.0002186218070556877	0.0	0.0	0.00021865122486420686	0.0	800.6399999948537	88.88888823843509	0.0	4.120048121731332e-12	-7.105427357601002e-13	0.0	-2.692645223154387e-26	7.105427357601002e-14
0.335	88.88888823778802	0.0	0.00033917069939566537	37.67776482109998	0.0	-800.6399999948537	0.0	1.5326496041222866e-09	0.0	0.99999999999818	0.0	1.9078351748896032e-06	0.0	0.0	0.0002186218070556877	0.0	0.0	0.00021865166393597582	0.0	800.6399999948537	88.88888823843509	0.0	4.120048121731332e-12	-7.105427357601002e-13	0.0	-2.692645223154387e-26	7.105427357601002e-14
0.34	88.88888823778802	0.0	0.00033917069939566537	38.12220926554443	0.0	-800.6399999948537	0.0	1.5326496041222866e-09	0.0	0.99999999999818	0.0	1.9078351748896032e-06	0.0	0.0	0.0002186218070556877	0.0	0.0	0.00021865210300774476	0.0	800.6399999948537	88.88888823843509	0.0	4.120048121731332e-12	-7.105427357601002e-13	0.0	-2.692645223154387e-26	7.105427357601002e-14
0.345	88.88888823778802	0.0	0.00033917069939566537	38.56665370998886	0.0	-800.6399999948537	0.0	1.5326496041222866e-09	0.0	0.99999999999818	0.0	1.9078351748896032e-06	0.0	0.0	0.0002186218070556877	0.0	0.0	0.00021865254207951372	0.0	800.6399999948537	88.88888823843509	0.0	4.120048121731332e-12	-7.105427357601002e-13	0.0	-2.692645223154387e-26	7.105427357601002e-14
0.35	88.88888823778802	0.0	0.00033917069939566537	39.011098154433306	0.0	-800.6399999948537	0.0	1.5326496041222866e-09	0.0	0.99999999999818	0.0	1.9078351748896032e-06	0.0	0.0	0.0002186218070556877	0.0	0.0	0.00021865298115128265	0.0	800.6399999948537	88.88888823843509	0.0	4.120048121731332e-12	-7.105427357601002e-13	0.0	-2.692645223154387e-26	7.105427357601002e-14
0.355	88.88888823778802	0.0	0.00033917069939566537	39.455542598877756	0.0	-800.6399999948537	0.0	1.5326496041222866e-09	0.0	0.99999999999818	0.0	1.9078351748896032e-06	0.0	0.0	0.0002186218070556877	0.0	0.0	0.00021865342022305158	0.0	800.6399999948537	88.88888823843509	0.0	4.120048121731332e-12	-7.105427357601002e-13	0.0	-2.692645223154387e-26	7.105427357601002e-14
0.36	88.88888823778802	0.0	0.00033917069939566537	39.8999870433222	0.0	-800.6399999948537	0.0	1.5326496041222866e-09	0.0	0.99999999999818	0.0	1.9078351748896032e-06	0.0	0.0	0.0002186218070556877	0.0	0.0	0.00021865385929482054	0.0	800.6399999948537	88.88888823843509	0.0	4.120048121731332e-12	-7.105427357601002e-13	0.0	-2.692645223154387e-26	7.105427357601002e-14
0.365	88.88888823778802	0.0	0.00033917069939566537	40.34443148776664	0.0	-800.6399999948537	0.0	1.5326496041222866e-09	0.0	0.99999999999818	0.0	1.9078351748896032e-06	0.0	0.0	0.0002186218070556877	0.0	0.0	0.00021865429836658948	0.0	800.6399999948537	88.88888823843509	0.0	4.120048121731332e-12	-7.105427357601002e-13	0.0	-2.692645223154387e-26	7.105427357601002e-14
0.37	88.88888823778802	0.0	0.00033917069939566537	40.788875932211084	0.0	-800.6399999948537	0.0	1.5326496041222866e-09	0.0	0.99999999999818	0.0	1.9078351748896032e-06	0.0	0.0	0.0002186218070556877	0.0	0.0	0.0002186547374383584	0.0	800.6399999948537	88.88888823843509	0.0	4.120048121731332e-12	-7.105427357601002e-13	0.0	-2.692645223154387e-26	7.105427357601002e-14
0.375	88.88888823778802	0.0	0.00033917069939566537	41.23332037665553	0.0	-800.6399999948537	0.0	1.5326496041222866e-09	0.0	0.99999999999818	0.0	1.9078351748896032e-06	0.0	0.0	0.0002186218070556877	0.0	0.0	0.00021865517651012737	0.0	800.6399999948537	88.88888823843509	0.0	4.120048121731332e-12	-7.105427357601002e-13	0.0	-2.692645223154387e-26	7.105427357601002e-14
0.38	88.88888823778802	0.0	0.00033917069939566537	41.67776482109998	0.0	-800.6399999948537	0.0	1.5326496041222866e-09	0.0	0.99999999999818	0.0	1.9078351748896032e-06	0.0	0.0	0.0002186218070556877	0.0	0.0	0.0002186556155818963	0.0	800.6399999948537	88.88888823843509	0.0	4.120048121731332e-12	-7.105427357601002e-13	0.0	-2.692645223154387e-26	7.105427357601002e-14
0.385	88.88888823778802	0.0	0.00033917069939566537	42.12220926554442	0.0	-800.6399999948537	0.0	1.5326496041222866e-09	0.0	0.99999999999818	0.0	1.9078351748896032e-06	0.0	0.0	0.0002186218070556877	0.0	0.0	0.00021865605465366526	0.0	800.6399999948537	88.88888823843509	0.0	4.120048121731332e-12	-7.105427357601002e-13	0.0	-2.692645223154387e-26	7.105427357601002e-14
0.39	88.88888823778802	0.0	0.00033917069939566537	42.56665370998886	0.0	-800.6399999948537	0.0	1.5326496041222866e-09	0.0	0.99999999999818	0.0	1.9078351748896032e-06	0.0	0.0	0.0002186218070556877	0.0	0.0	0.0002186564937254342	0.0	800.6399999948537	88.88888823843509	0.0	4.120048121731332e-12	-7.105427357601002e-13	0.0	-2.692645223154387e-26	7.105427357601002e-14
0.395	88.88888823778802	0.0	0.00033917069939566537	43.01109815443331	0.0	-800.6399999948537	0.0	1.5326496041222866e-09	0.0	0.99999999999818	0.0	1.9078351748896032e-06	0.0	0.0	0.0002186218070556877	0.0	0.0	0.00021865693279720313	0.0	800.6399999948537	88.88888823843509	0.0	4.120048121731332e-12	-7.105427357601002e-13	0.0	-2.692645223154387e-26	7.105427357601002e-14
0.4	88.88888823778802	0.0	0.00033917069939566537	43.455542598877756	0.0	-800.6399999948537	0.0	1.5326496041222866e-09	0.0	0.99999999999818	0.0	1.9078351748896032e-06	0.0	0.0	0.0002186218070556877	0.0	0.0	0.0002186573718689721	0.0	800.6399999948537	88.88888823843509	0.0	4.120048121731332e-12	-7.105427357601002e-13	0.0	-2.692645223154387e-26	7.105427357601002e-14
0.405	88.88888823778802	0.0	0.00033917069939566537	43.8999870433222	0.0	-800.6399999948537	0.0	1.5326496041222866e-09	0.0	0.99999999999818	0.0	1.9078351748896032e-06	0.0	0.0	0.0002186218070556877	0.0	0.0	0.00021865781094074102	0.0	800.6399999948537	88.88888823843509	0.0	4.120048121731332e-12	-7.105427357601002e-13	0.0	-2.692645223154387e-26	7.105427357601002e-14
0.41	88.88888823778802	0.0	0.00033917069939566537	44.34443148776664	0.0	-800.6399999948537	0.0	1.5326496041222866e-09	0.0	0.99999999999818	0.0	1.9078351748896032e-06	0.0	0.0	0.0002186218070556877	0.0	0.0	0.00021865825001250995	0.0	800.6399999948537	88.88888823843509	0.0	4.120048121731332e-12	-7.105427357601002e-13	0.0	-2.692645223154387e-26	7.105427357601002e-14
0.415	88.88888823778802	0.0	0.00033917069939566537	44.788875932211084	0.0	-800.6399999948537	0.0	1.5326496041222866e-09	0.0	0.99999999999818	0.0	1.9078351748896032e-06	0.0	0.0	0.0002186218070556877	0.0	0.0	0.00021865868908427892	0.0	800.6399999948537	88.88888823843509	0.0	4.120048121731332e-12	-7.105427357601002e-13	0.0	-2.692645223154387e-26	7.105427357601002e-14
0.42	88.88888823778802	0.0	0.00033917069939566537	45.23332037665553	0.0	-800.6399999948537	0.0	1.5326496041222866e-09	0.0	0.99999999999818	0.0	1.9078351748896032e-06	0.0	0.0	0.0002186218070556877	0.0	0.0	0.00021865912815604785	0.0	800.6399999948537	88.88888823843509	0.0	4.120048121731332e-12	-7.105427357601002e-13	0.0	-2.692645223154387e-26	7.105427357601002e-14
0.425	88.88888823778802	0.0	0.00033917069939566537	45.67776482109998	0.0	-800.6399999948537	0.0	1.5326496041222866e-09	0.0	0.99999999999818	0.0	1.9078351748896032e-06	0.0	0.0	0.0002186218070556877	0.0	0.0	0.00021865956722781678	0.0	800.6399999948537	88.88888823843509	0.0	4.120048121731332e-12	-7.105427357601002e-13	0.0	-2.692645223154387e-26	7.105427357601002e-14
0.43	88.88888823778802	0.0	0.00033917069939566537	46.12220926554442	0.0	-800.6399999948537	0.0	1.5326496041222866e-09	0.0	0.99999999999818	0.0	1.9078351748896032e-06	0.0	0.0	0.0002186218070556877	0.0	0.0	0.00021866000629958574	0.0	800.6399999948537	88.88888823843509	0.0	4.120048121731332e-12	-7.105427357601002e-13	0.0	-2.692645223154387e-26	7.105427357601002e-14
0.435	88.88888823778802	0.0	0.00033917069939566537	46.56665370998886	0.0	-800.6399999948537	0.0	1.5326496041222866e-09	0.0	0.99999999999818	0.0	1.9078351748896032e-06	0.0	0.0	0.0002186218070556877	0.0	0.0	0.00021866044537135467	0.0	800.6399999948537	88.88888823843509	0.0	4.120048121731332e-12	-7.105427357601002e-13	0.0	-2.692645223154387e-26	7.105427357601002e-14
0.44	88.88888823778802	0.0	0.00033917069939566537	47.011098154433306	0.0	-800.6399999948537	0.0	1.5326496041222866e-09	0.0	0.99999999999818	0.0	1.9078351748896032e-06	0.0	0.0	0.0002186218070556877	0.0	0.0	0.00021866088444312363	0.0	800.6399999948537	88.88888823843509	0.0	4.120048121731332e-12	-7.105427357601002e-13	0.0	-2.692645223154387e-26	7.105427357601002e-14
0.445	88.88888823778802	0.0	0.00033917069939566537	47.455542598877756	0.0	-800.6399999948537	0.0	1.5326496041222866e-09	0.0	0.99999999999818	0.0	1.9078351748896032e-06	0.0	0.0	0.0002186218070556877	0.0	0.0	0.00021866132351489257	0.0	800.6399999948537	88.88888823843509	0.0	4.120048121731332e-12	-7.105427357601002e-13	0.0	-2.692645223154387e-26	7.105427357601002e-14
0.45	88.88888823778802	0.0	0.00033917069939566537	47.8999870433222	0.0	-800.6399999948537	0.0	1.5326496041222866e-09	0.0	0.99999999999818	0.0	1.9078351748896032e-06	0.0	0.0	0.0002186218070556877	0.0	0.0	0.0002186617625866615	0.0	800.6399999948537	88.88888823843509	0.0	4.120048121731332e-12	-7.105427357601002e-13	0.0	-2.692645223154387e-26	7.105427357601002e-14
0.455	88.88888823778802	0.0	0.00033917069939566537	48.34443148776664	0.0	-800.6399999948537	0.0	1.5326496041222866e-09	0.0	0.99999999999818	0.0	1.9078351748896032e-06	0.0	0.0	0.0002186218070556877	0.0	0.0	0.00021866220165843046	0.0	800.6399999948537	88.88888823843509	0.0	4.120048121731332e-12	-7.105427357601002e-13	0.0	-2.692645223154387e-26	7.105427357601002e-14
0.46	88.88888823778802	0.0	0.00033917069939566537	48.788875932211084	0.0	-800.6399999948537	0.0	1.5326496041222866e-09	0.0	0.99999999999818	0.0	1.9078351748896032e-06	0.0	0.0	0.0002186218070556877	0.0	0.0	0.0002186626407301994	0.0	800.6399999948537	88.88888823843509	0.0	4.120048121731332e-12	-7.105427357601002e-13	0.0	-2.692645223154387e-26	7.105427357601002e-14
0.465	88.88888823778802	0.0	0.00033917069939566537	49.233320376655534	0.0	-800.6399999948537	0.0	1.5326496041222866e-09	0.0	0.99999999999818	0.0	1.9078351748896032e-06	0.0	0.0	0.0002186218070556877	0.0	0.0	0.00021866307980196833	0.0	800.6399999948537	88.88888823843509	0.0	4.120048121731332e-12	-7.105427357601002e-13	0.0	-2.692645223154387e-26	7.105427357601002e-14
0.47	88.88888823778802	0.0	0.00033917069939566537	49.67776482109997	0.0	-800.6399999948537	0.0	1.5326496041222866e-09	0.0	0.99999999999818	0.0	1.9078351748896032e-06	0.0	0.0	0.0002186218070556877	0.0	0.0	0.0002186635188737373	0.0	800.6399999948537	88.88888823843509	0.0	4.120048121731332e-12	-7.105427357601002e-13	0.0	-2.692645223154387e-26	7.105427357601002e-14
0.475	88.88888823778802	0.0	0.00033917069939566537	50.12220926554442	0.0	-800.6399999948537	0.0	1.5326496041222866e-09	0.0	0.99999999999818	0.0	1.9078351748896032e-06	0.0	0.0	0.0002186218070556877	0.0	0.0	0.00021866395794550622	0.0	800.6399999948537	88.88888823843509	0.0	4.120048121731332e-12	-7.105427357601002e-13	0.0	-2.692645223154387e-26	7.105427357601002e-14
0.48	88.88888823778802	0.0	0.00033917069939566537	50.56665370998886	0.0	-800.6399999948537	0.0	1.5326496041222866e-09	0.0	0.99999999999818	0.0	1.9078351748896032e-06	0.0	0.0	0.0002186218070556877	0.0	0.0	0.00021866439701727515	0.0	800.6399999948537	88.88888823843509	0.0	4.120048121731332e-12	-7.105427357601002e-13	0.0	-2.692645223154387e-26	7.105427357601002e-14
0.485	88.88888823778802	0.0	0.00033917069939566537	51.011098154433306	0.0	-800.6399999948537	0.0	1.5326496041222866e-09	0.0	0.99999999999818	0.0	1.9078351748896032e-06	0.0	0.0	0.0002186218070556877	0.0	0.0	0.00021866483608904411	0.0	800.6399999948537	88.88888823843509	0.0	4.120048121731332e-12	-7.105427357601002e-13	0.0	-2.692645223154387e-26	7.105427357601002e-14
0.49	88.88888823778802	0.0	0.00033917069939566537	51.45554259887775	0.0	-800.6399999948537	0.0	1.5326496041222866e-09	0.0	0.99999999999818	0.0	1.9078351748896032e-06	0.0	0.0	0.0002186218070556877	0.0	0.0	0.00021866527516081305	0.0	800.6399999948537	88.88888823843509	0.0	4.120048121731332e-12	-7.105427357601002e-13	0.0	-2.692645223154387e-26	7.105427357601002e-14
0.495	88.88888823778802	0.0	0.00033917069939566537	51.8999870433222	0.0	-800.6399999948537	0.0	1.5326496041222866e-09	0.0	0.99999999999818	0.0	1.9078351748896032e-06	0.0	0.0	0.0002186218070556877	0.0	0.0	0.000218665714232582	0.0	800.6399999948537	88.88888823843509	0.0	4.120048121731332e-12	-7.105427357601002e-13	0.0	-2.692645223154387e-26	7.105427357601002e-14
0.5	88.88888823778802	0.0	0.00033917069939566537	52.34443148776664	0.0	-800.6399999948537	0.0	1.5326496041222866e-09	0.0	0.99999999999818	0.0	1.9078351748896032e-06	0.0	0.0	0.0002186218070556877	0.0	0.0	0.00021866615330435094	0.0	800.6399999948537	88.88888823843509	0.0	4.120048121731332e-12	-7.105427357601002e-13	0.0	-2.692645223154387e-26	7.105427357601002e-14
0.505	88.88888823778802	0.0	0.00033917069939566537	52.788875932211084	0.0	-800.6399999948537	0.0	1.5326496041222866e-09	0.0	0.99999999999818	0.0	1.9078351748896032e-06	0.0	0.0	0.0002186218070556877	0.0	0.0	0.00021866659237611987	0.0	800.6399999948537	88.88888823843509	0.0	4.120048121731332e-12	-7.105427357601002e-13	0.0	-2.692645223154387e-26	7.105427357601002e-14
0.51	88.88888823778802	0.0	0.00033917069939566537	53.233320376655534	0.0	-800.6399999948537	0.0	1.5326496041222866e-09	0.0	0.99999999999818	0.0	1.9078351748896032e-06	0.0	0.0	0.0002186218070556877	0.0	0.0	0.00021866703144788883	0.0	800.6399999948537	88.88888823843509	0.0	4.120048121731332e-12	-7.105427357601002e-13	0.0	-2.692645223154387e-26	7.105427357601002e-14
0.515	88.88888823778802	0.0	0.00033917069939566537	53.67776482109998	0.0	-800.6399999948537	0.0	1.5326496041222866e-09	0.0	0.99999999999818	0.0	1.9078351748896032e-06	0.0	0.0	0.0002186218070556877	0.0	0.0	0.00021866747051965777	0.0	800.6399999948537	88.88888823843509	0.0	4.120048121731332e-12	-7.105427357601002e-13	0.0	-2.692645223154387e-26	7.105427357601002e-14
0.52	88.88888823778802	0.0	0.00033917069939566537	54.12220926554442	0.0	-800.6399999948537	0.0	1.5326496041222866e-09	0.0	0.99999999999818	0.0	1.9078351748896032e-06	0.0	0.0	0.0002186218070556877	0.0	0.0	0.0002186679095914267	0.0	800.6399999948537	88.88888823843509	0.0	4.120048121731332e-12	-7.105427357601002e-13	0.0	-2.692645223154387e-26	7.105427357601002e-14
0.525	88.88888823778802	0.0	0.00033917069939566537	54.56665370998886	0.0	-800.6399999948537	0.0	1.5326496041222866e-09	0.0	0.99999999999818	0.0	1.9078351748896032e-06	0.0	0.0	0.0002186218070556877	0.0	0.0	0.00021866834866319566	0.0	800.6399999948537	88.88888823843509	0.0	4.120048121731332e-12	-7.105427357601002e-13	0.0	-2.692645223154387e-26	7.105427357601002e-14
0.53	88.88888823778802	0.0	0.00033917069939566537	55.01109815443331	0.0	-800.6399999948537	0.0	1.5326496041222866e-09	0.0	0.99999999999818	0.0	1.9078351748896032e-06	0.0	0.0	0.0002186218070556877	0.0	0.0	0.0002186687877349646	0.0	800.6399999948537	88.88888823843509	0.0	4.120048121731332e-12	-7.105427357601002e-13	0.0	-2.692645223154387e-26	7.105427357601002e-14
0.535	88.88888823778802	0.0	0.00033917069939566537	55.455542598877756	0.0	-800.6399999948537	0.0	1.5326496041222866e-09	0.0	0.99999999999818	0.0	1.9078351748896032e-06	0.0	0.0	0.0002186218070556877	0.0	0.0	0.00021866922680673353	0.0	800.6399999948537	88.88888823843509	0.0	4.120048121731332e-12	-7.105427357601002e-13	0.0	-2.692645223154387e-26	7.105427357601002e-14
0.54	88.88888823778802	0.0	0.00033917069939566537	55.8999870433222	0.0	-800.6399999948537	0.0	1.5326496041222866e-09	0.0	0.99999999999818	0.0	1.9078351748896032e-06	0.0	0.0	0.0002186218070556877	0.0	0.0	0.0002186696658785025	0.0	800.6399999948537	88.88888823843509	0.0	4.120048121731332e-12	-7.105427357601002e-13	0.0	-2.692645223154387e-26	7.105427357601002e-14
0.545	88.88888823778802	0.0	0.00033917069939566537	56.34443148776664	0.0	-800.6399999948537	0.0	1.5326496041222866e-09	0.0	0.99999999999818	0.0	1.9078351748896032e-06	0.0	0.0	0.0002186218070556877	0.0	0.0	0.00021867010495027142	0.0	800.6399999948537	88.88888823843509	0.0	4.120048121731332e-12	-7.105427357601002e-13	0.0	-2.692645223154387e-26	7.105427357601002e-14
0.55	88.88888823778802	0.0	0.00033917069939566537	56.78887593221109	0.0	-800.6399999948537	0.0	1.5326496041222866e-09	0.0	0.99999999999818	0.0	1.9078351748896032e-06	0.0	0.0	0.0002186218070556877	0.0	0.0	0.00021867054402204038	0.0	800.6399999948537	88.88888823843509	0.0	4.120048121731332e-12	-7.105427357601002e-13	0.0	-2.692645223154387e-26	7.105427357601002e-14
0.555	88.88888823778802	0.0	0.00033917069939566537	57.233320376655534	0.0	-800.6399999948537	0.0	1.5326496041222866e-09	0.0	0.99999999999818	0.0	1.9078351748896032e-06	0.0	0.0	0.0002186218070556877	0.0	0.0	0.0002186709830938093	0.0	800.6399999948537	88.88888823843509	0.0	4.120048121731332e-12	-7.105427357601002e-13	0.0	-2.692645223154387e-26	7.105427357601002e-14
0.56	88.88888823778802	0.0	0.00033917069939566537	57.67776482109998	0.0	-800.6399999948537	0.0	1.5326496041222866e-09	0.0	0.99999999999818	0.0	1.9078351748896032e-06	0.0	0.0	0.0002186218070556877	0.0	0.0	0.00021867142216557825	0.0	800.6399999948537	88.88888823843509	0.0	4.120048121731332e-12	-7.105427357601002e-13	0.0	-2.692645223154387e-26	7.105427357601002e-14
0.565	88.88888823778802	0.0	0.00033917069939566537	58.12220926554441	0.0	-800.6399999948537	0.0	1.5326496041222866e-09	0.0	0.99999999999818	0.0	1.9078351748896032e-06	0.0	0.0	0.0002186218070556877	0.0	0.0	0.0002186718612373472	0.0	800.6399999948537	88.88888823843509	0.0	4.120048121731332e-12	-7.105427357601002e-13	0.0	-2.692645223154387e-26	7.105427357601002e-14
0.57	88.88888823778802	0.0	0.00033917069939566537	58.566653709988856	0.0	-800.6399999948537	0.0	1.5326496041222866e-09	0.0	0.99999999999818	0.0	1.9078351748896032e-06	0.0	0.0	0.0002186218070556877	0.0	0.0	0.00021867230030911614	0.0	800.6399999948537	88.88888823843509	0.0	4.120048121731332e-12	-7.105427357601002e-13	0.0	-2.692645223154387e-26	7.105427357601002e-14
0.575	88.88888823778802	0.0	0.00033917069939566537	59.011098154433306	0.0	-800.6399999948537	0.0	1.5326496041222866e-09	0.0	0.99999999999818	0.0	1.9078351748896032e-06	0.0	0.0	0.0002186218070556877	0.0	0.0	0.00021867273938088507	0.0	800.6399999948537	88.88888823843509	0.0	4.120048121731332e-12	-7.105427357601002e-13	0.0	-2.692645223154387e-26	7.105427357601002e-14
0.58	88.88888823778802	0.0	0.00033917069939566537	59.45554259887775	0.0	-800.6399999948537	0.0	1.5326496041222866e-09	0.0	0.99999999999818	0.0	1.9078351748896032e-06	0.0	0.0	0.0002186218070556877	0.0	0.0	0.00021867317845265403	0.0	800.6399999948537	88.88888823843509	0.0	4.120048121731332e-12	-7.105427357601002e-13	0.0	-2.692645223154387e-26	7.105427357601002e-14
0.585	88.88888823778802	0.0	0.00033917069939566537	59.89998704332219	0.0	-800.6399999948537	0.0	1.5326496041222866e-09	0.0	0.99999999999818	0.0	1.9078351748896032e-06	0.0	0.0	0.0002186218070556877	0.0	0.0	0.00021867361752442297	0.0	800.6399999948537	88.88888823843509	0.0	4.120048121731332e-12	-7.105427357601002e-13	0.0	-2.692645223154387e-26	7.105427357601002e-14
0.59	88.88888823778802	0.0	0.00033917069939566537	60.34443148776664	0.0	-800.6399999948537	0.0	1.5326496041222866e-09	0.0	0.99999999999818	0.0	1.9078351748896032e-06	0.0	0.0	0.0002186218070556877	0.0	0.0	0.0002186740565961919	0.0	800.6399999948537	88.88888823843509	0.0	4.120048121731332e-12	-7.105427357601002e-13	0.0	-2.692645223154387e-26	7.105427357601002e-14
0.595	88.88888823778802	0.0	0.00033917069939566537	60.788875932211084	0.0	-800.6399999948537	0.0	1.5326496041222866e-09	0.0	0.99999999999818	0.0	1.9078351748896032e-06	0.0	0.0	0.0002186218070556877	0.0	0.0	0.00021867449566796086	0.0	800.6399999948537	88.88888823843509	0.0	4.120048121731332e-12	-7.105427357601002e-13	0.0	-2.692645223154387e-26	7.105427357601002e-14
0.6	88.88888823778802	0.0	0.00033917069939566537	61.23332037665553	0.0	-800.6399999948537	0.0	1.5326496041222866e-09	0.0	0.99999999999818	0.0	1.9078351748896032e-06	0.0	0.0	0.0002186218070556877	0.0	0.0	0.0002186749347397298	0.0	800.6399999948537	88.88888823843509	0.0	4.120048121731332e-12	-7.105427357601002e-13	0.0	-2.692645223154387e-26	7.105427357601002e-14
0.605	88.88888823778802	0.0	0.00033917069939566537	61.67776482109997	0.0	-800.6399999948537	0.0	1.5326496041222866e-09	0.0	0.99999999999818	0.0	1.9078351748896032e-06	0.0	0.0	0.0002186218070556877	0.0	0.0	0.00021867537381149875	0.0	800.6399999948537	88.88888823843509	0.0	4.120048121731332e-12	-7.105427357601002e-13	0.0	-2.692645223154387e-26	7.105427357601002e-14
0.61	88.88888823778802	0.0	0.00033917069939566537	62.12220926554442	0.0	-800.6399999948537	0.0	1.5326496041222866e-09	0.0	0.99999999999818	0.0	1.9078351748896032e-06	0.0	0.0	0.0002186218070556877	0.0	0.0	0.00021867581288326769	0.0	800.6399999948537	88.88888823843509	0.0	4.120048121731332e-12	-7.105427357601002e-13	0.0	-2.692645223154387e-26	7.105427357601002e-14
0.615	88.88888823778802	0.0	0.00033917069939566537	62.56665370998886	0.0	-800.6399999948537	0.0	1.5326496041222866e-09	0.0	0.99999999999818	0.0	1.9078351748896032e-06	0.0	0.0	0.0002186218070556877	0.0	0.0	0.00021867625195503662	0.0	800.6399999948537	88.88888823843509	0.0	4.120048121731332e-12	-7.105427357601002e-13	0.0	-2.692645223154387e-26	7.105427357601002e-14
0.62	88.88888823778802	0.0	0.00033917069939566537	63.011098154433306	0.0	-800.6399999948537	0.0	1.5326496041222866e-09	0.0	0.99999999999818	0.0	1.9078351748896032e-06	0.0	0.0	0.0002186218070556877	0.0	0.0	0.00021867669102680558	0.0	800.6399999948537	88.88888823843509	0.0	4.120048121731332e-12	-7.105427357601002e-13	0.0	-2.692645223154387e-26	7.105427357601002e-14
0.625	88.88888823778802	0.0	0.00033917069939566537	63.455542598877756	0.0	-800.6399999948537	0.0	1.5326496041222866e-09	0.0	0.99999999999818	0.0	1.9078351748896032e-06	0.0	0.0	0.0002186218070556877	0.0	0.0	0.0002186771300985745	0.0	800.6399999948537	88.88888823843509	0.0	4.120048121731332e-12	-7.105427357601002e-13	0.0	-2.692645223154387e-26	7.105427357601002e-14
0.63	88.88888823778802	0.0	0.00033917069939566537	63.8999870433222	0.0	-800.6399999948537	0.0	1.5326496041222866e-09	0.0	0.99999999999818	0.0	1.9078351748896032e-06	0.0	0.0	0.0002186218070556877	0.0	0.0	0.00021867756917034345	0.0	800.6399999948537	88.88888823843509	0.0	4.120048121731332e-12	-7.105427357601002e-13	0.0	-2.692645223154387e-26	7.105427357601002e-14
0.635	88.88888823778802	0.0	0.00033917069939566537	64.34443148776664	0.0	-800.6399999948537	0.0	1.5326496041222866e-09	0.0	0.99999999999818	0.0	1.9078351748896032e-06	0.0	0.0	0.0002186218070556877	0.0	0.0	0.0002186780082421124	0.0	800.6399999948537	88.88888823843509	0.0	4.120048121731332e-12	-7.105427357601002e-13	0.0	-2.692645223154387e-26	7.105427357601002e-14
0.64	88.88888823778802	0.0	0.00033917069939566537	64.78887593221108	0.0	-800.6399999948537	0.0	1.5326496041222866e-09	0.0	0.99999999999818	0.0	1.9078351748896032e-06	0.0	0.0	0.0002186218070556877	0.0	0.0	0.00021867844731388134	0.0	800.6399999948537	88.88888823843509	0.0	4.120048121731332e-12	-7.105427357601002e-13	0.0	-2.692645223154387e-26	7.105427357601002e-14
0.645	88.88888823778802	0.0	0.00033917069939566537	65.23332037665554	0.0	-800.6399999948537	0.0	1.5326496041222866e-09	0.0	0.99999999999818	0.0	1.9078351748896032e-06	0.0	0.0	0.0002186218070556877	0.0	0.0	0.0002186788863856503	0.0	800.6399999948537	88.88888823843509	0.0	4.120048121731332e-12	-7.105427357601002e-13	0.0	-2.692645223154387e-26	7.105427357601002e-14
0.65	88.88888823778802	0.0	0.00033917069939566537	65.67776482109997	0.0	-800.6399999948537	0.0	1.5326496041222866e-09	0.0	0.99999999999818	0.0	1.9078351748896032e-06	0.0	0.0	0.0002186218070556877	0.0	0.0	0.00021867932545741923	0.0	800.6399999948537	88.88888823843509	0.0	4.120048121731332e-12	-7.105427357601002e-13	0.0	-2.692645223154387e-26	7.105427357601002e-14
0.655	88.88888823778802	0.0	0.00033917069939566537	66.12220926554443	0.0	-800.6399999948537	0.0	1.5326496041222866e-09	0.0	0.99999999999818	0.0	1.9078351748896032e-06	0.0	0.0	0.0002186218070556877	0.0	0.0	0.00021867976452918817	0.0	800.6399999948537	88.88888823843509	0.0	4.120048121731332e-12	-7.105427357601002e-13	0.0	-2.692645223154387e-26	7.105427357601002e-14
0.66	88.88888823778802	0.0	0.00033917069939566537	66.56665370998886	0.0	-800.6399999948537	0.0	1.5326496041222866e-09	0.0	0.99999999999818	0.0	1.9078351748896032e-06	0.0	0.0	0.0002186218070556877	0.0	0.0	0.00021868020360095713	0.0	800.6399999948537	88.88888823843509	0.0	4.120048121731332e-12	-7.105427357601002e-13	0.0	-2.692645223154387e-26	7.105427357601002e-14
0.665	88.88888823778802	0.0	0.00033917069939566537	67.01109815443331	0.0	-800.6399999948537	0.0	1.5326496041222866e-09	0.0	0.99999999999818	0.0	1.9078351748896032e-06	0.0	0.0	0.0002186218070556877	0.0	0.0	0.00021868064267272606	0.0	800.6399999948537	88.88888823843509	0.0	4.120048121731332e-12	-7.105427357601002e-13	0.0	-2.692645223154387e-26	7.105427357601002e-14
0.67	88.88888823778802	0.0	0.00033917069939566537	67.45554259887776	0.0	-800.6399999948537	0.0	1.5326496041222866e-09	0.0	0.99999999999818	0.0	1.9078351748896032e-06	0.0	0.0	0.0002186218070556877	0.0	0.0	0.000218681081744495	0.0	800.6399999948537	88.88888823843509	0.0	4.120048121731332e-12	-7.105427357601002e-13	0.0	-2.692645223154387e-26	7.105427357601002e-14
0.675	88.88888823778802	0.0	0.00033917069939566537	67.8999870433222	0.0	-800.6399999948537	0.0	1.5326496041222866e-09	0.0	0.99999999999818	0.0	1.9078351748896032e-06	0.0	0.0	0.0002186218070556877	0.0	0.0	0.00021868152081626395	0.0	800.6399999948537	88.88888823843509	0.0	4.120048121731332e-12	-7.105427357601002e-13	0.0	-2.692645223154387e-26	7.105427357601002e-14
0.68	88.88888823778802	0.0	0.00033917069939566537	68.34443148776666	0.0	-800.6399999948537	0.0	1.5326496041222866e-09	0.0	0.99999999999818	0.0	1.9078351748896032e-06	0.0	0.0	0.0002186218070556877	0.0	0.0	0.00021868195988803288	0.0	800.6399999948537	88.88888823843509	0.0	4.120048121731332e-12	-7.105427357601002e-13	0.0	-2.692645223154387e-26	7.105427357601002e-14
0.685	88.88888823778802	0.0	0.00033917069939566537	68.78887593221108	0.0	-800.6399999948537	0.0	1.5326496041222866e-09	0.0	0.99999999999818	0.0	1.9078351748896032e-06	0.0	0.0	0.0002186218070556877	0.0	0.0	0.00021868239895980182	0.0	800.6399999948537	88.88888823843509	0.0	4.120048121731332e-12	-7.105427357601002e-13	0.0	-2.692645223154387e-26	7.105427357601002e-14
0.69	88.88888823778802	0.0	0.00033917069939566537	69.23332037665553	0.0	-800.6399999948537	0.0	1.5326496041222866e-09	0.0	0.99999999999818	0.0	1.9078351748896032e-06	0.0	0.0	0.0002186218070556877	0.0	0.0	0.00021868283803157078	0.0	800.6399999948537	88.88888823843509	0.0	4.120048121731332e-12	-7.105427357601002e-13	0.0	-2.692645223154387e-26	7.105427357601002e-14
0.695	88.88888823778802	0.0	0.00033917069939566537	69.67776482109997	0.0	-800.6399999948537	0.0	1.5326496041222866e-09	0.0	0.99999999999818	0.0	1.9078351748896032e-06	0.0	0.0	0.0002186218070556877	0.0	0.0	0.0002186832771033397	0.0	800.6399999948537	88.88888823843509	0.0	4.120048121731332e-12	-7.105427357601002e-13	0.0	-2.692645223154387e-26	7.105427357601002e-14
0.7	88.88888823778802	0.0	0.00033917069939566537	70.12220926554441	0.0	-800.6399999948537	0.0	1.5326496041222866e-09	0.0	0.99999999999818	0.0	1.9078351748896032e-06	0.0	0.0	0.0002186218070556877	0.0	0.0	0.00021868371617510867	0.0	800.6399999948537	88.88888823843509	0.0	4.120048121731332e-12	-7.105427357601002e-13	0.0	-2.692645223154387e-26	7.105427357601002e-14
0.705	88.88888823778802	0.0	0.00033917069939566537	70.56665370998886	0.0	-800.6399999948537	0.0	1.5326496041222866e-09	0.0	0.99999999999818	0.0	1.9078351748896032e-06	0.0	0.0	0.0002186218070556877	0.0	0.0	0.0002186841552468776	0.0	800.6399999948537	88.88888823843509	0.0	4.120048121731332e-12	-7.105427357601002e-13	0.0	-2.692645223154387e-26	7.105427357601002e-14
0.71	88.88888823778802	0.0	0.00033917069939566537	71.01109815443331	0.0	-800.6399999948537	0.0	1.5326496041222866e-09	0.0	0.99999999999818	0.0	1.9078351748896032e-06	0.0	0.0	0.0002186218070556877	0.0	0.0	0.00021868459431864654	0.0	800.6399999948537	88.88888823843509	0.0	4.120048121731332e-12	-7.105427357601002e-13	0.0	-2.692645223154387e-26	7.105427357601002e-14
0.715	88.88888823778802	0.0	0.00033917069939566537	71.45554259887774	0.0	-800.6399999948537	0.0	1.5326496041222866e-09	0.0	0.99999999999818	0.0	1.9078351748896032e-06	0.0	0.0	0.0002186218070556877	0.0	0.0	0.0002186850333904155	0.0	800.6399999948537	88.88888823843509	0.0	4.120048121731332e-12	-7.105427357601002e-13	0.0	-2.692645223154387e-26	7.105427357601002e-14
0.72	88.88888823778802	0.0	0.00033917069939566537	71.8999870433222	0.0	-800.6399999948537	0.0	1.5326496041222866e-09	0.0	0.99999999999818	0.0	1.9078351748896032e-06	0.0	0.0	0.0002186218070556877	0.0	0.0	0.00021868547246218443	0.0	800.6399999948537	88.88888823843509	0.0	4.120048121731332e-12	-7.105427357601002e-13	0.0	-2.692645223154387e-26	7.105427357601002e-14
0.725	88.88888823778802	0.0	0.00033917069939566537	72.34443148776664	0.0	-800.6399999948537	0.0	1.5326496041222866e-09	0.0	0.99999999999818	0.0	1.9078351748896032e-06	0.0	0.0	0.0002186218070556877	0.0	0.0	0.00021868591153395336	0.0	800.6399999948537	88.88888823843509	0.0	4.120048121731332e-12	-7.105427357601002e-13	0.0	-2.692645223154387e-26	7.105427357601002e-14
0.73	88.88888823778802	0.0	0.00033917069939566537	72.78887593221108	0.0	-800.6399999948537	0.0	1.5326496041222866e-09	0.0	0.99999999999818	0.0	1.9078351748896032e-06	0.0	0.0	0.0002186218070556877	0.0	0.0	0.00021868635060572232	0.0	800.6399999948537	88.88888823843509	0.0	4.120048121731332e-12	-7.105427357601002e-13	0.0	-2.692645223154387e-26	7.105427357601002e-14
0.735	88.88888823778802	0.0	0.00033917069939566537	73.23332037665553	0.0	-800.6399999948537	0.0	1.5326496041222866e-09	0.0	0.99999999999818	0.0	1.9078351748896032e-06	0.0	0.0	0.0002186218070556877	0.0	0.0	0.00021868678967749126	0.0	800.6399999948537	88.88888823843509	0.0	4.120048121731332e-12	-7.105427357601002e-13	0.0	-2.692645223154387e-26	7.105427357601002e-14
0.74	88.88888823778802	0.0	0.00033917069939566537	73.67776482109997	0.0	-800.6399999948537	0.0	1.5326496041222866e-09	0.0	0.99999999999818	0.0	1.9078351748896032e-06	0.0	0.0	0.0002186218070556877	0.0	0.0	0.0002186872287492602	0.0	800.6399999948537	88.88888823843509	0.0	4.120048121731332e-12	-7.105427357601002e-13	0.0	-2.692645223154387e-26	7.105427357601002e-14
0.745	88.88888823778802	0.0	0.00033917069939566537	74.12220926554441	0.0	-800.6399999948537	0.0	1.5326496041222866e-09	0.0	0.99999999999818	0.0	1.9078351748896032e-06	0.0	0.0	0.0002186218070556877	0.0	0.0	0.00021868766782102915	0.0	800.6399999948537	88.88888823843509	0.0	4.120048121731332e-12	-7.105427357601002e-13	0.0	-2.692645223154387e-26	7.105427357601002e-14
0.75	88.88888823778802	0.0	0.00033917069939566537	74.56665370998886	0.0	-800.6399999948537	0.0	1.5326496041222866e-09	0.0	0.99999999999818	0.0	1.9078351748896032e-06	0.0	0.0	0.0002186218070556877	0.0	0.0	0.00021868810689279808	0.0	800.6399999948537	88.88888823843509	0.0	4.120048121731332e-12	-7.105427357601002e-13	0.0	-2.692645223154387e-26	7.105427357601002e-14
0.755	88.88888823778802	0.0	0.00033917069939566537	75.01109815443331	0.0	-800.6399999948537	0.0	1.5326496041222866e-09	0.0	0.99999999999818	0.0	1.9078351748896032e-06	0.0	0.0	0.0002186218070556877	0.0	0.0	0.00021868854596456704	0.0	800.6399999948537	88.88888823843509	0.0	4.120048121731332e-12	-7.105427357601002e-13	0.0	-2.692645223154387e-26	7.105427357601002e-14
0.76	88.88888823778802	0.0	0.00033917069939566537	75.45554259887776	0.0	-800.6399999948537	0.0	1.5326496041222866e-09	0.0	0.99999999999818	0.0	1.9078351748896032e-06	0.0	0.0	0.0002186218070556877	0.0	0.0	0.00021868898503633598	0.0	800.6399999948537	88.88888823843509	0.0	4.120048121731332e-12	-7.105427357601002e-13	0.0	-2.692645223154387e-26	7.105427357601002e-14
0.765	88.88888823778802	0.0	0.00033917069939566537	75.8999870433222	0.0	-800.6399999948537	0.0	1.5326496041222866e-09	0.0	0.99999999999818	0.0	1.9078351748896032e-06	0.0	0.0	0.0002186218070556877	0.0	0.0	0.0002186894241081049	0.0	800.6399999948537	88.88888823843509	0.0	4.120048121731332e-12	-7.105427357601002e-13	0.0	-2.692645223154387e-26	7.105427357601002e-14
0.77	88.88888823778802	0.0	0.00033917069939566537	76.34443148776664	0.0	-800.6399999948537	0.0	1.5326496041222866e-09	0.0	0.99999999999818	0.0	1.9078351748896032e-06	0.0	0.0	0.0002186218070556877	0.0	0.0	0.00021868986317987387	0.0	800.6399999948537	88.88888823843509	0.0	4.120048121731332e-12	-7.105427357601002e-13	0.0	-2.692645223154387e-26	7.105427357601002e-14
0.775	88.88888823778802	0.0	0.00033917069939566537	76.78887593221108	0.0	-800.6399999948537	0.0	1.5326496041222866e-09	0.0	0.99999999999818	0.0	1.9078351748896032e-06	0.0	0.0	0.0002186218070556877	0.0	0.0	0.0002186903022516428	0.0	800.6399999948537	88.88888823843509	0.0	4.120048121731332e-12	-7.105427357601002e-13	0.0	-2.692645223154387e-26	7.105427357601002e-14
0.78	88.88888823778802	0.0	0.00033917069939566537	77.23332037665553	0.0	-800.6399999948537	0.0	1.5326496041222866e-09	0.0	0.99999999999818	0.0	1.9078351748896032e-06	0.0	0.0	0.0002186218070556877	0.0	0.0	0.00021869074132341174	0.0	800.6399999948537	88.88888823843509	0.0	4.120048121731332e-12	-7.105427357601002e-13	0.0	-2.692645223154387e-26	7.105427357601002e-14
0.785	88.88888823778802	0.0	0.00033917069939566537	77.67776482109997	0.0	-800.6399999948537	0.0	1.5326496041222866e-09	0.0	0.99999999999818	0.0	1.9078351748896032e-06	0.0	0.0	0.0002186218070556877	0.0	0.0	0.0002186911803951807	0.0	800.6399999948537	88.88888823843509	0.0	4.120048121731332e-12	-7.105427357601002e-13	0.0	-2.692645223154387e-26	7.105427357601002e-14
0.79	88.88888823778802	0.0	0.00033917069939566537	78.12220926554443	0.0	-800.6399999948537	0.0	1.5326496041222866e-09	0.0	0.99999999999818	0.0	1.9078351748896032e-06	0.0	0.0	0.0002186218070556877	0.0	0.0	0.00021869161946694963	0.0	800.6399999948537	88.88888823843509	0.0	4.120048121731332e-12	-7.105427357601002e-13	0.0	-2.692645223154387e-26	7.105427357601002e-14
0.795	88.88888823778802	0.0	0.00033917069939566537	78.56665370998887	0.0	-800.6399999948537	0.0	1.5326496041222866e-09	0.0	0.99999999999818	0.0	1.9078351748896032e-06	0.0	0.0	0.0002186218070556877	0.0	0.0	0.00021869205853871856	0.0	800.6399999948537	88.88888823843509	0.0	4.120048121731332e-12	-7.105427357601002e-13	0.0	-2.692645223154387e-26	7.105427357601002e-14
0.8	88.88888823778802	0.0	0.00033917069939566537	79.01109815443331	0.0	-800.6399999948537	0.0	1.5326496041222866e-09	0.0	0.99999999999818	0.0	1.9078351748896032e-06	0.0	0.0	0.0002186218070556877	0.0	0.0	0.00021869249761048752	0.0	800.6399999948537	88.88888823843509	0.0	4.120048121731332e-12	-7.105427357601002e-13	0.0	-2.692645223154387e-26	7.105427357601002e-14
0.805	88.88888823778802	0.0	0.00033917069939566537	79.45554259887776	0.0	-800.6399999948537	0.0	1.5326496041222866e-09	0.0	0.99999999999818	0.0	1.9078351748896032e-06	0.0	0.0	0.0002186218070556877	0.0	0.0	0.00021869293668225646	0.0	800.6399999948537	88.88888823843509	0.0	4.120048121731332e-12	-7.105427357601002e-13	0.0	-2.692645223154387e-26	7.105427357601002e-14
0.81	88.88888823778802	0.0	0.00033917069939566537	79.8999870433222	0.0	-800.6399999948537	0.0	1.5326496041222866e-09	0.0	0.99999999999818	0.0	1.9078351748896032e-06	0.0	0.0	0.0002186218070556877	0.0	0.0	0.00021869337575402542	0.0	800.6399999948537	88.88888823843509	0.0	4.120048121731332e-12	-7.105427357601002e-13	0.0	-2.692645223154387e-26	7.105427357601002e-14
0.815	88.88888823778802	0.0	0.00033917069939566537	80.34443148776664	0.0	-800.6399999948537	0.0	1.5326496041222866e-09	0.0	0.99999999999818	0.0	1.9078351748896032e-06	0.0	0.0	0.0002186218070556877	0.0	0.0	0.00021869381482579435	0.0	800.6399999948537	88.88888823843509	0.0	4.120048121731332e-12	-7.105427357601002e-13	0.0	-2.692645223154387e-26	7.105427357601002e-14
0.82	88.88888823778802	0.0	0.00033917069939566537	80.78887593221108	0.0	-800.6399999948537	0.0	1.5326496041222866e-09	0.0	0.99999999999818	0.0	1.9078351748896032e-06	0.0	0.0	0.0002186218070556877	0.0	0.0	0.00021869425389756328	0.0	800.6399999948537	88.88888823843509	0.0	4.120048121731332e-12	-7.105427357601002e-13	0.0	-2.692645223154387e-26	7.105427357601002e-14
0.825	88.88888823778802	0.0	0.00033917069939566537	81.23332037665553	0.0	-800.6399999948537	0.0	1.5326496041222866e-09	0.0	0.99999999999818	0.0	1.9078351748896032e-06	0.0	0.0	0.0002186218070556877	0.0	0.0	0.00021869469296933224	0.0	800.6399999948537	88.88888823843509	0.0	4.120048121731332e-12	-7.105427357601002e-13	0.0	-2.692645223154387e-26	7.105427357601002e-14
0.83	88.88888823778802	0.0	0.00033917069939566537	81.67776482109997	0.0	-800.6399999948537	0.0	1.5326496041222866e-09	0.0	0.99999999999818	0.0	1.9078351748896032e-06	0.0	0.0	0.0002186218070556877	0.0	0.0	0.00021869513204110118	0.0	800.6399999948537	88.88888823843509	0.0	4.120048121731332e-12	-7.105427357601002e-13	0.0	-2.692645223154387e-26	7.105427357601002e-14
0.835	88.88888823778802	0.0	0.00033917069939566537	82.12220926554441	0.0	-800.6399999948537	0.0	1.5326496041222866e-09	0.0	0.99999999999818	0.0	1.9078351748896032e-06	0.0	0.0	0.0002186218070556877	0.0	0.0	0.0002186955711128701	0.0	800.6399999948537	88.88888823843509	0.0	4.120048121731332e-12	-7.105427357601002e-13	0.0	-2.692645223154387e-26	7.105427357601002e-14
0.84	88.88888823778802	0.0	0.00033917069939566537	82.56665370998886	0.0	-800.6399999948537	0.0	1.5326496041222866e-09	0.0	0.99999999999818	0.0	1.9078351748896032e-06	0.0	0.0	0.0002186218070556877	0.0	0.0	0.00021869601018463907	0.0	800.6399999948537	88.88888823843509	0.0	4.120048121731332e-12	-7.105427357601002e-13	0.0	-2.692645223154387e-26	7.105427357601002e-14
0.845	88.88888823778802	0.0	0.00033917069939566537	83.0110981544333	0.0	-800.6399999948537	0.0	1.5326496041222866e-09	0.0	0.99999999999818	0.0	1.9078351748896032e-06	0.0	0.0	0.0002186218070556877	0.0	0.0	0.000218696449256408	0.0	800.6399999948537	88.88888823843509	0.0	4.120048121731332e-12	-7.105427357601002e-13	0.0	-2.692645223154387e-26	7.105427357601002e-14
0.85	88.88888823778802	0.0	0.00033917069939566537	83.45554259887776	0.0	-800.6399999948537	0.0	1.5326496041222866e-09	0.0	0.99999999999818	0.0	1.9078351748896032e-06	0.0	0.0	0.0002186218070556877	0.0	0.0	0.00021869688832817696	0.0	800.6399999948537	88.88888823843509	0.0	4.120048121731332e-12	-7.105427357601002e-13	0.0	-2.692645223154387e-26	7.105427357601002e-14
0.855	88.88888823778802	0.0	0.00033917069939566537	83.8999870433222	0.0	-800.6399999948537	0.0	1.5326496041222866e-09	0.0	0.99999999999818	0.0	1.9078351748896032e-06	0.0	0.0	0.0002186218070556877	0.0	0.0	0.0002186973273999459	0.0	800.6399999948537	88.88888823843509	0.0	4.120048121731332e-12	-7.105427357601002e-13	0.0	-2.692645223154387e-26	7.105427357601002e-14
0.86	88.88888823778802	0.0	0.00033917069939566537	84.34443148776664	0.0	-800.6399999948537	0.0	1.5326496041222866e-09	0.0	0.99999999999818	0.0	1.9078351748896032e-06	0.0	0.0	0.0002186218070556877	0.0	0.0	0.00021869776647171483	0.0	800.6399999948537	88.88888823843509	0.0	4.120048121731332e-12	-7.105427357601002e-13	0.0	-2.692645223154387e-26	7.105427357601002e-14
0.865	88.88888823778802	0.0	0.00033917069939566537	84.78887593221108	0.0	-800.6399999948537	0.0	1.5326496041222866e-09	0.0	0.99999999999818	0.0	1.9078351748896032e-06	0.0	0.0	0.0002186218070556877	0.0	0.0	0.0002186982055434838	0.0	800.6399999948537	88.88888823843509	0.0	4.120048121731332e-12	-7.105427357601002e-13	0.0	-2.692645223154387e-26	7.105427357601002e-14
0.87	88.88888823778802	0.0	0.00033917069939566537	85.23332037665553	0.0	-800.6399999948537	0.0	1.5326496041222866e-09	0.0	0.99999999999818	0.0	1.9078351748896032e-06	0.0	0.0	0.0002186218070556877	0.0	0.0	0.00021869864461525272	0.0	800.6399999948537	88.88888823843509	0.0	4.120048121731332e-12	-7.105427357601002e-13	0.0	-2.692645223154387e-26	7.105427357601002e-14
0.875	88.88888823778802	0.0	0.00033917069939566537	85.67776482109997	0.0	-800.6399999948537	0.0	1.5326496041222866e-09	0.0	0.99999999999818	0.0	1.9078351748896032e-06	0.0	0.0	0.0002186218070556877	0.0	0.0	0.00021869908368702166	0.0	800.6399999948537	88.88888823843509	0.0	4.120048121731332e-12	-7.105427357601002e-13	0.0	-2.692645223154387e-26	7.105427357601002e-14
0.88	88.88888823778802	0.0	0.00033917069939566537	86.12220926554441	0.0	-800.6399999948537	0.0	1.5326496041222866e-09	0.0	0.99999999999818	0.0	1.9078351748896032e-06	0.0	0.0	0.0002186218070556877	0.0	0.0	0.00021869952275879062	0.0	800.6399999948537	88.88888823843509	0.0	4.120048121731332e-12	-7.105427357601002e-13	0.0	-2.692645223154387e-26	7.105427357601002e-14
0.885	88.88888823778802	0.0	0.00033917069939566537	86.56665370998887	0.0	-800.6399999948537	0.0	1.5326496041222866e-09	0.0	0.99999999999818	0.0	1.9078351748896032e-06	0.0	0.0	0.0002186218070556877	0.0	0.0	0.00021869996183055955	0.0	800.6399999948537	88.88888823843509	0.0	4.120048121731332e-12	-7.105427357601002e-13	0.0	-2.692645223154387e-26	7.105427357601002e-14
0.89	88.88888823778802	0.0	0.00033917069939566537	87.01109815443331	0.0	-800.6399999948537	0.0	1.5326496041222866e-09	0.0	0.99999999999818	0.0	1.9078351748896032e-06	0.0	0.0	0.0002186218070556877	0.0	0.0	0.00021870040090232848	0.0	800.6399999948537	88.88888823843509	0.0	4.120048121731332e-12	-7.105427357601002e-13	0.0	-2.692645223154387e-26	7.105427357601002e-14
0.895	88.88888823778802	0.0	0.00033917069939566537	87.45554259887776	0.0	-800.6399999948537	0.0	1.5326496041222866e-09	0.0	0.99999999999818	0.0	1.9078351748896032e-06	0.0	0.0	0.0002186218070556877	0.0	0.0	0.00021870083997409744	0.0	800.6399999948537	88.88888823843509	0.0	4.120048121731332e-12	-7.105427357601002e-13	0.0	-2.692645223154387e-26	7.105427357601002e-14
0.9	88.88888823778802	0.0	0.00033917069939566537	87.8999870433222	0.0	-800.6399999948537	0.0	1.5326496041222866e-09	0.0	0.99999999999818	0.0	1.9078351748896032e-06	0.0	0.0	0.0002186218070556877	0.0	0.0	0.00021870127904586638	0.0	800.6399999948537	88.88888823843509	0.0	4.120048121731332e-12	-7.105427357601002e-13	0.0	-2.692645223154387e-26	7.105427357601002e-14
0.905	88.88888823778802	0.0	0.00033917069939566537	88.34443148776664	0.0	-800.6399999948537	0.0	1.5326496041222866e-09	0.0	0.99999999999818	0.0	1.9078351748896032e-06	0.0	0.0	0.0002186218070556877	0.0	0.0	0.00021870171811763534	0.0	800.6399999948537	88.88888823843509	0.0	4.120048121731332e-12	-7.105427357601002e-13	0.0	-2.692645223154387e-26	7.105427357601002e-14
0.91	88.88888823778802	0.0	0.00033917069939566537	88.78887593221108	0.0	-800.6399999948537	0.0	1.5326496041222866e-09	0.0	0.99999999999818	0.0	1.9078351748896032e-06	0.0	0.0	0.0002186218070556877	0.0	0.0	0.00021870215718940427	0.0	800.6399999948537	88.88888823843509	0.0	4.120048121731332e-12	-7.105427357601002e-13	0.0	-2.692645223154387e-26	7.105427357601002e-14
0.915	88.88888823778802	0.0	0.00033917069939566537	89.23332037665553	0.0	-800.6399999948537	0.0	1.5326496041222866e-09	0.0	0.99999999999818	0.0	1.9078351748896032e-06	0.0	0.0	0.0002186218070556877	0.0	0.0	0.0002187025962611732	0.0	800.6399999948537	88.88888823843509	0.0	4.120048121731332e-12	-7.105427357601002e-13	0.0	-2.692645223154387e-26	7.105427357601002e-14
0.92	88.88888823778802	0.0	0.00033917069939566537	89.67776482109997	0.0	-800.6399999948537	0.0	1.5326496041222866e-09	0.0	0.99999999999818	0.0	1.9078351748896032e-06	0.0	0.0	0.0002186218070556877	0.0	0.0	0.00021870303533294216	0.0	800.6399999948537	88.88888823843509	0.0	4.120048121731332e-12	-7.105427357601002e-13	0.0	-2.692645223154387e-26	7.105427357601002e-14
0.925	88.88888823778802	0.0	0.00033917069939566537	90.12220926554443	0.0	-800.6399999948537	0.0	1.5326496041222866e-09	0.0	0.99999999999818	0.0	1.9078351748896032e-06	0.0	0.0	0.0002186218070556877	0.0	0.0	0.0002187034744047111	0.0	800.6399999948537	88.88888823843509	0.0	4.120048121731332e-12	-7.105427357601002e-13	0.0	-2.692645223154387e-26	7.105427357601002e-14
0.93	88.88888823778802	0.0	0.00033917069939566537	90.56665370998887	0.0	-800.6399999948537	0.0	1.5326496041222866e-09	0.0	0.99999999999818	0.0	1.9078351748896032e-06	0.0	0.0	0.0002186218070556877	0.0	0.0	0.00021870391347648003	0.0	800.6399999948537	88.88888823843509	0.0	4.120048121731332e-12	-7.105427357601002e-13	0.0	-2.692645223154387e-26	7.105427357601002e-14
0.935	88.88888823778802	0.0	0.00033917069939566537	91.01109815443331	0.0	-800.6399999948537	0.0	1.5326496041222866e-09	0.0	0.99999999999818	0.0	1.9078351748896032e-06	0.0	0.0	0.0002186218070556877	0.0	0.0	0.000218704352548249	0.0	800.6399999948537	88.88888823843509	0.0	4.120048121731332e-12	-7.105427357601002e-13	0.0	-2.692645223154387e-26	7.105427357601002e-14
0.94	88.88888823778802	0.0	0.00033917069939566537	91.45554259887774	0.0	-800.6399999948537	0.0	1.5326496041222866e-09	0.0	0.99999999999818	0.0	1.9078351748896032e-06	0.0	0.0	0.0002186218070556877	0.0	0.0	0.00021870479162001792	0.0	800.6399999948537	88.88888823843509	0.0	4.120048121731332e-12	-7.105427357601002e-13	0.0	-2.692645223154387e-26	7.105427357601002e-14
0.945	88.88888823778802	0.0	0.00033917069939566537	91.89998704332218	0.0	-800.6399999948537	0.0	1.5326496041222866e-09	0.0	0.99999999999818	0.0	1.9078351748896032e-06	0.0	0.0	0.0002186218070556877	0.0	0.0	0.00021870523069178685	0.0	800.6399999948537	88.88888823843509	0.0	4.120048121731332e-12	-7.105427357601002e-13	0.0	-2.692645223154387e-26	7.105427357601002e-14
0.95	88.88888823778802	0.0	0.00033917069939566537	92.34443148776664	0.0	-800.6399999948537	0.0	1.5326496041222866e-09	0.0	0.99999999999818	0.0	1.9078351748896032e-06	0.0	0.0	0.0002186218070556877	0.0	0.0	0.00021870566976355581	0.0	800.6399999948537	88.88888823843509	0.0	4.120048121731332e-12	-7.105427357601002e-13	0.0	-2.692645223154387e-26	7.105427357601002e-14
0.955	88.88888823778802	0.0	0.00033917069939566537	92.78887593221108	0.0	-800.6399999948537	0.0	1.5326496041222866e-09	0.0	0.99999999999818	0.0	1.9078351748896032e-06	0.0	0.0	0.0002186218070556877	0.0	0.0	0.00021870610883532475	0.0	800.6399999948537	88.88888823843509	0.0	4.120048121731332e-12	-7.105427357601002e-13	0.0	-2.692645223154387e-26	7.105427357601002e-14
0.96	88.88888823778802	0.0	0.00033917069939566537	93.23332037665553	0.0	-800.6399999948537	0.0	1.5326496041222866e-09	0.0	0.99999999999818	0.0	1.9078351748896032e-06	0.0	0.0	0.0002186218070556877	0.0	0.0	0.0002187065479070937	0.0	800.6399999948537	88.88888823843509	0.0	4.120048121731332e-12	-7.105427357601002e-13	0.0	-2.692645223154387e-26	7.105427357601002e-14
0.965	88.88888823778802	0.0	0.00033917069939566537	93.67776482109997	0.0	-800.6399999948537	0.0	1.5326496041222866e-09	0.0	0.99999999999818	0.0	1.9078351748896032e-06	0.0	0.0	0.0002186218070556877	0.0	0.0	0.00021870698697886264	0.0	800.6399999948537	88.88888823843509	0.0	4.120048121731332e-12	-7.105427357601002e-13	0.0	-2.692645223154387e-26	7.105427357601002e-14
0.97	88.88888823778802	0.0	0.00033917069939566537	94.12220926554441	0.0	-800.6399999948537	0.0	1.5326496041222866e-09	0.0	0.99999999999818	0.0	1.9078351748896032e-06	0.0	0.0	0.0002186218070556877	0.0	0.0	0.00021870742605063157	0.0	800.6399999948537	88.88888823843509	0.0	4.120048121731332e-12	-7.105427357601002e-13	0.0	-2.692645223154387e-26	7.105427357601002e-14
0.975	88.88888823778802	0.0	0.00033917069939566537	94.56665370998886	0.0	-800.6399999948537	0.0	1.5326496041222866e-09	0.0	0.99999999999818	0.0	1.9078351748896032e-06	0.0	0.0	0.0002186218070556877	0.0	0.0	0.00021870786512240053	0.0	800.6399999948537	88.88888823843509	0.0	4.120048121731332e-12	-7.105427357601002e-13	0.0	-2.692645223154387e-26	7.105427357601002e-14
0.98	88.88888823778802	0.0	0.00033917069939566537	95.0110981544333	0.0	-800.6399999948537	0.0	1.5326496041222866e-09	0.0	0.99999999999818	0.0	1.9078351748896032e-06	0.0	0.0	0.0002186218070556877	0.0	0.0	0.00021870830419416947	0.0	800.6399999948537	88.88888823843509	0.0	4.120048121731332e-12	-7.105427357601002e-13	0.0	-2.692645223154387e-26	7.105427357601002e-14
0.985	88.88888823778802	0.0	0.00033917069939566537	95.45554259887776	0.0	-800.6399999948537	0.0	1.5326496041222866e-09	0.0	0.99999999999818	0.0	1.9078351748896032e-06	0.0	0.0	0.0002186218070556877	0.0	0.0	0.0002187087432659384	0.0	800.6399999948537	88.88888823843509	0.0	4.120048121731332e-12	-7.105427357601002e-13	0.0	-2.692645223154387e-26	7.105427357601002e-14
0.99	88.88888823778802	0.0	0.00033917069939566537	95.8999870433222	0.0	-800.6399999948537	0.0	1.5326496041222866e-09	0.0	0.99999999999818	0.0	1.9078351748896032e-06	0.0	0.0	0.0002186218070556877	0.0	0.0	0.00021870918233770736	0.0	800.6399999948537	88.88888823843509	0.0	4.120048121731332e-12	-7.105427357601002e-13	0.0	-2.692645223154387e-26	7.105427357601002e-14
0.995	88.88888823778802	0.0	0.00033917069939566537	96.34443148776664	0.0	-800.6399999948537	0.0	1.5326496041222866e-09	0.0	0.99999999999818	0.0	1.9078351748896032e-06	0.0	0.0	0.0002186218070556877	0.0	0.0	0.0002187096214094763	0.0	800.6399999948537	88.88888823843509	0.0	4.120048121731332e-12	-7.105427357601002e-13	0.0	-2.692645223154387e-26	7.105427357601002e-14
1.0	88.88888823778802	0.0	0.00033917069939566537	96.78887593221108	0.0	-800.6399999948537	0.0	1.5326496041222866e-09	0.0	0.99999999999818	0.0	1.9078351748896032e-06	0.0	0.0	0.0002186218070556877	0.0	0.0	0.00021871006048124523	0.0	800.6399999948537	88.88888823843509	0.0	4.120048121731332e-12	-7.105427357601002e-13	0.0	-2.692645223154387e-26	7.105427357601002e-14
1.005	88.88888823778802	0.0	0.00033917069939566537	97.23332037665551	0.0	-800.6399999948537	0.0	1.5326496041222866e-09	0.0	0.99999999999818	0.0	1.9078351748896032e-06	0.0	0.0	0.0002186218070556877	0.0	0.0	0.0002187104995530142	0.0	800.6399999948537	88.88888823843509	0.0	4.120048121731332e-12	-7.105427357601002e-13	0.0	-2.692645223154387e-26	7.105427357601002e-14
1.01	88.88888823778802	0.0	0.00033917069939566537	97.67776482109997	0.0	-800.6399999948537	0.0	1.5326496041222866e-09	0.0	0.99999999999818	0.0	1.9078351748896032e-06	0.0	0.0	0.0002186218070556877	0.0	0.0	0.00021871093862478312	0.0	800.6399999948537	88.88888823843509	0.0	4.120048121731332e-12	-7.105427357601002e-13	0.0	-2.692645223154387e-26	7.105427357601002e-14
1.015	88.88888823778802	0.0	0.00033917069939566537	98.12220926554441	0.0	-800.6399999948537	0.0	1.5326496041222866e-09	0.0	0.99999999999818	0.0	1.9078351748896032e-06	0.0	0.0	0.0002186218070556877	0.0	0.0	0.00021871137769655208	0.0	800.6399999948537	88.88888823843509	0.0	4.120048121731332e-12	-7.105427357601002e-13	0.0	-2.692645223154387e-26	7.105427357601002e-14
1.02	88.88888823778802	0.0	0.00033917069939566537	98.56665370998887	0.0	-800.6399999948537	0.0	1.5326496041222866e-09	0.0	0.99999999999818	0.0	1.9078351748896032e-06	0.0	0.0	0.0002186218070556877	0.0	0.0	0.00021871181676832101	0.0	800.6399999948537	88.88888823843509	0.0	4.120048121731332e-12	-7.105427357601002e-13	0.0	-2.692645223154387e-26	7.105427357601002e-14
1.025	88.88888823778802	0.0	0.00033917069939566537	99.0110981544333	0.0	-800.6399999948537	0.0	1.5326496041222866e-09	0.0	0.99999999999818	0.0	1.9078351748896032e-06	0.0	0.0	0.0002186218070556877	0.0	0.0	0.00021871225584008995	0.0	800.6399999948537	88.88888823843509	0.0	4.120048121731332e-12	-7.105427357601002e-13	0.0	-2.692645223154387e-26	7.105427357601002e-14
1.03	88.88888823778802	0.0	0.00033917069939566537	99.45554259887776	0.0	-800.6399999948537	0.0	1.5326496041222866e-09	0.0	0.99999999999818	0.0	1.9078351748896032e-06	0.0	0.0	0.0002186218070556877	0.0	0.0	0.0002187126949118589	0.0	800.6399999948537	88.88888823843509	0.0	4.120048121731332e-12	-7.105427357601002e-13	0.0	-2.692645223154387e-26	7.105427357601002e-14
1.035	88.88888823778802	0.0	0.00033917069939566537	99.89998704332218	0.0	-800.6399999948537	0.0	1.5326496041222866e-09	0.0	0.99999999999818	0.0	1.9078351748896032e-06	0.0	0.0	0.0002186218070556877	0.0	0.0	0.00021871313398362784	0.0	800.6399999948537	88.88888823843509	0.0	4.120048121731332e-12	-7.105427357601002e-13	0.0	-2.692645223154387e-26	7.105427357601002e-14
1.04	88.88888823778802	0.0	0.00033917069939566537	100.34443148776664	0.0	-800.6399999948537	0.0	1.5326496041222866e-09	0.0	0.99999999999818	0.0	1.9078351748896032e-06	0.0	0.0	0.0002186218070556877	0.0	0.0	0.00021871357305539677	0.0	800.6399999948537	88.88888823843509	0.0	4.120048121731332e-12	-7.105427357601002e-13	0.0	-2.692645223154387e-26	7.105427357601002e-14
1.045	88.88888823778802	0.0	0.00033917069939566537	100.78887593221108	0.0	-800.6399999948537	0.0	1.5326496041222866e-09	0.0	0.99999999999818	0.0	1.9078351748896032e-06	0.0	0.0	0.0002186218070556877	0.0	0.0	0.00021871401212716573	0.0	800.6399999948537	88.88888823843509	0.0	4.120048121731332e-12	-7.105427357601002e-13	0.0	-2.692645223154387e-26	7.105427357601002e-14
1.05	88.88888823778802	0.0	0.00033917069939566537	101.23332037665553	0.0	-800.6399999948537	0.0	1.5326496041222866e-09	0.0	0.99999999999818	0.0	1.9078351748896032e-06	0.0	0.0	0.0002186218070556877	0.0	0.0	0.00021871445119893467	0.0	800.6399999948537	88.88888823843509	0.0	4.120048121731332e-12	-7.105427357601002e-13	0.0	-2.692645223154387e-26	7.105427357601002e-14
1.055	88.88888823778802	0.0	0.00033917069939566537	101.67776482109997	0.0	-800.6399999948537	0.0	1.5326496041222866e-09	0.0	0.99999999999818	0.0	1.9078351748896032e-06	0.0	0.0	0.0002186218070556877	0.0	0.0	0.00021871489027070363	0.0	800.6399999948537	88.88888823843509	0.0	4.120048121731332e-12	-7.105427357601002e-13	0.0	-2.692645223154387e-26	7.105427357601002e-14
1.06	88.88888823778802	0.0	0.00033917069939566537	102.12220926554443	0.0	-800.6399999948537	0.0	1.5326496041222866e-09	0.0	0.99999999999818	0.0	1.9078351748896032e-06	0.0	0.0	0.0002186218070556877	0.0	0.0	0.00021871532934247256	0.0	800.6399999948537	88.88888823843509	0.0	4.120048121731332e-12	-7.105427357601002e-13	0.0	-2.692645223154387e-26	7.105427357601002e-14
1.065	88.88888823778802	0.0	0.00033917069939566537	102.56665370998886	0.0	-800.6399999948537	0.0	1.5326496041222866e-09	0.0	0.99999999999818	0.0	1.9078351748896032e-06	0.0	0.0	0.0002186218070556877	0.0	0.0	0.0002187157684142415	0.0	800.6399999948537	88.88888823843509	0.0	4.120048121731332e-12	-7.105427357601002e-13	0.0	-2.692645223154387e-26	7.105427357601002e-14
1.07	88.88888823778802	0.0	0.00033917069939566537	103.01109815443331	0.0	-800.6399999948537	0.0	1.5326496041222866e-09	0.0	0.99999999999818	0.0	1.9078351748896032e-06	0.0	0.0	0.0002186218070556877	0.0	0.0	0.00021871620748601045	0.0	800.6399999948537	88.88888823843509	0.0	4.120048121731332e-12	-7.105427357601002e-13	0.0	-2.692645223154387e-26	7.105427357601002e-14
1.075	88.88888823778802	0.0	0.00033917069939566537	103.45554259887774	0.0	-800.6399999948537	0.0	1.5326496041222866e-09	0.0	0.99999999999818	0.0	1.9078351748896032e-06	0.0	0.0	0.0002186218070556877	0.0	0.0	0.0002187166465577794	0.0	800.6399999948537	88.88888823843509	0.0	4.120048121731332e-12	-7.105427357601002e-13	0.0	-2.692645223154387e-26	7.105427357601002e-14
1.08	88.88888823778802	0.0	0.00033917069939566537	103.8999870433222	0.0	-800.6399999948537	0.0	1.5326496041222866e-09	0.0	0.99999999999818	0.0	1.9078351748896032e-06	0.0	0.0	0.0002186218070556877	0.0	0.0	0.00021871708562954832	0.0	800.6399999948537	88.88888823843509	0.0	4.120048121731332e-12	-7.105427357601002e-13	0.0	-2.692645223154387e-26	7.105427357601002e-14
1.085	88.88888823778802	0.0	0.00033917069939566537	104.34443148776664	0.0	-800.6399999948537	0.0	1.5326496041222866e-09	0.0	0.99999999999818	0.0	1.9078351748896032e-06	0.0	0.0	0.0002186218070556877	0.0	0.0	0.00021871752470131728	0.0	800.6399999948537	88.88888823843509	0.0	4.120048121731332e-12	-7.105427357601002e-13	0.0	-2.692645223154387e-26	7.105427357601002e-14
1.09	88.88888823778802	0.0	0.00033917069939566537	104.78887593221108	0.0	-800.6399999948537	0.0	1.5326496041222866e-09	0.0	0.99999999999818	0.0	1.9078351748896032e-06	0.0	0.0	0.0002186218070556877	0.0	0.0	0.0002187179637730862	0.0	800.6399999948537	88.88888823843509	0.0	4.120048121731332e-12	-7.105427357601002e-13	0.0	-2.692645223154387e-26	7.105427357601002e-14
1.095	88.88888823778802	0.0	0.00033917069939566537	105.23332037665553	0.0	-800.6399999948537	0.0	1.5326496041222866e-09	0.0	0.99999999999818	0.0	1.9078351748896032e-06	0.0	0.0	0.0002186218070556877	0.0	0.0	0.00021871840284485515	0.0	800.6399999948537	88.88888823843509	0.0	4.120048121731332e-12	-7.105427357601002e-13	0.0	-2.692645223154387e-26	7.105427357601002e-14
1.1	88.88888823778802	0.0	0.00033917069939566537	105.67776482109998	0.0	-800.6399999948537	0.0	1.5326496041222866e-09	0.0	0.99999999999818	0.0	1.9078351748896032e-06	0.0	0.0	0.0002186218070556877	0.0	0.0	0.0002187188419166241	0.0	800.6399999948537	88.88888823843509	0.0	4.120048121731332e-12	-7.105427357601002e-13	0.0	-2.692645223154387e-26	7.105427357601002e-14
1.105	88.88888823778802	0.0	0.00033917069939566537	106.12220926554441	0.0	-800.6399999948537	0.0	1.5326496041222866e-09	0.0	0.99999999999818	0.0	1.9078351748896032e-06	0.0	0.0	0.0002186218070556877	0.0	0.0	0.00021871928098839304	0.0	800.6399999948537	88.88888823843509	0.0	4.120048121731332e-12	-7.105427357601002e-13	0.0	-2.692645223154387e-26	7.105427357601002e-14
1.11	88.88888823778802	0.0	0.00033917069939566537	106.56665370998887	0.0	-800.6399999948537	0.0	1.5326496041222866e-09	0.0	0.99999999999818	0.0	1.9078351748896032e-06	0.0	0.0	0.0002186218070556877	0.0	0.0	0.000218719720060162	0.0	800.6399999948537	88.88888823843509	0.0	4.120048121731332e-12	-7.105427357601002e-13	0.0	-2.692645223154387e-26	7.105427357601002e-14
1.115	88.88888823778802	0.0	0.00033917069939566537	107.0110981544333	0.0	-800.6399999948537	0.0	1.5326496041222866e-09	0.0	0.99999999999818	0.0	1.9078351748896032e-06	0.0	0.0	0.0002186218070556877	0.0	0.0	0.00021872015913193093	0.0	800.6399999948537	88.88888823843509	0.0	4.120048121731332e-12	-7.105427357601002e-13	0.0	-2.692645223154387e-26	7.105427357601002e-14
1.12	88.88888823778802	0.0	0.00033917069939566537	107.45554259887776	0.0	-800.6399999948537	0.0	1.5326496041222866e-09	0.0	0.99999999999818	0.0	1.9078351748896032e-06	0.0	0.0	0.0002186218070556877	0.0	0.0	0.00021872059820369987	0.0	800.6399999948537	88.88888823843509	0.0	4.120048121731332e-12	-7.105427357601002e-13	0.0	-2.692645223154387e-26	7.105427357601002e-14
1.125	88.88888823778802	0.0	0.00033917069939566537	107.8999870433222	0.0	-800.6399999948537	0.0	1.5326496041222866e-09	0.0	0.99999999999818	0.0	1.9078351748896032e-06	0.0	0.0	0.0002186218070556877	0.0	0.0	0.00021872103727546883	0.0	800.6399999948537	88.88888823843509	0.0	4.120048121731332e-12	-7.105427357601002e-13	0.0	-2.692645223154387e-26	7.105427357601002e-14
1.13	88.88888823778802	0.0	0.00033917069939566537	108.34443148776663	0.0	-800.6399999948537	0.0	1.5326496041222866e-09	0.0	0.99999999999818	0.0	1.9078351748896032e-06	0.0	0.0	0.0002186218070556877	0.0	0.0	0.00021872147634723776	0.0	800.6399999948537	88.88888823843509	0.0	4.120048121731332e-12	-7.105427357601002e-13	0.0	-2.692645223154387e-26	7.105427357601002e-14
1.135	88.88888823778802	0.0	0.00033917069939566537	108.78887593221108	0.0	-800.6399999948537	0.0	1.5326496041222866e-09	0.0	0.99999999999818	0.0	1.9078351748896032e-06	0.0	0.0	0.0002186218070556877	0.0	0.0	0.0002187219154190067	0.0	800.6399999948537	88.88888823843509	0.0	4.120048121731332e-12	-7.105427357601002e-13	0.0	-2.692645223154387e-26	7.105427357601002e-14
1.14	88.88888823778802	0.0	0.00033917069939566537	109.23332037665551	0.0	-800.6399999948537	0.0	1.5326496041222866e-09	0.0	0.99999999999818	0.0	1.9078351748896032e-06	0.0	0.0	0.0002186218070556877	0.0	0.0	0.00021872235449077565	0.0	800.6399999948537	88.88888823843509	0.0	4.120048121731332e-12	-7.105427357601002e-13	0.0	-2.692645223154387e-26	7.105427357601002e-14
1.145	88.88888823778802	0.0	0.00033917069939566537	109.67776482109997	0.0	-800.6399999948537	0.0	1.5326496041222866e-09	0.0	0.99999999999818	0.0	1.9078351748896032e-06	0.0	0.0	0.0002186218070556877	0.0	0.0	0.00021872279356254459	0.0	800.6399999948537	88.88888823843509	0.0	4.120048121731332e-12	-7.105427357601002e-13	0.0	-2.692645223154387e-26	7.105427357601002e-14
1.15	88.88888823778802	0.0	0.00033917069939566537	110.12220926554441	0.0	-800.6399999948537	0.0	1.5326496041222866e-09	0.0	0.99999999999818	0.0	1.9078351748896032e-06	0.0	0.0	0.0002186218070556877	0.0	0.0	0.00021872323263431352	0.0	800.6399999948537	88.88888823843509	0.0	4.120048121731332e-12	-7.105427357601002e-13	0.0	-2.692645223154387e-26	7.105427357601002e-14
1.155	88.88888823778802	0.0	0.00033917069939566537	110.56665370998887	0.0	-800.6399999948537	0.0	1.5326496041222866e-09	0.0	0.99999999999818	0.0	1.9078351748896032e-06	0.0	0.0	0.0002186218070556877	0.0	0.0	0.00021872367170608248	0.0	800.6399999948537	88.88888823843509	0.0	4.120048121731332e-12	-7.105427357601002e-13	0.0	-2.692645223154387e-26	7.105427357601002e-14
1.16	88.88888823778802	0.0	0.00033917069939566537	111.0110981544333	0.0	-800.6399999948537	0.0	1.5326496041222866e-09	0.0	0.99999999999818	0.0	1.9078351748896032e-06	0.0	0.0	0.0002186218070556877	0.0	0.0	0.0002187241107778514	0.0	800.6399999948537	88.88888823843509	0.0	4.120048121731332e-12	-7.105427357601002e-13	0.0	-2.692645223154387e-26	7.105427357601002e-14
1.165	88.88888823778802	0.0	0.00033917069939566537	111.45554259887776	0.0	-800.6399999948537	0.0	1.5326496041222866e-09	0.0	0.99999999999818	0.0	1.9078351748896032e-06	0.0	0.0	0.0002186218070556877	0.0	0.0	0.00021872454984962037	0.0	800.6399999948537	88.88888823843509	0.0	4.120048121731332e-12	-7.105427357601002e-13	0.0	-2.692645223154387e-26	7.105427357601002e-14
1.17	88.88888823778802	0.0	0.00033917069939566537	111.89998704332218	0.0	-800.6399999948537	0.0	1.5326496041222866e-09	0.0	0.99999999999818	0.0	1.9078351748896032e-06	0.0	0.0	0.0002186218070556877	0.0	0.0	0.0002187249889213893	0.0	800.6399999948537	88.88888823843509	0.0	4.120048121731332e-12	-7.105427357601002e-13	0.0	-2.692645223154387e-26	7.105427357601002e-14
1.175	88.88888823778802	0.0	0.00033917069939566537	112.34443148776664	0.0	-800.6399999948537	0.0	1.5326496041222866e-09	0.0	0.99999999999818	0.0	1.9078351748896032e-06	0.0	0.0	0.0002186218070556877	0.0	0.0	0.00021872542799315824	0.0	800.6399999948537	88.88888823843509	0.0	4.120048121731332e-12	-7.105427357601002e-13	0.0	-2.692645223154387e-26	7.105427357601002e-14
1.18	88.88888823778802	0.0	0.00033917069939566537	112.78887593221108	0.0	-800.6399999948537	0.0	1.5326496041222866e-09	0.0	0.99999999999818	0.0	1.9078351748896032e-06	0.0	0.0	0.0002186218070556877	0.0	0.0	0.0002187258670649272	0.0	800.6399999948537	88.88888823843509	0.0	4.120048121731332e-12	-7.105427357601002e-13	0.0	-2.692645223154387e-26	7.105427357601002e-14
1.185	88.88888823778802	0.0	0.00033917069939566537	113.23332037665553	0.0	-800.6399999948537	0.0	1.5326496041222866e-09	0.0	0.99999999999818	0.0	1.9078351748896032e-06	0.0	0.0	0.0002186218070556877	0.0	0.0	0.00021872630613669613	0.0	800.6399999948537	88.88888823843509	0.0	4.120048121731332e-12	-7.105427357601002e-13	0.0	-2.692645223154387e-26	7.105427357601002e-14
1.19	88.88888823778802	0.0	0.00033917069939566537	113.67776482109997	0.0	-800.6399999948537	0.0	1.5326496041222866e-09	0.0	0.99999999999818	0.0	1.9078351748896032e-06	0.0	0.0	0.0002186218070556877	0.0	0.0	0.00021872674520846506	0.0	800.6399999948537	88.88888823843509	0.0	4.120048121731332e-12	-7.105427357601002e-13	0.0	-2.692645223154387e-26	7.105427357601002e-14
1.195	88.88888823778802	0.0	0.00033917069939566537	114.12220926554443	0.0	-800.6399999948537	0.0	1.5326496041222866e-09	0.0	0.99999999999818	0.0	1.9078351748896032e-06	0.0	0.0	0.0002186218070556877	0.0	0.0	0.00021872718428023403	0.0	800.6399999948537	88.88888823843509	0.0	4.120048121731332e-12	-7.105427357601002e-13	0.0	-2.692645223154387e-26	7.105427357601002e-14
1.2	88.88888823778802	0.0	0.00033917069939566537	114.56665370998886	0.0	-800.6399999948537	0.0	1.5326496041222866e-09	0.0	0.99999999999818	0.0	1.9078351748896032e-06	0.0	0.0	0.0002186218070556877	0.0	0.0	0.00021872762335200296	0.0	800.6399999948537	88.88888823843509	0.0	4.120048121731332e-12	-7.105427357601002e-13	0.0	-2.692645223154387e-26	7.105427357601002e-14
1.205	88.88888823778802	0.0	0.00033917069939566537	115.01109815443331	0.0	-800.6399999948537	0.0	1.5326496041222866e-09	0.0	0.99999999999818	0.0	1.9078351748896032e-06	0.0	0.0	0.0002186218070556877	0.0	0.0	0.0002187280624237719	0.0	800.6399999948537	88.88888823843509	0.0	4.120048121731332e-12	-7.105427357601002e-13	0.0	-2.692645223154387e-26	7.105427357601002e-14
1.21	88.88888823778802	0.0	0.00033917069939566537	115.45554259887774	0.0	-800.6399999948537	0.0	1.5326496041222866e-09	0.0	0.99999999999818	0.0	1.9078351748896032e-06	0.0	0.0	0.0002186218070556877	0.0	0.0	0.00021872850149554085	0.0	800.6399999948537	88.88888823843509	0.0	4.120048121731332e-12	-7.105427357601002e-13	0.0	-2.692645223154387e-26	7.105427357601002e-14
1.215	88.88888823778802	0.0	0.00033917069939566537	115.8999870433222	0.0	-800.6399999948537	0.0	1.5326496041222866e-09	0.0	0.99999999999818	0.0	1.9078351748896032e-06	0.0	0.0	0.0002186218070556877	0.0	0.0	0.00021872894056730978	0.0	800.6399999948537	88.88888823843509	0.0	4.120048121731332e-12	-7.105427357601002e-13	0.0	-2.692645223154387e-26	7.105427357601002e-14
1.22	88.88888823778802	0.0	0.00033917069939566537	116.34443148776664	0.0	-800.6399999948537	0.0	1.5326496041222866e-09	0.0	0.99999999999818	0.0	1.9078351748896032e-06	0.0	0.0	0.0002186218070556877	0.0	0.0	0.00021872937963907874	0.0	800.6399999948537	88.88888823843509	0.0	4.120048121731332e-12	-7.105427357601002e-13	0.0	-2.692645223154387e-26	7.105427357601002e-14
1.225	88.88888823778802	0.0	0.00033917069939566537	116.7888759322111	0.0	-800.6399999948537	0.0	1.5326496041222866e-09	0.0	0.99999999999818	0.0	1.9078351748896032e-06	0.0	0.0	0.0002186218070556877	0.0	0.0	0.00021872981871084768	0.0	800.6399999948537	88.88888823843509	0.0	4.120048121731332e-12	-7.105427357601002e-13	0.0	-2.692645223154387e-26	7.105427357601002e-14
1.23	88.88888823778802	0.0	0.00033917069939566537	117.23332037665553	0.0	-800.6399999948537	0.0	1.5326496041222866e-09	0.0	0.99999999999818	0.0	1.9078351748896032e-06	0.0	0.0	0.0002186218070556877	0.0	0.0	0.0002187302577826166	0.0	800.6399999948537	88.88888823843509	0.0	4.120048121731332e-12	-7.105427357601002e-13	0.0	-2.692645223154387e-26	7.105427357601002e-14
1.235	88.88888823778802	0.0	0.00033917069939566537	117.67776482109998	0.0	-800.6399999948537	0.0	1.5326496041222866e-09	0.0	0.99999999999818	0.0	1.9078351748896032e-06	0.0	0.0	0.0002186218070556877	0.0	0.0	0.00021873069685438557	0.0	800.6399999948537	88.88888823843509	0.0	4.120048121731332e-12	-7.105427357601002e-13	0.0	-2.692645223154387e-26	7.105427357601002e-14
1.24	88.88888823778802	0.0	0.00033917069939566537	118.12220926554441	0.0	-800.6399999948537	0.0	1.5326496041222866e-09	0.0	0.99999999999818	0.0	1.9078351748896032e-06	0.0	0.0	0.0002186218070556877	0.0	0.0	0.0002187311359261545	0.0	800.6399999948537	88.88888823843509	0.0	4.120048121731332e-12	-7.105427357601002e-13	0.0	-2.692645223154387e-26	7.105427357601002e-14
1.245	88.88888823778802	0.0	0.00033917069939566537	118.56665370998887	0.0	-800.6399999948537	0.0	1.5326496041222866e-09	0.0	0.99999999999818	0.0	1.9078351748896032e-06	0.0	0.0	0.0002186218070556877	0.0	0.0	0.00021873157499792344	0.0	800.6399999948537	88.88888823843509	0.0	4.120048121731332e-12	-7.105427357601002e-13	0.0	-2.692645223154387e-26	7.105427357601002e-14
1.25	88.88888823778802	0.0	0.00033917069939566537	119.01109815443331	0.0	-800.6399999948537	0.0	1.5326496041222866e-09	0.0	0.99999999999818	0.0	1.9078351748896032e-06	0.0	0.0	0.0002186218070556877	0.0	0.0	0.0002187320140696924	0.0	800.6399999948537	88.88888823843509	0.0	4.120048121731332e-12	-7.105427357601002e-13	0.0	-2.692645223154387e-26	7.105427357601002e-14
1.255	88.88888823778802	0.0	0.00033917069939566537	119.45554259887774	0.0	-800.6399999948537	0.0	1.5326496041222866e-09	0.0	0.99999999999818	0.0	1.9078351748896032e-06	0.0	0.0	0.0002186218070556877	0.0	0.0	0.00021873245314146133	0.0	800.6399999948537	88.88888823843509	0.0	4.120048121731332e-12	-7.105427357601002e-13	0.0	-2.692645223154387e-26	7.105427357601002e-14
1.26	88.88888823778802	0.0	0.00033917069939566537	119.8999870433222	0.0	-800.6399999948537	0.0	1.5326496041222866e-09	0.0	0.99999999999818	0.0	1.9078351748896032e-06	0.0	0.0	0.0002186218070556877	0.0	0.0	0.0002187328922132303	0.0	800.6399999948537	88.88888823843509	0.0	4.120048121731332e-12	-7.105427357601002e-13	0.0	-2.692645223154387e-26	7.105427357601002e-14
1.265	88.88888823778802	0.0	0.00033917069939566537	120.34443148776663	0.0	-800.6399999948537	0.0	1.5326496041222866e-09	0.0	0.99999999999818	0.0	1.9078351748896032e-06	0.0	0.0	0.0002186218070556877	0.0	0.0	0.00021873333128499922	0.0	800.6399999948537	88.88888823843509	0.0	4.120048121731332e-12	-7.105427357601002e-13	0.0	-2.692645223154387e-26	7.105427357601002e-14
1.27	88.88888823778802	0.0	0.00033917069939566537	120.78887593221108	0.0	-800.6399999948537	0.0	1.5326496041222866e-09	0.0	0.99999999999818	0.0	1.9078351748896032e-06	0.0	0.0	0.0002186218070556877	0.0	0.0	0.00021873377035676816	0.0	800.6399999948537	88.88888823843509	0.0	4.120048121731332e-12	-7.105427357601002e-13	0.0	-2.692645223154387e-26	7.105427357601002e-14
1.275	88.88888823778802	0.0	0.00033917069939566537	121.23332037665551	0.0	-800.6399999948537	0.0	1.5326496041222866e-09	0.0	0.99999999999818	0.0	1.9078351748896032e-06	0.0	0.0	0.0002186218070556877	0.0	0.0	0.00021873420942853712	0.0	800.6399999948537	88.88888823843509	0.0	4.120048121731332e-12	-7.105427357601002e-13	0.0	-2.692645223154387e-26	7.105427357601002e-14
1.28	88.88888823778802	0.0	0.00033917069939566537	121.67776482109997	0.0	-800.6399999948537	0.0	1.5326496041222866e-09	0.0	0.99999999999818	0.0	1.9078351748896032e-06	0.0	0.0	0.0002186218070556877	0.0	0.0	0.00021873464850030605	0.0	800.6399999948537	88.88888823843509	0.0	4.120048121731332e-12	-7.105427357601002e-13	0.0	-2.692645223154387e-26	7.105427357601002e-14
1.285	88.88888823778802	0.0	0.00033917069939566537	122.12220926554441	0.0	-800.6399999948537	0.0	1.5326496041222866e-09	0.0	0.99999999999818	0.0	1.9078351748896032e-06	0.0	0.0	0.0002186218070556877	0.0	0.0	0.00021873508757207498	0.0	800.6399999948537	88.88888823843509	0.0	4.120048121731332e-12	-7.105427357601002e-13	0.0	-2.692645223154387e-26	7.105427357601002e-14
1.29	88.88888823778802	0.0	0.00033917069939566537	122.56665370998887	0.0	-800.6399999948537	0.0	1.5326496041222866e-09	0.0	0.99999999999818	0.0	1.9078351748896032e-06	0.0	0.0	0.0002186218070556877	0.0	0.0	0.00021873552664384394	0.0	800.6399999948537	88.88888823843509	0.0	4.120048121731332e-12	-7.105427357601002e-13	0.0	-2.692645223154387e-26	7.105427357601002e-14
1.295	88.88888823778802	0.0	0.00033917069939566537	123.0110981544333	0.0	-800.6399999948537	0.0	1.5326496041222866e-09	0.0	0.99999999999818	0.0	1.9078351748896032e-06	0.0	0.0	0.0002186218070556877	0.0	0.0	0.00021873596571561288	0.0	800.6399999948537	88.88888823843509	0.0	4.120048121731332e-12	-7.105427357601002e-13	0.0	-2.692645223154387e-26	7.105427357601002e-14
1.3	88.88888823778802	0.0	0.00033917069939566537	123.45554259887776	0.0	-800.6399999948537	0.0	1.5326496041222866e-09	0.0	0.99999999999818	0.0	1.9078351748896032e-06	0.0	0.0	0.0002186218070556877	0.0	0.0	0.0002187364047873818	0.0	800.6399999948537	88.88888823843509	0.0	4.120048121731332e-12	-7.105427357601002e-13	0.0	-2.692645223154387e-26	7.105427357601002e-14
1.305	88.88888823778802	0.0	0.00033917069939566537	123.89998704332218	0.0	-800.6399999948537	0.0	1.5326496041222866e-09	0.0	0.99999999999818	0.0	1.9078351748896032e-06	0.0	0.0	0.0002186218070556877	0.0	0.0	0.00021873684385915077	0.0	800.6399999948537	88.88888823843509	0.0	4.120048121731332e-12	-7.105427357601002e-13	0.0	-2.692645223154387e-26	7.105427357601002e-14
1.31	88.88888823778802	0.0	0.00033917069939566537	124.34443148776664	0.0	-800.6399999948537	0.0	1.5326496041222866e-09	0.0	0.99999999999818	0.0	1.9078351748896032e-06	0.0	0.0	0.0002186218070556877	0.0	0.0	0.0002187372829309197	0.0	800.6399999948537	88.88888823843509	0.0	4.120048121731332e-12	-7.105427357601002e-13	0.0	-2.692645223154387e-26	7.105427357601002e-14
1.315	88.88888823778802	0.0	0.00033917069939566537	124.78887593221108	0.0	-800.6399999948537	0.0	1.5326496041222866e-09	0.0	0.99999999999818	0.0	1.9078351748896032e-06	0.0	0.0	0.0002186218070556877	0.0	0.0	0.00021873772200268866	0.0	800.6399999948537	88.88888823843509	0.0	4.120048121731332e-12	-7.105427357601002e-13	0.0	-2.692645223154387e-26	7.105427357601002e-14
1.32	88.88888823778802	0.0	0.00033917069939566537	125.23332037665553	0.0	-800.6399999948537	0.0	1.5326496041222866e-09	0.0	0.99999999999818	0.0	1.9078351748896032e-06	0.0	0.0	0.0002186218070556877	0.0	0.0	0.0002187381610744576	0.0	800.6399999948537	88.88888823843509	0.0	4.120048121731332e-12	-7.105427357601002e-13	0.0	-2.692645223154387e-26	7.105427357601002e-14
1.325	88.88888823778802	0.0	0.00033917069939566537	125.67776482109997	0.0	-800.6399999948537	0.0	1.5326496041222866e-09	0.0	0.99999999999818	0.0	1.9078351748896032e-06	0.0	0.0	0.0002186218070556877	0.0	0.0	0.00021873860014622653	0.0	800.6399999948537	88.88888823843509	0.0	4.120048121731332e-12	-7.105427357601002e-13	0.0	-2.692645223154387e-26	7.105427357601002e-14
1.33	88.88888823778802	0.0	0.00033917069939566537	126.12220926554443	0.0	-800.6399999948537	0.0	1.5326496041222866e-09	0.0	0.99999999999818	0.0	1.9078351748896032e-06	0.0	0.0	0.0002186218070556877	0.0	0.0	0.0002187390392179955	0.0	800.6399999948537	88.88888823843509	0.0	4.120048121731332e-12	-7.105427357601002e-13	0.0	-2.692645223154387e-26	7.105427357601002e-14
1.335	88.88888823778802	0.0	0.00033917069939566537	126.56665370998886	0.0	-800.6399999948537	0.0	1.5326496041222866e-09	0.0	0.99999999999818	0.0	1.9078351748896032e-06	0.0	0.0	0.0002186218070556877	0.0	0.0	0.00021873947828976442	0.0	800.6399999948537	88.88888823843509	0.0	4.120048121731332e-12	-7.105427357601002e-13	0.0	-2.692645223154387e-26	7.105427357601002e-14
1.34	88.88888823778802	0.0	0.00033917069939566537	127.01109815443331	0.0	-800.6399999948537	0.0	1.5326496041222866e-09	0.0	0.99999999999818	0.0	1.9078351748896032e-06	0.0	0.0	0.0002186218070556877	0.0	0.0	0.00021873991736153336	0.0	800.6399999948537	88.88888823843509	0.0	4.120048121731332e-12	-7.105427357601002e-13	0.0	-2.692645223154387e-26	7.105427357601002e-14
1.345	88.88888823778802	0.0	0.00033917069939566537	127.45554259887774	0.0	-800.6399999948537	0.0	1.5326496041222866e-09	0.0	0.99999999999818	0.0	1.9078351748896032e-06	0.0	0.0	0.0002186218070556877	0.0	0.0	0.00021874035643330232	0.0	800.6399999948537	88.88888823843509	0.0	4.120048121731332e-12	-7.105427357601002e-13	0.0	-2.692645223154387e-26	7.105427357601002e-14
1.35	88.88888823778802	0.0	0.00033917069939566537	127.8999870433222	0.0	-800.6399999948537	0.0	1.5326496041222866e-09	0.0	0.99999999999818	0.0	1.9078351748896032e-06	0.0	0.0	0.0002186218070556877	0.0	0.0	0.00021874079550507125	0.0	800.6399999948537	88.88888823843509	0.0	4.120048121731332e-12	-7.105427357601002e-13	0.0	-2.692645223154387e-26	7.105427357601002e-14
1.355	88.88888823778802	0.0	0.00033917069939566537	128.34443148776666	0.0	-800.6399999948537	0.0	1.5326496041222866e-09	0.0	0.99999999999818	0.0	1.9078351748896032e-06	0.0	0.0	0.0002186218070556877	0.0	0.0	0.00021874123457684018	0.0	800.6399999948537	88.88888823843509	0.0	4.120048121731332e-12	-7.105427357601002e-13	0.0	-2.692645223154387e-26	7.105427357601002e-14
1.36	88.88888823778802	0.0	0.00033917069939566537	128.7888759322111	0.0	-800.6399999948537	0.0	1.5326496041222866e-09	0.0	0.99999999999818	0.0	1.9078351748896032e-06	0.0	0.0	0.0002186218070556877	0.0	0.0	0.00021874167364860914	0.0	800.6399999948537	88.88888823843509	0.0	4.120048121731332e-12	-7.105427357601002e-13	0.0	-2.692645223154387e-26	7.105427357601002e-14
1.365	88.88888823778802	0.0	0.00033917069939566537	129.2333203766555	0.0	-800.6399999948537	0.0	1.5326496041222866e-09	0.0	0.99999999999818	0.0	1.9078351748896032e-06	0.0	0.0	0.0002186218070556877	0.0	0.0	0.00021874211272037808	0.0	800.6399999948537	88.88888823843509	0.0	4.120048121731332e-12	-7.105427357601002e-13	0.0	-2.692645223154387e-26	7.105427357601002e-14
1.37	88.88888823778802	0.0	0.00033917069939566537	129.67776482109997	0.0	-800.6399999948537	0.0	1.5326496041222866e-09	0.0	0.99999999999818	0.0	1.9078351748896032e-06	0.0	0.0	0.0002186218070556877	0.0	0.0	0.00021874255179214704	0.0	800.6399999948537	88.88888823843509	0.0	4.120048121731332e-12	-7.105427357601002e-13	0.0	-2.692645223154387e-26	7.105427357601002e-14
1.375	88.88888823778802	0.0	0.00033917069939566537	130.12220926554443	0.0	-800.6399999948537	0.0	1.5326496041222866e-09	0.0	0.99999999999818	0.0	1.9078351748896032e-06	0.0	0.0	0.0002186218070556877	0.0	0.0	0.00021874299086391597	0.0	800.6399999948537	88.88888823843509	0.0	4.120048121731332e-12	-7.105427357601002e-13	0.0	-2.692645223154387e-26	7.105427357601002e-14
1.38	88.88888823778802	0.0	0.00033917069939566537	130.56665370998886	0.0	-800.6399999948537	0.0	1.5326496041222866e-09	0.0	0.99999999999818	0.0	1.9078351748896032e-06	0.0	0.0	0.0002186218070556877	0.0	0.0	0.0002187434299356849	0.0	800.6399999948537	88.88888823843509	0.0	4.120048121731332e-12	-7.105427357601002e-13	0.0	-2.692645223154387e-26	7.105427357601002e-14
1.385	88.88888823778802	0.0	0.00033917069939566537	131.0110981544333	0.0	-800.6399999948537	0.0	1.5326496041222866e-09	0.0	0.99999999999818	0.0	1.9078351748896032e-06	0.0	0.0	0.0002186218070556877	0.0	0.0	0.00021874386900745386	0.0	800.6399999948537	88.88888823843509	0.0	4.120048121731332e-12	-7.105427357601002e-13	0.0	-2.692645223154387e-26	7.105427357601002e-14
1.39	88.88888823778802	0.0	0.00033917069939566537	131.45554259887774	0.0	-800.6399999948537	0.0	1.5326496041222866e-09	0.0	0.99999999999818	0.0	1.9078351748896032e-06	0.0	0.0	0.0002186218070556877	0.0	0.0	0.0002187443080792228	0.0	800.6399999948537	88.88888823843509	0.0	4.120048121731332e-12	-7.105427357601002e-13	0.0	-2.692645223154387e-26	7.105427357601002e-14
1.395	88.88888823778802	0.0	0.00033917069939566537	131.8999870433222	0.0	-800.6399999948537	0.0	1.5326496041222866e-09	0.0	0.99999999999818	0.0	1.9078351748896032e-06	0.0	0.0	0.0002186218070556877	0.0	0.0	0.00021874474715099173	0.0	800.6399999948537	88.88888823843509	0.0	4.120048121731332e-12	-7.105427357601002e-13	0.0	-2.692645223154387e-26	7.105427357601002e-14
1.4	88.88888823778802	0.0	0.00033917069939566537	132.34443148776663	0.0	-800.6399999948537	0.0	1.5326496041222866e-09	0.0	0.99999999999818	0.0	1.9078351748896032e-06	0.0	0.0	0.0002186218070556877	0.0	0.0	0.0002187451862227607	0.0	800.6399999948537	88.88888823843509	0.0	4.120048121731332e-12	-7.105427357601002e-13	0.0	-2.692645223154387e-26	7.105427357601002e-14
1.405	88.88888823778802	0.0	0.00033917069939566537	132.78887593221108	0.0	-800.6399999948537	0.0	1.5326496041222866e-09	0.0	0.99999999999818	0.0	1.9078351748896032e-06	0.0	0.0	0.0002186218070556877	0.0	0.0	0.00021874562529452962	0.0	800.6399999948537	88.88888823843509	0.0	4.120048121731332e-12	-7.105427357601002e-13	0.0	-2.692645223154387e-26	7.105427357601002e-14
1.41	88.88888823778802	0.0	0.00033917069939566537	133.2333203766555	0.0	-800.6399999948537	0.0	1.5326496041222866e-09	0.0	0.99999999999818	0.0	1.9078351748896032e-06	0.0	0.0	0.0002186218070556877	0.0	0.0	0.00021874606436629856	0.0	800.6399999948537	88.88888823843509	0.0	4.120048121731332e-12	-7.105427357601002e-13	0.0	-2.692645223154387e-26	7.105427357601002e-14
1.415	88.88888823778802	0.0	0.00033917069939566537	133.67776482109997	0.0	-800.6399999948537	0.0	1.5326496041222866e-09	0.0	0.99999999999818	0.0	1.9078351748896032e-06	0.0	0.0	0.0002186218070556877	0.0	0.0	0.00021874650343806752	0.0	800.6399999948537	88.88888823843509	0.0	4.120048121731332e-12	-7.105427357601002e-13	0.0	-2.692645223154387e-26	7.105427357601002e-14
1.42	88.88888823778802	0.0	0.00033917069939566537	134.12220926554443	0.0	-800.6399999948537	0.0	1.5326496041222866e-09	0.0	0.99999999999818	0.0	1.9078351748896032e-06	0.0	0.0	0.0002186218070556877	0.0	0.0	0.00021874694250983645	0.0	800.6399999948537	88.88888823843509	0.0	4.120048121731332e-12	-7.105427357601002e-13	0.0	-2.692645223154387e-26	7.105427357601002e-14
1.425	88.88888823778802	0.0	0.00033917069939566537	134.56665370998888	0.0	-800.6399999948537	0.0	1.5326496041222866e-09	0.0	0.99999999999818	0.0	1.9078351748896032e-06	0.0	0.0	0.0002186218070556877	0.0	0.0	0.0002187473815816054	0.0	800.6399999948537	88.88888823843509	0.0	4.120048121731332e-12	-7.105427357601002e-13	0.0	-2.692645223154387e-26	7.105427357601002e-14
1.43	88.88888823778802	0.0	0.00033917069939566537	135.01109815443328	0.0	-800.6399999948537	0.0	1.5326496041222866e-09	0.0	0.99999999999818	0.0	1.9078351748896032e-06	0.0	0.0	0.0002186218070556877	0.0	0.0	0.00021874782065337434	0.0	800.6399999948537	88.88888823843509	0.0	4.120048121731332e-12	-7.105427357601002e-13	0.0	-2.692645223154387e-26	7.105427357601002e-14
1.435	88.88888823778802	0.0	0.00033917069939566537	135.45554259887774	0.0	-800.6399999948537	0.0	1.5326496041222866e-09	0.0	0.99999999999818	0.0	1.9078351748896032e-06	0.0	0.0	0.0002186218070556877	0.0	0.0	0.00021874825972514328	0.0	800.6399999948537	88.88888823843509	0.0	4.120048121731332e-12	-7.105427357601002e-13	0.0	-2.692645223154387e-26	7.105427357601002e-14
1.44	88.88888823778802	0.0	0.00033917069939566537	135.8999870433222	0.0	-800.6399999948537	0.0	1.5326496041222866e-09	0.0	0.99999999999818	0.0	1.9078351748896032e-06	0.0	0.0	0.0002186218070556877	0.0	0.0	0.00021874869879691224	0.0	800.6399999948537	88.88888823843509	0.0	4.120048121731332e-12	-7.105427357601002e-13	0.0	-2.692645223154387e-26	7.105427357601002e-14
1.445	88.88888823778802	0.0	0.00033917069939566537	136.34443148776666	0.0	-800.6399999948537	0.0	1.5326496041222866e-09	0.0	0.99999999999818	0.0	1.9078351748896032e-06	0.0	0.0	0.0002186218070556877	0.0	0.0	0.00021874913786868117	0.0	800.6399999948537	88.88888823843509	0.0	4.120048121731332e-12	-7.105427357601002e-13	0.0	-2.692645223154387e-26	7.105427357601002e-14
1.45	88.88888823778802	0.0	0.00033917069939566537	136.78887593221108	0.0	-800.6399999948537	0.0	1.5326496041222866e-09	0.0	0.99999999999818	0.0	1.9078351748896032e-06	0.0	0.0	0.0002186218070556877	0.0	0.0	0.0002187495769404501	0.0	800.6399999948537	88.88888823843509	0.0	4.120048121731332e-12	-7.105427357601002e-13	0.0	-2.692645223154387e-26	7.105427357601002e-14
1.455	88.88888823778802	0.0	0.00033917069939566537	137.23332037665554	0.0	-800.6399999948537	0.0	1.5326496041222866e-09	0.0	0.99999999999818	0.0	1.9078351748896032e-06	0.0	0.0	0.0002186218070556877	0.0	0.0	0.00021875001601221906	0.0	800.6399999948537	88.88888823843509	0.0	4.120048121731332e-12	-7.105427357601002e-13	0.0	-2.692645223154387e-26	7.105427357601002e-14
1.46	88.88888823778802	0.0	0.00033917069939566537	137.67776482109997	0.0	-800.6399999948537	0.0	1.5326496041222866e-09	0.0	0.99999999999818	0.0	1.9078351748896032e-06	0.0	0.0	0.0002186218070556877	0.0	0.0	0.000218750455083988	0.0	800.6399999948537	88.88888823843509	0.0	4.120048121731332e-12	-7.105427357601002e-13	0.0	-2.692645223154387e-26	7.105427357601002e-14
1.465	88.88888823778802	0.0	0.00033917069939566537	138.12220926554443	0.0	-800.6399999948537	0.0	1.5326496041222866e-09	0.0	0.99999999999818	0.0	1.9078351748896032e-06	0.0	0.0	0.0002186218070556877	0.0	0.0	0.00021875089415575693	0.0	800.6399999948537	88.88888823843509	0.0	4.120048121731332e-12	-7.105427357601002e-13	0.0	-2.692645223154387e-26	7.105427357601002e-14
1.47	88.88888823778802	0.0	0.00033917069939566537	138.56665370998886	0.0	-800.6399999948537	0.0	1.5326496041222866e-09	0.0	0.99999999999818	0.0	1.9078351748896032e-06	0.0	0.0	0.0002186218070556877	0.0	0.0	0.0002187513332275259	0.0	800.6399999948537	88.88888823843509	0.0	4.120048121731332e-12	-7.105427357601002e-13	0.0	-2.692645223154387e-26	7.105427357601002e-14
1.475	88.88888823778802	0.0	0.00033917069939566537	139.0110981544333	0.0	-800.6399999948537	0.0	1.5326496041222866e-09	0.0	0.99999999999818	0.0	1.9078351748896032e-06	0.0	0.0	0.0002186218070556877	0.0	0.0	0.00021875177229929482	0.0	800.6399999948537	88.88888823843509	0.0	4.120048121731332e-12	-7.105427357601002e-13	0.0	-2.692645223154387e-26	7.105427357601002e-14
1.48	88.88888823778802	0.0	0.00033917069939566537	139.45554259887774	0.0	-800.6399999948537	0.0	1.5326496041222866e-09	0.0	0.99999999999818	0.0	1.9078351748896032e-06	0.0	0.0	0.0002186218070556877	0.0	0.0	0.00021875221137106378	0.0	800.6399999948537	88.88888823843509	0.0	4.120048121731332e-12	-7.105427357601002e-13	0.0	-2.692645223154387e-26	7.105427357601002e-14
1.485	88.88888823778802	0.0	0.00033917069939566537	139.8999870433222	0.0	-800.6399999948537	0.0	1.5326496041222866e-09	0.0	0.99999999999818	0.0	1.9078351748896032e-06	0.0	0.0	0.0002186218070556877	0.0	0.0	0.00021875265044283271	0.0	800.6399999948537	88.88888823843509	0.0	4.120048121731332e-12	-7.105427357601002e-13	0.0	-2.692645223154387e-26	7.105427357601002e-14
1.49	88.88888823778802	0.0	0.00033917069939566537	140.34443148776663	0.0	-800.6399999948537	0.0	1.5326496041222866e-09	0.0	0.99999999999818	0.0	1.9078351748896032e-06	0.0	0.0	0.0002186218070556877	0.0	0.0	0.00021875308951460165	0.0	800.6399999948537	88.88888823843509	0.0	4.120048121731332e-12	-7.105427357601002e-13	0.0	-2.692645223154387e-26	7.105427357601002e-14
1.495	88.88888823778802	0.0	0.00033917069939566537	140.78887593221108	0.0	-800.6399999948537	0.0	1.5326496041222866e-09	0.0	0.99999999999818	0.0	1.9078351748896032e-06	0.0	0.0	0.0002186218070556877	0.0	0.0	0.0002187535285863706	0.0	800.6399999948537	88.88888823843509	0.0	4.120048121731332e-12	-7.105427357601002e-13	0.0	-2.692645223154387e-26	7.105427357601002e-14
1.5	88.88888823778802	0.0	0.00033917069939566537	141.2333203766555	0.0	-800.6399999948537	0.0	1.5326496041222866e-09	0.0	0.99999999999818	0.0	1.9078351748896032e-06	0.0	0.0	0.0002186218070556877	0.0	0.0	0.00021875396765813954	0.0	800.6399999948537	88.88888823843509	0.0	4.120048121731332e-12	-7.105427357601002e-13	0.0	-2.692645223154387e-26	7.105427357601002e-14
1.505	88.88888823778802	0.0	0.00033917069939566537	141.67776482109997	0.0	-800.6399999948537	0.0	1.5326496041222866e-09	0.0	0.99999999999818	0.0	1.9078351748896032e-06	0.0	0.0	0.0002186218070556877	0.0	0.0	0.00021875440672990847	0.0	800.6399999948537	88.88888823843509	0.0	4.120048121731332e-12	-7.105427357601002e-13	0.0	-2.692645223154387e-26	7.105427357601002e-14
1.51	88.88888823778802	0.0	0.00033917069939566537	142.12220926554443	0.0	-800.6399999948537	0.0	1.5326496041222866e-09	0.0	0.99999999999818	0.0	1.9078351748896032e-06	0.0	0.0	0.0002186218070556877	0.0	0.0	0.00021875484580167743	0.0	800.6399999948537	88.88888823843509	0.0	4.120048121731332e-12	-7.105427357601002e-13	0.0	-2.692645223154387e-26	7.105427357601002e-14
1.515	88.88888823778802	0.0	0.00033917069939566537	142.56665370998886	0.0	-800.6399999948537	0.0	1.5326496041222866e-09	0.0	0.99999999999818	0.0	1.9078351748896032e-06	0.0	0.0	0.0002186218070556877	0.0	0.0	0.00021875528487344637	0.0	800.6399999948537	88.88888823843509	0.0	4.120048121731332e-12	-7.105427357601002e-13	0.0	-2.692645223154387e-26	7.105427357601002e-14
1.52	88.88888823778802	0.0	0.00033917069939566537	143.0110981544333	0.0	-800.6399999948537	0.0	1.5326496041222866e-09	0.0	0.99999999999818	0.0	1.9078351748896032e-06	0.0	0.0	0.0002186218070556877	0.0	0.0	0.00021875572394521533	0.0	800.6399999948537	88.88888823843509	0.0	4.120048121731332e-12	-7.105427357601002e-13	0.0	-2.692645223154387e-26	7.105427357601002e-14
1.525	88.88888823778802	0.0	0.00033917069939566537	143.45554259887774	0.0	-800.6399999948537	0.0	1.5326496041222866e-09	0.0	0.99999999999818	0.0	1.9078351748896032e-06	0.0	0.0	0.0002186218070556877	0.0	0.0	0.00021875616301698426	0.0	800.6399999948537	88.88888823843509	0.0	4.120048121731332e-12	-7.105427357601002e-13	0.0	-2.692645223154387e-26	7.105427357601002e-14
1.53	88.88888823778802	0.0	0.00033917069939566537	143.8999870433222	0.0	-800.6399999948537	0.0	1.5326496041222866e-09	0.0	0.99999999999818	0.0	1.9078351748896032e-06	0.0	0.0	0.0002186218070556877	0.0	0.0	0.0002187566020887532	0.0	800.6399999948537	88.88888823843509	0.0	4.120048121731332e-12	-7.105427357601002e-13	0.0	-2.692645223154387e-26	7.105427357601002e-14
1.535	88.88888823778802	0.0	0.00033917069939566537	144.34443148776663	0.0	-800.6399999948537	0.0	1.5326496041222866e-09	0.0	0.99999999999818	0.0	1.9078351748896032e-06	0.0	0.0	0.0002186218070556877	0.0	0.0	0.00021875704116052215	0.0	800.6399999948537	88.88888823843509	0.0	4.120048121731332e-12	-7.105427357601002e-13	0.0	-2.692645223154387e-26	7.105427357601002e-14
1.54	88.88888823778802	0.0	0.00033917069939566537	144.78887593221108	0.0	-800.6399999948537	0.0	1.5326496041222866e-09	0.0	0.99999999999818	0.0	1.9078351748896032e-06	0.0	0.0	0.0002186218070556877	0.0	0.0	0.0002187574802322911	0.0	800.6399999948537	88.88888823843509	0.0	4.120048121731332e-12	-7.105427357601002e-13	0.0	-2.692645223154387e-26	7.105427357601002e-14
1.545	88.88888823778802	0.0	0.00033917069939566537	145.2333203766555	0.0	-800.6399999948537	0.0	1.5326496041222866e-09	0.0	0.99999999999818	0.0	1.9078351748896032e-06	0.0	0.0	0.0002186218070556877	0.0	0.0	0.00021875791930406002	0.0	800.6399999948537	88.88888823843509	0.0	4.120048121731332e-12	-7.105427357601002e-13	0.0	-2.692645223154387e-26	7.105427357601002e-14
1.55	88.88888823778802	0.0	0.00033917069939566537	145.67776482109997	0.0	-800.6399999948537	0.0	1.5326496041222866e-09	0.0	0.99999999999818	0.0	1.9078351748896032e-06	0.0	0.0	0.0002186218070556877	0.0	0.0	0.00021875835837582898	0.0	800.6399999948537	88.88888823843509	0.0	4.120048121731332e-12	-7.105427357601002e-13	0.0	-2.692645223154387e-26	7.105427357601002e-14
1.555	88.88888823778802	0.0	0.00033917069939566537	146.1222092655444	0.0	-800.6399999948537	0.0	1.5326496041222866e-09	0.0	0.99999999999818	0.0	1.9078351748896032e-06	0.0	0.0	0.0002186218070556877	0.0	0.0	0.00021875879744759791	0.0	800.6399999948537	88.88888823843509	0.0	4.120048121731332e-12	-7.105427357601002e-13	0.0	-2.692645223154387e-26	7.105427357601002e-14
1.56	88.88888823778802	0.0	0.00033917069939566537	146.56665370998886	0.0	-800.6399999948537	0.0	1.5326496041222866e-09	0.0	0.99999999999818	0.0	1.9078351748896032e-06	0.0	0.0	0.0002186218070556877	0.0	0.0	0.00021875923651936685	0.0	800.6399999948537	88.88888823843509	0.0	4.120048121731332e-12	-7.105427357601002e-13	0.0	-2.692645223154387e-26	7.105427357601002e-14
1.565	88.88888823778802	0.0	0.00033917069939566537	147.0110981544333	0.0	-800.6399999948537	0.0	1.5326496041222866e-09	0.0	0.99999999999818	0.0	1.9078351748896032e-06	0.0	0.0	0.0002186218070556877	0.0	0.0	0.0002187596755911358	0.0	800.6399999948537	88.88888823843509	0.0	4.120048121731332e-12	-7.105427357601002e-13	0.0	-2.692645223154387e-26	7.105427357601002e-14
1.57	88.88888823778802	0.0	0.00033917069939566537	147.45554259887774	0.0	-800.6399999948537	0.0	1.5326496041222866e-09	0.0	0.99999999999818	0.0	1.9078351748896032e-06	0.0	0.0	0.0002186218070556877	0.0	0.0	0.00021876011466290474	0.0	800.6399999948537	88.88888823843509	0.0	4.120048121731332e-12	-7.105427357601002e-13	0.0	-2.692645223154387e-26	7.105427357601002e-14
1.575	88.88888823778802	0.0	0.00033917069939566537	147.8999870433222	0.0	-800.6399999948537	0.0	1.5326496041222866e-09	0.0	0.99999999999818	0.0	1.9078351748896032e-06	0.0	0.0	0.0002186218070556877	0.0	0.0	0.0002187605537346737	0.0	800.6399999948537	88.88888823843509	0.0	4.120048121731332e-12	-7.105427357601002e-13	0.0	-2.692645223154387e-26	7.105427357601002e-14
1.58	88.88888823778802	0.0	0.00033917069939566537	148.34443148776666	0.0	-800.6399999948537	0.0	1.5326496041222866e-09	0.0	0.99999999999818	0.0	1.9078351748896032e-06	0.0	0.0	0.0002186218070556877	0.0	0.0	0.00021876099280644263	0.0	800.6399999948537	88.88888823843509	0.0	4.120048121731332e-12	-7.105427357601002e-13	0.0	-2.692645223154387e-26	7.105427357601002e-14
1.585	88.88888823778802	0.0	0.00033917069939566537	148.78887593221108	0.0	-800.6399999948537	0.0	1.5326496041222866e-09	0.0	0.99999999999818	0.0	1.9078351748896032e-06	0.0	0.0	0.0002186218070556877	0.0	0.0	0.00021876143187821157	0.0	800.6399999948537	88.88888823843509	0.0	4.120048121731332e-12	-7.105427357601002e-13	0.0	-2.692645223154387e-26	7.105427357601002e-14
1.59	88.88888823778802	0.0	0.00033917069939566537	149.23332037665554	0.0	-800.6399999948537	0.0	1.5326496041222866e-09	0.0	0.99999999999818	0.0	1.9078351748896032e-06	0.0	0.0	0.0002186218070556877	0.0	0.0	0.00021876187094998053	0.0	800.6399999948537	88.88888823843509	0.0	4.120048121731332e-12	-7.105427357601002e-13	0.0	-2.692645223154387e-26	7.105427357601002e-14
1.595	88.88888823778802	0.0	0.00033917069939566537	149.67776482109997	0.0	-800.6399999948537	0.0	1.5326496041222866e-09	0.0	0.99999999999818	0.0	1.9078351748896032e-06	0.0	0.0	0.0002186218070556877	0.0	0.0	0.00021876231002174946	0.0	800.6399999948537	88.88888823843509	0.0	4.120048121731332e-12	-7.105427357601002e-13	0.0	-2.692645223154387e-26	7.105427357601002e-14
1.6	88.88888823778802	0.0	0.00033917069939566537	150.12220926554443	0.0	-800.6399999948537	0.0	1.5326496041222866e-09	0.0	0.99999999999818	0.0	1.9078351748896032e-06	0.0	0.0	0.0002186218070556877	0.0	0.0	0.0002187627490935184	0.0	800.6399999948537	88.88888823843509	0.0	4.120048121731332e-12	-7.105427357601002e-13	0.0	-2.692645223154387e-26	7.105427357601002e-14
1.605	88.88888823778802	0.0	0.00033917069939566537	150.56665370998886	0.0	-800.6399999948537	0.0	1.5326496041222866e-09	0.0	0.99999999999818	0.0	1.9078351748896032e-06	0.0	0.0	0.0002186218070556877	0.0	0.0	0.00021876318816528735	0.0	800.6399999948537	88.88888823843509	0.0	4.120048121731332e-12	-7.105427357601002e-13	0.0	-2.692645223154387e-26	7.105427357601002e-14
1.61	88.88888823778802	0.0	0.00033917069939566537	151.0110981544333	0.0	-800.6399999948537	0.0	1.5326496041222866e-09	0.0	0.99999999999818	0.0	1.9078351748896032e-06	0.0	0.0	0.0002186218070556877	0.0	0.0	0.00021876362723705629	0.0	800.6399999948537	88.88888823843509	0.0	4.120048121731332e-12	-7.105427357601002e-13	0.0	-2.692645223154387e-26	7.105427357601002e-14
1.615	88.88888823778802	0.0	0.00033917069939566537	151.45554259887774	0.0	-800.6399999948537	0.0	1.5326496041222866e-09	0.0	0.99999999999818	0.0	1.9078351748896032e-06	0.0	0.0	0.0002186218070556877	0.0	0.0	0.00021876406630882522	0.0	800.6399999948537	88.88888823843509	0.0	4.120048121731332e-12	-7.105427357601002e-13	0.0	-2.692645223154387e-26	7.105427357601002e-14
1.62	88.88888823778802	0.0	0.00033917069939566537	151.8999870433222	0.0	-800.6399999948537	0.0	1.5326496041222866e-09	0.0	0.99999999999818	0.0	1.9078351748896032e-06	0.0	0.0	0.0002186218070556877	0.0	0.0	0.00021876450538059418	0.0	800.6399999948537	88.88888823843509	0.0	4.120048121731332e-12	-7.105427357601002e-13	0.0	-2.692645223154387e-26	7.105427357601002e-14
1.625	88.88888823778802	0.0	0.00033917069939566537	152.34443148776663	0.0	-800.6399999948537	0.0	1.5326496041222866e-09	0.0	0.99999999999818	0.0	1.9078351748896032e-06	0.0	0.0	0.0002186218070556877	0.0	0.0	0.0002187649444523631	0.0	800.6399999948537	88.88888823843509	0.0	4.120048121731332e-12	-7.105427357601002e-13	0.0	-2.692645223154387e-26	7.105427357601002e-14
1.63	88.88888823778802	0.0	0.00033917069939566537	152.78887593221108	0.0	-800.6399999948537	0.0	1.5326496041222866e-09	0.0	0.99999999999818	0.0	1.9078351748896032e-06	0.0	0.0	0.0002186218070556877	0.0	0.0	0.00021876538352413207	0.0	800.6399999948537	88.88888823843509	0.0	4.120048121731332e-12	-7.105427357601002e-13	0.0	-2.692645223154387e-26	7.105427357601002e-14
1.635	88.88888823778802	0.0	0.00033917069939566537	153.23332037665554	0.0	-800.6399999948537	0.0	1.5326496041222866e-09	0.0	0.99999999999818	0.0	1.9078351748896032e-06	0.0	0.0	0.0002186218070556877	0.0	0.0	0.000218765822595901	0.0	800.6399999948537	88.88888823843509	0.0	4.120048121731332e-12	-7.105427357601002e-13	0.0	-2.692645223154387e-26	7.105427357601002e-14
1.64	88.88888823778802	0.0	0.00033917069939566537	153.67776482109997	0.0	-800.6399999948537	0.0	1.5326496041222866e-09	0.0	0.99999999999818	0.0	1.9078351748896032e-06	0.0	0.0	0.0002186218070556877	0.0	0.0	0.00021876626166766994	0.0	800.6399999948537	88.88888823843509	0.0	4.120048121731332e-12	-7.105427357601002e-13	0.0	-2.692645223154387e-26	7.105427357601002e-14
1.645	88.88888823778802	0.0	0.00033917069939566537	154.12220926554443	0.0	-800.6399999948537	0.0	1.5326496041222866e-09	0.0	0.99999999999818	0.0	1.9078351748896032e-06	0.0	0.0	0.0002186218070556877	0.0	0.0	0.0002187667007394389	0.0	800.6399999948537	88.88888823843509	0.0	4.120048121731332e-12	-7.105427357601002e-13	0.0	-2.692645223154387e-26	7.105427357601002e-14
1.65	88.88888823778802	0.0	0.00033917069939566537	154.56665370998886	0.0	-800.6399999948537	0.0	1.5326496041222866e-09	0.0	0.99999999999818	0.0	1.9078351748896032e-06	0.0	0.0	0.0002186218070556877	0.0	0.0	0.00021876713981120783	0.0	800.6399999948537	88.88888823843509	0.0	4.120048121731332e-12	-7.105427357601002e-13	0.0	-2.692645223154387e-26	7.105427357601002e-14
1.655	88.88888823778802	0.0	0.00033917069939566537	155.0110981544333	0.0	-800.6399999948537	0.0	1.5326496041222866e-09	0.0	0.99999999999818	0.0	1.9078351748896032e-06	0.0	0.0	0.0002186218070556877	0.0	0.0	0.00021876757888297677	0.0	800.6399999948537	88.88888823843509	0.0	4.120048121731332e-12	-7.105427357601002e-13	0.0	-2.692645223154387e-26	7.105427357601002e-14
1.66	88.88888823778802	0.0	0.00033917069939566537	155.45554259887774	0.0	-800.6399999948537	0.0	1.5326496041222866e-09	0.0	0.99999999999818	0.0	1.9078351748896032e-06	0.0	0.0	0.0002186218070556877	0.0	0.0	0.00021876801795474573	0.0	800.6399999948537	88.88888823843509	0.0	4.120048121731332e-12	-7.105427357601002e-13	0.0	-2.692645223154387e-26	7.105427357601002e-14
1.665	88.88888823778802	0.0	0.00033917069939566537	155.8999870433222	0.0	-800.6399999948537	0.0	1.5326496041222866e-09	0.0	0.99999999999818	0.0	1.9078351748896032e-06	0.0	0.0	0.0002186218070556877	0.0	0.0	0.00021876845702651466	0.0	800.6399999948537	88.88888823843509	0.0	4.120048121731332e-12	-7.105427357601002e-13	0.0	-2.692645223154387e-26	7.105427357601002e-14
1.67	88.88888823778802	0.0	0.00033917069939566537	156.34443148776663	0.0	-800.6399999948537	0.0	1.5326496041222866e-09	0.0	0.99999999999818	0.0	1.9078351748896032e-06	0.0	0.0	0.0002186218070556877	0.0	0.0	0.0002187688960982836	0.0	800.6399999948537	88.88888823843509	0.0	4.120048121731332e-12	-7.105427357601002e-13	0.0	-2.692645223154387e-26	7.105427357601002e-14
1.675	88.88888823778802	0.0	0.00033917069939566537	156.78887593221108	0.0	-800.6399999948537	0.0	1.5326496041222866e-09	0.0	0.99999999999818	0.0	1.9078351748896032e-06	0.0	0.0	0.0002186218070556877	0.0	0.0	0.00021876933517005255	0.0	800.6399999948537	88.88888823843509	0.0	4.120048121731332e-12	-7.105427357601002e-13	0.0	-2.692645223154387e-26	7.105427357601002e-14
1.68	88.88888823778802	0.0	0.00033917069939566537	157.2333203766555	0.0	-800.6399999948537	0.0	1.5326496041222866e-09	0.0	0.99999999999818	0.0	1.9078351748896032e-06	0.0	0.0	0.0002186218070556877	0.0	0.0	0.00021876977424182149	0.0	800.6399999948537	88.88888823843509	0.0	4.120048121731332e-12	-7.105427357601002e-13	0.0	-2.692645223154387e-26	7.105427357601002e-14
1.685	88.88888823778802	0.0	0.00033917069939566537	157.67776482109997	0.0	-800.6399999948537	0.0	1.5326496041222866e-09	0.0	0.99999999999818	0.0	1.9078351748896032e-06	0.0	0.0	0.0002186218070556877	0.0	0.0	0.00021877021331359045	0.0	800.6399999948537	88.88888823843509	0.0	4.120048121731332e-12	-7.105427357601002e-13	0.0	-2.692645223154387e-26	7.105427357601002e-14
1.69	88.88888823778802	0.0	0.00033917069939566537	158.1222092655444	0.0	-800.6399999948537	0.0	1.5326496041222866e-09	0.0	0.99999999999818	0.0	1.9078351748896032e-06	0.0	0.0	0.0002186218070556877	0.0	0.0	0.00021877065238535938	0.0	800.6399999948537	88.88888823843509	0.0	4.120048121731332e-12	-7.105427357601002e-13	0.0	-2.692645223154387e-26	7.105427357601002e-14
1.695	88.88888823778802	0.0	0.00033917069939566537	158.56665370998886	0.0	-800.6399999948537	0.0	1.5326496041222866e-09	0.0	0.99999999999818	0.0	1.9078351748896032e-06	0.0	0.0	0.0002186218070556877	0.0	0.0	0.0002187710914571283	0.0	800.6399999948537	88.88888823843509	0.0	4.120048121731332e-12	-7.105427357601002e-13	0.0	-2.692645223154387e-26	7.105427357601002e-14
1.7	88.88888823778802	0.0	0.00033917069939566537	159.0110981544333	0.0	-800.6399999948537	0.0	1.5326496041222866e-09	0.0	0.99999999999818	0.0	1.9078351748896032e-06	0.0	0.0	0.0002186218070556877	0.0	0.0	0.00021877153052889727	0.0	800.6399999948537	88.88888823843509	0.0	4.120048121731332e-12	-7.105427357601002e-13	0.0	-2.692645223154387e-26	7.105427357601002e-14
1.705	88.88888823778802	0.0	0.00033917069939566537	159.45554259887774	0.0	-800.6399999948537	0.0	1.5326496041222866e-09	0.0	0.99999999999818	0.0	1.9078351748896032e-06	0.0	0.0	0.0002186218070556877	0.0	0.0	0.0002187719696006662	0.0	800.6399999948537	88.88888823843509	0.0	4.120048121731332e-12	-7.105427357601002e-13	0.0	-2.692645223154387e-26	7.105427357601002e-14
1.71	88.88888823778802	0.0	0.00033917069939566537	159.8999870433222	0.0	-800.6399999948537	0.0	1.5326496041222866e-09	0.0	0.99999999999818	0.0	1.9078351748896032e-06	0.0	0.0	0.0002186218070556877	0.0	0.0	0.00021877240867243514	0.0	800.6399999948537	88.88888823843509	0.0	4.120048121731332e-12	-7.105427357601002e-13	0.0	-2.692645223154387e-26	7.105427357601002e-14
1.715	88.88888823778802	0.0	0.00033917069939566537	160.34443148776666	0.0	-800.6399999948537	0.0	1.5326496041222866e-09	0.0	0.99999999999818	0.0	1.9078351748896032e-06	0.0	0.0	0.0002186218070556877	0.0	0.0	0.0002187728477442041	0.0	800.6399999948537	88.88888823843509	0.0	4.120048121731332e-12	-7.105427357601002e-13	0.0	-2.692645223154387e-26	7.105427357601002e-14
1.72	88.88888823778802	0.0	0.00033917069939566537	160.78887593221108	0.0	-800.6399999948537	0.0	1.5326496041222866e-09	0.0	0.99999999999818	0.0	1.9078351748896032e-06	0.0	0.0	0.0002186218070556877	0.0	0.0	0.00021877328681597303	0.0	800.6399999948537	88.88888823843509	0.0	4.120048121731332e-12	-7.105427357601002e-13	0.0	-2.692645223154387e-26	7.105427357601002e-14
1.725	88.88888823778802	0.0	0.00033917069939566537	161.23332037665554	0.0	-800.6399999948537	0.0	1.5326496041222866e-09	0.0	0.99999999999818	0.0	1.9078351748896032e-06	0.0	0.0	0.0002186218070556877	0.0	0.0	0.00021877372588774196	0.0	800.6399999948537	88.88888823843509	0.0	4.120048121731332e-12	-7.105427357601002e-13	0.0	-2.692645223154387e-26	7.105427357601002e-14
1.73	88.88888823778802	0.0	0.00033917069939566537	161.67776482109997	0.0	-800.6399999948537	0.0	1.5326496041222866e-09	0.0	0.99999999999818	0.0	1.9078351748896032e-06	0.0	0.0	0.0002186218070556877	0.0	0.0	0.00021877416495951092	0.0	800.6399999948537	88.88888823843509	0.0	4.120048121731332e-12	-7.105427357601002e-13	0.0	-2.692645223154387e-26	7.105427357601002e-14
1.735	88.88888823778802	0.0	0.00033917069939566537	162.12220926554443	0.0	-800.6399999948537	0.0	1.5326496041222866e-09	0.0	0.99999999999818	0.0	1.9078351748896032e-06	0.0	0.0	0.0002186218070556877	0.0	0.0	0.00021877460403127986	0.0	800.6399999948537	88.88888823843509	0.0	4.120048121731332e-12	-7.105427357601002e-13	0.0	-2.692645223154387e-26	7.105427357601002e-14
1.74	88.88888823778802	0.0	0.00033917069939566537	162.56665370998886	0.0	-800.6399999948537	0.0	1.5326496041222866e-09	0.0	0.99999999999818	0.0	1.9078351748896032e-06	0.0	0.0	0.0002186218070556877	0.0	0.0	0.00021877504310304882	0.0	800.6399999948537	88.88888823843509	0.0	4.120048121731332e-12	-7.105427357601002e-13	0.0	-2.692645223154387e-26	7.105427357601002e-14
1.745	88.88888823778802	0.0	0.00033917069939566537	163.0110981544333	0.0	-800.6399999948537	0.0	1.5326496041222866e-09	0.0	0.99999999999818	0.0	1.9078351748896032e-06	0.0	0.0	0.0002186218070556877	0.0	0.0	0.00021877548217481775	0.0	800.6399999948537	88.88888823843509	0.0	4.120048121731332e-12	-7.105427357601002e-13	0.0	-2.692645223154387e-26	7.105427357601002e-14
1.75	88.88888823778802	0.0	0.00033917069939566537	163.45554259887774	0.0	-800.6399999948537	0.0	1.5326496041222866e-09	0.0	0.99999999999818	0.0	1.9078351748896032e-06	0.0	0.0	0.0002186218070556877	0.0	0.0	0.00021877592124658668	0.0	800.6399999948537	88.88888823843509	0.0	4.120048121731332e-12	-7.105427357601002e-13	0.0	-2.692645223154387e-26	7.105427357601002e-14
1.755	88.88888823778802	0.0	0.00033917069939566537	163.89998704332217	0.0	-800.6399999948537	0.0	1.5326496041222866e-09	0.0	0.99999999999818	0.0	1.9078351748896032e-06	0.0	0.0	0.0002186218070556877	0.0	0.0	0.00021877636031835564	0.0	800.6399999948537	88.88888823843509	0.0	4.120048121731332e-12	-7.105427357601002e-13	0.0	-2.692645223154387e-26	7.105427357601002e-14
1.76	88.88888823778802	0.0	0.00033917069939566537	164.34443148776663	0.0	-800.6399999948537	0.0	1.5326496041222866e-09	0.0	0.99999999999818	0.0	1.9078351748896032e-06	0.0	0.0	0.0002186218070556877	0.0	0.0	0.00021877679939012458	0.0	800.6399999948537	88.88888823843509	0.0	4.120048121731332e-12	-7.105427357601002e-13	0.0	-2.692645223154387e-26	7.105427357601002e-14
1.765	88.88888823778802	0.0	0.00033917069939566537	164.78887593221108	0.0	-800.6399999948537	0.0	1.5326496041222866e-09	0.0	0.99999999999818	0.0	1.9078351748896032e-06	0.0	0.0	0.0002186218070556877	0.0	0.0	0.0002187772384618935	0.0	800.6399999948537	88.88888823843509	0.0	4.120048121731332e-12	-7.105427357601002e-13	0.0	-2.692645223154387e-26	7.105427357601002e-14
1.77	88.88888823778802	0.0	0.00033917069939566537	165.23332037665554	0.0	-800.6399999948537	0.0	1.5326496041222866e-09	0.0	0.99999999999818	0.0	1.9078351748896032e-06	0.0	0.0	0.0002186218070556877	0.0	0.0	0.00021877767753366247	0.0	800.6399999948537	88.88888823843509	0.0	4.120048121731332e-12	-7.105427357601002e-13	0.0	-2.692645223154387e-26	7.105427357601002e-14
1.775	88.88888823778802	0.0	0.00033917069939566537	165.67776482109997	0.0	-800.6399999948537	0.0	1.5326496041222866e-09	0.0	0.99999999999818	0.0	1.9078351748896032e-06	0.0	0.0	0.0002186218070556877	0.0	0.0	0.0002187781166054314	0.0	800.6399999948537	88.88888823843509	0.0	4.120048121731332e-12	-7.105427357601002e-13	0.0	-2.692645223154387e-26	7.105427357601002e-14
1.78	88.88888823778802	0.0	0.00033917069939566537	166.12220926554443	0.0	-800.6399999948537	0.0	1.5326496041222866e-09	0.0	0.99999999999818	0.0	1.9078351748896032e-06	0.0	0.0	0.0002186218070556877	0.0	0.0	0.00021877855567720034	0.0	800.6399999948537	88.88888823843509	0.0	4.120048121731332e-12	-7.105427357601002e-13	0.0	-2.692645223154387e-26	7.105427357601002e-14
1.785	88.88888823778802	0.0	0.00033917069939566537	166.56665370998886	0.0	-800.6399999948537	0.0	1.5326496041222866e-09	0.0	0.99999999999818	0.0	1.9078351748896032e-06	0.0	0.0	0.0002186218070556877	0.0	0.0	0.0002187789947489693	0.0	800.6399999948537	88.88888823843509	0.0	4.120048121731332e-12	-7.105427357601002e-13	0.0	-2.692645223154387e-26	7.105427357601002e-14
1.79	88.88888823778802	0.0	0.00033917069939566537	167.0110981544333	0.0	-800.6399999948537	0.0	1.5326496041222866e-09	0.0	0.99999999999818	0.0	1.9078351748896032e-06	0.0	0.0	0.0002186218070556877	0.0	0.0	0.00021877943382073823	0.0	800.6399999948537	88.88888823843509	0.0	4.120048121731332e-12	-7.105427357601002e-13	0.0	-2.692645223154387e-26	7.105427357601002e-14
1.795	88.88888823778802	0.0	0.00033917069939566537	167.45554259887774	0.0	-800.6399999948537	0.0	1.5326496041222866e-09	0.0	0.99999999999818	0.0	1.9078351748896032e-06	0.0	0.0	0.0002186218070556877	0.0	0.0	0.0002187798728925072	0.0	800.6399999948537	88.88888823843509	0.0	4.120048121731332e-12	-7.105427357601002e-13	0.0	-2.692645223154387e-26	7.105427357601002e-14
1.8	88.88888823778802	0.0	0.00033917069939566537	167.8999870433222	0.0	-800.6399999948537	0.0	1.5326496041222866e-09	0.0	0.99999999999818	0.0	1.9078351748896032e-06	0.0	0.0	0.0002186218070556877	0.0	0.0	0.00021878031196427612	0.0	800.6399999948537	88.88888823843509	0.0	4.120048121731332e-12	-7.105427357601002e-13	0.0	-2.692645223154387e-26	7.105427357601002e-14
1.805	88.88888823778802	0.0	0.00033917069939566537	168.34443148776663	0.0	-800.6399999948537	0.0	1.5326496041222866e-09	0.0	0.99999999999818	0.0	1.9078351748896032e-06	0.0	0.0	0.0002186218070556877	0.0	0.0	0.00021878075103604506	0.0	800.6399999948537	88.88888823843509	0.0	4.120048121731332e-12	-7.105427357601002e-13	0.0	-2.692645223154387e-26	7.105427357601002e-14
1.81	88.88888823778802	0.0	0.00033917069939566537	168.78887593221108	0.0	-800.6399999948537	0.0	1.5326496041222866e-09	0.0	0.99999999999818	0.0	1.9078351748896032e-06	0.0	0.0	0.0002186218070556877	0.0	0.0	0.00021878119010781402	0.0	800.6399999948537	88.88888823843509	0.0	4.120048121731332e-12	-7.105427357601002e-13	0.0	-2.692645223154387e-26	7.105427357601002e-14
1.815	88.88888823778802	0.0	0.00033917069939566537	169.2333203766555	0.0	-800.6399999948537	0.0	1.5326496041222866e-09	0.0	0.99999999999818	0.0	1.9078351748896032e-06	0.0	0.0	0.0002186218070556877	0.0	0.0	0.00021878162917958295	0.0	800.6399999948537	88.88888823843509	0.0	4.120048121731332e-12	-7.105427357601002e-13	0.0	-2.692645223154387e-26	7.105427357601002e-14
1.82	88.88888823778802	0.0	0.00033917069939566537	169.67776482109997	0.0	-800.6399999948537	0.0	1.5326496041222866e-09	0.0	0.99999999999818	0.0	1.9078351748896032e-06	0.0	0.0	0.0002186218070556877	0.0	0.0	0.00021878206825135188	0.0	800.6399999948537	88.88888823843509	0.0	4.120048121731332e-12	-7.105427357601002e-13	0.0	-2.692645223154387e-26	7.105427357601002e-14
1.825	88.88888823778802	0.0	0.00033917069939566537	170.1222092655444	0.0	-800.6399999948537	0.0	1.5326496041222866e-09	0.0	0.99999999999818	0.0	1.9078351748896032e-06	0.0	0.0	0.0002186218070556877	0.0	0.0	0.00021878250732312084	0.0	800.6399999948537	88.88888823843509	0.0	4.120048121731332e-12	-7.105427357601002e-13	0.0	-2.692645223154387e-26	7.105427357601002e-14
1.83	88.88888823778802	0.0	0.00033917069939566537	170.56665370998886	0.0	-800.6399999948537	0.0	1.5326496041222866e-09	0.0	0.99999999999818	0.0	1.9078351748896032e-06	0.0	0.0	0.0002186218070556877	0.0	0.0	0.00021878294639488978	0.0	800.6399999948537	88.88888823843509	0.0	4.120048121731332e-12	-7.105427357601002e-13	0.0	-2.692645223154387e-26	7.105427357601002e-14
1.835	88.88888823778802	0.0	0.00033917069939566537	171.0110981544333	0.0	-800.6399999948537	0.0	1.5326496041222866e-09	0.0	0.99999999999818	0.0	1.9078351748896032e-06	0.0	0.0	0.0002186218070556877	0.0	0.0	0.00021878338546665874	0.0	800.6399999948537	88.88888823843509	0.0	4.120048121731332e-12	-7.105427357601002e-13	0.0	-2.692645223154387e-26	7.105427357601002e-14
1.84	88.88888823778802	0.0	0.00033917069939566537	171.45554259887774	0.0	-800.6399999948537	0.0	1.5326496041222866e-09	0.0	0.99999999999818	0.0	1.9078351748896032e-06	0.0	0.0	0.0002186218070556877	0.0	0.0	0.00021878382453842767	0.0	800.6399999948537	88.88888823843509	0.0	4.120048121731332e-12	-7.105427357601002e-13	0.0	-2.692645223154387e-26	7.105427357601002e-14
1.845	88.88888823778802	0.0	0.00033917069939566537	171.8999870433222	0.0	-800.6399999948537	0.0	1.5326496041222866e-09	0.0	0.99999999999818	0.0	1.9078351748896032e-06	0.0	0.0	0.0002186218070556877	0.0	0.0	0.0002187842636101966	0.0	800.6399999948537	88.88888823843509	0.0	4.120048121731332e-12	-7.105427357601002e-13	0.0	-2.692645223154387e-26	7.105427357601002e-14
1.85	88.88888823778802	0.0	0.00033917069939566537	172.34443148776666	0.0	-800.6399999948537	0.0	1.5326496041222866e-09	0.0	0.99999999999818	0.0	1.9078351748896032e-06	0.0	0.0	0.0002186218070556877	0.0	0.0	0.00021878470268196556	0.0	800.6399999948537	88.88888823843509	0.0	4.120048121731332e-12	-7.105427357601002e-13	0.0	-2.692645223154387e-26	7.105427357601002e-14
1.855	88.88888823778802	0.0	0.00033917069939566537	172.78887593221108	0.0	-800.6399999948537	0.0	1.5326496041222866e-09	0.0	0.99999999999818	0.0	1.9078351748896032e-06	0.0	0.0	0.0002186218070556877	0.0	0.0	0.0002187851417537345	0.0	800.6399999948537	88.88888823843509	0.0	4.120048121731332e-12	-7.105427357601002e-13	0.0	-2.692645223154387e-26	7.105427357601002e-14
1.86	88.88888823778802	0.0	0.00033917069939566537	173.23332037665554	0.0	-800.6399999948537	0.0	1.5326496041222866e-09	0.0	0.99999999999818	0.0	1.9078351748896032e-06	0.0	0.0	0.0002186218070556877	0.0	0.0	0.00021878558082550343	0.0	800.6399999948537	88.88888823843509	0.0	4.120048121731332e-12	-7.105427357601002e-13	0.0	-2.692645223154387e-26	7.105427357601002e-14
1.865	88.88888823778802	0.0	0.00033917069939566537	173.67776482109997	0.0	-800.6399999948537	0.0	1.5326496041222866e-09	0.0	0.99999999999818	0.0	1.9078351748896032e-06	0.0	0.0	0.0002186218070556877	0.0	0.0	0.0002187860198972724	0.0	800.6399999948537	88.88888823843509	0.0	4.120048121731332e-12	-7.105427357601002e-13	0.0	-2.692645223154387e-26	7.105427357601002e-14
1.87	88.88888823778802	0.0	0.00033917069939566537	174.12220926554443	0.0	-800.6399999948537	0.0	1.5326496041222866e-09	0.0	0.99999999999818	0.0	1.9078351748896032e-06	0.0	0.0	0.0002186218070556877	0.0	0.0	0.00021878645896904132	0.0	800.6399999948537	88.88888823843509	0.0	4.120048121731332e-12	-7.105427357601002e-13	0.0	-2.692645223154387e-26	7.105427357601002e-14
1.875	88.88888823778802	0.0	0.00033917069939566537	174.56665370998886	0.0	-800.6399999948537	0.0	1.5326496041222866e-09	0.0	0.99999999999818	0.0	1.9078351748896032e-06	0.0	0.0	0.0002186218070556877	0.0	0.0	0.00021878689804081026	0.0	800.6399999948537	88.88888823843509	0.0	4.120048121731332e-12	-7.105427357601002e-13	0.0	-2.692645223154387e-26	7.105427357601002e-14
1.88	88.88888823778802	0.0	0.00033917069939566537	175.01109815443328	0.0	-800.6399999948537	0.0	1.5326496041222866e-09	0.0	0.99999999999818	0.0	1.9078351748896032e-06	0.0	0.0	0.0002186218070556877	0.0	0.0	0.00021878733711257922	0.0	800.6399999948537	88.88888823843509	0.0	4.120048121731332e-12	-7.105427357601002e-13	0.0	-2.692645223154387e-26	7.105427357601002e-14
1.885	88.88888823778802	0.0	0.00033917069939566537	175.45554259887774	0.0	-800.6399999948537	0.0	1.5326496041222866e-09	0.0	0.99999999999818	0.0	1.9078351748896032e-06	0.0	0.0	0.0002186218070556877	0.0	0.0	0.00021878777618434815	0.0	800.6399999948537	88.88888823843509	0.0	4.120048121731332e-12	-7.105427357601002e-13	0.0	-2.692645223154387e-26	7.105427357601002e-14
1.89	88.88888823778802	0.0	0.00033917069939566537	175.89998704332217	0.0	-800.6399999948537	0.0	1.5326496041222866e-09	0.0	0.99999999999818	0.0	1.9078351748896032e-06	0.0	0.0	0.0002186218070556877	0.0	0.0	0.0002187882152561171	0.0	800.6399999948537	88.88888823843509	0.0	4.120048121731332e-12	-7.105427357601002e-13	0.0	-2.692645223154387e-26	7.105427357601002e-14
1.895	88.88888823778802	0.0	0.00033917069939566537	176.34443148776663	0.0	-800.6399999948537	0.0	1.5326496041222866e-09	0.0	0.99999999999818	0.0	1.9078351748896032e-06	0.0	0.0	0.0002186218070556877	0.0	0.0	0.00021878865432788604	0.0	800.6399999948537	88.88888823843509	0.0	4.120048121731332e-12	-7.105427357601002e-13	0.0	-2.692645223154387e-26	7.105427357601002e-14
1.9	88.88888823778802	0.0	0.00033917069939566537	176.78887593221108	0.0	-800.6399999948537	0.0	1.5326496041222866e-09	0.0	0.99999999999818	0.0	1.9078351748896032e-06	0.0	0.0	0.0002186218070556877	0.0	0.0	0.00021878909339965498	0.0	800.6399999948537	88.88888823843509	0.0	4.120048121731332e-12	-7.105427357601002e-13	0.0	-2.692645223154387e-26	7.105427357601002e-14
1.905	88.88888823778802	0.0	0.00033917069939566537	177.23332037665554	0.0	-800.6399999948537	0.0	1.5326496041222866e-09	0.0	0.99999999999818	0.0	1.9078351748896032e-06	0.0	0.0	0.0002186218070556877	0.0	0.0	0.00021878953247142394	0.0	800.6399999948537	88.88888823843509	0.0	4.120048121731332e-12	-7.105427357601002e-13	0.0	-2.692645223154387e-26	7.105427357601002e-14
1.91	88.88888823778802	0.0	0.00033917069939566537	177.67776482109997	0.0	-800.6399999948537	0.0	1.5326496041222866e-09	0.0	0.99999999999818	0.0	1.9078351748896032e-06	0.0	0.0	0.0002186218070556877	0.0	0.0	0.00021878997154319287	0.0	800.6399999948537	88.88888823843509	0.0	4.120048121731332e-12	-7.105427357601002e-13	0.0	-2.692645223154387e-26	7.105427357601002e-14
1.915	88.88888823778802	0.0	0.00033917069939566537	178.12220926554443	0.0	-800.6399999948537	0.0	1.5326496041222866e-09	0.0	0.99999999999818	0.0	1.9078351748896032e-06	0.0	0.0	0.0002186218070556877	0.0	0.0	0.0002187904106149618	0.0	800.6399999948537	88.88888823843509	0.0	4.120048121731332e-12	-7.105427357601002e-13	0.0	-2.692645223154387e-26	7.105427357601002e-14
1.92	88.88888823778802	0.0	0.00033917069939566537	178.56665370998886	0.0	-800.6399999948537	0.0	1.5326496041222866e-09	0.0	0.99999999999818	0.0	1.9078351748896032e-06	0.0	0.0	0.0002186218070556877	0.0	0.0	0.00021879084968673076	0.0	800.6399999948537	88.88888823843509	0.0	4.120048121731332e-12	-7.105427357601002e-13	0.0	-2.692645223154387e-26	7.105427357601002e-14
1.925	88.88888823778802	0.0	0.00033917069939566537	179.0110981544333	0.0	-800.6399999948537	0.0	1.5326496041222866e-09	0.0	0.99999999999818	0.0	1.9078351748896032e-06	0.0	0.0	0.0002186218070556877	0.0	0.0	0.0002187912887584997	0.0	800.6399999948537	88.88888823843509	0.0	4.120048121731332e-12	-7.105427357601002e-13	0.0	-2.692645223154387e-26	7.105427357601002e-14
1.93	88.88888823778802	0.0	0.00033917069939566537	179.45554259887774	0.0	-800.6399999948537	0.0	1.5326496041222866e-09	0.0	0.99999999999818	0.0	1.9078351748896032e-06	0.0	0.0	0.0002186218070556877	0.0	0.0	0.00021879172783026863	0.0	800.6399999948537	88.88888823843509	0.0	4.120048121731332e-12	-7.105427357601002e-13	0.0	-2.692645223154387e-26	7.105427357601002e-14
1.935	88.88888823778802	0.0	0.00033917069939566537	179.8999870433222	0.0	-800.6399999948537	0.0	1.5326496041222866e-09	0.0	0.99999999999818	0.0	1.9078351748896032e-06	0.0	0.0	0.0002186218070556877	0.0	0.0	0.0002187921669020376	0.0	800.6399999948537	88.88888823843509	0.0	4.120048121731332e-12	-7.105427357601002e-13	0.0	-2.692645223154387e-26	7.105427357601002e-14
1.94	88.88888823778802	0.0	0.00033917069939566537	180.34443148776663	0.0	-800.6399999948537	0.0	1.5326496041222866e-09	0.0	0.99999999999818	0.0	1.9078351748896032e-06	0.0	0.0	0.0002186218070556877	0.0	0.0	0.00021879260597380652	0.0	800.6399999948537	88.88888823843509	0.0	4.120048121731332e-12	-7.105427357601002e-13	0.0	-2.692645223154387e-26	7.105427357601002e-14
1.945	88.88888823778802	0.0	0.00033917069939566537	180.78887593221108	0.0	-800.6399999948537	0.0	1.5326496041222866e-09	0.0	0.99999999999818	0.0	1.9078351748896032e-06	0.0	0.0	0.0002186218070556877	0.0	0.0	0.00021879304504557548	0.0	800.6399999948537	88.88888823843509	0.0	4.120048121731332e-12	-7.105427357601002e-13	0.0	-2.692645223154387e-26	7.105427357601002e-14
1.95	88.88888823778802	0.0	0.00033917069939566537	181.2333203766555	0.0	-800.6399999948537	0.0	1.5326496041222866e-09	0.0	0.99999999999818	0.0	1.9078351748896032e-06	0.0	0.0	0.0002186218070556877	0.0	0.0	0.00021879348411734442	0.0	800.6399999948537	88.88888823843509	0.0	4.120048121731332e-12	-7.105427357601002e-13	0.0	-2.692645223154387e-26	7.105427357601002e-14
1.955	88.88888823778802	0.0	0.00033917069939566537	181.67776482109997	0.0	-800.6399999948537	0.0	1.5326496041222866e-09	0.0	0.99999999999818	0.0	1.9078351748896032e-06	0.0	0.0	0.0002186218070556877	0.0	0.0	0.00021879392318911335	0.0	800.6399999948537	88.88888823843509	0.0	4.120048121731332e-12	-7.105427357601002e-13	0.0	-2.692645223154387e-26	7.105427357601002e-14
1.96	88.88888823778802	0.0	0.00033917069939566537	182.1222092655444	0.0	-800.6399999948537	0.0	1.5326496041222866e-09	0.0	0.99999999999818	0.0	1.9078351748896032e-06	0.0	0.0	0.0002186218070556877	0.0	0.0	0.0002187943622608823	0.0	800.6399999948537	88.88888823843509	0.0	4.120048121731332e-12	-7.105427357601002e-13	0.0	-2.692645223154387e-26	7.105427357601002e-14
1.965	88.88888823778802	0.0	0.00033917069939566537	182.56665370998886	0.0	-800.6399999948537	0.0	1.5326496041222866e-09	0.0	0.99999999999818	0.0	1.9078351748896032e-06	0.0	0.0	0.0002186218070556877	0.0	0.0	0.00021879480133265124	0.0	800.6399999948537	88.88888823843509	0.0	4.120048121731332e-12	-7.105427357601002e-13	0.0	-2.692645223154387e-26	7.105427357601002e-14
1.97	88.88888823778802	0.0	0.00033917069939566537	183.0110981544333	0.0	-800.6399999948537	0.0	1.5326496041222866e-09	0.0	0.99999999999818	0.0	1.9078351748896032e-06	0.0	0.0	0.0002186218070556877	0.0	0.0	0.00021879524040442017	0.0	800.6399999948537	88.88888823843509	0.0	4.120048121731332e-12	-7.105427357601002e-13	0.0	-2.692645223154387e-26	7.105427357601002e-14
1.975	88.88888823778802	0.0	0.00033917069939566537	183.45554259887777	0.0	-800.6399999948537	0.0	1.5326496041222866e-09	0.0	0.99999999999818	0.0	1.9078351748896032e-06	0.0	0.0	0.0002186218070556877	0.0	0.0	0.00021879567947618914	0.0	800.6399999948537	88.88888823843509	0.0	4.120048121731332e-12	-7.105427357601002e-13	0.0	-2.692645223154387e-26	7.105427357601002e-14
1.98	88.88888823778802	0.0	0.00033917069939566537	183.8999870433222	0.0	-800.6399999948537	0.0	1.5326496041222866e-09	0.0	0.99999999999818	0.0	1.9078351748896032e-06	0.0	0.0	0.0002186218070556877	0.0	0.0	0.00021879611854795807	0.0	800.6399999948537	88.88888823843509	0.0	4.120048121731332e-12	-7.105427357601002e-13	0.0	-2.692645223154387e-26	7.105427357601002e-14
1.985	88.88888823778802	0.0	0.00033917069939566537	184.34443148776666	0.0	-800.6399999948537	0.0	1.5326496041222866e-09	0.0	0.99999999999818	0.0	1.9078351748896032e-06	0.0	0.0	0.0002186218070556877	0.0	0.0	0.000218796557619727	0.0	800.6399999948537	88.88888823843509	0.0	4.120048121731332e-12	-7.105427357601002e-13	0.0	-2.692645223154387e-26	7.105427357601002e-14
1.99	88.88888823778802	0.0	0.00033917069939566537	184.78887593221108	0.0	-800.6399999948537	0.0	1.5326496041222866e-09	0.0	0.99999999999818	0.0	1.9078351748896032e-06	0.0	0.0	0.0002186218070556877	0.0	0.0	0.00021879699669149596	0.0	800.6399999948537	88.88888823843509	0.0	4.120048121731332e-12	-7.105427357601002e-13	0.0	-2.692645223154387e-26	7.105427357601002e-14
1.995	88.88888823778802	0.0	0.00033917069939566537	185.23332037665554	0.0	-800.6399999948537	0.0	1.5326496041222866e-09	0.0	0.99999999999818	0.0	1.9078351748896032e-06	0.0	0.0	0.0002186218070556877	0.0	0.0	0.0002187974357632649	0.0	800.6399999948537	88.88888823843509	0.0	4.120048121731332e-12	-7.105427357601002e-13	0.0	-2.692645223154387e-26	7.105427357601002e-14
2.0	88.88888823778802	0.0	0.00033917069939566537	185.67776482109997	0.0	-800.6399999948537	0.0	1.5326496041222866e-09	0.0	0.99999999999818	0.0	1.9078351748896032e-06	0.0	0.0	0.0002186218070556877	0.0	0.0	0.00021879787483503385	0.0	800.6399999948537	88.88888823843509	0.0	4.120048121731332e-12	-7.105427357601002e-13	0.0	-2.692645223154387e-26	7.105427357601002e-14
2.005	88.88888823778802	0.0	0.00033917069939566537	186.1222092655444	0.0	-800.6399999948537	0.0	1.5326496041222866e-09	0.0	0.99999999999818	0.0	1.9078351748896032e-06	0.0	0.0	0.0002186218070556877	0.0	0.0	0.0002187983139068028	0.0	800.6399999948537	88.88888823843509	0.0	4.120048121731332e-12	-7.105427357601002e-13	0.0	-2.692645223154387e-26	7.105427357601002e-14
2.01	88.88888823778802	0.0	0.00033917069939566537	186.56665370998883	0.0	-800.6399999948537	0.0	1.5326496041222866e-09	0.0	0.99999999999818	0.0	1.9078351748896032e-06	0.0	0.0	0.0002186218070556877	0.0	0.0	0.00021879875297857172	0.0	800.6399999948537	88.88888823843509	0.0	4.120048121731332e-12	-7.105427357601002e-13	0.0	-2.692645223154387e-26	7.105427357601002e-14
2.015	88.88888823778802	0.0	0.00033917069939566537	187.0110981544333	0.0	-800.6399999948537	0.0	1.5326496041222866e-09	0.0	0.99999999999818	0.0	1.9078351748896032e-06	0.0	0.0	0.0002186218070556877	0.0	0.0	0.00021879919205034068	0.0	800.6399999948537	88.88888823843509	0.0	4.120048121731332e-12	-7.105427357601002e-13	0.0	-2.692645223154387e-26	7.105427357601002e-14
2.02	88.88888823778802	0.0	0.00033917069939566537	187.45554259887774	0.0	-800.6399999948537	0.0	1.5326496041222866e-09	0.0	0.99999999999818	0.0	1.9078351748896032e-06	0.0	0.0	0.0002186218070556877	0.0	0.0	0.00021879963112210961	0.0	800.6399999948537	88.88888823843509	0.0	4.120048121731332e-12	-7.105427357601002e-13	0.0	-2.692645223154387e-26	7.105427357601002e-14
2.025	88.88888823778802	0.0	0.00033917069939566537	187.89998704332217	0.0	-800.6399999948537	0.0	1.5326496041222866e-09	0.0	0.99999999999818	0.0	1.9078351748896032e-06	0.0	0.0	0.0002186218070556877	0.0	0.0	0.00021880007019387855	0.0	800.6399999948537	88.88888823843509	0.0	4.120048121731332e-12	-7.105427357601002e-13	0.0	-2.692645223154387e-26	7.105427357601002e-14
2.03	88.88888823778802	0.0	0.00033917069939566537	188.34443148776663	0.0	-800.6399999948537	0.0	1.5326496041222866e-09	0.0	0.99999999999818	0.0	1.9078351748896032e-06	0.0	0.0	0.0002186218070556877	0.0	0.0	0.0002188005092656475	0.0	800.6399999948537	88.88888823843509	0.0	4.120048121731332e-12	-7.105427357601002e-13	0.0	-2.692645223154387e-26	7.105427357601002e-14
2.035	88.88888823778802	0.0	0.00033917069939566537	188.78887593221108	0.0	-800.6399999948537	0.0	1.5326496041222866e-09	0.0	0.99999999999818	0.0	1.9078351748896032e-06	0.0	0.0	0.0002186218070556877	0.0	0.0	0.00021880094833741644	0.0	800.6399999948537	88.88888823843509	0.0	4.120048121731332e-12	-7.105427357601002e-13	0.0	-2.692645223154387e-26	7.105427357601002e-14
2.04	88.88888823778802	0.0	0.00033917069939566537	189.23332037665554	0.0	-800.6399999948537	0.0	1.5326496041222866e-09	0.0	0.99999999999818	0.0	1.9078351748896032e-06	0.0	0.0	0.0002186218070556877	0.0	0.0	0.00021880138740918537	0.0	800.6399999948537	88.88888823843509	0.0	4.120048121731332e-12	-7.105427357601002e-13	0.0	-2.692645223154387e-26	7.105427357601002e-14
2.045	88.88888823778802	0.0	0.00033917069939566537	189.67776482109997	0.0	-800.6399999948537	0.0	1.5326496041222866e-09	0.0	0.99999999999818	0.0	1.9078351748896032e-06	0.0	0.0	0.0002186218070556877	0.0	0.0	0.00021880182648095433	0.0	800.6399999948537	88.88888823843509	0.0	4.120048121731332e-12	-7.105427357601002e-13	0.0	-2.692645223154387e-26	7.105427357601002e-14
2.05	88.88888823778802	0.0	0.00033917069939566537	190.1222092655444	0.0	-800.6399999948537	0.0	1.5326496041222866e-09	0.0	0.99999999999818	0.0	1.9078351748896032e-06	0.0	0.0	0.0002186218070556877	0.0	0.0	0.00021880226555272327	0.0	800.6399999948537	88.88888823843509	0.0	4.120048121731332e-12	-7.105427357601002e-13	0.0	-2.692645223154387e-26	7.105427357601002e-14
2.055	88.88888823778802	0.0	0.00033917069939566537	190.56665370998888	0.0	-800.6399999948537	0.0	1.5326496041222866e-09	0.0	0.99999999999818	0.0	1.9078351748896032e-06	0.0	0.0	0.0002186218070556877	0.0	0.0	0.00021880270462449223	0.0	800.6399999948537	88.88888823843509	0.0	4.120048121731332e-12	-7.105427357601002e-13	0.0	-2.692645223154387e-26	7.105427357601002e-14
2.06	88.88888823778802	0.0	0.00033917069939566537	191.0110981544333	0.0	-800.6399999948537	0.0	1.5326496041222866e-09	0.0	0.99999999999818	0.0	1.9078351748896032e-06	0.0	0.0	0.0002186218070556877	0.0	0.0	0.00021880314369626116	0.0	800.6399999948537	88.88888823843509	0.0	4.120048121731332e-12	-7.105427357601002e-13	0.0	-2.692645223154387e-26	7.105427357601002e-14
2.065	88.88888823778802	0.0	0.00033917069939566537	191.45554259887774	0.0	-800.6399999948537	0.0	1.5326496041222866e-09	0.0	0.99999999999818	0.0	1.9078351748896032e-06	0.0	0.0	0.0002186218070556877	0.0	0.0	0.0002188035827680301	0.0	800.6399999948537	88.88888823843509	0.0	4.120048121731332e-12	-7.105427357601002e-13	0.0	-2.692645223154387e-26	7.105427357601002e-14
2.07	88.88888823778802	0.0	0.00033917069939566537	191.89998704332217	0.0	-800.6399999948537	0.0	1.5326496041222866e-09	0.0	0.99999999999818	0.0	1.9078351748896032e-06	0.0	0.0	0.0002186218070556877	0.0	0.0	0.00021880402183979905	0.0	800.6399999948537	88.88888823843509	0.0	4.120048121731332e-12	-7.105427357601002e-13	0.0	-2.692645223154387e-26	7.105427357601002e-14
2.075	88.88888823778802	0.0	0.00033917069939566537	192.34443148776666	0.0	-800.6399999948537	0.0	1.5326496041222866e-09	0.0	0.99999999999818	0.0	1.9078351748896032e-06	0.0	0.0	0.0002186218070556877	0.0	0.0	0.000218804460911568	0.0	800.6399999948537	88.88888823843509	0.0	4.120048121731332e-12	-7.105427357601002e-13	0.0	-2.692645223154387e-26	7.105427357601002e-14
2.08	88.88888823778802	0.0	0.00033917069939566537	192.78887593221108	0.0	-800.6399999948537	0.0	1.5326496041222866e-09	0.0	0.99999999999818	0.0	1.9078351748896032e-06	0.0	0.0	0.0002186218070556877	0.0	0.0	0.00021880489998333692	0.0	800.6399999948537	88.88888823843509	0.0	4.120048121731332e-12	-7.105427357601002e-13	0.0	-2.692645223154387e-26	7.105427357601002e-14
2.085	88.88888823778802	0.0	0.00033917069939566537	193.2333203766555	0.0	-800.6399999948537	0.0	1.5326496041222866e-09	0.0	0.99999999999818	0.0	1.9078351748896032e-06	0.0	0.0	0.0002186218070556877	0.0	0.0	0.00021880533905510588	0.0	800.6399999948537	88.88888823843509	0.0	4.120048121731332e-12	-7.105427357601002e-13	0.0	-2.692645223154387e-26	7.105427357601002e-14
2.09	88.88888823778802	0.0	0.00033917069939566537	193.67776482109997	0.0	-800.6399999948537	0.0	1.5326496041222866e-09	0.0	0.99999999999818	0.0	1.9078351748896032e-06	0.0	0.0	0.0002186218070556877	0.0	0.0	0.0002188057781268748	0.0	800.6399999948537	88.88888823843509	0.0	4.120048121731332e-12	-7.105427357601002e-13	0.0	-2.692645223154387e-26	7.105427357601002e-14
2.095	88.88888823778802	0.0	0.00033917069939566537	194.12220926554443	0.0	-800.6399999948537	0.0	1.5326496041222866e-09	0.0	0.99999999999818	0.0	1.9078351748896032e-06	0.0	0.0	0.0002186218070556877	0.0	0.0	0.00021880621719864377	0.0	800.6399999948537	88.88888823843509	0.0	4.120048121731332e-12	-7.105427357601002e-13	0.0	-2.692645223154387e-26	7.105427357601002e-14
2.1	88.88888823778802	0.0	0.00033917069939566537	194.56665370998886	0.0	-800.6399999948537	0.0	1.5326496041222866e-09	0.0	0.99999999999818	0.0	1.9078351748896032e-06	0.0	0.0	0.0002186218070556877	0.0	0.0	0.0002188066562704127	0.0	800.6399999948537	88.88888823843509	0.0	4.120048121731332e-12	-7.105427357601002e-13	0.0	-2.692645223154387e-26	7.105427357601002e-14
2.105	88.88888823778802	0.0	0.00033917069939566537	195.0110981544333	0.0	-800.6399999948537	0.0	1.5326496041222866e-09	0.0	0.99999999999818	0.0	1.9078351748896032e-06	0.0	0.0	0.0002186218070556877	0.0	0.0	0.00021880709534218164	0.0	800.6399999948537	88.88888823843509	0.0	4.120048121731332e-12	-7.105427357601002e-13	0.0	-2.692645223154387e-26	7.105427357601002e-14
2.11	88.88888823778802	0.0	0.00033917069939566537	195.45554259887774	0.0	-800.6399999948537	0.0	1.5326496041222866e-09	0.0	0.99999999999818	0.0	1.9078351748896032e-06	0.0	0.0	0.0002186218070556877	0.0	0.0	0.0002188075344139506	0.0	800.6399999948537	88.88888823843509	0.0	4.120048121731332e-12	-7.105427357601002e-13	0.0	-2.692645223154387e-26	7.105427357601002e-14
2.115	88.88888823778802	0.0	0.00033917069939566537	195.8999870433222	0.0	-800.6399999948537	0.0	1.5326496041222866e-09	0.0	0.99999999999818	0.0	1.9078351748896032e-06	0.0	0.0	0.0002186218070556877	0.0	0.0	0.00021880797348571953	0.0	800.6399999948537	88.88888823843509	0.0	4.120048121731332e-12	-7.105427357601002e-13	0.0	-2.692645223154387e-26	7.105427357601002e-14
2.12	88.88888823778802	0.0	0.00033917069939566537	196.34443148776666	0.0	-800.6399999948537	0.0	1.5326496041222866e-09	0.0	0.99999999999818	0.0	1.9078351748896032e-06	0.0	0.0	0.0002186218070556877	0.0	0.0	0.00021880841255748847	0.0	800.6399999948537	88.88888823843509	0.0	4.120048121731332e-12	-7.105427357601002e-13	0.0	-2.692645223154387e-26	7.105427357601002e-14
2.125	88.88888823778802	0.0	0.00033917069939566537	196.78887593221108	0.0	-800.6399999948537	0.0	1.5326496041222866e-09	0.0	0.99999999999818	0.0	1.9078351748896032e-06	0.0	0.0	0.0002186218070556877	0.0	0.0	0.00021880885162925743	0.0	800.6399999948537	88.88888823843509	0.0	4.120048121731332e-12	-7.105427357601002e-13	0.0	-2.692645223154387e-26	7.105427357601002e-14
2.13	88.88888823778802	0.0	0.00033917069939566537	197.2333203766555	0.0	-800.6399999948537	0.0	1.5326496041222866e-09	0.0	0.99999999999818	0.0	1.9078351748896032e-06	0.0	0.0	0.0002186218070556877	0.0	0.0	0.00021880929070102636	0.0	800.6399999948537	88.88888823843509	0.0	4.120048121731332e-12	-7.105427357601002e-13	0.0	-2.692645223154387e-26	7.105427357601002e-14
2.135	88.88888823778802	0.0	0.00033917069939566537	197.67776482109994	0.0	-800.6399999948537	0.0	1.5326496041222866e-09	0.0	0.99999999999818	0.0	1.9078351748896032e-06	0.0	0.0	0.0002186218070556877	0.0	0.0	0.0002188097297727953	0.0	800.6399999948537	88.88888823843509	0.0	4.120048121731332e-12	-7.105427357601002e-13	0.0	-2.692645223154387e-26	7.105427357601002e-14
2.14	88.88888823778802	0.0	0.00033917069939566537	198.12220926554443	0.0	-800.6399999948537	0.0	1.5326496041222866e-09	0.0	0.99999999999818	0.0	1.9078351748896032e-06	0.0	0.0	0.0002186218070556877	0.0	0.0	0.00021881016884456425	0.0	800.6399999948537	88.88888823843509	0.0	4.120048121731332e-12	-7.105427357601002e-13	0.0	-2.692645223154387e-26	7.105427357601002e-14
2.145	88.88888823778802	0.0	0.00033917069939566537	198.56665370998886	0.0	-800.6399999948537	0.0	1.5326496041222866e-09	0.0	0.99999999999818	0.0	1.9078351748896032e-06	0.0	0.0	0.0002186218070556877	0.0	0.0	0.00021881060791633319	0.0	800.6399999948537	88.88888823843509	0.0	4.120048121731332e-12	-7.105427357601002e-13	0.0	-2.692645223154387e-26	7.105427357601002e-14
2.15	88.88888823778802	0.0	0.00033917069939566537	199.01109815443328	0.0	-800.6399999948537	0.0	1.5326496041222866e-09	0.0	0.99999999999818	0.0	1.9078351748896032e-06	0.0	0.0	0.0002186218070556877	0.0	0.0	0.00021881104698810215	0.0	800.6399999948537	88.88888823843509	0.0	4.120048121731332e-12	-7.105427357601002e-13	0.0	-2.692645223154387e-26	7.105427357601002e-14
2.155	88.88888823778802	0.0	0.00033917069939566537	199.45554259887774	0.0	-800.6399999948537	0.0	1.5326496041222866e-09	0.0	0.99999999999818	0.0	1.9078351748896032e-06	0.0	0.0	0.0002186218070556877	0.0	0.0	0.00021881148605987108	0.0	800.6399999948537	88.88888823843509	0.0	4.120048121731332e-12	-7.105427357601002e-13	0.0	-2.692645223154387e-26	7.105427357601002e-14
2.16	88.88888823778802	0.0	0.00033917069939566537	199.8999870433222	0.0	-800.6399999948537	0.0	1.5326496041222866e-09	0.0	0.99999999999818	0.0	1.9078351748896032e-06	0.0	0.0	0.0002186218070556877	0.0	0.0	0.00021881192513164	0.0	800.6399999948537	88.88888823843509	0.0	4.120048121731332e-12	-7.105427357601002e-13	0.0	-2.692645223154387e-26	7.105427357601002e-14
2.165	88.88888823778802	0.0	0.00033917069939566537	200.34443148776663	0.0	-800.6399999948537	0.0	1.5326496041222866e-09	0.0	0.99999999999818	0.0	1.9078351748896032e-06	0.0	0.0	0.0002186218070556877	0.0	0.0	0.00021881236420340897	0.0	800.6399999948537	88.88888823843509	0.0	4.120048121731332e-12	-7.105427357601002e-13	0.0	-2.692645223154387e-26	7.105427357601002e-14
2.17	88.88888823778802	0.0	0.00033917069939566537	200.78887593221108	0.0	-800.6399999948537	0.0	1.5326496041222866e-09	0.0	0.99999999999818	0.0	1.9078351748896032e-06	0.0	0.0	0.0002186218070556877	0.0	0.0	0.0002188128032751779	0.0	800.6399999948537	88.88888823843509	0.0	4.120048121731332e-12	-7.105427357601002e-13	0.0	-2.692645223154387e-26	7.105427357601002e-14
2.175	88.88888823778802	0.0	0.00033917069939566537	201.2333203766555	0.0	-800.6399999948537	0.0	1.5326496041222866e-09	0.0	0.99999999999818	0.0	1.9078351748896032e-06	0.0	0.0	0.0002186218070556877	0.0	0.0	0.00021881324234694684	0.0	800.6399999948537	88.88888823843509	0.0	4.120048121731332e-12	-7.105427357601002e-13	0.0	-2.692645223154387e-26	7.105427357601002e-14
2.18	88.88888823778802	0.0	0.00033917069939566537	201.67776482109997	0.0	-800.6399999948537	0.0	1.5326496041222866e-09	0.0	0.99999999999818	0.0	1.9078351748896032e-06	0.0	0.0	0.0002186218070556877	0.0	0.0	0.0002188136814187158	0.0	800.6399999948537	88.88888823843509	0.0	4.120048121731332e-12	-7.105427357601002e-13	0.0	-2.692645223154387e-26	7.105427357601002e-14
2.185	88.88888823778802	0.0	0.00033917069939566537	202.12220926554443	0.0	-800.6399999948537	0.0	1.5326496041222866e-09	0.0	0.99999999999818	0.0	1.9078351748896032e-06	0.0	0.0	0.0002186218070556877	0.0	0.0	0.00021881412049048473	0.0	800.6399999948537	88.88888823843509	0.0	4.120048121731332e-12	-7.105427357601002e-13	0.0	-2.692645223154387e-26	7.105427357601002e-14
2.19	88.88888823778802	0.0	0.00033917069939566537	202.56665370998886	0.0	-800.6399999948537	0.0	1.5326496041222866e-09	0.0	0.99999999999818	0.0	1.9078351748896032e-06	0.0	0.0	0.0002186218070556877	0.0	0.0	0.00021881455956225367	0.0	800.6399999948537	88.88888823843509	0.0	4.120048121731332e-12	-7.105427357601002e-13	0.0	-2.692645223154387e-26	7.105427357601002e-14
2.195	88.88888823778802	0.0	0.00033917069939566537	203.01109815443328	0.0	-800.6399999948537	0.0	1.5326496041222866e-09	0.0	0.99999999999818	0.0	1.9078351748896032e-06	0.0	0.0	0.0002186218070556877	0.0	0.0	0.00021881499863402263	0.0	800.6399999948537	88.88888823843509	0.0	4.120048121731332e-12	-7.105427357601002e-13	0.0	-2.692645223154387e-26	7.105427357601002e-14
2.2	88.88888823778802	0.0	0.00033917069939566537	203.45554259887777	0.0	-800.6399999948537	0.0	1.5326496041222866e-09	0.0	0.99999999999818	0.0	1.9078351748896032e-06	0.0	0.0	0.0002186218070556877	0.0	0.0	0.00021881543770579156	0.0	800.6399999948537	88.88888823843509	0.0	4.120048121731332e-12	-7.105427357601002e-13	0.0	-2.692645223154387e-26	7.105427357601002e-14
2.205	88.88888823778802	0.0	0.00033917069939566537	203.8999870433222	0.0	-800.6399999948537	0.0	1.5326496041222866e-09	0.0	0.99999999999818	0.0	1.9078351748896032e-06	0.0	0.0	0.0002186218070556877	0.0	0.0	0.00021881587677756052	0.0	800.6399999948537	88.88888823843509	0.0	4.120048121731332e-12	-7.105427357601002e-13	0.0	-2.692645223154387e-26	7.105427357601002e-14
2.21	88.88888823778802	0.0	0.00033917069939566537	204.34443148776663	0.0	-800.6399999948537	0.0	1.5326496041222866e-09	0.0	0.99999999999818	0.0	1.9078351748896032e-06	0.0	0.0	0.0002186218070556877	0.0	0.0	0.00021881631584932945	0.0	800.6399999948537	88.88888823843509	0.0	4.120048121731332e-12	-7.105427357601002e-13	0.0	-2.692645223154387e-26	7.105427357601002e-14
2.215	88.88888823778802	0.0	0.00033917069939566537	204.78887593221106	0.0	-800.6399999948537	0.0	1.5326496041222866e-09	0.0	0.99999999999818	0.0	1.9078351748896032e-06	0.0	0.0	0.0002186218070556877	0.0	0.0	0.00021881675492109839	0.0	800.6399999948537	88.88888823843509	0.0	4.120048121731332e-12	-7.105427357601002e-13	0.0	-2.692645223154387e-26	7.105427357601002e-14
2.22	88.88888823778802	0.0	0.00033917069939566537	205.23332037665554	0.0	-800.6399999948537	0.0	1.5326496041222866e-09	0.0	0.99999999999818	0.0	1.9078351748896032e-06	0.0	0.0	0.0002186218070556877	0.0	0.0	0.00021881719399286735	0.0	800.6399999948537	88.88888823843509	0.0	4.120048121731332e-12	-7.105427357601002e-13	0.0	-2.692645223154387e-26	7.105427357601002e-14
2.225	88.88888823778802	0.0	0.00033917069939566537	205.67776482109997	0.0	-800.6399999948537	0.0	1.5326496041222866e-09	0.0	0.99999999999818	0.0	1.9078351748896032e-06	0.0	0.0	0.0002186218070556877	0.0	0.0	0.00021881763306463628	0.0	800.6399999948537	88.88888823843509	0.0	4.120048121731332e-12	-7.105427357601002e-13	0.0	-2.692645223154387e-26	7.105427357601002e-14
2.23	88.88888823778802	0.0	0.00033917069939566537	206.1222092655444	0.0	-800.6399999948537	0.0	1.5326496041222866e-09	0.0	0.99999999999818	0.0	1.9078351748896032e-06	0.0	0.0	0.0002186218070556877	0.0	0.0	0.0002188180721364052	0.0	800.6399999948537	88.88888823843509	0.0	4.120048121731332e-12	-7.105427357601002e-13	0.0	-2.692645223154387e-26	7.105427357601002e-14
2.235	88.88888823778802	0.0	0.00033917069939566537	206.56665370998886	0.0	-800.6399999948537	0.0	1.5326496041222866e-09	0.0	0.99999999999818	0.0	1.9078351748896032e-06	0.0	0.0	0.0002186218070556877	0.0	0.0	0.00021881851120817417	0.0	800.6399999948537	88.88888823843509	0.0	4.120048121731332e-12	-7.105427357601002e-13	0.0	-2.692645223154387e-26	7.105427357601002e-14
2.24	88.88888823778802	0.0	0.00033917069939566537	207.0110981544333	0.0	-800.6399999948537	0.0	1.5326496041222866e-09	0.0	0.99999999999818	0.0	1.9078351748896032e-06	0.0	0.0	0.0002186218070556877	0.0	0.0	0.0002188189502799431	0.0	800.6399999948537	88.88888823843509	0.0	4.120048121731332e-12	-7.105427357601002e-13	0.0	-2.692645223154387e-26	7.105427357601002e-14
2.245	88.88888823778802	0.0	0.00033917069939566537	207.45554259887777	0.0	-800.6399999948537	0.0	1.5326496041222866e-09	0.0	0.99999999999818	0.0	1.9078351748896032e-06	0.0	0.0	0.0002186218070556877	0.0	0.0	0.00021881938935171204	0.0	800.6399999948537	88.88888823843509	0.0	4.120048121731332e-12	-7.105427357601002e-13	0.0	-2.692645223154387e-26	7.105427357601002e-14
2.25	88.88888823778802	0.0	0.00033917069939566537	207.8999870433222	0.0	-800.6399999948537	0.0	1.5326496041222866e-09	0.0	0.99999999999818	0.0	1.9078351748896032e-06	0.0	0.0	0.0002186218070556877	0.0	0.0	0.000218819828423481	0.0	800.6399999948537	88.88888823843509	0.0	4.120048121731332e-12	-7.105427357601002e-13	0.0	-2.692645223154387e-26	7.105427357601002e-14
2.255	88.88888823778802	0.0	0.00033917069939566537	208.34443148776663	0.0	-800.6399999948537	0.0	1.5326496041222866e-09	0.0	0.99999999999818	0.0	1.9078351748896032e-06	0.0	0.0	0.0002186218070556877	0.0	0.0	0.00021882026749524993	0.0	800.6399999948537	88.88888823843509	0.0	4.120048121731332e-12	-7.105427357601002e-13	0.0	-2.692645223154387e-26	7.105427357601002e-14
2.26	88.88888823778802	0.0	0.00033917069939566537	208.78887593221106	0.0	-800.6399999948537	0.0	1.5326496041222866e-09	0.0	0.99999999999818	0.0	1.9078351748896032e-06	0.0	0.0	0.0002186218070556877	0.0	0.0	0.0002188207065670189	0.0	800.6399999948537	88.88888823843509	0.0	4.120048121731332e-12	-7.105427357601002e-13	0.0	-2.692645223154387e-26	7.105427357601002e-14
2.265	88.88888823778802	0.0	0.00033917069939566537	209.23332037665554	0.0	-800.6399999948537	0.0	1.5326496041222866e-09	0.0	0.99999999999818	0.0	1.9078351748896032e-06	0.0	0.0	0.0002186218070556877	0.0	0.0	0.00021882114563878782	0.0	800.6399999948537	88.88888823843509	0.0	4.120048121731332e-12	-7.105427357601002e-13	0.0	-2.692645223154387e-26	7.105427357601002e-14
2.27	88.88888823778802	0.0	0.00033917069939566537	209.67776482109997	0.0	-800.6399999948537	0.0	1.5326496041222866e-09	0.0	0.99999999999818	0.0	1.9078351748896032e-06	0.0	0.0	0.0002186218070556877	0.0	0.0	0.00021882158471055676	0.0	800.6399999948537	88.88888823843509	0.0	4.120048121731332e-12	-7.105427357601002e-13	0.0	-2.692645223154387e-26	7.105427357601002e-14
2.275	88.88888823778802	0.0	0.00033917069939566537	210.1222092655444	0.0	-800.6399999948537	0.0	1.5326496041222866e-09	0.0	0.99999999999818	0.0	1.9078351748896032e-06	0.0	0.0	0.0002186218070556877	0.0	0.0	0.00021882202378232572	0.0	800.6399999948537	88.88888823843509	0.0	4.120048121731332e-12	-7.105427357601002e-13	0.0	-2.692645223154387e-26	7.105427357601002e-14
2.28	88.88888823778802	0.0	0.00033917069939566537	210.56665370998883	0.0	-800.6399999948537	0.0	1.5326496041222866e-09	0.0	0.99999999999818	0.0	1.9078351748896032e-06	0.0	0.0	0.0002186218070556877	0.0	0.0	0.00021882246285409465	0.0	800.6399999948537	88.88888823843509	0.0	4.120048121731332e-12	-7.105427357601002e-13	0.0	-2.692645223154387e-26	7.105427357601002e-14
2.285	88.88888823778802	0.0	0.00033917069939566537	211.0110981544333	0.0	-800.6399999948537	0.0	1.5326496041222866e-09	0.0	0.99999999999818	0.0	1.9078351748896032e-06	0.0	0.0	0.0002186218070556877	0.0	0.0	0.00021882290192586358	0.0	800.6399999948537	88.88888823843509	0.0	4.120048121731332e-12	-7.105427357601002e-13	0.0	-2.692645223154387e-26	7.105427357601002e-14
2.29	88.88888823778802	0.0	0.00033917069939566537	211.45554259887774	0.0	-800.6399999948537	0.0	1.5326496041222866e-09	0.0	0.99999999999818	0.0	1.9078351748896032e-06	0.0	0.0	0.0002186218070556877	0.0	0.0	0.00021882334099763254	0.0	800.6399999948537	88.88888823843509	0.0	4.120048121731332e-12	-7.105427357601002e-13	0.0	-2.692645223154387e-26	7.105427357601002e-14
2.295	88.88888823778802	0.0	0.00033917069939566537	211.8999870433222	0.0	-800.6399999948537	0.0	1.5326496041222866e-09	0.0	0.99999999999818	0.0	1.9078351748896032e-06	0.0	0.0	0.0002186218070556877	0.0	0.0	0.00021882378006940148	0.0	800.6399999948537	88.88888823843509	0.0	4.120048121731332e-12	-7.105427357601002e-13	0.0	-2.692645223154387e-26	7.105427357601002e-14
2.3	88.88888823778802	0.0	0.00033917069939566537	212.34443148776663	0.0	-800.6399999948537	0.0	1.5326496041222866e-09	0.0	0.99999999999818	0.0	1.9078351748896032e-06	0.0	0.0	0.0002186218070556877	0.0	0.0	0.0002188242191411704	0.0	800.6399999948537	88.88888823843509	0.0	4.120048121731332e-12	-7.105427357601002e-13	0.0	-2.692645223154387e-26	7.105427357601002e-14
2.305	88.88888823778802	0.0	0.00033917069939566537	212.78887593221108	0.0	-800.6399999948537	0.0	1.5326496041222866e-09	0.0	0.99999999999818	0.0	1.9078351748896032e-06	0.0	0.0	0.0002186218070556877	0.0	0.0	0.00021882465821293937	0.0	800.6399999948537	88.88888823843509	0.0	4.120048121731332e-12	-7.105427357601002e-13	0.0	-2.692645223154387e-26	7.105427357601002e-14
2.31	88.88888823778802	0.0	0.00033917069939566537	213.23332037665554	0.0	-800.6399999948537	0.0	1.5326496041222866e-09	0.0	0.99999999999818	0.0	1.9078351748896032e-06	0.0	0.0	0.0002186218070556877	0.0	0.0	0.0002188250972847083	0.0	800.6399999948537	88.88888823843509	0.0	4.120048121731332e-12	-7.105427357601002e-13	0.0	-2.692645223154387e-26	7.105427357601002e-14
2.315	88.88888823778802	0.0	0.00033917069939566537	213.67776482109997	0.0	-800.6399999948537	0.0	1.5326496041222866e-09	0.0	0.99999999999818	0.0	1.9078351748896032e-06	0.0	0.0	0.0002186218070556877	0.0	0.0	0.00021882553635647726	0.0	800.6399999948537	88.88888823843509	0.0	4.120048121731332e-12	-7.105427357601002e-13	0.0	-2.692645223154387e-26	7.105427357601002e-14
2.32	88.88888823778802	0.0	0.00033917069939566537	214.1222092655444	0.0	-800.6399999948537	0.0	1.5326496041222866e-09	0.0	0.99999999999818	0.0	1.9078351748896032e-06	0.0	0.0	0.0002186218070556877	0.0	0.0	0.0002188259754282462	0.0	800.6399999948537	88.88888823843509	0.0	4.120048121731332e-12	-7.105427357601002e-13	0.0	-2.692645223154387e-26	7.105427357601002e-14
2.325	88.88888823778802	0.0	0.00033917069939566537	214.56665370998888	0.0	-800.6399999948537	0.0	1.5326496041222866e-09	0.0	0.99999999999818	0.0	1.9078351748896032e-06	0.0	0.0	0.0002186218070556877	0.0	0.0	0.00021882641450001513	0.0	800.6399999948537	88.88888823843509	0.0	4.120048121731332e-12	-7.105427357601002e-13	0.0	-2.692645223154387e-26	7.105427357601002e-14
2.33	88.88888823778802	0.0	0.00033917069939566537	215.0110981544333	0.0	-800.6399999948537	0.0	1.5326496041222866e-09	0.0	0.99999999999818	0.0	1.9078351748896032e-06	0.0	0.0	0.0002186218070556877	0.0	0.0	0.0002188268535717841	0.0	800.6399999948537	88.88888823843509	0.0	4.120048121731332e-12	-7.105427357601002e-13	0.0	-2.692645223154387e-26	7.105427357601002e-14
2.335	88.88888823778802	0.0	0.00033917069939566537	215.45554259887774	0.0	-800.6399999948537	0.0	1.5326496041222866e-09	0.0	0.99999999999818	0.0	1.9078351748896032e-06	0.0	0.0	0.0002186218070556877	0.0	0.0	0.00021882729264355302	0.0	800.6399999948537	88.88888823843509	0.0	4.120048121731332e-12	-7.105427357601002e-13	0.0	-2.692645223154387e-26	7.105427357601002e-14
2.34	88.88888823778802	0.0	0.00033917069939566537	215.89998704332217	0.0	-800.6399999948537	0.0	1.5326496041222866e-09	0.0	0.99999999999818	0.0	1.9078351748896032e-06	0.0	0.0	0.0002186218070556877	0.0	0.0	0.00021882773171532196	0.0	800.6399999948537	88.88888823843509	0.0	4.120048121731332e-12	-7.105427357601002e-13	0.0	-2.692645223154387e-26	7.105427357601002e-14
2.345	88.88888823778802	0.0	0.00033917069939566537	216.34443148776666	0.0	-800.6399999948537	0.0	1.5326496041222866e-09	0.0	0.99999999999818	0.0	1.9078351748896032e-06	0.0	0.0	0.0002186218070556877	0.0	0.0	0.00021882817078709092	0.0	800.6399999948537	88.88888823843509	0.0	4.120048121731332e-12	-7.105427357601002e-13	0.0	-2.692645223154387e-26	7.105427357601002e-14
2.35	88.88888823778802	0.0	0.00033917069939566537	216.78887593221108	0.0	-800.6399999948537	0.0	1.5326496041222866e-09	0.0	0.99999999999818	0.0	1.9078351748896032e-06	0.0	0.0	0.0002186218070556877	0.0	0.0	0.00021882860985885985	0.0	800.6399999948537	88.88888823843509	0.0	4.120048121731332e-12	-7.105427357601002e-13	0.0	-2.692645223154387e-26	7.105427357601002e-14
2.355	88.88888823778802	0.0	0.00033917069939566537	217.2333203766555	0.0	-800.6399999948537	0.0	1.5326496041222866e-09	0.0	0.99999999999818	0.0	1.9078351748896032e-06	0.0	0.0	0.0002186218070556877	0.0	0.0	0.00021882904893062878	0.0	800.6399999948537	88.88888823843509	0.0	4.120048121731332e-12	-7.105427357601002e-13	0.0	-2.692645223154387e-26	7.105427357601002e-14
2.36	88.88888823778802	0.0	0.00033917069939566537	217.67776482109997	0.0	-800.6399999948537	0.0	1.5326496041222866e-09	0.0	0.99999999999818	0.0	1.9078351748896032e-06	0.0	0.0	0.0002186218070556877	0.0	0.0	0.00021882948800239774	0.0	800.6399999948537	88.88888823843509	0.0	4.120048121731332e-12	-7.105427357601002e-13	0.0	-2.692645223154387e-26	7.105427357601002e-14
2.365	88.88888823778802	0.0	0.00033917069939566537	218.12220926554443	0.0	-800.6399999948537	0.0	1.5326496041222866e-09	0.0	0.99999999999818	0.0	1.9078351748896032e-06	0.0	0.0	0.0002186218070556877	0.0	0.0	0.00021882992707416668	0.0	800.6399999948537	88.88888823843509	0.0	4.120048121731332e-12	-7.105427357601002e-13	0.0	-2.692645223154387e-26	7.105427357601002e-14
2.37	88.88888823778802	0.0	0.00033917069939566537	218.56665370998886	0.0	-800.6399999948537	0.0	1.5326496041222866e-09	0.0	0.99999999999818	0.0	1.9078351748896032e-06	0.0	0.0	0.0002186218070556877	0.0	0.0	0.00021883036614593564	0.0	800.6399999948537	88.88888823843509	0.0	4.120048121731332e-12	-7.105427357601002e-13	0.0	-2.692645223154387e-26	7.105427357601002e-14
2.375	88.88888823778802	0.0	0.00033917069939566537	219.0110981544333	0.0	-800.6399999948537	0.0	1.5326496041222866e-09	0.0	0.99999999999818	0.0	1.9078351748896032e-06	0.0	0.0	0.0002186218070556877	0.0	0.0	0.00021883080521770457	0.0	800.6399999948537	88.88888823843509	0.0	4.120048121731332e-12	-7.105427357601002e-13	0.0	-2.692645223154387e-26	7.105427357601002e-14
2.38	88.88888823778802	0.0	0.00033917069939566537	219.45554259887774	0.0	-800.6399999948537	0.0	1.5326496041222866e-09	0.0	0.99999999999818	0.0	1.9078351748896032e-06	0.0	0.0	0.0002186218070556877	0.0	0.0	0.0002188312442894735	0.0	800.6399999948537	88.88888823843509	0.0	4.120048121731332e-12	-7.105427357601002e-13	0.0	-2.692645223154387e-26	7.105427357601002e-14
2.385	88.88888823778802	0.0	0.00033917069939566537	219.89998704332217	0.0	-800.6399999948537	0.0	1.5326496041222866e-09	0.0	0.99999999999818	0.0	1.9078351748896032e-06	0.0	0.0	0.0002186218070556877	0.0	0.0	0.00021883168336124246	0.0	800.6399999948537	88.88888823843509	0.0	4.120048121731332e-12	-7.105427357601002e-13	0.0	-2.692645223154387e-26	7.105427357601002e-14
2.39	88.88888823778802	0.0	0.00033917069939566537	220.34443148776666	0.0	-800.6399999948537	0.0	1.5326496041222866e-09	0.0	0.99999999999818	0.0	1.9078351748896032e-06	0.0	0.0	0.0002186218070556877	0.0	0.0	0.0002188321224330114	0.0	800.6399999948537	88.88888823843509	0.0	4.120048121731332e-12	-7.105427357601002e-13	0.0	-2.692645223154387e-26	7.105427357601002e-14
2.395	88.88888823778802	0.0	0.00033917069939566537	220.78887593221108	0.0	-800.6399999948537	0.0	1.5326496041222866e-09	0.0	0.99999999999818	0.0	1.9078351748896032e-06	0.0	0.0	0.0002186218070556877	0.0	0.0	0.00021883256150478033	0.0	800.6399999948537	88.88888823843509	0.0	4.120048121731332e-12	-7.105427357601002e-13	0.0	-2.692645223154387e-26	7.105427357601002e-14
2.4	88.88888823778802	0.0	0.00033917069939566537	221.2333203766555	0.0	-800.6399999948537	0.0	1.5326496041222866e-09	0.0	0.99999999999818	0.0	1.9078351748896032e-06	0.0	0.0	0.0002186218070556877	0.0	0.0	0.0002188330005765493	0.0	800.6399999948537	88.88888823843509	0.0	4.120048121731332e-12	-7.105427357601002e-13	0.0	-2.692645223154387e-26	7.105427357601002e-14
2.405	88.88888823778802	0.0	0.00033917069939566537	221.67776482109994	0.0	-800.6399999948537	0.0	1.5326496041222866e-09	0.0	0.99999999999818	0.0	1.9078351748896032e-06	0.0	0.0	0.0002186218070556877	0.0	0.0	0.00021883343964831822	0.0	800.6399999948537	88.88888823843509	0.0	4.120048121731332e-12	-7.105427357601002e-13	0.0	-2.692645223154387e-26	7.105427357601002e-14
2.41	88.88888823778802	0.0	0.00033917069939566537	222.12220926554443	0.0	-800.6399999948537	0.0	1.5326496041222866e-09	0.0	0.99999999999818	0.0	1.9078351748896032e-06	0.0	0.0	0.0002186218070556877	0.0	0.0	0.00021883387872008718	0.0	800.6399999948537	88.88888823843509	0.0	4.120048121731332e-12	-7.105427357601002e-13	0.0	-2.692645223154387e-26	7.105427357601002e-14
2.415	88.88888823778802	0.0	0.00033917069939566537	222.56665370998886	0.0	-800.6399999948537	0.0	1.5326496041222866e-09	0.0	0.99999999999818	0.0	1.9078351748896032e-06	0.0	0.0	0.0002186218070556877	0.0	0.0	0.00021883431779185612	0.0	800.6399999948537	88.88888823843509	0.0	4.120048121731332e-12	-7.105427357601002e-13	0.0	-2.692645223154387e-26	7.105427357601002e-14
2.42	88.88888823778802	0.0	0.00033917069939566537	223.01109815443328	0.0	-800.6399999948537	0.0	1.5326496041222866e-09	0.0	0.99999999999818	0.0	1.9078351748896032e-06	0.0	0.0	0.0002186218070556877	0.0	0.0	0.00021883475686362505	0.0	800.6399999948537	88.88888823843509	0.0	4.120048121731332e-12	-7.105427357601002e-13	0.0	-2.692645223154387e-26	7.105427357601002e-14
2.425	88.88888823778802	0.0	0.00033917069939566537	223.45554259887774	0.0	-800.6399999948537	0.0	1.5326496041222866e-09	0.0	0.99999999999818	0.0	1.9078351748896032e-06	0.0	0.0	0.0002186218070556877	0.0	0.0	0.000218835195935394	0.0	800.6399999948537	88.88888823843509	0.0	4.120048121731332e-12	-7.105427357601002e-13	0.0	-2.692645223154387e-26	7.105427357601002e-14
2.43	88.88888823778802	0.0	0.00033917069939566537	223.8999870433222	0.0	-800.6399999948537	0.0	1.5326496041222866e-09	0.0	0.99999999999818	0.0	1.9078351748896032e-06	0.0	0.0	0.0002186218070556877	0.0	0.0	0.00021883563500716294	0.0	800.6399999948537	88.88888823843509	0.0	4.120048121731332e-12	-7.105427357601002e-13	0.0	-2.692645223154387e-26	7.105427357601002e-14
2.435	88.88888823778802	0.0	0.00033917069939566537	224.34443148776663	0.0	-800.6399999948537	0.0	1.5326496041222866e-09	0.0	0.99999999999818	0.0	1.9078351748896032e-06	0.0	0.0	0.0002186218070556877	0.0	0.0	0.00021883607407893188	0.0	800.6399999948537	88.88888823843509	0.0	4.120048121731332e-12	-7.105427357601002e-13	0.0	-2.692645223154387e-26	7.105427357601002e-14
2.44	88.88888823778802	0.0	0.00033917069939566537	224.78887593221108	0.0	-800.6399999948537	0.0	1.5326496041222866e-09	0.0	0.99999999999818	0.0	1.9078351748896032e-06	0.0	0.0	0.0002186218070556877	0.0	0.0	0.00021883651315070084	0.0	800.6399999948537	88.88888823843509	0.0	4.120048121731332e-12	-7.105427357601002e-13	0.0	-2.692645223154387e-26	7.105427357601002e-14
2.445	88.88888823778802	0.0	0.00033917069939566537	225.2333203766555	0.0	-800.6399999948537	0.0	1.5326496041222866e-09	0.0	0.99999999999818	0.0	1.9078351748896032e-06	0.0	0.0	0.0002186218070556877	0.0	0.0	0.00021883695222246977	0.0	800.6399999948537	88.88888823843509	0.0	4.120048121731332e-12	-7.105427357601002e-13	0.0	-2.692645223154387e-26	7.105427357601002e-14
2.45	88.88888823778802	0.0	0.00033917069939566537	225.6777648211	0.0	-800.6399999948537	0.0	1.5326496041222866e-09	0.0	0.99999999999818	0.0	1.9078351748896032e-06	0.0	0.0	0.0002186218070556877	0.0	0.0	0.0002188373912942387	0.0	800.6399999948537	88.88888823843509	0.0	4.120048121731332e-12	-7.105427357601002e-13	0.0	-2.692645223154387e-26	7.105427357601002e-14
2.455	88.88888823778802	0.0	0.00033917069939566537	226.12220926554443	0.0	-800.6399999948537	0.0	1.5326496041222866e-09	0.0	0.99999999999818	0.0	1.9078351748896032e-06	0.0	0.0	0.0002186218070556877	0.0	0.0	0.00021883783036600766	0.0	800.6399999948537	88.88888823843509	0.0	4.120048121731332e-12	-7.105427357601002e-13	0.0	-2.692645223154387e-26	7.105427357601002e-14
2.46	88.88888823778802	0.0	0.00033917069939566537	226.56665370998886	0.0	-800.6399999948537	0.0	1.5326496041222866e-09	0.0	0.99999999999818	0.0	1.9078351748896032e-06	0.0	0.0	0.0002186218070556877	0.0	0.0	0.0002188382694377766	0.0	800.6399999948537	88.88888823843509	0.0	4.120048121731332e-12	-7.105427357601002e-13	0.0	-2.692645223154387e-26	7.105427357601002e-14
2.465	88.88888823778802	0.0	0.00033917069939566537	227.01109815443328	0.0	-800.6399999948537	0.0	1.5326496041222866e-09	0.0	0.99999999999818	0.0	1.9078351748896032e-06	0.0	0.0	0.0002186218070556877	0.0	0.0	0.00021883870850954556	0.0	800.6399999948537	88.88888823843509	0.0	4.120048121731332e-12	-7.105427357601002e-13	0.0	-2.692645223154387e-26	7.105427357601002e-14
2.47	88.88888823778802	0.0	0.00033917069939566537	227.45554259887777	0.0	-800.6399999948537	0.0	1.5326496041222866e-09	0.0	0.99999999999818	0.0	1.9078351748896032e-06	0.0	0.0	0.0002186218070556877	0.0	0.0	0.0002188391475813145	0.0	800.6399999948537	88.88888823843509	0.0	4.120048121731332e-12	-7.105427357601002e-13	0.0	-2.692645223154387e-26	7.105427357601002e-14
2.475	88.88888823778802	0.0	0.00033917069939566537	227.8999870433222	0.0	-800.6399999948537	0.0	1.5326496041222866e-09	0.0	0.99999999999818	0.0	1.9078351748896032e-06	0.0	0.0	0.0002186218070556877	0.0	0.0	0.00021883958665308342	0.0	800.6399999948537	88.88888823843509	0.0	4.120048121731332e-12	-7.105427357601002e-13	0.0	-2.692645223154387e-26	7.105427357601002e-14
2.48	88.88888823778802	0.0	0.00033917069939566537	228.34443148776663	0.0	-800.6399999948537	0.0	1.5326496041222866e-09	0.0	0.99999999999818	0.0	1.9078351748896032e-06	0.0	0.0	0.0002186218070556877	0.0	0.0	0.00021884002572485238	0.0	800.6399999948537	88.88888823843509	0.0	4.120048121731332e-12	0.0746763395959249	0.0	-0.01180782706909112	0.0075604103562832235
2.485	88.88888823778802	0.0	0.00033917069939566537	228.78887593221106	0.0	-800.6399999948537	0.0	1.5326496041222866e-09	0.0	0.99999999999818	0.0	1.9078351748896032e-06	0.0	0.0	0.0002186218070556877	0.0	0.0	0.00021884046479662132	0.0	800.6399999948537	88.88888823843509	0.0	4.120048121731332e-12	-0.2886278455612512	0.0	0.05165506770445385	0.029321370918304824
2.49	88.88440765467631	0.0	0.0010503949847115819	229.23331677539502	0.0	-800.6399994184056	0.0	3.619635009560075e-05	0.0	0.9999999999981503	0.0	1.923427097401251e-06	0.0	0.0	0.00022040850976451587	0.0	0.0	0.0002292099552679007	0.0	800.6399994184056	88.88440765805937	0.0	0.0007084696282655153	-2.125575813180329	0.0	0.3045997411083037	0.21472898127314957
2.495	88.87036125445024	0.0	0.0029459813770462617	229.67770025228867	0.0	-800.6399904545328	0.0	0.00010691599720862733	0.0	0.999999999997744	0.0	2.1240402124789896e-06	0.0	0.0	0.0002433970793824164	0.0	0.0	0.0002598391322803349	0.0	800.6399904545328	88.87036126616304	0.0	0.002568452935016555	-1.8170489238066523	0.0	0.1807563799509965	0.1826017431570658
2.5	88.86820699715497	0.0	0.0026971185980333595	230.1220431272473	0.0	-800.6399777923784	0.0	0.00010665960643401192	0.0	0.9999999999971347	0.0	2.3938798113897167e-06	0.0	0.0	0.0002743184197086706	0.0	0.0	0.0002903948587463113	0.0	800.6399777923784	88.86820700904961	0.0	0.0022716389847938835	-0.007323702011537611	0.0	-0.12783053677929435	0.012804016067014413
2.505	88.8683059717154	0.0	0.0021319723163901435	230.5663844097829	0.0	-800.6399679873045	0.0	0.0001025215903536576	0.0	0.999999999996474	0.0	2.6556163747779836e-06	0.0	0.0	0.0003043112205615784	0.0	0.0	0.00031976513092747986	0.0	800.6399679873045	88.86830598178543	0.0	0.0016599720592872038	0.057336134100438585	0.0	-0.1225148976566687	0.01352676325711642
2.51	88.86840479720557	0.0	0.0016268815207887213	231.01072618681565	0.0	-800.6399610888436	0.0	9.728165611682808e-05	0.0	0.999999999995779	0.0	2.9055697171201274e-06	0.0	0.0	0.00033295376374447617	0.0	0.0	0.00034763427252516626	0.0	800.6399610888436	88.86840480515917	0.0	0.001110454829188366	0.019748803453722985	0.0	-0.10317594934207547	0.0105048996951386
2.515	88.86850346128223	0.0	0.0011882069032220692	231.45506845756498	0.0	-800.6399567676624	0.0	9.122628168826554e-05	0.0	0.9999999999950662	0.0	3.1413455379727845e-06	0.0	0.0	0.00035997168263677935	0.0	0.0	0.0003737686771322123	0.0	800.6399567676624	88.86850346699352	0.0	0.0006298735495725385	0.019715791035442486	0.0	-0.08896004315571299	0.009111861332581588
2.52	88.86860195901055	0.0	0.0008188267853283167	231.8994112212082	0.0	-800.6399546697468	0.0	8.462711368193495e-05	0.0	0.9999999999943513	0.0	3.361248543032408e-06	0.0	0.0	0.0003851707108212335	0.0	0.0	0.00039801255936395576	0.0	800.6399546697468	88.86860196250714	0.0	0.00022140786760108775	0.019682481237737193	0.0	-0.07443095678443246	0.007698939794231365
2.525	88.86870029166732	0.0	0.0005186973158534851	232.343754476915	0.0	-800.6399544330186	0.0	7.773512031037713e-05	0.0	0.9999999999936484	0.0	3.564237790321175e-06	0.0	0.0	0.0004084315651337405	0.0	0.0	0.00042028203093258723	0.0	800.6399544330186	88.86870029310701	0.0	-0.00011480104406824356	0.019649991117158077	0.0	-0.060139396952897356	0.006326823228732213
2.53	88.8687984655515	0.0	0.00028540819901950044	232.78809822387495	0.0	-800.639955701108	0.0	7.077604716036397e-05	0.0	0.9999999999929696	0.0	3.749869039505798e-06	0.0	0.0	0.0004297033393819232	0.0	0.0	0.0004405578748971259	0.0	800.639955701108	88.86879846519287	0.0	-0.0003810845128719439	0.019619202533268286	0.0	-0.04652443662878702	0.005049194303715613
2.535	88.86889649084195	0.0	0.00011471541050320294	233.23244246131975	0.0	-800.6399581343412	0.0	6.394718384520421e-05	0.0	0.9999999999923241	0.0	3.918227383495563e-06	0.0	0.0	0.00044899578449491553	0.0	0.0	0.0004588773936275127	0.0	800.6399581343412	88.86889648901233	0.0	-0.000581701677037873	0.019590775672639893	0.0	-0.033919400558010925	0.003917045092503392
2.54	88.86899438053315	0.0	1.0365580622282035e-06	233.6767871885396	0.0	-800.6399614180918	0.0	5.7415395843868675e-05	0.0	0.9999999999917185	0.0	4.069853392283721e-06	0.0	0.0	0.00046637084523100413	0.0	0.0	0.00047532569293214593	0.0	800.6399614180918	88.86899437759773	0.0	-0.0007223309984287273	0.028245824108807938	0.0	-0.023724858066021013	0.00368876059109094
2.545	88.86909214947153	0.0	-6.210148686260968e-05	234.121132404895	0.0	-800.6399652687016	0.0	5.131633160982236e-05	0.0	0.9999999999911565	0.0	4.2056658288508145e-06	0.0	0.0	0.0004819338040725027	0.0	0.0	0.0004900267390388289	0.0	800.6399652687016	88.86909214580551	0.0	-0.0008096088950418556	-0.0040099605212636415	0.0	-0.008879975517997473	0.0009743395126049619
2.55	88.86866897352124	0.0	-1.237804408409921e-05	234.56547765759638	0.0	-800.6399693759282	0.0	3.8395198468403964e-05	0.0	0.9999999999906536	0.0	4.323642616359312e-06	0.0	0.0	0.0004954529480821231	0.0	0.0	0.0005010261531678624	0.0	800.6399693759282	88.86866897009179	0.0	-0.000780850772942544	-0.28049700749311535	0.0	0.03376047285566413	0.02825213987294252
2.555	88.86653382771607	0.0	0.00026124123552185007	235.00981580031228	0.0	-800.639972628185	0.0	6.651219394842623e-06	0.0	0.9999999999904127	0.0	4.379053306482801e-06	0.0	0.0	0.0005018025454501495	0.0	0.0	0.0005029315871675627	0.0	800.639972628185	88.86653382659607	0.0	-0.000517061342068558	-0.3804269448653012	0.0	0.04388350667475156	0.03829496344659698
2.56	88.86535764453583	0.0	0.0003700099967572224	235.45414474989965	0.0	-800.6399748288735	0.0	-4.951300215977072e-06	0.0	0.99999999999043	0.0	4.375096006719929e-06	0.0	0.0	0.0005013490723007837	0.0	0.0	0.0005015131441401742	0.0	800.6399748288735	88.86535764437173	0.0	-0.00040757894598219413	-0.0951527730876478	0.0	0.003090387271039475	0.00952029449111444
2.565	88.86542715733185	0.0	0.0003202579730687473	235.8984716499783	0.0	-800.6399769926327	0.0	1.308103198523004e-06	0.0	0.9999999999904517	0.0	4.370105887934171e-06	0.0	0.0	0.0005007772468093926	0.0	0.0	0.0005018878881023888	0.0	800.6399769926327	88.86542715673694	0.0	-0.00045644467984415045	0.03747571320763162	0.0	-0.010407365849912534	0.003889398853749228
2.57	88.86552477840964	0.0	0.00029743994079151076	236.34279902983602	0.0	-800.6399793478352	0.0	8.042584373271778e-06	0.0	0.9999999999904006	0.0	4.381792906411929e-06	0.0	0.0	0.0005021164804771391	0.0	0.0	0.0005041919188072206	0.0	800.6399793478352	88.86552477760404	0.0	-0.000481340711409652	0.019988460781898237	0.0	-0.0025454912300255446	0.00201498905712071
2.575	88.86562235046273	0.0	0.00030112327232903767	236.787126897673	0.0	-800.6399817668376	0.0	1.467950583511161e-05	0.0	0.9999999999902756	0.0	4.41023629884214e-06	0.0	0.0	0.0005053758531597416	0.0	0.0	0.0005083972874556683	0.0	800.6399817668376	88.8656223496621	0.0	-0.00048271351449346927	0.03652122677166858	0.0	-0.0005225302036817626	0.0036524964650515427
2.58	88.86571988074164	0.0	0.00032678582445798773	237.2314552532633	0.0	-800.6399841431708	0.0	2.1038025237961593e-05	0.0	0.9999999999900774	0.0	4.454957293378525e-06	0.0	0.0	0.0005105005016449169	0.0	0.0	0.0005144242377327928	0.0	800.6399841431708	88.86571988012615	0.0	-0.0004650001493752118	-0.07555539733630212	0.0	0.0185972606601422	0.00778105145254018
2.585	88.86479670234945	0.0	0.0005068569904216956	237.67578206864889	0.0	-800.6399861112047	0.0	2.0305467432344428e-05	0.0	0.9999999999898389	0.0	4.508114526164083e-06	0.0	0.0	0.0005165918718233917	0.0	0.0	0.0005202413256573613	0.0	800.6399861112047	88.86479670330753	0.0	-0.00029436837134772317	-0.25680316120215707	0.0	0.042315484861249746	0.02602661404456287
2.59	88.86345292774182	0.0	0.0007193615951091503	238.12010253161299	0.0	-800.6399870357895	0.0	1.905978660218395e-05	0.0	0.9999999999896204	0.0	4.556298310838559e-06	0.0	0.0	0.0005221133268290777	0.0	0.0	0.0005257015523109869	0.0	800.6399870357895	88.86345293060761	0.0	-9.041520585221496e-05	-0.2070757432754533	0.0	0.028936111277869454	0.02090876897116774
2.595	88.86289493964071	0.0	0.0007941438017082922	238.56441800401163	0.0	-800.6399872614861	0.0	2.3918435851148562e-05	0.0	0.9999999999893797	0.0	4.608823852880915e-06	0.0	0.0	0.0005281323105804688	0.0	0.0	0.000532553679445113	0.0	800.6399872614861	88.86289494318585	0.0	-2.4963057984478555e-05	-0.034359901248848246	0.0	0.001322507221058627	0.0034385343377380364
2.6	88.86293034028886	0.0	0.000785538674784855	239.00873251244118	0.0	-800.6399874343862	0.0	3.1691564145861155e-05	0.0	0.999999999989057	0.0	4.678345575129097e-06	0.0	0.0	0.0005360989131191579	0.0	0.0	0.0005416326438037427	0.0	800.6399874343862	88.86293034374918	0.0	-4.5924319141422046e-05	-0.002932656531839939	0.0	-0.0018970196558554244	0.00034927292921790106
2.605	88.86267759864809	0.0	0.0008291842483995603	239.45304678068263	0.0	-800.6399876306971	0.0	3.769060284017847e-05	0.0	0.9999999999886447	0.0	4.765645050230281e-06	0.0	0.0	0.0005461026960732799	0.0	0.0	0.0005524302061539728	0.0	800.6399876306971	88.86267760251505	0.0	-1.779171092489749e-05	-0.10779247919643353	0.0	0.01367397459402832	0.010865632127267925
2.61	88.86189015964062	0.0	0.0009454088287076526	239.8973583498784	0.0	-800.6399874882035	0.0	4.164792842432251e-05	0.0	0.999999999988166	0.0	4.86503312693473e-06	0.0	0.0	0.0005574917307315868	0.0	0.0	0.000564361458774856	0.0	800.6399874882035	88.86189016463315	0.0	8.077674997575904e-05	-0.17730111603526666	0.0	0.020742734117452175	0.017851035478654565
2.615	88.86104105293917	0.0	0.0010521761927882749	240.34166559123477	0.0	-800.6399868442943	0.0	4.5543847159450033e-05	0.0	0.9999999999876307	0.0	4.973884859784911e-06	0.0	0.0	0.0005699652205017397	0.0	0.0	0.0005774088098999828	0.0	800.6399868442943	88.86104105900937	0.0	0.00016820701931127095	-0.1442768802467261	0.0	0.011878080822119184	0.014476500605375923
2.62	88.86047605604334	0.0	0.0011026903120850474	240.78596926954293	0.0	-800.6399859085582	0.0	5.005903360702781e-05	0.0	0.9999999999870296	0.0	5.093315253948735e-06	0.0	0.0	0.000583650935564255	0.0	0.0	0.000591749666660914	0.0	800.6399859085582	88.86047606266581	0.0	0.00019750147570079515	-0.09417421508075563	0.0	0.002197740175617945	0.009419985588075996
2.625	88.86002139261662	0.0	0.0011317356224845327	241.23027054194688	0.0	-800.6399849087294	0.0	5.439975876392624e-05	0.0	0.9999999999863551	0.0	5.224027421651808e-06	0.0	0.0	0.0005986294466452389	0.0	0.0	0.000607334049579428	0.0	800.6399849087294	88.86002139959112	0.0	0.00020332124554824036	-0.10426681179206791	0.0	0.002574051091104015	0.010429857995343047
2.63	88.8593833346116	0.0	0.0011832094325590979	241.67456915743546	0.0	-800.6399838374383	0.0	5.7869649935926487e-05	0.0	0.9999999999856111	0.0	5.3645616669439885e-06	0.0	0.0	0.000614733484910061	0.0	0.0	0.0006239124830955684	0.0	800.6399838374383	88.85938334219203	0.0	0.00022982614933443772	-0.14949374633914658	0.0	0.007468983354308606	0.014968021214195297
2.635	88.85855529552286	0.0	0.00125206562454383	242.11886404700442	0.0	-800.6399825822454	0.0	6.055886424915891e-05	0.0	0.9999999999848052	0.0	5.512717814903572e-06	0.0	0.0	0.0006317109288843118	0.0	0.0	0.0006412613197634808	0.0	800.6399825822454	88.85855530392666	0.0	0.0002723613429141706	-0.1707834748761646	0.0	0.007798311393399018	0.017096142533146466
2.64	88.85771691300381	0.0	0.0013088005954509283	242.5631547017304	0.0	-800.6399811374623	0.0	6.283601191745009e-05	0.0	0.9999999999839426	0.0	5.667022387033276e-06	0.0	0.0	0.0006493929303697961	0.0	0.0	0.000659262511184999	0.0	800.6399811374623	88.85771692213052	0.0	0.00030168325336972046	-0.16147710741141927	0.0	0.003647503335909137	0.016151829772055086
2.645	88.85693703794243	0.0	0.0013457548598838434	243.0074413242775	0.0	-800.6399796015074	0.0	6.479783358359421e-05	0.0	0.9999999999830251	0.0	5.826643929563592e-06	0.0	0.0	0.0006676842117828082	0.0	0.0	0.000677825723114654	0.0	800.6399796015074	88.85693704759157	0.0	0.00031027939422656134	-0.1562658768818892	0.0	0.0008023759681224834	0.015626793684201497
2.65	88.85612590781243	0.0	0.00137892316359629	243.45172401877602	0.0	-800.6399780418345	0.0	6.626672750983076e-05	0.0	0.9999999999820564	0.0	5.990598807683349e-06	0.0	0.0	0.0006864720568768239	0.0	0.0	0.000696809742156938	0.0	800.6399780418345	88.85612591795596	0.0	0.0003143203596790158	-0.1724158495960637	0.0	0.001395397187259112	0.017242149612285203
2.655	88.8552032123991	0.0	0.0014195586394980364	243.89600239044157	0.0	-800.6399764455878	0.0	6.711201211673153e-05	0.0	0.9999999999810429	0.0	6.1574503492737485e-06	0.0	0.0	0.0007055918351539396	0.0	0.0	0.0007160359174015358	0.0	800.6399764455878	88.85520322314309	0.0	0.0003253156353011839	-0.19477072488645794	0.0	0.0026177695382773505	0.0194788315846079
2.66	88.85419126612808	0.0	0.001462381869510529	244.34027590036163	0.0	-800.6399747852798	0.0	6.742742632028714e-05	0.0	0.9999999999799928	0.0	6.32571464928386e-06	0.0	0.0	0.0007248735036209202	0.0	0.0	0.0007353524521594446	0.0	800.6399747852798	88.85419127751841	0.0	0.0003382493507311542	-0.20673857773113963	0.0	0.002068497818030911	0.020674892552445746
2.665	88.85314615561289	0.0	0.0014987232544685608	244.78454425156534	0.0	-800.6399730746172	0.0	6.739364791460329e-05	0.0	0.9999999999789123	0.0	6.494300730771299e-06	0.0	0.0	0.0007441920455290748	0.0	0.0	0.0007546593101169317	0.0	800.6399730746172	88.85314616758437	0.0	0.0003446451503470278	-0.2112744803113742	0.0	0.000556537551984802	0.02112752133234943
2.67	88.85207377566697	0.0	0.0015287909382125245	245.2288073191589	0.0	-800.6399713494956	0.0	6.70710732714463e-05	0.0	0.9999999999778062	0.0	6.662446225669326e-06	0.0	0.0	0.0007634600999330827	0.0	0.0	0.0007738737572462645	0.0	800.6399713494956	88.85207378815008	0.0	0.0003448466109639122	-0.21974767473575224	0.0	-0.0001341715264103723	0.021974771569636047
2.675	88.85093976401879	0.0	0.0015582923970042393	245.67306488550284	0.0	-800.639969626477	0.0	6.640077893737113e-05	0.0	0.9999999999766803	0.0	6.829364641872262e-06	0.0	0.0	0.0007825875414763908	0.0	0.0	0.0007928961791937272	0.0	800.639969626477	88.85093977701518	0.0	0.0003447014640441601	-0.23475862099004985	0.0	0.0001847799801980023	0.023475869371077818
2.68	88.8497249999058	0.0	0.0015896058871538775	246.11731658025977	0.0	-800.6399678985116	0.0	6.53693142072221e-05	0.0	0.9999999999755413	0.0	6.994145086758796e-06	0.0	0.0	0.0008014699895534147	0.0	0.0	0.0008116231082624192	0.0	800.6399678985116	88.84972501344909	0.0	0.00034675015189283506	-0.25028472651295414	0.0	0.0004809800840401622	0.02502851886698562
2.685	88.8484414731444	0.0	0.0016203852131906446	246.5615620209332	0.0	-800.6399661590209	0.0	6.4082627838777e-05	0.0	0.9999999999743961	0.0	7.155997972542247e-06	0.0	0.0	0.0008200169640686884	0.0	0.0	0.0008299814288387666	0.0	800.6399661590209	88.8484414872359	0.0	0.00034878667896653026	-0.2622627396997738	0.0	0.00021515627170390583	0.026226282795518807
2.69	88.84710453889889	0.0	0.0016484055885580867	247.00580090735372	0.0	-800.6399644144333	0.0	6.266701610946161e-05	0.0	0.9999999999732498	0.0	7.314453689073019e-06	0.0	0.0	0.0008381746516630329	0.0	0.0	0.0008479342065275191	0.0	800.6399644144333	88.84710455350657	0.0	0.0003486695253004641	-0.27272799446578233	0.0	-0.0002074751513335253	0.027272807338311583
2.695	88.84571184675752	0.0	0.001674371058649487	247.45003297411145	0.0	-800.6399626747327	0.0	6.116528550364404e-05	0.0	0.9999999999721056	0.0	7.4692630398749334e-06	0.0	0.0	0.0008559144965237374	0.0	0.0	0.0008654567700878767	0.0	800.6399626747327	88.84571186185698	0.0	0.0003471470750029581	-0.28501251704350733	0.0	-0.0002985393045604382	0.028501267339750336
2.7	88.84425167449312	0.0	0.0017001033324400533	247.8942579129855	0.0	-800.639960942104	0.0	5.956615616494611e-05	0.0	0.9999999999709669	0.0	7.620197578896335e-06	0.0	0.0	0.0008732103206615877	0.0	0.0	0.0008825212168382196	0.0	800.639960942104	88.84425169008567	0.0	0.00034608182926426927	-0.2992422843026551	0.0	-0.00011112049049742194	0.029924230493437
2.705	88.84271931479725	0.0	0.001726086060663758	248.33847537012528	0.0	-800.6399592121971	0.0	5.789575562405636e-05	0.0	0.999999999969837	0.0	7.767032584045808e-06	0.0	0.0	0.0008900363728217785	0.0	0.0	0.0008991071290831157	0.0	800.6399592121971	88.84271933089134	0.0	0.0003459974689505979	-0.3134101546156861	0.0	2.6819567491248955e-05	0.03134101557632067
2.71	88.84111882624738	0.0	0.001751550327545811	248.78268499282154	0.0	-800.6399574817735	0.0	5.6234605821558464e-05	0.0	0.9999999999687189	0.0	7.909684387292787e-06	0.0	0.0	0.0009063830653542457	0.0	0.0	0.0009152171569639013	0.0	800.6399574817735	88.84111884283962	0.0	0.00034613990631142757	-0.32658446328757884	0.0	3.0310582668599253e-06	0.03265844633016446
2.715	88.83945367608686	0.0	0.0017760113109183489	249.22688645117205	0.0	-800.6399557513226	0.0	5.465530155434448e-05	0.0	0.999999999967613	0.0	8.048275480270954e-06	0.0	0.0	0.0009222644347662596	0.0	0.0	0.000930874747499295	0.0	800.6399557513226	88.83945369316554	0.0	0.00034600251733074957	-0.33960877272321	0.0	-3.5062056070416814e-05	0.033960877453315705
2.72	88.83772163851705	0.0	0.001799867214393742	249.67107941840015	0.0	-800.6399540216335	0.0	5.3180886650956624e-05	0.0	0.9999999999665193	0.0	8.183049016655177e-06	0.0	0.0	0.0009377083444165057	0.0	0.0	0.0009461099492786122	0.0	800.6399540216335	88.83772165607647	0.0	0.0003459403528094711	-0.35342962491569097	0.0	3.957068499356287e-05	0.03534296271308973
2.725	88.83591834510557	0.0	0.0018237157282627035	250.1152635487925	0.0	-800.6399522908429	0.0	5.181093460099019e-05	0.0	0.999999999965437	0.0	8.314266297241718e-06	0.0	0.0	0.0009527447371706029	0.0	0.0	0.0009609526887049375	0.0	800.6399522908429	88.83591836314955	0.0	0.00034650476429917096	-0.3679463684285622	0.0	0.00018712289640994125	0.036794641601019244
2.73	88.8340419616718	0.0	0.0018476939655226005	250.5594384800594	0.0	-800.6399505553735	0.0	5.056286641111175e-05	0.0	0.9999999999643652	0.0	8.442204650558649e-06	0.0	0.0	0.000967405392536945	0.0	0.0	0.0009754378829321401	0.0	800.6399505553735	88.83404198020668	0.0	0.00034778364095918514	-0.3825392524452317	0.0	0.0003083224923798325	0.03825393766975055
2.735	88.83209304928383	0.0	0.0018716081412681722	251.00360384775715	0.0	-800.6399488122506	0.0	4.9471585568552294e-05	0.0	0.9999999999633019	0.0	8.567211691505323e-06	0.0	0.0	0.0009817301442487899	0.0	0.0	0.0009896104482266317	0.0	800.6399488122506	88.83209306831289	0.0	0.0003495214487438658	-0.3970046694135476	0.0	0.0003798806137899451	0.03970048511610921
2.74	88.83007163300432	0.0	0.0018953901290370992	251.44775929001852	0.0	-800.6399470596496	0.0	4.8559783763471076e-05	0.0	0.9999999999622449	0.0	8.689712963212942e-06	0.0	0.0	0.0009957677559569763	0.0	0.0	0.001003521801545206	0.0	800.6399470596496	88.83007165252995	0.0	0.0003515744788242395	-0.41163979535573014	0.0	0.00044815540634202887	0.041164003931077414
2.745	88.82797600187266	0.0	0.0019192156775554988	251.89190444061876	0.0	-800.6399452958216	0.0	4.78247540780324e-05	0.0	0.999999999961191	0.0	8.810158225901177e-06	0.0	0.0	0.0010095697663862655	0.0	0.0	0.0010172225843698174	0.0	800.6399452958216	88.82797602190055	0.0	0.0003540386303922092	-0.42670671339308797	0.0	0.0005442746816098752	0.0426707060510674
2.75	88.82580397608982	0.0	0.0019432781622878703	252.33603892285706	0.0	-800.6399435183719	0.0	4.7253400719563946e-05	0.0	0.9999999999601371	0.0	8.92897289566228e-06	0.0	0.0	0.0010231849246299047	0.0	0.0	0.0010307596865141747	0.0	800.6399435183719	88.82580399662935	0.0	0.0003570317697654105	-0.4421451671070997	0.0	0.000650977432181427	0.04421456463291054
2.755	88.82355420284978	0.0	0.0019676177542850737	252.78016235096564	0.0	-800.6399417246678	0.0	4.683877871235527e-05	0.0	0.9999999999590804	0.0	9.04655568601744e-06	0.0	0.0	0.0010366589198918933	0.0	0.0	0.0010441780082030006	0.0	800.6399417246678	88.8235542239116	0.0	0.0003605232953766412	-0.4577734911473878	0.0	0.0007394432849669885	0.045777408835979264
2.76	88.82122595705054	0.0	0.001992183393078663	253.22427433432543	0.0	-800.6399399125112	0.0	4.6578071909707884e-05	0.0	0.9999999999580175	0.0	9.163295273760134e-06	0.0	0.0	0.001050036291251955	0.0	0.0	0.0010575216428944162	0.0	800.6399399125112	88.82122597864472	0.0	0.00036439315276881005	-0.47355260257807197	0.0	0.0008054764574072047	0.0473553287604245
2.765	88.81881826535556	0.0	0.002016963317818044	253.6683744783744	0.0	-800.6399380802401	0.0	4.646126354020762e-05	0.0	0.9999999999569452	0.0	9.27956626992886e-06	0.0	0.0	0.0010633599659730208	0.0	0.0	0.0010708318144529109	0.0	800.6399380802401	88.81881828749236	0.0	0.0003685630973213864	-0.48958031560128273	0.0	0.0008631983701723261	0.048958107657024276
2.77	88.81632963873906	0.0	0.0020420056389256654	254.1124623823157	0.0	-800.6399362263995	0.0	4.6468277960930575e-05	0.0	0.9999999999558608	0.0	9.395704863894203e-06	0.0	0.0	0.0010766684685191966	0.0	0.0	0.0010841439954949214	0.0	800.6399362263995	88.81632966143009	0.0	0.0003730215978789396	-0.5059289546792911	0.0	0.0009205612510391144	0.05059297921805921
2.775	88.81375848187267	0.0	0.0020673504315493235	254.55653763742507	0.0	-800.639934349557	0.0	4.657632919019986e-05	0.0	0.9999999999547614	0.0	9.511991757162142e-06	0.0	0.0	0.0010899939649136744	0.0	0.0	0.0010974871309339736	0.0	800.639934349557	88.81375850513066	0.0	0.0003777589540473381	-0.5225773370002667	0.0	0.0009723786970536021	0.05225782416697242
2.78	88.81110343319394	0.0	0.002092989224103917	255.00059982753976	0.0	-800.6399324484255	0.0	4.67662666064445e-05	0.0	0.9999999999536449	0.0	9.628654673610386e-06	0.0	0.0	0.00110336255039063	0.0	0.0	0.0011108846794346378	0.0	800.6399324484255	88.81110345703186	0.0	0.0003827263315140767	-0.5394786335394031	0.0	0.0010117973548923334	0.05394795823563937
2.785	88.80836326809595	0.0	0.0021188891417022607	255.44464853013986	0.0	-800.6399305220203	0.0	4.7021733706310486e-05	0.0	0.9999999999525093	0.0	9.745877714112527e-06	0.0	0.0	0.0011167953213561878	0.0	0.0	0.0011243554138684361	0.0	800.6399305220203	88.80836329252654	0.0	0.00038785824457926714	-0.5566308070754644	0.0	0.0010393610709160622	0.055663177744081284
2.79	88.80553665357363	0.0	0.0021450288566467364	255.88868331639054	0.0	-800.6399285696476	0.0	4.73257011862756e-05	0.0	0.999999999951353	0.0	9.863803775590575e-06	0.0	0.0	0.0011303086525914223	0.0	0.0	0.0011379132285707903	0.0	800.6399285696476	88.80553667860943	0.0	0.0003931080808408319	-0.5740664817272053	0.0	0.00106006097708415	0.05740674604712646
2.795	88.80262210052197	0.0	0.002171401296851519	256.3327037503651	0.0	-800.6399265907844	0.0	4.7660516464844674e-05	0.0	0.9999999999501749	0.0	9.982531878922175e-06	0.0	0.0	0.0011439138910530797	0.0	0.0	0.0011515669607850372	0.0	800.6399265907844	88.80262212617572	0.0	0.00039845128440641587	-0.5918065544283498	0.0	0.0010766780371393263	0.05918075338316935
2.8	88.79961808884447	0.0	0.0021979956765009094	256.776709388555	0.0	-800.6399245850141	0.0	4.801106067211364e-05	0.0	0.999999999948974	0.0	1.0102119374221773e-05	0.0	0.0	0.001157617608580186	0.0	0.0	0.0011653211165173305	0.0	800.6399245850141	88.79961811512896	0.0	0.00040386699150621737	-0.6098462509764129	0.0	0.0010886158160951006	0.06098472226011864
2.805	88.7965231510209	0.0	0.0022247900176216267	257.22069977997364	0.0	-800.6399225520378	0.0	4.836692792802059e-05	0.0	0.9999999999477497	0.0	1.0222591522473578e-05	0.0	0.0	0.0011714226998683042	0.0	0.0	0.0011791772207087755	0.0	800.6399225520378	88.79652317794857	0.0	0.0004093288476739912	-0.6281758403285191	0.0	0.0010951488942608724	0.062817679495787
2.81	88.79333584026774	0.0	0.002251759881770818	257.6646744663812	0.0	-800.639920491691	0.0	4.8722083628947746e-05	0.0	0.9999999999465018	0.0	1.034395332706065e-05	0.0	0.0	0.001185329738262901	0.0	0.0	0.0011931350695138863	0.0	800.639920491691	88.79333586785081	0.0	0.00041481163801572875	-0.6467977227316624	0.0	0.0010974525888453818	0.06467986537811046
2.815	88.79005467011986	0.0	0.0022788882761024683	258.10863298222085	0.0	-800.6399184039132	0.0	4.907376765848888e-05	0.0	0.9999999999452298	0.0	1.0466198944146002e-05	0.0	0.0	0.0011993380541095854	0.0	0.0	0.0012071936683720713	0.0	800.6399184039132	88.79005469837027	0.0	0.00042029952282685457	-0.6657215913731326	0.0	0.0010975446672010425	0.06657224961083054
2.82	88.78667811293677	0.0	0.0023061662648421483	258.5525748543869	0.0	-800.6399162886996	0.0	4.942254558446102e-05	0.0	0.9999999999439335	0.0	1.0589319631038181e-05	0.0	0.0	0.0012134466455697142	0.0	0.0	0.001221352184745984	0.0	800.6399162886996	88.7866781418664	0.0	0.0004257852373984015	-0.6849524210359448	0.0	0.0010966499718956051	0.06849532989366232
2.825	88.78320463593481	0.0	0.002333589485978961	258.99649960210667	0.0	-800.639914146071	0.0	4.977306393910845e-05	0.0	0.9999999999426128	0.0	1.0713313011452085e-05	0.0	0.0	0.0012276552403410739	0.0	0.0	0.0012356111172317124	0.0	800.639914146071	88.78320466555567	0.0	0.0004312649627033104	-0.7044885740368064	0.0	0.0010951324141442928	0.07044894252317897
2.83	88.77963272027198	0.0	0.002361157873811721	259.44040673697816	0.0	-800.6399119760644	0.0	5.013422148991482e-05	0.0	0.9999999999412671	0.0	1.0838193714542e-05	0.0	0.0	0.0012419655148012616	0.0	0.0	0.0012499735137344434	0.0	800.6399119760644	88.7796327505962	0.0	0.0004367361587136392	-0.724327684441306	0.0	0.0010933310271804431	0.0724328509601023
2.835	88.77596085161089	0.0	0.0023888788016545514	259.88429576302457	0.0	-800.6399097787236	0.0	5.051848375859938e-05	0.0	0.9999999999398955	0.0	1.096400328435197e-05	0.0	0.0	0.0012563822295470536	0.0	0.0	0.001264445993268283	0.0	800.6399097787236	88.77596088265092	0.0	0.0004421989485000989	-0.7444702524670296	0.0	0.0010919301465452703	0.07444710532450323
2.84	88.7721875079259	0.0	0.002416769608008568	260.32816617668	0.0	-800.6399075540825	0.0	5.094103891387128e-05	0.0	0.9999999999384972	0.0	1.1090817972788092e-05	0.0	0.0	0.00127091412240325	0.0	0.0	0.0012790395259371656	0.0	800.6399075540825	88.77218753969485	0.0	0.0004476572621418828	-0.7649179963965007	0.0	0.0010916499482599895	0.07649187753682392
2.845	88.76831116098106	0.0	0.0024448578158435467	260.7720174667496	0.0	-800.6399053021471	0.0	5.14192477594603e-05	0.0	0.9999999999370701	0.0	1.1218754800938543e-05	0.0	0.0	0.0012855746029987846	0.0	0.0	0.0012937700553489386	0.0	800.6399053021471	88.76831119349285	0.0	0.00045311798133654296	-0.7856714299954604	0.0	0.0010929284834861326	0.07856721901682544
2.85	88.7643302838457	0.0	0.0024731804859542644	261.21584911439794	0.0	-800.6399030228848	0.0	5.1972202701799176e-05	0.0	0.9999999999356121	0.0	1.1347976459098308e-05	0.0	0.0	0.001300382314268201	0.0	0.0	0.0013086589946829962	0.0	800.6399030228848	88.76433031711547	0.0	0.00045858942450959194	-0.8067298254789061	0.0	0.0010959482941829415	0.08067305699053991
2.855	88.76024335377114	0.0	0.0025017840516715927	261.65966059316594	0.0	-800.6399007162199	0.0	5.2620136446604396e-05	0.0	0.9999999999341201	0.0	1.1478694941114016e-05	0.0	0.0	0.0013153615489168902	0.0	0.0	0.001323733553361961	0.0	800.6399007162199	88.76024338781554	0.0	0.00046408053843260397	-0.8280925605906949	0.0	0.001100815952793286	0.08280932922693046
2.86	88.75604884896771	0.0	0.002530724581937173	262.103451368985	0.0	-800.6398983820308	0.0	5.338367358085651e-05	0.0	0.9999999999325907	0.0	1.1611173474168867e-05	0.0	0.0	0.0013305424705581566	0.0	0.0	0.0013390268493173965	0.0	800.6398983820308	88.75604888380514	0.0	0.00046960082125939423	-0.8497598460444067	0.0	0.0011076360415673535	0.08497605679289988
2.865	88.75174524499454	0.0	0.002560067666488123	262.54722090017225	0.0	-800.6398960201466	0.0	5.4283129342903394e-05	0.0	0.9999999999310194	0.0	1.1745726588265501e-05	0.0	0.0	0.0013459611216753667	0.0	0.0	0.001354577820367952	0.0	800.6398960201466	88.75174528064565	0.0	0.00047516019816736394	-0.8717323543559512	0.0	0.0011164526744177992	0.08717330692921682
2.87	88.74733101403119	0.0	0.0025898876700122574	262.9909686374135	0.0	-800.6398936303472	0.0	5.53379792060451e-05	0.0	0.9999999999294009	0.0	1.188271864312571e-05	0.0	0.0	0.0013616592548170918	0.0	0.0	0.0013704309836443974	0.0	800.6398936303472	88.74733105051908	0.0	0.0004807685398936304	-0.8940107126221619	0.0	0.0011271988668125476	0.08940114232270588
2.875	88.74280462543777	0.0	0.0026202667305749564	263.43469402374836	0.0	-800.6398912123641	0.0	5.656646741755139e-05	0.0	0.9999999999277295	0.0	1.2022561220240144e-05	0.0	0.0	0.0013776840337480162	0.0	0.0	0.0013866360828693474	0.0	800.6398912123641	88.74280466278844	0.0	0.00048643512704142546	-0.9165954850629987	0.0	0.0011397169241769746	0.09165961936384753
2.88	88.73816454546223	0.0	0.0026512938089977107	263.87839649455606	0.0	-800.6398887658848	0.0	5.7985296415390586e-05	0.0	0.9999999999259983	0.0	1.216570964245826e-05	0.0	0.0	0.0013940876346233255	0.0	0.0	0.0014032476466614321	0.0	800.6398887658848	88.73816458370486	0.0	0.0004921683202431336	-0.9394874027724617	0.0	0.0011538054887251284	0.09394881112793559
2.885	88.73340923606847	0.0	0.002683063813152915	264.32207547753677	0.0	-800.6398862905577	0.0	5.960940236859644e-05	0.0	0.9999999999241996	0.0	1.2312658815908921e-05	0.0	0.0	0.001410926769507904	0.0	0.0	0.0014203244825365207	0.0	800.6398862905577	88.73340927523566	0.0	0.0004979754255127713	-0.9626874255350989	0.0	0.0011692437138054916	0.09626881355944193
2.89	88.7285371541348	0.0	0.0027156766886450192	264.76573039268794	0.0	-800.6398837859972	0.0	6.14518590893473e-05	0.0	0.9999999999223256	0.0	1.2463938663780312e-05	0.0	0.0	0.0014282621631260578	0.0	0.0	0.0014379291433817818	0.0	800.6398837859972	88.7285371942631	0.0	0.0005038625983408892	-0.9861965782337261	0.0	0.0011857898223520348	0.09861972911225282
2.895	88.7235467516565	0.0	0.0027492364795674014	265.209360652279	0.0	-800.6398812517901	0.0	6.352392030388351e-05	0.0	0.9999999999203668	0.0	1.2620109496654332e-05	0.0	0.0	0.0014461580223409142	0.0	0.0	0.0014561274060394713	0.0	800.6398812517901	88.72354679278648	0.0	0.0005098347289951404	-1.0100157641052951	0.0	0.0012031806098371108	0.1010016480749093
2.9	88.71843647662874	0.0	0.0027838504647832688	265.6529656608286	0.0	-800.6398786875022	0.0	6.58351709181921e-05	0.0	0.9999999999183138	0.0	1.2781757633293095e-05	0.0	0.0	0.0014646815343335184	0.0	0.0	0.0014749877932251454	0.0	800.6398786875022	88.71843651880545	0.0	0.0005158953587609647	-1.0341456791865749	0.0	0.001221143172537328	0.10341464001633958
2.905	88.71320477414761	0.0	0.002819628454414046	266.0965448150882	0.0	-800.6398760926852	0.0	6.839374922608544e-05	0.0	0.9999999999161558	0.0	1.2949491494683607e-05	0.0	0.0	0.0014839024190133267	0.0	0.0	0.0014945811591037996	0.0	800.6398760926852	88.71320481742079	0.0	0.0005220466722831482	-1.0585867851069963	0.0	0.0012394103788023216	0.10585875106675183
2.91	88.70785008766453	0.0	0.002856682260174296	266.5400975040297	0.0	-800.6398734668828	0.0	7.12066142073644e-05	0.0	0.9999999999138814	0.0	1.3123938314348962e-05	0.0	0.0	0.0015038925520476343	0.0	0.0	0.001514980351441291	0.0	800.6398734668828	88.7078501320888	0.0	0.0005282895542927116	-1.0833392660003938	0.0	0.0012577296622536447	0.10833399960964125
2.915	88.7023708605242	0.0	0.0028951253150027146	266.98362310884136	0.0	-800.6398708096376	0.0	7.427983878794376e-05	0.0	0.999999999911479	0.0	1.3305741553273885e-05	0.0	0.0	0.001524725668633867	0.0	0.0	0.0015362599577685976	0.0	800.6398708096376	88.7023709061597	0.0	0.0005346236705209764	-1.1084029685508294	0.0	0.0012758664738678647	0.11084037028662211
2.92	88.69676553776442	0.0	0.002935072440620228	267.42712100293187	0.0	-800.6398681204965	0.0	7.761890505824515e-05	0.0	0.9999999999089353	0.0	1.3495559056330172e-05	0.0	0.0	0.0015464771522414936	0.0	0.0	0.001558496136119918	0.0	800.6398681204965	88.69676558467673	0.0	0.0005410475649283721	-1.1337773664929311	0.0	0.0012936068215491357	0.1133778104476469
2.925	88.6910325679766	0.0	0.0029766397534238356	267.870590551943	0.0	-800.6398653990165	0.0	8.122897407375386e-05	0.0	0.9999999999062367	0.0	1.3694061920730731e-05	0.0	0.0	0.0015692239049464151	0.0	0.0	0.0015817665230629364	0.0	800.6398653990165	88.69103261623731	0.0	0.0005475587689363604	-1.1594615713188243	0.0	0.0013107607664485385	0.11594623122201533
2.93	88.68517040501219	0.0	0.00301994470138051	268.3140311137721	0.0	-800.639862644769	0.0	8.511510668336284e-05	0.0	0.9999999999033684	0.0	1.3901933981001301e-05	0.0	0.0	0.001593044288413068	0.0	0.0	0.0016061502049917486	0.0	800.639862644769	88.68517045469918	0.0	0.0005541539323228354	-1.1854543774335962	0.0	0.0013271659006124513	0.1185455120342311
2.935	88.67917750942061	0.0	0.0030651061950632556	268.75744203860205	0.0	-800.6398598573439	0.0	8.928242248543698e-05	0.0	0.999999999900315	0.0	1.4119871771109445e-05	0.0	0.0	0.0016180181195547287	0.0	0.0	0.001631727734957346	0.0	800.6398598573439	88.67917756061848	0.0	0.0005608289636897704	-1.2117543216900137	0.0	0.0013426879557534494	0.12117550655744634
2.94	88.67305234957168	0.0	0.0031122447923937744	269.20082266893763	0.0	-800.639857036354	0.0	9.373619283555706e-05	0.0	0.9999999998970595	0.0	1.4348584801296768e-05	0.0	0.0	0.0016442267022561475	0.0	0.0	0.0016585811761428552	0.0	800.639857036354	88.6730524023721	0.0	0.0005675791689189054	-1.238359751186143	0.0	0.0013572199651265499	0.12383604949302283
2.945	88.66679340241984	0.0	0.003161482904799328	269.6441723396466	0.0	-800.6398541814357	0.0	9.848186948537424e-05	0.0	0.9999999998935839	0.0	1.4588795986043783e-05	0.0	0.0	0.0016717528764147113	0.0	0.0	0.0016867941535432059	0.0	800.6398541814357	88.66679345692201	0.0	0.0005743993843597127	-1.2652688980371827	0.0	0.0013706806457107288	0.12652696404741795
2.95	88.66039915388727	0.0	0.0032129449927316665	270.0874903780042	0.0	-800.6398512922525	0.0	0.00010352505671409549	0.0	0.9999999998898692	0.0	1.484124207056399e-05	0.0	0.0	0.001700681066813065	0.0	0.0	0.0017164518976610567	0.0	800.6398512922525	88.6603992101985	0.0	0.0005812840997747812	-1.292477357493264	0.0	6.24841962983432e-05	0.12924773590036484
2.955	88.65386809887582	0.0	0.003266757729112682	270.5307761037375	0.0	-800.6398483684967	0.0	0.0001088714395503109	0.0	0.9999999998858947	0.0	1.5106673930717814e-05	0.0	0.0	0.0017310973174867168	0.0	0.0	0.001747641267639789	0.0	800.6398483684967	88.653868157112	0.0	0.0005882275717941332	-1.3199864320794084	0.0	-0.001688462111046982	0.1319987511978059
2.96	88.64719858267625	0.0	0.003400749025824869	270.97402882899	0.0	-800.6398453910125	0.0	4.193445034839712e-05	0.0	0.999999999881771	0.0	1.537721130228328e-05	0.0	0.0	0.001762098616672845	0.0	0.0	0.0017596546027456093	0.0	800.6398453910125	88.64719864534165	0.0	0.000674455616616368	-1.3479663256063645	0.0	0.0873541000849728	0.13507938235609382
2.965	88.64038804470472	0.0	0.004009453008185101	271.4172478542379	0.0	-800.6398400818083	0.0	-0.0006407785757132626	0.0	0.9999999998934114	0.0	1.4600419842989075e-05	0.0	0.0	0.0016730848723041066	0.0	0.0	0.0015760850627917391	0.0	800.6398400818083	88.64038812399188	0.0	0.0014210792457552267	-1.3761534355298959	0.0	0.14641677465211214	0.1383920572150101
2.97	88.63343684880873	0.0	0.004180553572663432	271.8604324757763	0.0	-800.6398314551815	0.0	-0.0011897182376180901	0.0	0.9999999999245489	0.0	1.2284878949891136e-05	0.0	0.0	0.001407743431351158	0.0	0.0	0.0012352558936654442	0.0	800.6398314551815	88.63343692477396	0.0	0.0020028514863651616	-1.4044013082295712	0.0	0.10052355721738172	0.14079943253126298
2.975	88.62634354252721	0.0	0.003982888239747684	272.30358198663373	0.0	-800.639820310472	0.0	-0.00161049332180947	0.0	0.9999999999616519	0.0	8.758683515999707e-06	0.0	0.0	0.0010036711991280175	0.0	0.0	0.0007738835422970095	0.0	800.639820310472	88.6263435987023	0.0	0.0024303880506577544	-1.4329880079631134	0.0	0.07096916937321371	0.14347443165831383
2.98	88.61910649464156	0.0	0.0034853651329238423	272.7466956721702	0.0	-800.6398073854267	0.0	-0.0019114397036122783	0.0	0.9999999999906278	0.0	4.3323191825067675e-06	0.0	0.0	0.0004964472093239687	0.0	0.0	0.00022629640324340694	0.0	800.6398073854267	88.61910652151877	0.0	0.0027175126227936856	-1.4618950181782018	0.0	0.04442928133965392	0.14625700001075514
2.985	88.61172418240851	0.0	0.0027548691163043837	273.189772809732	0.0	-800.6397933427633	0.0	-0.0021029536975867113	0.0	0.9999999999997647	0.0	-7.072938690979677e-07	0.0	0.0	-8.10499071495921e-05	0.0	0.0	-0.0003761554536723401	0.0	800.6397933427633	88.61172417842812	0.0	0.0028802181747905973	-1.4910824015733701	0.0	0.021239893564544504	0.14912336709451146
2.99	88.604195292892	0.0	0.001854569327687229	273.63281266967226	0.0	-800.6397787618888	0.0	-0.0021968577926614425	0.0	0.9999999999814033	0.0	-6.101100901292404e-06	0.0	0.0	-0.0006991346640593828	0.0	0.0	-0.0010055088522219738	0.0	800.6397787618888	88.60419526367119	0.0	0.002935735599048671	-1.5205245707861081	0.0	0.0015685102453915235	0.15205253797910342
2.995	88.59651852352447	0.0	0.0008426491964239292	274.07581451592915	0.0	-800.6397641345185	0.0	-0.002205858712049088	0.0	0.9999999999324919	0.0	-1.162082373598485e-05	0.0	0.0	-0.001331648309104753	0.0	0.0	-0.0016374408242348553	0.0	800.6397641345185	88.59651848001597	0.0	0.0029017782468249674	-1.550237137493582	0.0	-0.01455798446768477	0.15503054916293293
3.0	88.58869245228827	0.0	-0.00022863302098572743	274.51877760566305	0.0	-800.6397498639707	0.0	-0.0021430502702661906	0.0	0.9999999998543118	0.0	-1.7070551116143943e-05	0.0	0.0	-0.0019561410659298	0.0	0.0	-0.002251379503087971	0.0	800.6397498639707	88.58869240846873	0.0	0.0027958825843451564	-1.5802421071910544	0.0	-0.02723217984381258	0.1580476734709711
3.005	88.58071559450185	0.0	-0.0013135455930726975	274.9617011887288	0.0	-800.6397362674883	0.0	-0.0020214883914382122	0.0	0.9999999997516555	0.0	-2.228712362206893e-05	0.0	0.0	-0.002553916242273203	0.0	0.0	-0.0028304932689084674	0.0	800.6397362674883	88.58071556505804	0.0	0.0026348731252235657	-1.610544945049952	0.0	-0.036643837366467924	0.16109617595842843
3.01	88.57258647209542	0.0	-0.0023732212268988413	275.4045845075609	0.0	-800.6397235808981	0.0	-0.0018538202482345448	0.0	0.999999999631735	0.0	-2.7139585923429487e-05	0.0	0.0	-0.0031099674626721575	0.0	0.0	-0.0033615736499071373	0.0	800.6397235808981	88.57258647043918	0.0	0.0024344254168662117	-1.6411408563184202	0.0	-0.04305798265295296	0.164170560702816
3.015	88.56430363568553	0.0	-0.0033757197739966043	275.8474267972622	0.0	-800.6397119651975	0.0	-0.0016519886155687427	0.0	0.9999999995030141	0.0	-3.1527775242352726e-05	0.0	0.0	-0.0036128169182462902	0.0	0.0	-0.003834833527285882	0.0	800.6397119651975	88.56430367248257	0.0	0.002208751148981484	-1.6720264520062738	0.0	-0.04679181847690597	0.1672681060598542
3.02	88.55586563696225	0.0	-0.004295873198117954	276.2902272856937	0.0	-800.6397015144477	0.0	-0.0014270022909850272	0.0	0.999999999374134	0.0	-3.5380259002603215e-05	0.0	0.0	-0.004054279038703694	0.0	0.0	-0.0042436395704305895	0.0	800.6397015144477	88.55586571924404	0.0	0.0019703857335856803	-1.703203956760054	0.0	-0.04819572079611945	0.17038857197083854
3.025	88.54727101177956	0.0	-0.005114953927531034	276.7329851934154	0.0	-800.6396922645017	0.0	-0.0011887677166216712	0.0	0.9999999992530365	0.0	-3.865177665410122e-05	0.0	0.0	-0.004429167347027479	0.0	0.0	-0.004584196435349718	0.0	800.6396922645017	88.54727114261736	0.0	0.001730064767593672	-1.7346757892459173	0.0	-0.04763671033486075	0.17353297525160669
3.03	88.5385182902669	0.0	-0.005820204506687034	277.1756997336252	0.0	-800.6396842021434	0.0	-0.0009459766578842154	0.0	0.9999999991463338	0.0	-4.132033293465672e-05	0.0	0.0	-0.0047349613718099684	0.0	0.0	-0.004855198785423	0.0	800.6396842021434	88.53851846892309	0.0	0.0014966776135308824	-1.7664575770100537	0.0	-0.03796205716063603	0.17668654417244392
3.035	88.5296059948339	0.0	-0.00640426209580151	277.61837011214703	0.0	-800.6396772742935	0.0	-0.0007060453052129337	0.0	0.9999999990589299	0.0	-4.3384079264997225e-05	0.0	0.0	-0.004971449281450355	0.0	0.0	-0.005057465866091636	0.0	800.6396772742935	88.52960621726966	0.0	0.001277288808634745	-1.798426621378487	0.0	-0.08383594043004274	0.18003796203552822
3.04	88.52053346654836	0.0	-0.007369245676133829	278.06099552848957	0.0	-800.6396720536994	0.0	-0.0008908959541517388	0.0	0.999999998980312	0.0	-4.515984502512532e-05	0.0	0.0	-0.005174937048568159	0.0	0.0	-0.005312688756882511	0.0	800.6396720536994	88.52053377108304	0.0	0.0006259014915524271	-1.83063852605585	0.0	-0.15866939617022835	0.1837501942954336
3.045	88.51129873104027	0.0	-0.008687784094095936	278.5035751789787	0.0	-800.6396710851557	0.0	-0.0012912698036643445	0.0	0.9999999988521601	0.0	-4.79136359036218e-05	0.0	0.0	-0.005490498238908911	0.0	0.0	-0.0056826103066957775	0.0	800.6396710851557	88.5112991571797	0.0	-0.00020598778243140686	-1.8632916011888767	0.0	-0.1534266913372286	0.1869597641385894
3.05	88.5018997424852	0.0	-0.009967991515253282	278.94610824633486	0.0	-800.6396737992635	0.0	-0.001572065109400496	0.0	0.9999999986730487	0.0	-5.15165219966633e-05	0.0	0.0	-0.005903358573814703	0.0	0.0	-0.0061329737861378795	0.0	800.6396737992635	88.50190029976685	0.0	-0.0008493713447846317	-1.8962790661378885	0.0	-0.11078070552905746	0.1899512216699408
3.055	88.49233524709139	0.0	-0.011174551995169348	279.3885939061623	0.0	-800.639679289681	0.0	-0.0017452475158947099	0.0	0.9999999984496591	0.0	-5.568425509285461e-05	0.0	0.0	-0.006380945607598637	0.0	0.0	-0.00663295037047017	0.0	800.639679289681	88.49233594281147	0.0	-0.0013192924018280085	-1.9295064432654385	0.0	-0.07780493803292707	0.19310744995947596
3.06	88.48260396295365	0.0	-0.012280634677339185	279.83103132778706	0.0	-800.63968673296	0.0	-0.0018239668086312154	0.0	0.9999999981901715	0.0	-6.01640378954361e-05	0.0	0.0	-0.006894290903906684	0.0	0.0	-0.007155478371002742	0.0	800.63968673296	88.48260480010543	0.0	-0.0016336931318769383	-1.9629951510916992	0.0	-0.04862921831991933	0.19635974037678727
3.065	88.47270457028246	0.0	-0.013267147103848681	280.2734196739795	0.0	-800.6396954001854	0.0	-0.0018219551121226017	0.0	0.9999999979045976	0.0	-6.47368093645044e-05	0.0	0.0	-0.007418291916639855	0.0	0.0	-0.007677430062937291	0.0	800.6396954001854	88.47270554648433	0.0	-0.0018122657971942342	-1.9967513093431442	-1.4632604692129778e-38	-0.02349331698674601	0.19968895130443748
3.07	88.46263573091066	0.0	-0.014121820415718956	280.7157581008285	0.0	-800.6397046631827	0.0	-0.001752978934315704	0.0	0.9999999976044578	0.0	-6.921800825870976e-05	0.0	0.0	-0.007931799485385402	0.0	0.0	-0.008179621535495443	0.0	800.6397046631827	88.4626368382153	0.0	-0.001875405408519277	-2.0307769537443696	-4.499862174049114e-36	-0.002449891198780306	0.20307784314952104
3.075	88.45239610085511	0.0	-0.01483829680389169	281.1580457576893	1.2927767958659189e-42	-800.6397139956524	0.0	-0.0016304130083740233	0.0	0.9999999973020536	-8.607473039345723e-48	-7.345705518390103e-05	4.9628744495522005e-42	5.687035251007543e-40	-0.008417558482564527	-4.2761630096827993e-44	0.0	-0.008646700456710739	0.0	800.6397139956524	88.45239732625099	8.779562815277867e-40	-0.0018433915957619565	-2.0650729448185245	2.985576221484553e-35	0.014597500629354925	0.2065124537272771
3.08	88.44198432907422	0.0	-0.015415195133258388	281.60028178715953	4.028590383017363e-40	-800.6397229709619	0.0	-0.0014668878377899265	0.0	0.9999999970095983	1.6204276728836193e-45	-7.733594539435379e-05	1.5660852697008415e-39	1.794601542185445e-37	-0.008862046560335297	-1.3693033394730472e-41	0.0	-0.009066932867332907	0.0	800.6397229709619	88.44198565546336	2.7701538069516912e-37	-0.0017357060484918978	-2.099640883761822	5.244891156945906e-35	0.02786520006582579	0.2099825780901557
3.085	88.43139905372404	0.0	-0.015855208731755104	282.042465325038	2.5522727642683084e-39	-800.6397312568714	0.0	-0.0012740283068057314	0.0	0.9999999967383666	7.930888721859837e-45	-8.076705655236916e-05	2.4017335036654177e-39	2.752183891699753e-37	-0.009255222938353083	-2.1319766368779697e-41	0.0	-0.00943191509213374	0.0	800.6397312568714	88.43140046115789	4.247773126706211e-37	-0.0015705209547364966	-2.1344826731784394	-2.555756254708938e-35	0.03765450444227556	0.21348147797417394
3.09	88.42063890350965	0.0	-0.016164264067968004	282.48459550027763	4.475799095036832e-39	-800.6397386079152	0.0	-0.0010622795879721416	0.0	0.99999999649799	1.8600996727088487e-44	-8.369036795387368e-05	1.3812394751187293e-39	1.5827838632682658e-37	-0.009590209750503124	-1.1114859215364297e-41	0.0	-0.00973623577740224	0.0	800.6397386079152	88.42064037049622	2.4426015694520374e-37	-0.0013643522842651447	-2.1695995182630177	4.924252319359731e-35	0.0443232703518004	0.21700522164090424
3.095	88.40970250216111	0.0	-0.016350743871591862	282.92667143495555	7.251392358478898e-39	-800.6397448565515	0.0	-0.0008407968163012447	0.0	0.9999999962959787	2.1519957448778044e-44	-8.607037183985853e-05	7.195420113307092e-39	8.245344175821112e-37	-0.009862938107269034	-6.850197869555425e-41	0.0	-0.009977106322412728	0.0	800.6397448565515	88.40970400690462	1.2722899191071678e-36	-0.0011318317484844656	-2.204991865690905	4.375859218570327e-34	0.04826367440189352	0.2205520008984237
3.1	88.39858847106291	0.0	-0.01642478503915087	283.3686922442625	2.0376423745729404e-38	-800.6397499034508	0.0	-0.0006173946503301584	0.0	0.9999999961374662	4.096113950988267e-44	-8.789278479774277e-05	2.32049224974544e-38	2.659088276464526e-36	-0.010071771250092544	-2.2902087369017286e-40	0.0	-0.010153976861202094	0.0	800.6397499034508	88.39858999253293	4.102564840571704e-36	-0.0008855886195836743	-2.2406598451543878	4.284532856522085e-34	0.04988075782322639	0.22412149900641626
3.105	88.38729543061643	0.0	-0.01639766372033469	283.81065703649966	4.483274684731213e-38	-800.6397537073574	0.0	-0.0003985520050055985	0.0	0.9999999960251825	9.483405870209912e-44	-8.916118172914862e-05	2.8488593189919034e-38	3.2645523460540674e-36	-0.010217118832495943	-2.802041634691541e-40	0.0	-0.010268153600218582	0.0	800.6397537073574	88.38729694939312	5.036059470260664e-36	-0.0006362321013983437	-2.276603312849801	-2.523697068448939e-35	0.04957570417714353	0.22771430333914797
3.11	88.37582200224107	0.0	-0.016281260698512653	284.25256491308124	7.007842986718619e-38	-800.6397562750956	0.0	-0.00018945398252377156	0.0	0.9999999959596041	1.0664513141146423e-43	-8.989370374516185e-05	2.6292368556182397e-38	3.0128835387646196e-36	-0.010301059672668316	-2.5861862942631436e-40	0.0	-0.010322428168271369	0.0	800.6397562750956	88.37582350111347	4.647219427040667e-36	-0.0003924005769697525	-2.3128217889338982	2.1810355378195936e-34	0.04773350580783873	0.23133143139106938
3.115	88.36416680999218	0.0	-0.016087612362747413	284.69441496854665	9.770775002048427e-38	-800.6397576519795	0.0	5.932999704092183e-06	0.0	0.9999999959392453	1.0410628210986112e-43	-9.011991558838489e-05	4.042218141091858e-38	4.632040842469253e-36	-0.010326981640558447	-4.05509430200569e-40	0.0	-0.010320728489056885	0.0	800.6397576519795	88.36416827431988	7.143744851928232e-36	-0.00016086965820170297	-2.3493146019608466	3.964230541971919e-34	0.04471311377035263	0.2349740062545109
3.12	88.3523284814221	0.0	-0.01582853832399997	285.1362062905772	1.3613344128790913e-37	-800.6397579128399	0.0	0.00018476348890055188	0.0	0.9999999959610297	9.872191940881985e-44	-8.987787295996886e-05	4.45819295643379e-38	5.108712874057198e-36	-0.010299245598305142	-4.478475498372021e-40	0.0	-0.010267797648446316	0.0	800.6397579128399	88.35232989928309	7.877834666994692e-36	5.330057751912806e-05	-2.386080935603256	-5.140930176362714e-35	0.04084081399998137	0.2386430431279632
3.125	88.34030564870346	0.0	-0.015515345581291402	285.577937960017	1.749982405954841e-37	-800.6397571538814	0.0	0.0003451988053558051	0.0	0.9999999960207034	1.0651533518025416e-43	-8.921146236477307e-05	4.0160592616187763e-38	4.6020649731536825e-36	-0.010222880568943942	-3.98351189419399e-40	0.0	-0.010168905475247087	0.0	800.6397571538814	88.34030701086769	7.09559813806135e-36	0.0002465903082915435	-2.4231197540082405	-7.467739929806816e-35	0.03640603895989629	0.24233932289122428
3.13	88.32809694986311	0.0	-0.01515859959107256	286.0196090508977	2.096220252671635e-37	-800.6397554854519	0.0	0.0004862839780078119	0.0	0.9999999961132443	9.240721050517156e-45	-8.816803638233956e-05	4.1587014737502677e-38	4.7655209094884027e-36	-0.010103312758418215	-4.191077139258381e-40	0.0	-0.010029595377323687	0.0	800.6397554854519	88.32809824963209	7.346603821923235e-36	0.000416830314977337	-2.4604298536184883	5.548500600780849e-35	0.03165937547116873	0.24606335323717593
3.135	88.31570102939844	0.0	-0.014767957373116198	286.46121863046955	2.4650677184777536e-37	-800.6397530257739	0.0	0.0006078202883153663	0.0	0.9999999962332407	-4.043548642495337e-44	-8.679636199185984e-05	4.175102436261592e-38	4.784315027117807e-36	-0.009946130450935382	-4.198947059878705e-40	0.0	-0.00985546769120921	0.0	800.6397530257739	88.3157022623524	7.374542049240669e-36	0.0005630059038701915	-2.4980099565487044	-7.248064800515143e-35	0.026812159339753994	0.24981538453235663
3.14	88.30311653868766	0.0	-0.014352056051932748	286.90276575923303	2.8278553631303835e-37	-800.639749895669	0.0	0.0007102383809143395	0.0	0.9999999963752176	-7.126981761714325e-44	-8.514489239820198e-05	3.839210773897542e-38	4.399411528645774e-36	-0.009756885974814436	-3.8275434212161314e-40	0.0	-0.009651999382836226	0.0	800.639749895669	88.30311770237788	6.780285595960734e-36	0.0006850628138781882	-2.5358586892527533	-7.537680072374504e-35	0.022037495081045546	0.2535954444198109
3.145	88.29034213660971	0.0	-0.013918447741045885	287.34424949097274	3.161302304768914e-37	-800.6397462142111	0.0	0.000794475422240946	0.0	0.9999999965339008	-1.5208036952287698e-43	-8.326034299085028e-05	3.9154289011510557e-38	4.486751068495583e-36	-0.009540932519398556	-3.909955608736358e-40	0.0	-0.009424398939729824	0.0	800.6397462142111	88.29034323022684	6.91389121067043e-36	0.0007837207391131135	-2.573974569544646	1.5802638296204096e-34	0.017472314769138072	0.2574033870493148
3.15	88.27737648993892	0.0	-0.013473577037239287	287.78566887279476	3.5315635676237298e-37	-800.639742095316	0.0	0.0008618592882995632	0.0	0.9999999967044121	-2.4402426679461788e-43	-8.118657785755581e-05	4.635392107714685e-38	5.311768137992477e-36	-0.009303296538916888	-4.592074001819785e-40	0.0	-0.009177494440961255	0.0	800.639742095316	88.27737751398271	8.184005156786022e-36	0.00086029929205798	-2.6123560721832937	2.5664898958669515e-34	0.013220140797086232	0.2612389523022098
3.155	88.26421827339549	0.0	-0.013022790874372256	288.2270229451648	3.972394566726122e-37	-800.6397376451285	0.0	0.0009140014834063681	0.0	0.9999999968824037	-3.4853481353210277e-43	-7.896376284336349e-05	5.167844718365231e-38	5.921913889366182e-36	-0.009048580700197132	-5.075557531786194e-40	0.0	-0.008915652303621848	0.0	800.6397376451285	88.26421922936383	9.122715558120516e-36	0.0009165588431602418	-2.6510016614497074	8.692144955783918e-35	0.009354398173718219	0.26510181654930814
3.16	88.25086616969588	0.0	-0.012570377556355669	288.66831074194636	4.432522432038463e-37	-800.6397329601944	0.0	0.0009527008587862423	0.0	0.9999999970641325	-4.705937104826286e-43	-7.662778414472692e-05	5.128528096367607e-38	5.8768603566158105e-36	-0.008780897258458343	-5.042568552879981e-40	0.0	-0.008642723611887145	0.0	800.6397329601944	88.25086705980482	9.051941000359714e-36	0.0009545591984300407	-2.68990978550742	-6.494998021094477e-35	0.005922008241049608	0.268991630433926
3.165	88.23731886954882	0.0	-0.0121196266035726	289.1095312904395	4.873862911001824e-37	-800.6397281262684	0.0	0.0009798584125497861	0.0	0.9999999972464871	-5.9542656281295455e-43	-7.420988519140582e-05	4.897072485231012e-38	5.6116317588860673e-36	-0.008503826447041474	-4.846694080162467e-40	0.0	-0.008362014854089687	0.0	800.6397281262684	88.23731969649064	8.64209098578961e-36	0.0009765360996665061	-2.7290789114083225	-9.257199975959995e-35	0.0029471075918808378	0.27290805026852527
3.17	88.22357507138582	0.0	-0.011672905732782225	289.55068361141906	5.295646313331936e-37	-800.6397232177143	0.0	0.0009974042165594697	0.0	0.9999999974269769	-7.112963199382458e-43	-7.173650855009752e-05	4.6676907701559156e-38	5.348779671176796e-36	-0.00822039836090033	-4.652113340422521e-40	0.0	-0.008076279593702638	0.0	800.6397232177143	88.22357583812763	8.236007390795464e-36	0.0009847968496451186	-2.7685075652148803	-5.67946349292068e-35	0.0004347490295895549	0.2768507599350008
3.175	88.2096334810085	0.0	-0.011231748734227016	289.9917667191718	5.705137760261001e-37	-800.6397182973609	0.0	0.0010072358477405078	0.0	0.9999999976036918	-8.260404673599272e-43	-6.922929940431433e-05	4.619431178735558e-38	5.293478250461281e-36	-0.007933093355366643	-4.611210567698665e-40	0.0	-0.0077877277784535745	0.0	800.6397182973609	88.20963419063082	8.14956666718251e-36	0.0009816335973680144	-2.8081932377993724	4.850055094671399e-35	-0.002138452748497381	0.2808194052020316
3.18	88.19549281126622	0.0	-0.010796950875995763	290.43277962153115	6.1193006650565056e-37	-800.6397134167579	0.0	0.001011168546761822	0.0	0.9999999977752442	-9.44486773931831e-43	-6.670525142104587e-05	4.82985254368482e-38	5.5346033726322514e-36	-0.007643858761238906	-4.774173224537724e-40	0.0	-0.007498049327924429	0.0	800.6397134167579	88.19549346683912	8.519424547255321e-36	0.0009692542382667336	-2.848118831694535	-1.6057338229388064e-35	-0.01288596340304521	0.2848147982023734
3.185	88.18115171988248	0.0	-0.010338110407575615	290.8737213197701	6.534269117932138e-37	-800.6397086140707	0.0	0.0009827255763456546	0.0	0.9999999979406193	-1.063225626558588e-42	-6.417818603247929e-05	4.5357737968265915e-38	5.1976139476147076e-36	-0.0073542783979818295	-4.554101179367984e-40	0.0	-0.007216519188203592	0.0	800.6397086140707	88.1811523204506	7.999395180665624e-36	0.0009805023735492693	-2.8885162564260254	-6.696602384583061e-35	0.08138316847157263	0.2889662503433212
3.19	88.16660753310336	0.0	-0.009303081320049044	291.31459080433166	6.934205968234246e-37	-800.6397017133371	0.0	0.00024210300087443987	0.0	0.9999999980358523	-1.1313290936589945e-42	-6.267671197280968e-05	4.5357737966618296e-38	5.197613946247152e-36	-0.007182222144300815	-4.554101177633165e-40	0.0	-0.007147161787415804	0.0	800.6397017133371	88.16660800658748	7.998075792423665e-36	0.0017489048632778703	-2.929080014903936	8.379761692804371e-36	0.15098129951344325	0.29329686473797184
3.195	88.15186108119175	0.0	-0.008744779655545001	291.7553870625502	7.334076391180014e-37	-800.6396914279103	0.0	-0.00035713316300791504	0.0	0.9999999980249956	-1.1234847931499675e-42	-6.28496549114396e-05	4.5357737966813173e-38	5.197613946404694e-36	-0.0072020399453	-4.554101177830915e-40	0.0	-0.00724947290223836	0.0	800.6396914279103	88.15186148400328	7.996738059279099e-36	0.0023358484891627504	-2.969602951304277	-2.6938814954164054e-37	0.09996835692214313	0.29712851362299086
3.2	88.13691120056254	0.0	-0.008589748231369888	292.1961090802089	7.733879466647947e-37	-800.6396786377288	0.0	-0.0008193624413286605	0.0	0.9999999979297084	-1.0555166998856935e-42	-6.434814439024408e-05	4.535773796844647e-38	5.1976139477693925e-36	-0.007373754191207922	-4.55410117956685e-40	0.0	-0.0074842029511366995	0.0	800.6396786377288	88.13691157615482	7.995381874594857e-36	0.0027531451923679885	-3.010402066795592	-2.7338759006358127e-37	0.06748795843194448	0.30111584528716656
3.205	88.12175666990827	0.0	-0.008763553946504373	292.6367558372937	8.133614269263008e-37	-800.6396641533742	0.0	-0.001152231251850144	0.0	0.9999999977663607	-9.425532606276009e-43	-6.683864422713049e-05	4.5357737970935125e-38	5.197613950037657e-36	-0.007659144450885274	-4.554101182542574e-40	0.0	-0.007814292889907141	0.0	800.6396641533742	88.12175705406752	7.99400712700766e-36	0.0030163235909416264	-3.0514474933655817	-4.9825188811004304e-37	0.03840188242625621	0.30516891239674093
3.21	88.10639626753789	0.0	-0.009193223594721411	293.07732630768	8.533280058601245e-37	-800.6396487012423	0.0	-0.001365889730741394	0.0	0.999999997549374	-7.987091779335204e-43	-7.000996652370669e-05	4.5357839466154547e-38	5.197625583105145e-36	-0.008022551217875337	-4.554109240998898e-40	0.0	-0.008205591474165852	0.0	800.6396487012423	88.10639669110913	7.992631589655965e-36	0.00314342817159221	-3.092761021175505	1.2864590970925254e-36	0.023663521646088006	0.3092851547740248
3.215	88.09082876353213	0.0	-0.009809223856837296	293.5178194590814	8.933090272888422e-37	-800.6396329132998	0.0	-0.0014723225058538001	0.0	0.9999999972931546	-6.367504096474736e-43	-7.35787331385977e-05	4.543396268221619e-38	5.206348664138844e-36	-0.008431501749130408	-4.560427623716467e-40	0.0	-0.008627380802503594	0.0	800.6396329132998	88.09082925323963	8.004630893054564e-36	0.0031539993773811465	-3.1341463829280753	1.2783005839681105e-36	-0.07230310998910076	0.3134980269369368
3.22	88.07505414035792	0.0	-0.011293610652534869	293.95823423753984	9.333285745333225e-37	-800.6396187170283	0.0	-0.0020701953979375557	0.0	0.9999999969630943	-4.388043857941614e-43	-7.793552258439255e-05	4.543388865026047e-38	5.206340184406861e-36	-0.008930753045505824	-4.560421230844932e-40	0.0	-0.009220448097849733	0.0	800.6396187170283	88.07505483080226	8.003184457144545e-36	0.00243474018511887	-3.1757646142636986	-5.136623858663074e-37	-0.16066469672635053	0.3179826100588463
3.225	88.0590700010539	0.0	-0.013067866709240485	294.3985696396352	9.733408737184803e-37	-800.6396084572012	0.0	-0.002559991395251938	0.0	0.9999999964916295	-1.7386165117495595e-43	-8.376691280032679e-05	4.5433888652047276e-38	5.206340189725473e-36	-0.00959898114382482	-4.560421239445337e-40	0.0	-0.009953831610538448	0.0	800.6396084572012	88.05907095458822	8.001732031878209e-36	0.0016850062985009524	-3.2178213052617366	-2.9218001112482754e-37	-0.14245567866709735	0.3220973078586788
3.23	88.04287492111226	0.0	-0.01491681089486789	294.83882459558987	1.013345862913729e-36	-800.6396017067074	0.0	-0.00285187244857514	0.0	0.9999999958985751	1.3525219993123653e-43	-9.057050939090139e-05	4.5433888652178904e-38	5.2063401959308605e-36	-0.010378615887087472	-4.5604212502636954e-40	0.0	-0.010770832885603425	0.0	800.6396017067074	88.04287617875363	8.0002604433971e-36	0.0010313653441316884	-3.260124049255353	-2.962411883594983e-37	-0.12103757414869809	0.3262370137015253
3.235	88.02646772126697	0.0	-0.01675799664831287	295.2789980479441	1.0533434460339136e-36	-800.6395979824625	0.0	-0.002970125788853262	0.0	0.9999999952096832	4.6742212924786535e-43	-9.788157031264714e-05	4.5433888649975826e-38	5.2063402025991605e-36	-0.011216401759966688	-4.560421262830242e-40	0.0	-0.011621711247224706	0.0	800.6395979824625	88.02646931516634	7.998769583742498e-36	0.0004743413695095373	-3.3026616047462674	-3.0010632877923093e-37	-0.10185773242203845	0.3304231933917374
3.24	88.00984720917947	0.0	-0.018522781752010775	295.719088933253	1.0933335264499484e-36	-800.6395968059944	0.0	-0.002940153110402155	0.0	0.9999999944562823	8.043625585895244e-43	-0.00010529762994632581	4.5433888645259717e-38	5.206340209363297e-36	-0.012066219599608125	-4.560421276573477e-40	0.0	-0.012464003068966232	0.0	800.6395968059944	88.0098491583825	7.997259343360425e-36	1.1675202109432805e-05	-3.345441711294465	-3.0399351477097003e-37	-0.08336549871318893	0.3346480247968684
3.245	87.99301218011877	0.0	-0.02015597974399384	296.1590961820061	1.1333160069814898e-36	-800.6395977157246	0.0	-0.0027874986354136633	0.0	0.9999999936741887	1.1306908404318737e-42	-0.0001124801161842646	4.543388863831043e-38	5.206340215914338e-36	-0.012889271900178705	-4.560421290840176e-40	0.0	-0.013262562605004627	0.0	800.6395977157246	87.99301448790386	7.995729611311566e-36	-0.00036105089235478573	-3.388467868633427	-3.066103226196569e-37	-0.06593289303876174	0.3389109269873962
3.25	87.9759614103497	0.0	-0.021615152057313708	296.5990187185427	1.1732907898890911e-36	-800.6396002765028	0.0	-0.0025370176262514404	0.0	0.9999999929012842	1.4338941269770154e-42	-0.00011915362121818893	4.543388862975304e-38	5.206340222001137e-36	-0.01365399925131538	-4.560421304939264e-40	0.0	-0.013989364617677157	0.0	800.6396002765028	87.97596406333155	7.9941802748359e-36	-0.0006498428279915594	-3.431744005701158	7.740818465323042e-38	-0.04982833256801614	0.34321057360449053
3.255	87.95869365795858	0.0	-0.022869680200348394	297.03885546095387	1.213257653613989e-36	-800.6396040860808	0.0	-0.002212243553855601	0.0	0.9999999921746566	1.704212651376248e-42	-0.00012510332664400023	4.543344770505389e-38	5.206289702247634e-36	-0.014335785276891144	-4.560357801589297e-40	0.0	-0.014623125712131898	0.0	800.6396040860808	87.95869662687677	7.992533654903481e-36	-0.0008618292889726961	-3.475272950230372	-1.870794675231012e-36	-0.03523323005586889	0.34754515475119324
3.26	87.94120766863236	0.0	-0.023899650326891318	297.47860532101276	1.2531829346504694e-36	-800.6396087797838	0.0	-0.0018348786272747101	0.0	0.9999999915278358	1.9342615279273077e-42	-0.0001301710443893881	4.5297575219331767e-38	5.190719867565664e-36	-0.0149165029587708	-4.5403138609091395e-40	0.0	-0.015148779718439892	0.0	800.6396087797838	87.9412109105078	7.96704720101655e-36	-0.0010048520167528815	-3.519056065065011	-1.0448081783341558e-35	-0.022254249186097055	0.351912643147098
3.265	87.92350218108736	0.0	-0.024694624655808274	297.9182672041403	1.2928340702901835e-36	-800.6396140332879	0.0	-0.0014244337638006151	0.0	0.9999999909885426	2.1186008166472044e-42	-0.00013425018791160477	4.4873738104573106e-38	5.1421517151572606e-36	-0.015383938378558957	-4.475610675293599e-40	0.0	-0.015556849932748442	0.0	800.6396140332879	87.92350564232775	7.890912701270618e-36	-0.0010871305990932294	-3.563093645273578	-1.703632994347995e-35	-0.010938574151281211	0.35631104357560145
3.27	87.9055759308216	0.0	-0.02525234611907742	298.3578400093977	1.3320756041412366e-36	-800.6396195637038	0.0	-0.0009980145413303766	0.0	0.9999999905772183	2.2532680581664016e-42	-0.00013727995511862506	4.441184291401003e-38	5.0892224271589886e-36	-0.01573112412949781	-4.4044273085019275e-40	0.0	-0.015842760038303018	0.0	800.6396195637038	87.90557955084324	7.808097552773492e-36	-0.0011169983577900024	-3.6073852534613593	-1.5883624870466086e-35	-0.0012857252573937512	0.36073854825870655
3.275	87.88742765331548	0.0	-0.025577431327021585	298.7973226294971	1.3709361859800868e-36	-800.6396251296192	0.0	-0.0005702106107060938	0.0	0.9999999903063514	2.3404362867082673e-42	-0.00013923917025349738	4.405132890542948e-38	5.047910565902384e-36	-0.015955633648416588	-4.34672640028433e-40	0.0	-0.0160061133454382	0.0	800.6396251296192	87.88743136827672	7.743116265567818e-36	-0.0011026855681927912	-3.6519298520168775	-6.965465449038634e-36	0.006743475832380339	0.3651936078098618
3.28	87.86905608700575	0.0	-0.025680083131408817	299.2367139508264	1.409611913111794e-36	-800.6396305301765	0.0	-0.00015308271300305565	0.0	0.9999999901805287	2.3796665860166602e-42	-0.00014013997194923226	4.4029680342862256e-38	5.045429824327895e-36	-0.016058857920111552	-4.343766942644342e-40	0.0	-0.01604996831229564	0.0	800.6396305301765	87.86905983330725	7.737693207622109e-36	-0.0010521482541057507	-3.6967259246400395	9.021575966403012e-37	0.013218029235408395	0.36967495557858154
3.285	87.85045997584719	0.0	-0.025574855635333425	299.67601285348786	1.4483248643419536e-36	-800.6396356033208	0.0	0.00024376251178862316	0.0	0.9999999901971242	2.3745771166242487e-42	-0.0001400215580025205	4.408403533850699e-38	5.051658448065618e-36	-0.01604528868121441	-4.3523459683954355e-40	0.0	-0.015980135496650658	0.0	800.6396356033208	87.85046369316079	7.745605867001864e-36	-0.0009729383195620357	-3.7417715735834634	3.5341441259586234e-36	0.0182298271238605	0.3741815980974243
3.29	87.83163807172934	0.0	-0.025279497182096034	300.1152182113449	1.487109476371232e-36	-800.6396402235321	0.0	0.0006130390635341854	0.0	0.9999999903474007	2.3277319644002078e-42	-0.0001389442053832481	4.42544667411346e-38	5.071188447526856e-36	-0.015921833163750163	-4.378738186213687e-40	0.0	-0.01580451274156485	0.0	800.6396402235321	87.83164170539416	7.773884908447444e-36	-0.0008721021228684626	-3.7870495031784897	8.053502815349073e-36	0.015283656366789786	0.3787080343704948
3.295	87.81258913666173	0.0	-0.02481389305129083	300.55432889207754	1.526072321506469e-36	-800.6396442990986	0.0	0.0009495975816502147	0.0	0.999999990617882	2.2394345092850476e-42	-0.0001369836969651889	4.4530066900937945e-38	5.1027698981894624e-36	-0.015697175445502726	-4.423759978112056e-40	0.0	-0.015532473073242917	0.0	800.6396442990986	87.812592639387	7.82060122461298e-36	-0.0007561061457261164	-3.8326828406110756	8.956553490874825e-36	0.05794675271971966	0.38331208672392975
3.3	87.79331113707356	0.0	-0.02383873538832029	300.993343749715	1.565291724385613e-36	-800.6396473240804	0.0	0.0008851936671319818	0.0	0.9999999909643474	2.125902849656134e-42	-0.00013443065416297027	4.4732597113316497e-38	5.1259781487052005e-36	-0.015404618287841896	-4.4547807790052606e-40	0.0	-0.015278883767351063	0.0	800.6396473240804	87.79331437330768	7.85444589959009e-36	-0.00023451024542578321	-3.878652389379056	2.9957516076658552e-36	0.1506097834690378	0.38815754101282707
3.305	87.77380308356898	0.0	-0.02266275121963238	301.43226164622985	1.6045595991516133e-36	-800.6396462032222	0.0	0.00043401885663892445	0.0	0.9999999911814421	2.0532193833323512e-42	-0.00013280581075206553	4.4732597116711075e-38	5.125978147257679e-36	-0.015218424946550539	-4.454780775136695e-40	0.0	-0.015154546523778543	0.0	800.6396462032222	87.77380600690559	7.852700586690551e-36	0.0006509915367962198	-3.924643981348434	-9.45237530285364e-37	0.1673145741470667	0.392820882172225
3.31	87.7540650794517	0.0	-0.021848108712360696	301.87108142672264	1.64381869597941e-36	-800.639641128422	0.0	9.631194175819253e-05	0.0	0.9999999912662203	2.0245971896795242e-42	-0.00013216595983246625	4.4732597118015985e-38	5.125978146687529e-36	-0.015145103431485937	-4.454780773626083e-40	0.0	-0.015126955184881271	0.0	800.639641128422	87.75406778890552	7.850934708608052e-36	0.0013480923291679578	-3.9707113155410907	-4.000814960497988e-37	0.12502125810466533	0.3972679028860013
3.315	87.7340960282	0.0	-0.02133721596636623	302.30980193917605	1.6830689887225368e-36	-800.6396330213432	0.0	-0.00013445950565954494	0.0	0.9999999912570835	2.027690420780429e-42	-0.0001322351085590052	4.4733040406337077e-38	5.126028943866264e-36	-0.015153027291934027	-4.454847912240131e-40	0.0	-0.015165474995829807	0.0	800.6396330213432	87.7340986030506	7.849225948573801e-36	0.0018658400021998105	-4.016976581918405	2.7141261246939326e-38	0.06992492279006449	0.4017585139671351
3.32	87.71389525248935	0.0	-0.02132091936360169	302.74842201715694	1.722320074553201e-36	-800.6396229299407	0.0	-0.0004825498026037225	0.0	0.9999999911768439	2.054780493646777e-42	-0.00013284053080293615	4.4751481152759473e-38	5.128142098485228e-36	-0.01522240357134457	-4.457646221052445e-40	0.0	-0.015303715331300129	0.0	800.6396229299407	87.71389782140025	7.850653684419077e-36	0.0019830019915230224	-4.063326293202134	-3.0350697887403317e-38	-0.04017100599246252	0.4063524858389602
3.325	87.69346208377625	0.0	-0.022126270939248183	303.1869405214298	1.7615687789804668e-36	-800.6396141440205	0.0	-0.0011352009680982266	0.0	0.9999999909001038	2.147288678328708e-42	-0.00013490768442237406	4.475147571461281e-38	5.1281414776601514e-36	-0.01545928192946529	-4.457645388690261e-40	0.0	-0.015628926453156097	0.0	800.6396141440205	87.69346486177858	7.848823917503939e-36	0.001534773468232867	-4.1099831385622565	1.1116371932753434e-37	-0.09721033431553071	0.41111325992193193
3.33	87.67279438736081	0.0	-0.02314830267084299	303.62535627510084	1.8008157295322367e-36	-800.6396075433574	0.0	-0.001581607865331012	0.0	0.9999999904305363	2.301130562690443e-42	-0.00013834464045205648	4.476610614760219e-38	5.129818005773212e-36	-0.0158531280828873	-4.4599269315972016e-40	0.0	-0.01608202373079691	0.0	800.6396075433574	87.6727974363215	7.849539501922397e-36	0.0011098204169801614	-4.15699990256968	-1.5832118654661168e-36	-0.0823211230731607	0.4157814925807588
3.335	87.65189114631117	0.0	-0.024295978142926312	304.06366810331315	1.84003553776541e-36	-800.6396029988917	0.0	-0.0018422042471566151	0.0	0.999999989824104	2.494227510705307e-42	-0.0001426608402066578	4.4686100174872347e-38	5.120650001384644e-36	-0.01634772814671792	-4.44698817109387e-40	0.0	-0.016609776372612656	0.0	800.6396029988917	87.65189451073431	7.833642665440713e-36	0.0007130074647887648	-4.204206631086057	-2.7569528227262686e-36	-0.07627884546961347	0.4204898555153757
3.34	87.6307513009112	0.0	-0.025488840677790118	304.50187482591	1.8791700269036854e-36	-800.6396003600076	0.0	-0.0019395410565272292	0.0	0.9999999891338931	2.7067350815157677e-42	-0.00014741960336685394	4.4642981745338036e-38	5.115708998813427e-36	-0.016893042242017493	-4.439868035081253e-40	0.0	-0.01716541395626943	0.0	800.6396003600076	87.63075500720026	7.824196379841234e-36	0.0003481413483598446	-4.251631461969889	-2.8292620156474206e-36	-0.06957406336354342	0.4252200681847592
3.345	87.60937377095468	0.0	-0.026657616786019474	304.9399752572578	1.9182532883790486e-36	-800.6395994594506	0.0	-0.001897259023135642	0.0	0.9999999884113164	2.921818805089099e-42	-0.00015224219942854922	4.4581392520108866e-38	5.108651399071215e-36	-0.017445671049484236	-4.429365581743703e-40	0.0	-0.01770893862961336	0.0	800.6395994594506	87.60937782667378	7.811496110218208e-36	1.8071647447140717e-05	-4.299278018313639	2.0229392553695946e-36	-0.06238892681869936	0.42997306726054885
3.35	87.58775745776083	0.0	-0.027744391756609938	305.37796820618644	1.95736585504377e-36	-800.6396001179494	0.0	-0.001739175136591228	0.0	0.9999999877055636	3.1257444158319156e-42	-0.00015680940583064946	4.476722905120858e-38	5.1299467033022025e-36	-0.01796903435774419	-4.4623997424659244e-40	0.0	-0.018207175605417188	0.0	800.6396001179494	87.58776185155548	7.842122781081206e-36	-0.0002752223199402262	-4.347149950634352	5.4934475482985195e-36	-0.05489035939900095	0.4347496480142934
3.355	87.56590124417036	0.0	-0.028702437909698793	305.8158524758912	1.996640300015526e-36	-800.6396021483779	0.0	-0.0014885299099752045	0.0	0.9999999870620327	3.3074110898145295e-42	-0.00016086096366287568	4.485580002698045e-38	5.140096194998227e-36	-0.01843330869208053	-4.478394399192737e-40	0.0	-0.018633608013020025	0.0	800.6396021483779	87.56590594667487	7.855677520038311e-36	-0.0005305662724898408	-4.395250365504921	9.674818418153433e-38	-0.04723395215237661	0.4395504160128515
3.36	87.5438039984435	0.0	-0.02949575947705547	306.25362686385785	2.0359047418710104e-36	-800.6396053596203	0.0	-0.0011673806633369743	0.0	0.9999999865204326	3.45683342930483e-42	-0.0001641933324460284	4.4823505571706224e-38	5.1363955271480525e-36	-0.018815170031235815	-4.472379724342095e-40	0.0	-0.018968037938491982	0.0	800.6396053596203	87.54380896424708	7.848040805504147e-36	-0.0007475404471959505	-4.443581166954402	-1.7811309531080929e-37	-0.03956610456757626	0.44437573137990444
3.365	87.5214645795979	0.0	-0.030098416668966465	306.69129016181466	2.0751446413198748e-36	-800.6396095602756	0.0	-0.0007961184716959111	0.0	0.9999999861130269	3.567172196235348e-42	-0.00016665614144394453	4.4863480065021723e-38	5.140976270044228e-36	-0.019097387157752364	-4.480074513606565e-40	0.0	-0.019196109080594888	0.0	800.6396095602756	87.52146975013686	7.853035414550847e-36	-0.0009264362414560571	-4.492143048960173	-1.7072982191900538e-36	-0.03202505335719861	0.4492257202828411
3.37	87.49888184215843	0.0	-0.030493660443606692	307.12884115571484	2.1143838120526207e-36	-800.6396145620845	0.0	-0.00039313387846153804	0.0	0.999999985863369	3.634207502790607e-42	-0.0001681475392493518	4.475298481015453e-38	5.12831444793618e-36	-0.019268288759796942	-4.458639576511594e-40	0.0	-0.019308733640692164	0.0	800.6396145620845	87.49888714926864	7.83167272290014e-36	-0.001068215797615381	-4.540920912730684	-3.293630100012022e-36	-0.0310811534265214	0.45410272817693126
3.375	87.47605463996688	0.0	-0.03067295057344656	307.56627862574294	2.1535248474244538e-36	-800.6396201831819	0.0	2.5408053633134756e-05	0.0	0.9999999857856903	3.6546190221796616e-42	-0.00016860890386382926	4.4738930651849447e-38	5.126703960565098e-36	-0.01932115725099897	-4.45619450161305e-40	0.0	-0.01930145476949806	0.0	800.6396201831819	87.47606000978499	7.827170752357665e-36	-0.0011744658744133687	-4.59003474718737	1.2155125547569168e-36	0.013324195219728314	0.45900540862353334
3.38	87.45298105625544	0.0	-0.03028593428235146	308.0036013404251	2.192701542273534e-36	-800.6396258592272	0.0	9.540667354930636e-05	0.0	0.9999999858547048	3.6363358079123264e-42	-0.0001681990958129315	4.481688765941375e-38	5.135637175440561e-36	-0.019274196706879236	-4.471161462857721e-40	0.0	-0.019274122770839272	0.0	800.6396258592272	87.45298629619593	7.83874131395941e-36	-0.0008669083052631603	-4.639492116435188	1.2919268090407241e-36	0.11564120098541629	0.4640933094306533
3.385	87.42966001182432	0.0	-0.02956430501163924	308.4408080714378	2.231890033906836e-36	-800.6396282429187	0.0	-0.00024357605673438866	0.0	0.9999999858184183	3.6459974448052266e-42	-0.00016841467605153502	4.481690164019443e-38	5.135638777802856e-36	-0.01929890038286589	-4.471164160166857e-40	0.0	-0.01934390217104587	0.0	800.6396282429187	87.42966501038646	7.83665338973958e-36	-0.00011542801582199067	-4.688959527216715	-1.1572188273134247e-36	0.14608404705886174	0.46912345919471454
3.39	87.40609182805024	0.0	-0.02913026840478461	308.8778975788193	2.2710621588763125e-36	-800.6396272978333	0.0	-0.0004434501252667688	0.0	0.9999999856687554	3.685713391295453e-42	-0.00016930102669074628	4.4791030089649975e-38	5.1326741175291004e-36	-0.019400468685905056	-4.4661536053523954e-40	0.0	-0.01947094127405754	0.0	800.6396272978333	87.40609668106649	7.830018213413015e-36	0.00046561501199066725	-4.738420018634552	-1.0766058248177439e-36	0.09115725539652672	0.47392967746500214
3.395	87.38227582154957	0.0	-0.029088919545404473	309.3148686246661	2.3102014130926718e-36	-800.6396239489184	0.0	-0.0006690383556178137	0.0	0.9999999854531049	3.742546492264162e-42	-0.00017057003749473091	4.4784932455163484e-38	5.131975381730197e-36	-0.019545886614454423	-4.464970025025957e-40	0.0	-0.019662606644603908	0.0	800.6396239489184	87.38228066038245	7.826819077625309e-36	0.0007206778400855475	-4.787954898074058	-4.645272974210218e-37	-0.016983326740810226	0.4787985018708658
3.4	87.35821159064753	0.0	-0.029871835379949037	309.7517199722201	2.3493301289424603e-36	-800.6396212713134	0.0	-0.00122933848282921	0.0	0.9999999850372622	3.850961060460587e-42	-0.0001729908197077345	4.478492957103739e-38	5.131975054448641e-36	-0.01982328782639829	-4.464969464024552e-40	0.0	-0.020014786177899556	0.0	800.6396212713134	87.35821669728192	7.824663166534308e-36	0.00035250321820554174	-4.837767438390017	-6.1630889894576384e-37	-0.08287754503695899	0.48384772889224215
3.405	87.33389698997969	0.0	-0.030836392440758642	310.1884503745514	2.3884447108223752e-36	-800.639620399978	0.0	-0.0015722015483464408	0.0	0.9999999844177863	4.009694283723185e-42	-0.00017653551084021674	4.4780345506274566e-38	5.131449764058322e-36	-0.020229479515739033	-4.464059932149639e-40	0.0	-0.02046518874422048	0.0	800.639620399978	87.33390243399435	7.821684652555195e-36	-1.3227616543814186e-06	-4.887945479973865	1.587484495311217e-37	-0.06912674549495648	0.48884342607975884
3.41	87.30933109295174	0.0	-0.031889844439947905	310.6250585778201	2.4275662315742633e-36	-800.6396212555276	0.0	-0.0017226965764445034	0.0	0.9999999836754753	4.195887803616022e-42	-0.00018069148725565447	4.481720753589766e-38	5.1356738473711174e-36	-0.020705719340057178	-4.471592279260635e-40	0.0	-0.02095870496028001	0.0	800.6396212555276	87.30933691626508	7.825921346788848e-36	-0.0003377370997112254	-4.938295425965341	5.9641607812013974e-37	-0.06533389235686511	0.4938727592366348
3.415	87.28451292379603	0.0	-0.03295080561126864	311.06154332328356	2.4666945234512134e-36	-800.6396237431586	0.0	-0.0017074178739494286	0.0	0.9999999828856728	4.389486996487449e-42	-0.00018501085045256164	4.48381894465456e-38	5.1380782033343196e-36	-0.02120068191106587	-4.476020674986684e-40	0.0	-0.021447844150492522	0.0	800.6396237431586	87.28451914104616	7.827359612689757e-36	-0.0006536399735512007	-4.988849082627667	9.385319203338964e-37	-0.06092405864863953	0.4989221072487882
3.42	87.2594414799432	0.0	-0.03394979371947802	311.4979033470871	2.5058509281258752e-36	-800.6396277526808	0.0	-0.001553438833428579	0.0	0.9999999821183132	4.573536394803498e-42	-0.00018911300820869954	4.4890714140023705e-38	5.1440970959466253e-36	-0.021670754571937786	-4.4872701861284725e-40	0.0	-0.02189287159492844	0.0	800.6396277526808	87.25944807925426	7.83427788292359e-36	-0.000946000935557106	-5.039610639436158	5.225649868208821e-37	-0.05592365834840615	0.5039920917304278
3.425	87.23411573818893	0.0	-0.03482934896912306	311.9341373801857	2.5450182838656482e-36	-800.6396331591972	0.0	-0.001287402067313285	0.0	0.9999999814364832	4.733880905107061e-42	-0.00019268468988869878	4.4891980232540066e-38	5.144242184579936e-36	-0.02208003915145203	-4.487539252183821e-40	0.0	-0.022261685119895784	0.0	800.6396331591972	87.23412268286545	7.83222502641311e-36	-0.001211989929503054	-5.090583438175619	-2.6026637628397988e-37	-0.05038666863110781	0.5090832796056421
3.43	87.20853465782422	0.0	-0.03554380409674355	312.3702441482542	2.5841807653448606e-36	-800.6396398244541	0.0	-0.0009347910884490915	0.0	0.9999999808943706	4.859288093790339e-42	-0.00019547791348146668	4.4912405270318033e-38	5.1465827256781535e-36	-0.02240011900368444	-4.4920986293324575e-40	0.0	-0.022529483040368652	0.0	800.6396398244541	87.20854188918555	7.833490757366419e-36	-0.001449117246421683	-5.141769851889677	4.590685696332245e-37	-0.044395144992930326	0.5141961506925207
3.435	87.18269718548501	0.0	-0.036058769557096915	312.80622237163004	2.6233526776260055e-36	-800.639647598886	0.0	-0.0005193513644518783	0.0	0.9999999805352858	4.9414272401552754e-42	-0.00019730633593187976	4.4943997894411817e-38	5.150202976607104e-36	-0.022609640786876464	-4.4992183611386224e-40	0.0	-0.02267826624670592	0.0	800.639647598886	87.18270462678707	7.836678590809414e-36	-0.001655370342601348	-5.193316655056654	1.0251196972034588e-36	-0.04896035936146755	0.5193547438550805
3.44	87.15660226055084	0.0	-0.036350384937230584	313.24207076528444	2.6625506068386707e-36	-800.639656324313	0.0	-6.265476739783552e-05	0.0	0.9999999803901959	4.974403434512399e-42	-0.00019804034534824498	4.4990060400615033e-38	5.155481352393851e-36	-0.02269375207188106	-4.509686715222502e-40	0.0	-0.02269621551539727	0.0	800.639656324313	87.1566098217406	7.842362283916031e-36	-0.001829335540767638	-5.246489015454614	5.712149194337822e-37	0.03234347744176172	0.5246588709801727
3.445	87.13025777936035	0.0	-0.03584472779358821	313.6777880371966	2.701764189191719e-36	-800.6396646596928	0.0	-0.00018861658377344336	0.0	0.999999980369736	4.979065819430742e-42	-0.00019814362894278443	4.499980596023131e-38	5.1565981114813344e-36	-0.02270558750023337	-4.511881569231175e-40	0.0	-0.022750250186379238	0.0	800.6396646596928	87.13026514260918	7.841690056977796e-36	-0.0013161147225826408	-5.285043949260408	-4.113301646130038e-37	0.1307915341791603	0.5286662082167441
3.45	87.10380819358903	0.0	-0.03533146004252439	314.1133732341219	2.7409666879245828e-36	-800.639669561853	0.0	-0.0004123908976405078	0.0	0.9999999802128633	5.014621784084869e-42	-0.00019893376488217817	4.499980595628311e-38	5.1565981121943345e-36	-0.022796130411155618	-4.511881572062334e-40	0.0	-0.022868391476101303	0.0	800.639669561853	87.10381535668972	7.839309591547443e-36	-0.0006756809327777285	-5.2857482710204335	-5.0402735602954426e-37	0.11897422935036177	0.5287087066792546
3.455	87.07744446354774	0.0	-0.03511471837993474	314.548826340939	2.7801572986204526e-36	-800.6396717328445	0.0	-0.000504615816075315	0.0	0.9999999799885683	5.065215239636473e-42	-0.00020005806872022507	4.4999805950616695e-38	5.156598113208894e-36	-0.022924966143340258	-4.511881576110307e-40	0.0	-0.02301295325878463	0.0	800.6396717328445	87.07745154333567	7.83693686173749e-36	-0.0002736255294316919	-5.258095982193822	-4.732265914761606e-37	0.0009452317070489691	0.5258096067154517
3.46	87.0512385683604	0.0	-0.035790862142354225	314.98414801710516	2.8193360806080876e-36	-800.639673981606	0.0	-0.000976889519212661	0.0	0.9999999796048149	5.151124321432957e-42	-0.000201967167620883	4.499980594086469e-38	5.156598114931626e-36	-0.023143732767121603	-4.511881583036106e-40	0.0	-0.023292811491291875	0.0	800.639673981606	87.05124592381381	7.834578363355366e-36	-0.0006278757565817525	-5.225327703816637	-4.176397703244716e-37	-0.08427466557596916	0.5226007255212299
3.465	87.02518773785492	0.0	-0.036623432406395914	315.4193390591154	2.8585031055582245e-36	-800.6396780254304	0.0	-0.0011922239135542256	0.0	0.9999999790433386	5.275376136754811e-42	-0.00020472833092314232	4.499980592647005e-38	5.156598117423233e-36	-0.023460138781195232	-4.511881593169364e-40	0.0	-0.02363435848369801	0.0	800.6396780254304	87.0251954385335	7.832233826929744e-36	-0.0009903872154377706	-5.19563290617171	-8.689805541150882e-37	-0.07280542558881864	0.519614298549313
3.47	86.99927810876896	0.0	-0.03750053552641465	315.8544002063297	2.8976553860814338e-36	-800.639683886136	0.0	-0.0011869683339609345	0.0	0.9999999784212996	5.4110916152210566e-42	-0.00020774447425939168	4.498165460239372e-38	5.154518133332992e-36	-0.023805763355692913	-4.507572451751578e-40	0.0	-0.023974399863456192	0.0	800.639683886136	86.99928618050136	7.826743699304947e-36	-0.0013532944862682085	-5.168264601598575	-5.755529352691956e-37	-0.07208780142737607	0.5168767323381032
3.475	86.97350314343304	0.0	-0.03832615881260396	316.289332145	2.936791193863124e-36	-800.6396915457775	0.0	-0.0009973327331968332	0.0	0.9999999778430464	5.535491171810178e-42	-0.00021050955217470329	4.4992999738447964e-38	5.155818194473706e-36	-0.02412261795176611	-4.510284258531951e-40	0.0	-0.02426011464536832	0.0	800.6396915457775	86.9735115712063	7.826398382581049e-36	-0.001708649831594222	-5.141530376772607	-3.2156996904958885e-37	-0.06979316839561771	0.5142004054999391
3.48	86.94786212971357	0.0	-0.03902012881684186	316.7241355451484	2.9759118246540715e-36	-800.6397009471201	0.0	-0.0006584699052693927	0.0	0.9999999773993511	5.629840266258322e-42	-0.0002126068233256398	4.498343600577944e-38	5.154722274596677e-36	-0.0243629475280308	-4.507969649376357e-40	0.0	-0.0244487523779099	0.0	800.6397009471201	86.94787086129215	7.822427984681956e-36	-0.002048708600190799	-5.114700839550561	-1.0241772879815874e-36	-0.0659801046814508	0.5115126396513872
3.485	86.92235575659656	0.0	-0.03951770388014931	317.1588110779097	3.015015626977097e-36	-800.6397119950649	0.0	-0.00020399389234072981	0.0	0.9999999771651364	5.679249202354587e-42	-0.00021370561561819202	4.4965425874615086e-38	5.152658467150007e-36	-0.02448885985274076	-4.503580398807688e-40	0.0	-0.024507192323297747	0.0	800.6397119950649	86.9223647074662	7.817002308088792e-36	-0.002366110023081433	-5.087752336780227	-8.277164397755927e-37	-0.06108788278966571	0.5088119060108203
3.49	86.89698426112525	0.0	-0.03976904868181567	317.5933594168617	3.054097899613825e-36	-800.6397245592627	0.0	0.000334616364310456	0.0	0.9999999771969377	5.672563136758264e-42	-0.00021355675619256928	4.495567355403083e-38	5.151540933222599e-36	-0.02447180181869367	-4.501185278410967e-40	0.0	-0.02441133179614274	0.0	800.6397245592627	86.89699332095363	7.813025740645789e-36	-0.002654169737278848	-5.060786203557418	-1.7572036268412438e-36	-0.06694863952309207	0.5061229012646148
3.495	86.87174735684383	0.0	-0.039718400873507934	318.02778122771207	3.0931186187173216e-36	-800.639738477386	0.0	0.0009101891279795264	0.0	0.9999999775309744	5.6020550121138314e-42	-0.00021198682708157123	4.489861683776809e-38	5.145002712283278e-36	-0.024291901190231575	-4.487245927971848e-40	0.0	-0.024150581818183144	0.0	800.639738477386	86.87175638870502	7.800843416678241e-36	-0.0028870659609186674	-5.034185601525347	-1.5806309431655745e-36	0.04923928589578686	0.5034426400085777
3.5	86.84664289818635	0.0	-0.038678464721511194	318.46207719128995	3.1321171948992504e-36	-800.6397511209982	0.0	0.0006946913212832936	0.0	0.9999999779460254	5.5137369839872496e-42	-0.00021001977258479522	4.4898616848700584e-38	5.145002710517988e-36	-0.02406649334373856	-4.487245920522066e-40	0.0	-0.023951567414313646	0.0	800.6397511209982	86.84665148341615	7.798589071008017e-36	-0.0021994377315031535	-5.0075836194662795	-2.8439741834459944e-37	0.1467535553730154	0.5009733556983008
3.505	86.8216729029589	0.0	-0.03786414510410831	318.8962479668279	3.171104529565023e-36	-800.6397607567498	0.0	0.0006549130374582831	0.0	0.9999999782917902	5.439526789130692e-42	-0.0002083669334010105	4.489861685775266e-38	5.1450027090346294e-36	-0.02387709192070485	-4.487245914315955e-40	0.0	-0.023763948649341383	0.0	800.6397607567498	86.82168114325788	7.796346807576554e-36	-0.0016826111306230875	-4.9805067109872425	-8.848010748490326e-37	0.0379478233251037	0.4980651276237283
3.51	86.79683817701348	0.0	-0.03776711498166946	319.3302942141411	3.210080681950282e-36	-800.6397691624446	0.0	0.00030796017822833376	0.0	0.9999999785643745	5.380604542730677e-42	-0.000207054593528471	4.4898616864852394e-38	5.145002707856901e-36	-0.023726708845494198	-4.48724590942332e-40	0.0	-0.023675724556988482	0.0	800.6397691624446	86.79684637454444	7.794116712932969e-36	-0.001823744417295133	-4.953491126214971	2.3106355232963248e-36	-0.05860281224625954	0.4953837767538783
3.515	86.77213761517524	0.0	-0.038025916645136326	319.76421663912345	3.249071194858656e-36	-800.6397791183208	0.0	3.333438602264145e-05	0.0	0.9999999786425916	5.3636216668489485e-42	-0.0002066765110417204	4.5049897782762014e-38	5.162338224629844e-36	-0.023683383782970052	-4.5230829391342505e-40	0.0	-0.023666174958829694	0.0	800.6397791183208	86.77214592039063	7.818152616568801e-36	-0.0021583888467607256	-4.9267064652184445	4.811845031516953e-36	-0.06994242179306052	0.492720291207816
3.52	86.74757072569466	0.0	-0.03835223549022947	320.1980158961798	3.288215198624785e-36	-800.6397907404673	0.0	-2.477958307020921e-05	0.0	0.9999999786362009	5.3649801561320384e-42	-0.00020670747291915152	4.515628840263675e-38	5.174529692456183e-36	-0.023686931752851262	-4.5483252575431065e-40	0.0	-0.02367327378646978	0.0	800.6397907404673	86.74757916805108	7.834397411548217e-36	-0.0024894907258286862	-4.899995584647125	1.3217280630438737e-36	-0.06554265517451147	0.4900433916420937
3.525	86.72313731025014	0.0	-0.03865427356433627	320.63169265324274	3.327395437497825e-36	-800.6398039989807	0.0	0.00010060455497925945	0.0	0.9999999786485991	5.3622974601478156e-42	-0.00020664747522217724	4.5142975456674757e-38	5.173004141033396e-36	-0.02368005652307011	-4.545142288427855e-40	0.0	-0.023644452704469264	0.0	800.6398039989807	86.72314587922408	7.829881694607525e-36	-0.0028120362913078827	-4.873329258234331	-1.2622235016872915e-36	-0.06327943694905433	0.4873740077835847
3.53	86.69883713019168	0.0	-0.03885399453353468	321.0652475769555	3.366506475038922e-36	-800.6398188371234	0.0	0.00037651040090654227	0.0	0.9999999787658951	5.336648611589315e-42	-0.00020607904622368733	4.503315807097245e-38	5.160419993930614e-36	-0.023614919356550333	-4.5191955568236076e-40	0.0	-0.023536590419895646	0.0	800.6398188371234	86.69884578029087	7.808645653460125e-36	-0.0031203646632017015	-4.846720430363642	-1.8185787496282467e-35	-0.05984923546806128	0.4847089937384125
3.535	86.67466991718408	0.0	-0.03888736205521257	321.4986813325338	3.405128153483336e-36	-800.6398351691481	0.0	0.0007709717300565716	0.0	0.999999979056062	5.2738969914573324e-42	-0.00020466616974461452	4.434900762425467e-38	5.082022120550486e-36	-0.023453015634687577	-4.357739327030196e-40	0.0	-0.02331572328861494	0.0	800.6398351691481	86.67467857380305	7.687871961965303e-36	-0.003408614128801589	-4.820149566682375	-1.8477851018375694e-36	-0.06472812643086373	0.48205841529361915
3.54	86.65063538425495	0.0	-0.038704112745364685	321.9319945834553	3.4438384783081713e-36	-800.6398528804039	0.0	0.0012538457224229604	0.0	0.9999999795677578	5.160989674053989e-42	-0.00020215057191946633	4.4947541369767725e-38	5.150609036117158e-36	-0.023164749352057437	-4.497927187073631e-40	0.0	-0.022956522948338103	0.0	800.6398528804039	86.65064395050467	7.789466800187394e-36	-0.003671159297694659	-4.793303689979211	1.365059258708224e-35	0.0038886983950342196	0.47933052673852866
3.545	86.62673204544315	0.0	-0.037769062794906834	322.36518799178356	3.48278043555842e-36	-800.6398709501266	0.0	0.0012722197191625138	0.0	0.9999999802491406	5.008201661707241e-42	-0.000198751320156379	4.494754138705153e-38	5.150609033059244e-36	-0.022775223785176865	-4.497927174814387e-40	0.0	-0.02259205884573145	0.0	800.6398709501266	86.6267402149355	7.787317974535937e-36	-0.0033347057813997187	-4.76918456691872	-2.1579826244946923e-36	0.11000651432273421	0.4770453109142689
3.55	86.60292940815691	0.0	-0.03667721652996677	322.798262155896	3.52171167336274e-36	-800.6398861208813	0.0	0.0011145892464340078	0.0	0.9999999808301344	4.875829264608644e-42	-0.00019580627821601417	4.4947541401605954e-38	5.150609030409934e-36	-0.022437746831265704	-4.497927164361316e-40	0.0	-0.02227275254717477	0.0	800.6398861208813	86.60293713074917	7.78517819880027e-36	-0.0027624197876887895	-4.754851588815731	-4.274372344241289e-37	0.06926466811365051	0.4755356056691484
3.555	86.57916756180992	0.0	-0.03620802955329389	323.2312174296769	3.560632223525756e-36	-800.6398993926855	0.0	0.0007748425173198505	0.0	0.9999999813206045	4.762511730554028e-42	-0.00019328517186934419	4.494754141375558e-38	5.150609028141987e-36	-0.022148849319062792	-4.4979271555369265e-40	0.0	-0.022050776517026173	0.0	800.6398993926855	86.57917508977411	7.783042108337983e-36	-0.0027390889081186837	-4.751494695551155	-4.271363168313214e-37	-0.03908772556186576	0.4751655468585697
3.56	86.55540649559997	0.0	-0.03627904569268936	323.66405390607235	3.5995420943782784e-36	-800.6399138943402	0.0	0.0003887163245741153	0.0	0.999999981590732	4.699466027918135e-42	-0.00019188252114632143	4.4947541420391496e-38	5.150609026880188e-36	-0.021988117382961726	-4.49792715067687e-40	0.0	-0.0219394174928965	0.0	800.6399138943402	86.55541404454257	7.780906104669201e-36	-0.0030621043982654085	-4.752987851547394	-4.272707914837298e-37	-0.07058567596400786	0.47535119495598627
3.565	86.53163758886176	0.0	-0.036467561288151054	324.0967715562232	3.638441283322968e-36	-800.6399300167968	0.0	0.00023530532529762504	0.0	0.9999999817314684	4.666435828924795e-42	-0.0001911476600762262	4.494754142383278e-38	5.1506090262191226e-36	-0.021903908505727543	-4.497927148144776e-40	0.0	-0.021872007482713965	0.0	800.6399300167968	86.53164520701576	7.778769400497261e-36	-0.0033869191323007237	-4.753980860765239	-4.2736001369187314e-37	-0.06492509166092246	0.4754424180912909
3.57	86.50786964460913	0.0	-0.03667611652000015	324.5293703597661	3.677329788529236e-36	-800.6399477605904	0.0	0.000282629967364456	0.0	0.9999999818476845	4.6390644112808095e-42	-0.0001905386964649225	4.4947541426666114e-38	5.1506090256713134e-36	-0.021834126414847256	-4.497927146053846e-40	0.0	-0.021791039961244447	0.0	800.6399477605904	86.5078773397752	7.77663278356352e-36	-0.0037099210233046366	-4.752720211863467	-4.2724668111097945e-37	-0.06410425754284861	0.47531525083980464
3.575	86.48411255904367	0.0	-0.03681991038557598	324.9618503480588	3.7162076128161626e-36	-800.6399671047258	0.0	0.0004981831611721079	0.0	0.9999999820271797	4.5966167234235493e-42	-0.0001895943136190277	4.4947541431027105e-38	5.150609024821763e-36	-0.021725908110263863	-4.497927142824417e-40	0.0	-0.02164832099844621	0.0	800.6399671047258	86.48412030328107	7.774497140314055e-36	-0.004026116408777159	-4.749982657101508	-4.270005804840054e-37	-0.06309614235716718	0.47504017057450476
3.58	86.46037029254019	0.0	-0.036827257145319675	325.39421158767027	3.755074762168366e-36	-800.6399880003044	0.0	0.0008493244923596944	0.0	0.999999982340433	4.522026486998062e-42	-0.0001879348182892385	4.494754143859326e-38	5.1506090233289125e-36	-0.02153574394983864	-4.497927137188452e-40	0.0	-0.021405007454199702	0.0	800.6399880003044	86.46037802737695	7.77236282407021e-36	-0.004329427157505977	-4.746990924727376	-4.267316700859561e-37	-0.0671256654858405	0.4747465502182294
3.585	86.43664204508107	0.0	-0.036584528373218766	325.8264541514374	3.793931243134227e-36	-800.6400103587422	0.0	0.0012529891809013652	0.0	0.9999999828386653	4.402013736796945e-42	-0.00018526475571730238	4.494754145050709e-38	5.15060902092697e-36	-0.021229777311696105	-4.497927128224395e-40	0.0	-0.02104605249499369	0.0	800.6400103587422	86.43664966725574	7.770229759379829e-36	-0.004557199664481417	-4.74461147275657	-4.265168797983862e-37	0.04615022947709691	0.4744835916140205
3.59	86.41292451248981	0.0	-0.03548026860181985	326.25857809970967	3.8327770611598475e-36	-800.6400315027014	0.0	0.0009571505145318924	0.0	0.9999999833380756	4.279955958978908e-42	-0.00018254919504815566	4.494754146229528e-38	5.150609018484092e-36	-0.020918596975725956	-4.497927119239145e-40	0.0	-0.020771849070786427	0.0	800.6400315027014	86.41293170705613	7.768097636294873e-36	-0.003931047139788272	-4.742385947730081	-4.263162334905535e-37	0.1203571769742988	0.4743912976360017
3.595	86.38921950941803	0.0	-0.03476457996191622	326.69058348910363	3.871612221345878e-36	-800.6400500226405	0.0	0.0007608363426536854	0.0	0.9999999837414012	4.180040090158542e-42	-0.0001803262510580135	4.4947541471698295e-38	5.150609016484366e-36	-0.0206638663540748	-4.497927111982622e-40	0.0	-0.0205538855141153	0.0	800.6400500226405	86.38922642907997	7.765966650899256e-36	-0.003608090035661333	-4.73965332428629	-4.2607158825534915e-37	-0.007557418713127791	0.4739659349467606
3.6	86.36552832119821	0.0	-0.03489204532392381	327.1224703879452	3.910436729810789e-36	-800.6400689323305	0.0	0.000278585563381322	0.0	0.9999999839639201	4.12438462396926e-42	-0.00017908801947815156	4.4947541476839676e-38	5.1506090153704716e-36	-0.020521975464611788	-4.497927107979122e-40	0.0	-0.02047407662904018	0.0	800.6400689323305	86.36553527883459	7.763836930235066e-36	-0.003957980745403229	-4.736885669969837	-4.258233758990502e-37	-0.08222387461880692	0.47375992460235516
3.605	86.34185038244577	0.0	-0.03517857389507123	327.5542388641247	3.949250592646697e-36	-800.6400896215104	0.0	7.088532263496075e-05	0.0	0.9999999840325356	4.1071448956767425e-42	-0.00017870446728708822	4.494754147841828e-38	5.1506090150254404e-36	-0.020478023620366603	-4.4979271067446076e-40	0.0	-0.020453769479958146	0.0	800.6400896215104	86.34185744094056	7.761708406196699e-36	-0.004319223386613409	-4.734221863410445	-4.2558384094685094e-37	-0.07307270276987818	0.47347857683197836
3.61	86.31818576575373	0.0	-0.03550858329778639	327.9858889846321	3.988053815875308e-36	-800.6401121350285	0.0	9.962541974009127e-05	0.0	0.9999999840625311	4.0995968736675963e-42	-0.00017853653770428098	4.494754147910735e-38	5.150609014874376e-36	-0.02045878030735912	-4.497927106204935e-40	0.0	-0.020425228899541514	0.0	800.6401121350285	86.318192942139	7.759581081228358e-36	-0.0046866814702764695	-4.731609746454998	-4.253490291228329e-37	-0.07366450654539242	0.47321831380740653
3.615	86.29453377697219	0.0	-0.03578139391608304	328.4174208145704	4.026846405348967e-36	-800.6401364870467	0.0	0.0003259012021873215	0.0	0.9999999841507472	4.0773570824458604e-42	-0.00017804174332541355	4.4947541481130283e-38	5.150609014429269e-36	-0.02040208104718615	-4.4979271046177694e-40	0.0	-0.02033186508242365	0.0	800.6401364870467	86.29454104732001	7.757454889302402e-36	-0.005053333668454564	-4.729185849994859	-4.251311464248887e-37	-0.07540650263453542	0.4729786987215298
3.62	86.27089340975306	0.0	-0.035911969405677945	328.84883441436006	4.065628366499354e-36	-800.6401626534009	0.0	0.0007113628582393631	0.0	0.9999999843755796	4.020394206483151e-42	-0.00017677442428668577	4.494754148626149e-38	5.15060901328921e-36	-0.02025685698046939	-4.497927100572649e-40	0.0	-0.020128074635026257	0.0	800.6401626534009	86.2709007146575	7.755329736828061e-36	-0.005410992607408925	-4.726985805350618	-4.249332964055249e-37	-0.06562069309512822	0.47274412613324474
3.625	86.2472635750366	0.0	-0.03567466922697927	329.2801298390064	4.104399704272233e-36	-800.6401905011899	0.0	0.001070988494693971	0.0	0.9999999847901723	3.914268900002778e-42	-0.00017441333174805145	4.4947541495628716e-38	5.1506090111652144e-36	-0.019986295701290978	-4.497927093113419e-40	0.0	-0.019821259031761088	0.0	800.6401905011899	86.2472707720882	7.753205519779824e-36	-0.005589322325600927	-4.725118733808861	-4.247645633186223e-37	0.04807283152480262	0.47253632712969557
3.63	86.22364305019913	0.0	-0.03470776619682635	329.71130713586905	4.1431604229488495e-36	-800.6402169912683	0.0	0.0008554564715357338	0.0	0.9999999851987179	3.808267066401031e-42	-0.00017205498625298804	4.4947541504734904e-38	5.150609009043685e-36	-0.01971604921023415	-4.497927085762984e-40	0.0	-0.019576188804880334	0.0	800.6402169912683	86.2236498886056	7.75108212283207e-36	-0.005037349141739682	-4.722995198138355	-4.24573385245096e-37	0.08407874711565065	0.4723743523663673
3.635	86.20003489209239	0.0	-0.03427143401936253	330.1423663583866	4.18191052733822e-36	-800.6402414691032	0.0	0.0006013751789379179	0.0	0.9999999855355152	3.7197759740016726e-42	-0.00017008622248672358	4.494754151214536e-38	5.150609007272618e-36	-0.019490445497602437	-4.497927079703418e-40	0.0	-0.019403907506594997	0.0	800.6402414691032	86.20004156293338	7.748959851133593e-36	-0.004948555834588773	-4.72032436345368	-4.243342389371632e-37	-0.03675617401099048	0.472046746758648
3.64	86.17644002344265	0.0	-0.03447180871292356	330.57330757379407	4.2206500234591134e-36	-800.6402671587138	0.0	0.00024902602170298594	0.0	0.9999999857053715	3.674756514463728e-42	-0.00016908462245757478	4.4947541515848515e-38	5.150609006371596e-36	-0.019375670587091172	-4.497927076647407e-40	0.0	-0.019332566806432423	0.0	800.6402671587138	86.17644675330726	7.746838790772921e-36	-0.005329585506250735	-4.717639189951465	-4.240932344236434e-37	-0.08508272527036277	0.47184063619727956
3.645	86.15285832321288	0.0	-0.03477475333193609	331.0041308479657	4.25937891722763e-36	-800.640294783819	0.0	0.00017085705760676496	0.0	0.9999999857850773	3.6535387229506356e-42	-0.00016861256568884693	4.4947541517578185e-38	5.150609005946943e-36	-0.019321576865242676	-4.497927075213357e-40	0.0	-0.019283619864927968	0.0	800.640294783819	86.15286515150864	7.744718917642853e-36	-0.005721842801029926	-4.714977136279923	-4.238538824061965e-37	-0.0791617326121534	0.47156416292539216
3.65	86.1292900282683	0.0	-0.035064443600123035	331.4348362476742	4.2980972146459894e-36	-800.6403243848794	0.0	0.00032506913368202393	0.0	0.999999985882012	3.6276542795114586e-42	-0.00016803668451274834	4.4947541519674724e-38	5.150609005428893e-36	-0.01925558574252483	-4.4979270734693346e-40	0.0	-0.0191904944178782	0.0	800.6403243848794	86.12929694860473	7.742600248971576e-36	-0.006118681357047134	-4.71232007330921	-4.236150264163052e-37	-0.07927713981972973	0.47129868807594744
3.655	86.10573478783502	0.0	-0.03524140303550206	331.8654238391545	4.3368049216683734e-36	-800.6403559641865	0.0	0.0006697747924072963	0.0	0.9999999860842997	3.573349782542992e-42	-0.00016682850950765064	4.494754152402474e-38	5.150609004342036e-36	-0.01911713908317362	-4.497927069829829e-40	0.0	-0.018998618073732255	0.0	800.6403559641865	86.10574175349	7.740482749667207e-36	-0.006511618684230757	-4.709762074543515	-4.233851575472808e-37	-0.08980437892606057	0.4710618178677055
3.66	86.08219184305185	0.0	-0.0352230591955793	332.29589368557293	4.375502043973444e-36	-800.6403894787579	0.0	0.001164287948689087	0.0	0.9999999864596789	3.471522269154966e-42	-0.0001645630349448946	4.4947541532004715e-38	5.150609002304052e-36	-0.018857534817529453	-4.497927063076112e-40	0.0	-0.018665074145743112	0.0	800.6403894787579	86.0821987735567	7.738366348552724e-36	-0.0068911641826736	-4.707612351118703	-4.231911932325868e-37	0.0012423304326732918	0.4707612515043084
3.665	86.05865887517847	0.0	-0.034328718634933364	332.7262458423336	4.414188586554284e-36	-800.6404233379494	0.0	0.0010890317332691417	0.0	0.9999999869418473	3.3386325650959925e-42	-0.00016160648386896663	4.4947541542071986e-38	5.1506089996443804e-36	-0.018518739015892783	-4.497927054401068e-40	0.0	-0.01835308953538242	0.0	800.6404233379494	86.05866547559697	7.73625082374487e-36	-0.006513442670478022	-4.705583007502176	-4.230080490629607e-37	0.09246804237648876	0.4706491451108156
3.67	86.03513714339468	0.0	-0.03356411617168793	333.1564803592077	4.452864553906208e-36	-800.6404548455761	0.0	0.0009659434963835644	0.0	0.9999999873623278	3.220727344252023e-42	-0.0001589833099361389	4.494754155067513e-38	5.150608997284624e-36	-0.018218145421471304	-4.4979270468359015e-40	0.0	-0.018076367107427976	0.0	800.6404548455761	86.03514346652767	7.734136313186833e-36	-0.006207813072985654	-4.70312730959653	-4.22788089706886e-37	-0.00890453342399644	0.4703135739162564
3.675	86.01162795840294	0.0	-0.033623256462256994	333.58659729879037	4.4915299516339416e-36	-800.6404868403156	0.0	0.000567197626152975	0.0	0.9999999876549373	3.137516698544706e-42	-0.0001571320263777569	4.4947541556560584e-38	5.150608995619237e-36	-0.018006003949666855	-4.4979270415713535e-40	0.0	-0.01791387695678595	0.0	800.6404868403156	86.0116342777079	7.732022949683858e-36	-0.006592892349316516	-4.70065491351761	-4.225664688844055e-37	-0.08984680080534707	0.4701513486484135
3.68	85.98813046854478	0.0	-0.033804369706839865	334.01659672154824	4.530184785161534e-36	-800.6405207988761	0.0	0.00045974073598850857	0.0	0.9999999878470619	3.082343923011927e-42	-0.00015590453377317922	4.4947541560377976e-38	5.1506089945150055e-36	-0.017865343656692224	-4.497927038114699e-40	0.0	-0.017782170937574053	0.0	800.6405207988761	85.98813682901996	7.72991064144704e-36	-0.006992489607941765	-4.698276749721705	-4.223526139834325e-37	-0.08097222316242654	0.46989744538462236
3.685	85.96464527105437	0.0	-0.03398494100641955	334.44647868757147	4.5688290598903416e-36	-800.6405567786057	0.0	0.0005999876302610888	0.0	0.9999999880454348	3.024917315815302e-42	-0.00015462689756642946	4.4947541564279393e-38	5.150608993365665e-36	-0.017718937330127717	-4.497927034545629e-40	0.0	-0.017610287142703972	0.0	800.6405567786057	85.96465167034641	7.727799437959595e-36	-0.007400046901806079	-4.695769850974567	-4.221272621393549e-37	-0.081739897900392	0.4696481225793463
3.69	85.9411728181937	0.0	-0.034059117039649804	334.87624325943887	4.607462781445764e-36	-800.640594797939	0.0	0.000944138138908268	0.0	0.9999999883362279	2.9398679887536457e-42	-0.0001527347067348057	4.4947541569922643e-38	5.1506089916634796e-36	-0.017502108230196347	-4.49792702931376e-40	0.0	-0.017339811489520074	0.0	800.640594797939	85.9411792126191	7.725689376231739e-36	-0.007806716103156563	-4.693180260204126	-4.218945640919105e-37	-0.09364130048951672	0.46941143624678594
3.695	85.91771322599811	0.0	-0.033938437957547855	335.3058905010264	4.646085955570144e-36	-800.6406348273321	0.0	0.0014494745583560125	0.0	0.9999999887843549	2.806699195588701e-42	-0.00014977194643740974	4.494754157843548e-38	5.150608988998228e-36	-0.01716260090481318	-4.497927021251189e-40	0.0	-0.016924567615993133	0.0	800.6406348273321	85.91771953755953	7.723580463689804e-36	-0.008202310437011381	-4.690863101385172	-4.216854841933614e-37	0.005553351399562194	0.46908663885948276
3.7	85.894264633105	0.0	-0.032904662706699575	335.7354204714766	4.684698587594302e-36	-800.6406750619469	0.0	0.0013470458844232474	0.0	0.9999999893154555	2.6453794153180824e-42	-0.00014618287854133613	4.49475415882194e-38	5.150608985769558e-36	-0.016751324014648118	-4.4979270116957755e-40	0.0	-0.016538667396053537	0.0	800.6406750619469	85.89427058233717	7.721472521134227e-36	-0.007792119860213182	-4.688552283743993	-4.214771570526883e-37	0.08147311195530844	0.4689260110654207
3.705	85.87082872877124	0.0	-0.03216241751408779	336.16483322774627	4.723300682656862e-36	-800.640713149805	0.0	0.0011671291983644408	0.0	0.9999999897865924	2.4988834984504762e-42	-0.00014292361429357566	4.4947541596602634e-38	5.1506089828375735e-36	-0.016377839839316677	-4.4979270032192174e-40	0.0	-0.01620430950998969	0.0	800.640713149805	85.870834414174	7.719365726231101e-36	-0.007616478042232763	-4.685900808962866	-4.2123964040454854e-37	-0.025260435059049156	0.4685968894585004
3.71	85.84740572319136	0.0	-0.03213059739206607	336.5941288373221	4.76189224680004e-36	-800.6407522039162	0.0	0.0008288412713497876	0.0	0.9999999901308394	2.389694502026246e-42	-0.00014049436029119715	4.4947541602540427e-38	5.150608980652255e-36	-0.0160994678331184	-4.497926997025625e-40	0.0	-0.01596686397631669	0.0	800.6407522039162	85.84741136255941	7.717260105985277e-36	-0.008008443662246121	-4.683429078030343	-4.21017947352829e-37	-0.08938563326545892	0.46842819855741413
3.715	85.82399420136079	0.0	-0.03219658865285612	337.0233073605564	4.800473285441079e-36	-800.6407932625451	0.0	0.0007833873219318144	0.0	0.9999999904041511	2.3016414760537832e-42	-0.0001385353426904212	4.4947541607135603e-38	5.150608978889953e-36	-0.015874980949900957	-4.497926992108275e-40	0.0	-0.015742440039962943	0.0	800.6407932625451	85.82399982787528	7.715155520922472e-36	-0.008417274749731946	-4.681171557951795	-4.208149571537605e-37	-0.08298539090304873	0.468190706123906
3.72	85.80059403549151	0.0	-0.032236863093575124	337.4523688544891	4.839043803707108e-36	-800.6408363922147	0.0	0.0009850829537580833	0.0	0.9999999907015822	2.2043808003499364e-42	-0.00013637147184671975	4.494754161201081e-38	5.1506089769433696e-36	-0.015627019614047426	-4.497926986756979e-40	0.0	-0.015460234561359847	0.0	800.6408363922147	85.8005996366293	7.713051955506366e-36	-0.008835355524279108	-4.678889750610201	-4.20609875752846e-37	-0.0883175043239259	0.4679723205482906
3.725	85.7772053759429	0.0	-0.03214520026939289	337.88131337600225	4.877603806711326e-36	-800.6408816148637	0.0	0.0013884388731834865	0.0	0.999999991096798	2.072704616502978e-42	-0.00013344191935247974	4.494754161827576e-38	5.1506089743079895e-36	-0.015291317623428433	-4.4979269796463674e-40	0.0	-0.015062476123633279	0.0	800.6408816148637	85.77721090021016	7.710949419829047e-36	-0.009252649484313726	-4.676621927629536	-4.204058328914769e-37	-0.06580567831107886	0.467708488711541
3.73	85.7538280248963	0.0	-0.031582179021382564	338.3101409824238	4.916153299608931e-36	-800.6409287180873	0.0	0.001705511720015809	0.0	0.9999999916304834	1.890164433616191e-42	-0.00012938073658870985	4.494754162632273e-38	5.15060897065461e-36	-0.014825940355019168	-4.497926970044448e-40	0.0	-0.014573883006298262	0.0	800.6409287180873	85.75383332627506	7.708847889783043e-36	-0.009392391279464809	-4.674475359927992	-4.202119655888094e-37	0.04901971423559723	0.4674732379822151
3.735	85.73046173048112	0.0	-0.030413636351694476	338.73885172698436	4.954692287210721e-36	-800.6409744340922	0.0	0.0015827422808951054	0.0	0.9999999921469377	1.7078887666740476e-42	-0.00012532543881593652	4.49475416336183e-38	5.1506089670065275e-36	-0.01436123745715287	-4.497926960752547e-40	0.0	-0.014120460742537267	0.0	800.6409744340922	85.7304666606991	7.706747345109375e-36	-0.008925220092552822	-4.671945163845474	-4.1998461080726536e-37	0.03661193574972157	0.4672088617290821
3.74	85.70710947167628	0.0	-0.030026109413629303	339.167445672908	4.993220775195853e-36	-800.6410193227905	0.0	0.0012269920070974904	0.0	0.9999999925891191	1.547004395190146e-42	-0.00012174605795553182	4.494754163944355e-38	5.150608963786572e-36	-0.013951070620880598	-4.497926952796942e-40	0.0	-0.013768953425022407	0.0	800.6410193227905	85.7071142421364	7.704648075684321e-36	-0.009157103244327714	-4.6691409706267475	-4.19733408272773e-37	-0.07556733943442727	0.46697524373755067
3.745	85.68377023579757	0.0	-0.029952303587528054	339.59592289059174	5.0317387698711515e-36	-800.6410661248535	0.0	0.0010552437159353323	0.0	0.999999992924874	1.4216097914867631e-42	-0.00011895625904294045	4.4947541643584446e-38	5.150608961276916e-36	-0.013631383211801846	-4.4979269467561355e-40	0.0	-0.013466648368618423	0.0	800.6410661248535	85.6837749369316	7.702549983687711e-36	-0.009567061348200262	-4.6666019885722205	-4.195052517930931e-37	-0.08646144346421526	0.46674028860761657
3.75	85.66044335641328	0.0	-0.02990704053397634	340.0242834428936	5.0702462768858244e-36	-800.6411150203556	0.0	0.0011619543560839251	0.0	0.999999993244559	1.2994206734335989e-42	-0.00011623777627981015	4.494754164728296e-38	5.150608958831412e-36	-0.013319868031634853	-4.4979269410044516e-40	0.0	-0.013133772965666172	0.0	800.6411150203556	85.66044799437273	7.700453002906092e-36	-0.009993080958578692	-4.664194708848157	-4.192888470596638e-37	-0.08619102325768015	0.46649910154830265
3.755	85.63712825743288	0.0	-0.029771529515050153	340.452527390107	5.108743301659513e-36	-800.6411660662035	0.0	0.001499253991245349	0.0	0.9999999936208254	1.1518390908799969e-42	-0.00011295435796216551	4.4947541651307196e-38	5.1506089558777026e-36	-0.01294361600521013	-4.497926934234773e-40	0.0	-0.012704268335083662	0.0	800.6411660662035	85.63713279790406	7.698357077991128e-36	-0.010425355198707723	-4.66187300193847	-4.1908025629883965e-37	-0.10138464384502079	0.46629753089857107
3.76	85.61382443656491	0.0	-0.029445337510983827	340.8806547869896	5.14722984911465e-36	-800.6412192646104	0.0	0.002020265322111512	0.0	0.9999999941044427	9.556020720046382e-43	-0.00010858844582433818	4.494754165590761e-38	5.150608951950199e-36	-0.012443319323695351	-4.497926925533662e-40	0.0	-0.012125504952815525	0.0	800.6412192646104	85.61382881244693	7.696262160935231e-36	-0.0108519926529266	-4.659918536482621	-4.189036329708996e-37	0.016634550701921862	0.4659948226636364
3.765	85.59052986621224	0.0	-0.028127633396847304	341.3086656888033	5.185705924237859e-36	-800.6412722122111	0.0	0.0018369534518192477	0.0	0.9999999946106656	7.413611637927804e-43	-0.00010382198031586866	4.494754165995184e-38	5.1506089476623635e-36	-0.011897122606954347	-4.497926916425841e-40	0.0	-0.01159925655305937	0.0	800.6412722122111	85.59053386164146	7.694168063298755e-36	-0.010355276272282273	-4.657780879853609	-4.187111026232047e-37	0.06319656545910009	0.4658209584230372
3.77	85.5672478493215	0.0	-0.027449472490588326	341.7365601465771	5.2241715316258736e-36	-800.6413237053686	0.0	0.0015568249569761752	0.0	0.9999999950552343	5.447526004063351e-43	-9.944780199368503e-05	4.4947541662764665e-38	5.1506089437274204e-36	-0.011395878690967547	-4.497926908427288e-40	0.0	-0.011153259055682516	0.0	800.6413237053686	85.56725161646092	7.692075103345366e-36	-0.01043052258929041	-4.655172516700409	-4.184775767171827e-37	-0.05821382951228122	0.46555364900502405
3.775	85.54397842928208	0.0	-0.027252281863364782	342.1643382257168	5.2626266771336645e-36	-800.6413768852489	0.0	0.0013370614763899423	0.0	0.9999999954020095	3.851714375914617e-43	-9.58974151171827e-05	4.494754166441544e-38	5.150608940533548e-36	-0.01098903432170219	-4.497926902188209e-40	0.0	-0.010770219157949144	0.0	800.6413768852489	85.54398208280722	7.689983283429601e-36	-0.010845388617164211	-4.6526636330668225	-4.182522934938889e-37	-0.0904517755168171	0.465354278009311
3.78	85.52072138160662	0.0	-0.02710400436785903	342.5919999880626	5.301071366316911e-36	-800.6414321924774	0.0	0.00141396041058763	0.0	0.9999999957206301	2.331515588904746e-43	-9.251525288104854e-05	4.4947541665461056e-38	5.150608937491009e-36	-0.010601467076464106	-4.497926896455675e-40	0.0	-0.010365149338322863	0.0	800.6414321924774	85.52072493277504	7.68789257658503e-36	-0.011280061641245228	-4.6501838376057005	-4.180293550743574e-37	-0.08828624550943313	0.4651021843065826
3.785	85.49747678902091	0.0	-0.026878386124132563	343.01954549577334	5.339505604762812e-36	-800.6414897022498	0.0	0.0017376985762551818	0.0	0.999999996073242	5.815647557237821e-44	-8.862193466797594e-05	4.4947541666028115e-38	5.150608933988643e-36	-0.010155325670813018	-4.497926890111581e-40	0.0	-0.009867335365896294	0.0	800.6414897022498	85.49748021013843	7.685802986825696e-36	-0.011724482156911801	-4.647684033362509	-4.178047589294221e-37	-0.10407719201073921	0.4648849205542125
3.79	85.47424443310418	0.0	-0.026467993686532413	343.44697481038713	5.377929398003178e-36	-800.6415494326908	0.0	0.0022591846215571803	0.0	0.9999999965004978	-1.6477915598951951e-43	-8.366202757469743e-05	4.494754166576369e-38	5.150608929526789e-36	-0.009586962182259866	-4.497926882424519e-40	0.0	-0.00922012664611586	0.0	800.6415494326908	85.47424766536696	7.683714491818589e-36	-0.01216609617670514	-4.645535556673982	-4.176106976730397e-37	0.01359449937787394	0.46455554478162875
3.795	85.45102210838887	0.0	-0.02506662422512251	343.87428798696726	5.4163427510065464e-36	-800.6416090116741	0.0	0.0020905832690747634	0.0	0.9999999969365702	-4.0685150593437464e-43	-7.827636375008311e-05	4.494754166422439e-38	5.1506089246819326e-36	-0.008969810566182616	-4.497926874578832e-40	0.0	-0.008621218655922629	0.0	800.6416090116741	85.4510249855444	7.681626890833836e-36	-0.011689033380199158	-4.6432782589983885	-4.1740744705908855e-37	0.05571368999010071	0.46436124952174274
3.8	85.4278126200323	0.0	-0.024334758110769218	344.3014850805467	5.454745668728924e-36	-800.6416673181398	0.0	0.0018006753716889622	0.0	0.9999999973141911	-6.3081642440394045e-43	-7.329355691483278e-05	4.4947541661639133e-38	5.150608920199485e-36	-0.008398822960964664	-4.497926867784782e-40	0.0	-0.008105363160567987	0.0	800.6416673181398	85.42781526942314	7.679540450510531e-36	-0.011812141390216519	-4.640700013440835	-4.171766177220205e-37	-0.06431395018953229	0.46411456450900945
3.805	85.40461523192306	0.0	-0.024037156075712485	344.7285661582573	5.493138157180998e-36	-800.6417274270234	0.0	0.0016153871490191094	0.0	0.9999999976133356	-8.196820630772179e-43	-6.909164439150867e-05	4.494754165859167e-38	5.150608916419511e-36	-0.007917319252804726	-4.497926862402657e-40	0.0	-0.0076425888309756594	0.0	800.6417274270234	85.4046177381277	7.677455103184774e-36	-0.012235665264408878	-4.638345575505317	-4.169651799795573e-37	-0.09165667902296705	0.4639251084455257
3.81	85.38142931851296	0.0	-0.023774001657365023	345.1555312770571	5.531520221480095e-36	-800.6417897102248	0.0	0.0017314757377833144	0.0	0.9999999978899073	-1.0051440191730176e-42	-6.496545753360897e-05	4.494754165482686e-38	5.15060891270766e-36	-0.0074444930668621494	-4.497926857426653e-40	0.0	-0.007146557570454238	0.0	800.6417897102248	85.38143168683983	7.67537078768941e-36	-0.012680314239010967	-4.636060073907563	-4.167597432355324e-37	-0.09402750205082767	0.4637013497933958
3.815	85.35825485798514	0.0	-0.023416627668848358	345.5823804941586	5.56989186676872e-36	-800.641854247064	0.0	0.002097238357555765	0.0	0.9999999981865628	-1.2181605650676275e-42	-6.0226231812988695e-05	4.494754164955847e-38	5.1506089084443257e-36	-0.006901417801894825	-4.497926852089312e-40	0.0	-0.006545743037849768	0.0	800.641854247064	85.35825705940829	7.673287499063642e-36	-0.01313501542917672	-4.6338068863583715	-4.165570799249871e-37	-0.07965481867364634	0.4634491466191323
3.82	85.33509148617884	0.0	-0.022644662473135884	346.0091138665103	5.608253098167085e-36	-800.6419209309065	0.0	0.0024591417360619442	0.0	0.9999999985221038	-1.481375382520016e-42	-5.437018702427543e-05	4.4947541641654167e-38	5.150608903176312e-36	-0.006230364498726495	-4.497926846052357e-40	0.0	-0.00584125082434565	0.0	800.6419209309065	85.33509344410226	7.671205202135611e-36	-0.013365292585309588	-4.631730712695278	-4.163695300406631e-37	0.0365283506007752	0.4631874751687736
3.825	85.31193855726092	0.0	-0.02119508818494504	346.43573144547844	5.6466039203175585e-36	-800.6419866043353	0.0	0.002363022754517162	0.0	0.9999999988286863	-1.7495389698328056e-42	-4.840404121981131e-05	4.4947541632016093e-38	5.150608897809259e-36	-0.005546694548711751	-4.49792684053641e-40	0.0	-0.005164294670709591	0.0	800.6419866043353	85.31194020940859	7.669123843549871e-36	-0.012936202914379061	-4.62930594388998	-4.161516781623686e-37	0.020871107056918307	0.46293529920762017
3.83	85.28879927327151	0.0	-0.020610845273389463	346.86223329044304	5.684944338552423e-36	-800.6420519946973	0.0	0.0019967788947911356	0.0	0.9999999990770493	-1.9938883617334378e-42	-4.296771738984731e-05	4.4947541621840816e-38	5.1506088929188215e-36	-0.0049237377250141	-4.4979268360679285e-40	0.0	-0.004592259654247945	0.0	800.6420519946973	85.28880072960402	7.667043715381682e-36	-0.013281515156676206	-4.626622644780317	-4.159113383516007e-37	-0.09066329166017287	0.4627510878393338
3.835	85.26567240571444	0.0	-0.020220638066071127	347.28861947141206	5.7232743591463384e-36	-800.6421194806977	0.0	0.0019210678658958924	0.0	0.9999999992729408	-2.2110115155548774e-42	-3.813712719887365e-05	4.494754161168472e-38	5.150608888573301e-36	-0.004370192863558147	-4.4979268325435e-40	0.0	-0.004041914249877752	0.0	800.6421194806977	85.26567370005577	7.664964705721953e-36	-0.013717062423524762	-4.624185593051304	-4.156922578897217e-37	-0.09047313273592096	0.4625070571000003
3.84	85.2425576022064	0.0	-0.019818479389391675	347.71489004755136	5.761593987416974e-36	-800.642189198473	0.0	0.0021387342046058763	0.0	0.9999999994517629	-2.43661365172299e-42	-3.311789526840289e-05	4.4947541600020944e-38	5.150608884058081e-36	-0.003795031251165866	-4.497926829326181e-40	0.0	-0.0034292120327568225	0.0	800.642189198473	85.24255872796651	7.662886779813366e-36	-0.014172371158864832	-4.621800075912574	-4.154779074938529e-37	-0.10268456059781964	0.4622940629154851
3.845	85.21945440793407	0.0	-0.01927802845327882	348.1410450779843	5.799903228678688e-36	-800.6422612161788	0.0	0.0025963073089967873	0.0	0.9999999996290536	-2.700649836967531e-42	-2.7243576545543312e-05	4.494754158493196e-38	5.150608878773635e-36	-0.0031218839101891434	-4.4979268261364134e-40	0.0	-0.0026854247771344025	0.0	800.6422612161788	85.21945533189157	7.660809894476721e-36	-0.014634662967732819	-4.6196905417659195	-4.152876780232327e-37	-0.027182164519121203	0.4619770510723389
3.85	85.19636112532355	0.0	-0.01794930924817832	348.5670846123773	5.8382020874046304e-36	-800.6423344668384	0.0	0.002660643271606443	0.0	0.9999999997906326	-3.005072652396373e-42	-2.047072969627302e-05	4.4947541565609866e-38	5.150608872680898e-36	-0.0023457728304633347	-4.497926823229314e-40	0.0	-0.0019232066258697588	0.0	800.6423344668384	85.1963617888451	7.658733899869457e-36	-0.014461245874471482	-4.617613447019883	-4.151004105761474e-37	0.042476020095558786	0.46178088048751004
3.855	85.17327918481222	0.0	-0.016772930706884716	348.9930087098455	5.8764905689311055e-36	-800.6424061304726	0.0	0.002457271393773129	0.0	0.9999999999028998	-3.2983043397426225e-42	-1.3946864827259917e-05	4.4947541545048637e-38	5.150608866812131e-36	-0.0015981929841349578	-4.497926821209429e-40	0.0	-0.0012192502259626102	0.0	800.6424061304726	85.17327961959043	7.656658926852075e-36	-0.014397130277230693	-4.615200532959326	-4.1488412790536565e-37	-0.037321078111751005	0.46153514299887793
3.86	85.15020958280414	0.0	-0.016211941208953383	349.4188174286488	5.9147686784721786e-36	-800.6424791620444	0.0	0.002223885486264959	0.0	0.9999999999667863	-3.557982397112735e-42	-8.16950641155779e-06	4.4947541525243e-38	5.15060886161491e-36	-0.000936156476185215	-4.497926820059995e-40	0.0	-0.0005821539635457054	0.0	800.6424791620444	85.15020983637866	7.654585063450768e-36	-0.014820670840581345	-4.612777095806328	-4.1466672755821715e-37	-0.09524666674370659	0.46137603387173515
3.865	85.12715166497067	0.0	-0.015705627688995156	349.8445108277033	5.953036421317685e-36	-800.6425543817671	0.0	0.0023185921923073445	0.0	0.9999999999968948	-3.8103855549953544e-42	-2.554001105347128e-06	4.4947541504554424e-38	5.1506088565632885e-36	-0.00029266696841663905	-4.497926819518288e-40	0.0	8.20737716102735e-05	0.0	800.6425543817671	85.1271517441377	7.652512250801537e-36	-0.015270798009906656	-4.6104330519080845	-4.1445602119743716e-37	-0.09673198278647158	0.46114477122288067
3.87	85.10410552354503	0.0	-0.015114400242095276	350.2700889656963	5.9912938027424925e-36	-800.6426318949796	0.0	0.002686079155987469	0.0	0.9999999999934917	-4.08927382659639e-42	3.650749195566894e-06	4.494754148004669e-38	5.150608850981593e-36	0.0004183450419345212	-4.497926819579512e-40	0.0	0.000851578766990995	0.0	800.6426318949796	85.10410541097171	7.650440495118653e-36	-0.015735787731256796	-4.608136031452403	-4.142493474462531e-37	-0.07343291207154058	0.460872108908157
3.875	85.08107052785192	0.0	-0.014048821904956944	350.6955519005908	6.029540827958548e-36	-800.6427115299618	0.0	0.003008368602248779	0.0	0.9999999999400718	-4.417898462276368e-42	1.0962041981817231e-05	4.494754144894745e-38	5.150608844404467e-36	0.0012561574808320566	-4.497926820540618e-40	0.0	0.0017134128876336236	0.0	800.6427115299618	85.08107019944936	7.648369741467005e-36	-0.01591414643544601	-4.60601267767468	-4.1405761750719645e-37	0.0349539178481333	0.460614530418579
3.88	85.05804615458295	0.0	-0.012439497039551717	351.1208996847987	6.067777501703019e-36	-800.642790026585	0.0	0.0029145117838719494	0.0	0.9999999998317551	-4.75006312444665e-42	1.835209384115737e-05	4.494754141507157e-38	5.150608837756485e-36	0.002102995044771071	-4.497926822489416e-40	0.0	0.0025483590104186608	0.0	800.642790026585	85.058045640759	7.646299949621276e-36	-0.015561483520603735	-4.603603458229344	-4.138412880267494e-37	0.003426749390615831	0.46036047336008945
3.885	85.03503503846797	0.0	-0.011699788616968127	351.5461323798306	6.106003829493892e-36	-800.6428688496769	0.0	0.0025712385408352633	0.0	0.9999999996844038	-5.05470011024562e-42	2.512970561361622e-05	4.494754138184512e-38	5.1506088316594425e-36	0.0028796521444363747	-4.497926825140518e-40	0.0	0.003284964592974845	0.0	800.6428688496769	85.03503434309654	7.644231343872954e-36	-0.015973599395570172	-4.601056294282557	-4.1361310643228e-37	-0.09795980863532851	0.46020989936402945
3.89	85.01203563322566	0.0	-0.011060724280668316	351.971250047781	6.144219816898897e-36	-800.6429498150707	0.0	0.0025817393956886897	0.0	0.9999999995039301	-5.341170315857106e-42	3.15031399949795e-05	4.494754134871638e-38	5.150608825926002e-36	0.0036099939268419	-4.4979268283875415e-40	0.0	0.004024578448852932	0.0	800.6429498150707	85.01203476764294	7.64216379164786e-36	-0.01641701637568704	-4.59876122147899	-4.13406748668303e-37	-0.09260939131937561	0.4599693606267648
3.895	84.98904763556116	0.0	-0.010373086235813808	352.3962527465078	6.182425469118166e-36	-800.6430330540476	0.0	0.002889039186007608	0.0	0.9999999992672551	-5.6460308215440654e-42	3.828572468099864e-05	4.4947541311455547e-38	5.1506088198244945e-36	0.004387220880714613	-4.4979268326457236e-40	0.0	0.004852227209883666	0.0	800.6430330540476	84.98904659217777	7.640097264065622e-36	-0.016880820757992743	-4.596513238925345	-4.1320471269619435e-37	-0.09854619327718818	0.45975695000538486
3.9	84.96607053787412	0.0	-0.009422059350512052	352.8211405320767	6.220620791191343e-36	-800.6431186135145	0.0	0.0033564924627765853	0.0	0.9999999989357135	-5.999051306747141e-42	4.613978020361947e-05	4.4947541265724987e-38	5.150608812759107e-36	0.005287229348534111	-4.497926838610724e-40	0.0	0.0058137914703065155	0.0	800.6431186135145	84.96606930669765	7.638031716082707e-36	-0.01726269094082177	-4.594545156847593	-4.130268639074388e-37	0.019650563277575327	0.45945871787298587
3.905	84.943102776739	0.0	-0.0075958023107408805	353.2459134541745	6.258805787606558e-36	-800.6432037529389	0.0	0.003252611533345373	0.0	0.9999999985241171	-6.367315032363283e-42	5.4332969752716586e-05	4.494754121506499e-38	5.150608805388635e-36	0.006226099713549509	-4.497926846016043e-40	0.0	0.006745596036587841	0.0	800.6432037529389	84.94310144986973	7.635967022113499e-36	-0.016826224320016715	-4.592336475268629	-4.128282666070502e-37	0.025725171253295858	0.4592408527833593
3.91	84.92014781389254	0.0	-0.006623149145882631	353.67057156841753	6.296980463362887e-36	-800.6432885423183	0.0	0.0029180794155323248	0.0	0.9999999980759506	-6.713525340459666e-42	6.203551138998457e-05	4.494754116468714e-38	5.150608798459542e-36	0.00710874596972437	-4.497926854079323e-40	0.0	0.007581564210557862	0.0	800.6432885423183	84.92014633858943	7.63390346786533e-36	-0.017159278668533343	-4.589824435969566	-4.126033512732253e-37	-0.08951136181160549	0.4590697184188554
3.915	84.89720465840789	0.0	-0.0058430997565102035	354.09511493695567	6.335144824028156e-36	-800.6433754205832	0.0	0.002890056654322061	0.0	0.9999999976041365	-7.036652727550704e-42	6.922450055819786e-05	4.494754111526217e-38	5.150608791992441e-36	0.007932543448108205	-4.497926862568057e-40	0.0	0.008409504454789628	0.0	800.6433754205832	84.89720303582811	7.631840974323037e-36	-0.017597032854883097	-4.587482134306479	-4.123928105848127e-37	-0.09215005990578981	0.4588407563209896
3.92	84.87427323249325	0.0	-0.005030951673696662	354.5195436183352	6.373298874864094e-36	-800.6434645523867	0.0	0.003174311659565789	0.0	0.9999999970551757	-7.374726689632298e-42	7.674602349347256e-05	4.494754106106438e-38	5.1506087852261915e-36	0.008794446489810159	-4.497926872444797e-40	0.0	0.009318877759551068	0.0	800.6434645523867	84.8742714605229	7.629779534835396e-36	-0.018058477511056485	-4.585135060171316	-4.121819162774233e-37	-0.1043935658115762	0.4586323313569931
3.925	84.85135327315291	0.0	-0.0040141532251076655	354.94385767048215	6.411442621077369e-36	-800.6435560161129	0.0	0.0036780720282954668	0.0	0.9999999963615949	-7.759476392040647e-42	8.530599568186061e-05	4.4947540996290185e-38	5.150608777525771e-36	0.009775347051321206	-4.497926884923491e-40	0.0	0.010372567779383331	0.0	800.6435560161129	84.85135135339584	7.627719126509115e-36	-0.018490811465854476	-4.583068614229546	-4.1199522009624245e-37	0.014435621854463841	0.4583091348632957
3.93	84.82844287744346	0.0	-0.0020485030502469534	355.3680571464416	6.449576067456358e-36	-800.6436472741505	0.0	0.0035675366161913784	0.0	0.9999999955546027	-8.163402636017071e-42	9.42926106047685e-05	4.494754092474378e-38	5.150608769441548e-36	0.010805137269860704	-4.497926899442653e-40	0.0	0.011394591736214077	0.0	800.6436472741505	84.82844098274155	7.625659600330604e-36	-0.018045893607609803	-4.580832071500396	-4.117940483098603e-37	0.029414191706883648	0.4580926506937257
3.935	84.8055453132996	0.0	-0.0009254046653443383	355.7921420976369	6.487699218625586e-36	-800.6437380978168	0.0	0.0032455331136592327	0.0	0.9999999947155767	-8.546073555552171e-42	0.00010280633371627216	4.494754085361371e-38	5.1506087617827595e-36	0.011780738079065572	-4.497926914538132e-40	0.0	0.012324368484627212	0.0	800.6437380978168	84.80554333043108	7.623601211490473e-36	-0.01836249893857747	-4.578352494649115	-4.115720633299591e-37	-0.08736864551972465	0.45791860461745526
3.94	84.7826592847302	0.0	-4.6612532337857355e-06	356.21611259425714	6.525812080875106e-36	-800.6438309829383	0.0	0.0032280030297584727	0.0	0.9999999938589971	-8.906517069734897e-42	0.00011082553800551466	4.494754078363572e-38	5.150608754568808e-36	0.012699671205964115	-4.497926929949456e-40	0.0	0.013249123233930227	0.0	800.6438309829383	84.78265720109479	7.621543857584848e-36	-0.018796828795253462	-4.576094543576185	-4.113691314684573e-37	-0.09333418315497453	0.45770462682272445
3.945	84.75978443185755	0.0	0.0009526012167177524	356.63996868827996	6.563914658876046e-36	-800.643926108069	0.0	0.0035293214605252327	0.0	0.9999999928943899	-9.283470228023097e-42	0.00011921205147297914	4.4947540707360415e-38	5.150608747024428e-36	0.013660694865354593	-4.49792694730438e-40	0.0	0.014260199355095444	0.0	800.643926108069	84.75978224990072	7.619487508342861e-36	-0.019256174235820257	-4.573892748260278	-4.1117119777748145e-37	-0.09293802865346507	0.4574836865917511
3.95	84.73692024790687	0.0	0.00221076539711131	357.06371042943675	6.602006957098652e-36	-800.6440235183534	0.0	0.003971028977763933	0.0	0.9999999917223005	-9.708531748837354e-42	0.00012866888740393516	4.494754061755807e-38	5.150608738517243e-36	0.01474436844646491	-4.497926968392226e-40	0.0	0.01539781535884556	0.0	800.6440235183534	84.73691801111327	7.617432123037815e-36	-0.01959524499625362	-4.57191958119599	-4.109929024872554e-37	0.023906804287608663	0.4571982085727652
3.955	84.71406543702159	0.0	0.0042816694534124206	357.4873378781	6.640088980992678e-36	-800.6441203425472	0.0	0.0038956380928298275	0.0	0.9999999904176633	-1.0147609376958844e-41	0.00013843755591485925	4.4947540520574034e-38	5.1506087297294904e-36	0.01586377541072924	-4.497926991864879e-40	0.0	0.01651383346499327	0.0	800.6441203425472	84.71406337547452	7.615377606980863e-36	-0.019173546827370835	-4.569695228864154	-4.1079300785122095e-37	0.015793451949501665	0.4569722520878953
3.96	84.69122346676197	0.0	0.005442314471146872	357.91085108521185	6.678160735132819e-36	-800.6442171849037	0.0	0.0035577011587721173	0.0	0.9999999890970787	-1.05625389561341e-41	0.0001476689748214529	4.4947540424982004e-38	5.1506087214250414e-36	0.016921618106087298	-4.4979270156244526e-40	0.0	0.017533039770825494	0.0	800.6442171849037	84.69122138055697	7.6133242208381e-36	-0.019570217784914593	-4.56722598896917	-4.105719148125272e-37	-0.09623816037891142	0.4568239816146754
3.965	84.66839303226918	0.0	0.006504699370004531	358.33425011114804	6.716222224930378e-36	-800.6443161062324	0.0	0.0035984396800475995	0.0	0.9999999877474939	-1.0961344720540673e-41	0.00015654166855379507	4.4947540329494546e-38	5.150608713443303e-36	0.017938353925403147	-4.4979270399057826e-40	0.0	0.018563916803321163	0.0	800.6443161062324	84.66839091918214	7.611271871216213e-36	-0.020003563662078155	-4.564930624828871	-4.103655655780996e-37	-0.0953102701878633	0.45659254984180137
3.97	84.6455740493007	0.0	0.007628592562694664	358.7575350135198	6.754273455563125e-36	-800.6444172611111	0.0	0.003956130069148717	0.0	0.9999999862345397	-1.138311535931085e-41	0.00016592528845119976	4.494754022465855e-38	5.150608705001938e-36	0.019013637572736438	-4.49792706712641e-40	0.0	0.019697264584156264	0.0	800.6444172611111	84.64557192011239	7.609220551809361e-36	-0.02046109005117749	-4.562722648849397	-4.101668316827072e-37	-0.06375619763728085	0.45631680686843457
3.975	84.62276552432445	0.0	0.009272334498839576	359.1807058483597	6.792314432069842e-36	-800.6445204256567	0.0	0.004253086210094406	0.0	0.9999999844423566	-1.1853750334924375e-41	0.00017639604985433444	4.494754010300472e-38	5.1506086955826026e-36	0.02021349846369382	-4.497927099370824e-40	0.0	0.020915684032874762	0.0	800.6445204256567	84.62276352940756	7.607170188685641e-36	-0.020581908746202228	-4.560654114773399	-4.099801861231332e-37	0.024713362339006593	0.4560721072909155
3.98	84.59996732515809	0.0	0.011256117878639187	359.6037626658116	6.83034515898334e-36	-800.6446224008604	0.0	0.0041069053542023325	0.0	0.9999999825296328	-1.2327007779951734e-41	0.00018692515638157975	4.4947539975703824e-38	5.150608686110769e-36	0.021420045215717536	-4.497927133783997e-40	0.0	0.022092225751152134	0.0	800.6446224008604	84.5999656212913	7.605120770494493e-36	-0.020371606599670328	-4.558385573310868	-4.097765494952947e-37	-0.012749046718516822	0.45584034017582165
3.985	84.57718139870936	0.0	0.012523282162131536	360.0267055246557	6.868365641571547e-36	-800.6447252391007	0.0	0.0038797027024838403	0.0	0.999999980630132	-1.2771974009227958e-41	0.00019682483547270167	4.4947539851467894e-38	5.1506086772051615e-36	0.02255446489751512	-4.4979271679592645e-40	0.0	0.023203678704241254	0.0	800.6447252391007	84.57717977549984	7.603072431864648e-36	-0.020770497790361254	-4.556040380389467	-4.095663592036183e-37	-0.09313038635134971	0.45569921238248096
3.99	84.55440656601144	0.0	0.01373839251176995	360.4495344820652	6.906375884964448e-36	-800.6448301653272	0.0	0.004022174877002816	0.0	0.9999999786517968	-1.3212771147776025e-41	0.00020663175998192476	4.494753972405263e-38	5.1506086683830033e-36	0.02367825568914948	-4.497927203552888e-40	0.0	0.024355946928820316	0.0	800.6448301653272	84.55440502324923	7.601025090211134e-36	-0.021204859601338694	-4.553837670093941	-4.093684035071916e-37	-0.10040773253659255	0.4554944482462959
3.995	84.53164260156748	0.0	0.015058915641586637	360.87224959305036	6.944375894106072e-36	-800.6449373227628	0.0	0.004471032011887878	0.0	0.999999976414172	-1.3687383200994446e-41	0.00021719100407445856	4.4947539582029955e-38	5.150608658884068e-36	0.024888255959024923	-4.497927243811577e-40	0.0	0.02563680325056562	0.0	800.6449373227628	84.53164116789432	7.598978727970981e-36	-0.021660109578468163	-4.551807496009985	-4.091852820167537e-37	-0.02158028199165998	0.4551858652166556
4.0	84.50888799943861	0.0	0.01718327036161715	361.2948509093714	6.982365673658009e-36	-800.6450456166173	0.0	0.004558416162976752	0.0	0.9999999738578434	-1.420280707772341e-41	0.00022865823608811953	4.4947539422118296e-38	5.150608648568313e-36	0.026202303985843514	-4.497927289804297e-40	0.0	0.026942693287579554	0.0	800.6450456166173	84.50888702065278	7.596933243555594e-36	-0.021464036952330033	-4.549728782765547	-4.089980324115533e-37	0.027271982974629017	0.45498105188876414
4.005	84.48614482046011	0.0	0.01898087745103404	361.71733848211704	7.020345228231296e-36	-800.6451526971595	0.0	0.004321413428675734	0.0	0.999999971233327	-1.47063740202858e-41	0.0002398616731642904	4.494753926017719e-38	5.150608638489858e-36	0.027486123342086912	-4.497927337023834e-40	0.0	0.028180687042550945	0.0	800.6451526971595	84.48614420448881	7.594888775541345e-36	-0.02154909967879236	-4.547396344221492	-4.087889883010564e-37	-0.05306154320587695	0.4547705909445594
4.01	84.46341344141364	0.0	0.02036229550071092	362.13971237052783	7.058314563128862e-36	-800.6452614365336	0.0	0.004249680261590001	0.0	0.9999999686261637	-1.5184334043791677e-41	0.0002504954034606661	4.494753910125229e-38	5.150608628923915e-36	0.02870465911164287	-4.4979273839311555e-40	0.0	0.02939813075889674	0.0	800.6452614365336	84.46341304297111	7.592845352718735e-36	-0.021953099382410014	-4.5450934716065206	-4.085822721486208e-37	-0.09137489666665664	0.45460118826704643
4.015	84.44069329215745	0.0	0.021757289668333898	362.56197263130434	7.096273683444277e-36	-800.6453722815237	0.0	0.0045301855567880306	0.0	0.9999999658342121	-1.5674631235962117e-41	0.0002614036130495601	4.4947538932944237e-38	5.150608619111052e-36	0.02995464789556823	-4.497927434163129e-40	0.0	0.030695933322972123	0.0	800.6453722815237	84.44069312709426	7.590802940574163e-36	-0.022388916426755386	-4.542879346144228	-4.0838319596594995e-37	-0.08663810938807712	0.45437054169061347
4.02	84.41798380376648	0.0	0.023453582188501607	362.9841193181492	7.134222594004626e-36	-800.6454853020513	0.0	0.004970578880147218	0.0	0.999999962636224	-1.621221644540132e-41	0.00027336389394847546	4.494753874225625e-38	5.150608608351787e-36	0.031325195179167056	-4.4979274917003704e-40	0.0	0.03211989928081862	0.0	800.6454853020513	84.4179840097928	7.588761500147057e-36	-0.02270007713603484	-4.54086134350599	-4.082009447707109e-37	0.020705022779627	0.45409085477374833
4.025	84.39528368190192	0.0	0.025889917165866676	363.40615248504935	7.172161299685546e-36	-800.6455976313788	0.0	0.004870239796334003	0.0	0.9999999591995922	-1.676485265127099e-41	0.00028565903181323766	4.4947538539527424e-38	5.150608597291252e-36	0.032734114250577935	-4.4979275535312706e-40	0.0	0.03351512020855158	0.0	800.6455976313788	84.39528469983097	7.586720946725884e-36	-0.022326635144506324	-4.538688832855324	-4.080057122124571e-37	0.01236680819255946	0.4538705681075883
4.03	84.37259588050686	0.0	0.027488351504060936	363.82807218549874	7.210089805288786e-36	-800.6457101720423	0.0	0.004596635091334906	0.0	0.9999999557755571	-1.7292761239192084e-41	0.0002974040257285037	4.4947538339524227e-38	5.1506085867256113e-36	0.03407999147128252	-4.497927615135535e-40	0.0	0.03483195916202769	0.0	800.6457101720423	84.37259730547508	7.584681458618752e-36	-0.02269715049119515	-4.536367846105804	-4.0779787109235275e-37	-0.090071679187793	0.4537261965389956
4.035	84.34991899707457	0.0	0.02901555484839484	364.2498784763017	7.248008115907086e-36	-800.6458246697143	0.0	0.004715446812523447	0.0	0.9999999522691329	-1.7812589925921487e-41	0.0003089692567335056	4.494753813652344e-38	5.1506085763216996e-36	0.035405269383562164	-4.497927678222114e-40	0.0	0.036182835166407745	0.0	800.6458246697143	84.34992082252383	7.582642951080466e-36	-0.02310751175959144	-4.534203102082776	-4.076033184334782e-37	-0.096082621713804	0.45352210134824156
4.04	84.32725278269804	0.0	0.030638000056747453	364.6715714115976	7.28591623640601e-36	-800.6459412889794	0.0	0.005160515251816012	0.0	0.9999999483983499	-1.836471928977516e-41	0.00032125311833498344	4.4947537914324885e-38	5.150608565271319e-36	0.036812896305231366	-4.4979277478641256e-40	0.0	0.03766121388661749	0.0	800.6459412889794	84.32725506210204	7.580605407249256e-36	-0.02354278930544817	-4.532194161345397	-4.074221044501555e-37	-0.017094103832786894	0.45322263981975963
4.045	84.30459568195336	0.0	0.03306500716924771	365.09315104212465	7.323814171355215e-36	-800.6460589431127	0.0	0.005258106520498686	0.0	0.9999999440708432	-1.895800588082581e-41	0.000334452652465393	4.4947537668003515e-38	5.1506085533972156e-36	0.03832545158095562	-4.4979278257234e-40	0.0	0.03916755044589145	0.0	800.6460589431127	84.30459893897155	7.578568734875927e-36	-0.023326788355702274	-4.5301446802111425	-4.07237517834162e-37	0.027278115032940663	0.4530226806596449
4.05	84.2819498203022	0.0	0.0351313384495006	365.51461741823	7.36170192529817e-36	-800.6461754022145	0.0	0.005020407824160851	0.0	0.9999999396609714	-1.9539411151437247e-41	0.00034738784910990636	4.4947537419017645e-38	5.1506085417609095e-36	0.0398077160169102	-4.497927905064558e-40	0.0	0.04060579134468582	0.0	800.6461754022145	84.28195388673764	7.576533055249454e-36	-0.023425717030114614	-4.527881776112963	-4.070347223991906e-37	-0.05278360054478629	0.4528189427016316
4.055	84.25931541489835	0.0	0.03682924388618579	365.9359705986123	7.399579503489579e-36	-800.6462934686525	0.0	0.004993205995243626	0.0	0.9999999352638786	-2.00983351090567e-41	0.00035982287795225434	4.494753717256938e-38	5.1506085305745286e-36	0.04123266544758509	-4.497927984175802e-40	0.0	0.042036239493520214	0.0	800.6462934686525	84.25932010042133	7.5744983861521e-36	-0.023807620458899406	-4.5256465102366885	-4.068340731326742e-37	-0.08974296985306529	0.4526536218374439
4.06	84.23669191735164	0.0	0.03855979427596484	366.3572106374911	7.437446910800457e-36	-800.6464135336234	0.0	0.005325704522043499	0.0	0.999999930564765	-2.0675045845238388e-41	0.00037265362987880767	4.4947536910992754e-38	5.150608519032179e-36	0.042702961412942775	-4.49792806872091e-40	0.0	0.04356194145375436	0.0	800.6464135336234	84.23669726026705	7.572464700802591e-36	-0.024222430098338053	-4.523526625569474	-4.066432418022816e-37	-0.056099388205940216	0.4523874475888233
4.065	84.21407834866925	0.0	0.04079216913902296	366.7783375862675	7.475304151852824e-36	-800.6465354288505	0.0	0.005641873208130119	0.0	0.9999999252846863	-2.1300233274578115e-41	0.0003865628989795244	4.4947536619069775e-38	5.1506085065196435e-36	0.04429684635896256	-4.497928163718562e-40	0.0	0.04517821907062331	0.0	800.6465354288505	84.21408471782101	7.570431943688987e-36	-0.024315914710305857	-4.521500947939454	-4.064605142931313e-37	0.024028405322364343	0.45215647940154213
4.07	84.1914747339873	0.0	0.04332251358384897	367.1993514934766	7.513151231033951e-36	-800.6466560717759	0.0	0.0054834351407226575	0.0	0.9999999197732476	-2.1929672466381889e-41	0.0004005667619830625	4.4947536316376457e-38	5.150608493922071e-36	0.045901570977220196	-4.497928262878693e-40	0.0	0.04674910752460898	0.0	800.6466560717759	84.19148242346921	7.568400110052693e-36	-0.02412610774900982	-4.5193326977222155	-4.062658735757692e-37	-0.01091305914279802	0.45193458738584075
4.075	84.16888287891884	0.0	0.04521297521322152	367.6202524237104	7.550988154133823e-36	-800.6467775648879	0.0	0.005332900452502659	0.0	0.9999999143024175	-2.2533430531818015e-41	0.0004139992672287996	4.4947536017751066e-38	5.15060848183836e-36	0.04744082282263331	-4.497928361308341e-40	0.0	0.04827687096706803	0.0	800.6467775648879	84.16889146291496	7.566369291010496e-36	-0.024478745983615418	-4.5171076182711545	-4.060664269288438e-37	-0.08441690882408869	0.45178963522350446
4.08	84.14630168530658	0.0	0.047083933943998506	368.04104042591774	7.588814925544739e-36	-800.6469009245103	0.0	0.005569941384760638	0.0	0.9999999085987884	-2.314269425509582e-41	0.0004275542632398239	4.4947535708181137e-38	5.150608469644487e-36	0.04899411108564928	-4.497928463926416e-40	0.0	0.04987254163447822	0.0	800.6469009245103	84.14631118288199	7.564339431789213e-36	-0.02487029673624667	-4.515000762628082	-4.058770414732185e-37	-0.08576194566848305	0.45158152085594705
4.085	84.12373065079197	0.0	0.04917910108761694	368.4617155415677	7.626631548993477e-36	-800.6470262883407	0.0	0.006053716522272213	0.0	0.9999999022704713	-2.3796836251463607e-41	0.0004421077182109968	4.494753536661388e-38	5.1506084565526393e-36	0.0506618143376898	-4.497928577783501e-40	0.0	0.05160680366995228	0.0	800.6470262883407	84.12374125021945	7.562310503196877e-36	-0.025204412078755345	-4.513057200870682	-4.057014804811162e-37	0.021792222273774323	0.4513109814671292
4.09	84.10116828158404	0.0	0.05210100462159288	368.88227783924515	7.664438030666207e-36	-800.6471510203037	0.0	0.005954053012748431	0.0	0.9999998955260119	-2.4471082586571837e-41	0.00045710845772110875	4.49475350045864e-38	5.150608443058234e-36	0.052380772638456446	-4.497928699127857e-40	0.0	0.05331251421309047	0.0	800.6471510203037	84.10118076766281	7.56028243003213e-36	-0.024785719770020257	-4.510988076357592	-4.055154689473698e-37	0.02274279792156813	0.451104540654355
4.095	84.07861785807245	0.0	0.05419216374799523	369.30272736565996	7.702234374757008e-36	-800.6472757382464	0.0	0.005707913204117857	0.0	0.9999998888000008	-2.5122136958742943e-41	0.00047159321877637454	4.4947534645413417e-38	5.150608430027936e-36	0.054040604168863374	-4.497928820140371e-40	0.0	0.054947710895205205	0.0	800.6472757382464	84.07863157321376	7.558255365782705e-36	-0.02510966359023056	-4.50875946377091	-4.053159424622006e-37	-0.0810521186199134	0.4509487925261196
4.1	84.05607810863718	0.0	0.05622392392991066	369.72306417278133	7.740020585923961e-36	-800.6474021895284	0.0	0.00587179791069027	0.0	0.9999998819070646	-2.576922533576022e-41	0.0004859897437598391	4.4947534279083904e-38	5.150608417077039e-36	0.05569032460038401	-4.497928944156134e-40	0.0	0.05662985708738664	0.0	800.6474021895284	84.05609305141783	7.556229260612676e-36	-0.025476876703342467	-4.506629781725262	-4.05124569914394e-37	-0.09065658798292822	0.45075415257629947
4.105	84.0335487978521	0.0	0.058370648007097174	370.1432883137806	7.777796668945514e-36	-800.6475305514253	0.0	0.006375479262169407	0.0	0.999999874381643	-2.645447761160498e-41	0.000501235345245399	4.4947533880992953e-38	5.1506084033623103e-36	0.05743734205575631	-4.497929079551439e-40	0.0	0.058456297357864076	0.0	800.6475305514253	84.03356508808587	7.554204104388977e-36	-0.025870540428138227	-4.504647133681772	-4.049455065251569e-37	0.015462344936570914	0.4504673671099644
4.11	84.01102803746875	0.0	0.06146643095103181	370.563399835853	7.815562628078959e-36	-800.6476589571608	0.0	0.006371849081331579	0.0	0.9999998662560247	-2.7171712896052246e-41	0.0005171925098086015	4.494753345313162e-38	5.1506083890075325e-36	0.059265898657781216	-4.4979292257452414e-40	0.0	0.06028169765813713	0.0	800.6476589571608	84.01104667354319	7.552179813077164e-36	-0.02543333919430591	-4.502588202246235	-4.04760277523195e-37	0.03344464914558475	0.45027124118206197
4.115	83.98851907700559	0.0	0.06379708029282292	370.98339879109307	7.853318468013305e-36	-800.6477866454327	0.0	0.006098858652606337	0.0	0.9999998581002134	-2.7870018879090076e-41	0.0005327285322879104	4.4947533025566234e-38	5.150608375031655e-36	0.06104619594007842	-4.497929372482282e-40	0.0	0.06202889196134306	0.0	800.6477866454327	83.98853937823748	7.550156515890119e-36	-0.025689104214132372	-4.500387937084582	-4.045633038135748e-37	-0.07091970802747648	0.45009466992226344
4.12	83.96602075993279	0.0	0.06600142750596436	371.4032852418332	7.891064194333737e-36	-800.6479159318196	0.0	0.006215493868274805	0.0	0.9999998498261624	-2.855822942483754e-41	0.0005480399498947275	4.494753259356788e-38	5.150608361257719e-36	0.06280075541074044	-4.497929521346731e-40	0.0	0.063809499792551	0.0	800.6479159318196	83.9660426647655	7.548134169273207e-36	-0.02603206594003071	-4.498289373974037	-4.043747676043244e-37	-0.08547576374620172	0.44991013989679907
4.125	83.94353266091755	0.0	0.06830032048311956	371.8230592349857	7.928799811255875e-36	-800.6480470166942	0.0	0.006687599744627969	0.0	0.999999840894404	-2.9280188336346287e-41	0.0005641022065290118	4.494753212906002e-38	5.150608346808335e-36	0.06464135472453184	-4.497929682044488e-40	0.0	0.06572535599475075	0.0	800.6480470166942	83.94355629408933	7.546112752186138e-36	-0.02640517191228802	-4.49633466029411	-4.041983110639851e-37	0.008449961672393237	0.44963426002935336
4.13	83.92105295703608	0.0	0.07148238278593923	372.24272081242367	7.96652532255535e-36	-800.6481784417467	0.0	0.006744686000304037	0.0	0.9999998312215315	-3.0039547893471666e-41	0.000580996558696933	4.494753162797478e-38	5.150608331610606e-36	0.06657730519552749	-4.497929856075969e-40	0.0	0.06765756620454272	0.0	800.6481784417467	83.92107936279648	7.544092189501576e-36	-0.026033334954779	-4.494341653672033	-4.040189430980413e-37	0.03475046358173654	0.4494475997783347
4.135	83.89858444776434	0.0	0.07405953765110362	372.6622700378102	8.00424073396619e-36	-800.6483088068259	0.0	0.006493037858334806	0.0	0.9999998214721613	-3.0783198192419235e-41	0.0005975414088152385	4.4947531124823007e-38	5.1506083167270925e-36	0.06847320569362426	-4.4979300314839856e-40	0.0	0.06951768453204896	0.0	800.6483088068259	83.898613042103	7.542072576380915e-36	-0.026206254032462305	-4.4922158635555345	-4.038285714793924e-37	-0.05778272559224379	0.4492587473623287
4.14	83.87612650853134	0.0	0.07644259082040121	373.0817069589725	8.04194604976809e-36	-800.6484406193833	0.0	0.0065902817833592845	0.0	0.9999998116175979	-3.1514509812847823e-41	0.00061381174607487	4.494753061802058e-38	5.1506083020905044e-36	0.07033764934808774	-4.497930208784633e-40	0.0	0.07140566119199114	0.0	800.6484406193833	83.87615714809515	7.540053899417306e-36	-0.026525750716329188	-4.490137170702013	-4.036418943730651e-37	-0.08162395602779876	0.4490879009939759
4.145	83.85367870510645	0.0	0.07891191404410941	373.50103162642375	8.079641274500075e-36	-800.6485741185285	0.0	0.007053345353614433	0.0	0.9999998010471872	-3.2277984344429026e-41	0.0006307976489225827	4.494753007623384e-38	5.150608286810222e-36	0.07228409081379004	-4.49793039896463e-40	0.0	0.07342629579304272	0.0	800.6485741185285	83.85371152829202	7.538036145800745e-36	-0.0268775344691549	-4.488171226578194	-4.0346444618705995e-37	0.010022686095817294	0.4488182417562926
4.15	83.83123932628014	0.0	0.08224733922870622	373.9202440869727	8.117326412380715e-36	-800.6487079431757	0.0	0.00712924487933605	0.0	0.9999997896298236	-3.3080180332209726e-41	0.0006486450329155663	4.494752949299722e-38	5.150608270755041e-36	0.07432925078859537	-4.497930604382689e-40	0.0	0.07546867400654876	0.0	800.6487079431757	83.83127548255082	7.5360192585226e-36	-0.02650614108665183	-4.486167510308074	-4.032841079793956e-37	0.037275000286549356	0.4486322364274563
4.155	83.80881111451276	0.0	0.08501002333581646	374.3393443909403	8.155001467945418e-36	-800.6488405922485	0.0	0.006885203771678743	0.0	0.9999997781132148	-3.3867583983361594e-41	0.0006661633146763167	4.4947528906591535e-38	5.150608254995974e-36	0.07633669844083366	-4.49793081158634e-40	0.0	0.0774411395925725	0.0	800.6488405922485	83.80884999134307	7.534003315994486e-36	-0.02665073816079247	-4.484051513619155	-4.030945928990919e-37	-0.05222433766258628	0.44843556235243576
4.16	83.78639346865958	0.0	0.08757555163390274	374.7583325988859	8.192666446618458e-36	-800.6489745709398	0.0	0.006991861793864012	0.0	0.999999766465351	-3.464343948249484e-41	0.0006834246713390666	4.4947528315294733e-38	5.150608239467892e-36	0.07831470466208892	-4.497931021151612e-40	0.0	0.07944416045120838	0.0	800.6489745709398	83.786434903122	7.531988307445988e-36	-0.026947880266622714	-4.481985042745626	-4.029090296416877e-37	-0.07799130402046141	0.4482663557183198
4.165	83.76398582609235	0.0	0.09023148225009338	375.1772087569291	8.230321352543845e-36	-800.6491101263932	0.0	0.0074692928000989	0.0	0.9999997539968566	-3.545280575281709e-41	0.000701431581001953	4.494752768418616e-38	5.1506082232691116e-36	0.08037814500829546	-4.497931245481503e-40	0.0	0.08158395521817398	0.0	800.6491101263932	83.76402998367858	7.529974212761797e-36	-0.027277987649166814	-4.4800398366859895	-4.027333974471113e-37	0.01979802547692755	0.4480083581821461
4.17	83.74158630834907	0.0	0.09378654049070907	375.5959729053096	8.267966189351e-36	-800.6492457215436	0.0	0.007525087255286549	0.0	0.9999997406139992	-3.6299017223411136e-41	0.0007202582285778731	4.49475270087616e-38	5.1506082063331774e-36	0.08253552045034743	-4.4979314862621656e-40	0.0	0.083739733919152	0.0	800.6492457215436	83.74163452379965	7.527960974439598e-36	-0.02684465875241889	-4.478074271800381	-4.0255653608488435e-37	0.04103512081811405	0.44782622818344475
4.175	83.71919788427363	0.0	0.096677444779898	376.0146251100532	8.305600962984328e-36	-800.6493802090237	0.0	0.007276837642812369	0.0	0.9999997271457538	-3.7128863001102177e-41	0.0007387207696415433	4.4947526330928246e-38	5.1506081897246275e-36	0.08465117237737436	-4.497931728579246e-40	0.0	0.08582439434482737	0.0	800.6493802090237	83.71924934696544	7.52594865579019e-36	-0.027012847575777536	-4.476020072119743	-4.023726190656085e-37	-0.05391113354477721	0.4476344724922212
4.18	83.69681965459651	0.0	0.09942958089515473	376.4331654149025	8.34322567735755e-36	-800.6495159455754	0.0	0.007421176825938665	0.0	0.9999997134691804	-3.7950841362616956e-41	0.0007570082752061201	4.4947525644418117e-38	5.150608173273343e-36	0.08674676673678311	-4.497931974644698e-40	0.0	0.08795040490056026	0.0	800.6495159455754	83.69687426572484	7.523937243838217e-36	-0.02728886692859533	-4.47401115358043	-4.021921850263664e-37	-0.07401652775427063	0.4474623363898116
4.185	83.67445115268148	0.0	0.10228848969550387	376.8515938692822	8.380840336912004e-36	-800.6496531515867	0.0	0.007935914533953193	0.0	0.9999996988069372	-3.8810554081168565e-41	0.0007761353007900569	4.494752491030928e-38	5.150608156066912e-36	0.08893856306199834	-4.497932238444011e-40	0.0	0.0902238769474205	0.0	800.6496531515867	83.67450912340738	7.521926725094692e-36	-0.027596985045891694	-4.472090993949726	-4.0201873352583904e-37	0.03279344648711216	0.44722112280502535
4.19	83.65209051385779	0.0	0.10608974493810867	377.2699105106692	8.418444945032428e-36	-800.6497898184439	0.0	0.007907673790105747	0.0	0.9999996832285715	-3.970135245051854e-41	0.0007959539249211129	4.494752413230836e-38	5.150608138238713e-36	0.09120961080056512	-4.4979325187256616e-40	0.0	0.09248925861711689	0.0	800.6497898184439	83.65215340454999	7.519917059977197e-36	-0.027076766848075917	-4.4701310627855175	-4.018424420395452e-37	0.045954725959664565	0.4470367272978587
4.195	83.62974121890679	0.0	0.10908862279661435	377.6881154097856	8.456039508078359e-36	-800.6499256962618	0.0	0.0076754595278126616	0.0	0.9999996676159383	-4.057239449662352e-41	0.000815333007256255	4.4947523354492456e-38	5.1506081208054925e-36	0.0934302907785593	-4.497932799624244e-40	0.0	0.0946881158009526	0.0	800.6499256962618	83.62980791720364	7.517908308913577e-36	-0.027283653720848944	-4.468086039787049	-4.016594353682506e-37	-0.05986941386355715	0.4468487127166898
4.2	83.60740195187101	0.0	0.11203461977593629	378.1062086066085	8.493624029628213e-36	-800.6500627371356	0.0	0.007884422645799099	0.0	0.999999651638766	-4.144284351013171e-41	0.0008346988957403835	4.494752256034322e-38	5.1506081033841695e-36	0.095649458887157	-4.497933087081523e-40	0.0	0.09694683650846089	0.0	800.6500627371356	83.60747247986211	7.515900460911673e-36	-0.027539499885833204	-4.4660943384724785	-4.014803392906557e-37	-0.053264162102401036	0.44664119504475175
4.205	83.58507205108361	0.0	0.11523114633907951	378.5241901443992	8.531198513569672e-36	-800.6502011064435	0.0	0.008349750303421666	0.0	0.999999634450319	-4.235727518797019e-41	0.0008550433175907913	4.4947521707909233e-38	5.1506080850828395e-36	0.09798075873656811	-4.497933396331569e-40	0.0	0.09933886377033159	0.0	800.6502011064435	83.58514688829156	7.513893498692591e-36	-0.02770668451613656	-4.464166669695166	-4.013063236893938e-37	0.03942703207612825	0.4464340773918985
4.21	83.56275039746093	0.0	0.11910635355767554	378.9420600844785	8.568762965436086e-36	-800.6503381411527	0.0	0.00822731653177922	0.0	0.9999996164719549	-4.32910106781499e-41	0.000875817213775053	4.4947520818284625e-38	5.1506080663948706e-36	0.1003612727788795	-4.497933719793929e-40	0.0	0.10169581634027738	0.0	800.6503381411527	83.56283083356172	7.511887398566738e-36	-0.02726516348423278	-4.4622186233851835	-4.011312298128385e-37	0.036133858219789046	0.4462364922167999
4.215	83.54043978071603	0.0	0.12227020904256516	379.3598184693211	8.606317389037273e-36	-800.6504749177138	0.0	0.008093944258063483	0.0	0.9999995984835709	-4.42036084416413e-41	0.0008961208344793644	4.494751993005559e-38	5.1506080481299457e-36	0.10268789724243425	-4.497934043436582e-40	0.0	0.1040145605682833	0.0	800.6504749177138	83.54052474698223	7.509882189575453e-36	-0.027454584432613255	-4.460229548995424	-4.00953164707524e-37	-0.05849855219987182	0.44606131540788657
4.22	83.51813888117597	0.0	0.12542262930789014	379.777465348305	8.643861788801614e-36	-800.650612765396	0.0	0.00839199786355847	0.0	0.9999995798794734	-4.5126185008014855e-41	0.000916646465219534	4.494751901328032e-38	5.150608029665255e-36	0.10503996223513516	-4.497934378157072e-40	0.0	0.10641869086460683	0.0	800.650612765396	83.51822846679053	7.507877861763339e-36	-0.027690730710834124	-4.458296907929575	-4.007791137956993e-37	-0.018247144801100797	0.4458334249195298
4.225	83.49584652069302	0.0	0.1290756280829368	380.1950007698784	8.681396169085422e-36	-800.65075155241	0.0	0.008720828890579435	0.0	0.9999995598611552	-4.609635558262883e-41	0.0009382309750932179	4.4947518028783017e-38	5.1506080102480656e-36	0.10751336593616431	-4.497934738321884e-40	0.0	0.10891702431103661	0.0	800.65075155241	83.49594172706183	7.505874394147849e-36	-0.02760130919695501	-4.4564009543343275	-4.0060816255336665e-37	0.047260747239509515	0.44566515506623966
4.23	83.47356314978718	0.0	0.13291333023446253	380.61242477413447	8.718920533515279e-36	-800.650888425077	0.0	0.008557085250785794	0.0	0.9999995392685048	-4.707160253842094e-41	0.0009599284251470257	4.494751701802759e-38	5.150607990729606e-36	0.10999971168455865	-4.497935108819651e-40	0.0	0.11136844866005498	0.0	800.650888425077	83.47366448867436	7.50387178197364e-36	-0.02734413291090077	-4.454477791828992	-4.004355573428914e-37	0.011893853939379945	0.4454493670627362
4.235	83.4512902889517	0.0	0.13625022344570345	381.0297374237467	8.756434887708146e-36	-800.6510255572721	0.0	0.008548974605644306	0.0	0.9999995186073406	-4.802842776558203e-41	0.0009812160256796021	4.4947516005801355e-38	5.1506079715795174e-36	0.11243909216651976	-4.49793548055049e-40	0.0	0.11381754948039466	0.0	800.6510255572721	83.45139697931289	7.501870041011056e-36	-0.02751744686751699	-4.452530125340341	-4.002610060606249e-37	-0.0561654410361112	0.44528843544190605
4.24	83.42902691904094	0.0	0.13962875000521563	381.4469387600773	8.793939235376603e-36	-800.6511636712322	0.0	0.008957289624109225	0.0	0.9999994969749038	-4.900847656617547e-41	0.0010030203080255214	4.494751494789074e-38	5.150607951964634e-36	0.1149376801037128	-4.497935869756278e-40	0.0	0.11638362393708357	0.0	800.6511636712322	83.42913915230875	7.499869170109572e-36	-0.027733463311692772	-4.450610753712662	-4.000878485516759e-37	0.022223726087446917	0.44506662394594365
4.245	83.4067714126324	0.0	0.1437725252794701	381.86402882476114	8.83143358027036e-36	-800.6513018870309	0.0	0.009126890762018525	0.0	0.9999994738607227	-5.003263881012266e-41	0.0010258060333537028	4.494751381952698e-38	5.150607931467131e-36	0.11754873323609555	-4.497936285621122e-40	0.0	0.11899828554078658	0.0	800.6513018870309	83.40689084365738	7.49786915959894e-36	-0.027346025941124345	-4.448712023370879	-3.999168961791202e-37	0.056077798617864875	0.44490654508989247
4.25	83.38452600468005	0.0	0.14753266519991054	382.2810076706601	8.868917927157093e-36	-800.6514382071949	0.0	0.00892044516438246	0.0	0.9999994504412723	-5.104762997127748e-41	0.001048387719010544	4.494751267824304e-38	5.150607911153314e-36	0.12013640519261279	-4.497936706978186e-40	0.0	0.12155380483727157	0.0	800.6514382071949	83.38465204865301	7.495870001589808e-36	-0.027306189065006436	-4.44679666289621	-3.997452883395065e-37	-0.01698387807380266	0.44468290964752955
4.255	83.36229052775096	0.0	0.15106040009367416	382.69787535396017	8.906392281068187e-36	-800.6515751125914	0.0	0.009059984857920705	0.0	0.9999994267229257	-5.205376546184486e-41	0.0010707723823360237	4.494751152429781e-38	5.1506078910161996e-36	0.12270150010133869	-4.497937133713516e-40	0.0	0.12414929931132802	0.0	800.6515751125914	83.36242287146919	7.493871706623688e-36	-0.02746392081109818	-4.444884530221316	-3.995736697651788e-37	-0.05172978687392107	0.44451855369434007
4.26	83.34006419476589	0.0	0.1546937169129985	383.1146319058718	8.94385664480689e-36	-800.6517129077296	0.0	0.00959523823375867	0.0	0.999999401562019	-5.309859458209895e-41	0.001094017907770138	4.4947510302134013e-38	5.150607870105251e-36	0.12536524266166296	-4.49793758640256e-40	0.0	0.12689813258241267	0.0	800.6517129077296	83.34020317457708	7.491874263607925e-36	-0.027657589587055297	-4.442990600787293	-3.9940260018857185e-37	0.05203415566177993	0.44432952897640804
4.265	83.3178451682122	0.0	0.15922663418880073	383.5312773913958	8.981311024233992e-36	-800.6518493649048	0.0	0.009489842984754592	0.0	0.9999993751644264	-5.417143087423552e-41	0.0011178865412943793	4.494750902193841e-38	5.150607848633344e-36	0.12810038826181352	-4.497938061342319e-40	0.0	0.12961677233875402	0.0	800.6518493649048	83.31799292286327	7.489877675929792e-36	-0.027053442905079956	-4.441127081310489	-3.9923497371722236e-37	0.06545346651387914	0.44416093827156966
4.27	83.29563685119719	0.0	0.16299061828344064	383.9478118495147	9.018755422851037e-36	-800.6519848351036	0.0	0.009342705567944405	0.0	0.9999993486885618	-5.522491761651108e-41	0.0011413246829850233	4.494750773991443e-38	5.150607827548526e-36	0.1307862031724449	-4.4979385376904874e-40	0.0	0.13229326033013697	0.0	800.6519848351036	83.29579189585287	7.48788191204995e-36	-0.027144415156567438	-4.439268069744648	-3.990686932363271e-37	-0.04097324982400459	0.44394571517535236
4.275	83.27343780813469	0.0	0.16673779089638743	384.36423532603	9.056189844762991e-36	-800.6521208935263	0.0	0.009647340491598976	0.0	0.9999993214143974	-5.628801044989715e-41	0.001164976542577126	4.494750642116995e-38	5.150607806271426e-36	0.13349650843905927	-4.497939028401647e-40	0.0	0.1350570197986084	0.0	800.6521208935263	83.27360026655417	7.48588699258292e-36	-0.027285733358028065	-4.437385864495269	-3.988991164501723e-37	0.006888555097917607	0.4437391211355357
4.28	83.2512467288375	0.0	0.17102808686643747	384.78054786357075	9.093614293803624e-36	-800.6522573322023	0.0	0.009956588762589045	0.0	0.9999992923261734	-5.739852516028551e-41	0.0011896834517346971	4.4947505016746685e-38	5.1506077840455054e-36	0.1363277136403879	-4.497939551750824e-40	0.0	0.13790937237082707	0.0	800.6522573322023	83.25141800828898	7.48389291842713e-36	-0.027057518221199898	-4.435526530314131	-3.9873152569814044e-37	0.06366727175245851	0.44359834448082547
4.285	83.22906448983278	0.0	0.1753848793955865	385.19674951731406	9.131028774954451e-36	-800.6523914327577	0.0	0.009790292419933939	0.0	0.9999992625476878	-5.851199514324162e-41	0.0012144561103232467	4.4947503581039784e-38	5.150607761760238e-36	0.13916645326029473	-4.497940087519294e-40	0.0	0.14071408455013273	0.0	800.6523914327577	83.22924497422181	7.481899673934247e-36	-0.026771580728014693	-4.433686783052101	-3.985664662584214e-37	0.022299320129693635	0.4433742860145268
4.29	83.20689225296245	0.0	0.17932078242915409	385.61284032872396	9.168433291925041e-36	-800.6525254675943	0.0	0.009849684206517348	0.0	0.9999992325510969	-5.961111532466406e-41	0.0012389095122806119	4.494750213678272e-38	5.1506077397621695e-36	0.1419686088224254	-4.497940627212042e-40	0.0	0.14353581122298326	0.0	800.6525254675943	83.20708114901291	7.479907254402455e-36	-0.02685123042160798	-4.431842588524878	-3.984011624970707e-37	-0.03887812678684411	0.4432013113496546
4.295	83.18472895892604	0.0	0.18332741659339863	386.0288203442755	9.205827848888714e-36	-800.6526600164508	0.0	0.010331440005601636	0.0	0.9999992010800871	-6.074140891831897e-41	0.0012640564653640946	4.494750062353184e-38	5.150607717140191e-36	0.14485023963771454	-4.497941193432343e-40	0.0	0.1464955507660512	0.0	800.6526600164508	83.18492659932875	7.477915668361023e-36	-0.026973390169074355	-4.429950393294746	-3.982302773101133e-37	0.06126160134370118	0.44303739651243296
4.3	83.1625727264509	0.0	0.18822546735317444	386.44468961076717	9.243212450065147e-36	-800.6527934594648	0.0	0.010383118571784627	0.0	0.9999991679115202	-6.190882779356057e-41	0.0012900293877223224	4.494749903073786e-38	5.15060769377519e-36	0.14782651973020922	-4.497941790194872e-40	0.0	0.149470095127787	0.0	800.6527934594648	83.16278156445591	7.475924943591164e-36	-0.026339306142466556	-4.428121920551102	-3.98065793619327e-37	0.07565426835575047	0.4428768148321339
4.305	83.14042684360265	0.0	0.19241400730243138	386.8604481741537	9.280587099590414e-36	-800.652925161618	0.0	0.010189181506315096	0.0	0.9999991345477057	-6.305987272445194e-41	0.0013156380199983934	4.4947497430597896e-38	5.1506076707378324e-36	0.15076105531783765	-4.497942390470411e-40	0.0	0.15238908061281004	0.0	800.652925161618	83.14064532136356	7.47393500408253e-36	-0.026351882575505355	-4.426339728892023	-3.9790636623385965e-37	-0.024067830572784984	0.4426405161757833
4.31	83.11829000930408	0.0	0.19656646328345426	387.2760960792663	9.317951801479348e-36	-800.6530570688674	0.0	0.010466163177900265	0.0	0.9999991003657046	-6.421635934623073e-41	0.0013413677199439736	4.494749579320724e-38	5.150607647591491e-36	0.1537094643498132	-4.497943005466862e-40	0.0	0.1553874155017546	0.0	800.6530570688674	83.1185182405245	7.471945887791661e-36	-0.026418425774401018	-4.42449039868175	-3.9773980597813334e-37	0.015999123073376656	0.44245193253014636
4.315	83.09616089621437	0.0	0.2012133948499204	387.6916333702624	9.355306559702306e-36	-800.6531890775989	0.0	0.01080491926129428	0.0	0.999999064089485	-6.541991525378772e-41	0.0013681446249742637	4.4947494057576166e-38	5.150607623503275e-36	0.15677787445904576	-4.497943658142015e-40	0.0	0.1584827968600135	0.0	800.6531890775989	83.09640039161098	7.46995760393903e-36	-0.026162277390182946	-4.422661076841432	-3.9757489265324915e-37	0.07539103234254733	0.4423303607979661
4.32	83.07404013297429	0.0	0.2060032134981532	388.1070600950691	9.392651378589096e-36	-800.6533184598994	0.0	0.010648913934386441	0.0	0.9999990269156198	-6.662929152545186e-41	0.0013950510224625832	4.494749228108985e-38	5.1506075992985676e-36	0.1598611234377744	-4.497944326967656e-40	0.0	0.16153348598420547	0.0	800.6533184598994	83.07429155035615	7.467970130801856e-36	-0.025782412044289896	-4.420891814144786	-3.9741612014600745e-37	0.04029961134406103	0.442107549031306
4.325	83.0519290706589	0.0	0.2103561581139561	388.5223762988455	9.429986262182496e-36	-800.6534473610166	0.0	0.010715311810991657	0.0	0.9999989894443655	-6.782518318429035e-41	0.0014216574121816252	4.4947490492414184e-38	5.150607575363595e-36	0.16290999413948748	-4.4979450011442e-40	0.0	0.16460319669888798	0.0	800.6534473610166	83.05219146462734	7.465983441723275e-36	-0.02578723467516922	-4.419134324246936	-3.972586372997459e-37	-0.024259809904124754	0.4419200913526562
4.33	83.0298265514451	0.0	0.21478301466688018	388.93758202465074	9.467311214348377e-36	-800.6535764061526	0.0	0.011214140015014792	0.0	0.9999989502162691	-6.905362074386806e-41	0.0014489878883924498	4.494748862193061e-38	5.1506075507773166e-36	0.16604183924354818	-4.4979457069296945e-40	0.0	0.16781581116753358	0.0	800.6535764061526	83.03010033350407	7.463997557274383e-36	-0.025836060734934867	-4.41726433608333	-3.970897545947267e-37	0.07506131930960064	0.4417902037901045
4.335	83.00773075607118	0.0	0.22008579375822104	389.3526773012251	9.50462623768445e-36	-800.6537038001275	0.0	0.011209504052085614	0.0	0.9999989090909303	-7.031706661967278e-41	0.0014770972353158856	4.4947486663113426e-38	5.150607525491589e-36	0.1692629365781672	-4.497946446849162e-40	0.0	0.17102709753063008	0.0	800.6537038001275	83.0080187162491	7.462012533957239e-36	-0.025135878321095245	-4.415480951154649	-3.969293239864242e-37	0.08946698629067283	0.4416387253360545
4.34	82.98564504499261	0.0	0.22468441149613894	389.7676622078509	9.541931339319688e-36	-800.6538293017016	0.0	0.011064456216034598	0.0	0.9999988677392567	-7.156367828508405e-41	0.001504832052088277	4.4947484695593167e-38	5.150607500541467e-36	0.1724411160040315	-4.4979471908421925e-40	0.0	0.17419683074956044	0.0	800.6538293017016	82.98594542349521	7.460028253949254e-36	-0.025075240370274147	-4.413783187235273	-3.967774962989284e-37	-0.01150609707431128	0.4413798184578748
4.345	82.96356804229738	0.0	0.22926761369666826	390.1825367703274	9.57922652155972e-36	-800.6539546433522	0.0	0.011393467374705934	0.0	0.9999988252387588	-7.282142196688146e-41	0.0015328145358192008	4.4947482675463945e-38	5.15060747536858e-36	0.17564767613877308	-4.4979479555048596e-40	0.0	0.17746081872251368	0.0	800.6539546433522	82.96388104162577	7.458044774561418e-36	-0.02506869093532382	-4.41194390430771	-3.966116868595819e-37	0.04794741241131422	0.4412204434193287
4.35	82.94149814759905	0.0	0.23447568917197156	390.5973010219194	9.616511787398027e-36	-800.6540794269707	0.0	0.011664651822053344	0.0	0.9999987803233511	-7.412614208293916e-41	0.0015618421588876092	4.4947480542688116e-38	5.1506074492564024e-36	0.1789740007030925	-4.497948763615601e-40	0.0	0.1808024953169799	0.0	800.6540794269707	82.9418259277516	7.456062131885756e-36	-0.024608195824304784	-4.410152971045278	-3.964503510303067e-37	0.09122250148270306	0.4411096323228077
4.355	82.91943691958615	0.0	0.2395485109393011	391.01195503099115	9.65378714299911e-36	-800.654201245746	0.0	0.011497587922931396	0.0	0.9999987346043129	-7.542976341311677e-41	0.0015908453360644473	4.4947478373887005e-38	5.150607423165321e-36	0.1822975241218598	-4.497949586186226e-40	0.0	0.18409631162980267	0.0	800.654201245746	82.91977938455861	7.454080258660836e-36	-0.024276366698019178	-4.408462008852136	-3.9629877438188e-37	0.0361517503118678	0.44086102382205694
4.36	82.89738482305813	0.0	0.24432720763201848	391.42649882917965	9.6910525911886e-36	-800.6543224393853	0.0	0.01165714863113411	0.0	0.9999986882994564	-7.672629901247349e-41	0.0016196908688343645	4.49474761793736e-38	5.15060739721583e-36	0.18560298295191868	-4.497950419297305e-40	0.0	0.1874358387184061	0.0	800.6543224393853	82.89774134522068	7.45209914780641e-36	-0.024209996560799207	-4.406739949791216	-3.961441791210971e-37	0.009479600126733809	0.4406750145844946
4.365	82.87534048201873	0.0	0.24934899280427797	391.84093245884304	9.728308135771418e-36	-800.6544433709191	0.0	0.012121959986560907	0.0	0.9999986396286348	-7.806464407475385e-41	0.0016494665853433732	4.494747387486471e-38	5.150607370429744e-36	0.1890150332861733	-4.497951294976681e-40	0.0	0.1909085244516881	0.0	800.6544433709191	82.8757121019096	7.450118828389563e-36	-0.024052201845991276	-4.404913937098343	-3.959793725461236e-37	0.09315077858705681	0.44058987574381003
4.37	82.85330309753235	0.0	0.25495335259942487	392.25525595841793	9.765553780222855e-36	-800.6545614936513	0.0	0.0119980317945499	0.0	0.9999985893169264	-7.942317452096707e-41	0.0016796913896045126	4.4947471494839235e-38	5.150607343240276e-36	0.19247854552622923	-4.497952200178475e-40	0.0	0.19434570737314552	0.0	800.6545614936513	82.85369206354703	7.448139340462839e-36	-0.02338365301568561	-4.403202925083842	-3.958255927941863e-37	0.08910098052019062	0.4404104333936307
4.375	82.83127530363191	0.0	0.25995884547093284	392.66946938490247	9.802789529656896e-36	-800.6546780640654	0.0	0.01199231230320411	0.0	0.9999985386766497	-8.076632841511088e-41	0.001709574093936081	4.494746910138825e-38	5.1506073163578325e-36	0.19590285612056535	-4.497953111292705e-40	0.0	0.19778125178102757	0.0	800.6546780640654	82.83167996739527	7.44616056226503e-36	-0.023254665052333815	-4.401588374376075	-3.9568115216640635e-37	7.129203241582524e-06	0.44015883743818485
4.38	82.80925564738065	0.0	0.2650077944433362	393.08357277239406	9.840015387130543e-36	-800.6547941244302	0.0	0.012447895950064836	0.0	0.9999984861334563	-8.213557436992159e-41	0.0017400372987192545	4.4947466620127274e-38	5.150607288953274e-36	0.19939368744227093	-4.497954056644245e-40	0.0	0.2013473112898111	0.0	800.6547941244302	82.8096764446111	7.444182554377803e-36	-0.023175761042750966	-4.399735586695641	-3.955138453779179e-37	0.09556873980952503	0.4400773411215899
4.385	82.78724222387844	0.0	0.2709099537606838	393.49756616410315	9.877231356539067e-36	-800.6549082900963	0.0	0.012549158186615601	0.0	0.9999984310739041	-8.35451326116809e-41	0.0017713973778471694	4.4947464022241785e-38	5.150607260742155e-36	0.20298729333958873	-4.49795504726993e-40	0.0	0.20494238029248668	0.0	800.6549082900963	82.78768245288468	7.442205408839264e-36	-0.022389493814708627	-4.398018665641246	-3.95359383995652e-37	0.11068198756863235	0.43994111748847653
4.39	82.76523831361244	0.0	0.27616597941995313	393.9114496069017	9.914437442102579e-36	-800.6550197271742	0.0	0.01238570110406567	0.0	0.9999983755778625	-8.494105322421759e-41	0.0018024540448849944	4.4947461405928094e-38	5.1506072328035894e-36	0.20654613091562443	-4.497956045749647e-40	0.0	0.20849062229035412	0.0	800.6550197271742	82.76569608266405	7.440228943779381e-36	-0.022196407503255598	-4.396452143451532	-3.952193116807472e-37	0.015110487043816859	0.43964781105423767
4.395	82.74324263259085	0.0	0.2813992665942819	394.3252231390782	9.951633647247975e-36	-800.6551303506375	0.0	0.012715292332443427	0.0	0.9999983187029241	-8.634713115263487e-41	0.0018337366936106985	4.494745872674936e-38	5.150607204661816e-36	0.21013086432833447	-4.497957069038684e-40	0.0	0.21213328521997443	0.0	800.6551303506375	82.74371819175735	7.43825324051739e-36	-0.022060755990488817	-4.394652091372819	-3.950570138148049e-37	0.07650765217202105	0.4395318011822167
4.4	82.7212534434854	0.0	0.2872746150728863	394.7388868026662	9.988819975757367e-36	-800.6552397200448	0.0	0.012983283457736982	0.0	0.9999982589080306	-8.779998276316569e-41	0.0018660599708562162	4.494745591224116e-38	5.150607175583971e-36	0.21383484539863587	-4.4979581448637206e-40	0.0	0.21585272195172617	0.0	800.6552397200448	82.7217494841996	7.436278366503657e-36	-0.021452487671621504	-4.392920648554366	-3.949010641228656e-37	0.11491454538605887	0.43944234180648317
4.405	82.6992725762891	0.0	0.292956656611631	395.1524406454331	1.0025996431942492e-35	-800.6553455757456	0.0	0.012824112340227274	0.0	0.9999981981386199	-8.92511706476443e-41	0.0018983462333469388	4.49474530540761e-38	5.150607146539253e-36	0.21753458510625298	-4.4979592382227975e-40	0.0	0.21952655951720948	0.0	800.6553455757456	82.69978879065151	7.434304211462357e-36	-0.021028594291957147	-4.391348876040032	-3.947602404960058e-37	0.05492529679304119	0.4391692354813331
4.41	82.67730025806233	0.0	0.29839639126288836	395.56588470423685	1.006316301909873e-35	-800.6554502096884	0.0	0.01303508465243981	0.0	0.9999981364460899	-9.0699581399354e-41	0.0019305707098299489	4.494745015466164e-38	5.150607117550056e-36	0.22122724487248646	-4.497960348191001e-40	0.0	0.22326083619811227	0.0	800.6554502096884	82.67783611273059	7.432330775186482e-36	-0.020833986638165762	-4.389674128080638	-3.9460969411681095e-37	0.05423892395435045	0.43900092040464145
4.415	82.65533478345155	0.0	0.3042300175469679	395.97921901239954	1.0100319740220199e-35	-800.6555537969236	0.0	0.013429211682201438	0.0	0.9999980717486023	-9.21930118399079e-41	0.001963796791721001	4.4947447116250235e-38	5.150607087660656e-36	0.22503468061486853	-4.497961512223926e-40	0.0	0.22710802195600188	0.0	800.6555537969236	82.65589215256766	7.430358124409748e-36	-0.020408265530425344	-4.387908196334204	-3.944504320172738e-37	0.11965195541759466	0.43895392616870565
4.42	82.63337641849918	0.0	0.3103424998015923	396.3924436323477	1.0137466600939494e-35	-800.6556536933581	0.0	0.013295154856631398	0.0	0.9999980054228794	-9.369824290927823e-41	0.0019972854160073676	4.494744400362311e-38	5.1506070575342044e-36	0.22887220180809106	-4.49796270555337e-40	0.0	0.23091680326229108	0.0	800.6556536933581	82.63395682721367	7.428386251729795e-36	-0.019744193016628102	-4.386309125457188	-3.943068722863699e-37	0.09561435455275706	0.43873511198518805
4.425	82.61142690816153	0.0	0.3160051919000991	396.8055585934976	1.0174603603886444e-35	-800.6557517523082	0.0	0.013397344858433663	0.0	0.999997938438302	-9.519323375691139e-41	0.002030546214281219	4.494744086227635e-38	5.1506070276126676e-36	0.2326836162662049	-4.4979639107375066e-40	0.0	0.2347548598476388	0.0	800.6557517523082	82.61202899829617	7.426415049729898e-36	-0.01948936264471155	-4.3847716309483555	-3.941691316469411e-37	0.035409512318866285	0.43849146045427345
4.43	82.58948466338137	0.0	0.3218190149873951	397.21856393429744	1.0211730752511972e-35	-800.655848656875	0.0	0.013900391660289885	0.0	0.999997868608986	-9.672607779607182e-41	0.002064649176585286	4.4947437589759967e-38	5.150606996933798e-36	0.23659153607651104	-4.4979651671043115e-40	0.0	0.23873702872620609	0.0	800.655848656875	82.59010942608613	7.424444590084863e-36	-0.019219624825620847	-4.382953841253823	-3.9400501782015094e-37	0.12501731149918208	0.4384736446211577
4.435	82.5675484489529	0.0	0.32833725376946027	397.6314597032087	1.024884805119068e-35	-800.6559420967475	0.0	0.013787256531836815	0.0	0.9999977964246716	-9.828444653466177e-41	0.0020993200166380447	4.4947434209163126e-38	5.150606965743836e-36	0.24056453030189787	-4.497966465843235e-40	0.0	0.2426867867778982	0.0	800.6559420967475	82.56819924140432	7.422474979149109e-36	-0.018336290741499284	-4.381319444978024	-3.938580466862309e-37	0.13100483443156616	0.43832775802573787
4.44	82.5456213006947	0.0	0.3342343517822504	398.0442459379572	1.0285955503306972e-35	-800.6560329622705	0.0	0.013792623298957174	0.0	0.9999977236901803	-9.982908378703892e-41	0.0021336853564655066	4.494743080503635e-38	5.150606934828596e-36	0.24450251698966355	-4.4979677744814765e-40	0.0	0.24663808229511847	0.0	800.6560329622705	82.54629600255412	7.42050598815269e-36	-0.018020656480880894	-4.379890456830301	-3.937303275771695e-37	0.03675522966346071	0.4380044675655804
4.445	82.52370154420328	0.0	0.3401799240335745	398.4569226766022	1.0323053112273218e-35	-800.6561223921696	0.0	0.014277813340069357	0.0	0.9999976484039598	-1.0140213460239193e-40	0.0021686828459511476	4.4947427283734333e-38	5.150606903344747e-36	0.24851294315134712	-4.497969129031035e-40	0.0	0.2507283745204263	0.0	800.6561223921696	82.52440077673872	7.41853771707368e-36	-0.017757905952685907	-4.378063240787593	-3.935653288882564e-37	0.13112431582436257	0.43800264070592043
4.45	82.50178729830317	0.0	0.3469561716954543	398.8694899585591	1.0360140881645678e-35	-800.6562087336625	0.0	0.01429048121206847	0.0	0.999997570070695	-1.0301234421899132e-40	0.002204507050580062	4.494742362223013e-38	5.150606871117661e-36	0.2526181044246555	-4.497970538403417e-40	0.0	0.2548222958237389	0.0	800.6562087336625	82.50251513617111	7.41657031313606e-36	-0.01679786029492147	-4.376438444674828	-3.934191491546214e-37	0.14623064938877617	0.43788807774188704
4.455	82.47988194712161	0.0	0.35309479936409	399.28194783337375	1.0397218815880064e-35	-800.6562917534152	0.0	0.014212646746157211	0.0	0.9999974911460502	-1.0460867072056146e-40	0.0022400223815254275	4.494741993535726e-38	5.150606839167707e-36	0.25668787161643514	-4.49797195841721e-40	0.0	0.25889391919506466	0.0	800.6562917534152	82.48063610478755	7.414603498749363e-36	-0.01642138020328566	-4.37506885884531	-3.932967950339323e-37	0.04881133915154342	0.43753411371535106
4.46	82.45798393956915	0.0	0.3592468787781477	399.6942963327193	1.043428691781116e-35	-800.6563730438312	0.0	0.014633742946105083	0.0	0.9999974099400706	-1.0622514239697621e-40	0.002275985905700708	4.4947416144184765e-38	5.1506068068145606e-36	0.26080899842594507	-4.4979734194776155e-40	0.0	0.2630861777415205	0.0	800.6563730438312	82.45876493362528	7.412637390507425e-36	-0.01610228944900548	-4.373257999297901	-3.931333071538256e-37	0.13803410272648534	0.4375435857367651
4.465	82.43609123989911	0.0	0.36621509796144336	400.1065354981444	1.0471345191182808e-35	-800.6564514795438	0.0	0.014796150957651244	0.0	0.9999973252236308	-1.0788470746578442e-40	0.002312908178780597	4.494741219146246e-38	5.1506067735992094e-36	0.26503999039820875	-4.497974943698714e-40	0.0	0.2673249627560798	0.0	800.6564514795438	82.43690328790277	7.410672143746636e-36	-0.015122019534450595	-4.371655530316806	-3.929891295866314e-37	0.15376187367277655	0.43743587861016703
4.47	82.41420712533655	0.0	0.37259869850690974	400.5186653733401	1.0508393639931205e-35	-800.6565259676829	0.0	0.014650122124759234	0.0	0.99999723968783	-1.095338686264874e-40	0.002349598984141824	4.494740820282044e-38	5.150606740591859e-36	0.2692444584118288	-4.497976482663032e-40	0.0	0.27152191359157946	0.0	800.6565259676829	82.41504808105076	7.408707471543474e-36	-0.014685021107830088	-4.370315717297521	-3.928694021445268e-37	0.06266646862358767	0.4370764985119595
4.475	82.39233032447393	0.0	0.37896732747415973	400.9306859918734	1.0545432267058746e-35	-800.6565984321205	0.0	0.01501921705506361	0.0	0.9999971520943843	-1.111964288719354e-40	0.002386587894635746	4.4947404120522217e-38	5.150606707316377e-36	0.27348308721709336	-4.497978058649555e-40	0.0	0.2758246023358097	0.0	800.6565984321205	82.39320061601046	7.406743494812953e-36	-0.014308945894249114	-4.368539010021759	-3.927090906271582e-37	0.13836455346183107	0.43707296681145336
4.48	82.37045881265473	0.0	0.38607488209465035	401.34259739495707	1.0582461076276164e-35	-800.6566681229347	0.0	0.015246773537324223	0.0	0.9999970606763231	-1.129045362516377e-40	0.002424590145298049	4.494739986233937e-38	5.150606673129214e-36	0.2778378369674276	-4.4979797034500306e-40	0.0	0.28019248121021184	0.0	800.6566681229347	82.37136250152469	7.404780363166629e-36	-0.013357688444808889	-4.366930694182022	-3.925643258616422e-37	0.16194388010321112	0.4369932437474516
4.485	82.34859536891643	0.0	0.3927587392183899	401.7543996258521	1.0619480071485509e-35	-800.6567333723006	0.0	0.015099323882500933	0.0	0.999996968137236	-1.1460674537124402e-40	0.0024624611706363523	4.4947395554284254e-38	5.150606639059961e-36	0.2821775497589589	-4.497981368421134e-40	0.0	0.2845181188700538	0.0	800.6567333723006	82.34953099229546	7.402817822169504e-36	-0.01280523143799087	-4.365599216914499	-3.924452481568339e-37	0.08354001119181244	0.4366398453668014
4.49	82.3267392796347	0.0	0.3993513812194232	402.16609271750764	1.0656489255632117e-35	-800.6567962933624	0.0	0.015429553123158772	0.0	0.9999968736898329	-1.163174767416272e-40	0.002500521800522178	4.4947391159710794e-38	5.150606604820054e-36	0.286538990103818	-4.497983067727976e-40	0.0	0.2889383602387033	0.0	800.6567962933624	82.32770693298168	7.400855949947587e-36	-0.012371938263956795	-4.363885209073715	-3.922907268128291e-37	0.13962027683122144	0.4366118177474674
4.495	82.30488841535781	0.0	0.406614145048734	402.5776767099052	1.0693488632314087e-35	-800.6568563824842	0.0	0.01569497857263037	0.0	0.9999967751698019	-1.1807465638753717e-40	0.0025396158193313587	4.49473865780265e-38	5.1506065696516805e-36	0.29101884889326035	-4.49798484030991e-40	0.0	0.29343464039750317	0.0	800.6568563824842	82.30589202068128	7.398894903950022e-36	-0.011435345118941112	-4.362275419484263	-3.921457696568538e-37	0.1708184711142301	0.4365618602845467
4.5	82.28304512352987	0.0	0.4135878829322723	402.98915164532895	1.0730478205348169e-35	-800.6569116593588	0.0	0.015555840013946864	0.0	0.9999966752560661	-1.1982949043301684e-40	0.002578657652973528	4.4947381933903423e-38	5.150606534529368e-36	0.2954927281279783	-4.4979866379695025e-40	0.0	0.2978910602954026	0.0	800.6569116593588	82.28408384115573	7.396934461019544e-36	-0.010775814502284119	-4.360961408056833	-3.9202818130665876e-37	0.10272287777018417	0.4362171064066427
4.505	82.26120914426434	0.0	0.42041003671880744	403.40051755879637	1.0767457977865199e-35	-800.6569642894366	0.0	0.015861064154644285	0.0	0.9999965734863341	-1.2159002070850098e-40	0.0026178262174023	4.494737720586045e-38	5.150606499292644e-36	0.29998113014129196	-4.497988469024138e-40	0.0	0.30243492046863935	0.0	800.6569642894366	82.26228278285696	7.394974656924577e-36	-0.010285349611463261	-4.359306741401289	-3.91879105743046e-37	0.1446526530386957	0.43617060487449016
4.51	82.23937826165198	0.0	0.4278590294127756	403.8117744875154	1.080442795321272e-35	-800.657013925715	0.0	0.01614976029833339	0.0	0.9999964674247107	-1.2339719235128687e-40	0.0026580324667098702	4.49473722808344e-38	5.150606463122656e-36	0.30458844296276055	-4.497990377300204e-40	0.0	0.30706148599485156	0.0	800.657013925715	82.24049071487049	7.393015664622429e-36	-0.009335346870345047	-4.357701449453089	-3.917345171430158e-37	0.1804036518106748	0.43614340990266237
4.515	82.21755459062119	0.0	0.4350989319325983	404.2229224756656	1.0841388135378949e-35	-800.6570584450818	0.0	0.016016745498401434	0.0	0.9999963597498496	-1.2520430849128796e-40	0.0026982374813236004	4.494736728330214e-38	5.150606426953846e-36	0.30919561479060376	-4.4979923146032825e-40	0.0	0.3116499455878194	0.0	800.6570584450818	82.21870541488346	7.391057279117683e-36	-0.008590763245750282	-4.3564093074898835	-3.916188469788337e-37	0.1183767286331972	0.4358017336388921
4.52	82.19573814699702	0.0	0.44215480683367403	404.6339615536235	1.087833852707761e-35	-800.6571000069026	0.0	0.01631129140203608	0.0	0.999996250182042	-1.2701596363689355e-40	0.0027385434806159984	4.494736220029019e-38	5.1506063906935194e-36	0.3138143591534257	-4.4979942859665676e-40	0.0	0.3163227863665429	0.0	800.6571000069026	82.19692698433497	7.389099509592974e-36	-0.008043342685220774	-4.354788748762672	-3.914728897421475e-37	0.15365901378188718	0.4357498839800922
4.525	82.17392664301671	0.0	0.44982162968945955	405.0448917596989	1.091527913175478e-35	-800.6571383314773	0.0	0.016609204859413744	0.0	0.9999961361075816	-1.2887422587565911e-40	0.0027798864022694323	4.4947356910645167e-38	5.150606353500952e-36	0.31855192703493634	-4.497996338415372e-40	0.0	0.3210809730641058	0.0	800.6571383314773	82.1751574970222	7.387142547507663e-36	-0.007051919848460908	-4.353191058935598	-3.9132897423659305e-37	0.19071588834702927	0.43573667444529884
4.53	82.15212213902471	0.0	0.4573043966417827	405.45571313795017	1.0952209953387978e-35	-800.657171266421	0.0	0.016480614005488618	0.0	0.9999960202697727	-1.307333498735009e-40	0.002821248496628846	4.4947351541666715e-38	5.150606316291105e-36	0.32329169249994555	-4.497998422592443e-40	0.0	0.32580232119559926	0.0	800.657171266421	82.15339469690616	7.385186185126796e-36	-0.00624414051894328	-4.35192990873882	-3.912160757479688e-37	0.13051836591328256	0.4353886651535172
4.535	82.13032470815594	0.0	0.46459751669226207	405.86642571815685	1.0989130994637432e-35	-800.6572009532958	0.0	0.016779002622396122	0.0	0.9999959024135292	-1.3259730438458915e-40	0.0028627180611859302	4.494734608154275e-38	5.150606278983908e-36	0.328043773746036	-4.498000543087776e-40	0.0	0.33060915136911045	0.0	800.6572009532958	82.13163857898921	7.383230421842453e-36	-0.005640099216352083	-4.3503216146757975	-3.910712151771572e-37	0.16654097819763286	0.4353508246062532
4.54	82.10853197789662	0.0	0.4725133360684137	406.2770295378485	1.1026042258879245e-35	-800.6572270870876	0.0	0.017072779746138272	0.0	0.9999957798288938	-1.3450781324106892e-40	0.002905223374582732	4.4947340404823677e-38	5.150606240745797e-36	0.3329145441312589	-4.498002748658535e-40	0.0	0.3355001424891612	0.0	800.6572270870876	82.10989143459534	7.381275468816178e-36	-0.004579879583147128	-4.348747809221247	-3.909294613509354e-37	0.20173881789706824	0.4353424635715324
4.545	82.08674613413588	0.0	0.4802162651642806	406.687524639295	1.106294374992969e-35	-800.6572475802204	0.0	0.016947308492483326	0.0	0.9999956554124116	-1.3641870550002647e-40	0.0029477372181383695	4.494733464573413e-38	5.1506062024997374e-36	0.33778629260641946	-4.498004987190308e-40	0.0	0.34035518874278875	0.0	800.6572475802204	82.08815069541622	7.379321089933349e-36	-0.003730291053949659	-4.34753864511895	-3.908212543289439e-37	0.13922870699551862	0.4349767453974335
4.55	82.06496710539894	0.0	0.4877500335451161	407.09791105436176	1.1099835470636597e-35	-800.6572645572852	0.0	0.01726400203419764	0.0	0.9999955287549215	-1.3833611518090422e-40	0.002990396062521634	4.494732878534763e-38	5.150606164122739e-36	0.34267465763731414	-4.498007266045273e-40	0.0	0.3453009610131127	0.0	800.6572645572852	82.06641649687548	7.377367297535016e-36	-0.0030700042935479835	-4.345919676775149	-3.906753723209179e-37	0.18312716591590852	0.4349776246645086
4.555	82.04319246001032	0.0	0.49594448931736734	407.5081888174072	1.1136717424091994e-35	-800.6572775903261	0.0	0.01754129634171054	0.0	0.9999953971447154	-1.4029994277382673e-40	0.003034087620373566	4.4947322698295136e-38	5.1506061248175724e-36	0.34768136408269845	-4.498009634012149e-40	0.0	0.35032617225095414	0.0	800.6572775903261	82.04469139593745	7.375414326852897e-36	-0.0019148193192900437	-4.344384512496665	-3.905371303975186e-37	0.21345660143593181	0.43496253302000004
4.56	82.02142471306718	0.0	0.5038460827301458	407.9183579724704	1.1173589614269827e-35	-800.6572847639809	0.0	0.017418233658438052	0.0	0.9999952637194195	-1.422623998049121e-40	0.003077748685907853	4.49473165297785e-38	5.150606085539376e-36	0.3526845770130446	-4.498012034639298e-40	0.0	0.3553161286269602	0.0	800.6572847639809	82.02297221937167	7.37346188651182e-36	-0.0010437356608247158	-4.343242481989526	-3.904350075444339e-37	0.14468139280128625	0.4345651615440595
4.565	81.9996634610801	0.0	0.5116244485332208	408.3284185490307	1.1210452043803704e-35	-800.6572881689311	0.0	0.017767375612529227	0.0	0.999995127713829	-1.4423456212750531e-40	0.003121625676525321	4.494731024443642e-38	5.150606046066485e-36	0.35771253392819397	-4.498014481694458e-40	0.0	0.3604061068050682	0.0	800.6572881689311	82.00125954613559	7.371510029571628e-36	-0.00032753807831942765	-4.341576184085009	-3.902847560174922e-37	0.20321920765620946	0.43463296939572554
4.57	81.97790625151228	0.0	0.5201250626340909	408.7383705833136	1.1247304715955262e-35	-800.6572871498771	0.0	0.018016776962434946	0.0	0.9999949865521722	-1.4625259182433048e-40	0.0031665231321770316	4.494730372333632e-38	5.150606005675779e-36	0.3628574287972829	-4.498017021521379e-40	0.0	0.36556753320694846	0.0	800.6572871498771	81.9795562473799	7.369559019737531e-36	0.0009473620661397715	-4.340088820203411	-3.901508717373581e-37	0.22583917023565633	0.43459606875888057
4.575	81.95615609596427	0.0	0.5282050741735758	409.1482141169499	1.1284147634479429e-35	-800.657280114284	0.0	0.017895897246935084	0.0	0.9999948436742966	-1.482664287282938e-40	0.00321132730606102	4.4947297125462556e-38	5.150605965368642e-36	0.367991635039522	-4.498019592229889e-40	0.0	0.3706943301211943	0.0	800.657280114284	81.95785819104847	7.367608478019628e-36	0.0018208100370532875	-4.3390270681084555	-3.90056039349738e-37	0.1476475645019927	0.4341538402580499
4.58	81.93441203617729	0.0	0.5362330062103136	409.55794917640327	1.1320980801739491e-35	-800.6572690580734	0.0	0.018291114813079157	0.0	0.9999946977292944	-1.5029489267024348e-40	0.0032564569048634585	4.4947290388451643e-38	5.1506059247686583e-36	0.3731631331669432	-4.498022218125837e-40	0.0	0.3759343485280876	0.0	800.6572690580734	81.93616670788695	7.365658526400058e-36	0.0025926990480176267	-4.3373009247856	-3.899002833914559e-37	0.2220479944958976	0.43429810757135096
4.585	81.91267171141268	0.0	0.5450301818363311	409.9675757997115	1.1357804221162643e-35	-800.6572529897347	0.0	0.018471375771988305	0.0	0.9999945464943933	-1.5236763773547572e-40	0.0033025716775502514	4.4947283409805797e-38	5.150605883282802e-36	0.37844752528117204	-4.49802493920185e-40	0.0	0.3812260078957633	0.0	800.6572529897347	81.9144848542785	7.363709445232826e-36	0.0039763039065838545	-4.335858861415906	-3.89770517097776e-37	0.23884500200439235	0.43424323830200645
4.59	81.89093854754647	0.0	0.5533042451632152	410.3770940281321	1.1394617896466063e-35	-800.6572308461411	0.0	0.018383999361933294	0.0	0.9999943936987415	-1.5443278804398692e-40	0.0033485174810266626	4.494727636167129e-38	5.1506058419484634e-36	0.38371255564642187	-4.498027688362932e-40	0.0	0.38649263576581316	0.0	800.6572308461411	81.89280760870726	7.361760774446602e-36	0.004868433352630452	-4.334878262580115	-3.896830388273786e-37	0.1531849480142771	0.4337584025663104
4.595	81.86921102112733	0.0	0.5615882484897168	410.7865038867525	1.1431421829890963e-35	-800.6572044138469	0.0	0.0188381530155506	0.0	0.9999942371654207	-1.5651947635831372e-40	0.0033949424657835265	4.494726914365685e-38	5.150605800182249e-36	0.38903249726811334	-4.498030504777461e-40	0.0	0.3918893690738766	0.0	800.6572044138469	81.87113692929589	7.359812693417852e-36	0.005695984353692344	-4.3331215420399385	-3.895244628394832e-37	0.23661710129810892	0.4339577162664272
4.6	81.84748702371618	0.0	0.5706498952879839	411.1958054054674	1.1468216024135806e-35	-800.6571722821756	0.0	0.01889425889086348	0.0	0.9999940754044045	-1.586462834168426e-40	0.0034422600191523255	4.4947261687166883e-38	5.150605757616141e-36	0.3944547211627699	-4.498033415251217e-40	0.0	0.39730217553124664	0.0	800.6571722821756	81.84947600378082	7.357865494209908e-36	0.007159045744028915	-4.331706488587154	-3.893971321914702e-37	0.2524387981630203	0.43390559399581435
4.605	81.82577013425548	0.0	0.5791547889189884	411.6049986410689	1.150500048430875e-35	-800.6571340930415	0.0	0.018887116911226375	0.0	0.9999939121458216	-1.6076354364689188e-40	0.003489365173304528	4.4947254164198665e-38	5.150605715238391e-36	0.3998526066351573	-4.49803635267563e-40	0.0	0.4027129359621638	0.0	800.6571340930415	81.82781930738942	7.355918671109642e-36	0.008104176959885023	-4.3307933395183795	-3.89315745991808e-37	0.16315729142809132	0.4333865624516167
4.61	81.80405843132174	0.0	0.5877033069379329	412.01408360902224	1.1541775211788273e-35	-800.6570913439992	0.0	0.019412107226988218	0.0	0.9999937443049485	-1.6291083817451074e-40	0.003537138535651376	4.4947246432644934e-38	5.150605672259615e-36	0.4053270644924793	-4.498039372550048e-40	0.0	0.4082740950399729	0.0	800.6570913439992	81.8061690227707	7.353972423912409e-36	0.008987646312390673	-4.329019475195869	-3.8915559234643206e-37	0.2512580326056421	0.4336304903437255
4.615	81.78235017872015	0.0	0.5970276091234901	412.42306034748066	1.1578540210019314e-35	-800.6570421076541	0.0	0.019323966773366605	0.0	0.9999935716469086	-1.6508990938556499e-40	0.003585618871089229	4.494723848179641e-38	5.150605628646066e-36	0.4108825369442095	-4.498042479099912e-40	0.0	0.41381000373779764	0.0	800.6570421076541	81.78452868158604	7.352027075797367e-36	0.010535351414900923	-4.327639087551679	-3.89031403562313e-37	0.2638340617458506	0.4335673936568852
4.62	81.76064893031433	0.0	0.6057680145611758	412.83192889697744	1.1615295482641476e-35	-800.6569869069045	0.0	0.01941062198787448	0.0	0.9999933972972864	-1.6726083364716562e-40	0.0036339179520570295	4.494723045562687e-38	5.150605585194265e-36	0.4164172399922694	-4.498045616090398e-40	0.0	0.4193707373259429	0.0	800.6569869069045	81.76289216586552	7.350082067252499e-36	0.011532959427817584	-4.326665171719195	-3.889443953834747e-37	0.19480523661142907	0.43310484398560034
4.625	81.73895206903902	0.0	0.6147504476026499	413.24068927828847	1.1652041031514048e-35	-800.6569268079193	0.0	0.019866981825452046	0.0	0.9999932174589236	-1.6947027553054503e-40	0.003683073979635081	4.4947222179388255e-38	5.150605540971873e-36	0.42205014352570563	-4.4980488518409805e-40	0.0	0.42506220837725045	0.0	800.6569268079193	81.74126279740105	7.348137702044104e-36	0.012636638178549283	-4.324982169159361	-3.887925389247805e-37	0.26648644397258225	0.4333184255067809
4.63	81.7172593393552	0.0	0.6241721446742576	413.64934153950173	1.1688776860978386e-35	-800.656859459402	0.0	0.019767739479514046	0.0	0.9999930335105535	-1.7170011289970017e-40	0.003732683769559861	4.494721371663381e-38	5.15060549634101e-36	0.42773504577590954	-4.4980521615454525e-40	0.0	0.4307252485907019	0.0	800.656859459402	81.71964185959395	7.346194097609311e-36	0.014109626224891814	-4.323758211662465	-3.886826138440206e-37	0.25342389087679007	0.4331178678072025
4.635	81.69557306848219	0.0	0.6331557315509855	414.05788570449425	1.1725502973169934e-35	-800.6567862581376	0.0	0.019960429890427806	0.0	0.999992847349704	-1.739269952252469e-40	0.003782227815401078	4.494720515469192e-38	5.150605451768803e-36	0.43341241530794294	-4.498055511062741e-40	0.0	0.43644349054064335	0.0	800.6567862581376	81.69802516156301	7.34425087098735e-36	0.015159499153139824	-4.322565844039161	-3.885755891130395e-37	0.23261341386417825	0.43288202176070484
4.64	81.67389035297903	0.0	0.6425972968685667	414.4663218027338	1.1762219370734358e-35	-800.656707631228	0.0	0.02033245204798307	0.0	0.9999926549528281	-1.7619822646979898e-40	0.0038327585435392166	4.4947196308583055e-38	5.15060540630994e-36	0.43920285219674116	-4.4980589727859646e-40	0.0	0.4422683089881511	0.0	800.656707631228	81.6764165718609	7.342308375629111e-36	0.016510413771934507	-4.321016951579537	-3.88435961510011e-37	0.28223650876514816	0.43302245834041514
4.645	81.65221256779441	0.0	0.6520927880269597	414.8746498762911	1.1798926057471892e-35	-800.6566212497384	0.0	0.020233523749493856	0.0	0.9999924592071994	-1.7847866312495341e-40	0.003883494075398331	4.4947187311152096e-38	5.1506053606667797e-36	0.4450167591616459	-4.49806249476674e-40	0.0	0.4480647865657697	0.0	800.6566212497384	81.65481444617896	7.34036646154928e-36	0.017886133723040144	-4.319988501862326	-3.883438429850681e-37	0.2397238200277156	0.43266347391606086
4.65	81.63054051842346	0.0	0.6613305884335191	415.2828699527966	1.1835623035851266e-35	-800.6565290367865	0.0	0.020542957425842372	0.0	0.9999922604056996	-1.8076460464968342e-40	0.003934352080731797	4.4947178175886525e-38	5.150605314912003e-36	0.4508447018071303	-4.4980660717368505e-40	0.0	0.4539499103618582	0.0	800.6565290367865	81.63321715361634	7.338424979795355e-36	0.018988512258185482	-4.31852106769289	-3.882116691519581e-37	0.2726473047676997	0.43271192224047206
4.655	81.60887125772504	0.0	0.6712414351466812	415.69098205824935	1.1872310308212597e-35	-800.6564306202569	0.0	0.02082521306872281	0.0	0.9999920549289563	-1.830966511183156e-40	0.003986235836719702	4.494716873655893e-38	5.1506052682369705e-36	0.4567901889189622	-4.498069768815375e-40	0.0	0.45991589444335074	0.0	800.6564306202569	81.61162912571832	7.336484334896412e-36	0.020600857841484684	-4.317126680331759	-3.880861176958362e-37	0.2984658268646614	0.4327431642884532
4.66	81.58720780386267	0.0	0.6808000009056007	416.09898624177794	1.1908987878985605e-35	-800.6563243105768	0.0	0.020729458767776494	0.0	0.9999918468594488	-1.8542759504701503e-40	0.004038095063451529	4.4947159180789224e-38	5.150605221582149e-36	0.4627328663919285	-4.498073512551397e-40	0.0	0.465854446938271	0.0	800.6563243105768	81.59004527223738	7.334544062555289e-36	0.021869368433428845	-4.316308005441509	-3.880130880738258e-37	0.22654469362858815	0.432224910157313
4.665	81.56554919309019	0.0	0.6903065455298095	416.5068825200169	1.194565574965032e-35	-800.6562120511032	0.0	0.021164701188502315	0.0	0.9999916344643586	-1.87776519863205e-40	0.004090354332185011	4.494714942902497e-38	5.150605174566213e-36	0.4687213869295364	-4.498077334123377e-40	0.0	0.4719176872020545	0.0	800.6562120511032	81.56846699596716	7.3326042906905e-36	0.023025033513107366	-4.314625949651211	-3.878613160075214e-37	0.29827210533622983	0.4324923506170406
4.67	81.54389303500355	0.0	0.7005668437167256	416.91467092275565	1.1982313922894812e-35	-800.6560925565348	0.0	0.021243572437268522	0.0	0.9999914155355711	-1.9016669480275545e-40	0.004143531340746625	4.494713937998481e-38	5.150605126727649e-36	0.47481507488740377	-4.498081273257804e-40	0.0	0.47800352241423416	0.0	800.6560925565348	81.54689859593353	7.330665411432489e-36	0.02478923601345164	-4.313311924873157	-3.8774307106677175e-37	0.3136197152211195	0.4324698496661745
4.675	81.5222430443497	0.0	0.7103052581499787	417.3223515000552	1.2018962403222695e-35	-800.655965392406	0.0	0.021264084628304463	0.0	0.9999911944834966	-1.9254932626913677e-40	0.00419654052111155	4.4947129236166853e-38	5.1506050790372815e-36	0.48088953232404397	-4.498085250604426e-40	0.0	0.48409523393628845	0.0	800.655965392406	81.52533327226656	7.328726804874466e-36	0.026063472161493233	-4.312541391786814	-3.876743772820083e-37	0.24064698377669436	0.4319250424167991
4.68	81.5005968887543	0.0	0.7201832760948339	417.72992426507676	1.2055601191805705e-35	-800.6558320107874	0.0	0.021753785200717808	0.0	0.9999909674366503	-1.949656390400169e-40	0.004250299048980463	4.4947118819957314e-38	5.150605030672921e-36	0.48704986078621115	-4.4980893358199664e-40	0.0	0.49032723433846487	0.0	800.6558320107874	81.50377419812506	7.32678876029102e-36	0.02735969470724862	-4.310842899450999	-3.875210932014806e-37	0.3167920652760668	0.43224673181377526
4.685	81.47895363634098	0.0	0.7306439041306798	418.13738926148466	1.2092230292585994e-35	-800.6556902532501	0.0	0.021661732651420858	0.0	0.9999907350372182	-1.9740766574520926e-40	0.004304629664987391	4.4947108160916665e-38	5.1506049817942033e-36	0.4932757477348946	-4.498093517350025e-40	0.0	0.4965328636278006	0.0	800.6556902532501	81.48222429700657	7.324851544195667e-36	0.02914988403688157	-4.309663810100754	-3.874151176294291e-37	0.314419778494844	0.43211181369179086
4.69	81.45731621554282	0.0	0.7406219477214337	418.5447465133338	1.2128849707717776e-35	-800.6555411660224	0.0	0.021845625534053167	0.0	0.9999904999768021	-1.998466938117198e-40	0.004358893567039846	4.4947097382533194e-38	5.150604932974273e-36	0.4994939912110476	-4.498097746766651e-40	0.0	0.5027911743474229	0.0	800.6555411660224	81.46067736782057	7.322914591594184e-36	0.03047300709999434	-4.308630825273951	-3.873224662256527e-37	0.28782711449990767	0.43182339024585314
4.695	81.43568141553537	0.0	0.7510632707099788	418.9519960466809	1.2165459439539284e-35	-800.655385274498	0.0	0.022216478839304853	0.0	0.9999902576560945	-2.023296701533925e-40	0.004414135237891186	4.4947086273979563e-38	5.150604883275285e-36	0.5058242813003713	-4.4981021068234796e-40	0.0	0.5091557267130923	0.0	800.655385274498	81.43913845843669	7.320978362357537e-36	0.03210478459376834	-4.3071388063071465	-3.871879708060406e-37	0.3349581428417561	0.4320143707592718
4.7	81.41405084941208	0.0	0.7615255643628254	419.3591379059448	1.2202059492061257e-35	-800.6552203271364	0.0	0.02212902824110797	0.0	0.9999900113784008	-2.0482174967959234e-40	0.004469579438174755	4.49470749867742e-38	5.150604833394444e-36	0.512177781328504	-4.498106538085197e-40	0.0	0.5154952263277988	0.0	800.6552203271364	81.41760533908241	7.319042653559517e-36	0.03372927229234829	-4.30627203299494	-3.871104029123413e-37	0.29030309493935597	0.43160461894059643
4.705	81.39242509719158	0.0	0.7717652749890808	419.7661721080283	1.223864986678826e-35	-800.6550482210313	0.0	0.022482161214203666	0.0	0.9999897610982971	-2.0732305072415657e-40	0.004525228800604415	4.4947063518865e-38	5.150604783327511e-36	0.5185547930220937	-4.498111041371305e-40	0.0	0.5219358910873317	0.0	800.6550482210313	81.39607639547981	7.317107318166698e-36	0.035102517005207806	-4.30478936253067	-3.869767760209187e-37	0.33388006498782236	0.4317717840891584
4.71	81.37080109585798	0.0	0.7827247623491392	420.1730986860273	1.2275230566700816e-35	-800.6548682656257	0.0	0.022699768011023747	0.0	0.9999895031157198	-2.09869534312033e-40	0.0045818833920642605	4.494705170080285e-38	5.1506047323575514e-36	0.5250469982921798	-4.498115683254732e-40	0.0	0.5284388956021204	0.0	800.6548682656257	81.37455718614528	7.315172862242208e-36	0.03703668069514874	-4.303505824267736	-3.868612398725002e-37	0.35328379621201633	0.4317982378399928
4.715	81.34918249907913	0.0	0.7932249322487761	420.57991767830765	1.2311801595256968e-35	-800.6546793116212	0.0	0.022655161843062002	0.0	0.999989242347466	-2.124119082318006e-40	0.004638446551222407	4.494703975789028e-38	5.150604681469166e-36	0.5315287277648951	-4.498120375269904e-40	0.0	0.5349291213910868	0.0	800.6546793116212	81.35304059669147	7.313238638380319e-36	0.03853124791690263	-4.30291587704564	-3.868088219181956e-37	0.27476844881670676	0.431167980552784
4.72	81.32756745433751	0.0	0.803758063770488	420.9866290822609	1.2348362952208743e-35	-800.6544830676797	0.0	0.023176515260122165	0.0	0.9999889754488492	-2.1498233310495503e-40	0.00469563379295586	4.4947027536983317e-38	5.150604630025039e-36	0.5380819743215074	-4.498125177592752e-40	0.0	0.5415687039322146	0.0	800.6544830676797	81.33152929823177	7.311304889660836e-36	0.03996209181318586	-4.30117735385925	-3.866518963130402e-37	0.3564032070735742	0.4315918196092692
4.725	81.30595422058086	0.0	0.8150258968741381	421.39323297724127	1.238491464470461e-35	-800.6542776414209	0.0	0.023087431415332704	0.0	0.9999887019831073	-2.175839368636036e-40	0.004753514708030153	4.4947015018177434e-38	5.1506045779510755e-36	0.5447147126457246	-4.498130098092711e-40	0.0	0.5481827658316961	0.0	800.6542776414209	81.31002824479447	7.309372066830816e-36	0.04201969902050234	-4.299987814795259	-3.865448927791324e-37	0.36543942934796303	0.4315488522045896
4.73	81.28434640455225	0.0	0.8257579187816396	421.79972936825607	1.2421456673189727e-35	-800.6540636606043	0.0	0.023249249927671	0.0	0.9999884255711483	-2.2018176587104407e-40	0.004811311642100856	4.4947002367275966e-38	5.1506045259522296e-36	0.5513378291693968	-4.498135071614139e-40	0.0	0.554843185320198	0.0	800.6540636606043	81.28852901220077	7.307439403624964e-36	0.04356009709953196	-4.299129689803749	-3.8646804495399365e-37	0.3280624401535144	0.43116285849307057
4.735	81.262740580868	0.0	0.8369289934840479	422.20611827816873	1.245798903971388e-35	-800.6538418289852	0.0	0.0236293531213518	0.0	0.9999881411582248	-2.2282261090845202e-40	0.0048700656042968415	4.494698935299434e-38	5.150604473091989e-36	0.5580706161800705	-4.498140189108288e-40	0.0	0.5616124963525867	0.0	800.6538418289852	81.26703757733115	7.305507443660095e-36	0.04538892444679364	-4.297656548199788	-3.86335238343638e-37	0.37626044361721744	0.43140959339953877
4.74	81.2411383186566	0.0	0.8481469161941693	422.61239975197725	1.2494511748339715e-35	-800.6536099113994	0.0	0.023549696800412228	0.0	0.999987852156743	-2.2547381842432094e-40	0.004929050112950482	4.494697613156335e-38	5.1506044200246566e-36	0.5648298241161852	-4.498145389175222e-40	0.0	0.5683589875299685	0.0	800.6536099113994	81.24555173991344	7.30357598699231e-36	0.04723214881430543	-4.296883258788379	-3.862660547401291e-37	0.3340584429046223	0.4309849276126917
4.745	81.21954023641085	0.0	0.8591431029151775	423.0185738029048	1.2531024800241443e-35	-800.6533697526403	0.0	0.02391938284295282	0.0	0.9999875585034054	-2.2813559182918637e-40	0.004988269693577017	4.494696270012016e-38	5.150604366745356e-36	0.5716159716165079	-4.4981506729551674e-40	0.0	0.5752113859572626	0.0	800.6533697526403	81.2240694593878	7.301644848070196e-36	0.04882048612165709	-4.2954392404740345	-3.8613590898284e-37	0.3767792782807374	0.4311932385038743
4.75	81.19794320266502	0.0	0.8708545116246253	423.4246404618668	1.2567528198204542e-35	-800.653120546463	0.0	0.02409370507021405	0.0	0.9999872563695736	-2.3084164675542137e-40	0.005048474457223234	4.4946948883632573e-38	5.150604312581153e-36	0.5785150162180053	-4.498156109336933e-40	0.0	0.5821137240240437	0.0	800.653120546463	81.20259706418129	7.299714602190177e-36	0.05096908392416223	-4.2942238269316615	-3.860265110375877e-37	0.3944005009955953	0.43122975350702764
4.755	81.17635105349912	0.0	0.8821046958091207	423.83059976885016	1.2604021945830696e-35	-800.6528613950761	0.0	0.024096284348451697	0.0	0.999986951116116	-2.335432588956149e-40	0.005108580377336557	4.4946934927313476e-38	5.150604258504037e-36	0.5854027361342232	-4.4981616018638875e-40	0.0	0.5890168009996108	0.0	800.6528613950761	81.18112652590247	7.297784519782006e-36	0.0526776486288038	-4.293653291284727	-3.859757197332758e-37	0.3310511467045829	0.43063968056246965
4.76	81.15476137165498	0.0	0.8935079646968085	424.2364517258961	1.2640506043291152e-35	-800.6525938556852	0.0	0.02457386562826961	0.0	0.9999866384597461	-2.3627782407661887e-40	0.005169419442551311	4.494692063537394e-38	5.150604203770593e-36	0.5923744715277691	-4.498167227603027e-40	0.0	0.596056694933718	0.0	800.6525938556852	81.15966170164663	7.295854951349041e-36	0.05442541881174337	-4.292010194647608	-3.85827464825808e-37	0.4008675797884861	0.4310689773978693
4.765	81.13317345556015	0.0	0.9054297525649267	424.6421963905119	1.267698049577235e-35	-800.6523157902656	0.0	0.024490873115193816	0.0	0.9999863192401558	-2.390369809314095e-40	0.005230805627780436	4.494690604628624e-38	5.15060414854385e-36	0.5994089053071145	-4.498172971450214e-40	0.0	0.6030728132641732	0.0	800.6523157902656	81.13820575658758	7.293926184525106e-36	0.056608096420031215	-4.291020072610271	-3.857385166295028e-37	0.3934482280813416	0.4309020163763986
4.77	81.11159005495992	0.0	0.9169199649680672	425.0478337817584	1.2713445304978815e-35	-800.6520283378325	0.0	0.024735752230905777	0.0	0.9999859961274654	-2.4179719870453962e-40	0.005292215416828263	4.4946891282120604e-38	5.1506040932932743e-36	0.6064460461816756	-4.498178785362816e-40	0.0	0.6101590842937342	0.0	800.6520283378325	81.11675152134099	7.29199756802452e-36	0.058360611466672346	-4.2899669012498975	-3.856438567878214e-37	0.3915505573013192	0.4307798492587905
4.775	81.09000748724215	0.0	0.9290071842361689	425.45336391712925	1.2749900472482083e-35	-800.6517316318171	0.0	0.02505731329124478	0.0	0.9999856638604581	-2.4460260470161206e-40	0.005354630561416617	4.4946876102544727e-38	5.150604037139223e-36	0.6135983962533332	-4.498184764005809e-40	0.0	0.6173374757813611	0.0	800.6517316318171	81.09530628781401	7.290069764183617e-36	0.06055229618335513	-4.28867227108564	-3.855272358776436e-37	0.4220805135604492	0.43093922783504307
4.78	81.0684287420526	0.0	0.9408423006199818	425.858786840079	1.2786346002202666e-35	-800.6514238668348	0.0	0.024991824017701964	0.0	0.9999853273227889	-2.4741112065563256e-40	0.005417114897191136	4.494686073074154e-38	5.150603980923006e-36	0.6207586775576605	-4.49819081950663e-40	0.0	0.6244971059741011	0.0	800.6514238668348	81.07386396553302	7.288142220024399e-36	0.062485983480255504	-4.288189755029967	-3.854843554676908e-37	0.35902597959680865	0.4303193120134096
4.785	81.04685284789959	0.0	0.9526171681879996	426.2641025622134	1.2822781895169226e-35	-800.651106911183	0.0	0.025474935026129214	0.0	0.9999849842269268	-2.502414048738667e-40	0.0054800835373176125	4.494684506226269e-38	5.150603924268593e-36	0.6279744593098492	-4.498196993029493e-40	0.0	0.6317951372759372	0.0	800.651106911183	81.05242564638894	7.286215034676795e-36	0.06428624171506953	-4.286563485511627	-3.853376331731098e-37	0.4263766831997207	0.430771674919533
4.79	81.02527749529877	0.0	0.9651191828479202	426.6693111203982	1.2859208154708329e-35	-800.6507791694302	0.0	0.025448116650311062	0.0	0.9999846327744388	-2.531072934647965e-40	0.005543844309879208	4.4946829015064797e-38	5.1506038669032224e-36	0.6352810166373979	-4.498203316931733e-40	0.0	0.6390854856790342	0.0	800.6507791694302	81.03099777524216	7.284288793298012e-36	0.06669061694457902	-4.285463975284406	-3.852387089406123e-37	0.43698829001885603	0.43076861827521784
4.795	81.00370656167615	0.0	0.977115644247588	427.0744125394554	1.2895624783049368e-35	-800.6504408929203	0.0	0.025604806425479527	0.0	0.9999842776674961	-2.5596988648030468e-40	0.005607531762277622	4.4946812803895935e-38	5.1506038096034875e-36	0.6425791745438473	-4.4982097066066015e-40	0.0	0.6464207223961813	0.0	800.6504408929203	81.00957057461784	7.282362608362912e-36	0.06860676290596003	-4.284719000002232	-3.851719785550178e-37	0.40655367529534675	0.43039636150734695
4.8	80.982136371213	0.0	0.9895683591624735	427.4794068352205	1.2932031781609816e-35	-800.650092852006	0.0	0.025977791027967587	0.0	0.9999839131215891	-2.5887513658331203e-40	0.005672168257118189	4.4946796164743656e-38	5.150603751448839e-36	0.6499860890590666	-4.498216266140349e-40	0.0	0.6538628113310581	0.0	800.650092852006	80.98815122988125	7.280437132049768e-36	0.0708308556062482	-4.283331788721512	-3.850469359641636e-37	0.4496738031480839	0.43068709919743225
4.805	80.96056888666475	0.0	1.0020099592544363	427.8842940459071	1.2968429153841668e-35	-800.6497329153083	0.0	0.02591165245576958	0.0	0.9999835431782306	-2.6178993699577676e-40	0.005737017229222825	4.49467792821552e-38	5.150603693106849e-36	0.6574173547913393	-4.498222922807697e-40	0.0	0.661285952960685	0.0	800.6497329153083	80.96673642350181	7.278512063404142e-36	0.07301493049070217	-4.282772200490589	-3.84996988276805e-37	0.40424946212347035	0.4301808381241792
4.81	80.93900429367591	0.0	1.0142778610037395	428.2890741963741	1.3004816901965223e-35	-800.6493629117675	0.0	0.026336151475597078	0.0	0.9999831670474348	-2.6472009286346276e-40	0.005802207832460052	4.4946762120115693e-38	5.150603634453692e-36	0.6648877719917009	-4.498229690831232e-40	0.0	0.6688307046015298	0.0	800.6493629117675	80.94532447363723	7.276587249785706e-36	0.07497552943363105	-4.281316314831448	-3.848657266651506e-37	0.45329667066633594	0.4305246480665087
4.815	80.91743964016945	0.0	1.0272586999430187	428.69374730998925	1.3041195028090461e-35	-800.6489816542011	0.0	0.026399792728006084	0.0	0.999982781394505	-2.6769063104944875e-40	0.005868296868722381	4.494674452655314e-38	5.150603574993494e-36	0.6724611466312306	-4.498236630211606e-40	0.0	0.6763936881182043	0.0	800.6489816542011	80.92392285669507	7.274663369547015e-36	0.0775091857976146	-4.280227811273818	-3.8476777070942384e-37	0.46665564330879405	0.4305591435079948
4.82	80.89587899248046	0.0	1.039764188369178	429.098313419624	1.3077563535174414e-35	-800.6485888789913	0.0	0.026508162997778115	0.0	0.9999823918860014	-2.7065728982043146e-40	0.005934299595483893	4.4946726760030804e-38	5.150603515608546e-36	0.6800246336937741	-4.498243638989399e-40	0.0	0.6839877174302921	0.0	800.6485888789913	80.90252167431717	7.272739524792653e-36	0.07958709782156752	-4.2795973120692095	-3.8471137032728205e-37	0.4312444656552799	0.4301270154573915
4.825	80.874318849939	0.0	1.0526525077297462	429.50277253592753	1.311392242416606e-35	-800.6481856494015	0.0	0.02690510249488875	0.0	0.9999819926302538	-2.736643254008092e-40	0.006001200632727182	4.4946708551867823e-38	5.1506034554153487e-36	0.6876910643708853	-4.498250823177493e-40	0.0	0.6916954615319122	0.0	800.6481856494015	80.88112769761779	7.270816329702287e-36	0.08190813899566625	-4.278177913645702	-3.845833980637697e-37	0.4790006024228027	0.4304909736327499
4.83	80.85276064469585	0.0	1.065644921685227	429.90712470179835	1.315027169893893e-35	-800.6477697747309	0.0	0.026839847808362276	0.0	0.9999815871543201	-2.7668427875210503e-40	0.006068389067120658	4.494669006299464e-38	5.150603394965068e-36	0.6953904320198387	-4.498258119310692e-40	0.0	0.6993845115428753	0.0	800.6477697747309	80.85973903974306	7.268893613247513e-36	0.08429248707872754	-4.277608136848225	-3.845324673747558e-37	0.44215036396408963	0.43003986230096997
4.835	80.83120509531642	0.0	1.078414441735544	430.31136992888037	1.3186611360526212e-35	-800.647342984313	0.0	0.02724282081459862	0.0	0.9999811753649559	-2.7971741137456516e-40	0.006135870716571228	4.494667128919738e-38	5.1506033342484324e-36	0.7031234034113044	-4.4982655290708755e-40	0.0	0.7071890048164136	0.0	800.647342984313	80.83835245492094	7.266971081069721e-36	0.08641226370952655	-4.276248041971561	-3.844098823406932e-37	0.48281115742944253	0.43034177034310733
4.84	80.80964897619336	0.0	1.09188608938769	430.7155082467667	1.322294141159626e-35	-800.6469042495687	0.0	0.027333430506436118	0.0	0.9999807533094724	-2.8279192652714906e-40	0.006204273051982456	4.4946652050349444e-38	5.150603272705416e-36	0.7109618828745663	-4.498273123580116e-40	0.0	0.7150194558545782	0.0	800.6469042495687	80.81697622095332	7.265049483774608e-36	0.08909107369460453	-4.275189382685104	-3.8431460396154395e-37	0.4968279901546087	0.4303961234679572
4.845	80.78809643672102	0.0	1.1048978728062786	431.1195396858265	1.325926185488224e-35	-800.6464531662388	0.0	0.027434918724163294	0.0	0.9999803270527318	-2.8586301868000634e-40	0.00627259923232219	4.494663262296424e-38	5.150603211228727e-36	0.7187916387645822	-4.498280793712006e-40	0.0	0.7228789811254731	0.0	800.6464531662388	80.7956000298182	7.263127886859493e-36	0.09132816247691566	-4.274605001895301	-3.842623316870818e-37	0.46365072411229413	0.42996767222895005
4.85	80.76654392012428	0.0	1.1182922817425551	431.5234642560989	1.3295572691278032e-35	-800.6459908315653	0.0	0.02783024547252283	0.0	0.9999798904869219	-2.8897408792336187e-40	0.006341814830183634	4.494661272872059e-38	5.150603148952451e-36	0.726723319800114	-4.498288649369941e-40	0.0	0.7308517591674162	0.0	800.6459908315653	80.77423100188234	7.261206935803391e-36	0.09380999780856396	-4.273212450100772	-3.8413678388082055e-37	0.510015737364529	0.4303540483840686
4.855	80.74499295044718	0.0	1.1317795741965253	431.9272820023993	1.3331873924829334e-35	-800.6455150815664	0.0	0.027768925366857	0.0	0.9999794473044114	-2.920979557555419e-40	0.006411315173647856	4.494659253595485e-38	5.150603086419957e-36	0.7346876344305564	-4.498296624114378e-40	0.0	0.7388069702930896	0.0	800.6455150815664	80.75286700246683	7.259286437201205e-36	0.09634461317446434	-4.272717371972827	-3.840925721811763e-37	0.4726784259708202	0.4298783390115933
4.86	80.7234441351752	0.0	1.1450556442154607	432.3309929302386	1.3368165556017997e-35	-800.6450276369482	0.0	0.028188287306532	0.0	0.9999789971963117	-2.9523635362324676e-40	0.006481138784241398	4.494657203063201e-38	5.150603023594934e-36	0.7426889970723839	-4.498304723506357e-40	0.0	0.746882319764922	0.0	800.6450276369482	80.73150474914839	7.25736609354115e-36	0.09862173503312222	-4.2713573821944335	-3.8396998470010845e-37	0.5148225170296364	0.4302271041027938
[truncated: 13,980 more rows]
