# Supplementary material for: An Efficient Contact Model for the Simulation of Cargo Airdrop Extraction Phase
Source: Hindawi journal article supplement (doi:10.1155/2018/9895451), 2018-10-17
Supplement: f1 [file 9895451.f1.zip › case3_aircraft_coupling/m8000/hist_contact.csv]

t(s)	cntcNrmForc(N)	cntcFricForc(N)	cntcPitchMoment(N/m)
2.48500000	78400.00000200	0.00000000	0.00000000
2.48501300	78400.00000200	0.00000000	0.00000000
2.48502600	78400.00000200	0.00000000	0.00000000
2.48533400	78400.00000300	0.00000000	0.00000100
2.48564300	78400.00000500	0.00000000	0.00000100
2.48595100	78400.00000800	0.00000000	0.00000200
2.48686600	78400.00002300	0.00000000	0.00000700
2.48778100	78400.00004700	0.00000000	0.00001600
2.48801000	78400.00005500	0.00000000	0.00001900
2.48801300	78400.00005500	0.00000000	0.00001900
2.48801600	78400.00005500	0.00000000	0.00001900
2.48801800	78400.00005500	0.00000000	0.00001900
2.48801900	78400.00005500	0.00000000	0.00001900
2.48802100	78400.00005500	0.00000000	0.00001900
2.48802200	78400.00005500	0.00000000	0.00001900
2.48802300	78400.00005500	0.00000000	0.00001900
2.48802400	78400.00005500	0.00000000	0.00001900
2.48803100	78400.00005500	0.00000000	0.00001900
2.48803700	78400.00005600	0.00000000	0.00001900
2.48804300	78400.00005600	0.00000000	0.00002000
2.48804900	78400.00005600	0.00000000	0.00002000
2.48806900	78400.00005700	0.00000000	0.00002000
2.48808800	78400.00005700	0.00000000	0.00002000
2.48810700	78400.00005800	0.00000000	0.00002000
2.48812600	78400.00005900	0.00000000	0.00002100
2.48819400	78400.00006100	0.00000000	0.00002100
2.48822500	78400.00006200	0.00000000	0.00002200
2.48823700	78400.00006300	0.00000000	0.00002200
2.48823800	78400.00006300	0.00000000	0.00002200
2.48823900	78400.00006300	0.00000000	0.00002200
2.48824000	78400.12021800	0.00000000	-0.01295300
2.48824100	78400.15030100	0.00000000	-0.01620100
2.48824200	78400.27058800	0.00000000	-0.02919000
2.48824300	78400.39096400	0.00000000	-0.04218900
2.48824400	78400.51142500	0.00000000	-0.05519700
2.48825600	78401.72086300	0.00000000	-0.18579500
2.48826900	78402.93902200	0.00000000	-0.31733300
2.48828100	78404.16586900	0.00000000	-0.44980700
2.48829300	78405.40136400	0.00000000	-0.58321200
2.48837000	78413.37935300	59.50415300	36.63808600
2.48844700	78421.68943500	256.19960700	161.33534100
2.48852400	78430.32198500	456.64342800	287.86125600
2.48860100	78439.26770300	664.99031700	419.44363400
2.48867800	78448.51642300	610.08865600	381.80004000
2.48875500	78458.05930800	156.91611900	90.25802000
2.48876500	78459.33267700	156.91866500	89.99518100
2.48877500	78460.61094100	156.92122200	89.80326100
2.48878500	78461.89406000	156.92378800	89.63755700
2.48879500	78463.18199000	156.92636400	89.46275200
2.48881500	78465.77220800	156.93154400	89.11167100
2.48883600	78468.38141800	156.93676300	88.75864900
2.48885600	78471.00944200	156.94201900	88.40370900
2.48887600	78473.65609500	156.94731200	88.04687300
2.48889600	78476.32119800	156.95264200	87.68816700
2.48901100	78491.78280900	156.98356600	85.61868100
2.48912500	78507.79892100	157.01559800	83.49413800
2.48924000	78524.33581300	157.04867200	81.31903800
2.48935400	78541.35955100	157.08271900	79.09797000
2.48946900	78558.83611900	157.11767200	76.83558900
2.48958300	78576.73145500	157.15346300	74.53660500
2.48979500	78610.76629600	157.22153300	70.21069700
2.49000700	78645.90009700	157.29180000	65.80619800
2.49021800	78681.92202200	157.36384400	61.35303900
2.49043000	78718.62500500	157.43725000	56.88070900
2.49064100	78755.80693500	157.51161400	52.41790100
2.49085300	78793.27177000	157.58654400	47.99219200
2.49106400	78830.83053100	157.66166100	43.62974600
2.49127600	78868.30219400	157.73660400	39.35504200
2.49148800	78905.51446800	157.81102900	35.19063800
2.49172500	78946.72635600	157.89345300	30.67795900
2.49196200	78987.19287100	157.97438600	26.35496100
2.49219900	79026.71572900	158.05343100	22.24320300
2.49243600	79065.11361200	158.13022700	18.36029000
2.49267400	79102.22220700	158.20444400	14.71990800
2.49291100	79137.89464400	158.27578900	11.33175000
2.49314800	79172.00130800	158.34400300	8.20163700
2.49343800	79211.34886700	158.42269800	4.73340300
2.49372700	79248.02543200	158.49605100	1.64941400
2.49401700	79281.89534700	158.56379100	-1.06059200
2.49430600	79312.85682300	158.62571400	-3.41313200
2.49459600	79340.84006600	158.68168000	-5.43011600
2.49488500	79365.80513800	158.73161000	-7.13791200
2.49517500	79387.73973900	158.77547900	-8.56640300
2.49550800	79409.24263100	158.81848500	-9.90650600
2.49577100	79423.45238700	158.84690500	-10.76899900
2.49603500	79435.24648700	158.87049300	-11.48629500
2.49629800	79444.68172400	158.88936300	-12.08475200
2.49656100	79451.82622500	158.90365200	-12.59036300
2.49682400	79456.75796200	158.91351600	-13.02827400
2.49708800	79459.56361200	158.91912700	-13.42250300
2.49736500	79460.32365400	158.92064700	-13.81511100
2.49764200	79458.94954400	158.91789900	-14.20866000
2.49782700	79456.91376100	158.91382800	-14.48194300
2.49785700	79456.50045600	158.91300100	-14.52782600
2.49787100	79456.29047400	158.91258100	-14.55039500
2.49787500	79456.23147700	158.91246300	-14.55665600
2.49787600	79456.22538900	158.91245100	-14.55730100
2.49787700	79456.20711700	158.91241400	-14.55923500
2.49787800	79456.19493500	158.91239000	-14.56052400
2.49787900	79456.18275200	158.91236600	-14.56181400
2.49788000	79456.17056700	158.91234100	-14.56310400
2.49788800	79456.04869400	158.91209700	-14.57599300
2.49789600	79455.92675300	158.91185400	-14.58888000
2.49790500	79455.80474300	158.91160900	-14.60176200
2.49791300	79455.68266800	158.91136500	-14.61464000
2.49799600	79454.45819600	158.90891600	-14.74319000
2.49808000	79453.22700800	158.90645400	-14.87132200
2.49816300	79451.98913700	158.90397800	-14.99903600
2.49824700	79450.74461900	158.90148900	-15.12633200
2.49870100	79443.85579800	158.88771200	-15.81186200
2.49915600	79436.77690200	158.87355400	-16.48499100
2.49961100	79429.51366000	158.85902700	-17.14571200
2.50006500	79422.07174700	158.84414300	-17.79401800
2.50052000	79414.45678800	158.82891400	-18.42990800
2.50058600	79413.32451600	158.82664900	-18.52222500
2.50065300	79412.18865300	158.82437700	-18.61427400
2.50069600	79411.45459600	158.82290900	-18.67346600
2.50070200	79411.35177500	158.82270400	-18.68173900
2.50070800	79411.24892600	158.82249800	-18.69000900
2.50071400	79411.14604600	158.82229200	-18.69827800
2.50072600	79410.94020200	158.82188000	-18.71480800
2.50073800	79410.73424200	158.82146800	-18.73132900
2.50075000	79410.52816500	158.82105600	-18.74784200
2.50087100	79408.46107200	158.81692200	-18.91249100
2.50099100	79406.38254100	158.81276500	-19.07627000
2.50111100	79404.29265700	158.80858500	-19.23917800
2.50123200	79402.19153700	158.80438300	-19.40121600
2.50157300	79396.16809800	158.79233600	-19.85635000
2.50191500	79390.05724100	158.78011400	-20.30448000
2.50225600	79383.86126500	158.76772300	-20.74560800
2.50259800	79377.58244700	158.75516500	-21.17974000
2.50294000	79371.22304300	158.74244600	-21.60688200
2.50366700	79357.42799900	158.71485600	-22.49287900
2.50439400	79343.29930100	158.68659900	-23.34732000
2.50512100	79328.85793400	158.65771600	-24.17030600
2.50584800	79314.12450500	158.62824900	-24.96195500
2.50657500	79299.11923700	158.59823800	-25.72240100
2.50730200	79283.86196500	158.56772400	-26.45179800
2.50831900	79262.14957000	158.52429900	-27.41965100
2.50933500	79240.03454100	158.48006900	-28.32768400
2.51035200	79217.56717700	158.43513400	-29.17646900
2.51136800	79194.79622600	158.38959200	-29.96663900
2.51238400	79171.76890400	158.34353800	-30.69888200
2.51340100	79148.53085500	158.29706200	-31.37393800
2.51441700	79125.12616400	158.25025200	-31.99260000
2.51598200	79088.87829700	158.17775700	-32.83648800
2.51754600	79052.48373100	158.10496700	-33.55208400
2.51911000	79016.08140900	158.03216300	-34.14290300
2.52067400	78979.80153700	157.95960300	-34.61268200
2.52223900	78943.76568100	157.88753100	-34.96535800
2.52380300	78908.08685100	157.81617400	-35.20504700
2.52536700	78872.86964700	157.74573900	-35.33602800
2.52693100	78838.21040200	157.67642100	-35.36271600
2.52849600	78804.19735800	157.60839500	-35.28964900
2.53006000	78770.91085900	157.54182200	-35.12146800
2.53202400	78730.24743100	157.46049500	-34.78278800
2.53398900	78690.97123300	157.38194200	-34.31103700
2.53558300	78660.20116200	157.32040200	-33.83713300
2.53717600	78630.46675600	157.26093400	-33.28711100
2.53877000	78601.81109700	157.20362200	-32.66613200
2.54036400	78574.27047100	157.14854100	-31.97934400
2.54195800	78547.87466800	157.09574900	-31.23186700
2.54355200	78522.64729600	157.04529500	-30.42877800
2.54514600	78498.60608800	156.99721200	-29.57509700
2.54702400	78471.81614700	156.94363200	-28.51097000
2.54749300	78465.38005900	156.93076000	-28.23597000
2.54796300	78459.04873000	156.91809700	-27.95762800
2.54798600	78458.73491400	156.91747000	-27.94362500
2.54799100	78458.67218200	156.91734400	-27.94082400
2.54799200	78458.65428900	156.91730900	-27.94002400
2.54799300	78458.64922500	156.91729800	-27.93920900
2.54799400	78458.64150500	156.91728300	-27.93598300
2.54799500	78458.63449500	156.91726900	-27.93304900
2.54799600	78458.62749200	156.91725500	-27.93011200
2.54800700	78458.55786600	156.91711600	-27.90063100
2.54801800	78458.48897200	156.91697800	-27.87094200
2.54802900	78458.42081000	156.91684200	-27.84104700
2.54803900	78458.35337800	156.91670700	-27.81094500
2.54814800	78457.71900600	156.91543800	-27.49864000
2.54825700	78457.15656500	156.91431300	-27.16606100
2.54836500	78456.66501700	156.91333000	-26.81355900
2.54847400	78456.24327600	156.91248700	-26.44150400
2.54858200	78455.89021200	156.91178000	-26.05027500
2.54898400	78455.16110600	156.91032200	-24.44164500
2.54938700	78455.29287300	156.91058600	-22.59690700
2.54978900	78456.21532700	156.91243100	-20.53896200
2.55019100	78457.85231800	156.91570500	-18.29233000
2.55059300	78460.12364800	156.92024700	-15.88248300
2.55099500	78462.94534400	156.92589100	-13.33576300
2.55139500	78466.21356200	156.93242700	-10.69243800
2.55179500	78469.85443600	156.93970900	-7.96664200
2.55219500	78473.78082400	156.94756200	-5.18471000
2.55259500	78477.90603000	156.95581200	-2.37250400
2.55299500	78482.14469800	156.96428900	0.44486000
2.55339500	78486.41369000	156.97282700	3.24326500
2.55393900	78492.12229200	156.98424500	6.97612800
2.55448300	78497.54962100	156.99509900	10.57868300
2.55502600	78502.52187900	157.00504400	14.00344300
2.55557000	78506.88423500	157.01376800	17.20937900
2.55611400	78510.50237300	157.02100500	20.16208800
2.55665800	78513.26469400	157.02652900	22.83430400
2.55720200	78515.08338100	157.03016700	25.20596000
2.55781200	78515.92322700	157.03184600	27.49551500
2.55842300	78515.44072700	157.03088100	29.38197900
2.55903400	78513.62165000	157.02724300	30.86796700
2.55964500	78510.48877500	157.02097800	31.96573900
2.56025600	78506.09955600	157.01219900	32.69621200
2.56086600	78500.54304700	157.00108600	33.08778900
2.56086800	78500.53152800	157.00106300	33.08822900
2.56086900	78500.52000200	157.00104000	33.08866700
2.56087000	78500.50847300	157.00101700	33.08910400
2.56087100	78500.49694000	157.00099400	33.08953900
2.56087200	78500.48540300	157.00097100	33.08997400
2.56087400	78500.46231800	157.00092500	33.09084000
2.56087700	78500.43922200	157.00087800	33.09170300
2.56087900	78500.41610900	157.00083200	33.09256200
2.56090200	78500.18416900	157.00036800	33.10091000
2.56090700	78500.13760300	157.00027500	33.10252800
2.56091100	78500.09097600	157.00018200	33.10412800
2.56091600	78500.04429000	157.00008900	33.10571200
2.56092300	78499.97138600	156.99994300	33.10819500
2.56093000	78499.89849600	156.99979700	33.11067600
2.56093800	78499.82560600	156.99965100	33.11315000
2.56101000	78499.09749900	156.99819500	33.13772900
2.56108200	78498.37083000	156.99674200	33.16201000
2.56115400	78497.64559700	156.99529100	33.18599400
2.56122600	78496.92180400	156.99384400	33.20968100
2.56194600	78489.76330200	156.97952700	33.43039600
2.56266700	78482.75004200	156.96550000	33.62221700
2.56338800	78475.88310400	156.95176600	33.78583500
2.56410800	78469.16342400	156.93832700	33.92193800
2.56482900	78462.59178200	156.92518400	34.03121500
2.56658000	78447.23990400	156.89448000	34.18920600
2.56833200	78432.77223500	156.86554400	34.20258000
2.57008300	78419.19055300	156.83838100	34.08103800
2.57183500	78406.49238100	156.81298500	33.83417200
2.57358600	78394.67173300	156.78934300	33.47138000
2.57533700	78383.71900800	156.76743800	33.00189300
2.57775000	78370.02945000	156.74005900	32.19707800
2.57835300	78366.85577100	156.73371200	31.96960800
2.57895600	78363.78012900	156.72756000	31.73233000
2.57955900	78360.80173700	156.72160300	31.48558800
2.57971000	78360.07223900	156.72014400	31.42246500
2.57986100	78359.34875300	156.71869800	31.35877600
2.58001200	78358.63126900	156.71726300	31.29452800
2.58004200	78358.48849100	156.71697700	31.28161200
2.58007200	78358.34595300	156.71669200	31.26867400
2.58010200	78358.20365300	156.71640700	31.25571300
2.58010800	78358.17522200	156.71635000	31.25311800
2.58011400	78358.14680100	156.71629400	31.25052300
2.58012000	78358.11838800	156.71623700	31.24792600
2.58012100	78358.11243800	156.71622500	31.24738200
2.58012200	78358.11216500	156.71622400	31.24735700
2.58012300	78358.10966400	156.71621900	31.24739100
2.58012900	78358.10373400	156.71620700	31.24809500
2.58013400	78358.09843800	156.71619700	31.24874700
2.58013900	78358.09323400	156.71618600	31.24941100
2.58014400	78358.08812100	156.71617600	31.25008800
2.58019400	78358.04202500	156.71608400	31.25751800
2.58024500	78358.00505500	156.71601000	31.26615600
2.58029500	78357.97718600	156.71595400	31.27599300
2.58034600	78357.95839600	156.71591700	31.28702500
2.58039700	78357.94865400	156.71589700	31.29924300
2.58081500	78358.21145300	156.71642300	31.44502700
2.58123400	78359.07216100	156.71814400	31.66725200
2.58165300	78360.50516800	156.72101000	31.96079600
2.58207200	78362.47923800	156.72495800	32.31983600
2.58249000	78364.95801900	156.72991600	32.73795200
2.58290900	78367.90072500	156.73580100	33.20827000
2.58332800	78371.26273100	156.74252500	33.72356600
2.58374700	78374.99620300	156.74999200	34.27637100
2.58408900	78378.28988300	156.75658000	34.75095300
2.58443100	78381.76971100	156.76353900	35.24134300
2.58477400	78385.40656800	156.77081300	35.74338100
2.58511600	78389.17112700	156.77834200	36.25298000
2.58545900	78393.03382600	156.78606800	36.76612000
2.58584200	78397.43795700	156.79487600	37.33992700
2.58622500	78401.88773000	156.80377500	37.90804500
2.58660800	78406.34315700	156.81268600	38.46544400
2.58699200	78410.76585400	156.82153200	39.00743200
2.58737500	78415.11926200	156.83023900	39.52967400
2.58775800	78419.36860000	156.83873700	40.02817000
2.58815400	78423.61475500	156.84723000	40.51439200
2.58855000	78427.68226700	156.85536500	40.96790200
2.58894600	78431.54134400	156.86308300	41.38565000
2.58934200	78435.16555800	156.87033100	41.76507300
2.58973800	78438.53203100	156.87706400	42.10409500
2.59013400	78441.62156300	156.88324300	42.40112400
2.59074000	78445.78374400	156.89156700	42.77234500
2.59134700	78449.22255800	156.89844500	43.04061100
2.59195400	78451.92068200	156.90384100	43.20643200
2.59256000	78453.88174400	156.90776300	43.27262100
2.59316700	78455.12798600	156.91025600	43.24390700
2.59377300	78455.69972500	156.91139900	43.12678900
2.59438000	78455.65318500	156.91130600	42.92920400
2.59486600	78455.21711800	156.91043400	42.71914800
2.59535100	78454.47075700	156.90894200	42.46838800
2.59583700	78453.45909900	156.90691800	42.18220900
2.59632200	78452.23009200	156.90446000	41.86603400
2.59680800	78450.83365000	156.90166700	41.52531900
2.59729300	78449.32083100	156.89864200	41.16546600
2.59777900	78447.74291200	156.89548600	40.79173600
2.59850900	78445.35769000	156.89071500	40.21440100
2.59924000	78443.10500200	156.88621000	39.63285600
2.59983100	78441.48400200	156.88296800	39.16869700
2.60042200	78440.12289300	156.88024600	38.71730700
2.60101400	78439.08504600	156.87817000	38.28394900
2.60160500	78438.42386800	156.87684800	37.87283900
2.60219600	78438.18153200	156.87636300	37.48707200
2.60278700	78438.38868800	156.87677700	37.12867500
2.60337900	78439.06415300	156.87812800	36.79863700
2.60397000	78440.21501800	156.88043000	36.49698700
2.60456100	78441.83699200	156.88367400	36.22288000
2.60517800	78444.01683000	156.88803400	35.96431100
2.60579600	78446.66524700	156.89333000	35.73140500
2.60641300	78449.74298700	156.89948600	35.52091800
2.60703000	78453.20199400	156.90640400	35.32914000
2.60764800	78456.98714500	156.91397400	35.15204000
2.60826500	78461.03778700	156.92207600	34.98540400
2.60888200	78465.28968600	156.93057900	34.82496600
2.60959900	78470.38697200	156.94077400	34.64111800
2.61031500	78475.56401000	156.95112800	34.45379000
2.61103100	78480.72225900	156.96144500	34.25732000
2.61174700	78485.77040000	156.97154100	34.04673800
2.61246300	78490.62691200	156.98125400	33.81787700
2.61317900	78495.22253100	156.99044500	33.56745300
2.61389500	78499.50194700	156.99900400	33.29310300
2.61461100	78503.42493200	157.00685000	32.99339800
2.61542000	78507.39609400	157.01479200	32.62384400
2.61622800	78510.86985300	157.02174000	32.22184100
2.61703700	78513.85827300	157.02771700	31.78916400
2.61784600	78516.39506800	157.03279000	31.32865100
2.61865400	78518.53256600	157.03706500	30.84399900
2.61946300	78520.33797800	157.04067600	30.33954000
2.62027200	78521.88927400	157.04377900	29.82001500
2.62108000	78523.27081500	157.04654200	29.29034700
2.62117100	78523.41869900	157.04683700	29.23063800
2.62126100	78523.56566200	157.04713100	29.17087100
2.62135200	78523.71182400	157.04742400	29.11105100
2.62144200	78523.85730500	157.04771500	29.05118700
2.62153300	78524.00222700	157.04800400	28.99128300
2.62162300	78524.14670700	157.04829300	28.93134800
2.62171400	78524.29086300	157.04858200	28.87138700
2.62195500	78524.67439500	157.04934900	28.71149700
2.62219600	78525.05865600	157.05011700	28.55159400
2.62243800	78525.44579800	157.05089200	28.39179400
2.62267900	78525.83791100	157.05167600	28.23221200
2.62292000	78526.23701600	157.05247400	28.07295900
2.62316200	78526.64506800	157.05329000	27.91414100
2.62380200	78527.78462000	157.05556900	27.49573100
2.62444200	78529.03194700	157.05806400	27.08284400
2.62508200	78530.41415600	157.06082800	26.67699200
2.62572200	78531.95283300	157.06390600	26.27942200
2.62636200	78533.66389900	157.06732800	25.89112200
2.62700100	78535.55738400	157.07111500	25.51281100
2.62764100	78537.63744000	157.07527500	25.14495700
2.62773100	78537.94487700	157.07589000	25.09408400
2.62782100	78538.25597100	157.07651200	25.04342300
2.62791100	78538.57070300	157.07714100	24.99297300
2.62800100	78538.88906000	157.07777800	24.94273600
2.62809100	78539.21102200	157.07842200	24.89271100
2.62818100	78539.53656400	157.07907300	24.84289800
2.62856900	78540.97692600	157.08195400	24.63107200
2.62895600	78542.48086400	157.08496200	24.42313400
2.62934300	78544.04554100	157.08809100	24.21903300
2.62973000	78545.66756900	157.09133500	24.01869100
2.63011700	78547.34304200	157.09468600	23.82201300
2.63050400	78549.06760600	157.09813500	23.62888400
2.63104700	78551.55966500	157.10311900	23.36377700
2.63158900	78554.12482700	157.10825000	23.10499800
2.63213200	78556.74812100	157.11349600	22.85211200
2.63271100	78559.59237800	157.11918500	22.58839100
2.63318700	78561.95486600	157.12391000	22.37569400
2.63366300	78564.32674100	157.12865300	22.16647700
2.63405300	78566.26749800	157.13253500	21.99764300
2.63444300	78568.20225800	157.13640500	21.83076700
2.63483200	78570.12584600	157.14025200	21.66569300
2.63522200	78572.03338000	157.14406700	21.50227200
2.63561200	78573.92029400	157.14784100	21.34036600
2.63600100	78575.78239600	157.15156500	21.17985100
2.63639100	78577.61588900	157.15523200	21.02061300
2.63678100	78579.41740700	157.15883500	20.86255500
2.63717000	78581.18402400	157.16236800	20.70559200
2.63756000	78582.91327900	157.16582700	20.54965900
2.63794900	78584.60318000	157.16920600	20.39470300
2.63833900	78586.25221300	157.17250400	20.24069000
2.63872900	78587.85933800	157.17571900	20.08760400
2.63911800	78589.42398400	157.17884800	19.93544400
2.63950800	78590.94603300	157.18189200	19.78422800
2.63989800	78592.42581500	157.18485200	19.63398800
2.64028700	78593.86408200	157.18772800	19.48477500
2.64067700	78595.26197800	157.19052400	19.33665500
2.64106700	78596.62102700	157.19324200	19.18970800
2.64145600	78597.94308500	157.19588600	19.04403100
2.64184600	78599.23032100	157.19846100	18.89973000
2.64229500	78600.67328800	157.20134700	18.73535800
2.64274400	78602.07740800	157.20415500	18.57317800
2.64319300	78603.44713700	157.20689400	18.41341000
2.64364200	78604.78719500	157.20957400	18.25628900
2.64409000	78606.10248100	157.21220500	18.10206300
2.64453900	78607.39800100	157.21479600	17.95098700
2.64503500	78608.81246800	157.21762500	17.78804400
2.64553100	78610.21565500	157.22043100	17.62962300
2.64602700	78611.61409600	157.22322800	17.47608300
2.64652300	78613.01402500	157.22602800	17.32777700
2.64701900	78614.42130600	157.22884300	17.18504900
2.64751500	78615.84131400	157.23168300	17.04823100
2.64801100	78617.27889300	157.23455800	16.91763800
2.64850700	78618.73827900	157.23747700	16.79356500
2.64900300	78620.22305800	157.24044600	16.67628400
2.64949900	78621.73614100	157.24347200	16.56604100
2.64999500	78623.27973300	157.24655900	16.46305600
2.65049100	78624.85533000	157.24971100	16.36751800
2.65098700	78626.46372900	157.25292700	16.27958600
2.65148300	78628.10504800	157.25621000	16.19939000
2.65197900	78629.77874700	157.25955700	16.12702600
2.65247500	78631.48367700	157.26296700	16.06256300
2.65297100	78633.21812600	157.26643600	16.00603800
2.65346700	78634.97986800	157.26996000	15.95746000
2.65396300	78636.76623400	157.27353200	15.91681300
2.65445900	78638.57417500	157.27714800	15.88405600
2.65495500	78640.40033600	157.28080100	15.85912400
2.65559800	78642.79092600	157.28558200	15.83830100
2.65624200	78645.19790200	157.29039600	15.83028800
2.65688500	78647.61284200	157.29522600	15.83483000
2.65741500	78649.60054600	157.29920100	15.84779000
2.65794400	78651.58345800	157.30316700	15.86890200
2.65847400	78653.55728700	157.30711500	15.89800200
2.65900400	78655.51802900	157.31103600	15.93493200
2.65953300	78657.46204500	157.31492400	15.97953900
2.66006300	78659.38610300	157.31877200	16.03168300
2.66059300	78661.28743200	157.32257500	16.09123900
2.66112200	78663.16374300	157.32632700	16.15810100
2.66165200	78665.01326400	157.33002700	16.23218400
2.66218200	78666.83473400	157.33366900	16.31342500
2.66271100	78668.62741400	157.33725500	16.40178700
2.66324100	78670.39107200	157.34078200	16.49726000
2.66377000	78672.12595600	157.34425200	16.59985900
2.66430000	78673.83277800	157.34766600	16.70962500
2.66483000	78675.51266800	157.35102500	16.82662900
2.66535900	78677.16713100	157.35433400	16.95096200
2.66588900	78678.79800800	157.35759600	17.08274300
2.66641900	78680.40741400	157.36081500	17.22210900
2.66709700	78682.44188400	157.36488400	17.41201800
2.66777600	78684.45025800	157.36890100	17.61501100
2.66845400	78686.43809100	157.37287600	17.83149500
2.66913300	78688.41099700	157.37682200	18.06189600
2.66981200	78690.37448500	157.38074900	18.30665300
2.67037300	78691.99523900	157.38399000	18.52027100
2.67093400	78693.61586700	157.38723200	18.74425300
2.67149600	78695.23885100	157.39047800	18.97883300
2.67205700	78696.86640100	157.39373300	19.22422800
2.67261800	78698.50039800	157.39700100	19.48063800
2.67318000	78700.14237900	157.40028500	19.74824500
2.67374100	78701.79352900	157.40358700	20.02720600
2.67430200	78703.45466200	157.40690900	20.31765100
2.67486400	78705.12623900	157.41025200	20.61968700
2.67542500	78706.80836600	157.41361700	20.93339200
2.67598600	78708.50082000	157.41700200	21.25881500
2.67654800	78710.20306600	157.42040600	21.59597900
2.67716700	78712.09064100	157.42418100	21.98140500
2.67778600	78713.98769500	157.42797500	22.38106300
2.67840500	78715.89249300	157.43178500	22.79487900
2.67902400	78717.80305600	157.43560600	23.22274700
2.67964300	78719.71723500	157.43943400	23.66453500
2.68026200	78721.63278400	157.44326600	24.12009100
2.68097800	78723.84941100	157.44769900	24.66453500
2.68169500	78726.06132400	157.45212300	25.22693400
2.68241200	78728.26520000	157.45653000	25.80700400
2.68312900	78730.45801200	157.46091600	26.40446500
2.68384500	78732.63708200	157.46527400	27.01905100
2.68456200	78734.80019200	157.46960000	27.65052100
2.68527900	78736.94561300	157.47389100	28.29866500
2.68599500	78739.07213800	157.47814400	28.96331500
2.68671200	78741.17909900	157.48235800	29.64434200
2.68742900	78743.26634600	157.48653300	30.34166500
2.68814600	78745.33423600	157.49066800	31.05525200
2.68886200	78747.38357800	157.49476700	31.78511500
2.68957900	78749.41558400	157.49883100	32.53131400
2.69029600	78751.43180100	157.50286400	33.29394500
2.69101300	78753.43404000	157.50686800	34.07314100
2.69199300	78756.15518600	157.51231000	35.16664500
2.69297400	78758.85932200	157.51771900	36.29195300
2.69374300	78760.96929400	157.52193900	37.19602200
2.69451100	78763.07467500	157.52614900	38.12016600
2.69527900	78765.17773900	157.53035500	39.06461600
2.69604800	78767.28053700	157.53456100	40.02958500
2.69681600	78769.38474800	157.53876900	41.01525000
2.69758500	78771.49169900	157.54298300	42.02175200
2.69835300	78773.60234900	157.54720500	43.04918700
2.69912100	78775.71726400	157.55143500	44.09760700
2.69989000	78777.83662800	157.55567300	45.16701000
2.70065800	78779.96027500	157.55992100	46.25734600
2.70142600	78782.08772800	157.56417500	47.36851900
2.70219500	78784.21824700	157.56843600	48.50038900
2.70306700	78786.63942900	157.57327900	49.81020900
2.70393900	78789.06170600	157.57812300	51.14616600
2.70481200	78791.48330600	157.58296700	52.50791400
2.70568400	78793.90243500	157.58780500	53.89508400
2.70655600	78796.31736600	157.59263500	55.30729800
2.70742900	78798.72654000	157.59745300	56.74418800
2.70830100	78801.12864000	157.60225700	58.20540400
2.70917300	78803.52264900	157.60704500	59.69063200
2.71004600	78805.90787300	157.61181600	61.19959600
2.71091800	78808.28397800	157.61656800	62.73207000
2.71179000	78810.65097600	157.62130200	64.28788200
2.71266300	78813.00921000	157.62601800	65.86690900
2.71353500	78815.35931800	157.63071900	67.46908200
2.71440700	78817.70218800	157.63540400	69.09437800
2.71527900	78820.03889800	157.64007800	70.74281300
2.71649100	78823.27545200	157.64655100	73.07009700
2.71770200	78826.50592100	157.65301200	75.44228700
2.71866200	78829.06577100	157.65813200	77.35563300
2.71962300	78831.62551100	157.66325100	79.29748000
2.72058300	78834.18649500	157.66837300	81.26791300
2.72154400	78836.74987700	157.67350000	83.26699700
2.72250400	78839.31649100	157.67863300	85.29474100
2.72346500	78841.88688900	157.68377400	87.35111600
2.72442600	78844.46136200	157.68892300	89.43604300
2.72538600	78847.03993300	157.69408000	91.54939800
2.72634700	78849.62239200	157.69924500	93.69101000
2.72745500	78852.60558000	157.70521100	96.19619600
2.72856300	78855.59261300	157.71118500	98.73834300
2.72967000	78858.58257400	157.71716500	101.31706500
2.73077800	78861.57453400	157.72314900	103.93196900
2.73188600	78864.56764600	157.72913500	106.58267500
2.73299400	78867.56122200	157.73512200	109.26884300
2.73410200	78870.55480200	157.74111000	111.99018300
2.73521000	78873.54818900	157.74709600	114.74647300
2.73631800	78876.54143000	157.75308300	117.53755600
2.73742600	78879.53482700	157.75907000	120.36335000
2.73853400	78882.52889200	157.76505800	123.22384000
2.73964200	78885.52430100	157.77104900	126.11906800
2.74100400	78889.20927200	157.77841900	129.72561700
2.74236600	78892.89900400	157.78579800	133.38504300
2.74372800	78896.59501100	157.79319000	137.09763700
2.74509000	78900.29856300	157.80059700	140.86368900
2.74621900	78903.37593000	157.80675200	144.02711100
2.74734800	78906.45961500	157.81291900	147.22762000
2.74847800	78909.54983300	157.81910000	150.46532400
2.74960700	78912.64666300	157.82529300	153.74031300
2.75073600	78915.75002900	157.83150000	157.05265200
2.75186500	78918.85973600	157.83771900	160.40238900
2.75329700	78922.80927800	157.84561900	164.70124000
2.75472800	78926.76789600	157.85353600	169.06030500
2.75615900	78930.73491800	157.86147000	173.47970400
2.75759000	78934.70975500	157.86942000	177.95961500
2.75902100	78938.69196000	157.87738400	182.50029700
2.76045200	78942.68127300	157.88536300	187.10210700
2.76188300	78946.67763100	157.89335500	191.76550800
2.76331400	78950.68113800	157.90136200	196.49105900
2.76474500	78954.69202000	157.90938400	201.27941000
2.76644200	78959.45663600	157.91891300	207.03806600
2.76813800	78964.23246000	157.92846500	212.88725300
2.76983500	78969.01985700	157.93804000	218.82831100
2.77153100	78973.81892800	157.94763800	224.86256800
2.77322800	78978.62962800	157.95725900	230.99139000
2.77492400	78983.45157700	157.96690300	237.21608500
2.77662000	78988.28421600	157.97656800	243.53795900
2.77831700	78993.12685300	157.98625400	249.95831900
2.78001300	78997.97872600	157.99595700	256.47849300
2.78202200	79003.73442000	158.00746900	264.32951700
2.78403100	79009.50091100	158.01900200	272.32478500
2.78603900	79015.27729500	158.03055500	280.46683300
2.78804800	79021.06282500	158.04212600	288.75831300
2.79005700	79026.85693100	158.05371400	297.20199200
2.79206500	79032.65911200	158.06531800	305.80071500
2.79434900	79039.26455500	158.07852900	315.76826400
2.79663300	79045.87886800	158.09175800	325.94406800
2.79891600	79052.50101300	158.10500200	336.33222800
2.80120000	79059.12974300	158.11825900	346.93671800
2.80348300	79065.76374000	158.13152700	357.76141300
2.80576700	79072.40167300	158.14480300	368.81009600
2.80805100	79079.04226200	158.15808500	380.08646300
2.81033400	79085.68434700	158.17136900	391.59414400
2.81261800	79092.32690600	158.18465400	403.33669800
2.81490100	79098.96903300	158.19793800	415.31759100
2.81718500	79105.60989500	158.21122000	427.54016000
2.81946800	79112.24868600	158.22449700	440.00758200
2.82175200	79118.88461300	158.23776900	452.72284800
2.82403600	79125.51688600	158.25103400	465.68874900
2.82631900	79132.14471600	158.26428900	478.90786600
2.82860300	79138.76734900	158.27753500	492.38257900
2.83088600	79145.38407900	158.29076800	506.11507700
2.83317000	79151.99426200	158.30398900	520.10736200
2.83545400	79158.59732300	158.31719500	534.36125000
2.83773700	79165.19275800	158.33038600	548.87838700
2.84002100	79171.78012700	158.34356000	563.66023900
2.84230400	79178.35903600	158.35671800	578.70809700
2.84458800	79184.92913900	158.36985800	594.02307200
2.84687200	79191.49011700	158.38298000	609.60610600
2.84915500	79198.04169100	158.39608300	625.45797500
2.85143900	79204.58361600	158.40916700	641.57930500
2.85372200	79211.11567300	158.42223100	657.97057800
2.85600600	79217.63768900	158.43527500	674.63215100
2.85828900	79224.14951900	158.44829900	691.56426700
2.86057300	79230.65106000	158.46130200	708.76707100
2.86285700	79237.14224200	158.47428400	726.24062000
2.86514000	79243.62301900	158.48724600	743.98489300
2.86742400	79250.09337200	158.50018700	761.99980700
2.86970700	79256.55330300	158.51310700	780.28522100
2.87199100	79263.00282900	158.52600600	798.84095100
2.87427500	79269.44198100	158.53888400	817.66677900
2.87655800	79275.87080800	158.55174200	836.76246400
2.87884200	79282.28936300	158.56457900	856.12775000
2.88112500	79288.69771200	158.57739500	875.76237800
2.88340900	79295.09592700	158.59019200	895.66609300
2.88569200	79301.48409000	158.60296800	915.83865000
2.88797600	79307.86227900	158.61572500	936.27982000
2.89026000	79314.23058500	158.62846100	956.98939400
2.89254300	79320.58908500	158.64117800	977.96718700
2.89482700	79326.93786800	158.65387600	999.21303900
2.89711000	79333.27700700	158.66655400	1020.72681800
2.89939400	79339.60658000	158.67921300	1042.50842100
2.90167800	79345.92665000	158.69185300	1064.55777000
2.90396100	79352.23727600	158.70447500	1086.87481600
2.90624500	79358.53851300	158.71707700	1109.45953400
2.90852800	79364.83040000	158.72966100	1132.31192400
2.91081200	79371.11297300	158.74222600	1155.43200400
2.91309600	79377.38625100	158.75477300	1178.81981100
2.91537900	79383.65024900	158.76730000	1202.47539600
2.91766300	79389.90496700	158.77981000	1226.39881800
2.91994600	79396.15039100	158.79230100	1250.59014600
2.92223000	79402.38650100	158.80477300	1275.04944900
2.92451300	79408.61326300	158.81722700	1299.77679700
2.92679700	79414.83062600	158.82966100	1324.77225600
2.92908100	79421.03853400	158.84207700	1350.03588600
2.93136400	79427.23691600	158.85447400	1375.56773800
2.93364800	79433.42568800	158.86685100	1401.36785300
2.93593100	79439.60476100	158.87921000	1427.43625700
2.93821500	79445.77402700	158.89154800	1453.77296500
2.94049900	79451.93337500	158.90386700	1480.37797600
2.94278200	79458.08267900	158.91616500	1507.25127700
2.94535400	79464.99526800	158.92999100	1537.83464300
2.94792500	79471.89474600	158.94378900	1568.75813500
2.95049700	79478.78089900	158.95756200	1600.02167600
2.95306800	79485.65349100	158.97130700	1631.62517400
2.95564000	79492.51228800	158.98502500	1663.56852200
2.95821200	79499.35703400	158.99871400	1695.85160800
2.95855000	79500.25787000	159.00051600	1700.13071000
2.95888900	79501.15845700	159.00231700	1704.41570800
2.95922800	79502.05879500	159.00411800	1708.70660200
2.95946600	79502.69209400	159.00538400	1711.72907600
2.95949000	79502.75521200	159.00551000	1712.03049600
2.95951400	79502.81832600	159.00563700	1712.33194600
2.95951500	79502.82236600	159.00564500	1712.35124100
2.95951700	79502.82640600	159.00565300	1712.37053700
2.95952000	79502.83448500	159.00566900	1712.40912900
2.95952300	79502.84256500	159.00568500	1712.44772100
2.95952400	78157.46294100	156.31492600	-2190.86910400
2.95952500	78157.48793000	156.31497600	-2190.80442500
2.95952700	78157.62701300	156.31525400	-2190.44112000
2.95952900	78157.75345100	156.31550700	-2190.11084100
2.95953100	78157.87988700	156.31576000	-2189.78056300
2.95955300	78159.14420000	156.31828800	-2186.47775600
2.95957500	78160.40841500	156.32081700	-2183.17491300
2.95959700	78161.67252800	156.32334500	-2179.87203600
2.95981700	78174.30810100	156.34861600	-2146.84139300
2.96003600	78186.93265500	156.37386500	-2113.80949800
2.96025500	78199.54526800	156.39909100	-2080.77852500
2.96062100	78220.59256400	156.44118500	-2025.59015000
2.96098800	78241.59984300	156.48320000	-1970.42018600
2.96135400	78262.56681700	156.52513400	-1915.26940200
2.96172100	78283.48902300	156.56697800	-1860.14845000
2.96228500	78315.60174400	156.63120300	-1775.37104500
2.96284900	78347.58829600	156.69517700	-1690.71272200
2.96341300	78379.43713800	156.75887400	-1606.20154500
2.96397700	78411.13722400	156.82227400	-1521.86453300
2.96549900	78495.89412300	156.99178800	-1295.24724600
2.96702200	78579.29426100	157.15858900	-1070.58082800
2.96854500	78661.15020000	157.32230000	-848.33983200
2.97006800	78741.29143200	157.48258300	-628.96593900
2.97027100	78751.83546300	157.50367100	-599.96240300
2.97047400	78762.34838900	157.52469700	-571.01387300
2.97067700	78772.82752500	157.54565500	-542.12522700
2.97088000	78783.27253100	157.56654500	-513.29738000
2.97128600	78804.05882500	157.60811800	-455.82768500
2.97169200	78824.70476900	157.64941000	-398.61171800
2.97209800	78845.20791300	157.69041600	-341.65628800
2.97250400	78865.56586700	157.73113200	-284.96808800
2.97398300	78938.45987300	157.87692000	-80.83142900
2.97546200	79009.29625400	158.01859300	119.38022200
2.97694100	79077.98160100	158.15596300	315.38945000
2.97842000	79144.43386900	158.28886800	506.94299600
2.97989900	79208.58578100	158.41717200	693.81880500
2.98159800	79279.37953300	158.55875900	902.49542800
2.98329800	79346.99203100	158.69398400	1104.46877700
2.98499700	79411.36970100	158.82273900	1299.50972600
2.98669600	79472.47521000	158.94495000	1487.42619300
2.98839600	79530.28698400	159.06057400	1668.06253500
2.99055600	79599.00892800	159.19801800	1886.97635700
2.99271600	79662.41482300	159.32483000	2093.75938300
2.99451400	79711.17911800	159.42235800	2256.57892600
2.99631200	79756.34043000	159.51268100	2410.91730000
2.99811000	79797.95570000	159.59591100	2556.79418900
2.99990800	79836.09425000	159.67218900	2694.26198900
3.00170600	79870.83695700	159.74167400	2823.40409800
3.00350400	79902.27489600	159.80455000	2944.33238700
3.00595000	79939.90901900	159.87981800	3095.87120900
3.00839500	79971.88854800	159.94377700	3232.88880100
3.01084100	79998.50885700	159.99701800	3355.87281800
3.01328600	80020.08337000	160.04016700	3465.37443300
3.01573200	80036.93958400	160.07387900	3561.99979600
3.01817800	80049.41511500	160.09883000	3646.40129300
3.02062300	80057.85403400	160.11570800	3719.26917500
3.02306900	80062.60351000	160.12520700	3781.32368400
3.02551400	80064.01071900	160.12802100	3833.30760000
3.02842100	80061.81158400	160.12362300	3883.04512600
3.03132800	80055.94431400	160.11188900	3920.91487100
3.03175600	80054.80348800	160.10960700	3925.57386800
3.03218500	80053.59587300	160.10719200	3930.00580500
3.03261300	80052.32398300	160.10464800	3934.21607700
3.03304200	80050.98954000	160.10197900	3938.20882700
3.03347100	80049.59425500	160.09918900	3941.98817100
3.03432800	80046.62789800	160.09325600	3948.92303600
3.03518500	80043.43832700	160.08687700	3955.05339700
3.03604200	80040.03864800	160.08007700	3960.41170000
3.03689900	80036.44182900	160.07288400	3965.03024200
3.03712100	80035.47700800	160.07095400	3966.11212700
3.03712400	80035.46522200	160.07093000	3966.12523000
3.03712700	80035.45336500	160.07090700	3966.13814000
3.03713200	80035.42964900	160.07085900	3966.16394000
3.03713800	80035.40592600	160.07081200	3966.18971900
3.03714300	80035.38219600	160.07076400	3966.21547000
3.03714600	80035.37088400	160.07074200	3966.22773600
3.03714800	80035.35957100	160.07071900	3966.23999000
3.03714900	80035.35607500	160.07071200	3966.24376800
3.03715000	80035.35118300	160.07070200	3966.24906300
3.03715100	80035.34978500	160.07070000	3966.25057600
3.03715400	81384.54528300	162.76909100	55.21418500
3.03715700	81384.38490000	162.76877000	55.60494900
3.03715900	81384.22451800	162.76844900	55.99570300
3.03718500	81382.62081200	162.76524200	59.90273600
3.03721000	81381.01730200	162.76203500	63.80883200
3.03723600	81379.41399100	162.75882800	67.71398900
3.03749200	81363.39179500	162.72678400	106.71389400
3.03774800	81347.39111800	162.69478200	145.61737300
3.03800400	81331.41363800	162.66282700	184.42191300
3.03852200	81299.11896600	162.59823800	262.72757800
3.03904100	81266.93992100	162.53388000	340.59673200
3.03955900	81234.87842800	162.46975700	418.02654900
3.04007800	81202.94805400	162.40589600	494.99690900
3.04092900	81150.85955300	162.30171900	620.27716200
3.04178000	81099.19764600	162.19839500	744.21188300
3.04263100	81048.00478000	162.09601000	866.73916500
3.04348200	80997.32103800	161.99464200	987.80090700
3.04523300	80894.80010400	161.78960000	1232.05267500
3.04698400	80794.88545200	161.58977100	1469.46134700
3.04873500	80697.86449000	161.39572900	1699.62381300
3.05048600	80603.98278300	161.20796600	1922.20663900
3.05223700	80513.44106000	161.02688200	2136.95095000
3.05398800	80426.41119400	160.85282200	2343.64573700
3.05574000	80343.04038400	160.68608100	2542.12084900
3.05749100	80263.44985500	160.52690000	2732.24914400
3.05969400	80168.80222600	160.33760400	2959.53561500
3.06189800	80080.42305200	160.16084600	3173.39976100
3.06410200	79998.38500100	159.99677000	3373.86745600
3.06630500	79922.70726800	159.84541500	3561.05265700
3.06850900	79853.36526100	159.70673100	3735.14105600
3.07071300	79790.29310300	159.58058600	3896.38590800
3.07392200	79709.42302700	159.41884600	4108.92024700
3.07713200	79641.16705400	159.28233400	4296.08935100
3.08034100	79584.94539600	159.16989100	4459.28735300
3.08355000	79540.08040700	159.08016100	4600.06413300
3.08676000	79505.82082800	159.01164200	4720.08409300
3.08996900	79481.36161700	158.96272300	4821.09220400
3.09317900	79465.86252300	158.93172500	4904.88194300
3.09638800	79458.46575400	158.91693200	4973.26467700
3.09959800	79458.31152400	158.91662300	5028.04248400
3.10280700	79464.55096500	158.92910200	5070.98547900
3.10601700	79476.35670900	158.95271300	5103.81296900
3.10922600	79492.93181300	158.98586400	5128.17746200
3.11243500	79513.51711600	159.02703400	5145.65125300
3.11564500	79537.39705200	159.07479400	5157.71571000
3.11885400	79563.90391600	159.12780800	5165.75323600
3.12206400	79592.42080000	159.18484200	5171.04160000
3.12527300	79622.38342100	159.24476700	5174.75027100
3.12848300	79653.28095000	159.30656200	5177.93851800
3.13169200	79684.65601000	159.36931200	5181.55511800
3.13490100	79716.10387400	159.43220800	5186.43950900
3.13811100	79747.27106300	159.49454200	5193.32417900
3.14132000	79777.85340400	159.55570700	5202.83809200
3.14453000	79807.59371300	159.61518700	5215.51093600
3.14773900	79836.27906500	159.67255800	5231.77817200
3.15094900	79863.73792500	159.72747600	5251.98653600
3.15415800	79889.83702100	159.77967400	5276.40005000
3.15736800	79914.47814200	159.82895600	5305.20633300
3.16057700	79937.59488400	159.87519000	5338.52310000
3.16378600	79959.14938700	159.91829900	5376.40475700
3.16699600	79979.12912700	159.95825800	5418.84901000
3.17064500	79999.94667700	159.99989300	5472.58427900
3.17429400	80018.78541800	160.03757100	5532.00399900
3.17794400	80035.71608300	160.07143200	5596.90143600
3.18159300	80050.83069000	160.10166100	5667.02006000
3.18440700	80061.31350300	160.12262700	5724.46505900
3.18480700	80062.72595400	160.12545200	5732.86890800
3.18481100	80062.73963500	160.12547900	5732.95068100
3.18481500	80062.75325800	160.12550700	5733.03260700
3.18482300	80062.78049900	160.12556100	5733.19647400
3.18482400	80062.78384600	160.12556800	5733.21661300
3.18482500	80062.78719400	160.12557400	5733.23675200
3.18482600	80062.79388700	160.12558800	5733.27703300
3.18482700	80062.79415600	160.12558800	5733.27864400
3.18482800	78637.73401400	157.27546800	1598.77098000
3.18483600	78638.25787700	157.27651600	1600.18410400
3.18484400	78638.73409700	157.27746800	1601.46878900
3.18485100	78639.21030500	157.27842100	1602.75350100
3.18492800	78643.97158700	157.28794300	1615.60204200
3.18500400	78648.73138200	157.29746300	1628.45308300
3.18508100	78653.48964500	157.30697900	1641.30651300
3.18545500	78676.73976300	157.35348000	1704.20571700
3.18582900	78699.94763400	157.39989500	1767.14862000
3.18620300	78723.10879400	157.44621800	1830.12445600
3.18674700	78756.70258800	157.51340500	1921.75368700
3.18729100	78790.17287400	157.58034600	2013.39254300
3.18783500	78823.51967200	157.64703900	2105.04056200
3.18837900	78856.72665000	157.71345300	2196.65769100
3.18922100	78907.80590300	157.81561200	2338.29219000
3.19006300	78958.48067100	157.91696100	2479.67837400
3.19090400	79008.71166500	158.01742300	2620.71636500
3.19174600	79058.46197800	158.11692400	2761.31122900
3.19331300	79149.67229100	158.29934500	3021.54027200
3.19488100	79238.89289000	158.47778600	3279.36916700
3.19644800	79325.92028500	158.65184100	3534.25097000
3.19801500	79410.57709200	158.82115400	3785.68825500
3.19958200	79492.71240000	158.98542500	4033.23446000
3.20155200	79592.18787200	159.18437600	4338.28878200
3.20352200	79687.23317400	159.37446600	4635.79113000
3.20549200	79777.65495000	159.55531000	4925.07398900
3.20746300	79863.29868600	159.72659700	5205.55192300
3.20943300	79944.04808400	159.88809600	5476.72156300
3.21186500	80036.86757000	160.07373500	5798.02113000
3.21429700	80122.01955000	160.24403900	6103.84134700
3.21466700	80134.29454200	160.26858900	6148.95743100
3.21503700	80146.39305700	160.29278600	6193.70457600
3.21540700	80158.31409500	160.31662800	6238.07974800
3.21546800	80160.29377500	160.32058800	6245.47280900
3.21553000	80162.26335000	160.32452700	6252.84464900
3.21565400	80166.18761500	160.33237500	6267.55694900
3.21571600	80168.16435600	160.33632900	6274.97159300
3.21571900	80168.24818200	160.33649600	6275.29500200
3.21572200	80168.33718700	160.33667400	6275.62927400
3.21572800	80168.51518900	160.33703000	6276.29779600
3.21573300	80168.69311900	160.33738600	6276.96616500
3.21573600	80168.77763700	160.33755500	6277.28371800
3.21573700	81477.60616300	162.95521200	2483.65168900
3.21573800	81477.60077900	162.95520200	2483.67609200
3.21573900	81477.55890300	162.95511800	2484.10637600
3.21574000	81477.53896200	162.95507800	2484.31127000
3.21574800	81477.33952900	162.95467900	2486.36009500
3.21575500	81477.14006000	162.95428000	2488.40871500
3.21576300	81476.94055200	162.95388100	2490.45712800
3.21584000	81474.94342100	162.94988700	2510.92994200
3.21591800	81472.94256800	162.94588500	2531.38206900
3.21599500	81470.93802900	162.94187600	2551.81340500
3.21631200	81462.69635000	162.92539300	2635.21057900
3.21662800	81454.39574000	162.90879100	2718.25105100
3.21694400	81446.03726900	162.89207500	2800.93158600
3.21726100	81437.62305600	162.87524600	2883.24590600
3.21803600	81416.79091600	162.83358200	3083.27514100
3.21881100	81395.66298300	162.79132600	3280.99564000
3.21958600	81374.26564900	162.74853100	3476.33407500
3.22036100	81352.62469200	162.70524900	3669.22011700
3.22198700	81306.55241100	162.61310500	4065.54231600
3.22361200	81259.73457400	162.51946900	4450.26329800
3.22523800	81212.38467600	162.42476900	4822.86766600
3.22686400	81164.70027600	162.32940100	5182.92966400
3.22849000	81116.86189900	162.23372400	5530.12026400
3.23027900	81064.22058700	162.12844100	5897.13408100
3.23206900	81011.80642300	162.02361300	6247.94331800
3.23385900	80959.81210400	161.91962400	6582.35008900
3.23564800	80908.41345100	161.81682700	6900.23963700
3.23743800	80857.76980900	161.71554000	7201.57757300
3.23968000	80795.61122500	161.59122200	7555.78437600
3.24192200	80735.11323100	161.47022600	7884.30111100
3.24416400	80676.49200100	161.35298400	8187.51116400
3.24640600	80619.93172800	161.23986300	8465.93821800
3.24864800	80565.58843200	161.13117700	8720.21759000
3.25089000	80513.59149100	161.02718300	8951.08869300
3.25406800	80444.11599500	160.88823200	9239.85037500
3.25724500	80379.77630800	160.75955300	9485.96088500
3.26042300	80320.70916900	160.64141800	9692.34512100
3.26360000	80266.98121500	160.53396200	9862.11077000
3.26677800	80218.59796000	160.43719600	9998.48463700
3.26995500	80175.51179700	160.35102400	10104.76129900
3.27313300	80137.62943100	160.27525900	10184.25396300
3.27631000	80104.81867100	160.20963700	10240.24716600
3.27948800	80076.91439800	160.15382900	10275.95529200
3.28266500	80053.72372400	160.10744700	10294.48870400
3.28584300	80035.03054900	160.07006100	10298.82608500
3.28902000	80020.59966800	160.04119900	10291.79130000
3.29219800	80010.18047900	160.02036100	10276.03441800
3.29537500	80003.51032900	160.00702100	10254.01727400
3.29767600	80000.86697300	160.00173400	10235.46330500
3.29770900	80000.84136200	160.00168300	10235.18342000
3.29774200	80000.81654600	160.00163300	10234.90300100
3.29777600	80000.79209100	160.00158400	10234.62231800
3.29777800	80000.79110000	160.00158200	10234.60569700
3.29778000	80000.78967600	160.00157900	10234.58933600
3.29778400	80000.78682800	160.00157400	10234.55661100
3.29778700	80000.78398600	160.00156800	10234.52388300
3.29778800	80000.78350000	160.00156700	10234.51830400
3.29778900	80000.78282400	160.00156600	10234.51049200
3.29779000	80000.78224200	160.00156400	10234.50379500
3.29779300	78496.97475800	156.99395000	5871.45229500
3.29779500	78497.10686200	156.99421400	5871.76823400
3.29779700	78497.23896600	156.99447800	5872.08417200
3.29781800	78498.56007500	156.99712000	5875.24352500
3.29783900	78499.88129700	156.99976300	5878.40282500
3.29786000	78501.20262800	157.00240500	5881.56206800
3.29807200	78514.42206600	157.02884400	5913.15144400
3.29828400	78527.65143600	157.05530300	5944.73361500
3.29849600	78540.88954700	157.08177900	5976.30692200
3.29899600	78572.20719100	157.14441400	6050.88470100
3.29949700	78603.55160400	157.20710300	6125.38228700
3.29999700	78634.91911300	157.26983800	6199.79474700
3.30049800	78666.29466700	157.33258900	6274.10109600
3.30161200	78736.11057000	157.47222100	6439.06036900
3.30272600	78805.77540200	157.61155100	6603.22770800
3.30384000	78875.16625400	157.75033300	6766.43152200
3.30495500	78944.16567600	157.88833100	6928.50761300
3.30652000	79040.21593500	158.08043200	7153.98050800
3.30808500	79134.99913800	158.26999800	7376.53364600
3.30965100	79228.22767000	158.45645500	7595.76278400
3.31121600	79319.65361500	158.63930700	7811.31774300
3.31278100	79409.05949400	158.81811900	8022.88996300
3.31476800	79519.33103500	159.03866200	8285.28285000
3.31675500	79625.65497200	159.25131000	8540.27085900
3.31826000	79703.36047500	159.40672100	8728.19063100
3.31830700	79705.73278900	159.41146600	8733.95030500
3.31835400	79708.09922600	159.41619800	8739.69924400
3.31844700	79712.82464400	159.42564900	8751.18354100
3.31845000	79712.98076400	159.42596200	8751.56303100
3.31845100	79713.03833900	159.42607700	8751.70298300
3.31845200	80968.59627400	161.93719300	5112.26877000
3.31845300	80968.58767200	161.93717500	5112.51971100
3.31845800	80968.56597400	161.93713200	5114.06362300
3.31846400	80968.54623400	161.93709200	5115.46709700
3.31846900	80968.52648100	161.93705300	5116.87049200
3.31852300	80968.32823200	161.93665600	5130.90008700
3.31857600	80968.12866500	161.93625700	5144.92172900
3.31863000	80967.92779100	161.93585600	5158.93537900
3.31895100	80966.69914200	161.93339800	5242.57160900
3.31927200	80965.42435900	161.93084900	5325.91369700
3.31959300	80964.10409200	161.92820800	5408.95443800
3.32006400	80962.08385300	161.92416800	5530.31897800
3.32053500	80959.96918200	161.91993800	5650.99485300
3.32100600	80957.75983500	161.91552000	5770.98215200
3.32147700	80955.45831600	161.91091700	5890.25502300
3.32216100	80951.95659600	161.90391300	6062.11768600
3.32284500	80948.26971800	161.89653900	6232.38054200
3.32352900	80944.40286500	161.88880600	6400.99231800
3.32421300	80940.36102700	161.88072200	6567.90488600
3.32572600	80930.81882200	161.86163800	6931.01169300
3.32724000	80920.49609700	161.84099200	7285.13355800
3.32875300	80909.44367600	161.81888700	7629.84130700
3.33026700	80897.71069800	161.79542100	7964.76539000
3.33178100	80885.34459600	161.77068900	8289.60412500
3.33347000	80870.85140700	161.74170300	8639.93328700
3.33515900	80855.68829800	161.71137700	8977.08254400
3.33684800	80839.91477900	161.67983000	9300.81864400
3.33853800	80823.58839000	161.64717700	9610.97249900
3.34022700	80806.76485300	161.61353000	9907.43760300
3.34222000	80786.35693400	161.57271400	10239.44843100
3.34421200	80765.41844400	161.53083700	10552.36462400
3.34620400	80744.03278900	161.48806600	10846.30437000
3.34819700	80722.28102900	161.44456200	11121.47623300
3.35018900	80700.24197900	161.40048400	11378.16555000
3.35218200	80677.99248400	161.35598500	11616.73124700
3.35494700	80646.91126300	161.29382300	11918.55513900
3.35771100	80615.76468100	161.23152900	12187.66502500
3.36047600	80584.74218600	161.16948400	12425.59703600
3.36324100	80554.02726800	161.10805500	12634.04272800
3.36600500	80523.79704700	161.04759400	12814.81750400
3.36877000	80494.22172500	160.98844300	12969.83299400
3.37153500	80465.46387400	160.93092800	13101.06943700
3.37429900	80437.67750300	160.87535500	13210.54853100
3.37706400	80411.00705300	160.82201400	13300.30870400
3.37748000	80407.10031600	160.81420100	13312.23334700
3.37789600	80403.22210600	160.80644400	13323.76252100
3.37794200	80402.79570600	160.80559100	13325.01310000
3.37794400	80402.77545300	160.80555100	13325.06930000
3.37794600	80402.75465700	160.80550900	13325.13011000
3.37795100	80402.71307100	160.80542600	13325.25169500
3.37795500	80402.67148600	160.80534300	13325.37324700
3.37796000	80402.62990500	160.80526000	13325.49475400
3.37796200	80402.60936100	160.80521900	13325.55477600
3.37796400	80402.58881900	160.80517800	13325.61477600
3.37796800	80402.54773700	160.80509500	13325.73474400
3.37796900	80402.53873900	160.80507700	13325.76102300
3.37797000	80402.53618500	160.80507200	13325.76847900
3.37797300	78837.09871700	157.67419700	8784.07656500
3.37797500	78837.22276400	157.67444600	8784.49577500
3.37797700	78837.34681100	157.67469400	8784.91497600
3.37799900	78838.58733700	157.67717500	8789.10647700
3.37802100	78839.82797100	157.67965600	8793.29706000
3.37804300	78841.06870400	157.68213700	8797.48672300
3.37826300	78853.48169100	157.70696300	8839.33274800
3.37848300	78865.90368500	157.73180700	8881.08512900
3.37870300	78878.33341200	157.75666700	8922.74221400
3.37917700	78905.06655100	157.81013300	9011.93026600
3.37965000	78931.81712900	157.86363400	9100.65477500
3.38012300	78958.58252400	157.91716500	9188.91311100
3.38059600	78985.35038400	157.97070100	9276.68954000
3.38150500	79036.75749700	158.07351500	9443.96572200
3.38241400	79088.06868400	158.17613700	9609.33240200
3.38332300	79139.21872000	158.27843700	9772.71066700
3.38423200	79190.14511900	158.38029000	9934.02593500
3.38574600	79274.26164500	158.54852300	10197.80010300
3.38725900	79357.34234600	158.71468500	10455.38408000
3.38877300	79439.13189300	158.87826400	10706.48846400
3.39028600	79519.40334200	159.03880700	10950.87165500
3.39180000	79597.95600300	159.19591200	11188.33575600
3.39358600	79688.22700700	159.37645400	11459.53123800
3.39384900	79701.25870400	159.40251700	11498.55533800
3.39385200	79701.39136800	159.40278300	11498.95297400
3.39385400	79701.52425300	159.40304900	11499.35076500
3.39386000	79701.79000400	159.40358000	11500.14628000
3.39386500	79702.05573400	159.40411100	11500.94172600
3.39387000	79702.32143600	159.40464300	11501.73708000
3.39387300	79702.45475200	159.40491000	11502.13614000
3.39387600	79702.58805200	159.40517600	11502.53515200
3.39388100	79702.85463400	159.40570900	11503.33310800
3.39388200	79702.86758300	159.40573500	11503.37186700
3.39388300	80907.99422100	161.81598800	8010.33176100
3.39388600	80907.98547900	161.81597100	8011.28405700
3.39388900	80907.97753100	161.81595500	8012.14974200
3.39389200	80907.96958000	161.81593900	8013.01538900
3.39392300	80907.88997700	161.81578000	8021.66979800
3.39395400	80907.81019800	161.81562000	8030.32044600
3.39398400	80907.73024100	161.81546000	8038.96732600
3.39429200	80906.92093600	161.81384200	8125.22898000
3.39459900	80906.09392700	161.81218800	8211.10796800
3.39490700	80905.24918900	161.81049800	8296.59827900
3.39536300	80903.96531900	161.80793100	8422.48944500
3.39581800	80902.64236800	161.80528500	8547.49745900
3.39627400	80901.27979500	161.80256000	8671.62250700
3.39672900	80899.87756300	161.79975500	8794.84436600
3.39740600	80897.72002100	161.79544000	8976.27020300
3.39808300	80895.47400700	161.79094800	9155.62415900
3.39876000	80893.13899300	161.78627800	9332.86416800
3.39943700	80890.71444000	161.78142900	9507.95112000
3.40087200	80885.27759700	161.77055500	9871.71434000
3.40230700	80879.43272200	161.75886500	10225.34338200
3.40374100	80873.17535600	161.74635100	10568.54363700
3.40517600	80866.50220000	161.73300400	10901.07218100
3.40661100	80859.41155100	161.71882300	11222.74319400
3.40827600	80850.65706100	161.70131400	11582.29315000
3.40994100	80841.33947000	161.68267900	11926.83828500
3.41160600	80831.46127000	161.66292300	12256.26304300
3.41327200	80821.02733200	161.64205500	12570.51287300
3.41493700	80810.04515700	161.62009000	12869.59273200
3.41685600	80796.72358600	161.59344700	13195.50337900
3.41877500	80782.70757500	161.56541500	13501.52163800
3.42069400	80768.02238500	161.53604500	13787.90877900
3.42261300	80752.69828500	161.50539700	14055.00185900
3.42453100	80736.77022500	161.47354000	14303.20172400
3.42645000	80720.27790700	161.44055600	14532.97060400
3.42907400	80696.89305300	161.39378600	14818.30061700
3.43169900	80672.66410400	161.34532800	15071.63182200
3.43432300	80647.73223100	161.29546400	15294.59765600
3.43694700	80622.25072100	161.24450100	15488.94823700
3.43957100	80596.38281100	161.19276600	15656.52478500
3.44132100	80578.99981700	161.15800000	15754.34895300
3.44134300	80578.77738800	161.15755500	15755.53012300
3.44136600	80578.55500200	161.15711000	15756.70789500
3.44138800	80578.33260800	161.15666500	15757.88396000
3.44141100	80578.11021000	161.15622000	15759.05832200
3.44143300	80577.88780400	161.15577600	15760.23097900
3.44147800	80577.44297000	161.15488600	15762.57118500
3.44148000	80577.42150700	161.15484300	15762.68400100
3.44148200	80577.40004400	161.15480000	15762.79678200
3.44148600	80577.35711900	161.15471400	15763.02229700
3.44149100	80577.30745000	161.15461500	15763.28318200
3.44149200	80577.30070700	161.15460100	15763.31859700
3.44149300	80577.28452100	161.15456900	15763.40358700
3.44149400	80577.28182400	161.15456400	15763.41775100
3.44149500	78965.04226600	157.93008500	11085.91752400
3.44149600	78965.09949800	157.93019900	11086.13876000
3.44150100	78965.39623200	157.93079200	11087.27146500
3.44150600	78965.69296800	157.93138600	11088.40409300
3.44151100	78965.98970900	157.93197900	11089.53664500
3.44156300	78968.95732200	157.93791500	11100.85791800
3.44161400	78971.92528000	157.94385100	11112.17146300
3.44162100	78972.32965400	157.94465900	11113.71229900
3.44162800	78972.73404600	157.94546800	11115.25285100
3.44163600	78973.15514900	157.94631000	11116.85690500
3.44164300	78973.57626000	157.94715300	11118.46079000
3.44165700	78974.41850000	157.94883700	11121.66809100
3.44167200	78975.26076500	157.95052200	11124.87493300
3.44168700	78976.10305500	157.95220600	11128.08114800
3.44174600	78979.54038800	157.95908100	11141.15802100
3.44180600	78982.97810200	157.96595600	11154.22439000
3.44186600	78986.41617300	157.97283200	11167.28020000
3.44195600	78991.62263300	157.98324500	11187.02873900
3.44204600	78996.82972800	157.99365900	11206.75270800
3.44213700	79002.03744400	158.00407500	11226.45208800
3.44222700	79007.24565900	158.01449100	11246.12662600
3.44235300	79014.51236500	158.02902500	11273.53298300
3.44247900	79021.77959800	158.04355900	11300.89005400
3.44260500	79029.04709900	158.05809400	11328.19729700
3.44273100	79036.31461900	158.07262900	11355.45417000
3.44301200	79052.53109900	158.10506200	11416.09433900
3.44329400	79068.74356900	158.13748700	11476.47459800
3.44357500	79084.94920800	158.16989800	11536.58866800
3.44385600	79101.14518500	158.20229000	11596.43013200
3.44413700	79117.32866900	158.23465700	11655.99244300
3.44452200	79139.45318100	158.27890600	11737.04930200
3.44490700	79161.54184800	158.32308400	11817.55421700
3.44529200	79183.58758400	158.36717500	11897.49060300
3.44567700	79205.58339600	158.41116700	11976.84208500
3.44606200	79227.52239000	158.45504500	12055.59258000
3.44655500	79255.50932200	158.51101900	12155.48664100
3.44704700	79283.37826800	158.56675700	12254.33889000
3.44754000	79311.11574700	158.62223100	12352.11891800
3.44803300	79338.70868300	158.67741700	12448.79779200
3.44852600	79366.14447600	158.73228900	12544.34851800
3.44901800	79393.41099500	158.78682200	12638.74590400
3.44965800	79428.54626300	158.85709300	12759.56634100
3.45029800	79463.35197300	158.92670400	12878.35547700
3.45093800	79497.80497600	158.99561000	12995.07128900
3.45157700	79531.88343800	159.06376700	13109.67678800
3.45221700	79565.56681900	159.13113400	13222.13985900
3.45285700	79598.83579800	159.19767200	13332.43288200
3.45349700	79631.67223500	159.26334400	13440.53240900
3.45413600	79664.05912200	159.32811800	13546.41892200
3.45456800	79685.63106600	159.37126200	13616.54554300
3.45457600	79686.06035800	159.37212100	13617.93792500
3.45458500	79686.48947700	159.37297900	13619.32947900
3.45459400	79686.91850800	159.37383700	13620.72062700
3.45460200	79687.34745300	159.37469500	13622.11136700
3.45461100	79687.77631200	159.37555300	13623.50170100
3.45461300	79687.85531900	159.37571100	13623.75770200
3.45461400	79687.93440700	159.37586900	13624.01409600
3.45461500	79687.96604100	159.37593200	13624.11664000
3.45461700	79688.07359600	159.37614700	13624.46531200
3.45461800	80854.59344000	161.70918700	10243.27626500
3.45462200	80854.59160400	161.70918300	10244.50991300
3.45462600	80854.58992900	161.70918000	10245.63131100
3.45463000	80854.58825000	161.70917600	10246.75261500
3.45466800	80854.57115400	161.70914200	10257.96039600
3.45470700	80854.55352700	161.70910700	10269.15861700
3.45474600	80854.53536600	161.70907100	10280.34726700
3.45488800	80854.46367500	161.70892700	10321.57278600
3.45503100	80854.38462500	161.70876900	10362.66710300
3.45517400	80854.29817300	161.70859600	10403.62996900
3.45531700	80854.20426300	161.70840900	10444.46085400
3.45566500	80853.94350700	161.70788700	10543.52056600
3.45601400	80853.63728400	161.70727500	10641.78545400
3.45636200	80853.28488400	161.70657000	10739.24946500
3.45671000	80852.88562100	161.70577100	10835.90678000
3.45720100	80852.24210400	161.70448400	10970.73958500
3.45769200	80851.50256400	161.70300500	11103.94578900
3.45818300	80850.66522400	161.70133000	11235.51089900
3.45867400	80849.72853400	161.69945700	11365.42249800
3.45916500	80848.69108500	161.69738200	11493.66955000
3.45997600	80846.75335100	161.69350700	11701.81927800
3.46078700	80844.53136200	161.68906300	11905.35750000
3.46159800	80842.01990000	161.68404000	12104.24718300
3.46240900	80839.21419900	161.67842800	12298.45634500
3.46321900	80836.10996900	161.67222000	12487.95810000
3.46403000	80832.70333400	161.66540700	12672.73014200
3.46484100	80828.99080900	161.65798200	12852.75435000
3.46565200	80824.96927000	161.64993900	13028.01659100
3.46660700	80819.83201500	161.63966400	13228.34445800
3.46756200	80814.25836200	161.62851700	13422.04053500
3.46851800	80808.24524800	161.61649000	13609.10213400
3.46947300	80801.79036800	161.60358100	13789.53351700
3.47042800	80794.89216200	161.58978400	13963.34556200
3.47138300	80787.54981300	161.57510000	14130.55551600
3.47307600	80773.44518000	161.54689000	14410.78245200
3.47430100	80762.37618000	161.52475200	14600.71317100
3.47552500	80750.58562200	161.50117100	14780.01719500
3.47675000	80738.08084000	161.47616200	14948.80021400
3.47797500	80724.87136800	161.44974300	15107.18323200
3.47919900	80710.96903700	161.42193800	15255.30256400
3.48042400	80696.38788500	161.39277600	15393.30884500
3.48199300	80676.73689000	161.35347400	15555.63494600
3.48356300	80656.03672700	161.31207300	15701.99851400
3.48513200	80634.33146700	161.26866300	15832.80410800
3.48670100	80611.67019500	161.22334000	15948.48446600
3.48827100	80588.10656600	161.17621300	16049.49706300
3.48984000	80563.69840000	161.12739700	16136.32102900
3.49156900	80535.89377200	161.07178800	16216.17121200
3.49329900	80507.22540900	161.01445100	16280.08254700
3.49463400	80484.55557800	160.96911100	16318.97526700
3.49482100	80481.35611600	160.96271200	16323.70199500
3.49486000	80480.68942500	160.96137900	16324.66814900
3.49489900	80480.02225800	160.96004500	16325.61223500
3.49490000	80479.98942800	160.95997900	16325.65903100
3.49490100	78858.66556400	157.71733100	11621.75514500
3.49490200	78858.72858000	157.71745700	11621.98651000
3.49490300	78858.77661100	157.71755300	11622.16804500
3.49491300	78859.30494400	157.71861000	11624.16469100
3.49492200	78859.78524400	157.71957000	11625.97943400
3.49493100	78860.26554000	157.72053100	11627.79380400
3.49502400	78865.06835800	157.73013700	11645.91704700
3.49511700	78869.87080300	157.73974200	11664.00298900
3.49521000	78874.67278400	157.74934600	11682.05152900
3.49556600	78893.09060000	157.78618100	11750.94740400
3.49592300	78911.49488900	157.82299000	11819.28596900
3.49627900	78929.88298700	157.85976600	11887.06490500
3.49663500	78948.24994800	157.89650000	11954.27932000
3.49753000	78994.22738800	157.98845500	12120.47059400
3.49842400	79039.97614600	158.07995200	12283.01560500
3.49931800	79085.43202500	158.17086400	12441.85792300
3.50021300	79130.53287900	158.26106600	12596.94455500
3.50151300	79195.32460100	158.39064900	12815.54688500
3.50281200	79259.07706300	158.51815400	13026.00205400
3.50411200	79321.61980200	158.64324000	13228.18242600
3.50541200	79382.80327800	158.76560700	13421.99930600
3.50562400	79392.64782700	158.78529600	13452.82721700
3.50583700	79402.45488700	158.80491000	13483.43632800
3.50604900	79412.22093800	158.82444200	13513.82058000
3.50610300	79414.72997400	158.82946000	13521.61581700
3.50615800	79417.23405000	158.83446800	13529.38081500
3.50626700	79422.23388600	158.84446800	13544.86602300
3.50627000	79422.36387200	158.84472800	13545.26852300
3.50627300	79422.49386300	158.84498800	13545.67094900
3.50627900	79422.75382100	158.84550800	13546.47568000
3.50628400	79423.01375600	158.84602800	13547.28029000
3.50629000	79423.27366000	158.84654700	13548.08473900
3.50629100	79423.31267100	158.84662500	13548.20548200
3.50629200	79423.36468500	158.84672900	13548.36646600
3.50629400	80587.28584700	161.17457200	10174.94865400
3.50629500	80587.28110900	161.17456200	10175.29652800
3.50629600	80587.27637000	161.17455300	10175.64439100
3.50630900	80587.22897300	161.17445800	10179.12248500
3.50632200	80587.18155300	161.17436300	10182.59959200
3.50633500	80587.13411700	161.17426800	10186.07571300
3.50646500	80586.65864000	161.17331700	10220.78264300
3.50659400	80586.18112500	161.17236200	10255.39052200
3.50672400	80585.70152000	161.17140300	10289.89897700
3.50708200	80584.36345100	161.16872700	10384.84906000
3.50744100	80583.00782800	161.16601600	10479.02780600
3.50780000	80581.63387600	161.16326800	10572.43311400
3.50815800	80580.24050600	161.16048100	10665.05793200
3.50888600	80577.34723000	161.15469400	10850.70456300
3.50961400	80574.36158400	161.14872300	11033.06417600
3.51034200	80571.27573100	161.14255100	11212.09535300
3.51107000	80568.08205200	161.13616400	11387.75951100
3.51274000	80560.31012500	161.12062000	11777.67818200
3.51440900	80551.85483300	161.10371000	12149.38404700
3.51607900	80542.63885800	161.08527800	12502.56736800
3.51774800	80532.59526500	161.06519100	12837.01552600
3.51941700	80521.66979700	161.04334000	13152.62647700
3.52129400	80508.27844400	161.01655700	13484.90494100
3.52317100	80493.66276200	160.98732600	13793.38029500
3.52504800	80477.78436100	160.95556900	14078.19496400
3.52692500	80460.61936200	160.92123900	14339.58773300
3.52880100	80442.15848700	160.88431700	14577.88952400
3.53095100	80419.43206000	160.83886400	14822.97183100
3.53310000	80395.04007500	160.79008000	15039.04577900
3.53524900	80369.03422800	160.73806800	15226.97464300
3.53739900	80341.48676600	160.68297400	15387.72220400
3.53954800	80312.48741800	160.62497500	15522.33055600
3.53955200	80312.43072000	160.62486100	15522.56330900
3.53955600	80312.37401900	160.62474800	15522.79588100
3.53956000	80312.31731000	160.62463500	15523.02836200
3.53956500	80312.26059800	160.62452100	15523.26075100
3.53956900	80312.20388000	160.62440800	15523.49304900
3.53957700	80312.09042900	160.62418100	15523.95737100
3.53958500	80311.97696000	160.62395400	15524.42141800
3.53959300	80311.86347200	160.62372700	15524.88509900
3.53967500	80310.72749900	160.62145500	15529.50182800
3.53975700	80309.58956700	160.61917900	15534.08210900
3.53984000	80308.44968400	160.61689900	15538.62601700
3.53996000	80306.78013000	160.61356000	15545.20200800
3.54008000	80305.10645300	160.61021300	15551.70067900
3.54019900	80303.42863600	160.60685700	15558.12204000
3.54031900	80301.74671300	160.60349300	15564.46635600
3.54049800	80299.23632800	160.59847300	15573.76505300
3.54067600	80296.71697000	160.59343400	15582.89426100
3.54085500	80294.18870900	160.58837700	15591.85464100
3.54103400	80291.65161300	160.58330300	15600.64684400
3.54141500	80286.20225600	160.57240500	15618.86952700
3.54146000	80285.55191300	160.57110400	15620.98498800
3.54150600	80284.90101300	160.56980200	15623.08973100
3.54155100	80284.24955900	160.56849900	15625.18378500
3.54159600	80283.59755400	160.56719500	15627.26716300
3.54161200	80283.37026400	160.56674100	15627.99051400
3.54162800	80283.14290600	160.56628600	15628.71257000
3.54164400	80282.91548100	160.56583100	15629.43333300
3.54166500	80282.60814900	160.56521600	15630.40495500
3.54168600	80282.30069600	160.56460100	15631.37421900
3.54170800	80281.99312000	160.56398600	15632.34112500
3.54178300	80280.90874300	160.56181700	15635.72820200
3.54185800	80279.82287300	160.55964600	15639.08612600
3.54193300	80278.73551500	160.55747100	15642.41495500
3.54194400	80278.57620500	160.55715200	15642.89994000
3.54195500	80278.41685000	160.55683400	15643.38424500
3.54196600	80278.25746400	160.55651500	15643.86792800
3.54196700	80278.24283800	160.55648600	15643.91227600
3.54196800	80278.22821300	160.55645600	15643.95661400
3.54197000	80278.19896200	160.55639800	15644.04527500
3.54197200	80278.16971000	160.55633900	15644.13391900
3.54197400	80278.14045700	160.55628100	15644.22254300
3.54197500	78672.17142500	157.34434300	10984.89024700
3.54197700	78672.31775400	157.34463600	10985.46958700
3.54197900	78672.42614700	157.34485200	10985.89870600
3.54198100	78672.53454000	157.34506900	10986.32780600
3.54200200	78673.61845500	157.34723700	10990.61779900
3.54202200	78674.70236300	157.34940500	10994.90595100
3.54204200	78675.78626200	157.35157300	10999.19226100
3.54213100	78680.56065600	157.36112100	11018.05131900
3.54222000	78685.33475800	157.37067000	11036.87454700
3.54230800	78690.10848700	157.38021700	11055.66187400
3.54244300	78697.31785700	157.39463600	11083.96983500
3.54257700	78704.52589200	157.40905200	11112.19545500
3.54271100	78711.73254600	157.42346500	11140.33873700
3.54284500	78718.93749600	157.43787500	11168.39939300
3.54303200	78728.98038300	157.45796100	11207.38750600
3.54321900	78739.01878500	157.47803800	11246.21403900
3.54340700	78749.05204400	157.49810400	11284.87849200
3.54359400	78759.07951900	157.51815900	11323.38039600
3.54398100	78779.83218000	157.55966400	11402.62525000
3.54436900	78800.55176800	157.60110400	11481.16702700
3.54475700	78821.23278700	157.64246600	11559.00220200
3.54514400	78841.86988200	157.68374000	11636.12768700
3.54553200	78862.45786100	157.72491600	11712.54087000
3.54600600	78887.57862600	157.77515700	11805.08062900
3.54648100	78912.60912500	157.82521800	11896.54625500
3.54695500	78937.54048900	157.87508100	11986.93438000
3.54743000	78962.36407400	157.92472800	12076.24209700
3.54790400	78987.07147300	157.97414300	12164.46692600
3.54855100	79020.56457900	158.04112900	12283.03589900
3.54919800	79053.80622600	158.10761200	12399.58231600
3.54984500	79086.77697500	158.17355400	12514.10257000
3.55049200	79119.45807500	158.23891600	12626.59384700
3.55113900	79151.83139800	158.30366300	12737.05368700
3.55178600	79183.87942900	158.36775900	12845.47995000
3.55188500	79188.74537700	158.37749100	12861.86399900
3.55198300	79193.60327900	158.38720700	12878.20055300
3.55208200	79198.45307900	158.39690600	12894.48960100
3.55218100	79203.29471800	158.40658900	12910.73114000
3.55222100	79205.22907400	158.41045800	12917.21445200
3.55222800	79205.59786900	158.41119600	12918.45016700
3.55222900	80377.30617000	160.75461200	9522.34311600
3.55223000	80377.30197500	160.75460400	9522.42195700
3.55223100	80377.30051500	160.75460100	9522.92592600
3.55223300	80377.29918900	160.75459800	9523.38406500
3.55223400	80377.29786400	160.75459600	9523.84218900
3.55225000	80377.28460300	160.75456900	9528.42265500
3.55226600	80377.27134500	160.75454300	9533.00170000
3.55228200	80377.25808800	160.75451600	9537.57932400
3.55238300	80377.17193400	160.75434400	9567.30517700
3.55248500	80377.08581800	160.75417200	9596.97081500
3.55258700	80376.99970400	160.75399900	9626.57608400
3.55273700	80376.87297400	160.75374600	9670.02037800
3.55288800	80376.74607300	160.75349200	9713.33317800
3.55303800	80376.61894700	160.75323800	9756.51447400
3.55318800	80376.49148500	160.75298300	9799.56369500
3.55340100	80376.30933000	160.75261900	9860.59207200
3.55361500	80376.12600900	160.75225200	9921.35095200
3.55382800	80375.94124400	160.75188200	9981.83916400
3.55404200	80375.75476300	160.75151000	10042.05557300
3.55446400	80375.37978400	160.75076000	10160.35373300
3.55488600	80374.99490700	160.74999000	10277.57566400
3.55530800	80374.59801800	160.74919600	10393.71290100
3.55573100	80374.18703600	160.74837400	10508.75723600
3.55615300	80373.75989100	160.74752000	10622.70075100
3.55663300	80373.25213100	160.74650400	10750.87403800
3.55711300	80372.71787100	160.74543600	10877.60398800
3.55759300	80372.15416600	160.74430800	11002.87994800
3.55807300	80371.55810800	160.74311600	11126.69164000
3.55855300	80370.92683200	160.74185400	11249.02920200
3.55893400	80370.39886900	160.74079800	11345.06925100
3.55931500	80369.84555300	160.73969100	11440.17023000
3.55969500	80369.26551100	160.73853100	11534.32777500
3.56007600	80368.65739000	160.73731500	11627.53768200
3.56045700	80368.01985800	160.73604000	11719.79592200
3.56096700	80367.11953700	160.73423900	11841.61458700
3.56147600	80366.16126000	160.73232300	11961.71753300
3.56198500	80365.14202500	160.73028400	12080.09661000
3.56249400	80364.05890700	160.72811800	12196.74424400
3.56300300	80362.90905700	160.72581800	12311.65345400
3.56370300	80361.21478600	160.72243000	12466.73298800
3.56440300	80359.38232600	160.71876500	12618.50218500
3.56510300	80357.40506600	160.71481000	12766.94854200
3.56580200	80355.27670900	160.71055300	12912.06175900
3.56590700	80354.94653100	160.70989300	12933.38130500
3.56601100	80354.61286000	160.70922600	12954.62678500
3.56611500	80354.27566800	160.70855100	12975.79815700
3.56621900	80353.93493800	160.70787000	12996.89539900
3.56632300	80353.59065200	160.70718100	13017.91849400
3.56652600	80352.90942700	160.70581900	13058.67456400
3.56672900	80352.21449500	160.70442900	13099.14886100
3.56693200	80351.50572200	160.70301100	13139.34128700
3.56713500	80350.78298200	160.70156600	13179.25175700
3.56733800	80350.04614700	160.70009200	13218.88020600
3.56770700	80348.67299700	160.69734600	13290.05474000
3.56807500	80347.25234600	160.69450500	13360.30070800
3.56844300	80345.78351300	160.69156700	13429.61811800
3.56881200	80344.26584400	160.68853200	13498.00715600
3.56918000	80342.69871200	160.68539700	13565.46818000
3.56977300	80340.06911800	160.68013800	13672.17508800
3.57036700	80337.30734400	160.67461500	13776.47911100
3.57096000	80334.41126000	160.66882300	13878.38452900
3.57155300	80331.37893400	160.66275800	13977.89674200
3.57214700	80328.20862500	160.65641700	14075.02223300
3.57274000	80324.89879200	160.64979800	14169.76854300
3.57362100	80319.72344900	160.63944700	14306.09472600
3.57450200	80314.23386600	160.62846800	14437.22567200
3.57538300	80308.42733900	160.61685500	14563.19824500
3.57626400	80302.30206700	160.60460400	14684.05378400
3.57714500	80295.85713400	160.59171400	14799.83786600
3.57802600	80289.09248200	160.57818500	14910.60007900
3.57890700	80282.00889000	160.56401800	15016.39378500
3.57978800	80274.60794200	160.54921600	15117.27589600
3.58066900	80266.89200000	160.53378400	15213.30665600
3.58155000	80258.86418100	160.51772800	15304.54942700
3.58243100	80250.52831600	160.50105700	15391.07047900
3.58331200	80241.88893300	160.48377800	15472.93879000
3.58419300	80232.95121400	160.46590200	15550.22586800
3.58467700	80227.91853600	160.45583700	15590.74374900
3.58468200	80227.86278800	160.45572600	15591.18125500
3.58468800	80227.80702500	160.45561400	15591.61843800
3.58469300	80227.75125300	160.45550300	15592.05546000
3.58469800	80227.69546900	160.45539100	15592.49231800
3.58470400	80227.63967400	160.45527900	15592.92901500
3.58471400	80227.52805600	160.45505600	15593.80192100
3.58471500	80227.51764700	160.45503500	15593.88330700
3.58471600	80227.50723500	160.45501400	15593.96468200
3.58471800	80227.48641300	160.45497300	15594.12741400
3.58471900	78623.39191100	157.24678400	10940.23786200
3.58472000	78623.48256200	157.24696500	10940.63282300
3.58472100	78623.52788700	157.24705600	10940.83029800
3.58472900	78623.98114200	157.24796200	10942.80488000
3.58473700	78624.43439100	157.24886900	10944.77914700
3.58474500	78624.88763700	157.24977500	10946.75309900
3.58482400	78629.41986000	157.25884000	10966.47528800
3.58490300	78633.95160200	157.26790300	10986.16589500
3.58498300	78638.48279300	157.27696600	11005.82483900
3.58510800	78645.64554600	157.29129100	11036.84155700
3.58523300	78652.80650400	157.30561300	11067.77863300
3.58535800	78659.96561700	157.31993100	11098.63605000
3.58548400	78667.12260100	157.33424500	11129.41347100
3.58567800	78678.20738400	157.35641500	11176.94357000
3.58587200	78689.28568800	157.37857100	11224.28006000
3.58606600	78700.35670000	157.40071300	11271.42202900
3.58626100	78711.41962600	157.42283900	11318.36859700
3.58667400	78734.95683800	157.46991400	11417.72527400
3.58708800	78758.44628600	157.51689300	11516.18311300
3.58750200	78781.88050800	157.56376100	11613.73405900
3.58791500	78805.25220400	157.61050400	11710.37038200
3.58832900	78828.55425200	157.65710900	11806.08473400
3.58885000	78857.81662700	157.71563300	11925.40891000
3.58937200	78886.94353700	157.77388700	12043.24329500
3.58989300	78915.92160800	157.83184300	12159.57490800
3.59041500	78944.73779900	157.88947600	12274.39143200
3.59093600	78973.37942200	157.94675900	12387.68122400
3.59160500	79009.82942400	158.01965900	12530.69346400
3.59227300	79045.94692200	158.09189400	12671.15600900
3.59294200	79081.70761300	158.16341500	12809.04904300
3.59361000	79117.08811200	158.23417600	12944.35447900
3.59412600	79144.09358600	158.28818700	13046.90133400
3.59413100	79144.35734200	158.28871500	13047.89985100
3.59413600	79144.62105000	158.28924200	13048.89806100
3.59413700	79144.66592500	158.28933200	13049.06785800
3.59413800	79144.72877900	158.28945800	13049.30577600
3.59413900	80312.83465900	160.62566900	9663.65736000
3.59414000	80312.80961100	160.62561900	9664.14981100
3.59414200	80312.81284300	160.62562600	9664.61346200
3.59414300	80312.81607500	160.62563200	9665.07710000
3.59415700	80312.84839000	160.62569700	9669.71271800
3.59417200	80312.88069900	160.62576100	9674.34694900
3.59418600	80312.91300100	160.62582600	9678.97979400
3.59420000	80312.94529600	160.62589100	9683.61125000
3.59434200	80313.26780300	160.62653600	9729.84940100
3.59448400	80313.58943400	160.62717900	9775.94827700
3.59462700	80313.91006900	160.62782000	9821.90741200
3.59476900	80314.22958600	160.62845900	9867.72633800
3.59548200	80315.81208000	160.63162400	10095.54893600
3.59619600	80317.34861800	160.63469700	10319.77319900
3.59690900	80318.82465400	160.63764900	10540.34656700
3.59762300	80320.22609600	160.64045200	10757.22047600
3.59833600	80321.53932000	160.64307900	10970.35042900
3.59936600	80323.25251800	160.64650500	11271.29562900
3.60039600	80324.71614300	160.64943200	11564.24356400
3.60142500	80325.89387500	160.65178800	11849.09766700
3.60245500	80326.75136600	160.65350300	12125.77588500
3.60348500	80327.25627700	160.65451300	12394.20988500
3.60451500	80327.37831100	160.65475700	12654.34521300
3.60585900	80326.91534600	160.65383100	12981.22410700
3.60720200	80325.69537300	160.65139100	13293.84665500
3.60854600	80323.66722200	160.64733400	13592.18952300
3.60989000	80320.78593400	160.64157200	13876.26341200
3.61123300	80317.01271100	160.63402500	14146.11129900
3.61257700	80312.31496100	160.62463000	14401.80690400
3.61392100	80306.66622100	160.61333200	14643.45299800
3.61535900	80299.54069200	160.59908100	14886.76304000
3.61679800	80291.28414600	160.58256800	15114.30809800
3.61823700	80281.88680200	160.56377400	15326.31238400
3.61967600	80271.34633300	160.54269300	15523.02957700
3.62111400	80259.66762500	160.51933500	15704.74068900
3.62255300	80246.86250900	160.49372500	15871.75196700
3.62399200	80232.94945800	160.46589900	16024.39288000
3.62399400	80232.92641000	160.46585300	16024.62491400
3.62399600	80232.90335800	160.46580700	16024.85687700
3.62399900	80232.88030400	160.46576100	16025.08880400
3.62400100	80232.85724500	160.46571400	16025.32069600
3.62400300	80232.83418400	160.46566800	16025.55255200
3.62400800	80232.78805400	160.46557600	16026.01615700
3.62401200	80232.74191700	160.46548400	16026.47965400
3.62401700	80232.69576700	160.46539200	16026.94301000
3.62406300	80232.23366100	160.46446700	16031.56873200
3.62410900	80231.77045700	160.46354100	16036.18022400
3.62415500	80231.30615200	160.46261200	16040.77749600
3.62416400	80231.21317000	160.46242600	16041.69552600
3.62417300	80231.12012300	160.46224000	16042.61242500
3.62417400	80231.10915300	160.46221800	16042.71973300
3.62417500	80231.09820400	160.46219600	16042.82758700
3.62417700	80231.07630400	160.46215300	16043.04327200
3.62417900	80231.05440200	160.46210900	16043.25893300
3.62418200	80231.03249600	160.46206500	16043.47456200
3.62418300	80231.01935200	160.46203900	16043.60392500
3.62418400	78618.81560100	157.23763100	11366.26489600
3.62418700	78619.04429000	157.23808900	11367.29183200
3.62419000	78619.21885900	157.23843800	11368.09874300
3.62419300	78619.39342600	157.23878700	11368.90560000
3.62422400	78621.13902900	157.24227800	11376.97121300
3.62425400	78622.88448700	157.24576900	11385.03144100
3.62428400	78624.62979900	157.24926000	11393.08628100
3.62431400	78626.37496100	157.25275000	11401.13573000
3.62461600	78643.81762900	157.28763500	11481.33293100
3.62491800	78661.24179100	157.32248400	11560.98725300
3.62522000	78678.64427500	157.35728900	11640.09536900
3.62552200	78696.02196500	157.39204400	11718.65405600
3.62582400	78713.37178400	157.42674400	11796.66017800
3.62693800	78777.05027300	157.55410100	12079.44462600
3.62805100	78840.16164300	157.68032300	12354.53396900
3.62916400	78902.56601900	157.80513200	12621.80043300
3.63027800	78964.13114100	157.92826200	12881.13158900
3.63139100	79024.73228900	158.04946500	13132.42969800
3.63250400	79084.25228900	158.16850500	13375.61169100
3.63274200	79096.81845000	158.19363700	13426.51053800
3.63279000	79099.32506600	158.19865000	13436.64541300
3.63283700	79101.82945900	158.20365900	13446.76531300
3.63288500	79104.33161600	158.20866300	13456.87023100
3.63290400	79105.32113300	158.21064200	13460.86474200
3.63292300	79106.31030100	158.21262100	13464.85690700
3.63294200	79107.29911600	158.21459800	13468.84672600
3.63294300	79107.37820600	158.21475600	13469.16581000
3.63294400	79107.41774900	158.21483500	13469.32534500
3.63294500	79107.45729200	158.21491500	13469.48487500
3.63294700	79107.59173400	158.21518300	13470.02725300
3.63294800	80267.37534700	160.53475100	10108.28824100
3.63295300	80267.39061000	160.53478100	10110.00846200
3.63295700	80267.40332800	160.53480700	10111.44183000
3.63296100	80267.41604600	160.53483200	10112.87506100
3.63300300	80267.54315900	160.53508600	10127.19985100
3.63304500	80267.67016600	160.53534000	10141.51095600
3.63308800	80267.79706200	160.53559400	10155.80836500
3.63313000	80267.92384300	160.53584800	10170.09206500
3.63355200	80269.18458600	160.53836900	10312.17259000
3.63397300	80270.42999100	160.54086000	10452.86988700
3.63439500	80271.65654500	160.54331300	10592.17308700
3.63481700	80272.86080700	160.54572200	10730.07180900
3.63523900	80274.03939100	160.54807900	10866.55617300
3.63636000	80277.02293600	160.55404600	11222.46494200
3.63748100	80279.74119300	160.55948200	11568.14986600
3.63860300	80282.13677100	160.56427400	11903.47142100
3.63972400	80284.15542700	160.56831100	12228.31219000
3.64084500	80285.74616500	160.57149200	12542.57544400
3.64196700	80286.86126300	160.57372300	12846.18524000
3.64338700	80287.52185700	160.57504400	13215.29711300
3.64480700	80287.26643700	160.57453300	13567.16577100
3.64622700	80286.02148200	160.57204300	13901.76898500
3.64764700	80283.72237900	160.56744500	14219.12988800
3.64906700	80280.31337200	160.56062700	14519.31468000
3.65048700	80275.74760900	160.55149500	14802.43053000
3.65190700	80269.98708100	160.53997400	15068.62333100
3.65350000	80262.06881100	160.52413800	15347.27155400
3.65509200	80252.58255300	160.50516500	15605.17050900
3.65668500	80241.51315300	160.48302600	15842.67893800
3.65827800	80228.85834900	160.45771700	16060.20199800
3.65987000	80214.62833800	160.42925700	16258.18742900
3.66011500	80212.30542700	160.42461100	16286.88379700
3.66036000	80209.94599000	160.41989200	16315.13288800
3.66060400	80207.55013800	160.41510000	16342.93656500
3.66084900	80205.11798900	160.41023600	16370.29670500
3.66089700	80204.62721100	160.40925400	16375.71567100
3.66094600	80204.13499000	160.40827000	16381.11698800
3.66099500	80203.64132500	160.40728300	16386.50067300
3.66101200	80203.46726300	160.40693500	16388.39099800
3.66103000	80203.29302000	160.40658600	16390.27913500
3.66103100	80203.28272300	160.40656500	16390.39060800
3.66103200	80203.27242300	160.40654500	16390.50206600
3.66103400	80203.25182200	160.40650400	16390.72495800
3.66103600	80203.22709800	160.40645400	16390.99239900
3.66103700	80203.22297700	160.40644600	16391.03696800
3.66103800	78585.21111600	157.17042200	11696.91535600
3.66103900	78585.23152800	157.17046300	11697.07348700
3.66104700	78585.70433800	157.17140900	11699.32979300
3.66105500	78586.17713700	157.17235400	11701.58567400
3.66106300	78586.64992200	157.17330000	11703.84112900
3.66114500	78591.37708200	157.18275400	11726.37224800
3.66122600	78596.10291300	157.19220600	11748.86071700
3.66130700	78600.82735800	157.20165500	11771.30648000
3.66138900	78605.55034700	157.21110100	11793.70946800
3.66215200	78649.78471400	157.29956900	12001.82750700
3.66291500	78693.83331500	157.38766700	12206.12431300
3.66367800	78737.64556200	157.47529100	12406.55318400
3.66444100	78781.17266100	157.56234500	12603.07108800
3.66520400	78824.36774500	157.64873500	12795.63887600
3.66628500	78884.86679200	157.76973400	13061.44721700
3.66736500	78944.48769400	157.88897500	13319.17605100
3.66844600	79003.11526500	158.00623100	13568.74872000
3.66861900	79012.40179600	158.02480400	13607.94278400
3.66879200	79021.65964600	158.04331900	13646.92584700
3.66896400	79030.88840000	158.06177700	13685.69775400
3.66913700	79040.08763700	158.08017500	13724.25829000
3.66920700	79043.75897900	158.08751800	13739.62327800
3.66922200	79044.56749000	158.08913500	13743.00515900
3.66923700	79045.37577200	158.09075200	13746.38539700
3.66925200	79046.18381800	158.09236800	13749.76398900
3.66925800	79046.50698700	158.09301400	13751.11510300
3.66926500	79046.83008600	158.09366000	13752.46567900
3.66926600	79046.92492200	158.09385000	13752.86196500
3.66926700	79046.94857300	158.09389700	13752.96083200
3.66926800	80200.74746300	160.40149500	10408.76031600
3.66926900	80200.70607100	160.40141200	10409.18522100
3.66927000	80200.73188200	160.40146400	10409.43996500
3.66927800	80200.76597600	160.40153200	10412.55423000
3.66928700	80200.80006400	160.40160000	10415.66784400
3.66929600	80200.83414900	160.40166800	10418.78080500
3.66938600	80201.17477100	160.40235000	10449.87454400
3.66947500	80201.51495300	160.40303000	10480.90296800
3.66956400	80201.85465800	160.40370900	10511.86598700
3.66965400	80202.19384600	160.40438800	10542.76348600
3.67043400	80205.13054100	160.41026100	10810.00451700
3.67121500	80207.99982700	160.41600000	11072.16786100
3.67199500	80210.77732300	160.42155500	11329.19290500
3.67277600	80213.43950000	160.42687900	11581.02465500
3.67355600	80215.96372200	160.43192700	11827.61402700
3.67469900	80219.36489100	160.43873000	12179.05953900
3.67584200	80222.35845400	160.44471700	12519.05737300
3.67698400	80224.88314000	160.44976600	12847.51207200
3.67812700	80226.88173000	160.45376300	13164.35076900
3.67927000	80228.30109800	160.45660200	13469.52164900
3.68041200	80229.09225300	160.45818500	13762.99438000
3.68180600	80229.14213100	160.45828400	14105.04847900
3.68320000	80228.11846100	160.45623700	14429.71155500
3.68459300	80225.95768800	160.45191500	14737.04605600
3.68598700	80222.60553900	160.44521100	15027.15397200
3.68738000	80218.01690200	160.43603400	15300.17483700
3.68877400	80212.15578600	160.42431200	15556.28381600
3.69016700	80204.99516900	160.40999000	15795.68971900
3.69157500	80196.42649300	160.39285300	16020.75327000
3.69298200	80186.50406900	160.37300800	16229.30596000
3.69438900	80175.22669900	160.35045300	16421.65500600
3.69567400	80163.75441800	160.32750900	16583.38586200
3.69567600	80163.73921400	160.32747800	16583.58202200
3.69567700	80163.72400400	160.32744800	16583.77814100
3.69567900	80163.70879400	160.32741800	16583.97423900
3.69568100	80163.69358200	160.32738700	16584.17031700
3.69568200	80163.67836900	160.32735700	16584.36637400
3.69568500	80163.64793600	160.32729600	16584.75842500
3.69568900	80163.61749900	160.32723500	16585.15041500
3.69569200	80163.58705300	160.32717400	16585.54232200
3.69572400	80163.28220700	160.32656400	16589.45683900
3.69573100	80163.22115900	160.32644200	16590.23891300
3.69573700	80163.16007000	160.32632000	16591.02033000
3.69573800	80163.14944000	160.32629900	16591.15577600
3.69574000	80163.13882300	160.32627800	16591.29152900
3.69574200	80163.11758500	160.32623500	16591.56300600
3.69574400	80163.09634500	160.32619300	16591.83445200
3.69574600	80163.07510100	160.32615000	16592.10585900
3.69574700	80163.07382500	160.32614800	16592.12214200
3.69574800	78541.91415600	157.08382800	11888.82667400
3.69574900	78541.96743500	157.08393500	11889.08689500
3.69575900	78542.55350100	157.08510700	11891.94895700
3.69576800	78543.08626900	157.08617300	11894.55024500
3.69577700	78543.61902000	157.08723800	11897.15097600
3.69586700	78548.94553200	157.09789100	11923.12758200
3.69595700	78554.27017500	157.10854000	11949.04829500
3.69604700	78559.59286300	157.11918600	11974.91303800
3.69613800	78564.91349900	157.12982700	12000.72171700
3.69688900	78609.07718900	157.21815400	12213.20584900
3.69764000	78653.04134300	157.30608300	12421.75817700
3.69839000	78696.75600500	157.39351200	12626.33430700
3.69914100	78740.17299100	157.48034600	12826.89348300
3.69989200	78783.24601700	157.56649200	13023.39880800
3.70106200	78849.55172200	157.69910300	13321.34561800
3.70223200	78914.75435900	157.82950900	13609.26326300
3.70340200	78978.70363000	157.95740700	13887.05995200
3.70340300	78978.79659400	157.95759300	13887.46062500
3.70340500	78978.88955300	157.95777900	13887.86125400
3.70340700	78978.98251000	157.95796500	13888.26186100
3.70340800	78979.07546400	157.95815100	13888.66244600
3.70341000	78979.16841500	157.95833700	13889.06300900
3.70341400	78979.35430700	157.95870900	13889.86406800
3.70341700	78979.54019100	157.95908000	13890.66506300
3.70342000	78979.72606000	157.95945200	13891.46596900
3.70345500	78981.58410100	157.96316800	13899.47019100
3.70348900	78983.44093200	157.96688200	13907.46560600
3.70352400	78985.29655100	157.97059300	13915.45221400
3.70353000	78985.66755100	157.97133500	13917.04866200
3.70353100	80135.61048100	160.27122100	10584.08071900
3.70353200	80135.62160000	160.27124300	10584.12771200
3.70353600	80135.63385200	160.27126800	10585.75010300
3.70354000	80135.65417300	160.27130800	10587.20146300
3.70358100	80135.85735200	160.27171500	10601.70791100
3.70362100	80136.06045700	160.27212100	10616.20046800
3.70366100	80136.26348400	160.27252700	10630.67898100
3.70406600	80138.28846500	160.27657700	10774.68991200
3.70447000	80140.30083900	160.28060200	10917.28550800
3.70487400	80142.29698400	160.28459400	11058.45819300
3.70527800	80144.27284500	160.28854600	11198.19841600
3.70609200	80148.17550800	160.29635100	11475.26799100
3.70690700	80151.95091800	160.30390200	11746.43427100
3.70772100	80155.56937500	160.31113900	12011.63821900
3.70853500	80159.00308100	160.31800600	12270.83141100
3.70934900	80162.22539400	160.32445100	12523.97175900
3.71054100	80166.50982200	160.33302000	12883.71009900
3.71173400	80170.20984100	160.34042000	13230.29380800
3.71292600	80173.25491000	160.34651000	13563.65708800
3.71411800	80175.58004800	160.35116000	13883.76019400
3.71531100	80177.12580200	160.35425200	14190.58733600
3.71650300	80177.83835100	160.35567700	14484.14732700
3.71792700	80177.53067200	160.35506100	14817.41003900
3.71935100	80175.89433000	160.35178900	15131.89044400
3.72077500	80172.86891300	160.34573800	15427.72658600
3.72219900	80168.40520200	160.33681000	15705.09711400
3.72362300	80162.46496700	160.32493000	15964.21909300
3.72504700	80155.02076900	160.31004200	16205.34581800
3.72647100	80146.05569200	160.29211100	16428.76465000
3.72789500	80135.56305000	160.27112600	16634.79485700
3.72808000	80134.08865200	160.26817700	16660.28888700
3.72826500	80132.58856600	160.26517700	16685.49639400
3.72845000	80131.06280900	160.26212600	16710.41819500
3.72863500	80129.51140300	160.25902300	16735.05510800
3.72864200	80129.44882400	160.25889800	16736.03489500
3.72864900	80129.38618300	160.25877200	16737.01377800
3.72865000	80129.37868800	160.25875700	16737.13012600
3.72865100	80129.37121000	160.25874200	16737.24691100
3.72865300	80129.35326400	160.25870700	16737.52717200
3.72865400	80129.35027300	160.25870100	16737.57387900
3.72865500	78505.98301600	157.01196600	12027.91644900
3.72865600	78506.00199600	157.01200400	12028.06960700
3.72866300	78506.42579900	157.01285200	12030.18906600
3.72867000	78506.84959100	157.01369900	12032.30816500
3.72867700	78507.27336900	157.01454700	12034.42690300
3.72874700	78511.51045900	157.02302100	12055.59442600
3.72881800	78515.74625700	157.03149300	12076.72581400
3.72888900	78519.98072100	157.03996100	12097.82103000
3.72895900	78524.21380000	157.04842800	12118.88002500
3.72966500	78566.45862600	157.13291700	12327.46859000
3.73037100	78608.51627400	157.21703300	12532.39010800
3.73107700	78650.34349600	157.30068700	12733.60609000
3.73178300	78691.89848600	157.38379700	12931.08099400
3.73248900	78733.14095500	157.46628200	13124.78239700
3.73364000	78799.61216900	157.59922400	13432.42628600
3.73479100	78864.98869800	157.72997700	13729.84762200
3.73594200	78929.11966400	157.85823900	14016.95233600
3.73594400	78929.22068600	157.85844100	14017.40112000
3.73594600	78929.32170200	157.85864300	14017.84985000
3.73594800	78929.42271300	157.85884500	14018.29855300
3.73595000	78929.52372100	157.85904700	14018.74723000
3.73595100	78929.62472500	157.85924900	14019.19588100
3.73595500	78929.82672300	157.85965300	14020.09310400
3.73595900	78930.02871100	157.86005700	14020.99024900
3.73596200	78930.23068300	157.86046100	14021.88728800
3.73599900	78932.24963400	157.86449900	14030.85188600
3.73603600	78934.26717100	157.86853400	14039.80594500
3.73604300	78934.67053300	157.86934100	14041.59571200
3.73605000	78935.07378900	157.87014800	14043.38461800
3.73605200	78935.15162000	157.87030300	14043.72967500
3.73605300	78935.22949700	157.87045900	14044.07514000
3.73605600	78935.38524400	157.87077000	14044.76602200
3.73605900	78935.57213200	157.87114400	14045.59501900
3.73606000	78935.60327800	157.87120700	14045.73317400
3.73606100	80082.52353100	160.16504700	10721.59481300
3.73606200	80082.47411700	160.16494800	10722.15760400
3.73606300	80082.50940300	160.16501900	10722.50592300
3.73607500	80082.57992400	160.16516000	10726.70334500
3.73608600	80082.65043900	160.16530100	10730.89961200
3.73609700	80082.72094600	160.16544200	10735.09472300
3.73621100	80083.42565800	160.16685100	10776.98223200
3.73632400	80084.12963200	160.16825900	10818.75392500
3.73643700	80084.83277700	160.16966600	10860.40962000
3.73655000	80085.53499300	160.17107000	10901.94908800
3.73740500	80090.79739700	160.18159500	11211.83127100
3.73826000	80095.96080000	160.19192200	11514.99228900
3.73911500	80100.98576100	160.20197200	11811.35572200
3.73997000	80105.83440900	160.21166900	12100.85384300
3.74082500	80110.47053800	160.22094100	12383.42801100
3.74205700	80116.70424500	160.23340800	12778.12172200
3.74328800	80122.32703800	160.24465400	13158.22358600
3.74452000	80127.24759100	160.25449500	13523.64154500
3.74575100	80131.38152800	160.26276300	13874.31519600
3.74698300	80134.65146300	160.26930300	14210.21328700
3.74821400	80136.98708700	160.27397400	14531.33443100
3.74968100	80138.46243000	160.27692500	14894.49856400
3.75114700	80138.42991700	160.27686000	15236.84042200
3.75261300	80136.81008600	160.27362000	15558.50496700
3.75408000	80133.53756300	160.26707500	15859.68547900
3.75554600	80128.56080900	160.25712200	16140.62078900
3.75701300	80121.84188100	160.24368400	16401.59255100
3.75847900	80113.35610900	160.22671200	16642.92254800
3.75994600	80103.09169200	160.20618300	16864.97002900
3.75996500	80102.94557400	160.20589100	16867.75262700
3.75998400	80102.79900300	160.20559800	16870.52877900
3.76000300	80102.65212600	160.20530400	16873.30169500
3.76000500	80102.64110700	160.20528200	16873.50353000
3.76000600	80102.63023900	160.20526000	16873.70853700
3.76000900	80102.60849500	160.20521700	16874.11849700
3.76001200	80102.58674400	160.20517300	16874.52840500
3.76001500	80102.56498700	160.20513000	16874.93824100
3.76001600	80102.55628300	160.20511300	16875.10215600
3.76001700	80102.54757800	160.20509500	16875.26605600
3.76001900	78476.88882400	156.95377800	12159.10162000
3.76002000	78476.95157900	156.95390300	12159.40748700
3.76002500	78477.25595800	156.95451200	12160.96728300
3.76002900	78477.53265800	156.95506500	12162.38511400
3.76003400	78477.80935400	156.95561900	12163.80278700
3.76007900	78480.57597800	156.96115200	12177.97084500
3.76012500	78483.34200300	156.96668400	12192.12312800
3.76017000	78486.10741600	156.97221500	12206.25962600
3.76021600	78488.87220300	156.97774400	12220.38032600
3.76067000	78516.48292800	157.03296600	12360.71588300
3.76112400	78544.01749800	157.08803500	12499.45913600
3.76157800	78571.46374800	157.14292700	12636.59915700
3.76203300	78598.80978700	157.19762000	12772.12553600
3.76248700	78626.04398400	157.25208800	12906.02842400
3.76375200	78701.16892200	157.40233800	13270.13192700
3.76501600	78775.10468800	157.55020900	13621.40349800
3.76628100	78847.63099200	157.69526200	13959.69037700
3.76645600	78857.56490500	157.71513000	14005.56684900
3.76663100	78867.46722200	157.73493400	14051.19086000
3.76680700	78877.33742900	157.75467500	14096.56221200
3.76698200	78887.17501200	157.77435000	14141.68063600
3.76705200	78891.10080000	157.78220200	14159.65713500
3.76706800	78891.96215900	157.78392400	14163.59922800
3.76708300	78892.82326600	157.78564700	14167.53937000
3.76708500	78892.90658300	157.78581300	14167.92055800
3.76708600	78892.98989400	157.78598000	14168.30170900
3.76708900	78893.15650800	157.78631300	14169.06395500
3.76709200	78893.32311600	157.78664600	14169.82614800
3.76709500	78893.48971300	157.78697900	14170.58826700
3.76709600	78893.52303100	157.78704600	14170.74068400
3.76709700	78893.58966700	157.78717900	14171.04550200
3.76709800	80037.67708200	160.07535400	10855.15827000
3.76709900	80037.66406300	160.07532800	10855.62028100
3.76710000	80037.67267800	160.07534500	10856.07546700
3.76710200	80037.68129400	160.07536300	10856.53064000
3.76711300	80037.76744300	160.07553500	10861.08163300
3.76712500	80037.85358500	160.07570700	10865.63128700
3.76713700	80037.93971700	160.07587900	10870.17960300
3.76725600	80038.80058700	160.07760100	10915.58910400
3.76737500	80039.66051800	160.07932100	10960.86447500
3.76749500	80040.51939400	160.08103900	11006.00550300
3.76761400	80041.37708800	160.08275400	11051.01192000
3.76842000	80047.14517100	160.09429000	11352.24599700
3.76922700	80052.81649700	160.10563300	11647.22548100
3.77003400	80058.35501100	160.11671000	11935.88557000
3.77084000	80063.72602100	160.12745200	12218.16858200
3.77164700	80068.89629400	160.13779300	12494.02427600
3.77294700	80076.72788400	160.15345600	12925.08479300
3.77424800	80083.82828400	160.16765700	13339.17749500
3.77554800	80090.08007100	160.18016000	13736.19347500
3.77684800	80095.37527800	160.19075100	14116.06475800
3.77814900	80099.61538600	160.19923100	14478.76069100
3.77944900	80102.71148000	160.20542300	14824.28892100
3.78074900	80104.58424500	160.20916800	15152.69276700
3.78205000	80105.16395900	160.21032800	15464.04985500
3.78335000	80104.39045200	160.20878100	15758.47060900
3.78498700	80101.41505200	160.20283000	16105.27110100
3.78662400	80096.13508500	160.19227000	16425.80436800
3.78826100	80088.49345600	160.17698700	16720.48950100
3.78989800	80078.45558300	160.15691100	16989.81056000
3.78990100	80078.43693500	160.15687400	16990.23652600
3.78990400	80078.41827500	160.15683700	16990.66235500
3.78990600	80078.39961100	160.15679900	16991.08811700
3.78990900	80078.38093900	160.15676200	16991.51381000
3.78991200	80078.36226000	160.15672500	16991.93943500
3.78991700	80078.32488400	160.15665000	16992.79048000
3.78992300	80078.28748300	160.15657500	16993.64132000
3.78992800	80078.25005800	160.15650000	16994.49188700
3.78998200	80077.87433700	160.15574900	17002.98253700
3.79003700	80077.49596400	160.15499200	17011.44590300
3.79003800	80077.48837000	160.15497700	17011.61489800
3.79003900	80077.48077300	160.15496200	17011.78387000
3.79004000	80077.47317700	160.15494600	17011.95283200
3.79004100	80077.46557800	160.15493100	17012.12178300
3.79004200	80077.45797800	160.15491600	17012.29072300
3.79004300	80077.45493800	160.15491000	17012.35828900
3.79004400	78449.59299100	156.89918600	12289.70722900
3.79004500	78449.70432200	156.89940900	12290.13333200
3.79004600	78449.72901200	156.89945800	12290.34169800
3.79005400	78450.26471200	156.90052900	12293.15079200
3.79006300	78450.80038700	156.90160100	12295.95928000
3.79007200	78451.33603600	156.90267200	12298.76716100
3.79015900	78456.69121100	156.91338200	12326.81258600
3.79024600	78462.04388600	156.92408800	12354.79723700
3.79033200	78467.39397700	156.93478800	12382.72104200
3.79041900	78472.74139200	156.94548300	12410.58391400
3.79124500	78523.40627700	157.04681300	12672.30406300
3.79207100	78573.74606200	157.14749200	12928.44884700
3.79289600	78623.68784600	157.24737600	13178.95731800
3.79372200	78673.16159300	157.34632300	13423.77437900
3.79454800	78722.10042600	157.44420100	13662.85114000
3.79586800	78799.07607900	157.59815200	14033.06646200
3.79678300	78851.41900300	157.70283800	14281.00238900
3.79679400	78852.01224300	157.70402400	14283.79584500
3.79680400	78852.60525800	157.70521100	14286.58737200
3.79681500	78853.19815100	157.70639600	14289.37795500
3.79682500	78853.79092200	157.70758200	14292.16759400
3.79683600	78854.38346900	157.70876700	14294.95530300
3.79683700	79995.66277100	159.99132600	10987.13324100
3.79684000	79995.69116500	159.99138200	10988.50823100
3.79684300	79995.71482400	159.99143000	10989.65396500
3.79684600	79995.73848200	159.99147700	10990.79961400
3.79687500	79995.97504700	159.99195000	11002.25150400
3.79690400	79996.21155500	159.99242300	11013.69501300
3.79693400	79996.44800600	159.99289600	11025.13014000
3.79696300	79996.68439900	159.99336900	11036.55688000
3.79725400	79999.04463300	159.99808900	11150.36221100
3.79754600	80001.39680100	160.00279400	11263.32492800
3.79783800	80003.73898300	160.00747800	11375.44154900
3.79813000	80006.06926200	160.01213900	11486.70871900
3.79842100	80008.38576000	160.01677200	11597.12321200
3.79965200	80017.96313700	160.03592600	12053.39790200
3.80088200	80027.12818300	160.05425600	12494.23951800
3.80211200	80035.75395800	160.07150800	12919.47431200
3.80334300	80043.72144300	160.08744300	13328.96475200
3.80457300	80050.91969500	160.10183900	13722.60720800
3.80580400	80057.24596400	160.11449200	14100.33177500
3.80728200	80063.56243600	160.12712500	14533.17412600
3.80876100	80068.33538200	160.13667100	14942.96664600
3.81024000	80071.43415400	160.14286800	15329.76530600
3.81171800	80072.74556700	160.14549100	15693.68527200
3.81319700	80072.17373700	160.14434700	16034.89796600
3.81467600	80069.63991500	160.13928000	16353.62818400
3.81615400	80065.08223500	160.13016400	16650.15119100
3.81763300	80058.45535800	160.11691100	16924.78982200
3.81860700	80052.94332400	160.10588700	17093.96270000
3.81871900	80052.25434500	160.10450900	17112.72731100
3.81883000	80051.55337500	160.10310700	17131.37131800
3.81884900	80051.43487400	160.10287000	17134.48099800
3.81886800	80051.31601100	160.10263200	17137.58720600
3.81888600	80051.19681200	160.10239400	17140.69004000
3.81888700	80051.19203900	160.10238400	17140.81408600
3.81888800	80051.18726300	160.10237500	17140.93812100
3.81888900	80051.18248800	160.10236500	17141.06215100
3.81889000	78421.26359300	156.84252700	12412.49235400
3.81889100	78421.33383300	156.84266800	12412.83278600
3.81889200	78421.35001300	156.84270000	12412.97219600
3.81889700	78421.69719000	156.84339400	12414.83202500
3.81890300	78422.04435600	156.84408900	12416.69159300
3.81890800	78422.39151100	156.84478300	12418.55090000
3.81896400	78425.86247400	156.85172500	12437.12961100
3.81902000	78429.33234300	156.85866500	12455.68220100
3.81907500	78432.80109500	156.86560200	12474.20865100
3.81913100	78436.26870400	156.87253700	12492.70893700
3.81968800	78470.87654500	156.94175300	12676.26795200
3.82024500	78505.34347800	157.01068700	12857.18717100
3.82080200	78539.64582800	157.07929200	13035.44642600
3.82135900	78573.76056700	157.14752100	13211.02681400
3.82191600	78607.66531900	157.21533100	13383.91077800
3.82317100	78683.15724900	157.36631400	13763.38550300
3.82442600	78757.23645300	157.51447300	14128.93130900
3.82535500	78811.03073400	157.62206100	14390.46548700
3.82536600	78811.65603500	157.62331200	14393.48742200
3.82537700	78812.28109300	157.62456200	14396.50717700
3.82538700	78812.90601500	157.62581200	14399.52586600
3.82539800	78813.53080200	157.62706200	14402.54348800
3.82540900	78814.15545500	157.62831100	14405.56004400
3.82542500	78815.05218200	157.63010400	14409.89022500
3.82542600	78815.13925700	157.63027900	14410.30944500
3.82542800	78815.22655100	157.63045300	14410.73091700
3.82542900	78815.26146600	157.63052300	14410.89948500
3.82543000	79953.95658600	159.90791300	11110.85961400
3.82543100	79953.96722200	159.90793400	11111.33963900
3.82543300	79953.97786000	159.90795600	11111.81965000
3.82544500	79954.08421900	159.90816800	11116.61896000
3.82545600	79954.19057000	159.90838100	11121.41681600
3.82546800	79954.29690900	159.90859400	11126.21321900
3.82558800	79955.35973900	159.91071900	11174.09722600
3.82570700	79956.42142200	159.91284300	11221.83554900
3.82582600	79957.48182500	159.91496400	11269.42797500
3.82594500	79958.54080200	159.91708200	11316.87423800
3.82686200	79966.63163600	159.93326300	11677.27990400
3.82778000	79974.56656900	159.94913300	12028.90528400
3.82869700	79982.28462400	159.96456900	12371.65892700
3.82961400	79989.72749200	159.97945500	12705.46168600
3.83053200	79996.83975100	159.99368000	13030.24732000
3.83187800	80006.57165400	160.01314300	13490.60105300
3.83322500	80015.32024100	160.03064000	13931.26827600
3.83457200	80022.94115400	160.04588200	14352.16510000
3.83591900	80029.30292800	160.05860600	14753.25581200
3.83726500	80034.28690100	160.06857400	15134.54855000
3.83861200	80037.78745600	160.07557500	15496.09662100
3.84018800	80039.87672800	160.07975300	15894.30079400
3.84176500	80039.68142600	160.07936300	16265.81196600
3.84334100	80037.09926800	160.07419900	16610.92264800
3.84491700	80032.05154500	160.06410300	16929.99205300
3.84649300	80024.48249300	160.04896500	17223.44186700
3.84651400	80024.36764300	160.04873500	17227.08521900
[truncated: 5,583 more rows]
