# Supplementary material for: An Efficient Contact Model for the Simulation of Cargo Airdrop Extraction Phase
Source: Hindawi journal article supplement (doi:10.1155/2018/9895451), 2018-10-17
Supplement: f1 [file 9895451.f1.zip › case3_aircraft_coupling/m8000_nocouple/df_cargo.csv]

t	u	v	w	x_g	y_g	z_g	p	q	r	e0	e1	e2	e3	yaw(deg)	pitch(deg)	roll(deg)	yaw_fix(deg)	pitch_fix(deg)	roll_fix(deg)	h_g	vx_g	vy_g	vz_g	ax_g	ay_g	az_g	g-force
0.0	88.88888823778802	0.0	0.00033917069939566537	7.899987043322199	0.0	-800.6399999948537	0.0	1.5326496041222866e-09	0.0	0.99999999999818	0.0	1.9078351748896032e-06	0.0	0.0	0.0002186218070556877	0.0	0.0	0.00021862224612745663	0.0	800.6399999948537	88.88888823843509	0.0	4.120048121731332e-12	-1.4210854715202004e-12	0.0	0.0	1.4210854715202004e-13
0.005	88.88888823778802	0.0	0.00033917069939566537	8.344431487766643	0.0	-800.6399999948537	0.0	1.5326496041222866e-09	0.0	0.99999999999818	0.0	1.9078351748896032e-06	0.0	0.0	0.0002186218070556877	0.0	0.0	0.0002186226851992256	0.0	800.6399999948537	88.88888823843509	0.0	4.120048121731332e-12	9.473903143468003e-13	0.0	5.385290446308774e-26	9.473903143468004e-14
0.01	88.88888823778802	0.0	0.00033917069939566537	8.788875932211088	0.0	-800.6399999948537	0.0	1.5326496041222866e-09	0.0	0.99999999999818	0.0	1.9078351748896032e-06	0.0	0.0	0.0002186218070556877	0.0	0.0	0.00021862312427099452	0.0	800.6399999948537	88.88888823843509	0.0	4.120048121731332e-12	-7.105427357601002e-13	0.0	-2.692645223154387e-26	7.105427357601002e-14
0.015	88.88888823778802	0.0	0.00033917069939566537	9.233320376655533	0.0	-800.6399999948537	0.0	1.5326496041222866e-09	0.0	0.99999999999818	0.0	1.9078351748896032e-06	0.0	0.0	0.0002186218070556877	0.0	0.0	0.00021862356334276345	0.0	800.6399999948537	88.88888823843509	0.0	4.120048121731332e-12	-7.105427357601002e-13	0.0	-2.692645223154387e-26	7.105427357601002e-14
0.02	88.88888823778802	0.0	0.00033917069939566537	9.677764821099977	0.0	-800.6399999948537	0.0	1.5326496041222866e-09	0.0	0.99999999999818	0.0	1.9078351748896032e-06	0.0	0.0	0.0002186218070556877	0.0	0.0	0.0002186240024145324	0.0	800.6399999948537	88.88888823843509	0.0	4.120048121731332e-12	-7.105427357601002e-13	0.0	-2.692645223154387e-26	7.105427357601002e-14
0.025	88.88888823778802	0.0	0.00033917069939566537	10.12220926554442	0.0	-800.6399999948537	0.0	1.5326496041222866e-09	0.0	0.99999999999818	0.0	1.9078351748896032e-06	0.0	0.0	0.0002186218070556877	0.0	0.0	0.00021862444148630135	0.0	800.6399999948537	88.88888823843509	0.0	4.120048121731332e-12	-7.105427357601002e-13	0.0	-2.692645223154387e-26	7.105427357601002e-14
0.03	88.88888823778802	0.0	0.00033917069939566537	10.566653709988865	0.0	-800.6399999948537	0.0	1.5326496041222866e-09	0.0	0.99999999999818	0.0	1.9078351748896032e-06	0.0	0.0	0.0002186218070556877	0.0	0.0	0.0002186248805580703	0.0	800.6399999948537	88.88888823843509	0.0	4.120048121731332e-12	-7.105427357601002e-13	0.0	-2.692645223154387e-26	7.105427357601002e-14
0.035	88.88888823778802	0.0	0.00033917069939566537	11.01109815443331	0.0	-800.6399999948537	0.0	1.5326496041222866e-09	0.0	0.99999999999818	0.0	1.9078351748896032e-06	0.0	0.0	0.0002186218070556877	0.0	0.0	0.00021862531962983924	0.0	800.6399999948537	88.88888823843509	0.0	4.120048121731332e-12	-7.105427357601002e-13	0.0	-2.692645223154387e-26	7.105427357601002e-14
0.04	88.88888823778802	0.0	0.00033917069939566537	11.455542598877754	0.0	-800.6399999948537	0.0	1.5326496041222866e-09	0.0	0.99999999999818	0.0	1.9078351748896032e-06	0.0	0.0	0.0002186218070556877	0.0	0.0	0.00021862575870160817	0.0	800.6399999948537	88.88888823843509	0.0	4.120048121731332e-12	-7.105427357601002e-13	0.0	-2.692645223154387e-26	7.105427357601002e-14
0.045	88.88888823778802	0.0	0.00033917069939566537	11.899987043322199	0.0	-800.6399999948537	0.0	1.5326496041222866e-09	0.0	0.99999999999818	0.0	1.9078351748896032e-06	0.0	0.0	0.0002186218070556877	0.0	0.0	0.00021862619777337713	0.0	800.6399999948537	88.88888823843509	0.0	4.120048121731332e-12	-7.105427357601002e-13	0.0	-2.692645223154387e-26	7.105427357601002e-14
0.05	88.88888823778802	0.0	0.00033917069939566537	12.344431487766643	0.0	-800.6399999948537	0.0	1.5326496041222866e-09	0.0	0.99999999999818	0.0	1.9078351748896032e-06	0.0	0.0	0.0002186218070556877	0.0	0.0	0.00021862663684514607	0.0	800.6399999948537	88.88888823843509	0.0	4.120048121731332e-12	-7.105427357601002e-13	0.0	-2.692645223154387e-26	7.105427357601002e-14
0.055	88.88888823778802	0.0	0.00033917069939566537	12.788875932211088	0.0	-800.6399999948537	0.0	1.5326496041222866e-09	0.0	0.99999999999818	0.0	1.9078351748896032e-06	0.0	0.0	0.0002186218070556877	0.0	0.0	0.000218627075916915	0.0	800.6399999948537	88.88888823843509	0.0	4.120048121731332e-12	-7.105427357601002e-13	0.0	-2.692645223154387e-26	7.105427357601002e-14
0.06	88.88888823778802	0.0	0.00033917069939566537	13.23332037665553	0.0	-800.6399999948537	0.0	1.5326496041222866e-09	0.0	0.99999999999818	0.0	1.9078351748896032e-06	0.0	0.0	0.0002186218070556877	0.0	0.0	0.00021862751498868396	0.0	800.6399999948537	88.88888823843509	0.0	4.120048121731332e-12	-7.105427357601002e-13	0.0	-2.692645223154387e-26	7.105427357601002e-14
0.065	88.88888823778802	0.0	0.00033917069939566537	13.677764821099977	0.0	-800.6399999948537	0.0	1.5326496041222866e-09	0.0	0.99999999999818	0.0	1.9078351748896032e-06	0.0	0.0	0.0002186218070556877	0.0	0.0	0.0002186279540604529	0.0	800.6399999948537	88.88888823843509	0.0	4.120048121731332e-12	-7.105427357601002e-13	0.0	-2.692645223154387e-26	7.105427357601002e-14
0.07	88.88888823778802	0.0	0.00033917069939566537	14.12220926554442	0.0	-800.6399999948537	0.0	1.5326496041222866e-09	0.0	0.99999999999818	0.0	1.9078351748896032e-06	0.0	0.0	0.0002186218070556877	0.0	0.0	0.00021862839313222183	0.0	800.6399999948537	88.88888823843509	0.0	4.120048121731332e-12	-7.105427357601002e-13	0.0	-2.692645223154387e-26	7.105427357601002e-14
0.075	88.88888823778802	0.0	0.00033917069939566537	14.566653709988865	0.0	-800.6399999948537	0.0	1.5326496041222866e-09	0.0	0.99999999999818	0.0	1.9078351748896032e-06	0.0	0.0	0.0002186218070556877	0.0	0.0	0.00021862883220399079	0.0	800.6399999948537	88.88888823843509	0.0	4.120048121731332e-12	-7.105427357601002e-13	0.0	-2.692645223154387e-26	7.105427357601002e-14
0.08	88.88888823778802	0.0	0.00033917069939566537	15.01109815443331	0.0	-800.6399999948537	0.0	1.5326496041222866e-09	0.0	0.99999999999818	0.0	1.9078351748896032e-06	0.0	0.0	0.0002186218070556877	0.0	0.0	0.00021862927127575972	0.0	800.6399999948537	88.88888823843509	0.0	4.120048121731332e-12	-7.105427357601002e-13	0.0	-2.692645223154387e-26	7.105427357601002e-14
0.085	88.88888823778802	0.0	0.00033917069939566537	15.455542598877756	0.0	-800.6399999948537	0.0	1.5326496041222866e-09	0.0	0.99999999999818	0.0	1.9078351748896032e-06	0.0	0.0	0.0002186218070556877	0.0	0.0	0.00021862971034752868	0.0	800.6399999948537	88.88888823843509	0.0	4.120048121731332e-12	-7.105427357601002e-13	0.0	-2.692645223154387e-26	7.105427357601002e-14
0.09	88.88888823778802	0.0	0.00033917069939566537	15.899987043322199	0.0	-800.6399999948537	0.0	1.5326496041222866e-09	0.0	0.99999999999818	0.0	1.9078351748896032e-06	0.0	0.0	0.0002186218070556877	0.0	0.0	0.0002186301494192976	0.0	800.6399999948537	88.88888823843509	0.0	4.120048121731332e-12	-7.105427357601002e-13	0.0	-2.692645223154387e-26	7.105427357601002e-14
0.095	88.88888823778802	0.0	0.00033917069939566537	16.34443148776664	0.0	-800.6399999948537	0.0	1.5326496041222866e-09	0.0	0.99999999999818	0.0	1.9078351748896032e-06	0.0	0.0	0.0002186218070556877	0.0	0.0	0.00021863058849106655	0.0	800.6399999948537	88.88888823843509	0.0	4.120048121731332e-12	-7.105427357601002e-13	0.0	-2.692645223154387e-26	7.105427357601002e-14
0.1	88.88888823778802	0.0	0.00033917069939566537	16.788875932211088	0.0	-800.6399999948537	0.0	1.5326496041222866e-09	0.0	0.99999999999818	0.0	1.9078351748896032e-06	0.0	0.0	0.0002186218070556877	0.0	0.0	0.0002186310275628355	0.0	800.6399999948537	88.88888823843509	0.0	4.120048121731332e-12	-7.105427357601002e-13	0.0	-2.692645223154387e-26	7.105427357601002e-14
0.105	88.88888823778802	0.0	0.00033917069939566537	17.23332037665553	0.0	-800.6399999948537	0.0	1.5326496041222866e-09	0.0	0.99999999999818	0.0	1.9078351748896032e-06	0.0	0.0	0.0002186218070556877	0.0	0.0	0.00021863146663460444	0.0	800.6399999948537	88.88888823843509	0.0	4.120048121731332e-12	-7.105427357601002e-13	0.0	-2.692645223154387e-26	7.105427357601002e-14
0.11	88.88888823778802	0.0	0.00033917069939566537	17.677764821099977	0.0	-800.6399999948537	0.0	1.5326496041222866e-09	0.0	0.99999999999818	0.0	1.9078351748896032e-06	0.0	0.0	0.0002186218070556877	0.0	0.0	0.00021863190570637337	0.0	800.6399999948537	88.88888823843509	0.0	4.120048121731332e-12	-7.105427357601002e-13	0.0	-2.692645223154387e-26	7.105427357601002e-14
0.115	88.88888823778802	0.0	0.00033917069939566537	18.12220926554442	0.0	-800.6399999948537	0.0	1.5326496041222866e-09	0.0	0.99999999999818	0.0	1.9078351748896032e-06	0.0	0.0	0.0002186218070556877	0.0	0.0	0.00021863234477814233	0.0	800.6399999948537	88.88888823843509	0.0	4.120048121731332e-12	-7.105427357601002e-13	0.0	-2.692645223154387e-26	7.105427357601002e-14
0.12	88.88888823778802	0.0	0.00033917069939566537	18.566653709988863	0.0	-800.6399999948537	0.0	1.5326496041222866e-09	0.0	0.99999999999818	0.0	1.9078351748896032e-06	0.0	0.0	0.0002186218070556877	0.0	0.0	0.00021863278384991127	0.0	800.6399999948537	88.88888823843509	0.0	4.120048121731332e-12	-7.105427357601002e-13	0.0	-2.692645223154387e-26	7.105427357601002e-14
0.125	88.88888823778802	0.0	0.00033917069939566537	19.01109815443331	0.0	-800.6399999948537	0.0	1.5326496041222866e-09	0.0	0.99999999999818	0.0	1.9078351748896032e-06	0.0	0.0	0.0002186218070556877	0.0	0.0	0.00021863322292168023	0.0	800.6399999948537	88.88888823843509	0.0	4.120048121731332e-12	-7.105427357601002e-13	0.0	-2.692645223154387e-26	7.105427357601002e-14
0.13	88.88888823778802	0.0	0.00033917069939566537	19.455542598877756	0.0	-800.6399999948537	0.0	1.5326496041222866e-09	0.0	0.99999999999818	0.0	1.9078351748896032e-06	0.0	0.0	0.0002186218070556877	0.0	0.0	0.00021863366199344916	0.0	800.6399999948537	88.88888823843509	0.0	4.120048121731332e-12	-7.105427357601002e-13	0.0	-2.692645223154387e-26	7.105427357601002e-14
0.135	88.88888823778802	0.0	0.00033917069939566537	19.8999870433222	0.0	-800.6399999948537	0.0	1.5326496041222866e-09	0.0	0.99999999999818	0.0	1.9078351748896032e-06	0.0	0.0	0.0002186218070556877	0.0	0.0	0.0002186341010652181	0.0	800.6399999948537	88.88888823843509	0.0	4.120048121731332e-12	-7.105427357601002e-13	0.0	-2.692645223154387e-26	7.105427357601002e-14
0.14	88.88888823778802	0.0	0.00033917069939566537	20.34443148776664	0.0	-800.6399999948537	0.0	1.5326496041222866e-09	0.0	0.99999999999818	0.0	1.9078351748896032e-06	0.0	0.0	0.0002186218070556877	0.0	0.0	0.00021863454013698705	0.0	800.6399999948537	88.88888823843509	0.0	4.120048121731332e-12	-7.105427357601002e-13	0.0	-2.692645223154387e-26	7.105427357601002e-14
0.145	88.88888823778802	0.0	0.00033917069939566537	20.788875932211084	0.0	-800.6399999948537	0.0	1.5326496041222866e-09	0.0	0.99999999999818	0.0	1.9078351748896032e-06	0.0	0.0	0.0002186218070556877	0.0	0.0	0.00021863497920875599	0.0	800.6399999948537	88.88888823843509	0.0	4.120048121731332e-12	-7.105427357601002e-13	0.0	-2.692645223154387e-26	7.105427357601002e-14
0.15	88.88888823778802	0.0	0.00033917069939566537	21.23332037665553	0.0	-800.6399999948537	0.0	1.5326496041222866e-09	0.0	0.99999999999818	0.0	1.9078351748896032e-06	0.0	0.0	0.0002186218070556877	0.0	0.0	0.00021863541828052492	0.0	800.6399999948537	88.88888823843509	0.0	4.120048121731332e-12	-7.105427357601002e-13	0.0	-2.692645223154387e-26	7.105427357601002e-14
0.155	88.88888823778802	0.0	0.00033917069939566537	21.677764821099977	0.0	-800.6399999948537	0.0	1.5326496041222866e-09	0.0	0.99999999999818	0.0	1.9078351748896032e-06	0.0	0.0	0.0002186218070556877	0.0	0.0	0.00021863585735229388	0.0	800.6399999948537	88.88888823843509	0.0	4.120048121731332e-12	-7.105427357601002e-13	0.0	-2.692645223154387e-26	7.105427357601002e-14
0.16	88.88888823778802	0.0	0.00033917069939566537	22.12220926554442	0.0	-800.6399999948537	0.0	1.5326496041222866e-09	0.0	0.99999999999818	0.0	1.9078351748896032e-06	0.0	0.0	0.0002186218070556877	0.0	0.0	0.0002186362964240628	0.0	800.6399999948537	88.88888823843509	0.0	4.120048121731332e-12	-7.105427357601002e-13	0.0	-2.692645223154387e-26	7.105427357601002e-14
0.165	88.88888823778802	0.0	0.00033917069939566537	22.566653709988863	0.0	-800.6399999948537	0.0	1.5326496041222866e-09	0.0	0.99999999999818	0.0	1.9078351748896032e-06	0.0	0.0	0.0002186218070556877	0.0	0.0	0.00021863673549583174	0.0	800.6399999948537	88.88888823843509	0.0	4.120048121731332e-12	-7.105427357601002e-13	0.0	-2.692645223154387e-26	7.105427357601002e-14
0.17	88.88888823778802	0.0	0.00033917069939566537	23.011098154433313	0.0	-800.6399999948537	0.0	1.5326496041222866e-09	0.0	0.99999999999818	0.0	1.9078351748896032e-06	0.0	0.0	0.0002186218070556877	0.0	0.0	0.0002186371745676007	0.0	800.6399999948537	88.88888823843509	0.0	4.120048121731332e-12	-7.105427357601002e-13	0.0	-2.692645223154387e-26	7.105427357601002e-14
0.175	88.88888823778802	0.0	0.00033917069939566537	23.455542598877752	0.0	-800.6399999948537	0.0	1.5326496041222866e-09	0.0	0.99999999999818	0.0	1.9078351748896032e-06	0.0	0.0	0.0002186218070556877	0.0	0.0	0.00021863761363936964	0.0	800.6399999948537	88.88888823843509	0.0	4.120048121731332e-12	-7.105427357601002e-13	0.0	-2.692645223154387e-26	7.105427357601002e-14
0.18	88.88888823778802	0.0	0.00033917069939566537	23.8999870433222	0.0	-800.6399999948537	0.0	1.5326496041222866e-09	0.0	0.99999999999818	0.0	1.9078351748896032e-06	0.0	0.0	0.0002186218070556877	0.0	0.0	0.0002186380527111386	0.0	800.6399999948537	88.88888823843509	0.0	4.120048121731332e-12	-7.105427357601002e-13	0.0	-2.692645223154387e-26	7.105427357601002e-14
0.185	88.88888823778802	0.0	0.00033917069939566537	24.34443148776664	0.0	-800.6399999948537	0.0	1.5326496041222866e-09	0.0	0.99999999999818	0.0	1.9078351748896032e-06	0.0	0.0	0.0002186218070556877	0.0	0.0	0.00021863849178290753	0.0	800.6399999948537	88.88888823843509	0.0	4.120048121731332e-12	-7.105427357601002e-13	0.0	-2.692645223154387e-26	7.105427357601002e-14
0.19	88.88888823778802	0.0	0.00033917069939566537	24.788875932211088	0.0	-800.6399999948537	0.0	1.5326496041222866e-09	0.0	0.99999999999818	0.0	1.9078351748896032e-06	0.0	0.0	0.0002186218070556877	0.0	0.0	0.00021863893085467646	0.0	800.6399999948537	88.88888823843509	0.0	4.120048121731332e-12	-7.105427357601002e-13	0.0	-2.692645223154387e-26	7.105427357601002e-14
0.195	88.88888823778802	0.0	0.00033917069939566537	25.23332037665553	0.0	-800.6399999948537	0.0	1.5326496041222866e-09	0.0	0.99999999999818	0.0	1.9078351748896032e-06	0.0	0.0	0.0002186218070556877	0.0	0.0	0.00021863936992644542	0.0	800.6399999948537	88.88888823843509	0.0	4.120048121731332e-12	-7.105427357601002e-13	0.0	-2.692645223154387e-26	7.105427357601002e-14
0.2	88.88888823778802	0.0	0.00033917069939566537	25.677764821099977	0.0	-800.6399999948537	0.0	1.5326496041222866e-09	0.0	0.99999999999818	0.0	1.9078351748896032e-06	0.0	0.0	0.0002186218070556877	0.0	0.0	0.00021863980899821436	0.0	800.6399999948537	88.88888823843509	0.0	4.120048121731332e-12	-7.105427357601002e-13	0.0	-2.692645223154387e-26	7.105427357601002e-14
0.205	88.88888823778802	0.0	0.00033917069939566537	26.12220926554442	0.0	-800.6399999948537	0.0	1.5326496041222866e-09	0.0	0.99999999999818	0.0	1.9078351748896032e-06	0.0	0.0	0.0002186218070556877	0.0	0.0	0.0002186402480699833	0.0	800.6399999948537	88.88888823843509	0.0	4.120048121731332e-12	-7.105427357601002e-13	0.0	-2.692645223154387e-26	7.105427357601002e-14
0.21	88.88888823778802	0.0	0.00033917069939566537	26.566653709988863	0.0	-800.6399999948537	0.0	1.5326496041222866e-09	0.0	0.99999999999818	0.0	1.9078351748896032e-06	0.0	0.0	0.0002186218070556877	0.0	0.0	0.00021864068714175225	0.0	800.6399999948537	88.88888823843509	0.0	4.120048121731332e-12	-7.105427357601002e-13	0.0	-2.692645223154387e-26	7.105427357601002e-14
0.215	88.88888823778802	0.0	0.00033917069939566537	27.01109815443331	0.0	-800.6399999948537	0.0	1.5326496041222866e-09	0.0	0.99999999999818	0.0	1.9078351748896032e-06	0.0	0.0	0.0002186218070556877	0.0	0.0	0.00021864112621352118	0.0	800.6399999948537	88.88888823843509	0.0	4.120048121731332e-12	-7.105427357601002e-13	0.0	-2.692645223154387e-26	7.105427357601002e-14
0.22	88.88888823778802	0.0	0.00033917069939566537	27.455542598877752	0.0	-800.6399999948537	0.0	1.5326496041222866e-09	0.0	0.99999999999818	0.0	1.9078351748896032e-06	0.0	0.0	0.0002186218070556877	0.0	0.0	0.00021864156528529012	0.0	800.6399999948537	88.88888823843509	0.0	4.120048121731332e-12	-7.105427357601002e-13	0.0	-2.692645223154387e-26	7.105427357601002e-14
0.225	88.88888823778802	0.0	0.00033917069939566537	27.8999870433222	0.0	-800.6399999948537	0.0	1.5326496041222866e-09	0.0	0.99999999999818	0.0	1.9078351748896032e-06	0.0	0.0	0.0002186218070556877	0.0	0.0	0.00021864200435705908	0.0	800.6399999948537	88.88888823843509	0.0	4.120048121731332e-12	-7.105427357601002e-13	0.0	-2.692645223154387e-26	7.105427357601002e-14
0.23	88.88888823778802	0.0	0.00033917069939566537	28.34443148776664	0.0	-800.6399999948537	0.0	1.5326496041222866e-09	0.0	0.99999999999818	0.0	1.9078351748896032e-06	0.0	0.0	0.0002186218070556877	0.0	0.0	0.000218642443428828	0.0	800.6399999948537	88.88888823843509	0.0	4.120048121731332e-12	-7.105427357601002e-13	0.0	-2.692645223154387e-26	7.105427357601002e-14
0.235	88.88888823778802	0.0	0.00033917069939566537	28.788875932211084	0.0	-800.6399999948537	0.0	1.5326496041222866e-09	0.0	0.99999999999818	0.0	1.9078351748896032e-06	0.0	0.0	0.0002186218070556877	0.0	0.0	0.00021864288250059697	0.0	800.6399999948537	88.88888823843509	0.0	4.120048121731332e-12	-7.105427357601002e-13	0.0	-2.692645223154387e-26	7.105427357601002e-14
0.24	88.88888823778802	0.0	0.00033917069939566537	29.23332037665553	0.0	-800.6399999948537	0.0	1.5326496041222866e-09	0.0	0.99999999999818	0.0	1.9078351748896032e-06	0.0	0.0	0.0002186218070556877	0.0	0.0	0.0002186433215723659	0.0	800.6399999948537	88.88888823843509	0.0	4.120048121731332e-12	-7.105427357601002e-13	0.0	-2.692645223154387e-26	7.105427357601002e-14
0.245	88.88888823778802	0.0	0.00033917069939566537	29.677764821099974	0.0	-800.6399999948537	0.0	1.5326496041222866e-09	0.0	0.99999999999818	0.0	1.9078351748896032e-06	0.0	0.0	0.0002186218070556877	0.0	0.0	0.00021864376064413484	0.0	800.6399999948537	88.88888823843509	0.0	4.120048121731332e-12	-7.105427357601002e-13	0.0	-2.692645223154387e-26	7.105427357601002e-14
0.25	88.88888823778802	0.0	0.00033917069939566537	30.12220926554442	0.0	-800.6399999948537	0.0	1.5326496041222866e-09	0.0	0.99999999999818	0.0	1.9078351748896032e-06	0.0	0.0	0.0002186218070556877	0.0	0.0	0.0002186441997159038	0.0	800.6399999948537	88.88888823843509	0.0	4.120048121731332e-12	-7.105427357601002e-13	0.0	-2.692645223154387e-26	7.105427357601002e-14
0.255	88.88888823778802	0.0	0.00033917069939566537	30.566653709988866	0.0	-800.6399999948537	0.0	1.5326496041222866e-09	0.0	0.99999999999818	0.0	1.9078351748896032e-06	0.0	0.0	0.0002186218070556877	0.0	0.0	0.00021864463878767273	0.0	800.6399999948537	88.88888823843509	0.0	4.120048121731332e-12	-7.105427357601002e-13	0.0	-2.692645223154387e-26	7.105427357601002e-14
0.26	88.88888823778802	0.0	0.00033917069939566537	31.01109815443331	0.0	-800.6399999948537	0.0	1.5326496041222866e-09	0.0	0.99999999999818	0.0	1.9078351748896032e-06	0.0	0.0	0.0002186218070556877	0.0	0.0	0.00021864507785944166	0.0	800.6399999948537	88.88888823843509	0.0	4.120048121731332e-12	-7.105427357601002e-13	0.0	-2.692645223154387e-26	7.105427357601002e-14
0.265	88.88888823778802	0.0	0.00033917069939566537	31.455542598877756	0.0	-800.6399999948537	0.0	1.5326496041222866e-09	0.0	0.99999999999818	0.0	1.9078351748896032e-06	0.0	0.0	0.0002186218070556877	0.0	0.0	0.00021864551693121062	0.0	800.6399999948537	88.88888823843509	0.0	4.120048121731332e-12	-7.105427357601002e-13	0.0	-2.692645223154387e-26	7.105427357601002e-14
0.27	88.88888823778802	0.0	0.00033917069939566537	31.8999870433222	0.0	-800.6399999948537	0.0	1.5326496041222866e-09	0.0	0.99999999999818	0.0	1.9078351748896032e-06	0.0	0.0	0.0002186218070556877	0.0	0.0	0.00021864595600297956	0.0	800.6399999948537	88.88888823843509	0.0	4.120048121731332e-12	-7.105427357601002e-13	0.0	-2.692645223154387e-26	7.105427357601002e-14
0.275	88.88888823778802	0.0	0.00033917069939566537	32.34443148776664	0.0	-800.6399999948537	0.0	1.5326496041222866e-09	0.0	0.99999999999818	0.0	1.9078351748896032e-06	0.0	0.0	0.0002186218070556877	0.0	0.0	0.0002186463950747485	0.0	800.6399999948537	88.88888823843509	0.0	4.120048121731332e-12	-7.105427357601002e-13	0.0	-2.692645223154387e-26	7.105427357601002e-14
0.28	88.88888823778802	0.0	0.00033917069939566537	32.788875932211084	0.0	-800.6399999948537	0.0	1.5326496041222866e-09	0.0	0.99999999999818	0.0	1.9078351748896032e-06	0.0	0.0	0.0002186218070556877	0.0	0.0	0.00021864683414651745	0.0	800.6399999948537	88.88888823843509	0.0	4.120048121731332e-12	-7.105427357601002e-13	0.0	-2.692645223154387e-26	7.105427357601002e-14
0.285	88.88888823778802	0.0	0.00033917069939566537	33.23332037665553	0.0	-800.6399999948537	0.0	1.5326496041222866e-09	0.0	0.99999999999818	0.0	1.9078351748896032e-06	0.0	0.0	0.0002186218070556877	0.0	0.0	0.00021864727321828638	0.0	800.6399999948537	88.88888823843509	0.0	4.120048121731332e-12	-7.105427357601002e-13	0.0	-2.692645223154387e-26	7.105427357601002e-14
0.29	88.88888823778802	0.0	0.00033917069939566537	33.67776482109997	0.0	-800.6399999948537	0.0	1.5326496041222866e-09	0.0	0.99999999999818	0.0	1.9078351748896032e-06	0.0	0.0	0.0002186218070556877	0.0	0.0	0.00021864771229005534	0.0	800.6399999948537	88.88888823843509	0.0	4.120048121731332e-12	-7.105427357601002e-13	0.0	-2.692645223154387e-26	7.105427357601002e-14
0.295	88.88888823778802	0.0	0.00033917069939566537	34.12220926554442	0.0	-800.6399999948537	0.0	1.5326496041222866e-09	0.0	0.99999999999818	0.0	1.9078351748896032e-06	0.0	0.0	0.0002186218070556877	0.0	0.0	0.00021864815136182428	0.0	800.6399999948537	88.88888823843509	0.0	4.120048121731332e-12	-7.105427357601002e-13	0.0	-2.692645223154387e-26	7.105427357601002e-14
0.3	88.88888823778802	0.0	0.00033917069939566537	34.56665370998886	0.0	-800.6399999948537	0.0	1.5326496041222866e-09	0.0	0.99999999999818	0.0	1.9078351748896032e-06	0.0	0.0	0.0002186218070556877	0.0	0.0	0.0002186485904335932	0.0	800.6399999948537	88.88888823843509	0.0	4.120048121731332e-12	-7.105427357601002e-13	0.0	-2.692645223154387e-26	7.105427357601002e-14
0.305	88.88888823778802	0.0	0.00033917069939566537	35.01109815443331	0.0	-800.6399999948537	0.0	1.5326496041222866e-09	0.0	0.99999999999818	0.0	1.9078351748896032e-06	0.0	0.0	0.0002186218070556877	0.0	0.0	0.00021864902950536217	0.0	800.6399999948537	88.88888823843509	0.0	4.120048121731332e-12	-7.105427357601002e-13	0.0	-2.692645223154387e-26	7.105427357601002e-14
0.31	88.88888823778802	0.0	0.00033917069939566537	35.455542598877756	0.0	-800.6399999948537	0.0	1.5326496041222866e-09	0.0	0.99999999999818	0.0	1.9078351748896032e-06	0.0	0.0	0.0002186218070556877	0.0	0.0	0.0002186494685771311	0.0	800.6399999948537	88.88888823843509	0.0	4.120048121731332e-12	-7.105427357601002e-13	0.0	-2.692645223154387e-26	7.105427357601002e-14
0.315	88.88888823778802	0.0	0.00033917069939566537	35.8999870433222	0.0	-800.6399999948537	0.0	1.5326496041222866e-09	0.0	0.99999999999818	0.0	1.9078351748896032e-06	0.0	0.0	0.0002186218070556877	0.0	0.0	0.00021864990764890004	0.0	800.6399999948537	88.88888823843509	0.0	4.120048121731332e-12	-7.105427357601002e-13	0.0	-2.692645223154387e-26	7.105427357601002e-14
0.32	88.88888823778802	0.0	0.00033917069939566537	36.34443148776664	0.0	-800.6399999948537	0.0	1.5326496041222866e-09	0.0	0.99999999999818	0.0	1.9078351748896032e-06	0.0	0.0	0.0002186218070556877	0.0	0.0	0.000218650346720669	0.0	800.6399999948537	88.88888823843509	0.0	4.120048121731332e-12	-7.105427357601002e-13	0.0	-2.692645223154387e-26	7.105427357601002e-14
0.325	88.88888823778802	0.0	0.00033917069939566537	36.788875932211084	0.0	-800.6399999948537	0.0	1.5326496041222866e-09	0.0	0.99999999999818	0.0	1.9078351748896032e-06	0.0	0.0	0.0002186218070556877	0.0	0.0	0.00021865078579243793	0.0	800.6399999948537	88.88888823843509	0.0	4.120048121731332e-12	-7.105427357601002e-13	0.0	-2.692645223154387e-26	7.105427357601002e-14
0.33	88.88888823778802	0.0	0.00033917069939566537	37.23332037665553	0.0	-800.6399999948537	0.0	1.5326496041222866e-09	0.0	0.99999999999818	0.0	1.9078351748896032e-06	0.0	0.0	0.0002186218070556877	0.0	0.0	0.00021865122486420686	0.0	800.6399999948537	88.88888823843509	0.0	4.120048121731332e-12	-7.105427357601002e-13	0.0	-2.692645223154387e-26	7.105427357601002e-14
0.335	88.88888823778802	0.0	0.00033917069939566537	37.67776482109998	0.0	-800.6399999948537	0.0	1.5326496041222866e-09	0.0	0.99999999999818	0.0	1.9078351748896032e-06	0.0	0.0	0.0002186218070556877	0.0	0.0	0.00021865166393597582	0.0	800.6399999948537	88.88888823843509	0.0	4.120048121731332e-12	-7.105427357601002e-13	0.0	-2.692645223154387e-26	7.105427357601002e-14
0.34	88.88888823778802	0.0	0.00033917069939566537	38.12220926554443	0.0	-800.6399999948537	0.0	1.5326496041222866e-09	0.0	0.99999999999818	0.0	1.9078351748896032e-06	0.0	0.0	0.0002186218070556877	0.0	0.0	0.00021865210300774476	0.0	800.6399999948537	88.88888823843509	0.0	4.120048121731332e-12	-7.105427357601002e-13	0.0	-2.692645223154387e-26	7.105427357601002e-14
0.345	88.88888823778802	0.0	0.00033917069939566537	38.56665370998886	0.0	-800.6399999948537	0.0	1.5326496041222866e-09	0.0	0.99999999999818	0.0	1.9078351748896032e-06	0.0	0.0	0.0002186218070556877	0.0	0.0	0.00021865254207951372	0.0	800.6399999948537	88.88888823843509	0.0	4.120048121731332e-12	-7.105427357601002e-13	0.0	-2.692645223154387e-26	7.105427357601002e-14
0.35	88.88888823778802	0.0	0.00033917069939566537	39.011098154433306	0.0	-800.6399999948537	0.0	1.5326496041222866e-09	0.0	0.99999999999818	0.0	1.9078351748896032e-06	0.0	0.0	0.0002186218070556877	0.0	0.0	0.00021865298115128265	0.0	800.6399999948537	88.88888823843509	0.0	4.120048121731332e-12	-7.105427357601002e-13	0.0	-2.692645223154387e-26	7.105427357601002e-14
0.355	88.88888823778802	0.0	0.00033917069939566537	39.455542598877756	0.0	-800.6399999948537	0.0	1.5326496041222866e-09	0.0	0.99999999999818	0.0	1.9078351748896032e-06	0.0	0.0	0.0002186218070556877	0.0	0.0	0.00021865342022305158	0.0	800.6399999948537	88.88888823843509	0.0	4.120048121731332e-12	-7.105427357601002e-13	0.0	-2.692645223154387e-26	7.105427357601002e-14
0.36	88.88888823778802	0.0	0.00033917069939566537	39.8999870433222	0.0	-800.6399999948537	0.0	1.5326496041222866e-09	0.0	0.99999999999818	0.0	1.9078351748896032e-06	0.0	0.0	0.0002186218070556877	0.0	0.0	0.00021865385929482054	0.0	800.6399999948537	88.88888823843509	0.0	4.120048121731332e-12	-7.105427357601002e-13	0.0	-2.692645223154387e-26	7.105427357601002e-14
0.365	88.88888823778802	0.0	0.00033917069939566537	40.34443148776664	0.0	-800.6399999948537	0.0	1.5326496041222866e-09	0.0	0.99999999999818	0.0	1.9078351748896032e-06	0.0	0.0	0.0002186218070556877	0.0	0.0	0.00021865429836658948	0.0	800.6399999948537	88.88888823843509	0.0	4.120048121731332e-12	-7.105427357601002e-13	0.0	-2.692645223154387e-26	7.105427357601002e-14
0.37	88.88888823778802	0.0	0.00033917069939566537	40.788875932211084	0.0	-800.6399999948537	0.0	1.5326496041222866e-09	0.0	0.99999999999818	0.0	1.9078351748896032e-06	0.0	0.0	0.0002186218070556877	0.0	0.0	0.0002186547374383584	0.0	800.6399999948537	88.88888823843509	0.0	4.120048121731332e-12	-7.105427357601002e-13	0.0	-2.692645223154387e-26	7.105427357601002e-14
0.375	88.88888823778802	0.0	0.00033917069939566537	41.23332037665553	0.0	-800.6399999948537	0.0	1.5326496041222866e-09	0.0	0.99999999999818	0.0	1.9078351748896032e-06	0.0	0.0	0.0002186218070556877	0.0	0.0	0.00021865517651012737	0.0	800.6399999948537	88.88888823843509	0.0	4.120048121731332e-12	-7.105427357601002e-13	0.0	-2.692645223154387e-26	7.105427357601002e-14
0.38	88.88888823778802	0.0	0.00033917069939566537	41.67776482109998	0.0	-800.6399999948537	0.0	1.5326496041222866e-09	0.0	0.99999999999818	0.0	1.9078351748896032e-06	0.0	0.0	0.0002186218070556877	0.0	0.0	0.0002186556155818963	0.0	800.6399999948537	88.88888823843509	0.0	4.120048121731332e-12	-7.105427357601002e-13	0.0	-2.692645223154387e-26	7.105427357601002e-14
0.385	88.88888823778802	0.0	0.00033917069939566537	42.12220926554442	0.0	-800.6399999948537	0.0	1.5326496041222866e-09	0.0	0.99999999999818	0.0	1.9078351748896032e-06	0.0	0.0	0.0002186218070556877	0.0	0.0	0.00021865605465366526	0.0	800.6399999948537	88.88888823843509	0.0	4.120048121731332e-12	-7.105427357601002e-13	0.0	-2.692645223154387e-26	7.105427357601002e-14
0.39	88.88888823778802	0.0	0.00033917069939566537	42.56665370998886	0.0	-800.6399999948537	0.0	1.5326496041222866e-09	0.0	0.99999999999818	0.0	1.9078351748896032e-06	0.0	0.0	0.0002186218070556877	0.0	0.0	0.0002186564937254342	0.0	800.6399999948537	88.88888823843509	0.0	4.120048121731332e-12	-7.105427357601002e-13	0.0	-2.692645223154387e-26	7.105427357601002e-14
0.395	88.88888823778802	0.0	0.00033917069939566537	43.01109815443331	0.0	-800.6399999948537	0.0	1.5326496041222866e-09	0.0	0.99999999999818	0.0	1.9078351748896032e-06	0.0	0.0	0.0002186218070556877	0.0	0.0	0.00021865693279720313	0.0	800.6399999948537	88.88888823843509	0.0	4.120048121731332e-12	-7.105427357601002e-13	0.0	-2.692645223154387e-26	7.105427357601002e-14
0.4	88.88888823778802	0.0	0.00033917069939566537	43.455542598877756	0.0	-800.6399999948537	0.0	1.5326496041222866e-09	0.0	0.99999999999818	0.0	1.9078351748896032e-06	0.0	0.0	0.0002186218070556877	0.0	0.0	0.0002186573718689721	0.0	800.6399999948537	88.88888823843509	0.0	4.120048121731332e-12	-7.105427357601002e-13	0.0	-2.692645223154387e-26	7.105427357601002e-14
0.405	88.88888823778802	0.0	0.00033917069939566537	43.8999870433222	0.0	-800.6399999948537	0.0	1.5326496041222866e-09	0.0	0.99999999999818	0.0	1.9078351748896032e-06	0.0	0.0	0.0002186218070556877	0.0	0.0	0.00021865781094074102	0.0	800.6399999948537	88.88888823843509	0.0	4.120048121731332e-12	-7.105427357601002e-13	0.0	-2.692645223154387e-26	7.105427357601002e-14
0.41	88.88888823778802	0.0	0.00033917069939566537	44.34443148776664	0.0	-800.6399999948537	0.0	1.5326496041222866e-09	0.0	0.99999999999818	0.0	1.9078351748896032e-06	0.0	0.0	0.0002186218070556877	0.0	0.0	0.00021865825001250995	0.0	800.6399999948537	88.88888823843509	0.0	4.120048121731332e-12	-7.105427357601002e-13	0.0	-2.692645223154387e-26	7.105427357601002e-14
0.415	88.88888823778802	0.0	0.00033917069939566537	44.788875932211084	0.0	-800.6399999948537	0.0	1.5326496041222866e-09	0.0	0.99999999999818	0.0	1.9078351748896032e-06	0.0	0.0	0.0002186218070556877	0.0	0.0	0.00021865868908427892	0.0	800.6399999948537	88.88888823843509	0.0	4.120048121731332e-12	-7.105427357601002e-13	0.0	-2.692645223154387e-26	7.105427357601002e-14
0.42	88.88888823778802	0.0	0.00033917069939566537	45.23332037665553	0.0	-800.6399999948537	0.0	1.5326496041222866e-09	0.0	0.99999999999818	0.0	1.9078351748896032e-06	0.0	0.0	0.0002186218070556877	0.0	0.0	0.00021865912815604785	0.0	800.6399999948537	88.88888823843509	0.0	4.120048121731332e-12	-7.105427357601002e-13	0.0	-2.692645223154387e-26	7.105427357601002e-14
0.425	88.88888823778802	0.0	0.00033917069939566537	45.67776482109998	0.0	-800.6399999948537	0.0	1.5326496041222866e-09	0.0	0.99999999999818	0.0	1.9078351748896032e-06	0.0	0.0	0.0002186218070556877	0.0	0.0	0.00021865956722781678	0.0	800.6399999948537	88.88888823843509	0.0	4.120048121731332e-12	-7.105427357601002e-13	0.0	-2.692645223154387e-26	7.105427357601002e-14
0.43	88.88888823778802	0.0	0.00033917069939566537	46.12220926554442	0.0	-800.6399999948537	0.0	1.5326496041222866e-09	0.0	0.99999999999818	0.0	1.9078351748896032e-06	0.0	0.0	0.0002186218070556877	0.0	0.0	0.00021866000629958574	0.0	800.6399999948537	88.88888823843509	0.0	4.120048121731332e-12	-7.105427357601002e-13	0.0	-2.692645223154387e-26	7.105427357601002e-14
0.435	88.88888823778802	0.0	0.00033917069939566537	46.56665370998886	0.0	-800.6399999948537	0.0	1.5326496041222866e-09	0.0	0.99999999999818	0.0	1.9078351748896032e-06	0.0	0.0	0.0002186218070556877	0.0	0.0	0.00021866044537135467	0.0	800.6399999948537	88.88888823843509	0.0	4.120048121731332e-12	-7.105427357601002e-13	0.0	-2.692645223154387e-26	7.105427357601002e-14
0.44	88.88888823778802	0.0	0.00033917069939566537	47.011098154433306	0.0	-800.6399999948537	0.0	1.5326496041222866e-09	0.0	0.99999999999818	0.0	1.9078351748896032e-06	0.0	0.0	0.0002186218070556877	0.0	0.0	0.00021866088444312363	0.0	800.6399999948537	88.88888823843509	0.0	4.120048121731332e-12	-7.105427357601002e-13	0.0	-2.692645223154387e-26	7.105427357601002e-14
0.445	88.88888823778802	0.0	0.00033917069939566537	47.455542598877756	0.0	-800.6399999948537	0.0	1.5326496041222866e-09	0.0	0.99999999999818	0.0	1.9078351748896032e-06	0.0	0.0	0.0002186218070556877	0.0	0.0	0.00021866132351489257	0.0	800.6399999948537	88.88888823843509	0.0	4.120048121731332e-12	-7.105427357601002e-13	0.0	-2.692645223154387e-26	7.105427357601002e-14
0.45	88.88888823778802	0.0	0.00033917069939566537	47.8999870433222	0.0	-800.6399999948537	0.0	1.5326496041222866e-09	0.0	0.99999999999818	0.0	1.9078351748896032e-06	0.0	0.0	0.0002186218070556877	0.0	0.0	0.0002186617625866615	0.0	800.6399999948537	88.88888823843509	0.0	4.120048121731332e-12	-7.105427357601002e-13	0.0	-2.692645223154387e-26	7.105427357601002e-14
0.455	88.88888823778802	0.0	0.00033917069939566537	48.34443148776664	0.0	-800.6399999948537	0.0	1.5326496041222866e-09	0.0	0.99999999999818	0.0	1.9078351748896032e-06	0.0	0.0	0.0002186218070556877	0.0	0.0	0.00021866220165843046	0.0	800.6399999948537	88.88888823843509	0.0	4.120048121731332e-12	-7.105427357601002e-13	0.0	-2.692645223154387e-26	7.105427357601002e-14
0.46	88.88888823778802	0.0	0.00033917069939566537	48.788875932211084	0.0	-800.6399999948537	0.0	1.5326496041222866e-09	0.0	0.99999999999818	0.0	1.9078351748896032e-06	0.0	0.0	0.0002186218070556877	0.0	0.0	0.0002186626407301994	0.0	800.6399999948537	88.88888823843509	0.0	4.120048121731332e-12	-7.105427357601002e-13	0.0	-2.692645223154387e-26	7.105427357601002e-14
0.465	88.88888823778802	0.0	0.00033917069939566537	49.233320376655534	0.0	-800.6399999948537	0.0	1.5326496041222866e-09	0.0	0.99999999999818	0.0	1.9078351748896032e-06	0.0	0.0	0.0002186218070556877	0.0	0.0	0.00021866307980196833	0.0	800.6399999948537	88.88888823843509	0.0	4.120048121731332e-12	-7.105427357601002e-13	0.0	-2.692645223154387e-26	7.105427357601002e-14
0.47	88.88888823778802	0.0	0.00033917069939566537	49.67776482109997	0.0	-800.6399999948537	0.0	1.5326496041222866e-09	0.0	0.99999999999818	0.0	1.9078351748896032e-06	0.0	0.0	0.0002186218070556877	0.0	0.0	0.0002186635188737373	0.0	800.6399999948537	88.88888823843509	0.0	4.120048121731332e-12	-7.105427357601002e-13	0.0	-2.692645223154387e-26	7.105427357601002e-14
0.475	88.88888823778802	0.0	0.00033917069939566537	50.12220926554442	0.0	-800.6399999948537	0.0	1.5326496041222866e-09	0.0	0.99999999999818	0.0	1.9078351748896032e-06	0.0	0.0	0.0002186218070556877	0.0	0.0	0.00021866395794550622	0.0	800.6399999948537	88.88888823843509	0.0	4.120048121731332e-12	-7.105427357601002e-13	0.0	-2.692645223154387e-26	7.105427357601002e-14
0.48	88.88888823778802	0.0	0.00033917069939566537	50.56665370998886	0.0	-800.6399999948537	0.0	1.5326496041222866e-09	0.0	0.99999999999818	0.0	1.9078351748896032e-06	0.0	0.0	0.0002186218070556877	0.0	0.0	0.00021866439701727515	0.0	800.6399999948537	88.88888823843509	0.0	4.120048121731332e-12	-7.105427357601002e-13	0.0	-2.692645223154387e-26	7.105427357601002e-14
0.485	88.88888823778802	0.0	0.00033917069939566537	51.011098154433306	0.0	-800.6399999948537	0.0	1.5326496041222866e-09	0.0	0.99999999999818	0.0	1.9078351748896032e-06	0.0	0.0	0.0002186218070556877	0.0	0.0	0.00021866483608904411	0.0	800.6399999948537	88.88888823843509	0.0	4.120048121731332e-12	-7.105427357601002e-13	0.0	-2.692645223154387e-26	7.105427357601002e-14
0.49	88.88888823778802	0.0	0.00033917069939566537	51.45554259887775	0.0	-800.6399999948537	0.0	1.5326496041222866e-09	0.0	0.99999999999818	0.0	1.9078351748896032e-06	0.0	0.0	0.0002186218070556877	0.0	0.0	0.00021866527516081305	0.0	800.6399999948537	88.88888823843509	0.0	4.120048121731332e-12	-7.105427357601002e-13	0.0	-2.692645223154387e-26	7.105427357601002e-14
0.495	88.88888823778802	0.0	0.00033917069939566537	51.8999870433222	0.0	-800.6399999948537	0.0	1.5326496041222866e-09	0.0	0.99999999999818	0.0	1.9078351748896032e-06	0.0	0.0	0.0002186218070556877	0.0	0.0	0.000218665714232582	0.0	800.6399999948537	88.88888823843509	0.0	4.120048121731332e-12	-7.105427357601002e-13	0.0	-2.692645223154387e-26	7.105427357601002e-14
0.5	88.88888823778802	0.0	0.00033917069939566537	52.34443148776664	0.0	-800.6399999948537	0.0	1.5326496041222866e-09	0.0	0.99999999999818	0.0	1.9078351748896032e-06	0.0	0.0	0.0002186218070556877	0.0	0.0	0.00021866615330435094	0.0	800.6399999948537	88.88888823843509	0.0	4.120048121731332e-12	-7.105427357601002e-13	0.0	-2.692645223154387e-26	7.105427357601002e-14
0.505	88.88888823778802	0.0	0.00033917069939566537	52.788875932211084	0.0	-800.6399999948537	0.0	1.5326496041222866e-09	0.0	0.99999999999818	0.0	1.9078351748896032e-06	0.0	0.0	0.0002186218070556877	0.0	0.0	0.00021866659237611987	0.0	800.6399999948537	88.88888823843509	0.0	4.120048121731332e-12	-7.105427357601002e-13	0.0	-2.692645223154387e-26	7.105427357601002e-14
0.51	88.88888823778802	0.0	0.00033917069939566537	53.233320376655534	0.0	-800.6399999948537	0.0	1.5326496041222866e-09	0.0	0.99999999999818	0.0	1.9078351748896032e-06	0.0	0.0	0.0002186218070556877	0.0	0.0	0.00021866703144788883	0.0	800.6399999948537	88.88888823843509	0.0	4.120048121731332e-12	-7.105427357601002e-13	0.0	-2.692645223154387e-26	7.105427357601002e-14
0.515	88.88888823778802	0.0	0.00033917069939566537	53.67776482109998	0.0	-800.6399999948537	0.0	1.5326496041222866e-09	0.0	0.99999999999818	0.0	1.9078351748896032e-06	0.0	0.0	0.0002186218070556877	0.0	0.0	0.00021866747051965777	0.0	800.6399999948537	88.88888823843509	0.0	4.120048121731332e-12	-7.105427357601002e-13	0.0	-2.692645223154387e-26	7.105427357601002e-14
0.52	88.88888823778802	0.0	0.00033917069939566537	54.12220926554442	0.0	-800.6399999948537	0.0	1.5326496041222866e-09	0.0	0.99999999999818	0.0	1.9078351748896032e-06	0.0	0.0	0.0002186218070556877	0.0	0.0	0.0002186679095914267	0.0	800.6399999948537	88.88888823843509	0.0	4.120048121731332e-12	-7.105427357601002e-13	0.0	-2.692645223154387e-26	7.105427357601002e-14
0.525	88.88888823778802	0.0	0.00033917069939566537	54.56665370998886	0.0	-800.6399999948537	0.0	1.5326496041222866e-09	0.0	0.99999999999818	0.0	1.9078351748896032e-06	0.0	0.0	0.0002186218070556877	0.0	0.0	0.00021866834866319566	0.0	800.6399999948537	88.88888823843509	0.0	4.120048121731332e-12	-7.105427357601002e-13	0.0	-2.692645223154387e-26	7.105427357601002e-14
0.53	88.88888823778802	0.0	0.00033917069939566537	55.01109815443331	0.0	-800.6399999948537	0.0	1.5326496041222866e-09	0.0	0.99999999999818	0.0	1.9078351748896032e-06	0.0	0.0	0.0002186218070556877	0.0	0.0	0.0002186687877349646	0.0	800.6399999948537	88.88888823843509	0.0	4.120048121731332e-12	-7.105427357601002e-13	0.0	-2.692645223154387e-26	7.105427357601002e-14
0.535	88.88888823778802	0.0	0.00033917069939566537	55.455542598877756	0.0	-800.6399999948537	0.0	1.5326496041222866e-09	0.0	0.99999999999818	0.0	1.9078351748896032e-06	0.0	0.0	0.0002186218070556877	0.0	0.0	0.00021866922680673353	0.0	800.6399999948537	88.88888823843509	0.0	4.120048121731332e-12	-7.105427357601002e-13	0.0	-2.692645223154387e-26	7.105427357601002e-14
0.54	88.88888823778802	0.0	0.00033917069939566537	55.8999870433222	0.0	-800.6399999948537	0.0	1.5326496041222866e-09	0.0	0.99999999999818	0.0	1.9078351748896032e-06	0.0	0.0	0.0002186218070556877	0.0	0.0	0.0002186696658785025	0.0	800.6399999948537	88.88888823843509	0.0	4.120048121731332e-12	-7.105427357601002e-13	0.0	-2.692645223154387e-26	7.105427357601002e-14
0.545	88.88888823778802	0.0	0.00033917069939566537	56.34443148776664	0.0	-800.6399999948537	0.0	1.5326496041222866e-09	0.0	0.99999999999818	0.0	1.9078351748896032e-06	0.0	0.0	0.0002186218070556877	0.0	0.0	0.00021867010495027142	0.0	800.6399999948537	88.88888823843509	0.0	4.120048121731332e-12	-7.105427357601002e-13	0.0	-2.692645223154387e-26	7.105427357601002e-14
0.55	88.88888823778802	0.0	0.00033917069939566537	56.78887593221109	0.0	-800.6399999948537	0.0	1.5326496041222866e-09	0.0	0.99999999999818	0.0	1.9078351748896032e-06	0.0	0.0	0.0002186218070556877	0.0	0.0	0.00021867054402204038	0.0	800.6399999948537	88.88888823843509	0.0	4.120048121731332e-12	-7.105427357601002e-13	0.0	-2.692645223154387e-26	7.105427357601002e-14
0.555	88.88888823778802	0.0	0.00033917069939566537	57.233320376655534	0.0	-800.6399999948537	0.0	1.5326496041222866e-09	0.0	0.99999999999818	0.0	1.9078351748896032e-06	0.0	0.0	0.0002186218070556877	0.0	0.0	0.0002186709830938093	0.0	800.6399999948537	88.88888823843509	0.0	4.120048121731332e-12	-7.105427357601002e-13	0.0	-2.692645223154387e-26	7.105427357601002e-14
0.56	88.88888823778802	0.0	0.00033917069939566537	57.67776482109998	0.0	-800.6399999948537	0.0	1.5326496041222866e-09	0.0	0.99999999999818	0.0	1.9078351748896032e-06	0.0	0.0	0.0002186218070556877	0.0	0.0	0.00021867142216557825	0.0	800.6399999948537	88.88888823843509	0.0	4.120048121731332e-12	-7.105427357601002e-13	0.0	-2.692645223154387e-26	7.105427357601002e-14
0.565	88.88888823778802	0.0	0.00033917069939566537	58.12220926554441	0.0	-800.6399999948537	0.0	1.5326496041222866e-09	0.0	0.99999999999818	0.0	1.9078351748896032e-06	0.0	0.0	0.0002186218070556877	0.0	0.0	0.0002186718612373472	0.0	800.6399999948537	88.88888823843509	0.0	4.120048121731332e-12	-7.105427357601002e-13	0.0	-2.692645223154387e-26	7.105427357601002e-14
0.57	88.88888823778802	0.0	0.00033917069939566537	58.566653709988856	0.0	-800.6399999948537	0.0	1.5326496041222866e-09	0.0	0.99999999999818	0.0	1.9078351748896032e-06	0.0	0.0	0.0002186218070556877	0.0	0.0	0.00021867230030911614	0.0	800.6399999948537	88.88888823843509	0.0	4.120048121731332e-12	-7.105427357601002e-13	0.0	-2.692645223154387e-26	7.105427357601002e-14
0.575	88.88888823778802	0.0	0.00033917069939566537	59.011098154433306	0.0	-800.6399999948537	0.0	1.5326496041222866e-09	0.0	0.99999999999818	0.0	1.9078351748896032e-06	0.0	0.0	0.0002186218070556877	0.0	0.0	0.00021867273938088507	0.0	800.6399999948537	88.88888823843509	0.0	4.120048121731332e-12	-7.105427357601002e-13	0.0	-2.692645223154387e-26	7.105427357601002e-14
0.58	88.88888823778802	0.0	0.00033917069939566537	59.45554259887775	0.0	-800.6399999948537	0.0	1.5326496041222866e-09	0.0	0.99999999999818	0.0	1.9078351748896032e-06	0.0	0.0	0.0002186218070556877	0.0	0.0	0.00021867317845265403	0.0	800.6399999948537	88.88888823843509	0.0	4.120048121731332e-12	-7.105427357601002e-13	0.0	-2.692645223154387e-26	7.105427357601002e-14
0.585	88.88888823778802	0.0	0.00033917069939566537	59.89998704332219	0.0	-800.6399999948537	0.0	1.5326496041222866e-09	0.0	0.99999999999818	0.0	1.9078351748896032e-06	0.0	0.0	0.0002186218070556877	0.0	0.0	0.00021867361752442297	0.0	800.6399999948537	88.88888823843509	0.0	4.120048121731332e-12	-7.105427357601002e-13	0.0	-2.692645223154387e-26	7.105427357601002e-14
0.59	88.88888823778802	0.0	0.00033917069939566537	60.34443148776664	0.0	-800.6399999948537	0.0	1.5326496041222866e-09	0.0	0.99999999999818	0.0	1.9078351748896032e-06	0.0	0.0	0.0002186218070556877	0.0	0.0	0.0002186740565961919	0.0	800.6399999948537	88.88888823843509	0.0	4.120048121731332e-12	-7.105427357601002e-13	0.0	-2.692645223154387e-26	7.105427357601002e-14
0.595	88.88888823778802	0.0	0.00033917069939566537	60.788875932211084	0.0	-800.6399999948537	0.0	1.5326496041222866e-09	0.0	0.99999999999818	0.0	1.9078351748896032e-06	0.0	0.0	0.0002186218070556877	0.0	0.0	0.00021867449566796086	0.0	800.6399999948537	88.88888823843509	0.0	4.120048121731332e-12	-7.105427357601002e-13	0.0	-2.692645223154387e-26	7.105427357601002e-14
0.6	88.88888823778802	0.0	0.00033917069939566537	61.23332037665553	0.0	-800.6399999948537	0.0	1.5326496041222866e-09	0.0	0.99999999999818	0.0	1.9078351748896032e-06	0.0	0.0	0.0002186218070556877	0.0	0.0	0.0002186749347397298	0.0	800.6399999948537	88.88888823843509	0.0	4.120048121731332e-12	-7.105427357601002e-13	0.0	-2.692645223154387e-26	7.105427357601002e-14
0.605	88.88888823778802	0.0	0.00033917069939566537	61.67776482109997	0.0	-800.6399999948537	0.0	1.5326496041222866e-09	0.0	0.99999999999818	0.0	1.9078351748896032e-06	0.0	0.0	0.0002186218070556877	0.0	0.0	0.00021867537381149875	0.0	800.6399999948537	88.88888823843509	0.0	4.120048121731332e-12	-7.105427357601002e-13	0.0	-2.692645223154387e-26	7.105427357601002e-14
0.61	88.88888823778802	0.0	0.00033917069939566537	62.12220926554442	0.0	-800.6399999948537	0.0	1.5326496041222866e-09	0.0	0.99999999999818	0.0	1.9078351748896032e-06	0.0	0.0	0.0002186218070556877	0.0	0.0	0.00021867581288326769	0.0	800.6399999948537	88.88888823843509	0.0	4.120048121731332e-12	-7.105427357601002e-13	0.0	-2.692645223154387e-26	7.105427357601002e-14
0.615	88.88888823778802	0.0	0.00033917069939566537	62.56665370998886	0.0	-800.6399999948537	0.0	1.5326496041222866e-09	0.0	0.99999999999818	0.0	1.9078351748896032e-06	0.0	0.0	0.0002186218070556877	0.0	0.0	0.00021867625195503662	0.0	800.6399999948537	88.88888823843509	0.0	4.120048121731332e-12	-7.105427357601002e-13	0.0	-2.692645223154387e-26	7.105427357601002e-14
0.62	88.88888823778802	0.0	0.00033917069939566537	63.011098154433306	0.0	-800.6399999948537	0.0	1.5326496041222866e-09	0.0	0.99999999999818	0.0	1.9078351748896032e-06	0.0	0.0	0.0002186218070556877	0.0	0.0	0.00021867669102680558	0.0	800.6399999948537	88.88888823843509	0.0	4.120048121731332e-12	-7.105427357601002e-13	0.0	-2.692645223154387e-26	7.105427357601002e-14
0.625	88.88888823778802	0.0	0.00033917069939566537	63.455542598877756	0.0	-800.6399999948537	0.0	1.5326496041222866e-09	0.0	0.99999999999818	0.0	1.9078351748896032e-06	0.0	0.0	0.0002186218070556877	0.0	0.0	0.0002186771300985745	0.0	800.6399999948537	88.88888823843509	0.0	4.120048121731332e-12	-7.105427357601002e-13	0.0	-2.692645223154387e-26	7.105427357601002e-14
0.63	88.88888823778802	0.0	0.00033917069939566537	63.8999870433222	0.0	-800.6399999948537	0.0	1.5326496041222866e-09	0.0	0.99999999999818	0.0	1.9078351748896032e-06	0.0	0.0	0.0002186218070556877	0.0	0.0	0.00021867756917034345	0.0	800.6399999948537	88.88888823843509	0.0	4.120048121731332e-12	-7.105427357601002e-13	0.0	-2.692645223154387e-26	7.105427357601002e-14
0.635	88.88888823778802	0.0	0.00033917069939566537	64.34443148776664	0.0	-800.6399999948537	0.0	1.5326496041222866e-09	0.0	0.99999999999818	0.0	1.9078351748896032e-06	0.0	0.0	0.0002186218070556877	0.0	0.0	0.0002186780082421124	0.0	800.6399999948537	88.88888823843509	0.0	4.120048121731332e-12	-7.105427357601002e-13	0.0	-2.692645223154387e-26	7.105427357601002e-14
0.64	88.88888823778802	0.0	0.00033917069939566537	64.78887593221108	0.0	-800.6399999948537	0.0	1.5326496041222866e-09	0.0	0.99999999999818	0.0	1.9078351748896032e-06	0.0	0.0	0.0002186218070556877	0.0	0.0	0.00021867844731388134	0.0	800.6399999948537	88.88888823843509	0.0	4.120048121731332e-12	-7.105427357601002e-13	0.0	-2.692645223154387e-26	7.105427357601002e-14
0.645	88.88888823778802	0.0	0.00033917069939566537	65.23332037665554	0.0	-800.6399999948537	0.0	1.5326496041222866e-09	0.0	0.99999999999818	0.0	1.9078351748896032e-06	0.0	0.0	0.0002186218070556877	0.0	0.0	0.0002186788863856503	0.0	800.6399999948537	88.88888823843509	0.0	4.120048121731332e-12	-7.105427357601002e-13	0.0	-2.692645223154387e-26	7.105427357601002e-14
0.65	88.88888823778802	0.0	0.00033917069939566537	65.67776482109997	0.0	-800.6399999948537	0.0	1.5326496041222866e-09	0.0	0.99999999999818	0.0	1.9078351748896032e-06	0.0	0.0	0.0002186218070556877	0.0	0.0	0.00021867932545741923	0.0	800.6399999948537	88.88888823843509	0.0	4.120048121731332e-12	-7.105427357601002e-13	0.0	-2.692645223154387e-26	7.105427357601002e-14
0.655	88.88888823778802	0.0	0.00033917069939566537	66.12220926554443	0.0	-800.6399999948537	0.0	1.5326496041222866e-09	0.0	0.99999999999818	0.0	1.9078351748896032e-06	0.0	0.0	0.0002186218070556877	0.0	0.0	0.00021867976452918817	0.0	800.6399999948537	88.88888823843509	0.0	4.120048121731332e-12	-7.105427357601002e-13	0.0	-2.692645223154387e-26	7.105427357601002e-14
0.66	88.88888823778802	0.0	0.00033917069939566537	66.56665370998886	0.0	-800.6399999948537	0.0	1.5326496041222866e-09	0.0	0.99999999999818	0.0	1.9078351748896032e-06	0.0	0.0	0.0002186218070556877	0.0	0.0	0.00021868020360095713	0.0	800.6399999948537	88.88888823843509	0.0	4.120048121731332e-12	-7.105427357601002e-13	0.0	-2.692645223154387e-26	7.105427357601002e-14
0.665	88.88888823778802	0.0	0.00033917069939566537	67.01109815443331	0.0	-800.6399999948537	0.0	1.5326496041222866e-09	0.0	0.99999999999818	0.0	1.9078351748896032e-06	0.0	0.0	0.0002186218070556877	0.0	0.0	0.00021868064267272606	0.0	800.6399999948537	88.88888823843509	0.0	4.120048121731332e-12	-7.105427357601002e-13	0.0	-2.692645223154387e-26	7.105427357601002e-14
0.67	88.88888823778802	0.0	0.00033917069939566537	67.45554259887776	0.0	-800.6399999948537	0.0	1.5326496041222866e-09	0.0	0.99999999999818	0.0	1.9078351748896032e-06	0.0	0.0	0.0002186218070556877	0.0	0.0	0.000218681081744495	0.0	800.6399999948537	88.88888823843509	0.0	4.120048121731332e-12	-7.105427357601002e-13	0.0	-2.692645223154387e-26	7.105427357601002e-14
0.675	88.88888823778802	0.0	0.00033917069939566537	67.8999870433222	0.0	-800.6399999948537	0.0	1.5326496041222866e-09	0.0	0.99999999999818	0.0	1.9078351748896032e-06	0.0	0.0	0.0002186218070556877	0.0	0.0	0.00021868152081626395	0.0	800.6399999948537	88.88888823843509	0.0	4.120048121731332e-12	-7.105427357601002e-13	0.0	-2.692645223154387e-26	7.105427357601002e-14
0.68	88.88888823778802	0.0	0.00033917069939566537	68.34443148776666	0.0	-800.6399999948537	0.0	1.5326496041222866e-09	0.0	0.99999999999818	0.0	1.9078351748896032e-06	0.0	0.0	0.0002186218070556877	0.0	0.0	0.00021868195988803288	0.0	800.6399999948537	88.88888823843509	0.0	4.120048121731332e-12	-7.105427357601002e-13	0.0	-2.692645223154387e-26	7.105427357601002e-14
0.685	88.88888823778802	0.0	0.00033917069939566537	68.78887593221108	0.0	-800.6399999948537	0.0	1.5326496041222866e-09	0.0	0.99999999999818	0.0	1.9078351748896032e-06	0.0	0.0	0.0002186218070556877	0.0	0.0	0.00021868239895980182	0.0	800.6399999948537	88.88888823843509	0.0	4.120048121731332e-12	-7.105427357601002e-13	0.0	-2.692645223154387e-26	7.105427357601002e-14
0.69	88.88888823778802	0.0	0.00033917069939566537	69.23332037665553	0.0	-800.6399999948537	0.0	1.5326496041222866e-09	0.0	0.99999999999818	0.0	1.9078351748896032e-06	0.0	0.0	0.0002186218070556877	0.0	0.0	0.00021868283803157078	0.0	800.6399999948537	88.88888823843509	0.0	4.120048121731332e-12	-7.105427357601002e-13	0.0	-2.692645223154387e-26	7.105427357601002e-14
0.695	88.88888823778802	0.0	0.00033917069939566537	69.67776482109997	0.0	-800.6399999948537	0.0	1.5326496041222866e-09	0.0	0.99999999999818	0.0	1.9078351748896032e-06	0.0	0.0	0.0002186218070556877	0.0	0.0	0.0002186832771033397	0.0	800.6399999948537	88.88888823843509	0.0	4.120048121731332e-12	-7.105427357601002e-13	0.0	-2.692645223154387e-26	7.105427357601002e-14
0.7	88.88888823778802	0.0	0.00033917069939566537	70.12220926554441	0.0	-800.6399999948537	0.0	1.5326496041222866e-09	0.0	0.99999999999818	0.0	1.9078351748896032e-06	0.0	0.0	0.0002186218070556877	0.0	0.0	0.00021868371617510867	0.0	800.6399999948537	88.88888823843509	0.0	4.120048121731332e-12	-7.105427357601002e-13	0.0	-2.692645223154387e-26	7.105427357601002e-14
0.705	88.88888823778802	0.0	0.00033917069939566537	70.56665370998886	0.0	-800.6399999948537	0.0	1.5326496041222866e-09	0.0	0.99999999999818	0.0	1.9078351748896032e-06	0.0	0.0	0.0002186218070556877	0.0	0.0	0.0002186841552468776	0.0	800.6399999948537	88.88888823843509	0.0	4.120048121731332e-12	-7.105427357601002e-13	0.0	-2.692645223154387e-26	7.105427357601002e-14
0.71	88.88888823778802	0.0	0.00033917069939566537	71.01109815443331	0.0	-800.6399999948537	0.0	1.5326496041222866e-09	0.0	0.99999999999818	0.0	1.9078351748896032e-06	0.0	0.0	0.0002186218070556877	0.0	0.0	0.00021868459431864654	0.0	800.6399999948537	88.88888823843509	0.0	4.120048121731332e-12	-7.105427357601002e-13	0.0	-2.692645223154387e-26	7.105427357601002e-14
0.715	88.88888823778802	0.0	0.00033917069939566537	71.45554259887774	0.0	-800.6399999948537	0.0	1.5326496041222866e-09	0.0	0.99999999999818	0.0	1.9078351748896032e-06	0.0	0.0	0.0002186218070556877	0.0	0.0	0.0002186850333904155	0.0	800.6399999948537	88.88888823843509	0.0	4.120048121731332e-12	-7.105427357601002e-13	0.0	-2.692645223154387e-26	7.105427357601002e-14
0.72	88.88888823778802	0.0	0.00033917069939566537	71.8999870433222	0.0	-800.6399999948537	0.0	1.5326496041222866e-09	0.0	0.99999999999818	0.0	1.9078351748896032e-06	0.0	0.0	0.0002186218070556877	0.0	0.0	0.00021868547246218443	0.0	800.6399999948537	88.88888823843509	0.0	4.120048121731332e-12	-7.105427357601002e-13	0.0	-2.692645223154387e-26	7.105427357601002e-14
0.725	88.88888823778802	0.0	0.00033917069939566537	72.34443148776664	0.0	-800.6399999948537	0.0	1.5326496041222866e-09	0.0	0.99999999999818	0.0	1.9078351748896032e-06	0.0	0.0	0.0002186218070556877	0.0	0.0	0.00021868591153395336	0.0	800.6399999948537	88.88888823843509	0.0	4.120048121731332e-12	-7.105427357601002e-13	0.0	-2.692645223154387e-26	7.105427357601002e-14
0.73	88.88888823778802	0.0	0.00033917069939566537	72.78887593221108	0.0	-800.6399999948537	0.0	1.5326496041222866e-09	0.0	0.99999999999818	0.0	1.9078351748896032e-06	0.0	0.0	0.0002186218070556877	0.0	0.0	0.00021868635060572232	0.0	800.6399999948537	88.88888823843509	0.0	4.120048121731332e-12	-7.105427357601002e-13	0.0	-2.692645223154387e-26	7.105427357601002e-14
0.735	88.88888823778802	0.0	0.00033917069939566537	73.23332037665553	0.0	-800.6399999948537	0.0	1.5326496041222866e-09	0.0	0.99999999999818	0.0	1.9078351748896032e-06	0.0	0.0	0.0002186218070556877	0.0	0.0	0.00021868678967749126	0.0	800.6399999948537	88.88888823843509	0.0	4.120048121731332e-12	-7.105427357601002e-13	0.0	-2.692645223154387e-26	7.105427357601002e-14
0.74	88.88888823778802	0.0	0.00033917069939566537	73.67776482109997	0.0	-800.6399999948537	0.0	1.5326496041222866e-09	0.0	0.99999999999818	0.0	1.9078351748896032e-06	0.0	0.0	0.0002186218070556877	0.0	0.0	0.0002186872287492602	0.0	800.6399999948537	88.88888823843509	0.0	4.120048121731332e-12	-7.105427357601002e-13	0.0	-2.692645223154387e-26	7.105427357601002e-14
0.745	88.88888823778802	0.0	0.00033917069939566537	74.12220926554441	0.0	-800.6399999948537	0.0	1.5326496041222866e-09	0.0	0.99999999999818	0.0	1.9078351748896032e-06	0.0	0.0	0.0002186218070556877	0.0	0.0	0.00021868766782102915	0.0	800.6399999948537	88.88888823843509	0.0	4.120048121731332e-12	-7.105427357601002e-13	0.0	-2.692645223154387e-26	7.105427357601002e-14
0.75	88.88888823778802	0.0	0.00033917069939566537	74.56665370998886	0.0	-800.6399999948537	0.0	1.5326496041222866e-09	0.0	0.99999999999818	0.0	1.9078351748896032e-06	0.0	0.0	0.0002186218070556877	0.0	0.0	0.00021868810689279808	0.0	800.6399999948537	88.88888823843509	0.0	4.120048121731332e-12	-7.105427357601002e-13	0.0	-2.692645223154387e-26	7.105427357601002e-14
0.755	88.88888823778802	0.0	0.00033917069939566537	75.01109815443331	0.0	-800.6399999948537	0.0	1.5326496041222866e-09	0.0	0.99999999999818	0.0	1.9078351748896032e-06	0.0	0.0	0.0002186218070556877	0.0	0.0	0.00021868854596456704	0.0	800.6399999948537	88.88888823843509	0.0	4.120048121731332e-12	-7.105427357601002e-13	0.0	-2.692645223154387e-26	7.105427357601002e-14
0.76	88.88888823778802	0.0	0.00033917069939566537	75.45554259887776	0.0	-800.6399999948537	0.0	1.5326496041222866e-09	0.0	0.99999999999818	0.0	1.9078351748896032e-06	0.0	0.0	0.0002186218070556877	0.0	0.0	0.00021868898503633598	0.0	800.6399999948537	88.88888823843509	0.0	4.120048121731332e-12	-7.105427357601002e-13	0.0	-2.692645223154387e-26	7.105427357601002e-14
0.765	88.88888823778802	0.0	0.00033917069939566537	75.8999870433222	0.0	-800.6399999948537	0.0	1.5326496041222866e-09	0.0	0.99999999999818	0.0	1.9078351748896032e-06	0.0	0.0	0.0002186218070556877	0.0	0.0	0.0002186894241081049	0.0	800.6399999948537	88.88888823843509	0.0	4.120048121731332e-12	-7.105427357601002e-13	0.0	-2.692645223154387e-26	7.105427357601002e-14
0.77	88.88888823778802	0.0	0.00033917069939566537	76.34443148776664	0.0	-800.6399999948537	0.0	1.5326496041222866e-09	0.0	0.99999999999818	0.0	1.9078351748896032e-06	0.0	0.0	0.0002186218070556877	0.0	0.0	0.00021868986317987387	0.0	800.6399999948537	88.88888823843509	0.0	4.120048121731332e-12	-7.105427357601002e-13	0.0	-2.692645223154387e-26	7.105427357601002e-14
0.775	88.88888823778802	0.0	0.00033917069939566537	76.78887593221108	0.0	-800.6399999948537	0.0	1.5326496041222866e-09	0.0	0.99999999999818	0.0	1.9078351748896032e-06	0.0	0.0	0.0002186218070556877	0.0	0.0	0.0002186903022516428	0.0	800.6399999948537	88.88888823843509	0.0	4.120048121731332e-12	-7.105427357601002e-13	0.0	-2.692645223154387e-26	7.105427357601002e-14
0.78	88.88888823778802	0.0	0.00033917069939566537	77.23332037665553	0.0	-800.6399999948537	0.0	1.5326496041222866e-09	0.0	0.99999999999818	0.0	1.9078351748896032e-06	0.0	0.0	0.0002186218070556877	0.0	0.0	0.00021869074132341174	0.0	800.6399999948537	88.88888823843509	0.0	4.120048121731332e-12	-7.105427357601002e-13	0.0	-2.692645223154387e-26	7.105427357601002e-14
0.785	88.88888823778802	0.0	0.00033917069939566537	77.67776482109997	0.0	-800.6399999948537	0.0	1.5326496041222866e-09	0.0	0.99999999999818	0.0	1.9078351748896032e-06	0.0	0.0	0.0002186218070556877	0.0	0.0	0.0002186911803951807	0.0	800.6399999948537	88.88888823843509	0.0	4.120048121731332e-12	-7.105427357601002e-13	0.0	-2.692645223154387e-26	7.105427357601002e-14
0.79	88.88888823778802	0.0	0.00033917069939566537	78.12220926554443	0.0	-800.6399999948537	0.0	1.5326496041222866e-09	0.0	0.99999999999818	0.0	1.9078351748896032e-06	0.0	0.0	0.0002186218070556877	0.0	0.0	0.00021869161946694963	0.0	800.6399999948537	88.88888823843509	0.0	4.120048121731332e-12	-7.105427357601002e-13	0.0	-2.692645223154387e-26	7.105427357601002e-14
0.795	88.88888823778802	0.0	0.00033917069939566537	78.56665370998887	0.0	-800.6399999948537	0.0	1.5326496041222866e-09	0.0	0.99999999999818	0.0	1.9078351748896032e-06	0.0	0.0	0.0002186218070556877	0.0	0.0	0.00021869205853871856	0.0	800.6399999948537	88.88888823843509	0.0	4.120048121731332e-12	-7.105427357601002e-13	0.0	-2.692645223154387e-26	7.105427357601002e-14
0.8	88.88888823778802	0.0	0.00033917069939566537	79.01109815443331	0.0	-800.6399999948537	0.0	1.5326496041222866e-09	0.0	0.99999999999818	0.0	1.9078351748896032e-06	0.0	0.0	0.0002186218070556877	0.0	0.0	0.00021869249761048752	0.0	800.6399999948537	88.88888823843509	0.0	4.120048121731332e-12	-7.105427357601002e-13	0.0	-2.692645223154387e-26	7.105427357601002e-14
0.805	88.88888823778802	0.0	0.00033917069939566537	79.45554259887776	0.0	-800.6399999948537	0.0	1.5326496041222866e-09	0.0	0.99999999999818	0.0	1.9078351748896032e-06	0.0	0.0	0.0002186218070556877	0.0	0.0	0.00021869293668225646	0.0	800.6399999948537	88.88888823843509	0.0	4.120048121731332e-12	-7.105427357601002e-13	0.0	-2.692645223154387e-26	7.105427357601002e-14
0.81	88.88888823778802	0.0	0.00033917069939566537	79.8999870433222	0.0	-800.6399999948537	0.0	1.5326496041222866e-09	0.0	0.99999999999818	0.0	1.9078351748896032e-06	0.0	0.0	0.0002186218070556877	0.0	0.0	0.00021869337575402542	0.0	800.6399999948537	88.88888823843509	0.0	4.120048121731332e-12	-7.105427357601002e-13	0.0	-2.692645223154387e-26	7.105427357601002e-14
0.815	88.88888823778802	0.0	0.00033917069939566537	80.34443148776664	0.0	-800.6399999948537	0.0	1.5326496041222866e-09	0.0	0.99999999999818	0.0	1.9078351748896032e-06	0.0	0.0	0.0002186218070556877	0.0	0.0	0.00021869381482579435	0.0	800.6399999948537	88.88888823843509	0.0	4.120048121731332e-12	-7.105427357601002e-13	0.0	-2.692645223154387e-26	7.105427357601002e-14
0.82	88.88888823778802	0.0	0.00033917069939566537	80.78887593221108	0.0	-800.6399999948537	0.0	1.5326496041222866e-09	0.0	0.99999999999818	0.0	1.9078351748896032e-06	0.0	0.0	0.0002186218070556877	0.0	0.0	0.00021869425389756328	0.0	800.6399999948537	88.88888823843509	0.0	4.120048121731332e-12	-7.105427357601002e-13	0.0	-2.692645223154387e-26	7.105427357601002e-14
0.825	88.88888823778802	0.0	0.00033917069939566537	81.23332037665553	0.0	-800.6399999948537	0.0	1.5326496041222866e-09	0.0	0.99999999999818	0.0	1.9078351748896032e-06	0.0	0.0	0.0002186218070556877	0.0	0.0	0.00021869469296933224	0.0	800.6399999948537	88.88888823843509	0.0	4.120048121731332e-12	-7.105427357601002e-13	0.0	-2.692645223154387e-26	7.105427357601002e-14
0.83	88.88888823778802	0.0	0.00033917069939566537	81.67776482109997	0.0	-800.6399999948537	0.0	1.5326496041222866e-09	0.0	0.99999999999818	0.0	1.9078351748896032e-06	0.0	0.0	0.0002186218070556877	0.0	0.0	0.00021869513204110118	0.0	800.6399999948537	88.88888823843509	0.0	4.120048121731332e-12	-7.105427357601002e-13	0.0	-2.692645223154387e-26	7.105427357601002e-14
0.835	88.88888823778802	0.0	0.00033917069939566537	82.12220926554441	0.0	-800.6399999948537	0.0	1.5326496041222866e-09	0.0	0.99999999999818	0.0	1.9078351748896032e-06	0.0	0.0	0.0002186218070556877	0.0	0.0	0.0002186955711128701	0.0	800.6399999948537	88.88888823843509	0.0	4.120048121731332e-12	-7.105427357601002e-13	0.0	-2.692645223154387e-26	7.105427357601002e-14
0.84	88.88888823778802	0.0	0.00033917069939566537	82.56665370998886	0.0	-800.6399999948537	0.0	1.5326496041222866e-09	0.0	0.99999999999818	0.0	1.9078351748896032e-06	0.0	0.0	0.0002186218070556877	0.0	0.0	0.00021869601018463907	0.0	800.6399999948537	88.88888823843509	0.0	4.120048121731332e-12	-7.105427357601002e-13	0.0	-2.692645223154387e-26	7.105427357601002e-14
0.845	88.88888823778802	0.0	0.00033917069939566537	83.0110981544333	0.0	-800.6399999948537	0.0	1.5326496041222866e-09	0.0	0.99999999999818	0.0	1.9078351748896032e-06	0.0	0.0	0.0002186218070556877	0.0	0.0	0.000218696449256408	0.0	800.6399999948537	88.88888823843509	0.0	4.120048121731332e-12	-7.105427357601002e-13	0.0	-2.692645223154387e-26	7.105427357601002e-14
0.85	88.88888823778802	0.0	0.00033917069939566537	83.45554259887776	0.0	-800.6399999948537	0.0	1.5326496041222866e-09	0.0	0.99999999999818	0.0	1.9078351748896032e-06	0.0	0.0	0.0002186218070556877	0.0	0.0	0.00021869688832817696	0.0	800.6399999948537	88.88888823843509	0.0	4.120048121731332e-12	-7.105427357601002e-13	0.0	-2.692645223154387e-26	7.105427357601002e-14
0.855	88.88888823778802	0.0	0.00033917069939566537	83.8999870433222	0.0	-800.6399999948537	0.0	1.5326496041222866e-09	0.0	0.99999999999818	0.0	1.9078351748896032e-06	0.0	0.0	0.0002186218070556877	0.0	0.0	0.0002186973273999459	0.0	800.6399999948537	88.88888823843509	0.0	4.120048121731332e-12	-7.105427357601002e-13	0.0	-2.692645223154387e-26	7.105427357601002e-14
0.86	88.88888823778802	0.0	0.00033917069939566537	84.34443148776664	0.0	-800.6399999948537	0.0	1.5326496041222866e-09	0.0	0.99999999999818	0.0	1.9078351748896032e-06	0.0	0.0	0.0002186218070556877	0.0	0.0	0.00021869776647171483	0.0	800.6399999948537	88.88888823843509	0.0	4.120048121731332e-12	-7.105427357601002e-13	0.0	-2.692645223154387e-26	7.105427357601002e-14
0.865	88.88888823778802	0.0	0.00033917069939566537	84.78887593221108	0.0	-800.6399999948537	0.0	1.5326496041222866e-09	0.0	0.99999999999818	0.0	1.9078351748896032e-06	0.0	0.0	0.0002186218070556877	0.0	0.0	0.0002186982055434838	0.0	800.6399999948537	88.88888823843509	0.0	4.120048121731332e-12	-7.105427357601002e-13	0.0	-2.692645223154387e-26	7.105427357601002e-14
0.87	88.88888823778802	0.0	0.00033917069939566537	85.23332037665553	0.0	-800.6399999948537	0.0	1.5326496041222866e-09	0.0	0.99999999999818	0.0	1.9078351748896032e-06	0.0	0.0	0.0002186218070556877	0.0	0.0	0.00021869864461525272	0.0	800.6399999948537	88.88888823843509	0.0	4.120048121731332e-12	-7.105427357601002e-13	0.0	-2.692645223154387e-26	7.105427357601002e-14
0.875	88.88888823778802	0.0	0.00033917069939566537	85.67776482109997	0.0	-800.6399999948537	0.0	1.5326496041222866e-09	0.0	0.99999999999818	0.0	1.9078351748896032e-06	0.0	0.0	0.0002186218070556877	0.0	0.0	0.00021869908368702166	0.0	800.6399999948537	88.88888823843509	0.0	4.120048121731332e-12	-7.105427357601002e-13	0.0	-2.692645223154387e-26	7.105427357601002e-14
0.88	88.88888823778802	0.0	0.00033917069939566537	86.12220926554441	0.0	-800.6399999948537	0.0	1.5326496041222866e-09	0.0	0.99999999999818	0.0	1.9078351748896032e-06	0.0	0.0	0.0002186218070556877	0.0	0.0	0.00021869952275879062	0.0	800.6399999948537	88.88888823843509	0.0	4.120048121731332e-12	-7.105427357601002e-13	0.0	-2.692645223154387e-26	7.105427357601002e-14
0.885	88.88888823778802	0.0	0.00033917069939566537	86.56665370998887	0.0	-800.6399999948537	0.0	1.5326496041222866e-09	0.0	0.99999999999818	0.0	1.9078351748896032e-06	0.0	0.0	0.0002186218070556877	0.0	0.0	0.00021869996183055955	0.0	800.6399999948537	88.88888823843509	0.0	4.120048121731332e-12	-7.105427357601002e-13	0.0	-2.692645223154387e-26	7.105427357601002e-14
0.89	88.88888823778802	0.0	0.00033917069939566537	87.01109815443331	0.0	-800.6399999948537	0.0	1.5326496041222866e-09	0.0	0.99999999999818	0.0	1.9078351748896032e-06	0.0	0.0	0.0002186218070556877	0.0	0.0	0.00021870040090232848	0.0	800.6399999948537	88.88888823843509	0.0	4.120048121731332e-12	-7.105427357601002e-13	0.0	-2.692645223154387e-26	7.105427357601002e-14
0.895	88.88888823778802	0.0	0.00033917069939566537	87.45554259887776	0.0	-800.6399999948537	0.0	1.5326496041222866e-09	0.0	0.99999999999818	0.0	1.9078351748896032e-06	0.0	0.0	0.0002186218070556877	0.0	0.0	0.00021870083997409744	0.0	800.6399999948537	88.88888823843509	0.0	4.120048121731332e-12	-7.105427357601002e-13	0.0	-2.692645223154387e-26	7.105427357601002e-14
0.9	88.88888823778802	0.0	0.00033917069939566537	87.8999870433222	0.0	-800.6399999948537	0.0	1.5326496041222866e-09	0.0	0.99999999999818	0.0	1.9078351748896032e-06	0.0	0.0	0.0002186218070556877	0.0	0.0	0.00021870127904586638	0.0	800.6399999948537	88.88888823843509	0.0	4.120048121731332e-12	-7.105427357601002e-13	0.0	-2.692645223154387e-26	7.105427357601002e-14
0.905	88.88888823778802	0.0	0.00033917069939566537	88.34443148776664	0.0	-800.6399999948537	0.0	1.5326496041222866e-09	0.0	0.99999999999818	0.0	1.9078351748896032e-06	0.0	0.0	0.0002186218070556877	0.0	0.0	0.00021870171811763534	0.0	800.6399999948537	88.88888823843509	0.0	4.120048121731332e-12	-7.105427357601002e-13	0.0	-2.692645223154387e-26	7.105427357601002e-14
0.91	88.88888823778802	0.0	0.00033917069939566537	88.78887593221108	0.0	-800.6399999948537	0.0	1.5326496041222866e-09	0.0	0.99999999999818	0.0	1.9078351748896032e-06	0.0	0.0	0.0002186218070556877	0.0	0.0	0.00021870215718940427	0.0	800.6399999948537	88.88888823843509	0.0	4.120048121731332e-12	-7.105427357601002e-13	0.0	-2.692645223154387e-26	7.105427357601002e-14
0.915	88.88888823778802	0.0	0.00033917069939566537	89.23332037665553	0.0	-800.6399999948537	0.0	1.5326496041222866e-09	0.0	0.99999999999818	0.0	1.9078351748896032e-06	0.0	0.0	0.0002186218070556877	0.0	0.0	0.0002187025962611732	0.0	800.6399999948537	88.88888823843509	0.0	4.120048121731332e-12	-7.105427357601002e-13	0.0	-2.692645223154387e-26	7.105427357601002e-14
0.92	88.88888823778802	0.0	0.00033917069939566537	89.67776482109997	0.0	-800.6399999948537	0.0	1.5326496041222866e-09	0.0	0.99999999999818	0.0	1.9078351748896032e-06	0.0	0.0	0.0002186218070556877	0.0	0.0	0.00021870303533294216	0.0	800.6399999948537	88.88888823843509	0.0	4.120048121731332e-12	-7.105427357601002e-13	0.0	-2.692645223154387e-26	7.105427357601002e-14
0.925	88.88888823778802	0.0	0.00033917069939566537	90.12220926554443	0.0	-800.6399999948537	0.0	1.5326496041222866e-09	0.0	0.99999999999818	0.0	1.9078351748896032e-06	0.0	0.0	0.0002186218070556877	0.0	0.0	0.0002187034744047111	0.0	800.6399999948537	88.88888823843509	0.0	4.120048121731332e-12	-7.105427357601002e-13	0.0	-2.692645223154387e-26	7.105427357601002e-14
0.93	88.88888823778802	0.0	0.00033917069939566537	90.56665370998887	0.0	-800.6399999948537	0.0	1.5326496041222866e-09	0.0	0.99999999999818	0.0	1.9078351748896032e-06	0.0	0.0	0.0002186218070556877	0.0	0.0	0.00021870391347648003	0.0	800.6399999948537	88.88888823843509	0.0	4.120048121731332e-12	-7.105427357601002e-13	0.0	-2.692645223154387e-26	7.105427357601002e-14
0.935	88.88888823778802	0.0	0.00033917069939566537	91.01109815443331	0.0	-800.6399999948537	0.0	1.5326496041222866e-09	0.0	0.99999999999818	0.0	1.9078351748896032e-06	0.0	0.0	0.0002186218070556877	0.0	0.0	0.000218704352548249	0.0	800.6399999948537	88.88888823843509	0.0	4.120048121731332e-12	-7.105427357601002e-13	0.0	-2.692645223154387e-26	7.105427357601002e-14
0.94	88.88888823778802	0.0	0.00033917069939566537	91.45554259887774	0.0	-800.6399999948537	0.0	1.5326496041222866e-09	0.0	0.99999999999818	0.0	1.9078351748896032e-06	0.0	0.0	0.0002186218070556877	0.0	0.0	0.00021870479162001792	0.0	800.6399999948537	88.88888823843509	0.0	4.120048121731332e-12	-7.105427357601002e-13	0.0	-2.692645223154387e-26	7.105427357601002e-14
0.945	88.88888823778802	0.0	0.00033917069939566537	91.89998704332218	0.0	-800.6399999948537	0.0	1.5326496041222866e-09	0.0	0.99999999999818	0.0	1.9078351748896032e-06	0.0	0.0	0.0002186218070556877	0.0	0.0	0.00021870523069178685	0.0	800.6399999948537	88.88888823843509	0.0	4.120048121731332e-12	-7.105427357601002e-13	0.0	-2.692645223154387e-26	7.105427357601002e-14
0.95	88.88888823778802	0.0	0.00033917069939566537	92.34443148776664	0.0	-800.6399999948537	0.0	1.5326496041222866e-09	0.0	0.99999999999818	0.0	1.9078351748896032e-06	0.0	0.0	0.0002186218070556877	0.0	0.0	0.00021870566976355581	0.0	800.6399999948537	88.88888823843509	0.0	4.120048121731332e-12	-7.105427357601002e-13	0.0	-2.692645223154387e-26	7.105427357601002e-14
0.955	88.88888823778802	0.0	0.00033917069939566537	92.78887593221108	0.0	-800.6399999948537	0.0	1.5326496041222866e-09	0.0	0.99999999999818	0.0	1.9078351748896032e-06	0.0	0.0	0.0002186218070556877	0.0	0.0	0.00021870610883532475	0.0	800.6399999948537	88.88888823843509	0.0	4.120048121731332e-12	-7.105427357601002e-13	0.0	-2.692645223154387e-26	7.105427357601002e-14
0.96	88.88888823778802	0.0	0.00033917069939566537	93.23332037665553	0.0	-800.6399999948537	0.0	1.5326496041222866e-09	0.0	0.99999999999818	0.0	1.9078351748896032e-06	0.0	0.0	0.0002186218070556877	0.0	0.0	0.0002187065479070937	0.0	800.6399999948537	88.88888823843509	0.0	4.120048121731332e-12	-7.105427357601002e-13	0.0	-2.692645223154387e-26	7.105427357601002e-14
0.965	88.88888823778802	0.0	0.00033917069939566537	93.67776482109997	0.0	-800.6399999948537	0.0	1.5326496041222866e-09	0.0	0.99999999999818	0.0	1.9078351748896032e-06	0.0	0.0	0.0002186218070556877	0.0	0.0	0.00021870698697886264	0.0	800.6399999948537	88.88888823843509	0.0	4.120048121731332e-12	-7.105427357601002e-13	0.0	-2.692645223154387e-26	7.105427357601002e-14
0.97	88.88888823778802	0.0	0.00033917069939566537	94.12220926554441	0.0	-800.6399999948537	0.0	1.5326496041222866e-09	0.0	0.99999999999818	0.0	1.9078351748896032e-06	0.0	0.0	0.0002186218070556877	0.0	0.0	0.00021870742605063157	0.0	800.6399999948537	88.88888823843509	0.0	4.120048121731332e-12	-7.105427357601002e-13	0.0	-2.692645223154387e-26	7.105427357601002e-14
0.975	88.88888823778802	0.0	0.00033917069939566537	94.56665370998886	0.0	-800.6399999948537	0.0	1.5326496041222866e-09	0.0	0.99999999999818	0.0	1.9078351748896032e-06	0.0	0.0	0.0002186218070556877	0.0	0.0	0.00021870786512240053	0.0	800.6399999948537	88.88888823843509	0.0	4.120048121731332e-12	-7.105427357601002e-13	0.0	-2.692645223154387e-26	7.105427357601002e-14
0.98	88.88888823778802	0.0	0.00033917069939566537	95.0110981544333	0.0	-800.6399999948537	0.0	1.5326496041222866e-09	0.0	0.99999999999818	0.0	1.9078351748896032e-06	0.0	0.0	0.0002186218070556877	0.0	0.0	0.00021870830419416947	0.0	800.6399999948537	88.88888823843509	0.0	4.120048121731332e-12	-7.105427357601002e-13	0.0	-2.692645223154387e-26	7.105427357601002e-14
0.985	88.88888823778802	0.0	0.00033917069939566537	95.45554259887776	0.0	-800.6399999948537	0.0	1.5326496041222866e-09	0.0	0.99999999999818	0.0	1.9078351748896032e-06	0.0	0.0	0.0002186218070556877	0.0	0.0	0.0002187087432659384	0.0	800.6399999948537	88.88888823843509	0.0	4.120048121731332e-12	-7.105427357601002e-13	0.0	-2.692645223154387e-26	7.105427357601002e-14
0.99	88.88888823778802	0.0	0.00033917069939566537	95.8999870433222	0.0	-800.6399999948537	0.0	1.5326496041222866e-09	0.0	0.99999999999818	0.0	1.9078351748896032e-06	0.0	0.0	0.0002186218070556877	0.0	0.0	0.00021870918233770736	0.0	800.6399999948537	88.88888823843509	0.0	4.120048121731332e-12	-7.105427357601002e-13	0.0	-2.692645223154387e-26	7.105427357601002e-14
0.995	88.88888823778802	0.0	0.00033917069939566537	96.34443148776664	0.0	-800.6399999948537	0.0	1.5326496041222866e-09	0.0	0.99999999999818	0.0	1.9078351748896032e-06	0.0	0.0	0.0002186218070556877	0.0	0.0	0.0002187096214094763	0.0	800.6399999948537	88.88888823843509	0.0	4.120048121731332e-12	-7.105427357601002e-13	0.0	-2.692645223154387e-26	7.105427357601002e-14
1.0	88.88888823778802	0.0	0.00033917069939566537	96.78887593221108	0.0	-800.6399999948537	0.0	1.5326496041222866e-09	0.0	0.99999999999818	0.0	1.9078351748896032e-06	0.0	0.0	0.0002186218070556877	0.0	0.0	0.00021871006048124523	0.0	800.6399999948537	88.88888823843509	0.0	4.120048121731332e-12	-7.105427357601002e-13	0.0	-2.692645223154387e-26	7.105427357601002e-14
1.005	88.88888823778802	0.0	0.00033917069939566537	97.23332037665551	0.0	-800.6399999948537	0.0	1.5326496041222866e-09	0.0	0.99999999999818	0.0	1.9078351748896032e-06	0.0	0.0	0.0002186218070556877	0.0	0.0	0.0002187104995530142	0.0	800.6399999948537	88.88888823843509	0.0	4.120048121731332e-12	-7.105427357601002e-13	0.0	-2.692645223154387e-26	7.105427357601002e-14
1.01	88.88888823778802	0.0	0.00033917069939566537	97.67776482109997	0.0	-800.6399999948537	0.0	1.5326496041222866e-09	0.0	0.99999999999818	0.0	1.9078351748896032e-06	0.0	0.0	0.0002186218070556877	0.0	0.0	0.00021871093862478312	0.0	800.6399999948537	88.88888823843509	0.0	4.120048121731332e-12	-7.105427357601002e-13	0.0	-2.692645223154387e-26	7.105427357601002e-14
1.015	88.88888823778802	0.0	0.00033917069939566537	98.12220926554441	0.0	-800.6399999948537	0.0	1.5326496041222866e-09	0.0	0.99999999999818	0.0	1.9078351748896032e-06	0.0	0.0	0.0002186218070556877	0.0	0.0	0.00021871137769655208	0.0	800.6399999948537	88.88888823843509	0.0	4.120048121731332e-12	-7.105427357601002e-13	0.0	-2.692645223154387e-26	7.105427357601002e-14
1.02	88.88888823778802	0.0	0.00033917069939566537	98.56665370998887	0.0	-800.6399999948537	0.0	1.5326496041222866e-09	0.0	0.99999999999818	0.0	1.9078351748896032e-06	0.0	0.0	0.0002186218070556877	0.0	0.0	0.00021871181676832101	0.0	800.6399999948537	88.88888823843509	0.0	4.120048121731332e-12	-7.105427357601002e-13	0.0	-2.692645223154387e-26	7.105427357601002e-14
1.025	88.88888823778802	0.0	0.00033917069939566537	99.0110981544333	0.0	-800.6399999948537	0.0	1.5326496041222866e-09	0.0	0.99999999999818	0.0	1.9078351748896032e-06	0.0	0.0	0.0002186218070556877	0.0	0.0	0.00021871225584008995	0.0	800.6399999948537	88.88888823843509	0.0	4.120048121731332e-12	-7.105427357601002e-13	0.0	-2.692645223154387e-26	7.105427357601002e-14
1.03	88.88888823778802	0.0	0.00033917069939566537	99.45554259887776	0.0	-800.6399999948537	0.0	1.5326496041222866e-09	0.0	0.99999999999818	0.0	1.9078351748896032e-06	0.0	0.0	0.0002186218070556877	0.0	0.0	0.0002187126949118589	0.0	800.6399999948537	88.88888823843509	0.0	4.120048121731332e-12	-7.105427357601002e-13	0.0	-2.692645223154387e-26	7.105427357601002e-14
1.035	88.88888823778802	0.0	0.00033917069939566537	99.89998704332218	0.0	-800.6399999948537	0.0	1.5326496041222866e-09	0.0	0.99999999999818	0.0	1.9078351748896032e-06	0.0	0.0	0.0002186218070556877	0.0	0.0	0.00021871313398362784	0.0	800.6399999948537	88.88888823843509	0.0	4.120048121731332e-12	-7.105427357601002e-13	0.0	-2.692645223154387e-26	7.105427357601002e-14
1.04	88.88888823778802	0.0	0.00033917069939566537	100.34443148776664	0.0	-800.6399999948537	0.0	1.5326496041222866e-09	0.0	0.99999999999818	0.0	1.9078351748896032e-06	0.0	0.0	0.0002186218070556877	0.0	0.0	0.00021871357305539677	0.0	800.6399999948537	88.88888823843509	0.0	4.120048121731332e-12	-7.105427357601002e-13	0.0	-2.692645223154387e-26	7.105427357601002e-14
1.045	88.88888823778802	0.0	0.00033917069939566537	100.78887593221108	0.0	-800.6399999948537	0.0	1.5326496041222866e-09	0.0	0.99999999999818	0.0	1.9078351748896032e-06	0.0	0.0	0.0002186218070556877	0.0	0.0	0.00021871401212716573	0.0	800.6399999948537	88.88888823843509	0.0	4.120048121731332e-12	-7.105427357601002e-13	0.0	-2.692645223154387e-26	7.105427357601002e-14
1.05	88.88888823778802	0.0	0.00033917069939566537	101.23332037665553	0.0	-800.6399999948537	0.0	1.5326496041222866e-09	0.0	0.99999999999818	0.0	1.9078351748896032e-06	0.0	0.0	0.0002186218070556877	0.0	0.0	0.00021871445119893467	0.0	800.6399999948537	88.88888823843509	0.0	4.120048121731332e-12	-7.105427357601002e-13	0.0	-2.692645223154387e-26	7.105427357601002e-14
1.055	88.88888823778802	0.0	0.00033917069939566537	101.67776482109997	0.0	-800.6399999948537	0.0	1.5326496041222866e-09	0.0	0.99999999999818	0.0	1.9078351748896032e-06	0.0	0.0	0.0002186218070556877	0.0	0.0	0.00021871489027070363	0.0	800.6399999948537	88.88888823843509	0.0	4.120048121731332e-12	-7.105427357601002e-13	0.0	-2.692645223154387e-26	7.105427357601002e-14
1.06	88.88888823778802	0.0	0.00033917069939566537	102.12220926554443	0.0	-800.6399999948537	0.0	1.5326496041222866e-09	0.0	0.99999999999818	0.0	1.9078351748896032e-06	0.0	0.0	0.0002186218070556877	0.0	0.0	0.00021871532934247256	0.0	800.6399999948537	88.88888823843509	0.0	4.120048121731332e-12	-7.105427357601002e-13	0.0	-2.692645223154387e-26	7.105427357601002e-14
1.065	88.88888823778802	0.0	0.00033917069939566537	102.56665370998886	0.0	-800.6399999948537	0.0	1.5326496041222866e-09	0.0	0.99999999999818	0.0	1.9078351748896032e-06	0.0	0.0	0.0002186218070556877	0.0	0.0	0.0002187157684142415	0.0	800.6399999948537	88.88888823843509	0.0	4.120048121731332e-12	-7.105427357601002e-13	0.0	-2.692645223154387e-26	7.105427357601002e-14
1.07	88.88888823778802	0.0	0.00033917069939566537	103.01109815443331	0.0	-800.6399999948537	0.0	1.5326496041222866e-09	0.0	0.99999999999818	0.0	1.9078351748896032e-06	0.0	0.0	0.0002186218070556877	0.0	0.0	0.00021871620748601045	0.0	800.6399999948537	88.88888823843509	0.0	4.120048121731332e-12	-7.105427357601002e-13	0.0	-2.692645223154387e-26	7.105427357601002e-14
1.075	88.88888823778802	0.0	0.00033917069939566537	103.45554259887774	0.0	-800.6399999948537	0.0	1.5326496041222866e-09	0.0	0.99999999999818	0.0	1.9078351748896032e-06	0.0	0.0	0.0002186218070556877	0.0	0.0	0.0002187166465577794	0.0	800.6399999948537	88.88888823843509	0.0	4.120048121731332e-12	-7.105427357601002e-13	0.0	-2.692645223154387e-26	7.105427357601002e-14
1.08	88.88888823778802	0.0	0.00033917069939566537	103.8999870433222	0.0	-800.6399999948537	0.0	1.5326496041222866e-09	0.0	0.99999999999818	0.0	1.9078351748896032e-06	0.0	0.0	0.0002186218070556877	0.0	0.0	0.00021871708562954832	0.0	800.6399999948537	88.88888823843509	0.0	4.120048121731332e-12	-7.105427357601002e-13	0.0	-2.692645223154387e-26	7.105427357601002e-14
1.085	88.88888823778802	0.0	0.00033917069939566537	104.34443148776664	0.0	-800.6399999948537	0.0	1.5326496041222866e-09	0.0	0.99999999999818	0.0	1.9078351748896032e-06	0.0	0.0	0.0002186218070556877	0.0	0.0	0.00021871752470131728	0.0	800.6399999948537	88.88888823843509	0.0	4.120048121731332e-12	-7.105427357601002e-13	0.0	-2.692645223154387e-26	7.105427357601002e-14
1.09	88.88888823778802	0.0	0.00033917069939566537	104.78887593221108	0.0	-800.6399999948537	0.0	1.5326496041222866e-09	0.0	0.99999999999818	0.0	1.9078351748896032e-06	0.0	0.0	0.0002186218070556877	0.0	0.0	0.0002187179637730862	0.0	800.6399999948537	88.88888823843509	0.0	4.120048121731332e-12	-7.105427357601002e-13	0.0	-2.692645223154387e-26	7.105427357601002e-14
1.095	88.88888823778802	0.0	0.00033917069939566537	105.23332037665553	0.0	-800.6399999948537	0.0	1.5326496041222866e-09	0.0	0.99999999999818	0.0	1.9078351748896032e-06	0.0	0.0	0.0002186218070556877	0.0	0.0	0.00021871840284485515	0.0	800.6399999948537	88.88888823843509	0.0	4.120048121731332e-12	-7.105427357601002e-13	0.0	-2.692645223154387e-26	7.105427357601002e-14
1.1	88.88888823778802	0.0	0.00033917069939566537	105.67776482109998	0.0	-800.6399999948537	0.0	1.5326496041222866e-09	0.0	0.99999999999818	0.0	1.9078351748896032e-06	0.0	0.0	0.0002186218070556877	0.0	0.0	0.0002187188419166241	0.0	800.6399999948537	88.88888823843509	0.0	4.120048121731332e-12	-7.105427357601002e-13	0.0	-2.692645223154387e-26	7.105427357601002e-14
1.105	88.88888823778802	0.0	0.00033917069939566537	106.12220926554441	0.0	-800.6399999948537	0.0	1.5326496041222866e-09	0.0	0.99999999999818	0.0	1.9078351748896032e-06	0.0	0.0	0.0002186218070556877	0.0	0.0	0.00021871928098839304	0.0	800.6399999948537	88.88888823843509	0.0	4.120048121731332e-12	-7.105427357601002e-13	0.0	-2.692645223154387e-26	7.105427357601002e-14
1.11	88.88888823778802	0.0	0.00033917069939566537	106.56665370998887	0.0	-800.6399999948537	0.0	1.5326496041222866e-09	0.0	0.99999999999818	0.0	1.9078351748896032e-06	0.0	0.0	0.0002186218070556877	0.0	0.0	0.000218719720060162	0.0	800.6399999948537	88.88888823843509	0.0	4.120048121731332e-12	-7.105427357601002e-13	0.0	-2.692645223154387e-26	7.105427357601002e-14
1.115	88.88888823778802	0.0	0.00033917069939566537	107.0110981544333	0.0	-800.6399999948537	0.0	1.5326496041222866e-09	0.0	0.99999999999818	0.0	1.9078351748896032e-06	0.0	0.0	0.0002186218070556877	0.0	0.0	0.00021872015913193093	0.0	800.6399999948537	88.88888823843509	0.0	4.120048121731332e-12	-7.105427357601002e-13	0.0	-2.692645223154387e-26	7.105427357601002e-14
1.12	88.88888823778802	0.0	0.00033917069939566537	107.45554259887776	0.0	-800.6399999948537	0.0	1.5326496041222866e-09	0.0	0.99999999999818	0.0	1.9078351748896032e-06	0.0	0.0	0.0002186218070556877	0.0	0.0	0.00021872059820369987	0.0	800.6399999948537	88.88888823843509	0.0	4.120048121731332e-12	-7.105427357601002e-13	0.0	-2.692645223154387e-26	7.105427357601002e-14
1.125	88.88888823778802	0.0	0.00033917069939566537	107.8999870433222	0.0	-800.6399999948537	0.0	1.5326496041222866e-09	0.0	0.99999999999818	0.0	1.9078351748896032e-06	0.0	0.0	0.0002186218070556877	0.0	0.0	0.00021872103727546883	0.0	800.6399999948537	88.88888823843509	0.0	4.120048121731332e-12	-7.105427357601002e-13	0.0	-2.692645223154387e-26	7.105427357601002e-14
1.13	88.88888823778802	0.0	0.00033917069939566537	108.34443148776663	0.0	-800.6399999948537	0.0	1.5326496041222866e-09	0.0	0.99999999999818	0.0	1.9078351748896032e-06	0.0	0.0	0.0002186218070556877	0.0	0.0	0.00021872147634723776	0.0	800.6399999948537	88.88888823843509	0.0	4.120048121731332e-12	-7.105427357601002e-13	0.0	-2.692645223154387e-26	7.105427357601002e-14
1.135	88.88888823778802	0.0	0.00033917069939566537	108.78887593221108	0.0	-800.6399999948537	0.0	1.5326496041222866e-09	0.0	0.99999999999818	0.0	1.9078351748896032e-06	0.0	0.0	0.0002186218070556877	0.0	0.0	0.0002187219154190067	0.0	800.6399999948537	88.88888823843509	0.0	4.120048121731332e-12	-7.105427357601002e-13	0.0	-2.692645223154387e-26	7.105427357601002e-14
1.14	88.88888823778802	0.0	0.00033917069939566537	109.23332037665551	0.0	-800.6399999948537	0.0	1.5326496041222866e-09	0.0	0.99999999999818	0.0	1.9078351748896032e-06	0.0	0.0	0.0002186218070556877	0.0	0.0	0.00021872235449077565	0.0	800.6399999948537	88.88888823843509	0.0	4.120048121731332e-12	-7.105427357601002e-13	0.0	-2.692645223154387e-26	7.105427357601002e-14
1.145	88.88888823778802	0.0	0.00033917069939566537	109.67776482109997	0.0	-800.6399999948537	0.0	1.5326496041222866e-09	0.0	0.99999999999818	0.0	1.9078351748896032e-06	0.0	0.0	0.0002186218070556877	0.0	0.0	0.00021872279356254459	0.0	800.6399999948537	88.88888823843509	0.0	4.120048121731332e-12	-7.105427357601002e-13	0.0	-2.692645223154387e-26	7.105427357601002e-14
1.15	88.88888823778802	0.0	0.00033917069939566537	110.12220926554441	0.0	-800.6399999948537	0.0	1.5326496041222866e-09	0.0	0.99999999999818	0.0	1.9078351748896032e-06	0.0	0.0	0.0002186218070556877	0.0	0.0	0.00021872323263431352	0.0	800.6399999948537	88.88888823843509	0.0	4.120048121731332e-12	-7.105427357601002e-13	0.0	-2.692645223154387e-26	7.105427357601002e-14
1.155	88.88888823778802	0.0	0.00033917069939566537	110.56665370998887	0.0	-800.6399999948537	0.0	1.5326496041222866e-09	0.0	0.99999999999818	0.0	1.9078351748896032e-06	0.0	0.0	0.0002186218070556877	0.0	0.0	0.00021872367170608248	0.0	800.6399999948537	88.88888823843509	0.0	4.120048121731332e-12	-7.105427357601002e-13	0.0	-2.692645223154387e-26	7.105427357601002e-14
1.16	88.88888823778802	0.0	0.00033917069939566537	111.0110981544333	0.0	-800.6399999948537	0.0	1.5326496041222866e-09	0.0	0.99999999999818	0.0	1.9078351748896032e-06	0.0	0.0	0.0002186218070556877	0.0	0.0	0.0002187241107778514	0.0	800.6399999948537	88.88888823843509	0.0	4.120048121731332e-12	-7.105427357601002e-13	0.0	-2.692645223154387e-26	7.105427357601002e-14
1.165	88.88888823778802	0.0	0.00033917069939566537	111.45554259887776	0.0	-800.6399999948537	0.0	1.5326496041222866e-09	0.0	0.99999999999818	0.0	1.9078351748896032e-06	0.0	0.0	0.0002186218070556877	0.0	0.0	0.00021872454984962037	0.0	800.6399999948537	88.88888823843509	0.0	4.120048121731332e-12	-7.105427357601002e-13	0.0	-2.692645223154387e-26	7.105427357601002e-14
1.17	88.88888823778802	0.0	0.00033917069939566537	111.89998704332218	0.0	-800.6399999948537	0.0	1.5326496041222866e-09	0.0	0.99999999999818	0.0	1.9078351748896032e-06	0.0	0.0	0.0002186218070556877	0.0	0.0	0.0002187249889213893	0.0	800.6399999948537	88.88888823843509	0.0	4.120048121731332e-12	-7.105427357601002e-13	0.0	-2.692645223154387e-26	7.105427357601002e-14
1.175	88.88888823778802	0.0	0.00033917069939566537	112.34443148776664	0.0	-800.6399999948537	0.0	1.5326496041222866e-09	0.0	0.99999999999818	0.0	1.9078351748896032e-06	0.0	0.0	0.0002186218070556877	0.0	0.0	0.00021872542799315824	0.0	800.6399999948537	88.88888823843509	0.0	4.120048121731332e-12	-7.105427357601002e-13	0.0	-2.692645223154387e-26	7.105427357601002e-14
1.18	88.88888823778802	0.0	0.00033917069939566537	112.78887593221108	0.0	-800.6399999948537	0.0	1.5326496041222866e-09	0.0	0.99999999999818	0.0	1.9078351748896032e-06	0.0	0.0	0.0002186218070556877	0.0	0.0	0.0002187258670649272	0.0	800.6399999948537	88.88888823843509	0.0	4.120048121731332e-12	-7.105427357601002e-13	0.0	-2.692645223154387e-26	7.105427357601002e-14
1.185	88.88888823778802	0.0	0.00033917069939566537	113.23332037665553	0.0	-800.6399999948537	0.0	1.5326496041222866e-09	0.0	0.99999999999818	0.0	1.9078351748896032e-06	0.0	0.0	0.0002186218070556877	0.0	0.0	0.00021872630613669613	0.0	800.6399999948537	88.88888823843509	0.0	4.120048121731332e-12	-7.105427357601002e-13	0.0	-2.692645223154387e-26	7.105427357601002e-14
1.19	88.88888823778802	0.0	0.00033917069939566537	113.67776482109997	0.0	-800.6399999948537	0.0	1.5326496041222866e-09	0.0	0.99999999999818	0.0	1.9078351748896032e-06	0.0	0.0	0.0002186218070556877	0.0	0.0	0.00021872674520846506	0.0	800.6399999948537	88.88888823843509	0.0	4.120048121731332e-12	-7.105427357601002e-13	0.0	-2.692645223154387e-26	7.105427357601002e-14
1.195	88.88888823778802	0.0	0.00033917069939566537	114.12220926554443	0.0	-800.6399999948537	0.0	1.5326496041222866e-09	0.0	0.99999999999818	0.0	1.9078351748896032e-06	0.0	0.0	0.0002186218070556877	0.0	0.0	0.00021872718428023403	0.0	800.6399999948537	88.88888823843509	0.0	4.120048121731332e-12	-7.105427357601002e-13	0.0	-2.692645223154387e-26	7.105427357601002e-14
1.2	88.88888823778802	0.0	0.00033917069939566537	114.56665370998886	0.0	-800.6399999948537	0.0	1.5326496041222866e-09	0.0	0.99999999999818	0.0	1.9078351748896032e-06	0.0	0.0	0.0002186218070556877	0.0	0.0	0.00021872762335200296	0.0	800.6399999948537	88.88888823843509	0.0	4.120048121731332e-12	-7.105427357601002e-13	0.0	-2.692645223154387e-26	7.105427357601002e-14
1.205	88.88888823778802	0.0	0.00033917069939566537	115.01109815443331	0.0	-800.6399999948537	0.0	1.5326496041222866e-09	0.0	0.99999999999818	0.0	1.9078351748896032e-06	0.0	0.0	0.0002186218070556877	0.0	0.0	0.0002187280624237719	0.0	800.6399999948537	88.88888823843509	0.0	4.120048121731332e-12	-7.105427357601002e-13	0.0	-2.692645223154387e-26	7.105427357601002e-14
1.21	88.88888823778802	0.0	0.00033917069939566537	115.45554259887774	0.0	-800.6399999948537	0.0	1.5326496041222866e-09	0.0	0.99999999999818	0.0	1.9078351748896032e-06	0.0	0.0	0.0002186218070556877	0.0	0.0	0.00021872850149554085	0.0	800.6399999948537	88.88888823843509	0.0	4.120048121731332e-12	-7.105427357601002e-13	0.0	-2.692645223154387e-26	7.105427357601002e-14
1.215	88.88888823778802	0.0	0.00033917069939566537	115.8999870433222	0.0	-800.6399999948537	0.0	1.5326496041222866e-09	0.0	0.99999999999818	0.0	1.9078351748896032e-06	0.0	0.0	0.0002186218070556877	0.0	0.0	0.00021872894056730978	0.0	800.6399999948537	88.88888823843509	0.0	4.120048121731332e-12	-7.105427357601002e-13	0.0	-2.692645223154387e-26	7.105427357601002e-14
1.22	88.88888823778802	0.0	0.00033917069939566537	116.34443148776664	0.0	-800.6399999948537	0.0	1.5326496041222866e-09	0.0	0.99999999999818	0.0	1.9078351748896032e-06	0.0	0.0	0.0002186218070556877	0.0	0.0	0.00021872937963907874	0.0	800.6399999948537	88.88888823843509	0.0	4.120048121731332e-12	-7.105427357601002e-13	0.0	-2.692645223154387e-26	7.105427357601002e-14
1.225	88.88888823778802	0.0	0.00033917069939566537	116.7888759322111	0.0	-800.6399999948537	0.0	1.5326496041222866e-09	0.0	0.99999999999818	0.0	1.9078351748896032e-06	0.0	0.0	0.0002186218070556877	0.0	0.0	0.00021872981871084768	0.0	800.6399999948537	88.88888823843509	0.0	4.120048121731332e-12	-7.105427357601002e-13	0.0	-2.692645223154387e-26	7.105427357601002e-14
1.23	88.88888823778802	0.0	0.00033917069939566537	117.23332037665553	0.0	-800.6399999948537	0.0	1.5326496041222866e-09	0.0	0.99999999999818	0.0	1.9078351748896032e-06	0.0	0.0	0.0002186218070556877	0.0	0.0	0.0002187302577826166	0.0	800.6399999948537	88.88888823843509	0.0	4.120048121731332e-12	-7.105427357601002e-13	0.0	-2.692645223154387e-26	7.105427357601002e-14
1.235	88.88888823778802	0.0	0.00033917069939566537	117.67776482109998	0.0	-800.6399999948537	0.0	1.5326496041222866e-09	0.0	0.99999999999818	0.0	1.9078351748896032e-06	0.0	0.0	0.0002186218070556877	0.0	0.0	0.00021873069685438557	0.0	800.6399999948537	88.88888823843509	0.0	4.120048121731332e-12	-7.105427357601002e-13	0.0	-2.692645223154387e-26	7.105427357601002e-14
1.24	88.88888823778802	0.0	0.00033917069939566537	118.12220926554441	0.0	-800.6399999948537	0.0	1.5326496041222866e-09	0.0	0.99999999999818	0.0	1.9078351748896032e-06	0.0	0.0	0.0002186218070556877	0.0	0.0	0.0002187311359261545	0.0	800.6399999948537	88.88888823843509	0.0	4.120048121731332e-12	-7.105427357601002e-13	0.0	-2.692645223154387e-26	7.105427357601002e-14
1.245	88.88888823778802	0.0	0.00033917069939566537	118.56665370998887	0.0	-800.6399999948537	0.0	1.5326496041222866e-09	0.0	0.99999999999818	0.0	1.9078351748896032e-06	0.0	0.0	0.0002186218070556877	0.0	0.0	0.00021873157499792344	0.0	800.6399999948537	88.88888823843509	0.0	4.120048121731332e-12	-7.105427357601002e-13	0.0	-2.692645223154387e-26	7.105427357601002e-14
1.25	88.88888823778802	0.0	0.00033917069939566537	119.01109815443331	0.0	-800.6399999948537	0.0	1.5326496041222866e-09	0.0	0.99999999999818	0.0	1.9078351748896032e-06	0.0	0.0	0.0002186218070556877	0.0	0.0	0.0002187320140696924	0.0	800.6399999948537	88.88888823843509	0.0	4.120048121731332e-12	-7.105427357601002e-13	0.0	-2.692645223154387e-26	7.105427357601002e-14
1.255	88.88888823778802	0.0	0.00033917069939566537	119.45554259887774	0.0	-800.6399999948537	0.0	1.5326496041222866e-09	0.0	0.99999999999818	0.0	1.9078351748896032e-06	0.0	0.0	0.0002186218070556877	0.0	0.0	0.00021873245314146133	0.0	800.6399999948537	88.88888823843509	0.0	4.120048121731332e-12	-7.105427357601002e-13	0.0	-2.692645223154387e-26	7.105427357601002e-14
1.26	88.88888823778802	0.0	0.00033917069939566537	119.8999870433222	0.0	-800.6399999948537	0.0	1.5326496041222866e-09	0.0	0.99999999999818	0.0	1.9078351748896032e-06	0.0	0.0	0.0002186218070556877	0.0	0.0	0.0002187328922132303	0.0	800.6399999948537	88.88888823843509	0.0	4.120048121731332e-12	-7.105427357601002e-13	0.0	-2.692645223154387e-26	7.105427357601002e-14
1.265	88.88888823778802	0.0	0.00033917069939566537	120.34443148776663	0.0	-800.6399999948537	0.0	1.5326496041222866e-09	0.0	0.99999999999818	0.0	1.9078351748896032e-06	0.0	0.0	0.0002186218070556877	0.0	0.0	0.00021873333128499922	0.0	800.6399999948537	88.88888823843509	0.0	4.120048121731332e-12	-7.105427357601002e-13	0.0	-2.692645223154387e-26	7.105427357601002e-14
1.27	88.88888823778802	0.0	0.00033917069939566537	120.78887593221108	0.0	-800.6399999948537	0.0	1.5326496041222866e-09	0.0	0.99999999999818	0.0	1.9078351748896032e-06	0.0	0.0	0.0002186218070556877	0.0	0.0	0.00021873377035676816	0.0	800.6399999948537	88.88888823843509	0.0	4.120048121731332e-12	-7.105427357601002e-13	0.0	-2.692645223154387e-26	7.105427357601002e-14
1.275	88.88888823778802	0.0	0.00033917069939566537	121.23332037665551	0.0	-800.6399999948537	0.0	1.5326496041222866e-09	0.0	0.99999999999818	0.0	1.9078351748896032e-06	0.0	0.0	0.0002186218070556877	0.0	0.0	0.00021873420942853712	0.0	800.6399999948537	88.88888823843509	0.0	4.120048121731332e-12	-7.105427357601002e-13	0.0	-2.692645223154387e-26	7.105427357601002e-14
1.28	88.88888823778802	0.0	0.00033917069939566537	121.67776482109997	0.0	-800.6399999948537	0.0	1.5326496041222866e-09	0.0	0.99999999999818	0.0	1.9078351748896032e-06	0.0	0.0	0.0002186218070556877	0.0	0.0	0.00021873464850030605	0.0	800.6399999948537	88.88888823843509	0.0	4.120048121731332e-12	-7.105427357601002e-13	0.0	-2.692645223154387e-26	7.105427357601002e-14
1.285	88.88888823778802	0.0	0.00033917069939566537	122.12220926554441	0.0	-800.6399999948537	0.0	1.5326496041222866e-09	0.0	0.99999999999818	0.0	1.9078351748896032e-06	0.0	0.0	0.0002186218070556877	0.0	0.0	0.00021873508757207498	0.0	800.6399999948537	88.88888823843509	0.0	4.120048121731332e-12	-7.105427357601002e-13	0.0	-2.692645223154387e-26	7.105427357601002e-14
1.29	88.88888823778802	0.0	0.00033917069939566537	122.56665370998887	0.0	-800.6399999948537	0.0	1.5326496041222866e-09	0.0	0.99999999999818	0.0	1.9078351748896032e-06	0.0	0.0	0.0002186218070556877	0.0	0.0	0.00021873552664384394	0.0	800.6399999948537	88.88888823843509	0.0	4.120048121731332e-12	-7.105427357601002e-13	0.0	-2.692645223154387e-26	7.105427357601002e-14
1.295	88.88888823778802	0.0	0.00033917069939566537	123.0110981544333	0.0	-800.6399999948537	0.0	1.5326496041222866e-09	0.0	0.99999999999818	0.0	1.9078351748896032e-06	0.0	0.0	0.0002186218070556877	0.0	0.0	0.00021873596571561288	0.0	800.6399999948537	88.88888823843509	0.0	4.120048121731332e-12	-7.105427357601002e-13	0.0	-2.692645223154387e-26	7.105427357601002e-14
1.3	88.88888823778802	0.0	0.00033917069939566537	123.45554259887776	0.0	-800.6399999948537	0.0	1.5326496041222866e-09	0.0	0.99999999999818	0.0	1.9078351748896032e-06	0.0	0.0	0.0002186218070556877	0.0	0.0	0.0002187364047873818	0.0	800.6399999948537	88.88888823843509	0.0	4.120048121731332e-12	-7.105427357601002e-13	0.0	-2.692645223154387e-26	7.105427357601002e-14
1.305	88.88888823778802	0.0	0.00033917069939566537	123.89998704332218	0.0	-800.6399999948537	0.0	1.5326496041222866e-09	0.0	0.99999999999818	0.0	1.9078351748896032e-06	0.0	0.0	0.0002186218070556877	0.0	0.0	0.00021873684385915077	0.0	800.6399999948537	88.88888823843509	0.0	4.120048121731332e-12	-7.105427357601002e-13	0.0	-2.692645223154387e-26	7.105427357601002e-14
1.31	88.88888823778802	0.0	0.00033917069939566537	124.34443148776664	0.0	-800.6399999948537	0.0	1.5326496041222866e-09	0.0	0.99999999999818	0.0	1.9078351748896032e-06	0.0	0.0	0.0002186218070556877	0.0	0.0	0.0002187372829309197	0.0	800.6399999948537	88.88888823843509	0.0	4.120048121731332e-12	-7.105427357601002e-13	0.0	-2.692645223154387e-26	7.105427357601002e-14
1.315	88.88888823778802	0.0	0.00033917069939566537	124.78887593221108	0.0	-800.6399999948537	0.0	1.5326496041222866e-09	0.0	0.99999999999818	0.0	1.9078351748896032e-06	0.0	0.0	0.0002186218070556877	0.0	0.0	0.00021873772200268866	0.0	800.6399999948537	88.88888823843509	0.0	4.120048121731332e-12	-7.105427357601002e-13	0.0	-2.692645223154387e-26	7.105427357601002e-14
1.32	88.88888823778802	0.0	0.00033917069939566537	125.23332037665553	0.0	-800.6399999948537	0.0	1.5326496041222866e-09	0.0	0.99999999999818	0.0	1.9078351748896032e-06	0.0	0.0	0.0002186218070556877	0.0	0.0	0.0002187381610744576	0.0	800.6399999948537	88.88888823843509	0.0	4.120048121731332e-12	-7.105427357601002e-13	0.0	-2.692645223154387e-26	7.105427357601002e-14
1.325	88.88888823778802	0.0	0.00033917069939566537	125.67776482109997	0.0	-800.6399999948537	0.0	1.5326496041222866e-09	0.0	0.99999999999818	0.0	1.9078351748896032e-06	0.0	0.0	0.0002186218070556877	0.0	0.0	0.00021873860014622653	0.0	800.6399999948537	88.88888823843509	0.0	4.120048121731332e-12	-7.105427357601002e-13	0.0	-2.692645223154387e-26	7.105427357601002e-14
1.33	88.88888823778802	0.0	0.00033917069939566537	126.12220926554443	0.0	-800.6399999948537	0.0	1.5326496041222866e-09	0.0	0.99999999999818	0.0	1.9078351748896032e-06	0.0	0.0	0.0002186218070556877	0.0	0.0	0.0002187390392179955	0.0	800.6399999948537	88.88888823843509	0.0	4.120048121731332e-12	-7.105427357601002e-13	0.0	-2.692645223154387e-26	7.105427357601002e-14
1.335	88.88888823778802	0.0	0.00033917069939566537	126.56665370998886	0.0	-800.6399999948537	0.0	1.5326496041222866e-09	0.0	0.99999999999818	0.0	1.9078351748896032e-06	0.0	0.0	0.0002186218070556877	0.0	0.0	0.00021873947828976442	0.0	800.6399999948537	88.88888823843509	0.0	4.120048121731332e-12	-7.105427357601002e-13	0.0	-2.692645223154387e-26	7.105427357601002e-14
1.34	88.88888823778802	0.0	0.00033917069939566537	127.01109815443331	0.0	-800.6399999948537	0.0	1.5326496041222866e-09	0.0	0.99999999999818	0.0	1.9078351748896032e-06	0.0	0.0	0.0002186218070556877	0.0	0.0	0.00021873991736153336	0.0	800.6399999948537	88.88888823843509	0.0	4.120048121731332e-12	-7.105427357601002e-13	0.0	-2.692645223154387e-26	7.105427357601002e-14
1.345	88.88888823778802	0.0	0.00033917069939566537	127.45554259887774	0.0	-800.6399999948537	0.0	1.5326496041222866e-09	0.0	0.99999999999818	0.0	1.9078351748896032e-06	0.0	0.0	0.0002186218070556877	0.0	0.0	0.00021874035643330232	0.0	800.6399999948537	88.88888823843509	0.0	4.120048121731332e-12	-7.105427357601002e-13	0.0	-2.692645223154387e-26	7.105427357601002e-14
1.35	88.88888823778802	0.0	0.00033917069939566537	127.8999870433222	0.0	-800.6399999948537	0.0	1.5326496041222866e-09	0.0	0.99999999999818	0.0	1.9078351748896032e-06	0.0	0.0	0.0002186218070556877	0.0	0.0	0.00021874079550507125	0.0	800.6399999948537	88.88888823843509	0.0	4.120048121731332e-12	-7.105427357601002e-13	0.0	-2.692645223154387e-26	7.105427357601002e-14
1.355	88.88888823778802	0.0	0.00033917069939566537	128.34443148776666	0.0	-800.6399999948537	0.0	1.5326496041222866e-09	0.0	0.99999999999818	0.0	1.9078351748896032e-06	0.0	0.0	0.0002186218070556877	0.0	0.0	0.00021874123457684018	0.0	800.6399999948537	88.88888823843509	0.0	4.120048121731332e-12	-7.105427357601002e-13	0.0	-2.692645223154387e-26	7.105427357601002e-14
1.36	88.88888823778802	0.0	0.00033917069939566537	128.7888759322111	0.0	-800.6399999948537	0.0	1.5326496041222866e-09	0.0	0.99999999999818	0.0	1.9078351748896032e-06	0.0	0.0	0.0002186218070556877	0.0	0.0	0.00021874167364860914	0.0	800.6399999948537	88.88888823843509	0.0	4.120048121731332e-12	-7.105427357601002e-13	0.0	-2.692645223154387e-26	7.105427357601002e-14
1.365	88.88888823778802	0.0	0.00033917069939566537	129.2333203766555	0.0	-800.6399999948537	0.0	1.5326496041222866e-09	0.0	0.99999999999818	0.0	1.9078351748896032e-06	0.0	0.0	0.0002186218070556877	0.0	0.0	0.00021874211272037808	0.0	800.6399999948537	88.88888823843509	0.0	4.120048121731332e-12	-7.105427357601002e-13	0.0	-2.692645223154387e-26	7.105427357601002e-14
1.37	88.88888823778802	0.0	0.00033917069939566537	129.67776482109997	0.0	-800.6399999948537	0.0	1.5326496041222866e-09	0.0	0.99999999999818	0.0	1.9078351748896032e-06	0.0	0.0	0.0002186218070556877	0.0	0.0	0.00021874255179214704	0.0	800.6399999948537	88.88888823843509	0.0	4.120048121731332e-12	-7.105427357601002e-13	0.0	-2.692645223154387e-26	7.105427357601002e-14
1.375	88.88888823778802	0.0	0.00033917069939566537	130.12220926554443	0.0	-800.6399999948537	0.0	1.5326496041222866e-09	0.0	0.99999999999818	0.0	1.9078351748896032e-06	0.0	0.0	0.0002186218070556877	0.0	0.0	0.00021874299086391597	0.0	800.6399999948537	88.88888823843509	0.0	4.120048121731332e-12	-7.105427357601002e-13	0.0	-2.692645223154387e-26	7.105427357601002e-14
1.38	88.88888823778802	0.0	0.00033917069939566537	130.56665370998886	0.0	-800.6399999948537	0.0	1.5326496041222866e-09	0.0	0.99999999999818	0.0	1.9078351748896032e-06	0.0	0.0	0.0002186218070556877	0.0	0.0	0.0002187434299356849	0.0	800.6399999948537	88.88888823843509	0.0	4.120048121731332e-12	-7.105427357601002e-13	0.0	-2.692645223154387e-26	7.105427357601002e-14
1.385	88.88888823778802	0.0	0.00033917069939566537	131.0110981544333	0.0	-800.6399999948537	0.0	1.5326496041222866e-09	0.0	0.99999999999818	0.0	1.9078351748896032e-06	0.0	0.0	0.0002186218070556877	0.0	0.0	0.00021874386900745386	0.0	800.6399999948537	88.88888823843509	0.0	4.120048121731332e-12	-7.105427357601002e-13	0.0	-2.692645223154387e-26	7.105427357601002e-14
1.39	88.88888823778802	0.0	0.00033917069939566537	131.45554259887774	0.0	-800.6399999948537	0.0	1.5326496041222866e-09	0.0	0.99999999999818	0.0	1.9078351748896032e-06	0.0	0.0	0.0002186218070556877	0.0	0.0	0.0002187443080792228	0.0	800.6399999948537	88.88888823843509	0.0	4.120048121731332e-12	-7.105427357601002e-13	0.0	-2.692645223154387e-26	7.105427357601002e-14
1.395	88.88888823778802	0.0	0.00033917069939566537	131.8999870433222	0.0	-800.6399999948537	0.0	1.5326496041222866e-09	0.0	0.99999999999818	0.0	1.9078351748896032e-06	0.0	0.0	0.0002186218070556877	0.0	0.0	0.00021874474715099173	0.0	800.6399999948537	88.88888823843509	0.0	4.120048121731332e-12	-7.105427357601002e-13	0.0	-2.692645223154387e-26	7.105427357601002e-14
1.4	88.88888823778802	0.0	0.00033917069939566537	132.34443148776663	0.0	-800.6399999948537	0.0	1.5326496041222866e-09	0.0	0.99999999999818	0.0	1.9078351748896032e-06	0.0	0.0	0.0002186218070556877	0.0	0.0	0.0002187451862227607	0.0	800.6399999948537	88.88888823843509	0.0	4.120048121731332e-12	-7.105427357601002e-13	0.0	-2.692645223154387e-26	7.105427357601002e-14
1.405	88.88888823778802	0.0	0.00033917069939566537	132.78887593221108	0.0	-800.6399999948537	0.0	1.5326496041222866e-09	0.0	0.99999999999818	0.0	1.9078351748896032e-06	0.0	0.0	0.0002186218070556877	0.0	0.0	0.00021874562529452962	0.0	800.6399999948537	88.88888823843509	0.0	4.120048121731332e-12	-7.105427357601002e-13	0.0	-2.692645223154387e-26	7.105427357601002e-14
1.41	88.88888823778802	0.0	0.00033917069939566537	133.2333203766555	0.0	-800.6399999948537	0.0	1.5326496041222866e-09	0.0	0.99999999999818	0.0	1.9078351748896032e-06	0.0	0.0	0.0002186218070556877	0.0	0.0	0.00021874606436629856	0.0	800.6399999948537	88.88888823843509	0.0	4.120048121731332e-12	-7.105427357601002e-13	0.0	-2.692645223154387e-26	7.105427357601002e-14
1.415	88.88888823778802	0.0	0.00033917069939566537	133.67776482109997	0.0	-800.6399999948537	0.0	1.5326496041222866e-09	0.0	0.99999999999818	0.0	1.9078351748896032e-06	0.0	0.0	0.0002186218070556877	0.0	0.0	0.00021874650343806752	0.0	800.6399999948537	88.88888823843509	0.0	4.120048121731332e-12	-7.105427357601002e-13	0.0	-2.692645223154387e-26	7.105427357601002e-14
1.42	88.88888823778802	0.0	0.00033917069939566537	134.12220926554443	0.0	-800.6399999948537	0.0	1.5326496041222866e-09	0.0	0.99999999999818	0.0	1.9078351748896032e-06	0.0	0.0	0.0002186218070556877	0.0	0.0	0.00021874694250983645	0.0	800.6399999948537	88.88888823843509	0.0	4.120048121731332e-12	-7.105427357601002e-13	0.0	-2.692645223154387e-26	7.105427357601002e-14
1.425	88.88888823778802	0.0	0.00033917069939566537	134.56665370998888	0.0	-800.6399999948537	0.0	1.5326496041222866e-09	0.0	0.99999999999818	0.0	1.9078351748896032e-06	0.0	0.0	0.0002186218070556877	0.0	0.0	0.0002187473815816054	0.0	800.6399999948537	88.88888823843509	0.0	4.120048121731332e-12	-7.105427357601002e-13	0.0	-2.692645223154387e-26	7.105427357601002e-14
1.43	88.88888823778802	0.0	0.00033917069939566537	135.01109815443328	0.0	-800.6399999948537	0.0	1.5326496041222866e-09	0.0	0.99999999999818	0.0	1.9078351748896032e-06	0.0	0.0	0.0002186218070556877	0.0	0.0	0.00021874782065337434	0.0	800.6399999948537	88.88888823843509	0.0	4.120048121731332e-12	-7.105427357601002e-13	0.0	-2.692645223154387e-26	7.105427357601002e-14
1.435	88.88888823778802	0.0	0.00033917069939566537	135.45554259887774	0.0	-800.6399999948537	0.0	1.5326496041222866e-09	0.0	0.99999999999818	0.0	1.9078351748896032e-06	0.0	0.0	0.0002186218070556877	0.0	0.0	0.00021874825972514328	0.0	800.6399999948537	88.88888823843509	0.0	4.120048121731332e-12	-7.105427357601002e-13	0.0	-2.692645223154387e-26	7.105427357601002e-14
1.44	88.88888823778802	0.0	0.00033917069939566537	135.8999870433222	0.0	-800.6399999948537	0.0	1.5326496041222866e-09	0.0	0.99999999999818	0.0	1.9078351748896032e-06	0.0	0.0	0.0002186218070556877	0.0	0.0	0.00021874869879691224	0.0	800.6399999948537	88.88888823843509	0.0	4.120048121731332e-12	-7.105427357601002e-13	0.0	-2.692645223154387e-26	7.105427357601002e-14
1.445	88.88888823778802	0.0	0.00033917069939566537	136.34443148776666	0.0	-800.6399999948537	0.0	1.5326496041222866e-09	0.0	0.99999999999818	0.0	1.9078351748896032e-06	0.0	0.0	0.0002186218070556877	0.0	0.0	0.00021874913786868117	0.0	800.6399999948537	88.88888823843509	0.0	4.120048121731332e-12	-7.105427357601002e-13	0.0	-2.692645223154387e-26	7.105427357601002e-14
1.45	88.88888823778802	0.0	0.00033917069939566537	136.78887593221108	0.0	-800.6399999948537	0.0	1.5326496041222866e-09	0.0	0.99999999999818	0.0	1.9078351748896032e-06	0.0	0.0	0.0002186218070556877	0.0	0.0	0.0002187495769404501	0.0	800.6399999948537	88.88888823843509	0.0	4.120048121731332e-12	-7.105427357601002e-13	0.0	-2.692645223154387e-26	7.105427357601002e-14
1.455	88.88888823778802	0.0	0.00033917069939566537	137.23332037665554	0.0	-800.6399999948537	0.0	1.5326496041222866e-09	0.0	0.99999999999818	0.0	1.9078351748896032e-06	0.0	0.0	0.0002186218070556877	0.0	0.0	0.00021875001601221906	0.0	800.6399999948537	88.88888823843509	0.0	4.120048121731332e-12	-7.105427357601002e-13	0.0	-2.692645223154387e-26	7.105427357601002e-14
1.46	88.88888823778802	0.0	0.00033917069939566537	137.67776482109997	0.0	-800.6399999948537	0.0	1.5326496041222866e-09	0.0	0.99999999999818	0.0	1.9078351748896032e-06	0.0	0.0	0.0002186218070556877	0.0	0.0	0.000218750455083988	0.0	800.6399999948537	88.88888823843509	0.0	4.120048121731332e-12	-7.105427357601002e-13	0.0	-2.692645223154387e-26	7.105427357601002e-14
1.465	88.88888823778802	0.0	0.00033917069939566537	138.12220926554443	0.0	-800.6399999948537	0.0	1.5326496041222866e-09	0.0	0.99999999999818	0.0	1.9078351748896032e-06	0.0	0.0	0.0002186218070556877	0.0	0.0	0.00021875089415575693	0.0	800.6399999948537	88.88888823843509	0.0	4.120048121731332e-12	-7.105427357601002e-13	0.0	-2.692645223154387e-26	7.105427357601002e-14
1.47	88.88888823778802	0.0	0.00033917069939566537	138.56665370998886	0.0	-800.6399999948537	0.0	1.5326496041222866e-09	0.0	0.99999999999818	0.0	1.9078351748896032e-06	0.0	0.0	0.0002186218070556877	0.0	0.0	0.0002187513332275259	0.0	800.6399999948537	88.88888823843509	0.0	4.120048121731332e-12	-7.105427357601002e-13	0.0	-2.692645223154387e-26	7.105427357601002e-14
1.475	88.88888823778802	0.0	0.00033917069939566537	139.0110981544333	0.0	-800.6399999948537	0.0	1.5326496041222866e-09	0.0	0.99999999999818	0.0	1.9078351748896032e-06	0.0	0.0	0.0002186218070556877	0.0	0.0	0.00021875177229929482	0.0	800.6399999948537	88.88888823843509	0.0	4.120048121731332e-12	-7.105427357601002e-13	0.0	-2.692645223154387e-26	7.105427357601002e-14
1.48	88.88888823778802	0.0	0.00033917069939566537	139.45554259887774	0.0	-800.6399999948537	0.0	1.5326496041222866e-09	0.0	0.99999999999818	0.0	1.9078351748896032e-06	0.0	0.0	0.0002186218070556877	0.0	0.0	0.00021875221137106378	0.0	800.6399999948537	88.88888823843509	0.0	4.120048121731332e-12	-7.105427357601002e-13	0.0	-2.692645223154387e-26	7.105427357601002e-14
1.485	88.88888823778802	0.0	0.00033917069939566537	139.8999870433222	0.0	-800.6399999948537	0.0	1.5326496041222866e-09	0.0	0.99999999999818	0.0	1.9078351748896032e-06	0.0	0.0	0.0002186218070556877	0.0	0.0	0.00021875265044283271	0.0	800.6399999948537	88.88888823843509	0.0	4.120048121731332e-12	-7.105427357601002e-13	0.0	-2.692645223154387e-26	7.105427357601002e-14
1.49	88.88888823778802	0.0	0.00033917069939566537	140.34443148776663	0.0	-800.6399999948537	0.0	1.5326496041222866e-09	0.0	0.99999999999818	0.0	1.9078351748896032e-06	0.0	0.0	0.0002186218070556877	0.0	0.0	0.00021875308951460165	0.0	800.6399999948537	88.88888823843509	0.0	4.120048121731332e-12	-7.105427357601002e-13	0.0	-2.692645223154387e-26	7.105427357601002e-14
1.495	88.88888823778802	0.0	0.00033917069939566537	140.78887593221108	0.0	-800.6399999948537	0.0	1.5326496041222866e-09	0.0	0.99999999999818	0.0	1.9078351748896032e-06	0.0	0.0	0.0002186218070556877	0.0	0.0	0.0002187535285863706	0.0	800.6399999948537	88.88888823843509	0.0	4.120048121731332e-12	-7.105427357601002e-13	0.0	-2.692645223154387e-26	7.105427357601002e-14
1.5	88.88888823778802	0.0	0.00033917069939566537	141.2333203766555	0.0	-800.6399999948537	0.0	1.5326496041222866e-09	0.0	0.99999999999818	0.0	1.9078351748896032e-06	0.0	0.0	0.0002186218070556877	0.0	0.0	0.00021875396765813954	0.0	800.6399999948537	88.88888823843509	0.0	4.120048121731332e-12	-7.105427357601002e-13	0.0	-2.692645223154387e-26	7.105427357601002e-14
1.505	88.88888823778802	0.0	0.00033917069939566537	141.67776482109997	0.0	-800.6399999948537	0.0	1.5326496041222866e-09	0.0	0.99999999999818	0.0	1.9078351748896032e-06	0.0	0.0	0.0002186218070556877	0.0	0.0	0.00021875440672990847	0.0	800.6399999948537	88.88888823843509	0.0	4.120048121731332e-12	-7.105427357601002e-13	0.0	-2.692645223154387e-26	7.105427357601002e-14
1.51	88.88888823778802	0.0	0.00033917069939566537	142.12220926554443	0.0	-800.6399999948537	0.0	1.5326496041222866e-09	0.0	0.99999999999818	0.0	1.9078351748896032e-06	0.0	0.0	0.0002186218070556877	0.0	0.0	0.00021875484580167743	0.0	800.6399999948537	88.88888823843509	0.0	4.120048121731332e-12	-7.105427357601002e-13	0.0	-2.692645223154387e-26	7.105427357601002e-14
1.515	88.88888823778802	0.0	0.00033917069939566537	142.56665370998886	0.0	-800.6399999948537	0.0	1.5326496041222866e-09	0.0	0.99999999999818	0.0	1.9078351748896032e-06	0.0	0.0	0.0002186218070556877	0.0	0.0	0.00021875528487344637	0.0	800.6399999948537	88.88888823843509	0.0	4.120048121731332e-12	-7.105427357601002e-13	0.0	-2.692645223154387e-26	7.105427357601002e-14
1.52	88.88888823778802	0.0	0.00033917069939566537	143.0110981544333	0.0	-800.6399999948537	0.0	1.5326496041222866e-09	0.0	0.99999999999818	0.0	1.9078351748896032e-06	0.0	0.0	0.0002186218070556877	0.0	0.0	0.00021875572394521533	0.0	800.6399999948537	88.88888823843509	0.0	4.120048121731332e-12	-7.105427357601002e-13	0.0	-2.692645223154387e-26	7.105427357601002e-14
1.525	88.88888823778802	0.0	0.00033917069939566537	143.45554259887774	0.0	-800.6399999948537	0.0	1.5326496041222866e-09	0.0	0.99999999999818	0.0	1.9078351748896032e-06	0.0	0.0	0.0002186218070556877	0.0	0.0	0.00021875616301698426	0.0	800.6399999948537	88.88888823843509	0.0	4.120048121731332e-12	-7.105427357601002e-13	0.0	-2.692645223154387e-26	7.105427357601002e-14
1.53	88.88888823778802	0.0	0.00033917069939566537	143.8999870433222	0.0	-800.6399999948537	0.0	1.5326496041222866e-09	0.0	0.99999999999818	0.0	1.9078351748896032e-06	0.0	0.0	0.0002186218070556877	0.0	0.0	0.0002187566020887532	0.0	800.6399999948537	88.88888823843509	0.0	4.120048121731332e-12	-7.105427357601002e-13	0.0	-2.692645223154387e-26	7.105427357601002e-14
1.535	88.88888823778802	0.0	0.00033917069939566537	144.34443148776663	0.0	-800.6399999948537	0.0	1.5326496041222866e-09	0.0	0.99999999999818	0.0	1.9078351748896032e-06	0.0	0.0	0.0002186218070556877	0.0	0.0	0.00021875704116052215	0.0	800.6399999948537	88.88888823843509	0.0	4.120048121731332e-12	-7.105427357601002e-13	0.0	-2.692645223154387e-26	7.105427357601002e-14
1.54	88.88888823778802	0.0	0.00033917069939566537	144.78887593221108	0.0	-800.6399999948537	0.0	1.5326496041222866e-09	0.0	0.99999999999818	0.0	1.9078351748896032e-06	0.0	0.0	0.0002186218070556877	0.0	0.0	0.0002187574802322911	0.0	800.6399999948537	88.88888823843509	0.0	4.120048121731332e-12	-7.105427357601002e-13	0.0	-2.692645223154387e-26	7.105427357601002e-14
1.545	88.88888823778802	0.0	0.00033917069939566537	145.2333203766555	0.0	-800.6399999948537	0.0	1.5326496041222866e-09	0.0	0.99999999999818	0.0	1.9078351748896032e-06	0.0	0.0	0.0002186218070556877	0.0	0.0	0.00021875791930406002	0.0	800.6399999948537	88.88888823843509	0.0	4.120048121731332e-12	-7.105427357601002e-13	0.0	-2.692645223154387e-26	7.105427357601002e-14
1.55	88.88888823778802	0.0	0.00033917069939566537	145.67776482109997	0.0	-800.6399999948537	0.0	1.5326496041222866e-09	0.0	0.99999999999818	0.0	1.9078351748896032e-06	0.0	0.0	0.0002186218070556877	0.0	0.0	0.00021875835837582898	0.0	800.6399999948537	88.88888823843509	0.0	4.120048121731332e-12	-7.105427357601002e-13	0.0	-2.692645223154387e-26	7.105427357601002e-14
1.555	88.88888823778802	0.0	0.00033917069939566537	146.1222092655444	0.0	-800.6399999948537	0.0	1.5326496041222866e-09	0.0	0.99999999999818	0.0	1.9078351748896032e-06	0.0	0.0	0.0002186218070556877	0.0	0.0	0.00021875879744759791	0.0	800.6399999948537	88.88888823843509	0.0	4.120048121731332e-12	-7.105427357601002e-13	0.0	-2.692645223154387e-26	7.105427357601002e-14
1.56	88.88888823778802	0.0	0.00033917069939566537	146.56665370998886	0.0	-800.6399999948537	0.0	1.5326496041222866e-09	0.0	0.99999999999818	0.0	1.9078351748896032e-06	0.0	0.0	0.0002186218070556877	0.0	0.0	0.00021875923651936685	0.0	800.6399999948537	88.88888823843509	0.0	4.120048121731332e-12	-7.105427357601002e-13	0.0	-2.692645223154387e-26	7.105427357601002e-14
1.565	88.88888823778802	0.0	0.00033917069939566537	147.0110981544333	0.0	-800.6399999948537	0.0	1.5326496041222866e-09	0.0	0.99999999999818	0.0	1.9078351748896032e-06	0.0	0.0	0.0002186218070556877	0.0	0.0	0.0002187596755911358	0.0	800.6399999948537	88.88888823843509	0.0	4.120048121731332e-12	-7.105427357601002e-13	0.0	-2.692645223154387e-26	7.105427357601002e-14
1.57	88.88888823778802	0.0	0.00033917069939566537	147.45554259887774	0.0	-800.6399999948537	0.0	1.5326496041222866e-09	0.0	0.99999999999818	0.0	1.9078351748896032e-06	0.0	0.0	0.0002186218070556877	0.0	0.0	0.00021876011466290474	0.0	800.6399999948537	88.88888823843509	0.0	4.120048121731332e-12	-7.105427357601002e-13	0.0	-2.692645223154387e-26	7.105427357601002e-14
1.575	88.88888823778802	0.0	0.00033917069939566537	147.8999870433222	0.0	-800.6399999948537	0.0	1.5326496041222866e-09	0.0	0.99999999999818	0.0	1.9078351748896032e-06	0.0	0.0	0.0002186218070556877	0.0	0.0	0.0002187605537346737	0.0	800.6399999948537	88.88888823843509	0.0	4.120048121731332e-12	-7.105427357601002e-13	0.0	-2.692645223154387e-26	7.105427357601002e-14
1.58	88.88888823778802	0.0	0.00033917069939566537	148.34443148776666	0.0	-800.6399999948537	0.0	1.5326496041222866e-09	0.0	0.99999999999818	0.0	1.9078351748896032e-06	0.0	0.0	0.0002186218070556877	0.0	0.0	0.00021876099280644263	0.0	800.6399999948537	88.88888823843509	0.0	4.120048121731332e-12	-7.105427357601002e-13	0.0	-2.692645223154387e-26	7.105427357601002e-14
1.585	88.88888823778802	0.0	0.00033917069939566537	148.78887593221108	0.0	-800.6399999948537	0.0	1.5326496041222866e-09	0.0	0.99999999999818	0.0	1.9078351748896032e-06	0.0	0.0	0.0002186218070556877	0.0	0.0	0.00021876143187821157	0.0	800.6399999948537	88.88888823843509	0.0	4.120048121731332e-12	-7.105427357601002e-13	0.0	-2.692645223154387e-26	7.105427357601002e-14
1.59	88.88888823778802	0.0	0.00033917069939566537	149.23332037665554	0.0	-800.6399999948537	0.0	1.5326496041222866e-09	0.0	0.99999999999818	0.0	1.9078351748896032e-06	0.0	0.0	0.0002186218070556877	0.0	0.0	0.00021876187094998053	0.0	800.6399999948537	88.88888823843509	0.0	4.120048121731332e-12	-7.105427357601002e-13	0.0	-2.692645223154387e-26	7.105427357601002e-14
1.595	88.88888823778802	0.0	0.00033917069939566537	149.67776482109997	0.0	-800.6399999948537	0.0	1.5326496041222866e-09	0.0	0.99999999999818	0.0	1.9078351748896032e-06	0.0	0.0	0.0002186218070556877	0.0	0.0	0.00021876231002174946	0.0	800.6399999948537	88.88888823843509	0.0	4.120048121731332e-12	-7.105427357601002e-13	0.0	-2.692645223154387e-26	7.105427357601002e-14
1.6	88.88888823778802	0.0	0.00033917069939566537	150.12220926554443	0.0	-800.6399999948537	0.0	1.5326496041222866e-09	0.0	0.99999999999818	0.0	1.9078351748896032e-06	0.0	0.0	0.0002186218070556877	0.0	0.0	0.0002187627490935184	0.0	800.6399999948537	88.88888823843509	0.0	4.120048121731332e-12	-7.105427357601002e-13	0.0	-2.692645223154387e-26	7.105427357601002e-14
1.605	88.88888823778802	0.0	0.00033917069939566537	150.56665370998886	0.0	-800.6399999948537	0.0	1.5326496041222866e-09	0.0	0.99999999999818	0.0	1.9078351748896032e-06	0.0	0.0	0.0002186218070556877	0.0	0.0	0.00021876318816528735	0.0	800.6399999948537	88.88888823843509	0.0	4.120048121731332e-12	-7.105427357601002e-13	0.0	-2.692645223154387e-26	7.105427357601002e-14
1.61	88.88888823778802	0.0	0.00033917069939566537	151.0110981544333	0.0	-800.6399999948537	0.0	1.5326496041222866e-09	0.0	0.99999999999818	0.0	1.9078351748896032e-06	0.0	0.0	0.0002186218070556877	0.0	0.0	0.00021876362723705629	0.0	800.6399999948537	88.88888823843509	0.0	4.120048121731332e-12	-7.105427357601002e-13	0.0	-2.692645223154387e-26	7.105427357601002e-14
1.615	88.88888823778802	0.0	0.00033917069939566537	151.45554259887774	0.0	-800.6399999948537	0.0	1.5326496041222866e-09	0.0	0.99999999999818	0.0	1.9078351748896032e-06	0.0	0.0	0.0002186218070556877	0.0	0.0	0.00021876406630882522	0.0	800.6399999948537	88.88888823843509	0.0	4.120048121731332e-12	-7.105427357601002e-13	0.0	-2.692645223154387e-26	7.105427357601002e-14
1.62	88.88888823778802	0.0	0.00033917069939566537	151.8999870433222	0.0	-800.6399999948537	0.0	1.5326496041222866e-09	0.0	0.99999999999818	0.0	1.9078351748896032e-06	0.0	0.0	0.0002186218070556877	0.0	0.0	0.00021876450538059418	0.0	800.6399999948537	88.88888823843509	0.0	4.120048121731332e-12	-7.105427357601002e-13	0.0	-2.692645223154387e-26	7.105427357601002e-14
1.625	88.88888823778802	0.0	0.00033917069939566537	152.34443148776663	0.0	-800.6399999948537	0.0	1.5326496041222866e-09	0.0	0.99999999999818	0.0	1.9078351748896032e-06	0.0	0.0	0.0002186218070556877	0.0	0.0	0.0002187649444523631	0.0	800.6399999948537	88.88888823843509	0.0	4.120048121731332e-12	-7.105427357601002e-13	0.0	-2.692645223154387e-26	7.105427357601002e-14
1.63	88.88888823778802	0.0	0.00033917069939566537	152.78887593221108	0.0	-800.6399999948537	0.0	1.5326496041222866e-09	0.0	0.99999999999818	0.0	1.9078351748896032e-06	0.0	0.0	0.0002186218070556877	0.0	0.0	0.00021876538352413207	0.0	800.6399999948537	88.88888823843509	0.0	4.120048121731332e-12	-7.105427357601002e-13	0.0	-2.692645223154387e-26	7.105427357601002e-14
1.635	88.88888823778802	0.0	0.00033917069939566537	153.23332037665554	0.0	-800.6399999948537	0.0	1.5326496041222866e-09	0.0	0.99999999999818	0.0	1.9078351748896032e-06	0.0	0.0	0.0002186218070556877	0.0	0.0	0.000218765822595901	0.0	800.6399999948537	88.88888823843509	0.0	4.120048121731332e-12	-7.105427357601002e-13	0.0	-2.692645223154387e-26	7.105427357601002e-14
1.64	88.88888823778802	0.0	0.00033917069939566537	153.67776482109997	0.0	-800.6399999948537	0.0	1.5326496041222866e-09	0.0	0.99999999999818	0.0	1.9078351748896032e-06	0.0	0.0	0.0002186218070556877	0.0	0.0	0.00021876626166766994	0.0	800.6399999948537	88.88888823843509	0.0	4.120048121731332e-12	-7.105427357601002e-13	0.0	-2.692645223154387e-26	7.105427357601002e-14
1.645	88.88888823778802	0.0	0.00033917069939566537	154.12220926554443	0.0	-800.6399999948537	0.0	1.5326496041222866e-09	0.0	0.99999999999818	0.0	1.9078351748896032e-06	0.0	0.0	0.0002186218070556877	0.0	0.0	0.0002187667007394389	0.0	800.6399999948537	88.88888823843509	0.0	4.120048121731332e-12	-7.105427357601002e-13	0.0	-2.692645223154387e-26	7.105427357601002e-14
1.65	88.88888823778802	0.0	0.00033917069939566537	154.56665370998886	0.0	-800.6399999948537	0.0	1.5326496041222866e-09	0.0	0.99999999999818	0.0	1.9078351748896032e-06	0.0	0.0	0.0002186218070556877	0.0	0.0	0.00021876713981120783	0.0	800.6399999948537	88.88888823843509	0.0	4.120048121731332e-12	-7.105427357601002e-13	0.0	-2.692645223154387e-26	7.105427357601002e-14
1.655	88.88888823778802	0.0	0.00033917069939566537	155.0110981544333	0.0	-800.6399999948537	0.0	1.5326496041222866e-09	0.0	0.99999999999818	0.0	1.9078351748896032e-06	0.0	0.0	0.0002186218070556877	0.0	0.0	0.00021876757888297677	0.0	800.6399999948537	88.88888823843509	0.0	4.120048121731332e-12	-7.105427357601002e-13	0.0	-2.692645223154387e-26	7.105427357601002e-14
1.66	88.88888823778802	0.0	0.00033917069939566537	155.45554259887774	0.0	-800.6399999948537	0.0	1.5326496041222866e-09	0.0	0.99999999999818	0.0	1.9078351748896032e-06	0.0	0.0	0.0002186218070556877	0.0	0.0	0.00021876801795474573	0.0	800.6399999948537	88.88888823843509	0.0	4.120048121731332e-12	-7.105427357601002e-13	0.0	-2.692645223154387e-26	7.105427357601002e-14
1.665	88.88888823778802	0.0	0.00033917069939566537	155.8999870433222	0.0	-800.6399999948537	0.0	1.5326496041222866e-09	0.0	0.99999999999818	0.0	1.9078351748896032e-06	0.0	0.0	0.0002186218070556877	0.0	0.0	0.00021876845702651466	0.0	800.6399999948537	88.88888823843509	0.0	4.120048121731332e-12	-7.105427357601002e-13	0.0	-2.692645223154387e-26	7.105427357601002e-14
1.67	88.88888823778802	0.0	0.00033917069939566537	156.34443148776663	0.0	-800.6399999948537	0.0	1.5326496041222866e-09	0.0	0.99999999999818	0.0	1.9078351748896032e-06	0.0	0.0	0.0002186218070556877	0.0	0.0	0.0002187688960982836	0.0	800.6399999948537	88.88888823843509	0.0	4.120048121731332e-12	-7.105427357601002e-13	0.0	-2.692645223154387e-26	7.105427357601002e-14
1.675	88.88888823778802	0.0	0.00033917069939566537	156.78887593221108	0.0	-800.6399999948537	0.0	1.5326496041222866e-09	0.0	0.99999999999818	0.0	1.9078351748896032e-06	0.0	0.0	0.0002186218070556877	0.0	0.0	0.00021876933517005255	0.0	800.6399999948537	88.88888823843509	0.0	4.120048121731332e-12	-7.105427357601002e-13	0.0	-2.692645223154387e-26	7.105427357601002e-14
1.68	88.88888823778802	0.0	0.00033917069939566537	157.2333203766555	0.0	-800.6399999948537	0.0	1.5326496041222866e-09	0.0	0.99999999999818	0.0	1.9078351748896032e-06	0.0	0.0	0.0002186218070556877	0.0	0.0	0.00021876977424182149	0.0	800.6399999948537	88.88888823843509	0.0	4.120048121731332e-12	-7.105427357601002e-13	0.0	-2.692645223154387e-26	7.105427357601002e-14
1.685	88.88888823778802	0.0	0.00033917069939566537	157.67776482109997	0.0	-800.6399999948537	0.0	1.5326496041222866e-09	0.0	0.99999999999818	0.0	1.9078351748896032e-06	0.0	0.0	0.0002186218070556877	0.0	0.0	0.00021877021331359045	0.0	800.6399999948537	88.88888823843509	0.0	4.120048121731332e-12	-7.105427357601002e-13	0.0	-2.692645223154387e-26	7.105427357601002e-14
1.69	88.88888823778802	0.0	0.00033917069939566537	158.1222092655444	0.0	-800.6399999948537	0.0	1.5326496041222866e-09	0.0	0.99999999999818	0.0	1.9078351748896032e-06	0.0	0.0	0.0002186218070556877	0.0	0.0	0.00021877065238535938	0.0	800.6399999948537	88.88888823843509	0.0	4.120048121731332e-12	-7.105427357601002e-13	0.0	-2.692645223154387e-26	7.105427357601002e-14
1.695	88.88888823778802	0.0	0.00033917069939566537	158.56665370998886	0.0	-800.6399999948537	0.0	1.5326496041222866e-09	0.0	0.99999999999818	0.0	1.9078351748896032e-06	0.0	0.0	0.0002186218070556877	0.0	0.0	0.0002187710914571283	0.0	800.6399999948537	88.88888823843509	0.0	4.120048121731332e-12	-7.105427357601002e-13	0.0	-2.692645223154387e-26	7.105427357601002e-14
1.7	88.88888823778802	0.0	0.00033917069939566537	159.0110981544333	0.0	-800.6399999948537	0.0	1.5326496041222866e-09	0.0	0.99999999999818	0.0	1.9078351748896032e-06	0.0	0.0	0.0002186218070556877	0.0	0.0	0.00021877153052889727	0.0	800.6399999948537	88.88888823843509	0.0	4.120048121731332e-12	-7.105427357601002e-13	0.0	-2.692645223154387e-26	7.105427357601002e-14
1.705	88.88888823778802	0.0	0.00033917069939566537	159.45554259887774	0.0	-800.6399999948537	0.0	1.5326496041222866e-09	0.0	0.99999999999818	0.0	1.9078351748896032e-06	0.0	0.0	0.0002186218070556877	0.0	0.0	0.0002187719696006662	0.0	800.6399999948537	88.88888823843509	0.0	4.120048121731332e-12	-7.105427357601002e-13	0.0	-2.692645223154387e-26	7.105427357601002e-14
1.71	88.88888823778802	0.0	0.00033917069939566537	159.8999870433222	0.0	-800.6399999948537	0.0	1.5326496041222866e-09	0.0	0.99999999999818	0.0	1.9078351748896032e-06	0.0	0.0	0.0002186218070556877	0.0	0.0	0.00021877240867243514	0.0	800.6399999948537	88.88888823843509	0.0	4.120048121731332e-12	-7.105427357601002e-13	0.0	-2.692645223154387e-26	7.105427357601002e-14
1.715	88.88888823778802	0.0	0.00033917069939566537	160.34443148776666	0.0	-800.6399999948537	0.0	1.5326496041222866e-09	0.0	0.99999999999818	0.0	1.9078351748896032e-06	0.0	0.0	0.0002186218070556877	0.0	0.0	0.0002187728477442041	0.0	800.6399999948537	88.88888823843509	0.0	4.120048121731332e-12	-7.105427357601002e-13	0.0	-2.692645223154387e-26	7.105427357601002e-14
1.72	88.88888823778802	0.0	0.00033917069939566537	160.78887593221108	0.0	-800.6399999948537	0.0	1.5326496041222866e-09	0.0	0.99999999999818	0.0	1.9078351748896032e-06	0.0	0.0	0.0002186218070556877	0.0	0.0	0.00021877328681597303	0.0	800.6399999948537	88.88888823843509	0.0	4.120048121731332e-12	-7.105427357601002e-13	0.0	-2.692645223154387e-26	7.105427357601002e-14
1.725	88.88888823778802	0.0	0.00033917069939566537	161.23332037665554	0.0	-800.6399999948537	0.0	1.5326496041222866e-09	0.0	0.99999999999818	0.0	1.9078351748896032e-06	0.0	0.0	0.0002186218070556877	0.0	0.0	0.00021877372588774196	0.0	800.6399999948537	88.88888823843509	0.0	4.120048121731332e-12	-7.105427357601002e-13	0.0	-2.692645223154387e-26	7.105427357601002e-14
1.73	88.88888823778802	0.0	0.00033917069939566537	161.67776482109997	0.0	-800.6399999948537	0.0	1.5326496041222866e-09	0.0	0.99999999999818	0.0	1.9078351748896032e-06	0.0	0.0	0.0002186218070556877	0.0	0.0	0.00021877416495951092	0.0	800.6399999948537	88.88888823843509	0.0	4.120048121731332e-12	-7.105427357601002e-13	0.0	-2.692645223154387e-26	7.105427357601002e-14
1.735	88.88888823778802	0.0	0.00033917069939566537	162.12220926554443	0.0	-800.6399999948537	0.0	1.5326496041222866e-09	0.0	0.99999999999818	0.0	1.9078351748896032e-06	0.0	0.0	0.0002186218070556877	0.0	0.0	0.00021877460403127986	0.0	800.6399999948537	88.88888823843509	0.0	4.120048121731332e-12	-7.105427357601002e-13	0.0	-2.692645223154387e-26	7.105427357601002e-14
1.74	88.88888823778802	0.0	0.00033917069939566537	162.56665370998886	0.0	-800.6399999948537	0.0	1.5326496041222866e-09	0.0	0.99999999999818	0.0	1.9078351748896032e-06	0.0	0.0	0.0002186218070556877	0.0	0.0	0.00021877504310304882	0.0	800.6399999948537	88.88888823843509	0.0	4.120048121731332e-12	-7.105427357601002e-13	0.0	-2.692645223154387e-26	7.105427357601002e-14
1.745	88.88888823778802	0.0	0.00033917069939566537	163.0110981544333	0.0	-800.6399999948537	0.0	1.5326496041222866e-09	0.0	0.99999999999818	0.0	1.9078351748896032e-06	0.0	0.0	0.0002186218070556877	0.0	0.0	0.00021877548217481775	0.0	800.6399999948537	88.88888823843509	0.0	4.120048121731332e-12	-7.105427357601002e-13	0.0	-2.692645223154387e-26	7.105427357601002e-14
1.75	88.88888823778802	0.0	0.00033917069939566537	163.45554259887774	0.0	-800.6399999948537	0.0	1.5326496041222866e-09	0.0	0.99999999999818	0.0	1.9078351748896032e-06	0.0	0.0	0.0002186218070556877	0.0	0.0	0.00021877592124658668	0.0	800.6399999948537	88.88888823843509	0.0	4.120048121731332e-12	-7.105427357601002e-13	0.0	-2.692645223154387e-26	7.105427357601002e-14
1.755	88.88888823778802	0.0	0.00033917069939566537	163.89998704332217	0.0	-800.6399999948537	0.0	1.5326496041222866e-09	0.0	0.99999999999818	0.0	1.9078351748896032e-06	0.0	0.0	0.0002186218070556877	0.0	0.0	0.00021877636031835564	0.0	800.6399999948537	88.88888823843509	0.0	4.120048121731332e-12	-7.105427357601002e-13	0.0	-2.692645223154387e-26	7.105427357601002e-14
1.76	88.88888823778802	0.0	0.00033917069939566537	164.34443148776663	0.0	-800.6399999948537	0.0	1.5326496041222866e-09	0.0	0.99999999999818	0.0	1.9078351748896032e-06	0.0	0.0	0.0002186218070556877	0.0	0.0	0.00021877679939012458	0.0	800.6399999948537	88.88888823843509	0.0	4.120048121731332e-12	-7.105427357601002e-13	0.0	-2.692645223154387e-26	7.105427357601002e-14
1.765	88.88888823778802	0.0	0.00033917069939566537	164.78887593221108	0.0	-800.6399999948537	0.0	1.5326496041222866e-09	0.0	0.99999999999818	0.0	1.9078351748896032e-06	0.0	0.0	0.0002186218070556877	0.0	0.0	0.0002187772384618935	0.0	800.6399999948537	88.88888823843509	0.0	4.120048121731332e-12	-7.105427357601002e-13	0.0	-2.692645223154387e-26	7.105427357601002e-14
1.77	88.88888823778802	0.0	0.00033917069939566537	165.23332037665554	0.0	-800.6399999948537	0.0	1.5326496041222866e-09	0.0	0.99999999999818	0.0	1.9078351748896032e-06	0.0	0.0	0.0002186218070556877	0.0	0.0	0.00021877767753366247	0.0	800.6399999948537	88.88888823843509	0.0	4.120048121731332e-12	-7.105427357601002e-13	0.0	-2.692645223154387e-26	7.105427357601002e-14
1.775	88.88888823778802	0.0	0.00033917069939566537	165.67776482109997	0.0	-800.6399999948537	0.0	1.5326496041222866e-09	0.0	0.99999999999818	0.0	1.9078351748896032e-06	0.0	0.0	0.0002186218070556877	0.0	0.0	0.0002187781166054314	0.0	800.6399999948537	88.88888823843509	0.0	4.120048121731332e-12	-7.105427357601002e-13	0.0	-2.692645223154387e-26	7.105427357601002e-14
1.78	88.88888823778802	0.0	0.00033917069939566537	166.12220926554443	0.0	-800.6399999948537	0.0	1.5326496041222866e-09	0.0	0.99999999999818	0.0	1.9078351748896032e-06	0.0	0.0	0.0002186218070556877	0.0	0.0	0.00021877855567720034	0.0	800.6399999948537	88.88888823843509	0.0	4.120048121731332e-12	-7.105427357601002e-13	0.0	-2.692645223154387e-26	7.105427357601002e-14
1.785	88.88888823778802	0.0	0.00033917069939566537	166.56665370998886	0.0	-800.6399999948537	0.0	1.5326496041222866e-09	0.0	0.99999999999818	0.0	1.9078351748896032e-06	0.0	0.0	0.0002186218070556877	0.0	0.0	0.0002187789947489693	0.0	800.6399999948537	88.88888823843509	0.0	4.120048121731332e-12	-7.105427357601002e-13	0.0	-2.692645223154387e-26	7.105427357601002e-14
1.79	88.88888823778802	0.0	0.00033917069939566537	167.0110981544333	0.0	-800.6399999948537	0.0	1.5326496041222866e-09	0.0	0.99999999999818	0.0	1.9078351748896032e-06	0.0	0.0	0.0002186218070556877	0.0	0.0	0.00021877943382073823	0.0	800.6399999948537	88.88888823843509	0.0	4.120048121731332e-12	-7.105427357601002e-13	0.0	-2.692645223154387e-26	7.105427357601002e-14
1.795	88.88888823778802	0.0	0.00033917069939566537	167.45554259887774	0.0	-800.6399999948537	0.0	1.5326496041222866e-09	0.0	0.99999999999818	0.0	1.9078351748896032e-06	0.0	0.0	0.0002186218070556877	0.0	0.0	0.0002187798728925072	0.0	800.6399999948537	88.88888823843509	0.0	4.120048121731332e-12	-7.105427357601002e-13	0.0	-2.692645223154387e-26	7.105427357601002e-14
1.8	88.88888823778802	0.0	0.00033917069939566537	167.8999870433222	0.0	-800.6399999948537	0.0	1.5326496041222866e-09	0.0	0.99999999999818	0.0	1.9078351748896032e-06	0.0	0.0	0.0002186218070556877	0.0	0.0	0.00021878031196427612	0.0	800.6399999948537	88.88888823843509	0.0	4.120048121731332e-12	-7.105427357601002e-13	0.0	-2.692645223154387e-26	7.105427357601002e-14
1.805	88.88888823778802	0.0	0.00033917069939566537	168.34443148776663	0.0	-800.6399999948537	0.0	1.5326496041222866e-09	0.0	0.99999999999818	0.0	1.9078351748896032e-06	0.0	0.0	0.0002186218070556877	0.0	0.0	0.00021878075103604506	0.0	800.6399999948537	88.88888823843509	0.0	4.120048121731332e-12	-7.105427357601002e-13	0.0	-2.692645223154387e-26	7.105427357601002e-14
1.81	88.88888823778802	0.0	0.00033917069939566537	168.78887593221108	0.0	-800.6399999948537	0.0	1.5326496041222866e-09	0.0	0.99999999999818	0.0	1.9078351748896032e-06	0.0	0.0	0.0002186218070556877	0.0	0.0	0.00021878119010781402	0.0	800.6399999948537	88.88888823843509	0.0	4.120048121731332e-12	-7.105427357601002e-13	0.0	-2.692645223154387e-26	7.105427357601002e-14
1.815	88.88888823778802	0.0	0.00033917069939566537	169.2333203766555	0.0	-800.6399999948537	0.0	1.5326496041222866e-09	0.0	0.99999999999818	0.0	1.9078351748896032e-06	0.0	0.0	0.0002186218070556877	0.0	0.0	0.00021878162917958295	0.0	800.6399999948537	88.88888823843509	0.0	4.120048121731332e-12	-7.105427357601002e-13	0.0	-2.692645223154387e-26	7.105427357601002e-14
1.82	88.88888823778802	0.0	0.00033917069939566537	169.67776482109997	0.0	-800.6399999948537	0.0	1.5326496041222866e-09	0.0	0.99999999999818	0.0	1.9078351748896032e-06	0.0	0.0	0.0002186218070556877	0.0	0.0	0.00021878206825135188	0.0	800.6399999948537	88.88888823843509	0.0	4.120048121731332e-12	-7.105427357601002e-13	0.0	-2.692645223154387e-26	7.105427357601002e-14
1.825	88.88888823778802	0.0	0.00033917069939566537	170.1222092655444	0.0	-800.6399999948537	0.0	1.5326496041222866e-09	0.0	0.99999999999818	0.0	1.9078351748896032e-06	0.0	0.0	0.0002186218070556877	0.0	0.0	0.00021878250732312084	0.0	800.6399999948537	88.88888823843509	0.0	4.120048121731332e-12	-7.105427357601002e-13	0.0	-2.692645223154387e-26	7.105427357601002e-14
1.83	88.88888823778802	0.0	0.00033917069939566537	170.56665370998886	0.0	-800.6399999948537	0.0	1.5326496041222866e-09	0.0	0.99999999999818	0.0	1.9078351748896032e-06	0.0	0.0	0.0002186218070556877	0.0	0.0	0.00021878294639488978	0.0	800.6399999948537	88.88888823843509	0.0	4.120048121731332e-12	-7.105427357601002e-13	0.0	-2.692645223154387e-26	7.105427357601002e-14
1.835	88.88888823778802	0.0	0.00033917069939566537	171.0110981544333	0.0	-800.6399999948537	0.0	1.5326496041222866e-09	0.0	0.99999999999818	0.0	1.9078351748896032e-06	0.0	0.0	0.0002186218070556877	0.0	0.0	0.00021878338546665874	0.0	800.6399999948537	88.88888823843509	0.0	4.120048121731332e-12	-7.105427357601002e-13	0.0	-2.692645223154387e-26	7.105427357601002e-14
1.84	88.88888823778802	0.0	0.00033917069939566537	171.45554259887774	0.0	-800.6399999948537	0.0	1.5326496041222866e-09	0.0	0.99999999999818	0.0	1.9078351748896032e-06	0.0	0.0	0.0002186218070556877	0.0	0.0	0.00021878382453842767	0.0	800.6399999948537	88.88888823843509	0.0	4.120048121731332e-12	-7.105427357601002e-13	0.0	-2.692645223154387e-26	7.105427357601002e-14
1.845	88.88888823778802	0.0	0.00033917069939566537	171.8999870433222	0.0	-800.6399999948537	0.0	1.5326496041222866e-09	0.0	0.99999999999818	0.0	1.9078351748896032e-06	0.0	0.0	0.0002186218070556877	0.0	0.0	0.0002187842636101966	0.0	800.6399999948537	88.88888823843509	0.0	4.120048121731332e-12	-7.105427357601002e-13	0.0	-2.692645223154387e-26	7.105427357601002e-14
1.85	88.88888823778802	0.0	0.00033917069939566537	172.34443148776666	0.0	-800.6399999948537	0.0	1.5326496041222866e-09	0.0	0.99999999999818	0.0	1.9078351748896032e-06	0.0	0.0	0.0002186218070556877	0.0	0.0	0.00021878470268196556	0.0	800.6399999948537	88.88888823843509	0.0	4.120048121731332e-12	-7.105427357601002e-13	0.0	-2.692645223154387e-26	7.105427357601002e-14
1.855	88.88888823778802	0.0	0.00033917069939566537	172.78887593221108	0.0	-800.6399999948537	0.0	1.5326496041222866e-09	0.0	0.99999999999818	0.0	1.9078351748896032e-06	0.0	0.0	0.0002186218070556877	0.0	0.0	0.0002187851417537345	0.0	800.6399999948537	88.88888823843509	0.0	4.120048121731332e-12	-7.105427357601002e-13	0.0	-2.692645223154387e-26	7.105427357601002e-14
1.86	88.88888823778802	0.0	0.00033917069939566537	173.23332037665554	0.0	-800.6399999948537	0.0	1.5326496041222866e-09	0.0	0.99999999999818	0.0	1.9078351748896032e-06	0.0	0.0	0.0002186218070556877	0.0	0.0	0.00021878558082550343	0.0	800.6399999948537	88.88888823843509	0.0	4.120048121731332e-12	-7.105427357601002e-13	0.0	-2.692645223154387e-26	7.105427357601002e-14
1.865	88.88888823778802	0.0	0.00033917069939566537	173.67776482109997	0.0	-800.6399999948537	0.0	1.5326496041222866e-09	0.0	0.99999999999818	0.0	1.9078351748896032e-06	0.0	0.0	0.0002186218070556877	0.0	0.0	0.0002187860198972724	0.0	800.6399999948537	88.88888823843509	0.0	4.120048121731332e-12	-7.105427357601002e-13	0.0	-2.692645223154387e-26	7.105427357601002e-14
1.87	88.88888823778802	0.0	0.00033917069939566537	174.12220926554443	0.0	-800.6399999948537	0.0	1.5326496041222866e-09	0.0	0.99999999999818	0.0	1.9078351748896032e-06	0.0	0.0	0.0002186218070556877	0.0	0.0	0.00021878645896904132	0.0	800.6399999948537	88.88888823843509	0.0	4.120048121731332e-12	-7.105427357601002e-13	0.0	-2.692645223154387e-26	7.105427357601002e-14
1.875	88.88888823778802	0.0	0.00033917069939566537	174.56665370998886	0.0	-800.6399999948537	0.0	1.5326496041222866e-09	0.0	0.99999999999818	0.0	1.9078351748896032e-06	0.0	0.0	0.0002186218070556877	0.0	0.0	0.00021878689804081026	0.0	800.6399999948537	88.88888823843509	0.0	4.120048121731332e-12	-7.105427357601002e-13	0.0	-2.692645223154387e-26	7.105427357601002e-14
1.88	88.88888823778802	0.0	0.00033917069939566537	175.01109815443328	0.0	-800.6399999948537	0.0	1.5326496041222866e-09	0.0	0.99999999999818	0.0	1.9078351748896032e-06	0.0	0.0	0.0002186218070556877	0.0	0.0	0.00021878733711257922	0.0	800.6399999948537	88.88888823843509	0.0	4.120048121731332e-12	-7.105427357601002e-13	0.0	-2.692645223154387e-26	7.105427357601002e-14
1.885	88.88888823778802	0.0	0.00033917069939566537	175.45554259887774	0.0	-800.6399999948537	0.0	1.5326496041222866e-09	0.0	0.99999999999818	0.0	1.9078351748896032e-06	0.0	0.0	0.0002186218070556877	0.0	0.0	0.00021878777618434815	0.0	800.6399999948537	88.88888823843509	0.0	4.120048121731332e-12	-7.105427357601002e-13	0.0	-2.692645223154387e-26	7.105427357601002e-14
1.89	88.88888823778802	0.0	0.00033917069939566537	175.89998704332217	0.0	-800.6399999948537	0.0	1.5326496041222866e-09	0.0	0.99999999999818	0.0	1.9078351748896032e-06	0.0	0.0	0.0002186218070556877	0.0	0.0	0.0002187882152561171	0.0	800.6399999948537	88.88888823843509	0.0	4.120048121731332e-12	-7.105427357601002e-13	0.0	-2.692645223154387e-26	7.105427357601002e-14
1.895	88.88888823778802	0.0	0.00033917069939566537	176.34443148776663	0.0	-800.6399999948537	0.0	1.5326496041222866e-09	0.0	0.99999999999818	0.0	1.9078351748896032e-06	0.0	0.0	0.0002186218070556877	0.0	0.0	0.00021878865432788604	0.0	800.6399999948537	88.88888823843509	0.0	4.120048121731332e-12	-7.105427357601002e-13	0.0	-2.692645223154387e-26	7.105427357601002e-14
1.9	88.88888823778802	0.0	0.00033917069939566537	176.78887593221108	0.0	-800.6399999948537	0.0	1.5326496041222866e-09	0.0	0.99999999999818	0.0	1.9078351748896032e-06	0.0	0.0	0.0002186218070556877	0.0	0.0	0.00021878909339965498	0.0	800.6399999948537	88.88888823843509	0.0	4.120048121731332e-12	-7.105427357601002e-13	0.0	-2.692645223154387e-26	7.105427357601002e-14
1.905	88.88888823778802	0.0	0.00033917069939566537	177.23332037665554	0.0	-800.6399999948537	0.0	1.5326496041222866e-09	0.0	0.99999999999818	0.0	1.9078351748896032e-06	0.0	0.0	0.0002186218070556877	0.0	0.0	0.00021878953247142394	0.0	800.6399999948537	88.88888823843509	0.0	4.120048121731332e-12	-7.105427357601002e-13	0.0	-2.692645223154387e-26	7.105427357601002e-14
1.91	88.88888823778802	0.0	0.00033917069939566537	177.67776482109997	0.0	-800.6399999948537	0.0	1.5326496041222866e-09	0.0	0.99999999999818	0.0	1.9078351748896032e-06	0.0	0.0	0.0002186218070556877	0.0	0.0	0.00021878997154319287	0.0	800.6399999948537	88.88888823843509	0.0	4.120048121731332e-12	-7.105427357601002e-13	0.0	-2.692645223154387e-26	7.105427357601002e-14
1.915	88.88888823778802	0.0	0.00033917069939566537	178.12220926554443	0.0	-800.6399999948537	0.0	1.5326496041222866e-09	0.0	0.99999999999818	0.0	1.9078351748896032e-06	0.0	0.0	0.0002186218070556877	0.0	0.0	0.0002187904106149618	0.0	800.6399999948537	88.88888823843509	0.0	4.120048121731332e-12	-7.105427357601002e-13	0.0	-2.692645223154387e-26	7.105427357601002e-14
1.92	88.88888823778802	0.0	0.00033917069939566537	178.56665370998886	0.0	-800.6399999948537	0.0	1.5326496041222866e-09	0.0	0.99999999999818	0.0	1.9078351748896032e-06	0.0	0.0	0.0002186218070556877	0.0	0.0	0.00021879084968673076	0.0	800.6399999948537	88.88888823843509	0.0	4.120048121731332e-12	-7.105427357601002e-13	0.0	-2.692645223154387e-26	7.105427357601002e-14
1.925	88.88888823778802	0.0	0.00033917069939566537	179.0110981544333	0.0	-800.6399999948537	0.0	1.5326496041222866e-09	0.0	0.99999999999818	0.0	1.9078351748896032e-06	0.0	0.0	0.0002186218070556877	0.0	0.0	0.0002187912887584997	0.0	800.6399999948537	88.88888823843509	0.0	4.120048121731332e-12	-7.105427357601002e-13	0.0	-2.692645223154387e-26	7.105427357601002e-14
1.93	88.88888823778802	0.0	0.00033917069939566537	179.45554259887774	0.0	-800.6399999948537	0.0	1.5326496041222866e-09	0.0	0.99999999999818	0.0	1.9078351748896032e-06	0.0	0.0	0.0002186218070556877	0.0	0.0	0.00021879172783026863	0.0	800.6399999948537	88.88888823843509	0.0	4.120048121731332e-12	-7.105427357601002e-13	0.0	-2.692645223154387e-26	7.105427357601002e-14
1.935	88.88888823778802	0.0	0.00033917069939566537	179.8999870433222	0.0	-800.6399999948537	0.0	1.5326496041222866e-09	0.0	0.99999999999818	0.0	1.9078351748896032e-06	0.0	0.0	0.0002186218070556877	0.0	0.0	0.0002187921669020376	0.0	800.6399999948537	88.88888823843509	0.0	4.120048121731332e-12	-7.105427357601002e-13	0.0	-2.692645223154387e-26	7.105427357601002e-14
1.94	88.88888823778802	0.0	0.00033917069939566537	180.34443148776663	0.0	-800.6399999948537	0.0	1.5326496041222866e-09	0.0	0.99999999999818	0.0	1.9078351748896032e-06	0.0	0.0	0.0002186218070556877	0.0	0.0	0.00021879260597380652	0.0	800.6399999948537	88.88888823843509	0.0	4.120048121731332e-12	-7.105427357601002e-13	0.0	-2.692645223154387e-26	7.105427357601002e-14
1.945	88.88888823778802	0.0	0.00033917069939566537	180.78887593221108	0.0	-800.6399999948537	0.0	1.5326496041222866e-09	0.0	0.99999999999818	0.0	1.9078351748896032e-06	0.0	0.0	0.0002186218070556877	0.0	0.0	0.00021879304504557548	0.0	800.6399999948537	88.88888823843509	0.0	4.120048121731332e-12	-7.105427357601002e-13	0.0	-2.692645223154387e-26	7.105427357601002e-14
1.95	88.88888823778802	0.0	0.00033917069939566537	181.2333203766555	0.0	-800.6399999948537	0.0	1.5326496041222866e-09	0.0	0.99999999999818	0.0	1.9078351748896032e-06	0.0	0.0	0.0002186218070556877	0.0	0.0	0.00021879348411734442	0.0	800.6399999948537	88.88888823843509	0.0	4.120048121731332e-12	-7.105427357601002e-13	0.0	-2.692645223154387e-26	7.105427357601002e-14
1.955	88.88888823778802	0.0	0.00033917069939566537	181.67776482109997	0.0	-800.6399999948537	0.0	1.5326496041222866e-09	0.0	0.99999999999818	0.0	1.9078351748896032e-06	0.0	0.0	0.0002186218070556877	0.0	0.0	0.00021879392318911335	0.0	800.6399999948537	88.88888823843509	0.0	4.120048121731332e-12	-7.105427357601002e-13	0.0	-2.692645223154387e-26	7.105427357601002e-14
1.96	88.88888823778802	0.0	0.00033917069939566537	182.1222092655444	0.0	-800.6399999948537	0.0	1.5326496041222866e-09	0.0	0.99999999999818	0.0	1.9078351748896032e-06	0.0	0.0	0.0002186218070556877	0.0	0.0	0.0002187943622608823	0.0	800.6399999948537	88.88888823843509	0.0	4.120048121731332e-12	-7.105427357601002e-13	0.0	-2.692645223154387e-26	7.105427357601002e-14
1.965	88.88888823778802	0.0	0.00033917069939566537	182.56665370998886	0.0	-800.6399999948537	0.0	1.5326496041222866e-09	0.0	0.99999999999818	0.0	1.9078351748896032e-06	0.0	0.0	0.0002186218070556877	0.0	0.0	0.00021879480133265124	0.0	800.6399999948537	88.88888823843509	0.0	4.120048121731332e-12	-7.105427357601002e-13	0.0	-2.692645223154387e-26	7.105427357601002e-14
1.97	88.88888823778802	0.0	0.00033917069939566537	183.0110981544333	0.0	-800.6399999948537	0.0	1.5326496041222866e-09	0.0	0.99999999999818	0.0	1.9078351748896032e-06	0.0	0.0	0.0002186218070556877	0.0	0.0	0.00021879524040442017	0.0	800.6399999948537	88.88888823843509	0.0	4.120048121731332e-12	-7.105427357601002e-13	0.0	-2.692645223154387e-26	7.105427357601002e-14
1.975	88.88888823778802	0.0	0.00033917069939566537	183.45554259887777	0.0	-800.6399999948537	0.0	1.5326496041222866e-09	0.0	0.99999999999818	0.0	1.9078351748896032e-06	0.0	0.0	0.0002186218070556877	0.0	0.0	0.00021879567947618914	0.0	800.6399999948537	88.88888823843509	0.0	4.120048121731332e-12	-7.105427357601002e-13	0.0	-2.692645223154387e-26	7.105427357601002e-14
1.98	88.88888823778802	0.0	0.00033917069939566537	183.8999870433222	0.0	-800.6399999948537	0.0	1.5326496041222866e-09	0.0	0.99999999999818	0.0	1.9078351748896032e-06	0.0	0.0	0.0002186218070556877	0.0	0.0	0.00021879611854795807	0.0	800.6399999948537	88.88888823843509	0.0	4.120048121731332e-12	-7.105427357601002e-13	0.0	-2.692645223154387e-26	7.105427357601002e-14
1.985	88.88888823778802	0.0	0.00033917069939566537	184.34443148776666	0.0	-800.6399999948537	0.0	1.5326496041222866e-09	0.0	0.99999999999818	0.0	1.9078351748896032e-06	0.0	0.0	0.0002186218070556877	0.0	0.0	0.000218796557619727	0.0	800.6399999948537	88.88888823843509	0.0	4.120048121731332e-12	-7.105427357601002e-13	0.0	-2.692645223154387e-26	7.105427357601002e-14
1.99	88.88888823778802	0.0	0.00033917069939566537	184.78887593221108	0.0	-800.6399999948537	0.0	1.5326496041222866e-09	0.0	0.99999999999818	0.0	1.9078351748896032e-06	0.0	0.0	0.0002186218070556877	0.0	0.0	0.00021879699669149596	0.0	800.6399999948537	88.88888823843509	0.0	4.120048121731332e-12	-7.105427357601002e-13	0.0	-2.692645223154387e-26	7.105427357601002e-14
1.995	88.88888823778802	0.0	0.00033917069939566537	185.23332037665554	0.0	-800.6399999948537	0.0	1.5326496041222866e-09	0.0	0.99999999999818	0.0	1.9078351748896032e-06	0.0	0.0	0.0002186218070556877	0.0	0.0	0.0002187974357632649	0.0	800.6399999948537	88.88888823843509	0.0	4.120048121731332e-12	-7.105427357601002e-13	0.0	-2.692645223154387e-26	7.105427357601002e-14
2.0	88.88888823778802	0.0	0.00033917069939566537	185.67776482109997	0.0	-800.6399999948537	0.0	1.5326496041222866e-09	0.0	0.99999999999818	0.0	1.9078351748896032e-06	0.0	0.0	0.0002186218070556877	0.0	0.0	0.00021879787483503385	0.0	800.6399999948537	88.88888823843509	0.0	4.120048121731332e-12	-7.105427357601002e-13	0.0	-2.692645223154387e-26	7.105427357601002e-14
2.005	88.88888823778802	0.0	0.00033917069939566537	186.1222092655444	0.0	-800.6399999948537	0.0	1.5326496041222866e-09	0.0	0.99999999999818	0.0	1.9078351748896032e-06	0.0	0.0	0.0002186218070556877	0.0	0.0	0.0002187983139068028	0.0	800.6399999948537	88.88888823843509	0.0	4.120048121731332e-12	-7.105427357601002e-13	0.0	-2.692645223154387e-26	7.105427357601002e-14
2.01	88.88888823778802	0.0	0.00033917069939566537	186.56665370998883	0.0	-800.6399999948537	0.0	1.5326496041222866e-09	0.0	0.99999999999818	0.0	1.9078351748896032e-06	0.0	0.0	0.0002186218070556877	0.0	0.0	0.00021879875297857172	0.0	800.6399999948537	88.88888823843509	0.0	4.120048121731332e-12	-7.105427357601002e-13	0.0	-2.692645223154387e-26	7.105427357601002e-14
2.015	88.88888823778802	0.0	0.00033917069939566537	187.0110981544333	0.0	-800.6399999948537	0.0	1.5326496041222866e-09	0.0	0.99999999999818	0.0	1.9078351748896032e-06	0.0	0.0	0.0002186218070556877	0.0	0.0	0.00021879919205034068	0.0	800.6399999948537	88.88888823843509	0.0	4.120048121731332e-12	-7.105427357601002e-13	0.0	-2.692645223154387e-26	7.105427357601002e-14
2.02	88.88888823778802	0.0	0.00033917069939566537	187.45554259887774	0.0	-800.6399999948537	0.0	1.5326496041222866e-09	0.0	0.99999999999818	0.0	1.9078351748896032e-06	0.0	0.0	0.0002186218070556877	0.0	0.0	0.00021879963112210961	0.0	800.6399999948537	88.88888823843509	0.0	4.120048121731332e-12	-7.105427357601002e-13	0.0	-2.692645223154387e-26	7.105427357601002e-14
2.025	88.88888823778802	0.0	0.00033917069939566537	187.89998704332217	0.0	-800.6399999948537	0.0	1.5326496041222866e-09	0.0	0.99999999999818	0.0	1.9078351748896032e-06	0.0	0.0	0.0002186218070556877	0.0	0.0	0.00021880007019387855	0.0	800.6399999948537	88.88888823843509	0.0	4.120048121731332e-12	-7.105427357601002e-13	0.0	-2.692645223154387e-26	7.105427357601002e-14
2.03	88.88888823778802	0.0	0.00033917069939566537	188.34443148776663	0.0	-800.6399999948537	0.0	1.5326496041222866e-09	0.0	0.99999999999818	0.0	1.9078351748896032e-06	0.0	0.0	0.0002186218070556877	0.0	0.0	0.0002188005092656475	0.0	800.6399999948537	88.88888823843509	0.0	4.120048121731332e-12	-7.105427357601002e-13	0.0	-2.692645223154387e-26	7.105427357601002e-14
2.035	88.88888823778802	0.0	0.00033917069939566537	188.78887593221108	0.0	-800.6399999948537	0.0	1.5326496041222866e-09	0.0	0.99999999999818	0.0	1.9078351748896032e-06	0.0	0.0	0.0002186218070556877	0.0	0.0	0.00021880094833741644	0.0	800.6399999948537	88.88888823843509	0.0	4.120048121731332e-12	-7.105427357601002e-13	0.0	-2.692645223154387e-26	7.105427357601002e-14
2.04	88.88888823778802	0.0	0.00033917069939566537	189.23332037665554	0.0	-800.6399999948537	0.0	1.5326496041222866e-09	0.0	0.99999999999818	0.0	1.9078351748896032e-06	0.0	0.0	0.0002186218070556877	0.0	0.0	0.00021880138740918537	0.0	800.6399999948537	88.88888823843509	0.0	4.120048121731332e-12	-7.105427357601002e-13	0.0	-2.692645223154387e-26	7.105427357601002e-14
2.045	88.88888823778802	0.0	0.00033917069939566537	189.67776482109997	0.0	-800.6399999948537	0.0	1.5326496041222866e-09	0.0	0.99999999999818	0.0	1.9078351748896032e-06	0.0	0.0	0.0002186218070556877	0.0	0.0	0.00021880182648095433	0.0	800.6399999948537	88.88888823843509	0.0	4.120048121731332e-12	-7.105427357601002e-13	0.0	-2.692645223154387e-26	7.105427357601002e-14
2.05	88.88888823778802	0.0	0.00033917069939566537	190.1222092655444	0.0	-800.6399999948537	0.0	1.5326496041222866e-09	0.0	0.99999999999818	0.0	1.9078351748896032e-06	0.0	0.0	0.0002186218070556877	0.0	0.0	0.00021880226555272327	0.0	800.6399999948537	88.88888823843509	0.0	4.120048121731332e-12	-7.105427357601002e-13	0.0	-2.692645223154387e-26	7.105427357601002e-14
2.055	88.88888823778802	0.0	0.00033917069939566537	190.56665370998888	0.0	-800.6399999948537	0.0	1.5326496041222866e-09	0.0	0.99999999999818	0.0	1.9078351748896032e-06	0.0	0.0	0.0002186218070556877	0.0	0.0	0.00021880270462449223	0.0	800.6399999948537	88.88888823843509	0.0	4.120048121731332e-12	-7.105427357601002e-13	0.0	-2.692645223154387e-26	7.105427357601002e-14
2.06	88.88888823778802	0.0	0.00033917069939566537	191.0110981544333	0.0	-800.6399999948537	0.0	1.5326496041222866e-09	0.0	0.99999999999818	0.0	1.9078351748896032e-06	0.0	0.0	0.0002186218070556877	0.0	0.0	0.00021880314369626116	0.0	800.6399999948537	88.88888823843509	0.0	4.120048121731332e-12	-7.105427357601002e-13	0.0	-2.692645223154387e-26	7.105427357601002e-14
2.065	88.88888823778802	0.0	0.00033917069939566537	191.45554259887774	0.0	-800.6399999948537	0.0	1.5326496041222866e-09	0.0	0.99999999999818	0.0	1.9078351748896032e-06	0.0	0.0	0.0002186218070556877	0.0	0.0	0.0002188035827680301	0.0	800.6399999948537	88.88888823843509	0.0	4.120048121731332e-12	-7.105427357601002e-13	0.0	-2.692645223154387e-26	7.105427357601002e-14
2.07	88.88888823778802	0.0	0.00033917069939566537	191.89998704332217	0.0	-800.6399999948537	0.0	1.5326496041222866e-09	0.0	0.99999999999818	0.0	1.9078351748896032e-06	0.0	0.0	0.0002186218070556877	0.0	0.0	0.00021880402183979905	0.0	800.6399999948537	88.88888823843509	0.0	4.120048121731332e-12	-7.105427357601002e-13	0.0	-2.692645223154387e-26	7.105427357601002e-14
2.075	88.88888823778802	0.0	0.00033917069939566537	192.34443148776666	0.0	-800.6399999948537	0.0	1.5326496041222866e-09	0.0	0.99999999999818	0.0	1.9078351748896032e-06	0.0	0.0	0.0002186218070556877	0.0	0.0	0.000218804460911568	0.0	800.6399999948537	88.88888823843509	0.0	4.120048121731332e-12	-7.105427357601002e-13	0.0	-2.692645223154387e-26	7.105427357601002e-14
2.08	88.88888823778802	0.0	0.00033917069939566537	192.78887593221108	0.0	-800.6399999948537	0.0	1.5326496041222866e-09	0.0	0.99999999999818	0.0	1.9078351748896032e-06	0.0	0.0	0.0002186218070556877	0.0	0.0	0.00021880489998333692	0.0	800.6399999948537	88.88888823843509	0.0	4.120048121731332e-12	-7.105427357601002e-13	0.0	-2.692645223154387e-26	7.105427357601002e-14
2.085	88.88888823778802	0.0	0.00033917069939566537	193.2333203766555	0.0	-800.6399999948537	0.0	1.5326496041222866e-09	0.0	0.99999999999818	0.0	1.9078351748896032e-06	0.0	0.0	0.0002186218070556877	0.0	0.0	0.00021880533905510588	0.0	800.6399999948537	88.88888823843509	0.0	4.120048121731332e-12	-7.105427357601002e-13	0.0	-2.692645223154387e-26	7.105427357601002e-14
2.09	88.88888823778802	0.0	0.00033917069939566537	193.67776482109997	0.0	-800.6399999948537	0.0	1.5326496041222866e-09	0.0	0.99999999999818	0.0	1.9078351748896032e-06	0.0	0.0	0.0002186218070556877	0.0	0.0	0.0002188057781268748	0.0	800.6399999948537	88.88888823843509	0.0	4.120048121731332e-12	-7.105427357601002e-13	0.0	-2.692645223154387e-26	7.105427357601002e-14
2.095	88.88888823778802	0.0	0.00033917069939566537	194.12220926554443	0.0	-800.6399999948537	0.0	1.5326496041222866e-09	0.0	0.99999999999818	0.0	1.9078351748896032e-06	0.0	0.0	0.0002186218070556877	0.0	0.0	0.00021880621719864377	0.0	800.6399999948537	88.88888823843509	0.0	4.120048121731332e-12	-7.105427357601002e-13	0.0	-2.692645223154387e-26	7.105427357601002e-14
2.1	88.88888823778802	0.0	0.00033917069939566537	194.56665370998886	0.0	-800.6399999948537	0.0	1.5326496041222866e-09	0.0	0.99999999999818	0.0	1.9078351748896032e-06	0.0	0.0	0.0002186218070556877	0.0	0.0	0.0002188066562704127	0.0	800.6399999948537	88.88888823843509	0.0	4.120048121731332e-12	-7.105427357601002e-13	0.0	-2.692645223154387e-26	7.105427357601002e-14
2.105	88.88888823778802	0.0	0.00033917069939566537	195.0110981544333	0.0	-800.6399999948537	0.0	1.5326496041222866e-09	0.0	0.99999999999818	0.0	1.9078351748896032e-06	0.0	0.0	0.0002186218070556877	0.0	0.0	0.00021880709534218164	0.0	800.6399999948537	88.88888823843509	0.0	4.120048121731332e-12	-7.105427357601002e-13	0.0	-2.692645223154387e-26	7.105427357601002e-14
2.11	88.88888823778802	0.0	0.00033917069939566537	195.45554259887774	0.0	-800.6399999948537	0.0	1.5326496041222866e-09	0.0	0.99999999999818	0.0	1.9078351748896032e-06	0.0	0.0	0.0002186218070556877	0.0	0.0	0.0002188075344139506	0.0	800.6399999948537	88.88888823843509	0.0	4.120048121731332e-12	-7.105427357601002e-13	0.0	-2.692645223154387e-26	7.105427357601002e-14
2.115	88.88888823778802	0.0	0.00033917069939566537	195.8999870433222	0.0	-800.6399999948537	0.0	1.5326496041222866e-09	0.0	0.99999999999818	0.0	1.9078351748896032e-06	0.0	0.0	0.0002186218070556877	0.0	0.0	0.00021880797348571953	0.0	800.6399999948537	88.88888823843509	0.0	4.120048121731332e-12	-7.105427357601002e-13	0.0	-2.692645223154387e-26	7.105427357601002e-14
2.12	88.88888823778802	0.0	0.00033917069939566537	196.34443148776666	0.0	-800.6399999948537	0.0	1.5326496041222866e-09	0.0	0.99999999999818	0.0	1.9078351748896032e-06	0.0	0.0	0.0002186218070556877	0.0	0.0	0.00021880841255748847	0.0	800.6399999948537	88.88888823843509	0.0	4.120048121731332e-12	-7.105427357601002e-13	0.0	-2.692645223154387e-26	7.105427357601002e-14
2.125	88.88888823778802	0.0	0.00033917069939566537	196.78887593221108	0.0	-800.6399999948537	0.0	1.5326496041222866e-09	0.0	0.99999999999818	0.0	1.9078351748896032e-06	0.0	0.0	0.0002186218070556877	0.0	0.0	0.00021880885162925743	0.0	800.6399999948537	88.88888823843509	0.0	4.120048121731332e-12	-7.105427357601002e-13	0.0	-2.692645223154387e-26	7.105427357601002e-14
2.13	88.88888823778802	0.0	0.00033917069939566537	197.2333203766555	0.0	-800.6399999948537	0.0	1.5326496041222866e-09	0.0	0.99999999999818	0.0	1.9078351748896032e-06	0.0	0.0	0.0002186218070556877	0.0	0.0	0.00021880929070102636	0.0	800.6399999948537	88.88888823843509	0.0	4.120048121731332e-12	-7.105427357601002e-13	0.0	-2.692645223154387e-26	7.105427357601002e-14
2.135	88.88888823778802	0.0	0.00033917069939566537	197.67776482109994	0.0	-800.6399999948537	0.0	1.5326496041222866e-09	0.0	0.99999999999818	0.0	1.9078351748896032e-06	0.0	0.0	0.0002186218070556877	0.0	0.0	0.0002188097297727953	0.0	800.6399999948537	88.88888823843509	0.0	4.120048121731332e-12	-7.105427357601002e-13	0.0	-2.692645223154387e-26	7.105427357601002e-14
2.14	88.88888823778802	0.0	0.00033917069939566537	198.12220926554443	0.0	-800.6399999948537	0.0	1.5326496041222866e-09	0.0	0.99999999999818	0.0	1.9078351748896032e-06	0.0	0.0	0.0002186218070556877	0.0	0.0	0.00021881016884456425	0.0	800.6399999948537	88.88888823843509	0.0	4.120048121731332e-12	-7.105427357601002e-13	0.0	-2.692645223154387e-26	7.105427357601002e-14
2.145	88.88888823778802	0.0	0.00033917069939566537	198.56665370998886	0.0	-800.6399999948537	0.0	1.5326496041222866e-09	0.0	0.99999999999818	0.0	1.9078351748896032e-06	0.0	0.0	0.0002186218070556877	0.0	0.0	0.00021881060791633319	0.0	800.6399999948537	88.88888823843509	0.0	4.120048121731332e-12	-7.105427357601002e-13	0.0	-2.692645223154387e-26	7.105427357601002e-14
2.15	88.88888823778802	0.0	0.00033917069939566537	199.01109815443328	0.0	-800.6399999948537	0.0	1.5326496041222866e-09	0.0	0.99999999999818	0.0	1.9078351748896032e-06	0.0	0.0	0.0002186218070556877	0.0	0.0	0.00021881104698810215	0.0	800.6399999948537	88.88888823843509	0.0	4.120048121731332e-12	-7.105427357601002e-13	0.0	-2.692645223154387e-26	7.105427357601002e-14
2.155	88.88888823778802	0.0	0.00033917069939566537	199.45554259887774	0.0	-800.6399999948537	0.0	1.5326496041222866e-09	0.0	0.99999999999818	0.0	1.9078351748896032e-06	0.0	0.0	0.0002186218070556877	0.0	0.0	0.00021881148605987108	0.0	800.6399999948537	88.88888823843509	0.0	4.120048121731332e-12	-7.105427357601002e-13	0.0	-2.692645223154387e-26	7.105427357601002e-14
2.16	88.88888823778802	0.0	0.00033917069939566537	199.8999870433222	0.0	-800.6399999948537	0.0	1.5326496041222866e-09	0.0	0.99999999999818	0.0	1.9078351748896032e-06	0.0	0.0	0.0002186218070556877	0.0	0.0	0.00021881192513164	0.0	800.6399999948537	88.88888823843509	0.0	4.120048121731332e-12	-7.105427357601002e-13	0.0	-2.692645223154387e-26	7.105427357601002e-14
2.165	88.88888823778802	0.0	0.00033917069939566537	200.34443148776663	0.0	-800.6399999948537	0.0	1.5326496041222866e-09	0.0	0.99999999999818	0.0	1.9078351748896032e-06	0.0	0.0	0.0002186218070556877	0.0	0.0	0.00021881236420340897	0.0	800.6399999948537	88.88888823843509	0.0	4.120048121731332e-12	-7.105427357601002e-13	0.0	-2.692645223154387e-26	7.105427357601002e-14
2.17	88.88888823778802	0.0	0.00033917069939566537	200.78887593221108	0.0	-800.6399999948537	0.0	1.5326496041222866e-09	0.0	0.99999999999818	0.0	1.9078351748896032e-06	0.0	0.0	0.0002186218070556877	0.0	0.0	0.0002188128032751779	0.0	800.6399999948537	88.88888823843509	0.0	4.120048121731332e-12	-7.105427357601002e-13	0.0	-2.692645223154387e-26	7.105427357601002e-14
2.175	88.88888823778802	0.0	0.00033917069939566537	201.2333203766555	0.0	-800.6399999948537	0.0	1.5326496041222866e-09	0.0	0.99999999999818	0.0	1.9078351748896032e-06	0.0	0.0	0.0002186218070556877	0.0	0.0	0.00021881324234694684	0.0	800.6399999948537	88.88888823843509	0.0	4.120048121731332e-12	-7.105427357601002e-13	0.0	-2.692645223154387e-26	7.105427357601002e-14
2.18	88.88888823778802	0.0	0.00033917069939566537	201.67776482109997	0.0	-800.6399999948537	0.0	1.5326496041222866e-09	0.0	0.99999999999818	0.0	1.9078351748896032e-06	0.0	0.0	0.0002186218070556877	0.0	0.0	0.0002188136814187158	0.0	800.6399999948537	88.88888823843509	0.0	4.120048121731332e-12	-7.105427357601002e-13	0.0	-2.692645223154387e-26	7.105427357601002e-14
2.185	88.88888823778802	0.0	0.00033917069939566537	202.12220926554443	0.0	-800.6399999948537	0.0	1.5326496041222866e-09	0.0	0.99999999999818	0.0	1.9078351748896032e-06	0.0	0.0	0.0002186218070556877	0.0	0.0	0.00021881412049048473	0.0	800.6399999948537	88.88888823843509	0.0	4.120048121731332e-12	-7.105427357601002e-13	0.0	-2.692645223154387e-26	7.105427357601002e-14
2.19	88.88888823778802	0.0	0.00033917069939566537	202.56665370998886	0.0	-800.6399999948537	0.0	1.5326496041222866e-09	0.0	0.99999999999818	0.0	1.9078351748896032e-06	0.0	0.0	0.0002186218070556877	0.0	0.0	0.00021881455956225367	0.0	800.6399999948537	88.88888823843509	0.0	4.120048121731332e-12	-7.105427357601002e-13	0.0	-2.692645223154387e-26	7.105427357601002e-14
2.195	88.88888823778802	0.0	0.00033917069939566537	203.01109815443328	0.0	-800.6399999948537	0.0	1.5326496041222866e-09	0.0	0.99999999999818	0.0	1.9078351748896032e-06	0.0	0.0	0.0002186218070556877	0.0	0.0	0.00021881499863402263	0.0	800.6399999948537	88.88888823843509	0.0	4.120048121731332e-12	-7.105427357601002e-13	0.0	-2.692645223154387e-26	7.105427357601002e-14
2.2	88.88888823778802	0.0	0.00033917069939566537	203.45554259887777	0.0	-800.6399999948537	0.0	1.5326496041222866e-09	0.0	0.99999999999818	0.0	1.9078351748896032e-06	0.0	0.0	0.0002186218070556877	0.0	0.0	0.00021881543770579156	0.0	800.6399999948537	88.88888823843509	0.0	4.120048121731332e-12	-7.105427357601002e-13	0.0	-2.692645223154387e-26	7.105427357601002e-14
2.205	88.88888823778802	0.0	0.00033917069939566537	203.8999870433222	0.0	-800.6399999948537	0.0	1.5326496041222866e-09	0.0	0.99999999999818	0.0	1.9078351748896032e-06	0.0	0.0	0.0002186218070556877	0.0	0.0	0.00021881587677756052	0.0	800.6399999948537	88.88888823843509	0.0	4.120048121731332e-12	-7.105427357601002e-13	0.0	-2.692645223154387e-26	7.105427357601002e-14
2.21	88.88888823778802	0.0	0.00033917069939566537	204.34443148776663	0.0	-800.6399999948537	0.0	1.5326496041222866e-09	0.0	0.99999999999818	0.0	1.9078351748896032e-06	0.0	0.0	0.0002186218070556877	0.0	0.0	0.00021881631584932945	0.0	800.6399999948537	88.88888823843509	0.0	4.120048121731332e-12	-7.105427357601002e-13	0.0	-2.692645223154387e-26	7.105427357601002e-14
2.215	88.88888823778802	0.0	0.00033917069939566537	204.78887593221106	0.0	-800.6399999948537	0.0	1.5326496041222866e-09	0.0	0.99999999999818	0.0	1.9078351748896032e-06	0.0	0.0	0.0002186218070556877	0.0	0.0	0.00021881675492109839	0.0	800.6399999948537	88.88888823843509	0.0	4.120048121731332e-12	-7.105427357601002e-13	0.0	-2.692645223154387e-26	7.105427357601002e-14
2.22	88.88888823778802	0.0	0.00033917069939566537	205.23332037665554	0.0	-800.6399999948537	0.0	1.5326496041222866e-09	0.0	0.99999999999818	0.0	1.9078351748896032e-06	0.0	0.0	0.0002186218070556877	0.0	0.0	0.00021881719399286735	0.0	800.6399999948537	88.88888823843509	0.0	4.120048121731332e-12	-7.105427357601002e-13	0.0	-2.692645223154387e-26	7.105427357601002e-14
2.225	88.88888823778802	0.0	0.00033917069939566537	205.67776482109997	0.0	-800.6399999948537	0.0	1.5326496041222866e-09	0.0	0.99999999999818	0.0	1.9078351748896032e-06	0.0	0.0	0.0002186218070556877	0.0	0.0	0.00021881763306463628	0.0	800.6399999948537	88.88888823843509	0.0	4.120048121731332e-12	-7.105427357601002e-13	0.0	-2.692645223154387e-26	7.105427357601002e-14
2.23	88.88888823778802	0.0	0.00033917069939566537	206.1222092655444	0.0	-800.6399999948537	0.0	1.5326496041222866e-09	0.0	0.99999999999818	0.0	1.9078351748896032e-06	0.0	0.0	0.0002186218070556877	0.0	0.0	0.0002188180721364052	0.0	800.6399999948537	88.88888823843509	0.0	4.120048121731332e-12	-7.105427357601002e-13	0.0	-2.692645223154387e-26	7.105427357601002e-14
2.235	88.88888823778802	0.0	0.00033917069939566537	206.56665370998886	0.0	-800.6399999948537	0.0	1.5326496041222866e-09	0.0	0.99999999999818	0.0	1.9078351748896032e-06	0.0	0.0	0.0002186218070556877	0.0	0.0	0.00021881851120817417	0.0	800.6399999948537	88.88888823843509	0.0	4.120048121731332e-12	-7.105427357601002e-13	0.0	-2.692645223154387e-26	7.105427357601002e-14
2.24	88.88888823778802	0.0	0.00033917069939566537	207.0110981544333	0.0	-800.6399999948537	0.0	1.5326496041222866e-09	0.0	0.99999999999818	0.0	1.9078351748896032e-06	0.0	0.0	0.0002186218070556877	0.0	0.0	0.0002188189502799431	0.0	800.6399999948537	88.88888823843509	0.0	4.120048121731332e-12	-7.105427357601002e-13	0.0	-2.692645223154387e-26	7.105427357601002e-14
2.245	88.88888823778802	0.0	0.00033917069939566537	207.45554259887777	0.0	-800.6399999948537	0.0	1.5326496041222866e-09	0.0	0.99999999999818	0.0	1.9078351748896032e-06	0.0	0.0	0.0002186218070556877	0.0	0.0	0.00021881938935171204	0.0	800.6399999948537	88.88888823843509	0.0	4.120048121731332e-12	-7.105427357601002e-13	0.0	-2.692645223154387e-26	7.105427357601002e-14
2.25	88.88888823778802	0.0	0.00033917069939566537	207.8999870433222	0.0	-800.6399999948537	0.0	1.5326496041222866e-09	0.0	0.99999999999818	0.0	1.9078351748896032e-06	0.0	0.0	0.0002186218070556877	0.0	0.0	0.000218819828423481	0.0	800.6399999948537	88.88888823843509	0.0	4.120048121731332e-12	-7.105427357601002e-13	0.0	-2.692645223154387e-26	7.105427357601002e-14
2.255	88.88888823778802	0.0	0.00033917069939566537	208.34443148776663	0.0	-800.6399999948537	0.0	1.5326496041222866e-09	0.0	0.99999999999818	0.0	1.9078351748896032e-06	0.0	0.0	0.0002186218070556877	0.0	0.0	0.00021882026749524993	0.0	800.6399999948537	88.88888823843509	0.0	4.120048121731332e-12	-7.105427357601002e-13	0.0	-2.692645223154387e-26	7.105427357601002e-14
2.26	88.88888823778802	0.0	0.00033917069939566537	208.78887593221106	0.0	-800.6399999948537	0.0	1.5326496041222866e-09	0.0	0.99999999999818	0.0	1.9078351748896032e-06	0.0	0.0	0.0002186218070556877	0.0	0.0	0.0002188207065670189	0.0	800.6399999948537	88.88888823843509	0.0	4.120048121731332e-12	-7.105427357601002e-13	0.0	-2.692645223154387e-26	7.105427357601002e-14
2.265	88.88888823778802	0.0	0.00033917069939566537	209.23332037665554	0.0	-800.6399999948537	0.0	1.5326496041222866e-09	0.0	0.99999999999818	0.0	1.9078351748896032e-06	0.0	0.0	0.0002186218070556877	0.0	0.0	0.00021882114563878782	0.0	800.6399999948537	88.88888823843509	0.0	4.120048121731332e-12	-7.105427357601002e-13	0.0	-2.692645223154387e-26	7.105427357601002e-14
2.27	88.88888823778802	0.0	0.00033917069939566537	209.67776482109997	0.0	-800.6399999948537	0.0	1.5326496041222866e-09	0.0	0.99999999999818	0.0	1.9078351748896032e-06	0.0	0.0	0.0002186218070556877	0.0	0.0	0.00021882158471055676	0.0	800.6399999948537	88.88888823843509	0.0	4.120048121731332e-12	-7.105427357601002e-13	0.0	-2.692645223154387e-26	7.105427357601002e-14
2.275	88.88888823778802	0.0	0.00033917069939566537	210.1222092655444	0.0	-800.6399999948537	0.0	1.5326496041222866e-09	0.0	0.99999999999818	0.0	1.9078351748896032e-06	0.0	0.0	0.0002186218070556877	0.0	0.0	0.00021882202378232572	0.0	800.6399999948537	88.88888823843509	0.0	4.120048121731332e-12	-7.105427357601002e-13	0.0	-2.692645223154387e-26	7.105427357601002e-14
2.28	88.88888823778802	0.0	0.00033917069939566537	210.56665370998883	0.0	-800.6399999948537	0.0	1.5326496041222866e-09	0.0	0.99999999999818	0.0	1.9078351748896032e-06	0.0	0.0	0.0002186218070556877	0.0	0.0	0.00021882246285409465	0.0	800.6399999948537	88.88888823843509	0.0	4.120048121731332e-12	-7.105427357601002e-13	0.0	-2.692645223154387e-26	7.105427357601002e-14
2.285	88.88888823778802	0.0	0.00033917069939566537	211.0110981544333	0.0	-800.6399999948537	0.0	1.5326496041222866e-09	0.0	0.99999999999818	0.0	1.9078351748896032e-06	0.0	0.0	0.0002186218070556877	0.0	0.0	0.00021882290192586358	0.0	800.6399999948537	88.88888823843509	0.0	4.120048121731332e-12	-7.105427357601002e-13	0.0	-2.692645223154387e-26	7.105427357601002e-14
2.29	88.88888823778802	0.0	0.00033917069939566537	211.45554259887774	0.0	-800.6399999948537	0.0	1.5326496041222866e-09	0.0	0.99999999999818	0.0	1.9078351748896032e-06	0.0	0.0	0.0002186218070556877	0.0	0.0	0.00021882334099763254	0.0	800.6399999948537	88.88888823843509	0.0	4.120048121731332e-12	-7.105427357601002e-13	0.0	-2.692645223154387e-26	7.105427357601002e-14
2.295	88.88888823778802	0.0	0.00033917069939566537	211.8999870433222	0.0	-800.6399999948537	0.0	1.5326496041222866e-09	0.0	0.99999999999818	0.0	1.9078351748896032e-06	0.0	0.0	0.0002186218070556877	0.0	0.0	0.00021882378006940148	0.0	800.6399999948537	88.88888823843509	0.0	4.120048121731332e-12	-7.105427357601002e-13	0.0	-2.692645223154387e-26	7.105427357601002e-14
2.3	88.88888823778802	0.0	0.00033917069939566537	212.34443148776663	0.0	-800.6399999948537	0.0	1.5326496041222866e-09	0.0	0.99999999999818	0.0	1.9078351748896032e-06	0.0	0.0	0.0002186218070556877	0.0	0.0	0.0002188242191411704	0.0	800.6399999948537	88.88888823843509	0.0	4.120048121731332e-12	-7.105427357601002e-13	0.0	-2.692645223154387e-26	7.105427357601002e-14
2.305	88.88888823778802	0.0	0.00033917069939566537	212.78887593221108	0.0	-800.6399999948537	0.0	1.5326496041222866e-09	0.0	0.99999999999818	0.0	1.9078351748896032e-06	0.0	0.0	0.0002186218070556877	0.0	0.0	0.00021882465821293937	0.0	800.6399999948537	88.88888823843509	0.0	4.120048121731332e-12	-7.105427357601002e-13	0.0	-2.692645223154387e-26	7.105427357601002e-14
2.31	88.88888823778802	0.0	0.00033917069939566537	213.23332037665554	0.0	-800.6399999948537	0.0	1.5326496041222866e-09	0.0	0.99999999999818	0.0	1.9078351748896032e-06	0.0	0.0	0.0002186218070556877	0.0	0.0	0.0002188250972847083	0.0	800.6399999948537	88.88888823843509	0.0	4.120048121731332e-12	-7.105427357601002e-13	0.0	-2.692645223154387e-26	7.105427357601002e-14
2.315	88.88888823778802	0.0	0.00033917069939566537	213.67776482109997	0.0	-800.6399999948537	0.0	1.5326496041222866e-09	0.0	0.99999999999818	0.0	1.9078351748896032e-06	0.0	0.0	0.0002186218070556877	0.0	0.0	0.00021882553635647726	0.0	800.6399999948537	88.88888823843509	0.0	4.120048121731332e-12	-7.105427357601002e-13	0.0	-2.692645223154387e-26	7.105427357601002e-14
2.32	88.88888823778802	0.0	0.00033917069939566537	214.1222092655444	0.0	-800.6399999948537	0.0	1.5326496041222866e-09	0.0	0.99999999999818	0.0	1.9078351748896032e-06	0.0	0.0	0.0002186218070556877	0.0	0.0	0.0002188259754282462	0.0	800.6399999948537	88.88888823843509	0.0	4.120048121731332e-12	-7.105427357601002e-13	0.0	-2.692645223154387e-26	7.105427357601002e-14
2.325	88.88888823778802	0.0	0.00033917069939566537	214.56665370998888	0.0	-800.6399999948537	0.0	1.5326496041222866e-09	0.0	0.99999999999818	0.0	1.9078351748896032e-06	0.0	0.0	0.0002186218070556877	0.0	0.0	0.00021882641450001513	0.0	800.6399999948537	88.88888823843509	0.0	4.120048121731332e-12	-7.105427357601002e-13	0.0	-2.692645223154387e-26	7.105427357601002e-14
2.33	88.88888823778802	0.0	0.00033917069939566537	215.0110981544333	0.0	-800.6399999948537	0.0	1.5326496041222866e-09	0.0	0.99999999999818	0.0	1.9078351748896032e-06	0.0	0.0	0.0002186218070556877	0.0	0.0	0.0002188268535717841	0.0	800.6399999948537	88.88888823843509	0.0	4.120048121731332e-12	-7.105427357601002e-13	0.0	-2.692645223154387e-26	7.105427357601002e-14
2.335	88.88888823778802	0.0	0.00033917069939566537	215.45554259887774	0.0	-800.6399999948537	0.0	1.5326496041222866e-09	0.0	0.99999999999818	0.0	1.9078351748896032e-06	0.0	0.0	0.0002186218070556877	0.0	0.0	0.00021882729264355302	0.0	800.6399999948537	88.88888823843509	0.0	4.120048121731332e-12	-7.105427357601002e-13	0.0	-2.692645223154387e-26	7.105427357601002e-14
2.34	88.88888823778802	0.0	0.00033917069939566537	215.89998704332217	0.0	-800.6399999948537	0.0	1.5326496041222866e-09	0.0	0.99999999999818	0.0	1.9078351748896032e-06	0.0	0.0	0.0002186218070556877	0.0	0.0	0.00021882773171532196	0.0	800.6399999948537	88.88888823843509	0.0	4.120048121731332e-12	-7.105427357601002e-13	0.0	-2.692645223154387e-26	7.105427357601002e-14
2.345	88.88888823778802	0.0	0.00033917069939566537	216.34443148776666	0.0	-800.6399999948537	0.0	1.5326496041222866e-09	0.0	0.99999999999818	0.0	1.9078351748896032e-06	0.0	0.0	0.0002186218070556877	0.0	0.0	0.00021882817078709092	0.0	800.6399999948537	88.88888823843509	0.0	4.120048121731332e-12	-7.105427357601002e-13	0.0	-2.692645223154387e-26	7.105427357601002e-14
2.35	88.88888823778802	0.0	0.00033917069939566537	216.78887593221108	0.0	-800.6399999948537	0.0	1.5326496041222866e-09	0.0	0.99999999999818	0.0	1.9078351748896032e-06	0.0	0.0	0.0002186218070556877	0.0	0.0	0.00021882860985885985	0.0	800.6399999948537	88.88888823843509	0.0	4.120048121731332e-12	-7.105427357601002e-13	0.0	-2.692645223154387e-26	7.105427357601002e-14
2.355	88.88888823778802	0.0	0.00033917069939566537	217.2333203766555	0.0	-800.6399999948537	0.0	1.5326496041222866e-09	0.0	0.99999999999818	0.0	1.9078351748896032e-06	0.0	0.0	0.0002186218070556877	0.0	0.0	0.00021882904893062878	0.0	800.6399999948537	88.88888823843509	0.0	4.120048121731332e-12	-7.105427357601002e-13	0.0	-2.692645223154387e-26	7.105427357601002e-14
2.36	88.88888823778802	0.0	0.00033917069939566537	217.67776482109997	0.0	-800.6399999948537	0.0	1.5326496041222866e-09	0.0	0.99999999999818	0.0	1.9078351748896032e-06	0.0	0.0	0.0002186218070556877	0.0	0.0	0.00021882948800239774	0.0	800.6399999948537	88.88888823843509	0.0	4.120048121731332e-12	-7.105427357601002e-13	0.0	-2.692645223154387e-26	7.105427357601002e-14
2.365	88.88888823778802	0.0	0.00033917069939566537	218.12220926554443	0.0	-800.6399999948537	0.0	1.5326496041222866e-09	0.0	0.99999999999818	0.0	1.9078351748896032e-06	0.0	0.0	0.0002186218070556877	0.0	0.0	0.00021882992707416668	0.0	800.6399999948537	88.88888823843509	0.0	4.120048121731332e-12	-7.105427357601002e-13	0.0	-2.692645223154387e-26	7.105427357601002e-14
2.37	88.88888823778802	0.0	0.00033917069939566537	218.56665370998886	0.0	-800.6399999948537	0.0	1.5326496041222866e-09	0.0	0.99999999999818	0.0	1.9078351748896032e-06	0.0	0.0	0.0002186218070556877	0.0	0.0	0.00021883036614593564	0.0	800.6399999948537	88.88888823843509	0.0	4.120048121731332e-12	-7.105427357601002e-13	0.0	-2.692645223154387e-26	7.105427357601002e-14
2.375	88.88888823778802	0.0	0.00033917069939566537	219.0110981544333	0.0	-800.6399999948537	0.0	1.5326496041222866e-09	0.0	0.99999999999818	0.0	1.9078351748896032e-06	0.0	0.0	0.0002186218070556877	0.0	0.0	0.00021883080521770457	0.0	800.6399999948537	88.88888823843509	0.0	4.120048121731332e-12	-7.105427357601002e-13	0.0	-2.692645223154387e-26	7.105427357601002e-14
2.38	88.88888823778802	0.0	0.00033917069939566537	219.45554259887774	0.0	-800.6399999948537	0.0	1.5326496041222866e-09	0.0	0.99999999999818	0.0	1.9078351748896032e-06	0.0	0.0	0.0002186218070556877	0.0	0.0	0.0002188312442894735	0.0	800.6399999948537	88.88888823843509	0.0	4.120048121731332e-12	-7.105427357601002e-13	0.0	-2.692645223154387e-26	7.105427357601002e-14
2.385	88.88888823778802	0.0	0.00033917069939566537	219.89998704332217	0.0	-800.6399999948537	0.0	1.5326496041222866e-09	0.0	0.99999999999818	0.0	1.9078351748896032e-06	0.0	0.0	0.0002186218070556877	0.0	0.0	0.00021883168336124246	0.0	800.6399999948537	88.88888823843509	0.0	4.120048121731332e-12	-7.105427357601002e-13	0.0	-2.692645223154387e-26	7.105427357601002e-14
2.39	88.88888823778802	0.0	0.00033917069939566537	220.34443148776666	0.0	-800.6399999948537	0.0	1.5326496041222866e-09	0.0	0.99999999999818	0.0	1.9078351748896032e-06	0.0	0.0	0.0002186218070556877	0.0	0.0	0.0002188321224330114	0.0	800.6399999948537	88.88888823843509	0.0	4.120048121731332e-12	-7.105427357601002e-13	0.0	-2.692645223154387e-26	7.105427357601002e-14
2.395	88.88888823778802	0.0	0.00033917069939566537	220.78887593221108	0.0	-800.6399999948537	0.0	1.5326496041222866e-09	0.0	0.99999999999818	0.0	1.9078351748896032e-06	0.0	0.0	0.0002186218070556877	0.0	0.0	0.00021883256150478033	0.0	800.6399999948537	88.88888823843509	0.0	4.120048121731332e-12	-7.105427357601002e-13	0.0	-2.692645223154387e-26	7.105427357601002e-14
2.4	88.88888823778802	0.0	0.00033917069939566537	221.2333203766555	0.0	-800.6399999948537	0.0	1.5326496041222866e-09	0.0	0.99999999999818	0.0	1.9078351748896032e-06	0.0	0.0	0.0002186218070556877	0.0	0.0	0.0002188330005765493	0.0	800.6399999948537	88.88888823843509	0.0	4.120048121731332e-12	-7.105427357601002e-13	0.0	-2.692645223154387e-26	7.105427357601002e-14
2.405	88.88888823778802	0.0	0.00033917069939566537	221.67776482109994	0.0	-800.6399999948537	0.0	1.5326496041222866e-09	0.0	0.99999999999818	0.0	1.9078351748896032e-06	0.0	0.0	0.0002186218070556877	0.0	0.0	0.00021883343964831822	0.0	800.6399999948537	88.88888823843509	0.0	4.120048121731332e-12	-7.105427357601002e-13	0.0	-2.692645223154387e-26	7.105427357601002e-14
2.41	88.88888823778802	0.0	0.00033917069939566537	222.12220926554443	0.0	-800.6399999948537	0.0	1.5326496041222866e-09	0.0	0.99999999999818	0.0	1.9078351748896032e-06	0.0	0.0	0.0002186218070556877	0.0	0.0	0.00021883387872008718	0.0	800.6399999948537	88.88888823843509	0.0	4.120048121731332e-12	-7.105427357601002e-13	0.0	-2.692645223154387e-26	7.105427357601002e-14
2.415	88.88888823778802	0.0	0.00033917069939566537	222.56665370998886	0.0	-800.6399999948537	0.0	1.5326496041222866e-09	0.0	0.99999999999818	0.0	1.9078351748896032e-06	0.0	0.0	0.0002186218070556877	0.0	0.0	0.00021883431779185612	0.0	800.6399999948537	88.88888823843509	0.0	4.120048121731332e-12	-7.105427357601002e-13	0.0	-2.692645223154387e-26	7.105427357601002e-14
2.42	88.88888823778802	0.0	0.00033917069939566537	223.01109815443328	0.0	-800.6399999948537	0.0	1.5326496041222866e-09	0.0	0.99999999999818	0.0	1.9078351748896032e-06	0.0	0.0	0.0002186218070556877	0.0	0.0	0.00021883475686362505	0.0	800.6399999948537	88.88888823843509	0.0	4.120048121731332e-12	-7.105427357601002e-13	0.0	-2.692645223154387e-26	7.105427357601002e-14
2.425	88.88888823778802	0.0	0.00033917069939566537	223.45554259887774	0.0	-800.6399999948537	0.0	1.5326496041222866e-09	0.0	0.99999999999818	0.0	1.9078351748896032e-06	0.0	0.0	0.0002186218070556877	0.0	0.0	0.000218835195935394	0.0	800.6399999948537	88.88888823843509	0.0	4.120048121731332e-12	-7.105427357601002e-13	0.0	-2.692645223154387e-26	7.105427357601002e-14
2.43	88.88888823778802	0.0	0.00033917069939566537	223.8999870433222	0.0	-800.6399999948537	0.0	1.5326496041222866e-09	0.0	0.99999999999818	0.0	1.9078351748896032e-06	0.0	0.0	0.0002186218070556877	0.0	0.0	0.00021883563500716294	0.0	800.6399999948537	88.88888823843509	0.0	4.120048121731332e-12	-7.105427357601002e-13	0.0	-2.692645223154387e-26	7.105427357601002e-14
2.435	88.88888823778802	0.0	0.00033917069939566537	224.34443148776663	0.0	-800.6399999948537	0.0	1.5326496041222866e-09	0.0	0.99999999999818	0.0	1.9078351748896032e-06	0.0	0.0	0.0002186218070556877	0.0	0.0	0.00021883607407893188	0.0	800.6399999948537	88.88888823843509	0.0	4.120048121731332e-12	-7.105427357601002e-13	0.0	-2.692645223154387e-26	7.105427357601002e-14
2.44	88.88888823778802	0.0	0.00033917069939566537	224.78887593221108	0.0	-800.6399999948537	0.0	1.5326496041222866e-09	0.0	0.99999999999818	0.0	1.9078351748896032e-06	0.0	0.0	0.0002186218070556877	0.0	0.0	0.00021883651315070084	0.0	800.6399999948537	88.88888823843509	0.0	4.120048121731332e-12	-7.105427357601002e-13	0.0	-2.692645223154387e-26	7.105427357601002e-14
2.445	88.88888823778802	0.0	0.00033917069939566537	225.2333203766555	0.0	-800.6399999948537	0.0	1.5326496041222866e-09	0.0	0.99999999999818	0.0	1.9078351748896032e-06	0.0	0.0	0.0002186218070556877	0.0	0.0	0.00021883695222246977	0.0	800.6399999948537	88.88888823843509	0.0	4.120048121731332e-12	-7.105427357601002e-13	0.0	-2.692645223154387e-26	7.105427357601002e-14
2.45	88.88888823778802	0.0	0.00033917069939566537	225.6777648211	0.0	-800.6399999948537	0.0	1.5326496041222866e-09	0.0	0.99999999999818	0.0	1.9078351748896032e-06	0.0	0.0	0.0002186218070556877	0.0	0.0	0.0002188373912942387	0.0	800.6399999948537	88.88888823843509	0.0	4.120048121731332e-12	-7.105427357601002e-13	0.0	-2.692645223154387e-26	7.105427357601002e-14
2.455	88.88888823778802	0.0	0.00033917069939566537	226.12220926554443	0.0	-800.6399999948537	0.0	1.5326496041222866e-09	0.0	0.99999999999818	0.0	1.9078351748896032e-06	0.0	0.0	0.0002186218070556877	0.0	0.0	0.00021883783036600766	0.0	800.6399999948537	88.88888823843509	0.0	4.120048121731332e-12	-7.105427357601002e-13	0.0	-2.692645223154387e-26	7.105427357601002e-14
2.46	88.88888823778802	0.0	0.00033917069939566537	226.56665370998886	0.0	-800.6399999948537	0.0	1.5326496041222866e-09	0.0	0.99999999999818	0.0	1.9078351748896032e-06	0.0	0.0	0.0002186218070556877	0.0	0.0	0.0002188382694377766	0.0	800.6399999948537	88.88888823843509	0.0	4.120048121731332e-12	-7.105427357601002e-13	0.0	-2.692645223154387e-26	7.105427357601002e-14
2.465	88.88888823778802	0.0	0.00033917069939566537	227.01109815443328	0.0	-800.6399999948537	0.0	1.5326496041222866e-09	0.0	0.99999999999818	0.0	1.9078351748896032e-06	0.0	0.0	0.0002186218070556877	0.0	0.0	0.00021883870850954556	0.0	800.6399999948537	88.88888823843509	0.0	4.120048121731332e-12	-7.105427357601002e-13	0.0	-2.692645223154387e-26	7.105427357601002e-14
2.47	88.88888823778802	0.0	0.00033917069939566537	227.45554259887777	0.0	-800.6399999948537	0.0	1.5326496041222866e-09	0.0	0.99999999999818	0.0	1.9078351748896032e-06	0.0	0.0	0.0002186218070556877	0.0	0.0	0.0002188391475813145	0.0	800.6399999948537	88.88888823843509	0.0	4.120048121731332e-12	-7.105427357601002e-13	0.0	-2.692645223154387e-26	7.105427357601002e-14
2.475	88.88888823778802	0.0	0.00033917069939566537	227.8999870433222	0.0	-800.6399999948537	0.0	1.5326496041222866e-09	0.0	0.99999999999818	0.0	1.9078351748896032e-06	0.0	0.0	0.0002186218070556877	0.0	0.0	0.00021883958665308342	0.0	800.6399999948537	88.88888823843509	0.0	4.120048121731332e-12	-7.105427357601002e-13	0.0	-2.692645223154387e-26	7.105427357601002e-14
2.48	88.88888823778802	0.0	0.00033917069939566537	228.34443148776663	0.0	-800.6399999948537	0.0	1.5326496041222866e-09	0.0	0.99999999999818	0.0	1.9078351748896032e-06	0.0	0.0	0.0002186218070556877	0.0	0.0	0.00021884002572485238	0.0	800.6399999948537	88.88888823843509	0.0	4.120048121731332e-12	0.07467665534216887	0.0	-0.011807849395968234	0.007560441892145556
2.485	88.88888823778802	0.0	0.00033917069939566537	228.78887593221106	0.0	-800.6399999948537	0.0	1.5326496041222866e-09	0.0	0.99999999999818	0.0	1.9078351748896032e-06	0.0	0.0	0.0002186218070556877	0.0	0.0	0.00021884046479662132	0.0	800.6399999948537	88.88888823843509	0.0	4.120048121731332e-12	-0.2886300578010056	0.0	0.051656128605092666	0.029321607372154362
2.49	88.88440763573143	0.0	0.0010503961632457454	229.2333167753651	0.0	-800.6399994184026	0.0	3.619498929727402e-05	0.0	0.9999999999981503	0.0	1.923426191699174e-06	0.0	0.0	0.00022040840597870287	0.0	0.0	0.00022920956542789626	0.0	800.6399994184026	88.8844076391145	0.0	0.0007084709678781422	-2.1255780233017183	0.0	0.3045999930781003	0.21472920362462156
2.495	88.87036123562572	0.0	0.002945928484637936	229.67770025216424	0.0	-800.6399904545979	0.0	0.00010692106256948121	0.0	0.9999999999977442	0.0	2.124040464581934e-06	0.0	0.0	0.00024339710827128586	0.0	0.0	0.00025984019355932363	0.0	800.6399904545979	88.8703612473384	0.0	0.002568399997879241	-1.8170485326026646	0.0	0.18072318095336912	0.18260137562371762
2.5	88.86820697916671	0.0	0.002696689904207146	230.1220431270302	0.0	-800.639977793452	0.0	0.0001067091535048887	0.0	0.9999999999971348	0.0	2.3939356330753724e-06	0.0	0.0	0.0002743248164026575	0.0	0.0	0.0002904101142155424	0.0	800.639977793452	88.86820699105964	0.0	0.00227120036950757	-0.007323422281046987	0.0	-0.1279674399795375	0.012817682399257313
2.505	88.86830595588896	0.0	0.00213050083959394	230.56638440948055	0.0	-800.6399679929358	0.0	0.00010269713059612831	0.0	0.9999999999964735	0.0	2.655932700273044e-06	0.0	0.0	0.00030434746879321736	0.0	0.0	0.00031983067497185234	0.0	800.6399679929358	88.8683059659523	0.0	0.0016584443599533213	0.05733674074974715	0.0	-0.12282271300465983	0.013554674717465097
2.51	88.86840478542643	0.0	0.001623481719251344	231.01072618644335	0.0	-800.6399611068113	0.0	9.76964236281006e-05	0.0	0.9999999999957762	0.0	2.906598004264958e-06	0.0	0.0	0.0003330715967715294	0.0	0.0	0.00034781863870891406	0.0	800.6399611068113	88.86840479336259	0.0	0.0011068722632430349	0.01974981666208464	0.0	-0.10369423828898927	0.010555827922299437
2.515	88.86850345564207	0.0	0.0011819155036783902	231.4550684571481	0.0	-800.6399568109562	0.0	9.201083180884837e-05	0.0	0.9999999999950585	0.0	3.143844860030474e-06	0.0	0.0	0.00036025808384788	0.0	0.0	0.00037417780036958946	0.0	800.6399568109562	88.86850346131702	0.0	0.0006231379280425481	0.01971722334441021	0.0	-0.08970325078770953	0.009184466287322342
2.52	88.86860196154676	0.0	0.0008087221438560365	231.89941122078247	0.0	-800.6399547569359	0.0	8.591631402732114e-05	0.0	0.9999999999943344	0.0	3.366312280569297e-06	0.0	0.0	0.0003857509724000882	0.0	0.0	0.00039879101129502016	0.0	800.6399547569359	88.86860196497761	0.0	0.00021040321156073964	0.01968429767510808	0.0	-0.0753924232256533	0.007791976036153021
2.525	88.86870030413928	0.0	0.0005039942826487691	232.34375447652567	0.0	-800.6399545880935	0.0	7.965701982456992e-05	0.0	0.9999999999936162	0.0	3.5732900712448093e-06	0.0	0.0	0.0004094688801175292	0.0	0.0	0.00042161106651770905	0.0	800.6399545880935	88.86870030547185	0.0	-0.00013111300624246906	0.019652116354270298	0.0	-0.0612954232865853	0.006436873925348734
2.53	88.86879848926034	0.0	0.00026552753977560154	232.78809822357496	0.0	-800.6399559528963	0.0	7.344290052480077e-05	0.0	0.9999999999929141	0.0	3.764636006368326e-06	0.0	0.0	0.0004313955091367999	0.0	0.0	0.00044265090769406016	0.0	800.6399559528963	88.86879848874071	0.0	-0.00040358981749790427	0.019621530025896543	0.0	-0.047838558000692914	0.005170620922232474
2.535	88.8688965264965	0.0	8.932843171560761e-05	233.23244246116704	0.0	-800.6399585156054	0.0	6.744874299133539e-05	0.0	0.9999999999922359	0.0	3.940688847987032e-06	0.0	0.0	0.0004515696787290237	0.0	0.0	0.0004619735492283907	0.0	800.6399585156054	88.86889652444057	0.0	-0.0006110809072314851	0.01959317700629034	0.0	-0.035346597923869245	0.004041379182892274
2.54	88.86899442816205	0.0	-2.9913197722413383e-05	233.67678718859398	0.0	-800.6399619644109	0.0	6.18144417407448e-05	0.0	0.9999999999915864	0.0	4.102180537127188e-06	0.0	0.0	0.0004700752631575126	0.0	0.0	0.00047968208235190063	0.0	800.6399619644109	88.8689944249258	0.0	-0.000759026516309814	0.028248365608381697	0.0	-0.025215520840674393	0.003786545458344963
2.545	88.86909220837909	0.0	-9.839670461200984e-05	234.12113240521447	0.0	-800.6399660172377	0.0	5.6646309550634474e-05	0.0	0.9999999999909686	0.0	4.250150406244021e-06	0.0	0.0	0.0004870313611486559	0.0	0.0	0.0004959100546631154	0.0	800.6399660172377	88.86909220433222	0.0	-0.0008538107213055922	-0.004009210343269842	0.0	-0.01038301578598822	0.0011130174499470458
2.55	88.86866902982037	0.0	-5.3541422701967126e-05	234.5654776582162	0.0	-800.6399703641622	0.0	4.4659521684340584e-05	0.0	0.9999999999903967	0.0	4.382622500492746e-06	0.0	0.0	0.0005022115449562198	0.0	0.0	0.0005087040652010439	0.0	800.6399703641622	88.86866902593734	0.0	-0.0008324970796502971	-0.28049747218024856	0.0	0.03229374509898652	0.02823503459746909
2.555	88.86653388675687	0.0	0.00021590774850292592	235.00981580121015	0.0	-800.6399738927031	0.0	1.3825535367554371e-05	0.0	0.9999999999900776	0.0	4.4548390753443185e-06	0.0	0.0	0.0005104869548560719	0.0	0.0	0.0005126647893313925	0.0	800.6399738927031	88.86653388515346	0.0	-0.0005758644667960562	-0.38042467353610243	0.0	0.04249319346933141	0.038279054811511753
2.56	88.86535772050452	0.0	0.0003213589651859199	235.4541447511315	0.0	-800.6399764043728	0.0	3.087243565428337e-06	0.0	0.9999999999900105	0.0	4.469909150944797e-06	0.0	0.0	0.0005122138583137902	0.0	0.0	0.0005135492194645323	0.0	800.6399764043728	88.86535771982655	0.0	-0.0004730811861727169	-0.09515039294451337	0.0	0.0018044387961757584	0.0095167501159085
2.565	88.865427237019	0.0	0.00026923135383524933	235.89847165160137	0.0	-800.6399789112198	0.0	1.0149722040401405e-05	0.0	0.9999999999899384	0.0	4.486033321770464e-06	0.0	0.0	0.000514061552186726	0.0	0.0	0.0005164569006452619	0.0	800.6399789112198	88.86542723585805	0.0	-0.0005280751816448357	0.03747576456613426	0.0	-0.011570383971915411	0.003922125335929337
2.57	88.86552485656748	0.0	0.00024502906816982863	236.34279903185222	0.0	-800.6399816385552	0.0	1.7614064742881325e-05	0.0	0.999999999989782	0.0	4.520753102375464e-06	0.0	0.0	0.0005180401459753398	0.0	0.0	0.0005215029584944483	0.0	800.6399816385552	88.86552485515078	0.0	-0.000558449126211079	0.01998774932516767	0.0	-0.0035714478268111184	0.0020304318818058745
2.575	88.86562242331955	0.0	0.00024834916918605604	236.78712690006523	0.0	-800.6399844553166	0.0	2.4897515058297064e-05	0.0	0.99999999998954	0.0	4.573951635086229e-06	0.0	0.0	0.0005241362487766339	0.0	0.0	0.0005286355711604674	0.0	800.6399844553166	88.8656224218733	0.0	-0.0005645849487880276	0.03651987159353591	0.0	-0.0014001816010495607	0.0036546703404332775
2.58	88.86571994427175	0.0	0.00027467788518602596	237.23145525599492	0.0	-800.6399872513343	0.0	3.181123544976408e-05	0.0	0.9999999999892127	0.0	4.644931360542467e-06	0.0	0.0	0.0005322699261759995	0.0	0.0	0.0005377488188223097	0.0	800.6399872513343	88.86571994298899	0.0	-0.0005508724537095847	-0.0755584134606598	0.0	0.017875758575119974	0.007764416648614366
2.585	88.86479674592309	0.0	0.00045643067670520014	237.67578207164135	0.0	-800.6399896570862	0.0	3.153664622177034e-05	0.0	0.9999999999888347	0.0	4.725614714820313e-06	0.0	0.0	0.0005415155575302598	0.0	0.0	0.0005467834024648328	0.0	800.6399896570862	88.86479674626811	0.0	-0.000383450905569908	-0.2568071579929665	0.0	0.04175286821831793	0.0260179204397432
2.59	88.8634529527652	0.0	0.0006715837864202398	238.1201025347736	0.0	-800.6399910334661	0.0	3.065030192781551e-05	0.0	0.9999999999884692	0.0	4.8023459195655054e-06	0.0	0.0	0.000550308305908067	0.0	0.0	0.0005555640671711604	0.0	800.6399910334661	88.8634529551169	0.0	-0.00018192229497332053	-0.20707938744758775	0.0	0.028527122817139944	0.02090350914126438
2.595	88.86289494529045	0.0	0.000749892136892261	238.56441800724804	0.0	-800.6399917212057	0.0	3.577378923588962e-05	0.0	0.9999999999880729	0.0	4.884197782427936e-06	0.0	0.0	0.0005596878384827789	0.0	0.0	0.0005658125028731954	0.0	800.6399917212057	88.86289494837618	0.0	-0.00011815577199699036	-0.034364323726994904	0.0	0.0010543716183451883	0.0034380495120391696
2.6	88.86293032008298	0.0	0.0007455753601622349	239.0087325156473	0.0	-800.6399923628838	0.0	4.372454132303095e-05	0.0	0.9999999999875824	0.0	4.9835972722287636e-06	0.0	0.0	0.0005710781809855997	0.0	0.0	0.0005783386612679706	0.0	800.6399923628838	88.86293032310041	0.0	-0.00014013875415464015	-0.0029385381886015693	0.0	-0.0020403733794056673	0.0003577447443814807
2.605	88.86267754608211	0.0	0.0007941531095441512	239.45304678370556	0.0	-800.6399930315903	0.0	4.982202127956258e-05	0.0	0.99999999998699	0.0	5.101117874631079e-06	0.0	0.0	0.0005845450500327463	0.0	0.0	0.0005926116189986202	0.0	800.6399930315903	88.86267754955982	0.0	-0.00011244487612117623	-0.10779927445838666	0.0	0.013639266864839647	0.01086587004080432
2.61	88.86189007215862	0.0	0.0009158395999415951	239.89735835254487	0.0	-800.6399933623945	0.0	5.3807334742801554e-05	0.0	0.9999999999863198	0.0	5.230883139846329e-06	0.0	0.0	0.0005994150540814042	0.0	0.0	0.0006080262849366711	0.0	800.6399933623945	88.86189007687733	0.0	-1.3812725202467352e-05	-0.17730814292680938	0.0	0.020800039390343826	0.017852400171067675
2.615	88.86104092913767	0.0	0.0010284826156649373	240.34166559337183	0.0	-800.6399931903889	0.0	5.767115648653975e-05	0.0	0.999999999985582	0.0	5.370104592013759e-06	0.0	0.0	0.0006153686573353808	0.0	0.0	0.0006245478542682573	0.0	800.6399931903889	88.86104093505898	0.0	7.409644773001329e-05	-0.14428473907509937	0.0	0.012009040268924442	0.014478364195636934
2.62	88.86047588910397	0.0	0.0010851667451044977	240.78596927095728	0.0	-800.6399927233218	0.0	6.210589680676466e-05	0.0	0.9999999999847671	0.0	5.5197615250413066e-06	0.0	0.0	0.000632518078610336	0.0	0.0	0.0006423398831177703	0.0	800.6399927233218	88.86047589566927	0.0	0.00010418947323424635	-0.0941834689873152	0.0	0.0023828137572931563	0.00942136064052667
2.625	88.86002117724355	0.0	0.001120560299068369	241.2302705424096	0.0	-800.639992187574	0.0	6.632965414374465e-05	0.0	0.9999999999838671	0.0	5.680451064498571e-06	0.0	0.0	0.000650931743456229	0.0	0.0	0.0006613419293127654	0.0	800.639992187574	88.86002118423987	0.0	0.00011103029523706689	-0.10427656388714013	0.0	0.0027943743683238186	0.010431399860143012
2.63	88.85938307075726	0.0	0.0011784570884676542	241.67456915669987	0.0	-800.6399915748907	0.0	6.965718032720793e-05	0.0	0.9999999999828858	0.0	5.8506362696692e-06	0.0	0.0	0.0006704335314402432	0.0	0.0	0.0006812972415404189	0.0	800.6399915748907	88.85938307846368	0.0	0.0001386892294163721	-0.1495033956442645	0.0	0.007707678778024597	0.014970194929028378
2.635	88.85855498259004	0.0	0.0012537226317631135	242.11886404482894	0.0	-800.6399907723704	0.0	7.218915479242291e-05	0.0	0.999999999981832	0.0	6.028066722521949e-06	0.0	0.0	0.0006907655636517167	0.0	0.0	0.0007019779110215311	0.0	800.6399907723704	88.85855499124754	0.0	0.0001824320350875902	-0.17079369878392944	0.0	0.00804026295044728	0.017098284525825378
2.64	88.85771654596748	0.0	0.0013167766670760998	242.56315469785926	0.0	-800.6399897742399	0.0	7.430427514471013e-05	0.0	0.9999999999807112	0.0	6.211244473448785e-06	0.0	0.0	0.0007117561877097226	0.0	0.0	0.0007232645178493847	0.0	800.6399897742399	88.8577165554693	0.0	0.00021294266535695717	-0.1614884314695549	0.0	0.003878761665116521	0.016153500639351184
2.645	88.8569366120843	0.0	0.0013598931429549418	243.00744131842777	0.0	-800.6399886791811	0.0	7.610861026823618e-05	0.0	0.9999999999795254	0.0	6.399337972322578e-06	0.0	0.0	0.0007333101149887854	0.0	0.0	0.0007450680286142646	0.0	800.6399886791811	88.85693662221188	0.0	0.00022264200573491065	-0.15627786149181588	0.0	0.0010104458984349566	0.015628112807811716
2.65	88.85612542134415	0.0	0.001399013225214178	243.45172401064778	0.0	-800.6399875552244	0.0	7.743268590278195e-05	0.0	0.9999999999782779	0.0	6.591385370877004e-06	0.0	0.0	0.0007553171257965205	0.0	0.0	0.0007672508591072223	0.0	800.6399875552244	88.85612543206646	0.0	0.0002276432946879445	-0.17242804613649318	0.0	0.001569953289905587	0.017243519318219557
2.655	88.85520266428131	0.0	0.0014453514320734928	243.8960023797307	0.0	-800.6399863903468	0.0	7.815265293497641e-05	0.0	0.9999999999769762	0.0	6.785990465269233e-06	0.0	0.0	0.0007776172269578588	0.0	0.0	0.0007896399449618466	0.0	800.6399863903468	88.85520267571445	0.0	0.00023941031582939143	-0.19478323015131122	0.0	0.002750771761229127	0.019480265268589404
2.66	88.85419065406415	0.0	0.0014936030759995064	244.34027588675556	0.0	-800.6399851580965	0.0	7.836794617755554e-05	0.0	0.9999999999756287	0.0	6.981725442731959e-06	0.0	0.0	0.0008000468031817952	0.0	0.0	0.0008120907077872582	0.0	800.6399851580965	88.85419066625805	0.0	0.0002528919487184682	-0.20675163735361934	0.0	0.00215377664855234	0.02067628552285308
2.665	88.85314547667186	0.0	0.0015350839806621338	244.78454423473724	0.0	-800.6399838733685	0.0	7.826388498268045e-05	0.0	0.9999999999742423	0.0	7.177568342621888e-06	0.0	0.0	0.0008224887464049498	0.0	0.0	0.0008345116592762827	0.0	800.6399838733685	88.85314548955358	0.0	0.00025958493230535237	-0.21128808638669247	0.0	0.0005894882664603137	0.021128890871355915
2.67	88.85207302752953	0.0	0.0015699971613758734	245.22880729876834	0.0	-800.6399825733645	0.0	7.79044002745803e-05	0.0	0.9999999999728215	0.0	7.372836046562294e-06	0.0	0.0	0.0008448647770275326	0.0	0.0	0.000856829625982439	0.0	800.6399825733645	88.85207304102073	0.0	0.0002598136275824916	-0.21976167704712188	0.0	-0.00015659567568171488	0.021976173283983984
2.675	88.85093894489826	0.0	0.0016040541280041942	245.67306486120017	0.0	-800.6399812760272	0.0	7.723298699880785e-05	0.0	0.9999999999713723	0.0	7.566828741893983e-06	0.0	0.0	0.0008670947024258988	0.0	0.0	0.0008789552469535412	0.0	800.6399812760272	88.8509389589991	0.0	0.0002594144507539596	-0.23477300068653525	0.0	0.0001054844039488464	0.023477302438380643
2.68	88.84972410769862	0.0	0.0016396453406958774	246.11731655168518	0.0	-800.6399799757261	0.0	7.6237619194678e-05	0.0	0.999999999969902	0.0	7.758726982767758e-06	0.0	0.0	0.0008890846210226489	0.0	0.0	0.0009007957160534442	0.0	800.6399799757261	88.84972412244493	0.0	0.00026092383684822915	-0.2502995416818976	0.0	0.0003446353428722561	0.025029977894454398
2.685	88.84844050559644	0.0	0.0016744430564556614	246.56156198771666	0.0	-800.639978667307	0.0	7.502484995562595e-05	0.0	0.9999999999684168	0.0	7.947835133951779e-06	0.0	0.0	0.0009107548188920496	0.0	0.0	0.0009222887523587423	0.0	800.639978667307	88.84844052098836	0.0	0.00026213754219432217	-0.26227805939266585	0.0	2.259681679465938e-05	0.026227806036609104
2.69	88.84710349343497	0.0	0.0017062454961159744	247.00580086911225	0.0	-800.6399773586014	0.0	7.372087367202462e-05	0.0	0.9999999999669216	0.0	8.1337781456869e-06	0.0	0.0	0.0009320623184974864	0.0	0.0	0.0009434082269758629	0.0	800.6399773586014	88.84710350943573	0.0	0.00026092023853305663	-0.2727437062586565	0.0	-0.0004546555219332219	0.027274408520690588
2.695	88.84571072190745	0.0	0.0017357828520931978	247.4500329304509	0.0	-800.6399760609578	0.0	7.236777707032898e-05	0.0	0.9999999999654197	0.0	8.31640033419712e-06	0.0	0.0	0.0009529892797923505	0.0	0.0	0.0009641400679702302	0.0	800.6399760609578	88.84571073848912	0.0	0.0002580298552248998	-0.28502861305952365	0.0	-0.0005980829455904399	0.028502924054532627
2.7	88.84425046766303	0.0	0.0017649057556053003	247.8942578635051	0.0	-800.6399747778694	0.0	7.095302631544269e-05	0.0	0.9999999999639136	0.0	8.4955642883476e-06	0.0	0.0	0.000973519956620472	0.0	0.0	0.000984466612728008	0.0	800.6399747778694	88.84425048482652	0.0	0.0002553416724088435	-0.2992589557029154	0.0	-0.00046025042014912035	0.029925930962770186
2.705	88.84271802314358	0.0	0.0017941279780670737	248.3384753144076	0.0	-800.6399735062246	0.0	6.950111363004877e-05	0.0	0.9999999999624067	0.0	8.671132661192336e-06	0.0	0.0	0.0009936386101811784	0.0	0.0	0.0010043772151403126	0.0	800.6399735062246	88.84271804089826	0.0	0.00025339398993604376	-0.3134273109073623	0.0	-0.00036885109643706147	0.03134275279450606
2.71	88.8411174477087	0.0	0.0018227109554248323	248.78268493043794	0.0	-800.6399722439485	0.0	6.809066937030396e-05	0.0	0.9999999999609008	0.0	8.843104740858764e-06	0.0	0.0	0.0010133451588998819	0.0	0.0	0.0010238837550360083	0.0	800.6399722439485	88.84111746605109	0.0	0.0002514483414311554	-0.326602081879912	0.0	-0.00043597932477001684	0.03266023728729851
2.715	88.83945220802231	0.0	0.0018501998809221545	249.2268863816823	0.0	-800.6399709926137	0.0	6.67922185019058e-05	0.0	0.9999999999593957	0.0	9.01168100264613e-06	0.0	0.0	0.0010326625755536685	0.0	0.0	0.0010430183161583822	0.0	800.6399709926137	88.83945222694008	0.0	0.00024901427318961854	-0.33962688545064645	0.0	-0.0005141932516170097	0.033962727469331225
2.72	88.83772007858595	0.0	0.001877021711563588	249.6710793413505	0.0	-800.6399697540121	0.0	6.562665135898906e-05	0.0	0.9999999999578906	0.0	9.177177284322761e-06	0.0	0.0	0.0010516270524848115	0.0	0.0	0.001061818966890615	0.0	800.6399697540121	88.83772009807385	0.0	0.0002464626979236427	-0.35344828721832755	0.0	-0.0004765345663897335	0.03534486084606394
2.725	88.83591669014334	0.0	0.0019038015287419733	250.11526346371747	0.0	-800.6399685272056	0.0	6.459135542103556e-05	0.0	0.9999999999563838	0.0	9.339922147127253e-06	0.0	0.0	0.0010702762400378767	0.0	0.0	0.001080323027183889	0.0	800.6399685272056	88.83591671020731	0.0	0.0002443604369729626	-0.36796565318463575	0.0	-0.00036296092291036636	0.036796583219672344
2.73	88.8340402087729	0.0	0.0019307017537801626	250.55943838647653	0.0	-800.6399673094667	0.0	6.370163447614781e-05	0.0	0.9999999999548733	0.0	9.500254766414674e-06	0.0	0.0	0.0010886490048455859	0.0	0.0	0.0010985722012017305	0.0	800.6399673094667	88.83404022942207	0.0	0.00024280972568129183	-0.3825590971118231	0.0	-0.00027298849610842024	0.03825591945120811
2.735	88.83209119567644	0.0	0.0019575517709598893	251.0036037451693	0.0	-800.6399660986018	0.0	6.299038324910382e-05	0.0	0.9999999999533565	0.0	9.65857944438882e-06	0.0	0.0	0.001106791676527791	0.0	0.0	0.0011166176167521566	0.0	800.6399660986018	88.83209121691704	0.0	0.00024156815062543376	-0.3970250760258883	0.0	-0.0002301686717198441	0.03970251427441086
2.74	88.83006967574077	0.0	0.001984304354689431	251.44775917791603	0.0	-800.6399648935059	0.0	6.247843243676643e-05	0.0	0.9999999999518299	0.0	9.815373577025366e-06	0.0	0.0	0.00112475896063362	0.0	0.0	0.0011345163691982565	0.0	800.6399648935059	88.83006969757832	0.0	0.00024050371690991718	-0.41166083239877105	0.0	-0.0001884413574324556	0.04116608755291111
2.745	88.8279739375749	0.0	0.002011153806784106	251.8919043184745	0.0	-800.6399636930935	0.0	6.216138819026081e-05	0.0	0.9999999999502889	0.0	9.971134322009873e-06	0.0	0.0	0.001142607827237345	0.0	0.0	0.001152324295158138	0.0	800.6399636930935	88.82797396001891	0.0	0.0002397224871051561	-0.4267284633944731	0.0	-0.00011699437429255386	0.04267284794324042
2.75	88.82580180111643	0.0	0.002038309757941065	252.3360387901286	0.0	-800.6399624955881	0.0	6.202466458803326e-05	0.0	0.9999999999487292	0.0	1.0126330537821544e-05	0.0	0.0	0.0011603920035630631	0.0	0.0	0.0011700930526911822	0.0	800.6399624955881	88.82580182418096	0.0	0.00023935089896501784	-0.4421676189470721	0.0	-3.341761856272815e-05	0.044216762020987066
2.755	88.82355191384097	0.0	0.0020658263640468194	252.78016220709108	0.0	-800.6399612989355	0.0	6.206004675959099e-05	0.0	0.999999999947147	0.0	1.0281400905665714e-05	0.0	0.0	0.0011781617587740126	0.0	0.0	0.0011878719464697277	0.0	800.6399612989355	88.82355193754177	0.0	0.0002393652695237922	-0.45779660300079666	0.0	3.315749264800251e-05	0.04577966042015694
2.76	88.8212235505456	0.0	0.0020936646058765545	253.22427417872794	0.0	-800.6399601014859	0.0	6.226365507104286e-05	0.0	0.9999999999455372	0.0	1.0436771179433181e-05	0.0	0.0	0.0011959658806723038	0.0	0.0	0.001205709169732873	0.0	800.6399601014859	88.821223574898	0.0	0.00023965103337276992	-0.4735765249227105	0.0	7.826769651552229e-05	0.047357653139033715
2.765	88.81881573691524	0.0	0.0021218230058943533	253.66837431045622	0.0	-800.6399589021005	0.0	6.262460377482268e-05	0.0	0.9999999999438962	0.0	1.059285060886815e-05	0.0	0.0	0.00121385126582416	0.0	0.0	0.001223649797182755	0.0	800.6399589021005	88.81881576193526	0.0	0.00024013411280829258	-0.4896050212058375	0.0	0.00011573725707489176	0.048960503488534646
2.77	88.81632698511902	0.0	0.002150358061280064	254.11246220145847	0.0	-800.639957699831	0.0	6.312218335365224e-05	0.0	0.9999999999422191	0.0	1.0750008147506782e-05	0.0	0.0	0.0012318601931905011	0.0	0.0	0.001241732970681831	0.0	800.639957699831	88.8163270108242	0.0	0.0002408055834500895	-0.5059542706097394	0.0	0.00015326473760041067	0.05059542938233781
2.775	88.81375569981424	0.0	0.0021793170699992022	254.5565374429945	0.0	-800.6399564937415	0.0	6.373313014391272e-05	0.0	0.9999999999405021	0.0	1.0908555885347091e-05	0.0	0.0	0.001250028425650759	0.0	0.0	0.001259991167543852	0.0	800.6399564937415	88.81375572622373	0.0	0.00024165743471785535	-0.522603398853742	0.0	0.00018550373496631183	0.052260343177702055
2.78	88.81110051830896	0.0	0.002208697808146179	255.00059961888445	0.0	-800.6399552830347	0.0	6.443796642071852e-05	0.0	0.9999999999387418	0.0	1.1068751945748326e-05	0.0	0.0	0.0012683855419630945	0.0	0.0	0.0012784512851254164	0.0	800.6399552830347	88.81110054544239	0.0	0.00024264172439324746	-0.5395057197127073	0.0	0.0002054401740427862	0.053950575882782896
2.785	88.80836021493509	0.0	0.0022384726880242626	255.44464830658285	0.0	-800.6399540672134	0.0	6.522015453292296e-05	0.0	0.9999999999369348	0.0	1.1230810176553293e-05	0.0	0.0	0.0012869560472852117	0.0	0.0	0.001297135483095054	0.0	800.6399540672134	88.80836024281194	0.0	0.0002436930162555776	-0.5566588698203627	0.0	0.0002134309586715475	0.05566589107365997
2.79	88.8055334580727	0.0	0.0022686247050513046	255.88868307723124	0.0	-800.6399528460729	0.0	6.606266508149802e-05	0.0	0.9999999999350784	0.0	1.1394903000271825e-05	0.0	0.0	0.0013057596997813274	0.0	0.0	0.0013160610425578345	0.0	800.6399528460729	88.80553348671262	0.0	0.00024476382530930034	-0.5740952598995838	0.0	0.0002143348624460523	0.05740952999098703
2.795	88.80261875915187	0.0	0.0022991507834193145	256.33270349488197	0.0	-800.6399516195856	0.0	6.694791066160446e-05	0.0	0.99999999993317	0.0	1.1561159046361632e-05	0.0	0.0	0.0013248112393015393	0.0	0.0	0.0013352402061984786	0.0	800.6399516195856	88.80261878857486	0.0	0.0002458283845259855	-0.5918361313670555	0.0	0.00021090855121584873	0.05918361689470656
2.8	88.79961459691337	0.0	0.002330044138461112	256.7767091160091	0.0	-800.6399503878359	0.0	6.786089271405492e-05	0.0	0.9999999999312076	0.0	1.1729665543086287e-05	0.0	0.0	0.0013441206614685638	0.0	0.0	0.0013546809199310058	0.0	800.6399503878359	88.79961462713969	0.0	0.0002468645788097476	-0.6098768628367187	0.0	0.00020252767066598724	0.060987689646437276
2.805	88.79651950306061	0.0	0.002361286584229917	257.22069948959967	0.0	-800.6399491510335	0.0	6.879139672054984e-05	0.0	0.9999999999291894	0.0	1.1900477993688167e-05	0.0	0.0	0.0013636943264854792	0.0	0.0	0.0013743882034254937	0.0	800.6399491510335	88.79651953411054	0.0	0.00024784453118620477	-0.6282075580460382	0.0	0.00018841640456605845	0.06282075863016205
2.81	88.7933320308746	0.0	0.00239285740421846	257.66467415738725	0.0	-800.6399479095298	0.0	6.973362840720997e-05	0.0	0.9999999999271137	0.0	1.2073632198983582e-05	0.0	0.0	0.001383536336823643	0.0	0.0	0.0013943654164148274	0.0	800.6399479095298	88.79333206276831	0.0	0.0002487413383510951	-0.6468304843927797	0.0	0.00016973316737056926	0.0646830506662407
2.815	88.79005069432894	0.0	0.0024247434391205616	258.10863265378833	0.0	-800.6399466637887	0.0	7.068509455390173e-05	0.0	0.9999999999249791	0.0	1.2249153733799204e-05	0.0	0.0	0.0014036496231423176	0.0	0.0	0.001414615204376936	0.0	800.6399466637887	88.79005072708662	0.0	0.00024953747658280196	-0.6657552658469494	0.0	0.00014851045080444792	0.06657552824111096
2.82	88.78667396636979	0.0	0.0024569398613360255	258.55257450567325	0.0	-800.639945414338	0.0	7.164664297860979e-05	0.0	0.999999999922784	0.0	1.2427065967372073e-05	0.0	0.0	0.0014240368633588116	0.0	0.0	0.0014351404556717108	0.0	800.639945414338	88.78667400001189	0.0	0.000250224151940291	-0.684987018219374	0.0	0.00012603289306081002	0.06849870298139661
2.825	88.78320031346253	0.0	0.002489446930115734	258.9964992322467	0.0	-800.639944161738	0.0	7.262316083759454e-05	0.0	0.9999999999205268	0.0	1.2607399309480116e-05	0.0	0.0	0.00144470154217699	0.0	0.0	0.0014559454587261805	0.0	800.639944161738	88.7832003480099	0.0	0.00025079641285150495	-0.7045243071729601	0.0	0.00010273654306244156	0.07045243146636862
2.83	88.77962821577373	0.0	0.0025222695650425685	259.44040634507854	0.0	-800.6399429065704	0.0	7.3623757766751e-05	0.0	0.9999999999182054	0.0	1.2790201733929567e-05	0.0	0.0	0.0014656491569901044	0.0	0.0	0.001477037111685822	0.0	800.6399429065704	88.77962825124764	0.0	0.00025125085491707047	-0.724364662945239	0.0	7.900005109867402e-05	0.07243646672531577
2.835	88.7759561589806	0.0	0.002555420382990504	259.8842953481608	0.0	-800.6399416494271	0.0	7.466110766355991e-05	0.0	0.9999999999158177	0.0	1.2975548640585457e-05	0.0	0.0	0.0014868883479862423	0.0	0.0	0.0014984259435002912	0.0	800.6399416494271	88.7759561954031	0.0	0.00025158690781329127	-0.7445083998320001	0.0	5.5550913251627704e-05	0.07445084019044443
2.84	88.77218262154004	0.0	0.0025889223519424387	260.32816573789836	0.0	-800.6399403908928	0.0	7.575058011186857e-05	0.0	0.9999999999133605	0.0	1.3163550639747172e-05	0.0	0.0	0.0015084317901720588	0.0	0.0	0.0015201268861806797	0.0	800.6399403908928	88.77218265893417	0.0	0.0002518081085686612	-0.7649572617658862	0.0	3.31860932863383e-05	0.07649572624857415
2.845	88.76830607510183	0.0	0.0026228091286605074	260.7720170030685	0.0	-800.6399391315259	0.0	7.690965117256764e-05	0.0	0.9999999999108306	0.0	1.3354359486489545e-05	0.0	0.0	0.0015302968733981737	0.0	0.0	0.0015421598782607373	0.0	800.6399391315259	88.76830611349202	0.0	0.000251921387269133	-0.7857118852006314	0.0	1.2432693100070042e-05	0.07857118852989957
2.85	88.76432499225257	0.0	0.002657124355488954	261.2158486248058	0.0	-800.6399378718442	0.0	7.815747165098409e-05	0.0	0.9999999999082234	0.0	1.3548172815923233e-05	0.0	0.0	0.0015525062449800407	0.0	0.0	0.001564550344575811	0.0	800.6399378718442	88.76432503166498	0.0	0.00025193552496662394	-0.806771563801334	0.0	-6.450952510777504e-06	0.0806771563827125
2.855	88.76023784989863	0.0	0.0026919214048566837	261.6596600766193	0.0	-800.6399366123195	0.0	7.951428404616225e-05	0.0	0.9999999999055342	0.0	1.3745237652389897e-05	0.0	0.0	0.001575088211822095	0.0	0.0	0.0015873295090100587	0.0	800.6399366123195	88.76023789036161	0.0	0.0002518602774109891	-0.8281356222390457	0.0	-2.3291675973124634e-05	0.082813562256659
2.86	88.75604312617463	0.0	0.0027272636097817205	262.10345082440716	0.0	-800.6399353533727	0.0	8.100067625489834e-05	0.0	0.9999999999027567	0.0	1.3945852219821454e-05	0.0	0.0	0.0015980769478696403	0.0	0.0	0.0016105344934456147	0.0	800.6399353533727	88.75604316771893	0.0	0.00025170628685415683	-0.8498042354077029	0.0	-3.791574435783704e-05	0.0849804236253547
2.865	88.75173929659863	0.0	0.00276322415219757	262.5472203264535	0.0	-800.6399340953689	0.0	8.263687240810538e-05	0.0	0.9999999998998836	0.0	1.4150365887595277e-05	0.0	0.0	0.0016215124879043143	0.0	0.0	0.0016342082135513422	0.0	800.6399340953689	88.7517393392579	0.0	0.0002514849829277836	-0.8717780937144445	0.0	-5.02048114545441e-05	0.08717780951600665
2.87	88.74732483314845	0.0	0.002799885303840388	262.9909680334102	0.0	-800.6399328386154	0.0	8.444219726608837e-05	0.0	0.9999999998969071	0.0	1.4359177552550442e-05	0.0	0.0	0.0016454405421368072	0.0	0.0	0.0016583991211321322	0.0	800.6399328386154	88.7473248769597	0.0	0.00025120811376245025	-0.8940578532786958	0.0	-6.0153497396104845e-05	0.08940578553023026
2.875	88.74279820490668	0.0	0.002837337369817054	263.4346933882819	0.0	-800.6399315833612	0.0	8.643468838479214e-05	0.0	0.9999999998938178	0.0	1.4572732885602057e-05	0.0	0.0	0.0016699121806921038	0.0	0.0	0.0016831608353720174	0.0	800.6399315833612	88.74279824991059	0.0	0.00025088718136460897	-0.9166440793277294	0.0	-6.78537048898169e-05	0.09166440818391325
2.88	88.7381578778957	0.0	0.0028756776866366613	263.8783958264115	0.0	-800.6399303297989	0.0	8.863079115787665e-05	0.0	0.9999999998906056	0.0	1.4791520718095116e-05	0.0	0.0	0.0016949834195161414	0.0	0.0	0.001708551686713276	0.0	800.6399303297989	88.73815792413717	0.0	0.0002505330841925261	-0.9395374890182495	0.0	-7.344526701852365e-05	0.09395374918889211
2.885	88.73340231390901	0.0	0.0029150097109344937	264.3220747754619	0.0	-800.6399290780687	0.0	9.104513685380659e-05	0.0	0.999999999887259	0.0	1.5016068761970994e-05	0.0	0.0	0.0017207147299430116	0.0	0.0	0.0017346341971478465	0.0	800.6399290780687	88.7334023614374	0.0	0.0002501559686617793	-0.962739036987396	0.0	-7.70890645575519e-05	0.0962739040073759
2.89	88.72852996964552	0.0	0.002955442083737924	264.7657296553924	0.0	-800.639927828262	0.0	9.369044605401281e-05	0.0	0.9999999998837656	0.0	1.5246938923946009e-05	0.0	0.0	0.0017471705017393807	0.0	0.0	0.0017614745328458118	0.0	800.639927828262	88.7285300185152	0.0	0.00024976512816092457	-0.9862497541926512	0.0	-7.896834365589914e-05	0.09862497573541218
2.895	88.72353929688343	0.0	0.002997087658500576	265.20935987843325	0.0	-800.6399265804263	0.0	9.657757251068772e-05	0.0	0.999999999880112	0.0	1.5484722556057927e-05	0.0	0.0	0.0017744184988572065	0.0	0.0	0.0017891419693482173	0.0	800.6399265804263	88.72353934715403	0.0	0.0002493688769852498	-1.0100705501460066	0.0	-7.929054588654577e-05	0.1010070553258161
2.9	88.718428743385	0.0	0.0030400626022539343	265.65296484906304	0.0	-800.6399253345701	0.0	9.971565808925157e-05	0.0	0.9999999998762833	0.0	1.573003596450234e-05	0.0	0.0	0.0018025293447842974	0.0	0.0	0.0018177084011476356	0.0	800.6399253345701	88.71842879512178	0.0	0.00024897445139964396	-1.034202120942259	0.0	-7.827591249596954e-05	0.10342021239045032
2.905	88.71319675402444	0.0	0.003084485658640611	266.09654396399173	0.0	-800.6399240906685	0.0	0.00010311235809010355	0.0	0.999999999872264	0.0	1.598351639815911e-05	0.0	0.0	0.0018315760628633071	0.0	0.0	0.0018472479158186585	0.0	800.6399240906685	88.7131968072988	0.0	0.00024858798732472717	-1.0586449254172219	0.0	-7.614164765394461e-05	0.10586449281554161
2.91	88.70784177204018	0.0	0.0031304775900498905	266.5400966121487	0.0	-800.6399228486684	0.0	0.00010677411127720723	0.0	0.999999999868037	0.0	1.6245818664814885e-05	0.0	0.0	0.0018616336885393919	0.0	0.0	0.0018778364455058795	0.0	800.6399228486684	88.70784182692992	0.0	0.0002482145656265017	-1.0833991478515752	0.0	-7.30917087626716e-05	0.10833991503171476
2.915	88.70236224055436	0.0	0.0031781607774722842	266.98362217467866	0.0	-800.6399216084942	0.0	0.00011070643446958303	0.0	0.9999999998635846	0.0	1.6517612453948553e-05	0.0	0.0	0.0018927789625740271	0.0	0.0	0.0019095515028061231	0.0	800.6399216084942	88.70236229714413	0.0	0.0002478582896593484	-1.1084646371216422	0.0	-6.931333864785812e-05	0.11084646392887565
2.92	88.69675660437383	0.0	0.003227658962628677	267.4271200249456	0.0	-800.6399203700516	0.0	0.00011491421997195602	0.0	0.9999999998588873	0.0	1.6799580405841054e-05	0.0	0.0	0.0019250901097812865	0.0	0.0	0.0019424720018582783	0.0	800.6399203700516	88.69675666275552	0.0	0.0002475223726023742	-1.133840867886704	0.0	-6.497458362188304e-05	0.11338408697483836
2.925	88.69102331185768	0.0	0.0032790971361344825	267.8705895285456	0.0	-800.6399191332326	0.0	0.0001194020073713831	0.0	0.999999999853925	0.0	1.7092416898551317e-05	0.0	0.0	0.001958646700025528	0.0	0.0	0.0019766781572971293	0.0	800.6399191332326	88.69102337213089	0.0	0.0002472092434505786	-1.1595269516675444	0.0	-6.022040885808343e-05	0.11595269532313275
2.93	88.68516081662473	0.0	0.0033326015538235687	268.314030043329	0.0	-800.6399178979184	0.0	0.00012417420597298737	0.0	0.9999999998486756	0.0	1.7396827456173483e-05	0.0	0.0	0.0019935295804126628	0.0	0.0	0.002012251446930331	0.0	800.6399178979184	88.6851608788972	0.0	0.0002469206709736564	-1.1855216830539916	0.0	-5.516941603525915e-05	0.11855216843376731
2.935	88.67916757898952	0.0	0.00338829985160329	268.75744091943045	0.0	-800.639916663983	0.0	0.00012923525492272462	0.0	0.9999999998431158	0.0	1.7713528636871926e-05	0.0	0.0	0.0020298208624599167	0.0	0.0	0.002049274620287178	0.0	800.639916663983	88.67916764337758	0.0	0.00024665790116109074	-1.211823599557486	0.0	-4.9911838305735915e-05	0.1211823600585355
2.94	88.67304206708314	0.0	0.0034463212211830736	269.20082149930545	0.0	-800.639915431295	0.0	0.0001345897169342095	0.0	0.999999999837221	0.0	1.8043248238797383e-05	0.0	0.0	0.00206760394569208	0.0	0.0	0.002087831734018131	0.0	800.639915431295	88.67304213371236	0.0	0.00024642179924858667	-1.2384310487741839	0.0	-4.4510536737575384e-05	0.1238431049574062
2.945	88.6667827576199	0.0	0.0035067966009346063	269.64417111777135	0.0	-800.6399141997194	0.0	0.00014024230765865634	0.0	0.9999999998309647	0.0	1.838672565846591e-05	0.0	0.0	0.0021069635587087107	0.0	0.0	0.0021280081957082125	0.0	800.6399141997194	88.66678282662564	0.0	0.0002462129799483651	-1.265342263063	0.0	-3.900281323402494e-05	0.12653422636641098
2.95	88.6603881362801	0.0	0.0035698588623847846	270.0874891020517	0.0	-800.6399129691188	0.0	0.00014619786802305712	0.0	0.9999999998243184	0.0	1.874471224891841e-05	0.0	0.0	0.002147985800226194	0.0	0.0	0.0021698907997658714	0.0	800.6399129691188	88.66038820780808	0.0	0.0002460319334761059	-1.2925528870572598	0.0	-0.0013100248588178926	0.12925535509235928
2.955	88.65385669772016	0.0	0.003635642966247157	270.5307747718206	0.0	-800.6399117393529	0.0	0.0001524612922507719	0.0	0.9999999998172522	0.0	1.9117971550812925e-05	0.0	0.0	0.00219075816555897	0.0	0.0	0.002213567742691271	0.0	800.6399117393529	88.65385677192721	0.0	0.000245879143775286	-1.3200637985886963	0.0	-0.00343357442508445	0.1320068264059761
2.96	88.64718678936627	0.0	0.0037794506349927187	270.97402743848863	0.0	-800.6399104926301	0.0	8.88619752573934e-05	0.0	0.9999999998098913	0.0	1.9499197642883285e-05	0.0	0.0	0.002234443457798908	0.0	0.0	0.0022390248233984935	0.0	800.6399104926301	88.64718686934837	0.0	0.0003223526013930273	-1.3480454030492695	0.0	0.08569853189668518	0.1350766688607442
2.965	88.64037584389229	0.0	0.004402784560426422	271.41724640387366	0.0	-800.6399069596324	0.0	-0.0005935282957594553	0.0	0.9999999998225216	0.0	1.8840126394471616e-05	0.0	0.0	0.0021589194559202083	0.0	0.0	0.0020689914915554474	0.0	800.6399069596324	88.64037594686332	0.0	0.0010627927887888035	-1.3762350733119415	0.0	0.14531711741985856	0.13838858484821434
2.97	88.6334242278043	0.0	0.004589690704011084	271.86043096348715	0.0	-800.6399001378777	0.0	-0.0011422114751915677	0.0	0.9999999998615157	0.0	1.664305282007042e-05	0.0	0.0	0.001907153369694741	0.0	0.0	0.0017417720073560046	0.0	800.6399001378777	88.63342433147986	0.0	0.001639429179783136	-1.4044861069713477	0.0	0.09964654572697523	0.1408016569061192
2.975	88.62633048769777	0.0	0.004409549184239932	272.3035804103049	0.0	-800.6398908197841	0.0	-0.001562852739352482	0.0	0.999999999912419	0.0	1.3235820801142443e-05	0.0	0.0	0.0015167133406381555	0.0	0.0	0.001294047677529222	0.0	800.6398908197841	88.62633057337783	0.0	0.002063464725704643	-1.4330760344738755	0.0	0.07045148299200081	0.1434806722886097
2.98	88.61909299180275	0.0	0.003931419851031986	272.74669402960075	0.0	-800.639879734264	0.0	-0.0018638097402360867	0.0	0.9999999999601554	0.0	8.92857534387993e-06	0.0	0.0	0.0010231393685513849	0.0	0.0	0.0007601055178747116	0.0	800.639879734264	88.61909304788274	0.0	0.002348935353101231	-1.461986319149844	0.0	0.044281395570585524	0.14626567742895077
2.985	88.6117102171682	0.0	0.003222042638458884	273.18977109863965	0.0	-800.639867534897	0.0	-0.0020554751543929058	0.0	0.9999999999919863	0.0	4.00787571308021e-06	0.0	0.0	0.0004592687263462004	0.0	0.0	0.0001712552616711377	0.0	800.639867534897	88.61171024015485	0.0	0.002511753195813514	-1.4911769492201188	0.0	0.021421666338668616	0.14913308089334662
2.99	88.60418085106619	0.0	0.0023442328030925503	273.63281088769367	0.0	-800.6398547929225	0.0	-0.002149647828964028	0.0	0.9999999999992146	0.0	-1.267549686574749e-06	0.0	0.0	-0.00014525049472776836	0.0	0.0	-0.0004445734785243575	0.0	800.6398547929225	88.60418084484498	0.0	0.002568853206418972	-1.5206221851374362	0.0	0.002003977651823265	0.15206235056247752
2.995	88.59650359198935	0.0	0.0013556887885737522	274.0758126606243	0.0	-800.6398419937583	0.0	-0.002158995483185979	0.0	0.9999999999777742	0.0	-6.669669431550533e-06	0.0	0.0	-0.000764287818356208	0.0	0.0	-0.0010630801243961799	0.0	800.6398419937583	88.59650356602884	0.0	0.002537507571926457	-1.5503375499951253	0.0	-0.013967037129217194	0.1550400463445189
3.0	88.58867701889893	0.0	0.00030812362390163185	274.51877567452215	0.0	-800.6398295368622	0.0	-0.0020965630469576245	0.0	0.9999999999279836	0.0	-1.2002708194761624e-05	0.0	0.0	-0.0013754090446069036	0.0	0.0	-0.0016637011947649805	0.0	800.6398295368622	88.58867698598296	0.0	0.0024347317028953794	-1.5803450298569999	0.0	-0.02659419538146671	0.15805687788330217
3.005	88.58069964831037	0.0	-0.0007532788735694387	274.9616991791793	0.0	-800.6398177383022	0.0	-0.001975352687855844	0.0	0.9999999998537508	0.0	-1.7103512847493763e-05	0.0	0.0	-0.0019599182021139334	0.0	0.0	-0.0022295980550847954	0.0	800.6398177383022	88.58069962225836	0.0	0.002276803395377805	-1.6106501294122686	0.0	-0.03606750670734638	0.16110539110830036
3.01	88.5725700027728	0.0	-0.001790155263611467	275.4045824169739	0.0	-800.6398068354315	0.0	-0.0018079572588257388	0.0	0.9999999997615013	0.0	-2.1840998740485124e-05	0.0	0.0	-0.002502794096559713	0.0	0.0	-0.002747539657438576	0.0	800.6398068354315	88.57256999647261	0.0	0.002078871516917757	-1.6412480898488013	0.0	-0.04264411601960587	0.16418020017844517
3.015	88.56428663377561	0.0	-0.0027709904064906112	275.84742462295696	0.0	-800.6397969932812	0.0	-0.0016062687122415126	0.0	0.9999999996590266	0.0	-2.6114741430495993e-05	0.0	0.0	-0.002992528934425899	0.0	0.0	-0.0032077017473153384	0.0	800.6397969932812	88.56428665771075	0.0	0.0018546764865462596	-1.6721355071815935	0.0	-0.04662727333725488	0.16727854784748442
3.02	88.55584809365158	0.0	-0.0036709392184415754	276.2902250249444	0.0	-800.6397883121098	0.0	-0.0013812517235962697	0.0	0.9999999995544191	0.0	-2.985292739832673e-05	0.0	0.0	-0.0034208934925773413	0.0	0.0	-0.0036034012183515226	0.0	800.6397883121098	88.55584815499297	0.0	0.001616363393419368	-1.7033146759040108	0.0	-0.048349235962296906	0.17040007434763998
3.025	88.54725291861057	0.0	-0.004471482240695304	276.7329828434543	0.0	-800.6397808356802	0.0	-0.001142777819884889	0.0	0.9999999994551949	0.0	-3.3009815940507497e-05	0.0	0.0	-0.0037826462724765255	0.0	0.0	-0.00393078294835435	0.0	800.6397808356802	88.5472530208522	0.0	0.001374374807625988	-1.7347880620915155	0.0	-0.0481565168439402	0.17354563291796704
3.03	88.53849963909789	0.0	-0.005159951879377968	277.17569729164575	0.0	-800.63977455989	0.0	-0.0008995146910022787	0.0	0.9999999993676628	0.0	-3.556285762279419e-05	0.0	0.0	-0.004075203299280593	0.0	0.0	-0.004188474925376574	0.0	800.63977455989	88.53849978215842	0.0	0.0011374122432933984	-1.7665702714910008	0.0	-0.03890881659438937	0.1766998704052882
3.035	88.52958677808721	0.0	-0.0057289612479245276	277.6183675753071	0.0	-800.6397694414469	0.0	-0.0006588660444117475	0.0	0.9999999992965362	0.0	-3.750960427104835e-05	0.0	0.0	-0.004298284032881933	0.0	0.0	-0.0043772261434229355	0.0	800.6397694414469	88.5295869587599	0.0	0.0009124582961749138	-1.7985484058096783	0.0	-0.08490354766516361	0.18005512990322342
3.04	88.52051362301368	0.0	-0.006677968100032096	278.06099288008994	0.0	-800.6397660574654	0.0	-0.0008408858125856487	0.0	0.999999999233134	0.0	-3.9163398960081854e-05	0.0	0.0	-0.004487794944746753	0.0	0.0	-0.004618122183990867	0.0	800.6397660574654	88.52051387454405	0.0	0.00025556029747413625	-1.8307629350275079	0.0	-0.16018391732475462	0.183775727767299
3.045	88.51127830610805	0.0	-0.007984228771325695	278.5035724296106	0.0	-800.6397669646743	0.0	-0.0012405191430262042	0.0	0.9999999991267646	0.0	-4.179128915805427e-05	0.0	0.0	-0.004788928979728775	0.0	0.0	-0.0049735047404938035	0.0	800.6397669646743	88.51127866428575	0.0	-0.0005862278990182922	-1.8634108489261318	0.0	-0.15561234091086434	0.1869897107473929
3.05	88.50187872741859	0.0	-0.009253315582800868	278.94610539299566	0.0	-800.6397716079852	0.0	-0.0015203307042493243	0.0	0.9999999989755161	0.0	-4.526611971142586e-05	0.0	0.0	-0.0051871152305688496	0.0	0.0	-0.005409047404581996	0.0	800.6397716079852	88.50187920246695	0.0	-0.0012410422787669736	-1.8964007310550812	0.0	-0.11320011754915855	0.1899776302452315
3.055	88.49231363289604	0.0	-0.010449503339744816	279.38859094580886	0.0	-800.6397790879572	0.0	-0.0016923016054970932	0.0	0.9999999987846342	0.0	-4.930304724909025e-05	0.0	0.0	-0.005649713051302955	0.0	0.0	-0.0058938561028729795	0.0	800.6397790879572	88.49231423307862	0.0	-0.0017236218591021037	-1.9296298019606677	0.0	-0.08043788167476261	0.1931305627140119
3.06	88.48258173927118	0.0	-0.011545542084266567	279.8310282573351	0.0	-800.6397885864803	0.0	-0.001769608249866833	0.0	0.9999999985609357	0.0	-5.3648738060099635e-05	0.0	0.0	-0.006147692537042368	0.0	0.0	-0.0064008115234174875	0.0	800.6397885864803	88.48258246875021	0.0	-0.002051584330246843	-1.9631205080204477	0.0	-0.05140970264330366	0.19637935447842614
3.065	88.47268172498376	0.0	-0.012521927525350956	280.2734164902944	0.0	-800.6397993783278	0.0	-0.0017660173439683847	0.0	0.9999999983131704	0.0	-5.808366971272873e-05	0.0	0.0	-0.006655898270085099	0.0	0.0	-0.006906738225198946	0.0	800.6397993783278	88.47268258266942	0.0	-0.00224429141037149	-1.9968789845213073	2.7857667498607066e-38	-0.026355696846716226	0.1997052904051148
3.07	88.46261225038592	0.0	-0.013366004692062255	280.7157548007179	0.0	-800.6398108373774	0.0	-0.001695335569044389	0.0	0.9999999980517159	0.0	-6.242291403193528e-05	0.0	0.0	-0.00715313904252141	0.0	0.0	-0.0073924160900222125	0.0	800.6398108373774	88.46261322967463	0.0	-0.0023218165303238443	-2.0309072043656804	-2.4840444983491874e-36	-0.0053315077823428295	0.20309142024516094
3.075	88.45237197032932	0.0	-0.014071068122783517	281.15804233789623	-2.521622734967241e-42	-800.6398224378207	0.0	-0.0015709809375045371	0.0	0.9999999977878604	-5.606796120470479e-47	-6.651562933403826e-05	-9.448361857216045e-42	-1.082702522219645e-39	-0.007622129670614591	6.559172470622297e-44	0.0	-0.007842468977094789	0.0	800.6398224378207	88.45237305954525	-1.6714600499164238e-39	-0.0023041376489151416	-2.0652059964964073	1.7314485521281468e-35	0.011754335715068452	0.20652394467404556
3.08	88.44195953269248	0.0	-0.014635437449875223	281.60027824435736	1.6686325460849025e-40	-800.6398337520774	0.0	-0.0014056281476524644	0.0	0.9999999975329386	2.470903685415335e-47	-7.024365827090217e-05	7.670057796985274e-40	8.789238872804212e-38	-0.008049330319583483	-6.171051486595095e-42	0.0	-0.008245151779221178	0.0	800.6398337520774	88.44196071601881	1.3567098950161984e-37	-0.002210463771655484	-2.0997769691611268	1.839105736722472e-35	0.025111674469539776	0.20999271216911675
3.085	88.43137357453062	0.0	-0.01506156126667175	282.0424616558242	9.67642226537879e-40	-800.6398444456811	0.0	-0.0012109451364375292	0.0	0.9999999972974808	1.61141493532435e-45	-7.351933555633352e-05	2.6290886578116282e-40	3.012713704234594e-38	-0.008424695287557602	-2.0302725533778736e-42	0.0	-0.008592062006919999	0.0	800.6398444456811	88.43137483321263	4.6498784736070687e-38	-0.0020587294839287157	-2.1346220270594074	-9.06698258793797e-35	0.035034368384691324	0.21349095075378088
3.09	88.4206127235315	0.0	-0.015355178299443533	282.48459170116786	-9.999004739885033e-41	-800.6398542698477	0.0	-0.0009974172784366156	0.0	0.9999999970905054	5.762902525841789e-46	-7.628270188289619e-05	-4.0607130747738344e-39	-4.653234460628702e-37	-0.008741353743967218	3.5562167817098986e-41	0.0	-0.008877801009259213	0.0	800.6398542698477	88.42061403716328	-7.181014837455862e-37	-0.0018652516786048234	-2.169742351488206	-1.628107846939171e-34	0.04187235475763273	0.21701463466629434
3.095	88.40967560256964	0.0	-0.015524540430151744	282.9266675023787	-5.763987917059321e-39	-800.6398630528215	0.0	-0.0007742357395802498	0.0	0.9999999969190351	-1.2541606384717796e-44	-7.849840630791e-05	-7.870528133200181e-39	-9.018960973660137e-37	-0.008995254769131164	6.936024428393499e-41	0.0	-0.009099603210389903	0.0	800.6398630528215	88.40967695032455	-1.3916616932647832e-36	-0.0016445030075913358	-2.205138359308971	-7.577547255429707e-35	0.04600979261199951	0.22056182998678758
3.1	88.39856083230463	0.0	-0.015579708094536284	283.3686881745557	-1.293758362731787e-38	-800.6398706903631	0.0	-0.0005492460376871565	0.0	0.9999999967878345	-3.7468682939274116e-44	-8.015240610276748e-05	-9.05538347958775e-39	-1.0376705201611024e-36	-0.009184789184849227	7.887819439352431e-41	0.0	-0.00925695060975869	0.0	800.6398706903631	88.39856219400355	-1.6009657528701853e-36	-0.0014089932464144083	-2.2408101556273152	-9.069459438476069e-35	0.04784397430471115	0.22413208604391707
3.105	88.38726703253114	0.0	-0.015531930824896862	283.81065282590504	-2.233174847972931e-38	-800.6398771358038	0.0	-0.0003289521744059816	0.0	0.9999999966993758	-2.646815073177855e-44	-8.124858685149086e-05	-1.3971961518734413e-38	-1.6010688686925062e-36	-0.009310402246228982	1.27051556795637e-40	0.0	-0.00935118846603426	0.0	800.6398771358038	88.38726838949337	-2.469887015002898e-36	-0.0011692495831253638	-2.2767575692791793	-2.536953802134877e-34	0.047768867582127554	0.22772586357241278
3.11	88.37579282420056	0.0	-0.01539310687677961	284.25256055774213	-3.9165953509581824e-38	-800.6398823902333	0.0	-0.0001185582968104409	0.0	0.9999999966539783	-3.6846598839444033e-44	-8.18054555207265e-05	-2.2077472952242392e-38	-2.529892070005251e-36	-0.009374214695421617	2.0273666467759134e-40	0.0	-0.009385152916201747	0.0	800.6398823902333	88.37579415985151	-3.902228394564862e-36	-0.0009338627411597164	-2.312980091665888	-2.2237760826088976e-34	0.04616297129443823	0.23134407112267802
3.115	88.36413683102072	0.0	-0.015175327519949293	284.6944104645052	-6.11233759933912e-38	-800.6398864930696	0.0	7.795612720642119e-05	0.0	0.9999999966500909	-6.931328479263014e-44	-8.185298280141515e-05	-2.591571721359569e-38	-2.9697224679819075e-36	-0.009379660920630254	2.3513792551877863e-40	0.0	-0.009362820130821183	0.0	800.6398864930696	88.36413813126504	-4.5800400140129343e-36	-0.0007095910204814544	-2.349477027414319	-1.2016641592777358e-34	0.04337960580230407	0.23498774633046696
3.12	88.35229768029484	0.0	-0.014890497542022903	285.1362016337728	-8.518795988919093e-38	-800.6398895132277	0.0	0.00025773829574482216	0.0	0.9999999966846527	-3.208278572004761e-44	-8.142965574815194e-05	-2.9085452955090596e-38	-3.332947431956264e-36	-0.009331151213457208	2.6772434646492265e-40	0.0	-0.009288983547995818	0.0	800.6398895132277	88.35229893367679	-5.139533249297088e-36	-0.0005015030229294265	-2.3862475376586665	-4.68615272806319e-35	0.03974036031130042	0.23865784309801596
3.125	88.34027400405164	0.0	-0.014550032257298933	285.57793314628447	-1.1106391941687134e-37	-800.6398915410937	0.0	0.00041894736831722576	0.0	0.9999999967534947	-1.1094402668027798e-44	-8.057980400025575e-05	-2.9195861703341955e-38	-3.345599342180324e-36	-0.009233765376405153	2.683164152291725e-40	0.0	-0.009168963967782369	0.0	800.6398915410937	88.34027520174045	-5.158340897194289e-36	-0.0003131481854212885	-2.4232905632094535	-5.860970639179729e-35	0.03553092718475669	0.24235510311372854
3.13	88.32806444027375	0.0	-0.014164621659574854	286.01960407596687	-1.3791950954034654e-37	-800.6398926813876	0.0	0.0005606307474430843	0.0	0.9999999968517383	1.4313347983248135e-44	-7.935122282371168e-05	-3.236198939068976e-38	-3.708410852622634e-36	-0.009092980343544627	2.9590712568020655e-40	0.0	-0.0090083550893136	0.0	800.6398926813876	88.32806557591441	-5.7169438231777845e-36	-0.00014674167935641426	-2.4606048809199406	-6.506690811942035e-35	0.03099909264217978	0.24608001389287334
3.135	88.31566763348829	0.0	-0.013744057116151894	286.4612134899646	-1.6635595595741503e-37	-800.6398930469652	0.0	0.0006825958627326226	0.0	0.9999999969741619	7.871960721552554e-44	-7.77931111013126e-05	-3.2172899346769e-38	-3.686742728706335e-36	-0.008914433891586806	2.9582379010807674e-40	0.0	-0.008812805779075249	0.0	800.6398930469652	88.31566870295855	-5.6827422215506727e-36	-3.3559029827582105e-06	-2.498189197833985	3.7149283381970397e-35	0.026354279854601297	0.24983282042680194
3.14	88.30308223516563	0.0	-0.013297114159737528	286.9027604486731	-1.943684129369832e-37	-800.6398927535907	0.0	0.0007852824760417155	0.0	0.9999999971155145	1.015701434570076e-43	-7.595433468184623e-05	-3.075050821787395e-38	-3.5237487089097086e-36	-0.008703725634356958	2.7928307066608818e-40	0.0	-0.008587838921061382	0.0	800.6398927535907	88.30308323627669	-5.4307293569829366e-36	0.00011688967804802877	-2.536042126563842	6.710157352900746e-35	0.021768491773797912	0.2536135551373499
3.145	88.2903069043361	0.0	-0.012831482411080657	287.34424400577205	-2.204745343623267e-37	-800.6398919156172	0.0	0.0008696390271654306	0.0	0.9999999972707694	1.6027019212230407e-43	-7.38819959210251e-05	-2.8868299989467833e-38	-3.308063530670424e-36	-0.00846625310425762	2.627719481773656e-40	0.0	-0.008338705691279173	0.0	800.6398919156172	88.29030783650872	-5.097582170553729e-36	0.00021464588253817808	-2.574162173010327	4.530256671890239e-35	0.017378275610986992	0.25742208330717203
3.15	88.27734030796891	0.0	-0.01235373898647707	287.7856632082632	-2.456006487503962e-37	-800.6398906425854	0.0	0.0009370060396719405	0.0	0.9999999974353083	2.328291325217095e-43	-7.162031585026666e-05	-2.866963240137152e-38	-3.2852979007683834e-36	-0.008207083658245073	2.619743272695029e-40	0.0	-0.008070273234021824	0.0	800.6398906425854	88.27734117190964	-5.061757826942682e-36	0.0002911630983832012	-2.6125478037847927	-4.843449307023994e-35	0.013287381985011277	0.2612581593286755
3.155	88.26418112100667	0.0	-0.011869355096119583	288.2270170965091	-2.720329953139262e-37	-800.639889036607	0.0	0.0009890083129757915	0.0	0.9999999976050451	3.021972418320099e-43	-6.920978464618252e-05	-3.086826321262353e-38	-3.5372424337758274e-36	-0.007930857128802963	2.794410408271462e-40	0.0	-0.007786943222837492	0.0	800.639889036607	88.26418191840276	-5.449123984362778e-36	0.00034813492303940196	-2.651197477135033	-3.5264376753514287e-35	0.00956996836394829	0.2651214749329381
3.16	88.25082802641089	0.0	-0.011382732712406356	288.6683047042713	-2.993858186084731e-37	-800.6398871905169	0.0	0.0010274579995322073	0.0	0.9999999977764917	3.7777258078618215e-43	-6.66865795116049e-05	-3.02376440692372e-38	-3.464978801172211e-36	-0.007641719118021329	2.7435713393005415e-40	0.0	-0.0074925981878367414	0.0	800.6398871905169	88.25082875965613	-5.336994283240934e-36	0.00038755908295714354	-2.690109636206491	3.617459001134221e-35	0.006274084260759976	0.2690116952651749
3.165	88.23727971515083	0.0	-0.01089726280316226	289.10952505874883	-3.255696580346566e-37	-800.639885186655	0.0	0.001054268849190315	0.0	0.999999997946777	4.572076925916685e-43	-6.408220216378048e-05	-2.9373135747589953e-38	-3.3659134428938183e-36	-0.007343279456803669	2.680872885565814e-40	0.0	-0.0071905724101831445	0.0	800.639885186655	88.23728038710877	-5.183611215728885e-36	0.0004116156572928194	-2.7292827451238586	1.751599102225798e-35	0.003425287007907915	0.272928489451393
3.17	88.22353488592239	0.0	-0.010415401462950037	289.5506771806171	-3.5107928937954853e-37	-800.6398830962286	0.0	0.0010713826911745428	0.0	0.9999999981136286	5.350573274051688e-43	-6.142332278787172e-05	-2.894993418195249e-38	-3.31741811415449e-36	-0.0070385943232557525	2.650798974638093e-40	0.0	-0.006883643877944798	0.0	800.6398830962286	88.2235354997301	-5.108131078552071e-36	0.00042256391676494216	-2.7687153288309694	6.081978994154859e-35	0.0010302460135205955	0.2768715520509543
3.175	88.2095922447901	0.0	-0.009938757533317485	289.9917600840645	-3.754338052022891e-37	-800.6398809791301	0.0	0.001080707511635801	0.0	0.9999999982753291	6.077345887006197e-43	-5.873178637362118e-05	-2.646638348677559e-38	-3.0328241653159796e-36	-0.006730166968814375	2.477644354067295e-40	0.0	-0.0065740439814207146	0.0	800.6398809791301	88.20959280370202	-4.6691778081873494e-36	0.000422656373027316	-2.80840494898816	2.8202434836321806e-35	-0.001404164859152705	0.28084053000199494
3.18	88.19545050486305	0.0	-0.009468188305838295	290.43277277682773	-3.99402889866461e-37	-800.6398788841493	0.0	0.0010840673717196583	0.0	0.9999999984306532	6.837529337001314e-43	-5.6024762350913324e-05	-2.761318399112107e-38	-3.1642378225059236e-36	-0.006419964865220259	2.5562798709024033e-40	0.0	-0.006263481555883833	0.0	800.6398788841493	88.19545101213207	-4.870714419401563e-36	0.00041407004802188074	-2.848334064223934	-4.3174961593806605e-35	-0.012283168421256157	0.2848360549095725
3.185	88.18110832755067	0.0	-0.008975029912943851	290.873714260084	-4.2430688864373e-37	-800.6398768471173	0.0	0.0010565604832266711	0.0	0.9999999985787377	7.620802661431654e-43	-5.3316093733220386e-05	-2.821706436712605e-38	-3.233437415413286e-36	-0.006109574304969618	2.5972221849022273e-40	0.0	-0.005960799273437878	0.0	800.6398768471173	88.1811087832638	-4.9764240327041264e-36	0.0004279145988974905	-2.888733268699421	-8.891949561888179e-36	0.08212674154224708	0.2889900465304504
3.19	88.16656303408281	0.0	-0.007902678062990071	291.3145835245085	-4.491869614148647e-37	-800.6398726962814	0.0	0.0003150273957500808	0.0	0.9999999986671387	8.096219068459887e-43	-5.163123948970527e-05	-2.821706436580174e-38	-3.2334374145381594e-36	-0.005916504230207477	2.5972221839837903e-40	0.0	-0.005870550572400493	0.0	800.6398726962814	88.16656338007776	-4.9756031790578895e-36	0.0012016198290017077	-2.92930004285689	1.9406285457388077e-36	0.15220850827103788	0.29332518083300435
3.195	88.15181545890997	0.0	-0.007305902306169977	291.755379556818	-4.740629014108809e-37	-800.639865130886	0.0	-0.00028527727307263277	0.0	0.9999999986675596	8.098495885997976e-43	-5.1623170551330115e-05	-2.8217064365795324e-38	-3.23343741453394e-36	-0.0059155795979781755	2.5972221839794407e-40	0.0	-0.005952276491090807	0.0	800.639865130886	88.15181574338949	-4.974770911724673e-36	0.001795450128331106	-2.9698283344804586	1.6759921375292162e-37	0.10155242263297837	0.2971564105117977
3.2	88.13686443685607	0.0	-0.007110720730516308	292.1961013429292	-4.989346513989262e-37	-800.6398550209422	0.0	-0.0007488026520017762	0.0	0.9999999985985399	7.725911540682545e-43	-5.294359261923042e-05	-2.8217064366840526e-38	-3.233437415219718e-36	-0.006066888821518345	2.597222184696563e-40	0.0	-0.0061667926493303325	0.0	800.6398550209422	88.1368646957091	-4.973927164310261e-36	0.002221843787228531	-3.010632595733161	1.7068291699858396e-37	0.06954879722809092	0.3011435813974269
3.205	88.12170874609771	0.0	-0.00724257567505314	292.63674786271037	-5.238021538051465e-37	-800.6398431652786	0.0	-0.0010832215696045485	0.0	0.9999999984732543	7.0724089719741456e-43	-5.52595761646343e-05	-2.821706436855452e-38	-3.233437416422661e-36	-0.006332280987053673	2.597222185998209e-40	0.0	-0.006477112770409718	0.0	800.6398431652786	88.12170900838326	-4.973071867548275e-36	0.002496560906733375	-3.051683024448219	2.3101113575093753e-37	0.04095300926564634	0.305195780289855
3.21	88.1063471649616	0.0	-0.007628675364671527	293.07731808990366	-5.486654006099407e-37	-800.6398302781273	0.0	-0.0012986840251373484	0.0	0.9999999983029267	6.225612243658937e-43	-5.826057873913054e-05	-2.821733023286144e-38	-3.2334678835583434e-36	-0.006676170551260902	2.5972397196058624e-40	0.0	-0.0068491583382168765	0.0	800.6398302781273	88.10634745577198	-4.972251800666619e-36	0.002637578222534406	-3.09300179700666	-2.835695386971989e-37	0.026644704001362693	0.30931165604512467
3.215	88.0907784639804	0.0	-0.008199883309089433	293.5178109921062	-5.735306154847259e-37	-800.6398169802425	0.0	-0.0014071517565886892	0.0	0.9999999980988555	5.265063140614296e-43	-6.1663822886231e-05	-2.8239213804715185e-38	-3.2359755577320493e-36	-0.007066153604525078	2.5987580351563348e-40	0.0	-0.007252277622151636	0.0	800.6398169802425	88.09077880535952	-4.97522867072059e-36	0.0026641450548393272	-3.134387308574797	-2.5220286644761364e-37	-0.06876989988054426	0.3135141639429444
3.22	88.07500267397626	0.0	-0.009637017132224606	293.95822553365775	-5.984029101297742e-37	-800.6398051839205	0.0	-0.0020060605433073917	0.0	0.9999999978314443	4.080781169912346e-43	-6.5857799906773e-05	-2.823824720081788e-38	-3.2358647950390726e-36	-0.007546747970806196	2.598692443910759e-40	0.0	-0.007826971635047808	0.0	800.6398051839205	88.07500317933956	-4.97416741736695e-36	0.001963834731994385	-3.176011367900363	2.6350769259062836e-37	-0.15686141870149486	0.3179882657223279
3.225	88.05901731062109	0.0	-0.01136524267435967	294.39856067433254	-6.2327149519539916e-37	-800.6397972322156	0.0	-0.0024982891394681604	0.0	0.9999999974416689	2.4785277028505172e-43	-7.15318541489777e-05	-2.8238247202678857e-38	-3.2358647979880796e-36	-0.008196946693954533	2.598692447962399e-40	0.0	-0.008542678753522288	0.0	800.6397972322156	88.05901803543836	-4.973264629164065e-36	0.0012328069752458636	-3.218077051128887	1.7890803678416566e-37	-0.1386530565930367	0.32210626471872583
3.23	88.04282099567034	0.0	-0.01316858117441684	294.8388153624924	-6.481355365695473e-37	-800.6397926944047	0.0	-0.002792688746303449	0.0	0.9999999969436825	5.999822002870746e-44	-7.818434034535048e-05	-2.8238247203703017e-38	-3.235864801445594e-36	-0.008959265460734361	2.5986924531388856e-40	0.0	-0.00934272514680663	0.0	800.6397926944047	88.04282197847672	-4.9723499297698574e-36	0.0005985587078763892	-3.2603815487540544	1.8413545094232429e-37	-0.11712384281042212	0.32624846111530653
3.235	88.02641254943336	0.0	-0.01496509691629102	295.27898854061806	-6.7299497452942905e-37	-800.6397910851892	0.0	-0.00291348904848373	0.0	0.9999999963577144	-1.4236483444858328e-43	-8.535061565772314e-05	-2.823824720340789e-38	-3.235864805170182e-36	-0.009780460123936904	2.5986924592298894e-40	0.0	-0.01017737827748515	0.0	800.6397910851892	88.0264138215245	-4.971423252150901e-36	6.112025747756207e-05	-3.3029213837195925	1.8653786472296884e-37	-0.09795319434029293	0.3304373540523773
3.24	88.00979077987132	0.0	-0.016686612443972598	295.7190791452036	-6.9784974901414216e-37	-800.6397919263092	0.0	-0.002886036760757939	0.0	0.9999999957100786	-3.478721488793148e-43	-9.262823852651609e-05	-2.823824720162389e-38	-3.235864808952671e-36	-0.010614414277780307	2.5986924659618923e-40	0.0	-0.011004166907040336	0.0	800.6397919263092	88.00979236095401	-4.9704845283181764e-36	-0.0003822284415267015	-3.3457033510856604	1.889539568153841e-37	-0.07955639861090247	0.334664909036274
3.245	87.99295448290607	0.0	-0.01827831180345108	296.1590861066917	-7.2269979962091326e-37	-800.6397947585825	0.0	-0.00273582376037631	0.0	0.9999999950321705	-5.469594233745896e-43	-9.967850875622758e-05	-2.823824719846946e-38	-3.235864812616973e-36	-0.011422315738695142	2.5986924730085865e-40	0.0	-0.0117879226818462	0.0	800.6397947585825	87.9929563782798	-4.9695336894339955e-36	-0.0007362985595612873	-3.3887311156651854	1.913839358064268e-37	-0.062290312353052775	0.3389303565231426
3.25	87.97590243410845	0.0	-0.019698023574722508	296.59900834938264	-7.475450655999505e-37	-800.6397991509423	0.0	-0.0024876676139839056	0.0	0.9999999943581157	-7.318425045224174e-43	-0.00010622576641288459	-2.823824719428313e-38	-3.23586481601984e-36	-0.012172576204894908	2.598692480015229e-40	0.0	-0.012500586957409488	0.0	800.6397991509423	87.97590463358428	-4.9685706654435365e-36	-0.0010074079117802584	-3.4320088208545485	1.9382803682544482e-37	-0.046404973715349775	0.343232253263136
3.255	87.95863339103155	0.0	-0.02091528173636803	297.0388447913295	-7.723854858484815e-37	-800.6398047065852	0.0	-0.0021650703564794556	0.0	0.9999999937219272	-8.964458703625328e-43	-0.00011205485926487436	-2.823824718953742e-38	-3.23586481904944e-36	-0.012840541046491957	2.5986924866282652e-40	0.0	-0.013120833926285274	0.0	800.6398047065852	87.9586358695066	-4.9675953853021644e-36	-0.001202896763367727	-3.475539066445066	1.9628640743332786e-37	-0.03206108982864693	0.3475686941579584
3.26	87.94114610063758	0.0	-0.02191021220549921	297.4785943442697	-7.972209989068832e-37	-800.6398110671047	0.0	-0.0017897134586603736	0.0	0.9999999931547304	-1.0362915431469288e-42	-0.0001170072088544212	-2.8238247184751653e-38	-3.2358648216233607e-36	-0.013408038510523383	2.598692492524151e-40	0.0	-0.013633549064880278	0.0	800.6398110671047	87.94114882001969	-4.966607777473056e-36	-0.0013307156490572334	-3.519323153881023	1.9875912152152956e-37	-0.019345189441265655	0.3519376322276092
3.265	87.92343930166636	0.0	-0.022672309211133838	297.91825591359964	-8.220515429572161e-37	-800.6398179146696	0.0	-0.001381105366683615	0.0	0.9999999926825054	-1.148357090790386e-42	-0.00012097578190802764	-2.8238247180416726e-38	-3.2358648236859726e-36	-0.013862803487065225	2.598692497432829e-40	0.0	-0.014029206607749475	0.0	800.6398179146696	87.92344221374981	-4.965607770116152e-36	-0.0013990950680582727	-3.5633619969317465	2.2766178968351665e-37	-0.008284907713419202	0.35633716282298183
3.27	87.90551172689946	0.0	-0.023199155802109968	298.3578283983525	-8.46877055821996e-37	-800.6398249727434	0.0	-0.0009563582440584726	0.0	0.9999999923245502	-1.2309136495674006e-42	-0.00012389935424011162	-2.8238247176938734e-38	-3.2358648252054654e-36	-0.014197820201035745	2.5986925011536896e-40	0.0	-0.014303183063184939	0.0	800.6398249727434	87.9055147767629	-4.964595291246726e-36	-0.001416282982828684	-3.607654928984516	1.7545480924107663e-37	0.0011384392166305423	0.3607655108608655
3.275	87.88736211373714	0.0	-0.023495126942690073	298.7973106912049	-8.716991552680361e-37	-800.6398320056267	0.0	-0.000530079596163356	0.0	0.9999999920927449	-1.2833548195697133e-42	-0.0001257563367017996	-2.824726401987516e-38	-3.236898080552186e-36	-0.014410614718062712	2.5999881738499226e-40	0.0	-0.014455039681515736	0.0	800.6398320056267	87.88736524326814	-4.9651552028725346e-36	-0.0013903409707341798	-3.6522005595126457	-4.850547164271364e-37	0.00897907515007	0.36522115971962843
3.28	87.8689892006833	0.0	-0.023570132238745056	299.2367016785209	-8.965356207083115e-37	-800.6398388171377	0.0	-0.0001143612084083374	0.0	0.9999999919915402	-1.3060467614406515e-42	-0.00012655854267062204	-2.8300737335148454e-38	-3.2430256717985715e-36	-0.014502540751421706	2.6077067040007773e-40	0.0	-0.014487801754424804	0.0	800.6398388171377	87.86899235190539	-4.973514528078585e-36	-0.001328989223462322	-3.6969978649885604	-3.9380512063545046e-36	0.01531815198378698	0.3697029599490674
3.285	87.85039173050751	0.0	-0.023438396416073003	299.67600024037046	-9.21476557487785e-37	-800.6398452485979	0.0	0.0002811524890497573	0.0	0.999999992018553	-1.2999391068047068e-42	-0.00012634494795953546	-2.850219630340089e-38	-3.266111169460772e-36	-0.014478064600282912	2.6369459895243445e-40	0.0	-0.014407257499314059	0.0	800.6398452485979	87.85039484846047	-5.0078583817853956e-36	-0.0012394895021315782	-3.7420449386980676	-1.0895789557142695e-35	0.020256825711484627	0.37420997664711897
3.29	87.83156845517772	0.0	-0.02311731607466675	300.1152052505811	-9.466790894804222e-37	-800.639851176306	0.0	0.0006491312526364636	0.0	0.9999999921656043	-1.26625675697409e-42	-0.00012517569454928264	-2.8861704176091874e-38	-3.307307737259321e-36	-0.0143440780280459	2.6889220929720727e-40	0.0	-0.014221295093683509	0.0	800.639851176306	87.83157149020084	-5.069937650168346e-36	-0.0011285603530350901	-3.787324321658758	-8.247638090294874e-36	0.017318187740735125	0.3787363916638405
3.295	87.81251813659749	0.0	-0.022626430481623397	300.55431557679555	-9.720851899553478e-37	-800.6398565086939	0.0	0.0009843787959616728	0.0	0.9999999924200046	-1.2071668307548106e-42	-0.0001231265818835655	-2.8941162164396325e-38	-3.3164129508301696e-36	-0.014109267011251429	2.7000746365591803e-40	0.0	-0.013939291341429641	0.0	800.6398565086939	87.81252104595362	-5.082792806162059e-36	-0.0010023195500054015	-3.8329598834693	5.988131139073626e-38	0.05993823676405149	0.3833428499465117
3.3	87.7932387286604	0.0	-0.021626693271665286	300.9933300667241	-9.974845133936145e-37	-800.6398607397805	0.0	0.0009193074816421732	0.0	0.9999999927414636	-1.1308918762262004e-42	-0.00012048747849366365	-2.892097143447247e-38	-3.314099261779852e-36	-0.013806848037127707	2.697168023005518e-40	0.0	-0.013675929147565156	0.0	800.6398607397805	87.79324139115015	-5.078131637674198e-36	-0.00047072087089701617	-3.8789287062726885	8.706816897597734e-37	0.15277685537116617	0.3881936201933697
3.305	87.77372927375113	0.0	-0.020424447830275822	301.4322475948973	-1.0228723559175636e-36	-800.6398607704724	0.0	0.0004666374721457421	0.0	0.9999999929458233	-1.081485626367437e-42	-0.00011877915933794126	-2.892097143636185e-38	-3.3140992608584085e-36	-0.013611089080358149	2.6971680208006823e-40	0.0	-0.013542247358982134	0.0	800.6398607704724	87.773731649063	-5.077003160515658e-36	0.0004269321491299246	-3.9249203827547303	1.6571138713071697e-37	0.16998952398235495	0.39285998077212303
3.31	87.75398986007082	0.0	-0.019581627549041816	301.8710670001264	-1.0482545228387329e-36	-800.6398567802559	0.0	0.0001270840038820142	0.0	0.9999999930309954	-1.0606863418362532e-42	-0.00011805998279054135	-2.892097143713237e-38	-3.314099260470411e-36	-0.013528677517998796	2.6971680198818285e-40	0.0	-0.013505840473651816	0.0	800.6398567802559	87.75399203745218	-5.07586138638272e-36	0.001138841917777549	-3.970992106820148	1.942014492911064e-37	0.12829833329112564	0.3973064154371686
3.315	87.73401938925261	0.0	-0.01904006437037233	302.30978713029924	-1.0736308245642036e-36	-800.6398496753991	0.0	-0.00010598937168136268	0.0	0.999999993031591	-1.0605415432130787e-42	-0.00011805497712665847	-2.892021476570241e-38	-3.314012552306415e-36	-0.013528103911166562	2.6970656909063665e-40	0.0	-0.013536204192004743	0.0	800.6398496753991	87.7340214393352	-5.074573479058075e-36	0.0016748113204498234	-4.017259097898318	6.047132389307217e-37	0.0739891459176317	0.40179403994285967
3.32	87.71381720281542	0.0	-0.01898997932164824	302.74840682793683	-1.0989903879829037e-36	-800.639840485319	0.0	-0.00045649154856585176	0.0	0.9999999929679994	-1.0760766341218449e-42	-0.00011859244130194694	-2.8902779069787506e-38	-3.312014569042466e-36	-0.013589692769364763	2.6947059612964965e-40	0.0	-0.013666979387585817	0.0	800.639840485319	87.71381923973694	-5.070346272970999e-36	0.0018144125021946362	-4.0636146822474	5.896055633629931e-37	-0.03532111536852019	0.4063768185682781
3.325	87.69338259815191	0.0	-0.019759190014981737	303.1869249355632	-1.1243391719198769e-36	-800.6398324790213	0.0	-0.0011123288273951783	0.0	0.9999999927281155	-1.1340501968020981e-42	-0.00012059825403462144	-2.890277906757102e-38	-3.312014570123469e-36	-0.013819541979160323	2.6947059638821753e-40	0.0	-0.013985638123788214	0.0	800.6398324790213	87.6933848132149	-5.0691650475577315e-36	0.0013921480694087196	-4.11027832177832	1.8660724086800397e-37	-0.09164921253042368	0.41112999721059335
3.33	87.67271346121262	0.0	-0.02074297715019643	303.62534028527847	-1.149682015868834e-36	-800.6398265189015	0.0	-0.0015624701706202838	0.0	0.9999999923142456	-1.2318668028813093e-42	-0.00012398258621685744	-2.8902779063567554e-38	-3.312014571947415e-36	-0.014207357883085294	2.6947059683432164e-40	0.0	-0.014433252855746353	0.0	800.6398265189015	87.67271590942475	-5.067970268181752e-36	0.0009968028315599303	-4.157296589568442	2.4031520678217467e-37	-0.07605655066499366	0.415799224777253
3.335	87.65180877477914	0.0	-0.021850877215290995	304.0636517021447	-1.175018851912525e-36	-800.6398224585438	0.0	-0.001827314324705491	0.0	0.9999999917752623	-1.3553840670515043e-42	-0.0001282561290110546	-2.890277905803898e-38	-3.312014574250648e-36	-0.014697069818332393	2.6947059741527835e-40	0.0	-0.014956739848993466	0.0	800.6398224585438	87.65181149614443	-5.066761875196181e-36	0.0006328867071975971	-4.204504894813255	2.4304407790757565e-37	-0.06940218937879715	0.42050776537894263
3.34	87.6306674798715	0.0	-0.02300314399172264	304.50185800593516	-1.2003496118280651e-36	-800.6398201320654	0.0	-0.0019293628308367438	0.0	0.9999999911577776	-1.4920169561098423e-42	-0.0001329834560142441	-2.890277905130862e-38	-3.3120145767984144e-36	-0.015238781594276092	2.694705980808532e-40	0.0	-0.015509461585775257	0.0	800.6398201320654	87.63067049854725	-5.065539806485524e-36	0.0003037146444052747	-4.251930756113373	2.4578552238334608e-37	-0.06219272828749798	0.425238557638353
3.345	87.60928849648072	0.0	-0.024131253917332302	304.93995801099584	-1.2256742270789069e-36	-800.6398193596284	0.0	-0.0018921871409949967	0.0	0.999999990507459	-1.6308502695597878e-42	-0.00013778691494629902	-2.89027790438083e-38	-3.3120145793872055e-36	-0.015789217447063485	2.6947059878181952e-40	0.0	-0.016051533271914952	0.0	800.6398193596284	87.60929181988368	-5.0643039986623584e-36	1.1573934899303243e-05	-4.2995779287423375	2.4853975816173244e-37	-0.05461873004001233	0.42999248331801615
3.35	87.58767072616602	0.0	-0.02517802558969905	305.3779505261403	-1.2509926288087444e-36	-800.6398199522338	0.0	-0.0017395286657449992	0.0	0.9999999898685735	-1.762683199259565e-42	-0.00014234816935799623	-2.8902779036068867e-38	-3.312014581845467e-36	-0.016311898706342524	2.694705994704619e-40	0.0	-0.01654987152636101	0.0	800.6398199522338	87.58767434470549	-5.06305438725417e-36	-0.0002421356495765417	-4.347449925520408	2.5130698908949887e-37	-0.04684578889222036	0.4347702310743497
3.355	87.56581305337225	0.0	-0.02609740303532873	305.8158343545627	-1.276304747836461e-36	-800.6398217158634	0.0	-0.0014945495697565399	0.0	0.9999999892824716	-1.880013559951327e-42	-0.00014640765302692768	-2.8902779028675076e-38	-3.312014584033305e-36	-0.01677708127365531	2.694706001022098e-40	0.0	-0.016978028439461723	0.0	800.6398217158634	87.5658169411349	-5.061790906835058e-36	-0.00045679184225619443	-4.39554978247306	2.5408739135458237e-37	-0.03902012645753146	0.43957229735809933
3.36	87.54371434763145	0.0	-0.0268539673133857	306.2536082937626	-1.3016105146517652e-36	-800.6398244551503	0.0	-0.0011792247086463035	0.0	0.9999999887856915	-1.97697319492775e-42	-0.00014976233507420843	-2.8902779022205534e-38	-3.312014585841294e-36	-0.017161499523705458	2.694706006376792e-40	0.0	-0.01731585143397661	0.0	800.6398244551503	87.5437184640882	-5.06051349121249e-36	-0.0006324642393054846	-4.443879514759175	2.568810820589011e-37	-0.031272912806042504	0.44439895518297085
3.365	87.5213734692847	0.0	-0.027422229665362487	306.6912711354949	-1.3269098594122842e-36	-800.6398279766665	0.0	-0.0008138738010943466	0.0	0.9999999884081885	-2.049224218962813e-42	-0.00015226213009952253	-2.8902779017173104e-38	-3.3120145871885594e-36	-0.017447954936168353	2.6947060104458132e-40	0.0	-0.01754900910327149	0.0	800.6398279766665	87.52137776189376	-5.059222073810191e-36	-0.0007698471954803522	-4.492439864087316	2.596881046405612e-37	-0.023723250784392795	0.4492502501398152
3.37	87.49878927419849	0.0	-0.02778576508309348	307.1288216657512	-1.3522027119424724e-36	-800.639832091893	0.0	-0.00041682480651223443	0.0	0.9999999881720247	-2.0938269954268284e-42	-0.00015380533035433823	-2.8902779013976264e-38	-3.312014588020267e-36	-0.017624792661327958	2.6947060129913688e-40	0.0	-0.01766842061431903	0.0	800.639832091893	87.4987936816619	-5.0579165879787655e-36	-0.0008702037070072539	-4.541216038484445	2.6250763436485685e-37	-0.022818365036751005	0.4541273366135462
3.375	87.47596061770818	0.0	-0.027936221967779114	307.56625866476486	-1.3774890017338836e-36	-800.6398366199433	0.0	-4.193702849999974e-06	0.0	0.9999999880906784	-2.1090869633829477e-42	-0.00015433330615098788	-2.89027790128667e-38	-3.312014588304825e-36	-0.017685294231712174	2.694706013868178e-40	0.0	-0.017669622021688217	0.0	800.6398366199433	87.4759650735697	-5.056596967243697e-36	-0.000935312536806781	-4.590325799250413	2.6534624300942008e-37	0.0215092940197359	0.45903761929708087
3.38	87.4528855906229	0.0	-0.0275234403705788	308.0035809034751	-1.4027686577426196e-36	-800.6398409978988	0.0	6.005932327908182e-05	0.0	0.9999999881413002	-2.0995965201999538e-42	-0.00015400494869214734	-2.890277901355768e-38	-3.312014588127867e-36	-0.01764766723813859	2.6947060133225378e-40	0.0	-0.0176524162929667	0.0	800.6398409978988	87.45288991980479	-5.055263096742429e-36	-0.0005870850677118548	-4.6397776353527345	2.682043534170987e-37	0.12369069588645644	0.46414260625122844
3.385	87.42956311414963	0.0	-0.02677886636702726	308.4407871490424	-1.4280416087194505e-36	-800.6398418825306	0.0	-0.00028398800421062186	0.0	0.9999999880934829	-2.1085617700418124e-42	-0.00015431513511855383	-2.890277901290506e-38	-3.312014588295033e-36	-0.017683211984751653	2.6947060138379597e-40	0.0	-0.01773377286333476	0.0	800.6398418825306	87.42956721499196	-5.053914918500067e-36	0.00020454427769868688	-4.689242370704724	2.710635464581138e-37	0.15422154081863668	0.4691777732892399
3.39	87.40599351145495	0.0	-0.026322697118183025	308.8778761638992	-1.4533077831262576e-36	-800.6398392343237	0.0	-0.0004892368268945472	0.0	0.999999987939596	-2.1372922435755342e-42	-0.0001553091735526317	-2.8902779010794854e-38	-3.312014588830747e-36	-0.017797120400009622	2.694706015496693e-40	0.0	-0.01787392889015191	0.0	800.6398392343237	87.40599747116117	-5.05255245923475e-36	0.0008272090558491027	-4.7387038153085355	2.7392294957959328e-37	0.09963705539285983	0.47397511951606736
3.395	87.38217608812644	0.0	-0.02625983767113763	309.3148467052916	-1.4785671091206421e-36	-800.6398339693524	0.0	-0.0007208259450803345	0.0	0.9999999877226114	-2.1774927687665577e-42	-0.00015670006142154218	-2.890277900779419e-38	-3.3120145895803524e-36	-0.017956504411278187	2.6947060178355362e-40	0.0	-0.018080430312235073	0.0	800.6398339693524	87.38218002666301	-5.05117567996975e-36	0.001125748002562678	-4.788239789070067	2.767869102847117e-37	-0.007972340885137336	0.4788246425974017
3.4	87.35811046694633	0.0	-0.027020518516105242	309.751697546062	-1.5038195157516997e-36	-800.6398291505801	0.0	-0.001286875730552669	0.0	0.999999987318619	-2.251404946926769e-42	-0.00015925733029956756	-2.8902779002131296e-38	-3.312014590958559e-36	-0.01824954584251709	2.694706022190108e-40	0.0	-0.018449093052827485	0.0	800.6398291505801	87.35811464209162	-5.049784565474664e-36	0.0008043214076284855	-4.83805068585473	2.7966656403492452e-37	-0.07326038649409383	0.4838605328307806
3.405	87.33379449453298	0.0	-0.027962937186388852	310.1884274345706	-1.5290649306624018e-36	-800.639825897985	0.0	-0.001636045366749524	0.0	0.9999999867231292	-2.358238605192669e-42	-0.00016295364119365746	-2.890277899361213e-38	-3.3120145929506125e-36	-0.018673111876013455	2.694706028608819e-40	0.0	-0.01891778552586089	0.0	800.639825897985	87.33379896977974	-5.0483789830364655e-36	0.00049978354504199	-4.888225935942596	2.8256690537910607e-37	-0.05901784418232215	0.4888582198015473
3.41	87.30922724304534	0.0	-0.0289946547938244	310.6250351170276	-1.5543032813771665e-36	-800.6398241196214	0.0	-0.0017933991043334618	0.0	0.9999999860091642	-2.4832153802028455e-42	-0.00016727768122304417	-2.890277898314487e-38	-3.3120145952810054e-36	-0.01916861037102731	2.6947060363045345e-40	0.0	-0.019431556524165138	0.0	800.6398241196214	87.30923205724623	-5.046958877610569e-36	0.000215116585329229	-4.938572798032463	2.854772137661501e-37	-0.054752875990124586	0.4938876305283965
3.415	87.28440773652878	0.0	-0.030034761973724244	311.06151933474337	-1.579534495137242e-36	-800.6398237089287	0.0	-0.001785500714319378	0.0	0.9999999852453878	-2.613429278807896e-42	-0.00017178291917387638	-2.890277897166401e-38	-3.312014597709078e-36	-0.01968487261901628	2.6947060445371347e-40	0.0	-0.019943064800405606	0.0	800.6398237089287	87.2844129040565	-5.045524191379734e-36	-4.6819924892045506e-05	-4.989122787975949	2.8839926145567593e-37	-0.04993072933802632	0.4989372633030444
3.42	87.25933497295848	0.0	-0.031014327063538794	311.49787882395816	-1.6047584988908563e-36	-800.6398245454407	0.0	-0.001639363789587409	0.0	0.9999999844962256	-2.737915758839745e-42	-0.00017608999560743735	-2.8902778960139547e-38	-3.3120146000303686e-36	-0.020178427229849184	2.694706052612197e-40	0.0	-0.020412707931555262	0.0	800.6398245454407	87.25934048418762	-5.044074865046782e-36	-0.0002833337924363239	-5.039880069870861	2.913332893431649e-37	-0.0445915908936541	0.5040077333599153
3.425	87.23400792991713	0.0	-0.03187645352255663	311.93411231573293	-1.6299752192869108e-36	-800.6398264958012	0.0	-0.0013815595969798844	0.0	0.9999999838204502	-2.847651171432333e-42	-0.00017988670356502344	-2.8902778949536e-38	-3.312014602076608e-36	-0.02061349792076768	2.694706059896233e-40	0.0	-0.020808495601818973	0.0	800.6398264958012	87.23401375258936	-5.042610838213508e-36	-0.0004919757168008539	-5.09084798506431	2.942794908482357e-37	-0.038793111298192864	0.5090995787910018
3.43	87.20842556800906	0.0	-0.032576001752019315	312.3702185358654	-1.655184582670105e-36	-800.6398294152102	0.0	-0.0010374894621657366	0.0	0.9999999832691087	-2.935493446245644e-42	-0.00018292593635072066	-2.8902778940747684e-38	-3.3120146037146124e-36	-0.020961768349654682	2.6947060658390172e-40	0.0	-0.021105714439175943	0.0	800.6398294152102	87.2084316497014	-5.0411320496413516e-36	-0.0006706342963219918	-5.142028880605665	2.9723800201087013e-37	-0.03261300111707194	0.514213230253993
3.435	87.18258683562004	0.0	-0.03307903617096813	312.8061962048307	-1.680386515077524e-36	-800.6398331493633	0.0	-0.0006308131914530141	0.0	0.9999999828834807	-2.996076177471964e-42	-0.0001850220230395385	-2.890277893453107e-38	-3.312014604844297e-36	-0.02120196219524517	2.694706069995621e-40	0.0	-0.02128642910683312	0.0	800.6398331493633	87.18259310727055	-5.0396384375871814e-36	-0.0008176372780858167	-5.19356965301275	3.0021736602134133e-37	-0.03705623481837064	0.519370184985949
3.44	87.15649067421965	0.0	-0.033362046177681515	313.2420440377541	-1.7055809422370124e-36	-800.6398375368968	0.0	-0.0001830243010211454	0.0	0.9999999826935344	-3.025666201747352e-42	-0.0001860458008511704	-2.890277893144858e-38	-3.312014605396059e-36	-0.021319278492795635	2.694706072043013e-40	0.0	-0.021338861706817338	0.0	800.6398375368968	87.15649705447346	-5.0381299401568205e-36	-0.0009318462156917101	-5.246734599024213	3.032902124402223e-37	0.044368688225893856	0.5246922196211096
3.445	87.13014497758601	0.0	-0.03285129649494156	313.6777607390394	-1.730767789262236e-36	-800.6398412320187	0.0	-0.00031815899340450647	0.0	0.9999999826159344	-3.037708054136693e-42	-0.00018646243387491197	-2.890277893018544e-38	-3.312014605620598e-36	-0.021367021121356074	2.694706072879453e-40	0.0	-0.02143000754449838	0.0	800.6398412320187	87.13015116994663	-5.0366070042985374e-36	-0.0003582969826563614	-5.285279970841827	3.0551788624257e-37	0.1427971860750942	0.5287208659257998
3.45	87.10369422522179	0.0	-0.03233692570658807	314.1133453631967	-1.7559470015129373e-36	-800.6398411963111	0.0	-0.0005497801079959086	0.0	0.9999999824057748	-3.0701861550810863e-42	-0.00018758613552508055	-2.8902778926753714e-38	-3.312014606226209e-36	-0.021495787847581185	2.6947060751447262e-40	0.0	-0.021587507943740442	0.0	800.6398411963111	87.10370022705145	-5.0350779960786116e-36	0.000341966773560019	-5.285976114992982	3.055581828564546e-37	0.13097252702294962	0.5287598442687481
3.455	87.07732936531048	0.0	-0.03212142182656045	314.54879789207104	-1.781118577936374e-36	-800.6398381253474	0.0	-0.0006513587614944838	0.0	0.99999998212737	-3.112913688748431e-42	-0.00018906445472135225	-2.8902778922183417e-38	-3.312014607022935e-36	-0.021665190752024346	2.694706078145603e-40	0.0	-0.021774108483652955	0.0	800.6398381253474	87.07733528614496	-5.033553958136063e-36	0.0008050354714223655	-5.258320418947449	3.039600819976735e-37	0.013586988504029725	0.5258337972646517
3.46	87.05112237383364	0.0	-0.032798094068687396	314.98411898413553	-1.806282556582796e-36	-800.6398348177568	0.0	-0.0011318267305258755	0.0	0.9999999816925447	-3.1789871643913445e-42	-0.0001913505142948541	-2.890277891499158e-38	-3.312014608254983e-36	-0.021927153887317457	2.69470608283251e-40	0.0	-0.022098352957649073	0.0	800.6398348177568	87.05112855095966	-5.032039061828415e-36	0.0005164617955611283	-5.2255476463137995	3.0206603059920396e-37	-0.07082670233318528	0.5226027614322286
3.465	87.02507048782425	0.0	-0.033632059112655675	315.4193094365674	-1.831438983525487e-36	-800.6398329698474	0.0	-0.0013561107800810586	0.0	0.9999999810829752	-3.270306439630761e-42	-0.0001945100469413322	-2.8902778904803196e-38	-3.312014609957784e-36	-0.022289209665809856	2.69470608940295e-40	0.0	-0.022486850078903265	0.0	800.6398329698474	87.02507698634918	-5.030533135216824e-36	0.00022244388311072944	-5.195844966853495	3.0034899418256314e-37	-0.058822910755368586	0.5196177927516199
3.47	86.99915984222284	0.0	-0.03451176614180376	315.8543699889051	-1.8565879015138553e-36	-800.6398325892901	0.0	-0.0013605666355000759	0.0	0.9999999804083706	-3.36966967165052e-42	-0.0001979478904252919	-2.890277889338959e-38	-3.3120146118105804e-36	-0.022683157517909593	2.694706096674394e-40	0.0	-0.022876623708705607	0.0	800.6398325892901	86.99916668746403	-5.029035374560653e-36	-6.916379294195305e-05	-5.16846898949197	2.987665045848155e-37	-0.05755769459118098	0.5168789469841734
3.475	86.97338389631395	0.0	-0.035341704866173024	316.28930132759217	-1.8817293502283042e-36	-800.6398336445071	0.0	-0.0011813661202064942	0.0	0.9999999797674087	-3.4625046305764226e-42	-0.00020115986382886715	-2.8902778882417215e-38	-3.3120146135416466e-36	-0.023051222565104532	2.6947061035832095e-40	0.0	-0.02321506017244349	0.0	800.6398336445071	86.9733910761911	-5.027545399644922e-36	-0.00035059459128016987	-5.141726466104046	2.972206249588871e-37	-0.05476384124087166	0.5142018099009595
3.48	86.94774194094869	0.0	-0.036042279223947545	316.72410412285194	-1.9068633684117743e-36	-800.6398360658108	0.0	-0.0008535890118192245	0.0	0.9999999792469033	-3.53681625213946e-42	-0.00020373095293950468	-2.8902778873419263e-38	-3.3120146149273134e-36	-0.023345847680725253	2.6947061091936434e-40	0.0	-0.02345959541152341	0.0	800.6398360658108	86.94774940906466	-5.0260631675282864e-36	-0.0006143843240952076	-5.114887510836752	2.9566916418154434e-37	-0.050513240387891185	0.5115136932279357
3.485	86.92223466710827	0.0	-0.03654932221764834	317.1587790460591	-1.9319899948739747e-36	-800.639839747175	0.0	-0.00041075480402229833	0.0	0.9999999789194407	-3.5830905331866175e-42	-0.00020533198515465832	-2.8902778867719624e-38	-3.312014615790183e-36	-0.023529312462148275	2.6947061127232976e-40	0.0	-0.023577267994949413	0.0	800.639839747175	86.92224234712052	-5.024588716455424e-36	-0.0008534898916630082	-5.087928521815144	2.9411076019026376e-37	-0.04528558329821759	0.508813005210703
3.49	86.896862314063	0.0	-0.03681352018623197	317.59332677104715	-1.957109268566872e-36	-800.6398445488891	0.0	0.00011576311091940415	0.0	0.9999999788407088	-3.594162388571808e-42	-0.0002057150574952899	-2.890277886634488e-38	-3.3120146159966464e-36	-0.023573209319808115	2.6947061135719286e-40	0.0	-0.02354410430655448	0.0	800.6398445488891	86.89687010554954	-5.023122058895564e-36	-0.0010615317727311895	-5.060953735152651	2.92551492055208e-37	-0.05048640250246627	0.5061205546724339
3.495	86.87162458293491	0.0	-0.03677726729762721	318.0277479713435	-1.982221228424898e-36	-800.6398503003588	0.0	0.0006767869261439792	0.0	0.9999999790473754	-3.5650544181096434e-42	-0.00020470795814397629	-2.8902778869949853e-38	-3.3120146154538915e-36	-0.02345780423261684	2.6947061113442993e-40	0.0	-0.02335021913406607	0.0	800.6398503003588	86.87163235937909	-5.021663176194559e-36	-0.0012106391824749695	-5.034339512054468	2.910124956202276e-37	0.06569460449499419	0.5034768128096127
3.5	86.84651936978007	0.0	-0.035760701094011076	318.46204331294615	-2.0073259129588567e-36	-800.6398543612717	0.0	0.00045073140009559685	0.0	0.9999999793269813	-3.525443719941816e-42	-0.00020333747755737501	-2.8902778874808454e-38	-3.312014614715305e-36	-0.02330075872231448	2.6947061083304574e-40	0.0	-0.023221094099468566	0.0	800.6398543612717	86.84652673124246	-5.020211934964676e-36	-0.0004423945004429217	-5.007721784668226	2.8947338507007674e-37	0.16306832479487607	0.5010376108755922
3.505	86.82154868027489	0.0	-0.034971563703596935	318.89621346302914	-2.0324233607432398e-36	-800.6398550043563	0.0	0.0003996591989839652	0.0	0.9999999795356556	-3.495706573453888e-42	-0.0002023086095027416	-2.8902778878420267e-38	-3.312014614160832e-36	-0.023182859125476695	2.6947061060811768e-40	0.0	-0.023106600172741763	0.0	800.6398550043563	86.82155572338722	-5.018768474745538e-36	0.00015793201694348324	-4.9806367292411835	2.8790822726007284e-37	0.0548583105121744	0.49809388334829574
3.51	86.79671330727801	0.0	-0.03490251331412423	319.3302590964729	-2.0575136107815744e-36	-800.6398539966601	0.0	3.96451607181809e-05	0.0	0.9999999796682927	-3.476726712289094e-42	-0.0002016519300582934	-2.8902778880709605e-38	-3.312014613806913e-36	-0.023107609202622004	2.694706104651503e-40	0.0	-0.023095242670805417	0.0	800.6398539966601	86.79672032469468	-5.0173328504075996e-36	0.00010293833492386945	-4.953610542646677	2.8634641331666414e-37	-0.040788117792520215	0.49537784648461386
3.515	86.77201217595062	0.0	-0.0351883289979223	319.76418088978306	-2.0825967021667164e-36	-800.6398540902087	0.0	-0.0002470366998798202	0.0	0.999999979606245	-3.485614227675901e-42	-0.0002019594269686319	-2.890277887963936e-38	-3.3120146139725905e-36	-0.023142845753691098	2.694706105320344e-40	0.0	-0.023166013472245187	0.0	800.6398540902087	86.7720193107513	-5.01590499337355e-36	-0.00013947513027110406	-4.92681198497967	2.847973560544476e-37	-0.05106133695186429	0.4927076576984636
3.52	86.7474447819535	0.0	-0.03554309756676899	320.1979795125259	-2.107672673602861e-36	-800.6398553789114	0.0	-0.00031832794861489673	0.0	0.9999999794548686	-3.5072381882829615e-42	-0.00020270758894487168	-2.8902778877023523e-38	-3.312014614375794e-36	-0.023228578802707466	2.694706106952013e-40	0.0	-0.023257207712028643	0.0	800.6398553789114	86.74745206271392	-5.014484868787774e-36	-0.00037436461060840707	-4.9000880246559575	2.8325253835878725e-37	-0.04590575888625127	0.4900303050636322
3.525	86.72301092817325	0.0	-0.035875572339945004	320.63165563296496	-2.1327415637195974e-36	-800.6398578131386	0.0	-0.00020721353291659452	0.0	0.999999979314461	-3.5272237844664556e-42	-0.00020339906556230558	-2.890277887459141e-38	-3.3120146147484647e-36	-0.023307816187962842	2.6947061084654374e-40	0.0	-0.023316570016499224	0.0	800.6398578131386	86.72301834663993	-5.013072463150199e-36	-0.0005968113302028716	-4.873407576407137	2.8171024595679687e-37	-0.04288618001097282	0.4873596272796755
3.53	86.69871037771769	0.0	-0.03610843376172374	321.06520991809793	-2.1578034110734488e-36	-800.6398613172754	0.0	5.340685493686632e-05	0.0	0.9999999792696815	-3.5335832265429286e-42	-0.00020361909429976569	-2.8902778873814577e-38	-3.3120146148670586e-36	-0.02333302962454104	2.6947061089481023e-40	0.0	-0.023301270079574474	0.0	800.6398613172754	86.6987178932831	-5.0116677609223186e-36	-0.0008014057313551948	-4.846783744979888	2.8017122111747722e-37	-0.03876164932982848	0.4846938738632874
3.535	86.67454286492288	0.0	-0.03617839465370672	321.4986430335151	-2.1828582541397177e-36	-800.6398657882447	0.0	0.0004316901353919548	0.0	0.999999979388636	-3.5166725132026146e-42	-0.00020303400478072654	-2.8902778875876803e-38	-3.312014614551793e-36	-0.02326598330299834	2.694706107665858e-40	0.0	-0.023177599965497522	0.0	800.6398657882447	86.67455040988918	-5.010270745207315e-36	-0.000982633295587037	-4.820197066796794	2.786343834744195e-37	-0.04304259306410492	0.48203892402558224
3.54	86.65050810758356	0.0	-0.036035922330177036	321.93195564310497	-2.207906131295455e-36	-800.6398710958999	0.0	0.0008976244698979733	0.0	0.9999999797215451	-3.4690873405540614e-42	-0.00020138761735634362	-2.890277888162722e-38	-3.312014613664545e-36	-0.023077321197419887	2.6947061040774495e-40	0.0	-0.022920449496933414	0.0	800.6398710958999	86.65051559340674	-5.0088813985117494e-36	-0.001135241373892021	-4.79333200948157	2.770811075524243e-37	0.026337782052837717	0.4793404367658135
3.545	86.6266046447638	0.0	-0.03514570970496089	322.3651484093798	-2.232947080842482e-36	-800.6398761986056	0.0	0.0008972023893814634	0.0	0.9999999802186189	-3.397305627218138e-42	-0.00019890405990390843	-2.8902778890153757e-38	-3.312014612326052e-36	-0.02279272647131401	2.6947060987195795e-40	0.0	-0.02266341994553036	0.0	800.6398761986056	86.62661177163677	-5.007499626874112e-36	-0.0006849408866511866	-4.769190929214062	2.756851188728888e-37	0.1326653583227673	0.47710357593080976
3.55	86.6028019915938	0.0	-0.03410701357588013	322.79822193129127	-2.257981137418813e-36	-800.63987784092	0.0	0.0007241847197299166	0.0	0.9999999806121629	-3.339832403908261e-42	-0.00019691555830009881	-2.8902778896852154e-38	-3.3120146112543654e-36	-0.02256486096794484	2.6947060944776373e-40	0.0	-0.022455956305388415	0.0	800.63987784092	86.60280870783275	-5.00612368070984e-36	-1.3338303865453053e-07	-4.754837705694589	2.7485561462502728e-37	0.09187383701051699	0.4755725224339819
3.555	86.57904022413496	0.0	-0.03369569933411834	323.2311765632078	-2.2830083215042532e-36	-800.6398770172118	0.0	0.00036625847347697735	0.0	0.9999999809106724	-3.295847890427989e-42	-0.00019539374917623562	-2.890277890190125e-38	-3.3120146104342015e-36	-0.022390474484546178	2.694706091260052e-40	0.0	-0.02235103098168274	0.0	800.6398770172118	86.57904678105018	-5.004750109924414e-36	0.00013830913187385584	-4.7514636333543105	2.7466107856259615e-37	-0.015303720634905685	0.4751488278734761
3.56	86.55527932224457	0.0	-0.033823911038518256	323.66401239850893	-2.3080286384820635e-36	-800.6398768261514	0.0	-3.631264018441305e-05	0.0	0.9999999809811337	-3.285415572723883e-42	-0.0001950328040387275	-2.890277890308898e-38	-3.312014610239672e-36	-0.02234911321772811	2.6947060905005605e-40	0.0	-0.02236143378681046	0.0	800.6398768261514	86.55528593105568	-5.003376599791667e-36	-6.167144632270091e-05	-4.752940400628111	2.7474658581274774e-37	-0.045473648931971325	0.47531579297000115
3.565	86.53151066762119	0.0	-0.03407253210220726	324.09672940875896	-2.3330420867068167e-36	-800.6398776295972	0.0	-0.0002076607728689768	0.0	0.9999999809128453	-3.295526469764153e-42	-0.00019538262842349447	-2.89027789019379e-38	-3.312014610428208e-36	-0.0223892001401277	2.6947060912366307e-40	0.0	-0.022420924216089547	0.0	800.6398776295972	86.53151737542142	-5.002002644242483e-36	-0.00025902215482921664	-4.753915240946564	2.748029065639076e-37	-0.039001915851076575	0.47540752273753606
3.57	86.50774307024949	0.0	-0.03434496718191592	324.5293275740469	-2.3580486650276457e-36	-800.6398794064296	0.0	-0.00017971044816183178	0.0	0.9999999808106447	-3.310624734701508e-42	-0.00019590500949626525	-2.890277890021243e-38	-3.31201461070974e-36	-0.022449060602807894	2.694706092338233e-40	0.0	-0.022472407467159936	0.0	800.6398794064296	86.50774988684026	-5.000628750403155e-36	-0.0004503647407449548	-4.752633651641484	2.7472881594576032e-37	-0.037378884344036425	0.4752780639553005
3.575	86.48398643981866	0.0	-0.034557421509114894	324.96180692625376	-2.383048375287646e-36	-800.6398821156595	0.0	1.5160148718149236e-05	0.0	0.9999999807641741	-3.3174766069177064e-42	-0.0001961420757004633	-2.890277889942678e-38	-3.312014610837504e-36	-0.02247622638926129	2.6947060928391293e-40	0.0	-0.022468064404468233	0.0	800.6398821156595	86.4839933417836	-4.999255489210151e-36	-0.000631122272439581	-4.7498721159482695	2.7456917611107977e-37	-0.03573678673215818	0.4750006551131149
3.58	86.46024474580386	0.0	-0.034639252830323174	325.3941675325423	-2.4080412213695014e-36	-800.6398856907734	0.0	0.00034449322961618964	0.0	0.9999999808474227	-3.3051960957591974e-42	-0.00019571718538229606	-2.8902778900833733e-38	-3.3120146106085125e-36	-0.022427537544352835	2.6947060919418077e-40	0.0	-0.022369374363829037	0.0	800.6398856907734	86.4602516810517	-4.997883088489756e-36	-0.0007957393265634305	-4.746856207457503	2.7439485296056257e-37	-0.03852709937167902	0.47470125544034353
3.585	86.4365171859315	0.0	-0.0344736194056337	325.82640946670165	-2.4330272075391194e-36	-800.6398900269955	0.0	0.0007214876923339036	0.0	0.9999999811163947	-3.265334815480507e-42	-0.00019433803496723558	-2.8902778905364586e-38	-3.3120146098652347e-36	-0.02226949854515388	2.6947060890425966e-40	0.0	-0.02216268336512221	0.0	800.6398900269955	86.4365240560699	-4.996511499501951e-36	-0.0008778116374475318	-4.744450705533391	2.7425526874225175e-37	0.07476666450426368	0.4745039783959391
3.59	86.41280049430871	0.0	-0.03346332967238995	326.25853278905424	-2.458006337296178e-36	-800.639892426936	0.0	0.00040616009992766833	0.0	0.9999999813802952	-3.2259483057098796e-42	-0.0001929753110174724	-2.8902778909787495e-38	-3.312014609130806e-36	-0.02211334188030004	2.6947060861980585e-40	0.0	-0.022046327067459872	0.0	800.639892426936	86.41280697357809	-4.995140523915189e-36	-0.00011225369850782023	-4.7421953420186	2.741245515584027e-37	0.14804486200809652	0.47445056584464
3.595	86.38909647940534	0.0	-0.032849771008257984	326.690537556961	-2.4829786139629917e-36	-800.6398914995425	0.0	0.00018612455952016717	0.0	0.9999999815378824	-3.2022956472288155e-42	-0.00019215695863290507	-2.8902778912417787e-38	-3.312014608689761e-36	-0.022019565602980996	2.694706084499454e-40	0.0	-0.021993006308838686	0.0	800.6398914995425	86.3891027243267	-4.993770288738153e-36	0.00035076288174948133	-4.739433005559827	2.7396546914115284e-37	0.02132471297177861	0.47394809797670034
3.6	86.36540641256185	0.0	-0.033079929876777034	327.12242384015246	-2.5079440415562843e-36	-800.6398902433518	0.0	-0.0003166538870800274	0.0	0.9999999814948431	-3.208765484630762e-42	-0.00019238080691067957	-2.890277891170025e-38	-3.312014608810405e-36	-0.022045216726590624	2.6947060849633722e-40	0.0	-0.022083720965319176	0.0	800.6398902433518	86.36541274762732	-4.9924008754728776e-36	0.00015016510652688273	-4.73663647471767	2.7380415844125602e-37	-0.05188723229561013	0.4736920664155263
3.605	86.34172973984688	0.0	-0.03347440806022316	327.55419170691266	-2.5329026240168687e-36	-800.6398900105365	0.0	-0.0005466081575216172	0.0	0.9999999812764258	-3.2414836405883584e-42	-0.00019351281416335895	-2.8902778908049383e-38	-3.312014609420492e-36	-0.022174935204918693	2.694706087317653e-40	0.0	-0.02224031266768623	0.0	800.6398900105365	86.34173622879736	-4.9910322401119275e-36	-5.7943975476624956e-05	-4.733943321896561	2.7364843309168694e-37	-0.04207498120510798	0.473413029805607
3.61	86.31806653409515	0.0	-0.03391859673533171	327.9858412249659	-2.5578543652594784e-36	-800.6398908272548	0.0	-0.0005417791377604198	0.0	0.9999999810034828	-3.282102505357995e-42	-0.00019491817605385425	-2.8902778903465383e-38	-3.3120146101778994e-36	-0.022335977817983764	2.694706090259658e-40	0.0	-0.022395520957795775	0.0	800.6398908272548	86.31807319782642	-4.98966438441186e-36	-0.0002686746185800626	-4.731300973782974	2.7349569027507937e-37	-0.041987701676397024	0.4731487279028846
3.615	86.29441610466677	0.0	-0.03431294077175221	328.41737246017243	-2.5827992690912047e-36	-800.639892690759	0.0	-0.00034090392070945305	0.0	0.9999999807805909	-3.315056879981765e-42	-0.00019605835617654384	-2.8902778899704396e-38	-3.312014610792388e-36	-0.022466632838309953	2.6947060926621667e-40	0.0	-0.022493182737176345	0.0	800.639892690759	86.29442292523336	-4.9882972662355154e-36	-0.0004754560467996027	-4.728845136010544	2.7335373507628285e-37	-0.043236661747394635	0.47290427920763883
3.62	86.27077745235384	0.0	-0.0345735565989356	328.8487854737441	-2.607737339050629e-36	-800.6398955625573	0.0	1.7907655399204827e-05	0.0	0.9999999806956482	-3.327565267306428e-42	-0.00019649113072488206	-2.890277889826701e-38	-3.3120146110256275e-36	-0.02251622514946612	2.694706093577749e-40	0.0	-0.0224880525717996	0.0	800.6398955625573	86.27078437754234	-4.986930825878086e-36	-0.0006706693634731181	-4.726613574402687	2.7322468680571885e-37	-0.032264267649842665	0.4726723692442232
3.625	86.24714948858113	0.0	-0.03447135007716558	329.2800803219096	-2.632668578388773e-36	-800.6398992939337	0.0	0.0003454223197027455	0.0	0.9999999808116103	-3.3104820710318266e-42	-0.0001959000735118243	-2.890277890022875e-38	-3.3120146107070894e-36	-0.022448494980644593	2.6947060923278137e-40	0.0	-0.022389096366456668	0.0	800.6398992939337	86.2471563746853	-4.9855649959463144e-36	-0.0006797022297773906	-4.724714134358976	2.7311435491665034e-37	0.08121231297724263	0.4725412055174724
3.63	86.2235310376611	0.0	-0.033660344999002174	329.7112570519971	-2.657592989855798e-36	-800.6399008348051	0.0	0.00010622349205025756	0.0	0.9999999809123966	-3.2955926391586715e-42	-0.00019538491780173977	-2.890277890193033e-38	-3.3120146104294526e-36	-0.022389462483555007	2.694706091241457e-40	0.0	-0.022358665577558563	0.0	800.6399008348051	86.22353760790614	-4.984199703306592e-36	3.321197658819415e-05	-4.722550596609902	2.729891269642291e-37	0.1159650618696097	0.47239741778628475
3.635	86.19992514937873	0.0	-0.033390989945488225	330.14231571884244	-2.6825105766244957e-36	-800.6398995587645	0.0	-0.00017616644896471247	0.0	0.9999999809242794	-3.293834556566598e-42	-0.00019532409034412804	-2.890277890213073e-38	-3.312014610396669e-36	-0.022382492170222673	2.6947060911133734e-40	0.0	-0.02240913354764599	0.0	800.6398995587645	86.19993161620526	-4.982835146958568e-36	0.0002828558950563378	-4.719836815592042	2.728328182350843e-37	-0.0037199881279876695	0.4719838281565344
3.64	86.17633273253679	0.0	-0.03376040647476486	330.5732563907804	-2.707421342629917e-36	-800.6398986675248	0.0	-0.0005532865573632439	0.0	0.9999999807337903	-3.321951880473466e-42	-0.00019629691456510018	-2.8902778898912725e-38	-3.312014610920964e-36	-0.022493969616499413	2.6947060931666212e-40	0.0	-0.022567638470637173	0.0	800.6398986675248	86.17633934549865	-4.981471381593964e-36	7.189192302012795e-05	-4.717111255501531	2.7267548639228903e-37	-0.05064168351151715	0.47173830856618076
3.645	86.15275368039491	0.0	-0.03424004590988029	331.0040791346798	-2.7323252917341954e-36	-800.6398988532964	0.0	-0.00065809427557825	0.0	0.9999999804250357	-3.3672321926230097e-42	-0.00019786355670122993	-2.890277889367293e-38	-3.3120146117652944e-36	-0.022673493584801026	2.694706096494631e-40	0.0	-0.022756168593198938	0.0	800.6398988532964	86.15276048436091	-4.980108391339393e-36	-0.00014706337064266002	-4.714408539852618	2.725192240772514e-37	-0.04419308999174521	0.47146156693667324
3.65	86.12918823313437	0.0	-0.03471513484328883	331.4347840183331	-2.7572224278560033e-36	-800.6399001409543	0.0	-0.0005322650104533763	0.0	0.9999999801208084	-3.4115006391126287e-42	-0.00019939518955159225	-2.8902778888481666e-38	-3.312014612590754e-36	-0.022849005784442055	2.6947060997738444e-40	0.0	-0.022908651286606265	0.0	800.6399001409543	86.12919522848141	-4.9787461875367296e-36	-0.0003676411383127598	-4.711709678371534	2.7236321283974837e-37	-0.043758394746911844	0.4711912869564845
3.655	86.10563604550626	0.0	-0.035087356096533885	331.865371109021	-2.7821127548845832e-36	-800.6399025190984	0.0	-0.00021745562942087704	0.0	0.9999999799264747	-3.4396012195880563e-42	-0.00020036743447046746	-2.890277888515118e-38	-3.312014613114736e-36	-0.022960416847676815	2.694706101868532e-40	0.0	-0.02297094773559215	0.0	800.6399025190984	86.10564319245846	-4.977384747945331e-36	-0.000581823196102051	-4.709107609560448	2.7221284639752185e-37	-0.053878760635454326	0.47094158235674766
3.66	86.0820963668454	0.0	-0.03527527899792355	332.2958404709871	-2.8069962765338473e-36	-800.6399059336592	0.0	0.0002459529448632883	0.0	0.9999999799282248	-3.439348772409756e-42	-0.00020035870011401557	-2.890277888518122e-38	-3.312014613110029e-36	-0.02295941596413381	2.6947061018496665e-40	0.0	-0.02290048740709475	0.0	800.6399059336592	86.08210359098133	-4.976024027211857e-36	-0.0007806829958402897	-4.706920581211923	2.7208599213101878e-37	0.03794741383509913	0.47070735456388574
3.665	86.05856688633405	0.0	-0.03459843843064311	332.72619216057114	-2.8318729960681474e-36	-800.6399087674012	0.0	0.0001366262967417986	0.0	0.999999980050733	-3.4216492317711977e-42	-0.0001997463181574552	-2.8902778887281975e-38	-3.3120146127799915e-36	-0.022889242159607845	2.6947061005291675e-40	0.0	-0.022861346856225716	0.0	800.6399087674012	86.0585738409339	-4.9746638795242606e-36	-0.00021867259273563935	-4.704848131329935	2.719657687779914e-37	0.12814889567604296	0.4706593043629518
3.67	86.03504890398004	0.0	-0.03407424014324973	333.1564262288533	-2.8567429164526958e-36	-800.6399083596644	0.0	-1.8959227276442667e-05	0.0	0.9999999800918188	-3.4157011230510155e-42	-0.00019954052103930367	-2.8902778887985523e-38	-3.3120146126690804e-36	-0.02286565954652579	2.6947061000863086e-40	0.0	-0.022866778274754564	0.0	800.6399083596644	86.03505565115773	-4.973304399696025e-36	0.0002607188585125859	-4.70233515573734	2.718209818339073e-37	0.02672493166169341	0.470241109845318
3.675	86.01154369226609	0.0	-0.03437603429924445	333.5865427395033	-2.8816060413546055e-36	-800.6399075510287	0.0	-0.00044508579323784044	0.0	0.9999999799629552	-3.4343364856759417e-42	-0.00020018528126549732	-2.8902778885777214e-38	-3.312014613016569e-36	-0.022939543627519043	2.69470610147531e-40	0.0	-0.022994285962123367	0.0	800.6399075510287	86.01155056174946	-4.971945673945358e-36	6.0457898158376334e-05	-4.699809297597568	2.7167534547204604e-37	-0.05242998533790321	0.4700101736893265
3.68	85.98805042158062	0.0	-0.03480860736713643	334.01654175445816	-2.9064623743474477e-36	-800.6399077741338	0.0	-0.000582029496240588	0.0	0.9999999796938814	-3.473055820828784e-42	-0.00020152492180760325	-2.8902778881150507e-38	-3.312014613738558e-36	-0.02309305512887017	2.6947061043756094e-40	0.0	-0.02316102513055692	0.0	800.6399077741338	85.98805746685	-4.970587641490671e-36	-0.0001511349683897684	-4.6973800203592955	2.7153487568854162e-37	-0.04306238480029632	0.4697577399538553
3.685	85.96456969771117	0.0	-0.03525052554955121	334.4464233351	-2.9313119189792425e-36	-800.6399090707869	0.0	-0.0004732715530527015	0.0	0.9999999794177153	-3.5125299066158e-42	-0.00020289067577699069	-2.8902778876380206e-38	-3.3120146144746185e-36	-0.023249559008668035	2.6947061073523566e-40	0.0	-0.02329660744332453	0.0	800.6399090707869	85.96457692432787	-4.969230334609756e-36	-0.00036770408768028133	-4.694819850453769	2.7138688461747393e-37	-0.04327046391757945	0.4695019250361216
3.69	85.94110198271001	0.0	-0.035597170595202426	334.87618754533923	-2.9561546789443547e-36	-800.6399114455091	0.0	-0.00016237177853065235	0.0	0.9999999792485263	-3.5365823860603336e-42	-0.00020372286146583184	-2.890277887344712e-38	-3.3120146149231185e-36	-0.023344920466122424	2.694706109176014e-40	0.0	-0.023343123531433727	0.0	800.6399114455091	85.94110935300665	-4.96787377755252e-36	-0.0005808339401788963	-4.692173925927534	2.7123398950605384e-37	-0.05475887180817437	0.4692493440080222
3.695	85.91764740313721	0.0	-0.03576132685078066	335.3058344504215	-2.9809906580145344e-36	-800.639914857384	0.0	0.00030829008561998833	0.0	0.9999999792797655	-3.532148724249004e-42	-0.0002035694623155713	-2.890277887398928e-38	-3.312014614840443e-36	-0.023327342217976284	2.6947061088392876e-40	0.0	-0.023254804927574965	0.0	800.639914857384	85.91765484202993	-4.966517975517197e-36	-0.0007809060410998796	-4.689812185269204	2.710969972452654e-37	0.045285489016284326	0.4690030821712684
3.7	85.89420410307264	0.0	-0.035025134428614615	335.73536411085206	-3.0058198596959578e-36	-800.6399174698589	0.0	0.00016771646004305198	0.0	0.999999979418131	-3.512470640746226e-42	-0.00020288862525207055	-2.8902778876387384e-38	-3.312014614473514e-36	-0.023249324035815765	2.6947061073478795e-40	0.0	-0.023206757700998257	0.0	800.6399174698589	85.89421124402215	-4.965162808120559e-36	-0.0001712182872560929	-4.6874482927260415	2.7095999944646387e-37	0.12005890403500045	0.4688985565921308
3.705	85.87077381054912	0.0	-0.034606247007365545	336.16477658463833	-3.030642287352606e-36	-800.6399169807632	0.0	-4.8442013632012546e-05	0.0	0.9999999794725198	-3.504717444831609e-42	-0.00020262037437597714	-2.890277887732857e-38	-3.3120146143289455e-36	-0.023218584749082248	2.694706106761634e-40	0.0	-0.023220635315659405	0.0	800.6399169807632	85.87078078356794	-4.963808398988787e-36	0.0001920917947250862	-4.6847242482066065	2.708030370863837e-37	0.013204321906039481	0.4684742856961517
3.71	85.84735668864025	0.0	-0.03490044251442244	336.5940719410617	-3.0554579449747316e-36	-800.6399164946686	0.0	-0.00041755820862516863	0.0	0.9999999793410713	-3.5234379580759735e-42	-0.0002032680807068819	-2.890277887505248e-38	-3.312014614678023e-36	-0.023292806428860197	2.694706108178496e-40	0.0	-0.02334025693093573	0.0	800.6399164946686	85.8473637828743	-4.962454765292031e-36	-3.8549567919635537e-07	-4.682187625890559	2.7065669885606413e-37	-0.049017381946416264	0.4682444198041825
3.715	85.823951347305	0.0	-0.03530268301900845	337.0232502421658	-3.08026683614411e-36	-800.639917007528	0.0	-0.00049623708331846	0.0	0.9999999790968338	-3.5580641365864504e-42	-0.0002044661031511299	-2.8902778870810577e-38	-3.312014615323689e-36	-0.023430089691347793	2.69470611081109e-40	0.0	-0.02348241838349588	0.0	800.639917007528	85.82395860773956	-4.961101815114155e-36	-0.00020650302284707612	-4.679868117902686	2.7052258603659524e-37	-0.04213554224981911	0.4680057799310038
3.72	85.80055767277341	0.0	-0.035690719391186676	337.4523115465588	-3.1050689642483925e-36	-800.6399185703426	0.0	-0.00033000743852718744	0.0	0.9999999788756159	-3.5892526365953897e-42	-0.00020554518622113637	-2.890277886695431e-38	-3.3120146159052506e-36	-0.023553743505257005	2.694706113195561e-40	0.0	-0.023576958550673533	0.0	800.6399185703426	85.80056509494855	-4.959749539054869e-36	-0.00041893391104841577	-4.677520433842849	2.703868999808775e-37	-0.04705370672278744	0.46777570971923876
3.725	85.77717583195712	0.0	-0.035959740227220066	337.88125591274536	-3.1298643326694193e-36	-800.6399211915976	0.0	3.595065625911635e-05	0.0	0.999999978792379	-3.6009455020124264e-42	-0.0002059497447317095	-2.890277886549987e-38	-3.312014616123282e-36	-0.023600102496682117	2.6947061140927535e-40	0.0	-0.02356665944630167	0.0	800.6399211915976	85.77718336723618	-4.9583979442536874e-36	-0.0006281629932395227	-4.675191322748399	2.702521512268372e-37	-0.022987292856745285	0.4675247835135033
3.73	85.7538056284437	0.0	-0.03576501920597704	338.310083399504	-3.154652944806027e-36	-800.6399246363911	0.0	0.0003070523760505166	0.0	0.9999999789211207	-3.582850522476371e-42	-0.00020532368108443975	-2.890277886774861e-38	-3.312014615785868e-36	-0.023528360885775017	2.6947061127050647e-40	0.0	-0.023478695420115877	0.0	800.6399246363911	85.75381308487779	-4.957047012407142e-36	-0.0005504428554515217	-4.672990692322307	2.701244048740958e-37	0.09133665256878237	0.4673883224325719
3.735	85.73044686395117	0.0	-0.03499553326356705	338.7387940616688	-3.1794348038433e-36	-800.6399256341692	0.0	0.0001508566909796488	0.0	0.9999999790273096	-3.5678837607703154e-42	-0.00020480584985930493	-2.890277886960005e-38	-3.312014615506788e-36	-0.023469021797126743	2.6947061115604737e-40	0.0	-0.02343547816159366	0.0	800.6399256341692	85.73045400653834	-4.95569673100595e-36	0.00012066299333279307	-4.670381415403332	2.6997364224218756e-37	0.07686217775921514	0.4671013847090878
3.74	85.70710249443921	0.0	-0.03502465806476725	339.16738796075646	-3.204209913334355e-36	-800.6399248001023	0.0	-0.0002449955312374439	0.0	0.9999999790159596	-3.5694853813740383e-42	-0.0002048612639278744	-2.89027788694023e-38	-3.312014615536647e-36	-0.023475371781769325	2.694706111682812e-40	0.0	-0.023505664211291015	0.0	800.6399248001023	85.70710965090522	-4.954347297365415e-36	9.147482740316875e-05	-4.66748950403518	2.6980699497825886e-37	-0.03397559890911598	0.46676131600208476
3.745	85.68377147963244	0.0	-0.03537118122721863	339.59586517641685	-3.228978277870759e-36	-800.6399248257685	0.0	-0.0004522497083552775	0.0	0.999999978824185	-3.596480248525372e-42	-0.00020579525254903173	-2.890277886605583e-38	-3.312014616040015e-36	-0.023582398996236556	2.694706113749918e-40	0.0	-0.023635224209164914	0.0	800.6399248257685	85.68377878037978	-4.9529986424543985e-36	-0.00010455219595490691	-4.6648779092857735	2.6965607380454086e-37	-0.04322882066918054	0.4665078202932814
3.75	85.66045318274962	0.0	-0.03575866513614165	340.02422576979853	-3.253739900986488e-36	-800.6399258675388	0.0	-0.0003836655276670218	0.0	0.999999978597746	-3.628197761123045e-42	-0.00020689263879246535	-2.8902778862091695e-38	-3.312014616631441e-36	-0.0237081501994026	2.694706116190664e-40	0.0	-0.023745136286564814	0.0	800.6399258675388	85.66046064585146	-4.951650723693425e-36	-0.00031362843520616287	-4.662394833797379	2.6951253554870005e-37	-0.04265641965903556	0.46625899622804723
3.755	85.63714704606834	0.0	-0.03606985967067014	340.4524698030855	-3.2784947862759195e-36	-800.6399279683736	0.0	-8.682373238067785e-05	0.0	0.9999999784670476	-3.646428448961393e-42	-0.00020752339777708374	-2.890277885979743e-38	-3.3120146169713844e-36	-0.02378042985637145	2.694706117599442e-40	0.0	-0.023770009453699746	0.0	800.6399279683736	85.6371546406653	-4.9503035060583084e-36	-0.0005264338673910276	-4.6599949623204875	2.6937387391549006e-37	-0.056323088992745754	0.4660335324760012
3.76	85.61385257376595	0.0	-0.03619835440734715	340.8805973329469	-3.303242937014892e-36	-800.6399311193296	0.0	0.00038491775054654676	0.0	0.9999999785392162	-3.636368724095579e-42	-0.00020717534388585987	-2.8902778861064805e-38	-3.312014616783803e-36	-0.023740545817493595	2.694706116821551e-40	0.0	-0.02365973864086981	0.0	800.6399311193296	85.61386022321722	-4.9489569583296144e-36	-0.0007241933645436628	-4.657982244560799	2.6925697317596792e-37	0.06156954311468693	0.4658389142105135
3.765	85.59056778991159	0.0	-0.03536724371072745	341.30860841620654	-3.327984356499638e-36	-800.639932875221	0.0	0.00016202744561542143	0.0	0.9999999786684658	-3.61831001406033e-42	-0.00020655053511799154	-2.890277886333119e-38	-3.3120146164470674e-36	-0.023668948005158424	2.69470611542839e-40	0.0	-0.023613321196874565	0.0	800.639932875221	85.59057509704508	-4.947610951978839e-36	-9.686291090160372e-06	-4.655764079621842	2.6912854341382786e-37	0.10568891005756662	0.465696352903973
3.77	85.5672959916582	0.0	-0.03519960996227138	341.73650310518036	-3.352719047759557e-36	-800.639932119727	0.0	-0.0001624149023176284	0.0	0.9999999786951965	-3.6145684014948545e-42	-0.00020642108000561735	-2.890277886379935e-38	-3.3120146163772976e-36	-0.023654113541691318	2.694706115140266e-40	0.0	-0.023659849639038714	0.0	800.639932119727	85.56730323156327	-4.9462657094482305e-36	0.00012617958831955892	-4.653047207684343	2.6897206013031762e-37	-0.014871609373857848	0.4653070973207311
3.775	85.54403717907613	0.0	-0.0355170110220279	342.16428146934936	-3.3774470147964305e-36	-800.6399319576005	0.0	-0.00042061805877382553	0.0	0.9999999785307471	-3.637550128613881e-42	-0.00020721621900373792	-2.890277886091612e-38	-3.3120146168058286e-36	-0.023745229761077163	2.694706116912835e-40	0.0	-0.023780347836812342	0.0	800.6399319576005	85.54404455221108	-4.9449212276120674e-36	-6.47848479392507e-05	-4.650448302599368	2.6882197166013125e-37	-0.045210841511725705	0.46506680633366576
3.78	85.52079116357301	0.0	-0.035897118950036055	342.59194357209395	-3.4021682612720887e-36	-800.6399327959939	0.0	-0.00038506953079840445	0.0	0.9999999783098813	-3.668277866987791e-42	-0.00020827936029754724	-2.890277885703256e-38	-3.312014617378805e-36	-0.02386705678202884	2.6947061192935092e-40	0.0	-0.0238906621314815	0.0	800.6399327959939	85.52079869700626	-4.94357748700326e-36	-0.00027268525690491455	-4.647880071815299	2.6867350202737946e-37	-0.04274032187168166	0.4648076580381555
3.785	85.49755805001853	0.0	-0.03621534618571798	343.0194894777976	-3.426882790907958e-36	-800.6399346968612	0.0	-0.00010529193825395347	0.0	0.9999999781724691	-3.687316358237398e-42	-0.00020893806826920364	-2.8902778854609953e-38	-3.3120146177338085e-36	-0.023942539157086315	2.694706120774649e-40	0.0	-0.023920826049875017	0.0	800.6399346968612	85.49756571874487	-4.9422344907186836e-36	-0.00048795456218240563	-4.6452869028975385	2.685236722590785e-37	-0.057582947647358634	0.46456437881192714
3.79	85.47433763650685	0.0	-0.03636198586864398	343.44691925035585	-3.4515906073975235e-36	-800.6399376681105	0.0	0.00036644901144599273	0.0	0.9999999782341006	-3.6787847193125585e-42	-0.00020864288423926532	-2.8902778855697137e-38	-3.3120146175747236e-36	-0.023908713558158767	2.694706120110334e-40	0.0	-0.023815846141062035	0.0	800.6399376681105	85.47434536814247	-4.9408922244228e-36	-0.0006947588133247812	-4.643075083356981	2.68395261388084e-37	0.060509669713658384	0.46434693548918027
3.795	85.4511277430992	0.0	-0.03554394851374529	343.8742329463189	-3.476291714021075e-36	-800.6399392913729	0.0	0.00015042398434284072	0.0	0.999999978356	-3.661874576990148e-42	-0.000208057814476971	-2.8902778857844547e-38	-3.312014617259408e-36	-0.0238416695005032	2.6947061187964046e-40	0.0	-0.0237727528438601	0.0	800.6399392913729	85.4511351354746	-4.939550547303933e-36	1.360355954333412e-05	-4.64072675058631	2.6825932694462414e-37	0.10043146664238271	0.464181335827921
3.8	85.42793119011867	0.0	-0.03542697952376594	344.301430624395	-3.500986114177063e-36	-800.6399385477704	0.0	-0.00018792652151366148	0.0	0.9999999783702703	-3.659891872729339e-42	-0.0002079892153907844	-2.890277885809568e-38	-3.312014617222435e-36	-0.02383380862409923	2.6947061186425852e-40	0.0	-0.023826589826566637	0.0	800.6399385477704	85.42793853584554	-4.938209655368544e-36	0.00010919953408150055	-4.638019587700863	2.6810340185492706e-37	-0.019482041848013363	0.46380605047639745
3.805	85.40474718345935	0.0	-0.035749021105239843	344.7285123523802	-3.5256738117702275e-36	-800.6399384707379	0.0	-0.00041523403305388396	0.0	0.9999999781990816	-3.6836338595876974e-42	-0.00020881065842436248	-2.8902778855079535e-38	-3.312014617665145e-36	-0.023927939064012194	2.694706120487797e-40	0.0	-0.023945545614587553	0.0	800.6399384707379	85.40475466540467	-4.936869497901315e-36	-8.217578147511412e-05	-4.63556220152365	2.6796147023856836e-37	-0.04477648918457446	0.4635778452231997
3.81	85.38157514274808	0.0	-0.03612105762413539	345.15547819102426	-3.550354810310616e-36	-800.6399394005985	0.0	-0.0003442946868805472	0.0	0.9999999779884742	-3.712715239563515e-42	-0.00020981683777778867	-2.890277885135851e-38	-3.31201461820742e-36	-0.02404323872730701	2.694706122757896e-40	0.0	-0.02404417877692272	0.0	800.6399394005985	85.38158278284502	-4.93553003331315e-36	-0.0002920710305915652	-4.633173167582309	2.678233814767035e-37	-0.047046927013278804	0.46334120272371726
3.815	85.35841507699658	0.0	-0.036416232157874935	345.5823282001072	-3.57502911325354e-36	-800.6399414049222	0.0	-2.6450014005718608e-05	0.0	0.9999999778814272	-3.727443311849051e-42	-0.00021032641064746971	-2.890277884946285e-38	-3.31201461848205e-36	-0.024101631478169634	2.694706123911735e-40	0.0	-0.024051756147775667	0.0	800.6399414049222	85.35842284356185	-4.934191259075094e-36	-0.0005099716067667244	-4.630823664162402	2.6768748978698846e-37	-0.03060386754786619	0.46309247894211564
3.82	85.33526662961762	0.0	-0.03630534868189673	346.00906243904814	-3.599696724034346e-36	-800.6399443537645	0.0	0.0002744030441538662	0.0	0.9999999779817818	-3.7136370426648897e-42	-0.00020984873101150933	-2.890277885124007e-38	-3.312014618224608e-36	-0.024046893422761898	2.6947061228300305e-40	0.0	-0.023973145466197873	0.0	800.6399443537645	85.33527435115796	-4.9328531476473746e-36	-0.0004903514474546535	-4.628673224281954	2.6756264009025382e-37	0.08470599518911101	0.4629448230924035
3.825	85.31212922059977	0.0	-0.03556051224063964	346.43568096108936	-3.62435764574566e-36	-800.6399450809831	0.0	0.00013519551857556995	0.0	0.9999999780763338	-3.7006002407150346e-42	-0.00020939767397889158	-2.8902778852912194e-38	-3.312014617981515e-36	-0.023995206093048897	2.694706121810871e-40	0.0	-0.02393441480308056	0.0	800.6399450809831	85.31213663175804	-4.931515661962331e-36	0.00016781293649215074	-4.6261243399132	2.674153895737309e-37	0.06574705540177284	0.46265915189944473
3.83	85.28900600763325	0.0	-0.035706322354364196	346.86218383069746	-3.649011882110142e-36	-800.6399444113417	0.0	-0.00028349493860529155	0.0	0.9999999780327005	-3.706619886296578e-42	-0.0002096059461827566	-2.8902778852140835e-38	-3.312014618093761e-36	-0.02401907233011536	2.694706122281185e-40	0.0	-0.02401563012055758	0.0	800.6399444113417	85.2890134818714	-4.930179014816461e-36	4.7845604132776154e-05	-4.623296025761429	2.6725241523852427e-37	-0.044379672954153876	0.4623509024236132
3.835	85.26589572813583	0.0	-0.03605181859800309	347.28857111743093	-3.6736594371377456e-36	-800.6399446553606	0.0	-0.00040547584088585626	0.0	0.9999999778379199	-3.733419068862382e-42	-0.00021053316436178305	-2.8902778848691554e-38	-3.312014618593478e-36	-0.0241253237091518	2.6947061243806876e-40	0.0	-0.02413179039244397	0.0	800.6399446553606	85.26590334966404	-4.928843119802211e-36	-0.00014921851817365728	-4.620748428960772	2.6710514048891236e-37	-0.04236093890682164	0.46209425978785434
3.84	85.2427980837369	0.0	-0.036403043251129995	347.71484288527006	-3.698300314526335e-36	-800.6399459329576	0.0	-0.00023734491332289998	0.0	0.999999977656828	-3.7582294216733107e-42	-0.00021139157152014304	-2.8902778845476104e-38	-3.3120146190561114e-36	-0.02422368992589639	2.694706126332645e-40	0.0	-0.024199784701555472	0.0	800.6399459329576	85.24280585595167	-4.927507955280724e-36	-0.00036382270753188565	-4.618241340978102	2.6696027397131066e-37	-0.05450219296474849	0.46185629337010436
3.845	85.21971265737264	0.0	-0.036635625182348766	348.1409991962695	-3.722934517862745e-36	-800.6399483027911	0.0	0.0001679064087519138	0.0	0.9999999776291766	-3.762008895403636e-42	-0.00021152233658138737	-2.890277884498441e-38	-3.312014619126587e-36	-0.024238674498465534	2.6947061266306945e-40	0.0	-0.024151683058682056	0.0	800.6399483027911	85.21972053013789	-4.92617349410577e-36	-0.0005838772224158457	-4.616043882703735	2.6683288590765665e-37	0.02262942294705913	0.46160993509487525
3.85	85.19663775954433	0.0	-0.03609638695951891	348.5670401061747	-3.747562050374615e-36	-800.6399506523209	0.0	0.0001699935842641531	0.0	0.9999999777591969	-3.7442167549194535e-42	-0.0002109067507866086	-2.8902778847294784e-38	-3.3120146187948286e-36	-0.024168133560953993	2.6947061252292317e-40	0.0	-0.02410298348406887	0.0	800.6399506523209	85.19664540612088	-4.924839625683209e-36	-0.00015929245191982177	-4.613864113602044	2.667065666780331e-37	0.08991637731799408	0.46147401891866857
3.855	85.17357487754181	0.0	-0.03575913310874113	348.99296566853064	-3.772182915170011e-36	-800.639950243528	0.0	-8.971534358118407e-05	0.0	0.9999999778074254	-3.737603874985428e-42	-0.00021067795341657192	-2.8902778848150674e-38	-3.31201461867152e-36	-0.024141915313037915	2.6947061247093778e-40	0.0	-0.024128685036792708	0.0	800.639950243528	85.17358238397988	-4.923506456176549e-36	0.00012925814989930593	-4.611291289734728	2.6655822515245296e-37	0.008695771587073497	0.46112994887804537
3.86	85.15052490530897	0.0	-0.03604290525688564	349.41877595071776	-3.7967971161299364e-36	-800.6399500427558	0.0	-0.0003707359282125242	0.0	0.9999999776705117	-3.756358122010801e-42	-0.00021132682689365879	-2.890277884571936e-38	-3.312014619021223e-36	-0.02421627073804326	2.6947061261851468e-40	0.0	-0.024234893056794923	0.0	800.6399500427558	85.15053253350372	-4.9221740458476415e-36	-5.372236809031697e-05	-4.608723241308847	2.6641003807623435e-37	-0.0466706268370661	0.46089595422817164
3.865	85.1274872449389	0.0	-0.03639959678840754	349.8444710144473	-3.821404656818029e-36	-800.6399508216027	0.0	-0.0003273018720929914	0.0	0.9999999774726088	-3.783365168711947e-42	-0.00021226123691150608	-2.8902778842196757e-38	-3.312014619524818e-36	-0.02432334624115957	2.6947061283183067e-40	0.0	-0.02432865813628322	0.0	800.6399508216027	85.12749502658471	-4.9208423489303796e-36	-0.00026106284700421715	-4.606247409483663	2.662669284791216e-37	-0.04821075888296562	0.46064996987568585
3.87	85.10446203323143	0.0	-0.03669165995619477	350.27005092169424	-3.846005540816325e-36	-800.6399526755852	0.0	-1.433532131928626e-05	0.0	0.999999977371136	-3.7971667758109574e-42	-0.00021273875524506082	-2.890277884038683e-38	-3.312014619782174e-36	-0.024378065812700647	2.6947061294120623e-40	0.0	-0.024332764903331014	0.0	800.6399526755852	85.10446994143811	-4.9195113699984276e-36	-0.00048162281692404064	-4.603832959934806	2.661272389255722e-37	-0.022493967514409133	0.4603887911489225
3.875	85.08144865508953	0.0	-0.03652006476088489	350.6955157336191	-3.870599771661176e-36	-800.6399554040589	0.0	0.00023836102498803416	0.0	0.9999999774728887	-3.783327005407668e-42	-0.0002122599165089375	-2.890277884220176e-38	-3.312014619524111e-36	-0.024323194934167278	2.6947061283152884e-40	0.0	-0.02426447949966988	0.0	800.6399554040589	85.08145649202402	-4.918181065091586e-36	-0.00040129990779254657	-4.601614538980433	2.6599850562454887e-37	0.08301855663764605	0.46023633544193693
3.88	85.05844667285331	0.0	-0.03586658811150621	351.12086549917274	-3.8951873521975266e-36	-800.6399557557885	0.0	8.440365963904319e-05	0.0	0.9999999775581438	-3.771707121314099e-42	-0.00021185788306103147	-2.8902778843720436e-38	-3.3120146193074335e-36	-0.024277125293555215	2.694706127396335e-40	0.0	-0.024240299632306003	0.0	800.6399557557885	85.05845423461423	-4.9168514094728267e-36	0.00017401919646759556	-4.599045680784286	2.6585017057456538e-37	0.04916238105544719	0.45993084386298383
3.885	85.03545858629194	0.0	-0.03608889834787014	351.54610029514197	-3.919768286856717e-36	-800.6399552996529	0.0	-0.0003083011491423484	0.0	0.9999999774821025	-3.782072313781343e-42	-0.0002122165057488541	-2.890277884236595e-38	-3.3120146195007105e-36	-0.02431822042737878	2.69470612821597e-40	0.0	-0.02432862140563045	0.0	800.6399552996529	85.03546624433253	-4.915522575063045e-36	2.9598618701093386e-06	-4.596317832050545	2.6569294863744747e-37	-0.04925731379947702	0.4596581762156371
3.89	85.01248289498307	0.0	-0.036430939316426894	351.9712201823744	-3.944342579147875e-36	-800.6399557751329	0.0	-0.0003511561631592757	0.0	0.999999977292554	-3.8078336884141777e-42	-0.00021310781707197313	-2.8902778838983457e-38	-3.312014619981076e-36	-0.02442035718378224	2.6947061302590762e-40	0.0	-0.02442922023612562	0.0	800.6399557751329	85.01249070075325	-4.9141944600045697e-36	-0.00019728752294962437	-4.593880352064636	2.6555202439942726e-37	-0.044080620566061525	0.45940918351938714
3.895	84.98951934851098	0.0	-0.03674559362762347	352.3962252223731	-3.96891023262565e-36	-800.6399573040361	0.0	-0.00010081803536970136	0.0	0.9999999771602002	-3.825758066721532e-42	-0.00021372797812983338	-2.8902778836616426e-38	-3.31201462031531e-36	-0.024491422407868165	2.6947061316856954e-40	0.0	-0.024458102475753044	0.0	800.6399573040361	84.98952729105913	-4.9128670462637743e-36	-0.00041631483516168535	-4.591488794054518	2.6541379404140384e-37	-0.04726714472279347	0.4591732083745573
3.9	84.96656746040132	0.0	-0.0368036385641414	352.82111547420953	-3.993471250704545e-36	-800.6399599186985	0.0	0.0002908095734008693	0.0	0.9999999772245127	-3.817054829981781e-42	-0.00021342685703036135	-2.890277883776712e-38	-3.312014620153023e-36	-0.02445691647083699	2.694706130992478e-40	0.0	-0.024374791669763696	0.0	800.6399599186985	84.96657542955097	-4.911540300542625e-36	-0.00053534114582307	-4.589428844026837	2.6529416738362143e-37	0.06969649443235557	0.4589958029843156
3.905	84.94362575483453	0.0	-0.03604488075295017	353.24589099113797	-4.018025636476033e-36	-800.6399608387137	0.0	0.00013544658249929948	0.0	0.9999999773237316	-3.803603689708954e-42	-0.0002129614644104258	-2.8902778839540415e-38	-3.312014619902204e-36	-0.02440358640374732	2.6947061299230124e-40	0.0	-0.024335989082130294	0.0	800.6399608387137	84.94363340235762	-4.910214127009975e-36	0.00013455956225015244	-4.587057174966229	2.6515706577508404e-37	0.0709627699431279	0.458760604685354
3.91	84.92069761774098	0.0	-0.03617270533277935	353.67055183237187	-4.042573393361942e-36	-800.6399602867795	0.0	-0.00026311409374560855	0.0	0.9999999772849093	-3.808870373404811e-42	-0.0002131436850752839	-2.890277883884684e-38	-3.312014620000407e-36	-0.024424467354294117	2.6947061303414684e-40	0.0	-0.02441136571764046	0.0	800.6399602867795	84.92070532178276	-4.908888756017189e-36	2.791799040374401e-05	-4.584330855398852	2.6500000452736465e-37	-0.042828367912389864	0.45845309095762476
3.915	84.8977820132401	0.0	-0.036500300883833436	354.09509806509027	-4.0671145252344645e-36	-800.639960625228	0.0	-0.00034701687837786406	0.0	0.9999999771070152	-3.832946133457618e-42	-0.00021397667624334236	-2.8902778835664055e-38	-3.312014620449344e-36	-0.02451992111307368	2.6947061322589572e-40	0.0	-0.024510778730394738	0.0	800.639960625228	84.89778985941142	-4.90756411400679e-36	-0.00016800794193484714	-4.581831829676257	2.6485555112223263e-37	-0.043715365536048975	0.4582040369597198
3.92	84.87487895243166	0.0	-0.03681817715874832	354.51952975188004	-4.0916490357107785e-36	-800.6399620041684	0.0	-0.00012251934615318215	0.0	0.9999999769687694	-3.85159147706876e-42	-0.00021462178179841097	-2.890277883318537e-38	-3.312014620797018e-36	-0.024593844766062873	2.694706133749082e-40	0.0	-0.024545877937611135	0.0	800.6399620041684	84.87488693730532	-4.9062401967887926e-36	-0.000386179104559675	-4.579322015317899	2.6471051441125976e-37	-0.05317873351929466	0.45796307818069687
3.925	84.85198819852705	0.0	-0.0369371388956619	354.9438469547282	-4.116176928373753e-36	-800.6399644921995	0.0	0.00030050267959244283	0.0	0.9999999770197441	-3.844722974814905e-42	-0.00021438414021607825	-2.890277883409984e-38	-3.312014620668944e-36	-0.02456661304602743	2.694706133199635e-40	0.0	-0.02445979026124604	0.0	800.6399644921995	84.8519962363187	-4.9049169862501386e-36	-0.0005552952652942611	-4.577158485006076	2.645848978257754e-37	0.0642975519840049	0.4577610072085023
3.93	84.82910794642844	0.0	-0.03617095321319663	355.36804972918713	-4.140698206446811e-36	-800.6399654966701	0.0	0.00013586980218617523	0.0	0.9999999771216516	-3.830968780591079e-42	-0.00021390826230873353	-2.890277883592619e-38	-3.312014620412473e-36	-0.02451208145346832	2.6947061321011905e-40	0.0	-0.024420866430103313	0.0	800.6399654966701	84.82911565796012	-4.903594364828655e-36	0.00012034341468611238	-4.574748608732667	2.644455482555479e-37	0.07393517471112214	0.45753460244183763
3.935	84.80624137231936	0.0	-0.03628270811170806	355.7921381340635	-4.165212873329578e-36	-800.6399649620328	0.0	-0.00025382185550551094	0.0	0.9999999770869397	-3.835657172135297e-42	-0.00021407047478883923	-2.8902778835304375e-38	-3.3120146204998975e-36	-0.024530669634882717	2.694706132475341e-40	0.0	-0.02449358103544654	0.0	800.6399649620328	84.8062491337501	-4.9022725521952347e-36	2.6319092991157716e-05	-4.572029422641559	2.6428890663486145e-37	-0.041402138955336246	0.45722168779061856
3.94	84.7833871315576	0.0	-0.036604603981969734	356.2161122394021	-4.189720933059643e-36	-800.6399653071048	0.0	-0.0003302966660980927	0.0	0.9999999769149408	-3.858836228732228e-42	-0.00021487244113945037	-2.890277883221902e-38	-3.312014620932111e-36	-0.02462256821139935	2.694706134329286e-40	0.0	-0.024588204060219852	0.0	800.6399653071048	84.78339503328053	-4.900951457244893e-36	-0.0001693747209436526	-4.569597224054908	2.64148331534928e-37	-0.04554758017384892	0.4569824216766987
3.945	84.76054496698765	0.0	-0.0369138701759818	356.6399721045169	-4.2142223890649225e-36	-800.6399666957659	0.0	-9.199059632133565e-05	0.0	0.9999999767885919	-3.875808346761363e-42	-0.0002154596551833127	-2.890277882994806e-38	-3.312014621248587e-36	-0.024689857985725226	2.6947061356911773e-40	0.0	-0.024614557424840373	0.0	800.6399666957659	84.76055300424045	-4.8996310599781336e-36	-0.00038891201301220594	-4.567225119509999	2.6401119498749806e-37	-0.0422049439275007	0.45674201196709563
3.95	84.73771440909334	0.0	-0.0369304358855669	357.06371778638066	-4.238717244638625e-36	-800.6399691553485	0.0	0.00026559998483332756	0.0	0.9999999768563487	-3.8667124970800877e-42	-0.00021514495016744615	-2.8902778831166356e-38	-3.312014621078977e-36	-0.024653795446487884	2.694706134960833e-40	0.0	-0.024538468633991933	0.0	800.6399691553485	84.73772245532618	-4.8983113269839394e-36	-0.000468650622909862	-4.565142301864	2.6389026434501073e-37	0.07095474565870209	0.4565693683570946
3.955	84.71489427701316	0.0	-0.036214064989409336	357.48734933925607	-4.263205502931089e-36	-800.639969783101	0.0	0.00011938811670155966	0.0	0.9999999769495765	-3.854175533894997e-42	-0.00021471118693075554	-2.890277883284087e-38	-3.312014620845205e-36	-0.02460408983979922	2.6947061339559467e-40	0.0	-0.02450426645793686	0.0	800.639969783101	84.7149020172859	-4.8969921818068546e-36	0.00016440851291152415	-4.562717856091562	2.637501726072918e-37	0.05932349824463285	0.4563103495620142
3.96	84.69208784650878	0.0	-0.03641633263519236	357.91086682830695	-4.287687167705491e-36	-800.6399693559035	0.0	-0.0002765637745554915	0.0	0.9999999768892534	-3.8622904737777124e-42	-0.00021499195369517306	-2.8902778831757617e-38	-3.3120146209965226e-36	-0.024636263341799136	2.6947061346061643e-40	0.0	-0.024583496143178046	0.0	800.6399693559035	84.69209567575598	-4.895673847735361e-36	-9.525307593752609e-08	-4.5599902286070915	2.635930115977721e-37	-0.04933131224144539	0.4560257061105176
3.965	84.66929386803795	0.0	-0.03674013669058999	358.3342703168746	-4.3121622426140495e-36	-800.6399698432027	0.0	-0.0002983990343228564	0.0	0.9999999767190414	-3.885131157880521e-42	-0.00021578221278088807	-2.8902778828696367e-38	-3.3120146214224276e-36	-0.02472682036456635	2.694706136440846e-40	0.0	-0.02466898116956544	0.0	800.6399698432027	84.66930183904435	-4.894356236345943e-36	-0.0001998789490187807	-4.557502949586715	2.634492304514648e-37	-0.048779678815717535	0.45577639904405953
3.97	84.64651234526995	0.0	-0.037028173277228855	358.7575598674443	-4.3366307312680505e-36	-800.639971393954	0.0	-7.447219437037455e-06	0.0	0.9999999766237617	-3.8978802520176667e-42	-0.00021622331548300778	-2.890277882697981e-38	-3.312014621660158e-36	-0.02477736701207208	2.6947061374678492e-40	0.0	-0.02467111464077969	0.0	800.639971393954	84.64652044311029	-4.8930393439925164e-36	-0.0004230715838655775	-4.555132148543825	2.633120233487707e-37	-0.014414144405166652	0.45551549543628495
3.975	84.62374232757746	0.0	-0.036810299901488465	359.1807355400853	-4.361092637141084e-36	-800.6399737471966	0.0	0.00020343553772008771	0.0	0.9999999767227646	-3.8846323616169155e-42	-0.00021576495505439222	-2.8902778828763395e-38	-3.31201462141313e-36	-0.024724842774735897	2.69470613640071e-40	0.0	-0.024612834652208013	0.0	800.6399737471966	84.62375033309553	-4.8917231056911855e-36	-0.00029262140446254377	-4.552925750383944	2.6318408285872885e-37	0.07029763888495233	0.45534684194075625
3.98	84.60098375624429	0.0	-0.03633084477013476	359.6037973875452	-4.385547963297074e-36	-800.6399737474469	0.0	-1.723538179417311e-05	0.0	0.9999999767918268	-3.875374201070172e-42	-0.00021544463428571406	-2.890277883000625e-38	-3.312014621240502e-36	-0.024688136717611442	2.6947061356562995e-40	0.0	-0.024617772225383527	0.0	800.6399737474469	84.60099155707802	-4.890407523898227e-36	0.00012281376768395681	-4.550417363077012	2.6303927591009224e-37	0.0295208162897933	0.4550513120164271
3.985	84.57823838673502	0.0	-0.03657693940401478	360.0267454770899	-4.409996713614216e-36	-800.6399735505476	0.0	-0.00030652620134765415	0.0	0.9999999766867254	-3.889458038264036e-42	-0.0002159319174272265	-2.8902778828114414e-38	-3.312014621503121e-36	-0.024743975253783364	2.6947061367891703e-40	0.0	-0.024705585513620516	0.0	800.6399735505476	84.57824629580927	-4.889092720563152e-36	-5.065446971964642e-05	-4.547811182365535	2.6288898693966584e-37	-0.0476103397709911	0.4548060388220688
3.99	84.55550513524663	0.0	-0.03690039307482025	360.4495798707659	-4.4344388916737256e-36	-800.639974311769	0.0	-0.00023082415073529366	0.0	0.9999999765264069	-3.9108800264801294e-42	-0.00021667309141064955	-2.8902778825223704e-38	-3.312014621902576e-36	-0.024828907538040283	2.6947061385172144e-40	0.0	-0.024771711761854637	0.0	800.639974311769	84.55551318660476	-4.887778619522856e-36	-0.00025858508330999674	-4.545392617494079	2.6274921656153346e-37	-0.05528902963749576	0.4545728866086045
3.995	84.53278387999605	0.0	-0.03714639173435563	360.8723006288946	-4.4588745009618476e-36	-800.6399761710885	0.0	0.00014712735957463975	0.0	0.9999999764914855	-3.915536537165244e-42	-0.00021683420085289164	-2.8902778824593234e-38	-3.312014621989406e-36	-0.024847369320634322	2.6947061388936226e-40	0.0	-0.024729562878081986	0.0	800.6399761710885	84.5327920402514	-4.886465209904597e-36	-0.0004871918261547064	-4.543225155840484	2.6262354443616546e-37	0.02567712156771319	0.4543297715452268
4.0	84.51007313947045	0.0	-0.03661098425478378	361.2949078078292	-4.483303544741551e-36	-800.6399779710263	0.0	0.00014783081674476557	0.0	0.9999999766074563	-3.9000591535719996e-42	-0.00021629870274996992	-2.890277882668586e-38	-3.3120146217008054e-36	-0.024786005756725956	2.694706137643591e-40	0.0	-0.024687212468674752	0.0	800.6399779710263	84.51008106966466	-4.885152391623476e-36	-5.214330554677751e-05	-4.540964145800549	2.6249263325682843e-37	0.07080259689065208	0.4541516088397417
4.005	84.48737499559194	0.0	-0.036476261382017636	361.71740145640194	-4.5077260258459704e-36	-800.6399775123414	0.0	-0.00016747009467473663	0.0	0.9999999766234643	-3.89791969698122e-42	-0.00021622468022938226	-2.8902778826974474e-38	-3.312014621660916e-36	-0.024777523400490407	2.6947061374710454e-40	0.0	-0.024735189116772346	0.0	800.6399775123414	84.487382869639	-4.883840310034282e-36	6.025245832331611e-05	-4.538333664377111	2.6234096793406464e-37	-0.012359436263187158	0.4538350493834001
4.01	84.46468966820716	0.0	-0.03676723557727901	362.13978165256646	-4.532141948767757e-36	-800.6399776639003	0.0	-0.0003060103299529124	0.0	0.9999999764781602	-3.917312387039195e-42	-0.00021689564303611458	-2.89027788243526e-38	-3.312014622022527e-36	-0.024854410076365355	2.694706139037251e-40	0.0	-0.024822854618740883	0.0	800.6399776639003	84.46469767045369	-4.8825289785557466e-36	-0.00012718662092494059	-4.535779684517157	2.621935016265707e-37	-0.048063922471493575	0.4536034334870263
4.015	84.44201672923742	0.0	-0.037072360295062695	362.56204845377965	-4.55655131682631e-36	-800.6399788367642	0.0	-9.699967912635095e-05	0.0	0.9999999763544819	-3.9337716627526965e-42	-0.00021746511337756492	-2.8902778822117116e-38	-3.312014622329442e-36	-0.024919666572150292	2.6947061403703585e-40	0.0	-0.0248506429798812	0.0	800.6399788367642	84.44202486642627	-4.8812183634388074e-36	-0.00034597217338878163	-4.533351786865344	2.6205311816217424e-37	-0.04009371590064866	0.45335290811386586
4.02	84.41935568018016	0.0	-0.03708558143367897	362.9842019206327	-4.580954133523883e-36	-800.6399810830135	0.0	0.0002472184429315112	0.0	0.9999999764176232	-3.9253740232065545e-42	-0.00021717456555863857	-2.890277882325884e-38	-3.312014622172859e-36	-0.02488637224382164	2.6947061396897692e-40	0.0	-0.024779820112892342	0.0	800.6399810830135	84.41936382503373	-4.879908428957272e-36	-0.00041810501095394483	-4.531198980068515	2.6192818941924743e-37	0.0629320154628828	0.4531635977827894
4.025	84.39670534186061	0.0	-0.03645130351519227	363.40624210557934	-4.6053504019061915e-36	-800.6399815119884	0.0	6.602299706363463e-05	0.0	0.9999999765047841	-3.913763420510396e-42	-0.00021677285323562848	-2.8902778824833386e-38	-3.3120146219563605e-36	-0.024840339401364334	2.694706138750282e-40	0.0	-0.02476090591747959	0.0	800.6399815119884	84.39671321349121	-4.878599100336212e-36	0.0001385282921302019	-4.5287725610791085	2.617879886333297e-37	0.05023481851416424	0.45290511640932235
4.03	84.37406841894231	0.0	-0.036665900556597714	363.8281690744993	-4.629740125776332e-36	-800.6399812149431	0.0	-0.00027465556036822004	0.0	0.9999999764292162	-3.923830954354395e-42	-0.00021712117730745338	-2.890277882346838e-38	-3.312014622144089e-36	-0.024880254400740414	2.694706139564821e-40	0.0	-0.024839588939624086	0.0	800.6399812149431	84.37407638577733	-4.877290565100135e-36	-2.7103824546039917e-05	-4.526120415517454	2.6163514506888322e-37	-0.04867560755567171	0.452638214587929
4.035	84.35144360049657	0.0	-0.03697947295734077	364.24998288969573	-4.65412330872795e-36	-800.6399818489411	0.0	-0.00022795198862796988	0.0	0.9999999762765246	-3.944124066242434e-42	-0.00021782329358260738	-2.890277882070624e-38	-3.312014622522492e-36	-0.0249607110012305	2.694706141210651e-40	0.0	-0.02490489237402407	0.0	800.6399818489411	84.35145170603987	-4.875982731899711e-36	-0.00023205179297539665	-4.523705947868943	2.6149560629847514e-37	-0.05524123535084689	0.452404322446945
4.04	84.3288307740705	0.0	-0.03722837420813244	364.6716836115028	-4.678499954247946e-36	-800.6399835777457	0.0	0.0001405109520631309	0.0	0.9999999762395791	-3.949024373499832e-42	-0.00021799283808113156	-2.8902778820037105e-38	-3.3120146226138686e-36	-0.024980139370101954	2.694706141608878e-40	0.0	-0.02486463895138116	0.0	800.6399835777457	84.32883899035407	-4.8746755901693986e-36	-0.0004622092384584308	-4.521543616405192	2.6137022934571347e-37	0.02601844741688024	0.45216184751326083
4.045	84.30622842020672	0.0	-0.03669698667510631	365.0932712893027	-4.702870065196301e-36	-800.6399852477457	0.0	0.00014399539000468475	0.0	0.9999999763521374	-3.93408297535715e-42	-0.00021747588440408137	-2.8902778822074696e-38	-3.312014622335262e-36	-0.02492090084090026	2.694706140395626e-40	0.0	-0.024823387310798115	0.0	800.6399852477457	84.30623640697729	-4.8733690372682286e-36	-2.7840898118111796e-05	-4.519282642399247	2.6123934335191627e-37	0.06623195045929385	0.4519767944613171
4.05	84.2836386601515	0.0	-0.03660777796686625	365.51474599082843	-4.7272336454980344e-36	-800.639984800544	0.0	-0.00017891614246945062	0.0	0.999999976359963	-3.933042915294988e-42	-0.00021743989962753202	-2.890277882221626e-38	-3.312014622315867e-36	-0.02491677728915677	2.6947061403112792e-40	0.0	-0.024874643010049418	0.0	800.639984800544	84.28364661026099	-4.8720632218090206e-36	4.547648929942458e-05	-4.516669830825748	2.610887003855642e-37	-0.017130111253704127	0.45167023148977903
4.055	84.26106154511211	0.0	-0.036898023630243644	365.9361077762739	-4.7515906986195744e-36	-800.6399850312561	0.0	-0.00027904002596549753	0.0	0.9999999762176842	-3.951926638367338e-42	-0.000218093252813452	-2.8902778819640413e-38	-3.3120146226679874e-36	-0.024991646051101272	2.6947061418448742e-40	0.0	-0.024954582089064637	0.0	800.6399850312561	84.26106962383912	-4.870758145617804e-36	-0.00014448299847018476	-4.514142291410887	2.6094275562081112e-37	-0.05137573943140132	0.4514434637217207
4.06	84.23849670807218	0.0	-0.03718641194390603	366.3573567075429	-4.7759412281375825e-36	-800.6399863008661	0.0	-2.437120449459144e-05	0.0	0.9999999761202713	-3.964823050392358e-42	-0.00021853945253004516	-2.890277881787418e-38	-3.312014622908465e-36	-0.025042776773481205	2.6947061428948707e-40	0.0	-0.02496156392486059	0.0	800.6399863008661	84.23850491509829	-4.869453778989133e-36	-0.0003675393660527669	-4.511809083008937	2.6080771132625847e-37	-0.014829912808513031	0.45118334552414335
4.065	84.21594326048303	0.0	-0.0369889060556049	366.77849284467015	-4.8002852375233694e-36	-800.639988402168	0.0	0.0001902329157503587	0.0	0.9999999762104033	-3.952891373598879e-42	-0.00021812663144512662	-2.890277881950847e-38	-3.3120146226859825e-36	-0.024995470960633988	2.6947061419233504e-40	0.0	-0.024907066208875773	0.0	800.639988402168	84.21595138316039	-4.868150060046378e-36	-0.00024942337505156427	-4.509603966824235	2.6067988812229945e-37	0.06070098848290653	0.451001247754368
4.07	84.19340127974264	0.0	-0.03658818029484892	367.1995162372697	-4.824622729659135e-36	-800.6399883129116	0.0	-5.5947749043385096e-05	0.0	0.999999976269592	-3.9450437424072145e-42	-0.0002178551132269627	-2.89027788205807e-38	-3.3120146225396486e-36	-0.024964357263971323	2.694706141285368e-40	0.0	-0.024923094058342986	0.0	800.6399883129116	84.19340922981164	-4.866846999917187e-36	9.574824515917027e-05	-4.507112458732129	2.605360501603088e-37	0.021354590675515397	0.45071630472173174
4.075	84.17087231760455	0.0	-0.0368397658774056	367.62042695621824	-4.848953708631485e-36	-800.6399882551782	0.0	-0.0002805145977055823	0.0	0.9999999761589301	-3.959708220080954e-42	-0.0002183624858023291	-2.8902778818575384e-38	-3.3120146228130885e-36	-0.02502249787977261	2.6947061424781766e-40	0.0	-0.025003455571044688	0.0	800.6399882551782	84.17088037955537	-4.8655447063295775e-36	-8.024141774907916e-05	-4.504531298101237	2.6038717642848522e-37	-0.04917261760173672	0.4504799680551337
4.08	84.14835543725965	0.0	-0.03714207998179664	368.04122506125077	-4.87327817788896e-36	-800.6399891809237	0.0	-0.00012269465574121343	0.0	0.9999999760328679	-3.9763718683157155e-42	-0.0002189390271771806	-2.8902778816287613e-38	-3.312014623123817e-36	-0.025088564656339175	2.694706143836972e-40	0.0	-0.0250386050007586	0.0	800.6399891809237	84.14836363378208	-4.86424311226435e-36	-0.0002953591481638098	-4.502154027176649	2.602497462505563e-37	-0.046896785441665347	0.45023982712447475
4.085	84.12585025622099	0.0	-0.03722905295768058	368.46191060088296	-4.897596140235415e-36	-800.639991218936	0.0	0.00025316987181718087	0.0	0.9999999760793501	-3.970232546960734e-42	-0.0002187266143414835	-2.890277881713158e-38	-3.312014623009345e-36	-0.025064223937756643	2.6947061433359483e-40	0.0	-0.02496607717498364	0.0	800.639991218936	84.12585849281005	-4.862942189409386e-36	-0.0004279254655312016	-4.500060045224075	2.6012821980771016e-37	0.055725864925103036	0.45004050687292313
4.09	84.1033554158952	0.0	-0.03659518384778483	368.88248364984497	-4.921907600003297e-36	-800.6399916886763	0.0	6.324291371141945e-05	0.0	0.9999999761677181	-3.958544717914404e-42	-0.00021832223008345437	-2.89027788187347e-38	-3.312014622791402e-36	-0.025017884914077037	2.694706142383435e-40	0.0	-0.024947959414784768	0.0	800.6399916886763	84.1033633774797	-4.861641849330688e-36	0.00012808298940211174	-4.497692214268531	2.5999136650578537e-37	0.05136998913999352	0.44979855635690963
4.095	84.0808738759676	0.0	-0.03680613597541819	369.30294425804794	-4.946212560073748e-36	-800.6399914385719	0.0	-0.000258451227504584	0.0	0.9999999760944005	-3.968243503420883e-42	-0.00021865779592423492	-2.8902778817404734e-38	-3.312014622972251e-36	-0.025056337927845843	2.6947061431737158e-40	0.0	-0.02502200023751471	0.0	800.6399914385719	84.08088193184966	-4.860342296048748e-36	-3.6256212727888784e-05	-4.495043324601275	2.5983871693864214e-37	-0.04877148440331228	0.44953079035515886
4.1	84.05840448837283	0.0	-0.03710840029408456	369.7232924895013	-4.970511024139079e-36	-800.6399921243528	0.0	-0.000175492106679903	0.0	0.999999975958757	-3.9861477207384056e-42	-0.0002192772594367978	-2.890277881494097e-38	-3.312014623306113e-36	-0.025127323219211982	2.694706144635787e-40	0.0	-0.0250722750227678	0.0	800.6399921243528	84.05841267895507	-4.859043447369593e-36	-0.0002442044741369184	-4.492603232246969	2.5969771471208727e-37	-0.059120752844062256	0.44929922174217896
4.105	84.03594721386648	0.0	-0.037330724244532994	370.143528404977	-4.994802995711393e-36	-800.6399939272202	0.0	0.0002425202694833541	0.0	0.9999999759633995	-3.9855356967025155e-42	-0.0002192560841710873	-2.890277881502536e-38	-3.312014623294704e-36	-0.02512489671244308	2.6947061445857427e-40	0.0	-0.02500279808332894	0.0	800.6399939272202	84.03595550408905	-4.857745296736948e-36	-0.00047993610964470595	-4.490481255918629	2.5957454467275094e-37	0.04889501991991676	0.4490747446999166
4.11	84.0135001613366	0.0	-0.036636233245515425	370.56365205609956	-5.01908847778408e-36	-800.6399948947338	0.0	0.00013665479817087105	0.0	0.9999999760661437	-3.971977220980973e-42	-0.00021878697787917415	-2.890277881689182e-38	-3.312014623041886e-36	-0.02507114108981442	2.6947061434782815e-40	0.0	-0.024963649367401926	0.0	800.6399948947338	84.01350814932964	-4.8564477177190073e-36	0.0001258889847113094	-4.4881332336063435	2.594387532356783e-37	0.06222622777942414	0.44885645841432864
4.115	83.99106651114872	0.0	-0.03679369707553945	370.98366350754054	-5.04336747409782e-36	-800.639994530967	0.0	-0.0002321798884694963	0.0	0.9999999760242112	-3.977514321366214e-42	-0.00021897855462297977	-2.8902778816130353e-38	-3.3120146231451314e-36	-0.025093094168086156	2.694706143930264e-40	0.0	-0.025030164005887527	0.0	800.639994530967	83.99107457020135	-4.8551509315244275e-36	-9.209737137071944e-06	-4.485464456309529	2.5928499023159644e-37	-0.045607250296761284	0.4485696312736271
4.12	83.96864501033176	0.0	-0.037090550018027864	371.4035628219295	-5.0676399882624604e-36	-800.6399950670026	0.0	-0.00019851211832999972	0.0	0.999999975888521	-3.995398593406824e-42	-0.00021959732805390628	-2.890277881366361e-38	-3.312014623478617e-36	-0.02516400038192482	2.694706145392838e-40	0.0	-0.02508703353870008	0.0	800.6399950670026	83.96865320186993	-4.853854850863574e-36	-0.00021196716084129493	-4.483038010565347	2.5914478395680003e-37	-0.05746672790963968	0.4483406319863319
4.125	83.94623549337437	0.0	-0.03732880936585626	371.82335005949676	-5.0919060237587095e-36	-800.6399967036778	0.0	0.00018568829914882788	0.0	0.9999999758705738	-3.9977602177944874e-42	-0.00021967903730220852	-2.8902778813337037e-38	-3.312014623522659e-36	-0.025173363572300454	2.6947061455862835e-40	0.0	-0.025033837759469126	0.0	800.6399967036778	83.9462437917899	-4.8525594613073785e-36	-0.0004463502562598637	-4.480920956672445	2.5902195610462486e-37	0.03829259388352795	0.44810845721423986
4.13	83.9238361717493	0.0	-0.036714804688154995	372.24302527409816	-5.116165583706971e-36	-800.63999790195	0.0	0.0001362227789873736	0.0	0.9999999759765279	-3.983804635552184e-42	-0.00021919619162166115	-2.8902778815263965e-38	-3.3120146232624364e-36	-0.02511803353166532	2.694706144444225e-40	0.0	-0.024994812807921526	0.0	800.63999790195	83.92384420267199	-4.8512646430200206e-36	7.676850630735591e-05	-4.478636274182199	2.588897881620321e-37	0.059681938186138594	0.4479033914826529
4.135	83.90144976439258	0.0	-0.036798177726201815	372.66258852263	-5.140418671401612e-36	-800.6399975072277	0.0	-0.00021418772488391165	0.0	0.9999999759509988	-3.987169997523148e-42	-0.00021931262893419828	-2.8902778814799937e-38	-3.31201462332519e-36	-0.025131376265158486	2.6947061447194103e-40	0.0	-0.025056173071218314	0.0	800.6399975072277	83.9014578340182	-4.849970586142278e-36	3.1199670404577036e-06	-4.476028113788763	2.5873947561520392e-37	-0.03676827173563194	0.4476179127473991
4.14	83.8790755161507	0.0	-0.037089815965096994	373.0820398714768	-5.164665290668454e-36	-800.6399979743119	0.0	-0.0002023203700909895	0.0	0.9999999758185025	-4.0046073861374795e-42	-0.00021991594075782204	-2.8902778812389166e-38	-3.312014623650343e-36	-0.025200510709273635	2.6947061461475633e-40	0.0	-0.025114133587797006	0.0	800.6399979743119	83.87908371614733	-4.848677236832494e-36	-0.0001971216656070394	-4.473586943564338	2.58598461470446e-37	-0.0578314142066354	0.4473960730057702
4.145	83.85671327751697	0.0	-0.03733229250498039	373.50137937978076	-5.1889054449251605e-36	-800.6399995354809	0.0	0.0001703214113661875	0.0	0.9999999757948165	-4.007719481620424e-42	-0.0002200236153668233	-2.8902778811957776e-38	-3.3120146237083785e-36	-0.025212849310885112	2.6947061464028663e-40	0.0	-0.025065340097637036	0.0	800.6399995354809	83.85672158642006	-4.8473845803440805e-36	-0.00043137532743710977	-4.471449374153262	2.5847445808794094e-37	0.03572078452631768	0.44715920520618574
4.15	83.83436138798169	0.0	-0.03673995961161768	373.9206071001863	-5.2131391372216426e-36	-800.6400007497127	0.0	0.00013625600343895687	0.0	0.9999999759002464	-3.9938548315872534e-42	-0.0002195439158269261	-2.8902778813876946e-38	-3.312014623449851e-36	-0.0251578797914165	2.6947061452664535e-40	0.0	-0.025026305627985173	0.0	800.6400007497127	83.83436943850076	-4.846092504322665e-36	7.069100288494013e-05	-4.469140569494338	2.5834089225093927e-37	0.057854053176274796	0.4469515020823748
4.155	83.81202248895787	0.0	-0.0368166253772317	374.33972309415805	-5.237366371116815e-36	-800.6400003628999	0.0	-0.000209696554893115	0.0	0.9999999758764584	-3.996985701102099e-42	-0.0002196522399939392	-2.8902778813444156e-38	-3.312014623508235e-36	-0.025170292826894036	2.694706145522862e-40	0.0	-0.025086379265854216	0.0	800.6400003628999	83.81203057529478	-4.84480119354892e-36	2.3742433972331567e-06	-4.46651599691279	2.581896179698785e-37	-0.03582851222438664	0.446665969522708
4.16	83.78969584559377	0.0	-0.03710558398329623	374.7587274257021	-5.261587150299016e-36	-800.6400008344358	0.0	-0.00019119177116414486	0.0	0.9999999757478019	-4.013892151268136e-42	-0.00022023718201169158	-2.8902778811101165e-38	-3.312014623823495e-36	-0.02523732224626945	2.694706146909621e-40	0.0	-0.0251411516736809	0.0	800.6400008344358	83.78970406131475	-4.843510596006264e-36	-0.00019836828950878338	-4.464061914643244	2.5804786635346515e-37	-0.05878739477306683	0.4464448984539135
4.165	83.76738120638926	0.0	-0.03734263241146788	375.17762015475023	-5.285801478231504e-36	-800.6400024053277	0.0	0.00019301547493142055	0.0	0.9999999757331982	-4.0158082730064875e-42	-0.0002203034774258591	-2.890277881083498e-38	-3.3120146238592306e-36	-0.02524491914131947	2.6947061470670273e-40	0.0	-0.025085856813209483	0.0	800.6400024053277	83.76738952874676	-4.842220690891067e-36	-0.0004341389331236994	-4.461950714100264	2.5792535896026615e-37	0.04077783648473215	0.446213704484838
4.17	83.7450767332359	0.0	-0.036714182084200686	375.59640132940206	-5.310009357702298e-36	-800.6400034547461	0.0	0.00013640477091682063	0.0	0.9999999758365441	-4.002235326753502e-42	-0.0002198338704717076	-2.8902778812717645e-38	-3.312014623606138e-36	-0.025191106147010638	2.694706145953082e-40	0.0	-0.025046779724814568	0.0	800.6400034547461	83.74508478099523	-4.84093135504105e-36	0.00010582927710148952	-4.4596534638477205	2.5779249007634147e-37	0.05673564572131232	0.4460014344271147
4.175	83.72278526690363	0.0	-0.0368478270873853	376.0150710189794	-5.334210792722742e-36	-800.6400031064572	0.0	-0.00021708496386678506	0.0	0.9999999758012136	-4.006878731687194e-42	-0.0002199945264713106	-2.8902778812074286e-38	-3.312014623692722e-36	-0.02520951596891722	2.6947061463339028e-40	0.0	-0.02510896998594115	0.0	800.6400031064572	83.72279337558467	-4.8396427873648224e-36	-1.0715412804512637e-05	-4.457048877217792	2.5764239702471343e-37	-0.042459991933670234	0.44572511197848597
4.18	83.70050580582634	0.0	-0.03713622347851075	376.43362928254584	-5.358405786696248e-36	-800.6400036525536	0.0	-0.00016406033226063423	0.0	0.9999999756777929	-4.0230731016978916e-42	-0.00022055483140682357	-2.890277880982469e-38	-3.312014623994693e-36	-0.025273722186565387	2.694706147664236e-40	0.0	-0.02515596980906139	0.0	800.6400036525536	83.7005140438489	-4.8383549172008873e-36	-0.00021511887023402816	-4.454640895931069	2.575032820978028e-37	-0.059422278042907464	0.4455037207345116
4.185	83.6782382262547	0.0	-0.03735795047526446	376.8520761724788	-5.382594342649471e-36	-800.6400053157502	0.0	0.000254370056214381	0.0	0.9999999756876176	-4.021785383714906e-42	-0.00022051027797616058	-2.890277881000388e-38	-3.312014623970686e-36	-0.02526861673936158	2.6947061475583313e-40	0.0	-0.025083098155783443	0.0	800.6400053157502	83.67824656420916	-4.837067731991248e-36	-0.0004541245957876273	-4.452559538595817	2.573824740066446e-37	0.045628484263909516	0.44527933259154096
4.19	83.65598069493713	0.0	-0.036697098920297815	377.27041175547123	-5.4067764644474594e-36	-800.6400060020854	0.0	9.235729570278371e-05	0.0	0.9999999757837577	-4.009171619634874e-42	-0.0002200738575248088	-2.89027788117563e-38	-3.3120146237354776e-36	-0.025218606638236822	2.6947061465220526e-40	0.0	-0.02505663973952839	0.0	800.6400060020854	83.65598874374706	-4.835781108978327e-36	0.0001238924958110195	-4.450241966511234	2.5724845554339845e-37	0.056242245401518474	0.4450597347622629
4.195	83.63373641002701	0.0	-0.03689262863100462	377.68863608366576	-5.430952155104172e-36	-800.6400057593564	0.0	-0.00022910986742066255	0.0	0.9999999757243916	-4.01696365528487e-42	-0.00022034345220675854	-2.8902778810674436e-38	-3.312014623880768e-36	-0.025249499913895666	2.694706147161956e-40	0.0	-0.02512227488176842	0.0	800.6400057593564	83.63374454708568	-4.83449527002474e-36	-3.6333540278702235e-05	-4.447597038902984	2.5709607000476025e-37	-0.05134084800007816	0.44478933556383704
4.2	83.61150415887458	0.0	-0.0371795947583255	378.1067492210842	-5.4551214183116364e-36	-800.6400064505361	0.0	-0.00011495086577430757	0.0	0.999999975611241	-4.031788454293848e-42	-0.00022085637169958294	-2.890277880861024e-38	-3.312014624157206e-36	-0.02530827615966346	2.694706148381586e-40	0.0	-0.025155205879069633	0.0	800.6400064505361	83.61151242485177	-4.8332101288014264e-36	-0.00024732515025373595	-4.445242772928282	2.569599292579203e-37	-0.040478647727569705	0.4445427069606808
4.205	83.58928354500418	0.0	-0.03723024080277765	378.52475121506654	-5.479284256805615e-36	-800.6400082327253	0.0	0.00022378125269656142	0.0	0.9999999756582857	-4.0256287862721356e-42	-0.0002206432548947135	-2.8902778809468805e-38	-3.312014624042354e-36	-0.025283854772143746	2.6947061478744966e-40	0.0	-0.025091097272501316	0.0	800.6400082327253	83.58929183538105	-4.831925654776326e-36	-0.00034341488430098124	-4.443110026100783	2.5683623594954225e-37	0.04641806685586472	0.4443352488939848
4.21	83.56707354698837	0.0	-0.036724615032284816	378.9426421418338	-5.50344067500472e-36	-800.6400084292657	0.0	-6.278206888078863e-06	0.0	0.9999999757327501	-4.015866925685231e-42	-0.00022030550673514154	-2.8902778810826805e-38	-3.3120146238603305e-36	-0.025245151683039507	2.6947061470718654e-40	0.0	-0.0250928958462893	0.0	800.6400084292657	83.5670816164857	-4.830641782746491e-36	9.59606072869698e-05	-4.4407414166772226	2.5669936348070943e-37	0.03656984480040135	0.44408919918571704
4.215	83.54487650978034	0.0	-0.03695203748866046	379.36042205258195	-5.527590675862175e-36	-800.6400083536237	0.0	-0.00023282902464204238	0.0	0.9999999756455071	-4.027302574307003e-42	-0.0002207011658660136	-2.8902778809235654e-38	-3.312014624073559e-36	-0.025290490880791338	2.6947061480122453e-40	0.0	-0.02515959644858998	0.0	800.6400083536237	83.54488468172315	-4.829358675742227e-36	-7.513149130493945e-05	-4.4381518521061505	2.5655010328048374e-37	-0.05507632235488953	0.4438493580443414
4.22	83.52269138288591	0.0	-0.037231435180542824	379.77809100855393	-5.551734262912254e-36	-800.6400092627678	0.0	-3.33982499627484e-05	0.0	0.9999999755541612	-4.0392538310445546e-42	-0.00022111466439240653	-2.8902778807567885e-38	-3.3120146242964174e-36	-0.02533787432274187	2.6947061489968436e-40	0.0	-0.025169164342419923	0.0	800.6400092627678	83.52269968058918	-4.828076258337474e-36	-0.00029524869430948205	-4.435912534877673	2.5642045474760303e-37	-0.011797341577775781	0.44359282224077035
4.225	83.50051724716454	0.0	-0.03703335064841015	380.19564906654205	-5.57587143943865e-36	-800.6400109868596	0.0	0.0001689311793606802	0.0	0.9999999756355724	-4.0286031857740596e-42	-0.00022074616539508873	-2.890277880905434e-38	-3.312014624097827e-36	-0.025295647447109056	2.6947061481193256e-40	0.0	-0.02512076912439225	0.0	800.6400109868596	83.50052545933531	-4.8267944657010205e-36	-0.0001685099557792242	-4.4337425110048425	2.5629473488938574e-37	0.04782660871181243	0.44340004553892864
4.23	83.47835449208617	0.0	-0.036768415086822166	380.61309628055477	-5.6000022085763204e-36	-800.640010775299	0.0	-0.00010659912841727943	0.0	0.9999999756750468	-4.023432660496355e-42	-0.0002205672716912714	-2.8902778809774555e-38	-3.312014624001409e-36	-0.025275147738189608	2.6947061476938333e-40	0.0	-0.025151307525182666	0.0	800.640010775299	83.47836258947562	-4.8255133297016934e-36	5.6773386159238693e-05	-4.4313049246305525	2.5615402368908823e-37	0.0063988284158696925	0.4431309544599665
4.235	83.45620429008073	0.0	-0.03702612142238815	381.03043271329716	-5.6241265739391075e-36	-800.6400109320289	0.0	-0.00021210331651253878	0.0	0.9999999755663628	-4.0376583445860546e-42	-0.00022105946255765829	-2.890277880779071e-38	-3.3120146242666836e-36	-0.025331548658282296	2.6947061488653127e-40	0.0	-0.025212070649467146	0.0	800.6400109320289	83.45621250347496	-4.8242329307493443e-36	-0.00012855137026391905	-4.428781906838235	2.5600848578485175e-37	-0.05878090089750686	0.44291719737043445
4.24	83.43406599902235	0.0	-0.037284951567585385	381.44765842545576	-5.6482445390318334e-36	-800.6400121373381	0.0	9.35793983414323e-05	0.0	0.9999999755164463	-4.044181249879002e-42	-0.00022128514691752163	-2.8902778806878703e-38	-3.312014624388323e-36	-0.025357410181559358	2.694706149403349e-40	0.0	-0.02518526212659546	0.0	800.6400121373381	83.43407432918426	-4.82295322014541e-36	-0.0003595097151392224	-4.4266344739225385	2.558839734242995e-37	0.021761818573927314	0.44266879653378677
4.245	83.41193816839396	0.0	-0.036811878706002714	381.86477346388244	-5.6723561065672687e-36	-800.6400134437913	0.0	0.0001377106182005451	0.0	0.9999999756167436	-4.031067592718568e-42	-0.00022083143079121994	-2.8902778808710633e-38	-3.3120146241438e-36	-0.025305418142020784	2.6947061483222577e-40	0.0	-0.025145810940510317	0.0	800.6400134437913	83.41194629141464	-4.8216740983978447e-36	2.8079287683498514e-05	-4.4243722926673	2.5575307565808737e-37	0.04964079453406024	0.4424650765043957
4.25	83.38982282619595	0.0	-0.036834643840244076	382.2817779013774	-5.69646128076194e-36	-800.640013086576	0.0	-0.00018516845652856014	0.0	0.999999975605405	-4.0325515370934255e-42	-0.00022088277340946764	-2.8902778808503645e-38	-3.312014624171465e-36	-0.025311301572833785	2.6947061484444766e-40	0.0	-0.025198857795800507	0.0	800.640013086576	83.3898309614284	-4.820395709295153e-36	4.109535302940342e-06	-4.421822919809889	2.5560607921343074e-37	-0.029343503155777845	0.4421920281431305
4.255	83.36771963912364	0.0	-0.037111334229491415	382.6986717935528	-5.720560064818874e-36	-800.6400135503022	0.0	-0.0001474974582563791	0.0	0.9999999754936008	-4.0471645684988694e-42	-0.00022138836600820995	-2.890277880646113e-38	-3.3120146244439474e-36	-0.02536923821837234	2.6947061496495976e-40	0.0	-0.025241112705035495	0.0	800.6400135503022	83.36772789898812	-4.8191180284867766e-36	-0.00019804503877023143	-4.419398227937658	2.554660446994149e-37	-0.056166915487317295	0.44197551311689054
4.26	83.34562822128598	0.0	-0.037295895453995406	383.11545519358424	-5.7446524618105146e-36	-800.6400151319217	0.0	0.00025169462094588396	0.0	0.9999999755141903	-4.044475909867661e-42	-0.00022129534178436848	-2.890277880683747e-38	-3.312014624393817e-36	-0.025358578427274008	2.694706149427661e-40	0.0	-0.025169007507503775	0.0	800.6400151319217	83.34563656496076	-4.817841025609672e-36	-0.0004078941374223914	-4.417314871985431	2.5534515738788933e-37	0.041163175366102506	0.4417506659335092
4.265	83.32354692575224	0.0	-0.03671218898873053	383.5321281629693	-5.768738475302554e-36	-800.640015539008	0.0	3.153493214703607e-05	0.0	0.9999999755990704	-4.033380369899848e-42	-0.00022091144998730435	-2.890277880838799e-38	-3.3120146241869196e-36	-0.0253145876666758	2.6947061485127525e-40	0.0	-0.025159973414907492	0.0	800.640015539008	83.32355501334972	-4.816564591595959e-36	0.00010206483511988205	-4.415014064559605	2.5521212955303253e-37	0.047197748833701585	0.44152663359931177
4.27	83.30147858488803	0.0	-0.03692480466613556	383.94869076247164	-5.7928181088044055e-36	-800.6400154203167	0.0	-0.00021690360067374315	0.0	0.9999999755254265	-4.0430085228322606e-42	-0.00022124457202934677	-2.8902778807042833e-38	-3.3120146243664385e-36	-0.025352760641752337	2.694706149306556e-40	0.0	-0.025222111719306474	0.0	800.6400154203167	83.3014867686403	-4.8152889236118876e-36	-6.480199554230215e-05	-4.4124192969259	2.550626251986349e-37	-0.056485463861974894	0.441278083066809
4.275	83.27942206500097	0.0	-0.03719858651113394	384.3651430504171	-5.816891365680573e-36	-800.6400162767258	0.0	-1.8794106570052896e-05	0.0	0.9999999754414424	-4.0539704747591764e-42	-0.00022162384184736802	-2.890277880550734e-38	-3.3120146245708476e-36	-0.02539622176255646	2.694706150211802e-40	0.0	-0.02522749583423739	0.0	800.6400162767258	83.27943037229802	-4.814013940277682e-36	-0.0002851728337516121	-4.410213215963429	2.5493486338828172e-37	-0.00586753591152702	0.44102171191718176
4.28	83.2573763917695	0.0	-0.036957627485564776	384.7814850844613	-5.840958249265029e-36	-800.6400178607489	0.0	0.00015703507234854532	0.0	0.9999999755247968	-4.043090432167486e-42	-0.00022124740598983766	-2.89027788070313e-38	-3.312014624367985e-36	-0.025353085389711084	2.6947061493133323e-40	0.0	-0.025182508599831874	0.0	800.6400178607489	83.25738459436279	-4.812739572575375e-36	-0.0001166676566758513	-4.408028933949026	2.5480836187855495e-37	0.04470946218033219	0.4408255666194991
4.285	83.23534228949065	0.0	-0.03677194008208156	385.1977169151834	-5.865018762493684e-36	-800.6400175899216	0.0	-0.00012950120107747034	0.0	0.9999999755514748	-4.039604464377755e-42	-0.00022112679586692535	-2.8902778807518757e-38	-3.31201462430298e-36	-0.025339264487354154	2.6947061490257846e-40	0.0	-0.025219607961149946	0.0	800.6400175899216	83.23535041208747	-4.8114658751071586e-36	3.919170074311007e-05	-4.405580947668142	2.5466707911505244e-37	-0.003013015395680285	0.44055819779818306
4.29	83.21332058243371	0.0	-0.03703338462167815	385.6138386083043	-5.8890729091543575e-36	-800.6400178494969	0.0	-0.00017645675423869732	0.0	0.9999999754456802	-4.053417665396412e-42	-0.00022160471533524595	-2.890277880558486e-38	-3.3120146245605474e-36	-0.025394030025659816	2.6947061501661293e-40	0.0	-0.025270159097572218	0.0	800.6400178494969	83.21332882299278	-4.810192903960411e-36	-0.00015245345040445596	-4.403087603287048	2.545232235310898e-37	-0.061183075003158845	0.4403512667279036
4.295	83.19131071000974	0.0	-0.037271248151733855	386.0298502231335	-5.913120692672857e-36	-800.6400191925717	0.0	0.00019410280219984069	0.0	0.9999999754331657	-4.0550494670048916e-42	-0.00022166117362873325	-2.890277880535592e-38	-3.3120146245909855e-36	-0.02540049966968934	2.6947061503010118e-40	0.0	-0.02521455274078365	0.0	800.6400191925717	83.19131905819805	-4.8089206161048684e-36	-0.00039067825983963233	-4.40100419231276	2.5440232858501223e-37	0.03709410757699826	0.44011605144065613
4.3	83.16931092976192	0.0	-0.036682963817394144	386.4457518121346	-5.9371621160898334e-36	-800.640019927403	0.0	9.58336628187666e-05	0.0	0.999999975529678	-4.0424526828648804e-42	-0.00022122534066209692	-2.890277880712048e-38	-3.3120146243560936e-36	-0.02535055688934296	2.694706149260716e-40	0.0	-0.025187098418709676	0.0	800.640019927403	83.16931901944469	-4.8076488939689204e-36	0.00011535715885173998	-4.398717469313122	2.5427009183191382e-37	0.048035164379960846	0.4398979739878038
4.305	83.14732405940408	0.0	-0.03687275040820196	386.86154343532445	-5.9611971828761555e-36	-800.6400197218155	0.0	-0.0002046270486345049	0.0	0.9999999754761874	-4.0494374796827135e-42	-0.00022146700589067094	-2.890277880614275e-38	-3.312014624486331e-36	-0.02537824968532609	2.694706149837289e-40	0.0	-0.025245719750014554	0.0	800.6400197218155	83.14733223524145	-4.806377934890337e-36	-4.3969879827217936e-05	-4.3961304562358805	2.5412102991675187e-37	-0.05441119660184648	0.439646716882548
4.31	83.1253489885502	0.0	-0.03714530767288913	387.277225154231	-5.985225896579594e-36	-800.640020463681	0.0	-3.9136144118058835e-05	0.0	0.999999975389036	-4.060801108258388e-42	-0.00022186017321804217	-2.8902778804548397e-38	-3.312014624698229e-36	-0.02542330334343455	2.694706150776678e-40	0.0	-0.025256931429436455	0.0	800.640020463681	83.12535728749879	-4.8051076597540756e-36	-0.00026089627310279097	-4.393912359213914	2.539926075651415e-37	-0.01103348181485127	0.4393926212190385
4.315	83.10338481419205	0.0	-0.03695324315245818	387.6927970252838	-6.009248260462746e-36	-800.6400220191308	0.0	0.00016119974534152003	0.0	0.999999975465669	-4.0508096765521934e-42	-0.00022151448218507924	-2.890277880595037e-38	-3.312014624511935e-36	-0.025383690068052498	2.6947061499506453e-40	0.0	-0.02521075110410319	0.0	800.6400220191308	83.10339303000498	-4.803838004181114e-36	-0.00013603391936509136	-4.39174754241923	2.5386721965139396e-37	0.0420100682876264	0.43919484653377805
4.32	83.08143199406241	0.0	-0.036743463211965255	388.10825909794943	-6.033264277397274e-36	-800.6400217813318	0.0	-0.00011995596730911246	0.0	0.999999975496543	-4.0467800362746843e-42	-0.00022137506167448683	-2.890277880651486e-38	-3.3120146244367964e-36	-0.025367713653991764	2.6947061496178654e-40	0.0	-0.0252451159573743	0.0	800.6400217813318	83.08144011910578	-4.8025690047490476e-36	4.0853751439828774e-05	-4.389335217306704	2.5372797037579357e-37	0.00022507947568576654	0.4389335223077597
4.325	83.05949149938044	0.0	-0.03700071237970268	388.5236114426761	-6.05727395144478e-36	-800.640022031014	0.0	-0.00016552483664355924	0.0	0.9999999753957779	-4.059922383431683e-42	-0.00022182977043874445	-2.8902778804671756e-38	-3.312014624681861e-36	-0.02541981944147029	2.6947061507039934e-40	0.0	-0.025292535330095643	0.0	800.640022031014	83.0594997406425	-4.801300728029196e-36	-0.00015057378074384404	-4.386855708119223	2.535849314789202e-37	-0.06154633312379901	0.4387287425617246
4.33	83.03756273877427	0.0	-0.03723384445333835	388.9388541149076	-6.081277285807386e-36	-800.6400233687835	0.0	0.00021681471109373946	0.0	0.9999999753921479	-4.06039485228996e-42	-0.00022184611726995527	-2.890277880460528e-38	-3.312014624690695e-36	-0.025421692650389877	2.6947061507431003e-40	0.0	-0.025230422490685547	0.0	800.6400233687835	83.03757108563735	-4.800033128761283e-36	-0.00039071993267395845	-4.384788255602483	2.534649641436098e-37	0.035641458576258084	0.43849331078180553
4.335	83.0156440098634	0.0	-0.03666080479945831	389.3539871593658	-6.105274283079e-36	-800.6400239380864	0.0	5.8772114741467086e-05	0.0	0.9999999754835073	-4.048481162294497e-42	-0.000221433918505849	-2.8902778806276517e-38	-3.312014624468548e-36	-0.025374458150222094	2.694706149758353e-40	0.0	-0.025213585520046822	0.0	800.6400239380864	83.01565210474467	-4.798766092167731e-36	0.00010415659515255121	-4.382511410423481	2.5333329963529363e-37	0.046317153399366304	0.43827561580803276
4.34	82.99373814114018	0.0	-0.03686186291277866	389.7690106505086	-6.129264947563419e-36	-800.6400237993926	0.0	-0.00019907924974193304	0.0	0.99999997542102	-4.056632385660912e-42	-0.00022171594063324102	-2.890277880513366e-38	-3.3120146246205296e-36	-0.02540677550627318	2.6947061504319033e-40	0.0	-0.02527061752404104	0.0	800.6400237993926	82.99374632725939	-4.7974998157059395e-36	-5.9790755964494225e-05	-4.379927108081461	2.531844004954671e-37	-0.057421902289738605	0.4380303499412957
4.345	82.97184405176685	0.0	-0.03712798506290811	390.18392464233614	-6.15324928237424e-36	-800.6400246339721	0.0	1.2583477644396767e-05	0.0	0.9999999753495503	-4.0659422108295956e-42	-0.0002220380489330174	-2.890277880382545e-38	-3.312014624794136e-36	-0.025443686399428338	2.6947061512022575e-40	0.0	-0.025267012623237932	0.0	800.6400246339721	82.9718523582442	-4.7962342215645695e-36	-0.0002821695710301083	-4.3777611860065235	2.530589060052379e-37	0.004696433044367939	0.4377763705156845
4.35	82.9499605741684	0.0	-0.036806683860870756	390.59872918567294	-6.177227290451457e-36	-800.6400260045308	0.0	0.00014313042884164743	0.0	0.9999999754370407	-4.054543327759458e-42	-0.0002216436618442635	-2.890277880542675e-38	-3.312014624581592e-36	-0.02539849296695616	2.69470615025921e-40	0.0	-0.025226008775775313	0.0	800.6400260045308	82.94996874011844	-4.79496922796572e-36	-3.601512475091845e-05	-4.375558926367518	2.529314302576955e-37	0.04145980545415205	0.4375755344347163
4.355	82.92808893847071	0.0	-0.03674398572769862	391.01342434441835	-6.201198975499274e-36	-800.640025689555	0.0	-0.00015538212560027448	0.0	0.9999999754429372	-4.0537744882817795e-42	-0.0002216170609605226	-2.8902778805534595e-38	-3.312014624567247e-36	-0.02539544473014197	2.6947061501956514e-40	0.0	-0.02527052247581865	0.0	800.640025689555	82.92809707877748	-4.793704924606291e-36	1.257566219908106e-05	-4.373099015187165	2.5278952517265816e-37	-0.020509038679010595	0.43731471067525834
4.36	82.90622936732407	0.0	-0.03700825527427281	391.42801017629296	-6.225164340842864e-36	-800.6400261074115	0.0	-0.00011428133902990689	0.0	0.9999999753466591	-4.0663188057715793e-42	-0.00022205107864670877	-2.8902778803772507e-38	-3.312014624801144e-36	-0.025445179494670754	2.694706151233421e-40	0.0	-0.025303261667836235	0.0	800.6400261074115	82.90623762710761	-4.7924413258551734e-36	-0.0001894172173801022	-4.370736831220749	2.5265307228492014e-37	-0.04059775014071536	0.43709253740033227
4.365	82.884381111489	0.0	-0.03705720945434708	391.84248673327136	-6.249123389485059e-36	-800.6400275980473	0.0	0.0002034166814902312	0.0	0.9999999753878553	-4.060953917186191e-42	-0.00022186546021570608	-2.890277880452667e-38	-3.3120146247011255e-36	-0.025423909188754135	2.694706150789349e-40	0.0	-0.0252449870811765	0.0	800.6400275980473	82.88438939506885	-4.7911783761905545e-36	-0.0002788439913229426	-4.368641467819145	2.5253158619394996e-37	0.03646499291122021	0.43687936515767184
4.37	82.8625433731284	0.0	-0.036654745693339555	392.25685407948873	-6.273076125145086e-36	-800.6400276390237	0.0	-5.08113946280313e-05	0.0	0.9999999754486469	-4.053029617283419e-42	-0.00022159128935616973	-2.890277880563901e-38	-3.312014624553365e-36	-0.025392491521748026	2.694706150134094e-40	0.0	-0.0252595434734933	0.0	800.6400276390237	82.86255148032258	-4.789916024976925e-36	6.849265551581358e-05	-4.366323099328184	2.5239762608371683e-37	0.024883518628360718	0.4366394003892253
4.375	82.84071817887384	0.0	-0.036889960233821815	392.67111226927057	-6.297022550956266e-36	-800.6400277206304	0.0	-0.0001764451157830727	0.0	0.999999975362507	-4.064255247570753e-42	-0.00022197968211546253	-2.890277880406266e-38	-3.3120146247626866e-36	-0.025436998054644472	2.6947061510625813e-40	0.0	-0.025310091275743636	0.0	800.6400277206304	82.84072639256635	-4.788654412751938e-36	-0.00011204492930680534	-4.363796731970382	2.5225199673349745e-37	-0.06202216937897933	0.43642374668949746
4.38	82.81890466836704	0.0	-0.03713493555499493	393.0852613629102	-6.320962670399136e-36	-800.6400288524892	0.0	0.00015528662412535231	0.0	0.999999975337477	-4.067512820447983e-42	-0.0002220923900602255	-2.890277880360426e-38	-3.31201462482346e-36	-0.025449913434067738	2.694706151332347e-40	0.0	-0.02526560493485755	0.0	800.6400288524892	82.81891299304733	-4.7873934759112626e-36	-0.000348035838952647	-4.361731108736677	2.521321519187236e-37	0.03159809131134185	0.4361845561719925
4.385	82.79710121316411	0.0	-0.03659611750324751	393.4993014130595	-6.344896486524007e-36	-800.6400296005518	0.0	9.829225168586858e-05	0.0	0.9999999754323935	-4.055148565199092e-42	-0.00022166460230223204	-2.8902778805341644e-38	-3.312014624592912e-36	-0.0254008925667403	2.694706150309258e-40	0.0	-0.02523744627895536	0.0	800.6400296005518	82.79710930078505	-4.786133103469268e-36	0.00011025821566813239	-4.359471662892626	2.5200149202533e-37	0.042521495260931824	0.4359679031433739
4.39	82.77531044021343	0.0	-0.036782412639141865	393.9132324779426	-6.368824002699127e-36	-800.6400294177752	0.0	-0.00018692530516567664	0.0	0.9999999753831914	-4.0615610509281383e-42	-0.0002218864662833614	-2.890277880444129e-38	-3.312014624712469e-36	-0.02542631630685494	2.6947061508396067e-40	0.0	-0.0252909964343063	0.0	800.6400294177752	82.77531861259635	-4.784873479830687e-36	-4.896766336519525e-05	-4.356918874492285	2.518543921601811e-37	-0.05645333921874061	0.435728459690391
4.395	82.753531357473	0.0	-0.0370450498059622	394.3270546187434	-6.392745222452378e-36	-800.640030195194	0.0	1.715657233776721e-05	0.0	0.9999999753154677	-4.0703765507515483e-42	-0.00022219147154482557	-2.890277880320113e-38	-3.3120146248768544e-36	-0.02546126733613885	2.694706151569587e-40	0.0	-0.025286081438376976	0.0	800.640030195194	82.75353964873207	-4.783614533628852e-36	-0.0002707892402631012	-4.354775044281686	2.517301678839406e-37	0.0071146373901959095	0.43547808560665546
4.4	82.73176276486252	0.0	-0.03670931339119165	394.74076789153065	-6.416660149027047e-36	-800.6400314623954	0.0	0.00013965669341508633	0.0	0.9999999754019886	-4.0591118205418367e-42	-0.00022180172597715785	-2.890277880478531e-38	-3.3120146246668125e-36	-0.02541660578281572	2.694706150636988e-40	0.0	-0.02524607274280979	0.0	800.6400314623954	82.73177090909297	-4.7823561807175466e-36	-9.215133278079374e-06	-4.352577648640003	2.5160299669295884e-37	0.03890490738383959	0.435275151820766
4.405	82.71000603759724	0.0	-0.036690029667658025	395.1543723486461	-6.440568785458525e-36	-800.6400311549398	0.0	-0.00015864996932543648	0.0	0.9999999754006731	-4.0592835709643315e-42	-0.00022180766832683422	-2.890277880476126e-38	-3.312014624669998e-36	-0.025417286725946227	2.6947061506511796e-40	0.0	-0.02529152261112093	0.0	800.6400311549398	82.71001417541488	-4.7810985206371816e-36	1.4002129533048042e-06	-4.350122266111593	2.5146137625166126e-37	-0.027925416689435077	0.43502118981742877
4.41	82.68826122853694	0.0	-0.03695218617128683	395.56786805294485	-6.464471135368996e-36	-800.6400316408732	0.0	-7.512396085521098e-05	0.0	0.9999999753138787	-4.0705834892911315e-42	-0.0002221986313593157	-2.890277880317204e-38	-3.312014624880699e-36	-0.025462087790463914	2.6947061515867223e-40	0.0	-0.025313044040607476	0.0	800.6400316408732	82.68826948497725	-4.7798415556989026e-36	-0.00020574648066432226	-4.347839537680898	2.5132940035591057e-37	-0.023354204950956334	0.4347902260206654
4.415	82.6665273745635	0.0	-0.03685925729891054	395.9812550618211	-6.488367202075495e-36	-800.6400330714637	0.0	0.00016886629805985874	0.0	0.9999999753743699	-4.0627099865348186e-42	-0.00022192621801748235	-2.8902778804279805e-38	-3.3120146247338956e-36	-0.025430871520154	2.694706150934687e-40	0.0	-0.025264667409703335	0.0	800.6400330714637	82.66653559177304	-4.7785852160548e-36	-0.00016751501798693963	-4.345715025064342	2.512063152951793e-37	0.03541998105511265	0.4345859368885274
4.42	82.64480450175621	0.0	-0.03661389504017488	396.3945334263624	-6.512256988543106e-36	-800.6400328992208	0.0	-0.00010389509907299855	0.0	0.999999975411266	-4.057903019736504e-42	-0.00022175990298208304	-2.8902778804955106e-38	-3.3120146246442604e-36	-0.025411813220489136	2.6947061505369933e-40	0.0	-0.025294431163148216	0.0	800.6400328992208	82.64481261221906	-4.7773295080798505e-36	4.07153162573451e-05	-4.343357188237699	2.510701677178998e-37	0.003845844748774041	0.43433588908974496
4.425	82.62309387167606	0.0	-0.036862886647912076	396.8077032082651	-6.536140498328721e-36	-800.6400331504067	0.0	-0.00013138133103390777	0.0	0.9999999753228782	-4.069412114600318e-42	-0.00022215810326096604	-2.890277880333686e-38	-3.312014624858893e-36	-0.02545744361237491	2.694706151489694e-40	0.0	-0.025332069142023485	0.0	800.6400331504067	82.62310209485311	-4.776074518602474e-36	-0.00015210427498011522	-4.340925938204758	2.509298866494803e-37	-0.05116021847424086	0.4341227403503897
4.43	82.60139465658894	0.0	-0.03699584092587372	397.2207644610204	-6.560017734521292e-36	-800.6400344925493	0.0	0.00021753884434005103	0.0	0.9999999753477611	-4.066173489194358e-42	-0.00022204605087499657	-2.8902778803792537e-38	-3.31201462479853e-36	-0.02544460335445726	2.6947061512214635e-40	0.0	-0.025269748853719295	0.0	800.6400344925493	82.60140294091211	-4.7748201861433685e-36	-0.00031321122153616943	-4.338856155071369	2.5080984963979324e-37	0.03219754091922744	0.43389756182815714
4.435	82.57970568789459	0.0	-0.03655268078792215	397.63371724542105	-6.583888700645773e-36	-800.6400346270066	0.0	-3.385230551348713e-05	0.0	0.9999999754144411	-4.057488068160962e-42	-0.00022174554617687228	-2.8902778805013134e-38	-3.312014624636582e-36	-0.025410168051756735	2.6947061505027363e-40	0.0	-0.025279446824882847	0.0	800.6400346270066	82.57971377760974	-4.7735664337619103e-36	7.06857881193957e-05	-4.336576421012476	2.5067807626406856e-37	0.03051432116943399	0.43366837766982513
4.44	82.55802925050497	0.0	-0.03678070540204227	398.0465616186069	-6.60775339999981e-36	-800.6400346931244	0.0	-0.00016073254912991238	0.0	0.9999999753363068	-4.0676644050717965e-42	-0.00022209763469850392	-2.8902778803582793e-38	-3.3120146248263245e-36	-0.025450514425359276	2.6947061513449406e-40	0.0	-0.025325493308360463	0.0	800.6400346931244	82.55803744357638	-4.7723134203337276e-36	-0.00010881663410021408	-4.334054160729059	2.5053271338886943e-37	-0.06257025286620524	0.4334505797051909
4.445	82.53636440034626	0.0	-0.03701896996191924	398.4592976391908	-6.631611835966261e-36	-800.640035814922	0.0	0.00018960135324384213	0.0	0.9999999753243312	-4.069222322200521e-42	-0.00022215153668145432	-2.890277880336342e-38	-3.312014624855393e-36	-0.02545669113777247	2.6947061514740103e-40	0.0	-0.025271176521706257	0.0	800.640035814922	82.53637270142809	-4.771061076701192e-36	-0.0003478068456585116	-4.332007400326887	2.5041396699351544e-37	0.029339535813258565	0.433210675363023
4.45	82.51470950682155	0.0	-0.03650347279934887	398.8719253596507	-6.655464011586493e-36	-800.6400363213414	0.0	4.140112769823799e-05	0.0	0.9999999754117602	-4.057837350233733e-42	-0.00022175763089947068	-2.890277880496406e-38	-3.312014624643101e-36	-0.025411552858993703	2.6947061505316238e-40	0.0	-0.025259315972285302	0.0	800.6400363213414	82.51471758110269	-4.769809292460953e-36	9.306288021288631e-05	-4.329770414456865	2.502846079979728e-37	0.039712853705042093	0.43299525346885015
4.455	82.4930671550741	0.0	-0.036707076365917225	399.2844448370622	-6.679309930159678e-36	-800.6400362445876	0.0	-0.00017154235716986937	0.0	0.9999999753505834	-4.06580627581001e-42	-0.00022203334575145872	-2.8902778803844233e-38	-3.3120146247916734e-36	-0.02544314745450758	2.6947061511910543e-40	0.0	-0.025308459237653097	0.0	800.6400362445876	82.49307532183983	-4.768558248799326e-36	-7.465024617131505e-05	-4.327241826432745	2.5013891459827694e-37	-0.06086783158903929	0.4327669894683668
4.46	82.47143635180328	0.0	-0.03695687952531033	399.6968561321656	-6.703149595189432e-36	-800.6400371750841	0.0	0.00011220180131299012	0.0	0.9999999753132467	-4.070664296682317e-42	-0.00022220142719392102	-2.890277880316035e-38	-3.312014624882278e-36	-0.02546240816951775	2.6947061515934817e-40	0.0	-0.0252763157893081	0.0	800.6400371750841	82.4714446317377	-4.767307873598679e-36	-0.00030633506050516666	-4.325189894200085	2.500198889099914e-37	0.026859671801728404	0.4325273293430121
4.465	82.44981555335009	0.0	-0.03646308245703887	400.10915929806913	-6.726983009751107e-36	-800.640037970448	0.0	0.00011331047332837276	0.0	0.9999999754058319	-4.058609920787984e-42	-0.00022178436087379123	-2.890277880485556e-38	-3.312014624657509e-36	-0.025414615888499137	2.694706150595517e-40	0.0	-0.025243854729826373	0.0	800.640037970448	82.44982361609416	-4.766058060678894e-36	0.00010907952393942145	-4.322962037013649	2.4989105551515466e-37	0.03767633744070657	0.4323126216045992
4.47	82.42820718437407	0.0	-0.03664235797209958	400.52135439059396	-6.75081017707541e-36	-800.6400377875724	0.0	-0.00017096303684850206	0.0	0.9999999753639734	-4.06406266444968e-42	-0.00022197301898048633	-2.8902778804089376e-38	-3.3120146247591786e-36	-0.02543623451560042	2.6947061510467056e-40	0.0	-0.025292832032147165	0.0	800.6400377875724	82.4282153287894	-4.764808980832099e-36	-4.8679267004925954e-05	-4.320451850656326	2.497464002013359e-37	-0.0574533798898919	0.43208338413667846
4.475	82.40661036058188	0.0	-0.0368973643241015	400.93344147067364	-6.77463110067551e-36	-800.6400385705356	0.0	5.8079994246658986e-05	0.0	0.999999975311029	-4.070952700693114e-42	-0.00022221140561176232	-2.8902778803119715e-38	-3.3120146248876584e-36	-0.02546355161200302	2.6947061516173794e-40	0.0	-0.025276193339424775	0.0	800.6400385705356	82.40661862047429	-4.763560569997597e-36	-0.0002739841446117837	-4.318369109949553	2.496256466993143e-37	0.01898676091522385	0.43184108497057744
4.48	82.38502370508012	0.0	-0.036471253109405265	401.3454205756351	-6.798445782712656e-36	-800.6400395618062	0.0	0.00013526352349287277	0.0	0.9999999754001911	-4.059344751108374e-42	-0.00022180978508325137	-2.8902778804752315e-38	-3.312014624671222e-36	-0.025417529288369798	2.6947061506563097e-40	0.0	-0.025237443194333724	0.0	800.6400395618062	82.38503177781809	-4.7623127321603814e-36	7.635838447870608e-05	-4.316156779678219	2.4949768211703816e-37	0.03591122095110697	0.43163061710856954
4.485	82.36344922919407	0.0	-0.036585893960709145	401.75729179317943	-6.822254228263296e-36	-800.6400393102026	0.0	-0.0001646100523680395	0.0	0.9999999753759099	-4.0625079909498536e-42	-0.00022191922922303536	-2.8902778804307885e-38	-3.312014624730203e-36	-0.025430070663282605	2.6947061509180372e-40	0.0	-0.025284600500664306	0.0	800.6400393102026	82.36345735492057	-4.7610656101071133e-36	-2.9824919104953198e-05	-4.313676733339378	2.4935471929368584e-37	-0.04863578438720429	0.43139509036701434
4.49	82.34188636934724	0.0	-0.036842274210972845	402.16905516830064	-6.846056439918158e-36	-800.6400399848842	0.0	2.2665462593767715e-05	0.0	0.9999999753142922	-4.0705280028986934e-42	-0.00022219671159957652	-2.890277880317948e-38	-3.312014624879753e-36	-0.02546186780219668	2.6947061515822015e-40	0.0	-0.025278107323927632	0.0	800.6400399848842	82.34189461114029	-4.7598191626352544e-36	-0.00025007872001669995	-4.311552792161896	2.4923166840558777e-37	0.009895419925807253	0.4311564147607519
4.495	82.32033380480858	0.0	-0.03648735053401644	402.58071074424686	-6.869852420179579e-36	-800.6400410800607	0.0	0.00013583064393709443	0.0	0.9999999753987041	-4.05953835297211e-42	-0.00022181648346544788	-2.890277880472507e-38	-3.312014624674838e-36	-0.0254182968664475	2.694706150672333e-40	0.0	-0.025239194710796935	0.0	800.6400410800607	82.3203418910523	-4.758573296954201e-36	3.266608265722565e-05	-4.309366614419711	2.4910517981619495e-37	0.034424953994485974	0.4309504112416268
4.5	82.29879312401786	0.0	-0.03653698120920945	402.99225859672964	-6.893642173432533e-36	-800.6400408044278	0.0	-0.00015699867252088522	0.0	0.9999999753864637	-4.0611331118810427e-42	-0.00022187166012788826	-2.8902778804501054e-38	-3.3120146247045753e-36	-0.025424619646374	2.694706150804277e-40	0.0	-0.025284171517419952	0.0	800.6400408044278	82.29880123440157	-4.757328127041421e-36	-1.743879697229829e-05	-4.306922603123317	2.4896425177281484e-37	-0.03986420353376253	0.43071070875957923
4.505	82.27726411167757	0.0	-0.03679285511113266	403.4036987758796	-6.917425702564272e-36	-800.6400414074276	0.0	2.2215922389106647e-06	0.0	0.999999975320806	-4.069680449680302e-42	-0.00022216738731891682	-2.8902778803298796e-38	-3.312014624863959e-36	-0.025458507487075586	2.6947061515119876e-40	0.0	-0.02528353507812451	0.0	800.6400414074276	82.27727233787598	-4.756083636145419e-36	-0.00023420277441889843	-4.304770717347614	2.488396546989851e-37	0.003960702483545649	0.43047725394145564
4.51	82.25574545140877	0.0	-0.036482637144459866	403.8150313364568	-6.941203010741839e-36	-800.6400425453318	0.0	0.00013721883049065315	0.0	0.9999999754012695	-4.059203962566875e-42	-0.00022180491397590945	-2.890277880477202e-38	-3.31201462466861e-36	-0.02541697110057152	2.6947061506446767e-40	0.0	-0.02524422477884033	0.0	800.6400425453318	82.2557535419172	-4.754839731271367e-36	6.822635400058785e-06	-4.302602982475889	2.4871420982461243e-37	0.0332500631771648	0.4302731457052799
4.515	82.23423849616627	0.0	-0.03649486945759083	404.22625633135726	-6.964974101032123e-36	-800.6400422666678	0.0	-0.00015104240713036894	0.0	0.999999975395787	-4.059918457619546e-42	-0.00022182963461055575	-2.8902778804671694e-38	-3.312014624681927e-36	-0.02541980387670547	2.694706150703776e-40	0.0	-0.025287495241120665	0.0	800.6400422666678	82.2342465942182	-4.7535965100757134e-36	-1.088460737665665e-05	-4.3001793238749055	2.4857442950098892e-37	-0.03491970625633888	0.4300321104681169
4.52	82.21274325074513	0.0	-0.03674962563834085	404.63737382172275	-6.988738976958799e-36	-800.6400428317979	0.0	-5.6560936166031456e-06	0.0	0.9999999753292581	-4.0685809286058783e-42	-0.0002221293452657712	-2.890277880345361e-38	-3.3120146248434475e-36	-0.02545414818878954	2.694706151420881e-40	0.0	-0.025289115592584475	0.0	800.6400428317979	82.2127514640879	-4.752353971073256e-36	-0.00022589725126425216	-4.2980113398037645	2.484489361106692e-37	0.0016216249468113473	0.4298011645720521
4.525	82.19125838925314	0.0	-0.036456864672245494	405.04838386209093	-7.012497641675733e-36	-800.640043971406	0.0	0.000137630757610119	0.0	0.9999999754077024	-4.058365709869572e-42	-0.00022177591148163898	-2.890277880488971e-38	-3.312014624652973e-36	-0.02541364765945569	2.6947061505753287e-40	0.0	-0.025249687284873236	0.0	800.640043971406	82.19126647467405	-4.7511120203305847e-36	-7.794923530532839e-07	-4.295847887964044	2.4832373181669255e-37	0.032399475267219716	0.42959700653662297
4.53	82.16978517756348	0.0	-0.03645879280679227	405.4592865041078	-7.036250098177686e-36	-800.6400436953871	0.0	-0.00014809168338341893	0.0	0.9999999754041957	-4.058822655518347e-42	-0.00022179172122922846	-2.8902778804825534e-38	-3.312014624661495e-36	-0.025415459323124324	2.6947061506131277e-40	0.0	-0.025292112427067522	0.0	800.6400436953871	82.16979326595218	-4.749870749476976e-36	-9.633941219795128e-06	-4.293431109730506	2.4818433988389052e-37	-0.03378732199991907	0.4293564052990202
4.535	82.14832367924387	0.0	-0.036712459458610604	405.8700818122065	-7.059996350178679e-36	-800.6400442541393	0.0	-2.1088129385922846e-06	0.0	0.9999999753392507	-4.067279729325657e-42	-0.00022208432539910073	-2.890277880363652e-38	-3.312014624819224e-36	-0.0254489892919532	2.694706151313128e-40	0.0	-0.02529271655747334	0.0	800.6400442541393	82.14833188241028	-4.7486301612144754e-36	-0.00022474664305418329	-4.291267027884279	2.4805907194295574e-37	0.002779367822271511	0.42912679279546584
4.54	82.12687252145797	0.0	-0.036410309525634586	406.2807698400072	-7.083736400779615e-36	-800.6400453620861	0.0	0.00013664825877216693	0.0	0.9999999754179715	-4.057026214516233e-42	-0.00022172956661876408	-2.890277880507754e-38	-3.3120146246280494e-36	-0.02540833692923522	2.694706150464601e-40	0.0	-0.025253569714946057	0.0	800.6400453620861	82.12688059256146	-4.747390158537415e-36	9.604863121852016e-06	-4.289104964101635	2.4793395600132594e-37	0.031833380178731524	0.42892230948243876
4.545	82.10543302790775	0.0	-0.036428577574540405	406.691350637435	-7.107470252875498e-36	-800.6400450908775	0.0	-0.00014831154893748074	0.0	0.9999999754118414	-4.057825229404841e-42	-0.00022175721153395918	-2.890277880496537e-38	-3.3120146246429474e-36	-0.025411504803244455	2.694706150530679e-40	0.0	-0.025296057843981885	0.0	800.6400450908775	82.10544110922137	-4.746150837130674e-36	-1.3631126956166795e-05	-4.286690686435199	2.4779471827145658e-37	-0.03640541287215329	0.42868452730716405
4.55	82.08400518265451	0.0	-0.036681270299113194	407.10182426889884	-7.13119791017901e-36	-800.6400456743571	0.0	1.2684065576643409e-05	0.0	0.9999999753508609	-4.065767957378198e-42	-0.00022203201998167153	-2.89027788038491e-38	-3.312014624791067e-36	-0.02544299553247658	2.6947061511879654e-40	0.0	-0.02529242412685884	0.0	800.6400456743571	82.08401337828705	-4.744912194166645e-36	-0.00023071262315955466	-4.284553286497802	2.4767095913566788e-37	0.007296812092963377	0.42845594999142955
4.555	82.06258756134373	0.0	-0.036344076863883044	407.5121907858274	-7.154919375664898e-36	-800.6400467150909	0.0	0.00013495898030942293	0.0	0.9999999754318701	-4.0552138556928746e-42	-0.0002216668612716056	-2.890277880533176e-38	-3.312014624594271e-36	-0.025401151425568393	2.6947061503147667e-40	0.0	-0.025253761226963246	0.0	800.6400467150909	82.06259560940109	-4.7436741293446045e-36	3.7038239023760725e-05	-4.282386792539228	2.4754560968251457e-37	0.03154982404964993	0.42825030101929856
4.56	82.04118171437888	0.0	-0.03640418013810867	407.92245024264787	-7.178634652487613e-36	-800.6400464569433	0.0	-0.00015042771597610223	0.0	0.9999999754187563	-4.05692355291161e-42	-0.00022172601465572287	-2.890277880509184e-38	-3.312014624626149e-36	-0.02540792990424265	2.694706150456121e-40	0.0	-0.025296855593199365	0.0	800.6400464569433	82.04118979118901	-4.742436753796998e-36	-2.2848934616530458e-05	-4.279962993791979	2.47405849441633e-37	-0.04261526400753895	0.4280175146995182
4.565	82.01978742950432	0.0	-0.03665549486988165	408.33260270143586	-7.202343744225126e-36	-800.6400470962772	0.0	3.9730087887192126e-05	0.0	0.999999975364732	-4.063960723832568e-42	-0.00022196949196270915	-2.890277880410294e-38	-3.312014624757431e-36	-0.025435830349124038	2.6947061510383887e-40	0.0	-0.025285473761421266	0.0	800.6400470962772	82.01979561998937	-4.7412000507544484e-36	-0.00024371106159096865	-4.27786459319511	2.472842793369926e-37	0.014980946533154741	0.4277890824515207
4.57	81.99840322568238	0.0	-0.036259634170254226	408.74264821486025	-7.226046653924868e-36	-800.6400480212002	0.0	0.00013454411244842116	0.0	0.99999997544918	-4.0529549835901515e-42	-0.00022158870712378232	-2.8902778805648297e-38	-3.312014624552227e-36	-0.025392195619704728	2.6947061501281377e-40	0.0	-0.025246929712413126	0.0	800.6400480212002	81.99841124262083	-4.739963916411894e-36	8.020881237494729e-05	-4.275680855579604	2.4715796935236194e-37	0.03152885407388896	0.4275797100823325
4.575	81.97703102151674	0.0	-0.03638573042611823	409.1525868350169	-7.249743384605042e-36	-800.6400477984221	0.0	-0.0001518698581257754	0.0	0.9999999754248434	-4.056128574674978e-42	-0.00022169850940363366	-2.8902778805203094e-38	-3.3120146246113994e-36	-0.02540477803444659	2.694706150390454e-40	0.0	-0.025290437221942415	0.0	800.6400477984221	81.97703909644733	-4.738728487023993e-36	-3.735657703370177e-05	-4.273235811473816	2.4701702329624046e-37	-0.05162582560818435	0.4273547651112833
4.58	81.95567026685944	0.0	-0.036634247993237196	409.56241862416823	-7.273433939854861e-36	-800.6400485246797	0.0	8.112318862199297e-05	0.0	0.9999999753820763	-4.061700854488364e-42	-0.00022189130331158084	-2.8902778804420365e-38	-3.312014624715345e-36	-0.02542687058947224	2.6947061508513976e-40	0.0	-0.025267197140298996	0.0	800.6400485246797	81.95567845418745	-4.737493722114495e-36	-0.0002637443025917326	-4.271178862139162	2.4689777905702025e-37	0.020906996721114315	0.42712300306698864
4.585	81.9343194669605	0.0	-0.03619419856728192	409.9721436252535	-7.297118322160869e-36	-800.6400492679688	0.0	0.00010647487317988373	0.0	0.9999999754694943	-4.050303959526067e-42	-0.0002214969850088656	-2.890277880601974e-38	-3.3120146245028344e-36	-0.025381685039301154	2.6947061499091375e-40	0.0	-0.025236694336012007	0.0	800.6400492679688	81.93432746121074	-4.736259517773031e-36	0.0001022135551666536	-4.268984923273915	2.4677090640950224e-37	0.031708506304624885	0.42691026814205424
4.59	81.91298081660238	0.0	-0.036373621018625985	410.381761911375	-7.320796535753029e-36	-800.640049121583	0.0	-0.00014910836031615827	0.0	0.9999999754302583	-4.055422334291279e-42	-0.00022167407437020283	-2.8902778805302153e-38	-3.3120146245982454e-36	-0.02540197798580204	2.694706150332081e-40	0.0	-0.025279410734693166	0.0	800.640049121583	81.9129888924565	-4.735026029147616e-36	-5.7649933289068555e-05	-4.266528491172513	2.466293342028878e-37	-0.05827911942857181	0.42669265076572593
4.595	81.89165351233072	0.0	-0.03661642604732479	410.7912735331522	-7.344468583548576e-36	-800.6400499678869	0.0	0.00013970150454658514	0.0	0.9999999754048063	-4.058739673127299e-42	-0.00022178885014234706	-2.890277880483643e-38	-3.3120146246601206e-36	-0.02541513032079373	2.6947061506064107e-40	0.0	-0.025239389201682432	0.0	800.6400499678869	81.89166169799617	-4.73379319767353e-36	-0.0002911120008898824	-4.264501626603827	2.465117911277566e-37	0.022311458705165675	0.4264559991897902
4.6	81.8703360693776	0.0	-0.03616715147465089	411.2006785420559	-7.368134468529077e-36	-800.6400504767848	0.0	4.135379897726883e-05	0.0	0.99999997548913	-4.0477413116334633e-42	-0.00022140832059888122	-2.890277880637881e-38	-3.312014624455049e-36	-0.02537152484608179	2.694706149697508e-40	0.0	-0.025227542210941284	0.0	800.6400504767848	81.87034405794118	-4.732560921370662e-36	8.63984146702874e-05	-4.262311062039241	2.4638511841136905e-37	0.03207460789393837	0.4262431743741316
4.605	81.84903080309552	0.0	-0.03636787841425583	411.6099769946566	-7.391794193965602e-36	-800.6400504364963	0.0	-0.00013759995660052727	0.0	0.9999999754354406	-4.054746503716788e-42	-0.00022165069147811356	-2.8902778805396994e-38	-3.3120146245856534e-36	-0.02539929850367714	2.6947061502762315e-40	0.0	-0.025266961694813253	0.0	800.6400504364963	81.8490388826845	-4.731329363025064e-36	-8.408718346843909e-05	-4.259852605404054	2.462434433385381e-37	-0.0609240744342623	0.42602882487706606
4.61	81.82773684904033	0.0	-0.036600147693803486	412.0191689497781	-7.415447763251019e-36	-800.6400514373493	0.0	0.00021911819337078276	0.0	0.9999999754356164	-4.054723228919226e-42	-0.0002216498861992456	-2.8902778805400184e-38	-3.3120146245852384e-36	-0.025399206225513875	2.694706150274325e-40	0.0	-0.025204188956339867	0.0	800.6400514373493	81.82774503368549	-4.7300984590645714e-36	-0.0003259278675538242	-4.257842424952922	2.4612684728423685e-37	0.023370225687449012	0.4257906561114002
4.615	81.80645267418465	0.0	-0.03614739706727612	412.4282544582033	-7.439095179329422e-36	-800.6400516593105	0.0	-2.3329436688144683e-05	0.0	0.9999999755055589	-4.0455963890663196e-42	-0.00022133410896238293	-2.890277880667912e-38	-3.312014624415047e-36	-0.025363020818749214	2.6947061495204288e-40	0.0	-0.025210872347643107	0.0	800.6400516593105	81.80646066027484	-4.728868105825117e-36	6.572220737296347e-05	-4.255644854867313	2.4599978430050186e-37	0.030009463128748866	0.42557506621788727
4.62	81.78518073812816	0.0	-0.03636827710252587	412.83723357717093	-7.462736445506461e-36	-800.640051754657	0.0	-0.00011188525270809767	0.0	0.9999999754416043	-4.053942644189752e-42	-0.00022162287894449177	-2.890277880550971e-38	-3.3120146245706645e-36	-0.025396111422010658	2.694706150209788e-40	0.0	-0.025242925111492752	0.0	800.640051754657	81.7851888241611	-4.72763847460814e-36	-0.00011733999984543307	-4.2532364195546775	2.4586090974653613e-37	-0.04364287226614865	0.4253460325538012
4.625	81.76391978028275	0.0	-0.036434684808690686	413.24610636435784	-7.486371565110711e-36	-800.6400528883154	0.0	0.00018373634014325616	0.0	0.9999999754724657	-4.0499162978812124e-42	-0.00022148357240110443	-2.8902778806074097e-38	-3.312014624495603e-36	-0.025380148067629508	2.6947061498771292e-40	0.0	-0.02519028852732581	0.0	800.6400528883154	81.76392789778134	-4.7264094744316464e-36	-0.00021595202952624185	-4.251192582903229	2.4574244363111005e-37	0.02460843397732105	0.4251263806440886
4.63	81.74266913120289	0.0	-0.03613692374792736	413.65487287046943	-7.510000541083718e-36	-800.6400528262366	0.0	-8.034954658837104e-05	0.0	0.9999999755173493	-4.044056536313259e-42	-0.0002212808319842195	-2.890277880689459e-38	-3.312014624386333e-36	-0.025356915726611754	2.6947061493933338e-40	0.0	-0.025213306976852326	0.0	800.6400528262366	81.74267711891083	-4.725181062501599e-36	3.9250573221452325e-05	-4.248936473991449	2.4561211019953284e-37	0.007131175079588401	0.42489424582680463
4.635	81.72143047850045	0.0	-0.036373837581457354	414.0635331549757	-7.533623376856018e-36	-800.6400530908102	0.0	-6.60084416108579e-05	0.0	0.9999999754509605	-4.052722160416934e-42	-0.00022158065173336235	-2.890277880568081e-38	-3.312014624547913e-36	-0.025391272539935165	2.694706150108931e-40	0.0	-0.025232217002435015	0.0	800.6400530908102	81.72143857324694	-4.723953355590653e-36	-0.0001580592467312162	-4.246649110639093	2.454800148942434e-37	-0.019875378560761454	0.42466956212524504
4.64	81.7002023761538	0.0	-0.0362460584169353	414.4720872740424	-7.557240075671794e-36	-800.6400542192181	0.0	0.00014773502934361908	0.0	0.9999999755083943	-4.045225733867601e-42	-0.00022132128475637404	-2.8902778806730897e-38	-3.312014624408154e-36	-0.025361551272953312	2.6947061494898475e-40	0.0	-0.02518989403409686	0.0	800.6400542192181	81.70021041632535	-4.7227262504921686e-36	-8.206824226053206e-05	-4.244559120238733	2.453589861756462e-37	0.0259787752270657	0.42446386208915493
4.645	81.67898522976418	0.0	-0.036136984498465925	414.8805352753577	-7.580850640298098e-36	-800.6400539909154	0.0	-0.00012175112338060172	0.0	0.9999999755241011	-4.043174436954165e-42	-0.000221250312450323	-2.8902778807017964e-38	-3.312014624369892e-36	-0.025353418445556167	2.6947061493205538e-40	0.0	-0.025224773161700288	0.0	800.6400539909154	81.67899322373577	-4.721499779249858e-36	6.020160263570229e-06	-4.24223574475846	2.452248993904647e-37	-0.02020859014172173	0.4242283877962658
4.65	81.65777976522668	0.0	-0.036382507404751865	415.2888772233961	-7.604455074452275e-36	-800.6400544622503	0.0	6.521117318959124e-06	0.0	0.9999999754671074	-4.0506154349963654e-42	-0.00022150776167033335	-2.8902778805976107e-38	-3.3120146245086416e-36	-0.02538291995377014	2.694706149934883e-40	0.0	-0.02522290499919986	0.0	800.6400544622503	81.65778787003578	-4.7202739909457735e-36	-0.00020684068444419814	-4.24008802820642	2.451006265579963e-37	0.005917580511445216	0.4240092157571404
4.655	81.63658438661234	0.0	-0.03605307290095349	415.6971131707203	-7.62805338117387e-36	-800.6400553925986	0.0	0.00013336096558821386	0.0	0.9999999755442782	-4.040538112012836e-42	-0.00022115909890665607	-2.890277880738665e-38	-3.3120146243207316e-36	-0.025342966143127352	2.694706149103074e-40	0.0	-0.02518469989679989	0.0	800.6400553925986	81.63659234761589	-4.7190487731829175e-36	5.627662430275895e-05	-4.237944563008966	2.4497662129217214e-37	0.02740735055582334	0.42380331855710796
4.66	81.61540068409717	0.0	-0.036147751567059364	416.1052431675764	-7.65164556337496e-36	-800.640055169642	0.0	-0.0001392234922413683	0.0	0.999999975527071	-4.042786969751298e-42	-0.00022123690657001096	-2.890277880707226e-38	-3.312014624362639e-36	-0.02535188224479359	2.694706149288562e-40	0.0	-0.0252245844893724	0.0	800.640055169642	81.61540868905871	-4.7178242395501244e-36	-3.507136063373516e-05	-4.235551020823418	2.4483861408280663e-37	-0.04761343772134375	0.42358186327379443
4.665	81.59422833500068	0.0	-0.036390899414376614	416.5132672757567	-7.675231624617618e-36	-800.6400558895994	0.0	0.00011240382165424788	0.0	0.9999999754954426	-4.0469174387179536e-42	-0.0002213798156270644	-2.890277880649417e-38	-3.3120146244396676e-36	-0.0253682584168413	2.69470614962947e-40	0.0	-0.025192383166462752	0.0	800.6400558895994	81.59423644969978	-4.716600365362194e-36	-0.00026426628260212603	-4.233508632614521	2.4472024198762567e-37	0.018448445165128863	0.4233548829002765
4.67	81.57306581723218	0.0	-0.03597049953757776	416.9211855385801	-7.698811567411258e-36	-800.6400564192301	0.0	4.838100752103899e-05	0.0	0.9999999755783366	-4.0360857144899244e-42	-0.0002210050515244398	-2.890277880800873e-38	-3.3120146242376955e-36	-0.02532531361300392	2.6947061487359546e-40	0.0	-0.02517852302876502	0.0	800.6400564192301	81.57307374795627	-4.7153770452249546e-36	8.562232359734689e-05	-4.231336986664284	2.44594664586832e-37	0.02784651178552186	0.4231428614892588
4.675	81.55191531663178	0.0	-0.03616797186462201	417.3289980265819	-7.722385395834985e-36	-800.6400563815951	0.0	-0.00012426940378582057	0.0	0.9999999755293747	-4.0424860151718896e-42	-0.0002212264939182014	-2.890277880711433e-38	-3.312014624357023e-36	-0.02535068904275994	2.694706149263719e-40	0.0	-0.025214123590562694	0.0	800.6400563815951	81.55192333675323	-4.714154433100816e-36	-8.508061175631652e-05	-4.228930760196903	2.444559513075668e-37	-0.052947228313627887	0.4229262203212949
4.68	81.53077590805216	0.0	-0.036336295410931196	417.736704788129	-7.745953112677095e-36	-800.640057387386	0.0	0.00020492347611585557	0.0	0.9999999755424227	-4.040780975863032e-42	-0.00022116750169193418	-2.890277880735273e-38	-3.3120146243252365e-36	-0.025343929031416156	2.694706149123073e-40	0.0	-0.02515541733903975	0.0	800.640057387386	81.5307840046862	-4.7129324613343075e-36	-0.0002723767009985705	-4.226918761987028	2.4433929572335625e-37	0.021662976986358964	0.4226974273048022
4.685	81.50964641466784	0.0	-0.03596496364394719	418.1443058765248	-7.769514721028193e-36	-800.6400574439505	0.0	-5.6966912707456674e-05	0.0	0.9999999755980619	-4.033505874125166e-42	-0.0002209157922764313	-2.8902778808368926e-38	-3.3120146241895723e-36	-0.025315085256367494	2.6947061485233476e-40	0.0	-0.02517173715738989	0.0	800.6400574439505	81.50965434915102	-4.71171105131547e-36	4.857521944820769e-05	-4.224713960822868	2.442118686882425e-37	0.01683161402937659	0.42247474899693693
4.69	81.4885289348087	0.0	-0.03619448714122621	418.55180135014064	-7.793070224257293e-36	-800.6400576504406	0.0	-6.847018811780629e-05	0.0	0.9999999755365272	-4.0415517270074243e-42	-0.00022119416871695222	-2.890277880724503e-38	-3.3120146243395886e-36	-0.025346984847462378	2.6947061491866293e-40	0.0	-0.025191352421397976	0.0	800.6400576504406	81.48853697285774	-4.710490348685583e-36	-0.00014490964594799733	-4.222419778479747	2.440794304489101e-37	-0.02106934210375915	0.42224723448323065
4.695	81.467421932503	0.0	-0.036075101278687294	418.9591912629703	-7.816619625482198e-36	-800.6400587229306	0.0	0.00014581075789186292	0.0	0.9999999755913137	-4.0343888257891814e-42	-0.00022094634129901243	-2.890277880824572e-38	-3.3120146242060286e-36	-0.025318585916577253	2.6947061485960925e-40	0.0	-0.02514958071622394	0.0	800.6400587229306	81.467429919775	-4.709270244032314e-36	-7.524101311432639e-05	-4.220345043367976	2.439592877876961e-37	0.023887950297921616	0.4220412647982431
4.7	81.44632580950906	0.0	-0.035979025121022495	419.36647565700326	-7.84016292714025e-36	-800.6400584991326	0.0	-0.00011955983696875912	0.0	0.9999999756052286	-4.032568534442014e-42	-0.0002208833614964538	-2.890277880849978e-38	-3.312014624172073e-36	-0.025311368962638834	2.6947061484461096e-40	0.0	-0.02518383208651185	0.0	800.6400584991326	81.44633375638678	-4.708050768895994e-36	1.253964726705726e-06	-4.218038483280632	2.4382617531743956e-37	-0.02278748953419467	0.42181000362859633
4.705	81.42524126353726	0.0	-0.03622216343596197	419.7736546100367	-7.863700133719072e-36	-800.6400590028973	0.0	3.647925559870881e-05	0.0	0.9999999755566388	-4.0389233750852614e-42	-0.00022110323102976997	-2.890277880761244e-38	-3.31201462429057e-36	-0.025336564155859134	2.6947061489698493e-40	0.0	-0.025173381549583925	0.0	800.6400590028973	81.42524931998537	-4.706831970266019e-36	-0.00021539291302946457	-4.215933288779894	2.4370431494997254e-37	0.013022884171789099	0.4215953402369932
4.71	81.4041665951751	0.0	-0.03583718245974269	420.1807281538852	-7.887231247059949e-36	-800.6400597589849	0.0	0.00012372873721716633	0.0	0.9999999756368937	-4.028423728501146e-42	-0.0002207399563980291	-2.890277880907776e-38	-3.312014624094789e-36	-0.02529493594843742	2.694706148104796e-40	0.0	-0.02513793587734879	0.0	800.6400597589849	81.40417448353753	-4.705613729074271e-36	0.0001011245267825773	-4.213784882692788	2.435800640983991e-37	0.02600163272649186	0.4213865104926202
4.715	81.38310376786768	0.0	-0.0360093431251778	420.58769636474796	-7.910756271573071e-36	-800.6400596120556	0.0	-0.00012946833903825286	0.0	0.9999999756061198	-4.032452022655897e-42	-0.00022087933033446616	-2.8902778808516064e-38	-3.3120146241698954e-36	-0.025310907025490735	2.6947061484365133e-40	0.0	-0.025175025824386094	0.0	800.6400596120556	81.38311173430783	-4.7043961843555314e-36	-5.764956697469976e-05	-4.211387238999957	2.4344186035406276e-37	-0.057642077516265135	0.4211781699698131
4.72	81.36205209212736	0.0	-0.036243164676426354	420.99455928988084	-7.934275209981092e-36	-800.6400604705262	0.0	0.00019832221231979447	0.0	0.99999997560086	-4.033140049247172e-42	-0.00022090313519347455	-2.8902778808420017e-38	-3.312014624182735e-36	-0.02531363486146342	2.6947061484931986e-40	0.0	-0.025118210695637987	0.0	800.6400604705262	81.36206016392806	-4.7031792854579955e-36	-0.00029689723042468716	-4.209392034702357	2.433261641791916e-37	0.01938644096199376	0.4209436676790473
4.725	81.34101010662084	0.0	-0.03582878312895308	421.40131697749433	-7.957788065078668e-36	-800.6400606749373	0.0	-2.94734650976742e-05	0.0	0.9999999756676637	-4.024393618655502e-42	-0.0002206005196409581	-2.8902778809639204e-38	-3.3120146240196366e-36	-0.025278957672670084	2.694706147773135e-40	0.0	-0.0251266542214266	0.0	800.6400606749373	81.34101799744967	-4.701962932957059e-36	5.8957680288327486e-05	-4.207221179294862	2.4320066018414335e-37	0.022892860628863077	0.42072834625890165
4.73	81.3199801202798	0.0	-0.036049817577705964	421.8079694880971	-7.981294840360757e-36	-800.6400608145959	0.0	-7.733606416287643e-05	0.0	0.9999999756104586	-4.031884323954136e-42	-0.00022085968866984728	-2.890277880859527e-38	-3.312014624159305e-36	-0.02530865625646531	2.6947061483897477e-40	0.0	-0.02514880937183003	0.0	800.6400608145959	81.31998811075438	-4.7007472877372434e-36	-0.0001292039528328303	-4.2049156523525255	2.4306761229781593e-37	-0.024818246356011313	0.42049888928214135
4.735	81.29896062481959	0.0	-0.03596461598938425	422.2145168763331	-8.004795538981526e-36	-800.6400618560664	0.0	0.0001481464671220901	0.0	0.999999975659855	-4.0254161532072217e-42	-0.0002206358980567693	-2.89027788094967e-38	-3.3120146240387275e-36	-0.025283011740592335	2.694706147857282e-40	0.0	-0.025106368535250684	0.0	800.6400618560664	81.29896857967601	-4.699532242200562e-36	-8.967498397162958e-05	-4.202857409206947	2.4294841328943656e-37	0.022195576753065153	0.4202916016975968
4.74	81.2779518545138	0.0	-0.035850090076526855	422.620959189971	-8.028290163712403e-36	-800.6400616477082	0.0	-0.0001141062923232199	0.0	0.9999999756767423	-4.023203565894749e-42	-0.00022055934530475858	-2.890277880980478e-38	-3.3120146239974714e-36	-0.025274239441178237	2.6947061476752594e-40	0.0	-0.025139057580080715	0.0	800.6400616477082	81.27795976088001	-4.698317816143892e-36	3.136236856335079e-06	-4.20057424087735	2.4281663346146852e-37	-0.020325636241355707	0.42006234161860956
4.745	81.2569546281346	0.0	-0.03609122463155658	423.02729649134784	-8.05177871814763e-36	-800.6400621424161	0.0	4.548405024669439e-05	0.0	0.999999975631657	-4.0291090369536056e-42	-0.00022076366721283635	-2.890277880898217e-38	-3.312014624107584e-36	-0.025297653007738105	2.6947061481612295e-40	0.0	-0.025126027359509234	0.0	800.6400621424161	81.25696264300713	-4.6971040650076106e-36	-0.00021405540738225835	-4.19847419077802	2.426950872173003e-37	0.011923735195771374	0.4198491122545119
4.75	81.23596722148577	0.0	-0.035713812515421516	423.43352883089176	-8.075261205204681e-36	-800.640062821542	0.0	0.00010044228655924401	0.0	0.9999999757114852	-4.01864899226583e-42	-0.0002204017627571378	-2.8902778810438387e-38	-3.3120146239125496e-36	-0.025256181810932126	2.694706147300767e-40	0.0	-0.02509725276398679	0.0	800.640062821542	81.23597507185599	-4.695890868201317e-36	9.529083436348189e-05	-4.196336366794166	2.4257145260251235e-37	0.02393856707913876	0.4196404646631813
4.755	81.21499158732063	0.0	-0.03589342955862884	423.8396562627137	-8.098737628016008e-36	-800.6400627140517	0.0	-0.00012009087298718455	0.0	0.9999999756765883	-4.023223828858075e-42	-0.00022056004637793108	-2.8902778809801987e-38	-3.312014623997846e-36	-0.025274319778248035	2.694706147676925e-40	0.0	-0.02513165626488783	0.0	800.6400627140517	81.21499951893058	-4.6946783638930034e-36	-6.786231566073756e-05	-4.193971278813772	2.424350951940483e-37	-0.052142881190454404	0.41942954077620326
4.76	81.1940269375498	0.0	-0.0360727449971728	424.24567884441564	-8.122207989902836e-36	-800.6400636306873	0.0	0.00020193434052896212	0.0	0.9999999756863743	-4.021941015533954e-42	-0.00022051566264232663	-2.8902778809980457e-38	-3.3120146239739404e-36	-0.025269233776665977	2.694706147571426e-40	0.0	-0.025073806337632492	0.0	800.6400636306873	81.19403495027532	-4.6934664943831836e-36	-0.00026363305411982417	-4.191976236174355	2.4231943619315804e-37	0.018968117056655676	0.4192019150017708
4.765	81.17307208880989	0.0	-0.0357178662552775	424.65159662588263	-8.145672293757704e-36	-800.6400636744702	0.0	-6.0701035690528644e-05	0.0	0.9999999757391532	-4.015019574927407e-42	-0.00022027618945935585	-2.8902778810942783e-38	-3.31201462384488e-36	-0.025241792170617918	2.694706147002538e-40	0.0	-0.025091195903418195	0.0	800.6400636744702	81.17307994709068	-4.692255180174186e-36	4.3126356178557094e-05	-4.189794278283188	2.421933338877354e-37	0.013230261648690188	0.41898151670637973
4.77	81.15212910989226	0.0	-0.035947157261931886	425.057409663792	-8.169130542851841e-36	-800.6400639180489	0.0	-3.8412495097974185e-05	0.0	0.9999999756841494	-4.022232487980241e-42	-0.0002205257472241973	-2.890277880993988e-38	-3.312014623979384e-36	-0.025270389384652734	2.6947061475954077e-40	0.0	-0.0251022002726666	0.0	800.6400639180489	81.15213707130722	-4.691044564622367e-36	-0.00015488681432150126	-4.187566238806066	2.4206464344554105e-37	-0.008590126994522508	0.4187575049437343
4.775	81.13119627709402	0.0	-0.0357279536902418	425.4631180098509	-8.19258274017191e-36	-800.6400648504542	0.0	0.00013345568402674677	0.0	0.9999999757477007	-4.013897657460986e-42	-0.0002202373725190697	-2.890277881109854e-38	-3.3120146238239735e-36	-0.02523734407680595	2.6947061469103926e-40	0.0	-0.025063968035432777	0.0	800.6400648504542	81.13120414388281	-4.6898345258397344e-36	8.291903804434445e-06	-4.1854806819372925	2.419439424082091e-37	0.022083034495842674	0.4185538937733444
4.78	81.11027461704703	0.0	-0.035757634792497356	425.8687217181127	-8.216028888851158e-36	-800.640064626918	0.0	-0.00012329922746143402	0.0	0.999999975742673	-4.0145575273721467e-42	-0.000220260203192185	-2.890277881100694e-38	-3.312014623836276e-36	-0.025239960279295325	2.694706146964599e-40	0.0	-0.025099290662186597	0.0	800.640064626918	81.1102824989407	-4.6886251383143034e-36	-2.69010534414549e-05	-4.183162011505933	2.418101986365074e-37	-0.03920926666720718	0.4183345763990701
4.785	81.08936422036773	0.0	-0.03599538257474122	426.27422085029536	-8.239468992447554e-36	-800.6400653078495	0.0	0.00013852905785547573	0.0	0.9999999757210852	-4.0173894873884527e-42	-0.00022035818546462026	-2.8902778810613417e-38	-3.312014623889092e-36	-0.025251188220923048	2.6947061471972846e-40	0.0	-0.025059605010411386	0.0	800.6400653078495	81.08937220907475	-4.687416406254167e-36	-0.0002579696265316325	-4.181130477168201	2.416925112743784e-37	0.014666466233142245	0.4181156200423103
4.79	81.06846349411276	0.0	-0.035606516512978234	426.6796154531636	-8.26290305367018e-36	-800.6400656470774	0.0	-3.5047930645064394e-08	0.0	0.9999999757945673	-4.00774408378315e-42	-0.00022002446657086078	-2.890277881195248e-38	-3.312014623709237e-36	-0.025212946851683616	2.6947061464052345e-40	0.0	-0.02505961505090392	0.0	800.6400656470774	81.06847131353314	-4.6862082198560215e-36	6.757694302239396e-05	-4.178986674484501	2.41568563113375e-37	0.019866115338946593	0.41790338941025224
4.795	81.04757457469029	0.0	-0.035817985899685094	427.0849055830446	-8.286331075774715e-36	-800.6400657297452	0.0	-7.868582988747433e-05	0.0	0.9999999757440312	-4.014379345389213e-42	-0.00022025403831856593	-2.8902778811031694e-38	-3.3120146238329514e-36	-0.025239253836798987	2.6947061469499604e-40	0.0	-0.025082156880704105	0.0	800.6400657297452	81.0475824892523	-4.6850007288499435e-36	-0.00011587209847330932	-4.176713213733763	2.414373517835856e-37	-0.024218824493656657	0.4176783430013827
4.8	81.0266960583318	0.0	-0.0357406624523536	427.4900912921557	-8.309753061774157e-36	-800.6400667117782	0.0	0.00014572603622686666	0.0	0.9999999757906839	-4.008254343838483e-42	-0.0002200421209301977	-2.8902778811881727e-38	-3.312014623718741e-36	-0.025214969892292643	2.6947061464470895e-40	0.0	-0.025040409446499254	0.0	800.6400667117782	81.02670394083025	-4.6837938328673147e-36	-8.208774931166515e-05	-4.174668531214347	2.413189497111657e-37	0.020018726095707522	0.4174716528688606
4.805	81.00582817979586	0.0	-0.035640591053962216	427.8951726353752	-8.333169014850581e-36	-800.6400665080819	0.0	-0.00011141659380273508	0.0	0.999999975805564	-4.0062994952500353e-42	-0.00021997448561548115	-2.890277881215276e-38	-3.3120146236822916e-36	-0.02520721945594647	2.6947061462867044e-40	0.0	-0.025072327949462354	0.0	800.6400665080819	81.00583602027562	-4.682587551451526e-36	-2.1576955847061233e-06	-4.172406977569191	2.411884177656581e-37	-0.022171158303425056	0.41724658832312334
4.81	80.98497172609089	0.0	-0.035879090408818294	428.3001496700225	-8.356578938308322e-36	-800.6400670395453	0.0	8.027934069843483e-05	0.0	0.9999999757702376	-4.0109393235193214e-42	-0.00022013501786696994	-2.890277881150924e-38	-3.312014623768814e-36	-0.02522561509736393	2.694706146667481e-40	0.0	-0.02504932961244179	0.0	800.6400670395453	80.9849796735925	-4.6813819376513525e-36	-0.00022383139961123177	-4.170331254669435	2.4106827243412947e-37	0.011213253030061352	0.4170346329828766
4.815	80.96412498358909	0.0	-0.035508445716210896	428.7050224469932	-8.379982835093016e-36	-800.6400675401945	0.0	4.5507302587604505e-05	0.0	0.9999999758479187	-4.0007319685983974e-42	-0.00021978185616095127	-2.890277881292395e-38	-3.312014623578479e-36	-0.02518514574590393	2.6947061458301648e-40	0.0	-0.025036292730565318	0.0	800.6400675401945	80.9641327700045	-4.680176872188189e-36	8.04481973356611e-05	-4.168202626965704	2.409451872490701e-37	0.01943656338444918	0.4168247943613719
4.82	80.94328993887058	0.0	-0.03570545763003288	429.10979101883896	-8.403380708244718e-36	-800.6400675346304	0.0	-9.401315421778264e-05	0.0	0.9999999758048821	-4.006389140868007e-42	-0.00021997758724167366	-2.890277881214035e-38	-3.312014623683961e-36	-0.025207574876135994	2.6947061462940527e-40	0.0	-0.025063225515342277	0.0	800.6400675346304	80.94329781394136	-4.6789724951066646e-36	-9.403578775240834e-05	-4.165918977725388	2.408134212693531e-37	-0.03194271856379264	0.4166041438373098
[truncated: 14,061 more rows]
