# Supplementary material for: An Efficient Contact Model for the Simulation of Cargo Airdrop Extraction Phase
Source: Hindawi journal article supplement (doi:10.1155/2018/9895451), 2018-10-17
Supplement: f1 [file 9895451.f1.zip › case3_aircraft_coupling/m8000_nocouple/hist_contact.csv]

t(s)	cntcNrmForc(N)	cntcFricForc(N)	cntcPitchMoment(N/m)
2.48500000	78400.00000200	0.00000000	0.00000000
2.48501300	78400.00000200	0.00000000	0.00000000
2.48502600	78400.00000200	0.00000000	0.00000000
2.48533400	78400.00000200	0.00000000	0.00000000
2.48564300	78400.00000200	0.00000000	0.00000000
2.48595100	78400.00000200	0.00000000	0.00000000
2.48686600	78400.00000200	0.00000000	0.00000000
2.48778100	78400.00000200	0.00000000	0.00000000
2.48801000	78400.00000200	0.00000000	0.00000000
2.48801300	78400.00000200	0.00000000	0.00000000
2.48801600	78400.00000200	0.00000000	0.00000000
2.48801800	78400.00000200	0.00000000	0.00000000
2.48801900	78400.00000200	0.00000000	0.00000000
2.48802100	78400.00000200	0.00000000	0.00000000
2.48802200	78400.00000200	0.00000000	0.00000000
2.48802300	78400.00000200	0.00000000	0.00000000
2.48802400	78400.00000200	0.00000000	0.00000000
2.48803100	78400.00000200	0.00000000	0.00000000
2.48803700	78400.00000200	0.00000000	0.00000000
2.48804300	78400.00000200	0.00000000	0.00000000
2.48804900	78400.00000200	0.00000000	0.00000000
2.48806900	78400.00000200	0.00000000	0.00000000
2.48808800	78400.00000200	0.00000000	0.00000000
2.48810700	78400.00000200	0.00000000	0.00000000
2.48812600	78400.00000200	0.00000000	0.00000000
2.48819400	78400.00000200	0.00000000	0.00000000
2.48822500	78400.00000200	0.00000000	0.00000000
2.48823700	78400.00000200	0.00000000	0.00000000
2.48823800	78400.00000200	0.00000000	0.00000000
2.48823900	78400.00000200	0.00000000	0.00000000
2.48824000	78400.12015700	0.00000000	-0.01297500
2.48824100	78400.15023900	0.00000000	-0.01622300
2.48824200	78400.27052600	0.00000000	-0.02921200
2.48824300	78400.39090100	0.00000000	-0.04221100
2.48824400	78400.51136300	0.00000000	-0.05521800
2.48825600	78401.72079600	0.00000000	-0.18581600
2.48826900	78402.93895100	0.00000000	-0.31735400
2.48828100	78404.16579400	0.00000000	-0.44982800
2.48829300	78405.40128600	0.00000000	-0.58323300
2.48837000	78413.38621500	59.66992400	36.74340800
2.48844700	78421.70380600	256.53704800	161.54866500
2.48852400	78430.34441600	457.16478600	288.19025600
2.48860100	78439.29873600	665.70240000	419.89187300
2.48867800	78448.55657600	607.11973700	379.88871200
2.48875500	78458.10909500	156.91621800	90.26313900
2.48876500	78459.38910500	156.91877800	89.98903900
2.48877500	78460.67406900	156.92134800	89.79632600
2.48878600	78461.96393400	156.92392800	89.62968200
2.48879600	78463.25866000	156.92651700	89.45397300
2.48881600	78465.86261000	156.93172500	89.10106900
2.48883600	78468.48574200	156.93697100	88.74620600
2.48885700	78471.12787000	156.94225600	88.38940700
2.48887700	78473.78881100	156.94757800	88.03069500
2.48889700	78476.46838000	156.95293700	87.67009500
2.48901300	78492.08995100	156.98418000	85.57961500
2.48912900	78508.27632100	157.01655300	83.43310300
2.48924400	78524.99276300	157.04998600	81.23519500
2.48936000	78542.20434000	157.08440900	78.99062300
2.48947600	78559.87603500	157.11975200	76.70418400
2.48959100	78577.97278200	157.15594600	74.38073300
2.48980400	78612.19229000	157.22438500	70.03433800
2.49001600	78647.51114000	157.29502200	65.61008400
2.49022900	78683.71613600	157.36743200	61.13826700
2.49044100	78720.59796900	157.44119600	56.64871600
2.49065300	78757.95242800	157.51590500	52.17043900
2.49086600	78795.58151800	157.59116300	47.73129100
2.49107800	78833.29447900	157.66658900	43.35767500
2.49129100	78870.90868500	157.74181700	39.07426600
2.49150300	78908.25043000	157.81650100	34.90377200
2.49174100	78949.56196400	157.89912400	30.39057600
2.49197900	78990.10992800	157.98022000	26.07026900
2.49221700	79029.69531100	158.05939100	21.96437200
2.49245500	79068.13631500	158.13627300	18.09039100
2.49269300	79105.26838800	158.21053700	14.46186300
2.49293100	79140.94464900	158.28188900	11.08827600
2.49316900	79175.03568600	158.35007100	7.97521000
2.49345800	79214.15267800	158.42830500	4.54662600
2.49374700	79250.59840700	158.50119700	1.50127100
2.49403600	79284.24035800	158.56848100	-1.17150900
2.49432500	79314.97952200	158.62995900	-3.48852300
2.49461400	79342.74854800	158.68549700	-5.47188500
2.49490300	79367.50959000	158.73501900	-7.14807700
2.49519300	79389.25211500	158.77850400	-8.54701700
2.49552600	79410.61708400	158.82123400	-9.85961100
2.49579000	79424.69713700	158.84939400	-10.70000800
2.49605300	79436.36395400	158.87272800	-11.39620000
2.49631700	79445.67527300	158.89135100	-11.97457800
2.49658000	79452.70009700	158.90540000	-12.46113900
2.49684400	79457.51719800	158.91503400	-12.88100900
2.49710700	79460.21399000	158.92042800	-13.25815900
2.49738700	79460.86298400	158.92172600	-13.63665600
2.49766600	79459.35338500	158.91870700	-14.01719900
2.49785000	79457.24053900	158.91448100	-14.27998300
2.49785100	79457.23638800	158.91447300	-14.28042400
2.49785200	79457.22391200	158.91444800	-14.28174800
2.49785300	79457.20307900	158.91440600	-14.28395600
2.49785400	79457.19473000	158.91438900	-14.28483900
2.49786000	79457.11075400	158.91422200	-14.29368300
2.49786600	79457.02587900	158.91405200	-14.30254400
2.49787200	79456.94010700	158.91388000	-14.31142300
2.49787300	79456.92284500	158.91384600	-14.31320100
2.49787400	79456.90554700	158.91381100	-14.31498000
2.49787500	79456.88821300	158.91377600	-14.31675900
2.49787700	79456.85816800	158.91371600	-14.31984000
2.49788000	79456.82818200	158.91365600	-14.32291900
2.49788200	79456.79815800	158.91359600	-14.32599800
2.49790200	79456.49768900	158.91299500	-14.35677700
2.49792300	79456.19681100	158.91239400	-14.38752500
2.49794400	79455.89552300	158.91179100	-14.41824400
2.49796500	79455.59382600	158.91118800	-14.44893200
2.49817300	79452.55449400	158.90510900	-14.75416500
2.49838200	79449.47488200	158.89895000	-15.05640000
2.49859000	79446.35553200	158.89271100	-15.35564300
2.49879800	79443.19698300	158.88639400	-15.65189700
2.49900700	79439.99977400	158.88000000	-15.94516700
2.49965000	79429.88418600	158.85976800	-16.83236700
2.50029400	79419.42036300	158.83884100	-17.69128800
2.50067500	79413.05845200	158.82611700	-18.18723700
2.50067600	79413.05196100	158.82610400	-18.18773400
2.50067700	79413.03248800	158.82606500	-18.18922300
2.50067800	79413.01301300	158.82602600	-18.19071300
2.50067900	79413.00003000	158.82600000	-18.19170600
2.50068000	79412.98704500	158.82597400	-18.19269800
2.50068700	79412.85717700	158.82571400	-18.20262400
2.50069500	79412.72726100	158.82545500	-18.21254600
2.50070300	79412.59729900	158.82519500	-18.22246400
2.50071000	79412.46729100	158.82493500	-18.23237700
2.50072100	79412.28882800	158.82457800	-18.24597400
2.50073200	79412.11027700	158.82422100	-18.25956200
2.50074200	79411.93163800	158.82386300	-18.27314400
2.50075300	79411.75291200	158.82350600	-18.28671700
2.50085900	79409.96087700	158.81992200	-18.42203700
2.50096500	79408.16019700	158.81632000	-18.55659900
2.50107000	79406.35094000	158.81270200	-18.69040500
2.50117600	79404.53317300	158.80906600	-18.82345600
2.50150600	79398.81153800	158.79762300	-19.23346400
2.50183700	79393.00984800	158.78602000	-19.63616200
2.50216700	79387.13011400	158.77426000	-20.03157500
2.50249700	79381.17433300	158.76234900	-20.41973100
2.50282700	79375.14448500	158.75028900	-20.80065600
2.50354500	79361.77520000	158.72355000	-21.60480800
2.50426400	79348.08441500	158.69616900	-22.37514900
2.50498200	79334.09179300	158.66818400	-23.11199600
2.50570100	79319.81665800	158.63963300	-23.81567900
2.50641900	79305.27797200	158.61055600	-24.48654200
2.50713800	79290.49434100	158.58098900	-25.12494600
2.50815100	79269.27404600	158.53854800	-25.97044800
2.50916300	79247.65309500	158.49530600	-26.75327200
2.51017600	79225.67991000	158.45136000	-27.47454600
2.51118900	79203.40143500	158.40680300	-28.13544100
2.51220200	79180.86314500	158.36172600	-28.73717100
2.51321400	79158.10902800	158.31621800	-29.28098500
2.51422700	79135.18158200	158.27036300	-29.76816800
2.51577000	79100.00594000	158.20001200	-30.40458300
2.51731400	79064.66110800	158.12932200	-30.91736300
2.51885700	79029.27747200	158.05855500	-31.31142000
2.52040000	78993.97745400	157.98795500	-31.59178000
2.52194300	78958.87557100	157.91775100	-31.76355700
2.52348600	78924.07854800	157.84815700	-31.83193700
2.52502900	78889.68541800	157.77937100	-31.80215300
2.52672900	78852.37145800	157.70474300	-31.66199700
2.52843000	78815.77056700	157.63154100	-31.41614300
2.53013000	78779.98410100	157.55996800	-31.07164000
2.53183000	78745.10309900	157.49020600	-30.63550100
2.53353000	78711.20862600	157.42241700	-30.11467800
2.53523000	78678.37210100	157.35674400	-29.51604200
2.53693000	78646.65568100	157.29331100	-28.84635800
2.53863000	78616.11261700	157.23222500	-28.11226800
2.54059400	78582.35184200	157.16470400	-27.19268200
2.54255800	78550.27150700	157.10054300	-26.20558300
2.54452100	78519.91357500	157.03982700	-25.16040800
2.54648500	78491.30725400	156.98261500	-24.06625400
2.54697600	78484.43164000	156.96886300	-23.78609500
2.54746700	78477.66679800	156.95533400	-23.50355400
2.54795800	78471.01284500	156.94202600	-23.21876400
2.54798200	78470.68306000	156.94136600	-23.20446800
2.54798700	78470.61713700	156.94123400	-23.20160800
2.54799200	78470.55122400	156.94110200	-23.19874800
2.54799300	78470.54898600	156.94109800	-23.19822700
2.54799400	78470.53822000	156.94107600	-23.19379600
2.54799500	78470.53309900	156.94106600	-23.19168400
2.54800300	78470.48210100	156.94096400	-23.17050600
2.54801100	78470.43148500	156.94086300	-23.14922000
2.54801900	78470.38125200	156.94076300	-23.12782600
2.54802600	78470.33140000	156.94066300	-23.10632500
2.54810500	78469.85378900	156.93970800	-22.88540500
2.54818300	78469.41392700	156.93882800	-22.65384200
2.54826200	78469.01142800	156.93802300	-22.41176600
2.54834100	78468.64589800	156.93729200	-22.15931400
2.54841900	78468.31692600	156.93663400	-21.89662300
2.54880700	78467.21457000	156.93442900	-20.45603700
2.54919400	78466.93653600	156.93387300	-18.78811200
2.54958100	78467.42260100	156.93484500	-16.91263400
2.54996900	78468.60709100	156.93721400	-14.85088900
2.55035600	78470.42028100	156.94084100	-12.62517600
2.55074400	78472.78876900	156.94557800	-10.25868500
2.55113100	78475.63649100	156.95127300	-7.77516300
2.55151900	78478.88555000	156.95777100	-5.19863900
2.55190600	78482.45705000	156.96491400	-2.55315700
2.55239300	78487.28613000	156.97457200	0.83619000
2.55288100	78492.34457100	156.98468900	4.25079200
2.55336800	78497.48044900	156.99496100	7.64632600
2.55385600	78502.54802700	157.00509600	10.98106800
2.55434300	78507.40972200	157.01481900	14.21637600
2.55483000	78511.93798400	157.02387600	17.31722700
2.55531800	78516.01692200	157.03203400	20.25259300
2.55574500	78519.14086500	157.03828200	22.66795000
2.55617200	78521.78003100	157.04356000	24.92042000
2.55659900	78523.88279900	157.04776600	26.99755300
2.55702700	78525.40663900	157.05081300	28.88964000
2.55745400	78526.31832000	157.05263700	30.58970200
2.55788100	78526.59399200	157.05318800	32.09344100
2.55830800	78526.21915400	157.05243800	33.39915900
2.55911100	78523.74376300	157.04748800	35.32152900
2.55991300	78519.00856300	157.03801700	36.57637400
2.56071600	78512.16461000	157.02432900	37.21613900
2.56082100	78511.12111500	157.02224200	37.25809900
2.56084300	78510.90858600	157.02181700	37.26538300
2.56086400	78510.69479600	157.02139000	37.27230200
2.56088500	78510.47974800	157.02095900	37.27885600
2.56090600	78510.26345000	157.02052700	37.28504800
2.56091400	78510.17658100	157.02035300	37.28742300
2.56092300	78510.08962200	157.02017900	37.28976700
2.56093100	78510.00282000	157.02000600	37.29214100
2.56094800	78509.82910800	157.01965800	37.29683500
2.56096500	78509.65547300	157.01931100	37.30151200
2.56098200	78509.48191600	157.01896400	37.30617200
2.56115000	78507.75058000	157.01550100	37.35183500
2.56131900	78506.02697100	157.01205400	37.39580400
2.56148800	78504.31110700	157.00862200	37.43808500
2.56165600	78502.60300400	157.00520600	37.47869000
2.56278900	78491.32595300	156.98265200	37.70875300
2.56392300	78480.40458500	156.96080900	37.86624900
2.56505600	78469.84260000	156.93968500	37.95395300
2.56618900	78459.64283800	156.91928600	37.97464000
2.56732300	78449.80723100	156.89961400	37.93108100
2.56910200	78435.10240300	156.87020500	37.73969000
2.57088100	78421.29932000	156.84259900	37.40730300
2.57236100	78410.50538600	156.82101100	37.03104100
2.57384100	78400.32920900	156.80065800	36.57045600
2.57532000	78390.76547600	156.78153100	36.03137300
2.57680000	78381.80707300	156.76361400	35.41954000
2.57828000	78373.44551900	156.74689100	34.74058200
2.57975900	78365.67094400	156.73134200	34.00000400
2.57992700	78364.82582300	156.72965200	33.91236700
2.58009500	78363.98809300	156.72797600	33.82401500
2.58009800	78363.97141200	156.72794300	33.82224000
2.58010200	78363.95473700	156.72790900	33.82046600
2.58010500	78363.93806400	156.72787600	33.81869100
2.58010800	78363.92139500	156.72784300	33.81691500
2.58011200	78363.90472800	156.72780900	33.81514000
2.58011800	78363.87140400	156.72774300	33.81158800
2.58011900	78363.87033500	156.72774100	33.81147400
2.58012000	78363.86499500	156.72773000	33.81090400
2.58012100	78363.85858600	156.72771700	33.81022100
2.58012200	78363.85377200	156.72770800	33.80970800
2.58012400	78363.85102500	156.72770200	33.80980300
2.58012600	78363.84872700	156.72769700	33.80985100
2.58012800	78363.84644100	156.72769300	33.80990000
2.58014500	78363.82417000	156.72764800	33.81046800
2.58016200	78363.80297700	156.72760600	33.81117900
2.58018000	78363.78286200	156.72756600	33.81203300
2.58019700	78363.76382400	156.72752800	33.81302900
2.58037100	78363.63247200	156.72726500	33.83075800
2.58054500	78363.60765800	156.72721500	33.86242500
2.58071800	78363.68814600	156.72737600	33.90774300
2.58089200	78363.87251700	156.72774500	33.96639900
2.58106600	78364.15914600	156.72831800	34.03805300
2.58148400	78365.25788100	156.73051600	34.26172100
2.58190300	78366.90984200	156.73382000	34.55307000
2.58232100	78369.08095400	156.73816200	34.90597500
2.58273900	78371.73224500	156.74346400	35.31375300
2.58315800	78374.82069100	156.74964100	35.76933800
2.58357600	78378.29983200	156.75660000	36.26538200
2.58392400	78381.44832400	156.76289700	36.70234400
2.58427100	78384.80261200	156.76960500	37.15763300
2.58461800	78388.33262100	156.77666500	37.62690500
2.58496500	78392.00791500	156.78401600	38.10587700
2.58531200	78395.79771800	156.79159500	38.59032400
2.58569200	78400.03751800	156.80007500	39.12158400
2.58607200	78404.33792500	156.80867600	39.64930100
2.58645200	78408.65965000	156.81731900	40.16848700
2.58683100	78412.96485000	156.82593000	40.67447200
2.58721100	78417.21727800	156.83443500	41.16291200
2.58759100	78421.38228400	156.84276500	41.62977600
2.58794400	78425.15349700	156.85030700	42.04189700
2.58829800	78428.79622100	156.85759200	42.42947200
2.58865200	78432.28792700	156.86457600	42.79014300
2.58900500	78435.60813400	156.87121600	43.12185100
2.58935900	78438.73854400	156.87747700	43.42285000
2.58971200	78441.66312100	156.88332600	43.69170100
2.59030700	78446.07681700	156.89215400	44.06806000
2.59090100	78449.82221600	156.89964400	44.34716900
2.59149500	78452.86885900	156.90573800	44.52790000
2.59208900	78455.20598200	156.91041200	44.61137200
2.59268300	78456.84079000	156.91368200	44.60063700
2.59327700	78457.79816100	156.91559600	44.50055600
2.59387100	78458.11902300	156.91623800	44.31753200
2.59424400	78458.01971700	156.91603900	44.16386700
2.59461600	78457.70782900	156.91541600	43.98269700
2.59498900	78457.20120900	156.91440200	43.77625400
2.59536100	78456.51917500	156.91303800	43.54686600
2.59573400	78455.68226800	156.91136500	43.29693500
2.59610600	78454.71204100	156.90942400	43.02890700
2.59663000	78453.16707700	156.90633400	42.62662300
2.59715300	78451.46660500	156.90293300	42.20030200
2.59767600	78449.67476200	156.89935000	41.75659300
2.59819900	78447.85520000	156.89571000	41.30187800
2.59872800	78446.04945600	156.89209900	40.83679400
2.59925800	78444.33993100	156.88868000	40.37233600
2.59966500	78443.12559800	156.88625100	40.01848700
2.60007300	78442.02644600	156.88405300	39.67021000
2.60048000	78441.06459900	156.88212900	39.32938500
2.60088800	78440.26008300	156.88052000	38.99765600
2.60129500	78439.63056500	156.87926100	38.67642300
2.60170300	78439.19123900	156.87838200	38.36683500
2.60211000	78438.95473100	156.87790900	38.06979300
2.60251800	78438.93103600	156.87786200	37.78595600
2.60292500	78439.12747900	156.87825500	37.51574800
2.60333300	78439.54872200	156.87909700	37.25936900
2.60374000	78440.19678900	156.88039400	37.01680700
2.60414800	78441.07112000	156.88214200	36.78784900
2.60455500	78442.16866600	156.88433700	36.57209800
2.60496300	78443.48399300	156.88696800	36.36899400
2.60537000	78445.00943100	156.89001900	36.17782500
2.60577800	78446.73522800	156.89347000	35.99775300
2.60618500	78448.64973500	156.89729900	35.82782500
2.60659200	78450.73959000	156.90147900	35.66700200
2.60700000	78452.98993800	156.90598000	35.51416900
2.60740700	78455.38465100	156.91076900	35.36815800
2.60781500	78457.90655200	156.91581300	35.22776700
2.60822200	78460.53765300	156.92107500	35.09177400
2.60863000	78463.25938600	156.92651900	34.95895800
2.60903700	78466.05284000	156.93210600	34.82810900
2.60952200	78469.44470400	156.93888900	34.67330300
2.61000700	78472.87940300	156.94575900	34.51770000
2.61049200	78476.32585200	156.95265200	34.35949300
2.61089100	78479.14496800	156.95829000	34.22638800
2.61128900	78481.93608900	156.96387200	34.08954400
2.61168800	78484.68439100	156.96936900	33.94818800
2.61208600	78487.37607900	156.97475200	33.80162300
2.61248500	78489.99852300	156.97999700	33.64923900
2.61288300	78492.54036200	156.98508100	33.49051200
2.61328100	78494.99157200	156.98998300	33.32500700
2.61368000	78497.34355400	156.99468700	33.15238000
2.61407800	78499.58915900	156.99917800	32.97237400
2.61447700	78501.72272900	157.00344500	32.78481800
2.61487500	78503.74011100	157.00748000	32.58963000
2.61527400	78505.63864200	157.01127700	32.38680900
2.61567200	78507.41713800	157.01483400	32.17643100
2.61607000	78509.07583900	157.01815200	31.95865100
2.61646900	78510.61637100	157.02123300	31.73369200
2.61686700	78512.04167600	157.02408300	31.50183900
2.61726600	78513.35592300	157.02671200	31.26344100
2.61766400	78514.56442900	157.02912900	31.01889700
2.61806300	78515.67354700	157.03134700	30.76865400
2.61846100	78516.69056800	157.03338100	30.51319800
2.61886000	78517.62359300	157.03524700	30.25304900
2.61925800	78518.48142400	157.03696300	29.98875700
2.61965600	78519.27342600	157.03854700	29.72088700
2.62005500	78520.00941300	157.04001900	29.45002300
2.62056100	78520.88021000	157.04176000	29.10225800
2.62106800	78521.69805100	157.04339600	28.75181800
2.62157400	78522.48423100	157.04496800	28.39990100
2.62199000	78523.12062800	157.04624100	28.11076100
2.62240600	78523.76110800	157.04752200	27.82203100
2.62282200	78524.41648800	157.04883300	27.53430000
2.62323800	78525.09704000	157.05019400	27.24812900
2.62365300	78525.81235700	157.05162500	26.96403900
2.62406900	78526.57127300	157.05314300	26.68251400
2.62448500	78527.38177200	157.05476400	26.40399300
2.62490100	78528.25092400	157.05650200	26.12887000
2.62531700	78529.18482500	157.05837000	25.85749400
2.62573200	78530.18856400	157.06037700	25.59016600
2.62614800	78531.26619000	157.06253200	25.32713900
2.62656400	78532.42069400	157.06484100	25.06862100
2.62698000	78533.65402200	157.06730800	24.81477100
2.62739500	78534.96707300	157.06993400	24.56570500
2.62781100	78536.35974100	157.07271900	24.32149700
2.62822700	78537.83093900	157.07566200	24.08217800
2.62864300	78539.37865800	157.07875700	23.84774100
2.62905900	78541.00001600	157.08200000	23.61814500
2.62947400	78542.69133100	157.08538300	23.39331600
2.62989000	78544.44818800	157.08889600	23.17315100
2.63030600	78546.26553100	157.09253100	22.95752000
2.63072200	78548.13773700	157.09627500	22.74627100
2.63113800	78550.05871200	157.10011700	22.53923400
2.63155300	78552.02198400	157.10404400	22.33622400
2.63202900	78554.31126600	157.10862300	22.10865200
2.63250500	78556.63663000	157.11327300	21.88578100
2.63298000	78558.98750000	157.11797500	21.66729400
2.63345600	78561.35332600	157.12270700	21.45287200
2.63393200	78563.72375100	157.12744800	21.24220100
2.63431900	78565.64919700	157.13129800	21.07331700
2.63470600	78567.56589500	157.13513200	20.90655600
2.63509300	78569.46895600	157.13893800	20.74176900
2.63548000	78571.35379300	157.14270800	20.57881600
2.63586700	78573.21616500	157.14643200	20.41756800
2.63625400	78575.05221000	157.15010400	20.25790900
2.63664100	78576.85847300	157.15371700	20.09973600
2.63702900	78578.63192500	157.15726400	19.94296000
2.63741600	78580.36998300	157.16074000	19.78750700
2.63780300	78582.07051700	157.16414100	19.63331900
2.63819000	78583.73186100	157.16746400	19.48035500
2.63857700	78585.35281500	157.17070600	19.32859000
2.63896400	78586.93263300	157.17386500	19.17801400
2.63935100	78588.47102000	157.17694200	19.02863600
2.63973800	78589.96812400	157.17993600	18.88047900
2.64012500	78591.42450500	157.18284900	18.73358400
2.64051200	78592.84112500	157.18568200	18.58800600
2.64090000	78594.21931400	157.18843900	18.44381700
2.64128700	78595.56075200	157.19112200	18.30110000
2.64167400	78596.86743100	157.19373500	18.15995400
2.64206100	78598.14162200	157.19628300	18.02048900
2.64252400	78599.62623500	157.19925200	17.85609100
2.64298700	78601.07269600	157.20214500	17.69450000
2.64345000	78602.48604300	157.20497200	17.53596000
2.64391300	78603.87155400	157.20774300	17.38073300
2.64437500	78605.23466400	157.21046900	17.22908800
2.64483800	78606.58087700	157.21316200	17.08130700
2.64530100	78607.91566500	157.21583100	16.93767300
2.64576400	78609.24440200	157.21848900	16.79847200
2.64622700	78610.57227200	157.22114500	16.66398900
2.64669000	78611.90420800	157.22380800	16.53450200
2.64715300	78613.24482400	157.22649000	16.41028300
2.64761600	78614.59835300	157.22919700	16.29159200
2.64807900	78615.96860600	157.23193700	16.17867700
2.64854200	78617.35892400	157.23471800	16.07176800
2.64900500	78618.77216100	157.23754400	15.97108100
2.64946700	78620.21064400	157.24042100	15.87680900
2.64993000	78621.67616600	157.24335200	15.78912500
2.65039300	78623.16999200	157.24634000	15.70818300
2.65085600	78624.69284800	157.24938600	15.63410900
2.65131900	78626.24494300	157.25249000	15.56701000
2.65178200	78627.82597900	157.25565200	15.50696800
2.65224500	78629.43518600	157.25887000	15.45404100
2.65270800	78631.07135100	157.26214300	15.40826700
2.65317100	78632.73285400	157.26546600	15.36965900
2.65363400	78634.41771000	157.26883500	15.33821100
2.65409700	78636.12361700	157.27224700	15.31389700
2.65455900	78637.84800100	157.27569600	15.29667300
2.65514600	78640.05706100	157.28011400	15.28493200
2.65573400	78642.28527200	157.28457100	15.28434200
2.65632100	78644.52631000	157.28905300	15.29471900
2.65690800	78646.77375200	157.29354800	15.31585400
2.65749500	78649.02123700	157.29804200	15.34752700
2.65808200	78651.26262200	157.30252500	15.38950600
2.65866900	78653.49211200	157.30698400	15.44156000
2.65915500	78655.32630300	157.31065300	15.49215700
2.65964200	78657.14593700	157.31429200	15.54939500
2.66012800	78658.94859000	157.31789700	15.61316600
2.66061400	78660.73216000	157.32146400	15.68336800
2.66110100	78662.49489400	157.32499000	15.75991600
2.66158700	78664.23540600	157.32847100	15.84273900
2.66207300	78665.95267900	157.33190500	15.93178300
2.66256000	78667.64606200	157.33529200	16.02701000
2.66304600	78669.31526800	157.33863100	16.12840100
2.66353200	78670.96035800	157.34192100	16.23595800
2.66401900	78672.58173000	157.34516300	16.34969900
2.66450500	78674.18009300	157.34836000	16.46966300
2.66504800	78675.93881200	157.35187800	16.61103300
2.66559100	78677.67184400	157.35534400	16.76033500
2.66613400	78679.38128900	157.35876300	16.91770000
2.66667700	78681.06952600	157.36213900	17.08327900
2.66722000	78682.73915400	157.36547800	17.25724400
2.66776300	78684.39292300	157.36878600	17.43978300
2.66844800	78686.46005800	157.37292000	17.68249600
2.66913300	78688.51223200	157.37702400	17.93959100
2.66981800	78690.55507500	157.38111000	18.21150300
2.67038000	78692.23036100	157.38446100	18.44631800
2.67094300	78693.90569100	157.38781100	18.69166800
2.67150600	78695.58354900	157.39116700	18.94778000
2.67206800	78697.26613700	157.39453200	19.21486600
2.67263100	78698.95532300	157.39791100	19.49312100
2.67319300	78700.65263800	157.40130500	19.78271800
2.67375600	78702.35924700	157.40471800	20.08381000
2.67431900	78704.07594900	157.40815200	20.39652100
2.67488100	78705.80318500	157.41160600	20.72095000
2.67544400	78707.54103600	157.41508200	21.05716900
2.67600700	78709.28925300	157.41857900	21.40522100
2.67656900	78711.04727700	157.42209500	21.76512100
2.67713200	78712.81426600	157.42562900	22.13685900
2.67769500	78714.58913200	157.42917800	22.52039900
2.67825700	78716.37058000	157.43274100	22.91568100
2.67902400	78718.80550000	157.43761100	23.47295000
2.67979000	78721.24583800	157.44249200	24.05160400
2.68055700	78723.68729000	157.44737500	24.65133800
2.68132300	78726.12551100	157.45225100	25.27181200
2.68209000	78728.55628200	157.45711300	25.91267000
2.68271800	78730.53933600	157.46107900	26.45262000
2.68334600	78732.51281500	157.46502600	27.00581900
2.68397400	78734.47501700	157.46895000	27.57208600
2.68460200	78736.42451000	157.47284900	28.15125700
2.68523000	78738.36015600	157.47672000	28.74318800
2.68585800	78740.28113400	157.48056200	29.34776000
2.68648500	78742.18693100	157.48437400	29.96487500
2.68711300	78744.07735100	157.48815500	30.59446600
2.68774100	78745.95249900	157.49190500	31.23649200
2.68836900	78747.81276200	157.49562600	31.89094200
2.68899700	78749.65877900	157.49931800	32.55783100
2.68962500	78751.49141700	157.50298300	33.23719800
2.69039300	78753.71639300	157.50743300	34.08523500
2.69116100	78755.92518400	157.51185000	34.95219700
2.69193000	78758.12025800	157.51624100	35.83827700
2.69269800	78760.30421200	157.52060800	36.74369600
2.69346600	78762.47966100	157.52495900	37.66868900
2.69423400	78764.64913900	157.52929800	38.61349500
2.69500200	78766.81500400	157.53363000	39.57834300
2.69577000	78768.97937000	157.53795900	40.56344700
2.69653800	78771.14404300	157.54228800	41.56899000
2.69730600	78773.31047900	157.54662100	42.59512100
2.69807400	78775.47976100	157.55096000	43.64194600
2.69884200	78777.65258000	157.55530500	44.70952800
2.69961000	78779.82924700	157.55965800	45.79787600
2.70037900	78782.00971300	157.56401900	46.90695500
2.70114700	78784.19360700	157.56838700	48.03667800
2.70191500	78786.38027400	157.57276100	49.18691800
2.70268300	78788.56882300	157.57713800	50.35750600
2.70345100	78790.75819600	157.58151600	51.54823900
2.70453300	78793.84271500	157.58768500	53.26004600
2.70561600	78796.92310100	157.59384600	55.01070700
2.70645500	78799.30704400	157.59861400	56.39467900
2.70729500	78801.68507800	157.60337000	57.80124900
2.70813400	78804.05601300	157.60811200	59.23010000
2.70897400	78806.41886600	157.61283800	60.68094000
2.70981300	78808.77297200	157.61754600	62.15351700
2.71065300	78811.11796400	157.62223600	63.64761600
2.71149200	78813.45375900	157.62690800	65.16306600
2.71233200	78815.78056700	157.63156100	66.69974200
2.71317100	78818.09887200	157.63619800	68.25756400
2.71401000	78820.40938800	157.64081900	69.83649500
2.71485000	78822.71301400	157.64542600	71.43653600
2.71568900	78825.01078300	157.65002200	73.05771600
2.71692500	78828.38491600	157.65677000	75.48273900
2.71794800	78831.17286400	157.66234600	77.52505500
2.71897100	78833.95835300	157.66791700	79.59914100
2.71999400	78836.74320500	157.67348600	81.70512300
2.72101700	78839.52901000	157.67905800	83.84310200
2.72204000	78842.31700600	157.68463400	86.01313000
2.72306300	78845.10805600	157.69021600	88.21520200
2.72408500	78847.90267000	157.69580500	90.44925300
2.72510800	78850.70100600	157.70140200	92.71515600
2.72613100	78853.50291300	157.70700600	95.01272700
2.72715400	78856.30799100	157.71261600	97.34173400
2.72817700	78859.11565900	157.71823100	99.70190400
2.72920000	78861.92522900	157.72385000	102.09294300
2.73041100	78865.25229000	157.73050500	104.96261000
2.73162200	78868.57989200	157.73716000	107.87460900
2.73283200	78871.90710500	157.74381400	110.82849100
2.73383700	78874.66571600	157.74933100	113.30974300
2.73484100	78877.42344900	157.75484700	115.81936800
2.73584500	78880.18032600	157.76036100	118.35724700
2.73684900	78882.93651300	157.76587300	120.92330200
2.73785300	78885.69234000	157.77138500	123.51750700
2.73885700	78888.44827000	157.77689700	126.13987900
2.74007800	78891.79977700	157.78360000	129.36608000
2.74129900	78895.15337700	157.79030700	132.63415300
2.74252000	78898.51022800	157.79702000	135.94430100
2.74374100	78901.87142700	157.80374300	139.29675200
2.74496100	78905.23795300	157.81047600	142.69173600
2.74618200	78908.61058800	157.81722100	146.12947400
2.74740300	78911.98988400	157.82398000	149.61014800
2.74862400	78915.37617200	157.83075200	153.13392100
2.74984500	78918.76954900	157.83753900	156.70091300
2.75106500	78922.16992500	157.84434000	160.31121900
2.75228600	78925.57706400	157.85115400	163.96491200
2.75350700	78928.99062400	157.85798100	167.66205800
2.75522900	78933.81592100	157.86763200	172.95122800
2.75665700	78937.82626300	157.87565300	177.40383400
2.75808600	78941.84364700	157.88368700	181.91642900
2.75951400	78945.86777300	157.89173600	186.48933600
2.76094200	78949.89847500	157.89979700	191.12296100
2.76237000	78953.93579700	157.90787200	195.81782300
2.76379900	78957.97994500	157.91596000	200.57453700
2.76544200	78962.64146800	157.92528300	206.12443600
2.76708500	78967.31288900	157.93462600	211.75826000
2.76872800	78971.99465900	157.94398900	217.47722600
2.77037100	78976.68709200	157.95337400	223.28258500
2.77201400	78981.39031400	157.96278100	229.17559500
2.77365700	78986.10421900	157.97220800	235.15750100
2.77530100	78990.82847200	157.98165700	241.22952400
2.77694400	78995.56257400	157.99112500	247.39287400
2.77858700	79000.30591800	158.00061200	253.64876800
2.78062900	79006.21254000	158.01242500	261.55401900
2.78267100	79012.13125700	158.02426300	269.60657700
2.78471300	79018.06099500	158.03612200	277.80902900
2.78639400	79022.95160900	158.04590300	284.67796500
2.78807600	79027.84874200	158.05569700	291.65199100
2.78975700	79032.75211800	158.06550400	298.73277400
2.79143900	79037.66143500	158.07532300	305.92198100
2.79312100	79042.57641800	158.08515300	313.22130900
2.79480200	79047.49675500	158.09499400	320.63245200
2.79699100	79053.91042100	158.10782100	330.45204800
2.79918100	79060.33158500	158.12066300	340.46762500
2.80137000	79066.75917600	158.13351800	350.68269900
2.80355900	79073.19203600	158.14638400	361.10069600
2.80574900	79079.62898400	158.15925800	371.72495700
2.80793800	79086.06888500	158.17213800	382.55874600
2.81012700	79092.51069600	158.18502100	393.60527600
2.81231700	79098.95349600	158.19790700	404.86768300
2.81450600	79105.39644900	158.21079300	416.34903800
2.81669500	79111.83879000	158.22367800	428.05229900
2.81888500	79118.27977300	158.23656000	439.98028700
2.82107400	79124.71866300	158.24943700	452.13567300
2.82326300	79131.15473100	158.26230900	464.52095600
2.82545300	79137.58724300	158.27517400	477.13846400
2.82764200	79144.01548700	158.28803100	489.99034600
2.82983200	79150.43877300	158.30087800	503.07858500
2.83202100	79156.85646800	158.31371300	516.40499700
2.83421000	79163.26797900	158.32653600	529.97124500
2.83640000	79169.67278400	158.33934600	543.77883900
2.83858900	79176.07041700	158.35214100	557.82914100
2.84077800	79182.46045300	158.36492100	572.12336100
2.84296800	79188.84251400	158.37768500	586.66256000
2.84515700	79195.21625000	158.39043300	601.44765000
2.84734600	79201.58134600	158.40316300	616.47940000
2.84953600	79207.93751200	158.41587500	631.75844300
2.85172500	79214.28448300	158.42856900	647.28528100
2.85391400	79220.62202700	158.44124400	663.06030100
2.85610400	79226.94994200	158.45390000	679.08378200
2.85829300	79233.26805400	158.46653600	695.35591000
2.86048200	79239.57622600	158.47915200	711.87678800
2.86267200	79245.87434400	158.49174900	728.64644300
2.86486100	79252.16232500	158.50432500	745.66484000
2.86705000	79258.44010000	158.51688000	762.93188600
2.86924000	79264.70762500	158.52941500	780.44744400
2.87142900	79270.96487000	158.54193000	798.21133500
2.87361800	79277.21181600	158.55442400	816.22335200
2.87580800	79283.44845800	158.56689700	834.48326600
2.87799700	79289.67480200	158.57935000	852.99083500
2.88018600	79295.89086100	158.59178200	871.74581000
2.88237600	79302.09665400	158.60419300	890.74794300
2.88456500	79308.29221500	158.61658400	909.99699600
2.88675400	79314.47757100	158.62895500	929.49273900
2.88894400	79320.65276400	158.64130600	949.23496200
2.89113300	79326.81782700	158.65363600	969.22347100
2.89332200	79332.97280100	158.66594600	989.45809500
2.89579400	79339.90829800	158.67981700	1012.59392300
2.89826500	79346.83103000	158.69366200	1036.04296600
2.90073600	79353.74104000	158.70748200	1059.80508800
2.90320800	79360.63835700	158.72127700	1083.88018700
2.90567900	79367.52300500	158.73504600	1108.26820000
2.90815000	79374.39499500	158.74879000	1132.96909700
2.91062100	79381.25432300	158.76250900	1157.98287700
2.91309300	79388.10097800	158.77620200	1183.30956400
2.91556400	79394.93492900	158.78987000	1208.94920300
2.91803500	79401.75613200	158.80351200	1234.90185300
2.92050600	79408.56452800	158.81712900	1261.16758200
2.92297800	79415.36004100	158.83072000	1287.74646100
2.92544900	79422.14258100	158.84428500	1314.63856300
2.92792000	79428.91204000	158.85782400	1341.84395100
2.93039200	79435.66829500	158.87133700	1369.36268000
2.93286300	79442.41120500	158.88482200	1397.19479300
2.93533400	79449.14061600	158.89828100	1425.34031400
2.93780500	79455.85635700	158.91171300	1453.79925200
2.94027700	79462.55824500	158.92511600	1482.57159500
2.94274800	79469.24608100	158.93849200	1511.65731300
2.94521900	79475.91965500	158.95183900	1541.05635600
2.94769000	79482.57874100	158.96515700	1570.76865600
2.95016200	79489.22310200	158.97844600	1600.79413000
2.95263300	79495.85249400	158.99170500	1631.13268100
2.95510400	79502.46665500	159.00493300	1661.78420200
2.95757600	79509.06532500	159.01813100	1692.74857800
2.95926700	79513.57341200	159.02714700	1714.12578800
2.95942900	79514.00321900	159.02800600	1716.17342200
2.95944700	79514.05287000	159.02810600	1716.41005900
2.95946600	79514.10252000	159.02820500	1716.64673100
2.95950300	79514.20181500	159.02840400	1717.12012900
2.95952200	79514.25157600	159.02850300	1717.35737100
2.95952400	79514.25562400	159.02851100	1717.37669500
2.95952500	79514.25967300	159.02851900	1717.39600200
2.95952800	79514.26777000	159.02853600	1717.43461600
2.95953100	79514.27586600	159.02855200	1717.47323000
2.95953400	79514.28396300	159.02856800	1717.51184500
2.95953600	79514.28801300	159.02857600	1717.53116000
2.95953700	79514.29206300	159.02858400	1717.55047500
2.95954000	79514.30016400	159.02860000	1717.58910500
2.95954100	78168.65536300	156.33731100	-2186.50706800
2.95954200	78168.74664400	156.33749300	-2186.26864300
2.95954300	78168.81686000	156.33763400	-2186.08523900
2.95954500	78168.88707600	156.33777400	-2185.90183500
2.95955700	78169.58920800	156.33917800	-2184.06779100
2.95956900	78170.29129600	156.34058300	-2182.23373900
2.95958100	78170.99334200	156.34198700	-2180.39968000
2.95970300	78178.01139000	156.35602300	-2162.05869000
2.95982500	78185.02493200	156.37005000	-2143.71734000
2.95994600	78192.03382600	156.38406800	-2125.37600200
2.96026100	78210.12440500	156.42024900	-2077.97905100
2.96057500	78228.18054200	156.45636100	-2030.59092300
2.96089000	78246.20155800	156.49240300	-1983.21341100
2.96120500	78264.18509400	156.52837000	-1935.85264700
2.96180600	78298.44408800	156.59688800	-1845.40121100
2.96240700	78332.54567700	156.66509100	-1755.06477100
2.96300800	78366.47703200	156.73295400	-1664.87738100
2.96361000	78400.22577200	156.80045200	-1574.87211500
2.96521500	78489.36592500	156.97873200	-1335.64926700
2.96682100	78576.91097700	157.15382200	-1098.52890000
2.96842600	78662.66069200	157.32532100	-864.06886200
2.97003200	78746.43497200	157.49287000	-632.78537800
2.97023800	78757.00645000	157.51401300	-603.43413000
2.97044300	78767.54569900	157.53509100	-574.13824700
2.97064900	78778.04941800	157.55609900	-544.90391200
2.97085400	78788.51729700	157.57703500	-515.73206700
2.97126500	78809.34430300	157.61868900	-457.57955800
2.97167700	78830.02442900	157.66004900	-399.68783500
2.97208800	78850.55543600	157.70111100	-342.06389200
2.97249900	78870.93514900	157.74187000	-284.71460000
2.97394100	78941.19027800	157.88238100	-85.83048500
2.97538300	79009.47714500	158.01895400	109.32437800
2.97682500	79075.72020700	158.15144000	300.49497500
2.97826700	79139.85345400	158.27970700	487.44816500
2.97970900	79201.82324700	158.40364600	669.97897600
2.98140000	79271.67919100	158.54335800	878.15168300
2.98309100	79338.44012800	158.67688000	1079.72677400
2.98478200	79402.06260600	158.80412500	1274.47756900
2.98647300	79462.51769500	158.92503500	1462.21348600
2.98816400	79519.79056900	159.03958100	1642.77951900
2.99035700	79589.31419700	159.17862800	1866.04008700
2.99255000	79653.51076000	159.30702200	2076.85767300
2.99434900	79702.25428700	159.40450900	2240.49744300
2.99614800	79747.49733800	159.49499500	2395.67762200
2.99794800	79789.29743800	159.57859500	2542.41594700
2.99974700	79827.72334100	159.65544700	2680.76280700
3.00154700	79862.85427000	159.72570900	2810.79948800
3.00334600	79894.77865400	159.78955700	2932.63565000
3.00579100	79933.19422400	159.86638800	3085.29855700
3.00823600	79966.12854100	159.93225700	3223.47965200
3.01068200	79993.86276900	159.98772600	3347.65898300
3.01312700	80016.69420000	160.03338800	3458.37975600
3.01557200	80034.93264600	160.06986500	3556.23986600
3.01801700	80048.89689000	160.09779400	3641.88327400
3.02046200	80058.91140800	160.11782300	3715.99173900
3.02290700	80065.30335900	160.13060700	3779.27704900
3.02535300	80068.39979600	160.13680000	3832.47366900
3.02825100	80068.24768500	160.13649500	3883.48958200
3.03114900	80064.45215500	160.12890400	3922.65201200
3.03157900	80063.61059600	160.12722100	3927.53390800
3.03200900	80062.70108900	160.12540200	3932.18544100
3.03243900	80061.72597900	160.12345200	3936.61196400
3.03286900	80060.68691300	160.12137400	3940.81763000
3.03330000	80059.58552300	160.11917100	3944.80656900
3.03416000	80057.20223100	160.11440400	3952.15071800
3.03502000	80054.58893900	160.10917800	3958.67725000
3.03588100	80051.75820300	160.10351600	3964.41873800
3.03674100	80048.72244300	160.09744500	3969.40760700
3.03696400	80047.90549500	160.09581100	3970.57864900
3.03702400	80047.68296600	160.09536600	3970.88912700
3.03708400	80047.45854700	160.09491700	3971.19249200
3.03714400	80047.23313600	160.09446600	3971.49251500
3.03714700	80047.22203600	160.09444400	3971.50265700
3.03715000	80047.21182700	160.09442400	3971.51622700
3.03715500	80047.19140500	160.09438300	3971.54335900
3.03716100	80047.17097200	160.09434200	3971.57044100
3.03716300	80047.16124200	160.09432200	3971.58329900
3.03716400	80047.15699800	160.09431400	3971.58891200
3.03716500	81396.67137200	162.79334300	59.72145800
3.03717000	81396.33447400	162.79266900	60.55176000
3.03717400	81396.05373100	162.79210700	61.24363200
3.03722000	81393.24636600	162.78649300	68.16222000
3.03726500	81390.44016800	162.78088000	75.07494200
3.03754600	81373.01926700	162.74603900	117.95976100
3.03782700	81355.62292900	162.71124600	160.73101600
3.03810800	81338.25413000	162.67650800	203.38214700
3.03862500	81306.40942300	162.61281900	281.44592400
3.03914200	81274.67800500	162.54935600	359.07330900
3.03965800	81243.06117700	162.48612200	436.26236900
3.04017500	81211.57243500	162.42314500	512.99278700
3.04101100	81160.91415000	162.32182800	636.15117100
3.04184700	81110.66045100	162.22132100	758.00513900
3.04268300	81060.85106900	162.12170200	878.49583600
3.04351900	81011.52348000	162.02304700	997.56810300
3.04526400	80910.27505600	161.82055000	1241.30233500
3.04700900	80811.56452600	161.62312900	1478.22551600
3.04875500	80715.67265600	161.43134500	1707.93772000
3.05050000	80622.84004000	161.24568000	1930.10703300
3.05224500	80533.26377700	161.06652800	2144.47510800
3.05399000	80447.11278800	160.89422600	2350.83114100
3.05573500	80364.53192300	160.72906400	2549.00492500
3.05748000	80285.64076000	160.57128200	2738.86887800
3.05968500	80191.38842900	160.38277700	2966.73429700
3.06189000	80103.30771600	160.20661500	3181.12733600
3.06409500	80021.47320600	160.04294600	3382.07119900
3.06629900	79945.90656600	159.89181300	3569.67795200
3.06850400	79876.58614100	159.75317200	3744.13207100
3.07070900	79813.44946100	159.62689900	3905.68617100
3.07391900	79732.36251000	159.46472500	4118.50813400
3.07712900	79663.72095300	159.32744200	4305.86197900
3.08033900	79606.95997000	159.21392000	4469.14426000
3.08354900	79561.41776600	159.12283600	4609.90897500
3.08675900	79526.35946500	159.05271900	4729.82606500
3.08996900	79500.99662000	159.00199300	4830.64718600
3.09317900	79484.50548900	158.96901100	4914.17342300
3.09638900	79476.04439200	158.95208900	4982.22444700
3.09959900	79474.76906200	158.94953800	5036.61112000
3.10280900	79479.84532300	158.95969100	5079.11260300
3.10601900	79490.45956500	158.98091900	5111.45730200
3.10922900	79505.82750900	159.01165500	5135.30670900
3.11243900	79525.20149300	159.05040300	5152.24182500
3.11564900	79547.87622000	159.09575200	5163.75231800
3.11885900	79573.19299300	159.14638600	5171.22836500
3.12206900	79600.54265300	159.20108500	5175.95489300
3.12527900	79629.36741300	159.25873500	5179.10784000
3.12849000	79659.16172100	159.31832300	5181.75220900
3.13170000	79689.47231500	159.37894500	5184.84174200
3.13491000	79719.89748000	159.43979500	5189.22006000
3.13812000	79750.08572100	159.50017100	5195.62305400
3.14133000	79779.73389700	159.55946800	5204.68233000
3.14454000	79808.58500400	159.61717000	5216.92948200
3.14775000	79836.42552100	159.67285100	5232.80118400
3.15096000	79863.08264400	159.72616500	5252.64473300
3.15417000	79888.42124500	159.77684200	5276.72411900
3.15738000	79912.34076100	159.82468200	5305.22639300
3.16059000	79934.77202900	159.86954400	5338.26822500
3.16380000	79955.67410800	159.91134800	5375.90256700
3.16701000	79975.03115000	159.95006200	5418.12532000
3.17065900	79995.16832800	159.99033700	5471.62564800
3.17430800	80013.35610700	160.02671200	5530.83532400
3.17795700	80029.65980300	160.05932000	5595.54407800
3.18160700	80044.16605500	160.08833200	5665.49171700
3.18442000	80054.18883500	160.10837800	5722.81262300
3.18482100	80055.53601300	160.11107200	5731.19736900
3.18482400	80055.54905300	160.11109800	5731.27892800
3.18482800	80055.56204000	160.11112400	5731.36064100
3.18483600	80055.58800500	160.11117600	5731.52408400
3.18483700	78630.62777200	157.26125600	1597.31540400
3.18483900	78630.78199800	157.26156400	1597.73240500
3.18484100	78630.90063200	157.26180100	1598.05317600
3.18484300	78631.01926700	157.26203900	1598.37394900
3.18486200	78632.20553500	157.26441100	1601.58176600
3.18488100	78633.39168300	157.26678300	1604.78973300
3.18490000	78634.57770800	157.26915500	1607.99785100
3.18509100	78646.43120800	157.29286200	1640.08729400
3.18528200	78658.27182600	157.31654400	1672.19016700
3.18547300	78670.09893700	157.34019800	1704.30485400
3.18592100	78697.76488700	157.39553000	1779.61755600
3.18636900	78725.34541000	157.45069100	1854.96584700
3.18681700	78752.83875200	157.50567800	1930.34493900
3.18726400	78780.23728100	157.56047500	2005.73469800
3.18819300	78836.70641700	157.67341300	2161.98320300
3.18912100	78892.68872100	157.78537700	2318.06467100
3.19004900	78948.13439000	157.89626900	2473.84274700
3.19097700	79002.99598600	158.00599200	2629.18614500
3.19260700	79097.77331700	158.19554700	2900.50923900
3.19423700	79190.39854900	158.38079700	3169.47692100
3.19586700	79280.65414300	158.56130800	3435.45735000
3.19749700	79368.35379200	158.73670800	3697.88104100
3.19912600	79453.34091900	158.90668200	3956.23864700
3.20110300	79552.58794900	159.10517600	4263.48333800
3.20308000	79647.42443700	159.29484900	4563.28393400
3.20505700	79737.67217900	159.47534400	4854.95459900
3.20703400	79823.18992000	159.64638000	5137.89302900
3.20901100	79903.87270000	159.80774500	5411.58032100
3.21144300	79996.39926600	159.99279900	5734.95593400
3.21387600	80081.42843400	160.16285700	6042.99976800
3.21573500	80141.37820800	160.28275600	6267.85984800
3.21573700	80141.45133700	160.28290300	6268.13859300
3.21574000	80141.52445300	160.28304900	6268.41730700
3.21574200	80141.59756300	160.28319500	6268.69600700
3.21574500	80141.68767600	160.28337500	6269.03954800
3.21574600	80141.71149800	160.28342300	6269.13036700
3.21574800	81450.12922000	162.90025800	2476.75617800
3.21574900	81450.09081100	162.90018200	2477.14293200
3.21575100	81450.05239900	162.90010500	2477.52967800
3.21576500	81449.66821700	162.89933600	2481.39673700
3.21578000	81449.28390900	162.89856800	2485.26306400
3.21579400	81448.89947200	162.89779900	2489.12865700
3.21594100	81445.04809900	162.89009600	2527.74414600
3.21608700	81441.18415100	162.88236800	2566.28563100
3.21623300	81437.30779600	162.87461600	2604.75260900
3.21637900	81433.41924600	162.86683800	2643.14445500
3.21783900	81393.90491100	162.78781000	3022.80771100
3.21930000	81353.37663000	162.70675300	3394.36780800
3.22076100	81312.01343500	162.62402700	3757.33242300
3.22222200	81269.98487000	162.53997000	4111.26022400
3.22368200	81227.45069900	162.45490100	4455.76294500
3.22636200	81148.58915200	162.29717800	5062.24273500
3.22904300	81069.38306000	162.13876600	5634.13811800
3.23172300	80990.58930900	161.98117900	6170.19826700
3.23440300	80912.86964900	161.82573900	6669.64275900
3.23708300	80836.79690300	161.67359400	7132.10371000
3.24028400	80748.77032000	161.49754100	7636.05380200
3.24348500	80664.48105400	161.32896200	8087.91390700
3.24668600	80584.47206600	161.16894400	8489.00741400
3.24988800	80509.16234400	161.01832500	8841.15365300
3.25308900	80438.86273200	160.87772500	9146.56353900
3.25629000	80373.78040500	160.74756100	9407.86021200
3.25949100	80314.03685000	160.62807400	9627.93919400
3.26269200	80259.67980300	160.51936000	9809.91148000
3.26589300	80210.69260200	160.42138500	9957.02856600
3.26762600	80186.39613300	160.37279200	10023.29857900
3.26935800	80163.63605400	160.32727200	10080.86996400
3.27109100	80142.39228400	160.28478500	10130.27973700
3.27332500	80117.20405600	160.23440800	10182.79740200
3.27555800	80094.43854000	160.18887700	10223.77144800
3.27779200	80074.03172700	160.14806300	10254.31432800
3.28002500	80055.91310300	160.11182600	10275.51898900
3.28225900	80040.00684900	160.08001400	10288.45106800
3.28449300	80026.23278100	160.05246600	10294.14277300
3.28672600	80014.50706900	160.02901400	10293.58874800
3.28896000	80004.74280200	160.00948600	10287.74311900
3.29156400	79995.71656500	159.99143300	10275.46104100
3.29416700	79989.09003600	159.97818000	10258.58541200
3.29677100	79984.71455800	159.96942900	10238.39779900
3.29720200	79984.19657600	159.96839300	10234.82837600
3.29763300	79983.73613000	159.96747200	10231.20202700
3.29769000	79983.67864100	159.96735700	10230.71737800
3.29774700	79983.62335800	159.96724700	10230.23111400
3.29774900	79983.62210600	159.96724400	10230.20865200
3.29775200	79983.61964300	159.96723900	10230.18699400
3.29775700	79983.61472300	159.96722900	10230.14367300
3.29776200	79983.60980800	159.96722000	10230.10034700
3.29776700	79983.60490200	159.96721000	10230.05701400
3.29777000	79983.60258900	159.96720500	10230.03658900
3.29777200	79983.60028100	159.96720100	10230.01616000
3.29777700	79983.59567100	159.96719100	10229.97529900
3.29778200	79983.59106700	159.96718200	10229.93443400
3.29778600	79983.58646800	159.96717300	10229.89356200
3.29778900	79983.58423800	159.96716800	10229.87372200
3.29779100	79983.58201100	159.96716400	10229.85388000
3.29779200	79983.58132000	159.96716300	10229.84770800
3.29779300	79983.58035100	159.96716100	10229.83907000
3.29779400	79983.57952000	159.96715900	10229.83166500
3.29779700	78480.14416900	156.96028800	5867.85325700
3.29779900	78480.28821300	156.96057600	5868.19879700
3.29780100	78480.43225700	156.96086500	5868.54433600
3.29782500	78481.87274700	156.96374500	5871.99968300
3.29784800	78483.31331100	156.96662700	5875.45494200
3.29787100	78484.75394500	156.96950800	5878.91011100
3.29810300	78499.16426300	156.99832900	5913.45688000
3.29833500	78513.58036900	157.02716100	5947.99258000
3.29856600	78528.00081400	157.05600200	5982.51507200
3.29907400	78559.57862100	157.11915700	6058.03208400
3.29958100	78591.15541800	157.18231100	6133.45360900
3.30008800	78622.72822700	157.24545600	6208.77539500
3.30059600	78654.28232200	157.30856500	6283.97564000
3.30165100	78719.81953700	157.43963900	6439.96832200
3.30270700	78785.12243300	157.57024500	6595.20771400
3.30376300	78850.09427700	157.70018900	6749.55003200
3.30481800	78914.64281600	157.82928600	6902.85790900
3.30637600	79008.92548400	158.01785100	7126.90165400
3.30793400	79101.84513400	158.20369000	7348.03179000
3.30949100	79193.14074400	158.38628100	7565.85703800
3.31104900	79282.58647800	158.56517300	7780.03618500
3.31260700	79369.98468200	158.73996900	7990.26851900
3.31459400	79478.21956100	158.95643900	8252.29329500
3.31658100	79582.48823200	159.16497600	8506.92377900
3.31807600	79658.17126100	159.31634300	8693.41954500
3.31843000	79675.70083200	159.35140200	8736.84518200
3.31843300	79675.82420900	159.35164800	8737.15133700
3.31843500	79675.94780300	159.35189600	8737.45784700
3.31844000	79676.19496500	159.35239000	8738.07082900
3.31844500	79676.44210700	159.35288400	8738.68377300
3.31845000	79676.68921900	159.35337800	8739.29666400
3.31845300	79676.84186600	159.35368400	8739.67526900
3.31845400	79676.88200000	159.35376400	8739.77482100
3.31845600	80932.00075200	161.86400200	5102.03828200
3.31845800	80931.99320200	161.86398600	5102.44061300
3.31845900	80931.98565200	161.86397100	5102.84293800
3.31847500	80931.91008800	161.86382000	5106.86582800
3.31849000	80931.83441400	161.86366900	5110.88806200
3.31850500	80931.75863100	161.86351700	5114.90964000
3.31865900	80930.99479400	161.86199000	5155.08922000
3.31881400	80930.22010600	161.86044000	5195.20238100
3.31896800	80929.43462700	161.85886900	5235.24849600
3.31912200	80928.63844500	161.85727700	5275.22678700
3.32066300	80920.10451600	161.84020900	5671.12599300
3.32220400	80910.58225200	161.82116500	6059.50496500
3.32374500	80900.14376300	161.80028800	6439.74497600
3.32528600	80888.85785200	161.77771600	6811.28764900
3.32682800	80876.79033500	161.75358100	7173.63740500
3.32953100	80853.92595500	161.70785200	7785.65814700
3.33223400	80829.16790900	161.65833600	8366.06840400
3.33493700	80802.80928500	161.60561900	8913.36166200
3.33764000	80775.11960900	161.55023900	9426.49765100
3.34034300	80746.34741700	161.49269500	9904.83091300
3.34304600	80716.72228000	161.43344500	10348.11740400
3.34515500	80693.14936600	161.38629900	10669.74682500
3.34726400	80669.28201800	161.33856400	10970.28013200
3.34937400	80645.21032400	161.29042100	11250.00920800
3.35148300	80621.02015700	161.24204000	11509.32467300
3.35359200	80596.79347400	161.19358700	11748.70819600
3.35570200	80572.60880900	161.14521800	11968.71955700
3.35781100	80548.54147900	161.09708300	12169.98805400
3.35992000	80524.66388000	161.04932800	12353.20402600
3.36245600	80496.30516700	160.99261000	12550.64067400
3.36499200	80468.43716200	160.93687400	12724.43133600
3.36752800	80441.17019700	160.88234000	12876.01907200
3.37006400	80414.60936400	160.82921900	13006.90763900
3.37260000	80388.85392800	160.77770800	13118.63341100
3.37561400	80359.42075900	160.71884200	13228.65132200
3.37636800	80352.27752500	160.70455500	13252.56797700
3.37712100	80345.22529000	160.69045100	13275.14406800
3.37787500	80338.26576000	160.67653200	13296.41278700
3.37789000	80338.12749800	160.67625500	13296.82533700
3.37790500	80337.98933300	160.67597900	13297.23688000
3.37792000	80337.85120500	160.67570200	13297.64791700
3.37793500	80337.71311500	160.67542600	13298.05844900
3.37795000	80337.57506400	160.67515000	13298.46847400
3.37795200	80337.55851000	160.67511700	13298.51730700
3.37795400	80337.54190100	160.67508400	13298.56662400
3.37795800	80337.50868300	160.67501700	13298.66523600
3.37796100	80337.47546700	160.67495100	13298.76382600
3.37796500	80337.44225300	160.67488500	13298.86238600
3.37796700	80337.41977200	160.67484000	13298.92908000
3.37796800	80337.41551100	160.67483100	13298.94172200
3.37796900	78773.37783500	157.54675600	8761.28282700
3.37797000	78773.48974800	157.54697900	8761.60929900
3.37797100	78773.51251000	157.54702500	8761.71172600
3.37798000	78774.03729900	157.54807500	8763.48271100
3.37798900	78774.56210000	157.54912400	8765.25352900
3.37799800	78775.08691100	157.55017400	8767.02417900
3.37809100	78780.33557200	157.56067100	8784.72146700
3.37818500	78785.58517600	157.57117000	8802.40191100
3.37827800	78790.83565500	157.58167100	8820.06542200
3.37837100	78796.08692500	157.59217400	8837.71188900
3.37930100	78848.62685700	157.69725400	9013.21701900
3.38023200	78901.16522600	157.80233000	9186.90936700
3.38116200	78953.63071000	157.90726100	9358.69457500
3.38209300	79005.95477500	158.01191000	9528.48324700
3.38302400	79058.07170600	158.11614300	9696.19121200
3.38534200	79186.61434800	158.37322900	10104.47682400
3.38766100	79312.57844000	158.62515700	10498.25682200
3.38997900	79435.15513700	158.87031000	10876.59473200
3.39229800	79553.63282600	159.10726600	11238.72320400
3.39287700	79582.53618700	159.16507200	11326.64497300
3.39345700	79611.13664000	159.22227300	11413.50959300
3.39357300	79616.81955800	159.23363900	11430.75478200
3.39368900	79622.48988400	159.24498000	11447.95714100
3.39380500	79628.14756600	159.25629500	11465.11668000
3.39385100	79630.40811400	159.26081600	11471.97206600
3.39385400	79630.53034700	159.26106100	11472.34190000
3.39385600	79630.65467100	159.26130900	11472.71887600
3.39386100	79630.90329900	159.26180700	11473.47276500
3.39386700	79631.15190700	159.26230400	11474.22659300
3.39387200	79631.40049200	159.26280100	11474.98033800
3.39387400	79631.53088200	159.26306200	11475.37569500
3.39387700	79631.66125600	159.26332300	11475.77100500
3.39387800	79631.70355600	159.26340700	11475.89926100
3.39387900	79631.76278500	159.26352600	11476.07884300
3.39388000	80836.08957600	161.67217900	7985.41478000
3.39388100	80836.08662300	161.67217300	7985.66365500
3.39389000	80836.05707600	161.67211400	7988.15224200
3.39389900	80836.02751200	161.67205500	7990.64052100
3.39390800	80835.99793300	161.67199600	7993.12848700
3.39399600	80835.70123600	161.67140200	8017.99092300
3.39408500	80835.40290400	161.67080600	8042.82195000
3.39417400	80835.10293800	161.67020600	8067.62146300
3.39426200	80834.80134000	161.66960300	8092.38933100
3.39514800	80831.69588200	161.66339200	8338.30165100
3.39603400	80828.42868200	161.65685700	8580.92320500
3.39692000	80825.00101600	161.65000200	8820.14518400
3.39780500	80821.41405100	161.64282800	9055.86586500
3.39869100	80817.66890700	161.63533800	9287.99094200
3.40107000	80806.83546800	161.61367100	9892.96604800
3.40344900	80794.88765300	161.58977500	10469.92419100
3.40582800	80781.84437300	161.56368900	11017.71144100
3.40820700	80767.72520000	161.53545000	11535.48803900
3.41058600	80752.55246700	161.50510500	12022.70000300
3.41322700	80734.51164800	161.46902300	12527.31648100
3.41586700	80715.25025800	161.43050100	12993.89571900
3.41850700	80694.82265700	161.38964500	13422.73652800
3.42114800	80673.29484400	161.34659000	13814.45163000
3.42378800	80650.74520400	161.30149000	14169.92260700
3.42642800	80627.26502200	161.25453000	14490.27244100
3.42906900	80602.95837200	161.20591700	14776.83239600
3.43170900	80577.94168000	161.15588300	15031.11153000
3.43355000	80560.15199100	161.12030400	15190.12166700
3.43539000	80542.12590800	161.08425200	15334.85315900
3.43723000	80523.91186500	161.04782400	15465.92611500
3.43907100	80505.55950600	161.01111900	15583.97473900
3.44091100	80487.12078800	160.97424200	15689.65602200
3.44106400	80485.58906700	160.97117800	15697.88487200
3.44121600	80484.05733600	160.96811500	15706.03511400
3.44136900	80482.52545200	160.96505100	15714.10573100
3.44141300	80482.08528000	160.96417100	15716.41296500
3.44145700	80481.64526300	160.96329100	15718.70700200
3.44145900	80481.62376000	160.96324800	15718.81364300
3.44146100	80481.60206300	160.96320400	15718.92670600
3.44146500	80481.55866700	160.96311700	15719.15278400
3.44147000	80481.51527100	160.96303100	15719.37881500
3.44147400	80481.47187600	160.96294400	15719.60478300
3.44147600	80481.45032600	160.96290100	15719.71698300
3.44147800	80481.42877400	160.96285800	15719.82915200
3.44148200	80481.38567400	160.96277100	15720.05344400
3.44148700	78871.48178300	157.74296400	11049.67941500
3.44148800	78871.49899000	157.74299800	11049.72773600
3.44148900	78871.57211800	157.74314400	11050.01325700
3.44149000	78871.64968700	157.74329900	11050.30992900
3.44150400	78872.42539500	157.74485100	11053.27638100
3.44151700	78873.20111100	157.74640200	11056.24230100
3.44153100	78873.97683300	157.74795400	11059.20768300
3.44155800	78875.52830300	157.75105700	11065.13683400
3.44158500	78877.07980300	157.75416000	11071.06382900
3.44161200	78878.63132900	157.75726300	11076.98866700
3.44162300	78879.25195000	157.75850400	11079.35818100
3.44163100	78879.74600000	157.75949200	11081.24382600
3.44164000	78880.24005600	157.76048000	11083.12938800
3.44165600	78881.16185800	157.76232400	11086.64681700
3.44167200	78882.08367300	157.76416700	11090.16371600
3.44168800	78883.00549600	157.76601100	11093.67985000
3.44184900	78892.22402500	157.78444800	11128.79888900
3.44200900	78901.44271700	157.80288500	11163.84021700
3.44217000	78910.66114200	157.82132200	11198.80292200
3.44233000	78919.87877500	157.83975800	11233.68587200
3.44286800	78950.70965900	157.90141900	11349.81347100
3.44340500	78981.50751100	157.96301500	11464.99339200
3.44394200	79012.25370100	158.02450700	11579.18269700
3.44447900	79042.92951500	158.08585900	11692.33652300
3.44501700	79073.51632700	158.14703300	11804.40919400
3.44519100	79083.40918100	158.16681800	11840.49923900
3.44536500	79093.29010100	158.18658000	11876.46924900
3.44553900	79103.15851700	158.20631700	11912.31795500
3.44571300	79113.01382300	158.22602800	11948.04389700
3.44591800	79124.57272800	158.24914500	11989.85033300
3.44612300	79136.11174600	158.27222300	12031.48301800
3.44632700	79147.62992100	158.29526000	12072.93964700
3.44653200	79159.12630300	158.31825300	12114.21794900
3.44707000	79189.23709600	158.37847400	12221.86312400
3.44760700	79219.17435900	158.43834900	12328.22201400
3.44814500	79248.92189300	158.49784400	12433.25730200
3.44868300	79278.46428200	158.55692900	12536.93464700
3.44922100	79307.78677800	158.61557400	12639.22229200
3.45015300	79358.05106500	158.71610200	12813.14690900
3.45108500	79407.54313100	158.81508600	12982.67428000
3.45184400	79447.24102700	158.89448200	13117.43116000
3.45260400	79486.35258800	158.97270500	13249.14465100
3.45336300	79524.84867400	159.04969700	13377.77414400
3.45412200	79562.70207700	159.12540400	13503.28528000
3.45425100	79569.03672100	159.13807300	13524.19561500
3.45437900	79575.35216800	159.15070400	13545.01597900
3.45450800	79581.64829700	159.16329700	13565.74623500
3.45453000	79582.77078800	159.16554200	13569.43931100
3.45455300	79583.89265800	159.16778500	13573.12950600
3.45457600	79585.01390600	159.17002800	13576.81682300
3.45458600	79585.46228200	159.17092500	13578.29118100
3.45459500	79585.91045700	159.17182100	13579.76460300
3.45459600	79585.98905600	159.17197800	13580.02286100
3.45459800	79586.06774900	159.17213500	13580.28156600
3.45460100	79586.22512700	159.17245000	13580.79893400
3.45460400	79586.38249600	159.17276500	13581.31625900
3.45460800	79586.53985200	159.17308000	13581.83352800
3.45460900	80752.03037700	161.50406100	10203.88744200
3.45461100	80752.02237600	161.50404500	10204.31223200
3.45461200	80752.02083500	161.50404200	10204.66788900
3.45461300	80752.01929300	161.50403900	10205.02353600
3.45462500	80752.00385000	161.50400800	10208.57947600
3.45463800	80751.98835000	161.50397700	10212.13444800
3.45465000	80751.97279200	161.50394600	10215.68845300
3.45477300	80751.81402900	161.50362800	10251.17519800
3.45489600	80751.64946300	161.50329900	10286.56478400
3.45501900	80751.47907100	161.50295800	10321.85694700
3.45514200	80751.30282000	161.50260600	10357.05135800
3.45528200	80751.09415000	161.50218800	10397.16054400
3.45542300	80750.87775500	161.50175600	10437.14119900
3.45556300	80750.65359300	161.50130700	10476.99279100
3.45626000	80749.42633100	161.49885300	10672.64704400
3.45678900	80748.36277100	161.49672600	10819.17083800
3.45731900	80747.18439500	161.49436900	10963.81736500
3.45784800	80745.88944300	161.49177900	11106.56229900
3.45837800	80744.47650200	161.48895300	11247.39154700
3.45899700	80742.67301400	161.48534600	11409.60017300
3.45961500	80740.70438200	161.48140900	11569.14845000
3.46023400	80738.56877900	161.47713800	11726.01721100
3.46085300	80736.26449900	161.47252900	11880.18896700
3.46178900	80732.45759000	161.46491500	12108.08510800
3.46272500	80728.25737600	161.45651500	12329.74192200
3.46366100	80723.65894500	161.44731800	12545.11461700
3.46459600	80718.65896400	161.43731800	12754.17643800
3.46553200	80713.25447700	161.42650900	12956.90617800
3.46667900	80706.07104500	161.41214200	13196.84234400
3.46782700	80698.27163100	161.39654300	13427.21703500
3.46897400	80689.85380000	161.37970800	13648.03035700
3.47012200	80680.81635000	161.36163300	13859.29637300
3.47126900	80671.15926900	161.34231900	14061.04204800
3.47241600	80660.88401900	161.32176800	14253.30892300
3.47300300	80655.39094000	161.31078200	14347.99266400
3.47359000	80649.73741300	161.29947500	14440.21983000
3.47417700	80643.92406200	161.28784800	14529.99993100
3.47476400	80637.95161200	161.27590300	14617.34331500
3.47535000	80631.82088500	161.26364200	14702.26118000
3.47597800	80625.08790000	161.25017600	14790.43641500
3.47660600	80618.17606800	161.23635200	14875.86492700
3.47723400	80611.08683800	161.22217400	14958.56395900
3.47786200	80603.82172600	161.20764300	15038.55118200
3.47945700	80584.57975600	161.16916000	15229.73761600
3.48105200	80564.24527400	161.12849100	15403.88175300
3.48264700	80542.85300200	161.08570600	15561.34278700
3.48424300	80520.44472100	161.04088900	15702.53041500
3.48583800	80497.06743100	160.99413500	15827.88845300
3.48775400	80467.77993700	160.93556000	15958.18861800
3.48967000	80437.26393100	160.87452800	16067.17695700
3.49158600	80405.62313200	160.81124600	16155.74958900
3.49350300	80372.96856100	160.74593700	16224.84133600
3.49481600	80350.05070600	160.70010100	16261.45432200
3.49487900	80348.94683000	160.69789400	16262.98907200
3.49488100	80348.91098300	160.69782200	16263.03861800
3.49488300	80348.87513300	160.69775000	16263.08811300
3.49488700	80348.80343200	160.69760700	16263.18704300
3.49488800	80348.78720500	160.69757400	16263.20942200
3.49488900	80348.78255400	160.69756500	16263.21583600
3.49489000	78730.91894200	157.46183800	11569.39428300
3.49489500	78731.19881400	157.46239800	11570.48289300
3.49490100	78731.46910400	157.46293800	11571.51227500
3.49490600	78731.73939000	157.46347900	11572.54153600
3.49495900	78734.44206500	157.46888400	11582.82745800
3.49501200	78737.14438100	157.47428900	11593.10121400
3.49506400	78739.84632800	157.47969300	11603.36279200
3.49511700	78742.54789100	157.48509600	11613.61217600
3.49564500	78769.53925000	157.53907800	11715.43205100
3.49617400	78796.47676000	157.59295400	11816.01643200
3.49670200	78823.34693400	157.64669400	11915.35172700
3.49723000	78850.13640500	157.70027300	12013.42457300
3.49904300	78941.26604300	157.88253200	12340.17131100
3.50085500	79030.79373200	158.06158700	12651.44731900
3.50266800	79118.28201400	158.23656400	12946.91502800
3.50448000	79203.31013100	158.40662000	13226.26345000
3.50587600	79266.90338100	158.53380700	13430.33070000
3.50593400	79269.48595400	158.53897200	13438.52136500
3.50599100	79272.05671500	158.54411300	13446.67895700
3.50604800	79274.62435700	158.54924900	13454.82005900
3.50616300	79279.75027800	158.55950100	13471.05280200
3.50627800	79284.86358600	158.56972700	13487.21955600
3.50627900	79284.90158400	158.56980300	13487.33959300
3.50628000	80447.33709000	160.89467400	10118.05098600
3.50628400	80447.31548100	160.89463100	10119.25582900
3.50628800	80447.29583600	160.89459200	10120.35104000
3.50629200	80447.27618800	160.89455200	10121.44615100
3.50633300	80447.07956100	160.89415900	10132.39181900
3.50637400	80446.88268000	160.89376500	10143.32758300
3.50641500	80446.68554100	160.89337100	10154.25343400
3.50645600	80446.48814400	160.89297600	10165.16936200
3.50686600	80444.49973600	160.88899900	10273.78075900
3.50727500	80442.48417400	160.88496800	10381.38948900
3.50768500	80440.44024500	160.88088000	10487.98668600
3.50809400	80438.36673100	160.87673300	10593.56362400
3.51038100	80426.19170800	160.85238300	11163.86311300
3.51266700	80412.86760900	160.82573500	11700.90414500
3.51495400	80398.22030500	160.79644100	12203.70873400
3.51724000	80382.10177800	160.76420400	12671.62277800
3.51952600	80364.39309500	160.72878600	13104.31209900
3.52161300	80346.76487300	160.69353000	13468.29222400
3.52369900	80327.67997500	160.65536000	13802.93835100
3.52578500	80307.10484700	160.61421000	14108.49884100
3.52787200	80285.02459100	160.57004900	14385.36059500
3.52995800	80261.44297900	160.52288600	14634.04201900
3.53314600	80222.56548700	160.44513100	14961.09726800
3.53633400	80180.39456600	160.36078900	15226.59815200
3.53952200	80135.16203600	160.27032400	15433.68609300
3.53952600	80135.10372100	160.27020700	15433.90999700
3.53953000	80135.04540000	160.27009100	15434.13373000
3.53953400	80134.98707500	160.26997400	15434.35737800
3.53953800	80134.92874500	160.26985700	15434.58094000
3.53954200	80134.87041100	160.26974100	15434.80441600
3.53955000	80134.75372900	160.26950700	15435.25111200
3.53955800	80134.63703300	160.26927400	15435.69754900
3.53956600	80134.52031900	160.26904100	15436.14364400
3.53964500	80133.35223600	160.26670400	15440.58576300
3.53972500	80132.18244600	160.26436500	15444.99369000
3.53980500	80131.01095200	160.26202200	15449.36747500
3.53988400	80129.83776100	160.25967600	15453.70717800
3.54050700	80120.61130100	160.24122300	15486.45469500
3.54113000	80111.28412200	160.22256800	15517.15145900
3.54149800	80105.72581300	160.21145200	15534.33947600
3.54165000	80103.42605300	160.20685200	15541.21656000
3.54167100	80103.11028300	160.20622100	15542.15026000
3.54169100	80102.79440400	160.20558900	15543.08172800
3.54171200	80102.47842000	160.20495700	15544.01097200
3.54175400	80101.84613400	160.20369200	15545.86278800
3.54179500	80101.21342600	160.20242700	15547.70572000
3.54183700	80100.58029500	160.20116100	15549.53977300
3.54187900	80099.94674300	160.19989300	15551.36496200
3.54195700	80098.75303900	160.19750600	15554.77659900
3.54195800	78497.57047800	156.99514100	10909.38243100
3.54195900	78497.60818600	156.99521600	10909.53373100
3.54196000	78497.64589400	156.99529200	10909.68502900
3.54196700	78498.02296500	156.99604600	10911.19787900
3.54197400	78498.40003200	156.99680000	10912.71049500
3.54198100	78498.77709200	156.99755400	10914.22287900
3.54205200	78502.54740300	157.00509500	10929.33389700
3.54212400	78506.31715500	157.01263400	10944.42158400
3.54219500	78510.08631300	157.02017300	10959.48591000
3.54226700	78513.85484100	157.02771000	10974.52683800
3.54290700	78547.61742500	157.09523500	11108.36429100
3.54354800	78581.30151400	157.16260300	11240.29625700
3.54418800	78614.88288500	157.22976600	11370.30413500
3.54482900	78648.33829500	157.29667700	11498.37242300
3.54547000	78681.64547000	157.36329100	11624.48865900
3.54649000	78734.33797100	157.46867600	11821.31012700
3.54751000	78786.51716700	157.57303400	12013.12007400
3.54853100	78838.10506900	157.67621000	12199.89630600
3.54955100	78889.02825200	157.77805700	12381.62513600
3.55057100	78939.21688700	157.87843400	12558.29482100
3.55159100	78988.60530700	157.97721100	12729.89958200
3.55180700	78998.94461000	157.99788900	12765.55199800
3.55202300	79009.24472700	158.01848900	12800.97743300
3.55206600	79011.30000000	158.02260000	12808.03529100
3.55210900	79013.35368000	158.02670700	12815.08407600
3.55215300	79015.40576200	158.03081200	12822.12378500
3.55217000	79016.22614400	158.03245200	12824.93712800
3.55218700	79017.04627300	158.03409300	12827.74901800
3.55220400	79017.86614300	158.03573200	12830.55945600
3.55220500	79017.89893300	158.03579800	12830.67184500
3.55220600	79017.93172100	158.03586300	12830.78422900
3.55220700	79017.96450900	158.03592900	12830.89661000
3.55220800	79018.03008400	158.03606000	12831.12136600
3.55220900	79018.09565900	158.03619100	12831.34611300
3.55221100	80187.86206300	160.37572400	9441.02132000
3.55221200	80187.85516200	160.37571000	9441.20422300
3.55221300	80187.85271800	160.37570500	9441.52550000
3.55221800	80187.84050000	160.37568100	9443.13177700
3.55222400	80187.82828000	160.37565700	9444.73787700
3.55222900	80187.81606100	160.37563200	9446.34380000
3.55228400	80187.69383600	160.37538800	9462.39328900
3.55234000	80187.57155500	160.37514300	9478.42505300
3.55239500	80187.44921200	160.37489800	9494.43907300
3.55245000	80187.32680500	160.37465400	9510.43532700
3.55300300	80186.09828700	160.37219700	9669.41626400
3.55355500	80184.85887800	160.36971800	9826.59848800
3.55410800	80183.60463200	160.36720900	9981.96239500
3.55466000	80182.33153600	160.36466300	10135.48901200
3.55521300	80181.03565400	160.36207100	10287.16002800
3.55623000	80178.57835800	160.35715700	10561.35650700
3.55724700	80176.00653600	160.35201300	10829.10445400
3.55826300	80173.29646500	160.34659300	11090.30601000
3.55906000	80171.06190600	160.34212400	11290.28621200
3.55985600	80168.71741500	160.33743500	11486.15420800
3.56065300	80166.25231300	160.33250500	11677.87276700
3.56144900	80163.65637900	160.32731300	11865.40914900
3.56224600	80160.91956900	160.32183900	12048.73270200
3.56304200	80158.03228900	160.31606500	12227.81688400
3.56423800	80153.39716300	160.30679400	12488.55184700
3.56543300	80148.37307600	160.29674600	12739.62528200
3.56642000	80143.91123000	160.28782200	12939.66397300
3.56721600	80140.09709000	160.28019400	13096.13632700
3.56801200	80136.08259500	160.27216500	13248.29011300
3.56880800	80131.86148300	160.26372300	13396.12489800
3.56960400	80127.42817500	160.25485600	13539.64504700
3.57040000	80122.77753500	160.24555500	13678.85772300
3.57119600	80117.90504700	160.23581000	13813.77412900
3.57234900	80110.44466600	160.22088900	14001.64261200
3.57350200	80102.50048200	160.20500100	14180.58253700
3.57465600	80094.06501600	160.18813000	14350.66570500
3.57580900	80085.13321200	160.17026600	14511.97743200
3.57696200	80075.70233800	160.15140500	14664.61555500
3.57811500	80065.77197100	160.13154400	14808.68986400
3.57951100	80053.08993400	160.10618000	14971.75666700
3.58090600	80039.68642300	160.07937300	15122.69383600
3.58230200	80025.57296300	160.05114600	15261.75432800
3.58369700	80010.76511000	160.02153000	15389.20856400
3.58392300	80008.30725700	160.01661500	15408.74270000
3.58414800	80005.83184000	160.01166400	15427.98217900
3.58437400	80003.33895500	160.00667800	15446.92826300
3.58460000	80000.82869500	160.00165700	15465.58221400
3.58464500	80000.32456600	160.00064900	15469.27805800
3.58469000	79999.81974700	159.99963900	15472.96227700
3.58469200	79999.79667400	159.99959300	15473.13029800
3.58469400	79999.77359700	159.99954700	15473.29826500
3.58469500	78401.83508300	156.80367000	10837.41667500
3.58469600	78401.84351800	156.80368700	10837.44071100
3.58469700	78401.90335800	156.80380700	10837.70444500
3.58470200	78402.23246700	156.80446500	10839.15488000
3.58470800	78402.53165600	156.80506300	10840.47330800
3.58471300	78402.83084100	156.80566200	10841.79159300
3.58476600	78405.82246600	156.81164500	10854.96657700
3.58481900	78408.81368700	156.81762700	10868.12725200
3.58487300	78411.80448900	156.82360900	10881.27360000
3.58492600	78414.79485700	156.82959000	10894.40560200
3.58545800	78444.67105800	156.88934200	11024.93240600
3.58598900	78474.48634000	156.94897300	11154.00418700
3.58652100	78504.22523300	157.00845000	11281.60309700
3.58705300	78533.87260500	157.06774500	11407.71206600
3.58758500	78563.41371800	157.12682700	11532.31484800
3.58865500	78622.47326400	157.24494700	11778.40121200
3.58972500	78680.93157900	157.36186300	12018.20986300
3.59079500	78738.68135900	157.47736300	12251.63509100
3.59186600	78795.62103900	157.59124200	12478.58302600
3.59293600	78851.65470500	157.70330900	12698.97103100
3.59400600	78906.69211000	157.81338400	12912.72787100
3.59400800	78906.80531900	157.81361100	12913.16488600
3.59401000	78906.91852200	157.81383700	12913.60184200
3.59401200	78907.03171900	157.81406300	12914.03876900
3.59401500	78907.14491200	157.81429000	12914.47566700
3.59401700	78907.25810000	157.81451600	12914.91253700
3.59402100	78907.48446200	157.81496900	12915.78618900
3.59402600	78907.71081000	157.81542200	12916.65975500
3.59403000	78907.93713800	157.81587400	12917.53320600
3.59407500	78910.19939700	157.82039900	12926.26136500
3.59408400	78910.65162500	157.82130300	12928.00561100
3.59409200	78911.10377600	157.82220800	12929.74939400
3.59410100	78911.55585400	157.82311200	12931.49271600
3.59410500	78911.73666900	157.82347300	12932.18995300
3.59410800	78911.91746100	157.82383500	12932.88704000
3.59410900	78911.96936200	157.82393900	12933.08713200
3.59411100	78912.02127400	157.82404300	12933.28728900
3.59411300	78912.14586100	157.82429200	12933.76764300
3.59411400	78912.20815300	157.82441600	12934.00780900
3.59411500	80077.96145300	160.15592300	9555.10010300
3.59411600	80077.92091800	160.15584200	9555.47008400
3.59412400	80077.95031800	160.15590100	9558.06912100
3.59413200	80077.95899500	160.15591800	9560.71965600
3.59421400	80078.04563800	160.15609100	9587.20156700
3.59429600	80078.13192400	160.15626400	9613.63789700
3.59437700	80078.21781200	160.15643600	9640.02807800
3.59474500	80078.59902700	160.15719800	9758.23998100
3.59511300	80078.96987600	160.15794000	9875.50666700
3.59548000	80079.32882700	160.15865800	9991.82302600
3.59584800	80079.67392800	160.15934800	10107.18027100
3.59653900	80080.27901100	160.16055800	10321.37638200
3.59723000	80080.81782500	160.16163600	10532.11841000
3.59792100	80081.27904500	160.16255800	10739.36394500
3.59861200	80081.65192000	160.16330400	10943.07591300
3.59930300	80081.92601100	160.16385200	11143.22021100
3.60040700	80082.13370000	160.16426700	11455.48682100
3.60151100	80082.02370800	160.16404700	11758.45488400
3.60261600	80081.55860000	160.16311700	12052.03039700
3.60372000	80080.70325400	160.16140700	12336.13779700
3.60482400	80079.42489200	160.15885000	12610.71868200
3.60592800	80077.69314300	160.15538600	12875.73205500
3.60730200	80074.86241800	160.14972500	13192.17867500
3.60867600	80071.23769000	160.14247500	13493.75381000
3.61005000	80066.77640600	160.13355300	13780.48058100
3.61142400	80061.44204200	160.12288400	14052.41658400
3.61279800	80055.20404900	160.11040800	14309.65195400
3.61417300	80048.03787700	160.09607600	14552.30761100
3.61554700	80039.92490000	160.07985000	14780.53339400
3.61696100	80030.57184100	160.06114400	15000.56507200
3.61837600	80020.19452400	160.04038900	15205.71720400
3.61979000	80008.79159800	160.01758300	15396.23726500
3.62120400	79996.36779100	159.99273600	15572.39723600
3.62261900	79982.93368600	159.96586700	15734.49172100
3.62403300	79968.50549300	159.93701100	15882.83610600
3.62403600	79968.48126500	159.93696300	15883.06602700
3.62403800	79968.45703300	159.93691400	15883.29587700
3.62404000	79968.43279800	159.93686600	15883.52569100
3.62404300	79968.40856100	159.93681700	15883.75547100
3.62404500	79968.38432000	159.93676900	15883.98521500
3.62404900	79968.33583400	159.93667200	15884.44459600
3.62405400	79968.28733800	159.93657500	15884.90387100
3.62405900	79968.23883200	159.93647800	15885.36300500
3.62410500	79967.75321100	159.93550600	15889.94656300
3.62415000	79967.26656500	159.93453300	15894.51598600
3.62415100	79967.25682100	159.93451400	15894.60723300
3.62415200	79967.24707700	159.93449400	15894.69846900
3.62415300	79967.23733300	159.93447500	15894.78970000
3.62415400	78362.41195500	156.72482400	11238.91079300
3.62415500	78362.41643800	156.72483300	11238.92654000
3.62415600	78362.50825100	156.72501700	11239.35441500
3.62415700	78362.54998300	156.72510000	11239.54889800
3.62416400	78362.96730000	156.72593500	11241.49355900
3.62417200	78363.38460600	156.72676900	11243.43790200
3.62417900	78363.80189900	156.72760400	11245.38192800
3.62425200	78367.97415300	156.73594800	11264.80470500
3.62432500	78372.14514700	156.74429000	11284.19566400
3.62439800	78376.31484600	156.75263000	11303.55476300
3.62447100	78380.48319900	156.76096600	11322.88195200
3.62520300	78422.08354800	156.84416700	11514.38878000
3.62593400	78463.50368100	156.92700700	11702.65592300
3.62666500	78504.70298300	157.00940600	11887.64160400
3.62739700	78545.64231400	157.09128500	12069.30701200
3.62812800	78586.28392700	157.17256800	12247.61646000
3.62922300	78646.47538900	157.29295100	12508.14432100
3.63031700	78705.80183300	157.41160400	12760.98215000
3.63141200	78764.15328800	157.52830700	13006.04455100
3.63250700	78821.42644800	157.64285300	13243.25962000
3.63266100	78829.42089700	157.65884200	13276.11859700
3.63281600	78837.39164800	157.67478300	13308.81977200
3.63284100	78838.69216700	157.67738400	13314.14964600
3.63286600	78839.99204500	157.67998400	13319.47529800
3.63289200	78841.29128000	157.68258300	13324.79673000
3.63290200	78841.81079300	157.68362200	13326.92412100
3.63291200	78842.33020400	157.68466000	13329.05083600
3.63291300	78842.39299800	157.68478600	13329.30793200
3.63291400	78842.45579000	157.68491200	13329.56500900
3.63291700	79999.80398400	159.99960800	9975.79409700
3.63291800	79999.78391200	159.99956800	9976.19721500
3.63291900	79999.78587100	159.99957200	9976.52776400
3.63292000	79999.78783000	159.99957600	9976.85830700
3.63293000	79999.80741700	159.99961500	9980.16332700
3.63294000	79999.82699400	159.99965400	9983.46761100
3.63294900	79999.84656500	159.99969300	9986.77115700
3.63304700	80000.04185300	160.00008400	10019.76605200
3.63314500	80000.23634800	160.00047300	10052.68707800
3.63324300	80000.43001100	160.00086000	10085.53411600
3.63334000	80000.62280200	160.00124600	10118.30701700
3.63405000	80001.99183800	160.00398400	10353.85961700
3.63475900	80003.29809200	160.00659600	10585.45361700
3.63546800	80004.52705800	160.00905400	10813.04303600
3.63617700	80005.66468800	160.01132900	11036.58569900
3.63688600	80006.69738400	160.01339500	11256.04341900
3.63798300	80008.05697800	160.01611400	11587.24764300
3.63907900	80009.08749300	160.01817500	11908.49017200
3.64017600	80009.74474400	160.01948900	12219.67756600
3.64127200	80009.98716200	160.01997400	12520.73534400
3.64236900	80009.77584400	160.01955200	12811.60670300
3.64346500	80009.07460600	160.01814900	13092.25281700
3.64483900	80007.45359600	160.01490700	13429.42732500
3.64621300	80004.95159400	160.00990300	13750.50938300
3.64758700	80001.51596200	160.00303200	14055.53105700
3.64896100	79997.10105600	159.99420200	14344.56131300
3.65033500	79991.66819900	159.98333600	14617.70407400
3.65170800	79985.18568600	159.97037100	14875.09640500
3.65308200	79977.62874400	159.95525700	15116.90660900
3.65458700	79968.09550400	159.93619100	15364.16634100
3.65609300	79957.23698900	159.91447400	15593.25996500
3.65759800	79945.04830800	159.89009700	15804.52181100
3.65910300	79931.53373500	159.86306700	15998.32000400
3.66060800	79916.70640100	159.83341300	16175.05363100
3.66084800	79914.22534300	159.82845100	16201.65082400
3.66089600	79913.72520900	159.82745000	16206.91978100
3.66094300	79913.22376900	159.82644800	16212.17194400
3.66099100	79912.72102800	159.82544200	16217.40734100
3.66099300	79912.70316400	159.82540600	16217.59282800
3.66099500	79912.68529900	159.82537100	16217.77827300
3.66099600	79912.66743000	159.82533500	16217.96369600
3.66099800	79912.64956100	159.82529900	16218.14909900
3.66100000	79912.62536400	159.82525100	16218.40006000
3.66100100	79912.61482800	159.82523000	16218.50933900
3.66100200	78302.87712800	156.60575400	11548.23526400
3.66100500	78303.07343600	156.60614700	11549.15459100
3.66100800	78303.22341700	156.60644700	11549.87536700
3.66101000	78303.37339600	156.60674700	11550.59609800
3.66103600	78304.87308600	156.60974600	11557.80098200
3.66106200	78306.37259500	156.61274500	11565.00144800
3.66108800	78307.87191900	156.61574400	11572.19749200
3.66111500	78309.37105700	156.61874200	11579.38911300
3.66137600	78324.35174800	156.64870300	11651.06161300
3.66163700	78339.31161700	156.67862300	11722.28962000
3.66189800	78354.24868000	156.70849700	11793.07119500
3.66215900	78369.16099000	156.73832200	11863.40444800
3.66242000	78384.04661800	156.76809300	11933.28754300
3.66349900	78445.18764600	156.89037500	12217.03799500
3.66457700	78505.71166100	157.01142300	12492.96679900
3.66565500	78565.49525300	157.13099100	12760.97059300
3.66673400	78624.42167400	157.24884300	13020.95978100
3.66781200	78682.38078000	157.36476200	13272.85786600
3.66889100	78739.26904900	157.47853800	13516.60141500
3.66913200	78751.82854200	157.50365700	13569.96342800
3.66918000	78754.33334800	157.50866700	13580.58658700
3.66922800	78756.83576600	157.51367200	13591.19332300
3.66922900	78756.90611400	157.51381200	13591.49141800
3.66923000	78756.92941100	157.51385900	13591.59012900
3.66923100	79907.92056300	159.81584100	10255.70773800
3.66923200	79907.92350500	159.81584700	10256.06635800
3.66923300	79907.92644600	159.81585300	10256.42496800
3.66924400	79907.95584700	159.81591200	10260.01059000
3.66925400	79907.98524400	159.81597000	10263.59533400
3.66926400	79908.01463300	159.81602900	10267.17920100
3.66936800	79908.30807300	159.81661600	10302.96959200
3.66947100	79908.60067600	159.81720100	10338.67207200
3.66957400	79908.89239300	159.81778500	10374.28650900
3.66967800	79909.18316700	159.81836600	10409.81273700
3.67045300	79911.32772800	159.82265500	10673.32328500
3.67122800	79913.39448300	159.82678900	10931.80834000
3.67200300	79915.36204700	159.83072400	11185.21243000
3.67277800	79917.20977800	159.83442000	11433.48551000
3.67355300	79918.91780700	159.83783600	11676.58322400
3.67469700	79921.14336700	159.84228700	12025.90363400
3.67584100	79922.96392800	159.84592800	12363.75179700
3.67698500	79924.32420800	159.84864800	12690.04232500
3.67812900	79925.17255700	159.85034500	13004.71203800
3.67927300	79925.46098200	159.85092200	13307.71838500
3.68041700	79925.14522300	159.85029000	13599.03988700
3.68181100	79923.88578900	159.84777200	13938.14997700
3.68320500	79921.60414400	159.84320800	14259.95238200
3.68459900	79918.24299500	159.83648600	14564.52260900
3.68599300	79913.75343600	159.82750700	14851.97451400
3.68738600	79908.09483200	159.81619000	15122.45831400
3.68878000	79901.23482200	159.80247000	15376.15866400
3.69017400	79893.14918100	159.78629800	15613.29268200
3.69158100	79883.72341200	159.76744700	15836.20682000
3.69298900	79873.02256500	159.74604500	16042.76314200
3.69439700	79861.04596800	159.72209200	16233.27382300
3.69568100	79849.01332100	159.69802700	16393.35786600
3.69568200	79848.99744500	159.69799500	16393.55211100
3.69568400	79848.98156500	159.69796300	16393.74631500
3.69568500	79848.96568500	159.69793100	16393.94049900
3.69568700	79848.94980200	159.69790000	16394.13466200
3.69568900	79848.93391800	159.69786800	16394.32880500
3.69569200	79848.90214300	159.69780400	16394.71702900
3.69569500	79848.87036300	159.69774100	16395.10519200
3.69569800	79848.83857600	159.69767700	16395.49327300
3.69569900	79848.83221800	159.69766400	16395.57088100
3.69570000	79848.82586000	159.69765200	16395.64848200
3.69570100	79848.81314300	159.69762600	16395.80367500
3.69570200	79848.80678400	159.69761400	16395.88126700
3.69570300	79848.79406500	159.69758800	16396.03644100
3.69570400	79848.78134600	159.69756300	16396.19160400
3.69570500	78236.87078300	156.47374200	11719.61927800
3.69570600	78236.93434200	156.47386900	11719.93189700
3.69571100	78237.26726300	156.47453500	11721.56929000
3.69571700	78237.56991000	156.47514000	11723.05763400
3.69572200	78237.87254800	156.47574500	11724.54579300
3.69577400	78240.89850200	156.48179700	11739.41714900
3.69582600	78243.92364800	156.48784700	11754.26989900
3.69587800	78246.94797100	156.49389600	11769.10402900
3.69592900	78249.97145400	156.49994300	11783.91952200
3.69644900	78280.15647200	156.56031300	11931.04600700
3.69696800	78310.23974400	156.62047900	12076.29216700
3.69748800	78340.20551500	156.68041100	12219.64359400
3.69800700	78370.03840100	156.74007700	12361.08670100
3.69852700	78399.72343300	156.79944700	12500.60876900
3.69968900	78465.53316800	156.93106600	12805.76773700
3.70085200	78530.37319000	157.06074600	13101.13053200
3.70201400	78594.09595300	157.18819200	13386.59598800
3.70317600	78656.56332400	157.31312700	13662.08180600
3.70334900	78665.72170100	157.33144300	13702.12324800
3.70337700	78667.20976100	157.33442000	13708.62099200
3.70340500	78668.69700000	157.33739400	13715.11286100
3.70343300	78670.18341400	157.34036700	13721.59885700
3.70344400	78670.77774800	157.34155500	13724.19161000
3.70345600	78671.37195200	157.34274400	13726.78342300
3.70346700	78671.96602300	157.34393200	13729.37429700
3.70347100	78672.20362500	157.34440700	13730.41046100
3.70347600	78672.44118600	157.34488200	13731.44631900
3.70348500	78672.91624100	157.34583200	13733.51758200
3.70348600	78672.97744800	157.34595500	13733.78443900
3.70348700	78673.03864900	157.34607700	13734.05126500
3.70348800	78673.06068500	157.34612100	13734.14732600
3.70349000	79820.04209400	159.64008400	10410.29727300
3.70349200	79820.04957800	159.64009900	10410.96048100
3.70349400	79820.05706400	159.64011400	10411.62365800
3.70351200	79820.13190100	159.64026400	10418.25380000
3.70353100	79820.20671600	159.64041300	10424.88096500
3.70355000	79820.28150700	159.64056300	10431.50515300
3.70356800	79820.35627400	159.64071300	10438.12636200
3.70375400	79821.10255300	159.64220500	10504.17446000
3.70394000	79821.84605700	159.64369200	10569.92377400
3.70412500	79822.58643700	159.64517300	10635.37344900
3.70431100	79823.32334700	159.64664700	10700.52264700
3.70449700	79824.05644400	159.64811300	10765.37054900
3.70567700	79828.60360900	159.65720700	11170.34138700
3.70685800	79832.89815800	159.66579600	11562.92835900
3.70803800	79836.85929300	159.67371900	11942.97133100
3.70921900	79840.41062600	159.68082100	12310.33817300
3.71039900	79843.48033100	159.68696100	12664.92326100
3.71157900	79846.00124600	159.69200200	13006.64707300
3.71296900	79848.18111600	159.69636200	13392.36678600
3.71435900	79849.42077300	159.69884200	13760.14323000
3.71574800	79849.63611700	159.69927200	14109.97481500
3.71713800	79848.75240000	159.69750500	14441.90241600
3.71852700	79846.70417000	159.69340800	14756.00736300
3.71991700	79843.43532100	159.68687100	15052.40949900
3.72130700	79838.89900300	159.67779800	15331.26521700
3.72269200	79833.07891200	159.66615800	15591.93301700
3.72407700	79825.93380600	159.65186800	15835.58086600
3.72546200	79817.44398200	159.63488800	16062.46056600
3.72684700	79807.59826400	159.61519700	16272.85243500
3.72823200	79796.39375100	159.59278800	16467.06345200
3.72848900	79794.16335400	159.58832700	16501.37946800
3.72854000	79793.71167300	159.58742300	16508.17724600
3.72859200	79793.25812700	159.58651600	16514.95325800
3.72860400	79793.15005900	159.58630000	16516.55948700
3.72860500	79793.14406300	159.58628800	16516.64856700
3.72860600	78179.99561700	156.35999100	11836.57225000
3.72861000	78180.24855200	156.36049700	11837.88324700
3.72861500	78180.51636100	156.36103300	11839.23135200
3.72866000	78183.19411100	156.36638800	11852.70484600
3.72870500	78185.87119500	156.37174200	11866.16360200
3.72875000	78188.54759100	156.37709500	11879.60745000
3.72919400	78214.76461400	156.42952900	12010.69954900
3.72963700	78240.90360400	156.48180700	12140.34581900
3.73008000	78266.95550900	156.53391100	12268.53847700
3.73052400	78292.90959600	156.58581900	12395.26773600
3.73134400	78340.60601900	156.68121200	12625.69674400
3.73216300	78387.87603100	156.77575200	12851.04797900
3.73298300	78434.66063700	156.86932100	13071.27420100
3.73380300	78480.90503900	156.96181000	13286.33714900
3.73462300	78526.55677000	157.05311400	13496.20322400
3.73587000	78594.75715200	157.18951400	13805.44035000
3.73588700	78595.68143200	157.19136300	13809.59776100
3.73590400	78596.60509200	157.19321000	13813.75049100
3.73592100	78597.52843900	157.19505700	13817.90093000
3.73593900	78598.45147400	157.19690300	13822.04907800
3.73595600	78599.37419700	157.19874800	13826.19493400
3.73599000	78601.21870000	157.20243700	13834.47977100
3.73600300	78601.94351200	157.20388700	13837.73510900
3.73600500	78602.01976500	157.20404000	13838.07691000
3.73600600	78602.09620700	157.20419200	13838.42015600
3.73600900	78602.24908400	157.20449800	13839.10660100
3.73601000	79746.11729200	159.49223500	10523.60064800
3.73601100	79746.12605400	159.49225200	10524.01151100
3.73601200	79746.13199600	159.49226400	10524.42949500
3.73602300	79746.19140100	159.49238300	10528.60873700
3.73603500	79746.25079600	159.49250200	10532.78682600
3.73604600	79746.31018400	159.49262000	10536.96374800
3.73615900	79746.90355500	159.49380700	10578.66881300
3.73627300	79747.49594900	159.49499200	10620.25705400
3.73638600	79748.08728200	159.49617500	10661.72830400
3.73650000	79748.67746400	159.49735500	10703.08234900
3.73735400	79753.07610000	159.50615200	11010.73206300
3.73820900	79757.36767000	159.51473500	11311.64772000
3.73906300	79761.51644100	159.52303300	11605.75961800
3.73991800	79765.48804300	159.53097600	11893.00651200
3.74077200	79769.24962700	159.53849900	12173.33599700
3.74200400	79774.23878000	159.54847800	12565.15806600
3.74323600	79778.63672900	159.55727300	12942.40584200
3.74446700	79782.36024600	159.56472000	13305.00325900
3.74569900	79785.33239900	159.57066500	13652.90498800
3.74693100	79787.48257800	159.57496500	13986.09390500
3.74816300	79788.74660100	159.57749300	14304.58181100
3.74962900	79789.01647000	159.57803300	14664.50068600
3.75109400	79787.86442200	159.57572900	15003.76766500
3.75256000	79785.21789600	159.57043600	15322.54425500
3.75402600	79781.01714900	159.56203400	15621.03821700
3.75549200	79775.21504000	159.55043000	15899.50081100
3.75695800	79767.77682800	159.53555400	16158.22410600
3.75842400	79758.67988900	159.51736000	16397.53831100
3.75988900	79747.91336800	159.49582700	16617.80916600
3.75990900	79747.76145200	159.49552300	16620.56948700
3.75992800	79747.60906300	159.49521800	16623.32344400
3.75994700	79747.45639000	159.49491300	16626.07420800
3.75994800	79747.44483000	159.49489000	16626.27588600
3.75995000	79747.43345500	159.49486700	16626.48069700
3.75995300	79747.41069600	159.49482100	16626.89026600
3.75995600	79747.38793500	159.49477600	16627.29978100
3.75995800	79747.36516600	159.49473000	16627.70922600
3.75995900	79747.36061100	159.49472100	16627.79110800
3.75996000	79747.35605500	159.49471200	16627.87298400
3.75996100	79747.34694600	159.49469400	16628.03672800
3.75996200	79747.33327900	159.49466700	16628.28232200
3.75996300	79747.33291400	159.49466600	16628.28887100
3.75996400	78132.93449100	156.26586900	11944.62297500
3.75996900	78133.23704800	156.26647400	11946.18203000
3.75997300	78133.51209100	156.26702400	11947.59918500
3.75997800	78133.78712700	156.26757400	11949.01617900
3.76002400	78136.53707300	156.27307400	11963.17728400
3.76006900	78139.28625300	156.27857300	11977.32231200
3.76011500	78142.03465400	156.28406900	11991.45125500
3.76016100	78144.78226800	156.28956500	12005.56410000
3.76061800	78172.21234100	156.34442500	12145.80478900
3.76107500	78199.55051800	156.39910100	12284.42403000
3.76153200	78226.78528800	156.45357100	12421.41165000
3.76199000	78253.90537300	156.50781100	12556.75800000
3.76244700	78280.89977500	156.56180000	12690.45398900
3.76371200	78354.82616200	156.70965200	13051.60521200
3.76497600	78427.49119100	156.85498200	13399.90245100
3.76624100	78498.69085000	156.99738200	13735.21157900
3.76641700	78508.43586500	157.01687200	13780.66931100
3.76659200	78518.14854900	157.03629700	13825.87497500
3.76676700	78527.82843400	157.05565700	13870.82842300
3.76694300	78537.47504600	157.07495000	13915.52943400
3.76701300	78541.32427300	157.08264900	13933.33911400
3.76702800	78542.17159100	157.08434300	13937.25745300
3.76703000	78542.25367300	157.08450700	13937.63699900
3.76703100	78542.33575000	157.08467200	13938.01650700
3.76703400	78542.49989800	157.08500000	13938.77546800
3.76703700	78542.66403800	157.08532800	13939.53437500
3.76703800	78542.69686500	157.08539400	13939.68614900
3.76704000	78542.79534200	157.08559100	13940.14144400
3.76704100	79683.84225000	159.36768400	10633.06600000
3.76704200	79683.79036100	159.36758100	10633.67115200
3.76705400	79683.89542400	159.36779100	10638.14281300
3.76706600	79683.97071700	159.36794100	10642.68697800
3.76718600	79684.72324900	159.36944600	10688.05927300
3.76730500	79685.47466300	159.37094900	10733.29667900
3.76742500	79686.22478300	159.37245000	10778.39754000
3.76792700	79689.35351100	159.37870700	10965.99978600
3.76843000	79692.44881900	159.38489800	11151.17997700
3.76893200	79695.50390600	159.39100800	11333.92863100
3.76943400	79698.50997300	159.39702000	11514.22790200
3.77024000	79703.21134100	159.40642300	11798.35198700
3.77104500	79707.73650300	159.41547300	12076.09330900
3.77185100	79712.05461600	159.42410900	12347.40460600
3.77265700	79716.13729900	159.43227500	12612.25126400
3.77346300	79719.95719400	159.43991400	12870.60379400
3.77481700	79725.71268800	159.45142500	13290.09222600
3.77617100	79730.53528800	159.46107100	13691.09306600
3.77752500	79734.31835600	159.46863700	14073.57305800
3.77887900	79736.96553400	159.47393100	14437.54292600
3.78023300	79738.39058700	159.47678100	14783.05270500
3.78158700	79738.51763300	159.47703500	15110.19301000
3.78294100	79737.28104500	159.47456200	15419.09175400
3.78429500	79734.62538300	159.46925100	15709.91247800
3.78564900	79730.50529600	159.46101100	15982.85248800
3.78721600	79723.86453200	159.44772900	16276.65316400
3.78878300	79715.17755800	159.43035500	16547.22773600
3.78903200	79713.60811800	159.42721600	16588.08810400
3.78928100	79711.98645100	159.42397300	16628.37605800
3.78952900	79710.31252300	159.42062500	16668.09356600
3.78977800	79708.58630700	159.41717300	16707.24261800
3.78982800	79708.23478700	159.41647000	16715.00438800
3.78987800	79707.88117500	159.41576200	16722.74351600
3.78992800	79707.52547000	159.41505100	16730.46002400
3.78994500	79707.40041900	159.41480100	16733.15677900
3.78996200	79707.27511300	159.41455000	16735.85075500
3.78998000	79707.14954700	159.41429900	16738.54196000
3.78998100	78091.37433600	156.18274900	12050.85300200
3.78998200	78091.45930600	156.18291900	12051.30046300
3.78998300	78091.54427400	156.18308900	12051.74790900
3.78998500	78091.62924200	156.18325800	12052.19533900
3.78999900	78092.47887200	156.18495800	12056.66877500
3.79001300	78093.32842900	156.18665700	12061.14064000
3.79002700	78094.17790700	156.18835600	12065.61093300
3.79016600	78102.66839100	156.20533700	12110.22738200
3.79030500	78111.15079200	156.22230200	12154.68633400
3.79044500	78119.62479800	156.23925000	12198.98752500
3.79058400	78128.09004400	156.25618000	12243.13062600
3.79141400	78178.30736300	156.35661500	12502.74786100
3.79224500	78228.13179600	156.45626400	12756.68866900
3.79307500	78277.49520300	156.55499000	13004.89880100
3.79390500	78326.33238800	156.65266500	13247.33006500
3.79473500	78374.58125600	156.74916300	13483.94058200
3.79606200	78450.29676800	156.90059400	13849.78716900
3.79624600	78460.66604700	156.92133200	13899.39546800
3.79643000	78470.99849000	156.94199700	13948.71303100
3.79661400	78481.29347800	156.96258700	13997.73942200
3.79664400	78482.93446300	156.96586900	14005.54376700
3.79667300	78484.57447300	156.96914900	14013.34066900
3.79670300	78486.21350700	156.97242700	14021.13013300
3.79676100	78489.48864300	156.97897700	14036.68674200
3.79676300	78489.55410600	156.97910800	14036.99757700
3.79676400	78489.61956700	156.97923900	14037.30838700
3.79676500	78489.68502500	156.97937000	14037.61918600
3.79676600	78489.75048200	156.97950100	14037.92997200
3.79676700	78489.81593800	156.97963200	14038.24074700
3.79677000	78489.97302500	156.97994600	14038.98656100
3.79677100	78489.99920500	156.97999800	14039.11085800
3.79677200	79628.31753600	159.25663500	10739.85036800
3.79677300	79628.30785700	159.25661600	10740.64380100
3.79678300	79628.37593400	159.25675200	10744.31551100
3.79679200	79628.44400500	159.25688800	10747.98634400
3.79680200	79628.51206800	159.25702400	10751.65630100
3.79689600	79629.19230700	159.25838500	10788.30760600
3.79699000	79629.87177700	159.25974400	10824.87108000
3.79708400	79630.55042000	159.26110100	10861.34662700
3.79717800	79631.22817500	159.26245600	10897.73412800
3.79808000	79637.66402800	159.27532800	11241.82230300
3.79898200	79643.96169300	159.28792300	11577.73391100
3.79988400	79650.07153600	159.30014300	11905.39019200
3.80078600	79655.94598400	159.31189200	12224.72305400
3.80168700	79661.53970100	159.32307900	12535.67560500
3.80291300	79668.61549400	159.33723100	12944.83244200
3.80413900	79674.98993200	159.34998000	13338.32658200
3.80536500	79680.56766200	159.36113500	13716.09945600
3.80659100	79685.26076800	159.37052200	14078.12348600
3.80781700	79688.98873900	159.37797700	14424.39977200
3.80904200	79691.67861200	159.38335700	14754.95882300
3.81060200	79693.49787500	159.38699600	15152.86175500
3.81216100	79693.41461800	159.38682900	15525.60398200
3.81372100	79691.33116200	159.38266200	15873.43093600
3.81528000	79687.16917700	159.37433800	16196.64949100
3.81684000	79680.86928200	159.36173900	16495.62421000
3.81839900	79672.39064100	159.34478100	16770.77363200
3.81859700	79671.15914600	159.34231800	16803.96760300
3.81879500	79669.89225700	159.33978500	16836.78734600
3.81879700	79669.87433000	159.33974900	16837.24272000
3.81880000	79669.85639200	159.33971300	16837.69794900
3.81880300	79669.83844600	159.33967700	16838.15310500
3.81880600	79669.82049500	159.33964100	16838.60818800
3.81880800	79669.80253500	159.33960500	16839.06319900
3.81881400	79669.76659600	159.33953300	16839.97300200
3.81881900	79669.73063300	159.33946100	16840.88258700
3.81882000	79669.72963400	159.33945900	16840.90782200
3.81882200	78052.84185600	156.10568400	12150.20633500
3.81882300	78052.93626400	156.10587300	12150.71349000
3.81882500	78053.03067100	156.10606100	12151.22062500
3.81884000	78053.97468800	156.10794900	12156.29088900
3.81885500	78054.91860600	156.10983700	12161.35917000
3.81887100	78055.86242400	156.11172500	12166.42546900
3.81902400	78065.29504800	156.13059000	12216.97934500
3.81917700	78074.71719200	156.14943400	12267.33450000
3.81933000	78084.12842800	156.16825700	12317.49058200
3.81948300	78093.52826000	156.18705700	12367.44715500
3.82040900	78150.10221600	156.30020400	12665.27460400
3.82133400	78206.14279500	156.41228600	12955.71184500
3.82226000	78261.55370600	156.52310700	13238.68531400
3.82318500	78316.24337400	156.63248700	13514.13104900
3.82411100	78370.12517100	156.74025000	13781.99509200
3.82510500	78426.98563600	156.85397100	14061.11330100
3.82521300	78433.12236600	156.86624500	14091.02865500
3.82532100	78439.24563100	156.87849100	14120.83883700
3.82534200	78440.41253700	156.88082500	14126.51545600
3.82534400	78440.49905900	156.88099800	14126.93630000
3.82534500	78440.58557700	156.88117100	14127.35710100
3.82534800	78440.75860400	156.88151700	14128.19863900
3.82535100	78440.93162200	156.88186300	14129.04011500
3.82535400	78441.10463000	156.88220900	14129.88150700
3.82535500	78441.13923100	156.88227800	14130.04977700
3.82535600	78441.17383100	156.88234800	14130.21804000
3.82535700	79577.00383800	159.15400800	10838.30517400
3.82535800	79576.99648600	159.15399300	10838.73454800
3.82536200	79577.03126800	159.15406300	10840.44922400
3.82536600	79577.06604800	159.15413200	10842.16371400
3.82537100	79577.10082900	159.15420200	10843.87801400
3.82541400	79577.44853900	159.15489700	10861.01060500
3.82545600	79577.79609100	159.15559200	10878.12426300
3.82549900	79578.14348000	159.15628700	10895.21898100
3.82554200	79578.49069800	159.15698100	10912.29474500
3.82597100	79581.95219100	159.16390400	11082.00774100
3.82640000	79585.39001900	159.17078000	11249.81451400
3.82682800	79588.79820300	159.17759600	11415.70560000
3.82725700	79592.17089700	159.18434200	11579.67210800
3.82768600	79595.50236500	159.19100500	11741.70575300
3.82897400	79605.20774600	159.21041500	12216.83243900
3.83026200	79614.34409500	159.22868800	12674.26277800
3.83155000	79622.77405300	159.24554800	13113.85801900
3.83283800	79630.36979400	159.26074000	13535.52177500
3.83412600	79637.01314000	159.27402600	13939.19648300
3.83541400	79642.59571600	159.28519100	14324.86362800
3.83696600	79647.77531300	159.29555100	14765.79042400
3.83851800	79651.11810200	159.30223600	15180.68733200
3.84007100	79652.49167100	159.30498300	15569.72542600
3.84162300	79651.78448900	159.30356900	15933.14277900
3.84317600	79648.90561800	159.29781100	16271.24053800
3.84472800	79643.78443700	159.28756900	16584.37908400
3.84628000	79636.37019900	159.27274000	16872.97418900
3.84648500	79635.22036600	159.27044100	16909.19559400
3.84651300	79635.05858600	159.27011700	16914.15934900
3.84654100	79634.89603500	159.26979200	16919.11517200
3.84657000	79634.73271500	159.26946500	16924.06306700
3.84658100	79634.66721300	159.26933400	16926.04063800
3.84659200	79634.60150500	159.26920300	16928.01567900
3.84660800	79634.50921500	159.26901800	16930.78392900
3.84660900	79634.50147900	159.26900300	16931.00810500
3.84661100	79634.49087500	159.26898200	16931.32535700
3.84661200	79634.48663400	159.26897300	16931.45225400
3.84661300	78016.39709700	156.03279400	12237.12307500
3.84661700	78016.69554900	156.03339100	12238.71438000
3.84662200	78016.95439200	156.03390900	12240.12939800
3.84666300	78019.54242700	156.03908500	12254.27187300
3.84670500	78022.12969100	156.04425900	12268.39933900
3.84674600	78024.71616400	156.04943200	12282.51162700
3.84716100	78050.53541800	156.10107100	12422.79816800
3.84757600	78076.26449600	156.15252900	12561.55759300
3.84799100	78101.89492000	156.20379000	12698.78346600
3.84840500	78127.41680000	156.25483400	12834.46774500
3.84935300	78185.23758700	156.37047500	13138.46991300
3.85030000	78242.34290100	156.48468600	13434.32784300
3.85124700	78298.63117200	156.59726200	13721.97194700
3.85219500	78354.00833200	156.70801700	14001.34779900
3.85280600	78389.20375700	156.77840800	14177.14870900
3.85283900	78391.09614800	156.78219200	14186.56369000
3.85287200	78392.98719400	156.78597400	14195.96840600
3.85290500	78394.87694600	156.78975400	14205.36295700
3.85291800	78395.63258400	156.79126500	14209.11878100
3.85291900	78395.71312600	156.79142600	14209.51835400
3.85292100	78395.82616300	156.79165200	14210.08006300
3.85292200	78395.85845700	156.79171700	14210.24055100
3.85292300	78395.92304900	156.79184600	14210.56151800
3.85292400	79529.51162900	159.05902300	10925.12054800
3.85292500	79529.46601900	159.05893200	10925.72478900
3.85293700	79529.59524400	159.05919000	10930.28518900
3.85294800	79529.69653600	159.05939300	10934.91342200
3.85306100	79530.70902400	159.06141800	10981.12619700
3.85317400	79531.72030900	159.06344100	11027.20371100
3.85328700	79532.73020800	159.06546000	11073.14435900
3.85385200	79537.75228000	159.07550500	11300.65405900
3.85441800	79542.72146400	159.08544300	11524.71771300
3.85498300	79547.62541500	159.09525100	11745.32196600
3.85554800	79552.44886300	159.10489800	11962.44394800
3.85643600	79559.83638300	159.11967300	12296.68884900
3.85732500	79566.94200100	159.13388400	12622.23642500
3.85821300	79573.71516900	159.14743000	12939.03192600
3.85910200	79580.11005500	159.16022000	13247.04077600
3.85999000	79586.08274400	159.17216500	13546.23601600
3.86151400	79595.22311500	159.19044600	14038.77903000
3.86303800	79602.80447900	159.20560900	14505.31060200
3.86456100	79608.65272800	159.21730500	14945.86990100
3.86608500	79612.61477300	159.22523000	15360.56850800
3.86760900	79614.55786600	159.22911600	15749.58119800
3.86913200	79614.37015100	159.22874000	16113.14867300
3.87065600	79611.96015200	159.22392000	16451.57124600
3.87218000	79607.25651100	159.21451300	16765.20574400
3.87323300	79602.63718800	159.20527400	16967.70324400
3.87335300	79602.04029000	159.20408100	16990.00150200
3.87337200	79601.94066400	159.20388100	16993.65720400
3.87339200	79601.84062800	159.20368100	16997.30882600
3.87341200	79601.74019300	159.20348000	17000.95642600
3.87345100	79601.53813200	159.20307600	17008.23956900
3.87345900	79601.49755000	159.20299500	17009.69459000
3.87346700	79601.45681700	159.20291400	17011.14768900
3.87346800	79601.45347400	159.20290700	17011.26695800
3.87346900	77982.50849500	155.96501700	12314.45857600
3.87347300	77982.74356600	155.96548700	12315.80652900
3.87347600	77982.95095100	155.96590200	12316.95861100
3.87347900	77983.15833000	155.96631700	12318.11059400
3.87351200	77985.23184100	155.97046400	12329.62498500
3.87354500	77987.30483500	155.97461000	12341.12948900
3.87357800	77989.37730800	155.97875500	12352.62410200
3.87361100	77991.44925500	155.98289900	12364.10882000
3.87393900	78012.13866100	156.02427700	12478.41084700
3.87426800	78032.76998400	156.06554000	12591.71892100
3.87459700	78053.33834600	156.10667700	12704.02916400
3.87492500	78073.83896100	156.14767800	12815.33785600
3.87525400	78094.26711300	156.18853400	12925.64144300
3.87663400	78179.19019400	156.35838000	13377.96925300
3.87801500	78262.42492800	156.52485000	13812.27829400
3.87939600	78343.66532600	156.68733100	14228.39026400
3.87941600	78344.82944800	156.68965900	14234.30146700
3.87943600	78345.99261500	156.69198500	14240.20475600
3.87945600	78347.15529900	156.69431100	14246.10417600
3.87947600	78348.31750000	156.69663500	14251.99972700
3.87949600	78349.47921500	156.69895800	14257.89140800
3.87953600	78351.80119300	156.70360200	14269.66316200
3.87955600	78352.95225300	156.70590500	14275.49823600
3.87955800	78353.05215000	156.70610400	14276.00291700
3.87955900	78353.15251000	156.70630500	14276.51152000
3.87956300	78353.35321900	156.70670600	14277.52863700
3.87956600	78353.55391800	156.70710800	14278.54567000
[truncated: 5,260 more rows]
