# Supplementary material for: An Efficient Contact Model for the Simulation of Cargo Airdrop Extraction Phase
Source: Hindawi journal article supplement (doi:10.1155/2018/9895451), 2018-10-17
Supplement: f1 [file 9895451.f1.zip › FEM_results/deg2_fd5000_fric_contact_forc.csv]

time	Sl 1
0	0
0.000961207	0
0.0019865	0
0.0029477	0
0.00397299	0
0.00499828	0
0.00595949	0
0.00698477	0
0.00794598	0
0.00897127	0
0.00999656	0
0.0109578	0
0.0119831	0
0.0129443	0
0.0139695	0
0.0149948	0
0.015956	0
0.0169813	0
0.0179425	0
0.0189678	0
0.0199931	0
0.0209543	0
0.0219796	0
0.0229408	0
0.0239661	0
0.0249914	0
0.0259526	0
0.0269779	0
0.0279391	0
0.0289644	0
0.0299897	0
0.0309509	0
0.0319762	42058.9
0.0329374	906354
0.0339627	319869
0.0349879	0
0.0359492	0
0.0369744	0
0.0379997	0
0.0389609	0
0.0399862	0
0.0409474	0
0.0419727	0
0.042998	0
0.0439592	0
0.0449845	0
0.0459457	0
0.046971	0
0.0479963	0
0.0489575	0
0.0499828	0
0.050944	0
0.0519693	0
0.0529946	0
0.0539558	0
0.0549811	0
0.0559423	0
0.0569676	0
0.0579928	0
0.0589541	0
0.0599793	0
0.0609405	0
0.0619658	0
0.0629911	0
0.0639523	0
0.0649776	0
0.0659388	0
0.0669641	0
0.0679894	0
0.0689506	0
0.0699759	0
0.0709371	0
0.0719624	0
0.0729877	0
0.0739489	0
0.0749742	0
0.0759995	0
0.0769607	0
0.077986	0
0.0789472	0
0.0799725	0
0.0809977	0
0.0819589	0
0.0829842	0
0.0839454	0
0.0849707	0
0.085996	0
0.0869572	0
0.0879825	0
0.0889437	0
0.089969	0
0.0909943	0
0.0919555	0
0.0929808	1562.84
0.093942	663418
0.0949673	508357
0.0959926	0
0.0969538	0
0.0979791	0
0.0989403	0
0.0999656	0
0.100991	0
0.101952	0
0.102977	0
0.103939	0
0.104964	0
0.105989	0
0.10695	0
0.107976	0
0.108937	0
0.109962	0
0.110987	0
0.111949	0
0.112974	0
0.113999	0
0.11496	0
0.115986	0
0.116947	0
0.117972	0
0.118997	0
0.119959	0
0.120984	0
0.121945	0
0.12297	0
0.123996	0
0.124957	0
0.125982	0
0.126943	0
0.127969	0
0.128994	0
0.129955	0
0.130981	0
0.131942	0
0.132967	0
0.133992	0
0.134954	0
0.135979	0
0.13694	0
0.137965	0
0.138991	0
0.139952	0
0.140977	0
0.141938	0
0.142964	0
0.143989	0
0.14495	0
0.145975	0
0.146937	0
0.147962	0
0.148987	0
0.149948	0
0.150974	505494
0.151999	547941
0.15296	85.7051
0.153985	0
0.154947	0
0.155972	0
0.156997	0
0.157958	0
0.158984	0
0.159945	0
0.16097	0
0.161995	0
0.162957	0
0.163982	0
0.164943	0
0.165968	0
0.166994	0
0.167955	0
0.16898	0
0.169941	0
0.170967	0
0.171992	0
0.172953	0
0.173979	0
0.17494	0
0.175965	0
0.17699	0
0.177952	0
0.178977	0
0.179938	0
0.180963	0
0.181989	0
0.18295	0
0.183975	0
0.184936	0
0.185962	0
0.186987	0
0.187948	0
0.188973	0
0.189999	0
0.19096	0
0.191985	0
0.192946	0
0.193972	0
0.194997	0
0.195958	0
0.196983	0
0.197945	0
0.19897	0
0.199995	0
0.200956	6677.16
0.201982	132339
0.202943	212035
0.203968	36284.5
0.204993	300851
0.205955	254548
0.20698	3051.25
0.207941	0
0.208966	0
0.209992	0
0.210953	0
0.211978	0
0.212939	0
0.213965	0
0.21499	0
0.215951	0
0.216977	0
0.217938	0
0.218963	652.288
0.219988	7586.7
0.22095	24565.8
0.221975	39193.9
0.222936	39980.2
0.223961	26603.7
0.224987	9538.75
0.225948	2036.93
0.226973	0
0.227998	0
0.22896	0
0.229985	0
0.230946	0
0.231971	0
0.232997	0
0.233958	0
0.234983	0
0.235944	0
0.23697	0
0.237995	0
0.238956	0
0.239981	0
0.240943	0
0.241968	0
0.242993	0
0.243954	560.296
0.24498	6444.63
0.245941	22787
0.246966	39975.7
0.247991	42745.9
0.248953	26431.1
0.249978	7872.77
0.250939	434.689
0.251964	0
0.25299	0
0.253951	0
0.254976	0
0.255937	0
0.256963	0
0.257988	52.0206
0.258949	183049
0.259975	333396
0.261	18466.8
0.261961	57806.8
0.262986	150421
0.263948	66113.9
0.264973	2273.97
0.265998	0
0.266959	0
0.267985	0
0.268946	0
0.269971	0
0.270996	0
0.271958	0
0.272983	0
0.273944	0
0.274969	0
0.275995	0
0.276956	0
0.277981	0
0.278942	0
0.279968	0
0.280993	0
0.281954	0
0.282979	0
0.283941	0
0.284966	0
0.285991	0
0.286952	0
0.287978	0
0.288939	0
0.289964	0
0.29099	0
0.291951	0
0.292976	0
0.293937	0
0.294962	0
0.295988	0
0.296949	0
0.297974	0
0.299	0
0.299961	4378.55
0.300986	91017.8
0.301947	154647
0.302973	32364.3
0.303998	266369
0.304959	207813
0.305984	1375.1
0.306946	0
0.307971	0
0.308996	0
0.309957	0
0.310983	0
0.311944	0
0.312969	0
0.313994	361.778
0.314956	6562.03
0.315981	22661.7
0.316942	36593.1
0.317967	33461.3
0.318993	18103.4
0.319954	4775.37
0.320979	398.032
0.32194	0
0.322966	0
0.323991	0
0.324952	0
0.325977	0
0.326939	0
0.327964	0
0.328989	0
0.32995	0
0.330976	0
0.331937	0
0.332962	0
0.333988	44.1696
0.334949	3060.31
0.335974	15083.2
0.336999	32105.5
0.337961	37675.2
0.338986	24719.8
0.339947	7257.96
0.340972	367.983
0.341998	0
0.342959	0
0.343984	0
0.344945	0
0.345971	0
0.346996	6333.73
0.347957	246076
0.348982	210509
0.349944	10773.3
0.350969	101760
0.351994	81649.7
0.352955	9757.31
0.353981	0
0.354942	0
0.355967	0
0.356992	0
0.357954	0
0.358979	0
0.35994	0
0.360965	0
0.361991	0
0.362952	0
0.363977	0
0.364938	0
0.365964	0
0.366989	0
0.36795	0
0.368975	0
0.369937	0
0.370962	0
0.371987	0
0.372948	0
0.373974	0
0.374999	0
0.37596	0
0.376986	0
0.377947	184.988
0.378972	20290.5
0.379997	75400.2
0.380959	74080.3
0.381984	15635.7
0.382945	0
0.38397	0
0.384996	92972.5
0.385957	250381
0.386982	44408.9
0.387943	0
0.388969	0
0.389994	827.671
0.390955	28001.4
0.39198	65338.1
0.392942	49123.6
0.393967	11794.6
0.394992	118.623
0.395953	0
0.396979	0
0.39794	0
0.398965	0
0.39999	0
0.400952	0
0.401977	0
0.402938	0
0.403963	0
0.404989	0
0.40595	0
0.406975	0
0.407936	0
0.408962	0
0.409987	0
0.410948	0
0.411973	0
0.412999	0
0.41396	1244.19
0.414985	27682.4
0.415946	69687.9
0.416972	50811
0.417997	4277.69
0.418958	0
0.419984	144119
0.420945	220157
0.42197	11105.7
0.422995	0
0.423957	1704.56
0.424982	29481.4
0.425943	53397.3
0.426968	33512.1
0.427994	6119.17
0.428955	25.0126
0.42998	0
0.430941	0
0.431967	0
0.432992	0
0.433953	0
0.434978	0
0.43594	0
0.436965	0
0.43799	0
0.438951	0
0.439977	0
0.440938	0
0.441963	0
0.442988	3211.22
0.44395	21698.7
0.444975	43278.2
0.445936	37957.2
0.446961	11821.7
0.447987	178.011
0.448948	0
0.449973	0
0.450998	0
0.45196	52740.5
0.452985	222720
0.453946	53478.6
0.454971	1308.77
0.455997	54447.4
0.456958	80616
0.457983	25283.7
0.458944	236.425
0.45997	0
0.460995	0
0.461956	0
0.462982	0
0.463943	0
0.464968	0
0.465993	0
0.466955	0
0.46798	0
0.468941	0
0.469966	0
0.470992	0
0.471953	0
0.472978	0
0.473939	0
0.474965	0
0.47599	0
0.476951	0
0.477976	306.023
0.478938	53277.1
0.479963	178058
0.480988	211769
0.481949	39498.7
0.482975	0
0.484	0
0.484961	0
0.485986	0
0.486948	0
0.487973	0
0.488998	0
0.489959	0
0.490985	0
0.491946	0
0.492971	0
0.493997	0
0.494958	0
0.495983	0
0.496944	0
0.497969	0
0.498995	0
0.499956	1587.02
0.500981	41118.3
0.501942	81948
0.502968	29845.7
0.503993	0.364658
0.504954	88772.3
0.50598	161283
0.506941	15410.8
0.507966	0
0.508991	0
0.509953	0
0.510978	3590.21
0.511939	27843
0.512964	43549.7
0.51399	25246.4
0.514951	3952.76
0.515976	1.60594
0.516937	0
0.517963	0
0.518988	0
0.519949	0
0.520974	0
0.522	0
0.522961	0
0.523986	0
0.524947	0
0.525973	0
0.526998	231.557
0.527959	24775.2
0.528984	86986.8
0.529946	190704
0.530971	111331
0.531996	532.33
0.532957	0
0.533983	0
0.534944	0
0.535969	0
0.536995	0
0.537956	0
0.538981	0
0.539942	0
0.540968	0
0.541993	0
0.542954	5826.6
0.543979	32017.1
0.54494	45519.2
0.545966	22108.3
0.546991	1275.82
0.547952	0
0.548978	0
0.549939	0
0.550964	150.95
0.551989	79162.1
0.552951	133716
0.553976	13049.8
0.554937	2876.54
0.555962	57042.8
0.556988	64204
0.557949	10841.9
0.558974	0
0.559999	0
0.560961	0
0.561986	0
0.562947	0
0.563972	0
0.564998	0
0.565959	0
0.566984	0
0.567945	0
0.568971	0
0.569996	7853.21
0.570957	75257.2
0.571982	69527.9
0.572944	4719.54
0.573969	102073
0.574994	77498
0.575955	1097.05
0.576981	0
0.577942	0
0.578967	0
0.579993	0
0.580954	5437.32
0.581979	32555.4
0.58294	40827.7
0.583966	15987
0.584991	347.373
0.585952	0
0.586977	0
0.587939	0
0.588964	0
0.589989	0
0.59095	0
0.591976	8765.98
0.592937	111802
0.593962	90319.8
0.594987	77330.6
0.595949	32916.1
0.596974	481.376
0.597999	0
0.59896	0
0.599986	0
0.600947	0
0.601972	0
0.602997	0
0.603959	0
0.604984	0
0.605945	0
0.60697	0
0.607996	235.818
0.608957	50879
0.609982	173693
0.610943	71724.6
0.611969	799.533
0.612994	0
0.613955	0
0.61498	0
0.615942	0
0.616967	0
0.617992	0
0.618953	0
0.619979	0
0.62094	0
0.621965	0
0.622991	5900.53
0.623952	170356
0.624977	96565.4
0.625938	0
0.626964	0
0.627989	0
0.62895	0
0.629975	0
0.630937	0
0.631962	0
0.632987	0
0.633948	0
0.634974	95.0003
0.635999	30097.3
0.63696	91647.8
0.637985	101825
0.638947	27247.2
0.639972	1.22717
0.640997	0
0.641958	0
0.642984	0
0.643945	0
0.64497	0
0.645995	0
0.646957	0
0.647982	18124.9
0.648943	79365.8
0.649968	92531.3
0.650994	40889.5
0.651955	717.549
0.65298	0
0.653941	0
0.654967	0
0.655992	0
0.656953	0
0.657978	0
0.65894	0
0.659965	28572.1
0.66099	138686
0.661951	50867.5
0.662977	784.292
0.663938	0
0.664963	0
0.665989	0
0.66695	0
0.667975	0
0.668936	174.631
0.669962	15775.3
0.670987	41226.2
0.671948	22290.3
0.672973	84499.5
0.673999	38048
0.67496	0
0.675985	582.575
0.676946	14773.7
0.677972	27728.8
0.678997	13803.2
0.679958	785.325
0.680983	0
0.681945	0
0.68297	0
0.683995	46675.8
0.684956	117125
0.685982	25811.2
0.686943	1074.65
0.687968	0
0.688993	180.283
0.689955	4599.15
0.69098	14671.9
0.691941	17612.3
0.692966	7936.99
0.693992	428.795
0.694953	16002
0.695978	104512
0.696939	39959.1
0.697965	6741.53
0.69899	4823.61
0.699951	5517.52
0.700976	7245.74
0.701938	8507.94
0.702963	7907.76
0.703988	6107.61
0.704949	5427.29
0.705975	47448
0.706936	95415.1
0.707961	8785.39
0.708987	3969.64
0.709948	12013.5
0.710973	13287.3
0.711998	6978.62
0.71296	2111.64
0.713985	1426.67
0.714946	7960.2
0.715971	72197.7
0.716997	65181
0.717958	580.715
0.718983	49.5821
0.719944	5514.6
0.72097	17620.2
0.721995	15460
0.722956	3169.68
0.723981	3265.18
0.724943	66817.7
0.725968	53497
0.726993	8888.23
0.727954	5138.94
0.72898	5022.8
0.729941	7127.58
0.730966	9517.06
0.731991	10510.4
0.732953	53259.5
0.733978	53330
0.734939	2779.54
0.735964	11302.7
0.73699	14145.5
0.737951	6834.51
0.738976	1378.44
0.739937	20549.1
0.740963	74235.1
0.741988	16928.2
0.742949	1528.57
0.743974	6614.05
0.745	13370.5
0.745961	11690.7
0.746986	27156.6
0.747947	53775.9
0.748973	12907.2
0.749998	11787.8
0.750959	10675.9
0.751985	5250.19
0.752946	14994
0.753971	58232.8
0.754996	19770.3
0.755958	4161.95
0.756983	8664.43
0.757944	12964.5
0.758969	28477.9
0.759995	40871.7
0.760956	8783.94
0.761981	13140
0.762942	14104
0.763968	16456.5
0.764993	37923.4
0.765954	19163.6
0.766979	11698.2
0.767941	9761.98
0.768966	22950.2
0.769991	36397.1
0.770952	13042.4
0.771978	9588.9
0.772939	16646.2
0.773964	33392.3
0.774989	19705
0.775951	9599.56
0.776976	18303.4
0.777937	29500.2
0.778962	19325.7
0.779988	11501.1
0.780949	22271.2
0.781974	26467.6
0.783	14916.5
0.783961	14971.3
0.784986	25456.2
0.785947	22099.7
0.786973	13529.4
0.787998	19693.6
0.788959	25434.1
0.789984	17779
0.790945	14911.3
0.791971	22842.2
0.792996	22654
0.793957	15401.2
0.794983	18155.1
0.795944	24014
0.796969	19603.7
0.797994	15683.7
0.798956	21124.6
0.799981	22826.2
0.800942	17189.4
0.801967	17418.3
0.802993	22616.6
0.803954	20567.7
0.804979	16556.8
0.80594	19739.8
0.806966	22459.1
0.807991	18442
0.808952	17375.5
0.809977	21430.7
0.810939	21106.3
0.811964	17498.1
0.812989	19050.4
0.81395	21847.8
0.814976	19473.6
0.815937	17596.6
0.816962	20387.2
0.817987	21178.3
0.818949	18290.7
0.819974	18603.9
0.820999	21169.9
0.82196	20004.2
0.822986	18078.7
0.823947	19770.6
0.824972	20998.7
0.825998	18965
0.826959	18557.3
0.827984	20572.3
0.828945	20282.8
0.829971	18550
0.830996	19417.8
0.831957	20708.4
0.832982	19474.5
0.833944	18664.8
0.834969	20057.8
0.835994	20312.3
0.836955	18921.9
0.837981	19219.9
0.838942	20393
0.839967	19766.4
0.840992	18849.8
0.841954	19781.1
0.842979	20278.1
0.84394	19256.8
0.844965	19135.7
0.845991	20140.7
0.846952	19859.2
0.847977	19074.2
0.848938	19564.3
0.849964	20154
0.850989	19472.4
0.85195	19167
0.852975	19892.5
0.853937	19962.3
0.854962	19253.8
0.855987	19461
0.856948	20016.2
0.857974	19650.7
0.858999	19242.1
0.85996	19743.4
0.860985	19929.8
0.861947	19409
0.862972	19404.5
0.863997	19874.6
0.864958	19741.3
0.865984	19333
0.866945	19602.2
0.86797	19906.7
0.868996	19517.7
0.869957	19404.3
0.870982	19767.1
0.871943	19777.5
0.872969	19446.9
0.873994	19528.8
0.874955	19818.2
0.87598	19653.6
0.876942	19420.4
0.877967	19653.8
0.878992	19780.3
0.879953	19543.5
0.880979	19480.3
0.88194	19745.2
0.882965	19716.1
0.88399	19465.5
0.884952	19593.4
0.885977	19766.4
0.886938	19598.4
0.887963	19489.6
0.888989	19680.1
0.88995	19729.4
0.890975	19523.6
0.891936	19546.1
0.892962	19748.7
0.893987	19633.9
0.894948	19488.3
0.895973	19659.6
0.896999	19705.5
0.89796	19561.5
0.898985	19566.2
0.899946	19679.6
0.900972	19660.4
0.901997	19535.9
0.902958	19618
0.903983	19704
0.904945	19593.3
0.90597	19555.8
0.906995	19665.1
0.907956	19671
0.908982	19557
0.909943	19591.5
0.910968	19689.9
0.911994	19623.3
0.912955	19539.5
0.91398	19654.9
0.914941	19677.7
0.915967	19562.6
0.916992	19598
0.917953	19684.5
0.918978	19630.5
0.91994	19536.7
0.920965	19645.8
0.92199	19677.8
0.922951	19580.8
0.923977	19574.1
0.924938	19662.8
0.925963	19655.5
0.926988	19574.2
0.92795	19599
0.928975	19661.3
0.929936	19646.1
0.930961	19567.5
0.931987	19600.9
0.932948	19703.7
0.933973	19595.4
0.934998	19558.3
0.93596	19678.8
0.936985	19636.5
0.937946	19583.2
0.938971	19605.1
0.939997	19666.9
0.940958	19602.4
0.941983	19595
0.942944	19653.3
0.94397	19615.2
0.944995	19588.5
0.945956	19650.5
0.946981	19632.1
0.947943	19587.1
0.948968	19622.9
0.949993	19648.8
0.950954	19609.8
0.95198	19600.6
0.952941	19622.2
0.953966	19639.5
0.954992	19610
0.955953	19602.7
0.956978	19648.2
0.957939	19611.5
0.958965	19599.7
0.95999	19634.9
0.960951	19635.9
0.961976	19600.4
0.962938	19610.5
0.963963	19639.8
0.964988	19635.2
0.965949	19590.9
0.966975	19620.9
0.968	19629.1
0.968961	19620.8
0.969986	19604.1
0.970948	19630
0.971973	19627.1
0.972998	19625.6
0.973959	19597.7
0.974985	19630.6
0.975946	19623.1
0.976971	19616.8
0.977996	19610.5
0.978958	19638.8
0.979983	19635.1
0.980944	19570.8
0.981969	19624
0.982995	19683.7
0.983956	19569.8
0.984981	19581.7
0.985942	19678.5
0.986968	19637.1
0.987993	19549.4
0.988954	19653.6
0.98998	19657.4
0.990941	19602.7
0.991966	19572.3
0.992991	19668.2
0.993952	19643.3
0.994978	19557.2
0.995939	19617.8
0.996964	19697.5
0.99799	19577.1
0.998951	19558.2
0.999976	19700.1
1.00094	19632.8
1.00196	19533.1
1.00299	19651.2
1.00395	19700.3
1.00497	19561.4
1.006	19566.3
1.00696	19687.8
1.00799	19660.3
1.00895	19540.3
1.00997	19613.7
1.011	19689
1.01196	19598.9
1.01298	19561.2
1.01395	19658.5
1.01497	19665.4
1.016	19563.9
1.01696	19606.4
1.01798	19666.2
1.01894	19619.7
1.01997	19577.8
1.02099	19641.7
1.02196	19650.9
1.02298	19580
1.02394	19604.9
1.02497	19665.5
1.02599	19629.8
1.02695	19552.9
1.02798	19639.9
1.02894	19680.7
1.02997	19591.5
1.03099	19548.7
1.03195	19688.5
1.03298	19664.3
1.03394	19541.6
1.03496	19612.7
1.03599	19692.6
1.03695	19598.4
1.03798	19548
1.03894	19679.5
1.03996	19661.1
1.04099	19551.3
1.04195	19606.2
1.04297	19686
1.044	19611.3
1.04496	19558.9
1.04599	19639.3
1.04695	19679
1.04797	19591.3
1.049	19562.1
1.04996	19675.9
1.05098	19666.6
1.05195	19556.6
1.05297	19582.7
1.054	19685.4
1.05496	19636.7
1.05598	19559.5
1.05694	19633.3
1.05797	19655.3
1.05899	19606.8
1.05996	19582.4
1.06098	19651.2
1.06194	19641.9
1.06297	19576
1.06399	19627.9
1.06495	19659.4
1.06598	19588.2
1.06694	19610.8
1.06797	19647.8
1.06899	19618.3
1.06995	19581.8
1.07098	19639.9
1.07194	19641
1.07296	19600.5
1.07399	19617.9
1.07495	19635
1.07598	19613.1
1.07694	19602.1
1.07796	19628.2
1.07899	19659.3
1.07995	19586.2
1.08097	19587.5
1.082	19665.8
1.08296	19635.4
1.08399	19565.6
1.08495	19616.6
1.08597	19688.3
1.087	19582.9
1.08796	19570.4
1.08898	19682.4
1.08995	19635.3
1.09097	19562.7
1.092	19613.7
1.09296	19687.4
1.09398	19613.3
1.09494	19560.3
1.09597	19627.7
1.09699	19686.1
1.09796	19568.8
1.09898	19589.8
1.09994	19681.3
1.10097	19613.9
1.10199	19577.2
1.10295	19650.8
1.10398	19630.5
1.10494	19600.1
1.10597	19613.3
1.10699	19635.3
1.10795	19643.5
1.10898	19579
1.10994	19621.2
1.11096	19651.4
1.11199	19615.3
1.11295	19586.7
1.11398	19641.2
1.11494	19641.1
1.11596	19583.8
1.11699	19619.9
1.11795	19648.4
1.11897	19632.5
1.12	19567
1.12096	19642.9
1.12199	19653.8
1.12295	19597.4
1.12397	19596.3
1.125	19638
1.12596	19648.7
1.12698	19581
1.12794	19614.6
1.12897	19656.9
1.13	19620.3
1.13096	19572.8
1.13198	19640.6
1.13294	19654.4
1.13397	19586.4
1.13499	19593.4
1.13595	19682.6
1.13698	19621.6
1.13794	19546.8
1.13897	19638.2
1.13999	19692.8
1.14095	19573.2
1.14198	19580.8
1.14294	19660.8
1.14396	19628
1.14499	19592.3
1.14595	19628.4
1.14698	19640.7
1.14794	19616
1.14896	19600.8
1.14999	19621.6
1.15095	19641.4
1.15197	19608.8
1.15294	19612.5
1.15396	19630.5
1.15499	19618.5
1.15595	19603.7
1.15697	19625.5
1.158	19648.9
1.15896	19589.3
1.15999	19609.5
1.16095	19651.7
1.16197	19614.7
1.163	19603.2
1.16396	19635.3
1.16498	19621.4
1.16594	19594.7
1.16697	19641.5
1.168	19630.9
1.16896	19586
1.16998	19642.6
1.17094	19640.9
1.17197	19589.9
1.17299	19606.4
1.17395	19658.4
1.17498	19611.1
1.17594	19585.4
1.17697	19646.4
1.17799	19643.4
1.17895	19581.6
1.17998	19619.7
1.18094	19642.4
1.18196	19617.4
1.18299	19596.7
1.18395	19640.5
1.18498	19629.3
1.18594	19605
1.18696	19611.8
1.18799	19642.5
1.18895	19615.7
1.18997	19592.8
1.19094	19642.6
1.19196	19636
1.19299	19592.1
1.19395	19616.8
1.19497	19641.2
1.196	19623.5
1.19696	19595.1
1.19798	19613.3
1.19895	19663.3
1.19997	19605.3
1.201	19594.1
1.20196	19638.4
1.20298	19642.4
1.20394	19594.1
1.20497	19601.5
1.20599	19642.5
1.20696	19637.2
1.20798	19604.5
1.20894	19609.5
1.20997	19631.9
1.21099	19613.3
1.21195	19629.1
1.21298	19609.8
1.21394	19623.9
1.21497	19631.2
1.21599	19613.8
1.21695	19599
1.21798	19643.3
1.21894	19633.4
1.21996	19579.6
1.22099	19637.3
1.22195	19657.3
1.22298	19581.3
1.22394	19601.4
1.22496	19657.7
1.22599	19619.4
1.22695	19589.2
1.22797	19634.3
1.229	19633.2
1.22996	19618.9
1.23099	19597.6
1.23195	19616.3
1.23297	19647.8
1.234	19621.8
1.23496	19585.9
1.23598	19628.3
1.23695	19650.1
1.23797	19607.9
1.239	19589.2
1.23996	19636
1.24098	19651.8
1.24194	19597.3
1.24297	19606.5
1.24399	19643.5
1.24496	19617.7
1.24598	19592
1.24694	19654.7
1.24797	19615
1.24899	19595.3
1.24995	19629.9
1.25098	19646.3
1.25194	19613.1
1.25297	19584.3
1.25399	19640.6
1.25495	19653.1
1.25598	19586.6
1.25694	19593.7
1.25796	19661
1.25899	19632
1.25995	19584.4
1.26098	19613.6
1.26194	19656.5
1.26296	19614.5
1.26399	19577.7
1.26495	19655.5
1.26597	19653.5
1.267	19558.6
1.26796	19621.9
1.26899	19674.9
1.26995	19591.7
1.27097	19591.9
1.272	19639.4
1.27296	19644.4
1.27398	19598.3
1.27495	19598
1.27597	19640.5
1.277	19649.8
1.27796	19591.2
1.27898	19592.7
1.27994	19657
1.28097	19639.1
1.28199	19567.5
1.28296	19633.1
1.28398	19671.4
1.28494	19577.8
1.28597	19575.7
1.28699	19699.4
1.28795	19613.9
1.28898	19555.6
1.28994	19638.2
1.29097	19681.1
1.29199	19571.4
1.29295	19587.9
1.29398	19672
1.29494	19641.5
1.29596	19550.3
1.29699	19639.3
1.29795	19664.2
1.29898	19603.3
1.29994	19578
1.30096	19654.1
1.30199	19647.1
1.30295	19577.9
1.30397	19599.9
1.305	19662.2
1.30596	19625.2
1.30699	19575.4
1.30795	19625.1
1.30897	19676.7
1.31	19589.1
1.31096	19583.5
1.31198	19660.5
1.31295	19642.6
1.31397	19551.6
1.315	19649
1.31596	19667.6
1.31698	19575
1.31794	19607.9
1.31897	19646.3
1.31999	19629.3
1.32096	19596.1
1.32198	19614.1
1.32294	19638.1
1.32397	19623.4
1.32499	19614.2
1.32595	19607
1.32698	19626
1.32794	19638.8
1.32897	19603.1
1.32999	19619.1
1.33095	19637.5
1.33198	19599.6
1.33294	19622.2
1.33396	19639.5
1.33499	19603.5
1.33595	19613.3
1.33698	19645.7
1.33794	19603.5
1.33896	19615.1
1.33999	19625.4
1.34095	19625.9
1.34197	19609.2
1.343	19630.5
1.34396	19620.4
1.34499	19604.7
1.34595	19628.1
1.34697	19619.6
1.348	19625.5
1.34896	19612.6
1.34998	19630
1.35094	19611
1.35197	19613.6
1.353	19636.5
1.35396	19620.9
1.35498	19600.5
1.35594	19614.6
1.35697	19643.6
1.35799	19633
1.35895	19581.1
1.35998	19613.6
1.36094	19656.5
1.36197	19635.2
1.36299	19562.3
1.36395	19620.9
1.36498	19691.1
1.36594	19592.6
1.36697	19563.1
1.36799	19669.9
1.36895	19644.9
1.36998	19564
1.37094	19622.2
1.37196	19676.7
1.37299	19588
1.37395	19580.6
1.37498	19658.4
1.37594	19646.6
1.37696	19585.5
1.37799	19594.8
1.37895	19666.4
1.37997	19627.1
1.381	19580.8
1.38196	19626.4
1.38299	19657.6
1.38395	19596.6
1.38497	19603
1.386	19639.2
1.38696	19633.6
1.38798	19578.5
1.38894	19633.1
1.38997	19656.8
1.391	19596.7
1.39196	19584.7
1.39298	19660.1
1.39394	19644.7
1.39497	19565.7
1.39599	19647.8
1.39695	19630
1.39798	19606.3
1.39894	19593
1.39997	19653.9
1.40099	19625.8
1.40195	19585.7
1.40298	19629
1.40394	19653.3
1.40496	19586.9
1.40599	19625.9
1.40695	19625
1.40798	19625.6
1.40894	19617.9
1.40996	19600.9
1.41099	19636
1.41195	19625.9
1.41297	19611.9
1.41394	19604.8
1.41496	19650.3
1.41599	19603.9
1.41695	19602.9
1.41797	19644.3
1.419	19635.1
1.41996	19580.9
1.42098	19616.3
1.42195	19667.4
1.42297	19592.5
1.424	19607.3
1.42496	19644.3
1.42598	19609.4
1.42694	19613.9
1.42797	19636.7
1.42899	19606.8
1.42996	19625.4
1.43098	19617.7
1.43194	19620.1
1.43297	19622.6
1.43399	19632
1.43495	19590.2
1.43598	19627.7
1.43694	19646.2
1.43797	19596.1
1.43899	19616.7
1.43995	19643.8
1.44098	19602.3
1.44194	19616.3
1.44296	19641
1.44399	19607.7
1.44495	19608
1.44598	19636
1.44694	19625.3
1.44796	19599.8
1.44899	19630.9
1.44995	19628.3
1.45097	19604.7
1.452	19608.7
1.45296	19663.8
1.45399	19609.5
1.45495	19576.8
1.45597	19646.1
1.457	19653.8
1.45796	19588.5
1.45898	19586.2
1.45995	19666.3
1.46097	19631.6
1.462	19575.1
1.46296	19639.9
1.46398	19628.6
1.46494	19617.4
1.46597	19607.1
1.46699	19630.5
1.46796	19634.6
1.46898	19603.3
1.46994	19605
1.47097	19650.2
1.47199	19615.5
1.47295	19589.7
1.47398	19636.4
1.47494	19635.5
1.47597	19602.7
1.47699	19606.2
1.47795	19657.5
1.47898	19623.4
1.47994	19585.9
1.48096	19618.9
1.48199	19648.8
1.48295	19613.3
1.48398	19601.3
1.48494	19628.7
1.48596	19624.2
1.48699	19614.8
1.48795	19623.6
1.48897	19617.1
1.49	19625.2
1.49096	19624
1.49199	19604.9
1.49295	19626.1
1.49397	19637
1.495	19593.5
1.49596	19630.1
1.49698	19637.9
1.49795	19593.3
1.49897	19613.8
1.5	19662.1
1.50096	19591.1
1.50198	19598.1
1.50294	19657
1.50397	19633
1.50499	19572.5
1.50596	19630.2
1.50698	19652.2
1.50794	19614.8
1.50897	19573
1.50999	19658.2
1.51095	19648.8
1.51198	19570.9
1.51294	19606.1
1.51397	19671.6
1.51499	19618.2
1.51595	19574.4
1.51698	19624.8
1.51794	19668.6
1.51896	19593.8
1.51999	19584.2
1.52095	19663
1.52198	19641.9
1.52294	19569.8
1.52396	19621
1.52499	19660.4
1.52595	19596.2
1.52697	19601.1
1.528	19643.8
1.52896	19644
1.52999	19585.6
1.53095	19607
1.53197	19657.4
1.533	19595
1.53396	19617.9
1.53498	19646.3
1.53595	19601.6
1.53697	19612.9
1.538	19628.6
1.53896	19633.5
1.53998	19578.4
1.54094	19656.2
1.54197	19624.9
1.54299	19598.7
1.54396	19620.8
1.54498	19632.8
1.54594	19631.3
1.54697	19600
1.54799	19615.7
1.54895	19644.9
1.54998	19607.8
1.55094	19609.2
1.55197	19629.4
1.55299	19615
1.55395	19635.6
1.55498	19616.4
1.55594	19606.4
1.55696	19618.8
1.55799	19637.3
1.55895	19605.1
1.55998	19613.9
1.56094	19632.5
1.56196	19634.6
1.56299	19595.7
1.56395	19613.8
1.56497	19654
1.566	19605.2
1.56696	19606
1.56799	19616.2
1.56895	19651.6
1.56997	19605.1
1.571	19599.5
1.57196	19631.4
1.57298	19649.7
1.57395	19580.7
1.57497	19627.9
1.576	19631.2
1.57696	19611.9
1.57798	19632.8
1.57894	19599.9
1.57997	19618.3
1.58099	19641.6
1.58196	19627.5
1.58298	19580.8
1.58394	19622.9
1.58497	19662.7
1.58599	19606.4
1.58695	19576.1
1.58798	19648.9
1.58894	19639.4
1.58997	19600.4
1.59099	19602.8
1.59195	19649.3
1.59298	19627.9
1.59394	19588.5
1.59496	19635.4
1.59599	19625.6
1.59695	19612.3
1.59798	19604.1
1.59894	19646.2
1.59996	19616.9
1.60099	19605.5
1.60195	19628
1.60297	19633.2
1.604	19613.6
1.60496	19598
1.60599	19640.9
1.60695	19624.3
1.60797	19608.5
1.609	19627.3
1.60996	19614.7
1.61098	19616.6
1.61194	19616.3
1.61297	19625.4
1.614	19626.8
1.61496	19611.2
1.61598	19623.2
1.61694	19630.4
1.61797	19604.7
1.61899	19618
1.61995	19632.8
1.62098	19620.3
1.62194	19606.4
1.62297	19620.2
1.62399	19645.6
1.62495	19609.5
1.62598	19590.8
1.62694	19643.9
1.62796	19632.8
1.62899	19609.6
1.62995	19592.9
1.63098	19639.9
1.63194	19641.7
1.63296	19616.9
1.63399	19583.4
1.63495	19628.9
1.63597	19656.5
1.63694	19600.7
1.63796	19595.1
1.63899	19651.6
1.63995	19621.8
1.64097	19601.2
1.642	19608.2
1.64296	19662.1
1.64398	19603
1.64495	19588.7
1.64597	19653.8
1.647	19639
1.64796	19556.9
1.64898	19636.2
1.64994	19675.5
1.65097	19576.7
1.652	19603.1
1.65296	19654
1.65398	19631.3
1.65494	19575.9
1.65597	19631.3
1.65699	19650.8
1.65795	19611.3
1.65898	19570.5
1.65994	19650
1.66097	19666.8
1.66199	19574.4
1.66295	19600.4
1.66398	19656.8
1.66494	19633.5
1.66596	19586.5
1.66699	19608.1
1.66795	19666.6
1.66898	19602.3
1.66994	19594.3
1.67096	19631.4
1.67199	19649.5
1.67295	19593.3
1.67397	19611.5
1.675	19642.9
1.67596	19613.7
1.67699	19614
1.67795	19627.3
1.67897	19610.3
1.68	19621.8
1.68096	19632
1.68198	19605.7
1.68295	19623
1.68397	19614.4
1.685	19648.7
1.68596	19589.6
1.68698	19618.1
1.68794	19638.2
1.68897	19613.5
1.68999	19609.3
1.69096	19635.7
1.69198	19625.3
1.69294	19610.8
1.69397	19601.4
1.69499	19643.8
1.69595	19633.6
1.69698	19577.7
1.69794	19651.7
1.69897	19638.3
1.69999	19577.8
1.70095	19614.9
1.70198	19680
1.70294	19582.2
1.70396	19590.3
1.70499	19663.3
1.70595	19620.7
1.70698	19581.7
1.70794	19631.8
1.70896	19649.5
1.70999	19613.2
1.71095	19594.4
1.71197	19613.5
1.713	19663.9
1.71396	19601.8
1.71499	19586.8
1.71595	19660.5
1.71697	19627.1
1.718	19582.8
1.71896	19613.8
1.71998	19666.1
1.72095	19611.2
1.72197	19587.1
1.723	19627.8
1.72396	19652.6
1.72498	19609.1
1.72594	19593.8
1.72697	19626.3
1.72799	19645.4
1.72896	19612.8
1.72998	19602.7
1.73094	19627.2
1.73197	19631.5
1.73299	19617.8
1.73395	19593.1
1.73498	19640.6
1.73594	19631.6
1.73697	19601.5
1.73799	19610.2
1.73895	19647.7
1.73998	19615.1
1.74094	19597.4
1.74196	19618.6
1.74299	19658.5
1.74395	19605.1
1.74498	19595.6
1.74594	19633.5
1.74696	19637.6
1.74799	19599.4
1.74895	19618.4
1.74997	19638.1
1.751	19625.8
1.75196	19592.4
1.75299	19626.1
1.75395	19627
1.75497	19628.1
1.756	19599.9
1.75696	19617.8
1.75798	19643.8
1.75895	19622.9
1.75997	19590
1.761	19626.4
1.76196	19664.6
1.76298	19584.2
1.76394	19591.3
1.76497	19662.6
1.76599	19634.8
1.76696	19577.2
1.76798	19607.5
1.76894	19675.1
1.76997	19611.9
1.77099	19576.4
1.77195	19641.3
1.77298	19651.5
1.77394	19586.3
1.77497	19596.6
1.77599	19674.2
1.77695	19616.8
1.77798	19575.4
1.77894	19631.2
1.77996	19645.3
1.78099	19621.3
1.78195	19586.3
1.78298	19628.9
1.78394	19654.4
1.78496	19600.3
1.78599	19592.3
1.78695	19661.1
1.78797	19613.3
1.789	19596.9
1.78996	19638.8
1.79099	19637
1.79195	19585
1.79297	19622.5
1.794	19641.4
1.79496	19617.1
1.79598	19604.8
1.79695	19620.4
1.79797	19633.7
1.799	19612.1
1.79996	19620.6
1.80098	19624.4
1.80194	19619
1.80297	19617.7
1.80399	19626.7
1.80496	19616.1
1.80598	19607.2
1.80694	19631.1
1.80797	19634.5
1.80899	19609.6
1.80995	19599.6
1.81098	19629.7
1.81194	19643.3
1.81297	19607.5
1.81399	19600.6
1.81495	19645.8
1.81598	19628.6
1.81694	19588.8
1.81796	19612
1.81899	19665.1
1.81995	19607.7
1.82098	19568.8
1.82194	19663.6
1.82296	19661.6
1.82399	19547
1.82495	19616.7
1.82597	19687.2
1.827	19598.3
1.82796	19574.3
1.82899	19639.2
1.82995	19655.7
1.83097	19594.6
1.832	19609.7
1.83296	19642.7
1.83398	19628.2
1.83494	19589
1.83597	19622.4
1.837	19633.2
1.83796	19625.1
1.83898	19610
1.83994	19608.5
1.84097	19643.5
1.84199	19612.5
1.84295	19601.9
1.84398	19636.7
1.84494	19627.6
1.84597	19598.6
1.84699	19624.1
1.84795	19643.9
1.84898	19614.9
1.84994	19579
1.85096	19646
1.85199	19640.6
1.85295	19594.5
1.85398	19608.5
1.85494	19657.8
1.85596	19616.1
1.85699	19574
1.85795	19647.1
1.85898	19662.7
1.85994	19573.2
1.86096	19607.5
1.86199	19647.2
1.86295	19632.6
1.86397	19576.6
1.865	19632.5
1.86596	19665.2
1.86699	19583.8
1.86795	19602.2
1.86897	19656.6
1.87	19623
1.87096	19578.3
1.87198	19637.7
1.87294	19650.7
1.87397	19583.7
1.875	19607.6
1.87596	19673.5
1.87698	19609.6
1.87794	19566.5
1.87897	19650.5
1.87999	19659.5
1.88095	19583.8
1.88198	19586.6
1.88294	19661.4
1.88397	19648.1
1.88499	19567.1
1.88595	19611.9
1.88698	19672.9
1.88794	19610.4
1.88896	19569.2
1.88999	19662
1.89095	19647.6
1.89198	19566.2
1.89294	19612.8
1.89396	19671.8
1.89499	19610.8
1.89595	19582.7
1.89697	19629.7
1.89794	19643.6
1.89896	19609.4
1.89999	19596.1
1.90095	19645
1.90197	19637.5
1.903	19601.2
1.90396	19602.9
1.90498	19637.7
1.90595	19639.7
1.90697	19583.3
1.908	19623.9
1.90896	19659.7
1.90998	19598.1
1.91094	19590.6
1.91197	19647.2
1.91299	19629.8
1.91396	19611.8
1.91498	19587.2
1.91594	19658.2
1.91697	19634.7
1.91799	19583.6
1.91895	19619.4
1.91998	19657.4
1.92094	19592.1
1.92197	19602.7
1.92299	19640.1
1.92395	19641
1.92498	19597.1
1.92594	19600
1.92696	19643.5
1.92799	19645.3
1.92895	19573.4
1.92998	19609.5
1.93094	19683.9
1.93196	19603
1.93299	19559.1
1.93395	19677.2
1.93497	19647.7
1.936	19560.9
1.93696	19615.7
1.93799	19673.7
1.93895	19615.8
1.93997	19566.7
1.941	19633.3
1.94196	19668.2
1.94298	19597.8
1.94395	19581.5
1.94497	19649.3
1.946	19644.4
1.94696	19580.7
1.94798	19618.8
1.94894	19662.8
1.94997	19602.4
1.95099	19588.8
1.95196	19641.2
1.95298	19647.2
1.95394	19593.9
1.95497	19589.5
1.95599	19655
1.95695	19648.1
1.95798	19572.3
1.95894	19626.7
1.95997	19649.4
1.96099	19610.9
1.96195	19584.4
1.96298	19639.5
1.96394	19656.3
1.96496	19585.3
1.96599	19605.1
1.96695	19649.3
1.96798	19629
1.96894	19581.3
1.96996	19641.2
1.97099	19626.7
1.97195	19597.2
1.97297	19631.9
1.974	19623.5
1.97496	19629
1.97599	19609.8
1.97695	19596.4
1.97797	19660.6
1.979	19618.8
1.97996	19569.9
1.98098	19649.4
1.98195	19641
1.98297	19590.9
1.984	19628.2
1.98496	19625.1
1.98598	19622.1
1.98694	19614.2
1.98797	19621.6
1.98899	19613.4
1.98996	19619.8
1.99098	19630.6
1.99194	19622.8
1.99297	19610.1
1.99399	19613.3
1.99495	19634.6
1.99598	19620.7
1.99694	19609.8
1.99797	19627.9
[truncated: 6,002 more rows]
