# Supplementary material for: An Efficient Contact Model for the Simulation of Cargo Airdrop Extraction Phase
Source: Hindawi journal article supplement (doi:10.1155/2018/9895451), 2018-10-17
Supplement: f1 [file 9895451.f1.zip › FEM_results/deg2_fd5000_fric_contact_forc_2.csv]

# time	fx	fy	fz	mx	my	mz
0.000000e+00	0.000000e+00	0.000000e+00	0.000000e+00	0.000000e+00	0.000000e+00	0.000000e+00
9.612070e-04	0.000000e+00	0.000000e+00	0.000000e+00	0.000000e+00	0.000000e+00	0.000000e+00
1.986500e-03	0.000000e+00	0.000000e+00	0.000000e+00	0.000000e+00	0.000000e+00	0.000000e+00
2.947700e-03	0.000000e+00	0.000000e+00	0.000000e+00	0.000000e+00	0.000000e+00	0.000000e+00
3.972990e-03	0.000000e+00	0.000000e+00	0.000000e+00	0.000000e+00	0.000000e+00	0.000000e+00
4.998280e-03	0.000000e+00	0.000000e+00	0.000000e+00	0.000000e+00	0.000000e+00	0.000000e+00
5.959490e-03	0.000000e+00	0.000000e+00	0.000000e+00	0.000000e+00	0.000000e+00	0.000000e+00
6.984770e-03	0.000000e+00	0.000000e+00	0.000000e+00	0.000000e+00	0.000000e+00	0.000000e+00
7.945980e-03	0.000000e+00	0.000000e+00	0.000000e+00	0.000000e+00	0.000000e+00	0.000000e+00
8.971270e-03	0.000000e+00	0.000000e+00	0.000000e+00	0.000000e+00	0.000000e+00	0.000000e+00
9.996560e-03	0.000000e+00	0.000000e+00	0.000000e+00	0.000000e+00	0.000000e+00	0.000000e+00
1.095780e-02	0.000000e+00	0.000000e+00	0.000000e+00	0.000000e+00	0.000000e+00	0.000000e+00
1.198310e-02	0.000000e+00	0.000000e+00	0.000000e+00	0.000000e+00	0.000000e+00	0.000000e+00
1.294430e-02	0.000000e+00	0.000000e+00	0.000000e+00	0.000000e+00	0.000000e+00	0.000000e+00
1.396950e-02	0.000000e+00	0.000000e+00	0.000000e+00	0.000000e+00	0.000000e+00	0.000000e+00
1.499480e-02	0.000000e+00	0.000000e+00	0.000000e+00	0.000000e+00	0.000000e+00	0.000000e+00
1.595600e-02	0.000000e+00	0.000000e+00	0.000000e+00	0.000000e+00	0.000000e+00	0.000000e+00
1.698130e-02	0.000000e+00	0.000000e+00	0.000000e+00	0.000000e+00	0.000000e+00	0.000000e+00
1.794250e-02	0.000000e+00	0.000000e+00	0.000000e+00	0.000000e+00	0.000000e+00	0.000000e+00
1.896780e-02	0.000000e+00	0.000000e+00	0.000000e+00	0.000000e+00	0.000000e+00	0.000000e+00
1.999310e-02	0.000000e+00	0.000000e+00	0.000000e+00	0.000000e+00	0.000000e+00	0.000000e+00
2.095430e-02	0.000000e+00	0.000000e+00	0.000000e+00	0.000000e+00	0.000000e+00	0.000000e+00
2.197960e-02	0.000000e+00	0.000000e+00	0.000000e+00	0.000000e+00	0.000000e+00	0.000000e+00
2.294080e-02	0.000000e+00	0.000000e+00	0.000000e+00	0.000000e+00	0.000000e+00	0.000000e+00
2.396610e-02	0.000000e+00	0.000000e+00	0.000000e+00	0.000000e+00	0.000000e+00	0.000000e+00
2.499140e-02	0.000000e+00	0.000000e+00	0.000000e+00	0.000000e+00	0.000000e+00	0.000000e+00
2.595260e-02	0.000000e+00	0.000000e+00	0.000000e+00	0.000000e+00	0.000000e+00	0.000000e+00
2.697790e-02	0.000000e+00	0.000000e+00	0.000000e+00	0.000000e+00	0.000000e+00	0.000000e+00
2.793910e-02	0.000000e+00	0.000000e+00	0.000000e+00	0.000000e+00	0.000000e+00	0.000000e+00
2.896440e-02	0.000000e+00	0.000000e+00	0.000000e+00	0.000000e+00	0.000000e+00	0.000000e+00
2.998970e-02	0.000000e+00	0.000000e+00	0.000000e+00	0.000000e+00	0.000000e+00	0.000000e+00
3.095090e-02	0.000000e+00	0.000000e+00	0.000000e+00	0.000000e+00	0.000000e+00	0.000000e+00
3.197620e-02	1.472810e-03	6.957300e+02	4.205310e+04	4.191770e+04	4.203700e+04	6.945950e+02
3.293740e-02	7.771990e-03	5.263680e+03	9.063390e+05	9.104800e+05	9.061860e+05	5.248640e+03
3.396270e-02	2.916630e-03	6.301670e+03	3.198070e+05	3.308060e+05	3.195980e+05	6.291910e+03
3.498790e-02	0.000000e+00	0.000000e+00	0.000000e+00	0.000000e+00	0.000000e+00	0.000000e+00
3.594920e-02	0.000000e+00	0.000000e+00	0.000000e+00	0.000000e+00	0.000000e+00	0.000000e+00
3.697440e-02	0.000000e+00	0.000000e+00	0.000000e+00	0.000000e+00	0.000000e+00	0.000000e+00
3.799970e-02	0.000000e+00	0.000000e+00	0.000000e+00	0.000000e+00	0.000000e+00	0.000000e+00
3.896090e-02	0.000000e+00	0.000000e+00	0.000000e+00	0.000000e+00	0.000000e+00	0.000000e+00
3.998620e-02	0.000000e+00	0.000000e+00	0.000000e+00	0.000000e+00	0.000000e+00	0.000000e+00
4.094740e-02	0.000000e+00	0.000000e+00	0.000000e+00	0.000000e+00	0.000000e+00	0.000000e+00
4.197270e-02	0.000000e+00	0.000000e+00	0.000000e+00	0.000000e+00	0.000000e+00	0.000000e+00
4.299800e-02	0.000000e+00	0.000000e+00	0.000000e+00	0.000000e+00	0.000000e+00	0.000000e+00
4.395920e-02	0.000000e+00	0.000000e+00	0.000000e+00	0.000000e+00	0.000000e+00	0.000000e+00
4.498450e-02	0.000000e+00	0.000000e+00	0.000000e+00	0.000000e+00	0.000000e+00	0.000000e+00
4.594570e-02	0.000000e+00	0.000000e+00	0.000000e+00	0.000000e+00	0.000000e+00	0.000000e+00
4.697100e-02	0.000000e+00	0.000000e+00	0.000000e+00	0.000000e+00	0.000000e+00	0.000000e+00
4.799630e-02	0.000000e+00	0.000000e+00	0.000000e+00	0.000000e+00	0.000000e+00	0.000000e+00
4.895750e-02	0.000000e+00	0.000000e+00	0.000000e+00	0.000000e+00	0.000000e+00	0.000000e+00
4.998280e-02	0.000000e+00	0.000000e+00	0.000000e+00	0.000000e+00	0.000000e+00	0.000000e+00
5.094400e-02	0.000000e+00	0.000000e+00	0.000000e+00	0.000000e+00	0.000000e+00	0.000000e+00
5.196930e-02	0.000000e+00	0.000000e+00	0.000000e+00	0.000000e+00	0.000000e+00	0.000000e+00
5.299460e-02	0.000000e+00	0.000000e+00	0.000000e+00	0.000000e+00	0.000000e+00	0.000000e+00
5.395580e-02	0.000000e+00	0.000000e+00	0.000000e+00	0.000000e+00	0.000000e+00	0.000000e+00
5.498110e-02	0.000000e+00	0.000000e+00	0.000000e+00	0.000000e+00	0.000000e+00	0.000000e+00
5.594230e-02	0.000000e+00	0.000000e+00	0.000000e+00	0.000000e+00	0.000000e+00	0.000000e+00
5.696760e-02	0.000000e+00	0.000000e+00	0.000000e+00	0.000000e+00	0.000000e+00	0.000000e+00
5.799280e-02	0.000000e+00	0.000000e+00	0.000000e+00	0.000000e+00	0.000000e+00	0.000000e+00
5.895410e-02	0.000000e+00	0.000000e+00	0.000000e+00	0.000000e+00	0.000000e+00	0.000000e+00
5.997930e-02	0.000000e+00	0.000000e+00	0.000000e+00	0.000000e+00	0.000000e+00	0.000000e+00
6.094050e-02	0.000000e+00	0.000000e+00	0.000000e+00	0.000000e+00	0.000000e+00	0.000000e+00
6.196580e-02	0.000000e+00	0.000000e+00	0.000000e+00	0.000000e+00	0.000000e+00	0.000000e+00
6.299110e-02	0.000000e+00	0.000000e+00	0.000000e+00	0.000000e+00	0.000000e+00	0.000000e+00
6.395230e-02	0.000000e+00	0.000000e+00	0.000000e+00	0.000000e+00	0.000000e+00	0.000000e+00
6.497760e-02	0.000000e+00	0.000000e+00	0.000000e+00	0.000000e+00	0.000000e+00	0.000000e+00
6.593880e-02	0.000000e+00	0.000000e+00	0.000000e+00	0.000000e+00	0.000000e+00	0.000000e+00
6.696410e-02	0.000000e+00	0.000000e+00	0.000000e+00	0.000000e+00	0.000000e+00	0.000000e+00
6.798940e-02	0.000000e+00	0.000000e+00	0.000000e+00	0.000000e+00	0.000000e+00	0.000000e+00
6.895060e-02	0.000000e+00	0.000000e+00	0.000000e+00	0.000000e+00	0.000000e+00	0.000000e+00
6.997590e-02	0.000000e+00	0.000000e+00	0.000000e+00	0.000000e+00	0.000000e+00	0.000000e+00
7.093710e-02	0.000000e+00	0.000000e+00	0.000000e+00	0.000000e+00	0.000000e+00	0.000000e+00
7.196240e-02	0.000000e+00	0.000000e+00	0.000000e+00	0.000000e+00	0.000000e+00	0.000000e+00
7.298770e-02	0.000000e+00	0.000000e+00	0.000000e+00	0.000000e+00	0.000000e+00	0.000000e+00
7.394890e-02	0.000000e+00	0.000000e+00	0.000000e+00	0.000000e+00	0.000000e+00	0.000000e+00
7.497420e-02	0.000000e+00	0.000000e+00	0.000000e+00	0.000000e+00	0.000000e+00	0.000000e+00
7.599950e-02	0.000000e+00	0.000000e+00	0.000000e+00	0.000000e+00	0.000000e+00	0.000000e+00
7.696070e-02	0.000000e+00	0.000000e+00	0.000000e+00	0.000000e+00	0.000000e+00	0.000000e+00
7.798600e-02	0.000000e+00	0.000000e+00	0.000000e+00	0.000000e+00	0.000000e+00	0.000000e+00
7.894720e-02	0.000000e+00	0.000000e+00	0.000000e+00	0.000000e+00	0.000000e+00	0.000000e+00
7.997250e-02	0.000000e+00	0.000000e+00	0.000000e+00	0.000000e+00	0.000000e+00	0.000000e+00
8.099770e-02	0.000000e+00	0.000000e+00	0.000000e+00	0.000000e+00	0.000000e+00	0.000000e+00
8.195890e-02	0.000000e+00	0.000000e+00	0.000000e+00	0.000000e+00	0.000000e+00	0.000000e+00
8.298420e-02	0.000000e+00	0.000000e+00	0.000000e+00	0.000000e+00	0.000000e+00	0.000000e+00
8.394540e-02	0.000000e+00	0.000000e+00	0.000000e+00	0.000000e+00	0.000000e+00	0.000000e+00
8.497070e-02	0.000000e+00	0.000000e+00	0.000000e+00	0.000000e+00	0.000000e+00	0.000000e+00
8.599600e-02	0.000000e+00	0.000000e+00	0.000000e+00	0.000000e+00	0.000000e+00	0.000000e+00
8.695720e-02	0.000000e+00	0.000000e+00	0.000000e+00	0.000000e+00	0.000000e+00	0.000000e+00
8.798250e-02	0.000000e+00	0.000000e+00	0.000000e+00	0.000000e+00	0.000000e+00	0.000000e+00
8.894370e-02	0.000000e+00	0.000000e+00	0.000000e+00	0.000000e+00	0.000000e+00	0.000000e+00
8.996900e-02	0.000000e+00	0.000000e+00	0.000000e+00	0.000000e+00	0.000000e+00	0.000000e+00
9.099430e-02	0.000000e+00	0.000000e+00	0.000000e+00	0.000000e+00	0.000000e+00	0.000000e+00
9.195550e-02	0.000000e+00	0.000000e+00	0.000000e+00	0.000000e+00	0.000000e+00	0.000000e+00
9.298080e-02	8.062840e-09	3.858290e+01	1.562360e+03	3.539690e+02	1.560630e+03	3.852250e+01
9.394200e-02	5.872470e-03	1.897600e+04	6.631470e+05	6.200880e+05	6.616820e+05	1.892340e+04
9.496730e-02	3.071690e-03	3.612420e+04	5.070720e+05	5.414250e+05	5.060590e+05	3.605950e+04
9.599260e-02	0.000000e+00	0.000000e+00	0.000000e+00	0.000000e+00	0.000000e+00	0.000000e+00
9.695380e-02	0.000000e+00	0.000000e+00	0.000000e+00	0.000000e+00	0.000000e+00	0.000000e+00
9.797910e-02	0.000000e+00	0.000000e+00	0.000000e+00	0.000000e+00	0.000000e+00	0.000000e+00
9.894030e-02	0.000000e+00	0.000000e+00	0.000000e+00	0.000000e+00	0.000000e+00	0.000000e+00
9.996560e-02	0.000000e+00	0.000000e+00	0.000000e+00	0.000000e+00	0.000000e+00	0.000000e+00
1.009910e-01	0.000000e+00	0.000000e+00	0.000000e+00	0.000000e+00	0.000000e+00	0.000000e+00
1.019520e-01	0.000000e+00	0.000000e+00	0.000000e+00	0.000000e+00	0.000000e+00	0.000000e+00
1.029770e-01	0.000000e+00	0.000000e+00	0.000000e+00	0.000000e+00	0.000000e+00	0.000000e+00
1.039390e-01	0.000000e+00	0.000000e+00	0.000000e+00	0.000000e+00	0.000000e+00	0.000000e+00
1.049640e-01	0.000000e+00	0.000000e+00	0.000000e+00	0.000000e+00	0.000000e+00	0.000000e+00
1.059890e-01	0.000000e+00	0.000000e+00	0.000000e+00	0.000000e+00	0.000000e+00	0.000000e+00
1.069500e-01	0.000000e+00	0.000000e+00	0.000000e+00	0.000000e+00	0.000000e+00	0.000000e+00
1.079760e-01	0.000000e+00	0.000000e+00	0.000000e+00	0.000000e+00	0.000000e+00	0.000000e+00
1.089370e-01	0.000000e+00	0.000000e+00	0.000000e+00	0.000000e+00	0.000000e+00	0.000000e+00
1.099620e-01	0.000000e+00	0.000000e+00	0.000000e+00	0.000000e+00	0.000000e+00	0.000000e+00
1.109870e-01	0.000000e+00	0.000000e+00	0.000000e+00	0.000000e+00	0.000000e+00	0.000000e+00
1.119490e-01	0.000000e+00	0.000000e+00	0.000000e+00	0.000000e+00	0.000000e+00	0.000000e+00
1.129740e-01	0.000000e+00	0.000000e+00	0.000000e+00	0.000000e+00	0.000000e+00	0.000000e+00
1.139990e-01	0.000000e+00	0.000000e+00	0.000000e+00	0.000000e+00	0.000000e+00	0.000000e+00
1.149600e-01	0.000000e+00	0.000000e+00	0.000000e+00	0.000000e+00	0.000000e+00	0.000000e+00
1.159860e-01	0.000000e+00	0.000000e+00	0.000000e+00	0.000000e+00	0.000000e+00	0.000000e+00
1.169470e-01	0.000000e+00	0.000000e+00	0.000000e+00	0.000000e+00	0.000000e+00	0.000000e+00
1.179720e-01	0.000000e+00	0.000000e+00	0.000000e+00	0.000000e+00	0.000000e+00	0.000000e+00
1.189970e-01	0.000000e+00	0.000000e+00	0.000000e+00	0.000000e+00	0.000000e+00	0.000000e+00
1.199590e-01	0.000000e+00	0.000000e+00	0.000000e+00	0.000000e+00	0.000000e+00	0.000000e+00
1.209840e-01	0.000000e+00	0.000000e+00	0.000000e+00	0.000000e+00	0.000000e+00	0.000000e+00
1.219450e-01	0.000000e+00	0.000000e+00	0.000000e+00	0.000000e+00	0.000000e+00	0.000000e+00
1.229700e-01	0.000000e+00	0.000000e+00	0.000000e+00	0.000000e+00	0.000000e+00	0.000000e+00
1.239960e-01	0.000000e+00	0.000000e+00	0.000000e+00	0.000000e+00	0.000000e+00	0.000000e+00
1.249570e-01	0.000000e+00	0.000000e+00	0.000000e+00	0.000000e+00	0.000000e+00	0.000000e+00
1.259820e-01	0.000000e+00	0.000000e+00	0.000000e+00	0.000000e+00	0.000000e+00	0.000000e+00
1.269430e-01	0.000000e+00	0.000000e+00	0.000000e+00	0.000000e+00	0.000000e+00	0.000000e+00
1.279690e-01	0.000000e+00	0.000000e+00	0.000000e+00	0.000000e+00	0.000000e+00	0.000000e+00
1.289940e-01	0.000000e+00	0.000000e+00	0.000000e+00	0.000000e+00	0.000000e+00	0.000000e+00
1.299550e-01	0.000000e+00	0.000000e+00	0.000000e+00	0.000000e+00	0.000000e+00	0.000000e+00
1.309810e-01	0.000000e+00	0.000000e+00	0.000000e+00	0.000000e+00	0.000000e+00	0.000000e+00
1.319420e-01	0.000000e+00	0.000000e+00	0.000000e+00	0.000000e+00	0.000000e+00	0.000000e+00
1.329670e-01	0.000000e+00	0.000000e+00	0.000000e+00	0.000000e+00	0.000000e+00	0.000000e+00
1.339920e-01	0.000000e+00	0.000000e+00	0.000000e+00	0.000000e+00	0.000000e+00	0.000000e+00
1.349540e-01	0.000000e+00	0.000000e+00	0.000000e+00	0.000000e+00	0.000000e+00	0.000000e+00
1.359790e-01	0.000000e+00	0.000000e+00	0.000000e+00	0.000000e+00	0.000000e+00	0.000000e+00
1.369400e-01	0.000000e+00	0.000000e+00	0.000000e+00	0.000000e+00	0.000000e+00	0.000000e+00
1.379650e-01	0.000000e+00	0.000000e+00	0.000000e+00	0.000000e+00	0.000000e+00	0.000000e+00
1.389910e-01	0.000000e+00	0.000000e+00	0.000000e+00	0.000000e+00	0.000000e+00	0.000000e+00
1.399520e-01	0.000000e+00	0.000000e+00	0.000000e+00	0.000000e+00	0.000000e+00	0.000000e+00
1.409770e-01	0.000000e+00	0.000000e+00	0.000000e+00	0.000000e+00	0.000000e+00	0.000000e+00
1.419380e-01	0.000000e+00	0.000000e+00	0.000000e+00	0.000000e+00	0.000000e+00	0.000000e+00
1.429640e-01	0.000000e+00	0.000000e+00	0.000000e+00	0.000000e+00	0.000000e+00	0.000000e+00
1.439890e-01	0.000000e+00	0.000000e+00	0.000000e+00	0.000000e+00	0.000000e+00	0.000000e+00
1.449500e-01	0.000000e+00	0.000000e+00	0.000000e+00	0.000000e+00	0.000000e+00	0.000000e+00
1.459750e-01	0.000000e+00	0.000000e+00	0.000000e+00	0.000000e+00	0.000000e+00	0.000000e+00
1.469370e-01	0.000000e+00	0.000000e+00	0.000000e+00	0.000000e+00	0.000000e+00	0.000000e+00
1.479620e-01	0.000000e+00	0.000000e+00	0.000000e+00	0.000000e+00	0.000000e+00	0.000000e+00
1.489870e-01	0.000000e+00	0.000000e+00	0.000000e+00	0.000000e+00	0.000000e+00	0.000000e+00
1.499480e-01	0.000000e+00	0.000000e+00	0.000000e+00	0.000000e+00	0.000000e+00	0.000000e+00
1.509740e-01	2.035630e-02	2.109650e+04	5.050540e+05	5.667480e+05	5.036470e+05	2.105720e+04
1.519990e-01	2.964510e-02	2.688990e+04	5.472810e+05	5.369620e+05	5.453340e+05	2.684040e+04
1.529600e-01	1.982210e-11	2.870480e+01	8.075520e+01	1.289130e+01	8.056500e+01	2.857540e+01
1.539850e-01	0.000000e+00	0.000000e+00	0.000000e+00	0.000000e+00	0.000000e+00	0.000000e+00
1.549470e-01	0.000000e+00	0.000000e+00	0.000000e+00	0.000000e+00	0.000000e+00	0.000000e+00
1.559720e-01	0.000000e+00	0.000000e+00	0.000000e+00	0.000000e+00	0.000000e+00	0.000000e+00
1.569970e-01	0.000000e+00	0.000000e+00	0.000000e+00	0.000000e+00	0.000000e+00	0.000000e+00
1.579580e-01	0.000000e+00	0.000000e+00	0.000000e+00	0.000000e+00	0.000000e+00	0.000000e+00
1.589840e-01	0.000000e+00	0.000000e+00	0.000000e+00	0.000000e+00	0.000000e+00	0.000000e+00
1.599450e-01	0.000000e+00	0.000000e+00	0.000000e+00	0.000000e+00	0.000000e+00	0.000000e+00
1.609700e-01	0.000000e+00	0.000000e+00	0.000000e+00	0.000000e+00	0.000000e+00	0.000000e+00
1.619950e-01	0.000000e+00	0.000000e+00	0.000000e+00	0.000000e+00	0.000000e+00	0.000000e+00
1.629570e-01	0.000000e+00	0.000000e+00	0.000000e+00	0.000000e+00	0.000000e+00	0.000000e+00
1.639820e-01	0.000000e+00	0.000000e+00	0.000000e+00	0.000000e+00	0.000000e+00	0.000000e+00
1.649430e-01	0.000000e+00	0.000000e+00	0.000000e+00	0.000000e+00	0.000000e+00	0.000000e+00
1.659680e-01	0.000000e+00	0.000000e+00	0.000000e+00	0.000000e+00	0.000000e+00	0.000000e+00
1.669940e-01	0.000000e+00	0.000000e+00	0.000000e+00	0.000000e+00	0.000000e+00	0.000000e+00
1.679550e-01	0.000000e+00	0.000000e+00	0.000000e+00	0.000000e+00	0.000000e+00	0.000000e+00
1.689800e-01	0.000000e+00	0.000000e+00	0.000000e+00	0.000000e+00	0.000000e+00	0.000000e+00
1.699410e-01	0.000000e+00	0.000000e+00	0.000000e+00	0.000000e+00	0.000000e+00	0.000000e+00
1.709670e-01	0.000000e+00	0.000000e+00	0.000000e+00	0.000000e+00	0.000000e+00	0.000000e+00
1.719920e-01	0.000000e+00	0.000000e+00	0.000000e+00	0.000000e+00	0.000000e+00	0.000000e+00
1.729530e-01	0.000000e+00	0.000000e+00	0.000000e+00	0.000000e+00	0.000000e+00	0.000000e+00
1.739790e-01	0.000000e+00	0.000000e+00	0.000000e+00	0.000000e+00	0.000000e+00	0.000000e+00
1.749400e-01	0.000000e+00	0.000000e+00	0.000000e+00	0.000000e+00	0.000000e+00	0.000000e+00
1.759650e-01	0.000000e+00	0.000000e+00	0.000000e+00	0.000000e+00	0.000000e+00	0.000000e+00
1.769900e-01	0.000000e+00	0.000000e+00	0.000000e+00	0.000000e+00	0.000000e+00	0.000000e+00
1.779520e-01	0.000000e+00	0.000000e+00	0.000000e+00	0.000000e+00	0.000000e+00	0.000000e+00
1.789770e-01	0.000000e+00	0.000000e+00	0.000000e+00	0.000000e+00	0.000000e+00	0.000000e+00
1.799380e-01	0.000000e+00	0.000000e+00	0.000000e+00	0.000000e+00	0.000000e+00	0.000000e+00
1.809630e-01	0.000000e+00	0.000000e+00	0.000000e+00	0.000000e+00	0.000000e+00	0.000000e+00
1.819890e-01	0.000000e+00	0.000000e+00	0.000000e+00	0.000000e+00	0.000000e+00	0.000000e+00
1.829500e-01	0.000000e+00	0.000000e+00	0.000000e+00	0.000000e+00	0.000000e+00	0.000000e+00
1.839750e-01	0.000000e+00	0.000000e+00	0.000000e+00	0.000000e+00	0.000000e+00	0.000000e+00
1.849360e-01	0.000000e+00	0.000000e+00	0.000000e+00	0.000000e+00	0.000000e+00	0.000000e+00
1.859620e-01	0.000000e+00	0.000000e+00	0.000000e+00	0.000000e+00	0.000000e+00	0.000000e+00
1.869870e-01	0.000000e+00	0.000000e+00	0.000000e+00	0.000000e+00	0.000000e+00	0.000000e+00
1.879480e-01	0.000000e+00	0.000000e+00	0.000000e+00	0.000000e+00	0.000000e+00	0.000000e+00
1.889730e-01	0.000000e+00	0.000000e+00	0.000000e+00	0.000000e+00	0.000000e+00	0.000000e+00
1.899990e-01	0.000000e+00	0.000000e+00	0.000000e+00	0.000000e+00	0.000000e+00	0.000000e+00
1.909600e-01	0.000000e+00	0.000000e+00	0.000000e+00	0.000000e+00	0.000000e+00	0.000000e+00
1.919850e-01	0.000000e+00	0.000000e+00	0.000000e+00	0.000000e+00	0.000000e+00	0.000000e+00
1.929460e-01	0.000000e+00	0.000000e+00	0.000000e+00	0.000000e+00	0.000000e+00	0.000000e+00
1.939720e-01	0.000000e+00	0.000000e+00	0.000000e+00	0.000000e+00	0.000000e+00	0.000000e+00
1.949970e-01	0.000000e+00	0.000000e+00	0.000000e+00	0.000000e+00	0.000000e+00	0.000000e+00
1.959580e-01	0.000000e+00	0.000000e+00	0.000000e+00	0.000000e+00	0.000000e+00	0.000000e+00
1.969830e-01	0.000000e+00	0.000000e+00	0.000000e+00	0.000000e+00	0.000000e+00	0.000000e+00
1.979450e-01	0.000000e+00	0.000000e+00	0.000000e+00	0.000000e+00	0.000000e+00	0.000000e+00
1.989700e-01	0.000000e+00	0.000000e+00	0.000000e+00	0.000000e+00	0.000000e+00	0.000000e+00
1.999950e-01	0.000000e+00	0.000000e+00	0.000000e+00	0.000000e+00	0.000000e+00	0.000000e+00
2.009560e-01	1.853940e-09	1.924040e+02	6.674390e+03	3.673480e+02	6.632500e+03	1.917050e+02
2.019820e-01	1.907240e-08	2.181690e+03	1.323210e+05	1.996880e+04	1.317790e+05	2.177470e+03
2.029430e-01	2.430800e-08	2.353830e+04	2.107240e+05	4.295310e+04	2.100830e+05	2.348340e+04
2.039680e-01	1.112810e-06	4.410060e+03	3.601550e+04	7.742290e+03	3.588290e+04	4.397600e+03
2.049930e-01	2.027590e-02	3.387430e+04	2.989380e+05	5.194880e+05	2.986710e+05	3.385880e+04
2.059550e-01	1.517320e-02	1.131440e+04	2.542960e+05	4.536090e+05	2.540180e+05	1.130310e+04
2.069800e-01	6.263060e-07	2.212830e+02	3.043220e+03	5.948400e+03	3.032870e+03	2.212940e+02
2.079410e-01	0.000000e+00	0.000000e+00	0.000000e+00	0.000000e+00	0.000000e+00	0.000000e+00
2.089660e-01	0.000000e+00	0.000000e+00	0.000000e+00	0.000000e+00	0.000000e+00	0.000000e+00
2.099920e-01	0.000000e+00	0.000000e+00	0.000000e+00	0.000000e+00	0.000000e+00	0.000000e+00
2.109530e-01	0.000000e+00	0.000000e+00	0.000000e+00	0.000000e+00	0.000000e+00	0.000000e+00
2.119780e-01	0.000000e+00	0.000000e+00	0.000000e+00	0.000000e+00	0.000000e+00	0.000000e+00
2.129390e-01	0.000000e+00	0.000000e+00	0.000000e+00	0.000000e+00	0.000000e+00	0.000000e+00
2.139650e-01	0.000000e+00	0.000000e+00	0.000000e+00	0.000000e+00	0.000000e+00	0.000000e+00
2.149900e-01	0.000000e+00	0.000000e+00	0.000000e+00	0.000000e+00	0.000000e+00	0.000000e+00
2.159510e-01	0.000000e+00	0.000000e+00	0.000000e+00	0.000000e+00	0.000000e+00	0.000000e+00
2.169770e-01	0.000000e+00	0.000000e+00	0.000000e+00	0.000000e+00	0.000000e+00	0.000000e+00
2.179380e-01	0.000000e+00	0.000000e+00	0.000000e+00	0.000000e+00	0.000000e+00	0.000000e+00
2.189630e-01	1.540300e-10	2.424210e+01	6.518370e+02	2.593190e+00	6.518370e+02	2.424210e+01
2.199880e-01	1.099410e-09	3.259590e+02	7.579690e+03	9.135040e+01	7.579690e+03	3.259590e+02
2.209500e-01	1.196910e-09	1.109690e+03	2.454070e+04	7.497310e+02	2.451130e+04	1.110660e+03
2.219750e-01	9.006680e-10	1.808550e+03	3.915210e+04	1.471100e+03	3.912530e+04	1.809430e+03
2.229360e-01	4.895630e-09	1.874660e+03	3.993620e+04	1.491420e+03	3.993620e+04	1.874660e+03
2.239610e-01	5.855990e-09	1.273870e+03	2.657320e+04	8.064090e+02	2.653320e+04	1.275180e+03
2.249870e-01	4.153270e-09	4.617580e+02	9.527570e+03	1.170680e+02	9.527570e+03	4.617580e+02
2.259480e-01	1.269310e-09	1.014570e+02	2.034400e+03	9.239070e+00	2.034400e+03	1.014570e+02
2.269730e-01	0.000000e+00	0.000000e+00	0.000000e+00	0.000000e+00	0.000000e+00	0.000000e+00
2.279980e-01	0.000000e+00	0.000000e+00	0.000000e+00	0.000000e+00	0.000000e+00	0.000000e+00
2.289600e-01	0.000000e+00	0.000000e+00	0.000000e+00	0.000000e+00	0.000000e+00	0.000000e+00
2.299850e-01	0.000000e+00	0.000000e+00	0.000000e+00	0.000000e+00	0.000000e+00	0.000000e+00
2.309460e-01	0.000000e+00	0.000000e+00	0.000000e+00	0.000000e+00	0.000000e+00	0.000000e+00
2.319710e-01	0.000000e+00	0.000000e+00	0.000000e+00	0.000000e+00	0.000000e+00	0.000000e+00
2.329970e-01	0.000000e+00	0.000000e+00	0.000000e+00	0.000000e+00	0.000000e+00	0.000000e+00
2.339580e-01	0.000000e+00	0.000000e+00	0.000000e+00	0.000000e+00	0.000000e+00	0.000000e+00
2.349830e-01	0.000000e+00	0.000000e+00	0.000000e+00	0.000000e+00	0.000000e+00	0.000000e+00
2.359440e-01	0.000000e+00	0.000000e+00	0.000000e+00	0.000000e+00	0.000000e+00	0.000000e+00
2.369700e-01	0.000000e+00	0.000000e+00	0.000000e+00	0.000000e+00	0.000000e+00	0.000000e+00
2.379950e-01	0.000000e+00	0.000000e+00	0.000000e+00	0.000000e+00	0.000000e+00	0.000000e+00
2.389560e-01	0.000000e+00	0.000000e+00	0.000000e+00	0.000000e+00	0.000000e+00	0.000000e+00
2.399810e-01	0.000000e+00	0.000000e+00	0.000000e+00	0.000000e+00	0.000000e+00	0.000000e+00
2.409430e-01	0.000000e+00	0.000000e+00	0.000000e+00	0.000000e+00	0.000000e+00	0.000000e+00
2.419680e-01	0.000000e+00	0.000000e+00	0.000000e+00	0.000000e+00	0.000000e+00	0.000000e+00
2.429930e-01	0.000000e+00	0.000000e+00	0.000000e+00	0.000000e+00	0.000000e+00	0.000000e+00
2.439540e-01	1.603060e-10	2.110400e+01	5.598980e+02	2.867330e+00	5.598980e+02	2.110400e+01
2.449800e-01	5.141860e-11	2.764360e+02	6.438700e+03	6.940120e+01	6.438700e+03	2.764360e+02
2.459410e-01	2.829240e-09	1.020940e+03	2.276410e+04	7.272940e+02	2.274970e+04	1.021420e+03
2.469660e-01	2.274490e-09	1.797320e+03	3.993530e+04	1.721940e+03	3.987580e+04	1.799280e+03
2.479910e-01	3.808200e-09	5.654970e+02	4.274220e+04	1.976430e+03	4.272780e+04	5.650170e+02
2.489530e-01	1.026100e-08	2.869250e+03	2.627490e+04	9.634930e+02	2.624000e+04	2.868090e+03
2.499780e-01	5.956510e-11	9.337030e+02	7.817210e+03	1.544210e+02	7.817210e+03	9.337020e+02
2.509390e-01	3.971230e-11	5.377430e+01	4.313500e+02	1.857520e+00	4.313500e+02	5.377430e+01
2.519640e-01	0.000000e+00	0.000000e+00	0.000000e+00	0.000000e+00	0.000000e+00	0.000000e+00
2.529900e-01	0.000000e+00	0.000000e+00	0.000000e+00	0.000000e+00	0.000000e+00	0.000000e+00
2.539510e-01	0.000000e+00	0.000000e+00	0.000000e+00	0.000000e+00	0.000000e+00	0.000000e+00
2.549760e-01	0.000000e+00	0.000000e+00	0.000000e+00	0.000000e+00	0.000000e+00	0.000000e+00
2.559370e-01	0.000000e+00	0.000000e+00	0.000000e+00	0.000000e+00	0.000000e+00	0.000000e+00
2.569630e-01	0.000000e+00	0.000000e+00	0.000000e+00	0.000000e+00	0.000000e+00	0.000000e+00
2.579880e-01	0.000000e+00	1.822360e+00	5.198870e+01	1.041160e+02	5.198870e+01	1.822360e+00
2.589490e-01	1.229130e-03	1.640480e+04	1.823120e+05	3.297520e+05	1.823200e+05	1.642270e+04
2.599750e-01	1.774440e-02	9.497080e+03	3.332610e+05	5.826870e+05	3.333300e+05	9.516790e+03
2.610000e-01	6.527760e-05	1.131900e+03	1.843210e+04	3.403030e+04	1.842960e+04	1.135000e+03
2.619610e-01	3.503470e-09	2.355200e+03	5.775880e+04	8.653740e+03	5.766840e+04	2.352830e+03
2.629860e-01	1.363280e-08	6.929280e+03	1.502610e+05	2.451080e+04	1.500690e+05	6.922630e+03
2.639480e-01	1.148460e-08	3.272800e+03	6.603280e+04	7.328670e+03	6.593110e+04	3.267900e+03
2.649730e-01	3.056080e-10	1.364230e+02	2.269870e+03	7.792360e+01	2.269870e+03	1.364230e+02
2.659980e-01	0.000000e+00	0.000000e+00	0.000000e+00	0.000000e+00	0.000000e+00	0.000000e+00
2.669590e-01	0.000000e+00	0.000000e+00	0.000000e+00	0.000000e+00	0.000000e+00	0.000000e+00
2.679850e-01	0.000000e+00	0.000000e+00	0.000000e+00	0.000000e+00	0.000000e+00	0.000000e+00
2.689460e-01	0.000000e+00	0.000000e+00	0.000000e+00	0.000000e+00	0.000000e+00	0.000000e+00
2.699710e-01	0.000000e+00	0.000000e+00	0.000000e+00	0.000000e+00	0.000000e+00	0.000000e+00
2.709960e-01	0.000000e+00	0.000000e+00	0.000000e+00	0.000000e+00	0.000000e+00	0.000000e+00
2.719580e-01	0.000000e+00	0.000000e+00	0.000000e+00	0.000000e+00	0.000000e+00	0.000000e+00
2.729830e-01	0.000000e+00	0.000000e+00	0.000000e+00	0.000000e+00	0.000000e+00	0.000000e+00
2.739440e-01	0.000000e+00	0.000000e+00	0.000000e+00	0.000000e+00	0.000000e+00	0.000000e+00
2.749690e-01	0.000000e+00	0.000000e+00	0.000000e+00	0.000000e+00	0.000000e+00	0.000000e+00
2.759950e-01	0.000000e+00	0.000000e+00	0.000000e+00	0.000000e+00	0.000000e+00	0.000000e+00
2.769560e-01	0.000000e+00	0.000000e+00	0.000000e+00	0.000000e+00	0.000000e+00	0.000000e+00
2.779810e-01	0.000000e+00	0.000000e+00	0.000000e+00	0.000000e+00	0.000000e+00	0.000000e+00
2.789420e-01	0.000000e+00	0.000000e+00	0.000000e+00	0.000000e+00	0.000000e+00	0.000000e+00
2.799680e-01	0.000000e+00	0.000000e+00	0.000000e+00	0.000000e+00	0.000000e+00	0.000000e+00
2.809930e-01	0.000000e+00	0.000000e+00	0.000000e+00	0.000000e+00	0.000000e+00	0.000000e+00
2.819540e-01	0.000000e+00	0.000000e+00	0.000000e+00	0.000000e+00	0.000000e+00	0.000000e+00
2.829790e-01	0.000000e+00	0.000000e+00	0.000000e+00	0.000000e+00	0.000000e+00	0.000000e+00
2.839410e-01	0.000000e+00	0.000000e+00	0.000000e+00	0.000000e+00	0.000000e+00	0.000000e+00
2.849660e-01	0.000000e+00	0.000000e+00	0.000000e+00	0.000000e+00	0.000000e+00	0.000000e+00
2.859910e-01	0.000000e+00	0.000000e+00	0.000000e+00	0.000000e+00	0.000000e+00	0.000000e+00
2.869520e-01	0.000000e+00	0.000000e+00	0.000000e+00	0.000000e+00	0.000000e+00	0.000000e+00
2.879780e-01	0.000000e+00	0.000000e+00	0.000000e+00	0.000000e+00	0.000000e+00	0.000000e+00
2.889390e-01	0.000000e+00	0.000000e+00	0.000000e+00	0.000000e+00	0.000000e+00	0.000000e+00
2.899640e-01	0.000000e+00	0.000000e+00	0.000000e+00	0.000000e+00	0.000000e+00	0.000000e+00
2.909900e-01	0.000000e+00	0.000000e+00	0.000000e+00	0.000000e+00	0.000000e+00	0.000000e+00
2.919510e-01	0.000000e+00	0.000000e+00	0.000000e+00	0.000000e+00	0.000000e+00	0.000000e+00
2.929760e-01	0.000000e+00	0.000000e+00	0.000000e+00	0.000000e+00	0.000000e+00	0.000000e+00
2.939370e-01	0.000000e+00	0.000000e+00	0.000000e+00	0.000000e+00	0.000000e+00	0.000000e+00
2.949620e-01	0.000000e+00	0.000000e+00	0.000000e+00	0.000000e+00	0.000000e+00	0.000000e+00
2.959880e-01	0.000000e+00	0.000000e+00	0.000000e+00	0.000000e+00	0.000000e+00	0.000000e+00
2.969490e-01	0.000000e+00	0.000000e+00	0.000000e+00	0.000000e+00	0.000000e+00	0.000000e+00
2.979740e-01	0.000000e+00	0.000000e+00	0.000000e+00	0.000000e+00	0.000000e+00	0.000000e+00
2.990000e-01	0.000000e+00	0.000000e+00	0.000000e+00	0.000000e+00	0.000000e+00	0.000000e+00
2.999610e-01	8.431850e-10	1.459130e+02	4.376120e+03	2.309900e+02	4.359180e+03	1.468400e+02
3.009860e-01	2.131630e-09	3.684490e+03	9.094320e+04	1.305000e+04	9.099670e+04	3.686970e+03
3.019470e-01	5.348370e-09	9.628080e+03	1.543470e+05	3.057670e+04	1.543730e+05	9.633830e+03
3.029730e-01	7.383690e-06	3.885530e+03	3.213020e+04	7.528340e+03	3.215290e+04	3.888340e+03
3.039980e-01	1.579380e-02	2.900510e+04	2.647850e+05	4.529510e+05	2.648230e+05	2.901680e+04
3.049590e-01	1.046960e-02	1.148720e+03	2.078100e+05	3.660010e+05	2.078120e+05	1.153290e+03
3.059840e-01	1.325340e-10	1.134500e+02	1.370410e+03	2.687350e+03	1.369120e+03	1.133240e+02
3.069460e-01	0.000000e+00	0.000000e+00	0.000000e+00	0.000000e+00	0.000000e+00	0.000000e+00
3.079710e-01	0.000000e+00	0.000000e+00	0.000000e+00	0.000000e+00	0.000000e+00	0.000000e+00
3.089960e-01	0.000000e+00	0.000000e+00	0.000000e+00	0.000000e+00	0.000000e+00	0.000000e+00
3.099570e-01	0.000000e+00	0.000000e+00	0.000000e+00	0.000000e+00	0.000000e+00	0.000000e+00
3.109830e-01	0.000000e+00	0.000000e+00	0.000000e+00	0.000000e+00	0.000000e+00	0.000000e+00
3.119440e-01	0.000000e+00	0.000000e+00	0.000000e+00	0.000000e+00	0.000000e+00	0.000000e+00
3.129690e-01	0.000000e+00	0.000000e+00	0.000000e+00	0.000000e+00	0.000000e+00	0.000000e+00
3.139940e-01	6.650550e-11	1.286070e+01	3.615490e+02	2.806900e+00	3.615490e+02	1.286070e+01
3.149560e-01	5.239040e-10	2.796160e+02	6.556070e+03	1.559630e+02	6.545840e+03	2.799610e+02
3.159810e-01	9.569310e-10	1.023500e+03	2.263860e+04	9.320180e+02	2.257340e+04	1.025690e+03
3.169420e-01	1.798550e-09	1.687440e+03	3.655420e+04	1.854140e+03	3.652260e+04	1.688500e+03
3.179670e-01	4.054630e-09	1.577320e+03	3.342410e+04	1.583890e+03	3.339480e+04	1.578300e+03
3.189930e-01	2.347670e-09	8.686960e+02	1.808250e+04	6.342870e+02	1.808000e+04	8.687790e+02
3.199540e-01	2.905480e-10	2.352960e+02	4.769570e+03	6.479570e+01	4.766930e+03	2.353840e+02
3.209790e-01	1.780510e-10	2.120930e+01	3.974670e+02	3.331760e+00	3.974670e+02	2.120930e+01
3.219400e-01	0.000000e+00	0.000000e+00	0.000000e+00	0.000000e+00	0.000000e+00	0.000000e+00
3.229660e-01	0.000000e+00	0.000000e+00	0.000000e+00	0.000000e+00	0.000000e+00	0.000000e+00
3.239910e-01	0.000000e+00	0.000000e+00	0.000000e+00	0.000000e+00	0.000000e+00	0.000000e+00
3.249520e-01	0.000000e+00	0.000000e+00	0.000000e+00	0.000000e+00	0.000000e+00	0.000000e+00
3.259770e-01	0.000000e+00	0.000000e+00	0.000000e+00	0.000000e+00	0.000000e+00	0.000000e+00
3.269390e-01	0.000000e+00	0.000000e+00	0.000000e+00	0.000000e+00	0.000000e+00	0.000000e+00
3.279640e-01	0.000000e+00	0.000000e+00	0.000000e+00	0.000000e+00	0.000000e+00	0.000000e+00
3.289890e-01	0.000000e+00	0.000000e+00	0.000000e+00	0.000000e+00	0.000000e+00	0.000000e+00
3.299500e-01	0.000000e+00	0.000000e+00	0.000000e+00	0.000000e+00	0.000000e+00	0.000000e+00
3.309760e-01	0.000000e+00	0.000000e+00	0.000000e+00	0.000000e+00	0.000000e+00	0.000000e+00
3.319370e-01	0.000000e+00	0.000000e+00	0.000000e+00	0.000000e+00	0.000000e+00	0.000000e+00
3.329620e-01	0.000000e+00	0.000000e+00	0.000000e+00	0.000000e+00	0.000000e+00	0.000000e+00
3.339880e-01	2.843190e-11	7.642520e-02	4.416950e+01	3.905150e-01	4.416950e+01	7.642520e-02
3.349490e-01	1.117280e-10	1.297000e+02	3.057560e+03	3.305560e+01	3.057560e+03	1.297000e+02
3.359740e-01	4.200170e-09	6.666370e+02	1.506850e+04	5.271070e+02	1.506250e+04	6.668400e+02
3.369990e-01	7.958420e-09	1.457450e+03	3.207240e+04	1.606450e+03	3.207240e+04	1.457450e+03
3.379610e-01	1.716420e-08	1.752290e+03	3.763440e+04	2.071800e+03	3.763440e+04	1.752290e+03
3.389860e-01	3.028300e-08	7.743820e+02	2.470770e+04	1.174920e+03	2.470770e+04	7.743820e+02
3.399470e-01	2.481010e-08	5.787980e+02	7.234840e+03	2.081910e+02	7.222840e+03	5.783910e+02
3.409720e-01	2.124580e-10	4.564310e+01	3.651410e+02	3.062330e+00	3.651410e+02	4.564310e+01
3.419980e-01	0.000000e+00	0.000000e+00	0.000000e+00	0.000000e+00	0.000000e+00	0.000000e+00
3.429590e-01	0.000000e+00	0.000000e+00	0.000000e+00	0.000000e+00	0.000000e+00	0.000000e+00
3.439840e-01	0.000000e+00	0.000000e+00	0.000000e+00	0.000000e+00	0.000000e+00	0.000000e+00
3.449450e-01	0.000000e+00	0.000000e+00	0.000000e+00	0.000000e+00	0.000000e+00	0.000000e+00
3.459710e-01	0.000000e+00	0.000000e+00	0.000000e+00	0.000000e+00	0.000000e+00	0.000000e+00
3.469960e-01	1.246470e-05	4.077450e+02	6.320590e+03	1.212460e+04	6.317230e+03	4.081730e+02
3.479570e-01	8.572630e-03	9.871140e+02	2.460740e+05	4.295580e+05	2.459740e+05	9.863280e+02
3.489820e-01	1.457950e-02	1.028550e+04	2.102580e+05	3.604680e+05	2.102460e+05	1.029330e+04
3.499440e-01	3.561080e-10	3.819260e+02	1.076650e+04	1.522970e+03	1.074450e+04	3.811220e+02
3.509690e-01	3.118790e-09	4.562420e+03	1.016580e+05	1.800980e+04	1.013460e+05	4.563030e+03
3.519940e-01	4.798870e-10	3.921480e+03	8.155550e+04	1.150440e+04	8.137900e+04	3.914460e+03
3.529550e-01	5.895780e-10	5.273900e+02	9.743050e+03	6.546900e+02	9.700240e+03	5.269850e+02
3.539810e-01	0.000000e+00	0.000000e+00	0.000000e+00	0.000000e+00	0.000000e+00	0.000000e+00
3.549420e-01	0.000000e+00	0.000000e+00	0.000000e+00	0.000000e+00	0.000000e+00	0.000000e+00
3.559670e-01	0.000000e+00	0.000000e+00	0.000000e+00	0.000000e+00	0.000000e+00	0.000000e+00
3.569920e-01	0.000000e+00	0.000000e+00	0.000000e+00	0.000000e+00	0.000000e+00	0.000000e+00
3.579540e-01	0.000000e+00	0.000000e+00	0.000000e+00	0.000000e+00	0.000000e+00	0.000000e+00
3.589790e-01	0.000000e+00	0.000000e+00	0.000000e+00	0.000000e+00	0.000000e+00	0.000000e+00
3.599400e-01	0.000000e+00	0.000000e+00	0.000000e+00	0.000000e+00	0.000000e+00	0.000000e+00
3.609650e-01	0.000000e+00	0.000000e+00	0.000000e+00	0.000000e+00	0.000000e+00	0.000000e+00
3.619910e-01	0.000000e+00	0.000000e+00	0.000000e+00	0.000000e+00	0.000000e+00	0.000000e+00
3.629520e-01	0.000000e+00	0.000000e+00	0.000000e+00	0.000000e+00	0.000000e+00	0.000000e+00
3.639770e-01	0.000000e+00	0.000000e+00	0.000000e+00	0.000000e+00	0.000000e+00	0.000000e+00
3.649380e-01	0.000000e+00	0.000000e+00	0.000000e+00	0.000000e+00	0.000000e+00	0.000000e+00
3.659640e-01	0.000000e+00	0.000000e+00	0.000000e+00	0.000000e+00	0.000000e+00	0.000000e+00
3.669890e-01	0.000000e+00	0.000000e+00	0.000000e+00	0.000000e+00	0.000000e+00	0.000000e+00
3.679500e-01	0.000000e+00	0.000000e+00	0.000000e+00	0.000000e+00	0.000000e+00	0.000000e+00
3.689750e-01	0.000000e+00	0.000000e+00	0.000000e+00	0.000000e+00	0.000000e+00	0.000000e+00
3.699370e-01	0.000000e+00	0.000000e+00	0.000000e+00	0.000000e+00	0.000000e+00	0.000000e+00
3.709620e-01	0.000000e+00	0.000000e+00	0.000000e+00	0.000000e+00	0.000000e+00	0.000000e+00
3.719870e-01	0.000000e+00	0.000000e+00	0.000000e+00	0.000000e+00	0.000000e+00	0.000000e+00
3.729480e-01	0.000000e+00	0.000000e+00	0.000000e+00	0.000000e+00	0.000000e+00	0.000000e+00
3.739740e-01	0.000000e+00	0.000000e+00	0.000000e+00	0.000000e+00	0.000000e+00	0.000000e+00
3.749990e-01	0.000000e+00	0.000000e+00	0.000000e+00	0.000000e+00	0.000000e+00	0.000000e+00
3.759600e-01	0.000000e+00	0.000000e+00	0.000000e+00	0.000000e+00	0.000000e+00	0.000000e+00
3.769860e-01	0.000000e+00	0.000000e+00	0.000000e+00	0.000000e+00	0.000000e+00	0.000000e+00
3.779470e-01	9.446980e-11	3.547060e+00	1.849540e+02	1.984490e+00	1.849540e+02	3.547060e+00
3.789720e-01	2.337990e-09	8.434850e+02	2.027300e+04	1.304880e+03	2.029050e+04	8.459500e+02
3.799970e-01	1.131810e-08	3.376780e+03	7.532450e+04	7.857740e+03	7.545000e+04	3.384670e+03
3.809590e-01	4.996630e-08	1.798400e+03	7.405850e+04	8.205210e+03	7.414230e+04	1.797970e+03
3.819840e-01	6.110010e-09	1.891660e+03	1.552080e+04	1.191520e+03	1.554620e+04	1.895780e+03
3.829450e-01	0.000000e+00	0.000000e+00	0.000000e+00	0.000000e+00	0.000000e+00	0.000000e+00
3.839700e-01	0.000000e+00	0.000000e+00	0.000000e+00	0.000000e+00	0.000000e+00	0.000000e+00
3.849960e-01	5.032070e-04	1.018670e+04	9.241270e+04	1.700940e+05	9.218640e+04	1.016830e+04
3.859570e-01	6.610350e-03	3.576150e+03	2.503550e+05	4.493960e+05	2.500280e+05	3.564210e+03
3.869820e-01	2.537770e-04	2.361900e+03	4.434600e+04	8.276000e+04	4.417660e+04	2.360850e+03
3.879430e-01	0.000000e+00	0.000000e+00	0.000000e+00	0.000000e+00	0.000000e+00	0.000000e+00
3.889690e-01	0.000000e+00	0.000000e+00	0.000000e+00	0.000000e+00	0.000000e+00	0.000000e+00
3.899940e-01	1.635460e-10	2.391610e+01	8.273250e+02	2.570230e+01	8.262100e+02	2.395460e+01
3.909550e-01	3.608350e-09	1.196480e+03	2.797580e+04	2.193820e+03	2.791850e+04	1.196620e+03
3.919800e-01	8.318150e-09	2.981670e+03	6.527000e+04	6.471100e+03	6.516540e+04	2.976870e+03
3.929420e-01	1.164820e-08	2.347700e+03	4.906750e+04	4.136410e+03	4.898020e+04	2.346030e+03
3.939670e-01	2.804070e-09	5.972210e+02	1.177950e+04	5.841210e+02	1.177690e+04	5.973080e+02
3.949920e-01	1.019430e-10	7.665000e+00	1.183750e+02	1.385480e+00	1.183750e+02	7.665000e+00
3.959530e-01	0.000000e+00	0.000000e+00	0.000000e+00	0.000000e+00	0.000000e+00	0.000000e+00
3.969790e-01	0.000000e+00	0.000000e+00	0.000000e+00	0.000000e+00	0.000000e+00	0.000000e+00
3.979400e-01	0.000000e+00	0.000000e+00	0.000000e+00	0.000000e+00	0.000000e+00	0.000000e+00
3.989650e-01	0.000000e+00	0.000000e+00	0.000000e+00	0.000000e+00	0.000000e+00	0.000000e+00
3.999900e-01	0.000000e+00	0.000000e+00	0.000000e+00	0.000000e+00	0.000000e+00	0.000000e+00
4.009520e-01	0.000000e+00	0.000000e+00	0.000000e+00	0.000000e+00	0.000000e+00	0.000000e+00
4.019770e-01	0.000000e+00	0.000000e+00	0.000000e+00	0.000000e+00	0.000000e+00	0.000000e+00
4.029380e-01	0.000000e+00	0.000000e+00	0.000000e+00	0.000000e+00	0.000000e+00	0.000000e+00
4.039630e-01	0.000000e+00	0.000000e+00	0.000000e+00	0.000000e+00	0.000000e+00	0.000000e+00
4.049890e-01	0.000000e+00	0.000000e+00	0.000000e+00	0.000000e+00	0.000000e+00	0.000000e+00
4.059500e-01	0.000000e+00	0.000000e+00	0.000000e+00	0.000000e+00	0.000000e+00	0.000000e+00
4.069750e-01	0.000000e+00	0.000000e+00	0.000000e+00	0.000000e+00	0.000000e+00	0.000000e+00
4.079360e-01	0.000000e+00	0.000000e+00	0.000000e+00	0.000000e+00	0.000000e+00	0.000000e+00
4.089620e-01	0.000000e+00	0.000000e+00	0.000000e+00	0.000000e+00	0.000000e+00	0.000000e+00
4.099870e-01	0.000000e+00	0.000000e+00	0.000000e+00	0.000000e+00	0.000000e+00	0.000000e+00
4.109480e-01	0.000000e+00	0.000000e+00	0.000000e+00	0.000000e+00	0.000000e+00	0.000000e+00
4.119730e-01	0.000000e+00	0.000000e+00	0.000000e+00	0.000000e+00	0.000000e+00	0.000000e+00
4.129990e-01	0.000000e+00	0.000000e+00	0.000000e+00	0.000000e+00	0.000000e+00	0.000000e+00
4.139600e-01	4.932970e-10	4.353990e+01	1.243430e+03	3.599340e+01	1.243430e+03	4.353990e+01
4.149850e-01	1.675270e-09	1.180380e+03	2.765720e+04	2.197010e+03	2.764750e+04	1.180720e+03
4.159460e-01	1.015200e-08	3.031900e+03	6.962190e+04	8.123090e+03	6.961400e+04	3.032170e+03
4.169720e-01	4.103840e-09	2.569120e+03	5.074600e+04	5.867030e+03	5.072220e+04	2.568290e+03
4.179970e-01	1.577960e-09	5.351800e+02	4.244080e+03	2.885620e+02	4.244080e+03	5.351800e+02
4.189580e-01	0.000000e+00	0.000000e+00	0.000000e+00	0.000000e+00	0.000000e+00	0.000000e+00
4.199840e-01	4.228440e-03	1.387730e+04	1.434490e+05	2.534370e+05	1.433090e+05	1.387320e+04
4.209450e-01	1.277770e-02	5.591430e+03	2.200860e+05	3.844540e+05	2.199460e+05	5.594040e+03
4.219700e-01	3.966030e-05	6.751690e+02	1.108520e+04	2.082920e+04	1.107890e+04	6.756600e+02
4.229950e-01	0.000000e+00	0.000000e+00	0.000000e+00	0.000000e+00	0.000000e+00	0.000000e+00
4.239570e-01	1.012420e-10	5.443460e+01	1.703690e+03	7.669420e+01	1.703910e+03	5.500130e+01
4.249820e-01	3.898090e-06	1.071820e+03	2.946190e+04	2.634530e+03	2.946200e+04	1.074070e+03
4.259430e-01	9.441080e-09	1.647810e+03	5.337190e+04	5.441180e+03	5.337190e+04	1.647810e+03
4.269680e-01	2.344930e-08	1.088000e+03	3.349440e+04	2.704050e+03	3.346970e+04	1.088850e+03
4.279940e-01	1.595530e-08	3.889560e+02	6.106800e+03	2.613820e+02	6.105600e+03	3.889970e+02
4.289550e-01	2.010340e-11	1.883200e+00	2.494160e+01	3.314110e-01	2.494160e+01	1.883200e+00
4.299800e-01	0.000000e+00	0.000000e+00	0.000000e+00	0.000000e+00	0.000000e+00	0.000000e+00
4.309410e-01	0.000000e+00	0.000000e+00	0.000000e+00	0.000000e+00	0.000000e+00	0.000000e+00
4.319670e-01	0.000000e+00	0.000000e+00	0.000000e+00	0.000000e+00	0.000000e+00	0.000000e+00
4.329920e-01	0.000000e+00	0.000000e+00	0.000000e+00	0.000000e+00	0.000000e+00	0.000000e+00
4.339530e-01	0.000000e+00	0.000000e+00	0.000000e+00	0.000000e+00	0.000000e+00	0.000000e+00
4.349780e-01	0.000000e+00	0.000000e+00	0.000000e+00	0.000000e+00	0.000000e+00	0.000000e+00
4.359400e-01	0.000000e+00	0.000000e+00	0.000000e+00	0.000000e+00	0.000000e+00	0.000000e+00
4.369650e-01	0.000000e+00	0.000000e+00	0.000000e+00	0.000000e+00	0.000000e+00	0.000000e+00
4.379900e-01	0.000000e+00	0.000000e+00	0.000000e+00	0.000000e+00	0.000000e+00	0.000000e+00
4.389510e-01	0.000000e+00	0.000000e+00	0.000000e+00	0.000000e+00	0.000000e+00	0.000000e+00
4.399770e-01	0.000000e+00	0.000000e+00	0.000000e+00	0.000000e+00	0.000000e+00	0.000000e+00
4.409380e-01	0.000000e+00	0.000000e+00	0.000000e+00	0.000000e+00	0.000000e+00	0.000000e+00
4.419630e-01	0.000000e+00	0.000000e+00	0.000000e+00	0.000000e+00	0.000000e+00	0.000000e+00
4.429880e-01	2.940850e-10	1.288990e+02	3.208630e+03	1.016000e+02	3.207840e+03	1.289270e+02
4.439500e-01	1.645430e-09	9.490860e+02	2.167790e+04	1.302190e+03	2.167580e+04	9.491380e+02
4.449750e-01	3.035490e-09	1.978250e+03	4.323300e+04	3.486940e+03	4.314920e+04	1.977890e+03
4.459360e-01	1.666930e-09	1.741440e+03	3.791720e+04	3.026230e+03	3.782740e+04	1.741890e+03
4.469610e-01	2.085650e-08	2.976550e+02	1.181800e+04	6.638900e+02	1.179400e+04	2.968210e+02
4.479870e-01	5.807820e-10	2.320500e+01	1.764920e+02	2.142900e+00	1.764920e+02	2.320500e+01
4.489480e-01	0.000000e+00	0.000000e+00	0.000000e+00	0.000000e+00	0.000000e+00	0.000000e+00
4.499730e-01	0.000000e+00	0.000000e+00	0.000000e+00	0.000000e+00	0.000000e+00	0.000000e+00
4.509980e-01	0.000000e+00	0.000000e+00	0.000000e+00	0.000000e+00	0.000000e+00	0.000000e+00
4.519600e-01	2.664840e-04	3.791040e+03	5.260410e+04	9.696610e+04	5.260500e+04	3.791380e+03
4.529850e-01	1.359900e-02	5.689100e+03	2.226470e+05	3.913220e+05	2.224570e+05	5.696980e+03
4.539460e-01	2.031500e-03	2.809410e+03	5.340480e+04	9.650610e+04	5.339320e+04	2.810450e+03
4.549710e-01	1.126020e-10	3.121040e+01	1.308400e+03	9.551970e+01	1.307530e+03	3.120910e+01
4.559970e-01	5.909620e-10	2.351910e+03	5.439660e+04	8.102890e+03	5.425650e+04	2.348020e+03
4.569580e-01	6.739100e-09	3.765010e+03	8.052800e+04	1.200470e+04	8.034630e+04	3.757650e+03
4.579830e-01	4.879670e-10	1.278300e+03	2.525140e+04	2.446460e+03	2.515790e+04	1.278570e+03
4.589440e-01	5.746100e-11	1.725710e+01	2.357940e+02	4.961000e+00	2.350840e+02	1.728160e+01
4.599700e-01	0.000000e+00	0.000000e+00	0.000000e+00	0.000000e+00	0.000000e+00	0.000000e+00
4.609950e-01	0.000000e+00	0.000000e+00	0.000000e+00	0.000000e+00	0.000000e+00	0.000000e+00
4.619560e-01	0.000000e+00	0.000000e+00	0.000000e+00	0.000000e+00	0.000000e+00	0.000000e+00
4.629820e-01	0.000000e+00	0.000000e+00	0.000000e+00	0.000000e+00	0.000000e+00	0.000000e+00
4.639430e-01	0.000000e+00	0.000000e+00	0.000000e+00	0.000000e+00	0.000000e+00	0.000000e+00
4.649680e-01	0.000000e+00	0.000000e+00	0.000000e+00	0.000000e+00	0.000000e+00	0.000000e+00
4.659930e-01	0.000000e+00	0.000000e+00	0.000000e+00	0.000000e+00	0.000000e+00	0.000000e+00
4.669550e-01	0.000000e+00	0.000000e+00	0.000000e+00	0.000000e+00	0.000000e+00	0.000000e+00
4.679800e-01	0.000000e+00	0.000000e+00	0.000000e+00	0.000000e+00	0.000000e+00	0.000000e+00
4.689410e-01	0.000000e+00	0.000000e+00	0.000000e+00	0.000000e+00	0.000000e+00	0.000000e+00
4.699660e-01	0.000000e+00	0.000000e+00	0.000000e+00	0.000000e+00	0.000000e+00	0.000000e+00
4.709920e-01	0.000000e+00	0.000000e+00	0.000000e+00	0.000000e+00	0.000000e+00	0.000000e+00
4.719530e-01	0.000000e+00	0.000000e+00	0.000000e+00	0.000000e+00	0.000000e+00	0.000000e+00
4.729780e-01	0.000000e+00	0.000000e+00	0.000000e+00	0.000000e+00	0.000000e+00	0.000000e+00
4.739390e-01	0.000000e+00	0.000000e+00	0.000000e+00	0.000000e+00	0.000000e+00	0.000000e+00
4.749650e-01	0.000000e+00	0.000000e+00	0.000000e+00	0.000000e+00	0.000000e+00	0.000000e+00
4.759900e-01	0.000000e+00	0.000000e+00	0.000000e+00	0.000000e+00	0.000000e+00	0.000000e+00
4.769510e-01	0.000000e+00	0.000000e+00	0.000000e+00	0.000000e+00	0.000000e+00	0.000000e+00
4.779760e-01	2.022690e-10	1.104200e+00	3.060210e+02	1.475690e+01	3.060210e+02	1.104200e+00
4.789380e-01	1.379680e-08	2.188390e+03	5.323210e+04	1.198170e+04	5.322730e+04	2.192190e+03
4.799630e-01	3.995810e-03	8.718170e+03	1.778440e+05	1.114580e+05	1.778330e+05	8.719560e+03
4.809880e-01	1.864260e-02	1.820380e+04	2.109850e+05	3.170170e+05	2.106840e+05	1.818800e+04
4.819490e-01	1.952580e-03	2.078810e+03	3.944400e+04	7.115340e+04	3.929440e+04	2.075650e+03
4.829750e-01	0.000000e+00	0.000000e+00	0.000000e+00	0.000000e+00	0.000000e+00	0.000000e+00
4.840000e-01	0.000000e+00	0.000000e+00	0.000000e+00	0.000000e+00	0.000000e+00	0.000000e+00
4.849610e-01	0.000000e+00	0.000000e+00	0.000000e+00	0.000000e+00	0.000000e+00	0.000000e+00
4.859860e-01	0.000000e+00	0.000000e+00	0.000000e+00	0.000000e+00	0.000000e+00	0.000000e+00
4.869480e-01	0.000000e+00	0.000000e+00	0.000000e+00	0.000000e+00	0.000000e+00	0.000000e+00
4.879730e-01	0.000000e+00	0.000000e+00	0.000000e+00	0.000000e+00	0.000000e+00	0.000000e+00
4.889980e-01	0.000000e+00	0.000000e+00	0.000000e+00	0.000000e+00	0.000000e+00	0.000000e+00
4.899590e-01	0.000000e+00	0.000000e+00	0.000000e+00	0.000000e+00	0.000000e+00	0.000000e+00
4.909850e-01	0.000000e+00	0.000000e+00	0.000000e+00	0.000000e+00	0.000000e+00	0.000000e+00
4.919460e-01	0.000000e+00	0.000000e+00	0.000000e+00	0.000000e+00	0.000000e+00	0.000000e+00
4.929710e-01	0.000000e+00	0.000000e+00	0.000000e+00	0.000000e+00	0.000000e+00	0.000000e+00
4.939970e-01	0.000000e+00	0.000000e+00	0.000000e+00	0.000000e+00	0.000000e+00	0.000000e+00
4.949580e-01	0.000000e+00	0.000000e+00	0.000000e+00	0.000000e+00	0.000000e+00	0.000000e+00
4.959830e-01	0.000000e+00	0.000000e+00	0.000000e+00	0.000000e+00	0.000000e+00	0.000000e+00
4.969440e-01	0.000000e+00	0.000000e+00	0.000000e+00	0.000000e+00	0.000000e+00	0.000000e+00
4.979690e-01	0.000000e+00	0.000000e+00	0.000000e+00	0.000000e+00	0.000000e+00	0.000000e+00
4.989950e-01	0.000000e+00	0.000000e+00	0.000000e+00	0.000000e+00	0.000000e+00	0.000000e+00
4.999560e-01	1.559790e-10	4.961620e+01	1.586240e+03	7.640980e+01	1.583790e+03	4.970100e+01
5.009810e-01	5.284090e-09	1.766530e+03	4.108030e+04	5.030500e+03	4.098510e+04	1.766880e+03
5.019420e-01	1.066180e-08	3.782430e+03	8.186070e+04	1.334880e+04	8.162900e+04	3.780570e+03
5.029680e-01	2.960630e-08	1.086820e+02	2.984550e+04	4.212870e+03	2.978460e+04	1.072490e+02
5.039930e-01	1.477780e-12	3.613950e-01	4.867600e-02	2.390210e-03	4.867600e-02	3.613950e-01
5.049540e-01	1.283990e-03	8.089110e+03	8.840300e+04	1.589540e+05	8.826480e+04	8.076490e+03
5.059800e-01	8.305940e-03	4.377690e+03	1.612240e+05	2.865630e+05	1.608310e+05	4.379620e+03
5.069410e-01	1.606840e-05	8.665540e+02	1.538640e+04	2.907490e+04	1.535590e+04	8.648740e+02
5.079660e-01	0.000000e+00	0.000000e+00	0.000000e+00	0.000000e+00	0.000000e+00	0.000000e+00
5.089910e-01	0.000000e+00	0.000000e+00	0.000000e+00	0.000000e+00	0.000000e+00	0.000000e+00
5.099530e-01	0.000000e+00	0.000000e+00	0.000000e+00	0.000000e+00	0.000000e+00	0.000000e+00
5.109780e-01	2.082340e-11	1.382200e+02	3.587550e+03	1.913000e+02	3.586750e+03	1.382480e+02
5.119390e-01	1.061300e-11	1.224500e+03	2.781610e+04	2.458500e+03	2.776340e+04	1.223720e+03
5.129640e-01	6.088910e-10	2.021310e+03	4.350280e+04	4.336210e+03	4.334760e+04	2.020960e+03
5.139900e-01	2.048840e-09	1.215750e+03	2.521710e+04	2.006670e+03	2.518700e+04	1.214990e+03
5.149510e-01	2.233600e-11	2.050780e+02	3.947440e+03	1.723910e+02	3.945430e+03	2.051480e+02
5.159760e-01	7.568830e-13	1.194120e-01	1.601490e+00	2.649450e-02	1.601490e+00	1.194120e-01
5.169370e-01	0.000000e+00	0.000000e+00	0.000000e+00	0.000000e+00	0.000000e+00	0.000000e+00
5.179630e-01	0.000000e+00	0.000000e+00	0.000000e+00	0.000000e+00	0.000000e+00	0.000000e+00
5.189880e-01	0.000000e+00	0.000000e+00	0.000000e+00	0.000000e+00	0.000000e+00	0.000000e+00
5.199490e-01	0.000000e+00	0.000000e+00	0.000000e+00	0.000000e+00	0.000000e+00	0.000000e+00
5.209740e-01	0.000000e+00	0.000000e+00	0.000000e+00	0.000000e+00	0.000000e+00	0.000000e+00
5.220000e-01	0.000000e+00	0.000000e+00	0.000000e+00	0.000000e+00	0.000000e+00	0.000000e+00
5.229610e-01	0.000000e+00	0.000000e+00	0.000000e+00	0.000000e+00	0.000000e+00	0.000000e+00
5.239860e-01	0.000000e+00	0.000000e+00	0.000000e+00	0.000000e+00	0.000000e+00	0.000000e+00
5.249470e-01	0.000000e+00	0.000000e+00	0.000000e+00	0.000000e+00	0.000000e+00	0.000000e+00
5.259730e-01	0.000000e+00	0.000000e+00	0.000000e+00	0.000000e+00	0.000000e+00	0.000000e+00
5.269980e-01	2.791610e-11	3.471130e+00	2.315310e+02	8.624890e+00	2.315310e+02	3.471130e+00
5.279590e-01	3.229050e-09	1.016490e+03	2.475430e+04	3.877050e+03	2.466760e+04	1.014340e+03
5.289840e-01	1.837510e-04	2.372430e+03	8.695440e+04	3.021960e+04	8.669760e+04	2.369220e+03
5.299460e-01	8.591670e-03	1.700020e+04	1.899450e+05	2.549060e+05	1.893660e+05	1.695980e+04
5.309710e-01	8.635930e-03	4.606540e+03	1.112360e+05	1.871130e+05	1.108300e+05	4.594640e+03
5.319960e-01	2.045870e-07	4.559250e+01	5.303740e+02	1.040540e+03	5.293140e+02	4.546220e+01
5.329570e-01	0.000000e+00	0.000000e+00	0.000000e+00	0.000000e+00	0.000000e+00	0.000000e+00
5.339830e-01	0.000000e+00	0.000000e+00	0.000000e+00	0.000000e+00	0.000000e+00	0.000000e+00
5.349440e-01	0.000000e+00	0.000000e+00	0.000000e+00	0.000000e+00	0.000000e+00	0.000000e+00
5.359690e-01	0.000000e+00	0.000000e+00	0.000000e+00	0.000000e+00	0.000000e+00	0.000000e+00
5.369950e-01	0.000000e+00	0.000000e+00	0.000000e+00	0.000000e+00	0.000000e+00	0.000000e+00
5.379560e-01	0.000000e+00	0.000000e+00	0.000000e+00	0.000000e+00	0.000000e+00	0.000000e+00
5.389810e-01	0.000000e+00	0.000000e+00	0.000000e+00	0.000000e+00	0.000000e+00	0.000000e+00
5.399420e-01	0.000000e+00	0.000000e+00	0.000000e+00	0.000000e+00	0.000000e+00	0.000000e+00
5.409680e-01	0.000000e+00	0.000000e+00	0.000000e+00	0.000000e+00	0.000000e+00	0.000000e+00
5.419930e-01	0.000000e+00	0.000000e+00	0.000000e+00	0.000000e+00	0.000000e+00	0.000000e+00
5.429540e-01	3.999040e-10	2.347180e+02	5.821870e+03	3.182240e+02	5.806520e+03	2.352470e+02
5.439790e-01	5.415390e-09	1.414490e+03	3.198580e+04	2.965760e+03	3.194330e+04	1.412700e+03
5.449400e-01	1.261060e-08	2.109900e+03	4.547030e+04	4.860420e+03	4.537290e+04	2.106920e+03
5.459660e-01	1.053930e-08	1.079470e+03	2.208190e+04	1.907080e+03	2.204000e+04	1.078840e+03
5.469910e-01	6.177330e-10	7.217580e+01	1.273780e+03	5.353480e+01	1.269660e+03	7.231860e+01
5.479520e-01	0.000000e+00	0.000000e+00	0.000000e+00	0.000000e+00	0.000000e+00	0.000000e+00
5.489780e-01	0.000000e+00	0.000000e+00	0.000000e+00	0.000000e+00	0.000000e+00	0.000000e+00
5.499390e-01	0.000000e+00	0.000000e+00	0.000000e+00	0.000000e+00	0.000000e+00	0.000000e+00
5.509640e-01	1.015940e-10	3.945450e+00	1.508980e+02	3.003630e+02	1.508980e+02	3.945450e+00
5.519890e-01	1.403370e-03	3.192710e+03	7.909770e+04	1.445350e+05	7.911030e+04	3.196250e+03
5.529510e-01	6.412740e-03	6.264790e+03	1.335690e+05	2.388150e+05	1.336520e+05	6.269720e+03
5.539760e-01	6.497640e-05	7.326830e+02	1.302920e+04	2.438740e+04	1.303650e+04	7.331290e+02
5.549370e-01	7.152500e-11	8.704250e+01	2.875220e+03	2.919130e+02	2.871890e+03	8.715820e+01
5.559620e-01	1.617790e-09	2.489950e+03	5.698840e+04	9.946910e+03	5.696740e+04	2.489320e+03
5.569880e-01	9.403500e-10	3.045660e+03	6.413170e+04	1.057830e+04	6.405370e+04	3.047190e+03
5.579490e-01	3.171480e-09	5.692920e+02	1.082690e+04	1.039910e+03	1.082690e+04	5.692920e+02
5.589740e-01	0.000000e+00	0.000000e+00	0.000000e+00	0.000000e+00	0.000000e+00	0.000000e+00
5.599990e-01	0.000000e+00	0.000000e+00	0.000000e+00	0.000000e+00	0.000000e+00	0.000000e+00
5.609610e-01	0.000000e+00	0.000000e+00	0.000000e+00	0.000000e+00	0.000000e+00	0.000000e+00
5.619860e-01	0.000000e+00	0.000000e+00	0.000000e+00	0.000000e+00	0.000000e+00	0.000000e+00
5.629470e-01	0.000000e+00	0.000000e+00	0.000000e+00	0.000000e+00	0.000000e+00	0.000000e+00
5.639720e-01	0.000000e+00	0.000000e+00	0.000000e+00	0.000000e+00	0.000000e+00	0.000000e+00
5.649980e-01	0.000000e+00	0.000000e+00	0.000000e+00	0.000000e+00	0.000000e+00	0.000000e+00
5.659590e-01	0.000000e+00	0.000000e+00	0.000000e+00	0.000000e+00	0.000000e+00	0.000000e+00
5.669840e-01	0.000000e+00	0.000000e+00	0.000000e+00	0.000000e+00	0.000000e+00	0.000000e+00
5.679450e-01	0.000000e+00	0.000000e+00	0.000000e+00	0.000000e+00	0.000000e+00	0.000000e+00
5.689710e-01	0.000000e+00	0.000000e+00	0.000000e+00	0.000000e+00	0.000000e+00	0.000000e+00
5.699960e-01	1.117630e-06	2.858530e+02	7.848010e+03	1.529230e+04	7.860750e+03	2.867960e+02
5.709570e-01	7.299240e-05	3.296490e+03	7.518500e+04	1.398150e+05	7.533200e+04	3.305380e+03
5.719820e-01	6.545520e-04	3.336340e+03	6.944780e+04	1.274190e+05	6.954880e+04	3.345110e+03
5.729440e-01	1.089910e-06	1.772640e+02	4.716210e+03	3.950010e+03	4.723340e+03	1.777180e+02
5.739690e-01	7.157030e-09	4.473410e+03	1.019750e+05	3.040050e+04	1.019980e+05	4.483060e+03
5.749940e-01	2.222950e-08	3.799960e+03	7.740480e+04	1.972930e+04	7.741750e+04	3.808800e+03
5.759550e-01	1.043820e-09	8.109110e+01	1.094050e+03	9.628520e+01	1.091920e+03	8.132680e+01
5.769810e-01	0.000000e+00	0.000000e+00	0.000000e+00	0.000000e+00	0.000000e+00	0.000000e+00
5.779420e-01	0.000000e+00	0.000000e+00	0.000000e+00	0.000000e+00	0.000000e+00	0.000000e+00
5.789670e-01	0.000000e+00	0.000000e+00	0.000000e+00	0.000000e+00	0.000000e+00	0.000000e+00
5.799930e-01	0.000000e+00	0.000000e+00	0.000000e+00	0.000000e+00	0.000000e+00	0.000000e+00
5.809540e-01	2.081430e-08	1.067240e+02	5.436270e+03	1.079350e+04	5.447020e+03	1.069640e+02
5.819790e-01	4.181330e-08	1.425700e+03	3.252420e+04	6.349000e+04	3.259800e+04	1.429740e+03
5.829400e-01	1.406090e-08	1.889850e+03	4.078390e+04	7.936480e+04	4.087000e+04	1.895020e+03
5.839660e-01	1.962860e-09	7.808770e+02	1.596790e+04	3.147380e+04	1.600660e+04	7.828030e+02
5.849910e-01	1.167490e-10	2.129740e+01	3.467200e+02	6.945990e+02	3.467200e+02	2.129740e+01
5.859520e-01	0.000000e+00	0.000000e+00	0.000000e+00	0.000000e+00	0.000000e+00	0.000000e+00
5.869770e-01	0.000000e+00	0.000000e+00	0.000000e+00	0.000000e+00	0.000000e+00	0.000000e+00
5.879390e-01	0.000000e+00	0.000000e+00	0.000000e+00	0.000000e+00	0.000000e+00	0.000000e+00
5.889640e-01	0.000000e+00	0.000000e+00	0.000000e+00	0.000000e+00	0.000000e+00	0.000000e+00
5.899890e-01	0.000000e+00	0.000000e+00	0.000000e+00	0.000000e+00	0.000000e+00	0.000000e+00
5.909500e-01	0.000000e+00	0.000000e+00	0.000000e+00	0.000000e+00	0.000000e+00	0.000000e+00
5.919760e-01	2.619410e-10	2.926470e+02	8.761090e+03	1.611980e+03	8.767230e+03	2.933120e+02
5.929370e-01	1.219160e-08	4.910420e+03	1.116940e+05	3.877470e+04	1.117680e+05	4.918330e+03
5.939620e-01	1.879480e-03	3.468530e+03	9.025320e+04	5.820700e+04	9.022970e+04	3.465320e+03
5.949870e-01	6.611060e-03	7.547780e+03	7.696140e+04	1.353540e+05	7.687930e+04	7.543120e+03
5.959490e-01	2.011480e-04	1.290940e+03	3.289080e+04	6.164350e+04	3.284110e+04	1.290640e+03
5.969740e-01	3.344640e-10	3.174470e+01	4.803280e+02	9.556360e+02	4.796980e+02	3.168150e+01
5.979990e-01	0.000000e+00	0.000000e+00	0.000000e+00	0.000000e+00	0.000000e+00	0.000000e+00
5.989600e-01	0.000000e+00	0.000000e+00	0.000000e+00	0.000000e+00	0.000000e+00	0.000000e+00
5.999860e-01	0.000000e+00	0.000000e+00	0.000000e+00	0.000000e+00	0.000000e+00	0.000000e+00
6.009470e-01	0.000000e+00	0.000000e+00	0.000000e+00	0.000000e+00	0.000000e+00	0.000000e+00
6.019720e-01	0.000000e+00	0.000000e+00	0.000000e+00	0.000000e+00	0.000000e+00	0.000000e+00
6.029970e-01	0.000000e+00	0.000000e+00	0.000000e+00	0.000000e+00	0.000000e+00	0.000000e+00
6.039590e-01	0.000000e+00	0.000000e+00	0.000000e+00	0.000000e+00	0.000000e+00	0.000000e+00
6.049840e-01	0.000000e+00	0.000000e+00	0.000000e+00	0.000000e+00	0.000000e+00	0.000000e+00
6.059450e-01	0.000000e+00	0.000000e+00	0.000000e+00	0.000000e+00	0.000000e+00	0.000000e+00
6.069700e-01	0.000000e+00	0.000000e+00	0.000000e+00	0.000000e+00	0.000000e+00	0.000000e+00
6.079960e-01	8.476170e-11	1.364710e-01	2.358180e+02	4.672230e+02	2.358180e+02	1.364720e-01
6.089570e-01	3.751260e-03	2.063000e+03	5.083720e+04	8.571130e+04	5.076150e+04	2.061310e+03
6.099820e-01	1.233840e-02	7.859120e+03	1.735150e+05	1.864750e+05	1.731920e+05	7.857250e+03
6.109430e-01	1.170740e-03	3.596340e+03	7.163440e+04	3.445710e+04	7.150900e+04	3.595480e+03
6.119690e-01	8.417510e-11	5.790440e+01	7.974330e+02	9.237700e+01	7.944400e+02	5.787340e+01
6.129940e-01	0.000000e+00	0.000000e+00	0.000000e+00	0.000000e+00	0.000000e+00	0.000000e+00
6.139550e-01	0.000000e+00	0.000000e+00	0.000000e+00	0.000000e+00	0.000000e+00	0.000000e+00
6.149800e-01	0.000000e+00	0.000000e+00	0.000000e+00	0.000000e+00	0.000000e+00	0.000000e+00
6.159420e-01	0.000000e+00	0.000000e+00	0.000000e+00	0.000000e+00	0.000000e+00	0.000000e+00
6.169670e-01	0.000000e+00	0.000000e+00	0.000000e+00	0.000000e+00	0.000000e+00	0.000000e+00
6.179920e-01	0.000000e+00	0.000000e+00	0.000000e+00	0.000000e+00	0.000000e+00	0.000000e+00
6.189530e-01	0.000000e+00	0.000000e+00	0.000000e+00	0.000000e+00	0.000000e+00	0.000000e+00
6.199790e-01	0.000000e+00	0.000000e+00	0.000000e+00	0.000000e+00	0.000000e+00	0.000000e+00
6.209400e-01	0.000000e+00	0.000000e+00	0.000000e+00	0.000000e+00	0.000000e+00	0.000000e+00
6.219650e-01	0.000000e+00	0.000000e+00	0.000000e+00	0.000000e+00	0.000000e+00	0.000000e+00
6.229910e-01	4.378470e-04	1.349570e+02	5.898990e+03	9.309280e+03	5.900110e+03	1.353260e+02
6.239520e-01	1.176740e-02	7.454980e+03	1.701930e+05	1.915540e+05	1.701320e+05	7.463500e+03
6.249770e-01	6.854950e-03	4.839340e+03	9.644410e+04	9.598080e+04	9.639440e+04	4.843130e+03
6.259380e-01	0.000000e+00	0.000000e+00	0.000000e+00	0.000000e+00	0.000000e+00	0.000000e+00
6.269640e-01	0.000000e+00	0.000000e+00	0.000000e+00	0.000000e+00	0.000000e+00	0.000000e+00
6.279890e-01	0.000000e+00	0.000000e+00	0.000000e+00	0.000000e+00	0.000000e+00	0.000000e+00
6.289500e-01	0.000000e+00	0.000000e+00	0.000000e+00	0.000000e+00	0.000000e+00	0.000000e+00
6.299750e-01	0.000000e+00	0.000000e+00	0.000000e+00	0.000000e+00	0.000000e+00	0.000000e+00
6.309370e-01	0.000000e+00	0.000000e+00	0.000000e+00	0.000000e+00	0.000000e+00	0.000000e+00
6.319620e-01	0.000000e+00	0.000000e+00	0.000000e+00	0.000000e+00	0.000000e+00	0.000000e+00
6.329870e-01	0.000000e+00	0.000000e+00	0.000000e+00	0.000000e+00	0.000000e+00	0.000000e+00
6.339480e-01	0.000000e+00	0.000000e+00	0.000000e+00	0.000000e+00	0.000000e+00	0.000000e+00
6.349740e-01	3.163460e-11	6.135170e-01	9.499830e+01	5.056730e+00	9.499830e+01	6.135190e-01
6.359990e-01	1.193230e-08	1.242660e+03	3.007160e+04	7.613280e+03	2.997830e+04	1.242940e+03
6.369600e-01	1.673480e-03	2.402240e+03	9.161630e+04	5.358530e+04	9.144040e+04	2.395510e+03
6.379850e-01	8.940850e-03	9.542410e+03	1.013770e+05	1.488770e+05	1.010990e+05	9.523630e+03
6.389470e-01	1.693600e-03	1.327550e+03	2.721480e+04	4.881740e+04	2.718030e+04	1.326410e+03
6.399720e-01	1.449020e-12	5.543740e-01	1.094810e+00	2.205250e+00	1.094810e+00	5.543740e-01
6.409970e-01	0.000000e+00	0.000000e+00	0.000000e+00	0.000000e+00	0.000000e+00	0.000000e+00
6.419580e-01	0.000000e+00	0.000000e+00	0.000000e+00	0.000000e+00	0.000000e+00	0.000000e+00
6.429840e-01	0.000000e+00	0.000000e+00	0.000000e+00	0.000000e+00	0.000000e+00	0.000000e+00
6.439450e-01	0.000000e+00	0.000000e+00	0.000000e+00	0.000000e+00	0.000000e+00	0.000000e+00
6.449700e-01	0.000000e+00	0.000000e+00	0.000000e+00	0.000000e+00	0.000000e+00	0.000000e+00
6.459950e-01	0.000000e+00	0.000000e+00	0.000000e+00	0.000000e+00	0.000000e+00	0.000000e+00
6.469570e-01	0.000000e+00	0.000000e+00	0.000000e+00	0.000000e+00	0.000000e+00	0.000000e+00
6.479820e-01	6.073870e-09	7.138610e+02	1.811080e+04	4.173920e+03	1.808170e+04	7.129230e+02
6.489430e-01	3.038770e-04	2.950430e+03	7.931090e+04	3.487000e+04	7.917840e+04	2.948930e+03
6.499680e-01	5.794100e-03	8.445130e+03	9.214510e+04	1.206160e+05	9.206420e+04	8.445990e+03
6.509940e-01	2.561690e-03	1.506960e+03	4.086170e+04	7.202580e+04	4.079230e+04	1.508830e+03
6.519550e-01	7.779680e-11	4.805080e+01	7.159380e+02	1.408140e+03	7.127200e+02	4.798220e+01
6.529800e-01	0.000000e+00	0.000000e+00	0.000000e+00	0.000000e+00	0.000000e+00	0.000000e+00
6.539410e-01	0.000000e+00	0.000000e+00	0.000000e+00	0.000000e+00	0.000000e+00	0.000000e+00
6.549670e-01	0.000000e+00	0.000000e+00	0.000000e+00	0.000000e+00	0.000000e+00	0.000000e+00
6.559920e-01	0.000000e+00	0.000000e+00	0.000000e+00	0.000000e+00	0.000000e+00	0.000000e+00
6.569530e-01	0.000000e+00	0.000000e+00	0.000000e+00	0.000000e+00	0.000000e+00	0.000000e+00
6.579780e-01	0.000000e+00	0.000000e+00	0.000000e+00	0.000000e+00	0.000000e+00	0.000000e+00
6.589400e-01	0.000000e+00	0.000000e+00	0.000000e+00	0.000000e+00	0.000000e+00	0.000000e+00
6.599650e-01	2.503210e-04	1.103900e+03	2.855080e+04	1.302620e+04	2.848890e+04	1.103080e+03
6.609900e-01	7.293200e-03	6.282370e+03	1.385440e+05	1.305970e+05	1.383120e+05	6.279790e+03
6.619510e-01	4.824290e-03	2.572310e+03	5.080240e+04	7.638660e+04	5.072870e+04	2.570960e+03
6.629770e-01	2.122760e-07	5.120880e+01	7.826180e+02	1.525000e+03	7.822600e+02	5.119280e+01
6.639380e-01	0.000000e+00	0.000000e+00	0.000000e+00	0.000000e+00	0.000000e+00	0.000000e+00
6.649630e-01	0.000000e+00	0.000000e+00	0.000000e+00	0.000000e+00	0.000000e+00	0.000000e+00
6.659890e-01	0.000000e+00	0.000000e+00	0.000000e+00	0.000000e+00	0.000000e+00	0.000000e+00
6.669500e-01	0.000000e+00	0.000000e+00	0.000000e+00	0.000000e+00	0.000000e+00	0.000000e+00
6.679750e-01	0.000000e+00	0.000000e+00	0.000000e+00	0.000000e+00	0.000000e+00	0.000000e+00
6.689360e-01	6.939470e-11	3.502230e+00	1.745960e+02	3.492380e+02	1.745890e+02	3.502450e+00
6.699620e-01	5.327740e-05	6.606020e+02	1.576150e+04	3.009610e+04	1.579880e+04	6.627440e+02
6.709870e-01	1.104750e-03	1.878730e+03	4.118340e+04	7.530680e+04	4.124320e+04	1.884220e+03
6.719480e-01	1.036780e-03	9.897090e+02	2.226830e+04	3.199690e+04	2.228920e+04	9.921300e+02
6.729730e-01	3.854510e-05	3.776210e+03	8.441510e+04	3.753610e+04	8.448510e+04	3.784590e+03
6.739990e-01	5.470940e-08	1.922550e+03	3.799940e+04	1.335660e+04	3.803850e+04	1.927240e+03
6.749600e-01	0.000000e+00	0.000000e+00	0.000000e+00	0.000000e+00	0.000000e+00	0.000000e+00
6.759850e-01	1.386160e-09	4.903090e+01	5.805080e+02	1.156500e+03	5.805080e+02	4.903090e+01
6.769460e-01	1.216420e-05	6.309460e+02	1.476020e+04	2.851990e+04	1.473930e+04	6.302150e+02
6.779720e-01	9.639980e-05	1.156480e+03	2.770470e+04	5.283550e+04	2.768680e+04	1.157110e+03
6.789970e-01	6.207880e-06	6.703020e+02	1.378690e+04	2.671380e+04	1.378250e+04	6.704560e+02
6.799580e-01	1.081500e-10	4.384320e+01	7.841000e+02	1.560800e+03	7.841000e+02	4.384320e+01
6.809830e-01	0.000000e+00	0.000000e+00	0.000000e+00	0.000000e+00	0.000000e+00	0.000000e+00
6.819450e-01	0.000000e+00	0.000000e+00	0.000000e+00	0.000000e+00	0.000000e+00	0.000000e+00
6.829700e-01	0.000000e+00	0.000000e+00	0.000000e+00	0.000000e+00	0.000000e+00	0.000000e+00
6.839950e-01	8.562540e-04	1.892540e+03	4.663740e+04	2.491700e+04	4.660970e+04	1.893790e+03
6.849560e-01	5.244330e-03	3.925710e+03	1.170590e+05	1.007160e+05	1.169650e+05	3.929540e+03
6.859820e-01	2.815530e-03	2.161700e+03	2.572050e+04	3.997180e+04	2.570110e+04	2.160800e+03
6.869430e-01	5.276550e-08	5.935380e+01	1.073010e+03	2.112420e+03	1.073010e+03	5.935380e+01
6.879680e-01	0.000000e+00	0.000000e+00	0.000000e+00	0.000000e+00	0.000000e+00	0.000000e+00
6.889930e-01	2.955330e-10	5.939840e+00	1.801850e+02	3.612440e+02	1.801850e+02	5.939840e+00
6.899550e-01	4.683390e-09	1.946930e+02	4.595030e+03	9.067560e+03	4.595030e+03	1.946930e+02
6.909800e-01	3.168700e-06	6.567220e+02	1.465720e+04	2.840270e+04	1.464000e+04	6.573250e+02
6.919410e-01	1.114590e-05	8.160310e+02	1.759340e+04	3.387840e+04	1.758590e+04	8.162960e+02
6.929660e-01	4.862510e-07	3.854280e+02	7.927630e+03	1.543420e+04	7.927630e+03	3.854280e+02
6.939920e-01	2.754070e-10	2.408640e+01	4.281180e+02	8.511590e+02	4.281180e+02	2.408640e+01
6.949530e-01	1.403190e-04	5.729280e+02	1.599170e+04	7.888820e+03	1.602770e+04	5.744050e+02
6.959780e-01	3.757550e-03	4.619270e+03	1.044100e+05	6.863570e+04	1.045170e+05	4.632780e+03
6.969390e-01	2.470900e-03	2.049270e+03	3.990650e+04	4.201850e+04	3.991650e+04	2.047930e+03
6.979650e-01	2.098310e-05	7.536590e+02	6.699270e+03	1.293950e+04	6.694510e+03	7.533540e+02
6.989900e-01	4.033240e-08	8.554560e+01	4.822850e+03	9.482470e+03	4.821050e+03	8.560840e+01
6.999510e-01	8.505360e-09	2.506250e+02	5.511830e+03	1.084700e+04	5.511830e+03	2.506260e+02
7.009760e-01	4.262290e-09	3.298700e+02	7.238230e+03	1.420600e+04	7.231580e+03	3.301030e+02
7.019380e-01	5.611240e-09	3.895150e+02	8.499020e+03	1.662900e+04	8.497060e+03	3.895830e+02
7.029630e-01	2.286970e-09	3.660380e+02	7.899280e+03	1.544510e+04	7.893840e+03	3.662290e+02
7.039880e-01	7.952470e-10	2.835930e+02	6.101020e+03	1.192470e+04	6.099040e+03	2.836620e+02
7.049490e-01	2.711130e-06	2.466480e+02	5.421680e+03	1.045760e+04	5.416170e+03	2.466120e+02
7.059750e-01	2.408390e-03	1.967830e+03	4.740720e+04	4.248950e+04	4.734430e+04	1.968590e+03
7.069360e-01	4.437800e-03	4.444860e+03	9.531150e+04	6.439170e+04	9.521960e+04	4.447740e+03
7.079610e-01	4.592220e-04	2.673760e+01	8.785350e+03	4.998630e+03	8.771060e+03	2.625560e+01
7.089870e-01	1.365410e-07	4.450140e+02	3.944620e+03	7.728890e+03	3.941820e+03	4.448810e+02
7.099480e-01	5.732000e-06	1.201360e+03	1.195330e+04	2.309410e+04	1.194400e+04	1.200710e+03
7.109730e-01	7.533260e-06	3.414780e+02	1.328290e+04	2.560360e+04	1.326720e+04	3.413200e+02
7.119980e-01	1.380980e-08	3.334510e+02	6.970650e+03	1.361930e+04	6.966080e+03	3.335780e+02
7.129600e-01	7.449500e-10	1.022530e+02	2.109160e+03	4.182230e+03	2.108680e+03	1.022700e+02
7.139850e-01	1.571690e-10	6.318050e+01	1.425270e+03	2.825940e+03	1.424510e+03	6.320700e+01
7.149460e-01	1.578150e-04	3.260160e+02	7.953520e+03	1.460890e+04	7.936910e+03	3.257710e+02
7.159710e-01	4.007970e-03	3.128040e+03	7.212990e+04	6.928230e+04	7.196810e+04	3.126840e+03
7.169970e-01	2.805310e-03	3.033800e+03	6.511040e+04	4.249520e+04	6.499640e+04	3.032660e+03
7.179580e-01	1.360380e-08	4.057780e+01	5.792960e+02	1.534230e+02	5.788160e+02	4.054560e+01
7.189830e-01	2.101660e-10	4.437650e+00	4.938310e+01	9.925260e+01	4.938310e+01	4.437650e+00
7.199440e-01	1.440700e-06	6.145050e+02	5.480260e+03	1.068980e+04	5.471210e+03	6.141830e+02
7.209700e-01	6.127330e-05	5.639010e+02	1.761120e+04	3.346620e+04	1.759160e+04	5.637410e+02
7.219950e-01	8.041170e-05	7.293710e+02	1.544280e+04	2.929630e+04	1.543280e+04	7.290210e+02
7.229560e-01	6.598940e-07	1.635700e+02	3.165460e+03	6.153560e+03	3.163160e+03	1.636450e+02
7.239810e-01	3.921690e-10	8.898470e+01	3.263970e+03	1.298470e+03	3.259770e+03	8.908360e+01
7.249430e-01	1.564040e-03	2.862990e+03	6.675630e+04	3.917950e+04	6.666400e+04	2.864610e+03
7.259680e-01	2.532120e-03	3.528210e+03	5.338050e+04	4.767700e+04	5.331590e+04	3.524360e+03
7.269930e-01	1.047250e-04	1.045190e+03	8.826560e+03	1.643550e+04	8.805900e+03	1.043430e+03
7.279540e-01	2.044710e-06	3.198070e+02	5.128980e+03	9.988410e+03	5.127190e+03	3.196800e+02
7.289800e-01	7.339100e-09	2.281600e+02	5.017620e+03	9.792120e+03	5.016010e+03	2.282160e+02
7.299410e-01	1.927750e-06	3.223660e+02	7.120290e+03	1.377700e+04	7.113190e+03	3.224050e+02
7.309660e-01	3.244300e-05	4.337960e+02	9.507170e+03	1.813390e+04	9.490610e+03	4.334460e+02
7.319910e-01	1.365290e-04	4.710880e+02	1.049980e+04	1.906520e+04	1.047320e+04	4.706820e+02
7.329530e-01	2.281820e-03	2.299440e+03	5.320980e+04	4.096370e+04	5.318860e+04	2.301590e+03
7.339780e-01	1.911520e-03	1.313400e+03	5.331380e+04	3.174170e+04	5.332260e+04	1.315010e+03
7.349390e-01	5.655150e-06	3.392120e+02	2.758760e+03	4.168750e+03	2.755660e+03	3.390360e+02
7.359640e-01	8.897300e-05	1.284610e+03	1.122950e+04	2.123440e+04	1.120770e+04	1.282350e+03
7.369900e-01	1.149740e-04	2.069320e+02	1.414400e+04	2.666910e+04	1.410360e+04	2.063630e+02
7.379510e-01	1.503510e-05	3.296760e+02	6.826550e+03	1.309410e+04	6.820260e+03	3.293520e+02
7.389760e-01	3.406240e-10	6.815770e+01	1.376750e+03	2.706050e+03	1.376690e+03	6.816000e+01
7.399370e-01	8.497900e-04	8.069640e+02	2.053320e+04	1.795670e+04	2.052530e+04	8.079160e+02
7.409630e-01	3.542420e-03	3.192050e+03	7.416640e+04	6.033600e+04	7.414500e+04	3.195850e+03
7.419880e-01	1.176290e-03	1.122390e+03	1.689090e+04	1.641640e+04	1.688060e+04	1.121970e+03
7.429490e-01	1.307250e-10	1.732080e+02	1.518720e+03	2.994830e+03	1.518100e+03	1.731870e+02
7.439740e-01	6.265740e-05	6.154800e+02	6.585350e+03	1.264250e+04	6.586660e+03	6.153650e+02
7.450000e-01	3.158310e-07	4.244610e+02	1.336380e+04	2.496130e+04	1.336080e+04	4.248630e+02
7.459610e-01	1.811800e-04	5.495490e+02	1.167780e+04	2.144490e+04	1.166910e+04	5.501100e+02
7.469860e-01	1.054570e-03	1.148160e+03	2.713230e+04	2.082160e+04	2.709030e+04	1.148040e+03
7.479470e-01	1.772880e-03	1.123170e+03	5.376420e+04	3.171620e+04	5.368420e+04	1.123520e+03
7.489730e-01	5.297750e-04	1.532330e+03	1.281590e+04	1.461540e+04	1.280200e+04	1.531280e+03
7.499980e-01	1.125350e-04	1.305400e+03	1.171530e+04	2.172500e+04	1.171270e+04	1.305560e+03
7.509590e-01	2.490200e-05	1.527950e+02	1.067480e+04	1.997730e+04	1.067070e+04	1.530640e+02
7.519850e-01	1.629130e-06	2.505250e+02	5.244210e+03	9.960590e+03	5.242390e+03	2.507060e+02
7.529460e-01	6.521280e-04	5.979370e+02	1.498210e+04	1.477140e+04	1.498490e+04	5.985280e+02
7.539710e-01	2.713460e-03	2.415660e+03	5.818270e+04	4.427810e+04	5.819370e+04	2.419290e+03
7.549960e-01	1.207340e-03	1.600860e+03	1.970540e+04	1.922370e+04	1.970270e+04	1.600990e+03
7.559580e-01	8.142630e-07	4.765060e+02	4.134580e+03	7.903430e+03	4.133000e+03	4.765340e+02
7.569830e-01	1.252920e-05	1.248550e+02	8.663530e+03	1.618630e+04	8.655740e+03	1.247700e+02
7.579440e-01	5.814950e-04	5.886220e+02	1.295110e+04	2.312680e+04	1.293520e+04	5.883760e+02
7.589690e-01	1.543230e-03	1.238800e+03	2.845090e+04	2.771970e+04	2.842560e+04	1.239420e+03
7.599950e-01	1.334540e-03	1.184150e+03	4.085450e+04	2.401430e+04	4.085570e+04	1.186120e+03
7.609560e-01	2.099990e-04	1.031800e+03	8.723130e+03	9.071650e+03	8.721160e+03	1.031880e+03
7.619810e-01	6.009490e-04	1.314840e+03	1.307410e+04	2.342960e+04	1.305570e+04	1.313590e+03
7.629420e-01	9.176530e-04	4.805090e+02	1.409580e+04	2.484960e+04	1.405740e+04	4.807300e+02
7.639680e-01	7.122820e-04	7.109460e+02	1.644110e+04	1.553580e+04	1.642250e+04	7.115400e+02
7.649930e-01	1.086750e-03	1.063500e+03	3.790850e+04	2.270980e+04	3.788420e+04	1.065900e+03
7.659540e-01	1.101540e-03	2.166550e+03	1.904070e+04	2.064240e+04	1.902190e+04	2.165420e+03
7.669790e-01	8.150060e-04	8.154570e+02	1.166970e+04	2.053220e+04	1.165490e+04	8.147680e+02
7.679410e-01	5.795970e-04	4.508320e+02	9.751560e+03	1.709560e+04	9.740730e+03	4.505360e+02
7.689660e-01	1.081190e-03	9.955770e+02	2.292860e+04	2.078600e+04	2.290650e+04	9.962560e+02
7.699910e-01	1.510200e-03	8.576110e+02	3.638700e+04	2.646270e+04	3.635860e+04	8.595470e+02
7.709520e-01	8.365500e-04	1.522150e+03	1.295330e+04	1.634360e+04	1.293280e+04	1.520960e+03
7.719780e-01	6.324960e-04	1.108270e+02	9.588260e+03	1.670960e+04	9.573160e+03	1.106400e+02
7.729390e-01	1.207830e-03	7.301330e+02	1.663020e+04	2.284840e+04	1.660740e+04	7.300620e+02
7.739640e-01	1.494700e-03	1.521270e+03	3.335760e+04	2.640450e+04	3.334160e+04	1.522090e+03
7.749890e-01	9.236920e-04	5.383140e+02	1.969760e+04	1.582630e+04	1.968350e+04	5.372800e+02
7.759510e-01	5.840840e-04	8.442100e+02	9.562370e+03	1.562100e+04	9.545150e+03	8.432610e+02
7.769760e-01	1.368570e-03	7.567890e+02	1.828770e+04	2.571030e+04	1.825860e+04	7.570610e+02
7.779370e-01	1.462590e-03	1.351670e+03	2.946920e+04	2.554740e+04	2.944930e+04	1.353140e+03
7.789620e-01	8.027100e-04	1.142870e+02	1.932540e+04	1.419520e+04	1.930640e+04	1.129710e+02
7.799880e-01	6.538980e-04	1.098630e+03	1.144850e+04	1.655570e+04	1.143590e+04	1.097920e+03
7.809490e-01	1.446730e-03	9.049070e+02	2.225280e+04	2.792660e+04	2.223190e+04	9.051700e+02
7.819740e-01	1.370570e-03	1.229520e+03	2.643900e+04	2.350090e+04	2.642120e+04	1.230800e+03
7.830000e-01	7.123250e-04	4.556380e+02	1.490950e+04	1.256920e+04	1.491300e+04	4.554220e+02
7.839610e-01	6.711980e-04	9.567260e+02	1.494070e+04	1.913170e+04	1.492760e+04	9.561530e+02
7.849860e-01	1.504220e-03	1.143680e+03	2.543050e+04	2.831230e+04	2.540950e+04	1.144310e+03
7.859470e-01	1.261370e-03	1.036410e+03	2.207540e+04	2.054320e+04	2.206680e+04	1.037180e+03
7.869730e-01	8.197120e-04	7.539900e+02	1.350840e+04	1.324650e+04	1.350040e+04	7.535300e+02
7.879980e-01	7.716810e-04	3.100900e+02	1.969120e+04	2.198020e+04	1.967390e+04	3.095300e+02
7.889590e-01	1.437420e-03	1.173260e+03	2.540700e+04	2.679370e+04	2.538530e+04	1.174120e+03
7.899840e-01	1.355010e-03	7.101690e+02	1.776480e+04	1.818080e+04	1.774610e+04	7.110380e+02
7.909450e-01	1.354850e-03	6.963260e+02	1.489500e+04	1.562210e+04	1.488360e+04	6.957060e+02
7.919710e-01	1.358130e-03	1.605450e+02	2.284160e+04	2.347780e+04	2.283160e+04	1.611160e+02
7.929960e-01	1.336470e-03	4.889890e+01	2.265390e+04	2.362660e+04	2.263590e+04	4.975060e+01
7.939570e-01	1.337650e-03	1.183640e+02	1.540070e+04	1.638700e+04	1.539090e+04	1.178000e+02
7.949830e-01	1.243130e-03	5.766310e+02	1.814590e+04	1.866450e+04	1.813370e+04	5.772520e+02
7.959440e-01	1.220770e-03	6.877750e+02	2.400410e+04	2.494500e+04	2.399240e+04	6.871680e+02
7.969690e-01	1.203580e-03	3.202720e+01	1.960370e+04	2.022760e+04	1.958860e+04	3.275520e+01
7.979940e-01	1.201200e-03	3.152370e+02	1.568050e+04	1.634870e+04	1.567170e+04	3.157460e+02
7.989560e-01	1.209180e-03	3.171620e+02	2.112220e+04	2.221480e+04	2.110530e+04	3.163660e+02
7.999810e-01	1.192630e-03	4.255410e+02	2.282220e+04	2.357780e+04	2.280330e+04	4.264040e+02
8.009420e-01	1.189840e-03	3.188230e+02	1.718640e+04	1.797510e+04	1.717590e+04	3.182520e+02
8.019670e-01	1.205850e-03	1.046860e+01	1.741830e+04	1.799030e+04	1.740600e+04	9.835160e+00
8.029930e-01	1.205310e-03	6.672380e+01	2.261650e+04	2.336750e+04	2.260110e+04	6.746460e+01
8.039540e-01	1.190160e-03	3.338470e+02	2.056500e+04	2.159540e+04	2.055430e+04	3.332670e+02
8.049790e-01	1.197550e-03	5.851120e+02	1.654650e+04	1.719540e+04	1.652930e+04	5.859050e+02
8.059400e-01	1.209530e-03	2.330120e+02	1.973840e+04	2.064150e+04	1.971420e+04	2.319830e+02
8.069660e-01	1.198200e-03	1.761300e+02	2.245840e+04	2.321640e+04	2.244490e+04	1.754750e+02
8.079910e-01	1.193010e-03	1.522260e+02	1.844140e+04	1.902690e+04	1.842570e+04	1.529610e+02
8.089520e-01	1.205020e-03	2.818230e+02	1.737320e+04	1.823590e+04	1.736190e+04	2.812430e+02
8.099770e-01	1.206960e-03	3.741390e+02	2.142740e+04	2.221300e+04	2.140930e+04	3.749560e+02
8.109390e-01	1.195840e-03	1.550730e+02	2.110570e+04	2.208060e+04	2.108520e+04	1.541740e+02
8.119640e-01	1.196950e-03	8.569510e+00	1.749810e+04	1.820150e+04	1.749060e+04	8.123760e+00
8.129890e-01	1.208820e-03	1.373050e+02	1.904990e+04	1.963550e+04	1.903760e+04	1.379200e+02
8.139500e-01	1.203300e-03	4.584670e+02	2.184300e+04	2.275610e+04	2.182110e+04	4.575170e+02
8.149760e-01	1.195740e-03	3.410630e+02	1.947060e+04	2.017290e+04	1.945480e+04	3.417990e+02
8.159370e-01	1.204180e-03	1.885220e+01	1.759660e+04	1.848420e+04	1.758650e+04	1.939080e+01
8.169620e-01	1.208080e-03	5.134310e+01	2.038710e+04	2.124150e+04	2.036690e+04	5.045420e+01
8.179870e-01	1.200470e-03	1.089500e+02	2.117800e+04	2.185750e+04	2.116090e+04	1.097320e+02
8.189490e-01	1.199240e-03	3.572030e+02	1.828720e+04	1.905650e+04	1.827470e+04	3.565810e+02
8.199740e-01	1.207910e-03	2.462640e+02	1.860230e+04	1.922940e+04	1.859650e+04	2.466530e+02
8.209990e-01	1.207130e-03	8.103920e+01	2.116970e+04	2.212370e+04	2.115520e+04	8.034550e+01
8.219600e-01	1.199150e-03	1.677550e+01	2.000420e+04	2.089660e+04	1.998610e+04	1.759330e+01
8.229860e-01	1.204110e-03	2.454640e+02	1.807700e+04	1.873630e+04	1.806360e+04	2.461190e+02
8.239470e-01	1.209610e-03	3.612000e+02	1.976730e+04	2.056220e+04	1.975840e+04	3.607040e+02
8.249720e-01	1.204420e-03	7.915730e+01	2.099860e+04	2.165780e+04	2.098450e+04	7.983440e+01
8.259980e-01	1.202450e-03	2.893310e+01	1.896500e+04	1.979240e+04	1.895370e+04	2.835330e+01
8.269590e-01	1.207990e-03	5.045400e+01	1.855720e+04	1.943020e+04	1.854600e+04	5.103080e+01
8.279840e-01	1.209150e-03	2.257660e+02	2.057110e+04	2.134990e+04	2.055790e+04	2.264110e+02
8.289450e-01	1.203360e-03	3.099640e+02	2.028040e+04	2.112670e+04	2.026120e+04	3.091090e+02
8.299710e-01	1.204820e-03	9.770590e+01	1.854970e+04	1.913520e+04	1.853460e+04	9.841630e+01
8.309960e-01	1.210900e-03	7.628570e+01	1.941770e+04	2.018330e+04	1.940620e+04	7.569820e+01
8.319570e-01	1.207470e-03	6.347180e+01	2.070830e+04	2.161770e+04	2.069310e+04	6.275590e+01
8.329820e-01	1.204600e-03	3.002410e+02	1.947220e+04	2.026290e+04	1.945580e+04	3.009990e+02
8.339440e-01	1.208590e-03	1.818430e+02	1.866390e+04	1.951310e+04	1.865210e+04	1.812460e+02
8.349690e-01	1.210510e-03	3.003070e+01	2.005780e+04	2.070880e+04	2.004580e+04	3.063370e+01
8.359940e-01	1.207400e-03	1.096510e+02	2.031200e+04	2.104480e+04	2.030090e+04	1.090820e+02
8.369550e-01	1.206940e-03	8.389360e+01	1.892170e+04	1.973450e+04	1.890240e+04	8.303400e+01
8.379810e-01	1.211490e-03	2.881420e+02	1.921770e+04	2.000740e+04	1.920110e+04	2.889070e+02
8.389420e-01	1.210580e-03	1.357530e+02	2.039250e+04	2.132900e+04	2.037420e+04	1.349300e+02
8.399670e-01	1.207040e-03	5.628720e+01	1.976630e+04	2.047710e+04	1.975500e+04	5.686670e+01
8.409920e-01	1.210350e-03	6.195550e+01	1.884970e+04	1.951160e+04	1.883100e+04	6.111680e+01
8.419540e-01	1.212720e-03	1.842370e+02	1.978020e+04	2.056160e+04	1.976810e+04	1.836310e+02
8.429790e-01	1.210370e-03	2.081730e+02	2.027700e+04	2.105590e+04	2.026310e+04	2.088430e+02
8.439400e-01	1.209380e-03	4.099750e+01	1.925680e+04	2.019040e+04	1.924030e+04	4.023440e+01
8.449650e-01	1.212220e-03	1.084300e+02	1.913540e+04	1.989770e+04	1.911580e+04	1.092990e+02
8.459910e-01	1.213080e-03	5.999290e+01	2.014060e+04	2.085650e+04	2.013090e+04	5.946930e+01
8.469520e-01	1.210390e-03	2.182920e+02	1.985800e+04	2.060340e+04	1.984230e+04	2.175600e+02
8.479770e-01	1.212080e-03	1.616200e+02	1.907350e+04	1.976420e+04	1.906240e+04	1.621910e+02
8.489380e-01	1.214730e-03	4.858460e+01	1.956420e+04	2.047430e+04	1.955110e+04	4.794200e+01
8.499640e-01	1.212790e-03	1.097840e+02	2.015370e+04	2.100360e+04	2.014220e+04	1.103690e+02
8.509890e-01	1.211930e-03	3.236040e+01	1.947240e+04	2.021890e+04	1.946000e+04	3.297860e+01
8.519500e-01	1.214090e-03	1.978880e+02	1.916600e+04	1.989810e+04	1.915130e+04	1.971910e+02
8.529750e-01	1.215400e-03	7.619430e+01	1.989240e+04	2.056230e+04	1.987150e+04	7.710900e+01
8.539370e-01	1.213770e-03	9.158050e+01	1.996210e+04	2.081520e+04	1.994620e+04	9.084090e+01
8.549620e-01	1.213550e-03	1.098130e+02	1.925350e+04	2.008820e+04	1.923490e+04	1.106490e+02
8.559870e-01	1.216100e-03	1.126100e+02	1.946070e+04	2.026560e+04	1.945240e+04	1.130850e+02
8.569480e-01	1.215340e-03	1.693880e+02	2.001550e+04	2.080970e+04	2.000050e+04	1.686810e+02
8.579740e-01	1.214150e-03	3.382300e+01	1.965070e+04	2.030350e+04	1.963720e+04	3.447850e+01
8.589990e-01	1.216050e-03	9.837980e+01	1.924180e+04	2.002140e+04	1.922970e+04	9.777330e+01
8.599600e-01	1.216910e-03	6.842260e+01	1.974330e+04	2.056750e+04	1.973270e+04	6.897810e+01
8.609850e-01	1.215910e-03	1.213660e+02	1.992940e+04	2.076570e+04	1.991610e+04	1.220170e+02
8.619470e-01	1.215470e-03	9.621270e+01	1.940880e+04	2.023210e+04	1.939550e+04	9.556140e+01
8.629720e-01	1.217280e-03	5.493730e+01	1.940440e+04	2.007760e+04	1.939230e+04	5.554540e+01
8.639970e-01	1.217820e-03	1.421110e+02	1.987410e+04	2.062250e+04	1.985430e+04	1.412320e+02
8.649580e-01	1.216470e-03	2.760820e+00	1.974130e+04	2.053020e+04	1.972780e+04	2.104770e+00
8.659840e-01	1.217550e-03	1.599390e+02	1.933230e+04	2.014270e+04	1.931630e+04	1.606850e+02
8.669450e-01	1.218660e-03	6.230330e+01	1.960210e+04	2.048450e+04	1.958550e+04	6.153870e+01
8.679700e-01	1.217870e-03	7.143190e+01	1.990660e+04	2.062860e+04	1.989570e+04	7.199940e+01
8.689960e-01	1.217800e-03	1.265230e+02	1.951730e+04	2.023960e+04	1.950090e+04	1.257650e+02
8.699570e-01	1.218990e-03	6.574470e+01	1.940420e+04	2.014680e+04	1.939490e+04	6.523590e+01
8.709820e-01	1.219830e-03	1.315230e+02	1.976670e+04	2.054760e+04	1.975080e+04	1.322640e+02
8.719430e-01	1.218780e-03	5.344530e+01	1.977740e+04	2.068760e+04	1.976240e+04	5.273700e+01
8.729690e-01	1.218920e-03	1.258190e+02	1.944650e+04	2.020660e+04	1.943600e+04	1.263720e+02
8.739940e-01	1.220500e-03	8.798510e+01	1.952860e+04	2.027000e+04	1.951430e+04	8.729970e+01
8.749550e-01	1.220210e-03	1.154740e+02	1.981790e+04	2.054630e+04	1.980140e+04	1.147120e+02
8.759800e-01	1.220040e-03	8.510670e+01	1.965340e+04	2.038930e+04	1.964090e+04	8.572830e+01
8.769420e-01	1.220790e-03	4.493730e+01	1.942030e+04	2.029840e+04	1.941000e+04	4.439420e+01
8.779670e-01	1.221440e-03	1.321870e+02	1.965340e+04	2.045760e+04	1.964310e+04	1.327320e+02
8.789920e-01	1.221260e-03	2.990480e+01	1.978030e+04	2.056500e+04	1.976180e+04	2.907300e+01
8.799530e-01	1.220950e-03	1.111810e+02	1.954320e+04	2.027510e+04	1.952970e+04	1.105270e+02
8.809790e-01	1.222320e-03	4.605140e+01	1.948020e+04	2.017580e+04	1.945950e+04	4.695710e+01
8.819400e-01	1.222750e-03	8.054010e+01	1.974500e+04	2.058180e+04	1.972770e+04	7.975190e+01
8.829650e-01	1.221960e-03	1.141270e+02	1.971580e+04	2.053330e+04	1.970580e+04	1.146590e+02
8.839900e-01	1.222670e-03	3.814820e+01	1.946550e+04	2.027940e+04	1.945350e+04	3.875220e+01
8.849520e-01	1.223340e-03	8.736520e+01	1.959320e+04	2.035600e+04	1.957960e+04	8.670320e+01
8.859770e-01	1.223440e-03	1.661920e+01	1.976640e+04	2.045840e+04	1.974950e+04	1.739360e+01
8.869380e-01	1.223380e-03	9.579170e+01	1.959820e+04	2.039980e+04	1.958760e+04	9.523430e+01
8.879630e-01	1.224020e-03	9.350220e+01	1.948940e+04	2.027930e+04	1.948000e+04	9.401600e+01
8.889890e-01	1.224750e-03	3.993780e+01	1.968010e+04	2.051000e+04	1.966480e+04	4.065660e+01
8.899500e-01	1.224190e-03	5.151690e+01	1.972930e+04	2.052470e+04	1.971570e+04	5.085680e+01
8.909750e-01	1.224580e-03	3.425550e+01	1.952360e+04	2.022930e+04	1.950780e+04	3.499310e+01
8.919360e-01	1.225630e-03	1.124610e+02	1.954580e+04	2.031790e+04	1.952860e+04	1.116750e+02
8.929620e-01	1.225590e-03	4.812670e+01	1.974860e+04	2.052210e+04	1.973700e+04	4.871780e+01
8.939870e-01	1.225550e-03	4.693350e+01	1.963380e+04	2.045950e+04	1.962270e+04	4.750830e+01
8.949480e-01	1.225970e-03	1.420120e+01	1.948830e+04	2.030560e+04	1.947420e+04	1.352290e+01
8.959730e-01	1.226740e-03	4.296450e+01	1.965960e+04	2.039020e+04	1.965090e+04	4.345450e+01
8.969990e-01	1.226600e-03	1.115530e+02	1.970520e+04	2.047410e+04	1.968970e+04	1.108250e+02
8.979600e-01	1.226720e-03	3.188610e+01	1.956150e+04	2.030150e+04	1.954550e+04	3.263140e+01
8.989850e-01	1.227630e-03	1.969650e+01	1.956620e+04	2.037320e+04	1.955490e+04	2.027680e+01
8.999460e-01	1.227630e-03	1.091590e+01	1.967960e+04	2.051410e+04	1.966500e+04	1.161010e+01
9.009720e-01	1.227660e-03	6.830680e+01	1.966030e+04	2.042680e+04	1.965120e+04	6.880930e+01
9.019970e-01	1.228080e-03	9.754770e+01	1.953570e+04	2.030010e+04	1.952140e+04	9.686480e+01
9.029580e-01	1.228760e-03	1.962500e+00	1.961800e+04	2.034040e+04	1.960520e+04	2.592820e+00
9.039830e-01	1.229000e-03	2.947420e+00	1.970400e+04	2.049070e+04	1.969100e+04	2.311930e+00
9.049450e-01	1.228940e-03	1.186580e+01	1.959330e+04	2.042270e+04	1.957560e+04	1.267080e+01
9.059700e-01	1.229570e-03	8.217070e+01	1.955560e+04	2.034130e+04	1.954090e+04	8.286820e+01
9.069950e-01	1.229970e-03	6.789680e+01	1.966500e+04	2.045410e+04	1.964970e+04	6.717830e+01
9.079560e-01	1.229900e-03	5.237370e+00	1.967100e+04	2.038920e+04	1.965960e+04	4.654410e+00
9.089820e-01	1.230480e-03	3.112710e+01	1.955700e+04	2.032140e+04	1.954700e+04	3.059400e+01
9.099430e-01	1.230950e-03	4.560270e+00	1.959150e+04	2.039830e+04	1.957750e+04	5.231680e+00
9.109680e-01	1.231130e-03	8.286130e+01	1.968970e+04	2.049330e+04	1.967730e+04	8.347960e+01
9.119940e-01	1.231140e-03	4.127390e+01	1.962330e+04	2.043000e+04	1.961750e+04	4.088480e+01
9.129550e-01	1.231670e-03	1.638420e+01	1.953950e+04	2.028050e+04	1.952260e+04	1.716030e+01
9.139800e-01	1.232390e-03	4.687370e+01	1.965480e+04	2.039110e+04	1.963970e+04	4.616230e+01
9.149410e-01	1.232140e-03	4.522110e+01	1.967760e+04	2.046570e+04	1.966470e+04	4.458640e+01
9.159670e-01	1.232490e-03	9.788830e+01	1.956240e+04	2.035060e+04	1.954330e+04	9.874120e+01
9.169920e-01	1.232960e-03	2.577500e+01	1.959800e+04	2.043200e+04	1.958120e+04	2.500340e+01
9.179530e-01	1.232890e-03	3.149940e+01	1.968450e+04	2.044610e+04	1.966430e+04	3.238710e+01
9.189780e-01	1.233040e-03	3.226740e+01	1.963050e+04	2.037840e+04	1.961740e+04	3.162590e+01
9.199400e-01	1.233470e-03	6.469480e+01	1.953660e+04	2.029170e+04	1.952000e+04	6.392870e+01
9.209650e-01	1.234060e-03	5.616730e+01	1.964570e+04	2.041810e+04	1.963510e+04	5.672460e+01
9.219900e-01	1.234030e-03	5.088640e+00	1.967780e+04	2.051370e+04	1.966400e+04	4.424410e+00
9.229510e-01	1.234060e-03	5.018390e+01	1.958070e+04	2.036970e+04	1.957070e+04	5.071540e+01
9.239770e-01	1.234880e-03	1.434370e+01	1.957410e+04	2.033080e+04	1.956390e+04	1.380350e+01
9.249380e-01	1.235100e-03	7.315800e+01	1.966270e+04	2.042150e+04	1.964670e+04	7.241310e+01
9.259630e-01	1.235290e-03	3.021450e+01	1.965550e+04	2.039350e+04	1.963910e+04	3.097360e+01
9.269880e-01	1.235610e-03	2.292100e+01	1.957420e+04	2.040330e+04	1.956380e+04	2.237190e+01
9.279500e-01	1.235960e-03	8.055090e+01	1.959880e+04	2.039740e+04	1.958770e+04	8.112290e+01
9.289750e-01	1.236310e-03	2.549980e+00	1.966130e+04	2.044760e+04	1.964180e+04	1.686090e+00
9.299360e-01	1.236200e-03	6.984470e+01	1.964600e+04	2.040290e+04	1.963280e+04	6.919880e+01
9.309610e-01	1.236740e-03	2.560860e+01	1.956750e+04	2.029460e+04	1.955500e+04	2.622780e+01
9.319870e-01	1.237380e-03	4.809490e+01	1.960080e+04	2.040760e+04	1.957850e+04	4.713070e+01
9.329480e-01	1.237250e-03	7.010580e+01	1.970360e+04	2.050330e+04	1.968910e+04	7.079580e+01
9.339730e-01	1.237410e-03	2.636440e+01	1.959540e+04	2.039300e+04	1.957710e+04	2.718790e+01
9.349980e-01	1.237820e-03	5.587500e+01	1.955820e+04	2.033790e+04	1.954090e+04	5.508680e+01
9.359600e-01	1.238340e-03	3.624560e+01	1.967880e+04	2.039960e+04	1.966970e+04	3.674960e+01
9.369850e-01	1.238500e-03	7.777200e+01	1.963630e+04	2.042010e+04	1.961550e+04	7.686140e+01
9.379460e-01	1.238660e-03	4.339740e+01	1.958320e+04	2.037140e+04	1.957000e+04	4.404460e+01
9.389710e-01	1.239320e-03	6.411180e+01	1.960500e+04	2.041050e+04	1.958840e+04	6.487440e+01
9.399970e-01	1.239290e-03	5.098220e+01	1.966680e+04	2.047300e+04	1.965610e+04	5.042160e+01
9.409580e-01	1.239480e-03	3.681220e+01	1.960240e+04	2.032260e+04	1.958540e+04	3.759130e+01
9.419830e-01	1.240140e-03	7.434270e+01	1.959490e+04	2.036830e+04	1.957840e+04	7.358090e+01
9.429440e-01	1.240180e-03	1.633030e+01	1.965330e+04	2.042950e+04	1.964450e+04	1.682120e+01
9.439700e-01	1.240470e-03	5.184610e+01	1.961510e+04	2.041020e+04	1.960470e+04	5.239630e+01
9.449950e-01	1.240680e-03	2.641440e+01	1.958850e+04	2.040860e+04	1.957280e+04	2.568190e+01
9.459560e-01	1.240960e-03	5.544600e+01	1.965040e+04	2.038710e+04	1.963640e+04	5.611730e+01
9.469810e-01	1.241160e-03	8.844430e+01	1.963190e+04	2.040320e+04	1.961760e+04	8.776120e+01
9.479430e-01	1.241370e-03	1.126830e-01	1.958710e+04	2.034560e+04	1.957040e+04	6.519690e-01
9.489680e-01	1.241880e-03	6.293750e+01	1.962280e+04	2.041780e+04	1.960690e+04	6.367770e+01
9.499930e-01	1.241910e-03	2.844440e+01	1.964880e+04	2.047260e+04	1.963480e+04	2.776910e+01
9.509540e-01	1.242030e-03	4.913450e+01	1.960970e+04	2.035860e+04	1.959570e+04	4.981060e+01
9.519800e-01	1.242510e-03	5.828030e+01	1.960050e+04	2.037070e+04	1.959330e+04	5.784530e+01
9.529410e-01	1.242780e-03	1.663440e+01	1.962220e+04	2.038070e+04	1.960960e+04	1.600700e+01
9.539660e-01	1.243150e-03	3.959410e+01	1.963950e+04	2.041880e+04	1.962590e+04	4.025340e+01
9.549920e-01	1.243300e-03	1.966760e+01	1.961000e+04	2.042460e+04	1.959870e+04	1.908770e+01
9.559530e-01	1.243700e-03	4.771420e+01	1.960260e+04	2.037200e+04	1.958470e+04	4.852650e+01
9.569780e-01	1.243960e-03	3.256430e+01	1.964820e+04	2.042710e+04	1.963790e+04	3.202070e+01
9.579390e-01	1.244100e-03	1.689260e+01	1.961150e+04	2.037580e+04	1.959990e+04	1.630140e+01
9.589650e-01	1.244690e-03	2.119990e+01	1.959970e+04	2.036490e+04	1.958370e+04	2.194000e+01
9.599900e-01	1.244920e-03	2.494210e+01	1.963490e+04	2.043600e+04	1.961640e+04	2.411050e+01
9.609510e-01	1.245110e-03	4.155570e+01	1.963590e+04	2.041300e+04	1.962000e+04	4.229570e+01
9.619760e-01	1.245550e-03	1.470720e+01	1.960040e+04	2.038340e+04	1.958590e+04	1.401450e+01
9.629380e-01	1.245860e-03	1.754330e+01	1.961050e+04	2.037720e+04	1.959600e+04	1.685310e+01
9.639630e-01	1.246200e-03	1.469600e+01	1.963980e+04	2.040650e+04	1.962030e+04	1.556030e+01
9.649880e-01	1.246270e-03	2.182330e+01	1.963520e+04	2.042430e+04	1.961950e+04	2.108740e+01
9.659490e-01	1.246500e-03	2.907510e+01	1.959090e+04	2.037570e+04	1.957640e+04	2.976660e+01
9.669750e-01	1.246880e-03	6.617940e+00	1.962090e+04	2.040630e+04	1.961270e+04	7.089630e+00
9.680000e-01	1.246990e-03	1.711230e+01	1.962910e+04	2.040410e+04	1.961500e+04	1.643540e+01
9.689610e-01	1.247390e-03	2.798710e-01	1.962080e+04	2.037990e+04	1.960740e+04	9.355470e-01
9.699860e-01	1.247640e-03	1.476330e+01	1.960410e+04	2.039020e+04	1.958610e+04	1.395030e+01
9.709480e-01	1.247920e-03	2.648540e+01	1.963000e+04	2.041310e+04	1.961390e+04	2.723210e+01
9.719730e-01	1.248200e-03	2.856730e+00	1.962710e+04	2.042010e+04	1.960700e+04	3.741410e+00
9.729980e-01	1.248490e-03	7.559950e+00	1.962560e+04	2.038940e+04	1.961250e+04	6.914790e+00
9.739590e-01	1.248920e-03	1.589510e+01	1.959770e+04	2.036990e+04	1.957920e+04	1.506370e+01
9.749850e-01	1.249290e-03	7.147070e+00	1.963060e+04	2.040510e+04	1.961840e+04	7.758730e+00
9.759460e-01	1.249650e-03	1.979170e+00	1.962310e+04	2.040450e+04	1.960780e+04	2.695040e+00
9.769710e-01	1.249850e-03	1.129130e+00	1.961680e+04	2.040890e+04	1.960500e+04	5.341630e-01
9.779960e-01	1.250220e-03	2.106350e+01	1.961050e+04	2.038530e+04	1.959310e+04	2.185440e+01
9.789580e-01	1.250490e-03	2.353590e+01	1.963880e+04	2.042600e+04	1.961980e+04	2.268930e+01
9.799830e-01	1.250680e-03	6.142130e+00	1.963510e+04	2.039240e+04	1.962800e+04	6.576220e+00
9.809440e-01	1.251170e-03	1.417800e+01	1.957080e+04	2.035170e+04	1.955860e+04	1.356980e+01
9.819690e-01	1.251600e-03	1.086970e+01	1.962400e+04	2.040500e+04	1.960460e+04	1.173370e+01
9.829950e-01	1.251720e-03	9.828270e+00	1.968370e+04	2.047130e+04	1.967400e+04	1.035420e+01
9.839560e-01	1.251890e-03	1.379650e+01	1.956980e+04	2.035500e+04	1.955510e+04	1.309810e+01
9.849810e-01	1.252550e-03	1.389290e+01	1.958170e+04	2.035040e+04	1.956450e+04	1.467980e+01
9.859420e-01	1.252760e-03	1.258370e+01	1.967850e+04	2.046130e+04	1.966140e+04	1.180220e+01
9.869680e-01	1.252720e-03	1.210260e+00	1.963710e+04	2.040510e+04	1.962170e+04	4.864030e-01
9.879930e-01	1.253270e-03	3.538380e+00	1.954940e+04	2.032800e+04	1.952810e+04	2.609720e+00
9.889540e-01	1.253680e-03	2.103320e+00	1.965360e+04	2.043890e+04	1.964140e+04	2.714790e+00
9.899800e-01	1.253730e-03	1.517820e+01	1.965740e+04	2.043690e+04	1.963320e+04	1.620590e+01
9.909410e-01	1.253920e-03	1.660170e+01	1.960270e+04	2.038460e+04	1.959180e+04	1.603730e+01
9.919660e-01	1.254450e-03	5.719120e+00	1.957230e+04	2.033840e+04	1.955720e+04	6.428550e+00
9.929910e-01	1.254780e-03	2.886550e+00	1.966820e+04	2.045430e+04	1.965670e+04	2.300610e+00
9.939520e-01	1.254690e-03	3.834010e+00	1.964330e+04	2.042710e+04	1.963660e+04	4.255860e+00
9.949780e-01	1.255140e-03	5.590980e+00	1.955720e+04	2.032790e+04	1.954840e+04	6.086260e+00
9.959390e-01	1.255730e-03	1.446870e+01	1.961780e+04	2.039320e+04	1.960090e+04	1.369420e+01
9.969640e-01	1.255710e-03	1.401970e+00	1.969750e+04	2.047660e+04	1.968690e+04	1.957230e+00
9.979900e-01	1.255840e-03	2.501220e+00	1.957710e+04	2.035770e+04	1.956500e+04	3.109060e+00
9.989510e-01	1.256430e-03	1.190150e+01	1.955820e+04	2.034910e+04	1.954060e+04	1.269980e+01
9.999760e-01	1.256670e-03	3.807250e+00	1.970010e+04	2.047210e+04	1.969250e+04	4.258510e+00
1.000940e+00	1.256600e-03	2.806540e+01	1.963280e+04	2.040420e+04	1.962250e+04	2.752060e+01
1.001960e+00	1.257080e-03	8.086020e+00	1.953310e+04	2.030430e+04	1.951610e+04	8.864790e+00
1.002990e+00	1.257600e-03	1.058480e+01	1.965120e+04	2.043770e+04	1.963360e+04	1.138450e+01
1.003950e+00	1.257400e-03	7.468680e+00	1.970030e+04	2.049050e+04	1.968650e+04	6.799880e+00
1.004970e+00	1.257550e-03	1.151810e+01	1.956140e+04	2.033630e+04	1.954730e+04	1.219360e+01
1.006000e+00	1.258320e-03	8.724440e+00	1.956630e+04	2.033610e+04	1.955410e+04	8.113610e+00
1.006960e+00	1.258530e-03	1.154100e+01	1.968780e+04	2.047180e+04	1.966900e+04	1.070030e+01
1.007990e+00	1.258460e-03	1.554660e+01	1.966030e+04	2.043250e+04	1.964480e+04	1.627030e+01
1.008950e+00	1.258880e-03	9.763680e+00	1.954030e+04	2.032900e+04	1.952540e+04	9.061410e+00
1.009970e+00	1.259550e-03	9.073910e+00	1.961370e+04	2.037960e+04	1.959920e+04	9.765480e+00
1.011000e+00	1.259610e-03	1.364100e+01	1.968900e+04	2.047220e+04	1.967350e+04	1.291520e+01
1.011960e+00	1.259630e-03	6.207270e+00	1.959890e+04	2.037880e+04	1.958390e+04	6.915490e+00
1.012980e+00	1.260260e-03	8.712020e+00	1.956120e+04	2.034180e+04	1.954770e+04	9.366560e+00
1.013950e+00	1.260600e-03	8.433440e+00	1.965850e+04	2.044550e+04	1.964450e+04	7.760620e+00
1.014970e+00	1.260590e-03	9.995300e+00	1.966540e+04	2.043380e+04	1.965160e+04	1.066330e+01
1.016000e+00	1.260920e-03	1.508360e+01	1.956390e+04	2.034290e+04	1.954670e+04	1.429610e+01
1.016960e+00	1.261500e-03	1.889900e-01	1.960640e+04	2.037750e+04	1.959160e+04	8.913170e-01
1.017980e+00	1.261640e-03	1.098290e+01	1.966620e+04	2.045610e+04	1.964600e+04	1.187150e+01
1.018940e+00	1.261800e-03	4.044500e-01	1.961970e+04	2.039640e+04	1.959980e+04	1.284620e+00
1.019970e+00	1.262280e-03	6.336500e+00	1.957780e+04	2.035290e+04	1.955630e+04	5.402850e+00
1.020990e+00	1.262710e-03	8.098810e-01	1.964170e+04	2.041710e+04	1.962410e+04	9.291930e-03
1.021960e+00	1.262820e-03	4.317900e+00	1.965090e+04	2.043300e+04	1.963860e+04	3.703100e+00
1.022980e+00	1.263160e-03	1.247700e+01	1.958000e+04	2.036360e+04	1.956410e+04	1.321730e+01
1.023940e+00	1.263700e-03	5.969200e+00	1.960490e+04	2.039120e+04	1.958630e+04	6.805420e+00
1.024970e+00	1.263930e-03	4.848170e+00	1.966550e+04	2.043420e+04	1.964820e+04	4.059030e+00
1.025990e+00	1.264110e-03	2.332340e+01	1.962980e+04	2.039490e+04	1.962420e+04	2.294350e+01
1.026950e+00	1.264570e-03	2.662420e+00	1.955290e+04	2.032950e+04	1.953820e+04	3.363600e+00
1.027980e+00	1.265100e-03	2.226930e+01	1.963990e+04	2.043230e+04	1.962230e+04	2.306820e+01
1.028940e+00	1.265120e-03	2.976650e+00	1.968070e+04	2.047020e+04	1.966300e+04	2.173630e+00
1.029970e+00	1.265270e-03	8.162300e-01	1.959150e+04	2.036580e+04	1.958330e+04	1.285770e+00
1.030990e+00	1.265970e-03	2.270600e+00	1.954870e+04	2.031790e+04	1.953230e+04	1.513210e+00
1.031950e+00	1.266270e-03	1.283760e+01	1.968850e+04	2.046660e+04	1.967730e+04	1.226270e+01
1.032980e+00	1.266190e-03	7.639180e+00	1.966430e+04	2.044000e+04	1.965000e+04	8.323240e+00
1.033940e+00	1.266600e-03	5.479400e+00	1.954160e+04	2.031970e+04	1.952170e+04	4.599020e+00
1.034960e+00	1.267230e-03	2.307390e+00	1.961270e+04	2.039620e+04	1.959390e+04	3.148650e+00
1.035990e+00	1.267270e-03	1.544690e+01	1.969260e+04	2.047270e+04	1.967880e+04	1.611290e+01
1.036950e+00	1.267330e-03	1.794870e+01	1.959840e+04	2.038270e+04	1.958730e+04	1.737430e+01
1.037980e+00	1.267820e-03	1.328510e+01	1.954800e+04	2.032360e+04	1.953140e+04	1.404790e+01
1.038940e+00	1.268280e-03	1.135120e+00	1.967950e+04	2.045280e+04	1.967010e+04	1.647440e+00
1.039960e+00	1.268150e-03	3.098930e+01	1.966110e+04	2.043410e+04	1.965070e+04	3.044060e+01
1.040990e+00	1.268550e-03	2.127300e+01	1.955130e+04	2.032130e+04	1.953960e+04	2.186620e+01
1.041950e+00	1.269150e-03	3.789570e+00	1.960620e+04	2.039900e+04	1.959680e+04	3.277250e+00
1.042970e+00	1.269180e-03	6.660320e+00	1.968600e+04	2.048130e+04	1.967540e+04	7.213630e+00
1.044000e+00	1.269240e-03	2.415720e+01	1.961130e+04	2.037750e+04	1.959830e+04	2.479460e+01
1.044960e+00	1.269690e-03	4.925500e+01	1.955880e+04	2.033260e+04	1.954630e+04	4.863490e+01
1.045990e+00	1.270120e-03	1.272190e+01	1.963930e+04	2.040090e+04	1.962250e+04	1.349550e+01
1.046950e+00	1.270230e-03	4.625440e+00	1.967900e+04	2.047030e+04	1.966140e+04	5.425330e+00
1.047970e+00	1.270190e-03	1.253960e+00	1.959130e+04	2.039450e+04	1.958280e+04	1.735720e+00
1.049000e+00	1.270900e-03	3.270980e+01	1.956210e+04	2.032100e+04	1.954360e+04	3.354010e+01
1.049960e+00	1.271160e-03	5.715900e+01	1.967580e+04	2.046020e+04	1.965470e+04	5.623950e+01
1.050980e+00	1.271120e-03	1.572710e+01	1.966660e+04	2.041970e+04	1.965110e+04	1.645520e+01
1.051950e+00	1.271540e-03	6.332270e-01	1.955660e+04	2.034560e+04	1.954760e+04	1.326420e-01
1.052970e+00	1.272040e-03	3.373640e+00	1.958270e+04	2.038080e+04	1.956960e+04	4.016160e+00
1.054000e+00	1.272220e-03	3.155140e+01	1.968540e+04	2.045750e+04	1.966760e+04	3.236020e+01
1.054960e+00	1.272230e-03	4.604880e+01	1.963660e+04	2.042360e+04	1.961940e+04	4.526370e+01
1.055980e+00	1.272670e-03	2.017020e+01	1.955950e+04	2.031790e+04	1.954010e+04	2.103300e+01
1.056940e+00	1.273260e-03	7.773720e+00	1.963330e+04	2.041850e+04	1.962330e+04	7.237370e+00
1.057970e+00	1.273310e-03	8.423340e+00	1.965530e+04	2.043830e+04	1.963860e+04	7.656160e+00
1.058990e+00	1.273550e-03	2.620660e+01	1.960680e+04	2.038490e+04	1.959560e+04	2.678130e+01
1.059960e+00	1.274030e-03	2.119260e+01	1.958240e+04	2.036560e+04	1.956850e+04	2.052250e+01
1.060980e+00	1.274300e-03	1.659780e+00	1.965120e+04	2.041990e+04	1.963700e+04	2.340020e+00
1.061940e+00	1.274470e-03	7.122240e-01	1.964190e+04	2.041260e+04	1.962820e+04	4.905060e-02
1.062970e+00	1.274800e-03	8.745180e+00	1.957600e+04	2.037330e+04	1.955870e+04	7.958000e+00
1.063990e+00	1.275280e-03	3.669870e+01	1.962790e+04	2.039940e+04	1.961630e+04	3.729020e+01
1.064950e+00	1.275390e-03	3.460820e+01	1.965940e+04	2.044430e+04	1.964930e+04	3.406870e+01
1.065980e+00	1.275570e-03	8.590370e-01	1.958820e+04	2.035180e+04	1.956700e+04	1.783780e+00
1.066940e+00	1.276170e-03	1.152460e+01	1.961080e+04	2.038540e+04	1.959590e+04	1.222920e+01
1.067970e+00	1.276400e-03	1.479390e+01	1.964780e+04	2.044720e+04	1.963270e+04	1.408100e+01
1.068990e+00	1.276620e-03	2.982660e+01	1.961830e+04	2.038550e+04	1.960460e+04	3.049000e+01
1.069950e+00	1.277100e-03	2.758230e+01	1.958180e+04	2.037060e+04	1.956500e+04	2.681030e+01
1.070980e+00	1.277420e-03	7.577280e+00	1.963990e+04	2.040740e+04	1.962830e+04	8.169080e+00
1.071940e+00	1.277690e-03	2.553860e+00	1.964100e+04	2.041390e+04	1.962780e+04	1.905200e+00
1.072960e+00	1.277890e-03	1.254870e+01	1.960050e+04	2.039020e+04	1.958520e+04	1.183100e+01
1.073990e+00	1.278290e-03	3.278620e+01	1.961790e+04	2.038670e+04	1.960720e+04	3.334550e+01
1.074950e+00	1.278560e-03	3.206750e+01	1.963500e+04	2.043420e+04	1.962360e+04	3.148290e+01
1.075980e+00	1.278630e-03	2.561370e+01	1.961310e+04	2.038270e+04	1.960010e+04	2.625130e+01
1.076940e+00	1.279150e-03	9.823160e+00	1.960210e+04	2.037190e+04	1.958810e+04	9.150120e+00
1.077960e+00	1.279450e-03	2.953590e+01	1.962820e+04	2.040860e+04	1.960670e+04	2.860110e+01
1.078990e+00	1.279680e-03	3.771250e+01	1.965930e+04	2.042780e+04	1.964950e+04	3.823800e+01
1.079950e+00	1.279930e-03	2.536190e+01	1.958620e+04	2.038850e+04	1.958040e+04	2.497510e+01
1.080970e+00	1.280440e-03	2.791360e+01	1.958750e+04	2.036180e+04	1.957650e+04	2.848280e+01
1.082000e+00	1.280840e-03	8.539250e+00	1.966580e+04	2.044020e+04	1.965300e+04	7.908410e+00
1.082960e+00	1.280830e-03	3.611100e+01	1.963540e+04	2.040770e+04	1.962590e+04	3.559290e+01
1.083990e+00	1.281350e-03	2.755410e+01	1.956560e+04	2.032580e+04	1.955880e+04	2.797550e+01
1.084950e+00	1.281960e-03	2.266140e+01	1.961660e+04	2.041510e+04	1.960250e+04	2.198540e+01
1.085970e+00	1.281770e-03	3.233800e+01	1.968830e+04	2.048930e+04	1.967870e+04	3.285860e+01
1.087000e+00	1.281980e-03	2.189290e+01	1.958290e+04	2.035760e+04	1.956980e+04	2.253740e+01
1.087960e+00	1.282600e-03	6.091830e+01	1.957030e+04	2.033740e+04	1.955210e+04	6.009510e+01
1.088980e+00	1.282910e-03	1.038940e+01	1.968240e+04	2.042890e+04	1.966990e+04	1.101200e+01
1.089950e+00	1.283010e-03	5.248630e+00	1.963530e+04	2.043230e+04	1.962050e+04	4.548770e+00
1.090970e+00	1.283310e-03	2.268600e+01	1.956270e+04	2.036120e+04	1.955020e+04	2.330550e+01
1.092000e+00	1.283880e-03	2.475930e+01	1.961370e+04	2.039370e+04	1.959430e+04	2.562220e+01
1.092960e+00	1.283960e-03	4.508170e+01	1.968730e+04	2.046340e+04	1.966870e+04	4.424570e+01
1.093980e+00	1.284070e-03	3.748120e+00	1.961330e+04	2.036800e+04	1.959960e+04	4.410890e+00
1.094940e+00	1.284730e-03	1.512730e+00	1.956030e+04	2.033790e+04	1.955250e+04	1.057460e+00
1.095970e+00	1.285080e-03	4.161920e+00	1.962770e+04	2.043250e+04	1.961090e+04	4.933030e+00
1.096990e+00	1.285140e-03	3.783230e+01	1.968610e+04	2.046190e+04	1.967630e+04	3.835830e+01
1.097960e+00	1.285420e-03	4.770250e+01	1.956870e+04	2.034700e+04	1.954970e+04	4.685600e+01
1.098980e+00	1.285960e-03	1.379710e+00	1.958980e+04	2.033700e+04	1.957290e+04	2.151310e+00
1.099940e+00	1.286310e-03	5.152970e+00	1.968130e+04	2.046740e+04	1.967120e+04	4.616110e+00
1.100970e+00	1.286270e-03	9.983370e+00	1.961390e+04	2.041630e+04	1.959680e+04	1.076680e+01
1.101990e+00	1.286820e-03	3.958640e+01	1.957720e+04	2.036000e+04	1.956220e+04	4.029360e+01
1.102950e+00	1.287160e-03	3.823320e+01	1.965080e+04	2.043260e+04	1.964430e+04	3.782290e+01
1.103980e+00	1.287300e-03	1.126760e+00	1.963050e+04	2.038650e+04	1.961360e+04	1.902180e+00
1.104940e+00	1.287730e-03	1.390240e+01	1.960010e+04	2.036050e+04	1.958620e+04	1.323120e+01
1.105970e+00	1.287990e-03	1.078240e+01	1.961330e+04	2.040930e+04	1.960030e+04	1.014220e+01
1.106990e+00	1.288280e-03	4.856880e+01	1.963520e+04	2.042350e+04	1.961310e+04	4.952620e+01
1.107950e+00	1.288380e-03	1.972620e+01	1.964350e+04	2.043960e+04	1.963530e+04	1.925470e+01
1.108980e+00	1.288660e-03	4.690250e+00	1.957900e+04	2.034430e+04	1.956490e+04	5.365400e+00
1.109940e+00	1.289290e-03	1.559920e+01	1.962120e+04	2.036890e+04	1.960910e+04	1.499180e+01
1.110960e+00	1.289340e-03	3.812450e+01	1.965140e+04	2.044370e+04	1.963670e+04	3.742720e+01
1.111990e+00	1.289550e-03	6.976590e+01	1.961520e+04	2.039130e+04	1.960440e+04	7.033090e+01
1.112950e+00	1.289990e-03	3.003800e+01	1.958670e+04	2.039390e+04	1.957330e+04	2.938500e+01
1.113980e+00	1.290120e-03	9.653910e+00	1.964120e+04	2.041350e+04	1.962890e+04	1.026830e+01
1.114940e+00	1.290350e-03	8.920680e+00	1.964110e+04	2.039680e+04	1.963290e+04	9.394620e+00
1.115960e+00	1.290600e-03	5.740330e+01	1.958370e+04	2.037100e+04	1.957170e+04	5.680040e+01
1.116990e+00	1.291080e-03	5.404970e+01	1.961980e+04	2.037960e+04	1.960470e+04	5.476160e+01
1.117950e+00	1.291260e-03	2.210260e+01	1.964840e+04	2.046040e+04	1.962550e+04	2.112020e+01
1.118970e+00	1.291170e-03	1.926230e+01	1.963250e+04	2.041370e+04	1.962190e+04	1.981740e+01
1.120000e+00	1.291700e-03	7.185380e+00	1.956700e+04	2.033030e+04	1.955230e+04	7.882290e+00
1.120960e+00	1.292080e-03	5.717780e+01	1.964280e+04	2.041880e+04	1.963640e+04	5.676700e+01
1.121990e+00	1.292210e-03	3.596950e+01	1.965380e+04	2.041230e+04	1.963770e+04	3.671920e+01
1.122950e+00	1.292520e-03	1.298470e+01	1.959740e+04	2.040080e+04	1.958070e+04	1.221840e+01
1.123970e+00	1.292820e-03	1.798850e+01	1.959630e+04	2.038810e+04	1.958560e+04	1.854740e+01
1.125000e+00	1.293240e-03	2.023070e+01	1.963800e+04	2.041140e+04	1.962120e+04	2.100140e+01
1.125960e+00	1.293320e-03	5.249500e+01	1.964860e+04	2.042450e+04	1.963900e+04	5.197380e+01
1.126980e+00	1.293620e-03	1.683420e+01	1.958100e+04	2.033270e+04	1.956450e+04	1.759550e+01
1.127940e+00	1.294120e-03	7.572900e+00	1.961460e+04	2.040590e+04	1.960070e+04	6.900890e+00
1.128970e+00	1.294160e-03	1.028740e+01	1.965690e+04	2.045120e+04	1.964170e+04	1.100140e+01
1.130000e+00	1.294310e-03	2.519890e+01	1.962030e+04	2.040240e+04	1.960920e+04	2.577030e+01
1.130960e+00	1.294720e-03	3.077120e+01	1.957280e+04	2.034880e+04	1.955830e+04	3.008080e+01
1.131980e+00	1.295070e-03	2.358250e+00	1.964060e+04	2.040220e+04	1.962740e+04	3.003980e+00
1.132940e+00	1.295240e-03	5.815250e+00	1.965440e+04	2.042780e+04	1.964050e+04	5.142890e+00
1.133970e+00	1.295440e-03	8.462030e+00	1.958640e+04	2.038310e+04	1.957250e+04	7.791950e+00
1.134990e+00	1.296060e-03	4.202890e+01	1.959340e+04	2.036320e+04	1.956900e+04	4.306510e+01
1.135950e+00	1.296250e-03	3.757690e+01	1.968260e+04	2.047870e+04	1.966520e+04	3.678290e+01
1.136980e+00	1.296270e-03	1.590540e+01	1.962160e+04	2.038770e+04	1.960850e+04	1.654770e+01
1.137940e+00	1.296910e-03	4.667430e+00	1.954680e+04	2.030900e+04	1.952950e+04	3.880440e+00
1.138970e+00	1.297370e-03	3.413630e+01	1.963820e+04	2.042760e+04	1.961830e+04	3.325660e+01
1.139990e+00	1.297370e-03	5.491670e+01	1.969270e+04	2.047370e+04	1.967340e+04	5.577560e+01
1.140950e+00	1.297550e-03	1.747970e+01	1.957320e+04	2.037490e+04	1.955280e+04	1.658160e+01
1.141980e+00	1.298070e-03	3.078720e+00	1.958080e+04	2.034810e+04	1.957190e+04	3.575280e+00
1.142940e+00	1.298490e-03	8.297600e+00	1.966080e+04	2.040810e+04	1.965180e+04	7.798230e+00
1.143960e+00	1.298560e-03	4.429700e+01	1.962800e+04	2.041240e+04	1.961140e+04	4.353410e+01
1.144990e+00	1.298980e-03	5.873100e+01	1.959220e+04	2.036740e+04	1.957640e+04	5.946480e+01
1.145950e+00	1.299340e-03	1.503560e+01	1.962840e+04	2.044250e+04	1.961780e+04	1.448120e+01
1.146980e+00	1.299430e-03	1.738390e+01	1.964070e+04	2.042300e+04	1.962760e+04	1.802440e+01
1.147940e+00	1.299850e-03	2.199590e-01	1.961600e+04	2.036830e+04	1.960330e+04	8.474330e-01
1.148960e+00	1.300210e-03	5.846520e+01	1.960070e+04	2.037390e+04	1.958590e+04	5.776230e+01
1.149990e+00	1.300590e-03	4.210280e+01	1.962160e+04	2.038350e+04	1.960360e+04	4.291520e+01
1.150950e+00	1.300920e-03	1.798740e+01	1.964140e+04	2.044810e+04	1.963030e+04	1.741460e+01
1.151970e+00	1.300970e-03	2.776100e+01	1.960880e+04	2.040540e+04	1.959560e+04	2.840830e+01
1.152940e+00	1.301490e-03	1.833460e+01	1.961250e+04	2.037310e+04	1.960170e+04	1.889890e+01
1.153960e+00	1.301640e-03	6.764170e+01	1.963040e+04	2.041170e+04	1.961700e+04	6.698960e+01
1.154990e+00	1.301930e-03	4.804860e+01	1.961840e+04	2.037120e+04	1.960630e+04	4.865610e+01
1.155950e+00	1.302410e-03	2.893670e+01	1.960370e+04	2.039790e+04	1.959090e+04	2.830400e+01
1.156970e+00	1.302500e-03	1.005350e+01	1.962550e+04	2.041730e+04	1.960650e+04	1.090330e+01
1.158000e+00	1.302840e-03	4.319820e+01	1.964890e+04	2.042520e+04	1.963790e+04	4.376860e+01
1.158960e+00	1.303010e-03	6.510980e+01	1.958920e+04	2.038190e+04	1.957630e+04	6.447270e+01
1.159990e+00	1.303390e-03	3.779350e+01	1.960950e+04	2.035360e+04	1.959780e+04	3.838730e+01
1.160950e+00	1.303810e-03	3.222880e+01	1.965170e+04	2.043250e+04	1.963760e+04	3.155050e+01
1.161970e+00	1.303810e-03	6.162250e+00	1.961470e+04	2.040680e+04	1.959860e+04	5.415640e+00
1.163000e+00	1.304440e-03	5.536670e+01	1.960310e+04	2.037390e+04	1.959130e+04	5.596500e+01
1.163960e+00	1.304680e-03	6.277560e+01	1.963520e+04	2.044360e+04	1.962660e+04	6.229380e+01
1.164980e+00	1.304810e-03	4.948180e+01	1.962130e+04	2.037420e+04	1.960650e+04	5.018460e+01
1.165940e+00	1.305340e-03	2.859590e+01	1.959470e+04	2.038000e+04	1.957290e+04	2.764700e+01
1.166970e+00	1.305500e-03	1.992750e+01	1.964150e+04	2.041550e+04	1.962720e+04	1.924120e+01
1.168000e+00	1.305770e-03	4.262530e+01	1.963090e+04	2.039930e+04	1.961660e+04	4.330910e+01
1.168960e+00	1.306090e-03	4.391030e+01	1.958600e+04	2.039140e+04	1.956420e+04	4.296540e+01
1.169980e+00	1.306410e-03	4.201230e+01	1.964260e+04	2.040760e+04	1.962890e+04	4.267620e+01
1.170940e+00	1.306670e-03	2.015100e+01	1.964090e+04	2.042380e+04	1.963190e+04	1.965250e+01
1.171970e+00	1.306910e-03	1.704300e+01	1.958990e+04	2.036620e+04	1.958130e+04	1.655680e+01
1.172990e+00	1.307560e-03	2.971870e+01	1.960640e+04	2.036950e+04	1.959190e+04	3.040880e+01
1.173950e+00	1.307660e-03	4.486200e+01	1.965830e+04	2.045460e+04	1.964790e+04	4.431500e+01
1.174980e+00	1.307790e-03	4.013800e+01	1.961110e+04	2.038370e+04	1.959490e+04	4.089020e+01
1.175940e+00	1.308340e-03	2.579050e+00	1.958540e+04	2.037510e+04	1.956840e+04	1.801440e+00
1.176970e+00	1.308590e-03	1.622590e+01	1.964640e+04	2.042920e+04	1.963260e+04	1.555580e+01
1.177990e+00	1.308860e-03	2.107430e+01	1.964340e+04	2.039530e+04	1.963100e+04	2.169220e+01
1.178950e+00	1.309220e-03	5.611840e+01	1.958150e+04	2.036890e+04	1.956730e+04	5.543600e+01
1.179980e+00	1.309540e-03	4.275190e+01	1.961970e+04	2.039520e+04	1.960900e+04	4.330950e+01
1.180940e+00	1.309870e-03	1.505790e+01	1.964240e+04	2.044430e+04	1.962580e+04	1.582320e+01
1.181960e+00	1.309890e-03	1.830490e+01	1.961740e+04	2.040390e+04	1.959900e+04	1.748060e+01
1.182990e+00	1.310350e-03	1.238040e+01	1.959670e+04	2.034190e+04	1.957560e+04	1.330230e+01
1.183950e+00	1.310750e-03	5.701350e+01	1.964040e+04	2.041830e+04	1.962610e+04	5.632790e+01
1.184980e+00	1.310910e-03	4.108920e+01	1.962930e+04	2.041080e+04	1.960950e+04	4.196610e+01
1.185940e+00	1.311280e-03	1.784180e+01	1.960500e+04	2.039770e+04	1.959070e+04	1.852450e+01
1.186960e+00	1.311610e-03	2.670460e+01	1.961180e+04	2.041010e+04	1.959750e+04	2.601790e+01
1.187990e+00	1.311970e-03	3.800410e+01	1.964250e+04	2.039100e+04	1.962750e+04	3.871160e+01
1.188950e+00	1.312160e-03	6.562190e+01	1.961560e+04	2.039940e+04	1.960280e+04	6.498880e+01
1.189970e+00	1.312450e-03	2.794730e+01	1.959280e+04	2.035980e+04	1.957650e+04	2.869900e+01
1.190940e+00	1.312920e-03	1.641350e+01	1.964260e+04	2.042440e+04	1.963080e+04	1.701140e+01
1.191960e+00	1.312840e-03	3.077100e+01	1.963600e+04	2.044330e+04	1.962680e+04	3.026430e+01
1.192990e+00	1.313260e-03	6.068110e+01	1.959200e+04	2.035230e+04	1.957900e+04	6.132020e+01
1.193950e+00	1.313710e-03	5.864370e+01	1.961670e+04	2.040290e+04	1.960540e+04	5.806320e+01
1.194970e+00	1.313850e-03	6.094640e+00	1.964120e+04	2.040090e+04	1.962370e+04	6.890450e+00
1.196000e+00	1.314280e-03	4.147010e+00	1.962350e+04	2.039690e+04	1.960730e+04	4.898830e+00
1.196960e+00	1.314430e-03	2.727020e+01	1.959510e+04	2.040020e+04	1.958050e+04	2.657260e+01
1.197980e+00	1.314830e-03	7.374990e+01	1.961320e+04	2.038330e+04	1.958910e+04	7.477320e+01
1.198950e+00	1.315050e-03	5.578640e+01	1.966320e+04	2.045970e+04	1.965010e+04	5.514230e+01
1.199970e+00	1.315150e-03	2.155070e+00	1.960530e+04	2.035970e+04	1.958780e+04	2.949050e+00
1.201000e+00	1.315750e-03	8.073470e+00	1.959410e+04	2.036180e+04	1.958040e+04	8.739800e+00
1.201960e+00	1.315990e-03	4.066980e+01	1.963840e+04	2.043870e+04	1.962650e+04	4.006960e+01
1.202980e+00	1.316160e-03	6.521740e+01	1.964230e+04	2.041580e+04	1.963100e+04	6.579370e+01
1.203940e+00	1.316470e-03	2.595030e+01	1.959410e+04	2.039740e+04	1.958410e+04	2.541760e+01
1.204970e+00	1.316810e-03	5.969230e-01	1.960150e+04	2.036090e+04	1.958750e+04	7.774960e-02
1.205990e+00	1.317250e-03	5.680740e+00	1.964250e+04	2.040720e+04	1.962120e+04	4.752300e+00
1.206960e+00	1.317340e-03	2.694710e+01	1.963720e+04	2.042020e+04	1.961660e+04	2.604300e+01
1.207980e+00	1.317720e-03	3.619840e+01	1.960450e+04	2.037800e+04	1.958840e+04	3.694430e+01
1.208940e+00	1.318080e-03	1.762710e+01	1.960950e+04	2.040780e+04	1.959780e+04	1.703500e+01
1.209970e+00	1.318240e-03	1.555930e+01	1.963190e+04	2.041020e+04	1.962150e+04	1.610890e+01
1.210990e+00	1.318590e-03	5.982380e+00	1.961330e+04	2.039080e+04	1.959390e+04	6.845350e+00
1.211950e+00	1.318880e-03	3.431250e+01	1.962910e+04	2.039700e+04	1.961570e+04	3.365850e+01
1.212980e+00	1.319200e-03	1.225610e+01	1.960980e+04	2.037720e+04	1.959030e+04	1.311990e+01
1.213940e+00	1.319500e-03	8.488130e-01	1.962390e+04	2.041590e+04	1.960880e+04	1.354120e-01
1.214970e+00	1.319670e-03	1.258100e+01	1.963120e+04	2.042260e+04	1.961950e+04	1.317450e+01
1.215990e+00	1.320000e-03	7.623940e+00	1.961380e+04	2.038460e+04	1.960580e+04	8.088130e+00
1.216950e+00	1.320350e-03	3.525550e+01	1.959900e+04	2.037550e+04	1.958290e+04	3.450890e+01
1.217980e+00	1.320640e-03	2.094510e+01	1.964330e+04	2.040910e+04	1.962870e+04	2.164100e+01
1.218940e+00	1.320860e-03	8.963870e+00	1.963340e+04	2.042360e+04	1.962320e+04	8.423650e+00
1.219960e+00	1.321180e-03	3.684660e+00	1.957960e+04	2.037090e+04	1.956150e+04	4.499530e+00
1.220990e+00	1.321760e-03	2.501930e+01	1.963730e+04	2.040170e+04	1.962070e+04	2.578390e+01
1.221950e+00	1.321910e-03	4.489560e+01	1.965720e+04	2.044430e+04	1.964620e+04	4.432880e+01
1.222980e+00	1.322140e-03	2.271680e+01	1.958130e+04	2.034850e+04	1.956510e+04	2.346650e+01
1.223940e+00	1.322720e-03	1.401330e+00	1.960140e+04	2.038030e+04	1.958590e+04	6.766820e-01
1.224960e+00	1.322780e-03	1.254840e+01	1.965770e+04	2.044860e+04	1.964340e+04	1.186380e+01
1.225990e+00	1.322950e-03	3.414310e+01	1.961940e+04	2.038930e+04	1.960240e+04	3.492100e+01
1.226950e+00	1.323430e-03	4.019190e+01	1.958920e+04	2.037240e+04	1.957180e+04	3.939810e+01
1.227970e+00	1.323670e-03	3.129490e+00	1.963430e+04	2.039590e+04	1.961920e+04	3.841880e+00
1.229000e+00	1.323970e-03	1.304420e+01	1.963320e+04	2.042430e+04	1.961410e+04	1.389610e+01
1.229960e+00	1.324090e-03	4.761450e+00	1.961890e+04	2.040390e+04	1.960680e+04	4.152220e+00
1.230990e+00	1.324400e-03	1.251040e+01	1.959760e+04	2.038070e+04	1.958640e+04	1.308820e+01
1.231950e+00	1.324790e-03	1.461350e+00	1.961630e+04	2.039210e+04	1.960010e+04	7.107450e-01
1.232970e+00	1.325000e-03	1.709150e+01	1.964780e+04	2.041320e+04	1.963020e+04	1.629290e+01
1.234000e+00	1.325180e-03	6.754690e+00	1.962180e+04	2.039480e+04	1.960960e+04	6.143480e+00
1.234960e+00	1.325630e-03	1.643290e+01	1.958590e+04	2.037030e+04	1.957100e+04	1.713820e+01
1.235980e+00	1.326010e-03	4.024780e+00	1.962830e+04	2.042140e+04	1.961150e+04	4.797370e+00
1.236950e+00	1.326140e-03	5.263830e+00	1.965010e+04	2.042960e+04	1.963160e+04	6.095080e+00
1.237970e+00	1.326380e-03	6.659220e+00	1.960790e+04	2.037180e+04	1.959390e+04	5.987320e+00
1.239000e+00	1.326850e-03	2.116850e+01	1.958920e+04	2.036520e+04	1.957570e+04	2.051250e+01
1.239960e+00	1.327160e-03	1.798370e+01	1.963600e+04	2.040980e+04	1.961890e+04	1.876730e+01
1.240980e+00	1.327270e-03	1.805070e+00	1.965180e+04	2.044810e+04	1.963510e+04	2.573020e+00
1.241940e+00	1.327430e-03	1.176550e+01	1.959730e+04	2.038070e+04	1.957630e+04	1.268310e+01
1.242970e+00	1.327880e-03	2.055980e+00	1.960650e+04	2.037790e+04	1.959100e+04	1.331410e+00
1.243990e+00	1.328180e-03	1.971540e+01	1.964350e+04	2.041250e+04	1.963190e+04	1.912420e+01
1.244960e+00	1.328360e-03	2.370560e+00	1.961770e+04	2.038510e+04	1.960570e+04	2.974830e+00
1.245980e+00	1.328790e-03	1.345380e-01	1.959200e+04	2.037900e+04	1.957140e+04	7.720070e-01
1.246940e+00	1.329060e-03	1.200100e+01	1.965470e+04	2.044460e+04	1.964330e+04	1.258440e+01
1.247970e+00	1.329280e-03	9.423010e+00	1.961500e+04	2.040390e+04	1.959680e+04	1.024150e+01
1.248990e+00	1.329660e-03	3.153180e+00	1.959530e+04	2.036540e+04	1.957810e+04	2.365270e+00
1.249950e+00	1.330050e-03	1.615410e+01	1.962990e+04	2.039680e+04	1.961050e+04	1.529370e+01
1.250980e+00	1.330270e-03	1.035310e+01	1.964630e+04	2.041470e+04	1.962390e+04	9.387050e+00
1.251940e+00	1.330450e-03	7.274140e+00	1.961310e+04	2.039490e+04	1.959760e+04	7.998340e+00
1.252970e+00	1.330800e-03	1.258430e+01	1.958430e+04	2.037870e+04	1.956930e+04	1.329250e+01
1.253990e+00	1.331150e-03	1.380660e+01	1.964060e+04	2.043270e+04	1.962580e+04	1.450620e+01
1.254950e+00	1.331230e-03	1.719370e+00	1.965310e+04	2.042670e+04	1.964100e+04	1.113790e+00
1.255980e+00	1.331430e-03	2.571600e+01	1.958660e+04	2.033940e+04	1.957710e+04	2.520040e+01
1.256940e+00	1.331950e-03	1.853040e+01	1.959370e+04	2.036530e+04	1.958250e+04	1.795700e+01
1.257960e+00	1.332190e-03	2.788840e+01	1.966100e+04	2.044780e+04	1.964520e+04	2.862390e+01
1.258990e+00	1.332240e-03	6.267930e+00	1.963200e+04	2.043650e+04	1.961630e+04	7.001320e+00
1.259950e+00	1.332570e-03	1.343630e+01	1.958440e+04	2.036780e+04	1.957110e+04	1.408280e+01
1.260980e+00	1.333030e-03	2.838790e+00	1.961360e+04	2.037820e+04	1.959930e+04	2.154100e+00
1.261940e+00	1.333300e-03	4.034950e+01	1.965650e+04	2.041460e+04	1.964760e+04	3.985460e+01
1.262960e+00	1.333510e-03	1.870580e+00	1.961450e+04	2.037810e+04	1.960630e+04	2.343320e+00
1.263990e+00	1.333990e-03	6.152540e+00	1.957770e+04	2.037450e+04	1.956120e+04	6.912590e+00
1.264950e+00	1.334190e-03	2.683880e+01	1.965550e+04	2.045840e+04	1.964300e+04	2.746170e+01
1.265970e+00	1.334200e-03	1.681080e+01	1.965350e+04	2.044460e+04	1.964610e+04	1.725520e+01
1.267000e+00	1.334550e-03	2.087960e+01	1.955860e+04	2.031950e+04	1.954340e+04	2.016120e+01
1.267960e+00	1.335100e-03	2.378960e+01	1.962190e+04	2.037130e+04	1.960820e+04	2.312810e+01
1.268990e+00	1.335150e-03	1.269860e+01	1.967490e+04	2.045220e+04	1.966280e+04	1.209120e+01
1.269950e+00	1.335290e-03	2.686300e+01	1.959170e+04	2.038840e+04	1.957800e+04	2.752560e+01
1.270970e+00	1.335730e-03	2.577640e+01	1.959190e+04	2.039030e+04	1.958410e+04	2.623250e+01
1.272000e+00	1.336030e-03	9.457620e+00	1.963940e+04	2.041510e+04	1.962610e+04	8.808480e+00
1.272960e+00	1.336220e-03	2.317980e+01	1.964440e+04	2.040360e+04	1.962980e+04	2.248550e+01
1.273980e+00	1.336550e-03	6.795040e+00	1.959830e+04	2.036500e+04	1.958670e+04	6.204000e+00
1.274950e+00	1.337030e-03	5.787390e+00	1.959800e+04	2.037580e+04	1.958450e+04	6.443890e+00
1.275970e+00	1.337310e-03	5.998530e+00	1.964050e+04	2.043750e+04	1.962070e+04	6.873540e+00
1.277000e+00	1.337420e-03	2.566530e+01	1.964980e+04	2.044800e+04	1.963380e+04	2.640650e+01
1.277960e+00	1.337740e-03	2.496120e+00	1.959120e+04	2.035590e+04	1.958030e+04	1.930760e+00
1.278980e+00	1.338360e-03	4.280750e+01	1.959270e+04	2.035030e+04	1.957860e+04	4.213190e+01
1.279940e+00	1.338660e-03	4.982430e+00	1.965700e+04	2.041650e+04	1.964220e+04	5.682820e+00
1.280970e+00	1.338930e-03	5.607880e+00	1.963910e+04	2.044160e+04	1.962840e+04	6.166600e+00
1.281990e+00	1.339250e-03	3.279880e+01	1.956750e+04	2.037200e+04	1.954390e+04	3.380710e+01
1.282960e+00	1.339690e-03	1.047850e+01	1.963310e+04	2.040840e+04	1.961360e+04	1.134250e+01
1.283980e+00	1.339860e-03	4.242710e+01	1.967140e+04	2.043810e+04	1.965970e+04	4.183500e+01
1.284940e+00	1.340120e-03	5.477090e+00	1.957780e+04	2.032000e+04	1.956330e+04	6.168760e+00
1.285970e+00	1.340850e-03	2.488840e+01	1.957570e+04	2.036560e+04	1.955600e+04	2.401690e+01
1.286990e+00	1.340890e-03	4.044620e+01	1.969940e+04	2.049980e+04	1.968980e+04	4.096370e+01
1.287950e+00	1.340900e-03	2.951660e+01	1.961390e+04	2.040640e+04	1.959820e+04	3.025040e+01
1.288980e+00	1.341410e-03	4.068130e+01	1.955560e+04	2.033210e+04	1.954510e+04	4.012910e+01
1.289940e+00	1.341970e-03	7.206610e+00	1.963820e+04	2.037630e+04	1.962430e+04	7.878490e+00
1.290970e+00	1.342100e-03	3.969420e+01	1.968110e+04	2.045860e+04	1.967070e+04	3.914570e+01
1.291990e+00	1.342260e-03	2.980670e+01	1.957140e+04	2.036740e+04	1.955770e+04	3.046750e+01
1.292950e+00	1.342980e-03	5.050850e+01	1.958780e+04	2.038590e+04	1.957480e+04	5.114740e+01
1.293980e+00	1.343110e-03	3.620260e+01	1.967200e+04	2.046950e+04	1.965610e+04	3.545960e+01
1.294940e+00	1.343190e-03	1.051800e+01	1.964150e+04	2.037240e+04	1.962930e+04	1.112810e+01
1.295960e+00	1.343820e-03	4.747710e+01	1.955020e+04	2.031590e+04	1.953000e+04	4.658490e+01
1.296990e+00	1.344260e-03	9.837360e+00	1.963930e+04	2.042000e+04	1.962620e+04	1.047820e+01
1.297950e+00	1.344350e-03	4.975710e+01	1.966410e+04	2.046850e+04	1.964420e+04	5.063610e+01
1.298980e+00	1.344470e-03	1.502880e+01	1.960330e+04	2.041200e+04	1.958750e+04	1.429530e+01
1.299940e+00	1.344970e-03	2.638660e+01	1.957800e+04	2.033420e+04	1.955890e+04	2.724120e+01
1.300960e+00	1.345450e-03	4.798510e+01	1.965400e+04	2.041230e+04	1.963850e+04	4.725920e+01
1.301990e+00	1.345470e-03	2.304190e+01	1.964710e+04	2.040170e+04	1.963110e+04	2.229850e+01
1.302950e+00	1.345850e-03	3.605150e+01	1.957790e+04	2.037440e+04	1.956330e+04	3.674650e+01
1.303970e+00	1.346290e-03	2.282640e+01	1.959990e+04	2.041830e+04	1.958460e+04	2.354530e+01
1.305000e+00	1.346440e-03	1.790410e+01	1.966220e+04	2.044030e+04	1.964560e+04	1.866950e+01
1.305960e+00	1.346570e-03	4.026630e+01	1.962520e+04	2.038270e+04	1.960910e+04	3.951940e+01
1.306990e+00	1.347020e-03	2.179920e+01	1.957540e+04	2.032030e+04	1.956180e+04	2.113950e+01
1.307950e+00	1.347650e-03	4.631350e+00	1.962510e+04	2.040170e+04	1.960920e+04	3.891840e+00
1.308970e+00	1.347680e-03	2.377610e+01	1.967670e+04	2.049060e+04	1.966460e+04	2.438260e+01
1.310000e+00	1.347790e-03	4.543880e+01	1.958900e+04	2.038490e+04	1.957640e+04	4.606330e+01
1.310960e+00	1.348320e-03	3.233350e+01	1.958350e+04	2.035930e+04	1.957350e+04	3.180010e+01
1.311980e+00	1.348610e-03	2.235800e+01	1.966050e+04	2.040440e+04	1.964910e+04	2.177480e+01
1.312950e+00	1.348740e-03	1.162890e+01	1.964260e+04	2.040730e+04	1.963690e+04	1.124410e+01
1.313970e+00	1.349120e-03	5.177220e+00	1.955160e+04	2.035180e+04	1.953240e+04	6.032170e+00
1.315000e+00	1.349490e-03	5.076050e+01	1.964890e+04	2.044660e+04	1.963480e+04	5.143810e+01
1.315960e+00	1.349470e-03	1.913240e+01	1.966760e+04	2.045460e+04	1.965310e+04	1.844170e+01
1.316980e+00	1.349720e-03	2.294090e+01	1.957500e+04	2.033230e+04	1.955540e+04	2.207030e+01
1.317940e+00	1.350330e-03	2.341770e+00	1.960790e+04	2.036130e+04	1.959800e+04	2.873470e+00
1.318970e+00	1.350540e-03	2.285980e+01	1.964630e+04	2.043920e+04	1.963330e+04	2.221930e+01
1.319990e+00	1.350690e-03	4.328130e+01	1.962930e+04	2.041650e+04	1.962000e+04	4.379070e+01
1.320960e+00	1.351040e-03	1.179670e-01	1.959610e+04	2.039040e+04	1.958930e+04	3.053450e-01
1.321980e+00	1.351370e-03	1.400970e+01	1.961410e+04	2.038500e+04	1.960450e+04	1.348900e+01
1.322940e+00	1.351660e-03	6.863570e+00	1.963810e+04	2.039980e+04	1.962380e+04	7.544750e+00
1.323970e+00	1.351870e-03	3.180760e+01	1.962340e+04	2.039830e+04	1.960910e+04	3.112520e+01
1.324990e+00	1.352100e-03	1.611000e+01	1.961420e+04	2.039410e+04	1.960790e+04	1.651720e+01
1.325950e+00	1.352510e-03	2.294430e+01	1.960700e+04	2.040430e+04	1.959700e+04	2.347820e+01
1.326980e+00	1.352690e-03	1.527770e+00	1.962600e+04	2.041640e+04	1.960980e+04	2.279130e+00
1.327940e+00	1.352920e-03	7.064440e+00	1.963880e+04	2.039330e+04	1.962540e+04	6.412100e+00
1.328970e+00	1.353210e-03	3.057560e+01	1.960310e+04	2.037590e+04	1.958450e+04	2.974050e+01
1.329990e+00	1.353610e-03	1.658280e+01	1.961910e+04	2.038260e+04	1.960450e+04	1.727560e+01
1.330950e+00	1.353870e-03	6.901030e+00	1.963750e+04	2.044310e+04	1.962930e+04	6.430380e+00
1.331980e+00	1.354050e-03	3.213670e+01	1.959960e+04	2.039080e+04	1.958320e+04	3.289440e+01
1.332940e+00	1.354410e-03	6.461810e+00	1.962220e+04	2.040120e+04	1.960510e+04	7.241040e+00
1.333960e+00	1.354460e-03	3.733720e+01	1.963950e+04	2.040390e+04	1.962890e+04	3.678140e+01
1.334990e+00	1.354800e-03	2.064510e+00	1.960350e+04	2.035260e+04	1.959210e+04	2.644800e+00
1.335950e+00	1.355250e-03	1.696320e+01	1.961330e+04	2.040910e+04	1.960030e+04	1.632460e+01
1.336980e+00	1.355370e-03	3.665400e+01	1.964570e+04	2.043990e+04	1.963600e+04	3.717700e+01
1.337940e+00	1.355700e-03	1.475940e+01	1.960350e+04	2.039670e+04	1.958460e+04	1.560720e+01
1.338960e+00	1.355990e-03	2.495030e+01	1.961510e+04	2.038740e+04	1.960290e+04	2.433970e+01
1.339990e+00	1.356380e-03	1.114270e+00	1.962540e+04	2.037510e+04	1.961050e+04	4.074410e-01
1.340950e+00	1.356710e-03	3.228010e+01	1.962590e+04	2.039820e+04	1.961070e+04	3.156450e+01
1.341970e+00	1.356920e-03	2.488470e+01	1.960920e+04	2.040240e+04	1.958990e+04	2.574380e+01
1.343000e+00	1.357250e-03	2.855820e+01	1.963050e+04	2.043100e+04	1.961820e+04	2.917200e+01
1.343960e+00	1.357260e-03	1.381080e+01	1.962040e+04	2.041550e+04	1.961080e+04	1.329330e+01
1.344990e+00	1.357670e-03	9.667980e+00	1.960470e+04	2.034540e+04	1.959290e+04	1.026390e+01
1.345950e+00	1.358020e-03	5.938700e+01	1.962800e+04	2.039860e+04	1.961860e+04	5.887410e+01
1.346970e+00	1.358190e-03	2.374910e+01	1.961960e+04	2.039130e+04	1.960290e+04	2.451840e+01
1.348000e+00	1.358550e-03	2.976400e+01	1.962550e+04	2.043160e+04	1.961000e+04	3.049020e+01
1.348960e+00	1.358700e-03	1.299550e+01	1.961260e+04	2.040880e+04	1.959370e+04	1.215160e+01
1.349980e+00	1.359060e-03	1.524270e+01	1.963000e+04	2.038910e+04	1.962010e+04	1.577320e+01
1.350940e+00	1.359300e-03	3.848330e+01	1.961100e+04	2.037850e+04	1.959890e+04	3.787540e+01
1.351970e+00	1.359610e-03	2.077170e+00	1.961360e+04	2.038580e+04	1.959750e+04	2.824240e+00
1.353000e+00	1.359950e-03	1.833460e+01	1.963650e+04	2.041870e+04	1.962240e+04	1.901170e+01
1.353960e+00	1.360050e-03	1.413170e+01	1.962090e+04	2.041950e+04	1.960990e+04	1.356500e+01
1.354980e+00	1.360320e-03	3.037860e+01	1.960050e+04	2.037250e+04	1.959210e+04	3.085660e+01
1.355940e+00	1.360790e-03	2.477970e+01	1.961460e+04	2.039450e+04	1.960060e+04	2.410270e+01
1.356970e+00	1.360920e-03	9.228310e+00	1.964360e+04	2.041010e+04	1.962520e+04	8.399410e+00
1.357990e+00	1.361120e-03	1.217310e+01	1.963300e+04	2.041500e+04	1.962600e+04	1.260330e+01
1.358950e+00	1.361400e-03	5.167170e+00	1.958110e+04	2.036610e+04	1.957470e+04	4.761240e+00
1.359980e+00	1.361790e-03	1.412180e+01	1.961360e+04	2.039090e+04	1.960070e+04	1.475740e+01
1.360940e+00	1.362040e-03	1.306300e+01	1.965650e+04	2.043380e+04	1.963580e+04	1.215460e+01
1.361970e+00	1.362100e-03	5.209790e+00	1.963520e+04	2.041420e+04	1.962580e+04	4.697390e+00
1.362990e+00	1.362580e-03	1.414000e+01	1.956230e+04	2.032950e+04	1.954820e+04	1.481770e+01
1.363950e+00	1.363100e-03	2.533330e+01	1.962090e+04	2.041780e+04	1.959570e+04	2.426920e+01
1.364980e+00	1.363070e-03	3.885620e+01	1.969110e+04	2.047020e+04	1.967470e+04	3.961660e+01
1.365940e+00	1.363350e-03	1.614550e+01	1.959260e+04	2.036520e+04	1.957810e+04	1.545250e+01
1.366970e+00	1.363860e-03	2.965220e+01	1.956310e+04	2.033620e+04	1.954500e+04	2.883510e+01
1.367990e+00	1.364310e-03	2.862800e+01	1.966990e+04	2.043440e+04	1.965530e+04	2.932120e+01
1.368950e+00	1.364220e-03	2.955520e+01	1.964490e+04	2.045170e+04	1.963110e+04	2.888810e+01
1.369980e+00	1.364500e-03	4.866210e+01	1.956390e+04	2.033460e+04	1.954450e+04	4.952460e+01
1.370940e+00	1.365170e-03	2.160340e+01	1.962220e+04	2.040720e+04	1.960240e+04	2.072860e+01
1.371960e+00	1.365120e-03	2.196580e+01	1.967670e+04	2.045130e+04	1.966350e+04	2.132120e+01
1.372990e+00	1.365520e-03	2.251920e+01	1.958800e+04	2.034330e+04	1.957360e+04	2.320950e+01
1.373950e+00	1.365990e-03	3.758160e+01	1.958060e+04	2.038500e+04	1.956850e+04	3.697440e+01
1.374980e+00	1.366280e-03	5.995610e+01	1.965830e+04	2.043430e+04	1.964270e+04	6.068440e+01
1.375940e+00	1.366470e-03	2.742190e+01	1.964660e+04	2.043300e+04	1.962910e+04	2.662660e+01
1.376960e+00	1.366620e-03	2.190220e+01	1.958550e+04	2.036160e+04	1.957720e+04	2.142930e+01
1.377990e+00	1.367330e-03	3.929200e+01	1.959480e+04	2.034580e+04	1.958040e+04	3.997770e+01
1.378950e+00	1.367500e-03	7.015010e+01	1.966630e+04	2.046580e+04	1.964960e+04	6.938220e+01
1.379970e+00	1.367480e-03	5.390330e+01	1.962700e+04	2.039700e+04	1.960550e+04	5.483870e+01
1.381000e+00	1.368030e-03	1.977610e+00	1.958080e+04	2.037790e+04	1.956190e+04	2.823720e+00
1.381960e+00	1.368230e-03	2.562260e+01	1.962640e+04	2.041630e+04	1.960920e+04	2.483880e+01
1.382990e+00	1.368570e-03	3.390340e+01	1.965760e+04	2.039530e+04	1.964120e+04	3.466200e+01
1.383950e+00	1.368750e-03	7.246050e+01	1.959650e+04	2.039250e+04	1.957850e+04	7.164650e+01
1.384970e+00	1.369130e-03	5.725180e+01	1.960290e+04	2.037500e+04	1.959270e+04	5.779180e+01
1.386000e+00	1.369570e-03	9.068750e-01	1.963920e+04	2.043960e+04	1.962650e+04	1.534990e+00
1.386960e+00	1.369530e-03	2.640910e+01	1.963360e+04	2.042010e+04	1.962480e+04	2.591530e+01
1.387980e+00	1.370130e-03	3.640100e+01	1.957850e+04	2.032550e+04	1.955770e+04	3.731280e+01
1.388940e+00	1.370530e-03	6.305500e+01	1.963300e+04	2.041900e+04	1.961680e+04	6.230530e+01
1.389970e+00	1.370630e-03	3.192820e+01	1.965680e+04	2.042630e+04	1.964220e+04	3.262360e+01
1.391000e+00	1.370940e-03	1.374240e+01	1.959670e+04	2.038900e+04	1.958210e+04	1.443680e+01
1.391960e+00	1.371380e-03	2.198790e+01	1.958470e+04	2.038300e+04	1.956620e+04	2.115600e+01
1.392980e+00	1.371750e-03	3.760900e+01	1.966010e+04	2.041690e+04	1.964250e+04	3.840680e+01
1.393940e+00	1.371870e-03	5.352830e+01	1.964460e+04	2.042880e+04	1.963090e+04	5.286560e+01
1.394970e+00	1.372230e-03	1.525630e+01	1.956570e+04	2.033240e+04	1.954030e+04	1.632880e+01
1.395990e+00	1.372750e-03	1.121840e+01	1.964780e+04	2.042430e+04	1.963900e+04	1.170970e+01
1.396950e+00	1.372700e-03	2.277440e+01	1.963000e+04	2.043630e+04	1.961310e+04	2.199820e+01
1.397980e+00	1.373030e-03	4.775050e+01	1.960620e+04	2.036560e+04	1.959760e+04	4.823540e+01
1.398940e+00	1.373480e-03	5.099430e+01	1.959290e+04	2.038450e+04	1.957610e+04	5.022240e+01
1.399970e+00	1.373690e-03	9.832540e+00	1.965390e+04	2.041130e+04	1.963960e+04	1.051670e+01
1.400990e+00	1.373960e-03	6.217290e+00	1.962580e+04	2.041050e+04	1.961020e+04	6.947680e+00
1.401950e+00	1.374250e-03	7.564860e+00	1.958570e+04	2.038390e+04	1.956670e+04	6.716570e+00
1.402980e+00	1.374690e-03	3.324790e+01	1.962900e+04	2.039160e+04	1.961160e+04	3.404200e+01
1.403940e+00	1.374850e-03	5.008510e+01	1.965320e+04	2.044260e+04	1.964290e+04	4.953970e+01
1.404960e+00	1.375060e-03	2.528960e+01	1.958690e+04	2.035250e+04	1.956930e+04	2.608960e+01
1.405990e+00	1.375560e-03	3.996780e-01	1.962590e+04	2.040580e+04	1.962040e+04	2.037740e-02
1.406950e+00	1.375650e-03	2.301410e+01	1.962500e+04	2.041640e+04	1.960760e+04	2.222210e+01
1.407980e+00	1.375910e-03	3.583730e+01	1.962560e+04	2.039050e+04	1.961060e+04	3.654450e+01
1.408940e+00	1.376060e-03	3.311330e+01	1.961790e+04	2.040750e+04	1.961160e+04	3.270880e+01
1.409960e+00	1.376330e-03	1.454120e+01	1.960090e+04	2.037130e+04	1.958950e+04	1.512350e+01
1.410990e+00	1.376720e-03	4.395110e+00	1.963600e+04	2.041610e+04	1.962580e+04	4.935410e+00
1.411950e+00	1.376850e-03	1.777150e+01	1.962590e+04	2.041500e+04	1.961100e+04	1.706410e+01
1.412970e+00	1.377150e-03	2.696620e+01	1.961190e+04	2.038180e+04	1.960050e+04	2.755050e+01
1.413940e+00	1.377510e-03	2.500910e+01	1.960480e+04	2.038130e+04	1.958860e+04	2.425790e+01
1.414960e+00	1.377710e-03	7.373020e+00	1.965030e+04	2.042690e+04	1.964290e+04	6.928800e+00
1.415990e+00	1.377970e-03	2.499710e+01	1.960390e+04	2.038510e+04	1.959140e+04	2.561670e+01
1.416950e+00	1.378330e-03	1.523260e+01	1.960290e+04	2.038930e+04	1.959010e+04	1.460140e+01
1.417970e+00	1.378580e-03	8.528650e+00	1.964430e+04	2.041720e+04	1.963020e+04	9.205540e+00
1.419000e+00	1.378740e-03	4.760480e+00	1.963510e+04	2.041470e+04	1.962810e+04	4.331670e+00
1.419960e+00	1.379010e-03	5.918140e+00	1.958090e+04	2.035410e+04	1.957080e+04	5.381910e+00
1.420980e+00	1.379460e-03	7.616790e+00	1.961630e+04	2.039180e+04	1.960130e+04	8.323860e+00
1.421950e+00	1.379550e-03	8.432300e+00	1.966740e+04	2.045670e+04	1.965720e+04	7.893000e+00
1.422970e+00	1.379720e-03	1.380000e+01	1.959250e+04	2.036910e+04	1.957370e+04	1.464280e+01
1.424000e+00	1.380190e-03	4.703900e+00	1.960730e+04	2.038380e+04	1.959780e+04	4.185600e+00
1.424960e+00	1.380380e-03	1.491450e+01	1.964430e+04	2.042100e+04	1.963650e+04	1.445680e+01
1.425980e+00	1.380570e-03	1.041410e+01	1.960940e+04	2.037790e+04	1.959260e+04	1.118500e+01
1.426940e+00	1.380930e-03	7.736470e+00	1.961390e+04	2.040340e+04	1.959940e+04	7.045550e+00
1.427970e+00	1.381130e-03	1.006360e+01	1.963670e+04	2.042080e+04	1.962770e+04	1.056240e+01
1.428990e+00	1.381400e-03	8.542240e+00	1.960680e+04	2.038830e+04	1.959100e+04	9.278790e+00
1.429960e+00	1.381670e-03	1.307250e+01	1.962540e+04	2.039950e+04	1.961330e+04	1.246600e+01
1.430980e+00	1.381950e-03	3.596880e+00	1.961770e+04	2.038550e+04	1.959850e+04	2.742780e+00
1.431940e+00	1.382310e-03	3.567600e+00	1.962010e+04	2.039770e+04	1.960280e+04	2.777470e+00
1.432970e+00	1.382600e-03	6.560320e+00	1.962260e+04	2.041060e+04	1.960280e+04	7.435680e+00
1.433990e+00	1.382860e-03	1.311060e+01	1.963200e+04	2.041410e+04	1.962150e+04	1.366140e+01
1.434950e+00	1.383170e-03	1.172400e+01	1.959020e+04	2.036900e+04	1.957220e+04	1.090880e+01
1.435980e+00	1.383510e-03	3.556220e+00	1.962770e+04	2.040020e+04	1.961400e+04	2.890180e+00
1.436940e+00	1.383670e-03	2.112750e+00	1.964620e+04	2.041790e+04	1.963880e+04	2.556950e+00
1.437970e+00	1.384010e-03	7.081240e+00	1.959610e+04	2.037820e+04	1.958180e+04	6.394450e+00
1.438990e+00	1.384400e-03	1.177430e+01	1.961670e+04	2.039630e+04	1.960520e+04	1.236080e+01
1.439950e+00	1.384650e-03	1.415820e+00	1.964380e+04	2.043130e+04	1.963670e+04	9.833750e-01
1.440980e+00	1.384930e-03	1.021790e+00	1.960230e+04	2.037610e+04	1.958670e+04	2.890570e-01
1.441940e+00	1.385280e-03	2.179430e+00	1.961630e+04	2.038860e+04	1.960090e+04	1.457830e+00
1.442960e+00	1.385490e-03	4.703330e+00	1.964100e+04	2.042400e+04	1.962910e+04	4.102990e+00
1.443990e+00	1.385700e-03	1.338200e+01	1.960770e+04	2.038280e+04	1.959470e+04	1.402050e+01
1.444950e+00	1.386090e-03	1.270070e+01	1.960800e+04	2.038820e+04	1.959560e+04	1.208200e+01
1.445980e+00	1.386340e-03	9.482160e-01	1.963600e+04	2.040850e+04	1.962350e+04	3.245730e-01
1.446940e+00	1.386610e-03	4.029940e+00	1.962530e+04	2.041030e+04	1.961170e+04	4.692650e+00
1.447960e+00	1.386860e-03	4.318070e+00	1.959980e+04	2.038920e+04	1.958450e+04	5.034890e+00
1.448990e+00	1.387260e-03	6.688220e+00	1.963090e+04	2.039930e+04	1.962250e+04	7.164850e+00
1.449950e+00	1.387520e-03	2.580640e+01	1.962830e+04	2.040600e+04	1.961710e+04	2.523120e+01
1.450970e+00	1.387820e-03	1.233190e+01	1.960470e+04	2.037380e+04	1.959120e+04	1.298930e+01
1.452000e+00	1.388270e-03	1.383120e+00	1.960870e+04	2.040050e+04	1.958650e+04	2.345220e+00
1.452960e+00	1.388460e-03	4.394800e+00	1.966380e+04	2.044470e+04	1.965130e+04	5.019470e+00
1.453990e+00	1.388670e-03	1.160130e+00	1.960950e+04	2.038530e+04	1.959900e+04	1.711620e+00
1.454950e+00	1.389130e-03	8.601390e+00	1.957680e+04	2.035330e+04	1.956530e+04	8.015460e+00
1.455970e+00	1.389500e-03	2.784020e-01	1.964610e+04	2.041100e+04	1.963340e+04	9.066700e-01
1.457000e+00	1.389550e-03	1.081790e+01	1.965380e+04	2.044120e+04	1.963840e+04	1.009530e+01
1.457960e+00	1.389740e-03	2.027930e+01	1.958850e+04	2.037320e+04	1.957950e+04	2.077720e+01
1.458980e+00	1.390280e-03	6.548620e+00	1.958620e+04	2.037260e+04	1.957180e+04	7.237750e+00
1.459950e+00	1.390440e-03	7.466310e+00	1.966630e+04	2.044160e+04	1.965270e+04	6.803570e+00
1.460970e+00	1.390610e-03	7.319070e+00	1.963160e+04	2.039740e+04	1.961880e+04	6.687740e+00
1.462000e+00	1.391090e-03	1.251620e+01	1.957510e+04	2.034050e+04	1.956090e+04	1.183500e+01
1.462960e+00	1.391540e-03	1.530430e+00	1.963990e+04	2.042980e+04	1.963400e+04	1.922250e+00
1.463980e+00	1.391720e-03	2.872260e+01	1.962860e+04	2.042340e+04	1.961060e+04	2.953720e+01
1.464940e+00	1.391940e-03	1.019470e+00	1.961740e+04	2.040600e+04	1.960570e+04	1.610810e+00
1.465970e+00	1.392270e-03	1.394740e+01	1.960710e+04	2.037310e+04	1.959170e+04	1.322410e+01
1.466990e+00	1.392590e-03	8.673860e+00	1.963050e+04	2.039260e+04	1.961350e+04	7.895060e+00
1.467960e+00	1.392960e-03	1.352630e+01	1.963460e+04	2.040650e+04	1.962110e+04	1.287130e+01
1.468980e+00	1.393280e-03	1.698110e+01	1.960330e+04	2.039850e+04	1.958710e+04	1.773250e+01
1.469940e+00	1.393710e-03	2.083190e+01	1.960500e+04	2.038760e+04	1.958340e+04	2.177240e+01
1.470970e+00	1.393880e-03	1.872880e+01	1.965020e+04	2.044400e+04	1.963710e+04	1.808720e+01
1.471990e+00	1.394050e-03	1.641160e+01	1.961550e+04	2.037320e+04	1.960550e+04	1.694710e+01
1.472950e+00	1.394520e-03	3.002780e+01	1.958970e+04	2.035350e+04	1.957770e+04	2.942460e+01
1.473980e+00	1.394760e-03	1.380550e+01	1.963640e+04	2.041400e+04	1.962440e+04	1.320260e+01
1.474940e+00	1.394880e-03	3.865250e+01	1.963550e+04	2.042470e+04	1.962040e+04	3.936230e+01
1.475970e+00	1.395140e-03	1.776100e+00	1.960270e+04	2.040620e+04	1.959080e+04	1.176360e+00
1.476990e+00	1.395550e-03	1.371510e+01	1.960620e+04	2.038050e+04	1.958580e+04	1.461290e+01
1.477950e+00	1.395800e-03	1.997300e+01	1.965750e+04	2.041640e+04	1.963810e+04	1.911250e+01
1.478980e+00	1.395910e-03	3.200570e+01	1.962340e+04	2.039160e+04	1.960640e+04	3.122490e+01
1.479940e+00	1.396350e-03	2.655370e+01	1.958590e+04	2.035550e+04	1.957330e+04	2.718100e+01
1.480960e+00	1.396770e-03	1.269630e+00	1.961890e+04	2.043180e+04	1.960620e+04	6.422800e-01
1.481990e+00	1.396900e-03	3.363400e+01	1.964880e+04	2.043000e+04	1.963620e+04	3.425850e+01
1.482950e+00	1.397190e-03	1.647250e+01	1.961330e+04	2.038830e+04	1.959650e+04	1.570130e+01
1.483980e+00	1.397520e-03	3.000240e+01	1.960130e+04	2.035920e+04	1.958410e+04	2.921860e+01
1.484940e+00	1.397830e-03	8.418840e+00	1.962870e+04	2.038990e+04	1.961430e+04	9.107590e+00
1.485960e+00	1.398020e-03	6.659730e+00	1.962420e+04	2.043060e+04	1.960490e+04	5.801290e+00
1.486990e+00	1.398170e-03	4.166800e+01	1.961480e+04	2.040150e+04	1.959580e+04	4.251630e+01
1.487950e+00	1.398490e-03	1.031360e+01	1.962360e+04	2.040840e+04	1.961100e+04	9.688450e+00
1.488970e+00	1.398740e-03	2.148560e+01	1.961710e+04	2.037490e+04	1.960010e+04	2.070730e+01
1.490000e+00	1.399100e-03	7.489960e+00	1.962520e+04	2.038560e+04	1.960980e+04	6.767580e+00
1.490960e+00	1.399300e-03	9.433500e+00	1.962400e+04	2.041460e+04	1.961600e+04	8.966430e+00
1.491990e+00	1.399590e-03	3.852910e+01	1.960490e+04	2.039550e+04	1.959280e+04	3.913610e+01
1.492950e+00	1.399930e-03	2.021610e+00	1.962610e+04	2.042210e+04	1.961490e+04	1.443900e+00
1.493970e+00	1.400090e-03	5.263380e+00	1.963700e+04	2.040450e+04	1.963020e+04	4.841520e+00
1.495000e+00	1.400640e-03	1.474880e+01	1.959350e+04	2.034810e+04	1.957220e+04	1.382110e+01
1.495960e+00	1.400920e-03	3.068630e+01	1.963010e+04	2.040670e+04	1.961180e+04	2.986150e+01
1.496980e+00	1.401120e-03	3.952850e+01	1.963790e+04	2.042870e+04	1.962080e+04	4.031010e+01
1.497950e+00	1.401400e-03	1.531710e+01	1.959330e+04	2.039510e+04	1.957360e+04	1.619030e+01
1.498970e+00	1.401810e-03	7.348270e+00	1.961380e+04	2.039080e+04	1.959260e+04	6.420910e+00
1.500000e+00	1.402050e-03	1.454290e+01	1.966210e+04	2.041620e+04	1.964870e+04	1.388950e+01
1.500960e+00	1.402270e-03	2.764610e+01	1.959110e+04	2.035980e+04	1.957580e+04	2.692450e+01
1.501980e+00	1.402790e-03	2.556630e+01	1.959810e+04	2.038460e+04	1.958470e+04	2.621770e+01
1.502940e+00	1.403060e-03	1.903620e+01	1.965700e+04	2.045740e+04	1.964480e+04	1.964580e+01
1.503970e+00	1.403130e-03	3.832180e+00	1.963300e+04	2.041710e+04	1.962380e+04	3.324800e+00
1.504990e+00	1.403500e-03	3.546810e+00	1.957250e+04	2.033430e+04	1.955870e+04	2.879020e+00
1.505960e+00	1.404010e-03	2.537570e+01	1.963020e+04	2.039220e+04	1.961780e+04	2.475490e+01
1.506980e+00	1.404020e-03	4.894750e-01	1.965220e+04	2.043780e+04	1.963580e+04	2.710880e-01
1.507940e+00	1.404260e-03	3.120980e+01	1.961480e+04	2.040390e+04	1.960410e+04	3.176950e+01
1.508970e+00	1.404610e-03	7.070920e+00	1.957300e+04	2.036600e+04	1.955590e+04	6.289630e+00
1.509990e+00	1.404990e-03	4.100430e+00	1.965820e+04	2.042250e+04	1.964660e+04	4.692960e+00
1.510950e+00	1.405100e-03	2.159110e+01	1.964880e+04	2.042010e+04	1.963960e+04	2.108370e+01
1.511980e+00	1.405480e-03	2.996720e+00	1.957090e+04	2.034100e+04	1.956060e+04	2.453680e+00
1.512940e+00	1.405920e-03	1.551500e+01	1.960610e+04	2.039770e+04	1.959420e+04	1.611600e+01
1.513970e+00	1.406070e-03	7.190340e+00	1.967160e+04	2.045980e+04	1.966090e+04	7.747080e+00
1.514990e+00	1.406180e-03	4.580420e+00	1.961820e+04	2.039560e+04	1.960690e+04	4.000520e+00
1.515950e+00	1.406590e-03	1.513820e+00	1.957440e+04	2.034220e+04	1.956390e+04	9.618130e-01
1.516980e+00	1.407070e-03	1.022070e+01	1.962480e+04	2.040140e+04	1.961150e+04	9.571940e+00
1.517940e+00	1.407170e-03	3.558780e+00	1.966860e+04	2.044640e+04	1.965780e+04	4.119680e+00
1.518960e+00	1.407340e-03	6.689000e+00	1.959380e+04	2.038260e+04	1.957890e+04	7.393810e+00
1.519990e+00	1.407830e-03	7.394840e+00	1.958420e+04	2.036280e+04	1.956810e+04	8.141990e+00
1.520950e+00	1.408180e-03	6.535310e+00	1.966300e+04	2.043820e+04	1.965110e+04	5.937220e+00
1.521980e+00	1.408260e-03	1.355300e+01	1.964190e+04	2.040810e+04	1.963270e+04	1.304810e+01
1.522940e+00	1.408680e-03	1.924430e+00	1.956980e+04	2.034200e+04	1.955620e+04	1.263200e+00
1.523960e+00	1.409120e-03	1.101890e+01	1.962100e+04	2.041710e+04	1.960990e+04	1.159300e+01
1.524990e+00	1.409200e-03	1.834040e+01	1.966040e+04	2.045150e+04	1.965060e+04	1.886700e+01
1.525950e+00	1.409440e-03	3.451890e+00	1.959620e+04	2.037060e+04	1.957910e+04	2.669330e+00
1.526970e+00	1.409920e-03	2.320750e+01	1.960110e+04	2.035990e+04	1.958690e+04	2.252650e+01
1.528000e+00	1.410300e-03	1.394170e+01	1.964380e+04	2.040590e+04	1.962600e+04	1.313700e+01
1.528960e+00	1.410390e-03	1.021970e+01	1.964400e+04	2.043990e+04	1.963060e+04	1.087260e+01
1.529990e+00	1.410640e-03	3.558420e+01	1.958560e+04	2.038910e+04	1.957150e+04	3.626160e+01
1.530950e+00	1.411030e-03	1.709070e+00	1.960700e+04	2.038810e+04	1.959230e+04	2.407500e+00
1.531970e+00	1.411200e-03	2.933510e+01	1.965740e+04	2.041990e+04	1.964610e+04	2.875500e+01
1.533000e+00	1.411450e-03	1.009180e+01	1.959500e+04	2.034600e+04	1.957040e+04	9.047840e+00
1.533960e+00	1.411950e-03	9.596510e+00	1.961790e+04	2.040370e+04	1.960060e+04	8.806050e+00
1.534980e+00	1.412050e-03	3.642090e+01	1.964630e+04	2.045110e+04	1.963450e+04	3.701680e+01
1.535950e+00	1.412290e-03	1.907400e+01	1.960160e+04	2.039260e+04	1.958350e+04	1.989110e+01
1.536970e+00	1.412670e-03	3.038910e+01	1.961290e+04	2.037820e+04	1.960220e+04	2.982910e+01
1.538000e+00	1.413080e-03	7.890080e+00	1.962860e+04	2.038620e+04	1.961540e+04	7.244130e+00
1.538960e+00	1.413360e-03	1.045940e+01	1.963350e+04	2.040910e+04	1.962420e+04	9.951800e+00
1.539980e+00	1.413640e-03	1.537140e+01	1.957840e+04	2.037250e+04	1.955310e+04	1.644020e+01
1.540940e+00	1.413990e-03	2.704600e+01	1.965620e+04	2.044270e+04	1.964630e+04	2.757610e+01
1.541970e+00	1.414050e-03	2.186290e+01	1.962490e+04	2.041200e+04	1.960910e+04	2.112560e+01
1.542990e+00	1.414460e-03	7.012550e+00	1.959870e+04	2.035630e+04	1.958490e+04	7.676830e+00
1.543960e+00	1.414870e-03	2.519580e+01	1.962080e+04	2.038780e+04	1.960550e+04	2.447800e+01
1.544980e+00	1.415010e-03	6.201640e+00	1.963280e+04	2.041330e+04	1.961440e+04	5.374380e+00
1.545940e+00	1.415240e-03	3.557230e+01	1.963130e+04	2.042480e+04	1.962050e+04	3.613390e+01
1.546970e+00	1.415500e-03	3.384670e+00	1.960000e+04	2.040310e+04	1.958830e+04	3.978360e+00
1.547990e+00	1.415820e-03	1.557520e+00	1.961570e+04	2.037250e+04	1.960120e+04	2.248440e+00
1.548950e+00	1.416090e-03	3.859530e+01	1.964490e+04	2.040740e+04	1.963120e+04	3.793060e+01
1.549980e+00	1.416210e-03	2.223070e+00	1.960780e+04	2.038160e+04	1.958840e+04	3.085980e+00
1.550940e+00	1.416610e-03	2.389260e+01	1.960920e+04	2.040300e+04	1.959460e+04	2.458670e+01
1.551970e+00	1.416840e-03	6.566170e+00	1.962940e+04	2.043040e+04	1.961550e+04	7.235560e+00
1.552990e+00	1.417140e-03	1.318280e+01	1.961500e+04	2.038830e+04	1.959240e+04	1.415720e+01
1.553950e+00	1.417400e-03	3.591160e+01	1.963560e+04	2.039540e+04	1.962190e+04	3.524860e+01
1.554980e+00	1.417580e-03	1.073280e+01	1.961640e+04	2.037730e+04	1.960200e+04	1.004300e+01
1.555940e+00	1.417930e-03	1.733420e+01	1.960640e+04	2.039270e+04	1.959550e+04	1.789880e+01
1.556960e+00	1.418180e-03	8.483220e+00	1.961880e+04	2.042460e+04	1.960550e+04	9.135350e+00
1.557990e+00	1.418360e-03	1.847660e+01	1.963730e+04	2.041170e+04	1.962790e+04	1.899180e+01
1.558950e+00	1.418650e-03	3.104890e+01	1.960510e+04	2.037690e+04	1.959140e+04	3.038810e+01
1.559980e+00	1.418990e-03	1.576520e+00	1.961390e+04	2.036960e+04	1.959830e+04	8.495650e-01
1.560940e+00	1.419340e-03	8.870630e+00	1.963250e+04	2.041060e+04	1.961390e+04	8.034310e+00
1.561960e+00	1.419460e-03	8.732510e+00	1.963460e+04	2.043840e+04	1.962020e+04	9.420620e+00
1.562990e+00	1.419710e-03	4.343800e+01	1.959570e+04	2.038010e+04	1.957950e+04	4.418810e+01
1.563950e+00	1.420140e-03	3.737030e+01	1.961380e+04	2.039970e+04	1.959760e+04	3.661730e+01
1.564970e+00	1.420290e-03	7.203950e-01	1.965400e+04	2.040410e+04	1.963930e+04	1.418080e+00
1.566000e+00	1.420670e-03	2.011890e+01	1.960520e+04	2.037020e+04	1.958670e+04	1.928920e+01
1.566960e+00	1.421020e-03	1.283920e+01	1.960600e+04	2.039530e+04	1.959850e+04	1.238910e+01
1.567990e+00	1.421340e-03	5.615120e+01	1.961610e+04	2.040920e+04	1.960200e+04	5.682710e+01
1.568950e+00	1.421590e-03	9.006810e+00	1.965160e+04	2.045400e+04	1.964080e+04	8.444490e+00
1.569970e+00	1.421750e-03	1.106300e+01	1.960510e+04	2.036180e+04	1.959060e+04	1.037120e+01
1.571000e+00	1.422270e-03	2.171410e+01	1.959950e+04	2.034990e+04	1.958580e+04	2.105110e+01
1.571960e+00	1.422490e-03	1.724520e+01	1.963140e+04	2.041980e+04	1.961430e+04	1.646040e+01
1.572980e+00	1.422660e-03	4.820760e+01	1.964960e+04	2.044300e+04	1.964060e+04	4.870710e+01
1.573950e+00	1.423020e-03	4.161450e+00	1.958070e+04	2.038270e+04	1.955970e+04	3.243950e+00
1.574970e+00	1.423300e-03	2.342870e+00	1.962790e+04	2.039830e+04	1.961610e+04	2.939850e+00
1.576000e+00	1.423610e-03	1.325610e+01	1.963120e+04	2.038310e+04	1.961520e+04	1.251270e+01
1.576960e+00	1.423900e-03	4.094310e+01	1.961190e+04	2.037870e+04	1.958950e+04	3.997490e+01
1.577980e+00	1.424160e-03	2.829270e+01	1.963280e+04	2.041580e+04	1.962400e+04	2.878360e+01
1.578940e+00	1.424440e-03	2.229460e+01	1.959990e+04	2.041430e+04	1.958820e+04	2.288800e+01
1.579970e+00	1.424660e-03	1.328870e+01	1.961830e+04	2.041130e+04	1.960390e+04	1.397570e+01
1.580990e+00	1.424930e-03	8.949340e+00	1.964160e+04	2.039750e+04	1.962520e+04	8.191850e+00
1.581960e+00	1.425190e-03	4.980310e+01	1.962740e+04	2.037760e+04	1.961860e+04	4.931280e+01
1.582980e+00	1.425590e-03	1.277920e+00	1.958080e+04	2.035090e+04	1.956670e+04	1.955390e+00
1.583940e+00	1.426010e-03	3.627580e+01	1.962290e+04	2.042800e+04	1.960240e+04	3.717490e+01
1.584970e+00	1.426070e-03	1.378160e+01	1.966270e+04	2.047410e+04	1.964470e+04	1.459470e+01
1.585990e+00	1.426200e-03	8.838460e+00	1.960640e+04	2.037400e+04	1.959510e+04	9.418380e+00
1.586950e+00	1.426740e-03	3.679910e+01	1.957610e+04	2.033070e+04	1.956100e+04	3.608940e+01
1.587980e+00	1.427110e-03	2.117750e+01	1.964890e+04	2.040180e+04	1.963690e+04	2.057170e+01
1.588940e+00	1.427240e-03	9.048890e+00	1.963940e+04	2.042580e+04	1.962260e+04	9.821820e+00
1.589970e+00	1.427400e-03	2.536360e+01	1.960040e+04	2.041000e+04	1.958920e+04	2.594030e+01
1.590990e+00	1.427810e-03	2.930770e+01	1.960280e+04	2.039670e+04	1.958910e+04	2.997140e+01
1.591950e+00	1.428020e-03	3.050750e+01	1.964930e+04	2.041150e+04	1.963540e+04	2.983720e+01
1.592980e+00	1.428150e-03	2.834660e+01	1.962790e+04	2.037810e+04	1.961330e+04	2.765280e+01
1.593940e+00	1.428600e-03	2.699490e+00	1.958850e+04	2.036100e+04	1.957030e+04	3.517700e+00
1.594960e+00	1.428920e-03	1.427480e+01	1.963540e+04	2.043660e+04	1.962720e+04	1.474700e+01
1.595990e+00	1.429110e-03	2.789000e+01	1.962560e+04	2.042360e+04	1.961280e+04	2.852170e+01
1.596950e+00	1.429330e-03	7.233510e+00	1.961230e+04	2.038560e+04	1.960140e+04	6.667680e+00
1.597980e+00	1.429650e-03	2.466300e+01	1.960410e+04	2.037200e+04	1.958640e+04	2.386170e+01
1.598940e+00	1.430010e-03	4.233540e+00	1.964620e+04	2.039730e+04	1.963370e+04	4.856690e+00
1.599960e+00	1.430180e-03	2.461860e+01	1.961690e+04	2.040410e+04	1.960120e+04	2.388370e+01
1.600990e+00	1.430450e-03	3.696120e+01	1.960550e+04	2.039790e+04	1.959370e+04	3.755880e+01
1.601950e+00	1.430820e-03	1.999920e+01	1.962800e+04	2.042570e+04	1.961430e+04	2.066000e+01
1.602970e+00	1.430890e-03	2.386400e+01	1.963320e+04	2.041190e+04	1.961760e+04	2.313290e+01
1.604000e+00	1.431190e-03	1.018820e+00	1.961360e+04	2.036130e+04	1.960300e+04	1.575190e+00
1.604960e+00	1.431610e-03	3.806800e+01	1.959800e+04	2.036550e+04	1.958420e+04	3.740020e+01
1.605990e+00	1.431840e-03	1.658830e+01	1.964090e+04	2.042490e+04	1.963200e+04	1.708550e+01
1.606950e+00	1.432150e-03	2.956910e+01	1.962430e+04	2.042950e+04	1.960910e+04	3.028450e+01
1.607970e+00	1.432340e-03	1.204910e+01	1.960850e+04	2.041280e+04	1.959240e+04	1.279550e+01
1.609000e+00	1.432710e-03	1.037820e+00	1.962730e+04	2.037690e+04	1.961820e+04	1.542200e+00
1.609960e+00	1.433030e-03	6.497180e+01	1.961460e+04	2.037330e+04	1.960280e+04	6.437580e+01
1.610980e+00	1.433350e-03	1.344840e+01	1.961660e+04	2.037120e+04	1.960370e+04	1.408450e+01
1.611940e+00	1.433730e-03	1.313430e+01	1.961630e+04	2.042850e+04	1.960030e+04	1.387720e+01
1.612970e+00	1.433930e-03	2.624890e+01	1.962540e+04	2.043480e+04	1.960780e+04	2.704880e+01
1.614000e+00	1.434220e-03	2.261140e+01	1.962680e+04	2.040570e+04	1.961310e+04	2.327720e+01
1.614960e+00	1.434580e-03	4.945550e+01	1.961110e+04	2.036780e+04	1.959920e+04	4.885600e+01
1.615980e+00	1.434960e-03	1.662400e+01	1.962320e+04	2.036930e+04	1.960850e+04	1.592620e+01
1.616940e+00	1.435270e-03	2.279880e-01	1.963040e+04	2.040370e+04	1.961920e+04	8.037110e-01
1.617970e+00	1.435540e-03	1.255150e+01	1.960470e+04	2.042120e+04	1.959050e+04	1.323090e+01
1.618990e+00	1.435840e-03	5.596890e+01	1.961790e+04	2.041700e+04	1.960410e+04	5.663640e+01
1.619950e+00	1.436120e-03	2.821150e+01	1.963280e+04	2.041520e+04	1.961770e+04	2.749780e+01
1.620980e+00	1.436270e-03	2.423020e+01	1.962030e+04	2.036090e+04	1.960250e+04	2.342220e+01
1.621940e+00	1.436720e-03	1.986290e+01	1.960640e+04	2.035750e+04	1.958850e+04	1.905100e+01
1.622970e+00	1.436990e-03	1.468070e+01	1.962020e+04	2.040480e+04	1.959720e+04	1.369160e+01
1.623990e+00	1.437130e-03	5.492490e+01	1.964550e+04	2.045820e+04	1.963260e+04	5.555820e+01
1.624950e+00	1.437410e-03	2.080590e+01	1.960950e+04	2.041700e+04	1.960270e+04	2.122880e+01
1.625980e+00	1.437690e-03	1.716640e+01	1.959080e+04	2.036250e+04	1.957820e+04	1.654240e+01
1.626940e+00	1.438150e-03	1.824670e+01	1.964390e+04	2.037430e+04	1.963260e+04	1.766540e+01
1.627960e+00	1.438420e-03	5.309550e+01	1.963270e+04	2.039660e+04	1.961550e+04	5.231180e+01
1.628990e+00	1.438650e-03	3.694480e+01	1.960960e+04	2.039650e+04	1.960260e+04	3.737270e+01
1.629950e+00	1.439050e-03	4.209460e+01	1.959290e+04	2.041060e+04	1.958200e+04	4.265940e+01
1.630980e+00	1.439170e-03	4.697270e+00	1.963990e+04	2.044000e+04	1.962590e+04	4.023380e+00
1.631940e+00	1.439370e-03	1.157170e+00	1.964170e+04	2.039590e+04	1.962110e+04	2.527850e-01
1.632960e+00	1.439620e-03	3.959740e+01	1.961690e+04	2.036640e+04	1.961010e+04	3.917410e+01
1.633990e+00	1.440120e-03	7.024560e+00	1.958340e+04	2.035160e+04	1.957480e+04	6.539500e+00
1.634950e+00	1.440600e-03	2.846750e+01	1.962890e+04	2.042610e+04	1.961550e+04	2.911920e+01
1.635970e+00	1.440650e-03	1.753720e+01	1.965650e+04	2.047120e+04	1.964240e+04	1.821410e+01
1.636940e+00	1.440840e-03	1.445630e+01	1.960070e+04	2.037230e+04	1.958530e+04	1.517780e+01
1.637960e+00	1.441320e-03	3.588660e+01	1.959510e+04	2.035110e+04	1.957800e+04	3.510330e+01
1.638990e+00	1.441590e-03	1.813340e+01	1.965160e+04	2.040740e+04	1.963780e+04	1.746660e+01
1.639950e+00	1.441770e-03	9.732590e+00	1.962180e+04	2.040890e+04	1.960670e+04	1.044770e+01
1.640970e+00	1.442050e-03	1.951940e+01	1.960120e+04	2.040380e+04	1.959130e+04	2.004840e+01
1.642000e+00	1.442370e-03	1.705630e+01	1.960820e+04	2.039900e+04	1.959030e+04	1.786490e+01
1.642960e+00	1.442540e-03	1.455590e+01	1.966210e+04	2.042780e+04	1.965410e+04	1.409180e+01
1.643980e+00	1.442680e-03	2.109520e+01	1.960300e+04	2.036090e+04	1.959200e+04	2.052620e+01
1.644950e+00	1.443220e-03	4.316270e+00	1.958870e+04	2.036090e+04	1.957480e+04	3.643110e+00
1.645970e+00	1.443480e-03	1.280790e+01	1.965380e+04	2.044940e+04	1.964060e+04	1.345390e+01
1.647000e+00	1.443540e-03	2.082710e+01	1.963900e+04	2.043280e+04	1.962980e+04	2.133100e+01
1.647960e+00	1.443870e-03	2.780680e+00	1.955690e+04	2.033100e+04	1.953720e+04	1.905540e+00
1.648980e+00	1.444280e-03	1.816790e+01	1.963620e+04	2.040350e+04	1.962050e+04	1.743310e+01
1.649940e+00	1.444350e-03	5.757630e+00	1.967550e+04	2.043910e+04	1.966630e+04	5.251270e+00
1.650970e+00	1.444570e-03	1.016800e+01	1.957670e+04	2.035700e+04	1.956110e+04	9.437760e+00
1.652000e+00	1.445000e-03	2.334670e+01	1.960310e+04	2.039360e+04	1.959240e+04	2.390260e+01
1.652960e+00	1.445230e-03	1.639550e+01	1.965400e+04	2.045340e+04	1.963640e+04	1.719490e+01
1.653980e+00	1.445340e-03	4.185840e+00	1.963130e+04	2.040960e+04	1.961410e+04	3.400680e+00
1.654940e+00	1.445730e-03	1.578050e+01	1.957590e+04	2.032100e+04	1.955660e+04	1.492050e+01
1.655970e+00	1.446220e-03	3.018810e+01	1.963130e+04	2.040410e+04	1.961610e+04	2.947080e+01
1.656990e+00	1.446380e-03	2.594340e+01	1.965080e+04	2.043190e+04	1.963100e+04	2.681730e+01
1.657950e+00	1.446610e-03	9.798990e+00	1.961130e+04	2.041970e+04	1.960100e+04	1.034240e+01
1.658980e+00	1.446950e-03	1.851420e+01	1.957050e+04	2.035920e+04	1.955280e+04	1.931450e+01
1.659940e+00	1.447350e-03	4.399800e+00	1.965000e+04	2.040660e+04	1.962990e+04	3.515490e+00
1.660970e+00	1.447420e-03	5.351220e+01	1.966670e+04	2.042340e+04	1.965210e+04	5.281730e+01
1.661990e+00	1.447710e-03	9.055990e+00	1.957440e+04	2.034640e+04	1.955790e+04	9.817930e+00
1.662950e+00	1.448190e-03	3.446120e+01	1.960040e+04	2.040850e+04	1.959000e+04	3.500670e+01
1.663980e+00	1.448330e-03	2.038230e+01	1.965680e+04	2.046120e+04	1.964100e+04	2.111700e+01
1.664940e+00	1.448440e-03	7.656940e+00	1.963350e+04	2.039890e+04	1.961700e+04	6.895450e+00
1.665960e+00	1.448820e-03	4.024250e+01	1.958650e+04	2.033800e+04	1.957360e+04	3.960910e+01
1.666990e+00	1.449310e-03	4.025520e+00	1.960810e+04	2.037630e+04	1.958850e+04	4.896340e+00
1.667950e+00	1.449560e-03	1.062680e+01	1.966660e+04	2.045700e+04	1.965150e+04	1.134100e+01
1.668980e+00	1.449630e-03	1.300770e+01	1.960230e+04	2.041290e+04	1.958230e+04	1.388830e+01
1.669940e+00	1.450060e-03	2.949640e+01	1.959430e+04	2.036280e+04	1.958150e+04	3.012950e+01
1.670960e+00	1.450450e-03	4.703430e+01	1.963130e+04	2.040060e+04	1.961480e+04	4.627240e+01
1.671990e+00	1.450590e-03	7.973200e+00	1.964950e+04	2.040100e+04	1.963470e+04	7.269680e+00
1.672950e+00	1.450910e-03	7.889030e+00	1.959330e+04	2.037850e+04	1.957200e+04	8.817820e+00
1.673970e+00	1.451230e-03	1.429110e+01	1.961150e+04	2.042150e+04	1.959610e+04	1.501300e+01
1.675000e+00	1.451500e-03	3.334010e+01	1.964290e+04	2.042260e+04	1.962930e+04	3.399930e+01
1.675960e+00	1.451750e-03	3.942780e+01	1.961370e+04	2.038760e+04	1.959420e+04	3.856090e+01
1.676990e+00	1.452090e-03	1.007140e+01	1.961400e+04	2.036350e+04	1.959560e+04	9.245640e+00
1.677950e+00	1.452470e-03	5.055890e+00	1.962730e+04	2.040240e+04	1.961480e+04	4.435550e+00
1.678970e+00	1.452750e-03	3.449620e+00	1.961030e+04	2.040220e+04	1.959370e+04	4.212000e+00
1.680000e+00	1.453030e-03	3.660640e+01	1.962180e+04	2.042550e+04	1.960540e+04	3.736670e+01
1.680960e+00	1.453340e-03	1.391830e+00	1.963200e+04	2.041340e+04	1.961890e+04	2.032210e+00
1.681980e+00	1.453640e-03	2.477780e+01	1.960570e+04	2.036830e+04	1.959020e+04	2.405210e+01
1.682950e+00	1.454080e-03	1.270300e+01	1.962300e+04	2.036790e+04	1.961210e+04	1.213670e+01
1.683970e+00	1.454430e-03	2.390540e+01	1.961440e+04	2.040030e+04	1.959090e+04	2.290000e+01
1.685000e+00	1.454610e-03	4.726010e+01	1.964860e+04	2.044730e+04	1.963930e+04	4.776920e+01
1.685960e+00	1.454980e-03	1.535700e+01	1.958960e+04	2.038800e+04	1.957380e+04	1.609510e+01
1.686980e+00	1.455260e-03	1.859990e+01	1.961810e+04	2.039650e+04	1.960970e+04	1.812360e+01
1.687940e+00	1.455520e-03	3.889940e+00	1.963820e+04	2.038610e+04	1.962510e+04	4.532200e+00
1.688970e+00	1.455880e-03	4.374910e+01	1.961350e+04	2.038540e+04	1.959710e+04	4.299200e+01
1.689990e+00	1.456190e-03	2.407720e+01	1.960930e+04	2.038620e+04	1.959140e+04	2.488560e+01
1.690960e+00	1.456510e-03	2.387090e+01	1.963570e+04	2.043350e+04	1.961790e+04	2.467640e+01
1.691980e+00	1.456640e-03	6.865250e+00	1.962530e+04	2.042860e+04	1.960910e+04	6.114790e+00
1.692940e+00	1.457000e-03	2.483190e+01	1.961080e+04	2.036690e+04	1.960080e+04	2.536700e+01
1.693970e+00	1.457410e-03	5.170500e+01	1.960130e+04	2.036670e+04	1.958370e+04	5.090370e+01
1.694990e+00	1.457700e-03	3.223590e-04	1.964380e+04	2.040530e+04	1.962840e+04	7.197130e-01
1.695950e+00	1.458010e-03	2.181190e+01	1.963360e+04	2.042530e+04	1.962240e+04	2.238870e+01
1.696980e+00	1.458320e-03	3.624040e+00	1.957770e+04	2.039400e+04	1.955440e+04	4.621300e+00
1.697940e+00	1.458660e-03	4.044020e+01	1.965170e+04	2.041820e+04	1.963790e+04	4.110500e+01
1.698970e+00	1.458750e-03	4.926820e+01	1.963820e+04	2.041000e+04	1.962580e+04	4.864760e+01
1.699990e+00	1.459060e-03	9.080100e+00	1.957780e+04	2.032290e+04	1.956180e+04	8.338190e+00
1.700950e+00	1.459650e-03	1.355970e+00	1.961490e+04	2.038930e+04	1.959640e+04	2.188170e+00
1.701980e+00	1.459640e-03	2.173900e+00	1.968000e+04	2.049850e+04	1.967360e+04	2.581810e+00
1.702940e+00	1.459730e-03	6.839080e+01	1.958210e+04	2.036670e+04	1.956580e+04	6.914290e+01
1.703960e+00	1.460230e-03	4.082540e+01	1.959030e+04	2.037860e+04	1.957890e+04	4.024330e+01
1.704990e+00	1.460450e-03	1.628870e+01	1.966330e+04	2.040170e+04	1.965300e+04	1.574610e+01
1.705950e+00	1.460690e-03	1.524060e+01	1.962070e+04	2.037970e+04	1.960570e+04	1.453470e+01
1.706980e+00	1.461020e-03	5.037260e+00	1.958170e+04	2.038060e+04	1.956510e+04	4.274260e+00
1.707940e+00	1.461300e-03	6.304430e+01	1.963170e+04	2.043480e+04	1.961580e+04	6.378630e+01
1.708960e+00	1.461460e-03	1.091460e+01	1.964950e+04	2.044100e+04	1.963070e+04	1.007370e+01
1.709990e+00	1.461620e-03	2.306430e+01	1.961320e+04	2.036910e+04	1.959590e+04	2.227290e+01
1.710950e+00	1.462150e-03	1.338970e+01	1.959440e+04	2.033720e+04	1.958140e+04	1.274980e+01
1.711970e+00	1.462530e-03	2.524710e+01	1.961350e+04	2.040180e+04	1.959280e+04	2.433690e+01
1.713000e+00	1.462600e-03	5.712630e+01	1.966380e+04	2.046980e+04	1.964770e+04	5.787470e+01
1.713960e+00	1.462740e-03	1.764520e+01	1.960180e+04	2.040720e+04	1.958400e+04	1.844840e+01
1.714990e+00	1.463110e-03	1.830940e+01	1.958680e+04	2.035710e+04	1.956800e+04	1.746570e+01
1.715950e+00	1.463460e-03	1.909880e+01	1.966050e+04	2.039560e+04	1.965020e+04	1.855430e+01
1.716970e+00	1.463700e-03	4.800700e+01	1.962700e+04	2.039250e+04	1.961590e+04	4.743700e+01
1.718000e+00	1.464080e-03	4.329650e+01	1.958280e+04	2.037730e+04	1.957690e+04	4.368670e+01
1.718960e+00	1.464610e-03	4.059550e+01	1.961380e+04	2.043370e+04	1.959950e+04	4.127850e+01
1.719980e+00	1.464540e-03	2.023530e+00	1.966610e+04	2.045870e+04	1.965140e+04	1.327560e+00
1.720950e+00	1.464760e-03	1.664580e+01	1.961120e+04	2.034460e+04	1.959710e+04	1.597070e+01
1.721970e+00	1.465360e-03	6.413010e+01	1.958700e+04	2.033120e+04	1.957690e+04	6.358990e+01
1.723000e+00	1.465730e-03	1.967590e+01	1.962780e+04	2.041050e+04	1.961430e+04	2.033080e+01
1.723960e+00	1.465900e-03	5.519020e+01	1.965250e+04	2.047550e+04	1.964070e+04	5.578900e+01
1.724980e+00	1.465940e-03	1.669970e+01	1.960910e+04	2.043230e+04	1.959880e+04	1.724430e+01
1.725940e+00	1.466380e-03	8.429410e+00	1.959380e+04	2.033500e+04	1.958350e+04	8.973750e+00
1.726970e+00	1.466860e-03	8.529190e+01	1.962610e+04	2.036420e+04	1.960880e+04	8.450460e+01
1.727990e+00	1.467020e-03	8.391170e-01	1.964540e+04	2.040000e+04	1.962540e+04	1.721290e+00
1.728960e+00	1.467330e-03	3.238810e+01	1.961280e+04	2.041160e+04	1.959820e+04	3.308200e+01
1.729980e+00	1.467560e-03	9.213660e+00	1.960270e+04	2.044080e+04	1.959180e+04	9.778850e+00
1.730940e+00	1.467790e-03	7.048240e+01	1.962710e+04	2.040630e+04	1.961370e+04	7.113450e+01
1.731970e+00	1.468080e-03	6.226010e+01	1.963140e+04	2.040400e+04	1.961950e+04	6.166110e+01
1.732990e+00	1.468340e-03	3.051170e+01	1.961780e+04	2.033570e+04	1.961120e+04	3.009690e+01
1.733950e+00	1.468920e-03	7.449170e+00	1.959310e+04	2.035340e+04	1.957810e+04	6.741970e+00
1.734980e+00	1.469150e-03	2.674470e+00	1.964060e+04	2.046340e+04	1.963010e+04	3.225350e+00
1.735940e+00	1.469310e-03	8.605790e+01	1.963140e+04	2.044190e+04	1.961730e+04	8.673830e+01
1.736970e+00	1.469510e-03	1.964430e+01	1.960150e+04	2.039860e+04	1.958950e+04	1.904020e+01
1.737990e+00	1.469760e-03	2.918350e+01	1.961020e+04	2.034530e+04	1.959630e+04	2.851470e+01
1.738950e+00	1.470220e-03	2.934220e+01	1.964770e+04	2.038380e+04	1.963860e+04	2.883790e+01
1.739980e+00	1.470350e-03	2.321950e+01	1.961510e+04	2.041310e+04	1.960580e+04	2.271000e+01
1.740940e+00	1.470730e-03	8.563900e+01	1.959720e+04	2.039190e+04	1.958900e+04	8.610960e+01
1.741960e+00	1.471100e-03	1.060160e+01	1.961860e+04	2.044530e+04	1.959950e+04	9.751420e+00
1.742990e+00	1.471180e-03	7.511900e+00	1.965850e+04	2.041680e+04	1.964040e+04	8.330300e+00
1.743950e+00	1.471570e-03	3.371680e+01	1.960510e+04	2.033730e+04	1.958750e+04	3.291640e+01
1.744980e+00	1.471990e-03	5.658100e+01	1.959550e+04	2.036210e+04	1.958420e+04	5.600230e+01
1.745940e+00	1.472370e-03	6.981880e+01	1.963340e+04	2.041980e+04	1.961950e+04	7.049040e+01
1.746960e+00	1.472530e-03	6.044450e+00	1.963760e+04	2.046680e+04	1.962460e+04	6.685510e+00
1.747990e+00	1.472660e-03	2.161190e+01	1.959940e+04	2.038010e+04	1.958240e+04	2.239090e+01
1.748950e+00	1.473110e-03	1.213120e+01	1.961840e+04	2.036860e+04	1.960230e+04	1.138280e+01
1.749970e+00	1.473280e-03	6.110210e+01	1.963800e+04	2.039550e+04	1.962080e+04	6.031440e+01
1.751000e+00	1.473590e-03	2.545880e+01	1.962580e+04	2.038410e+04	1.961260e+04	2.610420e+01
1.751960e+00	1.473900e-03	1.793230e+00	1.959240e+04	2.041550e+04	1.957920e+04	1.146160e+00
1.752990e+00	1.474110e-03	4.495310e+01	1.962600e+04	2.042460e+04	1.961530e+04	4.551080e+01
1.753950e+00	1.474320e-03	1.018920e+01	1.962700e+04	2.040980e+04	1.960430e+04	1.116580e+01
1.754970e+00	1.474460e-03	4.749130e+01	1.962800e+04	2.039230e+04	1.961370e+04	4.680740e+01
1.756000e+00	1.474920e-03	4.737040e+00	1.959990e+04	2.033200e+04	1.958430e+04	4.006900e+00
1.756960e+00	1.475330e-03	3.059770e+01	1.961780e+04	2.040520e+04	1.960010e+04	2.979490e+01
1.757980e+00	1.475430e-03	5.044540e+01	1.964370e+04	2.044730e+04	1.962670e+04	5.122220e+01
1.758950e+00	1.475610e-03	3.337620e+01	1.962290e+04	2.043440e+04	1.960970e+04	3.402190e+01
1.759970e+00	1.475860e-03	2.503680e+01	1.959000e+04	2.036610e+04	1.957560e+04	2.434920e+01
1.761000e+00	1.476430e-03	1.399440e+01	1.962640e+04	2.035190e+04	1.960510e+04	1.306590e+01
1.761960e+00	1.476620e-03	5.616250e+01	1.966450e+04	2.044100e+04	1.965450e+04	5.562880e+01
1.762980e+00	1.476790e-03	4.751390e+01	1.958410e+04	2.036440e+04	1.957150e+04	4.813770e+01
1.763940e+00	1.477330e-03	2.421130e+01	1.959130e+04	2.041320e+04	1.957780e+04	2.486970e+01
1.764970e+00	1.477350e-03	6.643190e+00	1.966260e+04	2.046170e+04	1.964510e+04	7.438960e+00
1.765990e+00	1.477470e-03	4.183850e+00	1.963480e+04	2.037480e+04	1.961540e+04	5.048720e+00
1.766960e+00	1.477820e-03	8.169710e+01	1.957700e+04	2.033800e+04	1.956500e+04	8.109180e+01
1.767980e+00	1.478380e-03	3.274290e+01	1.960750e+04	2.036720e+04	1.959290e+04	3.343660e+01
1.768940e+00	1.478680e-03	1.411330e+01	1.967510e+04	2.048710e+04	1.966140e+04	1.477730e+01
1.769970e+00	1.478470e-03	1.678880e+01	1.961190e+04	2.043420e+04	1.959690e+04	1.749930e+01
1.770990e+00	1.478980e-03	4.142160e+01	1.957640e+04	2.033280e+04	1.956500e+04	4.200800e+01
1.771950e+00	1.479310e-03	9.373640e+01	1.964110e+04	2.040690e+04	1.963020e+04	9.317300e+01
1.772980e+00	1.479340e-03	1.015310e+01	1.965150e+04	2.038160e+04	1.964270e+04	1.064350e+01
1.773940e+00	1.479810e-03	4.537400e+00	1.958630e+04	2.038030e+04	1.957750e+04	4.046150e+00
1.774970e+00	1.480080e-03	2.307550e+01	1.959660e+04	2.041740e+04	1.957730e+04	2.393710e+01
1.775990e+00	1.480310e-03	6.206540e+01	1.967410e+04	2.046760e+04	1.965670e+04	6.285720e+01
1.776950e+00	1.480290e-03	6.237510e+01	1.961670e+04	2.039940e+04	1.959700e+04	6.150150e+01
1.777980e+00	1.480740e-03	1.768510e+00	1.957540e+04	2.029930e+04	1.956150e+04	1.096980e+00
1.778940e+00	1.481410e-03	4.004310e+01	1.963120e+04	2.038670e+04	1.962200e+04	3.953730e+01
1.779960e+00	1.481420e-03	2.871280e+00	1.964530e+04	2.045520e+04	1.962640e+04	3.717190e+00
1.780990e+00	1.481640e-03	8.840900e+01	1.962110e+04	2.042560e+04	1.960650e+04	8.910400e+01
1.781950e+00	1.481870e-03	3.735160e+01	1.958630e+04	2.040630e+04	1.956910e+04	3.656650e+01
1.782980e+00	1.482210e-03	6.144200e+00	1.962890e+04	2.035420e+04	1.960900e+04	7.023200e+00
1.783940e+00	1.482540e-03	5.942510e+01	1.965430e+04	2.039390e+04	1.963950e+04	5.872390e+01
1.784960e+00	1.482670e-03	2.781930e+01	1.960030e+04	2.037910e+04	1.958860e+04	2.722450e+01
1.785990e+00	1.483210e-03	8.523210e+01	1.959210e+04	2.040300e+04	1.957670e+04	8.595600e+01
1.786950e+00	1.483320e-03	1.011050e+00	1.966110e+04	2.049430e+04	1.965470e+04	1.419430e+00
1.787970e+00	1.483430e-03	1.393430e+01	1.961330e+04	2.037600e+04	1.959730e+04	1.467840e+01
1.789000e+00	1.484000e-03	4.940510e+01	1.959680e+04	2.032260e+04	1.957810e+04	4.856700e+01
1.789960e+00	1.484210e-03	6.216070e+01	1.963870e+04	2.039780e+04	1.962330e+04	6.143500e+01
1.790990e+00	1.484440e-03	6.722420e+01	1.963690e+04	2.042650e+04	1.962680e+04	6.776330e+01
1.791950e+00	1.484800e-03	1.312160e+01	1.958500e+04	2.042500e+04	1.956920e+04	1.385880e+01
1.792970e+00	1.485010e-03	2.848930e+01	1.962250e+04	2.040840e+04	1.960780e+04	2.918520e+01
1.794000e+00	1.485340e-03	2.171540e+01	1.964140e+04	2.039070e+04	1.962410e+04	2.092590e+01
1.794960e+00	1.485480e-03	6.963060e+01	1.961700e+04	2.036680e+04	1.960090e+04	6.888170e+01
1.795980e+00	1.485900e-03	2.918200e+01	1.960480e+04	2.036070e+04	1.959190e+04	2.981670e+01
1.796950e+00	1.486200e-03	4.556380e+00	1.962040e+04	2.044310e+04	1.960740e+04	5.197420e+00
1.797970e+00	1.486220e-03	4.571030e+01	1.963360e+04	2.044420e+04	1.962310e+04	4.626120e+01
1.799000e+00	1.486530e-03	6.837390e+00	1.961210e+04	2.038030e+04	1.959680e+04	7.559210e+00
1.799960e+00	1.486810e-03	6.938260e+01	1.962050e+04	2.037390e+04	1.960620e+04	6.869790e+01
1.800980e+00	1.487170e-03	3.716900e+00	1.962440e+04	2.035990e+04	1.961030e+04	4.395910e+00
1.801940e+00	1.487540e-03	1.530170e+01	1.961900e+04	2.041920e+04	1.960600e+04	1.466290e+01
1.802970e+00	1.487660e-03	5.213570e+01	1.961760e+04	2.043630e+04	1.960320e+04	5.282540e+01
1.803990e+00	1.487960e-03	3.487020e+01	1.962670e+04	2.042320e+04	1.961600e+04	3.542670e+01
1.804960e+00	1.488140e-03	5.568020e+01	1.961600e+04	2.038650e+04	1.960640e+04	5.515940e+01
1.805980e+00	1.488610e-03	4.257400e+00	1.960720e+04	2.033290e+04	1.959180e+04	3.534850e+00
1.806940e+00	1.489000e-03	3.657010e+01	1.963110e+04	2.040450e+04	1.961560e+04	3.584390e+01
1.807970e+00	1.489060e-03	1.802890e+01	1.963450e+04	2.043030e+04	1.961840e+04	1.877780e+01
1.808990e+00	1.489260e-03	5.770190e+01	1.960950e+04	2.041920e+04	1.959820e+04	5.828000e+01
1.809950e+00	1.489550e-03	1.270020e+01	1.959960e+04	2.039990e+04	1.958880e+04	1.213780e+01
1.810980e+00	1.489850e-03	1.329640e+01	1.962970e+04	2.037110e+04	1.961330e+04	1.253970e+01
1.811940e+00	1.490160e-03	4.188220e+01	1.964330e+04	2.039220e+04	1.962490e+04	4.105600e+01
1.812970e+00	1.490420e-03	6.676770e+00	1.960750e+04	2.038640e+04	1.959110e+04	5.917910e+00
1.813990e+00	1.490840e-03	5.119960e+01	1.960050e+04	2.040580e+04	1.958550e+04	5.190710e+01
1.814950e+00	1.491060e-03	1.023350e+01	1.964580e+04	2.045950e+04	1.963520e+04	1.078790e+01
1.815980e+00	1.491140e-03	1.663120e+00	1.962860e+04	2.039110e+04	1.961960e+04	1.164210e+00
1.816940e+00	1.491570e-03	3.817390e+01	1.958880e+04	2.032690e+04	1.957650e+04	3.755700e+01
1.817960e+00	1.491970e-03	3.374040e+01	1.961200e+04	2.037980e+04	1.959280e+04	3.288700e+01
1.818990e+00	1.492150e-03	4.228500e+01	1.966510e+04	2.045580e+04	1.965320e+04	4.288670e+01
1.819950e+00	1.492210e-03	1.889070e+01	1.960770e+04	2.043270e+04	1.960010e+04	1.934130e+01
1.820980e+00	1.492580e-03	2.850780e+01	1.956880e+04	2.035470e+04	1.955200e+04	2.928210e+01
1.821940e+00	1.493040e-03	3.285160e+01	1.966360e+04	2.041100e+04	1.964480e+04	3.201040e+01
1.822960e+00	1.493000e-03	5.936040e+01	1.966150e+04	2.040360e+04	1.964900e+04	5.873810e+01
1.823990e+00	1.493450e-03	2.020760e+01	1.954700e+04	2.031630e+04	1.953130e+04	2.094330e+01
1.824950e+00	1.494000e-03	2.856580e+01	1.961670e+04	2.045260e+04	1.960680e+04	2.909830e+01
1.825970e+00	1.493960e-03	4.810680e+01	1.968710e+04	2.049180e+04	1.967490e+04	4.872100e+01
1.827000e+00	1.494070e-03	2.704030e+01	1.959830e+04	2.036440e+04	1.958060e+04	2.623480e+01
1.827960e+00	1.494610e-03	4.411550e+01	1.957420e+04	2.030520e+04	1.956090e+04	4.346440e+01
1.828990e+00	1.495090e-03	1.556700e+01	1.963920e+04	2.039430e+04	1.962350e+04	1.483590e+01
1.829950e+00	1.495140e-03	1.282560e+01	1.965570e+04	2.046460e+04	1.963990e+04	1.356370e+01
1.830970e+00	1.495390e-03	5.545910e+01	1.959450e+04	2.040670e+04	1.957670e+04	5.626470e+01
1.832000e+00	1.495800e-03	2.746410e+00	1.960970e+04	2.040590e+04	1.959510e+04	3.441110e+00
1.832960e+00	1.496080e-03	2.828620e+01	1.964270e+04	2.038200e+04	1.962400e+04	2.744800e+01
1.833980e+00	1.496350e-03	4.220080e+01	1.962820e+04	2.037590e+04	1.961600e+04	4.158850e+01
1.834940e+00	1.496760e-03	2.408170e+00	1.958900e+04	2.036580e+04	1.957860e+04	2.956750e+00
1.835970e+00	1.497110e-03	3.936630e+01	1.962240e+04	2.043230e+04	1.961440e+04	3.983110e+01
1.837000e+00	1.497250e-03	2.263590e+01	1.963320e+04	2.044240e+04	1.961680e+04	2.339610e+01
1.837960e+00	1.497460e-03	4.990920e+00	1.962510e+04	2.039200e+04	1.960950e+04	4.262040e+00
1.838980e+00	1.497760e-03	3.983060e+01	1.961000e+04	2.035650e+04	1.959870e+04	3.925120e+01
1.839940e+00	1.498180e-03	1.686290e+01	1.960850e+04	2.036530e+04	1.959350e+04	1.615520e+01
1.840970e+00	1.498510e-03	1.563370e+01	1.964350e+04	2.044010e+04	1.963360e+04	1.616180e+01
1.841990e+00	1.498620e-03	3.395760e+01	1.961250e+04	2.042280e+04	1.959900e+04	3.461200e+01
1.842950e+00	1.499000e-03	1.634600e+01	1.960190e+04	2.039200e+04	1.958670e+04	1.705960e+01
1.843980e+00	1.499210e-03	3.028210e+01	1.963670e+04	2.039140e+04	1.962380e+04	2.964710e+01
1.844940e+00	1.499470e-03	3.289900e+01	1.962760e+04	2.037670e+04	1.961550e+04	3.228900e+01
1.845970e+00	1.499870e-03	1.731630e+00	1.959860e+04	2.036890e+04	1.958320e+04	2.455070e+00
1.846990e+00	1.500140e-03	2.074920e+01	1.962410e+04	2.043160e+04	1.960880e+04	2.146940e+01
1.847950e+00	1.500250e-03	3.527910e+01	1.964390e+04	2.045380e+04	1.962770e+04	3.603180e+01
1.848980e+00	1.500430e-03	4.903650e-01	1.961490e+04	2.038800e+04	1.960670e+04	1.951610e-02
1.849940e+00	1.500920e-03	4.315740e+01	1.957900e+04	2.032470e+04	1.956600e+04	4.251710e+01
1.850960e+00	1.501340e-03	1.412660e+01	1.964600e+04	2.040150e+04	1.963340e+04	1.350310e+01
1.851990e+00	1.501510e-03	7.521550e+00	1.964060e+04	2.043440e+04	1.962440e+04	8.272330e+00
1.852950e+00	1.501710e-03	3.159110e+01	1.959450e+04	2.040100e+04	1.958140e+04	3.223330e+01
1.853980e+00	1.502130e-03	2.419630e+01	1.960850e+04	2.040280e+04	1.959260e+04	2.493860e+01
1.854940e+00	1.502340e-03	2.945770e+01	1.965780e+04	2.041680e+04	1.964130e+04	2.869790e+01
1.855960e+00	1.502520e-03	3.350330e+01	1.961610e+04	2.036200e+04	1.960380e+04	3.288810e+01
1.856990e+00	1.502980e-03	7.206720e-01	1.957400e+04	2.034660e+04	1.955900e+04	1.431990e+00
1.857950e+00	1.503390e-03	2.477950e+01	1.964710e+04	2.045960e+04	1.963050e+04	2.554450e+01
1.858980e+00	1.503380e-03	3.318010e+01	1.966270e+04	2.046510e+04	1.964860e+04	3.385600e+01
1.859940e+00	1.503640e-03	1.070890e+01	1.957320e+04	2.034620e+04	1.955400e+04	9.852900e+00
1.860960e+00	1.504170e-03	3.052510e+01	1.960750e+04	2.035450e+04	1.959830e+04	3.002130e+01
1.861990e+00	1.504560e-03	1.716640e+01	1.964720e+04	2.041240e+04	1.963140e+04	1.643290e+01
1.862950e+00	1.504660e-03	1.109140e+01	1.963260e+04	2.041910e+04	1.962050e+04	1.169880e+01
1.863970e+00	1.505000e-03	3.307360e+01	1.957660e+04	2.038500e+04	1.955470e+04	3.402330e+01
1.865000e+00	1.505310e-03	9.566380e+00	1.963250e+04	2.041950e+04	1.961100e+04	1.050180e+01
1.865960e+00	1.505350e-03	2.038490e+01	1.966520e+04	2.043250e+04	1.964990e+04	1.966610e+01
1.866990e+00	1.505710e-03	2.677820e+01	1.958380e+04	2.032510e+04	1.956410e+04	2.590690e+01
1.867950e+00	1.506290e-03	1.363570e+01	1.960220e+04	2.038670e+04	1.958490e+04	1.284640e+01
1.868970e+00	1.506530e-03	4.478220e+01	1.965650e+04	2.045280e+04	1.964140e+04	4.549520e+01
1.870000e+00	1.506720e-03	2.110240e+00	1.962300e+04	2.042670e+04	1.961140e+04	2.701520e+00
1.870960e+00	1.507070e-03	1.470430e+00	1.957830e+04	2.034230e+04	1.956220e+04	2.214860e+00
1.871980e+00	1.507540e-03	2.493300e+01	1.963770e+04	2.039410e+04	1.962300e+04	2.423360e+01
1.872940e+00	1.507650e-03	2.213320e+01	1.965070e+04	2.042520e+04	1.963830e+04	2.151720e+01
1.873970e+00	1.508040e-03	3.677570e+01	1.958370e+04	2.036010e+04	1.956860e+04	3.748840e+01
1.875000e+00	1.508540e-03	9.955050e+00	1.960760e+04	2.041970e+04	1.959190e+04	9.219920e+00
1.875960e+00	1.508610e-03	3.089490e+01	1.967350e+04	2.045180e+04	1.966260e+04	3.146010e+01
1.876980e+00	1.508840e-03	1.888670e+01	1.960960e+04	2.037100e+04	1.959930e+04	1.834250e+01
1.877940e+00	1.509230e-03	4.148190e+01	1.956650e+04	2.033730e+04	1.955180e+04	4.078380e+01
1.878970e+00	1.509690e-03	3.766380e+01	1.965050e+04	2.040940e+04	1.963500e+04	3.839090e+01
1.879990e+00	1.509770e-03	2.399440e+01	1.965950e+04	2.047190e+04	1.964460e+04	2.329070e+01
1.880950e+00	1.509860e-03	3.670960e+01	1.958380e+04	2.036740e+04	1.957300e+04	3.727210e+01
1.881980e+00	1.510460e-03	9.923400e+00	1.958660e+04	2.036690e+04	1.957550e+04	1.049380e+01
1.882940e+00	1.510670e-03	4.967960e+01	1.966130e+04	2.042600e+04	1.964660e+04	4.898210e+01
1.883970e+00	1.510690e-03	1.080830e+01	1.964810e+04	2.039930e+04	1.963750e+04	1.136430e+01
1.884990e+00	1.511060e-03	4.700700e+00	1.956710e+04	2.036780e+04	1.955690e+04	4.161560e+00
1.885950e+00	1.511480e-03	3.179890e+01	1.961190e+04	2.040690e+04	1.960170e+04	3.234170e+01
1.886980e+00	1.511690e-03	9.064920e+00	1.967290e+04	2.045330e+04	1.965700e+04	9.804680e+00
1.887940e+00	1.511690e-03	4.036620e+01	1.961040e+04	2.037570e+04	1.959470e+04	3.963460e+01
1.888960e+00	1.512320e-03	2.010600e+00	1.956920e+04	2.031940e+04	1.954840e+04	2.920870e+00
1.889990e+00	1.512700e-03	1.238820e+01	1.966200e+04	2.045390e+04	1.964670e+04	1.166740e+01
1.890950e+00	1.512590e-03	2.883600e+01	1.964760e+04	2.044660e+04	1.963540e+04	2.944600e+01
1.891980e+00	1.513000e-03	2.526690e+01	1.956620e+04	2.036130e+04	1.955020e+04	2.600930e+01
1.892940e+00	1.513470e-03	1.727610e+01	1.961280e+04	2.038690e+04	1.959640e+04	1.652040e+01
1.893960e+00	1.513640e-03	1.931550e+01	1.967180e+04	2.042560e+04	1.965760e+04	1.863590e+01
1.894990e+00	1.513840e-03	1.702940e+01	1.961080e+04	2.037150e+04	1.959940e+04	1.644570e+01
1.895950e+00	1.514200e-03	6.701430e+00	1.958270e+04	2.037250e+04	1.957600e+04	7.120470e+00
1.896970e+00	1.514590e-03	3.459170e+01	1.962970e+04	2.043490e+04	1.961950e+04	3.513420e+01
1.897940e+00	1.514690e-03	8.250690e+00	1.964360e+04	2.043430e+04	1.962810e+04	8.975220e+00
1.898960e+00	1.514930e-03	2.165700e+01	1.960940e+04	2.036780e+04	1.959580e+04	2.099370e+01
1.899990e+00	1.515440e-03	2.034110e+01	1.959610e+04	2.034720e+04	1.958010e+04	1.959750e+01
1.900950e+00	1.515890e-03	1.229690e+01	1.964500e+04	2.042490e+04	1.962900e+04	1.155430e+01
1.901970e+00	1.516020e-03	2.978370e+01	1.963750e+04	2.044120e+04	1.961640e+04	3.070460e+01
1.903000e+00	1.516210e-03	3.351810e+01	1.960120e+04	2.040340e+04	1.958650e+04	3.421700e+01
1.903960e+00	1.516630e-03	1.922890e+01	1.960290e+04	2.037140e+04	1.959250e+04	1.868050e+01
1.904980e+00	1.516980e-03	2.857400e+01	1.963770e+04	2.038840e+04	1.962460e+04	2.793180e+01
1.905950e+00	1.517220e-03	1.242850e+01	1.963970e+04	2.039460e+04	1.963020e+04	1.191400e+01
1.906970e+00	1.517550e-03	3.778570e+00	1.958330e+04	2.037710e+04	1.956660e+04	3.010170e+00
1.908000e+00	1.517880e-03	5.467000e+01	1.962380e+04	2.043180e+04	1.960560e+04	5.549130e+01
1.908960e+00	1.517980e-03	2.567650e+00	1.965970e+04	2.045380e+04	1.964680e+04	3.204160e+00
1.909980e+00	1.518160e-03	3.200220e+01	1.959810e+04	2.035910e+04	1.958390e+04	3.131790e+01
1.910940e+00	1.518700e-03	4.640990e+00	1.959060e+04	2.033030e+04	1.957740e+04	3.996340e+00
1.911970e+00	1.519110e-03	3.020300e+01	1.964720e+04	2.043060e+04	1.963640e+04	2.964080e+01
1.912990e+00	1.519200e-03	3.870460e+01	1.962980e+04	2.042880e+04	1.961280e+04	3.948460e+01
1.913960e+00	1.519450e-03	2.994710e+01	1.961180e+04	2.041040e+04	1.960690e+04	3.030300e+01
1.914980e+00	1.519770e-03	2.079060e+01	1.958720e+04	2.037710e+04	1.956900e+04	1.996920e+01
1.915940e+00	1.520110e-03	4.894310e+00	1.965820e+04	2.039290e+04	1.964380e+04	5.583820e+00
1.916970e+00	1.520400e-03	4.985640e+01	1.963460e+04	2.040470e+04	1.962100e+04	4.919530e+01
1.917990e+00	1.520790e-03	1.872680e+01	1.958360e+04	2.036070e+04	1.957190e+04	1.932210e+01
1.918950e+00	1.521250e-03	3.638650e+01	1.961940e+04	2.042540e+04	1.960680e+04	3.701480e+01
1.919980e+00	1.521310e-03	4.084860e+00	1.965740e+04	2.045800e+04	1.964650e+04	3.517610e+00
1.920940e+00	1.521520e-03	9.113370e+00	1.959210e+04	2.034970e+04	1.957400e+04	9.930850e+00
1.921970e+00	1.522130e-03	3.610350e+01	1.960270e+04	2.035850e+04	1.959160e+04	3.553020e+01
1.922990e+00	1.522400e-03	1.541200e+01	1.964010e+04	2.040790e+04	1.962140e+04	1.457470e+01
1.923950e+00	1.522580e-03	3.225880e+01	1.964100e+04	2.043640e+04	1.962310e+04	3.306710e+01
1.924980e+00	1.522920e-03	1.031270e+01	1.959710e+04	2.040330e+04	1.958200e+04	1.102530e+01
1.925940e+00	1.523250e-03	1.355790e+01	1.960000e+04	2.037980e+04	1.958310e+04	1.433450e+01
1.926960e+00	1.523570e-03	1.489530e+01	1.964350e+04	2.041050e+04	1.962490e+04	1.406250e+01
1.927990e+00	1.523660e-03	2.916500e+01	1.964530e+04	2.040140e+04	1.963330e+04	2.856300e+01
1.928950e+00	1.524000e-03	3.910840e+00	1.957340e+04	2.033830e+04	1.955630e+04	4.693280e+00
1.929980e+00	1.524520e-03	7.151330e+00	1.960950e+04	2.041160e+04	1.958900e+04	8.050680e+00
1.930940e+00	1.524570e-03	3.353280e+01	1.968390e+04	2.048850e+04	1.966800e+04	3.427550e+01
1.931960e+00	1.524650e-03	8.975360e+00	1.960300e+04	2.038000e+04	1.958750e+04	9.702920e+00
1.932990e+00	1.525210e-03	3.732850e+01	1.955910e+04	2.032390e+04	1.954060e+04	3.649680e+01
1.933950e+00	1.525640e-03	2.656490e+00	1.967720e+04	2.041920e+04	1.966670e+04	2.105000e+00
1.934970e+00	1.525690e-03	2.908650e+01	1.964770e+04	2.043270e+04	1.963450e+04	2.844160e+01
1.936000e+00	1.525910e-03	4.444310e+01	1.956080e+04	2.036370e+04	1.954820e+04	4.507000e+01
1.936960e+00	1.526450e-03	3.638230e+01	1.961570e+04	2.041270e+04	1.960250e+04	3.702690e+01
1.937990e+00	1.526410e-03	3.816090e+01	1.967370e+04	2.046050e+04	1.965620e+04	3.736640e+01
1.938950e+00	1.526560e-03	1.192070e+01	1.961580e+04	2.035460e+04	1.960140e+04	1.260800e+01
1.939970e+00	1.527200e-03	5.024640e+01	1.956660e+04	2.032690e+04	1.955530e+04	4.966500e+01
1.941000e+00	1.527490e-03	1.118360e+01	1.963330e+04	2.041240e+04	1.961930e+04	1.185510e+01
1.941960e+00	1.527630e-03	4.925090e+01	1.966810e+04	2.047750e+04	1.965540e+04	4.987880e+01
1.942980e+00	1.527720e-03	2.431690e+00	1.959780e+04	2.041320e+04	1.958450e+04	1.782060e+00
1.943950e+00	1.528230e-03	1.940880e+01	1.958150e+04	2.032970e+04	1.956790e+04	2.006890e+01
1.944970e+00	1.528620e-03	5.924160e+01	1.964920e+04	2.040480e+04	1.963520e+04	5.856930e+01
1.946000e+00	1.528690e-03	1.129380e+01	1.964440e+04	2.040630e+04	1.963050e+04	1.062280e+01
1.946960e+00	1.529000e-03	3.673610e+01	1.958070e+04	2.036950e+04	1.956490e+04	3.747490e+01
1.947980e+00	1.529310e-03	8.706840e+00	1.961880e+04	2.043770e+04	1.960600e+04	9.337570e+00
1.948940e+00	1.529310e-03	2.786980e+01	1.966280e+04	2.044190e+04	1.965170e+04	2.844190e+01
1.949970e+00	1.529460e-03	3.170230e+01	1.960240e+04	2.036680e+04	1.959290e+04	3.118320e+01
1.950990e+00	1.529940e-03	2.216710e+01	1.958880e+04	2.033690e+04	1.957960e+04	2.166120e+01
1.951960e+00	1.530330e-03	3.946010e-01	1.964120e+04	2.041370e+04	1.962600e+04	3.213570e-01
1.952980e+00	1.530320e-03	9.968610e+00	1.964720e+04	2.045280e+04	1.963580e+04	1.055190e+01
1.953940e+00	1.530560e-03	3.956630e+01	1.959390e+04	2.038980e+04	1.958700e+04	3.999140e+01
1.954970e+00	1.530970e-03	1.162080e+01	1.958950e+04	2.037620e+04	1.957910e+04	1.107390e+01
1.955990e+00	1.531340e-03	1.163240e+01	1.965500e+04	2.040490e+04	1.963840e+04	1.086570e+01
1.956950e+00	1.531520e-03	2.812240e+01	1.964810e+04	2.040590e+04	1.963260e+04	2.739740e+01
1.957980e+00	1.531860e-03	2.225410e+00	1.957230e+04	2.035800e+04	1.955230e+04	1.345110e+00
1.958940e+00	1.532360e-03	4.333270e+01	1.962670e+04	2.042550e+04	1.961320e+04	4.398970e+01
1.959970e+00	1.532450e-03	5.961760e-01	1.964940e+04	2.044840e+04	1.963070e+04	1.436450e+00
1.960990e+00	1.532620e-03	8.195340e-01	1.961090e+04	2.037540e+04	1.959680e+04	1.433250e-01
1.961950e+00	1.533160e-03	2.992810e+01	1.958440e+04	2.033210e+04	1.956870e+04	2.919440e+01
1.962980e+00	1.533480e-03	2.374760e+01	1.963950e+04	2.041980e+04	1.962230e+04	2.296220e+01
1.963940e+00	1.533480e-03	4.860240e+01	1.965620e+04	2.044570e+04	1.964210e+04	4.927940e+01
1.964960e+00	1.533690e-03	1.686130e+00	1.958530e+04	2.039060e+04	1.957170e+04	2.343560e+00
1.965990e+00	1.534130e-03	5.534120e+00	1.960510e+04	2.038360e+04	1.959490e+04	6.077630e+00
1.966950e+00	1.534440e-03	6.833240e+00	1.964930e+04	2.040180e+04	1.963570e+04	6.175280e+00
1.967980e+00	1.534550e-03	4.355410e+01	1.962900e+04	2.039690e+04	1.961710e+04	4.295410e+01
1.968940e+00	1.534900e-03	3.104070e+01	1.958130e+04	2.035140e+04	1.956150e+04	3.191400e+01
1.969960e+00	1.535270e-03	2.310870e+00	1.964120e+04	2.044570e+04	1.963230e+04	2.806090e+00
1.970990e+00	1.535270e-03	1.538910e+01	1.962670e+04	2.042160e+04	1.961270e+04	1.606160e+01
1.971950e+00	1.535690e-03	1.291510e+01	1.959720e+04	2.035880e+04	1.957950e+04	1.371640e+01
1.972970e+00	1.535880e-03	5.000780e+01	1.963180e+04	2.041160e+04	1.961930e+04	4.938580e+01
1.974000e+00	1.536170e-03	2.670360e+01	1.962350e+04	2.037280e+04	1.960340e+04	2.759130e+01
1.974960e+00	1.536530e-03	1.845430e+01	1.962900e+04	2.043000e+04	1.961560e+04	1.780060e+01
1.975990e+00	1.536660e-03	2.224860e+01	1.960980e+04	2.040090e+04	1.959780e+04	2.285190e+01
1.976950e+00	1.537150e-03	2.166000e+01	1.959640e+04	2.036740e+04	1.957210e+04	2.269400e+01
1.977970e+00	1.537360e-03	4.780890e+01	1.966050e+04	2.044370e+04	1.964480e+04	4.707520e+01
1.979000e+00	1.537530e-03	2.586390e+01	1.961880e+04	2.037460e+04	1.960860e+04	2.640320e+01
1.979960e+00	1.538040e-03	2.137700e+01	1.956990e+04	2.035390e+04	1.955800e+04	2.077520e+01
1.980980e+00	1.538280e-03	8.891400e+00	1.964940e+04	2.044150e+04	1.964320e+04	9.293840e+00
1.981950e+00	1.538480e-03	3.650750e+01	1.964100e+04	2.041970e+04	1.962610e+04	3.721360e+01
1.982970e+00	1.538750e-03	4.084020e+01	1.959090e+04	2.038100e+04	1.957240e+04	4.000740e+01
1.984000e+00	1.539120e-03	2.044980e+01	1.962820e+04	2.037680e+04	1.962060e+04	2.090340e+01
1.984960e+00	1.539540e-03	2.562830e+01	1.962510e+04	2.040510e+04	1.961240e+04	2.499850e+01
1.985980e+00	1.539770e-03	6.759620e-01	1.962210e+04	2.041170e+04	1.960890e+04	3.060760e-02
1.986940e+00	1.540090e-03	4.884640e+01	1.961410e+04	2.039390e+04	1.960120e+04	4.948280e+01
1.987970e+00	1.540350e-03	3.337230e+01	1.962160e+04	2.042330e+04	1.961380e+04	3.291510e+01
1.988990e+00	1.540610e-03	1.811840e+01	1.961340e+04	2.036130e+04	1.960120e+04	1.872820e+01
1.989960e+00	1.541100e-03	3.272560e+01	1.961980e+04	2.039030e+04	1.960500e+04	3.202460e+01
1.990980e+00	1.541210e-03	4.902680e+00	1.963060e+04	2.042430e+04	1.961500e+04	4.173580e+00
1.991940e+00	1.541550e-03	5.751250e+01	1.962270e+04	2.039920e+04	1.960930e+04	5.816510e+01
1.992970e+00	1.541800e-03	4.212600e+01	1.961010e+04	2.041320e+04	1.959940e+04	4.156790e+01
1.993990e+00	1.542140e-03	2.817650e+01	1.961330e+04	2.036280e+04	1.959750e+04	2.891260e+01
1.994950e+00	1.542540e-03	3.049010e+01	1.963460e+04	2.040360e+04	1.961860e+04	2.974530e+01
1.995980e+00	1.542610e-03	1.971120e+01	1.962070e+04	2.040390e+04	1.960340e+04	1.892210e+01
1.996940e+00	1.543000e-03	5.712430e+01	1.960970e+04	2.038870e+04	1.959260e+04	5.790670e+01
1.997970e+00	1.543340e-03	3.233730e+01	1.962790e+04	2.043450e+04	1.961860e+04	3.182820e+01
[truncated: 6,002 more rows]
