# Supplementary material for: An Efficient Contact Model for the Simulation of Cargo Airdrop Extraction Phase
Source: Hindawi journal article supplement (doi:10.1155/2018/9895451), 2018-10-17
Supplement: f1 [file 9895451.f1.zip › FEM_results/deg2_fd5000_fric_contact_forc_bw20Hz.csv]

time	Sl 1
0	-2429.6
0.000961207	-2627.18
0.0019865	-2801.17
0.0029477	-2940.88
0.00397299	-3033.93
0.00499828	-3066.13
0.00595949	-3021.45
0.00698477	-2882
0.00794598	-2628.08
0.00897127	-2238.25
0.00999656	-1689.47
0.0109578	-957.413
0.0119831	-16.7554
0.0129443	1158.35
0.0139695	2593.69
0.0149948	4314.25
0.015956	6343.35
0.0169813	8701.57
0.0179425	11405.5
0.0189678	14466.2
0.0199931	17887.7
0.0209543	21665.2
0.0219796	25782.4
0.0229408	30210
0.0239661	34902.5
0.0249914	39796
0.0259526	44805
0.0269779	49819.5
0.0279391	54702
0.0289644	59284.6
0.0299897	63365.8
0.0309509	66707.8
0.0319762	69035.9
0.0329374	70076
0.0339627	69672.8
0.0349879	67893
0.0359492	64974.8
0.0369744	61199.3
0.0379997	56820.1
0.0389609	52053.4
0.0399862	47080.7
0.0409474	42051.7
0.0419727	37087
0.042998	32281.6
0.0439592	27707.4
0.0449845	23416.8
0.0459457	19444.7
0.046971	15811.9
0.0479963	12526.9
0.0489575	9588.44
0.0499828	6987.55
0.050944	4709.21
0.0519693	2734.01
0.0529946	1039.58
0.0539558	-398.236
0.0549811	-1604.3
0.0559423	-2603.29
0.0569676	-3418.99
0.0579928	-4073.63
0.0589541	-4587.37
0.0599793	-4977.95
0.0609405	-5260.29
0.0619658	-5446.34
0.0629911	-5544.8
0.0639523	-5561.08
0.0649776	-5497.21
0.0659388	-5351.83
0.0669641	-5120.23
0.0679894	-4794.43
0.0689506	-4363.36
0.0699759	-3813.03
0.0709371	-3126.79
0.0719624	-2285.71
0.0729877	-1268.99
0.0739489	-54.4742
0.0749742	1380.71
0.0759995	3059.41
0.0769607	5003.53
0.077986	7233.03
0.0789472	9764.71
0.0799725	12610.8
0.0809977	15777.6
0.0819589	19263.3
0.0829842	23056.5
0.0839454	27133.9
0.0849707	31457.8
0.085996	35973.9
0.0869572	40608.6
0.0879825	45265.9
0.0889437	49825.2
0.089969	54137.9
0.0909943	58025.1
0.0919555	61274.6
0.0929808	63638.9
0.093942	64858.9
0.0949673	64758.5
0.0959926	63353
0.0969538	60837.4
0.0979791	57471.4
0.0989403	53497.3
0.0999656	49122.2
0.100991	44520.6
0.101952	39836.8
0.102977	35187.9
0.103939	30666.4
0.104964	26343.4
0.105989	22270.7
0.10695	18484.4
0.107976	15006.4
0.108937	11847.4
0.109962	9008.63
0.110987	6484.09
0.111949	4262.08
0.112974	2326.85
0.113999	659.931
0.11496	-758.647
0.115986	-1949.34
0.116947	-2932.2
0.117972	-3726.15
0.118997	-4348.38
0.119959	-4813.84
0.120984	-5134.85
0.121945	-5320.83
0.12297	-5378.08
0.123996	-5309.7
0.124957	-5115.49
0.125982	-4792.05
0.126943	-4332.89
0.127969	-3728.59
0.128994	-2967.14
0.129955	-2034.28
0.130981	-913.994
0.131942	410.947
0.132967	1958.26
0.133992	3745.33
0.134954	5788.28
0.135979	8100.86
0.13694	10693.2
0.137965	13570.3
0.138991	16730.5
0.139952	20163.9
0.140977	23850.2
0.141938	27756.3
0.142964	31834.9
0.143989	36021.3
0.14495	40231.4
0.145975	44358.7
0.146937	48272.3
0.147962	51814.1
0.148987	54796.5
0.149948	57000
0.150974	58191.5
0.151999	58201.5
0.15296	57025.8
0.153985	54828.4
0.154947	51842.1
0.155972	48287.4
0.156997	44353.2
0.157958	40198.7
0.158984	35956.1
0.159945	31732.9
0.16097	27614.5
0.161995	23666.9
0.162957	19938.9
0.163982	16464.9
0.164943	13266.9
0.165968	10356.7
0.166994	7737.8
0.167955	5407.45
0.16898	3357.89
0.169941	1578.03
0.170967	54.6153
0.171992	-1226.66
0.172953	-2280.2
0.173979	-3119.73
0.17494	-3757.64
0.175965	-4204.46
0.17699	-4468.5
0.177952	-4555.5
0.178977	-4468.56
0.179938	-4207.99
0.180963	-3771.46
0.181989	-3154.06
0.18295	-2348.67
0.183975	-1346.25
0.184936	-136.406
0.185962	1292.03
0.186987	2950.24
0.187948	4848.55
0.188973	6995.39
0.189999	9396.14
0.19096	12051.8
0.191985	14957.6
0.192946	18101.1
0.193972	21460.8
0.194997	25004.1
0.195958	28684.8
0.196983	32441.7
0.197945	36195.7
0.19897	39848
0.199995	43277.5
0.200956	46338.9
0.201982	48866.7
0.202943	50697
0.203968	51701.6
0.204993	51807.8
0.205955	51013.5
0.20698	49407.1
0.207941	47152.5
0.208966	44435
0.209992	41421
0.210953	38250.2
0.211978	35036.6
0.212939	31870.9
0.213965	28822.3
0.21499	25940.3
0.215951	23256.8
0.216977	20787.6
0.217938	18534.1
0.218963	16485.2
0.219988	14618.3
0.22095	12903.2
0.221975	11307.9
0.222936	9806.39
0.223961	8386.38
0.224987	7049.9
0.225948	5809.19
0.226973	4680.22
0.227998	3678.35
0.22896	2816.68
0.229985	2106.11
0.230946	1555.73
0.231971	1173.33
0.232997	965.669
0.233958	938.73
0.234983	1097.86
0.235944	1447.76
0.23697	1992.42
0.237995	2734.85
0.238956	3676.8
0.239981	4818.29
0.240943	6156.98
0.241968	7687.55
0.242993	9400.83
0.243954	11282.9
0.24498	13314.3
0.245941	15470.8
0.246966	17726.2
0.247991	20059.1
0.248953	22457.5
0.249978	24918.6
0.250939	27440.8
0.251964	30015.1
0.25299	32617.7
0.253951	35206.8
0.254976	37720.8
0.255937	40076.2
0.256963	42166.7
0.257988	43861.2
0.258949	45010.2
0.259975	45477.9
0.261	45195.6
0.261961	44176.3
0.262986	42482.9
0.263948	40205.8
0.264973	37464.1
0.265998	34392.9
0.266959	31121.2
0.267985	27759.5
0.268946	24399.7
0.269971	21116.4
0.270996	17969.2
0.271958	15004.8
0.272983	12258.7
0.273944	9757.18
0.274969	7519.02
0.275995	5556.8
0.276956	3878.44
0.277981	2488.35
0.278942	1388.5
0.279968	579.216
0.280993	59.8962
0.281954	-170.51
0.282979	-113.177
0.283941	230.736
0.284966	860.053
0.285991	1773.37
0.286952	2968.66
0.287978	4442.73
0.288939	6190.47
0.289964	8203.98
0.29099	10471.4
0.291951	12976
0.292976	15694.1
0.293937	18594.5
0.294962	21636
0.295988	24765.9
0.296949	27918.4
0.297974	31012.5
0.299	33949.8
0.299961	36613.3
0.300986	38869.5
0.301947	40583.2
0.302973	41642.2
0.303998	41974.7
0.304959	41566.7
0.305984	40483.3
0.306946	38854
0.307971	36826.2
0.308996	34532
0.309957	32080.6
0.310983	29560.4
0.311944	27039.9
0.312969	24569.6
0.313994	22183.5
0.314956	19900.4
0.315981	17727.9
0.316942	15667.4
0.317967	13722.8
0.318993	11906.2
0.319954	10238.3
0.320979	8744.18
0.32194	7447.51
0.322966	6368.19
0.323991	5521.71
0.324952	4919.59
0.325977	4569.88
0.326939	4477.56
0.327964	4644.68
0.328989	5070.5
0.32995	5751.34
0.330976	6680.31
0.331937	7846.94
0.332962	9236.58
0.333988	10829.7
0.334949	12601.1
0.335974	14520.1
0.336999	16552.3
0.337961	18664.8
0.338986	20831
0.339947	23031.1
0.340972	25246.3
0.341998	27450.7
0.342959	29605.1
0.343984	31653.6
0.344945	33522.3
0.345971	35117.9
0.346996	36326.9
0.347957	37024.8
0.348982	37112.1
0.349944	36557.2
0.350969	35397.9
0.351994	33712.9
0.352955	31605
0.353981	29193
0.354942	26595.2
0.355967	23916.4
0.356992	21245.7
0.357954	18657.3
0.358979	16212.4
0.35994	13960.9
0.360965	11942.5
0.361991	10188.3
0.362952	8721.94
0.363977	7560.78
0.364938	6716.73
0.365964	6196.95
0.366989	6004.37
0.36795	6138.03
0.368975	6593.17
0.369937	7361.19
0.370962	8429.31
0.371987	9780.17
0.372948	11391.1
0.373974	13233.5
0.374999	15271.5
0.37596	17461.1
0.376986	19749
0.377947	22071
0.378972	24351.7
0.379997	26508.2
0.380959	28461.8
0.381984	30149.9
0.382945	31524.4
0.38397	32536.8
0.384996	33127.9
0.385957	33243.3
0.386982	32870
0.387943	32053.2
0.388969	30870.6
0.389994	29396.4
0.390955	27689.3
0.39198	25796.6
0.392942	23767.4
0.393967	21662.2
0.394992	19551.5
0.395953	17504.8
0.396979	15583.6
0.39794	13839.1
0.398965	12312.7
0.39999	11037.4
0.400952	10038.5
0.401977	9334.51
0.402938	8937.55
0.403963	8854.03
0.404989	9084.75
0.40595	9624.97
0.406975	10464.3
0.407936	11586.3
0.408962	12968
0.409987	14579.5
0.410948	16382.4
0.411973	18329.8
0.412999	20364.3
0.41396	22417.4
0.414985	24409.5
0.415946	26254.2
0.416972	27869.6
0.417997	29186
0.418958	30140.6
0.419984	30670.1
0.420945	30725.7
0.42197	30307.7
0.422995	29472
0.423957	28298.1
0.424982	26858.9
0.425943	25217.5
0.426968	23437.2
0.427994	21588
0.428955	19743.4
0.42998	17972.5
0.430941	16334.4
0.431967	14877.2
0.432992	13639.2
0.433953	12649.2
0.434978	11927.9
0.43594	11487.9
0.436965	11334.4
0.43799	11465.5
0.438951	11872.3
0.439977	12538.8
0.440938	13441.6
0.441963	14549.4
0.442988	15823
0.44395	17215.2
0.444975	18675
0.445936	20154.3
0.446961	21613.4
0.447987	23018.1
0.448948	24331.1
0.449973	25504.5
0.450998	26476
0.45196	27169.6
0.452985	27509.8
0.453946	27453
0.454971	27006.2
0.455997	26210.9
0.456958	25120.2
0.457983	23799.6
0.458944	22329.9
0.45997	20797.8
0.460995	19283.4
0.461956	17854.8
0.462982	16568.4
0.463943	15469.7
0.464968	14593.7
0.465993	13966
0.466955	13603.2
0.46798	13513.2
0.468941	13695.5
0.469966	14141.2
0.470992	14832.7
0.471953	15744.1
0.472978	16839.9
0.473939	18075.1
0.474965	19394.4
0.47599	20731
0.476951	22006.7
0.477976	23130.2
0.478938	23999
0.479963	24511.5
0.480988	24599.4
0.481949	24262.4
0.482975	23569.6
0.484	22623.8
0.484961	21527.2
0.485986	20370.2
0.486948	19229.7
0.487973	18170
0.488998	17243.9
0.489959	16492.7
0.490985	15947.3
0.491946	15628.2
0.492971	15546.2
0.493997	15702.3
0.494958	16088
0.495983	16685.2
0.496944	17465.4
0.497969	18390.4
0.498995	19410.9
0.499956	20466.2
0.500981	21485.9
0.501942	22396.6
0.502968	23135.2
0.503993	23654.8
0.504954	23918.7
0.50598	23903.3
0.506941	23617.5
0.507966	23108.4
0.508991	22440.7
0.509953	21673.2
0.510978	20852.1
0.511939	20011.5
0.512964	19179.7
0.51399	18387.3
0.514951	17671.6
0.515976	17072.7
0.516937	16626.3
0.517963	16359.1
0.518988	16287.8
0.519949	16418.9
0.520974	16748.9
0.522	17264.1
0.522961	17940.6
0.523986	18743.6
0.524947	19627.6
0.525973	20535.2
0.526998	21397.2
0.527959	22132.7
0.528984	22654.9
0.529946	22890
0.530971	22807.5
0.531996	22438.6
0.532957	21858.5
0.533983	21153.6
0.534944	20400.9
0.535969	19664.7
0.536995	18996.7
0.537956	18436.6
0.538981	18012.3
0.539942	17740.3
0.540968	17626
0.541993	17664.1
0.542954	17838.4
0.543979	18124
0.54494	18493.1
0.545966	18922.7
0.546991	19397.6
0.547952	19904.5
0.548978	20423.5
0.549939	20923.6
0.550964	21361.3
0.551989	21683.3
0.552951	21840.6
0.553976	21810.2
0.554937	21600.8
0.555962	21236.9
0.556988	20748.9
0.557949	20178.3
0.558974	19579.6
0.559999	19009
0.560961	18515.2
0.561986	18135.4
0.562947	17895.4
0.563972	17810
0.564998	17882.7
0.565959	18106.4
0.566984	18462.5
0.567945	18921.5
0.568971	19442.7
0.569996	19973.9
0.570957	20454.8
0.571982	20829.4
0.572944	21058.2
0.573969	21121.4
0.574994	21019.9
0.575955	20780.4
0.576981	20450.3
0.577942	20080.8
0.578967	19713.4
0.579993	19377.3
0.580954	19090
0.581979	18859
0.58294	18688
0.583966	18584.2
0.584991	18560.5
0.585952	18629.4
0.586977	18796.4
0.587939	19055.9
0.588964	19390.9
0.589989	19772.7
0.59095	20160.6
0.591976	20502.1
0.592937	20738.1
0.593962	20819.4
0.594987	20728.2
0.595949	20485.3
0.596974	20139.8
0.597999	19751.2
0.59896	19375.1
0.599986	19055.8
0.600947	18826.2
0.601972	18707.2
0.602997	18708.1
0.603959	18826.8
0.604984	19049.7
0.605945	19351.3
0.60697	19694.9
0.607996	20031.6
0.608957	20302.3
0.609982	20450.4
0.610943	20447.9
0.611969	20313.1
0.612994	20097.2
0.613955	19856.5
0.61498	19638.3
0.615942	19477.2
0.616967	19396.2
0.617992	19406
0.618953	19505.5
0.619979	19681.6
0.62094	19909.4
0.621965	20151.7
0.622991	20359.2
0.623952	20478
0.624977	20472.8
0.625938	20350.5
0.626964	20154.4
0.627989	19936.5
0.62895	19740
0.629975	19596.3
0.630937	19524.2
0.631962	19530.6
0.632987	19610.6
0.633948	19747
0.634974	19910.6
0.635999	20061.5
0.63696	20155.5
0.637985	20161
0.638947	20076.4
0.639972	19931
0.640997	19766.6
0.641958	19621.3
0.642984	19522
0.643945	19483.5
0.64497	19508.6
0.645995	19588.1
0.646957	19700.8
0.647982	19814.3
0.648943	19889.9
0.649968	19896.4
0.650994	19827.6
0.651955	19705.2
0.65298	19565.9
0.653941	19444.1
0.654967	19363.7
0.655992	19337.1
0.656953	19364.4
0.657978	19434
0.65894	19522.4
0.659965	19595.2
0.66099	19615.8
0.661951	19565.3
0.662977	19457
0.663938	19326.5
0.664963	19210.5
0.665989	19136.2
0.66695	19118.8
0.667975	19161.9
0.668936	19257.3
0.669962	19385.6
0.670987	19519.6
0.671948	19631.2
0.672973	19698.8
0.673999	19715.2
0.67496	19691.4
0.675985	19649.1
0.676946	19607.5
0.677972	19578.6
0.678997	19570.9
0.679958	19591.3
0.680983	19643.3
0.681945	19721.2
0.68297	19808.3
0.683995	19877.4
0.684956	19900.8
0.685982	19868.5
0.686943	19796.2
0.687968	19713.4
0.688993	19646.2
0.689955	19609.8
0.69098	19608.9
0.691941	19640
0.692966	19694.7
0.693992	19760.2
0.694953	19817.5
0.695978	19843.8
0.696939	19826
0.697965	19771.4
0.69899	19702.4
0.699951	19642.1
0.700976	19605.9
0.701938	19601.2
0.702963	19627.5
0.703988	19677
0.704949	19734.3
0.705975	19777.8
0.706936	19787
0.707961	19756.2
0.708987	19698.8
0.709948	19635.2
0.710973	19582.3
0.711998	19551
0.71296	19546.2
0.713985	19565.3
0.714946	19596.4
0.715971	19620.5
0.716997	19622
0.717958	19601.6
0.718983	19574.1
0.719944	19555.6
0.72097	19554.3
0.721995	19570.8
0.722956	19601.3
0.723981	19637
0.724943	19663.8
0.725968	19669.9
0.726993	19655.9
0.727954	19634.4
0.72898	19619.9
0.729941	19620.7
0.730966	19636.3
0.731991	19659.2
0.732953	19676.4
0.733978	19677.7
0.734939	19663
0.735964	19642.1
0.73699	19625.6
0.737951	19619.9
0.738976	19625.2
0.739937	19635.1
0.740963	19638.9
0.741988	19631.2
0.742949	19617.3
0.743974	19607.3
0.745	19606.4
0.745961	19612.7
0.746986	19619.3
0.747947	19618.4
0.748973	19607.5
0.749998	19591.6
0.750959	19577.9
0.751985	19570.5
0.752946	19567.3
0.753971	19562.2
0.754996	19551.5
0.755958	19538.4
0.756983	19529.3
0.757944	19526.6
0.758969	19527.1
0.759995	19526.3
0.760956	19522.8
0.761981	19519.7
0.762942	19519.9
0.763968	19523
0.764993	19526.3
0.765954	19528
0.766979	19529.8
0.767941	19534.1
0.768966	19540.9
0.769991	19548
0.770952	19554.3
0.771978	19561.7
0.772939	19571.2
0.773964	19581.7
0.774989	19591.5
0.775951	19601
0.776976	19610.9
0.777937	19620.4
0.778962	19628.4
0.779988	19635.2
0.780949	19641.3
0.781974	19646.1
0.783	19649.6
0.783961	19652.3
0.784986	19654.2
0.785947	19655.1
0.786973	19654.9
0.787998	19654.3
0.788959	19653
0.789984	19651
0.790945	19648.7
0.791971	19646.6
0.792996	19644.4
0.793957	19642.1
0.794983	19640.1
0.795944	19638.3
0.796969	19636.4
0.797994	19634.5
0.798956	19632.7
0.799981	19630.9
0.800942	19629.1
0.801967	19627.4
0.802993	19626.1
0.803954	19624.7
0.804979	19623.5
0.80594	19622.5
0.806966	19621.7
0.807991	19620.9
0.808952	19620.3
0.809977	19619.9
0.810939	19619.4
0.811964	19618.9
0.812989	19618.4
0.81395	19617.9
0.814976	19617.4
0.815937	19616.8
0.816962	19616.5
0.817987	19616.2
0.818949	19615.9
0.819974	19615.9
0.820999	19616
0.82196	19616.1
0.822986	19616.3
0.823947	19616.6
0.824972	19617
0.825998	19617.3
0.826959	19617.7
0.827984	19618.1
0.828945	19618.5
0.829971	19618.8
0.830996	19619.1
0.831957	19619.4
0.832982	19619.5
0.833944	19619.6
0.834969	19619.8
0.835994	19620
0.836955	19620.1
0.837981	19620.3
0.838942	19620.4
0.839967	19620.6
0.840992	19620.7
0.841954	19620.8
0.842979	19620.8
0.84394	19620.9
0.844965	19620.9
0.845991	19620.9
0.846952	19621
0.847977	19621
0.848938	19621.1
0.849964	19621.1
0.850989	19621.2
0.85195	19621.3
0.852975	19621.4
0.853937	19621.5
0.854962	19621.6
0.855987	19621.6
0.856948	19621.6
0.857974	19621.6
0.858999	19621.6
0.85996	19621.5
0.860985	19621.4
0.861947	19621.3
0.862972	19621.2
0.863997	19621.1
0.864958	19621
0.865984	19620.9
0.866945	19620.8
0.86797	19620.8
0.868996	19620.7
0.869957	19620.6
0.870982	19620.6
0.871943	19620.5
0.872969	19620.5
0.873994	19620.4
0.874955	19620.4
0.87598	19620.3
0.876942	19620.3
0.877967	19620.2
0.878992	19620.2
0.879953	19620.1
0.880979	19620.1
0.88194	19620
0.882965	19620
0.88399	19620
0.884952	19619.9
0.885977	19619.9
0.886938	19619.8
0.887963	19619.8
0.888989	19619.8
0.88995	19619.7
0.890975	19619.7
0.891936	19619.7
0.892962	19619.6
0.893987	19619.6
0.894948	19619.6
0.895973	19619.6
0.896999	19619.6
0.89796	19619.6
0.898985	19619.7
0.899946	19619.7
0.900972	19619.7
0.901997	19619.8
0.902958	19619.8
0.903983	19619.8
0.904945	19619.9
0.90597	19619.9
0.906995	19619.9
0.907956	19619.9
0.908982	19619.9
0.909943	19619.9
0.910968	19619.9
0.911994	19619.9
0.912955	19619.9
0.91398	19620
0.914941	19620
0.915967	19620
0.916992	19620
0.917953	19620
0.918978	19620
0.91994	19620
0.920965	19620.1
0.92199	19620.1
0.922951	19620.1
0.923977	19620.2
0.924938	19620.2
0.925963	19620.3
0.926988	19620.3
0.92795	19620.4
0.928975	19620.4
0.929936	19620.5
0.930961	19620.5
0.931987	19620.5
0.932948	19620.5
0.933973	19620.5
0.934998	19620.5
0.93596	19620.5
0.936985	19620.5
0.937946	19620.5
0.938971	19620.4
0.939997	19620.4
0.940958	19620.3
0.941983	19620.3
0.942944	19620.3
0.94397	19620.2
0.944995	19620.2
0.945956	19620.1
0.946981	19620.1
0.947943	19620
0.948968	19620
0.949993	19620
0.950954	19619.9
0.95198	19619.9
0.952941	19619.9
0.953966	19619.9
0.954992	19619.9
0.955953	19619.9
0.956978	19619.9
0.957939	19619.8
0.958965	19619.8
0.95999	19619.8
0.960951	19619.8
0.961976	19619.8
0.962938	19619.8
0.963963	19619.8
0.964988	19619.8
0.965949	19619.8
0.966975	19619.8
0.968	19619.8
0.968961	19619.8
0.969986	19619.8
0.970948	19619.8
0.971973	19619.8
0.972998	19619.8
0.973959	19619.9
0.974985	19619.9
0.975946	19619.9
0.976971	19619.9
0.977996	19619.9
0.978958	19619.9
0.979983	19619.9
0.980944	19619.9
0.981969	19619.9
0.982995	19620
0.983956	19620
0.984981	19620
0.985942	19620.1
0.986968	19620.1
0.987993	19620.1
0.988954	19620.1
0.98998	19620.2
0.990941	19620.2
0.991966	19620.2
0.992991	19620.2
0.993952	19620.2
0.994978	19620.2
0.995939	19620.2
0.996964	19620.2
0.99799	19620.2
0.998951	19620.2
0.999976	19620.2
1.00094	19620.2
1.00196	19620.2
1.00299	19620.2
1.00395	19620.2
1.00497	19620.2
1.006	19620.2
1.00696	19620.2
1.00799	19620.1
1.00895	19620.1
1.00997	19620.1
1.011	19620.1
1.01196	19620
1.01298	19620
1.01395	19620
1.01497	19620
1.016	19620
1.01696	19620
1.01798	19620
1.01894	19620
1.01997	19620
1.02099	19620
1.02196	19620
1.02298	19620
1.02394	19620
1.02497	19620
1.02599	19620.1
1.02695	19620.1
1.02798	19620.1
1.02894	19620.1
1.02997	19620.1
1.03099	19620.1
1.03195	19620.1
1.03298	19620.1
1.03394	19620.1
1.03496	19620.1
1.03599	19620.1
1.03695	19620.1
1.03798	19620.1
1.03894	19620.1
1.03996	19620.1
1.04099	19620.1
1.04195	19620.1
1.04297	19620.1
1.044	19620.1
1.04496	19620.1
1.04599	19620.2
1.04695	19620.2
1.04797	19620.2
1.049	19620.2
1.04996	19620.2
1.05098	19620.2
1.05195	19620.2
1.05297	19620.1
1.054	19620.1
1.05496	19620.1
1.05598	19620.1
1.05694	19620.1
1.05797	19620.1
1.05899	19620.1
1.05996	19620.1
1.06098	19620.1
1.06194	19620.1
1.06297	19620
1.06399	19620
1.06495	19620
1.06598	19620
1.06694	19620
1.06797	19619.9
1.06899	19619.9
1.06995	19619.9
1.07098	19619.9
1.07194	19619.9
1.07296	19619.9
1.07399	19619.9
1.07495	19619.8
1.07598	19619.8
1.07694	19619.8
1.07796	19619.8
1.07899	19619.8
1.07995	19619.8
1.08097	19619.8
1.082	19619.8
1.08296	19619.8
1.08399	19619.8
1.08495	19619.8
1.08597	19619.8
1.087	19619.8
1.08796	19619.9
1.08898	19619.9
1.08995	19619.9
1.09097	19619.9
1.092	19620
1.09296	19620
1.09398	19620
1.09494	19620
1.09597	19620
1.09699	19620
1.09796	19620.1
1.09898	19620.1
1.09994	19620.1
1.10097	19620.1
1.10199	19620.2
1.10295	19620.2
1.10398	19620.2
1.10494	19620.2
1.10597	19620.2
1.10699	19620.2
1.10795	19620.2
1.10898	19620.2
1.10994	19620.2
1.11096	19620.2
1.11199	19620.2
1.11295	19620.2
1.11398	19620.2
1.11494	19620.2
1.11596	19620.2
1.11699	19620.2
1.11795	19620.2
1.11897	19620.2
1.12	19620.2
1.12096	19620.2
1.12199	19620.2
1.12295	19620.2
1.12397	19620.2
1.125	19620.1
1.12596	19620.1
1.12698	19620.1
1.12794	19620.1
1.12897	19620.1
1.13	19620
1.13096	19620
1.13198	19620
1.13294	19620
1.13397	19620
1.13499	19620
1.13595	19620
1.13698	19619.9
1.13794	19619.9
1.13897	19619.9
1.13999	19619.9
1.14095	19619.9
1.14198	19620
1.14294	19620
1.14396	19620
1.14499	19620
1.14595	19620
1.14698	19620
1.14794	19620
1.14896	19620
1.14999	19620
1.15095	19620
1.15197	19620
1.15294	19620
1.15396	19620
1.15499	19620
1.15595	19620
1.15697	19620
1.158	19620
1.15896	19620
1.15999	19620
1.16095	19620
1.16197	19620
1.163	19620
1.16396	19620
1.16498	19620
1.16594	19620
1.16697	19620
1.168	19620
1.16896	19620
1.16998	19620
1.17094	19620
1.17197	19620
1.17299	19620
1.17395	19620
1.17498	19620
1.17594	19620
1.17697	19620
1.17799	19620
1.17895	19620
1.17998	19620
1.18094	19620
1.18196	19620
1.18299	19620
1.18395	19620
1.18498	19620
1.18594	19620.1
1.18696	19620.1
1.18799	19620.1
1.18895	19620.1
1.18997	19620.1
1.19094	19620.1
1.19196	19620.1
1.19299	19620.1
1.19395	19620.1
1.19497	19620.1
1.196	19620.1
1.19696	19620.2
1.19798	19620.2
1.19895	19620.2
1.19997	19620.2
1.201	19620.2
1.20196	19620.2
1.20298	19620.2
1.20394	19620.2
1.20497	19620.2
1.20599	19620.2
1.20696	19620.2
1.20798	19620.1
1.20894	19620.1
1.20997	19620.1
1.21099	19620.1
1.21195	19620.1
1.21298	19620.1
1.21394	19620.1
1.21497	19620.1
1.21599	19620.1
1.21695	19620
1.21798	19620
1.21894	19620
1.21996	19620
1.22099	19619.9
1.22195	19619.9
1.22298	19619.9
1.22394	19619.9
1.22496	19619.9
1.22599	19619.8
1.22695	19619.8
1.22797	19619.8
1.229	19619.8
1.22996	19619.8
1.23099	19619.9
1.23195	19619.9
1.23297	19619.9
1.234	19619.9
1.23496	19619.9
1.23598	19620
1.23695	19620
1.23797	19620
1.239	19620.1
1.23996	19620.1
1.24098	19620.1
1.24194	19620.1
1.24297	19620.2
1.24399	19620.2
1.24496	19620.2
1.24598	19620.2
1.24694	19620.2
1.24797	19620.2
1.24899	19620.2
1.24995	19620.2
1.25098	19620.2
1.25194	19620.2
1.25297	19620.2
1.25399	19620.2
1.25495	19620.1
1.25598	19620.1
1.25694	19620.1
1.25796	19620.1
1.25899	19620.1
1.25995	19620.1
1.26098	19620.1
1.26194	19620.1
1.26296	19620.1
1.26399	19620.1
1.26495	19620.1
1.26597	19620.1
1.267	19620
1.26796	19620
1.26899	19620
1.26995	19620
1.27097	19620
1.272	19620
1.27296	19620
1.27398	19620
1.27495	19620
1.27597	19620
1.277	19620
1.27796	19620
1.27898	19620
1.27994	19620
1.28097	19620
1.28199	19619.9
1.28296	19619.9
1.28398	19619.9
1.28494	19619.9
1.28597	19619.9
1.28699	19619.9
1.28795	19619.9
1.28898	19619.9
1.28994	19619.9
1.29097	19619.9
1.29199	19619.9
1.29295	19619.9
1.29398	19619.9
1.29494	19619.9
1.29596	19619.9
1.29699	19619.9
1.29795	19619.9
1.29898	19619.9
1.29994	19619.9
1.30096	19619.9
1.30199	19619.9
1.30295	19619.9
1.30397	19619.9
1.305	19619.9
1.30596	19619.9
1.30699	19620
1.30795	19620
1.30897	19620
1.31	19620
1.31096	19620.1
1.31198	19620.1
1.31295	19620.1
1.31397	19620.1
1.315	19620.1
1.31596	19620.1
1.31698	19620.1
1.31794	19620.2
1.31897	19620.2
1.31999	19620.2
1.32096	19620.2
1.32198	19620.2
1.32294	19620.2
1.32397	19620.2
1.32499	19620.2
1.32595	19620.2
1.32698	19620.2
1.32794	19620.2
1.32897	19620.2
1.32999	19620.2
1.33095	19620.1
1.33198	19620.1
1.33294	19620.1
1.33396	19620.1
1.33499	19620.1
1.33595	19620.1
1.33698	19620.1
1.33794	19620
1.33896	19620
1.33999	19620
1.34095	19620
1.34197	19620
1.343	19619.9
1.34396	19619.9
1.34499	19619.9
1.34595	19619.9
1.34697	19619.9
1.348	19619.9
1.34896	19619.9
1.34998	19619.9
1.35094	19619.9
1.35197	19619.9
1.353	19619.9
1.35396	19619.9
1.35498	19619.9
1.35594	19619.9
1.35697	19619.9
1.35799	19619.9
1.35895	19619.9
1.35998	19619.9
1.36094	19620
1.36197	19620
1.36299	19620
1.36395	19620
1.36498	19620
1.36594	19620.1
1.36697	19620.1
1.36799	19620.1
1.36895	19620.1
1.36998	19620.1
1.37094	19620.1
1.37196	19620.1
1.37299	19620.1
1.37395	19620.2
1.37498	19620.2
1.37594	19620.2
1.37696	19620.2
1.37799	19620.2
1.37895	19620.2
1.37997	19620.2
1.381	19620.2
1.38196	19620.2
1.38299	19620.2
1.38395	19620.2
1.38497	19620.1
1.386	19620.1
1.38696	19620.1
1.38798	19620.1
1.38894	19620.1
1.38997	19620.1
1.391	19620.1
1.39196	19620.1
1.39298	19620
1.39394	19620
1.39497	19620
1.39599	19620
1.39695	19619.9
1.39798	19619.9
1.39894	19619.9
1.39997	19619.9
1.40099	19619.9
1.40195	19619.9
1.40298	19619.9
1.40394	19619.9
1.40496	19619.9
1.40599	19619.9
1.40695	19619.9
1.40798	19619.9
1.40894	19619.9
1.40996	19619.9
1.41099	19619.9
1.41195	19619.9
1.41297	19619.9
1.41394	19619.9
1.41496	19619.9
1.41599	19620
1.41695	19620
1.41797	19620
1.419	19620
1.41996	19620
1.42098	19620
1.42195	19620.1
1.42297	19620.1
1.424	19620.1
1.42496	19620.1
1.42598	19620.1
1.42694	19620.1
1.42797	19620.1
1.42899	19620.1
1.42996	19620.1
1.43098	19620.1
1.43194	19620.1
1.43297	19620.1
1.43399	19620.1
1.43495	19620.1
1.43598	19620.1
1.43694	19620.1
1.43797	19620.1
1.43899	19620.1
1.43995	19620.1
1.44098	19620.1
1.44194	19620.1
1.44296	19620.1
1.44399	19620.1
1.44495	19620.1
1.44598	19620.1
1.44694	19620.1
1.44796	19620.1
1.44899	19620.1
1.44995	19620.1
1.45097	19620.1
1.452	19620.1
1.45296	19620.1
1.45399	19620.1
1.45495	19620.1
1.45597	19620.1
1.457	19620.1
1.45796	19620.1
1.45898	19620.1
1.45995	19620.1
1.46097	19620.1
1.462	19620.1
1.46296	19620.1
1.46398	19620.1
1.46494	19620.1
1.46597	19620.1
1.46699	19620.1
1.46796	19620
1.46898	19620
1.46994	19620
1.47097	19620
1.47199	19620
1.47295	19620
1.47398	19620
1.47494	19620
1.47597	19620
1.47699	19620
1.47795	19620
1.47898	19620
1.47994	19620
1.48096	19620
1.48199	19620
1.48295	19620
1.48398	19620
1.48494	19620
1.48596	19620
1.48699	19620
1.48795	19620
1.48897	19620
1.49	19620
1.49096	19620
1.49199	19620
1.49295	19620
1.49397	19620
1.495	19620
1.49596	19620
1.49698	19620
1.49795	19620
1.49897	19620
1.5	19620
1.50096	19620
1.50198	19620
1.50294	19620
1.50397	19620
1.50499	19620
1.50596	19620
1.50698	19620
1.50794	19620
1.50897	19620
1.50999	19620
1.51095	19620
1.51198	19620
1.51294	19620
1.51397	19620
1.51499	19620
1.51595	19620
1.51698	19620
1.51794	19620
1.51896	19620
1.51999	19620
1.52095	19620
1.52198	19620
1.52294	19620
1.52396	19620
1.52499	19620
1.52595	19620
1.52697	19620
1.528	19620
1.52896	19620
1.52999	19620
1.53095	19620
1.53197	19620
1.533	19620.1
1.53396	19620.1
1.53498	19620.1
1.53595	19620.1
1.53697	19620.1
1.538	19620.1
1.53896	19620.1
1.53998	19620.2
1.54094	19620.2
1.54197	19620.2
1.54299	19620.2
1.54396	19620.2
1.54498	19620.2
1.54594	19620.2
1.54697	19620.2
1.54799	19620.2
1.54895	19620.2
1.54998	19620.2
1.55094	19620.2
1.55197	19620.1
1.55299	19620.1
1.55395	19620.1
1.55498	19620.1
1.55594	19620.1
1.55696	19620
1.55799	19620
1.55895	19620
1.55998	19620
1.56094	19620
1.56196	19620
1.56299	19620
1.56395	19620
1.56497	19619.9
1.566	19619.9
1.56696	19619.9
1.56799	19619.9
1.56895	19619.9
1.56997	19619.9
1.571	19619.9
1.57196	19619.8
1.57298	19619.8
1.57395	19619.8
1.57497	19619.8
1.576	19619.8
1.57696	19619.8
1.57798	19619.8
1.57894	19619.8
1.57997	19619.8
1.58099	19619.8
1.58196	19619.8
1.58298	19619.8
1.58394	19619.9
1.58497	19619.9
1.58599	19619.9
1.58695	19619.9
1.58798	19619.9
1.58894	19620
1.58997	19620
1.59099	19620
1.59195	19620
1.59298	19620
1.59394	19620
1.59496	19620
1.59599	19620.1
1.59695	19620.1
1.59798	19620.1
1.59894	19620.1
1.59996	19620.1
1.60099	19620.1
1.60195	19620.1
1.60297	19620.1
1.604	19620
1.60496	19620
1.60599	19620
1.60695	19620
1.60797	19620
1.609	19620
1.60996	19620
1.61098	19620
1.61194	19620
1.61297	19620
1.614	19620
1.61496	19620
1.61598	19620
1.61694	19620
1.61797	19620
1.61899	19620
1.61995	19620
1.62098	19620
1.62194	19620.1
1.62297	19620.1
1.62399	19620.1
1.62495	19620.1
1.62598	19620.1
1.62694	19620.1
1.62796	19620.1
1.62899	19620.1
1.62995	19620.1
1.63098	19620.1
1.63194	19620.1
1.63296	19620.1
1.63399	19620.1
1.63495	19620.1
1.63597	19620.1
1.63694	19620.1
1.63796	19620.1
1.63899	19620
1.63995	19620
1.64097	19620
1.642	19620
1.64296	19620
1.64398	19620
1.64495	19620
1.64597	19620
1.647	19620
1.64796	19620
1.64898	19620
1.64994	19620
1.65097	19620
1.652	19620
1.65296	19620
1.65398	19620
1.65494	19620
1.65597	19620
1.65699	19620
1.65795	19620
1.65898	19620
1.65994	19620.1
1.66097	19620.1
1.66199	19620.1
1.66295	19620.1
1.66398	19620.1
1.66494	19620.1
1.66596	19620.1
1.66699	19620.1
1.66795	19620.1
1.66898	19620
1.66994	19620
1.67096	19620
1.67199	19620
1.67295	19620
1.67397	19620
1.675	19620
1.67596	19620
1.67699	19620
1.67795	19620
1.67897	19620
1.68	19620
1.68096	19620
1.68198	19620
1.68295	19620
1.68397	19620
1.685	19620
1.68596	19620.1
1.68698	19620.1
1.68794	19620.1
1.68897	19620.1
1.68999	19620.1
1.69096	19620.1
1.69198	19620.1
1.69294	19620.1
1.69397	19620.1
1.69499	19620.1
1.69595	19620.1
1.69698	19620.1
1.69794	19620.1
1.69897	19620.1
1.69999	19620.1
1.70095	19620
1.70198	19620
1.70294	19620
1.70396	19620
1.70499	19620
1.70595	19620
1.70698	19620
1.70794	19620
1.70896	19620
1.70999	19620
1.71095	19620
1.71197	19620
1.713	19620
1.71396	19620
1.71499	19620
1.71595	19620
1.71697	19620
1.718	19620
1.71896	19620
1.71998	19620
1.72095	19620
1.72197	19620
1.723	19620
1.72396	19620
1.72498	19620
1.72594	19620
1.72697	19620
1.72799	19620
1.72896	19620
1.72998	19620
1.73094	19620
1.73197	19620
1.73299	19619.9
1.73395	19619.9
1.73498	19619.9
1.73594	19619.9
1.73697	19619.9
1.73799	19620
1.73895	19620
1.73998	19620
1.74094	19620
1.74196	19620
1.74299	19620
1.74395	19620
1.74498	19620
1.74594	19620
1.74696	19620
1.74799	19620
1.74895	19620
1.74997	19620
1.751	19620
1.75196	19620
1.75299	19620
1.75395	19620
1.75497	19620.1
1.756	19620.1
1.75696	19620.1
1.75798	19620.1
1.75895	19620.1
1.75997	19620.1
1.761	19620.1
1.76196	19620.1
1.76298	19620.1
1.76394	19620.1
1.76497	19620.1
1.76599	19620.1
1.76696	19620.1
1.76798	19620.1
1.76894	19620.1
1.76997	19620.1
1.77099	19620.1
1.77195	19620.1
1.77298	19620.1
1.77394	19620.1
1.77497	19620.1
1.77599	19620.1
1.77695	19620.1
1.77798	19620.1
1.77894	19620.1
1.77996	19620.1
1.78099	19620.1
1.78195	19620.1
1.78298	19620.1
1.78394	19620.1
1.78496	19620.1
1.78599	19620.1
1.78695	19620.1
1.78797	19620.1
1.789	19620.1
1.78996	19620.1
1.79099	19620.1
1.79195	19620.1
1.79297	19620.1
1.794	19620.1
1.79496	19620.1
1.79598	19620.1
1.79695	19620.1
1.79797	19620.1
1.799	19620.1
1.79996	19620.1
1.80098	19620.1
1.80194	19620.1
1.80297	19620.1
1.80399	19620.1
1.80496	19620.1
1.80598	19620.1
1.80694	19620.1
1.80797	19620.1
1.80899	19620.1
1.80995	19620.1
1.81098	19620.1
1.81194	19620.1
1.81297	19620.1
1.81399	19620.1
1.81495	19620.1
1.81598	19620.1
1.81694	19620.1
1.81796	19620.1
1.81899	19620.1
1.81995	19620
1.82098	19620
1.82194	19620.1
1.82296	19620
1.82399	19620
1.82495	19620
1.82597	19620
1.827	19620
1.82796	19620
1.82899	19620
1.82995	19620
1.83097	19620
1.832	19620
1.83296	19620
1.83398	19620
1.83494	19620
1.83597	19619.9
1.837	19619.9
1.83796	19619.9
1.83898	19619.9
1.83994	19619.9
1.84097	19619.9
1.84199	19619.9
1.84295	19619.9
1.84398	19619.9
1.84494	19619.9
1.84597	19619.9
1.84699	19619.9
1.84795	19619.9
1.84898	19619.9
1.84994	19620
1.85096	19620
1.85199	19620
1.85295	19620
1.85398	19620
1.85494	19620
1.85596	19620
1.85699	19620.1
1.85795	19620.1
1.85898	19620.1
1.85994	19620.1
1.86096	19620.1
1.86199	19620.1
1.86295	19620.1
1.86397	19620.1
1.865	19620.1
1.86596	19620.1
1.86699	19620.1
1.86795	19620.1
1.86897	19620.1
1.87	19620.1
1.87096	19620.1
1.87198	19620.1
1.87294	19620.1
1.87397	19620.1
1.875	19620.1
1.87596	19620.1
1.87698	19620.1
1.87794	19620.1
1.87897	19620.1
1.87999	19620.1
1.88095	19620.1
1.88198	19620.1
1.88294	19620.1
1.88397	19620.1
1.88499	19620.1
1.88595	19620.1
1.88698	19620.1
1.88794	19620.1
1.88896	19620.1
1.88999	19620.1
1.89095	19620.1
1.89198	19620.1
1.89294	19620.1
1.89396	19620.1
1.89499	19620.1
1.89595	19620.1
1.89697	19620.1
1.89794	19620.1
1.89896	19620.1
1.89999	19620.1
1.90095	19620.1
1.90197	19620.1
1.903	19620.1
1.90396	19620.1
1.90498	19620.1
1.90595	19620.1
1.90697	19620.1
1.908	19620.1
1.90896	19620.1
1.90998	19620.1
1.91094	19620.1
1.91197	19620.1
1.91299	19620.1
1.91396	19620.1
1.91498	19620
1.91594	19620
1.91697	19620
1.91799	19620
1.91895	19620
1.91998	19620
1.92094	19620
1.92197	19620
1.92299	19620
1.92395	19620.1
1.92498	19620.1
1.92594	19620.1
1.92696	19620.1
1.92799	19620.1
1.92895	19620.2
1.92998	19620.2
1.93094	19620.2
1.93196	19620.2
1.93299	19620.2
1.93395	19620.2
1.93497	19620.2
1.936	19620.2
1.93696	19620.2
1.93799	19620.2
1.93895	19620.2
1.93997	19620.2
1.941	19620.2
1.94196	19620.2
1.94298	19620.2
1.94395	19620.2
1.94497	19620.2
1.946	19620.2
1.94696	19620.2
1.94798	19620.2
1.94894	19620.2
1.94997	19620.1
1.95099	19620.1
1.95196	19620.1
1.95298	19620.1
1.95394	19620.1
1.95497	19620.1
1.95599	19620.1
1.95695	19620.1
1.95798	19620.1
1.95894	19620.1
1.95997	19620
1.96099	19620
1.96195	19620
1.96298	19620
1.96394	19620
1.96496	19619.9
1.96599	19619.9
1.96695	19619.9
1.96798	19619.9
1.96894	19619.9
1.96996	19619.8
1.97099	19619.8
1.97195	19619.8
1.97297	19619.8
1.974	19619.8
1.97496	19619.8
1.97599	19619.8
1.97695	19619.8
1.97797	19619.8
1.979	19619.8
1.97996	19619.9
1.98098	19619.9
1.98195	19619.9
1.98297	19619.9
1.984	19619.9
1.98496	19620
1.98598	19620
1.98694	19620
1.98797	19620
1.98899	19620
1.98996	19620
1.99098	19620.1
1.99194	19620.1
1.99297	19620.1
1.99399	19620.1
1.99495	19620.1
1.99598	19620.1
1.99694	19620.1
1.99797	19620.1
[truncated: 6,002 more rows]
