# Supplementary material for: An Efficient Contact Model for the Simulation of Cargo Airdrop Extraction Phase
Source: Hindawi journal article supplement (doi:10.1155/2018/9895451), 2018-10-17
Supplement: f1 [file 9895451.f1.zip › FEM_results/deg2_fd5000_fric_motion.csv]

time	2 X-displ	2 Y-displ	2 Z-displ	2 Xrot-displ	2 Yrot-displ	2 Zrot-displ	2 X-vel	2 Y-vel	2 Z-vel	2 Xrot-vel	2 Yrot-vel	2 Zrot-vel
0	0	0	0	0	0	0	0	0	-0.00062863	0	0	0
0.000961207	0	0	-4.8339e-006	0	0	0	0	0	-0.010058	0	0	0
0.0019865	0	0	-1.998e-005	0	0	0	0	0	-0.020116	0	0	0
0.0029477	0	0	-4.3546e-005	0	0	0	0	0	-0.029546	0	0	0
0.00397299	0	0	-7.8672e-005	0	0	0	0	0	-0.039604	0	0	0
0.00499828	0	0	-0.00012411	0	0	0	0	0	-0.049662	0	0	0
0.00595949	0	0	-0.00017608	0	0	0	0	0	-0.059091	0	0	0
0.00698477	0	0	-0.0002415	0	0	0	0	0	-0.069149	0	0	0
0.00794598	0	0	-0.00031219	0	0	0	0	0	-0.078579	0	0	0
0.00897127	0	0	-0.00039759	0	0	0	0	0	-0.088637	0	0	0
0.00999656	0	0	-0.0004933	0	0	0	0	0	-0.098695	0	0	0
0.0109578	0	0	-0.0005924	0	0	0	0	0	-0.10812	0	0	0
0.0119831	0	0	-0.00070809	0	0	0	0	0	-0.11818	0	0	0
0.0129443	0	0	-0.00082592	0	0	0	0	0	-0.12761	0	0	0
0.0139695	0	0	-0.00096159	0	0	0	0	0	-0.13767	0	0	0
0.0149948	0	0	-0.0011076	0	0	0	0	0	-0.14773	0	0	0
0.015956	0	0	-0.0012538	0	0	0	0	0	-0.15716	0	0	0
0.0169813	0	0	-0.0014198	0	0	0	0	0	-0.16722	0	0	0
0.0179425	0	0	-0.0015847	0	0	0	0	0	-0.17664	0	0	0
0.0189678	0	0	-0.0017707	0	0	0	0	0	-0.1867	0	0	0
0.0199931	0	0	-0.0019669	0	0	0	0	0	-0.19676	0	0	0
0.0209543	0	0	-0.0021603	0	0	0	0	0	-0.20619	0	0	0
0.0219796	0	0	-0.0023765	0	0	0	0	0	-0.21625	0	0	0
0.0229408	0	0	-0.0025886	0	0	0	0	0	-0.22568	0	0	0
0.0239661	0	0	-0.0028248	0	0	0	0	0	-0.23574	0	0	0
0.0249914	0	0	-0.0030714	0	0	0	0	0	-0.24579	0	0	0
0.0259526	0	0	-0.0033119	0	0	0	0	0	-0.25522	0	0	0
0.0269779	0	0	-0.0035784	0	0	0	0	0	-0.26528	0	0	0
0.0279391	0	0	-0.0038376	0	0	0	0	0	-0.27471	0	0	0
0.0289644	0	0	-0.0041241	0	0	0	0	0	-0.28477	0	0	0
0.0299897	0	0	-0.0044209	0	0	0	0	0	-0.29483	0	0	0
0.0309509	0	0	-0.0047085	0	0	0	0	0	-0.30426	0	0	0
0.0319762	0	3.0091e-008	-0.0050239	-3.536e-008	0	0	0	0.00042066	-0.28628	-0.00081852	0	0
0.0329374	0	1.3199e-006	-0.0051225	-5.8532e-006	0	0	0	0.0030503	0.14863	-0.0097806	0	0
0.0339627	0	6.6567e-006	-0.0048576	-9.273e-006	0	0	0	0.0061169	0.28729	0.0007034	0	0
0.0349879	0	1.2928e-005	-0.0045679	-8.5518e-006	0	0	0	0.0061169	0.27723	0.0007034	0	0
0.0359492	0	1.8808e-005	-0.0043056	-7.8757e-006	0	0	0	0.0061169	0.26781	0.0007034	0	0
0.0369744	0	2.508e-005	-0.0040359	-7.1545e-006	0	0	0	0.0061169	0.25775	0.0007034	0	0
0.0379997	0	3.1351e-005	-0.0037765	-6.4333e-006	0	0	0	0.0061169	0.24769	0.0007034	0	0
0.0389609	0	3.7231e-005	-0.0035426	-5.7572e-006	0	0	0	0.0061169	0.23826	0.0007034	0	0
0.0399862	0	4.3502e-005	-0.0033032	-5.036e-006	0	0	0	0.0061169	0.2282	0.0007034	0	0
0.0409474	0	4.9382e-005	-0.0030881	-4.3599e-006	0	0	0	0.0061169	0.21877	0.0007034	0	0
0.0419727	0	5.5654e-005	-0.0028686	-3.6387e-006	0	0	0	0.0061169	0.20871	0.0007034	0	0
0.042998	0	6.1925e-005	-0.0026594	-2.9175e-006	0	0	0	0.0061169	0.19866	0.0007034	0	0
0.0439592	0	6.7805e-005	-0.0024727	-2.2414e-006	0	0	0	0.0061169	0.18923	0.0007034	0	0
0.0449845	0	7.4076e-005	-0.0022835	-1.5202e-006	0	0	0	0.0061169	0.17917	0.0007034	0	0
0.0459457	0	7.9956e-005	-0.0021155	-8.4408e-007	0	0	0	0.0061169	0.16974	0.0007034	0	0
0.046971	0	8.6228e-005	-0.0019463	-1.2289e-007	0	0	0	0.0061169	0.15968	0.0007034	0	0
0.0479963	0	9.2499e-005	-0.0017875	5.9829e-007	0	0	0	0.0061169	0.14962	0.0007034	0	0
0.0489575	0	9.8379e-005	-0.0016479	1.2744e-006	0	0	0	0.0061169	0.14019	0.0007034	0	0
0.0499828	0	0.00010465	-0.001509	1.9956e-006	0	0	0	0.0061169	0.13014	0.0007034	0	0
0.050944	0	0.00011053	-0.0013881	2.6717e-006	0	0	0	0.0061169	0.12071	0.0007034	0	0
0.0519693	0	0.0001168	-0.0012692	3.3929e-006	0	0	0	0.0061169	0.11065	0.0007034	0	0
0.0529946	0	0.00012307	-0.0011606	4.1141e-006	0	0	0	0.0061169	0.10059	0.0007034	0	0
0.0539558	0	0.00012895	-0.0010681	4.7902e-006	0	0	0	0.0061169	0.09116	0.0007034	0	0
0.0549811	0	0.00013522	-0.00097948	5.5114e-006	0	0	0	0.0061169	0.081102	0.0007034	0	0
0.0559423	0	0.0001411	-0.00090575	6.1875e-006	0	0	0	0.0061169	0.071673	0.0007034	0	0
0.0569676	0	0.00014738	-0.0008371	6.9087e-006	0	0	0	0.0061169	0.061615	0.0007034	0	0
0.0579928	0	0.00015365	-0.00077876	7.6299e-006	0	0	0	0.0061169	0.051557	0.0007034	0	0
0.0589541	0	0.00015953	-0.00073344	8.306e-006	0	0	0	0.0061169	0.042127	0.0007034	0	0
0.0599793	0	0.0001658	-0.00069508	9.0272e-006	0	0	0	0.0061169	0.032069	0.0007034	0	0
0.0609405	0	0.00017168	-0.00066848	9.7033e-006	0	0	0	0.0061169	0.02264	0.0007034	0	0
0.0619658	0	0.00017795	-0.00065011	1.0424e-005	0	0	0	0.0061169	0.012582	0.0007034	0	0
0.0629911	0	0.00018422	-0.00064204	1.1146e-005	0	0	0	0.0061169	0.0025235	0.0007034	0	0
0.0639523	0	0.0001901	-0.00064384	1.1822e-005	0	0	0	0.0061169	-0.0069059	0.0007034	0	0
0.0649776	0	0.00019637	-0.00065576	1.2543e-005	0	0	0	0.0061169	-0.016964	0.0007034	0	0
0.0659388	0	0.00020225	-0.00067629	1.3219e-005	0	0	0	0.0061169	-0.026393	0.0007034	0	0
0.0669641	0	0.00020852	-0.00070819	1.394e-005	0	0	0	0.0061169	-0.036452	0.0007034	0	0
0.0679894	0	0.0002148	-0.0007504	1.4661e-005	0	0	0	0.0061169	-0.04651	0.0007034	0	0
0.0689506	0	0.00022067	-0.00079933	1.5338e-005	0	0	0	0.0061169	-0.055939	0.0007034	0	0
0.0699759	0	0.00022695	-0.00086152	1.6059e-005	0	0	0	0.0061169	-0.065997	0.0007034	0	0
0.0709371	0	0.00023283	-0.00092918	1.6735e-005	0	0	0	0.0061169	-0.075427	0.0007034	0	0
0.0719624	0	0.0002391	-0.0010114	1.7456e-005	0	0	0	0.0061169	-0.085485	0.0007034	0	0
0.0729877	0	0.00024537	-0.0011038	1.8177e-005	0	0	0	0.0061169	-0.095543	0.0007034	0	0
0.0739489	0	0.00025125	-0.0011999	1.8853e-005	0	0	0	0.0061169	-0.10497	0.0007034	0	0
0.0749742	0	0.00025752	-0.0013124	1.9575e-005	0	0	0	0.0061169	-0.11503	0.0007034	0	0
0.0759995	0	0.00026379	-0.0014351	2.0296e-005	0	0	0	0.0061169	-0.12509	0.0007034	0	0
0.0769607	0	0.00026967	-0.0015596	2.0972e-005	0	0	0	0.0061169	-0.13452	0.0007034	0	0
0.077986	0	0.00027594	-0.0017024	2.1693e-005	0	0	0	0.0061169	-0.14458	0.0007034	0	0
0.0789472	0	0.00028182	-0.0018455	2.2369e-005	0	0	0	0.0061169	-0.15401	0.0007034	0	0
0.0799725	0	0.00028809	-0.0020083	2.309e-005	0	0	0	0.0061169	-0.16406	0.0007034	0	0
0.0809977	0	0.00029437	-0.0021813	2.3812e-005	0	0	0	0.0061169	-0.17412	0.0007034	0	0
0.0819589	0	0.00030025	-0.0023529	2.4488e-005	0	0	0	0.0061169	-0.18355	0.0007034	0	0
0.0829842	0	0.00030652	-0.002546	2.5209e-005	0	0	0	0.0061169	-0.19361	0.0007034	0	0
0.0839454	0	0.0003124	-0.0027363	2.5885e-005	0	0	0	0.0061169	-0.20304	0.0007034	0	0
0.0849707	0	0.00031867	-0.0029493	2.6606e-005	0	0	0	0.0061169	-0.2131	0.0007034	0	0
0.085996	0	0.00032494	-0.0031726	2.7327e-005	0	0	0	0.0061169	-0.22315	0.0007034	0	0
0.0869572	0	0.00033082	-0.0033913	2.8003e-005	0	0	0	0.0061169	-0.23258	0.0007034	0	0
0.0879825	0	0.00033709	-0.0036346	2.8725e-005	0	0	0	0.0061169	-0.24264	0.0007034	0	0
0.0889437	0	0.00034297	-0.0038721	2.9401e-005	0	0	0	0.0061169	-0.25207	0.0007034	0	0
0.089969	0	0.00034924	-0.0041354	3.0122e-005	0	0	0	0.0061169	-0.26213	0.0007034	0	0
0.0909943	0	0.00035551	-0.004409	3.0843e-005	0	0	0	0.0061169	-0.27219	0.0007034	0	0
0.0919555	0	0.00036139	-0.0046748	3.1519e-005	0	0	0	0.0061169	-0.28162	0.0007034	0	0
0.0929808	0	0.00036767	-0.0049684	3.2223e-005	0	0	0	0.0061523	-0.29019	-0.0019742	0	0
0.093942	0	0.00037572	-0.0051398	-5.1644e-007	0	0	0	0.016109	0.034431	-0.051678	0	0
0.0949673	0	0.00040428	-0.0049385	-2.5975e-005	0	0	0	0.033775	0.2683	-0.00020992	0	0
0.0959926	0	0.00043891	-0.0046683	-2.619e-005	0	0	0	0.033775	0.25824	-0.00020992	0	0
0.0969538	0	0.00047137	-0.0044243	-2.6392e-005	0	0	0	0.033775	0.24881	-0.00020992	0	0
0.0979791	0	0.000506	-0.004174	-2.6607e-005	0	0	0	0.033775	0.23875	-0.00020992	0	0
0.0989403	0	0.00053847	-0.0039488	-2.6809e-005	0	0	0	0.033775	0.22932	-0.00020992	0	0
0.0999656	0	0.0005731	-0.0037185	-2.7024e-005	0	0	0	0.033775	0.21926	-0.00020992	0	0
0.100991	0	0.00060773	-0.0034985	-2.724e-005	0	0	0	0.033775	0.20921	-0.00020992	0	0
0.101952	0	0.00064019	-0.0033017	-2.7441e-005	0	0	0	0.033775	0.19978	-0.00020992	0	0
0.102977	0	0.00067482	-0.0031017	-2.7657e-005	0	0	0	0.033775	0.18972	-0.00020992	0	0
0.103939	0	0.00070729	-0.0029235	-2.7858e-005	0	0	0	0.033775	0.18029	-0.00020992	0	0
0.104964	0	0.00074192	-0.0027435	-2.8074e-005	0	0	0	0.033775	0.17023	-0.00020992	0	0
0.105989	0	0.00077655	-0.0025738	-2.8289e-005	0	0	0	0.033775	0.16017	-0.00020992	0	0
0.10695	0	0.00080901	-0.0024241	-2.8491e-005	0	0	0	0.033775	0.15074	-0.00020992	0	0
0.107976	0	0.00084364	-0.0022744	-2.8706e-005	0	0	0	0.033775	0.14068	-0.00020992	0	0
0.108937	0	0.00087611	-0.0021434	-2.8908e-005	0	0	0	0.033775	0.13126	-0.00020992	0	0
0.109962	0	0.00091074	-0.0020136	-2.9123e-005	0	0	0	0.033775	0.1212	-0.00020992	0	0
0.110987	0	0.00094537	-0.0018942	-2.9338e-005	0	0	0	0.033775	0.11114	-0.00020992	0	0
0.111949	0	0.00097783	-0.0017916	-2.954e-005	0	0	0	0.033775	0.10171	-0.00020992	0	0
0.112974	0	0.0010125	-0.0016922	-2.9755e-005	0	0	0	0.033775	0.091652	-0.00020992	0	0
0.113999	0	0.0010471	-0.001603	-2.997e-005	0	0	0	0.033775	0.081594	-0.00020992	0	0
0.11496	0	0.0010796	-0.0015288	-3.0172e-005	0	0	0	0.033775	0.072164	-0.00020992	0	0
0.115986	0	0.0011142	-0.0014597	-3.0387e-005	0	0	0	0.033775	0.062106	-0.00020992	0	0
0.116947	0	0.0011467	-0.0014042	-3.0589e-005	0	0	0	0.033775	0.052677	-0.00020992	0	0
0.117972	0	0.0011813	-0.001355	-3.0804e-005	0	0	0	0.033775	0.042619	-0.00020992	0	0
0.118997	0	0.0012159	-0.0013162	-3.102e-005	0	0	0	0.033775	0.03256	-0.00020992	0	0
0.119959	0	0.0012484	-0.0012891	-3.1221e-005	0	0	0	0.033775	0.023131	-0.00020992	0	0
0.120984	0	0.001283	-0.0012702	-3.1437e-005	0	0	0	0.033775	0.013073	-0.00020992	0	0
0.121945	0	0.0013155	-0.0012619	-3.1638e-005	0	0	0	0.033775	0.0036435	-0.00020992	0	0
0.12297	0	0.0013501	-0.001263	-3.1854e-005	0	0	0	0.033775	-0.0064146	-0.00020992	0	0
0.123996	0	0.0013847	-0.0012744	-3.2069e-005	0	0	0	0.033775	-0.016473	-0.00020992	0	0
0.124957	0	0.0014172	-0.0012945	-3.2271e-005	0	0	0	0.033775	-0.025902	-0.00020992	0	0
0.125982	0	0.0014518	-0.0013258	-3.2486e-005	0	0	0	0.033775	-0.03596	-0.00020992	0	0
0.126943	0	0.0014843	-0.0013646	-3.2688e-005	0	0	0	0.033775	-0.04539	-0.00020992	0	0
0.127969	0	0.0015189	-0.001416	-3.2903e-005	0	0	0	0.033775	-0.055448	-0.00020992	0	0
0.128994	0	0.0015535	-0.0014777	-3.3118e-005	0	0	0	0.033775	-0.065506	-0.00020992	0	0
0.129955	0	0.001586	-0.0015449	-3.332e-005	0	0	0	0.033775	-0.074935	-0.00020992	0	0
0.130981	0	0.0016206	-0.0016266	-3.3535e-005	0	0	0	0.033775	-0.084993	-0.00020992	0	0
0.131942	0	0.0016531	-0.0017125	-3.3737e-005	0	0	0	0.033775	-0.094423	-0.00020992	0	0
0.132967	0	0.0016877	-0.0018141	-3.3952e-005	0	0	0	0.033775	-0.10448	-0.00020992	0	0
0.133992	0	0.0017224	-0.0019261	-3.4167e-005	0	0	0	0.033775	-0.11454	-0.00020992	0	0
0.134954	0	0.0017548	-0.0020404	-3.4369e-005	0	0	0	0.033775	-0.12397	-0.00020992	0	0
0.135979	0	0.0017895	-0.0021723	-3.4584e-005	0	0	0	0.033775	-0.13403	-0.00020992	0	0
0.13694	0	0.0018219	-0.0023054	-3.4786e-005	0	0	0	0.033775	-0.14346	-0.00020992	0	0
0.137965	0	0.0018566	-0.0024573	-3.5001e-005	0	0	0	0.033775	-0.15351	-0.00020992	0	0
0.138991	0	0.0018912	-0.0026195	-3.5216e-005	0	0	0	0.033775	-0.16357	-0.00020992	0	0
0.139952	0	0.0019237	-0.002781	-3.5418e-005	0	0	0	0.033775	-0.173	-0.00020992	0	0
0.140977	0	0.0019583	-0.0029632	-3.5633e-005	0	0	0	0.033775	-0.18306	-0.00020992	0	0
0.141938	0	0.0019907	-0.0031434	-3.5835e-005	0	0	0	0.033775	-0.19249	-0.00020992	0	0
0.142964	0	0.0020254	-0.0033456	-3.605e-005	0	0	0	0.033775	-0.20255	-0.00020992	0	0
0.143989	0	0.00206	-0.0035581	-3.6266e-005	0	0	0	0.033775	-0.21261	-0.00020992	0	0
0.14495	0	0.0020925	-0.0037667	-3.6467e-005	0	0	0	0.033775	-0.22203	-0.00020992	0	0
0.145975	0	0.0021271	-0.0039992	-3.6683e-005	0	0	0	0.033775	-0.23209	-0.00020992	0	0
0.146937	0	0.0021596	-0.0042265	-3.6884e-005	0	0	0	0.033775	-0.24152	-0.00020992	0	0
0.147962	0	0.0021942	-0.004479	-3.71e-005	0	0	0	0.033775	-0.25158	-0.00020992	0	0
0.148987	0	0.0022288	-0.0047417	-3.7315e-005	0	0	0	0.033775	-0.26164	-0.00020992	0	0
0.149948	0	0.0022613	-0.0049974	-3.7517e-005	0	0	0	0.033775	-0.27107	-0.00020992	0	0
0.150974	0	0.0022927	-0.0051962	-8.9088e-006	0	0	0	0.022287	-0.007446	0.051352	0	0
0.151999	0	0.0023071	-0.0050333	2.7236e-005	0	0	0	0.0091618	0.24833	0.010895	0	0
0.15296	0	0.0023159	-0.0047989	3.7708e-005	0	0	0	0.0091618	0.2389	0.010895	0	0
0.153985	0	0.0023253	-0.0045588	4.8879e-005	0	0	0	0.0091618	0.22884	0.010895	0	0
0.154947	0	0.0023341	-0.004343	5.9351e-005	0	0	0	0.0091618	0.21941	0.010895	0	0
0.155972	0	0.0023435	-0.0041229	7.0522e-005	0	0	0	0.0091618	0.20935	0.010895	0	0
0.156997	0	0.0023529	-0.0039131	8.1692e-005	0	0	0	0.0091618	0.19929	0.010895	0	0
0.157958	0	0.0023617	-0.0037257	9.2165e-005	0	0	0	0.0091618	0.18987	0.010895	0	0
0.158984	0	0.0023711	-0.0035359	0.00010334	0	0	0	0.0091618	0.17981	0.010895	0	0
0.159945	0	0.0023799	-0.0033673	0.00011381	0	0	0	0.0091618	0.17038	0.010895	0	0
0.16097	0	0.0023893	-0.0031975	0.00012498	0	0	0	0.0091618	0.16032	0.010895	0	0
0.161995	0	0.0023987	-0.0030379	0.00013615	0	0	0	0.0091618	0.15026	0.010895	0	0
0.162957	0	0.0024075	-0.0028977	0.00014662	0	0	0	0.0091618	0.14083	0.010895	0	0
0.163982	0	0.0024169	-0.0027582	0.00015779	0	0	0	0.0091618	0.13077	0.010895	0	0
0.164943	0	0.0024257	-0.0026367	0.00016826	0	0	0	0.0091618	0.12134	0.010895	0	0
0.165968	0	0.0024351	-0.0025171	0.00017943	0	0	0	0.0091618	0.11129	0.010895	0	0
0.166994	0	0.0024445	-0.0024078	0.00019061	0	0	0	0.0091618	0.10123	0.010895	0	0
0.167955	0	0.0024533	-0.0023148	0.00020108	0	0	0	0.0091618	0.091799	0.010895	0	0
0.16898	0	0.0024627	-0.0022255	0.00021225	0	0	0	0.0091618	0.081741	0.010895	0	0
0.169941	0	0.0024715	-0.0021511	0.00022272	0	0	0	0.0091618	0.072312	0.010895	0	0
0.170967	0	0.0024809	-0.0020818	0.00023389	0	0	0	0.0091618	0.062253	0.010895	0	0
0.171992	0	0.0024903	-0.0020228	0.00024506	0	0	0	0.0091618	0.052195	0.010895	0	0
0.172953	0	0.0024991	-0.0019769	0.00025553	0	0	0	0.0091618	0.042766	0.010895	0	0
0.173979	0	0.0025085	-0.0019379	0.00026671	0	0	0	0.0091618	0.032708	0.010895	0	0
0.17494	0	0.0025173	-0.0019107	0.00027718	0	0	0	0.0091618	0.023278	0.010895	0	0
0.175965	0	0.0025267	-0.0018916	0.00028835	0	0	0	0.0091618	0.01322	0.010895	0	0
0.17699	0	0.0025361	-0.0018829	0.00029952	0	0	0	0.0091618	0.0031623	0.010895	0	0
0.177952	0	0.0025449	-0.0018841	0.00030999	0	0	0	0.0091618	-0.0062671	0.010895	0	0
0.178977	0	0.0025543	-0.0018954	0.00032116	0	0	0	0.0091618	-0.016325	0.010895	0	0
0.179938	0	0.0025631	-0.0019153	0.00033163	0	0	0	0.0091618	-0.025755	0.010895	0	0
0.180963	0	0.0025725	-0.0019465	0.0003428	0	0	0	0.0091618	-0.035813	0.010895	0	0
0.181989	0	0.0025819	-0.0019881	0.00035398	0	0	0	0.0091618	-0.045871	0.010895	0	0
0.18295	0	0.0025907	-0.0020364	0.00036445	0	0	0	0.0091618	-0.0553	0.010895	0	0
0.183975	0	0.0026001	-0.0020979	0.00037562	0	0	0	0.0091618	-0.065358	0.010895	0	0
0.184936	0	0.0026089	-0.002165	0.00038609	0	0	0	0.0091618	-0.074788	0.010895	0	0
0.185962	0	0.0026183	-0.0022465	0.00039726	0	0	0	0.0091618	-0.084846	0.010895	0	0
0.186987	0	0.0026277	-0.0023383	0.00040843	0	0	0	0.0091618	-0.094904	0.010895	0	0
0.187948	0	0.0026365	-0.0024338	0.0004189	0	0	0	0.0091618	-0.10433	0.010895	0	0
0.188973	0	0.0026459	-0.0025456	0.00043008	0	0	0	0.0091618	-0.11439	0.010895	0	0
0.189999	0	0.0026553	-0.0026677	0.00044125	0	0	0	0.0091618	-0.12445	0.010895	0	0
0.19096	0	0.0026641	-0.0027916	0.00045172	0	0	0	0.0091618	-0.13388	0.010895	0	0
0.191985	0	0.0026735	-0.0029337	0.00046289	0	0	0	0.0091618	-0.14394	0.010895	0	0
0.192946	0	0.0026823	-0.0030762	0.00047336	0	0	0	0.0091618	-0.15337	0.010895	0	0
0.193972	0	0.0026917	-0.0032383	0.00048453	0	0	0	0.0091618	-0.16342	0.010895	0	0
0.194997	0	0.0027011	-0.0034107	0.0004957	0	0	0	0.0091618	-0.17348	0.010895	0	0
0.195958	0	0.0027099	-0.0035817	0.00050617	0	0	0	0.0091618	-0.18291	0.010895	0	0
0.196983	0	0.0027193	-0.0037741	0.00051735	0	0	0	0.0091618	-0.19297	0.010895	0	0
0.197945	0	0.0027281	-0.0039638	0.00052782	0	0	0	0.0091618	-0.2024	0.010895	0	0
0.19897	0	0.0027375	-0.0041761	0.00053899	0	0	0	0.0091618	-0.21246	0.010895	0	0
0.199995	0	0.0027468	-0.0043988	0.00055016	0	0	0	0.0091618	-0.22252	0.010895	0	0
0.200956	0	0.0027556	-0.0046165	0.00055969	0	0	0	0.0090492	-0.22813	0.0021034	0	0
0.201982	0	0.0027647	-0.0048297	0.00050811	0	0	0	0.010466	-0.16742	-0.1413	0	0
0.202943	0	0.0027801	-0.0049464	0.00028447	0	0	0	0.021768	-0.076883	-0.32144	0	0
0.203968	0	0.0028041	-0.0050169	-6.9383e-005	0	0	0	0.023775	-0.070308	-0.34917	0	0
0.204993	0	0.002835	-0.0050353	-0.00031952	0	0	0	0.041939	0.079437	-0.057391	0	0
0.205955	0	0.0028796	-0.0048944	-0.00024752	0	0	0	0.046525	0.18589	0.15832	0	0
0.20698	0	0.0029273	-0.0047078	-8.3295e-005	0	0	0	0.046451	0.17677	0.16034	0	0
0.207941	0	0.0029719	-0.0045421	7.0829e-005	0	0	0	0.046451	0.16734	0.16034	0	0
0.208966	0	0.0030195	-0.0043754	0.00023523	0	0	0	0.046451	0.15728	0.16034	0	0
0.209992	0	0.0030672	-0.0042189	0.00039963	0	0	0	0.046451	0.14722	0.16034	0	0
0.210953	0	0.0031118	-0.0040817	0.00055375	0	0	0	0.046451	0.13779	0.16034	0	0
0.211978	0	0.0031594	-0.0039452	0.00071815	0	0	0	0.046451	0.12773	0.16034	0	0
0.212939	0	0.0032041	-0.0038267	0.00087227	0	0	0	0.046451	0.11831	0.16034	0	0
0.213965	0	0.0032517	-0.0037102	0.0010367	0	0	0	0.046451	0.10825	0.16034	0	0
0.21499	0	0.0032993	-0.0036041	0.0012011	0	0	0	0.046451	0.098189	0.16034	0	0
0.215951	0	0.003344	-0.0035139	0.0013552	0	0	0	0.046451	0.088759	0.16034	0	0
0.216977	0	0.0033916	-0.0034277	0.0015196	0	0	0	0.046451	0.078701	0.16034	0	0
0.217938	0	0.0034363	-0.0033563	0.0016737	0	0	0	0.046451	0.069272	0.16034	0	0
0.218963	0	0.0034839	-0.0032901	0.001838	0	0	0	0.046436	0.059596	0.15941	0	0
0.219988	0	0.0035314	-0.0032324	0.001998	0	0	0	0.04626	0.053624	0.14948	0	0
0.22095	0	0.0035757	-0.0031803	0.0021303	0	0	0	0.045714	0.056271	0.12061	0	0
0.221975	0	0.0036221	-0.0031181	0.0022318	0	0	0	0.044779	0.066433	0.072569	0	0
0.222936	0	0.0036648	-0.0030496	0.0022804	0	0	0	0.043883	0.076076	0.027219	0	0
0.223961	0	0.0037094	-0.0029693	0.0022912	0	0	0	0.043243	0.079363	-0.0047533	0	0
0.224987	0	0.0037536	-0.00289	0.0022796	0	0	0	0.043016	0.073987	-0.016181	0	0
0.225948	0	0.0037949	-0.0028225	0.0022626	0	0	0	0.042971	0.065457	-0.018391	0	0
0.226973	0	0.003839	-0.0027603	0.0022437	0	0	0	0.042971	0.055398	-0.018391	0	0
0.227998	0	0.003883	-0.0027083	0.0022249	0	0	0	0.042971	0.04534	-0.018391	0	0
0.22896	0	0.0039243	-0.0026689	0.0022072	0	0	0	0.042971	0.035911	-0.018391	0	0
0.229985	0	0.0039684	-0.002637	0.0021884	0	0	0	0.042971	0.025853	-0.018391	0	0
0.230946	0	0.0040097	-0.0026163	0.0021707	0	0	0	0.042971	0.016423	-0.018391	0	0
0.231971	0	0.0040538	-0.0026043	0.0021518	0	0	0	0.042971	0.0063653	-0.018391	0	0
0.232997	0	0.0040978	-0.0026026	0.002133	0	0	0	0.042971	-0.0036927	-0.018391	0	0
0.233958	0	0.0041391	-0.0026104	0.0021153	0	0	0	0.042971	-0.013122	-0.018391	0	0
0.234983	0	0.0041832	-0.0026287	0.0020964	0	0	0	0.042971	-0.02318	-0.018391	0	0
0.235944	0	0.0042245	-0.0026552	0.0020787	0	0	0	0.042971	-0.03261	-0.018391	0	0
0.23697	0	0.0042685	-0.0026935	0.0020599	0	0	0	0.042971	-0.042668	-0.018391	0	0
0.237995	0	0.0043126	-0.0027421	0.002041	0	0	0	0.042971	-0.052726	-0.018391	0	0
0.238956	0	0.0043539	-0.002797	0.0020234	0	0	0	0.042971	-0.062155	-0.018391	0	0
0.239981	0	0.004398	-0.0028655	0.0020045	0	0	0	0.042971	-0.072213	-0.018391	0	0
0.240943	0	0.0044393	-0.0029392	0.0019868	0	0	0	0.042971	-0.081643	-0.018391	0	0
0.241968	0	0.0044833	-0.0030277	0.001968	0	0	0	0.042971	-0.091701	-0.018391	0	0
0.242993	0	0.0045274	-0.0031266	0.0019491	0	0	0	0.042971	-0.10176	-0.018391	0	0
0.243954	0	0.0045687	-0.0032286	0.0019313	0	0	0	0.04296	-0.11088	-0.01915	0	0
0.24498	0	0.0046127	-0.0033459	0.0019087	0	0	0	0.04281	-0.11746	-0.027612	0	0
0.245941	0	0.0046536	-0.0034587	0.0018718	0	0	0	0.042306	-0.11565	-0.054469	0	0
0.246966	0	0.0046966	-0.0035727	0.0017938	0	0	0	0.04138	-0.10502	-0.10335	0	0
0.247991	0	0.004739	-0.0036743	0.0016626	0	0	0	0.041746	-0.093335	-0.15311	0	0
0.248953	0	0.0047798	-0.003762	0.0015016	0	0	0	0.043108	-0.090431	-0.18033	0	0
0.249978	0	0.0048243	-0.0038571	0.0013113	0	0	0	0.043559	-0.096713	-0.18878	0	0
0.250939	0	0.0048661	-0.0039542	0.0011295	0	0	0	0.043581	-0.10597	-0.18917	0	0
0.251964	0	0.0049108	-0.0040676	0.00093556	0	0	0	0.043581	-0.11603	-0.18917	0	0
0.25299	0	0.0049555	-0.0041914	0.00074161	0	0	0	0.043581	-0.12609	-0.18917	0	0
0.253951	0	0.0049974	-0.0043169	0.00055978	0	0	0	0.043581	-0.13552	-0.18917	0	0
0.254976	0	0.0050421	-0.0044607	0.00036582	0	0	0	0.043581	-0.14558	-0.18917	0	0
0.255937	0	0.005084	-0.0046048	0.00018399	0	0	0	0.043581	-0.15501	-0.18917	0	0
0.256963	0	0.0051287	-0.0047686	-9.9577e-006	0	0	0	0.043581	-0.16506	-0.18917	0	0
0.257988	0	0.0051733	-0.0049426	-0.00020391	0	0	0	0.043583	-0.17507	-0.18904	0	0
0.258949	0	0.0052178	-0.0050893	-0.00033267	0	0	0	0.051747	-0.090827	-0.0062228	0	0
0.259975	0	0.0052689	-0.0050944	-0.00018243	0	0	0	0.04648	0.066078	0.27524	0	0
0.261	0	0.0053162	-0.0050249	0.00011227	0	0	0	0.046017	0.063273	0.28908	0	0
0.261961	0	0.0053601	-0.0049607	0.00037389	0	0	0	0.044792	0.083723	0.22618	0	0
0.262986	0	0.0054043	-0.004842	0.00052763	0	0	0	0.041237	0.15058	0.065829	0	0
0.263948	0	0.0054431	-0.0046837	0.00055195	0	0	0	0.039747	0.17113	-0.00059872	0	0
0.264973	0	0.0054838	-0.0045123	0.00054939	0	0	0	0.03969	0.16199	-0.0028133	0	0
0.265998	0	0.0055245	-0.004351	0.0005465	0	0	0	0.03969	0.15193	-0.0028133	0	0
0.266959	0	0.0055626	-0.0042092	0.0005438	0	0	0	0.03969	0.1425	-0.0028133	0	0
0.267985	0	0.0056033	-0.004068	0.00054091	0	0	0	0.03969	0.13244	-0.0028133	0	0
0.268946	0	0.0056415	-0.0039449	0.00053821	0	0	0	0.03969	0.12301	-0.0028133	0	0
0.269971	0	0.0056822	-0.0038236	0.00053532	0	0	0	0.03969	0.11295	-0.0028133	0	0
0.270996	0	0.0057228	-0.0037126	0.00053244	0	0	0	0.03969	0.1029	-0.0028133	0	0
0.271958	0	0.005761	-0.0036179	0.00052973	0	0	0	0.03969	0.093466	-0.0028133	0	0
0.272983	0	0.0058017	-0.0035269	0.00052685	0	0	0	0.03969	0.083408	-0.0028133	0	0
0.273944	0	0.0058398	-0.003451	0.00052415	0	0	0	0.03969	0.073978	-0.0028133	0	0
0.274969	0	0.0058805	-0.00338	0.00052126	0	0	0	0.03969	0.06392	-0.0028133	0	0
0.275995	0	0.0059212	-0.0033193	0.00051838	0	0	0	0.03969	0.053862	-0.0028133	0	0
0.276956	0	0.0059594	-0.0032717	0.00051567	0	0	0	0.03969	0.044433	-0.0028133	0	0
0.277981	0	0.0060001	-0.003231	0.00051279	0	0	0	0.03969	0.034375	-0.0028133	0	0
0.278942	0	0.0060382	-0.0032022	0.00051008	0	0	0	0.03969	0.024945	-0.0028133	0	0
0.279968	0	0.0060789	-0.0031815	0.0005072	0	0	0	0.03969	0.014887	-0.0028133	0	0
0.280993	0	0.0061196	-0.003171	0.00050432	0	0	0	0.03969	0.0048291	-0.0028133	0	0
0.281954	0	0.0061578	-0.0031706	0.00050161	0	0	0	0.03969	-0.0046004	-0.0028133	0	0
0.282979	0	0.0061985	-0.0031802	0.00049873	0	0	0	0.03969	-0.014658	-0.0028133	0	0
0.283941	0	0.0062366	-0.0031985	0.00049602	0	0	0	0.03969	-0.024088	-0.0028133	0	0
0.284966	0	0.0062773	-0.003228	0.00049314	0	0	0	0.03969	-0.034146	-0.0028133	0	0
0.285991	0	0.006318	-0.0032679	0.00049025	0	0	0	0.03969	-0.044204	-0.0028133	0	0
0.286952	0	0.0063561	-0.0033146	0.00048755	0	0	0	0.03969	-0.053633	-0.0028133	0	0
0.287978	0	0.0063968	-0.0033744	0.00048466	0	0	0	0.03969	-0.063692	-0.0028133	0	0
0.288939	0	0.006435	-0.0034399	0.00048196	0	0	0	0.03969	-0.073121	-0.0028133	0	0
0.289964	0	0.0064757	-0.0035197	0.00047908	0	0	0	0.03969	-0.083179	-0.0028133	0	0
0.29099	0	0.0065164	-0.0036098	0.00047619	0	0	0	0.03969	-0.093237	-0.0028133	0	0
0.291951	0	0.0065545	-0.0037036	0.00047349	0	0	0	0.03969	-0.10267	-0.0028133	0	0
0.292976	0	0.0065952	-0.0038137	0.0004706	0	0	0	0.03969	-0.11272	-0.0028133	0	0
0.293937	0	0.0066334	-0.0039263	0.0004679	0	0	0	0.03969	-0.12215	-0.0028133	0	0
0.294962	0	0.0066741	-0.0040564	0.00046501	0	0	0	0.03969	-0.13221	-0.0028133	0	0
0.295988	0	0.0067148	-0.0041968	0.00046213	0	0	0	0.03969	-0.14227	-0.0028133	0	0
0.296949	0	0.0067529	-0.0043378	0.00045943	0	0	0	0.03969	-0.1517	-0.0028133	0	0
0.297974	0	0.0067936	-0.0044981	0.00045654	0	0	0	0.03969	-0.16176	-0.0028133	0	0
0.299	0	0.0068343	-0.0046688	0.00045366	0	0	0	0.03969	-0.17182	-0.0028133	0	0
0.299961	0	0.0068724	-0.0048379	0.00045033	0	0	0	0.039605	-0.17875	-0.0086299	0	0
0.300986	0	0.0069123	-0.0050087	0.00040381	0	0	0	0.037663	-0.14007	-0.11195	0	0
0.301947	0	0.00695	-0.0051125	0.00022907	0	0	0	0.042568	-0.076072	-0.24974	0	0
0.302973	0	0.006995	-0.0051838	-4.8287e-005	0	0	0	0.044374	-0.070947	-0.27414	0	0
0.303998	0	0.0070464	-0.0052084	-0.00023596	0	0	0	0.059712	0.060196	-0.027586	0	0
0.304959	0	0.007104	-0.0050977	-0.00016453	0	0	0	0.058643	0.14508	0.1367	0	0
0.305984	0	0.0071641	-0.0049535	-2.368e-005	0	0	0	0.058609	0.13536	0.13743	0	0
0.306946	0	0.0072204	-0.0048276	0.00010842	0	0	0	0.058609	0.12593	0.13743	0	0
0.307971	0	0.0072805	-0.0047033	0.00024932	0	0	0	0.058609	0.11587	0.13743	0	0
0.308996	0	0.0073406	-0.0045894	0.00039022	0	0	0	0.058609	0.10581	0.13743	0	0
0.309957	0	0.0073969	-0.0044919	0.00052232	0	0	0	0.058609	0.096381	0.13743	0	0
0.310983	0	0.007457	-0.0043979	0.00066322	0	0	0	0.058609	0.086323	0.13743	0	0
0.311944	0	0.0075133	-0.0043192	0.00079531	0	0	0	0.058609	0.076894	0.13743	0	0
0.312969	0	0.0075734	-0.0042452	0.00093621	0	0	0	0.058609	0.066836	0.13743	0	0
0.313994	0	0.0076335	-0.0041815	0.0010771	0	0	0	0.058601	0.056995	0.1369	0	0
0.314956	0	0.0076898	-0.0041299	0.0012062	0	0	0	0.058459	0.050907	0.12884	0	0
0.315981	0	0.0077495	-0.0040776	0.0013266	0	0	0	0.05792	0.052743	0.10059	0	0
0.316942	0	0.0078048	-0.0040234	0.0014051	0	0	0	0.057104	0.060984	0.058983	0	0
0.317967	0	0.007863	-0.003957	0.001445	0	0	0	0.056304	0.067868	0.018924	0	0
0.318993	0	0.0079205	-0.0038872	0.0014524	0	0	0	0.055871	0.066816	-0.0026459	0	0
0.319954	0	0.0079741	-0.003826	0.0014469	0	0	0	0.055764	0.059553	-0.0079511	0	0
0.320979	0	0.0080313	-0.0037697	0.0014383	0	0	0	0.055755	0.049668	-0.0083762	0	0
0.32194	0	0.0080849	-0.0037261	0.0014303	0	0	0	0.055755	0.040238	-0.0083762	0	0
0.322966	0	0.008142	-0.0036897	0.0014217	0	0	0	0.055755	0.03018	-0.0083762	0	0
0.323991	0	0.0081992	-0.0036636	0.0014131	0	0	0	0.055755	0.020122	-0.0083762	0	0
0.324952	0	0.0082528	-0.0036485	0.0014051	0	0	0	0.055755	0.010693	-0.0083762	0	0
0.325977	0	0.0083099	-0.0036424	0.0013965	0	0	0	0.055755	0.00063448	-0.0083762	0	0
0.326939	0	0.0083635	-0.003646	0.0013884	0	0	0	0.055755	-0.008795	-0.0083762	0	0
0.327964	0	0.0084207	-0.0036598	0.0013798	0	0	0	0.055755	-0.018853	-0.0083762	0	0
0.328989	0	0.0084779	-0.003684	0.0013713	0	0	0	0.055755	-0.028911	-0.0083762	0	0
0.32995	0	0.0085315	-0.003716	0.0013632	0	0	0	0.055755	-0.038341	-0.0083762	0	0
0.330976	0	0.0085886	-0.0037602	0.0013546	0	0	0	0.055755	-0.048399	-0.0083762	0	0
0.331937	0	0.0086422	-0.0038109	0.0013466	0	0	0	0.055755	-0.057828	-0.0083762	0	0
0.332962	0	0.0086994	-0.003875	0.001338	0	0	0	0.055755	-0.067886	-0.0083762	0	0
0.333988	0	0.0087565	-0.0039495	0.0013294	0	0	0	0.055754	-0.077911	-0.0084568	0	0
0.334949	0	0.0088101	-0.0040281	0.00132	0	0	0	0.055688	-0.085774	-0.012288	0	0
0.335974	0	0.0088671	-0.0041178	0.0013	0	0	0	0.055334	-0.087837	-0.031404	0	0
0.336999	0	0.0089235	-0.0042053	0.0012504	0	0	0	0.054575	-0.08122	-0.07071	0	0
0.337961	0	0.0089756	-0.0042793	0.001163	0	0	0	0.053736	-0.072628	-0.11302	0	0
0.338986	0	0.0090304	-0.0043518	0.0010311	0	0	0	0.053371	-0.07033	-0.14202	0	0
0.339947	0	0.0090818	-0.0044217	0.00089007	0	0	0	0.053646	-0.076486	-0.14944	0	0
0.340972	0	0.0091368	-0.0045048	0.00073655	0	0	0	0.053666	-0.086388	-0.14979	0	0
0.341998	0	0.0091919	-0.0045982	0.00058296	0	0	0	0.053666	-0.096447	-0.14979	0	0
0.342959	0	0.0092434	-0.0046951	0.00043898	0	0	0	0.053666	-0.10588	-0.14979	0	0
0.343984	0	0.0092985	-0.0048085	0.0002854	0	0	0	0.053666	-0.11593	-0.14979	0	0
0.344945	0	0.0093501	-0.0049242	0.00014141	0	0	0	0.053666	-0.12536	-0.14979	0	0
0.345971	0	0.0094051	-0.0050575	-1.2169e-005	0	0	0	0.053666	-0.13542	-0.14979	0	0
0.346996	0	0.0094601	-0.005201	-0.00016526	0	0	0	0.053947	-0.14124	-0.14061	0	0
0.347957	0	0.0095133	-0.0052975	-0.0002223	0	0	0	0.054087	-0.027658	0.068131	0	0
0.348982	0	0.0095655	-0.0052638	-4.8221e-005	0	0	0	0.049068	0.064338	0.22903	0	0
0.349944	0	0.0096127	-0.0052055	0.00017043	0	0	0	0.048859	0.060908	0.2162	0	0
0.350969	0	0.0096618	-0.0051251	0.00034521	0	0	0	0.046465	0.10404	0.10672	0	0
0.351994	0	0.0097083	-0.0049998	0.00040479	0	0	0	0.044516	0.13443	0.019653	0	0
0.352955	0	0.0097509	-0.0048718	0.00041662	0	0	0	0.04429	0.12913	0.010015	0	0
0.353981	0	0.0097963	-0.0047442	0.00042689	0	0	0	0.04429	0.11907	0.010015	0	0
0.354942	0	0.0098389	-0.004634	0.00043652	0	0	0	0.04429	0.10964	0.010015	0	0
0.355967	0	0.0098843	-0.0045264	0.00044678	0	0	0	0.04429	0.099584	0.010015	0	0
0.356992	0	0.0099297	-0.0044292	0.00045705	0	0	0	0.04429	0.089526	0.010015	0	0
0.357954	0	0.0099723	-0.0043473	0.00046668	0	0	0	0.04429	0.080096	0.010015	0	0
0.358979	0	0.010018	-0.00427	0.00047695	0	0	0	0.04429	0.070038	0.010015	0	0
0.35994	0	0.01006	-0.0042069	0.00048657	0	0	0	0.04429	0.060609	0.010015	0	0
0.360965	0	0.010106	-0.0041496	0.00049684	0	0	0	0.04429	0.050551	0.010015	0	0
0.361991	0	0.010151	-0.0041026	0.00050711	0	0	0	0.04429	0.040493	0.010015	0	0
0.362952	0	0.010194	-0.004068	0.00051673	0	0	0	0.04429	0.031063	0.010015	0	0
0.363977	0	0.010239	-0.0040409	0.000527	0	0	0	0.04429	0.021005	0.010015	0	0
0.364938	0	0.010282	-0.004025	0.00053663	0	0	0	0.04429	0.011576	0.010015	0	0
0.365964	0	0.010327	-0.0040179	0.0005469	0	0	0	0.04429	0.0015176	0.010015	0	0
0.366989	0	0.010372	-0.0040212	0.00055716	0	0	0	0.04429	-0.0085405	0.010015	0	0
0.36795	0	0.010415	-0.0040337	0.00056679	0	0	0	0.04429	-0.01797	0.010015	0	0
0.368975	0	0.01046	-0.0040569	0.00057706	0	0	0	0.04429	-0.028028	0.010015	0	0
0.369937	0	0.010503	-0.0040881	0.00058669	0	0	0	0.04429	-0.037457	0.010015	0	0
0.370962	0	0.010548	-0.0041313	0.00059695	0	0	0	0.04429	-0.047516	0.010015	0	0
0.371987	0	0.010594	-0.0041849	0.00060722	0	0	0	0.04429	-0.057574	0.010015	0	0
0.372948	0	0.010636	-0.0042444	0.00061685	0	0	0	0.04429	-0.067003	0.010015	0	0
0.373974	0	0.010682	-0.004318	0.00062712	0	0	0	0.04429	-0.077061	0.010015	0	0
0.374999	0	0.010727	-0.0044018	0.00063738	0	0	0	0.04429	-0.087119	0.010015	0	0
0.37596	0	0.01077	-0.0044898	0.00064701	0	0	0	0.04429	-0.096549	0.010015	0	0
0.376986	0	0.010815	-0.0045936	0.00065728	0	0	0	0.04429	-0.10661	0.010015	0	0
0.377947	0	0.010858	-0.0047003	0.00066689	0	0	0	0.044288	-0.11592	0.0097301	0	0
0.378972	0	0.010903	-0.0048208	0.00066932	0	0	0	0.043823	-0.11484	-0.016123	0	0
0.379997	0	0.010947	-0.0049263	0.00061459	0	0	0	0.042064	-0.085598	-0.10382	0	0
0.380959	0	0.010988	-0.0049953	0.00047692	0	0	0	0.043077	-0.060162	-0.17835	0	0
0.381984	0	0.011033	-0.0050564	0.00028257	0	0	0	0.043959	-0.062994	-0.19365	0	0
0.382945	0	0.011075	-0.0051212	9.6427e-005	0	0	0	0.043959	-0.072423	-0.19365	0	0
0.38397	0	0.01112	-0.0052003	-0.00010212	0	0	0	0.043959	-0.082482	-0.19365	0	0
0.384996	0	0.011166	-0.0052775	-0.00027506	0	0	0	0.049601	-0.041305	-0.089155	0	0
0.385957	0	0.011216	-0.0052642	-0.00025481	0	0	0	0.050768	0.068397	0.12863	0	0
0.386982	0	0.011267	-0.0051826	-9.153e-005	0	0	0	0.049689	0.078403	0.16749	0	0
0.387943	0	0.011315	-0.0051114	6.9463e-005	0	0	0	0.049689	0.068973	0.16749	0	0
0.388969	0	0.011366	-0.0050456	0.00024119	0	0	0	0.049689	0.058915	0.16749	0	0
0.389994	0	0.011417	-0.00499	0.00041282	0	0	0	0.049673	0.049382	0.16624	0	0
0.390955	0	0.011465	-0.0049422	0.00056213	0	0	0	0.049065	0.054127	0.13376	0	0
0.39198	0	0.011514	-0.0048759	0.00066409	0	0	0	0.047524	0.077761	0.058017	0	0
0.392942	0	0.011559	-0.0047935	0.00069296	0	0	0	0.046423	0.091313	0.0054306	0	0
0.393967	0	0.011607	-0.0047009	0.00068939	0	0	0	0.046138	0.086853	-0.0078609	0	0
0.394992	0	0.011654	-0.0046166	0.00068123	0	0	0	0.046135	0.076835	-0.0079614	0	0
0.395953	0	0.011698	-0.004547	0.00067358	0	0	0	0.046135	0.067406	-0.0079614	0	0
0.396979	0	0.011746	-0.0044827	0.00066542	0	0	0	0.046135	0.057348	-0.0079614	0	0
0.39794	0	0.01179	-0.0044318	0.00065776	0	0	0	0.046135	0.047918	-0.0079614	0	0
0.398965	0	0.011837	-0.0043875	0.0006496	0	0	0	0.046135	0.03786	-0.0079614	0	0
0.39999	0	0.011885	-0.0043536	0.00064144	0	0	0	0.046135	0.027802	-0.0079614	0	0
0.400952	0	0.011929	-0.0043311	0.00063379	0	0	0	0.046135	0.018373	-0.0079614	0	0
0.401977	0	0.011976	-0.0043171	0.00062562	0	0	0	0.046135	0.0083145	-0.0079614	0	0
0.402938	0	0.012021	-0.0043133	0.00061797	0	0	0	0.046135	-0.0011149	-0.0079614	0	0
0.403963	0	0.012068	-0.0043193	0.00060981	0	0	0	0.046135	-0.011173	-0.0079614	0	0
0.404989	0	0.012115	-0.0043356	0.00060164	0	0	0	0.046135	-0.021231	-0.0079614	0	0
0.40595	0	0.012159	-0.0043602	0.00059399	0	0	0	0.046135	-0.030661	-0.0079614	0	0
0.406975	0	0.012207	-0.0043965	0.00058583	0	0	0	0.046135	-0.040719	-0.0079614	0	0
0.407936	0	0.012251	-0.0044398	0.00057818	0	0	0	0.046135	-0.050148	-0.0079614	0	0
0.408962	0	0.012298	-0.0044961	0.00057001	0	0	0	0.046135	-0.060206	-0.0079614	0	0
0.409987	0	0.012346	-0.0045627	0.00056185	0	0	0	0.046135	-0.070264	-0.0079614	0	0
0.410948	0	0.01239	-0.0046344	0.0005542	0	0	0	0.046135	-0.079694	-0.0079614	0	0
0.411973	0	0.012437	-0.004721	0.00054604	0	0	0	0.046135	-0.089752	-0.0079614	0	0
0.412999	0	0.012485	-0.0048178	0.00053787	0	0	0	0.046135	-0.09981	-0.0079614	0	0
0.41396	0	0.012529	-0.0049179	0.00053003	0	0	0	0.04611	-0.10853	-0.0096578	0	0
0.414985	0	0.012576	-0.005029	0.00050848	0	0	0	0.045471	-0.10366	-0.043852	0	0
0.415946	0	0.012619	-0.0051185	0.00043438	0	0	0	0.044018	-0.079305	-0.11834	0	0
0.416972	0	0.012665	-0.00519	0.00028217	0	0	0	0.045409	-0.064202	-0.17122	0	0
0.417997	0	0.012712	-0.0052591	0.00010327	0	0	0	0.045643	-0.072416	-0.17517	0	0
0.418958	0	0.012755	-0.0053329	-6.5097e-005	0	0	0	0.045643	-0.081846	-0.17517	0	0
0.419984	0	0.012805	-0.0053984	-0.00019995	0	0	0	0.052997	-0.013832	-0.031126	0	0
0.420945	0	0.012855	-0.0053611	-0.00013909	0	0	0	0.049999	0.079277	0.14013	0	0
0.42197	0	0.012906	-0.0052807	1.2355e-005	0	0	0	0.049724	0.073604	0.14877	0	0
0.422995	0	0.012957	-0.00521	0.00016488	0	0	0	0.049724	0.063546	0.14877	0	0
0.423957	0	0.013004	-0.0051531	0.00030763	0	0	0	0.049692	0.055085	0.14648	0	0
0.424982	0	0.013055	-0.0050956	0.00044463	0	0	0	0.049123	0.060761	0.11089	0	0
0.425943	0	0.013102	-0.0050299	0.00052549	0	0	0	0.048333	0.076993	0.053682	0	0
0.426968	0	0.013151	-0.0049463	0.00055903	0	0	0	0.047787	0.083585	0.015658	0	0
0.427994	0	0.0132	-0.0048634	0.00057017	0	0	0	0.047599	0.076394	0.0087445	0	0
0.428955	0	0.013246	-0.0047942	0.00057857	0	0	0	0.047598	0.06697	0.0087326	0	0
0.42998	0	0.013295	-0.0047304	0.00058752	0	0	0	0.047598	0.056912	0.0087326	0	0
0.430941	0	0.01334	-0.0046799	0.00059591	0	0	0	0.047598	0.047482	0.0087326	0	0
0.431967	0	0.013389	-0.0046361	0.00060487	0	0	0	0.047598	0.037424	0.0087326	0	0
0.432992	0	0.013438	-0.0046025	0.00061382	0	0	0	0.047598	0.027366	0.0087326	0	0
0.433953	0	0.013484	-0.0045805	0.00062221	0	0	0	0.047598	0.017937	0.0087326	0	0
0.434978	0	0.013533	-0.0045669	0.00063117	0	0	0	0.047598	0.0078786	0.0087326	0	0
0.43594	0	0.013578	-0.0045636	0.00063956	0	0	0	0.047598	-0.0015508	0.0087326	0	0
0.436965	0	0.013627	-0.00457	0.00064852	0	0	0	0.047598	-0.011609	0.0087326	0	0
0.43799	0	0.013676	-0.0045867	0.00065747	0	0	0	0.047598	-0.021667	0.0087326	0	0
0.438951	0	0.013722	-0.0046118	0.00066586	0	0	0	0.047598	-0.031096	0.0087326	0	0
0.439977	0	0.01377	-0.0046485	0.00067482	0	0	0	0.047598	-0.041155	0.0087326	0	0
0.440938	0	0.013816	-0.0046923	0.00068321	0	0	0	0.047598	-0.050584	0.0087326	0	0
0.441963	0	0.013865	-0.004749	0.00069216	0	0	0	0.047598	-0.060642	0.0087326	0	0
0.442988	0	0.013914	-0.0048156	0.00070012	0	0	0	0.047526	-0.068897	0.0043951	0	0
0.44395	0	0.013959	-0.0048822	0.00069521	0	0	0	0.047052	-0.067515	-0.020929	0	0
0.444975	0	0.014007	-0.004946	0.00065019	0	0	0	0.046028	-0.055216	-0.072286	0	0
0.445936	0	0.014051	-0.0049944	0.00056032	0	0	0	0.045212	-0.046769	-0.11342	0	0
0.446961	0	0.014097	-0.0050434	0.00043539	0	0	0	0.04538	-0.051147	-0.12634	0	0
0.447987	0	0.014144	-0.0051006	0.00030571	0	0	0	0.04539	-0.061135	-0.1265	0	0
0.448948	0	0.014187	-0.0051636	0.00018412	0	0	0	0.04539	-0.070564	-0.1265	0	0
0.449973	0	0.014234	-0.0052408	5.4428e-005	0	0	0	0.04539	-0.080622	-0.1265	0	0
0.450998	0	0.014281	-0.0053283	-7.5268e-005	0	0	0	0.04539	-0.09068	-0.1265	0	0
0.45196	0	0.014325	-0.0054146	-0.00018627	0	0	0	0.047355	-0.072105	-0.07076	0	0
0.452985	0	0.014372	-0.0054379	-0.00016391	0	0	0	0.044158	0.032051	0.12196	0	0
0.453946	0	0.014414	-0.0053943	-1.6582e-005	0	0	0	0.042945	0.04549	0.16287	0	0
0.454971	0	0.014458	-0.0053525	0.0001503	0	0	0	0.042922	0.036302	0.16088	0	0
0.455997	0	0.014501	-0.0053095	0.00029246	0	0	0	0.041659	0.055319	0.098884	0	0
0.456958	0	0.014541	-0.0052421	0.00034818	0	0	0	0.039869	0.084126	0.017022	0	0
0.457983	0	0.014581	-0.0051525	0.0003472	0	0	0	0.039256	0.086132	-0.010386	0	0
0.458944	0	0.014619	-0.0050738	0.00033706	0	0	0	0.03925	0.076774	-0.010563	0	0
0.45997	0	0.014659	-0.005	0.00032623	0	0	0	0.03925	0.066716	-0.010563	0	0
0.460995	0	0.014699	-0.0049364	0.0003154	0	0	0	0.03925	0.056657	-0.010563	0	0
0.461956	0	0.014737	-0.0048862	0.00030525	0	0	0	0.03925	0.047228	-0.010563	0	0
0.462982	0	0.014777	-0.0048426	0.00029442	0	0	0	0.03925	0.03717	-0.010563	0	0
0.463943	0	0.014815	-0.0048111	0.00028426	0	0	0	0.03925	0.027741	-0.010563	0	0
0.464968	0	0.014855	-0.0047875	0.00027343	0	0	0	0.03925	0.017682	-0.010563	0	0
0.465993	0	0.014896	-0.0047742	0.0002626	0	0	0	0.03925	0.0076244	-0.010563	0	0
0.466955	0	0.014933	-0.0047711	0.00025245	0	0	0	0.03925	-0.0018051	-0.010563	0	0
0.46798	0	0.014973	-0.0047778	0.00024162	0	0	0	0.03925	-0.011863	-0.010563	0	0
0.468941	0	0.015011	-0.0047934	0.00023147	0	0	0	0.03925	-0.021293	-0.010563	0	0
0.469966	0	0.015051	-0.0048201	0.00022063	0	0	0	0.03925	-0.031351	-0.010563	0	0
0.470992	0	0.015092	-0.004857	0.0002098	0	0	0	0.03925	-0.041409	-0.010563	0	0
0.471953	0	0.015129	-0.0049011	0.00019965	0	0	0	0.03925	-0.050838	-0.010563	0	0
0.472978	0	0.01517	-0.004958	0.00018882	0	0	0	0.03925	-0.060896	-0.010563	0	0
0.473939	0	0.015207	-0.0050208	0.00017867	0	0	0	0.03925	-0.070326	-0.010563	0	0
0.474965	0	0.015248	-0.0050977	0.00016784	0	0	0	0.03925	-0.080384	-0.010563	0	0
0.47599	0	0.015288	-0.005185	0.000157	0	0	0	0.03925	-0.090442	-0.010563	0	0
0.476951	0	0.015326	-0.0052761	0.00014685	0	0	0	0.03925	-0.099871	-0.010563	0	0
0.477976	0	0.015366	-0.0053834	0.00013601	0	0	0	0.039248	-0.1097	-0.011098	0	0
0.478938	0	0.015403	-0.0054854	0.00010982	0	0	0	0.038116	-0.091713	-0.064322	0	0
0.479963	0	0.015443	-0.005545	-7.8945e-006	0	0	0	0.043123	-0.0085576	-0.14186	0	0
0.480988	0	0.015493	-0.005502	-9.1563e-005	0	0	0	0.051901	0.087652	-0.0092027	0	0
0.481949	0	0.015542	-0.0054097	-7.8763e-005	0	0	0	0.051	0.095124	0.021029	0	0
0.482975	0	0.015595	-0.005317	-5.7202e-005	0	0	0	0.051	0.085066	0.021029	0	0
0.484	0	0.015647	-0.0052346	-3.5641e-005	0	0	0	0.051	0.075008	0.021029	0	0
0.484961	0	0.015696	-0.0051668	-1.5428e-005	0	0	0	0.051	0.065578	0.021029	0	0
0.485986	0	0.015748	-0.0051044	6.1332e-006	0	0	0	0.051	0.05552	0.021029	0	0
0.486948	0	0.015797	-0.0050552	2.6347e-005	0	0	0	0.051	0.046091	0.021029	0	0
0.487973	0	0.01585	-0.0050128	4.7907e-005	0	0	0	0.051	0.036033	0.021029	0	0
0.488998	0	0.015902	-0.0049807	6.9468e-005	0	0	0	0.051	0.025975	0.021029	0	0
0.489959	0	0.015951	-0.00496	8.9681e-005	0	0	0	0.051	0.016545	0.021029	0	0
0.490985	0	0.016003	-0.0049478	0.00011124	0	0	0	0.051	0.0064871	0.021029	0	0
0.491946	0	0.016052	-0.0049458	0.00013146	0	0	0	0.051	-0.0029424	0.021029	0	0
0.492971	0	0.016104	-0.0049537	0.00015302	0	0	0	0.051	-0.013	0.021029	0	0
0.493997	0	0.016157	-0.0049718	0.00017458	0	0	0	0.051	-0.023059	0.021029	0	0
0.494958	0	0.016206	-0.0049982	0.00019479	0	0	0	0.051	-0.032488	0.021029	0	0
0.495983	0	0.016258	-0.0050364	0.00021635	0	0	0	0.051	-0.042546	0.021029	0	0
0.496944	0	0.016307	-0.0050815	0.00023656	0	0	0	0.051	-0.051975	0.021029	0	0
0.497969	0	0.016359	-0.0051396	0.00025813	0	0	0	0.051	-0.062034	0.021029	0	0
0.498995	0	0.016412	-0.0052081	0.00027969	0	0	0	0.051	-0.072092	0.021029	0	0
0.499956	0	0.016461	-0.0052815	0.0002997	0	0	0	0.05097	-0.080601	0.018858	0	0
0.500981	0	0.016513	-0.0053613	0.00030197	0	0	0	0.050017	-0.068571	-0.029687	0	0
0.501942	0	0.01656	-0.0054135	0.00023552	0	0	0	0.048201	-0.038733	-0.11248	0	0
0.502968	0	0.016609	-0.005448	9.9007e-005	0	0	0	0.048309	-0.034602	-0.14235	0	0
0.503993	0	0.016659	-0.0054883	-4.6945e-005	0	0	0	0.048309	-0.04466	-0.14235	0	0
0.504954	0	0.016706	-0.0055233	-0.00015969	0	0	0	0.052346	-0.0086298	-0.055815	0	0
0.50598	0	0.016759	-0.0054924	-0.00014034	0	0	0	0.04989	0.062202	0.084236	0	0
0.506941	0	0.016807	-0.0054319	-4.9625e-005	0	0	0	0.049536	0.058955	0.096482	0	0
0.507966	0	0.016858	-0.0053763	4.9297e-005	0	0	0	0.049536	0.048897	0.096482	0	0
0.508991	0	0.016908	-0.005331	0.00014822	0	0	0	0.049536	0.038839	0.096482	0	0
0.509953	0	0.016956	-0.0052979	0.00024096	0	0	0	0.049536	0.029409	0.096482	0	0
0.510978	0	0.017007	-0.0052722	0.000339	0	0	0	0.049456	0.0214	0.091648	0	0
0.511939	0	0.017054	-0.0052507	0.00041536	0	0	0	0.048847	0.025788	0.060106	0	0
0.512964	0	0.017104	-0.0052183	0.00045243	0	0	0	0.047811	0.037993	0.0097583	0	0
0.51399	0	0.017152	-0.0051769	0.0004458	0	0	0	0.047208	0.040429	-0.01914	0	0
0.514951	0	0.017198	-0.0051411	0.00042458	0	0	0	0.047118	0.032709	-0.023249	0	0
0.515976	0	0.017246	-0.0051124	0.00040075	0	0	0	0.047118	0.022651	-0.023249	0	0
0.516937	0	0.017291	-0.0050949	0.0003784	0	0	0	0.047118	0.013221	-0.023249	0	0
0.517963	0	0.01734	-0.0050861	0.00035456	0	0	0	0.047118	0.0031633	-0.023249	0	0
0.518988	0	0.017388	-0.0050877	0.00033072	0	0	0	0.047118	-0.0068947	-0.023249	0	0
0.519949	0	0.017433	-0.0050986	0.00030838	0	0	0	0.047118	-0.016324	-0.023249	0	0
0.520974	0	0.017482	-0.0051202	0.00028454	0	0	0	0.047118	-0.026382	-0.023249	0	0
0.522	0	0.01753	-0.005152	0.0002607	0	0	0	0.047118	-0.03644	-0.023249	0	0
0.522961	0	0.017575	-0.0051913	0.00023836	0	0	0	0.047118	-0.04587	-0.023249	0	0
0.523986	0	0.017623	-0.0052432	0.00021452	0	0	0	0.047118	-0.055928	-0.023249	0	0
0.524947	0	0.017669	-0.0053011	0.00019217	0	0	0	0.047118	-0.065357	-0.023249	0	0
0.525973	0	0.017717	-0.005373	0.00016833	0	0	0	0.047118	-0.075415	-0.023249	0	0
0.526998	0	0.017765	-0.0054551	0.00014448	0	0	0	0.047115	-0.085314	-0.023628	0	0
0.527959	0	0.01781	-0.0055378	0.00011406	0	0	0	0.046589	-0.081978	-0.050596	0	0
0.528984	0	0.017857	-0.0056071	2.6701e-005	0	0	0	0.045509	-0.046547	-0.12427	0	0
0.529946	0	0.017905	-0.0056176	-7.0685e-005	0	0	0	0.053603	0.036843	-0.042567	0	0
0.530971	0	0.017959	-0.0055491	-6.3251e-005	0	0	0	0.05121	0.080604	0.038112	0	0
0.531996	0	0.018011	-0.0054712	-2.3922e-005	0	0	0	0.051197	0.07067	0.038376	0	0
0.532957	0	0.01806	-0.0054075	1.2965e-005	0	0	0	0.051197	0.061241	0.038376	0	0
0.533983	0	0.018113	-0.0053496	5.2312e-005	0	0	0	0.051197	0.051183	0.038376	0	0
0.534944	0	0.018162	-0.0053046	8.9199e-005	0	0	0	0.051197	0.041753	0.038376	0	0
0.535969	0	0.018215	-0.0052666	0.00012855	0	0	0	0.051197	0.031695	0.038376	0	0
0.536995	0	0.018267	-0.0052389	0.00016789	0	0	0	0.051197	0.021637	0.038376	0	0
0.537956	0	0.018316	-0.0052224	0.00020478	0	0	0	0.051197	0.012208	0.038376	0	0
0.538981	0	0.018369	-0.0052147	0.00024413	0	0	0	0.051197	0.0021498	0.038376	0	0
0.539942	0	0.018418	-0.0052169	0.00028101	0	0	0	0.051197	-0.0072797	0.038376	0	0
0.540968	0	0.01847	-0.0052292	0.00032036	0	0	0	0.051197	-0.017338	0.038376	0	0
0.541993	0	0.018523	-0.0052518	0.00035971	0	0	0	0.051197	-0.027396	0.038376	0	0
0.542954	0	0.018572	-0.0052816	0.0003949	0	0	0	0.051074	-0.033767	0.031154	0	0
0.543979	0	0.018624	-0.0053143	0.00041124	0	0	0	0.050326	-0.026961	-0.0072363	0	0
0.54494	0	0.018672	-0.0053343	0.00038165	0	0	0	0.049316	-0.014649	-0.056109	0	0
0.545966	0	0.018722	-0.0053476	0.000309	0	0	0	0.048786	-0.013893	-0.081	0	0
0.546991	0	0.018772	-0.0053662	0.00022483	0	0	0	0.048755	-0.023407	-0.082316	0	0
0.547952	0	0.018819	-0.0053929	0.00014571	0	0	0	0.048755	-0.032837	-0.082316	0	0
0.548978	0	0.018869	-0.0054314	6.1312e-005	0	0	0	0.048755	-0.042895	-0.082316	0	0
0.549939	0	0.018916	-0.0054769	-1.781e-005	0	0	0	0.048755	-0.052324	-0.082316	0	0
0.550964	0	0.018966	-0.0055354	-0.00010221	0	0	0	0.048759	-0.062236	-0.081982	0	0
0.551989	0	0.019016	-0.0055905	-0.00016061	0	0	0	0.047011	-0.029382	-0.0037656	0	0
0.552951	0	0.019059	-0.005591	-0.00010935	0	0	0	0.044053	0.024051	0.10502	0	0
0.553976	0	0.019104	-0.0055663	7.6305e-006	0	0	0	0.043734	0.019571	0.1158	0	0
0.554937	0	0.019146	-0.0055516	0.00011863	0	0	0	0.043681	0.011826	0.11204	0	0
0.555962	0	0.01919	-0.0055326	0.0002088	0	0	0	0.042356	0.031985	0.049079	0	0
0.556988	0	0.019233	-0.0054869	0.00022196	0	0	0	0.040827	0.054045	-0.018897	0	0
0.557949	0	0.019272	-0.0054358	0.00019624	0	0	0	0.04058	0.049273	-0.029557	0	0
0.558974	0	0.019314	-0.0053901	0.00016594	0	0	0	0.04058	0.039215	-0.029557	0	0
0.559999	0	0.019355	-0.0053548	0.00013563	0	0	0	0.04058	0.029157	-0.029557	0	0
0.560961	0	0.019394	-0.005331	0.00010722	0	0	0	0.04058	0.019728	-0.029557	0	0
0.561986	0	0.019436	-0.0053156	7.6918e-005	0	0	0	0.04058	0.0096695	-0.029557	0	0
0.562947	0	0.019475	-0.0053105	4.8508e-005	0	0	0	0.04058	0.00024002	-0.029557	0	0
0.563972	0	0.019517	-0.0053151	1.8203e-005	0	0	0	0.04058	-0.0098181	-0.029557	0	0
0.564998	0	0.019558	-0.00533	-1.2102e-005	0	0	0	0.04058	-0.019876	-0.029557	0	0
0.565959	0	0.019597	-0.0053533	-4.0512e-005	0	0	0	0.04058	-0.029306	-0.029557	0	0
0.566984	0	0.019639	-0.0053882	-7.0817e-005	0	0	0	0.04058	-0.039364	-0.029557	0	0
0.567945	0	0.019678	-0.0054303	-9.9227e-005	0	0	0	0.04058	-0.048793	-0.029557	0	0
0.568971	0	0.019719	-0.0054852	-0.00012953	0	0	0	0.04058	-0.058851	-0.029557	0	0
0.569996	0	0.019761	-0.0055497	-0.0001584	0	0	0	0.040411	-0.064331	-0.019894	0	0
0.570957	0	0.019799	-0.0056016	-0.00015025	0	0	0	0.038776	-0.036578	0.050545	0	0
0.571982	0	0.019838	-0.0056235	-6.1004e-005	0	0	0	0.037123	-0.012356	0.11355	0	0
0.572944	0	0.019874	-0.005639	4.8976e-005	0	0	0	0.037039	-0.019329	0.11091	0	0
0.573969	0	0.019911	-0.0056422	0.00012394	0	0	0	0.034661	0.024544	0.014172	0	0
0.574994	0	0.019945	-0.0055979	9.3617e-005	0	0	0	0.032801	0.052236	-0.057975	0	0
0.575955	0	0.019977	-0.0055516	3.7209e-005	0	0	0	0.032774	0.043138	-0.058759	0	0
0.576981	0	0.02001	-0.0055122	-2.3036e-005	0	0	0	0.032774	0.03308	-0.058759	0	0
0.577942	0	0.020042	-0.0054847	-7.9515e-005	0	0	0	0.032774	0.02365	-0.058759	0	0
0.578967	0	0.020075	-0.0054653	-0.00013976	0	0	0	0.032774	0.013592	-0.058759	0	0
0.579993	0	0.020109	-0.0054562	-0.0002	0	0	0	0.032774	0.0035342	-0.058759	0	0
0.580954	0	0.02014	-0.0054564	-0.00025521	0	0	0	0.032713	-0.0030082	-0.052352	0	0
0.581979	0	0.020174	-0.0054573	-0.00029392	0	0	0	0.03196	0.0040371	-0.016164	0	0
0.58294	0	0.020204	-0.0054484	-0.00029005	0	0	0	0.03106	0.014007	0.024601	0	0
0.583966	0	0.020236	-0.0054339	-0.00025416	0	0	0	0.03068	0.011682	0.041302	0	0
0.584991	0	0.020267	-0.0054267	-0.00021155	0	0	0	0.030672	0.0017517	0.041585	0	0
0.585952	0	0.020296	-0.0054292	-0.00017158	0	0	0	0.030672	-0.0076778	0.041585	0	0
0.586977	0	0.020328	-0.0054419	-0.00012894	0	0	0	0.030672	-0.017736	0.041585	0	0
0.587939	0	0.020357	-0.0054632	-8.8973e-005	0	0	0	0.030672	-0.027165	0.041585	0	0
0.588964	0	0.020389	-0.0054959	-4.6337e-005	0	0	0	0.030672	-0.037223	0.041585	0	0
0.589989	0	0.02042	-0.0055389	-3.7007e-006	0	0	0	0.030672	-0.047281	0.041585	0	0
0.59095	0	0.02045	-0.0055886	3.6271e-005	0	0	0	0.030672	-0.056711	0.041585	0	0
0.591976	0	0.020481	-0.0056509	7.7668e-005	0	0	0	0.030492	-0.061499	0.030834	0	0
0.592937	0	0.02051	-0.0056931	7.0501e-005	0	0	0	0.028057	-0.01575	-0.061366	0	0
0.593962	0	0.020539	-0.005688	-2.5075e-005	0	0	0	0.030049	0.019141	-0.097271	0	0
0.594987	0	0.020572	-0.0056542	-9.0976e-005	0	0	0	0.033819	0.048651	-0.025102	0	0
0.595949	0	0.020604	-0.0056026	-9.7725e-005	0	0	0	0.033184	0.054036	0.0036884	0	0
0.596974	0	0.020638	-0.0055519	-9.3604e-005	0	0	0	0.033173	0.044145	0.0040537	0	0
0.597999	0	0.020672	-0.0055115	-8.9448e-005	0	0	0	0.033173	0.034087	0.0040537	0	0
0.59896	0	0.020704	-0.0054829	-8.5552e-005	0	0	0	0.033173	0.024657	0.0040537	0	0
0.599986	0	0.020738	-0.0054625	-8.1395e-005	0	0	0	0.033173	0.014599	0.0040537	0	0
0.600947	0	0.02077	-0.0054527	-7.7499e-005	0	0	0	0.033173	0.00517	0.0040537	0	0
0.601972	0	0.020804	-0.0054522	-7.3343e-005	0	0	0	0.033173	-0.0048881	0.0040537	0	0
0.602997	0	0.020838	-0.0054621	-6.9186e-005	0	0	0	0.033173	-0.014946	0.0040537	0	0
0.603959	0	0.02087	-0.0054806	-6.529e-005	0	0	0	0.033173	-0.024376	0.0040537	0	0
0.604984	0	0.020904	-0.0055105	-6.1134e-005	0	0	0	0.033173	-0.034434	0.0040537	0	0
0.605945	0	0.020935	-0.0055478	-5.7237e-005	0	0	0	0.033173	-0.043863	0.0040537	0	0
0.60697	0	0.020969	-0.0055976	-5.3081e-005	0	0	0	0.033173	-0.053921	0.0040537	0	0
0.607996	0	0.021003	-0.0056577	-4.8916e-005	0	0	0	0.033172	-0.063795	0.0044612	0	0
0.608957	0	0.021035	-0.0057162	-3.2687e-005	0	0	0	0.032101	-0.046965	0.042824	0	0
0.609982	0	0.021066	-0.0057273	2.3497e-005	0	0	0	0.028035	0.032461	0.042017	0	0
0.610943	0	0.021092	-0.0056805	3.7898e-005	0	0	0	0.026415	0.055181	-0.0034513	0	0
0.611969	0	0.021119	-0.0056285	3.3792e-005	0	0	0	0.026394	0.045387	-0.0040596	0	0
0.612994	0	0.021146	-0.0055868	2.963e-005	0	0	0	0.026394	0.035329	-0.0040596	0	0
0.613955	0	0.021172	-0.005557	2.5728e-005	0	0	0	0.026394	0.025899	-0.0040596	0	0
0.61498	0	0.021199	-0.0055353	2.1566e-005	0	0	0	0.026394	0.015841	-0.0040596	0	0
0.615942	0	0.021224	-0.0055243	1.7664e-005	0	0	0	0.026394	0.0064118	-0.0040596	0	0
0.616967	0	0.021251	-0.0055226	1.3501e-005	0	0	0	0.026394	-0.0036463	-0.0040596	0	0
0.617992	0	0.021278	-0.0055312	9.3389e-006	0	0	0	0.026394	-0.013704	-0.0040596	0	0
0.618953	0	0.021304	-0.0055486	5.4367e-006	0	0	0	0.026394	-0.023134	-0.0040596	0	0
0.619979	0	0.021331	-0.0055771	1.2744e-006	0	0	0	0.026394	-0.033192	-0.0040596	0	0
0.62094	0	0.021356	-0.0056132	-2.6277e-006	0	0	0	0.026394	-0.042621	-0.0040596	0	0
0.621965	0	0.021383	-0.0056618	-6.79e-006	0	0	0	0.026394	-0.052679	-0.0040596	0	0
0.622991	0	0.02141	-0.0057204	-1.0602e-005	0	0	0	0.026297	-0.058837	0.0005162	0	0
0.623952	0	0.021434	-0.005749	-2.5367e-006	0	0	0	0.022585	0.01603	0.012718	0	0
0.624977	0	0.021455	-0.0057043	6.5521e-006	0	0	0	0.020261	0.052036	0.0050089	0	0
0.625938	0	0.021475	-0.0056586	1.1367e-005	0	0	0	0.020261	0.042606	0.0050089	0	0
0.626964	0	0.021496	-0.0056197	1.6502e-005	0	0	0	0.020261	0.032548	0.0050089	0	0
0.627989	0	0.021517	-0.0055912	2.1638e-005	0	0	0	0.020261	0.02249	0.0050089	0	0
0.62895	0	0.021536	-0.0055738	2.6452e-005	0	0	0	0.020261	0.013061	0.0050089	0	0
0.629975	0	0.021557	-0.0055652	3.1588e-005	0	0	0	0.020261	0.0030028	0.0050089	0	0
0.630937	0	0.021576	-0.0055666	3.6402e-005	0	0	0	0.020261	-0.0064267	0.0050089	0	0
0.631962	0	0.021597	-0.005578	4.1538e-005	0	0	0	0.020261	-0.016485	0.0050089	0	0
0.632987	0	0.021618	-0.0055997	4.6673e-005	0	0	0	0.020261	-0.026543	0.0050089	0	0
0.633948	0	0.021637	-0.0056295	5.1488e-005	0	0	0	0.020261	-0.035972	0.0050089	0	0
0.634974	0	0.021658	-0.0056712	5.662e-005	0	0	0	0.020261	-0.045955	0.0048332	0	0
0.635999	0	0.021679	-0.0057184	5.2028e-005	0	0	0	0.019576	-0.039532	-0.026319	0	0
0.63696	0	0.021697	-0.0057421	1.5297e-006	0	0	0	0.020992	-0.0041747	-0.070108	0	0
0.637985	0	0.021722	-0.0057245	-4.4558e-005	0	0	0	0.025639	0.037015	-0.01023	0	0
0.638947	0	0.021746	-0.0056851	-4.0569e-005	0	0	0	0.025032	0.03954	0.010683	0	0
0.639972	0	0.021772	-0.0056494	-2.9616e-005	0	0	0	0.025032	0.029482	0.010683	0	0
0.640997	0	0.021797	-0.005624	-1.8663e-005	0	0	0	0.025032	0.019424	0.010683	0	0
0.641958	0	0.021821	-0.0056096	-8.3945e-006	0	0	0	0.025032	0.0099943	0.010683	0	0
0.642984	0	0.021847	-0.0056042	2.5586e-006	0	0	0	0.025032	-6.3811e-005	0.010683	0	0
0.643945	0	0.021871	-0.0056085	1.2827e-005	0	0	0	0.025032	-0.0094933	0.010683	0	0
0.64497	0	0.021897	-0.005623	2.378e-005	0	0	0	0.025032	-0.019551	0.010683	0	0
0.645995	0	0.021922	-0.0056479	3.4734e-005	0	0	0	0.025032	-0.029609	0.010683	0	0
0.646957	0	0.021946	-0.0056806	4.5002e-005	0	0	0	0.025032	-0.039039	0.010683	0	0
0.647982	0	0.021972	-0.0057232	5.1322e-005	0	0	0	0.02463	-0.038955	-0.0090166	0	0
0.648943	0	0.021995	-0.0057488	1.712e-005	0	0	0	0.023272	-0.0096574	-0.064259	0	0
0.649968	0	0.022021	-0.00574	-3.8594e-005	0	0	0	0.027606	0.02731	-0.026064	0	0
0.650994	0	0.022049	-0.005704	-4.4414e-005	0	0	0	0.026799	0.037047	0.007279	0	0
0.651955	0	0.022075	-0.0056724	-3.6975e-005	0	0	0	0.026782	0.027859	0.0077945	0	0
0.65298	0	0.022102	-0.0056487	-2.8983e-005	0	0	0	0.026782	0.017801	0.0077945	0	0
0.653941	0	0.022128	-0.0056358	-2.1491e-005	0	0	0	0.026782	0.0083712	0.0077945	0	0
0.654967	0	0.022155	-0.005632	-1.35e-005	0	0	0	0.026782	-0.0016869	0.0077945	0	0
0.655992	0	0.022183	-0.0056386	-5.5082e-006	0	0	0	0.026782	-0.011745	0.0077945	0	0
0.656953	0	0.022209	-0.0056541	1.9839e-006	0	0	0	0.026782	-0.021174	0.0077945	0	0
0.657978	0	0.022236	-0.0056807	9.9755e-006	0	0	0	0.026782	-0.031232	0.0077945	0	0
0.65894	0	0.022262	-0.0057149	1.7468e-005	0	0	0	0.026782	-0.040662	0.0077945	0	0
0.659965	0	0.022289	-0.0057582	2.0207e-005	0	0	0	0.026154	-0.0346	-0.014607	0	0
0.66099	0	0.022314	-0.0057649	-1.0119e-005	0	0	0	0.022902	0.026805	-0.03197	0	0
0.661951	0	0.022336	-0.0057291	-2.7186e-005	0	0	0	0.021753	0.03998	-0.0069908	0	0
0.662977	0	0.022358	-0.0056927	-3.3797e-005	0	0	0	0.021733	0.030212	-0.0063811	0	0
0.663938	0	0.022379	-0.0056679	-3.993e-005	0	0	0	0.021733	0.020782	-0.0063811	0	0
0.664963	0	0.022401	-0.0056514	-4.6473e-005	0	0	0	0.021733	0.010724	-0.0063811	0	0
0.665989	0	0.022423	-0.0056452	-5.3015e-005	0	0	0	0.021733	0.00066603	-0.0063811	0	0
0.66695	0	0.022444	-0.0056488	-5.9149e-005	0	0	0	0.021733	-0.0087634	-0.0063811	0	0
0.667975	0	0.022467	-0.0056626	-6.5691e-005	0	0	0	0.021733	-0.018821	-0.0063811	0	0
0.668936	0	0.022488	-0.005685	-7.1814e-005	0	0	0	0.02173	-0.028136	-0.0061235	0	0
0.669962	0	0.02251	-0.005716	-7.2582e-005	0	0	0	0.021369	-0.029612	0.011102	0	0
0.670987	0	0.022531	-0.0057411	-4.2635e-005	0	0	0	0.020401	-0.018497	0.0495	0	0
0.671948	0	0.022551	-0.005758	1.2958e-005	0	0	0	0.019928	-0.017148	0.057099	0	0
0.672973	0	0.02257	-0.0057611	4.3848e-005	0	0	0	0.01795	0.016826	-0.0071887	0	0
0.673999	0	0.022588	-0.0057357	1.4884e-005	0	0	0	0.017032	0.024821	-0.03776	0	0
0.67496	0	0.022604	-0.005716	-2.1411e-005	0	0	0	0.017032	0.015391	-0.03776	0	0
0.675985	0	0.022622	-0.0057051	-6.0057e-005	0	0	0	0.017063	0.0056981	-0.036905	0	0
0.676946	0	0.022638	-0.0057013	-9.0016e-005	0	0	0	0.017357	0.0036968	-0.020907	0	0
0.677972	0	0.022656	-0.0056954	-9.756e-005	0	0	0	0.016749	0.0078282	0.0075707	0	0
0.678997	0	0.022673	-0.0056881	-8.1256e-005	0	0	0	0.016421	0.0045141	0.021573	0	0
0.679958	0	0.022689	-0.0056877	-5.9971e-005	0	0	0	0.016403	-0.004603	0.022258	0	0
0.680983	0	0.022705	-0.0056973	-3.715e-005	0	0	0	0.016403	-0.014661	0.022258	0	0
0.681945	0	0.022721	-0.0057156	-1.5756e-005	0	0	0	0.016403	-0.024091	0.022258	0	0
0.68297	0	0.022738	-0.0057451	7.0641e-006	0	0	0	0.016403	-0.034149	0.022258	0	0
0.683995	0	0.022755	-0.0057784	2.0693e-005	0	0	0	0.015354	-0.018499	-0.0091082	0	0
0.684956	0	0.022768	-0.0057736	-4.3219e-006	0	0	0	0.01359	0.027741	-0.032816	0	0
0.685982	0	0.022783	-0.0057417	-2.763e-005	0	0	0	0.01465	0.029732	-0.015807	0	0
0.686943	0	0.022797	-0.005717	-4.2103e-005	0	0	0	0.014626	0.020745	-0.014857	0	0
0.687968	0	0.022812	-0.0057006	-5.7336e-005	0	0	0	0.014626	0.010687	-0.014857	0	0
0.688993	0	0.022827	-0.0056944	-7.2544e-005	0	0	0	0.014622	0.00073932	-0.014609	0	0
0.689955	0	0.022841	-0.0056972	-8.5004e-005	0	0	0	0.014523	-0.0063514	-0.0095563	0	0
0.69098	0	0.022856	-0.0057053	-8.7976e-005	0	0	0	0.014179	-0.0087447	0.0063444	0	0
0.691941	0	0.022869	-0.005714	-7.3785e-005	0	0	0	0.01379	-0.0097915	0.023497	0	0
0.692966	0	0.022883	-0.0057265	-4.4721e-005	0	0	0	0.013601	-0.015974	0.031622	0	0
0.693992	0	0.022897	-0.0057475	-1.1954e-005	0	0	0	0.01359	-0.025851	0.03202	0	0
0.694953	0	0.02291	-0.0057755	1.7204e-005	0	0	0	0.01327	-0.026504	0.020468	0	0
0.695978	0	0.022923	-0.0057825	1.2535e-005	0	0	0	0.010899	0.017425	-0.030204	0	0
0.696939	0	0.022934	-0.0057585	-1.793e-005	0	0	0	0.01195	0.025771	-0.027175	0	0
0.697965	0	0.022946	-0.0057351	-4.1836e-005	0	0	0	0.012324	0.019081	-0.019625	0	0
0.69899	0	0.022959	-0.0057192	-5.9347e-005	0	0	0	0.012271	0.011492	-0.014269	0	0
0.699951	0	0.02297	-0.0057112	-7.0605e-005	0	0	0	0.012149	0.0047331	-0.0085354	0	0
0.700976	0	0.022983	-0.0057095	-7.5694e-005	0	0	0	0.011979	-0.0015842	-0.00055417	0	0
0.701938	0	0.022994	-0.0057134	-7.2361e-005	0	0	0	0.011791	-0.0069229	0.0081152	0	0
0.702963	0	0.023006	-0.0057234	-5.9807e-005	0	0	0	0.011605	-0.012955	0.016633	0	0
0.703988	0	0.023018	-0.0057399	-3.9438e-005	0	0	0	0.011461	-0.019913	0.023185	0	0
0.704949	0	0.023029	-0.0057622	-1.4796e-005	0	0	0	0.011342	-0.026719	0.02856	0	0
0.705975	0	0.02304	-0.0057872	1.4342e-005	0	0	0	0.010262	-0.0109	0.017738	0	0
0.706936	0	0.023049	-0.0057793	1.1589e-005	0	0	0	0.0081686	0.024619	-0.023684	0	0
0.707961	0	0.023058	-0.0057557	-1.6394e-005	0	0	0	0.008216	0.018257	-0.027759	0	0
0.708987	0	0.023066	-0.0057411	-4.3264e-005	0	0	0	0.008458	0.010342	-0.02283	0	0
0.709948	0	0.023074	-0.005733	-5.9856e-005	0	0	0	0.0090314	0.0067559	-0.0098603	0	0
0.710973	0	0.023084	-0.0057275	-6.2848e-005	0	0	0	0.0088372	0.0034473	0.0041144	0	0
0.711998	0	0.023093	-0.0057268	-5.4499e-005	0	0	0	0.0086714	-0.0031475	0.011432	0	0
0.71296	0	0.023101	-0.0057335	-4.236e-005	0	0	0	0.0086243	-0.011606	0.01355	0	0
0.713985	0	0.02311	-0.00575	-2.7816e-005	0	0	0	0.008591	-0.02091	0.015194	0	0
0.714946	0	0.023118	-0.0057731	-1.0819e-005	0	0	0	0.0084236	-0.026242	0.022607	0	0
0.715971	0	0.023126	-0.0057905	1.2645e-005	0	0	0	0.0067553	0.0020427	0.01232	0	0
0.716997	0	0.023132	-0.0057733	7.3303e-006	0	0	0	0.0052818	0.023832	-0.019061	0	0
0.717958	0	0.023137	-0.0057545	-1.1207e-005	0	0	0	0.0052968	0.01453	-0.019303	0	0
0.718983	0	0.023143	-0.0057445	-3.0996e-005	0	0	0	0.0053001	0.0045074	-0.019218	0	0
0.719944	0	0.023148	-0.0057436	-4.7607e-005	0	0	0	0.0056162	-0.0021056	-0.012808	0	0
0.72097	0	0.023154	-0.0057465	-5.2134e-005	0	0	0	0.0058686	-0.0030062	0.0061024	0	0
0.721995	0	0.02316	-0.0057502	-3.751e-005	0	0	0	0.0055027	-0.0053306	0.021406	0	0
0.722956	0	0.023165	-0.0057586	-1.497e-005	0	0	0	0.0054309	-0.013378	0.024292	0	0
0.723981	0	0.02317	-0.005777	9.7067e-006	0	0	0	0.0053697	-0.021341	0.021101	0	0
0.724943	0	0.023175	-0.0057891	1.4996e-005	0	0	0	0.0039662	0.0022754	-0.015419	0	0
0.725968	0	0.02318	-0.0057753	-8.4989e-006	0	0	0	0.0058456	0.018426	-0.021253	0	0
0.726993	0	0.023186	-0.0057589	-2.5402e-005	0	0	0	0.0063654	0.012764	-0.012031	0	0
0.727954	0	0.023192	-0.0057497	-3.439e-005	0	0	0	0.0065045	0.0057745	-0.0066298	0	0
0.72898	0	0.023199	-0.0057474	-3.8679e-005	0	0	0	0.0063864	-0.0016915	-0.0011684	0	0
0.729941	0	0.023205	-0.0057518	-3.6787e-005	0	0	0	0.0062296	-0.0076564	0.0059912	0	0
0.730966	0	0.023211	-0.0057622	-2.6037e-005	0	0	0	0.0060059	-0.012815	0.015792	0	0
0.731991	0	0.023217	-0.0057777	-5.1468e-006	0	0	0	0.0057626	-0.017418	0.02537	0	0
0.732953	0	0.023223	-0.0057892	1.4528e-005	0	0	0	0.0046103	-0.00027235	0.0063085	0	0
0.733978	0	0.023227	-0.0057785	4.0326e-006	0	0	0	0.0040183	0.015951	-0.022129	0	0
0.734939	0	0.023231	-0.005767	-1.6974e-005	0	0	0	0.0041672	0.0077561	-0.020053	0	0
0.735964	0	0.023235	-0.0057615	-3.2302e-005	0	0	0	0.0048418	0.0036017	-0.0074205	0	0
0.73699	0	0.02324	-0.0057589	-3.2446e-005	0	0	0	0.0049126	0.00072985	0.0070496	0	0
0.737951	0	0.023245	-0.0057608	-2.2201e-005	0	0	0	0.0047601	-0.0055467	0.013447	0	0
0.738976	0	0.02325	-0.0057709	-7.5296e-006	0	0	0	0.0047272	-0.014938	0.014874	0	0
0.739937	0	0.023254	-0.0057874	6.3103e-006	0	0	0	0.0042971	-0.013519	0.0099823	0	0
0.740963	0	0.023258	-0.0057873	5.3957e-006	0	0	0	0.0026954	0.014362	-0.012013	0	0
0.741988	0	0.023261	-0.0057714	-7.9232e-006	0	0	0	0.0032806	0.012069	-0.012299	0	0
0.742949	0	0.023264	-0.0057637	-1.9135e-005	0	0	0	0.0033674	0.003402	-0.010523	0	0
0.743974	0	0.023268	-0.0057637	-2.6953e-005	0	0	0	0.0036842	-0.0031569	-0.0028979	0	0
0.745	0	0.023271	-0.0057686	-2.3745e-005	0	0	0	0.0034494	-0.0063072	0.010359	0	0
0.745961	0	0.023275	-0.0057762	-8.7637e-006	0	0	0	0.0031897	-0.010221	0.020453	0	0
0.746986	0	0.023278	-0.005787	1.1027e-005	0	0	0	0.0025676	-0.0056144	0.0096249	0	0
0.747947	0	0.02328	-0.0057842	6.3636e-006	0	0	0	0.0021279	0.010464	-0.01793	0	0
0.748973	0	0.023282	-0.0057745	-1.2176e-005	0	0	0	0.0028699	0.0065678	-0.014745	0	0
0.749998	0	0.023286	-0.0057698	-2.1623e-005	0	0	0	0.0035379	0.0025717	-0.0023085	0	0
0.750959	0	0.023289	-0.0057691	-1.9025e-005	0	0	0	0.0034428	-0.0018029	0.0075447	0	0
0.751985	0	0.023292	-0.0057743	-8.4093e-006	0	0	0	0.0033179	-0.009247	0.012728	0	0
0.752946	0	0.023296	-0.0057857	4.5324e-006	0	0	0	0.0030028	-0.010823	0.010923	0	0
0.753971	0	0.023298	-0.0057874	5.4909e-006	0	0	0	0.0017954	0.0090491	-0.010115	0	0
0.754996	0	0.0233	-0.0057763	-6.3323e-006	0	0	0	0.0026214	0.0083362	-0.010154	0	0
0.755958	0	0.023303	-0.0057717	-1.4329e-005	0	0	0	0.002855	0.00093469	-0.0057116	0	0
0.756983	0	0.023306	-0.0057736	-1.6258e-005	0	0	0	0.0029	-0.0045909	0.0032037	0	0
0.757944	0	0.023309	-0.0057796	-8.3756e-006	0	0	0	0.0026152	-0.0077546	0.013878	0	0
0.758969	0	0.023311	-0.0057868	7.2737e-006	0	0	0	0.0019573	-0.0027189	0.0098843	0	0
0.759995	0	0.023313	-0.0057834	5.3528e-006	0	0	0	0.0014206	0.0078062	-0.012865	0	0
0.760956	0	0.023314	-0.0057779	-7.8654e-006	0	0	0	0.0018936	0.0023226	-0.011682	0	0
0.761981	0	0.023317	-0.0057774	-1.4232e-005	0	0	0	0.0025618	-0.00090138	0.0012108	0	0
0.762942	0	0.023319	-0.0057793	-7.6039e-006	0	0	0	0.0023143	-0.0036474	0.012355	0	0
0.763968	0	0.023321	-0.0057848	6.2016e-006	0	0	0	0.0019352	-0.0049319	0.009219	0	0
0.764993	0	0.023323	-0.0057853	5.0598e-006	0	0	0	0.0014518	0.0044559	-0.011446	0	0
0.765954	0	0.023325	-0.0057804	-6.3312e-006	0	0	0	0.0024756	0.003838	-0.0086366	0	0
0.766979	0	0.023328	-0.0057784	-1.0001e-005	0	0	0	0.0028641	-0.00024606	0.0020043	0	0
0.767941	0	0.02333	-0.0057807	-4.4339e-006	0	0	0	0.0026486	-0.0050176	0.0095764	0	0
0.768966	0	0.023333	-0.0057862	5.2314e-006	0	0	0	0.0021175	-0.0028607	0.0046011	0	0
0.769991	0	0.023335	-0.0057845	2.0654e-006	0	0	0	0.0017454	0.0055342	-0.009299	0	0
0.770952	0	0.023337	-0.0057801	-5.6285e-006	0	0	0	0.0024522	0.0020532	-0.004851	0	0
0.771978	0	0.023339	-0.0057806	-6.7104e-006	0	0	0	0.0024853	-0.0030385	0.003428	0	0
0.772939	0	0.023341	-0.0057847	-6.0568e-008	0	0	0	0.0021237	-0.0042261	0.0090236	0	0
0.773964	0	0.023343	-0.0057858	4.7739e-006	0	0	0	0.0013387	0.0028962	-0.0022668	0	0
0.774989	0	0.023345	-0.0057819	-1.6002e-006	0	0	0	0.0016539	0.0025489	-0.0070079	0	0
0.775951	0	0.023346	-0.0057818	-5.5212e-006	0	0	0	0.0020443	-0.0022026	4.0246e-005	0	0
0.776976	0	0.023348	-0.0057848	-1.1973e-006	0	0	0	0.0016378	-0.0026735	0.0074816	0	0
0.777937	0	0.02335	-0.0057853	3.8561e-006	0	0	0	0.00098596	0.0020881	0.00056382	0	0
0.778962	0	0.023351	-0.0057826	-1.9252e-008	0	0	0	0.0010868	0.0016694	-0.006131	0	0
0.779988	0	0.023352	-0.0057831	-3.8075e-006	0	0	0	0.0016311	-0.0024489	0.00039113	0	0
0.780949	0	0.023353	-0.0057853	-5.7349e-007	0	0	0	0.0011735	-0.00098658	0.0050686	0	0
0.781974	0	0.023354	-0.0057844	2.46e-006	0	0	0	0.00054739	0.002403	-0.00069776	0	0
0.783	0	0.023355	-0.0057827	-6.3775e-007	0	0	0	0.00081829	-0.0001716	-0.0036829	0	0
0.783961	0	0.023356	-0.0057842	-2.2321e-006	0	0	0	0.0012455	-0.0022711	0.00099594	0	0
0.784986	0	0.023357	-0.0057853	5.462e-008	0	0	0	0.00065078	0.000806	0.0024137	0	0
0.785947	0	0.023357	-0.0057837	9.874e-007	0	0	0	0.00016057	0.0018173	-0.00093171	0	0
0.786973	0	0.023358	-0.0057833	-6.7403e-007	0	0	0	0.0005852	-0.0013496	-0.0012876	0	0
0.787998	0	0.023358	-0.005785	-8.5347e-007	0	0	0	0.00069981	-0.0011398	0.00066965	0	0
0.788959	0	0.023359	-0.0057848	-1.9467e-007	0	0	0	0.00013689	0.0016105	0.00042385	0	0
0.789984	0	0.023359	-0.0057833	-1.9193e-007	0	0	0	-0.00020937	0.00051061	-0.00030306	0	0
0.790945	0	0.023359	-0.005784	-2.6901e-007	0	0	0	0.00013605	-0.0016866	0.00023821	0	0
0.791971	0	0.023359	-0.0057852	-1.2694e-007	0	0	0	3.1551e-005	7.8295e-005	-0.00022135	0	0
0.792996	0	0.023359	-0.005784	-4.7325e-007	0	0	0	2.6645e-005	0.0015201	-0.00010333	0	0
0.793957	0	0.023359	-0.0057834	-2.5618e-007	0	0	0	6.3829e-005	-0.00056754	0.00034691	0	0
0.794983	0	0.023359	-0.0057846	-1.9004e-007	0	0	0	-0.00022146	-0.0011985	-0.0002233	0	0
0.795944	0	0.023359	-0.0057849	-2.8918e-007	0	0	0	0.0001226	0.00092577	0.00015418	0	0
0.796969	0	0.023359	-0.0057836	-1.3327e-007	0	0	0	8.0902e-005	0.00079667	-8.9035e-005	0	0
0.797994	0	0.023359	-0.0057839	-3.8804e-007	0	0	0	-6.351e-005	-0.0011959	-0.00017297	0	0
0.798956	0	0.023359	-0.0057849	-2.9601e-007	0	0	0	8.1734e-005	-0.00037446	0.00026633	0	0
0.799981	0	0.023359	-0.0057843	-2.2429e-007	0	0	0	-0.00013808	0.0012072	-0.00016327	0	0
0.800942	0	0.023359	-0.0057835	-2.9212e-007	0	0	0	2.7188e-005	-3.5542e-005	0.0001497	0	0
0.801967	0	0.023359	-0.0057843	-1.1497e-007	0	0	0	1.706e-005	-0.0010849	-2.306e-005	0	0
0.802993	0	0.023359	-0.0057848	-3.369e-007	0	0	0	-2.5637e-006	0.00049261	-0.00020414	0	0
0.803954	0	0.023359	-0.0057839	-3.0706e-007	0	0	0	0.00014695	0.00086137	0.00020348	0	0
0.804979	0	0.023359	-0.0057838	-2.5321e-007	0	0	0	-0.00015621	-0.00072337	-0.0001456	0	0
0.80594	0	0.023359	-0.0057846	-3.2027e-007	0	0	0	-2.7885e-005	-0.00058408	0.00013731	0	0
0.806966	0	0.023359	-0.0057845	-1.2719e-007	0	0	0	4.7495e-005	0.00085195	4.3335e-005	0	0
0.807991	0	0.023359	-0.0057837	-2.8585e-007	0	0	0	-2.1133e-005	0.00017498	-0.00019324	0	0
0.808952	0	0.023359	-0.0057841	-2.9001e-007	0	0	0	0.00010935	-0.00086096	0.0001463	0	0
0.809977	0	0.023359	-0.0057847	-2.6058e-007	0	0	0	-8.6684e-005	0.00011791	-0.00015346	0	0
0.810939	0	0.023359	-0.0057841	-3.4837e-007	0	0	0	-7.0585e-007	0.00077574	0.00010794	0	0
0.811964	0	0.023359	-0.0057838	-1.5238e-007	0	0	0	-9.3252e-006	-0.00034166	9.3335e-005	0	0
0.812989	0	0.023359	-0.0057845	-2.5338e-007	0	0	0	-6.7195e-005	-0.00057221	-0.00016895	0	0
0.81395	0	0.023359	-0.0057845	-2.6641e-007	0	0	0	0.00014928	0.00050245	0.00012308	0	0
0.814976	0	0.023359	-0.0057839	-2.5406e-007	0	0	0	-3.4951e-005	0.00036355	-0.00016633	0	0
0.815937	0	0.023359	-0.005784	-3.7085e-007	0	0	0	-3.196e-005	-0.00059369	6.261e-005	0	0
0.816962	0	0.023359	-0.0057846	-1.9258e-007	0	0	0	-1.4973e-005	-0.00014776	0.00011933	0	0
0.817987	0	0.023359	-0.0057842	-2.44e-007	0	0	0	-6.1784e-005	0.00061724	-0.00011888	0	0
0.818949	0	0.023359	-0.0057839	-2.386e-007	0	0	0	0.00010716	-5.7304e-005	0.00011661	0	0
0.819974	0	0.023359	-0.0057843	-2.3009e-007	0	0	0	-2.565e-005	-0.00053703	-0.00016751	0	0
0.820999	0	0.023359	-0.0057845	-3.6572e-007	0	0	0	2.5395e-005	0.00027459	3.8566e-005	0	0
0.82196	0	0.023359	-0.0057841	-2.3526e-007	0	0	0	6.4699e-006	0.00041545	0.00012063	0	0
0.822986	0	0.023359	-0.005784	-2.5362e-007	0	0	0	-0.00011071	-0.00037658	-7.8265e-005	0	0
0.823947	0	0.023359	-0.0057844	-2.2853e-007	0	0	0	6.452e-005	-0.00026591	0.00012368	0	0
0.824972	0	0.023359	-0.0057843	-2.0197e-007	0	0	0	1.6275e-005	0.00042921	-0.00014275	0	0
0.825998	0	0.023359	-0.005784	-3.4783e-007	0	0	0	3.7618e-005	5.862e-005	-1.411e-005	0	0
0.826959	0	0.023359	-0.0057842	-2.6352e-007	0	0	0	4.9631e-006	-0.00042795	9.6702e-005	0	0
0.827984	0	0.023359	-0.0057844	-2.7282e-007	0	0	0	-0.00010344	8.3206e-005	-6.7691e-005	0	0
0.828945	0	0.023359	-0.0057842	-2.3928e-007	0	0	0	4.7167e-005	0.00037198	0.0001446	0	0
0.829971	0	0.023359	-0.005784	-1.7521e-007	0	0	0	-1.0023e-005	-0.0001891	-0.00010701	0	0
0.830996	0	0.023359	-0.0057843	-3.1859e-007	0	0	0	3.7395e-005	-0.00026132	-4.9136e-005	0	0
0.831957	0	0.023359	-0.0057844	-2.7124e-007	0	0	0	5.8606e-005	0.00026171	6.9743e-005	0	0
0.832982	0	0.023359	-0.0057841	-2.9451e-007	0	0	0	-9.1671e-005	0.00015631	-7.0665e-005	0	0
0.833944	0	0.023359	-0.0057841	-2.6497e-007	0	0	0	-2.1428e-007	-0.00029394	0.000151	0	0
0.834969	0	0.023359	-0.0057844	-1.6902e-007	0	0	0	-2.0863e-005	-4.5954e-005	-5.7006e-005	0	0
0.835994	0	0.023359	-0.0057842	-2.8419e-007	0	0	0	4.2141e-005	0.00029118	-6.384e-005	0	0
0.836955	0	0.023359	-0.0057841	-2.6524e-007	0	0	0	7.3943e-005	-5.8619e-005	3.9198e-005	0	0
0.837981	0	0.023359	-0.0057843	-3.0496e-007	0	0	0	-7.1459e-005	-0.00024297	-8.6161e-005	0	0
0.838942	0	0.023359	-0.0057843	-2.9821e-007	0	0	0	-1.9874e-006	0.00013468	0.00013591	0	0
0.839967	0	0.023359	-0.0057841	-1.8025e-007	0	0	0	-3.6455e-005	0.0001874	-1.442e-006	0	0
0.840992	0	0.023359	-0.0057841	-2.5282e-007	0	0	0	2.9958e-006	-0.00020678	-5.4987e-005	0	0
0.841954	0	0.023359	-0.0057843	-2.4062e-007	0	0	0	8.5348e-005	-0.00010968	2.8658e-005	0	0
0.842979	0	0.023359	-0.0057843	-2.999e-007	0	0	0	-2.1941e-005	0.00021935	-0.000114	0	0
0.84394	0	0.023359	-0.0057841	-3.2371e-007	0	0	0	6.566e-007	2.8875e-005	0.00010578	0	0
0.844965	0	0.023359	-0.0057842	-2.1179e-007	0	0	0	-5.8812e-005	-0.00020676	3.3082e-005	0	0
0.845991	0	0.023359	-0.0057843	-2.4035e-007	0	0	0	-2.0252e-005	7.0613e-005	-2.2374e-005	0	0
0.846952	0	0.023359	-0.0057842	-2.1432e-007	0	0	0	7.9447e-005	0.00016969	3.7345e-005	0	0
0.847977	0	0.023359	-0.0057841	-2.7118e-007	0	0	0	-4.7961e-006	-0.00011441	-0.00013142	0	0
0.848938	0	0.023359	-0.0057843	-3.3132e-007	0	0	0	2.1474e-005	-0.0001267	5.5141e-005	0	0
0.849964	0	0.023359	-0.0057843	-2.4637e-007	0	0	0	-3.9708e-005	0.00014598	4.0794e-005	0	0
0.850989	0	0.023359	-0.0057841	-2.5717e-007	0	0	0	-4.9178e-005	5.6351e-005	2.3669e-007	0	0
0.85195	0	0.023359	-0.0057842	-2.0479e-007	0	0	0	4.307e-005	-0.00015598	6.6947e-005	0	0
0.852975	0	0.023359	-0.0057843	-2.3575e-007	0	0	0	2.9384e-006	-4.9207e-006	-0.00012076	0	0
0.853937	0	0.023359	-0.0057842	-3.153e-007	0	0	0	4.9047e-005	0.00015066	6.2014e-006	0	0
0.854962	0	0.023359	-0.0057841	-2.7094e-007	0	0	0	-1.311e-005	-4.4312e-005	1.9489e-005	0	0
0.855987	0	0.023359	-0.0057842	-2.831e-007	0	0	0	-6.4637e-005	-0.00011566	2.7901e-006	0	0
0.856948	0	0.023359	-0.0057843	-2.2417e-007	0	0	0	1.61e-005	7.7563e-005	8.7439e-005	0	0
0.857974	0	0.023359	-0.0057842	-2.1359e-007	0	0	0	-2.9221e-006	8.0469e-005	-8.7537e-005	0	0
0.858999	0	0.023359	-0.0057842	-2.8964e-007	0	0	0	4.9743e-005	-0.00011035	-2.9491e-006	0	0
0.85996	0	0.023359	-0.0057843	-2.6914e-007	0	0	0	1.1506e-005	-4.1e-005	-1.6109e-006	0	0
0.860985	0	0.023359	-0.0057842	-3.0063e-007	0	0	0	-4.6222e-005	0.0001118	-7.3303e-006	0	0
0.861947	0	0.023359	-0.0057842	-2.4535e-007	0	0	0	-5.9265e-007	3.9517e-006	9.9255e-005	0	0
0.862972	0	0.023359	-0.0057842	-2.0805e-007	0	0	0	-2.9253e-005	-0.00010003	-5.3672e-005	0	0
0.863997	0	0.023359	-0.0057843	-2.6831e-007	0	0	0	4.6792e-005	3.4198e-005	-1.2503e-005	0	0
0.864958	0	0.023359	-0.0057842	-2.6105e-007	0	0	0	4.2025e-005	8.5369e-005	-1.1339e-005	0	0
0.865984	0	0.023359	-0.0057842	-3.1002e-007	0	0	0	-3.7091e-005	-6.3991e-005	-4.1867e-005	0	0
0.866945	0	0.023359	-0.0057842	-2.764e-007	0	0	0	-6.6477e-006	-6.5379e-005	0.0001062	0	0
0.86797	0	0.023359	-0.0057842	-2.1008e-007	0	0	0	-4.4402e-005	8.0296e-005	-2.1535e-005	0	0
0.868996	0	0.023359	-0.0057842	-2.489e-007	0	0	0	2.4827e-005	2.0933e-005	-5.9995e-006	0	0
0.869957	0	0.023359	-0.0057842	-2.3449e-007	0	0	0	5.0805e-005	-7.8333e-005	-9.3474e-006	0	0
0.870982	0	0.023359	-0.0057843	-3.0098e-007	0	0	0	-1.4665e-005	2.1536e-006	-8.0471e-005	0	0
0.871943	0	0.023359	-0.0057842	-2.979e-007	0	0	0	1.1e-005	7.2541e-005	9.06e-005	0	0
0.872969	0	0.023359	-0.0057842	-2.3008e-007	0	0	0	-5.5252e-005	-1.9272e-005	-2.53e-006	0	0
0.873994	0	0.023359	-0.0057842	-2.4788e-007	0	0	0	-4.5115e-006	-6.1085e-005	1.5205e-005	0	0
0.874955	0	0.023359	-0.0057842	-2.1496e-007	0	0	0	4.6281e-005	3.5149e-005	2.9272e-006	0	0
0.87598	0	0.023359	-0.0057842	-2.7875e-007	0	0	0	3.5763e-006	4.7314e-005	-9.2585e-005	0	0
0.876942	0	0.023359	-0.0057842	-3.032e-007	0	0	0	2.4985e-005	-4.8951e-005	5.5047e-005	0	0
0.877967	0	0.023359	-0.0057842	-2.556e-007	0	0	0	-4.4912e-005	-2.652e-005	3.6398e-006	0	0
0.878992	0	0.023359	-0.0057842	-2.5901e-007	0	0	0	-2.4396e-005	5.3417e-005	2.6804e-005	0	0
0.879953	0	0.023359	-0.0057842	-2.1078e-007	0	0	0	2.5894e-005	1.2911e-005	2.9101e-005	0	0
0.880979	0	0.023359	-0.0057842	-2.5027e-007	0	0	0	3.0223e-006	-5.6184e-005	-8.576e-005	0	0
0.88194	0	0.023359	-0.0057842	-2.9352e-007	0	0	0	4.1837e-005	6.9093e-006	2.1506e-005	0	0
0.882965	0	0.023359	-0.0057842	-2.6871e-007	0	0	0	-2.0126e-005	5.2316e-005	-8.3676e-006	0	0
0.88399	0	0.023359	-0.0057842	-2.8048e-007	0	0	0	-3.4962e-005	-2.7994e-005	2.7346e-005	0	0
0.884952	0	0.023359	-0.0057842	-2.243e-007	0	0	0	5.2333e-006	-3.7257e-005	5.0357e-005	0	0
0.885977	0	0.023359	-0.0057842	-2.3731e-007	0	0	0	-2.5161e-006	3.7519e-005	-6.7852e-005	0	0
0.886938	0	0.023359	-0.0057842	-2.7442e-007	0	0	0	4.3526e-005	2.3347e-005	1.2643e-005	0	0
0.887963	0	0.023359	-0.0057842	-2.6414e-007	0	0	0	-7.7972e-006	-4.204e-005	-2.5416e-005	0	0
0.888989	0	0.023359	-0.0057842	-2.8891e-007	0	0	0	-2.4311e-005	-7.5895e-006	1.8349e-005	0	0
0.88995	0	0.023359	-0.0057842	-2.3645e-007	0	0	0	-1.3914e-006	4.2879e-005	5.3703e-005	0	0
0.890975	0	0.023359	-0.0057842	-2.3442e-007	0	0	0	-1.7778e-005	-1.0516e-005	-4.8282e-005	0	0
0.891936	0	0.023359	-0.0057842	-2.6156e-007	0	0	0	3.7043e-005	-4.207e-005	1.0668e-005	0	0
0.892962	0	0.023359	-0.0057842	-2.5745e-007	0	0	0	8.7719e-006	2.5507e-005	-3.3039e-005	0	0
0.893987	0	0.023359	-0.0057842	-2.9688e-007	0	0	0	-1.2366e-005	2.7526e-005	5.0617e-006	0	0
0.894948	0	0.023359	-0.0057842	-2.5174e-007	0	0	0	-7.2885e-006	-3.4079e-005	5.534e-005	0	0
0.895973	0	0.023359	-0.0057842	-2.4229e-007	0	0	0	-2.7513e-005	-1.0612e-005	-2.7594e-005	0	0
0.896999	0	0.023359	-0.0057842	-2.4809e-007	0	0	0	3.0003e-005	3.0339e-005	1.9114e-005	0	0
0.89796	0	0.023359	-0.0057842	-2.4903e-007	0	0	0	1.2093e-005	1.1516e-006	-3.9172e-005	0	0
0.898985	0	0.023359	-0.0057842	-2.9604e-007	0	0	0	4.1539e-006	-2.434e-005	-7.5248e-006	0	0
0.899946	0	0.023359	-0.0057842	-2.6438e-007	0	0	0	-3.3214e-006	5.5462e-006	4.2302e-005	0	0
0.900972	0	0.023359	-0.0057842	-2.5312e-007	0	0	0	-3.6377e-005	2.4177e-005	-1.1458e-005	0	0
0.901997	0	0.023359	-0.0057842	-2.4171e-007	0	0	0	1.4447e-005	-2.0888e-005	3.1468e-005	0	0
0.902958	0	0.023359	-0.0057842	-2.3388e-007	0	0	0	1.1361e-005	-1.9646e-005	-3.7354e-005	0	0
0.903983	0	0.023359	-0.0057842	-2.831e-007	0	0	0	1.4534e-005	2.3652e-005	-2.2332e-005	0	0
0.904945	0	0.023359	-0.0057842	-2.684e-007	0	0	0	6.4969e-006	9.7395e-006	2.5725e-005	0	0
0.90597	0	0.023359	-0.0057842	-2.6383e-007	0	0	0	-3.4116e-005	-2.2951e-005	-7.736e-006	0	0
0.906995	0	0.023359	-0.0057842	-2.452e-007	0	0	0	1.7532e-006	1.9932e-006	4.0752e-005	0	0
0.907956	0	0.023359	-0.0057842	-2.2827e-007	0	0	0	2.8575e-006	2.4116e-005	-3.1525e-005	0	0
0.908982	0	0.023359	-0.0057842	-2.6937e-007	0	0	0	2.0176e-005	-8.2234e-006	-2.0941e-005	0	0
0.909943	0	0.023359	-0.0057842	-2.6828e-007	0	0	0	1.5629e-005	-1.9977e-005	7.2067e-006	0	0
0.910968	0	0.023359	-0.0057842	-2.7563e-007	0	0	0	-2.5753e-005	1.5517e-005	-1.0858e-005	0	0
0.911994	0	0.023359	-0.0057842	-2.5756e-007	0	0	0	-3.7323e-006	1.557e-005	4.6262e-005	0	0
0.912955	0	0.023359	-0.0057842	-2.2426e-007	0	0	0	-1.28e-005	-2.2904e-005	-6.6479e-006	0	0
0.91398	0	0.023359	-0.0057842	-2.5904e-007	0	0	0	1.3746e-005	-2.6875e-006	-2.5766e-005	0	0
0.914941	0	0.023359	-0.0057842	-2.5664e-007	0	0	0	3.2401e-005	2.2774e-005	1.3349e-006	0	0
0.915967	0	0.023359	-0.0057842	-2.8031e-007	0	0	0	-1.7304e-005	-7.7876e-006	-3.6173e-005	0	0
0.916992	0	0.023359	-0.0057842	-2.7571e-007	0	0	0	-2.9706e-006	-1.6442e-005	4.8158e-005	0	0
0.917953	0	0.023359	-0.0057842	-2.3617e-007	0	0	0	-1.9362e-005	1.5051e-005	4.6594e-006	0	0
0.918978	0	0.023359	-0.0057842	-2.5167e-007	0	0	0	-2.9056e-007	1.7219e-005	-1.0212e-005	0	0
0.91994	0	0.023359	-0.0057842	-2.4706e-007	0	0	0	2.88e-005	-2.1661e-005	-1.2702e-006	0	0
0.920965	0	0.023359	-0.0057842	-2.7262e-007	0	0	0	-3.0119e-007	-7.0627e-006	-3.9744e-005	0	0
0.92199	0	0.023359	-0.0057842	-2.8447e-007	0	0	0	2.915e-006	2.1198e-005	3.1936e-005	0	0
0.922951	0	0.023359	-0.0057842	-2.4951e-007	0	0	0	-2.2358e-005	1.6598e-006	1.4327e-005	0	0
0.923977	0	0.023359	-0.0057842	-2.5353e-007	0	0	0	-1.2229e-005	-2.0917e-005	2.4083e-006	0	0
0.924938	0	0.023359	-0.0057842	-2.3583e-007	0	0	0	2.1266e-005	7.8483e-007	1.2708e-005	0	0
0.925963	0	0.023359	-0.0057842	-2.6349e-007	0	0	0	5.7915e-006	1.7155e-005	-5.1791e-005	0	0
0.926988	0	0.023359	-0.0057842	-2.8348e-007	0	0	0	1.7299e-005	-7.2613e-006	2.55e-005	0	0
0.92795	0	0.023359	-0.0057842	-2.6071e-007	0	0	0	-2.2718e-005	-1.6361e-005	3.5782e-006	0	0
0.928975	0	0.023359	-0.0057842	-2.6257e-007	0	0	0	-1.8358e-005	5.4249e-006	1.5639e-005	0	0
0.929936	0	0.023359	-0.0057842	-2.3474e-007	0	0	0	1.3735e-005	1.6484e-005	2.5543e-005	0	0
0.930961	0	0.023359	-0.0057842	-2.4971e-007	0	0	0	6.7567e-007	-1.0425e-005	-5.0514e-005	0	0
0.931987	0	0.023359	-0.0057842	-2.7919e-007	0	0	0	2.5579e-005	-1.8778e-005	1.6935e-005	0	0
0.932948	0	0.023359	-0.0057842	-2.614e-007	0	0	0	-1.0343e-005	2.2134e-005	-6.0489e-006	0	0
0.933973	0	0.023359	-0.0057842	-2.75e-007	0	0	0	-2.0731e-005	7.3301e-006	9.0333e-006	0	0
0.934998	0	0.023359	-0.0057842	-2.3783e-007	0	0	0	6.3898e-006	-2.3157e-005	4.0576e-005	0	0
0.93596	0	0.023359	-0.0057842	-2.4076e-007	0	0	0	-1.0577e-005	6.2024e-006	-4.7085e-005	0	0
0.936985	0	0.023359	-0.0057842	-2.7282e-007	0	0	0	3.0246e-005	1.2827e-005	7.3206e-006	0	0
0.937946	0	0.023359	-0.0057842	-2.602e-007	0	0	0	6.1719e-006	-5.3594e-006	-6.8766e-006	0	0
0.938971	0	0.023359	-0.0057842	-2.8294e-007	0	0	0	-2.3901e-005	-1.1381e-005	-4.9352e-006	0	0
0.939997	0	0.023359	-0.0057842	-2.4806e-007	0	0	0	1.3698e-006	1.1679e-005	5.0302e-005	0	0
0.940958	0	0.023359	-0.0057842	-2.3629e-007	0	0	0	-1.618e-005	2.4102e-006	-3.5752e-005	0	0
0.941983	0	0.023359	-0.0057842	-2.6089e-007	0	0	0	2.3302e-005	-8.6304e-006	6.0587e-006	0	0
0.942944	0	0.023359	-0.0057842	-2.51e-007	0	0	0	1.2475e-005	6.6764e-006	-1.1407e-005	0	0
0.94397	0	0.023359	-0.0057842	-2.8269e-007	0	0	0	-1.1944e-005	3.7686e-006	-1.5203e-005	0	0
0.944995	0	0.023359	-0.0057842	-2.559e-007	0	0	0	4.8919e-007	-1.2246e-005	4.9607e-005	0	0
0.945956	0	0.023359	-0.0057842	-2.4039e-007	0	0	0	-2.5655e-005	2.9912e-006	-3.1063e-005	0	0
0.946981	0	0.023359	-0.0057842	-2.5914e-007	0	0	0	2.1445e-005	8.8671e-006	1.4238e-005	0	0
0.947943	0	0.023359	-0.0057842	-2.4954e-007	0	0	0	1.836e-005	-7.2737e-006	-1.0875e-005	0	0
0.948968	0	0.023359	-0.0057842	-2.8074e-007	0	0	0	-1.225e-005	-5.6283e-006	-2.1461e-005	0	0
0.949993	0	0.023359	-0.0057842	-2.6408e-007	0	0	0	1.8884e-006	9.0351e-006	4.6666e-005	0	0
0.950954	0	0.023359	-0.0057842	-2.4321e-007	0	0	0	-2.1866e-005	4.1682e-006	-1.6076e-005	0	0
0.95198	0	0.023359	-0.0057842	-2.5626e-007	0	0	0	9.8557e-006	-6.1002e-006	1.2084e-005	0	0
0.952941	0	0.023359	-0.0057842	-2.4401e-007	0	0	0	1.5467e-005	-4.3765e-006	-6.2688e-006	0	0
0.953966	0	0.023359	-0.0057842	-2.7326e-007	0	0	0	-3.6494e-006	5.4049e-006	-2.4166e-005	0	0
0.954992	0	0.023359	-0.0057842	-2.6676e-007	0	0	0	5.774e-006	-1.0789e-006	2.8594e-005	0	0
0.955953	0	0.023359	-0.0057842	-2.5526e-007	0	0	0	-1.7199e-005	-7.4719e-006	-6.9308e-006	0	0
0.956978	0	0.023359	-0.0057842	-2.5873e-007	0	0	0	9.014e-007	6.0582e-006	1.2609e-005	0	0
0.957939	0	0.023359	-0.0057842	-2.4448e-007	0	0	0	7.5849e-006	2.174e-006	3.04e-006	0	0
0.958965	0	0.023359	-0.0057842	-2.6068e-007	0	0	0	-2.5062e-006	-8.0365e-006	-2.1158e-005	0	0
0.95999	0	0.023359	-0.0057842	-2.6249e-007	0	0	0	9.9101e-006	4.3379e-007	1.8676e-005	0	0
0.960951	0	0.023359	-0.0057842	-2.5364e-007	0	0	0	-1.0673e-005	7.0443e-006	-7.093e-006	0	0
0.961976	0	0.023359	-0.0057842	-2.6277e-007	0	0	0	-1.589e-006	-3.3193e-006	1.0881e-005	0	0
0.962938	0	0.023359	-0.0057842	-2.4729e-007	0	0	0	5.5677e-006	-7.5655e-006	3.9928e-006	0	0
0.963963	0	0.023359	-0.0057842	-2.6122e-007	0	0	0	-1.2705e-006	3.3618e-006	-1.7905e-005	0	0
0.964988	0	0.023359	-0.0057842	-2.653e-007	0	0	0	9.6372e-006	1.0759e-005	6.8501e-006	0	0
0.965949	0	0.023359	-0.0057842	-2.6136e-007	0	0	0	-4.9618e-006	-4.4665e-006	4.8799e-007	0	0
0.966975	0	0.023359	-0.0057842	-2.6346e-007	0	0	0	-7.3293e-006	-3.2321e-006	4.7715e-006	0	0
0.968	0	0.023359	-0.0057842	-2.4987e-007	0	0	0	9.575e-007	1.6741e-006	8.7604e-006	0	0
0.968961	0	0.023359	-0.0057842	-2.5676e-007	0	0	0	1.1734e-006	1.9215e-006	-1.2329e-005	0	0
0.969986	0	0.023359	-0.0057842	-2.614e-007	0	0	0	8.3623e-006	-7.0204e-006	7.4459e-006	0	0
0.970948	0	0.023359	-0.0057842	-2.601e-007	0	0	0	-4.7083e-006	-1.433e-006	-3.1037e-006	0	0
0.971973	0	0.023359	-0.0057842	-2.5924e-007	0	0	0	-5.5144e-006	2.1145e-006	1.1778e-005	0	0
0.972998	0	0.023359	-0.0057842	-2.5013e-007	0	0	0	-1.7342e-006	4.9946e-006	-3.2267e-006	0	0
0.973959	0	0.023359	-0.0057842	-2.5511e-007	0	0	0	6.0141e-006	-5.2481e-006	3.5585e-007	0	0
0.974985	0	0.023359	-0.0057842	-2.5617e-007	0	0	0	1.8186e-006	-2.9543e-007	-9.1013e-006	0	0
0.975946	0	0.023359	-0.0057842	-2.6739e-007	0	0	0	1.4167e-006	1.2366e-006	-6.7273e-006	0	0
0.976971	0	0.023359	-0.0057842	-2.6109e-007	0	0	0	1.35e-006	-1.2515e-007	1.0326e-005	0	0
0.977996	0	0.023359	-0.0057842	-2.618e-007	0	0	0	-8.8889e-006	-4.984e-006	-4.5804e-006	0	0
0.978958	0	0.023359	-0.0057842	-2.5615e-007	0	0	0	2.4829e-006	4.3633e-006	1.6664e-005	0	0
0.979983	0	0.023359	-0.0057842	-2.5375e-007	0	0	0	-9.3816e-007	1.0929e-005	-1.347e-005	0	0
0.980944	0	0.023359	-0.0057842	-2.6333e-007	0	0	0	6.1845e-006	-1.3142e-005	-1.472e-006	0	0
0.981969	0	0.023359	-0.0057842	-2.5907e-007	0	0	0	-1.3815e-007	-9.002e-006	-4.9529e-006	0	0
0.982995	0	0.023359	-0.0057842	-2.6555e-007	0	0	0	-4.4524e-006	2.178e-005	-8.7573e-007	0	0
0.983956	0	0.023359	-0.0057842	-2.5811e-007	0	0	0	1.8477e-006	-4.0462e-006	1.4429e-005	0	0
0.984981	0	0.023359	-0.0057842	-2.5438e-007	0	0	0	-5.2303e-006	-2.0186e-005	-2.941e-006	0	0
0.985942	0	0.023359	-0.0057842	-2.5585e-007	0	0	0	1.1472e-006	7.3209e-006	7.0463e-006	0	0
0.986968	0	0.023359	-0.0057842	-2.5247e-007	0	0	0	1.3561e-006	1.4416e-005	-7.1095e-006	0	0
0.987993	0	0.023359	-0.0057842	-2.613e-007	0	0	0	3.4515e-006	-2.1897e-005	-1.7791e-007	0	0
0.988954	0	0.023359	-0.0057842	-2.5975e-007	0	0	0	2.047e-006	-2.67e-006	4.1631e-006	0	0
0.98998	0	0.023359	-0.0057842	-2.6063e-007	0	0	0	-5.4547e-006	1.5249e-005	-5.4433e-006	0	0
0.990941	0	0.023359	-0.0057842	-2.6079e-007	0	0	0	2.7289e-006	5.5596e-006	8.3292e-006	0	0
0.991966	0	0.023359	-0.0057842	-2.5733e-007	0	0	0	-6.0694e-007	-1.8333e-005	-6.9033e-006	0	0
0.992991	0	0.023359	-0.0057842	-2.6181e-007	0	0	0	1.1828e-006	8.1502e-006	1.9395e-006	0	0
0.993952	0	0.023359	-0.0057842	-2.5677e-007	0	0	0	-1.0194e-006	1.7676e-005	4.1294e-006	0	0
0.994978	0	0.023359	-0.0057842	-2.5912e-007	0	0	0	-3.4357e-006	-1.5571e-005	-2.9486e-006	0	0
0.995939	0	0.023359	-0.0057842	-2.5707e-007	0	0	0	3.4309e-006	-1.3672e-005	-6.4999e-007	0	0
0.996964	0	0.023359	-0.0057842	-2.5932e-007	0	0	0	2.4582e-006	2.5422e-005	-4.5215e-006	0	0
0.99799	0	0.023359	-0.0057842	-2.6539e-007	0	0	0	1.3349e-006	1.3939e-006	-4.9171e-007	0	0
0.998951	0	0.023359	-0.0057842	-2.5614e-007	0	0	0	-4.8352e-006	-2.7341e-005	9.3375e-006	0	0
0.999976	0	0.023359	-0.0057842	-2.5643e-007	0	0	0	-5.9744e-006	1.5063e-005	-4.3565e-006	0	0
1.00094	0	0.023359	-0.0057842	-2.5404e-007	0	0	0	7.2728e-006	1.8473e-005	7.5337e-007	0	0
1.00196	0	0.023359	-0.0057842	-2.5785e-007	0	0	0	2.6196e-006	-2.7466e-005	-4.8654e-006	0	0
1.00299	0	0.023359	-0.0057842	-2.6265e-007	0	0	0	-2.4329e-006	-6.8607e-006	-4.8487e-006	0	0
1.00395	0	0.023359	-0.0057842	-2.6153e-007	0	0	0	1.1897e-006	3.085e-005	8.9404e-006	0	0
1.00497	0	0.023359	-0.0057842	-2.5389e-007	0	0	0	-5.0048e-006	-1.6166e-006	-1.9767e-009	0	0
1.006	0	0.023359	-0.0057842	-2.5794e-007	0	0	0	1.0406e-007	-2.7523e-005	-1.5474e-006	0	0
1.00696	0	0.023359	-0.0057842	-2.535e-007	0	0	0	5.0522e-006	6.7815e-006	7.1386e-006	0	0
1.00799	0	0.023359	-0.0057842	-2.5903e-007	0	0	0	-2.6842e-006	2.5534e-005	-1.09e-005	0	0
1.00895	0	0.023359	-0.0057842	-2.5821e-007	0	0	0	1.9893e-006	-1.3812e-005	1.0175e-005	0	0
1.00997	0	0.023359	-0.0057842	-2.5698e-007	0	0	0	-2.7122e-006	-1.5266e-005	-9.1779e-006	0	0
1.011	0	0.023359	-0.0057842	-2.6294e-007	0	0	0	4.6082e-006	2.0627e-005	3.8191e-007	0	0
1.01196	0	0.023359	-0.0057842	-2.5818e-007	0	0	0	9.2736e-007	8.2767e-006	-1.0828e-006	0	0
1.01298	0	0.023359	-0.0057842	-2.6485e-007	0	0	0	-2.9275e-006	-2.1024e-005	8.7742e-007	0	0
1.01395	0	0.023359	-0.0057842	-2.5753e-007	0	0	0	7.75e-007	-1.1891e-006	1.1888e-005	0	0
1.01497	0	0.023359	-0.0057842	-2.5686e-007	0	0	0	-4.1628e-006	2.0489e-005	-7.628e-006	0	0
1.016	0	0.023359	-0.0057842	-2.5815e-007	0	0	0	3.7059e-006	-9.1592e-006	5.0297e-006	0	0
1.01696	0	0.023359	-0.0057842	-2.5918e-007	0	0	0	3.276e-006	-1.3731e-005	-4.0443e-006	0	0
1.01798	0	0.023359	-0.0057842	-2.6079e-007	0	0	0	-2.3304e-006	1.0189e-005	2.3509e-006	0	0
1.01894	0	0.023359	-0.0057842	-2.6069e-007	0	0	0	-2.2528e-006	8.55e-006	-1.0141e-006	0	0
1.01997	0	0.023359	-0.0057842	-2.5647e-007	0	0	0	7.9101e-007	-1.2755e-005	-1.9601e-007	0	0
1.02099	0	0.023359	-0.0057842	-2.6061e-007	0	0	0	1.3269e-006	-1.5221e-006	-4.9109e-006	0	0
1.02196	0	0.023359	-0.0057842	-2.625e-007	0	0	0	3.2835e-006	1.3858e-005	2.0325e-006	0	0
1.02298	0	0.023359	-0.0057842	-2.609e-007	0	0	0	-3.2524e-006	-7.5643e-006	2.5994e-006	0	0
1.02394	0	0.023359	-0.0057842	-2.5507e-007	0	0	0	-5.9797e-006	-1.452e-005	1.0407e-005	0	0
1.02497	0	0.023359	-0.0057842	-2.5007e-007	0	0	0	-3.1921e-006	9.0587e-006	-1.9473e-006	0	0
1.02599	0	0.023359	-0.0057842	-2.5549e-007	0	0	0	8.8119e-006	1.3173e-005	-4.3395e-006	0	0
1.02695	0	0.023359	-0.0057842	-2.6126e-007	0	0	0	6.9266e-006	-1.873e-005	-5.0163e-006	0	0
1.02798	0	0.023359	-0.0057842	-2.6574e-007	0	0	0	-4.4024e-006	-6.9552e-006	-2.0243e-006	0	0
1.02894	0	0.023359	-0.0057842	-2.6488e-007	0	0	0	-2.5737e-006	2.1639e-005	8.6044e-006	0	0
1.02997	0	0.023359	-0.0057842	-2.5396e-007	0	0	0	-3.3287e-006	5.601e-006	4.2345e-006	0	0
1.03099	0	0.023359	-0.0057842	-2.5498e-007	0	0	0	-1.7242e-006	-2.9572e-005	-1.7089e-006	0	0
1.03195	0	0.023359	-0.0057842	-2.5334e-007	0	0	0	4.1626e-006	4.0884e-006	2.0149e-006	0	0
1.03298	0	0.023359	-0.0057842	-2.5696e-007	0	0	0	1.5443e-007	2.3969e-005	-6.9905e-006	0	0
1.03394	0	0.023359	-0.0057842	-2.6332e-007	0	0	0	3.0606e-006	-1.3379e-005	-1.9357e-006	0	0
1.03496	0	0.023359	-0.0057842	-2.6102e-007	0	0	0	1.3944e-006	-1.5117e-005	2.8663e-006	0	0
1.03599	0	0.023359	-0.0057842	-2.6151e-007	0	0	0	-6.1571e-006	2.2485e-005	-6.8785e-006	0	0
1.03695	0	0.023359	-0.0057842	-2.6065e-007	0	0	0	2.6453e-006	9.8175e-006	9.6979e-006	0	0
1.03798	0	0.023359	-0.0057842	-2.4869e-007	0	0	0	-4.8926e-006	-2.647e-005	1.3639e-006	0	0
1.03894	0	0.023359	-0.0057842	-2.5464e-007	0	0	0	-4.4597e-006	3.3063e-006	-6.4416e-006	0	0
1.03996	0	0.023359	-0.0057842	-2.5493e-007	0	0	0	1.1046e-005	2.3205e-005	2.5293e-006	0	0
1.04099	0	0.023359	-0.0057842	-2.5874e-007	0	0	0	-3.9015e-007	-1.3016e-005	-1.7178e-005	0	0
1.04195	0	0.023359	-0.0057842	-2.7164e-007	0	0	0	2.1828e-006	-1.7766e-005	3.1642e-006	0	0
1.04297	0	0.023359	-0.0057842	-2.5813e-007	0	0	0	-2.1868e-006	1.6506e-005	1.5828e-005	0	0
1.044	0	0.023359	-0.0057842	-2.5691e-007	0	0	0	-1.3557e-005	1.034e-005	-1.2474e-005	0	0
1.04496	0	0.023359	-0.0057842	-2.5609e-007	0	0	0	1.0317e-005	-1.8785e-005	1.2082e-005	0	0
1.04599	0	0.023359	-0.0057842	-2.527e-007	0	0	0	2.6444e-006	-6.5578e-006	-1.8239e-005	0	0
1.04695	0	0.023359	-0.0057842	-2.7144e-007	0	0	0	1.394e-006	2.0603e-005	-6.6932e-006	0	0
1.04797	0	0.023359	-0.0057842	-2.5624e-007	0	0	0	-4.1993e-007	4.0293e-006	2.2912e-005	0	0
1.049	0	0.023359	-0.0057842	-2.5719e-007	0	0	0	-1.5958e-005	-2.3952e-005	-1.4867e-005	0	0
1.04996	0	0.023359	-0.0057842	-2.541e-007	0	0	0	1.1649e-005	4.4228e-006	1.8697e-005	0	0
1.05098	0	0.023359	-0.0057842	-2.5199e-007	0	0	0	2.4348e-006	2.6183e-005	-2.5099e-005	0	0
1.05195	0	0.023359	-0.0057842	-2.7284e-007	0	0	0	3.7498e-006	-5.1465e-006	-6.5605e-006	0	0
1.05297	0	0.023359	-0.0057842	-2.6059e-007	0	0	0	7.9757e-007	-2.2582e-005	1.3773e-005	0	0
1.054	0	0.023359	-0.0057842	-2.6362e-007	0	0	0	-1.4232e-005	1.1982e-005	-1.2632e-005	0	0
1.05496	0	0.023359	-0.0057842	-2.5779e-007	0	0	0	7.9239e-006	1.7285e-005	1.9451e-005	0	0
1.05598	0	0.023359	-0.0057842	-2.4862e-007	0	0	0	-3.3511e-006	-1.277e-005	-1.4123e-005	0	0
1.05694	0	0.023359	-0.0057842	-2.6421e-007	0	0	0	1.5225e-006	-6.0837e-006	1.0072e-006	0	0
1.05797	0	0.023359	-0.0057842	-2.5402e-007	0	0	0	4.6961e-006	1.1793e-005	4.8891e-006	0	0
1.05899	0	0.023359	-0.0057842	-2.587e-007	0	0	0	-8.1904e-006	3.6885e-006	-8.2201e-006	0	0
1.05996	0	0.023359	-0.0057842	-2.5718e-007	0	0	0	2.325e-006	-1.2685e-005	1.1175e-005	0	0
1.06098	0	0.023359	-0.0057842	-2.5197e-007	0	0	0	8.7682e-007	3.7663e-006	-3.8408e-006	0	0
1.06194	0	0.023359	-0.0057842	-2.6377e-007	0	0	0	1.858e-006	1.3654e-005	-1.1936e-005	0	0
1.06297	0	0.023359	-0.0057842	-2.5945e-007	0	0	0	5.4853e-006	-1.0011e-005	1.7444e-005	0	0
1.06399	0	0.023359	-0.0057842	-2.5778e-007	0	0	0	-1.2922e-005	-4.0785e-006	-1.2651e-005	0	0
1.06495	0	0.023359	-0.0057842	-2.6028e-007	0	0	0	4.4102e-006	1.3064e-005	1.1542e-005	0	0
1.06598	0	0.023359	-0.0057842	-2.5047e-007	0	0	0	2.8182e-006	-2.3614e-006	-6.7868e-006	0	0
1.06694	0	0.023359	-0.0057842	-2.643e-007	0	0	0	-1.898e-006	-6.9892e-006	-1.5895e-005	0	0
1.06797	0	0.023359	-0.0057842	-2.5744e-007	0	0	0	4.9841e-006	7.8141e-006	1.5258e-005	0	0
1.06899	0	0.023359	-0.0057842	-2.5835e-007	0	0	0	-9.9375e-006	5.5049e-006	-1.4266e-005	0	0
1.06995	0	0.023359	-0.0057842	-2.5849e-007	0	0	0	3.7557e-006	-1.2019e-005	1.5768e-005	0	0
1.07098	0	0.023359	-0.0057842	-2.4984e-007	0	0	0	-9.5635e-007	-1.6655e-006	-5.1028e-006	0	0
1.07194	0	0.023359	-0.0057842	-2.6308e-007	0	0	0	1.1749e-006	8.5811e-006	-9.3193e-006	0	0
1.07296	0	0.023359	-0.0057842	-2.5772e-007	0	0	0	6.6711e-006	-1.7817e-006	1.0928e-005	0	0
1.07399	0	0.023359	-0.0057842	-2.6162e-007	0	0	0	-9.685e-006	-2.5864e-006	-1.8333e-005	0	0
1.07495	0	0.023359	-0.0057842	-2.6332e-007	0	0	0	6.0997e-006	4.7363e-006	2.2968e-005	0	0
1.07598	0	0.023359	-0.0057842	-2.4642e-007	0	0	0	-8.088e-006	1.1495e-006	-5.1456e-006	0	0
1.07694	0	0.023359	-0.0057842	-2.6166e-007	0	0	0	-1.7207e-006	-7.6278e-006	-5.0297e-006	0	0
1.07796	0	0.023359	-0.0057842	-2.5147e-007	0	0	0	1.1991e-005	-3.1326e-006	9.9296e-006	0	0
1.07899	0	0.023359	-0.0057842	-2.6227e-007	0	0	0	-6.954e-006	1.6655e-005	-2.2798e-005	0	0
1.07995	0	0.023359	-0.0057842	-2.665e-007	0	0	0	5.5977e-006	-1.1379e-006	2.0258e-005	0	0
1.08097	0	0.023359	-0.0057842	-2.485e-007	0	0	0	-9.6847e-006	-1.5542e-005	-2.5493e-006	0	0
1.082	0	0.023359	-0.0057842	-2.5784e-007	0	0	0	-3.6784e-006	8.5775e-006	-2.0805e-006	0	0
1.08296	0	0.023359	-0.0057842	-2.4867e-007	0	0	0	1.2542e-005	1.4455e-005	7.3922e-006	0	0
1.08399	0	0.023359	-0.0057842	-2.621e-007	0	0	0	-1.4493e-006	-1.3778e-005	-2.6383e-005	0	0
1.08495	0	0.023359	-0.0057842	-2.7542e-007	0	0	0	9.8304e-006	-1.347e-005	1.0045e-005	0	0
1.08597	0	0.023359	-0.0057842	-2.5738e-007	0	0	0	-8.189e-006	2.1035e-005	1.2516e-005	0	0
1.087	0	0.023359	-0.0057842	-2.5794e-007	0	0	0	-1.7564e-005	4.1719e-007	-4.2452e-007	0	0
1.08796	0	0.023359	-0.0057842	-2.477e-007	0	0	0	1.1496e-005	-2.2334e-005	1.9752e-005	0	0
1.08898	0	0.023359	-0.0057842	-2.5287e-007	0	0	0	5.3754e-006	1.0801e-005	-2.8068e-005	0	0
1.08995	0	0.023359	-0.0057842	-2.7327e-007	0	0	0	8.3888e-006	1.6559e-005	-2.5694e-006	0	0
1.09097	0	0.023359	-0.0057842	-2.6293e-007	0	0	0	-4.3103e-006	-1.3058e-005	9.5233e-006	0	0
1.092	0	0.023359	-0.0057842	-2.6083e-007	0	0	0	-1.5815e-005	-1.5858e-005	-2.57e-006	0	0
1.09296	0	0.023359	-0.0057842	-2.5361e-007	0	0	0	6.0735e-006	1.7319e-005	1.5776e-005	0	0
1.09398	0	0.023359	-0.0057842	-2.4965e-007	0	0	0	3.2416e-006	1.2316e-005	-1.5133e-005	0	0
1.09494	0	0.023359	-0.0057842	-2.6825e-007	0	0	0	4.7036e-006	-1.654e-005	-1.0209e-005	0	0
1.09597	0	0.023359	-0.0057842	-2.5921e-007	0	0	0	1.4828e-006	-1.0272e-005	1.6976e-005	0	0
1.09699	0	0.023359	-0.0057842	-2.5602e-007	0	0	0	-1.7101e-005	2.226e-005	-9.6499e-006	0	0
1.09796	0	0.023359	-0.0057842	-2.555e-007	0	0	0	6.5425e-006	-3.2031e-006	1.829e-005	0	0
1.09898	0	0.023359	-0.0057842	-2.4889e-007	0	0	0	4.5625e-006	-1.8141e-005	-2.0523e-005	0	0
1.09994	0	0.023359	-0.0057842	-2.7474e-007	0	0	0	7.9866e-006	1.1641e-005	-7.4502e-006	0	0
1.10097	0	0.023359	-0.0057842	-2.6408e-007	0	0	0	1.4043e-006	7.2442e-006	1.1994e-005	0	0
1.10199	0	0.023359	-0.0057842	-2.6447e-007	0	0	0	-1.7729e-005	-1.393e-005	-2.0913e-006	0	0
1.10295	0	0.023359	-0.0057842	-2.5245e-007	0	0	0	9.5081e-007	2.0127e-006	2.0478e-005	0	0
1.10398	0	0.023359	-0.0057842	-2.4294e-007	0	0	0	-3.2322e-007	6.818e-006	-9.5176e-006	0	0
1.10494	0	0.023359	-0.0057842	-2.621e-007	0	0	0	7.1894e-006	-4.0792e-006	-1.9902e-005	0	0
1.10597	0	0.023359	-0.0057842	-2.6213e-007	0	0	0	1.1408e-005	-5.8869e-006	6.8646e-006	0	0
1.10699	0	0.023359	-0.0057842	-2.6762e-007	0	0	0	-1.3045e-005	2.3054e-006	-8.6204e-006	0	0
1.10795	0	0.023359	-0.0057842	-2.6268e-007	0	0	0	-2.8945e-006	1.218e-005	2.1568e-005	0	0
1.10898	0	0.023359	-0.0057842	-2.4163e-007	0	0	0	-6.1577e-006	-9.5669e-006	2.1377e-006	0	0
1.10994	0	0.023359	-0.0057842	-2.5899e-007	0	0	0	2.7723e-006	-7.4613e-006	-2.1605e-005	0	0
1.11096	0	0.023359	-0.0057842	-2.5987e-007	0	0	0	2.0758e-005	8.9172e-006	1.365e-005	0	0
1.11199	0	0.023359	-0.0057842	-2.6637e-007	0	0	0	-1.5072e-005	4.7688e-006	-2.7711e-005	0	0
1.11295	0	0.023359	-0.0057842	-2.7434e-007	0	0	0	7.9728e-007	-1.1557e-005	2.2353e-005	0	0
1.11398	0	0.023359	-0.0057842	-2.4384e-007	0	0	0	-5.9392e-006	5.8607e-007	5.4673e-006	0	0
1.11494	0	0.023359	-0.0057842	-2.5945e-007	0	0	0	-8.2758e-006	1.0297e-005	-2.2038e-005	0	0
1.11596	0	0.023359	-0.0057842	-2.546e-007	0	0	0	2.0015e-005	-8.9265e-006	2.2432e-005	0	0
1.11699	0	0.023359	-0.0057842	-2.614e-007	0	0	0	-8.0959e-006	-7.7826e-006	-3.1855e-005	0	0
1.11795	0	0.023359	-0.0057842	-2.748e-007	0	0	0	3.7182e-006	6.4284e-006	1.8834e-005	0	0
1.11897	0	0.023359	-0.0057842	-2.4794e-007	0	0	0	-7.7887e-006	1.1897e-005	7.0141e-006	0	0
1.12	0	0.023359	-0.0057842	-2.594e-007	0	0	0	-9.4499e-006	-1.5671e-005	-8.8141e-006	0	0
1.12096	0	0.023359	-0.0057842	-2.519e-007	0	0	0	1.7112e-005	-3.5088e-006	1.6333e-005	0	0
1.12199	0	0.023359	-0.0057842	-2.593e-007	0	0	0	-1.8975e-006	1.3439e-005	-3.1645e-005	0	0
1.12295	0	0.023359	-0.0057842	-2.7604e-007	0	0	0	5.2642e-006	2.1018e-006	7.8849e-006	0	0
1.12397	0	0.023359	-0.0057842	-2.5711e-007	0	0	0	-5.3853e-006	-1.1214e-005	1.2307e-005	0	0
1.125	0	0.023359	-0.0057842	-2.6006e-007	0	0	0	-1.4128e-005	6.2081e-008	-4.1554e-006	0	0
1.12596	0	0.023359	-0.0057842	-2.5127e-007	0	0	0	1.0794e-005	1.2954e-005	1.7384e-005	0	0
1.12698	0	0.023359	-0.0057842	-2.5354e-007	0	0	0	1.4499e-006	-7.8148e-006	-2.1635e-005	0	0
1.12794	0	0.023359	-0.0057842	-2.7111e-007	0	0	0	5.841e-006	-8.5265e-006	-1.5295e-006	0	0
1.12897	0	0.023359	-0.0057842	-2.6178e-007	0	0	0	-5.1877e-007	9.8688e-006	7.8891e-006	0	0
1.13	0	0.023359	-0.0057842	-2.6136e-007	0	0	0	-1.2548e-005	9.3803e-006	-8.147e-007	0	0
1.13096	0	0.023359	-0.0057842	-2.5492e-007	0	0	0	2.4872e-006	-1.3081e-005	1.4669e-005	0	0
1.13198	0	0.023359	-0.0057842	-2.4754e-007	0	0	0	5.2704e-007	-2.1401e-006	-9.4561e-006	0	0
1.13294	0	0.023359	-0.0057842	-2.6359e-007	0	0	0	4.1098e-006	1.3469e-005	-1.2107e-005	0	0
1.13397	0	0.023359	-0.0057842	-2.5972e-007	0	0	0	7.3416e-006	-5.0851e-006	1.5657e-005	0	0
1.13499	0	0.023359	-0.0057842	-2.6261e-007	0	0	0	-1.3572e-005	-1.65e-005	-1.6257e-005	0	0
1.13595	0	0.023359	-0.0057842	-2.6203e-007	0	0	0	5.0532e-006	1.4591e-005	2.1269e-005	0	0
1.13698	0	0.023359	-0.0057842	-2.4509e-007	0	0	0	-4.3535e-006	1.359e-005	-5.6383e-006	0	0
1.13794	0	0.023359	-0.0057842	-2.6479e-007	0	0	0	-5.3228e-007	-2.3072e-005	-1.5614e-005	0	0
1.13897	0	0.023359	-0.0057842	-2.599e-007	0	0	0	1.5602e-005	-1.0692e-005	1.5461e-005	0	0
1.13999	0	0.023359	-0.0057842	-2.6345e-007	0	0	0	-1.2564e-005	2.5902e-005	-1.6255e-005	0	0
1.14095	0	0.023359	-0.0057842	-2.6397e-007	0	0	0	-3.1279e-006	1.7535e-006	2.3303e-005	0	0
1.14198	0	0.023359	-0.0057842	-2.396e-007	0	0	0	-5.7697e-006	-1.6725e-005	5.8995e-006	0	0
1.14294	0	0.023359	-0.0057842	-2.5652e-007	0	0	0	-2.5876e-007	3.1369e-006	-2.2991e-005	0	0
1.14396	0	0.023359	-0.0057842	-2.5848e-007	0	0	0	2.1129e-005	6.2864e-006	7.412e-006	0	0
1.14499	0	0.023359	-0.0057842	-2.6653e-007	0	0	0	-9.3527e-006	-8.3585e-006	-2.967e-005	0	0
1.14595	0	0.023359	-0.0057842	-2.7563e-007	0	0	0	-9.0339e-007	-4.2375e-006	2.0664e-005	0	0
1.14698	0	0.023359	-0.0057842	-2.4327e-007	0	0	0	-1.1235e-005	7.4723e-006	1.1161e-005	0	0
1.14794	0	0.023359	-0.0057842	-2.5369e-007	0	0	0	-9.3627e-006	3.753e-006	-1.4826e-005	0	0
1.14896	0	0.023359	-0.0057842	-2.4591e-007	0	0	0	1.9451e-005	-4.5528e-006	1.0525e-005	0	0
1.14999	0	0.023359	-0.0057842	-2.5867e-007	0	0	0	-2.5155e-006	-4.3234e-006	-3.2253e-005	0	0
1.15095	0	0.023359	-0.0057842	-2.7687e-007	0	0	0	7.0654e-006	5.8419e-006	1.0139e-005	0	0
1.15197	0	0.023359	-0.0057842	-2.5149e-007	0	0	0	-8.8936e-006	-4.1235e-007	1.3366e-005	0	0
1.15294	0	0.023359	-0.0057842	-2.6212e-007	0	0	0	-1.5434e-005	-3.1607e-006	-1.3526e-005	0	0
1.15396	0	0.023359	-0.0057842	-2.5047e-007	0	0	0	1.8312e-005	2.7578e-006	2.6075e-005	0	0
1.15499	0	0.023359	-0.0057842	-2.5227e-007	0	0	0	-7.0528e-006	8.853e-007	-3.3847e-005	0	0
1.15595	0	0.023359	-0.0057842	-2.7797e-007	0	0	0	8.524e-006	-6.1432e-006	5.1671e-006	0	0
1.15697	0	0.023359	-0.0057842	-2.5462e-007	0	0	0	9.5616e-007	-4.0387e-006	1.216e-005	0	0
1.158	0	0.023359	-0.0057842	-2.6509e-007	0	0	0	-1.9159e-005	1.1525e-005	-1.4752e-005	0	0
1.15896	0	0.023359	-0.0057842	-2.5445e-007	0	0	0	1.1918e-005	-4.789e-006	3.7684e-005	0	0
1.15999	0	0.023359	-0.0057842	-2.4159e-007	0	0	0	-8.5809e-006	-8.2634e-006	-2.8555e-005	0	0
1.16095	0	0.023359	-0.0057842	-2.7138e-007	0	0	0	8.922e-006	7.0655e-006	-5.2792e-006	0	0
1.16197	0	0.023359	-0.0057842	-2.5161e-007	0	0	0	9.3404e-006	3.0226e-006	1.0139e-005	0	0
1.163	0	0.023359	-0.0057842	-2.7248e-007	0	0	0	-1.7062e-005	-5.2886e-006	-2.6129e-005	0	0
1.16396	0	0.023359	-0.0057842	-2.6373e-007	0	0	0	1.2838e-005	1.9623e-006	3.948e-005	0	0
1.16498	0	0.023359	-0.0057842	-2.4664e-007	0	0	0	-1.3702e-005	2.6014e-006	-2.2383e-005	0	0
1.16594	0	0.023359	-0.0057842	-2.6877e-007	0	0	0	2.2364e-006	-1.0611e-005	5.4651e-006	0	0
1.16697	0	0.023359	-0.0057842	-2.4765e-007	0	0	0	1.0146e-005	2.5841e-006	7.1952e-006	0	0
1.168	0	0.023359	-0.0057842	-2.6829e-007	0	0	0	-1.0298e-005	6.9506e-006	-2.5293e-005	0	0
1.16896	0	0.023359	-0.0057842	-2.6391e-007	0	0	0	1.0489e-005	-1.0313e-005	2.7897e-005	0	0
1.16998	0	0.023359	-0.0057842	-2.5138e-007	0	0	0	-1.1831e-005	3.0132e-006	-1.4292e-005	0	0
1.17094	0	0.023359	-0.0057842	-2.6471e-007	0	0	0	-4.3871e-007	1.2603e-005	3.3415e-006	0	0
1.17197	0	0.023359	-0.0057842	-2.4575e-007	0	0	0	6.5309e-006	-3.5444e-006	7.842e-006	0	0
1.17299	0	0.023359	-0.0057842	-2.6129e-007	0	0	0	-7.5512e-006	-9.5359e-006	-2.3439e-005	0	0
1.17395	0	0.023359	-0.0057842	-2.6439e-007	0	0	0	1.3809e-005	7.4634e-006	1.8516e-005	0	0
1.17498	0	0.023359	-0.0057842	-2.5457e-007	0	0	0	-7.8702e-006	3.9178e-006	-1.3005e-005	0	0
1.17594	0	0.023359	-0.0057842	-2.6903e-007	0	0	0	-4.8602e-006	-1.244e-005	6.0198e-006	0	0
1.17697	0	0.023359	-0.0057842	-2.4445e-007	0	0	0	1.9061e-006	1.1511e-006	1.4971e-005	0	0
1.17799	0	0.023359	-0.0057842	-2.5612e-007	0	0	0	-7.6486e-006	1.2925e-005	-2.7377e-005	0	0
1.17895	0	0.023359	-0.0057842	-2.6382e-007	0	0	0	1.9181e-005	-5.8337e-006	1.4814e-005	0	0
1.17998	0	0.023359	-0.0057842	-2.5765e-007	0	0	0	-4.2964e-006	-5.5536e-006	-1.451e-005	0	0
1.18094	0	0.023359	-0.0057842	-2.7e-007	0	0	0	-9.8413e-006	5.3759e-006	5.6104e-006	0	0
1.18196	0	0.023359	-0.0057842	-2.4551e-007	0	0	0	-1.4072e-006	2.6098e-006	2.3048e-005	0	0
1.18299	0	0.023359	-0.0057842	-2.5008e-007	0	0	0	-6.8067e-006	-8.3349e-006	-2.2129e-005	0	0
1.18395	0	0.023359	-0.0057842	-2.6141e-007	0	0	0	2.0558e-005	1.864e-006	7.6331e-006	0	0
1.18498	0	0.023359	-0.0057842	-2.548e-007	0	0	0	-2.3477e-006	5.859e-006	-1.5709e-005	0	0
1.18594	0	0.023359	-0.0057842	-2.7545e-007	0	0	0	-8.8705e-006	-1.9028e-006	-5.3971e-006	0	0
1.18696	0	0.023359	-0.0057842	-2.5084e-007	0	0	0	3.494e-006	-4.7952e-006	3.1674e-005	0	0
1.18799	0	0.023359	-0.0057842	-2.5171e-007	0	0	0	-1.5114e-005	6.6847e-006	-2.5268e-005	0	0
1.18895	0	0.023359	-0.0057842	-2.6125e-007	0	0	0	1.7003e-005	3.3592e-006	1.7484e-005	0	0
1.18997	0	0.023359	-0.0057842	-2.4972e-007	0	0	0	5.9679e-007	-9.784e-006	-1.4863e-005	0	0
1.19094	0	0.023359	-0.0057842	-2.7684e-007	0	0	0	-5.1914e-006	2.0308e-006	-1.6274e-005	0	0
1.19196	0	0.023359	-0.0057842	-2.5845e-007	0	0	0	8.997e-006	8.9424e-006	3.0762e-005	0	0
1.19299	0	0.023359	-0.0057842	-2.5364e-007	0	0	0	-2.1622e-005	-5.6952e-006	-2.3869e-005	0	0
1.19395	0	0.023359	-0.0057842	-2.6078e-007	0	0	0	7.9561e-006	-6.7265e-006	1.9643e-005	0	0
1.19497	0	0.023359	-0.0057842	-2.3942e-007	0	0	0	2.5776e-006	4.7923e-006	-1.171e-005	0	0
1.196	0	0.023359	-0.0057842	-2.7367e-007	0	0	0	2.545e-006	6.1889e-006	-1.539e-005	0	0
1.19696	0	0.023359	-0.0057842	-2.6198e-007	0	0	0	1.3831e-005	-6.4735e-006	2.6472e-005	0	0
1.19798	0	0.023359	-0.0057842	-2.5935e-007	0	0	0	-2.3546e-005	-8.3351e-006	-2.3963e-005	0	0
1.19895	0	0.023359	-0.0057842	-2.6567e-007	0	0	0	4.8899e-006	1.1291e-005	2.7191e-005	0	0
1.19997	0	0.023359	-0.0057842	-2.3874e-007	0	0	0	1.443e-006	3.0093e-006	-9.1449e-006	0	0
1.201	0	0.023359	-0.0057842	-2.6883e-007	0	0	0	-6.1009e-007	-9.5088e-006	-1.9801e-005	0	0
1.20196	0	0.023359	-0.0057842	-2.6243e-007	0	0	0	1.749e-005	2.9081e-007	2.4082e-005	0	0
1.20298	0	0.023359	-0.0057842	-2.6279e-007	0	0	0	-1.6084e-005	1.0663e-005	-1.9325e-005	0	0
1.20394	0	0.023359	-0.0057842	-2.6604e-007	0	0	0	-2.204e-006	-1.9426e-006	2.5132e-005	0	0
1.20497	0	0.023359	-0.0057842	-2.4087e-007	0	0	0	-3.302e-006	-1.1235e-005	-8.2383e-007	0	0
1.20599	0	0.023359	-0.0057842	-2.5834e-007	0	0	0	1.0123e-006	4.175e-007	-1.1465e-005	0	0
1.20696	0	0.023359	-0.0057842	-2.5316e-007	0	0	0	1.2754e-005	7.9705e-006	5.1398e-006	0	0
1.20798	0	0.023359	-0.0057842	-2.6268e-007	0	0	0	-5.621e-006	8.5041e-007	-1.9977e-005	0	0
1.20894	0	0.023359	-0.0057842	-2.6877e-007	0	0	0	3.4104e-006	-3.9511e-006	1.3625e-005	0	0
1.20997	0	0.023359	-0.0057842	-2.5315e-007	0	0	0	-5.586e-006	1.0778e-006	2.0155e-006	0	0
1.21099	0	0.023359	-0.0057842	-2.5672e-007	0	0	0	-7.4804e-006	-2.3395e-006	-1.2869e-006	0	0
1.21195	0	0.023359	-0.0057842	-2.5235e-007	0	0	0	8.7209e-006	3.2558e-006	4.1541e-006	0	0
1.21298	0	0.023359	-0.0057842	-2.5631e-007	0	0	0	1.9366e-006	-2.4668e-006	-1.5117e-005	0	0
1.21394	0	0.023359	-0.0057842	-2.6753e-007	0	0	0	2.7619e-006	-1.2186e-006	2.1244e-006	0	0
1.21497	0	0.023359	-0.0057842	-2.5623e-007	0	0	0	-4.4003e-006	4.3691e-006	6.8932e-006	0	0
1.21599	0	0.023359	-0.0057842	-2.5903e-007	0	0	0	-7.2433e-006	1.9516e-006	-4.5068e-006	0	0
1.21695	0	0.023359	-0.0057842	-2.5626e-007	0	0	0	9.4223e-006	-8.0314e-006	1.2066e-005	0	0
1.21798	0	0.023359	-0.0057842	-2.5537e-007	0	0	0	-1.9295e-006	4.3248e-006	-1.5797e-005	0	0
1.21894	0	0.023359	-0.0057842	-2.6942e-007	0	0	0	3.2544e-006	9.9203e-006	3.2921e-006	0	0
1.21996	0	0.023359	-0.0057842	-2.5585e-007	0	0	0	1.4095e-007	-1.159e-005	1.542e-005	0	0
1.22099	0	0.023359	-0.0057842	-2.6091e-007	0	0	0	-1.1495e-005	-8.2467e-007	-1.5241e-005	0	0
1.22195	0	0.023359	-0.0057842	-2.5708e-007	0	0	0	9.9785e-006	1.6622e-005	1.7254e-005	0	0
1.22298	0	0.023359	-0.0057842	-2.513e-007	0	0	0	-2.5941e-006	-3.9081e-006	-8.9192e-006	0	0
1.22394	0	0.023359	-0.0057842	-2.6644e-007	0	0	0	-7.5762e-007	-1.3527e-005	-1.6366e-006	0	0
1.22496	0	0.023359	-0.0057842	-2.5446e-007	0	0	0	4.5825e-006	6.9583e-006	1.5397e-005	0	0
1.22599	0	0.023359	-0.0057842	-2.5449e-007	0	0	0	-1.2409e-005	5.5462e-006	-1.5558e-005	0	0
1.22695	0	0.023359	-0.0057842	-2.5915e-007	0	0	0	7.6029e-006	-8.3092e-006	1.3806e-005	0	0
1.22797	0	0.023359	-0.0057842	-2.5443e-007	0	0	0	4.7906e-006	-5.4271e-007	-9.7012e-006	0	0
1.229	0	0.023359	-0.0057842	-2.6778e-007	0	0	0	-1.216e-006	6.0434e-006	-1.7341e-006	0	0
1.22996	0	0.023359	-0.0057842	-2.6262e-007	0	0	0	7.4533e-007	4.5304e-006	6.4156e-006	0	0
1.23099	0	0.023359	-0.0057842	-2.58e-007	0	0	0	-5.6242e-006	-6.112e-006	6.8458e-006	0	0
1.23195	0	0.023359	-0.0057842	-2.5339e-007	0	0	0	-4.6114e-006	-7.9835e-006	5.263e-006	0	0
1.23297	0	0.023359	-0.0057842	-2.5379e-007	0	0	0	4.2494e-006	6.4117e-006	-1.7805e-006	0	0
1.234	0	0.023359	-0.0057842	-2.5972e-007	0	0	0	7.3251e-006	6.2669e-006	-3.4602e-006	0	0
1.23496	0	0.023359	-0.0057842	-2.6335e-007	0	0	0	-7.4178e-007	-8.9982e-006	-5.6952e-006	0	0
1.23598	0	0.023359	-0.0057842	-2.6516e-007	0	0	0	-2.4723e-006	-4.2598e-006	1.0196e-005	0	0
1.23695	0	0.023359	-0.0057842	-2.5452e-007	0	0	0	-5.2304e-006	9.9128e-006	5.6009e-006	0	0
1.23797	0	0.023359	-0.0057842	-2.566e-007	0	0	0	-1.197e-006	3.0805e-006	-6.6411e-006	0	0
1.239	0	0.023359	-0.0057842	-2.5632e-007	0	0	0	9.0794e-006	-1.2651e-005	2.0331e-006	0	0
1.23996	0	0.023359	-0.0057842	-2.6504e-007	0	0	0	3.7291e-007	-5.0072e-006	-1.0042e-005	0	0
1.24098	0	0.023359	-0.0057842	-2.6678e-007	0	0	0	-4.3068e-007	1.1019e-005	6.8008e-006	0	0
1.24194	0	0.023359	-0.0057842	-2.5766e-007	0	0	0	-6.2817e-006	-4.4895e-007	5.426e-006	0	0
1.24297	0	0.023359	-0.0057842	-2.5473e-007	0	0	0	-4.6762e-006	-7.4244e-006	1.8552e-006	0	0
1.24399	0	0.023359	-0.0057842	-2.5146e-007	0	0	0	5.2471e-006	6.4226e-006	-1.0563e-006	0	0
1.24496	0	0.023359	-0.0057842	-2.5793e-007	0	0	0	3.9373e-006	4.0841e-006	-1.5298e-005	0	0
1.24598	0	0.023359	-0.0057842	-2.6604e-007	0	0	0	4.0032e-006	-9.5109e-006	-1.353e-006	0	0
1.24694	0	0.023359	-0.0057842	-2.6529e-007	0	0	0	-1.9839e-006	6.8731e-006	3.555e-006	0	0
1.24797	0	0.023359	-0.0057842	-2.6061e-007	0	0	0	-6.5481e-006	3.6978e-006	1.1179e-005	0	0
1.24899	0	0.023359	-0.0057842	-2.5104e-007	0	0	0	-4.7825e-006	-8.2854e-006	2.1253e-006	0	0
1.24995	0	0.023359	-0.0057842	-2.5123e-007	0	0	0	3.0999e-006	-3.5286e-006	-2.7128e-006	0	0
1.25098	0	0.023359	-0.0057842	-2.5885e-007	0	0	0	8.1971e-006	1.0388e-005	-9.7301e-006	0	0
1.25194	0	0.023359	-0.0057842	-2.6746e-007	0	0	0	4.4526e-006	5.7016e-006	-8.9048e-006	0	0
1.25297	0	0.023359	-0.0057842	-2.6992e-007	0	0	0	-2.0284e-006	-1.2207e-005	5.6338e-006	0	0
1.25399	0	0.023359	-0.0057842	-2.6034e-007	0	0	0	-9.0417e-006	-1.1661e-006	1.2914e-005	0	0
1.25495	0	0.023359	-0.0057842	-2.4984e-007	0	0	0	-7.8056e-006	1.5169e-005	5.8037e-006	0	0
1.25598	0	0.023359	-0.0057842	-2.5087e-007	0	0	0	5.6458e-006	-2.958e-006	-8.5334e-006	0	0
1.25694	0	0.023359	-0.0057842	-2.599e-007	0	0	0	1.3959e-005	-1.4456e-005	-5.173e-006	0	0
1.25796	0	0.023359	-0.0057842	-2.6888e-007	0	0	0	-6.9932e-007	6.8589e-006	-1.2184e-005	0	0
1.25899	0	0.023359	-0.0057842	-2.7189e-007	0	0	0	-3.4278e-006	1.1573e-005	1.5767e-005	0	0
1.25995	0	0.023359	-0.0057842	-2.5283e-007	0	0	0	-1.0317e-005	-6.0176e-006	1.397e-005	0	0
1.26098	0	0.023359	-0.0057842	-2.4848e-007	0	0	0	-7.8695e-006	-8.4812e-006	9.5453e-007	0	0
1.26194	0	0.023359	-0.0057842	-2.4754e-007	0	0	0	1.1312e-005	9.5049e-006	-2.8591e-006	0	0
1.26296	0	0.023359	-0.0057842	-2.5967e-007	0	0	0	9.7221e-006	5.6621e-006	-2.2887e-005	0	0
1.26399	0	0.023359	-0.0057842	-2.7844e-007	0	0	0	6.7126e-006	-1.5276e-005	-2.1756e-007	0	0
1.26495	0	0.023359	-0.0057842	-2.7161e-007	0	0	0	-6.6754e-006	3.0193e-006	1.0893e-005	0	0
1.26597	0	0.023359	-0.0057842	-2.6129e-007	0	0	0	-1.4523e-005	1.8918e-005	1.518e-005	0	0
1.267	0	0.023359	-0.0057842	-2.4513e-007	0	0	0	-3.647e-006	-1.3287e-005	7.0737e-006	0	0
1.26796	0	0.023359	-0.0057842	-2.4884e-007	0	0	0	7.7979e-006	-1.1492e-005	-1.1737e-005	0	0
1.26899	0	0.023359	-0.0057842	-2.6338e-007	0	0	0	1.3845e-005	1.6768e-005	-8.8822e-006	0	0
1.26995	0	0.023359	-0.0057842	-2.6935e-007	0	0	0	4.1273e-007	2.4629e-006	-1.1986e-006	0	0
1.27097	0	0.023359	-0.0057842	-2.6587e-007	0	0	0	-1.2251e-005	-1.1192e-005	9.9706e-006	0	0
1.272	0	0.023359	-0.0057842	-2.5196e-007	0	0	0	-7.0461e-006	-1.3505e-006	1.0224e-005	0	0
1.27296	0	0.023359	-0.0057842	-2.4904e-007	0	0	0	4.1436e-006	1.0238e-005	4.8059e-007	0	0
1.27398	0	0.023359	-0.0057842	-2.5415e-007	0	0	0	7.2203e-006	-1.0987e-006	-9.6798e-006	0	0
1.27495	0	0.023359	-0.0057842	-2.6579e-007	0	0	0	4.4518e-006	-1.14e-005	-1.0757e-005	0	0
1.27597	0	0.023359	-0.0057842	-2.694e-007	0	0	0	1.1899e-006	-6.4386e-007	7.0092e-006	0	0
1.277	0	0.023359	-0.0057842	-2.5606e-007	0	0	0	-1.2142e-005	1.4755e-005	1.3339e-005	0	0
1.27796	0	0.023359	-0.0057842	-2.5034e-007	0	0	0	-9.953e-006	-9.6273e-007	4.7105e-007	0	0
1.27898	0	0.023359	-0.0057842	-2.4846e-007	0	0	0	1.1812e-005	-1.3728e-005	1.3436e-006	0	0
1.27994	0	0.023359	-0.0057842	-2.5787e-007	0	0	0	8.7385e-006	4.458e-006	-2.4754e-005	0	0
1.28097	0	0.023359	-0.0057842	-2.753e-007	0	0	0	6.0526e-006	1.4021e-005	1.9221e-006	0	0
1.28199	0	0.023359	-0.0057842	-2.6114e-007	0	0	0	-1.145e-005	-1.3116e-005	1.5264e-005	0	0
1.28296	0	0.023359	-0.0057842	-2.5757e-007	0	0	0	-1.5051e-005	-5.8455e-006	7.2234e-006	0	0
1.28398	0	0.023359	-0.0057842	-2.4151e-007	0	0	0	6.2753e-006	2.0334e-005	1.2713e-005	0	0
1.28494	0	0.023359	-0.0057842	-2.4777e-007	0	0	0	3.4466e-006	-1.3232e-006	-2.9103e-005	0	0
1.28597	0	0.023359	-0.0057842	-2.7075e-007	0	0	0	1.6455e-005	-2.237e-005	3.1682e-006	0	0
1.28699	0	0.023359	-0.0057842	-2.623e-007	0	0	0	-5.7235e-006	1.8338e-005	1.6127e-006	0	0
1.28795	0	0.023359	-0.0057842	-2.649e-007	0	0	0	-1.8267e-005	1.334e-005	3.505e-006	0	0
1.28898	0	0.023359	-0.0057842	-2.4435e-007	0	0	0	2.3065e-006	-1.956e-005	2.56e-005	0	0
1.28994	0	0.023359	-0.0057842	-2.4297e-007	0	0	0	-1.2914e-006	-8.8349e-006	-2.541e-005	0	0
1.29097	0	0.023359	-0.0057842	-2.6842e-007	0	0	0	1.9596e-005	2.115e-005	-4.6775e-006	0	0
1.29199	0	0.023359	-0.0057842	-2.6372e-007	0	0	0	2.3521e-006	-5.541e-006	-1.3382e-007	0	0
1.29295	0	0.023359	-0.0057842	-2.7004e-007	0	0	0	-2.0409e-005	-1.9006e-005	-1.2694e-006	0	0
1.29398	0	0.023359	-0.0057842	-2.4899e-007	0	0	0	-1.7199e-006	8.7318e-006	3.9229e-005	0	0
1.29494	0	0.023359	-0.0057842	-2.3666e-007	0	0	0	-7.0256e-006	1.7579e-005	-2.3955e-005	0	0
1.29596	0	0.023359	-0.0057842	-2.5998e-007	0	0	0	1.8232e-005	-1.8296e-005	-6.4844e-006	0	0
1.29699	0	0.023359	-0.0057842	-2.6024e-007	0	0	0	1.1073e-005	-7.2007e-006	-1.2166e-005	0	0
1.29795	0	0.023359	-0.0057842	-2.7802e-007	0	0	0	-1.1678e-005	1.3878e-005	-7.5635e-006	0	0
1.29898	0	0.023359	-0.0057842	-2.6113e-007	0	0	0	-4.0485e-006	4.1208e-006	3.7015e-005	0	0
1.29994	0	0.023359	-0.0057842	-2.3983e-007	0	0	0	-1.6866e-005	-1.5855e-005	-2.9318e-006	0	0
1.30096	0	0.023359	-0.0057842	-2.5159e-007	0	0	0	9.1974e-006	2.3315e-006	-9.9312e-008	0	0
1.30199	0	0.023359	-0.0057842	-2.5337e-007	0	0	0	1.9189e-005	1.5818e-005	-1.9229e-005	0	0
1.30295	0	0.023359	-0.0057842	-2.7793e-007	0	0	0	2.0961e-006	-5.6173e-006	-1.1571e-005	0	0
1.30397	0	0.023359	-0.0057842	-2.6876e-007	0	0	0	-9.7656e-006	-1.416e-005	2.3352e-005	0	0
1.305	0	0.023359	-0.0057842	-2.5139e-007	0	0	0	-1.8219e-005	7.3713e-006	9.1706e-006	0	0
1.30596	0	0.023359	-0.0057842	-2.4152e-007	0	0	0	1.6008e-006	9.4994e-006	6.7807e-006	0	0
1.30699	0	0.023359	-0.0057842	-2.4569e-007	0	0	0	1.2091e-005	-1.4915e-005	-1.9884e-005	0	0
1.30795	0	0.023359	-0.0057842	-2.7132e-007	0	0	0	1.4393e-005	-1.0453e-005	-1.8041e-005	0	0
1.30897	0	0.023359	-0.0057842	-2.7408e-007	0	0	0	1.2581e-006	1.8936e-005	8.3543e-006	0	0
1.31	0	0.023359	-0.0057842	-2.6575e-007	0	0	0	-2.1302e-005	1.0859e-006	5.3354e-006	0	0
1.31096	0	0.023359	-0.0057842	-2.5331e-007	0	0	0	-4.8734e-006	-1.4889e-005	2.123e-005	0	0
1.31198	0	0.023359	-0.0057842	-2.4363e-007	0	0	0	5.8944e-006	6.651e-006	-1.1425e-005	0	0
1.31295	0	0.023359	-0.0057842	-2.6364e-007	0	0	0	1.1711e-005	1.5563e-005	-1.9986e-005	0	0
1.31397	0	0.023359	-0.0057842	-2.7001e-007	0	0	0	8.1025e-006	-1.8774e-005	6.2138e-006	0	0
1.315	0	0.023359	-0.0057842	-2.6528e-007	0	0	0	-1.7705e-005	-3.6874e-006	-1.506e-006	0	0
1.31596	0	0.023359	-0.0057842	-2.5867e-007	0	0	0	-7.359e-006	1.8074e-005	1.6414e-005	0	0
1.31698	0	0.023359	-0.0057842	-2.4168e-007	0	0	0	3.539e-006	-5.2916e-006	4.801e-006	0	0
1.31794	0	0.023359	-0.0057842	-2.5483e-007	0	0	0	2.9321e-006	-9.3129e-006	-2.269e-005	0	0
1.31897	0	0.023359	-0.0057842	-2.6532e-007	0	0	0	1.4156e-005	3.4989e-006	6.5769e-006	0	0
1.31999	0	0.023359	-0.0057842	-2.6299e-007	0	0	0	-8.6226e-006	8.3455e-006	-8.4501e-006	0	0
1.32096	0	0.023359	-0.0057842	-2.6724e-007	0	0	0	-7.2903e-006	-3.7623e-006	1.2883e-005	0	0
1.32198	0	0.023359	-0.0057842	-2.4742e-007	0	0	0	-8.8932e-007	-5.5702e-006	9.0026e-006	0	0
1.32294	0	0.023359	-0.0057842	-2.5074e-007	0	0	0	-3.6914e-006	2.7838e-006	-1.3192e-005	0	0
1.32397	0	0.023359	-0.0057842	-2.5946e-007	0	0	0	1.2621e-005	3.5058e-006	-2.4964e-007	0	0
1.32499	0	0.023359	-0.0057842	-2.6306e-007	0	0	0	3.478e-006	6.9915e-007	-6.9648e-006	0	0
1.32595	0	0.023359	-0.0057842	-2.6865e-007	0	0	0	-6.9678e-006	-4.657e-006	3.8105e-006	0	0
1.32698	0	0.023359	-0.0057842	-2.5313e-007	0	0	0	-7.8188e-006	-1.1295e-006	1.5691e-005	0	0
1.32794	0	0.023359	-0.0057842	-2.5101e-007	0	0	0	-3.8758e-006	5.4871e-006	-7.2597e-006	0	0
1.32897	0	0.023359	-0.0057842	-2.5189e-007	0	0	0	1.1411e-005	-2.0985e-006	2.9144e-006	0	0
1.32999	0	0.023359	-0.0057842	-2.6224e-007	0	0	0	2.6536e-006	-1.4568e-006	-2.3989e-005	0	0
1.33095	0	0.023359	-0.0057842	-2.7443e-007	0	0	0	6.1913e-006	5.7898e-006	1.2016e-005	0	0
1.33198	0	0.023359	-0.0057842	-2.5901e-007	0	0	0	-1.1057e-005	-4.2325e-006	7.291e-006	0	0
1.33294	0	0.023359	-0.0057842	-2.5739e-007	0	0	0	-1.2764e-005	-2.6447e-006	5.946e-006	0	0
1.33396	0	0.023359	-0.0057842	-2.4253e-007	0	0	0	5.8615e-006	7.2608e-006	7.0259e-006	0	0
1.33499	0	0.023359	-0.0057842	-2.5341e-007	0	0	0	4.8153e-006	-1.9499e-006	-2.8522e-005	0	0
1.33595	0	0.023359	-0.0057842	-2.6725e-007	0	0	0	1.2788e-005	-4.5881e-006	2.258e-006	0	0
1.33698	0	0.023359	-0.0057842	-2.6349e-007	0	0	0	-6.7813e-006	7.6565e-006	-1.7217e-006	0	0
1.33794	0	0.023359	-0.0057842	-2.621e-007	0	0	0	-1.2733e-005	2.7937e-007	9.0421e-006	0	0
1.33896	0	0.023359	-0.0057842	-2.4631e-007	0	0	0	-1.3431e-007	-2.8868e-006	1.4872e-005	0	0
1.33999	0	0.023359	-0.0057842	-2.4732e-007	0	0	0	5.4207e-007	9.9039e-007	-2.0405e-005	0	0
1.34095	0	0.023359	-0.0057842	-2.654e-007	0	0	0	1.623e-005	3.1383e-006	-8.0301e-006	0	0
1.34197	0	0.023359	-0.0057842	-2.6389e-007	0	0	0	1.9894e-006	-2.8853e-006	-6.6785e-006	0	0
1.343	0	0.023359	-0.0057842	-2.7433e-007	0	0	0	-1.1274e-005	3.003e-006	7.7258e-006	0	0
1.34396	0	0.023359	-0.0057842	-2.5001e-007	0	0	0	-5.1828e-006	3.6442e-006	3.028e-005	0	0
1.34499	0	0.023359	-0.0057842	-2.451e-007	0	0	0	-9.4368e-006	-4.5725e-006	-1.9786e-005	0	0
1.34595	0	0.023359	-0.0057842	-2.5737e-007	0	0	0	1.9351e-005	-1.1308e-006	4.7238e-006	0	0
1.34697	0	0.023359	-0.0057842	-2.5697e-007	0	0	0	5.3929e-006	-1.9396e-007	-1.9773e-005	0	0
1.348	0	0.023359	-0.0057842	-2.741e-007	0	0	0	-8.5278e-006	1.8317e-006	1.3493e-006	0	0
1.34896	0	0.023359	-0.0057842	-2.5688e-007	0	0	0	-2.7098e-006	-1.5135e-006	2.4974e-005	0	0
1.34998	0	0.023359	-0.0057842	-2.4784e-007	0	0	0	-1.0249e-005	3.1078e-006	-8.2132e-006	0	0
1.35094	0	0.023359	-0.0057842	-2.5377e-007	0	0	0	8.7524e-006	-2.3664e-006	1.503e-006	0	0
1.35197	0	0.023359	-0.0057842	-2.5061e-007	0	0	0	6.4382e-006	-3.7145e-006	-8.2521e-006	0	0
1.353	0	0.023359	-0.0057842	-2.6813e-007	0	0	0	-2.0456e-006	5.1107e-006	-1.2747e-005	0	0
1.35396	0	0.023359	-0.0057842	-2.6312e-007	0	0	0	4.2741e-006	4.9601e-006	1.6763e-005	0	0
1.35498	0	0.023359	-0.0057842	-2.5564e-007	0	0	0	-1.1364e-005	-5.1325e-006	-8.0325e-006	0	0
1.35594	0	0.023359	-0.0057842	-2.6034e-007	0	0	0	1.4883e-006	-7.7266e-006	8.8535e-006	0	0
1.35697	0	0.023359	-0.0057842	-2.5161e-007	0	0	0	5.147e-006	4.4386e-006	-3.7802e-006	0	0
1.35799	0	0.023359	-0.0057842	-2.6263e-007	0	0	0	-6.3965e-007	1.0042e-005	-6.603e-006	0	0
1.35895	0	0.023359	-0.0057842	-2.6078e-007	0	0	0	1.6782e-006	-7.9607e-006	6.0062e-006	0	0
1.35998	0	0.023359	-0.0057842	-2.569e-007	0	0	0	-5.6109e-006	-1.0754e-005	-2.8032e-006	0	0
1.36094	0	0.023359	-0.0057842	-2.6092e-007	0	0	0	1.2403e-006	7.439e-006	2.1522e-006	0	0
1.36197	0	0.023359	-0.0057842	-2.5401e-007	0	0	0	3.1155e-006	1.3657e-005	2.8056e-006	0	0
1.36299	0	0.023359	-0.0057842	-2.6225e-007	0	0	0	-3.5307e-006	-1.5777e-005	-1.4601e-005	0	0
1.36395	0	0.023359	-0.0057842	-2.6395e-007	0	0	0	8.4629e-006	-1.3804e-005	2.1085e-005	0	0
1.36498	0	0.023359	-0.0057842	-2.4986e-007	0	0	0	-1.2263e-005	2.136e-005	-8.1132e-006	0	0
1.36594	0	0.023359	-0.0057842	-2.6228e-007	0	0	0	-2.6663e-006	7.4469e-006	8.4721e-008	0	0
1.36697	0	0.023359	-0.0057842	-2.4709e-007	0	0	0	1.0894e-005	-2.1311e-005	9.5514e-006	0	0
1.36799	0	0.023359	-0.0057842	-2.6583e-007	0	0	0	-2.993e-006	6.0013e-006	-2.4074e-005	0	0
1.36895	0	0.023359	-0.0057842	-2.7042e-007	0	0	0	1.1049e-005	1.687e-005	2.3118e-005	0	0
1.36998	0	0.023359	-0.0057842	-2.552e-007	0	0	0	-1.4792e-005	-1.2712e-005	-1.4691e-005	0	0
1.37094	0	0.023359	-0.0057842	-2.6803e-007	0	0	0	-2.4667e-006	-1.1219e-005	1.0572e-005	0	0
1.37196	0	0.023359	-0.0057842	-2.4545e-007	0	0	0	6.9502e-006	1.8566e-005	8.8709e-006	0	0
1.37299	0	0.023359	-0.0057842	-2.6738e-007	0	0	0	-3.2897e-006	7.8763e-007	-2.6212e-005	0	0
1.37395	0	0.023359	-0.0057842	-2.664e-007	0	0	0	1.4074e-005	-1.6689e-005	2.4168e-005	0	0
1.37498	0	0.023359	-0.0057842	-2.5426e-007	0	0	0	-1.7396e-005	3.147e-006	-1.5974e-005	0	0
1.37594	0	0.023359	-0.0057842	-2.6735e-007	0	0	0	-2.064e-006	1.5184e-005	9.6703e-006	0	0
1.37696	0	0.023359	-0.0057842	-2.4019e-007	0	0	0	6.9242e-006	-3.341e-006	1.6351e-005	0	0
1.37799	0	0.023359	-0.0057842	-2.5714e-007	0	0	0	-1.1716e-005	-1.5411e-005	-3.5727e-005	0	0
1.37895	0	0.023359	-0.0057842	-2.6562e-007	0	0	0	2.2018e-005	8.2338e-006	2.4758e-005	0	0
1.37997	0	0.023359	-0.0057842	-2.5303e-007	0	0	0	-7.5995e-006	1.0208e-005	-2.0654e-005	0	0
1.381	0	0.023359	-0.0057842	-2.7515e-007	0	0	0	-6.1222e-006	-1.0843e-005	9.1055e-006	0	0
1.38196	0	0.023359	-0.0057842	-2.4524e-007	0	0	0	4.3555e-006	-5.8674e-006	3.12e-005	0	0
1.38299	0	0.023359	-0.0057842	-2.5765e-007	0	0	0	-1.1613e-005	1.3539e-005	-3.7527e-005	0	0
1.38395	0	0.023359	-0.0057842	-2.6537e-007	0	0	0	2.3057e-005	8.568e-007	2.1749e-005	0	0
1.38497	0	0.023359	-0.0057842	-2.5356e-007	0	0	0	-8.2356e-006	-6.8679e-006	-2.0199e-005	0	0
1.386	0	0.023359	-0.0057842	-2.7565e-007	0	0	0	-6.1214e-006	3.3475e-006	9.8429e-006	0	0
1.38696	0	0.023359	-0.0057842	-2.4637e-007	0	0	0	4.6764e-006	7.6016e-006	2.7964e-005	0	0
1.38798	0	0.023359	-0.0057842	-2.5506e-007	0	0	0	-1.2758e-005	-1.2304e-005	-2.6128e-005	0	0
1.38894	0	0.023359	-0.0057842	-2.62e-007	0	0	0	1.7731e-005	-5.7585e-006	1.5533e-005	0	0
1.38997	0	0.023359	-0.0057842	-2.5507e-007	0	0	0	-3.7255e-007	1.3226e-005	-1.7289e-005	0	0
1.391	0	0.023359	-0.0057842	-2.7393e-007	0	0	0	-5.6987e-006	1.7089e-007	-4.237e-006	0	0
1.39196	0	0.023359	-0.0057842	-2.5527e-007	0	0	0	3.7592e-006	-1.5727e-005	2.9286e-005	0	0
1.39298	0	0.023359	-0.0057842	-2.5286e-007	0	0	0	-1.4907e-005	5.9177e-006	-2.0297e-005	0	0
1.39394	0	0.023359	-0.0057842	-2.588e-007	0	0	0	1.1497e-005	1.6521e-005	1.4965e-005	0	0
1.39497	0	0.023359	-0.0057842	-2.4739e-007	0	0	0	1.8874e-006	-1.2206e-005	-8.7969e-006	0	0
1.39599	0	0.023359	-0.0057842	-2.7106e-007	0	0	0	-2.148e-006	3.7274e-006	-1.4437e-005	0	0
1.39695	0	0.023359	-0.0057842	-2.5635e-007	0	0	0	7.4833e-006	8.0001e-006	2.6075e-005	0	0
1.39798	0	0.023359	-0.0057842	-2.5582e-007	0	0	0	-1.6459e-005	-5.6547e-008	-2.1821e-005	0	0
1.39894	0	0.023359	-0.0057842	-2.6159e-007	0	0	0	8.9637e-006	-1.2428e-005	2.2224e-005	0	0
1.39997	0	0.023359	-0.0057842	-2.4896e-007	0	0	0	2.2455e-006	5.6114e-006	-1.3381e-005	0	0
1.40099	0	0.023359	-0.0057842	-2.7084e-007	0	0	0	4.0769e-007	7.4756e-006	-6.7446e-006	0	0
1.40195	0	0.023359	-0.0057842	-2.5599e-007	0	0	0	2.8334e-006	-8.7693e-006	1.8865e-005	0	0
1.40298	0	0.023359	-0.0057842	-2.5968e-007	0	0	0	-1.3269e-005	-4.1915e-006	-1.7349e-005	0	0
1.40394	0	0.023359	-0.0057842	-2.5988e-007	0	0	0	1.1052e-005	1.2465e-005	1.9393e-005	0	0
1.40496	0	0.023359	-0.0057842	-2.4869e-007	0	0	0	-3.2891e-006	-5.4595e-006	-1.1217e-005	0	0
1.40599	0	0.023359	-0.0057842	-2.6719e-007	0	0	0	-1.4382e-006	-1.8195e-006	-5.4837e-006	0	0
1.40695	0	0.023359	-0.0057842	-2.5362e-007	0	0	0	8.302e-006	8.2711e-007	1.7448e-005	0	0
1.40798	0	0.023359	-0.0057842	-2.6072e-007	0	0	0	-9.4973e-006	3.327e-006	-1.7578e-005	0	0
1.40894	0	0.023359	-0.0057842	-2.6341e-007	0	0	0	6.7637e-006	1.0843e-006	1.2741e-005	0	0
1.40996	0	0.023359	-0.0057842	-2.5383e-007	0	0	0	-1.7322e-006	-8.0564e-006	-5.1121e-006	0	0
1.41099	0	0.023359	-0.0057842	-2.6493e-007	0	0	0	-2.8552e-006	1.4075e-006	-5.0911e-006	0	0
1.41195	0	0.023359	-0.0057842	-2.5543e-007	0	0	0	4.8998e-006	3.2189e-006	1.4508e-005	0	0
1.41297	0	0.023359	-0.0057842	-2.5423e-007	0	0	0	-8.735e-006	-4.7641e-007	-1.0674e-005	0	0
1.41394	0	0.023359	-0.0057842	-2.6015e-007	0	0	0	3.9771e-006	-8.0629e-006	2.509e-006	0	0
1.41496	0	0.023359	-0.0057842	-2.5529e-007	0	0	0	6.6715e-006	7.4582e-006	1.2556e-006	0	0
1.41599	0	0.023359	-0.0057842	-2.6323e-007	0	0	0	-5.661e-006	-7.1084e-007	-7.574e-006	0	0
1.41695	0	0.023359	-0.0057842	-2.6262e-007	0	0	0	1.8591e-006	-8.7524e-006	9.7534e-006	0	0
1.41797	0	0.023359	-0.0057842	-2.5499e-007	0	0	0	-2.9642e-006	4.5463e-006	-3.3521e-006	0	0
1.419	0	0.023359	-0.0057842	-2.6017e-007	0	0	0	4.216e-008	1.0798e-005	2.0881e-006	0	0
1.41996	0	0.023359	-0.0057842	-2.5547e-007	0	0	0	2.407e-006	-8.5801e-006	1.7189e-007	0	0
1.42098	0	0.023359	-0.0057842	-2.5945e-007	0	0	0	-1.2728e-006	-8.3435e-006	-7.7888e-006	0	0
1.42195	0	0.023359	-0.0057842	-2.6052e-007	0	0	0	2.7342e-006	1.3356e-005	7.0938e-006	0	0
1.42297	0	0.023359	-0.0057842	-2.5519e-007	0	0	0	-4.6259e-006	-2.2334e-006	-2.0121e-006	0	0
1.424	0	0.023359	-0.0057842	-2.5709e-007	0	0	0	-1.5886e-006	-6.7626e-006	-7.6674e-007	0	0
1.42496	0	0.023359	-0.0057842	-2.5431e-007	0	0	0	5.1747e-006	4.6621e-006	2.8349e-006	0	0
1.42598	0	0.023359	-0.0057842	-2.6042e-007	0	0	0	-1.0854e-007	-1.2193e-006	-1.247e-005	0	0
1.42694	0	0.023359	-0.0057842	-2.6412e-007	0	0	0	3.6287e-006	-3.9134e-006	2.7509e-006	0	0
1.42797	0	0.023359	-0.0057842	-2.6164e-007	0	0	0	-1.8648e-006	3.6765e-006	2.6313e-006	0	0
1.42899	0	0.023359	-0.0057842	-2.5915e-007	0	0	0	-5.8458e-006	-2.198e-006	3.2324e-006	0	0
1.42996	0	0.023359	-0.0057842	-2.5518e-007	0	0	0	5.1599e-007	1.6124e-007	4.3909e-006	0	0
1.43098	0	0.023359	-0.0057842	-2.5532e-007	0	0	0	2.173e-006	-1.5368e-006	-5.2616e-006	0	0
1.43194	0	0.023359	-0.0057842	-2.6238e-007	0	0	0	3.9937e-006	-9.0445e-007	-3.8687e-006	0	0
1.43297	0	0.023359	-0.0057842	-2.614e-007	0	0	0	2.5439e-007	9.3529e-007	3.8408e-006	0	0
1.43399	0	0.023359	-0.0057842	-2.6009e-007	0	0	0	-6.1783e-006	6.087e-006	-6.7916e-007	0	0
1.43495	0	0.023359	-0.0057842	-2.5633e-007	0	0	0	-3.8714e-007	-8.7096e-006	6.167e-006	0	0
1.43598	0	0.023359	-0.0057842	-2.5406e-007	0	0	0	1.2285e-006	-4.0587e-006	3.2524e-006	0	0
1.43694	0	0.023359	-0.0057842	-2.5675e-007	0	0	0	3.2076e-007	8.8442e-006	-8.317e-006	0	0
1.43797	0	0.023359	-0.0057842	-2.5984e-007	0	0	0	3.8912e-006	-3.1996e-006	1.4538e-006	0	0
1.43899	0	0.023359	-0.0057842	-2.5898e-007	0	0	0	-2.3443e-006	-4.5868e-006	-4.3039e-006	0	0
1.43995	0	0.023359	-0.0057842	-2.6079e-007	0	0	0	-1.3204e-006	6.4799e-006	7.2876e-006	0	0
1.44098	0	0.023359	-0.0057842	-2.5553e-007	0	0	0	-1.0109e-006	-3.2625e-006	1.5752e-006	0	0
1.44194	0	0.023359	-0.0057842	-2.5785e-007	0	0	0	2.4903e-007	-4.5207e-006	-4.1002e-006	0	0
1.44296	0	0.023359	-0.0057842	-2.566e-007	0	0	0	2.4146e-006	6.9834e-006	3.2008e-006	0	0
1.44399	0	0.023359	-0.0057842	-2.5537e-007	0	0	0	-4.4397e-006	-2.7184e-007	-8.3122e-006	0	0
1.44495	0	0.023359	-0.0057842	-2.5916e-007	0	0	0	2.0922e-006	-5.1989e-006	2.2473e-006	0	0
1.44598	0	0.023359	-0.0057842	-2.5527e-007	0	0	0	1.9884e-006	2.6637e-006	-7.3728e-006	0	0
1.44694	0	0.023359	-0.0057842	-2.632e-007	0	0	0	4.1558e-007	4.5816e-006	9.9677e-007	0	0
1.44796	0	0.023359	-0.0057842	-2.5562e-007	0	0	0	-2.2375e-006	-6.3659e-006	1.1227e-005	0	0
1.44899	0	0.023359	-0.0057842	-2.5702e-007	0	0	0	-5.0098e-006	3.7241e-007	-4.9128e-006	0	0
1.44995	0	0.023359	-0.0057842	-2.5692e-007	0	0	0	7.2977e-006	4.5855e-006	7.3057e-006	0	0
1.45097	0	0.023359	-0.0057842	-2.5748e-007	0	0	0	4.4943e-007	-3.6984e-006	-1.1087e-005	0	0
1.452	0	0.023359	-0.0057842	-2.6452e-007	0	0	0	1.9426e-007	-8.3697e-006	6.0641e-006	0	0
1.45296	0	0.023359	-0.0057842	-2.5725e-007	0	0	0	-2.2727e-006	1.259e-005	3.5176e-006	0	0
1.45399	0	0.023359	-0.0057842	-2.5874e-007	0	0	0	-2.4144e-006	5.9411e-006	7.6654e-007	0	0
1.45495	0	0.023359	-0.0057842	-2.5319e-007	0	0	0	1.3898e-006	-1.5174e-005	3.835e-006	0	0
1.45597	0	0.023359	-0.0057842	-2.6031e-007	0	0	0	1.5525e-006	-6.0809e-007	-1.2581e-005	0	0
1.457	0	0.023359	-0.0057842	-2.6374e-007	0	0	0	6.7886e-006	1.6702e-005	2.7805e-006	0	0
1.45796	0	0.023359	-0.0057842	-2.64e-007	0	0	0	-3.2024e-006	5.2497e-008	1.1265e-006	0	0
1.45898	0	0.023359	-0.0057842	-2.6115e-007	0	0	0	-6.0913e-006	-1.5801e-005	7.4759e-006	0	0
1.45995	0	0.023359	-0.0057842	-2.519e-007	0	0	0	-2.5771e-006	6.8276e-006	6.0104e-006	0	0
1.46097	0	0.023359	-0.0057842	-2.5231e-007	0	0	0	1.3108e-006	1.1521e-005	-6.2843e-006	0	0
1.462	0	0.023359	-0.0057842	-2.6056e-007	0	0	0	7.6801e-006	-1.1796e-005	-1.2717e-005	0	0
1.46296	0	0.023359	-0.0057842	-2.6689e-007	0	0	0	6.4887e-006	-6.5324e-007	-6.8804e-007	0	0
1.46398	0	0.023359	-0.0057842	-2.654e-007	0	0	0	-8.2837e-006	3.085e-006	2.6302e-006	0	0
1.46494	0	0.023359	-0.0057842	-2.5877e-007	0	0	0	-8.1867e-006	1.3961e-006	1.4037e-005	0	0
1.46597	0	0.023359	-0.0057842	-2.4795e-007	0	0	0	-1.1026e-006	-4.8547e-006	6.9522e-006	0	0
1.46699	0	0.023359	-0.0057842	-2.5053e-007	0	0	0	3.3668e-006	-1.031e-007	-8.4744e-006	0	0
1.46796	0	0.023359	-0.0057842	-2.6089e-007	0	0	0	9.7836e-006	7.3483e-006	-8.993e-006	0	0
1.46898	0	0.023359	-0.0057842	-2.6133e-007	0	0	0	3.6881e-007	-9.7904e-007	1.5134e-006	0	0
1.46994	0	0.023359	-0.0057842	-2.657e-007	0	0	0	-8.8725e-006	-8.4717e-006	-1.8433e-006	0	0
1.47097	0	0.023359	-0.0057842	-2.5438e-007	0	0	0	5.3721e-007	6.8919e-006	2.4235e-005	0	0
1.47199	0	0.023359	-0.0057842	-2.4633e-007	0	0	0	-7.8894e-006	4.6749e-006	-1.1258e-005	0	0
1.47295	0	0.023359	-0.0057842	-2.5731e-007	0	0	0	7.313e-006	-1.0462e-005	-9.1575e-006	0	0
1.47398	0	0.023359	-0.0057842	-2.6007e-007	0	0	0	1.3158e-005	-8.3723e-007	-3.464e-006	0	0
1.47494	0	0.023359	-0.0057842	-2.7105e-007	0	0	0	-5.239e-006	6.1006e-006	-1.2129e-005	0	0
1.47597	0	0.023359	-0.0057842	-2.6743e-007	0	0	0	-3.957e-006	-3.1717e-006	2.0203e-005	0	0
1.47699	0	0.023359	-0.0057842	-2.4896e-007	0	0	0	-1.1232e-005	-9.4074e-006	6.7803e-006	0	0
1.47795	0	0.023359	-0.0057842	-2.5158e-007	0	0	0	-6.8605e-007	8.0067e-006	-6.3702e-006	0	0
1.47898	0	0.023359	-0.0057842	-2.5192e-007	0	0	0	1.4813e-005	9.4409e-006	-8.5409e-007	0	0
1.47994	0	0.023359	-0.0057842	-2.6617e-007	0	0	0	1.9461e-006	-6.5194e-006	-2.2422e-005	0	0
1.48096	0	0.023359	-0.0057842	-2.7308e-007	0	0	0	2.6958e-006	-7.4877e-006	2.0112e-005	0	0
1.48199	0	0.023359	-0.0057842	-2.5686e-007	0	0	0	-1.483e-005	8.4204e-006	1.9599e-006	0	0
1.48295	0	0.023359	-0.0057842	-2.563e-007	0	0	0	-5.651e-006	3.8383e-006	1.0224e-005	0	0
1.48398	0	0.023359	-0.0057842	-2.459e-007	0	0	0	8.8114e-006	-5.9924e-006	2.1915e-007	0	0
1.48494	0	0.023359	-0.0057842	-2.6135e-007	0	0	0	4.972e-006	-2.2775e-007	-2.3278e-005	0	0
1.48596	0	0.023359	-0.0057842	-2.6842e-007	0	0	0	7.9276e-006	1.0628e-006	1.4512e-005	0	0
1.48699	0	0.023359	-0.0057842	-2.6173e-007	0	0	0	-1.3567e-005	-2.0841e-006	-2.1242e-008	0	0
1.48795	0	0.023359	-0.0057842	-2.5761e-007	0	0	0	-7.5307e-006	4.8262e-008	1.3017e-005	0	0
1.48897	0	0.023359	-0.0057842	-2.4405e-007	0	0	0	2.8841e-006	-1.4039e-006	-8.9089e-007	0	0
1.49	0	0.023359	-0.0057842	-2.5838e-007	0	0	0	7.0813e-006	1.9214e-006	-1.7036e-005	0	0
1.49096	0	0.023359	-0.0057842	-2.6629e-007	0	0	0	1.0992e-005	3.1199e-006	2.2395e-006	0	0
1.49199	0	0.023359	-0.0057842	-2.6505e-007	0	0	0	-9.0493e-006	-4.5878e-006	-6.5572e-006	0	0
1.49295	0	0.023359	-0.0057842	-2.6373e-007	0	0	0	-7.156e-006	-1.5442e-006	1.6702e-005	0	0
1.49397	0	0.023359	-0.0057842	-2.4382e-007	0	0	0	-5.0036e-006	6.6073e-006	1.191e-006	0	0
1.495	0	0.023359	-0.0057842	-2.54e-007	0	0	0	3.4473e-006	-6.178e-006	-1.3987e-005	0	0
1.49596	0	0.023359	-0.0057842	-2.6097e-007	0	0	0	1.7394e-005	-4.6926e-007	-1.0289e-006	0	0
1.49698	0	0.023359	-0.0057842	-2.6725e-007	0	0	0	-3.4794e-006	7.924e-006	-8.8304e-006	0	0
1.49795	0	0.023359	-0.0057842	-2.6879e-007	0	0	0	-9.9389e-006	-5.4648e-006	1.1327e-005	0	0
1.49897	0	0.023359	-0.0057842	-2.4879e-007	0	0	0	-6.4309e-006	-7.883e-006	1.1536e-005	0	0
1.5	0	0.023359	-0.0057842	-2.5284e-007	0	0	0	1.723e-006	1.4032e-005	-1.015e-005	0	0
1.50096	0	0.023359	-0.0057842	-2.584e-007	0	0	0	1.436e-005	-1.7388e-006	-4.8556e-006	0	0
1.50198	0	0.023359	-0.0057842	-2.6621e-007	0	0	0	7.315e-007	-1.1083e-005	-9.2811e-006	0	0
1.50294	0	0.023359	-0.0057842	-2.6773e-007	0	0	0	-7.929e-006	6.5427e-006	4.733e-006	0	0
1.50397	0	0.023359	-0.0057842	-2.5542e-007	0	0	0	-5.8475e-006	1.2138e-005	1.1434e-005	0	0
1.50499	0	0.023359	-0.0057842	-2.4655e-007	0	0	0	-3.9377e-006	-1.1731e-005	-4.4897e-006	0	0
1.50596	0	0.023359	-0.0057842	-2.5612e-007	0	0	0	8.6343e-006	-6.0368e-006	-8.5265e-006	0	0
1.50698	0	0.023359	-0.0057842	-2.5614e-007	0	0	0	7.7209e-006	1.0573e-005	-2.9762e-006	0	0
1.50794	0	0.023359	-0.0057842	-2.659e-007	0	0	0	-6.7323e-006	6.7307e-006	-6.2795e-006	0	0
1.50897	0	0.023359	-0.0057842	-2.5713e-007	0	0	0	-3.0498e-006	-1.6899e-005	1.7737e-005	0	0
1.50999	0	0.023359	-0.0057842	-2.5081e-007	0	0	0	-4.9975e-006	4.1109e-006	-4.3974e-006	0	0
1.51095	0	0.023359	-0.0057842	-2.5452e-007	0	0	0	5.6044e-006	1.6374e-005	-1.9795e-006	0	0
1.51198	0	0.023359	-0.0057842	-2.5844e-007	0	0	0	6.5676e-006	-9.3323e-006	-8.2605e-006	0	0
1.51294	0	0.023359	-0.0057842	-2.6384e-007	0	0	0	-9.3164e-007	-1.5269e-005	-1.4556e-006	0	0
1.51397	0	0.023359	-0.0057842	-2.6184e-007	0	0	0	-4.424e-006	1.0746e-005	4.6613e-006	0	0
1.51499	0	0.023359	-0.0057842	-2.5681e-007	0	0	0	-1.929e-006	9.5471e-006	6.4264e-006	0	0
1.51595	0	0.023359	-0.0057842	-2.5327e-007	0	0	0	-1.2475e-006	-1.2614e-005	-2.8828e-006	0	0
1.51698	0	0.023359	-0.0057842	-2.5735e-007	0	0	0	4.0699e-006	-9.3492e-006	1.8485e-006	0	0
1.51794	0	0.023359	-0.0057842	-2.5844e-007	0	0	0	2.089e-006	1.4939e-005	-4.5405e-006	0	0
1.51896	0	0.023359	-0.0057842	-2.6101e-007	0	0	0	-1.2398e-006	-3.9133e-008	6.535e-006	0	0
1.51999	0	0.023359	-0.0057842	-2.5524e-007	0	0	0	-4.9935e-006	-1.704e-005	3.0783e-006	0	0
1.52095	0	0.023359	-0.0057842	-2.5265e-007	0	0	0	-1.636e-006	3.4711e-006	2.0768e-006	0	0
1.52198	0	0.023359	-0.0057842	-2.5531e-007	0	0	0	5.2936e-006	1.4123e-005	-6.9496e-006	0	0
1.52294	0	0.023359	-0.0057842	-2.622e-007	0	0	0	5.9716e-006	-1.0102e-005	-1.0536e-005	0	0
1.52396	0	0.023359	-0.0057842	-2.6527e-007	0	0	0	4.861e-008	-9.1953e-006	4.4408e-006	0	0
1.52499	0	0.023359	-0.0057842	-2.5976e-007	0	0	0	-9.1929e-006	9.555e-006	8.3988e-006	0	0
1.52595	0	0.023359	-0.0057842	-2.4916e-007	0	0	0	-7.1489e-006	-5.8531e-007	4.0181e-006	0	0
1.52697	0	0.023359	-0.0057842	-2.4894e-007	0	0	0	4.9417e-006	-9.2256e-006	-4.5081e-006	0	0
1.528	0	0.023359	-0.0057842	-2.6128e-007	0	0	0	1.1808e-005	3.5906e-006	-1.6862e-005	0	0
1.52896	0	0.023359	-0.0057842	-2.7023e-007	0	0	0	6.3106e-006	1.3884e-005	-3.1867e-006	0	0
1.52999	0	0.023359	-0.0057842	-2.6578e-007	0	0	0	-1.1891e-005	-3.818e-006	8.0007e-006	0	0
1.53095	0	0.023359	-0.0057842	-2.5612e-007	0	0	0	-1.1875e-005	-9.618e-006	1.0764e-005	0	0
1.53197	0	0.023359	-0.0057842	-2.4483e-007	0	0	0	3.0328e-006	9.3868e-006	4.6789e-006	0	0
1.533	0	0.023359	-0.0057842	-2.5485e-007	0	0	0	8.1286e-006	-4.7606e-006	-2.0217e-005	0	0
1.53396	0	0.023359	-0.0057842	-2.6889e-007	0	0	0	1.2422e-005	-4.037e-006	-6.2279e-006	0	0
1.53498	0	0.023359	-0.0057842	-2.6556e-007	0	0	0	-6.9515e-006	9.0716e-006	3.9095e-006	0	0
1.53595	0	0.023359	-0.0057842	-2.6221e-007	0	0	0	-1.4963e-005	2.4931e-007	9.0877e-006	0	0
1.53697	0	0.023359	-0.0057842	-2.474e-007	0	0	0	6.2557e-007	-3.1598e-006	9.5121e-006	0	0
1.538	0	0.023359	-0.0057842	-2.4762e-007	0	0	0	4.3675e-006	1.5566e-006	-1.2005e-005	0	0
1.53896	0	0.023359	-0.0057842	-2.6321e-007	0	0	0	9.5703e-006	7.1434e-006	-8.2118e-006	0	0
1.53998	0	0.023359	-0.0057842	-2.6205e-007	0	0	0	8.19e-007	-1.3898e-005	2.8256e-006	0	0
1.54094	0	0.023359	-0.0057842	-2.6319e-007	0	0	0	-1.1497e-005	3.4243e-006	-4.7214e-006	0	0
1.54197	0	0.023359	-0.0057842	-2.5324e-007	0	0	0	-1.6989e-007	4.811e-006	1.8683e-005	0	0
1.54299	0	0.023359	-0.0057842	-2.4566e-007	0	0	0	-3.954e-006	-4.8142e-006	-1.0567e-005	0	0
1.54396	0	0.023359	-0.0057842	-2.6008e-007	0	0	0	8.8357e-006	-4.3414e-006	-9.0059e-006	0	0
1.54498	0	0.023359	-0.0057842	-2.6285e-007	0	0	0	1.0755e-005	3.6827e-007	-6.8948e-006	0	0
1.54594	0	0.023359	-0.0057842	-2.7209e-007	0	0	0	-6.0154e-006	7.0882e-006	-6.0097e-006	0	0
1.54697	0	0.023359	-0.0057842	-2.6187e-007	0	0	0	-7.5156e-006	-2.8377e-006	2.3022e-005	0	0
1.54799	0	0.023359	-0.0057842	-2.5229e-007	0	0	0	-7.9016e-006	-5.3831e-006	-4.1982e-006	0	0
1.54895	0	0.023359	-0.0057842	-2.5699e-007	0	0	0	1.0867e-005	7.5652e-006	-2.2046e-006	0	0
1.54998	0	0.023359	-0.0057842	-2.6102e-007	0	0	0	8.6205e-006	4.9692e-007	-1.0036e-005	0	0
1.55094	0	0.023359	-0.0057842	-2.7402e-007	0	0	0	-2.435e-006	-5.0838e-006	-4.1507e-006	0	0
1.55197	0	0.023359	-0.0057842	-2.6302e-007	0	0	0	-5.9924e-006	5.1882e-007	1.9018e-005	0	0
1.55299	0	0.023359	-0.0057842	-2.5132e-007	0	0	0	-1.234e-005	-3.5449e-006	5.796e-006	0	0
1.55395	0	0.023359	-0.0057842	-2.5246e-007	0	0	0	5.5177e-006	4.4239e-006	4.634e-006	0	0
1.55498	0	0.023359	-0.0057842	-2.525e-007	0	0	0	9.9973e-006	3.497e-006	-1.2788e-005	0	0
1.55594	0	0.023359	-0.0057842	-2.6779e-007	0	0	0	1.8672e-006	-4.307e-006	-1.013e-005	0	0
1.55696	0	0.023359	-0.0057842	-2.6268e-007	0	0	0	-2.7704e-006	-3.1924e-006	1.6553e-005	0	0
1.55799	0	0.023359	-0.0057842	-2.5658e-007	0	0	0	-1.1671e-005	4.9459e-006	9.365e-007	0	0
1.55895	0	0.023359	-0.0057842	-2.5295e-007	0	0	0	3.5795e-006	-2.0409e-006	1.0357e-005	0	0
1.55998	0	0.023359	-0.0057842	-2.5082e-007	0	0	0	3.7318e-006	-4.6352e-006	-1.6869e-005	0	0
1.56094	0	0.023359	-0.0057842	-2.7033e-007	0	0	0	8.4867e-006	9.3923e-008	-1.1366e-005	0	0
1.56196	0	0.023359	-0.0057842	-2.6485e-007	0	0	0	2.8391e-006	8.6284e-006	1.2244e-005	0	0
1.56299	0	0.023359	-0.0057842	-2.6215e-007	0	0	0	-1.8617e-005	-5.8277e-006	-3.0983e-006	0	0
1.56395	0	0.023359	-0.0057842	-2.5323e-007	0	0	0	-2.2779e-008	-7.7003e-006	2.6827e-005	0	0
1.56497	0	0.023359	-0.0057842	-2.3816e-007	0	0	0	-1.3222e-006	1.0178e-005	-1.361e-005	0	0
1.566	0	0.023359	-0.0057842	-2.6169e-007	0	0	0	1.0083e-005	2.1811e-006	-1.3978e-005	0	0
1.56696	0	0.023359	-0.0057842	-2.6396e-007	0	0	0	1.4853e-005	-4.032e-006	3.9437e-006	0	0
1.56799	0	0.023359	-0.0057842	-2.6793e-007	0	0	0	-1.382e-005	-5.7224e-006	-9.7762e-006	0	0
1.56895	0	0.023359	-0.0057842	-2.6161e-007	0	0	0	-8.5102e-006	9.3289e-006	2.1296e-005	0	0
1.56997	0	0.023359	-0.0057842	-2.4253e-007	0	0	0	-3.3441e-006	5.0528e-007	1.7077e-008	0	0
1.571	0	0.023359	-0.0057842	-2.5755e-007	0	0	0	8.5607e-006	-8.6839e-006	-1.8269e-005	0	0
1.57196	0	0.023359	-0.0057842	-2.6264e-007	0	0	0	1.5641e-005	-3.1395e-006	6.1805e-007	0	0
1.57298	0	0.023359	-0.0057842	-2.6917e-007	0	0	0	-9.1518e-006	1.1029e-005	-1.0602e-005	0	0
1.57395	0	0.023359	-0.0057842	-2.6789e-007	0	0	0	-6.2576e-006	-7.6858e-006	2.2328e-005	0	0
1.57497	0	0.023359	-0.0057842	-2.4488e-007	0	0	0	-8.0698e-006	-2.9675e-006	8.6332e-006	0	0
1.576	0	0.023359	-0.0057842	-2.5199e-007	0	0	0	-2.2489e-007	9.0988e-007	-1.2833e-005	0	0
1.57696	0	0.023359	-0.0057842	-2.5787e-007	0	0	0	1.8782e-005	-1.3124e-006	-7.4722e-006	0	0
1.57798	0	0.023359	-0.0057842	-2.7016e-007	0	0	0	3.5272e-006	5.257e-006	-1.75e-005	0	0
1.57894	0	0.023359	-0.0057842	-2.7576e-007	0	0	0	-6.6649e-006	-4.5083e-006	1.3434e-005	0	0
1.57997	0	0.023359	-0.0057842	-2.5388e-007	0	0	0	-1.3607e-005	-5.0405e-006	2.1346e-005	0	0
1.58099	0	0.023359	-0.0057842	-2.4442e-007	0	0	0	-8.1333e-006	5.5174e-006	-1.1926e-006	0	0
1.58196	0	0.023359	-0.0057842	-2.4941e-007	0	0	0	1.5768e-005	9.1321e-006	-6.8918e-006	0	0
1.58298	0	0.023359	-0.0057842	-2.6366e-007	0	0	0	1.3993e-005	-1.1765e-005	-1.5332e-005	0	0
1.58394	0	0.023359	-0.0057842	-2.7596e-007	0	0	0	-3.3216e-006	-8.2667e-006	-4.057e-006	0	0
1.58497	0	0.023359	-0.0057842	-2.663e-007	0	0	0	-1.0179e-005	1.2382e-005	2.5979e-005	0	0
1.58599	0	0.023359	-0.0057842	-2.4655e-007	0	0	0	-1.4348e-005	4.5083e-006	6.9241e-006	0	0
1.58695	0	0.023359	-0.0057842	-2.4455e-007	0	0	0	3.9199e-006	-1.6196e-005	2.0491e-006	0	0
1.58798	0	0.023359	-0.0057842	-2.4979e-007	0	0	0	1.3892e-005	-9.5464e-007	-2.0048e-005	0	0
1.58894	0	0.023359	-0.0057842	-2.715e-007	0	0	0	9.5328e-006	8.8221e-006	-1.405e-005	0	0
1.58997	0	0.023359	-0.0057842	-2.7064e-007	0	0	0	-4.0067e-006	-2.1488e-006	9.8698e-006	0	0
1.59099	0	0.023359	-0.0057842	-2.5843e-007	0	0	0	-1.8365e-005	-1.0312e-005	1.2032e-005	0	0
1.59195	0	0.023359	-0.0057842	-2.4893e-007	0	0	0	-2.9579e-006	3.6653e-006	8.9716e-006	0	0
1.59298	0	0.023359	-0.0057842	-2.469e-007	0	0	0	1.0942e-005	7.4635e-006	-1.0244e-005	0	0
1.59394	0	0.023359	-0.0057842	-2.6338e-007	0	0	0	9.478e-006	-7.2156e-006	-1.6181e-005	0	0
1.59496	0	0.023359	-0.0057842	-2.704e-007	0	0	0	1.8136e-006	1.0527e-006	2.5912e-006	0	0
1.59599	0	0.023359	-0.0057842	-2.6237e-007	0	0	0	-1.2355e-005	3.65e-006	9.6885e-006	0	0
1.59695	0	0.023359	-0.0057842	-2.5463e-007	0	0	0	-8.0907e-006	-2.259e-007	8.3042e-006	0	0
1.59798	0	0.023359	-0.0057842	-2.4367e-007	0	0	0	4.0812e-006	-8.7699e-006	1.0154e-005	0	0
1.59894	0	0.023359	-0.0057842	-2.5144e-007	0	0	0	2.2034e-006	4.7827e-006	-2.4863e-005	0	0
1.59996	0	0.023359	-0.0057842	-2.6766e-007	0	0	0	1.4767e-005	1.8886e-006	-4.5788e-008	0	0
1.60099	0	0.023359	-0.0057842	-2.6274e-007	0	0	0	-5.2624e-006	-5.0471e-006	-4.2869e-006	0	0
1.60195	0	0.023359	-0.0057842	-2.6545e-007	0	0	0	-1.3549e-005	-1.1279e-006	9.3401e-006	0	0
1.60297	0	0.023359	-0.0057842	-2.4465e-007	0	0	0	-1.6436e-006	6.1616e-006	1.9631e-005	0	0
1.604	0	0.023359	-0.0057842	-2.4464e-007	0	0	0	-1.9123e-006	1.4109e-006	-1.7152e-005	0	0
1.60496	0	0.023359	-0.0057842	-2.6062e-007	0	0	0	1.657e-005	-8.987e-006	-7.7376e-006	0	0
1.60599	0	0.023359	-0.0057842	-2.6479e-007	0	0	0	6.6727e-006	2.2621e-006	-1.4231e-005	0	0
1.60695	0	0.023359	-0.0057842	-2.7917e-007	0	0	0	-6.5789e-006	4.9693e-006	4.4839e-006	0	0
1.60797	0	0.023359	-0.0057842	-2.5165e-007	0	0	0	-1.3346e-005	-1.3044e-006	2.7326e-005	0	0
1.609	0	0.023359	-0.0057842	-2.4527e-007	0	0	0	-1.2484e-005	1.9183e-006	-7.7117e-006	0	0
1.60996	0	0.023359	-0.0057842	-2.4472e-007	0	0	0	1.8428e-005	-6.2929e-007	2.4744e-006	0	0
1.61098	0	0.023359	-0.0057842	-2.5892e-007	0	0	0	1.0476e-005	-2.3001e-006	-3.1413e-005	0	0
1.61194	0	0.023359	-0.0057842	-2.8002e-007	0	0	0	4.6054e-006	-3.1431e-006	9.504e-007	0	0
1.61297	0	0.023359	-0.0057842	-2.6718e-007	0	0	0	-9.4898e-006	-9.8796e-007	2.2523e-005	0	0
1.614	0	0.023359	-0.0057842	-2.5267e-007	0	0	0	-2.0024e-005	2.4805e-006	9.2739e-006	0	0
1.61496	0	0.023359	-0.0057842	-2.4352e-007	0	0	0	4.2264e-006	-1.4505e-006	1.0634e-005	0	0
1.61598	0	0.023359	-0.0057842	-2.4454e-007	0	0	0	1.1723e-005	2.0083e-007	-2.0314e-005	0	0
1.61694	0	0.023359	-0.0057842	-2.7389e-007	0	0	0	1.2089e-005	5.1888e-006	-2.3787e-005	0	0
1.61797	0	0.023359	-0.0057842	-2.7441e-007	0	0	0	4.4678e-006	-2.6009e-006	1.4546e-005	0	0
1.61899	0	0.023359	-0.0057842	-2.6565e-007	0	0	0	-2.3583e-005	-3.9782e-006	6.9677e-006	0	0
1.61995	0	0.023359	-0.0057842	-2.5035e-007	0	0	0	-8.9621e-006	2.0926e-006	2.8078e-005	0	0
1.62098	0	0.023359	-0.0057842	-2.3257e-007	0	0	0	2.7182e-006	2.2273e-006	-7.5704e-006	0	0
1.62194	0	0.023359	-0.0057842	-2.5452e-007	0	0	0	1.2815e-005	-3.7277e-006	-2.4932e-005	0	0
1.62297	0	0.023359	-0.0057842	-2.7326e-007	0	0	0	1.936e-005	-3.8964e-006	-8.1585e-006	0	0
1.62399	0	0.023359	-0.0057842	-2.763e-007	0	0	0	-9.3699e-006	9.3723e-006	-1.2763e-007	0	0
1.62495	0	0.023359	-0.0057842	-2.6901e-007	0	0	0	-1.8147e-005	3.687e-006	2.3151e-005	0	0
1.62598	0	0.023359	-0.0057842	-2.3808e-007	0	0	0	-9.5554e-006	-1.1454e-005	2.326e-005	0	0
1.62694	0	0.023359	-0.0057842	-2.381e-007	0	0	0	-1.108e-007	1.0305e-006	-2.2029e-005	0	0
1.62796	0	0.023359	-0.0057842	-2.5874e-007	0	0	0	2.6777e-005	7.3758e-006	-8.4581e-006	0	0
1.62899	0	0.023359	-0.0057842	-2.7113e-007	0	0	0	6.3053e-006	1.2864e-006	-1.9459e-005	0	0
1.62995	0	0.023359	-0.0057842	-2.8143e-007	0	0	0	-1.2937e-005	-1.2054e-005	5.5467e-006	0	0
1.63098	0	0.023359	-0.0057842	-2.5897e-007	0	0	0	-1.0448e-005	-7.0982e-007	3.1046e-005	0	0
1.63194	0	0.023359	-0.0057842	-2.4524e-007	0	0	0	-9.4872e-006	9.9378e-006	3.4442e-006	0	0
1.63296	0	0.023359	-0.0057842	-2.5046e-007	0	0	0	1.1113e-005	6.4335e-006	-7.8328e-006	0	0
1.63399	0	0.023359	-0.0057842	-2.5906e-007	0	0	0	1.3588e-005	-1.164e-005	-1.6542e-005	0	0
1.63495	0	0.023359	-0.0057842	-2.7559e-007	0	0	0	1.0208e-007	-6.2363e-006	-8.5101e-006	0	0
1.63597	0	0.023359	-0.0057842	-2.6527e-007	0	0	0	-9.0204e-006	1.2557e-005	2.2983e-005	0	0
1.63694	0	0.023359	-0.0057842	-2.5175e-007	0	0	0	-1.5386e-005	1.0247e-006	1.0191e-005	0	0
1.63796	0	0.023359	-0.0057842	-2.4578e-007	0	0	0	3.535e-006	-9.9847e-006	2.5285e-006	0	0
1.63899	0	0.023359	-0.0057842	-2.4931e-007	0	0	0	1.2021e-005	6.9008e-006	-1.6683e-005	0	0
1.63995	0	0.023359	-0.0057842	-2.6733e-007	0	0	0	7.2644e-006	5.6775e-006	-9.3622e-006	0	0
1.64097	0	0.023359	-0.0057842	-2.6788e-007	0	0	0	-3.0176e-006	-3.2575e-006	8.3467e-006	0	0
1.642	0	0.023359	-0.0057842	-2.6054e-007	0	0	0	-1.1293e-005	-9.0374e-006	1.3105e-005	0	0
1.64296	0	0.023359	-0.0057842	-2.5159e-007	0	0	0	-3.8757e-006	1.2053e-005	5.0227e-006	0	0
1.64398	0	0.023359	-0.0057842	-2.5104e-007	0	0	0	6.7165e-006	1.907e-006	-6.9033e-006	0	0
1.64495	0	0.023359	-0.0057842	-2.6083e-007	0	0	0	8.4983e-006	-1.2422e-005	-1.1251e-005	0	0
1.64597	0	0.023359	-0.0057842	-2.6807e-007	0	0	0	1.7024e-006	5.7195e-006	2.2768e-006	0	0
1.647	0	0.023359	-0.0057842	-2.6303e-007	0	0	0	-8.8535e-006	1.4144e-005	7.1182e-006	0	0
1.64796	0	0.023359	-0.0057842	-2.5567e-007	0	0	0	-7.0068e-006	-1.6254e-005	5.9563e-006	0	0
1.64898	0	0.023359	-0.0057842	-2.4795e-007	0	0	0	2.1374e-006	-6.3374e-006	2.7025e-006	0	0
1.64994	0	0.023359	-0.0057842	-2.5459e-007	0	0	0	4.9024e-006	1.9051e-005	-1.393e-005	0	0
1.65097	0	0.023359	-0.0057842	-2.6675e-007	0	0	0	9.9535e-006	-3.8097e-006	-2.8982e-006	0	0
1.652	0	0.023359	-0.0057842	-2.6741e-007	0	0	0	-2.5298e-006	-1.134e-005	-2.3736e-006	0	0
1.65296	0	0.023359	-0.0057842	-2.6417e-007	0	0	0	-9.887e-006	5.0688e-006	1.1983e-005	0	0
1.65398	0	0.023359	-0.0057842	-2.473e-007	0	0	0	-7.6905e-006	9.5649e-006	1.25e-005	0	0
1.65494	0	0.023359	-0.0057842	-2.4791e-007	0	0	0	4.292e-007	-1.1497e-005	-1.3106e-005	0	0
1.65597	0	0.023359	-0.0057842	-2.5506e-007	0	0	0	1.5347e-005	-3.9997e-006	-3.643e-006	0	0
1.65699	0	0.023359	-0.0057842	-2.6593e-007	0	0	0	1.5756e-006	1.1342e-005	-1.6172e-005	0	0
1.65795	0	0.023359	-0.0057842	-2.7131e-007	0	0	0	-2.7149e-006	6.4172e-006	1.3577e-005	0	0
1.65898	0	0.023359	-0.0057842	-2.5168e-007	0	0	0	-1.2584e-005	-1.9617e-005	1.798e-005	0	0
1.65994	0	0.023359	-0.0057842	-2.473e-007	0	0	0	-9.3567e-006	-3.7999e-006	-7.2855e-006	0	0
1.66097	0	0.023359	-0.0057842	-2.5164e-007	0	0	0	1.7852e-005	1.9314e-005	-5.4588e-006	0	0
1.66199	0	0.023359	-0.0057842	-2.6624e-007	0	0	0	1.2158e-005	-4.1215e-006	-1.5878e-005	0	0
1.66295	0	0.023359	-0.0057842	-2.7795e-007	0	0	0	-4.2101e-006	-1.3316e-005	1.8554e-006	0	0
1.66398	0	0.023359	-0.0057842	-2.6136e-007	0	0	0	-1.4591e-005	5.1284e-006	1.7215e-005	0	0
1.66494	0	0.023359	-0.0057842	-2.5031e-007	0	0	0	-1.0022e-005	1.1959e-005	7.0496e-006	0	0
1.66596	0	0.023359	-0.0057842	-2.4759e-007	0	0	0	1.0485e-005	-5.0789e-006	-1.3788e-006	0	0
1.66699	0	0.023359	-0.0057842	-2.5375e-007	0	0	0	7.5498e-006	-1.0748e-005	-1.6767e-005	0	0
1.66795	0	0.023359	-0.0057842	-2.7215e-007	0	0	0	3.0024e-006	1.195e-005	-8.4783e-006	0	0
1.66898	0	0.023359	-0.0057842	-2.5988e-007	0	0	0	-4.4608e-006	2.1818e-006	2.2372e-005	0	0
1.66994	0	0.023359	-0.0057842	-2.5237e-007	0	0	0	-1.7776e-005	-1.0176e-005	-2.5145e-006	0	0
1.67096	0	0.023359	-0.0057842	-2.4828e-007	0	0	0	6.8487e-006	-4.6022e-006	1.2953e-005	0	0
1.67199	0	0.023359	-0.0057842	-2.499e-007	0	0	0	9.9369e-006	1.1108e-005	-1.866e-005	0	0
1.67295	0	0.023359	-0.0057842	-2.7072e-007	0	0	0	6.49e-006	-2.3913e-006	-1.2745e-005	0	0
1.67397	0	0.023359	-0.0057842	-2.6564e-007	0	0	0	-1.6033e-006	-6.7955e-006	1.7679e-005	0	0
1.675	0	0.023359	-0.0057842	-2.5783e-007	0	0	0	-1.7879e-005	5.6354e-006	-4.4829e-007	0	0
1.67596	0	0.023359	-0.0057842	-2.5089e-007	0	0	0	1.6709e-006	1.8897e-006	1.5488e-005	0	0
1.67699	0	0.023359	-0.0057842	-2.4471e-007	0	0	0	5.9295e-006	-1.4768e-007	-1.4942e-005	0	0
1.67795	0	0.023359	-0.0057842	-2.6663e-007	0	0	0	8.855e-006	1.8178e-006	-1.4325e-005	0	0
1.67897	0	0.023359	-0.0057842	-2.7052e-007	0	0	0	6.3099e-006	-1.8033e-006	2.8657e-007	0	0
1.68	0	0.023359	-0.0057842	-2.6618e-007	0	0	0	-1.2386e-005	-6.3293e-007	9.6216e-006	0	0
1.68096	0	0.023359	-0.0057842	-2.5561e-007	0	0	0	-1.2209e-005	4.8966e-006	1.1899e-005	0	0
1.68198	0	0.023359	-0.0057842	-2.3934e-007	0	0	0	1.9734e-007	-3.507e-006	5.0362e-006	0	0
1.68295	0	0.023359	-0.0057842	-2.4905e-007	0	0	0	6.5644e-006	-1.3186e-006	-2.3624e-005	0	0
1.68397	0	0.023359	-0.0057842	-2.6701e-007	0	0	0	1.8354e-005	-3.8697e-006	-3.712e-007	0	0
1.685	0	0.023359	-0.0057842	-2.6696e-007	0	0	0	-6.8051e-006	9.4724e-006	-4.593e-006	0	0
1.68596	0	0.023359	-0.0057842	-2.7008e-007	0	0	0	-1.2738e-005	-4.7014e-006	1.1807e-005	0	0
1.68698	0	0.023359	-0.0057842	-2.4481e-007	0	0	0	-3.7827e-006	-4.6304e-006	2.0145e-005	0	0
1.68794	0	0.023359	-0.0057842	-2.4391e-007	0	0	0	-5.1449e-006	3.685e-006	-1.7033e-005	0	0
1.68897	0	0.023359	-0.0057842	-2.5646e-007	0	0	0	1.738e-005	4.5783e-007	1.4229e-006	0	0
1.68999	0	0.023359	-0.0057842	-2.5908e-007	0	0	0	3.6675e-006	-5.4841e-006	-1.5182e-005	0	0
1.69096	0	0.023359	-0.0057842	-2.7343e-007	0	0	0	-6.698e-006	2.2683e-006	-4.8927e-006	0	0
1.69198	0	0.023359	-0.0057842	-2.5438e-007	0	0	0	-3.778e-006	5.2684e-006	2.7563e-005	0	0
1.69294	0	0.023359	-0.0057842	-2.4477e-007	0	0	0	-1.5187e-005	1.8849e-007	-9.9228e-006	0	0
1.69397	0	0.023359	-0.0057842	-2.5094e-007	0	0	0	1.2067e-005	-8.4452e-006	5.0359e-006	0	0
1.69499	0	0.023359	-0.0057842	-2.5153e-007	0	0	0	1.0481e-005	3.2254e-006	-1.8155e-005	0	0
1.69595	0	0.023359	-0.0057842	-2.7478e-007	0	0	0	7.7187e-007	7.9431e-006	-1.2309e-005	0	0
1.69698	0	0.023359	-0.0057842	-2.6308e-007	0	0	0	-1.8234e-006	-1.2506e-005	3.1211e-005	0	0
1.69794	0	0.023359	-0.0057842	-2.5156e-007	0	0	0	-2.0646e-005	3.4193e-006	-4.6321e-006	0	0
1.69897	0	0.023359	-0.0057842	-2.4934e-007	0	0	0	5.5824e-006	1.1406e-005	1.4399e-005	0	0
1.69999	0	0.023359	-0.0057842	-2.436e-007	0	0	0	8.8496e-006	-1.009e-005	-2.2213e-005	0	0
1.70095	0	0.023359	-0.0057842	-2.7446e-007	0	0	0	9.0916e-006	-1.2171e-005	-2.2414e-005	0	0
1.70198	0	0.023359	-0.0057842	-2.7021e-007	0	0	0	6.5677e-006	1.9377e-005	2.1123e-005	0	0
1.70294	0	0.023359	-0.0057842	-2.6257e-007	0	0	0	-2.5692e-005	2.5516e-008	-6.794e-006	0	0
1.70396	0	0.023359	-0.0057842	-2.511e-007	0	0	0	-3.4783e-006	-1.4592e-005	3.1134e-005	0	0
1.70499	0	0.023359	-0.0057842	-2.3492e-007	0	0	0	3.7783e-006	8.4776e-006	-1.5204e-005	0	0
1.70595	0	0.023359	-0.0057842	-2.6214e-007	0	0	0	1.1924e-005	6.8053e-006	-2.3334e-005	0	0
1.70698	0	0.023359	-0.0057842	-2.6608e-007	0	0	0	1.303e-005	-1.1206e-005	3.1298e-006	0	0
1.70794	0	0.023359	-0.0057842	-2.6766e-007	0	0	0	-1.7008e-005	-4.7788e-006	-2.5694e-006	0	0
1.70896	0	0.023359	-0.0057842	-2.582e-007	0	0	0	-1.0198e-005	8.8875e-006	1.8265e-005	0	0
1.70999	0	0.023359	-0.0057842	-2.3871e-007	0	0	0	9.7449e-007	5.4537e-006	2.3157e-006	0	0
1.71095	0	0.023359	-0.0057842	-2.5581e-007	0	0	0	7.994e-006	-7.6278e-006	-2.675e-005	0	0
1.71197	0	0.023359	-0.0057842	-2.7164e-007	0	0	0	2.0107e-005	-9.1088e-006	1.1905e-007	0	0
1.713	0	0.023359	-0.0057842	-2.7189e-007	0	0	0	-9.9633e-006	1.3128e-005	-3.6462e-006	0	0
1.71396	0	0.023359	-0.0057842	-2.6821e-007	0	0	0	-1.701e-005	3.6865e-006	2.063e-005	0	0
1.71499	0	0.023359	-0.0057842	-2.3804e-007	0	0	0	-7.9466e-006	-1.2509e-005	1.9837e-005	0	0
1.71595	0	0.023359	-0.0057842	-2.417e-007	0	0	0	1.9027e-006	6.8562e-006	-1.9648e-005	0	0
1.71697	0	0.023359	-0.0057842	-2.616e-007	0	0	0	2.6034e-005	9.7149e-006	-7.5572e-006	0	0
1.718	0	0.023359	-0.0057842	-2.703e-007	0	0	0	2.3561e-006	-1.0014e-005	-1.3142e-005	0	0
1.71896	0	0.023359	-0.0057842	-2.7623e-007	0	0	0	-1.5948e-005	-1.1077e-005	1.5602e-005	0	0
1.71998	0	0.023359	-0.0057842	-2.445e-007	0	0	0	-1.5017e-005	1.1156e-005	2.9434e-005	0	0
1.72095	0	0.023359	-0.0057842	-2.3745e-007	0	0	0	-6.0718e-006	6.6247e-006	-1.2678e-005	0	0
1.72197	0	0.023359	-0.0057842	-2.5451e-007	0	0	0	2.6666e-005	-9.5701e-006	-1.4508e-005	0	0
1.723	0	0.023359	-0.0057842	-2.7237e-007	0	0	0	1.484e-005	-5.2316e-006	-2.0717e-005	0	0
1.72396	0	0.023359	-0.0057842	-2.8672e-007	0	0	0	-1.1062e-005	1.0167e-005	-7.623e-009	0	0
1.72498	0	0.023359	-0.0057842	-2.5712e-007	0	0	0	-1.9618e-005	3.2935e-006	4.3992e-005	0	0
1.72594	0	0.023359	-0.0057842	-2.3224e-007	0	0	0	-2.2636e-005	-8.6063e-006	-4.6502e-006	0	0
1.72697	0	0.023359	-0.0057842	-2.3947e-007	0	0	0	2.1778e-005	-5.0164e-006	-2.2078e-006	0	0
1.72799	0	0.023359	-0.0057842	-2.4799e-007	0	0	0	1.9079e-005	8.6829e-006	-3.5317e-005	0	0
1.72896	0	0.023359	-0.0057842	-2.8836e-007	0	0	0	4.5727e-006	2.0358e-006	-2.4346e-005	0	0
1.72998	0	0.023359	-0.0057842	-2.7531e-007	0	0	0	-1.2731e-006	-4.1108e-006	4.0903e-005	0	0
1.73094	0	0.023359	-0.0057842	-2.5401e-007	0	0	0	-3.4424e-005	-1.3466e-006	3.1754e-006	0	0
1.73197	0	0.023359	-0.0057842	-2.4153e-007	0	0	0	-8.0935e-007	3.8275e-006	3.3244e-005	0	0
1.73299	0	0.023359	-0.0057842	-2.2982e-007	0	0	0	1.3261e-005	3.6245e-006	-2.6972e-005	0	0
1.73395	0	0.023359	-0.0057842	-2.6962e-007	0	0	0	1.7569e-005	-9.009e-006	-3.8186e-005	0	0
1.73498	0	0.023359	-0.0057842	-2.7946e-007	0	0	0	1.4524e-005	8.6108e-007	1.1032e-005	0	0
1.73594	0	0.023359	-0.0057842	-2.7348e-007	0	0	0	-2.66e-005	5.8261e-006	2.1871e-006	0	0
1.73697	0	0.023359	-0.0057842	-2.5803e-007	0	0	0	-1.4648e-005	-3.1866e-006	3.8165e-005	0	0
1.73799	0	0.023359	-0.0057842	-2.2792e-007	0	0	0	-6.4461e-007	-7.1754e-006	-1.8213e-006	0	0
1.73895	0	0.023359	-0.0057842	-2.5448e-007	0	0	0	1.4395e-005	5.0097e-006	-3.1374e-005	0	0
1.73998	0	0.023359	-0.0057842	-2.674e-007	0	0	0	2.4475e-005	2.131e-006	4.0234e-006	0	0
1.74094	0	0.023359	-0.0057842	-2.7465e-007	0	0	0	-1.6786e-005	-7.8328e-006	-2.1882e-005	0	0
1.74196	0	0.023359	-0.0057842	-2.7e-007	0	0	0	-9.8592e-006	-8.9526e-006	4.3524e-005	0	0
1.74299	0	0.023359	-0.0057842	-2.3061e-007	0	0	0	-1.4703e-005	1.1555e-005	8.3198e-006	0	0
1.74395	0	0.023359	-0.0057842	-2.4903e-007	0	0	0	3.5229e-006	3.3417e-006	-1.9998e-005	0	0
1.74498	0	0.023359	-0.0057842	-2.5405e-007	0	0	0	3.0517e-005	-9.1782e-006	-2.0905e-006	0	0
1.74594	0	0.023359	-0.0057842	-2.7294e-007	0	0	0	-3.5346e-006	-1.2493e-006	-3.1653e-005	0	0
1.74696	0	0.023359	-0.0057842	-2.8188e-007	0	0	0	-5.4371e-006	6.656e-006	2.6547e-005	0	0
1.74799	0	0.023359	-0.0057842	-2.4652e-007	0	0	0	-1.744e-005	-4.2371e-006	1.6228e-005	0	0
1.74895	0	0.023359	-0.0057842	-2.4753e-007	0	0	0	-9.7653e-006	-3.7635e-006	-8.0163e-006	0	0
1.74997	0	0.023359	-0.0057842	-2.4244e-007	0	0	0	2.045e-005	3.8639e-006	-3.0682e-006	0	0
1.751	0	0.023359	-0.0057842	-2.6464e-007	0	0	0	7.0511e-006	7.8571e-006	-3.9092e-005	0	0
1.75196	0	0.023359	-0.0057842	-2.8175e-007	0	0	0	8.0692e-006	-5.8333e-006	1.5124e-005	0	0
1.75299	0	0.023359	-0.0057842	-2.6379e-007	0	0	0	-1.5806e-005	-3.3707e-006	1.1077e-005	0	0
1.75395	0	0.023359	-0.0057842	-2.554e-007	0	0	0	-1.9035e-005	1.2531e-006	1.2196e-005	0	0
1.75497	0	0.023359	-0.0057842	-2.3407e-007	0	0	0	4.8841e-006	4.8696e-006	2.0118e-005	0	0
1.756	0	0.023359	-0.0057842	-2.4618e-007	0	0	0	7.366e-006	-5.3603e-006	-3.2459e-005	0	0
1.75696	0	0.023359	-0.0057842	-2.702e-007	0	0	0	2.1854e-005	-6.0394e-006	-4.0007e-006	0	0
1.75798	0	0.023359	-0.0057842	-2.6757e-007	0	0	0	-5.4341e-006	6.6377e-006	-5.1535e-006	0	0
1.75895	0	0.023359	-0.0057842	-2.693e-007	0	0	0	-1.9832e-005	6.796e-006	1.7157e-005	0	0
1.75997	0	0.023359	-0.0057842	-2.3832e-007	0	0	0	-7.2455e-006	-8.878e-006	2.6323e-005	0	0
1.761	0	0.023359	-0.0057842	-2.3986e-007	0	0	0	5.8624e-007	-4.0349e-006	-2.9368e-005	0	0
1.76196	0	0.023359	-0.0057842	-2.5883e-007	0	0	0	2.7172e-005	1.6833e-005	-2.0928e-006	0	0
1.76298	0	0.023359	-0.0057842	-2.6725e-007	0	0	0	1.2985e-006	-2.8961e-006	-2.5832e-005	0	0
1.76394	0	0.023359	-0.0057842	-2.823e-007	0	0	0	-8.8991e-006	-1.5524e-005	1.4002e-005	0	0
1.76497	0	0.023359	-0.0057842	-2.4836e-007	0	0	0	-1.3143e-005	7.4721e-006	2.9799e-005	0	0
1.76599	0	0.023359	-0.0057842	-2.4345e-007	0	0	0	-1.3719e-005	1.3372e-005	-1.7701e-005	0	0
1.76696	0	0.023359	-0.0057842	-2.493e-007	0	0	0	2.5304e-005	-7.9094e-006	7.7464e-006	0	0
1.76798	0	0.023359	-0.0057842	-2.556e-007	0	0	0	6.6538e-006	-1.2852e-005	-3.6013e-005	0	0
1.76894	0	0.023359	-0.0057842	-2.8822e-007	0	0	0	1.4935e-006	1.3279e-005	-7.2039e-007	0	0
1.76997	0	0.023359	-0.0057842	-2.5584e-007	0	0	0	-8.899e-006	8.5869e-006	3.6712e-005	0	0
1.77099	0	0.023359	-0.0057842	-2.4924e-007	0	0	0	-2.8041e-005	-1.4627e-005	-7.8506e-006	0	0
1.77195	0	0.023359	-0.0057842	-2.409e-007	0	0	0	1.7283e-005	-2.6809e-006	2.5012e-005	0	0
1.77298	0	0.023359	-0.0057842	-2.4276e-007	0	0	0	1.0258e-005	1.2167e-005	-4.3478e-005	0	0
1.77394	0	0.023359	-0.0057842	-2.8529e-007	0	0	0	1.3774e-005	-4.252e-006	-1.6392e-005	0	0
1.77497	0	0.023359	-0.0057842	-2.7022e-007	0	0	0	-1.4693e-007	-1.4285e-005	1.9275e-005	0	0
1.77599	0	0.023359	-0.0057842	-2.6606e-007	0	0	0	-3.0225e-005	1.2397e-005	1.5377e-006	0	0
1.77695	0	0.023359	-0.0057842	-2.4532e-007	0	0	0	3.6706e-007	1.0369e-005	3.832e-005	0	0
1.77798	0	0.023359	-0.0057842	-2.3041e-007	0	0	0	2.1641e-007	-1.2476e-005	-2.7135e-005	0	0
1.77894	0	0.023359	-0.0057842	-2.7025e-007	0	0	0	2.085e-005	-6.182e-006	-2.6541e-005	0	0
1.77996	0	0.023359	-0.0057842	-2.6953e-007	0	0	0	1.6611e-005	6.6843e-006	4.9181e-006	0	0
1.78099	0	0.023359	-0.0057842	-2.7919e-007	0	0	0	-2.7404e-005	6.0388e-006	-1.0845e-005	0	0
1.78195	0	0.023359	-0.0057842	-2.5651e-007	0	0	0	-8.6385e-006	-9.0771e-006	5.5996e-005	0	0
1.78298	0	0.023359	-0.0057842	-2.2705e-007	0	0	0	-1.2358e-005	-4.4081e-006	-1.4861e-005	0	0
1.78394	0	0.023359	-0.0057842	-2.5403e-007	0	0	0	1.7749e-005	1.1542e-005	-2.5334e-005	0	0
1.78496	0	0.023359	-0.0057842	-2.6383e-007	0	0	0	2.9372e-005	3.9936e-007	-1.1311e-005	0	0
1.78599	0	0.023359	-0.0057842	-2.8597e-007	0	0	0	-1.3938e-005	-1.2064e-005	-1.6023e-005	0	0
1.78695	0	0.023359	-0.0057842	-2.7424e-007	0	0	0	-1.3515e-005	7.87e-006	4.3802e-005	0	0
1.78797	0	0.023359	-0.0057842	-2.3365e-007	0	0	0	-2.1068e-005	3.7986e-006	1.3235e-005	0	0
1.789	0	0.023359	-0.0057842	-2.4418e-007	0	0	0	6.1736e-006	-7.6844e-006	-1.8249e-005	0	0
1.78996	0	0.023359	-0.0057842	-2.5177e-007	0	0	0	3.4088e-005	1.7413e-006	-9.7395e-006	0	0
1.79099	0	0.023359	-0.0057842	-2.7619e-007	0	0	0	-1.1187e-006	8.7485e-006	-3.5283e-005	0	0
1.79195	0	0.023359	-0.0057842	-2.8656e-007	0	0	0	-6.2927e-006	-7.7135e-006	3.181e-005	0	0
1.79297	0	0.023359	-0.0057842	-2.4729e-007	0	0	0	-2.1743e-005	-6.1514e-006	2.0796e-005	0	0
1.794	0	0.023359	-0.0057842	-2.4681e-007	0	0	0	-8.4382e-006	4.7149e-006	3.5624e-007	0	0
1.79496	0	0.023359	-0.0057842	-2.4037e-007	0	0	0	2.3763e-005	3.6612e-006	2.3444e-006	0	0
1.79598	0	0.023359	-0.0057842	-2.6423e-007	0	0	0	8.2064e-006	-4.1097e-006	-3.9498e-005	0	0
1.79695	0	0.023359	-0.0057842	-2.8363e-007	0	0	0	6.3311e-006	-4.0447e-006	1.1089e-005	0	0
1.79797	0	0.023359	-0.0057842	-2.5967e-007	0	0	0	-1.8066e-005	2.3574e-006	1.8959e-005	0	0
1.799	0	0.023359	-0.0057842	-2.5205e-007	0	0	0	-1.9456e-005	-2.0987e-006	5.508e-006	0	0
1.79996	0	0.023359	-0.0057842	-2.3622e-007	0	0	0	1.3336e-005	-8.9543e-007	1.2336e-005	0	0
1.80098	0	0.023359	-0.0057842	-2.5276e-007	0	0	0	1.0902e-005	1.1793e-006	-4.1418e-005	0	0
1.80194	0	0.023359	-0.0057842	-2.8218e-007	0	0	0	1.8377e-005	7.5411e-007	-6.67e-006	0	0
1.80297	0	0.023359	-0.0057842	-2.7081e-007	0	0	0	-9.8654e-006	-3.4071e-007	9.7561e-006	0	0
1.80399	0	0.023359	-0.0057842	-2.6494e-007	0	0	0	-2.5704e-005	2.3883e-006	1.4826e-005	0	0
1.80496	0	0.023359	-0.0057842	-2.3877e-007	0	0	0	9.6565e-007	7.3214e-007	3.3371e-005	0	0
1.80598	0	0.023359	-0.0057842	-2.3636e-007	0	0	0	2.7858e-006	-5.5157e-006	-3.0054e-005	0	0
1.80694	0	0.023359	-0.0057842	-2.6464e-007	0	0	0	2.0795e-005	-2.3571e-007	-1.2775e-005	0	0
1.80797	0	0.023359	-0.0057842	-2.7169e-007	0	0	0	9.8721e-006	7.4311e-006	-3.7682e-006	0	0
1.80899	0	0.023359	-0.0057842	-2.7629e-007	0	0	0	-1.8853e-005	1.2756e-006	3.7619e-006	0	0
1.80995	0	0.023359	-0.0057842	-2.5437e-007	0	0	0	-1.2248e-005	-8.0119e-006	3.3709e-005	0	0
1.81098	0	0.023359	-0.0057842	-2.3794e-007	0	0	0	-5.3036e-006	-2.9052e-006	-3.2016e-006	0	0
1.81194	0	0.023359	-0.0057842	-2.5075e-007	0	0	0	1.5167e-005	8.8931e-006	-1.5645e-005	0	0
1.81297	0	0.023359	-0.0057842	-2.6458e-007	0	0	0	1.725e-005	8.5045e-007	-9.8022e-006	0	0
1.81399	0	0.023359	-0.0057842	-2.743e-007	0	0	0	-8.9687e-006	-8.2608e-006	-5.0849e-006	0	0
1.81495	0	0.023359	-0.0057842	-2.628e-007	0	0	0	-1.3265e-005	4.8861e-006	2.7444e-005	0	0
1.81598	0	0.023359	-0.0057842	-2.391e-007	0	0	0	-1.2285e-005	7.6916e-006	7.7615e-006	0	0
1.81694	0	0.023359	-0.0057842	-2.4448e-007	0	0	0	6.8478e-006	-6.8405e-006	-1.5234e-005	0	0
1.81796	0	0.023359	-0.0057842	-2.5711e-007	0	0	0	2.2936e-005	-1.079e-005	-8.8454e-006	0	0
1.81899	0	0.023359	-0.0057842	-2.762e-007	0	0	0	8.5754e-007	1.2113e-005	-2.044e-005	0	0
1.81995	0	0.023359	-0.0057842	-2.7634e-007	0	0	0	-7.8321e-006	4.8291e-006	2.4774e-005	0	0
1.82098	0	0.023359	-0.0057842	-2.4486e-007	0	0	0	-2.2537e-005	-1.9822e-005	1.5491e-005	0	0
1.82194	0	0.023359	-0.0057842	-2.4263e-007	0	0	0	-5.0706e-006	2.7143e-006	-6.4941e-007	0	0
1.82296	0	0.023359	-0.0057842	-2.4417e-007	0	0	0	2.4213e-005	2.2667e-005	-1.5086e-005	0	0
1.82399	0	0.023359	-0.0057842	-2.738e-007	0	0	0	1.3217e-005	-1.6693e-005	-3.1698e-005	0	0
1.82495	0	0.023359	-0.0057842	-2.8261e-007	0	0	0	-7.7839e-007	-1.6279e-005	1.8644e-005	0	0
1.82597	0	0.023359	-0.0057842	-2.6223e-007	0	0	0	-2.5084e-005	1.8805e-005	1.837e-005	0	0
1.827	0	0.023359	-0.0057842	-2.449e-007	0	0	0	-9.8967e-006	6.1222e-006	2.0027e-005	0	0
1.82796	0	0.023359	-0.0057842	-2.3585e-007	0	0	0	1.0746e-005	-1.4877e-005	-1.0205e-005	0	0
1.82899	0	0.023359	-0.0057842	-2.62e-007	0	0	0	1.8518e-005	-4.3173e-006	-2.8841e-005	0	0
1.82995	0	0.023359	-0.0057842	-2.7742e-007	0	0	0	1.1448e-005	1.2194e-005	-2.7189e-006	0	0
1.83097	0	0.023359	-0.0057842	-2.7463e-007	0	0	0	-1.6923e-005	-2.6566e-006	7.4069e-006	0	0
1.832	0	0.023359	-0.0057842	-2.5403e-007	0	0	0	-1.7318e-005	-5.7039e-006	2.8116e-005	0	0
1.83296	0	0.023359	-0.0057842	-2.3763e-007	0	0	0	-3.4444e-006	5.4672e-006	-3.2841e-006	0	0
1.83398	0	0.023359	-0.0057842	-2.4905e-007	0	0	0	1.8038e-005	8.657e-006	-1.6138e-005	0	0
1.83494	0	0.023359	-0.0057842	-2.665e-007	0	0	0	1.5879e-005	-7.1476e-006	-1.7557e-005	0	0
1.83597	0	0.023359	-0.0057842	-2.7894e-007	0	0	0	-4.3137e-006	-4.7788e-006	-4.5357e-007	0	0
1.837	0	0.023359	-0.0057842	-2.6425e-007	0	0	0	-1.5609e-005	2.1398e-006	2.1478e-005	0	0
1.83796	0	0.023359	-0.0057842	-2.4696e-007	0	0	0	-1.2559e-005	4.6458e-006	1.0595e-005	0	0
1.83898	0	0.023359	-0.0057842	-2.4469e-007	0	0	0	8.0935e-006	-7.9827e-007	-4.8975e-006	0	0
1.83994	0	0.023359	-0.0057842	-2.5516e-007	0	0	0	1.5429e-005	-6.1987e-006	-2.0207e-005	0	0
1.84097	0	0.023359	-0.0057842	-2.7422e-007	0	0	0	7.1113e-006	5.2761e-006	-6.9942e-006	0	0
1.84199	0	0.023359	-0.0057842	-2.6908e-007	0	0	0	-1.0464e-005	1.8011e-006	1.24e-005	0	0
1.84295	0	0.023359	-0.0057842	-2.5386e-007	0	0	0	-1.7625e-005	-7.4542e-006	1.7231e-005	0	0
1.84398	0	0.023359	-0.0057842	-2.4152e-007	0	0	0	-1.5259e-006	2.3037e-006	4.6206e-006	0	0
1.84494	0	0.023359	-0.0057842	-2.4521e-007	0	0	0	1.3784e-005	4.5015e-006	-1.2929e-005	0	0
1.84597	0	0.023359	-0.0057842	-2.6637e-007	0	0	0	1.256e-005	-5.4082e-006	-2.0451e-005	0	0
1.84699	0	0.023359	-0.0057842	-2.7637e-007	0	0	0	1.526e-006	-4.1002e-006	3.3754e-006	0	0
1.84795	0	0.023359	-0.0057842	-2.6465e-007	0	0	0	-1.5355e-005	8.274e-006	1.7609e-005	0	0
1.84898	0	0.023359	-0.0057842	-2.4892e-007	0	0	0	-1.4107e-005	4.9262e-006	1.2011e-005	0	0
1.84994	0	0.023359	-0.0057842	-2.4272e-007	0	0	0	6.7465e-006	-1.4636e-005	-2.569e-007	0	0
1.85096	0	0.023359	-0.0057842	-2.5159e-007	0	0	0	1.3227e-005	1.8462e-008	-2.1846e-005	0	0
1.85199	0	0.023359	-0.0057842	-2.7441e-007	0	0	0	9.3453e-006	9.0764e-006	-6.3441e-006	0	0
1.85295	0	0.023359	-0.0057842	-2.6893e-007	0	0	0	-6.4889e-006	-4.7114e-006	7.7781e-006	0	0
1.85398	0	0.023359	-0.0057842	-2.569e-007	0	0	0	-1.8047e-005	-9.5371e-006	1.2657e-005	0	0
1.85494	0	0.023359	-0.0057842	-2.4453e-007	0	0	0	-3.2841e-006	1.0078e-005	5.5778e-006	0	0
1.85596	0	0.023359	-0.0057842	-2.4953e-007	0	0	0	1.3561e-005	6.3271e-006	-1.3152e-005	0	0
1.85699	0	0.023359	-0.0057842	-2.6741e-007	0	0	0	1.2574e-005	-1.7191e-005	-1.9949e-005	0	0
1.85795	0	0.023359	-0.0057842	-2.7568e-007	0	0	0	3.8269e-007	-1.9659e-006	5.2432e-006	0	0
1.85898	0	0.023359	-0.0057842	-2.6469e-007	0	0	0	-1.6326e-005	1.8856e-005	1.3663e-005	0	0
1.85994	0	0.023359	-0.0057842	-2.5084e-007	0	0	0	-1.039e-005	-4.3384e-006	1.4246e-005	0	0
1.86096	0	0.023359	-0.0057842	-2.423e-007	0	0	0	5.0929e-006	-9.5285e-006	-6.2629e-006	0	0
1.86199	0	0.023359	-0.0057842	-2.5759e-007	0	0	0	1.3665e-005	4.0664e-006	-1.3643e-005	0	0
1.86295	0	0.023359	-0.0057842	-2.6976e-007	0	0	0	7.7682e-006	9.0984e-006	-9.9048e-006	0	0
1.86397	0	0.023359	-0.0057842	-2.6856e-007	0	0	0	-9.2988e-006	-1.47e-005	9.0803e-006	0	0
1.865	0	0.023359	-0.0057842	-2.558e-007	0	0	0	-1.3444e-005	-5.0305e-006	1.3585e-005	0	0
1.86596	0	0.023359	-0.0057842	-2.4129e-007	0	0	0	-3.54e-006	1.5335e-005	8.28e-006	0	0
1.86699	0	0.023359	-0.0057842	-2.5102e-007	0	0	0	1.0403e-005	-5.6897e-006	-1.7116e-005	0	0
1.86795	0	0.023359	-0.0057842	-2.6044e-007	0	0	0	1.5977e-005	-1.186e-005	-2.3373e-006	0	0
1.86897	0	0.023359	-0.0057842	-2.6879e-007	0	0	0	-7.0646e-006	7.8503e-006	-7.9186e-006	0	0
1.87	0	0.023359	-0.0057842	-2.65e-007	0	0	0	-7.4078e-006	8.2092e-006	2.1447e-005	0	0
1.87096	0	0.023359	-0.0057842	-2.4552e-007	0	0	0	-8.4128e-006	-1.1472e-005	4.756e-006	0	0
1.87198	0	0.023359	-0.0057842	-2.5444e-007	0	0	0	5.2652e-006	-2.1634e-006	-6.2908e-006	0	0
1.87294	0	0.023359	-0.0057842	-2.5584e-007	0	0	0	1.4794e-005	1.2966e-005	-2.4013e-006	0	0
1.87397	0	0.023359	-0.0057842	-2.6834e-007	0	0	0	-4.0693e-006	-8.0522e-006	-2.316e-005	0	0
1.875	0	0.023359	-0.0057842	-2.7042e-007	0	0	0	1.4101e-006	-1.1365e-005	2.4519e-005	0	0
1.87596	0	0.023359	-0.0057842	-2.4933e-007	0	0	0	-1.408e-005	1.432e-005	3.0196e-006	0	0
1.87698	0	0.023359	-0.0057842	-2.5581e-007	0	0	0	-2.7298e-006	6.9183e-006	-5.0147e-006	0	0
1.87794	0	0.023359	-0.0057842	-2.4769e-007	0	0	0	1.5887e-005	-1.7992e-005	9.7745e-006	0	0
1.87897	0	0.023359	-0.0057842	-2.6187e-007	0	0	0	-3.3316e-006	-5.8901e-007	-3.5654e-005	0	0
1.87999	0	0.023359	-0.0057842	-2.7295e-007	0	0	0	9.3045e-006	1.8094e-005	1.7761e-005	0	0
1.88095	0	0.023359	-0.0057842	-2.5576e-007	0	0	0	-9.5149e-006	-2.0648e-007	3.3625e-006	0	0
1.88198	0	0.023359	-0.0057842	-2.5839e-007	0	0	0	-1.2859e-005	-1.6729e-005	5.0692e-006	0	0
1.88294	0	0.023359	-0.0057842	-2.4828e-007	0	0	0	1.0578e-005	4.4594e-006	1.1496e-005	0	0
1.88397	0	0.023359	-0.0057842	-2.5642e-007	0	0	0	4.5606e-006	1.7822e-005	-2.8446e-005	0	0
1.88499	0	0.023359	-0.0057842	-2.7011e-007	0	0	0	7.0874e-006	-9.7706e-006	5.0811e-006	0	0
1.88595	0	0.023359	-0.0057842	-2.588e-007	0	0	0	-8.9525e-006	-1.3997e-005	4.217e-006	0	0
1.88698	0	0.023359	-0.0057842	-2.5646e-007	0	0	0	-1.2213e-005	1.5194e-005	1.5426e-006	0	0
1.88794	0	0.023359	-0.0057842	-2.4687e-007	0	0	0	6.9049e-006	8.4452e-006	7.3645e-006	0	0
1.88896	0	0.023359	-0.0057842	-2.5451e-007	0	0	0	5.5557e-006	-1.6995e-005	-2.6372e-005	0	0
1.88999	0	0.023359	-0.0057842	-2.7227e-007	0	0	0	1.1887e-005	4.6928e-006	-4.6954e-006	0	0
1.89095	0	0.023359	-0.0057842	-2.7021e-007	0	0	0	-2.7108e-006	1.7293e-005	1.7755e-006	0	0
1.89198	0	0.023359	-0.0057842	-2.6496e-007	0	0	0	-1.4813e-005	-1.022e-005	1.198e-005	0	0
1.89294	0	0.023359	-0.0057842	-2.4758e-007	0	0	0	-6.3146e-006	-1.2291e-005	1.4681e-005	0	0
1.89396	0	0.023359	-0.0057842	-2.4532e-007	0	0	0	3.6756e-006	1.4096e-005	-5.3592e-006	0	0
1.89499	0	0.023359	-0.0057842	-2.5797e-007	0	0	0	1.2229e-005	8.4485e-006	-1.6462e-005	0	0
1.89595	0	0.023359	-0.0057842	-2.6827e-007	0	0	0	8.365e-006	-9.706e-006	-5.1534e-006	0	0
1.89697	0	0.023359	-0.0057842	-2.6753e-007	0	0	0	-9.4009e-006	-3.484e-006	6.3247e-006	0	0
1.89794	0	0.023359	-0.0057842	-2.5801e-007	0	0	0	-1.2666e-005	6.4963e-006	1.6198e-005	0	0
1.89896	0	0.023359	-0.0057842	-2.4507e-007	0	0	0	-1.4145e-006	1.3262e-006	2.8404e-006	0	0
1.89999	0	0.023359	-0.0057842	-2.5092e-007	0	0	0	8.9214e-006	-1.0787e-005	-1.842e-005	0	0
1.90095	0	0.023359	-0.0057842	-2.6792e-007	0	0	0	1.4482e-005	1.0538e-006	-9.7888e-006	0	0
1.90197	0	0.023359	-0.0057842	-2.7164e-007	0	0	0	-1.4327e-006	1.1173e-005	3.0814e-006	0	0
1.903	0	0.023359	-0.0057842	-2.6157e-007	0	0	0	-1.8007e-005	7.888e-007	1.3608e-005	0	0
1.90396	0	0.023359	-0.0057842	-2.4759e-007	0	0	0	-8.0263e-006	-6.9518e-006	1.3042e-005	0	0
1.90498	0	0.023359	-0.0057842	-2.3948e-007	0	0	0	6.2198e-006	2.2261e-006	-5.4074e-006	0	0
1.90595	0	0.023359	-0.0057842	-2.5736e-007	0	0	0	1.2269e-005	1.1436e-005	-2.5718e-005	0	0
1.90697	0	0.023359	-0.0057842	-2.7339e-007	0	0	0	1.3504e-005	-7.4945e-006	-2.7138e-006	0	0
1.908	0	0.023359	-0.0057842	-2.6743e-007	0	0	0	-1.495e-005	-4.4765e-006	8.2693e-007	0	0
1.90896	0	0.023359	-0.0057842	-2.6234e-007	0	0	0	-1.4678e-005	1.3697e-005	1.7734e-005	0	0
1.90998	0	0.023359	-0.0057842	-2.399e-007	0	0	0	1.1456e-006	1.1325e-006	1.2225e-005	0	0
1.91094	0	0.023359	-0.0057842	-2.4821e-007	0	0	0	3.6369e-006	-1.2845e-005	-2.5118e-005	0	0
1.91197	0	0.023359	-0.0057842	-2.6664e-007	0	0	0	1.8861e-005	1.9669e-006	-4.2914e-006	0	0
1.91299	0	0.023359	-0.0057842	-2.6859e-007	0	0	0	-2.0494e-006	7.4731e-006	-2.5828e-006	0	0
1.91396	0	0.023359	-0.0057842	-2.7098e-007	0	0	0	-1.5254e-005	2.4183e-006	6.5722e-006	0	0
1.91498	0	0.023359	-0.0057842	-2.4754e-007	0	0	0	-4.7815e-006	-1.3001e-005	3.1418e-005	0	0
1.91594	0	0.023359	-0.0057842	-2.4189e-007	0	0	0	-6.7726e-006	5.4841e-006	-2.3053e-005	0	0
1.91697	0	0.023359	-0.0057842	-2.5633e-007	0	0	0	1.8967e-005	1.0963e-005	-3.1716e-006	0	0
1.91799	0	0.023359	-0.0057842	-2.6275e-007	0	0	0	7.8947e-006	-7.9316e-006	-1.4074e-005	0	0
1.91895	0	0.023359	-0.0057842	-2.7408e-007	0	0	0	-8.7991e-006	-5.8337e-006	-1.7187e-006	0	0
1.91998	0	0.023359	-0.0057842	-2.5996e-007	0	0	0	-6.6131e-006	1.3081e-005	2.4538e-005	0	0
1.92094	0	0.023359	-0.0057842	-2.4466e-007	0	0	0	-1.0941e-005	-1.9241e-006	-4.6883e-006	0	0
1.92197	0	0.023359	-0.0057842	-2.5237e-007	0	0	0	8.3448e-006	-9.9038e-006	-8.1601e-006	0	0
1.92299	0	0.023359	-0.0057842	-2.5873e-007	0	0	0	1.5039e-005	8.3093e-007	-1.4867e-005	0	0
1.92395	0	0.023359	-0.0057842	-2.7267e-007	0	0	0	-5.1371e-007	1.0063e-005	-1.3405e-005	0	0
1.92498	0	0.023359	-0.0057842	-2.7207e-007	0	0	0	-5.4701e-006	-2.5148e-006	1.719e-005	0	0
1.92594	0	0.023359	-0.0057842	-2.551e-007	0	0	0	-1.2039e-005	-1.1475e-005	1.0779e-005	0	0
1.92696	0	0.023359	-0.0057842	-2.4872e-007	0	0	0	-3.6973e-006	1.6491e-006	4.0618e-006	0	0
1.92799	0	0.023359	-0.0057842	-2.5086e-007	0	0	0	1.0948e-005	1.3526e-005	-5.3223e-006	0	0
1.92895	0	0.023359	-0.0057842	-2.633e-007	0	0	0	8.6489e-006	-9.3379e-006	-2.1517e-005	0	0
1.92998	0	0.023359	-0.0057842	-2.7657e-007	0	0	0	4.9449e-006	-1.2802e-005	4.2572e-006	0	0
1.93094	0	0.023359	-0.0057842	-2.6479e-007	0	0	0	-1.1572e-005	1.8349e-005	1.1745e-005	0	0
1.93196	0	0.023359	-0.0057842	-2.543e-007	0	0	0	-1.5088e-005	6.5241e-006	5.4345e-006	0	0
1.93299	0	0.023359	-0.0057842	-2.3962e-007	0	0	0	3.8771e-006	-2.2843e-005	1.3279e-005	0	0
1.93395	0	0.023359	-0.0057842	-2.4621e-007	0	0	0	5.0552e-006	5.8025e-006	-2.9411e-005	0	0
1.93497	0	0.023359	-0.0057842	-2.7228e-007	0	0	0	2.0064e-005	1.8351e-005	-3.8584e-006	0	0
1.936	0	0.023359	-0.0057842	-2.6585e-007	0	0	0	-4.3588e-006	-1.1953e-005	3.9348e-007	0	0
1.93696	0	0.023359	-0.0057842	-2.7089e-007	0	0	0	-2.0078e-005	-1.4202e-005	3.606e-006	0	0
1.93799	0	0.023359	-0.0057842	-2.4491e-007	0	0	0	-7.7657e-007	1.5132e-005	3.1454e-005	0	0
1.93895	0	0.023359	-0.0057842	-2.3684e-007	0	0	0	-6.5952e-006	1.0761e-005	-1.9853e-005	0	0
1.93997	0	0.023359	-0.0057842	-2.6175e-007	0	0	0	2.0075e-005	-1.5554e-005	-8.2269e-006	0	0
1.941	0	0.023359	-0.0057842	-2.6446e-007	0	0	0	1.218e-005	-7.7924e-006	-1.6394e-005	0	0
1.94196	0	0.023359	-0.0057842	-2.8466e-007	0	0	0	-1.0316e-005	1.5246e-005	-6.9539e-006	0	0
1.94298	0	0.023359	-0.0057842	-2.6044e-007	0	0	0	-9.443e-006	1.8234e-006	3.6386e-005	0	0
1.94395	0	0.023359	-0.0057842	-2.445e-007	0	0	0	-1.8071e-005	-1.5048e-005	-5.5872e-006	0	0
1.94497	0	0.023359	-0.0057842	-2.4804e-007	0	0	0	1.299e-005	7.6286e-007	6.2341e-008	0	0
1.946	0	0.023359	-0.0057842	-2.5607e-007	0	0	0	1.7197e-005	1.1141e-005	-1.5087e-005	0	0
1.94696	0	0.023359	-0.0057842	-2.7778e-007	0	0	0	-1.5552e-007	-8.4313e-006	-1.8545e-005	0	0
1.94798	0	0.023359	-0.0057842	-2.719e-007	0	0	0	-4.7228e-006	-7.4585e-006	2.2041e-005	0	0
1.94894	0	0.023359	-0.0057842	-2.5398e-007	0	0	0	-1.7886e-005	1.3855e-005	6.534e-006	0	0
1.94997	0	0.023359	-0.0057842	-2.4913e-007	0	0	0	-6.385e-007	2.727e-006	1.0659e-005	0	0
1.95099	0	0.023359	-0.0057842	-2.4413e-007	0	0	0	9.7699e-006	-1.2418e-005	-1.4678e-005	0	0
1.95196	0	0.023359	-0.0057842	-2.6703e-007	0	0	0	1.0242e-005	-1.0859e-006	-2.1408e-005	0	0
1.95298	0	0.023359	-0.0057842	-2.7035e-007	0	0	0	4.2746e-006	1.1754e-005	3.8991e-006	0	0
1.95394	0	0.023359	-0.0057842	-2.6756e-007	0	0	0	-1.4325e-005	-7.7026e-007	4.9483e-006	0	0
1.95497	0	0.023359	-0.0057842	-2.549e-007	0	0	0	-7.6962e-006	-1.5837e-005	2.2527e-005	0	0
1.95599	0	0.023359	-0.0057842	-2.4137e-007	0	0	0	-1.9576e-006	3.4369e-006	-8.319e-006	0	0
1.95695	0	0.023359	-0.0057842	-2.5682e-007	0	0	0	1.1954e-005	1.4479e-005	-1.4925e-005	0	0
1.95798	0	0.023359	-0.0057842	-2.6329e-007	0	0	0	1.1879e-005	-9.4567e-006	-4.0382e-006	0	0
1.95894	0	0.023359	-0.0057842	-2.7114e-007	0	0	0	-8.6576e-006	-4.6549e-006	-4.0347e-006	0	0
1.95997	0	0.023359	-0.0057842	-2.6106e-007	0	0	0	-8.5009e-006	9.6981e-006	1.8007e-005	0	0
1.96099	0	0.023359	-0.0057842	-2.4392e-007	0	0	0	-8.1444e-006	3.2234e-006	2.6403e-006	0	0
1.96195	0	0.023359	-0.0057842	-2.5286e-007	0	0	0	7.0058e-006	-1.2221e-005	-1.4295e-005	0	0
1.96298	0	0.023359	-0.0057842	-2.603e-007	0	0	0	1.7932e-005	-2.37e-006	-2.4078e-007	0	0
1.96394	0	0.023359	-0.0057842	-2.696e-007	0	0	0	-5.6358e-006	1.4359e-005	-1.6686e-005	0	0
1.96496	0	0.023359	-0.0057842	-2.7118e-007	0	0	0	-5.6314e-006	-4.4743e-006	2.0008e-005	0	0
1.96599	0	0.023359	-0.0057842	-2.4734e-007	0	0	0	-9.0794e-006	-1.0291e-005	1.3794e-005	0	0
1.96695	0	0.023359	-0.0057842	-2.5174e-007	0	0	0	-4.5966e-006	4.3739e-006	-1.0688e-005	0	0
1.96798	0	0.023359	-0.0057842	-2.5299e-007	0	0	0	1.6992e-005	8.2439e-006	1.4539e-007	0	0
1.96894	0	0.023359	-0.0057842	-2.614e-007	0	0	0	1.375e-006	-1.1678e-005	-2.3791e-005	0	0
1.96996	0	0.023359	-0.0057842	-2.7677e-007	0	0	0	1.1035e-006	6.9213e-007	7.5075e-006	0	0
1.97099	0	0.023359	-0.0057842	-2.5618e-007	0	0	0	-7.8234e-006	3.1571e-006	1.5024e-005	0	0
1.97195	0	0.023359	-0.0057842	-2.5777e-007	0	0	0	-1.2608e-005	-6.783e-006	-7.8277e-006	0	0
1.97297	0	0.023359	-0.0057842	-2.5059e-007	0	0	0	1.2565e-005	-9.6563e-007	2.0783e-005	0	0
1.974	0	0.023359	-0.0057842	-2.5452e-007	0	0	0	-1.6253e-006	9.1854e-007	-3.1045e-005	0	0
1.97496	0	0.023359	-0.0057842	-2.7102e-007	0	0	0	7.9501e-006	4.8639e-006	5.8454e-006	0	0
1.97599	0	0.023359	-0.0057842	-2.5511e-007	0	0	0	-4.8576e-006	-8.6681e-007	7.2525e-006	0	0
1.97695	0	0.023359	-0.0057842	-2.6222e-007	0	0	0	-1.3662e-005	-1.1993e-005	-9.2809e-006	0	0
1.97797	0	0.023359	-0.0057842	-2.5119e-007	0	0	0	1.0344e-005	8.8587e-006	2.0105e-005	0	0
1.979	0	0.023359	-0.0057842	-2.5206e-007	0	0	0	-3.3361e-006	7.6751e-006	-2.1696e-005	0	0
1.97996	0	0.023359	-0.0057842	-2.7059e-007	0	0	0	7.8989e-006	-1.6414e-005	5.1651e-007	0	0
1.98098	0	0.023359	-0.0057842	-2.5758e-007	0	0	0	1.7242e-006	2.5631e-007	6.8943e-006	0	0
1.98195	0	0.023359	-0.0057842	-2.646e-007	0	0	0	-1.4592e-005	9.564e-006	-1.0624e-005	0	0
1.98297	0	0.023359	-0.0057842	-2.5631e-007	0	0	0	6.3877e-006	-5.5626e-006	2.7849e-005	0	0
1.984	0	0.023359	-0.0057842	-2.4898e-007	0	0	0	-4.721e-006	-5.6661e-007	-2.2407e-005	0	0
1.98496	0	0.023359	-0.0057842	-2.6901e-007	0	0	0	8.6875e-006	1.3421e-006	-4.124e-006	0	0
1.98598	0	0.023359	-0.0057842	-2.6141e-007	0	0	0	7.3757e-006	2.9798e-006	6.8178e-006	0	0
1.98694	0	0.023359	-0.0057842	-2.6805e-007	0	0	0	-1.5244e-005	-5.2799e-007	-1.5126e-005	0	0
1.98797	0	0.023359	-0.0057842	-2.5959e-007	0	0	0	2.2291e-006	7.8705e-007	3.0905e-005	0	0
1.98899	0	0.023359	-0.0057842	-2.4588e-007	0	0	0	-7.6785e-006	-3.3934e-006	-1.7296e-005	0	0
1.98996	0	0.023359	-0.0057842	-2.6552e-007	0	0	0	9.2932e-006	-3.6117e-006	-8.3036e-006	0	0
1.99098	0	0.023359	-0.0057842	-2.5517e-007	0	0	0	9.7558e-006	3.014e-006	1.1004e-005	0	0
1.99194	0	0.023359	-0.0057842	-2.6615e-007	0	0	0	-1.6826e-005	2.2983e-006	-1.9775e-005	0	0
1.99297	0	0.023359	-0.0057842	-2.5923e-007	0	0	0	5.1815e-006	-1.5884e-006	3.501e-005	0	0
1.99399	0	0.023359	-0.0057842	-2.4179e-007	0	0	0	-1.0155e-005	-4.4897e-006	-1.8372e-005	0	0
1.99495	0	0.023359	-0.0057842	-2.6336e-007	0	0	0	6.2225e-006	2.4647e-006	-1.024e-005	0	0
1.99598	0	0.023359	-0.0057842	-2.5359e-007	0	0	0	1.42e-005	2.9973e-006	3.4737e-006	0	0
1.99694	0	0.023359	-0.0057842	-2.6779e-007	0	0	0	-1.2494e-005	-2.3349e-006	-2.3311e-005	0	0
1.99797	0	0.023359	-0.0057842	-2.6735e-007	0	0	0	4.6443e-006	2.0589e-006	2.8909e-005	0	0
[truncated: 6,002 more rows]
